# Supplementary material for: Full reconstruction of large lobula plate tangential cells in Drosophila from a 3D EM dataset
Source: PLoS One. 2018 Nov 28;13(11):e0207828. doi: 10.1371/journal.pone.0207828 (PMC6261601; doi:10.1371/journal.pone.0207828)
Supplement: S1 Dataset — (ZIP) [file pone.0207828.s001.zip]

Archive with 156 entries (139 files):
- Diameter hoc/C80_11_LP_ALL DIAMETERS FINAL_28Aug14_cleaned_v2_newends_v18.hx
- Diameter hoc/Cell bodies schematic/
- Diameter hoc/Cell bodies schematic/_dros-zellkoerper-abiasotto.157.hoc
- Diameter hoc/Cell bodies schematic/is12_12_25.txt
- Diameter hoc/Cell bodies schematic/zellkoerper3.005_distant.hoc
- Diameter hoc/Cell bodies schematic/zellkoerper3.005_located.hoc
- Diameter hoc/Cell_VSLBD_11skels_ck001_corrected_sorted_diametered.hoc0001.hoc
- Diameter hoc/Cell_Y_3skels_ck_was_2012-06-26_C80_11__explorational__vschuhbeck__4903f6_49.hoc0001.hoc
- Diameter hoc/Cell_Z_5skels_ck.001_corrected_sorted_diametered.hoc0001.hoc
- Diameter hoc/Cell126_4skels_ck.001_corrected_sorted_diametered.hoc0001.hoc
- Diameter hoc/cell138_corrected_sorted_diametered.hoc0001.hoc
- Diameter hoc/cell15_was_2012-06-26_C80_11__explorational__truff__604db8_3.hoc0001.hoc
- Diameter hoc/Cell151_4skels_ck.001_corrected_sorted_diametered.hoc0001.hoc
- Diameter hoc/Cell153_4skels_ck.001_corrected_sorted_diametered.hoc0001.hoc
- Diameter hoc/Cell19_7skels_ck.001_corrected_sorted_diametered.hoc0001.hoc
- Diameter hoc/cell23_was_2012-06-26_C80_11__explorational__vrobl__48ebdb.hoc0001.hoc
- Diameter hoc/Cell24_5skels_ck_corrected_sorted_diametered.hoc0001.hoc
- Diameter hoc/Cell25_3skels_ck.001_corrected_sorted_diametered.hoc0001.hoc
- Diameter hoc/Cell26_5skels_ck.001_corrected_sorted_diametered.hoc0001.hoc
- Diameter hoc/cell27_corrected_sorted_diametered.hoc0001.hoc
- Diameter hoc/Cell36_4skels_ck.001_corrected_sorted_diametered.hoc0001.hoc
- Diameter hoc/Cell41_3skels_ck.001_corrected_sorted_diametered.hoc0001.hoc
- Diameter hoc/Cell45_6skels_ck.001_corrected_sorted_diametered.hoc0001.hoc
- Diameter hoc/Cell48_5skels_ck.001_corrected_sorted_diametered.hoc0001.hoc
- Diameter hoc/Cell50_6skels_completed.hoc0001.hoc
- Diameter hoc/Cell65_7skels_ck.001_corrected_sorted_diametered.hoc0001.hoc
- Diameter hoc/Cell7_VCH_1Skel.001_truff__472ee6.hoc
- Diameter hoc/Cell7_VCH_1Skel.001_truff__472ee6asdf.hoc
- Diameter hoc/Cell71_4skels_ck.001_corrected_sorted_diametered.hoc0001.hoc
- Diameter hoc/Cell75_4skels_ck.001_corrected_sorted_diametered.hoc0001.hoc
- Diameter hoc/CellX_7skels_completed.hoc0001.hoc
- Diameter hoc/corrected_hw_DCH_cell3_28_70_127_ck_node_size_changed.hoc0001.hoc
- Diameter hoc/empty.tif
- Diameter hoc/emptywhite.tif
- Diameter hoc/Neuropil outline/
- Diameter hoc/Neuropil outline/is12_12_25.txt
- Diameter hoc/Neuropil outline/Lobula outline 17Sep13.008_0002.hoc
- Diameter hoc/Neuropil outline/Medulla outline ck 17Sep13.008_0002.hoc
- Diameter hoc/Neuropil outline/Outline LP ck 17Sep13.008_0002.hoc
- Diameter hoc/plotCompleteSkeletons/
- Diameter hoc/plotCompleteSkeletons/vs1_1_0001.hoc
- Diameter hoc/plotCompleteSkeletons/vs10001.hoc
- Diameter hoc/plotCompleteSkeletons/vs2_1_0001.hoc
- Diameter hoc/plotCompleteSkeletons/vs20001.hoc
- Diameter hoc/plotCompleteSkeletons/vs3_1_0001.hoc
- Diameter hoc/plotCompleteSkeletons/vs30001.hoc
- Diameter hoc/plotCompleteSkeletons/vs4_1_0001.hoc
- Diameter hoc/plotCompleteSkeletons/vs40001.hoc
- Diameter hoc/plotCompleteSkeletons/vs5_1_0001.hoc
- Diameter hoc/plotCompleteSkeletons/vs50001.hoc
- Diameter hoc/plotCompleteSkeletons/vs6_1_0001.hoc
- Diameter hoc/plotCompleteSkeletons/vs60001.hoc
- Diameter hoc/plotCompleteSkeletons/vsl1_1_0001.hoc
- Diameter hoc/plotCompleteSkeletons/vsl1_2_0001.hoc
- Diameter hoc/plotCompleteSkeletons/vsl1_3_0001.hoc
- Diameter hoc/plotCompleteSkeletons/vsl10001.hoc
- Diameter hoc/plotCompleteSkeletons/vsl2_1_0001.hoc
- Diameter hoc/plotCompleteSkeletons/vsl2_2_0001.hoc
- Diameter hoc/plotCompleteSkeletons/vsl20001.hoc
- Diameter hoc/plotCompleteSkeletons/vsl3_1_0001.hoc
- Diameter hoc/plotCompleteSkeletons/vsl30001.hoc
- Diameter hoc/plotCompleteSkeletons/vslbd_1_0001.hoc
- Diameter hoc/plotCompleteSkeletons/vslbd0001.hoc
- Diameter hoc/VS_VSL_preliminary/
- Diameter hoc/VS_VSL_preliminary/Old Diameters Mar13_VS_VSL_HS/
- Diameter hoc/VS_VSL_preliminary/Old Diameters Mar13_VS_VSL_HS/HSE/
- Diameter hoc/VS_VSL_preliminary/Old Diameters Mar13_VS_VSL_HS/HSE/2_14_729_smaurer_001.007.hoc
- Diameter hoc/VS_VSL_preliminary/Old Diameters Mar13_VS_VSL_HS/HSE/2_14_775_gmordhorst_002.018.hoc
- Diameter hoc/VS_VSL_preliminary/Old Diameters Mar13_VS_VSL_HS/HSE/2_14_777_gmordhorst_001.008.hoc
- Diameter hoc/VS_VSL_preliminary/Old Diameters Mar13_VS_VSL_HS/HSE/2_14_778_gmordhorst_001.016.hoc
- Diameter hoc/VS_VSL_preliminary/Old Diameters Mar13_VS_VSL_HS/HSN/
- Diameter hoc/VS_VSL_preliminary/Old Diameters Mar13_VS_VSL_HS/HSN/2_14_738_smaurer_002.023.hoc
- Diameter hoc/VS_VSL_preliminary/Old Diameters Mar13_VS_VSL_HS/HSN/2_14_739_smaurer_001.019.hoc
- Diameter hoc/VS_VSL_preliminary/Old Diameters Mar13_VS_VSL_HS/HSN/2_14_811_smaurer_001.015.hoc
- Diameter hoc/VS_VSL_preliminary/Old Diameters Mar13_VS_VSL_HS/HSN/2_14_812_smaurer_002.014.hoc
- Diameter hoc/VS_VSL_preliminary/Old Diameters Mar13_VS_VSL_HS/HSN/HSN_5skels_ck.001.hoc0007.hoc
- Diameter hoc/VS_VSL_preliminary/Old Diameters Mar13_VS_VSL_HS/HSS/
- Diameter hoc/VS_VSL_preliminary/Old Diameters Mar13_VS_VSL_HS/HSS/2_14_723_sbeyer_003.126.hoc
- Diameter hoc/VS_VSL_preliminary/Old Diameters Mar13_VS_VSL_HS/HSS/2_14_724_gmordhorst_001.055.hoc
- Diameter hoc/VS_VSL_preliminary/Old Diameters Mar13_VS_VSL_HS/HSS/2_14_725_smaurer_001.008.hoc
- Diameter hoc/VS_VSL_preliminary/Old Diameters Mar13_VS_VSL_HS/HSS/2_14_726_smaurer_002.053.hoc
- Diameter hoc/VS_VSL_preliminary/Old Diameters Mar13_VS_VSL_HS/HSS/2_14_727_gmordhorst_001.021.hoc
- Diameter hoc/VS_VSL_preliminary/Old Diameters Mar13_VS_VSL_HS/VS1/
- Diameter hoc/VS_VSL_preliminary/Old Diameters Mar13_VS_VSL_HS/VS1/2_14_732_smaurer_003.055.hoc
- Diameter hoc/VS_VSL_preliminary/Old Diameters Mar13_VS_VSL_HS/VS1/2_14_733_smaurer_002.022.hoc
- Diameter hoc/VS_VSL_preliminary/Old Diameters Mar13_VS_VSL_HS/VS1/2_14_789_smaurer_001.020.hoc
- Diameter hoc/VS_VSL_preliminary/Old Diameters Mar13_VS_VSL_HS/VS1/2_14_790_smaurer_002.043.hoc
- Diameter hoc/VS_VSL_preliminary/Old Diameters Mar13_VS_VSL_HS/VS1/2_14_791_sbeyer_002.059.hoc
- Diameter hoc/VS_VSL_preliminary/Old Diameters Mar13_VS_VSL_HS/VS2/
- Diameter hoc/VS_VSL_preliminary/Old Diameters Mar13_VS_VSL_HS/VS2/2_14_744_gmordhorst_001.027.hoc
- Diameter hoc/VS_VSL_preliminary/Old Diameters Mar13_VS_VSL_HS/VS2/2_14_745_gmordhorst_001.023.hoc
- Diameter hoc/VS_VSL_preliminary/Old Diameters Mar13_VS_VSL_HS/VS2/2_14_792_smaurer_002.039.hoc
- Diameter hoc/VS_VSL_preliminary/Old Diameters Mar13_VS_VSL_HS/VS3/
- Diameter hoc/VS_VSL_preliminary/Old Diameters Mar13_VS_VSL_HS/VS3/2_14_741_smaurer_001.022.hoc
- Diameter hoc/VS_VSL_preliminary/Old Diameters Mar13_VS_VSL_HS/VS3/2_14_743_smaurer_002.056.hoc
- Diameter hoc/VS_VSL_preliminary/Old Diameters Mar13_VS_VSL_HS/VS3/2_14_806_smaurer_002.033.hoc
- Diameter hoc/VS_VSL_preliminary/Old Diameters Mar13_VS_VSL_HS/VS3/2_14_808_smaurer_003.035.hoc
- Diameter hoc/VS_VSL_preliminary/Old Diameters Mar13_VS_VSL_HS/VS4/
- Diameter hoc/VS_VSL_preliminary/Old Diameters Mar13_VS_VSL_HS/VS4/2_14_759_smaurer_001.023.hoc
- Diameter hoc/VS_VSL_preliminary/Old Diameters Mar13_VS_VSL_HS/VS4/2_14_760_smaurer_001.011.hoc
- Diameter hoc/VS_VSL_preliminary/Old Diameters Mar13_VS_VSL_HS/VS4/2_14_761_smaurer_001.008.hoc
- Diameter hoc/VS_VSL_preliminary/Old Diameters Mar13_VS_VSL_HS/VS4/2_14_762_gmordhorst_001.027.hoc
- Diameter hoc/VS_VSL_preliminary/Old Diameters Mar13_VS_VSL_HS/VS4/2_14_763_smaurer_001.004.hoc
- Diameter hoc/VS_VSL_preliminary/Old Diameters Mar13_VS_VSL_HS/VS4/2_14_802_smaurer_001.019.hoc
- Diameter hoc/VS_VSL_preliminary/Old Diameters Mar13_VS_VSL_HS/VS5/
- Diameter hoc/VS_VSL_preliminary/Old Diameters Mar13_VS_VSL_HS/VS5/2_14_747_gmordhorst_001.035.hoc
- Diameter hoc/VS_VSL_preliminary/Old Diameters Mar13_VS_VSL_HS/VS5/2_14_749_gmordhorst_001.026.hoc
- Diameter hoc/VS_VSL_preliminary/Old Diameters Mar13_VS_VSL_HS/VS5/2_14_783_smaurer_002.023.hoc
- Diameter hoc/VS_VSL_preliminary/Old Diameters Mar13_VS_VSL_HS/VS5/2_14_784_gmordhorst_002.026.hoc
- Diameter hoc/VS_VSL_preliminary/Old Diameters Mar13_VS_VSL_HS/VS5/2_14_785_smaurer_002.010.hoc
- Diameter hoc/VS_VSL_preliminary/Old Diameters Mar13_VS_VSL_HS/VS6/
- Diameter hoc/VS_VSL_preliminary/Old Diameters Mar13_VS_VSL_HS/VS6/2_14_734_smaurer_001.012.hoc
- Diameter hoc/VS_VSL_preliminary/Old Diameters Mar13_VS_VSL_HS/VS6/2_14_735_smaurer_001.012.hoc
- Diameter hoc/VS_VSL_preliminary/Old Diameters Mar13_VS_VSL_HS/VS6/2_14_795_smaurer_003.018.hoc
- Diameter hoc/VS_VSL_preliminary/Old Diameters Mar13_VS_VSL_HS/VS6/2_14_797_smaurer_001.008.hoc
- Diameter hoc/VS_VSL_preliminary/Old Diameters Mar13_VS_VSL_HS/VSlike1/
- Diameter hoc/VS_VSL_preliminary/Old Diameters Mar13_VS_VSL_HS/VSlike1/2_14_756_smaurer_001.019.hoc
- Diameter hoc/VS_VSL_preliminary/Old Diameters Mar13_VS_VSL_HS/VSlike1/2_14_757_smaurer_001.015.hoc
- Diameter hoc/VS_VSL_preliminary/Old Diameters Mar13_VS_VSL_HS/VSlike1/2_14_782_gmordhorst_001.022.hoc
- Diameter hoc/VS_VSL_preliminary/Old Diameters Mar13_VS_VSL_HS/VSlike2/
- Diameter hoc/VS_VSL_preliminary/Old Diameters Mar13_VS_VSL_HS/VSlike2/2_14_766_sbeyer_002.072.hoc
- Diameter hoc/VS_VSL_preliminary/Old Diameters Mar13_VS_VSL_HS/VSlike2/2_14_767_gmordhorst_001.008.hoc
- Diameter hoc/VS_VSL_preliminary/Old Diameters Mar13_VS_VSL_HS/VSlike2/2_14_768_gmordhorst_001.006.hoc
- Diameter hoc/VS_VSL_preliminary/Old Diameters Mar13_VS_VSL_HS/VSlike3/
- Diameter hoc/VS_VSL_preliminary/Old Diameters Mar13_VS_VSL_HS/VSlike3/2_14_750_sbeyer_001.091.hoc
- Diameter hoc/VS_VSL_preliminary/Old Diameters Mar13_VS_VSL_HS/VSlike3/2_14_800_smaurer_001.015.hoc
- Diameter hoc/VS_VSL_preliminary/VS1_5skels_ck.001_completed.hoc0007.hoc
- Diameter hoc/VS_VSL_preliminary/VS2_3skels_ck.001_completed.hoc0003.hoc
- Diameter hoc/VS_VSL_preliminary/VS3_4skels_ck.001_completed.hoc0001.hoc
- Diameter hoc/VS_VSL_preliminary/VS4_skels_ck.001_completed.hoc0001.hoc
- Diameter hoc/VS_VSL_preliminary/VS4_skels_ck.001_completed.hoc0002.hoc
- Diameter hoc/VS_VSL_preliminary/VS4_skels_ck.001_completed.hoc0003.hoc
- Diameter hoc/VS_VSL_preliminary/VS4_skels_ck.001_completed.hoc0004.hoc
- Diameter hoc/VS_VSL_preliminary/VS4_skels_ck.001_completed.hoc0005.hoc
- Diameter hoc/VS_VSL_preliminary/VS4_skels_ck.001_completed.hoc0006.hoc
- Diameter hoc/VS_VSL_preliminary/VS4_skels_ck.001_completed.hoc0007.hoc
- Diameter hoc/VS_VSL_preliminary/VS5_5skels_ck.001_completed.hoc0001.hoc
- Diameter hoc/VS_VSL_preliminary/VS5_5skels_ck.001_completed.hoc0002.hoc
- Diameter hoc/VS_VSL_preliminary/VS5_5skels_ck.001_completed.hoc0003.hoc
- Diameter hoc/VS_VSL_preliminary/VS5_5skels_ck.001_completed.hoc0004.hoc
- Diameter hoc/VS_VSL_preliminary/VS5_5skels_ck.001_completed.hoc0005.hoc
- Diameter hoc/VS_VSL_preliminary/VS5_5skels_ck.001_completed.hoc0006.hoc
- Diameter hoc/VS_VSL_preliminary/VS6_4skels_ck.001_completed.hoc0001.hoc
- Diameter hoc/VS_VSL_preliminary/VS6_4skels_ck.001_completed.hoc0002.hoc
- Diameter hoc/VS_VSL_preliminary/VS6_4skels_ck.001_completed.hoc0003.hoc
- Diameter hoc/VS_VSL_preliminary/VS6_4skels_ck.001_completed.hoc0004.hoc
- Diameter hoc/VS_VSL_preliminary/VSlike1_3skels_ck.001_completed.hoc0001.hoc
- Diameter hoc/VS_VSL_preliminary/VSlike1_3skels_ck.001_completed.hoc0002.hoc
- Diameter hoc/VS_VSL_preliminary/VSlike1_3skels_ck.001_completed.hoc0003.hoc
- Diameter hoc/VS_VSL_preliminary/VSlike3_2skels_ck.001_completed.hoc0001.hoc
- Diameter hoc/VS_VSL_preliminary/VSlike3_2skels_ck.001_completed.hoc0002.hoc
- Diameter hoc/ZELLE_22.hoc0001.hoc
- Diameter hoc/Zelle_55_fertig.hoc0001.hoc
- Diameter hoc/Zelle163_fertig.hoc0001.hoc
- Diameter hoc/Zelle40_fertig.hoc0001.hoc
- Diameter hoc/Zelle64_fertig.hoc0001.hoc
