# Supplementary material for: Full reconstruction of large lobula plate tangential cells in Drosophila from a 3D EM dataset
Source: PLoS One. 2018 Nov 28;13(11):e0207828. doi: 10.1371/journal.pone.0207828 (PMC6261601; doi:10.1371/journal.pone.0207828)
Supplement: S1 Dataset — (ZIP) [file pone.0207828.s001.zip › Diameter hoc/C80_11_LP_ALL DIAMETERS FINAL_28Aug14_cleaned_v2_newends_v18.hx]

# Amira Script
remove -all
remove glow.col Cell19_7skels_ck.001_corrected_sorted_diametered.hoc0001.hoc Cell25_3skels_ck.001_corrected_sorted_diametered.hoc0001.hoc Cell26_5skels_ck.001_corrected_sorted_diametered.hoc0001.hoc Cell36_4skels_ck.001_corrected_sorted_diametered.hoc0001.hoc Cell41_3skels_ck.001_corrected_sorted_diametered.hoc0001.hoc Cell45_6skels_ck.001_corrected_sorted_diametered.hoc0001.hoc Cell48_5skels_ck.001_corrected_sorted_diametered.hoc0001.hoc Cell65_7skels_ck.001_corrected_sorted_diametered.hoc0001.hoc Cell71_4skels_ck.001_corrected_sorted_diametered.hoc0001.hoc Cell75_4skels_ck.001_corrected_sorted_diametered.hoc0001.hoc Cell126_4skels_ck.001_corrected_sorted_diametered.hoc0001.hoc Cell151_4skels_ck.001_corrected_sorted_diametered.hoc0001.hoc Cell153_4skels_ck.001_corrected_sorted_diametered.hoc0001.hoc Cell24_5skels_ck_corrected_sorted_diametered.hoc0001.hoc Cell50_6skels_completed.hoc0001.hoc cell27_corrected_sorted_diametered.hoc0001.hoc cell138_corrected_sorted_diametered.hoc0001.hoc Cell7_VCH_1Skel.001_truff__472ee6.hoc cell15_was_2012-06-26_C80_11__explorational__truff__604db8_3.hoc0001.hoc cell23_was_2012-06-26_C80_11__explorational__vrobl__48ebdb.hoc0001.hoc Cell_VSLBD_11skels_ck001_corrected_sorted_diametered.hoc0001.hoc Cell_Y_3skels_ck_was_2012-06-26_C80_11__explorational__vschuhbeck__4903f6_49.hoc0001.hoc Cell_Z_5skels_ck.001_corrected_sorted_diametered.hoc0001.hoc CellX_7skels_completed.hoc0001.hoc corrected_hw_DCH_cell3_28_70_127_ck_node_size_changed.hoc0001.hoc Zelle40_fertig.hoc0001.hoc Zelle64_fertig.hoc0001.hoc Zelle163_fertig.hoc0001.hoc ZELLE_22.hoc0001.hoc Zelle_55_fertig.hoc0001.hoc Lobula-outline-17Sep13.008_0002.hoc Medulla-outline-ck-17Sep13.008_0002.hoc Outline-LP-ck-17Sep13.008_0002.hoc zellkoerper3.005_distant.hoc zellkoerper3.005_located.hoc _dros-zellkoerper-abiasotto.157.hoc VS1_5skels_ck.001_completed.hoc0007.hoc VS2_3skels_ck.001_completed.hoc0003.hoc VS3_4skels_ck.001_completed.hoc0001.hoc VS4_skels_ck.001_completed.hoc0001.hoc VS5_5skels_ck.001_completed.hoc0005.hoc VS6_4skels_ck.001_completed.hoc0001.hoc VSlike1_3skels_ck.001_completed.hoc0003.hoc VSlike3_2skels_ck.001_completed.hoc0001.hoc 2_14_791_sbeyer_002.059.hoc 2_14_732_smaurer_003.055.hoc 2_14_733_smaurer_002.022.hoc 2_14_789_smaurer_001.020.hoc 2_14_790_smaurer_002.043.hoc 2_14_744_gmordhorst_001.027.hoc 2_14_745_gmordhorst_001.023.hoc 2_14_792_smaurer_002.039.hoc 2_14_741_smaurer_001.022.hoc 2_14_743_smaurer_002.056.hoc 2_14_806_smaurer_002.033.hoc 2_14_808_smaurer_003.035.hoc 2_14_762_gmordhorst_001.027.hoc 2_14_759_smaurer_001.023.hoc 2_14_760_smaurer_001.011.hoc 2_14_761_smaurer_001.008.hoc 2_14_763_smaurer_001.004.hoc 2_14_802_smaurer_001.019.hoc 2_14_747_gmordhorst_001.035.hoc 2_14_749_gmordhorst_001.026.hoc 2_14_784_gmordhorst_002.026.hoc 2_14_783_smaurer_002.023.hoc 2_14_785_smaurer_002.010.hoc 2_14_734_smaurer_001.012.hoc 2_14_735_smaurer_001.012.hoc 2_14_795_smaurer_003.018.hoc 2_14_797_smaurer_001.008.hoc 2_14_782_gmordhorst_001.022.hoc 2_14_756_smaurer_001.019.hoc 2_14_757_smaurer_001.015.hoc 2_14_767_gmordhorst_001.008.hoc 2_14_768_gmordhorst_001.006.hoc 2_14_766_sbeyer_002.072.hoc 2_14_750_sbeyer_001.091.hoc 2_14_800_smaurer_001.015.hoc 2_14_738_smaurer_002.023.hoc 2_14_739_smaurer_001.019.hoc 2_14_811_smaurer_001.015.hoc 2_14_812_smaurer_002.014.hoc 2_14_775_gmordhorst_002.018.hoc 2_14_777_gmordhorst_001.008.hoc 2_14_778_gmordhorst_001.016.hoc 2_14_729_smaurer_001.007.hoc 2_14_724_gmordhorst_001.055.hoc 2_14_727_gmordhorst_001.021.hoc 2_14_723_sbeyer_003.126.hoc 2_14_725_smaurer_001.008.hoc 2_14_726_smaurer_002.053.hoc vs10001.hoc vs20001.hoc vs30001.hoc vs40001.hoc vs50001.hoc vs60001.hoc vsl20001.hoc vsl30001.hoc vsl1_2_0001.hoc vsl1_3_0001.hoc vsl2_2_0001.hoc vslbd0001.hoc empty.tif empty2.tif SpatialGraphView SpatialGraphView2 SpatialGraphView3 SpatialGraphView4 SpatialGraphView5 SpatialGraphView6 SpatialGraphView7 SpatialGraphView8 SpatialGraphView9 SpatialGraphView10 SpatialGraphView11 SpatialGraphView12 SpatialGraphView13 SpatialGraphView14 SpatialGraphView15 SpatialGraphView16 SpatialGraphView17 SpatialGraphView18 SpatialGraphView19 SpatialGraphView20 SpatialGraphView21 SpatialGraphView22 SpatialGraphView23 SpatialGraphView24 SpatialGraphView25 SpatialGraphView26 SpatialGraphView27 SpatialGraphView28 SpatialGraphView29 SpatialGraphView30 Layer1 DataDirectory_Cell7_VCH_1Skel.001_truff__472ee6.hoc DataDirectory_Cell_Y_3skels_ck_was_2012-06-26_C80_11__explorational__vschuhbeck__4903f6_49.hoc0001.hoc DataDirectory_corrected_hw_DCH_cell3_28_70_127_ck_node_size_changed.hoc0001.hoc DataDirectory_Zelle40_fertig.hoc0001.hoc DataDirectory_Zelle_55_fertig.hoc0001.hoc Layer2 DataDirectory_Cell45_6skels_ck.001_corrected_sorted_diametered.hoc0001.hoc DataDirectory_Cell48_5skels_ck.001_corrected_sorted_diametered.hoc0001.hoc DataDirectory_cell15_was_2012-06-26_C80_11__explorational__truff__604db8_3.hoc0001.hoc DataDirectory_cell23_was_2012-06-26_C80_11__explorational__vrobl__48ebdb.hoc0001.hoc DataDirectory_Cell_Z_5skels_ck.001_corrected_sorted_diametered.hoc0001.hoc DataDirectory_Zelle64_fertig.hoc0001.hoc DataDirectory_Zelle163_fertig.hoc0001.hoc DataDirectory_ZELLE_22.hoc0001.hoc Layer3 DataDirectory_Cell19_7skels_ck.001_corrected_sorted_diametered.hoc0001.hoc DataDirectory_Cell41_3skels_ck.001_corrected_sorted_diametered.hoc0001.hoc DataDirectory_Cell71_4skels_ck.001_corrected_sorted_diametered.hoc0001.hoc DataDirectory_cell27_corrected_sorted_diametered.hoc0001.hoc DataDirectory_cell138_corrected_sorted_diametered.hoc0001.hoc DataDirectory_Cell_VSLBD_11skels_ck001_corrected_sorted_diametered.hoc0001.hoc Layer4 DataDirectory_Cell25_3skels_ck.001_corrected_sorted_diametered.hoc0001.hoc DataDirectory_Cell26_5skels_ck.001_corrected_sorted_diametered.hoc0001.hoc DataDirectory_Cell36_4skels_ck.001_corrected_sorted_diametered.hoc0001.hoc DataDirectory_Cell65_7skels_ck.001_corrected_sorted_diametered.hoc0001.hoc DataDirectory_Cell75_4skels_ck.001_corrected_sorted_diametered.hoc0001.hoc DataDirectory_Cell126_4skels_ck.001_corrected_sorted_diametered.hoc0001.hoc DataDirectory_Cell151_4skels_ck.001_corrected_sorted_diametered.hoc0001.hoc DataDirectory_Cell153_4skels_ck.001_corrected_sorted_diametered.hoc0001.hoc DataDirectory_Cell24_5skels_ck_corrected_sorted_diametered.hoc0001.hoc DataDirectory_Cell50_6skels_completed.hoc0001.hoc DataDirectory_CellX_7skels_completed.hoc0001.hoc Neuropil-outline DataDirectory_Lobula-outline-17Sep13.008_0002.hoc DataDirectory_Medulla-outline-ck-17Sep13.008_0002.hoc DataDirectory_Outline-LP-ck-17Sep13.008_0002.hoc SpatialGraphView31 SpatialGraphView32 SpatialGraphView33 Cell-bodies-schematic DataDirectory_zellkoerper3.005_distant.hoc DataDirectory_zellkoerper3.005_located.hoc SpatialGraphView35 SpatialGraphView36 DataDirectory__dros-zellkoerper-abiasotto.157.hoc SpatialGraphView34 HSN HSE HSS VS1 VS2 VS3 VS4 VS5 VS6 VS-like1 VS-like2 VS-like3 DataDirectory_VS1_5skels_ck.001_completed.hoc0007.hoc DataDirectory_VS2_3skels_ck.001_completed.hoc0003.hoc DataDirectory_VS3_4skels_ck.001_completed.hoc0001.hoc DataDirectory_VS4_skels_ck.001_completed.hoc0001.hoc DataDirectory_VS5_5skels_ck.001_completed.hoc0005.hoc DataDirectory_VS6_4skels_ck.001_completed.hoc0001.hoc DataDirectory_VSlike1_3skels_ck.001_completed.hoc0003.hoc DataDirectory_VSlike3_2skels_ck.001_completed.hoc0001.hoc SpatialGraphView37 SpatialGraphView38 SpatialGraphView39 SpatialGraphView40 SpatialGraphView41 SpatialGraphView42 SpatialGraphView43 SpatialGraphView44 DataDirectory_2_14_791_sbeyer_002.059.hoc DataDirectory_2_14_732_smaurer_003.055.hoc DataDirectory_2_14_733_smaurer_002.022.hoc DataDirectory_2_14_789_smaurer_001.020.hoc DataDirectory_2_14_790_smaurer_002.043.hoc SpatialGraphView45 SpatialGraphView46 SpatialGraphView47 SpatialGraphView48 SpatialGraphView49 DataDirectory_2_14_744_gmordhorst_001.027.hoc DataDirectory_2_14_745_gmordhorst_001.023.hoc DataDirectory_2_14_792_smaurer_002.039.hoc SpatialGraphView50 SpatialGraphView51 SpatialGraphView52 DataDirectory_2_14_741_smaurer_001.022.hoc DataDirectory_2_14_743_smaurer_002.056.hoc DataDirectory_2_14_806_smaurer_002.033.hoc DataDirectory_2_14_808_smaurer_003.035.hoc SpatialGraphView53 SpatialGraphView54 SpatialGraphView55 SpatialGraphView56 DataDirectory_2_14_762_gmordhorst_001.027.hoc DataDirectory_2_14_759_smaurer_001.023.hoc DataDirectory_2_14_760_smaurer_001.011.hoc DataDirectory_2_14_761_smaurer_001.008.hoc DataDirectory_2_14_763_smaurer_001.004.hoc DataDirectory_2_14_802_smaurer_001.019.hoc DataDirectory_2_14_747_gmordhorst_001.035.hoc DataDirectory_2_14_749_gmordhorst_001.026.hoc DataDirectory_2_14_784_gmordhorst_002.026.hoc DataDirectory_2_14_783_smaurer_002.023.hoc DataDirectory_2_14_785_smaurer_002.010.hoc DataDirectory_2_14_734_smaurer_001.012.hoc DataDirectory_2_14_735_smaurer_001.012.hoc DataDirectory_2_14_795_smaurer_003.018.hoc DataDirectory_2_14_797_smaurer_001.008.hoc DataDirectory_2_14_782_gmordhorst_001.022.hoc DataDirectory_2_14_756_smaurer_001.019.hoc DataDirectory_2_14_757_smaurer_001.015.hoc DataDirectory_2_14_767_gmordhorst_001.008.hoc DataDirectory_2_14_768_gmordhorst_001.006.hoc DataDirectory_2_14_766_sbeyer_002.072.hoc DataDirectory_2_14_750_sbeyer_001.091.hoc DataDirectory_2_14_800_smaurer_001.015.hoc DataDirectory_2_14_738_smaurer_002.023.hoc DataDirectory_2_14_739_smaurer_001.019.hoc DataDirectory_2_14_811_smaurer_001.015.hoc DataDirectory_2_14_812_smaurer_002.014.hoc DataDirectory_2_14_775_gmordhorst_002.018.hoc DataDirectory_2_14_777_gmordhorst_001.008.hoc DataDirectory_2_14_778_gmordhorst_001.016.hoc DataDirectory_2_14_729_smaurer_001.007.hoc DataDirectory_2_14_724_gmordhorst_001.055.hoc DataDirectory_2_14_727_gmordhorst_001.021.hoc DataDirectory_2_14_723_sbeyer_003.126.hoc DataDirectory_2_14_725_smaurer_001.008.hoc DataDirectory_2_14_726_smaurer_002.053.hoc SpatialGraphView57 SpatialGraphView58 SpatialGraphView59 SpatialGraphView60 SpatialGraphView61 SpatialGraphView62 SpatialGraphView63 SpatialGraphView64 SpatialGraphView65 SpatialGraphView66 SpatialGraphView67 SpatialGraphView68 SpatialGraphView69 SpatialGraphView70 SpatialGraphView71 SpatialGraphView72 SpatialGraphView73 SpatialGraphView74 SpatialGraphView75 SpatialGraphView76 SpatialGraphView77 SpatialGraphView78 SpatialGraphView79 SpatialGraphView80 SpatialGraphView81 SpatialGraphView82 SpatialGraphView83 SpatialGraphView84 SpatialGraphView85 SpatialGraphView86 SpatialGraphView87 SpatialGraphView88 SpatialGraphView89 SpatialGraphView90 SpatialGraphView91 SpatialGraphView92 DataDirectory_vs10001.hoc DataDirectory_vs20001.hoc DataDirectory_vs30001.hoc DataDirectory_vs40001.hoc DataDirectory_vs50001.hoc DataDirectory_vs60001.hoc DataDirectory_vsl20001.hoc DataDirectory_vsl30001.hoc SpatialGraphView93 SpatialGraphView94 SpatialGraphView95 SpatialGraphView96 SpatialGraphView97 SpatialGraphView98 SpatialGraphView100 SpatialGraphView101 DataDirectory_vsl1_2_0001.hoc SpatialGraphView102 DataDirectory_vsl1_3_0001.hoc SpatialGraphView103 DataDirectory_vsl2_2_0001.hoc SpatialGraphView104 GlobalAxis DataDirectory_vslbd0001.hoc SpatialGraphView99 DataDirectory_empty.tif DataDirectory_glow.col OrthoSlice DataDirectory_empty2.tif OrthoSlice2 OrthoSlice3

# Create viewers
viewer setVertical 0

viewer 0 setBackgroundMode 0
viewer 0 setBackgroundColor 0 0 0
viewer 0 setBackgroundColor2 0.72 0.72 0.78
viewer 0 setTransparencyType 5
viewer 0 setAutoRedraw 0
viewer 0 show
mainWindow show

set hideNewModules 1
[ load ${AMIRA_ROOT}/data/colormaps/glow.col ] setLabel glow.col
glow.col setIconPosition 0 0
glow.col setNoRemoveAll 1
glow.col fire
{glow.col} setMinMax 0 255
glow.col flags setValue 1
glow.col shift setMinMax -1 1
glow.col shift setButtons 0
glow.col shift setIncrement 0.133333
glow.col shift setValue 0
glow.col shift setSubMinMax -1 1
glow.col scale setMinMax 0 1
glow.col scale setButtons 0
glow.col scale setIncrement 0.1
glow.col scale setValue 1
glow.col scale setSubMinMax 0 1
glow.col fire
glow.col setViewerMask 32767

set hideNewModules 0
[ load ${SCRIPTDIR}/Cell19_7skels_ck.001_corrected_sorted_diametered.hoc0001.hoc ] setLabel Cell19_7skels_ck.001_corrected_sorted_diametered.hoc0001.hoc
Cell19_7skels_ck.001_corrected_sorted_diametered.hoc0001.hoc setIconPosition 20 10
Cell19_7skels_ck.001_corrected_sorted_diametered.hoc0001.hoc fire
Cell19_7skels_ck.001_corrected_sorted_diametered.hoc0001.hoc fire
Cell19_7skels_ck.001_corrected_sorted_diametered.hoc0001.hoc setViewerMask 32767

set hideNewModules 0
[ load ${SCRIPTDIR}/Cell25_3skels_ck.001_corrected_sorted_diametered.hoc0001.hoc ] setLabel Cell25_3skels_ck.001_corrected_sorted_diametered.hoc0001.hoc
Cell25_3skels_ck.001_corrected_sorted_diametered.hoc0001.hoc setIconPosition 20 40
Cell25_3skels_ck.001_corrected_sorted_diametered.hoc0001.hoc fire
Cell25_3skels_ck.001_corrected_sorted_diametered.hoc0001.hoc fire
Cell25_3skels_ck.001_corrected_sorted_diametered.hoc0001.hoc setViewerMask 32767

set hideNewModules 0
[ load ${SCRIPTDIR}/Cell26_5skels_ck.001_corrected_sorted_diametered.hoc0001.hoc ] setLabel Cell26_5skels_ck.001_corrected_sorted_diametered.hoc0001.hoc
Cell26_5skels_ck.001_corrected_sorted_diametered.hoc0001.hoc setIconPosition 20 70
Cell26_5skels_ck.001_corrected_sorted_diametered.hoc0001.hoc fire
Cell26_5skels_ck.001_corrected_sorted_diametered.hoc0001.hoc fire
Cell26_5skels_ck.001_corrected_sorted_diametered.hoc0001.hoc setViewerMask 32767

set hideNewModules 0
[ load ${SCRIPTDIR}/Cell36_4skels_ck.001_corrected_sorted_diametered.hoc0001.hoc ] setLabel Cell36_4skels_ck.001_corrected_sorted_diametered.hoc0001.hoc
Cell36_4skels_ck.001_corrected_sorted_diametered.hoc0001.hoc setIconPosition 20 100
Cell36_4skels_ck.001_corrected_sorted_diametered.hoc0001.hoc fire
Cell36_4skels_ck.001_corrected_sorted_diametered.hoc0001.hoc fire
Cell36_4skels_ck.001_corrected_sorted_diametered.hoc0001.hoc setViewerMask 32767

set hideNewModules 0
[ load ${SCRIPTDIR}/Cell41_3skels_ck.001_corrected_sorted_diametered.hoc0001.hoc ] setLabel Cell41_3skels_ck.001_corrected_sorted_diametered.hoc0001.hoc
Cell41_3skels_ck.001_corrected_sorted_diametered.hoc0001.hoc setIconPosition 20 130
Cell41_3skels_ck.001_corrected_sorted_diametered.hoc0001.hoc fire
Cell41_3skels_ck.001_corrected_sorted_diametered.hoc0001.hoc fire
Cell41_3skels_ck.001_corrected_sorted_diametered.hoc0001.hoc setViewerMask 32767

set hideNewModules 0
[ load ${SCRIPTDIR}/Cell45_6skels_ck.001_corrected_sorted_diametered.hoc0001.hoc ] setLabel Cell45_6skels_ck.001_corrected_sorted_diametered.hoc0001.hoc
Cell45_6skels_ck.001_corrected_sorted_diametered.hoc0001.hoc setIconPosition 20 160
Cell45_6skels_ck.001_corrected_sorted_diametered.hoc0001.hoc fire
Cell45_6skels_ck.001_corrected_sorted_diametered.hoc0001.hoc fire
Cell45_6skels_ck.001_corrected_sorted_diametered.hoc0001.hoc setViewerMask 32767

set hideNewModules 0
[ load ${SCRIPTDIR}/Cell48_5skels_ck.001_corrected_sorted_diametered.hoc0001.hoc ] setLabel Cell48_5skels_ck.001_corrected_sorted_diametered.hoc0001.hoc
Cell48_5skels_ck.001_corrected_sorted_diametered.hoc0001.hoc setIconPosition 20 190
Cell48_5skels_ck.001_corrected_sorted_diametered.hoc0001.hoc fire
Cell48_5skels_ck.001_corrected_sorted_diametered.hoc0001.hoc fire
Cell48_5skels_ck.001_corrected_sorted_diametered.hoc0001.hoc setViewerMask 32767

set hideNewModules 0
[ load ${SCRIPTDIR}/Cell65_7skels_ck.001_corrected_sorted_diametered.hoc0001.hoc ] setLabel Cell65_7skels_ck.001_corrected_sorted_diametered.hoc0001.hoc
Cell65_7skels_ck.001_corrected_sorted_diametered.hoc0001.hoc setIconPosition 20 220
Cell65_7skels_ck.001_corrected_sorted_diametered.hoc0001.hoc fire
Cell65_7skels_ck.001_corrected_sorted_diametered.hoc0001.hoc fire
Cell65_7skels_ck.001_corrected_sorted_diametered.hoc0001.hoc setViewerMask 32767

set hideNewModules 0
[ load ${SCRIPTDIR}/Cell71_4skels_ck.001_corrected_sorted_diametered.hoc0001.hoc ] setLabel Cell71_4skels_ck.001_corrected_sorted_diametered.hoc0001.hoc
Cell71_4skels_ck.001_corrected_sorted_diametered.hoc0001.hoc setIconPosition 20 250
Cell71_4skels_ck.001_corrected_sorted_diametered.hoc0001.hoc fire
Cell71_4skels_ck.001_corrected_sorted_diametered.hoc0001.hoc fire
Cell71_4skels_ck.001_corrected_sorted_diametered.hoc0001.hoc setViewerMask 32767

set hideNewModules 0
[ load ${SCRIPTDIR}/Cell75_4skels_ck.001_corrected_sorted_diametered.hoc0001.hoc ] setLabel Cell75_4skels_ck.001_corrected_sorted_diametered.hoc0001.hoc
Cell75_4skels_ck.001_corrected_sorted_diametered.hoc0001.hoc setIconPosition 20 280
Cell75_4skels_ck.001_corrected_sorted_diametered.hoc0001.hoc fire
Cell75_4skels_ck.001_corrected_sorted_diametered.hoc0001.hoc fire
Cell75_4skels_ck.001_corrected_sorted_diametered.hoc0001.hoc setViewerMask 32767

set hideNewModules 0
[ load ${SCRIPTDIR}/Cell126_4skels_ck.001_corrected_sorted_diametered.hoc0001.hoc ] setLabel Cell126_4skels_ck.001_corrected_sorted_diametered.hoc0001.hoc
Cell126_4skels_ck.001_corrected_sorted_diametered.hoc0001.hoc setIconPosition 20 310
Cell126_4skels_ck.001_corrected_sorted_diametered.hoc0001.hoc fire
Cell126_4skels_ck.001_corrected_sorted_diametered.hoc0001.hoc fire
Cell126_4skels_ck.001_corrected_sorted_diametered.hoc0001.hoc setViewerMask 32767

set hideNewModules 0
[ load ${SCRIPTDIR}/Cell151_4skels_ck.001_corrected_sorted_diametered.hoc0001.hoc ] setLabel Cell151_4skels_ck.001_corrected_sorted_diametered.hoc0001.hoc
Cell151_4skels_ck.001_corrected_sorted_diametered.hoc0001.hoc setIconPosition 20 340
Cell151_4skels_ck.001_corrected_sorted_diametered.hoc0001.hoc fire
Cell151_4skels_ck.001_corrected_sorted_diametered.hoc0001.hoc fire
Cell151_4skels_ck.001_corrected_sorted_diametered.hoc0001.hoc setViewerMask 32767

set hideNewModules 0
[ load ${SCRIPTDIR}/Cell153_4skels_ck.001_corrected_sorted_diametered.hoc0001.hoc ] setLabel Cell153_4skels_ck.001_corrected_sorted_diametered.hoc0001.hoc
Cell153_4skels_ck.001_corrected_sorted_diametered.hoc0001.hoc setIconPosition 20 370
Cell153_4skels_ck.001_corrected_sorted_diametered.hoc0001.hoc fire
Cell153_4skels_ck.001_corrected_sorted_diametered.hoc0001.hoc fire
Cell153_4skels_ck.001_corrected_sorted_diametered.hoc0001.hoc setViewerMask 32767

set hideNewModules 0
[ load ${SCRIPTDIR}/Cell24_5skels_ck_corrected_sorted_diametered.hoc0001.hoc ] setLabel Cell24_5skels_ck_corrected_sorted_diametered.hoc0001.hoc
Cell24_5skels_ck_corrected_sorted_diametered.hoc0001.hoc setIconPosition 20 400
Cell24_5skels_ck_corrected_sorted_diametered.hoc0001.hoc fire
Cell24_5skels_ck_corrected_sorted_diametered.hoc0001.hoc fire
Cell24_5skels_ck_corrected_sorted_diametered.hoc0001.hoc setViewerMask 32767

set hideNewModules 0
[ load ${SCRIPTDIR}/Cell50_6skels_completed.hoc0001.hoc ] setLabel Cell50_6skels_completed.hoc0001.hoc
Cell50_6skels_completed.hoc0001.hoc setIconPosition 20 430
Cell50_6skels_completed.hoc0001.hoc fire
Cell50_6skels_completed.hoc0001.hoc fire
Cell50_6skels_completed.hoc0001.hoc setViewerMask 32767

set hideNewModules 0
[ load ${SCRIPTDIR}/cell27_corrected_sorted_diametered.hoc0001.hoc ] setLabel cell27_corrected_sorted_diametered.hoc0001.hoc
cell27_corrected_sorted_diametered.hoc0001.hoc setIconPosition 20 460
cell27_corrected_sorted_diametered.hoc0001.hoc fire
cell27_corrected_sorted_diametered.hoc0001.hoc fire
cell27_corrected_sorted_diametered.hoc0001.hoc setViewerMask 32767

set hideNewModules 0
[ load ${SCRIPTDIR}/cell138_corrected_sorted_diametered.hoc0001.hoc ] setLabel cell138_corrected_sorted_diametered.hoc0001.hoc
cell138_corrected_sorted_diametered.hoc0001.hoc setIconPosition 20 490
cell138_corrected_sorted_diametered.hoc0001.hoc fire
cell138_corrected_sorted_diametered.hoc0001.hoc fire
cell138_corrected_sorted_diametered.hoc0001.hoc setViewerMask 32767

set hideNewModules 0
[ load ${SCRIPTDIR}/Cell7_VCH_1Skel.001_truff__472ee6.hoc ] setLabel Cell7_VCH_1Skel.001_truff__472ee6.hoc
Cell7_VCH_1Skel.001_truff__472ee6.hoc setIconPosition 20 520
Cell7_VCH_1Skel.001_truff__472ee6.hoc fire
Cell7_VCH_1Skel.001_truff__472ee6.hoc fire
Cell7_VCH_1Skel.001_truff__472ee6.hoc setViewerMask 32767

set hideNewModules 0
[ load ${SCRIPTDIR}/cell15_was_2012-06-26_C80_11__explorational__truff__604db8_3.hoc0001.hoc ] setLabel cell15_was_2012-06-26_C80_11__explorational__truff__604db8_3.hoc0001.hoc
cell15_was_2012-06-26_C80_11__explorational__truff__604db8_3.hoc0001.hoc setIconPosition 20 550
cell15_was_2012-06-26_C80_11__explorational__truff__604db8_3.hoc0001.hoc fire
cell15_was_2012-06-26_C80_11__explorational__truff__604db8_3.hoc0001.hoc fire
cell15_was_2012-06-26_C80_11__explorational__truff__604db8_3.hoc0001.hoc setViewerMask 32767

set hideNewModules 0
[ load ${SCRIPTDIR}/cell23_was_2012-06-26_C80_11__explorational__vrobl__48ebdb.hoc0001.hoc ] setLabel cell23_was_2012-06-26_C80_11__explorational__vrobl__48ebdb.hoc0001.hoc
cell23_was_2012-06-26_C80_11__explorational__vrobl__48ebdb.hoc0001.hoc setIconPosition 20 580
cell23_was_2012-06-26_C80_11__explorational__vrobl__48ebdb.hoc0001.hoc fire
cell23_was_2012-06-26_C80_11__explorational__vrobl__48ebdb.hoc0001.hoc fire
cell23_was_2012-06-26_C80_11__explorational__vrobl__48ebdb.hoc0001.hoc setViewerMask 32767

set hideNewModules 0
[ load ${SCRIPTDIR}/Cell_VSLBD_11skels_ck001_corrected_sorted_diametered.hoc0001.hoc ] setLabel Cell_VSLBD_11skels_ck001_corrected_sorted_diametered.hoc0001.hoc
Cell_VSLBD_11skels_ck001_corrected_sorted_diametered.hoc0001.hoc setIconPosition 20 610
Cell_VSLBD_11skels_ck001_corrected_sorted_diametered.hoc0001.hoc fire
Cell_VSLBD_11skels_ck001_corrected_sorted_diametered.hoc0001.hoc fire
Cell_VSLBD_11skels_ck001_corrected_sorted_diametered.hoc0001.hoc setViewerMask 32767

set hideNewModules 0
[ load ${SCRIPTDIR}/Cell_Y_3skels_ck_was_2012-06-26_C80_11__explorational__vschuhbeck__4903f6_49.hoc0001.hoc ] setLabel Cell_Y_3skels_ck_was_2012-06-26_C80_11__explorational__vschuhbeck__4903f6_49.hoc0001.hoc
Cell_Y_3skels_ck_was_2012-06-26_C80_11__explorational__vschuhbeck__4903f6_49.hoc0001.hoc setIconPosition 20 640
Cell_Y_3skels_ck_was_2012-06-26_C80_11__explorational__vschuhbeck__4903f6_49.hoc0001.hoc fire
Cell_Y_3skels_ck_was_2012-06-26_C80_11__explorational__vschuhbeck__4903f6_49.hoc0001.hoc fire
Cell_Y_3skels_ck_was_2012-06-26_C80_11__explorational__vschuhbeck__4903f6_49.hoc0001.hoc setViewerMask 32767

set hideNewModules 0
[ load ${SCRIPTDIR}/Cell_Z_5skels_ck.001_corrected_sorted_diametered.hoc0001.hoc ] setLabel Cell_Z_5skels_ck.001_corrected_sorted_diametered.hoc0001.hoc
Cell_Z_5skels_ck.001_corrected_sorted_diametered.hoc0001.hoc setIconPosition 20 670
Cell_Z_5skels_ck.001_corrected_sorted_diametered.hoc0001.hoc fire
Cell_Z_5skels_ck.001_corrected_sorted_diametered.hoc0001.hoc fire
Cell_Z_5skels_ck.001_corrected_sorted_diametered.hoc0001.hoc setViewerMask 32767

set hideNewModules 0
[ load ${SCRIPTDIR}/CellX_7skels_completed.hoc0001.hoc ] setLabel CellX_7skels_completed.hoc0001.hoc
CellX_7skels_completed.hoc0001.hoc setIconPosition 20 700
CellX_7skels_completed.hoc0001.hoc fire
CellX_7skels_completed.hoc0001.hoc fire
CellX_7skels_completed.hoc0001.hoc setViewerMask 32767

set hideNewModules 0
[ load ${SCRIPTDIR}/corrected_hw_DCH_cell3_28_70_127_ck_node_size_changed.hoc0001.hoc ] setLabel corrected_hw_DCH_cell3_28_70_127_ck_node_size_changed.hoc0001.hoc
corrected_hw_DCH_cell3_28_70_127_ck_node_size_changed.hoc0001.hoc setIconPosition 20 730
corrected_hw_DCH_cell3_28_70_127_ck_node_size_changed.hoc0001.hoc fire
corrected_hw_DCH_cell3_28_70_127_ck_node_size_changed.hoc0001.hoc fire
corrected_hw_DCH_cell3_28_70_127_ck_node_size_changed.hoc0001.hoc setViewerMask 32767

set hideNewModules 0
[ load ${SCRIPTDIR}/Zelle40_fertig.hoc0001.hoc ] setLabel Zelle40_fertig.hoc0001.hoc
Zelle40_fertig.hoc0001.hoc setIconPosition 20 760
Zelle40_fertig.hoc0001.hoc fire
Zelle40_fertig.hoc0001.hoc fire
Zelle40_fertig.hoc0001.hoc setViewerMask 32767

set hideNewModules 0
[ load ${SCRIPTDIR}/Zelle64_fertig.hoc0001.hoc ] setLabel Zelle64_fertig.hoc0001.hoc
Zelle64_fertig.hoc0001.hoc setIconPosition 20 790
Zelle64_fertig.hoc0001.hoc fire
Zelle64_fertig.hoc0001.hoc fire
Zelle64_fertig.hoc0001.hoc setViewerMask 32767

set hideNewModules 0
[ load ${SCRIPTDIR}/Zelle163_fertig.hoc0001.hoc ] setLabel Zelle163_fertig.hoc0001.hoc
Zelle163_fertig.hoc0001.hoc setIconPosition 20 820
Zelle163_fertig.hoc0001.hoc fire
Zelle163_fertig.hoc0001.hoc fire
Zelle163_fertig.hoc0001.hoc setViewerMask 32767

set hideNewModules 0
[ load ${SCRIPTDIR}/ZELLE_22.hoc0001.hoc ] setLabel ZELLE_22.hoc0001.hoc
ZELLE_22.hoc0001.hoc setIconPosition 20 850
ZELLE_22.hoc0001.hoc fire
ZELLE_22.hoc0001.hoc fire
ZELLE_22.hoc0001.hoc setViewerMask 32767

set hideNewModules 0
[ load ${SCRIPTDIR}/Zelle_55_fertig.hoc0001.hoc ] setLabel Zelle_55_fertig.hoc0001.hoc
Zelle_55_fertig.hoc0001.hoc setIconPosition 20 880
Zelle_55_fertig.hoc0001.hoc fire
Zelle_55_fertig.hoc0001.hoc fire
Zelle_55_fertig.hoc0001.hoc setViewerMask 32767

set hideNewModules 0
[ load "${SCRIPTDIR}/Neuropil outline/Lobula outline 17Sep13.008_0002.hoc" ] setLabel Lobula-outline-17Sep13.008_0002.hoc
Lobula-outline-17Sep13.008_0002.hoc setIconPosition 20 910
Lobula-outline-17Sep13.008_0002.hoc fire
Lobula-outline-17Sep13.008_0002.hoc fire
Lobula-outline-17Sep13.008_0002.hoc setViewerMask 32766

set hideNewModules 0
[ load "${SCRIPTDIR}/Neuropil outline/Medulla outline ck 17Sep13.008_0002.hoc" ] setLabel Medulla-outline-ck-17Sep13.008_0002.hoc
Medulla-outline-ck-17Sep13.008_0002.hoc setIconPosition 20 940
Medulla-outline-ck-17Sep13.008_0002.hoc fire
Medulla-outline-ck-17Sep13.008_0002.hoc fire
Medulla-outline-ck-17Sep13.008_0002.hoc setViewerMask 32766

set hideNewModules 0
[ load "${SCRIPTDIR}/Neuropil outline/Outline LP ck 17Sep13.008_0002.hoc" ] setLabel Outline-LP-ck-17Sep13.008_0002.hoc
Outline-LP-ck-17Sep13.008_0002.hoc setIconPosition 20 970
Outline-LP-ck-17Sep13.008_0002.hoc fire
Outline-LP-ck-17Sep13.008_0002.hoc fire
Outline-LP-ck-17Sep13.008_0002.hoc setViewerMask 32766

set hideNewModules 0
[ load "${SCRIPTDIR}/Cell bodies schematic/zellkoerper3.005_distant.hoc" ] setLabel zellkoerper3.005_distant.hoc
zellkoerper3.005_distant.hoc setIconPosition 20 1030
zellkoerper3.005_distant.hoc fire
zellkoerper3.005_distant.hoc fire
zellkoerper3.005_distant.hoc setViewerMask 32766

set hideNewModules 0
[ load "${SCRIPTDIR}/Cell bodies schematic/zellkoerper3.005_located.hoc" ] setLabel zellkoerper3.005_located.hoc
zellkoerper3.005_located.hoc setIconPosition 20 1060
zellkoerper3.005_located.hoc fire
zellkoerper3.005_located.hoc fire
zellkoerper3.005_located.hoc setViewerMask 32766

set hideNewModules 0
[ load "${SCRIPTDIR}/Cell bodies schematic/_dros-zellkoerper-abiasotto.157.hoc" ] setLabel _dros-zellkoerper-abiasotto.157.hoc
_dros-zellkoerper-abiasotto.157.hoc setIconPosition 20 1000
_dros-zellkoerper-abiasotto.157.hoc fire
_dros-zellkoerper-abiasotto.157.hoc fire
_dros-zellkoerper-abiasotto.157.hoc setViewerMask 32766

set hideNewModules 0
[ load ${SCRIPTDIR}/VS_VSL_preliminary/VS1_5skels_ck.001_completed.hoc0007.hoc ] setLabel VS1_5skels_ck.001_completed.hoc0007.hoc
VS1_5skels_ck.001_completed.hoc0007.hoc setIconPosition 20 1090
VS1_5skels_ck.001_completed.hoc0007.hoc fire
VS1_5skels_ck.001_completed.hoc0007.hoc fire
VS1_5skels_ck.001_completed.hoc0007.hoc setViewerMask 32767

set hideNewModules 0
[ load ${SCRIPTDIR}/VS_VSL_preliminary/VS2_3skels_ck.001_completed.hoc0003.hoc ] setLabel VS2_3skels_ck.001_completed.hoc0003.hoc
VS2_3skels_ck.001_completed.hoc0003.hoc setIconPosition 20 1120
VS2_3skels_ck.001_completed.hoc0003.hoc fire
VS2_3skels_ck.001_completed.hoc0003.hoc fire
VS2_3skels_ck.001_completed.hoc0003.hoc setViewerMask 32767

set hideNewModules 0
[ load ${SCRIPTDIR}/VS_VSL_preliminary/VS3_4skels_ck.001_completed.hoc0001.hoc ] setLabel VS3_4skels_ck.001_completed.hoc0001.hoc
VS3_4skels_ck.001_completed.hoc0001.hoc setIconPosition 20 1150
VS3_4skels_ck.001_completed.hoc0001.hoc fire
VS3_4skels_ck.001_completed.hoc0001.hoc fire
VS3_4skels_ck.001_completed.hoc0001.hoc setViewerMask 32767

set hideNewModules 0
[ load ${SCRIPTDIR}/VS_VSL_preliminary/VS4_skels_ck.001_completed.hoc0001.hoc ] setLabel VS4_skels_ck.001_completed.hoc0001.hoc
VS4_skels_ck.001_completed.hoc0001.hoc setIconPosition 20 1180
VS4_skels_ck.001_completed.hoc0001.hoc fire
VS4_skels_ck.001_completed.hoc0001.hoc fire
VS4_skels_ck.001_completed.hoc0001.hoc setViewerMask 32767

set hideNewModules 0
[ load ${SCRIPTDIR}/VS_VSL_preliminary/VS5_5skels_ck.001_completed.hoc0005.hoc ] setLabel VS5_5skels_ck.001_completed.hoc0005.hoc
VS5_5skels_ck.001_completed.hoc0005.hoc setIconPosition 20 1510
VS5_5skels_ck.001_completed.hoc0005.hoc fire
VS5_5skels_ck.001_completed.hoc0005.hoc fire
VS5_5skels_ck.001_completed.hoc0005.hoc setViewerMask 32767

set hideNewModules 0
[ load ${SCRIPTDIR}/VS_VSL_preliminary/VS6_4skels_ck.001_completed.hoc0001.hoc ] setLabel VS6_4skels_ck.001_completed.hoc0001.hoc
VS6_4skels_ck.001_completed.hoc0001.hoc setIconPosition 20 1570
VS6_4skels_ck.001_completed.hoc0001.hoc fire
VS6_4skels_ck.001_completed.hoc0001.hoc fire
VS6_4skels_ck.001_completed.hoc0001.hoc setViewerMask 32767

set hideNewModules 0
[ load ${SCRIPTDIR}/VS_VSL_preliminary/VSlike1_3skels_ck.001_completed.hoc0003.hoc ] setLabel VSlike1_3skels_ck.001_completed.hoc0003.hoc
VSlike1_3skels_ck.001_completed.hoc0003.hoc setIconPosition 20 1750
VSlike1_3skels_ck.001_completed.hoc0003.hoc fire
VSlike1_3skels_ck.001_completed.hoc0003.hoc fire
VSlike1_3skels_ck.001_completed.hoc0003.hoc setViewerMask 32767

set hideNewModules 0
[ load ${SCRIPTDIR}/VS_VSL_preliminary/VSlike3_2skels_ck.001_completed.hoc0001.hoc ] setLabel VSlike3_2skels_ck.001_completed.hoc0001.hoc
VSlike3_2skels_ck.001_completed.hoc0001.hoc setIconPosition 20 1780
VSlike3_2skels_ck.001_completed.hoc0001.hoc fire
VSlike3_2skels_ck.001_completed.hoc0001.hoc fire
VSlike3_2skels_ck.001_completed.hoc0001.hoc setViewerMask 32767

set hideNewModules 0
[ load "${SCRIPTDIR}/VS_VSL_preliminary/Old Diameters Mar13_VS_VSL_HS/VS1/2_14_791_sbeyer_002.059.hoc" ] setLabel 2_14_791_sbeyer_002.059.hoc
2_14_791_sbeyer_002.059.hoc setIconPosition 20 1210
2_14_791_sbeyer_002.059.hoc fire
2_14_791_sbeyer_002.059.hoc fire
2_14_791_sbeyer_002.059.hoc setViewerMask 32767

set hideNewModules 0
[ load "${SCRIPTDIR}/VS_VSL_preliminary/Old Diameters Mar13_VS_VSL_HS/VS1/2_14_732_smaurer_003.055.hoc" ] setLabel 2_14_732_smaurer_003.055.hoc
2_14_732_smaurer_003.055.hoc setIconPosition 20 1240
2_14_732_smaurer_003.055.hoc fire
2_14_732_smaurer_003.055.hoc fire
2_14_732_smaurer_003.055.hoc setViewerMask 32767

set hideNewModules 0
[ load "${SCRIPTDIR}/VS_VSL_preliminary/Old Diameters Mar13_VS_VSL_HS/VS1/2_14_733_smaurer_002.022.hoc" ] setLabel 2_14_733_smaurer_002.022.hoc
2_14_733_smaurer_002.022.hoc setIconPosition 20 1270
2_14_733_smaurer_002.022.hoc fire
2_14_733_smaurer_002.022.hoc fire
2_14_733_smaurer_002.022.hoc setViewerMask 32767

set hideNewModules 0
[ load "${SCRIPTDIR}/VS_VSL_preliminary/Old Diameters Mar13_VS_VSL_HS/VS1/2_14_789_smaurer_001.020.hoc" ] setLabel 2_14_789_smaurer_001.020.hoc
2_14_789_smaurer_001.020.hoc setIconPosition 20 1300
2_14_789_smaurer_001.020.hoc fire
2_14_789_smaurer_001.020.hoc fire
2_14_789_smaurer_001.020.hoc setViewerMask 32767

set hideNewModules 0
[ load "${SCRIPTDIR}/VS_VSL_preliminary/Old Diameters Mar13_VS_VSL_HS/VS1/2_14_790_smaurer_002.043.hoc" ] setLabel 2_14_790_smaurer_002.043.hoc
2_14_790_smaurer_002.043.hoc setIconPosition 20 1330
2_14_790_smaurer_002.043.hoc fire
2_14_790_smaurer_002.043.hoc fire
2_14_790_smaurer_002.043.hoc setViewerMask 32767

set hideNewModules 0
[ load "${SCRIPTDIR}/VS_VSL_preliminary/Old Diameters Mar13_VS_VSL_HS/VS2/2_14_744_gmordhorst_001.027.hoc" ] setLabel 2_14_744_gmordhorst_001.027.hoc
2_14_744_gmordhorst_001.027.hoc setIconPosition 20 1360
2_14_744_gmordhorst_001.027.hoc fire
2_14_744_gmordhorst_001.027.hoc fire
2_14_744_gmordhorst_001.027.hoc setViewerMask 32767

set hideNewModules 0
[ load "${SCRIPTDIR}/VS_VSL_preliminary/Old Diameters Mar13_VS_VSL_HS/VS2/2_14_745_gmordhorst_001.023.hoc" ] setLabel 2_14_745_gmordhorst_001.023.hoc
2_14_745_gmordhorst_001.023.hoc setIconPosition 20 1390
2_14_745_gmordhorst_001.023.hoc fire
2_14_745_gmordhorst_001.023.hoc fire
2_14_745_gmordhorst_001.023.hoc setViewerMask 32767

set hideNewModules 0
[ load "${SCRIPTDIR}/VS_VSL_preliminary/Old Diameters Mar13_VS_VSL_HS/VS2/2_14_792_smaurer_002.039.hoc" ] setLabel 2_14_792_smaurer_002.039.hoc
2_14_792_smaurer_002.039.hoc setIconPosition 20 1420
2_14_792_smaurer_002.039.hoc fire
2_14_792_smaurer_002.039.hoc fire
2_14_792_smaurer_002.039.hoc setViewerMask 32767

set hideNewModules 0
[ load "${SCRIPTDIR}/VS_VSL_preliminary/Old Diameters Mar13_VS_VSL_HS/VS3/2_14_741_smaurer_001.022.hoc" ] setLabel 2_14_741_smaurer_001.022.hoc
2_14_741_smaurer_001.022.hoc setIconPosition 20 1450
2_14_741_smaurer_001.022.hoc fire
2_14_741_smaurer_001.022.hoc fire
2_14_741_smaurer_001.022.hoc setViewerMask 32767

set hideNewModules 0
[ load "${SCRIPTDIR}/VS_VSL_preliminary/Old Diameters Mar13_VS_VSL_HS/VS3/2_14_743_smaurer_002.056.hoc" ] setLabel 2_14_743_smaurer_002.056.hoc
2_14_743_smaurer_002.056.hoc setIconPosition 20 1480
2_14_743_smaurer_002.056.hoc fire
2_14_743_smaurer_002.056.hoc fire
2_14_743_smaurer_002.056.hoc setViewerMask 32767

set hideNewModules 0
[ load "${SCRIPTDIR}/VS_VSL_preliminary/Old Diameters Mar13_VS_VSL_HS/VS3/2_14_806_smaurer_002.033.hoc" ] setLabel 2_14_806_smaurer_002.033.hoc
2_14_806_smaurer_002.033.hoc setIconPosition 20 1540
2_14_806_smaurer_002.033.hoc fire
2_14_806_smaurer_002.033.hoc fire
2_14_806_smaurer_002.033.hoc setViewerMask 32767

set hideNewModules 0
[ load "${SCRIPTDIR}/VS_VSL_preliminary/Old Diameters Mar13_VS_VSL_HS/VS3/2_14_808_smaurer_003.035.hoc" ] setLabel 2_14_808_smaurer_003.035.hoc
2_14_808_smaurer_003.035.hoc setIconPosition 20 1600
2_14_808_smaurer_003.035.hoc fire
2_14_808_smaurer_003.035.hoc fire
2_14_808_smaurer_003.035.hoc setViewerMask 32767

set hideNewModules 0
[ load "${SCRIPTDIR}/VS_VSL_preliminary/Old Diameters Mar13_VS_VSL_HS/VS4/2_14_762_gmordhorst_001.027.hoc" ] setLabel 2_14_762_gmordhorst_001.027.hoc
2_14_762_gmordhorst_001.027.hoc setIconPosition 20 1630
2_14_762_gmordhorst_001.027.hoc fire
2_14_762_gmordhorst_001.027.hoc fire
2_14_762_gmordhorst_001.027.hoc setViewerMask 32767

set hideNewModules 0
[ load "${SCRIPTDIR}/VS_VSL_preliminary/Old Diameters Mar13_VS_VSL_HS/VS4/2_14_759_smaurer_001.023.hoc" ] setLabel 2_14_759_smaurer_001.023.hoc
2_14_759_smaurer_001.023.hoc setIconPosition 20 1660
2_14_759_smaurer_001.023.hoc fire
2_14_759_smaurer_001.023.hoc fire
2_14_759_smaurer_001.023.hoc setViewerMask 32767

set hideNewModules 0
[ load "${SCRIPTDIR}/VS_VSL_preliminary/Old Diameters Mar13_VS_VSL_HS/VS4/2_14_760_smaurer_001.011.hoc" ] setLabel 2_14_760_smaurer_001.011.hoc
2_14_760_smaurer_001.011.hoc setIconPosition 20 1690
2_14_760_smaurer_001.011.hoc fire
2_14_760_smaurer_001.011.hoc fire
2_14_760_smaurer_001.011.hoc setViewerMask 32767

set hideNewModules 0
[ load "${SCRIPTDIR}/VS_VSL_preliminary/Old Diameters Mar13_VS_VSL_HS/VS4/2_14_761_smaurer_001.008.hoc" ] setLabel 2_14_761_smaurer_001.008.hoc
2_14_761_smaurer_001.008.hoc setIconPosition 20 1720
2_14_761_smaurer_001.008.hoc fire
2_14_761_smaurer_001.008.hoc fire
2_14_761_smaurer_001.008.hoc setViewerMask 32767

set hideNewModules 0
[ load "${SCRIPTDIR}/VS_VSL_preliminary/Old Diameters Mar13_VS_VSL_HS/VS4/2_14_763_smaurer_001.004.hoc" ] setLabel 2_14_763_smaurer_001.004.hoc
2_14_763_smaurer_001.004.hoc setIconPosition 20 1810
2_14_763_smaurer_001.004.hoc fire
2_14_763_smaurer_001.004.hoc fire
2_14_763_smaurer_001.004.hoc setViewerMask 32767

set hideNewModules 0
[ load "${SCRIPTDIR}/VS_VSL_preliminary/Old Diameters Mar13_VS_VSL_HS/VS4/2_14_802_smaurer_001.019.hoc" ] setLabel 2_14_802_smaurer_001.019.hoc
2_14_802_smaurer_001.019.hoc setIconPosition 20 1840
2_14_802_smaurer_001.019.hoc fire
2_14_802_smaurer_001.019.hoc fire
2_14_802_smaurer_001.019.hoc setViewerMask 32767

set hideNewModules 0
[ load "${SCRIPTDIR}/VS_VSL_preliminary/Old Diameters Mar13_VS_VSL_HS/VS5/2_14_747_gmordhorst_001.035.hoc" ] setLabel 2_14_747_gmordhorst_001.035.hoc
2_14_747_gmordhorst_001.035.hoc setIconPosition 20 1870
2_14_747_gmordhorst_001.035.hoc fire
2_14_747_gmordhorst_001.035.hoc fire
2_14_747_gmordhorst_001.035.hoc setViewerMask 32767

set hideNewModules 0
[ load "${SCRIPTDIR}/VS_VSL_preliminary/Old Diameters Mar13_VS_VSL_HS/VS5/2_14_749_gmordhorst_001.026.hoc" ] setLabel 2_14_749_gmordhorst_001.026.hoc
2_14_749_gmordhorst_001.026.hoc setIconPosition 20 1900
2_14_749_gmordhorst_001.026.hoc fire
2_14_749_gmordhorst_001.026.hoc fire
2_14_749_gmordhorst_001.026.hoc setViewerMask 32767

set hideNewModules 0
[ load "${SCRIPTDIR}/VS_VSL_preliminary/Old Diameters Mar13_VS_VSL_HS/VS5/2_14_784_gmordhorst_002.026.hoc" ] setLabel 2_14_784_gmordhorst_002.026.hoc
2_14_784_gmordhorst_002.026.hoc setIconPosition 20 1930
2_14_784_gmordhorst_002.026.hoc fire
2_14_784_gmordhorst_002.026.hoc fire
2_14_784_gmordhorst_002.026.hoc setViewerMask 32767

set hideNewModules 0
[ load "${SCRIPTDIR}/VS_VSL_preliminary/Old Diameters Mar13_VS_VSL_HS/VS5/2_14_783_smaurer_002.023.hoc" ] setLabel 2_14_783_smaurer_002.023.hoc
2_14_783_smaurer_002.023.hoc setIconPosition 20 1960
2_14_783_smaurer_002.023.hoc fire
2_14_783_smaurer_002.023.hoc fire
2_14_783_smaurer_002.023.hoc setViewerMask 32767

set hideNewModules 0
[ load "${SCRIPTDIR}/VS_VSL_preliminary/Old Diameters Mar13_VS_VSL_HS/VS5/2_14_785_smaurer_002.010.hoc" ] setLabel 2_14_785_smaurer_002.010.hoc
2_14_785_smaurer_002.010.hoc setIconPosition 20 1990
2_14_785_smaurer_002.010.hoc fire
2_14_785_smaurer_002.010.hoc fire
2_14_785_smaurer_002.010.hoc setViewerMask 32767

set hideNewModules 0
[ load "${SCRIPTDIR}/VS_VSL_preliminary/Old Diameters Mar13_VS_VSL_HS/VS6/2_14_734_smaurer_001.012.hoc" ] setLabel 2_14_734_smaurer_001.012.hoc
2_14_734_smaurer_001.012.hoc setIconPosition 20 2020
2_14_734_smaurer_001.012.hoc fire
2_14_734_smaurer_001.012.hoc fire
2_14_734_smaurer_001.012.hoc setViewerMask 32767

set hideNewModules 0
[ load "${SCRIPTDIR}/VS_VSL_preliminary/Old Diameters Mar13_VS_VSL_HS/VS6/2_14_735_smaurer_001.012.hoc" ] setLabel 2_14_735_smaurer_001.012.hoc
2_14_735_smaurer_001.012.hoc setIconPosition 20 2050
2_14_735_smaurer_001.012.hoc fire
2_14_735_smaurer_001.012.hoc fire
2_14_735_smaurer_001.012.hoc setViewerMask 32767

set hideNewModules 0
[ load "${SCRIPTDIR}/VS_VSL_preliminary/Old Diameters Mar13_VS_VSL_HS/VS6/2_14_795_smaurer_003.018.hoc" ] setLabel 2_14_795_smaurer_003.018.hoc
2_14_795_smaurer_003.018.hoc setIconPosition 20 2080
2_14_795_smaurer_003.018.hoc fire
2_14_795_smaurer_003.018.hoc fire
2_14_795_smaurer_003.018.hoc setViewerMask 32767

set hideNewModules 0
[ load "${SCRIPTDIR}/VS_VSL_preliminary/Old Diameters Mar13_VS_VSL_HS/VS6/2_14_797_smaurer_001.008.hoc" ] setLabel 2_14_797_smaurer_001.008.hoc
2_14_797_smaurer_001.008.hoc setIconPosition 20 2110
2_14_797_smaurer_001.008.hoc fire
2_14_797_smaurer_001.008.hoc fire
2_14_797_smaurer_001.008.hoc setViewerMask 32767

set hideNewModules 0
[ load "${SCRIPTDIR}/VS_VSL_preliminary/Old Diameters Mar13_VS_VSL_HS/VSlike1/2_14_782_gmordhorst_001.022.hoc" ] setLabel 2_14_782_gmordhorst_001.022.hoc
2_14_782_gmordhorst_001.022.hoc setIconPosition 20 2140
2_14_782_gmordhorst_001.022.hoc fire
2_14_782_gmordhorst_001.022.hoc fire
2_14_782_gmordhorst_001.022.hoc setViewerMask 32767

set hideNewModules 0
[ load "${SCRIPTDIR}/VS_VSL_preliminary/Old Diameters Mar13_VS_VSL_HS/VSlike1/2_14_756_smaurer_001.019.hoc" ] setLabel 2_14_756_smaurer_001.019.hoc
2_14_756_smaurer_001.019.hoc setIconPosition 20 2170
2_14_756_smaurer_001.019.hoc fire
2_14_756_smaurer_001.019.hoc fire
2_14_756_smaurer_001.019.hoc setViewerMask 32767

set hideNewModules 0
[ load "${SCRIPTDIR}/VS_VSL_preliminary/Old Diameters Mar13_VS_VSL_HS/VSlike1/2_14_757_smaurer_001.015.hoc" ] setLabel 2_14_757_smaurer_001.015.hoc
2_14_757_smaurer_001.015.hoc setIconPosition 20 2200
2_14_757_smaurer_001.015.hoc fire
2_14_757_smaurer_001.015.hoc fire
2_14_757_smaurer_001.015.hoc setViewerMask 32767

set hideNewModules 0
[ load "${SCRIPTDIR}/VS_VSL_preliminary/Old Diameters Mar13_VS_VSL_HS/VSlike2/2_14_767_gmordhorst_001.008.hoc" ] setLabel 2_14_767_gmordhorst_001.008.hoc
2_14_767_gmordhorst_001.008.hoc setIconPosition 20 2230
2_14_767_gmordhorst_001.008.hoc fire
2_14_767_gmordhorst_001.008.hoc fire
2_14_767_gmordhorst_001.008.hoc setViewerMask 32767

set hideNewModules 0
[ load "${SCRIPTDIR}/VS_VSL_preliminary/Old Diameters Mar13_VS_VSL_HS/VSlike2/2_14_768_gmordhorst_001.006.hoc" ] setLabel 2_14_768_gmordhorst_001.006.hoc
2_14_768_gmordhorst_001.006.hoc setIconPosition 20 2260
2_14_768_gmordhorst_001.006.hoc fire
2_14_768_gmordhorst_001.006.hoc fire
2_14_768_gmordhorst_001.006.hoc setViewerMask 32767

set hideNewModules 0
[ load "${SCRIPTDIR}/VS_VSL_preliminary/Old Diameters Mar13_VS_VSL_HS/VSlike2/2_14_766_sbeyer_002.072.hoc" ] setLabel 2_14_766_sbeyer_002.072.hoc
2_14_766_sbeyer_002.072.hoc setIconPosition 20 2290
2_14_766_sbeyer_002.072.hoc fire
2_14_766_sbeyer_002.072.hoc fire
2_14_766_sbeyer_002.072.hoc setViewerMask 32767

set hideNewModules 0
[ load "${SCRIPTDIR}/VS_VSL_preliminary/Old Diameters Mar13_VS_VSL_HS/VSlike3/2_14_750_sbeyer_001.091.hoc" ] setLabel 2_14_750_sbeyer_001.091.hoc
2_14_750_sbeyer_001.091.hoc setIconPosition 20 2320
2_14_750_sbeyer_001.091.hoc fire
2_14_750_sbeyer_001.091.hoc fire
2_14_750_sbeyer_001.091.hoc setViewerMask 32767

set hideNewModules 0
[ load "${SCRIPTDIR}/VS_VSL_preliminary/Old Diameters Mar13_VS_VSL_HS/VSlike3/2_14_800_smaurer_001.015.hoc" ] setLabel 2_14_800_smaurer_001.015.hoc
2_14_800_smaurer_001.015.hoc setIconPosition 20 2350
2_14_800_smaurer_001.015.hoc fire
2_14_800_smaurer_001.015.hoc fire
2_14_800_smaurer_001.015.hoc setViewerMask 32767

set hideNewModules 0
[ load "${SCRIPTDIR}/VS_VSL_preliminary/Old Diameters Mar13_VS_VSL_HS/HSN/2_14_738_smaurer_002.023.hoc" ] setLabel 2_14_738_smaurer_002.023.hoc
2_14_738_smaurer_002.023.hoc setIconPosition 20 2380
2_14_738_smaurer_002.023.hoc fire
2_14_738_smaurer_002.023.hoc fire
2_14_738_smaurer_002.023.hoc setViewerMask 32767

set hideNewModules 0
[ load "${SCRIPTDIR}/VS_VSL_preliminary/Old Diameters Mar13_VS_VSL_HS/HSN/2_14_739_smaurer_001.019.hoc" ] setLabel 2_14_739_smaurer_001.019.hoc
2_14_739_smaurer_001.019.hoc setIconPosition 20 2410
2_14_739_smaurer_001.019.hoc fire
2_14_739_smaurer_001.019.hoc fire
2_14_739_smaurer_001.019.hoc setViewerMask 32767

set hideNewModules 0
[ load "${SCRIPTDIR}/VS_VSL_preliminary/Old Diameters Mar13_VS_VSL_HS/HSN/2_14_811_smaurer_001.015.hoc" ] setLabel 2_14_811_smaurer_001.015.hoc
2_14_811_smaurer_001.015.hoc setIconPosition 20 2440
2_14_811_smaurer_001.015.hoc fire
2_14_811_smaurer_001.015.hoc fire
2_14_811_smaurer_001.015.hoc setViewerMask 32767

set hideNewModules 0
[ load "${SCRIPTDIR}/VS_VSL_preliminary/Old Diameters Mar13_VS_VSL_HS/HSN/2_14_812_smaurer_002.014.hoc" ] setLabel 2_14_812_smaurer_002.014.hoc
2_14_812_smaurer_002.014.hoc setIconPosition 20 2470
2_14_812_smaurer_002.014.hoc fire
2_14_812_smaurer_002.014.hoc fire
2_14_812_smaurer_002.014.hoc setViewerMask 32767

set hideNewModules 0
[ load "${SCRIPTDIR}/VS_VSL_preliminary/Old Diameters Mar13_VS_VSL_HS/HSE/2_14_775_gmordhorst_002.018.hoc" ] setLabel 2_14_775_gmordhorst_002.018.hoc
2_14_775_gmordhorst_002.018.hoc setIconPosition 20 2500
2_14_775_gmordhorst_002.018.hoc fire
2_14_775_gmordhorst_002.018.hoc fire
2_14_775_gmordhorst_002.018.hoc setViewerMask 32767

set hideNewModules 0
[ load "${SCRIPTDIR}/VS_VSL_preliminary/Old Diameters Mar13_VS_VSL_HS/HSE/2_14_777_gmordhorst_001.008.hoc" ] setLabel 2_14_777_gmordhorst_001.008.hoc
2_14_777_gmordhorst_001.008.hoc setIconPosition 20 2530
2_14_777_gmordhorst_001.008.hoc fire
2_14_777_gmordhorst_001.008.hoc fire
2_14_777_gmordhorst_001.008.hoc setViewerMask 32767

set hideNewModules 0
[ load "${SCRIPTDIR}/VS_VSL_preliminary/Old Diameters Mar13_VS_VSL_HS/HSE/2_14_778_gmordhorst_001.016.hoc" ] setLabel 2_14_778_gmordhorst_001.016.hoc
2_14_778_gmordhorst_001.016.hoc setIconPosition 20 2560
2_14_778_gmordhorst_001.016.hoc fire
2_14_778_gmordhorst_001.016.hoc fire
2_14_778_gmordhorst_001.016.hoc setViewerMask 32767

set hideNewModules 0
[ load "${SCRIPTDIR}/VS_VSL_preliminary/Old Diameters Mar13_VS_VSL_HS/HSE/2_14_729_smaurer_001.007.hoc" ] setLabel 2_14_729_smaurer_001.007.hoc
2_14_729_smaurer_001.007.hoc setIconPosition 20 2590
2_14_729_smaurer_001.007.hoc fire
2_14_729_smaurer_001.007.hoc fire
2_14_729_smaurer_001.007.hoc setViewerMask 32767

set hideNewModules 0
[ load "${SCRIPTDIR}/VS_VSL_preliminary/Old Diameters Mar13_VS_VSL_HS/HSS/2_14_724_gmordhorst_001.055.hoc" ] setLabel 2_14_724_gmordhorst_001.055.hoc
2_14_724_gmordhorst_001.055.hoc setIconPosition 20 2620
2_14_724_gmordhorst_001.055.hoc fire
2_14_724_gmordhorst_001.055.hoc fire
2_14_724_gmordhorst_001.055.hoc setViewerMask 32767

set hideNewModules 0
[ load "${SCRIPTDIR}/VS_VSL_preliminary/Old Diameters Mar13_VS_VSL_HS/HSS/2_14_727_gmordhorst_001.021.hoc" ] setLabel 2_14_727_gmordhorst_001.021.hoc
2_14_727_gmordhorst_001.021.hoc setIconPosition 20 2650
2_14_727_gmordhorst_001.021.hoc fire
2_14_727_gmordhorst_001.021.hoc fire
2_14_727_gmordhorst_001.021.hoc setViewerMask 32767

set hideNewModules 0
[ load "${SCRIPTDIR}/VS_VSL_preliminary/Old Diameters Mar13_VS_VSL_HS/HSS/2_14_723_sbeyer_003.126.hoc" ] setLabel 2_14_723_sbeyer_003.126.hoc
2_14_723_sbeyer_003.126.hoc setIconPosition 20 2680
2_14_723_sbeyer_003.126.hoc fire
2_14_723_sbeyer_003.126.hoc fire
2_14_723_sbeyer_003.126.hoc setViewerMask 32767

set hideNewModules 0
[ load "${SCRIPTDIR}/VS_VSL_preliminary/Old Diameters Mar13_VS_VSL_HS/HSS/2_14_725_smaurer_001.008.hoc" ] setLabel 2_14_725_smaurer_001.008.hoc
2_14_725_smaurer_001.008.hoc setIconPosition 20 2710
2_14_725_smaurer_001.008.hoc fire
2_14_725_smaurer_001.008.hoc fire
2_14_725_smaurer_001.008.hoc setViewerMask 32767

set hideNewModules 0
[ load "${SCRIPTDIR}/VS_VSL_preliminary/Old Diameters Mar13_VS_VSL_HS/HSS/2_14_726_smaurer_002.053.hoc" ] setLabel 2_14_726_smaurer_002.053.hoc
2_14_726_smaurer_002.053.hoc setIconPosition 20 2740
2_14_726_smaurer_002.053.hoc fire
2_14_726_smaurer_002.053.hoc fire
2_14_726_smaurer_002.053.hoc setViewerMask 32767

set hideNewModules 0
[ load ${SCRIPTDIR}/plotCompleteSkeletons/vs10001.hoc ] setLabel vs10001.hoc
vs10001.hoc setIconPosition 20 2770
vs10001.hoc fire
vs10001.hoc fire
vs10001.hoc setViewerMask 32767

set hideNewModules 0
[ load ${SCRIPTDIR}/plotCompleteSkeletons/vs20001.hoc ] setLabel vs20001.hoc
vs20001.hoc setIconPosition 20 2800
vs20001.hoc fire
vs20001.hoc fire
vs20001.hoc setViewerMask 32767

set hideNewModules 0
[ load ${SCRIPTDIR}/plotCompleteSkeletons/vs30001.hoc ] setLabel vs30001.hoc
vs30001.hoc setIconPosition 20 2830
vs30001.hoc fire
vs30001.hoc fire
vs30001.hoc setViewerMask 32767

set hideNewModules 0
[ load ${SCRIPTDIR}/plotCompleteSkeletons/vs40001.hoc ] setLabel vs40001.hoc
vs40001.hoc setIconPosition 20 2860
vs40001.hoc fire
vs40001.hoc fire
vs40001.hoc setViewerMask 32767

set hideNewModules 0
[ load ${SCRIPTDIR}/plotCompleteSkeletons/vs50001.hoc ] setLabel vs50001.hoc
vs50001.hoc setIconPosition 20 2890
vs50001.hoc fire
vs50001.hoc fire
vs50001.hoc setViewerMask 32767

set hideNewModules 0
[ load ${SCRIPTDIR}/plotCompleteSkeletons/vs60001.hoc ] setLabel vs60001.hoc
vs60001.hoc setIconPosition 20 2920
vs60001.hoc fire
vs60001.hoc fire
vs60001.hoc setViewerMask 32767

set hideNewModules 0
[ load ${SCRIPTDIR}/plotCompleteSkeletons/vsl20001.hoc ] setLabel vsl20001.hoc
vsl20001.hoc setIconPosition 20 2980
vsl20001.hoc fire
vsl20001.hoc fire
vsl20001.hoc setViewerMask 32767

set hideNewModules 0
[ load ${SCRIPTDIR}/plotCompleteSkeletons/vsl30001.hoc ] setLabel vsl30001.hoc
vsl30001.hoc setIconPosition 20 3010
vsl30001.hoc fire
vsl30001.hoc fire
vsl30001.hoc setViewerMask 32767

set hideNewModules 0
[ load ${SCRIPTDIR}/plotCompleteSkeletons/vsl1_2_0001.hoc ] setLabel vsl1_2_0001.hoc
vsl1_2_0001.hoc setIconPosition 20 3040
vsl1_2_0001.hoc fire
vsl1_2_0001.hoc fire
vsl1_2_0001.hoc setViewerMask 32767

set hideNewModules 0
[ load ${SCRIPTDIR}/plotCompleteSkeletons/vsl1_3_0001.hoc ] setLabel vsl1_3_0001.hoc
vsl1_3_0001.hoc setIconPosition 20 3070
vsl1_3_0001.hoc fire
vsl1_3_0001.hoc fire
vsl1_3_0001.hoc setViewerMask 32767

set hideNewModules 0
[ load ${SCRIPTDIR}/plotCompleteSkeletons/vsl2_2_0001.hoc ] setLabel vsl2_2_0001.hoc
vsl2_2_0001.hoc setIconPosition 20 3100
vsl2_2_0001.hoc fire
vsl2_2_0001.hoc fire
vsl2_2_0001.hoc setViewerMask 32767

set hideNewModules 0
[ load ${SCRIPTDIR}/plotCompleteSkeletons/vslbd0001.hoc ] setLabel vslbd0001.hoc
vslbd0001.hoc setIconPosition 20 2950
vslbd0001.hoc fire
vslbd0001.hoc fire
vslbd0001.hoc setViewerMask 32767

set hideNewModules 0
[ load -tif +mode 2 +box 0 1 0 1 0 118000 ${SCRIPTDIR}/empty.tif ] setLabel empty.tif
empty.tif setIconPosition 20 3130
empty.tif fire
empty.tif fire
empty.tif setViewerMask 32766

set hideNewModules 0
[ load -tif +mode 2 +box 70000 120000 85000 88000 70000 120000 ${SCRIPTDIR}/emptywhite.tif ] setLabel empty2.tif
empty2.tif setIconPosition 20 3160
empty2.tif fire
empty2.tif fire
empty2.tif setViewerMask 32766

set hideNewModules 0
create HxSpatialGraphView {SpatialGraphView}
SpatialGraphView setIconPosition 405 10
SpatialGraphView data connect Cell19_7skels_ck.001_corrected_sorted_diametered.hoc0001.hoc
SpatialGraphView nodeColormap setDefaultColor 1 0.8 0.5
SpatialGraphView nodeColormap setDefaultAlpha 0.500000
SpatialGraphView segmentColormap setDefaultColor 1 0.8 0.5
SpatialGraphView segmentColormap setDefaultAlpha 0.500000
SpatialGraphView fire
SpatialGraphView itemsToShow setValue 0 0
SpatialGraphView itemsToShow setValue 1 1
SpatialGraphView nodeScale setIndex 0 0
SpatialGraphView nodeScaleFactor setMinMax 0 13236
SpatialGraphView nodeScaleFactor setButtons 0
SpatialGraphView nodeScaleFactor setIncrement 882.4
SpatialGraphView nodeScaleFactor setValue 10
SpatialGraphView nodeScaleFactor setSubMinMax 0 13236
SpatialGraphView nodeColoring setIndex 0 0
SpatialGraphView nodeLabelColoringOptions setValue 0
SpatialGraphView nodeColor setColor 0 0.8 0.8 0.8
SpatialGraphView segmentStyle setValue 0 0
SpatialGraphView segmentStyle setValue 1 0
SpatialGraphView segmentStyle setValue 2 1
SpatialGraphView tubeScale setIndex 0 1
SpatialGraphView tubeScaleFactor setMinMax 0 10
SpatialGraphView tubeScaleFactor setButtons 0
SpatialGraphView tubeScaleFactor setIncrement 0.666667
SpatialGraphView tubeScaleFactor setValue 1
SpatialGraphView tubeScaleFactor setSubMinMax 0 10
SpatialGraphView segmentColoring setIndex 0 0
SpatialGraphView segmentLabelColoringOptions setValue 0
SpatialGraphView segmentColor setColor 0 1 0 0
SpatialGraphView fire
SpatialGraphView setViewerMask 16383
SpatialGraphView setShadowStyle 0

set hideNewModules 0
create HxSpatialGraphView {SpatialGraphView2}
SpatialGraphView2 setIconPosition 399 40
SpatialGraphView2 data connect Cell25_3skels_ck.001_corrected_sorted_diametered.hoc0001.hoc
SpatialGraphView2 nodeColormap setDefaultColor 1 0.8 0.5
SpatialGraphView2 nodeColormap setDefaultAlpha 0.500000
SpatialGraphView2 segmentColormap setDefaultColor 1 0.8 0.5
SpatialGraphView2 segmentColormap setDefaultAlpha 0.500000
SpatialGraphView2 fire
SpatialGraphView2 itemsToShow setValue 0 0
SpatialGraphView2 itemsToShow setValue 1 1
SpatialGraphView2 nodeScale setIndex 0 0
SpatialGraphView2 nodeScaleFactor setMinMax 0 9224
SpatialGraphView2 nodeScaleFactor setButtons 0
SpatialGraphView2 nodeScaleFactor setIncrement 614.933
SpatialGraphView2 nodeScaleFactor setValue 10
SpatialGraphView2 nodeScaleFactor setSubMinMax 0 9224
SpatialGraphView2 nodeColoring setIndex 0 0
SpatialGraphView2 nodeLabelColoringOptions setValue 0
SpatialGraphView2 nodeColor setColor 0 0.8 0.8 0.8
SpatialGraphView2 segmentStyle setValue 0 0
SpatialGraphView2 segmentStyle setValue 1 0
SpatialGraphView2 segmentStyle setValue 2 1
SpatialGraphView2 tubeScale setIndex 0 1
SpatialGraphView2 tubeScaleFactor setMinMax 0 10
SpatialGraphView2 tubeScaleFactor setButtons 0
SpatialGraphView2 tubeScaleFactor setIncrement 0.666667
SpatialGraphView2 tubeScaleFactor setValue 1
SpatialGraphView2 tubeScaleFactor setSubMinMax 0 10
SpatialGraphView2 segmentColoring setIndex 0 0
SpatialGraphView2 segmentLabelColoringOptions setValue 0
SpatialGraphView2 segmentColor setColor 0 1 0.625 0
SpatialGraphView2 fire
SpatialGraphView2 setViewerMask 16383
SpatialGraphView2 setShadowStyle 0

set hideNewModules 0
create HxSpatialGraphView {SpatialGraphView3}
SpatialGraphView3 setIconPosition 399 70
SpatialGraphView3 data connect Cell26_5skels_ck.001_corrected_sorted_diametered.hoc0001.hoc
SpatialGraphView3 nodeColormap setDefaultColor 1 0.8 0.5
SpatialGraphView3 nodeColormap setDefaultAlpha 0.500000
SpatialGraphView3 segmentColormap setDefaultColor 1 0.8 0.5
SpatialGraphView3 segmentColormap setDefaultAlpha 0.500000
SpatialGraphView3 fire
SpatialGraphView3 itemsToShow setValue 0 0
SpatialGraphView3 itemsToShow setValue 1 1
SpatialGraphView3 nodeScale setIndex 0 0
SpatialGraphView3 nodeScaleFactor setMinMax 0 10083
SpatialGraphView3 nodeScaleFactor setButtons 0
SpatialGraphView3 nodeScaleFactor setIncrement 672.2
SpatialGraphView3 nodeScaleFactor setValue 10
SpatialGraphView3 nodeScaleFactor setSubMinMax 0 10083
SpatialGraphView3 nodeColoring setIndex 0 0
SpatialGraphView3 nodeLabelColoringOptions setValue 0
SpatialGraphView3 nodeColor setColor 0 0.8 0.8 0.8
SpatialGraphView3 segmentStyle setValue 0 0
SpatialGraphView3 segmentStyle setValue 1 0
SpatialGraphView3 segmentStyle setValue 2 1
SpatialGraphView3 tubeScale setIndex 0 1
SpatialGraphView3 tubeScaleFactor setMinMax 0 10
SpatialGraphView3 tubeScaleFactor setButtons 0
SpatialGraphView3 tubeScaleFactor setIncrement 0.666667
SpatialGraphView3 tubeScaleFactor setValue 1
SpatialGraphView3 tubeScaleFactor setSubMinMax 0 10
SpatialGraphView3 segmentColoring setIndex 0 0
SpatialGraphView3 segmentLabelColoringOptions setValue 0
SpatialGraphView3 segmentColor setColor 0 1 0.958333 0
SpatialGraphView3 fire
SpatialGraphView3 setViewerMask 16383
SpatialGraphView3 setShadowStyle 0

set hideNewModules 0
create HxSpatialGraphView {SpatialGraphView4}
SpatialGraphView4 setIconPosition 399 100
SpatialGraphView4 data connect Cell36_4skels_ck.001_corrected_sorted_diametered.hoc0001.hoc
SpatialGraphView4 nodeColormap setDefaultColor 1 0.8 0.5
SpatialGraphView4 nodeColormap setDefaultAlpha 0.500000
SpatialGraphView4 segmentColormap setDefaultColor 1 0.8 0.5
SpatialGraphView4 segmentColormap setDefaultAlpha 0.500000
SpatialGraphView4 fire
SpatialGraphView4 itemsToShow setValue 0 0
SpatialGraphView4 itemsToShow setValue 1 1
SpatialGraphView4 nodeScale setIndex 0 0
SpatialGraphView4 nodeScaleFactor setMinMax 0 9477
SpatialGraphView4 nodeScaleFactor setButtons 0
SpatialGraphView4 nodeScaleFactor setIncrement 631.8
SpatialGraphView4 nodeScaleFactor setValue 10
SpatialGraphView4 nodeScaleFactor setSubMinMax 0 9477
SpatialGraphView4 nodeColoring setIndex 0 0
SpatialGraphView4 nodeLabelColoringOptions setValue 0
SpatialGraphView4 nodeColor setColor 0 0.8 0.8 0.8
SpatialGraphView4 segmentStyle setValue 0 0
SpatialGraphView4 segmentStyle setValue 1 0
SpatialGraphView4 segmentStyle setValue 2 1
SpatialGraphView4 tubeScale setIndex 0 1
SpatialGraphView4 tubeScaleFactor setMinMax 0 10
SpatialGraphView4 tubeScaleFactor setButtons 0
SpatialGraphView4 tubeScaleFactor setIncrement 0.666667
SpatialGraphView4 tubeScaleFactor setValue 1
SpatialGraphView4 tubeScaleFactor setSubMinMax 0 10
SpatialGraphView4 segmentColoring setIndex 0 0
SpatialGraphView4 segmentLabelColoringOptions setValue 0
SpatialGraphView4 segmentColor setColor 0 1 0 0.791667
SpatialGraphView4 fire
SpatialGraphView4 setViewerMask 16383
SpatialGraphView4 setShadowStyle 0

set hideNewModules 0
create HxSpatialGraphView {SpatialGraphView5}
SpatialGraphView5 setIconPosition 399 130
SpatialGraphView5 data connect Cell41_3skels_ck.001_corrected_sorted_diametered.hoc0001.hoc
SpatialGraphView5 nodeColormap setDefaultColor 1 0.8 0.5
SpatialGraphView5 nodeColormap setDefaultAlpha 0.500000
SpatialGraphView5 segmentColormap setDefaultColor 1 0.8 0.5
SpatialGraphView5 segmentColormap setDefaultAlpha 0.500000
SpatialGraphView5 fire
SpatialGraphView5 itemsToShow setValue 0 0
SpatialGraphView5 itemsToShow setValue 1 1
SpatialGraphView5 nodeScale setIndex 0 0
SpatialGraphView5 nodeScaleFactor setMinMax 0 9077
SpatialGraphView5 nodeScaleFactor setButtons 0
SpatialGraphView5 nodeScaleFactor setIncrement 605.133
SpatialGraphView5 nodeScaleFactor setValue 10
SpatialGraphView5 nodeScaleFactor setSubMinMax 0 9077
SpatialGraphView5 nodeColoring setIndex 0 0
SpatialGraphView5 nodeLabelColoringOptions setValue 0
SpatialGraphView5 nodeColor setColor 0 0.8 0.8 0.8
SpatialGraphView5 segmentStyle setValue 0 0
SpatialGraphView5 segmentStyle setValue 1 0
SpatialGraphView5 segmentStyle setValue 2 1
SpatialGraphView5 tubeScale setIndex 0 1
SpatialGraphView5 tubeScaleFactor setMinMax 0 10
SpatialGraphView5 tubeScaleFactor setButtons 0
SpatialGraphView5 tubeScaleFactor setIncrement 0.666667
SpatialGraphView5 tubeScaleFactor setValue 1
SpatialGraphView5 tubeScaleFactor setSubMinMax 0 10
SpatialGraphView5 segmentColoring setIndex 0 0
SpatialGraphView5 segmentLabelColoringOptions setValue 0
SpatialGraphView5 segmentColor setColor 0 0.764468 0.486111 1
SpatialGraphView5 fire
SpatialGraphView5 setViewerMask 16383
SpatialGraphView5 setShadowStyle 0

set hideNewModules 0
create HxSpatialGraphView {SpatialGraphView6}
SpatialGraphView6 setIconPosition 399 160
SpatialGraphView6 data connect Cell45_6skels_ck.001_corrected_sorted_diametered.hoc0001.hoc
SpatialGraphView6 nodeColormap setDefaultColor 1 0.8 0.5
SpatialGraphView6 nodeColormap setDefaultAlpha 0.500000
SpatialGraphView6 segmentColormap setDefaultColor 1 0.8 0.5
SpatialGraphView6 segmentColormap setDefaultAlpha 0.500000
SpatialGraphView6 fire
SpatialGraphView6 itemsToShow setValue 0 0
SpatialGraphView6 itemsToShow setValue 1 1
SpatialGraphView6 nodeScale setIndex 0 0
SpatialGraphView6 nodeScaleFactor setMinMax 0 13739
SpatialGraphView6 nodeScaleFactor setButtons 0
SpatialGraphView6 nodeScaleFactor setIncrement 915.933
SpatialGraphView6 nodeScaleFactor setValue 10
SpatialGraphView6 nodeScaleFactor setSubMinMax 0 13739
SpatialGraphView6 nodeColoring setIndex 0 0
SpatialGraphView6 nodeLabelColoringOptions setValue 0
SpatialGraphView6 nodeColor setColor 0 0.8 0.8 0.8
SpatialGraphView6 segmentStyle setValue 0 0
SpatialGraphView6 segmentStyle setValue 1 0
SpatialGraphView6 segmentStyle setValue 2 1
SpatialGraphView6 tubeScale setIndex 0 1
SpatialGraphView6 tubeScaleFactor setMinMax 0 10
SpatialGraphView6 tubeScaleFactor setButtons 0
SpatialGraphView6 tubeScaleFactor setIncrement 0.666667
SpatialGraphView6 tubeScaleFactor setValue 1
SpatialGraphView6 tubeScaleFactor setSubMinMax 0 10
SpatialGraphView6 segmentColoring setIndex 0 0
SpatialGraphView6 segmentLabelColoringOptions setValue 0
SpatialGraphView6 segmentColor setColor 0 1 1 0
SpatialGraphView6 fire
SpatialGraphView6 setViewerMask 16383
SpatialGraphView6 setShadowStyle 0

set hideNewModules 0
create HxSpatialGraphView {SpatialGraphView7}
SpatialGraphView7 setIconPosition 399 190
SpatialGraphView7 data connect Cell48_5skels_ck.001_corrected_sorted_diametered.hoc0001.hoc
SpatialGraphView7 nodeColormap setDefaultColor 1 0.8 0.5
SpatialGraphView7 nodeColormap setDefaultAlpha 0.500000
SpatialGraphView7 segmentColormap setDefaultColor 1 0.8 0.5
SpatialGraphView7 segmentColormap setDefaultAlpha 0.500000
SpatialGraphView7 fire
SpatialGraphView7 itemsToShow setValue 0 0
SpatialGraphView7 itemsToShow setValue 1 1
SpatialGraphView7 nodeScale setIndex 0 0
SpatialGraphView7 nodeScaleFactor setMinMax 0 13136
SpatialGraphView7 nodeScaleFactor setButtons 0
SpatialGraphView7 nodeScaleFactor setIncrement 875.733
SpatialGraphView7 nodeScaleFactor setValue 10
SpatialGraphView7 nodeScaleFactor setSubMinMax 0 13136
SpatialGraphView7 nodeColoring setIndex 0 0
SpatialGraphView7 nodeLabelColoringOptions setValue 0
SpatialGraphView7 nodeColor setColor 0 0.8 0.8 0.8
SpatialGraphView7 segmentStyle setValue 0 0
SpatialGraphView7 segmentStyle setValue 1 0
SpatialGraphView7 segmentStyle setValue 2 1
SpatialGraphView7 tubeScale setIndex 0 1
SpatialGraphView7 tubeScaleFactor setMinMax 0 10
SpatialGraphView7 tubeScaleFactor setButtons 0
SpatialGraphView7 tubeScaleFactor setIncrement 0.666667
SpatialGraphView7 tubeScaleFactor setValue 1
SpatialGraphView7 tubeScaleFactor setSubMinMax 0 10
SpatialGraphView7 segmentColoring setIndex 0 0
SpatialGraphView7 segmentLabelColoringOptions setValue 0
SpatialGraphView7 segmentColor setColor 0 1 1 0.2
SpatialGraphView7 fire
SpatialGraphView7 setViewerMask 32767
SpatialGraphView7 setShadowStyle 0

set hideNewModules 0
create HxSpatialGraphView {SpatialGraphView8}
SpatialGraphView8 setIconPosition 399 220
SpatialGraphView8 data connect Cell65_7skels_ck.001_corrected_sorted_diametered.hoc0001.hoc
SpatialGraphView8 nodeColormap setDefaultColor 1 0.8 0.5
SpatialGraphView8 nodeColormap setDefaultAlpha 0.500000
SpatialGraphView8 segmentColormap setDefaultColor 1 0.8 0.5
SpatialGraphView8 segmentColormap setDefaultAlpha 0.500000
SpatialGraphView8 fire
SpatialGraphView8 itemsToShow setValue 0 0
SpatialGraphView8 itemsToShow setValue 1 1
SpatialGraphView8 nodeScale setIndex 0 0
SpatialGraphView8 nodeScaleFactor setMinMax 0 10361
SpatialGraphView8 nodeScaleFactor setButtons 0
SpatialGraphView8 nodeScaleFactor setIncrement 690.733
SpatialGraphView8 nodeScaleFactor setValue 10
SpatialGraphView8 nodeScaleFactor setSubMinMax 0 10361
SpatialGraphView8 nodeColoring setIndex 0 0
SpatialGraphView8 nodeLabelColoringOptions setValue 0
SpatialGraphView8 nodeColor setColor 0 0.8 0.8 0.8
SpatialGraphView8 segmentStyle setValue 0 0
SpatialGraphView8 segmentStyle setValue 1 0
SpatialGraphView8 segmentStyle setValue 2 1
SpatialGraphView8 tubeScale setIndex 0 1
SpatialGraphView8 tubeScaleFactor setMinMax 0 10
SpatialGraphView8 tubeScaleFactor setButtons 0
SpatialGraphView8 tubeScaleFactor setIncrement 0.666667
SpatialGraphView8 tubeScaleFactor setValue 1
SpatialGraphView8 tubeScaleFactor setSubMinMax 0 10
SpatialGraphView8 segmentColoring setIndex 0 0
SpatialGraphView8 segmentLabelColoringOptions setValue 0
SpatialGraphView8 segmentColor setColor 0 0.809028 1 0.541667
SpatialGraphView8 fire
SpatialGraphView8 setViewerMask 16383
SpatialGraphView8 setShadowStyle 0

set hideNewModules 0
create HxSpatialGraphView {SpatialGraphView9}
SpatialGraphView9 setIconPosition 399 250
SpatialGraphView9 data connect Cell71_4skels_ck.001_corrected_sorted_diametered.hoc0001.hoc
SpatialGraphView9 nodeColormap setDefaultColor 1 0.8 0.5
SpatialGraphView9 nodeColormap setDefaultAlpha 0.500000
SpatialGraphView9 segmentColormap setDefaultColor 1 0.8 0.5
SpatialGraphView9 segmentColormap setDefaultAlpha 0.500000
SpatialGraphView9 fire
SpatialGraphView9 itemsToShow setValue 0 0
SpatialGraphView9 itemsToShow setValue 1 1
SpatialGraphView9 nodeScale setIndex 0 0
SpatialGraphView9 nodeScaleFactor setMinMax 0 10162
SpatialGraphView9 nodeScaleFactor setButtons 0
SpatialGraphView9 nodeScaleFactor setIncrement 677.467
SpatialGraphView9 nodeScaleFactor setValue 10
SpatialGraphView9 nodeScaleFactor setSubMinMax 0 10162
SpatialGraphView9 nodeColoring setIndex 0 0
SpatialGraphView9 nodeLabelColoringOptions setValue 0
SpatialGraphView9 nodeColor setColor 0 0.8 0.8 0.8
SpatialGraphView9 segmentStyle setValue 0 0
SpatialGraphView9 segmentStyle setValue 1 0
SpatialGraphView9 segmentStyle setValue 2 1
SpatialGraphView9 tubeScale setIndex 0 1
SpatialGraphView9 tubeScaleFactor setMinMax 0 10
SpatialGraphView9 tubeScaleFactor setButtons 0
SpatialGraphView9 tubeScaleFactor setIncrement 0.666667
SpatialGraphView9 tubeScaleFactor setValue 1
SpatialGraphView9 tubeScaleFactor setSubMinMax 0 10
SpatialGraphView9 segmentColoring setIndex 0 0
SpatialGraphView9 segmentLabelColoringOptions setValue 0
SpatialGraphView9 segmentColor setColor 0 0.451437 0.513889 0.438947
SpatialGraphView9 fire
SpatialGraphView9 setViewerMask 16383
SpatialGraphView9 setShadowStyle 0

set hideNewModules 0
create HxSpatialGraphView {SpatialGraphView10}
SpatialGraphView10 setIconPosition 393 280
SpatialGraphView10 data connect Cell75_4skels_ck.001_corrected_sorted_diametered.hoc0001.hoc
SpatialGraphView10 nodeColormap setDefaultColor 1 0.8 0.5
SpatialGraphView10 nodeColormap setDefaultAlpha 0.500000
SpatialGraphView10 segmentColormap setDefaultColor 1 0.8 0.5
SpatialGraphView10 segmentColormap setDefaultAlpha 0.500000
SpatialGraphView10 fire
SpatialGraphView10 itemsToShow setValue 0 0
SpatialGraphView10 itemsToShow setValue 1 1
SpatialGraphView10 nodeScale setIndex 0 0
SpatialGraphView10 nodeScaleFactor setMinMax 0 7998
SpatialGraphView10 nodeScaleFactor setButtons 0
SpatialGraphView10 nodeScaleFactor setIncrement 533.2
SpatialGraphView10 nodeScaleFactor setValue 10
SpatialGraphView10 nodeScaleFactor setSubMinMax 0 7998
SpatialGraphView10 nodeColoring setIndex 0 0
SpatialGraphView10 nodeLabelColoringOptions setValue 0
SpatialGraphView10 nodeColor setColor 0 0.8 0.8 0.8
SpatialGraphView10 segmentStyle setValue 0 0
SpatialGraphView10 segmentStyle setValue 1 0
SpatialGraphView10 segmentStyle setValue 2 1
SpatialGraphView10 tubeScale setIndex 0 1
SpatialGraphView10 tubeScaleFactor setMinMax 0 10
SpatialGraphView10 tubeScaleFactor setButtons 0
SpatialGraphView10 tubeScaleFactor setIncrement 0.666667
SpatialGraphView10 tubeScaleFactor setValue 1
SpatialGraphView10 tubeScaleFactor setSubMinMax 0 10
SpatialGraphView10 segmentColoring setIndex 0 0
SpatialGraphView10 segmentLabelColoringOptions setValue 0
SpatialGraphView10 segmentColor setColor 0 0.881944 0 0
SpatialGraphView10 fire
SpatialGraphView10 setViewerMask 16383
SpatialGraphView10 setShadowStyle 0

set hideNewModules 0
create HxSpatialGraphView {SpatialGraphView11}
SpatialGraphView11 setIconPosition 393 400
SpatialGraphView11 data connect Cell126_4skels_ck.001_corrected_sorted_diametered.hoc0001.hoc
SpatialGraphView11 nodeColormap setDefaultColor 1 0.8 0.5
SpatialGraphView11 nodeColormap setDefaultAlpha 0.500000
SpatialGraphView11 segmentColormap setDefaultColor 1 0.8 0.5
SpatialGraphView11 segmentColormap setDefaultAlpha 0.500000
SpatialGraphView11 fire
SpatialGraphView11 itemsToShow setValue 0 0
SpatialGraphView11 itemsToShow setValue 1 1
SpatialGraphView11 nodeScale setIndex 0 0
SpatialGraphView11 nodeScaleFactor setMinMax 0 5070
SpatialGraphView11 nodeScaleFactor setButtons 0
SpatialGraphView11 nodeScaleFactor setIncrement 338
SpatialGraphView11 nodeScaleFactor setValue 10
SpatialGraphView11 nodeScaleFactor setSubMinMax 0 5070
SpatialGraphView11 nodeColoring setIndex 0 0
SpatialGraphView11 nodeLabelColoringOptions setValue 0
SpatialGraphView11 nodeColor setColor 0 0.8 0.8 0.8
SpatialGraphView11 segmentStyle setValue 0 0
SpatialGraphView11 segmentStyle setValue 1 0
SpatialGraphView11 segmentStyle setValue 2 1
SpatialGraphView11 tubeScale setIndex 0 1
SpatialGraphView11 tubeScaleFactor setMinMax 0 10
SpatialGraphView11 tubeScaleFactor setButtons 0
SpatialGraphView11 tubeScaleFactor setIncrement 0.666667
SpatialGraphView11 tubeScaleFactor setValue 1
SpatialGraphView11 tubeScaleFactor setSubMinMax 0 10
SpatialGraphView11 segmentColoring setIndex 0 0
SpatialGraphView11 segmentLabelColoringOptions setValue 0
SpatialGraphView11 segmentColor setColor 0 0.861111 0.609954 0
SpatialGraphView11 fire
SpatialGraphView11 setViewerMask 16383
SpatialGraphView11 setShadowStyle 0

set hideNewModules 0
create HxSpatialGraphView {SpatialGraphView12}
SpatialGraphView12 setIconPosition 393 430
SpatialGraphView12 data connect Cell151_4skels_ck.001_corrected_sorted_diametered.hoc0001.hoc
SpatialGraphView12 nodeColormap setDefaultColor 1 0.8 0.5
SpatialGraphView12 nodeColormap setDefaultAlpha 0.500000
SpatialGraphView12 segmentColormap setDefaultColor 1 0.8 0.5
SpatialGraphView12 segmentColormap setDefaultAlpha 0.500000
SpatialGraphView12 fire
SpatialGraphView12 itemsToShow setValue 0 0
SpatialGraphView12 itemsToShow setValue 1 1
SpatialGraphView12 nodeScale setIndex 0 0
SpatialGraphView12 nodeScaleFactor setMinMax 0 9482
SpatialGraphView12 nodeScaleFactor setButtons 0
SpatialGraphView12 nodeScaleFactor setIncrement 632.133
SpatialGraphView12 nodeScaleFactor setValue 10
SpatialGraphView12 nodeScaleFactor setSubMinMax 0 9482
SpatialGraphView12 nodeColoring setIndex 0 0
SpatialGraphView12 nodeLabelColoringOptions setValue 0
SpatialGraphView12 nodeColor setColor 0 0.8 0.8 0.8
SpatialGraphView12 segmentStyle setValue 0 0
SpatialGraphView12 segmentStyle setValue 1 0
SpatialGraphView12 segmentStyle setValue 2 1
SpatialGraphView12 tubeScale setIndex 0 1
SpatialGraphView12 tubeScaleFactor setMinMax 0 10
SpatialGraphView12 tubeScaleFactor setButtons 0
SpatialGraphView12 tubeScaleFactor setIncrement 0.666667
SpatialGraphView12 tubeScaleFactor setValue 1
SpatialGraphView12 tubeScaleFactor setSubMinMax 0 10
SpatialGraphView12 segmentColoring setIndex 0 0
SpatialGraphView12 segmentLabelColoringOptions setValue 0
SpatialGraphView12 segmentColor setColor 0 0.513889 0.388093 0.010706
SpatialGraphView12 fire
SpatialGraphView12 setViewerMask 16383
SpatialGraphView12 setShadowStyle 0

set hideNewModules 0
create HxSpatialGraphView {SpatialGraphView13}
SpatialGraphView13 setIconPosition 393 460
SpatialGraphView13 data connect Cell153_4skels_ck.001_corrected_sorted_diametered.hoc0001.hoc
SpatialGraphView13 nodeColormap setDefaultColor 1 0.8 0.5
SpatialGraphView13 nodeColormap setDefaultAlpha 0.500000
SpatialGraphView13 segmentColormap setDefaultColor 1 0.8 0.5
SpatialGraphView13 segmentColormap setDefaultAlpha 0.500000
SpatialGraphView13 fire
SpatialGraphView13 itemsToShow setValue 0 0
SpatialGraphView13 itemsToShow setValue 1 1
SpatialGraphView13 nodeScale setIndex 0 0
SpatialGraphView13 nodeScaleFactor setMinMax 0 8082
SpatialGraphView13 nodeScaleFactor setButtons 0
SpatialGraphView13 nodeScaleFactor setIncrement 538.8
SpatialGraphView13 nodeScaleFactor setValue 10
SpatialGraphView13 nodeScaleFactor setSubMinMax 0 8082
SpatialGraphView13 nodeColoring setIndex 0 0
SpatialGraphView13 nodeLabelColoringOptions setValue 0
SpatialGraphView13 nodeColor setColor 0 0.8 0.8 0.8
SpatialGraphView13 segmentStyle setValue 0 0
SpatialGraphView13 segmentStyle setValue 1 0
SpatialGraphView13 segmentStyle setValue 2 1
SpatialGraphView13 tubeScale setIndex 0 1
SpatialGraphView13 tubeScaleFactor setMinMax 0 10
SpatialGraphView13 tubeScaleFactor setButtons 0
SpatialGraphView13 tubeScaleFactor setIncrement 0.666667
SpatialGraphView13 tubeScaleFactor setValue 1
SpatialGraphView13 tubeScaleFactor setSubMinMax 0 10
SpatialGraphView13 segmentColoring setIndex 0 0
SpatialGraphView13 segmentLabelColoringOptions setValue 0
SpatialGraphView13 segmentColor setColor 0 0.0416666 1 0
SpatialGraphView13 fire
SpatialGraphView13 setViewerMask 16383
SpatialGraphView13 setShadowStyle 0

set hideNewModules 0
create HxSpatialGraphView {SpatialGraphView14}
SpatialGraphView14 setIconPosition 393 490
SpatialGraphView14 data connect Cell24_5skels_ck_corrected_sorted_diametered.hoc0001.hoc
SpatialGraphView14 nodeColormap setDefaultColor 1 0.8 0.5
SpatialGraphView14 nodeColormap setDefaultAlpha 0.500000
SpatialGraphView14 segmentColormap setDefaultColor 1 0.8 0.5
SpatialGraphView14 segmentColormap setDefaultAlpha 0.500000
SpatialGraphView14 fire
SpatialGraphView14 itemsToShow setValue 0 0
SpatialGraphView14 itemsToShow setValue 1 1
SpatialGraphView14 nodeScale setIndex 0 0
SpatialGraphView14 nodeScaleFactor setMinMax 0 6630
SpatialGraphView14 nodeScaleFactor setButtons 0
SpatialGraphView14 nodeScaleFactor setIncrement 442
SpatialGraphView14 nodeScaleFactor setValue 10
SpatialGraphView14 nodeScaleFactor setSubMinMax 0 6630
SpatialGraphView14 nodeColoring setIndex 0 0
SpatialGraphView14 nodeLabelColoringOptions setValue 0
SpatialGraphView14 nodeColor setColor 0 0.8 0.8 0.8
SpatialGraphView14 segmentStyle setValue 0 0
SpatialGraphView14 segmentStyle setValue 1 0
SpatialGraphView14 segmentStyle setValue 2 1
SpatialGraphView14 tubeScale setIndex 0 1
SpatialGraphView14 tubeScaleFactor setMinMax 0 10
SpatialGraphView14 tubeScaleFactor setButtons 0
SpatialGraphView14 tubeScaleFactor setIncrement 0.666667
SpatialGraphView14 tubeScaleFactor setValue 1
SpatialGraphView14 tubeScaleFactor setSubMinMax 0 10
SpatialGraphView14 segmentColoring setIndex 0 0
SpatialGraphView14 segmentLabelColoringOptions setValue 0
SpatialGraphView14 segmentColor setColor 0 0.5961 0.3059 0.6392
SpatialGraphView14 fire
SpatialGraphView14 setViewerMask 32766
SpatialGraphView14 setShadowStyle 0

set hideNewModules 0
create HxSpatialGraphView {SpatialGraphView15}
SpatialGraphView15 setIconPosition 393 520
SpatialGraphView15 data connect Cell50_6skels_completed.hoc0001.hoc
SpatialGraphView15 nodeColormap setDefaultColor 1 0.8 0.5
SpatialGraphView15 nodeColormap setDefaultAlpha 0.500000
SpatialGraphView15 segmentColormap setDefaultColor 1 0.8 0.5
SpatialGraphView15 segmentColormap setDefaultAlpha 0.500000
SpatialGraphView15 fire
SpatialGraphView15 itemsToShow setValue 0 0
SpatialGraphView15 itemsToShow setValue 1 1
SpatialGraphView15 nodeScale setIndex 0 0
SpatialGraphView15 nodeScaleFactor setMinMax 0 13783
SpatialGraphView15 nodeScaleFactor setButtons 0
SpatialGraphView15 nodeScaleFactor setIncrement 918.867
SpatialGraphView15 nodeScaleFactor setValue 10
SpatialGraphView15 nodeScaleFactor setSubMinMax 0 13783
SpatialGraphView15 nodeColoring setIndex 0 0
SpatialGraphView15 nodeLabelColoringOptions setValue 0
SpatialGraphView15 nodeColor setColor 0 0.8 0.8 0.8
SpatialGraphView15 segmentStyle setValue 0 0
SpatialGraphView15 segmentStyle setValue 1 0
SpatialGraphView15 segmentStyle setValue 2 1
SpatialGraphView15 tubeScale setIndex 0 1
SpatialGraphView15 tubeScaleFactor setMinMax 0 10
SpatialGraphView15 tubeScaleFactor setButtons 0
SpatialGraphView15 tubeScaleFactor setIncrement 0.666667
SpatialGraphView15 tubeScaleFactor setValue 1
SpatialGraphView15 tubeScaleFactor setSubMinMax 0 10
SpatialGraphView15 segmentColoring setIndex 0 0
SpatialGraphView15 segmentLabelColoringOptions setValue 0
SpatialGraphView15 segmentColor setColor 0 0.465278 0.281105 0.281105
SpatialGraphView15 fire
SpatialGraphView15 setViewerMask 16383
SpatialGraphView15 setShadowStyle 0

set hideNewModules 0
create HxSpatialGraphView {SpatialGraphView16}
SpatialGraphView16 setIconPosition 393 670
SpatialGraphView16 data connect cell27_corrected_sorted_diametered.hoc0001.hoc
SpatialGraphView16 nodeColormap setDefaultColor 1 0.8 0.5
SpatialGraphView16 nodeColormap setDefaultAlpha 0.500000
SpatialGraphView16 segmentColormap setDefaultColor 1 0.8 0.5
SpatialGraphView16 segmentColormap setDefaultAlpha 0.500000
SpatialGraphView16 fire
SpatialGraphView16 itemsToShow setValue 0 0
SpatialGraphView16 itemsToShow setValue 1 1
SpatialGraphView16 nodeScale setIndex 0 0
SpatialGraphView16 nodeScaleFactor setMinMax 0 10029
SpatialGraphView16 nodeScaleFactor setButtons 0
SpatialGraphView16 nodeScaleFactor setIncrement 668.6
SpatialGraphView16 nodeScaleFactor setValue 10
SpatialGraphView16 nodeScaleFactor setSubMinMax 0 10029
SpatialGraphView16 nodeColoring setIndex 0 0
SpatialGraphView16 nodeLabelColoringOptions setValue 0
SpatialGraphView16 nodeColor setColor 0 0.8 0.8 0.8
SpatialGraphView16 segmentStyle setValue 0 0
SpatialGraphView16 segmentStyle setValue 1 0
SpatialGraphView16 segmentStyle setValue 2 1
SpatialGraphView16 tubeScale setIndex 0 1
SpatialGraphView16 tubeScaleFactor setMinMax 0 10
SpatialGraphView16 tubeScaleFactor setButtons 0
SpatialGraphView16 tubeScaleFactor setIncrement 0.666667
SpatialGraphView16 tubeScaleFactor setValue 1
SpatialGraphView16 tubeScaleFactor setSubMinMax 0 10
SpatialGraphView16 segmentColoring setIndex 0 0
SpatialGraphView16 segmentLabelColoringOptions setValue 0
SpatialGraphView16 segmentColor setColor 0 0.590278 0.474477 0.127074
SpatialGraphView16 fire
SpatialGraphView16 setViewerMask 16383
SpatialGraphView16 setShadowStyle 0

set hideNewModules 0
create HxSpatialGraphView {SpatialGraphView17}
SpatialGraphView17 setIconPosition 393 700
SpatialGraphView17 data connect cell138_corrected_sorted_diametered.hoc0001.hoc
SpatialGraphView17 nodeColormap setDefaultColor 1 0.8 0.5
SpatialGraphView17 nodeColormap setDefaultAlpha 0.500000
SpatialGraphView17 segmentColormap setDefaultColor 1 0.8 0.5
SpatialGraphView17 segmentColormap setDefaultAlpha 0.500000
SpatialGraphView17 fire
SpatialGraphView17 itemsToShow setValue 0 0
SpatialGraphView17 itemsToShow setValue 1 1
SpatialGraphView17 nodeScale setIndex 0 0
SpatialGraphView17 nodeScaleFactor setMinMax 0 6884
SpatialGraphView17 nodeScaleFactor setButtons 0
SpatialGraphView17 nodeScaleFactor setIncrement 458.933
SpatialGraphView17 nodeScaleFactor setValue 10
SpatialGraphView17 nodeScaleFactor setSubMinMax 0 6884
SpatialGraphView17 nodeColoring setIndex 0 0
SpatialGraphView17 nodeLabelColoringOptions setValue 0
SpatialGraphView17 nodeColor setColor 0 0.8 0.8 0.8
SpatialGraphView17 segmentStyle setValue 0 0
SpatialGraphView17 segmentStyle setValue 1 0
SpatialGraphView17 segmentStyle setValue 2 1
SpatialGraphView17 tubeScale setIndex 0 1
SpatialGraphView17 tubeScaleFactor setMinMax 0 10
SpatialGraphView17 tubeScaleFactor setButtons 0
SpatialGraphView17 tubeScaleFactor setIncrement 0.666667
SpatialGraphView17 tubeScaleFactor setValue 1
SpatialGraphView17 tubeScaleFactor setSubMinMax 0 10
SpatialGraphView17 segmentColoring setIndex 0 0
SpatialGraphView17 segmentLabelColoringOptions setValue 0
SpatialGraphView17 segmentColor setColor 0 1 0.5 0
SpatialGraphView17 fire
SpatialGraphView17 setViewerMask 16383
SpatialGraphView17 setShadowStyle 0

set hideNewModules 0
create HxSpatialGraphView {SpatialGraphView18}
SpatialGraphView18 setIconPosition 393 760
SpatialGraphView18 data connect Cell7_VCH_1Skel.001_truff__472ee6.hoc
SpatialGraphView18 nodeColormap setDefaultColor 1 0.8 0.5
SpatialGraphView18 nodeColormap setDefaultAlpha 0.500000
SpatialGraphView18 segmentColormap setDefaultColor 1 0.8 0.5
SpatialGraphView18 segmentColormap setDefaultAlpha 0.500000
SpatialGraphView18 fire
SpatialGraphView18 itemsToShow setValue 0 0
SpatialGraphView18 itemsToShow setValue 1 1
SpatialGraphView18 nodeScale setIndex 0 0
SpatialGraphView18 nodeScaleFactor setMinMax 0 14820
SpatialGraphView18 nodeScaleFactor setButtons 0
SpatialGraphView18 nodeScaleFactor setIncrement 988
SpatialGraphView18 nodeScaleFactor setValue 10
SpatialGraphView18 nodeScaleFactor setSubMinMax 0 14820
SpatialGraphView18 nodeColoring setIndex 0 0
SpatialGraphView18 nodeLabelColoringOptions setValue 0
SpatialGraphView18 nodeColor setColor 0 0.8 0.8 0.8
SpatialGraphView18 segmentStyle setValue 0 0
SpatialGraphView18 segmentStyle setValue 1 0
SpatialGraphView18 segmentStyle setValue 2 1
SpatialGraphView18 tubeScale setIndex 0 1
SpatialGraphView18 tubeScaleFactor setMinMax 0 10
SpatialGraphView18 tubeScaleFactor setButtons 0
SpatialGraphView18 tubeScaleFactor setIncrement 0.666667
SpatialGraphView18 tubeScaleFactor setValue 1
SpatialGraphView18 tubeScaleFactor setSubMinMax 0 10
SpatialGraphView18 segmentColoring setIndex 0 0
SpatialGraphView18 segmentLabelColoringOptions setValue 0
SpatialGraphView18 segmentColor setColor 0 1 1 1
SpatialGraphView18 fire
SpatialGraphView18 setViewerMask 16383
SpatialGraphView18 setShadowStyle 0

set hideNewModules 0
create HxSpatialGraphView {SpatialGraphView19}
SpatialGraphView19 setIconPosition 393 790
SpatialGraphView19 data connect cell15_was_2012-06-26_C80_11__explorational__truff__604db8_3.hoc0001.hoc
SpatialGraphView19 nodeColormap setDefaultColor 1 0.8 0.5
SpatialGraphView19 nodeColormap setDefaultAlpha 0.500000
SpatialGraphView19 segmentColormap setDefaultColor 1 0.8 0.5
SpatialGraphView19 segmentColormap setDefaultAlpha 0.500000
SpatialGraphView19 fire
SpatialGraphView19 itemsToShow setValue 0 0
SpatialGraphView19 itemsToShow setValue 1 1
SpatialGraphView19 nodeScale setIndex 0 0
SpatialGraphView19 nodeScaleFactor setMinMax 0 13304
SpatialGraphView19 nodeScaleFactor setButtons 0
SpatialGraphView19 nodeScaleFactor setIncrement 886.933
SpatialGraphView19 nodeScaleFactor setValue 10
SpatialGraphView19 nodeScaleFactor setSubMinMax 0 13304
SpatialGraphView19 nodeColoring setIndex 0 0
SpatialGraphView19 nodeLabelColoringOptions setValue 0
SpatialGraphView19 nodeColor setColor 0 0.8 0.8 0.8
SpatialGraphView19 segmentStyle setValue 0 0
SpatialGraphView19 segmentStyle setValue 1 0
SpatialGraphView19 segmentStyle setValue 2 1
SpatialGraphView19 tubeScale setIndex 0 1
SpatialGraphView19 tubeScaleFactor setMinMax 0 10
SpatialGraphView19 tubeScaleFactor setButtons 0
SpatialGraphView19 tubeScaleFactor setIncrement 0.666667
SpatialGraphView19 tubeScaleFactor setValue 1
SpatialGraphView19 tubeScaleFactor setSubMinMax 0 10
SpatialGraphView19 segmentColoring setIndex 0 0
SpatialGraphView19 segmentLabelColoringOptions setValue 0
SpatialGraphView19 segmentColor setColor 0 1 0.5 0.5
SpatialGraphView19 fire
SpatialGraphView19 setViewerMask 16383
SpatialGraphView19 setShadowStyle 0

set hideNewModules 0
create HxSpatialGraphView {SpatialGraphView20}
SpatialGraphView20 setIconPosition 393 820
SpatialGraphView20 data connect cell23_was_2012-06-26_C80_11__explorational__vrobl__48ebdb.hoc0001.hoc
SpatialGraphView20 nodeColormap setDefaultColor 1 0.8 0.5
SpatialGraphView20 nodeColormap setDefaultAlpha 0.500000
SpatialGraphView20 segmentColormap setDefaultColor 1 0.8 0.5
SpatialGraphView20 segmentColormap setDefaultAlpha 0.500000
SpatialGraphView20 fire
SpatialGraphView20 itemsToShow setValue 0 0
SpatialGraphView20 itemsToShow setValue 1 1
SpatialGraphView20 nodeScale setIndex 0 0
SpatialGraphView20 nodeScaleFactor setMinMax 0 12620
SpatialGraphView20 nodeScaleFactor setButtons 0
SpatialGraphView20 nodeScaleFactor setIncrement 841.333
SpatialGraphView20 nodeScaleFactor setValue 10
SpatialGraphView20 nodeScaleFactor setSubMinMax 0 12620
SpatialGraphView20 nodeColoring setIndex 0 0
SpatialGraphView20 nodeLabelColoringOptions setValue 0
SpatialGraphView20 nodeColor setColor 0 0.8 0.8 0.8
SpatialGraphView20 segmentStyle setValue 0 0
SpatialGraphView20 segmentStyle setValue 1 0
SpatialGraphView20 segmentStyle setValue 2 1
SpatialGraphView20 tubeScale setIndex 0 1
SpatialGraphView20 tubeScaleFactor setMinMax 0 10
SpatialGraphView20 tubeScaleFactor setButtons 0
SpatialGraphView20 tubeScaleFactor setIncrement 0.666667
SpatialGraphView20 tubeScaleFactor setValue 1
SpatialGraphView20 tubeScaleFactor setSubMinMax 0 10
SpatialGraphView20 segmentColoring setIndex 0 0
SpatialGraphView20 segmentLabelColoringOptions setValue 0
SpatialGraphView20 segmentColor setColor 0 1 0.833333 0.5
SpatialGraphView20 fire
SpatialGraphView20 setViewerMask 16383
SpatialGraphView20 setShadowStyle 0

set hideNewModules 0
create HxSpatialGraphView {SpatialGraphView21}
SpatialGraphView21 setIconPosition 393 850
SpatialGraphView21 data connect Cell_VSLBD_11skels_ck001_corrected_sorted_diametered.hoc0001.hoc
SpatialGraphView21 nodeColormap setDefaultColor 1 0.8 0.5
SpatialGraphView21 nodeColormap setDefaultAlpha 0.500000
SpatialGraphView21 segmentColormap setDefaultColor 1 0.8 0.5
SpatialGraphView21 segmentColormap setDefaultAlpha 0.500000
SpatialGraphView21 fire
SpatialGraphView21 itemsToShow setValue 0 0
SpatialGraphView21 itemsToShow setValue 1 1
SpatialGraphView21 nodeScale setIndex 0 0
SpatialGraphView21 nodeScaleFactor setMinMax 0 13058
SpatialGraphView21 nodeScaleFactor setButtons 0
SpatialGraphView21 nodeScaleFactor setIncrement 870.533
SpatialGraphView21 nodeScaleFactor setValue 10
SpatialGraphView21 nodeScaleFactor setSubMinMax 0 13058
SpatialGraphView21 nodeColoring setIndex 0 0
SpatialGraphView21 nodeLabelColoringOptions setValue 0
SpatialGraphView21 nodeColor setColor 0 0.8 0.8 0.8
SpatialGraphView21 segmentStyle setValue 0 0
SpatialGraphView21 segmentStyle setValue 1 0
SpatialGraphView21 segmentStyle setValue 2 1
SpatialGraphView21 tubeScale setIndex 0 1
SpatialGraphView21 tubeScaleFactor setMinMax 0 10
SpatialGraphView21 tubeScaleFactor setButtons 0
SpatialGraphView21 tubeScaleFactor setIncrement 0.666667
SpatialGraphView21 tubeScaleFactor setValue 1
SpatialGraphView21 tubeScaleFactor setSubMinMax 0 10
SpatialGraphView21 segmentColoring setIndex 0 0
SpatialGraphView21 segmentLabelColoringOptions setValue 0
SpatialGraphView21 segmentColor setColor 0 0.651 0.3373 0.1569
SpatialGraphView21 fire
SpatialGraphView21 setViewerMask 32767
SpatialGraphView21 setShadowStyle 0

set hideNewModules 0
create HxSpatialGraphView {SpatialGraphView22}
SpatialGraphView22 setIconPosition 393 880
SpatialGraphView22 data connect Cell_Y_3skels_ck_was_2012-06-26_C80_11__explorational__vschuhbeck__4903f6_49.hoc0001.hoc
SpatialGraphView22 nodeColormap setDefaultColor 1 0.8 0.5
SpatialGraphView22 nodeColormap setDefaultAlpha 0.500000
SpatialGraphView22 segmentColormap setDefaultColor 1 0.8 0.5
SpatialGraphView22 segmentColormap setDefaultAlpha 0.500000
SpatialGraphView22 fire
SpatialGraphView22 itemsToShow setValue 0 0
SpatialGraphView22 itemsToShow setValue 1 1
SpatialGraphView22 nodeScale setIndex 0 0
SpatialGraphView22 nodeScaleFactor setMinMax 0 13244
SpatialGraphView22 nodeScaleFactor setButtons 0
SpatialGraphView22 nodeScaleFactor setIncrement 882.933
SpatialGraphView22 nodeScaleFactor setValue 10
SpatialGraphView22 nodeScaleFactor setSubMinMax 0 13244
SpatialGraphView22 nodeColoring setIndex 0 0
SpatialGraphView22 nodeLabelColoringOptions setValue 0
SpatialGraphView22 nodeColor setColor 0 0.8 0.8 0.8
SpatialGraphView22 segmentStyle setValue 0 0
SpatialGraphView22 segmentStyle setValue 1 0
SpatialGraphView22 segmentStyle setValue 2 1
SpatialGraphView22 tubeScale setIndex 0 1
SpatialGraphView22 tubeScaleFactor setMinMax 0 10
SpatialGraphView22 tubeScaleFactor setButtons 0
SpatialGraphView22 tubeScaleFactor setIncrement 0.666667
SpatialGraphView22 tubeScaleFactor setValue 1
SpatialGraphView22 tubeScaleFactor setSubMinMax 0 10
SpatialGraphView22 segmentColoring setIndex 0 0
SpatialGraphView22 segmentLabelColoringOptions setValue 0
SpatialGraphView22 segmentColor setColor 0 1 1 0.5
SpatialGraphView22 fire
SpatialGraphView22 setViewerMask 16383
SpatialGraphView22 setShadowStyle 0

set hideNewModules 0
create HxSpatialGraphView {SpatialGraphView23}
SpatialGraphView23 setIconPosition 393 910
SpatialGraphView23 data connect Cell_Z_5skels_ck.001_corrected_sorted_diametered.hoc0001.hoc
SpatialGraphView23 nodeColormap setDefaultColor 1 0.8 0.5
SpatialGraphView23 nodeColormap setDefaultAlpha 0.500000
SpatialGraphView23 segmentColormap setDefaultColor 1 0.8 0.5
SpatialGraphView23 segmentColormap setDefaultAlpha 0.500000
SpatialGraphView23 fire
SpatialGraphView23 itemsToShow setValue 0 0
SpatialGraphView23 itemsToShow setValue 1 1
SpatialGraphView23 nodeScale setIndex 0 0
SpatialGraphView23 nodeScaleFactor setMinMax 0 12295
SpatialGraphView23 nodeScaleFactor setButtons 0
SpatialGraphView23 nodeScaleFactor setIncrement 819.667
SpatialGraphView23 nodeScaleFactor setValue 10
SpatialGraphView23 nodeScaleFactor setSubMinMax 0 12295
SpatialGraphView23 nodeColoring setIndex 0 0
SpatialGraphView23 nodeLabelColoringOptions setValue 0
SpatialGraphView23 nodeColor setColor 0 0.8 0.8 0.8
SpatialGraphView23 segmentStyle setValue 0 0
SpatialGraphView23 segmentStyle setValue 1 0
SpatialGraphView23 segmentStyle setValue 2 1
SpatialGraphView23 tubeScale setIndex 0 1
SpatialGraphView23 tubeScaleFactor setMinMax 0 10
SpatialGraphView23 tubeScaleFactor setButtons 0
SpatialGraphView23 tubeScaleFactor setIncrement 0.666667
SpatialGraphView23 tubeScaleFactor setValue 1
SpatialGraphView23 tubeScaleFactor setSubMinMax 0 10
SpatialGraphView23 segmentColoring setIndex 0 0
SpatialGraphView23 segmentLabelColoringOptions setValue 0
SpatialGraphView23 segmentColor setColor 0 1 0.498 0
SpatialGraphView23 fire
SpatialGraphView23 setViewerMask 32767
SpatialGraphView23 setShadowStyle 0

set hideNewModules 0
create HxSpatialGraphView {SpatialGraphView24}
SpatialGraphView24 setIconPosition 393 940
SpatialGraphView24 data connect CellX_7skels_completed.hoc0001.hoc
SpatialGraphView24 nodeColormap setDefaultColor 1 0.8 0.5
SpatialGraphView24 nodeColormap setDefaultAlpha 0.500000
SpatialGraphView24 segmentColormap setDefaultColor 1 0.8 0.5
SpatialGraphView24 segmentColormap setDefaultAlpha 0.500000
SpatialGraphView24 fire
SpatialGraphView24 itemsToShow setValue 0 0
SpatialGraphView24 itemsToShow setValue 1 1
SpatialGraphView24 nodeScale setIndex 0 0
SpatialGraphView24 nodeScaleFactor setMinMax 0 13242
SpatialGraphView24 nodeScaleFactor setButtons 0
SpatialGraphView24 nodeScaleFactor setIncrement 882.8
SpatialGraphView24 nodeScaleFactor setValue 10
SpatialGraphView24 nodeScaleFactor setSubMinMax 0 13242
SpatialGraphView24 nodeColoring setIndex 0 0
SpatialGraphView24 nodeLabelColoringOptions setValue 0
SpatialGraphView24 nodeColor setColor 0 0.8 0.8 0.8
SpatialGraphView24 segmentStyle setValue 0 0
SpatialGraphView24 segmentStyle setValue 1 0
SpatialGraphView24 segmentStyle setValue 2 1
SpatialGraphView24 tubeScale setIndex 0 1
SpatialGraphView24 tubeScaleFactor setMinMax 0 10
SpatialGraphView24 tubeScaleFactor setButtons 0
SpatialGraphView24 tubeScaleFactor setIncrement 0.666667
SpatialGraphView24 tubeScaleFactor setValue 1
SpatialGraphView24 tubeScaleFactor setSubMinMax 0 10
SpatialGraphView24 segmentColoring setIndex 0 0
SpatialGraphView24 segmentLabelColoringOptions setValue 0
SpatialGraphView24 segmentColor setColor 0 1 0.5 0.8125
SpatialGraphView24 fire
SpatialGraphView24 setViewerMask 16383
SpatialGraphView24 setShadowStyle 0

set hideNewModules 0
create HxSpatialGraphView {SpatialGraphView25}
SpatialGraphView25 setIconPosition 393 970
SpatialGraphView25 data connect corrected_hw_DCH_cell3_28_70_127_ck_node_size_changed.hoc0001.hoc
SpatialGraphView25 nodeColormap setDefaultColor 1 0.8 0.5
SpatialGraphView25 nodeColormap setDefaultAlpha 0.500000
SpatialGraphView25 segmentColormap setDefaultColor 1 0.8 0.5
SpatialGraphView25 segmentColormap setDefaultAlpha 0.500000
SpatialGraphView25 fire
SpatialGraphView25 itemsToShow setValue 0 0
SpatialGraphView25 itemsToShow setValue 1 1
SpatialGraphView25 nodeScale setIndex 0 0
SpatialGraphView25 nodeScaleFactor setMinMax 0 14723
SpatialGraphView25 nodeScaleFactor setButtons 0
SpatialGraphView25 nodeScaleFactor setIncrement 981.533
SpatialGraphView25 nodeScaleFactor setValue 10
SpatialGraphView25 nodeScaleFactor setSubMinMax 0 14723
SpatialGraphView25 nodeColoring setIndex 0 0
SpatialGraphView25 nodeLabelColoringOptions setValue 0
SpatialGraphView25 nodeColor setColor 0 0.8 0.8 0.8
SpatialGraphView25 segmentStyle setValue 0 0
SpatialGraphView25 segmentStyle setValue 1 0
SpatialGraphView25 segmentStyle setValue 2 1
SpatialGraphView25 tubeScale setIndex 0 1
SpatialGraphView25 tubeScaleFactor setMinMax 0 10
SpatialGraphView25 tubeScaleFactor setButtons 0
SpatialGraphView25 tubeScaleFactor setIncrement 0.666667
SpatialGraphView25 tubeScaleFactor setValue 1
SpatialGraphView25 tubeScaleFactor setSubMinMax 0 10
SpatialGraphView25 segmentColoring setIndex 0 0
SpatialGraphView25 segmentLabelColoringOptions setValue 0
SpatialGraphView25 segmentColor setColor 0 1 0 0.43662
SpatialGraphView25 fire
SpatialGraphView25 setViewerMask 16383
SpatialGraphView25 setShadowStyle 0

set hideNewModules 0
create HxSpatialGraphView {SpatialGraphView26}
SpatialGraphView26 setIconPosition 393 1000
SpatialGraphView26 data connect Zelle40_fertig.hoc0001.hoc
SpatialGraphView26 nodeColormap setDefaultColor 1 0.8 0.5
SpatialGraphView26 nodeColormap setDefaultAlpha 0.500000
SpatialGraphView26 segmentColormap setDefaultColor 1 0.8 0.5
SpatialGraphView26 segmentColormap setDefaultAlpha 0.500000
SpatialGraphView26 fire
SpatialGraphView26 itemsToShow setValue 0 0
SpatialGraphView26 itemsToShow setValue 1 1
SpatialGraphView26 nodeScale setIndex 0 0
SpatialGraphView26 nodeScaleFactor setMinMax 0 13123
SpatialGraphView26 nodeScaleFactor setButtons 0
SpatialGraphView26 nodeScaleFactor setIncrement 874.867
SpatialGraphView26 nodeScaleFactor setValue 10
SpatialGraphView26 nodeScaleFactor setSubMinMax 0 13123
SpatialGraphView26 nodeColoring setIndex 0 0
SpatialGraphView26 nodeLabelColoringOptions setValue 0
SpatialGraphView26 nodeColor setColor 0 0.8 0.8 0.8
SpatialGraphView26 segmentStyle setValue 0 0
SpatialGraphView26 segmentStyle setValue 1 0
SpatialGraphView26 segmentStyle setValue 2 1
SpatialGraphView26 tubeScale setIndex 0 1
SpatialGraphView26 tubeScaleFactor setMinMax 0 10
SpatialGraphView26 tubeScaleFactor setButtons 0
SpatialGraphView26 tubeScaleFactor setIncrement 0.666667
SpatialGraphView26 tubeScaleFactor setValue 1
SpatialGraphView26 tubeScaleFactor setSubMinMax 0 10
SpatialGraphView26 segmentColoring setIndex 0 0
SpatialGraphView26 segmentLabelColoringOptions setValue 0
SpatialGraphView26 segmentColor setColor 0 1 0 0
SpatialGraphView26 fire
SpatialGraphView26 setViewerMask 16383
SpatialGraphView26 setShadowStyle 0

set hideNewModules 0
create HxSpatialGraphView {SpatialGraphView27}
SpatialGraphView27 setIconPosition 393 1030
SpatialGraphView27 data connect Zelle64_fertig.hoc0001.hoc
SpatialGraphView27 nodeColormap setDefaultColor 1 0.8 0.5
SpatialGraphView27 nodeColormap setDefaultAlpha 0.500000
SpatialGraphView27 segmentColormap setDefaultColor 1 0.8 0.5
SpatialGraphView27 segmentColormap setDefaultAlpha 0.500000
SpatialGraphView27 fire
SpatialGraphView27 itemsToShow setValue 0 0
SpatialGraphView27 itemsToShow setValue 1 1
SpatialGraphView27 nodeScale setIndex 0 0
SpatialGraphView27 nodeScaleFactor setMinMax 0 11942
SpatialGraphView27 nodeScaleFactor setButtons 0
SpatialGraphView27 nodeScaleFactor setIncrement 796.133
SpatialGraphView27 nodeScaleFactor setValue 10
SpatialGraphView27 nodeScaleFactor setSubMinMax 0 11942
SpatialGraphView27 nodeColoring setIndex 0 0
SpatialGraphView27 nodeLabelColoringOptions setValue 0
SpatialGraphView27 nodeColor setColor 0 0.8 0.8 0.8
SpatialGraphView27 segmentStyle setValue 0 0
SpatialGraphView27 segmentStyle setValue 1 0
SpatialGraphView27 segmentStyle setValue 2 1
SpatialGraphView27 tubeScale setIndex 0 1
SpatialGraphView27 tubeScaleFactor setMinMax 0 10
SpatialGraphView27 tubeScaleFactor setButtons 0
SpatialGraphView27 tubeScaleFactor setIncrement 0.666667
SpatialGraphView27 tubeScaleFactor setValue 1
SpatialGraphView27 tubeScaleFactor setSubMinMax 0 10
SpatialGraphView27 segmentColoring setIndex 0 0
SpatialGraphView27 segmentLabelColoringOptions setValue 0
SpatialGraphView27 segmentColor setColor 0 0.509983 0.260417 0.520833
SpatialGraphView27 fire
SpatialGraphView27 setViewerMask 16383
SpatialGraphView27 setShadowStyle 0

set hideNewModules 0
create HxSpatialGraphView {SpatialGraphView28}
SpatialGraphView28 setIconPosition 393 1060
SpatialGraphView28 data connect Zelle163_fertig.hoc0001.hoc
SpatialGraphView28 nodeColormap setDefaultColor 1 0.8 0.5
SpatialGraphView28 nodeColormap setDefaultAlpha 0.500000
SpatialGraphView28 segmentColormap setDefaultColor 1 0.8 0.5
SpatialGraphView28 segmentColormap setDefaultAlpha 0.500000
SpatialGraphView28 fire
SpatialGraphView28 itemsToShow setValue 0 0
SpatialGraphView28 itemsToShow setValue 1 1
SpatialGraphView28 nodeScale setIndex 0 0
SpatialGraphView28 nodeScaleFactor setMinMax 0 13246
SpatialGraphView28 nodeScaleFactor setButtons 0
SpatialGraphView28 nodeScaleFactor setIncrement 883.067
SpatialGraphView28 nodeScaleFactor setValue 10
SpatialGraphView28 nodeScaleFactor setSubMinMax 0 13246
SpatialGraphView28 nodeColoring setIndex 0 0
SpatialGraphView28 nodeLabelColoringOptions setValue 0
SpatialGraphView28 nodeColor setColor 0 0.8 0.8 0.8
SpatialGraphView28 segmentStyle setValue 0 0
SpatialGraphView28 segmentStyle setValue 1 0
SpatialGraphView28 segmentStyle setValue 2 1
SpatialGraphView28 tubeScale setIndex 0 1
SpatialGraphView28 tubeScaleFactor setMinMax 0 10
SpatialGraphView28 tubeScaleFactor setButtons 0
SpatialGraphView28 tubeScaleFactor setIncrement 0.666667
SpatialGraphView28 tubeScaleFactor setValue 1
SpatialGraphView28 tubeScaleFactor setSubMinMax 0 10
SpatialGraphView28 segmentColoring setIndex 0 0
SpatialGraphView28 segmentLabelColoringOptions setValue 0
SpatialGraphView28 segmentColor setColor 0 0 0 0
SpatialGraphView28 fire
SpatialGraphView28 setViewerMask 16383
SpatialGraphView28 setShadowStyle 0

set hideNewModules 0
create HxSpatialGraphView {SpatialGraphView29}
SpatialGraphView29 setIconPosition 393 1090
SpatialGraphView29 data connect ZELLE_22.hoc0001.hoc
SpatialGraphView29 nodeColormap setDefaultColor 1 0.8 0.5
SpatialGraphView29 nodeColormap setDefaultAlpha 0.500000
SpatialGraphView29 segmentColormap setDefaultColor 1 0.8 0.5
SpatialGraphView29 segmentColormap setDefaultAlpha 0.500000
SpatialGraphView29 fire
SpatialGraphView29 itemsToShow setValue 0 0
SpatialGraphView29 itemsToShow setValue 1 1
SpatialGraphView29 nodeScale setIndex 0 0
SpatialGraphView29 nodeScaleFactor setMinMax 0 12385
SpatialGraphView29 nodeScaleFactor setButtons 0
SpatialGraphView29 nodeScaleFactor setIncrement 825.667
SpatialGraphView29 nodeScaleFactor setValue 10
SpatialGraphView29 nodeScaleFactor setSubMinMax 0 12385
SpatialGraphView29 nodeColoring setIndex 0 0
SpatialGraphView29 nodeLabelColoringOptions setValue 0
SpatialGraphView29 nodeColor setColor 0 0.8 0.8 0.8
SpatialGraphView29 segmentStyle setValue 0 0
SpatialGraphView29 segmentStyle setValue 1 0
SpatialGraphView29 segmentStyle setValue 2 1
SpatialGraphView29 tubeScale setIndex 0 1
SpatialGraphView29 tubeScaleFactor setMinMax 0 10
SpatialGraphView29 tubeScaleFactor setButtons 0
SpatialGraphView29 tubeScaleFactor setIncrement 0.666667
SpatialGraphView29 tubeScaleFactor setValue 1
SpatialGraphView29 tubeScaleFactor setSubMinMax 0 10
SpatialGraphView29 segmentColoring setIndex 0 0
SpatialGraphView29 segmentLabelColoringOptions setValue 0
SpatialGraphView29 segmentColor setColor 0 0 0 0
SpatialGraphView29 fire
SpatialGraphView29 setViewerMask 16383
SpatialGraphView29 setShadowStyle 0

set hideNewModules 0
create HxSpatialGraphView {SpatialGraphView30}
SpatialGraphView30 setIconPosition 393 1120
SpatialGraphView30 data connect Zelle_55_fertig.hoc0001.hoc
SpatialGraphView30 nodeColormap setDefaultColor 1 0.8 0.5
SpatialGraphView30 nodeColormap setDefaultAlpha 0.500000
SpatialGraphView30 segmentColormap setDefaultColor 1 0.8 0.5
SpatialGraphView30 segmentColormap setDefaultAlpha 0.500000
SpatialGraphView30 fire
SpatialGraphView30 itemsToShow setValue 0 0
SpatialGraphView30 itemsToShow setValue 1 1
SpatialGraphView30 nodeScale setIndex 0 0
SpatialGraphView30 nodeScaleFactor setMinMax 0 12480
SpatialGraphView30 nodeScaleFactor setButtons 0
SpatialGraphView30 nodeScaleFactor setIncrement 832
SpatialGraphView30 nodeScaleFactor setValue 10
SpatialGraphView30 nodeScaleFactor setSubMinMax 0 12480
SpatialGraphView30 nodeColoring setIndex 0 0
SpatialGraphView30 nodeLabelColoringOptions setValue 0
SpatialGraphView30 nodeColor setColor 0 0.8 0.8 0.8
SpatialGraphView30 segmentStyle setValue 0 0
SpatialGraphView30 segmentStyle setValue 1 0
SpatialGraphView30 segmentStyle setValue 2 1
SpatialGraphView30 tubeScale setIndex 0 1
SpatialGraphView30 tubeScaleFactor setMinMax 0 10
SpatialGraphView30 tubeScaleFactor setButtons 0
SpatialGraphView30 tubeScaleFactor setIncrement 0.666667
SpatialGraphView30 tubeScaleFactor setValue 1
SpatialGraphView30 tubeScaleFactor setSubMinMax 0 10
SpatialGraphView30 segmentColoring setIndex 0 0
SpatialGraphView30 segmentLabelColoringOptions setValue 0
SpatialGraphView30 segmentColor setColor 0 1 0.666667 0
SpatialGraphView30 fire
SpatialGraphView30 setViewerMask 16383
SpatialGraphView30 setShadowStyle 0

set hideNewModules 1
create HxDirectoryData {Layer1}
Layer1 setIconPosition 0 0
Layer1 setInvisible 1
Layer1 parentDir connect Data
Layer1 fire
Layer1 fire
Layer1 setViewerMask 32767

set hideNewModules 1
create HxDataDirectory {DataDirectory_Cell7_VCH_1Skel.001_truff__472ee6.hoc}
DataDirectory_Cell7_VCH_1Skel.001_truff__472ee6.hoc setIconPosition 0 0
DataDirectory_Cell7_VCH_1Skel.001_truff__472ee6.hoc setInvisible 1
DataDirectory_Cell7_VCH_1Skel.001_truff__472ee6.hoc parentDir connect Layer1
DataDirectory_Cell7_VCH_1Skel.001_truff__472ee6.hoc attachedData connect Cell7_VCH_1Skel.001_truff__472ee6.hoc
DataDirectory_Cell7_VCH_1Skel.001_truff__472ee6.hoc fire
DataDirectory_Cell7_VCH_1Skel.001_truff__472ee6.hoc fire
DataDirectory_Cell7_VCH_1Skel.001_truff__472ee6.hoc setViewerMask 16383

set hideNewModules 1
create HxDataDirectory {DataDirectory_Cell_Y_3skels_ck_was_2012-06-26_C80_11__explorational__vschuhbeck__4903f6_49.hoc0001.hoc}
DataDirectory_Cell_Y_3skels_ck_was_2012-06-26_C80_11__explorational__vschuhbeck__4903f6_49.hoc0001.hoc setIconPosition 0 0
DataDirectory_Cell_Y_3skels_ck_was_2012-06-26_C80_11__explorational__vschuhbeck__4903f6_49.hoc0001.hoc setInvisible 1
DataDirectory_Cell_Y_3skels_ck_was_2012-06-26_C80_11__explorational__vschuhbeck__4903f6_49.hoc0001.hoc parentDir connect Layer1
DataDirectory_Cell_Y_3skels_ck_was_2012-06-26_C80_11__explorational__vschuhbeck__4903f6_49.hoc0001.hoc attachedData connect Cell_Y_3skels_ck_was_2012-06-26_C80_11__explorational__vschuhbeck__4903f6_49.hoc0001.hoc
DataDirectory_Cell_Y_3skels_ck_was_2012-06-26_C80_11__explorational__vschuhbeck__4903f6_49.hoc0001.hoc fire
DataDirectory_Cell_Y_3skels_ck_was_2012-06-26_C80_11__explorational__vschuhbeck__4903f6_49.hoc0001.hoc fire
DataDirectory_Cell_Y_3skels_ck_was_2012-06-26_C80_11__explorational__vschuhbeck__4903f6_49.hoc0001.hoc setViewerMask 16383

set hideNewModules 1
create HxDataDirectory {DataDirectory_corrected_hw_DCH_cell3_28_70_127_ck_node_size_changed.hoc0001.hoc}
DataDirectory_corrected_hw_DCH_cell3_28_70_127_ck_node_size_changed.hoc0001.hoc setIconPosition 0 0
DataDirectory_corrected_hw_DCH_cell3_28_70_127_ck_node_size_changed.hoc0001.hoc setInvisible 1
DataDirectory_corrected_hw_DCH_cell3_28_70_127_ck_node_size_changed.hoc0001.hoc parentDir connect Layer1
DataDirectory_corrected_hw_DCH_cell3_28_70_127_ck_node_size_changed.hoc0001.hoc attachedData connect corrected_hw_DCH_cell3_28_70_127_ck_node_size_changed.hoc0001.hoc
DataDirectory_corrected_hw_DCH_cell3_28_70_127_ck_node_size_changed.hoc0001.hoc fire
DataDirectory_corrected_hw_DCH_cell3_28_70_127_ck_node_size_changed.hoc0001.hoc fire
DataDirectory_corrected_hw_DCH_cell3_28_70_127_ck_node_size_changed.hoc0001.hoc setViewerMask 16383

set hideNewModules 1
create HxDataDirectory {DataDirectory_Zelle40_fertig.hoc0001.hoc}
DataDirectory_Zelle40_fertig.hoc0001.hoc setIconPosition 0 0
DataDirectory_Zelle40_fertig.hoc0001.hoc setInvisible 1
DataDirectory_Zelle40_fertig.hoc0001.hoc parentDir connect Layer1
DataDirectory_Zelle40_fertig.hoc0001.hoc attachedData connect Zelle40_fertig.hoc0001.hoc
DataDirectory_Zelle40_fertig.hoc0001.hoc fire
DataDirectory_Zelle40_fertig.hoc0001.hoc fire
DataDirectory_Zelle40_fertig.hoc0001.hoc setViewerMask 16383

set hideNewModules 1
create HxDataDirectory {DataDirectory_Zelle_55_fertig.hoc0001.hoc}
DataDirectory_Zelle_55_fertig.hoc0001.hoc setIconPosition 0 0
DataDirectory_Zelle_55_fertig.hoc0001.hoc setInvisible 1
DataDirectory_Zelle_55_fertig.hoc0001.hoc parentDir connect Layer1
DataDirectory_Zelle_55_fertig.hoc0001.hoc attachedData connect Zelle_55_fertig.hoc0001.hoc
DataDirectory_Zelle_55_fertig.hoc0001.hoc fire
DataDirectory_Zelle_55_fertig.hoc0001.hoc fire
DataDirectory_Zelle_55_fertig.hoc0001.hoc setViewerMask 16383

set hideNewModules 1
create HxDirectoryData {Layer2}
Layer2 setIconPosition 0 0
Layer2 setInvisible 1
Layer2 parentDir connect Data
Layer2 fire
Layer2 fire
Layer2 setViewerMask 32767

set hideNewModules 1
create HxDataDirectory {DataDirectory_Cell45_6skels_ck.001_corrected_sorted_diametered.hoc0001.hoc}
DataDirectory_Cell45_6skels_ck.001_corrected_sorted_diametered.hoc0001.hoc setIconPosition 0 0
DataDirectory_Cell45_6skels_ck.001_corrected_sorted_diametered.hoc0001.hoc setInvisible 1
DataDirectory_Cell45_6skels_ck.001_corrected_sorted_diametered.hoc0001.hoc parentDir connect Layer2
DataDirectory_Cell45_6skels_ck.001_corrected_sorted_diametered.hoc0001.hoc attachedData connect Cell45_6skels_ck.001_corrected_sorted_diametered.hoc0001.hoc
DataDirectory_Cell45_6skels_ck.001_corrected_sorted_diametered.hoc0001.hoc fire
DataDirectory_Cell45_6skels_ck.001_corrected_sorted_diametered.hoc0001.hoc fire
DataDirectory_Cell45_6skels_ck.001_corrected_sorted_diametered.hoc0001.hoc setViewerMask 16383

set hideNewModules 1
create HxDataDirectory {DataDirectory_Cell48_5skels_ck.001_corrected_sorted_diametered.hoc0001.hoc}
DataDirectory_Cell48_5skels_ck.001_corrected_sorted_diametered.hoc0001.hoc setIconPosition 0 0
DataDirectory_Cell48_5skels_ck.001_corrected_sorted_diametered.hoc0001.hoc setInvisible 1
DataDirectory_Cell48_5skels_ck.001_corrected_sorted_diametered.hoc0001.hoc parentDir connect Layer2
DataDirectory_Cell48_5skels_ck.001_corrected_sorted_diametered.hoc0001.hoc attachedData connect Cell48_5skels_ck.001_corrected_sorted_diametered.hoc0001.hoc
DataDirectory_Cell48_5skels_ck.001_corrected_sorted_diametered.hoc0001.hoc fire
DataDirectory_Cell48_5skels_ck.001_corrected_sorted_diametered.hoc0001.hoc fire
DataDirectory_Cell48_5skels_ck.001_corrected_sorted_diametered.hoc0001.hoc setViewerMask 16383

set hideNewModules 1
create HxDataDirectory {DataDirectory_cell15_was_2012-06-26_C80_11__explorational__truff__604db8_3.hoc0001.hoc}
DataDirectory_cell15_was_2012-06-26_C80_11__explorational__truff__604db8_3.hoc0001.hoc setIconPosition 0 0
DataDirectory_cell15_was_2012-06-26_C80_11__explorational__truff__604db8_3.hoc0001.hoc setInvisible 1
DataDirectory_cell15_was_2012-06-26_C80_11__explorational__truff__604db8_3.hoc0001.hoc parentDir connect Layer2
DataDirectory_cell15_was_2012-06-26_C80_11__explorational__truff__604db8_3.hoc0001.hoc attachedData connect cell15_was_2012-06-26_C80_11__explorational__truff__604db8_3.hoc0001.hoc
DataDirectory_cell15_was_2012-06-26_C80_11__explorational__truff__604db8_3.hoc0001.hoc fire
DataDirectory_cell15_was_2012-06-26_C80_11__explorational__truff__604db8_3.hoc0001.hoc fire
DataDirectory_cell15_was_2012-06-26_C80_11__explorational__truff__604db8_3.hoc0001.hoc setViewerMask 16383

set hideNewModules 1
create HxDataDirectory {DataDirectory_cell23_was_2012-06-26_C80_11__explorational__vrobl__48ebdb.hoc0001.hoc}
DataDirectory_cell23_was_2012-06-26_C80_11__explorational__vrobl__48ebdb.hoc0001.hoc setIconPosition 0 0
DataDirectory_cell23_was_2012-06-26_C80_11__explorational__vrobl__48ebdb.hoc0001.hoc setInvisible 1
DataDirectory_cell23_was_2012-06-26_C80_11__explorational__vrobl__48ebdb.hoc0001.hoc parentDir connect Layer2
DataDirectory_cell23_was_2012-06-26_C80_11__explorational__vrobl__48ebdb.hoc0001.hoc attachedData connect cell23_was_2012-06-26_C80_11__explorational__vrobl__48ebdb.hoc0001.hoc
DataDirectory_cell23_was_2012-06-26_C80_11__explorational__vrobl__48ebdb.hoc0001.hoc fire
DataDirectory_cell23_was_2012-06-26_C80_11__explorational__vrobl__48ebdb.hoc0001.hoc fire
DataDirectory_cell23_was_2012-06-26_C80_11__explorational__vrobl__48ebdb.hoc0001.hoc setViewerMask 16383

set hideNewModules 1
create HxDataDirectory {DataDirectory_Cell_Z_5skels_ck.001_corrected_sorted_diametered.hoc0001.hoc}
DataDirectory_Cell_Z_5skels_ck.001_corrected_sorted_diametered.hoc0001.hoc setIconPosition 0 0
DataDirectory_Cell_Z_5skels_ck.001_corrected_sorted_diametered.hoc0001.hoc setInvisible 1
DataDirectory_Cell_Z_5skels_ck.001_corrected_sorted_diametered.hoc0001.hoc parentDir connect Layer2
DataDirectory_Cell_Z_5skels_ck.001_corrected_sorted_diametered.hoc0001.hoc attachedData connect Cell_Z_5skels_ck.001_corrected_sorted_diametered.hoc0001.hoc
DataDirectory_Cell_Z_5skels_ck.001_corrected_sorted_diametered.hoc0001.hoc fire
DataDirectory_Cell_Z_5skels_ck.001_corrected_sorted_diametered.hoc0001.hoc fire
DataDirectory_Cell_Z_5skels_ck.001_corrected_sorted_diametered.hoc0001.hoc setViewerMask 16383

set hideNewModules 1
create HxDataDirectory {DataDirectory_Zelle64_fertig.hoc0001.hoc}
DataDirectory_Zelle64_fertig.hoc0001.hoc setIconPosition 0 0
DataDirectory_Zelle64_fertig.hoc0001.hoc setInvisible 1
DataDirectory_Zelle64_fertig.hoc0001.hoc parentDir connect Layer2
DataDirectory_Zelle64_fertig.hoc0001.hoc attachedData connect Zelle64_fertig.hoc0001.hoc
DataDirectory_Zelle64_fertig.hoc0001.hoc fire
DataDirectory_Zelle64_fertig.hoc0001.hoc fire
DataDirectory_Zelle64_fertig.hoc0001.hoc setViewerMask 16383

set hideNewModules 1
create HxDataDirectory {DataDirectory_Zelle163_fertig.hoc0001.hoc}
DataDirectory_Zelle163_fertig.hoc0001.hoc setIconPosition 0 0
DataDirectory_Zelle163_fertig.hoc0001.hoc setInvisible 1
DataDirectory_Zelle163_fertig.hoc0001.hoc parentDir connect Layer2
DataDirectory_Zelle163_fertig.hoc0001.hoc attachedData connect Zelle163_fertig.hoc0001.hoc
DataDirectory_Zelle163_fertig.hoc0001.hoc fire
DataDirectory_Zelle163_fertig.hoc0001.hoc fire
DataDirectory_Zelle163_fertig.hoc0001.hoc setViewerMask 16383

set hideNewModules 1
create HxDataDirectory {DataDirectory_ZELLE_22.hoc0001.hoc}
DataDirectory_ZELLE_22.hoc0001.hoc setIconPosition 0 0
DataDirectory_ZELLE_22.hoc0001.hoc setInvisible 1
DataDirectory_ZELLE_22.hoc0001.hoc parentDir connect Layer2
DataDirectory_ZELLE_22.hoc0001.hoc attachedData connect ZELLE_22.hoc0001.hoc
DataDirectory_ZELLE_22.hoc0001.hoc fire
DataDirectory_ZELLE_22.hoc0001.hoc fire
DataDirectory_ZELLE_22.hoc0001.hoc setViewerMask 16383

set hideNewModules 1
create HxDirectoryData {Layer3}
Layer3 setIconPosition 0 0
Layer3 setInvisible 1
Layer3 parentDir connect Data
Layer3 fire
Layer3 fire
Layer3 setViewerMask 32767

set hideNewModules 1
create HxDataDirectory {DataDirectory_Cell19_7skels_ck.001_corrected_sorted_diametered.hoc0001.hoc}
DataDirectory_Cell19_7skels_ck.001_corrected_sorted_diametered.hoc0001.hoc setIconPosition 0 0
DataDirectory_Cell19_7skels_ck.001_corrected_sorted_diametered.hoc0001.hoc setInvisible 1
DataDirectory_Cell19_7skels_ck.001_corrected_sorted_diametered.hoc0001.hoc parentDir connect Layer3
DataDirectory_Cell19_7skels_ck.001_corrected_sorted_diametered.hoc0001.hoc attachedData connect Cell19_7skels_ck.001_corrected_sorted_diametered.hoc0001.hoc
DataDirectory_Cell19_7skels_ck.001_corrected_sorted_diametered.hoc0001.hoc fire
DataDirectory_Cell19_7skels_ck.001_corrected_sorted_diametered.hoc0001.hoc fire
DataDirectory_Cell19_7skels_ck.001_corrected_sorted_diametered.hoc0001.hoc setViewerMask 16383

set hideNewModules 1
create HxDataDirectory {DataDirectory_Cell41_3skels_ck.001_corrected_sorted_diametered.hoc0001.hoc}
DataDirectory_Cell41_3skels_ck.001_corrected_sorted_diametered.hoc0001.hoc setIconPosition 0 0
DataDirectory_Cell41_3skels_ck.001_corrected_sorted_diametered.hoc0001.hoc setInvisible 1
DataDirectory_Cell41_3skels_ck.001_corrected_sorted_diametered.hoc0001.hoc parentDir connect Layer3
DataDirectory_Cell41_3skels_ck.001_corrected_sorted_diametered.hoc0001.hoc attachedData connect Cell41_3skels_ck.001_corrected_sorted_diametered.hoc0001.hoc
DataDirectory_Cell41_3skels_ck.001_corrected_sorted_diametered.hoc0001.hoc fire
DataDirectory_Cell41_3skels_ck.001_corrected_sorted_diametered.hoc0001.hoc fire
DataDirectory_Cell41_3skels_ck.001_corrected_sorted_diametered.hoc0001.hoc setViewerMask 16383

set hideNewModules 1
create HxDataDirectory {DataDirectory_Cell71_4skels_ck.001_corrected_sorted_diametered.hoc0001.hoc}
DataDirectory_Cell71_4skels_ck.001_corrected_sorted_diametered.hoc0001.hoc setIconPosition 0 0
DataDirectory_Cell71_4skels_ck.001_corrected_sorted_diametered.hoc0001.hoc setInvisible 1
DataDirectory_Cell71_4skels_ck.001_corrected_sorted_diametered.hoc0001.hoc parentDir connect Layer3
DataDirectory_Cell71_4skels_ck.001_corrected_sorted_diametered.hoc0001.hoc attachedData connect Cell71_4skels_ck.001_corrected_sorted_diametered.hoc0001.hoc
DataDirectory_Cell71_4skels_ck.001_corrected_sorted_diametered.hoc0001.hoc fire
DataDirectory_Cell71_4skels_ck.001_corrected_sorted_diametered.hoc0001.hoc fire
DataDirectory_Cell71_4skels_ck.001_corrected_sorted_diametered.hoc0001.hoc setViewerMask 16383

set hideNewModules 1
create HxDataDirectory {DataDirectory_cell27_corrected_sorted_diametered.hoc0001.hoc}
DataDirectory_cell27_corrected_sorted_diametered.hoc0001.hoc setIconPosition 0 0
DataDirectory_cell27_corrected_sorted_diametered.hoc0001.hoc setInvisible 1
DataDirectory_cell27_corrected_sorted_diametered.hoc0001.hoc parentDir connect Layer3
DataDirectory_cell27_corrected_sorted_diametered.hoc0001.hoc attachedData connect cell27_corrected_sorted_diametered.hoc0001.hoc
DataDirectory_cell27_corrected_sorted_diametered.hoc0001.hoc fire
DataDirectory_cell27_corrected_sorted_diametered.hoc0001.hoc fire
DataDirectory_cell27_corrected_sorted_diametered.hoc0001.hoc setViewerMask 16383

set hideNewModules 1
create HxDataDirectory {DataDirectory_cell138_corrected_sorted_diametered.hoc0001.hoc}
DataDirectory_cell138_corrected_sorted_diametered.hoc0001.hoc setIconPosition 0 0
DataDirectory_cell138_corrected_sorted_diametered.hoc0001.hoc setInvisible 1
DataDirectory_cell138_corrected_sorted_diametered.hoc0001.hoc parentDir connect Layer3
DataDirectory_cell138_corrected_sorted_diametered.hoc0001.hoc attachedData connect cell138_corrected_sorted_diametered.hoc0001.hoc
DataDirectory_cell138_corrected_sorted_diametered.hoc0001.hoc fire
DataDirectory_cell138_corrected_sorted_diametered.hoc0001.hoc fire
DataDirectory_cell138_corrected_sorted_diametered.hoc0001.hoc setViewerMask 16383

set hideNewModules 1
create HxDataDirectory {DataDirectory_Cell_VSLBD_11skels_ck001_corrected_sorted_diametered.hoc0001.hoc}
DataDirectory_Cell_VSLBD_11skels_ck001_corrected_sorted_diametered.hoc0001.hoc setIconPosition 0 0
DataDirectory_Cell_VSLBD_11skels_ck001_corrected_sorted_diametered.hoc0001.hoc setInvisible 1
DataDirectory_Cell_VSLBD_11skels_ck001_corrected_sorted_diametered.hoc0001.hoc parentDir connect Layer3
DataDirectory_Cell_VSLBD_11skels_ck001_corrected_sorted_diametered.hoc0001.hoc attachedData connect Cell_VSLBD_11skels_ck001_corrected_sorted_diametered.hoc0001.hoc
DataDirectory_Cell_VSLBD_11skels_ck001_corrected_sorted_diametered.hoc0001.hoc fire
DataDirectory_Cell_VSLBD_11skels_ck001_corrected_sorted_diametered.hoc0001.hoc fire
DataDirectory_Cell_VSLBD_11skels_ck001_corrected_sorted_diametered.hoc0001.hoc setViewerMask 16383

set hideNewModules 1
create HxDirectoryData {Layer4}
Layer4 setIconPosition 0 0
Layer4 setInvisible 1
Layer4 parentDir connect Data
Layer4 fire
Layer4 fire
Layer4 setViewerMask 32767

set hideNewModules 1
create HxDataDirectory {DataDirectory_Cell25_3skels_ck.001_corrected_sorted_diametered.hoc0001.hoc}
DataDirectory_Cell25_3skels_ck.001_corrected_sorted_diametered.hoc0001.hoc setIconPosition 0 0
DataDirectory_Cell25_3skels_ck.001_corrected_sorted_diametered.hoc0001.hoc setInvisible 1
DataDirectory_Cell25_3skels_ck.001_corrected_sorted_diametered.hoc0001.hoc parentDir connect Layer4
DataDirectory_Cell25_3skels_ck.001_corrected_sorted_diametered.hoc0001.hoc attachedData connect Cell25_3skels_ck.001_corrected_sorted_diametered.hoc0001.hoc
DataDirectory_Cell25_3skels_ck.001_corrected_sorted_diametered.hoc0001.hoc fire
DataDirectory_Cell25_3skels_ck.001_corrected_sorted_diametered.hoc0001.hoc fire
DataDirectory_Cell25_3skels_ck.001_corrected_sorted_diametered.hoc0001.hoc setViewerMask 16383

set hideNewModules 1
create HxDataDirectory {DataDirectory_Cell26_5skels_ck.001_corrected_sorted_diametered.hoc0001.hoc}
DataDirectory_Cell26_5skels_ck.001_corrected_sorted_diametered.hoc0001.hoc setIconPosition 0 0
DataDirectory_Cell26_5skels_ck.001_corrected_sorted_diametered.hoc0001.hoc setInvisible 1
DataDirectory_Cell26_5skels_ck.001_corrected_sorted_diametered.hoc0001.hoc parentDir connect Layer4
DataDirectory_Cell26_5skels_ck.001_corrected_sorted_diametered.hoc0001.hoc attachedData connect Cell26_5skels_ck.001_corrected_sorted_diametered.hoc0001.hoc
DataDirectory_Cell26_5skels_ck.001_corrected_sorted_diametered.hoc0001.hoc fire
DataDirectory_Cell26_5skels_ck.001_corrected_sorted_diametered.hoc0001.hoc fire
DataDirectory_Cell26_5skels_ck.001_corrected_sorted_diametered.hoc0001.hoc setViewerMask 16383

set hideNewModules 1
create HxDataDirectory {DataDirectory_Cell36_4skels_ck.001_corrected_sorted_diametered.hoc0001.hoc}
DataDirectory_Cell36_4skels_ck.001_corrected_sorted_diametered.hoc0001.hoc setIconPosition 0 0
DataDirectory_Cell36_4skels_ck.001_corrected_sorted_diametered.hoc0001.hoc setInvisible 1
DataDirectory_Cell36_4skels_ck.001_corrected_sorted_diametered.hoc0001.hoc parentDir connect Layer4
DataDirectory_Cell36_4skels_ck.001_corrected_sorted_diametered.hoc0001.hoc attachedData connect Cell36_4skels_ck.001_corrected_sorted_diametered.hoc0001.hoc
DataDirectory_Cell36_4skels_ck.001_corrected_sorted_diametered.hoc0001.hoc fire
DataDirectory_Cell36_4skels_ck.001_corrected_sorted_diametered.hoc0001.hoc fire
DataDirectory_Cell36_4skels_ck.001_corrected_sorted_diametered.hoc0001.hoc setViewerMask 16383

set hideNewModules 1
create HxDataDirectory {DataDirectory_Cell65_7skels_ck.001_corrected_sorted_diametered.hoc0001.hoc}
DataDirectory_Cell65_7skels_ck.001_corrected_sorted_diametered.hoc0001.hoc setIconPosition 0 0
DataDirectory_Cell65_7skels_ck.001_corrected_sorted_diametered.hoc0001.hoc setInvisible 1
DataDirectory_Cell65_7skels_ck.001_corrected_sorted_diametered.hoc0001.hoc parentDir connect Layer4
DataDirectory_Cell65_7skels_ck.001_corrected_sorted_diametered.hoc0001.hoc attachedData connect Cell65_7skels_ck.001_corrected_sorted_diametered.hoc0001.hoc
DataDirectory_Cell65_7skels_ck.001_corrected_sorted_diametered.hoc0001.hoc fire
DataDirectory_Cell65_7skels_ck.001_corrected_sorted_diametered.hoc0001.hoc fire
DataDirectory_Cell65_7skels_ck.001_corrected_sorted_diametered.hoc0001.hoc setViewerMask 16383

set hideNewModules 1
create HxDataDirectory {DataDirectory_Cell75_4skels_ck.001_corrected_sorted_diametered.hoc0001.hoc}
DataDirectory_Cell75_4skels_ck.001_corrected_sorted_diametered.hoc0001.hoc setIconPosition 0 0
DataDirectory_Cell75_4skels_ck.001_corrected_sorted_diametered.hoc0001.hoc setInvisible 1
DataDirectory_Cell75_4skels_ck.001_corrected_sorted_diametered.hoc0001.hoc parentDir connect Layer4
DataDirectory_Cell75_4skels_ck.001_corrected_sorted_diametered.hoc0001.hoc attachedData connect Cell75_4skels_ck.001_corrected_sorted_diametered.hoc0001.hoc
DataDirectory_Cell75_4skels_ck.001_corrected_sorted_diametered.hoc0001.hoc fire
DataDirectory_Cell75_4skels_ck.001_corrected_sorted_diametered.hoc0001.hoc fire
DataDirectory_Cell75_4skels_ck.001_corrected_sorted_diametered.hoc0001.hoc setViewerMask 16383

set hideNewModules 1
create HxDataDirectory {DataDirectory_Cell126_4skels_ck.001_corrected_sorted_diametered.hoc0001.hoc}
DataDirectory_Cell126_4skels_ck.001_corrected_sorted_diametered.hoc0001.hoc setIconPosition 0 0
DataDirectory_Cell126_4skels_ck.001_corrected_sorted_diametered.hoc0001.hoc setInvisible 1
DataDirectory_Cell126_4skels_ck.001_corrected_sorted_diametered.hoc0001.hoc parentDir connect Layer4
DataDirectory_Cell126_4skels_ck.001_corrected_sorted_diametered.hoc0001.hoc attachedData connect Cell126_4skels_ck.001_corrected_sorted_diametered.hoc0001.hoc
DataDirectory_Cell126_4skels_ck.001_corrected_sorted_diametered.hoc0001.hoc fire
DataDirectory_Cell126_4skels_ck.001_corrected_sorted_diametered.hoc0001.hoc fire
DataDirectory_Cell126_4skels_ck.001_corrected_sorted_diametered.hoc0001.hoc setViewerMask 16383

set hideNewModules 1
create HxDataDirectory {DataDirectory_Cell151_4skels_ck.001_corrected_sorted_diametered.hoc0001.hoc}
DataDirectory_Cell151_4skels_ck.001_corrected_sorted_diametered.hoc0001.hoc setIconPosition 0 0
DataDirectory_Cell151_4skels_ck.001_corrected_sorted_diametered.hoc0001.hoc setInvisible 1
DataDirectory_Cell151_4skels_ck.001_corrected_sorted_diametered.hoc0001.hoc parentDir connect Layer4
DataDirectory_Cell151_4skels_ck.001_corrected_sorted_diametered.hoc0001.hoc attachedData connect Cell151_4skels_ck.001_corrected_sorted_diametered.hoc0001.hoc
DataDirectory_Cell151_4skels_ck.001_corrected_sorted_diametered.hoc0001.hoc fire
DataDirectory_Cell151_4skels_ck.001_corrected_sorted_diametered.hoc0001.hoc fire
DataDirectory_Cell151_4skels_ck.001_corrected_sorted_diametered.hoc0001.hoc setViewerMask 16383

set hideNewModules 1
create HxDataDirectory {DataDirectory_Cell153_4skels_ck.001_corrected_sorted_diametered.hoc0001.hoc}
DataDirectory_Cell153_4skels_ck.001_corrected_sorted_diametered.hoc0001.hoc setIconPosition 0 0
DataDirectory_Cell153_4skels_ck.001_corrected_sorted_diametered.hoc0001.hoc setInvisible 1
DataDirectory_Cell153_4skels_ck.001_corrected_sorted_diametered.hoc0001.hoc parentDir connect Layer4
DataDirectory_Cell153_4skels_ck.001_corrected_sorted_diametered.hoc0001.hoc attachedData connect Cell153_4skels_ck.001_corrected_sorted_diametered.hoc0001.hoc
DataDirectory_Cell153_4skels_ck.001_corrected_sorted_diametered.hoc0001.hoc fire
DataDirectory_Cell153_4skels_ck.001_corrected_sorted_diametered.hoc0001.hoc fire
DataDirectory_Cell153_4skels_ck.001_corrected_sorted_diametered.hoc0001.hoc setViewerMask 16383

set hideNewModules 1
create HxDataDirectory {DataDirectory_Cell24_5skels_ck_corrected_sorted_diametered.hoc0001.hoc}
DataDirectory_Cell24_5skels_ck_corrected_sorted_diametered.hoc0001.hoc setIconPosition 0 0
DataDirectory_Cell24_5skels_ck_corrected_sorted_diametered.hoc0001.hoc setInvisible 1
DataDirectory_Cell24_5skels_ck_corrected_sorted_diametered.hoc0001.hoc parentDir connect Layer4
DataDirectory_Cell24_5skels_ck_corrected_sorted_diametered.hoc0001.hoc attachedData connect Cell24_5skels_ck_corrected_sorted_diametered.hoc0001.hoc
DataDirectory_Cell24_5skels_ck_corrected_sorted_diametered.hoc0001.hoc fire
DataDirectory_Cell24_5skels_ck_corrected_sorted_diametered.hoc0001.hoc fire
DataDirectory_Cell24_5skels_ck_corrected_sorted_diametered.hoc0001.hoc setViewerMask 16383

set hideNewModules 1
create HxDataDirectory {DataDirectory_Cell50_6skels_completed.hoc0001.hoc}
DataDirectory_Cell50_6skels_completed.hoc0001.hoc setIconPosition 0 0
DataDirectory_Cell50_6skels_completed.hoc0001.hoc setInvisible 1
DataDirectory_Cell50_6skels_completed.hoc0001.hoc parentDir connect Layer4
DataDirectory_Cell50_6skels_completed.hoc0001.hoc attachedData connect Cell50_6skels_completed.hoc0001.hoc
DataDirectory_Cell50_6skels_completed.hoc0001.hoc fire
DataDirectory_Cell50_6skels_completed.hoc0001.hoc fire
DataDirectory_Cell50_6skels_completed.hoc0001.hoc setViewerMask 16383

set hideNewModules 1
create HxDataDirectory {DataDirectory_CellX_7skels_completed.hoc0001.hoc}
DataDirectory_CellX_7skels_completed.hoc0001.hoc setIconPosition 0 0
DataDirectory_CellX_7skels_completed.hoc0001.hoc setInvisible 1
DataDirectory_CellX_7skels_completed.hoc0001.hoc parentDir connect Layer4
DataDirectory_CellX_7skels_completed.hoc0001.hoc attachedData connect CellX_7skels_completed.hoc0001.hoc
DataDirectory_CellX_7skels_completed.hoc0001.hoc fire
DataDirectory_CellX_7skels_completed.hoc0001.hoc fire
DataDirectory_CellX_7skels_completed.hoc0001.hoc setViewerMask 16383

set hideNewModules 1
create HxDirectoryData {Neuropil-outline}
Neuropil-outline setIconPosition 0 0
Neuropil-outline setInvisible 1
Neuropil-outline parentDir connect Data
Neuropil-outline fire
Neuropil-outline fire
Neuropil-outline setViewerMask 32766
Neuropil-outline select

set hideNewModules 1
create HxDataDirectory {DataDirectory_Lobula-outline-17Sep13.008_0002.hoc}
DataDirectory_Lobula-outline-17Sep13.008_0002.hoc setIconPosition 0 0
DataDirectory_Lobula-outline-17Sep13.008_0002.hoc setInvisible 1
DataDirectory_Lobula-outline-17Sep13.008_0002.hoc parentDir connect Neuropil-outline
DataDirectory_Lobula-outline-17Sep13.008_0002.hoc attachedData connect Lobula-outline-17Sep13.008_0002.hoc
DataDirectory_Lobula-outline-17Sep13.008_0002.hoc fire
DataDirectory_Lobula-outline-17Sep13.008_0002.hoc fire
DataDirectory_Lobula-outline-17Sep13.008_0002.hoc setViewerMask 16383,32766

set hideNewModules 1
create HxDataDirectory {DataDirectory_Medulla-outline-ck-17Sep13.008_0002.hoc}
DataDirectory_Medulla-outline-ck-17Sep13.008_0002.hoc setIconPosition 0 0
DataDirectory_Medulla-outline-ck-17Sep13.008_0002.hoc setInvisible 1
DataDirectory_Medulla-outline-ck-17Sep13.008_0002.hoc parentDir connect Neuropil-outline
DataDirectory_Medulla-outline-ck-17Sep13.008_0002.hoc attachedData connect Medulla-outline-ck-17Sep13.008_0002.hoc
DataDirectory_Medulla-outline-ck-17Sep13.008_0002.hoc fire
DataDirectory_Medulla-outline-ck-17Sep13.008_0002.hoc fire
DataDirectory_Medulla-outline-ck-17Sep13.008_0002.hoc setViewerMask 16383,32766

set hideNewModules 1
create HxDataDirectory {DataDirectory_Outline-LP-ck-17Sep13.008_0002.hoc}
DataDirectory_Outline-LP-ck-17Sep13.008_0002.hoc setIconPosition 0 0
DataDirectory_Outline-LP-ck-17Sep13.008_0002.hoc setInvisible 1
DataDirectory_Outline-LP-ck-17Sep13.008_0002.hoc parentDir connect Neuropil-outline
DataDirectory_Outline-LP-ck-17Sep13.008_0002.hoc attachedData connect Outline-LP-ck-17Sep13.008_0002.hoc
DataDirectory_Outline-LP-ck-17Sep13.008_0002.hoc fire
DataDirectory_Outline-LP-ck-17Sep13.008_0002.hoc fire
DataDirectory_Outline-LP-ck-17Sep13.008_0002.hoc setViewerMask 16383,32766

set hideNewModules 0
create HxSpatialGraphView {SpatialGraphView31}
SpatialGraphView31 setIconPosition 393 910
SpatialGraphView31 data connect Lobula-outline-17Sep13.008_0002.hoc
SpatialGraphView31 nodeColormap setDefaultColor 1 0.8 0.5
SpatialGraphView31 nodeColormap setDefaultAlpha 0.500000
SpatialGraphView31 segmentColormap setDefaultColor 1 0.8 0.5
SpatialGraphView31 segmentColormap setDefaultAlpha 0.500000
SpatialGraphView31 fire
SpatialGraphView31 itemsToShow setValue 0 0
SpatialGraphView31 itemsToShow setValue 1 1
SpatialGraphView31 nodeScale setIndex 0 0
SpatialGraphView31 nodeScaleFactor setMinMax 0 16042
SpatialGraphView31 nodeScaleFactor setButtons 0
SpatialGraphView31 nodeScaleFactor setIncrement 1069.47
SpatialGraphView31 nodeScaleFactor setValue 10
SpatialGraphView31 nodeScaleFactor setSubMinMax 0 16042
SpatialGraphView31 nodeColoring setIndex 0 0
SpatialGraphView31 nodeLabelColoringOptions setValue 0
SpatialGraphView31 nodeColor setColor 0 0.8 0.8 0.8
SpatialGraphView31 segmentStyle setValue 0 1
SpatialGraphView31 segmentStyle setValue 1 0
SpatialGraphView31 segmentStyle setValue 2 0
SpatialGraphView31 tubeScale setIndex 0 0
SpatialGraphView31 tubeScaleFactor setMinMax 0 10
SpatialGraphView31 tubeScaleFactor setButtons 0
SpatialGraphView31 tubeScaleFactor setIncrement 0.666667
SpatialGraphView31 tubeScaleFactor setValue 0.2
SpatialGraphView31 tubeScaleFactor setSubMinMax 0 10
SpatialGraphView31 segmentColoring setIndex 0 0
SpatialGraphView31 segmentLabelColoringOptions setValue 0
SpatialGraphView31 segmentColor setColor 0 0 0.958 1
SpatialGraphView31 fire
SpatialGraphView31 setViewerMask 16383,32766
SpatialGraphView31 setShadowStyle 0

set hideNewModules 0
create HxSpatialGraphView {SpatialGraphView32}
SpatialGraphView32 setIconPosition 393 940
SpatialGraphView32 data connect Medulla-outline-ck-17Sep13.008_0002.hoc
SpatialGraphView32 nodeColormap setDefaultColor 1 0.8 0.5
SpatialGraphView32 nodeColormap setDefaultAlpha 0.500000
SpatialGraphView32 segmentColormap setDefaultColor 1 0.8 0.5
SpatialGraphView32 segmentColormap setDefaultAlpha 0.500000
SpatialGraphView32 fire
SpatialGraphView32 itemsToShow setValue 0 0
SpatialGraphView32 itemsToShow setValue 1 1
SpatialGraphView32 nodeScale setIndex 0 0
SpatialGraphView32 nodeScaleFactor setMinMax 0 20570
SpatialGraphView32 nodeScaleFactor setButtons 0
SpatialGraphView32 nodeScaleFactor setIncrement 1371.33
SpatialGraphView32 nodeScaleFactor setValue 10
SpatialGraphView32 nodeScaleFactor setSubMinMax 0 20570
SpatialGraphView32 nodeColoring setIndex 0 0
SpatialGraphView32 nodeLabelColoringOptions setValue 0
SpatialGraphView32 nodeColor setColor 0 0.8 0.8 0.8
SpatialGraphView32 segmentStyle setValue 0 1
SpatialGraphView32 segmentStyle setValue 1 0
SpatialGraphView32 segmentStyle setValue 2 0
SpatialGraphView32 tubeScale setIndex 0 0
SpatialGraphView32 tubeScaleFactor setMinMax 0 10
SpatialGraphView32 tubeScaleFactor setButtons 0
SpatialGraphView32 tubeScaleFactor setIncrement 0.666667
SpatialGraphView32 tubeScaleFactor setValue 0.2
SpatialGraphView32 tubeScaleFactor setSubMinMax 0 10
SpatialGraphView32 segmentColoring setIndex 0 0
SpatialGraphView32 segmentLabelColoringOptions setValue 0
SpatialGraphView32 segmentColor setColor 0 1 0 0
SpatialGraphView32 fire
SpatialGraphView32 setViewerMask 16383,32766
SpatialGraphView32 setShadowStyle 0

set hideNewModules 0
create HxSpatialGraphView {SpatialGraphView33}
SpatialGraphView33 setIconPosition 393 970
SpatialGraphView33 data connect Outline-LP-ck-17Sep13.008_0002.hoc
SpatialGraphView33 nodeColormap setDefaultColor 1 0.8 0.5
SpatialGraphView33 nodeColormap setDefaultAlpha 0.500000
SpatialGraphView33 segmentColormap setDefaultColor 1 0.8 0.5
SpatialGraphView33 segmentColormap setDefaultAlpha 0.500000
SpatialGraphView33 fire
SpatialGraphView33 itemsToShow setValue 0 0
SpatialGraphView33 itemsToShow setValue 1 1
SpatialGraphView33 nodeScale setIndex 0 0
SpatialGraphView33 nodeScaleFactor setMinMax 0 14922
SpatialGraphView33 nodeScaleFactor setButtons 0
SpatialGraphView33 nodeScaleFactor setIncrement 994.8
SpatialGraphView33 nodeScaleFactor setValue 10
SpatialGraphView33 nodeScaleFactor setSubMinMax 0 14922
SpatialGraphView33 nodeColoring setIndex 0 0
SpatialGraphView33 nodeLabelColoringOptions setValue 0
SpatialGraphView33 nodeColor setColor 0 0.8 0.8 0.8
SpatialGraphView33 segmentStyle setValue 0 1
SpatialGraphView33 segmentStyle setValue 1 0
SpatialGraphView33 segmentStyle setValue 2 0
SpatialGraphView33 tubeScale setIndex 0 1
SpatialGraphView33 tubeScaleFactor setMinMax 0 10
SpatialGraphView33 tubeScaleFactor setButtons 0
SpatialGraphView33 tubeScaleFactor setIncrement 0.666667
SpatialGraphView33 tubeScaleFactor setValue 0.174419
SpatialGraphView33 tubeScaleFactor setSubMinMax 0 10
SpatialGraphView33 segmentColoring setIndex 0 0
SpatialGraphView33 segmentLabelColoringOptions setValue 0
SpatialGraphView33 segmentColor setColor 0 0.8 0.8 0.8
SpatialGraphView33 fire
SpatialGraphView33 setViewerMask 16383,32766
SpatialGraphView33 setShadowStyle 0

set hideNewModules 1
create HxDirectoryData {Cell-bodies-schematic}
Cell-bodies-schematic setIconPosition 0 0
Cell-bodies-schematic setInvisible 1
Cell-bodies-schematic parentDir connect Data
Cell-bodies-schematic fire
Cell-bodies-schematic fire
Cell-bodies-schematic setViewerMask 32766

set hideNewModules 1
create HxDataDirectory {DataDirectory_zellkoerper3.005_distant.hoc}
DataDirectory_zellkoerper3.005_distant.hoc setIconPosition 0 0
DataDirectory_zellkoerper3.005_distant.hoc setInvisible 1
DataDirectory_zellkoerper3.005_distant.hoc parentDir connect Cell-bodies-schematic
DataDirectory_zellkoerper3.005_distant.hoc attachedData connect zellkoerper3.005_distant.hoc
DataDirectory_zellkoerper3.005_distant.hoc fire
DataDirectory_zellkoerper3.005_distant.hoc fire
DataDirectory_zellkoerper3.005_distant.hoc setViewerMask 16383,32766

set hideNewModules 1
create HxDataDirectory {DataDirectory_zellkoerper3.005_located.hoc}
DataDirectory_zellkoerper3.005_located.hoc setIconPosition 0 0
DataDirectory_zellkoerper3.005_located.hoc setInvisible 1
DataDirectory_zellkoerper3.005_located.hoc parentDir connect Cell-bodies-schematic
DataDirectory_zellkoerper3.005_located.hoc attachedData connect zellkoerper3.005_located.hoc
DataDirectory_zellkoerper3.005_located.hoc fire
DataDirectory_zellkoerper3.005_located.hoc fire
DataDirectory_zellkoerper3.005_located.hoc setViewerMask 16383,32766

set hideNewModules 1
create HxSpatialGraphView {SpatialGraphView35}
SpatialGraphView35 setIconPosition 393 1030
SpatialGraphView35 data connect zellkoerper3.005_distant.hoc
SpatialGraphView35 nodeColormap setDefaultColor 1 0.8 0.5
SpatialGraphView35 nodeColormap setDefaultAlpha 0.500000
SpatialGraphView35 segmentColormap setDefaultColor 1 0.8 0.5
SpatialGraphView35 segmentColormap setDefaultAlpha 0.500000
SpatialGraphView35 fire
SpatialGraphView35 itemsToShow setValue 0 1
SpatialGraphView35 itemsToShow setValue 1 0
SpatialGraphView35 nodeScale setIndex 0 0
SpatialGraphView35 nodeScaleFactor setMinMax 0 19268
SpatialGraphView35 nodeScaleFactor setButtons 0
SpatialGraphView35 nodeScaleFactor setIncrement 1284.53
SpatialGraphView35 nodeScaleFactor setValue 5031
SpatialGraphView35 nodeScaleFactor setSubMinMax 0 19268
SpatialGraphView35 nodeColoring setIndex 0 0
SpatialGraphView35 nodeLabelColoringOptions setValue 0
SpatialGraphView35 nodeColor setColor 0 1 0.842352 0.528
SpatialGraphView35 segmentStyle setValue 0 1
SpatialGraphView35 segmentStyle setValue 1 0
SpatialGraphView35 segmentStyle setValue 2 0
SpatialGraphView35 tubeScale setIndex 0 0
SpatialGraphView35 tubeScaleFactor setMinMax 0 10
SpatialGraphView35 tubeScaleFactor setButtons 0
SpatialGraphView35 tubeScaleFactor setIncrement 0.666667
SpatialGraphView35 tubeScaleFactor setValue 0.2
SpatialGraphView35 tubeScaleFactor setSubMinMax 0 10
SpatialGraphView35 segmentColoring setIndex 0 0
SpatialGraphView35 segmentLabelColoringOptions setValue 0
SpatialGraphView35 segmentColor setColor 0 0.8 0.8 0.8
SpatialGraphView35 fire
SpatialGraphView35 setViewerMask 16383,32766
SpatialGraphView35 setShadowStyle 0

set hideNewModules 1
create HxSpatialGraphView {SpatialGraphView36}
SpatialGraphView36 setIconPosition 393 1060
SpatialGraphView36 data connect zellkoerper3.005_located.hoc
SpatialGraphView36 nodeColormap setDefaultColor 1 0.8 0.5
SpatialGraphView36 nodeColormap setDefaultAlpha 0.500000
SpatialGraphView36 segmentColormap setDefaultColor 1 0.8 0.5
SpatialGraphView36 segmentColormap setDefaultAlpha 0.500000
SpatialGraphView36 fire
SpatialGraphView36 itemsToShow setValue 0 1
SpatialGraphView36 itemsToShow setValue 1 0
SpatialGraphView36 nodeScale setIndex 0 0
SpatialGraphView36 nodeScaleFactor setMinMax 0 5031
SpatialGraphView36 nodeScaleFactor setButtons 0
SpatialGraphView36 nodeScaleFactor setIncrement 335.4
SpatialGraphView36 nodeScaleFactor setValue 5031
SpatialGraphView36 nodeScaleFactor setSubMinMax 0 5031
SpatialGraphView36 nodeColoring setIndex 0 0
SpatialGraphView36 nodeLabelColoringOptions setValue 0
SpatialGraphView36 nodeColor setColor 0 0.8 0.673882 0.4224
SpatialGraphView36 segmentStyle setValue 0 1
SpatialGraphView36 segmentStyle setValue 1 0
SpatialGraphView36 segmentStyle setValue 2 0
SpatialGraphView36 tubeScale setIndex 0 0
SpatialGraphView36 tubeScaleFactor setMinMax 0 10
SpatialGraphView36 tubeScaleFactor setButtons 0
SpatialGraphView36 tubeScaleFactor setIncrement 0.666667
SpatialGraphView36 tubeScaleFactor setValue 0.2
SpatialGraphView36 tubeScaleFactor setSubMinMax 0 10
SpatialGraphView36 segmentColoring setIndex 0 0
SpatialGraphView36 segmentLabelColoringOptions setValue 0
SpatialGraphView36 segmentColor setColor 0 0.8 0.8 0.8
SpatialGraphView36 fire
SpatialGraphView36 setViewerMask 16383,32766
SpatialGraphView36 setShadowStyle 0

set hideNewModules 1
create HxDataDirectory {DataDirectory__dros-zellkoerper-abiasotto.157.hoc}
DataDirectory__dros-zellkoerper-abiasotto.157.hoc setIconPosition 0 0
DataDirectory__dros-zellkoerper-abiasotto.157.hoc setInvisible 1
DataDirectory__dros-zellkoerper-abiasotto.157.hoc parentDir connect Cell-bodies-schematic
DataDirectory__dros-zellkoerper-abiasotto.157.hoc attachedData connect _dros-zellkoerper-abiasotto.157.hoc
DataDirectory__dros-zellkoerper-abiasotto.157.hoc fire
DataDirectory__dros-zellkoerper-abiasotto.157.hoc fire
DataDirectory__dros-zellkoerper-abiasotto.157.hoc setViewerMask 16383,32766

set hideNewModules 0
create HxSpatialGraphView {SpatialGraphView34}
SpatialGraphView34 setIconPosition 393 1000
SpatialGraphView34 data connect _dros-zellkoerper-abiasotto.157.hoc
SpatialGraphView34 nodeColormap setDefaultColor 1 0.8 0.5
SpatialGraphView34 nodeColormap setDefaultAlpha 0.500000
SpatialGraphView34 segmentColormap setDefaultColor 1 0.8 0.5
SpatialGraphView34 segmentColormap setDefaultAlpha 0.500000
SpatialGraphView34 fire
SpatialGraphView34 itemsToShow setValue 0 1
SpatialGraphView34 itemsToShow setValue 1 0
SpatialGraphView34 nodeScale setIndex 0 0
SpatialGraphView34 nodeScaleFactor setMinMax 0 16134
SpatialGraphView34 nodeScaleFactor setButtons 0
SpatialGraphView34 nodeScaleFactor setIncrement 1075.6
SpatialGraphView34 nodeScaleFactor setValue 2157.45
SpatialGraphView34 nodeScaleFactor setSubMinMax 0 16134
SpatialGraphView34 nodeColoring setIndex 0 0
SpatialGraphView34 nodeLabelColoringOptions setValue 0
SpatialGraphView34 nodeColor setColor 0 1 0.842352 0.528
SpatialGraphView34 segmentStyle setValue 0 1
SpatialGraphView34 segmentStyle setValue 1 0
SpatialGraphView34 segmentStyle setValue 2 0
SpatialGraphView34 tubeScale setIndex 0 0
SpatialGraphView34 tubeScaleFactor setMinMax 0 10
SpatialGraphView34 tubeScaleFactor setButtons 0
SpatialGraphView34 tubeScaleFactor setIncrement 0.666667
SpatialGraphView34 tubeScaleFactor setValue 0.2
SpatialGraphView34 tubeScaleFactor setSubMinMax 0 10
SpatialGraphView34 segmentColoring setIndex 0 0
SpatialGraphView34 segmentLabelColoringOptions setValue 0
SpatialGraphView34 segmentColor setColor 0 0.8 0.8 0.8
SpatialGraphView34 fire
SpatialGraphView34 setViewerMask 16383,32766
SpatialGraphView34 setShadowStyle 0

set hideNewModules 1
create HxDirectoryData {HSN}
HSN setIconPosition 0 0
HSN setInvisible 1
HSN parentDir connect Layer1
HSN fire
HSN fire
HSN setViewerMask 32767

set hideNewModules 1
create HxDirectoryData {HSE}
HSE setIconPosition 0 0
HSE setInvisible 1
HSE parentDir connect Layer1
HSE fire
HSE fire
HSE setViewerMask 32767

set hideNewModules 1
create HxDirectoryData {HSS}
HSS setIconPosition 0 0
HSS setInvisible 1
HSS parentDir connect Layer1
HSS fire
HSS fire
HSS setViewerMask 32767

set hideNewModules 1
create HxDirectoryData {VS1}
VS1 setIconPosition 0 0
VS1 setInvisible 1
VS1 parentDir connect Layer4
VS1 fire
VS1 fire
VS1 setViewerMask 32767

set hideNewModules 1
create HxDirectoryData {VS2}
VS2 setIconPosition 0 0
VS2 setInvisible 1
VS2 parentDir connect Layer4
VS2 fire
VS2 fire
VS2 setViewerMask 32767

set hideNewModules 1
create HxDirectoryData {VS3}
VS3 setIconPosition 0 0
VS3 setInvisible 1
VS3 parentDir connect Layer4
VS3 fire
VS3 fire
VS3 setViewerMask 32767

set hideNewModules 1
create HxDirectoryData {VS4}
VS4 setIconPosition 0 0
VS4 setInvisible 1
VS4 parentDir connect Layer4
VS4 fire
VS4 fire
VS4 setViewerMask 32767

set hideNewModules 1
create HxDirectoryData {VS5}
VS5 setIconPosition 0 0
VS5 setInvisible 1
VS5 parentDir connect Layer4
VS5 fire
VS5 fire
VS5 setViewerMask 32767

set hideNewModules 1
create HxDirectoryData {VS6}
VS6 setIconPosition 0 0
VS6 setInvisible 1
VS6 parentDir connect Layer4
VS6 fire
VS6 fire
VS6 setViewerMask 32767

set hideNewModules 1
create HxDirectoryData {VS-like1}
VS-like1 setIconPosition 0 0
VS-like1 setInvisible 1
VS-like1 parentDir connect Layer4
VS-like1 fire
VS-like1 fire
VS-like1 setViewerMask 32767

set hideNewModules 1
create HxDirectoryData {VS-like2}
VS-like2 setIconPosition 0 0
VS-like2 setInvisible 1
VS-like2 parentDir connect Layer4
VS-like2 fire
VS-like2 fire
VS-like2 setViewerMask 32767

set hideNewModules 1
create HxDirectoryData {VS-like3}
VS-like3 setIconPosition 0 0
VS-like3 setInvisible 1
VS-like3 parentDir connect Layer4
VS-like3 fire
VS-like3 fire
VS-like3 setViewerMask 32767

set hideNewModules 1
create HxDataDirectory {DataDirectory_VS1_5skels_ck.001_completed.hoc0007.hoc}
DataDirectory_VS1_5skels_ck.001_completed.hoc0007.hoc setIconPosition 0 0
DataDirectory_VS1_5skels_ck.001_completed.hoc0007.hoc setInvisible 1
DataDirectory_VS1_5skels_ck.001_completed.hoc0007.hoc parentDir connect VS1
DataDirectory_VS1_5skels_ck.001_completed.hoc0007.hoc attachedData connect VS1_5skels_ck.001_completed.hoc0007.hoc
DataDirectory_VS1_5skels_ck.001_completed.hoc0007.hoc fire
DataDirectory_VS1_5skels_ck.001_completed.hoc0007.hoc fire
DataDirectory_VS1_5skels_ck.001_completed.hoc0007.hoc setViewerMask 16383

set hideNewModules 1
create HxDataDirectory {DataDirectory_VS2_3skels_ck.001_completed.hoc0003.hoc}
DataDirectory_VS2_3skels_ck.001_completed.hoc0003.hoc setIconPosition 0 0
DataDirectory_VS2_3skels_ck.001_completed.hoc0003.hoc setInvisible 1
DataDirectory_VS2_3skels_ck.001_completed.hoc0003.hoc parentDir connect VS2
DataDirectory_VS2_3skels_ck.001_completed.hoc0003.hoc attachedData connect VS2_3skels_ck.001_completed.hoc0003.hoc
DataDirectory_VS2_3skels_ck.001_completed.hoc0003.hoc fire
DataDirectory_VS2_3skels_ck.001_completed.hoc0003.hoc fire
DataDirectory_VS2_3skels_ck.001_completed.hoc0003.hoc setViewerMask 16383

set hideNewModules 1
create HxDataDirectory {DataDirectory_VS3_4skels_ck.001_completed.hoc0001.hoc}
DataDirectory_VS3_4skels_ck.001_completed.hoc0001.hoc setIconPosition 0 0
DataDirectory_VS3_4skels_ck.001_completed.hoc0001.hoc setInvisible 1
DataDirectory_VS3_4skels_ck.001_completed.hoc0001.hoc parentDir connect VS3
DataDirectory_VS3_4skels_ck.001_completed.hoc0001.hoc attachedData connect VS3_4skels_ck.001_completed.hoc0001.hoc
DataDirectory_VS3_4skels_ck.001_completed.hoc0001.hoc fire
DataDirectory_VS3_4skels_ck.001_completed.hoc0001.hoc fire
DataDirectory_VS3_4skels_ck.001_completed.hoc0001.hoc setViewerMask 16383

set hideNewModules 1
create HxDataDirectory {DataDirectory_VS4_skels_ck.001_completed.hoc0001.hoc}
DataDirectory_VS4_skels_ck.001_completed.hoc0001.hoc setIconPosition 0 0
DataDirectory_VS4_skels_ck.001_completed.hoc0001.hoc setInvisible 1
DataDirectory_VS4_skels_ck.001_completed.hoc0001.hoc parentDir connect VS4
DataDirectory_VS4_skels_ck.001_completed.hoc0001.hoc attachedData connect VS4_skels_ck.001_completed.hoc0001.hoc
DataDirectory_VS4_skels_ck.001_completed.hoc0001.hoc fire
DataDirectory_VS4_skels_ck.001_completed.hoc0001.hoc fire
DataDirectory_VS4_skels_ck.001_completed.hoc0001.hoc setViewerMask 16383

set hideNewModules 1
create HxDataDirectory {DataDirectory_VS5_5skels_ck.001_completed.hoc0005.hoc}
DataDirectory_VS5_5skels_ck.001_completed.hoc0005.hoc setIconPosition 0 0
DataDirectory_VS5_5skels_ck.001_completed.hoc0005.hoc setInvisible 1
DataDirectory_VS5_5skels_ck.001_completed.hoc0005.hoc parentDir connect VS5
DataDirectory_VS5_5skels_ck.001_completed.hoc0005.hoc attachedData connect VS5_5skels_ck.001_completed.hoc0005.hoc
DataDirectory_VS5_5skels_ck.001_completed.hoc0005.hoc fire
DataDirectory_VS5_5skels_ck.001_completed.hoc0005.hoc fire
DataDirectory_VS5_5skels_ck.001_completed.hoc0005.hoc setViewerMask 16383

set hideNewModules 1
create HxDataDirectory {DataDirectory_VS6_4skels_ck.001_completed.hoc0001.hoc}
DataDirectory_VS6_4skels_ck.001_completed.hoc0001.hoc setIconPosition 0 0
DataDirectory_VS6_4skels_ck.001_completed.hoc0001.hoc setInvisible 1
DataDirectory_VS6_4skels_ck.001_completed.hoc0001.hoc parentDir connect VS6
DataDirectory_VS6_4skels_ck.001_completed.hoc0001.hoc attachedData connect VS6_4skels_ck.001_completed.hoc0001.hoc
DataDirectory_VS6_4skels_ck.001_completed.hoc0001.hoc fire
DataDirectory_VS6_4skels_ck.001_completed.hoc0001.hoc fire
DataDirectory_VS6_4skels_ck.001_completed.hoc0001.hoc setViewerMask 16383

set hideNewModules 1
create HxDataDirectory {DataDirectory_VSlike1_3skels_ck.001_completed.hoc0003.hoc}
DataDirectory_VSlike1_3skels_ck.001_completed.hoc0003.hoc setIconPosition 0 0
DataDirectory_VSlike1_3skels_ck.001_completed.hoc0003.hoc setInvisible 1
DataDirectory_VSlike1_3skels_ck.001_completed.hoc0003.hoc parentDir connect VS-like1
DataDirectory_VSlike1_3skels_ck.001_completed.hoc0003.hoc attachedData connect VSlike1_3skels_ck.001_completed.hoc0003.hoc
DataDirectory_VSlike1_3skels_ck.001_completed.hoc0003.hoc fire
DataDirectory_VSlike1_3skels_ck.001_completed.hoc0003.hoc fire
DataDirectory_VSlike1_3skels_ck.001_completed.hoc0003.hoc setViewerMask 16383

set hideNewModules 1
create HxDataDirectory {DataDirectory_VSlike3_2skels_ck.001_completed.hoc0001.hoc}
DataDirectory_VSlike3_2skels_ck.001_completed.hoc0001.hoc setIconPosition 0 0
DataDirectory_VSlike3_2skels_ck.001_completed.hoc0001.hoc setInvisible 1
DataDirectory_VSlike3_2skels_ck.001_completed.hoc0001.hoc parentDir connect VS-like3
DataDirectory_VSlike3_2skels_ck.001_completed.hoc0001.hoc attachedData connect VSlike3_2skels_ck.001_completed.hoc0001.hoc
DataDirectory_VSlike3_2skels_ck.001_completed.hoc0001.hoc fire
DataDirectory_VSlike3_2skels_ck.001_completed.hoc0001.hoc fire
DataDirectory_VSlike3_2skels_ck.001_completed.hoc0001.hoc setViewerMask 16383

set hideNewModules 0
create HxSpatialGraphView {SpatialGraphView37}
SpatialGraphView37 setIconPosition 393 1780
SpatialGraphView37 data connect VSlike3_2skels_ck.001_completed.hoc0001.hoc
SpatialGraphView37 nodeColormap setDefaultColor 1 0.8 0.5
SpatialGraphView37 nodeColormap setDefaultAlpha 0.500000
SpatialGraphView37 segmentColormap setDefaultColor 1 0.8 0.5
SpatialGraphView37 segmentColormap setDefaultAlpha 0.500000
SpatialGraphView37 fire
SpatialGraphView37 itemsToShow setValue 0 0
SpatialGraphView37 itemsToShow setValue 1 1
SpatialGraphView37 nodeScale setIndex 0 0
SpatialGraphView37 nodeScaleFactor setMinMax 0 12947
SpatialGraphView37 nodeScaleFactor setButtons 0
SpatialGraphView37 nodeScaleFactor setIncrement 863.133
SpatialGraphView37 nodeScaleFactor setValue 10
SpatialGraphView37 nodeScaleFactor setSubMinMax 0 12947
SpatialGraphView37 nodeColoring setIndex 0 0
SpatialGraphView37 nodeLabelColoringOptions setValue 0
SpatialGraphView37 nodeColor setColor 0 0.8 0.8 0.8
SpatialGraphView37 segmentStyle setValue 0 0
SpatialGraphView37 segmentStyle setValue 1 0
SpatialGraphView37 segmentStyle setValue 2 1
SpatialGraphView37 tubeScale setIndex 0 1
SpatialGraphView37 tubeScaleFactor setMinMax 0 10
SpatialGraphView37 tubeScaleFactor setButtons 0
SpatialGraphView37 tubeScaleFactor setIncrement 0.666667
SpatialGraphView37 tubeScaleFactor setValue 1
SpatialGraphView37 tubeScaleFactor setSubMinMax 0 10
SpatialGraphView37 segmentColoring setIndex 0 0
SpatialGraphView37 segmentLabelColoringOptions setValue 0
SpatialGraphView37 segmentColor setColor 0 0.302 0.6863 0.2902
SpatialGraphView37 fire
SpatialGraphView37 setViewerMask 32767
SpatialGraphView37 setShadowStyle 0

set hideNewModules 0
create HxSpatialGraphView {SpatialGraphView38}
SpatialGraphView38 setIconPosition 393 1750
SpatialGraphView38 data connect VSlike1_3skels_ck.001_completed.hoc0003.hoc
SpatialGraphView38 nodeColormap setDefaultColor 1 0.8 0.5
SpatialGraphView38 nodeColormap setDefaultAlpha 0.500000
SpatialGraphView38 segmentColormap setDefaultColor 1 0.8 0.5
SpatialGraphView38 segmentColormap setDefaultAlpha 0.500000
SpatialGraphView38 fire
SpatialGraphView38 itemsToShow setValue 0 0
SpatialGraphView38 itemsToShow setValue 1 1
SpatialGraphView38 nodeScale setIndex 0 0
SpatialGraphView38 nodeScaleFactor setMinMax 0 14708
SpatialGraphView38 nodeScaleFactor setButtons 0
SpatialGraphView38 nodeScaleFactor setIncrement 980.533
SpatialGraphView38 nodeScaleFactor setValue 10
SpatialGraphView38 nodeScaleFactor setSubMinMax 0 14708
SpatialGraphView38 nodeColoring setIndex 0 0
SpatialGraphView38 nodeLabelColoringOptions setValue 0
SpatialGraphView38 nodeColor setColor 0 0.8 0.8 0.8
SpatialGraphView38 segmentStyle setValue 0 0
SpatialGraphView38 segmentStyle setValue 1 0
SpatialGraphView38 segmentStyle setValue 2 1
SpatialGraphView38 tubeScale setIndex 0 1
SpatialGraphView38 tubeScaleFactor setMinMax 0 10
SpatialGraphView38 tubeScaleFactor setButtons 0
SpatialGraphView38 tubeScaleFactor setIncrement 0.666667
SpatialGraphView38 tubeScaleFactor setValue 1
SpatialGraphView38 tubeScaleFactor setSubMinMax 0 10
SpatialGraphView38 segmentColoring setIndex 0 0
SpatialGraphView38 segmentLabelColoringOptions setValue 0
SpatialGraphView38 segmentColor setColor 0 0.8941 0.102 0.1098
SpatialGraphView38 fire
SpatialGraphView38 setViewerMask 32767
SpatialGraphView38 setShadowStyle 0

set hideNewModules 0
create HxSpatialGraphView {SpatialGraphView39}
SpatialGraphView39 setIconPosition 393 1570
SpatialGraphView39 data connect VS6_4skels_ck.001_completed.hoc0001.hoc
SpatialGraphView39 nodeColormap setDefaultColor 1 0.8 0.5
SpatialGraphView39 nodeColormap setDefaultAlpha 0.500000
SpatialGraphView39 segmentColormap setDefaultColor 1 0.8 0.5
SpatialGraphView39 segmentColormap setDefaultAlpha 0.500000
SpatialGraphView39 fire
SpatialGraphView39 itemsToShow setValue 0 0
SpatialGraphView39 itemsToShow setValue 1 1
SpatialGraphView39 nodeScale setIndex 0 0
SpatialGraphView39 nodeScaleFactor setMinMax 0 12838
SpatialGraphView39 nodeScaleFactor setButtons 0
SpatialGraphView39 nodeScaleFactor setIncrement 855.867
SpatialGraphView39 nodeScaleFactor setValue 10
SpatialGraphView39 nodeScaleFactor setSubMinMax 0 12838
SpatialGraphView39 nodeColoring setIndex 0 0
SpatialGraphView39 nodeLabelColoringOptions setValue 0
SpatialGraphView39 nodeColor setColor 0 0.8 0.8 0.8
SpatialGraphView39 segmentStyle setValue 0 0
SpatialGraphView39 segmentStyle setValue 1 0
SpatialGraphView39 segmentStyle setValue 2 1
SpatialGraphView39 tubeScale setIndex 0 1
SpatialGraphView39 tubeScaleFactor setMinMax 0 10
SpatialGraphView39 tubeScaleFactor setButtons 0
SpatialGraphView39 tubeScaleFactor setIncrement 0.666667
SpatialGraphView39 tubeScaleFactor setValue 1
SpatialGraphView39 tubeScaleFactor setSubMinMax 0 10
SpatialGraphView39 segmentColoring setIndex 0 0
SpatialGraphView39 segmentLabelColoringOptions setValue 0
SpatialGraphView39 segmentColor setColor 0 0.9922 0.9961 0.9922
SpatialGraphView39 fire
SpatialGraphView39 setViewerMask 32767
SpatialGraphView39 setShadowStyle 0

set hideNewModules 0
create HxSpatialGraphView {SpatialGraphView40}
SpatialGraphView40 setIconPosition 393 1510
SpatialGraphView40 data connect VS5_5skels_ck.001_completed.hoc0005.hoc
SpatialGraphView40 nodeColormap setDefaultColor 1 0.8 0.5
SpatialGraphView40 nodeColormap setDefaultAlpha 0.500000
SpatialGraphView40 segmentColormap setDefaultColor 1 0.8 0.5
SpatialGraphView40 segmentColormap setDefaultAlpha 0.500000
SpatialGraphView40 fire
SpatialGraphView40 itemsToShow setValue 0 0
SpatialGraphView40 itemsToShow setValue 1 1
SpatialGraphView40 nodeScale setIndex 0 0
SpatialGraphView40 nodeScaleFactor setMinMax 0 13925
SpatialGraphView40 nodeScaleFactor setButtons 0
SpatialGraphView40 nodeScaleFactor setIncrement 928.333
SpatialGraphView40 nodeScaleFactor setValue 10
SpatialGraphView40 nodeScaleFactor setSubMinMax 0 13925
SpatialGraphView40 nodeColoring setIndex 0 0
SpatialGraphView40 nodeLabelColoringOptions setValue 0
SpatialGraphView40 nodeColor setColor 0 0.8 0.8 0.8
SpatialGraphView40 segmentStyle setValue 0 0
SpatialGraphView40 segmentStyle setValue 1 0
SpatialGraphView40 segmentStyle setValue 2 1
SpatialGraphView40 tubeScale setIndex 0 1
SpatialGraphView40 tubeScaleFactor setMinMax 0 10
SpatialGraphView40 tubeScaleFactor setButtons 0
SpatialGraphView40 tubeScaleFactor setIncrement 0.666667
SpatialGraphView40 tubeScaleFactor setValue 1
SpatialGraphView40 tubeScaleFactor setSubMinMax 0 10
SpatialGraphView40 segmentColoring setIndex 0 0
SpatialGraphView40 segmentLabelColoringOptions setValue 0
SpatialGraphView40 segmentColor setColor 0 0.7294 0 0.4745
SpatialGraphView40 fire
SpatialGraphView40 setViewerMask 32767
SpatialGraphView40 setShadowStyle 0

set hideNewModules 0
create HxSpatialGraphView {SpatialGraphView41}
SpatialGraphView41 setIconPosition 393 1180
SpatialGraphView41 data connect VS4_skels_ck.001_completed.hoc0001.hoc
SpatialGraphView41 nodeColormap setDefaultColor 1 0.8 0.5
SpatialGraphView41 nodeColormap setDefaultAlpha 0.500000
SpatialGraphView41 segmentColormap setDefaultColor 1 0.8 0.5
SpatialGraphView41 segmentColormap setDefaultAlpha 0.500000
SpatialGraphView41 fire
SpatialGraphView41 itemsToShow setValue 0 0
SpatialGraphView41 itemsToShow setValue 1 1
SpatialGraphView41 nodeScale setIndex 0 0
SpatialGraphView41 nodeScaleFactor setMinMax 0 12957
SpatialGraphView41 nodeScaleFactor setButtons 0
SpatialGraphView41 nodeScaleFactor setIncrement 863.8
SpatialGraphView41 nodeScaleFactor setValue 10
SpatialGraphView41 nodeScaleFactor setSubMinMax 0 12957
SpatialGraphView41 nodeColoring setIndex 0 0
SpatialGraphView41 nodeLabelColoringOptions setValue 0
SpatialGraphView41 nodeColor setColor 0 0.8 0.8 0.8
SpatialGraphView41 segmentStyle setValue 0 0
SpatialGraphView41 segmentStyle setValue 1 0
SpatialGraphView41 segmentStyle setValue 2 1
SpatialGraphView41 tubeScale setIndex 0 1
SpatialGraphView41 tubeScaleFactor setMinMax 0 10
SpatialGraphView41 tubeScaleFactor setButtons 0
SpatialGraphView41 tubeScaleFactor setIncrement 0.666667
SpatialGraphView41 tubeScaleFactor setValue 1
SpatialGraphView41 tubeScaleFactor setSubMinMax 0 10
SpatialGraphView41 segmentColoring setIndex 0 0
SpatialGraphView41 segmentLabelColoringOptions setValue 0
SpatialGraphView41 segmentColor setColor 0 0.8863 0.9098 0.1725
SpatialGraphView41 fire
SpatialGraphView41 setViewerMask 32767
SpatialGraphView41 setShadowStyle 0

set hideNewModules 0
create HxSpatialGraphView {SpatialGraphView42}
SpatialGraphView42 setIconPosition 393 1150
SpatialGraphView42 data connect VS3_4skels_ck.001_completed.hoc0001.hoc
SpatialGraphView42 nodeColormap setDefaultColor 1 0.8 0.5
SpatialGraphView42 nodeColormap setDefaultAlpha 0.500000
SpatialGraphView42 segmentColormap setDefaultColor 1 0.8 0.5
SpatialGraphView42 segmentColormap setDefaultAlpha 0.500000
SpatialGraphView42 fire
SpatialGraphView42 itemsToShow setValue 0 0
SpatialGraphView42 itemsToShow setValue 1 1
SpatialGraphView42 nodeScale setIndex 0 0
SpatialGraphView42 nodeScaleFactor setMinMax 0 14625
SpatialGraphView42 nodeScaleFactor setButtons 0
SpatialGraphView42 nodeScaleFactor setIncrement 975
SpatialGraphView42 nodeScaleFactor setValue 10
SpatialGraphView42 nodeScaleFactor setSubMinMax 0 14625
SpatialGraphView42 nodeColoring setIndex 0 0
SpatialGraphView42 nodeLabelColoringOptions setValue 0
SpatialGraphView42 nodeColor setColor 0 0.8 0.8 0.8
SpatialGraphView42 segmentStyle setValue 0 0
SpatialGraphView42 segmentStyle setValue 1 0
SpatialGraphView42 segmentStyle setValue 2 1
SpatialGraphView42 tubeScale setIndex 0 1
SpatialGraphView42 tubeScaleFactor setMinMax 0 10
SpatialGraphView42 tubeScaleFactor setButtons 0
SpatialGraphView42 tubeScaleFactor setIncrement 0.666667
SpatialGraphView42 tubeScaleFactor setValue 1
SpatialGraphView42 tubeScaleFactor setSubMinMax 0 10
SpatialGraphView42 segmentColoring setIndex 0 0
SpatialGraphView42 segmentLabelColoringOptions setValue 0
SpatialGraphView42 segmentColor setColor 0 0.2941 0.7216 0.1804
SpatialGraphView42 fire
SpatialGraphView42 setViewerMask 32767
SpatialGraphView42 setShadowStyle 0

set hideNewModules 0
create HxSpatialGraphView {SpatialGraphView43}
SpatialGraphView43 setIconPosition 393 1210
SpatialGraphView43 data connect VS2_3skels_ck.001_completed.hoc0003.hoc
SpatialGraphView43 nodeColormap setDefaultColor 1 0.8 0.5
SpatialGraphView43 nodeColormap setDefaultAlpha 0.500000
SpatialGraphView43 segmentColormap setDefaultColor 1 0.8 0.5
SpatialGraphView43 segmentColormap setDefaultAlpha 0.500000
SpatialGraphView43 fire
SpatialGraphView43 itemsToShow setValue 0 1
SpatialGraphView43 itemsToShow setValue 1 1
SpatialGraphView43 nodeScale setIndex 0 0
SpatialGraphView43 nodeScaleFactor setMinMax 0 13940
SpatialGraphView43 nodeScaleFactor setButtons 0
SpatialGraphView43 nodeScaleFactor setIncrement 929.333
SpatialGraphView43 nodeScaleFactor setValue 10
SpatialGraphView43 nodeScaleFactor setSubMinMax 0 13940
SpatialGraphView43 nodeColoring setIndex 0 0
SpatialGraphView43 nodeLabelColoringOptions setValue 0
SpatialGraphView43 nodeColor setColor 0 0.8 0.8 0.8
SpatialGraphView43 segmentStyle setValue 0 0
SpatialGraphView43 segmentStyle setValue 1 0
SpatialGraphView43 segmentStyle setValue 2 1
SpatialGraphView43 tubeScale setIndex 0 1
SpatialGraphView43 tubeScaleFactor setMinMax 0 10
SpatialGraphView43 tubeScaleFactor setButtons 0
SpatialGraphView43 tubeScaleFactor setIncrement 0.666667
SpatialGraphView43 tubeScaleFactor setValue 1
SpatialGraphView43 tubeScaleFactor setSubMinMax 0 10
SpatialGraphView43 segmentColoring setIndex 0 0
SpatialGraphView43 segmentLabelColoringOptions setValue 0
SpatialGraphView43 segmentColor setColor 0 0.8196 0.0314 0.1922
SpatialGraphView43 fire
SpatialGraphView43 setViewerMask 32767
SpatialGraphView43 setShadowStyle 0

set hideNewModules 0
create HxSpatialGraphView {SpatialGraphView44}
SpatialGraphView44 setIconPosition 393 1240
SpatialGraphView44 data connect VS1_5skels_ck.001_completed.hoc0007.hoc
SpatialGraphView44 nodeColormap setDefaultColor 1 0.8 0.5
SpatialGraphView44 nodeColormap setDefaultAlpha 0.500000
SpatialGraphView44 segmentColormap setDefaultColor 1 0.8 0.5
SpatialGraphView44 segmentColormap setDefaultAlpha 0.500000
SpatialGraphView44 fire
SpatialGraphView44 itemsToShow setValue 0 0
SpatialGraphView44 itemsToShow setValue 1 1
SpatialGraphView44 nodeScale setIndex 0 0
SpatialGraphView44 nodeScaleFactor setMinMax 0 15143
SpatialGraphView44 nodeScaleFactor setButtons 0
SpatialGraphView44 nodeScaleFactor setIncrement 1009.53
SpatialGraphView44 nodeScaleFactor setValue 0
SpatialGraphView44 nodeScaleFactor setSubMinMax 0 15143
SpatialGraphView44 nodeColoring setIndex 0 0
SpatialGraphView44 nodeLabelColoringOptions setValue 0
SpatialGraphView44 nodeColor setColor 0 0.8 0.8 0.8
SpatialGraphView44 segmentStyle setValue 0 0
SpatialGraphView44 segmentStyle setValue 1 0
SpatialGraphView44 segmentStyle setValue 2 1
SpatialGraphView44 tubeScale setIndex 0 1
SpatialGraphView44 tubeScaleFactor setMinMax 0 10000
SpatialGraphView44 tubeScaleFactor setButtons 0
SpatialGraphView44 tubeScaleFactor setIncrement 0.666667
SpatialGraphView44 tubeScaleFactor setValue 1
SpatialGraphView44 tubeScaleFactor setSubMinMax 0 10000
SpatialGraphView44 segmentColoring setIndex 0 0
SpatialGraphView44 segmentLabelColoringOptions setValue 0
SpatialGraphView44 segmentColor setColor 0 0.5098 0.7922 0.8471
SpatialGraphView44 fire
SpatialGraphView44 setViewerMask 32767
SpatialGraphView44 setShadowStyle 0

set hideNewModules 1
create HxDataDirectory {DataDirectory_2_14_791_sbeyer_002.059.hoc}
DataDirectory_2_14_791_sbeyer_002.059.hoc setIconPosition 0 0
DataDirectory_2_14_791_sbeyer_002.059.hoc setInvisible 1
DataDirectory_2_14_791_sbeyer_002.059.hoc parentDir connect VS1
DataDirectory_2_14_791_sbeyer_002.059.hoc attachedData connect 2_14_791_sbeyer_002.059.hoc
DataDirectory_2_14_791_sbeyer_002.059.hoc fire
DataDirectory_2_14_791_sbeyer_002.059.hoc fire
DataDirectory_2_14_791_sbeyer_002.059.hoc setViewerMask 16383

set hideNewModules 1
create HxDataDirectory {DataDirectory_2_14_732_smaurer_003.055.hoc}
DataDirectory_2_14_732_smaurer_003.055.hoc setIconPosition 0 0
DataDirectory_2_14_732_smaurer_003.055.hoc setInvisible 1
DataDirectory_2_14_732_smaurer_003.055.hoc parentDir connect VS1
DataDirectory_2_14_732_smaurer_003.055.hoc attachedData connect 2_14_732_smaurer_003.055.hoc
DataDirectory_2_14_732_smaurer_003.055.hoc fire
DataDirectory_2_14_732_smaurer_003.055.hoc fire
DataDirectory_2_14_732_smaurer_003.055.hoc setViewerMask 16383

set hideNewModules 1
create HxDataDirectory {DataDirectory_2_14_733_smaurer_002.022.hoc}
DataDirectory_2_14_733_smaurer_002.022.hoc setIconPosition 0 0
DataDirectory_2_14_733_smaurer_002.022.hoc setInvisible 1
DataDirectory_2_14_733_smaurer_002.022.hoc parentDir connect VS1
DataDirectory_2_14_733_smaurer_002.022.hoc attachedData connect 2_14_733_smaurer_002.022.hoc
DataDirectory_2_14_733_smaurer_002.022.hoc fire
DataDirectory_2_14_733_smaurer_002.022.hoc fire
DataDirectory_2_14_733_smaurer_002.022.hoc setViewerMask 16383

set hideNewModules 1
create HxDataDirectory {DataDirectory_2_14_789_smaurer_001.020.hoc}
DataDirectory_2_14_789_smaurer_001.020.hoc setIconPosition 0 0
DataDirectory_2_14_789_smaurer_001.020.hoc setInvisible 1
DataDirectory_2_14_789_smaurer_001.020.hoc parentDir connect VS1
DataDirectory_2_14_789_smaurer_001.020.hoc attachedData connect 2_14_789_smaurer_001.020.hoc
DataDirectory_2_14_789_smaurer_001.020.hoc fire
DataDirectory_2_14_789_smaurer_001.020.hoc fire
DataDirectory_2_14_789_smaurer_001.020.hoc setViewerMask 16383

set hideNewModules 1
create HxDataDirectory {DataDirectory_2_14_790_smaurer_002.043.hoc}
DataDirectory_2_14_790_smaurer_002.043.hoc setIconPosition 0 0
DataDirectory_2_14_790_smaurer_002.043.hoc setInvisible 1
DataDirectory_2_14_790_smaurer_002.043.hoc parentDir connect VS1
DataDirectory_2_14_790_smaurer_002.043.hoc attachedData connect 2_14_790_smaurer_002.043.hoc
DataDirectory_2_14_790_smaurer_002.043.hoc fire
DataDirectory_2_14_790_smaurer_002.043.hoc fire
DataDirectory_2_14_790_smaurer_002.043.hoc setViewerMask 16383

set hideNewModules 0
create HxSpatialGraphView {SpatialGraphView45}
SpatialGraphView45 setIconPosition 393 1270
SpatialGraphView45 data connect 2_14_791_sbeyer_002.059.hoc
SpatialGraphView45 nodeColormap setDefaultColor 1 0.8 0.5
SpatialGraphView45 nodeColormap setDefaultAlpha 0.500000
SpatialGraphView45 segmentColormap setDefaultColor 1 0.8 0.5
SpatialGraphView45 segmentColormap setDefaultAlpha 0.500000
SpatialGraphView45 fire
SpatialGraphView45 itemsToShow setValue 0 0
SpatialGraphView45 itemsToShow setValue 1 1
SpatialGraphView45 nodeScale setIndex 0 0
SpatialGraphView45 nodeScaleFactor setMinMax 0 15043
SpatialGraphView45 nodeScaleFactor setButtons 0
SpatialGraphView45 nodeScaleFactor setIncrement 1002.87
SpatialGraphView45 nodeScaleFactor setValue 10
SpatialGraphView45 nodeScaleFactor setSubMinMax 0 15043
SpatialGraphView45 nodeColoring setIndex 0 0
SpatialGraphView45 nodeLabelColoringOptions setValue 0
SpatialGraphView45 nodeColor setColor 0 0.8 0.8 0.8
SpatialGraphView45 segmentStyle setValue 0 0
SpatialGraphView45 segmentStyle setValue 1 0
SpatialGraphView45 segmentStyle setValue 2 1
SpatialGraphView45 tubeScale setIndex 0 1
SpatialGraphView45 tubeScaleFactor setMinMax 0 10
SpatialGraphView45 tubeScaleFactor setButtons 0
SpatialGraphView45 tubeScaleFactor setIncrement 0.666667
SpatialGraphView45 tubeScaleFactor setValue 1
SpatialGraphView45 tubeScaleFactor setSubMinMax 0 10
SpatialGraphView45 segmentColoring setIndex 0 0
SpatialGraphView45 segmentLabelColoringOptions setValue 0
SpatialGraphView45 segmentColor setColor 0 0.5098 0.7922 0.8471
SpatialGraphView45 fire
SpatialGraphView45 setViewerMask 32767
SpatialGraphView45 setShadowStyle 0

set hideNewModules 0
create HxSpatialGraphView {SpatialGraphView46}
SpatialGraphView46 setIconPosition 393 1300
SpatialGraphView46 data connect 2_14_732_smaurer_003.055.hoc
SpatialGraphView46 nodeColormap setDefaultColor 1 0.8 0.5
SpatialGraphView46 nodeColormap setDefaultAlpha 0.500000
SpatialGraphView46 segmentColormap setDefaultColor 1 0.8 0.5
SpatialGraphView46 segmentColormap setDefaultAlpha 0.500000
SpatialGraphView46 fire
SpatialGraphView46 itemsToShow setValue 0 0
SpatialGraphView46 itemsToShow setValue 1 1
SpatialGraphView46 nodeScale setIndex 0 0
SpatialGraphView46 nodeScaleFactor setMinMax 0 15143
SpatialGraphView46 nodeScaleFactor setButtons 0
SpatialGraphView46 nodeScaleFactor setIncrement 1009.53
SpatialGraphView46 nodeScaleFactor setValue 10
SpatialGraphView46 nodeScaleFactor setSubMinMax 0 15143
SpatialGraphView46 nodeColoring setIndex 0 0
SpatialGraphView46 nodeLabelColoringOptions setValue 0
SpatialGraphView46 nodeColor setColor 0 0.8 0.8 0.8
SpatialGraphView46 segmentStyle setValue 0 0
SpatialGraphView46 segmentStyle setValue 1 0
SpatialGraphView46 segmentStyle setValue 2 1
SpatialGraphView46 tubeScale setIndex 0 1
SpatialGraphView46 tubeScaleFactor setMinMax 0 10
SpatialGraphView46 tubeScaleFactor setButtons 0
SpatialGraphView46 tubeScaleFactor setIncrement 0.666667
SpatialGraphView46 tubeScaleFactor setValue 1
SpatialGraphView46 tubeScaleFactor setSubMinMax 0 10
SpatialGraphView46 segmentColoring setIndex 0 0
SpatialGraphView46 segmentLabelColoringOptions setValue 0
SpatialGraphView46 segmentColor setColor 0 0.5098 0.7922 0.8471
SpatialGraphView46 fire
SpatialGraphView46 setViewerMask 32767
SpatialGraphView46 setShadowStyle 0

set hideNewModules 0
create HxSpatialGraphView {SpatialGraphView47}
SpatialGraphView47 setIconPosition 393 1330
SpatialGraphView47 data connect 2_14_733_smaurer_002.022.hoc
SpatialGraphView47 nodeColormap setDefaultColor 1 0.8 0.5
SpatialGraphView47 nodeColormap setDefaultAlpha 0.500000
SpatialGraphView47 segmentColormap setDefaultColor 1 0.8 0.5
SpatialGraphView47 segmentColormap setDefaultAlpha 0.500000
SpatialGraphView47 fire
SpatialGraphView47 itemsToShow setValue 0 0
SpatialGraphView47 itemsToShow setValue 1 1
SpatialGraphView47 nodeScale setIndex 0 0
SpatialGraphView47 nodeScaleFactor setMinMax 0 14210
SpatialGraphView47 nodeScaleFactor setButtons 0
SpatialGraphView47 nodeScaleFactor setIncrement 947.333
SpatialGraphView47 nodeScaleFactor setValue 10
SpatialGraphView47 nodeScaleFactor setSubMinMax 0 14210
SpatialGraphView47 nodeColoring setIndex 0 0
SpatialGraphView47 nodeLabelColoringOptions setValue 0
SpatialGraphView47 nodeColor setColor 0 0.8 0.8 0.8
SpatialGraphView47 segmentStyle setValue 0 0
SpatialGraphView47 segmentStyle setValue 1 0
SpatialGraphView47 segmentStyle setValue 2 1
SpatialGraphView47 tubeScale setIndex 0 0
SpatialGraphView47 tubeScaleFactor setMinMax 0 10
SpatialGraphView47 tubeScaleFactor setButtons 0
SpatialGraphView47 tubeScaleFactor setIncrement 0.666667
SpatialGraphView47 tubeScaleFactor setValue 1
SpatialGraphView47 tubeScaleFactor setSubMinMax 0 10
SpatialGraphView47 segmentColoring setIndex 0 0
SpatialGraphView47 segmentLabelColoringOptions setValue 0
SpatialGraphView47 segmentColor setColor 0 0.5098 0.7922 0.8471
SpatialGraphView47 fire
SpatialGraphView47 setViewerMask 32767
SpatialGraphView47 setShadowStyle 0

set hideNewModules 0
create HxSpatialGraphView {SpatialGraphView48}
SpatialGraphView48 setIconPosition 393 1360
SpatialGraphView48 data connect 2_14_789_smaurer_001.020.hoc
SpatialGraphView48 nodeColormap setDefaultColor 1 0.8 0.5
SpatialGraphView48 nodeColormap setDefaultAlpha 0.500000
SpatialGraphView48 segmentColormap setDefaultColor 1 0.8 0.5
SpatialGraphView48 segmentColormap setDefaultAlpha 0.500000
SpatialGraphView48 fire
SpatialGraphView48 itemsToShow setValue 0 0
SpatialGraphView48 itemsToShow setValue 1 1
SpatialGraphView48 nodeScale setIndex 0 0
SpatialGraphView48 nodeScaleFactor setMinMax 0 12879
SpatialGraphView48 nodeScaleFactor setButtons 0
SpatialGraphView48 nodeScaleFactor setIncrement 858.6
SpatialGraphView48 nodeScaleFactor setValue 10
SpatialGraphView48 nodeScaleFactor setSubMinMax 0 12879
SpatialGraphView48 nodeColoring setIndex 0 0
SpatialGraphView48 nodeLabelColoringOptions setValue 0
SpatialGraphView48 nodeColor setColor 0 0.8 0.8 0.8
SpatialGraphView48 segmentStyle setValue 0 0
SpatialGraphView48 segmentStyle setValue 1 0
SpatialGraphView48 segmentStyle setValue 2 1
SpatialGraphView48 tubeScale setIndex 0 1
SpatialGraphView48 tubeScaleFactor setMinMax 0 10
SpatialGraphView48 tubeScaleFactor setButtons 0
SpatialGraphView48 tubeScaleFactor setIncrement 0.666667
SpatialGraphView48 tubeScaleFactor setValue 1
SpatialGraphView48 tubeScaleFactor setSubMinMax 0 10
SpatialGraphView48 segmentColoring setIndex 0 0
SpatialGraphView48 segmentLabelColoringOptions setValue 0
SpatialGraphView48 segmentColor setColor 0 0.5098 0.7922 0.8471
SpatialGraphView48 fire
SpatialGraphView48 setViewerMask 32767
SpatialGraphView48 setShadowStyle 0

set hideNewModules 0
create HxSpatialGraphView {SpatialGraphView49}
SpatialGraphView49 setIconPosition 393 1390
SpatialGraphView49 data connect 2_14_790_smaurer_002.043.hoc
SpatialGraphView49 nodeColormap setDefaultColor 1 0.8 0.5
SpatialGraphView49 nodeColormap setDefaultAlpha 0.500000
SpatialGraphView49 segmentColormap setDefaultColor 1 0.8 0.5
SpatialGraphView49 segmentColormap setDefaultAlpha 0.500000
SpatialGraphView49 fire
SpatialGraphView49 itemsToShow setValue 0 0
SpatialGraphView49 itemsToShow setValue 1 1
SpatialGraphView49 nodeScale setIndex 0 0
SpatialGraphView49 nodeScaleFactor setMinMax 0 15065
SpatialGraphView49 nodeScaleFactor setButtons 0
SpatialGraphView49 nodeScaleFactor setIncrement 1004.33
SpatialGraphView49 nodeScaleFactor setValue 10
SpatialGraphView49 nodeScaleFactor setSubMinMax 0 15065
SpatialGraphView49 nodeColoring setIndex 0 0
SpatialGraphView49 nodeLabelColoringOptions setValue 0
SpatialGraphView49 nodeColor setColor 0 0.8 0.8 0.8
SpatialGraphView49 segmentStyle setValue 0 0
SpatialGraphView49 segmentStyle setValue 1 0
SpatialGraphView49 segmentStyle setValue 2 1
SpatialGraphView49 tubeScale setIndex 0 1
SpatialGraphView49 tubeScaleFactor setMinMax 0 10
SpatialGraphView49 tubeScaleFactor setButtons 0
SpatialGraphView49 tubeScaleFactor setIncrement 0.666667
SpatialGraphView49 tubeScaleFactor setValue 1
SpatialGraphView49 tubeScaleFactor setSubMinMax 0 10
SpatialGraphView49 segmentColoring setIndex 0 0
SpatialGraphView49 segmentLabelColoringOptions setValue 0
SpatialGraphView49 segmentColor setColor 0 0.5098 0.7922 0.8471
SpatialGraphView49 fire
SpatialGraphView49 setViewerMask 32767
SpatialGraphView49 setShadowStyle 0

set hideNewModules 1
create HxDataDirectory {DataDirectory_2_14_744_gmordhorst_001.027.hoc}
DataDirectory_2_14_744_gmordhorst_001.027.hoc setIconPosition 0 0
DataDirectory_2_14_744_gmordhorst_001.027.hoc setInvisible 1
DataDirectory_2_14_744_gmordhorst_001.027.hoc parentDir connect VS2
DataDirectory_2_14_744_gmordhorst_001.027.hoc attachedData connect 2_14_744_gmordhorst_001.027.hoc
DataDirectory_2_14_744_gmordhorst_001.027.hoc fire
DataDirectory_2_14_744_gmordhorst_001.027.hoc fire
DataDirectory_2_14_744_gmordhorst_001.027.hoc setViewerMask 16383

set hideNewModules 1
create HxDataDirectory {DataDirectory_2_14_745_gmordhorst_001.023.hoc}
DataDirectory_2_14_745_gmordhorst_001.023.hoc setIconPosition 0 0
DataDirectory_2_14_745_gmordhorst_001.023.hoc setInvisible 1
DataDirectory_2_14_745_gmordhorst_001.023.hoc parentDir connect VS2
DataDirectory_2_14_745_gmordhorst_001.023.hoc attachedData connect 2_14_745_gmordhorst_001.023.hoc
DataDirectory_2_14_745_gmordhorst_001.023.hoc fire
DataDirectory_2_14_745_gmordhorst_001.023.hoc fire
DataDirectory_2_14_745_gmordhorst_001.023.hoc setViewerMask 16383

set hideNewModules 1
create HxDataDirectory {DataDirectory_2_14_792_smaurer_002.039.hoc}
DataDirectory_2_14_792_smaurer_002.039.hoc setIconPosition 0 0
DataDirectory_2_14_792_smaurer_002.039.hoc setInvisible 1
DataDirectory_2_14_792_smaurer_002.039.hoc parentDir connect VS2
DataDirectory_2_14_792_smaurer_002.039.hoc attachedData connect 2_14_792_smaurer_002.039.hoc
DataDirectory_2_14_792_smaurer_002.039.hoc fire
DataDirectory_2_14_792_smaurer_002.039.hoc fire
DataDirectory_2_14_792_smaurer_002.039.hoc setViewerMask 16383

set hideNewModules 0
create HxSpatialGraphView {SpatialGraphView50}
SpatialGraphView50 setIconPosition 393 1420
SpatialGraphView50 data connect 2_14_744_gmordhorst_001.027.hoc
SpatialGraphView50 nodeColormap setDefaultColor 1 0.8 0.5
SpatialGraphView50 nodeColormap setDefaultAlpha 0.500000
SpatialGraphView50 segmentColormap setDefaultColor 1 0.8 0.5
SpatialGraphView50 segmentColormap setDefaultAlpha 0.500000
SpatialGraphView50 fire
SpatialGraphView50 itemsToShow setValue 0 0
SpatialGraphView50 itemsToShow setValue 1 1
SpatialGraphView50 nodeScale setIndex 0 0
SpatialGraphView50 nodeScaleFactor setMinMax 0 13940
SpatialGraphView50 nodeScaleFactor setButtons 0
SpatialGraphView50 nodeScaleFactor setIncrement 929.333
SpatialGraphView50 nodeScaleFactor setValue 10
SpatialGraphView50 nodeScaleFactor setSubMinMax 0 13940
SpatialGraphView50 nodeColoring setIndex 0 0
SpatialGraphView50 nodeLabelColoringOptions setValue 0
SpatialGraphView50 nodeColor setColor 0 0.8 0.8 0.8
SpatialGraphView50 segmentStyle setValue 0 0
SpatialGraphView50 segmentStyle setValue 1 0
SpatialGraphView50 segmentStyle setValue 2 1
SpatialGraphView50 tubeScale setIndex 0 1
SpatialGraphView50 tubeScaleFactor setMinMax 0 10
SpatialGraphView50 tubeScaleFactor setButtons 0
SpatialGraphView50 tubeScaleFactor setIncrement 0.666667
SpatialGraphView50 tubeScaleFactor setValue 1
SpatialGraphView50 tubeScaleFactor setSubMinMax 0 10
SpatialGraphView50 segmentColoring setIndex 0 0
SpatialGraphView50 segmentLabelColoringOptions setValue 0
SpatialGraphView50 segmentColor setColor 0 0.8196 0.0314 0.1922
SpatialGraphView50 fire
SpatialGraphView50 setViewerMask 32767
SpatialGraphView50 setShadowStyle 0

set hideNewModules 0
create HxSpatialGraphView {SpatialGraphView51}
SpatialGraphView51 setIconPosition 393 1450
SpatialGraphView51 data connect 2_14_745_gmordhorst_001.023.hoc
SpatialGraphView51 nodeColormap setDefaultColor 1 0.8 0.5
SpatialGraphView51 nodeColormap setDefaultAlpha 0.500000
SpatialGraphView51 segmentColormap setDefaultColor 1 0.8 0.5
SpatialGraphView51 segmentColormap setDefaultAlpha 0.500000
SpatialGraphView51 fire
SpatialGraphView51 itemsToShow setValue 0 0
SpatialGraphView51 itemsToShow setValue 1 1
SpatialGraphView51 nodeScale setIndex 0 0
SpatialGraphView51 nodeScaleFactor setMinMax 0 13943
SpatialGraphView51 nodeScaleFactor setButtons 0
SpatialGraphView51 nodeScaleFactor setIncrement 929.533
SpatialGraphView51 nodeScaleFactor setValue 10
SpatialGraphView51 nodeScaleFactor setSubMinMax 0 13943
SpatialGraphView51 nodeColoring setIndex 0 0
SpatialGraphView51 nodeLabelColoringOptions setValue 0
SpatialGraphView51 nodeColor setColor 0 0.8 0.8 0.8
SpatialGraphView51 segmentStyle setValue 0 0
SpatialGraphView51 segmentStyle setValue 1 0
SpatialGraphView51 segmentStyle setValue 2 1
SpatialGraphView51 tubeScale setIndex 0 1
SpatialGraphView51 tubeScaleFactor setMinMax 0 10
SpatialGraphView51 tubeScaleFactor setButtons 0
SpatialGraphView51 tubeScaleFactor setIncrement 0.666667
SpatialGraphView51 tubeScaleFactor setValue 1
SpatialGraphView51 tubeScaleFactor setSubMinMax 0 10
SpatialGraphView51 segmentColoring setIndex 0 0
SpatialGraphView51 segmentLabelColoringOptions setValue 0
SpatialGraphView51 segmentColor setColor 0 0.8196 0.0314 0.1922
SpatialGraphView51 fire
SpatialGraphView51 setViewerMask 32767
SpatialGraphView51 setShadowStyle 0

set hideNewModules 0
create HxSpatialGraphView {SpatialGraphView52}
SpatialGraphView52 setIconPosition 393 1480
SpatialGraphView52 data connect 2_14_792_smaurer_002.039.hoc
SpatialGraphView52 nodeColormap setDefaultColor 1 0.8 0.5
SpatialGraphView52 nodeColormap setDefaultAlpha 0.500000
SpatialGraphView52 segmentColormap setDefaultColor 1 0.8 0.5
SpatialGraphView52 segmentColormap setDefaultAlpha 0.500000
SpatialGraphView52 fire
SpatialGraphView52 itemsToShow setValue 0 0
SpatialGraphView52 itemsToShow setValue 1 1
SpatialGraphView52 nodeScale setIndex 0 0
SpatialGraphView52 nodeScaleFactor setMinMax 0 14320
SpatialGraphView52 nodeScaleFactor setButtons 0
SpatialGraphView52 nodeScaleFactor setIncrement 954.667
SpatialGraphView52 nodeScaleFactor setValue 10
SpatialGraphView52 nodeScaleFactor setSubMinMax 0 14320
SpatialGraphView52 nodeColoring setIndex 0 0
SpatialGraphView52 nodeLabelColoringOptions setValue 0
SpatialGraphView52 nodeColor setColor 0 0.8 0.8 0.8
SpatialGraphView52 segmentStyle setValue 0 0
SpatialGraphView52 segmentStyle setValue 1 0
SpatialGraphView52 segmentStyle setValue 2 1
SpatialGraphView52 tubeScale setIndex 0 1
SpatialGraphView52 tubeScaleFactor setMinMax 0 10
SpatialGraphView52 tubeScaleFactor setButtons 0
SpatialGraphView52 tubeScaleFactor setIncrement 0.666667
SpatialGraphView52 tubeScaleFactor setValue 1
SpatialGraphView52 tubeScaleFactor setSubMinMax 0 10
SpatialGraphView52 segmentColoring setIndex 0 0
SpatialGraphView52 segmentLabelColoringOptions setValue 0
SpatialGraphView52 segmentColor setColor 0 0.8196 0.0314 0.1922
SpatialGraphView52 fire
SpatialGraphView52 setViewerMask 32767
SpatialGraphView52 setShadowStyle 0

set hideNewModules 1
create HxDataDirectory {DataDirectory_2_14_741_smaurer_001.022.hoc}
DataDirectory_2_14_741_smaurer_001.022.hoc setIconPosition 0 0
DataDirectory_2_14_741_smaurer_001.022.hoc setInvisible 1
DataDirectory_2_14_741_smaurer_001.022.hoc parentDir connect VS3
DataDirectory_2_14_741_smaurer_001.022.hoc attachedData connect 2_14_741_smaurer_001.022.hoc
DataDirectory_2_14_741_smaurer_001.022.hoc fire
DataDirectory_2_14_741_smaurer_001.022.hoc fire
DataDirectory_2_14_741_smaurer_001.022.hoc setViewerMask 16383

set hideNewModules 1
create HxDataDirectory {DataDirectory_2_14_743_smaurer_002.056.hoc}
DataDirectory_2_14_743_smaurer_002.056.hoc setIconPosition 0 0
DataDirectory_2_14_743_smaurer_002.056.hoc setInvisible 1
DataDirectory_2_14_743_smaurer_002.056.hoc parentDir connect VS3
DataDirectory_2_14_743_smaurer_002.056.hoc attachedData connect 2_14_743_smaurer_002.056.hoc
DataDirectory_2_14_743_smaurer_002.056.hoc fire
DataDirectory_2_14_743_smaurer_002.056.hoc fire
DataDirectory_2_14_743_smaurer_002.056.hoc setViewerMask 16383

set hideNewModules 1
create HxDataDirectory {DataDirectory_2_14_806_smaurer_002.033.hoc}
DataDirectory_2_14_806_smaurer_002.033.hoc setIconPosition 0 0
DataDirectory_2_14_806_smaurer_002.033.hoc setInvisible 1
DataDirectory_2_14_806_smaurer_002.033.hoc parentDir connect VS3
DataDirectory_2_14_806_smaurer_002.033.hoc attachedData connect 2_14_806_smaurer_002.033.hoc
DataDirectory_2_14_806_smaurer_002.033.hoc fire
DataDirectory_2_14_806_smaurer_002.033.hoc fire
DataDirectory_2_14_806_smaurer_002.033.hoc setViewerMask 16383

set hideNewModules 1
create HxDataDirectory {DataDirectory_2_14_808_smaurer_003.035.hoc}
DataDirectory_2_14_808_smaurer_003.035.hoc setIconPosition 0 0
DataDirectory_2_14_808_smaurer_003.035.hoc setInvisible 1
DataDirectory_2_14_808_smaurer_003.035.hoc parentDir connect VS3
DataDirectory_2_14_808_smaurer_003.035.hoc attachedData connect 2_14_808_smaurer_003.035.hoc
DataDirectory_2_14_808_smaurer_003.035.hoc fire
DataDirectory_2_14_808_smaurer_003.035.hoc fire
DataDirectory_2_14_808_smaurer_003.035.hoc setViewerMask 16383

set hideNewModules 0
create HxSpatialGraphView {SpatialGraphView53}
SpatialGraphView53 setIconPosition 393 1540
SpatialGraphView53 data connect 2_14_741_smaurer_001.022.hoc
SpatialGraphView53 nodeColormap setDefaultColor 1 0.8 0.5
SpatialGraphView53 nodeColormap setDefaultAlpha 0.500000
SpatialGraphView53 segmentColormap setDefaultColor 1 0.8 0.5
SpatialGraphView53 segmentColormap setDefaultAlpha 0.500000
SpatialGraphView53 fire
SpatialGraphView53 itemsToShow setValue 0 0
SpatialGraphView53 itemsToShow setValue 1 1
SpatialGraphView53 nodeScale setIndex 0 0
SpatialGraphView53 nodeScaleFactor setMinMax 0 14625
SpatialGraphView53 nodeScaleFactor setButtons 0
SpatialGraphView53 nodeScaleFactor setIncrement 975
SpatialGraphView53 nodeScaleFactor setValue 10
SpatialGraphView53 nodeScaleFactor setSubMinMax 0 14625
SpatialGraphView53 nodeColoring setIndex 0 0
SpatialGraphView53 nodeLabelColoringOptions setValue 0
SpatialGraphView53 nodeColor setColor 0 0.8 0.8 0.8
SpatialGraphView53 segmentStyle setValue 0 0
SpatialGraphView53 segmentStyle setValue 1 0
SpatialGraphView53 segmentStyle setValue 2 1
SpatialGraphView53 tubeScale setIndex 0 1
SpatialGraphView53 tubeScaleFactor setMinMax 0 10
SpatialGraphView53 tubeScaleFactor setButtons 0
SpatialGraphView53 tubeScaleFactor setIncrement 0.666667
SpatialGraphView53 tubeScaleFactor setValue 1
SpatialGraphView53 tubeScaleFactor setSubMinMax 0 10
SpatialGraphView53 segmentColoring setIndex 0 0
SpatialGraphView53 segmentLabelColoringOptions setValue 0
SpatialGraphView53 segmentColor setColor 0 0.2941 0.7216 0.1804
SpatialGraphView53 fire
SpatialGraphView53 setViewerMask 32767
SpatialGraphView53 setShadowStyle 0

set hideNewModules 0
create HxSpatialGraphView {SpatialGraphView54}
SpatialGraphView54 setIconPosition 393 1600
SpatialGraphView54 data connect 2_14_743_smaurer_002.056.hoc
SpatialGraphView54 nodeColormap setDefaultColor 1 0.8 0.5
SpatialGraphView54 nodeColormap setDefaultAlpha 0.500000
SpatialGraphView54 segmentColormap setDefaultColor 1 0.8 0.5
SpatialGraphView54 segmentColormap setDefaultAlpha 0.500000
SpatialGraphView54 fire
SpatialGraphView54 itemsToShow setValue 0 0
SpatialGraphView54 itemsToShow setValue 1 1
SpatialGraphView54 nodeScale setIndex 0 0
SpatialGraphView54 nodeScaleFactor setMinMax 0 13003
SpatialGraphView54 nodeScaleFactor setButtons 0
SpatialGraphView54 nodeScaleFactor setIncrement 866.867
SpatialGraphView54 nodeScaleFactor setValue 10
SpatialGraphView54 nodeScaleFactor setSubMinMax 0 13003
SpatialGraphView54 nodeColoring setIndex 0 0
SpatialGraphView54 nodeLabelColoringOptions setValue 0
SpatialGraphView54 nodeColor setColor 0 0.8 0.8 0.8
SpatialGraphView54 segmentStyle setValue 0 0
SpatialGraphView54 segmentStyle setValue 1 0
SpatialGraphView54 segmentStyle setValue 2 1
SpatialGraphView54 tubeScale setIndex 0 1
SpatialGraphView54 tubeScaleFactor setMinMax 0 10
SpatialGraphView54 tubeScaleFactor setButtons 0
SpatialGraphView54 tubeScaleFactor setIncrement 0.666667
SpatialGraphView54 tubeScaleFactor setValue 1
SpatialGraphView54 tubeScaleFactor setSubMinMax 0 10
SpatialGraphView54 segmentColoring setIndex 0 0
SpatialGraphView54 segmentLabelColoringOptions setValue 0
SpatialGraphView54 segmentColor setColor 0 0.2941 0.7216 0.1804
SpatialGraphView54 fire
SpatialGraphView54 setViewerMask 32767
SpatialGraphView54 setShadowStyle 0

set hideNewModules 0
create HxSpatialGraphView {SpatialGraphView55}
SpatialGraphView55 setIconPosition 393 1630
SpatialGraphView55 data connect 2_14_806_smaurer_002.033.hoc
SpatialGraphView55 nodeColormap setDefaultColor 1 0.8 0.5
SpatialGraphView55 nodeColormap setDefaultAlpha 0.500000
SpatialGraphView55 segmentColormap setDefaultColor 1 0.8 0.5
SpatialGraphView55 segmentColormap setDefaultAlpha 0.500000
SpatialGraphView55 fire
SpatialGraphView55 itemsToShow setValue 0 0
SpatialGraphView55 itemsToShow setValue 1 1
SpatialGraphView55 nodeScale setIndex 0 0
SpatialGraphView55 nodeScaleFactor setMinMax 0 14500
SpatialGraphView55 nodeScaleFactor setButtons 0
SpatialGraphView55 nodeScaleFactor setIncrement 966.667
SpatialGraphView55 nodeScaleFactor setValue 10
SpatialGraphView55 nodeScaleFactor setSubMinMax 0 14500
SpatialGraphView55 nodeColoring setIndex 0 0
SpatialGraphView55 nodeLabelColoringOptions setValue 0
SpatialGraphView55 nodeColor setColor 0 0.8 0.8 0.8
SpatialGraphView55 segmentStyle setValue 0 0
SpatialGraphView55 segmentStyle setValue 1 0
SpatialGraphView55 segmentStyle setValue 2 1
SpatialGraphView55 tubeScale setIndex 0 1
SpatialGraphView55 tubeScaleFactor setMinMax 0 10
SpatialGraphView55 tubeScaleFactor setButtons 0
SpatialGraphView55 tubeScaleFactor setIncrement 0.666667
SpatialGraphView55 tubeScaleFactor setValue 1
SpatialGraphView55 tubeScaleFactor setSubMinMax 0 10
SpatialGraphView55 segmentColoring setIndex 0 0
SpatialGraphView55 segmentLabelColoringOptions setValue 0
SpatialGraphView55 segmentColor setColor 0 0.2941 0.7216 0.1804
SpatialGraphView55 fire
SpatialGraphView55 setViewerMask 32767
SpatialGraphView55 setShadowStyle 0

set hideNewModules 0
create HxSpatialGraphView {SpatialGraphView56}
SpatialGraphView56 setIconPosition 393 1660
SpatialGraphView56 data connect 2_14_808_smaurer_003.035.hoc
SpatialGraphView56 nodeColormap setDefaultColor 1 0.8 0.5
SpatialGraphView56 nodeColormap setDefaultAlpha 0.500000
SpatialGraphView56 segmentColormap setDefaultColor 1 0.8 0.5
SpatialGraphView56 segmentColormap setDefaultAlpha 0.500000
SpatialGraphView56 fire
SpatialGraphView56 itemsToShow setValue 0 0
SpatialGraphView56 itemsToShow setValue 1 1
SpatialGraphView56 nodeScale setIndex 0 0
SpatialGraphView56 nodeScaleFactor setMinMax 0 14498
SpatialGraphView56 nodeScaleFactor setButtons 0
SpatialGraphView56 nodeScaleFactor setIncrement 966.533
SpatialGraphView56 nodeScaleFactor setValue 10
SpatialGraphView56 nodeScaleFactor setSubMinMax 0 14498
SpatialGraphView56 nodeColoring setIndex 0 0
SpatialGraphView56 nodeLabelColoringOptions setValue 0
SpatialGraphView56 nodeColor setColor 0 0.8 0.8 0.8
SpatialGraphView56 segmentStyle setValue 0 0
SpatialGraphView56 segmentStyle setValue 1 0
SpatialGraphView56 segmentStyle setValue 2 1
SpatialGraphView56 tubeScale setIndex 0 1
SpatialGraphView56 tubeScaleFactor setMinMax 0 10
SpatialGraphView56 tubeScaleFactor setButtons 0
SpatialGraphView56 tubeScaleFactor setIncrement 0.666667
SpatialGraphView56 tubeScaleFactor setValue 1
SpatialGraphView56 tubeScaleFactor setSubMinMax 0 10
SpatialGraphView56 segmentColoring setIndex 0 0
SpatialGraphView56 segmentLabelColoringOptions setValue 0
SpatialGraphView56 segmentColor setColor 0 0.2941 0.7216 0.1804
SpatialGraphView56 fire
SpatialGraphView56 setViewerMask 32767
SpatialGraphView56 setShadowStyle 0

set hideNewModules 1
create HxDataDirectory {DataDirectory_2_14_762_gmordhorst_001.027.hoc}
DataDirectory_2_14_762_gmordhorst_001.027.hoc setIconPosition 0 0
DataDirectory_2_14_762_gmordhorst_001.027.hoc setInvisible 1
DataDirectory_2_14_762_gmordhorst_001.027.hoc parentDir connect VS4
DataDirectory_2_14_762_gmordhorst_001.027.hoc attachedData connect 2_14_762_gmordhorst_001.027.hoc
DataDirectory_2_14_762_gmordhorst_001.027.hoc fire
DataDirectory_2_14_762_gmordhorst_001.027.hoc fire
DataDirectory_2_14_762_gmordhorst_001.027.hoc setViewerMask 16383

set hideNewModules 1
create HxDataDirectory {DataDirectory_2_14_759_smaurer_001.023.hoc}
DataDirectory_2_14_759_smaurer_001.023.hoc setIconPosition 0 0
DataDirectory_2_14_759_smaurer_001.023.hoc setInvisible 1
DataDirectory_2_14_759_smaurer_001.023.hoc parentDir connect VS4
DataDirectory_2_14_759_smaurer_001.023.hoc attachedData connect 2_14_759_smaurer_001.023.hoc
DataDirectory_2_14_759_smaurer_001.023.hoc fire
DataDirectory_2_14_759_smaurer_001.023.hoc fire
DataDirectory_2_14_759_smaurer_001.023.hoc setViewerMask 16383

set hideNewModules 1
create HxDataDirectory {DataDirectory_2_14_760_smaurer_001.011.hoc}
DataDirectory_2_14_760_smaurer_001.011.hoc setIconPosition 0 0
DataDirectory_2_14_760_smaurer_001.011.hoc setInvisible 1
DataDirectory_2_14_760_smaurer_001.011.hoc parentDir connect VS4
DataDirectory_2_14_760_smaurer_001.011.hoc attachedData connect 2_14_760_smaurer_001.011.hoc
DataDirectory_2_14_760_smaurer_001.011.hoc fire
DataDirectory_2_14_760_smaurer_001.011.hoc fire
DataDirectory_2_14_760_smaurer_001.011.hoc setViewerMask 16383

set hideNewModules 1
create HxDataDirectory {DataDirectory_2_14_761_smaurer_001.008.hoc}
DataDirectory_2_14_761_smaurer_001.008.hoc setIconPosition 0 0
DataDirectory_2_14_761_smaurer_001.008.hoc setInvisible 1
DataDirectory_2_14_761_smaurer_001.008.hoc parentDir connect VS4
DataDirectory_2_14_761_smaurer_001.008.hoc attachedData connect 2_14_761_smaurer_001.008.hoc
DataDirectory_2_14_761_smaurer_001.008.hoc fire
DataDirectory_2_14_761_smaurer_001.008.hoc fire
DataDirectory_2_14_761_smaurer_001.008.hoc setViewerMask 16383

set hideNewModules 1
create HxDataDirectory {DataDirectory_2_14_763_smaurer_001.004.hoc}
DataDirectory_2_14_763_smaurer_001.004.hoc setIconPosition 0 0
DataDirectory_2_14_763_smaurer_001.004.hoc setInvisible 1
DataDirectory_2_14_763_smaurer_001.004.hoc parentDir connect VS4
DataDirectory_2_14_763_smaurer_001.004.hoc attachedData connect 2_14_763_smaurer_001.004.hoc
DataDirectory_2_14_763_smaurer_001.004.hoc fire
DataDirectory_2_14_763_smaurer_001.004.hoc fire
DataDirectory_2_14_763_smaurer_001.004.hoc setViewerMask 16383

set hideNewModules 1
create HxDataDirectory {DataDirectory_2_14_802_smaurer_001.019.hoc}
DataDirectory_2_14_802_smaurer_001.019.hoc setIconPosition 0 0
DataDirectory_2_14_802_smaurer_001.019.hoc setInvisible 1
DataDirectory_2_14_802_smaurer_001.019.hoc parentDir connect VS4
DataDirectory_2_14_802_smaurer_001.019.hoc attachedData connect 2_14_802_smaurer_001.019.hoc
DataDirectory_2_14_802_smaurer_001.019.hoc fire
DataDirectory_2_14_802_smaurer_001.019.hoc fire
DataDirectory_2_14_802_smaurer_001.019.hoc setViewerMask 16383

set hideNewModules 1
create HxDataDirectory {DataDirectory_2_14_747_gmordhorst_001.035.hoc}
DataDirectory_2_14_747_gmordhorst_001.035.hoc setIconPosition 0 0
DataDirectory_2_14_747_gmordhorst_001.035.hoc setInvisible 1
DataDirectory_2_14_747_gmordhorst_001.035.hoc parentDir connect VS5
DataDirectory_2_14_747_gmordhorst_001.035.hoc attachedData connect 2_14_747_gmordhorst_001.035.hoc
DataDirectory_2_14_747_gmordhorst_001.035.hoc fire
DataDirectory_2_14_747_gmordhorst_001.035.hoc fire
DataDirectory_2_14_747_gmordhorst_001.035.hoc setViewerMask 16383

set hideNewModules 1
create HxDataDirectory {DataDirectory_2_14_749_gmordhorst_001.026.hoc}
DataDirectory_2_14_749_gmordhorst_001.026.hoc setIconPosition 0 0
DataDirectory_2_14_749_gmordhorst_001.026.hoc setInvisible 1
DataDirectory_2_14_749_gmordhorst_001.026.hoc parentDir connect VS5
DataDirectory_2_14_749_gmordhorst_001.026.hoc attachedData connect 2_14_749_gmordhorst_001.026.hoc
DataDirectory_2_14_749_gmordhorst_001.026.hoc fire
DataDirectory_2_14_749_gmordhorst_001.026.hoc fire
DataDirectory_2_14_749_gmordhorst_001.026.hoc setViewerMask 16383

set hideNewModules 1
create HxDataDirectory {DataDirectory_2_14_784_gmordhorst_002.026.hoc}
DataDirectory_2_14_784_gmordhorst_002.026.hoc setIconPosition 0 0
DataDirectory_2_14_784_gmordhorst_002.026.hoc setInvisible 1
DataDirectory_2_14_784_gmordhorst_002.026.hoc parentDir connect VS5
DataDirectory_2_14_784_gmordhorst_002.026.hoc attachedData connect 2_14_784_gmordhorst_002.026.hoc
DataDirectory_2_14_784_gmordhorst_002.026.hoc fire
DataDirectory_2_14_784_gmordhorst_002.026.hoc fire
DataDirectory_2_14_784_gmordhorst_002.026.hoc setViewerMask 16383

set hideNewModules 1
create HxDataDirectory {DataDirectory_2_14_783_smaurer_002.023.hoc}
DataDirectory_2_14_783_smaurer_002.023.hoc setIconPosition 0 0
DataDirectory_2_14_783_smaurer_002.023.hoc setInvisible 1
DataDirectory_2_14_783_smaurer_002.023.hoc parentDir connect VS5
DataDirectory_2_14_783_smaurer_002.023.hoc attachedData connect 2_14_783_smaurer_002.023.hoc
DataDirectory_2_14_783_smaurer_002.023.hoc fire
DataDirectory_2_14_783_smaurer_002.023.hoc fire
DataDirectory_2_14_783_smaurer_002.023.hoc setViewerMask 16383

set hideNewModules 1
create HxDataDirectory {DataDirectory_2_14_785_smaurer_002.010.hoc}
DataDirectory_2_14_785_smaurer_002.010.hoc setIconPosition 0 0
DataDirectory_2_14_785_smaurer_002.010.hoc setInvisible 1
DataDirectory_2_14_785_smaurer_002.010.hoc parentDir connect VS5
DataDirectory_2_14_785_smaurer_002.010.hoc attachedData connect 2_14_785_smaurer_002.010.hoc
DataDirectory_2_14_785_smaurer_002.010.hoc fire
DataDirectory_2_14_785_smaurer_002.010.hoc fire
DataDirectory_2_14_785_smaurer_002.010.hoc setViewerMask 16383

set hideNewModules 1
create HxDataDirectory {DataDirectory_2_14_734_smaurer_001.012.hoc}
DataDirectory_2_14_734_smaurer_001.012.hoc setIconPosition 0 0
DataDirectory_2_14_734_smaurer_001.012.hoc setInvisible 1
DataDirectory_2_14_734_smaurer_001.012.hoc parentDir connect VS6
DataDirectory_2_14_734_smaurer_001.012.hoc attachedData connect 2_14_734_smaurer_001.012.hoc
DataDirectory_2_14_734_smaurer_001.012.hoc fire
DataDirectory_2_14_734_smaurer_001.012.hoc fire
DataDirectory_2_14_734_smaurer_001.012.hoc setViewerMask 16383

set hideNewModules 1
create HxDataDirectory {DataDirectory_2_14_735_smaurer_001.012.hoc}
DataDirectory_2_14_735_smaurer_001.012.hoc setIconPosition 0 0
DataDirectory_2_14_735_smaurer_001.012.hoc setInvisible 1
DataDirectory_2_14_735_smaurer_001.012.hoc parentDir connect VS6
DataDirectory_2_14_735_smaurer_001.012.hoc attachedData connect 2_14_735_smaurer_001.012.hoc
DataDirectory_2_14_735_smaurer_001.012.hoc fire
DataDirectory_2_14_735_smaurer_001.012.hoc fire
DataDirectory_2_14_735_smaurer_001.012.hoc setViewerMask 16383

set hideNewModules 1
create HxDataDirectory {DataDirectory_2_14_795_smaurer_003.018.hoc}
DataDirectory_2_14_795_smaurer_003.018.hoc setIconPosition 0 0
DataDirectory_2_14_795_smaurer_003.018.hoc setInvisible 1
DataDirectory_2_14_795_smaurer_003.018.hoc parentDir connect VS6
DataDirectory_2_14_795_smaurer_003.018.hoc attachedData connect 2_14_795_smaurer_003.018.hoc
DataDirectory_2_14_795_smaurer_003.018.hoc fire
DataDirectory_2_14_795_smaurer_003.018.hoc fire
DataDirectory_2_14_795_smaurer_003.018.hoc setViewerMask 16383

set hideNewModules 1
create HxDataDirectory {DataDirectory_2_14_797_smaurer_001.008.hoc}
DataDirectory_2_14_797_smaurer_001.008.hoc setIconPosition 0 0
DataDirectory_2_14_797_smaurer_001.008.hoc setInvisible 1
DataDirectory_2_14_797_smaurer_001.008.hoc parentDir connect VS6
DataDirectory_2_14_797_smaurer_001.008.hoc attachedData connect 2_14_797_smaurer_001.008.hoc
DataDirectory_2_14_797_smaurer_001.008.hoc fire
DataDirectory_2_14_797_smaurer_001.008.hoc fire
DataDirectory_2_14_797_smaurer_001.008.hoc setViewerMask 16383

set hideNewModules 1
create HxDataDirectory {DataDirectory_2_14_782_gmordhorst_001.022.hoc}
DataDirectory_2_14_782_gmordhorst_001.022.hoc setIconPosition 0 0
DataDirectory_2_14_782_gmordhorst_001.022.hoc setInvisible 1
DataDirectory_2_14_782_gmordhorst_001.022.hoc parentDir connect VS-like1
DataDirectory_2_14_782_gmordhorst_001.022.hoc attachedData connect 2_14_782_gmordhorst_001.022.hoc
DataDirectory_2_14_782_gmordhorst_001.022.hoc fire
DataDirectory_2_14_782_gmordhorst_001.022.hoc fire
DataDirectory_2_14_782_gmordhorst_001.022.hoc setViewerMask 16383

set hideNewModules 1
create HxDataDirectory {DataDirectory_2_14_756_smaurer_001.019.hoc}
DataDirectory_2_14_756_smaurer_001.019.hoc setIconPosition 0 0
DataDirectory_2_14_756_smaurer_001.019.hoc setInvisible 1
DataDirectory_2_14_756_smaurer_001.019.hoc parentDir connect VS-like1
DataDirectory_2_14_756_smaurer_001.019.hoc attachedData connect 2_14_756_smaurer_001.019.hoc
DataDirectory_2_14_756_smaurer_001.019.hoc fire
DataDirectory_2_14_756_smaurer_001.019.hoc fire
DataDirectory_2_14_756_smaurer_001.019.hoc setViewerMask 16383

set hideNewModules 1
create HxDataDirectory {DataDirectory_2_14_757_smaurer_001.015.hoc}
DataDirectory_2_14_757_smaurer_001.015.hoc setIconPosition 0 0
DataDirectory_2_14_757_smaurer_001.015.hoc setInvisible 1
DataDirectory_2_14_757_smaurer_001.015.hoc parentDir connect VS-like1
DataDirectory_2_14_757_smaurer_001.015.hoc attachedData connect 2_14_757_smaurer_001.015.hoc
DataDirectory_2_14_757_smaurer_001.015.hoc fire
DataDirectory_2_14_757_smaurer_001.015.hoc fire
DataDirectory_2_14_757_smaurer_001.015.hoc setViewerMask 16383

set hideNewModules 1
create HxDataDirectory {DataDirectory_2_14_767_gmordhorst_001.008.hoc}
DataDirectory_2_14_767_gmordhorst_001.008.hoc setIconPosition 0 0
DataDirectory_2_14_767_gmordhorst_001.008.hoc setInvisible 1
DataDirectory_2_14_767_gmordhorst_001.008.hoc parentDir connect VS-like2
DataDirectory_2_14_767_gmordhorst_001.008.hoc attachedData connect 2_14_767_gmordhorst_001.008.hoc
DataDirectory_2_14_767_gmordhorst_001.008.hoc fire
DataDirectory_2_14_767_gmordhorst_001.008.hoc fire
DataDirectory_2_14_767_gmordhorst_001.008.hoc setViewerMask 16383

set hideNewModules 1
create HxDataDirectory {DataDirectory_2_14_768_gmordhorst_001.006.hoc}
DataDirectory_2_14_768_gmordhorst_001.006.hoc setIconPosition 0 0
DataDirectory_2_14_768_gmordhorst_001.006.hoc setInvisible 1
DataDirectory_2_14_768_gmordhorst_001.006.hoc parentDir connect VS-like2
DataDirectory_2_14_768_gmordhorst_001.006.hoc attachedData connect 2_14_768_gmordhorst_001.006.hoc
DataDirectory_2_14_768_gmordhorst_001.006.hoc fire
DataDirectory_2_14_768_gmordhorst_001.006.hoc fire
DataDirectory_2_14_768_gmordhorst_001.006.hoc setViewerMask 16383

set hideNewModules 1
create HxDataDirectory {DataDirectory_2_14_766_sbeyer_002.072.hoc}
DataDirectory_2_14_766_sbeyer_002.072.hoc setIconPosition 0 0
DataDirectory_2_14_766_sbeyer_002.072.hoc setInvisible 1
DataDirectory_2_14_766_sbeyer_002.072.hoc parentDir connect VS-like2
DataDirectory_2_14_766_sbeyer_002.072.hoc attachedData connect 2_14_766_sbeyer_002.072.hoc
DataDirectory_2_14_766_sbeyer_002.072.hoc fire
DataDirectory_2_14_766_sbeyer_002.072.hoc fire
DataDirectory_2_14_766_sbeyer_002.072.hoc setViewerMask 16383

set hideNewModules 1
create HxDataDirectory {DataDirectory_2_14_750_sbeyer_001.091.hoc}
DataDirectory_2_14_750_sbeyer_001.091.hoc setIconPosition 0 0
DataDirectory_2_14_750_sbeyer_001.091.hoc setInvisible 1
DataDirectory_2_14_750_sbeyer_001.091.hoc parentDir connect VS-like3
DataDirectory_2_14_750_sbeyer_001.091.hoc attachedData connect 2_14_750_sbeyer_001.091.hoc
DataDirectory_2_14_750_sbeyer_001.091.hoc fire
DataDirectory_2_14_750_sbeyer_001.091.hoc fire
DataDirectory_2_14_750_sbeyer_001.091.hoc setViewerMask 16383

set hideNewModules 1
create HxDataDirectory {DataDirectory_2_14_800_smaurer_001.015.hoc}
DataDirectory_2_14_800_smaurer_001.015.hoc setIconPosition 0 0
DataDirectory_2_14_800_smaurer_001.015.hoc setInvisible 1
DataDirectory_2_14_800_smaurer_001.015.hoc parentDir connect VS-like3
DataDirectory_2_14_800_smaurer_001.015.hoc attachedData connect 2_14_800_smaurer_001.015.hoc
DataDirectory_2_14_800_smaurer_001.015.hoc fire
DataDirectory_2_14_800_smaurer_001.015.hoc fire
DataDirectory_2_14_800_smaurer_001.015.hoc setViewerMask 16383

set hideNewModules 1
create HxDataDirectory {DataDirectory_2_14_738_smaurer_002.023.hoc}
DataDirectory_2_14_738_smaurer_002.023.hoc setIconPosition 0 0
DataDirectory_2_14_738_smaurer_002.023.hoc setInvisible 1
DataDirectory_2_14_738_smaurer_002.023.hoc parentDir connect HSN
DataDirectory_2_14_738_smaurer_002.023.hoc attachedData connect 2_14_738_smaurer_002.023.hoc
DataDirectory_2_14_738_smaurer_002.023.hoc fire
DataDirectory_2_14_738_smaurer_002.023.hoc fire
DataDirectory_2_14_738_smaurer_002.023.hoc setViewerMask 16383

set hideNewModules 1
create HxDataDirectory {DataDirectory_2_14_739_smaurer_001.019.hoc}
DataDirectory_2_14_739_smaurer_001.019.hoc setIconPosition 0 0
DataDirectory_2_14_739_smaurer_001.019.hoc setInvisible 1
DataDirectory_2_14_739_smaurer_001.019.hoc parentDir connect HSN
DataDirectory_2_14_739_smaurer_001.019.hoc attachedData connect 2_14_739_smaurer_001.019.hoc
DataDirectory_2_14_739_smaurer_001.019.hoc fire
DataDirectory_2_14_739_smaurer_001.019.hoc fire
DataDirectory_2_14_739_smaurer_001.019.hoc setViewerMask 16383

set hideNewModules 1
create HxDataDirectory {DataDirectory_2_14_811_smaurer_001.015.hoc}
DataDirectory_2_14_811_smaurer_001.015.hoc setIconPosition 0 0
DataDirectory_2_14_811_smaurer_001.015.hoc setInvisible 1
DataDirectory_2_14_811_smaurer_001.015.hoc parentDir connect HSN
DataDirectory_2_14_811_smaurer_001.015.hoc attachedData connect 2_14_811_smaurer_001.015.hoc
DataDirectory_2_14_811_smaurer_001.015.hoc fire
DataDirectory_2_14_811_smaurer_001.015.hoc fire
DataDirectory_2_14_811_smaurer_001.015.hoc setViewerMask 16383

set hideNewModules 1
create HxDataDirectory {DataDirectory_2_14_812_smaurer_002.014.hoc}
DataDirectory_2_14_812_smaurer_002.014.hoc setIconPosition 0 0
DataDirectory_2_14_812_smaurer_002.014.hoc setInvisible 1
DataDirectory_2_14_812_smaurer_002.014.hoc parentDir connect HSN
DataDirectory_2_14_812_smaurer_002.014.hoc attachedData connect 2_14_812_smaurer_002.014.hoc
DataDirectory_2_14_812_smaurer_002.014.hoc fire
DataDirectory_2_14_812_smaurer_002.014.hoc fire
DataDirectory_2_14_812_smaurer_002.014.hoc setViewerMask 16383

set hideNewModules 1
create HxDataDirectory {DataDirectory_2_14_775_gmordhorst_002.018.hoc}
DataDirectory_2_14_775_gmordhorst_002.018.hoc setIconPosition 0 0
DataDirectory_2_14_775_gmordhorst_002.018.hoc setInvisible 1
DataDirectory_2_14_775_gmordhorst_002.018.hoc parentDir connect HSE
DataDirectory_2_14_775_gmordhorst_002.018.hoc attachedData connect 2_14_775_gmordhorst_002.018.hoc
DataDirectory_2_14_775_gmordhorst_002.018.hoc fire
DataDirectory_2_14_775_gmordhorst_002.018.hoc fire
DataDirectory_2_14_775_gmordhorst_002.018.hoc setViewerMask 16383

set hideNewModules 1
create HxDataDirectory {DataDirectory_2_14_777_gmordhorst_001.008.hoc}
DataDirectory_2_14_777_gmordhorst_001.008.hoc setIconPosition 0 0
DataDirectory_2_14_777_gmordhorst_001.008.hoc setInvisible 1
DataDirectory_2_14_777_gmordhorst_001.008.hoc parentDir connect HSE
DataDirectory_2_14_777_gmordhorst_001.008.hoc attachedData connect 2_14_777_gmordhorst_001.008.hoc
DataDirectory_2_14_777_gmordhorst_001.008.hoc fire
DataDirectory_2_14_777_gmordhorst_001.008.hoc fire
DataDirectory_2_14_777_gmordhorst_001.008.hoc setViewerMask 16383

set hideNewModules 1
create HxDataDirectory {DataDirectory_2_14_778_gmordhorst_001.016.hoc}
DataDirectory_2_14_778_gmordhorst_001.016.hoc setIconPosition 0 0
DataDirectory_2_14_778_gmordhorst_001.016.hoc setInvisible 1
DataDirectory_2_14_778_gmordhorst_001.016.hoc parentDir connect HSE
DataDirectory_2_14_778_gmordhorst_001.016.hoc attachedData connect 2_14_778_gmordhorst_001.016.hoc
DataDirectory_2_14_778_gmordhorst_001.016.hoc fire
DataDirectory_2_14_778_gmordhorst_001.016.hoc fire
DataDirectory_2_14_778_gmordhorst_001.016.hoc setViewerMask 16383

set hideNewModules 1
create HxDataDirectory {DataDirectory_2_14_729_smaurer_001.007.hoc}
DataDirectory_2_14_729_smaurer_001.007.hoc setIconPosition 0 0
DataDirectory_2_14_729_smaurer_001.007.hoc setInvisible 1
DataDirectory_2_14_729_smaurer_001.007.hoc parentDir connect HSE
DataDirectory_2_14_729_smaurer_001.007.hoc attachedData connect 2_14_729_smaurer_001.007.hoc
DataDirectory_2_14_729_smaurer_001.007.hoc fire
DataDirectory_2_14_729_smaurer_001.007.hoc fire
DataDirectory_2_14_729_smaurer_001.007.hoc setViewerMask 16383

set hideNewModules 1
create HxDataDirectory {DataDirectory_2_14_724_gmordhorst_001.055.hoc}
DataDirectory_2_14_724_gmordhorst_001.055.hoc setIconPosition 0 0
DataDirectory_2_14_724_gmordhorst_001.055.hoc setInvisible 1
DataDirectory_2_14_724_gmordhorst_001.055.hoc parentDir connect HSS
DataDirectory_2_14_724_gmordhorst_001.055.hoc attachedData connect 2_14_724_gmordhorst_001.055.hoc
DataDirectory_2_14_724_gmordhorst_001.055.hoc fire
DataDirectory_2_14_724_gmordhorst_001.055.hoc fire
DataDirectory_2_14_724_gmordhorst_001.055.hoc setViewerMask 16383

set hideNewModules 1
create HxDataDirectory {DataDirectory_2_14_727_gmordhorst_001.021.hoc}
DataDirectory_2_14_727_gmordhorst_001.021.hoc setIconPosition 0 0
DataDirectory_2_14_727_gmordhorst_001.021.hoc setInvisible 1
DataDirectory_2_14_727_gmordhorst_001.021.hoc parentDir connect HSS
DataDirectory_2_14_727_gmordhorst_001.021.hoc attachedData connect 2_14_727_gmordhorst_001.021.hoc
DataDirectory_2_14_727_gmordhorst_001.021.hoc fire
DataDirectory_2_14_727_gmordhorst_001.021.hoc fire
DataDirectory_2_14_727_gmordhorst_001.021.hoc setViewerMask 16383

set hideNewModules 1
create HxDataDirectory {DataDirectory_2_14_723_sbeyer_003.126.hoc}
DataDirectory_2_14_723_sbeyer_003.126.hoc setIconPosition 0 0
DataDirectory_2_14_723_sbeyer_003.126.hoc setInvisible 1
DataDirectory_2_14_723_sbeyer_003.126.hoc parentDir connect HSS
DataDirectory_2_14_723_sbeyer_003.126.hoc attachedData connect 2_14_723_sbeyer_003.126.hoc
DataDirectory_2_14_723_sbeyer_003.126.hoc fire
DataDirectory_2_14_723_sbeyer_003.126.hoc fire
DataDirectory_2_14_723_sbeyer_003.126.hoc setViewerMask 16383

set hideNewModules 1
create HxDataDirectory {DataDirectory_2_14_725_smaurer_001.008.hoc}
DataDirectory_2_14_725_smaurer_001.008.hoc setIconPosition 0 0
DataDirectory_2_14_725_smaurer_001.008.hoc setInvisible 1
DataDirectory_2_14_725_smaurer_001.008.hoc parentDir connect HSS
DataDirectory_2_14_725_smaurer_001.008.hoc attachedData connect 2_14_725_smaurer_001.008.hoc
DataDirectory_2_14_725_smaurer_001.008.hoc fire
DataDirectory_2_14_725_smaurer_001.008.hoc fire
DataDirectory_2_14_725_smaurer_001.008.hoc setViewerMask 16383

set hideNewModules 1
create HxDataDirectory {DataDirectory_2_14_726_smaurer_002.053.hoc}
DataDirectory_2_14_726_smaurer_002.053.hoc setIconPosition 0 0
DataDirectory_2_14_726_smaurer_002.053.hoc setInvisible 1
DataDirectory_2_14_726_smaurer_002.053.hoc parentDir connect HSS
DataDirectory_2_14_726_smaurer_002.053.hoc attachedData connect 2_14_726_smaurer_002.053.hoc
DataDirectory_2_14_726_smaurer_002.053.hoc fire
DataDirectory_2_14_726_smaurer_002.053.hoc fire
DataDirectory_2_14_726_smaurer_002.053.hoc setViewerMask 16383

set hideNewModules 0
create HxSpatialGraphView {SpatialGraphView57}
SpatialGraphView57 setIconPosition 393 1690
SpatialGraphView57 data connect 2_14_762_gmordhorst_001.027.hoc
SpatialGraphView57 nodeColormap setDefaultColor 1 0.8 0.5
SpatialGraphView57 nodeColormap setDefaultAlpha 0.500000
SpatialGraphView57 segmentColormap setDefaultColor 1 0.8 0.5
SpatialGraphView57 segmentColormap setDefaultAlpha 0.500000
SpatialGraphView57 fire
SpatialGraphView57 itemsToShow setValue 0 0
SpatialGraphView57 itemsToShow setValue 1 1
SpatialGraphView57 nodeScale setIndex 0 0
SpatialGraphView57 nodeScaleFactor setMinMax 0 12920
SpatialGraphView57 nodeScaleFactor setButtons 0
SpatialGraphView57 nodeScaleFactor setIncrement 861.333
SpatialGraphView57 nodeScaleFactor setValue 10
SpatialGraphView57 nodeScaleFactor setSubMinMax 0 12920
SpatialGraphView57 nodeColoring setIndex 0 0
SpatialGraphView57 nodeLabelColoringOptions setValue 0
SpatialGraphView57 nodeColor setColor 0 0.8 0.8 0.8
SpatialGraphView57 segmentStyle setValue 0 0
SpatialGraphView57 segmentStyle setValue 1 0
SpatialGraphView57 segmentStyle setValue 2 1
SpatialGraphView57 tubeScale setIndex 0 1
SpatialGraphView57 tubeScaleFactor setMinMax 0 10
SpatialGraphView57 tubeScaleFactor setButtons 0
SpatialGraphView57 tubeScaleFactor setIncrement 0.666667
SpatialGraphView57 tubeScaleFactor setValue 1
SpatialGraphView57 tubeScaleFactor setSubMinMax 0 10
SpatialGraphView57 segmentColoring setIndex 0 0
SpatialGraphView57 segmentLabelColoringOptions setValue 0
SpatialGraphView57 segmentColor setColor 0 0.8863 0.9098 0.1725
SpatialGraphView57 fire
SpatialGraphView57 setViewerMask 32767
SpatialGraphView57 setShadowStyle 0

set hideNewModules 0
create HxSpatialGraphView {SpatialGraphView58}
SpatialGraphView58 setIconPosition 393 1720
SpatialGraphView58 data connect 2_14_759_smaurer_001.023.hoc
SpatialGraphView58 nodeColormap setDefaultColor 1 0.8 0.5
SpatialGraphView58 nodeColormap setDefaultAlpha 0.500000
SpatialGraphView58 segmentColormap setDefaultColor 1 0.8 0.5
SpatialGraphView58 segmentColormap setDefaultAlpha 0.500000
SpatialGraphView58 fire
SpatialGraphView58 itemsToShow setValue 0 0
SpatialGraphView58 itemsToShow setValue 1 1
SpatialGraphView58 nodeScale setIndex 0 0
SpatialGraphView58 nodeScaleFactor setMinMax 0 12957
SpatialGraphView58 nodeScaleFactor setButtons 0
SpatialGraphView58 nodeScaleFactor setIncrement 863.8
SpatialGraphView58 nodeScaleFactor setValue 10
SpatialGraphView58 nodeScaleFactor setSubMinMax 0 12957
SpatialGraphView58 nodeColoring setIndex 0 0
SpatialGraphView58 nodeLabelColoringOptions setValue 0
SpatialGraphView58 nodeColor setColor 0 0.8 0.8 0.8
SpatialGraphView58 segmentStyle setValue 0 0
SpatialGraphView58 segmentStyle setValue 1 0
SpatialGraphView58 segmentStyle setValue 2 1
SpatialGraphView58 tubeScale setIndex 0 1
SpatialGraphView58 tubeScaleFactor setMinMax 0 10
SpatialGraphView58 tubeScaleFactor setButtons 0
SpatialGraphView58 tubeScaleFactor setIncrement 0.666667
SpatialGraphView58 tubeScaleFactor setValue 1
SpatialGraphView58 tubeScaleFactor setSubMinMax 0 10
SpatialGraphView58 segmentColoring setIndex 0 0
SpatialGraphView58 segmentLabelColoringOptions setValue 0
SpatialGraphView58 segmentColor setColor 0 0.8863 0.9098 0.1725
SpatialGraphView58 fire
SpatialGraphView58 setViewerMask 32767
SpatialGraphView58 setShadowStyle 0

set hideNewModules 0
create HxSpatialGraphView {SpatialGraphView59}
SpatialGraphView59 setIconPosition 393 1810
SpatialGraphView59 data connect 2_14_760_smaurer_001.011.hoc
SpatialGraphView59 nodeColormap setDefaultColor 1 0.8 0.5
SpatialGraphView59 nodeColormap setDefaultAlpha 0.500000
SpatialGraphView59 segmentColormap setDefaultColor 1 0.8 0.5
SpatialGraphView59 segmentColormap setDefaultAlpha 0.500000
SpatialGraphView59 fire
SpatialGraphView59 itemsToShow setValue 0 0
SpatialGraphView59 itemsToShow setValue 1 1
SpatialGraphView59 nodeScale setIndex 0 0
SpatialGraphView59 nodeScaleFactor setMinMax 0 13235
SpatialGraphView59 nodeScaleFactor setButtons 0
SpatialGraphView59 nodeScaleFactor setIncrement 882.333
SpatialGraphView59 nodeScaleFactor setValue 10
SpatialGraphView59 nodeScaleFactor setSubMinMax 0 13235
SpatialGraphView59 nodeColoring setIndex 0 0
SpatialGraphView59 nodeLabelColoringOptions setValue 0
SpatialGraphView59 nodeColor setColor 0 0.8 0.8 0.8
SpatialGraphView59 segmentStyle setValue 0 0
SpatialGraphView59 segmentStyle setValue 1 0
SpatialGraphView59 segmentStyle setValue 2 1
SpatialGraphView59 tubeScale setIndex 0 1
SpatialGraphView59 tubeScaleFactor setMinMax 0 10
SpatialGraphView59 tubeScaleFactor setButtons 0
SpatialGraphView59 tubeScaleFactor setIncrement 0.666667
SpatialGraphView59 tubeScaleFactor setValue 1
SpatialGraphView59 tubeScaleFactor setSubMinMax 0 10
SpatialGraphView59 segmentColoring setIndex 0 0
SpatialGraphView59 segmentLabelColoringOptions setValue 0
SpatialGraphView59 segmentColor setColor 0 0.8863 0.9098 0.1725
SpatialGraphView59 fire
SpatialGraphView59 setViewerMask 32767
SpatialGraphView59 setShadowStyle 0

set hideNewModules 0
create HxSpatialGraphView {SpatialGraphView60}
SpatialGraphView60 setIconPosition 393 1840
SpatialGraphView60 data connect 2_14_761_smaurer_001.008.hoc
SpatialGraphView60 nodeColormap setDefaultColor 1 0.8 0.5
SpatialGraphView60 nodeColormap setDefaultAlpha 0.500000
SpatialGraphView60 segmentColormap setDefaultColor 1 0.8 0.5
SpatialGraphView60 segmentColormap setDefaultAlpha 0.500000
SpatialGraphView60 fire
SpatialGraphView60 itemsToShow setValue 0 0
SpatialGraphView60 itemsToShow setValue 1 1
SpatialGraphView60 nodeScale setIndex 0 0
SpatialGraphView60 nodeScaleFactor setMinMax 0 13158
SpatialGraphView60 nodeScaleFactor setButtons 0
SpatialGraphView60 nodeScaleFactor setIncrement 877.2
SpatialGraphView60 nodeScaleFactor setValue 10
SpatialGraphView60 nodeScaleFactor setSubMinMax 0 13158
SpatialGraphView60 nodeColoring setIndex 0 0
SpatialGraphView60 nodeLabelColoringOptions setValue 0
SpatialGraphView60 nodeColor setColor 0 0.8 0.8 0.8
SpatialGraphView60 segmentStyle setValue 0 0
SpatialGraphView60 segmentStyle setValue 1 0
SpatialGraphView60 segmentStyle setValue 2 1
SpatialGraphView60 tubeScale setIndex 0 1
SpatialGraphView60 tubeScaleFactor setMinMax 0 10
SpatialGraphView60 tubeScaleFactor setButtons 0
SpatialGraphView60 tubeScaleFactor setIncrement 0.666667
SpatialGraphView60 tubeScaleFactor setValue 1
SpatialGraphView60 tubeScaleFactor setSubMinMax 0 10
SpatialGraphView60 segmentColoring setIndex 0 0
SpatialGraphView60 segmentLabelColoringOptions setValue 0
SpatialGraphView60 segmentColor setColor 0 0.8863 0.9098 0.1725
SpatialGraphView60 fire
SpatialGraphView60 setViewerMask 32767
SpatialGraphView60 setShadowStyle 0

set hideNewModules 0
create HxSpatialGraphView {SpatialGraphView61}
SpatialGraphView61 setIconPosition 393 1870
SpatialGraphView61 data connect 2_14_763_smaurer_001.004.hoc
SpatialGraphView61 nodeColormap setDefaultColor 1 0.8 0.5
SpatialGraphView61 nodeColormap setDefaultAlpha 0.500000
SpatialGraphView61 segmentColormap setDefaultColor 1 0.8 0.5
SpatialGraphView61 segmentColormap setDefaultAlpha 0.500000
SpatialGraphView61 fire
SpatialGraphView61 itemsToShow setValue 0 0
SpatialGraphView61 itemsToShow setValue 1 1
SpatialGraphView61 nodeScale setIndex 0 0
SpatialGraphView61 nodeScaleFactor setMinMax 0 12628
SpatialGraphView61 nodeScaleFactor setButtons 0
SpatialGraphView61 nodeScaleFactor setIncrement 841.867
SpatialGraphView61 nodeScaleFactor setValue 10
SpatialGraphView61 nodeScaleFactor setSubMinMax 0 12628
SpatialGraphView61 nodeColoring setIndex 0 0
SpatialGraphView61 nodeLabelColoringOptions setValue 0
SpatialGraphView61 nodeColor setColor 0 0.8 0.8 0.8
SpatialGraphView61 segmentStyle setValue 0 0
SpatialGraphView61 segmentStyle setValue 1 0
SpatialGraphView61 segmentStyle setValue 2 1
SpatialGraphView61 tubeScale setIndex 0 1
SpatialGraphView61 tubeScaleFactor setMinMax 0 10
SpatialGraphView61 tubeScaleFactor setButtons 0
SpatialGraphView61 tubeScaleFactor setIncrement 0.666667
SpatialGraphView61 tubeScaleFactor setValue 1
SpatialGraphView61 tubeScaleFactor setSubMinMax 0 10
SpatialGraphView61 segmentColoring setIndex 0 0
SpatialGraphView61 segmentLabelColoringOptions setValue 0
SpatialGraphView61 segmentColor setColor 0 0.8863 0.9098 0.1725
SpatialGraphView61 fire
SpatialGraphView61 setViewerMask 32767
SpatialGraphView61 setShadowStyle 0

set hideNewModules 0
create HxSpatialGraphView {SpatialGraphView62}
SpatialGraphView62 setIconPosition 393 1900
SpatialGraphView62 data connect 2_14_802_smaurer_001.019.hoc
SpatialGraphView62 nodeColormap setDefaultColor 1 0.8 0.5
SpatialGraphView62 nodeColormap setDefaultAlpha 0.500000
SpatialGraphView62 segmentColormap setDefaultColor 1 0.8 0.5
SpatialGraphView62 segmentColormap setDefaultAlpha 0.500000
SpatialGraphView62 fire
SpatialGraphView62 itemsToShow setValue 0 0
SpatialGraphView62 itemsToShow setValue 1 1
SpatialGraphView62 nodeScale setIndex 0 0
SpatialGraphView62 nodeScaleFactor setMinMax 0 13113
SpatialGraphView62 nodeScaleFactor setButtons 0
SpatialGraphView62 nodeScaleFactor setIncrement 874.2
SpatialGraphView62 nodeScaleFactor setValue 10
SpatialGraphView62 nodeScaleFactor setSubMinMax 0 13113
SpatialGraphView62 nodeColoring setIndex 0 0
SpatialGraphView62 nodeLabelColoringOptions setValue 0
SpatialGraphView62 nodeColor setColor 0 0.8 0.8 0.8
SpatialGraphView62 segmentStyle setValue 0 0
SpatialGraphView62 segmentStyle setValue 1 0
SpatialGraphView62 segmentStyle setValue 2 1
SpatialGraphView62 tubeScale setIndex 0 1
SpatialGraphView62 tubeScaleFactor setMinMax 0 10
SpatialGraphView62 tubeScaleFactor setButtons 0
SpatialGraphView62 tubeScaleFactor setIncrement 0.666667
SpatialGraphView62 tubeScaleFactor setValue 1
SpatialGraphView62 tubeScaleFactor setSubMinMax 0 10
SpatialGraphView62 segmentColoring setIndex 0 0
SpatialGraphView62 segmentLabelColoringOptions setValue 0
SpatialGraphView62 segmentColor setColor 0 0.8863 0.9098 0.1725
SpatialGraphView62 fire
SpatialGraphView62 setViewerMask 32767
SpatialGraphView62 setShadowStyle 0

set hideNewModules 0
create HxSpatialGraphView {SpatialGraphView63}
SpatialGraphView63 setIconPosition 393 1930
SpatialGraphView63 data connect 2_14_747_gmordhorst_001.035.hoc
SpatialGraphView63 nodeColormap setDefaultColor 1 0.8 0.5
SpatialGraphView63 nodeColormap setDefaultAlpha 0.500000
SpatialGraphView63 segmentColormap setDefaultColor 1 0.8 0.5
SpatialGraphView63 segmentColormap setDefaultAlpha 0.500000
SpatialGraphView63 fire
SpatialGraphView63 itemsToShow setValue 0 0
SpatialGraphView63 itemsToShow setValue 1 1
SpatialGraphView63 nodeScale setIndex 0 0
SpatialGraphView63 nodeScaleFactor setMinMax 0 13925
SpatialGraphView63 nodeScaleFactor setButtons 0
SpatialGraphView63 nodeScaleFactor setIncrement 928.333
SpatialGraphView63 nodeScaleFactor setValue 10
SpatialGraphView63 nodeScaleFactor setSubMinMax 0 13925
SpatialGraphView63 nodeColoring setIndex 0 0
SpatialGraphView63 nodeLabelColoringOptions setValue 0
SpatialGraphView63 nodeColor setColor 0 0.8 0.8 0.8
SpatialGraphView63 segmentStyle setValue 0 0
SpatialGraphView63 segmentStyle setValue 1 0
SpatialGraphView63 segmentStyle setValue 2 1
SpatialGraphView63 tubeScale setIndex 0 1
SpatialGraphView63 tubeScaleFactor setMinMax 0 10
SpatialGraphView63 tubeScaleFactor setButtons 0
SpatialGraphView63 tubeScaleFactor setIncrement 0.666667
SpatialGraphView63 tubeScaleFactor setValue 1
SpatialGraphView63 tubeScaleFactor setSubMinMax 0 10
SpatialGraphView63 segmentColoring setIndex 0 0
SpatialGraphView63 segmentLabelColoringOptions setValue 0
SpatialGraphView63 segmentColor setColor 0 0.7294 0 0.4745
SpatialGraphView63 fire
SpatialGraphView63 setViewerMask 32767
SpatialGraphView63 setShadowStyle 0

set hideNewModules 0
create HxSpatialGraphView {SpatialGraphView64}
SpatialGraphView64 setIconPosition 393 1960
SpatialGraphView64 data connect 2_14_749_gmordhorst_001.026.hoc
SpatialGraphView64 nodeColormap setDefaultColor 1 0.8 0.5
SpatialGraphView64 nodeColormap setDefaultAlpha 0.500000
SpatialGraphView64 segmentColormap setDefaultColor 1 0.8 0.5
SpatialGraphView64 segmentColormap setDefaultAlpha 0.500000
SpatialGraphView64 fire
SpatialGraphView64 itemsToShow setValue 0 0
SpatialGraphView64 itemsToShow setValue 1 1
SpatialGraphView64 nodeScale setIndex 0 0
SpatialGraphView64 nodeScaleFactor setMinMax 0 14000
SpatialGraphView64 nodeScaleFactor setButtons 0
SpatialGraphView64 nodeScaleFactor setIncrement 933.333
SpatialGraphView64 nodeScaleFactor setValue 10
SpatialGraphView64 nodeScaleFactor setSubMinMax 0 14000
SpatialGraphView64 nodeColoring setIndex 0 0
SpatialGraphView64 nodeLabelColoringOptions setValue 0
SpatialGraphView64 nodeColor setColor 0 0.8 0.8 0.8
SpatialGraphView64 segmentStyle setValue 0 0
SpatialGraphView64 segmentStyle setValue 1 0
SpatialGraphView64 segmentStyle setValue 2 1
SpatialGraphView64 tubeScale setIndex 0 1
SpatialGraphView64 tubeScaleFactor setMinMax 0 10
SpatialGraphView64 tubeScaleFactor setButtons 0
SpatialGraphView64 tubeScaleFactor setIncrement 0.666667
SpatialGraphView64 tubeScaleFactor setValue 1
SpatialGraphView64 tubeScaleFactor setSubMinMax 0 10
SpatialGraphView64 segmentColoring setIndex 0 0
SpatialGraphView64 segmentLabelColoringOptions setValue 0
SpatialGraphView64 segmentColor setColor 0 0.7294 0 0.4745
SpatialGraphView64 fire
SpatialGraphView64 setViewerMask 32767
SpatialGraphView64 setShadowStyle 0

set hideNewModules 0
create HxSpatialGraphView {SpatialGraphView65}
SpatialGraphView65 setIconPosition 393 1990
SpatialGraphView65 data connect 2_14_784_gmordhorst_002.026.hoc
SpatialGraphView65 nodeColormap setDefaultColor 1 0.8 0.5
SpatialGraphView65 nodeColormap setDefaultAlpha 0.500000
SpatialGraphView65 segmentColormap setDefaultColor 1 0.8 0.5
SpatialGraphView65 segmentColormap setDefaultAlpha 0.500000
SpatialGraphView65 fire
SpatialGraphView65 itemsToShow setValue 0 0
SpatialGraphView65 itemsToShow setValue 1 1
SpatialGraphView65 nodeScale setIndex 0 0
SpatialGraphView65 nodeScaleFactor setMinMax 0 14003
SpatialGraphView65 nodeScaleFactor setButtons 0
SpatialGraphView65 nodeScaleFactor setIncrement 933.533
SpatialGraphView65 nodeScaleFactor setValue 10
SpatialGraphView65 nodeScaleFactor setSubMinMax 0 14003
SpatialGraphView65 nodeColoring setIndex 0 0
SpatialGraphView65 nodeLabelColoringOptions setValue 0
SpatialGraphView65 nodeColor setColor 0 0.8 0.8 0.8
SpatialGraphView65 segmentStyle setValue 0 0
SpatialGraphView65 segmentStyle setValue 1 0
SpatialGraphView65 segmentStyle setValue 2 1
SpatialGraphView65 tubeScale setIndex 0 1
SpatialGraphView65 tubeScaleFactor setMinMax 0 10
SpatialGraphView65 tubeScaleFactor setButtons 0
SpatialGraphView65 tubeScaleFactor setIncrement 0.666667
SpatialGraphView65 tubeScaleFactor setValue 1
SpatialGraphView65 tubeScaleFactor setSubMinMax 0 10
SpatialGraphView65 segmentColoring setIndex 0 0
SpatialGraphView65 segmentLabelColoringOptions setValue 0
SpatialGraphView65 segmentColor setColor 0 0.7294 0 0.4745
SpatialGraphView65 fire
SpatialGraphView65 setViewerMask 32767
SpatialGraphView65 setShadowStyle 0

set hideNewModules 0
create HxSpatialGraphView {SpatialGraphView66}
SpatialGraphView66 setIconPosition 393 2020
SpatialGraphView66 data connect 2_14_783_smaurer_002.023.hoc
SpatialGraphView66 nodeColormap setDefaultColor 1 0.8 0.5
SpatialGraphView66 nodeColormap setDefaultAlpha 0.500000
SpatialGraphView66 segmentColormap setDefaultColor 1 0.8 0.5
SpatialGraphView66 segmentColormap setDefaultAlpha 0.500000
SpatialGraphView66 fire
SpatialGraphView66 itemsToShow setValue 0 0
SpatialGraphView66 itemsToShow setValue 1 1
SpatialGraphView66 nodeScale setIndex 0 0
SpatialGraphView66 nodeScaleFactor setMinMax 0 14063
SpatialGraphView66 nodeScaleFactor setButtons 0
SpatialGraphView66 nodeScaleFactor setIncrement 937.533
SpatialGraphView66 nodeScaleFactor setValue 10
SpatialGraphView66 nodeScaleFactor setSubMinMax 0 14063
SpatialGraphView66 nodeColoring setIndex 0 0
SpatialGraphView66 nodeLabelColoringOptions setValue 0
SpatialGraphView66 nodeColor setColor 0 0.8 0.8 0.8
SpatialGraphView66 segmentStyle setValue 0 0
SpatialGraphView66 segmentStyle setValue 1 0
SpatialGraphView66 segmentStyle setValue 2 1
SpatialGraphView66 tubeScale setIndex 0 1
SpatialGraphView66 tubeScaleFactor setMinMax 0 10
SpatialGraphView66 tubeScaleFactor setButtons 0
SpatialGraphView66 tubeScaleFactor setIncrement 0.666667
SpatialGraphView66 tubeScaleFactor setValue 1
SpatialGraphView66 tubeScaleFactor setSubMinMax 0 10
SpatialGraphView66 segmentColoring setIndex 0 0
SpatialGraphView66 segmentLabelColoringOptions setValue 0
SpatialGraphView66 segmentColor setColor 0 0.7294 0 0.4745
SpatialGraphView66 fire
SpatialGraphView66 setViewerMask 32767
SpatialGraphView66 setShadowStyle 0

set hideNewModules 0
create HxSpatialGraphView {SpatialGraphView67}
SpatialGraphView67 setIconPosition 393 2050
SpatialGraphView67 data connect 2_14_785_smaurer_002.010.hoc
SpatialGraphView67 nodeColormap setDefaultColor 1 0.8 0.5
SpatialGraphView67 nodeColormap setDefaultAlpha 0.500000
SpatialGraphView67 segmentColormap setDefaultColor 1 0.8 0.5
SpatialGraphView67 segmentColormap setDefaultAlpha 0.500000
SpatialGraphView67 fire
SpatialGraphView67 itemsToShow setValue 0 0
SpatialGraphView67 itemsToShow setValue 1 1
SpatialGraphView67 nodeScale setIndex 0 0
SpatialGraphView67 nodeScaleFactor setMinMax 0 10085
SpatialGraphView67 nodeScaleFactor setButtons 0
SpatialGraphView67 nodeScaleFactor setIncrement 672.333
SpatialGraphView67 nodeScaleFactor setValue 10
SpatialGraphView67 nodeScaleFactor setSubMinMax 0 10085
SpatialGraphView67 nodeColoring setIndex 0 0
SpatialGraphView67 nodeLabelColoringOptions setValue 0
SpatialGraphView67 nodeColor setColor 0 0.8 0.8 0.8
SpatialGraphView67 segmentStyle setValue 0 0
SpatialGraphView67 segmentStyle setValue 1 0
SpatialGraphView67 segmentStyle setValue 2 1
SpatialGraphView67 tubeScale setIndex 0 1
SpatialGraphView67 tubeScaleFactor setMinMax 0 10
SpatialGraphView67 tubeScaleFactor setButtons 0
SpatialGraphView67 tubeScaleFactor setIncrement 0.666667
SpatialGraphView67 tubeScaleFactor setValue 1
SpatialGraphView67 tubeScaleFactor setSubMinMax 0 10
SpatialGraphView67 segmentColoring setIndex 0 0
SpatialGraphView67 segmentLabelColoringOptions setValue 0
SpatialGraphView67 segmentColor setColor 0 0.7294 0 0.4745
SpatialGraphView67 fire
SpatialGraphView67 setViewerMask 32767
SpatialGraphView67 setShadowStyle 0

set hideNewModules 0
create HxSpatialGraphView {SpatialGraphView68}
SpatialGraphView68 setIconPosition 393 2080
SpatialGraphView68 data connect 2_14_734_smaurer_001.012.hoc
SpatialGraphView68 nodeColormap setDefaultColor 1 0.8 0.5
SpatialGraphView68 nodeColormap setDefaultAlpha 0.500000
SpatialGraphView68 segmentColormap setDefaultColor 1 0.8 0.5
SpatialGraphView68 segmentColormap setDefaultAlpha 0.500000
SpatialGraphView68 fire
SpatialGraphView68 itemsToShow setValue 0 0
SpatialGraphView68 itemsToShow setValue 1 1
SpatialGraphView68 nodeScale setIndex 0 0
SpatialGraphView68 nodeScaleFactor setMinMax 0 12838
SpatialGraphView68 nodeScaleFactor setButtons 0
SpatialGraphView68 nodeScaleFactor setIncrement 855.867
SpatialGraphView68 nodeScaleFactor setValue 10
SpatialGraphView68 nodeScaleFactor setSubMinMax 0 12838
SpatialGraphView68 nodeColoring setIndex 0 0
SpatialGraphView68 nodeLabelColoringOptions setValue 0
SpatialGraphView68 nodeColor setColor 0 0.8 0.8 0.8
SpatialGraphView68 segmentStyle setValue 0 0
SpatialGraphView68 segmentStyle setValue 1 0
SpatialGraphView68 segmentStyle setValue 2 1
SpatialGraphView68 tubeScale setIndex 0 1
SpatialGraphView68 tubeScaleFactor setMinMax 0 10
SpatialGraphView68 tubeScaleFactor setButtons 0
SpatialGraphView68 tubeScaleFactor setIncrement 0.666667
SpatialGraphView68 tubeScaleFactor setValue 1
SpatialGraphView68 tubeScaleFactor setSubMinMax 0 10
SpatialGraphView68 segmentColoring setIndex 0 0
SpatialGraphView68 segmentLabelColoringOptions setValue 0
SpatialGraphView68 segmentColor setColor 0 0.9922 0.9961 0.9922
SpatialGraphView68 fire
SpatialGraphView68 setViewerMask 32767
SpatialGraphView68 setShadowStyle 0

set hideNewModules 0
create HxSpatialGraphView {SpatialGraphView69}
SpatialGraphView69 setIconPosition 393 2110
SpatialGraphView69 data connect 2_14_735_smaurer_001.012.hoc
SpatialGraphView69 nodeColormap setDefaultColor 1 0.8 0.5
SpatialGraphView69 nodeColormap setDefaultAlpha 0.500000
SpatialGraphView69 segmentColormap setDefaultColor 1 0.8 0.5
SpatialGraphView69 segmentColormap setDefaultAlpha 0.500000
SpatialGraphView69 fire
SpatialGraphView69 itemsToShow setValue 0 0
SpatialGraphView69 itemsToShow setValue 1 1
SpatialGraphView69 nodeScale setIndex 0 0
SpatialGraphView69 nodeScaleFactor setMinMax 0 11960
SpatialGraphView69 nodeScaleFactor setButtons 0
SpatialGraphView69 nodeScaleFactor setIncrement 797.333
SpatialGraphView69 nodeScaleFactor setValue 10
SpatialGraphView69 nodeScaleFactor setSubMinMax 0 11960
SpatialGraphView69 nodeColoring setIndex 0 0
SpatialGraphView69 nodeLabelColoringOptions setValue 0
SpatialGraphView69 nodeColor setColor 0 0.8 0.8 0.8
SpatialGraphView69 segmentStyle setValue 0 0
SpatialGraphView69 segmentStyle setValue 1 0
SpatialGraphView69 segmentStyle setValue 2 1
SpatialGraphView69 tubeScale setIndex 0 1
SpatialGraphView69 tubeScaleFactor setMinMax 0 10
SpatialGraphView69 tubeScaleFactor setButtons 0
SpatialGraphView69 tubeScaleFactor setIncrement 0.666667
SpatialGraphView69 tubeScaleFactor setValue 1
SpatialGraphView69 tubeScaleFactor setSubMinMax 0 10
SpatialGraphView69 segmentColoring setIndex 0 0
SpatialGraphView69 segmentLabelColoringOptions setValue 0
SpatialGraphView69 segmentColor setColor 0 0.9922 0.9961 0.9922
SpatialGraphView69 fire
SpatialGraphView69 setViewerMask 32767
SpatialGraphView69 setShadowStyle 0

set hideNewModules 0
create HxSpatialGraphView {SpatialGraphView70}
SpatialGraphView70 setIconPosition 393 2140
SpatialGraphView70 data connect 2_14_795_smaurer_003.018.hoc
SpatialGraphView70 nodeColormap setDefaultColor 1 0.8 0.5
SpatialGraphView70 nodeColormap setDefaultAlpha 0.500000
SpatialGraphView70 segmentColormap setDefaultColor 1 0.8 0.5
SpatialGraphView70 segmentColormap setDefaultAlpha 0.500000
SpatialGraphView70 fire
SpatialGraphView70 itemsToShow setValue 0 0
SpatialGraphView70 itemsToShow setValue 1 1
SpatialGraphView70 nodeScale setIndex 0 0
SpatialGraphView70 nodeScaleFactor setMinMax 0 15323
SpatialGraphView70 nodeScaleFactor setButtons 0
SpatialGraphView70 nodeScaleFactor setIncrement 1021.53
SpatialGraphView70 nodeScaleFactor setValue 10
SpatialGraphView70 nodeScaleFactor setSubMinMax 0 15323
SpatialGraphView70 nodeColoring setIndex 0 0
SpatialGraphView70 nodeLabelColoringOptions setValue 0
SpatialGraphView70 nodeColor setColor 0 0.8 0.8 0.8
SpatialGraphView70 segmentStyle setValue 0 0
SpatialGraphView70 segmentStyle setValue 1 0
SpatialGraphView70 segmentStyle setValue 2 1
SpatialGraphView70 tubeScale setIndex 0 1
SpatialGraphView70 tubeScaleFactor setMinMax 0 10
SpatialGraphView70 tubeScaleFactor setButtons 0
SpatialGraphView70 tubeScaleFactor setIncrement 0.666667
SpatialGraphView70 tubeScaleFactor setValue 1
SpatialGraphView70 tubeScaleFactor setSubMinMax 0 10
SpatialGraphView70 segmentColoring setIndex 0 0
SpatialGraphView70 segmentLabelColoringOptions setValue 0
SpatialGraphView70 segmentColor setColor 0 0.9922 0.9961 0.9922
SpatialGraphView70 fire
SpatialGraphView70 setViewerMask 32767
SpatialGraphView70 setShadowStyle 0

set hideNewModules 0
create HxSpatialGraphView {SpatialGraphView71}
SpatialGraphView71 setIconPosition 393 2170
SpatialGraphView71 data connect 2_14_797_smaurer_001.008.hoc
SpatialGraphView71 nodeColormap setDefaultColor 1 0.8 0.5
SpatialGraphView71 nodeColormap setDefaultAlpha 0.500000
SpatialGraphView71 segmentColormap setDefaultColor 1 0.8 0.5
SpatialGraphView71 segmentColormap setDefaultAlpha 0.500000
SpatialGraphView71 fire
SpatialGraphView71 itemsToShow setValue 0 0
SpatialGraphView71 itemsToShow setValue 1 1
SpatialGraphView71 nodeScale setIndex 0 0
SpatialGraphView71 nodeScaleFactor setMinMax 0 15155
SpatialGraphView71 nodeScaleFactor setButtons 0
SpatialGraphView71 nodeScaleFactor setIncrement 1010.33
SpatialGraphView71 nodeScaleFactor setValue 10
SpatialGraphView71 nodeScaleFactor setSubMinMax 0 15155
SpatialGraphView71 nodeColoring setIndex 0 0
SpatialGraphView71 nodeLabelColoringOptions setValue 0
SpatialGraphView71 nodeColor setColor 0 0.8 0.8 0.8
SpatialGraphView71 segmentStyle setValue 0 0
SpatialGraphView71 segmentStyle setValue 1 0
SpatialGraphView71 segmentStyle setValue 2 1
SpatialGraphView71 tubeScale setIndex 0 1
SpatialGraphView71 tubeScaleFactor setMinMax 0 10
SpatialGraphView71 tubeScaleFactor setButtons 0
SpatialGraphView71 tubeScaleFactor setIncrement 0.666667
SpatialGraphView71 tubeScaleFactor setValue 1
SpatialGraphView71 tubeScaleFactor setSubMinMax 0 10
SpatialGraphView71 segmentColoring setIndex 0 0
SpatialGraphView71 segmentLabelColoringOptions setValue 0
SpatialGraphView71 segmentColor setColor 0 0.9922 0.9961 0.9922
SpatialGraphView71 fire
SpatialGraphView71 setViewerMask 32767
SpatialGraphView71 setShadowStyle 0

set hideNewModules 0
create HxSpatialGraphView {SpatialGraphView72}
SpatialGraphView72 setIconPosition 393 2200
SpatialGraphView72 data connect 2_14_782_gmordhorst_001.022.hoc
SpatialGraphView72 nodeColormap setDefaultColor 1 0.8 0.5
SpatialGraphView72 nodeColormap setDefaultAlpha 0.500000
SpatialGraphView72 segmentColormap setDefaultColor 1 0.8 0.5
SpatialGraphView72 segmentColormap setDefaultAlpha 0.500000
SpatialGraphView72 fire
SpatialGraphView72 itemsToShow setValue 0 0
SpatialGraphView72 itemsToShow setValue 1 1
SpatialGraphView72 nodeScale setIndex 0 0
SpatialGraphView72 nodeScaleFactor setMinMax 0 14708
SpatialGraphView72 nodeScaleFactor setButtons 0
SpatialGraphView72 nodeScaleFactor setIncrement 980.533
SpatialGraphView72 nodeScaleFactor setValue 10
SpatialGraphView72 nodeScaleFactor setSubMinMax 0 14708
SpatialGraphView72 nodeColoring setIndex 0 0
SpatialGraphView72 nodeLabelColoringOptions setValue 0
SpatialGraphView72 nodeColor setColor 0 0.8 0.8 0.8
SpatialGraphView72 segmentStyle setValue 0 0
SpatialGraphView72 segmentStyle setValue 1 0
SpatialGraphView72 segmentStyle setValue 2 1
SpatialGraphView72 tubeScale setIndex 0 1
SpatialGraphView72 tubeScaleFactor setMinMax 0 10
SpatialGraphView72 tubeScaleFactor setButtons 0
SpatialGraphView72 tubeScaleFactor setIncrement 0.666667
SpatialGraphView72 tubeScaleFactor setValue 1
SpatialGraphView72 tubeScaleFactor setSubMinMax 0 10
SpatialGraphView72 segmentColoring setIndex 0 0
SpatialGraphView72 segmentLabelColoringOptions setValue 0
SpatialGraphView72 segmentColor setColor 0 0.8941 0.102 0.1098
SpatialGraphView72 fire
SpatialGraphView72 setViewerMask 32767
SpatialGraphView72 setShadowStyle 0

set hideNewModules 0
create HxSpatialGraphView {SpatialGraphView73}
SpatialGraphView73 setIconPosition 393 2230
SpatialGraphView73 data connect 2_14_756_smaurer_001.019.hoc
SpatialGraphView73 nodeColormap setDefaultColor 1 0.8 0.5
SpatialGraphView73 nodeColormap setDefaultAlpha 0.500000
SpatialGraphView73 segmentColormap setDefaultColor 1 0.8 0.5
SpatialGraphView73 segmentColormap setDefaultAlpha 0.500000
SpatialGraphView73 fire
SpatialGraphView73 itemsToShow setValue 0 0
SpatialGraphView73 itemsToShow setValue 1 1
SpatialGraphView73 nodeScale setIndex 0 0
SpatialGraphView73 nodeScaleFactor setMinMax 0 14100
SpatialGraphView73 nodeScaleFactor setButtons 0
SpatialGraphView73 nodeScaleFactor setIncrement 940
SpatialGraphView73 nodeScaleFactor setValue 10
SpatialGraphView73 nodeScaleFactor setSubMinMax 0 14100
SpatialGraphView73 nodeColoring setIndex 0 0
SpatialGraphView73 nodeLabelColoringOptions setValue 0
SpatialGraphView73 nodeColor setColor 0 0.8 0.8 0.8
SpatialGraphView73 segmentStyle setValue 0 0
SpatialGraphView73 segmentStyle setValue 1 0
SpatialGraphView73 segmentStyle setValue 2 1
SpatialGraphView73 tubeScale setIndex 0 1
SpatialGraphView73 tubeScaleFactor setMinMax 0 10
SpatialGraphView73 tubeScaleFactor setButtons 0
SpatialGraphView73 tubeScaleFactor setIncrement 0.666667
SpatialGraphView73 tubeScaleFactor setValue 1
SpatialGraphView73 tubeScaleFactor setSubMinMax 0 10
SpatialGraphView73 segmentColoring setIndex 0 0
SpatialGraphView73 segmentLabelColoringOptions setValue 0
SpatialGraphView73 segmentColor setColor 0 0.8941 0.102 0.1098
SpatialGraphView73 fire
SpatialGraphView73 setViewerMask 32767
SpatialGraphView73 setShadowStyle 0

set hideNewModules 0
create HxSpatialGraphView {SpatialGraphView74}
SpatialGraphView74 setIconPosition 393 2260
SpatialGraphView74 data connect 2_14_757_smaurer_001.015.hoc
SpatialGraphView74 nodeColormap setDefaultColor 1 0.8 0.5
SpatialGraphView74 nodeColormap setDefaultAlpha 0.500000
SpatialGraphView74 segmentColormap setDefaultColor 1 0.8 0.5
SpatialGraphView74 segmentColormap setDefaultAlpha 0.500000
SpatialGraphView74 fire
SpatialGraphView74 itemsToShow setValue 0 0
SpatialGraphView74 itemsToShow setValue 1 1
SpatialGraphView74 nodeScale setIndex 0 0
SpatialGraphView74 nodeScaleFactor setMinMax 0 14805
SpatialGraphView74 nodeScaleFactor setButtons 0
SpatialGraphView74 nodeScaleFactor setIncrement 987
SpatialGraphView74 nodeScaleFactor setValue 10
SpatialGraphView74 nodeScaleFactor setSubMinMax 0 14805
SpatialGraphView74 nodeColoring setIndex 0 0
SpatialGraphView74 nodeLabelColoringOptions setValue 0
SpatialGraphView74 nodeColor setColor 0 0.8 0.8 0.8
SpatialGraphView74 segmentStyle setValue 0 0
SpatialGraphView74 segmentStyle setValue 1 0
SpatialGraphView74 segmentStyle setValue 2 1
SpatialGraphView74 tubeScale setIndex 0 1
SpatialGraphView74 tubeScaleFactor setMinMax 0 10
SpatialGraphView74 tubeScaleFactor setButtons 0
SpatialGraphView74 tubeScaleFactor setIncrement 0.666667
SpatialGraphView74 tubeScaleFactor setValue 1
SpatialGraphView74 tubeScaleFactor setSubMinMax 0 10
SpatialGraphView74 segmentColoring setIndex 0 0
SpatialGraphView74 segmentLabelColoringOptions setValue 0
SpatialGraphView74 segmentColor setColor 0 0.8941 0.102 0.1098
SpatialGraphView74 fire
SpatialGraphView74 setViewerMask 32767
SpatialGraphView74 setShadowStyle 0

set hideNewModules 0
create HxSpatialGraphView {SpatialGraphView75}
SpatialGraphView75 setIconPosition 393 2290
SpatialGraphView75 data connect 2_14_767_gmordhorst_001.008.hoc
SpatialGraphView75 nodeColormap setDefaultColor 1 0.8 0.5
SpatialGraphView75 nodeColormap setDefaultAlpha 0.500000
SpatialGraphView75 segmentColormap setDefaultColor 1 0.8 0.5
SpatialGraphView75 segmentColormap setDefaultAlpha 0.500000
SpatialGraphView75 fire
SpatialGraphView75 itemsToShow setValue 0 0
SpatialGraphView75 itemsToShow setValue 1 1
SpatialGraphView75 nodeScale setIndex 0 0
SpatialGraphView75 nodeScaleFactor setMinMax 0 9950
SpatialGraphView75 nodeScaleFactor setButtons 0
SpatialGraphView75 nodeScaleFactor setIncrement 663.333
SpatialGraphView75 nodeScaleFactor setValue 10
SpatialGraphView75 nodeScaleFactor setSubMinMax 0 9950
SpatialGraphView75 nodeColoring setIndex 0 0
SpatialGraphView75 nodeLabelColoringOptions setValue 0
SpatialGraphView75 nodeColor setColor 0 0.8 0.8 0.8
SpatialGraphView75 segmentStyle setValue 0 0
SpatialGraphView75 segmentStyle setValue 1 0
SpatialGraphView75 segmentStyle setValue 2 1
SpatialGraphView75 tubeScale setIndex 0 1
SpatialGraphView75 tubeScaleFactor setMinMax 0 10
SpatialGraphView75 tubeScaleFactor setButtons 0
SpatialGraphView75 tubeScaleFactor setIncrement 0.666667
SpatialGraphView75 tubeScaleFactor setValue 1
SpatialGraphView75 tubeScaleFactor setSubMinMax 0 10
SpatialGraphView75 segmentColoring setIndex 0 0
SpatialGraphView75 segmentLabelColoringOptions setValue 0
SpatialGraphView75 segmentColor setColor 0 0.2157 0.4941 0.7216
SpatialGraphView75 fire
SpatialGraphView75 setViewerMask 32767
SpatialGraphView75 setShadowStyle 0

set hideNewModules 0
create HxSpatialGraphView {SpatialGraphView76}
SpatialGraphView76 setIconPosition 393 2320
SpatialGraphView76 data connect 2_14_768_gmordhorst_001.006.hoc
SpatialGraphView76 nodeColormap setDefaultColor 1 0.8 0.5
SpatialGraphView76 nodeColormap setDefaultAlpha 0.500000
SpatialGraphView76 segmentColormap setDefaultColor 1 0.8 0.5
SpatialGraphView76 segmentColormap setDefaultAlpha 0.500000
SpatialGraphView76 fire
SpatialGraphView76 itemsToShow setValue 0 0
SpatialGraphView76 itemsToShow setValue 1 1
SpatialGraphView76 nodeScale setIndex 0 0
SpatialGraphView76 nodeScaleFactor setMinMax 0 12850
SpatialGraphView76 nodeScaleFactor setButtons 0
SpatialGraphView76 nodeScaleFactor setIncrement 856.667
SpatialGraphView76 nodeScaleFactor setValue 10
SpatialGraphView76 nodeScaleFactor setSubMinMax 0 12850
SpatialGraphView76 nodeColoring setIndex 0 0
SpatialGraphView76 nodeLabelColoringOptions setValue 0
SpatialGraphView76 nodeColor setColor 0 0.8 0.8 0.8
SpatialGraphView76 segmentStyle setValue 0 0
SpatialGraphView76 segmentStyle setValue 1 0
SpatialGraphView76 segmentStyle setValue 2 1
SpatialGraphView76 tubeScale setIndex 0 1
SpatialGraphView76 tubeScaleFactor setMinMax 0 10
SpatialGraphView76 tubeScaleFactor setButtons 0
SpatialGraphView76 tubeScaleFactor setIncrement 0.666667
SpatialGraphView76 tubeScaleFactor setValue 1
SpatialGraphView76 tubeScaleFactor setSubMinMax 0 10
SpatialGraphView76 segmentColoring setIndex 0 0
SpatialGraphView76 segmentLabelColoringOptions setValue 0
SpatialGraphView76 segmentColor setColor 0 0.2157 0.4941 0.7216
SpatialGraphView76 fire
SpatialGraphView76 setViewerMask 32767
SpatialGraphView76 setShadowStyle 0

set hideNewModules 0
create HxSpatialGraphView {SpatialGraphView77}
SpatialGraphView77 setIconPosition 393 2350
SpatialGraphView77 data connect 2_14_766_sbeyer_002.072.hoc
SpatialGraphView77 nodeColormap setDefaultColor 1 0.8 0.5
SpatialGraphView77 nodeColormap setDefaultAlpha 0.500000
SpatialGraphView77 segmentColormap setDefaultColor 1 0.8 0.5
SpatialGraphView77 segmentColormap setDefaultAlpha 0.500000
SpatialGraphView77 fire
SpatialGraphView77 itemsToShow setValue 0 0
SpatialGraphView77 itemsToShow setValue 1 1
SpatialGraphView77 nodeScale setIndex 0 0
SpatialGraphView77 nodeScaleFactor setMinMax 0 13466
SpatialGraphView77 nodeScaleFactor setButtons 0
SpatialGraphView77 nodeScaleFactor setIncrement 897.733
SpatialGraphView77 nodeScaleFactor setValue 10
SpatialGraphView77 nodeScaleFactor setSubMinMax 0 13466
SpatialGraphView77 nodeColoring setIndex 0 0
SpatialGraphView77 nodeLabelColoringOptions setValue 0
SpatialGraphView77 nodeColor setColor 0 0.8 0.8 0.8
SpatialGraphView77 segmentStyle setValue 0 0
SpatialGraphView77 segmentStyle setValue 1 0
SpatialGraphView77 segmentStyle setValue 2 1
SpatialGraphView77 tubeScale setIndex 0 1
SpatialGraphView77 tubeScaleFactor setMinMax 0 10
SpatialGraphView77 tubeScaleFactor setButtons 0
SpatialGraphView77 tubeScaleFactor setIncrement 0.666667
SpatialGraphView77 tubeScaleFactor setValue 1
SpatialGraphView77 tubeScaleFactor setSubMinMax 0 10
SpatialGraphView77 segmentColoring setIndex 0 0
SpatialGraphView77 segmentLabelColoringOptions setValue 0
SpatialGraphView77 segmentColor setColor 0 0.2157 0.4941 0.7216
SpatialGraphView77 fire
SpatialGraphView77 setViewerMask 32767
SpatialGraphView77 setShadowStyle 0

set hideNewModules 0
create HxSpatialGraphView {SpatialGraphView78}
SpatialGraphView78 setIconPosition 393 2380
SpatialGraphView78 data connect 2_14_750_sbeyer_001.091.hoc
SpatialGraphView78 nodeColormap setDefaultColor 1 0.8 0.5
SpatialGraphView78 nodeColormap setDefaultAlpha 0.500000
SpatialGraphView78 segmentColormap setDefaultColor 1 0.8 0.5
SpatialGraphView78 segmentColormap setDefaultAlpha 0.500000
SpatialGraphView78 fire
SpatialGraphView78 itemsToShow setValue 0 0
SpatialGraphView78 itemsToShow setValue 1 1
SpatialGraphView78 nodeScale setIndex 0 0
SpatialGraphView78 nodeScaleFactor setMinMax 0 13536
SpatialGraphView78 nodeScaleFactor setButtons 0
SpatialGraphView78 nodeScaleFactor setIncrement 902.4
SpatialGraphView78 nodeScaleFactor setValue 10
SpatialGraphView78 nodeScaleFactor setSubMinMax 0 13536
SpatialGraphView78 nodeColoring setIndex 0 0
SpatialGraphView78 nodeLabelColoringOptions setValue 0
SpatialGraphView78 nodeColor setColor 0 0.8 0.8 0.8
SpatialGraphView78 segmentStyle setValue 0 0
SpatialGraphView78 segmentStyle setValue 1 0
SpatialGraphView78 segmentStyle setValue 2 1
SpatialGraphView78 tubeScale setIndex 0 1
SpatialGraphView78 tubeScaleFactor setMinMax 0 10
SpatialGraphView78 tubeScaleFactor setButtons 0
SpatialGraphView78 tubeScaleFactor setIncrement 0.666667
SpatialGraphView78 tubeScaleFactor setValue 1
SpatialGraphView78 tubeScaleFactor setSubMinMax 0 10
SpatialGraphView78 segmentColoring setIndex 0 0
SpatialGraphView78 segmentLabelColoringOptions setValue 0
SpatialGraphView78 segmentColor setColor 0 0.302 0.6863 0.2902
SpatialGraphView78 fire
SpatialGraphView78 setViewerMask 32767
SpatialGraphView78 setShadowStyle 0

set hideNewModules 0
create HxSpatialGraphView {SpatialGraphView79}
SpatialGraphView79 setIconPosition 393 2410
SpatialGraphView79 data connect 2_14_800_smaurer_001.015.hoc
SpatialGraphView79 nodeColormap setDefaultColor 1 0.8 0.5
SpatialGraphView79 nodeColormap setDefaultAlpha 0.500000
SpatialGraphView79 segmentColormap setDefaultColor 1 0.8 0.5
SpatialGraphView79 segmentColormap setDefaultAlpha 0.500000
SpatialGraphView79 fire
SpatialGraphView79 itemsToShow setValue 0 0
SpatialGraphView79 itemsToShow setValue 1 1
SpatialGraphView79 nodeScale setIndex 0 0
SpatialGraphView79 nodeScaleFactor setMinMax 0 12947
SpatialGraphView79 nodeScaleFactor setButtons 0
SpatialGraphView79 nodeScaleFactor setIncrement 863.133
SpatialGraphView79 nodeScaleFactor setValue 10
SpatialGraphView79 nodeScaleFactor setSubMinMax 0 12947
SpatialGraphView79 nodeColoring setIndex 0 0
SpatialGraphView79 nodeLabelColoringOptions setValue 0
SpatialGraphView79 nodeColor setColor 0 0.8 0.8 0.8
SpatialGraphView79 segmentStyle setValue 0 0
SpatialGraphView79 segmentStyle setValue 1 0
SpatialGraphView79 segmentStyle setValue 2 1
SpatialGraphView79 tubeScale setIndex 0 1
SpatialGraphView79 tubeScaleFactor setMinMax 0 10
SpatialGraphView79 tubeScaleFactor setButtons 0
SpatialGraphView79 tubeScaleFactor setIncrement 0.666667
SpatialGraphView79 tubeScaleFactor setValue 1
SpatialGraphView79 tubeScaleFactor setSubMinMax 0 10
SpatialGraphView79 segmentColoring setIndex 0 0
SpatialGraphView79 segmentLabelColoringOptions setValue 0
SpatialGraphView79 segmentColor setColor 0 0.302 0.6863 0.2902
SpatialGraphView79 fire
SpatialGraphView79 setViewerMask 32767
SpatialGraphView79 setShadowStyle 0

set hideNewModules 0
create HxSpatialGraphView {SpatialGraphView80}
SpatialGraphView80 setIconPosition 393 2440
SpatialGraphView80 data connect 2_14_738_smaurer_002.023.hoc
SpatialGraphView80 nodeColormap setDefaultColor 1 0.8 0.5
SpatialGraphView80 nodeColormap setDefaultAlpha 0.500000
SpatialGraphView80 segmentColormap setDefaultColor 1 0.8 0.5
SpatialGraphView80 segmentColormap setDefaultAlpha 0.500000
SpatialGraphView80 fire
SpatialGraphView80 itemsToShow setValue 0 0
SpatialGraphView80 itemsToShow setValue 1 1
SpatialGraphView80 nodeScale setIndex 0 0
SpatialGraphView80 nodeScaleFactor setMinMax 0 15113
SpatialGraphView80 nodeScaleFactor setButtons 0
SpatialGraphView80 nodeScaleFactor setIncrement 1007.53
SpatialGraphView80 nodeScaleFactor setValue 10
SpatialGraphView80 nodeScaleFactor setSubMinMax 0 15113
SpatialGraphView80 nodeColoring setIndex 0 0
SpatialGraphView80 nodeLabelColoringOptions setValue 0
SpatialGraphView80 nodeColor setColor 0 0.8 0.8 0.8
SpatialGraphView80 segmentStyle setValue 0 0
SpatialGraphView80 segmentStyle setValue 1 0
SpatialGraphView80 segmentStyle setValue 2 1
SpatialGraphView80 tubeScale setIndex 0 1
SpatialGraphView80 tubeScaleFactor setMinMax 0 10
SpatialGraphView80 tubeScaleFactor setButtons 0
SpatialGraphView80 tubeScaleFactor setIncrement 0.666667
SpatialGraphView80 tubeScaleFactor setValue 1
SpatialGraphView80 tubeScaleFactor setSubMinMax 0 10
SpatialGraphView80 segmentColoring setIndex 0 0
SpatialGraphView80 segmentLabelColoringOptions setValue 0
SpatialGraphView80 segmentColor setColor 0 0.898 0.9607 0.9764
SpatialGraphView80 fire
SpatialGraphView80 setViewerMask 32767
SpatialGraphView80 setShadowStyle 0

set hideNewModules 0
create HxSpatialGraphView {SpatialGraphView81}
SpatialGraphView81 setIconPosition 393 2470
SpatialGraphView81 data connect 2_14_739_smaurer_001.019.hoc
SpatialGraphView81 nodeColormap setDefaultColor 1 0.8 0.5
SpatialGraphView81 nodeColormap setDefaultAlpha 0.500000
SpatialGraphView81 segmentColormap setDefaultColor 1 0.8 0.5
SpatialGraphView81 segmentColormap setDefaultAlpha 0.500000
SpatialGraphView81 fire
SpatialGraphView81 itemsToShow setValue 0 0
SpatialGraphView81 itemsToShow setValue 1 1
SpatialGraphView81 nodeScale setIndex 0 0
SpatialGraphView81 nodeScaleFactor setMinMax 0 15260
SpatialGraphView81 nodeScaleFactor setButtons 0
SpatialGraphView81 nodeScaleFactor setIncrement 1017.33
SpatialGraphView81 nodeScaleFactor setValue 10
SpatialGraphView81 nodeScaleFactor setSubMinMax 0 15260
SpatialGraphView81 nodeColoring setIndex 0 0
SpatialGraphView81 nodeLabelColoringOptions setValue 0
SpatialGraphView81 nodeColor setColor 0 0.8 0.8 0.8
SpatialGraphView81 segmentStyle setValue 0 0
SpatialGraphView81 segmentStyle setValue 1 0
SpatialGraphView81 segmentStyle setValue 2 1
SpatialGraphView81 tubeScale setIndex 0 1
SpatialGraphView81 tubeScaleFactor setMinMax 0 10
SpatialGraphView81 tubeScaleFactor setButtons 0
SpatialGraphView81 tubeScaleFactor setIncrement 0.666667
SpatialGraphView81 tubeScaleFactor setValue 1
SpatialGraphView81 tubeScaleFactor setSubMinMax 0 10
SpatialGraphView81 segmentColoring setIndex 0 0
SpatialGraphView81 segmentLabelColoringOptions setValue 0
SpatialGraphView81 segmentColor setColor 0 0.898 0.9607 0.9764
SpatialGraphView81 fire
SpatialGraphView81 setViewerMask 32767
SpatialGraphView81 setShadowStyle 0

set hideNewModules 0
create HxSpatialGraphView {SpatialGraphView82}
SpatialGraphView82 setIconPosition 393 2500
SpatialGraphView82 data connect 2_14_811_smaurer_001.015.hoc
SpatialGraphView82 nodeColormap setDefaultColor 1 0.8 0.5
SpatialGraphView82 nodeColormap setDefaultAlpha 0.500000
SpatialGraphView82 segmentColormap setDefaultColor 1 0.8 0.5
SpatialGraphView82 segmentColormap setDefaultAlpha 0.500000
SpatialGraphView82 fire
SpatialGraphView82 itemsToShow setValue 0 0
SpatialGraphView82 itemsToShow setValue 1 1
SpatialGraphView82 nodeScale setIndex 0 0
SpatialGraphView82 nodeScaleFactor setMinMax 0 15258
SpatialGraphView82 nodeScaleFactor setButtons 0
SpatialGraphView82 nodeScaleFactor setIncrement 1017.2
SpatialGraphView82 nodeScaleFactor setValue 10
SpatialGraphView82 nodeScaleFactor setSubMinMax 0 15258
SpatialGraphView82 nodeColoring setIndex 0 0
SpatialGraphView82 nodeLabelColoringOptions setValue 0
SpatialGraphView82 nodeColor setColor 0 0.8 0.8 0.8
SpatialGraphView82 segmentStyle setValue 0 0
SpatialGraphView82 segmentStyle setValue 1 0
SpatialGraphView82 segmentStyle setValue 2 1
SpatialGraphView82 tubeScale setIndex 0 1
SpatialGraphView82 tubeScaleFactor setMinMax 0 10
SpatialGraphView82 tubeScaleFactor setButtons 0
SpatialGraphView82 tubeScaleFactor setIncrement 0.666667
SpatialGraphView82 tubeScaleFactor setValue 1
SpatialGraphView82 tubeScaleFactor setSubMinMax 0 10
SpatialGraphView82 segmentColoring setIndex 0 0
SpatialGraphView82 segmentLabelColoringOptions setValue 0
SpatialGraphView82 segmentColor setColor 0 0.898 0.9607 0.9764
SpatialGraphView82 fire
SpatialGraphView82 setViewerMask 32767
SpatialGraphView82 setShadowStyle 0

set hideNewModules 0
create HxSpatialGraphView {SpatialGraphView83}
SpatialGraphView83 setIconPosition 393 2530
SpatialGraphView83 data connect 2_14_812_smaurer_002.014.hoc
SpatialGraphView83 nodeColormap setDefaultColor 1 0.8 0.5
SpatialGraphView83 nodeColormap setDefaultAlpha 0.500000
SpatialGraphView83 segmentColormap setDefaultColor 1 0.8 0.5
SpatialGraphView83 segmentColormap setDefaultAlpha 0.500000
SpatialGraphView83 fire
SpatialGraphView83 itemsToShow setValue 0 0
SpatialGraphView83 itemsToShow setValue 1 1
SpatialGraphView83 nodeScale setIndex 0 0
SpatialGraphView83 nodeScaleFactor setMinMax 0 13410
SpatialGraphView83 nodeScaleFactor setButtons 0
SpatialGraphView83 nodeScaleFactor setIncrement 894
SpatialGraphView83 nodeScaleFactor setValue 10
SpatialGraphView83 nodeScaleFactor setSubMinMax 0 13410
SpatialGraphView83 nodeColoring setIndex 0 0
SpatialGraphView83 nodeLabelColoringOptions setValue 0
SpatialGraphView83 nodeColor setColor 0 0.8 0.8 0.8
SpatialGraphView83 segmentStyle setValue 0 0
SpatialGraphView83 segmentStyle setValue 1 0
SpatialGraphView83 segmentStyle setValue 2 1
SpatialGraphView83 tubeScale setIndex 0 1
SpatialGraphView83 tubeScaleFactor setMinMax 0 10
SpatialGraphView83 tubeScaleFactor setButtons 0
SpatialGraphView83 tubeScaleFactor setIncrement 0.666667
SpatialGraphView83 tubeScaleFactor setValue 1
SpatialGraphView83 tubeScaleFactor setSubMinMax 0 10
SpatialGraphView83 segmentColoring setIndex 0 0
SpatialGraphView83 segmentLabelColoringOptions setValue 0
SpatialGraphView83 segmentColor setColor 0 0.898 0.9607 0.9764
SpatialGraphView83 fire
SpatialGraphView83 setViewerMask 32767
SpatialGraphView83 setShadowStyle 0

set hideNewModules 0
create HxSpatialGraphView {SpatialGraphView84}
SpatialGraphView84 setIconPosition 393 2560
SpatialGraphView84 data connect 2_14_775_gmordhorst_002.018.hoc
SpatialGraphView84 nodeColormap setDefaultColor 1 0.8 0.5
SpatialGraphView84 nodeColormap setDefaultAlpha 0.500000
SpatialGraphView84 segmentColormap setDefaultColor 1 0.8 0.5
SpatialGraphView84 segmentColormap setDefaultAlpha 0.500000
SpatialGraphView84 fire
SpatialGraphView84 itemsToShow setValue 0 0
SpatialGraphView84 itemsToShow setValue 1 1
SpatialGraphView84 nodeScale setIndex 0 0
SpatialGraphView84 nodeScaleFactor setMinMax 0 15114
SpatialGraphView84 nodeScaleFactor setButtons 0
SpatialGraphView84 nodeScaleFactor setIncrement 1007.6
SpatialGraphView84 nodeScaleFactor setValue 10
SpatialGraphView84 nodeScaleFactor setSubMinMax 0 15114
SpatialGraphView84 nodeColoring setIndex 0 0
SpatialGraphView84 nodeLabelColoringOptions setValue 0
SpatialGraphView84 nodeColor setColor 0 0.8 0.8 0.8
SpatialGraphView84 segmentStyle setValue 0 0
SpatialGraphView84 segmentStyle setValue 1 0
SpatialGraphView84 segmentStyle setValue 2 1
SpatialGraphView84 tubeScale setIndex 0 1
SpatialGraphView84 tubeScaleFactor setMinMax 0 10
SpatialGraphView84 tubeScaleFactor setButtons 0
SpatialGraphView84 tubeScaleFactor setIncrement 0.666667
SpatialGraphView84 tubeScaleFactor setValue 1
SpatialGraphView84 tubeScaleFactor setSubMinMax 0 10
SpatialGraphView84 segmentColoring setIndex 0 0
SpatialGraphView84 segmentLabelColoringOptions setValue 0
SpatialGraphView84 segmentColor setColor 0 0.6 0.847 0.7882
SpatialGraphView84 fire
SpatialGraphView84 setViewerMask 32767
SpatialGraphView84 setShadowStyle 0

set hideNewModules 0
create HxSpatialGraphView {SpatialGraphView85}
SpatialGraphView85 setIconPosition 393 2590
SpatialGraphView85 data connect 2_14_777_gmordhorst_001.008.hoc
SpatialGraphView85 nodeColormap setDefaultColor 1 0.8 0.5
SpatialGraphView85 nodeColormap setDefaultAlpha 0.500000
SpatialGraphView85 segmentColormap setDefaultColor 1 0.8 0.5
SpatialGraphView85 segmentColormap setDefaultAlpha 0.500000
SpatialGraphView85 fire
SpatialGraphView85 itemsToShow setValue 0 0
SpatialGraphView85 itemsToShow setValue 1 1
SpatialGraphView85 nodeScale setIndex 0 0
SpatialGraphView85 nodeScaleFactor setMinMax 0 13672
SpatialGraphView85 nodeScaleFactor setButtons 0
SpatialGraphView85 nodeScaleFactor setIncrement 911.467
SpatialGraphView85 nodeScaleFactor setValue 10
SpatialGraphView85 nodeScaleFactor setSubMinMax 0 13672
SpatialGraphView85 nodeColoring setIndex 0 0
SpatialGraphView85 nodeLabelColoringOptions setValue 0
SpatialGraphView85 nodeColor setColor 0 0.8 0.8 0.8
SpatialGraphView85 segmentStyle setValue 0 0
SpatialGraphView85 segmentStyle setValue 1 0
SpatialGraphView85 segmentStyle setValue 2 1
SpatialGraphView85 tubeScale setIndex 0 1
SpatialGraphView85 tubeScaleFactor setMinMax 0 10
SpatialGraphView85 tubeScaleFactor setButtons 0
SpatialGraphView85 tubeScaleFactor setIncrement 0.666667
SpatialGraphView85 tubeScaleFactor setValue 1
SpatialGraphView85 tubeScaleFactor setSubMinMax 0 10
SpatialGraphView85 segmentColoring setIndex 0 0
SpatialGraphView85 segmentLabelColoringOptions setValue 0
SpatialGraphView85 segmentColor setColor 0 0.6 0.847 0.7882
SpatialGraphView85 fire
SpatialGraphView85 setViewerMask 32767
SpatialGraphView85 setShadowStyle 0

set hideNewModules 0
create HxSpatialGraphView {SpatialGraphView86}
SpatialGraphView86 setIconPosition 393 2620
SpatialGraphView86 data connect 2_14_778_gmordhorst_001.016.hoc
SpatialGraphView86 nodeColormap setDefaultColor 1 0.8 0.5
SpatialGraphView86 nodeColormap setDefaultAlpha 0.500000
SpatialGraphView86 segmentColormap setDefaultColor 1 0.8 0.5
SpatialGraphView86 segmentColormap setDefaultAlpha 0.500000
SpatialGraphView86 fire
SpatialGraphView86 itemsToShow setValue 0 0
SpatialGraphView86 itemsToShow setValue 1 1
SpatialGraphView86 nodeScale setIndex 0 0
SpatialGraphView86 nodeScaleFactor setMinMax 0 14223
SpatialGraphView86 nodeScaleFactor setButtons 0
SpatialGraphView86 nodeScaleFactor setIncrement 948.2
SpatialGraphView86 nodeScaleFactor setValue 10
SpatialGraphView86 nodeScaleFactor setSubMinMax 0 14223
SpatialGraphView86 nodeColoring setIndex 0 0
SpatialGraphView86 nodeLabelColoringOptions setValue 0
SpatialGraphView86 nodeColor setColor 0 0.8 0.8 0.8
SpatialGraphView86 segmentStyle setValue 0 0
SpatialGraphView86 segmentStyle setValue 1 0
SpatialGraphView86 segmentStyle setValue 2 1
SpatialGraphView86 tubeScale setIndex 0 1
SpatialGraphView86 tubeScaleFactor setMinMax 0 10
SpatialGraphView86 tubeScaleFactor setButtons 0
SpatialGraphView86 tubeScaleFactor setIncrement 0.666667
SpatialGraphView86 tubeScaleFactor setValue 1
SpatialGraphView86 tubeScaleFactor setSubMinMax 0 10
SpatialGraphView86 segmentColoring setIndex 0 0
SpatialGraphView86 segmentLabelColoringOptions setValue 0
SpatialGraphView86 segmentColor setColor 0 0.6 0.847 0.7882
SpatialGraphView86 fire
SpatialGraphView86 setViewerMask 32767
SpatialGraphView86 setShadowStyle 0

set hideNewModules 0
create HxSpatialGraphView {SpatialGraphView87}
SpatialGraphView87 setIconPosition 393 2650
SpatialGraphView87 data connect 2_14_729_smaurer_001.007.hoc
SpatialGraphView87 nodeColormap setDefaultColor 1 0.8 0.5
SpatialGraphView87 nodeColormap setDefaultAlpha 0.500000
SpatialGraphView87 segmentColormap setDefaultColor 1 0.8 0.5
SpatialGraphView87 segmentColormap setDefaultAlpha 0.500000
SpatialGraphView87 fire
SpatialGraphView87 itemsToShow setValue 0 0
SpatialGraphView87 itemsToShow setValue 1 1
SpatialGraphView87 nodeScale setIndex 0 0
SpatialGraphView87 nodeScaleFactor setMinMax 0 13925
SpatialGraphView87 nodeScaleFactor setButtons 0
SpatialGraphView87 nodeScaleFactor setIncrement 928.333
SpatialGraphView87 nodeScaleFactor setValue 10
SpatialGraphView87 nodeScaleFactor setSubMinMax 0 13925
SpatialGraphView87 nodeColoring setIndex 0 0
SpatialGraphView87 nodeLabelColoringOptions setValue 0
SpatialGraphView87 nodeColor setColor 0 0.8 0.8 0.8
SpatialGraphView87 segmentStyle setValue 0 0
SpatialGraphView87 segmentStyle setValue 1 0
SpatialGraphView87 segmentStyle setValue 2 1
SpatialGraphView87 tubeScale setIndex 0 1
SpatialGraphView87 tubeScaleFactor setMinMax 0 10
SpatialGraphView87 tubeScaleFactor setButtons 0
SpatialGraphView87 tubeScaleFactor setIncrement 0.666667
SpatialGraphView87 tubeScaleFactor setValue 1
SpatialGraphView87 tubeScaleFactor setSubMinMax 0 10
SpatialGraphView87 segmentColoring setIndex 0 0
SpatialGraphView87 segmentLabelColoringOptions setValue 0
SpatialGraphView87 segmentColor setColor 0 0.6 0.847 0.7882
SpatialGraphView87 fire
SpatialGraphView87 setViewerMask 32767
SpatialGraphView87 setShadowStyle 0

set hideNewModules 0
create HxSpatialGraphView {SpatialGraphView88}
SpatialGraphView88 setIconPosition 393 2680
SpatialGraphView88 data connect 2_14_724_gmordhorst_001.055.hoc
SpatialGraphView88 nodeColormap setDefaultColor 1 0.8 0.5
SpatialGraphView88 nodeColormap setDefaultAlpha 0.500000
SpatialGraphView88 segmentColormap setDefaultColor 1 0.8 0.5
SpatialGraphView88 segmentColormap setDefaultAlpha 0.500000
SpatialGraphView88 fire
SpatialGraphView88 itemsToShow setValue 0 0
SpatialGraphView88 itemsToShow setValue 1 1
SpatialGraphView88 nodeScale setIndex 0 0
SpatialGraphView88 nodeScaleFactor setMinMax 0 14045
SpatialGraphView88 nodeScaleFactor setButtons 0
SpatialGraphView88 nodeScaleFactor setIncrement 936.333
SpatialGraphView88 nodeScaleFactor setValue 10
SpatialGraphView88 nodeScaleFactor setSubMinMax 0 14045
SpatialGraphView88 nodeColoring setIndex 0 0
SpatialGraphView88 nodeLabelColoringOptions setValue 0
SpatialGraphView88 nodeColor setColor 0 0.8 0.8 0.8
SpatialGraphView88 segmentStyle setValue 0 0
SpatialGraphView88 segmentStyle setValue 1 0
SpatialGraphView88 segmentStyle setValue 2 1
SpatialGraphView88 tubeScale setIndex 0 1
SpatialGraphView88 tubeScaleFactor setMinMax 0 10
SpatialGraphView88 tubeScaleFactor setButtons 0
SpatialGraphView88 tubeScaleFactor setIncrement 0.666667
SpatialGraphView88 tubeScaleFactor setValue 1
SpatialGraphView88 tubeScaleFactor setSubMinMax 0 10
SpatialGraphView88 segmentColoring setIndex 0 0
SpatialGraphView88 segmentLabelColoringOptions setValue 0
SpatialGraphView88 segmentColor setColor 0 0.1725 0.6352 0.3725
SpatialGraphView88 fire
SpatialGraphView88 setViewerMask 32767
SpatialGraphView88 setShadowStyle 0

set hideNewModules 0
create HxSpatialGraphView {SpatialGraphView89}
SpatialGraphView89 setIconPosition 393 2710
SpatialGraphView89 data connect 2_14_727_gmordhorst_001.021.hoc
SpatialGraphView89 nodeColormap setDefaultColor 1 0.8 0.5
SpatialGraphView89 nodeColormap setDefaultAlpha 0.500000
SpatialGraphView89 segmentColormap setDefaultColor 1 0.8 0.5
SpatialGraphView89 segmentColormap setDefaultAlpha 0.500000
SpatialGraphView89 fire
SpatialGraphView89 itemsToShow setValue 0 0
SpatialGraphView89 itemsToShow setValue 1 1
SpatialGraphView89 nodeScale setIndex 0 0
SpatialGraphView89 nodeScaleFactor setMinMax 0 12438
SpatialGraphView89 nodeScaleFactor setButtons 0
SpatialGraphView89 nodeScaleFactor setIncrement 829.2
SpatialGraphView89 nodeScaleFactor setValue 10
SpatialGraphView89 nodeScaleFactor setSubMinMax 0 12438
SpatialGraphView89 nodeColoring setIndex 0 0
SpatialGraphView89 nodeLabelColoringOptions setValue 0
SpatialGraphView89 nodeColor setColor 0 0.8 0.8 0.8
SpatialGraphView89 segmentStyle setValue 0 0
SpatialGraphView89 segmentStyle setValue 1 0
SpatialGraphView89 segmentStyle setValue 2 1
SpatialGraphView89 tubeScale setIndex 0 1
SpatialGraphView89 tubeScaleFactor setMinMax 0 10
SpatialGraphView89 tubeScaleFactor setButtons 0
SpatialGraphView89 tubeScaleFactor setIncrement 0.666667
SpatialGraphView89 tubeScaleFactor setValue 1
SpatialGraphView89 tubeScaleFactor setSubMinMax 0 10
SpatialGraphView89 segmentColoring setIndex 0 0
SpatialGraphView89 segmentLabelColoringOptions setValue 0
SpatialGraphView89 segmentColor setColor 0 0.1725 0.6352 0.3725
SpatialGraphView89 fire
SpatialGraphView89 setViewerMask 32767
SpatialGraphView89 setShadowStyle 0

set hideNewModules 0
create HxSpatialGraphView {SpatialGraphView90}
SpatialGraphView90 setIconPosition 393 2740
SpatialGraphView90 data connect 2_14_723_sbeyer_003.126.hoc
SpatialGraphView90 nodeColormap setDefaultColor 1 0.8 0.5
SpatialGraphView90 nodeColormap setDefaultAlpha 0.500000
SpatialGraphView90 segmentColormap setDefaultColor 1 0.8 0.5
SpatialGraphView90 segmentColormap setDefaultAlpha 0.500000
SpatialGraphView90 fire
SpatialGraphView90 itemsToShow setValue 0 0
SpatialGraphView90 itemsToShow setValue 1 1
SpatialGraphView90 nodeScale setIndex 0 0
SpatialGraphView90 nodeScaleFactor setMinMax 0 14118
SpatialGraphView90 nodeScaleFactor setButtons 0
SpatialGraphView90 nodeScaleFactor setIncrement 941.2
SpatialGraphView90 nodeScaleFactor setValue 10
SpatialGraphView90 nodeScaleFactor setSubMinMax 0 14118
SpatialGraphView90 nodeColoring setIndex 0 0
SpatialGraphView90 nodeLabelColoringOptions setValue 0
SpatialGraphView90 nodeColor setColor 0 0.8 0.8 0.8
SpatialGraphView90 segmentStyle setValue 0 0
SpatialGraphView90 segmentStyle setValue 1 0
SpatialGraphView90 segmentStyle setValue 2 1
SpatialGraphView90 tubeScale setIndex 0 1
SpatialGraphView90 tubeScaleFactor setMinMax 0 10
SpatialGraphView90 tubeScaleFactor setButtons 0
SpatialGraphView90 tubeScaleFactor setIncrement 0.666667
SpatialGraphView90 tubeScaleFactor setValue 1
SpatialGraphView90 tubeScaleFactor setSubMinMax 0 10
SpatialGraphView90 segmentColoring setIndex 0 0
SpatialGraphView90 segmentLabelColoringOptions setValue 0
SpatialGraphView90 segmentColor setColor 0 0.1725 0.6352 0.3725
SpatialGraphView90 fire
SpatialGraphView90 setViewerMask 32767
SpatialGraphView90 setShadowStyle 0

set hideNewModules 0
create HxSpatialGraphView {SpatialGraphView91}
SpatialGraphView91 setIconPosition 393 2770
SpatialGraphView91 data connect 2_14_725_smaurer_001.008.hoc
SpatialGraphView91 nodeColormap setDefaultColor 1 0.8 0.5
SpatialGraphView91 nodeColormap setDefaultAlpha 0.500000
SpatialGraphView91 segmentColormap setDefaultColor 1 0.8 0.5
SpatialGraphView91 segmentColormap setDefaultAlpha 0.500000
SpatialGraphView91 fire
SpatialGraphView91 itemsToShow setValue 0 0
SpatialGraphView91 itemsToShow setValue 1 1
SpatialGraphView91 nodeScale setIndex 0 0
SpatialGraphView91 nodeScaleFactor setMinMax 0 3856
SpatialGraphView91 nodeScaleFactor setButtons 0
SpatialGraphView91 nodeScaleFactor setIncrement 257.067
SpatialGraphView91 nodeScaleFactor setValue 10
SpatialGraphView91 nodeScaleFactor setSubMinMax 0 3856
SpatialGraphView91 nodeColoring setIndex 0 0
SpatialGraphView91 nodeLabelColoringOptions setValue 0
SpatialGraphView91 nodeColor setColor 0 0.8 0.8 0.8
SpatialGraphView91 segmentStyle setValue 0 0
SpatialGraphView91 segmentStyle setValue 1 0
SpatialGraphView91 segmentStyle setValue 2 1
SpatialGraphView91 tubeScale setIndex 0 1
SpatialGraphView91 tubeScaleFactor setMinMax 0 10
SpatialGraphView91 tubeScaleFactor setButtons 0
SpatialGraphView91 tubeScaleFactor setIncrement 0.666667
SpatialGraphView91 tubeScaleFactor setValue 1
SpatialGraphView91 tubeScaleFactor setSubMinMax 0 10
SpatialGraphView91 segmentColoring setIndex 0 0
SpatialGraphView91 segmentLabelColoringOptions setValue 0
SpatialGraphView91 segmentColor setColor 0 0.1725 0.6352 0.3725
SpatialGraphView91 fire
SpatialGraphView91 setViewerMask 32767
SpatialGraphView91 setShadowStyle 0

set hideNewModules 0
create HxSpatialGraphView {SpatialGraphView92}
SpatialGraphView92 setIconPosition 393 2800
SpatialGraphView92 data connect 2_14_726_smaurer_002.053.hoc
SpatialGraphView92 nodeColormap setDefaultColor 1 0.8 0.5
SpatialGraphView92 nodeColormap setDefaultAlpha 0.500000
SpatialGraphView92 segmentColormap setDefaultColor 1 0.8 0.5
SpatialGraphView92 segmentColormap setDefaultAlpha 0.500000
SpatialGraphView92 fire
SpatialGraphView92 itemsToShow setValue 0 0
SpatialGraphView92 itemsToShow setValue 1 1
SpatialGraphView92 nodeScale setIndex 0 0
SpatialGraphView92 nodeScaleFactor setMinMax 0 16423
SpatialGraphView92 nodeScaleFactor setButtons 0
SpatialGraphView92 nodeScaleFactor setIncrement 1094.87
SpatialGraphView92 nodeScaleFactor setValue 10
SpatialGraphView92 nodeScaleFactor setSubMinMax 0 16423
SpatialGraphView92 nodeColoring setIndex 0 0
SpatialGraphView92 nodeLabelColoringOptions setValue 0
SpatialGraphView92 nodeColor setColor 0 0.8 0.8 0.8
SpatialGraphView92 segmentStyle setValue 0 0
SpatialGraphView92 segmentStyle setValue 1 0
SpatialGraphView92 segmentStyle setValue 2 1
SpatialGraphView92 tubeScale setIndex 0 1
SpatialGraphView92 tubeScaleFactor setMinMax 0 10
SpatialGraphView92 tubeScaleFactor setButtons 0
SpatialGraphView92 tubeScaleFactor setIncrement 0.666667
SpatialGraphView92 tubeScaleFactor setValue 1
SpatialGraphView92 tubeScaleFactor setSubMinMax 0 10
SpatialGraphView92 segmentColoring setIndex 0 0
SpatialGraphView92 segmentLabelColoringOptions setValue 0
SpatialGraphView92 segmentColor setColor 0 0.1725 0.6352 0.3725
SpatialGraphView92 fire
SpatialGraphView92 setViewerMask 32767
SpatialGraphView92 setShadowStyle 0

set hideNewModules 1
create HxDataDirectory {DataDirectory_vs10001.hoc}
DataDirectory_vs10001.hoc setIconPosition 0 0
DataDirectory_vs10001.hoc setInvisible 1
DataDirectory_vs10001.hoc parentDir connect VS1
DataDirectory_vs10001.hoc attachedData connect vs10001.hoc
DataDirectory_vs10001.hoc fire
DataDirectory_vs10001.hoc fire
DataDirectory_vs10001.hoc setViewerMask 32767

set hideNewModules 1
create HxDataDirectory {DataDirectory_vs20001.hoc}
DataDirectory_vs20001.hoc setIconPosition 0 0
DataDirectory_vs20001.hoc setInvisible 1
DataDirectory_vs20001.hoc parentDir connect VS2
DataDirectory_vs20001.hoc attachedData connect vs20001.hoc
DataDirectory_vs20001.hoc fire
DataDirectory_vs20001.hoc fire
DataDirectory_vs20001.hoc setViewerMask 32767

set hideNewModules 1
create HxDataDirectory {DataDirectory_vs30001.hoc}
DataDirectory_vs30001.hoc setIconPosition 0 0
DataDirectory_vs30001.hoc setInvisible 1
DataDirectory_vs30001.hoc parentDir connect VS3
DataDirectory_vs30001.hoc attachedData connect vs30001.hoc
DataDirectory_vs30001.hoc fire
DataDirectory_vs30001.hoc fire
DataDirectory_vs30001.hoc setViewerMask 32767

set hideNewModules 1
create HxDataDirectory {DataDirectory_vs40001.hoc}
DataDirectory_vs40001.hoc setIconPosition 0 0
DataDirectory_vs40001.hoc setInvisible 1
DataDirectory_vs40001.hoc parentDir connect VS4
DataDirectory_vs40001.hoc attachedData connect vs40001.hoc
DataDirectory_vs40001.hoc fire
DataDirectory_vs40001.hoc fire
DataDirectory_vs40001.hoc setViewerMask 32767

set hideNewModules 1
create HxDataDirectory {DataDirectory_vs50001.hoc}
DataDirectory_vs50001.hoc setIconPosition 0 0
DataDirectory_vs50001.hoc setInvisible 1
DataDirectory_vs50001.hoc parentDir connect VS5
DataDirectory_vs50001.hoc attachedData connect vs50001.hoc
DataDirectory_vs50001.hoc fire
DataDirectory_vs50001.hoc fire
DataDirectory_vs50001.hoc setViewerMask 32767

set hideNewModules 1
create HxDataDirectory {DataDirectory_vs60001.hoc}
DataDirectory_vs60001.hoc setIconPosition 0 0
DataDirectory_vs60001.hoc setInvisible 1
DataDirectory_vs60001.hoc parentDir connect VS6
DataDirectory_vs60001.hoc attachedData connect vs60001.hoc
DataDirectory_vs60001.hoc fire
DataDirectory_vs60001.hoc fire
DataDirectory_vs60001.hoc setViewerMask 32767

set hideNewModules 1
create HxDataDirectory {DataDirectory_vsl20001.hoc}
DataDirectory_vsl20001.hoc setIconPosition 0 0
DataDirectory_vsl20001.hoc setInvisible 1
DataDirectory_vsl20001.hoc parentDir connect VS-like2
DataDirectory_vsl20001.hoc attachedData connect vsl20001.hoc
DataDirectory_vsl20001.hoc fire
DataDirectory_vsl20001.hoc fire
DataDirectory_vsl20001.hoc setViewerMask 32767

set hideNewModules 1
create HxDataDirectory {DataDirectory_vsl30001.hoc}
DataDirectory_vsl30001.hoc setIconPosition 0 0
DataDirectory_vsl30001.hoc setInvisible 1
DataDirectory_vsl30001.hoc parentDir connect VS-like3
DataDirectory_vsl30001.hoc attachedData connect vsl30001.hoc
DataDirectory_vsl30001.hoc fire
DataDirectory_vsl30001.hoc fire
DataDirectory_vsl30001.hoc setViewerMask 32767

set hideNewModules 1
create HxSpatialGraphView {SpatialGraphView93}
SpatialGraphView93 setIconPosition 294 2830
SpatialGraphView93 data connect vs10001.hoc
SpatialGraphView93 nodeColormap setDefaultColor 1 0.8 0.5
SpatialGraphView93 nodeColormap setDefaultAlpha 0.500000
SpatialGraphView93 segmentColormap setDefaultColor 1 0.8 0.5
SpatialGraphView93 segmentColormap setDefaultAlpha 0.500000
SpatialGraphView93 fire
SpatialGraphView93 itemsToShow setValue 0 0
SpatialGraphView93 itemsToShow setValue 1 1
SpatialGraphView93 nodeScale setIndex 0 0
SpatialGraphView93 nodeScaleFactor setMinMax 0 17938
SpatialGraphView93 nodeScaleFactor setButtons 0
SpatialGraphView93 nodeScaleFactor setIncrement 1195.87
SpatialGraphView93 nodeScaleFactor setValue 1793.75
SpatialGraphView93 nodeScaleFactor setSubMinMax 0 17938
SpatialGraphView93 nodeColoring setIndex 0 0
SpatialGraphView93 nodeLabelColoringOptions setValue 0
SpatialGraphView93 nodeColor setColor 0 0.8 0.8 0.8
SpatialGraphView93 segmentStyle setValue 0 0
SpatialGraphView93 segmentStyle setValue 1 0
SpatialGraphView93 segmentStyle setValue 2 1
SpatialGraphView93 tubeScale setIndex 0 1
SpatialGraphView93 tubeScaleFactor setMinMax 0 10
SpatialGraphView93 tubeScaleFactor setButtons 0
SpatialGraphView93 tubeScaleFactor setIncrement 0.666667
SpatialGraphView93 tubeScaleFactor setValue 1
SpatialGraphView93 tubeScaleFactor setSubMinMax 0 10
SpatialGraphView93 segmentColoring setIndex 0 0
SpatialGraphView93 segmentLabelColoringOptions setValue 0
SpatialGraphView93 segmentColor setColor 0 0.5098 0.7922 0.8471
SpatialGraphView93 fire
SpatialGraphView93 setViewerMask 32767
SpatialGraphView93 setShadowStyle 0

set hideNewModules 1
create HxSpatialGraphView {SpatialGraphView94}
SpatialGraphView94 setIconPosition 294 2860
SpatialGraphView94 data connect vs20001.hoc
SpatialGraphView94 nodeColormap setDefaultColor 1 0.8 0.5
SpatialGraphView94 nodeColormap setDefaultAlpha 0.500000
SpatialGraphView94 segmentColormap setDefaultColor 1 0.8 0.5
SpatialGraphView94 segmentColormap setDefaultAlpha 0.500000
SpatialGraphView94 fire
SpatialGraphView94 itemsToShow setValue 0 0
SpatialGraphView94 itemsToShow setValue 1 1
SpatialGraphView94 nodeScale setIndex 0 0
SpatialGraphView94 nodeScaleFactor setMinMax 0 18625
SpatialGraphView94 nodeScaleFactor setButtons 0
SpatialGraphView94 nodeScaleFactor setIncrement 1241.67
SpatialGraphView94 nodeScaleFactor setValue 1862.5
SpatialGraphView94 nodeScaleFactor setSubMinMax 0 18625
SpatialGraphView94 nodeColoring setIndex 0 0
SpatialGraphView94 nodeLabelColoringOptions setValue 0
SpatialGraphView94 nodeColor setColor 0 0.8 0.8 0.8
SpatialGraphView94 segmentStyle setValue 0 0
SpatialGraphView94 segmentStyle setValue 1 0
SpatialGraphView94 segmentStyle setValue 2 1
SpatialGraphView94 tubeScale setIndex 0 1
SpatialGraphView94 tubeScaleFactor setMinMax 0 10
SpatialGraphView94 tubeScaleFactor setButtons 0
SpatialGraphView94 tubeScaleFactor setIncrement 0.666667
SpatialGraphView94 tubeScaleFactor setValue 1
SpatialGraphView94 tubeScaleFactor setSubMinMax 0 10
SpatialGraphView94 segmentColoring setIndex 0 0
SpatialGraphView94 segmentLabelColoringOptions setValue 0
SpatialGraphView94 segmentColor setColor 0 0.8196 0.0314 0.1922
SpatialGraphView94 fire
SpatialGraphView94 setViewerMask 32767
SpatialGraphView94 setShadowStyle 0

set hideNewModules 1
create HxSpatialGraphView {SpatialGraphView95}
SpatialGraphView95 setIconPosition 294 2890
SpatialGraphView95 data connect vs30001.hoc
SpatialGraphView95 nodeColormap setDefaultColor 1 0.8 0.5
SpatialGraphView95 nodeColormap setDefaultAlpha 0.500000
SpatialGraphView95 segmentColormap setDefaultColor 1 0.8 0.5
SpatialGraphView95 segmentColormap setDefaultAlpha 0.500000
SpatialGraphView95 fire
SpatialGraphView95 itemsToShow setValue 0 0
SpatialGraphView95 itemsToShow setValue 1 1
SpatialGraphView95 nodeScale setIndex 0 0
SpatialGraphView95 nodeScaleFactor setMinMax 0 18017
SpatialGraphView95 nodeScaleFactor setButtons 0
SpatialGraphView95 nodeScaleFactor setIncrement 1201.13
SpatialGraphView95 nodeScaleFactor setValue 1801.67
SpatialGraphView95 nodeScaleFactor setSubMinMax 0 18017
SpatialGraphView95 nodeColoring setIndex 0 0
SpatialGraphView95 nodeLabelColoringOptions setValue 0
SpatialGraphView95 nodeColor setColor 0 0.8 0.8 0.8
SpatialGraphView95 segmentStyle setValue 0 0
SpatialGraphView95 segmentStyle setValue 1 0
SpatialGraphView95 segmentStyle setValue 2 1
SpatialGraphView95 tubeScale setIndex 0 1
SpatialGraphView95 tubeScaleFactor setMinMax 0 10
SpatialGraphView95 tubeScaleFactor setButtons 0
SpatialGraphView95 tubeScaleFactor setIncrement 0.666667
SpatialGraphView95 tubeScaleFactor setValue 1
SpatialGraphView95 tubeScaleFactor setSubMinMax 0 10
SpatialGraphView95 segmentColoring setIndex 0 0
SpatialGraphView95 segmentLabelColoringOptions setValue 0
SpatialGraphView95 segmentColor setColor 0 0.2941 0.7216 0.1804
SpatialGraphView95 fire
SpatialGraphView95 setViewerMask 32767
SpatialGraphView95 setShadowStyle 0

set hideNewModules 1
create HxSpatialGraphView {SpatialGraphView96}
SpatialGraphView96 setIconPosition 294 2920
SpatialGraphView96 data connect vs40001.hoc
SpatialGraphView96 nodeColormap setDefaultColor 1 0.8 0.5
SpatialGraphView96 nodeColormap setDefaultAlpha 0.500000
SpatialGraphView96 segmentColormap setDefaultColor 1 0.8 0.5
SpatialGraphView96 segmentColormap setDefaultAlpha 0.500000
SpatialGraphView96 fire
SpatialGraphView96 itemsToShow setValue 0 0
SpatialGraphView96 itemsToShow setValue 1 1
SpatialGraphView96 nodeScale setIndex 0 0
SpatialGraphView96 nodeScaleFactor setMinMax 0 16363
SpatialGraphView96 nodeScaleFactor setButtons 0
SpatialGraphView96 nodeScaleFactor setIncrement 1090.87
SpatialGraphView96 nodeScaleFactor setValue 1636.25
SpatialGraphView96 nodeScaleFactor setSubMinMax 0 16363
SpatialGraphView96 nodeColoring setIndex 0 0
SpatialGraphView96 nodeLabelColoringOptions setValue 0
SpatialGraphView96 nodeColor setColor 0 0.8 0.8 0.8
SpatialGraphView96 segmentStyle setValue 0 0
SpatialGraphView96 segmentStyle setValue 1 0
SpatialGraphView96 segmentStyle setValue 2 1
SpatialGraphView96 tubeScale setIndex 0 1
SpatialGraphView96 tubeScaleFactor setMinMax 0 10
SpatialGraphView96 tubeScaleFactor setButtons 0
SpatialGraphView96 tubeScaleFactor setIncrement 0.666667
SpatialGraphView96 tubeScaleFactor setValue 1
SpatialGraphView96 tubeScaleFactor setSubMinMax 0 10
SpatialGraphView96 segmentColoring setIndex 0 0
SpatialGraphView96 segmentLabelColoringOptions setValue 0
SpatialGraphView96 segmentColor setColor 0 0.8863 0.9098 0.1725
SpatialGraphView96 fire
SpatialGraphView96 setViewerMask 32767
SpatialGraphView96 setShadowStyle 0

set hideNewModules 0
create HxSpatialGraphView {SpatialGraphView97}
SpatialGraphView97 setIconPosition 294 2950
SpatialGraphView97 data connect vs50001.hoc
SpatialGraphView97 nodeColormap setDefaultColor 1 0.8 0.5
SpatialGraphView97 nodeColormap setDefaultAlpha 0.500000
SpatialGraphView97 segmentColormap setDefaultColor 1 0.8 0.5
SpatialGraphView97 segmentColormap setDefaultAlpha 0.500000
SpatialGraphView97 fire
SpatialGraphView97 itemsToShow setValue 0 0
SpatialGraphView97 itemsToShow setValue 1 1
SpatialGraphView97 nodeScale setIndex 0 0
SpatialGraphView97 nodeScaleFactor setMinMax 0 16287
SpatialGraphView97 nodeScaleFactor setButtons 0
SpatialGraphView97 nodeScaleFactor setIncrement 1085.8
SpatialGraphView97 nodeScaleFactor setValue 1628.67
SpatialGraphView97 nodeScaleFactor setSubMinMax 0 16287
SpatialGraphView97 nodeColoring setIndex 0 0
SpatialGraphView97 nodeLabelColoringOptions setValue 0
SpatialGraphView97 nodeColor setColor 0 0.8 0.8 0.8
SpatialGraphView97 segmentStyle setValue 0 0
SpatialGraphView97 segmentStyle setValue 1 0
SpatialGraphView97 segmentStyle setValue 2 1
SpatialGraphView97 tubeScale setIndex 0 1
SpatialGraphView97 tubeScaleFactor setMinMax 0 10
SpatialGraphView97 tubeScaleFactor setButtons 0
SpatialGraphView97 tubeScaleFactor setIncrement 0.666667
SpatialGraphView97 tubeScaleFactor setValue 1
SpatialGraphView97 tubeScaleFactor setSubMinMax 0 10
SpatialGraphView97 segmentColoring setIndex 0 0
SpatialGraphView97 segmentLabelColoringOptions setValue 0
SpatialGraphView97 segmentColor setColor 0 0.7294 0 0.4745
SpatialGraphView97 fire
SpatialGraphView97 setViewerMask 32767
SpatialGraphView97 setShadowStyle 0

set hideNewModules 0
create HxSpatialGraphView {SpatialGraphView98}
SpatialGraphView98 setIconPosition 294 2980
SpatialGraphView98 data connect vs60001.hoc
SpatialGraphView98 nodeColormap setDefaultColor 1 0.8 0.5
SpatialGraphView98 nodeColormap setDefaultAlpha 0.500000
SpatialGraphView98 segmentColormap setDefaultColor 1 0.8 0.5
SpatialGraphView98 segmentColormap setDefaultAlpha 0.500000
SpatialGraphView98 fire
SpatialGraphView98 itemsToShow setValue 0 0
SpatialGraphView98 itemsToShow setValue 1 1
SpatialGraphView98 nodeScale setIndex 0 0
SpatialGraphView98 nodeScaleFactor setMinMax 0 13729
SpatialGraphView98 nodeScaleFactor setButtons 0
SpatialGraphView98 nodeScaleFactor setIncrement 915.267
SpatialGraphView98 nodeScaleFactor setValue 1372.83
SpatialGraphView98 nodeScaleFactor setSubMinMax 0 13729
SpatialGraphView98 nodeColoring setIndex 0 0
SpatialGraphView98 nodeLabelColoringOptions setValue 0
SpatialGraphView98 nodeColor setColor 0 0.8 0.8 0.8
SpatialGraphView98 segmentStyle setValue 0 0
SpatialGraphView98 segmentStyle setValue 1 0
SpatialGraphView98 segmentStyle setValue 2 1
SpatialGraphView98 tubeScale setIndex 0 1
SpatialGraphView98 tubeScaleFactor setMinMax 0 10
SpatialGraphView98 tubeScaleFactor setButtons 0
SpatialGraphView98 tubeScaleFactor setIncrement 0.666667
SpatialGraphView98 tubeScaleFactor setValue 1
SpatialGraphView98 tubeScaleFactor setSubMinMax 0 10
SpatialGraphView98 segmentColoring setIndex 0 0
SpatialGraphView98 segmentLabelColoringOptions setValue 0
SpatialGraphView98 segmentColor setColor 0 0.9922 0.9961 0.9922
SpatialGraphView98 fire
SpatialGraphView98 setViewerMask 32767
SpatialGraphView98 setShadowStyle 0

set hideNewModules 0
create HxSpatialGraphView {SpatialGraphView100}
SpatialGraphView100 setIconPosition 288 3040
SpatialGraphView100 data connect vsl20001.hoc
SpatialGraphView100 nodeColormap setDefaultColor 1 0.8 0.5
SpatialGraphView100 nodeColormap setDefaultAlpha 0.500000
SpatialGraphView100 segmentColormap setDefaultColor 1 0.8 0.5
SpatialGraphView100 segmentColormap setDefaultAlpha 0.500000
SpatialGraphView100 fire
SpatialGraphView100 itemsToShow setValue 0 0
SpatialGraphView100 itemsToShow setValue 1 1
SpatialGraphView100 nodeScale setIndex 0 0
SpatialGraphView100 nodeScaleFactor setMinMax 0 10309
SpatialGraphView100 nodeScaleFactor setButtons 0
SpatialGraphView100 nodeScaleFactor setIncrement 687.267
SpatialGraphView100 nodeScaleFactor setValue 1030.83
SpatialGraphView100 nodeScaleFactor setSubMinMax 0 10309
SpatialGraphView100 nodeColoring setIndex 0 0
SpatialGraphView100 nodeLabelColoringOptions setValue 0
SpatialGraphView100 nodeColor setColor 0 0.8 0.8 0.8
SpatialGraphView100 segmentStyle setValue 0 0
SpatialGraphView100 segmentStyle setValue 1 0
SpatialGraphView100 segmentStyle setValue 2 1
SpatialGraphView100 tubeScale setIndex 0 1
SpatialGraphView100 tubeScaleFactor setMinMax 0 10
SpatialGraphView100 tubeScaleFactor setButtons 0
SpatialGraphView100 tubeScaleFactor setIncrement 0.666667
SpatialGraphView100 tubeScaleFactor setValue 1
SpatialGraphView100 tubeScaleFactor setSubMinMax 0 10
SpatialGraphView100 segmentColoring setIndex 0 0
SpatialGraphView100 segmentLabelColoringOptions setValue 0
SpatialGraphView100 segmentColor setColor 0 0.2157 0.4941 0.7216
SpatialGraphView100 fire
SpatialGraphView100 setViewerMask 32767
SpatialGraphView100 setShadowStyle 0

set hideNewModules 0
create HxSpatialGraphView {SpatialGraphView101}
SpatialGraphView101 setIconPosition 288 3070
SpatialGraphView101 data connect vsl30001.hoc
SpatialGraphView101 nodeColormap setDefaultColor 1 0.8 0.5
SpatialGraphView101 nodeColormap setDefaultAlpha 0.500000
SpatialGraphView101 segmentColormap setDefaultColor 1 0.8 0.5
SpatialGraphView101 segmentColormap setDefaultAlpha 0.500000
SpatialGraphView101 fire
SpatialGraphView101 itemsToShow setValue 0 0
SpatialGraphView101 itemsToShow setValue 1 1
SpatialGraphView101 nodeScale setIndex 0 0
SpatialGraphView101 nodeScaleFactor setMinMax 0 13667
SpatialGraphView101 nodeScaleFactor setButtons 0
SpatialGraphView101 nodeScaleFactor setIncrement 911.133
SpatialGraphView101 nodeScaleFactor setValue 1366.67
SpatialGraphView101 nodeScaleFactor setSubMinMax 0 13667
SpatialGraphView101 nodeColoring setIndex 0 0
SpatialGraphView101 nodeLabelColoringOptions setValue 0
SpatialGraphView101 nodeColor setColor 0 0.8 0.8 0.8
SpatialGraphView101 segmentStyle setValue 0 0
SpatialGraphView101 segmentStyle setValue 1 0
SpatialGraphView101 segmentStyle setValue 2 1
SpatialGraphView101 tubeScale setIndex 0 1
SpatialGraphView101 tubeScaleFactor setMinMax 0 10
SpatialGraphView101 tubeScaleFactor setButtons 0
SpatialGraphView101 tubeScaleFactor setIncrement 0.666667
SpatialGraphView101 tubeScaleFactor setValue 1
SpatialGraphView101 tubeScaleFactor setSubMinMax 0 10
SpatialGraphView101 segmentColoring setIndex 0 0
SpatialGraphView101 segmentLabelColoringOptions setValue 0
SpatialGraphView101 segmentColor setColor 0 0.302 0.6863 0.2902
SpatialGraphView101 fire
SpatialGraphView101 setViewerMask 32767
SpatialGraphView101 setShadowStyle 0

set hideNewModules 1
create HxDataDirectory {DataDirectory_vsl1_2_0001.hoc}
DataDirectory_vsl1_2_0001.hoc setIconPosition 0 0
DataDirectory_vsl1_2_0001.hoc setInvisible 1
DataDirectory_vsl1_2_0001.hoc parentDir connect VS-like1
DataDirectory_vsl1_2_0001.hoc attachedData connect vsl1_2_0001.hoc
DataDirectory_vsl1_2_0001.hoc fire
DataDirectory_vsl1_2_0001.hoc fire
DataDirectory_vsl1_2_0001.hoc setViewerMask 32767

set hideNewModules 0
create HxSpatialGraphView {SpatialGraphView102}
SpatialGraphView102 setIconPosition 288 3040
SpatialGraphView102 data connect vsl1_2_0001.hoc
SpatialGraphView102 nodeColormap setDefaultColor 1 0.8 0.5
SpatialGraphView102 nodeColormap setDefaultAlpha 0.500000
SpatialGraphView102 segmentColormap setDefaultColor 1 0.8 0.5
SpatialGraphView102 segmentColormap setDefaultAlpha 0.500000
SpatialGraphView102 fire
SpatialGraphView102 itemsToShow setValue 0 0
SpatialGraphView102 itemsToShow setValue 1 1
SpatialGraphView102 nodeScale setIndex 0 0
SpatialGraphView102 nodeScaleFactor setMinMax 0 15078
SpatialGraphView102 nodeScaleFactor setButtons 0
SpatialGraphView102 nodeScaleFactor setIncrement 1005.2
SpatialGraphView102 nodeScaleFactor setValue 1507.75
SpatialGraphView102 nodeScaleFactor setSubMinMax 0 15078
SpatialGraphView102 nodeColoring setIndex 0 0
SpatialGraphView102 nodeLabelColoringOptions setValue 0
SpatialGraphView102 nodeColor setColor 0 0.8 0.8 0.8
SpatialGraphView102 segmentStyle setValue 0 0
SpatialGraphView102 segmentStyle setValue 1 0
SpatialGraphView102 segmentStyle setValue 2 1
SpatialGraphView102 tubeScale setIndex 0 1
SpatialGraphView102 tubeScaleFactor setMinMax 0 10
SpatialGraphView102 tubeScaleFactor setButtons 0
SpatialGraphView102 tubeScaleFactor setIncrement 0.666667
SpatialGraphView102 tubeScaleFactor setValue 1
SpatialGraphView102 tubeScaleFactor setSubMinMax 0 10
SpatialGraphView102 segmentColoring setIndex 0 0
SpatialGraphView102 segmentLabelColoringOptions setValue 0
SpatialGraphView102 segmentColor setColor 0 0.8941 0.102 0.1098
SpatialGraphView102 fire
SpatialGraphView102 setViewerMask 32767
SpatialGraphView102 setShadowStyle 0

set hideNewModules 1
create HxDataDirectory {DataDirectory_vsl1_3_0001.hoc}
DataDirectory_vsl1_3_0001.hoc setIconPosition 0 0
DataDirectory_vsl1_3_0001.hoc setInvisible 1
DataDirectory_vsl1_3_0001.hoc parentDir connect VS-like1
DataDirectory_vsl1_3_0001.hoc attachedData connect vsl1_3_0001.hoc
DataDirectory_vsl1_3_0001.hoc fire
DataDirectory_vsl1_3_0001.hoc fire
DataDirectory_vsl1_3_0001.hoc setViewerMask 32767

set hideNewModules 0
create HxSpatialGraphView {SpatialGraphView103}
SpatialGraphView103 setIconPosition 288 3070
SpatialGraphView103 data connect vsl1_3_0001.hoc
SpatialGraphView103 nodeColormap setDefaultColor 1 0.8 0.5
SpatialGraphView103 nodeColormap setDefaultAlpha 0.500000
SpatialGraphView103 segmentColormap setDefaultColor 1 0.8 0.5
SpatialGraphView103 segmentColormap setDefaultAlpha 0.500000
SpatialGraphView103 fire
SpatialGraphView103 itemsToShow setValue 0 0
SpatialGraphView103 itemsToShow setValue 1 1
SpatialGraphView103 nodeScale setIndex 0 0
SpatialGraphView103 nodeScaleFactor setMinMax 0 17028
SpatialGraphView103 nodeScaleFactor setButtons 0
SpatialGraphView103 nodeScaleFactor setIncrement 1135.2
SpatialGraphView103 nodeScaleFactor setValue 1702.75
SpatialGraphView103 nodeScaleFactor setSubMinMax 0 17028
SpatialGraphView103 nodeColoring setIndex 0 0
SpatialGraphView103 nodeLabelColoringOptions setValue 0
SpatialGraphView103 nodeColor setColor 0 0.8 0.8 0.8
SpatialGraphView103 segmentStyle setValue 0 0
SpatialGraphView103 segmentStyle setValue 1 0
SpatialGraphView103 segmentStyle setValue 2 1
SpatialGraphView103 tubeScale setIndex 0 1
SpatialGraphView103 tubeScaleFactor setMinMax 0 10
SpatialGraphView103 tubeScaleFactor setButtons 0
SpatialGraphView103 tubeScaleFactor setIncrement 0.666667
SpatialGraphView103 tubeScaleFactor setValue 1
SpatialGraphView103 tubeScaleFactor setSubMinMax 0 10
SpatialGraphView103 segmentColoring setIndex 0 0
SpatialGraphView103 segmentLabelColoringOptions setValue 0
SpatialGraphView103 segmentColor setColor 0 0.8941 0.102 0.1098
SpatialGraphView103 fire
SpatialGraphView103 setViewerMask 32767
SpatialGraphView103 setShadowStyle 0

set hideNewModules 1
create HxDataDirectory {DataDirectory_vsl2_2_0001.hoc}
DataDirectory_vsl2_2_0001.hoc setIconPosition 0 0
DataDirectory_vsl2_2_0001.hoc setInvisible 1
DataDirectory_vsl2_2_0001.hoc parentDir connect VS-like2
DataDirectory_vsl2_2_0001.hoc attachedData connect vsl2_2_0001.hoc
DataDirectory_vsl2_2_0001.hoc fire
DataDirectory_vsl2_2_0001.hoc fire
DataDirectory_vsl2_2_0001.hoc setViewerMask 32767

set hideNewModules 0
create HxSpatialGraphView {SpatialGraphView104}
SpatialGraphView104 setIconPosition 288 3100
SpatialGraphView104 data connect vsl2_2_0001.hoc
SpatialGraphView104 nodeColormap setDefaultColor 1 0.8 0.5
SpatialGraphView104 nodeColormap setDefaultAlpha 0.500000
SpatialGraphView104 segmentColormap setDefaultColor 1 0.8 0.5
SpatialGraphView104 segmentColormap setDefaultAlpha 0.500000
SpatialGraphView104 fire
SpatialGraphView104 itemsToShow setValue 0 0
SpatialGraphView104 itemsToShow setValue 1 1
SpatialGraphView104 nodeScale setIndex 0 0
SpatialGraphView104 nodeScaleFactor setMinMax 0 10101
SpatialGraphView104 nodeScaleFactor setButtons 0
SpatialGraphView104 nodeScaleFactor setIncrement 673.4
SpatialGraphView104 nodeScaleFactor setValue 1010.08
SpatialGraphView104 nodeScaleFactor setSubMinMax 0 10101
SpatialGraphView104 nodeColoring setIndex 0 0
SpatialGraphView104 nodeLabelColoringOptions setValue 0
SpatialGraphView104 nodeColor setColor 0 0.8 0.8 0.8
SpatialGraphView104 segmentStyle setValue 0 0
SpatialGraphView104 segmentStyle setValue 1 0
SpatialGraphView104 segmentStyle setValue 2 1
SpatialGraphView104 tubeScale setIndex 0 1
SpatialGraphView104 tubeScaleFactor setMinMax 0 10
SpatialGraphView104 tubeScaleFactor setButtons 0
SpatialGraphView104 tubeScaleFactor setIncrement 0.666667
SpatialGraphView104 tubeScaleFactor setValue 1
SpatialGraphView104 tubeScaleFactor setSubMinMax 0 10
SpatialGraphView104 segmentColoring setIndex 0 0
SpatialGraphView104 segmentLabelColoringOptions setValue 0
SpatialGraphView104 segmentColor setColor 0 0.2157 0.4941 0.7216
SpatialGraphView104 fire
SpatialGraphView104 setViewerMask 32767
SpatialGraphView104 setShadowStyle 0

set hideNewModules 0
create HxAxis {GlobalAxis}
GlobalAxis setIconPosition 168 2770
GlobalAxis fire
GlobalAxis axis setValue 0 1
GlobalAxis axis setValue 1 1
GlobalAxis axis setValue 2 1
GlobalAxis options setValue 0 1
GlobalAxis options setValue 1 0
GlobalAxis options setValue 2 0
GlobalAxis thickness setMinMax 1 15
GlobalAxis thickness setButtons 0
GlobalAxis thickness setIncrement 0.933333
GlobalAxis thickness setValue 5
GlobalAxis thickness setSubMinMax 1 15
GlobalAxis color setColor 0 1 0 0
GlobalAxis color setColor 1 0 1 0
GlobalAxis color setColor 2 0 0 1
GlobalAxis color setColor 3 0.8 0.8 0.8
GlobalAxis color setColor 4 1 0.8 0.5
GlobalAxis fire
GlobalAxis setBoundingBox 0 215259 0 215259 0 215259
{GlobalAxis} setFontSize 10 
{GlobalAxis} setFontName {Helvetica} 
{GlobalAxis} setAxisText 0 {x} 
{GlobalAxis} setAxisText 1 {y} 
{GlobalAxis} setAxisText 2 {z} 
{GlobalAxis} setDelta 0 
{GlobalAxis} setLocalMode 0 
{GlobalAxis} setFlip 0 0 
{GlobalAxis} setFlip 1 0 
{GlobalAxis} setFlip 2 0 
GlobalAxis fire
GlobalAxis setViewerMask 32766
GlobalAxis setShadowStyle 0

set hideNewModules 1
create HxDataDirectory {DataDirectory_vslbd0001.hoc}
DataDirectory_vslbd0001.hoc setIconPosition 0 0
DataDirectory_vslbd0001.hoc setInvisible 1
DataDirectory_vslbd0001.hoc parentDir connect Layer3
DataDirectory_vslbd0001.hoc attachedData connect vslbd0001.hoc
DataDirectory_vslbd0001.hoc fire
DataDirectory_vslbd0001.hoc fire
DataDirectory_vslbd0001.hoc setViewerMask 32767

set hideNewModules 0
create HxSpatialGraphView {SpatialGraphView99}
SpatialGraphView99 setIconPosition 423 3010
SpatialGraphView99 data connect vslbd0001.hoc
SpatialGraphView99 nodeColormap setDefaultColor 1 0.8 0.5
SpatialGraphView99 nodeColormap setDefaultAlpha 0.500000
SpatialGraphView99 segmentColormap setDefaultColor 1 0.8 0.5
SpatialGraphView99 segmentColormap setDefaultAlpha 0.500000
SpatialGraphView99 fire
SpatialGraphView99 itemsToShow setValue 0 0
SpatialGraphView99 itemsToShow setValue 1 1
SpatialGraphView99 nodeScale setIndex 0 0
SpatialGraphView99 nodeScaleFactor setMinMax 0 2333
SpatialGraphView99 nodeScaleFactor setButtons 0
SpatialGraphView99 nodeScaleFactor setIncrement 155.533
SpatialGraphView99 nodeScaleFactor setValue 233.277
SpatialGraphView99 nodeScaleFactor setSubMinMax 0 2333
SpatialGraphView99 nodeColoring setIndex 0 0
SpatialGraphView99 nodeLabelColoringOptions setValue 0
SpatialGraphView99 nodeColor setColor 0 0.8 0.8 0.8
SpatialGraphView99 segmentStyle setValue 0 0
SpatialGraphView99 segmentStyle setValue 1 0
SpatialGraphView99 segmentStyle setValue 2 1
SpatialGraphView99 tubeScale setIndex 0 1
SpatialGraphView99 tubeScaleFactor setMinMax 0 10
SpatialGraphView99 tubeScaleFactor setButtons 0
SpatialGraphView99 tubeScaleFactor setIncrement 0.666667
SpatialGraphView99 tubeScaleFactor setValue 1
SpatialGraphView99 tubeScaleFactor setSubMinMax 0 10
SpatialGraphView99 segmentColoring setIndex 0 0
SpatialGraphView99 segmentLabelColoringOptions setValue 0
SpatialGraphView99 segmentColor setColor 0 0.651 0.3373 0.1569
SpatialGraphView99 fire
SpatialGraphView99 setViewerMask 32767
SpatialGraphView99 setShadowStyle 0

set hideNewModules 1
create HxDataDirectory {DataDirectory_empty.tif}
DataDirectory_empty.tif setIconPosition 0 0
DataDirectory_empty.tif setInvisible 1
DataDirectory_empty.tif parentDir connect Cell-bodies-schematic
DataDirectory_empty.tif attachedData connect empty.tif
DataDirectory_empty.tif fire
DataDirectory_empty.tif fire
DataDirectory_empty.tif setViewerMask 32767,32766

set hideNewModules 1
create HxDataDirectory {DataDirectory_glow.col}
DataDirectory_glow.col setIconPosition 0 0
DataDirectory_glow.col setNoRemoveAll 1
DataDirectory_glow.col setInvisible 1
DataDirectory_glow.col parentDir connect Colormaps
DataDirectory_glow.col attachedData connect glow.col
DataDirectory_glow.col fire
DataDirectory_glow.col fire
DataDirectory_glow.col setViewerMask 32767

set hideNewModules 0
create HxOrthoSlice {OrthoSlice}
OrthoSlice setIconPosition 349 3130
OrthoSlice data connect empty.tif
{OrthoSlice} fire
OrthoSlice sliceOrientation setValue 0
{OrthoSlice} fire
OrthoSlice options setValue 0 0
OrthoSlice options setValue 1 0
OrthoSlice options setValue 2 0
OrthoSlice mappingType setIndex 0 0
OrthoSlice linearRange setMinMax 0 -1.00000001384843e+024 1.00000001384843e+024
OrthoSlice linearRange setValue 0 0
OrthoSlice linearRange setMinMax 1 -1.00000001384843e+024 1.00000001384843e+024
OrthoSlice linearRange setValue 1 255
OrthoSlice contrastLimit setMinMax 0 -1.00000001384843e+024 1.00000001384843e+024
OrthoSlice contrastLimit setValue 0 7
OrthoSlice colormap setDefaultColor 1 0.8 0.5
OrthoSlice colormap setDefaultAlpha 1.000000
OrthoSlice colormap connect glow.col
OrthoSlice sliceNumber setMinMax 0 1
OrthoSlice sliceNumber setButtons 1
OrthoSlice sliceNumber setIncrement 1
OrthoSlice sliceNumber setValue 1
OrthoSlice sliceNumber setSubMinMax 0 1
OrthoSlice transparency setValue 0
OrthoSlice setFrameWidth 0
OrthoSlice setFrameColor 1 0.5 0
OrthoSlice frame 1
OrthoSlice fire

OrthoSlice fire
OrthoSlice setViewerMask 32767,32766
OrthoSlice setShadowStyle 0

set hideNewModules 1
create HxDataDirectory {DataDirectory_empty2.tif}
DataDirectory_empty2.tif setIconPosition 0 0
DataDirectory_empty2.tif setInvisible 1
DataDirectory_empty2.tif parentDir connect Cell-bodies-schematic
DataDirectory_empty2.tif attachedData connect empty2.tif
DataDirectory_empty2.tif fire
DataDirectory_empty2.tif fire
DataDirectory_empty2.tif setViewerMask 32767,32766

set hideNewModules 0
create HxOrthoSlice {OrthoSlice2}
OrthoSlice2 setIconPosition 433 3160
OrthoSlice2 data connect empty2.tif
{OrthoSlice2} fire
OrthoSlice2 sliceOrientation setValue 0
{OrthoSlice2} fire
OrthoSlice2 options setValue 0 0
OrthoSlice2 options setValue 1 0
OrthoSlice2 options setValue 2 0
OrthoSlice2 mappingType setIndex 0 0
OrthoSlice2 linearRange setMinMax 0 -1.00000001384843e+024 1.00000001384843e+024
OrthoSlice2 linearRange setValue 0 0
OrthoSlice2 linearRange setMinMax 1 -1.00000001384843e+024 1.00000001384843e+024
OrthoSlice2 linearRange setValue 1 255
OrthoSlice2 contrastLimit setMinMax 0 -1.00000001384843e+024 1.00000001384843e+024
OrthoSlice2 contrastLimit setValue 0 7
OrthoSlice2 colormap setDefaultColor 1 0.8 0.5
OrthoSlice2 colormap setDefaultAlpha 1.000000
OrthoSlice2 colormap connect glow.col
OrthoSlice2 sliceNumber setMinMax 0 1
OrthoSlice2 sliceNumber setButtons 1
OrthoSlice2 sliceNumber setIncrement 1
OrthoSlice2 sliceNumber setValue 1
OrthoSlice2 sliceNumber setSubMinMax 0 1
OrthoSlice2 transparency setValue 1
OrthoSlice2 setFrameWidth 0
OrthoSlice2 setFrameColor 1 0.5 0
OrthoSlice2 fire

OrthoSlice2 fire
OrthoSlice2 setViewerMask 32767,32766
OrthoSlice2 setShadowStyle 0

set hideNewModules 0
create HxOrthoSlice {OrthoSlice3}
OrthoSlice3 setIconPosition 433 3190
OrthoSlice3 data connect empty2.tif
{OrthoSlice3} fire
OrthoSlice3 sliceOrientation setValue 2
{OrthoSlice3} fire
OrthoSlice3 options setValue 0 0
OrthoSlice3 options setValue 1 0
OrthoSlice3 options setValue 2 0
OrthoSlice3 mappingType setIndex 0 0
OrthoSlice3 linearRange setMinMax 0 -1.00000001384843e+024 1.00000001384843e+024
OrthoSlice3 linearRange setValue 0 0
OrthoSlice3 linearRange setMinMax 1 -1.00000001384843e+024 1.00000001384843e+024
OrthoSlice3 linearRange setValue 1 255
OrthoSlice3 contrastLimit setMinMax 0 -1.00000001384843e+024 1.00000001384843e+024
OrthoSlice3 contrastLimit setValue 0 7
OrthoSlice3 colormap setDefaultColor 1 0.8 0.5
OrthoSlice3 colormap setDefaultAlpha 1.000000
OrthoSlice3 colormap connect glow.col
OrthoSlice3 sliceNumber setMinMax 0 1
OrthoSlice3 sliceNumber setButtons 1
OrthoSlice3 sliceNumber setIncrement 1
OrthoSlice3 sliceNumber setValue 1
OrthoSlice3 sliceNumber setSubMinMax 0 1
OrthoSlice3 transparency setValue 1
OrthoSlice3 setFrameWidth 0
OrthoSlice3 setFrameColor 1 0.5 0
OrthoSlice3 fire

OrthoSlice3 fire
OrthoSlice3 setViewerMask 32767,32766
OrthoSlice3 setShadowStyle 0

set hideNewModules 0


viewer 0 setCameraOrientation -0.118923 0.871042 0.476595 1.37496
viewer 0 setCameraPosition 243227 199046 189067
viewer 0 setCameraFocalDistance 178882
viewer 0 setCameraNearDistance -1531.43
viewer 0 setCameraFarDistance 265945
viewer 0 setCameraType orthographic
viewer 0 setCameraHeight 177365
viewer 0 setAutoRedraw 1
viewer 0 redraw
