# Supplementary material for: Full reconstruction of large lobula plate tangential cells in Drosophila from a 3D EM dataset
Source: PLoS One. 2018 Nov 28;13(11):e0207828. doi: 10.1371/journal.pone.0207828 (PMC6261601; doi:10.1371/journal.pone.0207828)
Supplement: S1 Dataset — (ZIP) [file pone.0207828.s001.zip › Diameter hoc/Cell bodies schematic/_dros-zellkoerper-abiasotto.157.hoc]

/* created with nml2hocm */

{create adhoc1}
{access adhoc1}
{nseg = 1}
{strdef color color = "White"}
{pt3dclear()}
{pt3dadd(204276.000000,147300.000000,91125.000000,1800.000000)}
{pt3dadd(202608.000000,150492.000000,37000.000000,1800.000000)}

{create adhoc2}
{access adhoc2}
{connect adhoc2(1), adhoc1(0)}
{nseg = 1}
{strdef color color = "White"}
{pt3dclear()}
{pt3dadd(202608.000000,150492.000000,37000.000000,1800.000000)}
{pt3dadd(207504.000000,132384.000000,87825.000000,1800.000000)}

{create adhoc3}
{access adhoc3}
{connect adhoc3(1), adhoc1(0)}
{nseg = 1}
{strdef color color = "White"}
{pt3dclear()}
{pt3dadd(202608.000000,150492.000000,37000.000000,1800.000000)}
{pt3dadd(204168.000000,122292.000000,93175.000000,1800.000000)}

{create adhoc4}
{access adhoc4}
{connect adhoc4(1), adhoc1(0)}
{nseg = 1}
{strdef color color = "White"}
{pt3dclear()}
{pt3dadd(202608.000000,150492.000000,37000.000000,1800.000000)}
{pt3dadd(204180.000000,123828.000000,91725.000000,1800.000000)}

{create adhoc5}
{access adhoc5}
{connect adhoc5(1), adhoc1(0)}
{nseg = 1}
{strdef color color = "White"}
{pt3dclear()}
{pt3dadd(202608.000000,150492.000000,37000.000000,1800.000000)}
{pt3dadd(202728.000000,127488.000000,84475.000000,1800.000000)}

{create adhoc6}
{access adhoc6}
{connect adhoc6(1), adhoc1(0)}
{nseg = 1}
{strdef color color = "White"}
{pt3dclear()}
{pt3dadd(202608.000000,150492.000000,37000.000000,1800.000000)}
{pt3dadd(202680.000000,125664.000000,83175.000000,1800.000000)}

{create adhoc7}
{access adhoc7}
{connect adhoc7(1), adhoc1(0)}
{nseg = 1}
{strdef color color = "White"}
{pt3dclear()}
{pt3dadd(202608.000000,150492.000000,37000.000000,1800.000000)}
{pt3dadd(202608.000000,122472.000000,80775.000000,1800.000000)}

{create adhoc8}
{access adhoc8}
{connect adhoc8(1), adhoc1(0)}
{nseg = 1}
{strdef color color = "White"}
{pt3dclear()}
{pt3dadd(202608.000000,150492.000000,37000.000000,1800.000000)}
{pt3dadd(202800.000000,124092.000000,85425.000000,1800.000000)}

{create adhoc9}
{access adhoc9}
{connect adhoc9(1), adhoc1(0)}
{nseg = 1}
{strdef color color = "White"}
{pt3dclear()}
{pt3dadd(202608.000000,150492.000000,37000.000000,1800.000000)}
{pt3dadd(203448.000000,118716.000000,90625.000000,1800.000000)}

{create adhoc10}
{access adhoc10}
{connect adhoc10(1), adhoc1(0)}
{nseg = 1}
{strdef color color = "White"}
{pt3dclear()}
{pt3dadd(202608.000000,150492.000000,37000.000000,1800.000000)}
{pt3dadd(203388.000000,122436.000000,83975.000000,1800.000000)}

{create adhoc11}
{access adhoc11}
{connect adhoc11(1), adhoc1(0)}
{nseg = 1}
{strdef color color = "White"}
{pt3dclear()}
{pt3dadd(202608.000000,150492.000000,37000.000000,1800.000000)}
{pt3dadd(203352.000000,119640.000000,83175.000000,1800.000000)}

{create adhoc12}
{access adhoc12}
{connect adhoc12(1), adhoc1(0)}
{nseg = 1}
{strdef color color = "White"}
{pt3dclear()}
{pt3dadd(202608.000000,150492.000000,37000.000000,1800.000000)}
{pt3dadd(203160.000000,120936.000000,86125.000000,1800.000000)}

{create adhoc13}
{access adhoc13}
{connect adhoc13(1), adhoc1(0)}
{nseg = 1}
{strdef color color = "White"}
{pt3dclear()}
{pt3dadd(202608.000000,150492.000000,37000.000000,1800.000000)}
{pt3dadd(203748.000000,120936.000000,80025.000000,1800.000000)}

{create adhoc14}
{access adhoc14}
{connect adhoc14(1), adhoc1(0)}
{nseg = 1}
{strdef color color = "White"}
{pt3dclear()}
{pt3dadd(202608.000000,150492.000000,37000.000000,1800.000000)}
{pt3dadd(204408.000000,124188.000000,77125.000000,1800.000000)}

{create adhoc15}
{access adhoc15}
{connect adhoc15(1), adhoc1(0)}
{nseg = 1}
{strdef color color = "White"}
{pt3dclear()}
{pt3dadd(202608.000000,150492.000000,37000.000000,1800.000000)}
{pt3dadd(203916.000000,119328.000000,74775.000000,1800.000000)}

{create adhoc16}
{access adhoc16}
{connect adhoc16(1), adhoc1(0)}
{nseg = 1}
{strdef color color = "White"}
{pt3dclear()}
{pt3dadd(202608.000000,150492.000000,37000.000000,1800.000000)}
{pt3dadd(203280.000000,121416.000000,76075.000000,1800.000000)}

{create adhoc17}
{access adhoc17}
{connect adhoc17(1), adhoc1(0)}
{nseg = 1}
{strdef color color = "White"}
{pt3dclear()}
{pt3dadd(202608.000000,150492.000000,37000.000000,1800.000000)}
{pt3dadd(203292.000000,119316.000000,77275.000000,1800.000000)}

{create adhoc18}
{access adhoc18}
{connect adhoc18(1), adhoc1(0)}
{nseg = 1}
{strdef color color = "White"}
{pt3dclear()}
{pt3dadd(202608.000000,150492.000000,37000.000000,1800.000000)}
{pt3dadd(202488.000000,120744.000000,88625.000000,1800.000000)}

{create adhoc19}
{access adhoc19}
{connect adhoc19(1), adhoc1(0)}
{nseg = 1}
{strdef color color = "White"}
{pt3dclear()}
{pt3dadd(202608.000000,150492.000000,37000.000000,1800.000000)}
{pt3dadd(199896.000000,118416.000000,89775.000000,1800.000000)}

{create adhoc20}
{access adhoc20}
{connect adhoc20(1), adhoc1(0)}
{nseg = 1}
{strdef color color = "White"}
{pt3dclear()}
{pt3dadd(202608.000000,150492.000000,37000.000000,1800.000000)}
{pt3dadd(203028.000000,116412.000000,88475.000000,1800.000000)}

{create adhoc21}
{access adhoc21}
{connect adhoc21(1), adhoc1(0)}
{nseg = 1}
{strdef color color = "White"}
{pt3dclear()}
{pt3dadd(202608.000000,150492.000000,37000.000000,1800.000000)}
{pt3dadd(199224.000000,114540.000000,84925.000000,1800.000000)}

{create adhoc22}
{access adhoc22}
{connect adhoc22(1), adhoc1(0)}
{nseg = 1}
{strdef color color = "White"}
{pt3dclear()}
{pt3dadd(202608.000000,150492.000000,37000.000000,1800.000000)}
{pt3dadd(199848.000000,111720.000000,87775.000000,1800.000000)}

{create adhoc23}
{access adhoc23}
{connect adhoc23(1), adhoc1(0)}
{nseg = 1}
{strdef color color = "White"}
{pt3dclear()}
{pt3dadd(202608.000000,150492.000000,37000.000000,1800.000000)}
{pt3dadd(196416.000000,112632.000000,92275.000000,1800.000000)}

{create adhoc24}
{access adhoc24}
{connect adhoc24(1), adhoc1(0)}
{nseg = 1}
{strdef color color = "White"}
{pt3dclear()}
{pt3dadd(202608.000000,150492.000000,37000.000000,1800.000000)}
{pt3dadd(196392.000000,111072.000000,92875.000000,1800.000000)}

{create adhoc25}
{access adhoc25}
{connect adhoc25(1), adhoc1(0)}
{nseg = 1}
{strdef color color = "White"}
{pt3dclear()}
{pt3dadd(202608.000000,150492.000000,37000.000000,1800.000000)}
{pt3dadd(196524.000000,106896.000000,90125.000000,1800.000000)}

{create adhoc26}
{access adhoc26}
{connect adhoc26(1), adhoc1(0)}
{nseg = 1}
{strdef color color = "White"}
{pt3dclear()}
{pt3dadd(202608.000000,150492.000000,37000.000000,1800.000000)}
{pt3dadd(196416.000000,111228.000000,89875.000000,1800.000000)}

{create adhoc27}
{access adhoc27}
{connect adhoc27(1), adhoc1(0)}
{nseg = 1}
{strdef color color = "White"}
{pt3dclear()}
{pt3dadd(202608.000000,150492.000000,37000.000000,1800.000000)}
{pt3dadd(196404.000000,108936.000000,89075.000000,1800.000000)}

{create adhoc28}
{access adhoc28}
{connect adhoc28(1), adhoc1(0)}
{nseg = 1}
{strdef color color = "White"}
{pt3dclear()}
{pt3dadd(202608.000000,150492.000000,37000.000000,1800.000000)}
{pt3dadd(196272.000000,111480.000000,82475.000000,1800.000000)}

{create adhoc29}
{access adhoc29}
{connect adhoc29(1), adhoc1(0)}
{nseg = 1}
{strdef color color = "White"}
{pt3dclear()}
{pt3dadd(202608.000000,150492.000000,37000.000000,1800.000000)}
{pt3dadd(196464.000000,106404.000000,83925.000000,1800.000000)}

{create adhoc30}
{access adhoc30}
{connect adhoc30(1), adhoc1(0)}
{nseg = 1}
{strdef color color = "White"}
{pt3dclear()}
{pt3dadd(202608.000000,150492.000000,37000.000000,1800.000000)}
{pt3dadd(196296.000000,109104.000000,82775.000000,1800.000000)}

{create adhoc31}
{access adhoc31}
{connect adhoc31(1), adhoc1(0)}
{nseg = 1}
{strdef color color = "White"}
{pt3dclear()}
{pt3dadd(202608.000000,150492.000000,37000.000000,1800.000000)}
{pt3dadd(196380.000000,110940.000000,85325.000000,1800.000000)}

{create adhoc32}
{access adhoc32}
{connect adhoc32(1), adhoc1(0)}
{nseg = 1}
{strdef color color = "White"}
{pt3dclear()}
{pt3dadd(202608.000000,150492.000000,37000.000000,1800.000000)}
{pt3dadd(196368.000000,108936.000000,86425.000000,1800.000000)}

{create adhoc33}
{access adhoc33}
{connect adhoc33(1), adhoc1(0)}
{nseg = 1}
{strdef color color = "White"}
{pt3dclear()}
{pt3dadd(202608.000000,150492.000000,37000.000000,1800.000000)}
{pt3dadd(193920.000000,101472.000000,87375.000000,1800.000000)}

{create adhoc34}
{access adhoc34}
{connect adhoc34(1), adhoc1(0)}
{nseg = 1}
{strdef color color = "White"}
{pt3dclear()}
{pt3dadd(202608.000000,150492.000000,37000.000000,1800.000000)}
{pt3dadd(194256.000000,108480.000000,92875.000000,1800.000000)}

{create adhoc35}
{access adhoc35}
{connect adhoc35(1), adhoc1(0)}
{nseg = 1}
{strdef color color = "White"}
{pt3dclear()}
{pt3dadd(202608.000000,150492.000000,37000.000000,1800.000000)}
{pt3dadd(194028.000000,107448.000000,90925.000000,1800.000000)}

{create adhoc36}
{access adhoc36}
{connect adhoc36(1), adhoc1(0)}
{nseg = 1}
{strdef color color = "White"}
{pt3dclear()}
{pt3dadd(202608.000000,150492.000000,37000.000000,1800.000000)}
{pt3dadd(194004.000000,103560.000000,90575.000000,1800.000000)}

{create adhoc37}
{access adhoc37}
{connect adhoc37(1), adhoc1(0)}
{nseg = 1}
{strdef color color = "White"}
{pt3dclear()}
{pt3dadd(202608.000000,150492.000000,37000.000000,1800.000000)}
{pt3dadd(194124.000000,105204.000000,92125.000000,1800.000000)}

{create adhoc38}
{access adhoc38}
{connect adhoc38(1), adhoc1(0)}
{nseg = 1}
{strdef color color = "White"}
{pt3dclear()}
{pt3dadd(202608.000000,150492.000000,37000.000000,1800.000000)}
{pt3dadd(193968.000000,104940.000000,88675.000000,1800.000000)}

{create adhoc39}
{access adhoc39}
{connect adhoc39(1), adhoc1(0)}
{nseg = 1}
{strdef color color = "White"}
{pt3dclear()}
{pt3dadd(202608.000000,150492.000000,37000.000000,1800.000000)}
{pt3dadd(193920.000000,106380.000000,87075.000000,1800.000000)}

{create adhoc40}
{access adhoc40}
{connect adhoc40(1), adhoc1(0)}
{nseg = 1}
{strdef color color = "White"}
{pt3dclear()}
{pt3dadd(202608.000000,150492.000000,37000.000000,1800.000000)}
{pt3dadd(193944.000000,107148.000000,84325.000000,1800.000000)}

{create adhoc41}
{access adhoc41}
{connect adhoc41(1), adhoc1(0)}
{nseg = 1}
{strdef color color = "White"}
{pt3dclear()}
{pt3dadd(202608.000000,150492.000000,37000.000000,1800.000000)}
{pt3dadd(193884.000000,104484.000000,84075.000000,1800.000000)}

{create adhoc42}
{access adhoc42}
{connect adhoc42(1), adhoc1(0)}
{nseg = 1}
{strdef color color = "White"}
{pt3dclear()}
{pt3dadd(202608.000000,150492.000000,37000.000000,1800.000000)}
{pt3dadd(193932.000000,103764.000000,86125.000000,1800.000000)}

{create adhoc43}
{access adhoc43}
{connect adhoc43(1), adhoc1(0)}
{nseg = 1}
{strdef color color = "White"}
{pt3dclear()}
{pt3dadd(202608.000000,150492.000000,37000.000000,1800.000000)}
{pt3dadd(190968.000000,102144.000000,80025.000000,1800.000000)}

{create adhoc44}
{access adhoc44}
{connect adhoc44(1), adhoc1(0)}
{nseg = 1}
{strdef color color = "White"}
{pt3dclear()}
{pt3dadd(202608.000000,150492.000000,37000.000000,1800.000000)}
{pt3dadd(190836.000000,99624.000000,77525.000000,1800.000000)}

{create adhoc45}
{access adhoc45}
{connect adhoc45(1), adhoc1(0)}
{nseg = 1}
{strdef color color = "White"}
{pt3dclear()}
{pt3dadd(202608.000000,150492.000000,37000.000000,1800.000000)}
{pt3dadd(193428.000000,97980.000000,82525.000000,1800.000000)}

{create adhoc46}
{access adhoc46}
{connect adhoc46(1), adhoc1(0)}
{nseg = 1}
{strdef color color = "White"}
{pt3dclear()}
{pt3dadd(202608.000000,150492.000000,37000.000000,1800.000000)}
{pt3dadd(193440.000000,101208.000000,84825.000000,1800.000000)}

{create adhoc47}
{access adhoc47}
{connect adhoc47(1), adhoc1(0)}
{nseg = 1}
{strdef color color = "White"}
{pt3dclear()}
{pt3dadd(202608.000000,150492.000000,37000.000000,1800.000000)}
{pt3dadd(196212.000000,103620.000000,84125.000000,1800.000000)}

{create adhoc48}
{access adhoc48}
{connect adhoc48(1), adhoc1(0)}
{nseg = 1}
{strdef color color = "White"}
{pt3dclear()}
{pt3dadd(202608.000000,150492.000000,37000.000000,1800.000000)}
{pt3dadd(196236.000000,106020.000000,81125.000000,1800.000000)}

{create adhoc49}
{access adhoc49}
{connect adhoc49(1), adhoc1(0)}
{nseg = 1}
{strdef color color = "White"}
{pt3dclear()}
{pt3dadd(202608.000000,150492.000000,37000.000000,1800.000000)}
{pt3dadd(195540.000000,99564.000000,80575.000000,1800.000000)}

{create adhoc50}
{access adhoc50}
{connect adhoc50(1), adhoc1(0)}
{nseg = 1}
{strdef color color = "White"}
{pt3dclear()}
{pt3dadd(202608.000000,150492.000000,37000.000000,1800.000000)}
{pt3dadd(195504.000000,101796.000000,79625.000000,1800.000000)}

{create adhoc51}
{access adhoc51}
{connect adhoc51(1), adhoc1(0)}
{nseg = 1}
{strdef color color = "White"}
{pt3dclear()}
{pt3dadd(202608.000000,150492.000000,37000.000000,1800.000000)}
{pt3dadd(195852.000000,104328.000000,73375.000000,1800.000000)}

{create adhoc52}
{access adhoc52}
{connect adhoc52(1), adhoc1(0)}
{nseg = 1}
{strdef color color = "White"}
{pt3dclear()}
{pt3dadd(202608.000000,150492.000000,37000.000000,1800.000000)}
{pt3dadd(195888.000000,99468.000000,77475.000000,1800.000000)}

{create adhoc53}
{access adhoc53}
{connect adhoc53(1), adhoc1(0)}
{nseg = 1}
{strdef color color = "White"}
{pt3dclear()}
{pt3dadd(202608.000000,150492.000000,37000.000000,1800.000000)}
{pt3dadd(195948.000000,102312.000000,74625.000000,1800.000000)}

{create adhoc54}
{access adhoc54}
{connect adhoc54(1), adhoc1(0)}
{nseg = 1}
{strdef color color = "White"}
{pt3dclear()}
{pt3dadd(202608.000000,150492.000000,37000.000000,1800.000000)}
{pt3dadd(195708.000000,100428.000000,75725.000000,1800.000000)}

{create adhoc55}
{access adhoc55}
{connect adhoc55(1), adhoc1(0)}
{nseg = 1}
{strdef color color = "White"}
{pt3dclear()}
{pt3dadd(202608.000000,150492.000000,37000.000000,1800.000000)}
{pt3dadd(195396.000000,102408.000000,77275.000000,1800.000000)}

{create adhoc56}
{access adhoc56}
{connect adhoc56(1), adhoc1(0)}
{nseg = 1}
{strdef color color = "White"}
{pt3dclear()}
{pt3dadd(202608.000000,150492.000000,37000.000000,1800.000000)}
{pt3dadd(196020.000000,104712.000000,70375.000000,1800.000000)}

{create adhoc57}
{access adhoc57}
{connect adhoc57(1), adhoc1(0)}
{nseg = 1}
{strdef color color = "White"}
{pt3dclear()}
{pt3dadd(202608.000000,150492.000000,37000.000000,1800.000000)}
{pt3dadd(194580.000000,107640.000000,63125.000000,1800.000000)}

{create adhoc58}
{access adhoc58}
{connect adhoc58(1), adhoc1(0)}
{nseg = 1}
{strdef color color = "White"}
{pt3dclear()}
{pt3dadd(202608.000000,150492.000000,37000.000000,1800.000000)}
{pt3dadd(194340.000000,107736.000000,58075.000000,1800.000000)}

{create adhoc59}
{access adhoc59}
{connect adhoc59(1), adhoc1(0)}
{nseg = 1}
{strdef color color = "White"}
{pt3dclear()}
{pt3dadd(202608.000000,150492.000000,37000.000000,1800.000000)}
{pt3dadd(194760.000000,109092.000000,49775.000000,1800.000000)}

{create adhoc60}
{access adhoc60}
{connect adhoc60(1), adhoc1(0)}
{nseg = 1}
{strdef color color = "White"}
{pt3dclear()}
{pt3dadd(202608.000000,150492.000000,37000.000000,1800.000000)}
{pt3dadd(195900.000000,100164.000000,50975.000000,1800.000000)}

{create adhoc61}
{access adhoc61}
{connect adhoc61(1), adhoc1(0)}
{nseg = 1}
{strdef color color = "White"}
{pt3dclear()}
{pt3dadd(202608.000000,150492.000000,37000.000000,1800.000000)}
{pt3dadd(195708.000000,102792.000000,51325.000000,1800.000000)}

{create adhoc62}
{access adhoc62}
{connect adhoc62(1), adhoc1(0)}
{nseg = 1}
{strdef color color = "White"}
{pt3dclear()}
{pt3dadd(202608.000000,150492.000000,37000.000000,1800.000000)}
{pt3dadd(195720.000000,105348.000000,51175.000000,1800.000000)}

{create adhoc63}
{access adhoc63}
{connect adhoc63(1), adhoc1(0)}
{nseg = 1}
{strdef color color = "White"}
{pt3dclear()}
{pt3dadd(202608.000000,150492.000000,37000.000000,1800.000000)}
{pt3dadd(195672.000000,106368.000000,53425.000000,1800.000000)}

{create adhoc64}
{access adhoc64}
{connect adhoc64(1), adhoc1(0)}
{nseg = 1}
{strdef color color = "White"}
{pt3dclear()}
{pt3dadd(202608.000000,150492.000000,37000.000000,1800.000000)}
{pt3dadd(195624.000000,105984.000000,55775.000000,1800.000000)}

{create adhoc65}
{access adhoc65}
{connect adhoc65(1), adhoc1(0)}
{nseg = 1}
{strdef color color = "White"}
{pt3dclear()}
{pt3dadd(202608.000000,150492.000000,37000.000000,1800.000000)}
{pt3dadd(195624.000000,104004.000000,56575.000000,1800.000000)}

{create adhoc66}
{access adhoc66}
{connect adhoc66(1), adhoc1(0)}
{nseg = 1}
{strdef color color = "White"}
{pt3dclear()}
{pt3dadd(202608.000000,150492.000000,37000.000000,1800.000000)}
{pt3dadd(195660.000000,104016.000000,53975.000000,1800.000000)}

{create adhoc67}
{access adhoc67}
{connect adhoc67(1), adhoc1(0)}
{nseg = 1}
{strdef color color = "White"}
{pt3dclear()}
{pt3dadd(202608.000000,150492.000000,37000.000000,1800.000000)}
{pt3dadd(195708.000000,100572.000000,55475.000000,1800.000000)}

{create adhoc68}
{access adhoc68}
{connect adhoc68(1), adhoc1(0)}
{nseg = 1}
{strdef color color = "White"}
{pt3dclear()}
{pt3dadd(202608.000000,150492.000000,37000.000000,1800.000000)}
{pt3dadd(195732.000000,96864.000000,55275.000000,1800.000000)}

{create adhoc69}
{access adhoc69}
{connect adhoc69(1), adhoc1(0)}
{nseg = 1}
{strdef color color = "White"}
{pt3dclear()}
{pt3dadd(202608.000000,150492.000000,37000.000000,1800.000000)}
{pt3dadd(195684.000000,99768.000000,57975.000000,1800.000000)}

{create adhoc70}
{access adhoc70}
{connect adhoc70(1), adhoc1(0)}
{nseg = 1}
{strdef color color = "White"}
{pt3dclear()}
{pt3dadd(202608.000000,150492.000000,37000.000000,1800.000000)}
{pt3dadd(195756.000000,102384.000000,57575.000000,1800.000000)}

{create adhoc71}
{access adhoc71}
{connect adhoc71(1), adhoc1(0)}
{nseg = 1}
{strdef color color = "White"}
{pt3dclear()}
{pt3dadd(202608.000000,150492.000000,37000.000000,1800.000000)}
{pt3dadd(195600.000000,106704.000000,59425.000000,1800.000000)}

{create adhoc72}
{access adhoc72}
{connect adhoc72(1), adhoc1(0)}
{nseg = 1}
{strdef color color = "White"}
{pt3dclear()}
{pt3dadd(202608.000000,150492.000000,37000.000000,1800.000000)}
{pt3dadd(197616.000000,103728.000000,45125.000000,1800.000000)}

{create adhoc73}
{access adhoc73}
{connect adhoc73(1), adhoc1(0)}
{nseg = 1}
{strdef color color = "White"}
{pt3dclear()}
{pt3dadd(202608.000000,150492.000000,37000.000000,1800.000000)}
{pt3dadd(196584.000000,105900.000000,43525.000000,1800.000000)}

{create adhoc74}
{access adhoc74}
{connect adhoc74(1), adhoc1(0)}
{nseg = 1}
{strdef color color = "White"}
{pt3dclear()}
{pt3dadd(202608.000000,150492.000000,37000.000000,1800.000000)}
{pt3dadd(197316.000000,104244.000000,40725.000000,1800.000000)}

{create adhoc75}
{access adhoc75}
{connect adhoc75(1), adhoc1(0)}
{nseg = 1}
{strdef color color = "White"}
{pt3dclear()}
{pt3dadd(202608.000000,150492.000000,37000.000000,1800.000000)}
{pt3dadd(197520.000000,106056.000000,39325.000000,1800.000000)}

{create adhoc76}
{access adhoc76}
{connect adhoc76(1), adhoc1(0)}
{nseg = 1}
{strdef color color = "White"}
{pt3dclear()}
{pt3dadd(202608.000000,150492.000000,37000.000000,1800.000000)}
{pt3dadd(199824.000000,101064.000000,40125.000000,1800.000000)}

{create adhoc77}
{access adhoc77}
{connect adhoc77(1), adhoc1(0)}
{nseg = 1}
{strdef color color = "White"}
{pt3dclear()}
{pt3dadd(202608.000000,150492.000000,37000.000000,1800.000000)}
{pt3dadd(196320.000000,101688.000000,42375.000000,1800.000000)}

{create adhoc78}
{access adhoc78}
{connect adhoc78(1), adhoc1(0)}
{nseg = 1}
{strdef color color = "White"}
{pt3dclear()}
{pt3dadd(202608.000000,150492.000000,37000.000000,1800.000000)}
{pt3dadd(196320.000000,96564.000000,40925.000000,1800.000000)}

{create adhoc79}
{access adhoc79}
{connect adhoc79(1), adhoc1(0)}
{nseg = 1}
{strdef color color = "White"}
{pt3dclear()}
{pt3dadd(202608.000000,150492.000000,37000.000000,1800.000000)}
{pt3dadd(197208.000000,100800.000000,40125.000000,1800.000000)}

{create adhoc80}
{access adhoc80}
{connect adhoc80(1), adhoc1(0)}
{nseg = 1}
{strdef color color = "White"}
{pt3dclear()}
{pt3dadd(202608.000000,150492.000000,37000.000000,1800.000000)}
{pt3dadd(195108.000000,98724.000000,41775.000000,1800.000000)}

{create adhoc81}
{access adhoc81}
{connect adhoc81(1), adhoc1(0)}
{nseg = 1}
{strdef color color = "White"}
{pt3dclear()}
{pt3dadd(202608.000000,150492.000000,37000.000000,1800.000000)}
{pt3dadd(192240.000000,98784.000000,44475.000000,1800.000000)}

{create adhoc82}
{access adhoc82}
{connect adhoc82(1), adhoc1(0)}
{nseg = 1}
{strdef color color = "White"}
{pt3dclear()}
{pt3dadd(202608.000000,150492.000000,37000.000000,1800.000000)}
{pt3dadd(192288.000000,101580.000000,44325.000000,1800.000000)}

{create adhoc83}
{access adhoc83}
{connect adhoc83(1), adhoc1(0)}
{nseg = 1}
{strdef color color = "White"}
{pt3dclear()}
{pt3dadd(202608.000000,150492.000000,37000.000000,1800.000000)}
{pt3dadd(192576.000000,103344.000000,46925.000000,1800.000000)}

{create adhoc84}
{access adhoc84}
{connect adhoc84(1), adhoc1(0)}
{nseg = 1}
{strdef color color = "White"}
{pt3dclear()}
{pt3dadd(202608.000000,150492.000000,37000.000000,1800.000000)}
{pt3dadd(192720.000000,99480.000000,47225.000000,1800.000000)}

{create adhoc85}
{access adhoc85}
{connect adhoc85(1), adhoc1(0)}
{nseg = 1}
{strdef color color = "White"}
{pt3dclear()}
{pt3dadd(202608.000000,150492.000000,37000.000000,1800.000000)}
{pt3dadd(193608.000000,96504.000000,47475.000000,1800.000000)}

{create adhoc86}
{access adhoc86}
{connect adhoc86(1), adhoc1(0)}
{nseg = 1}
{strdef color color = "White"}
{pt3dclear()}
{pt3dadd(202608.000000,150492.000000,37000.000000,1800.000000)}
{pt3dadd(193428.000000,91908.000000,50375.000000,1800.000000)}

{create adhoc87}
{access adhoc87}
{connect adhoc87(1), adhoc1(0)}
{nseg = 1}
{strdef color color = "White"}
{pt3dclear()}
{pt3dadd(202608.000000,150492.000000,37000.000000,1800.000000)}
{pt3dadd(193836.000000,94164.000000,37675.000000,1800.000000)}

{create adhoc88}
{access adhoc88}
{connect adhoc88(1), adhoc1(0)}
{nseg = 1}
{strdef color color = "White"}
{pt3dclear()}
{pt3dadd(202608.000000,150492.000000,37000.000000,1800.000000)}
{pt3dadd(193752.000000,95472.000000,41325.000000,1800.000000)}

{create adhoc89}
{access adhoc89}
{connect adhoc89(1), adhoc1(0)}
{nseg = 1}
{strdef color color = "White"}
{pt3dclear()}
{pt3dadd(202608.000000,150492.000000,37000.000000,1800.000000)}
{pt3dadd(194640.000000,92412.000000,46925.000000,1800.000000)}

{create adhoc90}
{access adhoc90}
{connect adhoc90(1), adhoc1(0)}
{nseg = 1}
{strdef color color = "White"}
{pt3dclear()}
{pt3dadd(202608.000000,150492.000000,37000.000000,1800.000000)}
{pt3dadd(194736.000000,92316.000000,44125.000000,1800.000000)}

{create adhoc91}
{access adhoc91}
{connect adhoc91(1), adhoc1(0)}
{nseg = 1}
{strdef color color = "White"}
{pt3dclear()}
{pt3dadd(202608.000000,150492.000000,37000.000000,1800.000000)}
{pt3dadd(194880.000000,92412.000000,41175.000000,1800.000000)}

{create adhoc92}
{access adhoc92}
{connect adhoc92(1), adhoc1(0)}
{nseg = 1}
{strdef color color = "White"}
{pt3dclear()}
{pt3dadd(202608.000000,150492.000000,37000.000000,1800.000000)}
{pt3dadd(194844.000000,94680.000000,42675.000000,1800.000000)}

{create adhoc93}
{access adhoc93}
{connect adhoc93(1), adhoc1(0)}
{nseg = 1}
{strdef color color = "White"}
{pt3dclear()}
{pt3dadd(202608.000000,150492.000000,37000.000000,1800.000000)}
{pt3dadd(195180.000000,94944.000000,47975.000000,1800.000000)}

{create adhoc94}
{access adhoc94}
{connect adhoc94(1), adhoc1(0)}
{nseg = 1}
{strdef color color = "White"}
{pt3dclear()}
{pt3dadd(202608.000000,150492.000000,37000.000000,1800.000000)}
{pt3dadd(195216.000000,95604.000000,45125.000000,1800.000000)}

{create adhoc95}
{access adhoc95}
{connect adhoc95(1), adhoc1(0)}
{nseg = 1}
{strdef color color = "White"}
{pt3dclear()}
{pt3dadd(202608.000000,150492.000000,37000.000000,1800.000000)}
{pt3dadd(195948.000000,100236.000000,45275.000000,1800.000000)}

{create adhoc96}
{access adhoc96}
{connect adhoc96(1), adhoc1(0)}
{nseg = 1}
{strdef color color = "White"}
{pt3dclear()}
{pt3dadd(202608.000000,150492.000000,37000.000000,1800.000000)}
{pt3dadd(197832.000000,99396.000000,47025.000000,1800.000000)}

{create adhoc97}
{access adhoc97}
{connect adhoc97(1), adhoc1(0)}
{nseg = 1}
{strdef color color = "White"}
{pt3dclear()}
{pt3dadd(202608.000000,150492.000000,37000.000000,1800.000000)}
{pt3dadd(197544.000000,96744.000000,36275.000000,1800.000000)}

{create adhoc98}
{access adhoc98}
{connect adhoc98(1), adhoc1(0)}
{nseg = 1}
{strdef color color = "White"}
{pt3dclear()}
{pt3dadd(202608.000000,150492.000000,37000.000000,1800.000000)}
{pt3dadd(194112.000000,96984.000000,31575.000000,1800.000000)}

{create adhoc99}
{access adhoc99}
{connect adhoc99(1), adhoc1(0)}
{nseg = 1}
{strdef color color = "White"}
{pt3dclear()}
{pt3dadd(202608.000000,150492.000000,37000.000000,1800.000000)}
{pt3dadd(194304.000000,94428.000000,32575.000000,1800.000000)}

{create adhoc100}
{access adhoc100}
{connect adhoc100(1), adhoc1(0)}
{nseg = 1}
{strdef color color = "White"}
{pt3dclear()}
{pt3dadd(202608.000000,150492.000000,37000.000000,1800.000000)}
{pt3dadd(193716.000000,89232.000000,31275.000000,1800.000000)}

{create adhoc101}
{access adhoc101}
{connect adhoc101(1), adhoc1(0)}
{nseg = 1}
{strdef color color = "White"}
{pt3dclear()}
{pt3dadd(202608.000000,150492.000000,37000.000000,1800.000000)}
{pt3dadd(193944.000000,89904.000000,34925.000000,1800.000000)}

{create adhoc102}
{access adhoc102}
{connect adhoc102(1), adhoc1(0)}
{nseg = 1}
{strdef color color = "White"}
{pt3dclear()}
{pt3dadd(202608.000000,150492.000000,37000.000000,1800.000000)}
{pt3dadd(193536.000000,89400.000000,28175.000000,1800.000000)}

{create adhoc103}
{access adhoc103}
{connect adhoc103(1), adhoc1(0)}
{nseg = 1}
{strdef color color = "White"}
{pt3dclear()}
{pt3dadd(202608.000000,150492.000000,37000.000000,1800.000000)}
{pt3dadd(191916.000000,83628.000000,14975.000000,1800.000000)}

{create adhoc104}
{access adhoc104}
{connect adhoc104(1), adhoc1(0)}
{nseg = 1}
{strdef color color = "White"}
{pt3dclear()}
{pt3dadd(202608.000000,150492.000000,37000.000000,1800.000000)}
{pt3dadd(191628.000000,92004.000000,8325.000000,1800.000000)}

{create adhoc105}
{access adhoc105}
{connect adhoc105(1), adhoc1(0)}
{nseg = 1}
{strdef color color = "White"}
{pt3dclear()}
{pt3dadd(202608.000000,150492.000000,37000.000000,1800.000000)}
{pt3dadd(189348.000000,88368.000000,5625.000000,1800.000000)}

{create adhoc106}
{access adhoc106}
{connect adhoc106(1), adhoc1(0)}
{nseg = 1}
{strdef color color = "White"}
{pt3dclear()}
{pt3dadd(202608.000000,150492.000000,37000.000000,1800.000000)}
{pt3dadd(190248.000000,81924.000000,13875.000000,1800.000000)}

{create adhoc107}
{access adhoc107}
{connect adhoc107(1), adhoc1(0)}
{nseg = 1}
{strdef color color = "White"}
{pt3dclear()}
{pt3dadd(202608.000000,150492.000000,37000.000000,1800.000000)}
{pt3dadd(191520.000000,86880.000000,11825.000000,1800.000000)}

{create adhoc108}
{access adhoc108}
{connect adhoc108(1), adhoc1(0)}
{nseg = 1}
{strdef color color = "White"}
{pt3dclear()}
{pt3dadd(202608.000000,150492.000000,37000.000000,1800.000000)}
{pt3dadd(186756.000000,85116.000000,5575.000000,1800.000000)}

{create adhoc109}
{access adhoc109}
{connect adhoc109(1), adhoc1(0)}
{nseg = 1}
{strdef color color = "White"}
{pt3dclear()}
{pt3dadd(202608.000000,150492.000000,37000.000000,1800.000000)}
{pt3dadd(185460.000000,84204.000000,1975.000000,1800.000000)}

{create adhoc110}
{access adhoc110}
{connect adhoc110(1), adhoc1(0)}
{nseg = 1}
{strdef color color = "White"}
{pt3dclear()}
{pt3dadd(202608.000000,150492.000000,37000.000000,1800.000000)}
{pt3dadd(185448.000000,84096.000000,7525.000000,1800.000000)}

{create adhoc111}
{access adhoc111}
{connect adhoc111(1), adhoc1(0)}
{nseg = 1}
{strdef color color = "White"}
{pt3dclear()}
{pt3dadd(202608.000000,150492.000000,37000.000000,1800.000000)}
{pt3dadd(185460.000000,82128.000000,8475.000000,1800.000000)}

{create adhoc112}
{access adhoc112}
{connect adhoc112(1), adhoc1(0)}
{nseg = 1}
{strdef color color = "White"}
{pt3dclear()}
{pt3dadd(202608.000000,150492.000000,37000.000000,1800.000000)}
{pt3dadd(186468.000000,79344.000000,12725.000000,1800.000000)}

{create adhoc113}
{access adhoc113}
{connect adhoc113(1), adhoc1(0)}
{nseg = 1}
{strdef color color = "White"}
{pt3dclear()}
{pt3dadd(202608.000000,150492.000000,37000.000000,1800.000000)}
{pt3dadd(186456.000000,81156.000000,11075.000000,1800.000000)}

{create adhoc114}
{access adhoc114}
{connect adhoc114(1), adhoc1(0)}
{nseg = 1}
{strdef color color = "White"}
{pt3dclear()}
{pt3dadd(202608.000000,150492.000000,37000.000000,1800.000000)}
{pt3dadd(186204.000000,78180.000000,9875.000000,1800.000000)}

{create adhoc115}
{access adhoc115}
{connect adhoc115(1), adhoc1(0)}
{nseg = 1}
{strdef color color = "White"}
{pt3dclear()}
{pt3dadd(202608.000000,150492.000000,37000.000000,1800.000000)}
{pt3dadd(186204.000000,79860.000000,8325.000000,1800.000000)}

{create adhoc116}
{access adhoc116}
{connect adhoc116(1), adhoc1(0)}
{nseg = 1}
{strdef color color = "White"}
{pt3dclear()}
{pt3dadd(202608.000000,150492.000000,37000.000000,1800.000000)}
{pt3dadd(186240.000000,80748.000000,2875.000000,1800.000000)}

{create adhoc117}
{access adhoc117}
{connect adhoc117(1), adhoc1(0)}
{nseg = 1}
{strdef color color = "White"}
{pt3dclear()}
{pt3dadd(202608.000000,150492.000000,37000.000000,1800.000000)}
{pt3dadd(186216.000000,80112.000000,6075.000000,1800.000000)}

{create adhoc118}
{access adhoc118}
{connect adhoc118(1), adhoc1(0)}
{nseg = 1}
{strdef color color = "White"}
{pt3dclear()}
{pt3dadd(202608.000000,150492.000000,37000.000000,1800.000000)}
{pt3dadd(187920.000000,86256.000000,25425.000000,1800.000000)}

{create adhoc119}
{access adhoc119}
{connect adhoc119(1), adhoc1(0)}
{nseg = 1}
{strdef color color = "White"}
{pt3dclear()}
{pt3dadd(202608.000000,150492.000000,37000.000000,1800.000000)}
{pt3dadd(188616.000000,81576.000000,29025.000000,1800.000000)}

{create adhoc120}
{access adhoc120}
{connect adhoc120(1), adhoc1(0)}
{nseg = 1}
{strdef color color = "White"}
{pt3dclear()}
{pt3dadd(202608.000000,150492.000000,37000.000000,1800.000000)}
{pt3dadd(188652.000000,82800.000000,25925.000000,1800.000000)}

{create adhoc121}
{access adhoc121}
{connect adhoc121(1), adhoc1(0)}
{nseg = 1}
{strdef color color = "White"}
{pt3dclear()}
{pt3dadd(202608.000000,150492.000000,37000.000000,1800.000000)}
{pt3dadd(188748.000000,80640.000000,23525.000000,1800.000000)}

{create adhoc122}
{access adhoc122}
{connect adhoc122(1), adhoc1(0)}
{nseg = 1}
{strdef color color = "White"}
{pt3dclear()}
{pt3dadd(202608.000000,150492.000000,37000.000000,1800.000000)}
{pt3dadd(188520.000000,81600.000000,20925.000000,1800.000000)}

{create adhoc123}
{access adhoc123}
{connect adhoc123(1), adhoc1(0)}
{nseg = 1}
{strdef color color = "White"}
{pt3dclear()}
{pt3dadd(202608.000000,150492.000000,37000.000000,1800.000000)}
{pt3dadd(188508.000000,79356.000000,20175.000000,1800.000000)}

{create adhoc124}
{access adhoc124}
{connect adhoc124(1), adhoc1(0)}
{nseg = 1}
{strdef color color = "White"}
{pt3dclear()}
{pt3dadd(202608.000000,150492.000000,37000.000000,1800.000000)}
{pt3dadd(188484.000000,87624.000000,20225.000000,1800.000000)}

{create adhoc125}
{access adhoc125}
{connect adhoc125(1), adhoc1(0)}
{nseg = 1}
{strdef color color = "White"}
{pt3dclear()}
{pt3dadd(202608.000000,150492.000000,37000.000000,1800.000000)}
{pt3dadd(188484.000000,83832.000000,19425.000000,1800.000000)}

{create adhoc126}
{access adhoc126}
{connect adhoc126(1), adhoc1(0)}
{nseg = 1}
{strdef color color = "White"}
{pt3dclear()}
{pt3dadd(202608.000000,150492.000000,37000.000000,1800.000000)}
{pt3dadd(188400.000000,88044.000000,17875.000000,1800.000000)}

{create adhoc127}
{access adhoc127}
{connect adhoc127(1), adhoc1(0)}
{nseg = 1}
{strdef color color = "White"}
{pt3dclear()}
{pt3dadd(202608.000000,150492.000000,37000.000000,1800.000000)}
{pt3dadd(188340.000000,85284.000000,16675.000000,1800.000000)}

{create adhoc128}
{access adhoc128}
{connect adhoc128(1), adhoc1(0)}
{nseg = 1}
{strdef color color = "White"}
{pt3dclear()}
{pt3dadd(202608.000000,150492.000000,37000.000000,1800.000000)}
{pt3dadd(188400.000000,79692.000000,17675.000000,1800.000000)}

{create adhoc129}
{access adhoc129}
{connect adhoc129(1), adhoc1(0)}
{nseg = 1}
{strdef color color = "White"}
{pt3dclear()}
{pt3dadd(202608.000000,150492.000000,37000.000000,1800.000000)}
{pt3dadd(188364.000000,79464.000000,14875.000000,1800.000000)}

{create adhoc130}
{access adhoc130}
{connect adhoc130(1), adhoc1(0)}
{nseg = 1}
{strdef color color = "White"}
{pt3dclear()}
{pt3dadd(202608.000000,150492.000000,37000.000000,1800.000000)}
{pt3dadd(188184.000000,81276.000000,13425.000000,1800.000000)}

{create adhoc131}
{access adhoc131}
{connect adhoc131(1), adhoc1(0)}
{nseg = 1}
{strdef color color = "White"}
{pt3dclear()}
{pt3dadd(202608.000000,150492.000000,37000.000000,1800.000000)}
{pt3dadd(188136.000000,79428.000000,11975.000000,1800.000000)}

{create adhoc132}
{access adhoc132}
{connect adhoc132(1), adhoc1(0)}
{nseg = 1}
{strdef color color = "White"}
{pt3dclear()}
{pt3dadd(202608.000000,150492.000000,37000.000000,1800.000000)}
{pt3dadd(188160.000000,80760.000000,9975.000000,1800.000000)}

{create adhoc133}
{access adhoc133}
{connect adhoc133(1), adhoc1(0)}
{nseg = 1}
{strdef color color = "White"}
{pt3dclear()}
{pt3dadd(202608.000000,150492.000000,37000.000000,1800.000000)}
{pt3dadd(188208.000000,82908.000000,1825.000000,1800.000000)}

{create adhoc134}
{access adhoc134}
{connect adhoc134(1), adhoc1(0)}
{nseg = 1}
{strdef color color = "White"}
{pt3dclear()}
{pt3dadd(202608.000000,150492.000000,37000.000000,1800.000000)}
{pt3dadd(188160.000000,83232.000000,4875.000000,1800.000000)}

{create adhoc135}
{access adhoc135}
{connect adhoc135(1), adhoc1(0)}
{nseg = 1}
{strdef color color = "White"}
{pt3dclear()}
{pt3dadd(202608.000000,150492.000000,37000.000000,1800.000000)}
{pt3dadd(188112.000000,84708.000000,8025.000000,1800.000000)}

{create adhoc136}
{access adhoc136}
{connect adhoc136(1), adhoc1(0)}
{nseg = 1}
{strdef color color = "White"}
{pt3dclear()}
{pt3dadd(202608.000000,150492.000000,37000.000000,1800.000000)}
{pt3dadd(188148.000000,84612.000000,10975.000000,1800.000000)}

{create adhoc137}
{access adhoc137}
{connect adhoc137(1), adhoc1(0)}
{nseg = 1}
{strdef color color = "White"}
{pt3dclear()}
{pt3dadd(202608.000000,150492.000000,37000.000000,1800.000000)}
{pt3dadd(188148.000000,83712.000000,12625.000000,1800.000000)}

{create adhoc138}
{access adhoc138}
{connect adhoc138(1), adhoc1(0)}
{nseg = 1}
{strdef color color = "White"}
{pt3dclear()}
{pt3dadd(202608.000000,150492.000000,37000.000000,1800.000000)}
{pt3dadd(188364.000000,88968.000000,14025.000000,1800.000000)}

{create adhoc139}
{access adhoc139}
{connect adhoc139(1), adhoc1(0)}
{nseg = 1}
{strdef color color = "White"}
{pt3dclear()}
{pt3dadd(202608.000000,150492.000000,37000.000000,1800.000000)}
{pt3dadd(188136.000000,88188.000000,11875.000000,1800.000000)}

{create adhoc140}
{access adhoc140}
{connect adhoc140(1), adhoc1(0)}
{nseg = 1}
{strdef color color = "White"}
{pt3dclear()}
{pt3dadd(202608.000000,150492.000000,37000.000000,1800.000000)}
{pt3dadd(192756.000000,95388.000000,6175.000000,1800.000000)}

{create adhoc141}
{access adhoc141}
{connect adhoc141(1), adhoc1(0)}
{nseg = 1}
{strdef color color = "White"}
{pt3dclear()}
{pt3dadd(202608.000000,150492.000000,37000.000000,1800.000000)}
{pt3dadd(193044.000000,91344.000000,5975.000000,1800.000000)}

{create adhoc142}
{access adhoc142}
{connect adhoc142(1), adhoc1(0)}
{nseg = 1}
{strdef color color = "White"}
{pt3dclear()}
{pt3dadd(202608.000000,150492.000000,37000.000000,1800.000000)}
{pt3dadd(191604.000000,89112.000000,6625.000000,1800.000000)}

{create adhoc143}
{access adhoc143}
{connect adhoc143(1), adhoc1(0)}
{nseg = 1}
{strdef color color = "White"}
{pt3dclear()}
{pt3dadd(202608.000000,150492.000000,37000.000000,1800.000000)}
{pt3dadd(187632.000000,87996.000000,3975.000000,1800.000000)}

{create adhoc144}
{access adhoc144}
{connect adhoc144(1), adhoc1(0)}
{nseg = 1}
{strdef color color = "White"}
{pt3dclear()}
{pt3dadd(202608.000000,150492.000000,37000.000000,1800.000000)}
{pt3dadd(190896.000000,85332.000000,3975.000000,1800.000000)}

{create adhoc145}
{access adhoc145}
{connect adhoc145(1), adhoc1(0)}
{nseg = 1}
{strdef color color = "White"}
{pt3dclear()}
{pt3dadd(202608.000000,150492.000000,37000.000000,1800.000000)}
{pt3dadd(191736.000000,88044.000000,3975.000000,1800.000000)}

{create adhoc146}
{access adhoc146}
{connect adhoc146(1), adhoc1(0)}
{nseg = 1}
{strdef color color = "White"}
{pt3dclear()}
{pt3dadd(202608.000000,150492.000000,37000.000000,1800.000000)}
{pt3dadd(189564.000000,94440.000000,6875.000000,1800.000000)}

{create adhoc147}
{access adhoc147}
{connect adhoc147(1), adhoc1(0)}
{nseg = 1}
{strdef color color = "White"}
{pt3dclear()}
{pt3dadd(202608.000000,150492.000000,37000.000000,1800.000000)}
{pt3dadd(189588.000000,93588.000000,3675.000000,1800.000000)}

{create adhoc148}
{access adhoc148}
{connect adhoc148(1), adhoc1(0)}
{nseg = 1}
{strdef color color = "White"}
{pt3dclear()}
{pt3dadd(202608.000000,150492.000000,37000.000000,1800.000000)}
{pt3dadd(189576.000000,91704.000000,1175.000000,1800.000000)}

{create adhoc149}
{access adhoc149}
{connect adhoc149(1), adhoc1(0)}
{nseg = 1}
{strdef color color = "White"}
{pt3dclear()}
{pt3dadd(202608.000000,150492.000000,37000.000000,1800.000000)}
{pt3dadd(189588.000000,89076.000000,2925.000000,1800.000000)}

{create adhoc150}
{access adhoc150}
{connect adhoc150(1), adhoc1(0)}
{nseg = 1}
{strdef color color = "White"}
{pt3dclear()}
{pt3dadd(202608.000000,150492.000000,37000.000000,1800.000000)}
{pt3dadd(192480.000000,89712.000000,1275.000000,1800.000000)}

{create adhoc151}
{access adhoc151}
{connect adhoc151(1), adhoc1(0)}
{nseg = 1}
{strdef color color = "White"}
{pt3dclear()}
{pt3dadd(202608.000000,150492.000000,37000.000000,1800.000000)}
{pt3dadd(192492.000000,93912.000000,525.000000,1800.000000)}

{create adhoc152}
{access adhoc152}
{connect adhoc152(1), adhoc1(0)}
{nseg = 1}
{strdef color color = "White"}
{pt3dclear()}
{pt3dadd(202608.000000,150492.000000,37000.000000,1800.000000)}
{pt3dadd(192492.000000,92712.000000,3475.000000,1800.000000)}

{create adhoc153}
{access adhoc153}
{connect adhoc153(1), adhoc1(0)}
{nseg = 1}
{strdef color color = "White"}
{pt3dclear()}
{pt3dadd(202608.000000,150492.000000,37000.000000,1800.000000)}
{pt3dadd(191412.000000,91200.000000,5075.000000,1800.000000)}

{create adhoc154}
{access adhoc154}
{connect adhoc154(1), adhoc1(0)}
{nseg = 1}
{strdef color color = "White"}
{pt3dclear()}
{pt3dadd(202608.000000,150492.000000,37000.000000,1800.000000)}
{pt3dadd(190092.000000,90264.000000,10225.000000,1800.000000)}

{create adhoc155}
{access adhoc155}
{connect adhoc155(1), adhoc1(0)}
{nseg = 1}
{strdef color color = "White"}
{pt3dclear()}
{pt3dadd(202608.000000,150492.000000,37000.000000,1800.000000)}
{pt3dadd(190068.000000,90828.000000,7225.000000,1800.000000)}

{create adhoc156}
{access adhoc156}
{connect adhoc156(1), adhoc1(0)}
{nseg = 1}
{strdef color color = "White"}
{pt3dclear()}
{pt3dadd(202608.000000,150492.000000,37000.000000,1800.000000)}
{pt3dadd(191688.000000,95784.000000,4275.000000,1800.000000)}

{create adhoc157}
{access adhoc157}
{connect adhoc157(1), adhoc1(0)}
{nseg = 1}
{strdef color color = "White"}
{pt3dclear()}
{pt3dadd(202608.000000,150492.000000,37000.000000,1800.000000)}
{pt3dadd(191532.000000,97740.000000,1525.000000,1800.000000)}

{create adhoc158}
{access adhoc158}
{connect adhoc158(1), adhoc1(0)}
{nseg = 1}
{strdef color color = "White"}
{pt3dclear()}
{pt3dadd(202608.000000,150492.000000,37000.000000,1800.000000)}
{pt3dadd(190764.000000,98076.000000,6225.000000,1800.000000)}

{create adhoc159}
{access adhoc159}
{connect adhoc159(1), adhoc1(0)}
{nseg = 1}
{strdef color color = "White"}
{pt3dclear()}
{pt3dadd(202608.000000,150492.000000,37000.000000,1800.000000)}
{pt3dadd(191124.000000,98028.000000,9125.000000,1800.000000)}

{create adhoc160}
{access adhoc160}
{connect adhoc160(1), adhoc1(0)}
{nseg = 1}
{strdef color color = "White"}
{pt3dclear()}
{pt3dadd(202608.000000,150492.000000,37000.000000,1800.000000)}
{pt3dadd(190896.000000,96504.000000,12625.000000,1800.000000)}

{create adhoc161}
{access adhoc161}
{connect adhoc161(1), adhoc1(0)}
{nseg = 1}
{strdef color color = "White"}
{pt3dclear()}
{pt3dadd(202608.000000,150492.000000,37000.000000,1800.000000)}
{pt3dadd(193068.000000,100068.000000,7975.000000,1800.000000)}

{create adhoc162}
{access adhoc162}
{connect adhoc162(1), adhoc1(0)}
{nseg = 1}
{strdef color color = "White"}
{pt3dclear()}
{pt3dadd(202608.000000,150492.000000,37000.000000,1800.000000)}
{pt3dadd(193104.000000,102204.000000,11025.000000,1800.000000)}

{create adhoc163}
{access adhoc163}
{connect adhoc163(1), adhoc1(0)}
{nseg = 1}
{strdef color color = "White"}
{pt3dclear()}
{pt3dadd(202608.000000,150492.000000,37000.000000,1800.000000)}
{pt3dadd(193104.000000,99660.000000,11675.000000,1800.000000)}

{create adhoc164}
{access adhoc164}
{connect adhoc164(1), adhoc1(0)}
{nseg = 1}
{strdef color color = "White"}
{pt3dclear()}
{pt3dadd(202608.000000,150492.000000,37000.000000,1800.000000)}
{pt3dadd(193344.000000,98592.000000,14675.000000,1800.000000)}

{create adhoc165}
{access adhoc165}
{connect adhoc165(1), adhoc1(0)}
{nseg = 1}
{strdef color color = "White"}
{pt3dclear()}
{pt3dadd(202608.000000,150492.000000,37000.000000,1800.000000)}
{pt3dadd(193104.000000,96456.000000,11925.000000,1800.000000)}

{create adhoc166}
{access adhoc166}
{connect adhoc166(1), adhoc1(0)}
{nseg = 1}
{strdef color color = "White"}
{pt3dclear()}
{pt3dadd(202608.000000,150492.000000,37000.000000,1800.000000)}
{pt3dadd(193116.000000,92964.000000,10825.000000,1800.000000)}

{create adhoc167}
{access adhoc167}
{connect adhoc167(1), adhoc1(0)}
{nseg = 1}
{strdef color color = "White"}
{pt3dclear()}
{pt3dadd(202608.000000,150492.000000,37000.000000,1800.000000)}
{pt3dadd(193116.000000,94476.000000,8325.000000,1800.000000)}

{create adhoc168}
{access adhoc168}
{connect adhoc168(1), adhoc1(0)}
{nseg = 1}
{strdef color color = "White"}
{pt3dclear()}
{pt3dadd(202608.000000,150492.000000,37000.000000,1800.000000)}
{pt3dadd(193332.000000,95088.000000,14975.000000,1800.000000)}

{create adhoc169}
{access adhoc169}
{connect adhoc169(1), adhoc1(0)}
{nseg = 1}
{strdef color color = "White"}
{pt3dclear()}
{pt3dadd(202608.000000,150492.000000,37000.000000,1800.000000)}
{pt3dadd(193344.000000,91416.000000,15275.000000,1800.000000)}

{create adhoc170}
{access adhoc170}
{connect adhoc170(1), adhoc1(0)}
{nseg = 1}
{strdef color color = "White"}
{pt3dclear()}
{pt3dadd(202608.000000,150492.000000,37000.000000,1800.000000)}
{pt3dadd(193104.000000,93012.000000,12825.000000,1800.000000)}

{create adhoc171}
{access adhoc171}
{connect adhoc171(1), adhoc1(0)}
{nseg = 1}
{strdef color color = "White"}
{pt3dclear()}
{pt3dadd(202608.000000,150492.000000,37000.000000,1800.000000)}
{pt3dadd(193476.000000,90228.000000,8475.000000,1800.000000)}

{create adhoc172}
{access adhoc172}
{connect adhoc172(1), adhoc1(0)}
{nseg = 1}
{strdef color color = "White"}
{pt3dclear()}
{pt3dadd(202608.000000,150492.000000,37000.000000,1800.000000)}
{pt3dadd(193464.000000,89868.000000,11025.000000,1800.000000)}

{create adhoc173}
{access adhoc173}
{connect adhoc173(1), adhoc1(0)}
{nseg = 1}
{strdef color color = "White"}
{pt3dclear()}
{pt3dadd(202608.000000,150492.000000,37000.000000,1800.000000)}
{pt3dadd(193692.000000,89388.000000,14075.000000,1800.000000)}

{create adhoc174}
{access adhoc174}
{connect adhoc174(1), adhoc1(0)}
{nseg = 1}
{strdef color color = "White"}
{pt3dclear()}
{pt3dadd(202608.000000,150492.000000,37000.000000,1800.000000)}
{pt3dadd(194136.000000,88644.000000,16025.000000,1800.000000)}

{create adhoc175}
{access adhoc175}
{connect adhoc175(1), adhoc1(0)}
{nseg = 1}
{strdef color color = "White"}
{pt3dclear()}
{pt3dadd(202608.000000,150492.000000,37000.000000,1800.000000)}
{pt3dadd(191616.000000,86628.000000,16575.000000,1800.000000)}

{create adhoc176}
{access adhoc176}
{connect adhoc176(1), adhoc1(0)}
{nseg = 1}
{strdef color color = "White"}
{pt3dclear()}
{pt3dadd(202608.000000,150492.000000,37000.000000,1800.000000)}
{pt3dadd(191388.000000,90024.000000,13525.000000,1800.000000)}

{create adhoc177}
{access adhoc177}
{connect adhoc177(1), adhoc1(0)}
{nseg = 1}
{strdef color color = "White"}
{pt3dclear()}
{pt3dadd(202608.000000,150492.000000,37000.000000,1800.000000)}
{pt3dadd(191712.000000,91656.000000,20275.000000,1800.000000)}

{create adhoc178}
{access adhoc178}
{connect adhoc178(1), adhoc1(0)}
{nseg = 1}
{strdef color color = "White"}
{pt3dclear()}
{pt3dadd(202608.000000,150492.000000,37000.000000,1800.000000)}
{pt3dadd(191580.000000,89280.000000,16525.000000,1800.000000)}

{create adhoc179}
{access adhoc179}
{connect adhoc179(1), adhoc1(0)}
{nseg = 1}
{strdef color color = "White"}
{pt3dclear()}
{pt3dadd(202608.000000,150492.000000,37000.000000,1800.000000)}
{pt3dadd(190152.000000,85104.000000,13325.000000,1800.000000)}

{create adhoc180}
{access adhoc180}
{connect adhoc180(1), adhoc1(0)}
{nseg = 1}
{strdef color color = "White"}
{pt3dclear()}
{pt3dadd(202608.000000,150492.000000,37000.000000,1800.000000)}
{pt3dadd(190236.000000,87876.000000,17975.000000,1800.000000)}

{create adhoc181}
{access adhoc181}
{connect adhoc181(1), adhoc1(0)}
{nseg = 1}
{strdef color color = "White"}
{pt3dclear()}
{pt3dadd(202608.000000,150492.000000,37000.000000,1800.000000)}
{pt3dadd(190380.000000,88524.000000,20425.000000,1800.000000)}

{create adhoc182}
{access adhoc182}
{connect adhoc182(1), adhoc1(0)}
{nseg = 1}
{strdef color color = "White"}
{pt3dclear()}
{pt3dadd(202608.000000,150492.000000,37000.000000,1800.000000)}
{pt3dadd(190356.000000,82500.000000,21625.000000,1800.000000)}

{create adhoc183}
{access adhoc183}
{connect adhoc183(1), adhoc1(0)}
{nseg = 1}
{strdef color color = "White"}
{pt3dclear()}
{pt3dadd(202608.000000,150492.000000,37000.000000,1800.000000)}
{pt3dadd(190212.000000,82848.000000,17175.000000,1800.000000)}

{create adhoc184}
{access adhoc184}
{connect adhoc184(1), adhoc1(0)}
{nseg = 1}
{strdef color color = "White"}
{pt3dclear()}
{pt3dadd(202608.000000,150492.000000,37000.000000,1800.000000)}
{pt3dadd(190296.000000,80880.000000,18425.000000,1800.000000)}

{create adhoc185}
{access adhoc185}
{connect adhoc185(1), adhoc1(0)}
{nseg = 1}
{strdef color color = "White"}
{pt3dclear()}
{pt3dadd(202608.000000,150492.000000,37000.000000,1800.000000)}
{pt3dadd(190308.000000,85608.000000,18525.000000,1800.000000)}

{create adhoc186}
{access adhoc186}
{connect adhoc186(1), adhoc1(0)}
{nseg = 1}
{strdef color color = "White"}
{pt3dclear()}
{pt3dadd(202608.000000,150492.000000,37000.000000,1800.000000)}
{pt3dadd(189996.000000,88212.000000,23075.000000,1800.000000)}

{create adhoc187}
{access adhoc187}
{connect adhoc187(1), adhoc1(0)}
{nseg = 1}
{strdef color color = "White"}
{pt3dclear()}
{pt3dadd(202608.000000,150492.000000,37000.000000,1800.000000)}
{pt3dadd(189792.000000,84900.000000,22225.000000,1800.000000)}

{create adhoc188}
{access adhoc188}
{connect adhoc188(1), adhoc1(0)}
{nseg = 1}
{strdef color color = "White"}
{pt3dclear()}
{pt3dadd(202608.000000,150492.000000,37000.000000,1800.000000)}
{pt3dadd(189984.000000,86172.000000,24875.000000,1800.000000)}

{create adhoc189}
{access adhoc189}
{connect adhoc189(1), adhoc1(0)}
{nseg = 1}
{strdef color color = "White"}
{pt3dclear()}
{pt3dadd(202608.000000,150492.000000,37000.000000,1800.000000)}
{pt3dadd(189972.000000,83448.000000,24725.000000,1800.000000)}

{create adhoc190}
{access adhoc190}
{connect adhoc190(1), adhoc1(0)}
{nseg = 1}
{strdef color color = "White"}
{pt3dclear()}
{pt3dadd(202608.000000,150492.000000,37000.000000,1800.000000)}
{pt3dadd(189912.000000,83448.000000,27125.000000,1800.000000)}

{create adhoc191}
{access adhoc191}
{connect adhoc191(1), adhoc1(0)}
{nseg = 1}
{strdef color color = "White"}
{pt3dclear()}
{pt3dadd(202608.000000,150492.000000,37000.000000,1800.000000)}
{pt3dadd(191556.000000,85860.000000,26775.000000,1800.000000)}

{create adhoc192}
{access adhoc192}
{connect adhoc192(1), adhoc1(0)}
{nseg = 1}
{strdef color color = "White"}
{pt3dclear()}
{pt3dadd(202608.000000,150492.000000,37000.000000,1800.000000)}
{pt3dadd(188676.000000,84348.000000,39675.000000,1800.000000)}

{create adhoc193}
{access adhoc193}
{connect adhoc193(1), adhoc1(0)}
{nseg = 1}
{strdef color color = "White"}
{pt3dclear()}
{pt3dadd(202608.000000,150492.000000,37000.000000,1800.000000)}
{pt3dadd(188676.000000,83652.000000,36975.000000,1800.000000)}

{create adhoc194}
{access adhoc194}
{connect adhoc194(1), adhoc1(0)}
{nseg = 1}
{strdef color color = "White"}
{pt3dclear()}
{pt3dadd(202608.000000,150492.000000,37000.000000,1800.000000)}
{pt3dadd(188628.000000,84120.000000,34775.000000,1800.000000)}

{create adhoc195}
{access adhoc195}
{connect adhoc195(1), adhoc1(0)}
{nseg = 1}
{strdef color color = "White"}
{pt3dclear()}
{pt3dadd(202608.000000,150492.000000,37000.000000,1800.000000)}
{pt3dadd(188652.000000,83652.000000,32175.000000,1800.000000)}

{create adhoc196}
{access adhoc196}
{connect adhoc196(1), adhoc1(0)}
{nseg = 1}
{strdef color color = "White"}
{pt3dclear()}
{pt3dadd(202608.000000,150492.000000,37000.000000,1800.000000)}
{pt3dadd(188652.000000,84468.000000,29825.000000,1800.000000)}

{create adhoc197}
{access adhoc197}
{connect adhoc197(1), adhoc1(0)}
{nseg = 1}
{strdef color color = "White"}
{pt3dclear()}
{pt3dadd(202608.000000,150492.000000,37000.000000,1800.000000)}
{pt3dadd(188664.000000,86880.000000,32325.000000,1800.000000)}

{create adhoc198}
{access adhoc198}
{connect adhoc198(1), adhoc1(0)}
{nseg = 1}
{strdef color color = "White"}
{pt3dclear()}
{pt3dadd(202608.000000,150492.000000,37000.000000,1800.000000)}
{pt3dadd(189048.000000,86652.000000,27825.000000,1800.000000)}

{create adhoc199}
{access adhoc199}
{connect adhoc199(1), adhoc1(0)}
{nseg = 1}
{strdef color color = "White"}
{pt3dclear()}
{pt3dadd(202608.000000,150492.000000,37000.000000,1800.000000)}
{pt3dadd(189648.000000,92268.000000,38975.000000,1800.000000)}

{create adhoc200}
{access adhoc200}
{connect adhoc200(1), adhoc1(0)}
{nseg = 1}
{strdef color color = "White"}
{pt3dclear()}
{pt3dadd(202608.000000,150492.000000,37000.000000,1800.000000)}
{pt3dadd(190020.000000,94752.000000,43725.000000,1800.000000)}

{create adhoc201}
{access adhoc201}
{connect adhoc201(1), adhoc1(0)}
{nseg = 1}
{strdef color color = "White"}
{pt3dclear()}
{pt3dadd(202608.000000,150492.000000,37000.000000,1800.000000)}
{pt3dadd(190080.000000,92376.000000,44025.000000,1800.000000)}

{create adhoc202}
{access adhoc202}
{connect adhoc202(1), adhoc1(0)}
{nseg = 1}
{strdef color color = "White"}
{pt3dclear()}
{pt3dadd(202608.000000,150492.000000,37000.000000,1800.000000)}
{pt3dadd(189144.000000,90204.000000,45625.000000,1800.000000)}

{create adhoc203}
{access adhoc203}
{connect adhoc203(1), adhoc1(0)}
{nseg = 1}
{strdef color color = "White"}
{pt3dclear()}
{pt3dadd(202608.000000,150492.000000,37000.000000,1800.000000)}
{pt3dadd(188772.000000,88332.000000,43975.000000,1800.000000)}

{create adhoc204}
{access adhoc204}
{connect adhoc204(1), adhoc1(0)}
{nseg = 1}
{strdef color color = "White"}
{pt3dclear()}
{pt3dadd(202608.000000,150492.000000,37000.000000,1800.000000)}
{pt3dadd(188736.000000,85968.000000,45075.000000,1800.000000)}

{create adhoc205}
{access adhoc205}
{connect adhoc205(1), adhoc1(0)}
{nseg = 1}
{strdef color color = "White"}
{pt3dclear()}
{pt3dadd(202608.000000,150492.000000,37000.000000,1800.000000)}
{pt3dadd(188172.000000,86088.000000,42275.000000,1800.000000)}

{create adhoc206}
{access adhoc206}
{connect adhoc206(1), adhoc1(0)}
{nseg = 1}
{strdef color color = "White"}
{pt3dclear()}
{pt3dadd(202608.000000,150492.000000,37000.000000,1800.000000)}
{pt3dadd(188064.000000,84240.000000,42925.000000,1800.000000)}

{create adhoc207}
{access adhoc207}
{connect adhoc207(1), adhoc1(0)}
{nseg = 1}
{strdef color color = "White"}
{pt3dclear()}
{pt3dadd(202608.000000,150492.000000,37000.000000,1800.000000)}
{pt3dadd(186492.000000,85464.000000,53875.000000,1800.000000)}

{create adhoc208}
{access adhoc208}
{connect adhoc208(1), adhoc1(0)}
{nseg = 1}
{strdef color color = "White"}
{pt3dclear()}
{pt3dadd(202608.000000,150492.000000,37000.000000,1800.000000)}
{pt3dadd(188100.000000,89052.000000,53375.000000,1800.000000)}

{create adhoc209}
{access adhoc209}
{connect adhoc209(1), adhoc1(0)}
{nseg = 1}
{strdef color color = "White"}
{pt3dclear()}
{pt3dadd(202608.000000,150492.000000,37000.000000,1800.000000)}
{pt3dadd(188148.000000,93528.000000,52675.000000,1800.000000)}

{create adhoc210}
{access adhoc210}
{connect adhoc210(1), adhoc1(0)}
{nseg = 1}
{strdef color color = "White"}
{pt3dclear()}
{pt3dadd(202608.000000,150492.000000,37000.000000,1800.000000)}
{pt3dadd(188148.000000,91776.000000,53875.000000,1800.000000)}

{create adhoc211}
{access adhoc211}
{connect adhoc211(1), adhoc1(0)}
{nseg = 1}
{strdef color color = "White"}
{pt3dclear()}
{pt3dadd(202608.000000,150492.000000,37000.000000,1800.000000)}
{pt3dadd(186084.000000,96924.000000,52925.000000,1800.000000)}

{create adhoc212}
{access adhoc212}
{connect adhoc212(1), adhoc1(0)}
{nseg = 1}
{strdef color color = "White"}
{pt3dclear()}
{pt3dadd(202608.000000,150492.000000,37000.000000,1800.000000)}
{pt3dadd(185976.000000,95964.000000,54875.000000,1800.000000)}

{create adhoc213}
{access adhoc213}
{connect adhoc213(1), adhoc1(0)}
{nseg = 1}
{strdef color color = "White"}
{pt3dclear()}
{pt3dadd(202608.000000,150492.000000,37000.000000,1800.000000)}
{pt3dadd(182904.000000,94428.000000,55775.000000,1800.000000)}

{create adhoc214}
{access adhoc214}
{connect adhoc214(1), adhoc1(0)}
{nseg = 1}
{strdef color color = "White"}
{pt3dclear()}
{pt3dadd(202608.000000,150492.000000,37000.000000,1800.000000)}
{pt3dadd(182964.000000,94224.000000,52475.000000,1800.000000)}

{create adhoc215}
{access adhoc215}
{connect adhoc215(1), adhoc1(0)}
{nseg = 1}
{strdef color color = "White"}
{pt3dclear()}
{pt3dadd(202608.000000,150492.000000,37000.000000,1800.000000)}
{pt3dadd(183168.000000,92448.000000,55025.000000,1800.000000)}

{create adhoc216}
{access adhoc216}
{connect adhoc216(1), adhoc1(0)}
{nseg = 1}
{strdef color color = "White"}
{pt3dclear()}
{pt3dadd(202608.000000,150492.000000,37000.000000,1800.000000)}
{pt3dadd(183132.000000,89388.000000,55675.000000,1800.000000)}

{create adhoc217}
{access adhoc217}
{connect adhoc217(1), adhoc1(0)}
{nseg = 1}
{strdef color color = "White"}
{pt3dclear()}
{pt3dadd(202608.000000,150492.000000,37000.000000,1800.000000)}
{pt3dadd(183132.000000,89868.000000,57625.000000,1800.000000)}

{create adhoc218}
{access adhoc218}
{connect adhoc218(1), adhoc1(0)}
{nseg = 1}
{strdef color color = "White"}
{pt3dclear()}
{pt3dadd(202608.000000,150492.000000,37000.000000,1800.000000)}
{pt3dadd(189840.000000,95952.000000,58525.000000,1800.000000)}

{create adhoc219}
{access adhoc219}
{connect adhoc219(1), adhoc1(0)}
{nseg = 1}
{strdef color color = "White"}
{pt3dclear()}
{pt3dadd(202608.000000,150492.000000,37000.000000,1800.000000)}
{pt3dadd(189864.000000,100116.000000,67075.000000,1800.000000)}

{create adhoc220}
{access adhoc220}
{connect adhoc220(1), adhoc1(0)}
{nseg = 1}
{strdef color color = "White"}
{pt3dclear()}
{pt3dadd(202608.000000,150492.000000,37000.000000,1800.000000)}
{pt3dadd(189708.000000,98736.000000,65725.000000,1800.000000)}

{create adhoc221}
{access adhoc221}
{connect adhoc221(1), adhoc1(0)}
{nseg = 1}
{strdef color color = "White"}
{pt3dclear()}
{pt3dadd(202608.000000,150492.000000,37000.000000,1800.000000)}
{pt3dadd(189804.000000,96276.000000,64275.000000,1800.000000)}

{create adhoc222}
{access adhoc222}
{connect adhoc222(1), adhoc1(0)}
{nseg = 1}
{strdef color color = "White"}
{pt3dclear()}
{pt3dadd(202608.000000,150492.000000,37000.000000,1800.000000)}
{pt3dadd(189756.000000,93624.000000,66875.000000,1800.000000)}

{create adhoc223}
{access adhoc223}
{connect adhoc223(1), adhoc1(0)}
{nseg = 1}
{strdef color color = "White"}
{pt3dclear()}
{pt3dadd(202608.000000,150492.000000,37000.000000,1800.000000)}
{pt3dadd(189840.000000,96108.000000,67025.000000,1800.000000)}

{create adhoc224}
{access adhoc224}
{connect adhoc224(1), adhoc1(0)}
{nseg = 1}
{strdef color color = "White"}
{pt3dclear()}
{pt3dadd(202608.000000,150492.000000,37000.000000,1800.000000)}
{pt3dadd(189384.000000,98652.000000,63175.000000,1800.000000)}

{create adhoc225}
{access adhoc225}
{connect adhoc225(1), adhoc1(0)}
{nseg = 1}
{strdef color color = "White"}
{pt3dclear()}
{pt3dadd(202608.000000,150492.000000,37000.000000,1800.000000)}
{pt3dadd(189372.000000,100752.000000,62175.000000,1800.000000)}

{create adhoc226}
{access adhoc226}
{connect adhoc226(1), adhoc1(0)}
{nseg = 1}
{strdef color color = "White"}
{pt3dclear()}
{pt3dadd(202608.000000,150492.000000,37000.000000,1800.000000)}
{pt3dadd(189492.000000,99624.000000,52675.000000,1800.000000)}

{create adhoc227}
{access adhoc227}
{connect adhoc227(1), adhoc1(0)}
{nseg = 1}
{strdef color color = "White"}
{pt3dclear()}
{pt3dadd(202608.000000,150492.000000,37000.000000,1800.000000)}
{pt3dadd(189540.000000,96288.000000,53075.000000,1800.000000)}

{create adhoc228}
{access adhoc228}
{connect adhoc228(1), adhoc1(0)}
{nseg = 1}
{strdef color color = "White"}
{pt3dclear()}
{pt3dadd(202608.000000,150492.000000,37000.000000,1800.000000)}
{pt3dadd(189408.000000,98568.000000,54675.000000,1800.000000)}

{create adhoc229}
{access adhoc229}
{connect adhoc229(1), adhoc1(0)}
{nseg = 1}
{strdef color color = "White"}
{pt3dclear()}
{pt3dadd(202608.000000,150492.000000,37000.000000,1800.000000)}
{pt3dadd(189420.000000,101460.000000,55025.000000,1800.000000)}

{create adhoc230}
{access adhoc230}
{connect adhoc230(1), adhoc1(0)}
{nseg = 1}
{strdef color color = "White"}
{pt3dclear()}
{pt3dadd(202608.000000,150492.000000,37000.000000,1800.000000)}
{pt3dadd(189360.000000,101004.000000,57925.000000,1800.000000)}

{create adhoc231}
{access adhoc231}
{connect adhoc231(1), adhoc1(0)}
{nseg = 1}
{strdef color color = "White"}
{pt3dclear()}
{pt3dadd(202608.000000,150492.000000,37000.000000,1800.000000)}
{pt3dadd(189360.000000,100752.000000,60125.000000,1800.000000)}

{create adhoc232}
{access adhoc232}
{connect adhoc232(1), adhoc1(0)}
{nseg = 1}
{strdef color color = "White"}
{pt3dclear()}
{pt3dadd(202608.000000,150492.000000,37000.000000,1800.000000)}
{pt3dadd(189348.000000,98148.000000,58075.000000,1800.000000)}

{create adhoc233}
{access adhoc233}
{connect adhoc233(1), adhoc1(0)}
{nseg = 1}
{strdef color color = "White"}
{pt3dclear()}
{pt3dadd(202608.000000,150492.000000,37000.000000,1800.000000)}
{pt3dadd(189348.000000,97092.000000,61225.000000,1800.000000)}

{create adhoc234}
{access adhoc234}
{connect adhoc234(1), adhoc1(0)}
{nseg = 1}
{strdef color color = "White"}
{pt3dclear()}
{pt3dadd(202608.000000,150492.000000,37000.000000,1800.000000)}
{pt3dadd(189360.000000,92460.000000,59225.000000,1800.000000)}

{create adhoc235}
{access adhoc235}
{connect adhoc235(1), adhoc1(0)}
{nseg = 1}
{strdef color color = "White"}
{pt3dclear()}
{pt3dadd(202608.000000,150492.000000,37000.000000,1800.000000)}
{pt3dadd(189336.000000,91608.000000,62775.000000,1800.000000)}

{create adhoc236}
{access adhoc236}
{connect adhoc236(1), adhoc1(0)}
{nseg = 1}
{strdef color color = "White"}
{pt3dclear()}
{pt3dadd(202608.000000,150492.000000,37000.000000,1800.000000)}
{pt3dadd(189372.000000,94332.000000,62025.000000,1800.000000)}

{create adhoc237}
{access adhoc237}
{connect adhoc237(1), adhoc1(0)}
{nseg = 1}
{strdef color color = "White"}
{pt3dclear()}
{pt3dadd(202608.000000,150492.000000,37000.000000,1800.000000)}
{pt3dadd(188784.000000,99768.000000,49325.000000,1800.000000)}

{create adhoc238}
{access adhoc238}
{connect adhoc238(1), adhoc1(0)}
{nseg = 1}
{strdef color color = "White"}
{pt3dclear()}
{pt3dadd(202608.000000,150492.000000,37000.000000,1800.000000)}
{pt3dadd(185472.000000,97812.000000,38325.000000,1800.000000)}

{create adhoc239}
{access adhoc239}
{connect adhoc239(1), adhoc1(0)}
{nseg = 1}
{strdef color color = "White"}
{pt3dclear()}
{pt3dadd(202608.000000,150492.000000,37000.000000,1800.000000)}
{pt3dadd(185340.000000,99828.000000,40675.000000,1800.000000)}

{create adhoc240}
{access adhoc240}
{connect adhoc240(1), adhoc1(0)}
{nseg = 1}
{strdef color color = "White"}
{pt3dclear()}
{pt3dadd(202608.000000,150492.000000,37000.000000,1800.000000)}
{pt3dadd(190104.000000,96924.000000,45725.000000,1800.000000)}

{create adhoc241}
{access adhoc241}
{connect adhoc241(1), adhoc1(0)}
{nseg = 1}
{strdef color color = "White"}
{pt3dclear()}
{pt3dadd(202608.000000,150492.000000,37000.000000,1800.000000)}
{pt3dadd(191544.000000,93648.000000,45825.000000,1800.000000)}

{create adhoc242}
{access adhoc242}
{connect adhoc242(1), adhoc1(0)}
{nseg = 1}
{strdef color color = "White"}
{pt3dclear()}
{pt3dadd(202608.000000,150492.000000,37000.000000,1800.000000)}
{pt3dadd(190872.000000,99936.000000,46275.000000,1800.000000)}

{create adhoc243}
{access adhoc243}
{connect adhoc243(1), adhoc1(0)}
{nseg = 1}
{strdef color color = "White"}
{pt3dclear()}
{pt3dadd(202608.000000,150492.000000,37000.000000,1800.000000)}
{pt3dadd(190404.000000,102636.000000,45075.000000,1800.000000)}

{create adhoc244}
{access adhoc244}
{connect adhoc244(1), adhoc1(0)}
{nseg = 1}
{strdef color color = "White"}
{pt3dclear()}
{pt3dadd(202608.000000,150492.000000,37000.000000,1800.000000)}
{pt3dadd(158760.000000,73956.000000,58525.000000,1800.000000)}

{create adhoc245}
{access adhoc245}
{connect adhoc245(1), adhoc1(0)}
{nseg = 1}
{strdef color color = "White"}
{pt3dclear()}
{pt3dadd(202608.000000,150492.000000,37000.000000,1800.000000)}
{pt3dadd(158724.000000,73176.000000,60925.000000,1800.000000)}

{create adhoc246}
{access adhoc246}
{connect adhoc246(1), adhoc1(0)}
{nseg = 1}
{strdef color color = "White"}
{pt3dclear()}
{pt3dadd(202608.000000,150492.000000,37000.000000,1800.000000)}
{pt3dadd(156372.000000,78012.000000,67125.000000,1800.000000)}

{create adhoc247}
{access adhoc247}
{connect adhoc247(1), adhoc1(0)}
{nseg = 1}
{strdef color color = "White"}
{pt3dclear()}
{pt3dadd(202608.000000,150492.000000,37000.000000,1800.000000)}
{pt3dadd(158940.000000,79212.000000,64975.000000,1800.000000)}

{create adhoc248}
{access adhoc248}
{connect adhoc248(1), adhoc1(0)}
{nseg = 1}
{strdef color color = "White"}
{pt3dclear()}
{pt3dadd(202608.000000,150492.000000,37000.000000,1800.000000)}
{pt3dadd(161676.000000,75852.000000,74725.000000,1800.000000)}

{create adhoc249}
{access adhoc249}
{connect adhoc249(1), adhoc1(0)}
{nseg = 1}
{strdef color color = "White"}
{pt3dclear()}
{pt3dadd(202608.000000,150492.000000,37000.000000,1800.000000)}
{pt3dadd(161520.000000,78156.000000,73325.000000,1800.000000)}

{create adhoc250}
{access adhoc250}
{connect adhoc250(1), adhoc1(0)}
{nseg = 1}
{strdef color color = "White"}
{pt3dclear()}
{pt3dadd(202608.000000,150492.000000,37000.000000,1800.000000)}
{pt3dadd(161556.000000,80472.000000,73675.000000,1800.000000)}

{create adhoc251}
{access adhoc251}
{connect adhoc251(1), adhoc1(0)}
{nseg = 1}
{strdef color color = "White"}
{pt3dclear()}
{pt3dadd(202608.000000,150492.000000,37000.000000,1800.000000)}
{pt3dadd(161532.000000,85452.000000,72275.000000,1800.000000)}

{create adhoc252}
{access adhoc252}
{connect adhoc252(1), adhoc1(0)}
{nseg = 1}
{strdef color color = "White"}
{pt3dclear()}
{pt3dadd(202608.000000,150492.000000,37000.000000,1800.000000)}
{pt3dadd(161472.000000,82956.000000,72875.000000,1800.000000)}

{create adhoc253}
{access adhoc253}
{connect adhoc253(1), adhoc1(0)}
{nseg = 1}
{strdef color color = "White"}
{pt3dclear()}
{pt3dadd(202608.000000,150492.000000,37000.000000,1800.000000)}
{pt3dadd(161484.000000,80772.000000,70875.000000,1800.000000)}

{create adhoc254}
{access adhoc254}
{connect adhoc254(1), adhoc1(0)}
{nseg = 1}
{strdef color color = "White"}
{pt3dclear()}
{pt3dadd(202608.000000,150492.000000,37000.000000,1800.000000)}
{pt3dadd(161532.000000,82884.000000,69925.000000,1800.000000)}

{create adhoc255}
{access adhoc255}
{connect adhoc255(1), adhoc1(0)}
{nseg = 1}
{strdef color color = "White"}
{pt3dclear()}
{pt3dadd(202608.000000,150492.000000,37000.000000,1800.000000)}
{pt3dadd(161268.000000,84852.000000,69325.000000,1800.000000)}

{create adhoc256}
{access adhoc256}
{connect adhoc256(1), adhoc1(0)}
{nseg = 1}
{strdef color color = "White"}
{pt3dclear()}
{pt3dadd(202608.000000,150492.000000,37000.000000,1800.000000)}
{pt3dadd(161244.000000,84084.000000,67025.000000,1800.000000)}

{create adhoc257}
{access adhoc257}
{connect adhoc257(1), adhoc1(0)}
{nseg = 1}
{strdef color color = "White"}
{pt3dclear()}
{pt3dadd(202608.000000,150492.000000,37000.000000,1800.000000)}
{pt3dadd(161100.000000,82584.000000,64625.000000,1800.000000)}

{create adhoc258}
{access adhoc258}
{connect adhoc258(1), adhoc1(0)}
{nseg = 1}
{strdef color color = "White"}
{pt3dclear()}
{pt3dadd(202608.000000,150492.000000,37000.000000,1800.000000)}
{pt3dadd(161916.000000,81564.000000,66425.000000,1800.000000)}

{create adhoc259}
{access adhoc259}
{connect adhoc259(1), adhoc1(0)}
{nseg = 1}
{strdef color color = "White"}
{pt3dclear()}
{pt3dadd(202608.000000,150492.000000,37000.000000,1800.000000)}
{pt3dadd(161244.000000,87192.000000,67025.000000,1800.000000)}

{create adhoc260}
{access adhoc260}
{connect adhoc260(1), adhoc1(0)}
{nseg = 1}
{strdef color color = "White"}
{pt3dclear()}
{pt3dadd(202608.000000,150492.000000,37000.000000,1800.000000)}
{pt3dadd(161112.000000,86856.000000,63875.000000,1800.000000)}

{create adhoc261}
{access adhoc261}
{connect adhoc261(1), adhoc1(0)}
{nseg = 1}
{strdef color color = "White"}
{pt3dclear()}
{pt3dadd(202608.000000,150492.000000,37000.000000,1800.000000)}
{pt3dadd(161100.000000,82872.000000,61325.000000,1800.000000)}

{create adhoc262}
{access adhoc262}
{connect adhoc262(1), adhoc1(0)}
{nseg = 1}
{strdef color color = "White"}
{pt3dclear()}
{pt3dadd(202608.000000,150492.000000,37000.000000,1800.000000)}
{pt3dadd(161064.000000,80892.000000,61725.000000,1800.000000)}

{create adhoc263}
{access adhoc263}
{connect adhoc263(1), adhoc1(0)}
{nseg = 1}
{strdef color color = "White"}
{pt3dclear()}
{pt3dadd(202608.000000,150492.000000,37000.000000,1800.000000)}
{pt3dadd(161460.000000,75108.000000,71475.000000,1800.000000)}

{create adhoc264}
{access adhoc264}
{connect adhoc264(1), adhoc1(0)}
{nseg = 1}
{strdef color color = "White"}
{pt3dclear()}
{pt3dadd(202608.000000,150492.000000,37000.000000,1800.000000)}
{pt3dadd(161148.000000,77880.000000,63225.000000,1800.000000)}

{create adhoc265}
{access adhoc265}
{connect adhoc265(1), adhoc1(0)}
{nseg = 1}
{strdef color color = "White"}
{pt3dclear()}
{pt3dadd(202608.000000,150492.000000,37000.000000,1800.000000)}
{pt3dadd(161088.000000,74400.000000,61475.000000,1800.000000)}

{create adhoc266}
{access adhoc266}
{connect adhoc266(1), adhoc1(0)}
{nseg = 1}
{strdef color color = "White"}
{pt3dclear()}
{pt3dadd(202608.000000,150492.000000,37000.000000,1800.000000)}
{pt3dadd(161100.000000,75708.000000,64825.000000,1800.000000)}

{create adhoc267}
{access adhoc267}
{connect adhoc267(1), adhoc1(0)}
{nseg = 1}
{strdef color color = "White"}
{pt3dclear()}
{pt3dadd(202608.000000,150492.000000,37000.000000,1800.000000)}
{pt3dadd(161268.000000,75372.000000,67225.000000,1800.000000)}

{create adhoc268}
{access adhoc268}
{connect adhoc268(1), adhoc1(0)}
{nseg = 1}
{strdef color color = "White"}
{pt3dclear()}
{pt3dadd(202608.000000,150492.000000,37000.000000,1800.000000)}
{pt3dadd(161268.000000,73956.000000,68675.000000,1800.000000)}

{create adhoc269}
{access adhoc269}
{connect adhoc269(1), adhoc1(0)}
{nseg = 1}
{strdef color color = "White"}
{pt3dclear()}
{pt3dadd(202608.000000,150492.000000,37000.000000,1800.000000)}
{pt3dadd(161532.000000,78060.000000,69925.000000,1800.000000)}

{create adhoc270}
{access adhoc270}
{connect adhoc270(1), adhoc1(0)}
{nseg = 1}
{strdef color color = "White"}
{pt3dclear()}
{pt3dadd(202608.000000,150492.000000,37000.000000,1800.000000)}
{pt3dadd(161496.000000,80148.000000,67725.000000,1800.000000)}

{create adhoc271}
{access adhoc271}
{connect adhoc271(1), adhoc1(0)}
{nseg = 1}
{strdef color color = "White"}
{pt3dclear()}
{pt3dadd(202608.000000,150492.000000,37000.000000,1800.000000)}
{pt3dadd(161604.000000,78060.000000,66625.000000,1800.000000)}

{create adhoc272}
{access adhoc272}
{connect adhoc272(1), adhoc1(0)}
{nseg = 1}
{strdef color color = "White"}
{pt3dclear()}
{pt3dadd(202608.000000,150492.000000,37000.000000,1800.000000)}
{pt3dadd(161904.000000,85572.000000,75175.000000,1800.000000)}

{create adhoc273}
{access adhoc273}
{connect adhoc273(1), adhoc1(0)}
{nseg = 1}
{strdef color color = "White"}
{pt3dclear()}
{pt3dadd(202608.000000,150492.000000,37000.000000,1800.000000)}
{pt3dadd(161616.000000,85944.000000,78525.000000,1800.000000)}

{create adhoc274}
{access adhoc274}
{connect adhoc274(1), adhoc1(0)}
{nseg = 1}
{strdef color color = "White"}
{pt3dclear()}
{pt3dadd(202608.000000,150492.000000,37000.000000,1800.000000)}
{pt3dadd(161604.000000,82968.000000,78325.000000,1800.000000)}

{create adhoc275}
{access adhoc275}
{connect adhoc275(1), adhoc1(0)}
{nseg = 1}
{strdef color color = "White"}
{pt3dclear()}
{pt3dadd(202608.000000,150492.000000,37000.000000,1800.000000)}
{pt3dadd(161652.000000,84948.000000,81625.000000,1800.000000)}

{create adhoc276}
{access adhoc276}
{connect adhoc276(1), adhoc1(0)}
{nseg = 1}
{strdef color color = "White"}
{pt3dclear()}
{pt3dadd(202608.000000,150492.000000,37000.000000,1800.000000)}
{pt3dadd(161640.000000,82776.000000,80675.000000,1800.000000)}

{create adhoc277}
{access adhoc277}
{connect adhoc277(1), adhoc1(0)}
{nseg = 1}
{strdef color color = "White"}
{pt3dclear()}
{pt3dadd(202608.000000,150492.000000,37000.000000,1800.000000)}
{pt3dadd(161616.000000,81036.000000,79975.000000,1800.000000)}

{create adhoc278}
{access adhoc278}
{connect adhoc278(1), adhoc1(0)}
{nseg = 1}
{strdef color color = "White"}
{pt3dclear()}
{pt3dadd(202608.000000,150492.000000,37000.000000,1800.000000)}
{pt3dadd(161628.000000,79560.000000,78075.000000,1800.000000)}

{create adhoc279}
{access adhoc279}
{connect adhoc279(1), adhoc1(0)}
{nseg = 1}
{strdef color color = "White"}
{pt3dclear()}
{pt3dadd(202608.000000,150492.000000,37000.000000,1800.000000)}
{pt3dadd(161628.000000,78972.000000,81125.000000,1800.000000)}

{create adhoc280}
{access adhoc280}
{connect adhoc280(1), adhoc1(0)}
{nseg = 1}
{strdef color color = "White"}
{pt3dclear()}
{pt3dadd(202608.000000,150492.000000,37000.000000,1800.000000)}
{pt3dadd(160752.000000,78240.000000,83025.000000,1800.000000)}

{create adhoc281}
{access adhoc281}
{connect adhoc281(1), adhoc1(0)}
{nseg = 1}
{strdef color color = "White"}
{pt3dclear()}
{pt3dadd(202608.000000,150492.000000,37000.000000,1800.000000)}
{pt3dadd(159708.000000,78132.000000,88725.000000,1800.000000)}

{create adhoc282}
{access adhoc282}
{connect adhoc282(1), adhoc1(0)}
{nseg = 1}
{strdef color color = "White"}
{pt3dclear()}
{pt3dadd(202608.000000,150492.000000,37000.000000,1800.000000)}
{pt3dadd(158856.000000,84900.000000,88925.000000,1800.000000)}

{create adhoc283}
{access adhoc283}
{connect adhoc283(1), adhoc1(0)}
{nseg = 1}
{strdef color color = "White"}
{pt3dclear()}
{pt3dadd(202608.000000,150492.000000,37000.000000,1800.000000)}
{pt3dadd(156360.000000,84576.000000,82125.000000,1800.000000)}

{create adhoc284}
{access adhoc284}
{connect adhoc284(1), adhoc1(0)}
{nseg = 1}
{strdef color color = "White"}
{pt3dclear()}
{pt3dadd(202608.000000,150492.000000,37000.000000,1800.000000)}
{pt3dadd(154368.000000,83160.000000,72775.000000,1800.000000)}

{create adhoc285}
{access adhoc285}
{connect adhoc285(1), adhoc1(0)}
{nseg = 1}
{strdef color color = "White"}
{pt3dclear()}
{pt3dadd(202608.000000,150492.000000,37000.000000,1800.000000)}
{pt3dadd(146220.000000,71652.000000,80425.000000,1800.000000)}

{create adhoc286}
{access adhoc286}
{connect adhoc286(1), adhoc1(0)}
{nseg = 1}
{strdef color color = "White"}
{pt3dclear()}
{pt3dadd(202608.000000,150492.000000,37000.000000,1800.000000)}
{pt3dadd(142080.000000,70548.000000,53025.000000,1800.000000)}

{create adhoc287}
{access adhoc287}
{connect adhoc287(1), adhoc1(0)}
{nseg = 1}
{strdef color color = "White"}
{pt3dclear()}
{pt3dadd(202608.000000,150492.000000,37000.000000,1800.000000)}
{pt3dadd(148632.000000,66876.000000,47025.000000,1800.000000)}

{create adhoc288}
{access adhoc288}
{connect adhoc288(1), adhoc1(0)}
{nseg = 1}
{strdef color color = "White"}
{pt3dclear()}
{pt3dadd(202608.000000,150492.000000,37000.000000,1800.000000)}
{pt3dadd(148524.000000,65076.000000,49025.000000,1800.000000)}

{create adhoc289}
{access adhoc289}
{connect adhoc289(1), adhoc1(0)}
{nseg = 1}
{strdef color color = "White"}
{pt3dclear()}
{pt3dadd(202608.000000,150492.000000,37000.000000,1800.000000)}
{pt3dadd(155112.000000,68568.000000,54525.000000,1800.000000)}

{create adhoc290}
{access adhoc290}
{connect adhoc290(1), adhoc1(0)}
{nseg = 1}
{strdef color color = "White"}
{pt3dclear()}
{pt3dadd(202608.000000,150492.000000,37000.000000,1800.000000)}
{pt3dadd(152280.000000,68496.000000,54525.000000,1800.000000)}

{create adhoc291}
{access adhoc291}
{connect adhoc291(1), adhoc1(0)}
{nseg = 1}
{strdef color color = "White"}
{pt3dclear()}
{pt3dadd(202608.000000,150492.000000,37000.000000,1800.000000)}
{pt3dadd(150852.000000,67584.000000,55625.000000,1800.000000)}

{create adhoc292}
{access adhoc292}
{connect adhoc292(1), adhoc1(0)}
{nseg = 1}
{strdef color color = "White"}
{pt3dclear()}
{pt3dadd(202608.000000,150492.000000,37000.000000,1800.000000)}
{pt3dadd(153036.000000,70116.000000,59025.000000,1800.000000)}

{create adhoc293}
{access adhoc293}
{connect adhoc293(1), adhoc1(0)}
{nseg = 1}
{strdef color color = "White"}
{pt3dclear()}
{pt3dadd(202608.000000,150492.000000,37000.000000,1800.000000)}
{pt3dadd(141348.000000,73524.000000,59825.000000,1800.000000)}

{create adhoc294}
{access adhoc294}
{connect adhoc294(1), adhoc1(0)}
{nseg = 1}
{strdef color color = "White"}
{pt3dclear()}
{pt3dadd(202608.000000,150492.000000,37000.000000,1800.000000)}
{pt3dadd(141108.000000,70068.000000,59825.000000,1800.000000)}

{create adhoc295}
{access adhoc295}
{connect adhoc295(1), adhoc1(0)}
{nseg = 1}
{strdef color color = "White"}
{pt3dclear()}
{pt3dadd(202608.000000,150492.000000,37000.000000,1800.000000)}
{pt3dadd(143868.000000,72324.000000,58125.000000,1800.000000)}

{create adhoc296}
{access adhoc296}
{connect adhoc296(1), adhoc1(0)}
{nseg = 1}
{strdef color color = "White"}
{pt3dclear()}
{pt3dadd(202608.000000,150492.000000,37000.000000,1800.000000)}
{pt3dadd(144900.000000,64884.000000,49375.000000,1800.000000)}

{create adhoc297}
{access adhoc297}
{connect adhoc297(1), adhoc1(0)}
{nseg = 1}
{strdef color color = "White"}
{pt3dclear()}
{pt3dadd(202608.000000,150492.000000,37000.000000,1800.000000)}
{pt3dadd(144852.000000,67176.000000,51725.000000,1800.000000)}

{create adhoc298}
{access adhoc298}
{connect adhoc298(1), adhoc1(0)}
{nseg = 1}
{strdef color color = "White"}
{pt3dclear()}
{pt3dadd(202608.000000,150492.000000,37000.000000,1800.000000)}
{pt3dadd(144804.000000,67380.000000,54575.000000,1800.000000)}

{create adhoc299}
{access adhoc299}
{connect adhoc299(1), adhoc1(0)}
{nseg = 1}
{strdef color color = "White"}
{pt3dclear()}
{pt3dadd(202608.000000,150492.000000,37000.000000,1800.000000)}
{pt3dadd(144756.000000,68184.000000,56425.000000,1800.000000)}

{create adhoc300}
{access adhoc300}
{connect adhoc300(1), adhoc1(0)}
{nseg = 1}
{strdef color color = "White"}
{pt3dclear()}
{pt3dadd(202608.000000,150492.000000,37000.000000,1800.000000)}
{pt3dadd(144732.000000,65076.000000,56925.000000,1800.000000)}

{create adhoc301}
{access adhoc301}
{connect adhoc301(1), adhoc1(0)}
{nseg = 1}
{strdef color color = "White"}
{pt3dclear()}
{pt3dadd(202608.000000,150492.000000,37000.000000,1800.000000)}
{pt3dadd(144720.000000,64908.000000,59625.000000,1800.000000)}

{create adhoc302}
{access adhoc302}
{connect adhoc302(1), adhoc1(0)}
{nseg = 1}
{strdef color color = "White"}
{pt3dclear()}
{pt3dadd(202608.000000,150492.000000,37000.000000,1800.000000)}
{pt3dadd(144948.000000,69168.000000,69625.000000,1800.000000)}

{create adhoc303}
{access adhoc303}
{connect adhoc303(1), adhoc1(0)}
{nseg = 1}
{strdef color color = "White"}
{pt3dclear()}
{pt3dadd(202608.000000,150492.000000,37000.000000,1800.000000)}
{pt3dadd(144912.000000,69828.000000,66275.000000,1800.000000)}

{create adhoc304}
{access adhoc304}
{connect adhoc304(1), adhoc1(0)}
{nseg = 1}
{strdef color color = "White"}
{pt3dclear()}
{pt3dadd(202608.000000,150492.000000,37000.000000,1800.000000)}
{pt3dadd(144732.000000,66528.000000,62725.000000,1800.000000)}

{create adhoc305}
{access adhoc305}
{connect adhoc305(1), adhoc1(0)}
{nseg = 1}
{strdef color color = "White"}
{pt3dclear()}
{pt3dadd(202608.000000,150492.000000,37000.000000,1800.000000)}
{pt3dadd(145020.000000,69624.000000,49675.000000,1800.000000)}

{create adhoc306}
{access adhoc306}
{connect adhoc306(1), adhoc1(0)}
{nseg = 1}
{strdef color color = "White"}
{pt3dclear()}
{pt3dadd(202608.000000,150492.000000,37000.000000,1800.000000)}
{pt3dadd(146868.000000,67032.000000,60425.000000,1800.000000)}

{create adhoc307}
{access adhoc307}
{connect adhoc307(1), adhoc1(0)}
{nseg = 1}
{strdef color color = "White"}
{pt3dclear()}
{pt3dadd(202608.000000,150492.000000,37000.000000,1800.000000)}
{pt3dadd(146892.000000,70572.000000,59225.000000,1800.000000)}

{create adhoc308}
{access adhoc308}
{connect adhoc308(1), adhoc1(0)}
{nseg = 1}
{strdef color color = "White"}
{pt3dclear()}
{pt3dadd(202608.000000,150492.000000,37000.000000,1800.000000)}
{pt3dadd(146916.000000,67848.000000,55975.000000,1800.000000)}

{create adhoc309}
{access adhoc309}
{connect adhoc309(1), adhoc1(0)}
{nseg = 1}
{strdef color color = "White"}
{pt3dclear()}
{pt3dadd(202608.000000,150492.000000,37000.000000,1800.000000)}
{pt3dadd(147024.000000,67812.000000,51625.000000,1800.000000)}

{create adhoc310}
{access adhoc310}
{connect adhoc310(1), adhoc1(0)}
{nseg = 1}
{strdef color color = "White"}
{pt3dclear()}
{pt3dadd(202608.000000,150492.000000,37000.000000,1800.000000)}
{pt3dadd(146952.000000,64848.000000,54425.000000,1800.000000)}

{create adhoc311}
{access adhoc311}
{connect adhoc311(1), adhoc1(0)}
{nseg = 1}
{strdef color color = "White"}
{pt3dclear()}
{pt3dadd(202608.000000,150492.000000,37000.000000,1800.000000)}
{pt3dadd(147024.000000,64512.000000,51525.000000,1800.000000)}

{create adhoc312}
{access adhoc312}
{connect adhoc312(1), adhoc1(0)}
{nseg = 1}
{strdef color color = "White"}
{pt3dclear()}
{pt3dadd(202608.000000,150492.000000,37000.000000,1800.000000)}
{pt3dadd(147132.000000,67044.000000,47125.000000,1800.000000)}

{create adhoc313}
{access adhoc313}
{connect adhoc313(1), adhoc1(0)}
{nseg = 1}
{strdef color color = "White"}
{pt3dclear()}
{pt3dadd(202608.000000,150492.000000,37000.000000,1800.000000)}
{pt3dadd(147816.000000,65436.000000,41625.000000,1800.000000)}

{create adhoc314}
{access adhoc314}
{connect adhoc314(1), adhoc1(0)}
{nseg = 1}
{strdef color color = "White"}
{pt3dclear()}
{pt3dadd(202608.000000,150492.000000,37000.000000,1800.000000)}
{pt3dadd(146364.000000,64776.000000,44675.000000,1800.000000)}

{create adhoc315}
{access adhoc315}
{connect adhoc315(1), adhoc1(0)}
{nseg = 1}
{strdef color color = "White"}
{pt3dclear()}
{pt3dadd(202608.000000,150492.000000,37000.000000,1800.000000)}
{pt3dadd(146628.000000,63336.000000,38975.000000,1800.000000)}

{create adhoc316}
{access adhoc316}
{connect adhoc316(1), adhoc1(0)}
{nseg = 1}
{strdef color color = "White"}
{pt3dclear()}
{pt3dadd(202608.000000,150492.000000,37000.000000,1800.000000)}
{pt3dadd(146856.000000,62472.000000,41375.000000,1800.000000)}

{create adhoc317}
{access adhoc317}
{connect adhoc317(1), adhoc1(0)}
{nseg = 1}
{strdef color color = "White"}
{pt3dclear()}
{pt3dadd(202608.000000,150492.000000,37000.000000,1800.000000)}
{pt3dadd(144504.000000,66540.000000,46875.000000,1800.000000)}

{create adhoc318}
{access adhoc318}
{connect adhoc318(1), adhoc1(0)}
{nseg = 1}
{strdef color color = "White"}
{pt3dclear()}
{pt3dadd(202608.000000,150492.000000,37000.000000,1800.000000)}
{pt3dadd(144516.000000,64008.000000,46925.000000,1800.000000)}

{create adhoc319}
{access adhoc319}
{connect adhoc319(1), adhoc1(0)}
{nseg = 1}
{strdef color color = "White"}
{pt3dclear()}
{pt3dadd(202608.000000,150492.000000,37000.000000,1800.000000)}
{pt3dadd(144504.000000,61572.000000,45575.000000,1800.000000)}

{create adhoc320}
{access adhoc320}
{connect adhoc320(1), adhoc1(0)}
{nseg = 1}
{strdef color color = "White"}
{pt3dclear()}
{pt3dadd(202608.000000,150492.000000,37000.000000,1800.000000)}
{pt3dadd(144612.000000,68220.000000,44075.000000,1800.000000)}

{create adhoc321}
{access adhoc321}
{connect adhoc321(1), adhoc1(0)}
{nseg = 1}
{strdef color color = "White"}
{pt3dclear()}
{pt3dadd(202608.000000,150492.000000,37000.000000,1800.000000)}
{pt3dadd(144660.000000,65304.000000,42375.000000,1800.000000)}

{create adhoc322}
{access adhoc322}
{connect adhoc322(1), adhoc1(0)}
{nseg = 1}
{strdef color color = "White"}
{pt3dclear()}
{pt3dadd(202608.000000,150492.000000,37000.000000,1800.000000)}
{pt3dadd(144756.000000,62844.000000,37425.000000,1800.000000)}

{create adhoc323}
{access adhoc323}
{connect adhoc323(1), adhoc1(0)}
{nseg = 1}
{strdef color color = "White"}
{pt3dclear()}
{pt3dadd(202608.000000,150492.000000,37000.000000,1800.000000)}
{pt3dadd(144720.000000,62712.000000,39975.000000,1800.000000)}

{create adhoc324}
{access adhoc324}
{connect adhoc324(1), adhoc1(0)}
{nseg = 1}
{strdef color color = "White"}
{pt3dclear()}
{pt3dadd(202608.000000,150492.000000,37000.000000,1800.000000)}
{pt3dadd(144732.000000,61176.000000,41975.000000,1800.000000)}

{create adhoc325}
{access adhoc325}
{connect adhoc325(1), adhoc1(0)}
{nseg = 1}
{strdef color color = "White"}
{pt3dclear()}
{pt3dadd(202608.000000,150492.000000,37000.000000,1800.000000)}
{pt3dadd(144648.000000,63564.000000,43425.000000,1800.000000)}

{create adhoc326}
{access adhoc326}
{connect adhoc326(1), adhoc1(0)}
{nseg = 1}
{strdef color color = "White"}
{pt3dclear()}
{pt3dadd(202608.000000,150492.000000,37000.000000,1800.000000)}
{pt3dadd(143748.000000,57288.000000,27825.000000,1800.000000)}

{create adhoc327}
{access adhoc327}
{connect adhoc327(1), adhoc1(0)}
{nseg = 1}
{strdef color color = "White"}
{pt3dclear()}
{pt3dadd(202608.000000,150492.000000,37000.000000,1800.000000)}
{pt3dadd(143712.000000,59184.000000,31425.000000,1800.000000)}

{create adhoc328}
{access adhoc328}
{connect adhoc328(1), adhoc1(0)}
{nseg = 1}
{strdef color color = "White"}
{pt3dclear()}
{pt3dadd(202608.000000,150492.000000,37000.000000,1800.000000)}
{pt3dadd(143712.000000,57324.000000,32275.000000,1800.000000)}

{create adhoc329}
{access adhoc329}
{connect adhoc329(1), adhoc1(0)}
{nseg = 1}
{strdef color color = "White"}
{pt3dclear()}
{pt3dadd(202608.000000,150492.000000,37000.000000,1800.000000)}
{pt3dadd(143664.000000,60840.000000,34075.000000,1800.000000)}

{create adhoc330}
{access adhoc330}
{connect adhoc330(1), adhoc1(0)}
{nseg = 1}
{strdef color color = "White"}
{pt3dclear()}
{pt3dadd(202608.000000,150492.000000,37000.000000,1800.000000)}
{pt3dadd(142092.000000,59640.000000,39825.000000,1800.000000)}

{create adhoc331}
{access adhoc331}
{connect adhoc331(1), adhoc1(0)}
{nseg = 1}
{strdef color color = "White"}
{pt3dclear()}
{pt3dadd(202608.000000,150492.000000,37000.000000,1800.000000)}
{pt3dadd(139248.000000,61368.000000,40925.000000,1800.000000)}

{create adhoc332}
{access adhoc332}
{connect adhoc332(1), adhoc1(0)}
{nseg = 1}
{strdef color color = "White"}
{pt3dclear()}
{pt3dadd(202608.000000,150492.000000,37000.000000,1800.000000)}
{pt3dadd(139200.000000,62628.000000,43425.000000,1800.000000)}

{create adhoc333}
{access adhoc333}
{connect adhoc333(1), adhoc1(0)}
{nseg = 1}
{strdef color color = "White"}
{pt3dclear()}
{pt3dadd(202608.000000,150492.000000,37000.000000,1800.000000)}
{pt3dadd(138804.000000,59388.000000,38075.000000,1800.000000)}

{create adhoc334}
{access adhoc334}
{connect adhoc334(1), adhoc1(0)}
{nseg = 1}
{strdef color color = "White"}
{pt3dclear()}
{pt3dadd(202608.000000,150492.000000,37000.000000,1800.000000)}
{pt3dadd(140280.000000,60456.000000,43775.000000,1800.000000)}

{create adhoc335}
{access adhoc335}
{connect adhoc335(1), adhoc1(0)}
{nseg = 1}
{strdef color color = "White"}
{pt3dclear()}
{pt3dadd(202608.000000,150492.000000,37000.000000,1800.000000)}
{pt3dadd(140412.000000,58968.000000,42075.000000,1800.000000)}

{create adhoc336}
{access adhoc336}
{connect adhoc336(1), adhoc1(0)}
{nseg = 1}
{strdef color color = "White"}
{pt3dclear()}
{pt3dadd(202608.000000,150492.000000,37000.000000,1800.000000)}
{pt3dadd(140436.000000,60264.000000,37475.000000,1800.000000)}

{create adhoc337}
{access adhoc337}
{connect adhoc337(1), adhoc1(0)}
{nseg = 1}
{strdef color color = "White"}
{pt3dclear()}
{pt3dadd(202608.000000,150492.000000,37000.000000,1800.000000)}
{pt3dadd(140424.000000,58536.000000,35375.000000,1800.000000)}

{create adhoc338}
{access adhoc338}
{connect adhoc338(1), adhoc1(0)}
{nseg = 1}
{strdef color color = "White"}
{pt3dclear()}
{pt3dadd(202608.000000,150492.000000,37000.000000,1800.000000)}
{pt3dadd(140232.000000,63576.000000,2375.000000,1800.000000)}

{create adhoc339}
{access adhoc339}
{connect adhoc339(1), adhoc1(0)}
{nseg = 1}
{strdef color color = "White"}
{pt3dclear()}
{pt3dadd(202608.000000,150492.000000,37000.000000,1800.000000)}
{pt3dadd(140208.000000,62124.000000,5325.000000,1800.000000)}

{create adhoc340}
{access adhoc340}
{connect adhoc340(1), adhoc1(0)}
{nseg = 1}
{strdef color color = "White"}
{pt3dclear()}
{pt3dadd(202608.000000,150492.000000,37000.000000,1800.000000)}
{pt3dadd(140232.000000,49704.000000,1925.000000,1800.000000)}

{create adhoc341}
{access adhoc341}
{connect adhoc341(1), adhoc1(0)}
{nseg = 1}
{strdef color color = "White"}
{pt3dclear()}
{pt3dadd(202608.000000,150492.000000,37000.000000,1800.000000)}
{pt3dadd(140196.000000,54660.000000,3825.000000,1800.000000)}

{create adhoc342}
{access adhoc342}
{connect adhoc342(1), adhoc1(0)}
{nseg = 1}
{strdef color color = "White"}
{pt3dclear()}
{pt3dadd(202608.000000,150492.000000,37000.000000,1800.000000)}
{pt3dadd(140184.000000,58152.000000,5175.000000,1800.000000)}

{create adhoc343}
{access adhoc343}
{connect adhoc343(1), adhoc1(0)}
{nseg = 1}
{strdef color color = "White"}
{pt3dclear()}
{pt3dadd(202608.000000,150492.000000,37000.000000,1800.000000)}
{pt3dadd(140124.000000,53616.000000,8625.000000,1800.000000)}

{create adhoc344}
{access adhoc344}
{connect adhoc344(1), adhoc1(0)}
{nseg = 1}
{strdef color color = "White"}
{pt3dclear()}
{pt3dadd(202608.000000,150492.000000,37000.000000,1800.000000)}
{pt3dadd(140148.000000,49968.000000,8775.000000,1800.000000)}

{create adhoc345}
{access adhoc345}
{connect adhoc345(1), adhoc1(0)}
{nseg = 1}
{strdef color color = "White"}
{pt3dclear()}
{pt3dadd(202608.000000,150492.000000,37000.000000,1800.000000)}
{pt3dadd(140160.000000,50244.000000,5775.000000,1800.000000)}

{create adhoc346}
{access adhoc346}
{connect adhoc346(1), adhoc1(0)}
{nseg = 1}
{strdef color color = "White"}
{pt3dclear()}
{pt3dadd(202608.000000,150492.000000,37000.000000,1800.000000)}
{pt3dadd(140220.000000,53112.000000,5525.000000,1800.000000)}

{create adhoc347}
{access adhoc347}
{connect adhoc347(1), adhoc1(0)}
{nseg = 1}
{strdef color color = "White"}
{pt3dclear()}
{pt3dadd(202608.000000,150492.000000,37000.000000,1800.000000)}
{pt3dadd(140124.000000,55320.000000,7725.000000,1800.000000)}

{create adhoc348}
{access adhoc348}
{connect adhoc348(1), adhoc1(0)}
{nseg = 1}
{strdef color color = "White"}
{pt3dclear()}
{pt3dadd(202608.000000,150492.000000,37000.000000,1800.000000)}
{pt3dadd(140100.000000,57636.000000,8225.000000,1800.000000)}

{create adhoc349}
{access adhoc349}
{connect adhoc349(1), adhoc1(0)}
{nseg = 1}
{strdef color color = "White"}
{pt3dclear()}
{pt3dadd(202608.000000,150492.000000,37000.000000,1800.000000)}
{pt3dadd(140112.000000,59496.000000,10425.000000,1800.000000)}

{create adhoc350}
{access adhoc350}
{connect adhoc350(1), adhoc1(0)}
{nseg = 1}
{strdef color color = "White"}
{pt3dclear()}
{pt3dadd(202608.000000,150492.000000,37000.000000,1800.000000)}
{pt3dadd(140124.000000,58584.000000,13575.000000,1800.000000)}

{create adhoc351}
{access adhoc351}
{connect adhoc351(1), adhoc1(0)}
{nseg = 1}
{strdef color color = "White"}
{pt3dclear()}
{pt3dadd(202608.000000,150492.000000,37000.000000,1800.000000)}
{pt3dadd(140124.000000,56040.000000,11675.000000,1800.000000)}

{create adhoc352}
{access adhoc352}
{connect adhoc352(1), adhoc1(0)}
{nseg = 1}
{strdef color color = "White"}
{pt3dclear()}
{pt3dadd(202608.000000,150492.000000,37000.000000,1800.000000)}
{pt3dadd(140196.000000,53004.000000,10725.000000,1800.000000)}

{create adhoc353}
{access adhoc353}
{connect adhoc353(1), adhoc1(0)}
{nseg = 1}
{strdef color color = "White"}
{pt3dclear()}
{pt3dadd(202608.000000,150492.000000,37000.000000,1800.000000)}
{pt3dadd(140364.000000,50376.000000,14025.000000,1800.000000)}

{create adhoc354}
{access adhoc354}
{connect adhoc354(1), adhoc1(0)}
{nseg = 1}
{strdef color color = "White"}
{pt3dclear()}
{pt3dadd(202608.000000,150492.000000,37000.000000,1800.000000)}
{pt3dadd(140136.000000,50892.000000,11375.000000,1800.000000)}

{create adhoc355}
{access adhoc355}
{connect adhoc355(1), adhoc1(0)}
{nseg = 1}
{strdef color color = "White"}
{pt3dclear()}
{pt3dadd(202608.000000,150492.000000,37000.000000,1800.000000)}
{pt3dadd(140220.000000,53484.000000,13525.000000,1800.000000)}

{create adhoc356}
{access adhoc356}
{connect adhoc356(1), adhoc1(0)}
{nseg = 1}
{strdef color color = "White"}
{pt3dclear()}
{pt3dadd(202608.000000,150492.000000,37000.000000,1800.000000)}
{pt3dadd(140448.000000,57084.000000,18625.000000,1800.000000)}

{create adhoc357}
{access adhoc357}
{connect adhoc357(1), adhoc1(0)}
{nseg = 1}
{strdef color color = "White"}
{pt3dclear()}
{pt3dadd(202608.000000,150492.000000,37000.000000,1800.000000)}
{pt3dadd(140460.000000,51084.000000,19125.000000,1800.000000)}

{create adhoc358}
{access adhoc358}
{connect adhoc358(1), adhoc1(0)}
{nseg = 1}
{strdef color color = "White"}
{pt3dclear()}
{pt3dadd(202608.000000,150492.000000,37000.000000,1800.000000)}
{pt3dadd(140340.000000,51612.000000,16525.000000,1800.000000)}

{create adhoc359}
{access adhoc359}
{connect adhoc359(1), adhoc1(0)}
{nseg = 1}
{strdef color color = "White"}
{pt3dclear()}
{pt3dadd(202608.000000,150492.000000,37000.000000,1800.000000)}
{pt3dadd(140412.000000,56232.000000,32975.000000,1800.000000)}

{create adhoc360}
{access adhoc360}
{connect adhoc360(1), adhoc1(0)}
{nseg = 1}
{strdef color color = "White"}
{pt3dclear()}
{pt3dadd(202608.000000,150492.000000,37000.000000,1800.000000)}
{pt3dadd(140496.000000,56940.000000,29925.000000,1800.000000)}

{create adhoc361}
{access adhoc361}
{connect adhoc361(1), adhoc1(0)}
{nseg = 1}
{strdef color color = "White"}
{pt3dclear()}
{pt3dadd(202608.000000,150492.000000,37000.000000,1800.000000)}
{pt3dadd(140484.000000,54528.000000,30025.000000,1800.000000)}

{create adhoc362}
{access adhoc362}
{connect adhoc362(1), adhoc1(0)}
{nseg = 1}
{strdef color color = "White"}
{pt3dclear()}
{pt3dadd(202608.000000,150492.000000,37000.000000,1800.000000)}
{pt3dadd(140496.000000,54552.000000,25575.000000,1800.000000)}

{create adhoc363}
{access adhoc363}
{connect adhoc363(1), adhoc1(0)}
{nseg = 1}
{strdef color color = "White"}
{pt3dclear()}
{pt3dadd(202608.000000,150492.000000,37000.000000,1800.000000)}
{pt3dadd(140544.000000,55500.000000,23075.000000,1800.000000)}

{create adhoc364}
{access adhoc364}
{connect adhoc364(1), adhoc1(0)}
{nseg = 1}
{strdef color color = "White"}
{pt3dclear()}
{pt3dadd(202608.000000,150492.000000,37000.000000,1800.000000)}
{pt3dadd(140196.000000,62976.000000,45875.000000,1800.000000)}

{create adhoc365}
{access adhoc365}
{connect adhoc365(1), adhoc1(0)}
{nseg = 1}
{strdef color color = "White"}
{pt3dclear()}
{pt3dadd(202608.000000,150492.000000,37000.000000,1800.000000)}
{pt3dadd(129912.000000,66672.000000,47625.000000,1800.000000)}

{create adhoc366}
{access adhoc366}
{connect adhoc366(1), adhoc1(0)}
{nseg = 1}
{strdef color color = "White"}
{pt3dclear()}
{pt3dadd(202608.000000,150492.000000,37000.000000,1800.000000)}
{pt3dadd(129912.000000,64692.000000,48325.000000,1800.000000)}

{create adhoc367}
{access adhoc367}
{connect adhoc367(1), adhoc1(0)}
{nseg = 1}
{strdef color color = "White"}
{pt3dclear()}
{pt3dadd(202608.000000,150492.000000,37000.000000,1800.000000)}
{pt3dadd(138252.000000,64380.000000,41525.000000,1800.000000)}

{create adhoc368}
{access adhoc368}
{connect adhoc368(1), adhoc1(0)}
{nseg = 1}
{strdef color color = "White"}
{pt3dclear()}
{pt3dadd(202608.000000,150492.000000,37000.000000,1800.000000)}
{pt3dadd(138204.000000,63120.000000,43675.000000,1800.000000)}

{create adhoc369}
{access adhoc369}
{connect adhoc369(1), adhoc1(0)}
{nseg = 1}
{strdef color color = "White"}
{pt3dclear()}
{pt3dadd(202608.000000,150492.000000,37000.000000,1800.000000)}
{pt3dadd(138096.000000,64332.000000,45925.000000,1800.000000)}

{create adhoc370}
{access adhoc370}
{connect adhoc370(1), adhoc1(0)}
{nseg = 1}
{strdef color color = "White"}
{pt3dclear()}
{pt3dadd(202608.000000,150492.000000,37000.000000,1800.000000)}
{pt3dadd(138036.000000,61344.000000,47625.000000,1800.000000)}

{create adhoc371}
{access adhoc371}
{connect adhoc371(1), adhoc1(0)}
{nseg = 1}
{strdef color color = "White"}
{pt3dclear()}
{pt3dadd(202608.000000,150492.000000,37000.000000,1800.000000)}
{pt3dadd(137976.000000,64236.000000,48925.000000,1800.000000)}

{create adhoc372}
{access adhoc372}
{connect adhoc372(1), adhoc1(0)}
{nseg = 1}
{strdef color color = "White"}
{pt3dclear()}
{pt3dadd(202608.000000,150492.000000,37000.000000,1800.000000)}
{pt3dadd(137928.000000,62376.000000,51075.000000,1800.000000)}

{create adhoc373}
{access adhoc373}
{connect adhoc373(1), adhoc1(0)}
{nseg = 1}
{strdef color color = "White"}
{pt3dclear()}
{pt3dadd(202608.000000,150492.000000,37000.000000,1800.000000)}
{pt3dadd(142488.000000,63228.000000,51175.000000,1800.000000)}

{create adhoc374}
{access adhoc374}
{connect adhoc374(1), adhoc1(0)}
{nseg = 1}
{strdef color color = "White"}
{pt3dclear()}
{pt3dadd(202608.000000,150492.000000,37000.000000,1800.000000)}
{pt3dadd(142500.000000,65988.000000,51225.000000,1800.000000)}

{create adhoc375}
{access adhoc375}
{connect adhoc375(1), adhoc1(0)}
{nseg = 1}
{strdef color color = "White"}
{pt3dclear()}
{pt3dadd(202608.000000,150492.000000,37000.000000,1800.000000)}
{pt3dadd(142608.000000,66672.000000,47525.000000,1800.000000)}

{create adhoc376}
{access adhoc376}
{connect adhoc376(1), adhoc1(0)}
{nseg = 1}
{strdef color color = "White"}
{pt3dclear()}
{pt3dadd(202608.000000,150492.000000,37000.000000,1800.000000)}
{pt3dadd(136188.000000,64908.000000,55825.000000,1800.000000)}

{create adhoc377}
{access adhoc377}
{connect adhoc377(1), adhoc1(0)}
{nseg = 1}
{strdef color color = "White"}
{pt3dclear()}
{pt3dadd(202608.000000,150492.000000,37000.000000,1800.000000)}
{pt3dadd(136284.000000,64308.000000,52175.000000,1800.000000)}

{create adhoc378}
{access adhoc378}
{connect adhoc378(1), adhoc1(0)}
{nseg = 1}
{strdef color color = "White"}
{pt3dclear()}
{pt3dadd(202608.000000,150492.000000,37000.000000,1800.000000)}
{pt3dadd(136320.000000,64332.000000,49425.000000,1800.000000)}

{create adhoc379}
{access adhoc379}
{connect adhoc379(1), adhoc1(0)}
{nseg = 1}
{strdef color color = "White"}
{pt3dclear()}
{pt3dadd(202608.000000,150492.000000,37000.000000,1800.000000)}
{pt3dadd(136512.000000,63936.000000,44125.000000,1800.000000)}

{create adhoc380}
{access adhoc380}
{connect adhoc380(1), adhoc1(0)}
{nseg = 1}
{strdef color color = "White"}
{pt3dclear()}
{pt3dadd(202608.000000,150492.000000,37000.000000,1800.000000)}
{pt3dadd(136416.000000,66564.000000,46875.000000,1800.000000)}

{create adhoc381}
{access adhoc381}
{connect adhoc381(1), adhoc1(0)}
{nseg = 1}
{strdef color color = "White"}
{pt3dclear()}
{pt3dadd(202608.000000,150492.000000,37000.000000,1800.000000)}
{pt3dadd(136236.000000,70728.000000,52425.000000,1800.000000)}

{create adhoc382}
{access adhoc382}
{connect adhoc382(1), adhoc1(0)}
{nseg = 1}
{strdef color color = "White"}
{pt3dclear()}
{pt3dadd(202608.000000,150492.000000,37000.000000,1800.000000)}
{pt3dadd(136200.000000,68568.000000,55075.000000,1800.000000)}

{create adhoc383}
{access adhoc383}
{connect adhoc383(1), adhoc1(0)}
{nseg = 1}
{strdef color color = "White"}
{pt3dclear()}
{pt3dadd(202608.000000,150492.000000,37000.000000,1800.000000)}
{pt3dadd(136296.000000,67320.000000,50975.000000,1800.000000)}

{create adhoc384}
{access adhoc384}
{connect adhoc384(1), adhoc1(0)}
{nseg = 1}
{strdef color color = "White"}
{pt3dclear()}
{pt3dadd(202608.000000,150492.000000,37000.000000,1800.000000)}
{pt3dadd(138768.000000,65532.000000,53025.000000,1800.000000)}

{create adhoc385}
{access adhoc385}
{connect adhoc385(1), adhoc1(0)}
{nseg = 1}
{strdef color color = "White"}
{pt3dclear()}
{pt3dadd(202608.000000,150492.000000,37000.000000,1800.000000)}
{pt3dadd(138648.000000,66492.000000,59975.000000,1800.000000)}

{create adhoc386}
{access adhoc386}
{connect adhoc386(1), adhoc1(0)}
{nseg = 1}
{strdef color color = "White"}
{pt3dclear()}
{pt3dadd(202608.000000,150492.000000,37000.000000,1800.000000)}
{pt3dadd(138684.000000,65364.000000,56475.000000,1800.000000)}

{create adhoc387}
{access adhoc387}
{connect adhoc387(1), adhoc1(0)}
{nseg = 1}
{strdef color color = "White"}
{pt3dclear()}
{pt3dadd(202608.000000,150492.000000,37000.000000,1800.000000)}
{pt3dadd(138840.000000,74736.000000,66575.000000,1800.000000)}

{create adhoc388}
{access adhoc388}
{connect adhoc388(1), adhoc1(0)}
{nseg = 1}
{strdef color color = "White"}
{pt3dclear()}
{pt3dadd(202608.000000,150492.000000,37000.000000,1800.000000)}
{pt3dadd(138660.000000,72564.000000,59325.000000,1800.000000)}

{create adhoc389}
{access adhoc389}
{connect adhoc389(1), adhoc1(0)}
{nseg = 1}
{strdef color color = "White"}
{pt3dclear()}
{pt3dadd(202608.000000,150492.000000,37000.000000,1800.000000)}
{pt3dadd(138684.000000,68832.000000,58275.000000,1800.000000)}

{create adhoc390}
{access adhoc390}
{connect adhoc390(1), adhoc1(0)}
{nseg = 1}
{strdef color color = "White"}
{pt3dclear()}
{pt3dadd(202608.000000,150492.000000,37000.000000,1800.000000)}
{pt3dadd(138660.000000,70320.000000,62625.000000,1800.000000)}

{create adhoc391}
{access adhoc391}
{connect adhoc391(1), adhoc1(0)}
{nseg = 1}
{strdef color color = "White"}
{pt3dclear()}
{pt3dadd(202608.000000,150492.000000,37000.000000,1800.000000)}
{pt3dadd(131784.000000,65736.000000,63375.000000,1800.000000)}

{create adhoc392}
{access adhoc392}
{connect adhoc392(1), adhoc1(0)}
{nseg = 1}
{strdef color color = "White"}
{pt3dclear()}
{pt3dadd(202608.000000,150492.000000,37000.000000,1800.000000)}
{pt3dadd(134880.000000,65280.000000,60775.000000,1800.000000)}

{create adhoc393}
{access adhoc393}
{connect adhoc393(1), adhoc1(0)}
{nseg = 1}
{strdef color color = "White"}
{pt3dclear()}
{pt3dadd(202608.000000,150492.000000,37000.000000,1800.000000)}
{pt3dadd(130908.000000,64956.000000,54175.000000,1800.000000)}

{create adhoc394}
{access adhoc394}
{connect adhoc394(1), adhoc1(0)}
{nseg = 1}
{strdef color color = "White"}
{pt3dclear()}
{pt3dadd(202608.000000,150492.000000,37000.000000,1800.000000)}
{pt3dadd(130740.000000,63264.000000,51875.000000,1800.000000)}

{create adhoc395}
{access adhoc395}
{connect adhoc395(1), adhoc1(0)}
{nseg = 1}
{strdef color color = "White"}
{pt3dclear()}
{pt3dadd(202608.000000,150492.000000,37000.000000,1800.000000)}
{pt3dadd(130800.000000,63192.000000,49325.000000,1800.000000)}

{create adhoc396}
{access adhoc396}
{connect adhoc396(1), adhoc1(0)}
{nseg = 1}
{strdef color color = "White"}
{pt3dclear()}
{pt3dadd(202608.000000,150492.000000,37000.000000,1800.000000)}
{pt3dadd(130788.000000,66384.000000,51125.000000,1800.000000)}

{create adhoc397}
{access adhoc397}
{connect adhoc397(1), adhoc1(0)}
{nseg = 1}
{strdef color color = "White"}
{pt3dclear()}
{pt3dadd(202608.000000,150492.000000,37000.000000,1800.000000)}
{pt3dadd(130740.000000,70272.000000,51575.000000,1800.000000)}

{create adhoc398}
{access adhoc398}
{connect adhoc398(1), adhoc1(0)}
{nseg = 1}
{strdef color color = "White"}
{pt3dclear()}
{pt3dadd(202608.000000,150492.000000,37000.000000,1800.000000)}
{pt3dadd(128760.000000,69564.000000,56075.000000,1800.000000)}

{create adhoc399}
{access adhoc399}
{connect adhoc399(1), adhoc1(0)}
{nseg = 1}
{strdef color color = "White"}
{pt3dclear()}
{pt3dadd(202608.000000,150492.000000,37000.000000,1800.000000)}
{pt3dadd(128712.000000,73452.000000,59525.000000,1800.000000)}

{create adhoc400}
{access adhoc400}
{connect adhoc400(1), adhoc1(0)}
{nseg = 1}
{strdef color color = "White"}
{pt3dclear()}
{pt3dadd(202608.000000,150492.000000,37000.000000,1800.000000)}
{pt3dadd(127356.000000,73320.000000,62325.000000,1800.000000)}

{create adhoc401}
{access adhoc401}
{connect adhoc401(1), adhoc1(0)}
{nseg = 1}
{strdef color color = "White"}
{pt3dclear()}
{pt3dadd(202608.000000,150492.000000,37000.000000,1800.000000)}
{pt3dadd(127368.000000,70320.000000,59725.000000,1800.000000)}

{create adhoc402}
{access adhoc402}
{connect adhoc402(1), adhoc1(0)}
{nseg = 1}
{strdef color color = "White"}
{pt3dclear()}
{pt3dadd(202608.000000,150492.000000,37000.000000,1800.000000)}
{pt3dadd(127356.000000,68712.000000,62825.000000,1800.000000)}

{create adhoc403}
{access adhoc403}
{connect adhoc403(1), adhoc1(0)}
{nseg = 1}
{strdef color color = "White"}
{pt3dclear()}
{pt3dadd(202608.000000,150492.000000,37000.000000,1800.000000)}
{pt3dadd(127332.000000,65040.000000,61475.000000,1800.000000)}

{create adhoc404}
{access adhoc404}
{connect adhoc404(1), adhoc1(0)}
{nseg = 1}
{strdef color color = "White"}
{pt3dclear()}
{pt3dadd(202608.000000,150492.000000,37000.000000,1800.000000)}
{pt3dadd(127392.000000,67116.000000,59075.000000,1800.000000)}

{create adhoc405}
{access adhoc405}
{connect adhoc405(1), adhoc1(0)}
{nseg = 1}
{strdef color color = "White"}
{pt3dclear()}
{pt3dadd(202608.000000,150492.000000,37000.000000,1800.000000)}
{pt3dadd(132036.000000,63696.000000,55675.000000,1800.000000)}

{create adhoc406}
{access adhoc406}
{connect adhoc406(1), adhoc1(0)}
{nseg = 1}
{strdef color color = "White"}
{pt3dclear()}
{pt3dadd(202608.000000,150492.000000,37000.000000,1800.000000)}
{pt3dadd(132024.000000,66912.000000,56225.000000,1800.000000)}

{create adhoc407}
{access adhoc407}
{connect adhoc407(1), adhoc1(0)}
{nseg = 1}
{strdef color color = "White"}
{pt3dclear()}
{pt3dadd(202608.000000,150492.000000,37000.000000,1800.000000)}
{pt3dadd(132012.000000,65004.000000,57475.000000,1800.000000)}

{create adhoc408}
{access adhoc408}
{connect adhoc408(1), adhoc1(0)}
{nseg = 1}
{strdef color color = "White"}
{pt3dclear()}
{pt3dadd(202608.000000,150492.000000,37000.000000,1800.000000)}
{pt3dadd(132012.000000,67548.000000,58325.000000,1800.000000)}

{create adhoc409}
{access adhoc409}
{connect adhoc409(1), adhoc1(0)}
{nseg = 1}
{strdef color color = "White"}
{pt3dclear()}
{pt3dadd(202608.000000,150492.000000,37000.000000,1800.000000)}
{pt3dadd(133164.000000,64380.000000,55925.000000,1800.000000)}

{create adhoc410}
{access adhoc410}
{connect adhoc410(1), adhoc1(0)}
{nseg = 1}
{strdef color color = "White"}
{pt3dclear()}
{pt3dadd(202608.000000,150492.000000,37000.000000,1800.000000)}
{pt3dadd(133104.000000,66288.000000,60975.000000,1800.000000)}

{create adhoc411}
{access adhoc411}
{connect adhoc411(1), adhoc1(0)}
{nseg = 1}
{strdef color color = "White"}
{pt3dclear()}
{pt3dadd(202608.000000,150492.000000,37000.000000,1800.000000)}
{pt3dadd(133164.000000,72096.000000,55475.000000,1800.000000)}

{create adhoc412}
{access adhoc412}
{connect adhoc412(1), adhoc1(0)}
{nseg = 1}
{strdef color color = "White"}
{pt3dclear()}
{pt3dadd(202608.000000,150492.000000,37000.000000,1800.000000)}
{pt3dadd(133212.000000,66648.000000,52975.000000,1800.000000)}

{create adhoc413}
{access adhoc413}
{connect adhoc413(1), adhoc1(0)}
{nseg = 1}
{strdef color color = "White"}
{pt3dclear()}
{pt3dadd(202608.000000,150492.000000,37000.000000,1800.000000)}
{pt3dadd(133272.000000,69204.000000,50475.000000,1800.000000)}

{create adhoc414}
{access adhoc414}
{connect adhoc414(1), adhoc1(0)}
{nseg = 1}
{strdef color color = "White"}
{pt3dclear()}
{pt3dadd(202608.000000,150492.000000,37000.000000,1800.000000)}
{pt3dadd(134520.000000,72912.000000,71375.000000,1800.000000)}

{create adhoc415}
{access adhoc415}
{connect adhoc415(1), adhoc1(0)}
{nseg = 1}
{strdef color color = "White"}
{pt3dclear()}
{pt3dadd(202608.000000,150492.000000,37000.000000,1800.000000)}
{pt3dadd(134868.000000,71100.000000,67825.000000,1800.000000)}

{create adhoc416}
{access adhoc416}
{connect adhoc416(1), adhoc1(0)}
{nseg = 1}
{strdef color color = "White"}
{pt3dclear()}
{pt3dadd(202608.000000,150492.000000,37000.000000,1800.000000)}
{pt3dadd(134796.000000,69756.000000,56125.000000,1800.000000)}

{create adhoc417}
{access adhoc417}
{connect adhoc417(1), adhoc1(0)}
{nseg = 1}
{strdef color color = "White"}
{pt3dclear()}
{pt3dadd(202608.000000,150492.000000,37000.000000,1800.000000)}
{pt3dadd(134760.000000,69192.000000,59275.000000,1800.000000)}

{create adhoc418}
{access adhoc418}
{connect adhoc418(1), adhoc1(0)}
{nseg = 1}
{strdef color color = "White"}
{pt3dclear()}
{pt3dadd(202608.000000,150492.000000,37000.000000,1800.000000)}
{pt3dadd(134712.000000,74052.000000,62225.000000,1800.000000)}

{create adhoc419}
{access adhoc419}
{connect adhoc419(1), adhoc1(0)}
{nseg = 1}
{strdef color color = "White"}
{pt3dclear()}
{pt3dadd(202608.000000,150492.000000,37000.000000,1800.000000)}
{pt3dadd(134736.000000,70080.000000,63225.000000,1800.000000)}

{create adhoc420}
{access adhoc420}
{connect adhoc420(1), adhoc1(0)}
{nseg = 1}
{strdef color color = "White"}
{pt3dclear()}
{pt3dadd(202608.000000,150492.000000,37000.000000,1800.000000)}
{pt3dadd(134904.000000,82980.000000,74025.000000,1800.000000)}

{create adhoc421}
{access adhoc421}
{connect adhoc421(1), adhoc1(0)}
{nseg = 1}
{strdef color color = "White"}
{pt3dclear()}
{pt3dadd(202608.000000,150492.000000,37000.000000,1800.000000)}
{pt3dadd(127680.000000,76380.000000,71675.000000,1800.000000)}

{create adhoc422}
{access adhoc422}
{connect adhoc422(1), adhoc1(0)}
{nseg = 1}
{strdef color color = "White"}
{pt3dclear()}
{pt3dadd(202608.000000,150492.000000,37000.000000,1800.000000)}
{pt3dadd(134784.000000,76560.000000,72625.000000,1800.000000)}

{create adhoc423}
{access adhoc423}
{connect adhoc423(1), adhoc1(0)}
{nseg = 1}
{strdef color color = "White"}
{pt3dclear()}
{pt3dadd(202608.000000,150492.000000,37000.000000,1800.000000)}
{pt3dadd(122340.000000,79728.000000,72875.000000,1800.000000)}

{create adhoc424}
{access adhoc424}
{connect adhoc424(1), adhoc1(0)}
{nseg = 1}
{strdef color color = "White"}
{pt3dclear()}
{pt3dadd(202608.000000,150492.000000,37000.000000,1800.000000)}
{pt3dadd(138096.000000,89496.000000,77975.000000,1800.000000)}

{create adhoc425}
{access adhoc425}
{connect adhoc425(1), adhoc1(0)}
{nseg = 1}
{strdef color color = "White"}
{pt3dclear()}
{pt3dadd(202608.000000,150492.000000,37000.000000,1800.000000)}
{pt3dadd(131256.000000,83712.000000,77125.000000,1800.000000)}

{create adhoc426}
{access adhoc426}
{connect adhoc426(1), adhoc1(0)}
{nseg = 1}
{strdef color color = "White"}
{pt3dclear()}
{pt3dadd(202608.000000,150492.000000,37000.000000,1800.000000)}
{pt3dadd(131160.000000,84996.000000,73425.000000,1800.000000)}

{create adhoc427}
{access adhoc427}
{connect adhoc427(1), adhoc1(0)}
{nseg = 1}
{strdef color color = "White"}
{pt3dclear()}
{pt3dadd(202608.000000,150492.000000,37000.000000,1800.000000)}
{pt3dadd(131256.000000,88944.000000,76725.000000,1800.000000)}

{create adhoc428}
{access adhoc428}
{connect adhoc428(1), adhoc1(0)}
{nseg = 1}
{strdef color color = "White"}
{pt3dclear()}
{pt3dadd(202608.000000,150492.000000,37000.000000,1800.000000)}
{pt3dadd(141324.000000,88056.000000,88875.000000,1800.000000)}

{create adhoc429}
{access adhoc429}
{connect adhoc429(1), adhoc1(0)}
{nseg = 1}
{strdef color color = "White"}
{pt3dclear()}
{pt3dadd(202608.000000,150492.000000,37000.000000,1800.000000)}
{pt3dadd(141300.000000,88704.000000,84425.000000,1800.000000)}

{create adhoc430}
{access adhoc430}
{connect adhoc430(1), adhoc1(0)}
{nseg = 1}
{strdef color color = "White"}
{pt3dclear()}
{pt3dadd(202608.000000,150492.000000,37000.000000,1800.000000)}
{pt3dadd(143004.000000,78864.000000,84975.000000,1800.000000)}

{create adhoc431}
{access adhoc431}
{connect adhoc431(1), adhoc1(0)}
{nseg = 1}
{strdef color color = "White"}
{pt3dclear()}
{pt3dadd(202608.000000,150492.000000,37000.000000,1800.000000)}
{pt3dadd(142572.000000,81456.000000,84425.000000,1800.000000)}

{create adhoc432}
{access adhoc432}
{connect adhoc432(1), adhoc1(0)}
{nseg = 1}
{strdef color color = "White"}
{pt3dclear()}
{pt3dadd(202608.000000,150492.000000,37000.000000,1800.000000)}
{pt3dadd(133236.000000,79464.000000,84225.000000,1800.000000)}

{create adhoc433}
{access adhoc433}
{connect adhoc433(1), adhoc1(0)}
{nseg = 1}
{strdef color color = "White"}
{pt3dclear()}
{pt3dadd(202608.000000,150492.000000,37000.000000,1800.000000)}
{pt3dadd(133152.000000,79968.000000,81025.000000,1800.000000)}

{create adhoc434}
{access adhoc434}
{connect adhoc434(1), adhoc1(0)}
{nseg = 1}
{strdef color color = "White"}
{pt3dclear()}
{pt3dadd(202608.000000,150492.000000,37000.000000,1800.000000)}
{pt3dadd(133116.000000,81636.000000,78975.000000,1800.000000)}

{create adhoc435}
{access adhoc435}
{connect adhoc435(1), adhoc1(0)}
{nseg = 1}
{strdef color color = "White"}
{pt3dclear()}
{pt3dadd(202608.000000,150492.000000,37000.000000,1800.000000)}
{pt3dadd(133068.000000,80808.000000,74675.000000,1800.000000)}

{create adhoc436}
{access adhoc436}
{connect adhoc436(1), adhoc1(0)}
{nseg = 1}
{strdef color color = "White"}
{pt3dclear()}
{pt3dadd(202608.000000,150492.000000,37000.000000,1800.000000)}
{pt3dadd(131880.000000,78348.000000,76825.000000,1800.000000)}

{create adhoc437}
{access adhoc437}
{connect adhoc437(1), adhoc1(0)}
{nseg = 1}
{strdef color color = "White"}
{pt3dclear()}
{pt3dadd(202608.000000,150492.000000,37000.000000,1800.000000)}
{pt3dadd(131796.000000,80328.000000,71975.000000,1800.000000)}

{create adhoc438}
{access adhoc438}
{connect adhoc438(1), adhoc1(0)}
{nseg = 1}
{strdef color color = "White"}
{pt3dclear()}
{pt3dadd(202608.000000,150492.000000,37000.000000,1800.000000)}
{pt3dadd(131844.000000,77400.000000,73725.000000,1800.000000)}

{create adhoc439}
{access adhoc439}
{connect adhoc439(1), adhoc1(0)}
{nseg = 1}
{strdef color color = "White"}
{pt3dclear()}
{pt3dadd(202608.000000,150492.000000,37000.000000,1800.000000)}
{pt3dadd(131784.000000,74304.000000,70875.000000,1800.000000)}

{create adhoc440}
{access adhoc440}
{connect adhoc440(1), adhoc1(0)}
{nseg = 1}
{strdef color color = "White"}
{pt3dclear()}
{pt3dadd(202608.000000,150492.000000,37000.000000,1800.000000)}
{pt3dadd(135744.000000,72864.000000,79825.000000,1800.000000)}

{create adhoc441}
{access adhoc441}
{connect adhoc441(1), adhoc1(0)}
{nseg = 1}
{strdef color color = "White"}
{pt3dclear()}
{pt3dadd(202608.000000,150492.000000,37000.000000,1800.000000)}
{pt3dadd(135780.000000,76764.000000,80775.000000,1800.000000)}

{create adhoc442}
{access adhoc442}
{connect adhoc442(1), adhoc1(0)}
{nseg = 1}
{strdef color color = "White"}
{pt3dclear()}
{pt3dadd(202608.000000,150492.000000,37000.000000,1800.000000)}
{pt3dadd(137688.000000,75036.000000,82925.000000,1800.000000)}

{create adhoc443}
{access adhoc443}
{connect adhoc443(1), adhoc1(0)}
{nseg = 1}
{strdef color color = "White"}
{pt3dclear()}
{pt3dadd(202608.000000,150492.000000,37000.000000,1800.000000)}
{pt3dadd(137784.000000,73596.000000,79425.000000,1800.000000)}

{create adhoc444}
{access adhoc444}
{connect adhoc444(1), adhoc1(0)}
{nseg = 1}
{strdef color color = "White"}
{pt3dclear()}
{pt3dadd(202608.000000,150492.000000,37000.000000,1800.000000)}
{pt3dadd(143628.000000,78216.000000,74225.000000,1800.000000)}

{create adhoc445}
{access adhoc445}
{connect adhoc445(1), adhoc1(0)}
{nseg = 1}
{strdef color color = "White"}
{pt3dclear()}
{pt3dadd(202608.000000,150492.000000,37000.000000,1800.000000)}
{pt3dadd(143520.000000,71592.000000,70675.000000,1800.000000)}

{create adhoc446}
{access adhoc446}
{connect adhoc446(1), adhoc1(0)}
{nseg = 1}
{strdef color color = "White"}
{pt3dclear()}
{pt3dadd(202608.000000,150492.000000,37000.000000,1800.000000)}
{pt3dadd(143652.000000,74112.000000,74425.000000,1800.000000)}

{create adhoc447}
{access adhoc447}
{connect adhoc447(1), adhoc1(0)}
{nseg = 1}
{strdef color color = "White"}
{pt3dclear()}
{pt3dadd(202608.000000,150492.000000,37000.000000,1800.000000)}
{pt3dadd(143592.000000,72516.000000,77475.000000,1800.000000)}

{create adhoc448}
{access adhoc448}
{connect adhoc448(1), adhoc1(0)}
{nseg = 1}
{strdef color color = "White"}
{pt3dclear()}
{pt3dadd(202608.000000,150492.000000,37000.000000,1800.000000)}
{pt3dadd(143628.000000,70980.000000,80125.000000,1800.000000)}

{create adhoc449}
{access adhoc449}
{connect adhoc449(1), adhoc1(0)}
{nseg = 1}
{strdef color color = "White"}
{pt3dclear()}
{pt3dadd(202608.000000,150492.000000,37000.000000,1800.000000)}
{pt3dadd(144216.000000,76620.000000,70375.000000,1800.000000)}

{create adhoc450}
{access adhoc450}
{connect adhoc450(1), adhoc1(0)}
{nseg = 1}
{strdef color color = "White"}
{pt3dclear()}
{pt3dadd(202608.000000,150492.000000,37000.000000,1800.000000)}
{pt3dadd(144468.000000,75492.000000,66625.000000,1800.000000)}

{create adhoc451}
{access adhoc451}
{connect adhoc451(1), adhoc1(0)}
{nseg = 1}
{strdef color color = "White"}
{pt3dclear()}
{pt3dadd(202608.000000,150492.000000,37000.000000,1800.000000)}
{pt3dadd(144216.000000,72540.000000,65225.000000,1800.000000)}

{create adhoc452}
{access adhoc452}
{connect adhoc452(1), adhoc1(0)}
{nseg = 1}
{strdef color color = "White"}
{pt3dclear()}
{pt3dadd(202608.000000,150492.000000,37000.000000,1800.000000)}
{pt3dadd(144420.000000,73644.000000,69325.000000,1800.000000)}

{create adhoc453}
{access adhoc453}
{connect adhoc453(1), adhoc1(0)}
{nseg = 1}
{strdef color color = "White"}
{pt3dclear()}
{pt3dadd(202608.000000,150492.000000,37000.000000,1800.000000)}
{pt3dadd(142284.000000,78540.000000,69725.000000,1800.000000)}

{create adhoc454}
{access adhoc454}
{connect adhoc454(1), adhoc1(0)}
{nseg = 1}
{strdef color color = "White"}
{pt3dclear()}
{pt3dadd(202608.000000,150492.000000,37000.000000,1800.000000)}
{pt3dadd(142272.000000,75552.000000,70675.000000,1800.000000)}

{create adhoc455}
{access adhoc455}
{connect adhoc455(1), adhoc1(0)}
{nseg = 1}
{strdef color color = "White"}
{pt3dclear()}
{pt3dadd(202608.000000,150492.000000,37000.000000,1800.000000)}
{pt3dadd(142308.000000,71568.000000,71125.000000,1800.000000)}

{create adhoc456}
{access adhoc456}
{connect adhoc456(1), adhoc1(0)}
{nseg = 1}
{strdef color color = "White"}
{pt3dclear()}
{pt3dadd(202608.000000,150492.000000,37000.000000,1800.000000)}
{pt3dadd(142356.000000,71364.000000,73625.000000,1800.000000)}

{create adhoc457}
{access adhoc457}
{connect adhoc457(1), adhoc1(0)}
{nseg = 1}
{strdef color color = "White"}
{pt3dclear()}
{pt3dadd(202608.000000,150492.000000,37000.000000,1800.000000)}
{pt3dadd(147888.000000,78720.000000,73925.000000,1800.000000)}

{create adhoc458}
{access adhoc458}
{connect adhoc458(1), adhoc1(0)}
{nseg = 1}
{strdef color color = "White"}
{pt3dclear()}
{pt3dadd(202608.000000,150492.000000,37000.000000,1800.000000)}
{pt3dadd(150876.000000,73800.000000,77875.000000,1800.000000)}

{create adhoc459}
{access adhoc459}
{connect adhoc459(1), adhoc1(0)}
{nseg = 1}
{strdef color color = "White"}
{pt3dclear()}
{pt3dadd(202608.000000,150492.000000,37000.000000,1800.000000)}
{pt3dadd(157188.000000,78912.000000,80325.000000,1800.000000)}

{create adhoc460}
{access adhoc460}
{connect adhoc460(1), adhoc1(0)}
{nseg = 1}
{strdef color color = "White"}
{pt3dclear()}
{pt3dadd(202608.000000,150492.000000,37000.000000,1800.000000)}
{pt3dadd(159384.000000,79632.000000,85625.000000,1800.000000)}

{create adhoc461}
{access adhoc461}
{connect adhoc461(1), adhoc1(0)}
{nseg = 1}
{strdef color color = "White"}
{pt3dclear()}
{pt3dadd(202608.000000,150492.000000,37000.000000,1800.000000)}
{pt3dadd(159312.000000,85128.000000,78825.000000,1800.000000)}

{create adhoc462}
{access adhoc462}
{connect adhoc462(1), adhoc1(0)}
{nseg = 1}
{strdef color color = "White"}
{pt3dclear()}
{pt3dadd(202608.000000,150492.000000,37000.000000,1800.000000)}
{pt3dadd(159408.000000,85212.000000,82775.000000,1800.000000)}

{create adhoc463}
{access adhoc463}
{connect adhoc463(1), adhoc1(0)}
{nseg = 1}
{strdef color color = "White"}
{pt3dclear()}
{pt3dadd(202608.000000,150492.000000,37000.000000,1800.000000)}
{pt3dadd(159336.000000,83136.000000,82375.000000,1800.000000)}

{create adhoc464}
{access adhoc464}
{connect adhoc464(1), adhoc1(0)}
{nseg = 1}
{strdef color color = "White"}
{pt3dclear()}
{pt3dadd(202608.000000,150492.000000,37000.000000,1800.000000)}
{pt3dadd(159372.000000,83880.000000,84675.000000,1800.000000)}

{create adhoc465}
{access adhoc465}
{connect adhoc465(1), adhoc1(0)}
{nseg = 1}
{strdef color color = "White"}
{pt3dclear()}
{pt3dadd(202608.000000,150492.000000,37000.000000,1800.000000)}
{pt3dadd(159372.000000,82068.000000,84925.000000,1800.000000)}

{create adhoc466}
{access adhoc466}
{connect adhoc466(1), adhoc1(0)}
{nseg = 1}
{strdef color color = "White"}
{pt3dclear()}
{pt3dadd(202608.000000,150492.000000,37000.000000,1800.000000)}
{pt3dadd(158460.000000,78288.000000,80625.000000,1800.000000)}

{create adhoc467}
{access adhoc467}
{connect adhoc467(1), adhoc1(0)}
{nseg = 1}
{strdef color color = "White"}
{pt3dclear()}
{pt3dadd(202608.000000,150492.000000,37000.000000,1800.000000)}
{pt3dadd(158436.000000,79776.000000,82275.000000,1800.000000)}

{create adhoc468}
{access adhoc468}
{connect adhoc468(1), adhoc1(0)}
{nseg = 1}
{strdef color color = "White"}
{pt3dclear()}
{pt3dadd(202608.000000,150492.000000,37000.000000,1800.000000)}
{pt3dadd(158508.000000,79656.000000,85275.000000,1800.000000)}

{create adhoc469}
{access adhoc469}
{connect adhoc469(1), adhoc1(0)}
{nseg = 1}
{strdef color color = "White"}
{pt3dclear()}
{pt3dadd(202608.000000,150492.000000,37000.000000,1800.000000)}
{pt3dadd(208848.000000,119892.000000,29425.000000,1800.000000)}

{create adhoc470}
{access adhoc470}
{connect adhoc470(1), adhoc1(0)}
{nseg = 1}
{strdef color color = "White"}
{pt3dclear()}
{pt3dadd(202608.000000,150492.000000,37000.000000,1800.000000)}
{pt3dadd(194328.000000,135432.000000,29825.000000,1800.000000)}

{create adhoc471}
{access adhoc471}
{connect adhoc471(1), adhoc1(0)}
{nseg = 1}
{strdef color color = "White"}
{pt3dclear()}
{pt3dadd(202608.000000,150492.000000,37000.000000,1800.000000)}
{pt3dadd(194304.000000,135960.000000,27475.000000,1800.000000)}

{create adhoc472}
{access adhoc472}
{connect adhoc472(1), adhoc1(0)}
{nseg = 1}
{strdef color color = "White"}
{pt3dclear()}
{pt3dadd(202608.000000,150492.000000,37000.000000,1800.000000)}
{pt3dadd(198600.000000,156216.000000,2025.000000,1800.000000)}

{create adhoc473}
{access adhoc473}
{connect adhoc473(1), adhoc1(0)}
{nseg = 1}
{strdef color color = "White"}
{pt3dclear()}
{pt3dadd(202608.000000,150492.000000,37000.000000,1800.000000)}
{pt3dadd(205140.000000,149256.000000,4475.000000,1800.000000)}

{create adhoc474}
{access adhoc474}
{connect adhoc474(1), adhoc1(0)}
{nseg = 1}
{strdef color color = "White"}
{pt3dclear()}
{pt3dadd(202608.000000,150492.000000,37000.000000,1800.000000)}
{pt3dadd(144000.000000,76848.000000,85025.000000,1800.000000)}

{create adhoc475}
{access adhoc475}
{connect adhoc475(1), adhoc1(0)}
{nseg = 1}
{strdef color color = "White"}
{pt3dclear()}
{pt3dadd(202608.000000,150492.000000,37000.000000,1800.000000)}
{pt3dadd(134760.000000,88080.000000,87025.000000,1800.000000)}

{create adhoc476}
{access adhoc476}
{connect adhoc476(1), adhoc1(0)}
{nseg = 1}
{strdef color color = "White"}
{pt3dclear()}
{pt3dadd(202608.000000,150492.000000,37000.000000,1800.000000)}
{pt3dadd(134784.000000,86412.000000,89325.000000,1800.000000)}

{create adhoc477}
{access adhoc477}
{connect adhoc477(1), adhoc1(0)}
{nseg = 1}
{strdef color color = "White"}
{pt3dclear()}
{pt3dadd(202608.000000,150492.000000,37000.000000,1800.000000)}
{pt3dadd(134772.000000,84912.000000,94825.000000,1800.000000)}

{create adhoc478}
{access adhoc478}
{connect adhoc478(1), adhoc1(0)}
{nseg = 1}
{strdef color color = "White"}
{pt3dclear()}
{pt3dadd(202608.000000,150492.000000,37000.000000,1800.000000)}
{pt3dadd(134820.000000,85092.000000,91825.000000,1800.000000)}

{create adhoc479}
{access adhoc479}
{connect adhoc479(1), adhoc1(0)}
{nseg = 1}
{strdef color color = "White"}
{pt3dclear()}
{pt3dadd(202608.000000,150492.000000,37000.000000,1800.000000)}
{pt3dadd(134772.000000,81816.000000,90225.000000,1800.000000)}

{create adhoc480}
{access adhoc480}
{connect adhoc480(1), adhoc1(0)}
{nseg = 1}
{strdef color color = "White"}
{pt3dclear()}
{pt3dadd(202608.000000,150492.000000,37000.000000,1800.000000)}
{pt3dadd(134796.000000,78408.000000,94075.000000,1800.000000)}

{create adhoc481}
{access adhoc481}
{connect adhoc481(1), adhoc1(0)}
{nseg = 1}
{strdef color color = "White"}
{pt3dclear()}
{pt3dadd(202608.000000,150492.000000,37000.000000,1800.000000)}
{pt3dadd(134796.000000,79212.000000,90425.000000,1800.000000)}

{create adhoc482}
{access adhoc482}
{connect adhoc482(1), adhoc1(0)}
{nseg = 1}
{strdef color color = "White"}
{pt3dclear()}
{pt3dadd(202608.000000,150492.000000,37000.000000,1800.000000)}
{pt3dadd(134796.000000,84660.000000,86125.000000,1800.000000)}

{create adhoc483}
{access adhoc483}
{connect adhoc483(1), adhoc1(0)}
{nseg = 1}
{strdef color color = "White"}
{pt3dclear()}
{pt3dadd(202608.000000,150492.000000,37000.000000,1800.000000)}
{pt3dadd(134748.000000,82356.000000,83725.000000,1800.000000)}

{create adhoc484}
{access adhoc484}
{connect adhoc484(1), adhoc1(0)}
{nseg = 1}
{strdef color color = "White"}
{pt3dclear()}
{pt3dadd(202608.000000,150492.000000,37000.000000,1800.000000)}
{pt3dadd(134760.000000,81060.000000,87125.000000,1800.000000)}

{create adhoc485}
{access adhoc485}
{connect adhoc485(1), adhoc1(0)}
{nseg = 1}
{strdef color color = "White"}
{pt3dclear()}
{pt3dadd(202608.000000,150492.000000,37000.000000,1800.000000)}
{pt3dadd(132372.000000,74328.000000,80375.000000,1800.000000)}

{create adhoc486}
{access adhoc486}
{connect adhoc486(1), adhoc1(0)}
{nseg = 1}
{strdef color color = "White"}
{pt3dclear()}
{pt3dadd(202608.000000,150492.000000,37000.000000,1800.000000)}
{pt3dadd(131544.000000,79680.000000,80525.000000,1800.000000)}

{create adhoc487}
{access adhoc487}
{connect adhoc487(1), adhoc1(0)}
{nseg = 1}
{strdef color color = "White"}
{pt3dclear()}
{pt3dadd(202608.000000,150492.000000,37000.000000,1800.000000)}
{pt3dadd(131556.000000,77700.000000,80725.000000,1800.000000)}

{create adhoc488}
{access adhoc488}
{connect adhoc488(1), adhoc1(0)}
{nseg = 1}
{strdef color color = "White"}
{pt3dclear()}
{pt3dadd(202608.000000,150492.000000,37000.000000,1800.000000)}
{pt3dadd(131628.000000,78960.000000,83475.000000,1800.000000)}

{create adhoc489}
{access adhoc489}
{connect adhoc489(1), adhoc1(0)}
{nseg = 1}
{strdef color color = "White"}
{pt3dclear()}
{pt3dadd(202608.000000,150492.000000,37000.000000,1800.000000)}
{pt3dadd(131676.000000,80796.000000,86375.000000,1800.000000)}

{create adhoc490}
{access adhoc490}
{connect adhoc490(1), adhoc1(0)}
{nseg = 1}
{strdef color color = "White"}
{pt3dclear()}
{pt3dadd(202608.000000,150492.000000,37000.000000,1800.000000)}
{pt3dadd(131652.000000,77784.000000,88875.000000,1800.000000)}

{create adhoc491}
{access adhoc491}
{connect adhoc491(1), adhoc1(0)}
{nseg = 1}
{strdef color color = "White"}
{pt3dclear()}
{pt3dadd(202608.000000,150492.000000,37000.000000,1800.000000)}
{pt3dadd(131760.000000,77424.000000,85475.000000,1800.000000)}

{create adhoc492}
{access adhoc492}
{connect adhoc492(1), adhoc1(0)}
{nseg = 1}
{strdef color color = "White"}
{pt3dclear()}
{pt3dadd(202608.000000,150492.000000,37000.000000,1800.000000)}
{pt3dadd(131628.000000,76320.000000,83425.000000,1800.000000)}

{create adhoc493}
{access adhoc493}
{connect adhoc493(1), adhoc1(0)}
{nseg = 1}
{strdef color color = "White"}
{pt3dclear()}
{pt3dadd(202608.000000,150492.000000,37000.000000,1800.000000)}
{pt3dadd(131664.000000,75096.000000,89775.000000,1800.000000)}

{create adhoc494}
{access adhoc494}
{connect adhoc494(1), adhoc1(0)}
{nseg = 1}
{strdef color color = "White"}
{pt3dclear()}
{pt3dadd(202608.000000,150492.000000,37000.000000,1800.000000)}
{pt3dadd(131640.000000,71016.000000,83175.000000,1800.000000)}

{create adhoc495}
{access adhoc495}
{connect adhoc495(1), adhoc1(0)}
{nseg = 1}
{strdef color color = "White"}
{pt3dclear()}
{pt3dadd(202608.000000,150492.000000,37000.000000,1800.000000)}
{pt3dadd(131460.000000,68760.000000,73775.000000,1800.000000)}

{create adhoc496}
{access adhoc496}
{connect adhoc496(1), adhoc1(0)}
{nseg = 1}
{strdef color color = "White"}
{pt3dclear()}
{pt3dadd(202608.000000,150492.000000,37000.000000,1800.000000)}
{pt3dadd(131508.000000,70008.000000,78525.000000,1800.000000)}

{create adhoc497}
{access adhoc497}
{connect adhoc497(1), adhoc1(0)}
{nseg = 1}
{strdef color color = "White"}
{pt3dclear()}
{pt3dadd(202608.000000,150492.000000,37000.000000,1800.000000)}
{pt3dadd(131352.000000,69492.000000,75825.000000,1800.000000)}

{create adhoc498}
{access adhoc498}
{connect adhoc498(1), adhoc1(0)}
{nseg = 1}
{strdef color color = "White"}
{pt3dclear()}
{pt3dadd(202608.000000,150492.000000,37000.000000,1800.000000)}
{pt3dadd(131460.000000,73932.000000,74625.000000,1800.000000)}

{create adhoc499}
{access adhoc499}
{connect adhoc499(1), adhoc1(0)}
{nseg = 1}
{strdef color color = "White"}
{pt3dclear()}
{pt3dadd(202608.000000,150492.000000,37000.000000,1800.000000)}
{pt3dadd(131460.000000,75816.000000,77025.000000,1800.000000)}

{create adhoc500}
{access adhoc500}
{connect adhoc500(1), adhoc1(0)}
{nseg = 1}
{strdef color color = "White"}
{pt3dclear()}
{pt3dadd(202608.000000,150492.000000,37000.000000,1800.000000)}
{pt3dadd(131472.000000,72720.000000,77225.000000,1800.000000)}

{create adhoc501}
{access adhoc501}
{connect adhoc501(1), adhoc1(0)}
{nseg = 1}
{strdef color color = "White"}
{pt3dclear()}
{pt3dadd(202608.000000,150492.000000,37000.000000,1800.000000)}
{pt3dadd(128412.000000,74112.000000,77775.000000,1800.000000)}

{create adhoc502}
{access adhoc502}
{connect adhoc502(1), adhoc1(0)}
{nseg = 1}
{strdef color color = "White"}
{pt3dclear()}
{pt3dadd(202608.000000,150492.000000,37000.000000,1800.000000)}
{pt3dadd(128472.000000,71964.000000,79075.000000,1800.000000)}

{create adhoc503}
{access adhoc503}
{connect adhoc503(1), adhoc1(0)}
{nseg = 1}
{strdef color color = "White"}
{pt3dclear()}
{pt3dadd(202608.000000,150492.000000,37000.000000,1800.000000)}
{pt3dadd(128412.000000,73740.000000,74625.000000,1800.000000)}

{create adhoc504}
{access adhoc504}
{connect adhoc504(1), adhoc1(0)}
{nseg = 1}
{strdef color color = "White"}
{pt3dclear()}
{pt3dadd(202608.000000,150492.000000,37000.000000,1800.000000)}
{pt3dadd(128328.000000,70836.000000,72325.000000,1800.000000)}

{create adhoc505}
{access adhoc505}
{connect adhoc505(1), adhoc1(0)}
{nseg = 1}
{strdef color color = "White"}
{pt3dclear()}
{pt3dadd(202608.000000,150492.000000,37000.000000,1800.000000)}
{pt3dadd(128388.000000,69144.000000,76775.000000,1800.000000)}

{create adhoc506}
{access adhoc506}
{connect adhoc506(1), adhoc1(0)}
{nseg = 1}
{strdef color color = "White"}
{pt3dclear()}
{pt3dadd(202608.000000,150492.000000,37000.000000,1800.000000)}
{pt3dadd(128364.000000,70812.000000,85175.000000,1800.000000)}

{create adhoc507}
{access adhoc507}
{connect adhoc507(1), adhoc1(0)}
{nseg = 1}
{strdef color color = "White"}
{pt3dclear()}
{pt3dadd(202608.000000,150492.000000,37000.000000,1800.000000)}
{pt3dadd(128280.000000,70812.000000,81175.000000,1800.000000)}

{create adhoc508}
{access adhoc508}
{connect adhoc508(1), adhoc1(0)}
{nseg = 1}
{strdef color color = "White"}
{pt3dclear()}
{pt3dadd(202608.000000,150492.000000,37000.000000,1800.000000)}
{pt3dadd(128280.000000,75948.000000,82375.000000,1800.000000)}

{create adhoc509}
{access adhoc509}
{connect adhoc509(1), adhoc1(0)}
{nseg = 1}
{strdef color color = "White"}
{pt3dclear()}
{pt3dadd(202608.000000,150492.000000,37000.000000,1800.000000)}
{pt3dadd(125748.000000,80460.000000,82625.000000,1800.000000)}

{create adhoc510}
{access adhoc510}
{connect adhoc510(1), adhoc1(0)}
{nseg = 1}
{strdef color color = "White"}
{pt3dclear()}
{pt3dadd(202608.000000,150492.000000,37000.000000,1800.000000)}
{pt3dadd(125736.000000,76212.000000,82375.000000,1800.000000)}

{create adhoc511}
{access adhoc511}
{connect adhoc511(1), adhoc1(0)}
{nseg = 1}
{strdef color color = "White"}
{pt3dclear()}
{pt3dadd(202608.000000,150492.000000,37000.000000,1800.000000)}
{pt3dadd(125748.000000,70380.000000,82725.000000,1800.000000)}

{create adhoc512}
{access adhoc512}
{connect adhoc512(1), adhoc1(0)}
{nseg = 1}
{strdef color color = "White"}
{pt3dclear()}
{pt3dadd(202608.000000,150492.000000,37000.000000,1800.000000)}
{pt3dadd(125688.000000,72528.000000,81075.000000,1800.000000)}

{create adhoc513}
{access adhoc513}
{connect adhoc513(1), adhoc1(0)}
{nseg = 1}
{strdef color color = "White"}
{pt3dclear()}
{pt3dadd(202608.000000,150492.000000,37000.000000,1800.000000)}
{pt3dadd(125664.000000,74004.000000,79125.000000,1800.000000)}

{create adhoc514}
{access adhoc514}
{connect adhoc514(1), adhoc1(0)}
{nseg = 1}
{strdef color color = "White"}
{pt3dclear()}
{pt3dadd(202608.000000,150492.000000,37000.000000,1800.000000)}
{pt3dadd(125568.000000,76116.000000,75975.000000,1800.000000)}

{create adhoc515}
{access adhoc515}
{connect adhoc515(1), adhoc1(0)}
{nseg = 1}
{strdef color color = "White"}
{pt3dclear()}
{pt3dadd(202608.000000,150492.000000,37000.000000,1800.000000)}
{pt3dadd(125616.000000,71352.000000,77625.000000,1800.000000)}

{create adhoc516}
{access adhoc516}
{connect adhoc516(1), adhoc1(0)}
{nseg = 1}
{strdef color color = "White"}
{pt3dclear()}
{pt3dadd(202608.000000,150492.000000,37000.000000,1800.000000)}
{pt3dadd(125580.000000,72600.000000,75025.000000,1800.000000)}

{create adhoc517}
{access adhoc517}
{connect adhoc517(1), adhoc1(0)}
{nseg = 1}
{strdef color color = "White"}
{pt3dclear()}
{pt3dadd(202608.000000,150492.000000,37000.000000,1800.000000)}
{pt3dadd(125448.000000,68820.000000,75575.000000,1800.000000)}

{create adhoc518}
{access adhoc518}
{connect adhoc518(1), adhoc1(0)}
{nseg = 1}
{strdef color color = "White"}
{pt3dclear()}
{pt3dadd(202608.000000,150492.000000,37000.000000,1800.000000)}
{pt3dadd(125556.000000,69336.000000,73725.000000,1800.000000)}

{create adhoc519}
{access adhoc519}
{connect adhoc519(1), adhoc1(0)}
{nseg = 1}
{strdef color color = "White"}
{pt3dclear()}
{pt3dadd(202608.000000,150492.000000,37000.000000,1800.000000)}
{pt3dadd(125496.000000,68916.000000,71475.000000,1800.000000)}

{create adhoc520}
{access adhoc520}
{connect adhoc520(1), adhoc1(0)}
{nseg = 1}
{strdef color color = "White"}
{pt3dclear()}
{pt3dadd(202608.000000,150492.000000,37000.000000,1800.000000)}
{pt3dadd(125400.000000,68760.000000,63225.000000,1800.000000)}

{create adhoc521}
{access adhoc521}
{connect adhoc521(1), adhoc1(0)}
{nseg = 1}
{strdef color color = "White"}
{pt3dclear()}
{pt3dadd(202608.000000,150492.000000,37000.000000,1800.000000)}
{pt3dadd(125424.000000,66888.000000,59325.000000,1800.000000)}

{create adhoc522}
{access adhoc522}
{connect adhoc522(1), adhoc1(0)}
{nseg = 1}
{strdef color color = "White"}
{pt3dclear()}
{pt3dadd(202608.000000,150492.000000,37000.000000,1800.000000)}
{pt3dadd(125364.000000,67752.000000,65625.000000,1800.000000)}

{create adhoc523}
{access adhoc523}
{connect adhoc523(1), adhoc1(0)}
{nseg = 1}
{strdef color color = "White"}
{pt3dclear()}
{pt3dadd(202608.000000,150492.000000,37000.000000,1800.000000)}
{pt3dadd(129192.000000,80484.000000,74125.000000,1800.000000)}

{create adhoc524}
{access adhoc524}
{connect adhoc524(1), adhoc1(0)}
{nseg = 1}
{strdef color color = "White"}
{pt3dclear()}
{pt3dadd(202608.000000,150492.000000,37000.000000,1800.000000)}
{pt3dadd(129144.000000,80100.000000,70325.000000,1800.000000)}

{create adhoc525}
{access adhoc525}
{connect adhoc525(1), adhoc1(0)}
{nseg = 1}
{strdef color color = "White"}
{pt3dclear()}
{pt3dadd(202608.000000,150492.000000,37000.000000,1800.000000)}
{pt3dadd(129156.000000,77892.000000,69625.000000,1800.000000)}

{create adhoc526}
{access adhoc526}
{connect adhoc526(1), adhoc1(0)}
{nseg = 1}
{strdef color color = "White"}
{pt3dclear()}
{pt3dadd(202608.000000,150492.000000,37000.000000,1800.000000)}
{pt3dadd(129144.000000,77652.000000,66075.000000,1800.000000)}

{create adhoc527}
{access adhoc527}
{connect adhoc527(1), adhoc1(0)}
{nseg = 1}
{strdef color color = "White"}
{pt3dclear()}
{pt3dadd(202608.000000,150492.000000,37000.000000,1800.000000)}
{pt3dadd(131244.000000,76044.000000,66875.000000,1800.000000)}

{create adhoc528}
{access adhoc528}
{connect adhoc528(1), adhoc1(0)}
{nseg = 1}
{strdef color color = "White"}
{pt3dclear()}
{pt3dadd(202608.000000,150492.000000,37000.000000,1800.000000)}
{pt3dadd(130188.000000,75468.000000,63425.000000,1800.000000)}

{create adhoc529}
{access adhoc529}
{connect adhoc529(1), adhoc1(0)}
{nseg = 1}
{strdef color color = "White"}
{pt3dclear()}
{pt3dadd(202608.000000,150492.000000,37000.000000,1800.000000)}
{pt3dadd(126108.000000,76188.000000,61925.000000,1800.000000)}

{create adhoc530}
{access adhoc530}
{connect adhoc530(1), adhoc1(0)}
{nseg = 1}
{strdef color color = "White"}
{pt3dclear()}
{pt3dadd(202608.000000,150492.000000,37000.000000,1800.000000)}
{pt3dadd(125268.000000,69888.000000,69325.000000,1800.000000)}

{create adhoc531}
{access adhoc531}
{connect adhoc531(1), adhoc1(0)}
{nseg = 1}
{strdef color color = "White"}
{pt3dclear()}
{pt3dadd(202608.000000,150492.000000,37000.000000,1800.000000)}
{pt3dadd(125244.000000,71568.000000,71875.000000,1800.000000)}

{create adhoc532}
{access adhoc532}
{connect adhoc532(1), adhoc1(0)}
{nseg = 1}
{strdef color color = "White"}
{pt3dclear()}
{pt3dadd(202608.000000,150492.000000,37000.000000,1800.000000)}
{pt3dadd(125268.000000,73836.000000,69975.000000,1800.000000)}

{create adhoc533}
{access adhoc533}
{connect adhoc533(1), adhoc1(0)}
{nseg = 1}
{strdef color color = "White"}
{pt3dclear()}
{pt3dadd(202608.000000,150492.000000,37000.000000,1800.000000)}
{pt3dadd(125268.000000,73908.000000,66925.000000,1800.000000)}

{create adhoc534}
{access adhoc534}
{connect adhoc534(1), adhoc1(0)}
{nseg = 1}
{strdef color color = "White"}
{pt3dclear()}
{pt3dadd(202608.000000,150492.000000,37000.000000,1800.000000)}
{pt3dadd(125148.000000,75204.000000,59375.000000,1800.000000)}

{create adhoc535}
{access adhoc535}
{connect adhoc535(1), adhoc1(0)}
{nseg = 1}
{strdef color color = "White"}
{pt3dclear()}
{pt3dadd(202608.000000,150492.000000,37000.000000,1800.000000)}
{pt3dadd(125148.000000,72024.000000,59125.000000,1800.000000)}

{create adhoc536}
{access adhoc536}
{connect adhoc536(1), adhoc1(0)}
{nseg = 1}
{strdef color color = "White"}
{pt3dclear()}
{pt3dadd(202608.000000,150492.000000,37000.000000,1800.000000)}
{pt3dadd(125160.000000,69804.000000,60475.000000,1800.000000)}

{create adhoc537}
{access adhoc537}
{connect adhoc537(1), adhoc1(0)}
{nseg = 1}
{strdef color color = "White"}
{pt3dclear()}
{pt3dadd(202608.000000,150492.000000,37000.000000,1800.000000)}
{pt3dadd(125124.000000,71184.000000,64725.000000,1800.000000)}

{create adhoc538}
{access adhoc538}
{connect adhoc538(1), adhoc1(0)}
{nseg = 1}
{strdef color color = "White"}
{pt3dclear()}
{pt3dadd(202608.000000,150492.000000,37000.000000,1800.000000)}
{pt3dadd(125760.000000,80412.000000,78725.000000,1800.000000)}

{create adhoc539}
{access adhoc539}
{connect adhoc539(1), adhoc1(0)}
{nseg = 1}
{strdef color color = "White"}
{pt3dclear()}
{pt3dadd(202608.000000,150492.000000,37000.000000,1800.000000)}
{pt3dadd(125364.000000,82824.000000,75525.000000,1800.000000)}

{create adhoc540}
{access adhoc540}
{connect adhoc540(1), adhoc1(0)}
{nseg = 1}
{strdef color color = "White"}
{pt3dclear()}
{pt3dadd(202608.000000,150492.000000,37000.000000,1800.000000)}
{pt3dadd(125424.000000,79140.000000,72325.000000,1800.000000)}

{create adhoc541}
{access adhoc541}
{connect adhoc541(1), adhoc1(0)}
{nseg = 1}
{strdef color color = "White"}
{pt3dclear()}
{pt3dadd(202608.000000,150492.000000,37000.000000,1800.000000)}
{pt3dadd(125436.000000,80832.000000,67375.000000,1800.000000)}

{create adhoc542}
{access adhoc542}
{connect adhoc542(1), adhoc1(0)}
{nseg = 1}
{strdef color color = "White"}
{pt3dclear()}
{pt3dadd(202608.000000,150492.000000,37000.000000,1800.000000)}
{pt3dadd(125268.000000,77124.000000,65075.000000,1800.000000)}

{create adhoc543}
{access adhoc543}
{connect adhoc543(1), adhoc1(0)}
{nseg = 1}
{strdef color color = "White"}
{pt3dclear()}
{pt3dadd(202608.000000,150492.000000,37000.000000,1800.000000)}
{pt3dadd(125436.000000,77496.000000,69075.000000,1800.000000)}

{create adhoc544}
{access adhoc544}
{connect adhoc544(1), adhoc1(0)}
{nseg = 1}
{strdef color color = "White"}
{pt3dclear()}
{pt3dadd(202608.000000,150492.000000,37000.000000,1800.000000)}
{pt3dadd(124164.000000,90060.000000,82125.000000,1800.000000)}

{create adhoc545}
{access adhoc545}
{connect adhoc545(1), adhoc1(0)}
{nseg = 1}
{strdef color color = "White"}
{pt3dclear()}
{pt3dadd(202608.000000,150492.000000,37000.000000,1800.000000)}
{pt3dadd(124080.000000,93348.000000,79425.000000,1800.000000)}

{create adhoc546}
{access adhoc546}
{connect adhoc546(1), adhoc1(0)}
{nseg = 1}
{strdef color color = "White"}
{pt3dclear()}
{pt3dadd(202608.000000,150492.000000,37000.000000,1800.000000)}
{pt3dadd(124032.000000,93120.000000,76325.000000,1800.000000)}

{create adhoc547}
{access adhoc547}
{connect adhoc547(1), adhoc1(0)}
{nseg = 1}
{strdef color color = "White"}
{pt3dclear()}
{pt3dadd(202608.000000,150492.000000,37000.000000,1800.000000)}
{pt3dadd(124044.000000,88404.000000,74275.000000,1800.000000)}

{create adhoc548}
{access adhoc548}
{connect adhoc548(1), adhoc1(0)}
{nseg = 1}
{strdef color color = "White"}
{pt3dclear()}
{pt3dadd(202608.000000,150492.000000,37000.000000,1800.000000)}
{pt3dadd(124080.000000,88008.000000,78025.000000,1800.000000)}

{create adhoc549}
{access adhoc549}
{connect adhoc549(1), adhoc1(0)}
{nseg = 1}
{strdef color color = "White"}
{pt3dclear()}
{pt3dadd(202608.000000,150492.000000,37000.000000,1800.000000)}
{pt3dadd(124068.000000,84660.000000,78225.000000,1800.000000)}

{create adhoc550}
{access adhoc550}
{connect adhoc550(1), adhoc1(0)}
{nseg = 1}
{strdef color color = "White"}
{pt3dclear()}
{pt3dadd(202608.000000,150492.000000,37000.000000,1800.000000)}
{pt3dadd(124080.000000,81204.000000,79275.000000,1800.000000)}

{create adhoc551}
{access adhoc551}
{connect adhoc551(1), adhoc1(0)}
{nseg = 1}
{strdef color color = "White"}
{pt3dclear()}
{pt3dadd(202608.000000,150492.000000,37000.000000,1800.000000)}
{pt3dadd(124056.000000,82044.000000,77075.000000,1800.000000)}

{create adhoc552}
{access adhoc552}
{connect adhoc552(1), adhoc1(0)}
{nseg = 1}
{strdef color color = "White"}
{pt3dclear()}
{pt3dadd(202608.000000,150492.000000,37000.000000,1800.000000)}
{pt3dadd(123888.000000,85620.000000,75625.000000,1800.000000)}

{create adhoc553}
{access adhoc553}
{connect adhoc553(1), adhoc1(0)}
{nseg = 1}
{strdef color color = "White"}
{pt3dclear()}
{pt3dadd(202608.000000,150492.000000,37000.000000,1800.000000)}
{pt3dadd(123960.000000,84660.000000,70375.000000,1800.000000)}

{create adhoc554}
{access adhoc554}
{connect adhoc554(1), adhoc1(0)}
{nseg = 1}
{strdef color color = "White"}
{pt3dclear()}
{pt3dadd(202608.000000,150492.000000,37000.000000,1800.000000)}
{pt3dadd(123972.000000,81216.000000,68825.000000,1800.000000)}

{create adhoc555}
{access adhoc555}
{connect adhoc555(1), adhoc1(0)}
{nseg = 1}
{strdef color color = "White"}
{pt3dclear()}
{pt3dadd(202608.000000,150492.000000,37000.000000,1800.000000)}
{pt3dadd(123912.000000,78276.000000,75775.000000,1800.000000)}

{create adhoc556}
{access adhoc556}
{connect adhoc556(1), adhoc1(0)}
{nseg = 1}
{strdef color color = "White"}
{pt3dclear()}
{pt3dadd(202608.000000,150492.000000,37000.000000,1800.000000)}
{pt3dadd(123948.000000,82092.000000,72125.000000,1800.000000)}

{create adhoc557}
{access adhoc557}
{connect adhoc557(1), adhoc1(0)}
{nseg = 1}
{strdef color color = "White"}
{pt3dclear()}
{pt3dadd(202608.000000,150492.000000,37000.000000,1800.000000)}
{pt3dadd(123384.000000,86508.000000,82375.000000,1800.000000)}

{create adhoc558}
{access adhoc558}
{connect adhoc558(1), adhoc1(0)}
{nseg = 1}
{strdef color color = "White"}
{pt3dclear()}
{pt3dadd(202608.000000,150492.000000,37000.000000,1800.000000)}
{pt3dadd(138132.000000,77196.000000,68125.000000,1800.000000)}

{create adhoc559}
{access adhoc559}
{connect adhoc559(1), adhoc1(0)}
{nseg = 1}
{strdef color color = "White"}
{pt3dclear()}
{pt3dadd(202608.000000,150492.000000,37000.000000,1800.000000)}
{pt3dadd(139908.000000,75564.000000,68125.000000,1800.000000)}

{create adhoc560}
{access adhoc560}
{connect adhoc560(1), adhoc1(0)}
{nseg = 1}
{strdef color color = "White"}
{pt3dclear()}
{pt3dadd(202608.000000,150492.000000,37000.000000,1800.000000)}
{pt3dadd(135192.000000,75228.000000,68125.000000,1800.000000)}

{create adhoc561}
{access adhoc561}
{connect adhoc561(1), adhoc1(0)}
{nseg = 1}
{strdef color color = "White"}
{pt3dclear()}
{pt3dadd(202608.000000,150492.000000,37000.000000,1800.000000)}
{pt3dadd(137904.000000,73380.000000,68125.000000,1800.000000)}

{create adhoc562}
{access adhoc562}
{connect adhoc562(1), adhoc1(0)}
{nseg = 1}
{strdef color color = "White"}
{pt3dclear()}
{pt3dadd(202608.000000,150492.000000,37000.000000,1800.000000)}
{pt3dadd(140868.000000,72324.000000,68125.000000,1800.000000)}

{create adhoc563}
{access adhoc563}
{connect adhoc563(1), adhoc1(0)}
{nseg = 1}
{strdef color color = "White"}
{pt3dclear()}
{pt3dadd(202608.000000,150492.000000,37000.000000,1800.000000)}
{pt3dadd(140172.000000,87660.000000,79675.000000,1800.000000)}

{create adhoc564}
{access adhoc564}
{connect adhoc564(1), adhoc1(0)}
{nseg = 1}
{strdef color color = "White"}
{pt3dclear()}
{pt3dadd(202608.000000,150492.000000,37000.000000,1800.000000)}
{pt3dadd(142512.000000,86028.000000,75925.000000,1800.000000)}

{create adhoc565}
{access adhoc565}
{connect adhoc565(1), adhoc1(0)}
{nseg = 1}
{strdef color color = "White"}
{pt3dclear()}
{pt3dadd(202608.000000,150492.000000,37000.000000,1800.000000)}
{pt3dadd(142716.000000,85188.000000,78475.000000,1800.000000)}

{create adhoc566}
{access adhoc566}
{connect adhoc566(1), adhoc1(0)}
{nseg = 1}
{strdef color color = "White"}
{pt3dclear()}
{pt3dadd(202608.000000,150492.000000,37000.000000,1800.000000)}
{pt3dadd(137796.000000,78648.000000,79575.000000,1800.000000)}

{create adhoc567}
{access adhoc567}
{connect adhoc567(1), adhoc1(0)}
{nseg = 1}
{strdef color color = "White"}
{pt3dclear()}
{pt3dadd(202608.000000,150492.000000,37000.000000,1800.000000)}
{pt3dadd(141552.000000,84072.000000,82225.000000,1800.000000)}

{create adhoc568}
{access adhoc568}
{connect adhoc568(1), adhoc1(0)}
{nseg = 1}
{strdef color color = "White"}
{pt3dclear()}
{pt3dadd(202608.000000,150492.000000,37000.000000,1800.000000)}
{pt3dadd(140508.000000,83544.000000,75225.000000,1800.000000)}

{create adhoc569}
{access adhoc569}
{connect adhoc569(1), adhoc1(0)}
{nseg = 1}
{strdef color color = "White"}
{pt3dclear()}
{pt3dadd(202608.000000,150492.000000,37000.000000,1800.000000)}
{pt3dadd(140472.000000,79932.000000,73025.000000,1800.000000)}

{create adhoc570}
{access adhoc570}
{connect adhoc570(1), adhoc1(0)}
{nseg = 1}
{strdef color color = "White"}
{pt3dclear()}
{pt3dadd(202608.000000,150492.000000,37000.000000,1800.000000)}
{pt3dadd(140472.000000,79344.000000,77425.000000,1800.000000)}

{create adhoc571}
{access adhoc571}
{connect adhoc571(1), adhoc1(0)}
{nseg = 1}
{strdef color color = "White"}
{pt3dclear()}
{pt3dadd(202608.000000,150492.000000,37000.000000,1800.000000)}
{pt3dadd(140484.000000,78876.000000,80475.000000,1800.000000)}

{create adhoc572}
{access adhoc572}
{connect adhoc572(1), adhoc1(0)}
{nseg = 1}
{strdef color color = "White"}
{pt3dclear()}
{pt3dadd(202608.000000,150492.000000,37000.000000,1800.000000)}
{pt3dadd(140568.000000,81132.000000,81975.000000,1800.000000)}

{create adhoc573}
{access adhoc573}
{connect adhoc573(1), adhoc1(0)}
{nseg = 1}
{strdef color color = "White"}
{pt3dclear()}
{pt3dadd(202608.000000,150492.000000,37000.000000,1800.000000)}
{pt3dadd(140652.000000,83124.000000,86325.000000,1800.000000)}

{create adhoc574}
{access adhoc574}
{connect adhoc574(1), adhoc1(0)}
{nseg = 1}
{strdef color color = "White"}
{pt3dclear()}
{pt3dadd(202608.000000,150492.000000,37000.000000,1800.000000)}
{pt3dadd(135444.000000,86808.000000,79375.000000,1800.000000)}

{create adhoc575}
{access adhoc575}
{connect adhoc575(1), adhoc1(0)}
{nseg = 1}
{strdef color color = "White"}
{pt3dclear()}
{pt3dadd(202608.000000,150492.000000,37000.000000,1800.000000)}
{pt3dadd(135096.000000,87132.000000,75925.000000,1800.000000)}

{create adhoc576}
{access adhoc576}
{connect adhoc576(1), adhoc1(0)}
{nseg = 1}
{strdef color color = "White"}
{pt3dclear()}
{pt3dadd(202608.000000,150492.000000,37000.000000,1800.000000)}
{pt3dadd(135144.000000,83844.000000,77675.000000,1800.000000)}

{create adhoc577}
{access adhoc577}
{connect adhoc577(1), adhoc1(0)}
{nseg = 1}
{strdef color color = "White"}
{pt3dclear()}
{pt3dadd(202608.000000,150492.000000,37000.000000,1800.000000)}
{pt3dadd(135288.000000,86052.000000,83575.000000,1800.000000)}

{create adhoc578}
{access adhoc578}
{connect adhoc578(1), adhoc1(0)}
{nseg = 1}
{strdef color color = "White"}
{pt3dclear()}
{pt3dadd(202608.000000,150492.000000,37000.000000,1800.000000)}
{pt3dadd(131124.000000,87636.000000,83225.000000,1800.000000)}

{create adhoc579}
{access adhoc579}
{connect adhoc579(1), adhoc1(0)}
{nseg = 1}
{strdef color color = "White"}
{pt3dclear()}
{pt3dadd(202608.000000,150492.000000,37000.000000,1800.000000)}
{pt3dadd(131016.000000,87444.000000,80125.000000,1800.000000)}

{create adhoc580}
{access adhoc580}
{connect adhoc580(1), adhoc1(0)}
{nseg = 1}
{strdef color color = "White"}
{pt3dclear()}
{pt3dadd(202608.000000,150492.000000,37000.000000,1800.000000)}
{pt3dadd(131004.000000,91020.000000,79275.000000,1800.000000)}

{create adhoc581}
{access adhoc581}
{connect adhoc581(1), adhoc1(0)}
{nseg = 1}
{strdef color color = "White"}
{pt3dclear()}
{pt3dadd(202608.000000,150492.000000,37000.000000,1800.000000)}
{pt3dadd(131040.000000,93480.000000,81475.000000,1800.000000)}

{create adhoc582}
{access adhoc582}
{connect adhoc582(1), adhoc1(0)}
{nseg = 1}
{strdef color color = "White"}
{pt3dclear()}
{pt3dadd(202608.000000,150492.000000,37000.000000,1800.000000)}
{pt3dadd(131388.000000,94608.000000,77825.000000,1800.000000)}

{create adhoc583}
{access adhoc583}
{connect adhoc583(1), adhoc1(0)}
{nseg = 1}
{strdef color color = "White"}
{pt3dclear()}
{pt3dadd(202608.000000,150492.000000,37000.000000,1800.000000)}
{pt3dadd(134196.000000,87060.000000,75975.000000,1800.000000)}

{create adhoc584}
{access adhoc584}
{connect adhoc584(1), adhoc1(0)}
{nseg = 1}
{strdef color color = "White"}
{pt3dclear()}
{pt3dadd(202608.000000,150492.000000,37000.000000,1800.000000)}
{pt3dadd(134736.000000,92628.000000,77725.000000,1800.000000)}

{create adhoc585}
{access adhoc585}
{connect adhoc585(1), adhoc1(0)}
{nseg = 1}
{strdef color color = "White"}
{pt3dclear()}
{pt3dadd(202608.000000,150492.000000,37000.000000,1800.000000)}
{pt3dadd(134748.000000,89496.000000,78975.000000,1800.000000)}

{create adhoc586}
{access adhoc586}
{connect adhoc586(1), adhoc1(0)}
{nseg = 1}
{strdef color color = "White"}
{pt3dclear()}
{pt3dadd(202608.000000,150492.000000,37000.000000,1800.000000)}
{pt3dadd(140904.000000,91368.000000,76475.000000,1800.000000)}

{create adhoc587}
{access adhoc587}
{connect adhoc587(1), adhoc1(0)}
{nseg = 1}
{strdef color color = "White"}
{pt3dclear()}
{pt3dadd(202608.000000,150492.000000,37000.000000,1800.000000)}
{pt3dadd(143304.000000,90204.000000,78025.000000,1800.000000)}

{create adhoc588}
{access adhoc588}
{connect adhoc588(1), adhoc1(0)}
{nseg = 1}
{strdef color color = "White"}
{pt3dclear()}
{pt3dadd(202608.000000,150492.000000,37000.000000,1800.000000)}
{pt3dadd(143304.000000,90504.000000,74375.000000,1800.000000)}

{create adhoc589}
{access adhoc589}
{connect adhoc589(1), adhoc1(0)}
{nseg = 1}
{strdef color color = "White"}
{pt3dclear()}
{pt3dadd(202608.000000,150492.000000,37000.000000,1800.000000)}
{pt3dadd(146280.000000,90012.000000,74075.000000,1800.000000)}

{create adhoc590}
{access adhoc590}
{connect adhoc590(1), adhoc1(0)}
{nseg = 1}
{strdef color color = "White"}
{pt3dclear()}
{pt3dadd(202608.000000,150492.000000,37000.000000,1800.000000)}
{pt3dadd(146160.000000,81864.000000,75375.000000,1800.000000)}

{create adhoc591}
{access adhoc591}
{connect adhoc591(1), adhoc1(0)}
{nseg = 1}
{strdef color color = "White"}
{pt3dclear()}
{pt3dadd(202608.000000,150492.000000,37000.000000,1800.000000)}
{pt3dadd(146256.000000,81852.000000,80025.000000,1800.000000)}

{create adhoc592}
{access adhoc592}
{connect adhoc592(1), adhoc1(0)}
{nseg = 1}
{strdef color color = "White"}
{pt3dclear()}
{pt3dadd(202608.000000,150492.000000,37000.000000,1800.000000)}
{pt3dadd(152580.000000,81612.000000,84075.000000,1800.000000)}

{create adhoc593}
{access adhoc593}
{connect adhoc593(1), adhoc1(0)}
{nseg = 1}
{strdef color color = "White"}
{pt3dclear()}
{pt3dadd(202608.000000,150492.000000,37000.000000,1800.000000)}
{pt3dadd(152352.000000,80988.000000,75775.000000,1800.000000)}

{create adhoc594}
{access adhoc594}
{connect adhoc594(1), adhoc1(0)}
{nseg = 1}
{strdef color color = "White"}
{pt3dclear()}
{pt3dadd(202608.000000,150492.000000,37000.000000,1800.000000)}
{pt3dadd(152556.000000,80040.000000,81325.000000,1800.000000)}

{create adhoc595}
{access adhoc595}
{connect adhoc595(1), adhoc1(0)}
{nseg = 1}
{strdef color color = "White"}
{pt3dclear()}
{pt3dadd(202608.000000,150492.000000,37000.000000,1800.000000)}
{pt3dadd(152520.000000,81576.000000,78975.000000,1800.000000)}

{create adhoc596}
{access adhoc596}
{connect adhoc596(1), adhoc1(0)}
{nseg = 1}
{strdef color color = "White"}
{pt3dclear()}
{pt3dadd(202608.000000,150492.000000,37000.000000,1800.000000)}
{pt3dadd(152496.000000,79080.000000,78425.000000,1800.000000)}

{create adhoc597}
{access adhoc597}
{connect adhoc597(1), adhoc1(0)}
{nseg = 1}
{strdef color color = "White"}
{pt3dclear()}
{pt3dadd(202608.000000,150492.000000,37000.000000,1800.000000)}
{pt3dadd(152772.000000,76104.000000,84725.000000,1800.000000)}

{create adhoc598}
{access adhoc598}
{connect adhoc598(1), adhoc1(0)}
{nseg = 1}
{strdef color color = "White"}
{pt3dclear()}
{pt3dadd(202608.000000,150492.000000,37000.000000,1800.000000)}
{pt3dadd(152772.000000,78384.000000,83425.000000,1800.000000)}

{create adhoc599}
{access adhoc599}
{connect adhoc599(1), adhoc1(0)}
{nseg = 1}
{strdef color color = "White"}
{pt3dclear()}
{pt3dadd(202608.000000,150492.000000,37000.000000,1800.000000)}
{pt3dadd(152352.000000,73548.000000,79325.000000,1800.000000)}

{create adhoc600}
{access adhoc600}
{connect adhoc600(1), adhoc1(0)}
{nseg = 1}
{strdef color color = "White"}
{pt3dclear()}
{pt3dadd(202608.000000,150492.000000,37000.000000,1800.000000)}
{pt3dadd(152364.000000,76776.000000,80325.000000,1800.000000)}

{create adhoc601}
{access adhoc601}
{connect adhoc601(1), adhoc1(0)}
{nseg = 1}
{strdef color color = "White"}
{pt3dclear()}
{pt3dadd(202608.000000,150492.000000,37000.000000,1800.000000)}
{pt3dadd(149316.000000,76032.000000,77825.000000,1800.000000)}

{create adhoc602}
{access adhoc602}
{connect adhoc602(1), adhoc1(0)}
{nseg = 1}
{strdef color color = "White"}
{pt3dclear()}
{pt3dadd(202608.000000,150492.000000,37000.000000,1800.000000)}
{pt3dadd(149352.000000,71424.000000,73925.000000,1800.000000)}

{create adhoc603}
{access adhoc603}
{connect adhoc603(1), adhoc1(0)}
{nseg = 1}
{strdef color color = "White"}
{pt3dclear()}
{pt3dadd(202608.000000,150492.000000,37000.000000,1800.000000)}
{pt3dadd(149100.000000,73536.000000,63225.000000,1800.000000)}

{create adhoc604}
{access adhoc604}
{connect adhoc604(1), adhoc1(0)}
{nseg = 1}
{strdef color color = "White"}
{pt3dclear()}
{pt3dadd(202608.000000,150492.000000,37000.000000,1800.000000)}
{pt3dadd(149208.000000,70164.000000,69825.000000,1800.000000)}

{create adhoc605}
{access adhoc605}
{connect adhoc605(1), adhoc1(0)}
{nseg = 1}
{strdef color color = "White"}
{pt3dclear()}
{pt3dadd(202608.000000,150492.000000,37000.000000,1800.000000)}
{pt3dadd(149064.000000,69048.000000,61075.000000,1800.000000)}

{create adhoc606}
{access adhoc606}
{connect adhoc606(1), adhoc1(0)}
{nseg = 1}
{strdef color color = "White"}
{pt3dclear()}
{pt3dadd(202608.000000,150492.000000,37000.000000,1800.000000)}
{pt3dadd(149868.000000,68364.000000,66475.000000,1800.000000)}

{create adhoc607}
{access adhoc607}
{connect adhoc607(1), adhoc1(0)}
{nseg = 1}
{strdef color color = "White"}
{pt3dclear()}
{pt3dadd(202608.000000,150492.000000,37000.000000,1800.000000)}
{pt3dadd(149040.000000,67656.000000,64175.000000,1800.000000)}

{create adhoc608}
{access adhoc608}
{connect adhoc608(1), adhoc1(0)}
{nseg = 1}
{strdef color color = "White"}
{pt3dclear()}
{pt3dadd(202608.000000,150492.000000,37000.000000,1800.000000)}
{pt3dadd(148452.000000,74484.000000,61575.000000,1800.000000)}

{create adhoc609}
{access adhoc609}
{connect adhoc609(1), adhoc1(0)}
{nseg = 1}
{strdef color color = "White"}
{pt3dclear()}
{pt3dadd(202608.000000,150492.000000,37000.000000,1800.000000)}
{pt3dadd(148500.000000,70608.000000,63375.000000,1800.000000)}

{create adhoc610}
{access adhoc610}
{connect adhoc610(1), adhoc1(0)}
{nseg = 1}
{strdef color color = "White"}
{pt3dclear()}
{pt3dadd(202608.000000,150492.000000,37000.000000,1800.000000)}
{pt3dadd(148584.000000,68952.000000,54375.000000,1800.000000)}

{create adhoc611}
{access adhoc611}
{connect adhoc611(1), adhoc1(0)}
{nseg = 1}
{strdef color color = "White"}
{pt3dclear()}
{pt3dadd(202608.000000,150492.000000,37000.000000,1800.000000)}
{pt3dadd(148476.000000,71568.000000,57475.000000,1800.000000)}

{create adhoc612}
{access adhoc612}
{connect adhoc612(1), adhoc1(0)}
{nseg = 1}
{strdef color color = "White"}
{pt3dclear()}
{pt3dadd(202608.000000,150492.000000,37000.000000,1800.000000)}
{pt3dadd(148716.000000,69996.000000,48025.000000,1800.000000)}

{create adhoc613}
{access adhoc613}
{connect adhoc613(1), adhoc1(0)}
{nseg = 1}
{strdef color color = "White"}
{pt3dclear()}
{pt3dadd(202608.000000,150492.000000,37000.000000,1800.000000)}
{pt3dadd(148620.000000,70236.000000,52175.000000,1800.000000)}

{create adhoc614}
{access adhoc614}
{connect adhoc614(1), adhoc1(0)}
{nseg = 1}
{strdef color color = "White"}
{pt3dclear()}
{pt3dadd(202608.000000,150492.000000,37000.000000,1800.000000)}
{pt3dadd(148572.000000,67248.000000,52375.000000,1800.000000)}

{create adhoc615}
{access adhoc615}
{connect adhoc615(1), adhoc1(0)}
{nseg = 1}
{strdef color color = "White"}
{pt3dclear()}
{pt3dadd(202608.000000,150492.000000,37000.000000,1800.000000)}
{pt3dadd(148524.000000,65496.000000,56225.000000,1800.000000)}

{create adhoc616}
{access adhoc616}
{connect adhoc616(1), adhoc1(0)}
{nseg = 1}
{strdef color color = "White"}
{pt3dclear()}
{pt3dadd(202608.000000,150492.000000,37000.000000,1800.000000)}
{pt3dadd(148476.000000,68328.000000,58425.000000,1800.000000)}

{create adhoc617}
{access adhoc617}
{connect adhoc617(1), adhoc1(0)}
{nseg = 1}
{strdef color color = "White"}
{pt3dclear()}
{pt3dadd(202608.000000,150492.000000,37000.000000,1800.000000)}
{pt3dadd(148488.000000,66180.000000,59425.000000,1800.000000)}

{create adhoc618}
{access adhoc618}
{connect adhoc618(1), adhoc1(0)}
{nseg = 1}
{strdef color color = "White"}
{pt3dclear()}
{pt3dadd(202608.000000,150492.000000,37000.000000,1800.000000)}
{pt3dadd(152028.000000,76980.000000,66925.000000,1800.000000)}

{create adhoc619}
{access adhoc619}
{connect adhoc619(1), adhoc1(0)}
{nseg = 1}
{strdef color color = "White"}
{pt3dclear()}
{pt3dadd(202608.000000,150492.000000,37000.000000,1800.000000)}
{pt3dadd(151884.000000,74904.000000,63575.000000,1800.000000)}

{create adhoc620}
{access adhoc620}
{connect adhoc620(1), adhoc1(0)}
{nseg = 1}
{strdef color color = "White"}
{pt3dclear()}
{pt3dadd(202608.000000,150492.000000,37000.000000,1800.000000)}
{pt3dadd(151944.000000,71244.000000,56325.000000,1800.000000)}

{create adhoc621}
{access adhoc621}
{connect adhoc621(1), adhoc1(0)}
{nseg = 1}
{strdef color color = "White"}
{pt3dclear()}
{pt3dadd(202608.000000,150492.000000,37000.000000,1800.000000)}
{pt3dadd(151944.000000,73932.000000,58675.000000,1800.000000)}

{create adhoc622}
{access adhoc622}
{connect adhoc622(1), adhoc1(0)}
{nseg = 1}
{strdef color color = "White"}
{pt3dclear()}
{pt3dadd(202608.000000,150492.000000,37000.000000,1800.000000)}
{pt3dadd(151872.000000,73068.000000,65375.000000,1800.000000)}

{create adhoc623}
{access adhoc623}
{connect adhoc623(1), adhoc1(0)}
{nseg = 1}
{strdef color color = "White"}
{pt3dclear()}
{pt3dadd(202608.000000,150492.000000,37000.000000,1800.000000)}
{pt3dadd(151860.000000,71868.000000,62275.000000,1800.000000)}

{create adhoc624}
{access adhoc624}
{connect adhoc624(1), adhoc1(0)}
{nseg = 1}
{strdef color color = "White"}
{pt3dclear()}
{pt3dadd(202608.000000,150492.000000,37000.000000,1800.000000)}
{pt3dadd(151884.000000,70176.000000,64625.000000,1800.000000)}

{create adhoc625}
{access adhoc625}
{connect adhoc625(1), adhoc1(0)}
{nseg = 1}
{strdef color color = "White"}
{pt3dclear()}
{pt3dadd(202608.000000,150492.000000,37000.000000,1800.000000)}
{pt3dadd(151920.000000,68376.000000,61875.000000,1800.000000)}

{create adhoc626}
{access adhoc626}
{connect adhoc626(1), adhoc1(0)}
{nseg = 1}
{strdef color color = "White"}
{pt3dclear()}
{pt3dadd(202608.000000,150492.000000,37000.000000,1800.000000)}
{pt3dadd(152124.000000,71856.000000,76075.000000,1800.000000)}

{create adhoc627}
{access adhoc627}
{connect adhoc627(1), adhoc1(0)}
{nseg = 1}
{strdef color color = "White"}
{pt3dclear()}
{pt3dadd(202608.000000,150492.000000,37000.000000,1800.000000)}
{pt3dadd(156084.000000,72696.000000,70475.000000,1800.000000)}

{create adhoc628}
{access adhoc628}
{connect adhoc628(1), adhoc1(0)}
{nseg = 1}
{strdef color color = "White"}
{pt3dclear()}
{pt3dadd(202608.000000,150492.000000,37000.000000,1800.000000)}
{pt3dadd(155340.000000,72972.000000,65975.000000,1800.000000)}

{create adhoc629}
{access adhoc629}
{connect adhoc629(1), adhoc1(0)}
{nseg = 1}
{strdef color color = "White"}
{pt3dclear()}
{pt3dadd(202608.000000,150492.000000,37000.000000,1800.000000)}
{pt3dadd(156960.000000,71400.000000,67975.000000,1800.000000)}

{create adhoc630}
{access adhoc630}
{connect adhoc630(1), adhoc1(0)}
{nseg = 1}
{strdef color color = "White"}
{pt3dclear()}
{pt3dadd(202608.000000,150492.000000,37000.000000,1800.000000)}
{pt3dadd(158268.000000,78336.000000,70075.000000,1800.000000)}

{create adhoc631}
{access adhoc631}
{connect adhoc631(1), adhoc1(0)}
{nseg = 1}
{strdef color color = "White"}
{pt3dclear()}
{pt3dadd(202608.000000,150492.000000,37000.000000,1800.000000)}
{pt3dadd(158328.000000,77112.000000,72475.000000,1800.000000)}

{create adhoc632}
{access adhoc632}
{connect adhoc632(1), adhoc1(0)}
{nseg = 1}
{strdef color color = "White"}
{pt3dclear()}
{pt3dadd(202608.000000,150492.000000,37000.000000,1800.000000)}
{pt3dadd(158340.000000,74688.000000,74225.000000,1800.000000)}

{create adhoc633}
{access adhoc633}
{connect adhoc633(1), adhoc1(0)}
{nseg = 1}
{strdef color color = "White"}
{pt3dclear()}
{pt3dadd(202608.000000,150492.000000,37000.000000,1800.000000)}
{pt3dadd(152688.000000,84132.000000,76575.000000,1800.000000)}

{create adhoc634}
{access adhoc634}
{connect adhoc634(1), adhoc1(0)}
{nseg = 1}
{strdef color color = "White"}
{pt3dclear()}
{pt3dadd(202608.000000,150492.000000,37000.000000,1800.000000)}
{pt3dadd(155640.000000,84972.000000,76575.000000,1800.000000)}

{create adhoc635}
{access adhoc635}
{connect adhoc635(1), adhoc1(0)}
{nseg = 1}
{strdef color color = "White"}
{pt3dclear()}
{pt3dadd(202608.000000,150492.000000,37000.000000,1800.000000)}
{pt3dadd(160584.000000,83556.000000,76575.000000,1800.000000)}

{create adhoc636}
{access adhoc636}
{connect adhoc636(1), adhoc1(0)}
{nseg = 1}
{strdef color color = "White"}
{pt3dclear()}
{pt3dadd(202608.000000,150492.000000,37000.000000,1800.000000)}
{pt3dadd(160872.000000,81132.000000,76575.000000,1800.000000)}

{create adhoc637}
{access adhoc637}
{connect adhoc637(1), adhoc1(0)}
{nseg = 1}
{strdef color color = "White"}
{pt3dclear()}
{pt3dadd(202608.000000,150492.000000,37000.000000,1800.000000)}
{pt3dadd(159432.000000,78492.000000,76575.000000,1800.000000)}

{create adhoc638}
{access adhoc638}
{connect adhoc638(1), adhoc1(0)}
{nseg = 1}
{strdef color color = "White"}
{pt3dclear()}
{pt3dadd(202608.000000,150492.000000,37000.000000,1800.000000)}
{pt3dadd(160980.000000,77496.000000,76975.000000,1800.000000)}

{create adhoc639}
{access adhoc639}
{connect adhoc639(1), adhoc1(0)}
{nseg = 1}
{strdef color color = "White"}
{pt3dclear()}
{pt3dadd(202608.000000,150492.000000,37000.000000,1800.000000)}
{pt3dadd(154176.000000,73932.000000,70725.000000,1800.000000)}

{create adhoc640}
{access adhoc640}
{connect adhoc640(1), adhoc1(0)}
{nseg = 1}
{strdef color color = "White"}
{pt3dclear()}
{pt3dadd(202608.000000,150492.000000,37000.000000,1800.000000)}
{pt3dadd(154128.000000,74460.000000,67875.000000,1800.000000)}

{create adhoc641}
{access adhoc641}
{connect adhoc641(1), adhoc1(0)}
{nseg = 1}
{strdef color color = "White"}
{pt3dclear()}
{pt3dadd(202608.000000,150492.000000,37000.000000,1800.000000)}
{pt3dadd(154152.000000,71412.000000,68225.000000,1800.000000)}

{create adhoc642}
{access adhoc642}
{connect adhoc642(1), adhoc1(0)}
{nseg = 1}
{strdef color color = "White"}
{pt3dclear()}
{pt3dadd(202608.000000,150492.000000,37000.000000,1800.000000)}
{pt3dadd(156648.000000,76200.000000,72125.000000,1800.000000)}

{create adhoc643}
{access adhoc643}
{connect adhoc643(1), adhoc1(0)}
{nseg = 1}
{strdef color color = "White"}
{pt3dclear()}
{pt3dadd(202608.000000,150492.000000,37000.000000,1800.000000)}
{pt3dadd(157728.000000,73800.000000,71525.000000,1800.000000)}

{create adhoc644}
{access adhoc644}
{connect adhoc644(1), adhoc1(0)}
{nseg = 1}
{strdef color color = "White"}
{pt3dclear()}
{pt3dadd(202608.000000,150492.000000,37000.000000,1800.000000)}
{pt3dadd(157752.000000,81516.000000,80025.000000,1800.000000)}

{create adhoc645}
{access adhoc645}
{connect adhoc645(1), adhoc1(0)}
{nseg = 1}
{strdef color color = "White"}
{pt3dclear()}
{pt3dadd(202608.000000,150492.000000,37000.000000,1800.000000)}
{pt3dadd(157800.000000,78396.000000,78125.000000,1800.000000)}

{create adhoc646}
{access adhoc646}
{connect adhoc646(1), adhoc1(0)}
{nseg = 1}
{strdef color color = "White"}
{pt3dclear()}
{pt3dadd(202608.000000,150492.000000,37000.000000,1800.000000)}
{pt3dadd(157752.000000,75924.000000,76025.000000,1800.000000)}

{create adhoc647}
{access adhoc647}
{connect adhoc647(1), adhoc1(0)}
{nseg = 1}
{strdef color color = "White"}
{pt3dclear()}
{pt3dadd(202608.000000,150492.000000,37000.000000,1800.000000)}
{pt3dadd(157800.000000,74868.000000,78575.000000,1800.000000)}

{create adhoc648}
{access adhoc648}
{connect adhoc648(1), adhoc1(0)}
{nseg = 1}
{strdef color color = "White"}
{pt3dclear()}
{pt3dadd(202608.000000,150492.000000,37000.000000,1800.000000)}
{pt3dadd(157512.000000,76956.000000,64075.000000,1800.000000)}

{create adhoc649}
{access adhoc649}
{connect adhoc649(1), adhoc1(0)}
{nseg = 1}
{strdef color color = "White"}
{pt3dclear()}
{pt3dadd(202608.000000,150492.000000,37000.000000,1800.000000)}
{pt3dadd(157620.000000,75684.000000,69275.000000,1800.000000)}

{create adhoc650}
{access adhoc650}
{connect adhoc650(1), adhoc1(0)}
{nseg = 1}
{strdef color color = "White"}
{pt3dclear()}
{pt3dadd(202608.000000,150492.000000,37000.000000,1800.000000)}
{pt3dadd(157668.000000,74124.000000,66925.000000,1800.000000)}

{create adhoc651}
{access adhoc651}
{connect adhoc651(1), adhoc1(0)}
{nseg = 1}
{strdef color color = "White"}
{pt3dclear()}
{pt3dadd(202608.000000,150492.000000,37000.000000,1800.000000)}
{pt3dadd(157536.000000,80484.000000,65175.000000,1800.000000)}

{create adhoc652}
{access adhoc652}
{connect adhoc652(1), adhoc1(0)}
{nseg = 1}
{strdef color color = "White"}
{pt3dclear()}
{pt3dadd(202608.000000,150492.000000,37000.000000,1800.000000)}
{pt3dadd(157524.000000,79824.000000,61325.000000,1800.000000)}

{create adhoc653}
{access adhoc653}
{connect adhoc653(1), adhoc1(0)}
{nseg = 1}
{strdef color color = "White"}
{pt3dclear()}
{pt3dadd(202608.000000,150492.000000,37000.000000,1800.000000)}
{pt3dadd(157668.000000,76356.000000,66775.000000,1800.000000)}

{create adhoc654}
{access adhoc654}
{connect adhoc654(1), adhoc1(0)}
{nseg = 1}
{strdef color color = "White"}
{pt3dclear()}
{pt3dadd(202608.000000,150492.000000,37000.000000,1800.000000)}
{pt3dadd(158148.000000,88332.000000,66225.000000,1800.000000)}

{create adhoc655}
{access adhoc655}
{connect adhoc655(1), adhoc1(0)}
{nseg = 1}
{strdef color color = "White"}
{pt3dclear()}
{pt3dadd(202608.000000,150492.000000,37000.000000,1800.000000)}
{pt3dadd(157524.000000,84132.000000,65275.000000,1800.000000)}

{create adhoc656}
{access adhoc656}
{connect adhoc656(1), adhoc1(0)}
{nseg = 1}
{strdef color color = "White"}
{pt3dclear()}
{pt3dadd(202608.000000,150492.000000,37000.000000,1800.000000)}
{pt3dadd(157752.000000,84000.000000,68875.000000,1800.000000)}

{create adhoc657}
{access adhoc657}
{connect adhoc657(1), adhoc1(0)}
{nseg = 1}
{strdef color color = "White"}
{pt3dclear()}
{pt3dadd(202608.000000,150492.000000,37000.000000,1800.000000)}
{pt3dadd(157716.000000,83724.000000,72375.000000,1800.000000)}

{create adhoc658}
{access adhoc658}
{connect adhoc658(1), adhoc1(0)}
{nseg = 1}
{strdef color color = "White"}
{pt3dclear()}
{pt3dadd(202608.000000,150492.000000,37000.000000,1800.000000)}
{pt3dadd(157764.000000,82056.000000,77075.000000,1800.000000)}

{create adhoc659}
{access adhoc659}
{connect adhoc659(1), adhoc1(0)}
{nseg = 1}
{strdef color color = "White"}
{pt3dclear()}
{pt3dadd(202608.000000,150492.000000,37000.000000,1800.000000)}
{pt3dadd(157776.000000,80316.000000,75925.000000,1800.000000)}

{create adhoc660}
{access adhoc660}
{connect adhoc660(1), adhoc1(0)}
{nseg = 1}
{strdef color color = "White"}
{pt3dclear()}
{pt3dadd(202608.000000,150492.000000,37000.000000,1800.000000)}
{pt3dadd(157812.000000,78792.000000,74625.000000,1800.000000)}

{create adhoc661}
{access adhoc661}
{connect adhoc661(1), adhoc1(0)}
{nseg = 1}
{strdef color color = "White"}
{pt3dclear()}
{pt3dadd(202608.000000,150492.000000,37000.000000,1800.000000)}
{pt3dadd(157692.000000,80388.000000,68675.000000,1800.000000)}

{create adhoc662}
{access adhoc662}
{connect adhoc662(1), adhoc1(0)}
{nseg = 1}
{strdef color color = "White"}
{pt3dclear()}
{pt3dadd(202608.000000,150492.000000,37000.000000,1800.000000)}
{pt3dadd(157752.000000,80784.000000,72775.000000,1800.000000)}

{create adhoc663}
{access adhoc663}
{connect adhoc663(1), adhoc1(0)}
{nseg = 1}
{strdef color color = "White"}
{pt3dclear()}
{pt3dadd(202608.000000,150492.000000,37000.000000,1800.000000)}
{pt3dadd(158400.000000,83688.000000,74825.000000,1800.000000)}

{create adhoc664}
{access adhoc664}
{connect adhoc664(1), adhoc1(0)}
{nseg = 1}
{strdef color color = "White"}
{pt3dclear()}
{pt3dadd(202608.000000,150492.000000,37000.000000,1800.000000)}
{pt3dadd(143436.000000,83160.000000,74725.000000,1800.000000)}

{create adhoc665}
{access adhoc665}
{connect adhoc665(1), adhoc1(0)}
{nseg = 1}
{strdef color color = "White"}
{pt3dclear()}
{pt3dadd(202608.000000,150492.000000,37000.000000,1800.000000)}
{pt3dadd(145668.000000,85440.000000,74725.000000,1800.000000)}

{create adhoc666}
{access adhoc666}
{connect adhoc666(1), adhoc1(0)}
{nseg = 1}
{strdef color color = "White"}
{pt3dclear()}
{pt3dadd(202608.000000,150492.000000,37000.000000,1800.000000)}
{pt3dadd(152604.000000,84000.000000,74725.000000,1800.000000)}

{create adhoc667}
{access adhoc667}
{connect adhoc667(1), adhoc1(0)}
{nseg = 1}
{strdef color color = "White"}
{pt3dclear()}
{pt3dadd(202608.000000,150492.000000,37000.000000,1800.000000)}
{pt3dadd(153780.000000,81240.000000,74725.000000,1800.000000)}

{create adhoc668}
{access adhoc668}
{connect adhoc668(1), adhoc1(0)}
{nseg = 1}
{strdef color color = "White"}
{pt3dclear()}
{pt3dadd(202608.000000,150492.000000,37000.000000,1800.000000)}
{pt3dadd(152580.000000,77328.000000,74725.000000,1800.000000)}

{create adhoc669}
{access adhoc669}
{connect adhoc669(1), adhoc1(0)}
{nseg = 1}
{strdef color color = "White"}
{pt3dclear()}
{pt3dadd(202608.000000,150492.000000,37000.000000,1800.000000)}
{pt3dadd(149220.000000,84756.000000,83225.000000,1800.000000)}

{create adhoc670}
{access adhoc670}
{connect adhoc670(1), adhoc1(0)}
{nseg = 1}
{strdef color color = "White"}
{pt3dclear()}
{pt3dadd(202608.000000,150492.000000,37000.000000,1800.000000)}
{pt3dadd(149148.000000,83412.000000,79725.000000,1800.000000)}

{create adhoc671}
{access adhoc671}
{connect adhoc671(1), adhoc1(0)}
{nseg = 1}
{strdef color color = "White"}
{pt3dclear()}
{pt3dadd(202608.000000,150492.000000,37000.000000,1800.000000)}
{pt3dadd(149148.000000,86652.000000,80175.000000,1800.000000)}

{create adhoc672}
{access adhoc672}
{connect adhoc672(1), adhoc1(0)}
{nseg = 1}
{strdef color color = "White"}
{pt3dclear()}
{pt3dadd(202608.000000,150492.000000,37000.000000,1800.000000)}
{pt3dadd(149124.000000,85320.000000,76075.000000,1800.000000)}

{create adhoc673}
{access adhoc673}
{connect adhoc673(1), adhoc1(0)}
{nseg = 1}
{strdef color color = "White"}
{pt3dclear()}
{pt3dadd(202608.000000,150492.000000,37000.000000,1800.000000)}
{pt3dadd(149100.000000,84672.000000,71675.000000,1800.000000)}

{create adhoc674}
{access adhoc674}
{connect adhoc674(1), adhoc1(0)}
{nseg = 1}
{strdef color color = "White"}
{pt3dclear()}
{pt3dadd(202608.000000,150492.000000,37000.000000,1800.000000)}
{pt3dadd(149088.000000,81156.000000,73175.000000,1800.000000)}

{create adhoc675}
{access adhoc675}
{connect adhoc675(1), adhoc1(0)}
{nseg = 1}
{strdef color color = "White"}
{pt3dclear()}
{pt3dadd(202608.000000,150492.000000,37000.000000,1800.000000)}
{pt3dadd(149052.000000,80916.000000,69475.000000,1800.000000)}

{create adhoc676}
{access adhoc676}
{connect adhoc676(1), adhoc1(0)}
{nseg = 1}
{strdef color color = "White"}
{pt3dclear()}
{pt3dadd(202608.000000,150492.000000,37000.000000,1800.000000)}
{pt3dadd(149112.000000,75444.000000,72225.000000,1800.000000)}

{create adhoc677}
{access adhoc677}
{connect adhoc677(1), adhoc1(0)}
{nseg = 1}
{strdef color color = "White"}
{pt3dclear()}
{pt3dadd(202608.000000,150492.000000,37000.000000,1800.000000)}
{pt3dadd(149028.000000,77820.000000,67025.000000,1800.000000)}

{create adhoc678}
{access adhoc678}
{connect adhoc678(1), adhoc1(0)}
{nseg = 1}
{strdef color color = "White"}
{pt3dclear()}
{pt3dadd(202608.000000,150492.000000,37000.000000,1800.000000)}
{pt3dadd(149052.000000,77928.000000,70925.000000,1800.000000)}

{create adhoc679}
{access adhoc679}
{connect adhoc679(1), adhoc1(0)}
{nseg = 1}
{strdef color color = "White"}
{pt3dclear()}
{pt3dadd(202608.000000,150492.000000,37000.000000,1800.000000)}
{pt3dadd(149052.000000,73488.000000,68275.000000,1800.000000)}

{create adhoc680}
{access adhoc680}
{connect adhoc680(1), adhoc1(0)}
{nseg = 1}
{strdef color color = "White"}
{pt3dclear()}
{pt3dadd(202608.000000,150492.000000,37000.000000,1800.000000)}
{pt3dadd(149076.000000,72708.000000,71925.000000,1800.000000)}

{create adhoc681}
{access adhoc681}
{connect adhoc681(1), adhoc1(0)}
{nseg = 1}
{strdef color color = "White"}
{pt3dclear()}
{pt3dadd(202608.000000,150492.000000,37000.000000,1800.000000)}
{pt3dadd(149124.000000,71940.000000,76225.000000,1800.000000)}

{create adhoc682}
{access adhoc682}
{connect adhoc682(1), adhoc1(0)}
{nseg = 1}
{strdef color color = "White"}
{pt3dclear()}
{pt3dadd(202608.000000,150492.000000,37000.000000,1800.000000)}
{pt3dadd(148968.000000,75132.000000,75575.000000,1800.000000)}

{create adhoc683}
{access adhoc683}
{connect adhoc683(1), adhoc1(0)}
{nseg = 1}
{strdef color color = "White"}
{pt3dclear()}
{pt3dadd(202608.000000,150492.000000,37000.000000,1800.000000)}
{pt3dadd(149124.000000,78012.000000,76225.000000,1800.000000)}

{create adhoc684}
{access adhoc684}
{connect adhoc684(1), adhoc1(0)}
{nseg = 1}
{strdef color color = "White"}
{pt3dclear()}
{pt3dadd(202608.000000,150492.000000,37000.000000,1800.000000)}
{pt3dadd(149160.000000,78768.000000,79225.000000,1800.000000)}

{create adhoc685}
{access adhoc685}
{connect adhoc685(1), adhoc1(0)}
{nseg = 1}
{strdef color color = "White"}
{pt3dclear()}
{pt3dadd(202608.000000,150492.000000,37000.000000,1800.000000)}
{pt3dadd(149220.000000,78120.000000,82725.000000,1800.000000)}

{create adhoc686}
{access adhoc686}
{connect adhoc686(1), adhoc1(0)}
{nseg = 1}
{strdef color color = "White"}
{pt3dclear()}
{pt3dadd(202608.000000,150492.000000,37000.000000,1800.000000)}
{pt3dadd(149088.000000,80772.000000,80925.000000,1800.000000)}

{create adhoc687}
{access adhoc687}
{connect adhoc687(1), adhoc1(0)}
{nseg = 1}
{strdef color color = "White"}
{pt3dclear()}
{pt3dadd(202608.000000,150492.000000,37000.000000,1800.000000)}
{pt3dadd(155292.000000,86916.000000,88225.000000,1800.000000)}

{create adhoc688}
{access adhoc688}
{connect adhoc688(1), adhoc1(0)}
{nseg = 1}
{strdef color color = "White"}
{pt3dclear()}
{pt3dadd(202608.000000,150492.000000,37000.000000,1800.000000)}
{pt3dadd(155220.000000,86820.000000,82325.000000,1800.000000)}

{create adhoc689}
{access adhoc689}
{connect adhoc689(1), adhoc1(0)}
{nseg = 1}
{strdef color color = "White"}
{pt3dclear()}
{pt3dadd(202608.000000,150492.000000,37000.000000,1800.000000)}
{pt3dadd(155304.000000,84192.000000,87775.000000,1800.000000)}

{create adhoc690}
{access adhoc690}
{connect adhoc690(1), adhoc1(0)}
{nseg = 1}
{strdef color color = "White"}
{pt3dclear()}
{pt3dadd(202608.000000,150492.000000,37000.000000,1800.000000)}
{pt3dadd(155340.000000,79476.000000,90475.000000,1800.000000)}

{create adhoc691}
{access adhoc691}
{connect adhoc691(1), adhoc1(0)}
{nseg = 1}
{strdef color color = "White"}
{pt3dclear()}
{pt3dadd(202608.000000,150492.000000,37000.000000,1800.000000)}
{pt3dadd(155304.000000,79836.000000,85475.000000,1800.000000)}

{create adhoc692}
{access adhoc692}
{connect adhoc692(1), adhoc1(0)}
{nseg = 1}
{strdef color color = "White"}
{pt3dclear()}
{pt3dadd(202608.000000,150492.000000,37000.000000,1800.000000)}
{pt3dadd(155256.000000,82104.000000,84025.000000,1800.000000)}

{create adhoc693}
{access adhoc693}
{connect adhoc693(1), adhoc1(0)}
{nseg = 1}
{strdef color color = "White"}
{pt3dclear()}
{pt3dadd(202608.000000,150492.000000,37000.000000,1800.000000)}
{pt3dadd(155196.000000,81372.000000,80825.000000,1800.000000)}

{create adhoc694}
{access adhoc694}
{connect adhoc694(1), adhoc1(0)}
{nseg = 1}
{strdef color color = "White"}
{pt3dclear()}
{pt3dadd(202608.000000,150492.000000,37000.000000,1800.000000)}
{pt3dadd(155184.000000,81204.000000,77675.000000,1800.000000)}

{create adhoc695}
{access adhoc695}
{connect adhoc695(1), adhoc1(0)}
{nseg = 1}
{strdef color color = "White"}
{pt3dclear()}
{pt3dadd(202608.000000,150492.000000,37000.000000,1800.000000)}
{pt3dadd(155148.000000,79392.000000,76175.000000,1800.000000)}

{create adhoc696}
{access adhoc696}
{connect adhoc696(1), adhoc1(0)}
{nseg = 1}
{strdef color color = "White"}
{pt3dclear()}
{pt3dadd(202608.000000,150492.000000,37000.000000,1800.000000)}
{pt3dadd(155184.000000,78852.000000,79075.000000,1800.000000)}

{create adhoc697}
{access adhoc697}
{connect adhoc697(1), adhoc1(0)}
{nseg = 1}
{strdef color color = "White"}
{pt3dclear()}
{pt3dadd(202608.000000,150492.000000,37000.000000,1800.000000)}
{pt3dadd(155208.000000,79164.000000,81475.000000,1800.000000)}

{create adhoc698}
{access adhoc698}
{connect adhoc698(1), adhoc1(0)}
{nseg = 1}
{strdef color color = "White"}
{pt3dclear()}
{pt3dadd(202608.000000,150492.000000,37000.000000,1800.000000)}
{pt3dadd(155172.000000,75708.000000,80075.000000,1800.000000)}

{create adhoc699}
{access adhoc699}
{connect adhoc699(1), adhoc1(0)}
{nseg = 1}
{strdef color color = "White"}
{pt3dclear()}
{pt3dadd(202608.000000,150492.000000,37000.000000,1800.000000)}
{pt3dadd(155112.000000,78288.000000,71525.000000,1800.000000)}

{create adhoc700}
{access adhoc700}
{connect adhoc700(1), adhoc1(0)}
{nseg = 1}
{strdef color color = "White"}
{pt3dclear()}
{pt3dadd(202608.000000,150492.000000,37000.000000,1800.000000)}
{pt3dadd(155196.000000,76680.000000,74025.000000,1800.000000)}

{create adhoc701}
{access adhoc701}
{connect adhoc701(1), adhoc1(0)}
{nseg = 1}
{strdef color color = "White"}
{pt3dclear()}
{pt3dadd(202608.000000,150492.000000,37000.000000,1800.000000)}
{pt3dadd(155172.000000,74964.000000,73675.000000,1800.000000)}

{create adhoc702}
{access adhoc702}
{connect adhoc702(1), adhoc1(0)}
{nseg = 1}
{strdef color color = "White"}
{pt3dclear()}
{pt3dadd(202608.000000,150492.000000,37000.000000,1800.000000)}
{pt3dadd(155136.000000,72672.000000,72725.000000,1800.000000)}

{create adhoc703}
{access adhoc703}
{connect adhoc703(1), adhoc1(0)}
{nseg = 1}
{strdef color color = "White"}
{pt3dclear()}
{pt3dadd(202608.000000,150492.000000,37000.000000,1800.000000)}
{pt3dadd(155160.000000,76068.000000,77375.000000,1800.000000)}

{create adhoc704}
{access adhoc704}
{connect adhoc704(1), adhoc1(0)}
{nseg = 1}
{strdef color color = "White"}
{pt3dclear()}
{pt3dadd(202608.000000,150492.000000,37000.000000,1800.000000)}
{pt3dadd(155148.000000,73116.000000,75875.000000,1800.000000)}

{create adhoc705}
{access adhoc705}
{connect adhoc705(1), adhoc1(0)}
{nseg = 1}
{strdef color color = "White"}
{pt3dclear()}
{pt3dadd(202608.000000,150492.000000,37000.000000,1800.000000)}
{pt3dadd(153492.000000,73956.000000,81875.000000,1800.000000)}

{create adhoc706}
{access adhoc706}
{connect adhoc706(1), adhoc1(0)}
{nseg = 1}
{strdef color color = "White"}
{pt3dclear()}
{pt3dadd(202608.000000,150492.000000,37000.000000,1800.000000)}
{pt3dadd(153588.000000,76152.000000,84675.000000,1800.000000)}

{create adhoc707}
{access adhoc707}
{connect adhoc707(1), adhoc1(0)}
{nseg = 1}
{strdef color color = "White"}
{pt3dclear()}
{pt3dadd(202608.000000,150492.000000,37000.000000,1800.000000)}
{pt3dadd(206664.000000,136260.000000,40625.000000,1800.000000)}

{create adhoc708}
{access adhoc708}
{connect adhoc708(1), adhoc1(0)}
{nseg = 1}
{strdef color color = "White"}
{pt3dclear()}
{pt3dadd(202608.000000,150492.000000,37000.000000,1800.000000)}
{pt3dadd(207240.000000,138744.000000,37325.000000,1800.000000)}

{create adhoc709}
{access adhoc709}
{connect adhoc709(1), adhoc1(0)}
{nseg = 1}
{strdef color color = "White"}
{pt3dclear()}
{pt3dadd(202608.000000,150492.000000,37000.000000,1800.000000)}
{pt3dadd(207168.000000,139356.000000,40225.000000,1800.000000)}

{create adhoc710}
{access adhoc710}
{connect adhoc710(1), adhoc1(0)}
{nseg = 1}
{strdef color color = "White"}
{pt3dclear()}
{pt3dadd(202608.000000,150492.000000,37000.000000,1800.000000)}
{pt3dadd(205992.000000,142428.000000,40675.000000,1800.000000)}

{create adhoc711}
{access adhoc711}
{connect adhoc711(1), adhoc1(0)}
{nseg = 1}
{strdef color color = "White"}
{pt3dclear()}
{pt3dadd(202608.000000,150492.000000,37000.000000,1800.000000)}
{pt3dadd(203556.000000,138300.000000,46025.000000,1800.000000)}

{create adhoc712}
{access adhoc712}
{connect adhoc712(1), adhoc1(0)}
{nseg = 1}
{strdef color color = "White"}
{pt3dclear()}
{pt3dadd(202608.000000,150492.000000,37000.000000,1800.000000)}
{pt3dadd(202128.000000,140184.000000,47525.000000,1800.000000)}

{create adhoc713}
{access adhoc713}
{connect adhoc713(1), adhoc1(0)}
{nseg = 1}
{strdef color color = "White"}
{pt3dclear()}
{pt3dadd(202608.000000,150492.000000,37000.000000,1800.000000)}
{pt3dadd(198528.000000,138132.000000,46725.000000,1800.000000)}

{create adhoc714}
{access adhoc714}
{connect adhoc714(1), adhoc1(0)}
{nseg = 1}
{strdef color color = "White"}
{pt3dclear()}
{pt3dadd(202608.000000,150492.000000,37000.000000,1800.000000)}
{pt3dadd(199044.000000,134616.000000,41775.000000,1800.000000)}

{create adhoc715}
{access adhoc715}
{connect adhoc715(1), adhoc1(0)}
{nseg = 1}
{strdef color color = "White"}
{pt3dclear()}
{pt3dadd(202608.000000,150492.000000,37000.000000,1800.000000)}
{pt3dadd(197784.000000,129492.000000,40025.000000,1800.000000)}

{create adhoc716}
{access adhoc716}
{connect adhoc716(1), adhoc1(0)}
{nseg = 1}
{strdef color color = "White"}
{pt3dclear()}
{pt3dadd(202608.000000,150492.000000,37000.000000,1800.000000)}
{pt3dadd(198024.000000,130416.000000,35225.000000,1800.000000)}

{create adhoc717}
{access adhoc717}
{connect adhoc717(1), adhoc1(0)}
{nseg = 1}
{strdef color color = "White"}
{pt3dclear()}
{pt3dadd(202608.000000,150492.000000,37000.000000,1800.000000)}
{pt3dadd(192600.000000,108684.000000,36625.000000,1800.000000)}

{create adhoc718}
{access adhoc718}
{connect adhoc718(1), adhoc1(0)}
{nseg = 1}
{strdef color color = "White"}
{pt3dclear()}
{pt3dadd(202608.000000,150492.000000,37000.000000,1800.000000)}
{pt3dadd(194352.000000,111480.000000,33375.000000,1800.000000)}

{create adhoc719}
{access adhoc719}
{connect adhoc719(1), adhoc1(0)}
{nseg = 1}
{strdef color color = "White"}
{pt3dclear()}
{pt3dadd(202608.000000,150492.000000,37000.000000,1800.000000)}
{pt3dadd(194364.000000,109908.000000,30775.000000,1800.000000)}

{create adhoc720}
{access adhoc720}
{connect adhoc720(1), adhoc1(0)}
{nseg = 1}
{strdef color color = "White"}
{pt3dclear()}
{pt3dadd(202608.000000,150492.000000,37000.000000,1800.000000)}
{pt3dadd(194340.000000,108636.000000,32575.000000,1800.000000)}

{create adhoc721}
{access adhoc721}
{connect adhoc721(1), adhoc1(0)}
{nseg = 1}
{strdef color color = "White"}
{pt3dclear()}
{pt3dadd(202608.000000,150492.000000,37000.000000,1800.000000)}
{pt3dadd(194340.000000,109392.000000,35325.000000,1800.000000)}

{create adhoc722}
{access adhoc722}
{connect adhoc722(1), adhoc1(0)}
{nseg = 1}
{strdef color color = "White"}
{pt3dclear()}
{pt3dadd(202608.000000,150492.000000,37000.000000,1800.000000)}
{pt3dadd(194388.000000,105924.000000,32275.000000,1800.000000)}

{create adhoc723}
{access adhoc723}
{connect adhoc723(1), adhoc1(0)}
{nseg = 1}
{strdef color color = "White"}
{pt3dclear()}
{pt3dadd(202608.000000,150492.000000,37000.000000,1800.000000)}
{pt3dadd(194352.000000,104328.000000,34125.000000,1800.000000)}

{create adhoc724}
{access adhoc724}
{connect adhoc724(1), adhoc1(0)}
{nseg = 1}
{strdef color color = "White"}
{pt3dclear()}
{pt3dadd(202608.000000,150492.000000,37000.000000,1800.000000)}
{pt3dadd(194352.000000,102768.000000,36025.000000,1800.000000)}

{create adhoc725}
{access adhoc725}
{connect adhoc725(1), adhoc1(0)}
{nseg = 1}
{strdef color color = "White"}
{pt3dclear()}
{pt3dadd(202608.000000,150492.000000,37000.000000,1800.000000)}
{pt3dadd(194328.000000,101076.000000,37625.000000,1800.000000)}

{create adhoc726}
{access adhoc726}
{connect adhoc726(1), adhoc1(0)}
{nseg = 1}
{strdef color color = "White"}
{pt3dclear()}
{pt3dadd(202608.000000,150492.000000,37000.000000,1800.000000)}
{pt3dadd(194340.000000,106428.000000,36275.000000,1800.000000)}

{create adhoc727}
{access adhoc727}
{connect adhoc727(1), adhoc1(0)}
{nseg = 1}
{strdef color color = "White"}
{pt3dclear()}
{pt3dadd(202608.000000,150492.000000,37000.000000,1800.000000)}
{pt3dadd(194328.000000,104916.000000,38325.000000,1800.000000)}

{create adhoc728}
{access adhoc728}
{connect adhoc728(1), adhoc1(0)}
{nseg = 1}
{strdef color color = "White"}
{pt3dclear()}
{pt3dadd(202608.000000,150492.000000,37000.000000,1800.000000)}
{pt3dadd(194340.000000,109428.000000,39725.000000,1800.000000)}

{create adhoc729}
{access adhoc729}
{connect adhoc729(1), adhoc1(0)}
{nseg = 1}
{strdef color color = "White"}
{pt3dclear()}
{pt3dadd(202608.000000,150492.000000,37000.000000,1800.000000)}
{pt3dadd(194316.000000,108780.000000,42175.000000,1800.000000)}

{create adhoc730}
{access adhoc730}
{connect adhoc730(1), adhoc1(0)}
{nseg = 1}
{strdef color color = "White"}
{pt3dclear()}
{pt3dadd(202608.000000,150492.000000,37000.000000,1800.000000)}
{pt3dadd(194184.000000,104052.000000,47025.000000,1800.000000)}

{create adhoc731}
{access adhoc731}
{connect adhoc731(1), adhoc1(0)}
{nseg = 1}
{strdef color color = "White"}
{pt3dclear()}
{pt3dadd(202608.000000,150492.000000,37000.000000,1800.000000)}
{pt3dadd(194196.000000,104556.000000,45075.000000,1800.000000)}

{create adhoc732}
{access adhoc732}
{connect adhoc732(1), adhoc1(0)}
{nseg = 1}
{strdef color color = "White"}
{pt3dclear()}
{pt3dadd(202608.000000,150492.000000,37000.000000,1800.000000)}
{pt3dadd(194232.000000,100896.000000,44275.000000,1800.000000)}

{create adhoc733}
{access adhoc733}
{connect adhoc733(1), adhoc1(0)}
{nseg = 1}
{strdef color color = "White"}
{pt3dclear()}
{pt3dadd(202608.000000,150492.000000,37000.000000,1800.000000)}
{pt3dadd(194340.000000,105900.000000,40975.000000,1800.000000)}

{create adhoc734}
{access adhoc734}
{connect adhoc734(1), adhoc1(0)}
{nseg = 1}
{strdef color color = "White"}
{pt3dclear()}
{pt3dadd(202608.000000,150492.000000,37000.000000,1800.000000)}
{pt3dadd(194280.000000,106224.000000,43375.000000,1800.000000)}

{create adhoc735}
{access adhoc735}
{connect adhoc735(1), adhoc1(0)}
{nseg = 1}
{strdef color color = "White"}
{pt3dclear()}
{pt3dadd(202608.000000,150492.000000,37000.000000,1800.000000)}
{pt3dadd(194316.000000,102696.000000,41925.000000,1800.000000)}

{create adhoc736}
{access adhoc736}
{connect adhoc736(1), adhoc1(0)}
{nseg = 1}
{strdef color color = "White"}
{pt3dclear()}
{pt3dadd(202608.000000,150492.000000,37000.000000,1800.000000)}
{pt3dadd(192792.000000,98052.000000,37425.000000,1800.000000)}

{create adhoc737}
{access adhoc737}
{connect adhoc737(1), adhoc1(0)}
{nseg = 1}
{strdef color color = "White"}
{pt3dclear()}
{pt3dadd(202608.000000,150492.000000,37000.000000,1800.000000)}
{pt3dadd(191868.000000,100404.000000,36525.000000,1800.000000)}

{create adhoc738}
{access adhoc738}
{connect adhoc738(1), adhoc1(0)}
{nseg = 1}
{strdef color color = "White"}
{pt3dclear()}
{pt3dadd(202608.000000,150492.000000,37000.000000,1800.000000)}
{pt3dadd(191892.000000,101724.000000,33625.000000,1800.000000)}

{create adhoc739}
{access adhoc739}
{connect adhoc739(1), adhoc1(0)}
{nseg = 1}
{strdef color color = "White"}
{pt3dclear()}
{pt3dadd(202608.000000,150492.000000,37000.000000,1800.000000)}
{pt3dadd(191892.000000,98448.000000,32925.000000,1800.000000)}

{create adhoc740}
{access adhoc740}
{connect adhoc740(1), adhoc1(0)}
{nseg = 1}
{strdef color color = "White"}
{pt3dclear()}
{pt3dadd(202608.000000,150492.000000,37000.000000,1800.000000)}
{pt3dadd(191964.000000,87900.000000,43625.000000,1800.000000)}

{create adhoc741}
{access adhoc741}
{connect adhoc741(1), adhoc1(0)}
{nseg = 1}
{strdef color color = "White"}
{pt3dclear()}
{pt3dadd(202608.000000,150492.000000,37000.000000,1800.000000)}
{pt3dadd(191952.000000,90552.000000,43525.000000,1800.000000)}

{create adhoc742}
{access adhoc742}
{connect adhoc742(1), adhoc1(0)}
{nseg = 1}
{strdef color color = "White"}
{pt3dclear()}
{pt3dadd(202608.000000,150492.000000,37000.000000,1800.000000)}
{pt3dadd(191988.000000,95832.000000,42725.000000,1800.000000)}

{create adhoc743}
{access adhoc743}
{connect adhoc743(1), adhoc1(0)}
{nseg = 1}
{strdef color color = "White"}
{pt3dclear()}
{pt3dadd(202608.000000,150492.000000,37000.000000,1800.000000)}
{pt3dadd(191904.000000,93744.000000,43375.000000,1800.000000)}

{create adhoc744}
{access adhoc744}
{connect adhoc744(1), adhoc1(0)}
{nseg = 1}
{strdef color color = "White"}
{pt3dclear()}
{pt3dadd(202608.000000,150492.000000,37000.000000,1800.000000)}
{pt3dadd(192084.000000,94188.000000,40875.000000,1800.000000)}

{create adhoc745}
{access adhoc745}
{connect adhoc745(1), adhoc1(0)}
{nseg = 1}
{strdef color color = "White"}
{pt3dclear()}
{pt3dadd(202608.000000,150492.000000,37000.000000,1800.000000)}
{pt3dadd(192084.000000,95628.000000,39825.000000,1800.000000)}

{create adhoc746}
{access adhoc746}
{connect adhoc746(1), adhoc1(0)}
{nseg = 1}
{strdef color color = "White"}
{pt3dclear()}
{pt3dadd(202608.000000,150492.000000,37000.000000,1800.000000)}
{pt3dadd(192048.000000,94764.000000,37525.000000,1800.000000)}

{create adhoc747}
{access adhoc747}
{connect adhoc747(1), adhoc1(0)}
{nseg = 1}
{strdef color color = "White"}
{pt3dclear()}
{pt3dadd(202608.000000,150492.000000,37000.000000,1800.000000)}
{pt3dadd(192060.000000,91752.000000,36575.000000,1800.000000)}

{create adhoc748}
{access adhoc748}
{connect adhoc748(1), adhoc1(0)}
{nseg = 1}
{strdef color color = "White"}
{pt3dclear()}
{pt3dadd(202608.000000,150492.000000,37000.000000,1800.000000)}
{pt3dadd(192000.000000,88248.000000,39125.000000,1800.000000)}

{create adhoc749}
{access adhoc749}
{connect adhoc749(1), adhoc1(0)}
{nseg = 1}
{strdef color color = "White"}
{pt3dclear()}
{pt3dadd(202608.000000,150492.000000,37000.000000,1800.000000)}
{pt3dadd(191928.000000,89436.000000,41375.000000,1800.000000)}

{create adhoc750}
{access adhoc750}
{connect adhoc750(1), adhoc1(0)}
{nseg = 1}
{strdef color color = "White"}
{pt3dclear()}
{pt3dadd(202608.000000,150492.000000,37000.000000,1800.000000)}
{pt3dadd(192048.000000,91956.000000,39625.000000,1800.000000)}

{create adhoc751}
{access adhoc751}
{connect adhoc751(1), adhoc1(0)}
{nseg = 1}
{strdef color color = "White"}
{pt3dclear()}
{pt3dadd(202608.000000,150492.000000,37000.000000,1800.000000)}
{pt3dadd(193392.000000,96924.000000,39575.000000,1800.000000)}

{create adhoc752}
{access adhoc752}
{connect adhoc752(1), adhoc1(0)}
{nseg = 1}
{strdef color color = "White"}
{pt3dclear()}
{pt3dadd(202608.000000,150492.000000,37000.000000,1800.000000)}
{pt3dadd(195552.000000,97044.000000,38625.000000,1800.000000)}

{create adhoc753}
{access adhoc753}
{connect adhoc753(1), adhoc1(0)}
{nseg = 1}
{strdef color color = "White"}
{pt3dclear()}
{pt3dadd(202608.000000,150492.000000,37000.000000,1800.000000)}
{pt3dadd(197928.000000,98256.000000,38475.000000,1800.000000)}

{create adhoc754}
{access adhoc754}
{connect adhoc754(1), adhoc1(0)}
{nseg = 1}
{strdef color color = "White"}
{pt3dclear()}
{pt3dadd(202608.000000,150492.000000,37000.000000,1800.000000)}
{pt3dadd(195624.000000,94152.000000,39125.000000,1800.000000)}

{create adhoc755}
{access adhoc755}
{connect adhoc755(1), adhoc1(0)}
{nseg = 1}
{strdef color color = "White"}
{pt3dclear()}
{pt3dadd(202608.000000,150492.000000,37000.000000,1800.000000)}
{pt3dadd(195660.000000,91164.000000,37925.000000,1800.000000)}

{create adhoc756}
{access adhoc756}
{connect adhoc756(1), adhoc1(0)}
{nseg = 1}
{strdef color color = "White"}
{pt3dclear()}
{pt3dadd(202608.000000,150492.000000,37000.000000,1800.000000)}
{pt3dadd(195696.000000,92340.000000,36075.000000,1800.000000)}

{create adhoc757}
{access adhoc757}
{connect adhoc757(1), adhoc1(0)}
{nseg = 1}
{strdef color color = "White"}
{pt3dclear()}
{pt3dadd(202608.000000,150492.000000,37000.000000,1800.000000)}
{pt3dadd(190584.000000,93144.000000,35125.000000,1800.000000)}

{create adhoc758}
{access adhoc758}
{connect adhoc758(1), adhoc1(0)}
{nseg = 1}
{strdef color color = "White"}
{pt3dclear()}
{pt3dadd(202608.000000,150492.000000,37000.000000,1800.000000)}
{pt3dadd(190680.000000,92292.000000,32575.000000,1800.000000)}

{create adhoc759}
{access adhoc759}
{connect adhoc759(1), adhoc1(0)}
{nseg = 1}
{strdef color color = "White"}
{pt3dclear()}
{pt3dadd(202608.000000,150492.000000,37000.000000,1800.000000)}
{pt3dadd(190608.000000,95412.000000,32975.000000,1800.000000)}

{create adhoc760}
{access adhoc760}
{connect adhoc760(1), adhoc1(0)}
{nseg = 1}
{strdef color color = "White"}
{pt3dclear()}
{pt3dadd(202608.000000,150492.000000,37000.000000,1800.000000)}
{pt3dadd(190656.000000,91980.000000,29725.000000,1800.000000)}

{create adhoc761}
{access adhoc761}
{connect adhoc761(1), adhoc1(0)}
{nseg = 1}
{strdef color color = "White"}
{pt3dclear()}
{pt3dadd(202608.000000,150492.000000,37000.000000,1800.000000)}
{pt3dadd(190608.000000,88836.000000,27975.000000,1800.000000)}

{create adhoc762}
{access adhoc762}
{connect adhoc762(1), adhoc1(0)}
{nseg = 1}
{strdef color color = "White"}
{pt3dclear()}
{pt3dadd(202608.000000,150492.000000,37000.000000,1800.000000)}
{pt3dadd(190656.000000,88896.000000,30925.000000,1800.000000)}

{create adhoc763}
{access adhoc763}
{connect adhoc763(1), adhoc1(0)}
{nseg = 1}
{strdef color color = "White"}
{pt3dclear()}
{pt3dadd(202608.000000,150492.000000,37000.000000,1800.000000)}
{pt3dadd(190620.000000,86268.000000,28925.000000,1800.000000)}

{create adhoc764}
{access adhoc764}
{connect adhoc764(1), adhoc1(0)}
{nseg = 1}
{strdef color color = "White"}
{pt3dclear()}
{pt3dadd(202608.000000,150492.000000,37000.000000,1800.000000)}
{pt3dadd(190644.000000,86028.000000,31125.000000,1800.000000)}

{create adhoc765}
{access adhoc765}
{connect adhoc765(1), adhoc1(0)}
{nseg = 1}
{strdef color color = "White"}
{pt3dclear()}
{pt3dadd(202608.000000,150492.000000,37000.000000,1800.000000)}
{pt3dadd(190644.000000,88704.000000,33525.000000,1800.000000)}

{create adhoc766}
{access adhoc766}
{connect adhoc766(1), adhoc1(0)}
{nseg = 1}
{strdef color color = "White"}
{pt3dclear()}
{pt3dadd(202608.000000,150492.000000,37000.000000,1800.000000)}
{pt3dadd(190644.000000,94260.000000,40875.000000,1800.000000)}

{create adhoc767}
{access adhoc767}
{connect adhoc767(1), adhoc1(0)}
{nseg = 1}
{strdef color color = "White"}
{pt3dclear()}
{pt3dadd(202608.000000,150492.000000,37000.000000,1800.000000)}
{pt3dadd(194052.000000,99240.000000,28825.000000,1800.000000)}

{create adhoc768}
{access adhoc768}
{connect adhoc768(1), adhoc1(0)}
{nseg = 1}
{strdef color color = "White"}
{pt3dclear()}
{pt3dadd(202608.000000,150492.000000,37000.000000,1800.000000)}
{pt3dadd(194064.000000,100308.000000,33025.000000,1800.000000)}

{create adhoc769}
{access adhoc769}
{connect adhoc769(1), adhoc1(0)}
{nseg = 1}
{strdef color color = "White"}
{pt3dclear()}
{pt3dadd(202608.000000,150492.000000,37000.000000,1800.000000)}
{pt3dadd(194052.000000,99144.000000,34875.000000,1800.000000)}

{create adhoc770}
{access adhoc770}
{connect adhoc770(1), adhoc1(0)}
{nseg = 1}
{strdef color color = "White"}
{pt3dclear()}
{pt3dadd(202608.000000,150492.000000,37000.000000,1800.000000)}
{pt3dadd(194244.000000,96264.000000,36875.000000,1800.000000)}

{create adhoc771}
{access adhoc771}
{connect adhoc771(1), adhoc1(0)}
{nseg = 1}
{strdef color color = "White"}
{pt3dclear()}
{pt3dadd(202608.000000,150492.000000,37000.000000,1800.000000)}
{pt3dadd(194040.000000,96600.000000,34775.000000,1800.000000)}

{create adhoc772}
{access adhoc772}
{connect adhoc772(1), adhoc1(0)}
{nseg = 1}
{strdef color color = "White"}
{pt3dclear()}
{pt3dadd(202608.000000,150492.000000,37000.000000,1800.000000)}
{pt3dadd(194220.000000,94092.000000,35375.000000,1800.000000)}

{create adhoc773}
{access adhoc773}
{connect adhoc773(1), adhoc1(0)}
{nseg = 1}
{strdef color color = "White"}
{pt3dclear()}
{pt3dadd(202608.000000,150492.000000,37000.000000,1800.000000)}
{pt3dadd(194256.000000,91836.000000,33475.000000,1800.000000)}

{create adhoc774}
{access adhoc774}
{connect adhoc774(1), adhoc1(0)}
{nseg = 1}
{strdef color color = "White"}
{pt3dclear()}
{pt3dadd(202608.000000,150492.000000,37000.000000,1800.000000)}
{pt3dadd(192600.000000,92868.000000,32525.000000,1800.000000)}

{create adhoc775}
{access adhoc775}
{connect adhoc775(1), adhoc1(0)}
{nseg = 1}
{strdef color color = "White"}
{pt3dclear()}
{pt3dadd(202608.000000,150492.000000,37000.000000,1800.000000)}
{pt3dadd(192012.000000,89304.000000,36825.000000,1800.000000)}

{create adhoc776}
{access adhoc776}
{connect adhoc776(1), adhoc1(0)}
{nseg = 1}
{strdef color color = "White"}
{pt3dclear()}
{pt3dadd(202608.000000,150492.000000,37000.000000,1800.000000)}
{pt3dadd(190872.000000,86364.000000,37275.000000,1800.000000)}

{create adhoc777}
{access adhoc777}
{connect adhoc777(1), adhoc1(0)}
{nseg = 1}
{strdef color color = "White"}
{pt3dclear()}
{pt3dadd(202608.000000,150492.000000,37000.000000,1800.000000)}
{pt3dadd(190740.000000,90396.000000,43625.000000,1800.000000)}

{create adhoc778}
{access adhoc778}
{connect adhoc778(1), adhoc1(0)}
{nseg = 1}
{strdef color color = "White"}
{pt3dclear()}
{pt3dadd(202608.000000,150492.000000,37000.000000,1800.000000)}
{pt3dadd(190728.000000,87972.000000,43675.000000,1800.000000)}

{create adhoc779}
{access adhoc779}
{connect adhoc779(1), adhoc1(0)}
{nseg = 1}
{strdef color color = "White"}
{pt3dclear()}
{pt3dadd(202608.000000,150492.000000,37000.000000,1800.000000)}
{pt3dadd(189492.000000,91020.000000,41475.000000,1800.000000)}

{create adhoc780}
{access adhoc780}
{connect adhoc780(1), adhoc1(0)}
{nseg = 1}
{strdef color color = "White"}
{pt3dclear()}
{pt3dadd(202608.000000,150492.000000,37000.000000,1800.000000)}
{pt3dadd(189480.000000,88164.000000,41525.000000,1800.000000)}

{create adhoc781}
{access adhoc781}
{connect adhoc781(1), adhoc1(0)}
{nseg = 1}
{strdef color color = "White"}
{pt3dclear()}
{pt3dadd(202608.000000,150492.000000,37000.000000,1800.000000)}
{pt3dadd(189504.000000,86172.000000,42375.000000,1800.000000)}

{create adhoc782}
{access adhoc782}
{connect adhoc782(1), adhoc1(0)}
{nseg = 1}
{strdef color color = "White"}
{pt3dclear()}
{pt3dadd(202608.000000,150492.000000,37000.000000,1800.000000)}
{pt3dadd(189720.000000,91956.000000,32875.000000,1800.000000)}

{create adhoc783}
{access adhoc783}
{connect adhoc783(1), adhoc1(0)}
{nseg = 1}
{strdef color color = "White"}
{pt3dclear()}
{pt3dadd(202608.000000,150492.000000,37000.000000,1800.000000)}
{pt3dadd(189720.000000,91104.000000,34925.000000,1800.000000)}

{create adhoc784}
{access adhoc784}
{connect adhoc784(1), adhoc1(0)}
{nseg = 1}
{strdef color color = "White"}
{pt3dclear()}
{pt3dadd(202608.000000,150492.000000,37000.000000,1800.000000)}
{pt3dadd(189708.000000,88548.000000,35575.000000,1800.000000)}

{create adhoc785}
{access adhoc785}
{connect adhoc785(1), adhoc1(0)}
{nseg = 1}
{strdef color color = "White"}
{pt3dclear()}
{pt3dadd(202608.000000,150492.000000,37000.000000,1800.000000)}
{pt3dadd(189732.000000,86376.000000,36825.000000,1800.000000)}

{create adhoc786}
{access adhoc786}
{connect adhoc786(1), adhoc1(0)}
{nseg = 1}
{strdef color color = "White"}
{pt3dclear()}
{pt3dadd(202608.000000,150492.000000,37000.000000,1800.000000)}
{pt3dadd(189732.000000,89484.000000,38325.000000,1800.000000)}

{create adhoc787}
{access adhoc787}
{connect adhoc787(1), adhoc1(0)}
{nseg = 1}
{strdef color color = "White"}
{pt3dclear()}
{pt3dadd(202608.000000,150492.000000,37000.000000,1800.000000)}
{pt3dadd(189384.000000,94740.000000,37525.000000,1800.000000)}

{create adhoc788}
{access adhoc788}
{connect adhoc788(1), adhoc1(0)}
{nseg = 1}
{strdef color color = "White"}
{pt3dclear()}
{pt3dadd(202608.000000,150492.000000,37000.000000,1800.000000)}
{pt3dadd(190140.000000,97224.000000,35975.000000,1800.000000)}

{create adhoc789}
{access adhoc789}
{connect adhoc789(1), adhoc1(0)}
{nseg = 1}
{strdef color color = "White"}
{pt3dclear()}
{pt3dadd(202608.000000,150492.000000,37000.000000,1800.000000)}
{pt3dadd(187860.000000,101160.000000,46175.000000,1800.000000)}

{create adhoc790}
{access adhoc790}
{connect adhoc790(1), adhoc1(0)}
{nseg = 1}
{strdef color color = "White"}
{pt3dclear()}
{pt3dadd(202608.000000,150492.000000,37000.000000,1800.000000)}
{pt3dadd(187992.000000,97776.000000,46725.000000,1800.000000)}

{create adhoc791}
{access adhoc791}
{connect adhoc791(1), adhoc1(0)}
{nseg = 1}
{strdef color color = "White"}
{pt3dclear()}
{pt3dadd(202608.000000,150492.000000,37000.000000,1800.000000)}
{pt3dadd(188808.000000,97884.000000,43925.000000,1800.000000)}

{create adhoc792}
{access adhoc792}
{connect adhoc792(1), adhoc1(0)}
{nseg = 1}
{strdef color color = "White"}
{pt3dclear()}
{pt3dadd(202608.000000,150492.000000,37000.000000,1800.000000)}
{pt3dadd(189348.000000,103560.000000,42875.000000,1800.000000)}

{create adhoc793}
{access adhoc793}
{connect adhoc793(1), adhoc1(0)}
{nseg = 1}
{strdef color color = "White"}
{pt3dclear()}
{pt3dadd(202608.000000,150492.000000,37000.000000,1800.000000)}
{pt3dadd(189372.000000,102456.000000,40475.000000,1800.000000)}

{create adhoc794}
{access adhoc794}
{connect adhoc794(1), adhoc1(0)}
{nseg = 1}
{strdef color color = "White"}
{pt3dclear()}
{pt3dadd(202608.000000,150492.000000,37000.000000,1800.000000)}
{pt3dadd(189384.000000,98184.000000,38775.000000,1800.000000)}

{create adhoc795}
{access adhoc795}
{connect adhoc795(1), adhoc1(0)}
{nseg = 1}
{strdef color color = "White"}
{pt3dclear()}
{pt3dadd(202608.000000,150492.000000,37000.000000,1800.000000)}
{pt3dadd(189324.000000,100164.000000,43025.000000,1800.000000)}

{create adhoc796}
{access adhoc796}
{connect adhoc796(1), adhoc1(0)}
{nseg = 1}
{strdef color color = "White"}
{pt3dclear()}
{pt3dadd(202608.000000,150492.000000,37000.000000,1800.000000)}
{pt3dadd(189456.000000,96816.000000,41325.000000,1800.000000)}

{create adhoc797}
{access adhoc797}
{connect adhoc797(1), adhoc1(0)}
{nseg = 1}
{strdef color color = "White"}
{pt3dclear()}
{pt3dadd(202608.000000,150492.000000,37000.000000,1800.000000)}
{pt3dadd(187992.000000,105360.000000,40075.000000,1800.000000)}

{create adhoc798}
{access adhoc798}
{connect adhoc798(1), adhoc1(0)}
{nseg = 1}
{strdef color color = "White"}
{pt3dclear()}
{pt3dadd(202608.000000,150492.000000,37000.000000,1800.000000)}
{pt3dadd(186900.000000,106068.000000,36875.000000,1800.000000)}

{create adhoc799}
{access adhoc799}
{connect adhoc799(1), adhoc1(0)}
{nseg = 1}
{strdef color color = "White"}
{pt3dclear()}
{pt3dadd(202608.000000,150492.000000,37000.000000,1800.000000)}
{pt3dadd(186900.000000,103320.000000,37025.000000,1800.000000)}

{create adhoc800}
{access adhoc800}
{connect adhoc800(1), adhoc1(0)}
{nseg = 1}
{strdef color color = "White"}
{pt3dclear()}
{pt3dadd(202608.000000,150492.000000,37000.000000,1800.000000)}
{pt3dadd(186864.000000,105216.000000,38475.000000,1800.000000)}

{create adhoc801}
{access adhoc801}
{connect adhoc801(1), adhoc1(0)}
{nseg = 1}
{strdef color color = "White"}
{pt3dclear()}
{pt3dadd(202608.000000,150492.000000,37000.000000,1800.000000)}
{pt3dadd(186876.000000,101604.000000,39125.000000,1800.000000)}

{create adhoc802}
{access adhoc802}
{connect adhoc802(1), adhoc1(0)}
{nseg = 1}
{strdef color color = "White"}
{pt3dclear()}
{pt3dadd(202608.000000,150492.000000,37000.000000,1800.000000)}
{pt3dadd(186876.000000,102468.000000,40875.000000,1800.000000)}

{create adhoc803}
{access adhoc803}
{connect adhoc803(1), adhoc1(0)}
{nseg = 1}
{strdef color color = "White"}
{pt3dclear()}
{pt3dadd(202608.000000,150492.000000,37000.000000,1800.000000)}
{pt3dadd(186816.000000,101160.000000,42975.000000,1800.000000)}

{create adhoc804}
{access adhoc804}
{connect adhoc804(1), adhoc1(0)}
{nseg = 1}
{strdef color color = "White"}
{pt3dclear()}
{pt3dadd(202608.000000,150492.000000,37000.000000,1800.000000)}
{pt3dadd(186864.000000,98940.000000,45275.000000,1800.000000)}

{create adhoc805}
{access adhoc805}
{connect adhoc805(1), adhoc1(0)}
{nseg = 1}
{strdef color color = "White"}
{pt3dclear()}
{pt3dadd(202608.000000,150492.000000,37000.000000,1800.000000)}
{pt3dadd(187044.000000,97704.000000,42125.000000,1800.000000)}

{create adhoc806}
{access adhoc806}
{connect adhoc806(1), adhoc1(0)}
{nseg = 1}
{strdef color color = "White"}
{pt3dclear()}
{pt3dadd(202608.000000,150492.000000,37000.000000,1800.000000)}
{pt3dadd(186996.000000,95028.000000,41275.000000,1800.000000)}

{create adhoc807}
{access adhoc807}
{connect adhoc807(1), adhoc1(0)}
{nseg = 1}
{strdef color color = "White"}
{pt3dclear()}
{pt3dadd(202608.000000,150492.000000,37000.000000,1800.000000)}
{pt3dadd(186912.000000,95700.000000,43925.000000,1800.000000)}

{create adhoc808}
{access adhoc808}
{connect adhoc808(1), adhoc1(0)}
{nseg = 1}
{strdef color color = "White"}
{pt3dclear()}
{pt3dadd(202608.000000,150492.000000,37000.000000,1800.000000)}
{pt3dadd(186936.000000,92280.000000,42975.000000,1800.000000)}

{create adhoc809}
{access adhoc809}
{connect adhoc809(1), adhoc1(0)}
{nseg = 1}
{strdef color color = "White"}
{pt3dclear()}
{pt3dadd(202608.000000,150492.000000,37000.000000,1800.000000)}
{pt3dadd(186864.000000,89388.000000,45275.000000,1800.000000)}

{create adhoc810}
{access adhoc810}
{connect adhoc810(1), adhoc1(0)}
{nseg = 1}
{strdef color color = "White"}
{pt3dclear()}
{pt3dadd(202608.000000,150492.000000,37000.000000,1800.000000)}
{pt3dadd(186924.000000,89472.000000,43125.000000,1800.000000)}

{create adhoc811}
{access adhoc811}
{connect adhoc811(1), adhoc1(0)}
{nseg = 1}
{strdef color color = "White"}
{pt3dclear()}
{pt3dadd(202608.000000,150492.000000,37000.000000,1800.000000)}
{pt3dadd(187068.000000,96168.000000,36825.000000,1800.000000)}

{create adhoc812}
{access adhoc812}
{connect adhoc812(1), adhoc1(0)}
{nseg = 1}
{strdef color color = "White"}
{pt3dclear()}
{pt3dadd(202608.000000,150492.000000,37000.000000,1800.000000)}
{pt3dadd(187056.000000,94176.000000,39225.000000,1800.000000)}

{create adhoc813}
{access adhoc813}
{connect adhoc813(1), adhoc1(0)}
{nseg = 1}
{strdef color color = "White"}
{pt3dclear()}
{pt3dadd(202608.000000,150492.000000,37000.000000,1800.000000)}
{pt3dadd(187092.000000,91584.000000,39525.000000,1800.000000)}

{create adhoc814}
{access adhoc814}
{connect adhoc814(1), adhoc1(0)}
{nseg = 1}
{strdef color color = "White"}
{pt3dclear()}
{pt3dadd(202608.000000,150492.000000,37000.000000,1800.000000)}
{pt3dadd(187032.000000,89244.000000,40625.000000,1800.000000)}

{create adhoc815}
{access adhoc815}
{connect adhoc815(1), adhoc1(0)}
{nseg = 1}
{strdef color color = "White"}
{pt3dclear()}
{pt3dadd(202608.000000,150492.000000,37000.000000,1800.000000)}
{pt3dadd(187020.000000,88920.000000,38175.000000,1800.000000)}

{create adhoc816}
{access adhoc816}
{connect adhoc816(1), adhoc1(0)}
{nseg = 1}
{strdef color color = "White"}
{pt3dclear()}
{pt3dadd(202608.000000,150492.000000,37000.000000,1800.000000)}
{pt3dadd(187044.000000,86520.000000,41025.000000,1800.000000)}

{create adhoc817}
{access adhoc817}
{connect adhoc817(1), adhoc1(0)}
{nseg = 1}
{strdef color color = "White"}
{pt3dclear()}
{pt3dadd(202608.000000,150492.000000,37000.000000,1800.000000)}
{pt3dadd(187056.000000,86472.000000,38575.000000,1800.000000)}

{create adhoc818}
{access adhoc818}
{connect adhoc818(1), adhoc1(0)}
{nseg = 1}
{strdef color color = "White"}
{pt3dclear()}
{pt3dadd(202608.000000,150492.000000,37000.000000,1800.000000)}
{pt3dadd(187068.000000,83688.000000,36825.000000,1800.000000)}

{create adhoc819}
{access adhoc819}
{connect adhoc819(1), adhoc1(0)}
{nseg = 1}
{strdef color color = "White"}
{pt3dclear()}
{pt3dadd(202608.000000,150492.000000,37000.000000,1800.000000)}
{pt3dadd(187080.000000,81288.000000,37475.000000,1800.000000)}

{create adhoc820}
{access adhoc820}
{connect adhoc820(1), adhoc1(0)}
{nseg = 1}
{strdef color color = "White"}
{pt3dclear()}
{pt3dadd(202608.000000,150492.000000,37000.000000,1800.000000)}
{pt3dadd(187080.000000,80964.000000,31625.000000,1800.000000)}

{create adhoc821}
{access adhoc821}
{connect adhoc821(1), adhoc1(0)}
{nseg = 1}
{strdef color color = "White"}
{pt3dclear()}
{pt3dadd(202608.000000,150492.000000,37000.000000,1800.000000)}
{pt3dadd(187044.000000,82176.000000,34475.000000,1800.000000)}

{create adhoc822}
{access adhoc822}
{connect adhoc822(1), adhoc1(0)}
{nseg = 1}
{strdef color color = "White"}
{pt3dclear()}
{pt3dadd(202608.000000,150492.000000,37000.000000,1800.000000)}
{pt3dadd(187056.000000,84372.000000,32875.000000,1800.000000)}

{create adhoc823}
{access adhoc823}
{connect adhoc823(1), adhoc1(0)}
{nseg = 1}
{strdef color color = "White"}
{pt3dclear()}
{pt3dadd(202608.000000,150492.000000,37000.000000,1800.000000)}
{pt3dadd(187044.000000,85896.000000,35775.000000,1800.000000)}

{create adhoc824}
{access adhoc824}
{connect adhoc824(1), adhoc1(0)}
{nseg = 1}
{strdef color color = "White"}
{pt3dclear()}
{pt3dadd(202608.000000,150492.000000,37000.000000,1800.000000)}
{pt3dadd(187068.000000,90984.000000,36575.000000,1800.000000)}

{create adhoc825}
{access adhoc825}
{connect adhoc825(1), adhoc1(0)}
{nseg = 1}
{strdef color color = "White"}
{pt3dclear()}
{pt3dadd(202608.000000,150492.000000,37000.000000,1800.000000)}
{pt3dadd(187032.000000,87792.000000,34525.000000,1800.000000)}

{create adhoc826}
{access adhoc826}
{connect adhoc826(1), adhoc1(0)}
{nseg = 1}
{strdef color color = "White"}
{pt3dclear()}
{pt3dadd(202608.000000,150492.000000,37000.000000,1800.000000)}
{pt3dadd(186828.000000,90864.000000,48475.000000,1800.000000)}

{create adhoc827}
{access adhoc827}
{connect adhoc827(1), adhoc1(0)}
{nseg = 1}
{strdef color color = "White"}
{pt3dclear()}
{pt3dadd(202608.000000,150492.000000,37000.000000,1800.000000)}
{pt3dadd(186768.000000,96528.000000,50225.000000,1800.000000)}

{create adhoc828}
{access adhoc828}
{connect adhoc828(1), adhoc1(0)}
{nseg = 1}
{strdef color color = "White"}
{pt3dclear()}
{pt3dadd(202608.000000,150492.000000,37000.000000,1800.000000)}
{pt3dadd(186768.000000,93264.000000,50225.000000,1800.000000)}

{create adhoc829}
{access adhoc829}
{connect adhoc829(1), adhoc1(0)}
{nseg = 1}
{strdef color color = "White"}
{pt3dclear()}
{pt3dadd(202608.000000,150492.000000,37000.000000,1800.000000)}
{pt3dadd(187092.000000,92736.000000,47675.000000,1800.000000)}

{create adhoc830}
{access adhoc830}
{connect adhoc830(1), adhoc1(0)}
{nseg = 1}
{strdef color color = "White"}
{pt3dclear()}
{pt3dadd(202608.000000,150492.000000,37000.000000,1800.000000)}
{pt3dadd(187152.000000,91776.000000,45075.000000,1800.000000)}

{create adhoc831}
{access adhoc831}
{connect adhoc831(1), adhoc1(0)}
{nseg = 1}
{strdef color color = "White"}
{pt3dclear()}
{pt3dadd(202608.000000,150492.000000,37000.000000,1800.000000)}
{pt3dadd(187056.000000,88716.000000,46925.000000,1800.000000)}

{create adhoc832}
{access adhoc832}
{connect adhoc832(1), adhoc1(0)}
{nseg = 1}
{strdef color color = "White"}
{pt3dclear()}
{pt3dadd(202608.000000,150492.000000,37000.000000,1800.000000)}
{pt3dadd(187092.000000,85476.000000,46775.000000,1800.000000)}

{create adhoc833}
{access adhoc833}
{connect adhoc833(1), adhoc1(0)}
{nseg = 1}
{strdef color color = "White"}
{pt3dclear()}
{pt3dadd(202608.000000,150492.000000,37000.000000,1800.000000)}
{pt3dadd(186948.000000,87420.000000,52275.000000,1800.000000)}

{create adhoc834}
{access adhoc834}
{connect adhoc834(1), adhoc1(0)}
{nseg = 1}
{strdef color color = "White"}
{pt3dclear()}
{pt3dadd(202608.000000,150492.000000,37000.000000,1800.000000)}
{pt3dadd(186792.000000,86364.000000,49925.000000,1800.000000)}

{create adhoc835}
{access adhoc835}
{connect adhoc835(1), adhoc1(0)}
{nseg = 1}
{strdef color color = "White"}
{pt3dclear()}
{pt3dadd(202608.000000,150492.000000,37000.000000,1800.000000)}
{pt3dadd(187020.000000,90444.000000,51025.000000,1800.000000)}

{create adhoc836}
{access adhoc836}
{connect adhoc836(1), adhoc1(0)}
{nseg = 1}
{strdef color color = "White"}
{pt3dclear()}
{pt3dadd(202608.000000,150492.000000,37000.000000,1800.000000)}
{pt3dadd(186804.000000,96024.000000,59925.000000,1800.000000)}

{create adhoc837}
{access adhoc837}
{connect adhoc837(1), adhoc1(0)}
{nseg = 1}
{strdef color color = "White"}
{pt3dclear()}
{pt3dadd(202608.000000,150492.000000,37000.000000,1800.000000)}
{pt3dadd(186804.000000,97284.000000,57325.000000,1800.000000)}

{create adhoc838}
{access adhoc838}
{connect adhoc838(1), adhoc1(0)}
{nseg = 1}
{strdef color color = "White"}
{pt3dclear()}
{pt3dadd(202608.000000,150492.000000,37000.000000,1800.000000)}
{pt3dadd(186852.000000,94092.000000,54625.000000,1800.000000)}

{create adhoc839}
{access adhoc839}
{connect adhoc839(1), adhoc1(0)}
{nseg = 1}
{strdef color color = "White"}
{pt3dclear()}
{pt3dadd(202608.000000,150492.000000,37000.000000,1800.000000)}
{pt3dadd(186792.000000,94932.000000,57875.000000,1800.000000)}

{create adhoc840}
{access adhoc840}
{connect adhoc840(1), adhoc1(0)}
{nseg = 1}
{strdef color color = "White"}
{pt3dclear()}
{pt3dadd(202608.000000,150492.000000,37000.000000,1800.000000)}
{pt3dadd(186804.000000,92076.000000,55575.000000,1800.000000)}

{create adhoc841}
{access adhoc841}
{connect adhoc841(1), adhoc1(0)}
{nseg = 1}
{strdef color color = "White"}
{pt3dclear()}
{pt3dadd(202608.000000,150492.000000,37000.000000,1800.000000)}
{pt3dadd(186804.000000,89796.000000,55725.000000,1800.000000)}

{create adhoc842}
{access adhoc842}
{connect adhoc842(1), adhoc1(0)}
{nseg = 1}
{strdef color color = "White"}
{pt3dclear()}
{pt3dadd(202608.000000,150492.000000,37000.000000,1800.000000)}
{pt3dadd(186792.000000,92448.000000,58825.000000,1800.000000)}

{create adhoc843}
{access adhoc843}
{connect adhoc843(1), adhoc1(0)}
{nseg = 1}
{strdef color color = "White"}
{pt3dclear()}
{pt3dadd(202608.000000,150492.000000,37000.000000,1800.000000)}
{pt3dadd(186300.000000,95748.000000,64425.000000,1800.000000)}

{create adhoc844}
{access adhoc844}
{connect adhoc844(1), adhoc1(0)}
{nseg = 1}
{strdef color color = "White"}
{pt3dclear()}
{pt3dadd(202608.000000,150492.000000,37000.000000,1800.000000)}
{pt3dadd(186816.000000,92940.000000,66375.000000,1800.000000)}

{create adhoc845}
{access adhoc845}
{connect adhoc845(1), adhoc1(0)}
{nseg = 1}
{strdef color color = "White"}
{pt3dclear()}
{pt3dadd(202608.000000,150492.000000,37000.000000,1800.000000)}
{pt3dadd(186780.000000,90468.000000,66275.000000,1800.000000)}

{create adhoc846}
{access adhoc846}
{connect adhoc846(1), adhoc1(0)}
{nseg = 1}
{strdef color color = "White"}
{pt3dclear()}
{pt3dadd(202608.000000,150492.000000,37000.000000,1800.000000)}
{pt3dadd(186288.000000,94272.000000,61775.000000,1800.000000)}

{create adhoc847}
{access adhoc847}
{connect adhoc847(1), adhoc1(0)}
{nseg = 1}
{strdef color color = "White"}
{pt3dclear()}
{pt3dadd(202608.000000,150492.000000,37000.000000,1800.000000)}
{pt3dadd(186288.000000,92724.000000,62875.000000,1800.000000)}

{create adhoc848}
{access adhoc848}
{connect adhoc848(1), adhoc1(0)}
{nseg = 1}
{strdef color color = "White"}
{pt3dclear()}
{pt3dadd(202608.000000,150492.000000,37000.000000,1800.000000)}
{pt3dadd(186288.000000,89532.000000,55925.000000,1800.000000)}

{create adhoc849}
{access adhoc849}
{connect adhoc849(1), adhoc1(0)}
{nseg = 1}
{strdef color color = "White"}
{pt3dclear()}
{pt3dadd(202608.000000,150492.000000,37000.000000,1800.000000)}
{pt3dadd(186288.000000,87912.000000,57275.000000,1800.000000)}

{create adhoc850}
{access adhoc850}
{connect adhoc850(1), adhoc1(0)}
{nseg = 1}
{strdef color color = "White"}
{pt3dclear()}
{pt3dadd(202608.000000,150492.000000,37000.000000,1800.000000)}
{pt3dadd(186312.000000,87588.000000,59375.000000,1800.000000)}

{create adhoc851}
{access adhoc851}
{connect adhoc851(1), adhoc1(0)}
{nseg = 1}
{strdef color color = "White"}
{pt3dclear()}
{pt3dadd(202608.000000,150492.000000,37000.000000,1800.000000)}
{pt3dadd(186276.000000,88380.000000,63475.000000,1800.000000)}

{create adhoc852}
{access adhoc852}
{connect adhoc852(1), adhoc1(0)}
{nseg = 1}
{strdef color color = "White"}
{pt3dclear()}
{pt3dadd(202608.000000,150492.000000,37000.000000,1800.000000)}
{pt3dadd(188856.000000,94512.000000,59825.000000,1800.000000)}

{create adhoc853}
{access adhoc853}
{connect adhoc853(1), adhoc1(0)}
{nseg = 1}
{strdef color color = "White"}
{pt3dclear()}
{pt3dadd(202608.000000,150492.000000,37000.000000,1800.000000)}
{pt3dadd(188088.000000,91584.000000,59825.000000,1800.000000)}

{create adhoc854}
{access adhoc854}
{connect adhoc854(1), adhoc1(0)}
{nseg = 1}
{strdef color color = "White"}
{pt3dclear()}
{pt3dadd(202608.000000,150492.000000,37000.000000,1800.000000)}
{pt3dadd(181488.000000,90672.000000,59825.000000,1800.000000)}

{create adhoc855}
{access adhoc855}
{connect adhoc855(1), adhoc1(0)}
{nseg = 1}
{strdef color color = "White"}
{pt3dclear()}
{pt3dadd(202608.000000,150492.000000,37000.000000,1800.000000)}
{pt3dadd(184416.000000,92256.000000,59825.000000,1800.000000)}

{create adhoc856}
{access adhoc856}
{connect adhoc856(1), adhoc1(0)}
{nseg = 1}
{strdef color color = "White"}
{pt3dclear()}
{pt3dadd(202608.000000,150492.000000,37000.000000,1800.000000)}
{pt3dadd(182496.000000,88776.000000,59825.000000,1800.000000)}

{create adhoc857}
{access adhoc857}
{connect adhoc857(1), adhoc1(0)}
{nseg = 1}
{strdef color color = "White"}
{pt3dclear()}
{pt3dadd(202608.000000,150492.000000,37000.000000,1800.000000)}
{pt3dadd(187176.000000,87648.000000,59825.000000,1800.000000)}

{create adhoc858}
{access adhoc858}
{connect adhoc858(1), adhoc1(0)}
{nseg = 1}
{strdef color color = "White"}
{pt3dclear()}
{pt3dadd(202608.000000,150492.000000,37000.000000,1800.000000)}
{pt3dadd(183000.000000,87060.000000,63325.000000,1800.000000)}

{create adhoc859}
{access adhoc859}
{connect adhoc859(1), adhoc1(0)}
{nseg = 1}
{strdef color color = "White"}
{pt3dclear()}
{pt3dadd(202608.000000,150492.000000,37000.000000,1800.000000)}
{pt3dadd(183852.000000,86964.000000,60025.000000,1800.000000)}

{create adhoc860}
{access adhoc860}
{connect adhoc860(1), adhoc1(0)}
{nseg = 1}
{strdef color color = "White"}
{pt3dclear()}
{pt3dadd(202608.000000,150492.000000,37000.000000,1800.000000)}
{pt3dadd(178344.000000,86592.000000,59675.000000,1800.000000)}

{create adhoc861}
{access adhoc861}
{connect adhoc861(1), adhoc1(0)}
{nseg = 1}
{strdef color color = "White"}
{pt3dclear()}
{pt3dadd(202608.000000,150492.000000,37000.000000,1800.000000)}
{pt3dadd(179676.000000,86604.000000,57375.000000,1800.000000)}

{create adhoc862}
{access adhoc862}
{connect adhoc862(1), adhoc1(0)}
{nseg = 1}
{strdef color color = "White"}
{pt3dclear()}
{pt3dadd(202608.000000,150492.000000,37000.000000,1800.000000)}
{pt3dadd(179784.000000,84144.000000,60875.000000,1800.000000)}

{create adhoc863}
{access adhoc863}
{connect adhoc863(1), adhoc1(0)}
{nseg = 1}
{strdef color color = "White"}
{pt3dclear()}
{pt3dadd(202608.000000,150492.000000,37000.000000,1800.000000)}
{pt3dadd(179772.000000,86676.000000,62125.000000,1800.000000)}

{create adhoc864}
{access adhoc864}
{connect adhoc864(1), adhoc1(0)}
{nseg = 1}
{strdef color color = "White"}
{pt3dclear()}
{pt3dadd(202608.000000,150492.000000,37000.000000,1800.000000)}
{pt3dadd(178392.000000,87312.000000,66075.000000,1800.000000)}

{create adhoc865}
{access adhoc865}
{connect adhoc865(1), adhoc1(0)}
{nseg = 1}
{strdef color color = "White"}
{pt3dclear()}
{pt3dadd(202608.000000,150492.000000,37000.000000,1800.000000)}
{pt3dadd(176748.000000,84300.000000,72525.000000,1800.000000)}

{create adhoc866}
{access adhoc866}
{connect adhoc866(1), adhoc1(0)}
{nseg = 1}
{strdef color color = "White"}
{pt3dclear()}
{pt3dadd(202608.000000,150492.000000,37000.000000,1800.000000)}
{pt3dadd(176520.000000,87852.000000,71525.000000,1800.000000)}

{create adhoc867}
{access adhoc867}
{connect adhoc867(1), adhoc1(0)}
{nseg = 1}
{strdef color color = "White"}
{pt3dclear()}
{pt3dadd(202608.000000,150492.000000,37000.000000,1800.000000)}
{pt3dadd(176520.000000,89928.000000,68825.000000,1800.000000)}

{create adhoc868}
{access adhoc868}
{connect adhoc868(1), adhoc1(0)}
{nseg = 1}
{strdef color color = "White"}
{pt3dclear()}
{pt3dadd(202608.000000,150492.000000,37000.000000,1800.000000)}
{pt3dadd(176520.000000,88128.000000,68675.000000,1800.000000)}

{create adhoc869}
{access adhoc869}
{connect adhoc869(1), adhoc1(0)}
{nseg = 1}
{strdef color color = "White"}
{pt3dclear()}
{pt3dadd(202608.000000,150492.000000,37000.000000,1800.000000)}
{pt3dadd(176676.000000,83508.000000,69325.000000,1800.000000)}

{create adhoc870}
{access adhoc870}
{connect adhoc870(1), adhoc1(0)}
{nseg = 1}
{strdef color color = "White"}
{pt3dclear()}
{pt3dadd(202608.000000,150492.000000,37000.000000,1800.000000)}
{pt3dadd(176496.000000,85788.000000,68475.000000,1800.000000)}

{create adhoc871}
{access adhoc871}
{connect adhoc871(1), adhoc1(0)}
{nseg = 1}
{strdef color color = "White"}
{pt3dclear()}
{pt3dadd(202608.000000,150492.000000,37000.000000,1800.000000)}
{pt3dadd(176328.000000,89676.000000,65875.000000,1800.000000)}

{create adhoc872}
{access adhoc872}
{connect adhoc872(1), adhoc1(0)}
{nseg = 1}
{strdef color color = "White"}
{pt3dclear()}
{pt3dadd(202608.000000,150492.000000,37000.000000,1800.000000)}
{pt3dadd(177024.000000,86736.000000,66275.000000,1800.000000)}

{create adhoc873}
{access adhoc873}
{connect adhoc873(1), adhoc1(0)}
{nseg = 1}
{strdef color color = "White"}
{pt3dclear()}
{pt3dadd(202608.000000,150492.000000,37000.000000,1800.000000)}
{pt3dadd(176616.000000,83364.000000,64025.000000,1800.000000)}

{create adhoc874}
{access adhoc874}
{connect adhoc874(1), adhoc1(0)}
{nseg = 1}
{strdef color color = "White"}
{pt3dclear()}
{pt3dadd(202608.000000,150492.000000,37000.000000,1800.000000)}
{pt3dadd(176388.000000,90888.000000,57425.000000,1800.000000)}

{create adhoc875}
{access adhoc875}
{connect adhoc875(1), adhoc1(0)}
{nseg = 1}
{strdef color color = "White"}
{pt3dclear()}
{pt3dadd(202608.000000,150492.000000,37000.000000,1800.000000)}
{pt3dadd(176352.000000,90300.000000,61275.000000,1800.000000)}

{create adhoc876}
{access adhoc876}
{connect adhoc876(1), adhoc1(0)}
{nseg = 1}
{strdef color color = "White"}
{pt3dclear()}
{pt3dadd(202608.000000,150492.000000,37000.000000,1800.000000)}
{pt3dadd(176388.000000,88260.000000,59625.000000,1800.000000)}

{create adhoc877}
{access adhoc877}
{connect adhoc877(1), adhoc1(0)}
{nseg = 1}
{strdef color color = "White"}
{pt3dclear()}
{pt3dadd(202608.000000,150492.000000,37000.000000,1800.000000)}
{pt3dadd(176400.000000,88752.000000,62475.000000,1800.000000)}

{create adhoc878}
{access adhoc878}
{connect adhoc878(1), adhoc1(0)}
{nseg = 1}
{strdef color color = "White"}
{pt3dclear()}
{pt3dadd(202608.000000,150492.000000,37000.000000,1800.000000)}
{pt3dadd(176364.000000,86976.000000,62725.000000,1800.000000)}

{create adhoc879}
{access adhoc879}
{connect adhoc879(1), adhoc1(0)}
{nseg = 1}
{strdef color color = "White"}
{pt3dclear()}
{pt3dadd(202608.000000,150492.000000,37000.000000,1800.000000)}
{pt3dadd(180264.000000,92520.000000,87075.000000,1800.000000)}

{create adhoc880}
{access adhoc880}
{connect adhoc880(1), adhoc1(0)}
{nseg = 1}
{strdef color color = "White"}
{pt3dclear()}
{pt3dadd(202608.000000,150492.000000,37000.000000,1800.000000)}
{pt3dadd(185448.000000,94584.000000,89625.000000,1800.000000)}

{create adhoc881}
{access adhoc881}
{connect adhoc881(1), adhoc1(0)}
{nseg = 1}
{strdef color color = "White"}
{pt3dclear()}
{pt3dadd(202608.000000,150492.000000,37000.000000,1800.000000)}
{pt3dadd(183168.000000,94320.000000,89625.000000,1800.000000)}

{create adhoc882}
{access adhoc882}
{connect adhoc882(1), adhoc1(0)}
{nseg = 1}
{strdef color color = "White"}
{pt3dclear()}
{pt3dadd(202608.000000,150492.000000,37000.000000,1800.000000)}
{pt3dadd(179520.000000,92724.000000,93125.000000,1800.000000)}

{create adhoc883}
{access adhoc883}
{connect adhoc883(1), adhoc1(0)}
{nseg = 1}
{strdef color color = "White"}
{pt3dclear()}
{pt3dadd(202608.000000,150492.000000,37000.000000,1800.000000)}
{pt3dadd(180648.000000,95556.000000,93125.000000,1800.000000)}

{create adhoc884}
{access adhoc884}
{connect adhoc884(1), adhoc1(0)}
{nseg = 1}
{strdef color color = "White"}
{pt3dclear()}
{pt3dadd(202608.000000,150492.000000,37000.000000,1800.000000)}
{pt3dadd(174864.000000,92388.000000,93425.000000,1800.000000)}

{create adhoc885}
{access adhoc885}
{connect adhoc885(1), adhoc1(0)}
{nseg = 1}
{strdef color color = "White"}
{pt3dclear()}
{pt3dadd(202608.000000,150492.000000,37000.000000,1800.000000)}
{pt3dadd(180360.000000,88584.000000,84625.000000,1800.000000)}

{create adhoc886}
{access adhoc886}
{connect adhoc886(1), adhoc1(0)}
{nseg = 1}
{strdef color color = "White"}
{pt3dclear()}
{pt3dadd(202608.000000,150492.000000,37000.000000,1800.000000)}
{pt3dadd(205644.000000,146136.000000,94775.000000,1800.000000)}

{create adhoc887}
{access adhoc887}
{connect adhoc887(1), adhoc1(0)}
{nseg = 1}
{strdef color color = "White"}
{pt3dclear()}
{pt3dadd(202608.000000,150492.000000,37000.000000,1800.000000)}
{pt3dadd(205620.000000,146172.000000,92975.000000,1800.000000)}

{create adhoc888}
{access adhoc888}
{connect adhoc888(1), adhoc1(0)}
{nseg = 1}
{strdef color color = "White"}
{pt3dclear()}
{pt3dadd(202608.000000,150492.000000,37000.000000,1800.000000)}
{pt3dadd(206616.000000,157248.000000,93925.000000,1800.000000)}

{create adhoc889}
{access adhoc889}
{connect adhoc889(1), adhoc1(0)}
{nseg = 1}
{strdef color color = "White"}
{pt3dclear()}
{pt3dadd(202608.000000,150492.000000,37000.000000,1800.000000)}
{pt3dadd(206592.000000,158736.000000,89375.000000,1800.000000)}

{create adhoc890}
{access adhoc890}
{connect adhoc890(1), adhoc1(0)}
{nseg = 1}
{strdef color color = "White"}
{pt3dclear()}
{pt3dadd(202608.000000,150492.000000,37000.000000,1800.000000)}
{pt3dadd(206616.000000,155268.000000,94275.000000,1800.000000)}

{create adhoc891}
{access adhoc891}
{connect adhoc891(1), adhoc1(0)}
{nseg = 1}
{strdef color color = "White"}
{pt3dclear()}
{pt3dadd(202608.000000,150492.000000,37000.000000,1800.000000)}
{pt3dadd(206592.000000,152256.000000,90075.000000,1800.000000)}

{create adhoc892}
{access adhoc892}
{connect adhoc892(1), adhoc1(0)}
{nseg = 1}
{strdef color color = "White"}
{pt3dclear()}
{pt3dadd(202608.000000,150492.000000,37000.000000,1800.000000)}
{pt3dadd(206568.000000,151212.000000,87725.000000,1800.000000)}

{create adhoc893}
{access adhoc893}
{connect adhoc893(1), adhoc1(0)}
{nseg = 1}
{strdef color color = "White"}
{pt3dclear()}
{pt3dadd(202608.000000,150492.000000,37000.000000,1800.000000)}
{pt3dadd(206628.000000,152508.000000,93175.000000,1800.000000)}

{create adhoc894}
{access adhoc894}
{connect adhoc894(1), adhoc1(0)}
{nseg = 1}
{strdef color color = "White"}
{pt3dclear()}
{pt3dadd(202608.000000,150492.000000,37000.000000,1800.000000)}
{pt3dadd(206628.000000,149592.000000,93575.000000,1800.000000)}

{create adhoc895}
{access adhoc895}
{connect adhoc895(1), adhoc1(0)}
{nseg = 1}
{strdef color color = "White"}
{pt3dclear()}
{pt3dadd(202608.000000,150492.000000,37000.000000,1800.000000)}
{pt3dadd(206628.000000,148356.000000,90275.000000,1800.000000)}

{create adhoc896}
{access adhoc896}
{connect adhoc896(1), adhoc1(0)}
{nseg = 1}
{strdef color color = "White"}
{pt3dclear()}
{pt3dadd(202608.000000,150492.000000,37000.000000,1800.000000)}
{pt3dadd(205620.000000,140676.000000,66375.000000,1800.000000)}

{create adhoc897}
{access adhoc897}
{connect adhoc897(1), adhoc1(0)}
{nseg = 1}
{strdef color color = "White"}
{pt3dclear()}
{pt3dadd(202608.000000,150492.000000,37000.000000,1800.000000)}
{pt3dadd(195612.000000,203256.000000,85775.000000,1800.000000)}

{create adhoc898}
{access adhoc898}
{connect adhoc898(1), adhoc1(0)}
{nseg = 1}
{strdef color color = "White"}
{pt3dclear()}
{pt3dadd(202608.000000,150492.000000,37000.000000,1800.000000)}
{pt3dadd(192648.000000,211044.000000,91825.000000,1800.000000)}

{create adhoc899}
{access adhoc899}
{connect adhoc899(1), adhoc1(0)}
{nseg = 1}
{strdef color color = "White"}
{pt3dclear()}
{pt3dadd(202608.000000,150492.000000,37000.000000,1800.000000)}
{pt3dadd(192624.000000,209448.000000,89325.000000,1800.000000)}

{create adhoc900}
{access adhoc900}
{connect adhoc900(1), adhoc1(0)}
{nseg = 1}
{strdef color color = "White"}
{pt3dclear()}
{pt3dadd(202608.000000,150492.000000,37000.000000,1800.000000)}
{pt3dadd(192540.000000,208380.000000,86225.000000,1800.000000)}

{create adhoc901}
{access adhoc901}
{connect adhoc901(1), adhoc1(0)}
{nseg = 1}
{strdef color color = "White"}
{pt3dclear()}
{pt3dadd(202608.000000,150492.000000,37000.000000,1800.000000)}
{pt3dadd(192552.000000,208404.000000,84125.000000,1800.000000)}

{create adhoc902}
{access adhoc902}
{connect adhoc902(1), adhoc1(0)}
{nseg = 1}
{strdef color color = "White"}
{pt3dclear()}
{pt3dadd(202608.000000,150492.000000,37000.000000,1800.000000)}
{pt3dadd(192504.000000,206976.000000,81525.000000,1800.000000)}

{create adhoc903}
{access adhoc903}
{connect adhoc903(1), adhoc1(0)}
{nseg = 1}
{strdef color color = "White"}
{pt3dclear()}
{pt3dadd(202608.000000,150492.000000,37000.000000,1800.000000)}
{pt3dadd(200328.000000,206580.000000,84675.000000,1800.000000)}

{create adhoc904}
{access adhoc904}
{connect adhoc904(1), adhoc1(0)}
{nseg = 1}
{strdef color color = "White"}
{pt3dclear()}
{pt3dadd(202608.000000,150492.000000,37000.000000,1800.000000)}
{pt3dadd(200340.000000,205848.000000,82175.000000,1800.000000)}

{create adhoc905}
{access adhoc905}
{connect adhoc905(1), adhoc1(0)}
{nseg = 1}
{strdef color color = "White"}
{pt3dclear()}
{pt3dadd(202608.000000,150492.000000,37000.000000,1800.000000)}
{pt3dadd(200316.000000,201600.000000,84575.000000,1800.000000)}

{create adhoc906}
{access adhoc906}
{connect adhoc906(1), adhoc1(0)}
{nseg = 1}
{strdef color color = "White"}
{pt3dclear()}
{pt3dadd(202608.000000,150492.000000,37000.000000,1800.000000)}
{pt3dadd(200328.000000,203196.000000,82625.000000,1800.000000)}

{create adhoc907}
{access adhoc907}
{connect adhoc907(1), adhoc1(0)}
{nseg = 1}
{strdef color color = "White"}
{pt3dclear()}
{pt3dadd(202608.000000,150492.000000,37000.000000,1800.000000)}
{pt3dadd(200316.000000,203868.000000,85125.000000,1800.000000)}

{create adhoc908}
{access adhoc908}
{connect adhoc908(1), adhoc1(0)}
{nseg = 1}
{strdef color color = "White"}
{pt3dclear()}
{pt3dadd(202608.000000,150492.000000,37000.000000,1800.000000)}
{pt3dadd(200460.000000,206292.000000,91725.000000,1800.000000)}

{create adhoc909}
{access adhoc909}
{connect adhoc909(1), adhoc1(0)}
{nseg = 1}
{strdef color color = "White"}
{pt3dclear()}
{pt3dadd(202608.000000,150492.000000,37000.000000,1800.000000)}
{pt3dadd(200412.000000,206364.000000,89075.000000,1800.000000)}

{create adhoc910}
{access adhoc910}
{connect adhoc910(1), adhoc1(0)}
{nseg = 1}
{strdef color color = "White"}
{pt3dclear()}
{pt3dadd(202608.000000,150492.000000,37000.000000,1800.000000)}
{pt3dadd(200460.000000,203472.000000,90575.000000,1800.000000)}

{create adhoc911}
{access adhoc911}
{connect adhoc911(1), adhoc1(0)}
{nseg = 1}
{strdef color color = "White"}
{pt3dclear()}
{pt3dadd(202608.000000,150492.000000,37000.000000,1800.000000)}
{pt3dadd(200376.000000,203568.000000,87425.000000,1800.000000)}

{create adhoc912}
{access adhoc912}
{connect adhoc912(1), adhoc1(0)}
{nseg = 1}
{strdef color color = "White"}
{pt3dclear()}
{pt3dadd(202608.000000,150492.000000,37000.000000,1800.000000)}
{pt3dadd(198444.000000,197652.000000,92825.000000,1800.000000)}

{create adhoc913}
{access adhoc913}
{connect adhoc913(1), adhoc1(0)}
{nseg = 1}
{strdef color color = "White"}
{pt3dclear()}
{pt3dadd(202608.000000,150492.000000,37000.000000,1800.000000)}
{pt3dadd(198396.000000,197736.000000,91025.000000,1800.000000)}

{create adhoc914}
{access adhoc914}
{connect adhoc914(1), adhoc1(0)}
{nseg = 1}
{strdef color color = "White"}
{pt3dclear()}
{pt3dadd(202608.000000,150492.000000,37000.000000,1800.000000)}
{pt3dadd(198384.000000,194448.000000,90275.000000,1800.000000)}

{create adhoc915}
{access adhoc915}
{connect adhoc915(1), adhoc1(0)}
{nseg = 1}
{strdef color color = "White"}
{pt3dclear()}
{pt3dadd(202608.000000,150492.000000,37000.000000,1800.000000)}
{pt3dadd(198420.000000,189864.000000,92825.000000,1800.000000)}

{create adhoc916}
{access adhoc916}
{connect adhoc916(1), adhoc1(0)}
{nseg = 1}
{strdef color color = "White"}
{pt3dclear()}
{pt3dadd(202608.000000,150492.000000,37000.000000,1800.000000)}
{pt3dadd(198420.000000,191460.000000,90825.000000,1800.000000)}

{create adhoc917}
{access adhoc917}
{connect adhoc917(1), adhoc1(0)}
{nseg = 1}
{strdef color color = "White"}
{pt3dclear()}
{pt3dadd(202608.000000,150492.000000,37000.000000,1800.000000)}
{pt3dadd(198432.000000,194340.000000,93525.000000,1800.000000)}

{create adhoc918}
{access adhoc918}
{connect adhoc918(1), adhoc1(0)}
{nseg = 1}
{strdef color color = "White"}
{pt3dclear()}
{pt3dadd(202608.000000,150492.000000,37000.000000,1800.000000)}
{pt3dadd(198264.000000,194724.000000,82825.000000,1800.000000)}

{create adhoc919}
{access adhoc919}
{connect adhoc919(1), adhoc1(0)}
{nseg = 1}
{strdef color color = "White"}
{pt3dclear()}
{pt3dadd(202608.000000,150492.000000,37000.000000,1800.000000)}
{pt3dadd(198276.000000,192756.000000,85325.000000,1800.000000)}

{create adhoc920}
{access adhoc920}
{connect adhoc920(1), adhoc1(0)}
{nseg = 1}
{strdef color color = "White"}
{pt3dclear()}
{pt3dadd(202608.000000,150492.000000,37000.000000,1800.000000)}
{pt3dadd(196332.000000,196992.000000,83225.000000,1800.000000)}

{create adhoc921}
{access adhoc921}
{connect adhoc921(1), adhoc1(0)}
{nseg = 1}
{strdef color color = "White"}
{pt3dclear()}
{pt3dadd(202608.000000,150492.000000,37000.000000,1800.000000)}
{pt3dadd(196356.000000,196488.000000,85475.000000,1800.000000)}

{create adhoc922}
{access adhoc922}
{connect adhoc922(1), adhoc1(0)}
{nseg = 1}
{strdef color color = "White"}
{pt3dclear()}
{pt3dadd(202608.000000,150492.000000,37000.000000,1800.000000)}
{pt3dadd(196368.000000,193860.000000,89275.000000,1800.000000)}

{create adhoc923}
{access adhoc923}
{connect adhoc923(1), adhoc1(0)}
{nseg = 1}
{strdef color color = "White"}
{pt3dclear()}
{pt3dadd(202608.000000,150492.000000,37000.000000,1800.000000)}
{pt3dadd(196428.000000,197352.000000,90375.000000,1800.000000)}

{create adhoc924}
{access adhoc924}
{connect adhoc924(1), adhoc1(0)}
{nseg = 1}
{strdef color color = "White"}
{pt3dclear()}
{pt3dadd(202608.000000,150492.000000,37000.000000,1800.000000)}
{pt3dadd(196476.000000,197076.000000,92875.000000,1800.000000)}

{create adhoc925}
{access adhoc925}
{connect adhoc925(1), adhoc1(0)}
{nseg = 1}
{strdef color color = "White"}
{pt3dclear()}
{pt3dadd(202608.000000,150492.000000,37000.000000,1800.000000)}
{pt3dadd(197904.000000,208848.000000,87425.000000,1800.000000)}

{create adhoc926}
{access adhoc926}
{connect adhoc926(1), adhoc1(0)}
{nseg = 1}
{strdef color color = "White"}
{pt3dclear()}
{pt3dadd(202608.000000,150492.000000,37000.000000,1800.000000)}
{pt3dadd(197856.000000,208116.000000,84675.000000,1800.000000)}

{create adhoc927}
{access adhoc927}
{connect adhoc927(1), adhoc1(0)}
{nseg = 1}
{strdef color color = "White"}
{pt3dclear()}
{pt3dadd(202608.000000,150492.000000,37000.000000,1800.000000)}
{pt3dadd(198024.000000,200544.000000,94325.000000,1800.000000)}

{create adhoc928}
{access adhoc928}
{connect adhoc928(1), adhoc1(0)}
{nseg = 1}
{strdef color color = "White"}
{pt3dclear()}
{pt3dadd(202608.000000,150492.000000,37000.000000,1800.000000)}
{pt3dadd(198000.000000,199992.000000,91875.000000,1800.000000)}

{create adhoc929}
{access adhoc929}
{connect adhoc929(1), adhoc1(0)}
{nseg = 1}
{strdef color color = "White"}
{pt3dclear()}
{pt3dadd(202608.000000,150492.000000,37000.000000,1800.000000)}
{pt3dadd(198036.000000,202932.000000,93275.000000,1800.000000)}

{create adhoc930}
{access adhoc930}
{connect adhoc930(1), adhoc1(0)}
{nseg = 1}
{strdef color color = "White"}
{pt3dclear()}
{pt3dadd(202608.000000,150492.000000,37000.000000,1800.000000)}
{pt3dadd(197988.000000,202308.000000,90675.000000,1800.000000)}

{create adhoc931}
{access adhoc931}
{connect adhoc931(1), adhoc1(0)}
{nseg = 1}
{strdef color color = "White"}
{pt3dclear()}
{pt3dadd(202608.000000,150492.000000,37000.000000,1800.000000)}
{pt3dadd(197976.000000,205596.000000,91375.000000,1800.000000)}

{create adhoc932}
{access adhoc932}
{connect adhoc932(1), adhoc1(0)}
{nseg = 1}
{strdef color color = "White"}
{pt3dclear()}
{pt3dadd(202608.000000,150492.000000,37000.000000,1800.000000)}
{pt3dadd(197928.000000,207732.000000,88925.000000,1800.000000)}

{create adhoc933}
{access adhoc933}
{connect adhoc933(1), adhoc1(0)}
{nseg = 1}
{strdef color color = "White"}
{pt3dclear()}
{pt3dadd(202608.000000,150492.000000,37000.000000,1800.000000)}
{pt3dadd(197904.000000,203532.000000,87525.000000,1800.000000)}

{create adhoc934}
{access adhoc934}
{connect adhoc934(1), adhoc1(0)}
{nseg = 1}
{strdef color color = "White"}
{pt3dclear()}
{pt3dadd(202608.000000,150492.000000,37000.000000,1800.000000)}
{pt3dadd(197868.000000,206700.000000,85325.000000,1800.000000)}

{create adhoc935}
{access adhoc935}
{connect adhoc935(1), adhoc1(0)}
{nseg = 1}
{strdef color color = "White"}
{pt3dclear()}
{pt3dadd(202608.000000,150492.000000,37000.000000,1800.000000)}
{pt3dadd(197808.000000,201072.000000,79625.000000,1800.000000)}

{create adhoc936}
{access adhoc936}
{connect adhoc936(1), adhoc1(0)}
{nseg = 1}
{strdef color color = "White"}
{pt3dclear()}
{pt3dadd(202608.000000,150492.000000,37000.000000,1800.000000)}
{pt3dadd(197820.000000,198168.000000,79925.000000,1800.000000)}

{create adhoc937}
{access adhoc937}
{connect adhoc937(1), adhoc1(0)}
{nseg = 1}
{strdef color color = "White"}
{pt3dclear()}
{pt3dadd(202608.000000,150492.000000,37000.000000,1800.000000)}
{pt3dadd(197832.000000,202968.000000,80525.000000,1800.000000)}

{create adhoc938}
{access adhoc938}
{connect adhoc938(1), adhoc1(0)}
{nseg = 1}
{strdef color color = "White"}
{pt3dclear()}
{pt3dadd(202608.000000,150492.000000,37000.000000,1800.000000)}
{pt3dadd(197868.000000,204300.000000,84325.000000,1800.000000)}

{create adhoc939}
{access adhoc939}
{connect adhoc939(1), adhoc1(0)}
{nseg = 1}
{strdef color color = "White"}
{pt3dclear()}
{pt3dadd(202608.000000,150492.000000,37000.000000,1800.000000)}
{pt3dadd(197868.000000,201792.000000,82775.000000,1800.000000)}

{create adhoc940}
{access adhoc940}
{connect adhoc940(1), adhoc1(0)}
{nseg = 1}
{strdef color color = "White"}
{pt3dclear()}
{pt3dadd(202608.000000,150492.000000,37000.000000,1800.000000)}
{pt3dadd(197844.000000,200652.000000,84975.000000,1800.000000)}

{create adhoc941}
{access adhoc941}
{connect adhoc941(1), adhoc1(0)}
{nseg = 1}
{strdef color color = "White"}
{pt3dclear()}
{pt3dadd(202608.000000,150492.000000,37000.000000,1800.000000)}
{pt3dadd(197856.000000,198252.000000,82625.000000,1800.000000)}

{create adhoc942}
{access adhoc942}
{connect adhoc942(1), adhoc1(0)}
{nseg = 1}
{strdef color color = "White"}
{pt3dclear()}
{pt3dadd(202608.000000,150492.000000,37000.000000,1800.000000)}
{pt3dadd(197844.000000,197712.000000,85175.000000,1800.000000)}

{create adhoc943}
{access adhoc943}
{connect adhoc943(1), adhoc1(0)}
{nseg = 1}
{strdef color color = "White"}
{pt3dclear()}
{pt3dadd(202608.000000,150492.000000,37000.000000,1800.000000)}
{pt3dadd(197904.000000,195480.000000,87225.000000,1800.000000)}

{create adhoc944}
{access adhoc944}
{connect adhoc944(1), adhoc1(0)}
{nseg = 1}
{strdef color color = "White"}
{pt3dclear()}
{pt3dadd(202608.000000,150492.000000,37000.000000,1800.000000)}
{pt3dadd(199740.000000,197784.000000,88825.000000,1800.000000)}

{create adhoc945}
{access adhoc945}
{connect adhoc945(1), adhoc1(0)}
{nseg = 1}
{strdef color color = "White"}
{pt3dclear()}
{pt3dadd(202608.000000,150492.000000,37000.000000,1800.000000)}
{pt3dadd(199740.000000,200976.000000,88025.000000,1800.000000)}

{create adhoc946}
{access adhoc946}
{connect adhoc946(1), adhoc1(0)}
{nseg = 1}
{strdef color color = "White"}
{pt3dclear()}
{pt3dadd(202608.000000,150492.000000,37000.000000,1800.000000)}
{pt3dadd(199824.000000,200028.000000,91175.000000,1800.000000)}

{create adhoc947}
{access adhoc947}
{connect adhoc947(1), adhoc1(0)}
{nseg = 1}
{strdef color color = "White"}
{pt3dclear()}
{pt3dadd(202608.000000,150492.000000,37000.000000,1800.000000)}
{pt3dadd(200652.000000,200496.000000,94075.000000,1800.000000)}

{create adhoc948}
{access adhoc948}
{connect adhoc948(1), adhoc1(0)}
{nseg = 1}
{strdef color color = "White"}
{pt3dclear()}
{pt3dadd(202608.000000,150492.000000,37000.000000,1800.000000)}
{pt3dadd(204504.000000,194256.000000,89825.000000,1800.000000)}

{create adhoc949}
{access adhoc949}
{connect adhoc949(1), adhoc1(0)}
{nseg = 1}
{strdef color color = "White"}
{pt3dclear()}
{pt3dadd(202608.000000,150492.000000,37000.000000,1800.000000)}
{pt3dadd(200028.000000,194568.000000,90575.000000,1800.000000)}

{create adhoc950}
{access adhoc950}
{connect adhoc950(1), adhoc1(0)}
{nseg = 1}
{strdef color color = "White"}
{pt3dclear()}
{pt3dadd(202608.000000,150492.000000,37000.000000,1800.000000)}
{pt3dadd(200052.000000,191892.000000,90825.000000,1800.000000)}

{create adhoc951}
{access adhoc951}
{connect adhoc951(1), adhoc1(0)}
{nseg = 1}
{strdef color color = "White"}
{pt3dclear()}
{pt3dadd(202608.000000,150492.000000,37000.000000,1800.000000)}
{pt3dadd(199932.000000,192132.000000,87875.000000,1800.000000)}

{create adhoc952}
{access adhoc952}
{connect adhoc952(1), adhoc1(0)}
{nseg = 1}
{strdef color color = "White"}
{pt3dclear()}
{pt3dadd(202608.000000,150492.000000,37000.000000,1800.000000)}
{pt3dadd(200028.000000,189612.000000,89075.000000,1800.000000)}

{create adhoc953}
{access adhoc953}
{connect adhoc953(1), adhoc1(0)}
{nseg = 1}
{strdef color color = "White"}
{pt3dclear()}
{pt3dadd(202608.000000,150492.000000,37000.000000,1800.000000)}
{pt3dadd(200040.000000,189396.000000,92625.000000,1800.000000)}

{create adhoc954}
{access adhoc954}
{connect adhoc954(1), adhoc1(0)}
{nseg = 1}
{strdef color color = "White"}
{pt3dclear()}
{pt3dadd(202608.000000,150492.000000,37000.000000,1800.000000)}
{pt3dadd(203556.000000,200748.000000,81025.000000,1800.000000)}

{create adhoc955}
{access adhoc955}
{connect adhoc955(1), adhoc1(0)}
{nseg = 1}
{strdef color color = "White"}
{pt3dclear()}
{pt3dadd(202608.000000,150492.000000,37000.000000,1800.000000)}
{pt3dadd(201516.000000,198348.000000,80325.000000,1800.000000)}

{create adhoc956}
{access adhoc956}
{connect adhoc956(1), adhoc1(0)}
{nseg = 1}
{strdef color color = "White"}
{pt3dclear()}
{pt3dadd(202608.000000,150492.000000,37000.000000,1800.000000)}
{pt3dadd(201528.000000,201852.000000,80025.000000,1800.000000)}

{create adhoc957}
{access adhoc957}
{connect adhoc957(1), adhoc1(0)}
{nseg = 1}
{strdef color color = "White"}
{pt3dclear()}
{pt3dadd(202608.000000,150492.000000,37000.000000,1800.000000)}
{pt3dadd(201540.000000,203448.000000,82475.000000,1800.000000)}

{create adhoc958}
{access adhoc958}
{connect adhoc958(1), adhoc1(0)}
{nseg = 1}
{strdef color color = "White"}
{pt3dclear()}
{pt3dadd(202608.000000,150492.000000,37000.000000,1800.000000)}
{pt3dadd(201588.000000,204336.000000,85475.000000,1800.000000)}

{create adhoc959}
{access adhoc959}
{connect adhoc959(1), adhoc1(0)}
{nseg = 1}
{strdef color color = "White"}
{pt3dclear()}
{pt3dadd(202608.000000,150492.000000,37000.000000,1800.000000)}
{pt3dadd(201564.000000,201960.000000,84175.000000,1800.000000)}

{create adhoc960}
{access adhoc960}
{connect adhoc960(1), adhoc1(0)}
{nseg = 1}
{strdef color color = "White"}
{pt3dclear()}
{pt3dadd(202608.000000,150492.000000,37000.000000,1800.000000)}
{pt3dadd(201564.000000,201024.000000,86425.000000,1800.000000)}

{create adhoc961}
{access adhoc961}
{connect adhoc961(1), adhoc1(0)}
{nseg = 1}
{strdef color color = "White"}
{pt3dclear()}
{pt3dadd(202608.000000,150492.000000,37000.000000,1800.000000)}
{pt3dadd(201588.000000,198216.000000,87075.000000,1800.000000)}

{create adhoc962}
{access adhoc962}
{connect adhoc962(1), adhoc1(0)}
{nseg = 1}
{strdef color color = "White"}
{pt3dclear()}
{pt3dadd(202608.000000,150492.000000,37000.000000,1800.000000)}
{pt3dadd(201576.000000,199404.000000,83125.000000,1800.000000)}

{create adhoc963}
{access adhoc963}
{connect adhoc963(1), adhoc1(0)}
{nseg = 1}
{strdef color color = "White"}
{pt3dclear()}
{pt3dadd(202608.000000,150492.000000,37000.000000,1800.000000)}
{pt3dadd(201552.000000,196368.000000,85075.000000,1800.000000)}

{create adhoc964}
{access adhoc964}
{connect adhoc964(1), adhoc1(0)}
{nseg = 1}
{strdef color color = "White"}
{pt3dclear()}
{pt3dadd(202608.000000,150492.000000,37000.000000,1800.000000)}
{pt3dadd(202704.000000,204000.000000,93575.000000,1800.000000)}

{create adhoc965}
{access adhoc965}
{connect adhoc965(1), adhoc1(0)}
{nseg = 1}
{strdef color color = "White"}
{pt3dclear()}
{pt3dadd(202608.000000,150492.000000,37000.000000,1800.000000)}
{pt3dadd(202692.000000,198324.000000,94625.000000,1800.000000)}

{create adhoc966}
{access adhoc966}
{connect adhoc966(1), adhoc1(0)}
{nseg = 1}
{strdef color color = "White"}
{pt3dclear()}
{pt3dadd(202608.000000,150492.000000,37000.000000,1800.000000)}
{pt3dadd(202680.000000,197268.000000,91175.000000,1800.000000)}

{create adhoc967}
{access adhoc967}
{connect adhoc967(1), adhoc1(0)}
{nseg = 1}
{strdef color color = "White"}
{pt3dclear()}
{pt3dadd(202608.000000,150492.000000,37000.000000,1800.000000)}
{pt3dadd(202596.000000,195696.000000,88025.000000,1800.000000)}

{create adhoc968}
{access adhoc968}
{connect adhoc968(1), adhoc1(0)}
{nseg = 1}
{strdef color color = "White"}
{pt3dclear()}
{pt3dadd(202608.000000,150492.000000,37000.000000,1800.000000)}
{pt3dadd(202692.000000,191532.000000,90575.000000,1800.000000)}

{create adhoc969}
{access adhoc969}
{connect adhoc969(1), adhoc1(0)}
{nseg = 1}
{strdef color color = "White"}
{pt3dclear()}
{pt3dadd(202608.000000,150492.000000,37000.000000,1800.000000)}
{pt3dadd(202668.000000,195252.000000,92625.000000,1800.000000)}

{create adhoc970}
{access adhoc970}
{connect adhoc970(1), adhoc1(0)}
{nseg = 1}
{strdef color color = "White"}
{pt3dclear()}
{pt3dadd(202608.000000,150492.000000,37000.000000,1800.000000)}
{pt3dadd(202740.000000,201288.000000,91225.000000,1800.000000)}

{create adhoc971}
{access adhoc971}
{connect adhoc971(1), adhoc1(0)}
{nseg = 1}
{strdef color color = "White"}
{pt3dclear()}
{pt3dadd(202608.000000,150492.000000,37000.000000,1800.000000)}
{pt3dadd(206544.000000,196524.000000,85725.000000,1800.000000)}

{create adhoc972}
{access adhoc972}
{connect adhoc972(1), adhoc1(0)}
{nseg = 1}
{strdef color color = "White"}
{pt3dclear()}
{pt3dadd(202608.000000,150492.000000,37000.000000,1800.000000)}
{pt3dadd(211968.000000,188580.000000,81925.000000,1800.000000)}

{create adhoc973}
{access adhoc973}
{connect adhoc973(1), adhoc1(0)}
{nseg = 1}
{strdef color color = "White"}
{pt3dclear()}
{pt3dadd(202608.000000,150492.000000,37000.000000,1800.000000)}
{pt3dadd(211272.000000,189756.000000,84675.000000,1800.000000)}

{create adhoc974}
{access adhoc974}
{connect adhoc974(1), adhoc1(0)}
{nseg = 1}
{strdef color color = "White"}
{pt3dclear()}
{pt3dadd(202608.000000,150492.000000,37000.000000,1800.000000)}
{pt3dadd(210828.000000,190488.000000,80225.000000,1800.000000)}

{create adhoc975}
{access adhoc975}
{connect adhoc975(1), adhoc1(0)}
{nseg = 1}
{strdef color color = "White"}
{pt3dclear()}
{pt3dadd(202608.000000,150492.000000,37000.000000,1800.000000)}
{pt3dadd(210768.000000,190032.000000,77475.000000,1800.000000)}

{create adhoc976}
{access adhoc976}
{connect adhoc976(1), adhoc1(0)}
{nseg = 1}
{strdef color color = "White"}
{pt3dclear()}
{pt3dadd(202608.000000,150492.000000,37000.000000,1800.000000)}
{pt3dadd(210780.000000,186996.000000,77575.000000,1800.000000)}

{create adhoc977}
{access adhoc977}
{connect adhoc977(1), adhoc1(0)}
{nseg = 1}
{strdef color color = "White"}
{pt3dclear()}
{pt3dadd(202608.000000,150492.000000,37000.000000,1800.000000)}
{pt3dadd(210864.000000,186468.000000,81375.000000,1800.000000)}

{create adhoc978}
{access adhoc978}
{connect adhoc978(1), adhoc1(0)}
{nseg = 1}
{strdef color color = "White"}
{pt3dclear()}
{pt3dadd(202608.000000,150492.000000,37000.000000,1800.000000)}
{pt3dadd(210936.000000,185220.000000,83425.000000,1800.000000)}

{create adhoc979}
{access adhoc979}
{connect adhoc979(1), adhoc1(0)}
{nseg = 1}
{strdef color color = "White"}
{pt3dclear()}
{pt3dadd(202608.000000,150492.000000,37000.000000,1800.000000)}
{pt3dadd(210852.000000,184020.000000,80875.000000,1800.000000)}

{create adhoc980}
{access adhoc980}
{connect adhoc980(1), adhoc1(0)}
{nseg = 1}
{strdef color color = "White"}
{pt3dclear()}
{pt3dadd(202608.000000,150492.000000,37000.000000,1800.000000)}
{pt3dadd(209892.000000,187704.000000,86625.000000,1800.000000)}

{create adhoc981}
{access adhoc981}
{connect adhoc981(1), adhoc1(0)}
{nseg = 1}
{strdef color color = "White"}
{pt3dclear()}
{pt3dadd(202608.000000,150492.000000,37000.000000,1800.000000)}
{pt3dadd(207540.000000,194184.000000,83325.000000,1800.000000)}

{create adhoc982}
{access adhoc982}
{connect adhoc982(1), adhoc1(0)}
{nseg = 1}
{strdef color color = "White"}
{pt3dclear()}
{pt3dadd(202608.000000,150492.000000,37000.000000,1800.000000)}
{pt3dadd(207528.000000,191964.000000,83125.000000,1800.000000)}

{create adhoc983}
{access adhoc983}
{connect adhoc983(1), adhoc1(0)}
{nseg = 1}
{strdef color color = "White"}
{pt3dclear()}
{pt3dadd(202608.000000,150492.000000,37000.000000,1800.000000)}
{pt3dadd(208932.000000,191400.000000,81175.000000,1800.000000)}

{create adhoc984}
{access adhoc984}
{connect adhoc984(1), adhoc1(0)}
{nseg = 1}
{strdef color color = "White"}
{pt3dclear()}
{pt3dadd(202608.000000,150492.000000,37000.000000,1800.000000)}
{pt3dadd(209040.000000,186936.000000,84575.000000,1800.000000)}

{create adhoc985}
{access adhoc985}
{connect adhoc985(1), adhoc1(0)}
{nseg = 1}
{strdef color color = "White"}
{pt3dclear()}
{pt3dadd(202608.000000,150492.000000,37000.000000,1800.000000)}
{pt3dadd(209016.000000,190008.000000,83875.000000,1800.000000)}

{create adhoc986}
{access adhoc986}
{connect adhoc986(1), adhoc1(0)}
{nseg = 1}
{strdef color color = "White"}
{pt3dclear()}
{pt3dadd(202608.000000,150492.000000,37000.000000,1800.000000)}
{pt3dadd(209100.000000,185928.000000,91625.000000,1800.000000)}

{create adhoc987}
{access adhoc987}
{connect adhoc987(1), adhoc1(0)}
{nseg = 1}
{strdef color color = "White"}
{pt3dclear()}
{pt3dadd(202608.000000,150492.000000,37000.000000,1800.000000)}
{pt3dadd(209088.000000,190584.000000,94675.000000,1800.000000)}

{create adhoc988}
{access adhoc988}
{connect adhoc988(1), adhoc1(0)}
{nseg = 1}
{strdef color color = "White"}
{pt3dclear()}
{pt3dadd(202608.000000,150492.000000,37000.000000,1800.000000)}
{pt3dadd(209088.000000,189372.000000,92475.000000,1800.000000)}

{create adhoc989}
{access adhoc989}
{connect adhoc989(1), adhoc1(0)}
{nseg = 1}
{strdef color color = "White"}
{pt3dclear()}
{pt3dadd(202608.000000,150492.000000,37000.000000,1800.000000)}
{pt3dadd(209088.000000,191328.000000,92425.000000,1800.000000)}

{create adhoc990}
{access adhoc990}
{connect adhoc990(1), adhoc1(0)}
{nseg = 1}
{strdef color color = "White"}
{pt3dclear()}
{pt3dadd(202608.000000,150492.000000,37000.000000,1800.000000)}
{pt3dadd(209100.000000,193320.000000,92975.000000,1800.000000)}

{create adhoc991}
{access adhoc991}
{connect adhoc991(1), adhoc1(0)}
{nseg = 1}
{strdef color color = "White"}
{pt3dclear()}
{pt3dadd(202608.000000,150492.000000,37000.000000,1800.000000)}
{pt3dadd(209064.000000,194076.000000,90525.000000,1800.000000)}

{create adhoc992}
{access adhoc992}
{connect adhoc992(1), adhoc1(0)}
{nseg = 1}
{strdef color color = "White"}
{pt3dclear()}
{pt3dadd(202608.000000,150492.000000,37000.000000,1800.000000)}
{pt3dadd(208968.000000,191388.000000,85725.000000,1800.000000)}

{create adhoc993}
{access adhoc993}
{connect adhoc993(1), adhoc1(0)}
{nseg = 1}
{strdef color color = "White"}
{pt3dclear()}
{pt3dadd(202608.000000,150492.000000,37000.000000,1800.000000)}
{pt3dadd(209088.000000,189384.000000,87475.000000,1800.000000)}

{create adhoc994}
{access adhoc994}
{connect adhoc994(1), adhoc1(0)}
{nseg = 1}
{strdef color color = "White"}
{pt3dclear()}
{pt3dadd(202608.000000,150492.000000,37000.000000,1800.000000)}
{pt3dadd(209004.000000,193068.000000,88125.000000,1800.000000)}

{create adhoc995}
{access adhoc995}
{connect adhoc995(1), adhoc1(0)}
{nseg = 1}
{strdef color color = "White"}
{pt3dclear()}
{pt3dadd(202608.000000,150492.000000,37000.000000,1800.000000)}
{pt3dadd(208200.000000,182808.000000,92225.000000,1800.000000)}

{create adhoc996}
{access adhoc996}
{connect adhoc996(1), adhoc1(0)}
{nseg = 1}
{strdef color color = "White"}
{pt3dclear()}
{pt3dadd(202608.000000,150492.000000,37000.000000,1800.000000)}
{pt3dadd(208200.000000,179736.000000,92325.000000,1800.000000)}

{create adhoc997}
{access adhoc997}
{connect adhoc997(1), adhoc1(0)}
{nseg = 1}
{strdef color color = "White"}
{pt3dclear()}
{pt3dadd(202608.000000,150492.000000,37000.000000,1800.000000)}
{pt3dadd(212220.000000,181092.000000,89625.000000,1800.000000)}

{create adhoc998}
{access adhoc998}
{connect adhoc998(1), adhoc1(0)}
{nseg = 1}
{strdef color color = "White"}
{pt3dclear()}
{pt3dadd(202608.000000,150492.000000,37000.000000,1800.000000)}
{pt3dadd(213768.000000,180900.000000,92675.000000,1800.000000)}

{create adhoc999}
{access adhoc999}
{connect adhoc999(1), adhoc1(0)}
{nseg = 1}
{strdef color color = "White"}
{pt3dclear()}
{pt3dadd(202608.000000,150492.000000,37000.000000,1800.000000)}
{pt3dadd(213768.000000,183600.000000,92425.000000,1800.000000)}

{create adhoc1000}
{access adhoc1000}
{connect adhoc1000(1), adhoc1(0)}
{nseg = 1}
{strdef color color = "White"}
{pt3dclear()}
{pt3dadd(202608.000000,150492.000000,37000.000000,1800.000000)}
{pt3dadd(212856.000000,187512.000000,84725.000000,1800.000000)}

{create adhoc1001}
{access adhoc1001}
{connect adhoc1001(1), adhoc1(0)}
{nseg = 1}
{strdef color color = "White"}
{pt3dclear()}
{pt3dadd(202608.000000,150492.000000,37000.000000,1800.000000)}
{pt3dadd(212868.000000,185832.000000,87425.000000,1800.000000)}

{create adhoc1002}
{access adhoc1002}
{connect adhoc1002(1), adhoc1(0)}
{nseg = 1}
{strdef color color = "White"}
{pt3dclear()}
{pt3dadd(202608.000000,150492.000000,37000.000000,1800.000000)}
{pt3dadd(212868.000000,187788.000000,88875.000000,1800.000000)}

{create adhoc1003}
{access adhoc1003}
{connect adhoc1003(1), adhoc1(0)}
{nseg = 1}
{strdef color color = "White"}
{pt3dclear()}
{pt3dadd(202608.000000,150492.000000,37000.000000,1800.000000)}
{pt3dadd(212916.000000,188124.000000,92025.000000,1800.000000)}

{create adhoc1004}
{access adhoc1004}
{connect adhoc1004(1), adhoc1(0)}
{nseg = 1}
{strdef color color = "White"}
{pt3dclear()}
{pt3dadd(202608.000000,150492.000000,37000.000000,1800.000000)}
{pt3dadd(212880.000000,185232.000000,90425.000000,1800.000000)}

{create adhoc1005}
{access adhoc1005}
{connect adhoc1005(1), adhoc1(0)}
{nseg = 1}
{strdef color color = "White"}
{pt3dclear()}
{pt3dadd(202608.000000,150492.000000,37000.000000,1800.000000)}
{pt3dadd(212892.000000,185952.000000,94075.000000,1800.000000)}

{create adhoc1006}
{access adhoc1006}
{connect adhoc1006(1), adhoc1(0)}
{nseg = 1}
{strdef color color = "White"}
{pt3dclear()}
{pt3dadd(202608.000000,150492.000000,37000.000000,1800.000000)}
{pt3dadd(210636.000000,186072.000000,88375.000000,1800.000000)}

{create adhoc1007}
{access adhoc1007}
{connect adhoc1007(1), adhoc1(0)}
{nseg = 1}
{strdef color color = "White"}
{pt3dclear()}
{pt3dadd(202608.000000,150492.000000,37000.000000,1800.000000)}
{pt3dadd(210672.000000,186288.000000,92225.000000,1800.000000)}

{create adhoc1008}
{access adhoc1008}
{connect adhoc1008(1), adhoc1(0)}
{nseg = 1}
{strdef color color = "White"}
{pt3dclear()}
{pt3dadd(202608.000000,150492.000000,37000.000000,1800.000000)}
{pt3dadd(210660.000000,183516.000000,90175.000000,1800.000000)}

{create adhoc1009}
{access adhoc1009}
{connect adhoc1009(1), adhoc1(0)}
{nseg = 1}
{strdef color color = "White"}
{pt3dclear()}
{pt3dadd(202608.000000,150492.000000,37000.000000,1800.000000)}
{pt3dadd(210672.000000,183336.000000,93375.000000,1800.000000)}

{create adhoc1010}
{access adhoc1010}
{connect adhoc1010(1), adhoc1(0)}
{nseg = 1}
{strdef color color = "White"}
{pt3dclear()}
{pt3dadd(202608.000000,150492.000000,37000.000000,1800.000000)}
{pt3dadd(210648.000000,180876.000000,94175.000000,1800.000000)}

{create adhoc1011}
{access adhoc1011}
{connect adhoc1011(1), adhoc1(0)}
{nseg = 1}
{strdef color color = "White"}
{pt3dclear()}
{pt3dadd(202608.000000,150492.000000,37000.000000,1800.000000)}
{pt3dadd(210660.000000,177876.000000,90575.000000,1800.000000)}

{create adhoc1012}
{access adhoc1012}
{connect adhoc1012(1), adhoc1(0)}
{nseg = 1}
{strdef color color = "White"}
{pt3dclear()}
{pt3dadd(202608.000000,150492.000000,37000.000000,1800.000000)}
{pt3dadd(210312.000000,180744.000000,91075.000000,1800.000000)}

{create adhoc1013}
{access adhoc1013}
{connect adhoc1013(1), adhoc1(0)}
{nseg = 1}
{strdef color color = "White"}
{pt3dclear()}
{pt3dadd(202608.000000,150492.000000,37000.000000,1800.000000)}
{pt3dadd(210312.000000,180144.000000,87575.000000,1800.000000)}

{create adhoc1014}
{access adhoc1014}
{connect adhoc1014(1), adhoc1(0)}
{nseg = 1}
{strdef color color = "White"}
{pt3dclear()}
{pt3dadd(202608.000000,150492.000000,37000.000000,1800.000000)}
{pt3dadd(210252.000000,181272.000000,85025.000000,1800.000000)}

{create adhoc1015}
{access adhoc1015}
{connect adhoc1015(1), adhoc1(0)}
{nseg = 1}
{strdef color color = "White"}
{pt3dclear()}
{pt3dadd(202608.000000,150492.000000,37000.000000,1800.000000)}
{pt3dadd(207252.000000,181152.000000,88575.000000,1800.000000)}

{create adhoc1016}
{access adhoc1016}
{connect adhoc1016(1), adhoc1(0)}
{nseg = 1}
{strdef color color = "White"}
{pt3dclear()}
{pt3dadd(202608.000000,150492.000000,37000.000000,1800.000000)}
{pt3dadd(205872.000000,182088.000000,85425.000000,1800.000000)}

{create adhoc1017}
{access adhoc1017}
{connect adhoc1017(1), adhoc1(0)}
{nseg = 1}
{strdef color color = "White"}
{pt3dclear()}
{pt3dadd(202608.000000,150492.000000,37000.000000,1800.000000)}
{pt3dadd(205956.000000,184704.000000,86875.000000,1800.000000)}

{create adhoc1018}
{access adhoc1018}
{connect adhoc1018(1), adhoc1(0)}
{nseg = 1}
{strdef color color = "White"}
{pt3dclear()}
{pt3dadd(202608.000000,150492.000000,37000.000000,1800.000000)}
{pt3dadd(205920.000000,182688.000000,87875.000000,1800.000000)}

{create adhoc1019}
{access adhoc1019}
{connect adhoc1019(1), adhoc1(0)}
{nseg = 1}
{strdef color color = "White"}
{pt3dclear()}
{pt3dadd(202608.000000,150492.000000,37000.000000,1800.000000)}
{pt3dadd(205932.000000,186168.000000,89025.000000,1800.000000)}

{create adhoc1020}
{access adhoc1020}
{connect adhoc1020(1), adhoc1(0)}
{nseg = 1}
{strdef color color = "White"}
{pt3dclear()}
{pt3dadd(202608.000000,150492.000000,37000.000000,1800.000000)}
{pt3dadd(205932.000000,185880.000000,94875.000000,1800.000000)}

{create adhoc1021}
{access adhoc1021}
{connect adhoc1021(1), adhoc1(0)}
{nseg = 1}
{strdef color color = "White"}
{pt3dclear()}
{pt3dadd(202608.000000,150492.000000,37000.000000,1800.000000)}
{pt3dadd(205968.000000,187968.000000,91825.000000,1800.000000)}

{create adhoc1022}
{access adhoc1022}
{connect adhoc1022(1), adhoc1(0)}
{nseg = 1}
{strdef color color = "White"}
{pt3dclear()}
{pt3dadd(202608.000000,150492.000000,37000.000000,1800.000000)}
{pt3dadd(205944.000000,184236.000000,90625.000000,1800.000000)}

{create adhoc1023}
{access adhoc1023}
{connect adhoc1023(1), adhoc1(0)}
{nseg = 1}
{strdef color color = "White"}
{pt3dclear()}
{pt3dadd(202608.000000,150492.000000,37000.000000,1800.000000)}
{pt3dadd(205956.000000,183708.000000,93475.000000,1800.000000)}

{create adhoc1024}
{access adhoc1024}
{connect adhoc1024(1), adhoc1(0)}
{nseg = 1}
{strdef color color = "White"}
{pt3dclear()}
{pt3dadd(202608.000000,150492.000000,37000.000000,1800.000000)}
{pt3dadd(205944.000000,181092.000000,93975.000000,1800.000000)}

{create adhoc1025}
{access adhoc1025}
{connect adhoc1025(1), adhoc1(0)}
{nseg = 1}
{strdef color color = "White"}
{pt3dclear()}
{pt3dadd(202608.000000,150492.000000,37000.000000,1800.000000)}
{pt3dadd(205932.000000,178680.000000,89025.000000,1800.000000)}

{create adhoc1026}
{access adhoc1026}
{connect adhoc1026(1), adhoc1(0)}
{nseg = 1}
{strdef color color = "White"}
{pt3dclear()}
{pt3dadd(202608.000000,150492.000000,37000.000000,1800.000000)}
{pt3dadd(205956.000000,181248.000000,91625.000000,1800.000000)}

{create adhoc1027}
{access adhoc1027}
{connect adhoc1027(1), adhoc1(0)}
{nseg = 1}
{strdef color color = "White"}
{pt3dclear()}
{pt3dadd(202608.000000,150492.000000,37000.000000,1800.000000)}
{pt3dadd(205980.000000,178740.000000,92075.000000,1800.000000)}

{create adhoc1028}
{access adhoc1028}
{connect adhoc1028(1), adhoc1(0)}
{nseg = 1}
{strdef color color = "White"}
{pt3dclear()}
{pt3dadd(202608.000000,150492.000000,37000.000000,1800.000000)}
{pt3dadd(205956.000000,177168.000000,94075.000000,1800.000000)}

{create adhoc1029}
{access adhoc1029}
{connect adhoc1029(1), adhoc1(0)}
{nseg = 1}
{strdef color color = "White"}
{pt3dclear()}
{pt3dadd(202608.000000,150492.000000,37000.000000,1800.000000)}
{pt3dadd(205956.000000,174852.000000,93475.000000,1800.000000)}

{create adhoc1030}
{access adhoc1030}
{connect adhoc1030(1), adhoc1(0)}
{nseg = 1}
{strdef color color = "White"}
{pt3dclear()}
{pt3dadd(202608.000000,150492.000000,37000.000000,1800.000000)}
{pt3dadd(205956.000000,172392.000000,94625.000000,1800.000000)}

{create adhoc1031}
{access adhoc1031}
{connect adhoc1031(1), adhoc1(0)}
{nseg = 1}
{strdef color color = "White"}
{pt3dclear()}
{pt3dadd(202608.000000,150492.000000,37000.000000,1800.000000)}
{pt3dadd(207444.000000,175764.000000,90825.000000,1800.000000)}

{create adhoc1032}
{access adhoc1032}
{connect adhoc1032(1), adhoc1(0)}
{nseg = 1}
{strdef color color = "White"}
{pt3dclear()}
{pt3dadd(202608.000000,150492.000000,37000.000000,1800.000000)}
{pt3dadd(207456.000000,172644.000000,91525.000000,1800.000000)}

{create adhoc1033}
{access adhoc1033}
{connect adhoc1033(1), adhoc1(0)}
{nseg = 1}
{strdef color color = "White"}
{pt3dclear()}
{pt3dadd(202608.000000,150492.000000,37000.000000,1800.000000)}
{pt3dadd(207336.000000,171108.000000,82725.000000,1800.000000)}

{create adhoc1034}
{access adhoc1034}
{connect adhoc1034(1), adhoc1(0)}
{nseg = 1}
{strdef color color = "White"}
{pt3dclear()}
{pt3dadd(202608.000000,150492.000000,37000.000000,1800.000000)}
{pt3dadd(207360.000000,174492.000000,83475.000000,1800.000000)}

{create adhoc1035}
{access adhoc1035}
{connect adhoc1035(1), adhoc1(0)}
{nseg = 1}
{strdef color color = "White"}
{pt3dclear()}
{pt3dadd(202608.000000,150492.000000,37000.000000,1800.000000)}
{pt3dadd(207408.000000,173184.000000,85625.000000,1800.000000)}

{create adhoc1036}
{access adhoc1036}
{connect adhoc1036(1), adhoc1(0)}
{nseg = 1}
{strdef color color = "White"}
{pt3dclear()}
{pt3dadd(202608.000000,150492.000000,37000.000000,1800.000000)}
{pt3dadd(207420.000000,171648.000000,87325.000000,1800.000000)}

{create adhoc1037}
{access adhoc1037}
{connect adhoc1037(1), adhoc1(0)}
{nseg = 1}
{strdef color color = "White"}
{pt3dclear()}
{pt3dadd(202608.000000,150492.000000,37000.000000,1800.000000)}
{pt3dadd(204720.000000,176952.000000,85625.000000,1800.000000)}

{create adhoc1038}
{access adhoc1038}
{connect adhoc1038(1), adhoc1(0)}
{nseg = 1}
{strdef color color = "White"}
{pt3dclear()}
{pt3dadd(202608.000000,150492.000000,37000.000000,1800.000000)}
{pt3dadd(204648.000000,176796.000000,83075.000000,1800.000000)}

{create adhoc1039}
{access adhoc1039}
{connect adhoc1039(1), adhoc1(0)}
{nseg = 1}
{strdef color color = "White"}
{pt3dclear()}
{pt3dadd(202608.000000,150492.000000,37000.000000,1800.000000)}
{pt3dadd(205596.000000,175836.000000,80325.000000,1800.000000)}

{create adhoc1040}
{access adhoc1040}
{connect adhoc1040(1), adhoc1(0)}
{nseg = 1}
{strdef color color = "White"}
{pt3dclear()}
{pt3dadd(202608.000000,150492.000000,37000.000000,1800.000000)}
{pt3dadd(208104.000000,180492.000000,73825.000000,1800.000000)}

{create adhoc1041}
{access adhoc1041}
{connect adhoc1041(1), adhoc1(0)}
{nseg = 1}
{strdef color color = "White"}
{pt3dclear()}
{pt3dadd(202608.000000,150492.000000,37000.000000,1800.000000)}
{pt3dadd(207948.000000,177924.000000,75075.000000,1800.000000)}

{create adhoc1042}
{access adhoc1042}
{connect adhoc1042(1), adhoc1(0)}
{nseg = 1}
{strdef color color = "White"}
{pt3dclear()}
{pt3dadd(202608.000000,150492.000000,37000.000000,1800.000000)}
{pt3dadd(207948.000000,182844.000000,75225.000000,1800.000000)}

{create adhoc1043}
{access adhoc1043}
{connect adhoc1043(1), adhoc1(0)}
{nseg = 1}
{strdef color color = "White"}
{pt3dclear()}
{pt3dadd(202608.000000,150492.000000,37000.000000,1800.000000)}
{pt3dadd(207828.000000,185256.000000,75275.000000,1800.000000)}

{create adhoc1044}
{access adhoc1044}
{connect adhoc1044(1), adhoc1(0)}
{nseg = 1}
{strdef color color = "White"}
{pt3dclear()}
{pt3dadd(202608.000000,150492.000000,37000.000000,1800.000000)}
{pt3dadd(207960.000000,187548.000000,75175.000000,1800.000000)}

{create adhoc1045}
{access adhoc1045}
{connect adhoc1045(1), adhoc1(0)}
{nseg = 1}
{strdef color color = "White"}
{pt3dclear()}
{pt3dadd(202608.000000,150492.000000,37000.000000,1800.000000)}
{pt3dadd(207924.000000,188736.000000,77125.000000,1800.000000)}

{create adhoc1046}
{access adhoc1046}
{connect adhoc1046(1), adhoc1(0)}
{nseg = 1}
{strdef color color = "White"}
{pt3dclear()}
{pt3dadd(202608.000000,150492.000000,37000.000000,1800.000000)}
{pt3dadd(207984.000000,188556.000000,79975.000000,1800.000000)}

{create adhoc1047}
{access adhoc1047}
{connect adhoc1047(1), adhoc1(0)}
{nseg = 1}
{strdef color color = "White"}
{pt3dclear()}
{pt3dadd(202608.000000,150492.000000,37000.000000,1800.000000)}
{pt3dadd(208044.000000,187728.000000,82475.000000,1800.000000)}

{create adhoc1048}
{access adhoc1048}
{connect adhoc1048(1), adhoc1(0)}
{nseg = 1}
{strdef color color = "White"}
{pt3dclear()}
{pt3dadd(202608.000000,150492.000000,37000.000000,1800.000000)}
{pt3dadd(208080.000000,186252.000000,83375.000000,1800.000000)}

{create adhoc1049}
{access adhoc1049}
{connect adhoc1049(1), adhoc1(0)}
{nseg = 1}
{strdef color color = "White"}
{pt3dclear()}
{pt3dadd(202608.000000,150492.000000,37000.000000,1800.000000)}
{pt3dadd(208140.000000,188040.000000,89225.000000,1800.000000)}

{create adhoc1050}
{access adhoc1050}
{connect adhoc1050(1), adhoc1(0)}
{nseg = 1}
{strdef color color = "White"}
{pt3dclear()}
{pt3dadd(202608.000000,150492.000000,37000.000000,1800.000000)}
{pt3dadd(208140.000000,185904.000000,86275.000000,1800.000000)}

{create adhoc1051}
{access adhoc1051}
{connect adhoc1051(1), adhoc1(0)}
{nseg = 1}
{strdef color color = "White"}
{pt3dclear()}
{pt3dadd(202608.000000,150492.000000,37000.000000,1800.000000)}
{pt3dadd(208104.000000,183672.000000,84825.000000,1800.000000)}

{create adhoc1052}
{access adhoc1052}
{connect adhoc1052(1), adhoc1(0)}
{nseg = 1}
{strdef color color = "White"}
{pt3dclear()}
{pt3dadd(202608.000000,150492.000000,37000.000000,1800.000000)}
{pt3dadd(208128.000000,183660.000000,88025.000000,1800.000000)}

{create adhoc1053}
{access adhoc1053}
{connect adhoc1053(1), adhoc1(0)}
{nseg = 1}
{strdef color color = "White"}
{pt3dclear()}
{pt3dadd(202608.000000,150492.000000,37000.000000,1800.000000)}
{pt3dadd(208152.000000,181284.000000,88525.000000,1800.000000)}

{create adhoc1054}
{access adhoc1054}
{connect adhoc1054(1), adhoc1(0)}
{nseg = 1}
{strdef color color = "White"}
{pt3dclear()}
{pt3dadd(202608.000000,150492.000000,37000.000000,1800.000000)}
{pt3dadd(208152.000000,177564.000000,88625.000000,1800.000000)}

{create adhoc1055}
{access adhoc1055}
{connect adhoc1055(1), adhoc1(0)}
{nseg = 1}
{strdef color color = "White"}
{pt3dclear()}
{pt3dadd(202608.000000,150492.000000,37000.000000,1800.000000)}
{pt3dadd(208128.000000,178152.000000,85275.000000,1800.000000)}

{create adhoc1056}
{access adhoc1056}
{connect adhoc1056(1), adhoc1(0)}
{nseg = 1}
{strdef color color = "White"}
{pt3dclear()}
{pt3dadd(202608.000000,150492.000000,37000.000000,1800.000000)}
{pt3dadd(207996.000000,184140.000000,80625.000000,1800.000000)}

{create adhoc1057}
{access adhoc1057}
{connect adhoc1057(1), adhoc1(0)}
{nseg = 1}
{strdef color color = "White"}
{pt3dclear()}
{pt3dadd(202608.000000,150492.000000,37000.000000,1800.000000)}
{pt3dadd(208020.000000,181788.000000,81425.000000,1800.000000)}

{create adhoc1058}
{access adhoc1058}
{connect adhoc1058(1), adhoc1(0)}
{nseg = 1}
{strdef color color = "White"}
{pt3dclear()}
{pt3dadd(202608.000000,150492.000000,37000.000000,1800.000000)}
{pt3dadd(207936.000000,182016.000000,78975.000000,1800.000000)}

{create adhoc1059}
{access adhoc1059}
{connect adhoc1059(1), adhoc1(0)}
{nseg = 1}
{strdef color color = "White"}
{pt3dclear()}
{pt3dadd(202608.000000,150492.000000,37000.000000,1800.000000)}
{pt3dadd(207084.000000,178404.000000,80325.000000,1800.000000)}

{create adhoc1060}
{access adhoc1060}
{connect adhoc1060(1), adhoc1(0)}
{nseg = 1}
{strdef color color = "White"}
{pt3dclear()}
{pt3dadd(202608.000000,150492.000000,37000.000000,1800.000000)}
{pt3dadd(208968.000000,179136.000000,78625.000000,1800.000000)}

{create adhoc1061}
{access adhoc1061}
{connect adhoc1061(1), adhoc1(0)}
{nseg = 1}
{strdef color color = "White"}
{pt3dclear()}
{pt3dadd(202608.000000,150492.000000,37000.000000,1800.000000)}
{pt3dadd(209124.000000,178080.000000,85025.000000,1800.000000)}

{create adhoc1062}
{access adhoc1062}
{connect adhoc1062(1), adhoc1(0)}
{nseg = 1}
{strdef color color = "White"}
{pt3dclear()}
{pt3dadd(202608.000000,150492.000000,37000.000000,1800.000000)}
{pt3dadd(209052.000000,179004.000000,82075.000000,1800.000000)}

{create adhoc1063}
{access adhoc1063}
{connect adhoc1063(1), adhoc1(0)}
{nseg = 1}
{strdef color color = "White"}
{pt3dclear()}
{pt3dadd(202608.000000,150492.000000,37000.000000,1800.000000)}
{pt3dadd(208980.000000,176760.000000,79575.000000,1800.000000)}

{create adhoc1064}
{access adhoc1064}
{connect adhoc1064(1), adhoc1(0)}
{nseg = 1}
{strdef color color = "White"}
{pt3dclear()}
{pt3dadd(202608.000000,150492.000000,37000.000000,1800.000000)}
{pt3dadd(209088.000000,176868.000000,82725.000000,1800.000000)}

{create adhoc1065}
{access adhoc1065}
{connect adhoc1065(1), adhoc1(0)}
{nseg = 1}
{strdef color color = "White"}
{pt3dclear()}
{pt3dadd(202608.000000,150492.000000,37000.000000,1800.000000)}
{pt3dadd(209124.000000,175368.000000,85025.000000,1800.000000)}

{create adhoc1066}
{access adhoc1066}
{connect adhoc1066(1), adhoc1(0)}
{nseg = 1}
{strdef color color = "White"}
{pt3dclear()}
{pt3dadd(202608.000000,150492.000000,37000.000000,1800.000000)}
{pt3dadd(207132.000000,165432.000000,78375.000000,1800.000000)}

{create adhoc1067}
{access adhoc1067}
{connect adhoc1067(1), adhoc1(0)}
{nseg = 1}
{strdef color color = "White"}
{pt3dclear()}
{pt3dadd(202608.000000,150492.000000,37000.000000,1800.000000)}
{pt3dadd(206304.000000,165204.000000,85475.000000,1800.000000)}

{create adhoc1068}
{access adhoc1068}
{connect adhoc1068(1), adhoc1(0)}
{nseg = 1}
{strdef color color = "White"}
{pt3dclear()}
{pt3dadd(202608.000000,150492.000000,37000.000000,1800.000000)}
{pt3dadd(206196.000000,165828.000000,80725.000000,1800.000000)}

{create adhoc1069}
{access adhoc1069}
{connect adhoc1069(1), adhoc1(0)}
{nseg = 1}
{strdef color color = "White"}
{pt3dclear()}
{pt3dadd(202608.000000,150492.000000,37000.000000,1800.000000)}
{pt3dadd(206268.000000,165492.000000,83425.000000,1800.000000)}

{create adhoc1070}
{access adhoc1070}
{connect adhoc1070(1), adhoc1(0)}
{nseg = 1}
{strdef color color = "White"}
{pt3dclear()}
{pt3dadd(202608.000000,150492.000000,37000.000000,1800.000000)}
{pt3dadd(205716.000000,161004.000000,80875.000000,1800.000000)}

{create adhoc1071}
{access adhoc1071}
{connect adhoc1071(1), adhoc1(0)}
{nseg = 1}
{strdef color color = "White"}
{pt3dclear()}
{pt3dadd(202608.000000,150492.000000,37000.000000,1800.000000)}
{pt3dadd(209304.000000,140532.000000,78325.000000,1800.000000)}

{create adhoc1072}
{access adhoc1072}
{connect adhoc1072(1), adhoc1(0)}
{nseg = 1}
{strdef color color = "White"}
{pt3dclear()}
{pt3dadd(202608.000000,150492.000000,37000.000000,1800.000000)}
{pt3dadd(209340.000000,142740.000000,80525.000000,1800.000000)}

{create adhoc1073}
{access adhoc1073}
{connect adhoc1073(1), adhoc1(0)}
{nseg = 1}
{strdef color color = "White"}
{pt3dclear()}
{pt3dadd(202608.000000,150492.000000,37000.000000,1800.000000)}
{pt3dadd(209304.000000,144840.000000,79075.000000,1800.000000)}

{create adhoc1074}
{access adhoc1074}
{connect adhoc1074(1), adhoc1(0)}
{nseg = 1}
{strdef color color = "White"}
{pt3dclear()}
{pt3dadd(202608.000000,150492.000000,37000.000000,1800.000000)}
{pt3dadd(209292.000000,150288.000000,77475.000000,1800.000000)}

{create adhoc1075}
{access adhoc1075}
{connect adhoc1075(1), adhoc1(0)}
{nseg = 1}
{strdef color color = "White"}
{pt3dclear()}
{pt3dadd(202608.000000,150492.000000,37000.000000,1800.000000)}
{pt3dadd(209292.000000,147576.000000,78725.000000,1800.000000)}

{create adhoc1076}
{access adhoc1076}
{connect adhoc1076(1), adhoc1(0)}
{nseg = 1}
{strdef color color = "White"}
{pt3dclear()}
{pt3dadd(202608.000000,150492.000000,37000.000000,1800.000000)}
{pt3dadd(208284.000000,155484.000000,69025.000000,1800.000000)}

{create adhoc1077}
{access adhoc1077}
{connect adhoc1077(1), adhoc1(0)}
{nseg = 1}
{strdef color color = "White"}
{pt3dclear()}
{pt3dadd(202608.000000,150492.000000,37000.000000,1800.000000)}
{pt3dadd(208260.000000,153480.000000,69275.000000,1800.000000)}

{create adhoc1078}
{access adhoc1078}
{connect adhoc1078(1), adhoc1(0)}
{nseg = 1}
{strdef color color = "White"}
{pt3dclear()}
{pt3dadd(202608.000000,150492.000000,37000.000000,1800.000000)}
{pt3dadd(208248.000000,151176.000000,67325.000000,1800.000000)}

{create adhoc1079}
{access adhoc1079}
{connect adhoc1079(1), adhoc1(0)}
{nseg = 1}
{strdef color color = "White"}
{pt3dclear()}
{pt3dadd(202608.000000,150492.000000,37000.000000,1800.000000)}
{pt3dadd(208272.000000,152136.000000,70625.000000,1800.000000)}

{create adhoc1080}
{access adhoc1080}
{connect adhoc1080(1), adhoc1(0)}
{nseg = 1}
{strdef color color = "White"}
{pt3dclear()}
{pt3dadd(202608.000000,150492.000000,37000.000000,1800.000000)}
{pt3dadd(201528.000000,172452.000000,66525.000000,1800.000000)}

{create adhoc1081}
{access adhoc1081}
{connect adhoc1081(1), adhoc1(0)}
{nseg = 1}
{strdef color color = "White"}
{pt3dclear()}
{pt3dadd(202608.000000,150492.000000,37000.000000,1800.000000)}
{pt3dadd(201372.000000,170952.000000,63725.000000,1800.000000)}

{create adhoc1082}
{access adhoc1082}
{connect adhoc1082(1), adhoc1(0)}
{nseg = 1}
{strdef color color = "White"}
{pt3dclear()}
{pt3dadd(202608.000000,150492.000000,37000.000000,1800.000000)}
{pt3dadd(201540.000000,169620.000000,66475.000000,1800.000000)}

{create adhoc1083}
{access adhoc1083}
{connect adhoc1083(1), adhoc1(0)}
{nseg = 1}
{strdef color color = "White"}
{pt3dclear()}
{pt3dadd(202608.000000,150492.000000,37000.000000,1800.000000)}
{pt3dadd(201372.000000,168024.000000,64925.000000,1800.000000)}

{create adhoc1084}
{access adhoc1084}
{connect adhoc1084(1), adhoc1(0)}
{nseg = 1}
{strdef color color = "White"}
{pt3dclear()}
{pt3dadd(202608.000000,150492.000000,37000.000000,1800.000000)}
{pt3dadd(195900.000000,173988.000000,55625.000000,1800.000000)}

{create adhoc1085}
{access adhoc1085}
{connect adhoc1085(1), adhoc1(0)}
{nseg = 1}
{strdef color color = "White"}
{pt3dclear()}
{pt3dadd(202608.000000,150492.000000,37000.000000,1800.000000)}
{pt3dadd(196932.000000,171120.000000,63325.000000,1800.000000)}

{create adhoc1086}
{access adhoc1086}
{connect adhoc1086(1), adhoc1(0)}
{nseg = 1}
{strdef color color = "White"}
{pt3dclear()}
{pt3dadd(202608.000000,150492.000000,37000.000000,1800.000000)}
{pt3dadd(196968.000000,172260.000000,57175.000000,1800.000000)}

{create adhoc1087}
{access adhoc1087}
{connect adhoc1087(1), adhoc1(0)}
{nseg = 1}
{strdef color color = "White"}
{pt3dclear()}
{pt3dadd(202608.000000,150492.000000,37000.000000,1800.000000)}
{pt3dadd(196944.000000,170772.000000,59025.000000,1800.000000)}

{create adhoc1088}
{access adhoc1088}
{connect adhoc1088(1), adhoc1(0)}
{nseg = 1}
{strdef color color = "White"}
{pt3dclear()}
{pt3dadd(202608.000000,150492.000000,37000.000000,1800.000000)}
{pt3dadd(199104.000000,176976.000000,64125.000000,1800.000000)}

{create adhoc1089}
{access adhoc1089}
{connect adhoc1089(1), adhoc1(0)}
{nseg = 1}
{strdef color color = "White"}
{pt3dclear()}
{pt3dadd(202608.000000,150492.000000,37000.000000,1800.000000)}
{pt3dadd(199272.000000,175392.000000,67225.000000,1800.000000)}

{create adhoc1090}
{access adhoc1090}
{connect adhoc1090(1), adhoc1(0)}
{nseg = 1}
{strdef color color = "White"}
{pt3dclear()}
{pt3dadd(202608.000000,150492.000000,37000.000000,1800.000000)}
{pt3dadd(199284.000000,175560.000000,71525.000000,1800.000000)}

{create adhoc1091}
{access adhoc1091}
{connect adhoc1091(1), adhoc1(0)}
{nseg = 1}
{strdef color color = "White"}
{pt3dclear()}
{pt3dadd(202608.000000,150492.000000,37000.000000,1800.000000)}
{pt3dadd(199104.000000,173928.000000,61375.000000,1800.000000)}

{create adhoc1092}
{access adhoc1092}
{connect adhoc1092(1), adhoc1(0)}
{nseg = 1}
{strdef color color = "White"}
{pt3dclear()}
{pt3dadd(202608.000000,150492.000000,37000.000000,1800.000000)}
{pt3dadd(199104.000000,171180.000000,61275.000000,1800.000000)}

{create adhoc1093}
{access adhoc1093}
{connect adhoc1093(1), adhoc1(0)}
{nseg = 1}
{strdef color color = "White"}
{pt3dclear()}
{pt3dadd(202608.000000,150492.000000,37000.000000,1800.000000)}
{pt3dadd(199116.000000,174204.000000,64525.000000,1800.000000)}

{create adhoc1094}
{access adhoc1094}
{connect adhoc1094(1), adhoc1(0)}
{nseg = 1}
{strdef color color = "White"}
{pt3dclear()}
{pt3dadd(202608.000000,150492.000000,37000.000000,1800.000000)}
{pt3dadd(199272.000000,173424.000000,69525.000000,1800.000000)}

{create adhoc1095}
{access adhoc1095}
{connect adhoc1095(1), adhoc1(0)}
{nseg = 1}
{strdef color color = "White"}
{pt3dclear()}
{pt3dadd(202608.000000,150492.000000,37000.000000,1800.000000)}
{pt3dadd(199272.000000,171288.000000,66875.000000,1800.000000)}

{create adhoc1096}
{access adhoc1096}
{connect adhoc1096(1), adhoc1(0)}
{nseg = 1}
{strdef color color = "White"}
{pt3dclear()}
{pt3dadd(202608.000000,150492.000000,37000.000000,1800.000000)}
{pt3dadd(199488.000000,168972.000000,64575.000000,1800.000000)}

{create adhoc1097}
{access adhoc1097}
{connect adhoc1097(1), adhoc1(0)}
{nseg = 1}
{strdef color color = "White"}
{pt3dclear()}
{pt3dadd(202608.000000,150492.000000,37000.000000,1800.000000)}
{pt3dadd(199524.000000,166896.000000,65775.000000,1800.000000)}

{create adhoc1098}
{access adhoc1098}
{connect adhoc1098(1), adhoc1(0)}
{nseg = 1}
{strdef color color = "White"}
{pt3dclear()}
{pt3dadd(202608.000000,150492.000000,37000.000000,1800.000000)}
{pt3dadd(199656.000000,164280.000000,66325.000000,1800.000000)}

{create adhoc1099}
{access adhoc1099}
{connect adhoc1099(1), adhoc1(0)}
{nseg = 1}
{strdef color color = "White"}
{pt3dclear()}
{pt3dadd(202608.000000,150492.000000,37000.000000,1800.000000)}
{pt3dadd(200256.000000,159456.000000,67675.000000,1800.000000)}

{create adhoc1100}
{access adhoc1100}
{connect adhoc1100(1), adhoc1(0)}
{nseg = 1}
{strdef color color = "White"}
{pt3dclear()}
{pt3dadd(202608.000000,150492.000000,37000.000000,1800.000000)}
{pt3dadd(200100.000000,156576.000000,66025.000000,1800.000000)}

{create adhoc1101}
{access adhoc1101}
{connect adhoc1101(1), adhoc1(0)}
{nseg = 1}
{strdef color color = "White"}
{pt3dclear()}
{pt3dadd(202608.000000,150492.000000,37000.000000,1800.000000)}
{pt3dadd(200268.000000,153852.000000,69375.000000,1800.000000)}

{create adhoc1102}
{access adhoc1102}
{connect adhoc1102(1), adhoc1(0)}
{nseg = 1}
{strdef color color = "White"}
{pt3dclear()}
{pt3dadd(202608.000000,150492.000000,37000.000000,1800.000000)}
{pt3dadd(200268.000000,151896.000000,67425.000000,1800.000000)}

{create adhoc1103}
{access adhoc1103}
{connect adhoc1103(1), adhoc1(0)}
{nseg = 1}
{strdef color color = "White"}
{pt3dclear()}
{pt3dadd(202608.000000,150492.000000,37000.000000,1800.000000)}
{pt3dadd(200100.000000,147096.000000,64775.000000,1800.000000)}

{create adhoc1104}
{access adhoc1104}
{connect adhoc1104(1), adhoc1(0)}
{nseg = 1}
{strdef color color = "White"}
{pt3dclear()}
{pt3dadd(202608.000000,150492.000000,37000.000000,1800.000000)}
{pt3dadd(200124.000000,149904.000000,65525.000000,1800.000000)}

{create adhoc1105}
{access adhoc1105}
{connect adhoc1105(1), adhoc1(0)}
{nseg = 1}
{strdef color color = "White"}
{pt3dclear()}
{pt3dadd(202608.000000,150492.000000,37000.000000,1800.000000)}
{pt3dadd(200268.000000,148752.000000,67975.000000,1800.000000)}

{create adhoc1106}
{access adhoc1106}
{connect adhoc1106(1), adhoc1(0)}
{nseg = 1}
{strdef color color = "White"}
{pt3dclear()}
{pt3dadd(202608.000000,150492.000000,37000.000000,1800.000000)}
{pt3dadd(201720.000000,147096.000000,74675.000000,1800.000000)}

{create adhoc1107}
{access adhoc1107}
{connect adhoc1107(1), adhoc1(0)}
{nseg = 1}
{strdef color color = "White"}
{pt3dclear()}
{pt3dadd(202608.000000,150492.000000,37000.000000,1800.000000)}
{pt3dadd(207264.000000,156648.000000,67725.000000,1800.000000)}

{create adhoc1108}
{access adhoc1108}
{connect adhoc1108(1), adhoc1(0)}
{nseg = 1}
{strdef color color = "White"}
{pt3dclear()}
{pt3dadd(202608.000000,150492.000000,37000.000000,1800.000000)}
{pt3dadd(204456.000000,156456.000000,67375.000000,1800.000000)}

{create adhoc1109}
{access adhoc1109}
{connect adhoc1109(1), adhoc1(0)}
{nseg = 1}
{strdef color color = "White"}
{pt3dclear()}
{pt3dadd(202608.000000,150492.000000,37000.000000,1800.000000)}
{pt3dadd(204300.000000,155520.000000,64775.000000,1800.000000)}

{create adhoc1110}
{access adhoc1110}
{connect adhoc1110(1), adhoc1(0)}
{nseg = 1}
{strdef color color = "White"}
{pt3dclear()}
{pt3dadd(202608.000000,150492.000000,37000.000000,1800.000000)}
{pt3dadd(203448.000000,152904.000000,74925.000000,1800.000000)}

{create adhoc1111}
{access adhoc1111}
{connect adhoc1111(1), adhoc1(0)}
{nseg = 1}
{strdef color color = "White"}
{pt3dclear()}
{pt3dadd(202608.000000,150492.000000,37000.000000,1800.000000)}
{pt3dadd(203436.000000,149532.000000,74075.000000,1800.000000)}

{create adhoc1112}
{access adhoc1112}
{connect adhoc1112(1), adhoc1(0)}
{nseg = 1}
{strdef color color = "White"}
{pt3dclear()}
{pt3dadd(202608.000000,150492.000000,37000.000000,1800.000000)}
{pt3dadd(203376.000000,153588.000000,67025.000000,1800.000000)}

{create adhoc1113}
{access adhoc1113}
{connect adhoc1113(1), adhoc1(0)}
{nseg = 1}
{strdef color color = "White"}
{pt3dclear()}
{pt3dadd(202608.000000,150492.000000,37000.000000,1800.000000)}
{pt3dadd(203388.000000,152220.000000,70725.000000,1800.000000)}

{create adhoc1114}
{access adhoc1114}
{connect adhoc1114(1), adhoc1(0)}
{nseg = 1}
{strdef color color = "White"}
{pt3dclear()}
{pt3dadd(202608.000000,150492.000000,37000.000000,1800.000000)}
{pt3dadd(203388.000000,150336.000000,71775.000000,1800.000000)}

{create adhoc1115}
{access adhoc1115}
{connect adhoc1115(1), adhoc1(0)}
{nseg = 1}
{strdef color color = "White"}
{pt3dclear()}
{pt3dadd(202608.000000,150492.000000,37000.000000,1800.000000)}
{pt3dadd(203376.000000,150468.000000,68625.000000,1800.000000)}

{create adhoc1116}
{access adhoc1116}
{connect adhoc1116(1), adhoc1(0)}
{nseg = 1}
{strdef color color = "White"}
{pt3dclear()}
{pt3dadd(202608.000000,150492.000000,37000.000000,1800.000000)}
{pt3dadd(203400.000000,154692.000000,70175.000000,1800.000000)}

{create adhoc1117}
{access adhoc1117}
{connect adhoc1117(1), adhoc1(0)}
{nseg = 1}
{strdef color color = "White"}
{pt3dclear()}
{pt3dadd(202608.000000,150492.000000,37000.000000,1800.000000)}
{pt3dadd(207072.000000,153864.000000,74525.000000,1800.000000)}

{create adhoc1118}
{access adhoc1118}
{connect adhoc1118(1), adhoc1(0)}
{nseg = 1}
{strdef color color = "White"}
{pt3dclear()}
{pt3dadd(202608.000000,150492.000000,37000.000000,1800.000000)}
{pt3dadd(207060.000000,156168.000000,74325.000000,1800.000000)}

{create adhoc1119}
{access adhoc1119}
{connect adhoc1119(1), adhoc1(0)}
{nseg = 1}
{strdef color color = "White"}
{pt3dclear()}
{pt3dadd(202608.000000,150492.000000,37000.000000,1800.000000)}
{pt3dadd(207000.000000,157212.000000,71825.000000,1800.000000)}

{create adhoc1120}
{access adhoc1120}
{connect adhoc1120(1), adhoc1(0)}
{nseg = 1}
{strdef color color = "White"}
{pt3dclear()}
{pt3dadd(202608.000000,150492.000000,37000.000000,1800.000000)}
{pt3dadd(207012.000000,154560.000000,69225.000000,1800.000000)}

{create adhoc1121}
{access adhoc1121}
{connect adhoc1121(1), adhoc1(0)}
{nseg = 1}
{strdef color color = "White"}
{pt3dclear()}
{pt3dadd(202608.000000,150492.000000,37000.000000,1800.000000)}
{pt3dadd(207000.000000,158208.000000,69525.000000,1800.000000)}

{create adhoc1122}
{access adhoc1122}
{connect adhoc1122(1), adhoc1(0)}
{nseg = 1}
{strdef color color = "White"}
{pt3dclear()}
{pt3dadd(202608.000000,150492.000000,37000.000000,1800.000000)}
{pt3dadd(207024.000000,154056.000000,71875.000000,1800.000000)}

{create adhoc1123}
{access adhoc1123}
{connect adhoc1123(1), adhoc1(0)}
{nseg = 1}
{strdef color color = "White"}
{pt3dclear()}
{pt3dadd(202608.000000,150492.000000,37000.000000,1800.000000)}
{pt3dadd(207948.000000,156672.000000,65125.000000,1800.000000)}

{create adhoc1124}
{access adhoc1124}
{connect adhoc1124(1), adhoc1(0)}
{nseg = 1}
{strdef color color = "White"}
{pt3dclear()}
{pt3dadd(202608.000000,150492.000000,37000.000000,1800.000000)}
{pt3dadd(207948.000000,164652.000000,63675.000000,1800.000000)}

{create adhoc1125}
{access adhoc1125}
{connect adhoc1125(1), adhoc1(0)}
{nseg = 1}
{strdef color color = "White"}
{pt3dclear()}
{pt3dadd(202608.000000,150492.000000,37000.000000,1800.000000)}
{pt3dadd(208104.000000,159456.000000,67075.000000,1800.000000)}

{create adhoc1126}
{access adhoc1126}
{connect adhoc1126(1), adhoc1(0)}
{nseg = 1}
{strdef color color = "White"}
{pt3dclear()}
{pt3dadd(202608.000000,150492.000000,37000.000000,1800.000000)}
{pt3dadd(207624.000000,162132.000000,65675.000000,1800.000000)}

{create adhoc1127}
{access adhoc1127}
{connect adhoc1127(1), adhoc1(0)}
{nseg = 1}
{strdef color color = "White"}
{pt3dclear()}
{pt3dadd(202608.000000,150492.000000,37000.000000,1800.000000)}
{pt3dadd(207588.000000,163140.000000,61025.000000,1800.000000)}

{create adhoc1128}
{access adhoc1128}
{connect adhoc1128(1), adhoc1(0)}
{nseg = 1}
{strdef color color = "White"}
{pt3dclear()}
{pt3dadd(202608.000000,150492.000000,37000.000000,1800.000000)}
{pt3dadd(207372.000000,168852.000000,49075.000000,1800.000000)}

{create adhoc1129}
{access adhoc1129}
{connect adhoc1129(1), adhoc1(0)}
{nseg = 1}
{strdef color color = "White"}
{pt3dclear()}
{pt3dadd(202608.000000,150492.000000,37000.000000,1800.000000)}
{pt3dadd(207552.000000,163344.000000,49625.000000,1800.000000)}

{create adhoc1130}
{access adhoc1130}
{connect adhoc1130(1), adhoc1(0)}
{nseg = 1}
{strdef color color = "White"}
{pt3dclear()}
{pt3dadd(202608.000000,150492.000000,37000.000000,1800.000000)}
{pt3dadd(209304.000000,164340.000000,55725.000000,1800.000000)}

{create adhoc1131}
{access adhoc1131}
{connect adhoc1131(1), adhoc1(0)}
{nseg = 1}
{strdef color color = "White"}
{pt3dclear()}
{pt3dadd(202608.000000,150492.000000,37000.000000,1800.000000)}
{pt3dadd(209136.000000,161316.000000,54225.000000,1800.000000)}

{create adhoc1132}
{access adhoc1132}
{connect adhoc1132(1), adhoc1(0)}
{nseg = 1}
{strdef color color = "White"}
{pt3dclear()}
{pt3dadd(202608.000000,150492.000000,37000.000000,1800.000000)}
{pt3dadd(209160.000000,159420.000000,51325.000000,1800.000000)}

{create adhoc1133}
{access adhoc1133}
{connect adhoc1133(1), adhoc1(0)}
{nseg = 1}
{strdef color color = "White"}
{pt3dclear()}
{pt3dadd(202608.000000,150492.000000,37000.000000,1800.000000)}
{pt3dadd(209124.000000,158304.000000,53775.000000,1800.000000)}

{create adhoc1134}
{access adhoc1134}
{connect adhoc1134(1), adhoc1(0)}
{nseg = 1}
{strdef color color = "White"}
{pt3dclear()}
{pt3dadd(202608.000000,150492.000000,37000.000000,1800.000000)}
{pt3dadd(208692.000000,154020.000000,57125.000000,1800.000000)}

{create adhoc1135}
{access adhoc1135}
{connect adhoc1135(1), adhoc1(0)}
{nseg = 1}
{strdef color color = "White"}
{pt3dclear()}
{pt3dadd(202608.000000,150492.000000,37000.000000,1800.000000)}
{pt3dadd(208692.000000,155928.000000,55925.000000,1800.000000)}

{create adhoc1136}
{access adhoc1136}
{connect adhoc1136(1), adhoc1(0)}
{nseg = 1}
{strdef color color = "White"}
{pt3dclear()}
{pt3dadd(202608.000000,150492.000000,37000.000000,1800.000000)}
{pt3dadd(208668.000000,158748.000000,56825.000000,1800.000000)}

{create adhoc1137}
{access adhoc1137}
{connect adhoc1137(1), adhoc1(0)}
{nseg = 1}
{strdef color color = "White"}
{pt3dclear()}
{pt3dadd(202608.000000,150492.000000,37000.000000,1800.000000)}
{pt3dadd(208620.000000,159840.000000,61325.000000,1800.000000)}

{create adhoc1138}
{access adhoc1138}
{connect adhoc1138(1), adhoc1(0)}
{nseg = 1}
{strdef color color = "White"}
{pt3dclear()}
{pt3dadd(202608.000000,150492.000000,37000.000000,1800.000000)}
{pt3dadd(208608.000000,153264.000000,62125.000000,1800.000000)}

{create adhoc1139}
{access adhoc1139}
{connect adhoc1139(1), adhoc1(0)}
{nseg = 1}
{strdef color color = "White"}
{pt3dclear()}
{pt3dadd(202608.000000,150492.000000,37000.000000,1800.000000)}
{pt3dadd(208608.000000,157032.000000,61825.000000,1800.000000)}

{create adhoc1140}
{access adhoc1140}
{connect adhoc1140(1), adhoc1(0)}
{nseg = 1}
{strdef color color = "White"}
{pt3dclear()}
{pt3dadd(202608.000000,150492.000000,37000.000000,1800.000000)}
{pt3dadd(207048.000000,167340.000000,72625.000000,1800.000000)}

{create adhoc1141}
{access adhoc1141}
{connect adhoc1141(1), adhoc1(0)}
{nseg = 1}
{strdef color color = "White"}
{pt3dclear()}
{pt3dadd(202608.000000,150492.000000,37000.000000,1800.000000)}
{pt3dadd(207480.000000,160908.000000,71325.000000,1800.000000)}

{create adhoc1142}
{access adhoc1142}
{connect adhoc1142(1), adhoc1(0)}
{nseg = 1}
{strdef color color = "White"}
{pt3dclear()}
{pt3dadd(202608.000000,150492.000000,37000.000000,1800.000000)}
{pt3dadd(207516.000000,159876.000000,74175.000000,1800.000000)}

{create adhoc1143}
{access adhoc1143}
{connect adhoc1143(1), adhoc1(0)}
{nseg = 1}
{strdef color color = "White"}
{pt3dclear()}
{pt3dadd(202608.000000,150492.000000,37000.000000,1800.000000)}
{pt3dadd(207504.000000,162432.000000,76575.000000,1800.000000)}

{create adhoc1144}
{access adhoc1144}
{connect adhoc1144(1), adhoc1(0)}
{nseg = 1}
{strdef color color = "White"}
{pt3dclear()}
{pt3dadd(202608.000000,150492.000000,37000.000000,1800.000000)}
{pt3dadd(207540.000000,164316.000000,74775.000000,1800.000000)}

{create adhoc1145}
{access adhoc1145}
{connect adhoc1145(1), adhoc1(0)}
{nseg = 1}
{strdef color color = "White"}
{pt3dclear()}
{pt3dadd(202608.000000,150492.000000,37000.000000,1800.000000)}
{pt3dadd(206772.000000,162324.000000,68675.000000,1800.000000)}

{create adhoc1146}
{access adhoc1146}
{connect adhoc1146(1), adhoc1(0)}
{nseg = 1}
{strdef color color = "White"}
{pt3dclear()}
{pt3dadd(202608.000000,150492.000000,37000.000000,1800.000000)}
{pt3dadd(207336.000000,166608.000000,69575.000000,1800.000000)}

{create adhoc1147}
{access adhoc1147}
{connect adhoc1147(1), adhoc1(0)}
{nseg = 1}
{strdef color color = "White"}
{pt3dclear()}
{pt3dadd(202608.000000,150492.000000,37000.000000,1800.000000)}
{pt3dadd(207360.000000,164136.000000,71925.000000,1800.000000)}

{create adhoc1148}
{access adhoc1148}
{connect adhoc1148(1), adhoc1(0)}
{nseg = 1}
{strdef color color = "White"}
{pt3dclear()}
{pt3dadd(202608.000000,150492.000000,37000.000000,1800.000000)}
{pt3dadd(201276.000000,162816.000000,69275.000000,1800.000000)}

{create adhoc1149}
{access adhoc1149}
{connect adhoc1149(1), adhoc1(0)}
{nseg = 1}
{strdef color color = "White"}
{pt3dclear()}
{pt3dadd(202608.000000,150492.000000,37000.000000,1800.000000)}
{pt3dadd(201264.000000,159612.000000,67225.000000,1800.000000)}

{create adhoc1150}
{access adhoc1150}
{connect adhoc1150(1), adhoc1(0)}
{nseg = 1}
{strdef color color = "White"}
{pt3dclear()}
{pt3dadd(202608.000000,150492.000000,37000.000000,1800.000000)}
{pt3dadd(201276.000000,159312.000000,69775.000000,1800.000000)}

{create adhoc1151}
{access adhoc1151}
{connect adhoc1151(1), adhoc1(0)}
{nseg = 1}
{strdef color color = "White"}
{pt3dclear()}
{pt3dadd(202608.000000,150492.000000,37000.000000,1800.000000)}
{pt3dadd(202776.000000,157128.000000,63725.000000,1800.000000)}

{create adhoc1152}
{access adhoc1152}
{connect adhoc1152(1), adhoc1(0)}
{nseg = 1}
{strdef color color = "White"}
{pt3dclear()}
{pt3dadd(202608.000000,150492.000000,37000.000000,1800.000000)}
{pt3dadd(202752.000000,159240.000000,62075.000000,1800.000000)}

{create adhoc1153}
{access adhoc1153}
{connect adhoc1153(1), adhoc1(0)}
{nseg = 1}
{strdef color color = "White"}
{pt3dclear()}
{pt3dadd(202608.000000,150492.000000,37000.000000,1800.000000)}
{pt3dadd(202752.000000,161448.000000,62225.000000,1800.000000)}

{create adhoc1154}
{access adhoc1154}
{connect adhoc1154(1), adhoc1(0)}
{nseg = 1}
{strdef color color = "White"}
{pt3dclear()}
{pt3dadd(202608.000000,150492.000000,37000.000000,1800.000000)}
{pt3dadd(202968.000000,166344.000000,70475.000000,1800.000000)}

{create adhoc1155}
{access adhoc1155}
{connect adhoc1155(1), adhoc1(0)}
{nseg = 1}
{strdef color color = "White"}
{pt3dclear()}
{pt3dadd(202608.000000,150492.000000,37000.000000,1800.000000)}
{pt3dadd(202932.000000,166068.000000,66925.000000,1800.000000)}

{create adhoc1156}
{access adhoc1156}
{connect adhoc1156(1), adhoc1(0)}
{nseg = 1}
{strdef color color = "White"}
{pt3dclear()}
{pt3dadd(202608.000000,150492.000000,37000.000000,1800.000000)}
{pt3dadd(202932.000000,165156.000000,68575.000000,1800.000000)}

{create adhoc1157}
{access adhoc1157}
{connect adhoc1157(1), adhoc1(0)}
{nseg = 1}
{strdef color color = "White"}
{pt3dclear()}
{pt3dadd(202608.000000,150492.000000,37000.000000,1800.000000)}
{pt3dadd(202956.000000,162780.000000,71425.000000,1800.000000)}

{create adhoc1158}
{access adhoc1158}
{connect adhoc1158(1), adhoc1(0)}
{nseg = 1}
{strdef color color = "White"}
{pt3dclear()}
{pt3dadd(202608.000000,150492.000000,37000.000000,1800.000000)}
{pt3dadd(202968.000000,160188.000000,72575.000000,1800.000000)}

{create adhoc1159}
{access adhoc1159}
{connect adhoc1159(1), adhoc1(0)}
{nseg = 1}
{strdef color color = "White"}
{pt3dclear()}
{pt3dadd(202608.000000,150492.000000,37000.000000,1800.000000)}
{pt3dadd(202992.000000,157536.000000,72925.000000,1800.000000)}

{create adhoc1160}
{access adhoc1160}
{connect adhoc1160(1), adhoc1(0)}
{nseg = 1}
{strdef color color = "White"}
{pt3dclear()}
{pt3dadd(202608.000000,150492.000000,37000.000000,1800.000000)}
{pt3dadd(202944.000000,159264.000000,68175.000000,1800.000000)}

{create adhoc1161}
{access adhoc1161}
{connect adhoc1161(1), adhoc1(0)}
{nseg = 1}
{strdef color color = "White"}
{pt3dclear()}
{pt3dadd(202608.000000,150492.000000,37000.000000,1800.000000)}
{pt3dadd(202800.000000,161628.000000,65825.000000,1800.000000)}

{create adhoc1162}
{access adhoc1162}
{connect adhoc1162(1), adhoc1(0)}
{nseg = 1}
{strdef color color = "White"}
{pt3dclear()}
{pt3dadd(202608.000000,150492.000000,37000.000000,1800.000000)}
{pt3dadd(202788.000000,158664.000000,65775.000000,1800.000000)}

{create adhoc1163}
{access adhoc1163}
{connect adhoc1163(1), adhoc1(0)}
{nseg = 1}
{strdef color color = "White"}
{pt3dclear()}
{pt3dadd(202608.000000,150492.000000,37000.000000,1800.000000)}
{pt3dadd(205416.000000,177276.000000,72625.000000,1800.000000)}

{create adhoc1164}
{access adhoc1164}
{connect adhoc1164(1), adhoc1(0)}
{nseg = 1}
{strdef color color = "White"}
{pt3dclear()}
{pt3dadd(202608.000000,150492.000000,37000.000000,1800.000000)}
{pt3dadd(205476.000000,175956.000000,74825.000000,1800.000000)}

{create adhoc1165}
{access adhoc1165}
{connect adhoc1165(1), adhoc1(0)}
{nseg = 1}
{strdef color color = "White"}
{pt3dclear()}
{pt3dadd(202608.000000,150492.000000,37000.000000,1800.000000)}
{pt3dadd(205404.000000,174264.000000,72675.000000,1800.000000)}

{create adhoc1166}
{access adhoc1166}
{connect adhoc1166(1), adhoc1(0)}
{nseg = 1}
{strdef color color = "White"}
{pt3dclear()}
{pt3dadd(202608.000000,150492.000000,37000.000000,1800.000000)}
{pt3dadd(205356.000000,171960.000000,75275.000000,1800.000000)}

{create adhoc1167}
{access adhoc1167}
{connect adhoc1167(1), adhoc1(0)}
{nseg = 1}
{strdef color color = "White"}
{pt3dclear()}
{pt3dadd(202608.000000,150492.000000,37000.000000,1800.000000)}
{pt3dadd(207492.000000,169536.000000,75375.000000,1800.000000)}

{create adhoc1168}
{access adhoc1168}
{connect adhoc1168(1), adhoc1(0)}
{nseg = 1}
{strdef color color = "White"}
{pt3dclear()}
{pt3dadd(202608.000000,150492.000000,37000.000000,1800.000000)}
{pt3dadd(206544.000000,169008.000000,67025.000000,1800.000000)}

{create adhoc1169}
{access adhoc1169}
{connect adhoc1169(1), adhoc1(0)}
{nseg = 1}
{strdef color color = "White"}
{pt3dclear()}
{pt3dadd(202608.000000,150492.000000,37000.000000,1800.000000)}
{pt3dadd(206424.000000,170796.000000,72475.000000,1800.000000)}

{create adhoc1170}
{access adhoc1170}
{connect adhoc1170(1), adhoc1(0)}
{nseg = 1}
{strdef color color = "White"}
{pt3dclear()}
{pt3dadd(202608.000000,150492.000000,37000.000000,1800.000000)}
{pt3dadd(205152.000000,169236.000000,72225.000000,1800.000000)}

{create adhoc1171}
{access adhoc1171}
{connect adhoc1171(1), adhoc1(0)}
{nseg = 1}
{strdef color color = "White"}
{pt3dclear()}
{pt3dadd(202608.000000,150492.000000,37000.000000,1800.000000)}
{pt3dadd(205140.000000,166752.000000,70675.000000,1800.000000)}

{create adhoc1172}
{access adhoc1172}
{connect adhoc1172(1), adhoc1(0)}
{nseg = 1}
{strdef color color = "White"}
{pt3dclear()}
{pt3dadd(202608.000000,150492.000000,37000.000000,1800.000000)}
{pt3dadd(205200.000000,167460.000000,73925.000000,1800.000000)}

{create adhoc1173}
{access adhoc1173}
{connect adhoc1173(1), adhoc1(0)}
{nseg = 1}
{strdef color color = "White"}
{pt3dclear()}
{pt3dadd(202608.000000,150492.000000,37000.000000,1800.000000)}
{pt3dadd(205188.000000,162684.000000,78825.000000,1800.000000)}

{create adhoc1174}
{access adhoc1174}
{connect adhoc1174(1), adhoc1(0)}
{nseg = 1}
{strdef color color = "White"}
{pt3dclear()}
{pt3dadd(202608.000000,150492.000000,37000.000000,1800.000000)}
{pt3dadd(205176.000000,164604.000000,73575.000000,1800.000000)}

{create adhoc1175}
{access adhoc1175}
{connect adhoc1175(1), adhoc1(0)}
{nseg = 1}
{strdef color color = "White"}
{pt3dclear()}
{pt3dadd(202608.000000,150492.000000,37000.000000,1800.000000)}
{pt3dadd(205188.000000,162744.000000,75975.000000,1800.000000)}

{create adhoc1176}
{access adhoc1176}
{connect adhoc1176(1), adhoc1(0)}
{nseg = 1}
{strdef color color = "White"}
{pt3dclear()}
{pt3dadd(202608.000000,150492.000000,37000.000000,1800.000000)}
{pt3dadd(205032.000000,159624.000000,75475.000000,1800.000000)}

{create adhoc1177}
{access adhoc1177}
{connect adhoc1177(1), adhoc1(0)}
{nseg = 1}
{strdef color color = "White"}
{pt3dclear()}
{pt3dadd(202608.000000,150492.000000,37000.000000,1800.000000)}
{pt3dadd(205176.000000,161784.000000,73125.000000,1800.000000)}

{create adhoc1178}
{access adhoc1178}
{connect adhoc1178(1), adhoc1(0)}
{nseg = 1}
{strdef color color = "White"}
{pt3dclear()}
{pt3dadd(202608.000000,150492.000000,37000.000000,1800.000000)}
{pt3dadd(205128.000000,157716.000000,71825.000000,1800.000000)}

{create adhoc1179}
{access adhoc1179}
{connect adhoc1179(1), adhoc1(0)}
{nseg = 1}
{strdef color color = "White"}
{pt3dclear()}
{pt3dadd(202608.000000,150492.000000,37000.000000,1800.000000)}
{pt3dadd(205140.000000,157344.000000,69275.000000,1800.000000)}

{create adhoc1180}
{access adhoc1180}
{connect adhoc1180(1), adhoc1(0)}
{nseg = 1}
{strdef color color = "White"}
{pt3dclear()}
{pt3dadd(202608.000000,150492.000000,37000.000000,1800.000000)}
{pt3dadd(205140.000000,162744.000000,69625.000000,1800.000000)}

{create adhoc1181}
{access adhoc1181}
{connect adhoc1181(1), adhoc1(0)}
{nseg = 1}
{strdef color color = "White"}
{pt3dclear()}
{pt3dadd(202608.000000,150492.000000,37000.000000,1800.000000)}
{pt3dadd(205824.000000,157788.000000,66475.000000,1800.000000)}

{create adhoc1182}
{access adhoc1182}
{connect adhoc1182(1), adhoc1(0)}
{nseg = 1}
{strdef color color = "White"}
{pt3dclear()}
{pt3dadd(202608.000000,150492.000000,37000.000000,1800.000000)}
{pt3dadd(205536.000000,173280.000000,68625.000000,1800.000000)}

{create adhoc1183}
{access adhoc1183}
{connect adhoc1183(1), adhoc1(0)}
{nseg = 1}
{strdef color color = "White"}
{pt3dclear()}
{pt3dadd(202608.000000,150492.000000,37000.000000,1800.000000)}
{pt3dadd(205668.000000,168756.000000,69875.000000,1800.000000)}

{create adhoc1184}
{access adhoc1184}
{connect adhoc1184(1), adhoc1(0)}
{nseg = 1}
{strdef color color = "White"}
{pt3dclear()}
{pt3dadd(202608.000000,150492.000000,37000.000000,1800.000000)}
{pt3dadd(201624.000000,170724.000000,79725.000000,1800.000000)}

{create adhoc1185}
{access adhoc1185}
{connect adhoc1185(1), adhoc1(0)}
{nseg = 1}
{strdef color color = "White"}
{pt3dclear()}
{pt3dadd(202608.000000,150492.000000,37000.000000,1800.000000)}
{pt3dadd(201564.000000,169404.000000,76675.000000,1800.000000)}

{create adhoc1186}
{access adhoc1186}
{connect adhoc1186(1), adhoc1(0)}
{nseg = 1}
{strdef color color = "White"}
{pt3dclear()}
{pt3dadd(202608.000000,150492.000000,37000.000000,1800.000000)}
{pt3dadd(201588.000000,170208.000000,73825.000000,1800.000000)}

{create adhoc1187}
{access adhoc1187}
{connect adhoc1187(1), adhoc1(0)}
{nseg = 1}
{strdef color color = "White"}
{pt3dclear()}
{pt3dadd(202608.000000,150492.000000,37000.000000,1800.000000)}
{pt3dadd(201792.000000,167616.000000,71125.000000,1800.000000)}

{create adhoc1188}
{access adhoc1188}
{connect adhoc1188(1), adhoc1(0)}
{nseg = 1}
{strdef color color = "White"}
{pt3dclear()}
{pt3dadd(202608.000000,150492.000000,37000.000000,1800.000000)}
{pt3dadd(201792.000000,169872.000000,70375.000000,1800.000000)}

{create adhoc1189}
{access adhoc1189}
{connect adhoc1189(1), adhoc1(0)}
{nseg = 1}
{strdef color color = "White"}
{pt3dclear()}
{pt3dadd(202608.000000,150492.000000,37000.000000,1800.000000)}
{pt3dadd(201792.000000,171852.000000,69175.000000,1800.000000)}

{create adhoc1190}
{access adhoc1190}
{connect adhoc1190(1), adhoc1(0)}
{nseg = 1}
{strdef color color = "White"}
{pt3dclear()}
{pt3dadd(202608.000000,150492.000000,37000.000000,1800.000000)}
{pt3dadd(203400.000000,178692.000000,81325.000000,1800.000000)}

{create adhoc1191}
{access adhoc1191}
{connect adhoc1191(1), adhoc1(0)}
{nseg = 1}
{strdef color color = "White"}
{pt3dclear()}
{pt3dadd(202608.000000,150492.000000,37000.000000,1800.000000)}
{pt3dadd(203340.000000,177888.000000,79075.000000,1800.000000)}

{create adhoc1192}
{access adhoc1192}
{connect adhoc1192(1), adhoc1(0)}
{nseg = 1}
{strdef color color = "White"}
{pt3dclear()}
{pt3dadd(202608.000000,150492.000000,37000.000000,1800.000000)}
{pt3dadd(203304.000000,178080.000000,75925.000000,1800.000000)}

{create adhoc1193}
{access adhoc1193}
{connect adhoc1193(1), adhoc1(0)}
{nseg = 1}
{strdef color color = "White"}
{pt3dclear()}
{pt3dadd(202608.000000,150492.000000,37000.000000,1800.000000)}
{pt3dadd(202752.000000,174972.000000,72975.000000,1800.000000)}

{create adhoc1194}
{access adhoc1194}
{connect adhoc1194(1), adhoc1(0)}
{nseg = 1}
{strdef color color = "White"}
{pt3dclear()}
{pt3dadd(202608.000000,150492.000000,37000.000000,1800.000000)}
{pt3dadd(202788.000000,173604.000000,75225.000000,1800.000000)}

{create adhoc1195}
{access adhoc1195}
{connect adhoc1195(1), adhoc1(0)}
{nseg = 1}
{strdef color color = "White"}
{pt3dclear()}
{pt3dadd(202608.000000,150492.000000,37000.000000,1800.000000)}
{pt3dadd(202740.000000,171708.000000,76525.000000,1800.000000)}

{create adhoc1196}
{access adhoc1196}
{connect adhoc1196(1), adhoc1(0)}
{nseg = 1}
{strdef color color = "White"}
{pt3dclear()}
{pt3dadd(202608.000000,150492.000000,37000.000000,1800.000000)}
{pt3dadd(202776.000000,170148.000000,74975.000000,1800.000000)}

{create adhoc1197}
{access adhoc1197}
{connect adhoc1197(1), adhoc1(0)}
{nseg = 1}
{strdef color color = "White"}
{pt3dclear()}
{pt3dadd(202608.000000,150492.000000,37000.000000,1800.000000)}
{pt3dadd(202740.000000,167292.000000,76675.000000,1800.000000)}

{create adhoc1198}
{access adhoc1198}
{connect adhoc1198(1), adhoc1(0)}
{nseg = 1}
{strdef color color = "White"}
{pt3dclear()}
{pt3dadd(202608.000000,150492.000000,37000.000000,1800.000000)}
{pt3dadd(202764.000000,169860.000000,77425.000000,1800.000000)}

{create adhoc1199}
{access adhoc1199}
{connect adhoc1199(1), adhoc1(0)}
{nseg = 1}
{strdef color color = "White"}
{pt3dclear()}
{pt3dadd(202608.000000,150492.000000,37000.000000,1800.000000)}
{pt3dadd(202776.000000,168096.000000,78775.000000,1800.000000)}

{create adhoc1200}
{access adhoc1200}
{connect adhoc1200(1), adhoc1(0)}
{nseg = 1}
{strdef color color = "White"}
{pt3dclear()}
{pt3dadd(202608.000000,150492.000000,37000.000000,1800.000000)}
{pt3dadd(202824.000000,170604.000000,80025.000000,1800.000000)}

{create adhoc1201}
{access adhoc1201}
{connect adhoc1201(1), adhoc1(0)}
{nseg = 1}
{strdef color color = "White"}
{pt3dclear()}
{pt3dadd(202608.000000,150492.000000,37000.000000,1800.000000)}
{pt3dadd(202884.000000,167916.000000,82825.000000,1800.000000)}

{create adhoc1202}
{access adhoc1202}
{connect adhoc1202(1), adhoc1(0)}
{nseg = 1}
{strdef color color = "White"}
{pt3dclear()}
{pt3dadd(202608.000000,150492.000000,37000.000000,1800.000000)}
{pt3dadd(202896.000000,171336.000000,83125.000000,1800.000000)}

{create adhoc1203}
{access adhoc1203}
{connect adhoc1203(1), adhoc1(0)}
{nseg = 1}
{strdef color color = "White"}
{pt3dclear()}
{pt3dadd(202608.000000,150492.000000,37000.000000,1800.000000)}
{pt3dadd(202944.000000,171012.000000,85475.000000,1800.000000)}

{create adhoc1204}
{access adhoc1204}
{connect adhoc1204(1), adhoc1(0)}
{nseg = 1}
{strdef color color = "White"}
{pt3dclear()}
{pt3dadd(202608.000000,150492.000000,37000.000000,1800.000000)}
{pt3dadd(201552.000000,174612.000000,83525.000000,1800.000000)}

{create adhoc1205}
{access adhoc1205}
{connect adhoc1205(1), adhoc1(0)}
{nseg = 1}
{strdef color color = "White"}
{pt3dclear()}
{pt3dadd(202608.000000,150492.000000,37000.000000,1800.000000)}
{pt3dadd(201468.000000,175020.000000,80725.000000,1800.000000)}

{create adhoc1206}
{access adhoc1206}
{connect adhoc1206(1), adhoc1(0)}
{nseg = 1}
{strdef color color = "White"}
{pt3dclear()}
{pt3dadd(202608.000000,150492.000000,37000.000000,1800.000000)}
{pt3dadd(201396.000000,174960.000000,77975.000000,1800.000000)}

{create adhoc1207}
{access adhoc1207}
{connect adhoc1207(1), adhoc1(0)}
{nseg = 1}
{strdef color color = "White"}
{pt3dclear()}
{pt3dadd(202608.000000,150492.000000,37000.000000,1800.000000)}
{pt3dadd(204432.000000,188316.000000,73725.000000,1800.000000)}

{create adhoc1208}
{access adhoc1208}
{connect adhoc1208(1), adhoc1(0)}
{nseg = 1}
{strdef color color = "White"}
{pt3dclear()}
{pt3dadd(202608.000000,150492.000000,37000.000000,1800.000000)}
{pt3dadd(204636.000000,184572.000000,80725.000000,1800.000000)}

{create adhoc1209}
{access adhoc1209}
{connect adhoc1209(1), adhoc1(0)}
{nseg = 1}
{strdef color color = "White"}
{pt3dclear()}
{pt3dadd(202608.000000,150492.000000,37000.000000,1800.000000)}
{pt3dadd(204636.000000,187356.000000,80725.000000,1800.000000)}

{create adhoc1210}
{access adhoc1210}
{connect adhoc1210(1), adhoc1(0)}
{nseg = 1}
{strdef color color = "White"}
{pt3dclear()}
{pt3dadd(202608.000000,150492.000000,37000.000000,1800.000000)}
{pt3dadd(204768.000000,188568.000000,87875.000000,1800.000000)}

{create adhoc1211}
{access adhoc1211}
{connect adhoc1211(1), adhoc1(0)}
{nseg = 1}
{strdef color color = "White"}
{pt3dclear()}
{pt3dadd(202608.000000,150492.000000,37000.000000,1800.000000)}
{pt3dadd(204720.000000,186744.000000,85425.000000,1800.000000)}

{create adhoc1212}
{access adhoc1212}
{connect adhoc1212(1), adhoc1(0)}
{nseg = 1}
{strdef color color = "White"}
{pt3dclear()}
{pt3dadd(202608.000000,150492.000000,37000.000000,1800.000000)}
{pt3dadd(204696.000000,185592.000000,83125.000000,1800.000000)}

{create adhoc1213}
{access adhoc1213}
{connect adhoc1213(1), adhoc1(0)}
{nseg = 1}
{strdef color color = "White"}
{pt3dclear()}
{pt3dadd(202608.000000,150492.000000,37000.000000,1800.000000)}
{pt3dadd(204696.000000,188664.000000,83025.000000,1800.000000)}

{create adhoc1214}
{access adhoc1214}
{connect adhoc1214(1), adhoc1(0)}
{nseg = 1}
{strdef color color = "White"}
{pt3dclear()}
{pt3dadd(202608.000000,150492.000000,37000.000000,1800.000000)}
{pt3dadd(204768.000000,189228.000000,85725.000000,1800.000000)}

{create adhoc1215}
{access adhoc1215}
{connect adhoc1215(1), adhoc1(0)}
{nseg = 1}
{strdef color color = "White"}
{pt3dclear()}
{pt3dadd(202608.000000,150492.000000,37000.000000,1800.000000)}
{pt3dadd(204684.000000,192204.000000,86525.000000,1800.000000)}

{create adhoc1216}
{access adhoc1216}
{connect adhoc1216(1), adhoc1(0)}
{nseg = 1}
{strdef color color = "White"}
{pt3dclear()}
{pt3dadd(202608.000000,150492.000000,37000.000000,1800.000000)}
{pt3dadd(204672.000000,195888.000000,86125.000000,1800.000000)}

{create adhoc1217}
{access adhoc1217}
{connect adhoc1217(1), adhoc1(0)}
{nseg = 1}
{strdef color color = "White"}
{pt3dclear()}
{pt3dadd(202608.000000,150492.000000,37000.000000,1800.000000)}
{pt3dadd(204672.000000,198624.000000,85975.000000,1800.000000)}

{create adhoc1218}
{access adhoc1218}
{connect adhoc1218(1), adhoc1(0)}
{nseg = 1}
{strdef color color = "White"}
{pt3dclear()}
{pt3dadd(202608.000000,150492.000000,37000.000000,1800.000000)}
{pt3dadd(205356.000000,195756.000000,81275.000000,1800.000000)}

{create adhoc1219}
{access adhoc1219}
{connect adhoc1219(1), adhoc1(0)}
{nseg = 1}
{strdef color color = "White"}
{pt3dclear()}
{pt3dadd(202608.000000,150492.000000,37000.000000,1800.000000)}
{pt3dadd(205320.000000,195384.000000,79175.000000,1800.000000)}

{create adhoc1220}
{access adhoc1220}
{connect adhoc1220(1), adhoc1(0)}
{nseg = 1}
{strdef color color = "White"}
{pt3dclear()}
{pt3dadd(202608.000000,150492.000000,37000.000000,1800.000000)}
{pt3dadd(205368.000000,192996.000000,81075.000000,1800.000000)}

{create adhoc1221}
{access adhoc1221}
{connect adhoc1221(1), adhoc1(0)}
{nseg = 1}
{strdef color color = "White"}
{pt3dclear()}
{pt3dadd(202608.000000,150492.000000,37000.000000,1800.000000)}
{pt3dadd(204660.000000,191400.000000,83325.000000,1800.000000)}

{create adhoc1222}
{access adhoc1222}
{connect adhoc1222(1), adhoc1(0)}
{nseg = 1}
{strdef color color = "White"}
{pt3dclear()}
{pt3dadd(202608.000000,150492.000000,37000.000000,1800.000000)}
{pt3dadd(204624.000000,194604.000000,83275.000000,1800.000000)}

{create adhoc1223}
{access adhoc1223}
{connect adhoc1223(1), adhoc1(0)}
{nseg = 1}
{strdef color color = "White"}
{pt3dclear()}
{pt3dadd(202608.000000,150492.000000,37000.000000,1800.000000)}
{pt3dadd(204504.000000,190140.000000,70875.000000,1800.000000)}

{create adhoc1224}
{access adhoc1224}
{connect adhoc1224(1), adhoc1(0)}
{nseg = 1}
{strdef color color = "White"}
{pt3dclear()}
{pt3dadd(202608.000000,150492.000000,37000.000000,1800.000000)}
{pt3dadd(204504.000000,193164.000000,71175.000000,1800.000000)}

{create adhoc1225}
{access adhoc1225}
{connect adhoc1225(1), adhoc1(0)}
{nseg = 1}
{strdef color color = "White"}
{pt3dclear()}
{pt3dadd(202608.000000,150492.000000,37000.000000,1800.000000)}
{pt3dadd(204504.000000,194904.000000,69125.000000,1800.000000)}

{create adhoc1226}
{access adhoc1226}
{connect adhoc1226(1), adhoc1(0)}
{nseg = 1}
{strdef color color = "White"}
{pt3dclear()}
{pt3dadd(202608.000000,150492.000000,37000.000000,1800.000000)}
{pt3dadd(204492.000000,199548.000000,69675.000000,1800.000000)}

{create adhoc1227}
{access adhoc1227}
{connect adhoc1227(1), adhoc1(0)}
{nseg = 1}
{strdef color color = "White"}
{pt3dclear()}
{pt3dadd(202608.000000,150492.000000,37000.000000,1800.000000)}
{pt3dadd(204504.000000,197796.000000,71175.000000,1800.000000)}

{create adhoc1228}
{access adhoc1228}
{connect adhoc1228(1), adhoc1(0)}
{nseg = 1}
{strdef color color = "White"}
{pt3dclear()}
{pt3dadd(202608.000000,150492.000000,37000.000000,1800.000000)}
{pt3dadd(204528.000000,201096.000000,73075.000000,1800.000000)}

{create adhoc1229}
{access adhoc1229}
{connect adhoc1229(1), adhoc1(0)}
{nseg = 1}
{strdef color color = "White"}
{pt3dclear()}
{pt3dadd(202608.000000,150492.000000,37000.000000,1800.000000)}
{pt3dadd(204624.000000,197544.000000,83175.000000,1800.000000)}

{create adhoc1230}
{access adhoc1230}
{connect adhoc1230(1), adhoc1(0)}
{nseg = 1}
{strdef color color = "White"}
{pt3dclear()}
{pt3dadd(202608.000000,150492.000000,37000.000000,1800.000000)}
{pt3dadd(204660.000000,200844.000000,86475.000000,1800.000000)}

{create adhoc1231}
{access adhoc1231}
{connect adhoc1231(1), adhoc1(0)}
{nseg = 1}
{strdef color color = "White"}
{pt3dclear()}
{pt3dadd(202608.000000,150492.000000,37000.000000,1800.000000)}
{pt3dadd(204636.000000,199932.000000,83525.000000,1800.000000)}

{create adhoc1232}
{access adhoc1232}
{connect adhoc1232(1), adhoc1(0)}
{nseg = 1}
{strdef color color = "White"}
{pt3dclear()}
{pt3dadd(202608.000000,150492.000000,37000.000000,1800.000000)}
{pt3dadd(204552.000000,200016.000000,78975.000000,1800.000000)}

{create adhoc1233}
{access adhoc1233}
{connect adhoc1233(1), adhoc1(0)}
{nseg = 1}
{strdef color color = "White"}
{pt3dclear()}
{pt3dadd(202608.000000,150492.000000,37000.000000,1800.000000)}
{pt3dadd(204612.000000,198180.000000,81025.000000,1800.000000)}

{create adhoc1234}
{access adhoc1234}
{connect adhoc1234(1), adhoc1(0)}
{nseg = 1}
{strdef color color = "White"}
{pt3dclear()}
{pt3dadd(202608.000000,150492.000000,37000.000000,1800.000000)}
{pt3dadd(204552.000000,197436.000000,78775.000000,1800.000000)}

{create adhoc1235}
{access adhoc1235}
{connect adhoc1235(1), adhoc1(0)}
{nseg = 1}
{strdef color color = "White"}
{pt3dclear()}
{pt3dadd(202608.000000,150492.000000,37000.000000,1800.000000)}
{pt3dadd(204528.000000,198096.000000,76425.000000,1800.000000)}

{create adhoc1236}
{access adhoc1236}
{connect adhoc1236(1), adhoc1(0)}
{nseg = 1}
{strdef color color = "White"}
{pt3dclear()}
{pt3dadd(202608.000000,150492.000000,37000.000000,1800.000000)}
{pt3dadd(204516.000000,198384.000000,73425.000000,1800.000000)}

{create adhoc1237}
{access adhoc1237}
{connect adhoc1237(1), adhoc1(0)}
{nseg = 1}
{strdef color color = "White"}
{pt3dclear()}
{pt3dadd(202608.000000,150492.000000,37000.000000,1800.000000)}
{pt3dadd(204540.000000,196548.000000,73125.000000,1800.000000)}

{create adhoc1238}
{access adhoc1238}
{connect adhoc1238(1), adhoc1(0)}
{nseg = 1}
{strdef color color = "White"}
{pt3dclear()}
{pt3dadd(202608.000000,150492.000000,37000.000000,1800.000000)}
{pt3dadd(204516.000000,195588.000000,76075.000000,1800.000000)}

{create adhoc1239}
{access adhoc1239}
{connect adhoc1239(1), adhoc1(0)}
{nseg = 1}
{strdef color color = "White"}
{pt3dclear()}
{pt3dadd(202608.000000,150492.000000,37000.000000,1800.000000)}
{pt3dadd(204564.000000,190044.000000,79925.000000,1800.000000)}

{create adhoc1240}
{access adhoc1240}
{connect adhoc1240(1), adhoc1(0)}
{nseg = 1}
{strdef color color = "White"}
{pt3dclear()}
{pt3dadd(202608.000000,150492.000000,37000.000000,1800.000000)}
{pt3dadd(204516.000000,192804.000000,77825.000000,1800.000000)}

{create adhoc1241}
{access adhoc1241}
{connect adhoc1241(1), adhoc1(0)}
{nseg = 1}
{strdef color color = "White"}
{pt3dclear()}
{pt3dadd(202608.000000,150492.000000,37000.000000,1800.000000)}
{pt3dadd(204540.000000,192048.000000,74625.000000,1800.000000)}

{create adhoc1242}
{access adhoc1242}
{connect adhoc1242(1), adhoc1(0)}
{nseg = 1}
{strdef color color = "White"}
{pt3dclear()}
{pt3dadd(202608.000000,150492.000000,37000.000000,1800.000000)}
{pt3dadd(203724.000000,190416.000000,77775.000000,1800.000000)}

{create adhoc1243}
{access adhoc1243}
{connect adhoc1243(1), adhoc1(0)}
{nseg = 1}
{strdef color color = "White"}
{pt3dclear()}
{pt3dadd(202608.000000,150492.000000,37000.000000,1800.000000)}
{pt3dadd(205008.000000,187308.000000,76375.000000,1800.000000)}

{create adhoc1244}
{access adhoc1244}
{connect adhoc1244(1), adhoc1(0)}
{nseg = 1}
{strdef color color = "White"}
{pt3dclear()}
{pt3dadd(202608.000000,150492.000000,37000.000000,1800.000000)}
{pt3dadd(201552.000000,189540.000000,75775.000000,1800.000000)}

{create adhoc1245}
{access adhoc1245}
{connect adhoc1245(1), adhoc1(0)}
{nseg = 1}
{strdef color color = "White"}
{pt3dclear()}
{pt3dadd(202608.000000,150492.000000,37000.000000,1800.000000)}
{pt3dadd(201708.000000,190164.000000,73575.000000,1800.000000)}

{create adhoc1246}
{access adhoc1246}
{connect adhoc1246(1), adhoc1(0)}
{nseg = 1}
{strdef color color = "White"}
{pt3dclear()}
{pt3dadd(202608.000000,150492.000000,37000.000000,1800.000000)}
{pt3dadd(201660.000000,187596.000000,71625.000000,1800.000000)}

{create adhoc1247}
{access adhoc1247}
{connect adhoc1247(1), adhoc1(0)}
{nseg = 1}
{strdef color color = "White"}
{pt3dclear()}
{pt3dadd(202608.000000,150492.000000,37000.000000,1800.000000)}
{pt3dadd(201600.000000,183936.000000,75425.000000,1800.000000)}

{create adhoc1248}
{access adhoc1248}
{connect adhoc1248(1), adhoc1(0)}
{nseg = 1}
{strdef color color = "White"}
{pt3dclear()}
{pt3dadd(202608.000000,150492.000000,37000.000000,1800.000000)}
{pt3dadd(201876.000000,185724.000000,84225.000000,1800.000000)}

{create adhoc1249}
{access adhoc1249}
{connect adhoc1249(1), adhoc1(0)}
{nseg = 1}
{strdef color color = "White"}
{pt3dclear()}
{pt3dadd(202608.000000,150492.000000,37000.000000,1800.000000)}
{pt3dadd(201756.000000,185484.000000,79925.000000,1800.000000)}

{create adhoc1250}
{access adhoc1250}
{connect adhoc1250(1), adhoc1(0)}
{nseg = 1}
{strdef color color = "White"}
{pt3dclear()}
{pt3dadd(202608.000000,150492.000000,37000.000000,1800.000000)}
{pt3dadd(201792.000000,184668.000000,81875.000000,1800.000000)}

{create adhoc1251}
{access adhoc1251}
{connect adhoc1251(1), adhoc1(0)}
{nseg = 1}
{strdef color color = "White"}
{pt3dclear()}
{pt3dadd(202608.000000,150492.000000,37000.000000,1800.000000)}
{pt3dadd(201720.000000,183144.000000,78975.000000,1800.000000)}

{create adhoc1252}
{access adhoc1252}
{connect adhoc1252(1), adhoc1(0)}
{nseg = 1}
{strdef color color = "White"}
{pt3dclear()}
{pt3dadd(202608.000000,150492.000000,37000.000000,1800.000000)}
{pt3dadd(201708.000000,181344.000000,76875.000000,1800.000000)}

{create adhoc1253}
{access adhoc1253}
{connect adhoc1253(1), adhoc1(0)}
{nseg = 1}
{strdef color color = "White"}
{pt3dclear()}
{pt3dadd(202608.000000,150492.000000,37000.000000,1800.000000)}
{pt3dadd(201744.000000,180972.000000,79775.000000,1800.000000)}

{create adhoc1254}
{access adhoc1254}
{connect adhoc1254(1), adhoc1(0)}
{nseg = 1}
{strdef color color = "White"}
{pt3dclear()}
{pt3dadd(202608.000000,150492.000000,37000.000000,1800.000000)}
{pt3dadd(201840.000000,182736.000000,82775.000000,1800.000000)}

{create adhoc1255}
{access adhoc1255}
{connect adhoc1255(1), adhoc1(0)}
{nseg = 1}
{strdef color color = "White"}
{pt3dclear()}
{pt3dadd(202608.000000,150492.000000,37000.000000,1800.000000)}
{pt3dadd(201924.000000,182352.000000,86025.000000,1800.000000)}

{create adhoc1256}
{access adhoc1256}
{connect adhoc1256(1), adhoc1(0)}
{nseg = 1}
{strdef color color = "White"}
{pt3dclear()}
{pt3dadd(202608.000000,150492.000000,37000.000000,1800.000000)}
{pt3dadd(201912.000000,184500.000000,85725.000000,1800.000000)}

{create adhoc1257}
{access adhoc1257}
{connect adhoc1257(1), adhoc1(0)}
{nseg = 1}
{strdef color color = "White"}
{pt3dclear()}
{pt3dadd(202608.000000,150492.000000,37000.000000,1800.000000)}
{pt3dadd(201936.000000,187272.000000,86725.000000,1800.000000)}

{create adhoc1258}
{access adhoc1258}
{connect adhoc1258(1), adhoc1(0)}
{nseg = 1}
{strdef color color = "White"}
{pt3dclear()}
{pt3dadd(202608.000000,150492.000000,37000.000000,1800.000000)}
{pt3dadd(201840.000000,188028.000000,83075.000000,1800.000000)}

{create adhoc1259}
{access adhoc1259}
{connect adhoc1259(1), adhoc1(0)}
{nseg = 1}
{strdef color color = "White"}
{pt3dclear()}
{pt3dadd(202608.000000,150492.000000,37000.000000,1800.000000)}
{pt3dadd(201912.000000,189024.000000,85875.000000,1800.000000)}

{create adhoc1260}
{access adhoc1260}
{connect adhoc1260(1), adhoc1(0)}
{nseg = 1}
{strdef color color = "White"}
{pt3dclear()}
{pt3dadd(202608.000000,150492.000000,37000.000000,1800.000000)}
{pt3dadd(201816.000000,191916.000000,86975.000000,1800.000000)}

{create adhoc1261}
{access adhoc1261}
{connect adhoc1261(1), adhoc1(0)}
{nseg = 1}
{strdef color color = "White"}
{pt3dclear()}
{pt3dadd(202608.000000,150492.000000,37000.000000,1800.000000)}
{pt3dadd(201804.000000,193884.000000,85325.000000,1800.000000)}

{create adhoc1262}
{access adhoc1262}
{connect adhoc1262(1), adhoc1(0)}
{nseg = 1}
{strdef color color = "White"}
{pt3dclear()}
{pt3dadd(202608.000000,150492.000000,37000.000000,1800.000000)}
{pt3dadd(201804.000000,191064.000000,83725.000000,1800.000000)}

{create adhoc1263}
{access adhoc1263}
{connect adhoc1263(1), adhoc1(0)}
{nseg = 1}
{strdef color color = "White"}
{pt3dclear()}
{pt3dadd(202608.000000,150492.000000,37000.000000,1800.000000)}
{pt3dadd(201780.000000,192228.000000,80925.000000,1800.000000)}

{create adhoc1264}
{access adhoc1264}
{connect adhoc1264(1), adhoc1(0)}
{nseg = 1}
{strdef color color = "White"}
{pt3dclear()}
{pt3dadd(202608.000000,150492.000000,37000.000000,1800.000000)}
{pt3dadd(201804.000000,193824.000000,82775.000000,1800.000000)}

{create adhoc1265}
{access adhoc1265}
{connect adhoc1265(1), adhoc1(0)}
{nseg = 1}
{strdef color color = "White"}
{pt3dclear()}
{pt3dadd(202608.000000,150492.000000,37000.000000,1800.000000)}
{pt3dadd(201756.000000,194520.000000,80375.000000,1800.000000)}

{create adhoc1266}
{access adhoc1266}
{connect adhoc1266(1), adhoc1(0)}
{nseg = 1}
{strdef color color = "White"}
{pt3dclear()}
{pt3dadd(202608.000000,150492.000000,37000.000000,1800.000000)}
{pt3dadd(201756.000000,196956.000000,80225.000000,1800.000000)}

{create adhoc1267}
{access adhoc1267}
{connect adhoc1267(1), adhoc1(0)}
{nseg = 1}
{strdef color color = "White"}
{pt3dclear()}
{pt3dadd(202608.000000,150492.000000,37000.000000,1800.000000)}
{pt3dadd(201696.000000,197616.000000,77475.000000,1800.000000)}

{create adhoc1268}
{access adhoc1268}
{connect adhoc1268(1), adhoc1(0)}
{nseg = 1}
{strdef color color = "White"}
{pt3dclear()}
{pt3dadd(202608.000000,150492.000000,37000.000000,1800.000000)}
{pt3dadd(201600.000000,196788.000000,75375.000000,1800.000000)}

{create adhoc1269}
{access adhoc1269}
{connect adhoc1269(1), adhoc1(0)}
{nseg = 1}
{strdef color color = "White"}
{pt3dclear()}
{pt3dadd(202608.000000,150492.000000,37000.000000,1800.000000)}
{pt3dadd(201672.000000,192096.000000,72775.000000,1800.000000)}

{create adhoc1270}
{access adhoc1270}
{connect adhoc1270(1), adhoc1(0)}
{nseg = 1}
{strdef color color = "White"}
{pt3dclear()}
{pt3dadd(202608.000000,150492.000000,37000.000000,1800.000000)}
{pt3dadd(201672.000000,195144.000000,72675.000000,1800.000000)}

{create adhoc1271}
{access adhoc1271}
{connect adhoc1271(1), adhoc1(0)}
{nseg = 1}
{strdef color color = "White"}
{pt3dclear()}
{pt3dadd(202608.000000,150492.000000,37000.000000,1800.000000)}
{pt3dadd(201708.000000,194196.000000,74475.000000,1800.000000)}

{create adhoc1272}
{access adhoc1272}
{connect adhoc1272(1), adhoc1(0)}
{nseg = 1}
{strdef color color = "White"}
{pt3dclear()}
{pt3dadd(202608.000000,150492.000000,37000.000000,1800.000000)}
{pt3dadd(201708.000000,195024.000000,77375.000000,1800.000000)}

{create adhoc1273}
{access adhoc1273}
{connect adhoc1273(1), adhoc1(0)}
{nseg = 1}
{strdef color color = "White"}
{pt3dclear()}
{pt3dadd(202608.000000,150492.000000,37000.000000,1800.000000)}
{pt3dadd(201684.000000,192576.000000,76275.000000,1800.000000)}

{create adhoc1274}
{access adhoc1274}
{connect adhoc1274(1), adhoc1(0)}
{nseg = 1}
{strdef color color = "White"}
{pt3dclear()}
{pt3dadd(202608.000000,150492.000000,37000.000000,1800.000000)}
{pt3dadd(201720.000000,190704.000000,78325.000000,1800.000000)}

{create adhoc1275}
{access adhoc1275}
{connect adhoc1275(1), adhoc1(0)}
{nseg = 1}
{strdef color color = "White"}
{pt3dclear()}
{pt3dadd(202608.000000,150492.000000,37000.000000,1800.000000)}
{pt3dadd(202776.000000,190020.000000,79975.000000,1800.000000)}

{create adhoc1276}
{access adhoc1276}
{connect adhoc1276(1), adhoc1(0)}
{nseg = 1}
{strdef color color = "White"}
{pt3dclear()}
{pt3dadd(202608.000000,150492.000000,37000.000000,1800.000000)}
{pt3dadd(202740.000000,185628.000000,78275.000000,1800.000000)}

{create adhoc1277}
{access adhoc1277}
{connect adhoc1277(1), adhoc1(0)}
{nseg = 1}
{strdef color color = "White"}
{pt3dclear()}
{pt3dadd(202608.000000,150492.000000,37000.000000,1800.000000)}
{pt3dadd(202728.000000,188040.000000,77725.000000,1800.000000)}

{create adhoc1278}
{access adhoc1278}
{connect adhoc1278(1), adhoc1(0)}
{nseg = 1}
{strdef color color = "White"}
{pt3dclear()}
{pt3dadd(202608.000000,150492.000000,37000.000000,1800.000000)}
{pt3dadd(202560.000000,186456.000000,75725.000000,1800.000000)}

{create adhoc1279}
{access adhoc1279}
{connect adhoc1279(1), adhoc1(0)}
{nseg = 1}
{strdef color color = "White"}
{pt3dclear()}
{pt3dadd(202608.000000,150492.000000,37000.000000,1800.000000)}
{pt3dadd(202704.000000,189504.000000,75925.000000,1800.000000)}

{create adhoc1280}
{access adhoc1280}
{connect adhoc1280(1), adhoc1(0)}
{nseg = 1}
{strdef color color = "White"}
{pt3dclear()}
{pt3dadd(202608.000000,150492.000000,37000.000000,1800.000000)}
{pt3dadd(200484.000000,188052.000000,73525.000000,1800.000000)}

{create adhoc1281}
{access adhoc1281}
{connect adhoc1281(1), adhoc1(0)}
{nseg = 1}
{strdef color color = "White"}
{pt3dclear()}
{pt3dadd(202608.000000,150492.000000,37000.000000,1800.000000)}
{pt3dadd(200508.000000,190704.000000,73625.000000,1800.000000)}

{create adhoc1282}
{access adhoc1282}
{connect adhoc1282(1), adhoc1(0)}
{nseg = 1}
{strdef color color = "White"}
{pt3dclear()}
{pt3dadd(202608.000000,150492.000000,37000.000000,1800.000000)}
{pt3dadd(199404.000000,196944.000000,73025.000000,1800.000000)}

{create adhoc1283}
{access adhoc1283}
{connect adhoc1283(1), adhoc1(0)}
{nseg = 1}
{strdef color color = "White"}
{pt3dclear()}
{pt3dadd(202608.000000,150492.000000,37000.000000,1800.000000)}
{pt3dadd(199368.000000,195168.000000,69575.000000,1800.000000)}

{create adhoc1284}
{access adhoc1284}
{connect adhoc1284(1), adhoc1(0)}
{nseg = 1}
{strdef color color = "White"}
{pt3dclear()}
{pt3dadd(202608.000000,150492.000000,37000.000000,1800.000000)}
{pt3dadd(199380.000000,190272.000000,70525.000000,1800.000000)}

{create adhoc1285}
{access adhoc1285}
{connect adhoc1285(1), adhoc1(0)}
{nseg = 1}
{strdef color color = "White"}
{pt3dclear()}
{pt3dadd(202608.000000,150492.000000,37000.000000,1800.000000)}
{pt3dadd(199632.000000,189864.000000,85625.000000,1800.000000)}

{create adhoc1286}
{access adhoc1286}
{connect adhoc1286(1), adhoc1(0)}
{nseg = 1}
{strdef color color = "White"}
{pt3dclear()}
{pt3dadd(202608.000000,150492.000000,37000.000000,1800.000000)}
{pt3dadd(199584.000000,185820.000000,83725.000000,1800.000000)}

{create adhoc1287}
{access adhoc1287}
{connect adhoc1287(1), adhoc1(0)}
{nseg = 1}
{strdef color color = "White"}
{pt3dclear()}
{pt3dadd(202608.000000,150492.000000,37000.000000,1800.000000)}
{pt3dadd(199584.000000,187812.000000,83425.000000,1800.000000)}

{create adhoc1288}
{access adhoc1288}
{connect adhoc1288(1), adhoc1(0)}
{nseg = 1}
{strdef color color = "White"}
{pt3dclear()}
{pt3dadd(202608.000000,150492.000000,37000.000000,1800.000000)}
{pt3dadd(199584.000000,189780.000000,83425.000000,1800.000000)}

{create adhoc1289}
{access adhoc1289}
{connect adhoc1289(1), adhoc1(0)}
{nseg = 1}
{strdef color color = "White"}
{pt3dclear()}
{pt3dadd(202608.000000,150492.000000,37000.000000,1800.000000)}
{pt3dadd(199500.000000,192144.000000,82525.000000,1800.000000)}

{create adhoc1290}
{access adhoc1290}
{connect adhoc1290(1), adhoc1(0)}
{nseg = 1}
{strdef color color = "White"}
{pt3dclear()}
{pt3dadd(202608.000000,150492.000000,37000.000000,1800.000000)}
{pt3dadd(199500.000000,192564.000000,80825.000000,1800.000000)}

{create adhoc1291}
{access adhoc1291}
{connect adhoc1291(1), adhoc1(0)}
{nseg = 1}
{strdef color color = "White"}
{pt3dclear()}
{pt3dadd(202608.000000,150492.000000,37000.000000,1800.000000)}
{pt3dadd(199428.000000,193500.000000,77825.000000,1800.000000)}

{create adhoc1292}
{access adhoc1292}
{connect adhoc1292(1), adhoc1(0)}
{nseg = 1}
{strdef color color = "White"}
{pt3dclear()}
{pt3dadd(202608.000000,150492.000000,37000.000000,1800.000000)}
{pt3dadd(199392.000000,192624.000000,71125.000000,1800.000000)}

{create adhoc1293}
{access adhoc1293}
{connect adhoc1293(1), adhoc1(0)}
{nseg = 1}
{strdef color color = "White"}
{pt3dclear()}
{pt3dadd(202608.000000,150492.000000,37000.000000,1800.000000)}
{pt3dadd(199428.000000,193716.000000,73975.000000,1800.000000)}

{create adhoc1294}
{access adhoc1294}
{connect adhoc1294(1), adhoc1(0)}
{nseg = 1}
{strdef color color = "White"}
{pt3dclear()}
{pt3dadd(202608.000000,150492.000000,37000.000000,1800.000000)}
{pt3dadd(199416.000000,191640.000000,76425.000000,1800.000000)}

{create adhoc1295}
{access adhoc1295}
{connect adhoc1295(1), adhoc1(0)}
{nseg = 1}
{strdef color color = "White"}
{pt3dclear()}
{pt3dadd(202608.000000,150492.000000,37000.000000,1800.000000)}
{pt3dadd(199452.000000,190728.000000,78725.000000,1800.000000)}

{create adhoc1296}
{access adhoc1296}
{connect adhoc1296(1), adhoc1(0)}
{nseg = 1}
{strdef color color = "White"}
{pt3dclear()}
{pt3dadd(202608.000000,150492.000000,37000.000000,1800.000000)}
{pt3dadd(199488.000000,189612.000000,80425.000000,1800.000000)}

{create adhoc1297}
{access adhoc1297}
{connect adhoc1297(1), adhoc1(0)}
{nseg = 1}
{strdef color color = "White"}
{pt3dclear()}
{pt3dadd(202608.000000,150492.000000,37000.000000,1800.000000)}
{pt3dadd(199512.000000,187968.000000,81775.000000,1800.000000)}

{create adhoc1298}
{access adhoc1298}
{connect adhoc1298(1), adhoc1(0)}
{nseg = 1}
{strdef color color = "White"}
{pt3dclear()}
{pt3dadd(202608.000000,150492.000000,37000.000000,1800.000000)}
{pt3dadd(199320.000000,189468.000000,75275.000000,1800.000000)}

{create adhoc1299}
{access adhoc1299}
{connect adhoc1299(1), adhoc1(0)}
{nseg = 1}
{strdef color color = "White"}
{pt3dclear()}
{pt3dadd(202608.000000,150492.000000,37000.000000,1800.000000)}
{pt3dadd(199428.000000,188676.000000,77375.000000,1800.000000)}

{create adhoc1300}
{access adhoc1300}
{connect adhoc1300(1), adhoc1(0)}
{nseg = 1}
{strdef color color = "White"}
{pt3dclear()}
{pt3dadd(202608.000000,150492.000000,37000.000000,1800.000000)}
{pt3dadd(199488.000000,185664.000000,80075.000000,1800.000000)}

{create adhoc1301}
{access adhoc1301}
{connect adhoc1301(1), adhoc1(0)}
{nseg = 1}
{strdef color color = "White"}
{pt3dclear()}
{pt3dadd(202608.000000,150492.000000,37000.000000,1800.000000)}
{pt3dadd(199428.000000,186216.000000,76875.000000,1800.000000)}

{create adhoc1302}
{access adhoc1302}
{connect adhoc1302(1), adhoc1(0)}
{nseg = 1}
{strdef color color = "White"}
{pt3dclear()}
{pt3dadd(202608.000000,150492.000000,37000.000000,1800.000000)}
{pt3dadd(199440.000000,186360.000000,74425.000000,1800.000000)}

{create adhoc1303}
{access adhoc1303}
{connect adhoc1303(1), adhoc1(0)}
{nseg = 1}
{strdef color color = "White"}
{pt3dclear()}
{pt3dadd(202608.000000,150492.000000,37000.000000,1800.000000)}
{pt3dadd(199404.000000,187692.000000,69125.000000,1800.000000)}

{create adhoc1304}
{access adhoc1304}
{connect adhoc1304(1), adhoc1(0)}
{nseg = 1}
{strdef color color = "White"}
{pt3dclear()}
{pt3dadd(202608.000000,150492.000000,37000.000000,1800.000000)}
{pt3dadd(199380.000000,186432.000000,71525.000000,1800.000000)}

{create adhoc1305}
{access adhoc1305}
{connect adhoc1305(1), adhoc1(0)}
{nseg = 1}
{strdef color color = "White"}
{pt3dclear()}
{pt3dadd(202608.000000,150492.000000,37000.000000,1800.000000)}
{pt3dadd(199440.000000,182820.000000,74975.000000,1800.000000)}

{create adhoc1306}
{access adhoc1306}
{connect adhoc1306(1), adhoc1(0)}
{nseg = 1}
{strdef color color = "White"}
{pt3dclear()}
{pt3dadd(202608.000000,150492.000000,37000.000000,1800.000000)}
{pt3dadd(209676.000000,167616.000000,75975.000000,1800.000000)}

{create adhoc1307}
{access adhoc1307}
{connect adhoc1307(1), adhoc1(0)}
{nseg = 1}
{strdef color color = "White"}
{pt3dclear()}
{pt3dadd(202608.000000,150492.000000,37000.000000,1800.000000)}
{pt3dadd(206628.000000,166116.000000,75275.000000,1800.000000)}

{create adhoc1308}
{access adhoc1308}
{connect adhoc1308(1), adhoc1(0)}
{nseg = 1}
{strdef color color = "White"}
{pt3dclear()}
{pt3dadd(202608.000000,150492.000000,37000.000000,1800.000000)}
{pt3dadd(205812.000000,167520.000000,77375.000000,1800.000000)}

{create adhoc1309}
{access adhoc1309}
{connect adhoc1309(1), adhoc1(0)}
{nseg = 1}
{strdef color color = "White"}
{pt3dclear()}
{pt3dadd(202608.000000,150492.000000,37000.000000,1800.000000)}
{pt3dadd(205812.000000,170556.000000,77375.000000,1800.000000)}

{create adhoc1310}
{access adhoc1310}
{connect adhoc1310(1), adhoc1(0)}
{nseg = 1}
{strdef color color = "White"}
{pt3dclear()}
{pt3dadd(202608.000000,150492.000000,37000.000000,1800.000000)}
{pt3dadd(206772.000000,172884.000000,77375.000000,1800.000000)}

{create adhoc1311}
{access adhoc1311}
{connect adhoc1311(1), adhoc1(0)}
{nseg = 1}
{strdef color color = "White"}
{pt3dclear()}
{pt3dadd(202608.000000,150492.000000,37000.000000,1800.000000)}
{pt3dadd(204828.000000,176148.000000,77375.000000,1800.000000)}

{create adhoc1312}
{access adhoc1312}
{connect adhoc1312(1), adhoc1(0)}
{nseg = 1}
{strdef color color = "White"}
{pt3dclear()}
{pt3dadd(202608.000000,150492.000000,37000.000000,1800.000000)}
{pt3dadd(208284.000000,175596.000000,77375.000000,1800.000000)}

{create adhoc1313}
{access adhoc1313}
{connect adhoc1313(1), adhoc1(0)}
{nseg = 1}
{strdef color color = "White"}
{pt3dclear()}
{pt3dadd(202608.000000,150492.000000,37000.000000,1800.000000)}
{pt3dadd(209796.000000,181080.000000,77175.000000,1800.000000)}

{create adhoc1314}
{access adhoc1314}
{connect adhoc1314(1), adhoc1(0)}
{nseg = 1}
{strdef color color = "White"}
{pt3dclear()}
{pt3dadd(202608.000000,150492.000000,37000.000000,1800.000000)}
{pt3dadd(207300.000000,180480.000000,77175.000000,1800.000000)}

{create adhoc1315}
{access adhoc1315}
{connect adhoc1315(1), adhoc1(0)}
{nseg = 1}
{strdef color color = "White"}
{pt3dclear()}
{pt3dadd(202608.000000,150492.000000,37000.000000,1800.000000)}
{pt3dadd(204612.000000,179976.000000,77175.000000,1800.000000)}

{create adhoc1316}
{access adhoc1316}
{connect adhoc1316(1), adhoc1(0)}
{nseg = 1}
{strdef color color = "White"}
{pt3dclear()}
{pt3dadd(202608.000000,150492.000000,37000.000000,1800.000000)}
{pt3dadd(206820.000000,177936.000000,77175.000000,1800.000000)}

{create adhoc1317}
{access adhoc1317}
{connect adhoc1317(1), adhoc1(0)}
{nseg = 1}
{strdef color color = "White"}
{pt3dclear()}
{pt3dadd(202608.000000,150492.000000,37000.000000,1800.000000)}
{pt3dadd(213144.000000,173436.000000,83525.000000,1800.000000)}

{create adhoc1318}
{access adhoc1318}
{connect adhoc1318(1), adhoc1(0)}
{nseg = 1}
{strdef color color = "White"}
{pt3dclear()}
{pt3dadd(202608.000000,150492.000000,37000.000000,1800.000000)}
{pt3dadd(211716.000000,175416.000000,86175.000000,1800.000000)}

{create adhoc1319}
{access adhoc1319}
{connect adhoc1319(1), adhoc1(0)}
{nseg = 1}
{strdef color color = "White"}
{pt3dclear()}
{pt3dadd(202608.000000,150492.000000,37000.000000,1800.000000)}
{pt3dadd(211704.000000,182328.000000,86425.000000,1800.000000)}

{create adhoc1320}
{access adhoc1320}
{connect adhoc1320(1), adhoc1(0)}
{nseg = 1}
{strdef color color = "White"}
{pt3dclear()}
{pt3dadd(202608.000000,150492.000000,37000.000000,1800.000000)}
{pt3dadd(211740.000000,177816.000000,86875.000000,1800.000000)}

{create adhoc1321}
{access adhoc1321}
{connect adhoc1321(1), adhoc1(0)}
{nseg = 1}
{strdef color color = "White"}
{pt3dclear()}
{pt3dadd(202608.000000,150492.000000,37000.000000,1800.000000)}
{pt3dadd(211536.000000,182892.000000,79725.000000,1800.000000)}

{create adhoc1322}
{access adhoc1322}
{connect adhoc1322(1), adhoc1(0)}
{nseg = 1}
{strdef color color = "White"}
{pt3dclear()}
{pt3dadd(202608.000000,150492.000000,37000.000000,1800.000000)}
{pt3dadd(211488.000000,181380.000000,77825.000000,1800.000000)}

{create adhoc1323}
{access adhoc1323}
{connect adhoc1323(1), adhoc1(0)}
{nseg = 1}
{strdef color color = "White"}
{pt3dclear()}
{pt3dadd(202608.000000,150492.000000,37000.000000,1800.000000)}
{pt3dadd(211560.000000,179868.000000,80025.000000,1800.000000)}

{create adhoc1324}
{access adhoc1324}
{connect adhoc1324(1), adhoc1(0)}
{nseg = 1}
{strdef color color = "White"}
{pt3dclear()}
{pt3dadd(202608.000000,150492.000000,37000.000000,1800.000000)}
{pt3dadd(211596.000000,181320.000000,81725.000000,1800.000000)}

{create adhoc1325}
{access adhoc1325}
{connect adhoc1325(1), adhoc1(0)}
{nseg = 1}
{strdef color color = "White"}
{pt3dclear()}
{pt3dadd(202608.000000,150492.000000,37000.000000,1800.000000)}
{pt3dadd(211668.000000,179592.000000,84325.000000,1800.000000)}

{create adhoc1326}
{access adhoc1326}
{connect adhoc1326(1), adhoc1(0)}
{nseg = 1}
{strdef color color = "White"}
{pt3dclear()}
{pt3dadd(202608.000000,150492.000000,37000.000000,1800.000000)}
{pt3dadd(211524.000000,175008.000000,79025.000000,1800.000000)}

{create adhoc1327}
{access adhoc1327}
{connect adhoc1327(1), adhoc1(0)}
{nseg = 1}
{strdef color color = "White"}
{pt3dclear()}
{pt3dadd(202608.000000,150492.000000,37000.000000,1800.000000)}
{pt3dadd(211632.000000,175932.000000,82975.000000,1800.000000)}

{create adhoc1328}
{access adhoc1328}
{connect adhoc1328(1), adhoc1(0)}
{nseg = 1}
{strdef color color = "White"}
{pt3dclear()}
{pt3dadd(202608.000000,150492.000000,37000.000000,1800.000000)}
{pt3dadd(210276.000000,178452.000000,82375.000000,1800.000000)}

{create adhoc1329}
{access adhoc1329}
{connect adhoc1329(1), adhoc1(0)}
{nseg = 1}
{strdef color color = "White"}
{pt3dclear()}
{pt3dadd(202608.000000,150492.000000,37000.000000,1800.000000)}
{pt3dadd(210276.000000,175404.000000,82375.000000,1800.000000)}

{create adhoc1330}
{access adhoc1330}
{connect adhoc1330(1), adhoc1(0)}
{nseg = 1}
{strdef color color = "White"}
{pt3dclear()}
{pt3dadd(202608.000000,150492.000000,37000.000000,1800.000000)}
{pt3dadd(210192.000000,176844.000000,79225.000000,1800.000000)}

{create adhoc1331}
{access adhoc1331}
{connect adhoc1331(1), adhoc1(0)}
{nseg = 1}
{strdef color color = "White"}
{pt3dclear()}
{pt3dadd(202608.000000,150492.000000,37000.000000,1800.000000)}
{pt3dadd(210168.000000,175872.000000,75875.000000,1800.000000)}

{create adhoc1332}
{access adhoc1332}
{connect adhoc1332(1), adhoc1(0)}
{nseg = 1}
{strdef color color = "White"}
{pt3dclear()}
{pt3dadd(202608.000000,150492.000000,37000.000000,1800.000000)}
{pt3dadd(210132.000000,173160.000000,76325.000000,1800.000000)}

{create adhoc1333}
{access adhoc1333}
{connect adhoc1333(1), adhoc1(0)}
{nseg = 1}
{strdef color color = "White"}
{pt3dclear()}
{pt3dadd(202608.000000,150492.000000,37000.000000,1800.000000)}
{pt3dadd(209496.000000,173676.000000,79875.000000,1800.000000)}

{create adhoc1334}
{access adhoc1334}
{connect adhoc1334(1), adhoc1(0)}
{nseg = 1}
{strdef color color = "White"}
{pt3dclear()}
{pt3dadd(202608.000000,150492.000000,37000.000000,1800.000000)}
{pt3dadd(209592.000000,172764.000000,82975.000000,1800.000000)}

{create adhoc1335}
{access adhoc1335}
{connect adhoc1335(1), adhoc1(0)}
{nseg = 1}
{strdef color color = "White"}
{pt3dclear()}
{pt3dadd(202608.000000,150492.000000,37000.000000,1800.000000)}
{pt3dadd(208728.000000,170604.000000,89125.000000,1800.000000)}

{create adhoc1336}
{access adhoc1336}
{connect adhoc1336(1), adhoc1(0)}
{nseg = 1}
{strdef color color = "White"}
{pt3dclear()}
{pt3dadd(202608.000000,150492.000000,37000.000000,1800.000000)}
{pt3dadd(208740.000000,172056.000000,86175.000000,1800.000000)}

{create adhoc1337}
{access adhoc1337}
{connect adhoc1337(1), adhoc1(0)}
{nseg = 1}
{strdef color color = "White"}
{pt3dclear()}
{pt3dadd(202608.000000,150492.000000,37000.000000,1800.000000)}
{pt3dadd(208704.000000,167232.000000,85775.000000,1800.000000)}

{create adhoc1338}
{access adhoc1338}
{connect adhoc1338(1), adhoc1(0)}
{nseg = 1}
{strdef color color = "White"}
{pt3dclear()}
{pt3dadd(202608.000000,150492.000000,37000.000000,1800.000000)}
{pt3dadd(208656.000000,169572.000000,83325.000000,1800.000000)}

{create adhoc1339}
{access adhoc1339}
{connect adhoc1339(1), adhoc1(0)}
{nseg = 1}
{strdef color color = "White"}
{pt3dclear()}
{pt3dadd(202608.000000,150492.000000,37000.000000,1800.000000)}
{pt3dadd(208644.000000,167592.000000,83125.000000,1800.000000)}

{create adhoc1340}
{access adhoc1340}
{connect adhoc1340(1), adhoc1(0)}
{nseg = 1}
{strdef color color = "White"}
{pt3dclear()}
{pt3dadd(202608.000000,150492.000000,37000.000000,1800.000000)}
{pt3dadd(208608.000000,166128.000000,81375.000000,1800.000000)}

{create adhoc1341}
{access adhoc1341}
{connect adhoc1341(1), adhoc1(0)}
{nseg = 1}
{strdef color color = "White"}
{pt3dclear()}
{pt3dadd(202608.000000,150492.000000,37000.000000,1800.000000)}
{pt3dadd(208536.000000,166572.000000,78525.000000,1800.000000)}

{create adhoc1342}
{access adhoc1342}
{connect adhoc1342(1), adhoc1(0)}
{nseg = 1}
{strdef color color = "White"}
{pt3dclear()}
{pt3dadd(202608.000000,150492.000000,37000.000000,1800.000000)}
{pt3dadd(208596.000000,168804.000000,80825.000000,1800.000000)}

{create adhoc1343}
{access adhoc1343}
{connect adhoc1343(1), adhoc1(0)}
{nseg = 1}
{strdef color color = "White"}
{pt3dclear()}
{pt3dadd(202608.000000,150492.000000,37000.000000,1800.000000)}
{pt3dadd(208536.000000,169308.000000,77875.000000,1800.000000)}

{create adhoc1344}
{access adhoc1344}
{connect adhoc1344(1), adhoc1(0)}
{nseg = 1}
{strdef color color = "White"}
{pt3dclear()}
{pt3dadd(202608.000000,150492.000000,37000.000000,1800.000000)}
{pt3dadd(208572.000000,170892.000000,80325.000000,1800.000000)}

{create adhoc1345}
{access adhoc1345}
{connect adhoc1345(1), adhoc1(0)}
{nseg = 1}
{strdef color color = "White"}
{pt3dclear()}
{pt3dadd(202608.000000,150492.000000,37000.000000,1800.000000)}
{pt3dadd(211956.000000,166764.000000,82525.000000,1800.000000)}

{create adhoc1346}
{access adhoc1346}
{connect adhoc1346(1), adhoc1(0)}
{nseg = 1}
{strdef color color = "White"}
{pt3dclear()}
{pt3dadd(202608.000000,150492.000000,37000.000000,1800.000000)}
{pt3dadd(210984.000000,163920.000000,83975.000000,1800.000000)}

{create adhoc1347}
{access adhoc1347}
{connect adhoc1347(1), adhoc1(0)}
{nseg = 1}
{strdef color color = "White"}
{pt3dclear()}
{pt3dadd(202608.000000,150492.000000,37000.000000,1800.000000)}
{pt3dadd(210480.000000,164112.000000,76425.000000,1800.000000)}

{create adhoc1348}
{access adhoc1348}
{connect adhoc1348(1), adhoc1(0)}
{nseg = 1}
{strdef color color = "White"}
{pt3dclear()}
{pt3dadd(202608.000000,150492.000000,37000.000000,1800.000000)}
{pt3dadd(210564.000000,164004.000000,80975.000000,1800.000000)}

{create adhoc1349}
{access adhoc1349}
{connect adhoc1349(1), adhoc1(0)}
{nseg = 1}
{strdef color color = "White"}
{pt3dclear()}
{pt3dadd(202608.000000,150492.000000,37000.000000,1800.000000)}
{pt3dadd(210504.000000,164424.000000,78775.000000,1800.000000)}

{create adhoc1350}
{access adhoc1350}
{connect adhoc1350(1), adhoc1(0)}
{nseg = 1}
{strdef color color = "White"}
{pt3dclear()}
{pt3dadd(202608.000000,150492.000000,37000.000000,1800.000000)}
{pt3dadd(210516.000000,160956.000000,78275.000000,1800.000000)}

{create adhoc1351}
{access adhoc1351}
{connect adhoc1351(1), adhoc1(0)}
{nseg = 1}
{strdef color color = "White"}
{pt3dclear()}
{pt3dadd(202608.000000,150492.000000,37000.000000,1800.000000)}
{pt3dadd(209952.000000,153024.000000,76525.000000,1800.000000)}

{create adhoc1352}
{access adhoc1352}
{connect adhoc1352(1), adhoc1(0)}
{nseg = 1}
{strdef color color = "White"}
{pt3dclear()}
{pt3dadd(202608.000000,150492.000000,37000.000000,1800.000000)}
{pt3dadd(206880.000000,150876.000000,77075.000000,1800.000000)}

{create adhoc1353}
{access adhoc1353}
{connect adhoc1353(1), adhoc1(0)}
{nseg = 1}
{strdef color color = "White"}
{pt3dclear()}
{pt3dadd(202608.000000,150492.000000,37000.000000,1800.000000)}
{pt3dadd(206892.000000,149088.000000,74725.000000,1800.000000)}

{create adhoc1354}
{access adhoc1354}
{connect adhoc1354(1), adhoc1(0)}
{nseg = 1}
{strdef color color = "White"}
{pt3dclear()}
{pt3dadd(202608.000000,150492.000000,37000.000000,1800.000000)}
{pt3dadd(206856.000000,147672.000000,76925.000000,1800.000000)}

{create adhoc1355}
{access adhoc1355}
{connect adhoc1355(1), adhoc1(0)}
{nseg = 1}
{strdef color color = "White"}
{pt3dclear()}
{pt3dadd(202608.000000,150492.000000,37000.000000,1800.000000)}
{pt3dadd(208440.000000,145080.000000,75775.000000,1800.000000)}

{create adhoc1356}
{access adhoc1356}
{connect adhoc1356(1), adhoc1(0)}
{nseg = 1}
{strdef color color = "White"}
{pt3dclear()}
{pt3dadd(202608.000000,150492.000000,37000.000000,1800.000000)}
{pt3dadd(208620.000000,142404.000000,77425.000000,1800.000000)}

{create adhoc1357}
{access adhoc1357}
{connect adhoc1357(1), adhoc1(0)}
{nseg = 1}
{strdef color color = "White"}
{pt3dclear()}
{pt3dadd(202608.000000,150492.000000,37000.000000,1800.000000)}
{pt3dadd(208356.000000,144384.000000,79175.000000,1800.000000)}

{create adhoc1358}
{access adhoc1358}
{connect adhoc1358(1), adhoc1(0)}
{nseg = 1}
{strdef color color = "White"}
{pt3dclear()}
{pt3dadd(202608.000000,150492.000000,37000.000000,1800.000000)}
{pt3dadd(208416.000000,143832.000000,82325.000000,1800.000000)}

{create adhoc1359}
{access adhoc1359}
{connect adhoc1359(1), adhoc1(0)}
{nseg = 1}
{strdef color color = "White"}
{pt3dclear()}
{pt3dadd(202608.000000,150492.000000,37000.000000,1800.000000)}
{pt3dadd(209316.000000,145848.000000,84375.000000,1800.000000)}

{create adhoc1360}
{access adhoc1360}
{connect adhoc1360(1), adhoc1(0)}
{nseg = 1}
{strdef color color = "White"}
{pt3dclear()}
{pt3dadd(202608.000000,150492.000000,37000.000000,1800.000000)}
{pt3dadd(212544.000000,149280.000000,90375.000000,1800.000000)}

{create adhoc1361}
{access adhoc1361}
{connect adhoc1361(1), adhoc1(0)}
{nseg = 1}
{strdef color color = "White"}
{pt3dclear()}
{pt3dadd(202608.000000,150492.000000,37000.000000,1800.000000)}
{pt3dadd(213576.000000,158328.000000,87775.000000,1800.000000)}

{create adhoc1362}
{access adhoc1362}
{connect adhoc1362(1), adhoc1(0)}
{nseg = 1}
{strdef color color = "White"}
{pt3dclear()}
{pt3dadd(202608.000000,150492.000000,37000.000000,1800.000000)}
{pt3dadd(212940.000000,154956.000000,88875.000000,1800.000000)}

{create adhoc1363}
{access adhoc1363}
{connect adhoc1363(1), adhoc1(0)}
{nseg = 1}
{strdef color color = "White"}
{pt3dclear()}
{pt3dadd(202608.000000,150492.000000,37000.000000,1800.000000)}
{pt3dadd(212928.000000,151200.000000,86075.000000,1800.000000)}

{create adhoc1364}
{access adhoc1364}
{connect adhoc1364(1), adhoc1(0)}
{nseg = 1}
{strdef color color = "White"}
{pt3dclear()}
{pt3dadd(202608.000000,150492.000000,37000.000000,1800.000000)}
{pt3dadd(212388.000000,153912.000000,82375.000000,1800.000000)}

{create adhoc1365}
{access adhoc1365}
{connect adhoc1365(1), adhoc1(0)}
{nseg = 1}
{strdef color color = "White"}
{pt3dclear()}
{pt3dadd(202608.000000,150492.000000,37000.000000,1800.000000)}
{pt3dadd(211008.000000,154608.000000,80025.000000,1800.000000)}

{create adhoc1366}
{access adhoc1366}
{connect adhoc1366(1), adhoc1(0)}
{nseg = 1}
{strdef color color = "White"}
{pt3dclear()}
{pt3dadd(202608.000000,150492.000000,37000.000000,1800.000000)}
{pt3dadd(213408.000000,160776.000000,84475.000000,1800.000000)}

{create adhoc1367}
{access adhoc1367}
{connect adhoc1367(1), adhoc1(0)}
{nseg = 1}
{strdef color color = "White"}
{pt3dclear()}
{pt3dadd(202608.000000,150492.000000,37000.000000,1800.000000)}
{pt3dadd(210216.000000,157536.000000,80475.000000,1800.000000)}

{create adhoc1368}
{access adhoc1368}
{connect adhoc1368(1), adhoc1(0)}
{nseg = 1}
{strdef color color = "White"}
{pt3dclear()}
{pt3dadd(202608.000000,150492.000000,37000.000000,1800.000000)}
{pt3dadd(210336.000000,161076.000000,86225.000000,1800.000000)}

{create adhoc1369}
{access adhoc1369}
{connect adhoc1369(1), adhoc1(0)}
{nseg = 1}
{strdef color color = "White"}
{pt3dclear()}
{pt3dadd(202608.000000,150492.000000,37000.000000,1800.000000)}
{pt3dadd(210300.000000,160896.000000,84325.000000,1800.000000)}

{create adhoc1370}
{access adhoc1370}
{connect adhoc1370(1), adhoc1(0)}
{nseg = 1}
{strdef color color = "White"}
{pt3dclear()}
{pt3dadd(202608.000000,150492.000000,37000.000000,1800.000000)}
{pt3dadd(210216.000000,160848.000000,80475.000000,1800.000000)}

{create adhoc1371}
{access adhoc1371}
{connect adhoc1371(1), adhoc1(0)}
{nseg = 1}
{strdef color color = "White"}
{pt3dclear()}
{pt3dadd(202608.000000,150492.000000,37000.000000,1800.000000)}
{pt3dadd(210252.000000,159372.000000,82275.000000,1800.000000)}

{create adhoc1372}
{access adhoc1372}
{connect adhoc1372(1), adhoc1(0)}
{nseg = 1}
{strdef color color = "White"}
{pt3dclear()}
{pt3dadd(202608.000000,150492.000000,37000.000000,1800.000000)}
{pt3dadd(210336.000000,157872.000000,86075.000000,1800.000000)}

{create adhoc1373}
{access adhoc1373}
{connect adhoc1373(1), adhoc1(0)}
{nseg = 1}
{strdef color color = "White"}
{pt3dclear()}
{pt3dadd(202608.000000,150492.000000,37000.000000,1800.000000)}
{pt3dadd(210252.000000,156816.000000,83025.000000,1800.000000)}

{create adhoc1374}
{access adhoc1374}
{connect adhoc1374(1), adhoc1(0)}
{nseg = 1}
{strdef color color = "White"}
{pt3dclear()}
{pt3dadd(202608.000000,150492.000000,37000.000000,1800.000000)}
{pt3dadd(210288.000000,154404.000000,84175.000000,1800.000000)}

{create adhoc1375}
{access adhoc1375}
{connect adhoc1375(1), adhoc1(0)}
{nseg = 1}
{strdef color color = "White"}
{pt3dclear()}
{pt3dadd(202608.000000,150492.000000,37000.000000,1800.000000)}
{pt3dadd(210336.000000,153516.000000,88275.000000,1800.000000)}

{create adhoc1376}
{access adhoc1376}
{connect adhoc1376(1), adhoc1(0)}
{nseg = 1}
{strdef color color = "White"}
{pt3dclear()}
{pt3dadd(202608.000000,150492.000000,37000.000000,1800.000000)}
{pt3dadd(210348.000000,151644.000000,90225.000000,1800.000000)}

{create adhoc1377}
{access adhoc1377}
{connect adhoc1377(1), adhoc1(0)}
{nseg = 1}
{strdef color color = "White"}
{pt3dclear()}
{pt3dadd(202608.000000,150492.000000,37000.000000,1800.000000)}
{pt3dadd(211032.000000,153336.000000,85375.000000,1800.000000)}

{create adhoc1378}
{access adhoc1378}
{connect adhoc1378(1), adhoc1(0)}
{nseg = 1}
{strdef color color = "White"}
{pt3dclear()}
{pt3dadd(202608.000000,150492.000000,37000.000000,1800.000000)}
{pt3dadd(212544.000000,156852.000000,84875.000000,1800.000000)}

{create adhoc1379}
{access adhoc1379}
{connect adhoc1379(1), adhoc1(0)}
{nseg = 1}
{strdef color color = "White"}
{pt3dclear()}
{pt3dadd(202608.000000,150492.000000,37000.000000,1800.000000)}
{pt3dadd(206148.000000,160644.000000,87175.000000,1800.000000)}

{create adhoc1380}
{access adhoc1380}
{connect adhoc1380(1), adhoc1(0)}
{nseg = 1}
{strdef color color = "White"}
{pt3dclear()}
{pt3dadd(202608.000000,150492.000000,37000.000000,1800.000000)}
{pt3dadd(206124.000000,162300.000000,86425.000000,1800.000000)}

{create adhoc1381}
{access adhoc1381}
{connect adhoc1381(1), adhoc1(0)}
{nseg = 1}
{strdef color color = "White"}
{pt3dclear()}
{pt3dadd(202608.000000,150492.000000,37000.000000,1800.000000)}
{pt3dadd(205668.000000,161424.000000,83675.000000,1800.000000)}

{create adhoc1382}
{access adhoc1382}
{connect adhoc1382(1), adhoc1(0)}
{nseg = 1}
{strdef color color = "White"}
{pt3dclear()}
{pt3dadd(202608.000000,150492.000000,37000.000000,1800.000000)}
{pt3dadd(205620.000000,156876.000000,82525.000000,1800.000000)}

{create adhoc1383}
{access adhoc1383}
{connect adhoc1383(1), adhoc1(0)}
{nseg = 1}
{strdef color color = "White"}
{pt3dclear()}
{pt3dadd(202608.000000,150492.000000,37000.000000,1800.000000)}
{pt3dadd(205680.000000,158928.000000,85075.000000,1800.000000)}

{create adhoc1384}
{access adhoc1384}
{connect adhoc1384(1), adhoc1(0)}
{nseg = 1}
{strdef color color = "White"}
{pt3dclear()}
{pt3dadd(202608.000000,150492.000000,37000.000000,1800.000000)}
{pt3dadd(205140.000000,158568.000000,79025.000000,1800.000000)}

{create adhoc1385}
{access adhoc1385}
{connect adhoc1385(1), adhoc1(0)}
{nseg = 1}
{strdef color color = "White"}
{pt3dclear()}
{pt3dadd(202608.000000,150492.000000,37000.000000,1800.000000)}
{pt3dadd(206076.000000,158628.000000,81175.000000,1800.000000)}

{create adhoc1386}
{access adhoc1386}
{connect adhoc1386(1), adhoc1(0)}
{nseg = 1}
{strdef color color = "White"}
{pt3dclear()}
{pt3dadd(202608.000000,150492.000000,37000.000000,1800.000000)}
{pt3dadd(204228.000000,162504.000000,75875.000000,1800.000000)}

{create adhoc1387}
{access adhoc1387}
{connect adhoc1387(1), adhoc1(0)}
{nseg = 1}
{strdef color color = "White"}
{pt3dclear()}
{pt3dadd(202608.000000,150492.000000,37000.000000,1800.000000)}
{pt3dadd(203136.000000,164856.000000,74925.000000,1800.000000)}

{create adhoc1388}
{access adhoc1388}
{connect adhoc1388(1), adhoc1(0)}
{nseg = 1}
{strdef color color = "White"}
{pt3dclear()}
{pt3dadd(202608.000000,150492.000000,37000.000000,1800.000000)}
{pt3dadd(203172.000000,164220.000000,79225.000000,1800.000000)}

{create adhoc1389}
{access adhoc1389}
{connect adhoc1389(1), adhoc1(0)}
{nseg = 1}
{strdef color color = "White"}
{pt3dclear()}
{pt3dadd(202608.000000,150492.000000,37000.000000,1800.000000)}
{pt3dadd(202776.000000,158748.000000,81575.000000,1800.000000)}

{create adhoc1390}
{access adhoc1390}
{connect adhoc1390(1), adhoc1(0)}
{nseg = 1}
{strdef color color = "White"}
{pt3dclear()}
{pt3dadd(202608.000000,150492.000000,37000.000000,1800.000000)}
{pt3dadd(202716.000000,160380.000000,78275.000000,1800.000000)}

{create adhoc1391}
{access adhoc1391}
{connect adhoc1391(1), adhoc1(0)}
{nseg = 1}
{strdef color color = "White"}
{pt3dclear()}
{pt3dadd(202608.000000,150492.000000,37000.000000,1800.000000)}
{pt3dadd(202680.000000,158736.000000,76525.000000,1800.000000)}

{create adhoc1392}
{access adhoc1392}
{connect adhoc1392(1), adhoc1(0)}
{nseg = 1}
{strdef color color = "White"}
{pt3dclear()}
{pt3dadd(202608.000000,150492.000000,37000.000000,1800.000000)}
{pt3dadd(202740.000000,157572.000000,79175.000000,1800.000000)}

{create adhoc1393}
{access adhoc1393}
{connect adhoc1393(1), adhoc1(0)}
{nseg = 1}
{strdef color color = "White"}
{pt3dclear()}
{pt3dadd(202608.000000,150492.000000,37000.000000,1800.000000)}
{pt3dadd(202872.000000,156624.000000,75475.000000,1800.000000)}

{create adhoc1394}
{access adhoc1394}
{connect adhoc1394(1), adhoc1(0)}
{nseg = 1}
{strdef color color = "White"}
{pt3dclear()}
{pt3dadd(202608.000000,150492.000000,37000.000000,1800.000000)}
{pt3dadd(203040.000000,155604.000000,78125.000000,1800.000000)}

{create adhoc1395}
{access adhoc1395}
{connect adhoc1395(1), adhoc1(0)}
{nseg = 1}
{strdef color color = "White"}
{pt3dclear()}
{pt3dadd(202608.000000,150492.000000,37000.000000,1800.000000)}
{pt3dadd(204360.000000,149592.000000,80675.000000,1800.000000)}

{create adhoc1396}
{access adhoc1396}
{connect adhoc1396(1), adhoc1(0)}
{nseg = 1}
{strdef color color = "White"}
{pt3dclear()}
{pt3dadd(202608.000000,150492.000000,37000.000000,1800.000000)}
{pt3dadd(204300.000000,153060.000000,77575.000000,1800.000000)}

{create adhoc1397}
{access adhoc1397}
{connect adhoc1397(1), adhoc1(0)}
{nseg = 1}
{strdef color color = "White"}
{pt3dclear()}
{pt3dadd(202608.000000,150492.000000,37000.000000,1800.000000)}
{pt3dadd(204312.000000,150168.000000,78175.000000,1800.000000)}

{create adhoc1398}
{access adhoc1398}
{connect adhoc1398(1), adhoc1(0)}
{nseg = 1}
{strdef color color = "White"}
{pt3dclear()}
{pt3dadd(202608.000000,150492.000000,37000.000000,1800.000000)}
{pt3dadd(207672.000000,155916.000000,79325.000000,1800.000000)}

{create adhoc1399}
{access adhoc1399}
{connect adhoc1399(1), adhoc1(0)}
{nseg = 1}
{strdef color color = "White"}
{pt3dclear()}
{pt3dadd(202608.000000,150492.000000,37000.000000,1800.000000)}
{pt3dadd(207636.000000,159744.000000,77325.000000,1800.000000)}

{create adhoc1400}
{access adhoc1400}
{connect adhoc1400(1), adhoc1(0)}
{nseg = 1}
{strdef color color = "White"}
{pt3dclear()}
{pt3dadd(202608.000000,150492.000000,37000.000000,1800.000000)}
{pt3dadd(207672.000000,158472.000000,79675.000000,1800.000000)}

{create adhoc1401}
{access adhoc1401}
{connect adhoc1401(1), adhoc1(0)}
{nseg = 1}
{strdef color color = "White"}
{pt3dclear()}
{pt3dadd(202608.000000,150492.000000,37000.000000,1800.000000)}
{pt3dadd(207720.000000,156804.000000,81325.000000,1800.000000)}

{create adhoc1402}
{access adhoc1402}
{connect adhoc1402(1), adhoc1(0)}
{nseg = 1}
{strdef color color = "White"}
{pt3dclear()}
{pt3dadd(202608.000000,150492.000000,37000.000000,1800.000000)}
{pt3dadd(207756.000000,156960.000000,83225.000000,1800.000000)}

{create adhoc1403}
{access adhoc1403}
{connect adhoc1403(1), adhoc1(0)}
{nseg = 1}
{strdef color color = "White"}
{pt3dclear()}
{pt3dadd(202608.000000,150492.000000,37000.000000,1800.000000)}
{pt3dadd(207528.000000,162900.000000,84125.000000,1800.000000)}

{create adhoc1404}
{access adhoc1404}
{connect adhoc1404(1), adhoc1(0)}
{nseg = 1}
{strdef color color = "White"}
{pt3dclear()}
{pt3dadd(202608.000000,150492.000000,37000.000000,1800.000000)}
{pt3dadd(207516.000000,159744.000000,83775.000000,1800.000000)}

{create adhoc1405}
{access adhoc1405}
{connect adhoc1405(1), adhoc1(0)}
{nseg = 1}
{strdef color color = "White"}
{pt3dclear()}
{pt3dadd(202608.000000,150492.000000,37000.000000,1800.000000)}
{pt3dadd(212520.000000,164940.000000,85875.000000,1800.000000)}

{create adhoc1406}
{access adhoc1406}
{connect adhoc1406(1), adhoc1(0)}
{nseg = 1}
{strdef color color = "White"}
{pt3dclear()}
{pt3dadd(202608.000000,150492.000000,37000.000000,1800.000000)}
{pt3dadd(212520.000000,159984.000000,86325.000000,1800.000000)}

{create adhoc1407}
{access adhoc1407}
{connect adhoc1407(1), adhoc1(0)}
{nseg = 1}
{strdef color color = "White"}
{pt3dclear()}
{pt3dadd(202608.000000,150492.000000,37000.000000,1800.000000)}
{pt3dadd(212556.000000,163008.000000,87375.000000,1800.000000)}

{create adhoc1408}
{access adhoc1408}
{connect adhoc1408(1), adhoc1(0)}
{nseg = 1}
{strdef color color = "White"}
{pt3dclear()}
{pt3dadd(202608.000000,150492.000000,37000.000000,1800.000000)}
{pt3dadd(212568.000000,171948.000000,94575.000000,1800.000000)}

{create adhoc1409}
{access adhoc1409}
{connect adhoc1409(1), adhoc1(0)}
{nseg = 1}
{strdef color color = "White"}
{pt3dclear()}
{pt3dadd(202608.000000,150492.000000,37000.000000,1800.000000)}
{pt3dadd(212568.000000,163452.000000,95075.000000,1800.000000)}

{create adhoc1410}
{access adhoc1410}
{connect adhoc1410(1), adhoc1(0)}
{nseg = 1}
{strdef color color = "White"}
{pt3dclear()}
{pt3dadd(202608.000000,150492.000000,37000.000000,1800.000000)}
{pt3dadd(212580.000000,165408.000000,94175.000000,1800.000000)}

{create adhoc1411}
{access adhoc1411}
{connect adhoc1411(1), adhoc1(0)}
{nseg = 1}
{strdef color color = "White"}
{pt3dclear()}
{pt3dadd(202608.000000,150492.000000,37000.000000,1800.000000)}
{pt3dadd(212568.000000,167580.000000,92675.000000,1800.000000)}

{create adhoc1412}
{access adhoc1412}
{connect adhoc1412(1), adhoc1(0)}
{nseg = 1}
{strdef color color = "White"}
{pt3dclear()}
{pt3dadd(202608.000000,150492.000000,37000.000000,1800.000000)}
{pt3dadd(212556.000000,166800.000000,90175.000000,1800.000000)}

{create adhoc1413}
{access adhoc1413}
{connect adhoc1413(1), adhoc1(0)}
{nseg = 1}
{strdef color color = "White"}
{pt3dclear()}
{pt3dadd(202608.000000,150492.000000,37000.000000,1800.000000)}
{pt3dadd(212568.000000,164280.000000,90475.000000,1800.000000)}

{create adhoc1414}
{access adhoc1414}
{connect adhoc1414(1), adhoc1(0)}
{nseg = 1}
{strdef color color = "White"}
{pt3dclear()}
{pt3dadd(202608.000000,150492.000000,37000.000000,1800.000000)}
{pt3dadd(213192.000000,158844.000000,90525.000000,1800.000000)}

{create adhoc1415}
{access adhoc1415}
{connect adhoc1415(1), adhoc1(0)}
{nseg = 1}
{strdef color color = "White"}
{pt3dclear()}
{pt3dadd(202608.000000,150492.000000,37000.000000,1800.000000)}
{pt3dadd(212304.000000,153540.000000,90825.000000,1800.000000)}

{create adhoc1416}
{access adhoc1416}
{connect adhoc1416(1), adhoc1(0)}
{nseg = 1}
{strdef color color = "White"}
{pt3dclear()}
{pt3dadd(202608.000000,150492.000000,37000.000000,1800.000000)}
{pt3dadd(212256.000000,157092.000000,88125.000000,1800.000000)}

{create adhoc1417}
{access adhoc1417}
{connect adhoc1417(1), adhoc1(0)}
{nseg = 1}
{strdef color color = "White"}
{pt3dclear()}
{pt3dadd(202608.000000,150492.000000,37000.000000,1800.000000)}
{pt3dadd(212316.000000,156804.000000,91425.000000,1800.000000)}

{create adhoc1418}
{access adhoc1418}
{connect adhoc1418(1), adhoc1(0)}
{nseg = 1}
{strdef color color = "White"}
{pt3dclear()}
{pt3dadd(202608.000000,150492.000000,37000.000000,1800.000000)}
{pt3dadd(212316.000000,156960.000000,94475.000000,1800.000000)}

{create adhoc1419}
{access adhoc1419}
{connect adhoc1419(1), adhoc1(0)}
{nseg = 1}
{strdef color color = "White"}
{pt3dclear()}
{pt3dadd(202608.000000,150492.000000,37000.000000,1800.000000)}
{pt3dadd(212280.000000,160620.000000,89125.000000,1800.000000)}

{create adhoc1420}
{access adhoc1420}
{connect adhoc1420(1), adhoc1(0)}
{nseg = 1}
{strdef color color = "White"}
{pt3dclear()}
{pt3dadd(202608.000000,150492.000000,37000.000000,1800.000000)}
{pt3dadd(212304.000000,162228.000000,92675.000000,1800.000000)}

{create adhoc1421}
{access adhoc1421}
{connect adhoc1421(1), adhoc1(0)}
{nseg = 1}
{strdef color color = "White"}
{pt3dclear()}
{pt3dadd(202608.000000,150492.000000,37000.000000,1800.000000)}
{pt3dadd(212328.000000,159636.000000,93075.000000,1800.000000)}

{create adhoc1422}
{access adhoc1422}
{connect adhoc1422(1), adhoc1(0)}
{nseg = 1}
{strdef color color = "White"}
{pt3dclear()}
{pt3dadd(202608.000000,150492.000000,37000.000000,1800.000000)}
{pt3dadd(212748.000000,171168.000000,89525.000000,1800.000000)}

{create adhoc1423}
{access adhoc1423}
{connect adhoc1423(1), adhoc1(0)}
{nseg = 1}
{strdef color color = "White"}
{pt3dclear()}
{pt3dadd(202608.000000,150492.000000,37000.000000,1800.000000)}
{pt3dadd(211944.000000,170340.000000,92275.000000,1800.000000)}

{create adhoc1424}
{access adhoc1424}
{connect adhoc1424(1), adhoc1(0)}
{nseg = 1}
{strdef color color = "White"}
{pt3dclear()}
{pt3dadd(202608.000000,150492.000000,37000.000000,1800.000000)}
{pt3dadd(205980.000000,172488.000000,91625.000000,1800.000000)}

{create adhoc1425}
{access adhoc1425}
{connect adhoc1425(1), adhoc1(0)}
{nseg = 1}
{strdef color color = "White"}
{pt3dclear()}
{pt3dadd(202608.000000,150492.000000,37000.000000,1800.000000)}
{pt3dadd(205980.000000,169164.000000,91475.000000,1800.000000)}

{create adhoc1426}
{access adhoc1426}
{connect adhoc1426(1), adhoc1(0)}
{nseg = 1}
{strdef color color = "White"}
{pt3dclear()}
{pt3dadd(202608.000000,150492.000000,37000.000000,1800.000000)}
{pt3dadd(206004.000000,166836.000000,92125.000000,1800.000000)}

{create adhoc1427}
{access adhoc1427}
{connect adhoc1427(1), adhoc1(0)}
{nseg = 1}
{strdef color color = "White"}
{pt3dclear()}
{pt3dadd(202608.000000,150492.000000,37000.000000,1800.000000)}
{pt3dadd(205992.000000,164376.000000,92175.000000,1800.000000)}

{create adhoc1428}
{access adhoc1428}
{connect adhoc1428(1), adhoc1(0)}
{nseg = 1}
{strdef color color = "White"}
{pt3dclear()}
{pt3dadd(202608.000000,150492.000000,37000.000000,1800.000000)}
{pt3dadd(210216.000000,172740.000000,94325.000000,1800.000000)}

{create adhoc1429}
{access adhoc1429}
{connect adhoc1429(1), adhoc1(0)}
{nseg = 1}
{strdef color color = "White"}
{pt3dclear()}
{pt3dadd(202608.000000,150492.000000,37000.000000,1800.000000)}
{pt3dadd(210228.000000,175164.000000,93125.000000,1800.000000)}

{create adhoc1430}
{access adhoc1430}
{connect adhoc1430(1), adhoc1(0)}
{nseg = 1}
{strdef color color = "White"}
{pt3dclear()}
{pt3dadd(202608.000000,150492.000000,37000.000000,1800.000000)}
{pt3dadd(210192.000000,172152.000000,86075.000000,1800.000000)}

{create adhoc1431}
{access adhoc1431}
{connect adhoc1431(1), adhoc1(0)}
{nseg = 1}
{strdef color color = "White"}
{pt3dclear()}
{pt3dadd(202608.000000,150492.000000,37000.000000,1800.000000)}
{pt3dadd(210192.000000,173352.000000,87875.000000,1800.000000)}

{create adhoc1432}
{access adhoc1432}
{connect adhoc1432(1), adhoc1(0)}
{nseg = 1}
{strdef color color = "White"}
{pt3dclear()}
{pt3dadd(202608.000000,150492.000000,37000.000000,1800.000000)}
{pt3dadd(210252.000000,173700.000000,91975.000000,1800.000000)}

{create adhoc1433}
{access adhoc1433}
{connect adhoc1433(1), adhoc1(0)}
{nseg = 1}
{strdef color color = "White"}
{pt3dclear()}
{pt3dadd(202608.000000,150492.000000,37000.000000,1800.000000)}
{pt3dadd(210216.000000,171336.000000,89175.000000,1800.000000)}

{create adhoc1434}
{access adhoc1434}
{connect adhoc1434(1), adhoc1(0)}
{nseg = 1}
{strdef color color = "White"}
{pt3dclear()}
{pt3dadd(202608.000000,150492.000000,37000.000000,1800.000000)}
{pt3dadd(210240.000000,171048.000000,92175.000000,1800.000000)}

{create adhoc1435}
{access adhoc1435}
{connect adhoc1435(1), adhoc1(0)}
{nseg = 1}
{strdef color color = "White"}
{pt3dclear()}
{pt3dadd(202608.000000,150492.000000,37000.000000,1800.000000)}
{pt3dadd(210228.000000,167160.000000,91775.000000,1800.000000)}

{create adhoc1436}
{access adhoc1436}
{connect adhoc1436(1), adhoc1(0)}
{nseg = 1}
{strdef color color = "White"}
{pt3dclear()}
{pt3dadd(202608.000000,150492.000000,37000.000000,1800.000000)}
{pt3dadd(210204.000000,169188.000000,89975.000000,1800.000000)}

{create adhoc1437}
{access adhoc1437}
{connect adhoc1437(1), adhoc1(0)}
{nseg = 1}
{strdef color color = "White"}
{pt3dclear()}
{pt3dadd(202608.000000,150492.000000,37000.000000,1800.000000)}
{pt3dadd(210168.000000,166956.000000,87675.000000,1800.000000)}

{create adhoc1438}
{access adhoc1438}
{connect adhoc1438(1), adhoc1(0)}
{nseg = 1}
{strdef color color = "White"}
{pt3dclear()}
{pt3dadd(202608.000000,150492.000000,37000.000000,1800.000000)}
{pt3dadd(210180.000000,163536.000000,86975.000000,1800.000000)}

{create adhoc1439}
{access adhoc1439}
{connect adhoc1439(1), adhoc1(0)}
{nseg = 1}
{strdef color color = "White"}
{pt3dclear()}
{pt3dadd(202608.000000,150492.000000,37000.000000,1800.000000)}
{pt3dadd(210192.000000,161580.000000,88175.000000,1800.000000)}

{create adhoc1440}
{access adhoc1440}
{connect adhoc1440(1), adhoc1(0)}
{nseg = 1}
{strdef color color = "White"}
{pt3dclear()}
{pt3dadd(202608.000000,150492.000000,37000.000000,1800.000000)}
{pt3dadd(209904.000000,164388.000000,90775.000000,1800.000000)}

{create adhoc1441}
{access adhoc1441}
{connect adhoc1441(1), adhoc1(0)}
{nseg = 1}
{strdef color color = "White"}
{pt3dclear()}
{pt3dadd(202608.000000,150492.000000,37000.000000,1800.000000)}
{pt3dadd(209916.000000,162276.000000,92375.000000,1800.000000)}

{create adhoc1442}
{access adhoc1442}
{connect adhoc1442(1), adhoc1(0)}
{nseg = 1}
{strdef color color = "White"}
{pt3dclear()}
{pt3dadd(202608.000000,150492.000000,37000.000000,1800.000000)}
{pt3dadd(208152.000000,164232.000000,89175.000000,1800.000000)}

{create adhoc1443}
{access adhoc1443}
{connect adhoc1443(1), adhoc1(0)}
{nseg = 1}
{strdef color color = "White"}
{pt3dclear()}
{pt3dadd(202608.000000,150492.000000,37000.000000,1800.000000)}
{pt3dadd(208200.000000,167136.000000,92225.000000,1800.000000)}

{create adhoc1444}
{access adhoc1444}
{connect adhoc1444(1), adhoc1(0)}
{nseg = 1}
{strdef color color = "White"}
{pt3dclear()}
{pt3dadd(202608.000000,150492.000000,37000.000000,1800.000000)}
{pt3dadd(208188.000000,167040.000000,94725.000000,1800.000000)}

{create adhoc1445}
{access adhoc1445}
{connect adhoc1445(1), adhoc1(0)}
{nseg = 1}
{strdef color color = "White"}
{pt3dclear()}
{pt3dadd(202608.000000,150492.000000,37000.000000,1800.000000)}
{pt3dadd(208188.000000,163968.000000,93975.000000,1800.000000)}

{create adhoc1446}
{access adhoc1446}
{connect adhoc1446(1), adhoc1(0)}
{nseg = 1}
{strdef color color = "White"}
{pt3dclear()}
{pt3dadd(202608.000000,150492.000000,37000.000000,1800.000000)}
{pt3dadd(208188.000000,159144.000000,94675.000000,1800.000000)}

{create adhoc1447}
{access adhoc1447}
{connect adhoc1447(1), adhoc1(0)}
{nseg = 1}
{strdef color color = "White"}
{pt3dclear()}
{pt3dadd(202608.000000,150492.000000,37000.000000,1800.000000)}
{pt3dadd(208140.000000,160512.000000,86125.000000,1800.000000)}

{create adhoc1448}
{access adhoc1448}
{connect adhoc1448(1), adhoc1(0)}
{nseg = 1}
{strdef color color = "White"}
{pt3dclear()}
{pt3dadd(202608.000000,150492.000000,37000.000000,1800.000000)}
{pt3dadd(208128.000000,158244.000000,86225.000000,1800.000000)}

{create adhoc1449}
{access adhoc1449}
{connect adhoc1449(1), adhoc1(0)}
{nseg = 1}
{strdef color color = "White"}
{pt3dclear()}
{pt3dadd(202608.000000,150492.000000,37000.000000,1800.000000)}
{pt3dadd(208164.000000,162312.000000,90975.000000,1800.000000)}

{create adhoc1450}
{access adhoc1450}
{connect adhoc1450(1), adhoc1(0)}
{nseg = 1}
{strdef color color = "White"}
{pt3dclear()}
{pt3dadd(202608.000000,150492.000000,37000.000000,1800.000000)}
{pt3dadd(208176.000000,160344.000000,92525.000000,1800.000000)}

{create adhoc1451}
{access adhoc1451}
{connect adhoc1451(1), adhoc1(0)}
{nseg = 1}
{strdef color color = "White"}
{pt3dclear()}
{pt3dadd(202608.000000,150492.000000,37000.000000,1800.000000)}
{pt3dadd(208164.000000,159504.000000,89775.000000,1800.000000)}

{create adhoc1452}
{access adhoc1452}
{connect adhoc1452(1), adhoc1(0)}
{nseg = 1}
{strdef color color = "White"}
{pt3dclear()}
{pt3dadd(202608.000000,150492.000000,37000.000000,1800.000000)}
{pt3dadd(208164.000000,155388.000000,87525.000000,1800.000000)}

{create adhoc1453}
{access adhoc1453}
{connect adhoc1453(1), adhoc1(0)}
{nseg = 1}
{strdef color color = "White"}
{pt3dclear()}
{pt3dadd(202608.000000,150492.000000,37000.000000,1800.000000)}
{pt3dadd(208176.000000,156912.000000,91125.000000,1800.000000)}

{create adhoc1454}
{access adhoc1454}
{connect adhoc1454(1), adhoc1(0)}
{nseg = 1}
{strdef color color = "White"}
{pt3dclear()}
{pt3dadd(202608.000000,150492.000000,37000.000000,1800.000000)}
{pt3dadd(208200.000000,153072.000000,93475.000000,1800.000000)}

{create adhoc1455}
{access adhoc1455}
{connect adhoc1455(1), adhoc1(0)}
{nseg = 1}
{strdef color color = "White"}
{pt3dclear()}
{pt3dadd(202608.000000,150492.000000,37000.000000,1800.000000)}
{pt3dadd(208188.000000,149676.000000,94475.000000,1800.000000)}

{create adhoc1456}
{access adhoc1456}
{connect adhoc1456(1), adhoc1(0)}
{nseg = 1}
{strdef color color = "White"}
{pt3dclear()}
{pt3dadd(202608.000000,150492.000000,37000.000000,1800.000000)}
{pt3dadd(208212.000000,146376.000000,94625.000000,1800.000000)}

{create adhoc1457}
{access adhoc1457}
{connect adhoc1457(1), adhoc1(0)}
{nseg = 1}
{strdef color color = "White"}
{pt3dclear()}
{pt3dadd(202608.000000,150492.000000,37000.000000,1800.000000)}
{pt3dadd(206052.000000,143472.000000,93325.000000,1800.000000)}

{create adhoc1458}
{access adhoc1458}
{connect adhoc1458(1), adhoc1(0)}
{nseg = 1}
{strdef color color = "White"}
{pt3dclear()}
{pt3dadd(202608.000000,150492.000000,37000.000000,1800.000000)}
{pt3dadd(208008.000000,130716.000000,75875.000000,1800.000000)}

{create adhoc1459}
{access adhoc1459}
{connect adhoc1459(1), adhoc1(0)}
{nseg = 1}
{strdef color color = "White"}
{pt3dclear()}
{pt3dadd(202608.000000,150492.000000,37000.000000,1800.000000)}
{pt3dadd(205164.000000,133944.000000,81925.000000,1800.000000)}

{create adhoc1460}
{access adhoc1460}
{connect adhoc1460(1), adhoc1(0)}
{nseg = 1}
{strdef color color = "White"}
{pt3dclear()}
{pt3dadd(202608.000000,150492.000000,37000.000000,1800.000000)}
{pt3dadd(205104.000000,131424.000000,79075.000000,1800.000000)}

{create adhoc1461}
{access adhoc1461}
{connect adhoc1461(1), adhoc1(0)}
{nseg = 1}
{strdef color color = "White"}
{pt3dclear()}
{pt3dadd(202608.000000,150492.000000,37000.000000,1800.000000)}
{pt3dadd(206064.000000,131544.000000,82325.000000,1800.000000)}

{create adhoc1462}
{access adhoc1462}
{connect adhoc1462(1), adhoc1(0)}
{nseg = 1}
{strdef color color = "White"}
{pt3dclear()}
{pt3dadd(202608.000000,150492.000000,37000.000000,1800.000000)}
{pt3dadd(206256.000000,129636.000000,80175.000000,1800.000000)}

{create adhoc1463}
{access adhoc1463}
{connect adhoc1463(1), adhoc1(0)}
{nseg = 1}
{strdef color color = "White"}
{pt3dclear()}
{pt3dadd(202608.000000,150492.000000,37000.000000,1800.000000)}
{pt3dadd(206304.000000,125940.000000,78375.000000,1800.000000)}

{create adhoc1464}
{access adhoc1464}
{connect adhoc1464(1), adhoc1(0)}
{nseg = 1}
{strdef color color = "White"}
{pt3dclear()}
{pt3dadd(202608.000000,150492.000000,37000.000000,1800.000000)}
{pt3dadd(206340.000000,127128.000000,80875.000000,1800.000000)}

{create adhoc1465}
{access adhoc1465}
{connect adhoc1465(1), adhoc1(0)}
{nseg = 1}
{strdef color color = "White"}
{pt3dclear()}
{pt3dadd(202608.000000,150492.000000,37000.000000,1800.000000)}
{pt3dadd(206436.000000,128172.000000,83725.000000,1800.000000)}

{create adhoc1466}
{access adhoc1466}
{connect adhoc1466(1), adhoc1(0)}
{nseg = 1}
{strdef color color = "White"}
{pt3dclear()}
{pt3dadd(202608.000000,150492.000000,37000.000000,1800.000000)}
{pt3dadd(201768.000000,128448.000000,79625.000000,1800.000000)}

{create adhoc1467}
{access adhoc1467}
{connect adhoc1467(1), adhoc1(0)}
{nseg = 1}
{strdef color color = "White"}
{pt3dclear()}
{pt3dadd(202608.000000,150492.000000,37000.000000,1800.000000)}
{pt3dadd(202572.000000,130512.000000,83325.000000,1800.000000)}

{create adhoc1468}
{access adhoc1468}
{connect adhoc1468(1), adhoc1(0)}
{nseg = 1}
{strdef color color = "White"}
{pt3dclear()}
{pt3dadd(202608.000000,150492.000000,37000.000000,1800.000000)}
{pt3dadd(202584.000000,133524.000000,83625.000000,1800.000000)}

{create adhoc1469}
{access adhoc1469}
{connect adhoc1469(1), adhoc1(0)}
{nseg = 1}
{strdef color color = "White"}
{pt3dclear()}
{pt3dadd(202608.000000,150492.000000,37000.000000,1800.000000)}
{pt3dadd(202632.000000,131868.000000,85475.000000,1800.000000)}

{create adhoc1470}
{access adhoc1470}
{connect adhoc1470(1), adhoc1(0)}
{nseg = 1}
{strdef color color = "White"}
{pt3dclear()}
{pt3dadd(202608.000000,150492.000000,37000.000000,1800.000000)}
{pt3dadd(201468.000000,135804.000000,81725.000000,1800.000000)}

{create adhoc1471}
{access adhoc1471}
{connect adhoc1471(1), adhoc1(0)}
{nseg = 1}
{strdef color color = "White"}
{pt3dclear()}
{pt3dadd(202608.000000,150492.000000,37000.000000,1800.000000)}
{pt3dadd(201396.000000,135156.000000,78825.000000,1800.000000)}

{create adhoc1472}
{access adhoc1472}
{connect adhoc1472(1), adhoc1(0)}
{nseg = 1}
{strdef color color = "White"}
{pt3dclear()}
{pt3dadd(202608.000000,150492.000000,37000.000000,1800.000000)}
{pt3dadd(201432.000000,132564.000000,80175.000000,1800.000000)}

{create adhoc1473}
{access adhoc1473}
{connect adhoc1473(1), adhoc1(0)}
{nseg = 1}
{strdef color color = "White"}
{pt3dclear()}
{pt3dadd(202608.000000,150492.000000,37000.000000,1800.000000)}
{pt3dadd(201780.000000,135132.000000,72525.000000,1800.000000)}

{create adhoc1474}
{access adhoc1474}
{connect adhoc1474(1), adhoc1(0)}
{nseg = 1}
{strdef color color = "White"}
{pt3dclear()}
{pt3dadd(202608.000000,150492.000000,37000.000000,1800.000000)}
{pt3dadd(201828.000000,132492.000000,77375.000000,1800.000000)}

{create adhoc1475}
{access adhoc1475}
{connect adhoc1475(1), adhoc1(0)}
{nseg = 1}
{strdef color color = "White"}
{pt3dclear()}
{pt3dadd(202608.000000,150492.000000,37000.000000,1800.000000)}
{pt3dadd(202356.000000,132792.000000,75125.000000,1800.000000)}

{create adhoc1476}
{access adhoc1476}
{connect adhoc1476(1), adhoc1(0)}
{nseg = 1}
{strdef color color = "White"}
{pt3dclear()}
{pt3dadd(202608.000000,150492.000000,37000.000000,1800.000000)}
{pt3dadd(203304.000000,136068.000000,71825.000000,1800.000000)}

{create adhoc1477}
{access adhoc1477}
{connect adhoc1477(1), adhoc1(0)}
{nseg = 1}
{strdef color color = "White"}
{pt3dclear()}
{pt3dadd(202608.000000,150492.000000,37000.000000,1800.000000)}
{pt3dadd(203388.000000,136056.000000,75125.000000,1800.000000)}

{create adhoc1478}
{access adhoc1478}
{connect adhoc1478(1), adhoc1(0)}
{nseg = 1}
{strdef color color = "White"}
{pt3dclear()}
{pt3dadd(202608.000000,150492.000000,37000.000000,1800.000000)}
{pt3dadd(205284.000000,133932.000000,77375.000000,1800.000000)}

{create adhoc1479}
{access adhoc1479}
{connect adhoc1479(1), adhoc1(0)}
{nseg = 1}
{strdef color color = "White"}
{pt3dclear()}
{pt3dadd(202608.000000,150492.000000,37000.000000,1800.000000)}
{pt3dadd(205164.000000,130800.000000,74275.000000,1800.000000)}

{create adhoc1480}
{access adhoc1480}
{connect adhoc1480(1), adhoc1(0)}
{nseg = 1}
{strdef color color = "White"}
{pt3dclear()}
{pt3dadd(202608.000000,150492.000000,37000.000000,1800.000000)}
{pt3dadd(202356.000000,124056.000000,74525.000000,1800.000000)}

{create adhoc1481}
{access adhoc1481}
{connect adhoc1481(1), adhoc1(0)}
{nseg = 1}
{strdef color color = "White"}
{pt3dclear()}
{pt3dadd(202608.000000,150492.000000,37000.000000,1800.000000)}
{pt3dadd(202344.000000,121356.000000,74075.000000,1800.000000)}

{create adhoc1482}
{access adhoc1482}
{connect adhoc1482(1), adhoc1(0)}
{nseg = 1}
{strdef color color = "White"}
{pt3dclear()}
{pt3dadd(202608.000000,150492.000000,37000.000000,1800.000000)}
{pt3dadd(207552.000000,126516.000000,70825.000000,1800.000000)}

{create adhoc1483}
{access adhoc1483}
{connect adhoc1483(1), adhoc1(0)}
{nseg = 1}
{strdef color color = "White"}
{pt3dclear()}
{pt3dadd(202608.000000,150492.000000,37000.000000,1800.000000)}
{pt3dadd(207192.000000,130560.000000,78375.000000,1800.000000)}

{create adhoc1484}
{access adhoc1484}
{connect adhoc1484(1), adhoc1(0)}
{nseg = 1}
{strdef color color = "White"}
{pt3dclear()}
{pt3dadd(202608.000000,150492.000000,37000.000000,1800.000000)}
{pt3dadd(209796.000000,132708.000000,75625.000000,1800.000000)}

{create adhoc1485}
{access adhoc1485}
{connect adhoc1485(1), adhoc1(0)}
{nseg = 1}
{strdef color color = "White"}
{pt3dclear()}
{pt3dadd(202608.000000,150492.000000,37000.000000,1800.000000)}
{pt3dadd(209508.000000,129228.000000,76575.000000,1800.000000)}

{create adhoc1486}
{access adhoc1486}
{connect adhoc1486(1), adhoc1(0)}
{nseg = 1}
{strdef color color = "White"}
{pt3dclear()}
{pt3dadd(202608.000000,150492.000000,37000.000000,1800.000000)}
{pt3dadd(209772.000000,128508.000000,86925.000000,1800.000000)}

{create adhoc1487}
{access adhoc1487}
{connect adhoc1487(1), adhoc1(0)}
{nseg = 1}
{strdef color color = "White"}
{pt3dclear()}
{pt3dadd(202608.000000,150492.000000,37000.000000,1800.000000)}
{pt3dadd(207984.000000,125400.000000,85875.000000,1800.000000)}

{create adhoc1488}
{access adhoc1488}
{connect adhoc1488(1), adhoc1(0)}
{nseg = 1}
{strdef color color = "White"}
{pt3dclear()}
{pt3dadd(202608.000000,150492.000000,37000.000000,1800.000000)}
{pt3dadd(207912.000000,125928.000000,83375.000000,1800.000000)}

{create adhoc1489}
{access adhoc1489}
{connect adhoc1489(1), adhoc1(0)}
{nseg = 1}
{strdef color color = "White"}
{pt3dclear()}
{pt3dadd(202608.000000,150492.000000,37000.000000,1800.000000)}
{pt3dadd(207900.000000,128424.000000,79775.000000,1800.000000)}

{create adhoc1490}
{access adhoc1490}
{connect adhoc1490(1), adhoc1(0)}
{nseg = 1}
{strdef color color = "White"}
{pt3dclear()}
{pt3dadd(202608.000000,150492.000000,37000.000000,1800.000000)}
{pt3dadd(207996.000000,128952.000000,85075.000000,1800.000000)}

{create adhoc1491}
{access adhoc1491}
{connect adhoc1491(1), adhoc1(0)}
{nseg = 1}
{strdef color color = "White"}
{pt3dclear()}
{pt3dadd(202608.000000,150492.000000,37000.000000,1800.000000)}
{pt3dadd(207948.000000,130524.000000,81875.000000,1800.000000)}

{create adhoc1492}
{access adhoc1492}
{connect adhoc1492(1), adhoc1(0)}
{nseg = 1}
{strdef color color = "White"}
{pt3dclear()}
{pt3dadd(202608.000000,150492.000000,37000.000000,1800.000000)}
{pt3dadd(207156.000000,132276.000000,81125.000000,1800.000000)}

{create adhoc1493}
{access adhoc1493}
{connect adhoc1493(1), adhoc1(0)}
{nseg = 1}
{strdef color color = "White"}
{pt3dclear()}
{pt3dadd(202608.000000,150492.000000,37000.000000,1800.000000)}
{pt3dadd(206964.000000,134592.000000,79175.000000,1800.000000)}

{create adhoc1494}
{access adhoc1494}
{connect adhoc1494(1), adhoc1(0)}
{nseg = 1}
{strdef color color = "White"}
{pt3dclear()}
{pt3dadd(202608.000000,150492.000000,37000.000000,1800.000000)}
{pt3dadd(210672.000000,136584.000000,84325.000000,1800.000000)}

{create adhoc1495}
{access adhoc1495}
{connect adhoc1495(1), adhoc1(0)}
{nseg = 1}
{strdef color color = "White"}
{pt3dclear()}
{pt3dadd(202608.000000,150492.000000,37000.000000,1800.000000)}
{pt3dadd(210684.000000,136404.000000,86425.000000,1800.000000)}

{create adhoc1496}
{access adhoc1496}
{connect adhoc1496(1), adhoc1(0)}
{nseg = 1}
{strdef color color = "White"}
{pt3dclear()}
{pt3dadd(202608.000000,150492.000000,37000.000000,1800.000000)}
{pt3dadd(210780.000000,138624.000000,81325.000000,1800.000000)}

{create adhoc1497}
{access adhoc1497}
{connect adhoc1497(1), adhoc1(0)}
{nseg = 1}
{strdef color color = "White"}
{pt3dclear()}
{pt3dadd(202608.000000,150492.000000,37000.000000,1800.000000)}
{pt3dadd(210660.000000,135540.000000,81675.000000,1800.000000)}

{create adhoc1498}
{access adhoc1498}
{connect adhoc1498(1), adhoc1(0)}
{nseg = 1}
{strdef color color = "White"}
{pt3dclear()}
{pt3dadd(202608.000000,150492.000000,37000.000000,1800.000000)}
{pt3dadd(210456.000000,136104.000000,76925.000000,1800.000000)}

{create adhoc1499}
{access adhoc1499}
{connect adhoc1499(1), adhoc1(0)}
{nseg = 1}
{strdef color color = "White"}
{pt3dclear()}
{pt3dadd(202608.000000,150492.000000,37000.000000,1800.000000)}
{pt3dadd(209760.000000,139620.000000,79825.000000,1800.000000)}

{create adhoc1500}
{access adhoc1500}
{connect adhoc1500(1), adhoc1(0)}
{nseg = 1}
{strdef color color = "White"}
{pt3dclear()}
{pt3dadd(202608.000000,150492.000000,37000.000000,1800.000000)}
{pt3dadd(209724.000000,138216.000000,77525.000000,1800.000000)}

{create adhoc1501}
{access adhoc1501}
{connect adhoc1501(1), adhoc1(0)}
{nseg = 1}
{strdef color color = "White"}
{pt3dclear()}
{pt3dadd(202608.000000,150492.000000,37000.000000,1800.000000)}
{pt3dadd(209748.000000,136920.000000,79775.000000,1800.000000)}

{create adhoc1502}
{access adhoc1502}
{connect adhoc1502(1), adhoc1(0)}
{nseg = 1}
{strdef color color = "White"}
{pt3dclear()}
{pt3dadd(202608.000000,150492.000000,37000.000000,1800.000000)}
{pt3dadd(209868.000000,131904.000000,86175.000000,1800.000000)}

{create adhoc1503}
{access adhoc1503}
{connect adhoc1503(1), adhoc1(0)}
{nseg = 1}
{strdef color color = "White"}
{pt3dclear()}
{pt3dadd(202608.000000,150492.000000,37000.000000,1800.000000)}
{pt3dadd(209820.000000,133284.000000,83125.000000,1800.000000)}

{create adhoc1504}
{access adhoc1504}
{connect adhoc1504(1), adhoc1(0)}
{nseg = 1}
{strdef color color = "White"}
{pt3dclear()}
{pt3dadd(202608.000000,150492.000000,37000.000000,1800.000000)}
{pt3dadd(209856.000000,130524.000000,83625.000000,1800.000000)}

{create adhoc1505}
{access adhoc1505}
{connect adhoc1505(1), adhoc1(0)}
{nseg = 1}
{strdef color color = "White"}
{pt3dclear()}
{pt3dadd(202608.000000,150492.000000,37000.000000,1800.000000)}
{pt3dadd(209784.000000,133308.000000,81175.000000,1800.000000)}

{create adhoc1506}
{access adhoc1506}
{connect adhoc1506(1), adhoc1(0)}
{nseg = 1}
{strdef color color = "White"}
{pt3dclear()}
{pt3dadd(202608.000000,150492.000000,37000.000000,1800.000000)}
{pt3dadd(209724.000000,133728.000000,78575.000000,1800.000000)}

{create adhoc1507}
{access adhoc1507}
{connect adhoc1507(1), adhoc1(0)}
{nseg = 1}
{strdef color color = "White"}
{pt3dclear()}
{pt3dadd(202608.000000,150492.000000,37000.000000,1800.000000)}
{pt3dadd(209724.000000,130716.000000,78825.000000,1800.000000)}

{create adhoc1508}
{access adhoc1508}
{connect adhoc1508(1), adhoc1(0)}
{nseg = 1}
{strdef color color = "White"}
{pt3dclear()}
{pt3dadd(202608.000000,150492.000000,37000.000000,1800.000000)}
{pt3dadd(207780.000000,136932.000000,87625.000000,1800.000000)}

{create adhoc1509}
{access adhoc1509}
{connect adhoc1509(1), adhoc1(0)}
{nseg = 1}
{strdef color color = "White"}
{pt3dclear()}
{pt3dadd(202608.000000,150492.000000,37000.000000,1800.000000)}
{pt3dadd(209148.000000,134352.000000,86075.000000,1800.000000)}

{create adhoc1510}
{access adhoc1510}
{connect adhoc1510(1), adhoc1(0)}
{nseg = 1}
{strdef color color = "White"}
{pt3dclear()}
{pt3dadd(202608.000000,150492.000000,37000.000000,1800.000000)}
{pt3dadd(209184.000000,134604.000000,88275.000000,1800.000000)}

{create adhoc1511}
{access adhoc1511}
{connect adhoc1511(1), adhoc1(0)}
{nseg = 1}
{strdef color color = "White"}
{pt3dclear()}
{pt3dadd(202608.000000,150492.000000,37000.000000,1800.000000)}
{pt3dadd(209220.000000,133920.000000,90975.000000,1800.000000)}

{create adhoc1512}
{access adhoc1512}
{connect adhoc1512(1), adhoc1(0)}
{nseg = 1}
{strdef color color = "White"}
{pt3dclear()}
{pt3dadd(202608.000000,150492.000000,37000.000000,1800.000000)}
{pt3dadd(209424.000000,141504.000000,90675.000000,1800.000000)}

{create adhoc1513}
{access adhoc1513}
{connect adhoc1513(1), adhoc1(0)}
{nseg = 1}
{strdef color color = "White"}
{pt3dclear()}
{pt3dadd(202608.000000,150492.000000,37000.000000,1800.000000)}
{pt3dadd(209436.000000,138432.000000,91675.000000,1800.000000)}

{create adhoc1514}
{access adhoc1514}
{connect adhoc1514(1), adhoc1(0)}
{nseg = 1}
{strdef color color = "White"}
{pt3dclear()}
{pt3dadd(202608.000000,150492.000000,37000.000000,1800.000000)}
{pt3dadd(209364.000000,139368.000000,87925.000000,1800.000000)}

{create adhoc1515}
{access adhoc1515}
{connect adhoc1515(1), adhoc1(0)}
{nseg = 1}
{strdef color color = "White"}
{pt3dclear()}
{pt3dadd(202608.000000,150492.000000,37000.000000,1800.000000)}
{pt3dadd(205320.000000,144432.000000,90575.000000,1800.000000)}

{create adhoc1516}
{access adhoc1516}
{connect adhoc1516(1), adhoc1(0)}
{nseg = 1}
{strdef color color = "White"}
{pt3dclear()}
{pt3dadd(202608.000000,150492.000000,37000.000000,1800.000000)}
{pt3dadd(207948.000000,148500.000000,88975.000000,1800.000000)}

{create adhoc1517}
{access adhoc1517}
{connect adhoc1517(1), adhoc1(0)}
{nseg = 1}
{strdef color color = "White"}
{pt3dclear()}
{pt3dadd(202608.000000,150492.000000,37000.000000,1800.000000)}
{pt3dadd(207936.000000,147780.000000,85925.000000,1800.000000)}

{create adhoc1518}
{access adhoc1518}
{connect adhoc1518(1), adhoc1(0)}
{nseg = 1}
{strdef color color = "White"}
{pt3dclear()}
{pt3dadd(202608.000000,150492.000000,37000.000000,1800.000000)}
{pt3dadd(207960.000000,146028.000000,88575.000000,1800.000000)}

{create adhoc1519}
{access adhoc1519}
{connect adhoc1519(1), adhoc1(0)}
{nseg = 1}
{strdef color color = "White"}
{pt3dclear()}
{pt3dadd(202608.000000,150492.000000,37000.000000,1800.000000)}
{pt3dadd(207924.000000,145164.000000,85825.000000,1800.000000)}

{create adhoc1520}
{access adhoc1520}
{connect adhoc1520(1), adhoc1(0)}
{nseg = 1}
{strdef color color = "White"}
{pt3dclear()}
{pt3dadd(202608.000000,150492.000000,37000.000000,1800.000000)}
{pt3dadd(207696.000000,146616.000000,80725.000000,1800.000000)}

{create adhoc1521}
{access adhoc1521}
{connect adhoc1521(1), adhoc1(0)}
{nseg = 1}
{strdef color color = "White"}
{pt3dclear()}
{pt3dadd(202608.000000,150492.000000,37000.000000,1800.000000)}
{pt3dadd(207756.000000,147240.000000,83325.000000,1800.000000)}

{create adhoc1522}
{access adhoc1522}
{connect adhoc1522(1), adhoc1(0)}
{nseg = 1}
{strdef color color = "White"}
{pt3dclear()}
{pt3dadd(202608.000000,150492.000000,37000.000000,1800.000000)}
{pt3dadd(207756.000000,150552.000000,82775.000000,1800.000000)}

{create adhoc1523}
{access adhoc1523}
{connect adhoc1523(1), adhoc1(0)}
{nseg = 1}
{strdef color color = "White"}
{pt3dclear()}
{pt3dadd(202608.000000,150492.000000,37000.000000,1800.000000)}
{pt3dadd(207864.000000,151764.000000,79625.000000,1800.000000)}

{create adhoc1524}
{access adhoc1524}
{connect adhoc1524(1), adhoc1(0)}
{nseg = 1}
{strdef color color = "White"}
{pt3dclear()}
{pt3dadd(202608.000000,150492.000000,37000.000000,1800.000000)}
{pt3dadd(207864.000000,149460.000000,79375.000000,1800.000000)}

{create adhoc1525}
{access adhoc1525}
{connect adhoc1525(1), adhoc1(0)}
{nseg = 1}
{strdef color color = "White"}
{pt3dclear()}
{pt3dadd(202608.000000,150492.000000,37000.000000,1800.000000)}
{pt3dadd(208044.000000,151428.000000,77425.000000,1800.000000)}

{create adhoc1526}
{access adhoc1526}
{connect adhoc1526(1), adhoc1(0)}
{nseg = 1}
{strdef color color = "White"}
{pt3dclear()}
{pt3dadd(202608.000000,150492.000000,37000.000000,1800.000000)}
{pt3dadd(208056.000000,154524.000000,77075.000000,1800.000000)}

{create adhoc1527}
{access adhoc1527}
{connect adhoc1527(1), adhoc1(0)}
{nseg = 1}
{strdef color color = "White"}
{pt3dclear()}
{pt3dadd(202608.000000,150492.000000,37000.000000,1800.000000)}
{pt3dadd(208080.000000,154176.000000,79775.000000,1800.000000)}

{create adhoc1528}
{access adhoc1528}
{connect adhoc1528(1), adhoc1(0)}
{nseg = 1}
{strdef color color = "White"}
{pt3dclear()}
{pt3dadd(202608.000000,150492.000000,37000.000000,1800.000000)}
{pt3dadd(208128.000000,153804.000000,82075.000000,1800.000000)}

{create adhoc1529}
{access adhoc1529}
{connect adhoc1529(1), adhoc1(0)}
{nseg = 1}
{strdef color color = "White"}
{pt3dclear()}
{pt3dadd(202608.000000,150492.000000,37000.000000,1800.000000)}
{pt3dadd(208200.000000,153816.000000,84475.000000,1800.000000)}

{create adhoc1530}
{access adhoc1530}
{connect adhoc1530(1), adhoc1(0)}
{nseg = 1}
{strdef color color = "White"}
{pt3dclear()}
{pt3dadd(202608.000000,150492.000000,37000.000000,1800.000000)}
{pt3dadd(208248.000000,151608.000000,87625.000000,1800.000000)}

{create adhoc1531}
{access adhoc1531}
{connect adhoc1531(1), adhoc1(0)}
{nseg = 1}
{strdef color color = "White"}
{pt3dclear()}
{pt3dadd(202608.000000,150492.000000,37000.000000,1800.000000)}
{pt3dadd(210204.000000,149772.000000,87425.000000,1800.000000)}

{create adhoc1532}
{access adhoc1532}
{connect adhoc1532(1), adhoc1(0)}
{nseg = 1}
{strdef color color = "White"}
{pt3dclear()}
{pt3dadd(202608.000000,150492.000000,37000.000000,1800.000000)}
{pt3dadd(210084.000000,152508.000000,81175.000000,1800.000000)}

{create adhoc1533}
{access adhoc1533}
{connect adhoc1533(1), adhoc1(0)}
{nseg = 1}
{strdef color color = "White"}
{pt3dclear()}
{pt3dadd(202608.000000,150492.000000,37000.000000,1800.000000)}
{pt3dadd(210132.000000,149724.000000,84975.000000,1800.000000)}

{create adhoc1534}
{access adhoc1534}
{connect adhoc1534(1), adhoc1(0)}
{nseg = 1}
{strdef color color = "White"}
{pt3dclear()}
{pt3dadd(202608.000000,150492.000000,37000.000000,1800.000000)}
{pt3dadd(210096.000000,147252.000000,82225.000000,1800.000000)}

{create adhoc1535}
{access adhoc1535}
{connect adhoc1535(1), adhoc1(0)}
{nseg = 1}
{strdef color color = "White"}
{pt3dclear()}
{pt3dadd(202608.000000,150492.000000,37000.000000,1800.000000)}
{pt3dadd(210096.000000,150192.000000,81725.000000,1800.000000)}

{create adhoc1536}
{access adhoc1536}
{connect adhoc1536(1), adhoc1(0)}
{nseg = 1}
{strdef color color = "White"}
{pt3dclear()}
{pt3dadd(202608.000000,150492.000000,37000.000000,1800.000000)}
{pt3dadd(208416.000000,139908.000000,86875.000000,1800.000000)}

{create adhoc1537}
{access adhoc1537}
{connect adhoc1537(1), adhoc1(0)}
{nseg = 1}
{strdef color color = "White"}
{pt3dclear()}
{pt3dadd(202608.000000,150492.000000,37000.000000,1800.000000)}
{pt3dadd(209880.000000,143388.000000,84075.000000,1800.000000)}

{create adhoc1538}
{access adhoc1538}
{connect adhoc1538(1), adhoc1(0)}
{nseg = 1}
{strdef color color = "White"}
{pt3dclear()}
{pt3dadd(202608.000000,150492.000000,37000.000000,1800.000000)}
{pt3dadd(213000.000000,147648.000000,86925.000000,1800.000000)}

{create adhoc1539}
{access adhoc1539}
{connect adhoc1539(1), adhoc1(0)}
{nseg = 1}
{strdef color color = "White"}
{pt3dclear()}
{pt3dadd(202608.000000,150492.000000,37000.000000,1800.000000)}
{pt3dadd(212652.000000,145452.000000,87975.000000,1800.000000)}

{create adhoc1540}
{access adhoc1540}
{connect adhoc1540(1), adhoc1(0)}
{nseg = 1}
{strdef color color = "White"}
{pt3dclear()}
{pt3dadd(202608.000000,150492.000000,37000.000000,1800.000000)}
{pt3dadd(211440.000000,147744.000000,85175.000000,1800.000000)}

{create adhoc1541}
{access adhoc1541}
{connect adhoc1541(1), adhoc1(0)}
{nseg = 1}
{strdef color color = "White"}
{pt3dclear()}
{pt3dadd(202608.000000,150492.000000,37000.000000,1800.000000)}
{pt3dadd(211404.000000,145920.000000,82175.000000,1800.000000)}

{create adhoc1542}
{access adhoc1542}
{connect adhoc1542(1), adhoc1(0)}
{nseg = 1}
{strdef color color = "White"}
{pt3dclear()}
{pt3dadd(202608.000000,150492.000000,37000.000000,1800.000000)}
{pt3dadd(211428.000000,143544.000000,85125.000000,1800.000000)}

{create adhoc1543}
{access adhoc1543}
{connect adhoc1543(1), adhoc1(0)}
{nseg = 1}
{strdef color color = "White"}
{pt3dclear()}
{pt3dadd(202608.000000,150492.000000,37000.000000,1800.000000)}
{pt3dadd(211392.000000,142260.000000,82375.000000,1800.000000)}

{create adhoc1544}
{access adhoc1544}
{connect adhoc1544(1), adhoc1(0)}
{nseg = 1}
{strdef color color = "White"}
{pt3dclear()}
{pt3dadd(202608.000000,150492.000000,37000.000000,1800.000000)}
{pt3dadd(211416.000000,139548.000000,83275.000000,1800.000000)}

{create adhoc1545}
{access adhoc1545}
{connect adhoc1545(1), adhoc1(0)}
{nseg = 1}
{strdef color color = "White"}
{pt3dclear()}
{pt3dadd(202608.000000,150492.000000,37000.000000,1800.000000)}
{pt3dadd(211452.000000,138972.000000,85875.000000,1800.000000)}

{create adhoc1546}
{access adhoc1546}
{connect adhoc1546(1), adhoc1(0)}
{nseg = 1}
{strdef color color = "White"}
{pt3dclear()}
{pt3dadd(202608.000000,150492.000000,37000.000000,1800.000000)}
{pt3dadd(211452.000000,141816.000000,85725.000000,1800.000000)}

{create adhoc1547}
{access adhoc1547}
{connect adhoc1547(1), adhoc1(0)}
{nseg = 1}
{strdef color color = "White"}
{pt3dclear()}
{pt3dadd(202608.000000,150492.000000,37000.000000,1800.000000)}
{pt3dadd(211500.000000,141648.000000,88825.000000,1800.000000)}

{create adhoc1548}
{access adhoc1548}
{connect adhoc1548(1), adhoc1(0)}
{nseg = 1}
{strdef color color = "White"}
{pt3dclear()}
{pt3dadd(202608.000000,150492.000000,37000.000000,1800.000000)}
{pt3dadd(211512.000000,145992.000000,90175.000000,1800.000000)}

{create adhoc1549}
{access adhoc1549}
{connect adhoc1549(1), adhoc1(0)}
{nseg = 1}
{strdef color color = "White"}
{pt3dclear()}
{pt3dadd(202608.000000,150492.000000,37000.000000,1800.000000)}
{pt3dadd(208716.000000,137304.000000,82725.000000,1800.000000)}

{create adhoc1550}
{access adhoc1550}
{connect adhoc1550(1), adhoc1(0)}
{nseg = 1}
{strdef color color = "White"}
{pt3dclear()}
{pt3dadd(202608.000000,150492.000000,37000.000000,1800.000000)}
{pt3dadd(207756.000000,137004.000000,84825.000000,1800.000000)}

{create adhoc1551}
{access adhoc1551}
{connect adhoc1551(1), adhoc1(0)}
{nseg = 1}
{strdef color color = "White"}
{pt3dclear()}
{pt3dadd(202608.000000,150492.000000,37000.000000,1800.000000)}
{pt3dadd(207552.000000,139296.000000,84225.000000,1800.000000)}

{create adhoc1552}
{access adhoc1552}
{connect adhoc1552(1), adhoc1(0)}
{nseg = 1}
{strdef color color = "White"}
{pt3dclear()}
{pt3dadd(202608.000000,150492.000000,37000.000000,1800.000000)}
{pt3dadd(207972.000000,143316.000000,88075.000000,1800.000000)}

{create adhoc1553}
{access adhoc1553}
{connect adhoc1553(1), adhoc1(0)}
{nseg = 1}
{strdef color color = "White"}
{pt3dclear()}
{pt3dadd(202608.000000,150492.000000,37000.000000,1800.000000)}
{pt3dadd(208944.000000,141828.000000,86025.000000,1800.000000)}

{create adhoc1554}
{access adhoc1554}
{connect adhoc1554(1), adhoc1(0)}
{nseg = 1}
{strdef color color = "White"}
{pt3dclear()}
{pt3dadd(202608.000000,150492.000000,37000.000000,1800.000000)}
{pt3dadd(209652.000000,140340.000000,83925.000000,1800.000000)}

{create adhoc1555}
{access adhoc1555}
{connect adhoc1555(1), adhoc1(0)}
{nseg = 1}
{strdef color color = "White"}
{pt3dclear()}
{pt3dadd(202608.000000,150492.000000,37000.000000,1800.000000)}
{pt3dadd(208116.000000,142188.000000,80125.000000,1800.000000)}

{create adhoc1556}
{access adhoc1556}
{connect adhoc1556(1), adhoc1(0)}
{nseg = 1}
{strdef color color = "White"}
{pt3dclear()}
{pt3dadd(202608.000000,150492.000000,37000.000000,1800.000000)}
{pt3dadd(208068.000000,139932.000000,78825.000000,1800.000000)}

{create adhoc1557}
{access adhoc1557}
{connect adhoc1557(1), adhoc1(0)}
{nseg = 1}
{strdef color color = "White"}
{pt3dclear()}
{pt3dadd(202608.000000,150492.000000,37000.000000,1800.000000)}
{pt3dadd(208140.000000,140376.000000,82025.000000,1800.000000)}

{create adhoc1558}
{access adhoc1558}
{connect adhoc1558(1), adhoc1(0)}
{nseg = 1}
{strdef color color = "White"}
{pt3dclear()}
{pt3dadd(202608.000000,150492.000000,37000.000000,1800.000000)}
{pt3dadd(208116.000000,138024.000000,80375.000000,1800.000000)}

{create adhoc1559}
{access adhoc1559}
{connect adhoc1559(1), adhoc1(0)}
{nseg = 1}
{strdef color color = "White"}
{pt3dclear()}
{pt3dadd(202608.000000,150492.000000,37000.000000,1800.000000)}
{pt3dadd(207408.000000,142356.000000,84075.000000,1800.000000)}

{create adhoc1560}
{access adhoc1560}
{connect adhoc1560(1), adhoc1(0)}
{nseg = 1}
{strdef color color = "White"}
{pt3dclear()}
{pt3dadd(202608.000000,150492.000000,37000.000000,1800.000000)}
{pt3dadd(204360.000000,143892.000000,78325.000000,1800.000000)}

{create adhoc1561}
{access adhoc1561}
{connect adhoc1561(1), adhoc1(0)}
{nseg = 1}
{strdef color color = "White"}
{pt3dclear()}
{pt3dadd(202608.000000,150492.000000,37000.000000,1800.000000)}
{pt3dadd(204360.000000,140076.000000,78475.000000,1800.000000)}

{create adhoc1562}
{access adhoc1562}
{connect adhoc1562(1), adhoc1(0)}
{nseg = 1}
{strdef color color = "White"}
{pt3dclear()}
{pt3dadd(202608.000000,150492.000000,37000.000000,1800.000000)}
{pt3dadd(204432.000000,141732.000000,82475.000000,1800.000000)}

{create adhoc1563}
{access adhoc1563}
{connect adhoc1563(1), adhoc1(0)}
{nseg = 1}
{strdef color color = "White"}
{pt3dclear()}
{pt3dadd(202608.000000,150492.000000,37000.000000,1800.000000)}
{pt3dadd(204468.000000,139476.000000,84675.000000,1800.000000)}

{create adhoc1564}
{access adhoc1564}
{connect adhoc1564(1), adhoc1(0)}
{nseg = 1}
{strdef color color = "White"}
{pt3dclear()}
{pt3dadd(202608.000000,150492.000000,37000.000000,1800.000000)}
{pt3dadd(203244.000000,140916.000000,87625.000000,1800.000000)}

{create adhoc1565}
{access adhoc1565}
{connect adhoc1565(1), adhoc1(0)}
{nseg = 1}
{strdef color color = "White"}
{pt3dclear()}
{pt3dadd(202608.000000,150492.000000,37000.000000,1800.000000)}
{pt3dadd(202752.000000,138372.000000,88925.000000,1800.000000)}

{create adhoc1566}
{access adhoc1566}
{connect adhoc1566(1), adhoc1(0)}
{nseg = 1}
{strdef color color = "White"}
{pt3dclear()}
{pt3dadd(202608.000000,150492.000000,37000.000000,1800.000000)}
{pt3dadd(202716.000000,138600.000000,86125.000000,1800.000000)}

{create adhoc1567}
{access adhoc1567}
{connect adhoc1567(1), adhoc1(0)}
{nseg = 1}
{strdef color color = "White"}
{pt3dclear()}
{pt3dadd(202608.000000,150492.000000,37000.000000,1800.000000)}
{pt3dadd(202692.000000,136692.000000,83875.000000,1800.000000)}

{create adhoc1568}
{access adhoc1568}
{connect adhoc1568(1), adhoc1(0)}
{nseg = 1}
{strdef color color = "White"}
{pt3dclear()}
{pt3dadd(202608.000000,150492.000000,37000.000000,1800.000000)}
{pt3dadd(202752.000000,136188.000000,86875.000000,1800.000000)}

{create adhoc1569}
{access adhoc1569}
{connect adhoc1569(1), adhoc1(0)}
{nseg = 1}
{strdef color color = "White"}
{pt3dclear()}
{pt3dadd(202608.000000,150492.000000,37000.000000,1800.000000)}
{pt3dadd(203340.000000,133968.000000,92625.000000,1800.000000)}

{create adhoc1570}
{access adhoc1570}
{connect adhoc1570(1), adhoc1(0)}
{nseg = 1}
{strdef color color = "White"}
{pt3dclear()}
{pt3dadd(202608.000000,150492.000000,37000.000000,1800.000000)}
{pt3dadd(203328.000000,135396.000000,90225.000000,1800.000000)}

{create adhoc1571}
{access adhoc1571}
{connect adhoc1571(1), adhoc1(0)}
{nseg = 1}
{strdef color color = "White"}
{pt3dclear()}
{pt3dadd(202608.000000,150492.000000,37000.000000,1800.000000)}
{pt3dadd(203340.000000,136680.000000,92675.000000,1800.000000)}

{create adhoc1572}
{access adhoc1572}
{connect adhoc1572(1), adhoc1(0)}
{nseg = 1}
{strdef color color = "White"}
{pt3dclear()}
{pt3dadd(202608.000000,150492.000000,37000.000000,1800.000000)}
{pt3dadd(204684.000000,141000.000000,90975.000000,1800.000000)}

{create adhoc1573}
{access adhoc1573}
{connect adhoc1573(1), adhoc1(0)}
{nseg = 1}
{strdef color color = "White"}
[truncated: 1,183,043 more chars]
