# Supplementary material for: Full reconstruction of large lobula plate tangential cells in Drosophila from a 3D EM dataset
Source: PLoS One. 2018 Nov 28;13(11):e0207828. doi: 10.1371/journal.pone.0207828 (PMC6261601; doi:10.1371/journal.pone.0207828)
Supplement: S1 Dataset — (ZIP) [file pone.0207828.s001.zip › Diameter hoc/Cell bodies schematic/zellkoerper3.005_distant.hoc]

/* created with nml2hocm */

{create adhoc1}
{access adhoc1}
{nseg = 1}
{strdef color color = "White"}
{pt3dclear()}
{pt3dadd(162828.000000,88524.000000,109825.000000,1800.000000)}
{pt3dadd(155340.000000,90636.000000,115025.000000,1800.000000)}

{create adhoc2}
{access adhoc2}
{connect adhoc2(1), adhoc1(0)}
{nseg = 1}
{strdef color color = "White"}
{pt3dclear()}
{pt3dadd(155340.000000,90636.000000,115025.000000,1800.000000)}
{pt3dadd(132684.000000,71532.000000,89025.000000,1800.000000)}

{create adhoc3}
{access adhoc3}
{connect adhoc3(1), adhoc1(0)}
{nseg = 1}
{strdef color color = "White"}
{pt3dclear()}
{pt3dadd(155340.000000,90636.000000,115025.000000,1800.000000)}
{pt3dadd(142572.000000,71532.000000,90825.000000,1800.000000)}

{create adhoc4}
{access adhoc4}
{connect adhoc4(1), adhoc1(0)}
{nseg = 1}
{strdef color color = "White"}
{pt3dclear()}
{pt3dadd(155340.000000,90636.000000,115025.000000,1800.000000)}
{pt3dadd(82764.000000,114444.000000,89825.000000,1800.000000)}

{create adhoc5}
{access adhoc5}
{connect adhoc5(1), adhoc1(0)}
{nseg = 1}
{strdef color color = "White"}
{pt3dclear()}
{pt3dadd(155340.000000,90636.000000,115025.000000,1800.000000)}
{pt3dadd(67596.000000,205260.000000,85425.000000,1800.000000)}

{create adhoc6}
{access adhoc6}
{connect adhoc6(1), adhoc1(0)}
{nseg = 1}
{strdef color color = "White"}
{pt3dclear()}
{pt3dadd(155340.000000,90636.000000,115025.000000,1800.000000)}
{pt3dadd(55596.000000,193548.000000,89825.000000,1800.000000)}

{create adhoc7}
{access adhoc7}
{connect adhoc7(1), adhoc1(0)}
{nseg = 1}
{strdef color color = "White"}
{pt3dclear()}
{pt3dadd(155340.000000,90636.000000,115025.000000,1800.000000)}
{pt3dadd(57612.000000,207852.000000,94625.000000,1800.000000)}

{create adhoc8}
{access adhoc8}
{connect adhoc8(1), adhoc1(0)}
{nseg = 1}
{strdef color color = "White"}
{pt3dclear()}
{pt3dadd(155340.000000,90636.000000,115025.000000,1800.000000)}
{pt3dadd(60396.000000,215244.000000,94625.000000,1800.000000)}

{create adhoc9}
{access adhoc9}
{connect adhoc9(1), adhoc1(0)}
{nseg = 1}
{strdef color color = "White"}
{pt3dclear()}
{pt3dadd(155340.000000,90636.000000,115025.000000,1800.000000)}
{pt3dadd(94284.000000,191052.000000,86625.000000,1800.000000)}

{create adhoc10}
{access adhoc10}
{connect adhoc10(1), adhoc1(0)}
{nseg = 1}
{strdef color color = "White"}
{pt3dclear()}
{pt3dadd(155340.000000,90636.000000,115025.000000,1800.000000)}
{pt3dadd(120108.000000,260748.000000,100425.000000,1800.000000)}

{create adhoc11}
{access adhoc11}
{connect adhoc11(1), adhoc1(0)}
{nseg = 1}
{strdef color color = "White"}
{pt3dclear()}
{pt3dadd(155340.000000,90636.000000,115025.000000,1800.000000)}
{pt3dadd(116268.000000,264204.000000,100425.000000,1800.000000)}

{create adhoc12}
{access adhoc12}
{connect adhoc12(1), adhoc1(0)}
{nseg = 1}
{strdef color color = "White"}
{pt3dclear()}
{pt3dadd(155340.000000,90636.000000,115025.000000,1800.000000)}
{pt3dadd(94380.000000,254412.000000,100225.000000,1800.000000)}

{create adhoc13}
{access adhoc13}
{connect adhoc13(1), adhoc1(0)}
{nseg = 1}
{strdef color color = "White"}
{pt3dclear()}
{pt3dadd(155340.000000,90636.000000,115025.000000,1800.000000)}
{pt3dadd(86412.000000,97260.000000,103425.000000,1800.000000)}

{create adhoc14}
{access adhoc14}
{connect adhoc14(1), adhoc1(0)}
{nseg = 1}
{strdef color color = "White"}
{pt3dclear()}
{pt3dadd(155340.000000,90636.000000,115025.000000,1800.000000)}
{pt3dadd(88428.000000,96108.000000,99625.000000,1800.000000)}

{create adhoc15}
{access adhoc15}
{connect adhoc15(1), adhoc1(0)}
{nseg = 1}
{strdef color color = "White"}
{pt3dclear()}
{pt3dadd(155340.000000,90636.000000,115025.000000,1800.000000)}
{pt3dadd(98988.000000,119532.000000,95025.000000,1800.000000)}

{create adhoc16}
{access adhoc16}
{connect adhoc16(1), adhoc1(0)}
{nseg = 1}
{strdef color color = "White"}
{pt3dclear()}
{pt3dadd(155340.000000,90636.000000,115025.000000,1800.000000)}
{pt3dadd(137292.000000,79692.000000,99825.000000,1800.000000)}

{create adhoc17}
{access adhoc17}
{connect adhoc17(1), adhoc1(0)}
{nseg = 1}
{strdef color color = "White"}
{pt3dclear()}
{pt3dadd(155340.000000,90636.000000,115025.000000,1800.000000)}
{pt3dadd(95724.000000,80460.000000,105225.000000,1800.000000)}

{create adhoc18}
{access adhoc18}
{connect adhoc18(1), adhoc1(0)}
{nseg = 1}
{strdef color color = "White"}
{pt3dclear()}
{pt3dadd(155340.000000,90636.000000,115025.000000,1800.000000)}
{pt3dadd(142284.000000,185772.000000,168425.000000,1800.000000)}

{create adhoc19}
{access adhoc19}
{connect adhoc19(1), adhoc1(0)}
{nseg = 1}
{strdef color color = "White"}
{pt3dclear()}
{pt3dadd(155340.000000,90636.000000,115025.000000,1800.000000)}
{pt3dadd(139212.000000,194124.000000,156625.000000,1800.000000)}

{create adhoc20}
{access adhoc20}
{connect adhoc20(1), adhoc1(0)}
{nseg = 1}
{strdef color color = "White"}
{pt3dclear()}
{pt3dadd(155340.000000,90636.000000,115025.000000,1800.000000)}
{pt3dadd(147372.000000,199692.000000,181225.000000,1800.000000)}

{create adhoc21}
{access adhoc21}
{connect adhoc21(1), adhoc1(0)}
{nseg = 1}
{strdef color color = "White"}
{pt3dclear()}
{pt3dadd(155340.000000,90636.000000,115025.000000,1800.000000)}
{pt3dadd(136620.000000,93228.000000,130625.000000,1800.000000)}

{create adhoc22}
{access adhoc22}
{connect adhoc22(1), adhoc1(0)}
{nseg = 1}
{strdef color color = "White"}
{pt3dclear()}
{pt3dadd(155340.000000,90636.000000,115025.000000,1800.000000)}
{pt3dadd(126060.000000,91404.000000,128425.000000,1800.000000)}

{create adhoc23}
{access adhoc23}
{connect adhoc23(1), adhoc1(0)}
{nseg = 1}
{strdef color color = "White"}
{pt3dclear()}
{pt3dadd(155340.000000,90636.000000,115025.000000,1800.000000)}
{pt3dadd(123564.000000,82092.000000,121825.000000,1800.000000)}
