# Supplementary material for: Full reconstruction of large lobula plate tangential cells in Drosophila from a 3D EM dataset
Source: PLoS One. 2018 Nov 28;13(11):e0207828. doi: 10.1371/journal.pone.0207828 (PMC6261601; doi:10.1371/journal.pone.0207828)
Supplement: S1 Dataset — (ZIP) [file pone.0207828.s001.zip › Diameter hoc/Cell bodies schematic/zellkoerper3.005_located.hoc]

/* created with nml2hocm */

{create adhoc1}
{access adhoc1}
{nseg = 1}
{strdef color color = "White"}
{pt3dclear()}
{pt3dadd(197484.000000,182220.000000,115425.000000,1800.000000)}
{pt3dadd(203244.000000,191340.000000,95025.000000,1800.000000)}

{create adhoc2}
{access adhoc2}
{connect adhoc2(1), adhoc1(0)}
{nseg = 1}
{strdef color color = "White"}
{pt3dclear()}
{pt3dadd(203244.000000,191340.000000,95025.000000,1800.000000)}
{pt3dadd(185100.000000,216588.000000,110225.000000,1800.000000)}

{create adhoc3}
{access adhoc3}
{connect adhoc3(1), adhoc1(0)}
{nseg = 1}
{strdef color color = "White"}
{pt3dclear()}
{pt3dadd(203244.000000,191340.000000,95025.000000,1800.000000)}
{pt3dadd(185100.000000,209772.000000,110225.000000,1800.000000)}

{create adhoc4}
{access adhoc4}
{connect adhoc4(1), adhoc1(0)}
{nseg = 1}
{strdef color color = "White"}
{pt3dclear()}
{pt3dadd(203244.000000,191340.000000,95025.000000,1800.000000)}
{pt3dadd(191340.000000,210444.000000,103825.000000,1800.000000)}

{create adhoc5}
{access adhoc5}
{connect adhoc5(1), adhoc1(0)}
{nseg = 1}
{strdef color color = "White"}
{pt3dclear()}
{pt3dadd(203244.000000,191340.000000,95025.000000,1800.000000)}
{pt3dadd(196716.000000,203052.000000,104225.000000,1800.000000)}

{create adhoc6}
{access adhoc6}
{connect adhoc6(1), adhoc1(0)}
{nseg = 1}
{strdef color color = "White"}
{pt3dclear()}
{pt3dadd(203244.000000,191340.000000,95025.000000,1800.000000)}
{pt3dadd(203148.000000,196332.000000,104225.000000,1800.000000)}

{create adhoc7}
{access adhoc7}
{connect adhoc7(1), adhoc1(0)}
{nseg = 1}
{strdef color color = "White"}
{pt3dclear()}
{pt3dadd(203244.000000,191340.000000,95025.000000,1800.000000)}
{pt3dadd(203244.000000,172620.000000,111825.000000,1800.000000)}

{create adhoc8}
{access adhoc8}
{connect adhoc8(1), adhoc1(0)}
{nseg = 1}
{strdef color color = "White"}
{pt3dclear()}
{pt3dadd(203244.000000,191340.000000,95025.000000,1800.000000)}
{pt3dadd(201228.000000,187212.000000,105425.000000,1800.000000)}

{create adhoc9}
{access adhoc9}
{connect adhoc9(1), adhoc1(0)}
{nseg = 1}
{strdef color color = "White"}
{pt3dclear()}
{pt3dadd(203244.000000,191340.000000,95025.000000,1800.000000)}
{pt3dadd(197484.000000,196716.000000,111225.000000,1800.000000)}

{create adhoc10}
{access adhoc10}
{connect adhoc10(1), adhoc1(0)}
{nseg = 1}
{strdef color color = "White"}
{pt3dclear()}
{pt3dadd(203244.000000,191340.000000,95025.000000,1800.000000)}
{pt3dadd(191628.000000,203436.000000,113825.000000,1800.000000)}

{create adhoc11}
{access adhoc11}
{connect adhoc11(1), adhoc1(0)}
{nseg = 1}
{strdef color color = "White"}
{pt3dclear()}
{pt3dadd(203244.000000,191340.000000,95025.000000,1800.000000)}
{pt3dadd(181260.000000,213036.000000,114825.000000,1800.000000)}

{create adhoc12}
{access adhoc12}
{connect adhoc12(1), adhoc1(0)}
{nseg = 1}
{strdef color color = "White"}
{pt3dclear()}
{pt3dadd(203244.000000,191340.000000,95025.000000,1800.000000)}
{pt3dadd(202284.000000,191052.000000,98425.000000,1800.000000)}

{create adhoc13}
{access adhoc13}
{connect adhoc13(1), adhoc1(0)}
{nseg = 1}
{strdef color color = "White"}
{pt3dclear()}
{pt3dadd(203244.000000,191340.000000,95025.000000,1800.000000)}
{pt3dadd(192300.000000,191820.000000,117625.000000,1800.000000)}

{create adhoc14}
{access adhoc14}
{connect adhoc14(1), adhoc1(0)}
{nseg = 1}
{strdef color color = "White"}
{pt3dclear()}
{pt3dadd(203244.000000,191340.000000,95025.000000,1800.000000)}
{pt3dadd(190380.000000,166284.000000,119825.000000,1800.000000)}

{create adhoc15}
{access adhoc15}
{connect adhoc15(1), adhoc1(0)}
{nseg = 1}
{strdef color color = "White"}
{pt3dclear()}
{pt3dadd(203244.000000,191340.000000,95025.000000,1800.000000)}
{pt3dadd(181932.000000,202764.000000,121625.000000,1800.000000)}

{create adhoc16}
{access adhoc16}
{connect adhoc16(1), adhoc1(0)}
{nseg = 1}
{strdef color color = "White"}
{pt3dclear()}
{pt3dadd(203244.000000,191340.000000,95025.000000,1800.000000)}
{pt3dadd(176940.000000,211404.000000,121625.000000,1800.000000)}

{create adhoc17}
{access adhoc17}
{connect adhoc17(1), adhoc1(0)}
{nseg = 1}
{strdef color color = "White"}
{pt3dclear()}
{pt3dadd(203244.000000,191340.000000,95025.000000,1800.000000)}
{pt3dadd(175596.000000,199692.000000,125825.000000,1800.000000)}

{create adhoc18}
{access adhoc18}
{connect adhoc18(1), adhoc1(0)}
{nseg = 1}
{strdef color color = "White"}
{pt3dclear()}
{pt3dadd(203244.000000,191340.000000,95025.000000,1800.000000)}
{pt3dadd(166092.000000,205164.000000,128825.000000,1800.000000)}

{create adhoc19}
{access adhoc19}
{connect adhoc19(1), adhoc1(0)}
{nseg = 1}
{strdef color color = "White"}
{pt3dclear()}
{pt3dadd(203244.000000,191340.000000,95025.000000,1800.000000)}
{pt3dadd(157260.000000,196908.000000,132825.000000,1800.000000)}
