# Supplementary material for: Full reconstruction of large lobula plate tangential cells in Drosophila from a 3D EM dataset
Source: PLoS One. 2018 Nov 28;13(11):e0207828. doi: 10.1371/journal.pone.0207828 (PMC6261601; doi:10.1371/journal.pone.0207828)
Supplement: S1 Dataset — (ZIP) [file pone.0207828.s001.zip › Diameter hoc/Cell7_VCH_1Skel.001_truff__472ee6.hoc]

/* created with convertKnossosNmlToHoc.m */

{create adhoc1}
{access adhoc1}
{nseg = 1}
{strdef color color = "White"}
{pt3dclear()}
{pt3dadd(177696.000000,127692.000000,35675.000000,169.705630)}
{pt3dadd(177624.000000,127704.000000,36025.000000,192.443507)}
{pt3dadd(177864.000000,127212.000000,36200.000000,194.833614)}
{pt3dadd(177660.000000,126984.000000,36500.000000,187.522154)}
{pt3dadd(177216.000000,126588.000000,36850.000000,141.156336)}
{pt3dadd(175536.000000,126108.000000,37175.000000,146.967738)}
{pt3dadd(175092.000000,126012.000000,37650.000000,178.471856)}
{pt3dadd(174804.000000,125856.000000,37700.000000,180.629324)}
{pt3dadd(174228.000000,125616.000000,37750.000000,177.182130)}
{pt3dadd(173604.000000,125568.000000,38050.000000,180.393082)}
{pt3dadd(173460.000000,125256.000000,38300.000000,178.785874)}
{pt3dadd(173016.000000,125532.000000,38625.000000,168.081274)}
{pt3dadd(172716.000000,125736.000000,38900.000000,158.004226)}
{pt3dadd(172152.000000,126024.000000,39275.000000,181.186698)}
{pt3dadd(171684.000000,126048.000000,39650.000000,192.673372)}
{pt3dadd(170940.000000,126072.000000,39950.000000,201.948768)}
{pt3dadd(170868.000000,125940.000000,40250.000000,181.149250)}
{pt3dadd(170916.000000,125736.000000,40350.000000,146.078516)}
{pt3dadd(170988.000000,125448.000000,40700.000000,117.902170)}
{pt3dadd(170652.000000,125304.000000,40900.000000,102.626466)}
{pt3dadd(170316.000000,125148.000000,41100.000000,87.928840)}
{pt3dadd(169920.000000,125076.000000,41600.000000,114.525826)}
{pt3dadd(169704.000000,125016.000000,41975.000000,141.122812)}
{pt3dadd(169428.000000,124944.000000,42375.000000,180.016154)}
{pt3dadd(169152.000000,124932.000000,42550.000000,222.718604)}
{pt3dadd(168804.000000,124896.000000,42850.000000,252.112986)}
{pt3dadd(168552.000000,125172.000000,43150.000000,238.995590)}
{pt3dadd(168480.000000,125280.000000,43500.000000,210.602490)}
{pt3dadd(168480.000000,125400.000000,43825.000000,170.491112)}
{pt3dadd(168552.000000,125628.000000,44200.000000,123.819357)}
{pt3dadd(168672.000000,125736.000000,44675.000000,89.045649)}
{pt3dadd(168792.000000,125628.000000,45050.000000,76.207479)}
{pt3dadd(168648.000000,125544.000000,45350.000000,71.407388)}
{pt3dadd(168300.000000,125592.000000,45550.000000,94.150090)}

{create adhoc2}
{access adhoc2}
{connect adhoc2(1), adhoc1(0)}
{nseg = 1}
{strdef color color = "White"}
{pt3dclear()}
{pt3dadd(168300.000000,125592.000000,45550.000000,94.150090)}
{pt3dadd(168348.000000,125748.000000,45200.000000,109.654890)}
{pt3dadd(168456.000000,125952.000000,44900.000000,193.719334)}
{pt3dadd(168360.000000,126096.000000,44525.000000,198.071788)}
{pt3dadd(168096.000000,126588.000000,44175.000000,224.563486)}
{pt3dadd(168540.000000,128244.000000,43650.000000,246.154630)}
{pt3dadd(168552.000000,128940.000000,43300.000000,272.751180)}
{pt3dadd(168564.000000,129072.000000,42875.000000,230.447690)}
{pt3dadd(168660.000000,129360.000000,42525.000000,246.253334)}
{pt3dadd(168696.000000,129684.000000,42100.000000,234.014376)}
{pt3dadd(168528.000000,129804.000000,41600.000000,228.755044)}
{pt3dadd(168984.000000,129960.000000,41175.000000,219.982468)}
{pt3dadd(169512.000000,130356.000000,40850.000000,198.038584)}
{pt3dadd(169776.000000,130500.000000,40700.000000,183.050468)}
{pt3dadd(169704.000000,130908.000000,40525.000000,177.503000)}
{pt3dadd(170196.000000,131112.000000,40125.000000,158.043970)}
{pt3dadd(170508.000000,131472.000000,39725.000000,132.572239)}
{pt3dadd(170556.000000,131688.000000,39325.000000,130.219151)}
{pt3dadd(170640.000000,132024.000000,38925.000000,140.160277)}
{pt3dadd(170472.000000,132516.000000,38625.000000,136.341791)}
{pt3dadd(170568.000000,133140.000000,38350.000000,127.294879)}
{pt3dadd(170868.000000,134004.000000,38075.000000,121.175400)}
{pt3dadd(171156.000000,134172.000000,37475.000000,104.224526)}
{pt3dadd(171552.000000,134328.000000,37225.000000,87.253962)}
{pt3dadd(171708.000000,134220.000000,36675.000000,80.856828)}
{pt3dadd(172140.000000,134040.000000,36100.000000,74.224051)}
{pt3dadd(172560.000000,134016.000000,35450.000000,73.720802)}
{pt3dadd(172824.000000,134424.000000,34950.000000,72.660442)}
{pt3dadd(173124.000000,134664.000000,34675.000000,74.519898)}
{pt3dadd(173484.000000,135036.000000,34425.000000,81.628731)}
{pt3dadd(173772.000000,135228.000000,34200.000000,112.027472)}
{pt3dadd(174120.000000,135228.000000,34150.000000,168.033097)}
{pt3dadd(174636.000000,135204.000000,33875.000000,231.235595)}
{pt3dadd(175404.000000,135252.000000,33725.000000,232.587091)}
{pt3dadd(175932.000000,135348.000000,33250.000000,231.875392)}
{pt3dadd(177120.000000,134880.000000,33150.000000,214.337932)}
{pt3dadd(177828.000000,134280.000000,33250.000000,170.691488)}
{pt3dadd(178236.000000,134088.000000,33200.000000,127.853312)}
{pt3dadd(178620.000000,134052.000000,32875.000000,171.008178)}
{pt3dadd(178764.000000,134304.000000,32800.000000,184.767790)}
{pt3dadd(178860.000000,134340.000000,32600.000000,183.045228)}
{pt3dadd(179400.000000,134544.000000,32175.000000,185.963030)}
{pt3dadd(179772.000000,134724.000000,31975.000000,168.394002)}
{pt3dadd(180132.000000,134784.000000,31850.000000,125.239136)}
{pt3dadd(180504.000000,134892.000000,31650.000000,106.592738)}
{pt3dadd(181224.000000,134928.000000,31425.000000,98.985222)}
{pt3dadd(181704.000000,135024.000000,31625.000000,86.447877)}
{pt3dadd(182064.000000,135096.000000,31700.000000,81.962420)}

{create adhoc3}
{access adhoc3}
{connect adhoc3(1), adhoc1(0)}
{nseg = 1}
{strdef color color = "White"}
{pt3dclear()}
{pt3dadd(168300.000000,125592.000000,45550.000000,94.150090)}
{pt3dadd(168108.000000,125376.000000,45900.000000,107.342137)}
{pt3dadd(167796.000000,125196.000000,46250.000000,122.703136)}
{pt3dadd(167796.000000,125304.000000,46475.000000,150.238062)}
{pt3dadd(167484.000000,125268.000000,46500.000000,175.845270)}
{pt3dadd(167400.000000,125292.000000,46575.000000,200.662798)}
{pt3dadd(167316.000000,125304.000000,46700.000000,237.369512)}
{pt3dadd(167232.000000,125316.000000,46775.000000,271.271258)}
{pt3dadd(167124.000000,125340.000000,46900.000000,292.788564)}
{pt3dadd(167076.000000,125376.000000,47000.000000,305.967476)}
{pt3dadd(167028.000000,125412.000000,47100.000000,319.146388)}
{pt3dadd(166968.000000,125424.000000,47200.000000,323.692258)}
{pt3dadd(166920.000000,125436.000000,47275.000000,319.301236)}
{pt3dadd(166908.000000,125532.000000,47375.000000,310.513920)}
{pt3dadd(166944.000000,125580.000000,47475.000000,292.595030)}
{pt3dadd(166992.000000,125604.000000,47550.000000,279.416118)}
{pt3dadd(167040.000000,125628.000000,47650.000000,266.671388)}
{pt3dadd(167040.000000,125664.000000,47750.000000,266.671388)}
{pt3dadd(166908.000000,125640.000000,47825.000000,241.517580)}
{pt3dadd(166872.000000,125628.000000,47925.000000,241.517580)}
{pt3dadd(166932.000000,125664.000000,48025.000000,243.210296)}
{pt3dadd(166968.000000,125628.000000,48125.000000,223.210832)}
{pt3dadd(166956.000000,125628.000000,48225.000000,211.724636)}
{pt3dadd(166884.000000,125652.000000,48325.000000,225.783510)}
{pt3dadd(166764.000000,125676.000000,48400.000000,217.661544)}
{pt3dadd(166632.000000,125700.000000,48475.000000,211.228850)}
{pt3dadd(166548.000000,125724.000000,48575.000000,222.455738)}
{pt3dadd(166488.000000,125748.000000,48675.000000,220.763022)}
{pt3dadd(166488.000000,125808.000000,48775.000000,214.549448)}
{pt3dadd(166488.000000,125880.000000,48875.000000,215.788590)}
{pt3dadd(166488.000000,125904.000000,48975.000000,211.516684)}
{pt3dadd(166428.000000,125880.000000,49050.000000,200.289796)}
{pt3dadd(166344.000000,125940.000000,49150.000000,195.549818)}
{pt3dadd(166272.000000,126036.000000,49200.000000,194.126420)}
{pt3dadd(166308.000000,126072.000000,49325.000000,198.112250)}
{pt3dadd(166272.000000,126084.000000,49425.000000,188.671602)}
{pt3dadd(166224.000000,126108.000000,49525.000000,186.318514)}
{pt3dadd(166236.000000,126192.000000,49650.000000,176.999618)}
{pt3dadd(166296.000000,126276.000000,49750.000000,166.184058)}
{pt3dadd(166308.000000,126336.000000,49875.000000,157.489218)}
{pt3dadd(166332.000000,126480.000000,49975.000000,155.510510)}
{pt3dadd(166236.000000,126576.000000,50075.000000,153.314998)}
{pt3dadd(166212.000000,126624.000000,50150.000000,149.963328)}
{pt3dadd(166104.000000,126744.000000,50225.000000,155.553916)}
{pt3dadd(166068.000000,126840.000000,50300.000000,160.262926)}
{pt3dadd(166044.000000,126840.000000,50400.000000,170.354204)}
{pt3dadd(166044.000000,126900.000000,50475.000000,169.312216)}
{pt3dadd(166056.000000,126960.000000,50575.000000,171.507728)}
{pt3dadd(165948.000000,126972.000000,50625.000000,166.959128)}
{pt3dadd(165996.000000,126984.000000,50750.000000,162.250118)}
{pt3dadd(165972.000000,127020.000000,50875.000000,159.728136)}
{pt3dadd(165876.000000,127092.000000,50950.000000,166.557866)}
{pt3dadd(165756.000000,127092.000000,51025.000000,174.135926)}
{pt3dadd(165696.000000,127056.000000,51100.000000,198.683990)}
{pt3dadd(165588.000000,126972.000000,51150.000000,239.770196)}
{pt3dadd(165552.000000,126948.000000,51250.000000,291.152184)}
{pt3dadd(165528.000000,126960.000000,51325.000000,335.501042)}
{pt3dadd(165468.000000,126972.000000,51425.000000,375.864070)}
{pt3dadd(165456.000000,126972.000000,51525.000000,410.297716)}
{pt3dadd(165360.000000,126996.000000,51600.000000,410.297716)}
{pt3dadd(165420.000000,127008.000000,51675.000000,382.872606)}
{pt3dadd(165360.000000,127044.000000,51775.000000,359.228490)}
{pt3dadd(165384.000000,127032.000000,51850.000000,326.502434)}
{pt3dadd(165324.000000,127056.000000,51900.000000,277.294296)}
{pt3dadd(165408.000000,127008.000000,51975.000000,238.481028)}
{pt3dadd(165336.000000,126984.000000,52050.000000,221.172520)}
{pt3dadd(165264.000000,126960.000000,52125.000000,205.877006)}
{pt3dadd(165192.000000,127032.000000,52200.000000,198.240034)}
{pt3dadd(165156.000000,126924.000000,52275.000000,194.254204)}
{pt3dadd(165288.000000,126864.000000,52375.000000,196.690276)}
{pt3dadd(165192.000000,126828.000000,52425.000000,184.451318)}
{pt3dadd(165108.000000,126780.000000,52500.000000,181.653008)}
{pt3dadd(165036.000000,126756.000000,52650.000000,174.074948)}
{pt3dadd(165060.000000,126720.000000,52750.000000,167.245218)}
{pt3dadd(165012.000000,126696.000000,52900.000000,166.006076)}
{pt3dadd(165120.000000,126744.000000,53000.000000,176.821636)}
{pt3dadd(165060.000000,126708.000000,53125.000000,179.619946)}
{pt3dadd(165048.000000,126720.000000,53250.000000,185.823094)}
{pt3dadd(165000.000000,126732.000000,53350.000000,196.638654)}
{pt3dadd(164928.000000,126744.000000,53475.000000,201.863626)}
{pt3dadd(164844.000000,126708.000000,53600.000000,196.638654)}
{pt3dadd(164808.000000,126720.000000,53725.000000,191.229426)}
{pt3dadd(164772.000000,126732.000000,53850.000000,188.618508)}
{pt3dadd(164652.000000,126828.000000,53950.000000,183.393536)}
{pt3dadd(164544.000000,126924.000000,54075.000000,176.971634)}
{pt3dadd(164568.000000,126984.000000,54200.000000,171.381046)}
{pt3dadd(164520.000000,127092.000000,54325.000000,166.672036)}
{pt3dadd(164460.000000,127260.000000,54450.000000,159.842306)}
{pt3dadd(164448.000000,127320.000000,54575.000000,183.799184)}
{pt3dadd(164484.000000,127308.000000,54700.000000,188.846174)}
{pt3dadd(164496.000000,127368.000000,54825.000000,186.867466)}
{pt3dadd(164604.000000,127356.000000,54925.000000,201.564222)}
{pt3dadd(164700.000000,127368.000000,55075.000000,215.276776)}
{pt3dadd(164748.000000,127476.000000,55175.000000,193.841880)}
{pt3dadd(164772.000000,127584.000000,55275.000000,193.841880)}
{pt3dadd(164808.000000,127680.000000,55400.000000,205.261236)}
{pt3dadd(164832.000000,127680.000000,55500.000000,205.261236)}
{pt3dadd(164856.000000,127692.000000,55625.000000,219.083154)}
{pt3dadd(164820.000000,127788.000000,55725.000000,238.505056)}
{pt3dadd(164832.000000,127836.000000,55825.000000,262.853320)}
{pt3dadd(164844.000000,127872.000000,55925.000000,291.747454)}
{pt3dadd(164868.000000,127860.000000,56025.000000,313.264760)}
{pt3dadd(164916.000000,127824.000000,56125.000000,334.159052)}
{pt3dadd(164916.000000,127848.000000,56250.000000,355.053344)}
{pt3dadd(164868.000000,127932.000000,56350.000000,361.993074)}
{pt3dadd(164808.000000,128004.000000,56475.000000,347.370156)}
{pt3dadd(164784.000000,128100.000000,56550.000000,335.852790)}
{pt3dadd(164676.000000,128196.000000,56700.000000,266.296660)}

{create adhoc4}
{access adhoc4}
{connect adhoc4(1), adhoc3(0)}
{nseg = 1}
{strdef color color = "White"}
{pt3dclear()}
{pt3dadd(164676.000000,128196.000000,56700.000000,266.296660)}
{pt3dadd(164856.000000,127824.000000,56575.000000,323.159960)}
{pt3dadd(164808.000000,127740.000000,56575.000000,308.957670)}
{pt3dadd(164820.000000,127572.000000,56575.000000,325.974448)}
{pt3dadd(164844.000000,127416.000000,56575.000000,313.229718)}
{pt3dadd(164880.000000,127272.000000,56600.000000,303.811704)}
{pt3dadd(164916.000000,127200.000000,56600.000000,295.403318)}
{pt3dadd(164988.000000,127152.000000,56600.000000,256.795396)}
{pt3dadd(165024.000000,127068.000000,56600.000000,224.179324)}
{pt3dadd(165108.000000,126996.000000,56600.000000,204.179860)}
{pt3dadd(165120.000000,126900.000000,56600.000000,172.511668)}
{pt3dadd(165192.000000,126828.000000,56575.000000,165.681938)}
{pt3dadd(165228.000000,126744.000000,56575.000000,164.603206)}
{pt3dadd(165264.000000,126660.000000,56575.000000,156.490636)}
{pt3dadd(165312.000000,126636.000000,56575.000000,137.186674)}
{pt3dadd(165372.000000,126540.000000,56600.000000,119.788971)}
{pt3dadd(165396.000000,126456.000000,56600.000000,105.536231)}
{pt3dadd(165396.000000,126360.000000,56575.000000,88.261608)}
{pt3dadd(165432.000000,126276.000000,56475.000000,76.283168)}
{pt3dadd(165468.000000,126216.000000,56475.000000,77.419636)}
{pt3dadd(165492.000000,126132.000000,56400.000000,80.718179)}
{pt3dadd(165540.000000,126072.000000,56400.000000,83.612049)}
{pt3dadd(165600.000000,125952.000000,56350.000000,87.866244)}
{pt3dadd(165588.000000,125880.000000,56325.000000,87.267778)}
{pt3dadd(165600.000000,125724.000000,56325.000000,86.689700)}
{pt3dadd(165600.000000,125616.000000,56375.000000,86.091234)}
{pt3dadd(165684.000000,125592.000000,56375.000000,80.325815)}
{pt3dadd(165744.000000,125532.000000,56400.000000,79.149271)}
{pt3dadd(165804.000000,125304.000000,56325.000000,82.360223)}
{pt3dadd(165708.000000,125148.000000,56325.000000,88.360531)}
{pt3dadd(165564.000000,124968.000000,56250.000000,144.144363)}
{pt3dadd(165420.000000,124608.000000,55975.000000,188.803124)}
{pt3dadd(165108.000000,124572.000000,55550.000000,207.548696)}
{pt3dadd(165228.000000,124608.000000,55125.000000,208.997193)}
{pt3dadd(164880.000000,123948.000000,54975.000000,208.234412)}
{pt3dadd(164736.000000,123312.000000,54350.000000,130.663463)}
{pt3dadd(164736.000000,124284.000000,54000.000000,108.150055)}

{create adhoc5}
{access adhoc5}
{connect adhoc5(1), adhoc3(0)}
{nseg = 1}
{strdef color color = "White"}
{pt3dclear()}
{pt3dadd(164676.000000,128196.000000,56700.000000,266.296660)}
{pt3dadd(164580.000000,128244.000000,56875.000000,339.983263)}
{pt3dadd(164712.000000,128340.000000,56975.000000,327.009728)}
{pt3dadd(164712.000000,128328.000000,57125.000000,311.410434)}
{pt3dadd(164760.000000,128352.000000,57225.000000,280.442466)}
{pt3dadd(164856.000000,128364.000000,57325.000000,232.013702)}
{pt3dadd(164952.000000,128388.000000,57425.000000,198.072578)}
{pt3dadd(165060.000000,128412.000000,57550.000000,178.073114)}
{pt3dadd(165168.000000,128448.000000,57650.000000,221.139132)}
{pt3dadd(165252.000000,128508.000000,57775.000000,249.675397)}
{pt3dadd(165336.000000,128688.000000,57850.000000,403.630280)}

{create adhoc6}
{access adhoc6}
{connect adhoc6(1), adhoc5(0)}
{nseg = 1}
{strdef color color = "White"}
{pt3dclear()}
{pt3dadd(165336.000000,128688.000000,57850.000000,403.630280)}
{pt3dadd(165360.000000,128472.000000,58200.000000,349.645363)}
{pt3dadd(165408.000000,128328.000000,58150.000000,350.442010)}
{pt3dadd(165492.000000,128220.000000,58175.000000,336.389507)}
{pt3dadd(165576.000000,128160.000000,58175.000000,285.409700)}

{create adhoc7}
{access adhoc7}
{connect adhoc7(1), adhoc5(0)}
{nseg = 1}
{strdef color color = "White"}
{pt3dclear()}
{pt3dadd(165336.000000,128688.000000,57850.000000,403.630280)}
{pt3dadd(165408.000000,128772.000000,57950.000000,222.111710)}
{pt3dadd(165468.000000,128868.000000,58075.000000,215.744710)}
{pt3dadd(165516.000000,129024.000000,58175.000000,192.100594)}
{pt3dadd(165576.000000,129156.000000,58300.000000,231.436974)}
{pt3dadd(165888.000000,129228.000000,58400.000000,241.884120)}
{pt3dadd(166080.000000,129396.000000,58500.000000,249.462180)}
{pt3dadd(166272.000000,129600.000000,58600.000000,251.214588)}
{pt3dadd(166440.000000,129852.000000,58675.000000,222.673618)}
{pt3dadd(166512.000000,129972.000000,58775.000000,185.966904)}
{pt3dadd(166644.000000,130212.000000,58875.000000,187.341816)}
{pt3dadd(166788.000000,130488.000000,58950.000000,173.608454)}
{pt3dadd(166956.000000,130644.000000,59025.000000,159.823368)}
{pt3dadd(167088.000000,130764.000000,59125.000000,174.421220)}
{pt3dadd(167172.000000,131016.000000,59150.000000,188.300190)}

{create adhoc8}
{access adhoc8}
{connect adhoc8(1), adhoc7(0)}
{nseg = 1}
{strdef color color = "White"}
{pt3dclear()}
{pt3dadd(167172.000000,131016.000000,59150.000000,188.300190)}
{pt3dadd(167220.000000,130848.000000,59275.000000,172.641173)}
{pt3dadd(167352.000000,130728.000000,59300.000000,151.584704)}
{pt3dadd(167460.000000,130656.000000,59300.000000,137.924666)}
{pt3dadd(167592.000000,130596.000000,59350.000000,125.547468)}
{pt3dadd(167736.000000,130464.000000,59400.000000,120.000000)}
{pt3dadd(167784.000000,130368.000000,59400.000000,120.000000)}
{pt3dadd(167856.000000,130320.000000,59400.000000,120.000000)}

{create adhoc9}
{access adhoc9}
{connect adhoc9(1), adhoc7(0)}
{nseg = 1}
{strdef color color = "White"}
{pt3dclear()}
{pt3dadd(167172.000000,131016.000000,59150.000000,188.300190)}
{pt3dadd(167136.000000,131268.000000,59250.000000,223.632320)}
{pt3dadd(167064.000000,131592.000000,59350.000000,230.698746)}
{pt3dadd(166956.000000,132120.000000,59450.000000,279.558752)}
{pt3dadd(166944.000000,132336.000000,59575.000000,305.065663)}
{pt3dadd(166908.000000,132456.000000,59675.000000,432.600220)}

{create adhoc10}
{access adhoc10}
{connect adhoc10(1), adhoc9(0)}
{nseg = 1}
{strdef color color = "White"}
{pt3dclear()}
{pt3dadd(166908.000000,132456.000000,59675.000000,432.600220)}
{pt3dadd(166932.000000,132564.000000,59900.000000,539.113073)}
{pt3dadd(166968.000000,132624.000000,60000.000000,491.517806)}
{pt3dadd(167028.000000,132552.000000,60125.000000,485.723818)}
{pt3dadd(167040.000000,132636.000000,60225.000000,439.777114)}
{pt3dadd(167148.000000,132732.000000,60325.000000,404.822148)}
{pt3dadd(167256.000000,132792.000000,60425.000000,419.073240)}
{pt3dadd(167232.000000,132780.000000,60550.000000,412.863396)}
{pt3dadd(167244.000000,132924.000000,60650.000000,438.656000)}
{pt3dadd(167340.000000,133020.000000,60775.000000,460.820190)}
{pt3dadd(167424.000000,133020.000000,60875.000000,463.476348)}
{pt3dadd(167460.000000,133044.000000,60975.000000,451.881414)}
{pt3dadd(167484.000000,133104.000000,61125.000000,443.337602)}
{pt3dadd(167592.000000,133140.000000,61225.000000,417.544998)}
{pt3dadd(167688.000000,133164.000000,61375.000000,384.930862)}
{pt3dadd(167796.000000,133200.000000,61450.000000,370.291010)}
{pt3dadd(167808.000000,133200.000000,61575.000000,367.634852)}
{pt3dadd(167856.000000,133224.000000,61700.000000,357.540870)}
{pt3dadd(167904.000000,133272.000000,61825.000000,337.993726)}
{pt3dadd(168024.000000,133344.000000,61925.000000,314.082560)}
{pt3dadd(168024.000000,133476.000000,62025.000000,307.828120)}
{pt3dadd(168084.000000,133524.000000,62175.000000,298.077980)}
{pt3dadd(168204.000000,133656.000000,62275.000000,283.455062)}
{pt3dadd(168216.000000,133752.000000,62400.000000,271.968866)}
{pt3dadd(168264.000000,133776.000000,62500.000000,282.685862)}
{pt3dadd(168216.000000,133788.000000,62625.000000,303.580154)}
{pt3dadd(168276.000000,133824.000000,62725.000000,295.092160)}
{pt3dadd(168264.000000,133788.000000,62850.000000,305.169208)}
{pt3dadd(168360.000000,133836.000000,62950.000000,308.735824)}
{pt3dadd(168372.000000,133884.000000,63050.000000,298.018828)}
{pt3dadd(168420.000000,133884.000000,63175.000000,264.828180)}
{pt3dadd(168432.000000,133848.000000,63300.000000,259.191364)}
{pt3dadd(168456.000000,133884.000000,63400.000000,247.300108)}
{pt3dadd(168516.000000,133920.000000,63475.000000,245.485900)}
{pt3dadd(168564.000000,133884.000000,63575.000000,260.299868)}
{pt3dadd(168648.000000,133920.000000,63675.000000,276.693196)}
{pt3dadd(168744.000000,133860.000000,63800.000000,274.940788)}
{pt3dadd(168792.000000,133848.000000,63925.000000,268.281248)}
{pt3dadd(168840.000000,133836.000000,64025.000000,261.621708)}
{pt3dadd(168912.000000,133836.000000,64150.000000,232.110984)}
{pt3dadd(168996.000000,133848.000000,64275.000000,214.192094)}
{pt3dadd(169068.000000,133848.000000,64375.000000,212.499378)}
{pt3dadd(169128.000000,133848.000000,64500.000000,212.499378)}
{pt3dadd(169188.000000,133848.000000,64625.000000,210.973816)}
{pt3dadd(169284.000000,133800.000000,64725.000000,219.668656)}
{pt3dadd(169320.000000,133740.000000,64850.000000,215.396750)}
{pt3dadd(169392.000000,133740.000000,64975.000000,224.478690)}
{pt3dadd(169512.000000,133716.000000,65125.000000,243.029486)}
{pt3dadd(169620.000000,133656.000000,65225.000000,260.948376)}
{pt3dadd(169824.000000,133572.000000,65325.000000,304.158200)}
{pt3dadd(169860.000000,133632.000000,65475.000000,379.333964)}
{pt3dadd(169824.000000,133572.000000,65625.000000,425.142270)}
{pt3dadd(169836.000000,133596.000000,65750.000000,451.377056)}
{pt3dadd(169872.000000,133488.000000,65900.000000,489.583574)}
{pt3dadd(170028.000000,133428.000000,66000.000000,495.581888)}
{pt3dadd(170196.000000,133104.000000,66125.000000,456.738082)}
{pt3dadd(170256.000000,133140.000000,66225.000000,440.367880)}
{pt3dadd(170292.000000,133092.000000,66350.000000,431.522770)}
{pt3dadd(170316.000000,133080.000000,66475.000000,415.710192)}
{pt3dadd(170352.000000,133080.000000,66550.000000,409.711878)}
{pt3dadd(170400.000000,133080.000000,66650.000000,402.274054)}
{pt3dadd(170436.000000,133068.000000,66750.000000,391.074084)}
{pt3dadd(170484.000000,133068.000000,66850.000000,380.624138)}
{pt3dadd(170520.000000,133068.000000,66975.000000,360.387666)}
{pt3dadd(170628.000000,133056.000000,67125.000000,352.134888)}
{pt3dadd(170796.000000,133044.000000,67250.000000,352.134888)}
{pt3dadd(170964.000000,133032.000000,67325.000000,344.697064)}
{pt3dadd(171036.000000,133032.000000,67425.000000,349.741028)}
{pt3dadd(171108.000000,133032.000000,67525.000000,364.380880)}
{pt3dadd(171192.000000,133056.000000,67625.000000,354.630740)}
{pt3dadd(171288.000000,133068.000000,67725.000000,362.068564)}
{pt3dadd(171372.000000,133080.000000,67825.000000,364.462424)}
{pt3dadd(171456.000000,133128.000000,67925.000000,378.713516)}
{pt3dadd(171528.000000,133164.000000,68025.000000,381.463340)}
{pt3dadd(171708.000000,133164.000000,68100.000000,391.213480)}
{pt3dadd(171804.000000,133188.000000,68200.000000,386.169516)}
{pt3dadd(171876.000000,133224.000000,68300.000000,393.869638)}
{pt3dadd(171948.000000,133332.000000,68400.000000,372.180722)}
{pt3dadd(172032.000000,133392.000000,68475.000000,325.395792)}
{pt3dadd(172260.000000,133368.000000,68600.000000,278.616688)}
{pt3dadd(172440.000000,133452.000000,68675.000000,234.063140)}
{pt3dadd(172488.000000,133536.000000,68775.000000,182.716574)}
{pt3dadd(172536.000000,133644.000000,68875.000000,138.834324)}
{pt3dadd(172656.000000,133548.000000,68950.000000,132.461958)}
{pt3dadd(172644.000000,133548.000000,69050.000000,136.705956)}
{pt3dadd(172644.000000,133512.000000,69150.000000,155.768978)}
{pt3dadd(172620.000000,133428.000000,69250.000000,177.139312)}
{pt3dadd(172644.000000,133368.000000,69325.000000,210.221252)}
{pt3dadd(172608.000000,133368.000000,69425.000000,237.790012)}
{pt3dadd(172608.000000,133416.000000,69550.000000,280.325118)}
{pt3dadd(172608.000000,133476.000000,69650.000000,303.421784)}
{pt3dadd(172656.000000,133500.000000,69725.000000,333.398016)}
{pt3dadd(172644.000000,133500.000000,69825.000000,349.070470)}
{pt3dadd(172692.000000,133476.000000,69925.000000,371.909182)}
{pt3dadd(172728.000000,133452.000000,70025.000000,369.343502)}
{pt3dadd(172776.000000,133440.000000,70100.000000,371.737362)}
{pt3dadd(172836.000000,133488.000000,70200.000000,345.206254)}
{pt3dadd(172908.000000,133536.000000,70325.000000,333.630772)}
{pt3dadd(172980.000000,133584.000000,70425.000000,333.630772)}
{pt3dadd(173028.000000,133656.000000,70500.000000,322.055290)}
{pt3dadd(173088.000000,133728.000000,70625.000000,338.299224)}
{pt3dadd(173220.000000,133848.000000,70700.000000,345.949034)}
{pt3dadd(173304.000000,133920.000000,70800.000000,350.340056)}
{pt3dadd(173364.000000,133932.000000,70875.000000,331.458758)}
{pt3dadd(173436.000000,133980.000000,70975.000000,329.374780)}
{pt3dadd(173508.000000,134040.000000,71075.000000,310.736986)}
{pt3dadd(173580.000000,134124.000000,71175.000000,301.334768)}
{pt3dadd(173652.000000,134148.000000,71275.000000,292.846774)}
{pt3dadd(173724.000000,134124.000000,71400.000000,294.930752)}
{pt3dadd(173760.000000,134172.000000,71500.000000,292.917758)}
{pt3dadd(173868.000000,134268.000000,71600.000000,271.400452)}
{pt3dadd(173928.000000,134352.000000,71675.000000,278.789676)}
{pt3dadd(173976.000000,134412.000000,71775.000000,280.802670)}
{pt3dadd(174120.000000,134484.000000,71850.000000,272.883090)}
{pt3dadd(174180.000000,134448.000000,71950.000000,262.166094)}
{pt3dadd(174204.000000,134544.000000,72050.000000,272.883090)}
{pt3dadd(174216.000000,134688.000000,72150.000000,274.896084)}
{pt3dadd(174300.000000,134784.000000,72325.000000,283.683400)}
{pt3dadd(174324.000000,134868.000000,72550.000000,285.561588)}
{pt3dadd(174432.000000,134964.000000,72650.000000,304.766578)}
{pt3dadd(174516.000000,135060.000000,72725.000000,308.863550)}
{pt3dadd(174564.000000,135144.000000,72825.000000,296.133560)}
{pt3dadd(174588.000000,135252.000000,72900.000000,263.389366)}
{pt3dadd(174600.000000,135348.000000,72975.000000,248.614874)}
{pt3dadd(174480.000000,135444.000000,73100.000000,220.704978)}
{pt3dadd(174492.000000,135528.000000,73175.000000,201.312492)}
{pt3dadd(174492.000000,135624.000000,73225.000000,188.888674)}
{pt3dadd(174492.000000,135732.000000,73275.000000,194.113646)}
{pt3dadd(174480.000000,135804.000000,73325.000000,201.750618)}
{pt3dadd(174492.000000,135888.000000,73400.000000,213.783296)}
{pt3dadd(174504.000000,135984.000000,73600.000000,221.689586)}
{pt3dadd(174588.000000,136068.000000,73700.000000,234.113404)}
{pt3dadd(174612.000000,136164.000000,73800.000000,250.832316)}
{pt3dadd(174636.000000,136272.000000,73875.000000,247.617900)}
{pt3dadd(174684.000000,136356.000000,74000.000000,239.711610)}
{pt3dadd(174744.000000,136464.000000,74175.000000,221.687082)}
{pt3dadd(174840.000000,136536.000000,74300.000000,232.404078)}
{pt3dadd(174912.000000,136620.000000,74375.000000,217.108564)}
{pt3dadd(174984.000000,136728.000000,74450.000000,220.322980)}
{pt3dadd(175116.000000,136848.000000,74550.000000,235.618494)}
{pt3dadd(175188.000000,136920.000000,74550.000000,261.032246)}
{pt3dadd(175260.000000,137016.000000,74575.000000,267.286686)}
{pt3dadd(175344.000000,137124.000000,74650.000000,280.637780)}
{pt3dadd(175416.000000,137220.000000,74650.000000,293.816692)}
{pt3dadd(175512.000000,137328.000000,74575.000000,297.913664)}
{pt3dadd(175680.000000,137400.000000,74775.000000,304.168104)}
{pt3dadd(175788.000000,137508.000000,74725.000000,304.168104)}
{pt3dadd(175860.000000,137592.000000,74750.000000,312.366964)}
{pt3dadd(175944.000000,137688.000000,74775.000000,312.366964)}
{pt3dadd(176028.000000,137760.000000,74800.000000,323.942446)}
{pt3dadd(176064.000000,137868.000000,74775.000000,326.176000)}
{pt3dadd(176112.000000,137952.000000,74925.000000,349.359664)}
{pt3dadd(176244.000000,138024.000000,74925.000000,351.593218)}
{pt3dadd(176316.000000,138108.000000,74950.000000,363.168700)}
{pt3dadd(176448.000000,138180.000000,75050.000000,355.984240)}
{pt3dadd(176556.000000,138276.000000,75075.000000,365.734380)}
{pt3dadd(176568.000000,138372.000000,75175.000000,365.734380)}
{pt3dadd(176520.000000,138564.000000,75300.000000,368.046696)}
{pt3dadd(176556.000000,138708.000000,75375.000000,365.568412)}
{pt3dadd(176580.000000,138912.000000,75450.000000,380.724534)}
{pt3dadd(176520.000000,139020.000000,75525.000000,370.974394)}
{pt3dadd(176580.000000,139140.000000,75625.000000,352.336600)}
{pt3dadd(176676.000000,139308.000000,75750.000000,332.454350)}
{pt3dadd(176868.000000,139596.000000,75850.000000,317.315760)}
{pt3dadd(176880.000000,139668.000000,75925.000000,297.768616)}
{pt3dadd(176904.000000,139740.000000,76000.000000,280.198682)}
{pt3dadd(176904.000000,139908.000000,76125.000000,265.575764)}
{pt3dadd(176916.000000,140100.000000,76200.000000,259.362190)}
{pt3dadd(176916.000000,140292.000000,76275.000000,238.165796)}
{pt3dadd(176940.000000,140400.000000,76325.000000,217.349912)}
{pt3dadd(176952.000000,140520.000000,76400.000000,212.609934)}
{pt3dadd(176940.000000,140640.000000,76500.000000,209.043318)}
{pt3dadd(176916.000000,140772.000000,76575.000000,207.619920)}
{pt3dadd(176880.000000,140916.000000,76625.000000,207.619920)}
{pt3dadd(176952.000000,141060.000000,76675.000000,200.041860)}
{pt3dadd(177084.000000,141204.000000,76725.000000,197.144866)}
{pt3dadd(177204.000000,141348.000000,76800.000000,189.238576)}
{pt3dadd(177336.000000,141480.000000,76875.000000,189.238576)}
{pt3dadd(177492.000000,141588.000000,76950.000000,197.083876)}
{pt3dadd(177660.000000,141660.000000,77050.000000,215.744032)}
{pt3dadd(177840.000000,141756.000000,77150.000000,218.641026)}
{pt3dadd(177984.000000,141864.000000,77225.000000,226.547316)}
{pt3dadd(178104.000000,141996.000000,77300.000000,227.970714)}
{pt3dadd(178308.000000,142008.000000,77400.000000,222.561486)}
{pt3dadd(178416.000000,141996.000000,77525.000000,215.901946)}
{pt3dadd(178572.000000,142020.000000,77625.000000,213.004952)}
{pt3dadd(178740.000000,142068.000000,77725.000000,200.972274)}
{pt3dadd(178896.000000,142128.000000,77850.000000,198.173964)}
{pt3dadd(179004.000000,142212.000000,77925.000000,206.582350)}
{pt3dadd(179064.000000,142188.000000,78050.000000,203.583192)}
{pt3dadd(178944.000000,142116.000000,78175.000000,218.357684)}
{pt3dadd(179316.000000,142308.000000,78400.000000,233.956978)}
{pt3dadd(179448.000000,142392.000000,78575.000000,256.147774)}
{pt3dadd(179544.000000,142500.000000,78725.000000,286.682264)}
{pt3dadd(179652.000000,142572.000000,78775.000000,322.872070)}
{pt3dadd(179760.000000,142680.000000,78825.000000,357.305716)}
{pt3dadd(179820.000000,142788.000000,78875.000000,379.366458)}
{pt3dadd(179916.000000,142884.000000,78950.000000,388.463656)}
{pt3dadd(180012.000000,142968.000000,79100.000000,416.033828)}
{pt3dadd(180108.000000,143052.000000,79225.000000,427.628762)}
{pt3dadd(180216.000000,143148.000000,79350.000000,421.630448)}
{pt3dadd(180264.000000,143256.000000,79450.000000,429.883226)}
{pt3dadd(180300.000000,143340.000000,79575.000000,443.179968)}
{pt3dadd(180396.000000,143448.000000,79700.000000,423.862574)}
{pt3dadd(180528.000000,143532.000000,79825.000000,397.627788)}
{pt3dadd(180660.000000,143628.000000,79925.000000,360.419880)}
{pt3dadd(180792.000000,143748.000000,79975.000000,323.211972)}
{pt3dadd(180960.000000,143856.000000,80050.000000,300.818032)}
{pt3dadd(181080.000000,143952.000000,80175.000000,260.505202)}
{pt3dadd(181200.000000,144036.000000,80275.000000,236.156938)}
{pt3dadd(181332.000000,144108.000000,80400.000000,241.237118)}
{pt3dadd(181440.000000,144204.000000,80475.000000,244.564890)}
{pt3dadd(181548.000000,144276.000000,80550.000000,223.749006)}
{pt3dadd(181632.000000,144408.000000,80625.000000,219.477100)}
{pt3dadd(181788.000000,144492.000000,80675.000000,220.852012)}
{pt3dadd(181932.000000,144600.000000,80700.000000,212.666910)}
{pt3dadd(181968.000000,144744.000000,80650.000000,220.056134)}
{pt3dadd(182124.000000,144888.000000,80725.000000,229.385822)}
{pt3dadd(182268.000000,145032.000000,80825.000000,241.842830)}
{pt3dadd(182376.000000,145128.000000,80875.000000,240.467918)}
{pt3dadd(182352.000000,145152.000000,81000.000000,248.653020)}
{pt3dadd(182424.000000,145284.000000,81075.000000,241.263796)}
{pt3dadd(182448.000000,145428.000000,81125.000000,264.325474)}
{pt3dadd(182472.000000,145584.000000,81175.000000,269.962290)}
{pt3dadd(182496.000000,145740.000000,81250.000000,278.974174)}
{pt3dadd(182544.000000,145860.000000,81325.000000,278.974174)}
{pt3dadd(182580.000000,145944.000000,81400.000000,286.363398)}
{pt3dadd(182556.000000,146016.000000,81500.000000,266.868336)}
{pt3dadd(182580.000000,146040.000000,81600.000000,257.786396)}
{pt3dadd(182628.000000,146112.000000,81675.000000,266.868336)}
{pt3dadd(182664.000000,146196.000000,81750.000000,263.423212)}
{pt3dadd(182604.000000,146256.000000,81850.000000,267.520184)}
{pt3dadd(182520.000000,146316.000000,81925.000000,277.597232)}
{pt3dadd(182568.000000,146436.000000,82025.000000,284.734752)}
{pt3dadd(182592.000000,146496.000000,82150.000000,286.747746)}
{pt3dadd(182652.000000,146556.000000,82250.000000,295.829686)}
{pt3dadd(182688.000000,146580.000000,82375.000000,276.437200)}
{pt3dadd(182712.000000,146628.000000,82475.000000,268.238340)}
{pt3dadd(182736.000000,146688.000000,82575.000000,270.182760)}
{pt3dadd(182760.000000,146760.000000,82675.000000,257.452770)}
{pt3dadd(182772.000000,146844.000000,82775.000000,250.063546)}
{pt3dadd(182844.000000,146880.000000,82875.000000,248.640148)}
{pt3dadd(182964.000000,146928.000000,83000.000000,233.865656)}
{pt3dadd(183000.000000,146928.000000,83100.000000,230.043048)}
{pt3dadd(183180.000000,146928.000000,83200.000000,251.560354)}
{pt3dadd(183360.000000,146940.000000,83275.000000,257.005158)}
{pt3dadd(183528.000000,146964.000000,83375.000000,289.396524)}
{pt3dadd(183696.000000,147000.000000,83450.000000,319.309606)}
{pt3dadd(183768.000000,147000.000000,83550.000000,338.804668)}
{pt3dadd(183780.000000,147036.000000,83650.000000,346.242492)}
{pt3dadd(183804.000000,147024.000000,83750.000000,352.283884)}
{pt3dadd(183852.000000,147084.000000,83850.000000,338.624424)}
{pt3dadd(183888.000000,147156.000000,83975.000000,327.443248)}
{pt3dadd(183864.000000,147120.000000,84075.000000,332.665086)}
{pt3dadd(183888.000000,147168.000000,84175.000000,318.523924)}
{pt3dadd(183888.000000,147180.000000,84300.000000,327.621122)}
{pt3dadd(183936.000000,147144.000000,84400.000000,334.096122)}
{pt3dadd(183996.000000,147120.000000,84525.000000,336.180100)}
{pt3dadd(184044.000000,147096.000000,84700.000000,309.648992)}
{pt3dadd(184128.000000,147264.000000,84725.000000,301.729412)}
{pt3dadd(184152.000000,147252.000000,84825.000000,286.590822)}
{pt3dadd(184164.000000,147252.000000,84900.000000,278.102828)}
{pt3dadd(184188.000000,147252.000000,85000.000000,280.260296)}
{pt3dadd(184272.000000,147276.000000,85075.000000,299.091282)}
{pt3dadd(184284.000000,147228.000000,85175.000000,311.401884)}
{pt3dadd(184296.000000,147132.000000,85275.000000,317.443276)}
{pt3dadd(184332.000000,147204.000000,85375.000000,341.087392)}
{pt3dadd(184404.000000,147300.000000,85450.000000,341.087392)}
{pt3dadd(184476.000000,147384.000000,85550.000000,341.087392)}
{pt3dadd(184500.000000,147384.000000,85650.000000,348.271852)}
{pt3dadd(184524.000000,147372.000000,85750.000000,354.975190)}
{pt3dadd(184548.000000,147420.000000,85850.000000,360.769178)}
{pt3dadd(184584.000000,147516.000000,85925.000000,365.315048)}
{pt3dadd(184668.000000,147492.000000,86050.000000,358.375318)}
{pt3dadd(184764.000000,147468.000000,86150.000000,360.940998)}
{pt3dadd(184848.000000,147372.000000,86225.000000,352.153682)}
{pt3dadd(184908.000000,147420.000000,86350.000000,331.203572)}
{pt3dadd(184944.000000,147468.000000,86550.000000,320.403262)}
{pt3dadd(185064.000000,147444.000000,86650.000000,312.204402)}
{pt3dadd(185100.000000,147468.000000,86775.000000,292.021848)}
{pt3dadd(185148.000000,147528.000000,86900.000000,308.246988)}
{pt3dadd(185220.000000,147576.000000,87025.000000,303.855966)}
{pt3dadd(185316.000000,147612.000000,87150.000000,310.110406)}
{pt3dadd(185388.000000,147648.000000,87275.000000,314.067820)}
{pt3dadd(185448.000000,147660.000000,87350.000000,320.109212)}
{pt3dadd(185436.000000,147708.000000,87500.000000,310.359072)}
{pt3dadd(185496.000000,147684.000000,87650.000000,312.516540)}
{pt3dadd(185496.000000,147732.000000,87775.000000,314.750094)}
{pt3dadd(185496.000000,147768.000000,87900.000000,330.975234)}
{pt3dadd(185568.000000,147792.000000,88050.000000,335.366256)}
{pt3dadd(185568.000000,147840.000000,88200.000000,326.878262)}
{pt3dadd(185664.000000,147864.000000,88350.000000,341.518114)}
{pt3dadd(185556.000000,147768.000000,88575.000000,334.380177)}
{pt3dadd(185592.000000,146988.000000,89325.000000,389.881160)}

{create adhoc11}
{access adhoc11}
{connect adhoc11(1), adhoc10(0)}
{nseg = 1}
{strdef color color = "White"}
{pt3dclear()}
{pt3dadd(185592.000000,146988.000000,89325.000000,389.881160)}
{pt3dadd(185748.000000,146940.000000,89500.000000,524.873387)}
{pt3dadd(185892.000000,146904.000000,89625.000000,559.639672)}
{pt3dadd(186048.000000,146856.000000,89775.000000,604.021260)}
{pt3dadd(186144.000000,146808.000000,89925.000000,607.910100)}
{pt3dadd(186204.000000,146772.000000,90075.000000,599.427208)}
{pt3dadd(186252.000000,146784.000000,90225.000000,587.344428)}
{pt3dadd(186300.000000,146808.000000,90375.000000,560.986608)}
{pt3dadd(186300.000000,146856.000000,90525.000000,538.014218)}
{pt3dadd(186372.000000,146784.000000,90700.000000,538.014218)}
{pt3dadd(186480.000000,146928.000000,90850.000000,522.714596)}
{pt3dadd(186468.000000,146904.000000,91000.000000,522.714596)}
{pt3dadd(186504.000000,146952.000000,91175.000000,529.604842)}
{pt3dadd(186420.000000,147000.000000,91300.000000,540.494452)}
{pt3dadd(186372.000000,147060.000000,91450.000000,525.716002)}
{pt3dadd(186492.000000,147276.000000,91575.000000,533.100796)}
{pt3dadd(186732.000000,147396.000000,91725.000000,506.398608)}
{pt3dadd(186804.000000,147492.000000,91900.000000,473.784472)}
{pt3dadd(186780.000000,147744.000000,92100.000000,453.080598)}
{pt3dadd(186816.000000,147972.000000,92450.000000,460.213828)}
{pt3dadd(186888.000000,148272.000000,92625.000000,452.829034)}
{pt3dadd(187044.000000,148596.000000,92750.000000,461.986070)}
{pt3dadd(186792.000000,148812.000000,92950.000000,505.873840)}
{pt3dadd(186756.000000,148944.000000,93150.000000,497.028730)}
{pt3dadd(186708.000000,149088.000000,93325.000000,477.030114)}
{pt3dadd(186696.000000,149340.000000,93525.000000,463.711034)}
{pt3dadd(186696.000000,149580.000000,93700.000000,448.957378)}
{pt3dadd(186672.000000,149868.000000,93825.000000,418.366350)}
{pt3dadd(186600.000000,149772.000000,94000.000000,421.213146)}
{pt3dadd(186612.000000,150000.000000,94200.000000,424.264268)}
{pt3dadd(186684.000000,149964.000000,94450.000000,418.265954)}
{pt3dadd(186768.000000,150204.000000,94625.000000,454.453602)}
{pt3dadd(186924.000000,150384.000000,94825.000000,489.070618)}
{pt3dadd(186960.000000,150648.000000,95075.000000,512.016426)}
{pt3dadd(186984.000000,150900.000000,95275.000000,540.635128)}
{pt3dadd(187044.000000,151056.000000,95475.000000,567.337316)}
{pt3dadd(187176.000000,151200.000000,95625.000000,571.363304)}
{pt3dadd(187236.000000,151344.000000,95800.000000,584.313304)}
{pt3dadd(187284.000000,151464.000000,96000.000000,623.303434)}
{pt3dadd(187332.000000,151584.000000,96200.000000,627.471386)}
{pt3dadd(187356.000000,151716.000000,96375.000000,643.869106)}
{pt3dadd(187392.000000,151860.000000,96550.000000,656.819106)}
{pt3dadd(187416.000000,152004.000000,96700.000000,643.869106)}
{pt3dadd(187380.000000,152172.000000,96900.000000,625.033076)}
{pt3dadd(187464.000000,152280.000000,97075.000000,609.193916)}
{pt3dadd(187440.000000,152304.000000,97250.000000,609.193916)}
{pt3dadd(187596.000000,152388.000000,97450.000000,596.243916)}
{pt3dadd(187536.000000,152568.000000,97675.000000,600.411868)}
{pt3dadd(187536.000000,152616.000000,97825.000000,584.014148)}
{pt3dadd(187584.000000,152736.000000,97975.000000,584.014148)}
{pt3dadd(187632.000000,152856.000000,98150.000000,567.616428)}
{pt3dadd(187644.000000,153036.000000,98350.000000,548.811990)}
{pt3dadd(187656.000000,153048.000000,98525.000000,548.811990)}
{pt3dadd(187668.000000,153060.000000,98725.000000,519.263006)}
{pt3dadd(187680.000000,153072.000000,98875.000000,539.417106)}
{pt3dadd(187704.000000,153168.000000,99050.000000,547.331934)}
{pt3dadd(187740.000000,153276.000000,99250.000000,588.498724)}
{pt3dadd(187764.000000,153396.000000,99425.000000,616.781052)}
{pt3dadd(187800.000000,153516.000000,99600.000000,654.244864)}
{pt3dadd(187824.000000,153636.000000,99750.000000,641.735984)}
{pt3dadd(187908.000000,153864.000000,99925.000000,626.436362)}
{pt3dadd(187980.000000,153912.000000,100100.000000,596.159182)}
{pt3dadd(188040.000000,153912.000000,100300.000000,567.876854)}
{pt3dadd(188088.000000,154140.000000,100475.000000,567.876854)}
{pt3dadd(188088.000000,154200.000000,100650.000000,580.385734)}
{pt3dadd(188100.000000,154416.000000,100850.000000,591.659368)}
{pt3dadd(188184.000000,154536.000000,101025.000000,637.336788)}
{pt3dadd(188196.000000,154680.000000,101175.000000,625.254008)}
{pt3dadd(188184.000000,154824.000000,101350.000000,606.449570)}
{pt3dadd(188232.000000,154920.000000,101500.000000,586.295470)}
{pt3dadd(188328.000000,155004.000000,101650.000000,578.650250)}
{pt3dadd(188376.000000,154980.000000,101800.000000,536.861670)}
{pt3dadd(188424.000000,154932.000000,101950.000000,572.095420)}
{pt3dadd(188388.000000,154932.000000,102100.000000,586.873870)}
{pt3dadd(188484.000000,155028.000000,102225.000000,602.713030)}
{pt3dadd(188592.000000,155076.000000,102375.000000,631.958870)}
{pt3dadd(188688.000000,155124.000000,102500.000000,648.934858)}
{pt3dadd(188724.000000,155244.000000,102650.000000,643.978288)}
{pt3dadd(188844.000000,155424.000000,102825.000000,679.094313)}
{pt3dadd(188832.000000,155472.000000,102950.000000,702.761100)}

{create adhoc12}
{access adhoc12}
{connect adhoc12(1), adhoc11(0)}
{nseg = 1}
{strdef color color = "White"}
{pt3dclear()}
{pt3dadd(188832.000000,155472.000000,102950.000000,702.761100)}
{pt3dadd(188748.000000,155196.000000,102825.000000,679.094313)}
{pt3dadd(188700.000000,155016.000000,102825.000000,656.487168)}
{pt3dadd(188652.000000,154848.000000,102825.000000,656.487168)}
{pt3dadd(188604.000000,154668.000000,102825.000000,704.489640)}
{pt3dadd(188580.000000,154500.000000,102825.000000,699.865008)}
{pt3dadd(188568.000000,154320.000000,102825.000000,729.144708)}
{pt3dadd(188544.000000,154152.000000,102825.000000,779.826976)}
{pt3dadd(188520.000000,154056.000000,102650.000000,806.420456)}
{pt3dadd(188496.000000,153984.000000,102500.000000,800.318204)}
{pt3dadd(188424.000000,153828.000000,102375.000000,825.130796)}
{pt3dadd(188364.000000,153768.000000,102275.000000,800.318204)}
{pt3dadd(188412.000000,153648.000000,102125.000000,763.042616)}
{pt3dadd(188436.000000,153588.000000,101975.000000,706.171956)}
{pt3dadd(188316.000000,153504.000000,101825.000000,643.406908)}
{pt3dadd(188256.000000,153444.000000,101675.000000,583.454448)}
{pt3dadd(188100.000000,153360.000000,101475.000000,570.504448)}
{pt3dadd(188148.000000,153180.000000,101200.000000,545.014988)}
{pt3dadd(188124.000000,153108.000000,101000.000000,458.739948)}
{pt3dadd(188004.000000,153012.000000,100825.000000,370.094919)}
{pt3dadd(187944.000000,152856.000000,100625.000000,314.457947)}
{pt3dadd(187908.000000,152820.000000,100450.000000,229.053047)}
{pt3dadd(187872.000000,152736.000000,100200.000000,153.916063)}
{pt3dadd(187908.000000,152688.000000,100000.000000,165.054119)}
{pt3dadd(187884.000000,152628.000000,99875.000000,176.209076)}
{pt3dadd(187860.000000,152532.000000,99725.000000,168.631016)}
{pt3dadd(187896.000000,152460.000000,99500.000000,165.393516)}
{pt3dadd(187896.000000,152388.000000,99350.000000,156.885126)}
{pt3dadd(187896.000000,152316.000000,99200.000000,149.315830)}
{pt3dadd(187860.000000,152232.000000,99075.000000,148.199050)}
{pt3dadd(187824.000000,152220.000000,98925.000000,148.199050)}
{pt3dadd(187800.000000,152172.000000,98775.000000,148.199050)}
{pt3dadd(187764.000000,152088.000000,98625.000000,153.237572)}
{pt3dadd(187752.000000,152064.000000,98475.000000,159.609938)}
{pt3dadd(187752.000000,152004.000000,98325.000000,159.609938)}
{pt3dadd(187740.000000,151956.000000,98200.000000,150.824970)}
{pt3dadd(187776.000000,151848.000000,98075.000000,145.277502)}
{pt3dadd(187776.000000,151788.000000,97925.000000,137.609314)}
{pt3dadd(187800.000000,151740.000000,97775.000000,127.668188)}
{pt3dadd(187872.000000,151692.000000,97625.000000,120.000000)}
{pt3dadd(187896.000000,151620.000000,97475.000000,120.000000)}
{pt3dadd(187884.000000,151572.000000,97325.000000,120.000000)}
{pt3dadd(187860.000000,151452.000000,97175.000000,120.000000)}
{pt3dadd(187872.000000,151380.000000,97050.000000,120.000000)}
{pt3dadd(187860.000000,151260.000000,96950.000000,120.000000)}
{pt3dadd(187836.000000,151116.000000,96825.000000,120.000000)}
{pt3dadd(187836.000000,150996.000000,96675.000000,120.000000)}
{pt3dadd(187788.000000,150852.000000,96575.000000,120.000000)}
{pt3dadd(187764.000000,150732.000000,96500.000000,120.000000)}
{pt3dadd(187680.000000,150648.000000,96375.000000,120.000000)}
{pt3dadd(187608.000000,150552.000000,96250.000000,120.000000)}
{pt3dadd(187584.000000,150432.000000,96125.000000,120.000000)}
{pt3dadd(187500.000000,150336.000000,96025.000000,120.000000)}
{pt3dadd(187440.000000,150192.000000,95925.000000,120.000000)}
{pt3dadd(187320.000000,150072.000000,95825.000000,120.000000)}
{pt3dadd(187236.000000,149940.000000,95750.000000,120.000000)}
{pt3dadd(187176.000000,149784.000000,95625.000000,120.000000)}
{pt3dadd(187092.000000,149688.000000,95500.000000,120.000000)}
{pt3dadd(187008.000000,149556.000000,95375.000000,120.000000)}
{pt3dadd(186948.000000,149460.000000,95275.000000,120.000000)}
{pt3dadd(186948.000000,149328.000000,95150.000000,120.000000)}
{pt3dadd(186948.000000,149196.000000,95000.000000,120.000000)}
{pt3dadd(186936.000000,149076.000000,94850.000000,120.000000)}
{pt3dadd(186936.000000,148944.000000,94775.000000,120.000000)}
{pt3dadd(186876.000000,148824.000000,94625.000000,120.000000)}
{pt3dadd(186780.000000,148716.000000,94500.000000,120.000000)}
{pt3dadd(186708.000000,148596.000000,94375.000000,120.000000)}
{pt3dadd(186660.000000,148512.000000,94275.000000,120.000000)}
{pt3dadd(186648.000000,148392.000000,94200.000000,120.000000)}
{pt3dadd(186636.000000,148332.000000,94075.000000,120.000000)}
{pt3dadd(186624.000000,148224.000000,93950.000000,120.000000)}
{pt3dadd(186648.000000,148104.000000,93825.000000,120.000000)}
{pt3dadd(186624.000000,147984.000000,93700.000000,120.000000)}
{pt3dadd(186600.000000,147864.000000,93575.000000,120.000000)}
{pt3dadd(186600.000000,147756.000000,93425.000000,120.000000)}
{pt3dadd(186588.000000,147648.000000,93300.000000,120.000000)}
{pt3dadd(186588.000000,147480.000000,93150.000000,120.000000)}
{pt3dadd(186612.000000,147348.000000,93025.000000,120.000000)}
{pt3dadd(186588.000000,147300.000000,92875.000000,120.000000)}
{pt3dadd(186588.000000,147204.000000,92725.000000,120.000000)}
{pt3dadd(186600.000000,147084.000000,92625.000000,120.000000)}
{pt3dadd(186624.000000,146952.000000,92450.000000,120.000000)}
{pt3dadd(186696.000000,146868.000000,92300.000000,120.000000)}
{pt3dadd(186696.000000,146760.000000,92175.000000,120.000000)}
{pt3dadd(186756.000000,146664.000000,92125.000000,120.000000)}
{pt3dadd(186852.000000,146592.000000,92025.000000,120.000000)}
{pt3dadd(186948.000000,146508.000000,91850.000000,120.000000)}
{pt3dadd(187008.000000,146412.000000,91750.000000,120.000000)}
{pt3dadd(187044.000000,146268.000000,91625.000000,120.000000)}
{pt3dadd(187128.000000,146100.000000,91475.000000,120.000000)}
{pt3dadd(187152.000000,145944.000000,91325.000000,120.000000)}
{pt3dadd(187104.000000,145800.000000,91350.000000,120.000000)}
{pt3dadd(187044.000000,145692.000000,91225.000000,120.000000)}
{pt3dadd(186960.000000,145512.000000,91150.000000,120.000000)}
{pt3dadd(186924.000000,145332.000000,90925.000000,120.000000)}
{pt3dadd(186816.000000,145164.000000,90825.000000,120.000000)}
{pt3dadd(186780.000000,145044.000000,90700.000000,120.000000)}
{pt3dadd(186732.000000,144924.000000,90625.000000,120.000000)}
{pt3dadd(186696.000000,144792.000000,90500.000000,120.000000)}
{pt3dadd(186684.000000,144660.000000,90475.000000,120.000000)}
{pt3dadd(186636.000000,144516.000000,90375.000000,120.000000)}
{pt3dadd(186552.000000,144348.000000,90275.000000,120.000000)}
{pt3dadd(186456.000000,144288.000000,90150.000000,120.000000)}
{pt3dadd(186336.000000,144180.000000,90025.000000,120.000000)}
{pt3dadd(186228.000000,144096.000000,89925.000000,120.000000)}
{pt3dadd(186204.000000,143928.000000,89850.000000,120.000000)}
{pt3dadd(186132.000000,143820.000000,89725.000000,120.000000)}
{pt3dadd(185976.000000,143628.000000,89550.000000,120.000000)}
{pt3dadd(185892.000000,143496.000000,89450.000000,120.000000)}
{pt3dadd(185832.000000,143340.000000,89300.000000,120.000000)}
{pt3dadd(185772.000000,143196.000000,89200.000000,120.000000)}
{pt3dadd(185628.000000,143076.000000,89100.000000,120.000000)}
{pt3dadd(185508.000000,142968.000000,89050.000000,120.000000)}
{pt3dadd(185400.000000,142884.000000,88900.000000,120.000000)}
{pt3dadd(185280.000000,142788.000000,88850.000000,120.000000)}
{pt3dadd(185112.000000,142692.000000,88775.000000,120.000000)}
{pt3dadd(184980.000000,142608.000000,88625.000000,120.000000)}
{pt3dadd(184836.000000,142536.000000,88525.000000,120.000000)}
{pt3dadd(184716.000000,142476.000000,88450.000000,120.000000)}

{create adhoc13}
{access adhoc13}
{connect adhoc13(1), adhoc12(0)}
{nseg = 1}
{strdef color color = "White"}
{pt3dclear()}
{pt3dadd(184716.000000,142476.000000,88450.000000,120.000000)}
{pt3dadd(184608.000000,142488.000000,88500.000000,120.000000)}
{pt3dadd(184476.000000,142464.000000,88525.000000,120.000000)}
{pt3dadd(184344.000000,142416.000000,88525.000000,120.000000)}
{pt3dadd(184236.000000,142332.000000,88475.000000,120.000000)}
{pt3dadd(184128.000000,142212.000000,88350.000000,120.000000)}
{pt3dadd(184008.000000,142116.000000,88225.000000,120.000000)}
{pt3dadd(183924.000000,142008.000000,88100.000000,120.000000)}
{pt3dadd(183816.000000,141924.000000,88025.000000,120.000000)}
{pt3dadd(183768.000000,141780.000000,87900.000000,120.000000)}
{pt3dadd(183732.000000,141672.000000,87775.000000,120.000000)}
{pt3dadd(183696.000000,141576.000000,87650.000000,120.000000)}
{pt3dadd(183696.000000,141420.000000,87550.000000,120.000000)}
{pt3dadd(183684.000000,141300.000000,87450.000000,120.000000)}
{pt3dadd(183624.000000,141228.000000,87325.000000,120.000000)}
{pt3dadd(183612.000000,141132.000000,87200.000000,120.000000)}
{pt3dadd(183588.000000,141036.000000,87100.000000,120.000000)}
{pt3dadd(183576.000000,140952.000000,86975.000000,120.000000)}
{pt3dadd(183504.000000,140844.000000,86825.000000,120.000000)}
{pt3dadd(183492.000000,140748.000000,86725.000000,120.000000)}
{pt3dadd(183528.000000,140652.000000,86575.000000,120.000000)}
{pt3dadd(183492.000000,140568.000000,86475.000000,120.000000)}
{pt3dadd(183432.000000,140496.000000,86350.000000,120.000000)}
{pt3dadd(183360.000000,140400.000000,86225.000000,120.000000)}
{pt3dadd(183288.000000,140352.000000,86100.000000,120.000000)}
{pt3dadd(183204.000000,140316.000000,86050.000000,120.000000)}
{pt3dadd(183120.000000,140244.000000,86000.000000,120.000000)}
{pt3dadd(183048.000000,140148.000000,85875.000000,120.000000)}
{pt3dadd(182964.000000,140100.000000,85800.000000,120.000000)}
{pt3dadd(182892.000000,140004.000000,85700.000000,120.000000)}
{pt3dadd(182868.000000,139872.000000,85625.000000,120.000000)}
{pt3dadd(182856.000000,139764.000000,85525.000000,120.000000)}
{pt3dadd(182808.000000,139644.000000,85400.000000,120.000000)}
{pt3dadd(182748.000000,139512.000000,85250.000000,120.000000)}
{pt3dadd(182664.000000,139476.000000,85200.000000,120.000000)}
{pt3dadd(182628.000000,139380.000000,85100.000000,120.000000)}
{pt3dadd(182580.000000,139236.000000,85000.000000,120.000000)}
{pt3dadd(182544.000000,139128.000000,84825.000000,120.000000)}
{pt3dadd(182544.000000,139056.000000,84625.000000,120.000000)}
{pt3dadd(182508.000000,139056.000000,84525.000000,120.000000)}
{pt3dadd(182436.000000,139008.000000,84425.000000,120.000000)}
{pt3dadd(182316.000000,138936.000000,84225.000000,120.000000)}
{pt3dadd(182220.000000,138840.000000,84025.000000,120.000000)}
{pt3dadd(182184.000000,138720.000000,83875.000000,120.000000)}

{create adhoc14}
{access adhoc14}
{connect adhoc14(1), adhoc12(0)}
{nseg = 1}
{strdef color color = "White"}
{pt3dclear()}
{pt3dadd(184716.000000,142476.000000,88450.000000,120.000000)}
{pt3dadd(184680.000000,142404.000000,88350.000000,120.000000)}
{pt3dadd(184608.000000,142284.000000,88300.000000,120.000000)}
{pt3dadd(184512.000000,142308.000000,88250.000000,120.000000)}
{pt3dadd(184416.000000,142308.000000,88125.000000,120.000000)}
{pt3dadd(184308.000000,142236.000000,88125.000000,120.000000)}
{pt3dadd(184308.000000,142104.000000,88125.000000,120.000000)}
{pt3dadd(184296.000000,141996.000000,88000.000000,120.000000)}
{pt3dadd(184224.000000,141912.000000,87975.000000,120.000000)}
{pt3dadd(184164.000000,141852.000000,87925.000000,120.000000)}
{pt3dadd(184104.000000,141732.000000,87850.000000,120.000000)}
{pt3dadd(184056.000000,141624.000000,87725.000000,120.000000)}
{pt3dadd(184080.000000,141504.000000,87600.000000,120.000000)}
{pt3dadd(184056.000000,141372.000000,87500.000000,120.000000)}
{pt3dadd(184032.000000,141264.000000,87425.000000,120.000000)}
{pt3dadd(183996.000000,141096.000000,87250.000000,120.000000)}
{pt3dadd(183984.000000,140988.000000,87150.000000,120.000000)}
{pt3dadd(183960.000000,140808.000000,86975.000000,120.000000)}
{pt3dadd(183984.000000,140700.000000,86925.000000,120.000000)}
{pt3dadd(183948.000000,140700.000000,86800.000000,120.000000)}
{pt3dadd(183876.000000,140424.000000,86700.000000,120.000000)}
{pt3dadd(183720.000000,140304.000000,86625.000000,120.000000)}
{pt3dadd(183708.000000,140148.000000,86625.000000,120.000000)}
{pt3dadd(183660.000000,140004.000000,86600.000000,120.000000)}
{pt3dadd(183600.000000,139920.000000,86600.000000,120.000000)}
{pt3dadd(183552.000000,139812.000000,86600.000000,120.000000)}
{pt3dadd(183504.000000,139704.000000,86600.000000,120.000000)}
{pt3dadd(183456.000000,139560.000000,86600.000000,120.000000)}
{pt3dadd(183456.000000,139416.000000,86600.000000,120.000000)}
{pt3dadd(183444.000000,139248.000000,86600.000000,120.000000)}
{pt3dadd(183432.000000,139080.000000,86600.000000,120.000000)}
{pt3dadd(183456.000000,138924.000000,86600.000000,120.000000)}
{pt3dadd(183468.000000,138780.000000,86550.000000,120.000000)}
{pt3dadd(183480.000000,138624.000000,86550.000000,120.000000)}
{pt3dadd(183432.000000,138492.000000,86425.000000,120.000000)}
{pt3dadd(183444.000000,138372.000000,86350.000000,120.000000)}
{pt3dadd(183492.000000,138276.000000,86250.000000,120.000000)}
{pt3dadd(183540.000000,138168.000000,86200.000000,120.000000)}
{pt3dadd(183588.000000,138060.000000,86200.000000,120.000000)}
{pt3dadd(183624.000000,137952.000000,86200.000000,120.000000)}
{pt3dadd(183672.000000,137832.000000,86100.000000,120.000000)}
{pt3dadd(183708.000000,137712.000000,86100.000000,120.000000)}
{pt3dadd(183744.000000,137568.000000,86100.000000,120.000000)}
{pt3dadd(183792.000000,137424.000000,86100.000000,120.000000)}
{pt3dadd(183840.000000,137256.000000,86100.000000,120.000000)}
{pt3dadd(183924.000000,137124.000000,86025.000000,120.000000)}
{pt3dadd(183996.000000,136980.000000,86025.000000,120.000000)}
{pt3dadd(184044.000000,136836.000000,86000.000000,120.000000)}
{pt3dadd(184092.000000,136680.000000,85925.000000,120.000000)}
{pt3dadd(184116.000000,136512.000000,85875.000000,120.000000)}
{pt3dadd(184116.000000,136320.000000,85825.000000,120.000000)}
{pt3dadd(184128.000000,136140.000000,85750.000000,120.000000)}
{pt3dadd(184152.000000,135960.000000,85700.000000,120.000000)}
{pt3dadd(184224.000000,135816.000000,85700.000000,120.000000)}
{pt3dadd(184284.000000,135624.000000,85700.000000,120.000000)}
{pt3dadd(184332.000000,135468.000000,85725.000000,120.000000)}
{pt3dadd(184356.000000,135288.000000,85725.000000,120.000000)}
{pt3dadd(184368.000000,135120.000000,85725.000000,120.000000)}
{pt3dadd(184344.000000,134988.000000,85675.000000,120.000000)}
{pt3dadd(184344.000000,134808.000000,85725.000000,120.000000)}
{pt3dadd(184344.000000,134640.000000,85775.000000,120.000000)}
{pt3dadd(184344.000000,134472.000000,85825.000000,120.000000)}
{pt3dadd(184344.000000,134304.000000,85875.000000,120.000000)}
{pt3dadd(184368.000000,134136.000000,86025.000000,120.000000)}
{pt3dadd(184416.000000,134016.000000,86125.000000,120.000000)}
{pt3dadd(184440.000000,133884.000000,86225.000000,120.000000)}
{pt3dadd(184464.000000,133752.000000,86300.000000,120.000000)}
{pt3dadd(184488.000000,133644.000000,86350.000000,120.000000)}
{pt3dadd(184464.000000,133548.000000,86475.000000,120.000000)}
{pt3dadd(184464.000000,133464.000000,86600.000000,120.000000)}
{pt3dadd(184476.000000,133368.000000,86700.000000,120.000000)}
{pt3dadd(184452.000000,133260.000000,86775.000000,120.000000)}
{pt3dadd(184428.000000,133224.000000,86900.000000,120.000000)}
{pt3dadd(184368.000000,133116.000000,87025.000000,120.000000)}
{pt3dadd(184344.000000,133044.000000,87150.000000,120.000000)}
{pt3dadd(184392.000000,132960.000000,87275.000000,120.000000)}
{pt3dadd(184356.000000,132852.000000,87350.000000,120.000000)}
{pt3dadd(184236.000000,132768.000000,87450.000000,120.000000)}
{pt3dadd(184140.000000,132744.000000,87475.000000,120.000000)}
{pt3dadd(184068.000000,132660.000000,87600.000000,120.000000)}
{pt3dadd(183912.000000,132588.000000,87625.000000,120.000000)}
{pt3dadd(183780.000000,132516.000000,87700.000000,120.000000)}
{pt3dadd(183648.000000,132516.000000,87800.000000,120.000000)}
{pt3dadd(183588.000000,132504.000000,87900.000000,120.000000)}
{pt3dadd(183540.000000,132456.000000,88050.000000,120.000000)}
{pt3dadd(183540.000000,132432.000000,88200.000000,120.000000)}
{pt3dadd(183492.000000,132420.000000,88300.000000,120.000000)}
{pt3dadd(183492.000000,132420.000000,88475.000000,120.000000)}
{pt3dadd(183492.000000,132408.000000,88600.000000,120.000000)}
{pt3dadd(183540.000000,132432.000000,88700.000000,120.000000)}
{pt3dadd(183636.000000,132456.000000,88825.000000,120.000000)}
{pt3dadd(183768.000000,132480.000000,88925.000000,120.000000)}
{pt3dadd(183888.000000,132468.000000,88975.000000,120.000000)}
{pt3dadd(183960.000000,132468.000000,89075.000000,120.000000)}
{pt3dadd(184080.000000,132468.000000,89125.000000,120.000000)}
{pt3dadd(184212.000000,132480.000000,89200.000000,120.000000)}
{pt3dadd(184344.000000,132492.000000,89275.000000,120.000000)}
{pt3dadd(184476.000000,132516.000000,89300.000000,120.000000)}
{pt3dadd(184632.000000,132528.000000,89300.000000,120.000000)}
{pt3dadd(184752.000000,132540.000000,89350.000000,120.000000)}
{pt3dadd(184884.000000,132612.000000,89425.000000,120.000000)}
{pt3dadd(185016.000000,132672.000000,89450.000000,120.000000)}
{pt3dadd(185124.000000,132744.000000,89575.000000,120.000000)}
{pt3dadd(185220.000000,132816.000000,89650.000000,120.000000)}
{pt3dadd(185328.000000,132852.000000,89725.000000,120.000000)}
{pt3dadd(185436.000000,132900.000000,89750.000000,120.000000)}
{pt3dadd(185484.000000,132996.000000,89800.000000,120.000000)}
{pt3dadd(185604.000000,133104.000000,89900.000000,120.000000)}
{pt3dadd(185736.000000,133164.000000,89950.000000,120.000000)}
{pt3dadd(185856.000000,133248.000000,90025.000000,120.000000)}
{pt3dadd(186000.000000,133332.000000,90025.000000,120.000000)}
{pt3dadd(186132.000000,133488.000000,90075.000000,120.000000)}
{pt3dadd(186264.000000,133656.000000,90275.000000,120.000000)}
{pt3dadd(186300.000000,133788.000000,90375.000000,120.000000)}
{pt3dadd(186324.000000,133908.000000,90450.000000,120.000000)}
{pt3dadd(186372.000000,134148.000000,90525.000000,120.000000)}
{pt3dadd(186360.000000,134304.000000,90650.000000,120.000000)}
{pt3dadd(186312.000000,134496.000000,90625.000000,120.000000)}

{create adhoc15}
{access adhoc15}
{connect adhoc15(1), adhoc14(0)}
{nseg = 1}
{strdef color color = "White"}
{pt3dclear()}
{pt3dadd(186312.000000,134496.000000,90625.000000,120.000000)}
{pt3dadd(186312.000000,134664.000000,90575.000000,120.000000)}
{pt3dadd(186312.000000,134856.000000,90600.000000,120.000000)}
{pt3dadd(186360.000000,135012.000000,90650.000000,120.000000)}
{pt3dadd(186360.000000,135180.000000,90625.000000,120.000000)}
{pt3dadd(186468.000000,135276.000000,90550.000000,120.000000)}
{pt3dadd(186552.000000,135420.000000,90550.000000,120.000000)}
{pt3dadd(186648.000000,135600.000000,90500.000000,120.000000)}
{pt3dadd(186744.000000,135744.000000,90375.000000,120.000000)}
{pt3dadd(186756.000000,135804.000000,90275.000000,120.000000)}
{pt3dadd(186888.000000,135924.000000,90300.000000,120.000000)}
{pt3dadd(187020.000000,136032.000000,90275.000000,120.000000)}
{pt3dadd(187080.000000,136176.000000,90175.000000,120.000000)}
{pt3dadd(187188.000000,136260.000000,90125.000000,120.000000)}
{pt3dadd(187248.000000,136404.000000,90025.000000,120.000000)}
{pt3dadd(187356.000000,136476.000000,90000.000000,120.000000)}
{pt3dadd(187440.000000,136620.000000,90000.000000,120.000000)}
{pt3dadd(187536.000000,136800.000000,89900.000000,120.000000)}
{pt3dadd(187584.000000,136956.000000,89850.000000,120.000000)}
{pt3dadd(187668.000000,137136.000000,89775.000000,120.000000)}
{pt3dadd(187728.000000,137328.000000,89700.000000,120.000000)}
{pt3dadd(187884.000000,137472.000000,89600.000000,120.000000)}
{pt3dadd(188016.000000,137628.000000,89500.000000,120.000000)}
{pt3dadd(188064.000000,137676.000000,89350.000000,120.000000)}
{pt3dadd(188052.000000,137808.000000,89275.000000,120.000000)}
{pt3dadd(188184.000000,137892.000000,89275.000000,120.000000)}
{pt3dadd(188292.000000,137976.000000,89200.000000,120.000000)}
{pt3dadd(188400.000000,138096.000000,89100.000000,120.000000)}
{pt3dadd(188484.000000,138180.000000,89025.000000,120.000000)}
{pt3dadd(188568.000000,138300.000000,89000.000000,120.000000)}
{pt3dadd(188580.000000,138432.000000,89075.000000,120.000000)}
{pt3dadd(188664.000000,138564.000000,89100.000000,120.000000)}
{pt3dadd(188664.000000,138696.000000,89150.000000,120.000000)}

{create adhoc16}
{access adhoc16}
{connect adhoc16(1), adhoc14(0)}
{nseg = 1}
{strdef color color = "White"}
{pt3dclear()}
{pt3dadd(186312.000000,134496.000000,90625.000000,120.000000)}
{pt3dadd(186408.000000,134436.000000,90750.000000,120.000000)}
{pt3dadd(186444.000000,134412.000000,90875.000000,120.000000)}
{pt3dadd(186396.000000,134400.000000,90975.000000,120.000000)}
{pt3dadd(186360.000000,134520.000000,91050.000000,120.000000)}
{pt3dadd(186324.000000,134604.000000,91125.000000,120.000000)}
{pt3dadd(186288.000000,134676.000000,91275.000000,120.000000)}
{pt3dadd(186288.000000,134796.000000,91325.000000,120.000000)}
{pt3dadd(186288.000000,134892.000000,91425.000000,120.000000)}
{pt3dadd(186300.000000,135048.000000,91475.000000,120.000000)}
{pt3dadd(186312.000000,135132.000000,91600.000000,120.000000)}
{pt3dadd(186300.000000,135216.000000,91650.000000,120.000000)}
{pt3dadd(186252.000000,135288.000000,91700.000000,120.000000)}
{pt3dadd(186240.000000,135384.000000,91775.000000,120.000000)}
{pt3dadd(186264.000000,135528.000000,91825.000000,120.000000)}
{pt3dadd(186276.000000,135660.000000,91950.000000,120.000000)}
{pt3dadd(186300.000000,135804.000000,92050.000000,120.000000)}
{pt3dadd(186336.000000,135984.000000,92200.000000,120.000000)}
{pt3dadd(186312.000000,136164.000000,92275.000000,120.000000)}
{pt3dadd(186312.000000,136308.000000,92375.000000,120.000000)}
{pt3dadd(186312.000000,136452.000000,92475.000000,120.000000)}
{pt3dadd(186240.000000,136548.000000,92525.000000,120.000000)}
{pt3dadd(186228.000000,136680.000000,92600.000000,120.000000)}
{pt3dadd(186300.000000,136860.000000,92700.000000,120.000000)}
{pt3dadd(186336.000000,136992.000000,92725.000000,120.000000)}
{pt3dadd(186336.000000,137040.000000,92800.000000,120.000000)}
{pt3dadd(186360.000000,137124.000000,92875.000000,120.000000)}
{pt3dadd(186420.000000,137220.000000,92975.000000,120.000000)}
{pt3dadd(186444.000000,137328.000000,93100.000000,120.000000)}
{pt3dadd(186504.000000,137436.000000,93225.000000,120.000000)}
{pt3dadd(186564.000000,137544.000000,93300.000000,120.000000)}
{pt3dadd(186636.000000,137628.000000,93475.000000,120.000000)}
{pt3dadd(186672.000000,137736.000000,93600.000000,120.000000)}
{pt3dadd(186672.000000,137844.000000,93650.000000,120.000000)}
{pt3dadd(186672.000000,137940.000000,93750.000000,120.000000)}
{pt3dadd(186672.000000,138060.000000,93800.000000,120.000000)}
{pt3dadd(186672.000000,138192.000000,93875.000000,120.000000)}
{pt3dadd(186708.000000,138324.000000,93875.000000,120.000000)}
{pt3dadd(186708.000000,138492.000000,93950.000000,120.000000)}
{pt3dadd(186756.000000,138660.000000,93975.000000,120.000000)}

{create adhoc17}
{access adhoc17}
{connect adhoc17(1), adhoc16(0)}
{nseg = 1}
{strdef color color = "White"}
{pt3dclear()}
{pt3dadd(186756.000000,138660.000000,93975.000000,120.000000)}
{pt3dadd(186864.000000,138816.000000,93900.000000,120.000000)}
{pt3dadd(186972.000000,138948.000000,93850.000000,120.000000)}
{pt3dadd(187104.000000,139008.000000,93750.000000,120.000000)}
{pt3dadd(187284.000000,139044.000000,93825.000000,120.000000)}
{pt3dadd(187428.000000,139092.000000,93825.000000,120.000000)}
{pt3dadd(187584.000000,139128.000000,93825.000000,120.000000)}
{pt3dadd(187740.000000,139224.000000,93875.000000,120.000000)}
{pt3dadd(187932.000000,139296.000000,93900.000000,120.000000)}
{pt3dadd(188076.000000,139284.000000,93925.000000,120.000000)}
{pt3dadd(188208.000000,139320.000000,93950.000000,120.000000)}
{pt3dadd(188340.000000,139572.000000,94025.000000,120.000000)}

{create adhoc18}
{access adhoc18}
{connect adhoc18(1), adhoc16(0)}
{nseg = 1}
{strdef color color = "White"}
{pt3dclear()}
{pt3dadd(186756.000000,138660.000000,93975.000000,120.000000)}
{pt3dadd(186732.000000,138768.000000,94100.000000,120.000000)}
{pt3dadd(186840.000000,139032.000000,94200.000000,120.000000)}
{pt3dadd(186960.000000,139152.000000,94275.000000,120.000000)}
{pt3dadd(187104.000000,139224.000000,94400.000000,120.000000)}
{pt3dadd(187164.000000,139296.000000,94450.000000,120.000000)}
{pt3dadd(187248.000000,139356.000000,94525.000000,120.000000)}
{pt3dadd(187368.000000,139416.000000,94600.000000,120.000000)}

{create adhoc19}
{access adhoc19}
{connect adhoc19(1), adhoc11(0)}
{nseg = 1}
{strdef color color = "White"}
{pt3dclear()}
{pt3dadd(188832.000000,155472.000000,102950.000000,702.761100)}
{pt3dadd(188940.000000,155484.000000,103100.000000,314.253700)}
{pt3dadd(188964.000000,155544.000000,103275.000000,236.552220)}
{pt3dadd(189132.000000,155580.000000,103450.000000,731.56780)}
{pt3dadd(189132.000000,155640.000000,103575.000000,731.56780)}
{pt3dadd(189096.000000,155712.000000,103775.000000,731.56780)}
{pt3dadd(189180.000000,155616.000000,103975.000000,731.56780)}
{pt3dadd(189240.000000,155544.000000,104125.000000,731.56780)}
{pt3dadd(189288.000000,155760.000000,104325.000000,731.56780)}
{pt3dadd(189324.000000,155880.000000,104475.000000,731.56780)}
{pt3dadd(189312.000000,155844.000000,104625.000000,731.56780)}
{pt3dadd(189396.000000,155760.000000,104800.000000,731.56780)}
{pt3dadd(189372.000000,155808.000000,104925.000000,731.56780)}
{pt3dadd(189444.000000,155760.000000,105075.000000,731.56780)}
{pt3dadd(189432.000000,155832.000000,105200.000000,731.56780)}
{pt3dadd(189612.000000,155784.000000,105325.000000,731.56780)}
{pt3dadd(189612.000000,155904.000000,105475.000000,731.56780)}
{pt3dadd(189552.000000,156024.000000,105675.000000,731.56780)}
{pt3dadd(189492.000000,156012.000000,105850.000000,731.56780)}
{pt3dadd(189540.000000,155988.000000,106025.000000,731.56780)}
{pt3dadd(189588.000000,156060.000000,106200.000000,731.56780)}
{pt3dadd(189612.000000,155844.000000,106350.000000,731.56780)}
{pt3dadd(189684.000000,155880.000000,106550.000000,731.56780)}
{pt3dadd(189768.000000,155976.000000,106725.000000,731.56780)}
{pt3dadd(189648.000000,156012.000000,106875.000000,731.56780)}
{pt3dadd(189528.000000,156132.000000,107050.000000,731.56780)}
{pt3dadd(189576.000000,156036.000000,107275.000000,731.56780)}
{pt3dadd(189624.000000,155880.000000,107500.000000,731.56780)}
{pt3dadd(189672.000000,155904.000000,107700.000000,731.56780)}
{pt3dadd(189708.000000,155940.000000,107900.000000,731.56780)}
{pt3dadd(189768.000000,155988.000000,108075.000000,731.56780)}
{pt3dadd(189744.000000,156180.000000,108250.000000,731.56780)}
{pt3dadd(189720.000000,156264.000000,108425.000000,731.56780)}
{pt3dadd(189948.000000,156348.000000,108575.000000,731.56780)}
{pt3dadd(189948.000000,156324.000000,108750.000000,731.56780)}
{pt3dadd(189864.000000,156312.000000,108925.000000,731.56780)}
{pt3dadd(189816.000000,156384.000000,109150.000000,731.56780)}
{pt3dadd(189816.000000,156372.000000,109475.000000,731.56780)}
{pt3dadd(189708.000000,156348.000000,109625.000000,731.56780)}
{pt3dadd(189600.000000,156528.000000,109775.000000,731.56780)}

{create adhoc20}
{access adhoc20}
{connect adhoc20(1), adhoc19(0)}
{nseg = 1}
{strdef color color = "White"}
{pt3dclear()}
{pt3dadd(189600.000000,156528.000000,109775.000000,720.00001234)}
{pt3dadd(189444.000000,156684.000000,109925.000000,720.00001234)}
{pt3dadd(189360.000000,156840.000000,110050.000000,720.00001234)}
{pt3dadd(189336.000000,156984.000000,110225.000000,720.00001234)}
{pt3dadd(189324.000000,157104.000000,110375.000000,720.00001234)}
{pt3dadd(189324.000000,157188.000000,110525.000000,720.00001234)}
{pt3dadd(189264.000000,157200.000000,110700.000000,720.00001234)}
{pt3dadd(189180.000000,157212.000000,110850.000000,720.00001234)}
{pt3dadd(189024.000000,157296.000000,111000.000000,720.00001234)}
{pt3dadd(188928.000000,157416.000000,111175.000000,720.00001234)}
{pt3dadd(188904.000000,157464.000000,111350.000000,720.00001234)}
{pt3dadd(188796.000000,157656.000000,111500.000000,720.00001234)}
{pt3dadd(188736.000000,157716.000000,111675.000000,720.00001234)}
{pt3dadd(188676.000000,157728.000000,111850.000000,720.00001234)}
{pt3dadd(188616.000000,157740.000000,112025.000000,720.00001234)}
{pt3dadd(188568.000000,157788.000000,112175.000000,720.00001234)}

{create adhoc21}
{access adhoc21}
{connect adhoc21(1), adhoc20(0)}
{nseg = 1}
{strdef color color = "White"}
{pt3dclear()}
{pt3dadd(188568.000000,157788.000000,112175.000000,320.0000)}
{pt3dadd(189504.000000,159288.000000,111950.000000,320.0000)}
{pt3dadd(189528.000000,159348.000000,111775.000000,320.0000)}
{pt3dadd(189600.000000,159324.000000,111675.000000,320.0000)}
{pt3dadd(189672.000000,159300.000000,111600.000000,320.0000)}
{pt3dadd(189684.000000,159324.000000,111500.000000,320.0000)}
{pt3dadd(189684.000000,159324.000000,111425.000000,320.0000)}
{pt3dadd(189732.000000,159276.000000,111350.000000,320.0000)}
{pt3dadd(189780.000000,159228.000000,111250.000000,320.0000)}
{pt3dadd(189828.000000,159168.000000,111200.000000,320.0000)}
{pt3dadd(189852.000000,159132.000000,111100.000000,320.0000)}
{pt3dadd(189876.000000,159084.000000,111050.000000,320.0000)}
{pt3dadd(189900.000000,159048.000000,111000.000000,320.0000)}
{pt3dadd(189924.000000,159000.000000,110950.000000,320.0000)}
{pt3dadd(189948.000000,158964.000000,110875.000000,320.0000)}
{pt3dadd(189948.000000,158940.000000,110800.000000,320.0000)}
{pt3dadd(189984.000000,158892.000000,110650.000000,320.0000)}
{pt3dadd(189984.000000,158904.000000,110550.000000,320.0000)}
{pt3dadd(189948.000000,158928.000000,110450.000000,320.0000)}
{pt3dadd(189948.000000,158916.000000,110325.000000,320.0000)}
{pt3dadd(189924.000000,158784.000000,110225.000000,320.0000)}
{pt3dadd(190056.000000,158724.000000,110150.000000,320.0000)}
{pt3dadd(190032.000000,158628.000000,110075.000000,320.0000)}
{pt3dadd(190056.000000,158592.000000,110000.000000,320.0000)}
{pt3dadd(190140.000000,158544.000000,109850.000000,320.0000)}
{pt3dadd(190128.000000,158520.000000,109775.000000,320.0000)}
{pt3dadd(190212.000000,158496.000000,109700.000000,320.0000)}
{pt3dadd(190152.000000,158388.000000,109600.000000,320.0000)}
{pt3dadd(190224.000000,158280.000000,109525.000000,320.0000)}
{pt3dadd(190200.000000,158220.000000,109425.000000,320.0000)}
{pt3dadd(190176.000000,158100.000000,109350.000000,320.0000)}
{pt3dadd(190284.000000,158028.000000,109250.000000,320.0000)}
{pt3dadd(190332.000000,158004.000000,109175.000000,320.0000)}
{pt3dadd(190356.000000,157932.000000,109075.000000,320.0000)}
{pt3dadd(190284.000000,157908.000000,109025.000000,320.0000)}
{pt3dadd(190368.000000,157884.000000,108950.000000,320.0000)}
{pt3dadd(190380.000000,157800.000000,108850.000000,320.0000)}
{pt3dadd(190380.000000,157740.000000,108775.000000,320.0000)}
{pt3dadd(190392.000000,157680.000000,108700.000000,320.0000)}
{pt3dadd(190320.000000,157620.000000,108600.000000,320.0000)}
{pt3dadd(190248.000000,157476.000000,108500.000000,320.0000)}
{pt3dadd(190116.000000,157332.000000,108450.000000,320.0000)}
{pt3dadd(190044.000000,157248.000000,108375.000000,320.0000)}
{pt3dadd(190080.000000,157320.000000,108275.000000,320.0000)}
{pt3dadd(190104.000000,157236.000000,108200.000000,320.0000)}
{pt3dadd(190056.000000,157200.000000,108125.000000,320.0000)}
{pt3dadd(190008.000000,157176.000000,108050.000000,320.0000)}
{pt3dadd(189888.000000,157296.000000,107975.000000,320.0000)}
{pt3dadd(189840.000000,157380.000000,107925.000000,320.0000)}
{pt3dadd(189792.000000,157464.000000,107850.000000,320.0000)}
{pt3dadd(189768.000000,157536.000000,107775.000000,320.0000)}
{pt3dadd(189780.000000,157584.000000,107675.000000,320.0000)}
{pt3dadd(189708.000000,157680.000000,107600.000000,320.0000)}
{pt3dadd(189660.000000,157764.000000,107525.000000,320.0000)}
{pt3dadd(189768.000000,157704.000000,107425.000000,320.0000)}
{pt3dadd(189792.000000,157608.000000,107350.000000,320.0000)}
{pt3dadd(189828.000000,157572.000000,107275.000000,320.0000)}
{pt3dadd(189792.000000,157584.000000,107200.000000,320.0000)}
{pt3dadd(189804.000000,157620.000000,107125.000000,320.0000)}
{pt3dadd(189840.000000,157644.000000,107050.000000,320.0000)}
{pt3dadd(189888.000000,157632.000000,106950.000000,320.0000)}
{pt3dadd(189840.000000,157608.000000,106875.000000,320.0000)}
{pt3dadd(189804.000000,157572.000000,106775.000000,320.0000)}
{pt3dadd(189780.000000,157596.000000,106700.000000,320.0000)}
{pt3dadd(189756.000000,157536.000000,106625.000000,320.0000)}
{pt3dadd(189696.000000,157548.000000,106550.000000,320.0000)}
{pt3dadd(189660.000000,157560.000000,106450.000000,320.0000)}
{pt3dadd(189612.000000,157560.000000,106375.000000,320.0000)}
{pt3dadd(189576.000000,157560.000000,106300.000000,320.0000)}
{pt3dadd(189528.000000,157572.000000,106225.000000,320.0000)}
{pt3dadd(189540.000000,157584.000000,106150.000000,320.0000)}
{pt3dadd(189432.000000,157560.000000,106000.000000,320.0000)}
{pt3dadd(189408.000000,157536.000000,105900.000000,320.0000)}
{pt3dadd(189408.000000,157500.000000,105800.000000,320.0000)}
{pt3dadd(189372.000000,157488.000000,105700.000000,320.0000)}
{pt3dadd(189396.000000,157476.000000,105625.000000,320.0000)}
{pt3dadd(189420.000000,157464.000000,105550.000000,320.0000)}
{pt3dadd(189444.000000,157464.000000,105450.000000,320.0000)}
{pt3dadd(189384.000000,157476.000000,105350.000000,320.0000)}
{pt3dadd(189324.000000,157488.000000,105250.000000,320.0000)}
{pt3dadd(189300.000000,157476.000000,105150.000000,320.0000)}
{pt3dadd(189276.000000,157464.000000,105050.000000,320.0000)}
{pt3dadd(189264.000000,157452.000000,104950.000000,320.0000)}
{pt3dadd(189204.000000,157512.000000,104775.000000,320.0000)}
{pt3dadd(189192.000000,157536.000000,104650.000000,320.0000)}
{pt3dadd(189228.000000,157500.000000,104525.000000,320.0000)}
{pt3dadd(189276.000000,157488.000000,104425.000000,320.0000)}
{pt3dadd(189252.000000,157488.000000,104325.000000,320.0000)}
{pt3dadd(189252.000000,157500.000000,104225.000000,320.0000)}
{pt3dadd(189288.000000,157476.000000,104125.000000,320.0000)}
{pt3dadd(189264.000000,157428.000000,104075.000000,320.0000)}
{pt3dadd(189312.000000,157416.000000,103975.000000,320.0000)}
{pt3dadd(189348.000000,157428.000000,103900.000000,320.0000)}
{pt3dadd(189384.000000,157440.000000,103825.000000,320.0000)}
{pt3dadd(189408.000000,157476.000000,103725.000000,320.0000)}
{pt3dadd(189456.000000,157464.000000,103650.000000,320.0000)}
{pt3dadd(189516.000000,157452.000000,103600.000000,320.0000)}
{pt3dadd(189564.000000,157428.000000,103525.000000,320.0000)}
{pt3dadd(189540.000000,157440.000000,103450.000000,320.0000)}
{pt3dadd(189528.000000,157380.000000,103350.000000,320.0000)}
{pt3dadd(189456.000000,157272.000000,103300.000000,320.0000)}
{pt3dadd(189456.000000,157248.000000,103225.000000,320.0000)}
{pt3dadd(189540.000000,157212.000000,103150.000000,320.0000)}
{pt3dadd(189504.000000,157164.000000,103075.000000,320.0000)}
{pt3dadd(189600.000000,157104.000000,103000.000000,320.0000)}
{pt3dadd(189624.000000,157056.000000,102925.000000,320.0000)}
{pt3dadd(189564.000000,156984.000000,102850.000000,320.0000)}
{pt3dadd(189492.000000,156912.000000,102800.000000,320.0000)}
{pt3dadd(189576.000000,156816.000000,102700.000000,320.0000)}
{pt3dadd(189636.000000,156720.000000,102650.000000,320.0000)}
{pt3dadd(189492.000000,156696.000000,102525.000000,320.0000)}
{pt3dadd(189360.000000,156624.000000,102400.000000,320.0000)}
{pt3dadd(189492.000000,156552.000000,102300.000000,320.0000)}
{pt3dadd(189516.000000,156552.000000,102225.000000,320.0000)}
{pt3dadd(189492.000000,156552.000000,102150.000000,320.0000)}
{pt3dadd(189444.000000,156576.000000,102075.000000,320.0000)}
{pt3dadd(189432.000000,156588.000000,102000.000000,320.0000)}
{pt3dadd(189468.000000,156528.000000,101925.000000,320.0000)}
{pt3dadd(189444.000000,156528.000000,101850.000000,320.0000)}
{pt3dadd(189408.000000,156480.000000,101775.000000,320.0000)}
{pt3dadd(189396.000000,156420.000000,101700.000000,320.0000)}
{pt3dadd(189360.000000,156360.000000,101650.000000,320.0000)}
{pt3dadd(189324.000000,156324.000000,101550.000000,320.0000)}
{pt3dadd(189276.000000,156276.000000,101475.000000,320.0000)}
{pt3dadd(189324.000000,156288.000000,101400.000000,320.0000)}
{pt3dadd(189360.000000,156300.000000,101325.000000,320.0000)}
{pt3dadd(189396.000000,156312.000000,101250.000000,320.0000)}
{pt3dadd(189348.000000,156324.000000,101150.000000,320.0000)}
{pt3dadd(189336.000000,156312.000000,101100.000000,320.0000)}
{pt3dadd(189324.000000,156360.000000,101025.000000,320.0000)}
{pt3dadd(189324.000000,156408.000000,100925.000000,320.0000)}
{pt3dadd(189312.000000,156456.000000,100825.000000,320.0000)}
{pt3dadd(189276.000000,156456.000000,100750.000000,320.0000)}
{pt3dadd(189228.000000,156444.000000,100650.000000,320.0000)}
{pt3dadd(189192.000000,156444.000000,100550.000000,320.0000)}
{pt3dadd(189144.000000,156432.000000,100450.000000,320.0000)}
{pt3dadd(189144.000000,156372.000000,100375.000000,320.0000)}
{pt3dadd(189060.000000,156396.000000,100275.000000,320.0000)}
{pt3dadd(189072.000000,156408.000000,100175.000000,320.0000)}
{pt3dadd(189072.000000,156420.000000,100100.000000,320.0000)}
{pt3dadd(189024.000000,156432.000000,100025.000000,320.0000)}
{pt3dadd(188964.000000,156432.000000,99925.000000,320.0000)}
{pt3dadd(188916.000000,156444.000000,99850.000000,320.0000)}
{pt3dadd(188868.000000,156444.000000,99750.000000,320.0000)}
{pt3dadd(188904.000000,156444.000000,99650.000000,320.0000)}
{pt3dadd(188952.000000,156432.000000,99550.000000,320.0000)}
{pt3dadd(188904.000000,156468.000000,99450.000000,320.0000)}
{pt3dadd(188904.000000,156456.000000,99350.000000,320.0000)}
{pt3dadd(188892.000000,156444.000000,99225.000000,320.0000)}
{pt3dadd(188892.000000,156444.000000,99125.000000,320.0000)}
{pt3dadd(188856.000000,156456.000000,99050.000000,320.0000)}
{pt3dadd(188868.000000,156480.000000,98950.000000,320.0000)}
{pt3dadd(188844.000000,156504.000000,98850.000000,320.0000)}
{pt3dadd(188844.000000,156504.000000,98750.000000,320.0000)}
{pt3dadd(188832.000000,156516.000000,98650.000000,320.0000)}
{pt3dadd(188832.000000,156528.000000,98575.000000,320.0000)}
{pt3dadd(188856.000000,156588.000000,98475.000000,320.0000)}
{pt3dadd(188868.000000,156600.000000,98375.000000,320.0000)}
{pt3dadd(188808.000000,156648.000000,98300.000000,320.0000)}
{pt3dadd(188820.000000,156600.000000,98200.000000,320.0000)}
{pt3dadd(188796.000000,156600.000000,98125.000000,320.0000)}
{pt3dadd(188808.000000,156576.000000,98025.000000,320.0000)}
{pt3dadd(188796.000000,156564.000000,97925.000000,320.0000)}
{pt3dadd(188784.000000,156540.000000,97825.000000,320.0000)}
{pt3dadd(188772.000000,156528.000000,97725.000000,320.0000)}
{pt3dadd(188760.000000,156576.000000,97600.000000,320.0000)}
{pt3dadd(188784.000000,156552.000000,97500.000000,320.0000)}
{pt3dadd(188796.000000,156528.000000,97400.000000,320.0000)}
{pt3dadd(188760.000000,156504.000000,97325.000000,320.0000)}
{pt3dadd(188688.000000,156480.000000,97200.000000,320.0000)}
{pt3dadd(188712.000000,156408.000000,97050.000000,320.0000)}
{pt3dadd(188652.000000,156360.000000,96950.000000,320.0000)}
{pt3dadd(188652.000000,156336.000000,96850.000000,320.0000)}
{pt3dadd(188616.000000,156324.000000,96700.000000,320.0000)}
{pt3dadd(188628.000000,156264.000000,96600.000000,320.0000)}
{pt3dadd(188544.000000,156228.000000,96525.000000,320.0000)}
{pt3dadd(188496.000000,156180.000000,96450.000000,320.0000)}
{pt3dadd(188436.000000,156144.000000,96350.000000,320.0000)}
{pt3dadd(188376.000000,156096.000000,96250.000000,320.0000)}
{pt3dadd(188352.000000,156132.000000,96150.000000,320.0000)}
{pt3dadd(188268.000000,156144.000000,96050.000000,320.0000)}
{pt3dadd(188220.000000,156096.000000,95975.000000,320.0000)}
{pt3dadd(188160.000000,156024.000000,95900.000000,320.0000)}
{pt3dadd(188088.000000,155964.000000,95800.000000,320.0000)}
{pt3dadd(188112.000000,155988.000000,95725.000000,320.0000)}
{pt3dadd(188028.000000,156000.000000,95650.000000,320.0000)}
{pt3dadd(187968.000000,155976.000000,95575.000000,320.0000)}
{pt3dadd(187968.000000,155988.000000,95475.000000,320.0000)}
{pt3dadd(187980.000000,155988.000000,95400.000000,320.0000)}
{pt3dadd(187968.000000,155976.000000,95300.000000,320.0000)}
{pt3dadd(187980.000000,155952.000000,95225.000000,320.0000)}
{pt3dadd(187992.000000,155916.000000,95150.000000,320.0000)}
{pt3dadd(187980.000000,155832.000000,95050.000000,320.0000)}
{pt3dadd(187896.000000,155808.000000,94975.000000,320.0000)}
{pt3dadd(187812.000000,155808.000000,94875.000000,320.0000)}
{pt3dadd(187740.000000,155772.000000,94775.000000,320.0000)}
{pt3dadd(187704.000000,155676.000000,94700.000000,320.0000)}
{pt3dadd(187620.000000,155628.000000,94650.000000,320.0000)}
{pt3dadd(187560.000000,155532.000000,94575.000000,320.0000)}
{pt3dadd(187476.000000,155460.000000,94475.000000,320.0000)}
{pt3dadd(187464.000000,155448.000000,94400.000000,320.0000)}
{pt3dadd(187404.000000,155448.000000,94325.000000,320.0000)}
{pt3dadd(187344.000000,155400.000000,94250.000000,320.0000)}
{pt3dadd(187284.000000,155340.000000,94150.000000,320.0000)}
{pt3dadd(187224.000000,155292.000000,94050.000000,320.0000)}
{pt3dadd(187164.000000,155244.000000,93950.000000,320.0000)}
{pt3dadd(187092.000000,155184.000000,93850.000000,320.0000)}
{pt3dadd(187032.000000,155196.000000,93775.000000,320.0000)}
{pt3dadd(187008.000000,155124.000000,93675.000000,320.0000)}

{create adhoc22}
{access adhoc22}
{connect adhoc22(1), adhoc21(0)}
{nseg = 1}
{strdef color color = "White"}
{pt3dclear()}
{pt3dadd(187008.000000,155124.000000,93675.000000,120.000000)}
{pt3dadd(186732.000000,154800.000000,93525.000000,120.000000)}
{pt3dadd(186672.000000,154788.000000,93400.000000,120.000000)}
{pt3dadd(186624.000000,154764.000000,93350.000000,120.000000)}
{pt3dadd(186564.000000,154740.000000,93250.000000,120.000000)}
{pt3dadd(186516.000000,154716.000000,93175.000000,120.000000)}
{pt3dadd(186456.000000,154740.000000,93125.000000,120.000000)}
{pt3dadd(186408.000000,154740.000000,93050.000000,120.000000)}
{pt3dadd(186348.000000,154752.000000,92975.000000,120.000000)}
{pt3dadd(186324.000000,154752.000000,92875.000000,120.000000)}
{pt3dadd(186336.000000,154740.000000,92800.000000,120.000000)}
{pt3dadd(186300.000000,154752.000000,92725.000000,120.000000)}
{pt3dadd(186276.000000,154716.000000,92650.000000,120.000000)}
{pt3dadd(186252.000000,154692.000000,92575.000000,120.000000)}
{pt3dadd(186228.000000,154656.000000,92500.000000,120.000000)}
{pt3dadd(186180.000000,154632.000000,92425.000000,120.000000)}
{pt3dadd(186168.000000,154596.000000,92350.000000,120.000000)}
{pt3dadd(186180.000000,154608.000000,92250.000000,120.000000)}
{pt3dadd(186180.000000,154620.000000,92175.000000,120.000000)}
{pt3dadd(186168.000000,154632.000000,92100.000000,120.000000)}
{pt3dadd(186132.000000,154608.000000,92025.000000,120.000000)}
{pt3dadd(186120.000000,154620.000000,91950.000000,120.000000)}
{pt3dadd(186120.000000,154608.000000,91850.000000,120.000000)}
{pt3dadd(186120.000000,154608.000000,91775.000000,120.000000)}
{pt3dadd(186108.000000,154596.000000,91700.000000,120.000000)}
{pt3dadd(186108.000000,154596.000000,91625.000000,120.000000)}
{pt3dadd(186096.000000,154584.000000,91525.000000,120.000000)}
{pt3dadd(186096.000000,154584.000000,91450.000000,120.000000)}
{pt3dadd(186084.000000,154584.000000,91375.000000,120.000000)}
{pt3dadd(186072.000000,154608.000000,91300.000000,120.000000)}
{pt3dadd(186000.000000,154608.000000,91225.000000,120.000000)}
{pt3dadd(185964.000000,154584.000000,91150.000000,120.000000)}
{pt3dadd(185940.000000,154572.000000,91050.000000,120.000000)}
{pt3dadd(185904.000000,154572.000000,90975.000000,120.000000)}
{pt3dadd(185892.000000,154560.000000,90900.000000,120.000000)}
{pt3dadd(185868.000000,154572.000000,90825.000000,120.000000)}
{pt3dadd(185880.000000,154608.000000,90725.000000,120.000000)}
{pt3dadd(185904.000000,154632.000000,90650.000000,120.000000)}
{pt3dadd(185916.000000,154656.000000,90575.000000,120.000000)}
{pt3dadd(185940.000000,154680.000000,90500.000000,120.000000)}
{pt3dadd(185952.000000,154692.000000,90425.000000,120.000000)}
{pt3dadd(185952.000000,154716.000000,90350.000000,120.000000)}
{pt3dadd(185952.000000,154752.000000,90275.000000,120.000000)}
{pt3dadd(185964.000000,154776.000000,90200.000000,120.000000)}
{pt3dadd(185964.000000,154812.000000,90125.000000,120.000000)}
{pt3dadd(185868.000000,154836.000000,90050.000000,120.000000)}
{pt3dadd(185928.000000,154812.000000,90000.000000,120.000000)}
{pt3dadd(185832.000000,154872.000000,89925.000000,120.000000)}
{pt3dadd(185808.000000,154836.000000,89850.000000,120.000000)}
{pt3dadd(185784.000000,154848.000000,89750.000000,120.000000)}
{pt3dadd(185784.000000,154848.000000,89675.000000,120.000000)}
{pt3dadd(185772.000000,154860.000000,89600.000000,120.000000)}
{pt3dadd(185748.000000,154872.000000,89525.000000,120.000000)}
{pt3dadd(185760.000000,154920.000000,89450.000000,120.000000)}
{pt3dadd(185784.000000,154968.000000,89375.000000,120.000000)}
{pt3dadd(185796.000000,155016.000000,89300.000000,120.000000)}
{pt3dadd(185784.000000,155100.000000,89225.000000,120.000000)}
{pt3dadd(185748.000000,155136.000000,89150.000000,120.000000)}
{pt3dadd(185712.000000,155172.000000,89075.000000,120.000000)}
{pt3dadd(185664.000000,155220.000000,89000.000000,120.000000)}
{pt3dadd(185628.000000,155256.000000,88925.000000,120.000000)}
{pt3dadd(185580.000000,155292.000000,88850.000000,120.000000)}
{pt3dadd(185520.000000,155340.000000,88800.000000,120.000000)}
{pt3dadd(185424.000000,155376.000000,88725.000000,120.000000)}
{pt3dadd(185340.000000,155412.000000,88625.000000,120.000000)}
{pt3dadd(185292.000000,155436.000000,88550.000000,120.000000)}
{pt3dadd(185232.000000,155460.000000,88500.000000,120.000000)}
{pt3dadd(185208.000000,155508.000000,88400.000000,120.000000)}
{pt3dadd(185184.000000,155556.000000,88350.000000,120.000000)}
{pt3dadd(185160.000000,155604.000000,88275.000000,120.000000)}
{pt3dadd(185136.000000,155664.000000,88225.000000,120.000000)}
{pt3dadd(185088.000000,155736.000000,88150.000000,120.000000)}
{pt3dadd(185040.000000,155808.000000,88075.000000,120.000000)}
{pt3dadd(184944.000000,155892.000000,88000.000000,120.000000)}
{pt3dadd(184848.000000,155904.000000,87925.000000,120.000000)}
{pt3dadd(184824.000000,156000.000000,87850.000000,120.000000)}
{pt3dadd(184764.000000,156072.000000,87775.000000,120.000000)}
{pt3dadd(184728.000000,156108.000000,87675.000000,120.000000)}
{pt3dadd(184752.000000,156132.000000,87600.000000,120.000000)}
{pt3dadd(184740.000000,156180.000000,87525.000000,120.000000)}
{pt3dadd(184728.000000,156204.000000,87450.000000,120.000000)}
{pt3dadd(184716.000000,156240.000000,87375.000000,120.000000)}
{pt3dadd(184692.000000,156276.000000,87300.000000,120.000000)}
{pt3dadd(184680.000000,156300.000000,87225.000000,120.000000)}
{pt3dadd(184668.000000,156336.000000,87175.000000,120.000000)}
{pt3dadd(184656.000000,156360.000000,87125.000000,120.000000)}
{pt3dadd(184572.000000,156408.000000,87075.000000,120.000000)}
{pt3dadd(184548.000000,156408.000000,87000.000000,120.000000)}
{pt3dadd(184512.000000,156432.000000,86950.000000,120.000000)}
{pt3dadd(184512.000000,156432.000000,86925.000000,120.000000)}
{pt3dadd(184488.000000,156516.000000,86875.000000,120.000000)}
{pt3dadd(184524.000000,156588.000000,86825.000000,120.000000)}
{pt3dadd(184428.000000,156588.000000,86750.000000,120.000000)}
{pt3dadd(184296.000000,156612.000000,86675.000000,120.000000)}
{pt3dadd(184224.000000,156696.000000,86600.000000,120.000000)}
{pt3dadd(184140.000000,156792.000000,86550.000000,120.000000)}
{pt3dadd(184056.000000,156912.000000,86475.000000,120.000000)}
{pt3dadd(183936.000000,156936.000000,86400.000000,120.000000)}
{pt3dadd(183936.000000,156852.000000,86325.000000,120.000000)}
{pt3dadd(183864.000000,156876.000000,86250.000000,120.000000)}
{pt3dadd(183804.000000,156876.000000,86175.000000,120.000000)}
{pt3dadd(183720.000000,156888.000000,86100.000000,120.000000)}
{pt3dadd(183648.000000,156888.000000,86025.000000,120.000000)}
{pt3dadd(183588.000000,156876.000000,85950.000000,120.000000)}
{pt3dadd(183540.000000,156924.000000,85875.000000,120.000000)}
{pt3dadd(183528.000000,156984.000000,85825.000000,120.000000)}
{pt3dadd(183516.000000,157080.000000,85775.000000,120.000000)}
{pt3dadd(183516.000000,157176.000000,85725.000000,120.000000)}
{pt3dadd(183504.000000,157272.000000,85675.000000,120.000000)}
{pt3dadd(183468.000000,157368.000000,85650.000000,120.000000)}
{pt3dadd(183420.000000,157476.000000,85600.000000,120.000000)}
{pt3dadd(183324.000000,157632.000000,85525.000000,120.000000)}
{pt3dadd(183240.000000,157800.000000,85500.000000,120.000000)}
{pt3dadd(183120.000000,157884.000000,85400.000000,120.000000)}
{pt3dadd(183012.000000,157956.000000,85300.000000,120.000000)}
{pt3dadd(183048.000000,158028.000000,85300.000000,120.000000)}
{pt3dadd(183084.000000,158100.000000,85300.000000,120.000000)}
{pt3dadd(183048.000000,158160.000000,85275.000000,120.000000)}
{pt3dadd(182988.000000,158220.000000,85250.000000,120.000000)}
{pt3dadd(182928.000000,158292.000000,85225.000000,120.000000)}
{pt3dadd(182880.000000,158364.000000,85225.000000,120.000000)}
{pt3dadd(182844.000000,158424.000000,85150.000000,120.000000)}
{pt3dadd(182796.000000,158496.000000,85100.000000,120.000000)}
{pt3dadd(182760.000000,158568.000000,85050.000000,120.000000)}
{pt3dadd(182736.000000,158640.000000,85100.000000,120.000000)}
{pt3dadd(182640.000000,158712.000000,85050.000000,120.000000)}
{pt3dadd(182436.000000,158784.000000,84875.000000,120.000000)}
{pt3dadd(182292.000000,158868.000000,84875.000000,120.000000)}
{pt3dadd(182148.000000,158952.000000,84825.000000,120.000000)}
{pt3dadd(182100.000000,159036.000000,84800.000000,120.000000)}
{pt3dadd(181968.000000,158988.000000,84725.000000,120.000000)}
{pt3dadd(181860.000000,158940.000000,84650.000000,120.000000)}
{pt3dadd(181788.000000,158988.000000,84575.000000,120.000000)}
{pt3dadd(181716.000000,159012.000000,84575.000000,120.000000)}
{pt3dadd(181644.000000,159072.000000,84550.000000,120.000000)}
{pt3dadd(181548.000000,159156.000000,84350.000000,120.000000)}
{pt3dadd(181476.000000,159132.000000,84050.000000,120.000000)}
{pt3dadd(181368.000000,159096.000000,83875.000000,120.000000)}
{pt3dadd(181296.000000,159096.000000,83650.000000,120.000000)}
{pt3dadd(181236.000000,159084.000000,83250.000000,120.000000)}
{pt3dadd(181188.000000,159036.000000,83125.000000,120.000000)}
{pt3dadd(181176.000000,159024.000000,83050.000000,120.000000)}
{pt3dadd(181128.000000,158988.000000,82975.000000,120.000000)}
{pt3dadd(181068.000000,158952.000000,82900.000000,120.000000)}
{pt3dadd(181080.000000,158952.000000,82850.000000,120.000000)}
{pt3dadd(181056.000000,158988.000000,82775.000000,120.000000)}
{pt3dadd(180984.000000,159012.000000,82725.000000,120.000000)}
{pt3dadd(180948.000000,158988.000000,82650.000000,120.000000)}
{pt3dadd(180912.000000,158976.000000,82575.000000,120.000000)}
{pt3dadd(180888.000000,158964.000000,82500.000000,120.000000)}
{pt3dadd(180852.000000,158952.000000,82425.000000,120.000000)}
{pt3dadd(180828.000000,158928.000000,82350.000000,120.000000)}
{pt3dadd(180804.000000,158904.000000,82275.000000,120.000000)}
{pt3dadd(180756.000000,158892.000000,82225.000000,120.000000)}
{pt3dadd(180720.000000,158868.000000,82150.000000,120.000000)}
{pt3dadd(180672.000000,158856.000000,82100.000000,120.000000)}
{pt3dadd(180636.000000,158844.000000,82025.000000,120.000000)}
{pt3dadd(180552.000000,158880.000000,81950.000000,120.000000)}
{pt3dadd(180456.000000,158904.000000,81900.000000,120.000000)}
{pt3dadd(180420.000000,158904.000000,81825.000000,120.000000)}
{pt3dadd(180336.000000,158928.000000,81750.000000,120.000000)}
{pt3dadd(180312.000000,158916.000000,81675.000000,120.000000)}
{pt3dadd(180288.000000,158916.000000,81600.000000,120.000000)}
{pt3dadd(180264.000000,158904.000000,81525.000000,120.000000)}
{pt3dadd(180240.000000,158904.000000,81450.000000,120.000000)}
{pt3dadd(180264.000000,158868.000000,81375.000000,120.000000)}
{pt3dadd(180216.000000,158868.000000,81300.000000,120.000000)}
{pt3dadd(180180.000000,158844.000000,81200.000000,120.000000)}
{pt3dadd(180144.000000,158796.000000,81125.000000,120.000000)}
{pt3dadd(180108.000000,158748.000000,81025.000000,120.000000)}
{pt3dadd(180120.000000,158796.000000,80950.000000,120.000000)}
{pt3dadd(180120.000000,158820.000000,80850.000000,120.000000)}
{pt3dadd(180132.000000,158796.000000,80800.000000,120.000000)}
{pt3dadd(180108.000000,158784.000000,80700.000000,120.000000)}
{pt3dadd(180036.000000,158820.000000,80625.000000,120.000000)}
{pt3dadd(179976.000000,158844.000000,80550.000000,120.000000)}
{pt3dadd(179904.000000,158880.000000,80500.000000,120.000000)}
{pt3dadd(179856.000000,158988.000000,80400.000000,120.000000)}
{pt3dadd(179856.000000,159048.000000,80325.000000,120.000000)}
{pt3dadd(179856.000000,159084.000000,80250.000000,120.000000)}
{pt3dadd(179856.000000,159084.000000,80175.000000,120.000000)}
{pt3dadd(179844.000000,159072.000000,80075.000000,120.000000)}
{pt3dadd(179880.000000,159096.000000,79975.000000,120.000000)}
{pt3dadd(179928.000000,159120.000000,79900.000000,120.000000)}
{pt3dadd(179928.000000,159180.000000,79825.000000,120.000000)}
{pt3dadd(179928.000000,159252.000000,79750.000000,120.000000)}
{pt3dadd(179940.000000,159324.000000,79675.000000,120.000000)}
{pt3dadd(179952.000000,159348.000000,79575.000000,120.000000)}
{pt3dadd(179964.000000,159360.000000,79500.000000,120.000000)}
{pt3dadd(179964.000000,159396.000000,79425.000000,120.000000)}
{pt3dadd(179976.000000,159492.000000,79350.000000,120.000000)}
{pt3dadd(180000.000000,159528.000000,79275.000000,120.000000)}
{pt3dadd(180084.000000,159612.000000,79200.000000,120.000000)}
{pt3dadd(180132.000000,159636.000000,79100.000000,120.000000)}
{pt3dadd(180192.000000,159684.000000,79025.000000,120.000000)}
{pt3dadd(180168.000000,159768.000000,78975.000000,120.000000)}
{pt3dadd(180144.000000,159864.000000,78900.000000,120.000000)}
{pt3dadd(180156.000000,159996.000000,78825.000000,120.000000)}
{pt3dadd(180180.000000,160128.000000,78775.000000,120.000000)}
{pt3dadd(180228.000000,160236.000000,78700.000000,120.000000)}
{pt3dadd(180252.000000,160320.000000,78625.000000,120.000000)}
{pt3dadd(180204.000000,160464.000000,78575.000000,120.000000)}
{pt3dadd(180156.000000,160572.000000,78500.000000,120.000000)}
{pt3dadd(180120.000000,160680.000000,78400.000000,120.000000)}
{pt3dadd(180036.000000,160764.000000,78250.000000,120.000000)}
{pt3dadd(179820.000000,160944.000000,78025.000000,120.000000)}
{pt3dadd(179652.000000,160980.000000,77675.000000,120.000000)}

{create adhoc23}
{access adhoc23}
{connect adhoc23(1), adhoc22(0)}
{nseg = 1}
{strdef color color = "White"}
{pt3dclear()}
{pt3dadd(179652.000000,160980.000000,77675.000000,120.000000)}
{pt3dadd(179628.000000,160908.000000,77450.000000,120.000000)}
{pt3dadd(179652.000000,161052.000000,77100.000000,120.000000)}
{pt3dadd(179664.000000,161172.000000,76900.000000,120.000000)}
{pt3dadd(179544.000000,161244.000000,76675.000000,120.000000)}
{pt3dadd(179460.000000,161316.000000,76500.000000,120.000000)}
{pt3dadd(179376.000000,161388.000000,76350.000000,120.000000)}
{pt3dadd(179268.000000,161568.000000,76250.000000,120.000000)}
{pt3dadd(179136.000000,161640.000000,76050.000000,120.000000)}
{pt3dadd(179016.000000,161808.000000,76000.000000,120.000000)}
{pt3dadd(178812.000000,161928.000000,75875.000000,120.000000)}
{pt3dadd(178752.000000,162072.000000,75850.000000,120.000000)}
{pt3dadd(178632.000000,162168.000000,75825.000000,120.000000)}
{pt3dadd(178128.000000,162456.000000,75800.000000,120.000000)}
{pt3dadd(178008.000000,162564.000000,75725.000000,120.000000)}
{pt3dadd(177852.000000,162600.000000,75500.000000,120.000000)}
{pt3dadd(177480.000000,162720.000000,75375.000000,120.000000)}
{pt3dadd(177396.000000,162840.000000,75325.000000,120.000000)}
{pt3dadd(177228.000000,163056.000000,75225.000000,120.000000)}
{pt3dadd(176976.000000,163188.000000,75075.000000,120.000000)}
{pt3dadd(176772.000000,163320.000000,75000.000000,120.000000)}
{pt3dadd(176544.000000,163440.000000,74850.000000,120.000000)}
{pt3dadd(176328.000000,163488.000000,74725.000000,120.000000)}
{pt3dadd(176172.000000,163536.000000,74575.000000,120.000000)}
{pt3dadd(176064.000000,163608.000000,74425.000000,120.000000)}
{pt3dadd(175944.000000,163692.000000,74300.000000,120.000000)}
{pt3dadd(175812.000000,163776.000000,74150.000000,120.000000)}
{pt3dadd(175656.000000,163824.000000,74025.000000,120.000000)}
{pt3dadd(175536.000000,163836.000000,73950.000000,120.000000)}
{pt3dadd(175464.000000,163896.000000,73875.000000,120.000000)}
{pt3dadd(175404.000000,163932.000000,73800.000000,120.000000)}
{pt3dadd(175284.000000,163968.000000,73700.000000,120.000000)}
{pt3dadd(175176.000000,164028.000000,73550.000000,120.000000)}
{pt3dadd(175092.000000,164124.000000,73400.000000,120.000000)}
{pt3dadd(174996.000000,164160.000000,73250.000000,120.000000)}
{pt3dadd(174900.000000,164196.000000,73100.000000,120.000000)}
{pt3dadd(174828.000000,164148.000000,73025.000000,120.000000)}
{pt3dadd(174756.000000,164100.000000,73000.000000,120.000000)}
{pt3dadd(174660.000000,164088.000000,72775.000000,120.000000)}
{pt3dadd(174576.000000,164148.000000,72625.000000,120.000000)}
{pt3dadd(174480.000000,164232.000000,72575.000000,120.000000)}
{pt3dadd(174408.000000,164316.000000,72575.000000,120.000000)}
{pt3dadd(174336.000000,164388.000000,72575.000000,120.000000)}
{pt3dadd(174264.000000,164544.000000,72425.000000,120.000000)}
{pt3dadd(174192.000000,164628.000000,72225.000000,120.000000)}
{pt3dadd(174120.000000,164700.000000,72000.000000,120.000000)}
{pt3dadd(173940.000000,164796.000000,71800.000000,120.000000)}
{pt3dadd(173748.000000,164904.000000,71700.000000,120.000000)}
{pt3dadd(173604.000000,164916.000000,71500.000000,120.000000)}
{pt3dadd(173472.000000,164940.000000,71450.000000,120.000000)}
{pt3dadd(173304.000000,164892.000000,71325.000000,120.000000)}
{pt3dadd(173040.000000,164988.000000,71125.000000,120.000000)}
{pt3dadd(172800.000000,165000.000000,70800.000000,120.000000)}
{pt3dadd(172632.000000,164976.000000,70550.000000,120.000000)}
{pt3dadd(172368.000000,165000.000000,70325.000000,120.000000)}
{pt3dadd(172212.000000,165024.000000,70100.000000,120.000000)}
{pt3dadd(172068.000000,165120.000000,69850.000000,120.000000)}
{pt3dadd(172044.000000,165240.000000,69725.000000,120.000000)}
{pt3dadd(171972.000000,165396.000000,69525.000000,120.000000)}
{pt3dadd(171852.000000,165588.000000,69350.000000,120.000000)}
{pt3dadd(171768.000000,165864.000000,69225.000000,120.000000)}
{pt3dadd(171696.000000,166080.000000,69050.000000,120.000000)}
{pt3dadd(171648.000000,166224.000000,68900.000000,120.000000)}
{pt3dadd(171660.000000,166356.000000,68800.000000,120.000000)}
{pt3dadd(171624.000000,166488.000000,68700.000000,120.000000)}
{pt3dadd(171636.000000,166608.000000,68675.000000,120.000000)}
{pt3dadd(171660.000000,166728.000000,68650.000000,120.000000)}
{pt3dadd(171672.000000,166824.000000,68600.000000,120.000000)}
{pt3dadd(171660.000000,167244.000000,68350.000000,120.000000)}
{pt3dadd(171636.000000,167436.000000,68275.000000,120.000000)}
{pt3dadd(171588.000000,167664.000000,68125.000000,120.000000)}

{create adhoc24}
{access adhoc24}
{connect adhoc24(1), adhoc23(0)}
{nseg = 1}
{strdef color color = "White"}
{pt3dclear()}
{pt3dadd(171588.000000,167664.000000,68125.000000,120.000000)}
{pt3dadd(171588.000000,167904.000000,68075.000000,120.000000)}
{pt3dadd(171636.000000,168036.000000,68050.000000,120.000000)}
{pt3dadd(171744.000000,168180.000000,68100.000000,120.000000)}
{pt3dadd(171828.000000,168276.000000,68100.000000,120.000000)}
{pt3dadd(171912.000000,168360.000000,68075.000000,120.000000)}
{pt3dadd(172020.000000,168552.000000,68100.000000,120.000000)}
{pt3dadd(172152.000000,168576.000000,68150.000000,120.000000)}
{pt3dadd(172368.000000,168648.000000,68300.000000,120.000000)}
{pt3dadd(172560.000000,168780.000000,68375.000000,120.000000)}
{pt3dadd(172680.000000,168876.000000,68350.000000,120.000000)}
{pt3dadd(172812.000000,168960.000000,68350.000000,120.000000)}

{create adhoc25}
{access adhoc25}
{connect adhoc25(1), adhoc23(0)}
{nseg = 1}
{strdef color color = "White"}
{pt3dclear()}
{pt3dadd(171588.000000,167664.000000,68125.000000,120.000000)}
{pt3dadd(171432.000000,167952.000000,67975.000000,120.000000)}
{pt3dadd(171360.000000,168096.000000,67975.000000,120.000000)}
{pt3dadd(171288.000000,168132.000000,68000.000000,120.000000)}
{pt3dadd(171240.000000,168252.000000,67950.000000,120.000000)}
{pt3dadd(171204.000000,168384.000000,67950.000000,120.000000)}
{pt3dadd(171144.000000,168516.000000,67950.000000,120.000000)}
{pt3dadd(171048.000000,168600.000000,67950.000000,120.000000)}
{pt3dadd(170952.000000,168696.000000,67950.000000,120.000000)}
{pt3dadd(170820.000000,168768.000000,67950.000000,120.000000)}
{pt3dadd(170700.000000,168864.000000,67925.000000,120.000000)}
{pt3dadd(170580.000000,168960.000000,67950.000000,120.000000)}
{pt3dadd(170412.000000,169104.000000,68000.000000,120.000000)}
{pt3dadd(170280.000000,169296.000000,68075.000000,120.000000)}
{pt3dadd(170148.000000,169440.000000,68100.000000,120.000000)}
{pt3dadd(170088.000000,169596.000000,68200.000000,120.000000)}
{pt3dadd(170004.000000,169668.000000,68225.000000,120.000000)}
{pt3dadd(169896.000000,169692.000000,68250.000000,120.000000)}
{pt3dadd(169800.000000,169776.000000,68300.000000,120.000000)}
{pt3dadd(169692.000000,169872.000000,68300.000000,120.000000)}
{pt3dadd(169644.000000,169980.000000,68300.000000,120.000000)}
{pt3dadd(169572.000000,170028.000000,68325.000000,120.000000)}
{pt3dadd(169476.000000,170100.000000,68325.000000,120.000000)}
{pt3dadd(169392.000000,170172.000000,68325.000000,120.000000)}
{pt3dadd(169332.000000,170256.000000,68325.000000,120.000000)}
{pt3dadd(169320.000000,170376.000000,68325.000000,120.000000)}
{pt3dadd(169308.000000,170496.000000,68325.000000,120.000000)}
{pt3dadd(169248.000000,170556.000000,68325.000000,120.000000)}
{pt3dadd(169092.000000,170580.000000,68325.000000,120.000000)}
{pt3dadd(168936.000000,170556.000000,68325.000000,120.000000)}
{pt3dadd(168804.000000,170556.000000,68250.000000,120.000000)}
{pt3dadd(168684.000000,170580.000000,68250.000000,120.000000)}
{pt3dadd(168612.000000,170652.000000,68250.000000,120.000000)}
{pt3dadd(168660.000000,170700.000000,68250.000000,120.000000)}
{pt3dadd(168708.000000,170760.000000,68250.000000,120.000000)}
{pt3dadd(168696.000000,170880.000000,68250.000000,120.000000)}
{pt3dadd(168660.000000,170976.000000,68200.000000,120.000000)}
{pt3dadd(168648.000000,171084.000000,68200.000000,120.000000)}

{create adhoc26}
{access adhoc26}
{connect adhoc26(1), adhoc22(0)}
{nseg = 1}
{strdef color color = "White"}
{pt3dclear()}
{pt3dadd(179652.000000,160980.000000,77675.000000,120.000000)}
{pt3dadd(179580.000000,161100.000000,77850.000000,120.000000)}
{pt3dadd(179436.000000,161304.000000,78000.000000,120.000000)}
{pt3dadd(179412.000000,161580.000000,78100.000000,120.000000)}
{pt3dadd(179376.000000,161676.000000,78100.000000,120.000000)}
{pt3dadd(179340.000000,161784.000000,78100.000000,120.000000)}
{pt3dadd(179316.000000,161880.000000,78100.000000,120.000000)}
{pt3dadd(179268.000000,162012.000000,78075.000000,120.000000)}
{pt3dadd(179268.000000,162168.000000,78125.000000,120.000000)}
{pt3dadd(179244.000000,162336.000000,78125.000000,120.000000)}
{pt3dadd(179232.000000,162444.000000,78150.000000,120.000000)}
{pt3dadd(179244.000000,162564.000000,78150.000000,120.000000)}
{pt3dadd(179268.000000,162684.000000,78150.000000,120.000000)}
{pt3dadd(179280.000000,162804.000000,78150.000000,120.000000)}
{pt3dadd(179328.000000,162924.000000,78175.000000,120.000000)}
{pt3dadd(179400.000000,163044.000000,78175.000000,120.000000)}
{pt3dadd(179460.000000,163164.000000,78175.000000,120.000000)}
{pt3dadd(179532.000000,163332.000000,78275.000000,120.000000)}
{pt3dadd(179544.000000,163464.000000,78325.000000,120.000000)}
{pt3dadd(179520.000000,163584.000000,78250.000000,120.000000)}
{pt3dadd(179448.000000,163680.000000,78250.000000,120.000000)}
{pt3dadd(179376.000000,163776.000000,78250.000000,120.000000)}
{pt3dadd(179328.000000,163908.000000,78250.000000,120.000000)}
{pt3dadd(179304.000000,164064.000000,78275.000000,120.000000)}
{pt3dadd(179328.000000,164220.000000,78325.000000,120.000000)}
{pt3dadd(179328.000000,164388.000000,78350.000000,120.000000)}
{pt3dadd(179304.000000,164556.000000,78350.000000,120.000000)}
{pt3dadd(179280.000000,164736.000000,78350.000000,120.000000)}
{pt3dadd(179316.000000,164940.000000,78600.000000,120.000000)}

{create adhoc27}
{access adhoc27}
{connect adhoc27(1), adhoc26(0)}
{nseg = 1}
{strdef color color = "White"}
{pt3dclear()}
{pt3dadd(179316.000000,164940.000000,78600.000000,120.000000)}
{pt3dadd(179364.000000,165180.000000,78700.000000,120.000000)}
{pt3dadd(179316.000000,165384.000000,78700.000000,120.000000)}
{pt3dadd(179196.000000,165504.000000,78675.000000,120.000000)}
{pt3dadd(179112.000000,165660.000000,78675.000000,120.000000)}
{pt3dadd(178968.000000,165792.000000,78625.000000,120.000000)}
{pt3dadd(178824.000000,165924.000000,78575.000000,120.000000)}
{pt3dadd(178740.000000,166056.000000,78575.000000,120.000000)}
{pt3dadd(178584.000000,166176.000000,78575.000000,120.000000)}
{pt3dadd(178416.000000,166296.000000,78575.000000,120.000000)}
{pt3dadd(178260.000000,166392.000000,78625.000000,120.000000)}
{pt3dadd(178116.000000,166488.000000,78625.000000,120.000000)}
{pt3dadd(177960.000000,166572.000000,78625.000000,120.000000)}
{pt3dadd(177888.000000,166704.000000,78800.000000,120.000000)}
{pt3dadd(177828.000000,166920.000000,78900.000000,120.000000)}
{pt3dadd(177876.000000,167112.000000,79000.000000,120.000000)}
{pt3dadd(177924.000000,167316.000000,78900.000000,120.000000)}
{pt3dadd(177972.000000,167520.000000,78900.000000,120.000000)}
{pt3dadd(178020.000000,167736.000000,78900.000000,120.000000)}
{pt3dadd(178068.000000,167940.000000,78900.000000,120.000000)}
{pt3dadd(178116.000000,168144.000000,78900.000000,120.000000)}
{pt3dadd(178152.000000,168216.000000,78900.000000,120.000000)}
{pt3dadd(178164.000000,168312.000000,78875.000000,120.000000)}
{pt3dadd(178164.000000,168408.000000,78875.000000,120.000000)}
{pt3dadd(178200.000000,168492.000000,78875.000000,120.000000)}
{pt3dadd(178236.000000,168588.000000,78875.000000,120.000000)}
{pt3dadd(178272.000000,168684.000000,78875.000000,120.000000)}
{pt3dadd(178320.000000,168780.000000,78875.000000,120.000000)}
{pt3dadd(178320.000000,168828.000000,78875.000000,120.000000)}
{pt3dadd(178320.000000,169056.000000,78775.000000,120.000000)}
{pt3dadd(178296.000000,169188.000000,78750.000000,120.000000)}
{pt3dadd(178296.000000,169344.000000,78675.000000,120.000000)}
{pt3dadd(178320.000000,169488.000000,78575.000000,120.000000)}
{pt3dadd(178248.000000,169620.000000,78475.000000,120.000000)}
{pt3dadd(178128.000000,169764.000000,78450.000000,120.000000)}
{pt3dadd(178020.000000,169920.000000,78450.000000,120.000000)}
{pt3dadd(177888.000000,169980.000000,78350.000000,120.000000)}
{pt3dadd(177768.000000,170040.000000,78350.000000,120.000000)}
{pt3dadd(177708.000000,170148.000000,78350.000000,120.000000)}
{pt3dadd(177636.000000,170268.000000,78350.000000,120.000000)}
{pt3dadd(177552.000000,170388.000000,78350.000000,120.000000)}
{pt3dadd(177456.000000,170496.000000,78350.000000,120.000000)}
{pt3dadd(177372.000000,170580.000000,78325.000000,120.000000)}
{pt3dadd(177216.000000,170676.000000,78325.000000,120.000000)}
{pt3dadd(177036.000000,170832.000000,78325.000000,120.000000)}
{pt3dadd(176856.000000,171000.000000,78325.000000,120.000000)}
{pt3dadd(176652.000000,171252.000000,78300.000000,120.000000)}
{pt3dadd(176652.000000,171456.000000,78400.000000,120.000000)}
{pt3dadd(176712.000000,171624.000000,78475.000000,120.000000)}
{pt3dadd(176784.000000,171744.000000,78475.000000,120.000000)}
{pt3dadd(176844.000000,171900.000000,78475.000000,120.000000)}
{pt3dadd(176772.000000,172188.000000,78675.000000,120.000000)}
{pt3dadd(176736.000000,172368.000000,78675.000000,120.000000)}
{pt3dadd(176700.000000,172488.000000,78675.000000,120.000000)}
{pt3dadd(176664.000000,172608.000000,78675.000000,120.000000)}
{pt3dadd(176640.000000,172728.000000,78675.000000,120.000000)}
{pt3dadd(176604.000000,172836.000000,78675.000000,120.000000)}
{pt3dadd(176628.000000,173028.000000,78850.000000,120.000000)}
{pt3dadd(176760.000000,173148.000000,79175.000000,120.000000)}
{pt3dadd(176808.000000,173244.000000,79250.000000,120.000000)}
{pt3dadd(176892.000000,173400.000000,79275.000000,120.000000)}
{pt3dadd(177180.000000,173400.000000,79275.000000,120.000000)}
{pt3dadd(177240.000000,173448.000000,79275.000000,120.000000)}
{pt3dadd(177180.000000,173508.000000,79325.000000,120.000000)}
{pt3dadd(177300.000000,173544.000000,79300.000000,120.000000)}
{pt3dadd(177420.000000,173592.000000,79425.000000,120.000000)}
{pt3dadd(177384.000000,173652.000000,79450.000000,120.000000)}
{pt3dadd(177456.000000,173712.000000,79475.000000,120.000000)}
{pt3dadd(177456.000000,173784.000000,79450.000000,120.000000)}
{pt3dadd(177384.000000,173844.000000,79450.000000,120.000000)}
{pt3dadd(177372.000000,173904.000000,79425.000000,120.000000)}
{pt3dadd(177288.000000,173976.000000,79425.000000,120.000000)}
{pt3dadd(177276.000000,174036.000000,79350.000000,120.000000)}
{pt3dadd(177264.000000,174096.000000,79475.000000,120.000000)}
{pt3dadd(177168.000000,174144.000000,79450.000000,120.000000)}
{pt3dadd(177192.000000,174204.000000,79400.000000,120.000000)}
{pt3dadd(177132.000000,174252.000000,79425.000000,120.000000)}
{pt3dadd(177228.000000,174300.000000,79475.000000,120.000000)}
{pt3dadd(177336.000000,174348.000000,79450.000000,120.000000)}
{pt3dadd(177264.000000,174396.000000,79500.000000,120.000000)}
{pt3dadd(177216.000000,174456.000000,79450.000000,120.000000)}

{create adhoc28}
{access adhoc28}
{connect adhoc28(1), adhoc26(0)}
{nseg = 1}
{strdef color color = "White"}
{pt3dclear()}
{pt3dadd(179316.000000,164940.000000,78600.000000,120.000000)}
{pt3dadd(179580.000000,164988.000000,78725.000000,120.000000)}
{pt3dadd(179664.000000,164964.000000,78725.000000,120.000000)}
{pt3dadd(179760.000000,164964.000000,78775.000000,120.000000)}
{pt3dadd(179856.000000,164964.000000,78775.000000,120.000000)}
{pt3dadd(179976.000000,165036.000000,78850.000000,120.000000)}
{pt3dadd(180084.000000,165072.000000,78875.000000,120.000000)}
{pt3dadd(180204.000000,165096.000000,78875.000000,120.000000)}
{pt3dadd(180312.000000,165108.000000,78900.000000,120.000000)}
{pt3dadd(180408.000000,165096.000000,78900.000000,120.000000)}
{pt3dadd(180480.000000,165096.000000,78950.000000,120.000000)}
{pt3dadd(180564.000000,165048.000000,78950.000000,120.000000)}
{pt3dadd(180660.000000,165048.000000,79000.000000,120.000000)}
{pt3dadd(180756.000000,165048.000000,79000.000000,120.000000)}
{pt3dadd(180840.000000,165048.000000,79000.000000,120.000000)}
{pt3dadd(180936.000000,165048.000000,79000.000000,120.000000)}
{pt3dadd(181080.000000,165072.000000,79025.000000,120.000000)}
{pt3dadd(181176.000000,165108.000000,79050.000000,120.000000)}
{pt3dadd(181272.000000,165108.000000,79050.000000,120.000000)}
{pt3dadd(181368.000000,165108.000000,79050.000000,120.000000)}
{pt3dadd(181464.000000,165108.000000,79050.000000,120.000000)}
{pt3dadd(181560.000000,165084.000000,79050.000000,120.000000)}
{pt3dadd(181620.000000,165060.000000,79025.000000,120.000000)}
{pt3dadd(181668.000000,165036.000000,79025.000000,120.000000)}

{create adhoc29}
{access adhoc29}
{connect adhoc29(1), adhoc21(0)}
{nseg = 1}
{strdef color color = "White"}
{pt3dclear()}
{pt3dadd(187008.000000,155124.000000,93675.000000,120.000000)}
{pt3dadd(187068.000000,155496.000000,93575.000000,120.000000)}
{pt3dadd(187152.000000,155556.000000,93450.000000,120.000000)}
{pt3dadd(187080.000000,155484.000000,93325.000000,120.000000)}
{pt3dadd(187008.000000,155412.000000,93250.000000,120.000000)}
{pt3dadd(186984.000000,155352.000000,93150.000000,120.000000)}
{pt3dadd(186924.000000,155352.000000,93075.000000,120.000000)}
{pt3dadd(186888.000000,155388.000000,92975.000000,120.000000)}
{pt3dadd(186840.000000,155424.000000,92875.000000,120.000000)}
{pt3dadd(186840.000000,155424.000000,92775.000000,120.000000)}
{pt3dadd(186744.000000,155352.000000,92700.000000,120.000000)}
{pt3dadd(186660.000000,155316.000000,92600.000000,120.000000)}
{pt3dadd(186576.000000,155280.000000,92475.000000,120.000000)}
{pt3dadd(186636.000000,155304.000000,92375.000000,120.000000)}
{pt3dadd(186684.000000,155304.000000,92275.000000,120.000000)}
{pt3dadd(186708.000000,155316.000000,92175.000000,120.000000)}
{pt3dadd(186636.000000,155292.000000,92075.000000,120.000000)}
{pt3dadd(186552.000000,155268.000000,91975.000000,120.000000)}
{pt3dadd(186492.000000,155244.000000,91875.000000,120.000000)}
{pt3dadd(186468.000000,155244.000000,91775.000000,120.000000)}
{pt3dadd(186444.000000,155256.000000,91700.000000,120.000000)}
{pt3dadd(186408.000000,155280.000000,91575.000000,120.000000)}
{pt3dadd(186396.000000,155244.000000,91475.000000,120.000000)}
{pt3dadd(186360.000000,155220.000000,91375.000000,120.000000)}
{pt3dadd(186348.000000,155280.000000,91275.000000,120.000000)}
{pt3dadd(186360.000000,155340.000000,91175.000000,120.000000)}
{pt3dadd(186336.000000,155364.000000,91075.000000,120.000000)}
{pt3dadd(186300.000000,155388.000000,90950.000000,120.000000)}
{pt3dadd(186276.000000,155412.000000,90875.000000,120.000000)}
{pt3dadd(186276.000000,155400.000000,90775.000000,120.000000)}
{pt3dadd(186228.000000,155412.000000,90700.000000,120.000000)}
{pt3dadd(186204.000000,155424.000000,90575.000000,120.000000)}
{pt3dadd(186168.000000,155424.000000,90475.000000,120.000000)}
{pt3dadd(186120.000000,155436.000000,90375.000000,120.000000)}
{pt3dadd(186108.000000,155460.000000,90250.000000,120.000000)}
{pt3dadd(186108.000000,155484.000000,90150.000000,120.000000)}
{pt3dadd(186096.000000,155508.000000,90050.000000,120.000000)}
{pt3dadd(186084.000000,155568.000000,89925.000000,120.000000)}
{pt3dadd(186060.000000,155616.000000,89825.000000,120.000000)}
{pt3dadd(185988.000000,155676.000000,89700.000000,120.000000)}
{pt3dadd(185976.000000,155700.000000,89600.000000,120.000000)}
{pt3dadd(185940.000000,155748.000000,89500.000000,120.000000)}
{pt3dadd(185904.000000,155808.000000,89400.000000,120.000000)}
{pt3dadd(185808.000000,155892.000000,89275.000000,120.000000)}
{pt3dadd(185712.000000,155988.000000,89175.000000,120.000000)}
{pt3dadd(185616.000000,156072.000000,89100.000000,120.000000)}
{pt3dadd(185496.000000,156156.000000,89000.000000,120.000000)}
{pt3dadd(185508.000000,156252.000000,88900.000000,120.000000)}
{pt3dadd(185472.000000,156324.000000,88775.000000,120.000000)}
{pt3dadd(185436.000000,156384.000000,88675.000000,120.000000)}
{pt3dadd(185412.000000,156420.000000,88575.000000,120.000000)}
{pt3dadd(185436.000000,156420.000000,88450.000000,120.000000)}
{pt3dadd(185412.000000,156456.000000,88350.000000,120.000000)}
{pt3dadd(185388.000000,156480.000000,88300.000000,120.000000)}
{pt3dadd(185364.000000,156516.000000,88250.000000,120.000000)}
{pt3dadd(185340.000000,156540.000000,88200.000000,120.000000)}
{pt3dadd(185316.000000,156576.000000,88150.000000,120.000000)}
{pt3dadd(185316.000000,156588.000000,88100.000000,120.000000)}
{pt3dadd(185316.000000,156600.000000,88025.000000,120.000000)}
{pt3dadd(185256.000000,156672.000000,87975.000000,120.000000)}
{pt3dadd(185268.000000,156696.000000,87925.000000,120.000000)}
{pt3dadd(185244.000000,156792.000000,87875.000000,120.000000)}
{pt3dadd(185220.000000,156888.000000,87800.000000,120.000000)}
{pt3dadd(185232.000000,156984.000000,87750.000000,120.000000)}
{pt3dadd(185232.000000,157080.000000,87700.000000,120.000000)}
{pt3dadd(185232.000000,157164.000000,87625.000000,120.000000)}
{pt3dadd(185244.000000,157212.000000,87575.000000,120.000000)}
{pt3dadd(185244.000000,157224.000000,87500.000000,120.000000)}
{pt3dadd(185208.000000,157236.000000,87425.000000,120.000000)}
{pt3dadd(185136.000000,157332.000000,87350.000000,120.000000)}
{pt3dadd(185112.000000,157356.000000,87275.000000,120.000000)}
{pt3dadd(185040.000000,157488.000000,87200.000000,120.000000)}
{pt3dadd(185016.000000,157572.000000,87125.000000,120.000000)}
{pt3dadd(184968.000000,157680.000000,87050.000000,120.000000)}
{pt3dadd(184932.000000,157788.000000,86925.000000,120.000000)}
{pt3dadd(184884.000000,157884.000000,86900.000000,120.000000)}
{pt3dadd(184884.000000,157980.000000,86875.000000,120.000000)}
{pt3dadd(184896.000000,158040.000000,86875.000000,120.000000)}
{pt3dadd(184896.000000,158124.000000,86850.000000,120.000000)}
{pt3dadd(184884.000000,158196.000000,86850.000000,120.000000)}
{pt3dadd(184872.000000,158244.000000,86850.000000,120.000000)}
{pt3dadd(184848.000000,158316.000000,86850.000000,120.000000)}
{pt3dadd(184896.000000,158388.000000,86875.000000,120.000000)}
{pt3dadd(184860.000000,158424.000000,86875.000000,120.000000)}
{pt3dadd(184812.000000,158484.000000,86850.000000,120.000000)}
{pt3dadd(184776.000000,158556.000000,86850.000000,120.000000)}
{pt3dadd(184728.000000,158592.000000,86825.000000,120.000000)}
{pt3dadd(184692.000000,158652.000000,86825.000000,120.000000)}
{pt3dadd(184716.000000,158700.000000,86850.000000,120.000000)}
{pt3dadd(184656.000000,158748.000000,86775.000000,120.000000)}
{pt3dadd(184680.000000,158820.000000,86825.000000,120.000000)}
{pt3dadd(184668.000000,158868.000000,86800.000000,120.000000)}
{pt3dadd(184668.000000,158916.000000,86825.000000,120.000000)}
{pt3dadd(184644.000000,158976.000000,86850.000000,120.000000)}
{pt3dadd(184596.000000,159036.000000,86825.000000,120.000000)}
{pt3dadd(184596.000000,159084.000000,86850.000000,120.000000)}
{pt3dadd(184572.000000,159132.000000,86875.000000,120.000000)}
{pt3dadd(184560.000000,159192.000000,86850.000000,120.000000)}
{pt3dadd(184572.000000,159228.000000,86850.000000,120.000000)}
{pt3dadd(184560.000000,159300.000000,86825.000000,120.000000)}
{pt3dadd(184596.000000,159360.000000,86875.000000,120.000000)}
{pt3dadd(184548.000000,159408.000000,86900.000000,120.000000)}
{pt3dadd(184476.000000,159468.000000,86900.000000,120.000000)}
{pt3dadd(184452.000000,159552.000000,86925.000000,120.000000)}
{pt3dadd(184464.000000,159600.000000,86875.000000,120.000000)}
{pt3dadd(184632.000000,159672.000000,86825.000000,120.000000)}
{pt3dadd(184572.000000,159816.000000,86800.000000,120.000000)}
{pt3dadd(184488.000000,159864.000000,86800.000000,120.000000)}
{pt3dadd(184500.000000,160008.000000,86800.000000,120.000000)}
{pt3dadd(184392.000000,159972.000000,86800.000000,120.000000)}
{pt3dadd(184236.000000,160008.000000,86800.000000,120.000000)}
{pt3dadd(184092.000000,160044.000000,86800.000000,120.000000)}
{pt3dadd(183972.000000,159984.000000,86800.000000,120.000000)}
{pt3dadd(183864.000000,159900.000000,86800.000000,120.000000)}
{pt3dadd(183756.000000,159888.000000,86800.000000,120.000000)}
{pt3dadd(183660.000000,160008.000000,86800.000000,120.000000)}
{pt3dadd(183672.000000,160140.000000,86800.000000,120.000000)}
{pt3dadd(183540.000000,160308.000000,86725.000000,120.000000)}
{pt3dadd(183576.000000,160404.000000,86775.000000,120.000000)}
{pt3dadd(183612.000000,160476.000000,86850.000000,120.000000)}
{pt3dadd(183588.000000,160548.000000,86825.000000,120.000000)}
{pt3dadd(183600.000000,160632.000000,86825.000000,120.000000)}
{pt3dadd(183612.000000,160716.000000,86850.000000,120.000000)}
{pt3dadd(183636.000000,160776.000000,86875.000000,120.000000)}
{pt3dadd(183612.000000,160860.000000,86875.000000,120.000000)}
{pt3dadd(183564.000000,160932.000000,86850.000000,120.000000)}
{pt3dadd(183600.000000,161004.000000,86850.000000,120.000000)}
{pt3dadd(183552.000000,161076.000000,86800.000000,120.000000)}
{pt3dadd(183576.000000,161160.000000,86775.000000,120.000000)}
{pt3dadd(183600.000000,161232.000000,86725.000000,120.000000)}
{pt3dadd(183636.000000,161316.000000,86725.000000,120.000000)}
{pt3dadd(183624.000000,161388.000000,86700.000000,120.000000)}
{pt3dadd(183648.000000,161460.000000,86675.000000,120.000000)}
{pt3dadd(183672.000000,161532.000000,86675.000000,120.000000)}
{pt3dadd(183660.000000,161592.000000,86675.000000,120.000000)}
{pt3dadd(183588.000000,161688.000000,86675.000000,120.000000)}
{pt3dadd(183564.000000,161760.000000,86600.000000,120.000000)}
{pt3dadd(183552.000000,161844.000000,86600.000000,120.000000)}
{pt3dadd(183552.000000,161904.000000,86575.000000,120.000000)}
{pt3dadd(183540.000000,161976.000000,86500.000000,120.000000)}
{pt3dadd(183588.000000,162036.000000,86450.000000,120.000000)}
{pt3dadd(183600.000000,162120.000000,86400.000000,120.000000)}
{pt3dadd(183660.000000,162168.000000,86425.000000,120.000000)}
{pt3dadd(183708.000000,162240.000000,86450.000000,120.000000)}
{pt3dadd(183756.000000,162312.000000,86475.000000,120.000000)}
{pt3dadd(183768.000000,162384.000000,86500.000000,120.000000)}

{create adhoc30}
{access adhoc30}
{connect adhoc30(1), adhoc29(0)}
{nseg = 1}
{strdef color color = "White"}
{pt3dclear()}
{pt3dadd(183768.000000,162384.000000,86500.000000,120.000000)}
{pt3dadd(183936.000000,162600.000000,86700.000000,120.000000)}
{pt3dadd(184032.000000,162684.000000,86800.000000,120.000000)}
{pt3dadd(184080.000000,162780.000000,86900.000000,120.000000)}
{pt3dadd(184176.000000,162852.000000,87025.000000,120.000000)}
{pt3dadd(184272.000000,163020.000000,87075.000000,120.000000)}
{pt3dadd(184380.000000,163188.000000,87150.000000,120.000000)}
{pt3dadd(184464.000000,163260.000000,87225.000000,120.000000)}
{pt3dadd(184596.000000,163356.000000,87250.000000,120.000000)}
{pt3dadd(184692.000000,163452.000000,87325.000000,120.000000)}
{pt3dadd(184776.000000,163524.000000,87400.000000,120.000000)}
{pt3dadd(184824.000000,163536.000000,87475.000000,120.000000)}
{pt3dadd(184884.000000,163548.000000,87550.000000,120.000000)}

{create adhoc31}
{access adhoc31}
{connect adhoc31(1), adhoc30(0)}
{nseg = 1}
{strdef color color = "White"}
{pt3dclear()}
{pt3dadd(184884.000000,163548.000000,87550.000000,120.000000)}
{pt3dadd(185400.000000,163512.000000,87600.000000,120.000000)}
{pt3dadd(185616.000000,163608.000000,87700.000000,120.000000)}
{pt3dadd(185808.000000,163632.000000,87800.000000,120.000000)}
{pt3dadd(185904.000000,163620.000000,87875.000000,120.000000)}
{pt3dadd(186000.000000,163608.000000,87925.000000,120.000000)}
{pt3dadd(186072.000000,163596.000000,88000.000000,120.000000)}
{pt3dadd(186156.000000,163608.000000,88050.000000,120.000000)}
{pt3dadd(186228.000000,163584.000000,88100.000000,120.000000)}
{pt3dadd(186264.000000,163584.000000,88150.000000,120.000000)}
{pt3dadd(186348.000000,163524.000000,88200.000000,120.000000)}
{pt3dadd(186408.000000,163524.000000,88275.000000,120.000000)}
{pt3dadd(186432.000000,163488.000000,88325.000000,120.000000)}
{pt3dadd(186408.000000,163476.000000,88400.000000,120.000000)}
{pt3dadd(186504.000000,163512.000000,88450.000000,120.000000)}
{pt3dadd(186552.000000,163500.000000,88525.000000,120.000000)}
{pt3dadd(186540.000000,163500.000000,88575.000000,120.000000)}
{pt3dadd(186540.000000,163488.000000,88650.000000,120.000000)}
{pt3dadd(186528.000000,163488.000000,88700.000000,120.000000)}
{pt3dadd(186528.000000,163488.000000,88775.000000,120.000000)}
{pt3dadd(186516.000000,163452.000000,88825.000000,120.000000)}
{pt3dadd(186660.000000,163452.000000,88875.000000,120.000000)}
{pt3dadd(186660.000000,163476.000000,88950.000000,120.000000)}
{pt3dadd(186720.000000,163512.000000,89000.000000,120.000000)}
{pt3dadd(186792.000000,163512.000000,89075.000000,120.000000)}
{pt3dadd(186804.000000,163500.000000,89150.000000,120.000000)}
{pt3dadd(186744.000000,163560.000000,89200.000000,120.000000)}
{pt3dadd(186708.000000,163596.000000,89275.000000,120.000000)}
{pt3dadd(186696.000000,163560.000000,89325.000000,120.000000)}
{pt3dadd(186732.000000,163524.000000,89400.000000,120.000000)}
{pt3dadd(186792.000000,163500.000000,89450.000000,120.000000)}
{pt3dadd(186780.000000,163404.000000,89525.000000,120.000000)}
{pt3dadd(186804.000000,163488.000000,89575.000000,120.000000)}
{pt3dadd(186828.000000,163452.000000,89650.000000,120.000000)}
{pt3dadd(186888.000000,163344.000000,89700.000000,120.000000)}
{pt3dadd(186912.000000,163308.000000,89775.000000,120.000000)}
{pt3dadd(186948.000000,163272.000000,89850.000000,120.000000)}
{pt3dadd(186996.000000,163260.000000,89925.000000,120.000000)}
{pt3dadd(186936.000000,163212.000000,89975.000000,120.000000)}
{pt3dadd(186936.000000,163152.000000,90050.000000,120.000000)}
{pt3dadd(186948.000000,163056.000000,90100.000000,120.000000)}

{create adhoc32}
{access adhoc32}
{connect adhoc32(1), adhoc31(0)}
{nseg = 1}
{strdef color color = "White"}
{pt3dclear()}
{pt3dadd(186948.000000,163056.000000,90100.000000,120.000000)}
{pt3dadd(186960.000000,163092.000000,90150.000000,120.000000)}
{pt3dadd(187020.000000,163008.000000,90200.000000,120.000000)}

{create adhoc33}
{access adhoc33}
{connect adhoc33(1), adhoc32(0)}
{nseg = 1}
{strdef color color = "White"}
{pt3dclear()}
{pt3dadd(187020.000000,163008.000000,90200.000000,120.000000)}
{pt3dadd(186876.000000,163620.000000,90275.000000,120.000000)}
{pt3dadd(186816.000000,163764.000000,90375.000000,120.000000)}
{pt3dadd(186816.000000,163836.000000,90475.000000,120.000000)}
{pt3dadd(186828.000000,163884.000000,90525.000000,120.000000)}
{pt3dadd(186828.000000,163920.000000,90600.000000,120.000000)}
{pt3dadd(186768.000000,163992.000000,90700.000000,120.000000)}
{pt3dadd(186816.000000,164112.000000,90750.000000,120.000000)}
{pt3dadd(186876.000000,164184.000000,90800.000000,120.000000)}
{pt3dadd(186924.000000,164208.000000,90900.000000,120.000000)}
{pt3dadd(187044.000000,164256.000000,90950.000000,120.000000)}
{pt3dadd(187200.000000,164352.000000,91000.000000,120.000000)}
{pt3dadd(187008.000000,164160.000000,91125.000000,120.000000)}
{pt3dadd(186948.000000,164040.000000,91250.000000,120.000000)}
{pt3dadd(186780.000000,164028.000000,91350.000000,120.000000)}

{create adhoc34}
{access adhoc34}
{connect adhoc34(1), adhoc32(0)}
{nseg = 1}
{strdef color color = "White"}
{pt3dclear()}
{pt3dadd(187020.000000,163008.000000,90200.000000,120.000000)}
{pt3dadd(187116.000000,162888.000000,90275.000000,120.000000)}
{pt3dadd(187092.000000,162816.000000,90350.000000,120.000000)}
{pt3dadd(187056.000000,162744.000000,90450.000000,120.000000)}
{pt3dadd(186972.000000,162696.000000,90550.000000,120.000000)}

{create adhoc35}
{access adhoc35}
{connect adhoc35(1), adhoc31(0)}
{nseg = 1}
{strdef color color = "White"}
{pt3dclear()}
{pt3dadd(186948.000000,163056.000000,90100.000000,120.000000)}
{pt3dadd(187152.000000,162612.000000,90025.000000,120.000000)}
{pt3dadd(187188.000000,162504.000000,90075.000000,120.000000)}
{pt3dadd(187164.000000,162384.000000,90125.000000,120.000000)}
{pt3dadd(187164.000000,162240.000000,90200.000000,120.000000)}
{pt3dadd(187176.000000,162096.000000,90275.000000,120.000000)}
{pt3dadd(187164.000000,162000.000000,90325.000000,120.000000)}
{pt3dadd(187176.000000,161916.000000,90400.000000,120.000000)}
{pt3dadd(187188.000000,161820.000000,90425.000000,120.000000)}
{pt3dadd(187200.000000,161712.000000,90425.000000,120.000000)}
{pt3dadd(187200.000000,161568.000000,90425.000000,120.000000)}
{pt3dadd(187212.000000,161448.000000,90425.000000,120.000000)}
{pt3dadd(187236.000000,161316.000000,90425.000000,120.000000)}
{pt3dadd(187212.000000,161220.000000,90450.000000,120.000000)}
{pt3dadd(187212.000000,161124.000000,90525.000000,120.000000)}
{pt3dadd(187224.000000,161028.000000,90525.000000,120.000000)}
{pt3dadd(187248.000000,160944.000000,90525.000000,120.000000)}
{pt3dadd(187248.000000,160836.000000,90525.000000,120.000000)}
{pt3dadd(187248.000000,160740.000000,90525.000000,120.000000)}
{pt3dadd(187248.000000,160632.000000,90525.000000,120.000000)}
{pt3dadd(187248.000000,160500.000000,90525.000000,120.000000)}
{pt3dadd(187272.000000,160380.000000,90475.000000,120.000000)}
{pt3dadd(187260.000000,160272.000000,90475.000000,120.000000)}
{pt3dadd(187260.000000,160164.000000,90475.000000,120.000000)}
{pt3dadd(187272.000000,160068.000000,90450.000000,120.000000)}
{pt3dadd(187272.000000,159996.000000,90425.000000,120.000000)}
{pt3dadd(187260.000000,159864.000000,90450.000000,120.000000)}
{pt3dadd(187248.000000,159744.000000,90450.000000,120.000000)}
{pt3dadd(187260.000000,159648.000000,90400.000000,120.000000)}
{pt3dadd(187260.000000,159552.000000,90400.000000,120.000000)}
{pt3dadd(187260.000000,159456.000000,90400.000000,120.000000)}
{pt3dadd(187248.000000,159372.000000,90400.000000,120.000000)}
{pt3dadd(187212.000000,159288.000000,90400.000000,120.000000)}
{pt3dadd(187176.000000,159192.000000,90400.000000,120.000000)}
{pt3dadd(187128.000000,159108.000000,90400.000000,120.000000)}
{pt3dadd(187080.000000,159048.000000,90450.000000,120.000000)}
{pt3dadd(187032.000000,158976.000000,90500.000000,120.000000)}
{pt3dadd(186996.000000,158928.000000,90475.000000,120.000000)}
{pt3dadd(186948.000000,158856.000000,90525.000000,120.000000)}
{pt3dadd(186912.000000,158796.000000,90550.000000,120.000000)}
{pt3dadd(186888.000000,158724.000000,90575.000000,120.000000)}
{pt3dadd(186840.000000,158652.000000,90600.000000,120.000000)}
{pt3dadd(186840.000000,158580.000000,90600.000000,120.000000)}
{pt3dadd(186792.000000,158496.000000,90650.000000,120.000000)}
{pt3dadd(186792.000000,158400.000000,90675.000000,120.000000)}
{pt3dadd(186780.000000,158340.000000,90675.000000,120.000000)}
{pt3dadd(186696.000000,158280.000000,90600.000000,120.000000)}
{pt3dadd(186636.000000,158244.000000,90625.000000,120.000000)}
{pt3dadd(186528.000000,157992.000000,90675.000000,120.000000)}
{pt3dadd(186552.000000,157824.000000,90725.000000,120.000000)}
{pt3dadd(186600.000000,157716.000000,90600.000000,120.000000)}
{pt3dadd(186648.000000,157560.000000,90600.000000,120.000000)}
{pt3dadd(186636.000000,157440.000000,90700.000000,120.000000)}
{pt3dadd(186696.000000,157296.000000,90675.000000,120.000000)}
{pt3dadd(186756.000000,157164.000000,90650.000000,120.000000)}
{pt3dadd(186768.000000,157116.000000,90625.000000,120.000000)}
{pt3dadd(186768.000000,157044.000000,90625.000000,120.000000)}
{pt3dadd(186792.000000,156948.000000,90550.000000,120.000000)}
{pt3dadd(186816.000000,156828.000000,90500.000000,120.000000)}
{pt3dadd(186756.000000,156732.000000,90450.000000,120.000000)}
{pt3dadd(186744.000000,156624.000000,90400.000000,120.000000)}
{pt3dadd(186768.000000,156516.000000,90450.000000,120.000000)}
{pt3dadd(186816.000000,156444.000000,90425.000000,120.000000)}
{pt3dadd(186804.000000,156372.000000,90350.000000,120.000000)}
{pt3dadd(186804.000000,156336.000000,90375.000000,120.000000)}
{pt3dadd(186792.000000,156300.000000,90375.000000,120.000000)}
{pt3dadd(186792.000000,156276.000000,90375.000000,120.000000)}
{pt3dadd(186792.000000,156240.000000,90375.000000,120.000000)}
{pt3dadd(186792.000000,156120.000000,90350.000000,120.000000)}
{pt3dadd(186804.000000,156000.000000,90400.000000,120.000000)}
{pt3dadd(186804.000000,155880.000000,90425.000000,120.000000)}
{pt3dadd(186888.000000,155784.000000,90450.000000,120.000000)}
{pt3dadd(186936.000000,155700.000000,90500.000000,120.000000)}
{pt3dadd(186948.000000,155652.000000,90625.000000,120.000000)}
{pt3dadd(186960.000000,155556.000000,90675.000000,120.000000)}
{pt3dadd(186936.000000,155388.000000,90850.000000,120.000000)}
{pt3dadd(186912.000000,155304.000000,90825.000000,120.000000)}
{pt3dadd(186852.000000,155232.000000,90900.000000,120.000000)}
{pt3dadd(186816.000000,155124.000000,91000.000000,120.000000)}
{pt3dadd(186648.000000,154872.000000,91200.000000,120.000000)}
{pt3dadd(186648.000000,154740.000000,91350.000000,120.000000)}
{pt3dadd(186492.000000,154632.000000,91500.000000,120.000000)}
{pt3dadd(186552.000000,154392.000000,91750.000000,120.000000)}
{pt3dadd(186636.000000,154308.000000,91950.000000,120.000000)}
{pt3dadd(186660.000000,154236.000000,92175.000000,120.000000)}
{pt3dadd(186732.000000,154224.000000,92375.000000,120.000000)}
{pt3dadd(186768.000000,154308.000000,92600.000000,120.000000)}
{pt3dadd(186864.000000,154488.000000,92800.000000,120.000000)}
{pt3dadd(186996.000000,154692.000000,92925.000000,120.000000)}
{pt3dadd(187068.000000,154788.000000,92950.000000,120.000000)}
{pt3dadd(187116.000000,154932.000000,92950.000000,120.000000)}
{pt3dadd(187320.000000,155280.000000,93175.000000,120.000000)}

{create adhoc36}
{access adhoc36}
{connect adhoc36(1), adhoc35(0)}
{nseg = 1}
{strdef color color = "White"}
{pt3dclear()}
{pt3dadd(187320.000000,155280.000000,93175.000000,120.000000)}
{pt3dadd(187404.000000,155220.000000,93375.000000,120.000000)}
{pt3dadd(187440.000000,155316.000000,93550.000000,120.000000)}
{pt3dadd(187428.000000,155172.000000,93625.000000,120.000000)}
{pt3dadd(187464.000000,155112.000000,93700.000000,120.000000)}
{pt3dadd(187572.000000,155076.000000,93775.000000,120.000000)}
{pt3dadd(187596.000000,155088.000000,93950.000000,120.000000)}
{pt3dadd(187752.000000,155064.000000,94100.000000,120.000000)}
{pt3dadd(187824.000000,155052.000000,94175.000000,120.000000)}
{pt3dadd(187860.000000,155076.000000,94325.000000,120.000000)}
{pt3dadd(187908.000000,155112.000000,94475.000000,120.000000)}
{pt3dadd(188016.000000,155160.000000,94600.000000,120.000000)}
{pt3dadd(188148.000000,155172.000000,94700.000000,120.000000)}
{pt3dadd(188268.000000,155208.000000,94825.000000,120.000000)}
{pt3dadd(188340.000000,155268.000000,94900.000000,120.000000)}
{pt3dadd(188460.000000,155328.000000,94900.000000,120.000000)}

{create adhoc37}
{access adhoc37}
{connect adhoc37(1), adhoc35(0)}
{nseg = 1}
{strdef color color = "White"}
{pt3dclear()}
{pt3dadd(187320.000000,155280.000000,93175.000000,120.000000)}
{pt3dadd(187452.000000,155496.000000,93175.000000,120.000000)}
{pt3dadd(187560.000000,155664.000000,93225.000000,120.000000)}
{pt3dadd(187656.000000,155808.000000,93375.000000,120.000000)}

{create adhoc38}
{access adhoc38}
{connect adhoc38(1), adhoc37(0)}
{nseg = 1}
{strdef color color = "White"}
{pt3dclear()}
{pt3dadd(187656.000000,155808.000000,93375.000000,120.000000)}
{pt3dadd(187800.000000,155664.000000,93550.000000,120.000000)}
{pt3dadd(187884.000000,155772.000000,93575.000000,120.000000)}
{pt3dadd(187932.000000,155868.000000,93625.000000,120.000000)}
{pt3dadd(188004.000000,155916.000000,93675.000000,120.000000)}
{pt3dadd(188040.000000,155976.000000,93675.000000,120.000000)}
{pt3dadd(188040.000000,156060.000000,93675.000000,120.000000)}
{pt3dadd(188076.000000,156132.000000,93675.000000,120.000000)}
{pt3dadd(188208.000000,156204.000000,93775.000000,120.000000)}
{pt3dadd(188268.000000,156216.000000,93850.000000,120.000000)}
{pt3dadd(188400.000000,156216.000000,93925.000000,120.000000)}
{pt3dadd(188448.000000,156276.000000,94025.000000,120.000000)}
{pt3dadd(188472.000000,156348.000000,94075.000000,120.000000)}
{pt3dadd(188508.000000,156480.000000,94125.000000,120.000000)}
{pt3dadd(188544.000000,156576.000000,94150.000000,120.000000)}
{pt3dadd(188556.000000,156624.000000,94150.000000,120.000000)}
{pt3dadd(188592.000000,156732.000000,94225.000000,120.000000)}
{pt3dadd(188616.000000,156840.000000,94300.000000,120.000000)}
{pt3dadd(188652.000000,156972.000000,94375.000000,120.000000)}
{pt3dadd(188640.000000,157092.000000,94450.000000,120.000000)}
{pt3dadd(188652.000000,157260.000000,94550.000000,120.000000)}
{pt3dadd(188664.000000,157344.000000,94600.000000,120.000000)}
{pt3dadd(188664.000000,157428.000000,94600.000000,120.000000)}
{pt3dadd(188664.000000,157572.000000,94750.000000,120.000000)}
{pt3dadd(188736.000000,157764.000000,95000.000000,120.000000)}
{pt3dadd(188736.000000,157884.000000,95125.000000,120.000000)}
{pt3dadd(188688.000000,158160.000000,95275.000000,120.000000)}
{pt3dadd(188820.000000,158340.000000,95275.000000,120.000000)}
{pt3dadd(188904.000000,158508.000000,95250.000000,120.000000)}
{pt3dadd(188928.000000,158652.000000,95275.000000,120.000000)}
{pt3dadd(188952.000000,158724.000000,95275.000000,120.000000)}
{pt3dadd(188952.000000,158832.000000,95275.000000,120.000000)}
{pt3dadd(189000.000000,159108.000000,95525.000000,120.000000)}
{pt3dadd(189168.000000,159348.000000,95650.000000,120.000000)}
{pt3dadd(189204.000000,159480.000000,95750.000000,120.000000)}
{pt3dadd(189228.000000,159624.000000,95800.000000,120.000000)}
{pt3dadd(189276.000000,159744.000000,95900.000000,120.000000)}
{pt3dadd(189324.000000,159864.000000,95975.000000,120.000000)}
{pt3dadd(189360.000000,159924.000000,96025.000000,120.000000)}
{pt3dadd(189396.000000,160020.000000,96150.000000,120.000000)}
{pt3dadd(189504.000000,160224.000000,96275.000000,120.000000)}
{pt3dadd(189576.000000,160296.000000,96325.000000,120.000000)}
{pt3dadd(189600.000000,160440.000000,96450.000000,120.000000)}
{pt3dadd(189612.000000,160536.000000,96500.000000,120.000000)}
{pt3dadd(189660.000000,160704.000000,96575.000000,120.000000)}
{pt3dadd(189600.000000,160824.000000,96650.000000,120.000000)}
{pt3dadd(189576.000000,160956.000000,96750.000000,120.000000)}
{pt3dadd(189672.000000,161052.000000,96875.000000,120.000000)}
{pt3dadd(189708.000000,161148.000000,96975.000000,120.000000)}
{pt3dadd(189696.000000,161196.000000,97100.000000,120.000000)}
{pt3dadd(189744.000000,161352.000000,97125.000000,120.000000)}
{pt3dadd(189792.000000,161400.000000,97150.000000,120.000000)}
{pt3dadd(189780.000000,161448.000000,97250.000000,120.000000)}

{create adhoc39}
{access adhoc39}
{connect adhoc39(1), adhoc37(0)}
{nseg = 1}
{strdef color color = "White"}
{pt3dclear()}
{pt3dadd(187656.000000,155808.000000,93375.000000,120.000000)}
{pt3dadd(187692.000000,155880.000000,93375.000000,120.000000)}
{pt3dadd(187680.000000,155988.000000,93375.000000,120.000000)}
{pt3dadd(187692.000000,156120.000000,93375.000000,120.000000)}
{pt3dadd(187740.000000,156240.000000,93375.000000,120.000000)}
{pt3dadd(187776.000000,156348.000000,93375.000000,120.000000)}
{pt3dadd(187776.000000,156444.000000,93400.000000,120.000000)}
{pt3dadd(187836.000000,156492.000000,93300.000000,120.000000)}
{pt3dadd(187908.000000,156528.000000,93300.000000,120.000000)}
{pt3dadd(187956.000000,156600.000000,93250.000000,120.000000)}
{pt3dadd(188016.000000,156672.000000,93250.000000,120.000000)}
{pt3dadd(188076.000000,156744.000000,93250.000000,120.000000)}
{pt3dadd(188124.000000,156912.000000,93225.000000,120.000000)}
{pt3dadd(188208.000000,157044.000000,93125.000000,118.392792)}
{pt3dadd(188196.000000,157104.000000,93275.000000,116.785584)}
{pt3dadd(188208.000000,157164.000000,93275.000000,115.968056)}
{pt3dadd(188220.000000,157248.000000,93275.000000,115.150528)}
{pt3dadd(188292.000000,157428.000000,93325.000000,114.333000)}
{pt3dadd(188400.000000,157584.000000,93375.000000,115.122680)}
{pt3dadd(188436.000000,157740.000000,93400.000000,115.912360)}
{pt3dadd(188352.000000,157956.000000,93450.000000,115.912360)}
{pt3dadd(188376.000000,158052.000000,93450.000000,115.912360)}
{pt3dadd(188388.000000,158136.000000,93475.000000,115.912360)}
{pt3dadd(188412.000000,158208.000000,93475.000000,115.912360)}
{pt3dadd(188424.000000,158292.000000,93475.000000,115.912360)}
{pt3dadd(188436.000000,158388.000000,93475.000000,115.912360)}

{create adhoc40}
{access adhoc40}
{connect adhoc40(1), adhoc30(0)}
{nseg = 1}
{strdef color color = "White"}
{pt3dclear()}
{pt3dadd(184884.000000,163548.000000,87550.000000,120.000000)}
{pt3dadd(184584.000000,163596.000000,87625.000000,113.900693)}
{pt3dadd(184608.000000,163596.000000,87775.000000,114.705360)}
{pt3dadd(184788.000000,163668.000000,87825.000000,113.887832)}
{pt3dadd(184824.000000,163680.000000,87900.000000,111.434266)}
{pt3dadd(184872.000000,163716.000000,87950.000000,112.833421)}
{pt3dadd(184884.000000,163788.000000,88025.000000,110.544162)}
{pt3dadd(184956.000000,163800.000000,88100.000000,109.754482)}
{pt3dadd(185052.000000,163824.000000,88175.000000,108.964802)}
{pt3dadd(185136.000000,163788.000000,88250.000000,109.464661)}
{pt3dadd(185124.000000,163788.000000,88350.000000,111.963960)}

{create adhoc41}
{access adhoc41}
{connect adhoc41(1), adhoc29(0)}
{nseg = 1}
{strdef color color = "White"}
{pt3dclear()}
{pt3dadd(183768.000000,162384.000000,86500.000000,120.000000)}
{pt3dadd(183684.000000,162672.000000,86350.000000,273.034983)}
{pt3dadd(183552.000000,162708.000000,86250.000000,252.571118)}
{pt3dadd(183576.000000,162816.000000,86175.000000,257.112088)}
{pt3dadd(183516.000000,163308.000000,86175.000000,226.558124)}
{pt3dadd(183612.000000,163476.000000,86275.000000,169.832068)}
{pt3dadd(183540.000000,163560.000000,86325.000000,135.932600)}
{pt3dadd(183504.000000,163632.000000,86225.000000,127.446884)}
{pt3dadd(183456.000000,163692.000000,86150.000000,122.088386)}
{pt3dadd(183432.000000,163764.000000,86150.000000,115.940208)}
{pt3dadd(183408.000000,163824.000000,86100.000000,116.786566)}
{pt3dadd(183432.000000,163896.000000,86125.000000,117.604094)}
{pt3dadd(183360.000000,163968.000000,86025.000000,120.144184)}
{pt3dadd(183360.000000,164052.000000,85975.000000,123.591378)}
{pt3dadd(183360.000000,164124.000000,85950.000000,129.739556)}
{pt3dadd(183360.000000,164208.000000,85950.000000,136.561386)}
{pt3dadd(183348.000000,164280.000000,85975.000000,142.108854)}
{pt3dadd(183408.000000,164364.000000,85975.000000,145.933760)}
{pt3dadd(183408.000000,164436.000000,85950.000000,164.089678)}
{pt3dadd(183396.000000,164508.000000,85900.000000,177.335134)}
{pt3dadd(183360.000000,164568.000000,85850.000000,184.655062)}
{pt3dadd(183300.000000,164640.000000,85800.000000,190.245650)}
{pt3dadd(183288.000000,164700.000000,85800.000000,199.686298)}
{pt3dadd(183228.000000,164772.000000,85750.000000,179.747072)}
{pt3dadd(183204.000000,164844.000000,85725.000000,161.960646)}
{pt3dadd(183168.000000,164916.000000,85700.000000,147.818888)}
{pt3dadd(183192.000000,164988.000000,85750.000000,139.310498)}
{pt3dadd(183204.000000,165048.000000,85775.000000,125.168740)}
{pt3dadd(183228.000000,165132.000000,85800.000000,125.168740)}
{pt3dadd(183168.000000,165192.000000,85775.000000,124.351212)}
{pt3dadd(183096.000000,165252.000000,85725.000000,122.687326)}
{pt3dadd(183072.000000,165324.000000,85700.000000,120.057660)}
{pt3dadd(182964.000000,165396.000000,85650.000000,118.393774)}
{pt3dadd(182952.000000,165456.000000,85525.000000,116.729888)}
{pt3dadd(182940.000000,165528.000000,85475.000000,120.177082)}
{pt3dadd(182940.000000,165600.000000,85400.000000,125.535580)}
{pt3dadd(182916.000000,165672.000000,85375.000000,126.381938)}
{pt3dadd(182892.000000,165732.000000,85425.000000,126.381938)}
{pt3dadd(182796.000000,165792.000000,85400.000000,134.867654)}
{pt3dadd(182712.000000,165852.000000,85300.000000,134.867654)}
{pt3dadd(182664.000000,165912.000000,85125.000000,127.219897)}
{pt3dadd(182652.000000,165996.000000,85125.000000,125.556011)}
{pt3dadd(182568.000000,166068.000000,85025.000000,124.766331)}
{pt3dadd(182496.000000,166140.000000,84900.000000,115.490935)}
{pt3dadd(182472.000000,166224.000000,84875.000000,111.254061)}
{pt3dadd(182448.000000,166296.000000,84825.000000,111.990859)}
{pt3dadd(182388.000000,166356.000000,84800.000000,111.201179)}
{pt3dadd(182352.000000,166452.000000,84775.000000,111.201179)}
{pt3dadd(182304.000000,166524.000000,84750.000000,111.990859)}
{pt3dadd(182268.000000,166596.000000,84750.000000,111.228078)}
{pt3dadd(182280.000000,166680.000000,84725.000000,111.990859)}
{pt3dadd(182232.000000,166740.000000,84675.000000,111.990859)}
{pt3dadd(182196.000000,166812.000000,84600.000000,110.491280)}
{pt3dadd(182196.000000,166896.000000,84575.000000,110.491280)}
{pt3dadd(182148.000000,166968.000000,84575.000000,111.254061)}
{pt3dadd(182100.000000,167028.000000,84525.000000,111.254061)}
{pt3dadd(182052.000000,167100.000000,84475.000000,111.254061)}
{pt3dadd(182004.000000,167172.000000,84425.000000,115.207206)}
{pt3dadd(181980.000000,167244.000000,84325.000000,124.809702)}
{pt3dadd(181956.000000,167304.000000,84275.000000,138.794108)}
{pt3dadd(181968.000000,167388.000000,84200.000000,145.948784)}
{pt3dadd(181980.000000,167460.000000,84150.000000,156.340960)}
{pt3dadd(181956.000000,167544.000000,84125.000000,163.162790)}
{pt3dadd(181920.000000,167604.000000,84050.000000,172.164248)}
{pt3dadd(181896.000000,167664.000000,84025.000000,165.334518)}
{pt3dadd(181872.000000,167748.000000,83975.000000,166.376506)}
{pt3dadd(181860.000000,167820.000000,83925.000000,169.968736)}
{pt3dadd(181848.000000,167892.000000,83875.000000,186.300548)}
{pt3dadd(181860.000000,167976.000000,83850.000000,176.182310)}
{pt3dadd(181836.000000,168048.000000,83825.000000,174.203602)}
{pt3dadd(181812.000000,168132.000000,83825.000000,171.182906)}
{pt3dadd(181788.000000,168216.000000,83825.000000,163.346678)}
{pt3dadd(181764.000000,168276.000000,83775.000000,144.894146)}
{pt3dadd(181740.000000,168336.000000,83750.000000,150.885996)}
{pt3dadd(181716.000000,168408.000000,83725.000000,156.102204)}
{pt3dadd(181656.000000,168468.000000,83700.000000,161.318412)}
{pt3dadd(181584.000000,168528.000000,83675.000000,180.777442)}
{pt3dadd(181476.000000,168600.000000,83675.000000,214.566354)}
{pt3dadd(181344.000000,168648.000000,83650.000000,228.351440)}
{pt3dadd(181212.000000,168696.000000,83625.000000,248.825804)}
{pt3dadd(181080.000000,168756.000000,83625.000000,262.405780)}
{pt3dadd(181104.000000,168828.000000,83650.000000,271.487720)}
{pt3dadd(181128.000000,168900.000000,83675.000000,257.844056)}
{pt3dadd(181068.000000,168960.000000,83700.000000,259.658264)}
{pt3dadd(181008.000000,169032.000000,83700.000000,256.091648)}
{pt3dadd(180960.000000,169116.000000,83700.000000,252.986726)}
{pt3dadd(180936.000000,169200.000000,83725.000000,240.690370)}
{pt3dadd(180936.000000,169248.000000,83750.000000,234.257676)}
{pt3dadd(180924.000000,169308.000000,83800.000000,224.258366)}
{pt3dadd(180900.000000,169356.000000,83825.000000,218.842713)}
{pt3dadd(180888.000000,169404.000000,83875.000000,216.300110)}

{create adhoc42}
{access adhoc42}
{connect adhoc42(1), adhoc41(0)}
{nseg = 1}
{strdef color color = "White"}
{pt3dclear()}
{pt3dadd(180888.000000,169404.000000,83875.000000,216.300110)}
{pt3dadd(180876.000000,169452.000000,83900.000000,240.865590)}
{pt3dadd(180864.000000,169500.000000,83950.000000,260.696228)}
{pt3dadd(180888.000000,169548.000000,83975.000000,285.318456)}
{pt3dadd(180924.000000,169572.000000,84025.000000,305.200706)}
{pt3dadd(180960.000000,169596.000000,84075.000000,292.304402)}
{pt3dadd(181008.000000,169620.000000,84125.000000,269.586666)}
{pt3dadd(181044.000000,169668.000000,84150.000000,257.290310)}
{pt3dadd(181032.000000,169788.000000,84100.000000,219.997516)}
{pt3dadd(181164.000000,169872.000000,84225.000000,181.662734)}
{pt3dadd(181212.000000,169932.000000,84300.000000,174.084674)}
{pt3dadd(181200.000000,170004.000000,84350.000000,165.276236)}
{pt3dadd(181140.000000,170052.000000,84350.000000,151.080108)}
{pt3dadd(181200.000000,170112.000000,84450.000000,151.080108)}
{pt3dadd(181260.000000,170088.000000,84550.000000,151.080108)}
{pt3dadd(181368.000000,170064.000000,84600.000000,155.955178)}
{pt3dadd(181500.000000,170040.000000,84650.000000,164.763616)}
{pt3dadd(181512.000000,170052.000000,84725.000000,177.434182)}
{pt3dadd(181584.000000,170028.000000,84775.000000,196.537442)}
{pt3dadd(181632.000000,170052.000000,84850.000000,207.353002)}
{pt3dadd(181656.000000,170088.000000,84925.000000,208.681080)}
{pt3dadd(181692.000000,170112.000000,85000.000000,201.851350)}
{pt3dadd(181716.000000,170184.000000,85050.000000,181.497687)}
{pt3dadd(181524.000000,170364.000000,85100.000000,147.737340)}

{create adhoc43}
{access adhoc43}
{connect adhoc43(1), adhoc41(0)}
{nseg = 1}
{strdef color color = "White"}
{pt3dclear()}
{pt3dadd(180888.000000,169404.000000,83875.000000,216.300110)}
{pt3dadd(180828.000000,169692.000000,83575.000000,236.095940)}
{pt3dadd(180816.000000,169788.000000,83400.000000,200.787990)}
{pt3dadd(180768.000000,169920.000000,83275.000000,191.469094)}
{pt3dadd(180684.000000,170124.000000,83175.000000,167.999762)}
{pt3dadd(180588.000000,170376.000000,83025.000000,161.116938)}
{pt3dadd(180468.000000,170520.000000,82875.000000,162.123436)}
{pt3dadd(180420.000000,170676.000000,82800.000000,156.380338)}
{pt3dadd(180468.000000,170820.000000,82675.000000,146.439212)}
{pt3dadd(180552.000000,171012.000000,82525.000000,138.771024)}
{pt3dadd(180552.000000,171240.000000,82400.000000,126.393826)}
{pt3dadd(180636.000000,171444.000000,82450.000000,120.846358)}
{pt3dadd(180696.000000,171600.000000,82450.000000,122.629666)}
{pt3dadd(180708.000000,171684.000000,82475.000000,123.476024)}
{pt3dadd(180780.000000,171780.000000,82375.000000,127.044784)}
{pt3dadd(180840.000000,171900.000000,82350.000000,134.712972)}
{pt3dadd(180900.000000,172032.000000,82350.000000,136.435534)}
{pt3dadd(180972.000000,172152.000000,82325.000000,138.346838)}
{pt3dadd(180972.000000,172224.000000,82325.000000,141.069240)}
{pt3dadd(180996.000000,172284.000000,82325.000000,141.069240)}
{pt3dadd(181020.000000,172356.000000,82325.000000,142.186020)}
{pt3dadd(181044.000000,172392.000000,82325.000000,146.010926)}
{pt3dadd(181080.000000,172512.000000,82275.000000,147.017424)}
{pt3dadd(181068.000000,172596.000000,82275.000000,147.017424)}
{pt3dadd(181008.000000,172728.000000,82200.000000,146.078330)}
{pt3dadd(180948.000000,172848.000000,82200.000000,137.293362)}
{pt3dadd(180960.000000,173004.000000,82200.000000,131.745894)}
{pt3dadd(180912.000000,173136.000000,82125.000000,125.380898)}
{pt3dadd(180888.000000,173256.000000,82100.000000,121.812138)}
{pt3dadd(180912.000000,173352.000000,82100.000000,120.028830)}
{pt3dadd(181032.000000,173484.000000,82100.000000,120.028830)}
{pt3dadd(181044.000000,173616.000000,82100.000000,118.421622)}
{pt3dadd(180972.000000,173772.000000,82075.000000,117.631942)}
{pt3dadd(180984.000000,173844.000000,82075.000000,119.354504)}
{pt3dadd(180972.000000,173928.000000,82075.000000,120.230708)}
{pt3dadd(180972.000000,174036.000000,82075.000000,126.820164)}
{pt3dadd(180972.000000,174156.000000,82075.000000,131.057038)}
{pt3dadd(180984.000000,174264.000000,82075.000000,140.332434)}
{pt3dadd(180996.000000,174348.000000,82075.000000,141.239538)}
{pt3dadd(180972.000000,174468.000000,82075.000000,145.064444)}
{pt3dadd(180960.000000,174564.000000,82075.000000,140.197550)}
{pt3dadd(180924.000000,174636.000000,82075.000000,139.290446)}
{pt3dadd(180912.000000,174732.000000,82075.000000,141.563384)}
{pt3dadd(180876.000000,174852.000000,82000.000000,141.563384)}
{pt3dadd(180876.000000,174972.000000,82075.000000,140.556886)}
{pt3dadd(180852.000000,175092.000000,82125.000000,144.381792)}
{pt3dadd(180804.000000,175224.000000,82075.000000,143.505588)}
{pt3dadd(180732.000000,175368.000000,82050.000000,138.224660)}
{pt3dadd(180696.000000,175500.000000,82025.000000,124.231790)}

{create adhoc44}
{access adhoc44}
{connect adhoc44(1), adhoc20(0)}
{nseg = 1}
{strdef color color = "White"}
{pt3dclear()}
{pt3dadd(188568.000000,157788.000000,112175.000000,120.000000)}
{pt3dadd(188472.000000,157908.000000,112325.000000,383.791733)}
{pt3dadd(188424.000000,157980.000000,112500.000000,419.004928)}
{pt3dadd(188364.000000,158064.000000,112675.000000,497.895174)}
{pt3dadd(188268.000000,157968.000000,112825.000000,501.280604)}
{pt3dadd(188316.000000,157776.000000,112975.000000,501.280604)}
{pt3dadd(188052.000000,157968.000000,113150.000000,519.444484)}
{pt3dadd(188100.000000,157980.000000,113300.000000,557.854464)}
{pt3dadd(187992.000000,157968.000000,113475.000000,586.104086)}
{pt3dadd(187860.000000,158016.000000,113625.000000,596.993696)}
{pt3dadd(187776.000000,158100.000000,113750.000000,617.858524)}
{pt3dadd(187608.000000,158184.000000,113900.000000,634.834512)}
{pt3dadd(187584.000000,158256.000000,114075.000000,613.969684)}
{pt3dadd(187524.000000,158232.000000,114225.000000,596.993696)}
{pt3dadd(187452.000000,158220.000000,114400.000000,604.908524)}
{pt3dadd(187356.000000,158208.000000,114550.000000,596.126476)}
{pt3dadd(187224.000000,158220.000000,114725.000000,587.344428)}
{pt3dadd(187068.000000,158256.000000,114875.000000,612.833888)}
{pt3dadd(186984.000000,158268.000000,115025.000000,625.342768)}
{pt3dadd(186888.000000,158280.000000,115200.000000,647.705120)}
{pt3dadd(186720.000000,158328.000000,115350.000000,665.899520)}
{pt3dadd(186600.000000,158328.000000,115500.000000,684.093920)}
{pt3dadd(186480.000000,158328.000000,115650.000000,684.093920)}
{pt3dadd(186396.000000,158304.000000,115800.000000,708.061308)}
{pt3dadd(186360.000000,158232.000000,115975.000000,728.961200)}
{pt3dadd(186276.000000,158124.000000,116125.000000,744.361440)}
{pt3dadd(186120.000000,158172.000000,116275.000000,770.954920)}
{pt3dadd(185964.000000,158220.000000,116425.000000,796.642532)}
{pt3dadd(185928.000000,158232.000000,116575.000000,825.144724)}
{pt3dadd(185664.000000,158232.000000,116725.000000,836.732700)}
{pt3dadd(185556.000000,158268.000000,116900.000000,886.560740)}
{pt3dadd(185364.000000,158280.000000,117025.000000,911.415040)}
{pt3dadd(185304.000000,158196.000000,117200.000000,941.962928)}
{pt3dadd(185112.000000,158136.000000,117350.000000,975.857908)}
{pt3dadd(184884.000000,158148.000000,117500.000000,988.277600)}
{pt3dadd(184692.000000,158376.000000,117650.000000,981.267960)}
{pt3dadd(184464.000000,158412.000000,117825.000000,981.267960)}
{pt3dadd(184200.000000,158400.000000,117950.000000,981.267960)}
{pt3dadd(184164.000000,158520.000000,118100.000000,947.372980)}
{pt3dadd(183804.000000,158568.000000,118250.000000,960.684060)}
{pt3dadd(183636.000000,158556.000000,118400.000000,967.693700)}
{pt3dadd(183456.000000,158556.000000,118550.000000,967.693700)}
{pt3dadd(183312.000000,158640.000000,118675.000000,974.464560)}
{pt3dadd(183264.000000,158700.000000,118825.000000,987.322220)}
{pt3dadd(183216.000000,158772.000000,119000.000000,974.011140)}
{pt3dadd(183084.000000,158868.000000,119125.000000,941.270728)}
{pt3dadd(183060.000000,158832.000000,119275.000000,955.051228)}
{pt3dadd(182904.000000,158784.000000,119425.000000,935.422708)}
{pt3dadd(182748.000000,158772.000000,119575.000000,935.422708)}
{pt3dadd(182580.000000,158808.000000,119675.000000,929.105268)}
{pt3dadd(182400.000000,158832.000000,119800.000000,941.524960)}
{pt3dadd(182232.000000,158868.000000,119950.000000,921.204240)}
{pt3dadd(182064.000000,158892.000000,120100.000000,921.204240)}
{pt3dadd(181992.000000,158904.000000,120225.000000,914.664020)}
{pt3dadd(181932.000000,158916.000000,120400.000000,914.664020)}
{pt3dadd(181944.000000,158928.000000,120550.000000,921.204240)}
{pt3dadd(181548.000000,159108.000000,120700.000000,980.460100)}
{pt3dadd(181416.000000,159084.000000,120850.000000,980.460100)}
{pt3dadd(181284.000000,159048.000000,121000.000000,993.771180)}
{pt3dadd(181140.000000,159024.000000,121175.000000,1027.666160)}
{pt3dadd(181008.000000,159000.000000,121350.000000,1041.446660)}
{pt3dadd(180816.000000,158844.000000,121500.000000,982.190800)}
{pt3dadd(180624.000000,158712.000000,121625.000000,1001.819320)}
{pt3dadd(180456.000000,158736.000000,121775.000000,1016.085780)}
{pt3dadd(180288.000000,158772.000000,121925.000000,1001.819320)}
{pt3dadd(180108.000000,158796.000000,122050.000000,1001.819320)}
{pt3dadd(179796.000000,158880.000000,122225.000000,1008.359540)}
{pt3dadd(179496.000000,158928.000000,122350.000000,1030.138760)}
{pt3dadd(179184.000000,158904.000000,122500.000000,1009.101440)}
{pt3dadd(178944.000000,158844.000000,122650.000000,1009.101440)}
{pt3dadd(178608.000000,158892.000000,122800.000000,1009.101440)}
{pt3dadd(178428.000000,158976.000000,122950.000000,1022.881940)}
{pt3dadd(178320.000000,159084.000000,123125.000000,1038.711600)}
{pt3dadd(177996.000000,158940.000000,123275.000000,1045.482460)}
{pt3dadd(177768.000000,158784.000000,123425.000000,1067.261680)}
{pt3dadd(177708.000000,158760.000000,123575.000000,1089.808940)}
{pt3dadd(177648.000000,158736.000000,123750.000000,1104.578520)}
{pt3dadd(177420.000000,158688.000000,123925.000000,1112.914420)}
{pt3dadd(177192.000000,158652.000000,124100.000000,1099.603340)}
{pt3dadd(176964.000000,158604.000000,124275.000000,1035.005720)}
{pt3dadd(176604.000000,158544.000000,124400.000000,1005.448820)}
{pt3dadd(176304.000000,158448.000000,124575.000000,964.041080)}
{pt3dadd(176004.000000,158436.000000,124750.000000,880.777552)}
{pt3dadd(175728.000000,158484.000000,124875.000000,880.777552)}
{pt3dadd(175476.000000,158532.000000,125050.000000,945.375172)}
{pt3dadd(175176.000000,158580.000000,125200.000000,952.384812)}
{pt3dadd(175020.000000,158628.000000,125375.000000,979.022972)}
{pt3dadd(174864.000000,158640.000000,125525.000000,1079.850600)}
{pt3dadd(174384.000000,158448.000000,125675.000000,1122.718580)}
{pt3dadd(173952.000000,158184.000000,125800.000000,1122.718580)}
{pt3dadd(173640.000000,157896.000000,125950.000000,1115.708940)}
{pt3dadd(173184.000000,157560.000000,126100.000000,1122.965760)}
{pt3dadd(172884.000000,157392.000000,126275.000000,1066.466520)}
{pt3dadd(172548.000000,157452.000000,126425.000000,1036.909620)}
{pt3dadd(172500.000000,157704.000000,126550.000000,1029.396860)}
{pt3dadd(172356.000000,157752.000000,126725.000000,1036.406500)}
{pt3dadd(172212.000000,157704.000000,126875.000000,1015.369180)}
{pt3dadd(171984.000000,157668.000000,127050.000000,1015.369180)}
{pt3dadd(171756.000000,157620.000000,127225.000000,1052.978060)}
{pt3dadd(171420.000000,157536.000000,127350.000000,1093.286240)}
{pt3dadd(171216.000000,157548.000000,127525.000000,1115.833500)}
{pt3dadd(170928.000000,157476.000000,127700.000000,1160.213240)}
{pt3dadd(170976.000000,157476.000000,127875.000000,1172.070380)}
{pt3dadd(170952.000000,157272.000000,128050.000000,1180.406280)}
{pt3dadd(170544.000000,157356.000000,128225.000000,1140.098100)}
{pt3dadd(170208.000000,157128.000000,128400.000000,1124.807660)}
{pt3dadd(169920.000000,157212.000000,128550.000000,1094.208420)}
{pt3dadd(169560.000000,157296.000000,128700.000000,1097.120860)}
{pt3dadd(169392.000000,157200.000000,128850.000000,1097.120860)}
{pt3dadd(169260.000000,157104.000000,128975.000000,1128.799180)}
{pt3dadd(169308.000000,156984.000000,129125.000000,1144.089620)}
{pt3dadd(169476.000000,156924.000000,129275.000000,1191.654620)}
{pt3dadd(169344.000000,156876.000000,129400.000000,1215.820180)}
{pt3dadd(169116.000000,156828.000000,129550.000000,1242.633540)}
{pt3dadd(168888.000000,156792.000000,129700.000000,1203.698400)}
{pt3dadd(168660.000000,156744.000000,129850.000000,1220.086280)}
{pt3dadd(168396.000000,156684.000000,129975.000000,1229.020520)}
{pt3dadd(168240.000000,156600.000000,130125.000000,1246.584620)}
{pt3dadd(168288.000000,156468.000000,130275.000000,1286.960560)}
{pt3dadd(168228.000000,156324.000000,130425.000000,1352.709060)}
{pt3dadd(168024.000000,156180.000000,130575.000000,1361.338920)}
{pt3dadd(167772.000000,156024.000000,130700.000000,1400.339480)}
{pt3dadd(167532.000000,155868.000000,130875.000000,1400.339480)}
{pt3dadd(167280.000000,155712.000000,131025.000000,1369.538980)}
{pt3dadd(167040.000000,155556.000000,131200.000000,1351.355480)}
{pt3dadd(166788.000000,155400.000000,131325.000000,1369.538980)}
{pt3dadd(166548.000000,155256.000000,131450.000000,1349.363120)}
{pt3dadd(166368.000000,155136.000000,131600.000000,1349.363120)}
{pt3dadd(166200.000000,155016.000000,131725.000000,1359.276260)}
{pt3dadd(165972.000000,154776.000000,131875.000000,1383.323120)}
{pt3dadd(165732.000000,154584.000000,132025.000000,1402.811700)}
{pt3dadd(165480.000000,154392.000000,132225.000000,1455.998660)}
{pt3dadd(165120.000000,154164.000000,132375.000000,1505.623860)}
{pt3dadd(164880.000000,153912.000000,132550.000000,1515.886580)}
{pt3dadd(164472.000000,153672.000000,132700.000000,1539.774520)}
{pt3dadd(164172.000000,153492.000000,132875.000000,1560.661880)}
{pt3dadd(163716.000000,153420.000000,133025.000000,1527.650780)}
{pt3dadd(163140.000000,153276.000000,133200.000000,1527.650780)}
{pt3dadd(162252.000000,153168.000000,133575.000000,1549.274700)}
{pt3dadd(162108.000000,153156.000000,133625.000000,1559.899340)}
{pt3dadd(161940.000000,153144.000000,133700.000000,1582.285800)}
{pt3dadd(161808.000000,153144.000000,133750.000000,1615.296900)}
{pt3dadd(161652.000000,153204.000000,133775.000000,1637.683360)}
{pt3dadd(161520.000000,153312.000000,133875.000000,1660.859320)}
{pt3dadd(161388.000000,153336.000000,133875.000000,1695.034560)}
{pt3dadd(161244.000000,153372.000000,133900.000000,1695.034560)}
{pt3dadd(161100.000000,153384.000000,133925.000000,1683.647380)}
{pt3dadd(160968.000000,153372.000000,133975.000000,1661.260920)}
{pt3dadd(160848.000000,153360.000000,134000.000000,1616.461040)}
{pt3dadd(160716.000000,153360.000000,134000.000000,1571.661160)}
{pt3dadd(160560.000000,153348.000000,134025.000000,1583.449940)}
{pt3dadd(160428.000000,153348.000000,134050.000000,1594.837120)}
{pt3dadd(160284.000000,153336.000000,134075.000000,1605.836400)}
{pt3dadd(160152.000000,153324.000000,134100.000000,1616.461040)}
{pt3dadd(160008.000000,153324.000000,134125.000000,1673.465400)}
{pt3dadd(159876.000000,153312.000000,134125.000000,1673.465400)}
{pt3dadd(159732.000000,153312.000000,134150.000000,1673.465400)}
{pt3dadd(159588.000000,153300.000000,134175.000000,1684.852580)}
{pt3dadd(159444.000000,153288.000000,134200.000000,1731.232300)}
{pt3dadd(159312.000000,153288.000000,134225.000000,1731.232300)}
{pt3dadd(159192.000000,153276.000000,134250.000000,1708.056340)}
{pt3dadd(159048.000000,153264.000000,134275.000000,1696.669160)}
{pt3dadd(158916.000000,153264.000000,134275.000000,1685.281980)}
{pt3dadd(158784.000000,153252.000000,134300.000000,1649.901540)}
{pt3dadd(158652.000000,153252.000000,134325.000000,1662.536440)}
{pt3dadd(158520.000000,153240.000000,134350.000000,1673.923620)}
{pt3dadd(158400.000000,153228.000000,134375.000000,1709.304060)}
{pt3dadd(158244.000000,153276.000000,134350.000000,1744.684500)}
{pt3dadd(158088.000000,153324.000000,134325.000000,1767.860460)}
{pt3dadd(157932.000000,153444.000000,134325.000000,1780.940900)}
{pt3dadd(157788.000000,153576.000000,134300.000000,1817.569060)}
{pt3dadd(157584.000000,153576.000000,134275.000000,1830.203960)}
{pt3dadd(157476.000000,153540.000000,134350.000000,1830.203960)}
{pt3dadd(157320.000000,153492.000000,134450.000000,1830.203960)}
{pt3dadd(157176.000000,153408.000000,134450.000000,1769.108180)}
{pt3dadd(157044.000000,153336.000000,134475.000000,1710.093560)}
{pt3dadd(156924.000000,153288.000000,134475.000000,1662.078220)}
{pt3dadd(156768.000000,153240.000000,134475.000000,1615.698500)}
{pt3dadd(156636.000000,153204.000000,134475.000000,1550.722760)}
{pt3dadd(156480.000000,153156.000000,134500.000000,1505.210900)}
{pt3dadd(156324.000000,153108.000000,134475.000000,1494.586260)}
{pt3dadd(156180.000000,153072.000000,134450.000000,1443.211040)}
{pt3dadd(156036.000000,153000.000000,134450.000000,1384.651600)}
{pt3dadd(155868.000000,152964.000000,134500.000000,1404.827460)}
{pt3dadd(155736.000000,152916.000000,134550.000000,1418.452680)}
{pt3dadd(155592.000000,152868.000000,134625.000000,1141.172380)}
{pt3dadd(155448.000000,152976.000000,134625.000000,1170.923680)}
{pt3dadd(155304.000000,153096.000000,134600.000000,1229.483120)}
{pt3dadd(155148.000000,153216.000000,134575.000000,1229.483120)}
{pt3dadd(155004.000000,153216.000000,134600.000000,1229.483120)}
{pt3dadd(154872.000000,153204.000000,134625.000000,1486.587560)}
{pt3dadd(154740.000000,153264.000000,134625.000000,1476.324840)}
{pt3dadd(154596.000000,153348.000000,134650.000000,1435.948900)}
{pt3dadd(154452.000000,153324.000000,134800.000000,1388.014100)}
{pt3dadd(154320.000000,153228.000000,134925.000000,1350.342020)}
{pt3dadd(154188.000000,153132.000000,135025.000000,1313.953220)}
{pt3dadd(154044.000000,153072.000000,135050.000000,1259.315380)}
{pt3dadd(153912.000000,153168.000000,135050.000000,1232.502020)}
{pt3dadd(153780.000000,153276.000000,135025.000000,1241.436260)}
{pt3dadd(153648.000000,153324.000000,134975.000000,1259.619760)}
{pt3dadd(153504.000000,153336.000000,135100.000000,1305.921700)}
{pt3dadd(153336.000000,153360.000000,135250.000000,1331.821700)}
{pt3dadd(153192.000000,153396.000000,135375.000000,1378.123640)}
{pt3dadd(153084.000000,153420.000000,135500.000000,1387.372900)}
{pt3dadd(152940.000000,153468.000000,135575.000000,1387.372900)}
{pt3dadd(152796.000000,153528.000000,135625.000000,1358.635060)}
{pt3dadd(152664.000000,153600.000000,135675.000000,1349.700820)}
{pt3dadd(152508.000000,153660.000000,135750.000000,1295.062980)}
{pt3dadd(152376.000000,153756.000000,135825.000000,1276.879480)}
{pt3dadd(152220.000000,153840.000000,135900.000000,1250.066120)}
{pt3dadd(152100.000000,153924.000000,135975.000000,1250.066120)}
{pt3dadd(151968.000000,154008.000000,136050.000000,1268.249620)}
{pt3dadd(151824.000000,154092.000000,136150.000000,1312.974320)}
{pt3dadd(151716.000000,154176.000000,136250.000000,1321.908560)}
{pt3dadd(151596.000000,154224.000000,136300.000000,1339.472660)}
{pt3dadd(151440.000000,154272.000000,136325.000000,1321.908560)}
{pt3dadd(151296.000000,154284.000000,136350.000000,1286.759300)}
{pt3dadd(151164.000000,154236.000000,136375.000000,1267.934600)}
{pt3dadd(151044.000000,154140.000000,136400.000000,1250.370500)}
{pt3dadd(150936.000000,154260.000000,136450.000000,1216.418520)}
{pt3dadd(150804.000000,154392.000000,136500.000000,1192.252960)}
{pt3dadd(150660.000000,154536.000000,136525.000000,1154.644080)}
{pt3dadd(150528.000000,154680.000000,136575.000000,1091.135200)}
{pt3dadd(150408.000000,154740.000000,136550.000000,1082.799300)}
{pt3dadd(150288.000000,154752.000000,136575.000000,1095.955620)}
{pt3dadd(150132.000000,154800.000000,136700.000000,1120.121180)}
{pt3dadd(150000.000000,154848.000000,136825.000000,1166.065960)}
{pt3dadd(149844.000000,154872.000000,136925.000000,1159.295100)}
{pt3dadd(149700.000000,154944.000000,137050.000000,1128.695860)}
{pt3dadd(149556.000000,155004.000000,137100.000000,1079.211780)}
{pt3dadd(149412.000000,155076.000000,137175.000000,1033.267000)}
{pt3dadd(149268.000000,155124.000000,137200.000000,1001.588680)}
{pt3dadd(149160.000000,155268.000000,137425.000000,1008.359540)}
{pt3dadd(149016.000000,155352.000000,137450.000000,1015.616360)}
{pt3dadd(148884.000000,155352.000000,137450.000000,1029.396860)}
{pt3dadd(148752.000000,155460.000000,137600.000000,1029.396860)}
{pt3dadd(148608.000000,155616.000000,137650.000000,995.501880)}
{pt3dadd(148476.000000,155628.000000,137775.000000,1002.511520)}
{pt3dadd(148176.000000,155664.000000,137850.000000,988.245060)}
{pt3dadd(148056.000000,155652.000000,137950.000000,1027.180200)}
{pt3dadd(147936.000000,155676.000000,138100.000000,1081.754840)}
{pt3dadd(147804.000000,155784.000000,138225.000000,1147.328140)}
{pt3dadd(147672.000000,155796.000000,138375.000000,1162.097720)}
{pt3dadd(147528.000000,155676.000000,138475.000000,1208.042500)}
{pt3dadd(147372.000000,155856.000000,138675.000000,1208.042500)}
{pt3dadd(147240.000000,156024.000000,138800.000000,1216.976740)}
{pt3dadd(147036.000000,156036.000000,138950.000000,1208.640840)}
{pt3dadd(146832.000000,156072.000000,139200.000000,1224.470500)}
{pt3dadd(146592.000000,155976.000000,139900.000000,1224.470500)}
{pt3dadd(146448.000000,155928.000000,139950.000000,1208.082620)}
{pt3dadd(146304.000000,155880.000000,140000.000000,1171.115500)}
{pt3dadd(146184.000000,155844.000000,140075.000000,1188.081260)}
{pt3dadd(146052.000000,155796.000000,140125.000000,1213.981260)}
{pt3dadd(145944.000000,155736.000000,140300.000000,1222.611120)}
{pt3dadd(145824.000000,155688.000000,140475.000000,1238.999000)}
{pt3dadd(145704.000000,155712.000000,140525.000000,1242.014140)}
{pt3dadd(145596.000000,155748.000000,140550.000000,1216.996400)}
{pt3dadd(145464.000000,155772.000000,140600.000000,1160.497160)}
{pt3dadd(145344.000000,155784.000000,140775.000000,1092.611440)}
{pt3dadd(145188.000000,155724.000000,140825.000000,1027.038140)}
{pt3dadd(145056.000000,155664.000000,140850.000000,1004.490880)}
{pt3dadd(144924.000000,155604.000000,140850.000000,981.943620)}
{pt3dadd(144804.000000,155556.000000,140825.000000,1034.979360)}
{pt3dadd(144696.000000,155496.000000,140825.000000,1077.847340)}
{pt3dadd(144588.000000,155520.000000,140925.000000,1160.984740)}
{pt3dadd(144480.000000,155604.000000,140925.000000,1191.583980)}
{pt3dadd(144348.000000,155748.000000,141200.000000,1222.183220)}
{pt3dadd(144240.000000,155724.000000,141375.000000,1169.147480)}
{pt3dadd(144120.000000,155700.000000,141425.000000,1146.600220)}
{pt3dadd(144012.000000,155652.000000,141525.000000,1069.780260)}
{pt3dadd(143904.000000,155604.000000,141600.000000,1053.950600)}
{pt3dadd(143784.000000,155568.000000,141700.000000,1045.898620)}
{pt3dadd(143664.000000,155520.000000,141700.000000,1045.898620)}
{pt3dadd(143556.000000,155472.000000,141725.000000,1053.155440)}
{pt3dadd(143448.000000,155448.000000,141575.000000,1080.732980)}
{pt3dadd(143316.000000,155484.000000,141625.000000,1065.963400)}
{pt3dadd(143184.000000,155508.000000,141650.000000,1050.672960)}
{pt3dadd(143052.000000,155532.000000,141700.000000,1073.220220)}
{pt3dadd(142932.000000,155568.000000,141750.000000,1073.220220)}
{pt3dadd(142836.000000,155520.000000,141850.000000,1065.963400)}
{pt3dadd(142728.000000,155496.000000,141850.000000,1065.963400)}
{pt3dadd(142596.000000,155412.000000,141800.000000,1065.963400)}
{pt3dadd(142476.000000,155376.000000,141875.000000,1050.672960)}
{pt3dadd(142368.000000,155328.000000,142050.000000,1058.185720)}
{pt3dadd(142272.000000,155316.000000,142125.000000,1097.120860)}
{pt3dadd(142140.000000,155316.000000,142200.000000,1119.668120)}
{pt3dadd(142008.000000,155256.000000,142175.000000,1143.010540)}
{pt3dadd(141852.000000,155136.000000,142225.000000,1174.688860)}
{pt3dadd(141756.000000,155184.000000,142400.000000,1198.854420)}
{pt3dadd(141636.000000,155232.000000,142525.000000,1207.484280)}
{pt3dadd(141528.000000,155352.000000,142400.000000,1241.436260)}
{pt3dadd(141420.000000,155268.000000,142525.000000,1258.402020)}
{pt3dadd(141300.000000,155100.000000,142700.000000,1258.402020)}
{pt3dadd(141192.000000,155052.000000,142625.000000,1258.402020)}
{pt3dadd(141084.000000,154860.000000,142725.000000,1241.436260)}
{pt3dadd(140976.000000,154908.000000,142725.000000,1223.872160)}
{pt3dadd(140868.000000,155052.000000,142725.000000,1191.076740)}
{pt3dadd(140760.000000,155100.000000,142750.000000,1247.641400)}
{pt3dadd(140652.000000,155076.000000,142725.000000,1304.206060)}
{pt3dadd(140568.000000,155088.000000,142750.000000,1369.106620)}
{pt3dadd(140460.000000,155076.000000,142800.000000,1415.408560)}
{pt3dadd(140352.000000,155016.000000,142850.000000,1485.876060)}
{pt3dadd(140232.000000,154956.000000,142925.000000,1446.875500)}
{pt3dadd(140112.000000,154884.000000,142975.000000,1407.874940)}
{pt3dadd(139992.000000,154824.000000,142925.000000,1359.940140)}
{pt3dadd(139896.000000,154764.000000,142950.000000,1331.202300)}
{pt3dadd(139776.000000,154716.000000,142875.000000,1293.530220)}
{pt3dadd(139656.000000,154680.000000,142800.000000,1332.530780)}
{pt3dadd(139512.000000,154608.000000,143000.000000,1361.268620)}
{pt3dadd(139416.000000,154620.000000,143075.000000,1398.940700)}
{pt3dadd(139284.000000,154632.000000,143125.000000,1390.006460)}
{pt3dadd(139152.000000,154632.000000,143150.000000,1381.376600)}
{pt3dadd(139044.000000,154656.000000,143075.000000,1333.441800)}
{pt3dadd(138912.000000,154560.000000,143100.000000,1262.974300)}
{pt3dadd(138804.000000,154416.000000,143250.000000,1243.485720)}
{pt3dadd(138684.000000,154344.000000,143350.000000,1243.485720)}
{pt3dadd(138564.000000,154428.000000,143475.000000,1243.485720)}
{pt3dadd(138444.000000,154440.000000,143475.000000,1226.519960)}
{pt3dadd(138324.000000,154380.000000,143450.000000,1242.349620)}
{pt3dadd(138192.000000,154200.000000,143475.000000,1191.370700)}
{pt3dadd(138060.000000,153924.000000,143500.000000,1158.575280)}
{pt3dadd(137952.000000,153540.000000,143575.000000,1142.187400)}
{pt3dadd(137628.000000,153228.000000,143800.000000,1150.523300)}
{pt3dadd(137304.000000,152976.000000,143925.000000,1195.248000)}
{pt3dadd(137004.000000,152712.000000,144025.000000,1236.977660)}
{pt3dadd(136800.000000,152448.000000,144150.000000,1261.143220)}
{pt3dadd(136608.000000,152184.000000,144250.000000,1286.160960)}
{pt3dadd(136428.000000,151908.000000,144350.000000,1286.160960)}
{pt3dadd(136320.000000,151752.000000,144475.000000,1258.402020)}
{pt3dadd(136200.000000,151596.000000,144575.000000,1209.159600)}
{pt3dadd(136080.000000,151440.000000,144700.000000,1170.224460)}
{pt3dadd(135996.000000,151248.000000,144825.000000,1115.649820)}
{pt3dadd(135888.000000,151080.000000,144925.000000,1107.313920)}
{pt3dadd(135768.000000,150912.000000,145050.000000,1082.296180)}
{pt3dadd(135780.000000,150660.000000,145150.000000,1089.808940)}
{pt3dadd(135900.000000,150360.000000,145275.000000,1076.028440)}
{pt3dadd(135984.000000,149988.000000,145400.000000,1062.717360)}
{pt3dadd(135900.000000,149760.000000,145500.000000,1011.797400)}
{pt3dadd(135696.000000,149604.000000,145625.000000,1011.797400)}
{pt3dadd(135756.000000,149304.000000,145800.000000,997.027820)}
{pt3dadd(136032.000000,148788.000000,146050.000000,997.027820)}
{pt3dadd(136140.000000,148692.000000,146150.000000,1047.947780)}
{pt3dadd(136356.000000,148440.000000,146250.000000,1090.815760)}
{pt3dadd(136320.000000,148440.000000,146350.000000,1054.488000)}
{pt3dadd(136572.000000,148284.000000,146450.000000,1061.744820)}
{pt3dadd(136032.000000,148344.000000,146550.000000,1082.782140)}
{pt3dadd(136380.000000,148044.000000,146650.000000,1031.862180)}
{pt3dadd(136404.000000,147900.000000,146750.000000,988.994200)}
{pt3dadd(136416.000000,147744.000000,146850.000000,995.765060)}
{pt3dadd(136560.000000,147564.000000,146975.000000,1003.277820)}
{pt3dadd(136836.000000,147288.000000,147050.000000,989.011360)}
{pt3dadd(136704.000000,147228.000000,147150.000000,1056.897080)}
{pt3dadd(136860.000000,147108.000000,147350.000000,1152.541740)}
{pt3dadd(137004.000000,147048.000000,147450.000000,1244.788460)}
{pt3dadd(137052.000000,146940.000000,147550.000000,1325.518680)}
{pt3dadd(137100.000000,146844.000000,147650.000000,1417.765400)}
{pt3dadd(137160.000000,146760.000000,147750.000000,1455.437480)}
{pt3dadd(137160.000000,146628.000000,147850.000000,1508.624440)}
{pt3dadd(137172.000000,146472.000000,147950.000000,1529.511800)}
{pt3dadd(137184.000000,146316.000000,148050.000000,1551.135720)}
{pt3dadd(137232.000000,146172.000000,148150.000000,1561.398440)}
{pt3dadd(137292.000000,145944.000000,148250.000000,1604.672260)}
{pt3dadd(137364.000000,145656.000000,148400.000000,1604.672260)}
{pt3dadd(137460.000000,145212.000000,148600.000000,1604.672260)}
{pt3dadd(137184.000000,145020.000000,148850.000000,1604.672260)}
{pt3dadd(137592.000000,144516.000000,149050.000000,1615.167600)}
{pt3dadd(137868.000000,144000.000000,149325.000000,1614.521100)}

{create adhoc45}
{access adhoc45}
{connect adhoc45(1), adhoc44(0)}
{nseg = 1}
{strdef color color = "White"}
{pt3dclear()}
{pt3dadd(137868.000000,144000.000000,149325.000000,1614.521100)}
{pt3dadd(137076.000000,141504.000000,149475.000000,638.763247)}
{pt3dadd(136740.000000,141072.000000,149475.000000,438.527978)}
{pt3dadd(136464.000000,140868.000000,149575.000000,133.812356)}
{pt3dadd(136368.000000,140928.000000,149750.000000,118.596416)}
{pt3dadd(136296.000000,140796.000000,149900.000000,120.575124)}
{pt3dadd(135840.000000,140736.000000,150100.000000,132.512600)}
{pt3dadd(135672.000000,140760.000000,150250.000000,141.294223)}
{pt3dadd(135432.000000,140724.000000,150450.000000,188.300190)}

{create adhoc46}
{access adhoc46}
{connect adhoc46(1), adhoc45(0)}
{nseg = 1}
{strdef color color = "White"}
{pt3dclear()}
{pt3dadd(135432.000000,140724.000000,150450.000000,188.300190)}
{pt3dadd(135324.000000,140844.000000,150625.000000,166.903557)}
{pt3dadd(135312.000000,141300.000000,150825.000000,142.704850)}

{create adhoc47}
{access adhoc47}
{connect adhoc47(1), adhoc45(0)}
{nseg = 1}
{strdef color color = "White"}
{pt3dclear()}
{pt3dadd(135432.000000,140724.000000,150450.000000,188.300190)}
{pt3dadd(135312.000000,140328.000000,150325.000000,156.282947)}
{pt3dadd(135324.000000,140064.000000,150325.000000,139.399779)}
{pt3dadd(135264.000000,139692.000000,150325.000000,121.997952)}
{pt3dadd(135168.000000,139524.000000,150325.000000,108.150055)}

{create adhoc48}
{access adhoc48}
{connect adhoc48(1), adhoc44(0)}
{nseg = 1}
{strdef color color = "White"}
{pt3dclear()}
{pt3dadd(137868.000000,144000.000000,149325.000000,1614.521100)}
{pt3dadd(137976.000000,143712.000000,149475.000000,1634.815567)}
{pt3dadd(138048.000000,143532.000000,149625.000000,1535.515140)}
{pt3dadd(138024.000000,143388.000000,149775.000000,1457.326560)}
{pt3dadd(138024.000000,143184.000000,149925.000000,1364.591880)}
{pt3dadd(138012.000000,142956.000000,150025.000000,1306.032440)}
{pt3dadd(137904.000000,142908.000000,150175.000000,1267.031880)}
{pt3dadd(137916.000000,142584.000000,150325.000000,1258.402020)}
{pt3dadd(137964.000000,142296.000000,150475.000000,1258.402020)}
{pt3dadd(138000.000000,142368.000000,150675.000000,1241.436260)}
{pt3dadd(137892.000000,142104.000000,150850.000000,1209.685033)}
{pt3dadd(137964.000000,141936.000000,151075.000000,1181.898700)}

{create adhoc49}
{access adhoc49}
{connect adhoc49(1), adhoc48(0)}
{nseg = 1}
{strdef color color = "White"}
{pt3dclear()}
{pt3dadd(137964.000000,141936.000000,151075.000000,1181.898700)}
{pt3dadd(137880.000000,141888.000000,151150.000000,1183.792200)}
{pt3dadd(137760.000000,141792.000000,151250.000000,1122.083500)}
{pt3dadd(137808.000000,141672.000000,151400.000000,1077.703760)}
{pt3dadd(137856.000000,141540.000000,151575.000000,1052.686020)}
{pt3dadd(137784.000000,141360.000000,151700.000000,1085.481440)}
{pt3dadd(137640.000000,141288.000000,151850.000000,1085.481440)}
{pt3dadd(137436.000000,141288.000000,152025.000000,1107.260660)}
{pt3dadd(137424.000000,141216.000000,152175.000000,1128.297980)}
{pt3dadd(137472.000000,141060.000000,152300.000000,1113.007540)}
{pt3dadd(137508.000000,140976.000000,152475.000000,1072.699360)}
{pt3dadd(137568.000000,140772.000000,152650.000000,1065.442540)}
{pt3dadd(137532.000000,140760.000000,153000.000000,1065.442540)}
{pt3dadd(137532.000000,140316.000000,153225.000000,1051.176080)}
{pt3dadd(137736.000000,140064.000000,153300.000000,1036.909620)}
{pt3dadd(137724.000000,139704.000000,153425.000000,1029.652800)}
{pt3dadd(137772.000000,139464.000000,153575.000000,1015.872300)}
{pt3dadd(137760.000000,139080.000000,153725.000000,926.462088)}
{pt3dadd(137880.000000,138744.000000,154100.000000,820.421116)}
{pt3dadd(137928.000000,138612.000000,154350.000000,693.116260)}
{pt3dadd(137880.000000,138468.000000,154600.000000,463.649440)}

{create adhoc50}
{access adhoc50}
{connect adhoc50(1), adhoc49(0)}
{nseg = 1}
{strdef color color = "White"}
{pt3dclear()}
{pt3dadd(137880.000000,138468.000000,154600.000000,463.649440)}
{pt3dadd(139740.000000,137208.000000,154800.000000,624.183173)}
{pt3dadd(140148.000000,136740.000000,155000.000000,676.514236)}
{pt3dadd(140196.000000,136476.000000,155250.000000,729.293138)}
{pt3dadd(140652.000000,136020.000000,155500.000000,729.293138)}
{pt3dadd(140808.000000,135816.000000,155775.000000,714.417490)}
{pt3dadd(140964.000000,135612.000000,155925.000000,703.605526)}
{pt3dadd(141120.000000,135384.000000,156075.000000,689.726066)}
{pt3dadd(141276.000000,135168.000000,156250.000000,689.726066)}
{pt3dadd(141432.000000,134940.000000,156400.000000,704.702830)}
{pt3dadd(141516.000000,134844.000000,156575.000000,727.543950)}

{create adhoc51}
{access adhoc51}
{connect adhoc51(1), adhoc50(0)}
{nseg = 1}
{strdef color color = "White"}
{pt3dclear()}
{pt3dadd(141516.000000,134844.000000,156575.000000,727.543950)}
{pt3dadd(139992.000000,135588.000000,156425.000000,400.356560)}
{pt3dadd(139920.000000,135552.000000,156625.000000,302.696032)}
{pt3dadd(139992.000000,135336.000000,156850.000000,189.972210)}
{pt3dadd(139884.000000,135216.000000,157150.000000,173.665142)}
{pt3dadd(139692.000000,134988.000000,157475.000000,162.073308)}
{pt3dadd(139608.000000,134976.000000,157775.000000,163.270238)}
{pt3dadd(139392.000000,134820.000000,158075.000000,168.670394)}
{pt3dadd(138960.000000,134556.000000,158375.000000,176.248454)}
{pt3dadd(138756.000000,134604.000000,158450.000000,187.475342)}
{pt3dadd(138564.000000,134544.000000,158475.000000,200.592738)}
{pt3dadd(138408.000000,134592.000000,158575.000000,210.240266)}
{pt3dadd(138276.000000,134520.000000,158650.000000,233.381080)}
{pt3dadd(138156.000000,134532.000000,158650.000000,265.772446)}
{pt3dadd(137988.000000,134568.000000,158650.000000,292.161896)}
{pt3dadd(137844.000000,134592.000000,158675.000000,322.696386)}
{pt3dadd(137724.000000,134592.000000,158700.000000,348.186912)}
{pt3dadd(137592.000000,134592.000000,158750.000000,363.859366)}
{pt3dadd(137472.000000,134604.000000,158800.000000,352.283884)}
{pt3dadd(137292.000000,134604.000000,158850.000000,340.708402)}
{pt3dadd(137172.000000,134700.000000,158800.000000,343.364560)}
{pt3dadd(137064.000000,134724.000000,158800.000000,338.658384)}
{pt3dadd(136944.000000,134760.000000,158825.000000,315.596706)}
{pt3dadd(136800.000000,134784.000000,158850.000000,297.677816)}
{pt3dadd(136668.000000,134784.000000,158875.000000,276.861932)}
{pt3dadd(136524.000000,134820.000000,158875.000000,237.873816)}
{pt3dadd(136212.000000,134868.000000,158875.000000,205.088850)}
{pt3dadd(136020.000000,134928.000000,158875.000000,191.773332)}
{pt3dadd(135852.000000,134976.000000,158875.000000,190.299736)}
{pt3dadd(135660.000000,135012.000000,158875.000000,190.299736)}
{pt3dadd(135528.000000,135000.000000,158800.000000,199.311620)}
{pt3dadd(135420.000000,135000.000000,158875.000000,212.891596)}
{pt3dadd(135312.000000,135132.000000,158825.000000,210.455524)}
{pt3dadd(135192.000000,135144.000000,158775.000000,209.032126)}
{pt3dadd(135060.000000,135252.000000,158750.000000,205.046296)}
{pt3dadd(134940.000000,135204.000000,158800.000000,189.831264)}
{pt3dadd(134820.000000,135264.000000,158800.000000,183.829348)}
{pt3dadd(134676.000000,135300.000000,158750.000000,187.548260)}
{pt3dadd(134556.000000,135288.000000,158800.000000,191.970816)}
{pt3dadd(133908.000000,135384.000000,159050.000000,188.378586)}
{pt3dadd(133632.000000,135516.000000,159050.000000,184.134588)}
{pt3dadd(133236.000000,135588.000000,159250.000000,171.340320)}
{pt3dadd(132720.000000,135516.000000,159450.000000,166.465250)}
{pt3dadd(132504.000000,135348.000000,159625.000000,168.044610)}
{pt3dadd(132192.000000,135204.000000,159825.000000,177.864453)}
{pt3dadd(132156.000000,135204.000000,160025.000000,231.824720)}

{create adhoc52}
{access adhoc52}
{connect adhoc52(1), adhoc51(0)}
{nseg = 1}
{strdef color color = "White"}
{pt3dclear()}
{pt3dadd(132156.000000,135204.000000,160025.000000,231.824720)}
{pt3dadd(132180.000000,134940.000000,160250.000000,167.605617)}
{pt3dadd(132336.000000,134724.000000,160375.000000,159.800318)}
{pt3dadd(132312.000000,134664.000000,160525.000000,155.221800)}
{pt3dadd(132528.000000,134256.000000,160700.000000,171.852156)}
{pt3dadd(132624.000000,134040.000000,160775.000000,207.619776)}
{pt3dadd(132696.000000,133884.000000,160975.000000,245.620950)}
{pt3dadd(132768.000000,133596.000000,161125.000000,286.943893)}
{pt3dadd(132768.000000,133332.000000,161275.000000,327.849670)}

{create adhoc53}
{access adhoc53}
{connect adhoc53(1), adhoc52(0)}
{nseg = 1}
{strdef color color = "White"}
{pt3dclear()}
{pt3dadd(132768.000000,133332.000000,161275.000000,327.849670)}
{pt3dadd(133236.000000,133236.000000,161450.000000,177.823338)}
{pt3dadd(133476.000000,133260.000000,161550.000000,149.370533)}
{pt3dadd(133668.000000,133476.000000,161750.000000,115.468787)}
{pt3dadd(133896.000000,133572.000000,161800.000000,123.907863)}
{pt3dadd(134232.000000,133596.000000,161900.000000,158.340940)}

{create adhoc54}
{access adhoc54}
{connect adhoc54(1), adhoc53(0)}
{nseg = 1}
{strdef color color = "White"}
{pt3dclear()}
{pt3dadd(134232.000000,133596.000000,161900.000000,158.340940)}
{pt3dadd(134316.000000,133716.000000,162075.000000,199.522990)}
{pt3dadd(134508.000000,133764.000000,162225.000000,180.090992)}
{pt3dadd(134664.000000,133836.000000,162425.000000,173.269162)}
{pt3dadd(134772.000000,133896.000000,162650.000000,143.257312)}
{pt3dadd(134904.000000,134004.000000,162850.000000,115.292018)}
{pt3dadd(134952.000000,133860.000000,163075.000000,91.524700)}
{pt3dadd(134916.000000,133908.000000,163200.000000,76.473640)}

{create adhoc55}
{access adhoc55}
{connect adhoc55(1), adhoc53(0)}
{nseg = 1}
{strdef color color = "White"}
{pt3dclear()}
{pt3dadd(134232.000000,133596.000000,161900.000000,158.340940)}
{pt3dadd(134100.000000,133548.000000,161675.000000,108.585857)}
{pt3dadd(133956.000000,133548.000000,161500.000000,97.635963)}
{pt3dadd(133944.000000,133572.000000,161300.000000,82.360259)}
{pt3dadd(133788.000000,133500.000000,161075.000000,81.461555)}
{pt3dadd(133728.000000,133548.000000,161000.000000,81.962420)}

{create adhoc56}
{access adhoc56}
{connect adhoc56(1), adhoc52(0)}
{nseg = 1}
{strdef color color = "White"}
{pt3dclear()}
{pt3dadd(132768.000000,133332.000000,161275.000000,327.849670)}
{pt3dadd(132528.000000,133032.000000,161550.000000,280.766970)}
{pt3dadd(132480.000000,132708.000000,161650.000000,260.249300)}
{pt3dadd(132408.000000,132564.000000,161750.000000,266.296660)}

{create adhoc57}
{access adhoc57}
{connect adhoc57(1), adhoc56(0)}
{nseg = 1}
{strdef color color = "White"}
{pt3dclear()}
{pt3dadd(132408.000000,132564.000000,161750.000000,266.296660)}
{pt3dadd(132336.000000,132720.000000,162000.000000,218.725940)}
{pt3dadd(132420.000000,132852.000000,162225.000000,184.622892)}
{pt3dadd(132516.000000,132888.000000,162450.000000,152.993571)}
{pt3dadd(132696.000000,132864.000000,162675.000000,136.398247)}
{pt3dadd(133044.000000,132876.000000,162875.000000,117.591645)}
{pt3dadd(133152.000000,132696.000000,163050.000000,105.443159)}
{pt3dadd(133152.000000,132840.000000,163200.000000,96.989285)}
{pt3dadd(133080.000000,132960.000000,163400.000000,88.277470)}
{pt3dadd(133236.000000,132696.000000,163550.000000,81.962420)}

{create adhoc58}
{access adhoc58}
{connect adhoc58(1), adhoc56(0)}
{nseg = 1}
{strdef color color = "White"}
{pt3dclear()}
{pt3dadd(132408.000000,132564.000000,161750.000000,266.296660)}
{pt3dadd(132276.000000,132360.000000,161750.000000,228.807190)}
{pt3dadd(132156.000000,132156.000000,161750.000000,203.208980)}
{pt3dadd(132036.000000,131952.000000,161750.000000,172.641173)}
{pt3dadd(131916.000000,131784.000000,161750.000000,181.885990)}

{create adhoc59}
{access adhoc59}
{connect adhoc59(1), adhoc58(0)}
{nseg = 1}
{strdef color color = "White"}
{pt3dclear()}
{pt3dadd(131916.000000,131784.000000,161750.000000,181.885990)}
{pt3dadd(132288.000000,131628.000000,161600.000000,126.834048)}
{pt3dadd(132396.000000,131628.000000,161700.000000,107.229251)}
{pt3dadd(132504.000000,131352.000000,161850.000000,87.244537)}
{pt3dadd(132504.000000,131160.000000,161850.000000,81.125058)}
{pt3dadd(132504.000000,130956.000000,161850.000000,78.687524)}
{pt3dadd(132552.000000,130824.000000,161850.000000,82.222814)}
{pt3dadd(132684.000000,130776.000000,161850.000000,80.659205)}
{pt3dadd(132732.000000,130752.000000,162000.000000,82.488312)}
{pt3dadd(132624.000000,131064.000000,162150.000000,71.352425)}

{create adhoc60}
{access adhoc60}
{connect adhoc60(1), adhoc58(0)}
{nseg = 1}
{strdef color color = "White"}
{pt3dclear()}
{pt3dadd(131916.000000,131784.000000,161750.000000,181.885990)}
{pt3dadd(131772.000000,131604.000000,161600.000000,217.903570)}
{pt3dadd(131556.000000,131532.000000,161425.000000,196.943150)}
{pt3dadd(131568.000000,131268.000000,161250.000000,184.565952)}
{pt3dadd(131472.000000,131112.000000,161075.000000,164.134712)}
{pt3dadd(131280.000000,130788.000000,160850.000000,143.492330)}
{pt3dadd(131076.000000,130464.000000,160700.000000,128.225084)}
{pt3dadd(130764.000000,130368.000000,160525.000000,127.252874)}
{pt3dadd(130572.000000,130140.000000,160375.000000,137.194000)}
{pt3dadd(130248.000000,129876.000000,160200.000000,155.990184)}
{pt3dadd(130032.000000,129852.000000,160200.000000,179.960338)}
{pt3dadd(129804.000000,129660.000000,160400.000000,218.746458)}
{pt3dadd(129684.000000,129444.000000,160425.000000,240.870414)}
{pt3dadd(129672.000000,129276.000000,160600.000000,256.622004)}
{pt3dadd(129576.000000,129108.000000,160625.000000,252.043486)}
{pt3dadd(129564.000000,128964.000000,160600.000000,242.713798)}
{pt3dadd(129576.000000,128832.000000,160625.000000,216.672942)}
{pt3dadd(129636.000000,128736.000000,160700.000000,207.343254)}
{pt3dadd(129696.000000,128628.000000,160775.000000,199.436964)}
{pt3dadd(129804.000000,128532.000000,160750.000000,199.436964)}
{pt3dadd(129888.000000,128424.000000,160700.000000,200.860362)}
{pt3dadd(129960.000000,128292.000000,160675.000000,220.859826)}
{pt3dadd(130056.000000,128172.000000,160650.000000,233.756130)}
{pt3dadd(130116.000000,128076.000000,160475.000000,245.229036)}
{pt3dadd(130176.000000,127956.000000,160425.000000,269.426973)}
{pt3dadd(130224.000000,127824.000000,160400.000000,266.296660)}

{create adhoc61}
{access adhoc61}
{connect adhoc61(1), adhoc60(0)}
{nseg = 1}
{strdef color color = "White"}
{pt3dclear()}
{pt3dadd(130224.000000,127824.000000,160400.000000,266.296660)}
{pt3dadd(130260.000000,127704.000000,160375.000000,266.296660)}

{create adhoc62}
{access adhoc62}
{connect adhoc62(1), adhoc60(0)}
{nseg = 1}
{strdef color color = "White"}
{pt3dclear()}
{pt3dadd(130224.000000,127824.000000,160400.000000,266.296660)}
{pt3dadd(130248.000000,127452.000000,160125.000000,224.603887)}
{pt3dadd(130128.000000,127176.000000,159975.000000,199.292914)}
{pt3dadd(130056.000000,127020.000000,159950.000000,176.623038)}
{pt3dadd(129936.000000,126888.000000,159975.000000,155.104452)}
{pt3dadd(129852.000000,126744.000000,159975.000000,147.535156)}
{pt3dadd(129780.000000,126612.000000,159975.000000,146.493168)}
{pt3dadd(129636.000000,126384.000000,160000.000000,141.093012)}
{pt3dadd(129420.000000,126264.000000,159850.000000,139.044526)}
{pt3dadd(129276.000000,126156.000000,159925.000000,140.827834)}
{pt3dadd(129228.000000,126036.000000,160000.000000,139.519343)}
{pt3dadd(129168.000000,125904.000000,160025.000000,133.148330)}

{create adhoc63}
{access adhoc63}
{connect adhoc63(1), adhoc51(0)}
{nseg = 1}
{strdef color color = "White"}
{pt3dclear()}
{pt3dadd(132156.000000,135204.000000,160025.000000,231.824720)}
{pt3dadd(131592.000000,135504.000000,160125.000000,154.735522)}
{pt3dadd(131412.000000,135624.000000,159975.000000,108.150055)}

{create adhoc64}
{access adhoc64}
{connect adhoc64(1), adhoc50(0)}
{nseg = 1}
{strdef color color = "White"}
{pt3dclear()}
{pt3dadd(141516.000000,134844.000000,156575.000000,727.543950)}
{pt3dadd(141852.000000,134832.000000,156375.000000,679.647543)}
{pt3dadd(142008.000000,134784.000000,156450.000000,679.480614)}
{pt3dadd(142140.000000,134772.000000,156550.000000,669.736324)}
{pt3dadd(142284.000000,134748.000000,156625.000000,656.786324)}
{pt3dadd(142428.000000,134676.000000,156725.000000,643.836324)}
{pt3dadd(142524.000000,134616.000000,156800.000000,622.971496)}
{pt3dadd(142632.000000,134532.000000,156925.000000,618.183776)}
{pt3dadd(142728.000000,134448.000000,157025.000000,613.559144)}
{pt3dadd(142872.000000,134424.000000,157075.000000,646.009424)}
{pt3dadd(142992.000000,134472.000000,157125.000000,668.371776)}
{pt3dadd(143100.000000,134472.000000,157200.000000,698.648956)}
{pt3dadd(143196.000000,134436.000000,157300.000000,694.024324)}
{pt3dadd(143304.000000,134400.000000,157425.000000,689.557216)}
{pt3dadd(143412.000000,134376.000000,157525.000000,689.557216)}
{pt3dadd(143532.000000,134340.000000,157650.000000,716.150696)}
{pt3dadd(143688.000000,134232.000000,158075.000000,754.740816)}
{pt3dadd(144240.000000,134076.000000,158300.000000,809.060728)}
{pt3dadd(144408.000000,134016.000000,158500.000000,861.530308)}
{pt3dadd(144384.000000,133788.000000,158675.000000,883.930248)}
{pt3dadd(144468.000000,133644.000000,158850.000000,902.244328)}
{pt3dadd(144288.000000,133728.000000,159025.000000,747.101988)}
{pt3dadd(144252.000000,133716.000000,159175.000000,753.642208)}
{pt3dadd(144456.000000,133656.000000,159350.000000,766.499868)}
{pt3dadd(144552.000000,133704.000000,159550.000000,792.230640)}
{pt3dadd(144564.000000,133752.000000,159700.000000,785.913200)}
{pt3dadd(144552.000000,133704.000000,159850.000000,949.855333)}
{pt3dadd(144636.000000,133632.000000,159975.000000,895.711700)}

{create adhoc65}
{access adhoc65}
{connect adhoc65(1), adhoc64(0)}
{nseg = 1}
{strdef color color = "White"}
{pt3dclear()}
{pt3dadd(144636.000000,133632.000000,159975.000000,895.711700)}
{pt3dadd(144972.000000,131904.000000,159975.000000,426.516452)}
{pt3dadd(145020.000000,131556.000000,159975.000000,370.142325)}
{pt3dadd(144960.000000,131100.000000,159975.000000,242.445109)}
{pt3dadd(144828.000000,130692.000000,159975.000000,260.061983)}
{pt3dadd(144624.000000,130344.000000,159975.000000,313.752046)}
{pt3dadd(144576.000000,130200.000000,159725.000000,333.934600)}
{pt3dadd(144516.000000,130044.000000,159600.000000,347.594060)}
{pt3dadd(144396.000000,129912.000000,159550.000000,371.469010)}
{pt3dadd(144264.000000,129816.000000,159475.000000,366.596866)}
{pt3dadd(144144.000000,129744.000000,159350.000000,374.849644)}
{pt3dadd(144180.000000,129648.000000,159250.000000,369.805680)}
{pt3dadd(144060.000000,129552.000000,159175.000000,360.387666)}
{pt3dadd(144072.000000,129456.000000,159125.000000,352.949842)}
{pt3dadd(144048.000000,129372.000000,159025.000000,348.403972)}
{pt3dadd(144120.000000,129264.000000,158800.000000,342.807352)}
{pt3dadd(144084.000000,129192.000000,158575.000000,345.285636)}
{pt3dadd(144060.000000,129096.000000,158500.000000,354.703650)}
{pt3dadd(144060.000000,129000.000000,158400.000000,354.703650)}
{pt3dadd(144072.000000,128904.000000,158300.000000,377.887314)}
{pt3dadd(144000.000000,128832.000000,158275.000000,377.887314)}
{pt3dadd(143916.000000,128748.000000,158150.000000,388.705772)}
{pt3dadd(143796.000000,128664.000000,158125.000000,402.471422)}
{pt3dadd(143676.000000,128580.000000,158125.000000,430.589172)}
{pt3dadd(143544.000000,128508.000000,158100.000000,427.641980)}
{pt3dadd(143424.000000,128424.000000,158100.000000,439.236914)}
{pt3dadd(143292.000000,128340.000000,158075.000000,436.390118)}
{pt3dadd(143160.000000,128268.000000,158050.000000,420.146184)}
{pt3dadd(143100.000000,128184.000000,158000.000000,399.466258)}
{pt3dadd(142932.000000,128220.000000,157900.000000,396.619462)}
{pt3dadd(142812.000000,128196.000000,157875.000000,385.024528)}
{pt3dadd(142692.000000,128160.000000,157825.000000,379.618546)}
{pt3dadd(142572.000000,128160.000000,157750.000000,382.096830)}
{pt3dadd(142488.000000,128028.000000,157800.000000,360.036088)}
{pt3dadd(142380.000000,127968.000000,157725.000000,344.879966)}
{pt3dadd(142284.000000,127896.000000,157725.000000,332.473668)}
{pt3dadd(142152.000000,127860.000000,157700.000000,327.429704)}
{pt3dadd(142032.000000,127812.000000,157725.000000,318.011690)}
{pt3dadd(141936.000000,127848.000000,157700.000000,330.322292)}
{pt3dadd(141828.000000,127896.000000,157650.000000,331.970707)}
{pt3dadd(141696.000000,127944.000000,157600.000000,327.849670)}

{create adhoc66}
{access adhoc66}
{connect adhoc66(1), adhoc65(0)}
{nseg = 1}
{strdef color color = "White"}
{pt3dclear()}
{pt3dadd(141696.000000,127944.000000,157600.000000,327.849670)}
{pt3dadd(141888.000000,127500.000000,158200.000000,237.030147)}
{pt3dadd(141756.000000,127284.000000,158375.000000,238.448796)}
{pt3dadd(141552.000000,127044.000000,158575.000000,224.323986)}
{pt3dadd(141276.000000,126804.000000,158725.000000,224.323986)}
{pt3dadd(141012.000000,126468.000000,158900.000000,233.028892)}
{pt3dadd(140688.000000,126480.000000,159050.000000,227.996973)}
{pt3dadd(140892.000000,126180.000000,159225.000000,231.824720)}

{create adhoc67}
{access adhoc67}
{connect adhoc67(1), adhoc66(0)}
{nseg = 1}
{strdef color color = "White"}
{pt3dclear()}
{pt3dadd(140892.000000,126180.000000,159225.000000,231.824720)}
{pt3dadd(141012.000000,125508.000000,159325.000000,207.547613)}
{pt3dadd(141192.000000,124896.000000,159325.000000,179.798598)}
{pt3dadd(141204.000000,124596.000000,159325.000000,162.981122)}
{pt3dadd(141396.000000,124344.000000,159325.000000,150.742164)}
{pt3dadd(141504.000000,124188.000000,159275.000000,141.933726)}
{pt3dadd(141684.000000,124068.000000,159175.000000,139.015924)}
{pt3dadd(141936.000000,123900.000000,159325.000000,142.840830)}
{pt3dadd(142164.000000,123768.000000,159350.000000,144.961550)}
{pt3dadd(142356.000000,123648.000000,159400.000000,148.199050)}
{pt3dadd(142560.000000,123528.000000,159375.000000,157.007488)}
{pt3dadd(142752.000000,123384.000000,159400.000000,168.050590)}
{pt3dadd(142848.000000,123240.000000,159350.000000,181.885990)}

{create adhoc68}
{access adhoc68}
{connect adhoc68(1), adhoc67(0)}
{nseg = 1}
{strdef color color = "White"}
{pt3dclear()}
{pt3dadd(142848.000000,123240.000000,159350.000000,181.885990)}
{pt3dadd(142896.000000,123336.000000,159550.000000,142.704850)}

{create adhoc69}
{access adhoc69}
{connect adhoc69(1), adhoc68(0)}
{nseg = 1}
{strdef color color = "White"}
{pt3dclear()}
{pt3dadd(142896.000000,123336.000000,159550.000000,142.704850)}
{pt3dadd(142860.000000,123612.000000,159625.000000,105.134267)}
{pt3dadd(142836.000000,123804.000000,159725.000000,87.880313)}
{pt3dadd(142404.000000,123552.000000,159825.000000,90.942990)}

{create adhoc70}
{access adhoc70}
{connect adhoc70(1), adhoc68(0)}
{nseg = 1}
{strdef color color = "White"}
{pt3dclear()}
{pt3dadd(142896.000000,123336.000000,159550.000000,142.704850)}
{pt3dadd(143052.000000,123240.000000,159675.000000,110.335010)}
{pt3dadd(143100.000000,123240.000000,159825.000000,101.958632)}
{pt3dadd(143076.000000,123096.000000,159975.000000,93.599176)}
{pt3dadd(142968.000000,123036.000000,160150.000000,93.599176)}
{pt3dadd(142848.000000,123000.000000,160325.000000,93.599176)}
{pt3dadd(142740.000000,123024.000000,160525.000000,93.599176)}
{pt3dadd(142716.000000,122880.000000,160725.000000,94.218746)}
{pt3dadd(142716.000000,122712.000000,160900.000000,99.759794)}
{pt3dadd(142644.000000,122508.000000,161075.000000,138.011716)}
{pt3dadd(142572.000000,122112.000000,161275.000000,168.321833)}
{pt3dadd(142536.000000,121752.000000,161450.000000,285.409700)}

{create adhoc71}
{access adhoc71}
{connect adhoc71(1), adhoc70(0)}
{nseg = 1}
{strdef color color = "White"}
{pt3dclear()}
{pt3dadd(142536.000000,121752.000000,161450.000000,285.409700)}
{pt3dadd(142704.000000,120852.000000,161450.000000,222.704850)}
{pt3dadd(142908.000000,120396.000000,161250.000000,184.191830)}
{pt3dadd(142920.000000,120288.000000,161050.000000,131.849817)}
{pt3dadd(143268.000000,120288.000000,160950.000000,124.231790)}

{create adhoc72}
{access adhoc72}
{connect adhoc72(1), adhoc71(0)}
{nseg = 1}
{strdef color color = "White"}
{pt3dclear()}
{pt3dadd(143268.000000,120288.000000,160950.000000,124.231790)}
{pt3dadd(143484.000000,120360.000000,160850.000000,128.612810)}

{create adhoc73}
{access adhoc73}
{connect adhoc73(1), adhoc71(0)}
{nseg = 1}
{strdef color color = "White"}
{pt3dclear()}
{pt3dadd(143268.000000,120288.000000,160950.000000,124.231790)}
{pt3dadd(144588.000000,120120.000000,160950.000000,190.804813)}
{pt3dadd(145176.000000,120048.000000,160875.000000,165.928012)}
{pt3dadd(145644.000000,120012.000000,160700.000000,168.650414)}
{pt3dadd(146004.000000,119976.000000,160700.000000,159.841976)}
{pt3dadd(146100.000000,119796.000000,160600.000000,130.582644)}
{pt3dadd(146100.000000,119592.000000,160500.000000,123.690100)}
{pt3dadd(145992.000000,119352.000000,160525.000000,113.262266)}
{pt3dadd(145812.000000,119148.000000,160525.000000,102.085990)}
{pt3dadd(145572.000000,119064.000000,160525.000000,84.195383)}
{pt3dadd(145368.000000,119064.000000,160525.000000,81.962420)}

{create adhoc74}
{access adhoc74}
{connect adhoc74(1), adhoc70(0)}
{nseg = 1}
{strdef color color = "White"}
{pt3dclear()}
{pt3dadd(142536.000000,121752.000000,161450.000000,285.409700)}
{pt3dadd(142452.000000,121800.000000,161600.000000,240.000000)}

{create adhoc75}
{access adhoc75}
{connect adhoc75(1), adhoc74(0)}
{nseg = 1}
{strdef color color = "White"}
{pt3dclear()}
{pt3dadd(142452.000000,121800.000000,161600.000000,240.000000)}
{pt3dadd(142320.000000,122148.000000,161675.000000,185.624040)}
{pt3dadd(142392.000000,122352.000000,161825.000000,187.286836)}
{pt3dadd(142464.000000,122556.000000,162050.000000,188.979552)}
{pt3dadd(142488.000000,122820.000000,162250.000000,234.170816)}
{pt3dadd(142296.000000,122784.000000,162425.000000,313.856400)}
{pt3dadd(142200.000000,122604.000000,162625.000000,396.573313)}
{pt3dadd(142308.000000,122472.000000,162875.000000,551.375200)}

{create adhoc76}
{access adhoc76}
{connect adhoc76(1), adhoc74(0)}
{nseg = 1}
{strdef color color = "White"}
{pt3dclear()}
{pt3dadd(142452.000000,121800.000000,161600.000000,240.000000)}
{pt3dadd(142416.000000,121080.000000,161775.000000,230.092907)}
{pt3dadd(142296.000000,120912.000000,161925.000000,248.463580)}

{create adhoc77}
{access adhoc77}
{connect adhoc77(1), adhoc76(0)}
{nseg = 1}
{strdef color color = "White"}
{pt3dclear()}
{pt3dadd(142296.000000,120912.000000,161925.000000,248.463580)}
{pt3dadd(142368.000000,121020.000000,162075.000000,128.612810)}

{create adhoc78}
{access adhoc78}
{connect adhoc78(1), adhoc76(0)}
{nseg = 1}
{strdef color color = "White"}
{pt3dclear()}
{pt3dadd(142296.000000,120912.000000,161925.000000,248.463580)}
{pt3dadd(141852.000000,120480.000000,161825.000000,145.587920)}
{pt3dadd(141624.000000,120372.000000,161825.000000,124.415838)}
{pt3dadd(141588.000000,120240.000000,161650.000000,94.217180)}
{pt3dadd(141444.000000,120288.000000,161875.000000,97.017173)}
{pt3dadd(141180.000000,120312.000000,162025.000000,91.048436)}
{pt3dadd(140952.000000,120516.000000,162175.000000,89.975583)}
{pt3dadd(140760.000000,120552.000000,162275.000000,64.306404)}

{create adhoc79}
{access adhoc79}
{connect adhoc79(1), adhoc67(0)}
{nseg = 1}
{strdef color color = "White"}
{pt3dclear()}
{pt3dadd(142848.000000,123240.000000,159350.000000,181.885990)}
{pt3dadd(142944.000000,123288.000000,159250.000000,166.266330)}
{pt3dadd(142872.000000,123132.000000,159125.000000,128.612810)}

{create adhoc80}
{access adhoc80}
{connect adhoc80(1), adhoc79(0)}
{nseg = 1}
{strdef color color = "White"}
{pt3dclear()}
{pt3dadd(142872.000000,123132.000000,159125.000000,128.612810)}
{pt3dadd(142608.000000,122928.000000,159025.000000,124.167693)}
{pt3dadd(142572.000000,122832.000000,158925.000000,90.942990)}

{create adhoc81}
{access adhoc81}
{connect adhoc81(1), adhoc79(0)}
{nseg = 1}
{strdef color color = "White"}
{pt3dclear()}
{pt3dadd(142872.000000,123132.000000,159125.000000,128.612810)}
{pt3dadd(143112.000000,123480.000000,159050.000000,109.235285)}
{pt3dadd(143304.000000,123420.000000,158925.000000,95.646062)}
{pt3dadd(143736.000000,123312.000000,158775.000000,87.845140)}

{create adhoc82}
{access adhoc82}
{connect adhoc82(1), adhoc66(0)}
{nseg = 1}
{strdef color color = "White"}
{pt3dclear()}
{pt3dadd(140892.000000,126180.000000,159225.000000,231.824720)}
{pt3dadd(140940.000000,125520.000000,159475.000000,194.487233)}
{pt3dadd(140904.000000,125088.000000,159600.000000,153.710956)}
{pt3dadd(140880.000000,124908.000000,159775.000000,122.640740)}
{pt3dadd(140820.000000,124800.000000,159975.000000,99.684332)}
{pt3dadd(140844.000000,124560.000000,160200.000000,95.143362)}
{pt3dadd(140676.000000,124548.000000,160425.000000,100.313344)}
{pt3dadd(140496.000000,124428.000000,160600.000000,106.124746)}
{pt3dadd(140268.000000,124320.000000,160800.000000,109.660036)}
{pt3dadd(140112.000000,124356.000000,161025.000000,114.830018)}
{pt3dadd(139836.000000,124380.000000,161225.000000,116.552580)}
{pt3dadd(139584.000000,124392.000000,161450.000000,114.254300)}
{pt3dadd(139308.000000,124440.000000,161625.000000,128.612810)}

{create adhoc83}
{access adhoc83}
{connect adhoc83(1), adhoc82(0)}
{nseg = 1}
{strdef color color = "White"}
{pt3dclear()}
{pt3dadd(139308.000000,124440.000000,161625.000000,128.612810)}
{pt3dadd(139056.000000,124728.000000,161650.000000,130.124650)}
{pt3dadd(138864.000000,124932.000000,161650.000000,150.829186)}
{pt3dadd(138672.000000,125100.000000,161650.000000,151.736290)}
{pt3dadd(138516.000000,125304.000000,161525.000000,153.582488)}
{pt3dadd(138360.000000,125388.000000,161575.000000,154.521582)}
{pt3dadd(138204.000000,125484.000000,161500.000000,142.990742)}
{pt3dadd(138108.000000,125676.000000,161500.000000,128.243555)}
{pt3dadd(137976.000000,125760.000000,161350.000000,122.507102)}
{pt3dadd(137820.000000,126000.000000,161375.000000,113.126940)}
{pt3dadd(137736.000000,126204.000000,161375.000000,116.147636)}
{pt3dadd(137664.000000,126324.000000,161375.000000,134.561300)}
{pt3dadd(137664.000000,126612.000000,161225.000000,153.396793)}
{pt3dadd(137544.000000,126924.000000,161075.000000,216.300110)}

{create adhoc84}
{access adhoc84}
{connect adhoc84(1), adhoc83(0)}
{nseg = 1}
{strdef color color = "White"}
{pt3dclear()}
{pt3dadd(137544.000000,126924.000000,161075.000000,216.300110)}
{pt3dadd(137340.000000,127176.000000,160925.000000,202.155257)}
{pt3dadd(137016.000000,127272.000000,160775.000000,170.985870)}
{pt3dadd(136824.000000,127260.000000,160775.000000,151.725848)}
{pt3dadd(136572.000000,127356.000000,160675.000000,129.360904)}
{pt3dadd(136332.000000,127392.000000,160675.000000,123.415278)}
{pt3dadd(136080.000000,127488.000000,160675.000000,122.870937)}
{pt3dadd(135840.000000,127620.000000,160725.000000,128.612810)}

{create adhoc85}
{access adhoc85}
{connect adhoc85(1), adhoc83(0)}
{nseg = 1}
{strdef color color = "White"}
{pt3dclear()}
{pt3dadd(137544.000000,126924.000000,161075.000000,216.300110)}
{pt3dadd(137664.000000,126216.000000,161100.000000,127.771907)}
{pt3dadd(137652.000000,126096.000000,161000.000000,87.845140)}

{create adhoc86}
{access adhoc86}
{connect adhoc86(1), adhoc82(0)}
{nseg = 1}
{strdef color color = "White"}
{pt3dclear()}
{pt3dadd(139308.000000,124440.000000,161625.000000,128.612810)}
{pt3dadd(139092.000000,124368.000000,161625.000000,103.827600)}
{pt3dadd(139008.000000,124272.000000,161625.000000,97.455720)}
{pt3dadd(138888.000000,124212.000000,161625.000000,89.302186)}
{pt3dadd(138792.000000,124128.000000,161625.000000,87.309270)}
{pt3dadd(138696.000000,124020.000000,161625.000000,88.485814)}
{pt3dadd(138624.000000,123936.000000,161625.000000,91.009310)}
{pt3dadd(138588.000000,123816.000000,161625.000000,94.450723)}
{pt3dadd(138504.000000,123696.000000,161625.000000,104.450455)}
{pt3dadd(138420.000000,123444.000000,161750.000000,110.261857)}
{pt3dadd(138504.000000,123252.000000,161800.000000,107.466563)}
{pt3dadd(138552.000000,123036.000000,161775.000000,108.865718)}
{pt3dadd(138624.000000,122736.000000,162000.000000,99.444911)}
{pt3dadd(138816.000000,122532.000000,162150.000000,104.466064)}

{create adhoc87}
{access adhoc87}
{connect adhoc87(1), adhoc86(0)}
{nseg = 1}
{strdef color color = "White"}
{pt3dclear()}
{pt3dadd(138816.000000,122532.000000,162150.000000,104.466064)}
{pt3dadd(138948.000000,122244.000000,162025.000000,82.142828)}
{pt3dadd(138996.000000,122160.000000,161950.000000,81.962420)}

{create adhoc88}
{access adhoc88}
{connect adhoc88(1), adhoc86(0)}
{nseg = 1}
{strdef color color = "White"}
{pt3dclear()}
{pt3dadd(138816.000000,122532.000000,162150.000000,104.466064)}
{pt3dadd(138732.000000,122280.000000,162375.000000,89.503506)}
{pt3dadd(138756.000000,122016.000000,162600.000000,96.962126)}
{pt3dadd(138864.000000,121656.000000,162775.000000,96.962126)}
{pt3dadd(138948.000000,121368.000000,162950.000000,106.922058)}
{pt3dadd(139032.000000,121164.000000,163150.000000,104.466064)}

{create adhoc89}
{access adhoc89}
{connect adhoc89(1), adhoc88(0)}
{nseg = 1}
{strdef color color = "White"}
{pt3dclear()}
{pt3dadd(139032.000000,121164.000000,163150.000000,104.466064)}
{pt3dadd(138960.000000,120792.000000,163250.000000,84.067801)}
{pt3dadd(138876.000000,120660.000000,163400.000000,77.735409)}
{pt3dadd(138840.000000,120360.000000,163500.000000,70.114103)}
{pt3dadd(138600.000000,120132.000000,163575.000000,76.473640)}

{create adhoc90}
{access adhoc90}
{connect adhoc90(1), adhoc88(0)}
{nseg = 1}
{strdef color color = "White"}
{pt3dclear()}
{pt3dadd(139032.000000,121164.000000,163150.000000,104.466064)}
{pt3dadd(139116.000000,121392.000000,163250.000000,82.848126)}
{pt3dadd(139008.000000,121368.000000,163475.000000,62.115894)}

{create adhoc91}
{access adhoc91}
{connect adhoc91(1), adhoc65(0)}
{nseg = 1}
{strdef color color = "White"}
{pt3dclear()}
{pt3dadd(141696.000000,127944.000000,157600.000000,327.849670)}
{pt3dadd(141516.000000,127932.000000,157550.000000,300.585730)}
{pt3dadd(141336.000000,127944.000000,157525.000000,257.225620)}

{create adhoc92}
{access adhoc92}
{connect adhoc92(1), adhoc91(0)}
{nseg = 1}
{strdef color color = "White"}
{pt3dclear()}
{pt3dadd(141336.000000,127944.000000,157525.000000,257.225620)}
{pt3dadd(142896.000000,128064.000000,157500.000000,230.288493)}
{pt3dadd(143208.000000,128112.000000,157450.000000,173.311152)}
{pt3dadd(143448.000000,128040.000000,157400.000000,139.435056)}
{pt3dadd(143604.000000,127944.000000,157400.000000,110.639140)}
{pt3dadd(143760.000000,127896.000000,157400.000000,91.906123)}
{pt3dadd(143928.000000,127848.000000,157400.000000,122.337095)}
{pt3dadd(144036.000000,127740.000000,157400.000000,135.357523)}
{pt3dadd(144276.000000,127632.000000,157400.000000,143.511057)}
{pt3dadd(144228.000000,127596.000000,157225.000000,150.788387)}
{pt3dadd(143988.000000,127404.000000,157175.000000,147.988394)}
{pt3dadd(143868.000000,127248.000000,157175.000000,115.822488)}
{pt3dadd(143880.000000,126924.000000,157000.000000,98.547865)}
{pt3dadd(143412.000000,126816.000000,156800.000000,87.095788)}
{pt3dadd(143124.000000,126624.000000,156625.000000,83.142643)}
{pt3dadd(142992.000000,126564.000000,156575.000000,85.942636)}
{pt3dadd(142788.000000,126276.000000,156450.000000,87.677570)}
{pt3dadd(142848.000000,126036.000000,156625.000000,100.153753)}
{pt3dadd(142836.000000,126108.000000,156800.000000,87.845140)}

{create adhoc93}
{access adhoc93}
{connect adhoc93(1), adhoc91(0)}
{nseg = 1}
{strdef color color = "White"}
{pt3dclear()}
{pt3dadd(141336.000000,127944.000000,157525.000000,257.225620)}
{pt3dadd(140856.000000,127932.000000,157300.000000,243.016780)}
{pt3dadd(140460.000000,127968.000000,157250.000000,239.041618)}
{pt3dadd(139920.000000,128016.000000,157200.000000,219.264682)}
{pt3dadd(139680.000000,127956.000000,157075.000000,220.957398)}
{pt3dadd(139740.000000,127992.000000,156925.000000,222.592454)}
{pt3dadd(139392.000000,128136.000000,157225.000000,248.688278)}
{pt3dadd(139176.000000,128112.000000,157375.000000,275.958277)}
{pt3dadd(138936.000000,128172.000000,157525.000000,339.411250)}

{create adhoc94}
{access adhoc94}
{connect adhoc94(1), adhoc93(0)}
{nseg = 1}
{strdef color color = "White"}
{pt3dclear()}
{pt3dadd(138936.000000,128172.000000,157525.000000,339.411250)}
{pt3dadd(138624.000000,128412.000000,157400.000000,170.910603)}
{pt3dadd(138468.000000,128472.000000,157300.000000,169.179146)}
{pt3dadd(138324.000000,128580.000000,157225.000000,138.956934)}
{pt3dadd(138192.000000,128616.000000,157225.000000,145.849478)}
{pt3dadd(138060.000000,128640.000000,157225.000000,181.460508)}
{pt3dadd(137940.000000,128484.000000,157100.000000,199.874172)}
{pt3dadd(137904.000000,128568.000000,157300.000000,206.087746)}
{pt3dadd(137568.000000,128448.000000,157425.000000,218.120424)}
{pt3dadd(137388.000000,128460.000000,157550.000000,220.938832)}
{pt3dadd(137328.000000,128436.000000,157700.000000,200.083164)}
{pt3dadd(137316.000000,128328.000000,157925.000000,180.823142)}
{pt3dadd(137040.000000,128136.000000,158100.000000,162.370610)}
{pt3dadd(136848.000000,128004.000000,158350.000000,141.218864)}
{pt3dadd(136716.000000,127908.000000,158600.000000,129.070378)}
{pt3dadd(136560.000000,128028.000000,158725.000000,116.669520)}
{pt3dadd(136236.000000,128304.000000,158875.000000,113.562733)}
{pt3dadd(135864.000000,128364.000000,159025.000000,103.509323)}
{pt3dadd(135840.000000,128544.000000,159200.000000,93.798371)}
{pt3dadd(135744.000000,128676.000000,159250.000000,93.239981)}
{pt3dadd(135876.000000,128676.000000,159450.000000,93.239981)}
{pt3dadd(136008.000000,128844.000000,159625.000000,90.535366)}
{pt3dadd(135936.000000,128940.000000,159900.000000,87.018817)}
{pt3dadd(135780.000000,128760.000000,160150.000000,90.942990)}

{create adhoc95}
{access adhoc95}
{connect adhoc95(1), adhoc93(0)}
{nseg = 1}
{strdef color color = "White"}
{pt3dclear()}
{pt3dadd(138936.000000,128172.000000,157525.000000,339.411250)}
{pt3dadd(138816.000000,127980.000000,157800.000000,310.238503)}
{pt3dadd(138744.000000,127848.000000,158050.000000,326.779746)}
{pt3dadd(138636.000000,127644.000000,158275.000000,322.233876)}
{pt3dadd(138504.000000,127404.000000,158450.000000,328.488316)}
{pt3dadd(138288.000000,127152.000000,158625.000000,332.879338)}
{pt3dadd(138108.000000,126948.000000,158750.000000,314.689804)}
{pt3dadd(137844.000000,126720.000000,158875.000000,289.935410)}
{pt3dadd(137580.000000,126588.000000,159050.000000,296.875140)}
{pt3dadd(137388.000000,126264.000000,159200.000000,317.111612)}
{pt3dadd(137184.000000,125940.000000,159200.000000,324.296072)}
{pt3dadd(136944.000000,125784.000000,159275.000000,355.329412)}
{pt3dadd(136704.000000,125640.000000,159250.000000,368.508324)}
{pt3dadd(136488.000000,125580.000000,159325.000000,349.677338)}
{pt3dadd(136344.000000,125616.000000,159300.000000,319.363818)}
{pt3dadd(136200.000000,125580.000000,159225.000000,307.788336)}
{pt3dadd(135996.000000,125616.000000,159275.000000,278.507404)}
{pt3dadd(135840.000000,125616.000000,159175.000000,265.328492)}
{pt3dadd(135684.000000,125508.000000,159175.000000,255.669794)}
{pt3dadd(135504.000000,125496.000000,159225.000000,261.505396)}
{pt3dadd(135372.000000,125388.000000,159200.000000,257.408424)}
{pt3dadd(135228.000000,125376.000000,159125.000000,257.408424)}
{pt3dadd(135120.000000,125196.000000,158975.000000,259.101140)}
{pt3dadd(134916.000000,125136.000000,158975.000000,260.574736)}
{pt3dadd(134724.000000,125148.000000,158950.000000,247.844746)}
{pt3dadd(134604.000000,125076.000000,159025.000000,235.548390)}
{pt3dadd(134436.000000,125016.000000,158900.000000,230.468210)}
{pt3dadd(134292.000000,124968.000000,158900.000000,225.561078)}
{pt3dadd(134112.000000,124896.000000,158900.000000,243.479968)}
{pt3dadd(133956.000000,124800.000000,158925.000000,250.374356)}
{pt3dadd(133800.000000,124716.000000,158850.000000,289.161624)}
{pt3dadd(133632.000000,124656.000000,158875.000000,310.678930)}
{pt3dadd(133320.000000,124548.000000,158800.000000,333.775596)}
{pt3dadd(133140.000000,124536.000000,158825.000000,333.775596)}
{pt3dadd(132948.000000,124512.000000,158850.000000,348.398514)}
{pt3dadd(132792.000000,124476.000000,158875.000000,337.580056)}
{pt3dadd(132612.000000,124440.000000,158900.000000,321.142930)}
{pt3dadd(132480.000000,124320.000000,158850.000000,308.398200)}
{pt3dadd(132348.000000,124248.000000,158925.000000,300.478620)}
{pt3dadd(132180.000000,124104.000000,158950.000000,316.169222)}
{pt3dadd(132048.000000,123984.000000,158950.000000,329.934872)}
{pt3dadd(131940.000000,123900.000000,159025.000000,344.059682)}
{pt3dadd(131928.000000,123804.000000,159125.000000,381.652050)}
{pt3dadd(131832.000000,123756.000000,159125.000000,408.033110)}
{pt3dadd(131676.000000,123660.000000,159175.000000,463.649440)}

{create adhoc96}
{access adhoc96}
{connect adhoc96(1), adhoc95(0)}
{nseg = 1}
{strdef color color = "White"}
{pt3dclear()}
{pt3dadd(131676.000000,123660.000000,159175.000000,463.649440)}
{pt3dadd(131544.000000,123624.000000,159250.000000,420.007210)}
{pt3dadd(131400.000000,123552.000000,159325.000000,360.126290)}
{pt3dadd(131244.000000,123552.000000,159375.000000,315.396402)}
{pt3dadd(131100.000000,123480.000000,159575.000000,272.136380)}
{pt3dadd(131040.000000,123492.000000,159925.000000,250.827110)}
{pt3dadd(130788.000000,123396.000000,160175.000000,220.275698)}
{pt3dadd(130740.000000,123048.000000,160375.000000,203.058874)}
{pt3dadd(130620.000000,123012.000000,160575.000000,195.421902)}
{pt3dadd(130500.000000,122832.000000,160750.000000,192.524908)}
{pt3dadd(130368.000000,122496.000000,160975.000000,172.747972)}
{pt3dadd(130284.000000,122232.000000,161225.000000,184.748588)}
{pt3dadd(130092.000000,122184.000000,161450.000000,206.872544)}
{pt3dadd(130116.000000,122004.000000,161675.000000,262.509516)}
{pt3dadd(130380.000000,121776.000000,161900.000000,325.036734)}
{pt3dadd(130656.000000,121584.000000,162100.000000,396.258792)}
{pt3dadd(130620.000000,121572.000000,162350.000000,502.967487)}
{pt3dadd(130692.000000,121464.000000,162575.000000,514.451230)}

{create adhoc97}
{access adhoc97}
{connect adhoc97(1), adhoc96(0)}
{nseg = 1}
{strdef color color = "White"}
{pt3dclear()}
{pt3dadd(130692.000000,121464.000000,162575.000000,514.451230)}
{pt3dadd(131340.000000,121152.000000,162875.000000,389.881160)}

{create adhoc98}
{access adhoc98}
{connect adhoc98(1), adhoc97(0)}
{nseg = 1}
{strdef color color = "White"}
{pt3dclear()}
{pt3dadd(131340.000000,121152.000000,162875.000000,389.881160)}
{pt3dadd(131292.000000,120564.000000,162875.000000,226.774450)}
{pt3dadd(131232.000000,120144.000000,162875.000000,195.159606)}
{pt3dadd(131244.000000,119916.000000,162850.000000,153.560572)}
{pt3dadd(131028.000000,119784.000000,162900.000000,150.642770)}
{pt3dadd(130980.000000,119640.000000,162800.000000,154.257220)}
{pt3dadd(131076.000000,119520.000000,162900.000000,133.148330)}

{create adhoc99}
{access adhoc99}
{connect adhoc99(1), adhoc97(0)}
{nseg = 1}
{strdef color color = "White"}
{pt3dclear()}
{pt3dadd(131340.000000,121152.000000,162875.000000,389.881160)}
{pt3dadd(131568.000000,121032.000000,163125.000000,248.463580)}

{create adhoc100}
{access adhoc100}
{connect adhoc100(1), adhoc99(0)}
{nseg = 1}
{strdef color color = "White"}
{pt3dclear()}
{pt3dadd(131568.000000,121032.000000,163125.000000,248.463580)}
{pt3dadd(131856.000000,120876.000000,163375.000000,165.642387)}
{pt3dadd(132060.000000,120828.000000,163550.000000,148.231790)}
{pt3dadd(132360.000000,120816.000000,163650.000000,122.821193)}
{pt3dadd(132588.000000,120720.000000,163650.000000,120.000000)}

{create adhoc101}
{access adhoc101}
{connect adhoc101(1), adhoc100(0)}
{nseg = 1}
{strdef color color = "White"}
{pt3dclear()}
{pt3dadd(132588.000000,120720.000000,163650.000000,120.000000)}
{pt3dadd(132852.000000,120540.000000,163650.000000,111.383363)}
{pt3dadd(132864.000000,120408.000000,163650.000000,94.150090)}

{create adhoc102}
{access adhoc102}
{connect adhoc102(1), adhoc100(0)}
{nseg = 1}
{strdef color color = "White"}
{pt3dclear()}
{pt3dadd(132588.000000,120720.000000,163650.000000,120.000000)}
{pt3dadd(132660.000000,120672.000000,163825.000000,94.822021)}
{pt3dadd(132612.000000,120468.000000,164025.000000,101.233629)}
{pt3dadd(132300.000000,120300.000000,164225.000000,96.063647)}
{pt3dadd(132036.000000,120372.000000,164450.000000,105.284057)}
{pt3dadd(131916.000000,120468.000000,164550.000000,94.150090)}

{create adhoc103}
{access adhoc103}
{connect adhoc103(1), adhoc99(0)}
{nseg = 1}
{strdef color color = "White"}
{pt3dclear()}
{pt3dadd(131568.000000,121032.000000,163125.000000,248.463580)}
{pt3dadd(131664.000000,121344.000000,163325.000000,144.518887)}
{pt3dadd(131664.000000,121440.000000,163500.000000,133.104124)}
{pt3dadd(131760.000000,121608.000000,163725.000000,108.257766)}
{pt3dadd(131676.000000,121800.000000,163950.000000,118.975216)}
{pt3dadd(131556.000000,122064.000000,163975.000000,154.045950)}
{pt3dadd(131448.000000,122340.000000,163975.000000,179.421930)}
{pt3dadd(131340.000000,122580.000000,163975.000000,266.296660)}

{create adhoc104}
{access adhoc104}
{connect adhoc104(1), adhoc103(0)}
{nseg = 1}
{strdef color color = "White"}
{pt3dclear()}
{pt3dadd(131340.000000,122580.000000,163975.000000,266.296660)}
{pt3dadd(131196.000000,122616.000000,163900.000000,207.403007)}
{pt3dadd(130704.000000,122760.000000,163825.000000,158.637453)}
{pt3dadd(130848.000000,122796.000000,163675.000000,120.000000)}

{create adhoc105}
{access adhoc105}
{connect adhoc105(1), adhoc103(0)}
{nseg = 1}
{strdef color color = "White"}
{pt3dclear()}
{pt3dadd(131340.000000,122580.000000,163975.000000,266.296660)}
{pt3dadd(131388.000000,122592.000000,164025.000000,266.296660)}

{create adhoc106}
{access adhoc106}
{connect adhoc106(1), adhoc105(0)}
{nseg = 1}
{strdef color color = "White"}
{pt3dclear()}
{pt3dadd(131388.000000,122592.000000,164025.000000,266.296660)}
{pt3dadd(131352.000000,122340.000000,164200.000000,203.605550)}
{pt3dadd(131292.000000,122268.000000,164300.000000,142.704850)}

{create adhoc107}
{access adhoc107}
{connect adhoc107(1), adhoc105(0)}
{nseg = 1}
{strdef color color = "White"}
{pt3dclear()}
{pt3dadd(131388.000000,122592.000000,164025.000000,266.296660)}
{pt3dadd(131520.000000,122976.000000,164025.000000,164.998171)}
{pt3dadd(131544.000000,123120.000000,164125.000000,142.284908)}
{pt3dadd(131436.000000,123144.000000,164250.000000,106.965363)}
{pt3dadd(131352.000000,123228.000000,164325.000000,104.466064)}

{create adhoc108}
{access adhoc108}
{connect adhoc108(1), adhoc107(0)}
{nseg = 1}
{strdef color color = "White"}
{pt3dclear()}
{pt3dadd(131352.000000,123228.000000,164325.000000,104.466064)}
{pt3dadd(131160.000000,122652.000000,164275.000000,115.014278)}
{pt3dadd(131064.000000,122232.000000,164425.000000,143.914481)}
{pt3dadd(130920.000000,121908.000000,164600.000000,167.714127)}
{pt3dadd(130656.000000,121776.000000,164575.000000,142.704850)}

{create adhoc109}
{access adhoc109}
{connect adhoc109(1), adhoc108(0)}
{nseg = 1}
{strdef color color = "White"}
{pt3dclear()}
{pt3dadd(130656.000000,121776.000000,164575.000000,142.704850)}
{pt3dadd(130356.000000,121584.000000,164500.000000,132.153670)}
{pt3dadd(130260.000000,121452.000000,164425.000000,115.912360)}

{create adhoc110}
{access adhoc110}
{connect adhoc110(1), adhoc108(0)}
{nseg = 1}
{strdef color color = "White"}
{pt3dclear()}
{pt3dadd(130656.000000,121776.000000,164575.000000,142.704850)}
{pt3dadd(130800.000000,121800.000000,164750.000000,154.490341)}
{pt3dadd(130848.000000,121860.000000,164875.000000,104.466064)}

{create adhoc111}
{access adhoc111}
{connect adhoc111(1), adhoc107(0)}
{nseg = 1}
{strdef color color = "White"}
{pt3dclear()}
{pt3dadd(131352.000000,123228.000000,164325.000000,104.466064)}
{pt3dadd(131280.000000,123360.000000,164475.000000,116.232618)}
{pt3dadd(131136.000000,123468.000000,164650.000000,124.231790)}

{create adhoc112}
{access adhoc112}
{connect adhoc112(1), adhoc111(0)}
{nseg = 1}
{strdef color color = "White"}
{pt3dclear()}
{pt3dadd(131136.000000,123468.000000,164650.000000,124.231790)}
{pt3dadd(131220.000000,123276.000000,164750.000000,84.852810)}

{create adhoc113}
{access adhoc113}
{connect adhoc113(1), adhoc111(0)}
{nseg = 1}
{strdef color color = "White"}
{pt3dclear()}
{pt3dadd(131136.000000,123468.000000,164650.000000,124.231790)}
{pt3dadd(130824.000000,123504.000000,164625.000000,102.367260)}
{pt3dadd(130476.000000,123576.000000,164525.000000,96.579516)}
{pt3dadd(130476.000000,123528.000000,164400.000000,89.302186)}
{pt3dadd(129960.000000,123516.000000,164325.000000,86.689700)}
{pt3dadd(129720.000000,123456.000000,164200.000000,86.847697)}
{pt3dadd(129336.000000,123312.000000,164000.000000,87.845140)}

{create adhoc114}
{access adhoc114}
{connect adhoc114(1), adhoc96(0)}
{nseg = 1}
{strdef color color = "White"}
{pt3dclear()}
{pt3dadd(130692.000000,121464.000000,162575.000000,514.451230)}
{pt3dadd(129672.000000,121272.000000,162575.000000,247.990537)}
{pt3dadd(129432.000000,121260.000000,162725.000000,194.369586)}
{pt3dadd(129288.000000,121404.000000,162775.000000,111.660854)}
{pt3dadd(129204.000000,121608.000000,162775.000000,109.938292)}
{pt3dadd(129036.000000,121896.000000,162850.000000,110.649991)}
{pt3dadd(128856.000000,122052.000000,162800.000000,113.103557)}
{pt3dadd(128616.000000,122256.000000,162725.000000,114.767443)}
{pt3dadd(128376.000000,122472.000000,162775.000000,119.432287)}
{pt3dadd(128136.000000,122616.000000,162700.000000,117.062298)}
{pt3dadd(127992.000000,122940.000000,162775.000000,117.062298)}
{pt3dadd(127800.000000,123156.000000,162800.000000,113.845951)}
{pt3dadd(127596.000000,123300.000000,162725.000000,110.629604)}
{pt3dadd(127512.000000,123408.000000,162775.000000,104.613264)}
{pt3dadd(127440.000000,123432.000000,162775.000000,100.552281)}
{pt3dadd(127428.000000,123576.000000,162950.000000,98.489086)}
{pt3dadd(127464.000000,123840.000000,163150.000000,92.048440)}
{pt3dadd(127296.000000,123996.000000,163375.000000,94.150090)}

{create adhoc115}
{access adhoc115}
{connect adhoc115(1), adhoc95(0)}
{nseg = 1}
{strdef color color = "White"}
{pt3dclear()}
{pt3dadd(131676.000000,123660.000000,159175.000000,463.649440)}
{pt3dadd(131640.000000,123576.000000,158950.000000,331.104750)}
{pt3dadd(131556.000000,123456.000000,158950.000000,247.861621)}
{pt3dadd(131388.000000,123300.000000,158950.000000,172.700761)}
{pt3dadd(131328.000000,123180.000000,158925.000000,124.101389)}
{pt3dadd(131256.000000,123048.000000,158925.000000,101.926959)}
{pt3dadd(131244.000000,122928.000000,158925.000000,91.927227)}
{pt3dadd(131148.000000,122796.000000,158925.000000,87.866244)}
{pt3dadd(131040.000000,122664.000000,158925.000000,88.485814)}
{pt3dadd(130944.000000,122532.000000,158925.000000,89.703850)}
{pt3dadd(130824.000000,122400.000000,158925.000000,89.084280)}
{pt3dadd(130752.000000,122328.000000,158925.000000,88.485814)}
{pt3dadd(130644.000000,122316.000000,158925.000000,89.105384)}
{pt3dadd(130512.000000,122292.000000,158925.000000,89.105384)}
{pt3dadd(130368.000000,122280.000000,158925.000000,88.485814)}
{pt3dadd(130224.000000,122268.000000,158925.000000,88.485814)}
{pt3dadd(130080.000000,122280.000000,158925.000000,89.703850)}
{pt3dadd(129972.000000,122280.000000,158975.000000,88.877757)}
{pt3dadd(129828.000000,122280.000000,158975.000000,90.942990)}

{create adhoc116}
{access adhoc116}
{connect adhoc116(1), adhoc115(0)}
{nseg = 1}
{strdef color color = "White"}
{pt3dclear()}
{pt3dadd(129828.000000,122280.000000,158975.000000,90.942990)}
{pt3dadd(129828.000000,122352.000000,159025.000000,89.910373)}
{pt3dadd(129828.000000,122460.000000,159025.000000,85.633436)}
{pt3dadd(129852.000000,122568.000000,159025.000000,83.278932)}
{pt3dadd(129876.000000,122664.000000,159025.000000,81.004632)}
{pt3dadd(129816.000000,122760.000000,159025.000000,76.130867)}
{pt3dadd(129804.000000,122844.000000,159025.000000,74.072758)}
{pt3dadd(129780.000000,122928.000000,159025.000000,66.574165)}

{create adhoc117}
{access adhoc117}
{connect adhoc117(1), adhoc115(0)}
{nseg = 1}
{strdef color color = "White"}
{pt3dclear()}
{pt3dadd(129828.000000,122280.000000,158975.000000,90.942990)}
{pt3dadd(129696.000000,122280.000000,158975.000000,110.362380)}
{pt3dadd(129564.000000,122280.000000,158975.000000,110.128588)}
{pt3dadd(129432.000000,122232.000000,158975.000000,119.508750)}
{pt3dadd(129372.000000,122256.000000,159075.000000,120.384954)}
{pt3dadd(129300.000000,122220.000000,159100.000000,114.771510)}
{pt3dadd(129204.000000,122292.000000,159150.000000,112.975396)}
{pt3dadd(129120.000000,122280.000000,159225.000000,103.086928)}
{pt3dadd(129024.000000,122316.000000,159300.000000,88.833001)}
{pt3dadd(128880.000000,122364.000000,159350.000000,76.894819)}
{pt3dadd(128772.000000,122436.000000,159425.000000,75.718275)}
{pt3dadd(128664.000000,122400.000000,159575.000000,80.219004)}
{pt3dadd(128652.000000,122544.000000,159625.000000,86.777702)}
{pt3dadd(128496.000000,122760.000000,159725.000000,94.356082)}
{pt3dadd(128424.000000,122844.000000,159725.000000,98.760300)}
{pt3dadd(128352.000000,122856.000000,159950.000000,102.457671)}
{pt3dadd(128388.000000,122988.000000,159950.000000,90.942990)}

{create adhoc118}
{access adhoc118}
{connect adhoc118(1), adhoc64(0)}
{nseg = 1}
{strdef color color = "White"}
{pt3dclear()}
{pt3dadd(144636.000000,133632.000000,159975.000000,895.711700)}
{pt3dadd(144684.000000,133056.000000,160300.000000,831.394833)}
{pt3dadd(144552.000000,133080.000000,160550.000000,702.761100)}

{create adhoc119}
{access adhoc119}
{connect adhoc119(1), adhoc118(0)}
{nseg = 1}
{strdef color color = "White"}
{pt3dclear()}
{pt3dadd(144552.000000,133080.000000,160550.000000,702.761100)}
{pt3dadd(144468.000000,134052.000000,160925.000000,433.132657)}
{pt3dadd(144300.000000,134244.000000,161175.000000,370.220866)}
{pt3dadd(144084.000000,134292.000000,161375.000000,304.988720)}
{pt3dadd(143916.000000,134232.000000,161600.000000,315.082702)}
{pt3dadd(143532.000000,134100.000000,161800.000000,350.630410)}
{pt3dadd(143364.000000,134016.000000,161850.000000,389.881160)}

{create adhoc120}
{access adhoc120}
{connect adhoc120(1), adhoc119(0)}
{nseg = 1}
{strdef color color = "White"}
{pt3dclear()}
{pt3dadd(143364.000000,134016.000000,161850.000000,389.881160)}
{pt3dadd(143148.000000,134064.000000,162125.000000,403.791900)}
{pt3dadd(143016.000000,134184.000000,162325.000000,375.796367)}
{pt3dadd(142848.000000,134124.000000,162525.000000,305.894560)}

{create adhoc121}
{access adhoc121}
{connect adhoc121(1), adhoc120(0)}
{nseg = 1}
{strdef color color = "White"}
{pt3dclear()}
{pt3dadd(142848.000000,134124.000000,162525.000000,305.894560)}
{pt3dadd(142488.000000,133920.000000,162700.000000,292.695260)}
{pt3dadd(142284.000000,133668.000000,162850.000000,304.523470)}
{pt3dadd(142272.000000,133512.000000,163025.000000,300.426498)}
{pt3dadd(142152.000000,133416.000000,163200.000000,308.346078)}
{pt3dadd(141780.000000,133116.000000,163425.000000,310.503546)}
{pt3dadd(141552.000000,132912.000000,163650.000000,331.453656)}
{pt3dadd(141192.000000,132924.000000,163850.000000,351.725560)}
{pt3dadd(140952.000000,132960.000000,164075.000000,432.600220)}

{create adhoc122}
{access adhoc122}
{connect adhoc122(1), adhoc121(0)}
{nseg = 1}
{strdef color color = "White"}
{pt3dclear()}
{pt3dadd(140952.000000,132960.000000,164075.000000,432.600220)}
{pt3dadd(140868.000000,133488.000000,164200.000000,238.841687)}
{pt3dadd(140664.000000,133752.000000,164325.000000,189.781381)}
{pt3dadd(140580.000000,133956.000000,164425.000000,117.460615)}
{pt3dadd(140568.000000,134124.000000,164475.000000,108.150055)}

{create adhoc123}
{access adhoc123}
{connect adhoc123(1), adhoc122(0)}
{nseg = 1}
{strdef color color = "White"}
{pt3dclear()}
{pt3dadd(140568.000000,134124.000000,164475.000000,108.150055)}
{pt3dadd(140544.000000,134268.000000,164450.000000,102.255403)}
{pt3dadd(140556.000000,134436.000000,164475.000000,108.082810)}
{pt3dadd(140556.000000,134628.000000,164475.000000,109.265977)}
{pt3dadd(140556.000000,134748.000000,164475.000000,142.704850)}

{create adhoc124}
{access adhoc124}
{connect adhoc124(1), adhoc123(0)}
{nseg = 1}
{strdef color color = "White"}
{pt3dclear()}
{pt3dadd(140556.000000,134748.000000,164475.000000,142.704850)}
{pt3dadd(140388.000000,134772.000000,164350.000000,102.242710)}
{pt3dadd(140352.000000,134568.000000,164225.000000,79.170470)}

{create adhoc125}
{access adhoc125}
{connect adhoc125(1), adhoc123(0)}
{nseg = 1}
{strdef color color = "White"}
{pt3dclear()}
{pt3dadd(140556.000000,134748.000000,164475.000000,142.704850)}
{pt3dadd(140532.000000,134940.000000,164600.000000,194.940580)}

{create adhoc126}
{access adhoc126}
{connect adhoc126(1), adhoc125(0)}
{nseg = 1}
{strdef color color = "White"}
{pt3dclear()}
{pt3dadd(140532.000000,134940.000000,164600.000000,194.940580)}
{pt3dadd(140064.000000,134916.000000,164600.000000,137.843800)}

{create adhoc127}
{access adhoc127}
{connect adhoc127(1), adhoc126(0)}
{nseg = 1}
{strdef color color = "White"}
{pt3dclear()}
{pt3dadd(140064.000000,134916.000000,164600.000000,137.843800)}
{pt3dadd(140316.000000,134868.000000,164775.000000,131.972910)}
{pt3dadd(140376.000000,134820.000000,164950.000000,117.408340)}
{pt3dadd(140424.000000,134736.000000,165075.000000,94.150090)}

{create adhoc128}
{access adhoc128}
{connect adhoc128(1), adhoc126(0)}
{nseg = 1}
{strdef color color = "White"}
{pt3dclear()}
{pt3dadd(140064.000000,134916.000000,164600.000000,137.843800)}
{pt3dadd(139620.000000,135156.000000,164725.000000,108.752360)}
{pt3dadd(139428.000000,135216.000000,164725.000000,93.809530)}
{pt3dadd(139296.000000,135084.000000,164725.000000,79.555603)}
{pt3dadd(139152.000000,135036.000000,164725.000000,75.151385)}
{pt3dadd(138996.000000,134928.000000,164925.000000,68.080506)}
{pt3dadd(138876.000000,134736.000000,165100.000000,65.870653)}
{pt3dadd(138732.000000,134760.000000,165350.000000,62.115894)}

{create adhoc129}
{access adhoc129}
{connect adhoc129(1), adhoc125(0)}
{nseg = 1}
{strdef color color = "White"}
{pt3dclear()}
{pt3dadd(140532.000000,134940.000000,164600.000000,194.940580)}
{pt3dadd(140712.000000,135108.000000,164650.000000,171.111903)}
{pt3dadd(140820.000000,135240.000000,164650.000000,175.775753)}
{pt3dadd(140904.000000,135348.000000,164650.000000,208.932130)}

{create adhoc130}
{access adhoc130}
{connect adhoc130(1), adhoc129(0)}
{nseg = 1}
{strdef color color = "White"}
{pt3dclear()}
{pt3dadd(140904.000000,135348.000000,164650.000000,208.932130)}
{pt3dadd(140832.000000,135540.000000,164925.000000,175.458367)}
{pt3dadd(140868.000000,135504.000000,165000.000000,148.535042)}
{pt3dadd(140820.000000,135564.000000,165225.000000,126.930130)}
{pt3dadd(140748.000000,135492.000000,165450.000000,109.959566)}
{pt3dadd(140688.000000,135540.000000,165700.000000,103.594570)}
{pt3dadd(140892.000000,135576.000000,165925.000000,100.794577)}
{pt3dadd(140628.000000,135792.000000,166150.000000,93.938300)}
{pt3dadd(140844.000000,135804.000000,166400.000000,91.945384)}
{pt3dadd(140736.000000,135168.000000,166650.000000,86.320583)}
{pt3dadd(140316.000000,135252.000000,166925.000000,90.942990)}

{create adhoc131}
{access adhoc131}
{connect adhoc131(1), adhoc129(0)}
{nseg = 1}
{strdef color color = "White"}
{pt3dclear()}
{pt3dadd(140904.000000,135348.000000,164650.000000,208.932130)}
{pt3dadd(141216.000000,135372.000000,164650.000000,176.220640)}
{pt3dadd(141492.000000,135420.000000,164650.000000,159.023706)}
{pt3dadd(141636.000000,135444.000000,164650.000000,142.083638)}
{pt3dadd(141816.000000,135432.000000,164450.000000,136.295896)}
{pt3dadd(142068.000000,135276.000000,164275.000000,149.090164)}
{pt3dadd(142236.000000,135336.000000,164100.000000,161.884432)}
{pt3dadd(142428.000000,135420.000000,163950.000000,185.525853)}
{pt3dadd(142368.000000,135552.000000,163750.000000,201.815140)}

{create adhoc132}
{access adhoc132}
{connect adhoc132(1), adhoc131(0)}
{nseg = 1}
{strdef color color = "White"}
{pt3dclear()}
{pt3dadd(142368.000000,135552.000000,163750.000000,201.815140)}
{pt3dadd(142404.000000,135648.000000,163550.000000,212.251907)}
{pt3dadd(142476.000000,135732.000000,163350.000000,164.636841)}
{pt3dadd(142560.000000,135696.000000,163125.000000,161.933851)}
{pt3dadd(142428.000000,135528.000000,163000.000000,139.338219)}
{pt3dadd(142200.000000,135624.000000,162775.000000,110.168237)}
{pt3dadd(142056.000000,135648.000000,162650.000000,107.463622)}
{pt3dadd(141828.000000,135552.000000,162725.000000,104.385971)}
{pt3dadd(141672.000000,135504.000000,162725.000000,83.889082)}
{pt3dadd(141360.000000,135504.000000,162625.000000,66.574165)}

{create adhoc133}
{access adhoc133}
{connect adhoc133(1), adhoc131(0)}
{nseg = 1}
{strdef color color = "White"}
{pt3dclear()}
{pt3dadd(142368.000000,135552.000000,163750.000000,201.815140)}
{pt3dadd(141960.000000,135840.000000,163650.000000,117.385817)}
{pt3dadd(141828.000000,135936.000000,163625.000000,73.868670)}

{create adhoc134}
{access adhoc134}
{connect adhoc134(1), adhoc129(0)}
{nseg = 1}
{strdef color color = "White"}
{pt3dclear()}
{pt3dadd(140904.000000,135348.000000,164650.000000,208.932130)}
{pt3dadd(140760.000000,135552.000000,164725.000000,188.281497)}
{pt3dadd(140664.000000,135648.000000,164800.000000,151.980430)}
{pt3dadd(140652.000000,135852.000000,164875.000000,103.656673)}
{pt3dadd(140652.000000,136020.000000,164875.000000,100.907570)}

{create adhoc135}
{access adhoc135}
{connect adhoc135(1), adhoc122(0)}
{nseg = 1}
{strdef color color = "White"}
{pt3dclear()}
{pt3dadd(140568.000000,134124.000000,164475.000000,108.150055)}
{pt3dadd(140412.000000,133944.000000,164500.000000,98.854445)}
{pt3dadd(140364.000000,133800.000000,164575.000000,91.539245)}
{pt3dadd(140388.000000,133692.000000,164575.000000,86.301718)}
{pt3dadd(140412.000000,133596.000000,164600.000000,81.031770)}
{pt3dadd(140472.000000,133500.000000,164600.000000,81.962420)}

{create adhoc136}
{access adhoc136}
{connect adhoc136(1), adhoc121(0)}
{nseg = 1}
{strdef color color = "White"}
{pt3dclear()}
{pt3dadd(140952.000000,132960.000000,164075.000000,432.600220)}
{pt3dadd(140568.000000,132876.000000,164350.000000,367.422250)}
{pt3dadd(140292.000000,132900.000000,164650.000000,383.459348)}
{pt3dadd(139896.000000,132972.000000,164925.000000,392.933987)}
{pt3dadd(139512.000000,132768.000000,165000.000000,463.649440)}

{create adhoc137}
{access adhoc137}
{connect adhoc137(1), adhoc136(0)}
{nseg = 1}
{strdef color color = "White"}
{pt3dclear()}
{pt3dadd(139512.000000,132768.000000,165000.000000,463.649440)}
{pt3dadd(138768.000000,132084.000000,165025.000000,358.969603)}
{pt3dadd(138444.000000,131892.000000,164725.000000,325.723034)}
{pt3dadd(138384.000000,131580.000000,164500.000000,288.130666)}
{pt3dadd(138312.000000,131352.000000,164375.000000,320.619892)}
{pt3dadd(138168.000000,131172.000000,164275.000000,333.026190)}
{pt3dadd(138120.000000,130908.000000,164300.000000,363.339710)}
{pt3dadd(138084.000000,130716.000000,164300.000000,381.577844)}
{pt3dadd(138036.000000,130524.000000,164325.000000,377.885448)}
{pt3dadd(137664.000000,130356.000000,164325.000000,350.563417)}
{pt3dadd(137676.000000,130164.000000,164275.000000,257.225620)}

{create adhoc138}
{access adhoc138}
{connect adhoc138(1), adhoc137(0)}
{nseg = 1}
{strdef color color = "White"}
{pt3dclear()}
{pt3dadd(137676.000000,130164.000000,164275.000000,257.225620)}
{pt3dadd(137412.000000,130032.000000,164275.000000,246.126387)}
{pt3dadd(137112.000000,129852.000000,164275.000000,231.449532)}
{pt3dadd(136908.000000,129924.000000,164325.000000,237.086348)}
{pt3dadd(136692.000000,129804.000000,164200.000000,234.759400)}
{pt3dadd(136380.000000,129780.000000,164400.000000,285.409700)}

{create adhoc139}
{access adhoc139}
{connect adhoc139(1), adhoc138(0)}
{nseg = 1}
{strdef color color = "White"}
{pt3dclear()}
{pt3dadd(136380.000000,129780.000000,164400.000000,285.409700)}
{pt3dadd(136164.000000,129696.000000,164300.000000,257.225620)}

{create adhoc140}
{access adhoc140}
{connect adhoc140(1), adhoc139(0)}
{nseg = 1}
{strdef color color = "White"}
{pt3dclear()}
{pt3dadd(136164.000000,129696.000000,164300.000000,257.225620)}
{pt3dadd(135936.000000,129708.000000,164400.000000,246.126387)}
{pt3dadd(135744.000000,129612.000000,164275.000000,225.839456)}
{pt3dadd(135564.000000,129600.000000,164175.000000,222.394332)}
{pt3dadd(135372.000000,129528.000000,164200.000000,228.031148)}
{pt3dadd(135180.000000,129408.000000,164200.000000,229.610508)}
{pt3dadd(134904.000000,129396.000000,163975.000000,217.371550)}
{pt3dadd(134628.000000,129348.000000,163950.000000,211.583808)}
{pt3dadd(134364.000000,129192.000000,163975.000000,195.251996)}
{pt3dadd(134160.000000,129012.000000,164075.000000,167.717524)}
{pt3dadd(133896.000000,128928.000000,164100.000000,178.434520)}
{pt3dadd(133644.000000,128784.000000,164050.000000,197.162660)}
{pt3dadd(133344.000000,128700.000000,164075.000000,285.409700)}

{create adhoc141}
{access adhoc141}
{connect adhoc141(1), adhoc140(0)}
{nseg = 1}
{strdef color color = "White"}
{pt3dclear()}
{pt3dadd(133344.000000,128700.000000,164075.000000,285.409700)}
{pt3dadd(133224.000000,129000.000000,164075.000000,143.718112)}
{pt3dadd(133224.000000,129120.000000,164075.000000,79.170470)}

{create adhoc142}
{access adhoc142}
{connect adhoc142(1), adhoc140(0)}
{nseg = 1}
{strdef color color = "White"}
{pt3dclear()}
{pt3dadd(133344.000000,128700.000000,164075.000000,285.409700)}
{pt3dadd(133056.000000,128640.000000,164075.000000,279.369997)}
{pt3dadd(132816.000000,128688.000000,164175.000000,287.895844)}
{pt3dadd(132624.000000,128592.000000,164150.000000,284.073236)}
{pt3dadd(132456.000000,128580.000000,164275.000000,275.888134)}
{pt3dadd(132252.000000,128556.000000,164350.000000,251.931256)}
{pt3dadd(132036.000000,128532.000000,164450.000000,227.974378)}
{pt3dadd(131856.000000,128604.000000,164550.000000,200.736592)}
{pt3dadd(131640.000000,128616.000000,164650.000000,180.262228)}
{pt3dadd(131412.000000,128592.000000,164800.000000,153.394690)}
{pt3dadd(131376.000000,128460.000000,164975.000000,137.086652)}
{pt3dadd(131220.000000,128340.000000,165125.000000,142.311624)}
{pt3dadd(130992.000000,128316.000000,165175.000000,143.508554)}
{pt3dadd(130788.000000,128220.000000,165325.000000,139.264556)}
{pt3dadd(130548.000000,128088.000000,165425.000000,159.249270)}
{pt3dadd(130308.000000,128040.000000,165425.000000,185.204836)}
{pt3dadd(130080.000000,128028.000000,165425.000000,188.101830)}
{pt3dadd(129636.000000,127980.000000,165250.000000,207.371340)}
{pt3dadd(129396.000000,127932.000000,165050.000000,216.300110)}

{create adhoc143}
{access adhoc143}
{connect adhoc143(1), adhoc142(0)}
{nseg = 1}
{strdef color color = "White"}
{pt3dclear()}
{pt3dadd(129396.000000,127932.000000,165050.000000,216.300110)}
{pt3dadd(129456.000000,128088.000000,164825.000000,137.294775)}
{pt3dadd(129516.000000,128172.000000,164625.000000,89.817628)}
{pt3dadd(129756.000000,128268.000000,164300.000000,73.868670)}

{create adhoc144}
{access adhoc144}
{connect adhoc144(1), adhoc142(0)}
{nseg = 1}
{strdef color color = "White"}
{pt3dclear()}
{pt3dadd(129396.000000,127932.000000,165050.000000,216.300110)}
{pt3dadd(129180.000000,127608.000000,164925.000000,188.150055)}
{pt3dadd(128784.000000,127284.000000,164725.000000,154.676459)}
{pt3dadd(128628.000000,127140.000000,164575.000000,131.597951)}
{pt3dadd(128496.000000,127068.000000,164550.000000,103.279899)}
{pt3dadd(128424.000000,127080.000000,164575.000000,100.907570)}

{create adhoc145}
{access adhoc145}
{connect adhoc145(1), adhoc139(0)}
{nseg = 1}
{strdef color color = "White"}
{pt3dclear()}
{pt3dadd(136164.000000,129696.000000,164300.000000,257.225620)}
{pt3dadd(136128.000000,129720.000000,164625.000000,157.885215)}
{pt3dadd(136020.000000,129744.000000,164725.000000,132.481671)}
{pt3dadd(136068.000000,129864.000000,164825.000000,97.429031)}
{pt3dadd(136056.000000,130068.000000,164900.000000,92.006801)}
{pt3dadd(135960.000000,130164.000000,164950.000000,89.240933)}
{pt3dadd(135840.000000,130224.000000,164975.000000,84.852810)}

{create adhoc146}
{access adhoc146}
{connect adhoc146(1), adhoc138(0)}
{nseg = 1}
{strdef color color = "White"}
{pt3dclear()}
{pt3dadd(136380.000000,129780.000000,164400.000000,285.409700)}
{pt3dadd(136404.000000,129708.000000,164750.000000,154.732610)}
{pt3dadd(136428.000000,129780.000000,164825.000000,84.218933)}
{pt3dadd(136416.000000,129912.000000,164900.000000,73.868670)}

{create adhoc147}
{access adhoc147}
{connect adhoc147(1), adhoc137(0)}
{nseg = 1}
{strdef color color = "White"}
{pt3dclear()}
{pt3dadd(137676.000000,130164.000000,164275.000000,257.225620)}
{pt3dadd(137964.000000,129816.000000,164225.000000,496.927150)}

{create adhoc148}
{access adhoc148}
{connect adhoc148(1), adhoc147(0)}
{nseg = 1}
{strdef color color = "White"}
{pt3dclear()}
{pt3dadd(137964.000000,129816.000000,164225.000000,496.927150)}
{pt3dadd(138132.000000,129588.000000,164575.000000,124.231790)}

{create adhoc149}
{access adhoc149}
{connect adhoc149(1), adhoc148(0)}
{nseg = 1}
{strdef color color = "White"}
{pt3dclear()}
{pt3dadd(138132.000000,129588.000000,164575.000000,124.231790)}
{pt3dadd(138312.000000,129408.000000,164700.000000,102.622775)}
{pt3dadd(138468.000000,129264.000000,164875.000000,127.301177)}
{pt3dadd(138396.000000,129000.000000,165075.000000,145.714841)}
{pt3dadd(138348.000000,128676.000000,165275.000000,163.821873)}
{pt3dadd(138312.000000,128340.000000,165500.000000,178.066716)}
{pt3dadd(138432.000000,128148.000000,165700.000000,178.066716)}
{pt3dadd(138648.000000,127896.000000,165900.000000,166.928660)}
{pt3dadd(138720.000000,127848.000000,166000.000000,146.061430)}
{pt3dadd(138528.000000,127752.000000,166150.000000,136.966662)}
{pt3dadd(138564.000000,127560.000000,166325.000000,127.551168)}
{pt3dadd(138516.000000,127248.000000,166525.000000,127.551168)}
{pt3dadd(138444.000000,126516.000000,166700.000000,119.385262)}
{pt3dadd(138636.000000,126540.000000,166900.000000,120.243520)}
{pt3dadd(138840.000000,126660.000000,167100.000000,79.170470)}

{create adhoc150}
{access adhoc150}
{connect adhoc150(1), adhoc148(0)}
{nseg = 1}
{strdef color color = "White"}
{pt3dclear()}
{pt3dadd(138132.000000,129588.000000,164575.000000,124.231790)}
{pt3dadd(138240.000000,129756.000000,164700.000000,89.875777)}
{pt3dadd(138324.000000,129792.000000,164825.000000,76.473640)}

{create adhoc151}
{access adhoc151}
{connect adhoc151(1), adhoc147(0)}
{nseg = 1}
{strdef color color = "White"}
{pt3dclear()}
{pt3dadd(137964.000000,129816.000000,164225.000000,496.927150)}
{pt3dadd(137988.000000,129492.000000,164150.000000,314.150987)}
{pt3dadd(137736.000000,129288.000000,164100.000000,246.669502)}
{pt3dadd(137556.000000,129024.000000,164025.000000,173.913738)}
{pt3dadd(137412.000000,128676.000000,163900.000000,164.794670)}
{pt3dadd(137220.000000,128364.000000,163825.000000,134.979557)}
{pt3dadd(137136.000000,128256.000000,163925.000000,110.762159)}
{pt3dadd(137100.000000,128016.000000,163975.000000,112.900015)}
{pt3dadd(137076.000000,127968.000000,164025.000000,87.845140)}

{create adhoc152}
{access adhoc152}
{connect adhoc152(1), adhoc136(0)}
{nseg = 1}
{strdef color color = "White"}
{pt3dclear()}
{pt3dadd(139512.000000,132768.000000,165000.000000,463.649440)}
{pt3dadd(139320.000000,132564.000000,165350.000000,463.649440)}
{pt3dadd(139332.000000,132516.000000,165550.000000,402.389182)}
{pt3dadd(139212.000000,132696.000000,165725.000000,354.444878)}
{pt3dadd(139212.000000,132948.000000,165950.000000,308.079934)}
{pt3dadd(139116.000000,132972.000000,166100.000000,260.135630)}
{pt3dadd(139032.000000,133236.000000,166225.000000,226.560187)}
{pt3dadd(138900.000000,133176.000000,166300.000000,223.927920)}

{create adhoc153}
{access adhoc153}
{connect adhoc153(1), adhoc152(0)}
{nseg = 1}
{strdef color color = "White"}
{pt3dclear()}
{pt3dadd(138900.000000,133176.000000,166300.000000,223.927920)}
{pt3dadd(139008.000000,133344.000000,166425.000000,181.792147)}
{pt3dadd(138984.000000,132948.000000,166625.000000,192.891380)}
{pt3dadd(138744.000000,133728.000000,166700.000000,257.225620)}

{create adhoc154}
{access adhoc154}
{connect adhoc154(1), adhoc153(0)}
{nseg = 1}
{strdef color color = "White"}
{pt3dclear()}
{pt3dadd(138744.000000,133728.000000,166700.000000,257.225620)}
{pt3dadd(138648.000000,134796.000000,166475.000000,262.296810)}
{pt3dadd(138372.000000,135096.000000,166325.000000,218.634327)}
{pt3dadd(138084.000000,135240.000000,166200.000000,188.082416)}
{pt3dadd(137940.000000,135444.000000,166250.000000,150.081242)}
{pt3dadd(137760.000000,135552.000000,166250.000000,177.600464)}
{pt3dadd(137556.000000,135576.000000,166150.000000,205.119686)}
{pt3dadd(137316.000000,135660.000000,166000.000000,272.222100)}
{pt3dadd(137004.000000,135672.000000,165875.000000,339.411250)}

{create adhoc155}
{access adhoc155}
{connect adhoc155(1), adhoc154(0)}
{nseg = 1}
{strdef color color = "White"}
{pt3dclear()}
{pt3dadd(137004.000000,135672.000000,165875.000000,339.411250)}
{pt3dadd(136776.000000,136020.000000,165900.000000,184.576230)}
{pt3dadd(136764.000000,136224.000000,165900.000000,147.144784)}
{pt3dadd(136800.000000,136392.000000,166000.000000,98.756592)}
{pt3dadd(136800.000000,136500.000000,166100.000000,93.580624)}
{pt3dadd(136836.000000,136704.000000,166175.000000,99.915907)}
{pt3dadd(136872.000000,136872.000000,166100.000000,99.915907)}
{pt3dadd(136908.000000,136956.000000,166050.000000,100.535477)}
{pt3dadd(136848.000000,137052.000000,166000.000000,97.433903)}
{pt3dadd(136788.000000,137172.000000,166000.000000,89.018500)}
{pt3dadd(136764.000000,137400.000000,166000.000000,81.962420)}

{create adhoc156}
{access adhoc156}
{connect adhoc156(1), adhoc154(0)}
{nseg = 1}
{strdef color color = "White"}
{pt3dclear()}
{pt3dadd(137004.000000,135672.000000,165875.000000,339.411250)}
{pt3dadd(136824.000000,135768.000000,165750.000000,225.269113)}
{pt3dadd(136548.000000,135984.000000,165600.000000,79.170470)}

{create adhoc157}
{access adhoc157}
{connect adhoc157(1), adhoc153(0)}
{nseg = 1}
{strdef color color = "White"}
{pt3dclear()}
{pt3dadd(138744.000000,133728.000000,166700.000000,257.225620)}
{pt3dadd(138792.000000,133956.000000,166825.000000,227.996973)}
{pt3dadd(139092.000000,133632.000000,167000.000000,189.213302)}
{pt3dadd(139092.000000,134016.000000,167125.000000,165.336938)}
{pt3dadd(139152.000000,134436.000000,167225.000000,153.917582)}
{pt3dadd(139236.000000,134664.000000,167400.000000,134.182304)}
{pt3dadd(139380.000000,134760.000000,167550.000000,130.965957)}
{pt3dadd(139392.000000,134844.000000,167700.000000,119.789681)}
{pt3dadd(139548.000000,134940.000000,167825.000000,106.994655)}
{pt3dadd(139572.000000,135120.000000,167975.000000,105.148457)}
{pt3dadd(139404.000000,135240.000000,168150.000000,123.304375)}
{pt3dadd(139560.000000,135408.000000,168350.000000,140.662480)}
{pt3dadd(139620.000000,135480.000000,168525.000000,161.930034)}
{pt3dadd(139572.000000,135636.000000,168625.000000,188.942726)}
{pt3dadd(139500.000000,135672.000000,168800.000000,197.390967)}
{pt3dadd(139452.000000,135660.000000,168950.000000,208.932130)}

{create adhoc158}
{access adhoc158}
{connect adhoc158(1), adhoc157(0)}
{nseg = 1}
{strdef color color = "White"}
{pt3dclear()}
{pt3dadd(139452.000000,135660.000000,168950.000000,208.932130)}
{pt3dadd(139224.000000,135552.000000,169050.000000,154.914453)}
{pt3dadd(139212.000000,135312.000000,169175.000000,97.470290)}

{create adhoc159}
{access adhoc159}
{connect adhoc159(1), adhoc157(0)}
{nseg = 1}
{strdef color color = "White"}
{pt3dclear()}
{pt3dadd(139452.000000,135660.000000,168950.000000,208.932130)}
{pt3dadd(139524.000000,135876.000000,169100.000000,142.829310)}
{pt3dadd(139476.000000,136140.000000,169400.000000,124.896625)}
{pt3dadd(139476.000000,136332.000000,169575.000000,112.657667)}
{pt3dadd(139512.000000,136536.000000,169750.000000,123.010039)}
{pt3dadd(139572.000000,136560.000000,169975.000000,126.095777)}
{pt3dadd(139740.000000,136620.000000,170150.000000,142.704850)}

{create adhoc160}
{access adhoc160}
{connect adhoc160(1), adhoc159(0)}
{nseg = 1}
{strdef color color = "White"}
{pt3dclear()}
{pt3dadd(139740.000000,136620.000000,170150.000000,142.704850)}
{pt3dadd(139800.000000,136656.000000,170325.000000,155.419413)}
{pt3dadd(139884.000000,136572.000000,170550.000000,162.492743)}
{pt3dadd(139860.000000,136548.000000,170675.000000,163.924840)}

{create adhoc161}
{access adhoc161}
{connect adhoc161(1), adhoc160(0)}
{nseg = 1}
{strdef color color = "White"}
{pt3dclear()}
{pt3dadd(139860.000000,136548.000000,170675.000000,163.924840)}
{pt3dadd(139752.000000,136536.000000,170825.000000,161.218210)}
{pt3dadd(139560.000000,136572.000000,170950.000000,138.542451)}
{pt3dadd(139452.000000,136560.000000,171175.000000,134.298453)}
{pt3dadd(139392.000000,136572.000000,171425.000000,124.550921)}
{pt3dadd(139512.000000,136632.000000,171650.000000,125.586917)}
{pt3dadd(139464.000000,136728.000000,171725.000000,133.148330)}

{create adhoc162}
{access adhoc162}
{connect adhoc162(1), adhoc160(0)}
{nseg = 1}
{strdef color color = "White"}
{pt3dclear()}
{pt3dadd(139860.000000,136548.000000,170675.000000,163.924840)}
{pt3dadd(139680.000000,136548.000000,170625.000000,151.606463)}
{pt3dadd(139500.000000,136512.000000,170625.000000,123.827634)}
{pt3dadd(139404.000000,136416.000000,170625.000000,108.611694)}
{pt3dadd(139320.000000,136332.000000,170550.000000,84.054640)}
{pt3dadd(139212.000000,136224.000000,170550.000000,87.845140)}

{create adhoc163}
{access adhoc163}
{connect adhoc163(1), adhoc159(0)}
{nseg = 1}
{strdef color color = "White"}
{pt3dclear()}
{pt3dadd(139740.000000,136620.000000,170150.000000,142.704850)}
{pt3dadd(139920.000000,136788.000000,170200.000000,105.134267)}
{pt3dadd(139968.000000,136848.000000,170150.000000,83.956140)}
{pt3dadd(140040.000000,136908.000000,170150.000000,79.170470)}

{create adhoc164}
{access adhoc164}
{connect adhoc164(1), adhoc152(0)}
{nseg = 1}
{strdef color color = "White"}
{pt3dclear()}
{pt3dadd(138900.000000,133176.000000,166300.000000,223.927920)}
{pt3dadd(138708.000000,132948.000000,166375.000000,184.517083)}
{pt3dadd(138540.000000,132816.000000,166375.000000,169.840676)}
{pt3dadd(138372.000000,132684.000000,166375.000000,148.237564)}
{pt3dadd(138228.000000,132456.000000,166500.000000,127.694460)}
{pt3dadd(138084.000000,132048.000000,166600.000000,124.776658)}
{pt3dadd(137712.000000,131460.000000,166675.000000,126.972170)}
{pt3dadd(137640.000000,131088.000000,166800.000000,144.796144)}
{pt3dadd(137568.000000,130752.000000,166925.000000,187.183606)}
{pt3dadd(137496.000000,130596.000000,167075.000000,241.199743)}
{pt3dadd(137544.000000,130392.000000,167250.000000,327.849670)}

{create adhoc165}
{access adhoc165}
{connect adhoc165(1), adhoc164(0)}
{nseg = 1}
{strdef color color = "White"}
{pt3dclear()}
{pt3dadd(137544.000000,130392.000000,167250.000000,327.849670)}
{pt3dadd(137592.000000,130536.000000,167350.000000,313.703013)}
{pt3dadd(137628.000000,130404.000000,167525.000000,268.996350)}
{pt3dadd(137676.000000,130248.000000,167725.000000,232.973884)}
{pt3dadd(137772.000000,129936.000000,167850.000000,183.870017)}
{pt3dadd(137628.000000,129924.000000,167975.000000,147.737340)}

{create adhoc166}
{access adhoc166}
{connect adhoc166(1), adhoc165(0)}
{nseg = 1}
{strdef color color = "White"}
{pt3dclear()}
{pt3dadd(137628.000000,129924.000000,167975.000000,147.737340)}
{pt3dadd(137328.000000,129852.000000,168125.000000,152.947280)}

{create adhoc167}
{access adhoc167}
{connect adhoc167(1), adhoc166(0)}
{nseg = 1}
{strdef color color = "White"}
{pt3dclear()}
{pt3dadd(137328.000000,129852.000000,168125.000000,152.947280)}
{pt3dadd(137292.000000,129876.000000,168275.000000,144.610983)}
{pt3dadd(137232.000000,129900.000000,168450.000000,120.728102)}
{pt3dadd(137172.000000,129768.000000,168600.000000,103.923026)}
{pt3dadd(137064.000000,129612.000000,168750.000000,92.588088)}
{pt3dadd(136968.000000,129432.000000,168875.000000,79.433104)}
{pt3dadd(136968.000000,129492.000000,169050.000000,75.785987)}
{pt3dadd(137088.000000,129444.000000,169200.000000,81.962420)}

{create adhoc168}
{access adhoc168}
{connect adhoc168(1), adhoc166(0)}
{nseg = 1}
{strdef color color = "White"}
{pt3dclear()}
{pt3dadd(137328.000000,129852.000000,168125.000000,152.947280)}
{pt3dadd(137496.000000,129756.000000,168225.000000,100.346550)}
{pt3dadd(137484.000000,129756.000000,168350.000000,73.987013)}
{pt3dadd(137424.000000,129708.000000,168325.000000,73.868670)}

{create adhoc169}
{access adhoc169}
{connect adhoc169(1), adhoc165(0)}
{nseg = 1}
{strdef color color = "White"}
{pt3dclear()}
{pt3dadd(137628.000000,129924.000000,167975.000000,147.737340)}
{pt3dadd(137808.000000,129384.000000,167825.000000,93.735220)}
{pt3dadd(137940.000000,129204.000000,167900.000000,90.905244)}
{pt3dadd(138108.000000,129216.000000,167850.000000,81.557662)}
{pt3dadd(138264.000000,129252.000000,167850.000000,94.150090)}

{create adhoc170}
{access adhoc170}
{connect adhoc170(1), adhoc164(0)}
{nseg = 1}
{strdef color color = "White"}
{pt3dclear()}
{pt3dadd(137544.000000,130392.000000,167250.000000,327.849670)}
{pt3dadd(137616.000000,130248.000000,167125.000000,231.740597)}
{pt3dadd(137652.000000,130092.000000,167125.000000,169.112820)}
{pt3dadd(137724.000000,129984.000000,167050.000000,119.376980)}
{pt3dadd(137688.000000,129840.000000,166975.000000,77.068774)}
{pt3dadd(137688.000000,129672.000000,166925.000000,77.646852)}
{pt3dadd(137700.000000,129564.000000,166925.000000,77.125858)}
{pt3dadd(137700.000000,129456.000000,166925.000000,77.125858)}
{pt3dadd(137676.000000,129360.000000,166925.000000,77.125858)}
{pt3dadd(137652.000000,129216.000000,166925.000000,77.646852)}
{pt3dadd(137652.000000,129264.000000,167025.000000,76.504260)}
{pt3dadd(137604.000000,129192.000000,167050.000000,76.473640)}

{create adhoc171}
{access adhoc171}
{connect adhoc171(1), adhoc120(0)}
{nseg = 1}
{strdef color color = "White"}
{pt3dclear()}
{pt3dadd(142848.000000,134124.000000,162525.000000,305.894560)}
{pt3dadd(143340.000000,134136.000000,162625.000000,175.629343)}
{pt3dadd(143532.000000,133980.000000,162825.000000,148.412562)}
{pt3dadd(143664.000000,134148.000000,162950.000000,133.598594)}
{pt3dadd(143820.000000,134220.000000,163150.000000,148.755354)}
{pt3dadd(144048.000000,134184.000000,163350.000000,152.816337)}
{pt3dadd(144180.000000,134160.000000,163575.000000,152.816337)}
{pt3dadd(144180.000000,134340.000000,163825.000000,154.599645)}
{pt3dadd(144216.000000,134292.000000,163925.000000,129.864712)}
{pt3dadd(143964.000000,134028.000000,164150.000000,110.747125)}
{pt3dadd(143484.000000,133932.000000,164325.000000,108.150055)}

{create adhoc172}
{access adhoc172}
{connect adhoc172(1), adhoc171(0)}
{nseg = 1}
{strdef color color = "White"}
{pt3dclear()}
{pt3dadd(143484.000000,133932.000000,164325.000000,108.150055)}
{pt3dadd(143328.000000,133776.000000,164325.000000,121.900275)}
{pt3dadd(143076.000000,133752.000000,164475.000000,154.643165)}
{pt3dadd(142716.000000,133488.000000,164650.000000,181.013154)}
{pt3dadd(142428.000000,133284.000000,164800.000000,215.838333)}
{pt3dadd(142284.000000,133152.000000,165025.000000,240.000000)}

{create adhoc173}
{access adhoc173}
{connect adhoc173(1), adhoc172(0)}
{nseg = 1}
{strdef color color = "White"}
{pt3dclear()}
{pt3dadd(142284.000000,133152.000000,165025.000000,240.000000)}
{pt3dadd(142224.000000,133008.000000,165225.000000,191.343740)}
{pt3dadd(142056.000000,132756.000000,165425.000000,146.165761)}
{pt3dadd(142128.000000,132864.000000,165600.000000,104.466064)}

{create adhoc174}
{access adhoc174}
{connect adhoc174(1), adhoc172(0)}
{nseg = 1}
{strdef color color = "White"}
{pt3dclear()}
{pt3dadd(142284.000000,133152.000000,165025.000000,240.000000)}
{pt3dadd(142644.000000,132864.000000,165075.000000,131.013047)}
{pt3dadd(142740.000000,132768.000000,165075.000000,106.696395)}
{pt3dadd(142776.000000,132648.000000,165075.000000,72.011228)}
{pt3dadd(142740.000000,132528.000000,165075.000000,69.005667)}
{pt3dadd(142680.000000,132432.000000,165075.000000,66.574165)}

{create adhoc175}
{access adhoc175}
{connect adhoc175(1), adhoc171(0)}
{nseg = 1}
{strdef color color = "White"}
{pt3dclear()}
{pt3dadd(143484.000000,133932.000000,164325.000000,108.150055)}
{pt3dadd(143352.000000,134196.000000,164325.000000,82.025548)}
{pt3dadd(143268.000000,134316.000000,164450.000000,87.171535)}
{pt3dadd(143088.000000,134496.000000,164625.000000,90.387882)}
{pt3dadd(143040.000000,134604.000000,164800.000000,110.058523)}
{pt3dadd(142968.000000,134652.000000,164975.000000,134.403728)}
{pt3dadd(142572.000000,134568.000000,165100.000000,160.745870)}
{pt3dadd(142512.000000,134496.000000,165325.000000,188.300190)}

{create adhoc176}
{access adhoc176}
{connect adhoc176(1), adhoc175(0)}
{nseg = 1}
{strdef color color = "White"}
{pt3dclear()}
{pt3dadd(142512.000000,134496.000000,165325.000000,188.300190)}
{pt3dadd(142656.000000,134568.000000,165475.000000,122.577633)}
{pt3dadd(142656.000000,134520.000000,165675.000000,81.962420)}

{create adhoc177}
{access adhoc177}
{connect adhoc177(1), adhoc175(0)}
{nseg = 1}
{strdef color color = "White"}
{pt3dclear()}
{pt3dadd(142512.000000,134496.000000,165325.000000,188.300190)}
{pt3dadd(141960.000000,134352.000000,165425.000000,115.673890)}
{pt3dadd(141804.000000,134244.000000,165550.000000,84.852810)}

{create adhoc178}
{access adhoc178}
{connect adhoc178(1), adhoc119(0)}
{nseg = 1}
{strdef color color = "White"}
{pt3dclear()}
{pt3dadd(143364.000000,134016.000000,161850.000000,389.881160)}
{pt3dadd(142836.000000,133608.000000,161850.000000,204.603027)}
{pt3dadd(142656.000000,133404.000000,161850.000000,189.754510)}
{pt3dadd(142536.000000,133308.000000,161850.000000,165.037610)}
{pt3dadd(142332.000000,133008.000000,161675.000000,195.904150)}
{pt3dadd(142044.000000,132816.000000,161525.000000,244.802820)}
{pt3dadd(141816.000000,132744.000000,161275.000000,266.296660)}

{create adhoc179}
{access adhoc179}
{connect adhoc179(1), adhoc178(0)}
{nseg = 1}
{strdef color color = "White"}
{pt3dclear()}
{pt3dadd(141816.000000,132744.000000,161275.000000,266.296660)}
{pt3dadd(141804.000000,132900.000000,161100.000000,87.845140)}

{create adhoc180}
{access adhoc180}
{connect adhoc180(1), adhoc178(0)}
{nseg = 1}
{strdef color color = "White"}
{pt3dclear()}
{pt3dadd(141816.000000,132744.000000,161275.000000,266.296660)}
{pt3dadd(141576.000000,132648.000000,161150.000000,94.150090)}

{create adhoc181}
{access adhoc181}
{connect adhoc181(1), adhoc180(0)}
{nseg = 1}
{strdef color color = "White"}
{pt3dclear()}
{pt3dadd(141576.000000,132648.000000,161150.000000,94.150090)}
{pt3dadd(141252.000000,132576.000000,161000.000000,105.047853)}
{pt3dadd(141060.000000,132360.000000,160800.000000,105.047853)}
{pt3dadd(140976.000000,132384.000000,160675.000000,94.150090)}

{create adhoc182}
{access adhoc182}
{connect adhoc182(1), adhoc181(0)}
{nseg = 1}
{strdef color color = "White"}
{pt3dclear()}
{pt3dadd(140976.000000,132384.000000,160675.000000,94.150090)}
{pt3dadd(141000.000000,132648.000000,160575.000000,87.985883)}
{pt3dadd(140880.000000,132852.000000,160550.000000,83.923327)}
{pt3dadd(140760.000000,133044.000000,160550.000000,81.962420)}

{create adhoc183}
{access adhoc183}
{connect adhoc183(1), adhoc181(0)}
{nseg = 1}
{strdef color color = "White"}
{pt3dclear()}
{pt3dadd(140976.000000,132384.000000,160675.000000,94.150090)}
{pt3dadd(140736.000000,132348.000000,160525.000000,86.988440)}
{pt3dadd(140592.000000,132240.000000,160375.000000,92.154884)}
{pt3dadd(140400.000000,132192.000000,160225.000000,90.295428)}
{pt3dadd(140352.000000,132288.000000,160050.000000,94.887303)}
{pt3dadd(140220.000000,132336.000000,159850.000000,84.852810)}

{create adhoc184}
{access adhoc184}
{connect adhoc184(1), adhoc180(0)}
{nseg = 1}
{strdef color color = "White"}
{pt3dclear()}
{pt3dadd(141576.000000,132648.000000,161150.000000,94.150090)}
{pt3dadd(141444.000000,132384.000000,161325.000000,87.055233)}
{pt3dadd(141276.000000,132348.000000,161375.000000,85.037796)}
{pt3dadd(141192.000000,132300.000000,161475.000000,81.064583)}
{pt3dadd(141204.000000,132252.000000,161525.000000,79.170470)}

{create adhoc185}
{access adhoc185}
{connect adhoc185(1), adhoc118(0)}
{nseg = 1}
{strdef color color = "White"}
{pt3dclear()}
{pt3dadd(144552.000000,133080.000000,160550.000000,702.761100)}
{pt3dadd(144744.000000,132804.000000,160825.000000,711.594780)}
{pt3dadd(145020.000000,132420.000000,161000.000000,667.793508)}
{pt3dadd(145164.000000,132204.000000,161225.000000,649.599108)}
{pt3dadd(145332.000000,132156.000000,161350.000000,594.958960)}
{pt3dadd(145368.000000,132132.000000,161475.000000,554.202833)}
{pt3dadd(145380.000000,132108.000000,161675.000000,480.000000)}

{create adhoc186}
{access adhoc186}
{connect adhoc186(1), adhoc185(0)}
{nseg = 1}
{strdef color color = "White"}
{pt3dclear()}
{pt3dadd(145380.000000,132108.000000,161675.000000,480.000000)}
{pt3dadd(145968.000000,132300.000000,161675.000000,242.870937)}
{pt3dadd(146388.000000,132288.000000,161675.000000,197.198586)}
{pt3dadd(146532.000000,132324.000000,161700.000000,125.198586)}
{pt3dadd(146676.000000,132312.000000,161775.000000,124.322382)}
{pt3dadd(146808.000000,132336.000000,161850.000000,126.952048)}
{pt3dadd(146940.000000,132360.000000,161850.000000,131.653158)}
{pt3dadd(147072.000000,132312.000000,161875.000000,135.612948)}
{pt3dadd(147192.000000,132336.000000,161875.000000,150.601064)}
{pt3dadd(147300.000000,132348.000000,161900.000000,162.131904)}
{pt3dadd(147384.000000,132372.000000,161950.000000,174.490354)}
{pt3dadd(147504.000000,132384.000000,161975.000000,183.931002)}
{pt3dadd(147612.000000,132456.000000,161925.000000,193.704574)}
{pt3dadd(147732.000000,132408.000000,161925.000000,187.501426)}
{pt3dadd(147840.000000,132420.000000,161875.000000,187.501426)}
{pt3dadd(147972.000000,132372.000000,161800.000000,193.298894)}
{pt3dadd(148092.000000,132348.000000,161825.000000,189.448834)}
{pt3dadd(148188.000000,132288.000000,161750.000000,181.870774)}
{pt3dadd(148272.000000,132240.000000,161675.000000,202.345138)}
{pt3dadd(148548.000000,132132.000000,161675.000000,231.537874)}
{pt3dadd(148716.000000,132012.000000,161525.000000,252.690390)}
{pt3dadd(148860.000000,131940.000000,161550.000000,327.849670)}

{create adhoc187}
{access adhoc187}
{connect adhoc187(1), adhoc186(0)}
{nseg = 1}
{strdef color color = "White"}
{pt3dclear()}
{pt3dadd(148860.000000,131940.000000,161550.000000,327.849670)}
{pt3dadd(149076.000000,131592.000000,161450.000000,246.692593)}
{pt3dadd(149136.000000,131364.000000,161400.000000,220.769952)}
{pt3dadd(149160.000000,131160.000000,161325.000000,187.984986)}
{pt3dadd(149172.000000,131016.000000,161325.000000,175.898940)}
{pt3dadd(149208.000000,130872.000000,161325.000000,163.924840)}

{create adhoc188}
{access adhoc188}
{connect adhoc188(1), adhoc187(0)}
{nseg = 1}
{strdef color color = "White"}
{pt3dclear()}
{pt3dadd(149208.000000,130872.000000,161325.000000,163.924840)}
{pt3dadd(149280.000000,130884.000000,161000.000000,126.784955)}
{pt3dadd(149268.000000,130668.000000,160800.000000,113.134059)}
{pt3dadd(149232.000000,130596.000000,160550.000000,102.741883)}
{pt3dadd(149352.000000,130476.000000,160350.000000,115.789796)}
{pt3dadd(149328.000000,130200.000000,160175.000000,126.181972)}
{pt3dadd(149316.000000,130200.000000,159975.000000,136.235382)}
{pt3dadd(149436.000000,129972.000000,159775.000000,156.326392)}
{pt3dadd(149604.000000,129792.000000,159600.000000,177.193622)}
{pt3dadd(149928.000000,129732.000000,159500.000000,204.431408)}
{pt3dadd(150228.000000,129564.000000,159500.000000,223.091564)}
{pt3dadd(150276.000000,129540.000000,159400.000000,231.204134)}
{pt3dadd(150240.000000,129588.000000,159200.000000,236.804118)}
{pt3dadd(150384.000000,129432.000000,159100.000000,244.989220)}
{pt3dadd(150528.000000,129324.000000,159325.000000,220.608640)}
{pt3dadd(150588.000000,129204.000000,159600.000000,257.225620)}

{create adhoc189}
{access adhoc189}
{connect adhoc189(1), adhoc188(0)}
{nseg = 1}
{strdef color color = "White"}
{pt3dclear()}
{pt3dadd(150588.000000,129204.000000,159600.000000,257.225620)}
{pt3dadd(150636.000000,129276.000000,159700.000000,257.225620)}

{create adhoc190}
{access adhoc190}
{connect adhoc190(1), adhoc189(0)}
{nseg = 1}
{strdef color color = "White"}
{pt3dclear()}
{pt3dadd(150636.000000,129276.000000,159700.000000,257.225620)}
{pt3dadd(150912.000000,129192.000000,159775.000000,158.340940)}

{create adhoc191}
{access adhoc191}
{connect adhoc191(1), adhoc190(0)}
{nseg = 1}
{strdef color color = "White"}
{pt3dclear()}
{pt3dadd(150912.000000,129192.000000,159775.000000,158.340940)}
{pt3dadd(151044.000000,129096.000000,159950.000000,141.084060)}
{pt3dadd(151272.000000,128844.000000,160125.000000,124.353765)}
{pt3dadd(151464.000000,128688.000000,160150.000000,108.150055)}

{create adhoc192}
{access adhoc192}
{connect adhoc192(1), adhoc190(0)}
{nseg = 1}
{strdef color color = "White"}
{pt3dclear()}
{pt3dadd(150912.000000,129192.000000,159775.000000,158.340940)}
{pt3dadd(150900.000000,129384.000000,159925.000000,111.484483)}
{pt3dadd(150912.000000,129456.000000,160000.000000,103.355310)}
{pt3dadd(150924.000000,129504.000000,160100.000000,99.255882)}
{pt3dadd(151020.000000,129552.000000,160200.000000,115.563920)}
{pt3dadd(151020.000000,129672.000000,160275.000000,135.548634)}
{pt3dadd(151200.000000,129696.000000,160375.000000,137.408090)}
{pt3dadd(151200.000000,129816.000000,160450.000000,150.575453)}
{pt3dadd(151260.000000,129792.000000,160575.000000,94.150090)}

{create adhoc193}
{access adhoc193}
{connect adhoc193(1), adhoc192(0)}
{nseg = 1}
{strdef color color = "White"}
{pt3dclear()}
{pt3dadd(151260.000000,129792.000000,160575.000000,94.150090)}
{pt3dadd(151344.000000,129684.000000,160575.000000,85.094327)}
{pt3dadd(151428.000000,129576.000000,160525.000000,77.264155)}
{pt3dadd(151488.000000,129492.000000,160525.000000,71.295418)}
{pt3dadd(151524.000000,129432.000000,160525.000000,69.676668)}
{pt3dadd(151596.000000,129372.000000,160475.000000,69.676668)}
{pt3dadd(151704.000000,129336.000000,160425.000000,71.187016)}
{pt3dadd(151764.000000,129228.000000,160425.000000,78.945351)}
{pt3dadd(151812.000000,129120.000000,160425.000000,77.675306)}
{pt3dadd(151884.000000,129048.000000,160475.000000,76.685952)}
{pt3dadd(151980.000000,129060.000000,160525.000000,73.713139)}
{pt3dadd(152052.000000,129120.000000,160650.000000,72.688896)}
{pt3dadd(152076.000000,129120.000000,160750.000000,68.341476)}
{pt3dadd(152076.000000,129120.000000,160875.000000,74.319268)}
{pt3dadd(152040.000000,129336.000000,160975.000000,76.927372)}
{pt3dadd(151968.000000,129456.000000,161025.000000,77.850471)}
{pt3dadd(151944.000000,129528.000000,161025.000000,76.894819)}
{pt3dadd(151944.000000,129600.000000,161025.000000,78.031287)}
{pt3dadd(152112.000000,129672.000000,161125.000000,74.246639)}
{pt3dadd(152256.000000,129840.000000,161200.000000,72.124640)}
{pt3dadd(152340.000000,129960.000000,161300.000000,87.887728)}
{pt3dadd(152400.000000,130032.000000,161350.000000,89.867623)}
{pt3dadd(152448.000000,130236.000000,161400.000000,86.681441)}
{pt3dadd(152436.000000,130296.000000,161500.000000,86.211894)}
{pt3dadd(152616.000000,130464.000000,161600.000000,87.775503)}
{pt3dadd(152676.000000,130548.000000,161600.000000,70.651214)}
{pt3dadd(152712.000000,130596.000000,161600.000000,69.286843)}
{pt3dadd(152736.000000,130692.000000,161600.000000,62.115894)}

{create adhoc194}
{access adhoc194}
{connect adhoc194(1), adhoc192(0)}
{nseg = 1}
{strdef color color = "White"}
{pt3dclear()}
{pt3dadd(151260.000000,129792.000000,160575.000000,94.150090)}
{pt3dadd(151224.000000,129876.000000,160700.000000,73.524129)}
{pt3dadd(151164.000000,129732.000000,160825.000000,71.683238)}
{pt3dadd(151116.000000,129588.000000,160850.000000,79.482886)}
{pt3dadd(151032.000000,129504.000000,160825.000000,95.600677)}
{pt3dadd(151020.000000,129384.000000,160825.000000,115.524364)}
{pt3dadd(151020.000000,129276.000000,160825.000000,126.586342)}
{pt3dadd(151008.000000,129156.000000,160825.000000,138.524524)}
{pt3dadd(151104.000000,129084.000000,160875.000000,130.083456)}
{pt3dadd(151176.000000,129012.000000,160925.000000,114.595863)}
{pt3dadd(151248.000000,128928.000000,160950.000000,90.942990)}

{create adhoc195}
{access adhoc195}
{connect adhoc195(1), adhoc189(0)}
{nseg = 1}
{strdef color color = "White"}
{pt3dclear()}
{pt3dadd(150636.000000,129276.000000,159700.000000,257.225620)}
{pt3dadd(150552.000000,129012.000000,159800.000000,111.963960)}

{create adhoc196}
{access adhoc196}
{connect adhoc196(1), adhoc195(0)}
{nseg = 1}
{strdef color color = "White"}
{pt3dclear()}
{pt3dadd(150552.000000,129012.000000,159800.000000,111.963960)}
{pt3dadd(150420.000000,128928.000000,159950.000000,97.470290)}

{create adhoc197}
{access adhoc197}
{connect adhoc197(1), adhoc195(0)}
{nseg = 1}
{strdef color color = "White"}
{pt3dclear()}
{pt3dadd(150552.000000,129012.000000,159800.000000,111.963960)}
{pt3dadd(150732.000000,128952.000000,159650.000000,98.426782)}
{pt3dadd(150828.000000,128724.000000,159500.000000,87.110934)}
{pt3dadd(150912.000000,128664.000000,159375.000000,78.032975)}
{pt3dadd(150876.000000,128532.000000,159300.000000,69.910668)}
{pt3dadd(150900.000000,128460.000000,159300.000000,69.759672)}
{pt3dadd(150888.000000,128388.000000,159275.000000,71.352425)}

{create adhoc198}
{access adhoc198}
{connect adhoc198(1), adhoc188(0)}
{nseg = 1}
{strdef color color = "White"}
{pt3dclear()}
{pt3dadd(150588.000000,129204.000000,159600.000000,257.225620)}
{pt3dadd(150384.000000,129528.000000,159675.000000,158.927140)}
{pt3dadd(150300.000000,129588.000000,159750.000000,126.485106)}
{pt3dadd(150372.000000,129708.000000,159850.000000,82.195700)}
{pt3dadd(150468.000000,129696.000000,159900.000000,76.473640)}

{create adhoc199}
{access adhoc199}
{connect adhoc199(1), adhoc187(0)}
{nseg = 1}
{strdef color color = "White"}
{pt3dclear()}
{pt3dadd(149208.000000,130872.000000,161325.000000,163.924840)}
{pt3dadd(149460.000000,130800.000000,161550.000000,161.218210)}
{pt3dadd(149508.000000,130536.000000,161725.000000,149.083154)}
{pt3dadd(149592.000000,130356.000000,161850.000000,161.083770)}
{pt3dadd(149700.000000,130056.000000,161925.000000,179.844092)}
{pt3dadd(149784.000000,129792.000000,162075.000000,210.921283)}
{pt3dadd(149772.000000,129612.000000,162225.000000,275.687600)}

{create adhoc200}
{access adhoc200}
{connect adhoc200(1), adhoc199(0)}
{nseg = 1}
{strdef color color = "White"}
{pt3dclear()}
{pt3dadd(149772.000000,129612.000000,162225.000000,275.687600)}
{pt3dadd(149712.000000,129912.000000,162375.000000,172.665821)}
{pt3dadd(149556.000000,129756.000000,162425.000000,141.259529)}
{pt3dadd(149352.000000,129600.000000,162425.000000,97.588748)}
{pt3dadd(149220.000000,129516.000000,162425.000000,94.150090)}

{create adhoc201}
{access adhoc201}
{connect adhoc201(1), adhoc199(0)}
{nseg = 1}
{strdef color color = "White"}
{pt3dclear()}
{pt3dadd(149772.000000,129612.000000,162225.000000,275.687600)}
{pt3dadd(149856.000000,129300.000000,162350.000000,215.736123)}
{pt3dadd(149976.000000,129096.000000,162500.000000,169.788190)}
{pt3dadd(150180.000000,128964.000000,162650.000000,137.843800)}

{create adhoc202}
{access adhoc202}
{connect adhoc202(1), adhoc201(0)}
{nseg = 1}
{strdef color color = "White"}
{pt3dclear()}
{pt3dadd(150180.000000,128964.000000,162650.000000,137.843800)}
{pt3dadd(150300.000000,129000.000000,162825.000000,134.926813)}
{pt3dadd(150396.000000,128880.000000,163000.000000,136.226118)}
{pt3dadd(150684.000000,128928.000000,163150.000000,145.034556)}
{pt3dadd(150744.000000,128868.000000,163325.000000,163.448220)}
{pt3dadd(150684.000000,128796.000000,163500.000000,181.974480)}
{pt3dadd(150792.000000,128616.000000,163675.000000,216.300110)}

{create adhoc203}
{access adhoc203}
{connect adhoc203(1), adhoc202(0)}
{nseg = 1}
{strdef color color = "White"}
{pt3dclear()}
{pt3dadd(150792.000000,128616.000000,163675.000000,216.300110)}
{pt3dadd(150768.000000,128748.000000,163950.000000,235.116817)}
{pt3dadd(150804.000000,128700.000000,164150.000000,214.396644)}
{pt3dadd(150420.000000,128628.000000,164400.000000,189.325220)}
{pt3dadd(150252.000000,128652.000000,164625.000000,152.525253)}
{pt3dadd(150444.000000,128688.000000,164750.000000,90.942990)}

{create adhoc204}
{access adhoc204}
{connect adhoc204(1), adhoc203(0)}
{nseg = 1}
{strdef color color = "White"}
{pt3dclear()}
{pt3dadd(150444.000000,128688.000000,164750.000000,90.942990)}
{pt3dadd(150684.000000,128736.000000,164625.000000,82.258027)}
{pt3dadd(150828.000000,128736.000000,164625.000000,81.581394)}
{pt3dadd(150948.000000,128772.000000,164625.000000,77.663281)}
{pt3dadd(151080.000000,128820.000000,164625.000000,77.160032)}
{pt3dadd(151152.000000,128928.000000,164675.000000,77.160032)}
{pt3dadd(151212.000000,129012.000000,164675.000000,74.551928)}
{pt3dadd(151224.000000,129132.000000,164700.000000,75.110318)}
{pt3dadd(151212.000000,129180.000000,164825.000000,75.110318)}
{pt3dadd(151200.000000,129120.000000,164975.000000,74.078915)}
{pt3dadd(151248.000000,129060.000000,165125.000000,71.352425)}

{create adhoc205}
{access adhoc205}
{connect adhoc205(1), adhoc203(0)}
{nseg = 1}
{strdef color color = "White"}
{pt3dclear()}
{pt3dadd(150444.000000,128688.000000,164750.000000,90.942990)}
{pt3dadd(150444.000000,128640.000000,164925.000000,99.045733)}
{pt3dadd(150564.000000,128472.000000,165100.000000,81.962420)}

{create adhoc206}
{access adhoc206}
{connect adhoc206(1), adhoc202(0)}
{nseg = 1}
{strdef color color = "White"}
{pt3dclear()}
{pt3dadd(150792.000000,128616.000000,163675.000000,216.300110)}
{pt3dadd(150864.000000,128448.000000,163675.000000,161.719917)}
{pt3dadd(151044.000000,128304.000000,163700.000000,115.912360)}

{create adhoc207}
{access adhoc207}
{connect adhoc207(1), adhoc206(0)}
{nseg = 1}
{strdef color color = "White"}
{pt3dclear()}
{pt3dadd(151044.000000,128304.000000,163700.000000,115.912360)}
{pt3dadd(151512.000000,128304.000000,163625.000000,118.829710)}
{pt3dadd(151716.000000,128328.000000,163625.000000,111.963960)}

{create adhoc208}
{access adhoc208}
{connect adhoc208(1), adhoc207(0)}
{nseg = 1}
{strdef color color = "White"}
{pt3dclear()}
{pt3dadd(151716.000000,128328.000000,163625.000000,111.963960)}
{pt3dadd(151776.000000,128364.000000,163550.000000,114.781935)}
{pt3dadd(151872.000000,128208.000000,163475.000000,124.231790)}

{create adhoc209}
{access adhoc209}
{connect adhoc209(1), adhoc208(0)}
{nseg = 1}
{strdef color color = "White"}
{pt3dclear()}
{pt3dadd(151872.000000,128208.000000,163475.000000,124.231790)}
{pt3dadd(151992.000000,128256.000000,163475.000000,113.510633)}
{pt3dadd(152124.000000,128268.000000,163475.000000,103.483400)}
{pt3dadd(152328.000000,128256.000000,163475.000000,94.150090)}

{create adhoc210}
{access adhoc210}
{connect adhoc210(1), adhoc208(0)}
{nseg = 1}
{strdef color color = "White"}
{pt3dclear()}
{pt3dadd(151872.000000,128208.000000,163475.000000,124.231790)}
{pt3dadd(151704.000000,128160.000000,163425.000000,114.204557)}
{pt3dadd(151608.000000,128100.000000,163425.000000,94.150090)}

{create adhoc211}
{access adhoc211}
{connect adhoc211(1), adhoc210(0)}
{nseg = 1}
{strdef color color = "White"}
{pt3dclear()}
{pt3dadd(151608.000000,128100.000000,163425.000000,94.150090)}
{pt3dadd(151500.000000,128052.000000,163425.000000,87.055233)}
{pt3dadd(151380.000000,128004.000000,163425.000000,87.392300)}
{pt3dadd(151272.000000,127980.000000,163425.000000,86.750880)}
{pt3dadd(151140.000000,127956.000000,163425.000000,89.746804)}
{pt3dadd(151008.000000,127932.000000,163425.000000,91.007794)}
{pt3dadd(150900.000000,127896.000000,163425.000000,91.649214)}
{pt3dadd(150828.000000,127872.000000,163525.000000,94.172710)}
{pt3dadd(150708.000000,127836.000000,163525.000000,95.478170)}
{pt3dadd(150660.000000,127824.000000,163650.000000,93.040636)}
{pt3dadd(150540.000000,127812.000000,163725.000000,93.040636)}
{pt3dadd(150396.000000,127764.000000,163800.000000,91.194267)}
{pt3dadd(150240.000000,127644.000000,163825.000000,94.150090)}

{create adhoc212}
{access adhoc212}
{connect adhoc212(1), adhoc210(0)}
{nseg = 1}
{strdef color color = "White"}
{pt3dclear()}
{pt3dadd(151608.000000,128100.000000,163425.000000,94.150090)}
{pt3dadd(151620.000000,128328.000000,163400.000000,84.163677)}
{pt3dadd(151692.000000,128388.000000,163350.000000,76.564455)}
{pt3dadd(151704.000000,128304.000000,163225.000000,71.352425)}

{create adhoc213}
{access adhoc213}
{connect adhoc213(1), adhoc207(0)}
{nseg = 1}
{strdef color color = "White"}
{pt3dclear()}
{pt3dadd(151716.000000,128328.000000,163625.000000,111.963960)}
{pt3dadd(151704.000000,128232.000000,163850.000000,95.919920)}
{pt3dadd(151764.000000,128196.000000,163875.000000,84.852810)}

{create adhoc214}
{access adhoc214}
{connect adhoc214(1), adhoc206(0)}
{nseg = 1}
{strdef color color = "White"}
{pt3dclear()}
{pt3dadd(151044.000000,128304.000000,163700.000000,115.912360)}
{pt3dadd(151116.000000,128220.000000,163850.000000,94.242530)}
{pt3dadd(151224.000000,128136.000000,163900.000000,89.908564)}
{pt3dadd(151284.000000,128100.000000,163925.000000,86.220150)}
{pt3dadd(151320.000000,128004.000000,164000.000000,88.095173)}
{pt3dadd(151356.000000,127932.000000,164025.000000,97.470290)}

{create adhoc215}
{access adhoc215}
{connect adhoc215(1), adhoc214(0)}
{nseg = 1}
{strdef color color = "White"}
{pt3dclear()}
{pt3dadd(151356.000000,127932.000000,164025.000000,97.470290)}
{pt3dadd(151380.000000,127860.000000,164125.000000,88.161967)}
{pt3dadd(151380.000000,127740.000000,164225.000000,88.119682)}
{pt3dadd(151356.000000,127716.000000,164350.000000,87.455642)}
{pt3dadd(151332.000000,127728.000000,164400.000000,86.279098)}
{pt3dadd(151260.000000,127764.000000,164450.000000,86.837488)}
{pt3dadd(151200.000000,127764.000000,164525.000000,88.633602)}
{pt3dadd(151368.000000,127716.000000,164600.000000,89.985098)}
{pt3dadd(151404.000000,127728.000000,164700.000000,89.985098)}
{pt3dadd(151368.000000,127764.000000,164775.000000,92.422632)}
{pt3dadd(151464.000000,127740.000000,164875.000000,94.860166)}
{pt3dadd(151488.000000,127728.000000,164950.000000,94.860166)}
{pt3dadd(151584.000000,127716.000000,165000.000000,90.512746)}
{pt3dadd(151668.000000,127632.000000,165100.000000,86.456462)}
{pt3dadd(151704.000000,127368.000000,165275.000000,84.597006)}
{pt3dadd(151692.000000,127296.000000,165350.000000,84.597006)}
{pt3dadd(151740.000000,127068.000000,165450.000000,84.597006)}
{pt3dadd(151752.000000,126972.000000,165525.000000,85.155396)}
{pt3dadd(151896.000000,126924.000000,165575.000000,86.774146)}
{pt3dadd(151956.000000,126876.000000,165625.000000,87.372612)}
{pt3dadd(151980.000000,126804.000000,165650.000000,90.172605)}
{pt3dadd(152064.000000,126720.000000,165725.000000,89.553035)}
{pt3dadd(152280.000000,126672.000000,165850.000000,94.613445)}
{pt3dadd(152352.000000,126720.000000,165950.000000,87.845140)}

{create adhoc216}
{access adhoc216}
{connect adhoc216(1), adhoc214(0)}
{nseg = 1}
{strdef color color = "White"}
{pt3dclear()}
{pt3dadd(151356.000000,127932.000000,164025.000000,97.470290)}
{pt3dadd(151260.000000,127824.000000,164000.000000,86.201060)}
{pt3dadd(151164.000000,127824.000000,163975.000000,82.383605)}
{pt3dadd(151068.000000,127776.000000,163975.000000,75.750828)}
{pt3dadd(150972.000000,127740.000000,163975.000000,72.540416)}
{pt3dadd(150936.000000,127680.000000,163975.000000,64.306404)}

{create adhoc217}
{access adhoc217}
{connect adhoc217(1), adhoc201(0)}
{nseg = 1}
{strdef color color = "White"}
{pt3dclear()}
{pt3dadd(150180.000000,128964.000000,162650.000000,137.843800)}
{pt3dadd(150204.000000,128628.000000,162450.000000,170.791123)}
{pt3dadd(150240.000000,128364.000000,162300.000000,231.824720)}

{create adhoc218}
{access adhoc218}
{connect adhoc218(1), adhoc217(0)}
{nseg = 1}
{strdef color color = "White"}
{pt3dclear()}
{pt3dadd(150240.000000,128364.000000,162300.000000,231.824720)}
{pt3dadd(150240.000000,128328.000000,162200.000000,233.312173)}
{pt3dadd(150312.000000,128160.000000,162025.000000,214.600693)}
{pt3dadd(150456.000000,128004.000000,161925.000000,175.690280)}

{create adhoc219}
{access adhoc219}
{connect adhoc219(1), adhoc218(0)}
{nseg = 1}
{strdef color color = "White"}
{pt3dclear()}
{pt3dadd(150456.000000,128004.000000,161925.000000,175.690280)}
{pt3dadd(150696.000000,127764.000000,161825.000000,120.483553)}
{pt3dadd(150780.000000,127488.000000,161675.000000,103.330723)}
{pt3dadd(150984.000000,127248.000000,161550.000000,124.231790)}

{create adhoc220}
{access adhoc220}
{connect adhoc220(1), adhoc218(0)}
{nseg = 1}
{strdef color color = "White"}
{pt3dclear()}
{pt3dadd(150456.000000,128004.000000,161925.000000,175.690280)}
{pt3dadd(150168.000000,127872.000000,161900.000000,111.343740)}
{pt3dadd(150072.000000,127812.000000,161900.000000,99.032822)}
{pt3dadd(150000.000000,127788.000000,161875.000000,77.679146)}
{pt3dadd(149856.000000,127764.000000,161725.000000,77.679146)}
{pt3dadd(149844.000000,127824.000000,161700.000000,78.237536)}
{pt3dadd(149784.000000,127668.000000,161575.000000,84.033453)}
{pt3dadd(149628.000000,127692.000000,161500.000000,84.033453)}
{pt3dadd(149592.000000,127608.000000,161425.000000,86.641557)}
{pt3dadd(149532.000000,127500.000000,161425.000000,90.691632)}
{pt3dadd(149448.000000,127368.000000,161425.000000,81.962420)}

{create adhoc221}
{access adhoc221}
{connect adhoc221(1), adhoc218(0)}
{nseg = 1}
{strdef color color = "White"}
{pt3dclear()}
{pt3dadd(150456.000000,128004.000000,161925.000000,175.690280)}
{pt3dadd(150564.000000,128160.000000,161825.000000,136.024042)}
{pt3dadd(150588.000000,128268.000000,161800.000000,108.150055)}

{create adhoc222}
{access adhoc222}
{connect adhoc222(1), adhoc221(0)}
{nseg = 1}
{strdef color color = "White"}
{pt3dclear()}
{pt3dadd(150588.000000,128268.000000,161800.000000,108.150055)}
{pt3dadd(150636.000000,128256.000000,161700.000000,100.692145)}
{pt3dadd(150648.000000,128352.000000,161600.000000,95.553343)}
{pt3dadd(150660.000000,128316.000000,161525.000000,90.893894)}
{pt3dadd(150624.000000,128292.000000,161425.000000,86.847697)}
{pt3dadd(150648.000000,128160.000000,161325.000000,84.852810)}

{create adhoc223}
{access adhoc223}
{connect adhoc223(1), adhoc222(0)}
{nseg = 1}
{strdef color color = "White"}
{pt3dclear()}
{pt3dadd(150648.000000,128160.000000,161325.000000,84.852810)}
{pt3dadd(150600.000000,128064.000000,161250.000000,84.988757)}
{pt3dadd(150672.000000,127968.000000,161125.000000,83.219832)}
{pt3dadd(150648.000000,127932.000000,161025.000000,82.083364)}
{pt3dadd(150816.000000,127932.000000,160925.000000,78.668500)}
{pt3dadd(150852.000000,127884.000000,160800.000000,77.608140)}
{pt3dadd(150996.000000,127956.000000,160600.000000,78.744608)}
{pt3dadd(151080.000000,127932.000000,160550.000000,78.744608)}
{pt3dadd(151128.000000,127860.000000,160475.000000,77.180999)}
{pt3dadd(151128.000000,127920.000000,160350.000000,79.389218)}
{pt3dadd(151128.000000,127920.000000,160250.000000,71.352425)}

{create adhoc224}
{access adhoc224}
{connect adhoc224(1), adhoc222(0)}
{nseg = 1}
{strdef color color = "White"}
{pt3dclear()}
{pt3dadd(150648.000000,128160.000000,161325.000000,84.852810)}
{pt3dadd(150552.000000,128136.000000,161400.000000,99.156310)}
{pt3dadd(150468.000000,128040.000000,161450.000000,95.251412)}
{pt3dadd(150384.000000,128112.000000,161525.000000,94.418065)}
{pt3dadd(150324.000000,128160.000000,161600.000000,87.845140)}

{create adhoc225}
{access adhoc225}
{connect adhoc225(1), adhoc221(0)}
{nseg = 1}
{strdef color color = "White"}
{pt3dclear()}
{pt3dadd(150588.000000,128268.000000,161800.000000,108.150055)}
{pt3dadd(150648.000000,128448.000000,161850.000000,98.854445)}
{pt3dadd(150636.000000,128592.000000,161925.000000,89.902123)}
{pt3dadd(150600.000000,128604.000000,162000.000000,83.566840)}
{pt3dadd(150516.000000,128868.000000,162100.000000,76.473640)}
{pt3dadd(150504.000000,128976.000000,162125.000000,76.473640)}

{create adhoc226}
{access adhoc226}
{connect adhoc226(1), adhoc217(0)}
{nseg = 1}
{strdef color color = "White"}
{pt3dclear()}
{pt3dadd(150240.000000,128364.000000,162300.000000,231.824720)}
{pt3dadd(150348.000000,127992.000000,162375.000000,130.985870)}
{pt3dadd(150348.000000,127932.000000,162375.000000,109.720344)}
{pt3dadd(150372.000000,127848.000000,162375.000000,78.129134)}
{pt3dadd(150420.000000,127728.000000,162375.000000,76.079420)}
{pt3dadd(150360.000000,127596.000000,162250.000000,73.987013)}
{pt3dadd(150408.000000,127560.000000,162200.000000,68.921900)}

{create adhoc227}
{access adhoc227}
{connect adhoc227(1), adhoc186(0)}
{nseg = 1}
{strdef color color = "White"}
{pt3dclear()}
{pt3dadd(148860.000000,131940.000000,161550.000000,327.849670)}
{pt3dadd(149304.000000,132504.000000,161450.000000,181.773320)}
{pt3dadd(149460.000000,132552.000000,161450.000000,139.653448)}
{pt3dadd(149604.000000,132660.000000,161525.000000,87.867894)}
{pt3dadd(149784.000000,132732.000000,161600.000000,77.182727)}
{pt3dadd(149976.000000,132780.000000,161700.000000,74.081153)}
{pt3dadd(150264.000000,132792.000000,161850.000000,73.560159)}
{pt3dadd(150432.000000,132708.000000,161950.000000,75.834459)}
{pt3dadd(150528.000000,132600.000000,162025.000000,101.038195)}
{pt3dadd(150768.000000,132576.000000,162175.000000,129.509788)}
{pt3dadd(150876.000000,132252.000000,162300.000000,156.377326)}
{pt3dadd(150984.000000,132132.000000,162450.000000,175.544718)}
{pt3dadd(151080.000000,132060.000000,162600.000000,198.338718)}
{pt3dadd(151440.000000,131880.000000,162750.000000,192.135570)}
{pt3dadd(151464.000000,131892.000000,162950.000000,179.896612)}
{pt3dadd(151596.000000,131820.000000,163125.000000,165.177560)}
{pt3dadd(151824.000000,131616.000000,163275.000000,160.783902)}
{pt3dadd(151848.000000,131400.000000,163475.000000,162.207300)}
{pt3dadd(151980.000000,131184.000000,163700.000000,165.799530)}
{pt3dadd(152064.000000,130944.000000,163925.000000,179.518487)}
{pt3dadd(152160.000000,130884.000000,164025.000000,181.885990)}

{create adhoc228}
{access adhoc228}
{connect adhoc228(1), adhoc227(0)}
{nseg = 1}
{strdef color color = "White"}
{pt3dclear()}
{pt3dadd(152160.000000,130884.000000,164025.000000,181.885990)}
{pt3dadd(151920.000000,131220.000000,164100.000000,140.676713)}
{pt3dadd(151908.000000,131340.000000,164300.000000,115.912360)}

{create adhoc229}
{access adhoc229}
{connect adhoc229(1), adhoc227(0)}
{nseg = 1}
{strdef color color = "White"}
{pt3dclear()}
{pt3dadd(152160.000000,130884.000000,164025.000000,181.885990)}
{pt3dadd(152124.000000,130608.000000,164125.000000,142.137053)}
{pt3dadd(151968.000000,130500.000000,164275.000000,117.508810)}
{pt3dadd(151896.000000,130500.000000,164450.000000,99.961630)}
{pt3dadd(152028.000000,130440.000000,164625.000000,94.420582)}
{pt3dadd(151992.000000,130548.000000,164825.000000,86.532838)}
{pt3dadd(152460.000000,130536.000000,165025.000000,85.472478)}
{pt3dadd(152568.000000,130368.000000,165350.000000,84.914088)}
{pt3dadd(152820.000000,130392.000000,165575.000000,76.504260)}
{pt3dadd(153132.000000,130416.000000,165825.000000,79.170470)}

{create adhoc230}
{access adhoc230}
{connect adhoc230(1), adhoc185(0)}
{nseg = 1}
{strdef color color = "White"}
{pt3dclear()}
{pt3dadd(145380.000000,132108.000000,161675.000000,480.000000)}
{pt3dadd(145200.000000,131904.000000,161925.000000,458.570553)}
{pt3dadd(145116.000000,131784.000000,162025.000000,447.855830)}

{create adhoc231}
{access adhoc231}
{connect adhoc231(1), adhoc230(0)}
{nseg = 1}
{strdef color color = "White"}
{pt3dclear()}
{pt3dadd(145116.000000,131784.000000,162025.000000,447.855830)}
{pt3dadd(144480.000000,131856.000000,162025.000000,207.058797)}
{pt3dadd(144312.000000,131904.000000,162025.000000,158.176402)}
{pt3dadd(144156.000000,131964.000000,162025.000000,84.439330)}
{pt3dadd(143952.000000,132024.000000,162025.000000,80.904040)}
{pt3dadd(143808.000000,132072.000000,162025.000000,80.364674)}
{pt3dadd(143652.000000,132120.000000,161975.000000,75.817291)}
{pt3dadd(143484.000000,132084.000000,161925.000000,72.631109)}
{pt3dadd(143340.000000,132072.000000,161925.000000,71.067500)}
{pt3dadd(143196.000000,132084.000000,161925.000000,67.463406)}
{pt3dadd(142992.000000,132120.000000,161800.000000,71.352425)}

{create adhoc232}
{access adhoc232}
{connect adhoc232(1), adhoc230(0)}
{nseg = 1}
{strdef color color = "White"}
{pt3dclear()}
{pt3dadd(145116.000000,131784.000000,162025.000000,447.855830)}
{pt3dadd(145212.000000,131544.000000,162200.000000,427.861450)}
{pt3dadd(145212.000000,131424.000000,162375.000000,442.288036)}
{pt3dadd(145236.000000,131124.000000,162550.000000,462.991910)}
{pt3dadd(145332.000000,130968.000000,162700.000000,493.077010)}
{pt3dadd(145248.000000,130596.000000,162850.000000,551.375200)}

{create adhoc233}
{access adhoc233}
{connect adhoc233(1), adhoc232(0)}
{nseg = 1}
{strdef color color = "White"}
{pt3dclear()}
{pt3dadd(145248.000000,130596.000000,162850.000000,551.375200)}
{pt3dadd(145080.000000,129792.000000,162850.000000,308.634923)}
{pt3dadd(144876.000000,129336.000000,162850.000000,334.323740)}
{pt3dadd(144660.000000,129120.000000,163100.000000,296.139593)}
{pt3dadd(144588.000000,128916.000000,163125.000000,417.864260)}

{create adhoc234}
{access adhoc234}
{connect adhoc234(1), adhoc233(0)}
{nseg = 1}
{strdef color color = "White"}
{pt3dclear()}
{pt3dadd(144588.000000,128916.000000,163125.000000,417.864260)}
{pt3dadd(144240.000000,128628.000000,163125.000000,317.245847)}
{pt3dadd(144072.000000,128532.000000,163125.000000,291.485348)}
{pt3dadd(143976.000000,128412.000000,163100.000000,257.605212)}
{pt3dadd(143880.000000,128304.000000,163100.000000,253.782604)}
{pt3dadd(143772.000000,128328.000000,163075.000000,253.782604)}
{pt3dadd(143688.000000,128196.000000,163125.000000,257.349220)}
{pt3dadd(143592.000000,128088.000000,163200.000000,262.986036)}
{pt3dadd(143484.000000,128100.000000,163150.000000,270.375260)}
{pt3dadd(143388.000000,128124.000000,163100.000000,270.375260)}
{pt3dadd(143304.000000,128112.000000,163275.000000,284.018924)}
{pt3dadd(143208.000000,128016.000000,163300.000000,296.329526)}
{pt3dadd(143112.000000,127932.000000,163350.000000,307.129836)}
{pt3dadd(143004.000000,127920.000000,163400.000000,320.324006)}
{pt3dadd(142896.000000,127968.000000,163375.000000,345.040906)}
{pt3dadd(142776.000000,128016.000000,163375.000000,359.680758)}
{pt3dadd(142692.000000,127980.000000,163425.000000,380.630868)}
{pt3dadd(142584.000000,128004.000000,163475.000000,371.843552)}
{pt3dadd(142488.000000,127932.000000,163525.000000,369.449692)}
{pt3dadd(142392.000000,127908.000000,163525.000000,364.227854)}
{pt3dadd(142164.000000,127884.000000,163500.000000,332.885963)}
{pt3dadd(142056.000000,127836.000000,163575.000000,363.771970)}

{create adhoc235}
{access adhoc235}
{connect adhoc235(1), adhoc234(0)}
{nseg = 1}
{strdef color color = "White"}
{pt3dclear()}
{pt3dadd(142056.000000,127836.000000,163575.000000,363.771970)}
{pt3dadd(142260.000000,127500.000000,163800.000000,267.794803)}
{pt3dadd(142308.000000,127380.000000,163925.000000,207.153251)}
{pt3dadd(142368.000000,127176.000000,164000.000000,173.386973)}
{pt3dadd(142380.000000,127020.000000,163975.000000,142.440808)}
{pt3dadd(142404.000000,126852.000000,164050.000000,194.940580)}

{create adhoc236}
{access adhoc236}
{connect adhoc236(1), adhoc235(0)}
{nseg = 1}
{strdef color color = "White"}
{pt3dclear()}
{pt3dadd(142404.000000,126852.000000,164050.000000,194.940580)}
{pt3dadd(142308.000000,126708.000000,164025.000000,168.867587)}
{pt3dadd(142188.000000,126552.000000,164025.000000,152.765676)}
{pt3dadd(142164.000000,126408.000000,163925.000000,136.170352)}
{pt3dadd(142056.000000,126324.000000,163975.000000,125.778176)}
{pt3dadd(141912.000000,126240.000000,163975.000000,120.230708)}
{pt3dadd(141768.000000,126108.000000,163975.000000,119.354504)}
{pt3dadd(141672.000000,125988.000000,163975.000000,130.009140)}
{pt3dadd(141600.000000,125784.000000,163975.000000,147.979376)}
{pt3dadd(141564.000000,125580.000000,163975.000000,178.845916)}
{pt3dadd(141540.000000,125376.000000,163975.000000,195.208944)}
{pt3dadd(141504.000000,125184.000000,163975.000000,209.350702)}
{pt3dadd(141480.000000,125040.000000,163950.000000,208.111560)}
{pt3dadd(141432.000000,124848.000000,163950.000000,197.296000)}
{pt3dadd(141396.000000,124668.000000,163950.000000,184.399696)}
{pt3dadd(141348.000000,124488.000000,163950.000000,180.413866)}
{pt3dadd(141312.000000,124296.000000,163950.000000,179.085788)}
{pt3dadd(141228.000000,124200.000000,164000.000000,177.888858)}
{pt3dadd(141120.000000,124104.000000,164050.000000,174.971056)}
{pt3dadd(140988.000000,124020.000000,164125.000000,159.454386)}
{pt3dadd(140892.000000,123936.000000,164250.000000,142.361917)}
{pt3dadd(140808.000000,123972.000000,164375.000000,124.231790)}

{create adhoc237}
{access adhoc237}
{connect adhoc237(1), adhoc235(0)}
{nseg = 1}
{strdef color color = "White"}
{pt3dclear()}
{pt3dadd(142404.000000,126852.000000,164050.000000,194.940580)}
{pt3dadd(142596.000000,126792.000000,164200.000000,122.615330)}
{pt3dadd(142716.000000,126768.000000,164200.000000,102.110168)}
{pt3dadd(142824.000000,126744.000000,164200.000000,74.889090)}
{pt3dadd(142932.000000,126708.000000,164200.000000,71.352425)}

{create adhoc238}
{access adhoc238}
{connect adhoc238(1), adhoc237(0)}
{nseg = 1}
{strdef color color = "White"}
{pt3dclear()}
{pt3dadd(142932.000000,126708.000000,164200.000000,71.352425)}
{pt3dadd(143004.000000,126852.000000,164200.000000,77.495105)}
{pt3dadd(143088.000000,126924.000000,164200.000000,75.902352)}
{pt3dadd(143196.000000,127032.000000,164175.000000,66.574165)}

{create adhoc239}
{access adhoc239}
{connect adhoc239(1), adhoc238(0)}
{nseg = 1}
{strdef color color = "White"}
{pt3dclear()}
{pt3dadd(143196.000000,127032.000000,164175.000000,66.574165)}
{pt3dadd(143292.000000,126996.000000,164250.000000,72.486162)}
{pt3dadd(143160.000000,126972.000000,164400.000000,74.917663)}
{pt3dadd(143148.000000,126948.000000,164525.000000,73.868670)}

{create adhoc240}
{access adhoc240}
{connect adhoc240(1), adhoc238(0)}
{nseg = 1}
{strdef color color = "White"}
{pt3dclear()}
{pt3dadd(143196.000000,127032.000000,164175.000000,66.574165)}
{pt3dadd(143340.000000,127128.000000,164050.000000,74.072758)}
{pt3dadd(143520.000000,127284.000000,163950.000000,76.504260)}
{pt3dadd(143664.000000,127428.000000,163925.000000,73.868670)}

{create adhoc241}
{access adhoc241}
{connect adhoc241(1), adhoc237(0)}
{nseg = 1}
{strdef color color = "White"}
{pt3dclear()}
{pt3dadd(142932.000000,126708.000000,164200.000000,71.352425)}
{pt3dadd(142932.000000,126600.000000,164250.000000,73.958440)}
{pt3dadd(142968.000000,126516.000000,164250.000000,76.989462)}
{pt3dadd(143028.000000,126456.000000,164250.000000,97.857033)}
{pt3dadd(143124.000000,126408.000000,164425.000000,112.920757)}
{pt3dadd(143256.000000,126348.000000,164425.000000,175.690280)}

{create adhoc242}
{access adhoc242}
{connect adhoc242(1), adhoc241(0)}
{nseg = 1}
{strdef color color = "White"}
{pt3dclear()}
{pt3dadd(143256.000000,126348.000000,164425.000000,175.690280)}
{pt3dadd(143292.000000,126228.000000,164575.000000,134.796045)}
{pt3dadd(143292.000000,126132.000000,164625.000000,114.870071)}
{pt3dadd(143328.000000,126072.000000,164625.000000,115.912360)}

{create adhoc243}
{access adhoc243}
{connect adhoc243(1), adhoc242(0)}
{nseg = 1}
{strdef color color = "White"}
{pt3dclear()}
{pt3dadd(143328.000000,126072.000000,164625.000000,115.912360)}
{pt3dadd(143340.000000,126060.000000,164775.000000,114.870071)}
{pt3dadd(143376.000000,126000.000000,164900.000000,106.582079)}
{pt3dadd(143436.000000,125856.000000,165000.000000,100.370169)}
{pt3dadd(143436.000000,125796.000000,165125.000000,90.818539)}
{pt3dadd(143316.000000,125736.000000,165250.000000,84.195811)}
{pt3dadd(143280.000000,125568.000000,165350.000000,77.559625)}
{pt3dadd(143352.000000,125508.000000,165425.000000,71.352425)}

{create adhoc244}
{access adhoc244}
{connect adhoc244(1), adhoc242(0)}
{nseg = 1}
{strdef color color = "White"}
{pt3dclear()}
{pt3dadd(143328.000000,126072.000000,164625.000000,115.912360)}
{pt3dadd(143400.000000,125988.000000,164625.000000,99.302530)}
{pt3dadd(143436.000000,125940.000000,164625.000000,95.980564)}
{pt3dadd(143556.000000,125880.000000,164625.000000,89.768654)}
{pt3dadd(143664.000000,125820.000000,164625.000000,88.507664)}
{pt3dadd(143772.000000,125748.000000,164625.000000,89.127234)}
{pt3dadd(143880.000000,125688.000000,164625.000000,87.392300)}
{pt3dadd(144000.000000,125616.000000,164700.000000,85.532844)}
{pt3dadd(144048.000000,125628.000000,164825.000000,84.988757)}
{pt3dadd(144108.000000,125580.000000,164875.000000,84.852810)}

{create adhoc245}
{access adhoc245}
{connect adhoc245(1), adhoc241(0)}
{nseg = 1}
{strdef color color = "White"}
{pt3dclear()}
{pt3dadd(143256.000000,126348.000000,164425.000000,175.690280)}
{pt3dadd(143460.000000,126348.000000,164300.000000,125.996808)}
{pt3dadd(143580.000000,126372.000000,164200.000000,95.717652)}
{pt3dadd(143652.000000,126288.000000,164150.000000,84.852810)}

{create adhoc246}
{access adhoc246}
{connect adhoc246(1), adhoc234(0)}
{nseg = 1}
{strdef color color = "White"}
{pt3dclear()}
{pt3dadd(142056.000000,127836.000000,163575.000000,363.771970)}
{pt3dadd(141936.000000,127728.000000,163600.000000,381.802733)}
{pt3dadd(141828.000000,127680.000000,163550.000000,335.856296)}
{pt3dadd(141720.000000,127632.000000,163500.000000,304.888328)}
{pt3dadd(141564.000000,127608.000000,163450.000000,269.315476)}
{pt3dadd(141444.000000,127656.000000,163450.000000,246.253798)}
{pt3dadd(141324.000000,127740.000000,163475.000000,242.431190)}
{pt3dadd(141228.000000,127800.000000,163500.000000,240.738474)}
{pt3dadd(141132.000000,127752.000000,163400.000000,248.644764)}
{pt3dadd(141024.000000,127728.000000,163475.000000,252.089888)}
{pt3dadd(140940.000000,127692.000000,163425.000000,263.576084)}
{pt3dadd(140844.000000,127656.000000,163500.000000,275.886686)}
{pt3dadd(140760.000000,127632.000000,163500.000000,289.065598)}
{pt3dadd(140664.000000,127524.000000,163500.000000,304.942816)}
{pt3dadd(140568.000000,127464.000000,163475.000000,326.252086)}
{pt3dadd(140472.000000,127380.000000,163450.000000,337.827568)}
{pt3dadd(140340.000000,127284.000000,163425.000000,340.139884)}
{pt3dadd(140244.000000,127164.000000,163400.000000,344.530906)}
{pt3dadd(140148.000000,127032.000000,163375.000000,351.715366)}
{pt3dadd(140004.000000,127104.000000,163300.000000,342.297352)}
{pt3dadd(139920.000000,126996.000000,163350.000000,332.879338)}
{pt3dadd(139824.000000,126792.000000,163450.000000,335.273198)}
{pt3dadd(139728.000000,126588.000000,163575.000000,330.882176)}
{pt3dadd(139632.000000,126348.000000,163650.000000,324.652337)}
{pt3dadd(139488.000000,126240.000000,163550.000000,305.894560)}

{create adhoc247}
{access adhoc247}
{connect adhoc247(1), adhoc246(0)}
{nseg = 1}
{strdef color color = "White"}
{pt3dclear()}
{pt3dadd(139488.000000,126240.000000,163550.000000,305.894560)}
{pt3dadd(139368.000000,126012.000000,163600.000000,276.681913)}
{pt3dadd(139320.000000,125784.000000,163600.000000,254.717060)}
{pt3dadd(139248.000000,125580.000000,163600.000000,240.000000)}

{create adhoc248}
{access adhoc248}
{connect adhoc248(1), adhoc247(0)}
{nseg = 1}
{strdef color color = "White"}
{pt3dclear()}
{pt3dadd(139248.000000,125580.000000,163600.000000,240.000000)}
{pt3dadd(138948.000000,125556.000000,163600.000000,234.549813)}
{pt3dadd(138780.000000,125508.000000,163675.000000,238.539956)}
{pt3dadd(138660.000000,125448.000000,163650.000000,230.902984)}
{pt3dadd(138528.000000,125424.000000,163675.000000,226.324466)}
{pt3dadd(138420.000000,125340.000000,163725.000000,203.141994)}
{pt3dadd(138312.000000,125340.000000,163775.000000,175.553210)}
{pt3dadd(138204.000000,125256.000000,163775.000000,115.912360)}

{create adhoc249}
{access adhoc249}
{connect adhoc249(1), adhoc248(0)}
{nseg = 1}
{strdef color color = "White"}
{pt3dclear()}
{pt3dadd(138204.000000,125256.000000,163775.000000,115.912360)}
{pt3dadd(138276.000000,125076.000000,163775.000000,102.510913)}
{pt3dadd(138216.000000,124884.000000,163775.000000,105.846964)}
{pt3dadd(138096.000000,124764.000000,163775.000000,108.387054)}
{pt3dadd(137988.000000,124632.000000,163775.000000,116.771630)}
{pt3dadd(137904.000000,124440.000000,163800.000000,128.612810)}

{create adhoc250}
{access adhoc250}
{connect adhoc250(1), adhoc249(0)}
{nseg = 1}
{strdef color color = "White"}
{pt3dclear()}
{pt3dadd(137904.000000,124440.000000,163800.000000,128.612810)}
{pt3dadd(137808.000000,124152.000000,163650.000000,111.602340)}
{pt3dadd(137820.000000,124032.000000,163625.000000,97.015673)}
{pt3dadd(137880.000000,123972.000000,163525.000000,84.852810)}

{create adhoc251}
{access adhoc251}
{connect adhoc251(1), adhoc249(0)}
{nseg = 1}
{strdef color color = "White"}
{pt3dclear()}
{pt3dadd(137904.000000,124440.000000,163800.000000,128.612810)}
{pt3dadd(137664.000000,124356.000000,163725.000000,110.183055)}
{pt3dadd(137412.000000,124152.000000,163600.000000,124.268049)}
{pt3dadd(137184.000000,124152.000000,163525.000000,126.114247)}
{pt3dadd(136968.000000,124056.000000,163325.000000,139.405157)}
{pt3dadd(136776.000000,123876.000000,163175.000000,149.101400)}
{pt3dadd(136500.000000,123504.000000,163025.000000,155.473766)}
{pt3dadd(136188.000000,123288.000000,162900.000000,157.669278)}
{pt3dadd(136032.000000,123036.000000,162900.000000,157.669278)}
{pt3dadd(135876.000000,122880.000000,162700.000000,155.473766)}
{pt3dadd(135768.000000,122592.000000,162800.000000,160.022366)}
{pt3dadd(135648.000000,122292.000000,162800.000000,153.650000)}
{pt3dadd(135504.000000,122112.000000,162925.000000,155.493787)}
{pt3dadd(135540.000000,121836.000000,163000.000000,137.843800)}

{create adhoc252}
{access adhoc252}
{connect adhoc252(1), adhoc251(0)}
{nseg = 1}
{strdef color color = "White"}
{pt3dclear()}
{pt3dadd(135540.000000,121836.000000,163000.000000,137.843800)}
{pt3dadd(135492.000000,121548.000000,163125.000000,114.488048)}
{pt3dadd(135444.000000,121284.000000,163275.000000,113.505312)}
{pt3dadd(135528.000000,121092.000000,163475.000000,111.659114)}
{pt3dadd(135588.000000,121068.000000,163650.000000,111.659114)}
{pt3dadd(135432.000000,121068.000000,163850.000000,110.995074)}
{pt3dadd(135336.000000,121104.000000,164075.000000,107.553661)}
{pt3dadd(135180.000000,121188.000000,164225.000000,103.201207)}
{pt3dadd(135036.000000,121260.000000,164400.000000,91.263025)}
{pt3dadd(135024.000000,121356.000000,164575.000000,84.671660)}
{pt3dadd(135024.000000,121380.000000,164800.000000,68.921900)}

{create adhoc253}
{access adhoc253}
{connect adhoc253(1), adhoc251(0)}
{nseg = 1}
{strdef color color = "White"}
{pt3dclear()}
{pt3dadd(135540.000000,121836.000000,163000.000000,137.843800)}
{pt3dadd(135696.000000,122040.000000,163150.000000,109.821393)}
{pt3dadd(135720.000000,121980.000000,163350.000000,94.150090)}

{create adhoc254}
{access adhoc254}
{connect adhoc254(1), adhoc253(0)}
{nseg = 1}
{strdef color color = "White"}
{pt3dclear()}
{pt3dadd(135720.000000,121980.000000,163350.000000,94.150090)}
{pt3dadd(135780.000000,122052.000000,163525.000000,87.389617)}
{pt3dadd(135732.000000,122016.000000,163700.000000,73.868670)}

{create adhoc255}
{access adhoc255}
{connect adhoc255(1), adhoc253(0)}
{nseg = 1}
{strdef color color = "White"}
{pt3dclear()}
{pt3dadd(135720.000000,121980.000000,163350.000000,94.150090)}
{pt3dadd(135636.000000,122004.000000,163475.000000,93.155173)}
{pt3dadd(135432.000000,122112.000000,163450.000000,88.697760)}
{pt3dadd(135336.000000,122088.000000,163475.000000,85.162470)}
{pt3dadd(135228.000000,122184.000000,163550.000000,80.165640)}
{pt3dadd(135108.000000,122280.000000,163525.000000,76.473640)}

{create adhoc256}
{access adhoc256}
{connect adhoc256(1), adhoc248(0)}
{nseg = 1}
{strdef color color = "White"}
{pt3dclear()}
{pt3dadd(138204.000000,125256.000000,163775.000000,115.912360)}
{pt3dadd(138072.000000,125340.000000,163800.000000,163.020230)}
{pt3dadd(137964.000000,125472.000000,163725.000000,145.812138)}
{pt3dadd(137856.000000,125580.000000,163575.000000,146.629666)}
{pt3dadd(137724.000000,125700.000000,163575.000000,141.889688)}
{pt3dadd(137508.000000,125832.000000,163575.000000,143.800992)}
{pt3dadd(137352.000000,125988.000000,163525.000000,142.983464)}
{pt3dadd(137220.000000,126096.000000,163425.000000,162.243486)}
{pt3dadd(137112.000000,126288.000000,163375.000000,195.325426)}
{pt3dadd(136956.000000,126456.000000,163175.000000,205.874057)}
{pt3dadd(136776.000000,126636.000000,163075.000000,285.409700)}

{create adhoc257}
{access adhoc257}
{connect adhoc257(1), adhoc256(0)}
{nseg = 1}
{strdef color color = "White"}
{pt3dclear()}
{pt3dadd(136776.000000,126636.000000,163075.000000,285.409700)}
{pt3dadd(136476.000000,126816.000000,162925.000000,275.687600)}

{create adhoc258}
{access adhoc258}
{connect adhoc258(1), adhoc257(0)}
{nseg = 1}
{strdef color color = "White"}
{pt3dclear()}
{pt3dadd(136476.000000,126816.000000,162925.000000,275.687600)}
{pt3dadd(136836.000000,126936.000000,162900.000000,156.915087)}
{pt3dadd(136908.000000,127080.000000,162900.000000,126.414342)}
{pt3dadd(136944.000000,127224.000000,162900.000000,108.936860)}
{pt3dadd(136932.000000,127308.000000,162900.000000,116.542213)}
{pt3dadd(136932.000000,127332.000000,162750.000000,188.300190)}

{create adhoc259}
{access adhoc259}
{connect adhoc259(1), adhoc257(0)}
{nseg = 1}
{strdef color color = "White"}
{pt3dclear()}
{pt3dadd(136476.000000,126816.000000,162925.000000,275.687600)}
{pt3dadd(136056.000000,127164.000000,162775.000000,293.074957)}
{pt3dadd(135720.000000,127512.000000,162650.000000,288.512808)}
{pt3dadd(135348.000000,127836.000000,162550.000000,279.675590)}
{pt3dadd(135012.000000,127932.000000,162375.000000,223.927920)}

{create adhoc260}
{access adhoc260}
{connect adhoc260(1), adhoc259(0)}
{nseg = 1}
{strdef color color = "White"}
{pt3dclear()}
{pt3dadd(135012.000000,127932.000000,162375.000000,223.927920)}
{pt3dadd(134604.000000,127932.000000,162200.000000,172.621780)}
{pt3dadd(134328.000000,127920.000000,162100.000000,154.547683)}
{pt3dadd(134028.000000,127872.000000,161975.000000,169.705630)}

{create adhoc261}
{access adhoc261}
{connect adhoc261(1), adhoc260(0)}
{nseg = 1}
{strdef color color = "White"}
{pt3dclear()}
{pt3dadd(134028.000000,127872.000000,161975.000000,169.705630)}
{pt3dadd(133992.000000,127800.000000,161975.000000,149.953991)}
{pt3dadd(133908.000000,127704.000000,161875.000000,122.431478)}
{pt3dadd(133848.000000,127584.000000,161875.000000,107.984410)}
{pt3dadd(133764.000000,127512.000000,161800.000000,86.588568)}
{pt3dadd(133704.000000,127428.000000,161725.000000,97.470290)}

{create adhoc262}
{access adhoc262}
{connect adhoc262(1), adhoc260(0)}
{nseg = 1}
{strdef color color = "White"}
{pt3dclear()}
{pt3dadd(134028.000000,127872.000000,161975.000000,169.705630)}
{pt3dadd(134076.000000,128052.000000,161825.000000,115.912360)}

{create adhoc263}
{access adhoc263}
{connect adhoc263(1), adhoc259(0)}
{nseg = 1}
{strdef color color = "White"}
{pt3dclear()}
{pt3dadd(135012.000000,127932.000000,162375.000000,223.927920)}
{pt3dadd(135120.000000,128088.000000,162525.000000,162.341773)}
{pt3dadd(134976.000000,128268.000000,162450.000000,131.979455)}
{pt3dadd(134844.000000,128484.000000,162325.000000,106.595043)}
{pt3dadd(134892.000000,128376.000000,162025.000000,101.047575)}
{pt3dadd(134928.000000,128388.000000,161825.000000,95.460878)}
{pt3dadd(134964.000000,128628.000000,161600.000000,98.456802)}
{pt3dadd(135156.000000,128724.000000,161525.000000,98.456802)}
{pt3dadd(135228.000000,128832.000000,161500.000000,91.759383)}
{pt3dadd(135324.000000,128820.000000,161475.000000,93.701485)}

{create adhoc264}
{access adhoc264}
{connect adhoc264(1), adhoc256(0)}
{nseg = 1}
{strdef color color = "White"}
{pt3dclear()}
{pt3dadd(136776.000000,126636.000000,163075.000000,285.409700)}
{pt3dadd(136068.000000,127020.000000,163175.000000,163.095477)}
{pt3dadd(135864.000000,127092.000000,163325.000000,138.331978)}
{pt3dadd(135696.000000,127152.000000,163400.000000,97.642522)}
{pt3dadd(135636.000000,127212.000000,163450.000000,90.149362)}
{pt3dadd(135576.000000,127416.000000,163525.000000,98.106018)}
{pt3dadd(135600.000000,127416.000000,163625.000000,100.666282)}
{pt3dadd(135504.000000,127440.000000,163750.000000,99.367386)}
{pt3dadd(135324.000000,127560.000000,163800.000000,99.945464)}
{pt3dadd(135204.000000,127608.000000,163825.000000,95.495802)}
{pt3dadd(135096.000000,127620.000000,163775.000000,88.751378)}
{pt3dadd(135012.000000,127680.000000,163775.000000,79.663668)}
{pt3dadd(134952.000000,127788.000000,163750.000000,69.875210)}
{pt3dadd(134892.000000,127872.000000,163750.000000,68.269710)}
{pt3dadd(134844.000000,127932.000000,163750.000000,35.506220)}

{create adhoc265}
{access adhoc265}
{connect adhoc265(1), adhoc247(0)}
{nseg = 1}
{strdef color color = "White"}
{pt3dclear()}
{pt3dadd(139248.000000,125580.000000,163600.000000,240.000000)}
{pt3dadd(139416.000000,125232.000000,163600.000000,181.434363)}
{pt3dadd(139524.000000,124992.000000,163600.000000,162.063027)}
{pt3dadd(139656.000000,124692.000000,163450.000000,181.885990)}

{create adhoc266}
{access adhoc266}
{connect adhoc266(1), adhoc265(0)}
{nseg = 1}
{strdef color color = "White"}
{pt3dclear()}
{pt3dadd(139656.000000,124692.000000,163450.000000,181.885990)}
{pt3dadd(139704.000000,124500.000000,163425.000000,168.179633)}
{pt3dadd(139740.000000,124320.000000,163350.000000,175.479174)}
{pt3dadd(139764.000000,124200.000000,163225.000000,182.361998)}
{pt3dadd(139800.000000,124080.000000,163250.000000,181.049622)}
{pt3dadd(139860.000000,123960.000000,163275.000000,179.866844)}
{pt3dadd(139812.000000,123804.000000,163325.000000,176.629344)}
{pt3dadd(139896.000000,123648.000000,163300.000000,160.442918)}
{pt3dadd(139788.000000,123480.000000,163325.000000,140.254908)}
{pt3dadd(139764.000000,123348.000000,163325.000000,153.770182)}
{pt3dadd(139788.000000,123228.000000,163350.000000,161.844098)}
{pt3dadd(139800.000000,123084.000000,163275.000000,181.752570)}
{pt3dadd(139968.000000,122988.000000,163350.000000,202.296594)}
{pt3dadd(139908.000000,122868.000000,163350.000000,220.811904)}
{pt3dadd(139944.000000,122712.000000,163325.000000,233.481234)}
{pt3dadd(139932.000000,122568.000000,163300.000000,230.971270)}
{pt3dadd(139992.000000,122424.000000,163325.000000,234.520896)}
{pt3dadd(140016.000000,122316.000000,163275.000000,243.251672)}
{pt3dadd(140064.000000,122196.000000,163325.000000,251.357066)}
{pt3dadd(140196.000000,122100.000000,163325.000000,245.803044)}
{pt3dadd(140136.000000,121992.000000,163350.000000,255.617998)}
{pt3dadd(140136.000000,121848.000000,163350.000000,242.975460)}
{pt3dadd(140064.000000,121752.000000,163325.000000,225.760698)}
{pt3dadd(139980.000000,121632.000000,163275.000000,210.009108)}
{pt3dadd(139932.000000,121536.000000,163150.000000,182.472338)}
{pt3dadd(139860.000000,121392.000000,163100.000000,171.627880)}
{pt3dadd(139848.000000,121236.000000,163025.000000,184.524184)}
{pt3dadd(139812.000000,121080.000000,162925.000000,210.200526)}
{pt3dadd(139872.000000,120948.000000,162850.000000,235.354334)}
{pt3dadd(139740.000000,120816.000000,162750.000000,262.891104)}
{pt3dadd(139812.000000,120684.000000,162725.000000,292.817743)}
{pt3dadd(139776.000000,120552.000000,162725.000000,266.296660)}

{create adhoc267}
{access adhoc267}
{connect adhoc267(1), adhoc266(0)}
{nseg = 1}
{strdef color color = "White"}
{pt3dclear()}
{pt3dadd(139776.000000,120552.000000,162725.000000,266.296660)}
{pt3dadd(139836.000000,120420.000000,162700.000000,253.497137)}
{pt3dadd(139968.000000,120300.000000,162750.000000,215.586876)}
{pt3dadd(139980.000000,120132.000000,162725.000000,192.917000)}
{pt3dadd(139872.000000,120108.000000,162450.000000,170.726204)}
{pt3dadd(139788.000000,119952.000000,162275.000000,163.509866)}
{pt3dadd(139956.000000,119808.000000,162075.000000,170.339596)}
{pt3dadd(139992.000000,119616.000000,161875.000000,178.184896)}
{pt3dadd(139896.000000,119460.000000,161700.000000,181.536566)}
{pt3dadd(139872.000000,119256.000000,161500.000000,201.643384)}
{pt3dadd(139932.000000,119160.000000,161275.000000,222.644808)}
{pt3dadd(139920.000000,118896.000000,161075.000000,228.054036)}
{pt3dadd(139836.000000,118824.000000,160850.000000,226.630638)}
{pt3dadd(139788.000000,118800.000000,160675.000000,219.319178)}
{pt3dadd(139740.000000,118776.000000,160500.000000,181.854255)}
{pt3dadd(139776.000000,118608.000000,160325.000000,172.195557)}
{pt3dadd(139860.000000,118596.000000,160150.000000,168.069169)}
{pt3dadd(139872.000000,118512.000000,159925.000000,168.460792)}
{pt3dadd(139920.000000,118404.000000,159725.000000,188.300190)}

{create adhoc268}
{access adhoc268}
{connect adhoc268(1), adhoc267(0)}
{nseg = 1}
{strdef color color = "White"}
{pt3dclear()}
{pt3dadd(139920.000000,118404.000000,159725.000000,188.300190)}
{pt3dadd(139992.000000,118032.000000,159475.000000,240.000000)}

{create adhoc269}
{access adhoc269}
{connect adhoc269(1), adhoc268(0)}
{nseg = 1}
{strdef color color = "White"}
{pt3dclear()}
{pt3dadd(139992.000000,118032.000000,159475.000000,240.000000)}
{pt3dadd(139728.000000,117660.000000,159400.000000,188.300190)}

{create adhoc270}
{access adhoc270}
{connect adhoc270(1), adhoc269(0)}
{nseg = 1}
{strdef color color = "White"}
{pt3dclear()}
{pt3dadd(139728.000000,117660.000000,159400.000000,188.300190)}
{pt3dadd(139788.000000,117564.000000,159275.000000,170.296893)}
{pt3dadd(139800.000000,117492.000000,159125.000000,144.673653)}
{pt3dadd(139908.000000,117120.000000,158925.000000,111.430470)}

{create adhoc271}
{access adhoc271}
{connect adhoc271(1), adhoc269(0)}
{nseg = 1}
{strdef color color = "White"}
{pt3dclear()}
{pt3dadd(139728.000000,117660.000000,159400.000000,188.300190)}
{pt3dadd(139692.000000,117600.000000,159325.000000,93.414393)}
{pt3dadd(139596.000000,117456.000000,159200.000000,90.942990)}

{create adhoc272}
{access adhoc272}
{connect adhoc272(1), adhoc268(0)}
{nseg = 1}
{strdef color color = "White"}
{pt3dclear()}
{pt3dadd(139992.000000,118032.000000,159475.000000,240.000000)}
{pt3dadd(139920.000000,118248.000000,159375.000000,157.586490)}

{create adhoc273}
{access adhoc273}
{connect adhoc273(1), adhoc267(0)}
{nseg = 1}
{strdef color color = "White"}
{pt3dclear()}
{pt3dadd(139920.000000,118404.000000,159725.000000,188.300190)}
{pt3dadd(139968.000000,117840.000000,159625.000000,145.297483)}
{pt3dadd(139884.000000,117636.000000,159850.000000,133.270253)}
{pt3dadd(140064.000000,117264.000000,159975.000000,152.218500)}

{create adhoc274}
{access adhoc274}
{connect adhoc274(1), adhoc273(0)}
{nseg = 1}
{strdef color color = "White"}
{pt3dclear()}
{pt3dadd(140064.000000,117264.000000,159975.000000,152.218500)}
{pt3dadd(140100.000000,117108.000000,160075.000000,93.701485)}

{create adhoc275}
{access adhoc275}
{connect adhoc275(1), adhoc273(0)}
{nseg = 1}
{strdef color color = "White"}
{pt3dclear()}
{pt3dadd(140064.000000,117264.000000,159975.000000,152.218500)}
{pt3dadd(140184.000000,117132.000000,159825.000000,116.787637)}
{pt3dadd(140268.000000,116988.000000,159800.000000,98.383423)}
{pt3dadd(140196.000000,116856.000000,159775.000000,97.005860)}

{create adhoc276}
{access adhoc276}
{connect adhoc276(1), adhoc266(0)}
{nseg = 1}
{strdef color color = "White"}
{pt3dclear()}
{pt3dadd(139776.000000,120552.000000,162725.000000,266.296660)}
{pt3dadd(140028.000000,120552.000000,162975.000000,280.179387)}
{pt3dadd(139968.000000,120516.000000,163125.000000,217.203340)}
{pt3dadd(140016.000000,120420.000000,163225.000000,156.113163)}
{pt3dadd(139980.000000,120492.000000,163250.000000,107.634740)}

{create adhoc277}
{access adhoc277}
{connect adhoc277(1), adhoc265(0)}
{nseg = 1}
{strdef color color = "White"}
{pt3dclear()}
{pt3dadd(139656.000000,124692.000000,163450.000000,181.885990)}
{pt3dadd(139956.000000,124428.000000,163650.000000,112.583747)}
{pt3dadd(140064.000000,124416.000000,163675.000000,71.012440)}

{create adhoc278}
{access adhoc278}
{connect adhoc278(1), adhoc246(0)}
{nseg = 1}
{strdef color color = "White"}
{pt3dclear()}
{pt3dadd(139488.000000,126240.000000,163550.000000,305.894560)}
{pt3dadd(139536.000000,126168.000000,163900.000000,308.608317)}
{pt3dadd(139548.000000,126120.000000,163975.000000,265.939532)}
{pt3dadd(139560.000000,126036.000000,164000.000000,241.137818)}
{pt3dadd(139632.000000,125928.000000,164000.000000,195.549818)}
{pt3dadd(139644.000000,125832.000000,164025.000000,181.696474)}
{pt3dadd(139536.000000,125676.000000,164225.000000,161.436996)}
{pt3dadd(139500.000000,125640.000000,164425.000000,143.452803)}
{pt3dadd(139488.000000,125628.000000,164550.000000,107.634740)}

{create adhoc279}
{access adhoc279}
{connect adhoc279(1), adhoc278(0)}
{nseg = 1}
{strdef color color = "White"}
{pt3dclear()}
{pt3dadd(139488.000000,125628.000000,164550.000000,107.634740)}
{pt3dadd(139500.000000,125580.000000,164700.000000,135.748707)}
{pt3dadd(139584.000000,125544.000000,164850.000000,135.075396)}
{pt3dadd(139476.000000,125520.000000,165025.000000,136.620460)}
{pt3dadd(139452.000000,125556.000000,165150.000000,127.830307)}
{pt3dadd(139332.000000,125460.000000,165275.000000,115.360060)}

{create adhoc280}
{access adhoc280}
{connect adhoc280(1), adhoc278(0)}
{nseg = 1}
{strdef color color = "White"}
{pt3dclear()}
{pt3dadd(139488.000000,125628.000000,164550.000000,107.634740)}
{pt3dadd(139380.000000,125580.000000,164500.000000,83.475103)}
{pt3dadd(139260.000000,125580.000000,164450.000000,79.650830)}
{pt3dadd(139140.000000,125592.000000,164425.000000,84.626666)}
{pt3dadd(139020.000000,125628.000000,164350.000000,101.370230)}
{pt3dadd(138900.000000,125664.000000,164375.000000,107.767364)}
{pt3dadd(138792.000000,125556.000000,164225.000000,130.335993)}
{pt3dadd(138756.000000,125520.000000,164125.000000,100.907570)}

{create adhoc281}
{access adhoc281}
{connect adhoc281(1), adhoc233(0)}
{nseg = 1}
{strdef color color = "White"}
{pt3dclear()}
{pt3dadd(144588.000000,128916.000000,163125.000000,417.864260)}
{pt3dadd(145032.000000,128328.000000,163125.000000,252.507733)}
{pt3dadd(145224.000000,128184.000000,163250.000000,162.465427)}
{pt3dadd(145260.000000,128064.000000,163300.000000,147.737340)}

{create adhoc282}
{access adhoc282}
{connect adhoc282(1), adhoc281(0)}
{nseg = 1}
{strdef color color = "White"}
{pt3dclear()}
{pt3dadd(145260.000000,128064.000000,163300.000000,147.737340)}
{pt3dadd(145332.000000,127896.000000,163325.000000,144.439493)}
{pt3dadd(145524.000000,127764.000000,163350.000000,133.279471)}
{pt3dadd(145572.000000,127632.000000,163325.000000,140.109201)}
{pt3dadd(145668.000000,127548.000000,163475.000000,148.221771)}
{pt3dadd(145632.000000,127416.000000,163525.000000,166.266330)}
{pt3dadd(145716.000000,127272.000000,163500.000000,188.300190)}

{create adhoc283}
{access adhoc283}
{connect adhoc283(1), adhoc282(0)}
{nseg = 1}
{strdef color color = "White"}
{pt3dclear()}
{pt3dadd(145716.000000,127272.000000,163500.000000,188.300190)}
{pt3dadd(145788.000000,127152.000000,163550.000000,188.601870)}
{pt3dadd(145800.000000,127020.000000,163600.000000,178.778904)}
{pt3dadd(145932.000000,126912.000000,163750.000000,167.926397)}
{pt3dadd(146124.000000,126756.000000,163875.000000,194.940580)}

{create adhoc284}
{access adhoc284}
{connect adhoc284(1), adhoc283(0)}
{nseg = 1}
{strdef color color = "White"}
{pt3dclear()}
{pt3dadd(146124.000000,126756.000000,163875.000000,194.940580)}
{pt3dadd(146232.000000,126552.000000,164025.000000,174.526047)}
{pt3dadd(146340.000000,126288.000000,164150.000000,163.853684)}
{pt3dadd(146328.000000,126192.000000,164325.000000,168.125590)}
{pt3dadd(146268.000000,125976.000000,164525.000000,173.350562)}
{pt3dadd(146268.000000,125688.000000,164675.000000,190.761106)}
{pt3dadd(146316.000000,125400.000000,164850.000000,205.749222)}
{pt3dadd(146376.000000,125076.000000,165025.000000,212.251907)}
{pt3dadd(146424.000000,124428.000000,165125.000000,194.940580)}

{create adhoc285}
{access adhoc285}
{connect adhoc285(1), adhoc284(0)}
{nseg = 1}
{strdef color color = "White"}
{pt3dclear()}
{pt3dadd(146424.000000,124428.000000,165125.000000,194.940580)}
{pt3dadd(146784.000000,124116.000000,165625.000000,154.583277)}
{pt3dadd(146796.000000,123960.000000,165750.000000,73.868670)}

{create adhoc286}
{access adhoc286}
{connect adhoc286(1), adhoc284(0)}
{nseg = 1}
{strdef color color = "White"}
{pt3dclear()}
{pt3dadd(146424.000000,124428.000000,165125.000000,194.940580)}
{pt3dadd(146532.000000,123744.000000,165025.000000,206.064693)}
{pt3dadd(146628.000000,123588.000000,165250.000000,239.576057)}
{pt3dadd(146640.000000,123396.000000,165150.000000,295.474670)}

{create adhoc287}
{access adhoc287}
{connect adhoc287(1), adhoc286(0)}
{nseg = 1}
{strdef color color = "White"}
{pt3dclear()}
{pt3dadd(146640.000000,123396.000000,165150.000000,295.474670)}
{pt3dadd(146508.000000,123180.000000,165025.000000,193.856760)}
{pt3dadd(146340.000000,123036.000000,165000.000000,167.759180)}
{pt3dadd(146196.000000,122844.000000,164925.000000,135.293912)}
{pt3dadd(146064.000000,122664.000000,164900.000000,130.427018)}
{pt3dadd(145968.000000,122508.000000,164900.000000,129.519914)}
{pt3dadd(145848.000000,122400.000000,164925.000000,134.386808)}
{pt3dadd(145620.000000,122304.000000,164875.000000,140.332434)}
{pt3dadd(145416.000000,122148.000000,164825.000000,174.881680)}
{pt3dadd(145428.000000,121956.000000,164650.000000,212.495498)}
{pt3dadd(145452.000000,121836.000000,164450.000000,260.305800)}
{pt3dadd(145536.000000,121692.000000,164350.000000,316.681900)}

{create adhoc288}
{access adhoc288}
{connect adhoc288(1), adhoc287(0)}
{nseg = 1}
{strdef color color = "White"}
{pt3dclear()}
{pt3dadd(145536.000000,121692.000000,164350.000000,316.681900)}
{pt3dadd(145680.000000,121560.000000,164200.000000,316.681900)}

{create adhoc289}
{access adhoc289}
{connect adhoc289(1), adhoc288(0)}
{nseg = 1}
{strdef color color = "White"}
{pt3dclear()}
{pt3dadd(145680.000000,121560.000000,164200.000000,316.681900)}
{pt3dadd(145788.000000,121440.000000,164175.000000,289.352367)}
{pt3dadd(145860.000000,121308.000000,164125.000000,275.687600)}

{create adhoc290}
{access adhoc290}
{connect adhoc290(1), adhoc289(0)}
{nseg = 1}
{strdef color color = "White"}
{pt3dclear()}
{pt3dadd(145860.000000,121308.000000,164125.000000,275.687600)}
{pt3dadd(145836.000000,121332.000000,163925.000000,199.980147)}
{pt3dadd(145692.000000,121224.000000,163725.000000,135.405087)}
{pt3dadd(145608.000000,121200.000000,163725.000000,81.962420)}

{create adhoc291}
{access adhoc291}
{connect adhoc291(1), adhoc289(0)}
{nseg = 1}
{strdef color color = "White"}
{pt3dclear()}
{pt3dadd(145860.000000,121308.000000,164125.000000,275.687600)}
{pt3dadd(145908.000000,121188.000000,164200.000000,270.387423)}
{pt3dadd(145860.000000,121008.000000,164375.000000,244.678076)}
{pt3dadd(145884.000000,120888.000000,164375.000000,224.678612)}
{pt3dadd(146040.000000,120744.000000,164375.000000,203.243716)}
{pt3dadd(146112.000000,120648.000000,164375.000000,189.184842)}
{pt3dadd(146268.000000,120564.000000,164375.000000,190.764202)}
{pt3dadd(146424.000000,120480.000000,164375.000000,179.733830)}
{pt3dadd(146568.000000,120396.000000,164275.000000,170.318336)}
{pt3dadd(146628.000000,120336.000000,164400.000000,158.380860)}
{pt3dadd(146712.000000,120288.000000,164400.000000,151.069400)}
{pt3dadd(146820.000000,120240.000000,164400.000000,130.124650)}
{pt3dadd(146916.000000,120180.000000,164400.000000,133.148330)}

{create adhoc292}
{access adhoc292}
{connect adhoc292(1), adhoc291(0)}
{nseg = 1}
{strdef color color = "White"}
{pt3dclear()}
{pt3dadd(146916.000000,120180.000000,164400.000000,133.148330)}
{pt3dadd(147000.000000,120012.000000,164525.000000,125.793373)}
{pt3dadd(147204.000000,119928.000000,164550.000000,124.281533)}
{pt3dadd(147312.000000,119808.000000,164600.000000,128.612810)}

{create adhoc293}
{access adhoc293}
{connect adhoc293(1), adhoc292(0)}
{nseg = 1}
{strdef color color = "White"}
{pt3dclear()}
{pt3dadd(147312.000000,119808.000000,164600.000000,128.612810)}
{pt3dadd(147396.000000,119748.000000,164650.000000,133.201647)}
{pt3dadd(147432.000000,119676.000000,164650.000000,140.057912)}
{pt3dadd(147456.000000,119604.000000,164650.000000,140.057912)}
{pt3dadd(147492.000000,119508.000000,164650.000000,139.150808)}
{pt3dadd(147504.000000,119400.000000,164650.000000,136.724300)}
{pt3dadd(147552.000000,119280.000000,164650.000000,128.612810)}

{create adhoc294}
{access adhoc294}
{connect adhoc294(1), adhoc293(0)}
{nseg = 1}
{strdef color color = "White"}
{pt3dclear()}
{pt3dadd(147552.000000,119280.000000,164650.000000,128.612810)}
{pt3dadd(147624.000000,119196.000000,164650.000000,131.689807)}
{pt3dadd(147660.000000,119088.000000,164650.000000,117.216372)}
{pt3dadd(147636.000000,119052.000000,164725.000000,118.931210)}
{pt3dadd(147876.000000,118980.000000,164800.000000,119.838314)}
{pt3dadd(148044.000000,119052.000000,164850.000000,116.269554)}
{pt3dadd(148140.000000,119064.000000,164875.000000,105.988254)}
{pt3dadd(148188.000000,119064.000000,164850.000000,103.728588)}
{pt3dadd(148272.000000,119028.000000,164875.000000,90.493676)}
{pt3dadd(148356.000000,118980.000000,164875.000000,64.064010)}
{pt3dadd(148368.000000,118920.000000,164875.000000,43.908850)}
{pt3dadd(148368.000000,118860.000000,164875.000000,1.000000)}

{create adhoc295}
{access adhoc295}
{connect adhoc295(1), adhoc293(0)}
{nseg = 1}
{strdef color color = "White"}
{pt3dclear()}
{pt3dadd(147552.000000,119280.000000,164650.000000,128.612810)}
{pt3dadd(147336.000000,119112.000000,164525.000000,124.084220)}
{pt3dadd(147336.000000,119124.000000,164400.000000,121.213283)}
{pt3dadd(147324.000000,119208.000000,164375.000000,120.000000)}

{create adhoc296}
{access adhoc296}
{connect adhoc296(1), adhoc292(0)}
{nseg = 1}
{strdef color color = "White"}
{pt3dclear()}
{pt3dadd(147312.000000,119808.000000,164600.000000,128.612810)}
{pt3dadd(147468.000000,119772.000000,164800.000000,104.883585)}
{pt3dadd(147600.000000,119904.000000,164875.000000,99.678949)}
{pt3dadd(147732.000000,119700.000000,164950.000000,92.696684)}
{pt3dadd(147804.000000,119676.000000,165050.000000,92.597133)}
{pt3dadd(147852.000000,119580.000000,165125.000000,97.809705)}
{pt3dadd(147888.000000,119496.000000,165125.000000,92.597133)}
{pt3dadd(147912.000000,119376.000000,165125.000000,91.577771)}
{pt3dadd(147936.000000,119256.000000,165125.000000,86.739687)}
{pt3dadd(147960.000000,119124.000000,165100.000000,71.012440)}

{create adhoc297}
{access adhoc297}
{connect adhoc297(1), adhoc291(0)}
{nseg = 1}
{strdef color color = "White"}
{pt3dclear()}
{pt3dadd(146916.000000,120180.000000,164400.000000,133.148330)}
{pt3dadd(147048.000000,120264.000000,164075.000000,161.582180)}
{pt3dadd(147228.000000,120204.000000,163950.000000,139.532952)}
{pt3dadd(147228.000000,120288.000000,163725.000000,135.643313)}
{pt3dadd(147288.000000,120360.000000,163675.000000,97.005860)}

{create adhoc298}
{access adhoc298}
{connect adhoc298(1), adhoc297(0)}
{nseg = 1}
{strdef color color = "White"}
{pt3dclear()}
{pt3dadd(147288.000000,120360.000000,163675.000000,97.005860)}
{pt3dadd(147348.000000,120300.000000,163575.000000,137.469610)}
{pt3dadd(147312.000000,120312.000000,163400.000000,146.347607)}
{pt3dadd(147372.000000,120216.000000,163350.000000,123.639850)}

{create adhoc299}
{access adhoc299}
{connect adhoc299(1), adhoc297(0)}
{nseg = 1}
{strdef color color = "White"}
{pt3dclear()}
{pt3dadd(147288.000000,120360.000000,163675.000000,97.005860)}
{pt3dadd(147288.000000,120468.000000,163700.000000,122.235593)}
{pt3dadd(147336.000000,120660.000000,163725.000000,117.252516)}
{pt3dadd(147312.000000,120780.000000,163725.000000,118.914267)}
{pt3dadd(147324.000000,120936.000000,163725.000000,90.942990)}

{create adhoc300}
{access adhoc300}
{connect adhoc300(1), adhoc288(0)}
{nseg = 1}
{strdef color color = "White"}
{pt3dclear()}
{pt3dadd(145680.000000,121560.000000,164200.000000,316.681900)}
{pt3dadd(145608.000000,121980.000000,163775.000000,221.523253)}
{pt3dadd(145632.000000,121944.000000,163625.000000,163.190255)}
{pt3dadd(145740.000000,122028.000000,163625.000000,115.075725)}
{pt3dadd(145860.000000,122088.000000,163625.000000,90.290097)}
{pt3dadd(145992.000000,122148.000000,163625.000000,74.403979)}
{pt3dadd(146124.000000,122208.000000,163625.000000,73.546127)}
{pt3dadd(146220.000000,122256.000000,163650.000000,73.516690)}

{create adhoc301}
{access adhoc301}
{connect adhoc301(1), adhoc287(0)}
{nseg = 1}
{strdef color color = "White"}
{pt3dclear()}
{pt3dadd(145536.000000,121692.000000,164350.000000,316.681900)}
{pt3dadd(145608.000000,122052.000000,164125.000000,186.365203)}
{pt3dadd(145668.000000,122196.000000,164125.000000,156.942856)}
{pt3dadd(145656.000000,122328.000000,164125.000000,131.266514)}
{pt3dadd(145656.000000,122556.000000,164050.000000,129.155298)}
{pt3dadd(145656.000000,122736.000000,164000.000000,142.992930)}
{pt3dadd(145668.000000,122832.000000,164000.000000,163.115327)}
{pt3dadd(145620.000000,122868.000000,164025.000000,142.704850)}

{create adhoc302}
{access adhoc302}
{connect adhoc302(1), adhoc286(0)}
{nseg = 1}
{strdef color color = "White"}
{pt3dclear()}
{pt3dadd(146640.000000,123396.000000,165150.000000,295.474670)}
{pt3dadd(147048.000000,123300.000000,165250.000000,197.931037)}
{pt3dadd(147216.000000,123048.000000,165250.000000,216.314732)}
{pt3dadd(147348.000000,122808.000000,165250.000000,203.584742)}
{pt3dadd(147372.000000,122532.000000,165450.000000,211.803306)}
{pt3dadd(147252.000000,122328.000000,165550.000000,192.132665)}
{pt3dadd(147396.000000,122160.000000,165625.000000,192.132665)}
{pt3dadd(147492.000000,122040.000000,165650.000000,140.981348)}
{pt3dadd(147480.000000,121812.000000,165550.000000,181.885990)}

{create adhoc303}
{access adhoc303}
{connect adhoc303(1), adhoc302(0)}
{nseg = 1}
{strdef color color = "White"}
{pt3dclear()}
{pt3dadd(147480.000000,121812.000000,165550.000000,181.885990)}
{pt3dadd(147372.000000,121788.000000,165675.000000,126.586923)}
{pt3dadd(147252.000000,121752.000000,165775.000000,115.627726)}
{pt3dadd(147384.000000,121704.000000,165900.000000,93.446760)}
{pt3dadd(147360.000000,121656.000000,165950.000000,97.470290)}

{create adhoc304}
{access adhoc304}
{connect adhoc304(1), adhoc302(0)}
{nseg = 1}
{strdef color color = "White"}
{pt3dclear()}
{pt3dadd(147480.000000,121812.000000,165550.000000,181.885990)}
{pt3dadd(147492.000000,121800.000000,165425.000000,195.252900)}
{pt3dadd(147492.000000,121764.000000,165350.000000,181.862418)}
{pt3dadd(147600.000000,121752.000000,165225.000000,195.177936)}
{pt3dadd(147816.000000,121500.000000,165175.000000,197.976246)}
{pt3dadd(147876.000000,121548.000000,165075.000000,188.974788)}
{pt3dadd(147876.000000,121584.000000,165050.000000,207.106850)}
{pt3dadd(147864.000000,121680.000000,165050.000000,163.924840)}

{create adhoc305}
{access adhoc305}
{connect adhoc305(1), adhoc283(0)}
{nseg = 1}
{strdef color color = "White"}
{pt3dclear()}
{pt3dadd(146124.000000,126756.000000,163875.000000,194.940580)}
{pt3dadd(145956.000000,126744.000000,164050.000000,172.129700)}
{pt3dadd(145872.000000,126720.000000,164150.000000,188.300190)}

{create adhoc306}
{access adhoc306}
{connect adhoc306(1), adhoc282(0)}
{nseg = 1}
{strdef color color = "White"}
{pt3dclear()}
{pt3dadd(145716.000000,127272.000000,163500.000000,188.300190)}
{pt3dadd(145680.000000,126960.000000,163400.000000,138.725503)}
{pt3dadd(145668.000000,126816.000000,163375.000000,136.587437)}
{pt3dadd(145620.000000,126732.000000,163325.000000,181.885990)}

{create adhoc307}
{access adhoc307}
{connect adhoc307(1), adhoc306(0)}
{nseg = 1}
{strdef color color = "White"}
{pt3dclear()}
{pt3dadd(145620.000000,126732.000000,163325.000000,181.885990)}
{pt3dadd(145728.000000,126696.000000,163200.000000,149.785550)}
{pt3dadd(145716.000000,126648.000000,163125.000000,137.900160)}
{pt3dadd(145728.000000,126564.000000,163025.000000,134.307930)}
{pt3dadd(145668.000000,126456.000000,162925.000000,119.830364)}
{pt3dadd(145788.000000,126372.000000,162875.000000,134.689663)}
{pt3dadd(145860.000000,126288.000000,162775.000000,115.912360)}

{create adhoc308}
{access adhoc308}
{connect adhoc308(1), adhoc307(0)}
{nseg = 1}
{strdef color color = "White"}
{pt3dclear()}
{pt3dadd(145860.000000,126288.000000,162775.000000,115.912360)}
{pt3dadd(145848.000000,126288.000000,162600.000000,175.690280)}

{create adhoc309}
{access adhoc309}
{connect adhoc309(1), adhoc308(0)}
{nseg = 1}
{strdef color color = "White"}
{pt3dclear()}
{pt3dadd(145848.000000,126288.000000,162600.000000,175.690280)}
{pt3dadd(145788.000000,126444.000000,162575.000000,156.542567)}
{pt3dadd(145608.000000,126540.000000,162500.000000,137.289526)}
{pt3dadd(145536.000000,126564.000000,162400.000000,128.781136)}
{pt3dadd(145440.000000,126624.000000,162300.000000,116.470021)}
{pt3dadd(145332.000000,126648.000000,162300.000000,108.016147)}
{pt3dadd(145260.000000,126684.000000,162300.000000,103.022273)}
{pt3dadd(145164.000000,126720.000000,162300.000000,103.733972)}
{pt3dadd(145068.000000,126720.000000,162350.000000,97.285820)}
{pt3dadd(144996.000000,126744.000000,162375.000000,93.224837)}
{pt3dadd(144900.000000,126768.000000,162275.000000,95.020951)}
{pt3dadd(144876.000000,126792.000000,162175.000000,101.678711)}
{pt3dadd(144732.000000,126888.000000,162075.000000,101.006640)}
{pt3dadd(144732.000000,126864.000000,161975.000000,124.231790)}

{create adhoc310}
{access adhoc310}
{connect adhoc310(1), adhoc308(0)}
{nseg = 1}
{strdef color color = "White"}
{pt3dclear()}
{pt3dadd(145848.000000,126288.000000,162600.000000,175.690280)}
{pt3dadd(145944.000000,126180.000000,162525.000000,171.783073)}
{pt3dadd(145932.000000,126120.000000,162450.000000,137.843800)}

{create adhoc311}
{access adhoc311}
{connect adhoc311(1), adhoc307(0)}
{nseg = 1}
{strdef color color = "White"}
{pt3dclear()}
{pt3dadd(145860.000000,126288.000000,162775.000000,115.912360)}
{pt3dadd(145956.000000,126108.000000,162725.000000,142.255100)}
{pt3dadd(146112.000000,125964.000000,162750.000000,180.398818)}
{pt3dadd(146100.000000,125796.000000,162775.000000,223.389790)}
{pt3dadd(146004.000000,125556.000000,162800.000000,266.296660)}

{create adhoc312}
{access adhoc312}
{connect adhoc312(1), adhoc311(0)}
{nseg = 1}
{strdef color color = "White"}
{pt3dclear()}
{pt3dadd(146004.000000,125556.000000,162800.000000,266.296660)}
{pt3dadd(145800.000000,125484.000000,162725.000000,180.661420)}
{pt3dadd(145800.000000,125544.000000,162600.000000,171.895867)}
{pt3dadd(145812.000000,125520.000000,162550.000000,240.000000)}

{create adhoc313}
{access adhoc313}
{connect adhoc313(1), adhoc311(0)}
{nseg = 1}
{strdef color color = "White"}
{pt3dclear()}
{pt3dadd(146004.000000,125556.000000,162800.000000,266.296660)}
{pt3dadd(145956.000000,125484.000000,162950.000000,185.579617)}
{pt3dadd(146004.000000,125376.000000,163050.000000,160.781953)}
{pt3dadd(146088.000000,125496.000000,163150.000000,131.636085)}
{pt3dadd(146160.000000,125544.000000,163250.000000,142.704850)}

{create adhoc314}
{access adhoc314}
{connect adhoc314(1), adhoc306(0)}
{nseg = 1}
{strdef color color = "White"}
{pt3dclear()}
{pt3dadd(145620.000000,126732.000000,163325.000000,181.885990)}
{pt3dadd(145512.000000,126660.000000,163300.000000,127.550387)}
{pt3dadd(145416.000000,126732.000000,163175.000000,91.544613)}
{pt3dadd(145296.000000,126732.000000,163125.000000,73.868670)}

{create adhoc315}
{access adhoc315}
{connect adhoc315(1), adhoc281(0)}
{nseg = 1}
{strdef color color = "White"}
{pt3dclear()}
{pt3dadd(145260.000000,128064.000000,163300.000000,147.737340)}
{pt3dadd(145032.000000,127932.000000,163375.000000,206.162600)}
{pt3dadd(144900.000000,127824.000000,163475.000000,258.881673)}
{pt3dadd(144852.000000,127836.000000,163500.000000,305.894560)}

{create adhoc316}
{access adhoc316}
{connect adhoc316(1), adhoc232(0)}
{nseg = 1}
{strdef color color = "White"}
{pt3dclear()}
{pt3dadd(145248.000000,130596.000000,162850.000000,551.375200)}
{pt3dadd(145500.000000,130512.000000,163175.000000,652.580550)}
{pt3dadd(145500.000000,130380.000000,163375.000000,591.882382)}
{pt3dadd(145776.000000,130176.000000,163425.000000,559.583574)}
{pt3dadd(146016.000000,130200.000000,163625.000000,491.701324)}
{pt3dadd(146124.000000,130260.000000,163850.000000,416.468644)}
{pt3dadd(146208.000000,130212.000000,164000.000000,372.087056)}
{pt3dadd(146424.000000,130188.000000,164125.000000,372.087056)}
{pt3dadd(146376.000000,130092.000000,164250.000000,366.865218)}
{pt3dadd(146196.000000,130140.000000,164350.000000,366.865218)}
{pt3dadd(146112.000000,130068.000000,164475.000000,364.471358)}
{pt3dadd(146040.000000,130032.000000,164575.000000,345.590060)}
{pt3dadd(146136.000000,130008.000000,164700.000000,328.792740)}
{pt3dadd(146172.000000,130056.000000,164850.000000,319.374726)}
{pt3dadd(146268.000000,130008.000000,164975.000000,312.671388)}
{pt3dadd(146292.000000,129948.000000,165075.000000,310.359072)}
{pt3dadd(146352.000000,129816.000000,165200.000000,316.834072)}
{pt3dadd(146268.000000,129840.000000,165325.000000,321.225094)}
{pt3dadd(146340.000000,129732.000000,165400.000000,333.208788)}
{pt3dadd(146316.000000,129672.000000,165500.000000,361.601042)}
{pt3dadd(146340.000000,129540.000000,165625.000000,402.549768)}
{pt3dadd(146352.000000,129432.000000,165850.000000,436.365264)}
{pt3dadd(146472.000000,129276.000000,165950.000000,492.458760)}
{pt3dadd(146508.000000,129192.000000,166075.000000,496.927150)}

{create adhoc317}
{access adhoc317}
{connect adhoc317(1), adhoc316(0)}
{nseg = 1}
{strdef color color = "White"}
{pt3dclear()}
{pt3dadd(146508.000000,129192.000000,166075.000000,496.927150)}
{pt3dadd(146100.000000,129192.000000,166225.000000,485.642383)}
{pt3dadd(146052.000000,129084.000000,166375.000000,480.342026)}
{pt3dadd(145848.000000,129072.000000,166500.000000,480.342026)}
{pt3dadd(145644.000000,128652.000000,166650.000000,487.232272)}
{pt3dadd(145332.000000,128580.000000,166800.000000,497.750932)}
{pt3dadd(145032.000000,128580.000000,166925.000000,488.905822)}
{pt3dadd(144720.000000,128604.000000,167075.000000,462.274786)}
{pt3dadd(144468.000000,128748.000000,167175.000000,433.331850)}
{pt3dadd(144300.000000,129012.000000,167400.000000,363.771970)}

{create adhoc318}
{access adhoc318}
{connect adhoc318(1), adhoc317(0)}
{nseg = 1}
{strdef color color = "White"}
{pt3dclear()}
{pt3dadd(144300.000000,129012.000000,167400.000000,363.771970)}
{pt3dadd(144012.000000,129084.000000,167575.000000,359.641497)}
{pt3dadd(143676.000000,129228.000000,167800.000000,343.944807)}
{pt3dadd(143448.000000,129300.000000,168025.000000,316.681900)}

{create adhoc319}
{access adhoc319}
{connect adhoc319(1), adhoc318(0)}
{nseg = 1}
{strdef color color = "White"}
{pt3dclear()}
{pt3dadd(143448.000000,129300.000000,168025.000000,316.681900)}
{pt3dadd(142380.000000,129264.000000,167925.000000,454.087467)}
{pt3dadd(142080.000000,129120.000000,167925.000000,389.881160)}

{create adhoc320}
{access adhoc320}
{connect adhoc320(1), adhoc319(0)}
{nseg = 1}
{strdef color color = "White"}
{pt3dclear()}
{pt3dadd(142080.000000,129120.000000,167925.000000,389.881160)}
{pt3dadd(141756.000000,128844.000000,167775.000000,335.852790)}
{pt3dadd(141444.000000,128400.000000,167650.000000,275.637846)}
{pt3dadd(141072.000000,127968.000000,167500.000000,228.251070)}
{pt3dadd(140952.000000,127824.000000,167475.000000,186.515930)}
{pt3dadd(140820.000000,127668.000000,167400.000000,176.516620)}
{pt3dadd(140700.000000,127536.000000,167350.000000,173.046752)}
{pt3dadd(140616.000000,127392.000000,167400.000000,170.435834)}
{pt3dadd(140544.000000,127248.000000,167350.000000,171.514566)}
{pt3dadd(140424.000000,127104.000000,167300.000000,174.641784)}
{pt3dadd(140340.000000,126960.000000,167200.000000,173.168188)}
{pt3dadd(140268.000000,126816.000000,167200.000000,187.864944)}
{pt3dadd(140244.000000,126300.000000,167050.000000,186.625802)}
{pt3dadd(140040.000000,126000.000000,166925.000000,193.945730)}
{pt3dadd(139908.000000,125676.000000,166725.000000,219.359482)}
{pt3dadd(139848.000000,125520.000000,166725.000000,273.573056)}
{pt3dadd(139740.000000,125292.000000,166575.000000,323.208112)}
{pt3dadd(139824.000000,125124.000000,166450.000000,368.796112)}
{pt3dadd(139812.000000,124932.000000,166350.000000,413.380848)}
{pt3dadd(139776.000000,124824.000000,166500.000000,429.053302)}
{pt3dadd(139728.000000,124656.000000,166625.000000,395.088837)}
{pt3dadd(139692.000000,124536.000000,166550.000000,363.771970)}

{create adhoc321}
{access adhoc321}
{connect adhoc321(1), adhoc320(0)}
{nseg = 1}
{strdef color color = "White"}
{pt3dclear()}
{pt3dadd(139692.000000,124536.000000,166550.000000,363.771970)}
{pt3dadd(139608.000000,124392.000000,166350.000000,458.788423)}
{pt3dadd(139596.000000,124248.000000,166275.000000,411.363828)}
{pt3dadd(139608.000000,124464.000000,166025.000000,370.277622)}
{pt3dadd(139512.000000,124428.000000,165850.000000,329.328896)}
{pt3dadd(139176.000000,124320.000000,165700.000000,267.624170)}
{pt3dadd(138504.000000,124008.000000,165550.000000,327.849670)}

{create adhoc322}
{access adhoc322}
{connect adhoc322(1), adhoc321(0)}
{nseg = 1}
{strdef color color = "White"}
{pt3dclear()}
{pt3dadd(138504.000000,124008.000000,165550.000000,327.849670)}
{pt3dadd(138960.000000,124356.000000,165400.000000,336.101180)}
{pt3dadd(138864.000000,124596.000000,165100.000000,304.092863)}
{pt3dadd(138756.000000,124836.000000,165075.000000,231.824720)}

{create adhoc323}
{access adhoc323}
{connect adhoc323(1), adhoc321(0)}
{nseg = 1}
{strdef color color = "White"}
{pt3dclear()}
{pt3dadd(138504.000000,124008.000000,165550.000000,327.849670)}
{pt3dadd(138312.000000,123864.000000,165550.000000,306.384643)}
{pt3dadd(138156.000000,123720.000000,165550.000000,294.105826)}
{pt3dadd(137964.000000,123264.000000,165350.000000,285.756587)}
{pt3dadd(137808.000000,122844.000000,165125.000000,275.687600)}

{create adhoc324}
{access adhoc324}
{connect adhoc324(1), adhoc323(0)}
{nseg = 1}
{strdef color color = "White"}
{pt3dclear()}
{pt3dadd(137808.000000,122844.000000,165125.000000,275.687600)}
{pt3dadd(137928.000000,122544.000000,164950.000000,283.198373)}
{pt3dadd(138120.000000,122328.000000,164925.000000,316.681900)}

{create adhoc325}
{access adhoc325}
{connect adhoc325(1), adhoc324(0)}
{nseg = 1}
{strdef color color = "White"}
{pt3dclear()}
{pt3dadd(138120.000000,122328.000000,164925.000000,316.681900)}
{pt3dadd(138540.000000,122148.000000,165150.000000,301.518910)}
{pt3dadd(138852.000000,121632.000000,165300.000000,228.940176)}
{pt3dadd(139116.000000,121476.000000,165300.000000,192.233462)}
{pt3dadd(139308.000000,121392.000000,165300.000000,150.980878)}
{pt3dadd(139404.000000,121224.000000,165300.000000,136.426218)}
{pt3dadd(139512.000000,121068.000000,165300.000000,156.503768)}
{pt3dadd(139608.000000,120912.000000,165300.000000,184.916742)}
{pt3dadd(139668.000000,120756.000000,165300.000000,233.607150)}
{pt3dadd(139848.000000,120576.000000,165175.000000,242.115540)}
{pt3dadd(139920.000000,120420.000000,165125.000000,272.862437)}
{pt3dadd(140076.000000,120384.000000,164950.000000,175.690280)}

{create adhoc326}
{access adhoc326}
{connect adhoc326(1), adhoc325(0)}
{nseg = 1}
{strdef color color = "White"}
{pt3dclear()}
{pt3dadd(140076.000000,120384.000000,164950.000000,175.690280)}
{pt3dadd(140472.000000,120228.000000,164850.000000,204.933963)}
{pt3dadd(140496.000000,120012.000000,164750.000000,219.884324)}
{pt3dadd(140484.000000,119844.000000,164550.000000,228.006290)}
{pt3dadd(140544.000000,119568.000000,164400.000000,233.639947)}
{pt3dadd(140796.000000,119412.000000,164225.000000,216.300110)}

{create adhoc327}
{access adhoc327}
{connect adhoc327(1), adhoc326(0)}
{nseg = 1}
{strdef color color = "White"}
{pt3dclear()}
{pt3dadd(140796.000000,119412.000000,164225.000000,216.300110)}
{pt3dadd(140976.000000,119412.000000,164050.000000,318.900673)}
{pt3dadd(141036.000000,119100.000000,163900.000000,450.082492)}
{pt3dadd(140940.000000,118920.000000,163700.000000,509.712716)}
{pt3dadd(140844.000000,118872.000000,163500.000000,586.880400)}
{pt3dadd(140784.000000,118872.000000,163325.000000,539.842654)}
{pt3dadd(140724.000000,118812.000000,163150.000000,521.648254)}
{pt3dadd(140364.000000,118824.000000,162925.000000,502.843816)}
{pt3dadd(139788.000000,119292.000000,162775.000000,489.524736)}
{pt3dadd(139428.000000,119736.000000,162800.000000,476.205656)}
{pt3dadd(139728.000000,119604.000000,163025.000000,507.404242)}
{pt3dadd(139620.000000,119664.000000,162700.000000,495.321462)}
{pt3dadd(139476.000000,119556.000000,162500.000000,437.722458)}
{pt3dadd(139668.000000,119304.000000,162225.000000,370.544084)}
{pt3dadd(139788.000000,118428.000000,162050.000000,304.155390)}
{pt3dadd(139872.000000,117756.000000,161975.000000,220.819202)}
{pt3dadd(139980.000000,117396.000000,161825.000000,130.725676)}
{pt3dadd(140088.000000,117120.000000,161650.000000,109.832463)}
{pt3dadd(140292.000000,116892.000000,161475.000000,112.286029)}
{pt3dadd(140544.000000,116700.000000,161325.000000,128.091673)}
{pt3dadd(140724.000000,116568.000000,161125.000000,133.450171)}
{pt3dadd(140784.000000,116412.000000,160875.000000,132.762715)}
{pt3dadd(140712.000000,116136.000000,160700.000000,257.378292)}
{pt3dadd(140652.000000,115968.000000,160500.000000,354.889754)}
{pt3dadd(140556.000000,115644.000000,160375.000000,422.420298)}
{pt3dadd(140340.000000,115356.000000,160375.000000,623.975450)}
{pt3dadd(140136.000000,114768.000000,160125.000000,532.593300)}

{create adhoc328}
{access adhoc328}
{connect adhoc328(1), adhoc327(0)}
{nseg = 1}
{strdef color color = "White"}
{pt3dclear()}
{pt3dadd(140136.000000,114768.000000,160125.000000,532.593300)}
{pt3dadd(140124.000000,115092.000000,159725.000000,614.926533)}
{pt3dadd(140160.000000,115344.000000,159600.000000,633.363800)}

{create adhoc329}
{access adhoc329}
{connect adhoc329(1), adhoc327(0)}
{nseg = 1}
{strdef color color = "White"}
{pt3dclear()}
{pt3dadd(140136.000000,114768.000000,160125.000000,532.593300)}
{pt3dadd(140316.000000,114048.000000,160125.000000,615.216523)}
{pt3dadd(140664.000000,113676.000000,160125.000000,636.034282)}
{pt3dadd(141000.000000,113448.000000,160125.000000,656.188382)}
{pt3dadd(141288.000000,113196.000000,160125.000000,597.312174)}
{pt3dadd(141552.000000,113016.000000,160125.000000,630.098828)}
{pt3dadd(141948.000000,113076.000000,160625.000000,605.324100)}
{pt3dadd(142104.000000,112908.000000,160475.000000,611.789100)}

{create adhoc330}
{access adhoc330}
{connect adhoc330(1), adhoc326(0)}
{nseg = 1}
{strdef color color = "White"}
{pt3dclear()}
{pt3dadd(140796.000000,119412.000000,164225.000000,216.300110)}
{pt3dadd(140976.000000,119124.000000,164175.000000,205.874057)}
{pt3dadd(141084.000000,118884.000000,164125.000000,243.823082)}
{pt3dadd(141204.000000,118668.000000,164025.000000,295.634313)}
{pt3dadd(141192.000000,118596.000000,164025.000000,463.649440)}

{create adhoc331}
{access adhoc331}
{connect adhoc331(1), adhoc325(0)}
{nseg = 1}
{strdef color color = "White"}
{pt3dclear()}
{pt3dadd(140076.000000,120384.000000,164950.000000,175.690280)}
{pt3dadd(140460.000000,120132.000000,164975.000000,245.595860)}
{pt3dadd(140436.000000,120144.000000,165125.000000,196.379974)}
{pt3dadd(140520.000000,120180.000000,165200.000000,176.840663)}
{pt3dadd(140460.000000,120144.000000,165250.000000,111.963960)}

{create adhoc332}
{access adhoc332}
{connect adhoc332(1), adhoc324(0)}
{nseg = 1}
{strdef color color = "White"}
{pt3dclear()}
{pt3dadd(138120.000000,122328.000000,164925.000000,316.681900)}
{pt3dadd(138408.000000,122208.000000,164850.000000,269.556537)}
{pt3dadd(138360.000000,122004.000000,164775.000000,224.066358)}
{pt3dadd(138504.000000,121980.000000,164625.000000,183.912450)}
{pt3dadd(138552.000000,121956.000000,164525.000000,142.524847)}
{pt3dadd(138600.000000,122016.000000,164400.000000,115.912360)}

{create adhoc333}
{access adhoc333}
{connect adhoc333(1), adhoc323(0)}
{nseg = 1}
{strdef color color = "White"}
{pt3dclear()}
{pt3dadd(137808.000000,122844.000000,165125.000000,275.687600)}
{pt3dadd(137592.000000,122616.000000,165125.000000,260.721473)}
{pt3dadd(137460.000000,122520.000000,165125.000000,193.160191)}
{pt3dadd(137376.000000,122316.000000,165275.000000,148.113428)}
{pt3dadd(137376.000000,122196.000000,165375.000000,95.540548)}
{pt3dadd(137388.000000,122016.000000,165550.000000,85.829596)}
{pt3dadd(137400.000000,121968.000000,165775.000000,81.837148)}
{pt3dadd(137508.000000,121944.000000,165925.000000,94.150090)}

{create adhoc334}
{access adhoc334}
{connect adhoc334(1), adhoc333(0)}
{nseg = 1}
{strdef color color = "White"}
{pt3dclear()}
{pt3dadd(137508.000000,121944.000000,165925.000000,94.150090)}
{pt3dadd(137544.000000,121896.000000,166175.000000,112.587503)}
{pt3dadd(137592.000000,121740.000000,166275.000000,106.564034)}
{pt3dadd(137556.000000,121788.000000,166450.000000,107.915530)}
{pt3dadd(137544.000000,121440.000000,166600.000000,116.274986)}
{pt3dadd(137508.000000,121188.000000,166700.000000,110.126808)}
{pt3dadd(137580.000000,121296.000000,166850.000000,113.689582)}
{pt3dadd(137676.000000,121356.000000,166900.000000,115.900860)}
{pt3dadd(137652.000000,121428.000000,166950.000000,112.689908)}
{pt3dadd(137712.000000,121476.000000,167025.000000,108.995296)}
{pt3dadd(137784.000000,121560.000000,167125.000000,108.232515)}
{pt3dadd(138036.000000,121632.000000,167200.000000,115.387191)}
{pt3dadd(138108.000000,121680.000000,167275.000000,116.176871)}
{pt3dadd(138060.000000,121776.000000,167325.000000,124.928871)}
{pt3dadd(138096.000000,121800.000000,167400.000000,126.712179)}
{pt3dadd(138120.000000,121812.000000,167450.000000,133.623138)}
{pt3dadd(138288.000000,121836.000000,167525.000000,122.905688)}
{pt3dadd(138372.000000,121932.000000,167575.000000,119.904730)}
{pt3dadd(138504.000000,122040.000000,167650.000000,113.676226)}
{pt3dadd(138672.000000,122136.000000,167675.000000,103.439044)}
{pt3dadd(138828.000000,122352.000000,167775.000000,100.620636)}
{pt3dadd(138828.000000,122400.000000,167825.000000,99.359646)}
{pt3dadd(138804.000000,122568.000000,167900.000000,100.071345)}
{pt3dadd(138792.000000,122640.000000,167925.000000,102.207298)}
{pt3dadd(138852.000000,122640.000000,168025.000000,102.785376)}
{pt3dadd(139020.000000,122712.000000,168075.000000,97.956027)}
{pt3dadd(139200.000000,122844.000000,168100.000000,98.575597)}
{pt3dadd(139260.000000,122952.000000,168125.000000,96.512402)}
{pt3dadd(139356.000000,123048.000000,168175.000000,95.063905)}
{pt3dadd(139416.000000,123096.000000,168175.000000,96.923361)}
{pt3dadd(139380.000000,123144.000000,168250.000000,94.860166)}
{pt3dadd(139404.000000,123288.000000,168325.000000,96.402583)}
{pt3dadd(139428.000000,123408.000000,168350.000000,94.150090)}

{create adhoc335}
{access adhoc335}
{connect adhoc335(1), adhoc333(0)}
{nseg = 1}
{strdef color color = "White"}
{pt3dclear()}
{pt3dadd(137508.000000,121944.000000,165925.000000,94.150090)}
{pt3dadd(137664.000000,121980.000000,166000.000000,98.695481)}
{pt3dadd(137640.000000,122160.000000,166000.000000,94.439791)}
{pt3dadd(137580.000000,122280.000000,166125.000000,94.439791)}
{pt3dadd(137604.000000,122400.000000,166125.000000,89.380672)}
{pt3dadd(137616.000000,122352.000000,166250.000000,123.145946)}
{pt3dadd(137568.000000,122172.000000,166375.000000,146.539073)}
{pt3dadd(137592.000000,122088.000000,166500.000000,266.296660)}

{create adhoc336}
{access adhoc336}
{connect adhoc336(1), adhoc320(0)}
{nseg = 1}
{strdef color color = "White"}
{pt3dclear()}
{pt3dadd(139692.000000,124536.000000,166550.000000,363.771970)}
{pt3dadd(139776.000000,124272.000000,166375.000000,441.257323)}
{pt3dadd(139812.000000,124044.000000,166550.000000,337.552488)}
{pt3dadd(139872.000000,123876.000000,166525.000000,308.058116)}
{pt3dadd(139980.000000,123720.000000,166525.000000,256.843700)}
{pt3dadd(140040.000000,123096.000000,166650.000000,217.925640)}
{pt3dadd(140196.000000,122892.000000,166850.000000,216.642800)}
{pt3dadd(140292.000000,122856.000000,166925.000000,211.052212)}
{pt3dadd(140364.000000,122652.000000,167050.000000,205.011010)}
{pt3dadd(140508.000000,122316.000000,167200.000000,147.737340)}

{create adhoc337}
{access adhoc337}
{connect adhoc337(1), adhoc336(0)}
{nseg = 1}
{strdef color color = "White"}
{pt3dclear()}
{pt3dadd(140508.000000,122316.000000,167200.000000,147.737340)}
{pt3dadd(140520.000000,122100.000000,167075.000000,135.039153)}
{pt3dadd(140628.000000,121908.000000,166975.000000,142.202404)}
{pt3dadd(140736.000000,121764.000000,166950.000000,144.323124)}
{pt3dadd(140832.000000,121668.000000,166900.000000,162.479042)}
{pt3dadd(140916.000000,121644.000000,166900.000000,176.620800)}
{pt3dadd(140988.000000,121548.000000,166850.000000,187.817770)}
{pt3dadd(141060.000000,121452.000000,166850.000000,216.323248)}
{pt3dadd(141120.000000,121356.000000,166850.000000,233.115793)}
{pt3dadd(141228.000000,121284.000000,166950.000000,295.474670)}

{create adhoc338}
{access adhoc338}
{connect adhoc338(1), adhoc337(0)}
{nseg = 1}
{strdef color color = "White"}
{pt3dclear()}
{pt3dadd(141228.000000,121284.000000,166950.000000,295.474670)}
{pt3dadd(141372.000000,121224.000000,166875.000000,282.283290)}
{pt3dadd(141492.000000,121176.000000,166875.000000,273.808908)}
{pt3dadd(141612.000000,121116.000000,166875.000000,253.702090)}
{pt3dadd(141720.000000,121044.000000,166875.000000,236.224608)}
{pt3dadd(141828.000000,120972.000000,166875.000000,212.755276)}
{pt3dadd(141948.000000,121080.000000,167025.000000,170.406382)}
{pt3dadd(142092.000000,121116.000000,167025.000000,149.539152)}
{pt3dadd(142212.000000,121128.000000,166950.000000,132.181047)}
{pt3dadd(142356.000000,121212.000000,166925.000000,116.151020)}
{pt3dadd(142500.000000,121224.000000,166850.000000,109.421357)}
{pt3dadd(142524.000000,121200.000000,166850.000000,108.150055)}

{create adhoc339}
{access adhoc339}
{connect adhoc339(1), adhoc337(0)}
{nseg = 1}
{strdef color color = "White"}
{pt3dclear()}
{pt3dadd(141228.000000,121284.000000,166950.000000,295.474670)}
{pt3dadd(141180.000000,121056.000000,166750.000000,235.620567)}
{pt3dadd(141156.000000,120852.000000,166750.000000,191.543321)}
{pt3dadd(141120.000000,120648.000000,166750.000000,160.989357)}
{pt3dadd(141216.000000,120540.000000,166750.000000,123.524434)}
{pt3dadd(141300.000000,120408.000000,166775.000000,114.126342)}
{pt3dadd(141288.000000,120372.000000,166625.000000,103.773970)}
{pt3dadd(141360.000000,120804.000000,166500.000000,89.338315)}
{pt3dadd(141360.000000,120888.000000,166475.000000,90.942990)}

{create adhoc340}
{access adhoc340}
{connect adhoc340(1), adhoc337(0)}
{nseg = 1}
{strdef color color = "White"}
{pt3dclear()}
{pt3dadd(141228.000000,121284.000000,166950.000000,295.474670)}
{pt3dadd(141348.000000,121248.000000,167150.000000,276.449317)}
{pt3dadd(141564.000000,121308.000000,167125.000000,270.574046)}
{pt3dadd(141660.000000,121248.000000,167100.000000,250.467228)}
{pt3dadd(141876.000000,121320.000000,167225.000000,233.748316)}
{pt3dadd(141972.000000,121332.000000,167250.000000,223.043716)}
{pt3dadd(142152.000000,121356.000000,167300.000000,207.444422)}
{pt3dadd(142284.000000,121452.000000,167350.000000,192.376496)}
{pt3dadd(142416.000000,121416.000000,167450.000000,196.648402)}
{pt3dadd(142620.000000,121452.000000,167525.000000,202.650318)}
{pt3dadd(142668.000000,121512.000000,167625.000000,200.039400)}
{pt3dadd(142848.000000,121440.000000,167725.000000,198.756560)}
{pt3dadd(142908.000000,121536.000000,167850.000000,207.164946)}
{pt3dadd(143124.000000,121740.000000,168000.000000,204.267952)}
{pt3dadd(143076.000000,121872.000000,168150.000000,196.891124)}
{pt3dadd(143112.000000,121908.000000,168250.000000,202.300352)}
{pt3dadd(143076.000000,121896.000000,168325.000000,212.288098)}
{pt3dadd(143100.000000,122004.000000,168425.000000,218.947638)}
{pt3dadd(143064.000000,122052.000000,168525.000000,226.584610)}
{pt3dadd(143064.000000,122196.000000,168625.000000,237.289210)}
{pt3dadd(142980.000000,122292.000000,168750.000000,218.685256)}
{pt3dadd(142908.000000,122424.000000,168875.000000,194.713104)}
{pt3dadd(142788.000000,122628.000000,168950.000000,162.097998)}
{pt3dadd(142728.000000,122736.000000,169100.000000,135.728009)}
{pt3dadd(142728.000000,122940.000000,169225.000000,108.428085)}
{pt3dadd(142764.000000,123216.000000,169325.000000,105.427127)}
{pt3dadd(142644.000000,123396.000000,169450.000000,103.927548)}
{pt3dadd(142560.000000,123480.000000,169475.000000,107.490322)}
{pt3dadd(142572.000000,123600.000000,169575.000000,104.690329)}
{pt3dadd(142668.000000,123708.000000,169600.000000,103.927548)}
{pt3dadd(142872.000000,123768.000000,169725.000000,102.576052)}
{pt3dadd(142800.000000,123876.000000,169825.000000,96.977567)}
{pt3dadd(142920.000000,123936.000000,169900.000000,92.924595)}
{pt3dadd(142992.000000,123972.000000,169900.000000,76.473640)}

{create adhoc341}
{access adhoc341}
{connect adhoc341(1), adhoc336(0)}
{nseg = 1}
{strdef color color = "White"}
{pt3dclear()}
{pt3dadd(140508.000000,122316.000000,167200.000000,147.737340)}
{pt3dadd(140424.000000,122472.000000,167375.000000,113.119240)}
{pt3dadd(140412.000000,122616.000000,167350.000000,97.470290)}

{create adhoc342}
{access adhoc342}
{connect adhoc342(1), adhoc319(0)}
{nseg = 1}
{strdef color color = "White"}
{pt3dclear()}
{pt3dadd(142080.000000,129120.000000,167925.000000,389.881160)}
{pt3dadd(141828.000000,129264.000000,168025.000000,387.572163)}
{pt3dadd(141768.000000,129360.000000,168025.000000,181.885990)}

{create adhoc343}
{access adhoc343}
{connect adhoc343(1), adhoc342(0)}
{nseg = 1}
{strdef color color = "White"}
{pt3dclear()}
{pt3dadd(141768.000000,129360.000000,168025.000000,181.885990)}
{pt3dadd(141576.000000,129408.000000,168200.000000,144.101187)}
{pt3dadd(141288.000000,129384.000000,168250.000000,140.428786)}
{pt3dadd(141084.000000,129324.000000,168325.000000,132.592558)}
{pt3dadd(141072.000000,129276.000000,168400.000000,127.725664)}
{pt3dadd(141060.000000,129384.000000,168450.000000,127.061624)}
{pt3dadd(140988.000000,129456.000000,168575.000000,129.124819)}
{pt3dadd(140892.000000,129552.000000,168650.000000,119.709325)}
{pt3dadd(140748.000000,129756.000000,168750.000000,111.349869)}
{pt3dadd(140700.000000,129888.000000,168800.000000,107.257318)}
{pt3dadd(140604.000000,130032.000000,168850.000000,110.057311)}
{pt3dadd(140520.000000,130152.000000,168850.000000,105.735893)}
{pt3dadd(140472.000000,130176.000000,168950.000000,108.150055)}

{create adhoc344}
{access adhoc344}
{connect adhoc344(1), adhoc342(0)}
{nseg = 1}
{strdef color color = "White"}
{pt3dclear()}
{pt3dadd(141768.000000,129360.000000,168025.000000,181.885990)}
{pt3dadd(141696.000000,129552.000000,168025.000000,149.447533)}
{pt3dadd(141696.000000,129720.000000,168025.000000,120.202233)}
{pt3dadd(141720.000000,129912.000000,168025.000000,94.150090)}

{create adhoc345}
{access adhoc345}
{connect adhoc345(1), adhoc344(0)}
{nseg = 1}
{strdef color color = "White"}
{pt3dclear()}
{pt3dadd(141720.000000,129912.000000,168025.000000,94.150090)}
{pt3dadd(141600.000000,129876.000000,167875.000000,96.363557)}
{pt3dadd(141408.000000,129888.000000,167750.000000,98.892861)}
{pt3dadd(141204.000000,129816.000000,167675.000000,119.050959)}
{pt3dadd(141096.000000,129768.000000,167550.000000,255.509361)}
{pt3dadd(140808.000000,129732.000000,167500.000000,403.161003)}
{pt3dadd(140604.000000,129732.000000,167400.000000,528.488279)}
{pt3dadd(140460.000000,129744.000000,167225.000000,781.011583)}
{pt3dadd(140304.000000,129684.000000,167250.000000,727.543950)}

{create adhoc346}
{access adhoc346}
{connect adhoc346(1), adhoc344(0)}
{nseg = 1}
{strdef color color = "White"}
{pt3dclear()}
{pt3dadd(141720.000000,129912.000000,168025.000000,94.150090)}
{pt3dadd(141744.000000,130104.000000,168025.000000,124.662430)}
{pt3dadd(141744.000000,130224.000000,168025.000000,139.328040)}
{pt3dadd(141756.000000,130356.000000,168025.000000,154.439148)}
{pt3dadd(141768.000000,130488.000000,168025.000000,160.804144)}
{pt3dadd(141720.000000,130596.000000,168025.000000,167.007292)}
{pt3dadd(141660.000000,130752.000000,168025.000000,170.794517)}
{pt3dadd(141660.000000,130884.000000,168025.000000,194.940580)}

{create adhoc347}
{access adhoc347}
{connect adhoc347(1), adhoc346(0)}
{nseg = 1}
{strdef color color = "White"}
{pt3dclear()}
{pt3dadd(141660.000000,130884.000000,168025.000000,194.940580)}
{pt3dadd(141552.000000,130956.000000,168150.000000,163.924840)}

{create adhoc348}
{access adhoc348}
{connect adhoc348(1), adhoc347(0)}
{nseg = 1}
{strdef color color = "White"}
{pt3dclear()}
{pt3dadd(141552.000000,130956.000000,168150.000000,163.924840)}
{pt3dadd(141552.000000,130860.000000,168175.000000,169.911890)}
{pt3dadd(141468.000000,130824.000000,168225.000000,181.885990)}

{create adhoc349}
{access adhoc349}
{connect adhoc349(1), adhoc347(0)}
{nseg = 1}
{strdef color color = "White"}
{pt3dclear()}
{pt3dadd(141552.000000,130956.000000,168150.000000,163.924840)}
{pt3dadd(141408.000000,131124.000000,168250.000000,110.447157)}
{pt3dadd(141228.000000,131064.000000,168350.000000,97.936482)}
{pt3dadd(141180.000000,130956.000000,168450.000000,83.981532)}
{pt3dadd(141216.000000,130788.000000,168575.000000,87.422945)}
{pt3dadd(141144.000000,130716.000000,168675.000000,93.823538)}
{pt3dadd(141228.000000,130680.000000,168750.000000,108.150055)}

{create adhoc350}
{access adhoc350}
{connect adhoc350(1), adhoc349(0)}
{nseg = 1}
{strdef color color = "White"}
{pt3dclear()}
{pt3dadd(141228.000000,130680.000000,168750.000000,108.150055)}
{pt3dadd(141120.000000,130368.000000,168800.000000,102.653052)}
{pt3dadd(141060.000000,130308.000000,168875.000000,111.963960)}

{create adhoc351}
{access adhoc351}
{connect adhoc351(1), adhoc349(0)}
{nseg = 1}
{strdef color color = "White"}
{pt3dclear()}
{pt3dadd(141228.000000,130680.000000,168750.000000,108.150055)}
{pt3dadd(141240.000000,130800.000000,168775.000000,96.678678)}
{pt3dadd(141240.000000,130908.000000,168900.000000,99.266113)}
{pt3dadd(141240.000000,130968.000000,168975.000000,115.912360)}

{create adhoc352}
{access adhoc352}
{connect adhoc352(1), adhoc346(0)}
{nseg = 1}
{strdef color color = "White"}
{pt3dclear()}
{pt3dadd(141660.000000,130884.000000,168025.000000,194.940580)}
{pt3dadd(141696.000000,131028.000000,167975.000000,170.674255)}
{pt3dadd(141672.000000,131064.000000,167875.000000,140.268328)}
{pt3dadd(141492.000000,131196.000000,167875.000000,118.849240)}
{pt3dadd(141312.000000,131280.000000,167875.000000,94.033376)}
{pt3dadd(141288.000000,131196.000000,167750.000000,88.237459)}
{pt3dadd(141084.000000,131136.000000,167675.000000,82.117980)}
{pt3dadd(140868.000000,131088.000000,167600.000000,82.716446)}
{pt3dadd(140748.000000,131016.000000,167475.000000,79.921152)}
{pt3dadd(140604.000000,131016.000000,167425.000000,78.784684)}
{pt3dadd(140460.000000,130944.000000,167400.000000,80.294760)}
{pt3dadd(140328.000000,130920.000000,167375.000000,79.170470)}

{create adhoc353}
{access adhoc353}
{connect adhoc353(1), adhoc319(0)}
{nseg = 1}
{strdef color color = "White"}
{pt3dclear()}
{pt3dadd(142080.000000,129120.000000,167925.000000,389.881160)}
{pt3dadd(141840.000000,128640.000000,167925.000000,282.060423)}
{pt3dadd(141708.000000,128520.000000,167950.000000,220.712278)}
{pt3dadd(141576.000000,128580.000000,168000.000000,165.128838)}
{pt3dadd(141360.000000,128640.000000,168050.000000,142.762029)}
{pt3dadd(141300.000000,128628.000000,168150.000000,115.655242)}
{pt3dadd(141312.000000,128640.000000,168250.000000,106.965363)}
{pt3dadd(141324.000000,128496.000000,168225.000000,104.466064)}

{create adhoc354}
{access adhoc354}
{connect adhoc354(1), adhoc318(0)}
{nseg = 1}
{strdef color color = "White"}
{pt3dclear()}
{pt3dadd(143448.000000,129300.000000,168025.000000,316.681900)}
{pt3dadd(142812.000000,129288.000000,168325.000000,611.789100)}

{create adhoc355}
{access adhoc355}
{connect adhoc355(1), adhoc354(0)}
{nseg = 1}
{strdef color color = "White"}
{pt3dclear()}
{pt3dadd(142812.000000,129288.000000,168325.000000,611.789100)}
{pt3dadd(142716.000000,129396.000000,168525.000000,702.761100)}

{create adhoc356}
{access adhoc356}
{connect adhoc356(1), adhoc355(0)}
{nseg = 1}
{strdef color color = "White"}
{pt3dclear()}
{pt3dadd(142716.000000,129396.000000,168525.000000,702.761100)}
{pt3dadd(142680.000000,129432.000000,168725.000000,527.739050)}
{pt3dadd(142632.000000,129480.000000,169000.000000,483.758483)}
{pt3dadd(142560.000000,129408.000000,169150.000000,570.819400)}

{create adhoc357}
{access adhoc357}
{connect adhoc357(1), adhoc356(0)}
{nseg = 1}
{strdef color color = "White"}
{pt3dclear()}
{pt3dadd(142560.000000,129408.000000,169150.000000,570.819400)}
{pt3dadd(142728.000000,129840.000000,169150.000000,364.536550)}
{pt3dadd(142704.000000,130080.000000,169150.000000,285.448024)}
{pt3dadd(142632.000000,130308.000000,169150.000000,210.272260)}
{pt3dadd(142656.000000,130560.000000,169150.000000,197.961658)}
{pt3dadd(142572.000000,130788.000000,169325.000000,222.309922)}
{pt3dadd(142332.000000,130872.000000,169475.000000,259.306380)}
{pt3dadd(142044.000000,131256.000000,169600.000000,316.681900)}

{create adhoc358}
{access adhoc358}
{connect adhoc358(1), adhoc357(0)}
{nseg = 1}
{strdef color color = "White"}
{pt3dclear()}
{pt3dadd(142044.000000,131256.000000,169600.000000,316.681900)}
{pt3dadd(141924.000000,131556.000000,169750.000000,254.935577)}
{pt3dadd(141948.000000,131736.000000,169900.000000,226.415960)}
{pt3dadd(141852.000000,131892.000000,169875.000000,193.669036)}
{pt3dadd(141888.000000,132048.000000,169825.000000,180.998470)}
{pt3dadd(141996.000000,132180.000000,169900.000000,171.010724)}
{pt3dadd(142044.000000,132300.000000,169875.000000,168.212414)}
{pt3dadd(142080.000000,132432.000000,169900.000000,181.329810)}
{pt3dadd(141972.000000,132552.000000,169925.000000,192.526780)}
{pt3dadd(141852.000000,132696.000000,169975.000000,203.723750)}
{pt3dadd(141948.000000,132852.000000,169900.000000,213.930727)}
{pt3dadd(141972.000000,132984.000000,169850.000000,208.932130)}

{create adhoc359}
{access adhoc359}
{connect adhoc359(1), adhoc358(0)}
{nseg = 1}
{strdef color color = "White"}
{pt3dclear()}
{pt3dadd(141972.000000,132984.000000,169850.000000,208.932130)}
{pt3dadd(141888.000000,133128.000000,169875.000000,224.565273)}
{pt3dadd(141852.000000,133248.000000,169850.000000,256.886083)}
{pt3dadd(141804.000000,133368.000000,169900.000000,305.894560)}

{create adhoc360}
{access adhoc360}
{connect adhoc360(1), adhoc359(0)}
{nseg = 1}
{strdef color color = "White"}
{pt3dclear()}
{pt3dadd(141804.000000,133368.000000,169900.000000,305.894560)}
{pt3dadd(141768.000000,133488.000000,170025.000000,261.085073)}
{pt3dadd(141504.000000,133584.000000,170150.000000,181.885990)}

{create adhoc361}
{access adhoc361}
{connect adhoc361(1), adhoc360(0)}
{nseg = 1}
{strdef color color = "White"}
{pt3dclear()}
{pt3dadd(141504.000000,133584.000000,170150.000000,181.885990)}
{pt3dadd(141384.000000,133488.000000,170250.000000,205.175283)}
{pt3dadd(141348.000000,133452.000000,170400.000000,182.342118)}
{pt3dadd(141348.000000,133368.000000,170525.000000,169.147392)}
{pt3dadd(141144.000000,133368.000000,170675.000000,137.365700)}
{pt3dadd(141084.000000,133476.000000,170700.000000,115.912360)}

{create adhoc362}
{access adhoc362}
{connect adhoc362(1), adhoc360(0)}
{nseg = 1}
{strdef color color = "White"}
{pt3dclear()}
{pt3dadd(141504.000000,133584.000000,170150.000000,181.885990)}
{pt3dadd(141072.000000,133680.000000,170050.000000,200.251497)}
{pt3dadd(140928.000000,133776.000000,170000.000000,223.927920)}

{create adhoc363}
{access adhoc363}
{connect adhoc363(1), adhoc362(0)}
{nseg = 1}
{strdef color color = "White"}
{pt3dclear()}
{pt3dadd(140928.000000,133776.000000,170000.000000,223.927920)}
{pt3dadd(140952.000000,134184.000000,170100.000000,161.675085)}
{pt3dadd(140940.000000,134340.000000,170100.000000,129.868807)}
{pt3dadd(140832.000000,134532.000000,170125.000000,103.913241)}
{pt3dadd(140772.000000,134592.000000,170125.000000,93.505299)}
{pt3dadd(140700.000000,134772.000000,170200.000000,99.444048)}
{pt3dadd(140676.000000,134832.000000,170275.000000,102.056534)}
{pt3dadd(140688.000000,134940.000000,170375.000000,107.655019)}
{pt3dadd(140544.000000,135024.000000,170400.000000,109.006515)}
{pt3dadd(140400.000000,135072.000000,170400.000000,102.093735)}
{pt3dadd(140316.000000,135060.000000,170425.000000,100.907570)}

{create adhoc364}
{access adhoc364}
{connect adhoc364(1), adhoc362(0)}
{nseg = 1}
{strdef color color = "White"}
{pt3dclear()}
{pt3dadd(140928.000000,133776.000000,170000.000000,223.927920)}
{pt3dadd(140736.000000,133848.000000,169875.000000,187.157620)}
{pt3dadd(140604.000000,133908.000000,169700.000000,145.395075)}
{pt3dadd(140628.000000,133848.000000,169525.000000,127.239157)}
{pt3dadd(140688.000000,133848.000000,169350.000000,106.345944)}
{pt3dadd(140904.000000,133764.000000,169100.000000,100.117440)}
{pt3dadd(140928.000000,133680.000000,168875.000000,111.694895)}
{pt3dadd(140904.000000,133680.000000,168775.000000,97.470290)}

{create adhoc365}
{access adhoc365}
{connect adhoc365(1), adhoc359(0)}
{nseg = 1}
{strdef color color = "White"}
{pt3dclear()}
{pt3dadd(141804.000000,133368.000000,169900.000000,305.894560)}
{pt3dadd(141840.000000,133680.000000,169675.000000,90.942990)}

{create adhoc366}
{access adhoc366}
{connect adhoc366(1), adhoc365(0)}
{nseg = 1}
{strdef color color = "White"}
{pt3dclear()}
{pt3dadd(141840.000000,133680.000000,169675.000000,90.942990)}
{pt3dadd(141840.000000,133728.000000,169575.000000,86.141575)}
{pt3dadd(141852.000000,133836.000000,169525.000000,88.083991)}
{pt3dadd(141852.000000,133824.000000,169400.000000,82.856465)}
{pt3dadd(141864.000000,133896.000000,169300.000000,94.150090)}

{create adhoc367}
{access adhoc367}
{connect adhoc367(1), adhoc366(0)}
{nseg = 1}
{strdef color color = "White"}
{pt3dclear()}
{pt3dadd(141864.000000,133896.000000,169300.000000,94.150090)}
{pt3dadd(141696.000000,133872.000000,169250.000000,88.949347)}
{pt3dadd(141636.000000,133860.000000,169250.000000,88.592110)}
{pt3dadd(141528.000000,133824.000000,169250.000000,90.655305)}
{pt3dadd(141432.000000,133764.000000,169325.000000,94.716288)}
{pt3dadd(141456.000000,133656.000000,169200.000000,180.635972)}
{pt3dadd(141468.000000,133536.000000,169200.000000,275.969834)}
{pt3dadd(141468.000000,133416.000000,169200.000000,373.741230)}
{pt3dadd(141480.000000,133296.000000,169200.000000,552.030010)}
{pt3dadd(141516.000000,133236.000000,169000.000000,570.819400)}

{create adhoc368}
{access adhoc368}
{connect adhoc368(1), adhoc367(0)}
{nseg = 1}
{strdef color color = "White"}
{pt3dclear()}
{pt3dadd(141516.000000,133236.000000,169000.000000,570.819400)}
{pt3dadd(141564.000000,133188.000000,169175.000000,436.216421)}
{pt3dadd(141672.000000,133164.000000,169175.000000,296.889013)}
{pt3dadd(141720.000000,133116.000000,169300.000000,93.420621)}
{pt3dadd(141744.000000,133056.000000,169325.000000,84.852810)}

{create adhoc369}
{access adhoc369}
{connect adhoc369(1), adhoc367(0)}
{nseg = 1}
{strdef color color = "White"}
{pt3dclear()}
{pt3dadd(141516.000000,133236.000000,169000.000000,570.819400)}
{pt3dadd(141492.000000,133152.000000,169025.000000,565.686577)}
{pt3dadd(141432.000000,132960.000000,169025.000000,514.451230)}

{create adhoc370}
{access adhoc370}
{connect adhoc370(1), adhoc366(0)}
{nseg = 1}
{strdef color color = "White"}
{pt3dclear()}
{pt3dadd(141864.000000,133896.000000,169300.000000,94.150090)}
{pt3dadd(141948.000000,134064.000000,169250.000000,88.087850)}
{pt3dadd(142020.000000,134136.000000,169200.000000,98.069330)}
{pt3dadd(142116.000000,134172.000000,169200.000000,104.961874)}
{pt3dadd(142188.000000,134244.000000,169150.000000,105.603294)}
{pt3dadd(142140.000000,134316.000000,169075.000000,117.125237)}
{pt3dadd(142152.000000,134412.000000,168975.000000,94.150090)}

{create adhoc371}
{access adhoc371}
{connect adhoc371(1), adhoc365(0)}
{nseg = 1}
{strdef color color = "White"}
{pt3dclear()}
{pt3dadd(141840.000000,133680.000000,169675.000000,90.942990)}
{pt3dadd(141840.000000,133536.000000,169800.000000,305.894560)}

{create adhoc372}
{access adhoc372}
{connect adhoc372(1), adhoc358(0)}
{nseg = 1}
{strdef color color = "White"}
{pt3dclear()}
{pt3dadd(141972.000000,132984.000000,169850.000000,208.932130)}
{pt3dadd(142260.000000,132840.000000,169700.000000,184.466065)}
{pt3dadd(142428.000000,132828.000000,169675.000000,128.964157)}
{pt3dadd(142560.000000,132720.000000,169650.000000,42.426407)}

{create adhoc373}
{access adhoc373}
{connect adhoc373(1), adhoc357(0)}
{nseg = 1}
{strdef color color = "White"}
{pt3dclear()}
{pt3dadd(142044.000000,131256.000000,169600.000000,316.681900)}
{pt3dadd(142140.000000,131160.000000,169925.000000,285.409700)}

{create adhoc374}
{access adhoc374}
{connect adhoc374(1), adhoc373(0)}
{nseg = 1}
{strdef color color = "White"}
{pt3dclear()}
{pt3dadd(142140.000000,131160.000000,169925.000000,285.409700)}
{pt3dadd(142044.000000,131100.000000,170050.000000,172.829525)}
{pt3dadd(141912.000000,131124.000000,170150.000000,146.957737)}
{pt3dadd(141864.000000,131136.000000,170250.000000,114.722155)}
{pt3dadd(141864.000000,131196.000000,170350.000000,114.722155)}
{pt3dadd(141816.000000,131244.000000,170400.000000,126.613910)}
{pt3dadd(141744.000000,131256.000000,170425.000000,136.652087)}
{pt3dadd(141768.000000,131232.000000,170500.000000,148.963202)}
{pt3dadd(141720.000000,131256.000000,170550.000000,152.657814)}
{pt3dadd(141732.000000,131340.000000,170625.000000,153.564918)}
{pt3dadd(141624.000000,131388.000000,170725.000000,148.348710)}
{pt3dadd(141540.000000,131472.000000,170800.000000,145.221492)}
{pt3dadd(141480.000000,131568.000000,170925.000000,154.540388)}
{pt3dadd(141348.000000,131748.000000,171025.000000,169.259440)}
{pt3dadd(141240.000000,131988.000000,171125.000000,188.994718)}
{pt3dadd(141252.000000,132108.000000,171225.000000,190.973426)}
{pt3dadd(141252.000000,132156.000000,171325.000000,191.979924)}
{pt3dadd(141168.000000,132168.000000,171450.000000,176.288662)}
{pt3dadd(140952.000000,132372.000000,171600.000000,156.211112)}
{pt3dadd(140868.000000,132516.000000,171625.000000,130.739381)}
{pt3dadd(140868.000000,132648.000000,171675.000000,119.407408)}
{pt3dadd(140760.000000,132732.000000,171775.000000,104.466064)}

{create adhoc375}
{access adhoc375}
{connect adhoc375(1), adhoc374(0)}
{nseg = 1}
{strdef color color = "White"}
{pt3dclear()}
{pt3dadd(140760.000000,132732.000000,171775.000000,104.466064)}
{pt3dadd(140832.000000,132648.000000,171775.000000,117.643215)}
{pt3dadd(140868.000000,132492.000000,171850.000000,105.808431)}
{pt3dadd(140856.000000,132468.000000,171925.000000,97.338397)}
{pt3dadd(140892.000000,132336.000000,172000.000000,84.915218)}
{pt3dadd(140844.000000,132252.000000,172225.000000,68.731403)}
{pt3dadd(140916.000000,132168.000000,172250.000000,62.115894)}

{create adhoc376}
{access adhoc376}
{connect adhoc376(1), adhoc374(0)}
{nseg = 1}
{strdef color color = "White"}
{pt3dclear()}
{pt3dadd(140760.000000,132732.000000,171775.000000,104.466064)}
{pt3dadd(140640.000000,132804.000000,171800.000000,253.519738)}
{pt3dadd(140532.000000,132912.000000,171800.000000,324.258350)}
{pt3dadd(140472.000000,132996.000000,171800.000000,316.681900)}

{create adhoc377}
{access adhoc377}
{connect adhoc377(1), adhoc376(0)}
{nseg = 1}
{strdef color color = "White"}
{pt3dclear()}
{pt3dadd(140472.000000,132996.000000,171800.000000,316.681900)}
{pt3dadd(140472.000000,132888.000000,171650.000000,339.411250)}

{create adhoc378}
{access adhoc378}
{connect adhoc378(1), adhoc377(0)}
{nseg = 1}
{strdef color color = "White"}
{pt3dclear()}
{pt3dadd(140472.000000,132888.000000,171650.000000,339.411250)}
{pt3dadd(140352.000000,132720.000000,171650.000000,257.972873)}
{pt3dadd(140124.000000,132588.000000,171675.000000,191.846810)}
{pt3dadd(139884.000000,132432.000000,171750.000000,138.738294)}
{pt3dadd(139620.000000,132264.000000,171850.000000,94.529944)}
{pt3dadd(139464.000000,132144.000000,171950.000000,85.199866)}
{pt3dadd(139260.000000,131988.000000,172100.000000,80.227967)}
{pt3dadd(139260.000000,131820.000000,172175.000000,81.962420)}

{create adhoc379}
{access adhoc379}
{connect adhoc379(1), adhoc377(0)}
{nseg = 1}
{strdef color color = "White"}
{pt3dclear()}
{pt3dadd(140472.000000,132888.000000,171650.000000,339.411250)}
{pt3dadd(140340.000000,132792.000000,171575.000000,216.458815)}
{pt3dadd(140436.000000,132660.000000,171400.000000,166.938375)}
{pt3dadd(140472.000000,132564.000000,171300.000000,112.840505)}
{pt3dadd(140424.000000,132552.000000,171200.000000,94.107488)}
{pt3dadd(140316.000000,132480.000000,171075.000000,98.200039)}
{pt3dadd(140316.000000,132396.000000,170900.000000,120.492407)}
{pt3dadd(140280.000000,132300.000000,170750.000000,124.553390)}
{pt3dadd(140340.000000,132204.000000,170650.000000,148.564998)}
{pt3dadd(140364.000000,132192.000000,170575.000000,108.150055)}

{create adhoc380}
{access adhoc380}
{connect adhoc380(1), adhoc376(0)}
{nseg = 1}
{strdef color color = "White"}
{pt3dclear()}
{pt3dadd(140472.000000,132996.000000,171800.000000,316.681900)}
{pt3dadd(140388.000000,133128.000000,171825.000000,275.687600)}

{create adhoc381}
{access adhoc381}
{connect adhoc381(1), adhoc380(0)}
{nseg = 1}
{strdef color color = "White"}
{pt3dclear()}
{pt3dadd(140388.000000,133128.000000,171825.000000,275.687600)}
{pt3dadd(140352.000000,133332.000000,171825.000000,242.617933)}
{pt3dadd(140376.000000,133452.000000,171825.000000,194.940580)}

{create adhoc382}
{access adhoc382}
{connect adhoc382(1), adhoc381(0)}
{nseg = 1}
{strdef color color = "White"}
{pt3dclear()}
{pt3dadd(140376.000000,133452.000000,171825.000000,194.940580)}
{pt3dadd(140400.000000,133728.000000,171675.000000,126.192371)}
{pt3dadd(140400.000000,133824.000000,171475.000000,92.595541)}
{pt3dadd(140352.000000,133980.000000,171225.000000,94.150090)}

{create adhoc383}
{access adhoc383}
{connect adhoc383(1), adhoc381(0)}
{nseg = 1}
{strdef color color = "White"}
{pt3dclear()}
{pt3dadd(140376.000000,133452.000000,171825.000000,194.940580)}
{pt3dadd(140292.000000,133572.000000,171925.000000,139.717187)}
{pt3dadd(140208.000000,133788.000000,171975.000000,116.792644)}
{pt3dadd(140220.000000,133908.000000,172000.000000,91.588908)}
{pt3dadd(140232.000000,134028.000000,172000.000000,77.336168)}
{pt3dadd(140268.000000,134112.000000,172000.000000,81.535498)}
{pt3dadd(140292.000000,134220.000000,172000.000000,80.915928)}
{pt3dadd(140304.000000,134280.000000,172050.000000,91.864756)}
{pt3dadd(140352.000000,134352.000000,172100.000000,104.642747)}
{pt3dadd(140424.000000,134508.000000,172200.000000,128.612810)}

{create adhoc384}
{access adhoc384}
{connect adhoc384(1), adhoc383(0)}
{nseg = 1}
{strdef color color = "White"}
{pt3dclear()}
{pt3dadd(140424.000000,134508.000000,172200.000000,128.612810)}
{pt3dadd(140448.000000,134484.000000,172325.000000,105.637663)}
{pt3dadd(140352.000000,134424.000000,172375.000000,100.243879)}
{pt3dadd(140352.000000,134400.000000,172475.000000,95.414530)}
{pt3dadd(140292.000000,134292.000000,172575.000000,95.414530)}
{pt3dadd(140184.000000,134292.000000,172625.000000,87.640853)}
{pt3dadd(140100.000000,134244.000000,172700.000000,94.150090)}

{create adhoc385}
{access adhoc385}
{connect adhoc385(1), adhoc383(0)}
{nseg = 1}
{strdef color color = "White"}
{pt3dclear()}
{pt3dadd(140424.000000,134508.000000,172200.000000,128.612810)}
{pt3dadd(140472.000000,134592.000000,172200.000000,106.974671)}
{pt3dadd(140508.000000,134664.000000,172200.000000,99.942429)}
{pt3dadd(140556.000000,134712.000000,172200.000000,93.049885)}
{pt3dadd(140592.000000,134772.000000,172200.000000,93.049885)}
{pt3dadd(140616.000000,134808.000000,172200.000000,97.873649)}
{pt3dadd(140616.000000,134844.000000,172200.000000,101.197834)}
{pt3dadd(140664.000000,134832.000000,172275.000000,106.965363)}
{pt3dadd(140748.000000,134952.000000,172250.000000,104.466064)}

{create adhoc386}
{access adhoc386}
{connect adhoc386(1), adhoc380(0)}
{nseg = 1}
{strdef color color = "White"}
{pt3dclear()}
{pt3dadd(140388.000000,133128.000000,171825.000000,275.687600)}
{pt3dadd(140292.000000,133080.000000,171975.000000,251.991967)}
{pt3dadd(140040.000000,133236.000000,172000.000000,225.734254)}
{pt3dadd(139896.000000,133380.000000,172075.000000,190.090792)}
{pt3dadd(139800.000000,133368.000000,172175.000000,164.398076)}
{pt3dadd(139788.000000,133428.000000,172300.000000,137.527190)}
{pt3dadd(139824.000000,133440.000000,172350.000000,104.980193)}
{pt3dadd(139860.000000,133380.000000,172475.000000,97.470290)}

{create adhoc387}
{access adhoc387}
{connect adhoc387(1), adhoc373(0)}
{nseg = 1}
{strdef color color = "White"}
{pt3dclear()}
{pt3dadd(142140.000000,131160.000000,169925.000000,285.409700)}
{pt3dadd(142236.000000,130992.000000,169800.000000,225.800030)}
{pt3dadd(142404.000000,130836.000000,169800.000000,174.561829)}
{pt3dadd(142476.000000,130800.000000,169800.000000,135.048917)}
{pt3dadd(142548.000000,130764.000000,169800.000000,110.618913)}
{pt3dadd(142632.000000,130728.000000,169800.000000,93.669455)}
{pt3dadd(142704.000000,130692.000000,169800.000000,89.746804)}
{pt3dadd(142788.000000,130668.000000,169800.000000,86.331940)}
{pt3dadd(142884.000000,130668.000000,169800.000000,84.597006)}
{pt3dadd(143016.000000,130776.000000,169825.000000,81.601082)}
{pt3dadd(143220.000000,130776.000000,169850.000000,80.981512)}
{pt3dadd(143340.000000,130800.000000,169950.000000,84.904163)}
{pt3dadd(143508.000000,130704.000000,170050.000000,87.699457)}
{pt3dadd(143568.000000,130668.000000,170150.000000,89.434391)}
{pt3dadd(143628.000000,130620.000000,170100.000000,90.570859)}
{pt3dadd(143688.000000,130572.000000,170100.000000,86.847697)}
{pt3dadd(143748.000000,130512.000000,170100.000000,84.852810)}

{create adhoc388}
{access adhoc388}
{connect adhoc388(1), adhoc356(0)}
{nseg = 1}
{strdef color color = "White"}
{pt3dclear()}
{pt3dadd(142560.000000,129408.000000,169150.000000,570.819400)}
{pt3dadd(142440.000000,129120.000000,169150.000000,522.107933)}
{pt3dadd(142380.000000,128868.000000,169150.000000,471.122887)}
{pt3dadd(142392.000000,128640.000000,169350.000000,417.864260)}

{create adhoc389}
{access adhoc389}
{connect adhoc389(1), adhoc388(0)}
{nseg = 1}
{strdef color color = "White"}
{pt3dclear()}
{pt3dadd(142392.000000,128640.000000,169350.000000,417.864260)}
{pt3dadd(142032.000000,128628.000000,169500.000000,311.699560)}
{pt3dadd(141708.000000,128496.000000,169725.000000,252.411473)}
{pt3dadd(141552.000000,128412.000000,169950.000000,240.000000)}

{create adhoc390}
{access adhoc390}
{connect adhoc390(1), adhoc389(0)}
{nseg = 1}
{strdef color color = "White"}
{pt3dclear()}
{pt3dadd(141552.000000,128412.000000,169950.000000,240.000000)}
{pt3dadd(141312.000000,128208.000000,170125.000000,210.038443)}
{pt3dadd(141108.000000,128064.000000,170200.000000,186.606987)}
{pt3dadd(140940.000000,127956.000000,170400.000000,169.705630)}

{create adhoc391}
{access adhoc391}
{connect adhoc391(1), adhoc390(0)}
{nseg = 1}
{strdef color color = "White"}
{pt3dclear()}
{pt3dadd(140940.000000,127956.000000,170400.000000,169.705630)}
{pt3dadd(140856.000000,127884.000000,170600.000000,208.932130)}

{create adhoc392}
{access adhoc392}
{connect adhoc392(1), adhoc391(0)}
{nseg = 1}
{strdef color color = "White"}
{pt3dclear()}
{pt3dadd(140856.000000,127884.000000,170600.000000,208.932130)}
{pt3dadd(140988.000000,127932.000000,170875.000000,179.007013)}
{pt3dadd(141168.000000,128244.000000,170975.000000,150.768194)}
{pt3dadd(141000.000000,128256.000000,171075.000000,116.656087)}
{pt3dadd(140952.000000,128376.000000,171200.000000,115.912360)}

{create adhoc393}
{access adhoc393}
{connect adhoc393(1), adhoc391(0)}
{nseg = 1}
{strdef color color = "White"}
{pt3dclear()}
{pt3dadd(140856.000000,127884.000000,170600.000000,208.932130)}
{pt3dadd(140976.000000,127656.000000,170600.000000,231.153670)}
{pt3dadd(140988.000000,127560.000000,170600.000000,228.747946)}
{pt3dadd(140988.000000,127476.000000,170600.000000,222.099576)}
{pt3dadd(140988.000000,127380.000000,170575.000000,180.364436)}
{pt3dadd(141036.000000,127320.000000,170575.000000,182.275740)}
{pt3dadd(141048.000000,127212.000000,170525.000000,158.305586)}
{pt3dadd(141060.000000,127224.000000,170400.000000,138.007503)}
{pt3dadd(141084.000000,127188.000000,170350.000000,128.612810)}

{create adhoc394}
{access adhoc394}
{connect adhoc394(1), adhoc391(0)}
{nseg = 1}
{strdef color color = "White"}
{pt3dclear()}
{pt3dadd(140856.000000,127884.000000,170600.000000,208.932130)}
{pt3dadd(140640.000000,127788.000000,170525.000000,161.595103)}
{pt3dadd(140508.000000,127860.000000,170500.000000,152.227092)}
{pt3dadd(140448.000000,127848.000000,170500.000000,136.499493)}
{pt3dadd(140304.000000,127764.000000,170475.000000,147.737340)}

{create adhoc395}
{access adhoc395}
{connect adhoc395(1), adhoc391(0)}
{nseg = 1}
{strdef color color = "White"}
{pt3dclear()}
{pt3dadd(140856.000000,127884.000000,170600.000000,208.932130)}
{pt3dadd(140964.000000,127968.000000,170800.000000,182.849083)}
{pt3dadd(141036.000000,127956.000000,170800.000000,143.670962)}
{pt3dadd(141132.000000,127980.000000,170800.000000,118.855098)}
{pt3dadd(141240.000000,127992.000000,170800.000000,84.886790)}
{pt3dadd(141348.000000,128004.000000,170875.000000,84.852810)}

{create adhoc396}
{access adhoc396}
{connect adhoc396(1), adhoc390(0)}
{nseg = 1}
{strdef color color = "White"}
{pt3dclear()}
{pt3dadd(140940.000000,127956.000000,170400.000000,169.705630)}
{pt3dadd(140832.000000,127824.000000,170225.000000,187.550197)}
{pt3dadd(140604.000000,127752.000000,170150.000000,161.295983)}
{pt3dadd(140376.000000,127680.000000,170150.000000,90.942990)}

{create adhoc397}
{access adhoc397}
{connect adhoc397(1), adhoc389(0)}
{nseg = 1}
{strdef color color = "White"}
{pt3dclear()}
{pt3dadd(141552.000000,128412.000000,169950.000000,240.000000)}
{pt3dadd(141756.000000,128652.000000,170000.000000,158.018633)}
{pt3dadd(141924.000000,128760.000000,170100.000000,116.656087)}
{pt3dadd(141888.000000,128808.000000,170250.000000,115.912360)}

{create adhoc398}
{access adhoc398}
{connect adhoc398(1), adhoc388(0)}
{nseg = 1}
{strdef color color = "White"}
{pt3dclear()}
{pt3dadd(142392.000000,128640.000000,169350.000000,417.864260)}
{pt3dadd(142896.000000,128520.000000,169450.000000,332.093257)}
{pt3dadd(143292.000000,128568.000000,169600.000000,341.923740)}
{pt3dadd(143592.000000,128592.000000,169775.000000,317.445822)}
{pt3dadd(143772.000000,128484.000000,169950.000000,336.271200)}
{pt3dadd(143796.000000,128388.000000,170075.000000,295.474670)}

{create adhoc399}
{access adhoc399}
{connect adhoc399(1), adhoc398(0)}
{nseg = 1}
{strdef color color = "White"}
{pt3dclear()}
{pt3dadd(143796.000000,128388.000000,170075.000000,295.474670)}
{pt3dadd(144372.000000,128328.000000,169925.000000,204.052183)}
{pt3dadd(144720.000000,128352.000000,170125.000000,178.608444)}
{pt3dadd(145104.000000,128280.000000,170275.000000,151.181698)}
{pt3dadd(145308.000000,128220.000000,170450.000000,147.082270)}
{pt3dadd(145464.000000,128028.000000,170625.000000,176.592994)}
{pt3dadd(145656.000000,127812.000000,170725.000000,217.845578)}
{pt3dadd(146016.000000,127512.000000,170825.000000,261.052504)}
{pt3dadd(146124.000000,127296.000000,171025.000000,336.359260)}
{pt3dadd(146064.000000,127368.000000,171225.000000,363.771970)}

{create adhoc400}
{access adhoc400}
{connect adhoc400(1), adhoc398(0)}
{nseg = 1}
{strdef color color = "White"}
{pt3dclear()}
{pt3dadd(143796.000000,128388.000000,170075.000000,295.474670)}
{pt3dadd(143652.000000,128436.000000,170275.000000,177.412512)}
{pt3dadd(143616.000000,128220.000000,170500.000000,148.564998)}
{pt3dadd(143592.000000,128028.000000,170675.000000,208.932130)}

{create adhoc401}
{access adhoc401}
{connect adhoc401(1), adhoc400(0)}
{nseg = 1}
{strdef color color = "White"}
{pt3dclear()}
{pt3dadd(143592.000000,128028.000000,170675.000000,208.932130)}
{pt3dadd(143328.000000,127776.000000,170875.000000,235.385917)}
{pt3dadd(143280.000000,127668.000000,171075.000000,187.847325)}
{pt3dadd(143100.000000,127548.000000,171300.000000,157.692958)}
{pt3dadd(142980.000000,127500.000000,171400.000000,104.466064)}

{create adhoc402}
{access adhoc402}
{connect adhoc402(1), adhoc400(0)}
{nseg = 1}
{strdef color color = "White"}
{pt3dclear()}
{pt3dadd(143592.000000,128028.000000,170675.000000,208.932130)}
{pt3dadd(143772.000000,127920.000000,170700.000000,158.521800)}
{pt3dadd(143916.000000,127968.000000,170700.000000,131.577700)}
{pt3dadd(144024.000000,128064.000000,170775.000000,108.621292)}
{pt3dadd(144132.000000,128124.000000,170775.000000,100.112902)}
{pt3dadd(144204.000000,128208.000000,170775.000000,115.865430)}
{pt3dadd(144276.000000,128256.000000,170775.000000,123.001038)}
{pt3dadd(144360.000000,128316.000000,170775.000000,132.660142)}
{pt3dadd(144420.000000,128316.000000,170775.000000,139.552686)}
{pt3dadd(144480.000000,128376.000000,170775.000000,131.636490)}
{pt3dadd(144516.000000,128412.000000,170775.000000,128.612810)}

{create adhoc403}
{access adhoc403}
{connect adhoc403(1), adhoc355(0)}
{nseg = 1}
{strdef color color = "White"}
{pt3dclear()}
{pt3dadd(142716.000000,129396.000000,168525.000000,702.761100)}
{pt3dadd(142800.000000,129348.000000,168575.000000,660.560083)}
{pt3dadd(142992.000000,129384.000000,168600.000000,535.419131)}
{pt3dadd(143160.000000,129408.000000,168600.000000,414.360969)}
{pt3dadd(143412.000000,129468.000000,168600.000000,287.682197)}
{pt3dadd(143508.000000,129528.000000,168750.000000,98.695481)}
{pt3dadd(143484.000000,129540.000000,168800.000000,94.150090)}

{create adhoc404}
{access adhoc404}
{connect adhoc404(1), adhoc354(0)}
{nseg = 1}
{strdef color color = "White"}
{pt3dclear()}
{pt3dadd(142812.000000,129288.000000,168325.000000,611.789100)}
{pt3dadd(142344.000000,129300.000000,168425.000000,555.462627)}
{pt3dadd(142092.000000,129264.000000,168425.000000,374.401645)}
{pt3dadd(141852.000000,129192.000000,168425.000000,271.537883)}
{pt3dadd(141852.000000,129108.000000,168525.000000,101.030212)}
{pt3dadd(141828.000000,129000.000000,168525.000000,97.470290)}

{create adhoc405}
{access adhoc405}
{connect adhoc405(1), adhoc317(0)}
{nseg = 1}
{strdef color color = "White"}
{pt3dclear()}
{pt3dadd(144300.000000,129012.000000,167400.000000,363.771970)}
{pt3dadd(144624.000000,129204.000000,167650.000000,295.474670)}

{create adhoc406}
{access adhoc406}
{connect adhoc406(1), adhoc405(0)}
{nseg = 1}
{strdef color color = "White"}
{pt3dclear()}
{pt3dadd(144624.000000,129204.000000,167650.000000,295.474670)}
{pt3dadd(144876.000000,129480.000000,167650.000000,179.523327)}
{pt3dadd(144912.000000,129612.000000,167650.000000,138.880214)}
{pt3dadd(145104.000000,129696.000000,167750.000000,78.333853)}
{pt3dadd(145140.000000,129744.000000,167750.000000,73.868670)}

{create adhoc407}
{access adhoc407}
{connect adhoc407(1), adhoc405(0)}
{nseg = 1}
{strdef color color = "White"}
{pt3dclear()}
{pt3dadd(144624.000000,129204.000000,167650.000000,295.474670)}
{pt3dadd(145032.000000,129300.000000,167675.000000,148.003752)}
{pt3dadd(145224.000000,129432.000000,167750.000000,70.217493)}
{pt3dadd(145236.000000,129408.000000,167825.000000,62.115894)}

{create adhoc408}
{access adhoc408}
{connect adhoc408(1), adhoc316(0)}
{nseg = 1}
{strdef color color = "White"}
{pt3dclear()}
{pt3dadd(146508.000000,129192.000000,166075.000000,496.927150)}
{pt3dadd(146736.000000,129312.000000,166025.000000,396.264960)}
{pt3dadd(146952.000000,129216.000000,166025.000000,309.274230)}
{pt3dadd(147024.000000,129156.000000,166050.000000,226.859362)}
{pt3dadd(147072.000000,129072.000000,166050.000000,141.258312)}
{pt3dadd(147132.000000,128976.000000,166050.000000,111.886900)}
{pt3dadd(147144.000000,128892.000000,166050.000000,68.921900)}

{create adhoc409}
{access adhoc409}
{connect adhoc409(1), adhoc49(0)}
{nseg = 1}
{strdef color color = "White"}
{pt3dclear()}
{pt3dadd(137880.000000,138468.000000,154600.000000,463.649440)}
{pt3dadd(137136.000000,139224.000000,154750.000000,1481.363947)}
{pt3dadd(136704.000000,139224.000000,155250.000000,1734.673533)}
{pt3dadd(136884.000000,139788.000000,155625.000000,1223.578200)}

{create adhoc410}
{access adhoc410}
{connect adhoc410(1), adhoc409(0)}
{nseg = 1}
{strdef color color = "White"}
{pt3dclear()}
{pt3dadd(136884.000000,139788.000000,155625.000000,1223.578200)}
{pt3dadd(135876.000000,139488.000000,155925.000000,901.440963)}
{pt3dadd(135600.000000,139236.000000,156125.000000,781.981710)}
{pt3dadd(135312.000000,139020.000000,156300.000000,865.200440)}

{create adhoc411}
{access adhoc411}
{connect adhoc411(1), adhoc410(0)}
{nseg = 1}
{strdef color color = "White"}
{pt3dclear()}
{pt3dadd(135312.000000,139020.000000,156300.000000,865.200440)}
{pt3dadd(135180.000000,137832.000000,156300.000000,512.594003)}
{pt3dadd(135204.000000,137604.000000,156475.000000,395.602008)}
{pt3dadd(135252.000000,137376.000000,156675.000000,264.348346)}
{pt3dadd(135276.000000,137328.000000,156900.000000,237.188392)}
{pt3dadd(135504.000000,137328.000000,157025.000000,245.094682)}
{pt3dadd(135528.000000,137400.000000,157150.000000,255.093992)}
{pt3dadd(135540.000000,137532.000000,157325.000000,261.753532)}
{pt3dadd(135600.000000,137688.000000,157475.000000,273.226438)}
{pt3dadd(135744.000000,137796.000000,157625.000000,264.738444)}
{pt3dadd(135852.000000,137832.000000,157775.000000,269.643993)}
{pt3dadd(135972.000000,137916.000000,157950.000000,285.409700)}

{create adhoc412}
{access adhoc412}
{connect adhoc412(1), adhoc411(0)}
{nseg = 1}
{strdef color color = "White"}
{pt3dclear()}
{pt3dadd(135972.000000,137916.000000,157950.000000,285.409700)}
{pt3dadd(135564.000000,137268.000000,158025.000000,171.369185)}
{pt3dadd(135360.000000,137148.000000,158175.000000,165.327907)}
{pt3dadd(135240.000000,137052.000000,158350.000000,147.234083)}
{pt3dadd(135300.000000,137124.000000,158525.000000,194.223120)}
{pt3dadd(134724.000000,137148.000000,158700.000000,203.317888)}
{pt3dadd(134268.000000,137004.000000,158850.000000,212.412656)}
{pt3dadd(133956.000000,136896.000000,159025.000000,226.274170)}
{pt3dadd(133860.000000,136824.000000,159225.000000,169.705630)}

{create adhoc413}
{access adhoc413}
{connect adhoc413(1), adhoc411(0)}
{nseg = 1}
{strdef color color = "White"}
{pt3dclear()}
{pt3dadd(135972.000000,137916.000000,157950.000000,285.409700)}
{pt3dadd(136092.000000,138096.000000,158250.000000,313.834283)}
{pt3dadd(136224.000000,138132.000000,158450.000000,294.883214)}
{pt3dadd(136488.000000,137940.000000,158625.000000,292.938794)}
{pt3dadd(136680.000000,137856.000000,158700.000000,304.922488)}
{pt3dadd(136884.000000,137688.000000,158850.000000,326.611404)}
{pt3dadd(137052.000000,137664.000000,159025.000000,366.714600)}
{pt3dadd(137340.000000,137688.000000,159175.000000,447.855830)}

{create adhoc414}
{access adhoc414}
{connect adhoc414(1), adhoc413(0)}
{nseg = 1}
{strdef color color = "White"}
{pt3dclear()}
{pt3dadd(137340.000000,137688.000000,159175.000000,447.855830)}
{pt3dadd(137556.000000,137940.000000,159325.000000,379.549210)}
{pt3dadd(137700.000000,138048.000000,159325.000000,282.361640)}
{pt3dadd(137772.000000,138156.000000,159325.000000,212.971988)}
{pt3dadd(137748.000000,138408.000000,159325.000000,124.689380)}
{pt3dadd(137844.000000,138804.000000,159300.000000,100.907570)}

{create adhoc415}
{access adhoc415}
{connect adhoc415(1), adhoc413(0)}
{nseg = 1}
{strdef color color = "White"}
{pt3dclear()}
{pt3dadd(137340.000000,137688.000000,159175.000000,447.855830)}
{pt3dadd(137628.000000,137724.000000,159350.000000,375.559443)}
{pt3dadd(137556.000000,137856.000000,159525.000000,339.411250)}

{create adhoc416}
{access adhoc416}
{connect adhoc416(1), adhoc415(0)}
{nseg = 1}
{strdef color color = "White"}
{pt3dclear()}
{pt3dadd(137556.000000,137856.000000,159525.000000,339.411250)}
{pt3dadd(138012.000000,137292.000000,159450.000000,204.527648)}
{pt3dadd(138132.000000,137268.000000,159425.000000,173.157270)}
{pt3dadd(138324.000000,137256.000000,159425.000000,145.638048)}
{pt3dadd(138480.000000,137088.000000,159425.000000,151.339515)}
{pt3dadd(138636.000000,136944.000000,159425.000000,201.815140)}

{create adhoc417}
{access adhoc417}
{connect adhoc417(1), adhoc416(0)}
{nseg = 1}
{strdef color color = "White"}
{pt3dclear()}
{pt3dadd(138636.000000,136944.000000,159425.000000,201.815140)}
{pt3dadd(139008.000000,136824.000000,159450.000000,195.479183)}
{pt3dadd(139176.000000,136896.000000,159450.000000,172.465270)}
{pt3dadd(139320.000000,136992.000000,159475.000000,169.762280)}
{pt3dadd(139464.000000,137088.000000,159475.000000,163.113910)}
{pt3dadd(139620.000000,137184.000000,159475.000000,169.762280)}
[truncated: 362,852 more chars]
