# Supplementary material for: Full reconstruction of large lobula plate tangential cells in Drosophila from a 3D EM dataset
Source: PLoS One. 2018 Nov 28;13(11):e0207828. doi: 10.1371/journal.pone.0207828 (PMC6261601; doi:10.1371/journal.pone.0207828)
Supplement: S1 Dataset — (ZIP) [file pone.0207828.s001.zip › Diameter hoc/cell15_was_2012-06-26_C80_11__explorational__truff__604db8_3.hoc0001.hoc]

/* created with convertKnossosNmlToHoc.m */

{create adhoc1}
{access adhoc1}
{nseg = 1}
{strdef color color = "White"}
{pt3dclear()}
{pt3dadd(143616.000000,127980.000000,152500.000000,66.820490)}
{pt3dadd(143496.000000,127980.000000,152700.000000,355.098063)}
{pt3dadd(143616.000000,128136.000000,153000.000000,478.142772)}
{pt3dadd(143568.000000,127812.000000,153250.000000,584.855194)}
{pt3dadd(143664.000000,127752.000000,153475.000000,619.595568)}
{pt3dadd(143724.000000,127812.000000,153750.000000,599.320074)}
{pt3dadd(143616.000000,127872.000000,153975.000000,559.103742)}
{pt3dadd(143340.000000,128064.000000,154175.000000,547.381990)}
{pt3dadd(143196.000000,128280.000000,154400.000000,553.385816)}
{pt3dadd(143232.000000,128652.000000,154600.000000,594.223316)}
{pt3dadd(143472.000000,128820.000000,154850.000000,686.418316)}
{pt3dadd(143916.000000,128736.000000,155075.000000,748.545080)}
{pt3dadd(143868.000000,128616.000000,155325.000000,766.570846)}
{pt3dadd(143904.000000,128448.000000,155525.000000,799.294133)}
{pt3dadd(143820.000000,128484.000000,155725.000000,661.921800)}

{create adhoc2}
{access adhoc2}
{connect adhoc2(1), adhoc1(0)}
{nseg = 1}
{strdef color color = "White"}
{pt3dclear()}
{pt3dadd(143820.000000,128484.000000,155725.000000,661.921800)}
{pt3dadd(144660.000000,127704.000000,155725.000000,404.867510)}
{pt3dadd(145128.000000,127404.000000,155875.000000,290.448366)}
{pt3dadd(145380.000000,127320.000000,156025.000000,188.694766)}
{pt3dadd(145620.000000,127164.000000,156250.000000,138.817550)}
{pt3dadd(145800.000000,127008.000000,156450.000000,152.711022)}
{pt3dadd(145872.000000,126816.000000,156525.000000,168.028574)}
{pt3dadd(146736.000000,126420.000000,156925.000000,193.539294)}
{pt3dadd(147084.000000,126432.000000,157150.000000,203.956678)}
{pt3dadd(147420.000000,126468.000000,157350.000000,200.660044)}
{pt3dadd(147696.000000,126432.000000,157600.000000,200.660044)}
{pt3dadd(148044.000000,126204.000000,157800.000000,181.559492)}
{pt3dadd(148260.000000,125988.000000,157975.000000,177.352056)}
{pt3dadd(148416.000000,125772.000000,158225.000000,181.559492)}
{pt3dadd(148752.000000,125388.000000,158450.000000,184.856126)}
{pt3dadd(149052.000000,125064.000000,158650.000000,174.934804)}
{pt3dadd(149244.000000,124908.000000,158850.000000,186.393734)}
{pt3dadd(149340.000000,124932.000000,159075.000000,164.150218)}
{pt3dadd(149376.000000,124980.000000,159325.000000,141.751780)}
{pt3dadd(149220.000000,125136.000000,159625.000000,130.292850)}
{pt3dadd(149124.000000,125388.000000,159900.000000,130.292850)}
{pt3dadd(149340.000000,126048.000000,160400.000000,124.006070)}
{pt3dadd(149448.000000,126204.000000,160600.000000,142.433322)}
{pt3dadd(149532.000000,126096.000000,160875.000000,158.669652)}
{pt3dadd(149724.000000,126048.000000,161125.000000,166.831948)}
{pt3dadd(149928.000000,126036.000000,161375.000000,165.442798)}
{pt3dadd(150096.000000,126072.000000,161550.000000,186.164922)}
{pt3dadd(150228.000000,126204.000000,161775.000000,172.933042)}
{pt3dadd(150252.000000,126276.000000,162050.000000,167.609980)}
{pt3dadd(150240.000000,126060.000000,162250.000000,163.230684)}
{pt3dadd(150288.000000,126024.000000,162400.000000,170.906614)}
{pt3dadd(150312.000000,126000.000000,162700.000000,166.267920)}
{pt3dadd(150372.000000,125904.000000,162850.000000,212.474176)}
{pt3dadd(150360.000000,125844.000000,163050.000000,311.088126)}
{pt3dadd(150588.000000,125772.000000,163250.000000,444.219146)}
{pt3dadd(150636.000000,125700.000000,163450.000000,614.131816)}
{pt3dadd(150456.000000,125664.000000,163700.000000,755.154336)}
{pt3dadd(150492.000000,125628.000000,163950.000000,920.939533)}
{pt3dadd(150576.000000,125976.000000,164100.000000,931.390500)}

{create adhoc3}
{access adhoc3}
{connect adhoc3(1), adhoc2(0)}
{nseg = 1}
{strdef color color = "White"}
{pt3dclear()}
{pt3dadd(150576.000000,125976.000000,164100.000000,931.390500)}
{pt3dadd(149904.000000,125628.000000,164175.000000,857.090767)}
{pt3dadd(149640.000000,125592.000000,164175.000000,853.784012)}
{pt3dadd(149316.000000,125544.000000,164200.000000,828.419932)}
{pt3dadd(149064.000000,125532.000000,164250.000000,771.831520)}
{pt3dadd(148824.000000,125580.000000,164500.000000,765.527506)}
{pt3dadd(148572.000000,125712.000000,164675.000000,699.325926)}
{pt3dadd(148308.000000,125664.000000,164775.000000,641.934090)}
{pt3dadd(148224.000000,125508.000000,164650.000000,600.382600)}

{create adhoc4}
{access adhoc4}
{connect adhoc4(1), adhoc3(0)}
{nseg = 1}
{strdef color color = "White"}
{pt3dclear()}
{pt3dadd(148224.000000,125508.000000,164650.000000,600.382600)}
{pt3dadd(147984.000000,124872.000000,164425.000000,383.400293)}
{pt3dadd(147744.000000,124500.000000,164150.000000,318.726953)}
{pt3dadd(147480.000000,124116.000000,163900.000000,406.362580)}

{create adhoc5}
{access adhoc5}
{connect adhoc5(1), adhoc4(0)}
{nseg = 1}
{strdef color color = "White"}
{pt3dclear()}
{pt3dadd(147480.000000,124116.000000,163900.000000,406.362580)}
{pt3dadd(147636.000000,124008.000000,163575.000000,379.296887)}
{pt3dadd(147492.000000,123948.000000,163325.000000,343.646266)}
{pt3dadd(147168.000000,123960.000000,163050.000000,297.832680)}
{pt3dadd(146856.000000,123936.000000,162800.000000,248.939698)}
{pt3dadd(146544.000000,123948.000000,162525.000000,244.521890)}
{pt3dadd(146028.000000,123804.000000,162250.000000,295.859512)}
{pt3dadd(145464.000000,123408.000000,162025.000000,352.256888)}
{pt3dadd(144408.000000,123048.000000,161775.000000,420.524570)}
{pt3dadd(143928.000000,122988.000000,161600.000000,545.882907)}
{pt3dadd(143448.000000,123324.000000,161300.000000,518.633060)}

{create adhoc6}
{access adhoc6}
{connect adhoc6(1), adhoc5(0)}
{nseg = 1}
{strdef color color = "White"}
{pt3dclear()}
{pt3dadd(143448.000000,123324.000000,161300.000000,518.633060)}
{pt3dadd(143160.000000,123576.000000,161250.000000,593.645820)}
{pt3dadd(142860.000000,123708.000000,161150.000000,602.344358)}
{pt3dadd(142560.000000,123732.000000,161025.000000,637.621334)}
{pt3dadd(142284.000000,123756.000000,160925.000000,637.621334)}
{pt3dadd(141984.000000,123768.000000,160800.000000,637.621334)}
{pt3dadd(141720.000000,123792.000000,160675.000000,652.440780)}
{pt3dadd(141504.000000,124308.000000,160775.000000,661.921800)}

{create adhoc7}
{access adhoc7}
{connect adhoc7(1), adhoc6(0)}
{nseg = 1}
{strdef color color = "White"}
{pt3dclear()}
{pt3dadd(141504.000000,124308.000000,160775.000000,661.921800)}
{pt3dadd(142248.000000,123792.000000,160350.000000,493.936280)}

{create adhoc8}
{access adhoc8}
{connect adhoc8(1), adhoc7(0)}
{nseg = 1}
{strdef color color = "White"}
{pt3dclear()}
{pt3dadd(142248.000000,123792.000000,160350.000000,493.936280)}
{pt3dadd(141756.000000,123960.000000,160000.000000,318.083933)}
{pt3dadd(141612.000000,123900.000000,159825.000000,230.320974)}
{pt3dadd(141564.000000,123948.000000,159625.000000,107.784357)}
{pt3dadd(141408.000000,123996.000000,159450.000000,77.353070)}

{create adhoc9}
{access adhoc9}
{connect adhoc9(1), adhoc7(0)}
{nseg = 1}
{strdef color color = "White"}
{pt3dclear()}
{pt3dadd(142248.000000,123792.000000,160350.000000,493.936280)}
{pt3dadd(143112.000000,123948.000000,160600.000000,318.395720)}

{create adhoc10}
{access adhoc10}
{connect adhoc10(1), adhoc6(0)}
{nseg = 1}
{strdef color color = "White"}
{pt3dclear()}
{pt3dadd(141504.000000,124308.000000,160775.000000,661.921800)}
{pt3dadd(141336.000000,124824.000000,161450.000000,443.782933)}
{pt3dadd(141132.000000,125160.000000,161500.000000,386.370290)}
{pt3dadd(141084.000000,125424.000000,161550.000000,306.299457)}
{pt3dadd(141408.000000,125316.000000,161775.000000,351.031280)}

{create adhoc11}
{access adhoc11}
{connect adhoc11(1), adhoc10(0)}
{nseg = 1}
{strdef color color = "White"}
{pt3dclear()}
{pt3dadd(141408.000000,125316.000000,161775.000000,351.031280)}
{pt3dadd(141504.000000,125736.000000,161975.000000,189.131496)}
{pt3dadd(141588.000000,126048.000000,162175.000000,39.068558)}

{create adhoc12}
{access adhoc12}
{connect adhoc12(1), adhoc10(0)}
{nseg = 1}
{strdef color color = "White"}
{pt3dclear()}
{pt3dadd(141408.000000,125316.000000,161775.000000,351.031280)}
{pt3dadd(140628.000000,125148.000000,161650.000000,268.041947)}
{pt3dadd(140100.000000,125232.000000,161650.000000,294.551376)}
{pt3dadd(139476.000000,125448.000000,161750.000000,344.421640)}
{pt3dadd(139248.000000,125772.000000,161850.000000,427.401434)}
{pt3dadd(139176.000000,125964.000000,162325.000000,499.959594)}
{pt3dadd(139092.000000,126108.000000,162425.000000,531.883746)}
{pt3dadd(139008.000000,126144.000000,162400.000000,573.933594)}
{pt3dadd(138924.000000,126120.000000,162350.000000,552.644330)}
{pt3dadd(138828.000000,126072.000000,162275.000000,520.647084)}
{pt3dadd(138732.000000,126060.000000,162325.000000,490.173518)}
{pt3dadd(138648.000000,126012.000000,162225.000000,476.722408)}
{pt3dadd(138552.000000,126108.000000,162300.000000,445.211856)}
{pt3dadd(138468.000000,126108.000000,162300.000000,423.827000)}
{pt3dadd(138384.000000,126072.000000,162325.000000,433.470512)}
{pt3dadd(138288.000000,125976.000000,162325.000000,433.470512)}
{pt3dadd(138204.000000,126036.000000,162275.000000,446.921622)}
{pt3dadd(138108.000000,126276.000000,162300.000000,473.245834)}
{pt3dadd(138024.000000,126408.000000,162200.000000,485.446388)}
{pt3dadd(137940.000000,126528.000000,162275.000000,501.796296)}
{pt3dadd(137856.000000,126588.000000,162275.000000,510.980598)}
{pt3dadd(137772.000000,126624.000000,162250.000000,526.551936)}
{pt3dadd(137688.000000,126732.000000,162200.000000,528.822004)}
{pt3dadd(137604.000000,126876.000000,162125.000000,548.132002)}
{pt3dadd(137520.000000,127032.000000,161975.000000,548.132002)}
{pt3dadd(137436.000000,127176.000000,161975.000000,548.132002)}
{pt3dadd(137352.000000,127212.000000,162025.000000,527.856508)}
{pt3dadd(137268.000000,127224.000000,162100.000000,511.462782)}
{pt3dadd(137184.000000,127284.000000,162100.000000,496.632930)}
{pt3dadd(137100.000000,127236.000000,162000.000000,466.159364)}
{pt3dadd(137016.000000,127248.000000,161975.000000,456.975062)}
{pt3dadd(136932.000000,127176.000000,162050.000000,452.494916)}
{pt3dadd(136848.000000,127188.000000,162050.000000,471.804914)}
{pt3dadd(136764.000000,127188.000000,161975.000000,455.124214)}
{pt3dadd(136680.000000,127200.000000,161950.000000,450.857406)}
{pt3dadd(136596.000000,127212.000000,161925.000000,442.526968)}
{pt3dadd(136512.000000,127272.000000,161925.000000,430.326414)}
{pt3dadd(136428.000000,127272.000000,161925.000000,388.276566)}
{pt3dadd(136344.000000,127284.000000,162025.000000,377.737270)}
{pt3dadd(136248.000000,127296.000000,162075.000000,347.409564)}
{pt3dadd(136164.000000,127248.000000,162050.000000,313.655408)}
{pt3dadd(136080.000000,127200.000000,162050.000000,286.147282)}
{pt3dadd(135984.000000,127236.000000,162000.000000,247.067178)}
{pt3dadd(135900.000000,127224.000000,161900.000000,209.376224)}
{pt3dadd(135816.000000,127284.000000,161825.000000,178.367784)}
{pt3dadd(135648.000000,127368.000000,161825.000000,148.758593)}
{pt3dadd(135504.000000,127404.000000,161825.000000,115.920671)}
{pt3dadd(135360.000000,127488.000000,161825.000000,102.871589)}
{pt3dadd(135204.000000,127608.000000,161800.000000,91.608608)}
{pt3dadd(135060.000000,127668.000000,161750.000000,148.881124)}
{pt3dadd(134172.000000,127800.000000,161625.000000,234.698567)}
{pt3dadd(133296.000000,127884.000000,161625.000000,332.000809)}
{pt3dadd(132732.000000,127824.000000,161550.000000,411.349991)}
{pt3dadd(132552.000000,127752.000000,161375.000000,507.799416)}
{pt3dadd(132456.000000,127752.000000,161825.000000,540.885494)}
{pt3dadd(132360.000000,127692.000000,162000.000000,526.761836)}
{pt3dadd(132372.000000,127692.000000,162100.000000,511.190498)}
{pt3dadd(132372.000000,127728.000000,162200.000000,506.710352)}
{pt3dadd(132048.000000,127764.000000,162300.000000,486.434858)}
{pt3dadd(131796.000000,127824.000000,162400.000000,457.412410)}
{pt3dadd(131640.000000,127908.000000,162500.000000,449.081972)}
{pt3dadd(131652.000000,127944.000000,162600.000000,405.303156)}
{pt3dadd(131640.000000,127824.000000,162700.000000,352.932082)}
{pt3dadd(131640.000000,127620.000000,162800.000000,289.188060)}
{pt3dadd(131736.000000,127500.000000,162900.000000,186.159400)}

{create adhoc13}
{access adhoc13}
{connect adhoc13(1), adhoc5(0)}
{nseg = 1}
{strdef color color = "White"}
{pt3dclear()}
{pt3dadd(143448.000000,123324.000000,161300.000000,518.633060)}
{pt3dadd(143436.000000,123588.000000,160725.000000,430.885687)}
{pt3dadd(143844.000000,123420.000000,160675.000000,390.006844)}
{pt3dadd(143940.000000,123420.000000,160450.000000,356.486488)}
{pt3dadd(144060.000000,123348.000000,160250.000000,349.290344)}
{pt3dadd(144204.000000,123552.000000,160000.000000,338.751048)}
{pt3dadd(144300.000000,123360.000000,159750.000000,335.240732)}
{pt3dadd(144408.000000,123384.000000,159600.000000,362.818018)}
{pt3dadd(144456.000000,123324.000000,159450.000000,313.343865)}
{pt3dadd(144528.000000,123048.000000,159250.000000,269.597609)}
{pt3dadd(145080.000000,122340.000000,158675.000000,227.934505)}
{pt3dadd(145416.000000,121872.000000,158350.000000,181.728249)}
{pt3dadd(145392.000000,121584.000000,158000.000000,117.124206)}
{pt3dadd(145392.000000,121464.000000,157825.000000,130.162513)}
{pt3dadd(145368.000000,121332.000000,157675.000000,164.349313)}
{pt3dadd(145188.000000,121176.000000,157450.000000,233.232413)}
{pt3dadd(144996.000000,120828.000000,157200.000000,303.315513)}
{pt3dadd(145020.000000,120384.000000,157025.000000,391.496362)}
{pt3dadd(145116.000000,120108.000000,156775.000000,472.084546)}
{pt3dadd(145092.000000,119820.000000,156425.000000,537.518092)}
{pt3dadd(145092.000000,119928.000000,156175.000000,563.511512)}
{pt3dadd(145392.000000,119880.000000,155925.000000,600.859100)}
{pt3dadd(145308.000000,119604.000000,155775.000000,600.382600)}

{create adhoc14}
{access adhoc14}
{connect adhoc14(1), adhoc13(0)}
{nseg = 1}
{strdef color color = "White"}
{pt3dclear()}
{pt3dadd(145308.000000,119604.000000,155775.000000,600.382600)}
{pt3dadd(145476.000000,118392.000000,155750.000000,348.259440)}
{pt3dadd(145620.000000,117324.000000,155550.000000,337.652090)}
{pt3dadd(145992.000000,117036.000000,155475.000000,249.737866)}
{pt3dadd(146148.000000,116256.000000,155475.000000,267.638418)}
{pt3dadd(145632.000000,115632.000000,155375.000000,281.361674)}
{pt3dadd(145116.000000,114996.000000,155375.000000,324.143080)}
{pt3dadd(145272.000000,114108.000000,155625.000000,379.132708)}
{pt3dadd(144972.000000,113268.000000,155475.000000,506.449767)}
{pt3dadd(145212.000000,112452.000000,155475.000000,470.415500)}

{create adhoc15}
{access adhoc15}
{connect adhoc15(1), adhoc14(0)}
{nseg = 1}
{strdef color color = "White"}
{pt3dclear()}
{pt3dadd(145212.000000,112452.000000,155475.000000,470.415500)}
{pt3dadd(145296.000000,112944.000000,154875.000000,589.640627)}
{pt3dadd(145116.000000,112548.000000,154425.000000,439.631176)}
{pt3dadd(145140.000000,111816.000000,154275.000000,377.710372)}
{pt3dadd(144852.000000,111732.000000,154000.000000,196.681827)}
{pt3dadd(144504.000000,111468.000000,153800.000000,160.811480)}

{create adhoc16}
{access adhoc16}
{connect adhoc16(1), adhoc15(0)}
{nseg = 1}
{strdef color color = "White"}
{pt3dclear()}
{pt3dadd(144504.000000,111468.000000,153800.000000,160.811480)}
{pt3dadd(144588.000000,110736.000000,153625.000000,122.710837)}
{pt3dadd(144972.000000,110100.000000,153550.000000,119.831362)}
{pt3dadd(145140.000000,109224.000000,153350.000000,111.669066)}
{pt3dadd(145176.000000,108912.000000,153200.000000,111.669066)}
{pt3dadd(145500.000000,108288.000000,153025.000000,110.681823)}
{pt3dadd(145980.000000,107868.000000,153000.000000,111.669066)}
{pt3dadd(146376.000000,107208.000000,153375.000000,174.812020)}
{pt3dadd(146772.000000,106860.000000,153775.000000,244.895120)}
{pt3dadd(147456.000000,106464.000000,154150.000000,340.696928)}
{pt3dadd(147648.000000,106356.000000,154425.000000,470.415500)}

{create adhoc17}
{access adhoc17}
{connect adhoc17(1), adhoc15(0)}
{nseg = 1}
{strdef color color = "White"}
{pt3dclear()}
{pt3dadd(144504.000000,111468.000000,153800.000000,160.811480)}
{pt3dadd(144432.000000,111708.000000,153475.000000,141.908827)}
{pt3dadd(144048.000000,111828.000000,153250.000000,126.609502)}
{pt3dadd(143928.000000,111888.000000,153050.000000,116.215914)}
{pt3dadd(143796.000000,111924.000000,152850.000000,113.632914)}
{pt3dadd(143748.000000,112092.000000,152650.000000,116.215914)}
{pt3dadd(143520.000000,112224.000000,152450.000000,172.886211)}
{pt3dadd(143328.000000,112260.000000,152225.000000,291.157696)}
{pt3dadd(143340.000000,112632.000000,151875.000000,415.342760)}
{pt3dadd(143100.000000,112620.000000,151400.000000,463.859332)}
{pt3dadd(142992.000000,112464.000000,150850.000000,597.789887)}
{pt3dadd(142872.000000,112572.000000,150275.000000,368.582860)}

{create adhoc18}
{access adhoc18}
{connect adhoc18(1), adhoc14(0)}
{nseg = 1}
{strdef color color = "White"}
{pt3dclear()}
{pt3dadd(145212.000000,112452.000000,155475.000000,470.415500)}
{pt3dadd(145740.000000,111792.000000,155525.000000,351.400797)}
{pt3dadd(146136.000000,111444.000000,155450.000000,245.646897)}
{pt3dadd(146736.000000,110832.000000,155475.000000,153.153800)}

{create adhoc19}
{access adhoc19}
{connect adhoc19(1), adhoc18(0)}
{nseg = 1}
{strdef color color = "White"}
{pt3dclear()}
{pt3dadd(146736.000000,110832.000000,155475.000000,153.153800)}
{pt3dadd(147012.000000,110604.000000,155425.000000,127.604772)}
{pt3dadd(147264.000000,110304.000000,155350.000000,155.588853)}
{pt3dadd(147912.000000,108780.000000,155450.000000,158.728503)}
{pt3dadd(148380.000000,108132.000000,155525.000000,158.728503)}
{pt3dadd(148404.000000,107352.000000,155725.000000,163.196400)}
{pt3dadd(148572.000000,106956.000000,155875.000000,168.519462)}
{pt3dadd(148476.000000,106440.000000,155975.000000,149.723882)}
{pt3dadd(148296.000000,106320.000000,156100.000000,143.736472)}
{pt3dadd(148428.000000,105972.000000,156225.000000,146.319472)}
{pt3dadd(148416.000000,105396.000000,156475.000000,151.750232)}
{pt3dadd(148428.000000,105024.000000,156600.000000,143.287520)}
{pt3dadd(148476.000000,104772.000000,156750.000000,147.458280)}
{pt3dadd(148788.000000,104196.000000,156950.000000,164.930860)}
{pt3dadd(148824.000000,104064.000000,157075.000000,246.060812)}
{pt3dadd(148860.000000,104064.000000,157550.000000,354.433640)}
{pt3dadd(149136.000000,104028.000000,157950.000000,422.590136)}
{pt3dadd(149280.000000,103992.000000,158500.000000,441.853650)}
{pt3dadd(148956.000000,104112.000000,159150.000000,421.798070)}
{pt3dadd(148896.000000,104136.000000,159500.000000,333.617221)}
{pt3dadd(149052.000000,104040.000000,159750.000000,214.358493)}
{pt3dadd(149052.000000,104136.000000,160050.000000,136.303340)}
{pt3dadd(148932.000000,104100.000000,160525.000000,112.869066)}
{pt3dadd(149124.000000,103944.000000,160875.000000,111.669066)}
{pt3dadd(149304.000000,103908.000000,161275.000000,151.583763)}
{pt3dadd(149220.000000,103932.000000,161675.000000,148.895255)}
{pt3dadd(149412.000000,104112.000000,162125.000000,153.363152)}
{pt3dadd(149448.000000,104424.000000,162375.000000,154.686152)}
{pt3dadd(149520.000000,104652.000000,162600.000000,188.445012)}
{pt3dadd(149580.000000,104820.000000,162875.000000,221.881312)}
{pt3dadd(149460.000000,104856.000000,163400.000000,298.908060)}
{pt3dadd(149400.000000,105192.000000,163800.000000,331.466920)}
{pt3dadd(149412.000000,105456.000000,164350.000000,409.875100)}
{pt3dadd(149232.000000,105408.000000,164675.000000,288.794300)}

{create adhoc20}
{access adhoc20}
{connect adhoc20(1), adhoc18(0)}
{nseg = 1}
{strdef color color = "White"}
{pt3dclear()}
{pt3dadd(146736.000000,110832.000000,155475.000000,153.153800)}
{pt3dadd(146244.000000,110964.000000,155850.000000,227.555233)}
{pt3dadd(145836.000000,110556.000000,155900.000000,376.972080)}
{pt3dadd(145812.000000,109932.000000,155975.000000,492.295092)}
{pt3dadd(145620.000000,110016.000000,156150.000000,561.398106)}
{pt3dadd(145488.000000,110028.000000,156250.000000,615.109900)}
{pt3dadd(145548.000000,110016.000000,156350.000000,639.754894)}
{pt3dadd(145428.000000,109920.000000,156450.000000,646.058908)}
{pt3dadd(145548.000000,109944.000000,156550.000000,614.463730)}
{pt3dadd(145452.000000,109932.000000,156650.000000,598.892392)}
{pt3dadd(145536.000000,110160.000000,156875.000000,558.250370)}
{pt3dadd(145668.000000,110280.000000,157000.000000,486.109886)}
{pt3dadd(145728.000000,110328.000000,157150.000000,384.356286)}
{pt3dadd(145212.000000,108984.000000,156900.000000,292.854834)}
{pt3dadd(144696.000000,107916.000000,156625.000000,227.837988)}
{pt3dadd(144192.000000,106680.000000,156325.000000,197.221968)}
{pt3dadd(144156.000000,106200.000000,156075.000000,162.521160)}
{pt3dadd(144240.000000,105732.000000,155825.000000,158.350400)}
{pt3dadd(144192.000000,105708.000000,155700.000000,154.297886)}
{pt3dadd(144492.000000,105348.000000,155425.000000,146.987476)}
{pt3dadd(144588.000000,105288.000000,155200.000000,130.346924)}
{pt3dadd(144720.000000,105048.000000,155000.000000,124.644628)}
{pt3dadd(144720.000000,104604.000000,154750.000000,127.356778)}
{pt3dadd(144468.000000,104280.000000,154500.000000,172.231294)}
{pt3dadd(144396.000000,104004.000000,154400.000000,215.977550)}
{pt3dadd(144336.000000,103644.000000,154250.000000,266.919950)}
{pt3dadd(144288.000000,103536.000000,154125.000000,317.862350)}
{pt3dadd(144156.000000,103536.000000,154000.000000,378.293154)}
{pt3dadd(144144.000000,103596.000000,153850.000000,418.340622)}
{pt3dadd(143988.000000,103500.000000,153700.000000,457.047318)}
{pt3dadd(144012.000000,103440.000000,153575.000000,473.728018)}
{pt3dadd(143976.000000,103188.000000,153425.000000,477.598134)}
{pt3dadd(143928.000000,103056.000000,153300.000000,465.397580)}
{pt3dadd(143712.000000,102876.000000,153175.000000,381.415828)}
{pt3dadd(143796.000000,102756.000000,153050.000000,293.234979)}
{pt3dadd(143112.000000,101904.000000,153050.000000,225.611879)}
{pt3dadd(142848.000000,101604.000000,152900.000000,165.071466)}
{pt3dadd(142236.000000,101184.000000,152900.000000,108.401169)}
{pt3dadd(141984.000000,100920.000000,153100.000000,117.828459)}
{pt3dadd(141804.000000,100140.000000,152900.000000,126.268506)}
{pt3dadd(141768.000000,99576.000000,152800.000000,113.172604)}
{pt3dadd(141876.000000,99444.000000,152675.000000,110.349670)}
{pt3dadd(142008.000000,98748.000000,152550.000000,114.817567)}
{pt3dadd(142128.000000,98508.000000,152425.000000,138.034407)}
{pt3dadd(142476.000000,98136.000000,152225.000000,163.870697)}
{pt3dadd(142536.000000,97896.000000,152075.000000,205.515039)}
{pt3dadd(142680.000000,97836.000000,151950.000000,242.614310)}
{pt3dadd(142560.000000,97740.000000,151825.000000,245.197310)}
{pt3dadd(142668.000000,97632.000000,151575.000000,229.666467)}
{pt3dadd(142740.000000,97584.000000,151425.000000,138.915000)}

{create adhoc21}
{access adhoc21}
{connect adhoc21(1), adhoc13(0)}
{nseg = 1}
{strdef color color = "White"}
{pt3dclear()}
{pt3dadd(145308.000000,119604.000000,155775.000000,600.382600)}
{pt3dadd(145380.000000,119592.000000,155575.000000,610.388977)}
{pt3dadd(145560.000000,119808.000000,155350.000000,554.623596)}
{pt3dadd(145788.000000,119868.000000,155125.000000,473.640548)}
{pt3dadd(145824.000000,119868.000000,154875.000000,380.024028)}
{pt3dadd(145908.000000,119856.000000,154700.000000,271.852851)}
{pt3dadd(146388.000000,120036.000000,154425.000000,193.797698)}
{pt3dadd(146700.000000,119892.000000,154225.000000,171.057848)}
{pt3dadd(147000.000000,119760.000000,154125.000000,213.236892)}
{pt3dadd(147600.000000,119724.000000,154125.000000,295.689844)}
{pt3dadd(147744.000000,119688.000000,153875.000000,416.784263)}
{pt3dadd(147960.000000,119928.000000,153700.000000,504.965112)}
{pt3dadd(148116.000000,119904.000000,153525.000000,558.178528)}
{pt3dadd(148032.000000,119880.000000,153350.000000,596.982532)}
{pt3dadd(148044.000000,120072.000000,153175.000000,608.146100)}
{pt3dadd(148080.000000,120108.000000,153000.000000,563.225612)}
{pt3dadd(148128.000000,120288.000000,152775.000000,512.071520)}
{pt3dadd(148080.000000,120288.000000,152600.000000,453.197467)}
{pt3dadd(147972.000000,120180.000000,152375.000000,288.794300)}

{create adhoc22}
{access adhoc22}
{connect adhoc22(1), adhoc4(0)}
{nseg = 1}
{strdef color color = "White"}
{pt3dclear()}
{pt3dadd(147480.000000,124116.000000,163900.000000,406.362580)}
{pt3dadd(147588.000000,123672.000000,163825.000000,223.654193)}
{pt3dadd(147696.000000,123180.000000,163925.000000,179.906800)}
{pt3dadd(147792.000000,122736.000000,163925.000000,125.094284)}
{pt3dadd(147780.000000,122340.000000,163925.000000,121.491426)}
{pt3dadd(147780.000000,122364.000000,163750.000000,124.203576)}
{pt3dadd(147492.000000,121896.000000,163875.000000,136.805364)}
{pt3dadd(147216.000000,121440.000000,163800.000000,140.408222)}
{pt3dadd(146784.000000,121296.000000,163775.000000,157.048774)}
{pt3dadd(146412.000000,121308.000000,163875.000000,175.239776)}
{pt3dadd(145944.000000,120744.000000,163675.000000,184.347827)}
{pt3dadd(145728.000000,120372.000000,163575.000000,205.240720)}

{create adhoc23}
{access adhoc23}
{connect adhoc23(1), adhoc22(0)}
{nseg = 1}
{strdef color color = "White"}
{pt3dclear()}
{pt3dadd(145728.000000,120372.000000,163575.000000,205.240720)}
{pt3dadd(144912.000000,120240.000000,163725.000000,150.608810)}
{pt3dadd(143184.000000,119916.000000,164000.000000,319.082474)}
{pt3dadd(142296.000000,119904.000000,164100.000000,410.418690)}
{pt3dadd(141864.000000,119952.000000,164425.000000,464.963948)}
{pt3dadd(141936.000000,120036.000000,164775.000000,499.150748)}
{pt3dadd(142380.000000,119976.000000,165100.000000,411.252154)}
{pt3dadd(142500.000000,119916.000000,165375.000000,323.353560)}
{pt3dadd(143100.000000,119532.000000,165700.000000,220.141350)}
{pt3dadd(143556.000000,119460.000000,165900.000000,167.938950)}
{pt3dadd(143712.000000,119520.000000,165975.000000,134.720250)}
{pt3dadd(143748.000000,119412.000000,166200.000000,126.000000)}

{create adhoc24}
{access adhoc24}
{connect adhoc24(1), adhoc22(0)}
{nseg = 1}
{strdef color color = "White"}
{pt3dclear()}
{pt3dadd(145728.000000,120372.000000,163575.000000,205.240720)}
{pt3dadd(145668.000000,119832.000000,163300.000000,142.789990)}
{pt3dadd(145656.000000,119292.000000,162950.000000,221.801296)}
{pt3dadd(145608.000000,119148.000000,162850.000000,334.004604)}
{pt3dadd(145992.000000,118764.000000,162575.000000,480.107192)}
{pt3dadd(145968.000000,118536.000000,162275.000000,635.746204)}
{pt3dadd(145848.000000,118260.000000,162025.000000,791.385216)}
{pt3dadd(145884.000000,117960.000000,161825.000000,754.429022)}
{pt3dadd(146016.000000,117876.000000,161525.000000,720.363067)}
{pt3dadd(145824.000000,117840.000000,161125.000000,387.012000)}

{create adhoc25}
{access adhoc25}
{connect adhoc25(1), adhoc24(0)}
{nseg = 1}
{strdef color color = "White"}
{pt3dclear()}
{pt3dadd(145824.000000,117840.000000,161125.000000,387.012000)}
{pt3dadd(147072.000000,117216.000000,160950.000000,199.838685)}
{pt3dadd(147384.000000,117048.000000,160225.000000,108.843540)}

{create adhoc26}
{access adhoc26}
{connect adhoc26(1), adhoc24(0)}
{nseg = 1}
{strdef color color = "White"}
{pt3dclear()}
{pt3dadd(145824.000000,117840.000000,161125.000000,387.012000)}
{pt3dadd(145092.000000,117432.000000,160925.000000,237.362133)}
{pt3dadd(145068.000000,117264.000000,160800.000000,188.622140)}
{pt3dadd(144960.000000,117456.000000,160650.000000,130.024368)}
{pt3dadd(144936.000000,117072.000000,160275.000000,113.524591)}
{pt3dadd(144936.000000,116880.000000,160175.000000,112.201591)}
{pt3dadd(145044.000000,116628.000000,159950.000000,115.313873)}
{pt3dadd(145116.000000,116388.000000,159725.000000,115.313873)}
{pt3dadd(145068.000000,115800.000000,159550.000000,177.781761)}
{pt3dadd(145200.000000,115152.000000,159325.000000,271.408252)}
{pt3dadd(146340.000000,114768.000000,159600.000000,350.944932)}
{pt3dadd(146736.000000,114624.000000,159400.000000,442.446384)}
{pt3dadd(147156.000000,114348.000000,158950.000000,557.856447)}
{pt3dadd(147540.000000,114288.000000,158800.000000,571.792970)}

{create adhoc27}
{access adhoc27}
{connect adhoc27(1), adhoc3(0)}
{nseg = 1}
{strdef color color = "White"}
{pt3dclear()}
{pt3dadd(148224.000000,125508.000000,164650.000000,600.382600)}
{pt3dadd(148056.000000,126192.000000,165400.000000,350.979467)}
{pt3dadd(147852.000000,126300.000000,165500.000000,389.057016)}
{pt3dadd(147636.000000,126384.000000,165600.000000,437.940226)}
{pt3dadd(147348.000000,126504.000000,165850.000000,545.936098)}
{pt3dadd(147048.000000,126420.000000,166000.000000,747.152547)}
{pt3dadd(146724.000000,126432.000000,166100.000000,766.257260)}

{create adhoc28}
{access adhoc28}
{connect adhoc28(1), adhoc27(0)}
{nseg = 1}
{strdef color color = "White"}
{pt3dclear()}
{pt3dadd(146724.000000,126432.000000,166100.000000,766.257260)}
{pt3dadd(146448.000000,126420.000000,165975.000000,819.288653)}
{pt3dadd(146172.000000,126420.000000,165875.000000,846.388632)}
{pt3dadd(145896.000000,126432.000000,165800.000000,756.816324)}
{pt3dadd(145620.000000,126348.000000,165750.000000,634.995776)}
{pt3dadd(145344.000000,126384.000000,165675.000000,489.750352)}
{pt3dadd(145068.000000,126840.000000,165700.000000,344.504928)}
{pt3dadd(144828.000000,127056.000000,165750.000000,193.557208)}
{pt3dadd(144588.000000,127116.000000,165650.000000,151.646772)}
{pt3dadd(144168.000000,126660.000000,165725.000000,143.184060)}
{pt3dadd(143796.000000,126396.000000,165725.000000,137.481764)}
{pt3dadd(143280.000000,126180.000000,165575.000000,131.432447)}
{pt3dadd(142692.000000,125772.000000,165450.000000,132.300000)}

{create adhoc29}
{access adhoc29}
{connect adhoc29(1), adhoc27(0)}
{nseg = 1}
{strdef color color = "White"}
{pt3dclear()}
{pt3dadd(146724.000000,126432.000000,166100.000000,766.257260)}
{pt3dadd(146652.000000,126348.000000,166300.000000,657.581273)}
{pt3dadd(146700.000000,126300.000000,166450.000000,484.269010)}
{pt3dadd(146832.000000,125580.000000,166750.000000,353.874700)}
{pt3dadd(146604.000000,125556.000000,167150.000000,250.662490)}
{pt3dadd(146532.000000,125640.000000,167425.000000,215.466110)}
{pt3dadd(146364.000000,125544.000000,167700.000000,280.987366)}
{pt3dadd(146028.000000,125412.000000,167850.000000,419.044244)}
{pt3dadd(145356.000000,125640.000000,167975.000000,565.146832)}
{pt3dadd(144984.000000,125592.000000,168125.000000,713.382402)}
{pt3dadd(144696.000000,125676.000000,168250.000000,785.619602)}
{pt3dadd(144852.000000,125664.000000,168400.000000,822.194972)}
{pt3dadd(144936.000000,125676.000000,168550.000000,770.193904)}
{pt3dadd(145020.000000,125676.000000,168700.000000,653.623164)}
{pt3dadd(144876.000000,125700.000000,168825.000000,539.894588)}
{pt3dadd(144672.000000,125664.000000,168975.000000,454.587616)}
{pt3dadd(144204.000000,125448.000000,169125.000000,363.030286)}
{pt3dadd(143856.000000,125292.000000,169250.000000,336.213907)}
{pt3dadd(143652.000000,125232.000000,169400.000000,387.012000)}

{create adhoc30}
{access adhoc30}
{connect adhoc30(1), adhoc29(0)}
{nseg = 1}
{strdef color color = "White"}
{pt3dclear()}
{pt3dadd(143652.000000,125232.000000,169400.000000,387.012000)}
{pt3dadd(142128.000000,124896.000000,169250.000000,343.655460)}
{pt3dadd(141648.000000,125028.000000,169525.000000,406.362580)}

{create adhoc31}
{access adhoc31}
{connect adhoc31(1), adhoc30(0)}
{nseg = 1}
{strdef color color = "White"}
{pt3dclear()}
{pt3dadd(141648.000000,125028.000000,169525.000000,406.362580)}
{pt3dadd(140232.000000,125736.000000,169500.000000,201.238550)}
{pt3dadd(139644.000000,125820.000000,169275.000000,150.351373)}
{pt3dadd(139224.000000,125964.000000,169150.000000,89.810960)}
{pt3dadd(139212.000000,125976.000000,169000.000000,86.543063)}
{pt3dadd(139080.000000,126168.000000,168825.000000,87.316594)}
{pt3dadd(138588.000000,126348.000000,168575.000000,88.686414)}
{pt3dadd(138180.000000,126372.000000,168450.000000,146.158841)}
{pt3dadd(137604.000000,126528.000000,168275.000000,146.158841)}
{pt3dadd(136476.000000,126444.000000,167975.000000,146.158841)}
{pt3dadd(135432.000000,126468.000000,167850.000000,146.158841)}
{pt3dadd(135084.000000,126396.000000,167725.000000,156.624923)}
{pt3dadd(134508.000000,126060.000000,167650.000000,103.640454)}
{pt3dadd(133824.000000,125556.000000,167525.000000,99.152496)}
{pt3dadd(133272.000000,125328.000000,167375.000000,112.190803)}
{pt3dadd(132996.000000,125016.000000,167250.000000,113.003010)}
{pt3dadd(132444.000000,124464.000000,167125.000000,111.784845)}
{pt3dadd(131424.000000,123660.000000,166725.000000,85.281760)}

{create adhoc32}
{access adhoc32}
{connect adhoc32(1), adhoc30(0)}
{nseg = 1}
{strdef color color = "White"}
{pt3dclear()}
{pt3dadd(141648.000000,125028.000000,169525.000000,406.362580)}
{pt3dadd(141300.000000,125220.000000,169675.000000,482.857017)}
{pt3dadd(141432.000000,125172.000000,169825.000000,508.577986)}
{pt3dadd(141480.000000,125232.000000,169950.000000,504.707870)}
{pt3dadd(141588.000000,125232.000000,170100.000000,460.519044)}
{pt3dadd(141672.000000,125148.000000,170250.000000,376.806550)}
{pt3dadd(141552.000000,125208.000000,170400.000000,249.471370)}

{create adhoc33}
{access adhoc33}
{connect adhoc33(1), adhoc29(0)}
{nseg = 1}
{strdef color color = "White"}
{pt3dclear()}
{pt3dadd(143652.000000,125232.000000,169400.000000,387.012000)}
{pt3dadd(143964.000000,124932.000000,169525.000000,202.952615)}
{pt3dadd(144156.000000,124272.000000,169650.000000,236.586772)}
{pt3dadd(144348.000000,124032.000000,169775.000000,257.971628)}
{pt3dadd(144444.000000,124056.000000,170050.000000,345.870222)}
{pt3dadd(144456.000000,123852.000000,170175.000000,454.041399)}
{pt3dadd(144396.000000,123792.000000,170325.000000,559.389642)}
{pt3dadd(144408.000000,123804.000000,170450.000000,597.690902)}
{pt3dadd(144420.000000,123876.000000,170600.000000,652.155098)}
{pt3dadd(144336.000000,123852.000000,170875.000000,663.876850)}
{pt3dadd(144228.000000,123804.000000,171025.000000,631.879604)}
{pt3dadd(144132.000000,123564.000000,171150.000000,620.157852)}
{pt3dadd(144096.000000,123612.000000,171300.000000,557.536733)}
{pt3dadd(144228.000000,123636.000000,171450.000000,571.792970)}

{create adhoc34}
{access adhoc34}
{connect adhoc34(1), adhoc2(0)}
{nseg = 1}
{strdef color color = "White"}
{pt3dclear()}
{pt3dadd(150576.000000,125976.000000,164100.000000,931.390500)}
{pt3dadd(150756.000000,125976.000000,164150.000000,835.319337)}
{pt3dadd(150852.000000,125880.000000,164175.000000,883.970922)}
{pt3dadd(151020.000000,125832.000000,164350.000000,893.284822)}
{pt3dadd(151116.000000,125760.000000,164275.000000,952.702650)}
{pt3dadd(151212.000000,125820.000000,164200.000000,944.656940)}
{pt3dadd(151308.000000,125748.000000,164375.000000,965.707540)}
{pt3dadd(151488.000000,125676.000000,164600.000000,1014.722020)}
{pt3dadd(151584.000000,125832.000000,164525.000000,1045.552220)}
{pt3dadd(151680.000000,125760.000000,164500.000000,993.432072)}
{pt3dadd(151776.000000,125784.000000,164425.000000,996.953684)}
{pt3dadd(151872.000000,125820.000000,164475.000000,947.939204)}
{pt3dadd(151968.000000,125748.000000,164375.000000,907.795104)}
{pt3dadd(152064.000000,125856.000000,164400.000000,827.326676)}
{pt3dadd(152160.000000,125916.000000,164400.000000,813.078812)}
{pt3dadd(152256.000000,125844.000000,164400.000000,794.596952)}
{pt3dadd(152352.000000,125844.000000,164400.000000,749.573592)}
{pt3dadd(152448.000000,125796.000000,164325.000000,689.375838)}
{pt3dadd(152544.000000,125832.000000,164300.000000,696.673518)}
{pt3dadd(152724.000000,125832.000000,164275.000000,696.673518)}
{pt3dadd(152808.000000,125916.000000,164400.000000,676.800092)}
{pt3dadd(152988.000000,125976.000000,164425.000000,670.496078)}
{pt3dadd(153084.000000,125976.000000,164300.000000,658.774326)}
{pt3dadd(153180.000000,126036.000000,164250.000000,631.603220)}
{pt3dadd(153276.000000,126036.000000,164175.000000,577.935778)}
{pt3dadd(153456.000000,126144.000000,164250.000000,529.257832)}
{pt3dadd(153600.000000,126204.000000,164375.000000,501.964742)}
{pt3dadd(153696.000000,126240.000000,164375.000000,461.322720)}
{pt3dadd(153780.000000,126108.000000,164375.000000,424.845328)}
{pt3dadd(153924.000000,126300.000000,164450.000000,420.781698)}
{pt3dadd(154008.000000,126300.000000,164450.000000,432.982252)}
{pt3dadd(154092.000000,126300.000000,164450.000000,437.921608)}
{pt3dadd(154188.000000,126336.000000,164475.000000,431.068140)}
{pt3dadd(154272.000000,126372.000000,164475.000000,408.328290)}
{pt3dadd(154356.000000,126420.000000,164475.000000,400.772346)}
{pt3dadd(154452.000000,126480.000000,164575.000000,384.885964)}
{pt3dadd(154548.000000,126432.000000,164525.000000,366.495498)}
{pt3dadd(154632.000000,126408.000000,164450.000000,373.348966)}
{pt3dadd(154716.000000,126444.000000,164500.000000,387.758378)}
{pt3dadd(154800.000000,126396.000000,164475.000000,412.829062)}
{pt3dadd(154884.000000,126588.000000,164350.000000,420.385006)}
{pt3dadd(154980.000000,126636.000000,164375.000000,416.321376)}
{pt3dadd(155064.000000,126516.000000,164350.000000,427.940950)}
{pt3dadd(155148.000000,126516.000000,164250.000000,391.924014)}
{pt3dadd(155244.000000,126576.000000,164050.000000,318.336758)}
{pt3dadd(155532.000000,126684.000000,163950.000000,263.524242)}
{pt3dadd(156168.000000,127056.000000,163875.000000,210.034726)}
{pt3dadd(156792.000000,127680.000000,163725.000000,160.157510)}
{pt3dadd(157140.000000,128232.000000,163725.000000,169.910370)}
{pt3dadd(157188.000000,129108.000000,163625.000000,264.786890)}
{pt3dadd(157212.000000,130068.000000,163550.000000,384.280662)}
{pt3dadd(156636.000000,130860.000000,163200.000000,465.410614)}
{pt3dadd(156480.000000,130968.000000,163175.000000,562.336044)}
{pt3dadd(156396.000000,131052.000000,163075.000000,621.686198)}
{pt3dadd(156240.000000,131136.000000,163050.000000,627.690024)}
{pt3dadd(156084.000000,131220.000000,163025.000000,563.008768)}
{pt3dadd(155880.000000,131304.000000,162950.000000,517.774960)}
{pt3dadd(155796.000000,131412.000000,162900.000000,437.779590)}
{pt3dadd(155640.000000,131544.000000,162875.000000,373.315270)}
{pt3dadd(155556.000000,131760.000000,162825.000000,324.637324)}
{pt3dadd(155400.000000,131844.000000,162650.000000,332.967762)}
{pt3dadd(155244.000000,131952.000000,162550.000000,373.015230)}
{pt3dadd(155088.000000,132240.000000,162375.000000,429.539192)}
{pt3dadd(154932.000000,132372.000000,162350.000000,473.728018)}
{pt3dadd(154776.000000,132456.000000,162200.000000,446.219892)}
{pt3dadd(154596.000000,132540.000000,162150.000000,434.019338)}
{pt3dadd(154440.000000,132576.000000,162125.000000,404.009298)}
{pt3dadd(154368.000000,132600.000000,162075.000000,372.498746)}
{pt3dadd(154284.000000,132612.000000,162025.000000,359.688162)}
{pt3dadd(154200.000000,132744.000000,162075.000000,408.581144)}
{pt3dadd(154116.000000,132744.000000,161925.000000,420.781698)}
{pt3dadd(154032.000000,132780.000000,161825.000000,445.852382)}
{pt3dadd(153960.000000,132912.000000,161750.000000,453.786128)}
{pt3dadd(153876.000000,133020.000000,161750.000000,466.596712)}
{pt3dadd(153792.000000,133104.000000,161725.000000,457.412410)}
{pt3dadd(153708.000000,133164.000000,161725.000000,445.211856)}
{pt3dadd(153624.000000,133224.000000,161725.000000,420.141172)}
{pt3dadd(153540.000000,133248.000000,161700.000000,438.531638)}
{pt3dadd(153456.000000,133308.000000,161675.000000,425.721054)}
{pt3dadd(153372.000000,133308.000000,161600.000000,402.981204)}
{pt3dadd(153288.000000,133392.000000,161575.000000,402.981204)}
{pt3dadd(153204.000000,133452.000000,161450.000000,418.867586)}
{pt3dadd(153120.000000,133512.000000,161400.000000,404.743928)}
{pt3dadd(153036.000000,133620.000000,161350.000000,384.118212)}
{pt3dadd(152952.000000,133776.000000,161300.000000,398.527624)}
{pt3dadd(152868.000000,133944.000000,161250.000000,387.988328)}
{pt3dadd(152784.000000,134028.000000,161075.000000,383.721520)}
{pt3dadd(152700.000000,134136.000000,160975.000000,364.324822)}
{pt3dadd(152616.000000,134220.000000,160925.000000,370.541126)}
{pt3dadd(152532.000000,134268.000000,160850.000000,359.474866)}
{pt3dadd(152448.000000,134412.000000,160825.000000,362.818018)}
{pt3dadd(152316.000000,134592.000000,160575.000000,347.688128)}
{pt3dadd(152232.000000,134676.000000,160550.000000,347.688128)}
{pt3dadd(152088.000000,134652.000000,160525.000000,362.097540)}
{pt3dadd(152004.000000,135000.000000,160425.000000,390.678540)}
{pt3dadd(151920.000000,135348.000000,160325.000000,419.259540)}
{pt3dadd(151836.000000,135684.000000,160250.000000,452.779896)}
{pt3dadd(151752.000000,135984.000000,160200.000000,486.300252)}
{pt3dadd(151668.000000,136092.000000,160200.000000,513.940688)}
{pt3dadd(151584.000000,136224.000000,160300.000000,535.229952)}
{pt3dadd(151500.000000,136284.000000,160275.000000,554.526807)}
{pt3dadd(151416.000000,136368.000000,160375.000000,600.382600)}

{create adhoc35}
{access adhoc35}
{connect adhoc35(1), adhoc34(0)}
{nseg = 1}
{strdef color color = "White"}
{pt3dclear()}
{pt3dadd(151416.000000,136368.000000,160375.000000,600.382600)}
{pt3dadd(151332.000000,136500.000000,160250.000000,611.365790)}
{pt3dadd(151248.000000,136656.000000,159900.000000,595.536662)}
{pt3dadd(151092.000000,136404.000000,160500.000000,536.106942)}
{pt3dadd(150720.000000,136776.000000,160575.000000,485.427492)}
{pt3dadd(150108.000000,137244.000000,160750.000000,405.432122)}
{pt3dadd(150180.000000,137256.000000,160850.000000,343.462518)}
{pt3dadd(150144.000000,137280.000000,160925.000000,295.967028)}
{pt3dadd(150144.000000,137256.000000,161025.000000,298.999372)}
{pt3dadd(150240.000000,137376.000000,161100.000000,293.079088)}
{pt3dadd(150180.000000,137424.000000,161200.000000,288.208458)}
{pt3dadd(150084.000000,137400.000000,161275.000000,302.682572)}
{pt3dadd(150024.000000,137436.000000,161375.000000,290.827908)}
{pt3dadd(149892.000000,137436.000000,161450.000000,297.355020)}
{pt3dadd(149856.000000,137496.000000,161525.000000,306.459264)}
{pt3dadd(149928.000000,137580.000000,161625.000000,316.699764)}
{pt3dadd(149916.000000,137640.000000,161700.000000,310.483460)}
{pt3dadd(149856.000000,137724.000000,161775.000000,310.483460)}
{pt3dadd(149772.000000,137748.000000,161875.000000,295.285644)}
{pt3dadd(149712.000000,137784.000000,161950.000000,292.101684)}
{pt3dadd(149676.000000,137844.000000,162025.000000,279.598404)}
{pt3dadd(149664.000000,137868.000000,162100.000000,271.340594)}
{pt3dadd(149628.000000,137880.000000,162200.000000,268.721144)}
{pt3dadd(149628.000000,137952.000000,162275.000000,271.471564)}
{pt3dadd(149532.000000,137964.000000,162375.000000,265.551280)}
{pt3dadd(149448.000000,137940.000000,162450.000000,297.698100)}
{pt3dadd(149340.000000,137916.000000,162550.000000,326.581626)}
{pt3dadd(149196.000000,137976.000000,162625.000000,360.722960)}
{pt3dadd(148980.000000,138060.000000,162775.000000,406.362580)}

{create adhoc36}
{access adhoc36}
{connect adhoc36(1), adhoc35(0)}
{nseg = 1}
{strdef color color = "White"}
{pt3dclear()}
{pt3dadd(148980.000000,138060.000000,162775.000000,406.362580)}
{pt3dadd(147540.000000,137796.000000,162625.000000,233.158020)}
{pt3dadd(147120.000000,137760.000000,162375.000000,199.697722)}
{pt3dadd(147048.000000,137664.000000,162250.000000,153.884136)}
{pt3dadd(147060.000000,137604.000000,162125.000000,153.884136)}
{pt3dadd(146748.000000,137472.000000,161875.000000,148.181840)}
{pt3dadd(146520.000000,137364.000000,161750.000000,149.713376)}
{pt3dadd(146304.000000,137208.000000,161625.000000,148.324226)}
{pt3dadd(146112.000000,137088.000000,161375.000000,148.324226)}
{pt3dadd(145968.000000,137076.000000,161275.000000,159.096106)}
{pt3dadd(145644.000000,137064.000000,161050.000000,177.891686)}
{pt3dadd(143448.000000,137364.000000,160950.000000,265.805910)}
{pt3dadd(141912.000000,137976.000000,160725.000000,332.106010)}
{pt3dadd(141528.000000,138816.000000,160600.000000,374.049480)}
{pt3dadd(141444.000000,139368.000000,160250.000000,505.777330)}
{pt3dadd(141324.000000,139632.000000,160000.000000,592.906110)}
{pt3dadd(140244.000000,140124.000000,159800.000000,581.742542)}
{pt3dadd(139764.000000,140424.000000,159525.000000,548.306242)}
{pt3dadd(139644.000000,140352.000000,159275.000000,511.951986)}
{pt3dadd(139284.000000,139680.000000,159050.000000,428.328402)}
{pt3dadd(139452.000000,138504.000000,158550.000000,394.731298)}
{pt3dadd(139332.000000,137808.000000,158400.000000,389.544958)}
{pt3dadd(139392.000000,137580.000000,158275.000000,448.974678)}
{pt3dadd(139524.000000,137400.000000,158100.000000,553.880306)}
{pt3dadd(139548.000000,137400.000000,157900.000000,616.261507)}
{pt3dadd(139584.000000,137412.000000,157800.000000,729.768860)}

{create adhoc37}
{access adhoc37}
{connect adhoc37(1), adhoc36(0)}
{nseg = 1}
{strdef color color = "White"}
{pt3dclear()}
{pt3dadd(139584.000000,137412.000000,157800.000000,729.768860)}
{pt3dadd(138264.000000,136248.000000,157875.000000,352.512073)}
{pt3dadd(137484.000000,136020.000000,158100.000000,310.314248)}
{pt3dadd(136788.000000,135876.000000,158300.000000,231.223580)}
{pt3dadd(136320.000000,135960.000000,158525.000000,262.522440)}
{pt3dadd(135096.000000,135888.000000,158975.000000,304.701484)}
{pt3dadd(134772.000000,135288.000000,159200.000000,343.157467)}
{pt3dadd(134592.000000,134916.000000,159400.000000,406.362580)}

{create adhoc38}
{access adhoc38}
{connect adhoc38(1), adhoc36(0)}
{nseg = 1}
{strdef color color = "White"}
{pt3dclear()}
{pt3dadd(139584.000000,137412.000000,157800.000000,729.768860)}
{pt3dadd(139512.000000,137352.000000,157575.000000,734.989747)}
{pt3dadd(139440.000000,137292.000000,157475.000000,694.356030)}
{pt3dadd(139344.000000,137280.000000,157350.000000,657.315210)}
{pt3dadd(139308.000000,137088.000000,157250.000000,569.627996)}
{pt3dadd(139344.000000,136980.000000,157025.000000,520.950050)}
{pt3dadd(139296.000000,136944.000000,156775.000000,429.464822)}
{pt3dadd(138768.000000,136740.000000,155950.000000,343.655460)}
{pt3dadd(138756.000000,136620.000000,155725.000000,237.591800)}

{create adhoc39}
{access adhoc39}
{connect adhoc39(1), adhoc35(0)}
{nseg = 1}
{strdef color color = "White"}
{pt3dclear()}
{pt3dadd(148980.000000,138060.000000,162775.000000,406.362580)}
{pt3dadd(149028.000000,138036.000000,162875.000000,371.986387)}
{pt3dadd(148992.000000,138096.000000,162950.000000,378.734234)}
{pt3dadd(148848.000000,138252.000000,163050.000000,378.734234)}
{pt3dadd(148764.000000,138288.000000,163125.000000,378.734234)}
{pt3dadd(148656.000000,138312.000000,163200.000000,395.489834)}
{pt3dadd(148728.000000,138324.000000,163300.000000,410.619724)}
{pt3dadd(148692.000000,138252.000000,163375.000000,410.619724)}
{pt3dadd(148608.000000,138180.000000,163475.000000,403.063780)}
{pt3dadd(148488.000000,138204.000000,163550.000000,374.180254)}
{pt3dadd(148428.000000,138312.000000,163625.000000,337.825998)}
{pt3dadd(148344.000000,138348.000000,163725.000000,310.248712)}
{pt3dadd(148284.000000,138348.000000,163800.000000,277.301556)}
{pt3dadd(148200.000000,138324.000000,163900.000000,242.678456)}
{pt3dadd(148032.000000,138180.000000,163975.000000,250.936266)}
{pt3dadd(147924.000000,138072.000000,164050.000000,267.646982)}
{pt3dadd(147804.000000,138192.000000,164150.000000,259.782396)}
{pt3dadd(147672.000000,138240.000000,164275.000000,248.441550)}
{pt3dadd(147348.000000,138144.000000,164425.000000,254.603658)}
{pt3dadd(147288.000000,138180.000000,164500.000000,241.475218)}
{pt3dadd(147252.000000,138228.000000,164600.000000,238.724798)}
{pt3dadd(147132.000000,138240.000000,164675.000000,255.693628)}
{pt3dadd(147048.000000,138240.000000,164775.000000,275.292284)}
{pt3dadd(146892.000000,138276.000000,164850.000000,293.715848)}
{pt3dadd(146772.000000,138228.000000,164950.000000,306.844288)}
{pt3dadd(146796.000000,138204.000000,165025.000000,329.238248)}
{pt3dadd(146652.000000,138180.000000,165150.000000,323.021944)}
{pt3dadd(146544.000000,138132.000000,165300.000000,329.238248)}
{pt3dadd(146532.000000,138060.000000,165450.000000,329.238248)}
{pt3dadd(146580.000000,138060.000000,165525.000000,353.927594)}
{pt3dadd(146460.000000,138096.000000,165600.000000,370.608294)}
{pt3dadd(146352.000000,138024.000000,165700.000000,370.608294)}
{pt3dadd(146496.000000,138048.000000,165875.000000,400.110077)}
{pt3dadd(146412.000000,138084.000000,166025.000000,303.234000)}

{create adhoc40}
{access adhoc40}
{connect adhoc40(1), adhoc39(0)}
{nseg = 1}
{strdef color color = "White"}
{pt3dclear()}
{pt3dadd(146412.000000,138084.000000,166025.000000,303.234000)}
{pt3dadd(146460.000000,138036.000000,166125.000000,280.222970)}
{pt3dadd(146340.000000,138192.000000,166200.000000,242.686184)}
{pt3dadd(146280.000000,138228.000000,166300.000000,219.271264)}
{pt3dadd(146196.000000,138288.000000,166450.000000,182.786572)}
{pt3dadd(145932.000000,138000.000000,166600.000000,176.799162)}
{pt3dadd(145740.000000,138060.000000,166750.000000,187.599964)}
{pt3dadd(145776.000000,138120.000000,166900.000000,187.599964)}
{pt3dadd(145716.000000,138276.000000,167000.000000,187.599964)}
{pt3dadd(145608.000000,138564.000000,167150.000000,185.827014)}
{pt3dadd(145572.000000,138804.000000,167300.000000,187.216164)}
{pt3dadd(145584.000000,138924.000000,167375.000000,163.781890)}
{pt3dadd(145524.000000,138948.000000,167525.000000,162.093370)}
{pt3dadd(145524.000000,139116.000000,167675.000000,233.774442)}
{pt3dadd(145332.000000,139308.000000,168050.000000,281.905603)}
{pt3dadd(145032.000000,139380.000000,168700.000000,544.564760)}

{create adhoc41}
{access adhoc41}
{connect adhoc41(1), adhoc40(0)}
{nseg = 1}
{strdef color color = "White"}
{pt3dclear()}
{pt3dadd(145032.000000,139380.000000,168700.000000,544.564760)}
{pt3dadd(145032.000000,139212.000000,169000.000000,483.403273)}
{pt3dadd(144972.000000,139128.000000,169200.000000,467.485148)}
{pt3dadd(145044.000000,138960.000000,169475.000000,448.175150)}
{pt3dadd(145068.000000,138876.000000,169550.000000,438.531638)}
{pt3dadd(145116.000000,138780.000000,169675.000000,522.043258)}
{pt3dadd(145116.000000,138696.000000,169750.000000,568.403206)}
{pt3dadd(145032.000000,138360.000000,169900.000000,590.756940)}
{pt3dadd(145200.000000,138396.000000,169975.000000,610.066938)}
{pt3dadd(145092.000000,138300.000000,170125.000000,619.710450)}
{pt3dadd(145200.000000,138384.000000,170225.000000,540.068946)}
{pt3dadd(145296.000000,138336.000000,170300.000000,493.708998)}
{pt3dadd(145296.000000,138192.000000,170400.000000,437.834908)}
{pt3dadd(145308.000000,138336.000000,170575.000000,386.680816)}
{pt3dadd(145068.000000,138240.000000,170650.000000,343.601004)}
{pt3dadd(145092.000000,138432.000000,170825.000000,343.601004)}
{pt3dadd(145068.000000,138588.000000,170925.000000,355.220578)}
{pt3dadd(145272.000000,138804.000000,171000.000000,362.416722)}
{pt3dadd(145632.000000,138816.000000,171100.000000,359.666302)}
{pt3dadd(145644.000000,138924.000000,171250.000000,362.911643)}
{pt3dadd(145692.000000,139152.000000,171350.000000,275.042200)}

{create adhoc42}
{access adhoc42}
{connect adhoc42(1), adhoc41(0)}
{nseg = 1}
{strdef color color = "White"}
{pt3dclear()}
{pt3dadd(145692.000000,139152.000000,171350.000000,275.042200)}
{pt3dadd(145428.000000,138924.000000,171425.000000,304.955927)}
{pt3dadd(145344.000000,138744.000000,171500.000000,289.753252)}
{pt3dadd(145164.000000,138696.000000,171600.000000,268.515222)}
{pt3dadd(145104.000000,138792.000000,171700.000000,214.553111)}
{pt3dadd(145200.000000,138792.000000,171800.000000,189.489499)}
{pt3dadd(145248.000000,138732.000000,171900.000000,81.220726)}

{create adhoc43}
{access adhoc43}
{connect adhoc43(1), adhoc41(0)}
{nseg = 1}
{strdef color color = "White"}
{pt3dclear()}
{pt3dadd(145692.000000,139152.000000,171350.000000,275.042200)}
{pt3dadd(146448.000000,140064.000000,171350.000000,162.107987)}
{pt3dadd(146988.000000,140388.000000,171450.000000,120.866361)}
{pt3dadd(147588.000000,140784.000000,171625.000000,81.328535)}
{pt3dadd(147792.000000,140688.000000,171675.000000,79.742797)}
{pt3dadd(147756.000000,140652.000000,171775.000000,70.013411)}
{pt3dadd(147912.000000,140844.000000,172025.000000,84.961330)}
{pt3dadd(147876.000000,140748.000000,172200.000000,68.961374)}
{pt3dadd(148212.000000,140856.000000,172425.000000,76.347902)}
{pt3dadd(148188.000000,140940.000000,172675.000000,86.077288)}
{pt3dadd(148104.000000,140928.000000,172800.000000,99.778824)}
{pt3dadd(148248.000000,140700.000000,172950.000000,135.042404)}
{pt3dadd(148404.000000,140520.000000,173075.000000,235.964344)}
{pt3dadd(148716.000000,140508.000000,173150.000000,333.183722)}
{pt3dadd(148848.000000,140580.000000,173300.000000,411.710334)}
{pt3dadd(148908.000000,140580.000000,173375.000000,491.451136)}
{pt3dadd(148968.000000,140568.000000,173525.000000,556.519216)}
{pt3dadd(148980.000000,140520.000000,173625.000000,572.869124)}
{pt3dadd(149040.000000,140532.000000,173700.000000,572.869124)}
{pt3dadd(149124.000000,140640.000000,173825.000000,572.869124)}
{pt3dadd(149244.000000,140712.000000,174000.000000,505.004316)}
{pt3dadd(149352.000000,140676.000000,174075.000000,441.418793)}
{pt3dadd(149388.000000,140616.000000,174225.000000,205.240720)}

{create adhoc44}
{access adhoc44}
{connect adhoc44(1), adhoc40(0)}
{nseg = 1}
{strdef color color = "White"}
{pt3dclear()}
{pt3dadd(145032.000000,139380.000000,168700.000000,544.564760)}
{pt3dadd(145008.000000,139464.000000,168700.000000,455.337180)}
{pt3dadd(145044.000000,139548.000000,168600.000000,442.195820)}
{pt3dadd(145128.000000,139632.000000,168575.000000,432.070124)}
{pt3dadd(144972.000000,139716.000000,168625.000000,447.200014)}
{pt3dadd(144924.000000,139800.000000,168800.000000,442.719868)}
{pt3dadd(144672.000000,139872.000000,169000.000000,456.210593)}
{pt3dadd(144420.000000,140016.000000,169025.000000,448.014770)}

{create adhoc45}
{access adhoc45}
{connect adhoc45(1), adhoc44(0)}
{nseg = 1}
{strdef color color = "White"}
{pt3dclear()}
{pt3dadd(144420.000000,140016.000000,169025.000000,448.014770)}
{pt3dadd(144444.000000,140088.000000,168850.000000,559.599700)}
{pt3dadd(144240.000000,140172.000000,168825.000000,614.097952)}
{pt3dadd(144168.000000,140256.000000,168825.000000,663.498586)}
{pt3dadd(144144.000000,140340.000000,168875.000000,706.377970)}
{pt3dadd(144156.000000,140424.000000,168900.000000,791.673050)}
{pt3dadd(144108.000000,140508.000000,168875.000000,820.202710)}
{pt3dadd(144108.000000,140664.000000,168900.000000,806.633298)}
{pt3dadd(144108.000000,140748.000000,168850.000000,793.710056)}
{pt3dadd(144036.000000,140820.000000,168825.000000,785.664346)}
{pt3dadd(144024.000000,140904.000000,168950.000000,719.296334)}
{pt3dadd(144000.000000,140988.000000,168925.000000,711.633766)}
{pt3dadd(144156.000000,141132.000000,169025.000000,732.500858)}
{pt3dadd(143976.000000,141216.000000,169025.000000,787.710792)}
{pt3dadd(143856.000000,141300.000000,169000.000000,741.155366)}
{pt3dadd(143988.000000,141444.000000,169050.000000,763.065798)}
{pt3dadd(143916.000000,141528.000000,169150.000000,770.728366)}
{pt3dadd(143796.000000,141684.000000,169125.000000,770.728366)}
{pt3dadd(143928.000000,141768.000000,169225.000000,735.391858)}
{pt3dadd(143904.000000,141924.000000,169250.000000,753.417624)}
{pt3dadd(143988.000000,142008.000000,169450.000000,731.507192)}
{pt3dadd(143964.000000,142164.000000,169500.000000,702.977532)}
{pt3dadd(144048.000000,142320.000000,169600.000000,688.729668)}
{pt3dadd(143976.000000,142404.000000,169600.000000,688.729668)}
{pt3dadd(144060.000000,142548.000000,169750.000000,702.299080)}
{pt3dadd(144084.000000,142692.000000,169925.000000,695.679852)}
{pt3dadd(144096.000000,142836.000000,170025.000000,732.255222)}
{pt3dadd(143940.000000,142980.000000,169950.000000,754.165654)}
{pt3dadd(143868.000000,143148.000000,170050.000000,794.489982)}
{pt3dadd(144084.000000,143196.000000,170125.000000,794.489982)}
{pt3dadd(144324.000000,143232.000000,170225.000000,831.065352)}
{pt3dadd(144216.000000,143148.000000,170300.000000,831.065352)}
{pt3dadd(144204.000000,143424.000000,170475.000000,839.111062)}
{pt3dadd(144180.000000,143448.000000,170550.000000,785.217322)}
{pt3dadd(144264.000000,143484.000000,170650.000000,783.839700)}
{pt3dadd(144396.000000,143580.000000,170750.000000,661.921800)}

{create adhoc46}
{access adhoc46}
{connect adhoc46(1), adhoc45(0)}
{nseg = 1}
{strdef color color = "White"}
{pt3dclear()}
{pt3dadd(144396.000000,143580.000000,170750.000000,661.921800)}
{pt3dadd(144324.000000,143976.000000,170500.000000,566.807613)}
{pt3dadd(144192.000000,144276.000000,170400.000000,493.366666)}
{pt3dadd(143448.000000,144624.000000,170000.000000,442.254822)}
{pt3dadd(143148.000000,144912.000000,169650.000000,380.860230)}
{pt3dadd(142872.000000,145236.000000,169525.000000,339.831834)}
{pt3dadd(142452.000000,145524.000000,169325.000000,336.799490)}
{pt3dadd(142284.000000,145824.000000,169050.000000,328.469052)}
{pt3dadd(142308.000000,146064.000000,168925.000000,350.923148)}
{pt3dadd(141972.000000,146316.000000,168725.000000,423.481308)}
{pt3dadd(142116.000000,146904.000000,168700.000000,504.726036)}
{pt3dadd(142044.000000,147180.000000,168700.000000,639.671236)}
{pt3dadd(141720.000000,147504.000000,168775.000000,711.650172)}
{pt3dadd(141756.000000,147804.000000,168700.000000,746.927148)}
{pt3dadd(141756.000000,148308.000000,168875.000000,759.234988)}
{pt3dadd(141456.000000,148992.000000,168750.000000,773.482852)}
{pt3dadd(140952.000000,149640.000000,168825.000000,681.617464)}
{pt3dadd(140244.000000,149880.000000,168750.000000,598.572268)}
{pt3dadd(140352.000000,149688.000000,168875.000000,517.327540)}
{pt3dadd(139524.000000,150060.000000,170700.000000,455.149436)}
{pt3dadd(140652.000000,150636.000000,170825.000000,379.300384)}
{pt3dadd(140892.000000,151008.000000,170800.000000,342.279193)}
{pt3dadd(141504.000000,151284.000000,170850.000000,387.012000)}

{create adhoc47}
{access adhoc47}
{connect adhoc47(1), adhoc45(0)}
{nseg = 1}
{strdef color color = "White"}
{pt3dclear()}
{pt3dadd(144396.000000,143580.000000,170750.000000,661.921800)}
{pt3dadd(144684.000000,143676.000000,170900.000000,526.784023)}
{pt3dadd(145272.000000,143748.000000,171100.000000,367.433277)}
{pt3dadd(145476.000000,143640.000000,171300.000000,252.105269)}
{pt3dadd(145944.000000,143556.000000,171325.000000,172.054472)}
{pt3dadd(146172.000000,143628.000000,171300.000000,98.695663)}
{pt3dadd(146400.000000,143688.000000,171250.000000,85.121255)}
{pt3dadd(146580.000000,143712.000000,171275.000000,81.445504)}
{pt3dadd(146724.000000,143724.000000,171300.000000,75.933563)}
{pt3dadd(146808.000000,143844.000000,171325.000000,81.646120)}
{pt3dadd(147612.000000,144048.000000,171250.000000,82.458327)}
{pt3dadd(148320.000000,144228.000000,171400.000000,74.447322)}
{pt3dadd(148440.000000,144420.000000,171475.000000,66.888585)}
{pt3dadd(148440.000000,144492.000000,171625.000000,64.841790)}
{pt3dadd(148464.000000,144492.000000,171850.000000,53.711546)}
{pt3dadd(148656.000000,144552.000000,172050.000000,55.459822)}
{pt3dadd(148560.000000,144492.000000,172200.000000,63.470826)}
{pt3dadd(148620.000000,144432.000000,172275.000000,70.217357)}
{pt3dadd(148776.000000,144396.000000,172350.000000,78.628911)}
{pt3dadd(148908.000000,144444.000000,172500.000000,86.258439)}
{pt3dadd(149016.000000,144468.000000,172650.000000,80.181523)}
{pt3dadd(149208.000000,144456.000000,172800.000000,78.595785)}
{pt3dadd(149268.000000,144468.000000,172950.000000,81.156268)}
{pt3dadd(149400.000000,144408.000000,173175.000000,81.156268)}
{pt3dadd(149664.000000,144432.000000,173300.000000,85.644226)}
{pt3dadd(149640.000000,144312.000000,173450.000000,93.648617)}
{pt3dadd(149856.000000,144276.000000,173600.000000,104.638003)}
{pt3dadd(149988.000000,144300.000000,173825.000000,107.602083)}
{pt3dadd(150024.000000,144312.000000,173900.000000,108.497542)}
{pt3dadd(149976.000000,144204.000000,174050.000000,102.499357)}
{pt3dadd(149772.000000,144060.000000,174275.000000,99.676423)}
{pt3dadd(149412.000000,143904.000000,174425.000000,92.961283)}
{pt3dadd(149052.000000,143844.000000,174750.000000,92.961283)}
{pt3dadd(149028.000000,143916.000000,174975.000000,94.888758)}
{pt3dadd(149268.000000,143904.000000,175250.000000,97.211192)}
{pt3dadd(149556.000000,144072.000000,175900.000000,96.358375)}
{pt3dadd(149616.000000,144036.000000,176100.000000,96.358375)}
{pt3dadd(149676.000000,143928.000000,176250.000000,93.394295)}
{pt3dadd(149676.000000,144048.000000,176550.000000,94.430900)}
{pt3dadd(150000.000000,143808.000000,176850.000000,101.374548)}
{pt3dadd(150084.000000,143796.000000,177025.000000,112.101196)}
{pt3dadd(150192.000000,143844.000000,177200.000000,117.556336)}
{pt3dadd(150060.000000,143700.000000,177400.000000,125.211708)}
{pt3dadd(150192.000000,143616.000000,177625.000000,125.211708)}
{pt3dadd(150144.000000,143640.000000,177825.000000,120.956568)}
{pt3dadd(150204.000000,143700.000000,178025.000000,111.082737)}
{pt3dadd(150108.000000,143544.000000,178275.000000,112.342737)}
{pt3dadd(150192.000000,143424.000000,178450.000000,121.341667)}
{pt3dadd(150192.000000,143160.000000,178625.000000,154.581399)}
{pt3dadd(150228.000000,143016.000000,178750.000000,224.439493)}
{pt3dadd(150312.000000,142884.000000,178850.000000,291.866470)}
{pt3dadd(150444.000000,142716.000000,178950.000000,339.123042)}
{pt3dadd(150348.000000,142836.000000,179025.000000,397.747212)}
{pt3dadd(150348.000000,142800.000000,179100.000000,446.465384)}
{pt3dadd(150384.000000,142716.000000,179200.000000,446.465384)}
{pt3dadd(150408.000000,142704.000000,179275.000000,442.401754)}
{pt3dadd(150420.000000,142680.000000,179375.000000,442.401754)}
{pt3dadd(150420.000000,142620.000000,179525.000000,400.707644)}
{pt3dadd(150396.000000,142524.000000,179625.000000,327.611792)}
{pt3dadd(150348.000000,142548.000000,179725.000000,271.779248)}
{pt3dadd(150144.000000,142380.000000,179825.000000,214.506732)}
{pt3dadd(149964.000000,142320.000000,179900.000000,163.647302)}
{pt3dadd(149976.000000,142020.000000,179975.000000,133.027020)}
{pt3dadd(149976.000000,141864.000000,180075.000000,121.200888)}
{pt3dadd(150012.000000,141744.000000,180250.000000,107.175338)}
{pt3dadd(149940.000000,141552.000000,180325.000000,104.944046)}
{pt3dadd(149916.000000,141516.000000,180425.000000,115.857314)}
{pt3dadd(149844.000000,141300.000000,180575.000000,141.606966)}
{pt3dadd(149616.000000,140928.000000,180775.000000,168.057918)}
{pt3dadd(149532.000000,140892.000000,180850.000000,215.176162)}
{pt3dadd(149772.000000,141048.000000,181000.000000,274.679970)}
{pt3dadd(149784.000000,140988.000000,181175.000000,334.992660)}
{pt3dadd(149676.000000,141024.000000,181300.000000,401.832894)}
{pt3dadd(149976.000000,141072.000000,181450.000000,460.303926)}
{pt3dadd(150024.000000,141084.000000,181550.000000,507.799416)}
{pt3dadd(150012.000000,140952.000000,181650.000000,552.607246)}
{pt3dadd(150096.000000,140940.000000,181750.000000,590.908506)}
{pt3dadd(150180.000000,141012.000000,181850.000000,590.908506)}
{pt3dadd(150252.000000,141192.000000,181950.000000,607.258414)}
{pt3dadd(150312.000000,141228.000000,182025.000000,607.258414)}
{pt3dadd(150324.000000,141168.000000,182125.000000,607.258414)}
{pt3dadd(150372.000000,141036.000000,182200.000000,594.950574)}
{pt3dadd(150480.000000,141180.000000,182300.000000,584.318592)}
{pt3dadd(150492.000000,140940.000000,182400.000000,541.644472)}
{pt3dadd(150468.000000,140976.000000,182500.000000,627.285878)}
{pt3dadd(150348.000000,141024.000000,182625.000000,635.215020)}
{pt3dadd(150420.000000,141048.000000,182800.000000,1000.000000)}

{create adhoc48}
{access adhoc48}
{connect adhoc48(1), adhoc44(0)}
{nseg = 1}
{strdef color color = "White"}
{pt3dclear()}
{pt3dadd(144420.000000,140016.000000,169025.000000,448.014770)}
{pt3dadd(143280.000000,139872.000000,168400.000000,230.196762)}
{pt3dadd(143268.000000,139740.000000,168500.000000,113.766605)}
{pt3dadd(142884.000000,139440.000000,168575.000000,98.724300)}

{create adhoc49}
{access adhoc49}
{connect adhoc49(1), adhoc39(0)}
{nseg = 1}
{strdef color color = "White"}
{pt3dclear()}
{pt3dadd(146412.000000,138084.000000,166025.000000,303.234000)}
{pt3dadd(145872.000000,137484.000000,166200.000000,225.332003)}
{pt3dadd(145668.000000,137124.000000,166425.000000,276.800662)}
{pt3dadd(145308.000000,136476.000000,166625.000000,310.236962)}
{pt3dadd(145032.000000,136320.000000,166850.000000,364.380986)}
{pt3dadd(144708.000000,136380.000000,166975.000000,445.364034)}
{pt3dadd(144648.000000,136308.000000,167100.000000,523.926020)}
{pt3dadd(144492.000000,136392.000000,167300.000000,568.846508)}
{pt3dadd(144516.000000,136464.000000,167475.000000,594.839928)}
{pt3dadd(144420.000000,136188.000000,167675.000000,644.240562)}
{pt3dadd(144480.000000,136140.000000,167900.000000,622.951298)}
{pt3dadd(144492.000000,136308.000000,168125.000000,590.954052)}
{pt3dadd(144492.000000,136428.000000,168325.000000,612.864484)}
{pt3dadd(144372.000000,136236.000000,168450.000000,653.701984)}
{pt3dadd(143976.000000,135612.000000,168675.000000,647.082756)}
{pt3dadd(143796.000000,135384.000000,168800.000000,757.020667)}
{pt3dadd(143832.000000,135444.000000,169050.000000,661.921800)}

{create adhoc50}
{access adhoc50}
{connect adhoc50(1), adhoc49(0)}
{nseg = 1}
{strdef color color = "White"}
{pt3dclear()}
{pt3dadd(143832.000000,135444.000000,169050.000000,661.921800)}
{pt3dadd(143784.000000,135300.000000,169275.000000,720.503280)}
{pt3dadd(143448.000000,135588.000000,169750.000000,692.614334)}
{pt3dadd(143388.000000,135660.000000,170025.000000,641.502490)}
{pt3dadd(143340.000000,135696.000000,170275.000000,528.958902)}
{pt3dadd(143352.000000,135780.000000,170475.000000,388.776985)}
{pt3dadd(142752.000000,136152.000000,170975.000000,276.593623)}
{pt3dadd(142680.000000,136068.000000,171275.000000,225.914173)}
{pt3dadd(142800.000000,136020.000000,171600.000000,205.288457)}
{pt3dadd(142872.000000,136152.000000,171800.000000,242.507601)}
{pt3dadd(142848.000000,136188.000000,171900.000000,282.422298)}
{pt3dadd(142992.000000,136272.000000,172025.000000,329.924404)}
{pt3dadd(143064.000000,136176.000000,172275.000000,336.451516)}
{pt3dadd(143412.000000,136200.000000,172475.000000,349.521288)}
{pt3dadd(143808.000000,136080.000000,172575.000000,359.558716)}
{pt3dadd(144732.000000,136068.000000,172700.000000,376.314316)}
{pt3dadd(144960.000000,135720.000000,172850.000000,393.829056)}
{pt3dadd(145176.000000,135276.000000,173025.000000,416.510380)}
{pt3dadd(145560.000000,134976.000000,173250.000000,493.936280)}

{create adhoc51}
{access adhoc51}
{connect adhoc51(1), adhoc50(0)}
{nseg = 1}
{strdef color color = "White"}
{pt3dclear()}
{pt3dadd(145560.000000,134976.000000,173250.000000,493.936280)}
{pt3dadd(145692.000000,134688.000000,173350.000000,502.168540)}
{pt3dadd(145596.000000,134688.000000,173450.000000,354.221124)}
{pt3dadd(145224.000000,133248.000000,173725.000000,277.202576)}
{pt3dadd(145236.000000,132948.000000,173925.000000,199.147423)}
{pt3dadd(145152.000000,132024.000000,174150.000000,114.225439)}
{pt3dadd(145188.000000,131760.000000,174275.000000,104.009584)}
{pt3dadd(144792.000000,131364.000000,174500.000000,98.281687)}
{pt3dadd(144828.000000,131088.000000,174600.000000,93.569331)}
{pt3dadd(145332.000000,130152.000000,174825.000000,87.571146)}
{pt3dadd(145656.000000,130140.000000,175000.000000,89.498621)}
{pt3dadd(146076.000000,130092.000000,175250.000000,96.111618)}
{pt3dadd(146640.000000,129816.000000,175475.000000,93.288684)}
{pt3dadd(147312.000000,129456.000000,175700.000000,128.621322)}
{pt3dadd(147912.000000,128928.000000,176000.000000,195.159920)}
{pt3dadd(148956.000000,128568.000000,176325.000000,255.700333)}
{pt3dadd(149040.000000,128628.000000,176450.000000,318.179337)}
{pt3dadd(149220.000000,128784.000000,176575.000000,399.057424)}
{pt3dadd(149412.000000,128700.000000,176675.000000,436.271388)}
{pt3dadd(149556.000000,128664.000000,176800.000000,469.357466)}
{pt3dadd(149628.000000,128652.000000,176900.000000,527.088538)}
{pt3dadd(149700.000000,128664.000000,177025.000000,580.755980)}
{pt3dadd(149988.000000,128568.000000,177250.000000,650.928454)}
{pt3dadd(150072.000000,128352.000000,177375.000000,700.329088)}
{pt3dadd(150192.000000,128232.000000,177500.000000,739.221946)}
{pt3dadd(150216.000000,128244.000000,177725.000000,720.294878)}
{pt3dadd(150252.000000,128244.000000,177875.000000,695.649884)}
{pt3dadd(150252.000000,128328.000000,178000.000000,630.416766)}
{pt3dadd(150252.000000,128436.000000,178200.000000,590.200434)}
{pt3dadd(150336.000000,128616.000000,178325.000000,507.155238)}
{pt3dadd(150372.000000,128724.000000,178450.000000,397.051214)}
{pt3dadd(150276.000000,128544.000000,178675.000000,292.665116)}
{pt3dadd(150036.000000,128544.000000,179050.000000,209.670607)}
{pt3dadd(149664.000000,128544.000000,179400.000000,127.939703)}
{pt3dadd(149532.000000,128352.000000,180125.000000,75.642616)}
{pt3dadd(149376.000000,128076.000000,180450.000000,85.414980)}
{pt3dadd(149016.000000,127968.000000,180900.000000,96.174587)}
{pt3dadd(148944.000000,127860.000000,181150.000000,90.913098)}
{pt3dadd(148764.000000,127944.000000,181625.000000,93.601606)}
{pt3dadd(148572.000000,128268.000000,182125.000000,93.245962)}
{pt3dadd(148476.000000,128352.000000,182650.000000,98.724300)}

{create adhoc52}
{access adhoc52}
{connect adhoc52(1), adhoc50(0)}
{nseg = 1}
{strdef color color = "White"}
{pt3dclear()}
{pt3dadd(145560.000000,134976.000000,173250.000000,493.936280)}
{pt3dadd(145548.000000,134616.000000,172825.000000,393.638287)}
{pt3dadd(145464.000000,133884.000000,172825.000000,271.398446)}
{pt3dadd(146088.000000,133488.000000,172825.000000,184.155601)}
{pt3dadd(146892.000000,133464.000000,172650.000000,129.243657)}
{pt3dadd(147468.000000,133644.000000,172450.000000,84.369141)}
{pt3dadd(148008.000000,133896.000000,172125.000000,82.533450)}
{pt3dadd(148860.000000,133848.000000,171575.000000,84.972005)}
{pt3dadd(149760.000000,133572.000000,171325.000000,91.038277)}
{pt3dadd(150324.000000,133308.000000,171225.000000,89.545845)}

{create adhoc53}
{access adhoc53}
{connect adhoc53(1), adhoc49(0)}
{nseg = 1}
{strdef color color = "White"}
{pt3dclear()}
{pt3dadd(143832.000000,135444.000000,169050.000000,661.921800)}
{pt3dadd(144060.000000,133356.000000,169025.000000,418.024620)}
{pt3dadd(143832.000000,132660.000000,168900.000000,439.877530)}
{pt3dadd(143604.000000,131964.000000,168850.000000,397.096124)}
{pt3dadd(143388.000000,131712.000000,168975.000000,448.078672)}
{pt3dadd(143148.000000,131796.000000,169050.000000,458.084958)}
{pt3dadd(142908.000000,131784.000000,169025.000000,406.747336)}
{pt3dadd(142764.000000,131700.000000,168975.000000,420.198446)}
{pt3dadd(142536.000000,131580.000000,168925.000000,400.801748)}
{pt3dadd(143112.000000,131304.000000,169000.000000,345.812120)}
{pt3dadd(143112.000000,131616.000000,169475.000000,346.811640)}
{pt3dadd(143340.000000,131532.000000,169700.000000,195.467360)}

{create adhoc54}
{access adhoc54}
{connect adhoc54(1), adhoc34(0)}
{nseg = 1}
{strdef color color = "White"}
{pt3dclear()}
{pt3dadd(151416.000000,136368.000000,160375.000000,600.382600)}
{pt3dadd(151416.000000,137148.000000,159675.000000,699.990213)}
{pt3dadd(151356.000000,137448.000000,159225.000000,622.990180)}
{pt3dadd(151236.000000,137700.000000,158950.000000,576.630232)}
{pt3dadd(151248.000000,137868.000000,158700.000000,501.052358)}
{pt3dadd(151248.000000,138060.000000,158450.000000,432.255026)}
{pt3dadd(151032.000000,138312.000000,158175.000000,408.678220)}
{pt3dadd(150816.000000,138600.000000,158050.000000,391.997520)}
{pt3dadd(150684.000000,138876.000000,157925.000000,385.144052)}
{pt3dadd(150576.000000,139176.000000,157650.000000,385.144052)}
{pt3dadd(149988.000000,139572.000000,157400.000000,418.664408)}
{pt3dadd(149724.000000,139788.000000,157250.000000,422.931216)}
{pt3dadd(149472.000000,139956.000000,157125.000000,444.316072)}
{pt3dadd(149244.000000,139968.000000,157000.000000,467.055922)}
{pt3dadd(149076.000000,139812.000000,156875.000000,480.507032)}
{pt3dadd(148860.000000,139956.000000,156750.000000,485.693372)}
{pt3dadd(148740.000000,140016.000000,156625.000000,481.426564)}
{pt3dadd(148620.000000,140100.000000,156300.000000,467.975454)}
{pt3dadd(148152.000000,140232.000000,155975.000000,430.761490)}
{pt3dadd(148164.000000,140220.000000,155525.000000,402.180490)}
{pt3dadd(147996.000000,140484.000000,155050.000000,351.026398)}
{pt3dadd(147840.000000,140592.000000,154550.000000,329.369396)}
{pt3dadd(147240.000000,140712.000000,154200.000000,307.712394)}
{pt3dadd(147288.000000,140700.000000,154050.000000,305.217678)}
{pt3dadd(147108.000000,140832.000000,153500.000000,282.529782)}
{pt3dadd(146940.000000,140916.000000,153250.000000,267.871474)}
{pt3dadd(146940.000000,140904.000000,153125.000000,259.200770)}
{pt3dadd(147000.000000,140868.000000,153000.000000,259.200770)}
{pt3dadd(147120.000000,140904.000000,152600.000000,254.562076)}
{pt3dadd(147144.000000,140880.000000,152200.000000,244.275596)}
{pt3dadd(147084.000000,140868.000000,152025.000000,268.038148)}
{pt3dadd(147132.000000,141036.000000,151450.000000,254.077852)}
{pt3dadd(147204.000000,141168.000000,151000.000000,248.157568)}
{pt3dadd(147024.000000,141192.000000,150850.000000,260.660848)}
{pt3dadd(147144.000000,141312.000000,150725.000000,270.947328)}
{pt3dadd(147132.000000,141312.000000,150575.000000,249.339804)}
{pt3dadd(147168.000000,141588.000000,150050.000000,266.050520)}
{pt3dadd(147120.000000,141804.000000,149825.000000,278.497916)}
{pt3dadd(147120.000000,142008.000000,149700.000000,294.455628)}
{pt3dadd(147024.000000,142140.000000,149575.000000,345.724524)}
{pt3dadd(146928.000000,142440.000000,149425.000000,409.381896)}
{pt3dadd(146832.000000,142608.000000,149275.000000,445.706136)}
{pt3dadd(146580.000000,143160.000000,149100.000000,474.287136)}
{pt3dadd(146496.000000,143628.000000,148950.000000,490.173518)}
{pt3dadd(146436.000000,143928.000000,148825.000000,465.102834)}
{pt3dadd(146316.000000,144084.000000,148925.000000,411.198322)}
{pt3dadd(146280.000000,144312.000000,148625.000000,360.215774)}
{pt3dadd(146208.000000,145944.000000,148375.000000,295.198928)}
{pt3dadd(146016.000000,146724.000000,148300.000000,232.055974)}
{pt3dadd(146268.000000,147504.000000,148225.000000,186.122402)}
{pt3dadd(146148.000000,148236.000000,148000.000000,174.214514)}
{pt3dadd(146268.000000,148152.000000,147800.000000,186.122402)}
{pt3dadd(146436.000000,148284.000000,147575.000000,199.870352)}
{pt3dadd(146688.000000,148308.000000,147350.000000,218.665932)}
{pt3dadd(146820.000000,147924.000000,147150.000000,240.777206)}
{pt3dadd(146724.000000,148164.000000,146950.000000,240.777206)}
{pt3dadd(146568.000000,148404.000000,146750.000000,235.663040)}
{pt3dadd(146940.000000,148608.000000,146500.000000,251.823824)}
{pt3dadd(147024.000000,148740.000000,146275.000000,256.462518)}
{pt3dadd(147192.000000,148728.000000,146075.000000,267.215044)}
{pt3dadd(147504.000000,148872.000000,145825.000000,276.503482)}
{pt3dadd(147648.000000,148956.000000,145600.000000,284.368068)}
{pt3dadd(147852.000000,149208.000000,145400.000000,254.459334)}
{pt3dadd(148092.000000,149508.000000,145175.000000,241.796940)}
{pt3dadd(148332.000000,149808.000000,145025.000000,218.382020)}
{pt3dadd(148572.000000,150096.000000,144800.000000,211.248610)}
{pt3dadd(148740.000000,150132.000000,144550.000000,190.721630)}
{pt3dadd(149112.000000,150660.000000,144325.000000,202.206800)}
{pt3dadd(149328.000000,150840.000000,144200.000000,210.230500)}
{pt3dadd(149412.000000,151116.000000,143925.000000,218.254200)}
{pt3dadd(149424.000000,151548.000000,143725.000000,239.861724)}
{pt3dadd(149460.000000,151944.000000,143500.000000,272.836100)}
{pt3dadd(149616.000000,152280.000000,143250.000000,261.350930)}
{pt3dadd(150132.000000,152556.000000,143025.000000,248.257646)}
{pt3dadd(150768.000000,153132.000000,142825.000000,246.102618)}
{pt3dadd(151452.000000,153816.000000,142675.000000,218.332986)}
{pt3dadd(151452.000000,154212.000000,142450.000000,214.989834)}
{pt3dadd(151824.000000,154644.000000,142225.000000,241.866224)}
{pt3dadd(152004.000000,154932.000000,142000.000000,273.383072)}
{pt3dadd(152088.000000,155412.000000,141775.000000,280.176794)}
{pt3dadd(152148.000000,155424.000000,141575.000000,293.472312)}
{pt3dadd(152316.000000,155484.000000,141300.000000,296.815464)}
{pt3dadd(152472.000000,155748.000000,141075.000000,299.847808)}
{pt3dadd(152424.000000,155928.000000,140850.000000,299.847808)}
{pt3dadd(152448.000000,155808.000000,140625.000000,297.471894)}
{pt3dadd(152568.000000,155928.000000,140425.000000,277.245200)}
{pt3dadd(152940.000000,156072.000000,140175.000000,239.201240)}
{pt3dadd(153048.000000,156072.000000,139975.000000,204.694246)}
{pt3dadd(153240.000000,156180.000000,139750.000000,176.474032)}
{pt3dadd(153564.000000,156444.000000,139525.000000,162.726082)}
{pt3dadd(153636.000000,156576.000000,139300.000000,175.819366)}
{pt3dadd(153708.000000,156840.000000,139100.000000,184.705214)}
{pt3dadd(153960.000000,157140.000000,138900.000000,222.396168)}
{pt3dadd(154068.000000,157392.000000,138675.000000,257.143494)}
{pt3dadd(154368.000000,157668.000000,138450.000000,297.089656)}
{pt3dadd(154164.000000,158136.000000,138225.000000,318.697180)}
{pt3dadd(153984.000000,158328.000000,138025.000000,332.657476)}
{pt3dadd(153672.000000,158892.000000,137800.000000,332.657476)}
{pt3dadd(153780.000000,159300.000000,137600.000000,329.314324)}
{pt3dadd(153852.000000,159372.000000,137500.000000,305.492026)}
{pt3dadd(154248.000000,159636.000000,137375.000000,277.722394)}
{pt3dadd(154524.000000,160020.000000,137125.000000,272.608228)}
{pt3dadd(154728.000000,160212.000000,137125.000000,260.753564)}
{pt3dadd(154968.000000,160344.000000,136850.000000,246.279450)}
{pt3dadd(155208.000000,160752.000000,136725.000000,257.031976)}
{pt3dadd(155436.000000,161076.000000,136650.000000,261.039056)}
{pt3dadd(155652.000000,161400.000000,136700.000000,263.533772)}
{pt3dadd(155904.000000,161712.000000,136575.000000,258.419606)}
{pt3dadd(156132.000000,162108.000000,136525.000000,261.039056)}
{pt3dadd(156372.000000,162696.000000,136550.000000,245.647836)}
{pt3dadd(156588.000000,163116.000000,136525.000000,241.640756)}
{pt3dadd(156816.000000,163404.000000,136425.000000,236.770126)}
{pt3dadd(157500.000000,164580.000000,136075.000000,250.554996)}
{pt3dadd(157848.000000,164820.000000,135875.000000,259.225700)}
{pt3dadd(158016.000000,165144.000000,135625.000000,266.359110)}
{pt3dadd(158004.000000,165468.000000,135375.000000,262.724568)}
{pt3dadd(158316.000000,165504.000000,135125.000000,256.254352)}
{pt3dadd(158688.000000,165984.000000,134875.000000,233.623352)}
{pt3dadd(158772.000000,166152.000000,134600.000000,209.037680)}
{pt3dadd(158772.000000,166296.000000,134350.000000,190.419100)}
{pt3dadd(158928.000000,166404.000000,134075.000000,187.122466)}
{pt3dadd(159000.000000,166392.000000,133825.000000,173.857322)}
{pt3dadd(158772.000000,166560.000000,133575.000000,166.579588)}
{pt3dadd(158940.000000,166872.000000,133325.000000,172.741696)}
{pt3dadd(159072.000000,167376.000000,133075.000000,176.203166)}
{pt3dadd(159204.000000,167892.000000,132700.000000,181.272750)}
{pt3dadd(159408.000000,168276.000000,132450.000000,184.120510)}
{pt3dadd(159744.000000,168936.000000,132100.000000,176.810100)}
{pt3dadd(160008.000000,170148.000000,131750.000000,163.716816)}
{pt3dadd(160524.000000,171336.000000,131650.000000,157.115696)}
{pt3dadd(161160.000000,172200.000000,131275.000000,157.115696)}
{pt3dadd(161424.000000,172512.000000,131100.000000,193.348040)}
{pt3dadd(162372.000000,173580.000000,130675.000000,221.896480)}
{pt3dadd(163080.000000,174216.000000,130300.000000,223.504594)}
{pt3dadd(163500.000000,174612.000000,130075.000000,231.967306)}
{pt3dadd(163836.000000,175512.000000,129850.000000,235.783570)}
{pt3dadd(164124.000000,176568.000000,129625.000000,214.176046)}
{pt3dadd(164388.000000,177144.000000,129125.000000,198.261078)}
{pt3dadd(164568.000000,177528.000000,128900.000000,207.591220)}
{pt3dadd(164808.000000,177768.000000,128675.000000,238.704004)}
{pt3dadd(165084.000000,177888.000000,128450.000000,278.928376)}
{pt3dadd(165588.000000,177432.000000,128325.000000,300.535900)}
{pt3dadd(166044.000000,177456.000000,127925.000000,319.201288)}
{pt3dadd(166260.000000,177420.000000,127500.000000,346.306992)}
{pt3dadd(166872.000000,177384.000000,126900.000000,319.201288)}
{pt3dadd(167688.000000,177408.000000,125850.000000,285.109447)}
{pt3dadd(168516.000000,177432.000000,125100.000000,215.502760)}

{create adhoc55}
{access adhoc55}
{connect adhoc55(1), adhoc54(0)}
{nseg = 1}
{strdef color color = "White"}
{pt3dclear()}
{pt3dadd(168516.000000,177432.000000,125100.000000,215.502760)}
{pt3dadd(168576.000000,177240.000000,124675.000000,319.226260)}
{pt3dadd(168576.000000,177192.000000,124575.000000,358.830513)}
{pt3dadd(168696.000000,177024.000000,124400.000000,334.315520)}

{create adhoc56}
{access adhoc56}
{connect adhoc56(1), adhoc55(0)}
{nseg = 1}
{strdef color color = "White"}
{pt3dclear()}
{pt3dadd(168696.000000,177024.000000,124400.000000,334.315520)}
{pt3dadd(168780.000000,177216.000000,124300.000000,351.881013)}
{pt3dadd(168984.000000,177660.000000,124475.000000,362.247580)}
{pt3dadd(169176.000000,178008.000000,124550.000000,372.786876)}
{pt3dadd(169368.000000,178332.000000,124550.000000,362.247580)}
{pt3dadd(169668.000000,178728.000000,124275.000000,369.101048)}
{pt3dadd(169920.000000,179112.000000,124075.000000,358.561752)}
{pt3dadd(170316.000000,179592.000000,123850.000000,351.708284)}
{pt3dadd(170520.000000,179856.000000,123675.000000,334.952684)}
{pt3dadd(170544.000000,180096.000000,123675.000000,334.952684)}
{pt3dadd(170676.000000,180216.000000,123675.000000,318.994972)}
{pt3dadd(171012.000000,180396.000000,123525.000000,309.890728)}
{pt3dadd(171408.000000,180564.000000,123325.000000,309.890728)}
{pt3dadd(171564.000000,180756.000000,123325.000000,304.252368)}
{pt3dadd(171636.000000,180900.000000,123325.000000,301.068408)}
{pt3dadd(171648.000000,181128.000000,123200.000000,317.026120)}
{pt3dadd(171816.000000,181428.000000,123200.000000,340.539776)}
{pt3dadd(172056.000000,181704.000000,123075.000000,316.777224)}
{pt3dadd(172344.000000,181992.000000,122925.000000,351.371738)}
{pt3dadd(173172.000000,182424.000000,122600.000000,361.409166)}
{pt3dadd(173712.000000,182544.000000,122250.000000,377.295548)}
{pt3dadd(174204.000000,182880.000000,121950.000000,373.425432)}
{pt3dadd(174588.000000,183264.000000,121575.000000,404.041452)}
{pt3dadd(174876.000000,183852.000000,121200.000000,391.840898)}
{pt3dadd(175452.000000,184056.000000,120950.000000,399.396842)}
{pt3dadd(175788.000000,184464.000000,120875.000000,408.581144)}
{pt3dadd(175860.000000,184908.000000,120775.000000,425.261844)}
{pt3dadd(176112.000000,185196.000000,120725.000000,432.817788)}
{pt3dadd(176328.000000,185484.000000,120750.000000,422.278492)}
{pt3dadd(176484.000000,185820.000000,120750.000000,414.722548)}
{pt3dadd(176688.000000,186144.000000,120650.000000,389.651864)}
{pt3dadd(176820.000000,186384.000000,120525.000000,365.775020)}
{pt3dadd(177096.000000,186600.000000,120300.000000,361.904904)}
{pt3dadd(177300.000000,186948.000000,120200.000000,365.248056)}
{pt3dadd(177564.000000,187260.000000,119975.000000,346.539924)}
{pt3dadd(177864.000000,187512.000000,119800.000000,330.582212)}
{pt3dadd(178164.000000,187704.000000,119575.000000,321.022756)}
{pt3dadd(178260.000000,187836.000000,119575.000000,301.379216)}
{pt3dadd(178416.000000,187956.000000,119525.000000,301.379216)}
{pt3dadd(178536.000000,188076.000000,119525.000000,316.577032)}
{pt3dadd(178680.000000,188184.000000,119400.000000,329.024428)}
{pt3dadd(178932.000000,188316.000000,119300.000000,357.980582)}
{pt3dadd(179040.000000,188484.000000,119200.000000,355.230162)}
{pt3dadd(179160.000000,188556.000000,119200.000000,351.887010)}
{pt3dadd(179388.000000,188676.000000,119025.000000,380.468010)}
{pt3dadd(179520.000000,188784.000000,119025.000000,413.988366)}
{pt3dadd(179712.000000,188940.000000,119025.000000,413.988366)}
{pt3dadd(179904.000000,189096.000000,118950.000000,425.843030)}
{pt3dadd(180456.000000,189324.000000,118700.000000,419.626726)}
{pt3dadd(180816.000000,189528.000000,118575.000000,391.045726)}
{pt3dadd(181260.000000,189720.000000,118300.000000,364.721514)}
{pt3dadd(181632.000000,189912.000000,118050.000000,330.127000)}
{pt3dadd(181980.000000,190248.000000,117900.000000,330.127000)}
{pt3dadd(182256.000000,190632.000000,117700.000000,314.735780)}
{pt3dadd(182520.000000,190800.000000,117425.000000,305.176324)}
{pt3dadd(182808.000000,190860.000000,117075.000000,270.874476)}
{pt3dadd(183228.000000,190884.000000,116750.000000,265.760310)}
{pt3dadd(183540.000000,190896.000000,116475.000000,244.152786)}
{pt3dadd(183888.000000,190956.000000,116175.000000,251.286196)}
{pt3dadd(184080.000000,190968.000000,115850.000000,240.533670)}
{pt3dadd(184488.000000,190788.000000,115550.000000,247.327392)}
{pt3dadd(184800.000000,190800.000000,115225.000000,240.533670)}
{pt3dadd(185100.000000,190812.000000,114825.000000,250.286530)}
{pt3dadd(185484.000000,190764.000000,114575.000000,261.576684)}
{pt3dadd(185748.000000,190680.000000,114225.000000,248.914290)}
{pt3dadd(186048.000000,190524.000000,113975.000000,242.120568)}
{pt3dadd(186264.000000,190524.000000,113800.000000,259.666816)}
{pt3dadd(186516.000000,190452.000000,113450.000000,262.417236)}
{pt3dadd(186804.000000,190344.000000,113200.000000,239.786236)}
{pt3dadd(187044.000000,190284.000000,112850.000000,245.654908)}
{pt3dadd(187224.000000,190308.000000,112550.000000,254.943346)}
{pt3dadd(187380.000000,190356.000000,112350.000000,241.814906)}
{pt3dadd(187680.000000,190428.000000,111925.000000,257.772618)}
{pt3dadd(187800.000000,190548.000000,111600.000000,302.060620)}
{pt3dadd(188148.000000,190644.000000,111250.000000,336.362468)}
{pt3dadd(188412.000000,190728.000000,110800.000000,331.491838)}
{pt3dadd(188688.000000,190500.000000,110300.000000,341.732338)}
{pt3dadd(188832.000000,190404.000000,110050.000000,334.878870)}
{pt3dadd(188976.000000,190332.000000,109850.000000,323.259296)}
{pt3dadd(189120.000000,190224.000000,109500.000000,309.536040)}
{pt3dadd(189276.000000,189996.000000,109250.000000,319.776540)}
{pt3dadd(189408.000000,189768.000000,108925.000000,325.257627)}
{pt3dadd(189408.000000,189588.000000,108175.000000,288.794300)}

{create adhoc57}
{access adhoc57}
{connect adhoc57(1), adhoc56(0)}
{nseg = 1}
{strdef color color = "White"}
{pt3dclear()}
{pt3dadd(189408.000000,189588.000000,108175.000000,288.794300)}
{pt3dadd(189432.000000,189456.000000,108250.000000,262.777017)}
{pt3dadd(189456.000000,189312.000000,108225.000000,233.991562)}
{pt3dadd(189480.000000,189168.000000,108225.000000,206.863462)}
{pt3dadd(189528.000000,189012.000000,108225.000000,189.933402)}
{pt3dadd(189588.000000,188868.000000,108225.000000,170.198042)}
{pt3dadd(189636.000000,188712.000000,108200.000000,165.128458)}
{pt3dadd(189696.000000,188568.000000,108200.000000,159.805396)}
{pt3dadd(189744.000000,188412.000000,108200.000000,162.945046)}
{pt3dadd(189660.000000,188244.000000,107900.000000,182.494556)}
{pt3dadd(189660.000000,187968.000000,107650.000000,212.470416)}
{pt3dadd(189600.000000,187800.000000,107600.000000,230.202394)}
{pt3dadd(189564.000000,187680.000000,107400.000000,241.687564)}
{pt3dadd(189552.000000,187476.000000,107175.000000,237.089304)}
{pt3dadd(189444.000000,187272.000000,106925.000000,215.851274)}
{pt3dadd(189432.000000,187032.000000,106675.000000,199.140558)}
{pt3dadd(189360.000000,186792.000000,106475.000000,207.005144)}
{pt3dadd(189348.000000,186588.000000,106275.000000,225.428708)}
{pt3dadd(189360.000000,186336.000000,106025.000000,243.774918)}
{pt3dadd(189480.000000,186096.000000,105775.000000,267.763368)}
{pt3dadd(189600.000000,185748.000000,105525.000000,255.887374)}
{pt3dadd(189696.000000,185532.000000,105475.000000,253.136954)}
{pt3dadd(189900.000000,185196.000000,105250.000000,244.466250)}
{pt3dadd(190044.000000,184956.000000,104950.000000,263.810994)}
{pt3dadd(190128.000000,184608.000000,104700.000000,294.799973)}
{pt3dadd(190164.000000,184356.000000,104525.000000,334.315520)}

{create adhoc58}
{access adhoc58}
{connect adhoc58(1), adhoc57(0)}
{nseg = 1}
{strdef color color = "White"}
{pt3dclear()}
{pt3dadd(190164.000000,184356.000000,104525.000000,334.315520)}
{pt3dadd(190068.000000,184128.000000,104400.000000,256.723067)}
{pt3dadd(190008.000000,183936.000000,104275.000000,226.724650)}
{pt3dadd(189984.000000,183756.000000,104025.000000,202.962098)}
{pt3dadd(190032.000000,183504.000000,103900.000000,197.847932)}
{pt3dadd(190188.000000,183180.000000,103725.000000,202.917516)}
{pt3dadd(190272.000000,182904.000000,103575.000000,215.579910)}
{pt3dadd(190356.000000,182592.000000,103425.000000,227.639340)}
{pt3dadd(190404.000000,182328.000000,103300.000000,221.770668)}
{pt3dadd(190464.000000,181968.000000,103200.000000,205.646804)}
{pt3dadd(190476.000000,181848.000000,103050.000000,200.577220)}
{pt3dadd(190560.000000,181704.000000,103050.000000,191.731090)}
{pt3dadd(190596.000000,181560.000000,103050.000000,187.313282)}
{pt3dadd(190644.000000,181416.000000,103050.000000,193.181954)}
{pt3dadd(190692.000000,181272.000000,103050.000000,214.419984)}
{pt3dadd(190716.000000,181092.000000,102900.000000,237.266128)}
{pt3dadd(190776.000000,180876.000000,102725.000000,246.112258)}
{pt3dadd(190824.000000,180600.000000,102600.000000,255.400696)}
{pt3dadd(190836.000000,180264.000000,102550.000000,255.400696)}
{pt3dadd(190908.000000,179976.000000,102425.000000,247.910616)}
{pt3dadd(190944.000000,179724.000000,102350.000000,231.995648)}
{pt3dadd(190968.000000,179436.000000,102325.000000,231.995648)}
{pt3dadd(190992.000000,179112.000000,102300.000000,222.707210)}
{pt3dadd(191004.000000,178836.000000,102200.000000,224.862238)}
{pt3dadd(190968.000000,178608.000000,102075.000000,220.444430)}
{pt3dadd(191028.000000,178368.000000,101925.000000,220.444430)}
{pt3dadd(191076.000000,178140.000000,101875.000000,215.805736)}
{pt3dadd(190992.000000,177888.000000,101800.000000,233.351984)}
{pt3dadd(190992.000000,177588.000000,101725.000000,245.855264)}
{pt3dadd(191052.000000,177372.000000,101475.000000,255.143702)}
{pt3dadd(190944.000000,177132.000000,101225.000000,263.568590)}
{pt3dadd(190992.000000,176880.000000,101125.000000,257.406482)}
{pt3dadd(190968.000000,176592.000000,101025.000000,242.015262)}
{pt3dadd(190824.000000,176292.000000,101150.000000,229.511982)}
{pt3dadd(190716.000000,176100.000000,101150.000000,214.354872)}
{pt3dadd(190668.000000,175956.000000,101150.000000,204.068392)}
{pt3dadd(190608.000000,175836.000000,101150.000000,206.023064)}
{pt3dadd(190572.000000,175740.000000,101125.000000,208.285844)}
{pt3dadd(190524.000000,175644.000000,101200.000000,212.924538)}
{pt3dadd(190488.000000,175476.000000,101200.000000,230.701098)}
{pt3dadd(190452.000000,175236.000000,101025.000000,243.363492)}
{pt3dadd(190452.000000,175008.000000,100825.000000,254.704338)}
{pt3dadd(190452.000000,174816.000000,100800.000000,250.286530)}
{pt3dadd(190452.000000,174624.000000,100575.000000,237.624136)}
{pt3dadd(190488.000000,174288.000000,100525.000000,221.709168)}
{pt3dadd(190464.000000,174060.000000,100375.000000,209.046774)}
{pt3dadd(190476.000000,173928.000000,100325.000000,214.416644)}
{pt3dadd(190476.000000,173796.000000,100325.000000,223.705082)}
{pt3dadd(190440.000000,173724.000000,100050.000000,253.336306)}
{pt3dadd(190380.000000,173544.000000,99850.000000,266.631824)}
{pt3dadd(190548.000000,173100.000000,99700.000000,287.158804)}
{pt3dadd(190572.000000,172800.000000,99425.000000,293.079088)}
{pt3dadd(190584.000000,172440.000000,99400.000000,289.711657)}
{pt3dadd(190584.000000,172044.000000,99200.000000,318.395720)}

{create adhoc59}
{access adhoc59}
{connect adhoc59(1), adhoc58(0)}
{nseg = 1}
{strdef color color = "White"}
{pt3dclear()}
{pt3dadd(190584.000000,172044.000000,99200.000000,318.395720)}
{pt3dadd(190656.000000,171732.000000,99250.000000,240.019293)}
{pt3dadd(190752.000000,171456.000000,99250.000000,226.988866)}
{pt3dadd(190752.000000,171276.000000,99275.000000,198.768652)}
{pt3dadd(190788.000000,170988.000000,99250.000000,186.298860)}
{pt3dadd(190764.000000,170688.000000,99225.000000,182.837390)}
{pt3dadd(190716.000000,170400.000000,99175.000000,182.837390)}
{pt3dadd(190692.000000,170172.000000,99225.000000,182.837390)}
{pt3dadd(190716.000000,169944.000000,99225.000000,190.479012)}
{pt3dadd(190764.000000,169644.000000,99175.000000,205.103832)}
{pt3dadd(190788.000000,169392.000000,99175.000000,216.589002)}
{pt3dadd(190752.000000,169128.000000,99175.000000,216.589002)}
{pt3dadd(190764.000000,168840.000000,99225.000000,212.171194)}
{pt3dadd(190752.000000,168504.000000,99275.000000,216.589002)}
{pt3dadd(190800.000000,168264.000000,99300.000000,216.589002)}
{pt3dadd(190824.000000,168156.000000,99350.000000,218.851782)}
{pt3dadd(190836.000000,167904.000000,99500.000000,230.911212)}
{pt3dadd(190860.000000,167628.000000,99550.000000,240.199650)}
{pt3dadd(190920.000000,167328.000000,99600.000000,253.328090)}
{pt3dadd(190980.000000,167208.000000,99825.000000,263.080950)}
{pt3dadd(191016.000000,166920.000000,99775.000000,267.951580)}
{pt3dadd(190980.000000,166608.000000,99900.000000,257.665100)}
{pt3dadd(191220.000000,166320.000000,100025.000000,263.034970)}
{pt3dadd(191304.000000,166068.000000,100250.000000,254.777160)}
{pt3dadd(191400.000000,165828.000000,100450.000000,247.287080)}
{pt3dadd(191496.000000,165576.000000,100550.000000,235.946234)}
{pt3dadd(191544.000000,165204.000000,100625.000000,239.762498)}
{pt3dadd(191472.000000,164964.000000,100675.000000,215.774048)}
{pt3dadd(191388.000000,164712.000000,100650.000000,206.485610)}
{pt3dadd(191400.000000,164496.000000,100525.000000,206.485610)}
{pt3dadd(191364.000000,164256.000000,100425.000000,215.331740)}
{pt3dadd(191376.000000,163968.000000,100300.000000,217.384148)}
{pt3dadd(191436.000000,163740.000000,100225.000000,220.845618)}
{pt3dadd(191496.000000,163488.000000,100175.000000,220.845618)}
{pt3dadd(191520.000000,163356.000000,100025.000000,216.427810)}
{pt3dadd(191556.000000,163224.000000,100025.000000,221.541976)}
{pt3dadd(191592.000000,163092.000000,100025.000000,217.534896)}
{pt3dadd(191616.000000,162768.000000,99775.000000,228.670773)}
{pt3dadd(191700.000000,162564.000000,99725.000000,195.467360)}

{create adhoc60}
{access adhoc60}
{connect adhoc60(1), adhoc59(0)}
{nseg = 1}
{strdef color color = "White"}
{pt3dclear()}
{pt3dadd(191700.000000,162564.000000,99725.000000,195.467360)}
{pt3dadd(191712.000000,162336.000000,99350.000000,240.617820)}
{pt3dadd(191652.000000,162144.000000,99050.000000,204.601102)}
{pt3dadd(191676.000000,162024.000000,98875.000000,194.679780)}
{pt3dadd(191616.000000,161844.000000,98700.000000,163.380920)}
{pt3dadd(191580.000000,161724.000000,98475.000000,145.034710)}
{pt3dadd(191580.000000,161640.000000,98325.000000,145.034710)}
{pt3dadd(191592.000000,161544.000000,98175.000000,143.426596)}
{pt3dadd(191664.000000,161376.000000,97875.000000,139.454446)}
{pt3dadd(191688.000000,161232.000000,97675.000000,138.194446)}
{pt3dadd(191808.000000,161148.000000,97550.000000,134.222296)}
{pt3dadd(191940.000000,161052.000000,97325.000000,132.962296)}
{pt3dadd(191964.000000,160920.000000,97075.000000,126.000000)}
{pt3dadd(192072.000000,160908.000000,96775.000000,122.568708)}
{pt3dadd(192492.000000,160848.000000,96350.000000,120.225850)}
{pt3dadd(192624.000000,160920.000000,96325.000000,116.794558)}
{pt3dadd(192816.000000,160980.000000,96300.000000,110.399186)}
{pt3dadd(192972.000000,161016.000000,96300.000000,104.944046)}
{pt3dadd(193104.000000,161052.000000,96300.000000,104.944046)}
{pt3dadd(193200.000000,160968.000000,96175.000000,103.855612)}
{pt3dadd(193404.000000,160956.000000,96075.000000,109.869904)}
{pt3dadd(193572.000000,160956.000000,96150.000000,126.524206)}
{pt3dadd(193716.000000,160956.000000,95925.000000,131.979346)}
{pt3dadd(193824.000000,161028.000000,95875.000000,135.410638)}
{pt3dadd(194016.000000,161040.000000,95600.000000,138.841930)}
{pt3dadd(194184.000000,161052.000000,95575.000000,137.518930)}
{pt3dadd(194292.000000,161076.000000,95475.000000,127.260000)}
{pt3dadd(194376.000000,161124.000000,95400.000000,127.260000)}
{pt3dadd(194484.000000,161148.000000,95300.000000,127.260000)}
{pt3dadd(194628.000000,161208.000000,95275.000000,135.830410)}
{pt3dadd(194688.000000,161268.000000,95250.000000,140.284017)}
{pt3dadd(194640.000000,161340.000000,95200.000000,168.852050)}

{create adhoc61}
{access adhoc61}
{connect adhoc61(1), adhoc59(0)}
{nseg = 1}
{strdef color color = "White"}
{pt3dclear()}
{pt3dadd(191700.000000,162564.000000,99725.000000,195.467360)}
{pt3dadd(191784.000000,162372.000000,99800.000000,232.262487)}
{pt3dadd(191808.000000,162216.000000,99950.000000,206.978718)}
{pt3dadd(191796.000000,161952.000000,100000.000000,194.345246)}
{pt3dadd(191820.000000,161748.000000,100075.000000,163.336806)}
{pt3dadd(191772.000000,161580.000000,100050.000000,144.541226)}
{pt3dadd(191712.000000,161340.000000,100025.000000,131.939438)}
{pt3dadd(191664.000000,161220.000000,100075.000000,122.634284)}
{pt3dadd(191580.000000,160920.000000,100125.000000,122.634284)}
{pt3dadd(191592.000000,160620.000000,100275.000000,123.834284)}
{pt3dadd(191544.000000,160332.000000,100375.000000,125.157284)}
{pt3dadd(191508.000000,159984.000000,100450.000000,137.759072)}
{pt3dadd(191472.000000,159600.000000,100575.000000,147.064226)}
{pt3dadd(191436.000000,159396.000000,100650.000000,152.766522)}
{pt3dadd(191460.000000,159156.000000,100575.000000,194.429626)}
{pt3dadd(191400.000000,158940.000000,100550.000000,233.509730)}
{pt3dadd(191412.000000,158820.000000,100650.000000,241.151352)}
{pt3dadd(191376.000000,158676.000000,100575.000000,248.082528)}
{pt3dadd(191364.000000,158556.000000,100575.000000,255.013704)}
{pt3dadd(191376.000000,158436.000000,100575.000000,225.382480)}
{pt3dadd(191376.000000,158280.000000,100575.000000,195.751256)}
{pt3dadd(191232.000000,157944.000000,100575.000000,195.751256)}
{pt3dadd(191088.000000,157644.000000,100575.000000,214.416644)}
{pt3dadd(190980.000000,157368.000000,100575.000000,235.969972)}
{pt3dadd(190956.000000,157224.000000,100575.000000,253.746532)}
{pt3dadd(190896.000000,157068.000000,100575.000000,274.273512)}
{pt3dadd(190764.000000,156696.000000,100475.000000,298.036064)}
{pt3dadd(190704.000000,156408.000000,100400.000000,283.377756)}
{pt3dadd(190764.000000,155964.000000,100275.000000,263.779100)}
{pt3dadd(190764.000000,155688.000000,100075.000000,224.241274)}
{pt3dadd(190752.000000,155364.000000,99975.000000,183.538766)}
{pt3dadd(190872.000000,155088.000000,99900.000000,130.039760)}
{pt3dadd(190896.000000,154668.000000,99850.000000,116.111358)}
{pt3dadd(190872.000000,154308.000000,99900.000000,108.833624)}
{pt3dadd(190812.000000,154116.000000,99975.000000,130.594890)}
{pt3dadd(190740.000000,153924.000000,99975.000000,165.927528)}
{pt3dadd(190680.000000,153720.000000,99975.000000,189.795310)}
{pt3dadd(190584.000000,153576.000000,99900.000000,197.855040)}
{pt3dadd(190512.000000,153432.000000,99900.000000,196.246926)}
{pt3dadd(190440.000000,153276.000000,99900.000000,194.473976)}
{pt3dadd(190416.000000,153096.000000,99725.000000,171.257136)}
{pt3dadd(190368.000000,152928.000000,99725.000000,167.795666)}
{pt3dadd(190356.000000,152652.000000,99525.000000,162.726082)}
{pt3dadd(190428.000000,152280.000000,99250.000000,166.022716)}
{pt3dadd(190524.000000,152136.000000,99025.000000,159.735936)}
{pt3dadd(190548.000000,151848.000000,98900.000000,162.726082)}
{pt3dadd(190572.000000,151620.000000,98600.000000,166.187552)}
{pt3dadd(190536.000000,151488.000000,98575.000000,173.118728)}
{pt3dadd(190596.000000,151272.000000,98350.000000,165.442798)}
{pt3dadd(190656.000000,151068.000000,98200.000000,164.053648)}
{pt3dadd(190680.000000,150864.000000,98100.000000,164.053648)}
{pt3dadd(190728.000000,150720.000000,98000.000000,176.716042)}
{pt3dadd(190776.000000,150480.000000,97950.000000,173.081500)}
{pt3dadd(190836.000000,150300.000000,97800.000000,179.068910)}
{pt3dadd(190860.000000,150024.000000,97675.000000,192.334054)}
{pt3dadd(190872.000000,149784.000000,97525.000000,203.272310)}
{pt3dadd(190980.000000,149676.000000,97625.000000,194.426180)}
{pt3dadd(191088.000000,149556.000000,97625.000000,196.199130)}
{pt3dadd(191184.000000,149496.000000,97675.000000,207.684300)}
{pt3dadd(191232.000000,149364.000000,97550.000000,209.736708)}
{pt3dadd(191292.000000,149256.000000,97575.000000,209.736708)}
{pt3dadd(191448.000000,149016.000000,97500.000000,218.582838)}
{pt3dadd(191592.000000,148692.000000,97350.000000,224.451510)}
{pt3dadd(191676.000000,148656.000000,97300.000000,218.289402)}
{pt3dadd(191724.000000,148548.000000,97275.000000,220.444430)}
{pt3dadd(191808.000000,148440.000000,97250.000000,224.862238)}
{pt3dadd(191880.000000,148332.000000,97225.000000,222.486324)}
{pt3dadd(191928.000000,148176.000000,97175.000000,224.641352)}
{pt3dadd(191952.000000,148080.000000,97150.000000,237.936870)}
{pt3dadd(191952.000000,147936.000000,97100.000000,231.774762)}
{pt3dadd(192024.000000,147648.000000,97000.000000,214.887162)}
{pt3dadd(192108.000000,147516.000000,96900.000000,206.462274)}
{pt3dadd(192216.000000,147312.000000,96875.000000,200.300166)}
{pt3dadd(192264.000000,147132.000000,96775.000000,183.370106)}
{pt3dadd(192288.000000,146904.000000,96800.000000,183.370106)}
{pt3dadd(192288.000000,146772.000000,96800.000000,195.839898)}
{pt3dadd(192288.000000,146628.000000,96800.000000,199.846978)}
{pt3dadd(192264.000000,146496.000000,96800.000000,201.801650)}
{pt3dadd(192204.000000,146016.000000,96675.000000,221.351160)}
{pt3dadd(192204.000000,145788.000000,96600.000000,234.646678)}
{pt3dadd(192204.000000,145548.000000,96625.000000,241.440400)}
{pt3dadd(192180.000000,145284.000000,96600.000000,235.571728)}
{pt3dadd(192012.000000,144996.000000,96575.000000,228.293994)}
{pt3dadd(191964.000000,144876.000000,96525.000000,210.517434)}
{pt3dadd(191928.000000,144756.000000,96525.000000,193.587374)}
{pt3dadd(191880.000000,144660.000000,96500.000000,177.463510)}
{pt3dadd(191832.000000,144528.000000,96500.000000,185.487210)}
{pt3dadd(191796.000000,144384.000000,96500.000000,188.948680)}
{pt3dadd(191748.000000,144168.000000,96325.000000,204.105790)}
{pt3dadd(191736.000000,143976.000000,96250.000000,218.541134)}
{pt3dadd(191736.000000,143772.000000,96150.000000,222.002604)}
{pt3dadd(191748.000000,143592.000000,96025.000000,212.205954)}
{pt3dadd(191760.000000,143172.000000,95850.000000,208.744484)}
{pt3dadd(191784.000000,142896.000000,95775.000000,186.986254)}
{pt3dadd(191808.000000,142620.000000,95650.000000,169.254276)}
{pt3dadd(191808.000000,142500.000000,95550.000000,167.481326)}
{pt3dadd(191808.000000,142392.000000,95550.000000,177.277976)}
{pt3dadd(191808.000000,142284.000000,95550.000000,180.739446)}
{pt3dadd(191820.000000,141888.000000,95375.000000,182.270982)}
{pt3dadd(191844.000000,141780.000000,95350.000000,185.567616)}
{pt3dadd(191820.000000,141660.000000,95350.000000,202.497676)}
{pt3dadd(191784.000000,141540.000000,95325.000000,200.017027)}
{pt3dadd(191760.000000,141372.000000,95200.000000,261.944950)}

{create adhoc62}
{access adhoc62}
{connect adhoc62(1), adhoc58(0)}
{nseg = 1}
{strdef color color = "White"}
{pt3dclear()}
{pt3dadd(190584.000000,172044.000000,99200.000000,318.395720)}
{pt3dadd(190620.000000,172092.000000,99100.000000,251.342163)}
{pt3dadd(190740.000000,172092.000000,98950.000000,184.582461)}
{pt3dadd(190776.000000,171864.000000,98775.000000,137.147462)}
{pt3dadd(190800.000000,171600.000000,98600.000000,103.497333)}
{pt3dadd(190848.000000,171372.000000,98325.000000,84.174622)}
{pt3dadd(190920.000000,171192.000000,98175.000000,79.900376)}
{pt3dadd(190956.000000,171120.000000,98050.000000,82.112219)}
{pt3dadd(190992.000000,171012.000000,97900.000000,79.900376)}
{pt3dadd(191040.000000,170952.000000,97775.000000,75.777862)}
{pt3dadd(191124.000000,170868.000000,97500.000000,74.925045)}
{pt3dadd(191112.000000,170844.000000,97175.000000,79.199291)}
{pt3dadd(190992.000000,170844.000000,97000.000000,83.687249)}
{pt3dadd(190896.000000,170784.000000,96700.000000,96.114946)}
{pt3dadd(190872.000000,170904.000000,96525.000000,103.738175)}
{pt3dadd(190776.000000,170952.000000,96475.000000,111.881823)}
{pt3dadd(190668.000000,170988.000000,96325.000000,121.309113)}
{pt3dadd(190548.000000,171096.000000,96225.000000,132.739306)}
{pt3dadd(190464.000000,171180.000000,96025.000000,135.451456)}
{pt3dadd(190356.000000,171264.000000,95900.000000,147.868892)}
{pt3dadd(190320.000000,171384.000000,95875.000000,150.451892)}
{pt3dadd(190272.000000,171456.000000,95825.000000,151.910502)}
{pt3dadd(190236.000000,171564.000000,95775.000000,150.960093)}
{pt3dadd(190152.000000,171684.000000,95925.000000,153.153800)}

{create adhoc63}
{access adhoc63}
{connect adhoc63(1), adhoc57(0)}
{nseg = 1}
{strdef color color = "White"}
{pt3dclear()}
{pt3dadd(190164.000000,184356.000000,104525.000000,334.315520)}
{pt3dadd(190356.000000,184656.000000,104275.000000,260.972250)}
{pt3dadd(190608.000000,184668.000000,103925.000000,196.120081)}
{pt3dadd(190824.000000,184800.000000,103750.000000,147.166146)}
{pt3dadd(191040.000000,184884.000000,103625.000000,93.667140)}
{pt3dadd(191268.000000,185004.000000,103500.000000,83.537710)}
{pt3dadd(191400.000000,185124.000000,103325.000000,79.861959)}
{pt3dadd(191580.000000,185232.000000,103225.000000,71.913603)}
{pt3dadd(191652.000000,185244.000000,103225.000000,85.281760)}

{create adhoc64}
{access adhoc64}
{connect adhoc64(1), adhoc56(0)}
{nseg = 1}
{strdef color color = "White"}
{pt3dclear()}
{pt3dadd(189408.000000,189588.000000,108175.000000,288.794300)}
{pt3dadd(189324.000000,189696.000000,108125.000000,271.726800)}
{pt3dadd(189228.000000,189804.000000,108100.000000,212.353222)}
{pt3dadd(189132.000000,190092.000000,107900.000000,175.326465)}
{pt3dadd(189048.000000,190188.000000,107875.000000,139.336313)}
{pt3dadd(189060.000000,190260.000000,107850.000000,115.817953)}
{pt3dadd(189060.000000,190332.000000,107850.000000,115.817953)}
{pt3dadd(189060.000000,190416.000000,107850.000000,116.960811)}
{pt3dadd(188988.000000,190572.000000,107850.000000,129.999118)}
{pt3dadd(188952.000000,190668.000000,107850.000000,129.999118)}
{pt3dadd(188904.000000,190500.000000,107400.000000,136.629878)}
{pt3dadd(188832.000000,190320.000000,107125.000000,137.952878)}
{pt3dadd(188700.000000,190284.000000,106775.000000,147.723288)}
{pt3dadd(188520.000000,190212.000000,106450.000000,144.583638)}
{pt3dadd(188328.000000,190260.000000,106100.000000,149.274930)}
{pt3dadd(188256.000000,190320.000000,105800.000000,163.899750)}
{pt3dadd(188232.000000,190308.000000,105525.000000,175.210222)}
{pt3dadd(188172.000000,190500.000000,105200.000000,202.086612)}
{pt3dadd(188160.000000,190764.000000,104900.000000,212.503996)}
{pt3dadd(188088.000000,191040.000000,104625.000000,223.275876)}
{pt3dadd(188016.000000,191232.000000,104300.000000,213.479226)}
{pt3dadd(187920.000000,191352.000000,103925.000000,205.016514)}
{pt3dadd(187752.000000,191496.000000,103625.000000,164.114574)}
{pt3dadd(187644.000000,191592.000000,103375.000000,148.266430)}
{pt3dadd(187428.000000,191688.000000,103000.000000,132.803258)}
{pt3dadd(187248.000000,191676.000000,102700.000000,120.201470)}
{pt3dadd(187080.000000,191772.000000,102550.000000,120.201470)}
{pt3dadd(186984.000000,191940.000000,102500.000000,126.916610)}
{pt3dadd(186888.000000,192048.000000,102400.000000,124.573752)}
{pt3dadd(186780.000000,192300.000000,102300.000000,125.662186)}
{pt3dadd(186624.000000,192300.000000,102200.000000,128.005044)}
{pt3dadd(186420.000000,192432.000000,102100.000000,123.834284)}
{pt3dadd(186324.000000,192636.000000,101925.000000,121.374284)}
{pt3dadd(186204.000000,192792.000000,101925.000000,124.977142)}
{pt3dadd(186108.000000,192888.000000,101900.000000,137.578930)}
{pt3dadd(186084.000000,193008.000000,101900.000000,143.009690)}
{pt3dadd(186060.000000,193128.000000,101900.000000,148.711986)}
{pt3dadd(186012.000000,193236.000000,101850.000000,151.171986)}
{pt3dadd(185928.000000,193320.000000,101825.000000,153.884136)}
{pt3dadd(185916.000000,193428.000000,101800.000000,146.208206)}
{pt3dadd(185760.000000,193464.000000,101650.000000,149.347856)}
{pt3dadd(185652.000000,193500.000000,101475.000000,160.286112)}
{pt3dadd(185496.000000,193524.000000,101350.000000,181.344472)}
{pt3dadd(185376.000000,193812.000000,101150.000000,191.265794)}
{pt3dadd(185304.000000,193992.000000,101075.000000,204.530938)}
{pt3dadd(185124.000000,194076.000000,100900.000000,199.932678)}
{pt3dadd(185088.000000,194196.000000,100775.000000,187.462886)}
{pt3dadd(184836.000000,194340.000000,100700.000000,179.037998)}
{pt3dadd(184608.000000,194544.000000,100350.000000,177.176406)}
{pt3dadd(184428.000000,194700.000000,100100.000000,181.383842)}
{pt3dadd(184296.000000,194844.000000,100075.000000,197.467272)}
{pt3dadd(184104.000000,195240.000000,99875.000000,204.068392)}
{pt3dadd(183960.000000,195324.000000,99975.000000,210.230500)}
{pt3dadd(183828.000000,195444.000000,99975.000000,220.516980)}
{pt3dadd(183720.000000,195600.000000,99975.000000,225.155674)}
{pt3dadd(183672.000000,195684.000000,99950.000000,225.155674)}
{pt3dadd(183624.000000,195768.000000,99950.000000,233.179374)}
{pt3dadd(183588.000000,195864.000000,99950.000000,233.179374)}
{pt3dadd(183516.000000,195960.000000,99950.000000,222.892894)}
{pt3dadd(183456.000000,196056.000000,99950.000000,220.516980)}
{pt3dadd(183420.000000,196476.000000,99900.000000,222.779760)}
{pt3dadd(183264.000000,196704.000000,99850.000000,214.756060)}
{pt3dadd(183336.000000,197004.000000,99800.000000,208.593952)}
{pt3dadd(183228.000000,197292.000000,99775.000000,205.132482)}
{pt3dadd(183192.000000,197616.000000,99725.000000,186.786272)}
{pt3dadd(183204.000000,197772.000000,99725.000000,164.467912)}
{pt3dadd(183216.000000,197904.000000,99725.000000,155.019032)}
{pt3dadd(183228.000000,198024.000000,99775.000000,148.087856)}
{pt3dadd(183228.000000,198120.000000,99775.000000,149.776376)}
{pt3dadd(183300.000000,198432.000000,99650.000000,154.374636)}
{pt3dadd(183240.000000,198660.000000,99600.000000,172.275188)}
{pt3dadd(183204.000000,198996.000000,99600.000000,192.010548)}
{pt3dadd(183192.000000,199260.000000,99550.000000,195.307182)}
{pt3dadd(183120.000000,199392.000000,99650.000000,193.618662)}
{pt3dadd(183048.000000,199584.000000,99650.000000,200.896396)}
{pt3dadd(183036.000000,199896.000000,99425.000000,193.254774)}
{pt3dadd(182904.000000,200172.000000,99450.000000,203.495274)}
{pt3dadd(182916.000000,200268.000000,99375.000000,220.425334)}
{pt3dadd(182892.000000,200436.000000,99375.000000,247.301724)}
{pt3dadd(182832.000000,200544.000000,99350.000000,266.900380)}
{pt3dadd(182868.000000,200928.000000,99400.000000,295.120594)}
{pt3dadd(182928.000000,201264.000000,99425.000000,298.008534)}
{pt3dadd(182904.000000,201420.000000,99275.000000,309.298688)}
{pt3dadd(182916.000000,201636.000000,99075.000000,313.341813)}
{pt3dadd(182844.000000,201852.000000,98650.000000,318.395720)}

{create adhoc65}
{access adhoc65}
{connect adhoc65(1), adhoc64(0)}
{nseg = 1}
{strdef color color = "White"}
{pt3dclear()}
{pt3dadd(182844.000000,201852.000000,98650.000000,318.395720)}
{pt3dadd(183012.000000,201924.000000,98450.000000,219.907943)}
{pt3dadd(183444.000000,201864.000000,98275.000000,181.496474)}
{pt3dadd(183600.000000,201840.000000,98175.000000,133.287944)}
{pt3dadd(183636.000000,201840.000000,98050.000000,112.999100)}
{pt3dadd(183744.000000,201864.000000,97700.000000,104.559053)}
{pt3dadd(183792.000000,201888.000000,97425.000000,97.508156)}
{pt3dadd(183924.000000,201840.000000,97175.000000,93.648617)}
{pt3dadd(184032.000000,201804.000000,96925.000000,101.035145)}
{pt3dadd(184116.000000,201804.000000,96750.000000,108.690517)}
{pt3dadd(184224.000000,201780.000000,96525.000000,113.158414)}
{pt3dadd(184284.000000,201720.000000,96175.000000,121.598461)}
{pt3dadd(184440.000000,201660.000000,95950.000000,137.459702)}
{pt3dadd(184512.000000,201624.000000,95700.000000,148.372970)}
{pt3dadd(184620.000000,201540.000000,95525.000000,148.372970)}
{pt3dadd(184680.000000,201504.000000,95450.000000,152.345120)}
{pt3dadd(184776.000000,201408.000000,95325.000000,146.030112)}
{pt3dadd(184872.000000,201396.000000,95200.000000,137.459702)}
{pt3dadd(185148.000000,201132.000000,95050.000000,125.458000)}
{pt3dadd(185220.000000,201096.000000,95125.000000,121.855142)}
{pt3dadd(185280.000000,201036.000000,94975.000000,115.540134)}
{pt3dadd(185364.000000,201012.000000,94950.000000,116.682992)}
{pt3dadd(185400.000000,200976.000000,94900.000000,110.287620)}
{pt3dadd(185424.000000,200928.000000,94900.000000,114.978912)}
{pt3dadd(185460.000000,200868.000000,94800.000000,118.581770)}
{pt3dadd(185496.000000,200808.000000,94800.000000,118.581770)}
{pt3dadd(185472.000000,200724.000000,94675.000000,115.313873)}
{pt3dadd(185460.000000,200652.000000,94500.000000,119.366387)}
{pt3dadd(185424.000000,200580.000000,94425.000000,110.815556)}
{pt3dadd(185424.000000,200472.000000,94300.000000,104.100416)}
{pt3dadd(185472.000000,200376.000000,94175.000000,100.988134)}
{pt3dadd(185568.000000,200352.000000,94000.000000,102.024739)}
{pt3dadd(185496.000000,200316.000000,93850.000000,109.798357)}
{pt3dadd(185244.000000,200268.000000,93325.000000,122.519948)}
{pt3dadd(185196.000000,200244.000000,93175.000000,129.235088)}
{pt3dadd(185136.000000,200208.000000,93025.000000,144.949158)}
{pt3dadd(185112.000000,200232.000000,92700.000000,162.273922)}
{pt3dadd(185088.000000,200184.000000,92375.000000,168.875042)}
{pt3dadd(185136.000000,200028.000000,92200.000000,185.762642)}
{pt3dadd(185172.000000,199920.000000,91875.000000,198.396114)}
{pt3dadd(185184.000000,199800.000000,91800.000000,200.169064)}
{pt3dadd(185244.000000,199668.000000,91475.000000,187.535592)}
{pt3dadd(185280.000000,199560.000000,91400.000000,176.763712)}
{pt3dadd(185316.000000,199644.000000,91300.000000,150.253133)}
{pt3dadd(185364.000000,199644.000000,91175.000000,132.300000)}

{create adhoc66}
{access adhoc66}
{connect adhoc66(1), adhoc65(0)}
{nseg = 1}
{strdef color color = "White"}
{pt3dclear()}
{pt3dadd(185364.000000,199644.000000,91175.000000,132.300000)}
{pt3dadd(185412.000000,199548.000000,91175.000000,114.934685)}
{pt3dadd(185484.000000,199476.000000,91175.000000,106.570067)}
{pt3dadd(185544.000000,199404.000000,91200.000000,98.914695)}
{pt3dadd(185604.000000,199332.000000,91225.000000,95.950615)}
{pt3dadd(185652.000000,199260.000000,91200.000000,103.001512)}
{pt3dadd(185772.000000,199224.000000,91125.000000,109.396884)}
{pt3dadd(185856.000000,199152.000000,91100.000000,113.449398)}
{pt3dadd(185916.000000,199092.000000,91075.000000,106.189181)}
{pt3dadd(186012.000000,199080.000000,91075.000000,105.293722)}
{pt3dadd(186108.000000,198996.000000,91050.000000,94.567074)}
{pt3dadd(186180.000000,198936.000000,91050.000000,85.611219)}
{pt3dadd(186264.000000,198924.000000,91050.000000,78.998222)}
{pt3dadd(186324.000000,198864.000000,91025.000000,79.575442)}
{pt3dadd(186372.000000,198828.000000,91025.000000,78.722625)}
{pt3dadd(186444.000000,198816.000000,91050.000000,75.698576)}
{pt3dadd(186576.000000,198708.000000,91000.000000,72.818529)}
{pt3dadd(186624.000000,198660.000000,90950.000000,70.606686)}
{pt3dadd(186648.000000,198588.000000,90925.000000,72.517358)}
{pt3dadd(186708.000000,198528.000000,90850.000000,70.931620)}
{pt3dadd(186804.000000,198432.000000,90875.000000,70.931620)}
{pt3dadd(186852.000000,198348.000000,90875.000000,70.931620)}
{pt3dadd(186876.000000,198288.000000,90850.000000,69.020948)}
{pt3dadd(187008.000000,198000.000000,90800.000000,68.352744)}
{pt3dadd(187044.000000,197928.000000,90800.000000,65.003760)}
{pt3dadd(187068.000000,197856.000000,90800.000000,65.003760)}
{pt3dadd(187104.000000,197808.000000,90775.000000,65.003760)}
{pt3dadd(187128.000000,197724.000000,90750.000000,66.914432)}
{pt3dadd(187164.000000,197652.000000,90750.000000,66.278046)}
{pt3dadd(187224.000000,197604.000000,90750.000000,68.890334)}
{pt3dadd(187284.000000,197532.000000,90725.000000,68.890334)}
{pt3dadd(187332.000000,197448.000000,90600.000000,67.070646)}
{pt3dadd(187476.000000,197244.000000,90525.000000,70.094696)}
{pt3dadd(187536.000000,197208.000000,90500.000000,74.423336)}
{pt3dadd(187560.000000,197172.000000,90500.000000,77.598587)}
{pt3dadd(187644.000000,197184.000000,90450.000000,84.298387)}
{pt3dadd(187728.000000,197088.000000,90400.000000,92.498836)}
{pt3dadd(187812.000000,197004.000000,90300.000000,96.174587)}
{pt3dadd(187896.000000,196992.000000,90250.000000,94.588849)}
{pt3dadd(188004.000000,196968.000000,90175.000000,92.923825)}
{pt3dadd(188076.000000,196908.000000,90150.000000,86.224025)}
{pt3dadd(188160.000000,196884.000000,90075.000000,85.283793)}
{pt3dadd(188232.000000,196836.000000,90000.000000,81.608042)}
{pt3dadd(188304.000000,196776.000000,89900.000000,81.608042)}
{pt3dadd(188376.000000,196740.000000,89850.000000,76.358573)}
{pt3dadd(188472.000000,196668.000000,89825.000000,80.235439)}
{pt3dadd(188544.000000,196632.000000,89825.000000,79.339980)}
{pt3dadd(188616.000000,196608.000000,89825.000000,79.339980)}
{pt3dadd(188676.000000,196536.000000,89800.000000,79.339980)}
{pt3dadd(188748.000000,196488.000000,89750.000000,81.709402)}
{pt3dadd(188844.000000,196428.000000,89725.000000,84.532336)}
{pt3dadd(188904.000000,196356.000000,89725.000000,87.355270)}
{pt3dadd(188976.000000,196284.000000,89725.000000,92.067626)}
{pt3dadd(189000.000000,196248.000000,89725.000000,107.227772)}
{pt3dadd(189024.000000,196188.000000,89725.000000,126.025970)}
{pt3dadd(189060.000000,196128.000000,89725.000000,140.752797)}
{pt3dadd(189132.000000,196056.000000,89725.000000,152.182990)}
{pt3dadd(189204.000000,195972.000000,89700.000000,165.873212)}
{pt3dadd(189228.000000,195888.000000,89675.000000,154.987312)}
{pt3dadd(189252.000000,195804.000000,89675.000000,149.285016)}
{pt3dadd(189300.000000,195732.000000,89650.000000,140.286086)}
{pt3dadd(189360.000000,195624.000000,89550.000000,138.754550)}
{pt3dadd(189408.000000,195540.000000,89550.000000,137.066030)}
{pt3dadd(189444.000000,195444.000000,89425.000000,151.091580)}
{pt3dadd(189516.000000,195336.000000,89425.000000,158.401990)}
{pt3dadd(189552.000000,195240.000000,89425.000000,164.104286)}
{pt3dadd(189612.000000,195144.000000,89425.000000,172.566998)}
{pt3dadd(189648.000000,195048.000000,89350.000000,181.897140)}
{pt3dadd(189720.000000,194988.000000,89350.000000,185.358610)}
{pt3dadd(189756.000000,194844.000000,89150.000000,190.681672)}
{pt3dadd(189828.000000,194808.000000,89225.000000,193.978306)}
{pt3dadd(189900.000000,194712.000000,89225.000000,192.116714)}
{pt3dadd(189984.000000,194640.000000,89150.000000,175.476162)}
{pt3dadd(190116.000000,194448.000000,89075.000000,162.244282)}
{pt3dadd(190140.000000,194388.000000,89050.000000,141.955438)}
{pt3dadd(190332.000000,194040.000000,89000.000000,129.353650)}
{pt3dadd(190440.000000,193836.000000,88925.000000,110.926398)}
{pt3dadd(190560.000000,193596.000000,88950.000000,105.198501)}
{pt3dadd(190608.000000,193512.000000,89000.000000,101.930604)}
{pt3dadd(190644.000000,193452.000000,89000.000000,100.182328)}
{pt3dadd(190668.000000,193392.000000,89025.000000,95.234355)}
{pt3dadd(190668.000000,193296.000000,89025.000000,97.161830)}
{pt3dadd(190704.000000,193224.000000,89025.000000,98.198435)}
{pt3dadd(190752.000000,193164.000000,89025.000000,97.211192)}
{pt3dadd(190776.000000,193104.000000,89025.000000,98.959468)}
{pt3dadd(190836.000000,192792.000000,89025.000000,102.819007)}
{pt3dadd(190920.000000,192588.000000,89075.000000,99.996073)}
{pt3dadd(190992.000000,192540.000000,89050.000000,95.283717)}
{pt3dadd(191052.000000,192468.000000,89050.000000,96.270960)}
{pt3dadd(191100.000000,192408.000000,89050.000000,96.270960)}
{pt3dadd(191148.000000,192348.000000,89050.000000,96.270960)}
{pt3dadd(191196.000000,192252.000000,89125.000000,100.130499)}
{pt3dadd(191220.000000,192084.000000,89200.000000,101.878775)}
{pt3dadd(191244.000000,192012.000000,89225.000000,99.951300)}
{pt3dadd(191268.000000,191928.000000,89250.000000,93.874384)}
{pt3dadd(191304.000000,191820.000000,89300.000000,85.469774)}
{pt3dadd(191292.000000,191736.000000,89300.000000,79.171680)}
{pt3dadd(191316.000000,191652.000000,89300.000000,73.731150)}
{pt3dadd(191400.000000,191544.000000,89300.000000,69.660440)}
{pt3dadd(191472.000000,191472.000000,89300.000000,69.054359)}
{pt3dadd(191544.000000,191424.000000,89325.000000,66.684937)}
{pt3dadd(191616.000000,191364.000000,89325.000000,54.461081)}
{pt3dadd(191664.000000,191268.000000,89350.000000,55.830901)}
{pt3dadd(191700.000000,191184.000000,89375.000000,54.461081)}
{pt3dadd(191772.000000,191100.000000,89375.000000,54.461081)}
{pt3dadd(191832.000000,191016.000000,89375.000000,56.830503)}
{pt3dadd(191952.000000,190932.000000,89375.000000,64.578421)}
{pt3dadd(192060.000000,190848.000000,89375.000000,69.589363)}
{pt3dadd(192180.000000,190776.000000,89375.000000,73.506057)}
{pt3dadd(192312.000000,190716.000000,89375.000000,98.724300)}

{create adhoc67}
{access adhoc67}
{connect adhoc67(1), adhoc65(0)}
{nseg = 1}
{strdef color color = "White"}
{pt3dclear()}
{pt3dadd(185364.000000,199644.000000,91175.000000,132.300000)}
{pt3dadd(185472.000000,199704.000000,90925.000000,106.782093)}
{pt3dadd(185652.000000,199800.000000,90825.000000,120.231552)}
{pt3dadd(185724.000000,199836.000000,90700.000000,116.628694)}
{pt3dadd(185808.000000,199848.000000,90625.000000,116.628694)}
{pt3dadd(185892.000000,199884.000000,90450.000000,115.733235)}
{pt3dadd(185976.000000,199896.000000,90400.000000,104.303042)}
{pt3dadd(186084.000000,199908.000000,90375.000000,101.035145)}
{pt3dadd(186180.000000,199992.000000,90250.000000,96.087172)}
{pt3dadd(186204.000000,200112.000000,90175.000000,92.753158)}
{pt3dadd(186300.000000,200136.000000,90025.000000,93.648617)}
{pt3dadd(186396.000000,200220.000000,89825.000000,90.825683)}
{pt3dadd(186372.000000,200292.000000,89600.000000,90.825683)}
{pt3dadd(186276.000000,200388.000000,89450.000000,92.661374)}
{pt3dadd(186276.000000,200520.000000,89275.000000,104.973760)}
{pt3dadd(186240.000000,200652.000000,89175.000000,105.913992)}
{pt3dadd(186168.000000,200712.000000,89050.000000,107.749683)}
{pt3dadd(186108.000000,200772.000000,88900.000000,109.874722)}
{pt3dadd(186096.000000,200940.000000,88775.000000,116.589862)}
{pt3dadd(186012.000000,201000.000000,88625.000000,122.577272)}
{pt3dadd(185940.000000,201060.000000,88500.000000,132.004562)}
{pt3dadd(185892.000000,201180.000000,88375.000000,149.491582)}
{pt3dadd(185844.000000,201312.000000,88225.000000,162.093370)}
{pt3dadd(185832.000000,201420.000000,88125.000000,163.416370)}
{pt3dadd(185868.000000,201504.000000,88000.000000,163.416370)}
{pt3dadd(185712.000000,201708.000000,87900.000000,168.014630)}
{pt3dadd(185712.000000,201816.000000,87775.000000,164.553160)}
{pt3dadd(185712.000000,201960.000000,87700.000000,164.553160)}
{pt3dadd(185640.000000,202068.000000,87500.000000,170.540570)}
{pt3dadd(185544.000000,202152.000000,87475.000000,172.229090)}
{pt3dadd(185472.000000,202200.000000,87475.000000,173.917610)}
{pt3dadd(185388.000000,202308.000000,87475.000000,173.917610)}
{pt3dadd(185364.000000,202380.000000,87475.000000,183.714260)}
{pt3dadd(185328.000000,202404.000000,87475.000000,180.574610)}
{pt3dadd(185304.000000,202512.000000,87425.000000,177.277976)}
{pt3dadd(185268.000000,202584.000000,87400.000000,169.602046)}
{pt3dadd(185208.000000,202884.000000,87425.000000,169.602046)}
{pt3dadd(185220.000000,202980.000000,87325.000000,152.129466)}
{pt3dadd(185208.000000,203076.000000,87325.000000,156.957636)}
{pt3dadd(185136.000000,203292.000000,87275.000000,153.967490)}
{pt3dadd(185052.000000,203388.000000,87250.000000,153.967490)}
{pt3dadd(184980.000000,203472.000000,87225.000000,165.452660)}
{pt3dadd(184896.000000,203556.000000,87200.000000,174.901540)}
{pt3dadd(184788.000000,203616.000000,87125.000000,178.536082)}
{pt3dadd(184692.000000,203712.000000,87050.000000,186.595812)}
{pt3dadd(184632.000000,203808.000000,87025.000000,196.044692)}
{pt3dadd(184584.000000,203904.000000,87050.000000,186.248042)}
{pt3dadd(184476.000000,203940.000000,87050.000000,181.178458)}
{pt3dadd(184452.000000,204024.000000,87025.000000,175.855396)}
{pt3dadd(184392.000000,204156.000000,87025.000000,186.141876)}
{pt3dadd(184356.000000,204264.000000,87025.000000,186.141876)}
{pt3dadd(184272.000000,204600.000000,86950.000000,182.845242)}
{pt3dadd(184176.000000,204900.000000,86925.000000,182.845242)}
{pt3dadd(184056.000000,204948.000000,86975.000000,181.237128)}
{pt3dadd(183960.000000,205032.000000,86975.000000,160.178768)}
{pt3dadd(183900.000000,205128.000000,86950.000000,145.804030)}
{pt3dadd(183864.000000,205224.000000,86875.000000,136.498876)}
{pt3dadd(183792.000000,205308.000000,86900.000000,127.193722)}
{pt3dadd(183744.000000,205356.000000,86925.000000,117.888568)}
{pt3dadd(183684.000000,205428.000000,86875.000000,114.285710)}
{pt3dadd(183636.000000,205440.000000,86875.000000,117.888568)}
{pt3dadd(183564.000000,205332.000000,86700.000000,124.203576)}
{pt3dadd(183468.000000,205332.000000,86650.000000,125.346434)}
{pt3dadd(183336.000000,205332.000000,86625.000000,124.258000)}
{pt3dadd(183120.000000,205284.000000,86525.000000,123.169566)}
{pt3dadd(183036.000000,205428.000000,86500.000000,118.478274)}
{pt3dadd(182964.000000,205524.000000,86500.000000,111.074832)}
{pt3dadd(182868.000000,205572.000000,86500.000000,107.806935)}
{pt3dadd(182736.000000,205644.000000,86450.000000,104.842855)}
{pt3dadd(182628.000000,205644.000000,86400.000000,101.878775)}
{pt3dadd(182520.000000,205656.000000,86325.000000,98.914695)}
{pt3dadd(182412.000000,205692.000000,86275.000000,96.890847)}
{pt3dadd(182340.000000,205704.000000,86225.000000,94.963372)}
{pt3dadd(182244.000000,205752.000000,86150.000000,90.892662)}
{pt3dadd(182148.000000,205824.000000,86100.000000,89.144386)}
{pt3dadd(181992.000000,205872.000000,86000.000000,92.108466)}
{pt3dadd(181884.000000,206004.000000,85825.000000,87.834220)}
{pt3dadd(181860.000000,206100.000000,85775.000000,87.834220)}
{pt3dadd(181776.000000,206112.000000,85650.000000,92.845162)}
{pt3dadd(181644.000000,206208.000000,85550.000000,93.697979)}
{pt3dadd(181512.000000,206244.000000,85500.000000,91.674131)}
{pt3dadd(181464.000000,206328.000000,85375.000000,95.008145)}
{pt3dadd(181464.000000,206448.000000,85300.000000,94.112686)}
{pt3dadd(181392.000000,206520.000000,85075.000000,90.611971)}
{pt3dadd(181296.000000,206568.000000,84975.000000,89.759154)}
{pt3dadd(181200.000000,206580.000000,84850.000000,87.923463)}
{pt3dadd(181104.000000,206676.000000,84750.000000,87.028004)}
{pt3dadd(181092.000000,206808.000000,84625.000000,88.863695)}
{pt3dadd(181020.000000,206928.000000,84500.000000,91.424178)}
{pt3dadd(180936.000000,207024.000000,84425.000000,92.276995)}
{pt3dadd(180840.000000,207120.000000,84400.000000,97.224968)}
{pt3dadd(180768.000000,207192.000000,84350.000000,113.086209)}
{pt3dadd(180684.000000,207264.000000,84350.000000,117.341349)}
{pt3dadd(180612.000000,207348.000000,84250.000000,120.305429)}
{pt3dadd(180504.000000,207456.000000,84175.000000,124.164968)}
{pt3dadd(180492.000000,207696.000000,84125.000000,121.052686)}
{pt3dadd(180372.000000,207768.000000,84050.000000,110.139418)}
{pt3dadd(180264.000000,207852.000000,83925.000000,108.996560)}
{pt3dadd(180252.000000,207948.000000,83950.000000,110.084994)}
{pt3dadd(180132.000000,208092.000000,83875.000000,114.924452)}
{pt3dadd(180072.000000,208164.000000,83875.000000,119.313984)}
{pt3dadd(179844.000000,208584.000000,84025.000000,118.347446)}
{pt3dadd(179640.000000,208968.000000,84025.000000,132.930666)}
{pt3dadd(179436.000000,209400.000000,84025.000000,145.731014)}
{pt3dadd(179424.000000,209880.000000,84025.000000,154.780338)}
{pt3dadd(179424.000000,210240.000000,83950.000000,169.958326)}
{pt3dadd(179400.000000,210600.000000,83950.000000,193.576716)}
{pt3dadd(179376.000000,210960.000000,84075.000000,217.122754)}
{pt3dadd(179292.000000,211176.000000,84100.000000,239.547552)}
{pt3dadd(179292.000000,211428.000000,84175.000000,264.876462)}
{pt3dadd(179364.000000,211848.000000,84250.000000,283.646370)}
{pt3dadd(179244.000000,211944.000000,84500.000000,277.449756)}
{pt3dadd(179184.000000,211860.000000,84675.000000,241.804466)}
{pt3dadd(179556.000000,211728.000000,84825.000000,204.559630)}
{pt3dadd(179676.000000,211788.000000,84975.000000,126.705550)}

{create adhoc68}
{access adhoc68}
{connect adhoc68(1), adhoc64(0)}
{nseg = 1}
{strdef color color = "White"}
{pt3dclear()}
{pt3dadd(182844.000000,201852.000000,98650.000000,318.395720)}
{pt3dadd(182652.000000,202056.000000,98625.000000,266.226213)}
{pt3dadd(182568.000000,202176.000000,98600.000000,227.276548)}
{pt3dadd(182472.000000,202380.000000,98575.000000,200.829284)}
{pt3dadd(182448.000000,202488.000000,98550.000000,176.451604)}
{pt3dadd(182352.000000,202848.000000,98500.000000,158.260602)}
{pt3dadd(182280.000000,202980.000000,98500.000000,147.347334)}
{pt3dadd(182232.000000,203160.000000,98450.000000,137.576924)}
{pt3dadd(182172.000000,203352.000000,98425.000000,113.709142)}
{pt3dadd(182184.000000,203496.000000,98425.000000,98.548996)}
{pt3dadd(182184.000000,203640.000000,98425.000000,94.496482)}
{pt3dadd(182196.000000,203772.000000,98425.000000,90.443968)}
{pt3dadd(182016.000000,203988.000000,98300.000000,81.177886)}
{pt3dadd(181932.000000,204324.000000,98125.000000,83.284402)}
{pt3dadd(181824.000000,204660.000000,98125.000000,87.558648)}
{pt3dadd(181728.000000,204876.000000,98075.000000,86.663189)}
{pt3dadd(181764.000000,205020.000000,98125.000000,94.318561)}
{pt3dadd(181644.000000,205356.000000,98200.000000,107.367643)}
{pt3dadd(181536.000000,205632.000000,98200.000000,122.527789)}
{pt3dadd(181488.000000,205908.000000,98250.000000,136.553339)}
{pt3dadd(181428.000000,206040.000000,98200.000000,154.103100)}
{pt3dadd(181380.000000,206172.000000,98200.000000,156.815250)}
{pt3dadd(181320.000000,206316.000000,98200.000000,158.204400)}
{pt3dadd(181284.000000,206424.000000,98200.000000,161.344050)}
{pt3dadd(181248.000000,206520.000000,98200.000000,158.204400)}
{pt3dadd(181224.000000,206628.000000,98200.000000,153.376230)}
{pt3dadd(181188.000000,206736.000000,98200.000000,154.834840)}
{pt3dadd(181128.000000,206832.000000,98200.000000,154.834840)}
{pt3dadd(181080.000000,206928.000000,98200.000000,154.834840)}
{pt3dadd(181020.000000,207024.000000,98200.000000,156.366376)}
{pt3dadd(180996.000000,207120.000000,98200.000000,156.366376)}
{pt3dadd(180972.000000,207216.000000,98200.000000,161.194546)}
{pt3dadd(180948.000000,207312.000000,98200.000000,164.184692)}
{pt3dadd(180912.000000,207408.000000,98200.000000,161.045042)}
{pt3dadd(180864.000000,207504.000000,98200.000000,162.653156)}
{pt3dadd(180816.000000,207600.000000,98200.000000,164.184692)}
{pt3dadd(180780.000000,207696.000000,98200.000000,165.957642)}
{pt3dadd(180720.000000,207828.000000,98200.000000,169.254276)}
{pt3dadd(180672.000000,207972.000000,98200.000000,179.671660)}
{pt3dadd(180612.000000,208104.000000,98200.000000,191.156830)}
{pt3dadd(180564.000000,208236.000000,98200.000000,202.095086)}
{pt3dadd(180456.000000,208644.000000,98175.000000,200.322136)}
{pt3dadd(180408.000000,208848.000000,98150.000000,198.633616)}
{pt3dadd(180348.000000,209052.000000,98125.000000,181.585472)}
{pt3dadd(180264.000000,209148.000000,98125.000000,158.098600)}
{pt3dadd(180132.000000,209520.000000,98100.000000,152.229928)}
{pt3dadd(179808.000000,209880.000000,98075.000000,148.933294)}
{pt3dadd(179616.000000,210024.000000,98000.000000,136.931592)}
{pt3dadd(179412.000000,210072.000000,97900.000000,135.788734)}
{pt3dadd(179268.000000,210132.000000,97900.000000,130.264171)}
{pt3dadd(179124.000000,210180.000000,97850.000000,110.941460)}
{pt3dadd(178992.000000,210216.000000,97850.000000,95.835516)}
{pt3dadd(178836.000000,210240.000000,97850.000000,96.923950)}
{pt3dadd(178752.000000,210312.000000,97800.000000,95.835516)}
{pt3dadd(178668.000000,210372.000000,97800.000000,100.323474)}
{pt3dadd(178620.000000,210516.000000,97725.000000,106.414305)}
{pt3dadd(178560.000000,210636.000000,97650.000000,110.090056)}
{pt3dadd(178524.000000,210792.000000,97600.000000,109.001622)}
{pt3dadd(178392.000000,210864.000000,97600.000000,104.289266)}
{pt3dadd(178296.000000,210972.000000,97600.000000,99.801308)}
{pt3dadd(178200.000000,211056.000000,97600.000000,91.271922)}
{pt3dadd(178116.000000,211164.000000,97575.000000,87.596171)}
{pt3dadd(178044.000000,211272.000000,97575.000000,82.071608)}
{pt3dadd(177972.000000,211368.000000,97575.000000,82.071608)}
{pt3dadd(177888.000000,211464.000000,97575.000000,88.684605)}
{pt3dadd(177816.000000,211584.000000,97575.000000,90.270343)}
{pt3dadd(177732.000000,211728.000000,97500.000000,97.213991)}
{pt3dadd(177660.000000,211872.000000,97400.000000,104.969846)}
{pt3dadd(177612.000000,211980.000000,97225.000000,111.913494)}
{pt3dadd(177492.000000,212268.000000,97050.000000,124.515282)}
{pt3dadd(177384.000000,212412.000000,96925.000000,154.977290)}
{pt3dadd(177240.000000,212484.000000,96550.000000,183.366280)}
{pt3dadd(177096.000000,212580.000000,96350.000000,211.755270)}
{pt3dadd(177048.000000,212664.000000,96300.000000,233.010850)}
{pt3dadd(177000.000000,212820.000000,96250.000000,245.070280)}
{pt3dadd(176964.000000,212916.000000,96250.000000,240.652472)}
{pt3dadd(176952.000000,213060.000000,96275.000000,229.311626)}
{pt3dadd(176904.000000,213192.000000,96225.000000,224.440996)}
{pt3dadd(176844.000000,213324.000000,96225.000000,229.079690)}
{pt3dadd(176796.000000,213444.000000,96225.000000,233.950320)}
{pt3dadd(176724.000000,213516.000000,96225.000000,240.744042)}
{pt3dadd(176640.000000,213624.000000,96225.000000,252.084888)}
{pt3dadd(176352.000000,213816.000000,96275.000000,262.325388)}
{pt3dadd(176232.000000,213936.000000,96300.000000,253.479258)}
{pt3dadd(176052.000000,214056.000000,96225.000000,250.984542)}
{pt3dadd(175632.000000,214248.000000,96225.000000,233.252564)}
{pt3dadd(175404.000000,214332.000000,96125.000000,213.025870)}
{pt3dadd(175236.000000,214236.000000,96100.000000,174.071638)}
{pt3dadd(175092.000000,214212.000000,96050.000000,152.239662)}
{pt3dadd(174924.000000,214272.000000,95975.000000,126.345388)}
{pt3dadd(174768.000000,214320.000000,95975.000000,124.813852)}
{pt3dadd(174600.000000,214404.000000,95975.000000,114.420264)}
{pt3dadd(174432.000000,214428.000000,95875.000000,115.360496)}
{pt3dadd(174252.000000,214428.000000,95775.000000,115.889188)}
{pt3dadd(174132.000000,214476.000000,95750.000000,109.798357)}
{pt3dadd(174000.000000,214572.000000,95750.000000,97.972225)}
{pt3dadd(173868.000000,214668.000000,95750.000000,95.008145)}
{pt3dadd(173784.000000,214764.000000,95750.000000,92.319637)}
{pt3dadd(173664.000000,214812.000000,95725.000000,91.379405)}
{pt3dadd(173532.000000,214932.000000,95725.000000,89.714381)}
{pt3dadd(173400.000000,215040.000000,95700.000000,84.273851)}
{pt3dadd(173220.000000,215256.000000,95675.000000,83.378392)}
{pt3dadd(173004.000000,215556.000000,95575.000000,79.049752)}
{pt3dadd(172932.000000,215700.000000,95525.000000,78.154293)}
{pt3dadd(172788.000000,215784.000000,95500.000000,75.942451)}
{pt3dadd(172680.000000,215904.000000,95500.000000,75.306065)}
{pt3dadd(172584.000000,216048.000000,95500.000000,73.641041)}
{pt3dadd(172524.000000,216120.000000,95500.000000,77.969681)}
{pt3dadd(172368.000000,216252.000000,95500.000000,85.260512)}
{pt3dadd(172272.000000,216348.000000,95450.000000,91.960312)}
{pt3dadd(172176.000000,216408.000000,95275.000000,103.232600)}
{pt3dadd(172200.000000,216480.000000,95125.000000,104.044807)}
{pt3dadd(172068.000000,216588.000000,94925.000000,101.020758)}
{pt3dadd(171924.000000,216780.000000,94625.000000,95.565618)}
{pt3dadd(171864.000000,216888.000000,94575.000000,92.742684)}
{pt3dadd(171876.000000,217020.000000,94600.000000,84.986829)}
{pt3dadd(171948.000000,217128.000000,94575.000000,98.561237)}
{pt3dadd(171948.000000,217320.000000,94450.000000,113.701084)}
{pt3dadd(171948.000000,217500.000000,94375.000000,127.726634)}
{pt3dadd(172008.000000,217620.000000,94300.000000,143.587875)}
{pt3dadd(172116.000000,217752.000000,94125.000000,151.343730)}
{pt3dadd(172308.000000,217860.000000,93925.000000,142.481678)}
{pt3dadd(172428.000000,217908.000000,93850.000000,139.769528)}
{pt3dadd(172536.000000,217908.000000,93775.000000,127.767826)}
{pt3dadd(172608.000000,217968.000000,93725.000000,116.854558)}
{pt3dadd(172656.000000,218064.000000,93675.000000,110.763727)}
{pt3dadd(172704.000000,218136.000000,93625.000000,115.455019)}
{pt3dadd(172740.000000,218280.000000,93575.000000,121.157315)}
{pt3dadd(172788.000000,218472.000000,93300.000000,128.560757)}
{pt3dadd(172752.000000,218592.000000,93250.000000,139.474025)}
{pt3dadd(172680.000000,218712.000000,93050.000000,169.083216)}
{pt3dadd(172620.000000,218844.000000,93000.000000,187.878796)}
{pt3dadd(172548.000000,218940.000000,92975.000000,189.486910)}
{pt3dadd(172512.000000,219024.000000,92925.000000,192.477056)}
{pt3dadd(172464.000000,219120.000000,92825.000000,197.800118)}
{pt3dadd(172452.000000,219168.000000,92800.000000,182.444054)}
{pt3dadd(172440.000000,219216.000000,92800.000000,166.360624)}
{pt3dadd(172428.000000,219480.000000,92800.000000,157.790214)}
{pt3dadd(172392.000000,219648.000000,92700.000000,157.790214)}
{pt3dadd(172320.000000,219744.000000,92675.000000,150.859038)}
{pt3dadd(172284.000000,219816.000000,92725.000000,152.467152)}
{pt3dadd(172236.000000,219888.000000,92725.000000,157.065412)}
{pt3dadd(172188.000000,219960.000000,92725.000000,165.635822)}
{pt3dadd(172176.000000,220044.000000,92725.000000,156.330668)}
{pt3dadd(172116.000000,220296.000000,92700.000000,148.168372)}
{pt3dadd(172080.000000,220536.000000,92675.000000,138.397962)}
{pt3dadd(172092.000000,220836.000000,92675.000000,131.087552)}
{pt3dadd(172080.000000,220920.000000,92575.000000,126.489292)}
{pt3dadd(172068.000000,220992.000000,92575.000000,130.092150)}
{pt3dadd(172068.000000,221076.000000,92575.000000,139.862560)}
{pt3dadd(172056.000000,221148.000000,92575.000000,149.632970)}
{pt3dadd(172032.000000,221220.000000,92575.000000,147.172970)}
{pt3dadd(172008.000000,221316.000000,92500.000000,144.460820)}
{pt3dadd(172008.000000,221436.000000,92450.000000,145.783820)}
{pt3dadd(172020.000000,221508.000000,92425.000000,129.922579)}
{pt3dadd(172032.000000,221580.000000,92400.000000,122.612169)}
{pt3dadd(172080.000000,221628.000000,92325.000000,125.072169)}
{pt3dadd(172104.000000,221724.000000,92275.000000,126.395169)}
{pt3dadd(172128.000000,221808.000000,92125.000000,127.784319)}
{pt3dadd(172128.000000,221892.000000,92075.000000,139.047300)}
{pt3dadd(172140.000000,222000.000000,91950.000000,143.218060)}
{pt3dadd(172140.000000,222108.000000,91950.000000,138.526768)}
{pt3dadd(172164.000000,222228.000000,91825.000000,132.512476)}
{pt3dadd(172200.000000,222372.000000,91725.000000,132.512476)}
{pt3dadd(172332.000000,222732.000000,91650.000000,122.144954)}
{pt3dadd(172428.000000,222912.000000,91525.000000,114.371336)}
{pt3dadd(172428.000000,222996.000000,91500.000000,116.602628)}
{pt3dadd(172404.000000,223092.000000,91500.000000,111.078065)}
{pt3dadd(172392.000000,223188.000000,91500.000000,98.962267)}
{pt3dadd(172368.000000,223272.000000,91500.000000,96.401784)}
{pt3dadd(172356.000000,223356.000000,91500.000000,104.175402)}
{pt3dadd(172332.000000,223440.000000,91500.000000,113.945812)}
{pt3dadd(172368.000000,223788.000000,91400.000000,134.933547)}
{pt3dadd(172452.000000,223848.000000,91400.000000,153.336125)}
{pt3dadd(172476.000000,224148.000000,91350.000000,169.254276)}
{pt3dadd(172500.000000,224196.000000,91325.000000,174.082446)}
{pt3dadd(172536.000000,224244.000000,91325.000000,183.412588)}
{pt3dadd(172560.000000,224292.000000,91375.000000,181.639638)}
{pt3dadd(172572.000000,224340.000000,91450.000000,183.412588)}
{pt3dadd(172584.000000,224412.000000,91450.000000,186.709222)}
{pt3dadd(172608.000000,224508.000000,91450.000000,190.343764)}
{pt3dadd(172704.000000,224820.000000,91450.000000,182.702142)}
{pt3dadd(172752.000000,225060.000000,91450.000000,182.702142)}
{pt3dadd(172752.000000,225144.000000,91425.000000,180.929192)}
{pt3dadd(172764.000000,225228.000000,91425.000000,180.929192)}
{pt3dadd(172776.000000,225312.000000,91425.000000,168.295720)}
{pt3dadd(172788.000000,225396.000000,91425.000000,163.467550)}
{pt3dadd(172824.000000,225480.000000,91325.000000,160.170916)}
{pt3dadd(172896.000000,225684.000000,91325.000000,153.884136)}
{pt3dadd(172908.000000,225756.000000,91350.000000,152.195616)}
{pt3dadd(172932.000000,225852.000000,91325.000000,159.506026)}
{pt3dadd(172932.000000,225972.000000,91325.000000,161.037562)}
{pt3dadd(172908.000000,226080.000000,91325.000000,161.037562)}
{pt3dadd(172896.000000,226188.000000,91325.000000,174.965964)}
{pt3dadd(172872.000000,226272.000000,91275.000000,173.357850)}
{pt3dadd(172872.000000,226368.000000,91275.000000,163.587440)}
{pt3dadd(172860.000000,226524.000000,91075.000000,146.895758)}
{pt3dadd(172788.000000,226632.000000,91025.000000,134.478322)}
{pt3dadd(172608.000000,226872.000000,90925.000000,114.234912)}
{pt3dadd(172488.000000,226944.000000,90850.000000,107.272616)}
{pt3dadd(172368.000000,227004.000000,90850.000000,120.504496)}
{pt3dadd(172260.000000,227208.000000,90500.000000,150.289462)}
{pt3dadd(172188.000000,227280.000000,90475.000000,166.003532)}
{pt3dadd(172020.000000,227508.000000,90425.000000,175.308686)}
{pt3dadd(171972.000000,227592.000000,90400.000000,187.340566)}
{pt3dadd(171900.000000,227652.000000,90350.000000,191.156830)}
{pt3dadd(171864.000000,227748.000000,90350.000000,181.360180)}
{pt3dadd(171864.000000,227832.000000,90325.000000,176.532010)}
{pt3dadd(171804.000000,228012.000000,90150.000000,168.369714)}
{pt3dadd(171720.000000,228132.000000,90025.000000,155.137834)}
{pt3dadd(171612.000000,228396.000000,89950.000000,131.146042)}
{pt3dadd(171516.000000,228612.000000,89875.000000,111.157726)}
{pt3dadd(171444.000000,228732.000000,89825.000000,105.726966)}
{pt3dadd(171324.000000,228852.000000,89775.000000,110.899116)}
{pt3dadd(171168.000000,229032.000000,89675.000000,106.643976)}
{pt3dadd(170976.000000,229032.000000,89600.000000,110.319727)}
{pt3dadd(170808.000000,229116.000000,89475.000000,121.309113)}
{pt3dadd(170520.000000,229236.000000,89350.000000,120.109113)}
{pt3dadd(170400.000000,229344.000000,89225.000000,111.669066)}
{pt3dadd(170304.000000,229404.000000,89125.000000,109.833375)}
{pt3dadd(170196.000000,229464.000000,89125.000000,106.157624)}
{pt3dadd(170088.000000,229488.000000,89075.000000,101.466332)}
{pt3dadd(169992.000000,229524.000000,89025.000000,95.375501)}
{pt3dadd(169884.000000,229536.000000,89025.000000,90.887543)}
{pt3dadd(169788.000000,229536.000000,89025.000000,88.355586)}
{pt3dadd(169656.000000,229560.000000,88975.000000,85.331537)}
{pt3dadd(169572.000000,229608.000000,88975.000000,74.033949)}
{pt3dadd(169488.000000,229632.000000,88975.000000,69.488878)}
{pt3dadd(169416.000000,229644.000000,88975.000000,66.608831)}
{pt3dadd(169356.000000,229668.000000,88975.000000,70.976479)}
{pt3dadd(169260.000000,229680.000000,88975.000000,70.308274)}
{pt3dadd(169164.000000,229692.000000,88975.000000,77.746323)}
{pt3dadd(169092.000000,229752.000000,89025.000000,79.852839)}
{pt3dadd(169032.000000,229776.000000,89025.000000,80.521044)}
{pt3dadd(168972.000000,229824.000000,89025.000000,77.832536)}
{pt3dadd(168900.000000,229884.000000,89025.000000,81.524790)}
{pt3dadd(168804.000000,229884.000000,89025.000000,80.671973)}
{pt3dadd(168708.000000,229932.000000,89000.000000,83.110528)}
{pt3dadd(168612.000000,229980.000000,89000.000000,86.134577)}
{pt3dadd(168528.000000,230016.000000,89000.000000,91.935367)}
{pt3dadd(168420.000000,230064.000000,89000.000000,95.611118)}
{pt3dadd(168252.000000,230136.000000,89025.000000,117.648238)}
{pt3dadd(168156.000000,230244.000000,89075.000000,140.787213)}
{pt3dadd(168036.000000,230340.000000,89150.000000,160.962741)}
{pt3dadd(167952.000000,230448.000000,89175.000000,177.199071)}
{pt3dadd(167796.000000,230472.000000,89200.000000,195.560440)}
{pt3dadd(167544.000000,230508.000000,89300.000000,199.567520)}
{pt3dadd(167316.000000,230544.000000,89275.000000,201.619928)}
{pt3dadd(167088.000000,230616.000000,89250.000000,199.846978)}
{pt3dadd(166740.000000,230448.000000,89225.000000,196.212436)}
{pt3dadd(166524.000000,230508.000000,89125.000000,190.889374)}
{pt3dadd(166428.000000,230532.000000,89050.000000,175.571822)}
{pt3dadd(166176.000000,230568.000000,88975.000000,161.643420)}
{pt3dadd(166068.000000,230592.000000,89025.000000,163.416370)}
{pt3dadd(165960.000000,230556.000000,88900.000000,163.416370)}
{pt3dadd(165744.000000,230520.000000,88825.000000,160.276720)}
{pt3dadd(165636.000000,230532.000000,88775.000000,167.952650)}
{pt3dadd(165492.000000,230556.000000,88675.000000,169.247700)}
{pt3dadd(165420.000000,230592.000000,88650.000000,177.294650)}

{create adhoc69}
{access adhoc69}
{connect adhoc69(1), adhoc55(0)}
{nseg = 1}
{strdef color color = "White"}
{pt3dclear()}
{pt3dadd(168696.000000,177024.000000,124400.000000,334.315520)}
{pt3dadd(168612.000000,176820.000000,124400.000000,333.253040)}
{pt3dadd(168480.000000,176460.000000,124300.000000,304.854538)}
{pt3dadd(168432.000000,176196.000000,124275.000000,287.885708)}
{pt3dadd(168312.000000,175980.000000,124275.000000,264.944838)}
{pt3dadd(168228.000000,175764.000000,124275.000000,257.080252)}
{pt3dadd(168132.000000,175536.000000,124275.000000,265.750956)}
{pt3dadd(168048.000000,175320.000000,124275.000000,279.535826)}
{pt3dadd(168012.000000,175080.000000,124275.000000,307.043952)}
{pt3dadd(167964.000000,174840.000000,124200.000000,335.927478)}
{pt3dadd(168024.000000,174588.000000,124150.000000,346.680004)}
{pt3dadd(168000.000000,174324.000000,124100.000000,338.009300)}
{pt3dadd(167964.000000,174072.000000,124100.000000,334.976956)}
{pt3dadd(167904.000000,173820.000000,124150.000000,309.963546)}
{pt3dadd(167772.000000,173388.000000,124125.000000,286.449890)}
{pt3dadd(167688.000000,172896.000000,124100.000000,286.449890)}
{pt3dadd(167652.000000,172716.000000,124075.000000,278.959810)}
{pt3dadd(167532.000000,172476.000000,124075.000000,273.321450)}
{pt3dadd(167448.000000,172308.000000,124075.000000,268.450820)}
{pt3dadd(167376.000000,172116.000000,124075.000000,280.898216)}
{pt3dadd(167304.000000,171924.000000,124075.000000,267.769776)}
{pt3dadd(167220.000000,171744.000000,124075.000000,272.640406)}
{pt3dadd(167208.000000,171552.000000,124075.000000,272.640406)}
{pt3dadd(167196.000000,171360.000000,124075.000000,282.880906)}
{pt3dadd(167112.000000,171180.000000,124075.000000,273.321450)}
{pt3dadd(167076.000000,171048.000000,124075.000000,278.192080)}
{pt3dadd(167052.000000,170904.000000,124075.000000,278.192080)}
{pt3dadd(167040.000000,170760.000000,124075.000000,273.077914)}
{pt3dadd(167040.000000,170556.000000,124050.000000,273.077914)}
{pt3dadd(167052.000000,170352.000000,124050.000000,264.820104)}
{pt3dadd(167040.000000,170196.000000,124050.000000,279.294218)}
{pt3dadd(167028.000000,170052.000000,124025.000000,300.621800)}
{pt3dadd(166944.000000,169824.000000,124100.000000,324.444098)}
{pt3dadd(166968.000000,169608.000000,124100.000000,327.332038)}
{pt3dadd(166932.000000,169428.000000,124100.000000,348.659620)}
{pt3dadd(166908.000000,169248.000000,124100.000000,355.513088)}
{pt3dadd(166884.000000,169080.000000,124175.000000,317.255446)}
{pt3dadd(166788.000000,168912.000000,124200.000000,295.927864)}
{pt3dadd(166716.000000,168720.000000,124225.000000,282.799424)}
{pt3dadd(166752.000000,168528.000000,124225.000000,258.977126)}
{pt3dadd(166740.000000,168360.000000,124375.000000,243.019414)}
{pt3dadd(166716.000000,168144.000000,124400.000000,259.949474)}
{pt3dadd(166776.000000,168024.000000,124425.000000,257.454758)}
{pt3dadd(166800.000000,167856.000000,124475.000000,259.830672)}
{pt3dadd(166740.000000,167424.000000,124850.000000,267.695258)}
{pt3dadd(166728.000000,167076.000000,124975.000000,255.191978)}
{pt3dadd(166848.000000,166788.000000,125050.000000,236.573398)}
{pt3dadd(166920.000000,166704.000000,125375.000000,220.449534)}
{pt3dadd(167016.000000,166620.000000,125475.000000,207.787140)}
{pt3dadd(167052.000000,166452.000000,125475.000000,189.121752)}
{pt3dadd(167076.000000,166272.000000,125475.000000,196.255162)}
{pt3dadd(166992.000000,165912.000000,125500.000000,203.532896)}
{pt3dadd(167040.000000,165588.000000,125500.000000,201.924782)}
{pt3dadd(167064.000000,165432.000000,125500.000000,212.211262)}
{pt3dadd(167064.000000,165252.000000,125500.000000,218.373370)}
{pt3dadd(167016.000000,165072.000000,125500.000000,209.084932)}
{pt3dadd(166980.000000,164904.000000,125500.000000,209.084932)}
{pt3dadd(166956.000000,164748.000000,125500.000000,234.681496)}
{pt3dadd(166932.000000,164580.000000,125500.000000,247.809936)}
{pt3dadd(166824.000000,164280.000000,125425.000000,269.417460)}
{pt3dadd(166824.000000,163980.000000,125375.000000,251.516908)}
{pt3dadd(166752.000000,163572.000000,125300.000000,247.700644)}
{pt3dadd(166776.000000,163140.000000,125175.000000,244.950224)}
{pt3dadd(166800.000000,162756.000000,125350.000000,234.197698)}
{pt3dadd(166764.000000,162396.000000,125500.000000,212.590174)}
{pt3dadd(166512.000000,161988.000000,125350.000000,226.483646)}
{pt3dadd(166416.000000,161712.000000,125525.000000,223.738877)}
{pt3dadd(166272.000000,161592.000000,125700.000000,195.467360)}

{create adhoc70}
{access adhoc70}
{connect adhoc70(1), adhoc54(0)}
{nseg = 1}
{strdef color color = "White"}
{pt3dclear()}
{pt3dadd(168516.000000,177432.000000,125100.000000,215.502760)}
{pt3dadd(168768.000000,177144.000000,125050.000000,215.673793)}
{pt3dadd(169212.000000,176916.000000,124725.000000,234.306990)}
{pt3dadd(169524.000000,176688.000000,124475.000000,251.853238)}
{pt3dadd(169836.000000,176508.000000,124225.000000,264.356518)}
{pt3dadd(170160.000000,176220.000000,123975.000000,289.023500)}
{pt3dadd(170460.000000,175980.000000,123825.000000,288.794300)}

{create adhoc71}
{access adhoc71}
{connect adhoc71(1), adhoc1(0)}
{nseg = 1}
{strdef color color = "White"}
{pt3dclear()}
{pt3dadd(143820.000000,128484.000000,155725.000000,661.921800)}
{pt3dadd(143256.000000,128940.000000,155925.000000,351.031280)}

{create adhoc72}
{access adhoc72}
{connect adhoc72(1), adhoc71(0)}
{nseg = 1}
{strdef color color = "White"}
{pt3dclear()}
{pt3dadd(143256.000000,128940.000000,155925.000000,351.031280)}
{pt3dadd(143832.000000,130212.000000,155925.000000,200.969793)}
{pt3dadd(143880.000000,130512.000000,155950.000000,171.548800)}
{pt3dadd(143820.000000,130776.000000,155975.000000,136.801474)}
{pt3dadd(143856.000000,131196.000000,156100.000000,133.953714)}
{pt3dadd(143604.000000,131208.000000,156250.000000,159.007043)}
{pt3dadd(143400.000000,131172.000000,156450.000000,138.915000)}

{create adhoc73}
{access adhoc73}
{connect adhoc73(1), adhoc71(0)}
{nseg = 1}
{strdef color color = "White"}
{pt3dclear()}
{pt3dadd(143256.000000,128940.000000,155925.000000,351.031280)}
{pt3dadd(142740.000000,128868.000000,156250.000000,385.254100)}
{pt3dadd(142560.000000,129036.000000,156450.000000,407.342116)}
{pt3dadd(142476.000000,129240.000000,156675.000000,407.342116)}
{pt3dadd(142668.000000,129240.000000,156900.000000,410.659853)}
{pt3dadd(142620.000000,129396.000000,157100.000000,351.031280)}

{create adhoc74}
{access adhoc74}
{connect adhoc74(1), adhoc73(0)}
{nseg = 1}
{strdef color color = "White"}
{pt3dclear()}
{pt3dadd(142620.000000,129396.000000,157100.000000,351.031280)}
{pt3dadd(143604.000000,129420.000000,157100.000000,183.532917)}
{pt3dadd(143808.000000,129420.000000,157200.000000,85.281760)}

{create adhoc75}
{access adhoc75}
{connect adhoc75(1), adhoc73(0)}
{nseg = 1}
{strdef color color = "White"}
{pt3dclear()}
{pt3dadd(142620.000000,129396.000000,157100.000000,351.031280)}
{pt3dadd(141672.000000,129312.000000,157300.000000,183.532917)}
{pt3dadd(141564.000000,129312.000000,157475.000000,114.285710)}

{create adhoc76}
{access adhoc76}
{connect adhoc76(1), adhoc73(0)}
{nseg = 1}
{strdef color color = "White"}
{pt3dclear()}
{pt3dadd(142620.000000,129396.000000,157100.000000,351.031280)}
{pt3dadd(143340.000000,129840.000000,157300.000000,172.643398)}
{pt3dadd(143844.000000,129984.000000,157525.000000,89.545845)}
