# Supplementary material for: Full reconstruction of large lobula plate tangential cells in Drosophila from a 3D EM dataset
Source: PLoS One. 2018 Nov 28;13(11):e0207828. doi: 10.1371/journal.pone.0207828 (PMC6261601; doi:10.1371/journal.pone.0207828)
Supplement: S1 Dataset — (ZIP) [file pone.0207828.s001.zip › Diameter hoc/Cell19_7skels_ck.001_corrected_sorted_diametered.hoc0001.hoc]

/* created with convertKnossosNmlToHoc.m */

{create adhoc1}
{access adhoc1}
{nseg = 1}
{strdef color color = "White"}
{pt3dclear()}
{pt3dadd(178740.000000,208992.000000,91325.000000,153.153800)}
{pt3dadd(178704.000000,209136.000000,91500.000000,159.409400)}
{pt3dadd(178764.000000,209172.000000,91725.000000,151.211640)}
{pt3dadd(178740.000000,209268.000000,91875.000000,154.663133)}
{pt3dadd(178656.000000,209556.000000,92100.000000,138.915000)}

{create adhoc2}
{access adhoc2}
{connect adhoc2(1), adhoc1(0)}
{nseg = 1}
{strdef color color = "White"}
{pt3dclear()}
{pt3dadd(178656.000000,209556.000000,92100.000000,138.915000)}
{pt3dadd(178872.000000,209436.000000,92375.000000,174.423270)}
{pt3dadd(179028.000000,209484.000000,92650.000000,185.942732)}
{pt3dadd(179172.000000,209616.000000,93100.000000,199.207876)}
{pt3dadd(179352.000000,209604.000000,93325.000000,223.196326)}
{pt3dadd(179484.000000,209652.000000,93525.000000,253.812346)}
{pt3dadd(179652.000000,209760.000000,93800.000000,266.940786)}
{pt3dadd(179796.000000,209856.000000,93975.000000,306.886948)}
{pt3dadd(179796.000000,209904.000000,94375.000000,339.555376)}
{pt3dadd(180024.000000,209832.000000,94450.000000,359.198916)}
{pt3dadd(180216.000000,209808.000000,94600.000000,346.129144)}
{pt3dadd(180372.000000,209856.000000,94600.000000,319.252754)}
{pt3dadd(180516.000000,209652.000000,94825.000000,279.306592)}
{pt3dadd(180672.000000,209532.000000,95225.000000,242.821900)}
{pt3dadd(180756.000000,209508.000000,95375.000000,193.202500)}
{pt3dadd(180828.000000,209400.000000,95550.000000,169.787580)}
{pt3dadd(180948.000000,209304.000000,95725.000000,162.477170)}
{pt3dadd(181116.000000,209280.000000,95875.000000,157.878910)}
{pt3dadd(181152.000000,209232.000000,96025.000000,145.847030)}
{pt3dadd(181152.000000,209268.000000,96150.000000,184.927134)}
{pt3dadd(181284.000000,209232.000000,96250.000000,202.058757)}
{pt3dadd(181464.000000,209172.000000,96800.000000,334.315520)}

{create adhoc3}
{access adhoc3}
{connect adhoc3(1), adhoc2(0)}
{nseg = 1}
{strdef color color = "White"}
{pt3dclear()}
{pt3dadd(181464.000000,209172.000000,96800.000000,334.315520)}
{pt3dadd(181704.000000,208872.000000,96650.000000,363.303460)}
{pt3dadd(182016.000000,208524.000000,96725.000000,361.904904)}
{pt3dadd(182280.000000,208200.000000,97000.000000,361.904904)}
{pt3dadd(182520.000000,207852.000000,96950.000000,373.524478)}
{pt3dadd(182832.000000,207600.000000,97150.000000,390.205178)}
{pt3dadd(183648.000000,207144.000000,97350.000000,393.715494)}
{pt3dadd(183792.000000,206808.000000,97775.000000,401.271438)}
{pt3dadd(183912.000000,206544.000000,98275.000000,404.614590)}
{pt3dadd(184416.000000,206016.000000,98275.000000,369.172718)}
{pt3dadd(184608.000000,205584.000000,98500.000000,316.137762)}
{pt3dadd(185172.000000,204876.000000,98300.000000,287.676770)}
{pt3dadd(185640.000000,204336.000000,97925.000000,251.659834)}
{pt3dadd(186300.000000,203664.000000,97950.000000,228.971938)}
{pt3dadd(187008.000000,203016.000000,97850.000000,239.724464)}
{pt3dadd(187272.000000,202668.000000,98000.000000,302.402932)}
{pt3dadd(187776.000000,201840.000000,98175.000000,366.060304)}
{pt3dadd(187776.000000,201036.000000,98725.000000,455.477273)}
{pt3dadd(188184.000000,200904.000000,98800.000000,544.564760)}

{create adhoc4}
{access adhoc4}
{connect adhoc4(1), adhoc3(0)}
{nseg = 1}
{strdef color color = "White"}
{pt3dclear()}
{pt3dadd(188184.000000,200904.000000,98800.000000,544.564760)}
{pt3dadd(188448.000000,200376.000000,99100.000000,427.243493)}
{pt3dadd(188820.000000,200064.000000,99250.000000,329.556536)}
{pt3dadd(189228.000000,199764.000000,99350.000000,256.102514)}
{pt3dadd(189612.000000,199380.000000,99400.000000,229.904302)}
{pt3dadd(189924.000000,198984.000000,99475.000000,206.082004)}
{pt3dadd(190032.000000,198468.000000,99400.000000,228.713004)}
{pt3dadd(190236.000000,198084.000000,99375.000000,260.229852)}
{pt3dadd(190452.000000,197724.000000,99350.000000,291.634026)}
{pt3dadd(190644.000000,197304.000000,99325.000000,314.321922)}
{pt3dadd(190788.000000,196848.000000,99375.000000,338.144220)}
{pt3dadd(191064.000000,196488.000000,99450.000000,344.671332)}
{pt3dadd(191208.000000,196092.000000,99525.000000,354.708760)}
{pt3dadd(191412.000000,195708.000000,99625.000000,361.562228)}
{pt3dadd(191628.000000,195408.000000,99825.000000,361.562228)}
{pt3dadd(191952.000000,195084.000000,99900.000000,333.101236)}
{pt3dadd(192276.000000,194784.000000,100075.000000,308.150560)}
{pt3dadd(192576.000000,194472.000000,100050.000000,281.952348)}
{pt3dadd(192756.000000,193932.000000,99950.000000,258.130050)}
{pt3dadd(192888.000000,193512.000000,100000.000000,251.602938)}
{pt3dadd(192936.000000,192828.000000,100100.000000,268.486297)}
{pt3dadd(192864.000000,192672.000000,100475.000000,318.395720)}

{create adhoc5}
{access adhoc5}
{connect adhoc5(1), adhoc4(0)}
{nseg = 1}
{strdef color color = "White"}
{pt3dclear()}
{pt3dadd(192864.000000,192672.000000,100475.000000,318.395720)}
{pt3dadd(192660.000000,192420.000000,100700.000000,227.283257)}
{pt3dadd(192792.000000,192132.000000,100950.000000,207.287814)}
{pt3dadd(193068.000000,192108.000000,101150.000000,180.840550)}
{pt3dadd(193080.000000,192096.000000,101525.000000,180.840550)}
{pt3dadd(193236.000000,191880.000000,101150.000000,195.997660)}
{pt3dadd(192996.000000,191436.000000,101150.000000,224.217874)}
{pt3dadd(193200.000000,190884.000000,101550.000000,249.405744)}
{pt3dadd(193344.000000,190884.000000,102150.000000,293.446380)}
{pt3dadd(193404.000000,191100.000000,102950.000000,356.774706)}
{pt3dadd(193944.000000,190332.000000,103150.000000,389.721862)}
{pt3dadd(194304.000000,190032.000000,103525.000000,407.315234)}
{pt3dadd(194628.000000,189288.000000,103525.000000,440.751534)}
{pt3dadd(194772.000000,189108.000000,103775.000000,458.266274)}
{pt3dadd(194928.000000,188772.000000,104000.000000,463.205630)}
{pt3dadd(195096.000000,188412.000000,104400.000000,492.228078)}
{pt3dadd(195228.000000,187968.000000,104525.000000,519.868514)}
{pt3dadd(195132.000000,187572.000000,104950.000000,503.187814)}
{pt3dadd(195036.000000,187440.000000,105675.000000,485.673074)}
{pt3dadd(194868.000000,187308.000000,106075.000000,452.152718)}
{pt3dadd(194724.000000,187176.000000,106475.000000,436.581380)}
{pt3dadd(194616.000000,187116.000000,106850.000000,447.744948)}
{pt3dadd(194136.000000,186912.000000,107350.000000,502.726908)}
{pt3dadd(193824.000000,186600.000000,107650.000000,535.812986)}
{pt3dadd(193632.000000,186324.000000,107950.000000,574.519682)}
{pt3dadd(193500.000000,186228.000000,108250.000000,595.808946)}
{pt3dadd(193320.000000,186036.000000,108575.000000,590.091020)}
{pt3dadd(192996.000000,185940.000000,108925.000000,566.619612)}
{pt3dadd(192816.000000,185796.000000,109275.000000,551.048274)}
{pt3dadd(192384.000000,185616.000000,109575.000000,545.861934)}
{pt3dadd(192240.000000,185532.000000,109850.000000,519.868514)}
{pt3dadd(192096.000000,185520.000000,110175.000000,509.236532)}
{pt3dadd(191964.000000,185520.000000,110475.000000,499.110836)}
{pt3dadd(191820.000000,185508.000000,110700.000000,489.926534)}
{pt3dadd(191772.000000,185340.000000,110950.000000,463.602322)}
{pt3dadd(191652.000000,184980.000000,111450.000000,454.855368)}
{pt3dadd(191532.000000,184728.000000,111850.000000,421.335012)}
{pt3dadd(191340.000000,184416.000000,112175.000000,383.194556)}
{pt3dadd(191244.000000,184056.000000,112450.000000,407.950196)}
{pt3dadd(191052.000000,183912.000000,112775.000000,408.686083)}
{pt3dadd(190524.000000,183372.000000,113225.000000,571.792970)}

{create adhoc6}
{access adhoc6}
{connect adhoc6(1), adhoc5(0)}
{nseg = 1}
{strdef color color = "White"}
{pt3dclear()}
{pt3dadd(190524.000000,183372.000000,113225.000000,571.792970)}
{pt3dadd(189876.000000,183336.000000,113725.000000,554.073000)}
{pt3dadd(189696.000000,183288.000000,114100.000000,687.259240)}
{pt3dadd(189288.000000,183228.000000,114400.000000,726.152098)}
{pt3dadd(188856.000000,183312.000000,114650.000000,750.797092)}
{pt3dadd(188436.000000,183240.000000,114875.000000,786.074068)}
{pt3dadd(188028.000000,183204.000000,115100.000000,747.669936)}
{pt3dadd(187848.000000,183324.000000,115300.000000,709.265804)}
{pt3dadd(187440.000000,183348.000000,115575.000000,688.398712)}
{pt3dadd(187080.000000,183444.000000,115850.000000,669.471644)}
{pt3dadd(186720.000000,183600.000000,116150.000000,634.194668)}
{pt3dadd(186384.000000,183648.000000,116575.000000,598.917692)}
{pt3dadd(186048.000000,183720.000000,116875.000000,558.701360)}
{pt3dadd(185196.000000,183912.000000,117225.000000,525.104256)}
{pt3dadd(184632.000000,184260.000000,117700.000000,494.630690)}
{pt3dadd(184248.000000,184524.000000,118025.000000,476.240224)}
{pt3dadd(183912.000000,184512.000000,118475.000000,446.230184)}
{pt3dadd(183492.000000,184668.000000,118725.000000,411.122072)}
{pt3dadd(182904.000000,184884.000000,119000.000000,386.051388)}
{pt3dadd(182064.000000,184968.000000,119125.000000,363.311538)}
{pt3dadd(181620.000000,185160.000000,119100.000000,367.578346)}
{pt3dadd(181176.000000,185280.000000,119375.000000,379.197920)}
{pt3dadd(180780.000000,185412.000000,119350.000000,419.245388)}
{pt3dadd(180504.000000,185688.000000,119425.000000,444.316072)}
{pt3dadd(179904.000000,185904.000000,119850.000000,458.725484)}
{pt3dadd(179460.000000,186000.000000,120125.000000,467.909786)}
{pt3dadd(179064.000000,186384.000000,120275.000000,463.846156)}
{pt3dadd(178656.000000,186672.000000,120450.000000,441.392060)}
{pt3dadd(178332.000000,186936.000000,120675.000000,420.007204)}
{pt3dadd(178116.000000,187176.000000,120825.000000,408.940944)}
{pt3dadd(177720.000000,187284.000000,120950.000000,404.236788)}
{pt3dadd(177480.000000,187500.000000,121150.000000,408.300418)}
{pt3dadd(177144.000000,187968.000000,121225.000000,425.815158)}
{pt3dadd(176712.000000,188328.000000,121800.000000,452.139370)}
{pt3dadd(176184.000000,188676.000000,121875.000000,471.536068)}
{pt3dadd(175740.000000,189120.000000,122125.000000,481.179580)}
{pt3dadd(175176.000000,189504.000000,122275.000000,528.227794)}
{pt3dadd(174588.000000,189624.000000,122525.000000,555.520884)}
{pt3dadd(174060.000000,189864.000000,122825.000000,545.877372)}
{pt3dadd(173448.000000,189984.000000,123025.000000,560.001030)}
{pt3dadd(173112.000000,190092.000000,123200.000000,545.877372)}
{pt3dadd(172764.000000,190032.000000,123425.000000,522.405964)}
{pt3dadd(170988.000000,189348.000000,124175.000000,490.408718)}
{pt3dadd(170340.000000,188952.000000,124300.000000,500.052230)}
{pt3dadd(169896.000000,188868.000000,124525.000000,470.042190)}
{pt3dadd(169428.000000,188676.000000,124775.000000,447.302340)}
{pt3dadd(168924.000000,188616.000000,124925.000000,399.036188)}
{pt3dadd(168564.000000,188484.000000,125050.000000,371.816192)}
{pt3dadd(168468.000000,188472.000000,125250.000000,366.876836)}
{pt3dadd(167508.000000,188616.000000,125825.000000,396.886876)}
{pt3dadd(166956.000000,188928.000000,126250.000000,462.408132)}
{pt3dadd(166488.000000,189168.000000,126475.000000,540.764920)}
{pt3dadd(165984.000000,189300.000000,126600.000000,599.982162)}
{pt3dadd(165384.000000,189444.000000,126725.000000,621.271426)}
{pt3dadd(164808.000000,189276.000000,126900.000000,616.332070)}
{pt3dadd(164184.000000,189396.000000,127000.000000,587.674322)}
{pt3dadd(163428.000000,189204.000000,127200.000000,534.006880)}
{pt3dadd(162972.000000,188460.000000,127250.000000,506.713790)}
{pt3dadd(162348.000000,188376.000000,127300.000000,476.240224)}
{pt3dadd(161832.000000,188304.000000,127525.000000,451.169540)}
{pt3dadd(161196.000000,188100.000000,127650.000000,428.715444)}
{pt3dadd(160704.000000,187968.000000,127850.000000,424.651814)}
{pt3dadd(160404.000000,188052.000000,128225.000000,392.727662)}
{pt3dadd(159660.000000,187968.000000,128350.000000,397.207808)}
{pt3dadd(159012.000000,188004.000000,128575.000000,443.567756)}
{pt3dadd(158376.000000,187704.000000,128825.000000,494.679600)}
{pt3dadd(157752.000000,187692.000000,128950.000000,539.487430)}
{pt3dadd(156948.000000,187500.000000,129075.000000,611.627914)}
{pt3dadd(155568.000000,187464.000000,129375.000000,643.625160)}
{pt3dadd(154752.000000,187488.000000,129350.000000,649.628986)}
{pt3dadd(153516.000000,187128.000000,129475.000000,626.157578)}
{pt3dadd(152040.000000,187140.000000,130125.000000,608.990184)}
{pt3dadd(150864.000000,187152.000000,130700.000000,573.713208)}
{pt3dadd(149772.000000,187032.000000,131075.000000,561.991456)}
{pt3dadd(148188.000000,186648.000000,131225.000000,539.637722)}
{pt3dadd(147168.000000,186276.000000,131500.000000,524.807870)}
{pt3dadd(145428.000000,185268.000000,132125.000000,519.621530)}
{pt3dadd(144432.000000,184716.000000,132700.000000,548.279278)}
{pt3dadd(143268.000000,184164.000000,133200.000000,633.920684)}
{pt3dadd(141960.000000,184476.000000,133975.000000,628.981328)}
{pt3dadd(141576.000000,185040.000000,134000.000000,649.256822)}
{pt3dadd(140928.000000,185724.000000,133750.000000,691.483982)}
{pt3dadd(140016.000000,186336.000000,133600.000000,679.176142)}
{pt3dadd(139236.000000,186588.000000,133475.000000,588.089094)}
{pt3dadd(138240.000000,187308.000000,133850.000000,574.637984)}
{pt3dadd(137292.000000,188484.000000,133750.000000,545.615536)}
{pt3dadd(136572.000000,189348.000000,133800.000000,514.020358)}
{pt3dadd(135984.000000,190188.000000,133775.000000,464.150094)}
{pt3dadd(135000.000000,191448.000000,133550.000000,432.639542)}
{pt3dadd(133884.000000,192192.000000,133450.000000,397.197670)}
{pt3dadd(132972.000000,192936.000000,132975.000000,382.067780)}
{pt3dadd(132036.000000,194160.000000,132750.000000,328.355986)}
{pt3dadd(131508.000000,195636.000000,132075.000000,321.828874)}
{pt3dadd(131040.000000,196908.000000,131450.000000,334.029428)}
{pt3dadd(130752.000000,197640.000000,130850.000000,354.341410)}
{pt3dadd(130404.000000,198528.000000,130200.000000,347.814298)}
{pt3dadd(130272.000000,199176.000000,129725.000000,357.373754)}
{pt3dadd(129804.000000,199308.000000,129025.000000,367.411182)}
{pt3dadd(129528.000000,199992.000000,128300.000000,335.567088)}
{pt3dadd(129348.000000,200736.000000,127550.000000,315.255106)}
{pt3dadd(129276.000000,201612.000000,126825.000000,332.848478)}
{pt3dadd(129132.000000,202284.000000,126150.000000,332.848478)}
{pt3dadd(128724.000000,202884.000000,125325.000000,311.520896)}
{pt3dadd(127752.000000,204000.000000,124525.000000,314.408836)}
{pt3dadd(127044.000000,204828.000000,124200.000000,319.523002)}
{pt3dadd(126072.000000,206064.000000,123925.000000,327.853440)}
{pt3dadd(125172.000000,207240.000000,123800.000000,342.983330)}
{pt3dadd(124260.000000,208152.000000,123775.000000,360.800596)}
{pt3dadd(123396.000000,208416.000000,123425.000000,370.360052)}
{pt3dadd(122508.000000,209172.000000,123375.000000,392.754012)}
{pt3dadd(121776.000000,209748.000000,123375.000000,376.867630)}
{pt3dadd(120504.000000,210612.000000,123700.000000,376.867630)}
{pt3dadd(119856.000000,210516.000000,123700.000000,387.933890)}
{pt3dadd(118644.000000,209796.000000,123425.000000,403.063780)}
{pt3dadd(117864.000000,209472.000000,123275.000000,395.867636)}
{pt3dadd(116940.000000,209472.000000,123225.000000,411.754018)}
{pt3dadd(116016.000000,209472.000000,123050.000000,420.500972)}
{pt3dadd(115152.000000,209316.000000,122950.000000,438.015712)}
{pt3dadd(114312.000000,208944.000000,122525.000000,422.885822)}
{pt3dadd(113784.000000,208488.000000,122025.000000,422.885822)}
{pt3dadd(113028.000000,208188.000000,122000.000000,396.962012)}
{pt3dadd(112404.000000,208176.000000,121500.000000,369.742016)}
{pt3dadd(111876.000000,208272.000000,121200.000000,341.161016)}
{pt3dadd(111216.000000,208392.000000,120800.000000,323.343750)}
{pt3dadd(111012.000000,208296.000000,119975.000000,298.393074)}
{pt3dadd(110088.000000,208632.000000,119000.000000,284.608204)}
{pt3dadd(109608.000000,208800.000000,118775.000000,265.263460)}
{pt3dadd(109044.000000,209460.000000,118675.000000,261.920308)}
{pt3dadd(108660.000000,209736.000000,118450.000000,264.539758)}
{pt3dadd(108312.000000,209940.000000,118175.000000,271.673168)}
{pt3dadd(107676.000000,210264.000000,118175.000000,279.537754)}
{pt3dadd(107064.000000,210828.000000,117750.000000,305.735966)}
{pt3dadd(106560.000000,211428.000000,117150.000000,324.209008)}
{pt3dadd(106044.000000,211968.000000,116600.000000,346.602968)}
{pt3dadd(105384.000000,212316.000000,116375.000000,383.816932)}
{pt3dadd(104604.000000,212724.000000,116300.000000,429.784684)}
{pt3dadd(103608.000000,213492.000000,116500.000000,419.747256)}
{pt3dadd(103044.000000,214116.000000,116600.000000,375.459254)}
{pt3dadd(102360.000000,214452.000000,116425.000000,345.575214)}
{pt3dadd(101892.000000,215028.000000,116425.000000,301.227840)}
{pt3dadd(101496.000000,215472.000000,116400.000000,264.364332)}
{pt3dadd(100968.000000,216228.000000,116525.000000,261.331988)}
{pt3dadd(100200.000000,217356.000000,116925.000000,294.000416)}
{pt3dadd(99504.000000,217908.000000,117275.000000,345.269312)}
{pt3dadd(98748.000000,218100.000000,117450.000000,366.876836)}
{pt3dadd(96828.000000,219264.000000,117675.000000,343.114284)}
{pt3dadd(95580.000000,220020.000000,117800.000000,332.361758)}
{pt3dadd(94476.000000,221196.000000,117025.000000,308.539460)}
{pt3dadd(93636.000000,221988.000000,116700.000000,264.760644)}
{pt3dadd(92880.000000,222444.000000,116775.000000,243.153120)}
{pt3dadd(92076.000000,222648.000000,117025.000000,260.699368)}
{pt3dadd(90996.000000,222984.000000,117075.000000,304.888194)}
{pt3dadd(90324.000000,223140.000000,117175.000000,325.200176)}
{pt3dadd(89400.000000,223212.000000,117350.000000,351.464252)}
{pt3dadd(88608.000000,223296.000000,117450.000000,361.217112)}
{pt3dadd(87684.000000,223524.000000,117500.000000,358.329172)}
{pt3dadd(86196.000000,223680.000000,117225.000000,327.925216)}
{pt3dadd(85236.000000,223668.000000,117475.000000,312.727400)}
{pt3dadd(84660.000000,224088.000000,117525.000000,286.463324)}
{pt3dadd(84144.000000,224520.000000,117600.000000,289.213744)}
{pt3dadd(83892.000000,225264.000000,117750.000000,292.101684)}
{pt3dadd(83772.000000,225576.000000,117550.000000,295.285644)}
{pt3dadd(83484.000000,226032.000000,117225.000000,303.956348)}
{pt3dadd(82944.000000,225936.000000,117175.000000,315.811012)}
{pt3dadd(82404.000000,225996.000000,117175.000000,315.811012)}
{pt3dadd(82020.000000,226068.000000,117175.000000,318.843356)}
{pt3dadd(81576.000000,226092.000000,117400.000000,301.874526)}
{pt3dadd(81120.000000,226200.000000,117600.000000,285.713742)}
{pt3dadd(80676.000000,226236.000000,117850.000000,276.609498)}
{pt3dadd(80232.000000,226272.000000,117800.000000,282.529782)}
{pt3dadd(79740.000000,226236.000000,117800.000000,289.056894)}
{pt3dadd(79260.000000,226188.000000,117825.000000,306.025724)}
{pt3dadd(78504.000000,225816.000000,117900.000000,332.223936)}
{pt3dadd(78144.000000,225792.000000,118250.000000,359.801222)}
{pt3dadd(77580.000000,225612.000000,118650.000000,381.458224)}
{pt3dadd(77016.000000,226020.000000,119025.000000,350.345440)}
{pt3dadd(76344.000000,226140.000000,119325.000000,328.737916)}
{pt3dadd(75936.000000,225864.000000,119675.000000,300.276924)}
{pt3dadd(75384.000000,225756.000000,119650.000000,258.041330)}
{pt3dadd(74808.000000,225864.000000,119625.000000,215.805736)}
{pt3dadd(74424.000000,226104.000000,119325.000000,219.812816)}
{pt3dadd(74196.000000,226080.000000,118900.000000,211.789116)}
{pt3dadd(73608.000000,226260.000000,118475.000000,207.581680)}
{pt3dadd(73188.000000,226224.000000,118075.000000,211.999488)}
{pt3dadd(72696.000000,226248.000000,117875.000000,223.907376)}
{pt3dadd(72348.000000,226200.000000,117800.000000,238.565684)}
{pt3dadd(71856.000000,226320.000000,117750.000000,265.012948)}
{pt3dadd(71520.000000,226308.000000,117725.000000,284.611604)}
{pt3dadd(70968.000000,226080.000000,117700.000000,303.474673)}
{pt3dadd(70728.000000,225900.000000,117800.000000,303.234000)}

{create adhoc7}
{access adhoc7}
{connect adhoc7(1), adhoc5(0)}
{nseg = 1}
{strdef color color = "White"}
{pt3dclear()}
{pt3dadd(190524.000000,183372.000000,113225.000000,571.792970)}
{pt3dadd(190356.000000,182580.000000,113225.000000,653.942950)}
{pt3dadd(190968.000000,182592.000000,112225.000000,543.844542)}
{pt3dadd(191100.000000,182352.000000,111800.000000,510.758464)}
{pt3dadd(191208.000000,181812.000000,111200.000000,453.027392)}
{pt3dadd(191484.000000,181608.000000,110675.000000,391.426204)}
{pt3dadd(191532.000000,181404.000000,110225.000000,420.007204)}
{pt3dadd(191808.000000,181308.000000,109675.000000,437.521944)}
{pt3dadd(192336.000000,181284.000000,109150.000000,437.521944)}
{pt3dadd(192480.000000,181152.000000,108550.000000,433.651828)}
{pt3dadd(192900.000000,181068.000000,107825.000000,426.455684)}
{pt3dadd(193212.000000,181128.000000,107250.000000,431.395040)}
{pt3dadd(193536.000000,181092.000000,106725.000000,436.334396)}
{pt3dadd(193476.000000,180780.000000,106125.000000,458.788492)}
{pt3dadd(193452.000000,180312.000000,105425.000000,458.788492)}
{pt3dadd(193452.000000,179892.000000,104900.000000,492.308848)}
{pt3dadd(193404.000000,179604.000000,104525.000000,465.984636)}
{pt3dadd(193536.000000,178932.000000,104100.000000,435.974596)}
{pt3dadd(193692.000000,178140.000000,103575.000000,399.111088)}
{pt3dadd(194028.000000,177516.000000,103275.000000,399.111088)}
{pt3dadd(194160.000000,176868.000000,102750.000000,372.786876)}
{pt3dadd(194568.000000,176172.000000,102375.000000,369.101048)}
{pt3dadd(194820.000000,175596.000000,102325.000000,399.111088)}
{pt3dadd(194964.000000,175068.000000,102100.000000,421.850938)}
{pt3dadd(194988.000000,174636.000000,101875.000000,448.175150)}
{pt3dadd(195240.000000,174228.000000,101675.000000,437.635854)}
{pt3dadd(195096.000000,173460.000000,101150.000000,430.782386)}
{pt3dadd(195204.000000,172692.000000,100950.000000,400.772346)}
{pt3dadd(195492.000000,172272.000000,100625.000000,384.885964)}
{pt3dadd(195636.000000,171660.000000,100400.000000,366.495498)}
{pt3dadd(196116.000000,170892.000000,100100.000000,373.348966)}
{pt3dadd(196296.000000,170172.000000,99800.000000,400.568962)}
{pt3dadd(196620.000000,169716.000000,99325.000000,412.188536)}
{pt3dadd(197040.000000,169176.000000,99025.000000,415.874364)}
{pt3dadd(197520.000000,168912.000000,98625.000000,428.036077)}
{pt3dadd(197520.000000,168636.000000,98650.000000,387.012000)}

{create adhoc8}
{access adhoc8}
{connect adhoc8(1), adhoc7(0)}
{nseg = 1}
{strdef color color = "White"}
{pt3dclear()}
{pt3dadd(197520.000000,168636.000000,98650.000000,387.012000)}
{pt3dadd(198672.000000,168708.000000,98650.000000,352.942953)}
{pt3dadd(199140.000000,168144.000000,98075.000000,374.310804)}
{pt3dadd(199584.000000,167892.000000,97875.000000,386.511358)}
{pt3dadd(200076.000000,167448.000000,97725.000000,419.947658)}
{pt3dadd(200484.000000,167100.000000,97500.000000,445.018342)}
{pt3dadd(200808.000000,166560.000000,97275.000000,470.788850)}
{pt3dadd(201144.000000,166176.000000,96725.000000,493.936280)}

{create adhoc9}
{access adhoc9}
{connect adhoc9(1), adhoc8(0)}
{nseg = 1}
{strdef color color = "White"}
{pt3dclear()}
{pt3dadd(201144.000000,166176.000000,96725.000000,493.936280)}
{pt3dadd(201144.000000,165480.000000,96850.000000,311.058627)}
{pt3dadd(201288.000000,165108.000000,97025.000000,243.590326)}
{pt3dadd(201348.000000,164736.000000,97075.000000,172.586070)}
{pt3dadd(201432.000000,164388.000000,97075.000000,146.657080)}
{pt3dadd(201480.000000,163944.000000,97175.000000,152.246294)}
{pt3dadd(201528.000000,163584.000000,97125.000000,174.357568)}
{pt3dadd(201612.000000,163176.000000,97325.000000,188.285970)}
{pt3dadd(201768.000000,162540.000000,97325.000000,191.133730)}
{pt3dadd(201648.000000,162180.000000,97325.000000,196.836026)}
{pt3dadd(201756.000000,161760.000000,97325.000000,189.558292)}
{pt3dadd(201804.000000,161388.000000,97275.000000,175.122948)}
{pt3dadd(201900.000000,161028.000000,97175.000000,177.277976)}
{pt3dadd(202080.000000,160524.000000,97100.000000,183.879096)}
{pt3dadd(202164.000000,160176.000000,97100.000000,194.817352)}
{pt3dadd(202272.000000,159816.000000,97150.000000,204.147494)}
{pt3dadd(202428.000000,159444.000000,97175.000000,204.147494)}
{pt3dadd(202548.000000,159192.000000,97275.000000,201.992466)}
{pt3dadd(202656.000000,158796.000000,97450.000000,225.407386)}
{pt3dadd(202680.000000,158376.000000,97500.000000,227.562414)}
{pt3dadd(202800.000000,157920.000000,97525.000000,225.510006)}
{pt3dadd(202752.000000,157344.000000,97525.000000,231.099220)}
{pt3dadd(202632.000000,156720.000000,97500.000000,229.046812)}
{pt3dadd(202668.000000,156276.000000,97650.000000,207.493484)}
{pt3dadd(202680.000000,155892.000000,97725.000000,203.286048)}
{pt3dadd(202812.000000,155472.000000,97825.000000,196.008314)}
{pt3dadd(202860.000000,154980.000000,97900.000000,187.122466)}
{pt3dadd(202920.000000,154536.000000,98025.000000,179.844732)}
{pt3dadd(202992.000000,154068.000000,98000.000000,174.521670)}
{pt3dadd(203088.000000,153540.000000,98050.000000,168.932456)}
{pt3dadd(202956.000000,153000.000000,98025.000000,168.932456)}
{pt3dadd(202752.000000,152568.000000,98000.000000,172.229090)}
{pt3dadd(202644.000000,152112.000000,97925.000000,167.630830)}
{pt3dadd(202572.000000,151680.000000,97875.000000,169.319350)}
{pt3dadd(202536.000000,151236.000000,97650.000000,167.630830)}
{pt3dadd(202548.000000,150996.000000,97300.000000,171.092300)}
{pt3dadd(202452.000000,150288.000000,96950.000000,185.527644)}
{pt3dadd(202356.000000,149940.000000,96700.000000,199.456046)}
{pt3dadd(202344.000000,149568.000000,96400.000000,199.456046)}
{pt3dadd(202392.000000,149148.000000,96075.000000,206.733780)}
{pt3dadd(202116.000000,148644.000000,95750.000000,210.550044)}
{pt3dadd(201996.000000,148164.000000,95525.000000,199.749242)}
{pt3dadd(201876.000000,147804.000000,95400.000000,190.419100)}
{pt3dadd(201972.000000,147048.000000,95075.000000,181.420170)}
{pt3dadd(201936.000000,146484.000000,94725.000000,160.116886)}
{pt3dadd(201876.000000,146040.000000,94450.000000,148.240892)}
{pt3dadd(201984.000000,145572.000000,94125.000000,154.403000)}
{pt3dadd(202068.000000,145500.000000,93825.000000,168.150950)}
{pt3dadd(202248.000000,145104.000000,93350.000000,191.585224)}
{pt3dadd(202404.000000,144720.000000,92825.000000,207.299294)}
{pt3dadd(202356.000000,144492.000000,92300.000000,208.757904)}
{pt3dadd(202368.000000,144288.000000,91800.000000,195.664620)}
{pt3dadd(202104.000000,144048.000000,91525.000000,175.929260)}
{pt3dadd(201300.000000,144060.000000,91350.000000,156.665746)}
{pt3dadd(201072.000000,144120.000000,91125.000000,154.977226)}
{pt3dadd(200688.000000,144156.000000,90875.000000,169.602046)}
{pt3dadd(200316.000000,144348.000000,90650.000000,174.671630)}
{pt3dadd(200040.000000,144420.000000,90475.000000,192.144210)}
{pt3dadd(199716.000000,144516.000000,90175.000000,198.745330)}
{pt3dadd(199332.000000,144588.000000,89825.000000,195.605680)}
{pt3dadd(199056.000000,144588.000000,89400.000000,193.450652)}
{pt3dadd(198744.000000,144600.000000,89050.000000,195.312244)}
{pt3dadd(198408.000000,144528.000000,88775.000000,182.218960)}
{pt3dadd(198120.000000,144600.000000,88450.000000,182.218960)}
{pt3dadd(197664.000000,144552.000000,88100.000000,188.820080)}
{pt3dadd(197196.000000,144480.000000,87925.000000,177.881824)}
{pt3dadd(196848.000000,144228.000000,87725.000000,184.043932)}
{pt3dadd(196572.000000,144000.000000,87650.000000,197.137216)}
{pt3dadd(195924.000000,143892.000000,87425.000000,204.455760)}
{pt3dadd(195552.000000,143784.000000,87275.000000,226.277900)}

{create adhoc10}
{access adhoc10}
{connect adhoc10(1), adhoc9(0)}
{nseg = 1}
{strdef color color = "White"}
{pt3dclear()}
{pt3dadd(195552.000000,143784.000000,87275.000000,226.277900)}
{pt3dadd(195348.000000,143064.000000,87400.000000,155.521203)}
{pt3dadd(195180.000000,142632.000000,87425.000000,141.312722)}
{pt3dadd(194928.000000,142284.000000,87400.000000,118.914284)}
{pt3dadd(194676.000000,142008.000000,87375.000000,116.571426)}
{pt3dadd(194412.000000,141684.000000,87300.000000,122.886434)}
{pt3dadd(194280.000000,141348.000000,87225.000000,153.894874)}
{pt3dadd(194016.000000,140868.000000,87100.000000,184.903314)}
{pt3dadd(193872.000000,140532.000000,87000.000000,232.252428)}
{pt3dadd(193584.000000,139872.000000,86825.000000,290.667802)}
{pt3dadd(193284.000000,139692.000000,86625.000000,322.142452)}
{pt3dadd(193056.000000,139632.000000,86350.000000,322.142452)}
{pt3dadd(192756.000000,139428.000000,86125.000000,314.652372)}
{pt3dadd(192708.000000,139356.000000,85650.000000,283.539588)}
{pt3dadd(192372.000000,139080.000000,85300.000000,239.498952)}
{pt3dadd(192108.000000,138900.000000,85025.000000,202.852152)}
{pt3dadd(191772.000000,138888.000000,84700.000000,173.043712)}
{pt3dadd(191388.000000,138816.000000,84375.000000,144.053133)}
{pt3dadd(191076.000000,138768.000000,84125.000000,126.000000)}

{create adhoc11}
{access adhoc11}
{connect adhoc11(1), adhoc10(0)}
{nseg = 1}
{strdef color color = "White"}
{pt3dclear()}
{pt3dadd(191076.000000,138768.000000,84125.000000,126.000000)}
{pt3dadd(191244.000000,138648.000000,83800.000000,138.915000)}

{create adhoc12}
{access adhoc12}
{connect adhoc12(1), adhoc10(0)}
{nseg = 1}
{strdef color color = "White"}
{pt3dclear()}
{pt3dadd(191076.000000,138768.000000,84125.000000,126.000000)}
{pt3dadd(190896.000000,138780.000000,83850.000000,116.376417)}
{pt3dadd(190668.000000,138780.000000,83550.000000,112.427852)}
{pt3dadd(190404.000000,138768.000000,83200.000000,111.227852)}
{pt3dadd(190128.000000,138756.000000,82875.000000,124.918074)}
{pt3dadd(189636.000000,138648.000000,82550.000000,135.831342)}
{pt3dadd(189156.000000,138612.000000,82350.000000,145.136496)}
{pt3dadd(188700.000000,138444.000000,82075.000000,153.174636)}
{pt3dadd(188616.000000,138504.000000,81850.000000,168.268108)}
{pt3dadd(188388.000000,138468.000000,81525.000000,175.909730)}
{pt3dadd(188052.000000,138228.000000,81300.000000,187.394900)}
{pt3dadd(187764.000000,137976.000000,81000.000000,212.416007)}
{pt3dadd(187488.000000,137796.000000,80550.000000,226.277900)}

{create adhoc13}
{access adhoc13}
{connect adhoc13(1), adhoc12(0)}
{nseg = 1}
{strdef color color = "White"}
{pt3dclear()}
{pt3dadd(187488.000000,137796.000000,80550.000000,226.277900)}
{pt3dadd(187296.000000,137904.000000,80225.000000,246.303967)}
{pt3dadd(187116.000000,137760.000000,79925.000000,256.717104)}
{pt3dadd(186900.000000,137724.000000,79600.000000,246.920454)}
{pt3dadd(186564.000000,137580.000000,79275.000000,231.005486)}
{pt3dadd(186348.000000,137352.000000,79125.000000,226.587678)}
{pt3dadd(185892.000000,136992.000000,78825.000000,217.916974)}
{pt3dadd(185592.000000,136632.000000,78775.000000,230.420254)}
{pt3dadd(185412.000000,136044.000000,78825.000000,232.193204)}
{pt3dadd(185232.000000,135672.000000,78925.000000,215.956874)}
{pt3dadd(185328.000000,135276.000000,78950.000000,196.413137)}
{pt3dadd(185448.000000,135024.000000,79050.000000,114.285710)}

{create adhoc14}
{access adhoc14}
{connect adhoc14(1), adhoc12(0)}
{nseg = 1}
{strdef color color = "White"}
{pt3dclear()}
{pt3dadd(187488.000000,137796.000000,80550.000000,226.277900)}
{pt3dadd(187896.000000,137196.000000,80725.000000,275.042200)}

{create adhoc15}
{access adhoc15}
{connect adhoc15(1), adhoc14(0)}
{nseg = 1}
{strdef color color = "White"}
{pt3dclear()}
{pt3dadd(187896.000000,137196.000000,80725.000000,275.042200)}
{pt3dadd(187692.000000,136944.000000,80750.000000,214.566253)}
{pt3dadd(187320.000000,136656.000000,80800.000000,180.769044)}
{pt3dadd(187308.000000,136392.000000,80725.000000,137.766753)}
{pt3dadd(187092.000000,136320.000000,80475.000000,145.860750)}

{create adhoc16}
{access adhoc16}
{connect adhoc16(1), adhoc14(0)}
{nseg = 1}
{strdef color color = "White"}
{pt3dclear()}
{pt3dadd(187896.000000,137196.000000,80725.000000,275.042200)}
{pt3dadd(188280.000000,136896.000000,80925.000000,180.827237)}
{pt3dadd(188568.000000,136608.000000,81200.000000,161.416342)}
{pt3dadd(188856.000000,136332.000000,81050.000000,137.038662)}
{pt3dadd(189072.000000,135912.000000,81025.000000,128.176610)}
{pt3dadd(189036.000000,135612.000000,81050.000000,124.124096)}
{pt3dadd(189120.000000,135276.000000,81125.000000,122.864096)}
{pt3dadd(189180.000000,135000.000000,81125.000000,131.863026)}
{pt3dadd(189288.000000,134676.000000,81275.000000,146.487846)}
{pt3dadd(189504.000000,134304.000000,81300.000000,191.582242)}
{pt3dadd(189528.000000,133860.000000,81075.000000,258.113760)}
{pt3dadd(189768.000000,133344.000000,81050.000000,318.249906)}
{pt3dadd(189816.000000,132996.000000,81150.000000,356.507548)}
{pt3dadd(189612.000000,132756.000000,81200.000000,381.458224)}
{pt3dadd(189540.000000,132468.000000,81200.000000,382.098290)}
{pt3dadd(189552.000000,132168.000000,81275.000000,351.031280)}

{create adhoc17}
{access adhoc17}
{connect adhoc17(1), adhoc16(0)}
{nseg = 1}
{strdef color color = "White"}
{pt3dclear()}
{pt3dadd(189552.000000,132168.000000,81275.000000,351.031280)}
{pt3dadd(189492.000000,131928.000000,81275.000000,249.471370)}

{create adhoc18}
{access adhoc18}
{connect adhoc18(1), adhoc16(0)}
{nseg = 1}
{strdef color color = "White"}
{pt3dclear()}
{pt3dadd(189552.000000,132168.000000,81275.000000,351.031280)}
{pt3dadd(188904.000000,132108.000000,81025.000000,232.944680)}
{pt3dadd(188472.000000,132192.000000,80775.000000,132.300000)}

{create adhoc19}
{access adhoc19}
{connect adhoc19(1), adhoc9(0)}
{nseg = 1}
{strdef color color = "White"}
{pt3dclear()}
{pt3dadd(195552.000000,143784.000000,87275.000000,226.277900)}
{pt3dadd(194952.000000,144240.000000,86975.000000,146.429303)}
{pt3dadd(194664.000000,144432.000000,86800.000000,149.762762)}
{pt3dadd(194328.000000,144480.000000,86775.000000,171.370286)}
{pt3dadd(193944.000000,144312.000000,86575.000000,229.027826)}
{pt3dadd(193620.000000,144480.000000,86525.000000,295.773638)}
{pt3dadd(193296.000000,144456.000000,86450.000000,389.780763)}
{pt3dadd(192972.000000,144432.000000,86350.000000,448.014770)}

{create adhoc20}
{access adhoc20}
{connect adhoc20(1), adhoc19(0)}
{nseg = 1}
{strdef color color = "White"}
{pt3dclear()}
{pt3dadd(192972.000000,144432.000000,86350.000000,448.014770)}
{pt3dadd(192552.000000,143892.000000,86500.000000,318.395720)}

{create adhoc21}
{access adhoc21}
{connect adhoc21(1), adhoc19(0)}
{nseg = 1}
{strdef color color = "White"}
{pt3dclear()}
{pt3dadd(192972.000000,144432.000000,86350.000000,448.014770)}
{pt3dadd(193260.000000,143328.000000,85950.000000,223.891762)}
{pt3dadd(193224.000000,143268.000000,85875.000000,103.660515)}

{create adhoc22}
{access adhoc22}
{connect adhoc22(1), adhoc19(0)}
{nseg = 1}
{strdef color color = "White"}
{pt3dclear()}
{pt3dadd(192972.000000,144432.000000,86350.000000,448.014770)}
{pt3dadd(193068.000000,144912.000000,86450.000000,408.575593)}
{pt3dadd(193080.000000,145260.000000,86425.000000,356.093808)}
{pt3dadd(192684.000000,145296.000000,86500.000000,301.949784)}
{pt3dadd(192444.000000,145536.000000,86550.000000,247.244398)}
{pt3dadd(192120.000000,145596.000000,86525.000000,202.238142)}
{pt3dadd(191772.000000,145644.000000,86550.000000,154.981570)}
{pt3dadd(191448.000000,145680.000000,86500.000000,142.949690)}
{pt3dadd(191172.000000,145788.000000,86450.000000,132.690760)}
{pt3dadd(190896.000000,145848.000000,86300.000000,129.843000)}
{pt3dadd(190644.000000,145908.000000,86175.000000,133.815150)}
{pt3dadd(190272.000000,146100.000000,86050.000000,133.815150)}
{pt3dadd(189972.000000,146268.000000,85975.000000,133.815150)}
{pt3dadd(189636.000000,146448.000000,85700.000000,145.847030)}
{pt3dadd(189312.000000,146544.000000,85525.000000,148.153133)}
{pt3dadd(189252.000000,146760.000000,85350.000000,186.159400)}

{create adhoc23}
{access adhoc23}
{connect adhoc23(1), adhoc22(0)}
{nseg = 1}
{strdef color color = "White"}
{pt3dclear()}
{pt3dadd(189252.000000,146760.000000,85350.000000,186.159400)}
{pt3dadd(189384.000000,147012.000000,85075.000000,254.489527)}
{pt3dadd(189456.000000,147288.000000,84900.000000,298.676662)}
{pt3dadd(189420.000000,147288.000000,84675.000000,338.847182)}
{pt3dadd(189312.000000,147324.000000,84525.000000,367.308174)}
{pt3dadd(189360.000000,147480.000000,84275.000000,391.185018)}
{pt3dadd(189312.000000,147516.000000,84000.000000,404.254790)}
{pt3dadd(189324.000000,147636.000000,83750.000000,376.677504)}
{pt3dadd(189204.000000,147744.000000,83500.000000,329.905864)}
{pt3dadd(189228.000000,148044.000000,83250.000000,270.176987)}
{pt3dadd(189108.000000,148152.000000,82900.000000,153.153800)}

{create adhoc24}
{access adhoc24}
{connect adhoc24(1), adhoc22(0)}
{nseg = 1}
{strdef color color = "White"}
{pt3dclear()}
{pt3dadd(189252.000000,146760.000000,85350.000000,186.159400)}
{pt3dadd(188820.000000,146712.000000,85400.000000,146.153133)}
{pt3dadd(188544.000000,146652.000000,85400.000000,143.522640)}
{pt3dadd(188244.000000,146700.000000,85350.000000,131.490760)}
{pt3dadd(187908.000000,146640.000000,85275.000000,126.799468)}
{pt3dadd(187512.000000,146616.000000,85225.000000,131.971618)}
{pt3dadd(187224.000000,146580.000000,85225.000000,129.628760)}
{pt3dadd(186924.000000,146520.000000,85125.000000,115.242145)}
{pt3dadd(186696.000000,146556.000000,85100.000000,116.502145)}
{pt3dadd(186456.000000,146604.000000,85100.000000,119.933437)}
{pt3dadd(186288.000000,146520.000000,85150.000000,117.221287)}
{pt3dadd(186096.000000,146544.000000,85150.000000,117.221287)}
{pt3dadd(185904.000000,146628.000000,85125.000000,122.745850)}
{pt3dadd(185688.000000,146604.000000,85000.000000,121.485850)}
{pt3dadd(185424.000000,146628.000000,85000.000000,133.517730)}
{pt3dadd(185112.000000,146688.000000,84975.000000,133.517730)}
{pt3dadd(184788.000000,146736.000000,84800.000000,138.443588)}
{pt3dadd(184452.000000,146604.000000,84475.000000,152.133810)}
{pt3dadd(184236.000000,146376.000000,84175.000000,153.393810)}
{pt3dadd(183960.000000,146232.000000,83925.000000,151.620860)}
{pt3dadd(183660.000000,146232.000000,83700.000000,145.892963)}
{pt3dadd(183264.000000,146436.000000,83500.000000,136.914591)}
{pt3dadd(182952.000000,146484.000000,83275.000000,118.512013)}
{pt3dadd(182700.000000,146496.000000,83075.000000,110.856641)}
{pt3dadd(182448.000000,146400.000000,82800.000000,98.254853)}
{pt3dadd(182268.000000,146328.000000,82450.000000,96.327378)}
{pt3dadd(181968.000000,146028.000000,82175.000000,95.431919)}
{pt3dadd(181656.000000,145956.000000,82125.000000,96.284736)}
{pt3dadd(181404.000000,145896.000000,81825.000000,96.284736)}
{pt3dadd(181200.000000,145800.000000,81550.000000,94.159697)}
{pt3dadd(180960.000000,145740.000000,81275.000000,96.087172)}
{pt3dadd(180816.000000,145764.000000,81000.000000,104.638003)}
{pt3dadd(180720.000000,145812.000000,80650.000000,107.460937)}
{pt3dadd(180636.000000,145980.000000,80325.000000,112.656309)}
{pt3dadd(180612.000000,146136.000000,79975.000000,124.086502)}
{pt3dadd(180768.000000,146484.000000,79700.000000,125.123107)}
{pt3dadd(180888.000000,146592.000000,79500.000000,129.885007)}
{pt3dadd(181044.000000,146616.000000,79150.000000,108.843540)}

{create adhoc25}
{access adhoc25}
{connect adhoc25(1), adhoc8(0)}
{nseg = 1}
{strdef color color = "White"}
{pt3dclear()}
{pt3dadd(201144.000000,166176.000000,96725.000000,493.936280)}
{pt3dadd(201432.000000,166128.000000,96075.000000,367.764667)}
{pt3dadd(201540.000000,165864.000000,95475.000000,351.201048)}
{pt3dadd(201528.000000,165852.000000,95225.000000,309.251147)}
{pt3dadd(201528.000000,165708.000000,95075.000000,334.315520)}

{create adhoc26}
{access adhoc26}
{connect adhoc26(1), adhoc25(0)}
{nseg = 1}
{strdef color color = "White"}
{pt3dclear()}
{pt3dadd(201528.000000,165708.000000,95075.000000,334.315520)}
{pt3dadd(201684.000000,165648.000000,94700.000000,351.309887)}
{pt3dadd(201792.000000,165552.000000,94375.000000,341.638988)}
{pt3dadd(201900.000000,165432.000000,94025.000000,327.164874)}
{pt3dadd(201972.000000,165432.000000,93725.000000,306.852892)}
{pt3dadd(202068.000000,165312.000000,93375.000000,283.030594)}
{pt3dadd(202164.000000,165216.000000,93100.000000,265.213328)}
{pt3dadd(202224.000000,165180.000000,92750.000000,268.245672)}
{pt3dadd(202308.000000,165036.000000,92450.000000,276.503482)}
{pt3dadd(202416.000000,165024.000000,92100.000000,296.815464)}
{pt3dadd(202440.000000,165000.000000,91600.000000,310.600334)}
{pt3dadd(202440.000000,164940.000000,91200.000000,313.219784)}
{pt3dadd(202536.000000,164760.000000,90775.000000,299.434914)}
{pt3dadd(202284.000000,164568.000000,90100.000000,320.060630)}
{pt3dadd(202092.000000,164316.000000,89725.000000,327.256774)}
{pt3dadd(201828.000000,163884.000000,89300.000000,340.980030)}
{pt3dadd(201708.000000,163632.000000,89050.000000,393.462193)}
{pt3dadd(201756.000000,163488.000000,88450.000000,387.012000)}

{create adhoc27}
{access adhoc27}
{connect adhoc27(1), adhoc26(0)}
{nseg = 1}
{strdef color color = "White"}
{pt3dclear()}
{pt3dadd(201756.000000,163488.000000,88450.000000,387.012000)}
{pt3dadd(201756.000000,163464.000000,88200.000000,357.452933)}
{pt3dadd(201624.000000,163380.000000,87950.000000,339.392520)}
{pt3dadd(201576.000000,163308.000000,87600.000000,319.748980)}
{pt3dadd(201528.000000,163140.000000,87275.000000,301.931714)}
{pt3dadd(201336.000000,162972.000000,86950.000000,280.324190)}
{pt3dadd(201156.000000,162972.000000,86525.000000,266.600934)}
{pt3dadd(201000.000000,162900.000000,86150.000000,271.471564)}
{pt3dadd(200988.000000,162960.000000,85650.000000,277.391848)}
{pt3dadd(201108.000000,163080.000000,85300.000000,280.011298)}
{pt3dadd(201048.000000,163332.000000,84975.000000,295.402518)}
{pt3dadd(201108.000000,163488.000000,84550.000000,298.586478)}
{pt3dadd(200976.000000,163608.000000,84325.000000,316.403744)}
{pt3dadd(200820.000000,163800.000000,84025.000000,313.371400)}
{pt3dadd(200412.000000,163944.000000,83775.000000,328.569216)}
{pt3dadd(200196.000000,164064.000000,83500.000000,331.601560)}
{pt3dadd(199908.000000,164220.000000,83225.000000,322.497316)}
{pt3dadd(199536.000000,164532.000000,82975.000000,337.627206)}
{pt3dadd(199404.000000,164832.000000,82850.000000,358.252922)}
{pt3dadd(199248.000000,165204.000000,82725.000000,361.763238)}
{pt3dadd(199200.000000,165492.000000,82650.000000,383.420240)}
{pt3dadd(198960.000000,165828.000000,82400.000000,400.542057)}
{pt3dadd(198672.000000,166128.000000,82275.000000,426.680730)}

{create adhoc28}
{access adhoc28}
{connect adhoc28(1), adhoc27(0)}
{nseg = 1}
{strdef color color = "White"}
{pt3dclear()}
{pt3dadd(198672.000000,166128.000000,82275.000000,426.680730)}
{pt3dadd(197604.000000,166008.000000,82250.000000,206.476057)}
{pt3dadd(197172.000000,165792.000000,82300.000000,159.746614)}
{pt3dadd(196896.000000,165564.000000,82300.000000,95.142571)}
{pt3dadd(196572.000000,165372.000000,82350.000000,106.028471)}
{pt3dadd(196224.000000,165252.000000,82325.000000,130.324395)}
{pt3dadd(195852.000000,165156.000000,82375.000000,147.038453)}
{pt3dadd(195408.000000,165072.000000,82475.000000,151.090967)}
{pt3dadd(195036.000000,164988.000000,82375.000000,152.127572)}
{pt3dadd(194640.000000,164796.000000,82550.000000,143.265520)}
{pt3dadd(194244.000000,164628.000000,82475.000000,120.897071)}
{pt3dadd(193812.000000,164424.000000,82425.000000,126.220133)}
{pt3dadd(193392.000000,164208.000000,82350.000000,177.079563)}
{pt3dadd(193044.000000,163896.000000,82350.000000,240.647001)}
{pt3dadd(192636.000000,163620.000000,82425.000000,312.961393)}
{pt3dadd(192252.000000,163404.000000,82450.000000,421.893030)}
{pt3dadd(191844.000000,163224.000000,82700.000000,470.415500)}

{create adhoc29}
{access adhoc29}
{connect adhoc29(1), adhoc28(0)}
{nseg = 1}
{strdef color color = "White"}
{pt3dclear()}
{pt3dadd(191844.000000,163224.000000,82700.000000,470.415500)}
{pt3dadd(191076.000000,163428.000000,83300.000000,319.221090)}
{pt3dadd(190620.000000,163164.000000,83400.000000,168.852050)}

{create adhoc30}
{access adhoc30}
{connect adhoc30(1), adhoc28(0)}
{nseg = 1}
{strdef color color = "White"}
{pt3dclear()}
{pt3dadd(191844.000000,163224.000000,82700.000000,470.415500)}
{pt3dadd(191508.000000,162480.000000,82575.000000,240.905167)}
{pt3dadd(191496.000000,162000.000000,82400.000000,183.092588)}
{pt3dadd(191544.000000,161568.000000,82225.000000,136.527848)}
{pt3dadd(191568.000000,161244.000000,82050.000000,186.244420)}
{pt3dadd(191580.000000,160836.000000,81975.000000,233.500992)}
{pt3dadd(191616.000000,160404.000000,81850.000000,251.928244)}
{pt3dadd(191532.000000,160068.000000,81725.000000,264.345680)}
{pt3dadd(191460.000000,159708.000000,81500.000000,266.721594)}
{pt3dadd(190812.000000,159348.000000,81100.000000,274.277538)}
{pt3dadd(190728.000000,158844.000000,80825.000000,264.240110)}
{pt3dadd(190596.000000,158544.000000,80500.000000,262.467160)}
{pt3dadd(190380.000000,158244.000000,80050.000000,264.075274)}
{pt3dadd(190164.000000,157848.000000,79725.000000,246.343296)}
{pt3dadd(189840.000000,157428.000000,79475.000000,197.233076)}
{pt3dadd(189660.000000,157080.000000,79225.000000,167.324342)}
{pt3dadd(189408.000000,156660.000000,78975.000000,169.097292)}
{pt3dadd(189180.000000,156504.000000,78500.000000,170.785812)}
{pt3dadd(189072.000000,156216.000000,78050.000000,174.082446)}
{pt3dadd(189084.000000,155580.000000,77650.000000,180.249567)}
{pt3dadd(189132.000000,155100.000000,77375.000000,177.294650)}

{create adhoc31}
{access adhoc31}
{connect adhoc31(1), adhoc30(0)}
{nseg = 1}
{strdef color color = "White"}
{pt3dclear()}
{pt3dadd(189132.000000,155100.000000,77375.000000,177.294650)}
{pt3dadd(189108.000000,154812.000000,76975.000000,213.780043)}
{pt3dadd(188652.000000,154536.000000,76525.000000,173.212886)}
{pt3dadd(188604.000000,154068.000000,76200.000000,128.511927)}
{pt3dadd(188340.000000,153720.000000,75875.000000,98.724300)}

{create adhoc32}
{access adhoc32}
{connect adhoc32(1), adhoc30(0)}
{nseg = 1}
{strdef color color = "White"}
{pt3dclear()}
{pt3dadd(189132.000000,155100.000000,77375.000000,177.294650)}
{pt3dadd(189036.000000,154272.000000,76950.000000,128.287497)}
{pt3dadd(188724.000000,153984.000000,76900.000000,102.097380)}
{pt3dadd(188520.000000,153840.000000,76725.000000,98.724300)}

{create adhoc33}
{access adhoc33}
{connect adhoc33(1), adhoc28(0)}
{nseg = 1}
{strdef color color = "White"}
{pt3dclear()}
{pt3dadd(191844.000000,163224.000000,82700.000000,470.415500)}
{pt3dadd(191748.000000,163296.000000,82350.000000,369.135097)}
{pt3dadd(191472.000000,163764.000000,82350.000000,283.965280)}
{pt3dadd(191268.000000,164460.000000,82025.000000,217.918826)}
{pt3dadd(191292.000000,164592.000000,81850.000000,149.678360)}
{pt3dadd(191316.000000,164928.000000,81825.000000,135.732970)}
{pt3dadd(191280.000000,165048.000000,81650.000000,133.507840)}

{create adhoc34}
{access adhoc34}
{connect adhoc34(1), adhoc27(0)}
{nseg = 1}
{strdef color color = "White"}
{pt3dclear()}
{pt3dadd(198672.000000,166128.000000,82275.000000,426.680730)}
{pt3dadd(198384.000000,166788.000000,82275.000000,394.691530)}
{pt3dadd(198144.000000,167232.000000,82425.000000,374.210634)}
{pt3dadd(197856.000000,167532.000000,82475.000000,349.521288)}
{pt3dadd(197544.000000,167856.000000,82550.000000,345.651172)}
{pt3dadd(197208.000000,168300.000000,82550.000000,345.651172)}
{pt3dadd(196596.000000,168684.000000,82425.000000,338.797704)}
{pt3dadd(196164.000000,168972.000000,82350.000000,345.324816)}
{pt3dadd(195816.000000,169188.000000,82375.000000,345.324816)}
{pt3dadd(195516.000000,169272.000000,82425.000000,305.154296)}
{pt3dadd(195192.000000,169488.000000,82475.000000,301.811144)}
{pt3dadd(194964.000000,169656.000000,82425.000000,274.569640)}
{pt3dadd(194664.000000,170172.000000,82300.000000,334.315520)}

{create adhoc35}
{access adhoc35}
{connect adhoc35(1), adhoc34(0)}
{nseg = 1}
{strdef color color = "White"}
{pt3dclear()}
{pt3dadd(194664.000000,170172.000000,82300.000000,334.315520)}
{pt3dadd(194748.000000,170700.000000,82075.000000,245.325893)}
{pt3dadd(195084.000000,171132.000000,81850.000000,269.790782)}
{pt3dadd(195504.000000,171564.000000,81700.000000,269.790782)}
{pt3dadd(195948.000000,171948.000000,81575.000000,293.205702)}
{pt3dadd(196164.000000,172428.000000,81325.000000,348.892406)}
{pt3dadd(196572.000000,172692.000000,81075.000000,390.586516)}
{pt3dadd(196668.000000,173256.000000,80800.000000,409.983214)}
{pt3dadd(196668.000000,173832.000000,80650.000000,403.766910)}
{pt3dadd(196680.000000,174420.000000,80500.000000,406.799254)}
{pt3dadd(196572.000000,174924.000000,80225.000000,374.875102)}
{pt3dadd(196332.000000,175608.000000,79850.000000,321.840146)}
{pt3dadd(196608.000000,176088.000000,79550.000000,289.996052)}
{pt3dadd(196428.000000,176472.000000,79250.000000,287.108112)}
{pt3dadd(196272.000000,176784.000000,79125.000000,293.635224)}
{pt3dadd(196176.000000,177096.000000,78975.000000,293.635224)}
{pt3dadd(196152.000000,177480.000000,78875.000000,322.793336)}
{pt3dadd(196080.000000,177840.000000,78950.000000,342.436876)}
{pt3dadd(195924.000000,178212.000000,78925.000000,383.465272)}
{pt3dadd(195912.000000,178584.000000,78850.000000,394.531532)}
{pt3dadd(195672.000000,178896.000000,78850.000000,405.070828)}
{pt3dadd(195660.000000,179280.000000,78725.000000,405.070828)}
{pt3dadd(195684.000000,179592.000000,78500.000000,381.468620)}
{pt3dadd(195780.000000,179892.000000,78325.000000,351.031280)}

{create adhoc36}
{access adhoc36}
{connect adhoc36(1), adhoc35(0)}
{nseg = 1}
{strdef color color = "White"}
{pt3dclear()}
{pt3dadd(195780.000000,179892.000000,78325.000000,351.031280)}
{pt3dadd(195384.000000,180288.000000,78075.000000,351.031280)}

{create adhoc37}
{access adhoc37}
{connect adhoc37(1), adhoc36(0)}
{nseg = 1}
{strdef color color = "White"}
{pt3dclear()}
{pt3dadd(195384.000000,180288.000000,78075.000000,351.031280)}
{pt3dadd(194880.000000,180588.000000,77950.000000,288.745800)}
{pt3dadd(193944.000000,180420.000000,77775.000000,230.202630)}
{pt3dadd(193440.000000,180312.000000,77650.000000,192.158670)}
{pt3dadd(193020.000000,180276.000000,77625.000000,138.669154)}
{pt3dadd(192708.000000,180072.000000,77525.000000,143.360446)}
{pt3dadd(192252.000000,179988.000000,77425.000000,152.809326)}
{pt3dadd(191844.000000,179796.000000,77425.000000,160.869056)}
{pt3dadd(191448.000000,179652.000000,77500.000000,167.800232)}
{pt3dadd(190848.000000,179532.000000,77375.000000,177.249112)}
{pt3dadd(190392.000000,179460.000000,77300.000000,179.961262)}
{pt3dadd(189876.000000,179304.000000,77175.000000,174.891678)}
{pt3dadd(189432.000000,179148.000000,77150.000000,165.442798)}
{pt3dadd(189108.000000,178884.000000,77200.000000,165.442798)}
{pt3dadd(188616.000000,178896.000000,77175.000000,163.669848)}
{pt3dadd(188160.000000,178872.000000,77125.000000,169.956628)}
{pt3dadd(187812.000000,178764.000000,77150.000000,176.887804)}
{pt3dadd(187368.000000,178572.000000,77100.000000,181.267100)}
{pt3dadd(187080.000000,178308.000000,76875.000000,181.267100)}
{pt3dadd(186684.000000,178248.000000,76750.000000,186.856314)}
{pt3dadd(186360.000000,178128.000000,76700.000000,206.405824)}
{pt3dadd(186024.000000,178068.000000,76675.000000,225.250093)}
{pt3dadd(185748.000000,177756.000000,76475.000000,275.042200)}

{create adhoc38}
{access adhoc38}
{connect adhoc38(1), adhoc37(0)}
{nseg = 1}
{strdef color color = "White"}
{pt3dclear()}
{pt3dadd(185748.000000,177756.000000,76475.000000,275.042200)}
{pt3dadd(184800.000000,177612.000000,76300.000000,220.710527)}
{pt3dadd(184380.000000,177540.000000,76225.000000,218.730040)}
{pt3dadd(183948.000000,177492.000000,76250.000000,213.615874)}
{pt3dadd(183540.000000,177228.000000,76325.000000,226.709158)}
{pt3dadd(183336.000000,176832.000000,76325.000000,226.709158)}
{pt3dadd(182964.000000,176436.000000,76325.000000,218.685458)}
{pt3dadd(182604.000000,176124.000000,76250.000000,206.809464)}
{pt3dadd(182484.000000,175728.000000,76225.000000,196.008662)}
{pt3dadd(182316.000000,175284.000000,75850.000000,175.829170)}
{pt3dadd(182184.000000,175008.000000,75575.000000,195.467360)}

{create adhoc39}
{access adhoc39}
{connect adhoc39(1), adhoc37(0)}
{nseg = 1}
{strdef color color = "White"}
{pt3dclear()}
{pt3dadd(185748.000000,177756.000000,76475.000000,275.042200)}
{pt3dadd(185520.000000,177144.000000,76625.000000,286.276363)}
{pt3dadd(185472.000000,176880.000000,76700.000000,285.339236)}
{pt3dadd(185544.000000,176748.000000,76750.000000,259.502946)}
{pt3dadd(184968.000000,176664.000000,76775.000000,237.909280)}
{pt3dadd(184848.000000,176616.000000,77350.000000,145.860750)}

{create adhoc40}
{access adhoc40}
{connect adhoc40(1), adhoc36(0)}
{nseg = 1}
{strdef color color = "White"}
{pt3dclear()}
{pt3dadd(195384.000000,180288.000000,78075.000000,351.031280)}
{pt3dadd(195024.000000,180684.000000,78200.000000,351.031280)}
{pt3dadd(194556.000000,181548.000000,78200.000000,344.344976)}
{pt3dadd(194364.000000,181824.000000,78200.000000,341.001824)}
{pt3dadd(194256.000000,182112.000000,78200.000000,341.001824)}
{pt3dadd(194172.000000,182340.000000,78250.000000,334.474712)}
{pt3dadd(194124.000000,182448.000000,78250.000000,328.258408)}
{pt3dadd(194112.000000,182568.000000,78250.000000,313.784294)}
{pt3dadd(194028.000000,182700.000000,78175.000000,299.310180)}
{pt3dadd(193968.000000,182844.000000,78125.000000,281.492914)}
{pt3dadd(193920.000000,182952.000000,78125.000000,270.202760)}
{pt3dadd(193908.000000,183084.000000,78175.000000,257.074320)}
{pt3dadd(193872.000000,183192.000000,78275.000000,257.074320)}
{pt3dadd(193788.000000,183300.000000,78325.000000,247.785882)}
{pt3dadd(193740.000000,183396.000000,78350.000000,236.445036)}
{pt3dadd(193692.000000,183492.000000,78375.000000,225.104190)}
{pt3dadd(193644.000000,183600.000000,78375.000000,218.633974)}
{pt3dadd(193620.000000,183744.000000,78325.000000,216.139258)}
{pt3dadd(193536.000000,183852.000000,78300.000000,228.047146)}
{pt3dadd(193488.000000,183960.000000,78275.000000,242.007442)}
{pt3dadd(193428.000000,184068.000000,78275.000000,246.214878)}
{pt3dadd(193380.000000,184152.000000,78250.000000,257.555724)}
{pt3dadd(193344.000000,184260.000000,78200.000000,262.669890)}
{pt3dadd(193260.000000,184356.000000,78150.000000,262.669890)}
{pt3dadd(193224.000000,184440.000000,78100.000000,271.340594)}
{pt3dadd(193164.000000,184548.000000,78050.000000,286.731814)}
{pt3dadd(193116.000000,184680.000000,78000.000000,292.101684)}
{pt3dadd(193032.000000,184776.000000,77975.000000,286.987518)}
{pt3dadd(192888.000000,184896.000000,78000.000000,277.234658)}
{pt3dadd(192780.000000,185004.000000,77950.000000,261.073874)}
{pt3dadd(192672.000000,185124.000000,77925.000000,237.658954)}
{pt3dadd(192564.000000,185220.000000,77900.000000,217.131974)}
{pt3dadd(192456.000000,185316.000000,77875.000000,204.469580)}
{pt3dadd(192396.000000,185424.000000,77900.000000,194.672930)}
{pt3dadd(192348.000000,185532.000000,77950.000000,186.248042)}
{pt3dadd(192264.000000,185640.000000,77975.000000,190.064306)}
{pt3dadd(192192.000000,185736.000000,77950.000000,188.291356)}
{pt3dadd(192204.000000,185856.000000,77925.000000,194.160028)}
{pt3dadd(192132.000000,185940.000000,77925.000000,203.956678)}
{pt3dadd(192060.000000,186036.000000,77925.000000,203.956678)}
{pt3dadd(191976.000000,186132.000000,77875.000000,208.164114)}
{pt3dadd(191940.000000,186228.000000,77825.000000,206.475594)}
{pt3dadd(191856.000000,186324.000000,77775.000000,200.606922)}
{pt3dadd(191784.000000,186432.000000,77725.000000,192.583222)}
{pt3dadd(191616.000000,186540.000000,77675.000000,190.721630)}
{pt3dadd(191556.000000,186696.000000,77675.000000,184.559522)}
{pt3dadd(191580.000000,186792.000000,77675.000000,184.559522)}
{pt3dadd(191604.000000,186900.000000,77650.000000,181.098052)}
{pt3dadd(191556.000000,186984.000000,77550.000000,181.098052)}
{pt3dadd(191520.000000,187068.000000,77450.000000,181.098052)}
{pt3dadd(191472.000000,187176.000000,77350.000000,177.463510)}
{pt3dadd(191484.000000,187320.000000,77275.000000,184.741244)}
{pt3dadd(191460.000000,187416.000000,77225.000000,194.071386)}
{pt3dadd(191424.000000,187524.000000,77175.000000,197.887650)}
{pt3dadd(191340.000000,187656.000000,77125.000000,205.911350)}
{pt3dadd(191232.000000,187764.000000,77125.000000,211.500564)}
{pt3dadd(191136.000000,187920.000000,77150.000000,204.222830)}
{pt3dadd(191136.000000,188040.000000,77100.000000,206.377858)}
{pt3dadd(191052.000000,188136.000000,77050.000000,212.848074)}
{pt3dadd(190968.000000,188292.000000,76975.000000,208.640638)}
{pt3dadd(190812.000000,188400.000000,76950.000000,210.693046)}
{pt3dadd(190656.000000,188508.000000,76925.000000,214.154516)}
{pt3dadd(190500.000000,188604.000000,76875.000000,206.130816)}
{pt3dadd(190416.000000,188712.000000,76825.000000,189.243216)}
{pt3dadd(190356.000000,188832.000000,76775.000000,174.655072)}
{pt3dadd(190296.000000,188940.000000,76725.000000,160.726670)}
{pt3dadd(189936.000000,189048.000000,76575.000000,154.125550)}
{pt3dadd(189720.000000,189048.000000,76625.000000,136.638530)}
{pt3dadd(189636.000000,189156.000000,76350.000000,131.207770)}
{pt3dadd(189408.000000,189312.000000,76175.000000,131.207770)}
{pt3dadd(189120.000000,189420.000000,76000.000000,122.767723)}
{pt3dadd(188880.000000,189504.000000,75850.000000,113.905671)}
{pt3dadd(188736.000000,189528.000000,75850.000000,114.934685)}
{pt3dadd(188604.000000,189300.000000,76075.000000,108.843540)}

{create adhoc41}
{access adhoc41}
{connect adhoc41(1), adhoc35(0)}
{nseg = 1}
{strdef color color = "White"}
{pt3dclear()}
{pt3dadd(195780.000000,179892.000000,78325.000000,351.031280)}
{pt3dadd(195084.000000,180408.000000,77475.000000,334.315520)}

{create adhoc42}
{access adhoc42}
{connect adhoc42(1), adhoc34(0)}
{nseg = 1}
{strdef color color = "White"}
{pt3dclear()}
{pt3dadd(194664.000000,170172.000000,82300.000000,334.315520)}
{pt3dadd(193908.000000,170280.000000,82450.000000,181.287122)}
{pt3dadd(193608.000000,170268.000000,82500.000000,160.432273)}
{pt3dadd(193344.000000,170148.000000,82575.000000,114.301272)}
{pt3dadd(192912.000000,170124.000000,82700.000000,115.196731)}
{pt3dadd(192576.000000,169968.000000,82750.000000,120.368881)}
{pt3dadd(192180.000000,169872.000000,82875.000000,145.063155)}
{pt3dadd(191820.000000,169692.000000,83050.000000,173.611595)}
{pt3dadd(191448.000000,169668.000000,83250.000000,226.596064)}
{pt3dadd(191052.000000,169584.000000,83525.000000,274.654540)}
{pt3dadd(190704.000000,169560.000000,83775.000000,293.000750)}
{pt3dadd(190260.000000,169644.000000,83950.000000,313.496727)}
{pt3dadd(190500.000000,169560.000000,84400.000000,237.591800)}

{create adhoc43}
{access adhoc43}
{connect adhoc43(1), adhoc42(0)}
{nseg = 1}
{strdef color color = "White"}
{pt3dclear()}
{pt3dadd(190500.000000,169560.000000,84400.000000,237.591800)}
{pt3dadd(190176.000000,169620.000000,84800.000000,176.390720)}
{pt3dadd(190044.000000,169608.000000,84925.000000,141.049906)}
{pt3dadd(190068.000000,169548.000000,85200.000000,110.587898)}
{pt3dadd(189972.000000,169308.000000,85400.000000,87.250599)}
{pt3dadd(189888.000000,169380.000000,85600.000000,81.449809)}
{pt3dadd(189600.000000,169416.000000,86000.000000,86.711298)}
{pt3dadd(189456.000000,169464.000000,86225.000000,110.066990)}
{pt3dadd(189120.000000,169488.000000,86500.000000,174.283154)}
{pt3dadd(188808.000000,169440.000000,86700.000000,241.841952)}
{pt3dadd(188232.000000,169452.000000,86800.000000,406.362580)}

{create adhoc44}
{access adhoc44}
{connect adhoc44(1), adhoc43(0)}
{nseg = 1}
{strdef color color = "White"}
{pt3dclear()}
{pt3dadd(188232.000000,169452.000000,86800.000000,406.362580)}
{pt3dadd(188232.000000,169584.000000,87650.000000,245.342037)}
{pt3dadd(188184.000000,169728.000000,87875.000000,160.811480)}

{create adhoc45}
{access adhoc45}
{connect adhoc45(1), adhoc43(0)}
{nseg = 1}
{strdef color color = "White"}
{pt3dclear()}
{pt3dadd(188232.000000,169452.000000,86800.000000,406.362580)}
{pt3dadd(187788.000000,169296.000000,86675.000000,228.505460)}
{pt3dadd(187800.000000,169176.000000,86450.000000,126.000000)}

{create adhoc46}
{access adhoc46}
{connect adhoc46(1), adhoc42(0)}
{nseg = 1}
{strdef color color = "White"}
{pt3dclear()}
{pt3dadd(190500.000000,169560.000000,84400.000000,237.591800)}
{pt3dadd(190920.000000,169344.000000,82675.000000,163.197267)}
{pt3dadd(190884.000000,169188.000000,82625.000000,126.000000)}

{create adhoc47}
{access adhoc47}
{connect adhoc47(1), adhoc26(0)}
{nseg = 1}
{strdef color color = "White"}
{pt3dclear()}
{pt3dadd(201756.000000,163488.000000,88450.000000,387.012000)}
{pt3dadd(201672.000000,162864.000000,88975.000000,190.339353)}
{pt3dadd(201660.000000,162492.000000,88950.000000,144.408144)}
{pt3dadd(201600.000000,162120.000000,88925.000000,84.914913)}
{pt3dadd(201576.000000,161784.000000,88800.000000,83.974681)}
{pt3dadd(201552.000000,161412.000000,88650.000000,83.974681)}
{pt3dadd(201528.000000,161064.000000,88550.000000,81.868165)}
{pt3dadd(201492.000000,160668.000000,88350.000000,79.255878)}
{pt3dadd(201492.000000,160224.000000,88175.000000,78.403061)}
{pt3dadd(201576.000000,159864.000000,88025.000000,78.403061)}
{pt3dadd(201660.000000,159540.000000,87975.000000,81.091569)}
{pt3dadd(201624.000000,159072.000000,87700.000000,98.358231)}
{pt3dadd(201576.000000,158880.000000,87425.000000,129.337152)}
{pt3dadd(201708.000000,158628.000000,87075.000000,149.512680)}
{pt3dadd(201804.000000,158472.000000,86750.000000,178.226412)}
{pt3dadd(201900.000000,158256.000000,86325.000000,195.713432)}
{pt3dadd(201912.000000,158100.000000,85975.000000,202.314552)}
{pt3dadd(201804.000000,157776.000000,85600.000000,189.844760)}
{pt3dadd(201600.000000,157860.000000,85050.000000,173.344983)}
{pt3dadd(201276.000000,157824.000000,84650.000000,147.595331)}
{pt3dadd(201144.000000,157800.000000,84325.000000,126.607596)}
{pt3dadd(201000.000000,157812.000000,83900.000000,110.107819)}
{pt3dadd(200772.000000,157860.000000,83600.000000,96.533411)}
{pt3dadd(200712.000000,157764.000000,83300.000000,94.605936)}
{pt3dadd(200604.000000,157680.000000,82950.000000,87.571146)}
{pt3dadd(200508.000000,157632.000000,82650.000000,90.131629)}
{pt3dadd(200352.000000,157764.000000,82400.000000,89.144386)}
{pt3dadd(200340.000000,157956.000000,82100.000000,102.718794)}
{pt3dadd(200388.000000,158400.000000,81875.000000,117.684576)}
{pt3dadd(200472.000000,158964.000000,81550.000000,142.044130)}
{pt3dadd(200352.000000,159324.000000,81300.000000,157.009912)}
{pt3dadd(200328.000000,159720.000000,81075.000000,163.725052)}
{pt3dadd(200244.000000,160116.000000,80875.000000,153.826395)}
{pt3dadd(199884.000000,160488.000000,80650.000000,134.088288)}
{pt3dadd(199608.000000,160896.000000,80500.000000,114.739676)}
{pt3dadd(199344.000000,161160.000000,80375.000000,95.001569)}
{pt3dadd(198768.000000,161424.000000,80225.000000,85.597921)}
{pt3dadd(198408.000000,161520.000000,80125.000000,82.774987)}
{pt3dadd(198120.000000,161460.000000,80050.000000,85.799036)}
{pt3dadd(197880.000000,161400.000000,79950.000000,83.963345)}
{pt3dadd(197448.000000,161388.000000,79825.000000,87.840211)}
{pt3dadd(197148.000000,161364.000000,79750.000000,89.588487)}
{pt3dadd(196836.000000,161340.000000,79700.000000,95.679318)}
{pt3dadd(196416.000000,161376.000000,79625.000000,110.785262)}
{pt3dadd(195840.000000,161628.000000,79450.000000,125.038389)}
{pt3dadd(195408.000000,161856.000000,79275.000000,146.222692)}
{pt3dadd(195024.000000,161856.000000,79100.000000,159.580360)}
{pt3dadd(194568.000000,161964.000000,78875.000000,178.680912)}
{pt3dadd(194088.000000,162084.000000,78875.000000,181.977546)}
{pt3dadd(193824.000000,162144.000000,78800.000000,185.274180)}
{pt3dadd(193644.000000,162120.000000,78750.000000,178.343004)}
{pt3dadd(193404.000000,162156.000000,78750.000000,178.343004)}
{pt3dadd(193092.000000,162216.000000,78525.000000,159.242452)}
{pt3dadd(192552.000000,162264.000000,78500.000000,146.640664)}
{pt3dadd(192144.000000,162384.000000,78350.000000,135.181734)}
{pt3dadd(191784.000000,162300.000000,78225.000000,119.263583)}
{pt3dadd(191556.000000,162384.000000,78000.000000,106.846147)}
{pt3dadd(191136.000000,162432.000000,77800.000000,103.578250)}
{pt3dadd(190788.000000,162492.000000,77650.000000,93.448820)}
{pt3dadd(190548.000000,162576.000000,77600.000000,80.993231)}
{pt3dadd(190500.000000,162852.000000,77550.000000,86.517794)}
{pt3dadd(190320.000000,163104.000000,77325.000000,88.541642)}
{pt3dadd(190116.000000,163356.000000,77325.000000,122.817979)}
{pt3dadd(189828.000000,163356.000000,77250.000000,183.806839)}
{pt3dadd(189420.000000,163344.000000,77300.000000,253.534944)}
{pt3dadd(189180.000000,163152.000000,77250.000000,351.842756)}
{pt3dadd(189096.000000,162972.000000,77225.000000,458.442680)}
{pt3dadd(188796.000000,162876.000000,77325.000000,600.382600)}

{create adhoc48}
{access adhoc48}
{connect adhoc48(1), adhoc47(0)}
{nseg = 1}
{strdef color color = "White"}
{pt3dclear()}
{pt3dadd(188796.000000,162876.000000,77325.000000,600.382600)}
{pt3dadd(188532.000000,162792.000000,77275.000000,456.162343)}
{pt3dadd(188196.000000,163272.000000,76800.000000,249.471370)}

{create adhoc49}
{access adhoc49}
{connect adhoc49(1), adhoc47(0)}
{nseg = 1}
{strdef color color = "White"}
{pt3dclear()}
{pt3dadd(188796.000000,162876.000000,77325.000000,600.382600)}
{pt3dadd(188664.000000,161928.000000,76900.000000,145.860750)}

{create adhoc50}
{access adhoc50}
{connect adhoc50(1), adhoc25(0)}
{nseg = 1}
{strdef color color = "White"}
{pt3dclear()}
{pt3dadd(201528.000000,165708.000000,95075.000000,334.315520)}
{pt3dadd(201084.000000,165480.000000,94975.000000,208.794773)}
{pt3dadd(200712.000000,165228.000000,94975.000000,185.222160)}
{pt3dadd(200340.000000,164820.000000,95000.000000,150.521352)}
{pt3dadd(199992.000000,164460.000000,94900.000000,153.661002)}
{pt3dadd(199596.000000,164136.000000,94700.000000,152.338002)}
{pt3dadd(199296.000000,163824.000000,94600.000000,141.944414)}
{pt3dadd(198900.000000,163500.000000,93775.000000,132.070583)}
{pt3dadd(198540.000000,163248.000000,93475.000000,119.653147)}
{pt3dadd(198264.000000,163032.000000,93125.000000,111.082737)}
{pt3dadd(197916.000000,162864.000000,92900.000000,109.822737)}
{pt3dadd(197508.000000,162660.000000,92675.000000,113.254029)}
{pt3dadd(197232.000000,162408.000000,92450.000000,117.113568)}
{pt3dadd(196872.000000,162048.000000,92100.000000,134.600588)}
{pt3dadd(196560.000000,161748.000000,91975.000000,161.789578)}
{pt3dadd(196356.000000,161328.000000,91825.000000,185.649297)}
{pt3dadd(195912.000000,160992.000000,91675.000000,261.944950)}

{create adhoc51}
{access adhoc51}
{connect adhoc51(1), adhoc50(0)}
{nseg = 1}
{strdef color color = "White"}
{pt3dclear()}
{pt3dadd(195912.000000,160992.000000,91675.000000,261.944950)}
{pt3dadd(195840.000000,160440.000000,91375.000000,194.470770)}
{pt3dadd(195744.000000,159912.000000,91100.000000,189.400822)}
{pt3dadd(195504.000000,159516.000000,90900.000000,172.470762)}
{pt3dadd(195408.000000,159132.000000,90775.000000,207.093862)}
{pt3dadd(195372.000000,158820.000000,90775.000000,261.156437)}
{pt3dadd(195072.000000,158412.000000,90350.000000,368.582860)}

{create adhoc52}
{access adhoc52}
{connect adhoc52(1), adhoc51(0)}
{nseg = 1}
{strdef color color = "White"}
{pt3dclear()}
{pt3dadd(195072.000000,158412.000000,90350.000000,368.582860)}
{pt3dadd(194976.000000,158028.000000,90125.000000,381.176100)}
{pt3dadd(195108.000000,157776.000000,89775.000000,307.265142)}
{pt3dadd(194952.000000,157140.000000,89350.000000,261.331570)}
{pt3dadd(194868.000000,156600.000000,89000.000000,219.152526)}
{pt3dadd(194820.000000,156132.000000,88850.000000,165.180814)}
{pt3dadd(194760.000000,155688.000000,88775.000000,146.080262)}
{pt3dadd(194652.000000,155400.000000,88775.000000,132.390040)}
{pt3dadd(194520.000000,155064.000000,88700.000000,128.607040)}
{pt3dadd(194340.000000,154668.000000,88525.000000,111.282276)}
{pt3dadd(194160.000000,154308.000000,88375.000000,111.282276)}
{pt3dadd(193980.000000,153936.000000,88175.000000,110.139418)}
{pt3dadd(193884.000000,153552.000000,88100.000000,113.570710)}
{pt3dadd(193740.000000,153156.000000,87925.000000,126.802590)}
{pt3dadd(193512.000000,152892.000000,87875.000000,154.928156)}
{pt3dadd(193248.000000,152496.000000,87750.000000,192.942156)}
{pt3dadd(193068.000000,152076.000000,87725.000000,247.487414)}
{pt3dadd(192888.000000,151680.000000,87550.000000,311.890368)}
{pt3dadd(193020.000000,151308.000000,87525.000000,327.047478)}
{pt3dadd(193104.000000,150960.000000,87425.000000,303.613204)}
{pt3dadd(192864.000000,150444.000000,87475.000000,272.314344)}
{pt3dadd(192840.000000,150000.000000,87875.000000,225.542704)}
{pt3dadd(192612.000000,149772.000000,88225.000000,179.040302)}
{pt3dadd(192432.000000,149592.000000,88550.000000,176.545586)}
{pt3dadd(192108.000000,149436.000000,89050.000000,220.291842)}
{pt3dadd(191880.000000,149316.000000,89400.000000,251.590702)}
{pt3dadd(191688.000000,149112.000000,89825.000000,256.418872)}
{pt3dadd(191568.000000,149160.000000,90175.000000,239.778320)}
{pt3dadd(191364.000000,149016.000000,90550.000000,212.741188)}
{pt3dadd(191328.000000,148620.000000,90925.000000,162.279792)}
{pt3dadd(191256.000000,148212.000000,91200.000000,124.265792)}
{pt3dadd(191160.000000,147852.000000,91275.000000,108.551722)}
{pt3dadd(191088.000000,147468.000000,91350.000000,115.862132)}
{pt3dadd(190968.000000,147084.000000,91350.000000,136.105542)}
{pt3dadd(190716.000000,146784.000000,91400.000000,168.749672)}
{pt3dadd(190572.000000,146436.000000,91275.000000,174.204812)}
{pt3dadd(190512.000000,145980.000000,91300.000000,176.228660)}
{pt3dadd(190368.000000,145572.000000,91275.000000,163.190353)}
{pt3dadd(190200.000000,145056.000000,91200.000000,141.858509)}
{pt3dadd(190032.000000,144612.000000,91125.000000,108.274147)}
{pt3dadd(189768.000000,144216.000000,91125.000000,100.130499)}
{pt3dadd(189588.000000,143820.000000,91100.000000,94.605936)}
{pt3dadd(189408.000000,143352.000000,91025.000000,97.873833)}
{pt3dadd(189372.000000,143136.000000,91050.000000,96.837228)}
{pt3dadd(189384.000000,142752.000000,91125.000000,95.088952)}
{pt3dadd(189516.000000,142476.000000,91325.000000,92.064903)}
{pt3dadd(189540.000000,142152.000000,91350.000000,92.064903)}
{pt3dadd(189540.000000,141780.000000,91350.000000,86.869531)}
{pt3dadd(189552.000000,141300.000000,91300.000000,85.882288)}
{pt3dadd(189420.000000,141000.000000,91325.000000,85.882288)}
{pt3dadd(189252.000000,140640.000000,91300.000000,90.654613)}
{pt3dadd(189060.000000,140280.000000,91275.000000,93.215096)}
{pt3dadd(188868.000000,139920.000000,91300.000000,93.215096)}
{pt3dadd(188688.000000,139560.000000,91275.000000,96.327378)}
{pt3dadd(188592.000000,139224.000000,91225.000000,96.327378)}
{pt3dadd(188364.000000,138660.000000,91125.000000,96.327378)}
{pt3dadd(188112.000000,138168.000000,90975.000000,94.579102)}
{pt3dadd(187812.000000,137856.000000,90850.000000,94.579102)}
{pt3dadd(187680.000000,137604.000000,90800.000000,95.721960)}
{pt3dadd(187716.000000,137148.000000,90825.000000,110.827904)}
{pt3dadd(187608.000000,136728.000000,90875.000000,125.793686)}
{pt3dadd(187476.000000,136332.000000,90875.000000,140.899630)}
{pt3dadd(187500.000000,135864.000000,90825.000000,152.725762)}
{pt3dadd(187632.000000,135480.000000,90900.000000,160.888058)}
{pt3dadd(187560.000000,134952.000000,90925.000000,156.508762)}
{pt3dadd(187740.000000,134580.000000,90975.000000,158.197282)}
{pt3dadd(187944.000000,134100.000000,90950.000000,192.898090)}
{pt3dadd(188196.000000,133740.000000,90975.000000,251.870284)}
{pt3dadd(188580.000000,133416.000000,91100.000000,297.110388)}
{pt3dadd(188640.000000,133116.000000,91200.000000,299.958148)}
{pt3dadd(188760.000000,132600.000000,91100.000000,282.408387)}
{pt3dadd(188352.000000,132108.000000,91350.000000,239.545283)}
{pt3dadd(188388.000000,131772.000000,91450.000000,182.104625)}
{pt3dadd(188412.000000,131424.000000,91675.000000,135.332985)}
{pt3dadd(188352.000000,131004.000000,91725.000000,135.332985)}
{pt3dadd(188220.000000,130500.000000,91650.000000,226.336768)}
{pt3dadd(188220.000000,130068.000000,91625.000000,283.624120)}
{pt3dadd(188748.000000,129516.000000,91275.000000,544.564760)}

{create adhoc53}
{access adhoc53}
{connect adhoc53(1), adhoc51(0)}
{nseg = 1}
{strdef color color = "White"}
{pt3dclear()}
{pt3dadd(195072.000000,158412.000000,90350.000000,368.582860)}
{pt3dadd(195528.000000,158256.000000,90000.000000,263.938953)}
{pt3dadd(196056.000000,158400.000000,89800.000000,168.151575)}
{pt3dadd(196296.000000,158364.000000,89625.000000,81.220726)}

{create adhoc54}
{access adhoc54}
{connect adhoc54(1), adhoc51(0)}
{nseg = 1}
{strdef color color = "White"}
{pt3dclear()}
{pt3dadd(195072.000000,158412.000000,90350.000000,368.582860)}
{pt3dadd(195444.000000,158928.000000,91325.000000,197.299391)}
{pt3dadd(195504.000000,158652.000000,91575.000000,104.287053)}
{pt3dadd(195468.000000,158580.000000,91675.000000,89.545845)}

{create adhoc55}
{access adhoc55}
{connect adhoc55(1), adhoc50(0)}
{nseg = 1}
{strdef color color = "White"}
{pt3dclear()}
{pt3dadd(195912.000000,160992.000000,91675.000000,261.944950)}
{pt3dadd(195468.000000,160884.000000,91825.000000,148.650337)}
{pt3dadd(195132.000000,160680.000000,92100.000000,131.994830)}
{pt3dadd(194916.000000,160368.000000,92150.000000,104.805840)}
{pt3dadd(194640.000000,160032.000000,92300.000000,169.022004)}
{pt3dadd(194364.000000,159888.000000,92300.000000,217.454193)}
{pt3dadd(194076.000000,159792.000000,92400.000000,406.362580)}

{create adhoc56}
{access adhoc56}
{connect adhoc56(1), adhoc55(0)}
{nseg = 1}
{strdef color color = "White"}
{pt3dclear()}
{pt3dadd(194076.000000,159792.000000,92400.000000,406.362580)}
{pt3dadd(193764.000000,159756.000000,92350.000000,456.904787)}
{pt3dadd(193308.000000,159624.000000,92275.000000,374.406892)}
{pt3dadd(193056.000000,159264.000000,92375.000000,323.911867)}
{pt3dadd(192612.000000,159060.000000,92200.000000,226.277900)}

{create adhoc57}
{access adhoc57}
{connect adhoc57(1), adhoc55(0)}
{nseg = 1}
{strdef color color = "White"}
{pt3dclear()}
{pt3dadd(194076.000000,159792.000000,92400.000000,406.362580)}
{pt3dadd(193860.000000,160080.000000,91725.000000,114.285710)}

{create adhoc58}
{access adhoc58}
{connect adhoc58(1), adhoc8(0)}
{nseg = 1}
{strdef color color = "White"}
{pt3dclear()}
{pt3dadd(201144.000000,166176.000000,96725.000000,493.936280)}
{pt3dadd(200004.000000,166452.000000,97325.000000,232.267653)}
{pt3dadd(199740.000000,166272.000000,97225.000000,173.473296)}
{pt3dadd(199464.000000,165936.000000,97075.000000,93.490668)}
{pt3dadd(198924.000000,165648.000000,96950.000000,90.526588)}
{pt3dadd(198216.000000,165396.000000,96750.000000,87.966105)}
{pt3dadd(197844.000000,165120.000000,96600.000000,87.966105)}
{pt3dadd(197484.000000,164892.000000,96525.000000,87.153898)}
{pt3dadd(197112.000000,164748.000000,96450.000000,84.593416)}
{pt3dadd(196740.000000,164592.000000,96300.000000,88.645930)}
{pt3dadd(196380.000000,164484.000000,96250.000000,94.170492)}
{pt3dadd(195960.000000,164508.000000,96000.000000,98.882848)}
{pt3dadd(195684.000000,164472.000000,95700.000000,103.370806)}
{pt3dadd(195372.000000,164412.000000,95425.000000,105.931289)}
{pt3dadd(195216.000000,164472.000000,95250.000000,102.175732)}
{pt3dadd(194940.000000,164400.000000,95175.000000,94.023140)}

{create adhoc59}
{access adhoc59}
{connect adhoc59(1), adhoc7(0)}
{nseg = 1}
{strdef color color = "White"}
{pt3dclear()}
{pt3dadd(197520.000000,168636.000000,98650.000000,387.012000)}
{pt3dadd(197532.000000,168084.000000,98775.000000,180.572713)}
{pt3dadd(197280.000000,167652.000000,99200.000000,133.799052)}
{pt3dadd(196980.000000,167100.000000,99650.000000,73.453004)}
{pt3dadd(196848.000000,167064.000000,99750.000000,75.038742)}
{pt3dadd(196548.000000,166740.000000,99900.000000,76.624480)}
{pt3dadd(196272.000000,166512.000000,99925.000000,93.068918)}
{pt3dadd(195984.000000,166188.000000,99925.000000,135.349646)}
{pt3dadd(195684.000000,165924.000000,99875.000000,178.940094)}
{pt3dadd(195432.000000,165732.000000,99875.000000,239.286142)}
{pt3dadd(195012.000000,165540.000000,99950.000000,321.762733)}
{pt3dadd(194760.000000,165936.000000,100450.000000,387.012000)}

{create adhoc60}
{access adhoc60}
{connect adhoc60(1), adhoc59(0)}
{nseg = 1}
{strdef color color = "White"}
{pt3dclear()}
{pt3dadd(194760.000000,165936.000000,100450.000000,387.012000)}
{pt3dadd(194244.000000,166224.000000,100200.000000,426.680730)}

{create adhoc61}
{access adhoc61}
{connect adhoc61(1), adhoc59(0)}
{nseg = 1}
{strdef color color = "White"}
{pt3dclear()}
{pt3dadd(194760.000000,165936.000000,100450.000000,387.012000)}
{pt3dadd(194868.000000,165276.000000,99325.000000,207.164357)}
{pt3dadd(194892.000000,165156.000000,99100.000000,73.669590)}

{create adhoc62}
{access adhoc62}
{connect adhoc62(1), adhoc59(0)}
{nseg = 1}
{strdef color color = "White"}
{pt3dclear()}
{pt3dadd(194760.000000,165936.000000,100450.000000,387.012000)}
{pt3dadd(194856.000000,165288.000000,100775.000000,224.155267)}
{pt3dadd(194844.000000,164868.000000,101050.000000,177.297788)}
{pt3dadd(195240.000000,164496.000000,101200.000000,116.139533)}
{pt3dadd(195528.000000,164220.000000,101350.000000,99.541076)}
{pt3dadd(195552.000000,163968.000000,101350.000000,88.551690)}
{pt3dadd(195468.000000,163680.000000,101425.000000,78.583993)}
{pt3dadd(195492.000000,163392.000000,101375.000000,70.250485)}
{pt3dadd(195564.000000,163068.000000,101350.000000,71.915509)}
{pt3dadd(195552.000000,162720.000000,101450.000000,84.343206)}
{pt3dadd(195624.000000,162336.000000,101525.000000,99.503352)}
{pt3dadd(195624.000000,162060.000000,101525.000000,126.519193)}
{pt3dadd(195612.000000,161724.000000,101525.000000,168.437063)}
{pt3dadd(195456.000000,161340.000000,101300.000000,220.734150)}
{pt3dadd(195180.000000,160968.000000,101125.000000,279.610296)}
{pt3dadd(195144.000000,160512.000000,101200.000000,346.552320)}
{pt3dadd(195420.000000,160140.000000,101425.000000,426.680730)}

{create adhoc63}
{access adhoc63}
{connect adhoc63(1), adhoc62(0)}
{nseg = 1}
{strdef color color = "White"}
{pt3dclear()}
{pt3dadd(195420.000000,160140.000000,101425.000000,426.680730)}
{pt3dadd(195276.000000,159756.000000,101225.000000,338.434603)}
{pt3dadd(195360.000000,159444.000000,101175.000000,268.993468)}
{pt3dadd(195384.000000,159204.000000,101125.000000,189.085110)}
{pt3dadd(195324.000000,158796.000000,100925.000000,168.852050)}

{create adhoc64}
{access adhoc64}
{connect adhoc64(1), adhoc62(0)}
{nseg = 1}
{strdef color color = "White"}
{pt3dclear()}
{pt3dadd(195420.000000,160140.000000,101425.000000,426.680730)}
{pt3dadd(195432.000000,160176.000000,101900.000000,275.028003)}
{pt3dadd(195288.000000,160284.000000,102125.000000,160.811480)}

{create adhoc65}
{access adhoc65}
{connect adhoc65(1), adhoc59(0)}
{nseg = 1}
{strdef color color = "White"}
{pt3dclear()}
{pt3dadd(194760.000000,165936.000000,100450.000000,387.012000)}
{pt3dadd(194904.000000,166260.000000,101050.000000,295.516250)}
{pt3dadd(195036.000000,166428.000000,101500.000000,226.800983)}
{pt3dadd(195216.000000,166476.000000,101875.000000,169.800371)}
{pt3dadd(195252.000000,166308.000000,102075.000000,70.161514)}

{create adhoc66}
{access adhoc66}
{connect adhoc66(1), adhoc59(0)}
{nseg = 1}
{strdef color color = "White"}
{pt3dclear()}
{pt3dadd(194760.000000,165936.000000,100450.000000,387.012000)}
{pt3dadd(194364.000000,166788.000000,100025.000000,236.339283)}
{pt3dadd(194196.000000,167244.000000,100100.000000,235.240704)}
{pt3dadd(193992.000000,167568.000000,100025.000000,224.701408)}
{pt3dadd(193776.000000,167940.000000,99775.000000,254.717448)}
{pt3dadd(193692.000000,168432.000000,99375.000000,264.047590)}
{pt3dadd(193488.000000,168924.000000,99375.000000,258.458376)}
{pt3dadd(193368.000000,169272.000000,99050.000000,276.275642)}
{pt3dadd(193332.000000,169608.000000,98625.000000,247.942897)}
{pt3dadd(193380.000000,170016.000000,98275.000000,351.031280)}

{create adhoc67}
{access adhoc67}
{connect adhoc67(1), adhoc66(0)}
{nseg = 1}
{strdef color color = "White"}
{pt3dclear()}
{pt3dadd(193380.000000,170016.000000,98275.000000,351.031280)}
{pt3dadd(193440.000000,170232.000000,98325.000000,448.014770)}

{create adhoc68}
{access adhoc68}
{connect adhoc68(1), adhoc67(0)}
{nseg = 1}
{strdef color color = "White"}
{pt3dclear()}
{pt3dadd(193440.000000,170232.000000,98325.000000,448.014770)}
{pt3dadd(193632.000000,170724.000000,98475.000000,237.591800)}

{create adhoc69}
{access adhoc69}
{connect adhoc69(1), adhoc67(0)}
{nseg = 1}
{strdef color color = "White"}
{pt3dclear()}
{pt3dadd(193440.000000,170232.000000,98325.000000,448.014770)}
{pt3dadd(193416.000000,170064.000000,97825.000000,205.240720)}

{create adhoc70}
{access adhoc70}
{connect adhoc70(1), adhoc66(0)}
{nseg = 1}
{strdef color color = "White"}
{pt3dclear()}
{pt3dadd(193380.000000,170016.000000,98275.000000,351.031280)}
{pt3dadd(192648.000000,170172.000000,98150.000000,77.353070)}

{create adhoc71}
{access adhoc71}
{connect adhoc71(1), adhoc4(0)}
{nseg = 1}
{strdef color color = "White"}
{pt3dclear()}
{pt3dadd(192864.000000,192672.000000,100475.000000,318.395720)}
{pt3dadd(193476.000000,192780.000000,100375.000000,318.395720)}

{create adhoc72}
{access adhoc72}
{connect adhoc72(1), adhoc3(0)}
{nseg = 1}
{strdef color color = "White"}
{pt3dclear()}
{pt3dadd(188184.000000,200904.000000,98800.000000,544.564760)}
{pt3dadd(187332.000000,201144.000000,98350.000000,447.245013)}
{pt3dadd(186768.000000,201156.000000,98300.000000,348.027664)}
{pt3dadd(186396.000000,201228.000000,98275.000000,280.162856)}
{pt3dadd(186084.000000,201204.000000,98175.000000,213.537896)}
{pt3dadd(185748.000000,201180.000000,98100.000000,183.521856)}
{pt3dadd(185328.000000,201156.000000,97950.000000,162.463496)}
{pt3dadd(184908.000000,201228.000000,97875.000000,167.533080)}
{pt3dadd(184668.000000,201180.000000,97700.000000,184.243796)}
{pt3dadd(184392.000000,201168.000000,97550.000000,225.798072)}
{pt3dadd(184104.000000,201012.000000,97400.000000,284.770266)}
{pt3dadd(183696.000000,200664.000000,97100.000000,368.463977)}
{pt3dadd(183576.000000,200424.000000,96650.000000,448.014770)}

{create adhoc73}
{access adhoc73}
{connect adhoc73(1), adhoc72(0)}
{nseg = 1}
{strdef color color = "White"}
{pt3dclear()}
{pt3dadd(183576.000000,200424.000000,96650.000000,448.014770)}
{pt3dadd(183576.000000,200052.000000,96650.000000,518.633060)}

{create adhoc74}
{access adhoc74}
{connect adhoc74(1), adhoc73(0)}
{nseg = 1}
{strdef color color = "White"}
{pt3dclear()}
{pt3dadd(183576.000000,200052.000000,96650.000000,518.633060)}
{pt3dadd(183432.000000,199668.000000,96650.000000,406.785330)}
{pt3dadd(183696.000000,199188.000000,96475.000000,293.289846)}
{pt3dadd(183684.000000,198804.000000,96300.000000,205.807379)}
{pt3dadd(183492.000000,198648.000000,96050.000000,140.216093)}
{pt3dadd(183264.000000,198348.000000,95775.000000,106.976361)}
{pt3dadd(183156.000000,198132.000000,95575.000000,96.262855)}
{pt3dadd(183060.000000,198060.000000,95325.000000,108.843540)}

{create adhoc75}
{access adhoc75}
{connect adhoc75(1), adhoc73(0)}
{nseg = 1}
{strdef color color = "White"}
{pt3dclear()}
{pt3dadd(183576.000000,200052.000000,96650.000000,518.633060)}
{pt3dadd(183372.000000,199692.000000,97075.000000,303.234000)}

{create adhoc76}
{access adhoc76}
{connect adhoc76(1), adhoc75(0)}
{nseg = 1}
{strdef color color = "White"}
{pt3dclear()}
{pt3dadd(183372.000000,199692.000000,97075.000000,303.234000)}
{pt3dadd(183492.000000,199776.000000,97500.000000,165.480120)}
{pt3dadd(183600.000000,199656.000000,97625.000000,132.826618)}
{pt3dadd(183540.000000,199620.000000,97875.000000,85.746192)}
{pt3dadd(183468.000000,199548.000000,97950.000000,94.023140)}

{create adhoc77}
{access adhoc77}
{connect adhoc77(1), adhoc75(0)}
{nseg = 1}
{strdef color color = "White"}
{pt3dclear()}
{pt3dadd(183372.000000,199692.000000,97075.000000,303.234000)}
{pt3dadd(183384.000000,199092.000000,97025.000000,98.724300)}

{create adhoc78}
{access adhoc78}
{connect adhoc78(1), adhoc72(0)}
{nseg = 1}
{strdef color color = "White"}
{pt3dclear()}
{pt3dadd(183576.000000,200424.000000,96650.000000,448.014770)}
{pt3dadd(183180.000000,200772.000000,96775.000000,269.561340)}
{pt3dadd(183024.000000,201300.000000,96875.000000,212.196804)}
{pt3dadd(182904.000000,201648.000000,96950.000000,141.398478)}
{pt3dadd(182808.000000,201984.000000,97100.000000,108.754348)}
{pt3dadd(182676.000000,202308.000000,97075.000000,108.754348)}
{pt3dadd(182664.000000,202548.000000,97075.000000,111.214348)}
{pt3dadd(182688.000000,202692.000000,97050.000000,109.916200)}
{pt3dadd(182616.000000,202920.000000,97125.000000,132.300000)}

{create adhoc79}
{access adhoc79}
{connect adhoc79(1), adhoc2(0)}
{nseg = 1}
{strdef color color = "White"}
{pt3dclear()}
{pt3dadd(181464.000000,209172.000000,96800.000000,334.315520)}
{pt3dadd(181212.000000,209412.000000,96575.000000,280.930080)}
{pt3dadd(181128.000000,209748.000000,96800.000000,238.282280)}
{pt3dadd(180888.000000,210036.000000,96900.000000,226.427616)}
{pt3dadd(180564.000000,210312.000000,97225.000000,235.987072)}
{pt3dadd(180204.000000,210564.000000,97425.000000,276.211444)}
{pt3dadd(179928.000000,210876.000000,97325.000000,303.981076)}
{pt3dadd(179796.000000,211176.000000,97125.000000,323.244590)}
{pt3dadd(179760.000000,211500.000000,97050.000000,315.754510)}
{pt3dadd(179724.000000,211848.000000,97225.000000,286.596398)}
{pt3dadd(179664.000000,212232.000000,97125.000000,255.218156)}
{pt3dadd(179580.000000,212556.000000,97175.000000,282.438152)}
{pt3dadd(179412.000000,212892.000000,97225.000000,313.816394)}
{pt3dadd(179316.000000,213240.000000,97275.000000,375.416483)}
{pt3dadd(179136.000000,213516.000000,97200.000000,406.362580)}

{create adhoc80}
{access adhoc80}
{connect adhoc80(1), adhoc79(0)}
{nseg = 1}
{strdef color color = "White"}
{pt3dclear()}
{pt3dadd(179136.000000,213516.000000,97200.000000,406.362580)}
{pt3dadd(179004.000000,213816.000000,97200.000000,399.912387)}
{pt3dadd(178872.000000,214056.000000,97200.000000,370.489680)}
{pt3dadd(178884.000000,214356.000000,97275.000000,362.933736)}
{pt3dadd(178788.000000,214632.000000,97475.000000,355.737592)}
{pt3dadd(178740.000000,214908.000000,97675.000000,319.720656)}
{pt3dadd(178668.000000,215232.000000,97675.000000,290.089432)}
{pt3dadd(178920.000000,215604.000000,97725.000000,278.799278)}
{pt3dadd(178980.000000,216012.000000,97775.000000,246.130850)}
{pt3dadd(179004.000000,216348.000000,97925.000000,223.442954)}
{pt3dadd(179016.000000,216720.000000,97850.000000,225.705734)}
{pt3dadd(179100.000000,217056.000000,97950.000000,235.992214)}
{pt3dadd(179040.000000,217404.000000,98025.000000,241.362084)}
{pt3dadd(179160.000000,217812.000000,97900.000000,263.993084)}
{pt3dadd(179244.000000,218124.000000,97750.000000,283.337828)}
{pt3dadd(179388.000000,218424.000000,97525.000000,309.536040)}
{pt3dadd(179436.000000,218736.000000,97275.000000,335.734252)}
{pt3dadd(179364.000000,219120.000000,97175.000000,332.983832)}
{pt3dadd(179304.000000,219444.000000,97075.000000,308.398160)}
{pt3dadd(178956.000000,219780.000000,96975.000000,282.583200)}
{pt3dadd(178776.000000,220236.000000,96450.000000,249.914772)}
{pt3dadd(178668.000000,220596.000000,96175.000000,226.092474)}
{pt3dadd(178572.000000,220836.000000,95900.000000,223.473024)}
{pt3dadd(178176.000000,221232.000000,95750.000000,248.058696)}
{pt3dadd(177792.000000,221604.000000,95675.000000,284.412952)}
{pt3dadd(177492.000000,221988.000000,95475.000000,280.596688)}
{pt3dadd(177444.000000,222672.000000,94825.000000,278.220774)}
{pt3dadd(177408.000000,223404.000000,94525.000000,286.478584)}
{pt3dadd(177360.000000,223692.000000,94275.000000,277.807880)}
{pt3dadd(177396.000000,223812.000000,93875.000000,252.794470)}
{pt3dadd(177480.000000,224136.000000,93525.000000,254.656062)}
{pt3dadd(177384.000000,224184.000000,93100.000000,244.369582)}
{pt3dadd(177324.000000,224208.000000,92600.000000,217.493192)}
{pt3dadd(177324.000000,224388.000000,92300.000000,199.716632)}
{pt3dadd(177396.000000,224580.000000,91925.000000,190.428194)}
{pt3dadd(177300.000000,224760.000000,91500.000000,206.343162)}
{pt3dadd(177384.000000,224964.000000,91150.000000,254.447428)}
{pt3dadd(177444.000000,225192.000000,90775.000000,298.079418)}
{pt3dadd(177480.000000,225444.000000,90400.000000,334.564110)}
{pt3dadd(177432.000000,225684.000000,90100.000000,372.736074)}
{pt3dadd(177432.000000,225924.000000,89775.000000,372.736074)}
{pt3dadd(177540.000000,226056.000000,89475.000000,318.030688)}
{pt3dadd(177576.000000,226092.000000,89175.000000,272.790584)}
{pt3dadd(177648.000000,226116.000000,88675.000000,251.463002)}
{pt3dadd(177576.000000,226008.000000,88225.000000,217.708846)}
{pt3dadd(177396.000000,225840.000000,87900.000000,226.379550)}
{pt3dadd(177192.000000,225588.000000,87525.000000,272.644157)}
{pt3dadd(176808.000000,225372.000000,87250.000000,318.395720)}

{create adhoc81}
{access adhoc81}
{connect adhoc81(1), adhoc80(0)}
{nseg = 1}
{strdef color color = "White"}
{pt3dclear()}
{pt3dadd(176808.000000,225372.000000,87250.000000,318.395720)}
{pt3dadd(176316.000000,224664.000000,87025.000000,236.598613)}
{pt3dadd(176016.000000,224208.000000,86875.000000,224.153192)}
{pt3dadd(175800.000000,223860.000000,86650.000000,205.729628)}
{pt3dadd(175644.000000,223500.000000,86625.000000,213.753328)}
{pt3dadd(175488.000000,223104.000000,86625.000000,233.351984)}
{pt3dadd(175380.000000,222756.000000,86625.000000,241.776872)}
{pt3dadd(175128.000000,222456.000000,86675.000000,251.065310)}
{pt3dadd(174864.000000,222216.000000,86650.000000,241.268660)}
{pt3dadd(174540.000000,222072.000000,86625.000000,229.783490)}
{pt3dadd(174288.000000,221880.000000,86625.000000,202.907100)}
{pt3dadd(174036.000000,221760.000000,86650.000000,205.283014)}
{pt3dadd(173748.000000,221592.000000,86650.000000,242.496978)}
{pt3dadd(173436.000000,221460.000000,86625.000000,305.825304)}
{pt3dadd(173076.000000,221196.000000,86525.000000,397.140807)}
{pt3dadd(172836.000000,220956.000000,86325.000000,493.936280)}

{create adhoc82}
{access adhoc82}
{connect adhoc82(1), adhoc81(0)}
{nseg = 1}
{strdef color color = "White"}
{pt3dclear()}
{pt3dadd(172836.000000,220956.000000,86325.000000,493.936280)}
{pt3dadd(172584.000000,220848.000000,86225.000000,393.284847)}
{pt3dadd(172104.000000,220608.000000,85925.000000,303.479052)}
{pt3dadd(171912.000000,220356.000000,85575.000000,247.792348)}
{pt3dadd(171648.000000,220092.000000,85225.000000,194.757392)}
{pt3dadd(171456.000000,219960.000000,85000.000000,215.335984)}
{pt3dadd(171396.000000,219576.000000,84750.000000,251.690240)}
{pt3dadd(171348.000000,219312.000000,84625.000000,298.946812)}
{pt3dadd(171264.000000,219144.000000,84425.000000,357.996860)}
{pt3dadd(171276.000000,219024.000000,84200.000000,368.582860)}

{create adhoc83}
{access adhoc83}
{connect adhoc83(1), adhoc82(0)}
{nseg = 1}
{strdef color color = "White"}
{pt3dclear()}
{pt3dadd(171276.000000,219024.000000,84200.000000,368.582860)}
{pt3dadd(171048.000000,218916.000000,83800.000000,232.790443)}
{pt3dadd(170832.000000,218952.000000,83600.000000,179.210997)}
{pt3dadd(170676.000000,219012.000000,83325.000000,121.738570)}
{pt3dadd(170472.000000,219168.000000,83150.000000,97.442646)}
{pt3dadd(170412.000000,219420.000000,83125.000000,91.641856)}
{pt3dadd(170304.000000,219720.000000,83050.000000,98.037228)}
{pt3dadd(170196.000000,220008.000000,83050.000000,102.505125)}
{pt3dadd(170028.000000,220296.000000,82825.000000,111.460980)}
{pt3dadd(170136.000000,220620.000000,82625.000000,131.749824)}
{pt3dadd(170160.000000,220872.000000,82575.000000,175.340272)}
{pt3dadd(170064.000000,221220.000000,82375.000000,191.188416)}
{pt3dadd(170004.000000,221604.000000,82225.000000,193.771416)}
{pt3dadd(169740.000000,221904.000000,81975.000000,207.664888)}
{pt3dadd(169452.000000,222096.000000,81725.000000,220.960406)}
{pt3dadd(169140.000000,222324.000000,81650.000000,215.322046)}
{pt3dadd(168840.000000,222528.000000,81600.000000,259.610048)}
{pt3dadd(168624.000000,222660.000000,81575.000000,298.690152)}
{pt3dadd(168372.000000,222828.000000,81675.000000,309.490954)}
{pt3dadd(168312.000000,223176.000000,81550.000000,287.732724)}
{pt3dadd(168000.000000,223320.000000,81400.000000,259.184284)}
{pt3dadd(167832.000000,223548.000000,80900.000000,199.048138)}
{pt3dadd(167676.000000,223572.000000,80750.000000,150.094203)}
{pt3dadd(167520.000000,223680.000000,80575.000000,119.004557)}
{pt3dadd(167244.000000,223764.000000,80350.000000,110.142505)}
{pt3dadd(167088.000000,223920.000000,80100.000000,106.539647)}
{pt3dadd(166908.000000,224088.000000,79850.000000,115.110057)}
{pt3dadd(166848.000000,224196.000000,79700.000000,127.831648)}
{pt3dadd(166560.000000,224268.000000,79500.000000,145.430520)}
{pt3dadd(166308.000000,224304.000000,79200.000000,153.153800)}

{create adhoc84}
{access adhoc84}
{connect adhoc84(1), adhoc83(0)}
{nseg = 1}
{strdef color color = "White"}
{pt3dclear()}
{pt3dadd(166308.000000,224304.000000,79200.000000,153.153800)}
{pt3dadd(165960.000000,224004.000000,78975.000000,137.356267)}
{pt3dadd(165660.000000,223884.000000,78875.000000,146.707232)}
{pt3dadd(165420.000000,223800.000000,78700.000000,153.308352)}
{pt3dadd(165312.000000,223644.000000,78425.000000,154.508352)}
{pt3dadd(165180.000000,223368.000000,78200.000000,165.818824)}
{pt3dadd(165024.000000,222984.000000,77875.000000,204.127752)}
{pt3dadd(164736.000000,222840.000000,77450.000000,260.200268)}
{pt3dadd(164508.000000,222468.000000,77175.000000,304.240904)}
{pt3dadd(164124.000000,222144.000000,76825.000000,322.141456)}
{pt3dadd(164040.000000,221712.000000,76775.000000,324.096128)}
{pt3dadd(164160.000000,221328.000000,76200.000000,301.702168)}
{pt3dadd(164292.000000,220908.000000,75975.000000,252.591948)}
{pt3dadd(164268.000000,220728.000000,75700.000000,196.519432)}
{pt3dadd(164388.000000,220512.000000,74900.000000,178.618880)}
{pt3dadd(164376.000000,220080.000000,74525.000000,180.671288)}
{pt3dadd(164304.000000,219744.000000,74300.000000,178.051838)}
{pt3dadd(164316.000000,219348.000000,73950.000000,200.897982)}
{pt3dadd(164268.000000,218880.000000,73675.000000,250.829970)}
{pt3dadd(163992.000000,218640.000000,73275.000000,275.042200)}

{create adhoc85}
{access adhoc85}
{connect adhoc85(1), adhoc84(0)}
{nseg = 1}
{strdef color color = "White"}
{pt3dclear()}
{pt3dadd(163992.000000,218640.000000,73275.000000,275.042200)}
{pt3dadd(163728.000000,218436.000000,72850.000000,242.712253)}
{pt3dadd(163392.000000,218280.000000,72475.000000,216.510904)}
{pt3dadd(162936.000000,218028.000000,72125.000000,195.272874)}
{pt3dadd(162612.000000,217572.000000,71825.000000,175.537514)}
{pt3dadd(162336.000000,217092.000000,71850.000000,148.894017)}
{pt3dadd(162120.000000,216768.000000,71900.000000,138.915000)}

{create adhoc86}
{access adhoc86}
{connect adhoc86(1), adhoc84(0)}
{nseg = 1}
{strdef color color = "White"}
{pt3dclear()}
{pt3dadd(163992.000000,218640.000000,73275.000000,275.042200)}
{pt3dadd(164376.000000,218400.000000,73700.000000,179.838065)}
{pt3dadd(164508.000000,217968.000000,73825.000000,142.178081)}
{pt3dadd(164700.000000,217836.000000,73875.000000,111.169641)}
{pt3dadd(164772.000000,217656.000000,73875.000000,97.125403)}
{pt3dadd(164964.000000,217500.000000,73950.000000,120.000000)}

{create adhoc87}
{access adhoc87}
{connect adhoc87(1), adhoc83(0)}
{nseg = 1}
{strdef color color = "White"}
{pt3dclear()}
{pt3dadd(166308.000000,224304.000000,79200.000000,153.153800)}
{pt3dadd(166560.000000,224892.000000,79400.000000,139.251267)}
{pt3dadd(166644.000000,225132.000000,79450.000000,147.875352)}
{pt3dadd(166536.000000,225132.000000,79575.000000,158.292736)}
{pt3dadd(166536.000000,225252.000000,79625.000000,175.621227)}
{pt3dadd(166428.000000,225636.000000,79675.000000,205.240720)}

{create adhoc88}
{access adhoc88}
{connect adhoc88(1), adhoc82(0)}
{nseg = 1}
{strdef color color = "White"}
{pt3dclear()}
{pt3dadd(171276.000000,219024.000000,84200.000000,368.582860)}
{pt3dadd(171408.000000,218592.000000,84200.000000,544.564760)}

{create adhoc89}
{access adhoc89}
{connect adhoc89(1), adhoc88(0)}
{nseg = 1}
{strdef color color = "White"}
{pt3dclear()}
{pt3dadd(171408.000000,218592.000000,84200.000000,544.564760)}
{pt3dadd(171084.000000,218016.000000,84200.000000,306.959667)}
{pt3dadd(170940.000000,217596.000000,83850.000000,296.943100)}
{pt3dadd(170928.000000,217284.000000,83700.000000,231.130700)}
{pt3dadd(171012.000000,217044.000000,83450.000000,245.789008)}
{pt3dadd(171144.000000,216240.000000,83175.000000,252.720184)}
{pt3dadd(171204.000000,215544.000000,82925.000000,245.230104)}
{pt3dadd(171336.000000,215232.000000,82775.000000,221.241654)}
{pt3dadd(171432.000000,214860.000000,82525.000000,203.341102)}
{pt3dadd(171432.000000,214572.000000,82300.000000,170.782242)}
{pt3dadd(171276.000000,214416.000000,82050.000000,158.148770)}
{pt3dadd(171252.000000,214236.000000,81875.000000,139.802560)}
{pt3dadd(171264.000000,214188.000000,81525.000000,132.492150)}
{pt3dadd(171084.000000,214404.000000,81225.000000,132.492150)}
{pt3dadd(170928.000000,214320.000000,80525.000000,130.149292)}
{pt3dadd(170688.000000,214320.000000,80225.000000,124.195237)}
{pt3dadd(170496.000000,214452.000000,79875.000000,114.285710)}

{create adhoc90}
{access adhoc90}
{connect adhoc90(1), adhoc89(0)}
{nseg = 1}
{strdef color color = "White"}
{pt3dclear()}
{pt3dadd(170496.000000,214452.000000,79875.000000,114.285710)}
{pt3dadd(170184.000000,214536.000000,79600.000000,124.195237)}
{pt3dadd(170088.000000,214620.000000,79450.000000,131.607902)}
{pt3dadd(169728.000000,214548.000000,79150.000000,161.139750)}
{pt3dadd(169584.000000,214392.000000,78925.000000,182.466250)}
{pt3dadd(169476.000000,214020.000000,78550.000000,261.944950)}

{create adhoc91}
{access adhoc91}
{connect adhoc91(1), adhoc90(0)}
{nseg = 1}
{strdef color color = "White"}
{pt3dclear()}
{pt3dadd(169476.000000,214020.000000,78550.000000,261.944950)}
{pt3dadd(168984.000000,213684.000000,78400.000000,294.524890)}
{pt3dadd(168588.000000,213288.000000,78300.000000,262.068138)}
{pt3dadd(168420.000000,213168.000000,77975.000000,248.387247)}
{pt3dadd(168216.000000,213180.000000,77750.000000,177.294650)}

{create adhoc92}
{access adhoc92}
{connect adhoc92(1), adhoc90(0)}
{nseg = 1}
{strdef color color = "White"}
{pt3dclear()}
{pt3dadd(169476.000000,214020.000000,78550.000000,261.944950)}
{pt3dadd(169428.000000,213984.000000,78125.000000,198.775770)}
{pt3dadd(169584.000000,213912.000000,77925.000000,160.081037)}
{pt3dadd(169704.000000,213936.000000,77725.000000,145.860750)}

{create adhoc93}
{access adhoc93}
{connect adhoc93(1), adhoc89(0)}
{nseg = 1}
{strdef color color = "White"}
{pt3dclear()}
{pt3dadd(170496.000000,214452.000000,79875.000000,114.285710)}
{pt3dadd(169860.000000,214644.000000,79800.000000,114.285710)}
{pt3dadd(169500.000000,214572.000000,79500.000000,114.285710)}

{create adhoc94}
{access adhoc94}
{connect adhoc94(1), adhoc88(0)}
{nseg = 1}
{strdef color color = "White"}
{pt3dclear()}
{pt3dadd(171408.000000,218592.000000,84200.000000,544.564760)}
{pt3dadd(171960.000000,218388.000000,84200.000000,286.425853)}
{pt3dadd(172068.000000,218352.000000,84075.000000,145.860750)}

{create adhoc95}
{access adhoc95}
{connect adhoc95(1), adhoc81(0)}
{nseg = 1}
{strdef color color = "White"}
{pt3dclear()}
{pt3dadd(172836.000000,220956.000000,86325.000000,493.936280)}
{pt3dadd(171588.000000,221676.000000,86400.000000,387.012000)}

{create adhoc96}
{access adhoc96}
{connect adhoc96(1), adhoc95(0)}
{nseg = 1}
{strdef color color = "White"}
{pt3dclear()}
{pt3dadd(171588.000000,221676.000000,86400.000000,387.012000)}
{pt3dadd(171492.000000,222144.000000,86850.000000,279.782950)}
{pt3dadd(171264.000000,222456.000000,87150.000000,177.294650)}

{create adhoc97}
{access adhoc97}
{connect adhoc97(1), adhoc95(0)}
{nseg = 1}
{strdef color color = "White"}
{pt3dclear()}
{pt3dadd(171588.000000,221676.000000,86400.000000,387.012000)}
{pt3dadd(171096.000000,221532.000000,86000.000000,346.574413)}
{pt3dadd(171000.000000,221484.000000,85850.000000,271.186578)}
{pt3dadd(170796.000000,221088.000000,85650.000000,216.841723)}
{pt3dadd(170748.000000,220944.000000,85600.000000,138.915000)}

{create adhoc98}
{access adhoc98}
{connect adhoc98(1), adhoc80(0)}
{nseg = 1}
{strdef color color = "White"}
{pt3dclear()}
{pt3dadd(176808.000000,225372.000000,87250.000000,318.395720)}
{pt3dadd(176412.000000,225708.000000,87250.000000,261.494890)}
{pt3dadd(175956.000000,225672.000000,87200.000000,177.294650)}

{create adhoc99}
{access adhoc99}
{connect adhoc99(1), adhoc98(0)}
{nseg = 1}
{strdef color color = "White"}
{pt3dclear()}
{pt3dadd(175956.000000,225672.000000,87200.000000,177.294650)}
{pt3dadd(175620.000000,225864.000000,87200.000000,166.433500)}
{pt3dadd(175260.000000,225960.000000,87275.000000,159.663010)}
{pt3dadd(174996.000000,226032.000000,87250.000000,150.664080)}
{pt3dadd(174696.000000,226152.000000,87275.000000,146.065820)}
{pt3dadd(174372.000000,226248.000000,87250.000000,143.218060)}
{pt3dadd(174072.000000,226356.000000,87225.000000,141.828910)}
{pt3dadd(173748.000000,226332.000000,87150.000000,143.360446)}
{pt3dadd(173340.000000,226512.000000,87075.000000,143.360446)}
{pt3dadd(173028.000000,226452.000000,86975.000000,184.394552)}
{pt3dadd(172668.000000,226584.000000,87000.000000,246.214506)}
{pt3dadd(172068.000000,226620.000000,87100.000000,285.294610)}
{pt3dadd(171732.000000,226548.000000,87150.000000,342.735268)}
{pt3dadd(171348.000000,226632.000000,87150.000000,405.878222)}
{pt3dadd(171108.000000,226716.000000,87200.000000,439.398578)}
{pt3dadd(170916.000000,226824.000000,87275.000000,471.554200)}
{pt3dadd(170700.000000,226968.000000,87325.000000,518.633060)}

{create adhoc100}
{access adhoc100}
{connect adhoc100(1), adhoc99(0)}
{nseg = 1}
{strdef color color = "White"}
{pt3dclear()}
{pt3dadd(170700.000000,226968.000000,87325.000000,518.633060)}
{pt3dadd(170208.000000,227208.000000,87150.000000,401.326620)}
{pt3dadd(169860.000000,227436.000000,87025.000000,353.831762)}
{pt3dadd(169548.000000,227532.000000,87150.000000,305.403410)}
{pt3dadd(169344.000000,227700.000000,87200.000000,303.234000)}

{create adhoc101}
{access adhoc101}
{connect adhoc101(1), adhoc100(0)}
{nseg = 1}
{strdef color color = "White"}
{pt3dclear()}
{pt3dadd(169344.000000,227700.000000,87200.000000,303.234000)}
{pt3dadd(168972.000000,227808.000000,87325.000000,199.340188)}
{pt3dadd(168804.000000,227868.000000,87425.000000,163.141529)}
{pt3dadd(168576.000000,227820.000000,87400.000000,125.351871)}
{pt3dadd(168324.000000,227868.000000,87400.000000,127.404279)}
{pt3dadd(168084.000000,227880.000000,87425.000000,164.503550)}
{pt3dadd(167904.000000,228048.000000,87600.000000,201.610223)}
{pt3dadd(167568.000000,228264.000000,87975.000000,275.042200)}

{create adhoc102}
{access adhoc102}
{connect adhoc102(1), adhoc101(0)}
{nseg = 1}
{strdef color color = "White"}
{pt3dclear()}
{pt3dadd(167568.000000,228264.000000,87975.000000,275.042200)}
{pt3dadd(167448.000000,228516.000000,88050.000000,300.371893)}
{pt3dadd(167100.000000,228792.000000,88475.000000,351.031280)}

{create adhoc103}
{access adhoc103}
{connect adhoc103(1), adhoc102(0)}
{nseg = 1}
{strdef color color = "White"}
{pt3dclear()}
{pt3dadd(167100.000000,228792.000000,88475.000000,351.031280)}
{pt3dadd(166872.000000,229140.000000,88800.000000,383.359110)}
{pt3dadd(167064.000000,229332.000000,89100.000000,322.255786)}
{pt3dadd(167172.000000,229608.000000,89275.000000,304.438520)}
{pt3dadd(167232.000000,229788.000000,89475.000000,241.048850)}
{pt3dadd(167412.000000,229716.000000,89825.000000,261.944950)}

{create adhoc104}
{access adhoc104}
{connect adhoc104(1), adhoc102(0)}
{nseg = 1}
{strdef color color = "White"}
{pt3dclear()}
{pt3dadd(167100.000000,228792.000000,88475.000000,351.031280)}
{pt3dadd(167100.000000,228444.000000,88925.000000,237.464930)}
{pt3dadd(166872.000000,228216.000000,88950.000000,162.454503)}
{pt3dadd(166920.000000,228168.000000,88925.000000,126.000000)}

{create adhoc105}
{access adhoc105}
{connect adhoc105(1), adhoc102(0)}
{nseg = 1}
{strdef color color = "White"}
{pt3dclear()}
{pt3dadd(167100.000000,228792.000000,88475.000000,351.031280)}
{pt3dadd(167340.000000,229656.000000,88475.000000,160.811480)}

{create adhoc106}
{access adhoc106}
{connect adhoc106(1), adhoc102(0)}
{nseg = 1}
{strdef color color = "White"}
{pt3dclear()}
{pt3dadd(167100.000000,228792.000000,88475.000000,351.031280)}
{pt3dadd(167700.000000,229008.000000,88525.000000,235.206860)}
{pt3dadd(167796.000000,229080.000000,88450.000000,202.677526)}
{pt3dadd(168108.000000,229092.000000,88450.000000,161.643420)}
{pt3dadd(168480.000000,229128.000000,88525.000000,167.232634)}
{pt3dadd(168624.000000,229080.000000,88050.000000,172.821848)}
{pt3dadd(169260.000000,228840.000000,87925.000000,160.820146)}
{pt3dadd(169464.000000,228492.000000,87925.000000,173.108327)}
{pt3dadd(169728.000000,228144.000000,87825.000000,108.843540)}

{create adhoc107}
{access adhoc107}
{connect adhoc107(1), adhoc101(0)}
{nseg = 1}
{strdef color color = "White"}
{pt3dclear()}
{pt3dadd(167568.000000,228264.000000,87975.000000,275.042200)}
{pt3dadd(167436.000000,227988.000000,87450.000000,183.379797)}
{pt3dadd(167136.000000,227832.000000,87475.000000,153.772738)}
{pt3dadd(166848.000000,227748.000000,87275.000000,123.964298)}
{pt3dadd(166620.000000,227700.000000,87200.000000,117.002002)}
{pt3dadd(166320.000000,227772.000000,87275.000000,126.307156)}
{pt3dadd(165984.000000,227868.000000,87175.000000,130.090156)}
{pt3dadd(165768.000000,227748.000000,86825.000000,135.545296)}
{pt3dadd(165384.000000,227868.000000,86700.000000,140.976056)}
{pt3dadd(165012.000000,227892.000000,86475.000000,142.236056)}
{pt3dadd(164556.000000,227796.000000,86225.000000,139.245910)}
{pt3dadd(164124.000000,227760.000000,86025.000000,145.233320)}
{pt3dadd(163848.000000,227940.000000,85775.000000,175.041760)}
{pt3dadd(163812.000000,228000.000000,85625.000000,196.799990)}
{pt3dadd(162888.000000,228312.000000,85650.000000,202.502286)}
{pt3dadd(162432.000000,228348.000000,85500.000000,207.100546)}
{pt3dadd(161904.000000,228624.000000,85450.000000,207.100546)}
{pt3dadd(161604.000000,228756.000000,85350.000000,207.100546)}
{pt3dadd(161196.000000,228804.000000,85225.000000,207.100546)}
{pt3dadd(160908.000000,228960.000000,85225.000000,218.038802)}
{pt3dadd(160476.000000,229044.000000,85175.000000,218.038802)}
{pt3dadd(160008.000000,228924.000000,85100.000000,209.468392)}
{pt3dadd(159684.000000,228636.000000,85100.000000,195.508096)}
{pt3dadd(159504.000000,228576.000000,84775.000000,176.889516)}
{pt3dadd(159372.000000,228444.000000,84475.000000,169.247894)}
{pt3dadd(159072.000000,228408.000000,84225.000000,167.639780)}
{pt3dadd(158820.000000,228120.000000,83950.000000,185.540332)}
{pt3dadd(158508.000000,228168.000000,83850.000000,221.894588)}
{pt3dadd(158196.000000,227832.000000,83750.000000,251.803322)}
{pt3dadd(157932.000000,227436.000000,83400.000000,306.970160)}
{pt3dadd(157884.000000,227484.000000,83125.000000,318.395720)}

{create adhoc108}
{access adhoc108}
{connect adhoc108(1), adhoc107(0)}
{nseg = 1}
{strdef color color = "White"}
{pt3dclear()}
{pt3dadd(157884.000000,227484.000000,83125.000000,318.395720)}
{pt3dadd(157404.000000,227916.000000,83175.000000,294.077407)}
{pt3dadd(157080.000000,228120.000000,83275.000000,238.996767)}
{pt3dadd(157044.000000,228504.000000,83275.000000,153.153800)}

{create adhoc109}
{access adhoc109}
{connect adhoc109(1), adhoc108(0)}
{nseg = 1}
{strdef color color = "White"}
{pt3dclear()}
{pt3dadd(157044.000000,228504.000000,83275.000000,153.153800)}
{pt3dadd(157044.000000,228768.000000,83375.000000,141.456267)}
{pt3dadd(157068.000000,228972.000000,83375.000000,134.505000)}
{pt3dadd(157068.000000,229248.000000,83500.000000,132.300000)}

{create adhoc110}
{access adhoc110}
{connect adhoc110(1), adhoc108(0)}
{nseg = 1}
{strdef color color = "White"}
{pt3dclear()}
{pt3dadd(157044.000000,228504.000000,83275.000000,153.153800)}
{pt3dadd(156816.000000,228624.000000,83150.000000,137.356267)}
{pt3dadd(156720.000000,228792.000000,82950.000000,136.656760)}
{pt3dadd(156648.000000,229116.000000,82850.000000,132.486000)}
{pt3dadd(156420.000000,229224.000000,82675.000000,134.505000)}
{pt3dadd(156264.000000,229248.000000,82475.000000,132.300000)}

{create adhoc111}
{access adhoc111}
{connect adhoc111(1), adhoc107(0)}
{nseg = 1}
{strdef color color = "White"}
{pt3dclear()}
{pt3dadd(157884.000000,227484.000000,83125.000000,318.395720)}
{pt3dadd(157920.000000,226872.000000,83125.000000,256.000500)}
{pt3dadd(157848.000000,226644.000000,83025.000000,193.968593)}
{pt3dadd(157476.000000,226440.000000,82675.000000,132.300000)}

{create adhoc112}
{access adhoc112}
{connect adhoc112(1), adhoc100(0)}
{nseg = 1}
{strdef color color = "White"}
{pt3dclear()}
{pt3dadd(169344.000000,227700.000000,87200.000000,303.234000)}
{pt3dadd(169884.000000,227568.000000,86575.000000,198.318500)}
{pt3dadd(169884.000000,227712.000000,86425.000000,145.860750)}

{create adhoc113}
{access adhoc113}
{connect adhoc113(1), adhoc99(0)}
{nseg = 1}
{strdef color color = "White"}
{pt3dclear()}
{pt3dadd(170700.000000,226968.000000,87325.000000,518.633060)}
{pt3dadd(170400.000000,226428.000000,87100.000000,252.972923)}
{pt3dadd(170340.000000,226080.000000,87100.000000,189.023076)}
{pt3dadd(170292.000000,225888.000000,87175.000000,104.101092)}
{pt3dadd(170316.000000,225684.000000,87175.000000,97.705720)}
{pt3dadd(170376.000000,225444.000000,87125.000000,91.904930)}
{pt3dadd(170496.000000,225252.000000,87075.000000,88.940850)}
{pt3dadd(170568.000000,225000.000000,86975.000000,94.202339)}
{pt3dadd(170592.000000,224880.000000,87025.000000,92.454063)}
{pt3dadd(170592.000000,224664.000000,87025.000000,96.506577)}
{pt3dadd(170520.000000,224496.000000,87075.000000,101.218933)}
{pt3dadd(170376.000000,224376.000000,87100.000000,103.146408)}
{pt3dadd(170256.000000,224292.000000,87150.000000,102.159165)}
{pt3dadd(169956.000000,224148.000000,87150.000000,106.871521)}
{pt3dadd(169716.000000,224052.000000,87150.000000,117.784789)}
{pt3dadd(169584.000000,223860.000000,87000.000000,122.476081)}
{pt3dadd(169080.000000,223428.000000,87000.000000,128.203978)}
{pt3dadd(168864.000000,223260.000000,87125.000000,140.621414)}
{pt3dadd(168768.000000,223128.000000,87150.000000,141.803827)}
{pt3dadd(168720.000000,223008.000000,87275.000000,160.811480)}

{create adhoc114}
{access adhoc114}
{connect adhoc114(1), adhoc98(0)}
{nseg = 1}
{strdef color color = "White"}
{pt3dclear()}
{pt3dadd(175956.000000,225672.000000,87200.000000,177.294650)}
{pt3dadd(176292.000000,225876.000000,87100.000000,244.353977)}
{pt3dadd(176436.000000,226140.000000,87100.000000,218.518688)}
{pt3dadd(176460.000000,226440.000000,87000.000000,215.515682)}
{pt3dadd(176472.000000,226836.000000,87000.000000,196.679884)}
{pt3dadd(176400.000000,227064.000000,86750.000000,176.268528)}
{pt3dadd(176424.000000,227280.000000,86650.000000,170.896870)}
{pt3dadd(176496.000000,227652.000000,86475.000000,169.351350)}
{pt3dadd(176460.000000,227904.000000,86250.000000,167.805830)}
{pt3dadd(176484.000000,228120.000000,86075.000000,153.785516)}
{pt3dadd(176460.000000,228168.000000,85725.000000,150.768072)}
{pt3dadd(176292.000000,228180.000000,85500.000000,149.145276)}
{pt3dadd(176364.000000,228024.000000,85175.000000,154.017526)}
{pt3dadd(176472.000000,228144.000000,84950.000000,150.890122)}
{pt3dadd(176484.000000,228216.000000,84775.000000,159.230468)}
{pt3dadd(176292.000000,228204.000000,84525.000000,157.574988)}
{pt3dadd(176268.000000,228300.000000,84275.000000,158.889474)}
{pt3dadd(176244.000000,228408.000000,84000.000000,153.737580)}
{pt3dadd(176244.000000,228492.000000,83850.000000,161.413510)}
{pt3dadd(176172.000000,228588.000000,83725.000000,156.815250)}
{pt3dadd(176064.000000,228564.000000,83575.000000,174.287830)}
{pt3dadd(175872.000000,228588.000000,83400.000000,174.287830)}
{pt3dadd(175884.000000,228648.000000,83225.000000,171.440070)}
{pt3dadd(175800.000000,228684.000000,83025.000000,165.153290)}
{pt3dadd(175584.000000,228720.000000,82750.000000,166.611900)}
{pt3dadd(175476.000000,228780.000000,82550.000000,150.528470)}
{pt3dadd(175296.000000,228852.000000,82300.000000,148.920356)}
{pt3dadd(175152.000000,228888.000000,81975.000000,147.597356)}
{pt3dadd(174900.000000,229116.000000,81625.000000,149.055966)}
{pt3dadd(174804.000000,229260.000000,81500.000000,150.587502)}
{pt3dadd(174432.000000,229488.000000,81350.000000,164.515904)}
{pt3dadd(174144.000000,229824.000000,81350.000000,161.525758)}
{pt3dadd(173844.000000,230208.000000,81350.000000,160.265758)}
{pt3dadd(173376.000000,230580.000000,81350.000000,154.834998)}
{pt3dadd(172956.000000,230964.000000,81350.000000,147.872702)}
{pt3dadd(172728.000000,231144.000000,81300.000000,129.972150)}
{pt3dadd(172536.000000,231324.000000,81300.000000,126.000000)}
{pt3dadd(172464.000000,231384.000000,81300.000000,126.000000)}

{create adhoc115}
{access adhoc115}
{connect adhoc115(1), adhoc79(0)}
{nseg = 1}
{strdef color color = "White"}
{pt3dclear()}
{pt3dadd(179136.000000,213516.000000,97200.000000,406.362580)}
{pt3dadd(178560.000000,213252.000000,97200.000000,230.605460)}
{pt3dadd(178236.000000,213096.000000,97025.000000,191.346276)}
{pt3dadd(177972.000000,212964.000000,97050.000000,142.236056)}
{pt3dadd(177900.000000,212736.000000,97075.000000,142.236056)}
{pt3dadd(177828.000000,212508.000000,97050.000000,136.805296)}
{pt3dadd(177840.000000,212400.000000,97200.000000,139.703827)}
{pt3dadd(177936.000000,212412.000000,97400.000000,126.000000)}

{create adhoc116}
{access adhoc116}
{connect adhoc116(1), adhoc1(0)}
{nseg = 1}
{strdef color color = "White"}
{pt3dclear()}
{pt3dadd(178656.000000,209556.000000,92100.000000,138.915000)}
{pt3dadd(178452.000000,209844.000000,92100.000000,145.976517)}
{pt3dadd(178236.000000,210192.000000,92100.000000,169.779934)}
{pt3dadd(178176.000000,210396.000000,91925.000000,183.045078)}
{pt3dadd(177996.000000,210588.000000,91775.000000,194.921072)}
{pt3dadd(177708.000000,210780.000000,91650.000000,216.679302)}
{pt3dadd(177480.000000,210972.000000,91525.000000,227.480104)}
{pt3dadd(177324.000000,211092.000000,91575.000000,278.462652)}
{pt3dadd(177204.000000,211116.000000,91575.000000,338.363720)}
{pt3dadd(176808.000000,211296.000000,91575.000000,396.102832)}
{pt3dadd(176508.000000,211536.000000,91575.000000,489.699280)}
{pt3dadd(176064.000000,211836.000000,91575.000000,493.936280)}

{create adhoc117}
{access adhoc117}
{connect adhoc117(1), adhoc116(0)}
{nseg = 1}
{strdef color color = "White"}
{pt3dclear()}
{pt3dadd(176064.000000,211836.000000,91575.000000,493.936280)}
{pt3dadd(175860.000000,212232.000000,91575.000000,357.731773)}
{pt3dadd(175776.000000,212628.000000,91575.000000,265.279206)}
{pt3dadd(175692.000000,213036.000000,91475.000000,192.951950)}
{pt3dadd(175656.000000,213204.000000,91350.000000,126.651850)}
{pt3dadd(175488.000000,213360.000000,91200.000000,154.777416)}
{pt3dadd(175128.000000,213528.000000,91000.000000,186.928714)}
{pt3dadd(174696.000000,213960.000000,90800.000000,216.904574)}
{pt3dadd(174240.000000,214188.000000,90800.000000,248.203434)}
{pt3dadd(173772.000000,214428.000000,90800.000000,284.099578)}
{pt3dadd(173652.000000,214524.000000,90650.000000,294.852104)}
{pt3dadd(173484.000000,214572.000000,90500.000000,310.049920)}
{pt3dadd(173304.000000,214632.000000,90325.000000,319.154164)}
{pt3dadd(173100.000000,214680.000000,90175.000000,331.601560)}
{pt3dadd(173076.000000,214764.000000,90050.000000,349.194932)}
{pt3dadd(172980.000000,215148.000000,89925.000000,373.884278)}
{pt3dadd(173172.000000,215388.000000,89825.000000,418.036616)}
{pt3dadd(173244.000000,215160.000000,89600.000000,454.900124)}
{pt3dadd(173352.000000,215280.000000,89450.000000,478.776968)}
{pt3dadd(173544.000000,215556.000000,89300.000000,452.512892)}
{pt3dadd(173340.000000,215820.000000,89300.000000,422.185186)}
{pt3dadd(173052.000000,216072.000000,89300.000000,362.835032)}
{pt3dadd(172860.000000,216168.000000,89125.000000,300.156564)}
{pt3dadd(172716.000000,216192.000000,89000.000000,241.532394)}
{pt3dadd(172356.000000,216156.000000,89000.000000,214.306954)}
{pt3dadd(172140.000000,216108.000000,89050.000000,196.530394)}
{pt3dadd(172020.000000,216036.000000,89050.000000,186.777534)}
{pt3dadd(171900.000000,216036.000000,89150.000000,193.247750)}
{pt3dadd(171612.000000,215964.000000,89250.000000,210.177810)}
{pt3dadd(171132.000000,215952.000000,89425.000000,221.488282)}
{pt3dadd(170952.000000,216012.000000,89500.000000,219.715332)}
{pt3dadd(170640.000000,216012.000000,89375.000000,217.560304)}
{pt3dadd(170352.000000,216036.000000,89225.000000,205.500874)}
{pt3dadd(170052.000000,216108.000000,89150.000000,194.160028)}
{pt3dadd(169848.000000,216024.000000,89000.000000,196.114700)}
{pt3dadd(169728.000000,215928.000000,88850.000000,194.426180)}
{pt3dadd(169728.000000,215844.000000,88725.000000,183.487924)}
{pt3dadd(169524.000000,215808.000000,88600.000000,183.487924)}
{pt3dadd(169488.000000,215832.000000,88475.000000,155.167492)}
{pt3dadd(169308.000000,215736.000000,88325.000000,126.770219)}
{pt3dadd(169212.000000,215652.000000,88175.000000,105.048257)}
{pt3dadd(169152.000000,215712.000000,88025.000000,81.876699)}
{pt3dadd(169140.000000,215784.000000,87850.000000,55.463116)}
{pt3dadd(169104.000000,215748.000000,87650.000000,54.783852)}
{pt3dadd(169212.000000,215508.000000,87300.000000,61.877842)}
{pt3dadd(169320.000000,215316.000000,87075.000000,68.064426)}
{pt3dadd(169536.000000,215172.000000,86875.000000,98.724300)}

{create adhoc118}
{access adhoc118}
{connect adhoc118(1), adhoc116(0)}
{nseg = 1}
{strdef color color = "White"}
{pt3dclear()}
{pt3dadd(176064.000000,211836.000000,91575.000000,493.936280)}
{pt3dadd(176064.000000,211620.000000,91325.000000,450.454593)}
{pt3dadd(175980.000000,211704.000000,91150.000000,400.815004)}
{pt3dadd(175872.000000,211584.000000,91000.000000,354.416738)}
{pt3dadd(175848.000000,211656.000000,90875.000000,318.092498)}
{pt3dadd(175716.000000,211608.000000,91050.000000,260.434958)}
{pt3dadd(175560.000000,211488.000000,91050.000000,221.354854)}
{pt3dadd(175368.000000,211380.000000,91025.000000,188.306470)}
{pt3dadd(175176.000000,211272.000000,90950.000000,163.700480)}
{pt3dadd(175020.000000,211020.000000,90800.000000,133.724620)}
{pt3dadd(174852.000000,210948.000000,90650.000000,157.080312)}
{pt3dadd(174636.000000,210900.000000,90500.000000,172.397864)}
{pt3dadd(174456.000000,210960.000000,90325.000000,191.661378)}
{pt3dadd(174204.000000,210924.000000,90100.000000,230.741482)}
{pt3dadd(174000.000000,210888.000000,89875.000000,269.821586)}
{pt3dadd(173952.000000,210876.000000,89750.000000,279.110024)}
{pt3dadd(173748.000000,210948.000000,89500.000000,279.110024)}
{pt3dadd(173664.000000,210780.000000,89350.000000,262.986160)}
{pt3dadd(173604.000000,210648.000000,89125.000000,228.285352)}
{pt3dadd(173616.000000,210720.000000,88925.000000,181.722097)}
{pt3dadd(173712.000000,210708.000000,88725.000000,160.811480)}
