# Supplementary material for: Full reconstruction of large lobula plate tangential cells in Drosophila from a 3D EM dataset
Source: PLoS One. 2018 Nov 28;13(11):e0207828. doi: 10.1371/journal.pone.0207828 (PMC6261601; doi:10.1371/journal.pone.0207828)
Supplement: S1 Dataset — (ZIP) [file pone.0207828.s001.zip › Diameter hoc/cell23_was_2012-06-26_C80_11__explorational__vrobl__48ebdb.hoc0001.hoc]

/* created with convertKnossosNmlToHoc.m */

{create adhoc1}
{access adhoc1}
{nseg = 1}
{strdef color color = "White"}
{pt3dclear()}
{pt3dadd(159300.000000,234528.000000,75875.000000,47.488075)}
{pt3dadd(159852.000000,233892.000000,76075.000000,76.167220)}
{pt3dadd(160092.000000,233508.000000,76200.000000,76.626592)}
{pt3dadd(160344.000000,233100.000000,76075.000000,82.599591)}
{pt3dadd(160440.000000,232848.000000,76250.000000,79.856689)}
{pt3dadd(160704.000000,232716.000000,76400.000000,70.668996)}
{pt3dadd(160884.000000,232332.000000,76625.000000,75.603716)}
{pt3dadd(161136.000000,232176.000000,76725.000000,79.503756)}
{pt3dadd(161412.000000,231828.000000,76975.000000,134.239398)}
{pt3dadd(161496.000000,231384.000000,76975.000000,183.278793)}
{pt3dadd(161784.000000,230592.000000,77075.000000,351.031280)}

{create adhoc2}
{access adhoc2}
{connect adhoc2(1), adhoc1(0)}
{nseg = 1}
{strdef color color = "White"}
{pt3dclear()}
{pt3dadd(161784.000000,230592.000000,77075.000000,351.031280)}
{pt3dadd(161844.000000,230520.000000,77200.000000,369.475047)}
{pt3dadd(161904.000000,230448.000000,77325.000000,329.082458)}
{pt3dadd(161952.000000,230340.000000,77475.000000,316.635062)}
{pt3dadd(161952.000000,230232.000000,77600.000000,287.751536)}
{pt3dadd(161928.000000,230028.000000,77750.000000,291.261852)}
{pt3dadd(161916.000000,229908.000000,77900.000000,296.631722)}
{pt3dadd(162108.000000,229680.000000,78025.000000,282.671426)}
{pt3dadd(162276.000000,229152.000000,78150.000000,265.960710)}
{pt3dadd(162384.000000,228912.000000,78300.000000,250.803600)}
{pt3dadd(162432.000000,228744.000000,78425.000000,209.249324)}
{pt3dadd(162552.000000,228624.000000,78550.000000,196.746044)}
{pt3dadd(162888.000000,228396.000000,78700.000000,192.929780)}
{pt3dadd(163248.000000,227880.000000,78825.000000,197.137216)}
{pt3dadd(163608.000000,227256.000000,78975.000000,197.137216)}
{pt3dadd(163932.000000,226824.000000,79100.000000,212.493280)}
{pt3dadd(164436.000000,226668.000000,79250.000000,206.331172)}
{pt3dadd(164676.000000,226560.000000,79375.000000,210.147436)}
{pt3dadd(164868.000000,226428.000000,79525.000000,200.350786)}
{pt3dadd(165012.000000,226332.000000,79650.000000,200.350786)}
{pt3dadd(165216.000000,226056.000000,79925.000000,182.004576)}
{pt3dadd(165372.000000,226116.000000,80050.000000,173.541864)}
{pt3dadd(165864.000000,226068.000000,80300.000000,161.724650)}
{pt3dadd(166176.000000,225888.000000,80725.000000,153.153800)}

{create adhoc3}
{access adhoc3}
{connect adhoc3(1), adhoc2(0)}
{nseg = 1}
{strdef color color = "White"}
{pt3dclear()}
{pt3dadd(166176.000000,225888.000000,80725.000000,153.153800)}
{pt3dadd(166308.000000,225708.000000,80825.000000,181.983737)}
{pt3dadd(166428.000000,225420.000000,80800.000000,256.798898)}
{pt3dadd(166560.000000,225240.000000,80800.000000,303.570538)}
{pt3dadd(166680.000000,225120.000000,80850.000000,345.514008)}
{pt3dadd(166800.000000,225108.000000,81050.000000,376.130028)}
{pt3dadd(166920.000000,224928.000000,81050.000000,369.602916)}
{pt3dadd(167040.000000,224760.000000,81100.000000,369.602916)}
{pt3dadd(167172.000000,224736.000000,81325.000000,365.917088)}
{pt3dadd(167292.000000,224604.000000,81350.000000,373.850834)}
{pt3dadd(167412.000000,224508.000000,81400.000000,352.523252)}
{pt3dadd(167532.000000,224412.000000,81475.000000,355.707212)}
{pt3dadd(167664.000000,224436.000000,81550.000000,328.199086)}
{pt3dadd(167784.000000,224328.000000,81575.000000,309.490954)}
{pt3dadd(167904.000000,224232.000000,81725.000000,284.801608)}
{pt3dadd(168024.000000,224172.000000,81800.000000,287.421058)}
{pt3dadd(168156.000000,224112.000000,81825.000000,263.658506)}
{pt3dadd(168276.000000,224052.000000,81800.000000,256.864784)}
{pt3dadd(168396.000000,224016.000000,81750.000000,247.111924)}
{pt3dadd(168516.000000,223908.000000,81850.000000,229.565676)}
{pt3dadd(168636.000000,223740.000000,81900.000000,217.657788)}
{pt3dadd(168756.000000,223596.000000,81925.000000,211.789116)}
{pt3dadd(168876.000000,223632.000000,81900.000000,199.319324)}
{pt3dadd(168996.000000,223428.000000,81900.000000,193.157216)}
{pt3dadd(169116.000000,223308.000000,82175.000000,179.228814)}
{pt3dadd(169236.000000,223056.000000,82225.000000,177.176406)}
{pt3dadd(169356.000000,223044.000000,82325.000000,197.703386)}
{pt3dadd(169476.000000,222804.000000,82150.000000,227.719426)}
{pt3dadd(169608.000000,222708.000000,82100.000000,252.305098)}
{pt3dadd(169728.000000,222696.000000,82200.000000,286.812092)}
{pt3dadd(169836.000000,222576.000000,82225.000000,312.627052)}
{pt3dadd(169968.000000,222432.000000,82125.000000,318.547336)}
{pt3dadd(170100.000000,222468.000000,82125.000000,328.106792)}
{pt3dadd(170220.000000,222504.000000,82150.000000,325.074448)}
{pt3dadd(170340.000000,222408.000000,82100.000000,335.111876)}
{pt3dadd(170556.000000,222300.000000,82100.000000,328.895572)}
{pt3dadd(170676.000000,222372.000000,82075.000000,332.079532)}
{pt3dadd(170868.000000,222384.000000,82025.000000,325.552420)}
{pt3dadd(171480.000000,222228.000000,82025.000000,331.768724)}
{pt3dadd(171996.000000,222000.000000,81875.000000,315.811012)}
{pt3dadd(173172.000000,221688.000000,81700.000000,325.370468)}
{pt3dadd(174084.000000,221064.000000,81950.000000,348.110318)}
{pt3dadd(174252.000000,220788.000000,82075.000000,345.077974)}
{pt3dadd(174552.000000,220764.000000,82200.000000,328.109144)}
{pt3dadd(174456.000000,220596.000000,82325.000000,322.739274)}
{pt3dadd(174504.000000,220632.000000,82450.000000,310.291878)}
{pt3dadd(174660.000000,220656.000000,82575.000000,298.091324)}
{pt3dadd(174648.000000,220524.000000,82700.000000,292.452964)}
{pt3dadd(174708.000000,220596.000000,82825.000000,294.947680)}
{pt3dadd(174756.000000,220584.000000,82950.000000,294.947680)}
{pt3dadd(174768.000000,220488.000000,83175.000000,284.707180)}
{pt3dadd(174804.000000,220380.000000,83300.000000,250.405332)}
{pt3dadd(174996.000000,220416.000000,83425.000000,234.490364)}
{pt3dadd(174924.000000,220212.000000,83550.000000,225.201926)}
{pt3dadd(174960.000000,220080.000000,83725.000000,222.707210)}
{pt3dadd(175008.000000,219936.000000,83850.000000,225.083124)}
{pt3dadd(175296.000000,219852.000000,83975.000000,231.876846)}
{pt3dadd(175392.000000,219984.000000,84100.000000,256.462518)}
{pt3dadd(175548.000000,219924.000000,84225.000000,258.617546)}
{pt3dadd(175572.000000,219804.000000,84350.000000,269.370072)}
{pt3dadd(175812.000000,219864.000000,84475.000000,274.484238)}
{pt3dadd(176100.000000,219984.000000,84600.000000,276.978954)}
{pt3dadd(176016.000000,219792.000000,84725.000000,271.058670)}
{pt3dadd(176064.000000,219864.000000,84850.000000,283.561950)}
{pt3dadd(176196.000000,219900.000000,84975.000000,293.121406)}
{pt3dadd(176208.000000,219612.000000,85100.000000,308.319222)}
{pt3dadd(176196.000000,219456.000000,85225.000000,326.136488)}
{pt3dadd(176340.000000,219480.000000,85350.000000,349.650144)}
{pt3dadd(176580.000000,219444.000000,85475.000000,349.650144)}
{pt3dadd(176676.000000,219480.000000,85600.000000,353.160460)}
{pt3dadd(176700.000000,219360.000000,85800.000000,343.601004)}
{pt3dadd(176820.000000,219132.000000,85875.000000,328.403188)}
{pt3dadd(177060.000000,219084.000000,86100.000000,290.231224)}
{pt3dadd(177360.000000,218952.000000,86525.000000,293.119164)}
{pt3dadd(177528.000000,218820.000000,86750.000000,277.161452)}
{pt3dadd(177600.000000,218688.000000,86775.000000,280.193796)}
{pt3dadd(177756.000000,218556.000000,86900.000000,292.048460)}
{pt3dadd(177840.000000,218424.000000,86775.000000,319.154164)}
{pt3dadd(178128.000000,218172.000000,86875.000000,325.370468)}
{pt3dadd(178188.000000,217920.000000,86800.000000,325.370468)}
{pt3dadd(178272.000000,217824.000000,86875.000000,319.450184)}
{pt3dadd(178632.000000,217620.000000,87150.000000,304.976070)}
{pt3dadd(178788.000000,217212.000000,87275.000000,292.528674)}
{pt3dadd(179208.000000,216936.000000,87400.000000,280.674010)}
{pt3dadd(179196.000000,216528.000000,87525.000000,263.963294)}
{pt3dadd(179316.000000,216672.000000,87625.000000,238.366730)}
{pt3dadd(179412.000000,216468.000000,87750.000000,219.748150)}
{pt3dadd(179400.000000,216360.000000,87875.000000,197.448220)}
{pt3dadd(179628.000000,216300.000000,88125.000000,183.487924)}
{pt3dadd(179772.000000,216192.000000,88350.000000,189.958140)}
{pt3dadd(179940.000000,216156.000000,88575.000000,207.690118)}
{pt3dadd(179868.000000,216132.000000,88825.000000,240.782812)}
{pt3dadd(180000.000000,216084.000000,88950.000000,269.003026)}
{pt3dadd(180084.000000,215904.000000,89150.000000,285.713742)}
{pt3dadd(180108.000000,215736.000000,89375.000000,311.911954)}
{pt3dadd(179760.000000,215688.000000,89550.000000,322.664480)}
{pt3dadd(179580.000000,215532.000000,90200.000000,337.073892)}
{pt3dadd(179604.000000,215388.000000,90600.000000,387.753342)}
{pt3dadd(179448.000000,215244.000000,90550.000000,424.077582)}
{pt3dadd(179316.000000,215088.000000,90550.000000,464.719604)}
{pt3dadd(179172.000000,214944.000000,90575.000000,524.149324)}
{pt3dadd(179196.000000,214800.000000,90650.000000,551.789760)}
{pt3dadd(179124.000000,214656.000000,90725.000000,546.344118)}
{pt3dadd(178992.000000,214512.000000,90725.000000,551.048274)}
{pt3dadd(178896.000000,214368.000000,90800.000000,522.025826)}
{pt3dadd(178764.000000,214224.000000,90900.000000,487.285452)}
{pt3dadd(178476.000000,214080.000000,90900.000000,459.645016)}
{pt3dadd(178284.000000,213948.000000,90900.000000,432.004580)}
{pt3dadd(177924.000000,213336.000000,91025.000000,418.553470)}
{pt3dadd(177744.000000,212856.000000,91175.000000,422.820278)}
{pt3dadd(177816.000000,212892.000000,91275.000000,431.567232)}
{pt3dadd(177720.000000,212436.000000,91425.000000,444.377816)}
{pt3dadd(177840.000000,212328.000000,91550.000000,436.821872)}
{pt3dadd(177780.000000,212220.000000,91675.000000,412.132526)}
{pt3dadd(177948.000000,211848.000000,91800.000000,377.538012)}
{pt3dadd(177996.000000,210780.000000,91950.000000,353.661168)}
{pt3dadd(178116.000000,210588.000000,92125.000000,320.224868)}
{pt3dadd(178236.000000,210336.000000,92425.000000,316.714552)}
{pt3dadd(178344.000000,209628.000000,92975.000000,322.930856)}
{pt3dadd(178476.000000,208716.000000,93250.000000,328.569216)}
{pt3dadd(178596.000000,208320.000000,93375.000000,313.371400)}
{pt3dadd(178716.000000,207864.000000,93275.000000,313.371400)}
{pt3dadd(178836.000000,208032.000000,93150.000000,298.173584)}
{pt3dadd(178944.000000,207552.000000,93275.000000,283.699470)}
{pt3dadd(179052.000000,206916.000000,93375.000000,275.441660)}
{pt3dadd(179184.000000,206412.000000,93225.000000,265.688800)}
{pt3dadd(179304.000000,205884.000000,93050.000000,254.936274)}
{pt3dadd(179424.000000,205728.000000,92950.000000,249.822108)}
{pt3dadd(179556.000000,205536.000000,92925.000000,252.441558)}
{pt3dadd(179688.000000,205032.000000,92675.000000,247.570928)}
{pt3dadd(179808.000000,204900.000000,92600.000000,254.704338)}
{pt3dadd(179940.000000,204660.000000,92550.000000,242.041944)}
{pt3dadd(180084.000000,204528.000000,92400.000000,221.319820)}
{pt3dadd(180216.000000,204324.000000,92400.000000,200.081790)}
{pt3dadd(180336.000000,204108.000000,92200.000000,191.656902)}
{pt3dadd(180600.000000,203760.000000,92050.000000,184.523492)}
{pt3dadd(180648.000000,203436.000000,91925.000000,188.339756)}
{pt3dadd(180840.000000,202980.000000,91775.000000,206.399078)}
{pt3dadd(181200.000000,202548.000000,91650.000000,230.387528)}
{pt3dadd(181440.000000,201936.000000,91500.000000,243.397460)}
{pt3dadd(181620.000000,201372.000000,90350.000000,288.794300)}

{create adhoc4}
{access adhoc4}
{connect adhoc4(1), adhoc3(0)}
{nseg = 1}
{strdef color color = "White"}
{pt3dclear()}
{pt3dadd(181620.000000,201372.000000,90350.000000,288.794300)}
{pt3dadd(181752.000000,201336.000000,90425.000000,349.930183)}
{pt3dadd(181896.000000,201240.000000,90600.000000,417.658318)}
{pt3dadd(182040.000000,201108.000000,90725.000000,453.982558)}
{pt3dadd(182172.000000,201012.000000,90900.000000,472.455600)}
{pt3dadd(182304.000000,200748.000000,91025.000000,468.391970)}
{pt3dadd(182448.000000,200628.000000,91200.000000,449.081972)}
{pt3dadd(182580.000000,200496.000000,91600.000000,435.630862)}
{pt3dadd(182712.000000,200256.000000,91525.000000,435.630862)}
{pt3dadd(182844.000000,200124.000000,91525.000000,470.371236)}
{pt3dadd(182988.000000,199968.000000,91550.000000,503.457314)}
{pt3dadd(183120.000000,199824.000000,91675.000000,522.767312)}
{pt3dadd(183240.000000,199572.000000,91825.000000,546.344118)}
{pt3dadd(183372.000000,199476.000000,91825.000000,551.048274)}
{pt3dadd(183516.000000,199320.000000,91850.000000,539.884706)}
{pt3dadd(183648.000000,199056.000000,91825.000000,506.798628)}
{pt3dadd(183768.000000,198780.000000,91875.000000,468.091932)}
{pt3dadd(183900.000000,198432.000000,91850.000000,422.858124)}
{pt3dadd(184020.000000,198096.000000,91825.000000,401.473268)}
{pt3dadd(184164.000000,197844.000000,91850.000000,373.832832)}
{pt3dadd(184308.000000,197772.000000,91925.000000,373.832832)}
{pt3dadd(184440.000000,197532.000000,91975.000000,381.028976)}
{pt3dadd(184572.000000,197412.000000,92125.000000,394.752232)}
{pt3dadd(184704.000000,197208.000000,92175.000000,398.622348)}
{pt3dadd(184836.000000,196920.000000,92150.000000,391.066404)}
{pt3dadd(184968.000000,196704.000000,92200.000000,408.581144)}
{pt3dadd(185088.000000,196524.000000,92250.000000,434.905356)}
{pt3dadd(185208.000000,196188.000000,92200.000000,447.105910)}
{pt3dadd(185340.000000,195900.000000,92150.000000,443.235794)}
{pt3dadd(185712.000000,195720.000000,92100.000000,468.306478)}
{pt3dadd(185832.000000,195216.000000,92125.000000,468.306478)}
{pt3dadd(186072.000000,194568.000000,92175.000000,478.938460)}
{pt3dadd(186216.000000,194328.000000,92125.000000,503.694100)}
{pt3dadd(186336.000000,194112.000000,92150.000000,552.372046)}
{pt3dadd(186480.000000,193896.000000,92150.000000,592.588378)}
{pt3dadd(186732.000000,193500.000000,92175.000000,613.877642)}
{pt3dadd(186876.000000,193176.000000,92250.000000,608.432000)}
{pt3dadd(187044.000000,192912.000000,92125.000000,597.800018)}
{pt3dadd(187164.000000,192684.000000,92175.000000,565.802772)}
{pt3dadd(187272.000000,192432.000000,92350.000000,516.402138)}
{pt3dadd(187548.000000,191880.000000,92350.000000,477.598134)}
{pt3dadd(187680.000000,191712.000000,92400.000000,462.768282)}
{pt3dadd(187812.000000,191568.000000,92450.000000,440.314186)}
{pt3dadd(187944.000000,191412.000000,92525.000000,427.503602)}
{pt3dadd(188064.000000,191208.000000,92450.000000,415.303048)}
{pt3dadd(188304.000000,190872.000000,92700.000000,423.633486)}
{pt3dadd(188544.000000,190752.000000,92600.000000,406.952786)}
{pt3dadd(188784.000000,190644.000000,92650.000000,403.082670)}
{pt3dadd(188904.000000,190344.000000,92825.000000,407.146300)}
{pt3dadd(189036.000000,190248.000000,93225.000000,419.346854)}
{pt3dadd(189180.000000,190176.000000,93350.000000,411.016416)}
{pt3dadd(189540.000000,190032.000000,93475.000000,432.401272)}
{pt3dadd(189780.000000,189636.000000,93825.000000,449.081972)}
{pt3dadd(190284.000000,189288.000000,94050.000000,467.472438)}
{pt3dadd(190488.000000,189228.000000,94300.000000,481.596096)}
{pt3dadd(190620.000000,189144.000000,94525.000000,499.110836)}
{pt3dadd(190764.000000,189060.000000,94650.000000,514.682174)}
{pt3dadd(190848.000000,188976.000000,94775.000000,519.386330)}
{pt3dadd(190920.000000,188928.000000,94900.000000,519.386330)}
{pt3dadd(190992.000000,188880.000000,95025.000000,524.572670)}
{pt3dadd(191028.000000,188772.000000,95150.000000,545.861934)}
{pt3dadd(191052.000000,188652.000000,95275.000000,540.416292)}
{pt3dadd(191352.000000,188556.000000,95525.000000,594.880488)}
{pt3dadd(191316.000000,188388.000000,95750.000000,637.068207)}
{pt3dadd(192120.000000,187068.000000,96025.000000,766.257260)}

{create adhoc5}
{access adhoc5}
{connect adhoc5(1), adhoc4(0)}
{nseg = 1}
{strdef color color = "White"}
{pt3dclear()}
{pt3dadd(192120.000000,187068.000000,96025.000000,766.257260)}
{pt3dadd(192120.000000,187140.000000,96275.000000,638.430683)}
{pt3dadd(192036.000000,187068.000000,96500.000000,623.497350)}
{pt3dadd(192288.000000,187368.000000,96750.000000,584.604492)}
{pt3dadd(192564.000000,187284.000000,96975.000000,589.790832)}
{pt3dadd(192816.000000,187248.000000,97200.000000,578.069080)}
{pt3dadd(193056.000000,187128.000000,97450.000000,567.437098)}
{pt3dadd(193428.000000,187248.000000,97575.000000,580.360340)}
{pt3dadd(193404.000000,187344.000000,97825.000000,580.360340)}
{pt3dadd(193368.000000,187380.000000,98075.000000,603.831748)}
{pt3dadd(193572.000000,187764.000000,98300.000000,588.260410)}
{pt3dadd(193788.000000,187824.000000,98425.000000,593.446750)}
{pt3dadd(193992.000000,187896.000000,98550.000000,574.519682)}
{pt3dadd(194244.000000,187728.000000,98800.000000,569.074040)}
{pt3dadd(194364.000000,187716.000000,98950.000000,556.766200)}
{pt3dadd(194316.000000,187776.000000,99200.000000,578.055464)}
{pt3dadd(194304.000000,187704.000000,99425.000000,583.501106)}
{pt3dadd(194424.000000,187548.000000,99675.000000,572.337538)}
{pt3dadd(194340.000000,187608.000000,99900.000000,567.151198)}
{pt3dadd(194220.000000,187788.000000,100150.000000,541.157778)}
{pt3dadd(194076.000000,188184.000000,100400.000000,494.797830)}
{pt3dadd(194028.000000,188016.000000,100525.000000,457.841636)}
{pt3dadd(193980.000000,187764.000000,100775.000000,430.201200)}
{pt3dadd(193956.000000,187512.000000,101025.000000,411.810734)}
{pt3dadd(194172.000000,187356.000000,101150.000000,407.330588)}
{pt3dadd(194028.000000,187200.000000,101375.000000,427.697116)}
{pt3dadd(193992.000000,187212.000000,101575.000000,435.630862)}
{pt3dadd(193860.000000,186960.000000,101850.000000,443.961300)}
{pt3dadd(193836.000000,186588.000000,102125.000000,462.351766)}
{pt3dadd(193764.000000,186516.000000,102350.000000,476.475424)}
{pt3dadd(193860.000000,186504.000000,102700.000000,491.305276)}
{pt3dadd(193860.000000,186216.000000,102875.000000,509.695742)}
{pt3dadd(193656.000000,185928.000000,103175.000000,546.173134)}
{pt3dadd(193908.000000,184860.000000,104100.000000,568.526868)}
{pt3dadd(193632.000000,184632.000000,104750.000000,573.713208)}
{pt3dadd(193224.000000,184512.000000,105700.000000,601.789407)}
{pt3dadd(192792.000000,184308.000000,106575.000000,544.564760)}

{create adhoc6}
{access adhoc6}
{connect adhoc6(1), adhoc5(0)}
{nseg = 1}
{strdef color color = "White"}
{pt3dclear()}
{pt3dadd(192792.000000,184308.000000,106575.000000,544.564760)}
{pt3dadd(192276.000000,184752.000000,107375.000000,622.802787)}
{pt3dadd(192156.000000,184728.000000,107625.000000,645.069620)}
{pt3dadd(192168.000000,184812.000000,107750.000000,656.233188)}
{pt3dadd(192300.000000,184908.000000,107875.000000,649.929174)}
{pt3dadd(192252.000000,185004.000000,108025.000000,631.903408)}
{pt3dadd(192144.000000,185148.000000,108150.000000,612.976340)}
{pt3dadd(192144.000000,185268.000000,108300.000000,584.318592)}
{pt3dadd(192108.000000,185256.000000,108425.000000,578.600666)}
{pt3dadd(191952.000000,185352.000000,108575.000000,561.433272)}
{pt3dadd(191784.000000,185460.000000,108725.000000,550.801290)}
{pt3dadd(191736.000000,185460.000000,108875.000000,556.805116)}
{pt3dadd(191652.000000,185376.000000,109000.000000,592.082092)}
{pt3dadd(191436.000000,185532.000000,109150.000000,623.677270)}
{pt3dadd(191148.000000,185652.000000,109300.000000,653.767906)}
{pt3dadd(190860.000000,185664.000000,109425.000000,682.425654)}
{pt3dadd(190620.000000,185820.000000,109575.000000,676.421828)}
{pt3dadd(190320.000000,185892.000000,109700.000000,646.331192)}
{pt3dadd(190128.000000,185976.000000,109850.000000,609.290372)}
{pt3dadd(189660.000000,185724.000000,110000.000000,559.889738)}
{pt3dadd(189384.000000,185784.000000,110150.000000,517.108332)}
{pt3dadd(189084.000000,185520.000000,110300.000000,495.819068)}
{pt3dadd(189000.000000,185604.000000,110450.000000,495.819068)}
{pt3dadd(188868.000000,185484.000000,110575.000000,490.632728)}
{pt3dadd(188652.000000,185220.000000,110725.000000,495.112874)}
{pt3dadd(188424.000000,185376.000000,110875.000000,495.112874)}
{pt3dadd(188388.000000,185520.000000,111025.000000,481.661764)}
{pt3dadd(188304.000000,185592.000000,111150.000000,454.021328)}
{pt3dadd(188244.000000,185760.000000,111275.000000,427.697116)}
{pt3dadd(187776.000000,185820.000000,111425.000000,414.886532)}
{pt3dadd(187716.000000,185976.000000,111550.000000,402.685978)}
{pt3dadd(187632.000000,185940.000000,111675.000000,391.066404)}
{pt3dadd(187680.000000,186048.000000,111800.000000,383.510460)}
{pt3dadd(187620.000000,186036.000000,111950.000000,372.971164)}
{pt3dadd(187320.000000,185892.000000,112075.000000,365.415220)}
{pt3dadd(187092.000000,185940.000000,112225.000000,361.729392)}
{pt3dadd(187008.000000,185844.000000,112350.000000,361.729392)}
{pt3dadd(186984.000000,185628.000000,112475.000000,369.285336)}
{pt3dadd(186864.000000,185592.000000,112625.000000,372.628488)}
{pt3dadd(186888.000000,185424.000000,112750.000000,359.558716)}
{pt3dadd(186732.000000,185328.000000,112875.000000,352.705248)}
{pt3dadd(186696.000000,185460.000000,113000.000000,345.851780)}
{pt3dadd(186600.000000,185328.000000,113125.000000,328.258408)}
{pt3dadd(186660.000000,185028.000000,113250.000000,335.454552)}
{pt3dadd(186480.000000,184944.000000,113400.000000,352.210152)}
{pt3dadd(186468.000000,184752.000000,113500.000000,362.749448)}
{pt3dadd(186636.000000,184680.000000,113750.000000,381.222490)}
{pt3dadd(186480.000000,184860.000000,113875.000000,369.932336)}
{pt3dadd(186504.000000,184824.000000,114000.000000,350.288796)}
{pt3dadd(186540.000000,184944.000000,114150.000000,358.222542)}
{pt3dadd(186432.000000,184920.000000,114275.000000,351.026398)}
{pt3dadd(186444.000000,184680.000000,114425.000000,343.092652)}
{pt3dadd(186348.000000,184884.000000,114525.000000,376.039808)}
{pt3dadd(186108.000000,184728.000000,114675.000000,385.144052)}
{pt3dadd(186108.000000,184692.000000,114825.000000,370.014162)}
{pt3dadd(185868.000000,184788.000000,115075.000000,377.210306)}
{pt3dadd(185616.000000,184608.000000,115325.000000,370.014162)}
{pt3dadd(185376.000000,184452.000000,115675.000000,378.761116)}
{pt3dadd(185076.000000,184368.000000,116075.000000,401.500966)}
{pt3dadd(184812.000000,184176.000000,116450.000000,430.081966)}
{pt3dadd(184392.000000,183924.000000,116825.000000,461.592518)}
{pt3dadd(184092.000000,183732.000000,116925.000000,495.112874)}
{pt3dadd(183936.000000,183636.000000,117175.000000,521.106294)}
{pt3dadd(183756.000000,183732.000000,117300.000000,551.579860)}
{pt3dadd(183240.000000,183600.000000,117550.000000,538.128750)}
{pt3dadd(183000.000000,183672.000000,117675.000000,561.600158)}
{pt3dadd(182892.000000,183624.000000,117925.000000,611.124998)}
{pt3dadd(182448.000000,183480.000000,118050.000000,644.299930)}
{pt3dadd(181764.000000,183348.000000,118300.000000,677.474862)}
{pt3dadd(181356.000000,183216.000000,118475.000000,718.219062)}
{pt3dadd(180924.000000,183156.000000,118600.000000,671.170848)}
{pt3dadd(180612.000000,183192.000000,118700.000000,595.321796)}
{pt3dadd(180276.000000,182976.000000,118825.000000,519.472744)}
{pt3dadd(179856.000000,182652.000000,118950.000000,443.623692)}
{pt3dadd(179568.000000,182664.000000,119075.000000,398.815862)}
{pt3dadd(179448.000000,182520.000000,119200.000000,387.196288)}
{pt3dadd(179052.000000,182544.000000,119450.000000,387.196288)}
{pt3dadd(178764.000000,182556.000000,119575.000000,383.510460)}
{pt3dadd(178560.000000,182412.000000,119700.000000,387.380576)}
{pt3dadd(178188.000000,182316.000000,119825.000000,372.971164)}
{pt3dadd(178152.000000,182328.000000,119950.000000,372.971164)}
{pt3dadd(177900.000000,182340.000000,120075.000000,380.904910)}
{pt3dadd(177372.000000,182136.000000,120200.000000,384.590738)}
{pt3dadd(177192.000000,181836.000000,120350.000000,392.921176)}
{pt3dadd(176952.000000,181884.000000,120475.000000,411.394218)}
{pt3dadd(176760.000000,181680.000000,120675.000000,427.280600)}
{pt3dadd(176724.000000,181788.000000,120800.000000,431.547408)}
{pt3dadd(176496.000000,181848.000000,120925.000000,439.481154)}
{pt3dadd(176076.000000,181692.000000,121050.000000,435.214346)}
{pt3dadd(175884.000000,181680.000000,121300.000000,443.961300)}
{pt3dadd(175524.000000,181368.000000,121525.000000,448.441446)}
{pt3dadd(175368.000000,181344.000000,121675.000000,452.921592)}
{pt3dadd(175140.000000,181236.000000,121925.000000,448.857962)}
{pt3dadd(174936.000000,181332.000000,122050.000000,424.168616)}
{pt3dadd(174684.000000,181080.000000,122175.000000,393.764660)}
{pt3dadd(174288.000000,181056.000000,122300.000000,366.544664)}
{pt3dadd(174072.000000,181020.000000,122425.000000,342.667820)}
{pt3dadd(173784.000000,180996.000000,122550.000000,342.667820)}
{pt3dadd(173772.000000,180924.000000,122675.000000,376.104120)}
{pt3dadd(173604.000000,180744.000000,122825.000000,402.027930)}
{pt3dadd(173352.000000,180684.000000,122950.000000,444.077778)}
{pt3dadd(173328.000000,180888.000000,123075.000000,477.598134)}
{pt3dadd(173100.000000,180720.000000,123200.000000,522.405964)}
{pt3dadd(172908.000000,180780.000000,123325.000000,554.403210)}
{pt3dadd(172644.000000,180840.000000,123575.000000,554.403210)}
{pt3dadd(172320.000000,180684.000000,123825.000000,522.892658)}
{pt3dadd(171804.000000,180372.000000,124050.000000,504.502192)}
{pt3dadd(171264.000000,180468.000000,124275.000000,487.334798)}
{pt3dadd(170652.000000,180492.000000,124525.000000,446.590598)}
{pt3dadd(170220.000000,180504.000000,124750.000000,471.346238)}
{pt3dadd(169920.000000,180480.000000,125000.000000,502.856790)}
{pt3dadd(169560.000000,180276.000000,125125.000000,526.433596)}
{pt3dadd(168696.000000,180036.000000,125350.000000,526.433596)}
{pt3dadd(168372.000000,180132.000000,125475.000000,550.010402)}
{pt3dadd(168060.000000,180060.000000,125600.000000,534.439064)}
{pt3dadd(167952.000000,179928.000000,125800.000000,519.609212)}
{pt3dadd(167328.000000,179640.000000,126050.000000,488.098660)}
{pt3dadd(166788.000000,179388.000000,126275.000000,456.588108)}
{pt3dadd(166044.000000,179256.000000,126500.000000,446.462412)}
{pt3dadd(165636.000000,179256.000000,126625.000000,441.758256)}
{pt3dadd(165240.000000,179160.000000,126825.000000,437.278110)}
{pt3dadd(164700.000000,179028.000000,127050.000000,458.662966)}
{pt3dadd(164112.000000,178908.000000,127200.000000,480.047822)}
{pt3dadd(163488.000000,178680.000000,127450.000000,470.863520)}
{pt3dadd(163128.000000,178632.000000,127675.000000,462.116566)}
{pt3dadd(162228.000000,178608.000000,127900.000000,462.116566)}
{pt3dadd(161616.000000,178680.000000,128025.000000,457.412410)}
{pt3dadd(161496.000000,178824.000000,128125.000000,457.412410)}
{pt3dadd(161340.000000,178764.000000,128250.000000,453.145602)}
{pt3dadd(161184.000000,178620.000000,128375.000000,457.412410)}
{pt3dadd(160632.000000,178524.000000,128600.000000,457.412410)}
{pt3dadd(160080.000000,178512.000000,128850.000000,457.412410)}
{pt3dadd(159756.000000,178416.000000,128975.000000,448.228108)}
{pt3dadd(159504.000000,178452.000000,129100.000000,444.164478)}
{pt3dadd(159072.000000,178236.000000,129225.000000,444.164478)}
{pt3dadd(158568.000000,178140.000000,129350.000000,453.348780)}
{pt3dadd(158400.000000,178320.000000,129450.000000,479.342200)}
{pt3dadd(157788.000000,178140.000000,129675.000000,479.342200)}
{pt3dadd(157116.000000,178140.000000,129800.000000,487.672638)}
{pt3dadd(156456.000000,177900.000000,129900.000000,475.472084)}
{pt3dadd(155892.000000,177864.000000,130050.000000,466.287782)}
{pt3dadd(154704.000000,177336.000000,130300.000000,435.814216)}
{pt3dadd(153852.000000,177348.000000,130425.000000,435.814216)}
{pt3dadd(153636.000000,177300.000000,130650.000000,440.294362)}
{pt3dadd(153384.000000,177288.000000,130775.000000,452.494916)}
{pt3dadd(152832.000000,177060.000000,131025.000000,429.755066)}
{pt3dadd(152412.000000,176940.000000,131150.000000,397.910972)}
{pt3dadd(151908.000000,176604.000000,131400.000000,366.066878)}
{pt3dadd(151668.000000,176604.000000,131650.000000,338.846882)}
{pt3dadd(151416.000000,176580.000000,131775.000000,322.960500)}
{pt3dadd(150384.000000,176100.000000,131900.000000,337.369912)}
{pt3dadd(149496.000000,175584.000000,132025.000000,373.694152)}
{pt3dadd(148800.000000,175236.000000,132125.000000,414.722548)}
{pt3dadd(147708.000000,175164.000000,132375.000000,421.576016)}
{pt3dadd(146124.000000,175092.000000,132450.000000,433.195590)}
{pt3dadd(144792.000000,175200.000000,132575.000000,441.526028)}
{pt3dadd(144660.000000,175128.000000,132550.000000,432.779074)}
{pt3dadd(144360.000000,175044.000000,132450.000000,407.708390)}
{pt3dadd(144144.000000,175008.000000,132400.000000,404.198074)}
{pt3dadd(143916.000000,174852.000000,132375.000000,392.578500)}
{pt3dadd(143688.000000,174888.000000,132425.000000,357.983986)}
{pt3dadd(143472.000000,175068.000000,132400.000000,330.406700)}
{pt3dadd(143136.000000,174972.000000,132500.000000,365.603080)}
{pt3dadd(142932.000000,174876.000000,132375.000000,399.123436)}
{pt3dadd(142728.000000,174744.000000,132125.000000,439.765458)}
{pt3dadd(142608.000000,174864.000000,132075.000000,488.483630)}
{pt3dadd(142380.000000,174696.000000,132050.000000,545.083364)}
{pt3dadd(142140.000000,174768.000000,132200.000000,534.957668)}
{pt3dadd(141912.000000,174636.000000,132100.000000,540.144008)}
{pt3dadd(141792.000000,174456.000000,132200.000000,529.512026)}
{pt3dadd(141588.000000,174504.000000,132150.000000,529.512026)}
{pt3dadd(141348.000000,174540.000000,132150.000000,518.880044)}
{pt3dadd(141228.000000,174564.000000,132325.000000,534.451382)}
{pt3dadd(141000.000000,174492.000000,132325.000000,534.451382)}
{pt3dadd(140784.000000,174276.000000,132275.000000,539.637722)}
{pt3dadd(140568.000000,174228.000000,132350.000000,550.269704)}
{pt3dadd(140352.000000,174300.000000,132550.000000,550.269704)}
{pt3dadd(140136.000000,174276.000000,132625.000000,529.994210)}
{pt3dadd(140016.000000,174288.000000,132725.000000,519.868514)}
{pt3dadd(139884.000000,174132.000000,132775.000000,500.558516)}
{pt3dadd(139668.000000,174228.000000,133000.000000,480.283022)}
{pt3dadd(139428.000000,174000.000000,132775.000000,485.469362)}
{pt3dadd(139188.000000,173880.000000,132900.000000,476.722408)}
{pt3dadd(138972.000000,173748.000000,133100.000000,472.018252)}
{pt3dadd(138756.000000,173880.000000,133150.000000,476.498398)}
{pt3dadd(138540.000000,173892.000000,133175.000000,481.202554)}
{pt3dadd(138324.000000,173832.000000,133050.000000,457.625748)}
{pt3dadd(138096.000000,173928.000000,133025.000000,461.892556)}
{pt3dadd(137880.000000,173916.000000,133200.000000,466.596712)}
{pt3dadd(137664.000000,174000.000000,133275.000000,449.916012)}
{pt3dadd(137424.000000,173928.000000,133225.000000,440.731710)}
{pt3dadd(137184.000000,173892.000000,133350.000000,454.182820)}
{pt3dadd(136944.000000,173760.000000,133350.000000,468.306478)}
{pt3dadd(136728.000000,173688.000000,133325.000000,463.602322)}
{pt3dadd(136512.000000,173664.000000,133425.000000,489.926534)}
{pt3dadd(136296.000000,173448.000000,133250.000000,499.110836)}
{pt3dadd(136056.000000,173448.000000,133200.000000,499.110836)}
{pt3dadd(135816.000000,173436.000000,133100.000000,480.720370)}
{pt3dadd(135588.000000,173280.000000,132950.000000,471.973416)}
{pt3dadd(135468.000000,173244.000000,132850.000000,445.649204)}
{pt3dadd(135228.000000,173172.000000,132850.000000,428.134464)}
{pt3dadd(135108.000000,173028.000000,132975.000000,393.026352)}
{pt3dadd(134892.000000,172968.000000,132900.000000,381.406778)}
{pt3dadd(134652.000000,172944.000000,133000.000000,373.473032)}
{pt3dadd(134460.000000,172932.000000,133100.000000,381.406778)}
{pt3dadd(134256.000000,172692.000000,132950.000000,385.470408)}
{pt3dadd(134028.000000,172716.000000,132925.000000,425.517876)}
{pt3dadd(133800.000000,172680.000000,132875.000000,425.517876)}
{pt3dadd(133584.000000,172728.000000,133000.000000,408.762276)}
{pt3dadd(133392.000000,172464.000000,133000.000000,427.152742)}
{pt3dadd(133164.000000,172464.000000,133050.000000,440.603852)}
{pt3dadd(133044.000000,172500.000000,133200.000000,435.664496)}
{pt3dadd(132840.000000,172368.000000,133125.000000,460.735180)}
{pt3dadd(132636.000000,172200.000000,132925.000000,477.490780)}
{pt3dadd(132408.000000,172152.000000,133100.000000,440.627272)}
{pt3dadd(132180.000000,171972.000000,132975.000000,394.229006)}
{pt3dadd(131952.000000,172020.000000,132900.000000,362.304854)}
{pt3dadd(131724.000000,172056.000000,132850.000000,357.600698)}
{pt3dadd(131604.000000,172008.000000,132825.000000,361.470814)}
{pt3dadd(131376.000000,171924.000000,132550.000000,398.334322)}
{pt3dadd(131136.000000,171960.000000,132325.000000,440.028432)}
{pt3dadd(130908.000000,172188.000000,132350.000000,467.248428)}
{pt3dadd(130680.000000,172080.000000,132300.000000,471.952584)}
{pt3dadd(130440.000000,171924.000000,132125.000000,510.756588)}
{pt3dadd(130212.000000,171900.000000,132225.000000,515.942928)}
{pt3dadd(129984.000000,172056.000000,132375.000000,520.647084)}
{pt3dadd(129768.000000,172032.000000,132275.000000,530.290596)}
{pt3dadd(129552.000000,172104.000000,132275.000000,521.106294)}
{pt3dadd(129432.000000,171984.000000,132275.000000,490.632728)}
{pt3dadd(129204.000000,172020.000000,132400.000000,471.322730)}
{pt3dadd(128940.000000,171876.000000,132250.000000,442.741730)}
{pt3dadd(128784.000000,171924.000000,132300.000000,394.023558)}
{pt3dadd(128652.000000,171972.000000,132375.000000,374.626860)}
{pt3dadd(128424.000000,171852.000000,132250.000000,348.703050)}
{pt3dadd(128196.000000,171816.000000,132450.000000,319.746896)}
{pt3dadd(128076.000000,171792.000000,132700.000000,304.549080)}
{pt3dadd(127860.000000,171624.000000,132650.000000,316.403744)}
{pt3dadd(127644.000000,171480.000000,132700.000000,327.470004)}
{pt3dadd(127512.000000,171252.000000,132625.000000,333.997116)}
{pt3dadd(127308.000000,171024.000000,132600.000000,340.213420)}
{pt3dadd(127380.000000,170784.000000,132825.000000,366.477496)}
{pt3dadd(127392.000000,170628.000000,132925.000000,373.330964)}
{pt3dadd(127380.000000,170484.000000,132975.000000,365.775020)}
{pt3dadd(127344.000000,170232.000000,133025.000000,369.285336)}
{pt3dadd(127368.000000,170076.000000,133050.000000,372.628488)}
{pt3dadd(127416.000000,169932.000000,133025.000000,368.758372)}
{pt3dadd(127500.000000,169644.000000,133000.000000,380.377946)}
{pt3dadd(127584.000000,169500.000000,132950.000000,405.448630)}
{pt3dadd(127500.000000,169344.000000,132975.000000,425.815158)}
{pt3dadd(127608.000000,169200.000000,133125.000000,454.396158)}
{pt3dadd(127584.000000,169044.000000,133025.000000,480.720370)}
{pt3dadd(127680.000000,168888.000000,133075.000000,480.720370)}
{pt3dadd(127692.000000,168732.000000,133025.000000,471.536068)}
{pt3dadd(127776.000000,168456.000000,132975.000000,467.055922)}
{pt3dadd(127824.000000,168156.000000,133025.000000,457.871620)}
{pt3dadd(127788.000000,167940.000000,133025.000000,452.932264)}
{pt3dadd(127752.000000,167736.000000,133075.000000,466.383374)}
{pt3dadd(127668.000000,167532.000000,133175.000000,470.863520)}
{pt3dadd(127704.000000,167400.000000,133150.000000,458.662966)}
{pt3dadd(127740.000000,167172.000000,133275.000000,450.332528)}
{pt3dadd(127920.000000,166944.000000,133375.000000,432.817788)}
{pt3dadd(127980.000000,166824.000000,133375.000000,454.107052)}
{pt3dadd(127956.000000,166704.000000,133450.000000,441.296468)}
{pt3dadd(128016.000000,166476.000000,133175.000000,449.230214)}
{pt3dadd(128052.000000,166224.000000,133400.000000,457.560652)}
{pt3dadd(128028.000000,166104.000000,133375.000000,470.371236)}
{pt3dadd(128016.000000,165984.000000,133450.000000,444.377816)}
{pt3dadd(128076.000000,165864.000000,133475.000000,457.188400)}
{pt3dadd(128136.000000,165732.000000,133525.000000,461.455208)}
{pt3dadd(128364.000000,165624.000000,133475.000000,475.578866)}
{pt3dadd(128436.000000,165504.000000,133350.000000,475.578872)}
{pt3dadd(128352.000000,165384.000000,133475.000000,462.768288)}
{pt3dadd(128316.000000,165264.000000,133400.000000,446.087588)}
{pt3dadd(128412.000000,165156.000000,133625.000000,450.567734)}
{pt3dadd(128460.000000,165036.000000,133750.000000,436.444076)}
{pt3dadd(128364.000000,164904.000000,133700.000000,427.697116)}
{pt3dadd(128436.000000,164784.000000,134000.000000,440.507700)}
{pt3dadd(128340.000000,164664.000000,133675.000000,461.892556)}
{pt3dadd(128436.000000,164436.000000,133850.000000,466.596712)}
{pt3dadd(128484.000000,164316.000000,133850.000000,475.781014)}
{pt3dadd(128496.000000,164196.000000,134050.000000,471.717384)}
{pt3dadd(128496.000000,164076.000000,133900.000000,481.360896)}
{pt3dadd(128688.000000,163968.000000,133975.000000,476.656740)}
{pt3dadd(128916.000000,163848.000000,134075.000000,459.142000)}
{pt3dadd(129000.000000,163728.000000,134075.000000,437.757144)}
{pt3dadd(129024.000000,163608.000000,134050.000000,446.087582)}
{pt3dadd(129048.000000,163488.000000,134000.000000,436.444070)}
{pt3dadd(129228.000000,163368.000000,134175.000000,431.963924)}
{pt3dadd(129288.000000,163248.000000,134125.000000,436.027554)}
{pt3dadd(129348.000000,163128.000000,134225.000000,448.228108)}
{pt3dadd(129264.000000,163008.000000,134050.000000,443.961300)}
{pt3dadd(129324.000000,162876.000000,134150.000000,439.481154)}
{pt3dadd(129420.000000,162768.000000,134250.000000,439.481154)}
{pt3dadd(129600.000000,162636.000000,134275.000000,443.747962)}
{pt3dadd(129672.000000,162528.000000,134200.000000,443.747962)}
{pt3dadd(129672.000000,162396.000000,134400.000000,435.814216)}
{pt3dadd(129756.000000,162276.000000,134500.000000,431.547408)}
{pt3dadd(129732.000000,162168.000000,134325.000000,427.280600)}
{pt3dadd(129756.000000,162036.000000,134375.000000,415.080046)}
{pt3dadd(129756.000000,161916.000000,134425.000000,406.749608)}
{pt3dadd(129876.000000,161796.000000,134575.000000,410.619724)}
{pt3dadd(129924.000000,161676.000000,134650.000000,406.556094)}
{pt3dadd(130068.000000,161556.000000,134650.000000,402.492464)}
{pt3dadd(130128.000000,161424.000000,134625.000000,410.426210)}
{pt3dadd(130188.000000,161304.000000,134750.000000,414.489840)}
{pt3dadd(130044.000000,161184.000000,134725.000000,414.489840)}
{pt3dadd(130128.000000,161064.000000,134800.000000,400.080428)}
{pt3dadd(130104.000000,160956.000000,134800.000000,385.671016)}
{pt3dadd(130128.000000,160836.000000,134900.000000,374.051442)}
{pt3dadd(130152.000000,160716.000000,134975.000000,358.921552)}
{pt3dadd(130188.000000,160596.000000,135025.000000,358.921552)}
{pt3dadd(130248.000000,160476.000000,134950.000000,369.460848)}
{pt3dadd(130440.000000,160356.000000,135100.000000,369.460848)}
{pt3dadd(130224.000000,160212.000000,134850.000000,373.146676)}
{pt3dadd(130320.000000,160092.000000,134975.000000,380.342820)}
{pt3dadd(130464.000000,159960.000000,135125.000000,380.342820)}
{pt3dadd(130560.000000,159840.000000,135200.000000,384.212936)}
{pt3dadd(130728.000000,159720.000000,135275.000000,411.432932)}
{pt3dadd(130848.000000,159588.000000,135200.000000,437.757144)}
{pt3dadd(130992.000000,159468.000000,135325.000000,469.267696)}
{pt3dadd(131100.000000,159348.000000,135200.000000,496.908132)}
{pt3dadd(131160.000000,159216.000000,135200.000000,519.362228)}
{pt3dadd(131076.000000,159096.000000,135100.000000,529.005740)}
{pt3dadd(131280.000000,158976.000000,135375.000000,524.066384)}
{pt3dadd(131316.000000,158856.000000,135275.000000,518.880044)}
{pt3dadd(131484.000000,158736.000000,135325.000000,518.880044)}
{pt3dadd(131616.000000,158616.000000,135300.000000,541.233778)}
{pt3dadd(131712.000000,158496.000000,135225.000000,563.587526)}
{pt3dadd(131832.000000,158388.000000,135200.000000,597.184630)}
{pt3dadd(132024.000000,158256.000000,135300.000000,619.538364)}
{pt3dadd(132132.000000,158136.000000,135350.000000,671.539432)}
{pt3dadd(132228.000000,158016.000000,135375.000000,698.710538)}
{pt3dadd(132300.000000,157884.000000,135475.000000,725.881630)}
{pt3dadd(132372.000000,157764.000000,135700.000000,762.457000)}
{pt3dadd(132372.000000,157632.000000,135650.000000,789.628106)}
{pt3dadd(132420.000000,157428.000000,135600.000000,797.673816)}
{pt3dadd(132648.000000,157092.000000,135675.000000,830.700464)}
{pt3dadd(132912.000000,156732.000000,135800.000000,873.041012)}
{pt3dadd(132960.000000,156360.000000,136025.000000,857.332734)}
{pt3dadd(132624.000000,156108.000000,136300.000000,864.995302)}
{pt3dadd(132840.000000,155856.000000,136600.000000,856.949592)}
{pt3dadd(132804.000000,155616.000000,136575.000000,816.625264)}
{pt3dadd(132876.000000,155364.000000,136675.000000,747.113610)}
{pt3dadd(132984.000000,155232.000000,137075.000000,719.942504)}
{pt3dadd(132924.000000,155100.000000,137225.000000,685.108830)}
{pt3dadd(132888.000000,154980.000000,137300.000000,644.271330)}
{pt3dadd(132864.000000,154848.000000,137400.000000,618.394078)}
{pt3dadd(132828.000000,154716.000000,137400.000000,601.226684)}
{pt3dadd(132804.000000,154644.000000,137375.000000,573.933594)}
{pt3dadd(132708.000000,154416.000000,137350.000000,541.936348)}
{pt3dadd(132672.000000,154284.000000,137400.000000,525.586440)}
{pt3dadd(132756.000000,154152.000000,137350.000000,495.112874)}
{pt3dadd(132840.000000,154032.000000,137325.000000,484.987178)}
{pt3dadd(132588.000000,153900.000000,137450.000000,456.406178)}
{pt3dadd(132636.000000,153780.000000,137500.000000,461.663508)}
{pt3dadd(132708.000000,153648.000000,137775.000000,368.993138)}
{pt3dadd(132804.000000,154332.000000,137975.000000,374.000114)}
{pt3dadd(132972.000000,154224.000000,138150.000000,369.822788)}
{pt3dadd(133680.000000,153804.000000,138350.000000,370.215916)}
{pt3dadd(133824.000000,153168.000000,138725.000000,345.004846)}
{pt3dadd(133980.000000,152196.000000,139275.000000,404.547988)}
{pt3dadd(134220.000000,151044.000000,139575.000000,384.067418)}
{pt3dadd(134640.000000,149676.000000,139975.000000,393.764934)}
{pt3dadd(135228.000000,148908.000000,140450.000000,438.164510)}
{pt3dadd(135648.000000,148848.000000,140875.000000,458.645080)}
{pt3dadd(135912.000000,148740.000000,141375.000000,469.773308)}
{pt3dadd(136080.000000,148728.000000,141525.000000,490.253878)}
{pt3dadd(136428.000000,148620.000000,142050.000000,490.253878)}
{pt3dadd(136620.000000,148572.000000,142550.000000,484.777738)}
{pt3dadd(136872.000000,148764.000000,143100.000000,494.475254)}
{pt3dadd(137016.000000,148740.000000,143600.000000,522.270462)}
{pt3dadd(137244.000000,148956.000000,144075.000000,501.789892)}
{pt3dadd(137448.000000,149316.000000,144975.000000,464.719958)}
{pt3dadd(137808.000000,149664.000000,145350.000000,481.983490)}
{pt3dadd(137628.000000,150048.000000,145625.000000,522.748624)}
{pt3dadd(136668.000000,150612.000000,146150.000000,567.335410)}
{pt3dadd(134688.000000,152376.000000,146775.000000,592.546474)}
{pt3dadd(132804.000000,154356.000000,146650.000000,595.908346)}
{pt3dadd(132408.000000,155184.000000,146600.000000,527.204282)}
{pt3dadd(131976.000000,155520.000000,146525.000000,423.409702)}
{pt3dadd(131580.000000,155640.000000,146375.000000,317.084538)}
{pt3dadd(131220.000000,155808.000000,146375.000000,263.253108)}
{pt3dadd(130776.000000,155784.000000,146275.000000,266.783084)}
{pt3dadd(130260.000000,155784.000000,146250.000000,355.471856)}
{pt3dadd(129984.000000,155448.000000,146200.000000,501.515048)}
{pt3dadd(129300.000000,155316.000000,146025.000000,623.636446)}
{pt3dadd(128412.000000,155088.000000,146300.000000,711.253124)}
{pt3dadd(127740.000000,155040.000000,146575.000000,757.872678)}
{pt3dadd(127116.000000,154920.000000,146825.000000,726.100578)}
{pt3dadd(126624.000000,154956.000000,147225.000000,661.354426)}
{pt3dadd(126132.000000,155016.000000,147375.000000,624.574258)}
{pt3dadd(125772.000000,155184.000000,147600.000000,612.197500)}
{pt3dadd(125076.000000,155220.000000,147850.000000,638.219646)}
{pt3dadd(124632.000000,155232.000000,148075.000000,667.742743)}
{pt3dadd(124272.000000,155196.000000,148275.000000,733.855300)}

{create adhoc7}
{access adhoc7}
{connect adhoc7(1), adhoc6(0)}
{nseg = 1}
{strdef color color = "White"}
{pt3dclear()}
{pt3dadd(124272.000000,155196.000000,148275.000000,733.855300)}
{pt3dadd(123648.000000,154644.000000,148300.000000,339.526178)}
{pt3dadd(123516.000000,154488.000000,148300.000000,245.461734)}
{pt3dadd(123408.000000,154356.000000,148300.000000,117.600602)}
{pt3dadd(123348.000000,154188.000000,148300.000000,106.626225)}
{pt3dadd(123324.000000,154020.000000,148300.000000,106.626225)}
{pt3dadd(123300.000000,153780.000000,148300.000000,101.887483)}
{pt3dadd(123276.000000,153540.000000,148300.000000,100.041514)}
{pt3dadd(123228.000000,153276.000000,148300.000000,104.116720)}
{pt3dadd(123072.000000,152940.000000,148300.000000,155.260946)}
{pt3dadd(123036.000000,152544.000000,148300.000000,241.798631)}
{pt3dadd(123132.000000,152232.000000,148300.000000,344.395525)}
{pt3dadd(123324.000000,151800.000000,148200.000000,547.614100)}

{create adhoc8}
{access adhoc8}
{connect adhoc8(1), adhoc7(0)}
{nseg = 1}
{strdef color color = "White"}
{pt3dclear()}
{pt3dadd(123324.000000,151800.000000,148200.000000,547.614100)}
{pt3dadd(123276.000000,151488.000000,148475.000000,506.558267)}
{pt3dadd(123516.000000,151188.000000,148625.000000,426.940572)}
{pt3dadd(123576.000000,151116.000000,148800.000000,338.265947)}
{pt3dadd(123732.000000,150900.000000,148950.000000,239.756345)}
{pt3dadd(124032.000000,150816.000000,149075.000000,104.240974)}

{create adhoc9}
{access adhoc9}
{connect adhoc9(1), adhoc7(0)}
{nseg = 1}
{strdef color color = "White"}
{pt3dclear()}
{pt3dadd(123324.000000,151800.000000,148200.000000,547.614100)}
{pt3dadd(122976.000000,151776.000000,147950.000000,538.921810)}
{pt3dadd(123072.000000,151644.000000,147875.000000,480.775798)}
{pt3dadd(123024.000000,151596.000000,147800.000000,414.594876)}
{pt3dadd(122700.000000,151368.000000,147725.000000,350.581050)}
{pt3dadd(122496.000000,151284.000000,147675.000000,271.614714)}
{pt3dadd(122556.000000,151140.000000,147650.000000,195.259425)}
{pt3dadd(122364.000000,151032.000000,147600.000000,169.519529)}
{pt3dadd(122328.000000,150900.000000,147550.000000,154.116205)}
{pt3dadd(122208.000000,150684.000000,147450.000000,127.517139)}
{pt3dadd(122100.000000,150408.000000,147325.000000,123.024224)}
{pt3dadd(122160.000000,150132.000000,147225.000000,119.894512)}
{pt3dadd(122004.000000,149952.000000,147175.000000,110.537255)}
{pt3dadd(122052.000000,149688.000000,147125.000000,113.400961)}
{pt3dadd(121908.000000,149652.000000,147075.000000,130.148523)}
{pt3dadd(121800.000000,149424.000000,146950.000000,138.635832)}
{pt3dadd(121776.000000,149208.000000,146875.000000,149.582689)}
{pt3dadd(121692.000000,148920.000000,146800.000000,150.731946)}
{pt3dadd(121704.000000,148668.000000,146725.000000,139.785089)}
{pt3dadd(121632.000000,148548.000000,146625.000000,124.653492)}
{pt3dadd(121776.000000,148512.000000,146525.000000,99.277115)}

{create adhoc10}
{access adhoc10}
{connect adhoc10(1), adhoc6(0)}
{nseg = 1}
{strdef color color = "White"}
{pt3dclear()}
{pt3dadd(124272.000000,155196.000000,148275.000000,733.855300)}
{pt3dadd(123816.000000,155196.000000,148525.000000,678.836557)}
{pt3dadd(123300.000000,155472.000000,148700.000000,616.148978)}
{pt3dadd(122808.000000,155784.000000,149025.000000,598.011238)}
{pt3dadd(122616.000000,156060.000000,149325.000000,562.570684)}
{pt3dadd(122400.000000,156288.000000,149475.000000,547.000270)}
{pt3dadd(121644.000000,156516.000000,149625.000000,570.581410)}
{pt3dadd(121344.000000,156540.000000,149950.000000,599.102316)}
{pt3dadd(120876.000000,156420.000000,150375.000000,601.572436)}
{pt3dadd(120528.000000,156276.000000,150700.000000,604.452090)}
{pt3dadd(120168.000000,156048.000000,151175.000000,609.313590)}
{pt3dadd(119724.000000,155640.000000,151500.000000,568.831206)}
{pt3dadd(119340.000000,155136.000000,151875.000000,531.076076)}
{pt3dadd(118980.000000,154092.000000,152225.000000,472.004436)}
{pt3dadd(118920.000000,153588.000000,152475.000000,440.416762)}
{pt3dadd(118824.000000,153144.000000,152875.000000,426.906262)}
{pt3dadd(118740.000000,152472.000000,153100.000000,435.640662)}
{pt3dadd(118608.000000,152064.000000,153350.000000,468.749482)}
{pt3dadd(118452.000000,151608.000000,153550.000000,521.578102)}
{pt3dadd(118248.000000,150924.000000,154050.000000,563.276916)}
{pt3dadd(118152.000000,150588.000000,154275.000000,566.120182)}
{pt3dadd(118044.000000,150192.000000,154475.000000,569.054646)}
{pt3dadd(117648.000000,149532.000000,154675.000000,545.180050)}
{pt3dadd(117204.000000,148644.000000,155125.000000,529.878102)}
{pt3dadd(117156.000000,147984.000000,155400.000000,521.955227)}
{pt3dadd(117408.000000,147024.000000,155425.000000,547.792360)}

{create adhoc11}
{access adhoc11}
{connect adhoc11(1), adhoc10(0)}
{nseg = 1}
{strdef color color = "White"}
{pt3dclear()}
{pt3dadd(117408.000000,147024.000000,155425.000000,547.792360)}
{pt3dadd(117420.000000,146256.000000,155425.000000,433.802073)}
{pt3dadd(117612.000000,145704.000000,155425.000000,299.854740)}
{pt3dadd(118008.000000,145128.000000,155425.000000,213.633988)}
{pt3dadd(118056.000000,145488.000000,155375.000000,170.270184)}
{pt3dadd(118332.000000,145272.000000,155325.000000,169.368988)}
{pt3dadd(118428.000000,145032.000000,155125.000000,188.763742)}
{pt3dadd(118500.000000,144816.000000,154950.000000,206.590246)}
{pt3dadd(118668.000000,144696.000000,154850.000000,211.619670)}
{pt3dadd(118812.000000,144444.000000,154775.000000,210.161898)}
{pt3dadd(119040.000000,144288.000000,154675.000000,225.345192)}
{pt3dadd(119520.000000,143796.000000,154625.000000,263.403910)}
{pt3dadd(119880.000000,143592.000000,154550.000000,337.786010)}
{pt3dadd(120060.000000,143412.000000,154475.000000,442.818866)}
{pt3dadd(120444.000000,143304.000000,154350.000000,535.460894)}
{pt3dadd(120396.000000,143280.000000,154175.000000,610.151100)}
{pt3dadd(120420.000000,143256.000000,154000.000000,701.525880)}
{pt3dadd(120564.000000,143292.000000,153600.000000,735.367500)}

{create adhoc12}
{access adhoc12}
{connect adhoc12(1), adhoc11(0)}
{nseg = 1}
{strdef color color = "White"}
{pt3dclear()}
{pt3dadd(120564.000000,143292.000000,153600.000000,735.367500)}
{pt3dadd(121836.000000,143952.000000,153650.000000,348.097280)}
{pt3dadd(122160.000000,144156.000000,153625.000000,156.896313)}
{pt3dadd(122832.000000,144216.000000,153625.000000,161.764600)}

{create adhoc13}
{access adhoc13}
{connect adhoc13(1), adhoc11(0)}
{nseg = 1}
{strdef color color = "White"}
{pt3dclear()}
{pt3dadd(120564.000000,143292.000000,153600.000000,735.367500)}
{pt3dadd(120600.000000,143328.000000,153425.000000,666.522500)}
{pt3dadd(120828.000000,143292.000000,153300.000000,459.189254)}
{pt3dadd(120840.000000,143436.000000,153175.000000,282.192923)}
{pt3dadd(120840.000000,143436.000000,153000.000000,146.725270)}

{create adhoc14}
{access adhoc14}
{connect adhoc14(1), adhoc10(0)}
{nseg = 1}
{strdef color color = "White"}
{pt3dclear()}
{pt3dadd(117408.000000,147024.000000,155425.000000,547.792360)}
{pt3dadd(116952.000000,147036.000000,155575.000000,525.426423)}
{pt3dadd(116748.000000,147084.000000,155775.000000,517.967806)}
{pt3dadd(116616.000000,146952.000000,156125.000000,520.154294)}
{pt3dadd(116532.000000,146688.000000,156500.000000,520.103328)}
{pt3dadd(116544.000000,146688.000000,156825.000000,531.329452)}
{pt3dadd(116544.000000,146688.000000,157225.000000,547.695833)}
{pt3dadd(116532.000000,146748.000000,157425.000000,562.910500)}

{create adhoc15}
{access adhoc15}
{connect adhoc15(1), adhoc14(0)}
{nseg = 1}
{strdef color color = "White"}
{pt3dclear()}
{pt3dadd(116532.000000,146748.000000,157425.000000,562.910500)}
{pt3dadd(116184.000000,146952.000000,158125.000000,538.348067)}
{pt3dadd(115980.000000,146904.000000,158300.000000,519.908626)}
{pt3dadd(115740.000000,146796.000000,158600.000000,496.062500)}
{pt3dadd(115500.000000,146664.000000,158775.000000,473.296808)}
{pt3dadd(115140.000000,146616.000000,158925.000000,458.751080)}
{pt3dadd(114816.000000,146628.000000,159175.000000,444.205352)}
{pt3dadd(114756.000000,146484.000000,159350.000000,447.235956)}
{pt3dadd(114612.000000,146340.000000,159500.000000,464.407482)}
{pt3dadd(114144.000000,146148.000000,159775.000000,516.891484)}
{pt3dadd(113820.000000,145980.000000,160075.000000,533.282958)}
{pt3dadd(113376.000000,145812.000000,160275.000000,552.705036)}
{pt3dadd(112728.000000,145536.000000,160400.000000,543.184546)}
{pt3dadd(112044.000000,145476.000000,160425.000000,529.209902)}
{pt3dadd(111420.000000,145476.000000,160425.000000,477.449012)}
{pt3dadd(110904.000000,145548.000000,160425.000000,475.907654)}
{pt3dadd(110532.000000,145464.000000,160425.000000,469.565504)}
{pt3dadd(109860.000000,145080.000000,160400.000000,478.038600)}
{pt3dadd(109464.000000,144828.000000,160325.000000,503.437944)}
{pt3dadd(108888.000000,144576.000000,160425.000000,533.369024)}
{pt3dadd(108228.000000,144396.000000,160450.000000,566.641056)}
{pt3dadd(107700.000000,144048.000000,160400.000000,603.748842)}
{pt3dadd(107160.000000,143796.000000,160500.000000,623.181086)}
{pt3dadd(106836.000000,143556.000000,160500.000000,610.139326)}
{pt3dadd(106440.000000,143304.000000,160500.000000,566.004578)}
{pt3dadd(106044.000000,143124.000000,160500.000000,526.833994)}
{pt3dadd(105408.000000,142932.000000,160600.000000,512.209688)}
{pt3dadd(104676.000000,142668.000000,160825.000000,510.336168)}
{pt3dadd(103992.000000,142320.000000,160925.000000,508.449098)}
{pt3dadd(103596.000000,142080.000000,161100.000000,526.436354)}
{pt3dadd(102912.000000,141852.000000,161275.000000,522.963378)}
{pt3dadd(102252.000000,141696.000000,161375.000000,534.746538)}
{pt3dadd(101784.000000,141888.000000,161450.000000,509.004610)}
{pt3dadd(101376.000000,141828.000000,161775.000000,519.500960)}
{pt3dadd(100932.000000,141744.000000,161975.000000,501.060232)}
{pt3dadd(100404.000000,141624.000000,162175.000000,475.467142)}
{pt3dadd(100140.000000,141636.000000,162350.000000,430.981214)}
{pt3dadd(99876.000000,141576.000000,162500.000000,416.838246)}
{pt3dadd(99348.000000,141216.000000,162575.000000,369.273486)}
{pt3dadd(99168.000000,141072.000000,162700.000000,361.342400)}
{pt3dadd(98928.000000,140892.000000,162775.000000,350.050770)}
{pt3dadd(98820.000000,140700.000000,162875.000000,318.515534)}
{pt3dadd(98544.000000,140472.000000,163250.000000,288.743502)}
{pt3dadd(98436.000000,140376.000000,163525.000000,280.430570)}
{pt3dadd(98088.000000,140196.000000,163650.000000,292.028392)}
{pt3dadd(97488.000000,139968.000000,163875.000000,343.176212)}
{pt3dadd(96984.000000,139920.000000,163925.000000,384.930736)}
{pt3dadd(96672.000000,139812.000000,164150.000000,468.841970)}
{pt3dadd(96324.000000,139740.000000,164325.000000,549.478562)}
{pt3dadd(95964.000000,139812.000000,164550.000000,594.083766)}
{pt3dadd(95796.000000,139956.000000,165075.000000,567.560786)}
{pt3dadd(95340.000000,140040.000000,165225.000000,535.524846)}
{pt3dadd(94908.000000,140184.000000,165475.000000,485.741650)}
{pt3dadd(94728.000000,140352.000000,165600.000000,466.997730)}
{pt3dadd(93840.000000,140364.000000,165875.000000,452.084262)}
{pt3dadd(93540.000000,140028.000000,166100.000000,450.037754)}
{pt3dadd(93180.000000,139776.000000,166475.000000,462.665946)}
{pt3dadd(92364.000000,139236.000000,166575.000000,455.480136)}
{pt3dadd(92112.000000,138960.000000,166575.000000,397.571692)}
{pt3dadd(91644.000000,138792.000000,166575.000000,350.703150)}
{pt3dadd(91296.000000,138540.000000,166575.000000,374.076678)}
{pt3dadd(90984.000000,138132.000000,166575.000000,424.188880)}
{pt3dadd(90576.000000,137652.000000,166575.000000,466.200080)}
{pt3dadd(90084.000000,137244.000000,166575.000000,536.297264)}
{pt3dadd(90228.000000,137484.000000,166850.000000,563.697334)}
{pt3dadd(89700.000000,136824.000000,166700.000000,535.480946)}
{pt3dadd(88788.000000,137088.000000,166875.000000,608.715272)}
{pt3dadd(88188.000000,137076.000000,166975.000000,599.001053)}
{pt3dadd(87984.000000,137292.000000,167150.000000,1000.000000)}

{create adhoc16}
{access adhoc16}
{connect adhoc16(1), adhoc14(0)}
{nseg = 1}
{strdef color color = "White"}
{pt3dclear()}
{pt3dadd(116532.000000,146748.000000,157425.000000,562.910500)}
{pt3dadd(116460.000000,146868.000000,157725.000000,408.743207)}
{pt3dadd(116808.000000,146184.000000,157725.000000,301.047304)}
{pt3dadd(116916.000000,145944.000000,157825.000000,220.071182)}
{pt3dadd(117132.000000,145548.000000,157925.000000,160.072136)}
{pt3dadd(117204.000000,145248.000000,158025.000000,167.257030)}
{pt3dadd(117204.000000,145260.000000,158200.000000,174.027430)}
{pt3dadd(117288.000000,144924.000000,158300.000000,184.905250)}
{pt3dadd(117540.000000,144696.000000,158400.000000,214.305528)}
{pt3dadd(117792.000000,144432.000000,158425.000000,221.412690)}
{pt3dadd(118296.000000,144000.000000,158500.000000,228.898282)}
{pt3dadd(118920.000000,143472.000000,158500.000000,376.078922)}
{pt3dadd(119148.000000,143064.000000,158500.000000,515.437736)}
{pt3dadd(119292.000000,141612.000000,158500.000000,620.335320)}
{pt3dadd(119364.000000,140904.000000,158675.000000,745.227680)}
{pt3dadd(119268.000000,140676.000000,158900.000000,863.552640)}
{pt3dadd(119268.000000,140676.000000,159100.000000,803.027674)}
{pt3dadd(119400.000000,140484.000000,159200.000000,714.576770)}
{pt3dadd(119316.000000,140232.000000,159450.000000,601.372430)}
{pt3dadd(119520.000000,139812.000000,159550.000000,489.020984)}
{pt3dadd(119748.000000,139356.000000,159600.000000,400.509064)}
{pt3dadd(120192.000000,139008.000000,159600.000000,388.779790)}
{pt3dadd(120360.000000,138480.000000,159600.000000,419.721300)}
{pt3dadd(120456.000000,137508.000000,159600.000000,575.182000)}

{create adhoc17}
{access adhoc17}
{connect adhoc17(1), adhoc16(0)}
{nseg = 1}
{strdef color color = "White"}
{pt3dclear()}
{pt3dadd(120456.000000,137508.000000,159600.000000,575.182000)}
{pt3dadd(120300.000000,137568.000000,159925.000000,596.171433)}
{pt3dadd(120252.000000,137580.000000,160125.000000,522.879724)}
{pt3dadd(120204.000000,137664.000000,160300.000000,472.869273)}
{pt3dadd(120108.000000,137604.000000,160500.000000,345.578220)}

{create adhoc18}
{access adhoc18}
{connect adhoc18(1), adhoc17(0)}
{nseg = 1}
{strdef color color = "White"}
{pt3dclear()}
{pt3dadd(120108.000000,137604.000000,160500.000000,345.578220)}
{pt3dadd(120120.000000,138000.000000,160675.000000,234.405893)}
{pt3dadd(120168.000000,138060.000000,160825.000000,216.780040)}

{create adhoc19}
{access adhoc19}
{connect adhoc19(1), adhoc17(0)}
{nseg = 1}
{strdef color color = "White"}
{pt3dclear()}
{pt3dadd(120108.000000,137604.000000,160500.000000,345.578220)}
{pt3dadd(119964.000000,136908.000000,160700.000000,206.783660)}
{pt3dadd(120000.000000,136668.000000,160825.000000,120.711240)}

{create adhoc20}
{access adhoc20}
{connect adhoc20(1), adhoc16(0)}
{nseg = 1}
{strdef color color = "White"}
{pt3dclear()}
{pt3dadd(120456.000000,137508.000000,159600.000000,575.182000)}
{pt3dadd(120384.000000,136848.000000,159600.000000,503.192873)}
{pt3dadd(120360.000000,135960.000000,159650.000000,460.530402)}
{pt3dadd(120396.000000,135444.000000,159425.000000,427.248226)}
{pt3dadd(120588.000000,135072.000000,159200.000000,412.469292)}
{pt3dadd(120636.000000,134916.000000,158950.000000,379.361218)}
{pt3dadd(120876.000000,134832.000000,158825.000000,367.784406)}
{pt3dadd(121020.000000,134844.000000,158725.000000,340.137586)}
{pt3dadd(121152.000000,134856.000000,158625.000000,305.295526)}
{pt3dadd(121296.000000,134808.000000,158525.000000,257.327894)}
{pt3dadd(121404.000000,134748.000000,158475.000000,211.966726)}
{pt3dadd(121500.000000,134604.000000,158350.000000,168.377774)}
{pt3dadd(121548.000000,134496.000000,158200.000000,131.329016)}
{pt3dadd(121620.000000,134460.000000,158075.000000,106.982406)}
{pt3dadd(121656.000000,134340.000000,157950.000000,111.959372)}
{pt3dadd(121584.000000,134316.000000,157825.000000,117.727947)}
{pt3dadd(121452.000000,134256.000000,157575.000000,148.927500)}

{create adhoc21}
{access adhoc21}
{connect adhoc21(1), adhoc5(0)}
{nseg = 1}
{strdef color color = "White"}
{pt3dclear()}
{pt3dadd(192792.000000,184308.000000,106575.000000,544.564760)}
{pt3dadd(192780.000000,184092.000000,106850.000000,553.640830)}
{pt3dadd(192732.000000,183984.000000,106975.000000,499.189852)}
{pt3dadd(192732.000000,183876.000000,106750.000000,435.532480)}
{pt3dadd(192912.000000,183648.000000,106725.000000,368.692246)}
{pt3dadd(193020.000000,183420.000000,106425.000000,323.458438)}
{pt3dadd(193056.000000,183300.000000,106475.000000,311.257884)}
{pt3dadd(193176.000000,183096.000000,106675.000000,304.061740)}
{pt3dadd(193224.000000,182976.000000,106750.000000,319.452960)}
{pt3dadd(193140.000000,182772.000000,106725.000000,329.693460)}
{pt3dadd(193152.000000,182676.000000,106750.000000,321.022756)}
{pt3dadd(193224.000000,182436.000000,106825.000000,298.628796)}
{pt3dadd(193044.000000,182220.000000,106825.000000,298.628796)}
{pt3dadd(193128.000000,181992.000000,106900.000000,308.188252)}
{pt3dadd(192888.000000,181908.000000,106825.000000,295.684972)}
{pt3dadd(192804.000000,181740.000000,106950.000000,288.194892)}
{pt3dadd(192540.000000,181512.000000,106725.000000,285.575442)}
{pt3dadd(192504.000000,181272.000000,106675.000000,273.128046)}
{pt3dadd(192600.000000,181056.000000,106775.000000,263.568590)}
{pt3dadd(192828.000000,180828.000000,106700.000000,281.992154)}
{pt3dadd(192912.000000,180708.000000,106775.000000,295.120594)}
{pt3dadd(193056.000000,180468.000000,106725.000000,295.120594)}
{pt3dadd(193188.000000,180240.000000,106750.000000,301.040878)}
{pt3dadd(193332.000000,180108.000000,106750.000000,310.600334)}
{pt3dadd(193680.000000,179880.000000,106725.000000,320.637762)}
{pt3dadd(193668.000000,179652.000000,106675.000000,337.393362)}
{pt3dadd(193824.000000,179532.000000,106675.000000,362.406772)}
{pt3dadd(193872.000000,179400.000000,106600.000000,380.000144)}
{pt3dadd(194064.000000,179160.000000,106475.000000,376.656992)}
{pt3dadd(194136.000000,179040.000000,106475.000000,366.619564)}
{pt3dadd(194100.000000,178812.000000,106400.000000,356.080268)}
{pt3dadd(194268.000000,178572.000000,106450.000000,356.080268)}
{pt3dadd(194292.000000,178332.000000,106175.000000,348.524324)}
{pt3dadd(194544.000000,178092.000000,106100.000000,359.063620)}
{pt3dadd(194496.000000,177864.000000,106125.000000,380.720622)}
{pt3dadd(194448.000000,177624.000000,106125.000000,412.644774)}
{pt3dadd(194448.000000,177408.000000,106125.000000,434.029630)}
{pt3dadd(194448.000000,177156.000000,106100.000000,459.100314)}
{pt3dadd(194484.000000,176916.000000,106050.000000,485.424526)}
{pt3dadd(194508.000000,176676.000000,105975.000000,481.360896)}
{pt3dadd(194568.000000,176436.000000,105925.000000,463.846156)}
{pt3dadd(194640.000000,176316.000000,105825.000000,459.142000)}
{pt3dadd(194736.000000,176064.000000,105750.000000,445.690890)}
{pt3dadd(194652.000000,175836.000000,105675.000000,427.300424)}
{pt3dadd(194652.000000,175620.000000,105700.000000,435.630862)}
{pt3dadd(194652.000000,175392.000000,105750.000000,448.441446)}
{pt3dadd(194568.000000,175164.000000,105875.000000,431.760746)}
{pt3dadd(194688.000000,174936.000000,105875.000000,420.141172)}
{pt3dadd(194736.000000,174684.000000,105675.000000,405.011282)}
{pt3dadd(194832.000000,174456.000000,105575.000000,392.810728)}
{pt3dadd(194820.000000,174216.000000,105375.000000,372.444200)}
{pt3dadd(194784.000000,173964.000000,105350.000000,365.248056)}
{pt3dadd(195000.000000,173712.000000,105400.000000,352.178284)}
{pt3dadd(195096.000000,173508.000000,105325.000000,352.178284)}
{pt3dadd(195180.000000,173280.000000,105250.000000,352.178284)}
{pt3dadd(195156.000000,173064.000000,105125.000000,372.544812)}
{pt3dadd(195300.000000,172836.000000,105000.000000,391.941510)}
{pt3dadd(195456.000000,172620.000000,104900.000000,420.897664)}
{pt3dadd(195600.000000,172344.000000,104850.000000,444.774508)}
{pt3dadd(195732.000000,172104.000000,104775.000000,471.098720)}
{pt3dadd(195708.000000,171828.000000,104700.000000,466.618574)}
{pt3dadd(195912.000000,171624.000000,104600.000000,480.742232)}
{pt3dadd(195972.000000,171384.000000,104525.000000,489.926534)}
{pt3dadd(196008.000000,171144.000000,104425.000000,481.179580)}
{pt3dadd(196140.000000,170832.000000,104325.000000,462.789114)}
{pt3dadd(196368.000000,170592.000000,104175.000000,493.262680)}
{pt3dadd(196404.000000,170340.000000,104125.000000,503.894662)}
{pt3dadd(196632.000000,169968.000000,103975.000000,525.183926)}
{pt3dadd(196692.000000,169752.000000,103900.000000,554.206374)}
{pt3dadd(196884.000000,169476.000000,103900.000000,572.596840)}
{pt3dadd(196872.000000,169224.000000,103825.000000,556.246932)}
{pt3dadd(197064.000000,168960.000000,103850.000000,574.272698)}
{pt3dadd(197016.000000,168720.000000,103800.000000,568.554772)}
{pt3dadd(197100.000000,168516.000000,103650.000000,552.983434)}
{pt3dadd(197208.000000,168264.000000,103700.000000,548.044078)}
{pt3dadd(197220.000000,168036.000000,103550.000000,543.104722)}
{pt3dadd(197436.000000,167808.000000,103500.000000,491.992878)}
{pt3dadd(197544.000000,167604.000000,103450.000000,451.350856)}
{pt3dadd(197592.000000,167388.000000,103425.000000,433.836116)}
{pt3dadd(197616.000000,167184.000000,103375.000000,408.765432)}
{pt3dadd(197532.000000,167028.000000,103400.000000,387.380576)}
{pt3dadd(197520.000000,166776.000000,103350.000000,383.510460)}
{pt3dadd(197520.000000,166536.000000,103225.000000,387.196288)}
{pt3dadd(197580.000000,166284.000000,103100.000000,376.130028)}
{pt3dadd(197640.000000,166020.000000,102975.000000,376.130028)}
{pt3dadd(197604.000000,165756.000000,102675.000000,353.736068)}
{pt3dadd(197604.000000,165516.000000,102375.000000,331.342108)}
{pt3dadd(197556.000000,165252.000000,102250.000000,335.212224)}
{pt3dadd(197616.000000,165024.000000,102300.000000,346.278484)}
{pt3dadd(197580.000000,164796.000000,102150.000000,362.164866)}
{pt3dadd(197532.000000,164448.000000,101975.000000,396.759380)}
{pt3dadd(197448.000000,164100.000000,101925.000000,419.153340)}
{pt3dadd(197232.000000,163812.000000,101725.000000,408.087080)}
{pt3dadd(197112.000000,163116.000000,101575.000000,404.216964)}
{pt3dadd(197016.000000,162228.000000,101275.000000,395.886526)}
{pt3dadd(196776.000000,161592.000000,101100.000000,391.619718)}
{pt3dadd(196656.000000,160908.000000,100925.000000,391.619718)}
{pt3dadd(196416.000000,160308.000000,100725.000000,430.326414)}
{pt3dadd(196284.000000,159888.000000,100725.000000,451.711270)}
{pt3dadd(196044.000000,159360.000000,100450.000000,455.774900)}
{pt3dadd(195936.000000,158904.000000,100375.000000,451.711270)}
{pt3dadd(195732.000000,158376.000000,100325.000000,459.645016)}
{pt3dadd(195540.000000,157968.000000,100175.000000,436.068210)}
{pt3dadd(195432.000000,157800.000000,100075.000000,410.997526)}
{pt3dadd(195192.000000,157236.000000,99975.000000,399.377952)}
{pt3dadd(194964.000000,156804.000000,99875.000000,381.784580)}
{pt3dadd(194736.000000,156468.000000,99725.000000,351.456874)}
{pt3dadd(194508.000000,156156.000000,99575.000000,318.509718)}
{pt3dadd(194268.000000,155988.000000,99550.000000,297.182136)}
{pt3dadd(194064.000000,155676.000000,99425.000000,273.359838)}
{pt3dadd(193848.000000,155376.000000,99275.000000,264.689134)}
{pt3dadd(193608.000000,155136.000000,99150.000000,264.689134)}
{pt3dadd(193392.000000,154620.000000,99075.000000,293.572660)}
{pt3dadd(193224.000000,154368.000000,99050.000000,314.900242)}
{pt3dadd(193116.000000,153756.000000,99000.000000,359.089068)}
{pt3dadd(192948.000000,153828.000000,98925.000000,374.286884)}
{pt3dadd(192720.000000,153588.000000,98775.000000,396.680844)}
{pt3dadd(192504.000000,153204.000000,98525.000000,385.614584)}
{pt3dadd(192252.000000,152688.000000,98275.000000,385.614584)}
{pt3dadd(192108.000000,152292.000000,98050.000000,365.248056)}
{pt3dadd(192120.000000,151812.000000,97800.000000,384.644754)}
{pt3dadd(192276.000000,151416.000000,97525.000000,396.845308)}
{pt3dadd(192420.000000,151152.000000,97300.000000,420.722152)}
{pt3dadd(192540.000000,151008.000000,97175.000000,420.722152)}
{pt3dadd(192696.000000,150480.000000,96925.000000,424.407980)}
{pt3dadd(192948.000000,150216.000000,96800.000000,405.011282)}
{pt3dadd(192672.000000,149616.000000,96675.000000,382.271432)}
{pt3dadd(192756.000000,149412.000000,96550.000000,365.590732)}
{pt3dadd(192804.000000,148968.000000,96425.000000,355.553304)}
{pt3dadd(192888.000000,148692.000000,96300.000000,338.797704)}
{pt3dadd(192852.000000,148476.000000,96050.000000,326.350308)}
{pt3dadd(192900.000000,148020.000000,95825.000000,333.203776)}
{pt3dadd(192888.000000,147624.000000,95700.000000,326.007632)}
{pt3dadd(192624.000000,147324.000000,95450.000000,326.007632)}
{pt3dadd(192660.000000,147084.000000,95200.000000,323.119692)}
{pt3dadd(192516.000000,146640.000000,94975.000000,326.007632)}
{pt3dadd(192108.000000,145992.000000,94825.000000,312.937860)}
{pt3dadd(191796.000000,145656.000000,94600.000000,292.625878)}
{pt3dadd(191724.000000,145452.000000,94475.000000,272.047286)}
{pt3dadd(191340.000000,144948.000000,94225.000000,259.544006)}
{pt3dadd(191244.000000,144696.000000,94100.000000,236.129086)}
{pt3dadd(191184.000000,144420.000000,93850.000000,227.871276)}
{pt3dadd(190956.000000,143964.000000,93750.000000,230.365992)}
{pt3dadd(190752.000000,143340.000000,93500.000000,239.654430)}
{pt3dadd(190632.000000,143244.000000,93525.000000,252.157710)}
{pt3dadd(190392.000000,142908.000000,93450.000000,267.314820)}
{pt3dadd(190152.000000,142380.000000,93275.000000,278.604974)}
{pt3dadd(189912.000000,141780.000000,93075.000000,289.895128)}
{pt3dadd(189684.000000,141336.000000,93025.000000,307.712394)}
{pt3dadd(189588.000000,140964.000000,92775.000000,331.226050)}
{pt3dadd(189072.000000,140052.000000,92575.000000,368.440014)}
{pt3dadd(189396.000000,139404.000000,92350.000000,390.097016)}
{pt3dadd(189708.000000,139248.000000,92125.000000,407.690388)}
{pt3dadd(190020.000000,138528.000000,91900.000000,431.567232)}
{pt3dadd(190296.000000,137952.000000,91650.000000,464.653310)}
{pt3dadd(190764.000000,137880.000000,91425.000000,478.776968)}
{pt3dadd(190656.000000,137232.000000,91200.000000,492.228078)}
{pt3dadd(190452.000000,137160.000000,90975.000000,484.672134)}
{pt3dadd(190392.000000,136836.000000,90750.000000,454.268178)}
{pt3dadd(190464.000000,136728.000000,90550.000000,413.626156)}
{pt3dadd(190296.000000,136428.000000,90325.000000,367.658404)}
{pt3dadd(190152.000000,136152.000000,90100.000000,335.734252)}
{pt3dadd(190260.000000,136188.000000,89750.000000,328.880784)}
{pt3dadd(190056.000000,136044.000000,89500.000000,346.474156)}
{pt3dadd(190080.000000,136068.000000,89275.000000,350.159984)}
{pt3dadd(190080.000000,136020.000000,88925.000000,366.117696)}
{pt3dadd(190164.000000,136056.000000,88675.000000,362.933736)}
{pt3dadd(190104.000000,135960.000000,88450.000000,359.749776)}
{pt3dadd(190128.000000,136128.000000,88200.000000,352.193832)}
{pt3dadd(189948.000000,135876.000000,87975.000000,329.799872)}
{pt3dadd(189972.000000,135996.000000,87750.000000,311.091740)}
{pt3dadd(190056.000000,135648.000000,87500.000000,321.129168)}
{pt3dadd(190104.000000,135996.000000,87250.000000,334.852424)}
{pt3dadd(189996.000000,135936.000000,87025.000000,342.408368)}
{pt3dadd(189888.000000,135864.000000,86750.000000,387.319147)}
{pt3dadd(189780.000000,135996.000000,86500.000000,406.362580)}

{create adhoc22}
{access adhoc22}
{connect adhoc22(1), adhoc21(0)}
{nseg = 1}
{strdef color color = "White"}
{pt3dclear()}
{pt3dadd(189780.000000,135996.000000,86500.000000,406.362580)}
{pt3dadd(189384.000000,136656.000000,86300.000000,283.065033)}
{pt3dadd(189432.000000,136968.000000,86050.000000,246.346094)}
{pt3dadd(189492.000000,137376.000000,85825.000000,204.167050)}
{pt3dadd(189492.000000,137844.000000,85625.000000,204.167050)}
{pt3dadd(189576.000000,138024.000000,85625.000000,208.374486)}
{pt3dadd(189768.000000,138360.000000,85600.000000,219.715332)}
{pt3dadd(190152.000000,138912.000000,85400.000000,227.356954)}
{pt3dadd(190032.000000,138948.000000,85275.000000,231.364034)}
{pt3dadd(190440.000000,139344.000000,85050.000000,213.017824)}
{pt3dadd(190488.000000,139848.000000,84850.000000,206.855716)}
{pt3dadd(190632.000000,140268.000000,84700.000000,191.698606)}
{pt3dadd(190656.000000,140436.000000,84575.000000,177.770204)}
{pt3dadd(190704.000000,140592.000000,84475.000000,170.128582)}
{pt3dadd(190740.000000,140748.000000,84350.000000,186.212012)}
{pt3dadd(191088.000000,141084.000000,84225.000000,184.350420)}
{pt3dadd(191244.000000,141228.000000,84125.000000,188.166684)}
{pt3dadd(191232.000000,141264.000000,84000.000000,198.088006)}
{pt3dadd(191484.000000,141444.000000,83775.000000,199.860956)}
{pt3dadd(191736.000000,141720.000000,83675.000000,190.064306)}
{pt3dadd(191796.000000,142068.000000,83550.000000,191.925898)}
{pt3dadd(191856.000000,142200.000000,83325.000000,200.772028)}
{pt3dadd(192048.000000,142284.000000,83200.000000,206.934136)}
{pt3dadd(192000.000000,142572.000000,83100.000000,219.596530)}
{pt3dadd(192012.000000,142620.000000,82975.000000,229.393180)}
{pt3dadd(192000.000000,142884.000000,82850.000000,240.193982)}
{pt3dadd(191988.000000,142848.000000,82725.000000,233.400260)}
{pt3dadd(192108.000000,142992.000000,82625.000000,238.038954)}
{pt3dadd(192156.000000,143256.000000,82500.000000,227.238152)}
{pt3dadd(192216.000000,143400.000000,82400.000000,229.500932)}
{pt3dadd(192264.000000,143532.000000,82275.000000,237.365518)}
{pt3dadd(192300.000000,143616.000000,82175.000000,264.471222)}
{pt3dadd(192444.000000,144084.000000,82050.000000,288.293520)}
{pt3dadd(192612.000000,144324.000000,81925.000000,304.208488)}
{pt3dadd(192528.000000,144516.000000,81675.000000,304.208488)}
{pt3dadd(192432.000000,144732.000000,81450.000000,289.550180)}
{pt3dadd(192360.000000,144768.000000,81325.000000,266.862284)}
{pt3dadd(192360.000000,144720.000000,81100.000000,240.664072)}
{pt3dadd(192444.000000,144972.000000,80875.000000,246.302432)}
{pt3dadd(192360.000000,145128.000000,80775.000000,248.678346)}
{pt3dadd(192276.000000,145068.000000,80525.000000,255.472068)}
{pt3dadd(192180.000000,144972.000000,80425.000000,260.342698)}
{pt3dadd(192276.000000,145116.000000,80300.000000,265.213328)}
{pt3dadd(192228.000000,145008.000000,80200.000000,254.460802)}
{pt3dadd(192348.000000,145248.000000,80075.000000,241.798408)}
{pt3dadd(192264.000000,145188.000000,79975.000000,222.534894)}
{pt3dadd(192276.000000,145260.000000,79850.000000,217.664264)}
{pt3dadd(192156.000000,145164.000000,79625.000000,212.793634)}
{pt3dadd(191904.000000,145176.000000,79425.000000,210.417720)}
{pt3dadd(191772.000000,145008.000000,79300.000000,218.441420)}
{pt3dadd(191592.000000,145008.000000,79100.000000,235.329020)}
{pt3dadd(191472.000000,144876.000000,78875.000000,242.819100)}
{pt3dadd(191328.000000,144612.000000,78750.000000,250.309180)}
{pt3dadd(191196.000000,144384.000000,78625.000000,276.507392)}
{pt3dadd(191004.000000,144084.000000,78525.000000,289.010672)}
{pt3dadd(190812.000000,143712.000000,78325.000000,286.747892)}
{pt3dadd(190752.000000,143712.000000,78200.000000,255.739452)}
{pt3dadd(190584.000000,143508.000000,77975.000000,225.931012)}
{pt3dadd(190200.000000,142920.000000,77600.000000,175.071582)}
{pt3dadd(190152.000000,142464.000000,77475.000000,120.095237)}
{pt3dadd(189984.000000,141912.000000,77475.000000,114.285710)}

{create adhoc23}
{access adhoc23}
{connect adhoc23(1), adhoc21(0)}
{nseg = 1}
{strdef color color = "White"}
{pt3dclear()}
{pt3dadd(189780.000000,135996.000000,86500.000000,406.362580)}
{pt3dadd(189924.000000,135804.000000,86300.000000,314.449910)}
{pt3dadd(190032.000000,135708.000000,86075.000000,283.819800)}
{pt3dadd(190332.000000,135636.000000,85875.000000,250.065644)}
{pt3dadd(190620.000000,135504.000000,85675.000000,250.065644)}
{pt3dadd(190956.000000,135252.000000,85425.000000,247.446194)}
{pt3dadd(190956.000000,135072.000000,85175.000000,261.231064)}
{pt3dadd(191100.000000,135000.000000,84975.000000,279.654628)}
{pt3dadd(191400.000000,134904.000000,84725.000000,277.391848)}
{pt3dadd(191304.000000,134640.000000,84600.000000,266.051002)}
{pt3dadd(191460.000000,134136.000000,84375.000000,254.710156)}
{pt3dadd(191256.000000,133476.000000,84125.000000,236.286592)}
{pt3dadd(191112.000000,133332.000000,84000.000000,222.501722)}
{pt3dadd(191028.000000,132936.000000,83775.000000,232.254582)}
{pt3dadd(190824.000000,132540.000000,83650.000000,238.724798)}
{pt3dadd(190596.000000,132012.000000,83400.000000,242.932234)}
{pt3dadd(190452.000000,131676.000000,83150.000000,240.777206)}
{pt3dadd(189972.000000,131220.000000,82925.000000,236.138512)}
{pt3dadd(189792.000000,131004.000000,82700.000000,216.589002)}
{pt3dadd(189480.000000,131028.000000,82350.000000,202.841052)}
{pt3dadd(189468.000000,130920.000000,82125.000000,200.686024)}
{pt3dadd(189096.000000,130800.000000,81875.000000,200.686024)}
{pt3dadd(188904.000000,131004.000000,81675.000000,200.686024)}
{pt3dadd(188724.000000,130824.000000,81425.000000,198.997504)}
{pt3dadd(188604.000000,130764.000000,81175.000000,208.327646)}
{pt3dadd(188592.000000,130824.000000,80950.000000,202.458974)}
{pt3dadd(188340.000000,130644.000000,80700.000000,193.128832)}
{pt3dadd(187944.000000,130392.000000,80525.000000,190.171403)}
{pt3dadd(187776.000000,130380.000000,80300.000000,168.852050)}

{create adhoc24}
{access adhoc24}
{connect adhoc24(1), adhoc23(0)}
{nseg = 1}
{strdef color color = "White"}
{pt3dclear()}
{pt3dadd(187776.000000,130380.000000,80300.000000,168.852050)}
{pt3dadd(187728.000000,130392.000000,80075.000000,146.689017)}
{pt3dadd(187560.000000,130164.000000,79775.000000,138.473410)}
{pt3dadd(187416.000000,129948.000000,79350.000000,123.507628)}
{pt3dadd(187248.000000,129756.000000,78950.000000,145.618902)}
{pt3dadd(186900.000000,129480.000000,78425.000000,158.252374)}
{pt3dadd(186192.000000,128868.000000,77925.000000,168.022784)}
{pt3dadd(185784.000000,128388.000000,77550.000000,170.734934)}
{pt3dadd(184608.000000,126480.000000,77150.000000,201.824580)}
{pt3dadd(184428.000000,126252.000000,77075.000000,179.713306)}
{pt3dadd(183828.000000,124716.000000,77000.000000,176.078764)}
{pt3dadd(183324.000000,123300.000000,77375.000000,189.826714)}
{pt3dadd(183312.000000,123060.000000,77575.000000,224.333708)}
{pt3dadd(183324.000000,122880.000000,77550.000000,244.645690)}
{pt3dadd(183348.000000,122628.000000,77650.000000,290.579262)}
{pt3dadd(183468.000000,122340.000000,77825.000000,315.767132)}
{pt3dadd(183444.000000,122112.000000,77825.000000,315.767132)}
{pt3dadd(183420.000000,121920.000000,77825.000000,291.181460)}
{pt3dadd(183396.000000,121704.000000,77825.000000,258.207084)}
{pt3dadd(183396.000000,121560.000000,77950.000000,218.260922)}
{pt3dadd(183540.000000,121200.000000,78025.000000,189.776418)}
{pt3dadd(183492.000000,120816.000000,78100.000000,176.028468)}
{pt3dadd(183408.000000,120564.000000,78125.000000,159.792138)}
{pt3dadd(183384.000000,120300.000000,78100.000000,151.732408)}
{pt3dadd(183384.000000,120048.000000,78050.000000,150.124294)}
{pt3dadd(183288.000000,119844.000000,78000.000000,155.193878)}
{pt3dadd(183192.000000,119652.000000,77925.000000,160.516940)}
{pt3dadd(183108.000000,119448.000000,77825.000000,176.753270)}
{pt3dadd(183060.000000,119244.000000,77750.000000,176.753270)}
{pt3dadd(182928.000000,118944.000000,77475.000000,173.763124)}
{pt3dadd(182712.000000,118524.000000,77250.000000,162.991244)}
{pt3dadd(182712.000000,118044.000000,76850.000000,153.069922)}
{pt3dadd(182628.000000,117900.000000,76700.000000,131.885619)}
{pt3dadd(182424.000000,117612.000000,76225.000000,134.875765)}
{pt3dadd(182304.000000,117300.000000,75825.000000,139.474025)}
{pt3dadd(182100.000000,117084.000000,75475.000000,137.014025)}
{pt3dadd(181920.000000,117048.000000,75125.000000,135.624875)}
{pt3dadd(181548.000000,116760.000000,74675.000000,142.915706)}
{pt3dadd(181044.000000,116556.000000,74300.000000,144.523820)}
{pt3dadd(180540.000000,116412.000000,73925.000000,153.853962)}
{pt3dadd(179892.000000,116328.000000,73550.000000,170.118270)}
{pt3dadd(179724.000000,116352.000000,73050.000000,215.502760)}

{create adhoc25}
{access adhoc25}
{connect adhoc25(1), adhoc24(0)}
{nseg = 1}
{strdef color color = "White"}
{pt3dclear()}
{pt3dadd(179724.000000,116352.000000,73050.000000,215.502760)}
{pt3dadd(178416.000000,116040.000000,72675.000000,134.486020)}
{pt3dadd(177864.000000,115548.000000,72300.000000,126.383781)}
{pt3dadd(177240.000000,114816.000000,71925.000000,100.710145)}
{pt3dadd(176940.000000,114540.000000,71175.000000,89.545845)}

{create adhoc26}
{access adhoc26}
{connect adhoc26(1), adhoc24(0)}
{nseg = 1}
{strdef color color = "White"}
{pt3dclear()}
{pt3dadd(179724.000000,116352.000000,73050.000000,215.502760)}
{pt3dadd(179712.000000,116400.000000,72475.000000,150.115433)}
{pt3dadd(179712.000000,116532.000000,72125.000000,121.047323)}
{pt3dadd(179928.000000,116976.000000,71725.000000,100.803913)}
{pt3dadd(180228.000000,117576.000000,71050.000000,94.408541)}
{pt3dadd(180468.000000,118044.000000,70575.000000,91.444461)}
{pt3dadd(180528.000000,118776.000000,70125.000000,94.945176)}
{pt3dadd(180624.000000,119220.000000,69800.000000,99.015886)}
{pt3dadd(180432.000000,119604.000000,69325.000000,94.067913)}
{pt3dadd(180276.000000,119796.000000,69100.000000,94.097762)}
{pt3dadd(180048.000000,120240.000000,68875.000000,89.545845)}

{create adhoc27}
{access adhoc27}
{connect adhoc27(1), adhoc23(0)}
{nseg = 1}
{strdef color color = "White"}
{pt3dclear()}
{pt3dadd(187776.000000,130380.000000,80300.000000,168.852050)}
{pt3dadd(187524.000000,129600.000000,80500.000000,154.618330)}
{pt3dadd(187440.000000,128952.000000,80725.000000,148.601758)}
{pt3dadd(187332.000000,128412.000000,80850.000000,155.879492)}
{pt3dadd(187188.000000,127848.000000,80950.000000,176.406472)}
{pt3dadd(187368.000000,127176.000000,80950.000000,207.026754)}
{pt3dadd(187488.000000,126540.000000,81100.000000,215.489466)}
{pt3dadd(187404.000000,126192.000000,81350.000000,237.807826)}
{pt3dadd(187416.000000,125460.000000,81475.000000,227.390442)}
{pt3dadd(187308.000000,125028.000000,81600.000000,212.732134)}
{pt3dadd(187008.000000,123864.000000,81375.000000,195.802074)}
{pt3dadd(186924.000000,123684.000000,81250.000000,193.940482)}
{pt3dadd(186960.000000,122916.000000,81125.000000,183.654002)}
{pt3dadd(186912.000000,122112.000000,81125.000000,190.255122)}
{pt3dadd(186684.000000,121584.000000,81300.000000,177.785330)}
{pt3dadd(186120.000000,120804.000000,81425.000000,189.844760)}
{pt3dadd(186012.000000,119952.000000,81300.000000,195.713432)}
{pt3dadd(185928.000000,119304.000000,81100.000000,235.883952)}
{pt3dadd(185820.000000,118860.000000,80975.000000,276.054472)}
{pt3dadd(185604.000000,118212.000000,80850.000000,271.883712)}
{pt3dadd(185208.000000,117612.000000,80675.000000,254.996112)}
{pt3dadd(184104.000000,116676.000000,80525.000000,238.355560)}
{pt3dadd(183444.000000,115908.000000,80325.000000,191.583920)}
{pt3dadd(183168.000000,115296.000000,80050.000000,147.951930)}
{pt3dadd(183144.000000,115188.000000,79925.000000,153.654226)}
{pt3dadd(182928.000000,114912.000000,79800.000000,168.279046)}
{pt3dadd(182820.000000,114780.000000,79650.000000,182.867190)}
{pt3dadd(182700.000000,114576.000000,79550.000000,181.408580)}
{pt3dadd(182700.000000,114192.000000,79400.000000,178.268930)}
{pt3dadd(182700.000000,113988.000000,79275.000000,166.838737)}
{pt3dadd(182532.000000,113556.000000,78800.000000,155.353567)}
{pt3dadd(182472.000000,113364.000000,78575.000000,146.467719)}
{pt3dadd(182292.000000,113160.000000,78325.000000,154.527449)}
{pt3dadd(182232.000000,113064.000000,78075.000000,150.356689)}
{pt3dadd(182088.000000,112668.000000,77700.000000,152.481728)}
{pt3dadd(182088.000000,112608.000000,77450.000000,137.515946)}
{pt3dadd(181812.000000,112476.000000,77225.000000,123.262819)}
{pt3dadd(181668.000000,112476.000000,76975.000000,108.888081)}
{pt3dadd(181536.000000,112344.000000,76700.000000,100.337250)}
{pt3dadd(181440.000000,112356.000000,76350.000000,99.248816)}
{pt3dadd(181476.000000,112356.000000,76125.000000,103.301330)}
{pt3dadd(181332.000000,112296.000000,75875.000000,108.249303)}
{pt3dadd(181080.000000,112056.000000,75600.000000,104.196789)}
{pt3dadd(181104.000000,112140.000000,75350.000000,101.758234)}
{pt3dadd(181140.000000,112344.000000,75100.000000,95.460140)}
{pt3dadd(181152.000000,112320.000000,74975.000000,88.847143)}
{pt3dadd(181068.000000,112224.000000,74750.000000,85.734861)}
{pt3dadd(180972.000000,112236.000000,74525.000000,83.174378)}
{pt3dadd(180960.000000,112188.000000,74300.000000,83.947910)}
{pt3dadd(180912.000000,112152.000000,74175.000000,83.947910)}
{pt3dadd(180936.000000,112092.000000,74025.000000,85.612933)}
{pt3dadd(180852.000000,111996.000000,73800.000000,88.725215)}
{pt3dadd(180792.000000,111900.000000,73675.000000,93.213173)}
{pt3dadd(180864.000000,111840.000000,73425.000000,93.213173)}
{pt3dadd(180684.000000,111852.000000,73200.000000,91.106657)}
{pt3dadd(180540.000000,111756.000000,72975.000000,92.002116)}
{pt3dadd(180480.000000,111768.000000,72725.000000,101.307270)}
{pt3dadd(180372.000000,111552.000000,72475.000000,123.675719)}
{pt3dadd(180096.000000,111372.000000,72375.000000,148.479718)}
{pt3dadd(179940.000000,111240.000000,72125.000000,161.575620)}
{pt3dadd(179892.000000,111144.000000,72000.000000,185.871544)}
{pt3dadd(179928.000000,111012.000000,71875.000000,201.227608)}
{pt3dadd(179976.000000,110604.000000,71750.000000,195.358936)}
{pt3dadd(179676.000000,110292.000000,71525.000000,178.310792)}
{pt3dadd(179400.000000,110148.000000,71400.000000,167.321406)}
{pt3dadd(179424.000000,110316.000000,71175.000000,135.765265)}
{pt3dadd(179112.000000,110352.000000,70600.000000,99.791316)}
{pt3dadd(178920.000000,110376.000000,70375.000000,83.291539)}
{pt3dadd(178608.000000,110400.000000,69925.000000,85.751539)}
{pt3dadd(178632.000000,110364.000000,69600.000000,81.825335)}
{pt3dadd(178524.000000,110124.000000,69200.000000,99.453075)}
{pt3dadd(178284.000000,109764.000000,68950.000000,121.679074)}
{pt3dadd(178452.000000,109764.000000,68700.000000,119.751599)}
{pt3dadd(178464.000000,109536.000000,68475.000000,114.023702)}
{pt3dadd(178068.000000,109464.000000,68275.000000,130.262291)}
{pt3dadd(177564.000000,109188.000000,68050.000000,118.146493)}
{pt3dadd(177300.000000,109104.000000,67925.000000,99.110001)}
{pt3dadd(176952.000000,108720.000000,67675.000000,94.337676)}
{pt3dadd(176760.000000,108456.000000,67425.000000,94.337676)}
{pt3dadd(176508.000000,108480.000000,67000.000000,82.025290)}
{pt3dadd(176376.000000,108336.000000,66775.000000,83.773566)}
{pt3dadd(176184.000000,108900.000000,66525.000000,91.678908)}
{pt3dadd(175992.000000,108960.000000,66300.000000,94.023140)}

{create adhoc28}
{access adhoc28}
{connect adhoc28(1), adhoc4(0)}
{nseg = 1}
{strdef color color = "White"}
{pt3dclear()}
{pt3dadd(192120.000000,187068.000000,96025.000000,766.257260)}
{pt3dadd(192372.000000,185376.000000,95575.000000,557.300773)}
{pt3dadd(192516.000000,184980.000000,95350.000000,509.736080)}
{pt3dadd(192300.000000,184668.000000,95125.000000,437.757144)}
{pt3dadd(192156.000000,184284.000000,94875.000000,441.627260)}
{pt3dadd(192072.000000,183972.000000,94650.000000,415.303048)}
{pt3dadd(191976.000000,183900.000000,94550.000000,415.303048)}
{pt3dadd(191796.000000,183744.000000,94300.000000,419.366678)}
{pt3dadd(191688.000000,183396.000000,94075.000000,419.366678)}
{pt3dadd(191712.000000,183216.000000,93950.000000,423.430308)}
{pt3dadd(191604.000000,182964.000000,93750.000000,435.630862)}
{pt3dadd(191424.000000,182604.000000,93525.000000,440.335018)}
{pt3dadd(191616.000000,182436.000000,93300.000000,440.335018)}
{pt3dadd(191616.000000,182172.000000,93075.000000,444.398648)}
{pt3dadd(191556.000000,182064.000000,92850.000000,453.145602)}
{pt3dadd(191472.000000,181860.000000,92625.000000,444.815164)}
{pt3dadd(191388.000000,181620.000000,92375.000000,431.364054)}
{pt3dadd(191604.000000,181416.000000,92275.000000,435.630862)}
{pt3dadd(191544.000000,181176.000000,92075.000000,439.897670)}
{pt3dadd(191496.000000,181116.000000,91950.000000,449.541182)}
{pt3dadd(191364.000000,180972.000000,91825.000000,477.181618)}
{pt3dadd(191172.000000,180696.000000,91625.000000,500.758424)}
{pt3dadd(191232.000000,180432.000000,91425.000000,500.758424)}
{pt3dadd(191136.000000,180216.000000,91325.000000,505.238570)}
{pt3dadd(191028.000000,180048.000000,91100.000000,510.424910)}
{pt3dadd(190836.000000,179820.000000,90900.000000,500.299214)}
{pt3dadd(190932.000000,179628.000000,90700.000000,485.469362)}
{pt3dadd(190872.000000,179376.000000,90475.000000,504.779360)}
{pt3dadd(190932.000000,179280.000000,90225.000000,500.299214)}
{pt3dadd(190932.000000,179304.000000,90125.000000,468.788662)}
{pt3dadd(190752.000000,179160.000000,90025.000000,447.403806)}
{pt3dadd(190740.000000,178920.000000,89925.000000,407.346257)}
{pt3dadd(190800.000000,178848.000000,89800.000000,387.012000)}

{create adhoc29}
{access adhoc29}
{connect adhoc29(1), adhoc28(0)}
{nseg = 1}
{strdef color color = "White"}
{pt3dclear()}
{pt3dadd(190800.000000,178848.000000,89800.000000,387.012000)}
{pt3dadd(189624.000000,179748.000000,89675.000000,326.346767)}
{pt3dadd(189276.000000,179868.000000,89475.000000,311.325780)}
{pt3dadd(189048.000000,179880.000000,89350.000000,297.602524)}
{pt3dadd(188616.000000,179880.000000,89125.000000,303.522808)}
{pt3dadd(188424.000000,179916.000000,89025.000000,309.739112)}
{pt3dadd(188364.000000,180072.000000,88900.000000,306.988692)}
{pt3dadd(188136.000000,180144.000000,88675.000000,286.461712)}
{pt3dadd(187968.000000,180204.000000,88425.000000,272.676842)}
{pt3dadd(187824.000000,180180.000000,88300.000000,256.516058)}
{pt3dadd(187704.000000,180228.000000,88175.000000,232.753506)}
{pt3dadd(187536.000000,180120.000000,88050.000000,227.639340)}
{pt3dadd(187404.000000,180180.000000,87925.000000,237.925820)}
{pt3dadd(187272.000000,180192.000000,87800.000000,237.925820)}
{pt3dadd(187260.000000,180144.000000,87700.000000,237.925820)}
{pt3dadd(186996.000000,180312.000000,87475.000000,242.343628)}
{pt3dadd(186816.000000,180432.000000,87350.000000,231.542826)}
{pt3dadd(186696.000000,180432.000000,87250.000000,231.542826)}
{pt3dadd(186612.000000,180300.000000,87025.000000,226.904132)}
{pt3dadd(186516.000000,180456.000000,86800.000000,224.641352)}
{pt3dadd(186192.000000,180396.000000,86575.000000,227.017266)}
{pt3dadd(185952.000000,180456.000000,86450.000000,237.818068)}
{pt3dadd(186156.000000,180564.000000,86350.000000,250.946508)}
{pt3dadd(186036.000000,180516.000000,86225.000000,269.370072)}
{pt3dadd(185724.000000,180516.000000,85975.000000,287.793636)}
{pt3dadd(185400.000000,180540.000000,85875.000000,319.171878)}
{pt3dadd(185244.000000,180648.000000,85650.000000,350.550120)}
{pt3dadd(185256.000000,180636.000000,85525.000000,363.619892)}
{pt3dadd(185028.000000,180516.000000,85400.000000,389.543702)}
{pt3dadd(184956.000000,180624.000000,85175.000000,411.200704)}
{pt3dadd(184836.000000,180804.000000,84950.000000,407.330588)}
{pt3dadd(184728.000000,180708.000000,84750.000000,392.921176)}
{pt3dadd(184500.000000,180732.000000,84525.000000,392.921176)}
{pt3dadd(184392.000000,180768.000000,84425.000000,370.181326)}
{pt3dadd(184380.000000,180780.000000,84200.000000,348.524324)}
{pt3dadd(184368.000000,180780.000000,83950.000000,326.130364)}
{pt3dadd(184440.000000,180948.000000,83775.000000,306.785620)}
{pt3dadd(184296.000000,180684.000000,83525.000000,274.117192)}
{pt3dadd(184224.000000,180744.000000,83325.000000,239.416384)}
{pt3dadd(184284.000000,180744.000000,83125.000000,209.507650)}
{pt3dadd(184416.000000,180708.000000,82875.000000,186.661506)}
{pt3dadd(184548.000000,180624.000000,82625.000000,174.602076)}
{pt3dadd(184428.000000,180576.000000,82400.000000,162.726082)}
{pt3dadd(184548.000000,180636.000000,82250.000000,159.735936)}
{pt3dadd(184524.000000,180564.000000,82050.000000,158.127822)}
{pt3dadd(184548.000000,180564.000000,81850.000000,171.221106)}
{pt3dadd(184428.000000,180492.000000,81625.000000,183.280536)}
{pt3dadd(184356.000000,180372.000000,81425.000000,204.002660)}
{pt3dadd(184368.000000,180324.000000,81200.000000,222.348870)}
{pt3dadd(184380.000000,180264.000000,80850.000000,257.049678)}
{pt3dadd(184452.000000,179964.000000,80650.000000,278.657202)}
{pt3dadd(184644.000000,179820.000000,80400.000000,298.001946)}
{pt3dadd(184656.000000,179724.000000,80175.000000,311.786816)}
{pt3dadd(184548.000000,179556.000000,79925.000000,324.915256)}
{pt3dadd(184488.000000,179556.000000,79675.000000,293.511082)}
{pt3dadd(184440.000000,179520.000000,79450.000000,269.748530)}
{pt3dadd(184008.000000,179400.000000,79200.000000,245.985978)}
{pt3dadd(183480.000000,179472.000000,78975.000000,234.695824)}
{pt3dadd(183492.000000,179412.000000,78800.000000,226.438014)}
{pt3dadd(183096.000000,179448.000000,78575.000000,240.873358)}
{pt3dadd(182856.000000,179364.000000,78275.000000,243.028386)}
{pt3dadd(182808.000000,179424.000000,78050.000000,240.975978)}
{pt3dadd(182676.000000,179496.000000,77850.000000,224.045918)}
{pt3dadd(182496.000000,179484.000000,77575.000000,210.750400)}
{pt3dadd(182400.000000,179412.000000,77350.000000,194.626536)}
{pt3dadd(182172.000000,179472.000000,77125.000000,183.141366)}
{pt3dadd(182100.000000,179484.000000,76900.000000,177.552152)}
{pt3dadd(182028.000000,179544.000000,76650.000000,183.141366)}
{pt3dadd(181836.000000,179376.000000,76425.000000,199.056334)}
{pt3dadd(181812.000000,179544.000000,76150.000000,217.674914)}
{pt3dadd(181764.000000,179604.000000,75925.000000,217.674914)}
{pt3dadd(181392.000000,179460.000000,75700.000000,219.447864)}
{pt3dadd(181320.000000,179328.000000,75450.000000,221.500272)}
{pt3dadd(181392.000000,179388.000000,75200.000000,211.747412)}
{pt3dadd(181188.000000,179364.000000,74950.000000,206.876782)}
{pt3dadd(181128.000000,179232.000000,74725.000000,214.154516)}
{pt3dadd(180984.000000,179232.000000,74500.000000,217.970780)}
{pt3dadd(180900.000000,179184.000000,74250.000000,227.259218)}
{pt3dadd(180816.000000,179196.000000,74000.000000,234.392628)}
{pt3dadd(180612.000000,179076.000000,73750.000000,239.263258)}
{pt3dadd(180516.000000,179016.000000,73500.000000,258.861914)}
{pt3dadd(180420.000000,178776.000000,73250.000000,281.492914)}
{pt3dadd(180312.000000,178800.000000,73000.000000,295.967028)}
{pt3dadd(180120.000000,178536.000000,72775.000000,301.336898)}
{pt3dadd(180048.000000,178440.000000,72525.000000,315.811012)}
{pt3dadd(179940.000000,178368.000000,72300.000000,328.880784)}
{pt3dadd(179844.000000,178284.000000,72025.000000,335.407896)}
{pt3dadd(179652.000000,178104.000000,71800.000000,326.303652)}
{pt3dadd(179640.000000,177936.000000,71575.000000,313.800372)}
{pt3dadd(179160.000000,177720.000000,71350.000000,290.037820)}
{pt3dadd(179244.000000,177672.000000,71100.000000,259.421800)}
{pt3dadd(179088.000000,177540.000000,70850.000000,230.263688)}
{pt3dadd(179016.000000,177168.000000,70625.000000,207.963758)}
{pt3dadd(179160.000000,177048.000000,70400.000000,203.756322)}
{pt3dadd(179136.000000,176880.000000,70150.000000,210.550044)}
{pt3dadd(179292.000000,176808.000000,69950.000000,204.681372)}
{pt3dadd(179280.000000,176484.000000,69725.000000,202.726700)}
{pt3dadd(179316.000000,176304.000000,69525.000000,210.368322)}
{pt3dadd(179268.000000,176016.000000,69300.000000,221.709168)}
{pt3dadd(179292.000000,176016.000000,69200.000000,214.915446)}
{pt3dadd(179640.000000,175848.000000,68975.000000,225.201926)}
{pt3dadd(179892.000000,175524.000000,68850.000000,238.497444)}
{pt3dadd(179904.000000,175392.000000,68625.000000,247.785882)}
{pt3dadd(180180.000000,175212.000000,68500.000000,232.628772)}
{pt3dadd(180312.000000,174804.000000,68275.000000,228.621692)}
{pt3dadd(180696.000000,174828.000000,68050.000000,218.335212)}
{pt3dadd(180972.000000,174720.000000,67825.000000,211.201802)}
{pt3dadd(181260.000000,174456.000000,67600.000000,206.331172)}
{pt3dadd(181428.000000,174084.000000,67375.000000,232.778436)}
{pt3dadd(181356.000000,173736.000000,67150.000000,254.331764)}
{pt3dadd(181236.000000,173760.000000,67025.000000,283.962988)}
{pt3dadd(181104.000000,173544.000000,66900.000000,324.043554)}
{pt3dadd(181188.000000,173436.000000,66800.000000,346.731450)}
{pt3dadd(181176.000000,173052.000000,66575.000000,340.811166)}
{pt3dadd(181332.000000,172440.000000,66325.000000,337.923226)}
{pt3dadd(181356.000000,172128.000000,66200.000000,318.578482)}
{pt3dadd(180588.000000,172032.000000,65925.000000,280.760696)}
{pt3dadd(180336.000000,171768.000000,65700.000000,255.810020)}
{pt3dadd(180276.000000,171612.000000,65550.000000,237.144632)}
{pt3dadd(179940.000000,171132.000000,65325.000000,220.433916)}
{pt3dadd(179784.000000,171036.000000,65100.000000,236.594700)}
{pt3dadd(179232.000000,171012.000000,64875.000000,238.970614)}
{pt3dadd(178848.000000,170916.000000,64775.000000,238.970614)}
{pt3dadd(178728.000000,170844.000000,64650.000000,233.647552)}
{pt3dadd(178680.000000,170844.000000,64525.000000,235.699960)}
{pt3dadd(178584.000000,170892.000000,64400.000000,217.276396)}
{pt3dadd(178332.000000,170796.000000,64275.000000,231.061266)}
{pt3dadd(178020.000000,170784.000000,64025.000000,228.906238)}
{pt3dadd(177684.000000,170724.000000,63800.000000,234.229300)}
{pt3dadd(177492.000000,170688.000000,63550.000000,246.137188)}
{pt3dadd(177336.000000,170460.000000,63425.000000,255.890048)}
{pt3dadd(177300.000000,170532.000000,63200.000000,242.105178)}
{pt3dadd(177144.000000,170628.000000,62975.000000,234.463556)}
{pt3dadd(176976.000000,170736.000000,62725.000000,232.601964)}
{pt3dadd(176736.000000,170688.000000,62525.000000,216.686996)}
{pt3dadd(176556.000000,170652.000000,62375.000000,195.448966)}
{pt3dadd(176484.000000,170652.000000,62150.000000,165.299552)}
{pt3dadd(176448.000000,170508.000000,61900.000000,150.572725)}
{pt3dadd(176352.000000,170616.000000,61675.000000,133.085705)}
{pt3dadd(176196.000000,170640.000000,61450.000000,135.040377)}
{pt3dadd(176124.000000,170832.000000,61250.000000,148.788327)}
{pt3dadd(175932.000000,170952.000000,61125.000000,174.299047)}
{pt3dadd(175764.000000,171144.000000,61000.000000,192.660416)}
{pt3dadd(175668.000000,171372.000000,60875.000000,222.809830)}
{pt3dadd(175536.000000,171540.000000,60725.000000,236.770126)}
{pt3dadd(175524.000000,171732.000000,60625.000000,244.260206)}
{pt3dadd(175500.000000,171888.000000,60475.000000,246.522986)}
{pt3dadd(175488.000000,171936.000000,60375.000000,248.477658)}
{pt3dadd(175464.000000,171900.000000,60250.000000,256.342244)}
{pt3dadd(175572.000000,172068.000000,60100.000000,251.228078)}
{pt3dadd(175680.000000,172428.000000,59825.000000,251.228078)}
{pt3dadd(175656.000000,172368.000000,59675.000000,297.792818)}
{pt3dadd(175656.000000,172620.000000,59425.000000,342.080820)}
{pt3dadd(175584.000000,172800.000000,59300.000000,358.038532)}
{pt3dadd(175476.000000,172908.000000,59175.000000,397.747212)}
{pt3dadd(175404.000000,173016.000000,59050.000000,420.141172)}
{pt3dadd(175200.000000,173280.000000,58800.000000,373.576432)}
{pt3dadd(175056.000000,173400.000000,58550.000000,357.539523)}
{pt3dadd(175056.000000,173652.000000,58300.000000,237.591800)}

{create adhoc30}
{access adhoc30}
{connect adhoc30(1), adhoc28(0)}
{nseg = 1}
{strdef color color = "White"}
{pt3dclear()}
{pt3dadd(190800.000000,178848.000000,89800.000000,387.012000)}
{pt3dadd(191172.000000,178512.000000,89575.000000,363.303460)}
{pt3dadd(191484.000000,177984.000000,89350.000000,328.129926)}
{pt3dadd(191868.000000,177792.000000,89225.000000,308.486386)}
{pt3dadd(192264.000000,177708.000000,89100.000000,311.829538)}
{pt3dadd(192384.000000,177528.000000,89000.000000,304.976070)}
{pt3dadd(192732.000000,177384.000000,88875.000000,313.233880)}
{pt3dadd(192876.000000,177252.000000,88750.000000,322.338124)}
{pt3dadd(192996.000000,177072.000000,88525.000000,325.226064)}
{pt3dadd(193152.000000,176940.000000,88400.000000,318.698952)}
{pt3dadd(193416.000000,176592.000000,88175.000000,304.224838)}
{pt3dadd(193716.000000,176376.000000,87925.000000,310.441142)}
{pt3dadd(193908.000000,176136.000000,87675.000000,320.980438)}
{pt3dadd(194208.000000,175800.000000,87450.000000,354.416738)}
{pt3dadd(194232.000000,175548.000000,87200.000000,376.073740)}
{pt3dadd(194364.000000,175344.000000,87075.000000,422.472006)}
{pt3dadd(194436.000000,175032.000000,86700.000000,449.692002)}
{pt3dadd(194316.000000,174504.000000,86450.000000,498.369948)}
{pt3dadd(194244.000000,174276.000000,86325.000000,530.367194)}
{pt3dadd(194232.000000,173904.000000,86100.000000,559.389642)}
{pt3dadd(194040.000000,173388.000000,85875.000000,554.685486)}
{pt3dadd(194088.000000,173064.000000,85675.000000,569.515338)}
{pt3dadd(193956.000000,172656.000000,85425.000000,547.161604)}
{pt3dadd(194076.000000,172464.000000,85175.000000,529.994210)}
{pt3dadd(193764.000000,172260.000000,84950.000000,505.238570)}
{pt3dadd(193932.000000,172200.000000,84725.000000,492.427986)}
{pt3dadd(193956.000000,171996.000000,84600.000000,447.194178)}
{pt3dadd(194112.000000,171900.000000,84350.000000,420.869966)}
{pt3dadd(194196.000000,171576.000000,84125.000000,369.715874)}
{pt3dadd(194400.000000,171396.000000,84000.000000,335.121360)}
{pt3dadd(194532.000000,171312.000000,83775.000000,335.121360)}
{pt3dadd(194544.000000,171120.000000,83600.000000,341.648472)}
{pt3dadd(194808.000000,171000.000000,83400.000000,331.109176)}
{pt3dadd(195048.000000,170928.000000,83275.000000,337.029460)}
{pt3dadd(195396.000000,170916.000000,83150.000000,376.104120)}
{pt3dadd(195348.000000,170724.000000,82900.000000,393.618860)}
{pt3dadd(195636.000000,170640.000000,82675.000000,427.582500)}
{pt3dadd(195888.000000,170508.000000,82425.000000,493.936280)}

{create adhoc31}
{access adhoc31}
{connect adhoc31(1), adhoc30(0)}
{nseg = 1}
{strdef color color = "White"}
{pt3dclear()}
{pt3dadd(195888.000000,170508.000000,82425.000000,493.936280)}
{pt3dadd(197004.000000,170436.000000,82300.000000,289.343017)}
{pt3dadd(197904.000000,170232.000000,82175.000000,258.959014)}
{pt3dadd(198384.000000,169968.000000,81950.000000,193.942168)}
{pt3dadd(199092.000000,169824.000000,81850.000000,188.352954)}
{pt3dadd(199176.000000,169572.000000,81725.000000,190.041474)}
{pt3dadd(199488.000000,169380.000000,81600.000000,170.777960)}
{pt3dadd(199788.000000,169068.000000,81475.000000,170.777960)}
{pt3dadd(200100.000000,169008.000000,81275.000000,172.466480)}
{pt3dadd(200556.000000,168936.000000,81150.000000,182.263130)}
{pt3dadd(200952.000000,168564.000000,81050.000000,189.904752)}
{pt3dadd(201048.000000,167784.000000,80825.000000,206.792352)}
{pt3dadd(201168.000000,167220.000000,80675.000000,214.433974)}
{pt3dadd(201156.000000,167100.000000,80450.000000,224.230624)}
{pt3dadd(201084.000000,166896.000000,80325.000000,224.230624)}
{pt3dadd(200988.000000,166584.000000,80200.000000,231.024346)}
{pt3dadd(201024.000000,166452.000000,80075.000000,222.599458)}
{pt3dadd(200904.000000,166152.000000,79825.000000,220.547050)}
{pt3dadd(200796.000000,165744.000000,79700.000000,220.547050)}
{pt3dadd(200712.000000,165372.000000,79475.000000,222.809830)}
{pt3dadd(200616.000000,164892.000000,79250.000000,225.304546)}
{pt3dadd(200604.000000,164592.000000,79000.000000,229.311626)}
{pt3dadd(200724.000000,164448.000000,78875.000000,229.311626)}
{pt3dadd(200448.000000,163980.000000,78625.000000,227.156598)}
{pt3dadd(200376.000000,163716.000000,78400.000000,220.686382)}
{pt3dadd(200316.000000,163476.000000,78275.000000,215.815752)}
{pt3dadd(200340.000000,163104.000000,78025.000000,201.887350)}
{pt3dadd(200280.000000,162660.000000,77925.000000,198.071086)}
{pt3dadd(200424.000000,162264.000000,77700.000000,200.226114)}
{pt3dadd(200544.000000,162084.000000,77350.000000,198.271442)}
{pt3dadd(200400.000000,161616.000000,77125.000000,186.212012)}
{pt3dadd(200412.000000,161424.000000,76900.000000,206.934136)}
{pt3dadd(200016.000000,161184.000000,76675.000000,259.305210)}
{pt3dadd(199836.000000,161016.000000,76475.000000,295.322146)}
{pt3dadd(199752.000000,160884.000000,76350.000000,313.987534)}
{pt3dadd(199728.000000,160548.000000,76250.000000,328.422878)}
{pt3dadd(199500.000000,160356.000000,75925.000000,326.046964)}
{pt3dadd(199284.000000,160248.000000,75700.000000,286.338284)}
{pt3dadd(199176.000000,160188.000000,75575.000000,242.297648)}
{pt3dadd(199332.000000,160176.000000,75500.000000,225.586932)}
{pt3dadd(199248.000000,159936.000000,75275.000000,214.786130)}
{pt3dadd(199188.000000,159996.000000,75075.000000,201.038180)}
{pt3dadd(199044.000000,159924.000000,74825.000000,184.914316)}
{pt3dadd(199260.000000,159780.000000,74625.000000,181.452846)}
{pt3dadd(199212.000000,159828.000000,74400.000000,174.175112)}
{pt3dadd(199140.000000,159756.000000,74300.000000,170.540570)}
{pt3dadd(199284.000000,159756.000000,74175.000000,168.932456)}
{pt3dadd(199248.000000,159660.000000,73950.000000,159.162046)}
{pt3dadd(199308.000000,159552.000000,73825.000000,154.563786)}
{pt3dadd(199332.000000,159468.000000,73575.000000,143.650518)}
{pt3dadd(199416.000000,159276.000000,73350.000000,129.960296)}
{pt3dadd(199476.000000,159192.000000,73225.000000,126.970150)}
{pt3dadd(199548.000000,159144.000000,73000.000000,133.600910)}
{pt3dadd(199596.000000,159096.000000,72775.000000,133.600910)}
{pt3dadd(199536.000000,159108.000000,72625.000000,146.202698)}
{pt3dadd(199536.000000,158976.000000,72525.000000,152.216990)}
{pt3dadd(199140.000000,158268.000000,72200.000000,147.044840)}
{pt3dadd(198792.000000,158028.000000,71850.000000,150.184490)}
{pt3dadd(198528.000000,157560.000000,71500.000000,173.401330)}
{pt3dadd(198312.000000,157152.000000,71150.000000,201.621544)}
{pt3dadd(198144.000000,156912.000000,70925.000000,240.701648)}
{pt3dadd(198024.000000,156756.000000,70700.000000,294.104048)}
{pt3dadd(198072.000000,156792.000000,70575.000000,334.050210)}
{pt3dadd(198072.000000,156516.000000,70450.000000,342.308020)}
{pt3dadd(197940.000000,156312.000000,70325.000000,317.722348)}
{pt3dadd(197880.000000,156108.000000,70200.000000,303.248234)}
{pt3dadd(197448.000000,155592.000000,69975.000000,268.946386)}
{pt3dadd(196836.000000,154944.000000,69750.000000,227.392110)}
{pt3dadd(196872.000000,154812.000000,69500.000000,205.838782)}
{pt3dadd(196752.000000,154608.000000,69375.000000,202.204240)}
{pt3dadd(196644.000000,154284.000000,69150.000000,178.987400)}
{pt3dadd(196644.000000,154104.000000,68925.000000,171.345778)}
{pt3dadd(196584.000000,153732.000000,68800.000000,172.953892)}
{pt3dadd(196608.000000,153684.000000,68600.000000,166.022716)}
{pt3dadd(196500.000000,153504.000000,68400.000000,162.726082)}
{pt3dadd(196572.000000,153456.000000,68225.000000,165.716228)}
{pt3dadd(196560.000000,152964.000000,68000.000000,164.027708)}
{pt3dadd(196656.000000,152400.000000,67800.000000,153.114440)}
{pt3dadd(196644.000000,151800.000000,67675.000000,156.411074)}
{pt3dadd(196536.000000,151032.000000,67575.000000,163.342250)}
{pt3dadd(196308.000000,150156.000000,67475.000000,181.074228)}
{pt3dadd(196236.000000,149928.000000,67500.000000,179.466114)}
{pt3dadd(196128.000000,149700.000000,67400.000000,185.781122)}
{pt3dadd(196392.000000,149460.000000,67425.000000,179.494342)}
{pt3dadd(196296.000000,149244.000000,67425.000000,171.031630)}
{pt3dadd(196344.000000,149124.000000,67475.000000,150.309506)}
{pt3dadd(196284.000000,148992.000000,67450.000000,138.879313)}
{pt3dadd(196068.000000,148788.000000,67375.000000,131.475871)}
{pt3dadd(195984.000000,148560.000000,67300.000000,131.475871)}
{pt3dadd(196008.000000,148332.000000,67325.000000,128.628111)}
{pt3dadd(195960.000000,148212.000000,67325.000000,133.226371)}
{pt3dadd(195924.000000,148068.000000,67225.000000,144.656564)}
{pt3dadd(195936.000000,147936.000000,67150.000000,140.797025)}
{pt3dadd(195888.000000,147816.000000,67025.000000,130.429503)}
{pt3dadd(195960.000000,147480.000000,66875.000000,141.739975)}
{pt3dadd(195996.000000,147156.000000,66625.000000,149.017709)}
{pt3dadd(195984.000000,146832.000000,66300.000000,164.373773)}
{pt3dadd(195900.000000,146736.000000,65975.000000,180.235014)}
{pt3dadd(195624.000000,146364.000000,65750.000000,176.901000)}
{pt3dadd(195480.000000,146184.000000,65525.000000,163.007528)}
{pt3dadd(195252.000000,145944.000000,65400.000000,145.959384)}
{pt3dadd(194880.000000,145848.000000,65075.000000,114.685169)}
{pt3dadd(194760.000000,145704.000000,64850.000000,100.659619)}
{pt3dadd(194580.000000,145560.000000,64575.000000,110.389005)}
{pt3dadd(194472.000000,145368.000000,64350.000000,106.957713)}
{pt3dadd(194436.000000,145308.000000,64125.000000,104.726421)}
{pt3dadd(194388.000000,145140.000000,63925.000000,114.942276)}
{pt3dadd(194256.000000,144936.000000,63700.000000,118.054558)}
{pt3dadd(194184.000000,144948.000000,63525.000000,113.586661)}
{pt3dadd(194064.000000,144768.000000,63425.000000,118.277953)}
{pt3dadd(193944.000000,144660.000000,63300.000000,131.968175)}
{pt3dadd(193620.000000,144384.000000,63100.000000,123.417344)}
{pt3dadd(193632.000000,144336.000000,62975.000000,133.046832)}
{pt3dadd(193524.000000,144168.000000,62850.000000,89.545845)}

{create adhoc32}
{access adhoc32}
{connect adhoc32(1), adhoc30(0)}
{nseg = 1}
{strdef color color = "White"}
{pt3dclear()}
{pt3dadd(195888.000000,170508.000000,82425.000000,493.936280)}
{pt3dadd(195780.000000,170520.000000,82175.000000,417.715360)}
{pt3dadd(195504.000000,170304.000000,81950.000000,358.026646)}
{pt3dadd(195240.000000,169932.000000,81825.000000,306.757750)}
{pt3dadd(194916.000000,169488.000000,81575.000000,265.063640)}
{pt3dadd(194460.000000,169140.000000,81350.000000,267.951580)}
{pt3dadd(194100.000000,168696.000000,81125.000000,296.835106)}
{pt3dadd(193836.000000,168540.000000,80900.000000,319.229066)}
{pt3dadd(193488.000000,168180.000000,80675.000000,365.793806)}
{pt3dadd(193212.000000,167940.000000,80450.000000,417.131428)}
{pt3dadd(192732.000000,167424.000000,80325.000000,465.397580)}
{pt3dadd(192444.000000,166992.000000,80200.000000,469.461210)}
{pt3dadd(192300.000000,166848.000000,80000.000000,469.461210)}
{pt3dadd(191736.000000,166608.000000,79775.000000,456.650626)}
{pt3dadd(191556.000000,166344.000000,79650.000000,434.196530)}
{pt3dadd(191328.000000,165912.000000,79400.000000,399.000150)}
{pt3dadd(191448.000000,165792.000000,79275.000000,380.527108)}
{pt3dadd(191316.000000,165672.000000,79025.000000,366.803852)}
{pt3dadd(190956.000000,165624.000000,78800.000000,346.178136)}
{pt3dadd(190824.000000,165552.000000,78675.000000,322.664480)}
{pt3dadd(190704.000000,165420.000000,78450.000000,294.203488)}
{pt3dadd(190596.000000,165408.000000,78200.000000,277.234658)}
{pt3dadd(190500.000000,165396.000000,78000.000000,274.202314)}
{pt3dadd(190116.000000,165348.000000,77775.000000,265.944504)}
{pt3dadd(190140.000000,165420.000000,77525.000000,255.704004)}
{pt3dadd(190152.000000,165516.000000,77375.000000,277.311528)}
{pt3dadd(189948.000000,165444.000000,77150.000000,304.819654)}
{pt3dadd(189816.000000,165468.000000,77025.000000,307.851998)}
{pt3dadd(189696.000000,165384.000000,76775.000000,316.109808)}
{pt3dadd(189588.000000,165576.000000,76525.000000,318.485722)}
{pt3dadd(189180.000000,165612.000000,76425.000000,312.269418)}
{pt3dadd(189000.000000,165600.000000,76200.000000,282.385378)}
{pt3dadd(189048.000000,165768.000000,75950.000000,268.600508)}
{pt3dadd(188856.000000,165828.000000,75725.000000,265.712568)}
{pt3dadd(188988.000000,165996.000000,75500.000000,270.826734)}
{pt3dadd(188928.000000,166152.000000,75275.000000,260.074208)}
{pt3dadd(188712.000000,166464.000000,75050.000000,279.418952)}
{pt3dadd(188760.000000,166668.000000,74900.000000,306.927078)}
{pt3dadd(188616.000000,166740.000000,74650.000000,309.815018)}
{pt3dadd(188508.000000,166776.000000,74525.000000,297.907130)}
{pt3dadd(188100.000000,166980.000000,74300.000000,329.285372)}
{pt3dadd(187608.000000,167052.000000,73950.000000,320.181128)}
{pt3dadd(186912.000000,166920.000000,73475.000000,295.167718)}
{pt3dadd(186600.000000,166728.000000,73225.000000,286.909908)}
{pt3dadd(186444.000000,166548.000000,72975.000000,314.015612)}
{pt3dadd(186300.000000,166476.000000,72725.000000,314.015612)}
{pt3dadd(185988.000000,166116.000000,72475.000000,333.659152)}
{pt3dadd(185772.000000,165528.000000,72225.000000,341.916962)}
{pt3dadd(185832.000000,165264.000000,71975.000000,366.930372)}
{pt3dadd(185712.000000,164784.000000,71875.000000,363.587220)}
{pt3dadd(185592.000000,164412.000000,71650.000000,345.993848)}
{pt3dadd(185388.000000,163944.000000,71450.000000,323.599888)}
{pt3dadd(185316.000000,163740.000000,71350.000000,326.632232)}
{pt3dadd(185304.000000,163500.000000,71325.000000,290.277976)}
{pt3dadd(185460.000000,163260.000000,71400.000000,297.131444)}
{pt3dadd(185376.000000,163044.000000,71275.000000,276.552852)}
{pt3dadd(185532.000000,162708.000000,71350.000000,269.062772)}
{pt3dadd(185820.000000,162444.000000,71475.000000,269.062772)}
{pt3dadd(185868.000000,162216.000000,71500.000000,280.403618)}
{pt3dadd(185976.000000,161976.000000,71450.000000,261.695486)}
{pt3dadd(185976.000000,161712.000000,71275.000000,266.113294)}
{pt3dadd(186000.000000,161580.000000,71200.000000,276.353794)}
{pt3dadd(186012.000000,161340.000000,71275.000000,276.353794)}
{pt3dadd(185916.000000,161124.000000,71125.000000,290.827908)}
{pt3dadd(185844.000000,160896.000000,71075.000000,293.578328)}
{pt3dadd(185928.000000,160680.000000,71075.000000,303.818828)}
{pt3dadd(185880.000000,160452.000000,71050.000000,312.923072)}
{pt3dadd(185664.000000,160104.000000,71000.000000,301.632918)}
{pt3dadd(185208.000000,159840.000000,70775.000000,289.778254)}
{pt3dadd(184920.000000,159708.000000,70525.000000,271.112866)}
{pt3dadd(184668.000000,159480.000000,70050.000000,256.454558)}
{pt3dadd(184320.000000,159408.000000,69800.000000,226.823334)}
{pt3dadd(184236.000000,159456.000000,69600.000000,215.482488)}
{pt3dadd(183948.000000,159216.000000,69375.000000,224.153192)}
{pt3dadd(183948.000000,159144.000000,69125.000000,245.706520)}
{pt3dadd(183744.000000,158904.000000,68925.000000,243.654112)}
{pt3dadd(183672.000000,158940.000000,68675.000000,241.881162)}
{pt3dadd(183564.000000,158868.000000,68425.000000,243.933570)}
{pt3dadd(183396.000000,158832.000000,68225.000000,227.772786)}
{pt3dadd(183168.000000,158496.000000,67975.000000,224.884846)}
{pt3dadd(183216.000000,158544.000000,67750.000000,229.092282)}
{pt3dadd(183096.000000,158436.000000,67500.000000,230.865232)}
{pt3dadd(182916.000000,158376.000000,67275.000000,240.153670)}
{pt3dadd(182640.000000,158244.000000,67025.000000,256.314454)}
{pt3dadd(182544.000000,158364.000000,66775.000000,265.418698)}
{pt3dadd(182412.000000,158160.000000,66525.000000,255.622048)}
{pt3dadd(182208.000000,158004.000000,66300.000000,273.398608)}
{pt3dadd(181824.000000,158172.000000,65750.000000,260.103090)}
{pt3dadd(181860.000000,157932.000000,65400.000000,246.318220)}
{pt3dadd(181776.000000,157800.000000,65150.000000,229.349390)}
{pt3dadd(181812.000000,157752.000000,64950.000000,246.279450)}
{pt3dadd(181812.000000,157716.000000,64750.000000,241.165284)}
{pt3dadd(181608.000000,157440.000000,64500.000000,249.590172)}
{pt3dadd(181560.000000,157404.000000,64250.000000,242.796450)}
{pt3dadd(181596.000000,157320.000000,64000.000000,263.108432)}
{pt3dadd(181476.000000,157116.000000,63775.000000,271.366242)}
{pt3dadd(181476.000000,156996.000000,63500.000000,291.678224)}
{pt3dadd(181272.000000,156816.000000,63275.000000,317.876436)}
{pt3dadd(181248.000000,156648.000000,63050.000000,340.949380)}
{pt3dadd(180840.000000,156408.000000,62825.000000,368.582860)}

{create adhoc33}
{access adhoc33}
{connect adhoc33(1), adhoc32(0)}
{nseg = 1}
{strdef color color = "White"}
{pt3dclear()}
{pt3dadd(180840.000000,156408.000000,62825.000000,368.582860)}
{pt3dadd(180372.000000,155004.000000,63225.000000,224.297920)}
{pt3dadd(180036.000000,153732.000000,63075.000000,205.834520)}
{pt3dadd(179316.000000,152700.000000,62975.000000,164.280244)}
{pt3dadd(178656.000000,152604.000000,62975.000000,148.043914)}
{pt3dadd(177672.000000,152328.000000,62975.000000,156.854850)}
{pt3dadd(176508.000000,151656.000000,62675.000000,114.285710)}

{create adhoc34}
{access adhoc34}
{connect adhoc34(1), adhoc32(0)}
{nseg = 1}
{strdef color color = "White"}
{pt3dclear()}
{pt3dadd(180840.000000,156408.000000,62825.000000,368.582860)}
{pt3dadd(180864.000000,156444.000000,62575.000000,231.274527)}
{pt3dadd(180780.000000,156336.000000,62350.000000,197.178476)}
{pt3dadd(180684.000000,156204.000000,61925.000000,138.932518)}
{pt3dadd(180756.000000,156408.000000,61600.000000,132.841687)}
{pt3dadd(180708.000000,156348.000000,61125.000000,115.793543)}
{pt3dadd(180564.000000,156468.000000,60875.000000,101.406928)}
{pt3dadd(180384.000000,156252.000000,60650.000000,95.392636)}
{pt3dadd(180408.000000,156300.000000,60400.000000,107.705022)}
{pt3dadd(180216.000000,156252.000000,60150.000000,125.254783)}
{pt3dadd(180132.000000,156228.000000,59925.000000,133.417079)}
{pt3dadd(180036.000000,156216.000000,59700.000000,152.631864)}
{pt3dadd(179892.000000,156204.000000,59475.000000,146.333770)}
{pt3dadd(179748.000000,156156.000000,59225.000000,137.355398)}
{pt3dadd(179472.000000,156096.000000,58700.000000,119.805637)}
{pt3dadd(179208.000000,156108.000000,58050.000000,137.537619)}
{pt3dadd(179004.000000,156024.000000,57525.000000,131.250839)}
{pt3dadd(178440.000000,155868.000000,56975.000000,133.689394)}
{pt3dadd(177984.000000,155820.000000,56500.000000,144.056916)}
{pt3dadd(177792.000000,155580.000000,56175.000000,153.930747)}
{pt3dadd(177696.000000,155664.000000,55925.000000,131.819469)}
{pt3dadd(177516.000000,155604.000000,55500.000000,130.430319)}
{pt3dadd(177300.000000,155532.000000,55250.000000,133.253253)}
{pt3dadd(177144.000000,155580.000000,55025.000000,133.253253)}
{pt3dadd(177156.000000,155760.000000,54600.000000,124.274881)}
{pt3dadd(176784.000000,155676.000000,54225.000000,115.296509)}
{pt3dadd(176832.000000,155700.000000,53900.000000,106.318137)}
{pt3dadd(176784.000000,155556.000000,53575.000000,104.390662)}
{pt3dadd(176712.000000,155304.000000,53250.000000,104.390662)}
{pt3dadd(176820.000000,155220.000000,52900.000000,128.686586)}
{pt3dadd(176688.000000,155220.000000,52550.000000,140.512718)}
{pt3dadd(176580.000000,154788.000000,52250.000000,179.466950)}
{pt3dadd(176616.000000,154488.000000,51900.000000,218.421182)}
{pt3dadd(176700.000000,154116.000000,51675.000000,236.767392)}
{pt3dadd(176688.000000,154008.000000,51375.000000,236.767392)}
{pt3dadd(176592.000000,153816.000000,51050.000000,231.336632)}
{pt3dadd(176448.000000,153480.000000,50725.000000,195.346480)}
{pt3dadd(176340.000000,153084.000000,50175.000000,155.496789)}
{pt3dadd(176280.000000,152256.000000,49925.000000,122.712347)}
{pt3dadd(176268.000000,151668.000000,49625.000000,106.071795)}
{pt3dadd(176148.000000,151080.000000,49100.000000,103.728937)}
{pt3dadd(176076.000000,150864.000000,48900.000000,114.122525)}
{pt3dadd(175908.000000,150012.000000,48600.000000,125.385506)}
{pt3dadd(176052.000000,149472.000000,48375.000000,140.319313)}
{pt3dadd(176268.000000,148872.000000,48150.000000,145.860750)}

{create adhoc35}
{access adhoc35}
{connect adhoc35(1), adhoc3(0)}
{nseg = 1}
{strdef color color = "White"}
{pt3dclear()}
{pt3dadd(181620.000000,201372.000000,90350.000000,288.794300)}
{pt3dadd(181380.000000,201528.000000,89525.000000,330.564227)}
{pt3dadd(181236.000000,201780.000000,89050.000000,349.817308)}
{pt3dadd(181104.000000,201876.000000,88500.000000,375.325573)}
{pt3dadd(180744.000000,202080.000000,87975.000000,351.031280)}

{create adhoc36}
{access adhoc36}
{connect adhoc36(1), adhoc35(0)}
{nseg = 1}
{strdef color color = "White"}
{pt3dclear()}
{pt3dadd(180744.000000,202080.000000,87975.000000,351.031280)}
{pt3dadd(180792.000000,201576.000000,87475.000000,305.403410)}
{pt3dadd(180516.000000,201168.000000,86700.000000,274.184464)}
{pt3dadd(179820.000000,200760.000000,85975.000000,247.078760)}
{pt3dadd(179292.000000,200352.000000,85400.000000,227.480104)}
{pt3dadd(179040.000000,200316.000000,84775.000000,230.099554)}
{pt3dadd(178860.000000,200172.000000,84225.000000,241.440400)}
{pt3dadd(178452.000000,200496.000000,83775.000000,232.594270)}
{pt3dadd(177864.000000,200736.000000,83000.000000,241.882708)}
{pt3dadd(177792.000000,200592.000000,82100.000000,250.728838)}
{pt3dadd(177408.000000,200124.000000,81275.000000,220.920398)}
{pt3dadd(177288.000000,199620.000000,80400.000000,202.301818)}
{pt3dadd(176124.000000,198864.000000,79225.000000,195.024084)}
{pt3dadd(175332.000000,198096.000000,78425.000000,166.635094)}
{pt3dadd(174612.000000,197484.000000,77150.000000,153.972700)}
{pt3dadd(174012.000000,197196.000000,75925.000000,181.161690)}
{pt3dadd(173952.000000,196656.000000,74800.000000,192.646860)}
{pt3dadd(173616.000000,196692.000000,73850.000000,213.884890)}
{pt3dadd(173292.000000,197076.000000,72925.000000,227.116770)}
{pt3dadd(173160.000000,197208.000000,72025.000000,219.057040)}
{pt3dadd(172968.000000,197772.000000,71675.000000,197.298810)}
{pt3dadd(172560.000000,198144.000000,71150.000000,181.215380)}
{pt3dadd(171948.000000,198444.000000,70700.000000,155.379090)}
{pt3dadd(171540.000000,198768.000000,70700.000000,145.930210)}
{pt3dadd(171144.000000,199092.000000,70700.000000,180.437204)}
{pt3dadd(170736.000000,199416.000000,70700.000000,201.057157)}
{pt3dadd(170256.000000,200280.000000,70600.000000,318.395720)}

{create adhoc37}
{access adhoc37}
{connect adhoc37(1), adhoc35(0)}
{nseg = 1}
{strdef color color = "White"}
{pt3dclear()}
{pt3dadd(180744.000000,202080.000000,87975.000000,351.031280)}
{pt3dadd(180684.000000,202164.000000,87775.000000,304.955927)}
{pt3dadd(180744.000000,202368.000000,87650.000000,271.752406)}
{pt3dadd(180720.000000,202284.000000,87400.000000,237.005080)}
{pt3dadd(180180.000000,202884.000000,87275.000000,213.016630)}
{pt3dadd(179880.000000,203184.000000,87150.000000,187.180340)}
{pt3dadd(179856.000000,203388.000000,87025.000000,167.630830)}
{pt3dadd(179616.000000,203544.000000,86900.000000,167.630830)}
{pt3dadd(179484.000000,203664.000000,86875.000000,169.403780)}
{pt3dadd(179352.000000,204024.000000,86750.000000,174.726842)}
{pt3dadd(179232.000000,204144.000000,86700.000000,184.648164)}
{pt3dadd(179100.000000,204372.000000,86675.000000,184.648164)}
{pt3dadd(178908.000000,204576.000000,86650.000000,180.049904)}
{pt3dadd(178704.000000,204996.000000,86575.000000,180.049904)}
{pt3dadd(178572.000000,205428.000000,86525.000000,195.964872)}
{pt3dadd(178452.000000,205956.000000,86550.000000,223.734504)}
{pt3dadd(178320.000000,206388.000000,86525.000000,277.878528)}
{pt3dadd(178248.000000,206868.000000,86500.000000,334.042524)}
{pt3dadd(178140.000000,207468.000000,86450.000000,390.893744)}
{pt3dadd(178020.000000,207576.000000,86400.000000,425.488258)}
{pt3dadd(177900.000000,207924.000000,86525.000000,439.897670)}
{pt3dadd(177780.000000,208368.000000,86600.000000,420.500972)}
{pt3dadd(177660.000000,208764.000000,86575.000000,401.802877)}
{pt3dadd(177432.000000,209124.000000,86400.000000,351.031280)}

{create adhoc38}
{access adhoc38}
{connect adhoc38(1), adhoc37(0)}
{nseg = 1}
{strdef color color = "White"}
{pt3dclear()}
{pt3dadd(177432.000000,209124.000000,86400.000000,351.031280)}
{pt3dadd(177072.000000,209724.000000,86375.000000,285.109447)}
{pt3dadd(176868.000000,209904.000000,86350.000000,271.329688)}
{pt3dadd(176652.000000,210132.000000,86450.000000,236.582362)}
{pt3dadd(176544.000000,210060.000000,86325.000000,245.870800)}
{pt3dadd(176424.000000,210168.000000,86275.000000,233.367520)}
{pt3dadd(176316.000000,210264.000000,86375.000000,217.452552)}
{pt3dadd(176196.000000,210204.000000,86425.000000,213.245116)}
{pt3dadd(176088.000000,210228.000000,86475.000000,215.018066)}
{pt3dadd(175968.000000,210120.000000,86450.000000,212.523350)}
{pt3dadd(175728.000000,210300.000000,86550.000000,217.162044)}
{pt3dadd(175500.000000,210336.000000,86525.000000,219.116716)}
{pt3dadd(175284.000000,210372.000000,86550.000000,221.169124)}
{pt3dadd(175152.000000,210516.000000,86625.000000,227.037796)}
{pt3dadd(175032.000000,210408.000000,86625.000000,209.305818)}
{pt3dadd(174912.000000,210264.000000,86375.000000,198.505016)}
{pt3dadd(174792.000000,210300.000000,86400.000000,198.505016)}
{pt3dadd(174672.000000,210348.000000,86700.000000,194.497936)}
{pt3dadd(174564.000000,210420.000000,86650.000000,192.445528)}
{pt3dadd(174444.000000,210396.000000,86600.000000,203.383784)}
{pt3dadd(174336.000000,210348.000000,86725.000000,211.808672)}
{pt3dadd(174216.000000,210324.000000,86875.000000,211.808672)}
{pt3dadd(174108.000000,210360.000000,86875.000000,209.947080)}
{pt3dadd(173988.000000,210456.000000,86900.000000,206.130816)}
{pt3dadd(173892.000000,210432.000000,86950.000000,204.078408)}
{pt3dadd(173772.000000,210396.000000,87025.000000,199.660600)}
{pt3dadd(173640.000000,210336.000000,87175.000000,213.620896)}
{pt3dadd(173532.000000,210324.000000,87175.000000,223.907376)}
{pt3dadd(173316.000000,210432.000000,87200.000000,239.064486)}
{pt3dadd(173208.000000,210552.000000,87275.000000,245.534702)}
{pt3dadd(173088.000000,210504.000000,87325.000000,239.666030)}
{pt3dadd(172968.000000,210540.000000,87475.000000,251.520694)}
{pt3dadd(172848.000000,210504.000000,87600.000000,270.865438)}
{pt3dadd(172728.000000,210516.000000,87450.000000,273.484888)}
{pt3dadd(172608.000000,210504.000000,87575.000000,273.484888)}
{pt3dadd(172488.000000,210528.000000,87600.000000,281.508588)}
{pt3dadd(172260.000000,210528.000000,87600.000000,259.901064)}
{pt3dadd(172140.000000,210648.000000,87525.000000,236.138512)}
{pt3dadd(171936.000000,210528.000000,87600.000000,224.230624)}
{pt3dadd(171732.000000,210552.000000,87725.000000,234.471124)}
{pt3dadd(171528.000000,210408.000000,87725.000000,244.223984)}
{pt3dadd(171408.000000,210444.000000,87850.000000,256.727264)}
{pt3dadd(171300.000000,210564.000000,87975.000000,256.727264)}
{pt3dadd(171072.000000,210516.000000,87975.000000,258.882292)}
{pt3dadd(170952.000000,210576.000000,88100.000000,248.641792)}
{pt3dadd(170844.000000,210540.000000,88175.000000,243.527626)}
{pt3dadd(170736.000000,210468.000000,88250.000000,233.287126)}
{pt3dadd(170616.000000,210540.000000,88200.000000,241.551657)}
{pt3dadd(170496.000000,210528.000000,88125.000000,237.591800)}

{create adhoc39}
{access adhoc39}
{connect adhoc39(1), adhoc37(0)}
{nseg = 1}
{strdef color color = "White"}
{pt3dclear()}
{pt3dadd(177432.000000,209124.000000,86400.000000,351.031280)}
{pt3dadd(177396.000000,209412.000000,85975.000000,363.903127)}
{pt3dadd(177552.000000,209640.000000,85750.000000,373.884278)}
{pt3dadd(177732.000000,209760.000000,85625.000000,370.541126)}
{pt3dadd(177960.000000,209940.000000,85475.000000,349.915410)}
{pt3dadd(178680.000000,210036.000000,85250.000000,346.731450)}
{pt3dadd(178884.000000,210156.000000,85100.000000,328.914184)}
{pt3dadd(179088.000000,210120.000000,84975.000000,293.472312)}
{pt3dadd(179388.000000,210072.000000,84850.000000,276.503482)}
{pt3dadd(179544.000000,210084.000000,84700.000000,265.750956)}
{pt3dadd(179664.000000,210132.000000,84575.000000,251.966086)}
{pt3dadd(179736.000000,210060.000000,84450.000000,242.677648)}
{pt3dadd(179712.000000,210024.000000,84325.000000,231.876846)}
{pt3dadd(179832.000000,210048.000000,84175.000000,227.238152)}
{pt3dadd(179976.000000,210108.000000,84025.000000,229.732868)}
{pt3dadd(179952.000000,209892.000000,83900.000000,234.847034)}
{pt3dadd(180120.000000,209868.000000,83750.000000,255.425626)}
{pt3dadd(180264.000000,209892.000000,83600.000000,266.226428)}
{pt3dadd(180408.000000,209988.000000,83475.000000,264.071400)}
{pt3dadd(180288.000000,209904.000000,83350.000000,254.782962)}
{pt3dadd(180336.000000,209916.000000,83225.000000,235.233452)}
{pt3dadd(180300.000000,210012.000000,83100.000000,194.411450)}
{pt3dadd(180276.000000,209976.000000,82950.000000,173.689326)}
{pt3dadd(180024.000000,210324.000000,82700.000000,158.371774)}
{pt3dadd(179784.000000,210564.000000,82600.000000,144.443372)}
{pt3dadd(179400.000000,210888.000000,82475.000000,144.443372)}
{pt3dadd(178740.000000,211356.000000,82475.000000,148.046230)}
{pt3dadd(177900.000000,211656.000000,82475.000000,154.333010)}
{pt3dadd(177012.000000,211416.000000,82250.000000,162.008940)}
{pt3dadd(176160.000000,211332.000000,82125.000000,163.467550)}
{pt3dadd(175224.000000,211164.000000,82125.000000,158.639380)}
{pt3dadd(174612.000000,211332.000000,82275.000000,164.341676)}
{pt3dadd(174060.000000,211572.000000,82275.000000,159.513506)}
{pt3dadd(173424.000000,212136.000000,82150.000000,151.837576)}
{pt3dadd(172752.000000,212472.000000,82000.000000,156.665746)}
{pt3dadd(172308.000000,212724.000000,81875.000000,165.128458)}
{pt3dadd(171648.000000,213108.000000,81600.000000,166.736572)}
{pt3dadd(171312.000000,213468.000000,81475.000000,165.277962)}
{pt3dadd(170436.000000,213588.000000,81375.000000,156.299590)}
{pt3dadd(169968.000000,213624.000000,81225.000000,134.204758)}
{pt3dadd(169728.000000,213852.000000,81000.000000,108.475384)}
{pt3dadd(169704.000000,213912.000000,80750.000000,90.175588)}
{pt3dadd(169620.000000,213960.000000,80625.000000,91.634198)}
{pt3dadd(169452.000000,214404.000000,80225.000000,113.877714)}
{pt3dadd(169476.000000,214728.000000,79950.000000,134.284026)}
{pt3dadd(169332.000000,215088.000000,79825.000000,158.151808)}
{pt3dadd(169272.000000,215304.000000,79700.000000,179.913074)}
{pt3dadd(169080.000000,215460.000000,79575.000000,181.444610)}
{pt3dadd(168960.000000,215628.000000,79450.000000,157.452818)}
{pt3dadd(168888.000000,215688.000000,79325.000000,140.738760)}
{pt3dadd(168696.000000,215844.000000,79200.000000,131.289880)}
{pt3dadd(168492.000000,215904.000000,79075.000000,139.313580)}
{pt3dadd(168228.000000,216408.000000,78850.000000,144.383164)}
{pt3dadd(168024.000000,216744.000000,78625.000000,170.427364)}
{pt3dadd(167964.000000,216900.000000,78400.000000,200.889372)}
{pt3dadd(167844.000000,216876.000000,78275.000000,220.624732)}
{pt3dadd(167808.000000,216900.000000,78175.000000,222.887512)}
{pt3dadd(167736.000000,216876.000000,77975.000000,221.114562)}
{pt3dadd(167628.000000,216840.000000,77850.000000,223.269590)}
{pt3dadd(167580.000000,216852.000000,77625.000000,221.006810)}
{pt3dadd(167532.000000,216828.000000,77400.000000,221.006810)}
{pt3dadd(167316.000000,216804.000000,77075.000000,214.536594)}
{pt3dadd(167244.000000,216900.000000,76950.000000,218.171136)}
{pt3dadd(166992.000000,217080.000000,76725.000000,206.685966)}
{pt3dadd(166956.000000,217080.000000,76600.000000,198.662266)}
{pt3dadd(166860.000000,217248.000000,76475.000000,192.192050)}
{pt3dadd(166728.000000,217308.000000,76350.000000,186.602836)}
{pt3dadd(166440.000000,217572.000000,76225.000000,170.366506)}
{pt3dadd(166356.000000,217788.000000,76100.000000,173.827976)}
{pt3dadd(166056.000000,217896.000000,75975.000000,159.246587)}
{pt3dadd(165684.000000,218376.000000,75850.000000,186.159400)}

{create adhoc40}
{access adhoc40}
{connect adhoc40(1), adhoc2(0)}
{nseg = 1}
{strdef color color = "White"}
{pt3dclear()}
{pt3dadd(166176.000000,225888.000000,80725.000000,153.153800)}
{pt3dadd(166056.000000,226476.000000,80900.000000,108.843540)}

{create adhoc41}
{access adhoc41}
{connect adhoc41(1), adhoc1(0)}
{nseg = 1}
{strdef color color = "White"}
{pt3dclear()}
{pt3dadd(161784.000000,230592.000000,77075.000000,351.031280)}
{pt3dadd(161700.000000,230724.000000,76925.000000,329.526933)}
{pt3dadd(161628.000000,230832.000000,76800.000000,300.730600)}
{pt3dadd(161544.000000,230820.000000,76650.000000,251.256446)}
{pt3dadd(161508.000000,230868.000000,76525.000000,206.244237)}
{pt3dadd(161508.000000,230844.000000,76375.000000,103.660510)}
