# Supplementary material for: Full reconstruction of large lobula plate tangential cells in Drosophila from a 3D EM dataset
Source: PLoS One. 2018 Nov 28;13(11):e0207828. doi: 10.1371/journal.pone.0207828 (PMC6261601; doi:10.1371/journal.pone.0207828)
Supplement: S1 Dataset — (ZIP) [file pone.0207828.s001.zip › Diameter hoc/Cell24_5skels_ck_corrected_sorted_diametered.hoc0001.hoc]

/* created with convertKnossosNmlToHoc.m */

{create adhoc1}
{access adhoc1}
{nseg = 1}
{strdef color color = "White"}
{pt3dclear()}
{pt3dadd(192636.000000,179292.000000,63900.000000,144.980130)}
{pt3dadd(192708.000000,179496.000000,64400.000000,143.477977)}
{pt3dadd(192972.000000,179700.000000,65025.000000,161.699900)}
{pt3dadd(193188.000000,179616.000000,65400.000000,164.866170)}
{pt3dadd(193476.000000,179628.000000,65925.000000,163.606170)}
{pt3dadd(194244.000000,179328.000000,66900.000000,158.023269)}
{pt3dadd(194484.000000,179196.000000,67400.000000,137.040915)}
{pt3dadd(194724.000000,179016.000000,67875.000000,132.710405)}
{pt3dadd(194964.000000,178980.000000,68275.000000,125.748109)}
{pt3dadd(195180.000000,179016.000000,68825.000000,127.008109)}
{pt3dadd(195468.000000,179016.000000,69275.000000,125.960250)}
{pt3dadd(195744.000000,178836.000000,69950.000000,127.160250)}
{pt3dadd(195816.000000,178740.000000,70175.000000,133.022296)}
{pt3dadd(195960.000000,178668.000000,70425.000000,139.984592)}
{pt3dadd(196140.000000,178524.000000,70750.000000,148.769444)}
{pt3dadd(196248.000000,178512.000000,70975.000000,158.539854)}
{pt3dadd(196332.000000,178404.000000,71250.000000,162.512004)}
{pt3dadd(196620.000000,178176.000000,71575.000000,155.549708)}
{pt3dadd(197016.000000,177996.000000,71775.000000,143.132272)}
{pt3dadd(197544.000000,177768.000000,72100.000000,140.049716)}
{pt3dadd(197964.000000,177612.000000,72325.000000,124.188475)}
{pt3dadd(198216.000000,177432.000000,72575.000000,114.761185)}
{pt3dadd(198528.000000,177300.000000,72850.000000,107.470354)}
{pt3dadd(198900.000000,177300.000000,73275.000000,108.457597)}
{pt3dadd(199068.000000,177252.000000,73675.000000,100.295301)}
{pt3dadd(199176.000000,177132.000000,73950.000000,117.845062)}
{pt3dadd(199308.000000,177072.000000,74150.000000,128.730962)}
{pt3dadd(199668.000000,176928.000000,74675.000000,137.281793)}
{pt3dadd(199716.000000,176820.000000,75025.000000,141.749690)}
{pt3dadd(199632.000000,176544.000000,75275.000000,148.380450)}
{pt3dadd(199548.000000,176472.000000,75500.000000,135.778662)}
{pt3dadd(199656.000000,176532.000000,75750.000000,134.320052)}
{pt3dadd(199968.000000,176652.000000,75950.000000,138.490812)}
{pt3dadd(200112.000000,176688.000000,76225.000000,143.921572)}
{pt3dadd(200232.000000,176616.000000,76500.000000,137.290812)}
{pt3dadd(200196.000000,176388.000000,76800.000000,137.290812)}
{pt3dadd(200124.000000,176280.000000,77250.000000,129.887370)}
{pt3dadd(200100.000000,176328.000000,77725.000000,119.863545)}
{pt3dadd(200004.000000,176352.000000,78325.000000,115.692785)}
{pt3dadd(199956.000000,176376.000000,78900.000000,119.475785)}
{pt3dadd(200004.000000,176328.000000,79475.000000,125.790793)}
{pt3dadd(200064.000000,176172.000000,79800.000000,121.078437)}
{pt3dadd(200124.000000,176184.000000,80125.000000,118.380671)}
{pt3dadd(200352.000000,176220.000000,80425.000000,112.652774)}
{pt3dadd(200340.000000,176328.000000,80725.000000,103.674402)}
{pt3dadd(200436.000000,176400.000000,81025.000000,94.127905)}
{pt3dadd(200532.000000,176520.000000,81325.000000,94.872598)}
{pt3dadd(200520.000000,176568.000000,81600.000000,99.820571)}
{pt3dadd(200496.000000,176568.000000,81850.000000,100.857176)}
{pt3dadd(200472.000000,176604.000000,82100.000000,103.238372)}
{pt3dadd(200568.000000,176700.000000,82425.000000,102.303817)}
{pt3dadd(200808.000000,176784.000000,83075.000000,107.359914)}
{pt3dadd(200832.000000,176748.000000,83500.000000,106.271480)}
{pt3dadd(200892.000000,176748.000000,83750.000000,110.962772)}
{pt3dadd(200664.000000,176772.000000,83925.000000,117.559948)}
{pt3dadd(200640.000000,176736.000000,84000.000000,117.673478)}
{pt3dadd(200628.000000,176688.000000,84125.000000,115.423271)}
{pt3dadd(200628.000000,176664.000000,84225.000000,115.423271)}
{pt3dadd(200616.000000,176664.000000,84325.000000,111.820413)}
{pt3dadd(200616.000000,176628.000000,84425.000000,104.769516)}
{pt3dadd(200628.000000,176628.000000,84550.000000,107.733596)}
{pt3dadd(200640.000000,176640.000000,84650.000000,107.858764)}
{pt3dadd(200700.000000,176676.000000,84725.000000,106.822159)}
{pt3dadd(200760.000000,176724.000000,84850.000000,107.965017)}
{pt3dadd(200784.000000,176748.000000,84950.000000,107.965017)}
{pt3dadd(200832.000000,176748.000000,85025.000000,106.928412)}
{pt3dadd(200844.000000,176748.000000,85125.000000,105.000937)}
{pt3dadd(200844.000000,176652.000000,85225.000000,106.037542)}
{pt3dadd(200856.000000,176604.000000,85325.000000,104.894684)}
{pt3dadd(200892.000000,176652.000000,85425.000000,104.894684)}
{pt3dadd(200916.000000,176700.000000,85500.000000,104.894684)}
{pt3dadd(200892.000000,176736.000000,85600.000000,108.947198)}
{pt3dadd(200892.000000,176772.000000,85725.000000,105.087659)}
{pt3dadd(200880.000000,176772.000000,85800.000000,102.962620)}
{pt3dadd(200940.000000,176724.000000,85925.000000,103.867799)}
{pt3dadd(200940.000000,176724.000000,86025.000000,105.992838)}
{pt3dadd(200952.000000,176748.000000,86100.000000,109.595696)}
{pt3dadd(200964.000000,176784.000000,86175.000000,112.418630)}
{pt3dadd(201012.000000,176808.000000,86200.000000,111.431387)}
{pt3dadd(201048.000000,176808.000000,86275.000000,113.794105)}
{pt3dadd(201036.000000,176808.000000,86350.000000,113.794105)}
{pt3dadd(201060.000000,176808.000000,86425.000000,107.078965)}
{pt3dadd(201060.000000,176808.000000,86525.000000,108.115570)}
{pt3dadd(201048.000000,176796.000000,86600.000000,110.139418)}
{pt3dadd(201096.000000,176736.000000,86675.000000,104.944046)}
{pt3dadd(201120.000000,176736.000000,86775.000000,103.855612)}
{pt3dadd(201156.000000,176748.000000,86850.000000,108.110752)}
{pt3dadd(201132.000000,176808.000000,86925.000000,109.199186)}
{pt3dadd(201132.000000,176832.000000,87000.000000,115.213478)}
{pt3dadd(201144.000000,176844.000000,87100.000000,121.608850)}
{pt3dadd(201096.000000,176832.000000,87200.000000,122.697284)}
{pt3dadd(201024.000000,176808.000000,87275.000000,122.697284)}
{pt3dadd(200940.000000,176772.000000,87375.000000,128.836168)}
{pt3dadd(200868.000000,176808.000000,87450.000000,116.430380)}
{pt3dadd(200820.000000,176832.000000,87525.000000,110.035008)}
{pt3dadd(200808.000000,176844.000000,87600.000000,107.909969)}
{pt3dadd(200796.000000,176856.000000,87675.000000,100.966321)}
{pt3dadd(200784.000000,176868.000000,87775.000000,91.715155)}
{pt3dadd(200772.000000,176892.000000,87850.000000,97.070046)}
{pt3dadd(200772.000000,176904.000000,87925.000000,98.997521)}
{pt3dadd(200760.000000,176928.000000,88025.000000,97.070046)}
{pt3dadd(200748.000000,176952.000000,88075.000000,102.870836)}
{pt3dadd(200784.000000,176952.000000,88150.000000,103.858079)}
{pt3dadd(200772.000000,176976.000000,88225.000000,100.555607)}
{pt3dadd(200784.000000,176964.000000,88300.000000,102.680646)}
{pt3dadd(200832.000000,176952.000000,88375.000000,109.076018)}
{pt3dadd(200808.000000,176988.000000,88450.000000,107.987584)}
{pt3dadd(200820.000000,177012.000000,88525.000000,106.060109)}
{pt3dadd(200820.000000,177048.000000,88600.000000,107.435106)}
{pt3dadd(200856.000000,177048.000000,88675.000000,106.215246)}
{pt3dadd(200844.000000,177060.000000,88750.000000,104.372618)}
{pt3dadd(200904.000000,177048.000000,88850.000000,106.459014)}
{pt3dadd(200856.000000,177036.000000,88950.000000,114.114386)}
{pt3dadd(200868.000000,177048.000000,89025.000000,120.509758)}
{pt3dadd(200880.000000,177060.000000,89100.000000,129.503236)}
{pt3dadd(200844.000000,177072.000000,89200.000000,135.318014)}
{pt3dadd(200844.000000,177084.000000,89300.000000,134.182056)}
{pt3dadd(200832.000000,177060.000000,89400.000000,138.167884)}
{pt3dadd(200856.000000,177072.000000,89475.000000,134.605166)}
{pt3dadd(200808.000000,177024.000000,89575.000000,137.744816)}
{pt3dadd(200772.000000,177036.000000,89700.000000,142.343076)}
{pt3dadd(200808.000000,177012.000000,89825.000000,155.082860)}
{pt3dadd(200844.000000,177060.000000,89900.000000,161.868912)}
{pt3dadd(200856.000000,177036.000000,90000.000000,174.002040)}
{pt3dadd(200820.000000,177024.000000,90125.000000,174.002040)}
{pt3dadd(200856.000000,176964.000000,90225.000000,183.332182)}
{pt3dadd(200952.000000,176856.000000,90300.000000,183.118104)}
{pt3dadd(201024.000000,176796.000000,90425.000000,181.345154)}
{pt3dadd(201168.000000,176748.000000,90525.000000,181.345154)}
{pt3dadd(201264.000000,176712.000000,90650.000000,174.034744)}
{pt3dadd(201264.000000,176676.000000,90825.000000,160.106342)}
{pt3dadd(201348.000000,176676.000000,90975.000000,154.033640)}
{pt3dadd(201396.000000,176664.000000,91150.000000,146.357710)}
{pt3dadd(201408.000000,176592.000000,91400.000000,146.357710)}
{pt3dadd(201336.000000,176544.000000,91525.000000,155.356640)}
{pt3dadd(201312.000000,176580.000000,91675.000000,155.356640)}
{pt3dadd(201288.000000,176568.000000,91800.000000,161.643420)}
{pt3dadd(201288.000000,176544.000000,91950.000000,171.092300)}
{pt3dadd(201264.000000,176496.000000,92250.000000,174.553770)}
{pt3dadd(201216.000000,176508.000000,92325.000000,184.350420)}
{pt3dadd(201216.000000,176484.000000,92400.000000,188.948680)}
{pt3dadd(201276.000000,176484.000000,92500.000000,188.948680)}
{pt3dadd(201312.000000,176460.000000,92625.000000,180.888950)}
{pt3dadd(201348.000000,176412.000000,92725.000000,175.819366)}
{pt3dadd(201348.000000,176352.000000,92850.000000,158.346786)}
{pt3dadd(201336.000000,176304.000000,92975.000000,152.359376)}
{pt3dadd(201312.000000,176256.000000,93075.000000,147.531206)}
{pt3dadd(201336.000000,176172.000000,93175.000000,148.989816)}
{pt3dadd(201300.000000,176112.000000,93300.000000,148.989816)}
{pt3dadd(201288.000000,176064.000000,93450.000000,153.369112)}
{pt3dadd(201276.000000,175992.000000,93550.000000,156.216872)}
{pt3dadd(201216.000000,175896.000000,93675.000000,159.356522)}
{pt3dadd(201132.000000,175848.000000,93800.000000,157.897912)}
{pt3dadd(201060.000000,175752.000000,93925.000000,154.907766)}
{pt3dadd(201024.000000,175692.000000,94075.000000,150.528470)}
{pt3dadd(200928.000000,175572.000000,94200.000000,150.528470)}
{pt3dadd(200904.000000,175500.000000,94350.000000,147.388820)}
{pt3dadd(200808.000000,175392.000000,94600.000000,188.422926)}
{pt3dadd(200712.000000,175308.000000,95175.000000,219.112960)}
{pt3dadd(200544.000000,175356.000000,95375.000000,351.031280)}

{create adhoc2}
{access adhoc2}
{connect adhoc2(1), adhoc1(0)}
{nseg = 1}
{strdef color color = "White"}
{pt3dclear()}
{pt3dadd(200544.000000,175356.000000,95375.000000,351.031280)}
{pt3dadd(200532.000000,175248.000000,95650.000000,368.875380)}
{pt3dadd(200436.000000,175092.000000,95800.000000,396.680844)}
{pt3dadd(200316.000000,174852.000000,95900.000000,440.833182)}
{pt3dadd(200232.000000,174576.000000,96025.000000,489.511128)}
{pt3dadd(200172.000000,174420.000000,96175.000000,535.871076)}
{pt3dadd(200148.000000,174132.000000,96250.000000,568.957154)}
{pt3dadd(200112.000000,173856.000000,96350.000000,594.950574)}
{pt3dadd(200052.000000,173940.000000,96475.000000,594.950574)}
{pt3dadd(199992.000000,173976.000000,96600.000000,583.228822)}
{pt3dadd(199932.000000,173940.000000,96700.000000,572.065254)}
{pt3dadd(199860.000000,173892.000000,96800.000000,566.619612)}
{pt3dadd(199740.000000,173820.000000,96900.000000,560.901686)}
{pt3dadd(199740.000000,173808.000000,97000.000000,550.269704)}
{pt3dadd(199740.000000,173796.000000,97100.000000,525.514064)}
{pt3dadd(199752.000000,173772.000000,97200.000000,501.937258)}
{pt3dadd(199764.000000,173724.000000,97325.000000,470.426706)}
{pt3dadd(199716.000000,173688.000000,97400.000000,433.470512)}
{pt3dadd(199764.000000,173628.000000,97475.000000,396.607004)}
{pt3dadd(199824.000000,173556.000000,97550.000000,373.867154)}
{pt3dadd(199836.000000,173520.000000,97650.000000,352.210152)}
{pt3dadd(199836.000000,173484.000000,97775.000000,341.670856)}
{pt3dadd(199824.000000,173448.000000,97875.000000,327.947600)}
{pt3dadd(199836.000000,173352.000000,97950.000000,331.290752)}
{pt3dadd(199908.000000,173316.000000,98025.000000,328.106792)}
{pt3dadd(199860.000000,173352.000000,98150.000000,331.290752)}
{pt3dadd(199848.000000,173340.000000,98275.000000,345.700164)}
{pt3dadd(199872.000000,173352.000000,98350.000000,355.737592)}
{pt3dadd(199908.000000,173364.000000,98425.000000,359.247908)}
{pt3dadd(200016.000000,173364.000000,98525.000000,380.904910)}
{pt3dadd(200076.000000,173328.000000,98600.000000,377.720950)}
{pt3dadd(200148.000000,173280.000000,98700.000000,366.654690)}
{pt3dadd(200160.000000,173232.000000,98800.000000,356.617262)}
{pt3dadd(200148.000000,173184.000000,98900.000000,343.547490)}
{pt3dadd(200136.000000,173196.000000,99000.000000,325.074448)}
{pt3dadd(200196.000000,173184.000000,99100.000000,319.154164)}
{pt3dadd(200244.000000,173184.000000,99200.000000,309.594708)}
{pt3dadd(200256.000000,173184.000000,99300.000000,306.562364)}
{pt3dadd(200316.000000,173232.000000,99450.000000,306.562364)}
{pt3dadd(200292.000000,173196.000000,99575.000000,297.458120)}
{pt3dadd(200220.000000,173208.000000,99675.000000,303.378404)}
{pt3dadd(200220.000000,173172.000000,99800.000000,300.490464)}
{pt3dadd(200172.000000,173148.000000,99900.000000,306.706768)}
{pt3dadd(200124.000000,173172.000000,100000.000000,309.739112)}
{pt3dadd(200100.000000,173124.000000,100100.000000,315.659396)}
{pt3dadd(200016.000000,173064.000000,100200.000000,318.843356)}
{pt3dadd(199872.000000,173088.000000,100275.000000,324.763640)}
{pt3dadd(199812.000000,173004.000000,100400.000000,331.617108)}
{pt3dadd(199740.000000,172920.000000,100475.000000,338.144220)}
{pt3dadd(199680.000000,172848.000000,100550.000000,348.181648)}
{pt3dadd(199644.000000,172800.000000,100625.000000,358.720944)}
{pt3dadd(199572.000000,172728.000000,100700.000000,372.444200)}
{pt3dadd(199500.000000,172620.000000,100775.000000,376.130028)}
{pt3dadd(199428.000000,172488.000000,100850.000000,355.818046)}
{pt3dadd(199392.000000,172428.000000,100975.000000,339.860334)}
{pt3dadd(199356.000000,172368.000000,101100.000000,326.137078)}
{pt3dadd(199416.000000,172308.000000,101225.000000,306.144828)}
{pt3dadd(199332.000000,172188.000000,101400.000000,250.511136)}
{pt3dadd(199332.000000,171768.000000,101575.000000,238.096670)}
{pt3dadd(199500.000000,171456.000000,101650.000000,108.843540)}

{create adhoc3}
{access adhoc3}
{connect adhoc3(1), adhoc2(0)}
{nseg = 1}
{strdef color color = "White"}
{pt3dclear()}
{pt3dadd(199500.000000,171456.000000,101650.000000,108.843540)}
{pt3dadd(199584.000000,171384.000000,101825.000000,180.120720)}
{pt3dadd(199692.000000,171336.000000,101975.000000,277.439466)}
{pt3dadd(199680.000000,171276.000000,102125.000000,364.583710)}
{pt3dadd(199620.000000,171276.000000,102225.000000,432.448518)}
{pt3dadd(199500.000000,171204.000000,102325.000000,496.105890)}
{pt3dadd(199404.000000,171252.000000,102475.000000,573.481810)}
{pt3dadd(199344.000000,171156.000000,102600.000000,573.481810)}
{pt3dadd(199284.000000,171120.000000,102725.000000,568.295470)}
{pt3dadd(199176.000000,171072.000000,102875.000000,529.588774)}
{pt3dadd(198984.000000,171120.000000,103025.000000,480.485770)}
{pt3dadd(198780.000000,171588.000000,103350.000000,351.031280)}

{create adhoc4}
{access adhoc4}
{connect adhoc4(1), adhoc3(0)}
{nseg = 1}
{strdef color color = "White"}
{pt3dclear()}
{pt3dadd(198780.000000,171588.000000,103350.000000,351.031280)}
{pt3dadd(198696.000000,171636.000000,103500.000000,577.488727)}
{pt3dadd(198612.000000,171612.000000,103600.000000,668.704418)}
{pt3dadd(198516.000000,171600.000000,103725.000000,712.856756)}
{pt3dadd(198396.000000,171540.000000,103850.000000,778.290302)}
{pt3dadd(198276.000000,171432.000000,103925.000000,715.901574)}
{pt3dadd(198228.000000,171324.000000,104000.000000,679.326204)}
{pt3dadd(198180.000000,171228.000000,104075.000000,679.326204)}
{pt3dadd(198144.000000,171120.000000,104150.000000,718.219062)}
{pt3dadd(198096.000000,171024.000000,104225.000000,761.098446)}
{pt3dadd(198060.000000,170916.000000,104275.000000,785.254714)}
{pt3dadd(198012.000000,170868.000000,104375.000000,821.830084)}
{pt3dadd(197964.000000,170808.000000,104500.000000,854.856732)}
{pt3dadd(197916.000000,170712.000000,104650.000000,879.013000)}
{pt3dadd(197784.000000,170484.000000,104750.000000,870.967290)}
{pt3dadd(197652.000000,170268.000000,104875.000000,813.636090)}
{pt3dadd(197520.000000,170052.000000,104975.000000,790.630132)}
{pt3dadd(197388.000000,169824.000000,105075.000000,757.603484)}
{pt3dadd(197220.000000,169668.000000,105175.000000,733.447216)}
{pt3dadd(197052.000000,169500.000000,105275.000000,733.447216)}
{pt3dadd(196872.000000,169344.000000,105400.000000,759.324468)}
{pt3dadd(196644.000000,169236.000000,105525.000000,774.284716)}
{pt3dadd(196416.000000,169116.000000,105625.000000,789.992994)}
{pt3dadd(196308.000000,169080.000000,105725.000000,797.655562)}
{pt3dadd(196188.000000,169032.000000,105850.000000,814.149262)}
{pt3dadd(196080.000000,168984.000000,106000.000000,854.473590)}
{pt3dadd(195984.000000,168780.000000,106100.000000,854.473590)}
{pt3dadd(195900.000000,168564.000000,106200.000000,854.473590)}
{pt3dadd(195804.000000,168360.000000,106300.000000,832.563158)}
{pt3dadd(195708.000000,168144.000000,106400.000000,832.563158)}
{pt3dadd(195612.000000,167940.000000,106500.000000,792.238830)}
{pt3dadd(195492.000000,167796.000000,106600.000000,763.709170)}
{pt3dadd(195240.000000,167592.000000,106700.000000,727.133800)}
{pt3dadd(195156.000000,167724.000000,106800.000000,714.210558)}
{pt3dadd(195072.000000,167844.000000,106925.000000,675.806426)}
{pt3dadd(194988.000000,167964.000000,107025.000000,668.856242)}
{pt3dadd(194904.000000,167856.000000,107150.000000,675.475470)}
{pt3dadd(194820.000000,167748.000000,107275.000000,682.094698)}
{pt3dadd(194736.000000,167628.000000,107400.000000,670.372946)}
{pt3dadd(194760.000000,167424.000000,107500.000000,663.753718)}
{pt3dadd(194688.000000,167328.000000,107650.000000,670.703902)}
{pt3dadd(194532.000000,167256.000000,107725.000000,657.780660)}
{pt3dadd(194580.000000,167232.000000,107900.000000,635.638412)}
{pt3dadd(194604.000000,167244.000000,108075.000000,635.638412)}
{pt3dadd(194604.000000,167268.000000,108225.000000,602.041308)}
{pt3dadd(194424.000000,167244.000000,108425.000000,570.446130)}
{pt3dadd(194628.000000,167064.000000,108675.000000,583.369372)}
{pt3dadd(194820.000000,166884.000000,109025.000000,543.910432)}
{pt3dadd(194616.000000,166584.000000,109125.000000,510.824354)}
{pt3dadd(194448.000000,166368.000000,109350.000000,485.753670)}
{pt3dadd(194364.000000,166128.000000,109525.000000,456.731222)}
{pt3dadd(193932.000000,166164.000000,110000.000000,416.514890)}
{pt3dadd(193944.000000,165576.000000,110000.000000,382.213042)}
{pt3dadd(194064.000000,164808.000000,110000.000000,348.458886)}
{pt3dadd(194112.000000,164232.000000,110000.000000,315.790458)}
{pt3dadd(194040.000000,163560.000000,110000.000000,300.660568)}
{pt3dadd(193968.000000,162636.000000,110000.000000,264.621267)}
{pt3dadd(194004.000000,161460.000000,109800.000000,351.031280)}

{create adhoc5}
{access adhoc5}
{connect adhoc5(1), adhoc4(0)}
{nseg = 1}
{strdef color color = "White"}
{pt3dclear()}
{pt3dadd(194004.000000,161460.000000,109800.000000,351.031280)}
{pt3dadd(194472.000000,161652.000000,109425.000000,376.247763)}
{pt3dadd(194508.000000,161556.000000,109450.000000,375.829004)}
{pt3dadd(194544.000000,161388.000000,109450.000000,425.699268)}
{pt3dadd(194592.000000,161292.000000,109450.000000,494.496600)}
{pt3dadd(194688.000000,161124.000000,109475.000000,523.519048)}
{pt3dadd(194724.000000,160944.000000,109450.000000,506.351654)}
{pt3dadd(194796.000000,160812.000000,109400.000000,596.710248)}
{pt3dadd(194796.000000,160644.000000,109325.000000,570.716828)}
{pt3dadd(194796.000000,160488.000000,109275.000000,498.576344)}
{pt3dadd(194808.000000,160380.000000,109200.000000,447.896894)}
{pt3dadd(194844.000000,160248.000000,109125.000000,402.663086)}
{pt3dadd(194868.000000,160116.000000,109100.000000,358.510748)}
{pt3dadd(194820.000000,159972.000000,109075.000000,331.290752)}
{pt3dadd(194880.000000,159864.000000,109000.000000,338.144220)}
{pt3dadd(194856.000000,159732.000000,108950.000000,348.181648)}
{pt3dadd(194820.000000,159564.000000,108900.000000,358.219076)}
{pt3dadd(194808.000000,159420.000000,108900.000000,377.615774)}
{pt3dadd(194808.000000,159300.000000,108925.000000,380.958926)}
{pt3dadd(194796.000000,159168.000000,108925.000000,384.644754)}
{pt3dadd(194784.000000,159012.000000,108925.000000,384.644754)}
{pt3dadd(194796.000000,158880.000000,108875.000000,384.644754)}
{pt3dadd(194808.000000,158736.000000,108850.000000,372.444200)}
{pt3dadd(194820.000000,158592.000000,108800.000000,383.510460)}
{pt3dadd(194868.000000,158472.000000,108800.000000,387.380576)}
{pt3dadd(194916.000000,158316.000000,108775.000000,383.870260)}
{pt3dadd(194952.000000,158184.000000,108750.000000,373.832832)}
{pt3dadd(194916.000000,158064.000000,108725.000000,354.189292)}
{pt3dadd(194964.000000,157908.000000,108700.000000,333.563576)}
{pt3dadd(194988.000000,157764.000000,108675.000000,319.154164)}
{pt3dadd(195024.000000,157644.000000,108650.000000,315.811012)}
{pt3dadd(195060.000000,157488.000000,108600.000000,315.811012)}
{pt3dadd(195072.000000,157380.000000,108625.000000,307.946426)}
{pt3dadd(195084.000000,157188.000000,108650.000000,297.193900)}
{pt3dadd(195000.000000,156924.000000,108425.000000,282.719786)}
{pt3dadd(195012.000000,156732.000000,108425.000000,276.503482)}
{pt3dadd(194976.000000,156480.000000,108425.000000,267.832778)}
{pt3dadd(195156.000000,156132.000000,108550.000000,267.832778)}
{pt3dadd(195180.000000,155928.000000,108575.000000,275.697364)}
{pt3dadd(195204.000000,155712.000000,108575.000000,262.401846)}
{pt3dadd(195240.000000,155544.000000,108575.000000,230.927196)}
{pt3dadd(195192.000000,155280.000000,108725.000000,206.364584)}
{pt3dadd(195288.000000,155160.000000,108700.000000,187.101070)}
{pt3dadd(195312.000000,155088.000000,108625.000000,158.338236)}
{pt3dadd(195336.000000,154980.000000,108575.000000,160.045088)}
{pt3dadd(195408.000000,154872.000000,108600.000000,178.104410)}
{pt3dadd(195444.000000,154776.000000,108575.000000,197.251630)}
{pt3dadd(195480.000000,154668.000000,108500.000000,221.297206)}
{pt3dadd(195492.000000,154512.000000,108450.000000,250.060040)}
{pt3dadd(195720.000000,154140.000000,108450.000000,254.515296)}
{pt3dadd(195828.000000,153636.000000,108200.000000,252.266178)}
{pt3dadd(195864.000000,153396.000000,108175.000000,247.655484)}
{pt3dadd(195948.000000,153024.000000,108025.000000,235.819486)}
{pt3dadd(196020.000000,152940.000000,108050.000000,238.341286)}
{pt3dadd(196116.000000,152868.000000,108025.000000,242.678754)}
{pt3dadd(196080.000000,152784.000000,107975.000000,249.769100)}
{pt3dadd(195996.000000,152712.000000,107925.000000,256.859446)}
{pt3dadd(195960.000000,152616.000000,107925.000000,271.777968)}
{pt3dadd(195996.000000,152520.000000,107875.000000,269.256168)}
{pt3dadd(196128.000000,152424.000000,107850.000000,284.735886)}
{pt3dadd(196128.000000,152340.000000,107850.000000,296.342330)}
{pt3dadd(196116.000000,152256.000000,107825.000000,317.986202)}
{pt3dadd(196116.000000,152172.000000,107825.000000,330.433598)}
{pt3dadd(196116.000000,152076.000000,107800.000000,342.880994)}
{pt3dadd(196116.000000,151980.000000,107775.000000,344.671332)}
{pt3dadd(196104.000000,151884.000000,107775.000000,347.855292)}
{pt3dadd(196104.000000,151800.000000,107750.000000,344.344976)}
{pt3dadd(196104.000000,151704.000000,107750.000000,351.541120)}
{pt3dadd(196104.000000,151608.000000,107725.000000,358.737264)}
{pt3dadd(196092.000000,151536.000000,107700.000000,369.276560)}
{pt3dadd(196128.000000,151452.000000,107675.000000,387.749602)}
{pt3dadd(196164.000000,151356.000000,107625.000000,402.879492)}
{pt3dadd(196200.000000,151296.000000,107600.000000,406.749608)}
{pt3dadd(196236.000000,151212.000000,107575.000000,414.683354)}
{pt3dadd(196236.000000,151116.000000,107575.000000,410.997526)}
{pt3dadd(196200.000000,151032.000000,107575.000000,386.308180)}
{pt3dadd(196176.000000,150936.000000,107575.000000,367.835138)}
{pt3dadd(196188.000000,150852.000000,107525.000000,350.241766)}
{pt3dadd(196200.000000,150768.000000,107500.000000,328.584764)}
{pt3dadd(196212.000000,150684.000000,107475.000000,315.148852)}
{pt3dadd(196224.000000,150600.000000,107450.000000,311.912202)}
{pt3dadd(196260.000000,150504.000000,107450.000000,300.057538)}
{pt3dadd(196308.000000,150408.000000,107450.000000,291.054730)}
{pt3dadd(196392.000000,150312.000000,107425.000000,284.785736)}
{pt3dadd(196344.000000,150120.000000,107375.000000,261.736956)}
{pt3dadd(196392.000000,149916.000000,107350.000000,249.309160)}
{pt3dadd(196428.000000,149736.000000,107100.000000,252.059580)}
{pt3dadd(196476.000000,149244.000000,107100.000000,255.142104)}
{pt3dadd(196608.000000,148560.000000,107100.000000,250.120944)}
{pt3dadd(196668.000000,148332.000000,107025.000000,276.568208)}
{pt3dadd(196752.000000,148152.000000,106900.000000,292.232654)}
{pt3dadd(196836.000000,147888.000000,106825.000000,304.680050)}
{pt3dadd(196812.000000,147624.000000,106725.000000,313.784294)}
{pt3dadd(196788.000000,147408.000000,106575.000000,328.258408)}
{pt3dadd(196836.000000,147540.000000,106375.000000,291.039264)}
{pt3dadd(196812.000000,147660.000000,106200.000000,262.554760)}
{pt3dadd(196932.000000,147396.000000,106000.000000,252.995304)}
{pt3dadd(196920.000000,147024.000000,106000.000000,223.364080)}
{pt3dadd(196932.000000,146892.000000,105925.000000,195.594448)}
{pt3dadd(196920.000000,146760.000000,105925.000000,202.904858)}
{pt3dadd(196884.000000,146652.000000,105875.000000,209.836034)}
{pt3dadd(196824.000000,146544.000000,105900.000000,184.648164)}
{pt3dadd(196740.000000,146388.000000,105900.000000,192.671864)}
{pt3dadd(196764.000000,146256.000000,105800.000000,177.578392)}
{pt3dadd(196848.000000,146112.000000,105725.000000,175.970278)}
{pt3dadd(196896.000000,145980.000000,105625.000000,174.108686)}
{pt3dadd(197004.000000,145860.000000,105450.000000,186.168116)}
{pt3dadd(197016.000000,145728.000000,105325.000000,186.168116)}
{pt3dadd(197076.000000,145512.000000,105275.000000,232.374372)}
{pt3dadd(197292.000000,145404.000000,105100.000000,281.484592)}
{pt3dadd(197424.000000,145272.000000,104975.000000,321.655112)}
{pt3dadd(197544.000000,145104.000000,104875.000000,331.895612)}
{pt3dadd(197760.000000,144996.000000,104675.000000,347.286832)}
{pt3dadd(198012.000000,144864.000000,104450.000000,324.598936)}
{pt3dadd(198432.000000,144780.000000,104225.000000,282.419892)}
{pt3dadd(198588.000000,144600.000000,104125.000000,246.065636)}
{pt3dadd(198732.000000,144408.000000,104125.000000,229.354920)}
{pt3dadd(198912.000000,144132.000000,104050.000000,223.716560)}
{pt3dadd(198972.000000,143976.000000,103975.000000,223.716560)}
{pt3dadd(199008.000000,143868.000000,103850.000000,227.723640)}
{pt3dadd(199104.000000,143760.000000,103775.000000,218.837792)}
{pt3dadd(199128.000000,143652.000000,103675.000000,201.789646)}
{pt3dadd(199212.000000,143508.000000,103575.000000,169.500351)}
{pt3dadd(199248.000000,143424.000000,103450.000000,140.786617)}
{pt3dadd(199224.000000,143424.000000,103300.000000,119.454773)}
{pt3dadd(199188.000000,143376.000000,103175.000000,104.348829)}
{pt3dadd(199164.000000,143292.000000,103000.000000,99.153459)}
{pt3dadd(199056.000000,143172.000000,102875.000000,96.179174)}
{pt3dadd(199008.000000,143052.000000,102775.000000,102.574548)}
{pt3dadd(198972.000000,142992.000000,102625.000000,114.576250)}
{pt3dadd(198924.000000,142908.000000,102425.000000,131.290308)}
{pt3dadd(198852.000000,142764.000000,102325.000000,149.717560)}
{pt3dadd(198816.000000,142644.000000,102225.000000,167.204580)}
{pt3dadd(198828.000000,142500.000000,102075.000000,177.463510)}
{pt3dadd(198864.000000,142332.000000,101950.000000,179.152030)}
{pt3dadd(198852.000000,142188.000000,101850.000000,179.152030)}
{pt3dadd(198792.000000,142056.000000,101750.000000,174.082446)}
{pt3dadd(198756.000000,141996.000000,101625.000000,170.620976)}
{pt3dadd(198756.000000,141888.000000,101525.000000,168.932456)}
{pt3dadd(198780.000000,141732.000000,101425.000000,162.645676)}
{pt3dadd(198792.000000,141564.000000,101300.000000,158.047416)}
{pt3dadd(198804.000000,141324.000000,101200.000000,158.047416)}
{pt3dadd(198924.000000,141072.000000,101100.000000,153.449156)}
{pt3dadd(199008.000000,140820.000000,101000.000000,146.138746)}
{pt3dadd(199032.000000,140628.000000,100900.000000,146.138746)}
{pt3dadd(199032.000000,140448.000000,100750.000000,138.735304)}
{pt3dadd(199080.000000,140268.000000,100650.000000,128.341716)}
{pt3dadd(199200.000000,140064.000000,100525.000000,119.901669)}
{pt3dadd(199248.000000,139884.000000,100400.000000,119.901669)}
{pt3dadd(199236.000000,139632.000000,100275.000000,121.360279)}
{pt3dadd(199308.000000,139512.000000,100125.000000,131.753867)}
{pt3dadd(199248.000000,139260.000000,99925.000000,139.157309)}
{pt3dadd(199272.000000,139164.000000,99875.000000,152.195616)}
{pt3dadd(199296.000000,139044.000000,99825.000000,156.366376)}
{pt3dadd(199380.000000,138960.000000,99725.000000,153.518616)}
{pt3dadd(199440.000000,138852.000000,99650.000000,147.816320)}
{pt3dadd(199476.000000,138756.000000,99625.000000,146.427170)}
{pt3dadd(199464.000000,138612.000000,99600.000000,139.116760)}
{pt3dadd(199512.000000,138516.000000,99575.000000,143.944930)}
{pt3dadd(199476.000000,138432.000000,99500.000000,151.620860)}
{pt3dadd(199524.000000,138348.000000,99450.000000,157.323156)}
{pt3dadd(199500.000000,138204.000000,99425.000000,158.712306)}
{pt3dadd(199488.000000,138108.000000,99375.000000,164.414602)}
{pt3dadd(199428.000000,137988.000000,99350.000000,166.187552)}
{pt3dadd(199440.000000,137856.000000,99325.000000,173.829174)}
{pt3dadd(199404.000000,137724.000000,99275.000000,180.760350)}
{pt3dadd(199440.000000,137604.000000,99200.000000,194.688752)}
{pt3dadd(199368.000000,137460.000000,99125.000000,203.574600)}
{pt3dadd(199488.000000,137280.000000,99025.000000,216.236994)}
{pt3dadd(199596.000000,137124.000000,98975.000000,239.999546)}
{pt3dadd(199728.000000,136860.000000,99000.000000,264.585218)}
{pt3dadd(199908.000000,136452.000000,98650.000000,285.163810)}
{pt3dadd(200016.000000,136140.000000,98525.000000,304.762466)}
{pt3dadd(200088.000000,135876.000000,98400.000000,315.514992)}
{pt3dadd(200052.000000,135876.000000,98275.000000,306.410748)}
{pt3dadd(200184.000000,135744.000000,98200.000000,292.625878)}
{pt3dadd(200280.000000,135600.000000,98125.000000,269.994878)}
{pt3dadd(200268.000000,135456.000000,98050.000000,252.448630)}
{pt3dadd(200388.000000,135156.000000,97800.000000,229.033710)}
{pt3dadd(200448.000000,134892.000000,97700.000000,212.322994)}
{pt3dadd(200496.000000,134700.000000,97575.000000,197.887650)}
{pt3dadd(200520.000000,134604.000000,97425.000000,186.011656)}
{pt3dadd(200556.000000,134556.000000,97300.000000,175.073400)}
{pt3dadd(200592.000000,134544.000000,97200.000000,170.003816)}
{pt3dadd(200640.000000,134496.000000,97125.000000,161.117968)}
{pt3dadd(200640.000000,134472.000000,97025.000000,157.821334)}
{pt3dadd(200676.000000,134460.000000,96950.000000,157.821334)}
{pt3dadd(200724.000000,134436.000000,96875.000000,154.831188)}
{pt3dadd(200760.000000,134424.000000,96800.000000,151.841042)}
{pt3dadd(200796.000000,134412.000000,96725.000000,147.461746)}
{pt3dadd(200844.000000,134400.000000,96650.000000,144.471600)}
{pt3dadd(200868.000000,134304.000000,96575.000000,149.069860)}
{pt3dadd(200844.000000,134268.000000,96500.000000,149.069860)}
{pt3dadd(200856.000000,134184.000000,96425.000000,149.069860)}
{pt3dadd(200868.000000,134136.000000,96350.000000,156.745790)}
{pt3dadd(200856.000000,134124.000000,96250.000000,155.356640)}
{pt3dadd(200904.000000,134208.000000,96175.000000,146.786230)}
{pt3dadd(200808.000000,134436.000000,96100.000000,146.786230)}
{pt3dadd(200820.000000,134448.000000,96000.000000,158.662224)}
{pt3dadd(200784.000000,134580.000000,95900.000000,160.435174)}
{pt3dadd(200808.000000,134748.000000,95775.000000,164.814470)}
{pt3dadd(201024.000000,135396.000000,95725.000000,171.776766)}
{pt3dadd(201072.000000,135684.000000,95625.000000,169.260787)}
{pt3dadd(201132.000000,136428.000000,95650.000000,160.811480)}

{create adhoc6}
{access adhoc6}
{connect adhoc6(1), adhoc5(0)}
{nseg = 1}
{strdef color color = "White"}
{pt3dclear()}
{pt3dadd(201132.000000,136428.000000,95650.000000,160.811480)}
{pt3dadd(201264.000000,135504.000000,95200.000000,138.915000)}

{create adhoc7}
{access adhoc7}
{connect adhoc7(1), adhoc5(0)}
{nseg = 1}
{strdef color color = "White"}
{pt3dclear()}
{pt3dadd(201132.000000,136428.000000,95650.000000,160.811480)}
{pt3dadd(201276.000000,137496.000000,95825.000000,149.207653)}
{pt3dadd(201432.000000,138336.000000,95825.000000,150.786112)}
{pt3dadd(201564.000000,138960.000000,95925.000000,150.786112)}
{pt3dadd(201696.000000,139236.000000,96075.000000,161.045042)}
{pt3dadd(201756.000000,139632.000000,96200.000000,162.653156)}
{pt3dadd(201804.000000,139860.000000,96325.000000,162.653156)}
{pt3dadd(201780.000000,140136.000000,96450.000000,161.194546)}
{pt3dadd(201768.000000,140376.000000,96550.000000,156.815250)}
{pt3dadd(201756.000000,140532.000000,96650.000000,147.816320)}
{pt3dadd(201720.000000,140736.000000,96725.000000,144.676670)}
{pt3dadd(201684.000000,140916.000000,96800.000000,143.218060)}
{pt3dadd(201684.000000,141036.000000,96900.000000,133.790770)}
{pt3dadd(201720.000000,141156.000000,97000.000000,123.916939)}
{pt3dadd(201744.000000,141300.000000,97075.000000,114.513291)}
{pt3dadd(201756.000000,141444.000000,97150.000000,111.665531)}
{pt3dadd(201780.000000,141588.000000,97200.000000,111.665531)}
{pt3dadd(201828.000000,141804.000000,97450.000000,124.082967)}
{pt3dadd(201864.000000,141912.000000,97600.000000,145.267270)}
{pt3dadd(201864.000000,141984.000000,97675.000000,161.981328)}
{pt3dadd(201816.000000,142020.000000,97775.000000,166.360624)}
{pt3dadd(201876.000000,142092.000000,97850.000000,174.420354)}
{pt3dadd(201828.000000,142164.000000,97950.000000,187.513638)}
{pt3dadd(201876.000000,142164.000000,98025.000000,198.314440)}
{pt3dadd(201840.000000,142224.000000,98125.000000,214.438304)}
{pt3dadd(201804.000000,142320.000000,98200.000000,240.034868)}
{pt3dadd(201804.000000,142380.000000,98275.000000,263.449788)}
{pt3dadd(201816.000000,142368.000000,98350.000000,278.841008)}
{pt3dadd(201816.000000,142404.000000,98450.000000,299.152990)}
{pt3dadd(201828.000000,142404.000000,98525.000000,326.661116)}
{pt3dadd(201888.000000,142488.000000,98800.000000,342.618828)}
{pt3dadd(201840.000000,142452.000000,98925.000000,348.835132)}
{pt3dadd(201780.000000,142464.000000,99075.000000,355.051436)}
{pt3dadd(201804.000000,142476.000000,99175.000000,342.604040)}
{pt3dadd(201780.000000,142476.000000,99275.000000,320.210080)}
{pt3dadd(201756.000000,142464.000000,99350.000000,294.011868)}
{pt3dadd(201732.000000,142464.000000,99450.000000,277.043038)}
{pt3dadd(201708.000000,142464.000000,99500.000000,255.435514)}
{pt3dadd(201648.000000,142440.000000,99550.000000,236.770126)}
{pt3dadd(201588.000000,142416.000000,99600.000000,218.993566)}
{pt3dadd(201528.000000,142392.000000,99650.000000,206.934136)}
{pt3dadd(201504.000000,142416.000000,99725.000000,189.202158)}
{pt3dadd(201480.000000,142452.000000,99850.000000,174.577338)}
{pt3dadd(201432.000000,142572.000000,99925.000000,164.656016)}
{pt3dadd(201372.000000,142668.000000,100000.000000,155.207136)}
{pt3dadd(201300.000000,142728.000000,100075.000000,150.378966)}
{pt3dadd(201264.000000,142680.000000,100175.000000,150.378966)}
{pt3dadd(201276.000000,142740.000000,100250.000000,151.910502)}
{pt3dadd(201252.000000,142764.000000,100325.000000,153.369112)}
{pt3dadd(201240.000000,142752.000000,100400.000000,153.369112)}
{pt3dadd(201240.000000,142740.000000,100525.000000,154.900648)}
{pt3dadd(201240.000000,142764.000000,100575.000000,156.508762)}
{pt3dadd(201240.000000,142800.000000,100675.000000,156.192843)}
{pt3dadd(201204.000000,142896.000000,100725.000000,168.852050)}

{create adhoc8}
{access adhoc8}
{connect adhoc8(1), adhoc7(0)}
{nseg = 1}
{strdef color color = "White"}
{pt3dclear()}
{pt3dadd(201204.000000,142896.000000,100725.000000,168.852050)}
{pt3dadd(201096.000000,142956.000000,100775.000000,153.524517)}
{pt3dadd(200976.000000,142980.000000,100875.000000,150.459010)}
{pt3dadd(200868.000000,142908.000000,100950.000000,138.457308)}
{pt3dadd(200640.000000,142848.000000,101075.000000,139.915918)}
{pt3dadd(200244.000000,142632.000000,101075.000000,138.526768)}
{pt3dadd(199884.000000,142428.000000,101075.000000,132.211760)}
{pt3dadd(199752.000000,142392.000000,100825.000000,128.239610)}
{pt3dadd(199668.000000,142332.000000,100625.000000,128.239610)}
{pt3dadd(199584.000000,142188.000000,100500.000000,117.353710)}
{pt3dadd(199584.000000,142056.000000,100375.000000,113.570710)}
{pt3dadd(199656.000000,142116.000000,100250.000000,117.173568)}
{pt3dadd(199644.000000,142008.000000,100150.000000,121.145718)}
{pt3dadd(199668.000000,141960.000000,100050.000000,132.720250)}
{pt3dadd(199656.000000,141912.000000,99900.000000,145.860750)}

{create adhoc9}
{access adhoc9}
{connect adhoc9(1), adhoc8(0)}
{nseg = 1}
{strdef color color = "White"}
{pt3dclear()}
{pt3dadd(199656.000000,141912.000000,99900.000000,145.860750)}
{pt3dadd(199776.000000,141936.000000,99750.000000,134.720250)}
{pt3dadd(199908.000000,141756.000000,99575.000000,136.398150)}
{pt3dadd(200004.000000,141696.000000,99450.000000,136.398150)}
{pt3dadd(200076.000000,141696.000000,99325.000000,134.055292)}
{pt3dadd(200172.000000,141600.000000,99250.000000,132.795292)}
{pt3dadd(200160.000000,141504.000000,99175.000000,135.643052)}
{pt3dadd(200160.000000,141444.000000,99100.000000,135.643052)}
{pt3dadd(200160.000000,141372.000000,99025.000000,138.633198)}
{pt3dadd(200196.000000,141276.000000,98975.000000,149.546466)}
{pt3dadd(200232.000000,141204.000000,98900.000000,153.518616)}
{pt3dadd(200268.000000,141192.000000,98800.000000,149.347856)}
{pt3dadd(200304.000000,141204.000000,98700.000000,145.564856)}
{pt3dadd(200388.000000,141156.000000,98650.000000,135.171268)}
{pt3dadd(200448.000000,141120.000000,98550.000000,121.145718)}
{pt3dadd(200496.000000,141084.000000,98475.000000,113.742276)}
{pt3dadd(200580.000000,140952.000000,98400.000000,112.482276)}
{pt3dadd(200628.000000,140940.000000,98275.000000,117.654426)}
{pt3dadd(200664.000000,140976.000000,98175.000000,122.345718)}
{pt3dadd(200640.000000,141012.000000,98075.000000,123.332961)}
{pt3dadd(200616.000000,141012.000000,98000.000000,120.368881)}
{pt3dadd(200580.000000,141000.000000,97925.000000,110.639495)}
{pt3dadd(200688.000000,140964.000000,97750.000000,96.937959)}
{pt3dadd(200724.000000,140868.000000,97650.000000,92.246667)}
{pt3dadd(200760.000000,140832.000000,97575.000000,90.319192)}
{pt3dadd(200796.000000,140772.000000,97450.000000,91.259424)}
{pt3dadd(200820.000000,140712.000000,97375.000000,94.593438)}
{pt3dadd(200856.000000,140712.000000,97250.000000,105.582824)}
{pt3dadd(200916.000000,140724.000000,97175.000000,103.558976)}
{pt3dadd(200952.000000,140736.000000,97075.000000,109.954348)}
{pt3dadd(201012.000000,140712.000000,96975.000000,110.941591)}
{pt3dadd(201060.000000,140748.000000,96900.000000,119.919963)}
{pt3dadd(201072.000000,140796.000000,96800.000000,119.919963)}
{pt3dadd(201096.000000,140796.000000,96725.000000,120.907206)}
{pt3dadd(201072.000000,140748.000000,96600.000000,117.475914)}
{pt3dadd(201084.000000,140724.000000,96525.000000,116.488671)}
{pt3dadd(201096.000000,140700.000000,96425.000000,107.510299)}
{pt3dadd(201120.000000,140676.000000,96325.000000,101.782402)}
{pt3dadd(201180.000000,140724.000000,96250.000000,106.250299)}
{pt3dadd(201192.000000,140772.000000,96175.000000,112.264591)}
{pt3dadd(201192.000000,140832.000000,96050.000000,115.376873)}
{pt3dadd(201204.000000,140916.000000,96000.000000,123.032245)}
{pt3dadd(201204.000000,140988.000000,95900.000000,136.070552)}
{pt3dadd(201300.000000,141012.000000,95775.000000,141.501312)}
{pt3dadd(201348.000000,141072.000000,95675.000000,145.880608)}
{pt3dadd(201408.000000,141072.000000,95600.000000,153.654226)}
{pt3dadd(201528.000000,141072.000000,95500.000000,153.654226)}
{pt3dadd(201564.000000,141180.000000,95425.000000,145.083816)}
{pt3dadd(201564.000000,141240.000000,95325.000000,140.913056)}
{pt3dadd(201636.000000,141312.000000,95250.000000,130.519468)}
{pt3dadd(201720.000000,141336.000000,95175.000000,130.519468)}
{pt3dadd(201912.000000,141396.000000,95075.000000,134.690228)}
{pt3dadd(201936.000000,141516.000000,94925.000000,137.273228)}
{pt3dadd(201936.000000,141564.000000,94800.000000,139.985378)}
{pt3dadd(201876.000000,141480.000000,94650.000000,143.416670)}
{pt3dadd(201900.000000,141504.000000,94550.000000,133.518013)}
{pt3dadd(201924.000000,141540.000000,94425.000000,133.518013)}
{pt3dadd(201936.000000,141588.000000,94325.000000,125.479873)}
{pt3dadd(201960.000000,141624.000000,94225.000000,130.078133)}
{pt3dadd(201912.000000,141624.000000,94125.000000,138.648543)}
{pt3dadd(201888.000000,141564.000000,94050.000000,150.078736)}
{pt3dadd(201924.000000,141552.000000,93975.000000,148.620126)}
{pt3dadd(201888.000000,141576.000000,93875.000000,155.335266)}
{pt3dadd(201876.000000,141516.000000,93825.000000,144.421998)}
{pt3dadd(201912.000000,141468.000000,93750.000000,137.111588)}
{pt3dadd(201936.000000,141432.000000,93675.000000,132.732292)}
{pt3dadd(201996.000000,141396.000000,93450.000000,130.020142)}
{pt3dadd(202056.000000,141408.000000,93325.000000,128.760142)}
{pt3dadd(202032.000000,141468.000000,93200.000000,131.103000)}
{pt3dadd(202020.000000,141492.000000,93075.000000,136.805296)}
{pt3dadd(202008.000000,141468.000000,92950.000000,130.791004)}
{pt3dadd(202044.000000,141468.000000,92825.000000,130.791004)}
{pt3dadd(202008.000000,141408.000000,92725.000000,139.361414)}
{pt3dadd(202020.000000,141420.000000,92625.000000,155.209558)}
{pt3dadd(202020.000000,141432.000000,92525.000000,156.817672)}
{pt3dadd(202020.000000,141444.000000,92425.000000,162.831964)}
{pt3dadd(201996.000000,141468.000000,92350.000000,161.571964)}
{pt3dadd(202056.000000,141444.000000,92275.000000,154.261554)}
{pt3dadd(202032.000000,141432.000000,92200.000000,140.996410)}
{pt3dadd(202020.000000,141480.000000,92125.000000,136.398150)}
{pt3dadd(202020.000000,141528.000000,92050.000000,136.398150)}
{pt3dadd(202044.000000,141564.000000,91975.000000,140.370300)}
{pt3dadd(202032.000000,141612.000000,91900.000000,139.110300)}
{pt3dadd(201960.000000,141624.000000,91800.000000,133.096008)}
{pt3dadd(201960.000000,141672.000000,91725.000000,124.655961)}
{pt3dadd(201948.000000,141732.000000,91650.000000,117.605064)}
{pt3dadd(201960.000000,141720.000000,91550.000000,110.201622)}
{pt3dadd(201972.000000,141768.000000,91475.000000,104.746482)}
{pt3dadd(201948.000000,141804.000000,91375.000000,99.221919)}
{pt3dadd(201924.000000,141864.000000,91275.000000,99.221919)}
{pt3dadd(201912.000000,141996.000000,91100.000000,103.689816)}
{pt3dadd(201984.000000,142104.000000,91025.000000,102.653211)}
{pt3dadd(202056.000000,142236.000000,90925.000000,103.640454)}
{pt3dadd(202128.000000,142308.000000,90850.000000,111.396309)}
{pt3dadd(202140.000000,142428.000000,90775.000000,113.521348)}
{pt3dadd(202116.000000,142500.000000,90700.000000,112.321348)}
{pt3dadd(202116.000000,142500.000000,90600.000000,122.220005)}
{pt3dadd(202092.000000,142524.000000,90500.000000,125.487902)}
{pt3dadd(201996.000000,142584.000000,90425.000000,138.719782)}
{pt3dadd(202044.000000,142560.000000,90350.000000,132.918992)}
{pt3dadd(201984.000000,142620.000000,90250.000000,148.012464)}
{pt3dadd(201972.000000,142704.000000,90150.000000,143.841704)}
{pt3dadd(201960.000000,142788.000000,90050.000000,149.013854)}
{pt3dadd(202020.000000,142908.000000,89950.000000,129.691143)}
{pt3dadd(202092.000000,143052.000000,89875.000000,130.543960)}
{pt3dadd(202068.000000,143268.000000,89800.000000,116.650488)}
{pt3dadd(202140.000000,143496.000000,89750.000000,109.935348)}
{pt3dadd(202176.000000,143580.000000,89600.000000,102.531906)}
{pt3dadd(202200.000000,143700.000000,89525.000000,104.367597)}
{pt3dadd(202248.000000,143880.000000,89450.000000,101.929042)}
{pt3dadd(202224.000000,144084.000000,89375.000000,100.729042)}
{pt3dadd(202212.000000,144240.000000,89275.000000,99.788810)}
{pt3dadd(202248.000000,144444.000000,89200.000000,100.877244)}
{pt3dadd(202236.000000,144612.000000,89125.000000,102.901092)}
{pt3dadd(202224.000000,144744.000000,89025.000000,108.162581)}
{pt3dadd(202212.000000,144960.000000,88950.000000,99.633195)}
{pt3dadd(202188.000000,145200.000000,88900.000000,107.288567)}
{pt3dadd(202164.000000,145380.000000,88825.000000,102.340594)}
{pt3dadd(202068.000000,145512.000000,88825.000000,99.376514)}
{pt3dadd(201924.000000,145716.000000,88850.000000,106.427411)}
{pt3dadd(201864.000000,145872.000000,88850.000000,151.603597)}
{pt3dadd(201756.000000,146100.000000,88850.000000,175.037871)}
{pt3dadd(201696.000000,146508.000000,88900.000000,200.229254)}
{pt3dadd(201636.000000,146808.000000,89000.000000,216.883556)}
{pt3dadd(201576.000000,146796.000000,89150.000000,215.560556)}
{pt3dadd(201612.000000,146976.000000,89225.000000,175.032470)}
{pt3dadd(201600.000000,147108.000000,89350.000000,132.300000)}

{create adhoc10}
{access adhoc10}
{connect adhoc10(1), adhoc8(0)}
{nseg = 1}
{strdef color color = "White"}
{pt3dclear()}
{pt3dadd(199656.000000,141912.000000,99900.000000,145.860750)}
{pt3dadd(199920.000000,141456.000000,99575.000000,138.505257)}
{pt3dadd(200040.000000,141360.000000,99375.000000,138.735304)}
{pt3dadd(200112.000000,141312.000000,99275.000000,133.563154)}
{pt3dadd(200136.000000,141156.000000,99175.000000,122.132961)}
{pt3dadd(200148.000000,141060.000000,99075.000000,119.168881)}
{pt3dadd(200124.000000,140976.000000,98950.000000,115.196731)}
{pt3dadd(200172.000000,140940.000000,98825.000000,115.196731)}
{pt3dadd(200256.000000,140832.000000,98700.000000,116.396731)}
{pt3dadd(200328.000000,140820.000000,98550.000000,114.469256)}
{pt3dadd(200388.000000,140820.000000,98400.000000,114.469256)}
{pt3dadd(200364.000000,140736.000000,98300.000000,112.126398)}
{pt3dadd(200412.000000,140664.000000,98175.000000,113.449398)}
{pt3dadd(200460.000000,140700.000000,98025.000000,112.249398)}
{pt3dadd(200472.000000,140688.000000,97900.000000,119.904770)}
{pt3dadd(200544.000000,140640.000000,97825.000000,133.262438)}
{pt3dadd(200604.000000,140628.000000,97725.000000,142.567592)}
{pt3dadd(200688.000000,140568.000000,97625.000000,146.946888)}
{pt3dadd(200760.000000,140496.000000,97525.000000,153.577648)}
{pt3dadd(200700.000000,140448.000000,97450.000000,152.317648)}
{pt3dadd(200652.000000,140508.000000,97350.000000,147.938352)}
{pt3dadd(200640.000000,140460.000000,97275.000000,137.544764)}
{pt3dadd(200676.000000,140424.000000,97175.000000,133.165468)}
{pt3dadd(200700.000000,140400.000000,97100.000000,120.443877)}
{pt3dadd(200724.000000,140400.000000,97000.000000,112.300229)}
{pt3dadd(200772.000000,140376.000000,96925.000000,102.426398)}
{pt3dadd(200832.000000,140376.000000,96850.000000,98.566859)}
{pt3dadd(200916.000000,140400.000000,96800.000000,87.840211)}
{pt3dadd(200916.000000,140484.000000,96725.000000,95.131042)}
{pt3dadd(200952.000000,140484.000000,96650.000000,104.534690)}
{pt3dadd(201012.000000,140436.000000,96575.000000,113.085521)}
{pt3dadd(201060.000000,140412.000000,96500.000000,119.176352)}
{pt3dadd(201120.000000,140424.000000,96425.000000,128.580000)}
{pt3dadd(201168.000000,140424.000000,96350.000000,132.552150)}
{pt3dadd(201216.000000,140424.000000,96250.000000,136.722910)}
{pt3dadd(201252.000000,140436.000000,96150.000000,138.045910)}
{pt3dadd(201252.000000,140532.000000,96075.000000,134.778013)}
{pt3dadd(201240.000000,140544.000000,96000.000000,133.518013)}
{pt3dadd(201204.000000,140592.000000,95925.000000,134.976623)}
{pt3dadd(201192.000000,140616.000000,95825.000000,134.976623)}
{pt3dadd(201168.000000,140628.000000,95750.000000,136.365773)}
{pt3dadd(201192.000000,140616.000000,95675.000000,143.416670)}
{pt3dadd(201228.000000,140652.000000,95600.000000,145.999670)}
{pt3dadd(201252.000000,140676.000000,95525.000000,140.568910)}
{pt3dadd(201288.000000,140712.000000,95450.000000,137.721150)}
{pt3dadd(201348.000000,140784.000000,95350.000000,130.317708)}
{pt3dadd(201396.000000,140796.000000,95200.000000,123.266811)}
{pt3dadd(201648.000000,140964.000000,95075.000000,121.943811)}
{pt3dadd(201780.000000,141060.000000,94900.000000,121.943811)}
{pt3dadd(201804.000000,141120.000000,94750.000000,120.620811)}
{pt3dadd(201888.000000,141132.000000,94625.000000,122.852103)}
{pt3dadd(201912.000000,141120.000000,94500.000000,124.977142)}
{pt3dadd(201924.000000,141096.000000,94375.000000,119.249245)}
{pt3dadd(201936.000000,141120.000000,94250.000000,111.958414)}
{pt3dadd(201888.000000,141120.000000,94150.000000,106.230517)}
{pt3dadd(201912.000000,141060.000000,94050.000000,101.035145)}
{pt3dadd(201912.000000,141072.000000,93975.000000,101.035145)}
{pt3dadd(201888.000000,141096.000000,93900.000000,106.763042)}
{pt3dadd(201936.000000,141096.000000,93825.000000,118.026023)}
{pt3dadd(201924.000000,141084.000000,93750.000000,125.076920)}
{pt3dadd(201924.000000,141060.000000,93675.000000,129.129434)}
{pt3dadd(201912.000000,141048.000000,93625.000000,128.041000)}
{pt3dadd(201924.000000,140988.000000,93575.000000,122.313103)}
{pt3dadd(201948.000000,140928.000000,93525.000000,113.873056)}
{pt3dadd(201972.000000,140976.000000,93450.000000,110.090056)}
{pt3dadd(201996.000000,141036.000000,93375.000000,113.692914)}
{pt3dadd(202056.000000,141072.000000,93325.000000,112.656309)}
{pt3dadd(202056.000000,141048.000000,93275.000000,111.669066)}
{pt3dadd(202056.000000,141048.000000,93200.000000,112.705671)}
{pt3dadd(202044.000000,141048.000000,93150.000000,116.488671)}
{pt3dadd(202044.000000,141084.000000,93075.000000,111.797379)}
{pt3dadd(202104.000000,141024.000000,93025.000000,112.833984)}
{pt3dadd(202080.000000,141060.000000,92950.000000,120.872124)}
{pt3dadd(202092.000000,141084.000000,92875.000000,123.103416)}
{pt3dadd(202116.000000,141120.000000,92800.000000,123.103416)}
{pt3dadd(202092.000000,141108.000000,92750.000000,126.534708)}
{pt3dadd(202080.000000,141096.000000,92675.000000,129.966000)}
{pt3dadd(202044.000000,141060.000000,92600.000000,128.643000)}
{pt3dadd(202008.000000,141108.000000,92550.000000,126.411708)}
{pt3dadd(202020.000000,141120.000000,92475.000000,122.628708)}
{pt3dadd(202032.000000,141108.000000,92200.000000,121.428708)}
{pt3dadd(202008.000000,141192.000000,92025.000000,116.960811)}
{pt3dadd(202008.000000,141276.000000,91900.000000,116.960811)}
{pt3dadd(201984.000000,141300.000000,91775.000000,121.652103)}
{pt3dadd(201936.000000,141372.000000,91650.000000,118.384206)}
{pt3dadd(202008.000000,141408.000000,91550.000000,119.584206)}
{pt3dadd(201948.000000,141456.000000,91450.000000,120.620811)}
{pt3dadd(201924.000000,141552.000000,91350.000000,118.160811)}
{pt3dadd(201936.000000,141636.000000,91250.000000,115.700811)}
{pt3dadd(201912.000000,141732.000000,91125.000000,124.140858)}
{pt3dadd(201972.000000,141804.000000,91025.000000,131.103154)}
{pt3dadd(202044.000000,141816.000000,90925.000000,139.965206)}
{pt3dadd(202116.000000,141864.000000,90850.000000,145.137356)}
{pt3dadd(202116.000000,141960.000000,90750.000000,150.309506)}
{pt3dadd(202164.000000,141948.000000,90675.000000,151.768116)}
{pt3dadd(202248.000000,141912.000000,90575.000000,146.065820)}
{pt3dadd(202284.000000,141936.000000,90450.000000,140.635060)}
{pt3dadd(202332.000000,141972.000000,90375.000000,139.245910)}
{pt3dadd(202404.000000,141948.000000,90300.000000,135.273760)}
{pt3dadd(202380.000000,141984.000000,90200.000000,133.815150)}
{pt3dadd(202368.000000,142032.000000,90125.000000,129.123858)}
{pt3dadd(202368.000000,142068.000000,90000.000000,125.692566)}
{pt3dadd(202428.000000,142056.000000,89900.000000,119.678274)}
{pt3dadd(202368.000000,142104.000000,89800.000000,117.335416)}
{pt3dadd(202368.000000,142200.000000,89700.000000,109.931974)}
{pt3dadd(202344.000000,142188.000000,89500.000000,113.363266)}
{pt3dadd(202260.000000,142176.000000,89375.000000,118.054558)}
{pt3dadd(202320.000000,142176.000000,89225.000000,128.448146)}
{pt3dadd(202296.000000,142152.000000,89150.000000,136.221764)}
{pt3dadd(202188.000000,142152.000000,89100.000000,140.913056)}
{pt3dadd(202116.000000,142020.000000,89025.000000,140.913056)}
{pt3dadd(202080.000000,141972.000000,88925.000000,138.453056)}
{pt3dadd(202044.000000,141972.000000,88825.000000,125.095388)}
{pt3dadd(201996.000000,141960.000000,88700.000000,116.233336)}
{pt3dadd(201960.000000,141900.000000,88575.000000,112.630478)}
{pt3dadd(201876.000000,141876.000000,88425.000000,111.430478)}
{pt3dadd(201816.000000,141888.000000,88275.000000,118.061238)}
{pt3dadd(201780.000000,141900.000000,88175.000000,123.256610)}
{pt3dadd(201744.000000,141948.000000,88025.000000,124.345044)}
{pt3dadd(201684.000000,141972.000000,87925.000000,127.947902)}
{pt3dadd(201684.000000,141924.000000,87825.000000,124.680005)}
{pt3dadd(201720.000000,141948.000000,87725.000000,115.817953)}
{pt3dadd(201696.000000,141948.000000,87625.000000,111.562813)}
{pt3dadd(201708.000000,141936.000000,87525.000000,107.510299)}
{pt3dadd(201684.000000,141936.000000,87425.000000,98.959468)}
{pt3dadd(201672.000000,141888.000000,87325.000000,95.283717)}
{pt3dadd(201672.000000,141888.000000,87225.000000,89.759154)}
{pt3dadd(201672.000000,141864.000000,87125.000000,88.818922)}
{pt3dadd(201672.000000,141828.000000,87025.000000,89.759154)}
{pt3dadd(201672.000000,141804.000000,86925.000000,87.320599)}
{pt3dadd(201696.000000,141756.000000,86825.000000,90.033503)}
{pt3dadd(201744.000000,141684.000000,86750.000000,77.353070)}

{create adhoc11}
{access adhoc11}
{connect adhoc11(1), adhoc7(0)}
{nseg = 1}
{strdef color color = "White"}
{pt3dclear()}
{pt3dadd(201204.000000,142896.000000,100725.000000,168.852050)}
{pt3dadd(201168.000000,143196.000000,100950.000000,117.619370)}
{pt3dadd(200808.000000,143136.000000,101175.000000,105.537143)}
{pt3dadd(200484.000000,142968.000000,101325.000000,91.511593)}
{pt3dadd(200172.000000,142800.000000,101325.000000,89.925855)}
{pt3dadd(199932.000000,142620.000000,101325.000000,81.725406)}
{pt3dadd(199740.000000,142344.000000,101125.000000,79.402972)}
{pt3dadd(199656.000000,142224.000000,100975.000000,75.526106)}
{pt3dadd(199524.000000,142104.000000,100800.000000,69.813548)}
{pt3dadd(199452.000000,141900.000000,100550.000000,67.707032)}
{pt3dadd(199548.000000,141756.000000,100325.000000,70.194924)}
{pt3dadd(199524.000000,141636.000000,100125.000000,72.517358)}
{pt3dadd(199572.000000,141492.000000,99925.000000,80.253764)}
{pt3dadd(199704.000000,141384.000000,99775.000000,85.966321)}
{pt3dadd(199800.000000,141192.000000,99600.000000,96.602223)}
{pt3dadd(199956.000000,141024.000000,99425.000000,110.352920)}
{pt3dadd(200088.000000,140928.000000,99275.000000,125.458864)}
{pt3dadd(200088.000000,140784.000000,99075.000000,132.862306)}
{pt3dadd(200100.000000,140664.000000,98950.000000,131.922074)}
{pt3dadd(200124.000000,140628.000000,98825.000000,129.690782)}
{pt3dadd(200160.000000,140676.000000,98700.000000,120.712410)}
{pt3dadd(200184.000000,140664.000000,98575.000000,105.606466)}
{pt3dadd(200208.000000,140640.000000,98450.000000,91.904930)}
{pt3dadd(200256.000000,140556.000000,98325.000000,91.904930)}
{pt3dadd(200352.000000,140520.000000,98200.000000,87.192574)}
{pt3dadd(200388.000000,140436.000000,98075.000000,86.297115)}
{pt3dadd(200460.000000,140424.000000,97950.000000,87.149932)}
{pt3dadd(200436.000000,140400.000000,97825.000000,89.588487)}
{pt3dadd(200448.000000,140388.000000,97700.000000,87.028004)}
{pt3dadd(200544.000000,140340.000000,97600.000000,85.442266)}
{pt3dadd(200568.000000,140256.000000,97475.000000,86.337725)}
{pt3dadd(200520.000000,140208.000000,97350.000000,90.197264)}
{pt3dadd(200532.000000,140172.000000,97200.000000,94.056803)}
{pt3dadd(200580.000000,140148.000000,97075.000000,95.721827)}
{pt3dadd(200604.000000,140172.000000,96975.000000,96.495358)}
{pt3dadd(200592.000000,140196.000000,96875.000000,95.599899)}
{pt3dadd(200640.000000,140232.000000,96775.000000,93.576051)}
{pt3dadd(200724.000000,140256.000000,96675.000000,89.716512)}
{pt3dadd(200796.000000,140244.000000,96575.000000,92.539446)}
{pt3dadd(200892.000000,140268.000000,96500.000000,97.027404)}
{pt3dadd(200940.000000,140280.000000,96375.000000,99.850338)}
{pt3dadd(200964.000000,140268.000000,96250.000000,97.161830)}
{pt3dadd(200976.000000,140268.000000,96175.000000,96.309013)}
{pt3dadd(200976.000000,140220.000000,96075.000000,93.486079)}
{pt3dadd(201048.000000,140244.000000,95975.000000,91.558604)}
{pt3dadd(201084.000000,140268.000000,95875.000000,88.735670)}
{pt3dadd(201120.000000,140304.000000,95775.000000,87.149932)}
{pt3dadd(201120.000000,140292.000000,95675.000000,85.564194)}
{pt3dadd(201144.000000,140364.000000,95575.000000,84.711377)}
{pt3dadd(201144.000000,140412.000000,95475.000000,83.815918)}
{pt3dadd(201192.000000,140448.000000,95350.000000,82.963101)}
{pt3dadd(201264.000000,140424.000000,95225.000000,86.297115)}
{pt3dadd(201372.000000,140448.000000,95100.000000,87.070646)}
{pt3dadd(201492.000000,140496.000000,95025.000000,86.258439)}
{pt3dadd(201492.000000,140496.000000,94900.000000,83.083188)}
{pt3dadd(201528.000000,140532.000000,94750.000000,87.795544)}
{pt3dadd(201648.000000,140640.000000,94600.000000,90.759624)}
{pt3dadd(201780.000000,140748.000000,94450.000000,92.424648)}
{pt3dadd(201876.000000,140880.000000,94250.000000,94.985131)}
{pt3dadd(201804.000000,140844.000000,94100.000000,99.055841)}
{pt3dadd(201924.000000,140796.000000,94025.000000,95.196302)}
{pt3dadd(201960.000000,140748.000000,93900.000000,92.232222)}
{pt3dadd(202020.000000,140712.000000,93800.000000,96.091761)}
{pt3dadd(202044.000000,140688.000000,93675.000000,92.757747)}
{pt3dadd(202032.000000,140724.000000,93525.000000,90.197264)}
{pt3dadd(202032.000000,140712.000000,93400.000000,87.758709)}
{pt3dadd(202056.000000,140700.000000,93275.000000,87.758709)}
{pt3dadd(202032.000000,140712.000000,93150.000000,84.794629)}
{pt3dadd(202080.000000,140748.000000,93000.000000,88.128643)}
{pt3dadd(202092.000000,140820.000000,92875.000000,89.793667)}
{pt3dadd(202152.000000,140832.000000,92775.000000,90.567198)}
{pt3dadd(202128.000000,140832.000000,92650.000000,82.757246)}
{pt3dadd(202020.000000,140856.000000,92525.000000,79.423232)}
{pt3dadd(201972.000000,140892.000000,92400.000000,76.089218)}
{pt3dadd(202020.000000,140904.000000,92250.000000,74.424194)}
{pt3dadd(201960.000000,140940.000000,92125.000000,74.424194)}
{pt3dadd(201900.000000,140976.000000,92000.000000,82.234146)}
{pt3dadd(201948.000000,141000.000000,91850.000000,90.763532)}
{pt3dadd(201996.000000,141060.000000,91725.000000,96.025021)}
{pt3dadd(201984.000000,141096.000000,91600.000000,103.780876)}
{pt3dadd(201960.000000,141156.000000,91500.000000,109.305439)}
{pt3dadd(201972.000000,141168.000000,91350.000000,112.269519)}
{pt3dadd(202032.000000,141144.000000,91200.000000,99.813930)}
{pt3dadd(202008.000000,141216.000000,91050.000000,94.552441)}
{pt3dadd(202020.000000,141252.000000,90950.000000,92.321149)}
{pt3dadd(202080.000000,141372.000000,90825.000000,94.552441)}
{pt3dadd(202164.000000,141420.000000,90700.000000,94.552441)}
{pt3dadd(202152.000000,141480.000000,90525.000000,98.478644)}
{pt3dadd(202236.000000,141540.000000,90400.000000,97.741948)}
{pt3dadd(202332.000000,141612.000000,90275.000000,109.743650)}
{pt3dadd(202332.000000,141744.000000,90100.000000,117.905946)}
{pt3dadd(202320.000000,141696.000000,89950.000000,122.597238)}
{pt3dadd(202260.000000,141756.000000,89825.000000,125.035793)}
{pt3dadd(202236.000000,141780.000000,89675.000000,129.106503)}
{pt3dadd(202164.000000,141840.000000,89550.000000,115.080953)}
{pt3dadd(202092.000000,141888.000000,89400.000000,99.162802)}
{pt3dadd(201996.000000,141900.000000,89250.000000,89.759154)}
{pt3dadd(201912.000000,141912.000000,89100.000000,88.408929)}
{pt3dadd(201912.000000,141936.000000,88950.000000,85.281760)}

{create adhoc12}
{access adhoc12}
{connect adhoc12(1), adhoc4(0)}
{nseg = 1}
{strdef color color = "White"}
{pt3dclear()}
{pt3dadd(194004.000000,161460.000000,109800.000000,351.031280)}
{pt3dadd(193284.000000,165420.000000,110900.000000,432.115023)}
{pt3dadd(193032.000000,165240.000000,111400.000000,487.986202)}
{pt3dadd(192984.000000,164808.000000,111625.000000,543.860292)}
{pt3dadd(192888.000000,164784.000000,111825.000000,566.214026)}
{pt3dadd(192816.000000,164844.000000,111950.000000,613.262240)}
{pt3dadd(192636.000000,164796.000000,112050.000000,613.262240)}
{pt3dadd(192588.000000,164868.000000,112150.000000,592.986746)}
{pt3dadd(192504.000000,164760.000000,112225.000000,575.819352)}
{pt3dadd(192240.000000,164796.000000,112325.000000,558.651958)}
{pt3dadd(192132.000000,164700.000000,112400.000000,535.180550)}
{pt3dadd(192024.000000,164472.000000,112650.000000,529.734908)}
{pt3dadd(192048.000000,164412.000000,112775.000000,550.010402)}
{pt3dadd(191844.000000,164280.000000,112900.000000,561.173970)}
{pt3dadd(191856.000000,164424.000000,113025.000000,561.173970)}
{pt3dadd(191520.000000,164496.000000,113300.000000,555.987630)}
{pt3dadd(191448.000000,164364.000000,113450.000000,567.151198)}
{pt3dadd(191436.000000,164328.000000,113600.000000,578.872950)}
{pt3dadd(191544.000000,164640.000000,113675.000000,591.180790)}
{pt3dadd(191448.000000,164676.000000,113775.000000,585.994450)}
{pt3dadd(191508.000000,164640.000000,113875.000000,596.626432)}
{pt3dadd(193392.000000,165012.000000,113875.000000,714.293232)}
{pt3dadd(194124.000000,164292.000000,113875.000000,906.811666)}
{pt3dadd(194220.000000,162720.000000,113875.000000,1125.682466)}
{pt3dadd(194112.000000,162264.000000,114125.000000,1492.671334)}
{pt3dadd(194016.000000,162912.000000,114325.000000,1897.276540)}
{pt3dadd(193068.000000,163512.000000,114900.000000,2321.877160)}
{pt3dadd(192876.000000,163716.000000,115375.000000,2770.024320)}
{pt3dadd(192588.000000,164100.000000,116175.000000,3306.373460)}
{pt3dadd(192348.000000,165216.000000,116900.000000,3835.657980)}
{pt3dadd(192264.000000,165804.000000,117725.000000,4204.298480)}
{pt3dadd(191904.000000,166464.000000,118425.000000,4387.291940)}
{pt3dadd(190716.000000,165852.000000,119500.000000,4425.629200)}
{pt3dadd(189336.000000,165624.000000,120475.000000,4138.790380)}
{pt3dadd(188088.000000,165900.000000,121325.000000,3710.947980)}
{pt3dadd(186960.000000,165480.000000,122075.000000,3271.644120)}
{pt3dadd(185328.000000,163980.000000,122725.000000,2664.050040)}
{pt3dadd(185292.000000,164772.000000,123625.000000,1913.975280)}
/*{pt3dadd(184740.000000,163776.000000,124450.000000,1513.209800)}
{pt3dadd(183492.000000,163416.000000,125175.000000,821.252933)}
{pt3dadd(180960.000000,159672.000000,125700.000000,1000.000000)}*/

{create adhoc13}
{access adhoc13}
{connect adhoc13(1), adhoc3(0)}
{nseg = 1}
{strdef color color = "White"}
{pt3dclear()}
{pt3dadd(198780.000000,171588.000000,103350.000000,351.031280)}
{pt3dadd(198624.000000,172584.000000,103450.000000,271.633660)}
{pt3dadd(198708.000000,172884.000000,103325.000000,274.177700)}
{pt3dadd(198780.000000,173136.000000,103150.000000,274.177700)}
{pt3dadd(198732.000000,173376.000000,103025.000000,292.601264)}
{pt3dadd(198696.000000,173544.000000,102875.000000,305.729704)}
{pt3dadd(198720.000000,173616.000000,102750.000000,321.890488)}
{pt3dadd(198744.000000,173688.000000,102600.000000,308.105618)}
{pt3dadd(198768.000000,173760.000000,102475.000000,292.907802)}
{pt3dadd(198816.000000,173748.000000,102350.000000,270.276802)}
{pt3dadd(198876.000000,173748.000000,102200.000000,257.148362)}
{pt3dadd(198888.000000,173832.000000,102075.000000,248.477658)}
{pt3dadd(198888.000000,173940.000000,101925.000000,253.591824)}
{pt3dadd(198996.000000,174108.000000,101825.000000,262.262528)}
{pt3dadd(199092.000000,174264.000000,101700.000000,258.446264)}
{pt3dadd(199200.000000,174432.000000,101550.000000,243.090200)}
{pt3dadd(199296.000000,174588.000000,101450.000000,229.129904)}
{pt3dadd(199308.000000,174684.000000,101275.000000,219.377044)}
{pt3dadd(199308.000000,174792.000000,101125.000000,205.592174)}
{pt3dadd(199320.000000,175008.000000,100950.000000,215.878654)}
{pt3dadd(199332.000000,175212.000000,100800.000000,238.724798)}
{pt3dadd(199344.000000,175428.000000,100650.000000,275.079054)}
{pt3dadd(199356.000000,175632.000000,100525.000000,315.159620)}
{pt3dadd(199452.000000,175776.000000,100250.000000,350.601492)}
{pt3dadd(199464.000000,175896.000000,100075.000000,363.729932)}
{pt3dadd(199440.000000,176052.000000,99925.000000,363.729932)}
{pt3dadd(199428.000000,176124.000000,99775.000000,333.845892)}
{pt3dadd(199500.000000,176244.000000,99650.000000,296.028106)}
{pt3dadd(199716.000000,176316.000000,99525.000000,251.740104)}
{pt3dadd(199800.000000,176424.000000,99375.000000,236.348884)}
{pt3dadd(199764.000000,176544.000000,99225.000000,228.858804)}
{pt3dadd(199728.000000,176664.000000,99100.000000,231.234718)}
{pt3dadd(199692.000000,176784.000000,98975.000000,241.475218)}
{pt3dadd(199704.000000,176844.000000,98775.000000,252.816064)}
{pt3dadd(199620.000000,176928.000000,98625.000000,248.608628)}
{pt3dadd(199572.000000,177012.000000,98525.000000,256.098708)}
{pt3dadd(199524.000000,177144.000000,98400.000000,251.460014)}
{pt3dadd(199416.000000,177216.000000,98250.000000,246.090144)}
{pt3dadd(199176.000000,177348.000000,98100.000000,246.090144)}
{pt3dadd(199032.000000,177636.000000,98000.000000,260.050440)}
{pt3dadd(199068.000000,177732.000000,97825.000000,260.050440)}
{pt3dadd(199008.000000,178152.000000,97875.000000,255.843004)}
{pt3dadd(198960.000000,178344.000000,97975.000000,248.709594)}
{pt3dadd(198972.000000,178560.000000,97975.000000,243.838964)}
{pt3dadd(198972.000000,178704.000000,97975.000000,234.086104)}
{pt3dadd(199032.000000,178848.000000,98000.000000,224.333244)}
{pt3dadd(199080.000000,178968.000000,98025.000000,235.674090)}
{pt3dadd(199104.000000,179076.000000,98075.000000,245.426950)}
{pt3dadd(199128.000000,179196.000000,98125.000000,258.555390)}
{pt3dadd(199104.000000,179316.000000,98150.000000,273.946610)}
{pt3dadd(199080.000000,179436.000000,98175.000000,289.337830)}
{pt3dadd(199056.000000,179556.000000,98175.000000,286.843114)}
{pt3dadd(199032.000000,179688.000000,98200.000000,279.353034)}
{pt3dadd(199020.000000,179964.000000,98200.000000,261.806786)}
{pt3dadd(199008.000000,180132.000000,98125.000000,242.208130)}
{pt3dadd(198960.000000,180324.000000,98075.000000,236.569770)}
{pt3dadd(198900.000000,180552.000000,98075.000000,250.354640)}
{pt3dadd(198744.000000,180720.000000,98125.000000,263.483080)}
{pt3dadd(198732.000000,180972.000000,98150.000000,290.588784)}
{pt3dadd(198672.000000,181152.000000,98175.000000,313.219784)}
{pt3dadd(198612.000000,181320.000000,98175.000000,313.219784)}
{pt3dadd(198552.000000,181512.000000,98175.000000,294.796220)}
{pt3dadd(198456.000000,181704.000000,98200.000000,277.249972)}
{pt3dadd(198324.000000,181932.000000,98250.000000,256.937990)}
{pt3dadd(198156.000000,182112.000000,98325.000000,243.153120)}
{pt3dadd(198192.000000,182316.000000,98350.000000,233.400260)}
{pt3dadd(198192.000000,182496.000000,98375.000000,227.238152)}
{pt3dadd(198108.000000,182652.000000,98425.000000,234.031874)}
{pt3dadd(197916.000000,182820.000000,98400.000000,234.031874)}
{pt3dadd(197640.000000,182976.000000,98450.000000,236.526590)}
{pt3dadd(197628.000000,183108.000000,98550.000000,236.526590)}
{pt3dadd(197640.000000,183264.000000,98625.000000,240.533670)}
{pt3dadd(197640.000000,183396.000000,98600.000000,240.533670)}
{pt3dadd(197592.000000,183552.000000,98525.000000,245.647836)}
{pt3dadd(197568.000000,183708.000000,98475.000000,248.267286)}
{pt3dadd(197556.000000,183852.000000,98475.000000,250.530066)}
{pt3dadd(197556.000000,183984.000000,98425.000000,257.323788)}
{pt3dadd(197592.000000,184188.000000,98350.000000,252.685094)}
{pt3dadd(197604.000000,184344.000000,98400.000000,240.777206)}
{pt3dadd(197604.000000,184476.000000,98375.000000,238.157756)}
{pt3dadd(197640.000000,184812.000000,98325.000000,257.502500)}
{pt3dadd(197700.000000,184968.000000,98350.000000,281.324798)}
{pt3dadd(197700.000000,185124.000000,98375.000000,317.341734)}
{pt3dadd(197640.000000,185268.000000,98475.000000,355.513698)}
{pt3dadd(197664.000000,185388.000000,98525.000000,392.727662)}
{pt3dadd(197664.000000,185508.000000,98575.000000,429.591170)}
{pt3dadd(197580.000000,185652.000000,98625.000000,449.957698)}
{pt3dadd(197484.000000,185808.000000,98650.000000,462.768282)}
{pt3dadd(197460.000000,185952.000000,98625.000000,458.898166)}
{pt3dadd(197436.000000,186060.000000,98575.000000,446.697612)}
{pt3dadd(197424.000000,186216.000000,98575.000000,409.834104)}
{pt3dadd(197316.000000,186336.000000,98550.000000,370.759444)}
{pt3dadd(197280.000000,186456.000000,98450.000000,329.065334)}
{pt3dadd(197232.000000,186552.000000,98375.000000,296.918514)}
{pt3dadd(197184.000000,186648.000000,98275.000000,264.771694)}
{pt3dadd(197076.000000,186744.000000,98275.000000,245.426950)}
{pt3dadd(197004.000000,186864.000000,98300.000000,235.674090)}
{pt3dadd(197016.000000,186984.000000,98300.000000,230.803460)}
{pt3dadd(196932.000000,187104.000000,98350.000000,233.066240)}
{pt3dadd(196932.000000,187188.000000,98350.000000,237.704934)}
{pt3dadd(196872.000000,187296.000000,98400.000000,235.442154)}
{pt3dadd(196788.000000,187392.000000,98450.000000,231.234718)}
{pt3dadd(196776.000000,187500.000000,98425.000000,244.363158)}
{pt3dadd(196788.000000,187620.000000,98375.000000,257.491598)}
{pt3dadd(196764.000000,187728.000000,98400.000000,271.276468)}
{pt3dadd(196752.000000,187860.000000,98500.000000,289.700032)}
{pt3dadd(196800.000000,187992.000000,98600.000000,301.040878)}
{pt3dadd(196812.000000,188124.000000,98600.000000,275.853008)}
{pt3dadd(196800.000000,188268.000000,98525.000000,275.853008)}
{pt3dadd(196788.000000,188472.000000,98525.000000,279.036968)}
{pt3dadd(196896.000000,188592.000000,98625.000000,273.116684)}
{pt3dadd(196896.000000,188724.000000,98700.000000,287.590798)}
{pt3dadd(196968.000000,188844.000000,98700.000000,304.520858)}
{pt3dadd(196980.000000,188940.000000,98650.000000,286.974610)}
{pt3dadd(197004.000000,189084.000000,98625.000000,253.881916)}
{pt3dadd(197220.000000,189240.000000,98675.000000,225.295206)}
{pt3dadd(197316.000000,189360.000000,98650.000000,197.525574)}
{pt3dadd(197304.000000,189492.000000,98650.000000,180.595514)}
{pt3dadd(197388.000000,189636.000000,98525.000000,162.694962)}
{pt3dadd(197424.000000,189768.000000,98475.000000,159.555312)}
{pt3dadd(197520.000000,189912.000000,98575.000000,161.013922)}
{pt3dadd(197652.000000,190008.000000,98625.000000,161.013922)}
{pt3dadd(197784.000000,190164.000000,98650.000000,164.648464)}
{pt3dadd(197904.000000,190332.000000,98650.000000,174.907394)}
{pt3dadd(197916.000000,190512.000000,98575.000000,172.059634)}
{pt3dadd(197808.000000,190656.000000,98500.000000,169.211874)}
{pt3dadd(197748.000000,190800.000000,98450.000000,157.901402)}
{pt3dadd(197652.000000,190908.000000,98400.000000,152.578340)}
{pt3dadd(197472.000000,191004.000000,98275.000000,137.851513)}
{pt3dadd(197340.000000,191112.000000,98200.000000,128.873141)}
{pt3dadd(197148.000000,191208.000000,98075.000000,118.999310)}
{pt3dadd(196944.000000,191352.000000,98050.000000,110.020938)}
{pt3dadd(196752.000000,191460.000000,97925.000000,100.250528)}
{pt3dadd(196728.000000,191544.000000,97750.000000,103.518425)}
{pt3dadd(196764.000000,191664.000000,97675.000000,107.570939)}
{pt3dadd(196728.000000,191772.000000,97475.000000,112.518912)}
{pt3dadd(196668.000000,191880.000000,97450.000000,115.482992)}
{pt3dadd(196512.000000,192012.000000,97400.000000,122.113752)}
{pt3dadd(196404.000000,192144.000000,97275.000000,128.744512)}
{pt3dadd(196344.000000,192264.000000,97125.000000,129.887370)}
{pt3dadd(196344.000000,192384.000000,96950.000000,134.813228)}
{pt3dadd(196236.000000,192516.000000,96925.000000,138.244520)}
{pt3dadd(196104.000000,192636.000000,96850.000000,134.073760)}
{pt3dadd(195996.000000,192756.000000,96725.000000,134.073760)}
{pt3dadd(195936.000000,192900.000000,96600.000000,137.856760)}
{pt3dadd(195888.000000,193032.000000,96475.000000,137.856760)}
{pt3dadd(195792.000000,193152.000000,96425.000000,140.439760)}
{pt3dadd(195756.000000,193260.000000,96375.000000,143.151910)}
{pt3dadd(195684.000000,193380.000000,96300.000000,140.304150)}
{pt3dadd(195624.000000,193500.000000,96175.000000,140.304150)}
{pt3dadd(195516.000000,193608.000000,96075.000000,143.151910)}
{pt3dadd(195480.000000,193740.000000,96025.000000,143.151910)}
{pt3dadd(195456.000000,193860.000000,95925.000000,134.711863)}
{pt3dadd(195324.000000,193980.000000,95825.000000,123.173008)}
{pt3dadd(195168.000000,194112.000000,95800.000000,116.122111)}
{pt3dadd(195108.000000,194256.000000,95750.000000,105.236211)}
{pt3dadd(195096.000000,194376.000000,95550.000000,103.913211)}
{pt3dadd(195096.000000,194520.000000,95375.000000,101.985736)}
{pt3dadd(195048.000000,194664.000000,95250.000000,108.598733)}
{pt3dadd(194988.000000,194748.000000,95075.000000,109.635338)}
{pt3dadd(195024.000000,194880.000000,94900.000000,117.673478)}
{pt3dadd(195012.000000,195072.000000,94925.000000,121.844238)}
{pt3dadd(195036.000000,195228.000000,94900.000000,130.822610)}
{pt3dadd(194868.000000,195312.000000,94900.000000,133.165468)}
{pt3dadd(194856.000000,195432.000000,94875.000000,137.856760)}
{pt3dadd(194916.000000,195528.000000,94825.000000,139.245910)}
{pt3dadd(194916.000000,195624.000000,94725.000000,132.615150)}
{pt3dadd(194940.000000,195708.000000,94600.000000,131.292150)}
{pt3dadd(194928.000000,195816.000000,94525.000000,133.875150)}
{pt3dadd(194880.000000,195936.000000,94375.000000,135.198150)}
{pt3dadd(194820.000000,196020.000000,94225.000000,138.188296)}
{pt3dadd(194628.000000,196140.000000,94175.000000,146.350592)}
{pt3dadd(194532.000000,196320.000000,93825.000000,152.052888)}
{pt3dadd(194400.000000,196452.000000,93500.000000,158.040298)}
{pt3dadd(194328.000000,196512.000000,93250.000000,162.419594)}
{pt3dadd(194244.000000,196572.000000,93125.000000,164.027708)}
{pt3dadd(194148.000000,196632.000000,93025.000000,164.027708)}
{pt3dadd(194100.000000,196680.000000,92925.000000,159.648412)}
{pt3dadd(194052.000000,196704.000000,92800.000000,147.646710)}
{pt3dadd(194004.000000,196764.000000,92725.000000,137.253122)}
{pt3dadd(193944.000000,196824.000000,92625.000000,124.214815)}
{pt3dadd(193896.000000,196908.000000,92525.000000,109.961688)}
{pt3dadd(193884.000000,197076.000000,92350.000000,98.422833)}
{pt3dadd(193944.000000,197208.000000,92250.000000,92.124739)}
{pt3dadd(193920.000000,197328.000000,92350.000000,85.826645)}
{pt3dadd(193872.000000,197460.000000,92300.000000,79.828460)}
{pt3dadd(193920.000000,197616.000000,92250.000000,78.163436)}
{pt3dadd(193956.000000,197772.000000,92225.000000,77.414462)}
{pt3dadd(193848.000000,197952.000000,92050.000000,81.220726)}

{create adhoc14}
{access adhoc14}
{connect adhoc14(1), adhoc2(0)}
{nseg = 1}
{strdef color color = "White"}
{pt3dclear()}
{pt3dadd(199500.000000,171456.000000,101650.000000,108.843540)}
{pt3dadd(200112.000000,171132.000000,101650.000000,126.901430)}
{pt3dadd(200136.000000,170916.000000,101400.000000,152.647932)}
{pt3dadd(200148.000000,170808.000000,101275.000000,173.979776)}
{pt3dadd(200160.000000,170796.000000,101150.000000,187.873248)}
{pt3dadd(200172.000000,170784.000000,101025.000000,199.749242)}
{pt3dadd(200184.000000,170736.000000,100925.000000,205.338456)}
{pt3dadd(200268.000000,170640.000000,100825.000000,196.452608)}
{pt3dadd(200316.000000,170604.000000,100725.000000,182.524206)}
{pt3dadd(200448.000000,170556.000000,100425.000000,174.061494)}
{pt3dadd(200556.000000,170508.000000,100300.000000,166.783760)}
{pt3dadd(200664.000000,170496.000000,100175.000000,157.897912)}
{pt3dadd(200640.000000,170520.000000,100075.000000,157.897912)}
{pt3dadd(200664.000000,170544.000000,99975.000000,160.888058)}
{pt3dadd(200832.000000,170460.000000,99900.000000,169.350770)}
{pt3dadd(200988.000000,170436.000000,99825.000000,171.039290)}
{pt3dadd(201132.000000,170424.000000,99750.000000,199.523794)}
{pt3dadd(201276.000000,170376.000000,99600.000000,241.078070)}
{pt3dadd(201492.000000,170316.000000,99500.000000,290.188290)}
{pt3dadd(201684.000000,170304.000000,99425.000000,328.497218)}
{pt3dadd(201768.000000,170280.000000,99325.000000,374.310804)}
{pt3dadd(201768.000000,170280.000000,99250.000000,403.266958)}
{pt3dadd(201780.000000,170256.000000,99150.000000,419.153340)}
{pt3dadd(201864.000000,170196.000000,99050.000000,427.483778)}
{pt3dadd(201864.000000,170112.000000,98975.000000,439.684332)}
{pt3dadd(201864.000000,170040.000000,98875.000000,439.684332)}
{pt3dadd(201876.000000,170040.000000,98800.000000,431.353894)}
{pt3dadd(201876.000000,170040.000000,98700.000000,419.153340)}
{pt3dadd(201876.000000,170052.000000,98600.000000,406.952786)}
{pt3dadd(201888.000000,170052.000000,98525.000000,391.066404)}
{pt3dadd(201888.000000,170004.000000,98450.000000,380.000144)}
{pt3dadd(201900.000000,169968.000000,98375.000000,365.590732)}
{pt3dadd(201924.000000,169872.000000,98300.000000,345.947192)}
{pt3dadd(201948.000000,169776.000000,98225.000000,326.303652)}
{pt3dadd(201960.000000,169680.000000,98125.000000,310.345940)}
{pt3dadd(201984.000000,169596.000000,98050.000000,300.786484)}
{pt3dadd(202068.000000,169524.000000,97975.000000,286.312370)}
{pt3dadd(202140.000000,169452.000000,97875.000000,273.809090)}
{pt3dadd(202176.000000,169404.000000,97800.000000,261.305810)}
{pt3dadd(202212.000000,169344.000000,97725.000000,248.802530)}
{pt3dadd(202224.000000,169284.000000,97625.000000,240.544720)}
{pt3dadd(202224.000000,169176.000000,97550.000000,233.411310)}
{pt3dadd(202260.000000,169092.000000,97475.000000,223.614660)}
{pt3dadd(202320.000000,169056.000000,97400.000000,217.452552)}
{pt3dadd(202356.000000,169044.000000,97325.000000,213.245116)}
{pt3dadd(202320.000000,168972.000000,97250.000000,196.315056)}
{pt3dadd(202332.000000,168912.000000,97175.000000,186.518406)}
{pt3dadd(202356.000000,168828.000000,97100.000000,188.291356)}
{pt3dadd(202380.000000,168744.000000,97000.000000,182.968294)}
{pt3dadd(202380.000000,168672.000000,96900.000000,168.380150)}
{pt3dadd(202380.000000,168660.000000,96825.000000,156.921220)}
{pt3dadd(202440.000000,168660.000000,96750.000000,153.624586)}
{pt3dadd(202488.000000,168576.000000,96675.000000,150.163116)}
{pt3dadd(202536.000000,168480.000000,96575.000000,151.851636)}
{pt3dadd(202620.000000,168336.000000,96500.000000,149.391636)}
{pt3dadd(202680.000000,168192.000000,96425.000000,154.563786)}
{pt3dadd(202716.000000,168096.000000,96150.000000,150.184490)}
{pt3dadd(202692.000000,168204.000000,96000.000000,147.044840)}
{pt3dadd(202704.000000,168216.000000,95850.000000,143.748206)}
{pt3dadd(202716.000000,168180.000000,95725.000000,141.516914)}
{pt3dadd(202680.000000,168024.000000,95650.000000,144.507060)}
{pt3dadd(202716.000000,167928.000000,95575.000000,147.354820)}
{pt3dadd(202704.000000,167904.000000,95475.000000,150.494470)}
{pt3dadd(202680.000000,167880.000000,95400.000000,159.380318)}
{pt3dadd(202788.000000,167880.000000,95300.000000,174.843490)}
{pt3dadd(202860.000000,167880.000000,95175.000000,171.853344)}
{pt3dadd(202968.000000,167820.000000,95075.000000,171.853344)}
{pt3dadd(203016.000000,167868.000000,94975.000000,160.940076)}
{pt3dadd(202932.000000,167748.000000,94900.000000,140.624035)}
{pt3dadd(202908.000000,167712.000000,94825.000000,132.564305)}
{pt3dadd(202896.000000,167688.000000,94750.000000,132.564305)}
{pt3dadd(202848.000000,167556.000000,94675.000000,125.933545)}
{pt3dadd(202800.000000,167448.000000,94600.000000,128.276403)}
{pt3dadd(202752.000000,167364.000000,94525.000000,138.175060)}
{pt3dadd(202740.000000,167328.000000,94450.000000,141.165206)}
{pt3dadd(202824.000000,167268.000000,94350.000000,138.453056)}
{pt3dadd(202836.000000,167220.000000,94250.000000,143.625206)}
{pt3dadd(202836.000000,167184.000000,94175.000000,147.597356)}
{pt3dadd(202872.000000,167160.000000,94100.000000,146.138746)}
{pt3dadd(202848.000000,167088.000000,93975.000000,141.759450)}
{pt3dadd(202872.000000,166992.000000,93900.000000,144.471600)}
{pt3dadd(202956.000000,166896.000000,93825.000000,140.499450)}
{pt3dadd(202980.000000,166848.000000,93675.000000,140.499450)}
{pt3dadd(203028.000000,166752.000000,93575.000000,141.958060)}
{pt3dadd(203016.000000,166728.000000,93500.000000,146.337356)}
{pt3dadd(203064.000000,166656.000000,93400.000000,147.795966)}
{pt3dadd(203124.000000,166584.000000,93325.000000,154.758262)}
{pt3dadd(203148.000000,166500.000000,93225.000000,154.758262)}
{pt3dadd(203112.000000,166392.000000,93175.000000,149.327502)}
{pt3dadd(203088.000000,166176.000000,92950.000000,141.165206)}
{pt3dadd(203232.000000,166020.000000,92750.000000,135.734446)}
{pt3dadd(203256.000000,165912.000000,92525.000000,123.317010)}
{pt3dadd(203316.000000,165816.000000,92350.000000,115.913568)}
{pt3dadd(203316.000000,165780.000000,92175.000000,115.913568)}
{pt3dadd(203460.000000,165684.000000,92025.000000,122.544328)}
{pt3dadd(203616.000000,165528.000000,91850.000000,129.506624)}
{pt3dadd(203760.000000,165300.000000,91700.000000,146.655093)}
{pt3dadd(203904.000000,165132.000000,91500.000000,160.811480)}

{create adhoc15}
{access adhoc15}
{connect adhoc15(1), adhoc14(0)}
{nseg = 1}
{strdef color color = "White"}
{pt3dclear()}
{pt3dadd(203904.000000,165132.000000,91500.000000,160.811480)}
{pt3dadd(203928.000000,165396.000000,91950.000000,131.249873)}
{pt3dadd(203808.000000,165636.000000,92225.000000,107.494662)}
{pt3dadd(203736.000000,165732.000000,92350.000000,89.545845)}

{create adhoc16}
{access adhoc16}
{connect adhoc16(1), adhoc14(0)}
{nseg = 1}
{strdef color color = "White"}
{pt3dclear()}
{pt3dadd(203904.000000,165132.000000,91500.000000,160.811480)}
{pt3dadd(204060.000000,164808.000000,91300.000000,166.305870)}
{pt3dadd(204024.000000,164616.000000,91100.000000,170.701382)}
{pt3dadd(203988.000000,164484.000000,90950.000000,183.794666)}
{pt3dadd(203940.000000,164328.000000,90850.000000,182.106146)}
{pt3dadd(203880.000000,164172.000000,90700.000000,177.726850)}
{pt3dadd(203796.000000,164064.000000,90575.000000,166.267920)}
{pt3dadd(203712.000000,163956.000000,90450.000000,157.268990)}
{pt3dadd(203628.000000,163728.000000,90325.000000,136.013410)}
{pt3dadd(203568.000000,163572.000000,90200.000000,131.415150)}
{pt3dadd(203508.000000,163512.000000,90075.000000,125.400858)}
{pt3dadd(203460.000000,163392.000000,89975.000000,123.169566)}
{pt3dadd(203472.000000,163296.000000,89850.000000,125.881716)}
{pt3dadd(203424.000000,163092.000000,89750.000000,121.182610)}
{pt3dadd(203436.000000,162960.000000,89625.000000,145.860750)}

{create adhoc17}
{access adhoc17}
{connect adhoc17(1), adhoc16(0)}
{nseg = 1}
{strdef color color = "White"}
{pt3dclear()}
{pt3dadd(203436.000000,162960.000000,89625.000000,145.860750)}
{pt3dadd(203412.000000,162828.000000,89500.000000,160.081037)}
{pt3dadd(203496.000000,162696.000000,89350.000000,170.867176)}
{pt3dadd(203472.000000,162528.000000,89250.000000,175.465436)}
{pt3dadd(203508.000000,162252.000000,89100.000000,179.844732)}
{pt3dadd(203580.000000,162168.000000,88975.000000,172.913556)}
{pt3dadd(203592.000000,161964.000000,88875.000000,172.913556)}
{pt3dadd(203640.000000,161892.000000,88775.000000,178.236618)}
{pt3dadd(203652.000000,161820.000000,88675.000000,183.559680)}
{pt3dadd(203688.000000,161748.000000,88600.000000,190.490856)}
{pt3dadd(203712.000000,161664.000000,88525.000000,199.376704)}
{pt3dadd(203724.000000,161568.000000,88450.000000,199.376704)}
{pt3dadd(203700.000000,161460.000000,88400.000000,199.376704)}
{pt3dadd(203748.000000,161400.000000,88325.000000,201.331376)}
{pt3dadd(203736.000000,161244.000000,88275.000000,196.008314)}
{pt3dadd(203760.000000,161112.000000,88225.000000,188.730580)}
{pt3dadd(203748.000000,160860.000000,88025.000000,178.313196)}
{pt3dadd(203640.000000,160668.000000,87825.000000,169.850484)}
{pt3dadd(203652.000000,160428.000000,87725.000000,159.433100)}
{pt3dadd(203628.000000,160320.000000,87600.000000,159.433100)}
{pt3dadd(203592.000000,160188.000000,87525.000000,159.433100)}
{pt3dadd(203532.000000,159984.000000,87425.000000,159.433100)}
{pt3dadd(203484.000000,159792.000000,87350.000000,156.585340)}
{pt3dadd(203472.000000,159660.000000,87225.000000,152.414580)}
{pt3dadd(203424.000000,159528.000000,87125.000000,146.427170)}
{pt3dadd(203352.000000,159396.000000,87050.000000,140.439760)}
{pt3dadd(203352.000000,159264.000000,86900.000000,137.592000)}
{pt3dadd(203268.000000,159048.000000,86775.000000,137.592000)}
{pt3dadd(203268.000000,159036.000000,86725.000000,131.864103)}
{pt3dadd(203220.000000,158856.000000,86550.000000,126.938245)}
{pt3dadd(203172.000000,158640.000000,86375.000000,125.615245)}
{pt3dadd(203268.000000,158448.000000,86200.000000,128.463005)}
{pt3dadd(203364.000000,158292.000000,86025.000000,124.680005)}
{pt3dadd(203400.000000,158232.000000,85875.000000,130.407902)}
{pt3dadd(203388.000000,158124.000000,85725.000000,135.333760)}
{pt3dadd(203460.000000,157944.000000,85625.000000,142.644170)}
{pt3dadd(203448.000000,157788.000000,85525.000000,145.783820)}
{pt3dadd(203472.000000,157584.000000,85425.000000,152.414580)}
{pt3dadd(203472.000000,157452.000000,85325.000000,158.116876)}
{pt3dadd(203472.000000,157392.000000,85200.000000,164.104286)}
{pt3dadd(203496.000000,157308.000000,85100.000000,164.104286)}
{pt3dadd(203484.000000,157128.000000,85025.000000,158.116876)}
{pt3dadd(203472.000000,156936.000000,84925.000000,161.256526)}
{pt3dadd(203472.000000,156720.000000,84850.000000,159.724990)}
{pt3dadd(203496.000000,156600.000000,84750.000000,155.126730)}
{pt3dadd(203460.000000,156456.000000,84650.000000,150.528470)}
{pt3dadd(203424.000000,156276.000000,84575.000000,149.205470)}
{pt3dadd(203436.000000,156132.000000,84500.000000,143.218060)}
{pt3dadd(203400.000000,156000.000000,84425.000000,137.787300)}
{pt3dadd(203388.000000,155844.000000,84275.000000,128.360010)}
{pt3dadd(203364.000000,155688.000000,84200.000000,117.992488)}
{pt3dadd(203352.000000,155568.000000,84100.000000,110.337116)}
{pt3dadd(203340.000000,155376.000000,84025.000000,106.554116)}
{pt3dadd(203376.000000,155148.000000,83950.000000,109.137116)}
{pt3dadd(203460.000000,155004.000000,83875.000000,108.196884)}
{pt3dadd(203532.000000,154896.000000,83750.000000,113.392256)}
{pt3dadd(203688.000000,154596.000000,83625.000000,119.787628)}
{pt3dadd(203796.000000,154332.000000,83500.000000,119.787628)}
{pt3dadd(203856.000000,154152.000000,83325.000000,121.176778)}
{pt3dadd(203844.000000,153912.000000,83175.000000,120.281319)}
{pt3dadd(203844.000000,153744.000000,82950.000000,121.481319)}
{pt3dadd(203928.000000,153600.000000,82800.000000,122.741319)}
{pt3dadd(203976.000000,153468.000000,82575.000000,126.524319)}
{pt3dadd(203832.000000,153252.000000,82400.000000,127.982929)}
{pt3dadd(203844.000000,152964.000000,82175.000000,136.533760)}
{pt3dadd(203832.000000,152640.000000,82000.000000,139.116760)}
{pt3dadd(203856.000000,152388.000000,81875.000000,137.856760)}
{pt3dadd(203796.000000,152208.000000,81700.000000,136.533760)}
{pt3dadd(203736.000000,152040.000000,81575.000000,136.533760)}
{pt3dadd(203652.000000,151824.000000,81475.000000,137.856760)}
{pt3dadd(203580.000000,151596.000000,81400.000000,132.930902)}
{pt3dadd(203496.000000,151344.000000,81350.000000,129.499610)}
{pt3dadd(203412.000000,151116.000000,81225.000000,121.844238)}
{pt3dadd(203328.000000,150888.000000,81125.000000,114.070620)}
{pt3dadd(203196.000000,150600.000000,81000.000000,106.032480)}
{pt3dadd(203232.000000,150540.000000,80875.000000,110.958338)}
{pt3dadd(203220.000000,150444.000000,80700.000000,116.972630)}
{pt3dadd(203196.000000,150360.000000,80575.000000,117.912862)}
{pt3dadd(203088.000000,150228.000000,80450.000000,120.255720)}
{pt3dadd(203052.000000,150072.000000,80325.000000,118.420029)}
{pt3dadd(203040.000000,149868.000000,80250.000000,107.693381)}
{pt3dadd(203064.000000,149688.000000,80150.000000,98.715009)}
{pt3dadd(203016.000000,149556.000000,80050.000000,106.753149)}
{pt3dadd(202980.000000,149352.000000,79975.000000,117.012079)}
{pt3dadd(202968.000000,149172.000000,79850.000000,128.275060)}
{pt3dadd(202944.000000,149040.000000,79775.000000,136.418708)}
{pt3dadd(202884.000000,148896.000000,79675.000000,140.471222)}
{pt3dadd(202800.000000,148764.000000,79575.000000,140.471222)}
{pt3dadd(202764.000000,148704.000000,79475.000000,132.795292)}
{pt3dadd(202764.000000,148620.000000,79400.000000,126.480284)}
{pt3dadd(202788.000000,148464.000000,79325.000000,123.048992)}
{pt3dadd(202764.000000,148356.000000,79250.000000,126.651850)}
{pt3dadd(202776.000000,148260.000000,79125.000000,126.651850)}
{pt3dadd(202776.000000,148116.000000,79050.000000,126.651850)}
{pt3dadd(202788.000000,148044.000000,78925.000000,128.994708)}
{pt3dadd(202776.000000,147936.000000,78825.000000,124.282352)}
{pt3dadd(202740.000000,147852.000000,78750.000000,112.556270)}
{pt3dadd(202776.000000,147768.000000,78650.000000,99.507188)}
{pt3dadd(202752.000000,147696.000000,78550.000000,87.194802)}
{pt3dadd(202668.000000,147576.000000,78475.000000,79.903971)}
{pt3dadd(202584.000000,147456.000000,78400.000000,82.592479)}
{pt3dadd(202512.000000,147348.000000,78300.000000,90.715703)}
{pt3dadd(202440.000000,147240.000000,78250.000000,98.838927)}
{pt3dadd(202404.000000,147132.000000,78150.000000,103.113173)}
{pt3dadd(202356.000000,147012.000000,78075.000000,100.674618)}
{pt3dadd(202308.000000,146868.000000,78000.000000,95.663676)}
{pt3dadd(202272.000000,146772.000000,77875.000000,94.575242)}
{pt3dadd(202248.000000,146688.000000,77725.000000,93.486808)}
{pt3dadd(202068.000000,146376.000000,77575.000000,105.904244)}
{pt3dadd(201996.000000,146172.000000,77450.000000,116.893630)}
{pt3dadd(201864.000000,145956.000000,77400.000000,139.391592)}
{pt3dadd(201816.000000,145764.000000,77225.000000,148.253644)}
{pt3dadd(201588.000000,145548.000000,77125.000000,158.647232)}
{pt3dadd(201432.000000,145248.000000,77050.000000,158.647232)}
{pt3dadd(201432.000000,145092.000000,76975.000000,167.646162)}
{pt3dadd(201348.000000,144948.000000,76800.000000,165.873212)}
{pt3dadd(201336.000000,144840.000000,76700.000000,172.474332)}
{pt3dadd(201288.000000,144660.000000,76625.000000,175.770966)}
{pt3dadd(201288.000000,144528.000000,76525.000000,174.239430)}
{pt3dadd(201324.000000,144372.000000,76425.000000,170.942796)}
{pt3dadd(201300.000000,144252.000000,76325.000000,169.254276)}
{pt3dadd(201312.000000,144156.000000,76225.000000,173.070540)}
{pt3dadd(201324.000000,144084.000000,76125.000000,169.773906)}
{pt3dadd(201348.000000,144024.000000,76025.000000,178.236618)}
{pt3dadd(201384.000000,143964.000000,75925.000000,183.306202)}
{pt3dadd(201492.000000,143856.000000,75875.000000,184.994722)}
{pt3dadd(201540.000000,143772.000000,75800.000000,181.178458)}
{pt3dadd(201528.000000,143664.000000,75700.000000,190.064306)}
{pt3dadd(201480.000000,143568.000000,75625.000000,190.064306)}
{pt3dadd(201468.000000,143508.000000,75550.000000,188.291356)}
{pt3dadd(201492.000000,143472.000000,75450.000000,183.463186)}
{pt3dadd(201504.000000,143376.000000,75400.000000,178.393602)}
{pt3dadd(201600.000000,143280.000000,75325.000000,172.804388)}
{pt3dadd(201636.000000,143244.000000,75175.000000,188.719356)}
{pt3dadd(201576.000000,142992.000000,75050.000000,213.907226)}
{pt3dadd(201492.000000,142800.000000,74975.000000,220.508346)}
{pt3dadd(201408.000000,142740.000000,74875.000000,225.577930)}
{pt3dadd(201324.000000,142692.000000,74775.000000,227.350880)}
{pt3dadd(201252.000000,142548.000000,74700.000000,197.542440)}
{pt3dadd(201120.000000,142464.000000,74650.000000,157.627743)}
{pt3dadd(201048.000000,142404.000000,74550.000000,142.164571)}
{pt3dadd(200976.000000,142308.000000,74475.000000,123.737319)}
{pt3dadd(200856.000000,142212.000000,74375.000000,104.414608)}
{pt3dadd(200796.000000,142116.000000,74300.000000,103.214608)}
{pt3dadd(200820.000000,142032.000000,74175.000000,103.214608)}
{pt3dadd(200808.000000,141948.000000,74100.000000,103.214608)}
{pt3dadd(200760.000000,141864.000000,74025.000000,106.178688)}
{pt3dadd(200688.000000,141768.000000,73950.000000,109.001622)}
{pt3dadd(200640.000000,141624.000000,73850.000000,109.001622)}
{pt3dadd(200592.000000,141492.000000,73775.000000,110.038227)}
{pt3dadd(200532.000000,141396.000000,73675.000000,110.038227)}
{pt3dadd(200496.000000,141288.000000,73575.000000,110.038227)}
{pt3dadd(200472.000000,141156.000000,73500.000000,117.089124)}
{pt3dadd(200400.000000,141036.000000,73425.000000,111.893752)}
{pt3dadd(200412.000000,140880.000000,73300.000000,106.369189)}
{pt3dadd(200388.000000,140748.000000,73200.000000,107.457623)}
{pt3dadd(200328.000000,140640.000000,73100.000000,103.598084)}
{pt3dadd(200280.000000,140556.000000,72950.000000,98.672226)}
{pt3dadd(200184.000000,140448.000000,72825.000000,100.599701)}
{pt3dadd(200124.000000,140340.000000,72700.000000,108.355556)}
{pt3dadd(199848.000000,139920.000000,72675.000000,106.230517)}
{pt3dadd(199716.000000,139596.000000,72550.000000,101.685446)}
{pt3dadd(199548.000000,139368.000000,72400.000000,95.072449)}
{pt3dadd(199524.000000,139176.000000,72250.000000,95.072449)}
{pt3dadd(199452.000000,138984.000000,72150.000000,91.804552)}
{pt3dadd(199332.000000,138720.000000,72050.000000,95.072449)}
{pt3dadd(199224.000000,138516.000000,71950.000000,110.880501)}
{pt3dadd(199224.000000,138252.000000,71875.000000,115.368459)}
{pt3dadd(199176.000000,138048.000000,71775.000000,121.096356)}
{pt3dadd(199092.000000,137904.000000,71675.000000,126.824253)}
{pt3dadd(199008.000000,137748.000000,71575.000000,124.592961)}
{pt3dadd(198840.000000,137604.000000,71475.000000,118.277953)}
{pt3dadd(198816.000000,137484.000000,71350.000000,122.745850)}
{pt3dadd(198780.000000,137292.000000,71275.000000,122.745850)}
{pt3dadd(198708.000000,137112.000000,71175.000000,126.916610)}
{pt3dadd(198660.000000,136884.000000,71100.000000,137.310198)}
{pt3dadd(198588.000000,136656.000000,71000.000000,143.625206)}
{pt3dadd(198504.000000,136476.000000,70925.000000,144.885206)}
{pt3dadd(198360.000000,136344.000000,70825.000000,143.625206)}
{pt3dadd(198204.000000,136212.000000,70750.000000,134.763154)}
{pt3dadd(198036.000000,135996.000000,70625.000000,127.800858)}
{pt3dadd(197844.000000,135780.000000,70525.000000,123.828708)}
{pt3dadd(197688.000000,135624.000000,70400.000000,117.113568)}
{pt3dadd(197604.000000,135516.000000,70275.000000,108.969920)}
{pt3dadd(197616.000000,135396.000000,70175.000000,108.969920)}
{pt3dadd(197592.000000,135288.000000,70050.000000,107.769920)}
{pt3dadd(197580.000000,135180.000000,69950.000000,109.029920)}
{pt3dadd(197472.000000,135060.000000,69875.000000,117.068060)}
{pt3dadd(197376.000000,134988.000000,69750.000000,125.211708)}
{pt3dadd(197328.000000,134892.000000,69625.000000,126.300142)}
{pt3dadd(197280.000000,134784.000000,69525.000000,128.760142)}
{pt3dadd(197244.000000,134676.000000,69450.000000,128.760142)}
{pt3dadd(197196.000000,134508.000000,69325.000000,126.177142)}
{pt3dadd(197172.000000,134388.000000,69175.000000,130.149292)}
{pt3dadd(197160.000000,134280.000000,69075.000000,129.060858)}
{pt3dadd(197136.000000,134136.000000,69000.000000,129.060858)}
{pt3dadd(197112.000000,133980.000000,68925.000000,125.458000)}
{pt3dadd(197040.000000,133824.000000,68850.000000,128.041000)}
{pt3dadd(196956.000000,133692.000000,68775.000000,126.651850)}
{pt3dadd(196872.000000,133584.000000,68650.000000,135.513902)}
{pt3dadd(196848.000000,133476.000000,68550.000000,134.253902)}
{pt3dadd(196812.000000,133356.000000,68450.000000,143.559056)}
{pt3dadd(196728.000000,133224.000000,68400.000000,132.020201)}
{pt3dadd(196680.000000,133116.000000,68275.000000,132.020201)}
{pt3dadd(196656.000000,133020.000000,68150.000000,132.020201)}
{pt3dadd(196668.000000,132912.000000,68075.000000,140.590611)}
{pt3dadd(196608.000000,132792.000000,67975.000000,142.198725)}
{pt3dadd(196596.000000,132720.000000,67850.000000,158.116876)}
{pt3dadd(196584.000000,132708.000000,67750.000000,158.116876)}
{pt3dadd(196512.000000,132696.000000,67650.000000,150.343258)}
{pt3dadd(196476.000000,132648.000000,67550.000000,140.572848)}
{pt3dadd(196488.000000,132600.000000,67425.000000,128.571146)}
{pt3dadd(196524.000000,132492.000000,67375.000000,117.140953)}
{pt3dadd(196488.000000,132408.000000,67300.000000,117.140953)}
{pt3dadd(196464.000000,132336.000000,67200.000000,124.914571)}
{pt3dadd(196452.000000,132252.000000,67100.000000,128.697571)}
{pt3dadd(196452.000000,132192.000000,67000.000000,126.673723)}
{pt3dadd(196464.000000,132120.000000,66850.000000,128.798762)}
{pt3dadd(196500.000000,132060.000000,66750.000000,120.760622)}
{pt3dadd(196464.000000,132048.000000,66650.000000,107.186214)}
{pt3dadd(196500.000000,132048.000000,66575.000000,108.575364)}
{pt3dadd(196512.000000,131904.000000,66450.000000,107.635132)}
{pt3dadd(196584.000000,131760.000000,66250.000000,108.388550)}
{pt3dadd(196608.000000,131652.000000,66125.000000,94.023140)}

{create adhoc18}
{access adhoc18}
{connect adhoc18(1), adhoc16(0)}
{nseg = 1}
{strdef color color = "White"}
{pt3dclear()}
{pt3dadd(203436.000000,162960.000000,89625.000000,145.860750)}
{pt3dadd(203760.000000,162324.000000,89275.000000,102.767401)}
{pt3dadd(203820.000000,161916.000000,89075.000000,98.461652)}
{pt3dadd(203784.000000,161592.000000,88875.000000,88.094130)}
{pt3dadd(203772.000000,161412.000000,88725.000000,95.849985)}
{pt3dadd(203736.000000,161256.000000,88600.000000,97.515009)}
{pt3dadd(203640.000000,161052.000000,88500.000000,94.826501)}
{pt3dadd(203616.000000,160848.000000,88350.000000,95.679318)}
{pt3dadd(203568.000000,160644.000000,88200.000000,93.931042)}
{pt3dadd(203520.000000,160440.000000,88050.000000,86.175187)}
{pt3dadd(203472.000000,160236.000000,87875.000000,84.510163)}
{pt3dadd(203448.000000,160032.000000,87700.000000,86.258439)}
{pt3dadd(203472.000000,159840.000000,87575.000000,84.593416)}
{pt3dadd(203448.000000,159540.000000,87425.000000,85.446233)}
{pt3dadd(203496.000000,159312.000000,87225.000000,85.446233)}
{pt3dadd(203460.000000,159144.000000,87025.000000,83.995766)}
{pt3dadd(203388.000000,158880.000000,86800.000000,81.220726)}

{create adhoc19}
{access adhoc19}
{connect adhoc19(1), adhoc1(0)}
{nseg = 1}
{strdef color color = "White"}
{pt3dclear()}
{pt3dadd(200544.000000,175356.000000,95375.000000,351.031280)}
{pt3dadd(200676.000000,175392.000000,95250.000000,274.753933)}
{pt3dadd(200820.000000,175488.000000,95075.000000,207.353171)}
{pt3dadd(200820.000000,175632.000000,94900.000000,170.917325)}
{pt3dadd(200856.000000,175668.000000,94775.000000,131.837221)}
{pt3dadd(200844.000000,175704.000000,94675.000000,131.837221)}
{pt3dadd(200856.000000,175752.000000,94525.000000,147.300393)}
{pt3dadd(200856.000000,175848.000000,94375.000000,163.800170)}
{pt3dadd(200856.000000,176040.000000,94300.000000,171.077904)}
{pt3dadd(200904.000000,176124.000000,94150.000000,186.395456)}
{pt3dadd(200988.000000,176268.000000,94050.000000,213.620896)}
{pt3dadd(201084.000000,176412.000000,93975.000000,228.778006)}
{pt3dadd(201132.000000,176592.000000,93850.000000,236.801706)}
{pt3dadd(201192.000000,176700.000000,93750.000000,245.647836)}
{pt3dadd(201252.000000,176808.000000,93650.000000,247.802864)}
{pt3dadd(201252.000000,176976.000000,93550.000000,235.894976)}
{pt3dadd(201240.000000,177156.000000,93450.000000,226.606538)}
{pt3dadd(201264.000000,177264.000000,93325.000000,233.739948)}
{pt3dadd(201252.000000,177372.000000,93250.000000,241.604534)}
{pt3dadd(201240.000000,177480.000000,93150.000000,256.995754)}
{pt3dadd(201228.000000,177588.000000,93000.000000,263.789476)}
{pt3dadd(201216.000000,177684.000000,92875.000000,263.789476)}
{pt3dadd(201192.000000,177780.000000,92800.000000,261.294760)}
{pt3dadd(201168.000000,177888.000000,92675.000000,253.430174)}
{pt3dadd(201072.000000,178032.000000,92575.000000,242.677648)}
{pt3dadd(201036.000000,178176.000000,92450.000000,235.883926)}
{pt3dadd(201120.000000,178164.000000,92350.000000,235.883926)}
{pt3dadd(201228.000000,178260.000000,92275.000000,219.760062)}
{pt3dadd(201228.000000,178344.000000,92175.000000,205.324718)}
{pt3dadd(201156.000000,178440.000000,92100.000000,194.523916)}
{pt3dadd(201096.000000,178500.000000,91975.000000,185.193774)}
{pt3dadd(201060.000000,178536.000000,91875.000000,175.863632)}
{pt3dadd(201024.000000,178620.000000,91800.000000,175.863632)}
{pt3dadd(201048.000000,178740.000000,91725.000000,174.175112)}
{pt3dadd(201072.000000,178788.000000,91625.000000,178.182192)}
{pt3dadd(201048.000000,178848.000000,91525.000000,191.930142)}
{pt3dadd(201000.000000,178932.000000,91425.000000,205.678092)}
{pt3dadd(200928.000000,179004.000000,91350.000000,212.955826)}
{pt3dadd(200808.000000,179064.000000,91250.000000,216.417296)}
{pt3dadd(200712.000000,179160.000000,91175.000000,203.947504)}
{pt3dadd(200592.000000,179256.000000,91075.000000,195.522616)}
{pt3dadd(200460.000000,179388.000000,91000.000000,185.236136)}
{pt3dadd(200280.000000,179580.000000,90925.000000,185.236136)}
{pt3dadd(200136.000000,179796.000000,90825.000000,191.104808)}
{pt3dadd(200016.000000,180012.000000,90675.000000,207.992408)}
{pt3dadd(199980.000000,180192.000000,90575.000000,209.947080)}
{pt3dadd(199944.000000,180312.000000,90450.000000,206.485610)}
{pt3dadd(199908.000000,180432.000000,90350.000000,204.530938)}
{pt3dadd(199872.000000,180528.000000,90275.000000,195.200796)}
{pt3dadd(199884.000000,180600.000000,90175.000000,178.313196)}
{pt3dadd(199800.000000,180708.000000,90100.000000,172.723982)}
{pt3dadd(199704.000000,180828.000000,90000.000000,178.047044)}
{pt3dadd(199704.000000,180960.000000,89900.000000,176.185452)}
{pt3dadd(199704.000000,181068.000000,89825.000000,181.508514)}
{pt3dadd(199704.000000,181152.000000,89725.000000,193.978306)}
{pt3dadd(199656.000000,181296.000000,89675.000000,199.567520)}
{pt3dadd(199608.000000,181452.000000,89600.000000,197.705928)}
{pt3dadd(199572.000000,181584.000000,89525.000000,192.636344)}
{pt3dadd(199572.000000,181656.000000,89450.000000,182.715022)}
{pt3dadd(199572.000000,181716.000000,89325.000000,171.776766)}
{pt3dadd(199620.000000,181836.000000,89225.000000,159.900772)}
{pt3dadd(199584.000000,181920.000000,89125.000000,149.128892)}
{pt3dadd(199524.000000,181992.000000,89025.000000,144.749596)}
{pt3dadd(199464.000000,182028.000000,88900.000000,143.360446)}
{pt3dadd(199440.000000,182100.000000,88800.000000,134.055292)}
{pt3dadd(199464.000000,182160.000000,88700.000000,132.666142)}
{pt3dadd(199392.000000,182268.000000,88625.000000,141.665072)}
{pt3dadd(199404.000000,182244.000000,88450.000000,156.982624)}
{pt3dadd(199440.000000,182208.000000,88350.000000,164.658554)}
{pt3dadd(199452.000000,182208.000000,88250.000000,189.319772)}
{pt3dadd(199440.000000,182268.000000,88200.000000,213.925762)}
{pt3dadd(199452.000000,182340.000000,88125.000000,228.361106)}
{pt3dadd(199476.000000,182484.000000,88075.000000,235.154828)}
{pt3dadd(199464.000000,182580.000000,87975.000000,257.454758)}
{pt3dadd(199500.000000,182676.000000,87900.000000,264.944838)}
{pt3dadd(199536.000000,182760.000000,87800.000000,262.450122)}
{pt3dadd(199536.000000,182820.000000,87700.000000,257.811428)}
{pt3dadd(199500.000000,182880.000000,87625.000000,247.010626)}
{pt3dadd(199500.000000,182940.000000,87525.000000,234.507346)}
{pt3dadd(199500.000000,183036.000000,87425.000000,222.599458)}
{pt3dadd(199476.000000,183180.000000,87350.000000,209.937064)}
{pt3dadd(199356.000000,183288.000000,87275.000000,196.843780)}
{pt3dadd(199260.000000,183432.000000,87175.000000,189.912604)}
{pt3dadd(199176.000000,183540.000000,87075.000000,175.287784)}
{pt3dadd(199104.000000,183648.000000,87000.000000,167.646162)}
{pt3dadd(199008.000000,183732.000000,86900.000000,167.646162)}
{pt3dadd(198960.000000,183852.000000,86800.000000,174.577338)}
{pt3dadd(198876.000000,183924.000000,86625.000000,179.646922)}
{pt3dadd(198792.000000,184008.000000,86500.000000,181.178458)}
{pt3dadd(198732.000000,184104.000000,86425.000000,181.178458)}
{pt3dadd(198732.000000,184164.000000,86275.000000,174.577338)}
{pt3dadd(198756.000000,184248.000000,86175.000000,163.266866)}
{pt3dadd(198744.000000,184332.000000,86100.000000,156.665746)}
{pt3dadd(198732.000000,184416.000000,86000.000000,155.134210)}
{pt3dadd(198720.000000,184488.000000,85900.000000,156.907160)}
{pt3dadd(198696.000000,184572.000000,85775.000000,152.736400)}
{pt3dadd(198732.000000,184704.000000,85700.000000,150.153400)}
{pt3dadd(198660.000000,184728.000000,85550.000000,142.379782)}
{pt3dadd(198564.000000,184716.000000,85475.000000,138.209022)}
{pt3dadd(198504.000000,184740.000000,85375.000000,124.977142)}
{pt3dadd(198408.000000,184776.000000,85275.000000,126.300142)}
{pt3dadd(198360.000000,184896.000000,85225.000000,125.100142)}
{pt3dadd(198312.000000,184980.000000,85125.000000,127.443000)}
{pt3dadd(198252.000000,185016.000000,85025.000000,130.155150)}
{pt3dadd(198168.000000,185040.000000,84950.000000,133.938150)}
{pt3dadd(198072.000000,185100.000000,84850.000000,138.317446)}
{pt3dadd(197988.000000,185148.000000,84775.000000,143.489596)}
{pt3dadd(197892.000000,185208.000000,84675.000000,155.521476)}
{pt3dadd(197796.000000,185268.000000,84600.000000,161.808256)}
{pt3dadd(197712.000000,185328.000000,84525.000000,171.257136)}
{pt3dadd(197616.000000,185400.000000,84425.000000,174.553770)}
{pt3dadd(197520.000000,185484.000000,84325.000000,179.152030)}
{pt3dadd(197424.000000,185556.000000,84200.000000,174.082446)}
{pt3dadd(197364.000000,185652.000000,84100.000000,169.254276)}
{pt3dadd(197304.000000,185772.000000,84025.000000,162.653156)}
{pt3dadd(197292.000000,185856.000000,83850.000000,154.977226)}
{pt3dadd(197304.000000,185916.000000,83700.000000,150.378966)}
{pt3dadd(197304.000000,185892.000000,83575.000000,150.378966)}
{pt3dadd(197304.000000,185952.000000,83500.000000,144.948206)}
{pt3dadd(197232.000000,185988.000000,83400.000000,142.100446)}
{pt3dadd(197148.000000,186000.000000,83300.000000,143.489596)}
{pt3dadd(197040.000000,186000.000000,83225.000000,144.948206)}
{pt3dadd(196944.000000,186000.000000,83175.000000,144.948206)}
{pt3dadd(196956.000000,185988.000000,83100.000000,148.920356)}
{pt3dadd(196956.000000,186012.000000,83000.000000,150.309506)}
{pt3dadd(196932.000000,186036.000000,82925.000000,151.768116)}
{pt3dadd(196896.000000,186084.000000,82850.000000,148.920356)}
{pt3dadd(196848.000000,186144.000000,82800.000000,144.541060)}
{pt3dadd(196752.000000,186156.000000,82750.000000,143.151910)}
{pt3dadd(196716.000000,186204.000000,82650.000000,136.836902)}
{pt3dadd(196680.000000,186216.000000,82575.000000,138.368438)}
{pt3dadd(196644.000000,186228.000000,82500.000000,134.585438)}
{pt3dadd(196596.000000,186276.000000,82450.000000,130.802438)}
{pt3dadd(196548.000000,186324.000000,82350.000000,127.019438)}
{pt3dadd(196512.000000,186348.000000,82225.000000,130.622296)}
{pt3dadd(196488.000000,186384.000000,82125.000000,124.920000)}
{pt3dadd(196416.000000,186396.000000,82050.000000,130.092150)}
{pt3dadd(196428.000000,186432.000000,81950.000000,133.875150)}
{pt3dadd(196404.000000,186432.000000,81875.000000,139.047300)}
{pt3dadd(196368.000000,186432.000000,81775.000000,140.370300)}
{pt3dadd(196332.000000,186432.000000,81700.000000,144.541060)}
{pt3dadd(196284.000000,186444.000000,81625.000000,147.531206)}
{pt3dadd(196236.000000,186444.000000,81550.000000,148.920356)}
{pt3dadd(196176.000000,186444.000000,81475.000000,147.531206)}
{pt3dadd(196128.000000,186492.000000,81375.000000,150.378966)}
{pt3dadd(196116.000000,186516.000000,81300.000000,148.920356)}
{pt3dadd(196104.000000,186540.000000,81225.000000,144.541060)}
{pt3dadd(196104.000000,186528.000000,81125.000000,144.541060)}
{pt3dadd(196104.000000,186528.000000,81025.000000,147.388820)}
{pt3dadd(196044.000000,186564.000000,80950.000000,147.388820)}
{pt3dadd(195996.000000,186576.000000,80875.000000,147.388820)}
{pt3dadd(195936.000000,186588.000000,80775.000000,150.236580)}
{pt3dadd(195864.000000,186600.000000,80700.000000,150.236580)}
{pt3dadd(195816.000000,186624.000000,80600.000000,147.388820)}
{pt3dadd(195756.000000,186624.000000,80525.000000,143.218060)}
{pt3dadd(195732.000000,186636.000000,80425.000000,141.828910)}
{pt3dadd(195696.000000,186648.000000,80325.000000,140.370300)}
{pt3dadd(195672.000000,186660.000000,80250.000000,140.370300)}
{pt3dadd(195648.000000,186672.000000,80150.000000,141.759450)}
{pt3dadd(195612.000000,186684.000000,80075.000000,143.082450)}
{pt3dadd(195588.000000,186696.000000,80000.000000,141.759450)}
{pt3dadd(195552.000000,186708.000000,79925.000000,141.759450)}
{pt3dadd(195528.000000,186720.000000,79875.000000,143.218060)}
{pt3dadd(195504.000000,186720.000000,79825.000000,143.218060)}
{pt3dadd(195468.000000,186732.000000,79775.000000,146.065820)}
{pt3dadd(195444.000000,186744.000000,79725.000000,147.388820)}
{pt3dadd(195408.000000,186756.000000,79675.000000,148.847430)}
{pt3dadd(195360.000000,186792.000000,79625.000000,148.847430)}
{pt3dadd(195288.000000,186828.000000,79550.000000,150.306040)}
{pt3dadd(195216.000000,186876.000000,79500.000000,150.306040)}
{pt3dadd(195144.000000,186936.000000,79450.000000,151.695190)}
{pt3dadd(195072.000000,186984.000000,79350.000000,147.524430)}
{pt3dadd(195036.000000,187020.000000,79250.000000,142.093670)}
{pt3dadd(195024.000000,187056.000000,79125.000000,137.922910)}
{pt3dadd(194964.000000,187068.000000,79025.000000,135.075150)}
{pt3dadd(194904.000000,187116.000000,78950.000000,129.903000)}
{pt3dadd(194844.000000,187188.000000,78875.000000,132.615150)}
{pt3dadd(194784.000000,187284.000000,78800.000000,132.615150)}
{pt3dadd(194640.000000,187344.000000,78700.000000,136.785910)}
{pt3dadd(194484.000000,187428.000000,78600.000000,139.633670)}
{pt3dadd(194532.000000,187500.000000,78475.000000,146.264430)}
{pt3dadd(194484.000000,187512.000000,78375.000000,147.723040)}
{pt3dadd(194424.000000,187500.000000,78275.000000,153.153800)}
{pt3dadd(194400.000000,187512.000000,78175.000000,156.293450)}
{pt3dadd(194376.000000,187548.000000,78075.000000,162.894570)}
{pt3dadd(194328.000000,187584.000000,77975.000000,171.357282)}
{pt3dadd(194268.000000,187632.000000,77900.000000,172.888818)}
{pt3dadd(194280.000000,187620.000000,77800.000000,176.028468)}
{pt3dadd(194232.000000,187632.000000,77725.000000,179.489938)}
{pt3dadd(194184.000000,187692.000000,77650.000000,183.306202)}
{pt3dadd(194244.000000,187764.000000,77575.000000,185.260874)}
{pt3dadd(194232.000000,187800.000000,77500.000000,198.354158)}
{pt3dadd(194208.000000,187812.000000,77425.000000,212.102108)}
{pt3dadd(194184.000000,187848.000000,77325.000000,235.517028)}
{pt3dadd(194148.000000,187836.000000,77225.000000,246.857874)}
{pt3dadd(194208.000000,187824.000000,77150.000000,248.910282)}
{pt3dadd(194268.000000,187860.000000,77075.000000,246.755254)}
{pt3dadd(194292.000000,187860.000000,76975.000000,236.468774)}
{pt3dadd(194316.000000,187848.000000,76900.000000,213.053854)}
{pt3dadd(194340.000000,187860.000000,76800.000000,194.435274)}
{pt3dadd(194376.000000,187884.000000,76700.000000,201.228996)}
{pt3dadd(194424.000000,187980.000000,76625.000000,203.384024)}
{pt3dadd(194484.000000,188052.000000,76550.000000,205.245616)}
{pt3dadd(194544.000000,188112.000000,76475.000000,211.114288)}
{pt3dadd(194580.000000,188136.000000,76375.000000,214.575758)}
{pt3dadd(194604.000000,188160.000000,76300.000000,201.913364)}
{pt3dadd(194628.000000,188184.000000,76200.000000,192.116714)}
{pt3dadd(194688.000000,188256.000000,76125.000000,183.654002)}
{pt3dadd(194688.000000,188280.000000,76025.000000,171.184210)}
{pt3dadd(194652.000000,188280.000000,75950.000000,155.721038)}
{pt3dadd(194688.000000,188280.000000,75850.000000,153.948088)}
{pt3dadd(194676.000000,188280.000000,75775.000000,152.259568)}
{pt3dadd(194544.000000,188316.000000,75675.000000,148.088808)}
{pt3dadd(194436.000000,188328.000000,75600.000000,151.228458)}
{pt3dadd(194424.000000,188316.000000,75500.000000,160.090510)}
{pt3dadd(194364.000000,188316.000000,75400.000000,155.262340)}
{pt3dadd(194400.000000,188364.000000,75325.000000,158.723810)}
{pt3dadd(194388.000000,188364.000000,75250.000000,164.426106)}
{pt3dadd(194400.000000,188532.000000,75100.000000,178.174056)}
{pt3dadd(194340.000000,188556.000000,74875.000000,188.591440)}
{pt3dadd(194076.000000,188580.000000,74750.000000,199.008824)}
{pt3dadd(193956.000000,188508.000000,74575.000000,202.825088)}
{pt3dadd(193920.000000,188484.000000,74450.000000,207.894672)}
{pt3dadd(193908.000000,188556.000000,74350.000000,201.424456)}
{pt3dadd(193896.000000,188640.000000,74275.000000,195.835242)}
{pt3dadd(193800.000000,188712.000000,74200.000000,185.417858)}
{pt3dadd(193692.000000,188772.000000,74125.000000,172.152714)}
{pt3dadd(193608.000000,188748.000000,74050.000000,165.551594)}
{pt3dadd(193572.000000,188724.000000,73975.000000,153.675600)}
{pt3dadd(193524.000000,188736.000000,73900.000000,145.999670)}
{pt3dadd(193464.000000,188724.000000,73825.000000,144.541060)}
{pt3dadd(193344.000000,188724.000000,73750.000000,141.958060)}
{pt3dadd(193344.000000,188760.000000,73675.000000,139.110300)}
{pt3dadd(193260.000000,188796.000000,73600.000000,143.708560)}
{pt3dadd(193164.000000,188784.000000,73525.000000,146.556320)}
{pt3dadd(193200.000000,188808.000000,73400.000000,141.384170)}
{pt3dadd(193188.000000,188784.000000,73325.000000,142.644170)}
{pt3dadd(193116.000000,188772.000000,73225.000000,137.718312)}
{pt3dadd(192996.000000,188772.000000,73175.000000,134.578662)}
{pt3dadd(192936.000000,188784.000000,73075.000000,134.578662)}
{pt3dadd(192900.000000,188808.000000,72975.000000,130.323522)}
{pt3dadd(192876.000000,188832.000000,72875.000000,131.646522)}
{pt3dadd(192804.000000,188856.000000,72825.000000,135.249380)}
{pt3dadd(192732.000000,188856.000000,72725.000000,136.780916)}
{pt3dadd(192624.000000,188844.000000,72650.000000,127.918864)}
{pt3dadd(192516.000000,188844.000000,72525.000000,134.634004)}
{pt3dadd(192468.000000,188856.000000,72425.000000,129.708146)}
{pt3dadd(192408.000000,188856.000000,72300.000000,127.248146)}
{pt3dadd(192348.000000,188844.000000,72225.000000,119.085850)}
{pt3dadd(192264.000000,188820.000000,72100.000000,123.777142)}
{pt3dadd(192276.000000,188796.000000,72000.000000,125.100142)}
{pt3dadd(192216.000000,188760.000000,71900.000000,130.026000)}
{pt3dadd(192180.000000,188748.000000,71800.000000,135.198150)}
{pt3dadd(192168.000000,188712.000000,71650.000000,141.828910)}
{pt3dadd(192180.000000,188724.000000,71500.000000,150.827840)}
{pt3dadd(192108.000000,188748.000000,71375.000000,147.044840)}
{pt3dadd(192060.000000,188796.000000,71275.000000,141.030548)}
{pt3dadd(192012.000000,188808.000000,71175.000000,133.627106)}
{pt3dadd(191976.000000,188868.000000,71050.000000,120.905515)}
{pt3dadd(191976.000000,188832.000000,70950.000000,105.191445)}
{pt3dadd(191928.000000,188820.000000,70800.000000,102.960153)}
{pt3dadd(191880.000000,188832.000000,70675.000000,110.363595)}
{pt3dadd(191724.000000,188820.000000,70350.000000,116.377887)}
{pt3dadd(191652.000000,188784.000000,70225.000000,133.927648)}
{pt3dadd(191532.000000,188820.000000,70125.000000,139.382788)}
{pt3dadd(191580.000000,188892.000000,70025.000000,141.614080)}
{pt3dadd(191628.000000,188952.000000,69900.000000,140.224930)}
{pt3dadd(191700.000000,188904.000000,69825.000000,136.441930)}
{pt3dadd(191664.000000,188940.000000,69725.000000,126.183000)}
{pt3dadd(191628.000000,188928.000000,69600.000000,128.766000)}
{pt3dadd(191580.000000,188940.000000,69500.000000,131.226000)}
{pt3dadd(191520.000000,188928.000000,69375.000000,131.226000)}
{pt3dadd(191484.000000,188940.000000,69275.000000,135.009000)}
{pt3dadd(191508.000000,188904.000000,69175.000000,130.541103)}
{pt3dadd(191448.000000,188904.000000,69075.000000,120.667272)}
{pt3dadd(191424.000000,188844.000000,68975.000000,117.064414)}
{pt3dadd(191280.000000,188796.000000,68900.000000,126.513294)}
{pt3dadd(191220.000000,188724.000000,68825.000000,130.892590)}
{pt3dadd(191124.000000,188700.000000,68750.000000,140.791247)}
{pt3dadd(191100.000000,188712.000000,68650.000000,141.686706)}
{pt3dadd(191040.000000,188736.000000,68550.000000,137.634192)}
{pt3dadd(190812.000000,188784.000000,68325.000000,123.259454)}
{pt3dadd(190644.000000,188796.000000,68125.000000,113.954300)}
{pt3dadd(190548.000000,188844.000000,67925.000000,103.068400)}
{pt3dadd(190440.000000,188844.000000,67750.000000,104.008632)}
{pt3dadd(190416.000000,188868.000000,67550.000000,111.664004)}
{pt3dadd(190428.000000,188988.000000,67425.000000,116.589862)}
{pt3dadd(190452.000000,189036.000000,67300.000000,115.501428)}
{pt3dadd(190440.000000,189060.000000,67175.000000,116.488671)}
{pt3dadd(190332.000000,189108.000000,67025.000000,124.526811)}
{pt3dadd(190320.000000,189060.000000,66900.000000,124.526811)}
{pt3dadd(190416.000000,189084.000000,66825.000000,121.943811)}
{pt3dadd(190416.000000,189096.000000,66750.000000,126.635103)}
{pt3dadd(190392.000000,189084.000000,66625.000000,132.363000)}
{pt3dadd(190368.000000,189096.000000,66525.000000,128.580000)}
{pt3dadd(190380.000000,189096.000000,66450.000000,122.852103)}
{pt3dadd(190404.000000,189132.000000,66400.000000,119.420811)}
{pt3dadd(190428.000000,189168.000000,66325.000000,115.817953)}
{pt3dadd(190356.000000,189252.000000,66250.000000,111.126661)}
{pt3dadd(190308.000000,189312.000000,66200.000000,108.895369)}
{pt3dadd(190200.000000,189396.000000,66050.000000,114.623266)}
{pt3dadd(190200.000000,189552.000000,66000.000000,116.662360)}
{pt3dadd(190116.000000,189612.000000,65825.000000,132.300000)}
