# Supplementary material for: Full reconstruction of large lobula plate tangential cells in Drosophila from a 3D EM dataset
Source: PLoS One. 2018 Nov 28;13(11):e0207828. doi: 10.1371/journal.pone.0207828 (PMC6261601; doi:10.1371/journal.pone.0207828)
Supplement: S1 Dataset — (ZIP) [file pone.0207828.s001.zip › Diameter hoc/Cell25_3skels_ck.001_corrected_sorted_diametered.hoc0001.hoc]

/* created with convertKnossosNmlToHoc.m */

{create adhoc1}
{access adhoc1}
{nseg = 1}
{strdef color color = "White"}
{pt3dclear()}
{pt3dadd(190404.000000,137760.000000,48675.000000,132.300000)}
{pt3dadd(190332.000000,137808.000000,48950.000000,191.360220)}
{pt3dadd(190296.000000,138036.000000,49050.000000,207.590072)}
{pt3dadd(190296.000000,138264.000000,49175.000000,228.648432)}
{pt3dadd(190200.000000,138504.000000,49325.000000,208.592852)}
{pt3dadd(190116.000000,138684.000000,49375.000000,190.692300)}
{pt3dadd(190020.000000,138816.000000,49550.000000,179.207130)}
{pt3dadd(189996.000000,138924.000000,49550.000000,159.471770)}
{pt3dadd(189852.000000,139128.000000,49500.000000,142.584170)}
{pt3dadd(189792.000000,139380.000000,49525.000000,146.556320)}
{pt3dadd(189696.000000,139584.000000,49500.000000,147.816320)}
{pt3dadd(189708.000000,139788.000000,49450.000000,138.045910)}
{pt3dadd(189516.000000,140040.000000,49525.000000,128.172079)}
{pt3dadd(189276.000000,140148.000000,49425.000000,126.713469)}
{pt3dadd(188448.000000,140544.000000,49325.000000,136.634791)}
{pt3dadd(187584.000000,140772.000000,49350.000000,143.945201)}
{pt3dadd(187128.000000,140940.000000,49325.000000,149.117351)}
{pt3dadd(186564.000000,141288.000000,49350.000000,161.838942)}
{pt3dadd(186120.000000,141552.000000,49225.000000,164.829088)}
{pt3dadd(185820.000000,141768.000000,49100.000000,161.194546)}
{pt3dadd(185484.000000,141864.000000,48900.000000,182.432576)}
{pt3dadd(185220.000000,141996.000000,48850.000000,230.662826)}
{pt3dadd(184764.000000,142176.000000,48825.000000,281.304582)}
{pt3dadd(184524.000000,142416.000000,48875.000000,312.821430)}
{pt3dadd(184524.000000,142692.000000,48900.000000,347.568756)}
{pt3dadd(184692.000000,143076.000000,48825.000000,317.760316)}
{pt3dadd(184596.000000,143328.000000,48925.000000,265.557916)}
{pt3dadd(184524.000000,143544.000000,49075.000000,225.333544)}
{pt3dadd(184428.000000,143748.000000,49225.000000,209.172760)}
{pt3dadd(184560.000000,144012.000000,49200.000000,191.355494)}
{pt3dadd(184716.000000,144360.000000,49325.000000,223.914354)}
{pt3dadd(184872.000000,144684.000000,49275.000000,248.608628)}
{pt3dadd(184884.000000,144984.000000,49275.000000,244.792364)}
{pt3dadd(185136.000000,145248.000000,49350.000000,236.367476)}
{pt3dadd(185196.000000,145488.000000,49400.000000,229.234066)}
{pt3dadd(185328.000000,145716.000000,49475.000000,199.258206)}
{pt3dadd(185412.000000,146028.000000,49500.000000,184.822862)}
{pt3dadd(185568.000000,146340.000000,49550.000000,179.753278)}
{pt3dadd(185712.000000,146604.000000,49550.000000,169.831956)}
{pt3dadd(185832.000000,146868.000000,49500.000000,169.831956)}
{pt3dadd(186036.000000,147144.000000,49400.000000,189.567316)}
{pt3dadd(186084.000000,147456.000000,49400.000000,199.363966)}
{pt3dadd(186192.000000,147708.000000,49450.000000,219.590660)}
{pt3dadd(186516.000000,148008.000000,49450.000000,254.097654)}
{pt3dadd(186576.000000,148260.000000,49575.000000,246.073954)}
{pt3dadd(186708.000000,148524.000000,49650.000000,272.272166)}
{pt3dadd(186744.000000,148776.000000,49700.000000,341.375180)}
{pt3dadd(187080.000000,149208.000000,49925.000000,387.773446)}
{pt3dadd(187176.000000,149616.000000,50000.000000,409.430448)}
{pt3dadd(187344.000000,149952.000000,50075.000000,445.915140)}
{pt3dadd(187536.000000,150204.000000,50125.000000,419.716928)}
{pt3dadd(187860.000000,150600.000000,50325.000000,340.817264)}
{pt3dadd(188304.000000,151104.000000,50550.000000,281.123480)}
{pt3dadd(188484.000000,151392.000000,50675.000000,241.042914)}
{pt3dadd(188484.000000,151644.000000,50700.000000,193.786342)}
{pt3dadd(188496.000000,151824.000000,50775.000000,175.440132)}
{pt3dadd(188508.000000,152172.000000,50900.000000,173.751612)}
{pt3dadd(188388.000000,152400.000000,50875.000000,177.758692)}
{pt3dadd(188280.000000,152640.000000,50875.000000,184.892102)}
{pt3dadd(188112.000000,152856.000000,50900.000000,210.821092)}
{pt3dadd(188004.000000,153096.000000,50900.000000,229.167302)}
{pt3dadd(187956.000000,153408.000000,51000.000000,250.405332)}
{pt3dadd(187812.000000,153684.000000,51075.000000,252.560360)}
{pt3dadd(187716.000000,153996.000000,51150.000000,235.630300)}
{pt3dadd(187668.000000,154260.000000,51125.000000,217.011720)}
{pt3dadd(187764.000000,154524.000000,51175.000000,194.693360)}
{pt3dadd(187740.000000,154812.000000,51375.000000,176.916800)}
{pt3dadd(187728.000000,155148.000000,51625.000000,181.555494)}
{pt3dadd(187716.000000,155436.000000,51775.000000,183.328444)}
{pt3dadd(187704.000000,155736.000000,51800.000000,188.651506)}
{pt3dadd(187800.000000,156060.000000,51775.000000,204.499650)}
{pt3dadd(187764.000000,156348.000000,51775.000000,196.439920)}
{pt3dadd(187728.000000,156600.000000,51725.000000,178.707942)}
{pt3dadd(187740.000000,156912.000000,51750.000000,166.676062)}
{pt3dadd(187680.000000,157224.000000,51900.000000,147.327450)}
{pt3dadd(187728.000000,157488.000000,52075.000000,143.511186)}
{pt3dadd(187800.000000,157704.000000,52025.000000,174.985836)}
{pt3dadd(187884.000000,157992.000000,52000.000000,220.225940)}
{pt3dadd(187848.000000,158232.000000,52000.000000,280.362086)}
{pt3dadd(187920.000000,158472.000000,51975.000000,334.333798)}
{pt3dadd(187980.000000,158736.000000,52000.000000,367.308174)}
{pt3dadd(188052.000000,159012.000000,52150.000000,342.120304)}
{pt3dadd(187932.000000,159288.000000,52275.000000,295.348664)}
{pt3dadd(187932.000000,159408.000000,52500.000000,245.471448)}
{pt3dadd(188040.000000,159816.000000,52775.000000,198.214876)}
{pt3dadd(187980.000000,160380.000000,52850.000000,167.102092)}
{pt3dadd(187932.000000,161136.000000,52850.000000,163.805458)}
{pt3dadd(187920.000000,161640.000000,52950.000000,203.380954)}
{pt3dadd(187896.000000,161928.000000,53050.000000,249.194540)}
{pt3dadd(187908.000000,162168.000000,53175.000000,283.381340)}
{pt3dadd(187644.000000,162540.000000,53250.000000,285.336012)}
{pt3dadd(187572.000000,162924.000000,53450.000000,290.405596)}
{pt3dadd(187728.000000,163128.000000,53425.000000,244.199340)}
{pt3dadd(187932.000000,163428.000000,53525.000000,185.783966)}
{pt3dadd(188136.000000,163608.000000,53700.000000,142.193518)}
{pt3dadd(188244.000000,163812.000000,53875.000000,126.345374)}
{pt3dadd(188184.000000,164004.000000,54025.000000,115.573494)}
{pt3dadd(188196.000000,164280.000000,54200.000000,123.735790)}
{pt3dadd(188148.000000,164544.000000,54250.000000,131.509408)}
{pt3dadd(188076.000000,164796.000000,54225.000000,143.625206)}
{pt3dadd(187980.000000,165048.000000,54300.000000,138.170066)}
{pt3dadd(187992.000000,165288.000000,54350.000000,138.170066)}
{pt3dadd(187980.000000,165540.000000,54250.000000,120.741688)}
{pt3dadd(187896.000000,165864.000000,54325.000000,120.741688)}
{pt3dadd(187884.000000,166092.000000,54075.000000,116.769538)}
{pt3dadd(187992.000000,166296.000000,53975.000000,136.118150)}
{pt3dadd(187992.000000,166512.000000,53875.000000,136.118150)}
{pt3dadd(188112.000000,166800.000000,53825.000000,153.546528)}
{pt3dadd(188088.000000,167028.000000,53825.000000,148.115768)}
{pt3dadd(188160.000000,167316.000000,53825.000000,152.087918)}
{pt3dadd(188220.000000,167592.000000,53725.000000,145.156742)}
{pt3dadd(188208.000000,167868.000000,53750.000000,149.327502)}
{pt3dadd(188220.000000,168168.000000,53800.000000,138.933914)}
{pt3dadd(188184.000000,168444.000000,53925.000000,140.193914)}
{pt3dadd(188304.000000,168792.000000,54025.000000,143.184060)}
{pt3dadd(188616.000000,168996.000000,53975.000000,160.916038)}
{pt3dadd(188688.000000,169320.000000,54000.000000,185.293718)}
{pt3dadd(188664.000000,169836.000000,54125.000000,228.441683)}
{pt3dadd(188808.000000,170124.000000,54650.000000,275.042200)}

{create adhoc2}
{access adhoc2}
{connect adhoc2(1), adhoc1(0)}
{nseg = 1}
{strdef color color = "White"}
{pt3dclear()}
{pt3dadd(188808.000000,170124.000000,54650.000000,275.042200)}
{pt3dadd(188832.000000,170244.000000,55075.000000,222.147440)}
{pt3dadd(188856.000000,170304.000000,55450.000000,205.979274)}
{pt3dadd(188868.000000,170424.000000,55950.000000,183.133130)}
{pt3dadd(188700.000000,170280.000000,56225.000000,174.247282)}
{pt3dadd(188580.000000,170100.000000,56625.000000,174.247282)}
{pt3dadd(188724.000000,170064.000000,57025.000000,161.015402)}
{pt3dadd(188760.000000,169980.000000,57500.000000,157.718768)}
{pt3dadd(189252.000000,169788.000000,57975.000000,162.788352)}
{pt3dadd(189780.000000,169728.000000,58450.000000,166.084986)}
{pt3dadd(190152.000000,169800.000000,58600.000000,192.532250)}
{pt3dadd(190656.000000,169716.000000,58850.000000,220.921240)}
{pt3dadd(191112.000000,169608.000000,59050.000000,236.277304)}
{pt3dadd(191556.000000,169716.000000,59125.000000,238.138896)}
{pt3dadd(191940.000000,169788.000000,59200.000000,231.852116)}
{pt3dadd(192108.000000,170028.000000,59750.000000,194.632972)}
{pt3dadd(192360.000000,170184.000000,60125.000000,174.406278)}
{pt3dadd(192660.000000,170496.000000,60500.000000,150.887918)}
{pt3dadd(192756.000000,170724.000000,60850.000000,147.253376)}
{pt3dadd(193128.000000,170916.000000,61175.000000,155.313106)}
{pt3dadd(193320.000000,171060.000000,61600.000000,176.371466)}
{pt3dadd(193548.000000,171276.000000,62075.000000,221.611570)}
{pt3dadd(193728.000000,171456.000000,62525.000000,291.694670)}
{pt3dadd(193824.000000,171528.000000,63075.000000,341.571886)}
{pt3dadd(194124.000000,171420.000000,63525.000000,347.440558)}
{pt3dadd(194244.000000,171396.000000,63925.000000,345.177778)}
{pt3dadd(194472.000000,171312.000000,64325.000000,320.164368)}
{pt3dadd(194628.000000,171228.000000,64775.000000,275.975542)}
{pt3dadd(194820.000000,171228.000000,65075.000000,231.687540)}
{pt3dadd(195072.000000,171048.000000,65525.000000,233.842568)}
{pt3dadd(195348.000000,170784.000000,65825.000000,236.105348)}
{pt3dadd(195768.000000,170628.000000,66025.000000,231.234718)}
{pt3dadd(196128.000000,170172.000000,66275.000000,226.596024)}
{pt3dadd(196368.000000,169800.000000,66675.000000,246.194680)}
{pt3dadd(196692.000000,169536.000000,67050.000000,250.833374)}
{pt3dadd(196812.000000,169308.000000,67450.000000,244.363158)}
{pt3dadd(197292.000000,169020.000000,68050.000000,226.016948)}
{pt3dadd(197556.000000,168816.000000,68675.000000,207.221368)}
{pt3dadd(197664.000000,168600.000000,69050.000000,178.736864)}
{pt3dadd(197796.000000,168456.000000,69475.000000,186.601450)}
{pt3dadd(198072.000000,168192.000000,69900.000000,203.312166)}
{pt3dadd(198552.000000,167916.000000,70550.000000,224.034290)}
{pt3dadd(198828.000000,167712.000000,71125.000000,229.736586)}
{pt3dadd(198936.000000,167508.000000,71400.000000,229.736586)}
{pt3dadd(199116.000000,167388.000000,71900.000000,204.140022)}
{pt3dadd(199140.000000,167220.000000,72325.000000,178.543458)}
{pt3dadd(199212.000000,167088.000000,72675.000000,162.419594)}
{pt3dadd(199332.000000,166992.000000,73075.000000,165.716228)}
{pt3dadd(199644.000000,166884.000000,73650.000000,170.785812)}
{pt3dadd(199848.000000,166896.000000,74100.000000,181.724068)}
{pt3dadd(199992.000000,166836.000000,74400.000000,194.817352)}
{pt3dadd(200172.000000,166860.000000,74625.000000,206.302522)}
{pt3dadd(200328.000000,166740.000000,75125.000000,211.891736)}
{pt3dadd(200340.000000,166584.000000,75500.000000,217.760408)}
{pt3dadd(200328.000000,166572.000000,75675.000000,217.760408)}
{pt3dadd(200604.000000,166548.000000,75875.000000,215.605380)}
{pt3dadd(200676.000000,166464.000000,75975.000000,207.581680)}
{pt3dadd(200844.000000,166416.000000,76275.000000,201.992466)}
{pt3dadd(200964.000000,166344.000000,76600.000000,194.350844)}
{pt3dadd(201096.000000,166260.000000,76900.000000,198.768652)}
{pt3dadd(201372.000000,166212.000000,77225.000000,216.314900)}
{pt3dadd(201456.000000,166080.000000,77575.000000,252.799592)}
{pt3dadd(201552.000000,165996.000000,77925.000000,302.676808)}
{pt3dadd(201648.000000,165888.000000,78225.000000,361.300978)}
{pt3dadd(201744.000000,165840.000000,78600.000000,403.385572)}
{pt3dadd(201804.000000,165828.000000,79025.000000,432.341726)}
{pt3dadd(201984.000000,165696.000000,79400.000000,436.027554)}
{pt3dadd(202296.000000,165504.000000,79800.000000,420.897664)}
{pt3dadd(202500.000000,165360.000000,80175.000000,384.573424)}
{pt3dadd(202608.000000,165096.000000,80425.000000,336.018614)}
{pt3dadd(202668.000000,164844.000000,80675.000000,296.309934)}
{pt3dadd(202824.000000,164460.000000,81125.000000,264.163114)}
{pt3dadd(202872.000000,164064.000000,81425.000000,223.129008)}
{pt3dadd(202932.000000,163692.000000,81900.000000,197.532444)}
{pt3dadd(202932.000000,163356.000000,82400.000000,197.532444)}
{pt3dadd(202896.000000,163152.000000,82600.000000,186.731642)}
{pt3dadd(202896.000000,162972.000000,82875.000000,180.569534)}
{pt3dadd(202908.000000,162696.000000,83125.000000,194.497936)}
{pt3dadd(202944.000000,162420.000000,83400.000000,214.724630)}
{pt3dadd(203076.000000,162168.000000,83600.000000,226.065476)}
{pt3dadd(203088.000000,161880.000000,83725.000000,244.730864)}
{pt3dadd(203064.000000,161652.000000,83775.000000,250.892972)}
{pt3dadd(203064.000000,161112.000000,84075.000000,255.310780)}
{pt3dadd(203028.000000,160824.000000,84575.000000,255.310780)}
{pt3dadd(203064.000000,160428.000000,84875.000000,248.177370)}
{pt3dadd(203160.000000,160128.000000,85100.000000,240.312784)}
{pt3dadd(203328.000000,159792.000000,85400.000000,238.157756)}
{pt3dadd(203556.000000,159696.000000,85750.000000,254.318540)}
{pt3dadd(203832.000000,159468.000000,86075.000000,268.792654)}
{pt3dadd(203952.000000,159312.000000,86450.000000,264.585218)}
{pt3dadd(204144.000000,159048.000000,86800.000000,246.853240)}
{pt3dadd(204336.000000,158736.000000,87300.000000,231.535688)}
{pt3dadd(204456.000000,158544.000000,87600.000000,208.904688)}
{pt3dadd(204420.000000,158448.000000,87925.000000,181.135056)}
{pt3dadd(204480.000000,158448.000000,88200.000000,197.845772)}
{pt3dadd(204516.000000,158376.000000,88475.000000,229.362620)}
{pt3dadd(204696.000000,158412.000000,88775.000000,267.552460)}
{pt3dadd(204840.000000,158484.000000,89075.000000,318.395720)}

{create adhoc3}
{access adhoc3}
{connect adhoc3(1), adhoc2(0)}
{nseg = 1}
{strdef color color = "White"}
{pt3dclear()}
{pt3dadd(204840.000000,158484.000000,89075.000000,318.395720)}
{pt3dadd(204792.000000,158688.000000,89350.000000,340.152760)}
{pt3dadd(204960.000000,158808.000000,89650.000000,387.777710)}
{pt3dadd(204984.000000,159012.000000,89975.000000,413.701520)}
{pt3dadd(205056.000000,159252.000000,90300.000000,428.831410)}
{pt3dadd(205188.000000,159408.000000,90550.000000,422.304298)}
{pt3dadd(205236.000000,159528.000000,90850.000000,393.348144)}
{pt3dadd(205248.000000,159876.000000,91250.000000,349.159318)}
{pt3dadd(205224.000000,160080.000000,91675.000000,309.450638)}
{pt3dadd(205248.000000,160272.000000,91975.000000,259.573422)}
{pt3dadd(205200.000000,160584.000000,92225.000000,228.056574)}
{pt3dadd(205032.000000,160944.000000,92725.000000,210.510326)}
{pt3dadd(205044.000000,161256.000000,93200.000000,224.295196)}
{pt3dadd(205008.000000,161496.000000,93575.000000,244.607178)}
{pt3dadd(205068.000000,161724.000000,93950.000000,279.354504)}
{pt3dadd(204912.000000,162156.000000,94300.000000,294.710568)}
{pt3dadd(204816.000000,162600.000000,94625.000000,296.865596)}
{pt3dadd(204684.000000,162972.000000,95050.000000,285.575442)}
{pt3dadd(204600.000000,163356.000000,95400.000000,258.469738)}
{pt3dadd(204540.000000,163548.000000,95725.000000,243.271922)}
{pt3dadd(204540.000000,163740.000000,96075.000000,248.142552)}
{pt3dadd(204528.000000,163836.000000,96400.000000,263.533772)}
{pt3dadd(204516.000000,164028.000000,96700.000000,271.791582)}
{pt3dadd(204432.000000,164160.000000,96975.000000,283.699470)}
{pt3dadd(204324.000000,164340.000000,97275.000000,286.449890)}
{pt3dadd(204036.000000,164652.000000,97675.000000,291.819760)}
{pt3dadd(203772.000000,164952.000000,98075.000000,281.067234)}
{pt3dadd(203520.000000,165336.000000,98525.000000,287.283538)}
{pt3dadd(203364.000000,165576.000000,99000.000000,295.954242)}
{pt3dadd(203256.000000,165768.000000,99475.000000,327.798336)}
{pt3dadd(203016.000000,166080.000000,99950.000000,368.826732)}
{pt3dadd(203004.000000,166200.000000,100300.000000,400.204974)}
{pt3dadd(203052.000000,166632.000000,100700.000000,407.058442)}
{pt3dadd(202620.000000,166944.000000,101275.000000,393.273572)}
{pt3dadd(202140.000000,167472.000000,101550.000000,346.771170)}
{pt3dadd(201828.000000,167796.000000,101875.000000,314.847018)}
{pt3dadd(201360.000000,168096.000000,102325.000000,300.437606)}
{pt3dadd(201060.000000,168408.000000,102500.000000,267.769178)}
{pt3dadd(200832.000000,168672.000000,103000.000000,260.975456)}
{pt3dadd(200388.000000,168948.000000,103425.000000,275.633764)}
{pt3dadd(200256.000000,169224.000000,103825.000000,269.417460)}
{pt3dadd(199956.000000,169644.000000,104125.000000,260.313216)}
{pt3dadd(199524.000000,170064.000000,104550.000000,292.981644)}
{pt3dadd(199056.000000,170484.000000,105050.000000,316.744196)}
{pt3dadd(198576.000000,170964.000000,105500.000000,332.701908)}
{pt3dadd(198132.000000,171372.000000,105875.000000,324.444098)}
{pt3dadd(198000.000000,171456.000000,106225.000000,319.074228)}
{pt3dadd(197652.000000,171576.000000,106475.000000,297.746646)}
{pt3dadd(197364.000000,171672.000000,106750.000000,304.600114)}
{pt3dadd(197028.000000,171816.000000,107050.000000,324.966642)}
{pt3dadd(196680.000000,171936.000000,107300.000000,362.180606)}
{pt3dadd(196356.000000,171984.000000,107625.000000,395.127762)}
{pt3dadd(195960.000000,172116.000000,107975.000000,406.417916)}
{pt3dadd(195564.000000,172104.000000,108475.000000,385.090334)}
{pt3dadd(195372.000000,172200.000000,108775.000000,346.015674)}
{pt3dadd(195132.000000,172200.000000,109050.000000,323.275824)}
{pt3dadd(194976.000000,172236.000000,109375.000000,301.618822)}
{pt3dadd(194736.000000,172260.000000,109600.000000,308.145934)}
{pt3dadd(194388.000000,172380.000000,109925.000000,333.159344)}
{pt3dadd(194100.000000,172512.000000,110250.000000,345.014008)}
{pt3dadd(193980.000000,172488.000000,110525.000000,363.487050)}
{pt3dadd(193860.000000,172548.000000,110800.000000,377.210306)}
{pt3dadd(193344.000000,172488.000000,111150.000000,362.012490)}
{pt3dadd(193104.000000,172500.000000,111500.000000,351.473194)}
{pt3dadd(192744.000000,172440.000000,111850.000000,342.368950)}
{pt3dadd(192240.000000,172284.000000,112150.000000,312.041244)}
{pt3dadd(191940.000000,172272.000000,112375.000000,287.027834)}
{pt3dadd(191520.000000,172284.000000,112650.000000,289.778254)}
{pt3dadd(191148.000000,172272.000000,112925.000000,286.594294)}
{pt3dadd(190980.000000,172188.000000,112925.000000,318.438388)}
{pt3dadd(190740.000000,172332.000000,113125.000000,353.032902)}
{pt3dadd(190488.000000,172404.000000,113150.000000,385.980058)}
{pt3dadd(190236.000000,172404.000000,113175.000000,401.937770)}
{pt3dadd(189948.000000,172464.000000,113250.000000,408.464882)}
{pt3dadd(189660.000000,172656.000000,113475.000000,382.541072)}
{pt3dadd(189360.000000,172788.000000,113500.000000,353.584918)}
{pt3dadd(189096.000000,172992.000000,113550.000000,331.927916)}
{pt3dadd(188856.000000,173112.000000,113650.000000,321.890488)}
{pt3dadd(188628.000000,173208.000000,113850.000000,325.400804)}
{pt3dadd(188352.000000,173436.000000,114025.000000,325.400804)}
{pt3dadd(188088.000000,173472.000000,114075.000000,319.762444)}
{pt3dadd(187800.000000,173688.000000,114325.000000,303.601660)}
{pt3dadd(187440.000000,173892.000000,114775.000000,285.178096)}
{pt3dadd(187200.000000,174024.000000,115025.000000,252.509668)}
{pt3dadd(186972.000000,174240.000000,115375.000000,236.348884)}
{pt3dadd(186960.000000,174264.000000,115600.000000,218.572324)}
{pt3dadd(186768.000000,174384.000000,115900.000000,216.309544)}
{pt3dadd(186624.000000,174504.000000,116150.000000,214.154516)}
{pt3dadd(186636.000000,174528.000000,116500.000000,223.000646)}
{pt3dadd(186504.000000,174720.000000,116800.000000,227.871276)}
{pt3dadd(186432.000000,174804.000000,117075.000000,245.647836)}
{pt3dadd(186312.000000,175044.000000,117300.000000,264.071400)}
{pt3dadd(186336.000000,175248.000000,117575.000000,291.177104)}
{pt3dadd(186360.000000,175584.000000,117850.000000,291.177104)}
{pt3dadd(186240.000000,175920.000000,118100.000000,284.043694)}
{pt3dadd(186060.000000,176244.000000,118450.000000,266.267134)}
{pt3dadd(185964.000000,177072.000000,118775.000000,238.046920)}
{pt3dadd(185904.000000,177732.000000,118750.000000,205.072544)}
{pt3dadd(185772.000000,177924.000000,118675.000000,192.410150)}
{pt3dadd(185808.000000,178164.000000,118675.000000,182.613500)}
{pt3dadd(185760.000000,178440.000000,118625.000000,197.770610)}
{pt3dadd(185784.000000,178692.000000,118625.000000,220.070540)}
{pt3dadd(185808.000000,178956.000000,118575.000000,256.555232)}
{pt3dadd(185772.000000,179220.000000,118575.000000,300.595868)}
{pt3dadd(185880.000000,179544.000000,118500.000000,359.220038)}
{pt3dadd(185808.000000,179832.000000,118525.000000,400.914148)}
{pt3dadd(185928.000000,180132.000000,118450.000000,420.557688)}
{pt3dadd(185844.000000,180408.000000,118375.000000,399.230106)}
{pt3dadd(185844.000000,180684.000000,118525.000000,365.475950)}
{pt3dadd(185964.000000,181092.000000,118300.000000,323.781840)}
{pt3dadd(185952.000000,181320.000000,118300.000000,279.593014)}
{pt3dadd(185928.000000,181584.000000,118225.000000,259.949474)}
{pt3dadd(185796.000000,181860.000000,118225.000000,268.207284)}
{pt3dadd(185676.000000,182148.000000,118175.000000,281.335724)}
{pt3dadd(185556.000000,182436.000000,118225.000000,314.282880)}
{pt3dadd(185268.000000,182640.000000,118250.000000,338.105178)}
{pt3dadd(184944.000000,182904.000000,118275.000000,335.354758)}
{pt3dadd(184500.000000,183216.000000,118275.000000,308.478368)}
{pt3dadd(183924.000000,183588.000000,118350.000000,285.063448)}
{pt3dadd(183612.000000,183900.000000,118400.000000,235.186232)}
{pt3dadd(183408.000000,184260.000000,118300.000000,196.928590)}
{pt3dadd(183132.000000,184560.000000,118175.000000,187.175730)}
{pt3dadd(182856.000000,184812.000000,118200.000000,200.923680)}
{pt3dadd(182568.000000,185100.000000,118175.000000,204.739944)}
{pt3dadd(182328.000000,185364.000000,118300.000000,214.536594)}
{pt3dadd(181908.000000,185604.000000,118475.000000,249.283920)}
{pt3dadd(181668.000000,185832.000000,118650.000000,267.707484)}
{pt3dadd(181332.000000,186192.000000,118950.000000,263.289676)}
{pt3dadd(180828.000000,186612.000000,119325.000000,267.497112)}
{pt3dadd(180528.000000,186804.000000,119700.000000,256.011942)}
{pt3dadd(179820.000000,186984.000000,120075.000000,221.264616)}
{pt3dadd(179424.000000,187152.000000,120425.000000,193.044402)}
{pt3dadd(178872.000000,187296.000000,120800.000000,190.991994)}
{pt3dadd(178416.000000,187452.000000,121250.000000,209.415558)}
{pt3dadd(177720.000000,187452.000000,121725.000000,265.248102)}
{pt3dadd(176880.000000,187500.000000,122200.000000,303.505744)}
{pt3dadd(176304.000000,187584.000000,122525.000000,341.763386)}
{pt3dadd(176004.000000,187704.000000,122950.000000,350.609516)}
{pt3dadd(175752.000000,187920.000000,123325.000000,336.824646)}
{pt3dadd(174984.000000,188124.000000,123700.000000,288.269836)}
{pt3dadd(174228.000000,188256.000000,124125.000000,253.646736)}
{pt3dadd(173364.000000,188496.000000,124500.000000,227.448524)}
{pt3dadd(172800.000000,188748.000000,124775.000000,220.654802)}
{pt3dadd(172416.000000,188916.000000,125000.000000,207.992408)}
{pt3dadd(172032.000000,189084.000000,125250.000000,252.280410)}
{pt3dadd(171624.000000,189204.000000,125525.000000,254.235082)}
{pt3dadd(170880.000000,189312.000000,126100.000000,280.433294)}
{pt3dadd(169860.000000,189456.000000,126500.000000,287.227016)}
{pt3dadd(169512.000000,189696.000000,126825.000000,276.455136)}
{pt3dadd(168492.000000,189792.000000,127250.000000,226.577920)}
{pt3dadd(167532.000000,189780.000000,127475.000000,219.300186)}
{pt3dadd(167040.000000,189804.000000,127625.000000,186.631758)}
{pt3dadd(166404.000000,189828.000000,127725.000000,200.416628)}
{pt3dadd(165720.000000,190212.000000,127850.000000,247.673200)}
{pt3dadd(165204.000000,190440.000000,128050.000000,282.420526)}
{pt3dadd(164688.000000,190464.000000,128400.000000,303.658556)}
{pt3dadd(164292.000000,190572.000000,128625.000000,301.703884)}
{pt3dadd(163800.000000,190716.000000,128800.000000,270.187036)}
{pt3dadd(163356.000000,190632.000000,128850.000000,235.563936)}
{pt3dadd(162660.000000,190500.000000,128975.000000,191.817680)}
{pt3dadd(161784.000000,190632.000000,129175.000000,170.579650)}
{pt3dadd(161028.000000,190836.000000,129350.000000,157.946178)}
{pt3dadd(159996.000000,190800.000000,129700.000000,164.877354)}
{pt3dadd(159432.000000,190752.000000,129875.000000,166.832026)}
{pt3dadd(158580.000000,190752.000000,130225.000000,181.420170)}
{pt3dadd(157188.000000,190836.000000,130700.000000,200.038750)}
{pt3dadd(156936.000000,190848.000000,130800.000000,223.473024)}
{pt3dadd(156648.000000,190932.000000,130825.000000,236.768542)}
{pt3dadd(156120.000000,190932.000000,130850.000000,250.728838)}
{pt3dadd(155700.000000,190824.000000,130925.000000,257.199054)}
{pt3dadd(155268.000000,190848.000000,131250.000000,245.858208)}
{pt3dadd(154860.000000,191016.000000,131525.000000,229.734344)}
{pt3dadd(154644.000000,191208.000000,131675.000000,227.239628)}
{pt3dadd(153924.000000,191544.000000,131950.000000,372.231188)}
{pt3dadd(153456.000000,191736.000000,132200.000000,423.500084)}
{pt3dadd(152820.000000,191904.000000,132300.000000,581.135883)}
{pt3dadd(152580.000000,192204.000000,132000.000000,493.936280)}

{create adhoc4}
{access adhoc4}
{connect adhoc4(1), adhoc2(0)}
{nseg = 1}
{strdef color color = "White"}
{pt3dclear()}
{pt3dadd(204840.000000,158484.000000,89075.000000,318.395720)}
{pt3dadd(204780.000000,157872.000000,88875.000000,198.697103)}
{pt3dadd(204420.000000,157236.000000,88700.000000,169.678262)}
{pt3dadd(204168.000000,156636.000000,88375.000000,132.459118)}
{pt3dadd(204120.000000,156384.000000,88375.000000,146.149340)}
{pt3dadd(204120.000000,156120.000000,88300.000000,141.551080)}
{pt3dadd(204012.000000,155700.000000,88200.000000,145.334080)}
{pt3dadd(204024.000000,155376.000000,88125.000000,144.074080)}
{pt3dadd(204096.000000,155172.000000,87975.000000,149.776376)}
{pt3dadd(204060.000000,154944.000000,87925.000000,151.549326)}
{pt3dadd(204120.000000,154656.000000,87750.000000,165.477728)}
{pt3dadd(204156.000000,154404.000000,87600.000000,171.465138)}
{pt3dadd(204144.000000,154164.000000,87475.000000,178.427434)}
{pt3dadd(204204.000000,153924.000000,87400.000000,168.033846)}
{pt3dadd(204252.000000,153636.000000,87325.000000,149.606594)}
{pt3dadd(204228.000000,153384.000000,87325.000000,124.415211)}
{pt3dadd(204216.000000,153156.000000,87250.000000,118.427801)}
{pt3dadd(204216.000000,152880.000000,87225.000000,116.896265)}
{pt3dadd(204156.000000,152616.000000,87175.000000,122.910557)}
{pt3dadd(204060.000000,152328.000000,87100.000000,131.888929)}
{pt3dadd(204072.000000,152076.000000,87050.000000,135.748468)}
{pt3dadd(204096.000000,151812.000000,86950.000000,131.965468)}
{pt3dadd(204024.000000,151524.000000,86875.000000,129.117708)}
{pt3dadd(203904.000000,150828.000000,86200.000000,136.793638)}
{pt3dadd(203856.000000,150564.000000,86050.000000,146.242518)}
{pt3dadd(203880.000000,150336.000000,85900.000000,159.932740)}
{pt3dadd(203928.000000,150108.000000,85800.000000,175.026212)}
{pt3dadd(203976.000000,149880.000000,85650.000000,194.761572)}
{pt3dadd(204024.000000,149604.000000,85500.000000,211.691632)}
{pt3dadd(204084.000000,149340.000000,85425.000000,248.176324)}
{pt3dadd(203916.000000,149028.000000,85250.000000,279.580498)}
{pt3dadd(203904.000000,148404.000000,84675.000000,304.166170)}
{pt3dadd(203940.000000,148164.000000,84475.000000,299.748362)}
{pt3dadd(203928.000000,147960.000000,84500.000000,290.459924)}
{pt3dadd(203892.000000,147720.000000,84350.000000,266.637626)}
{pt3dadd(203808.000000,147492.000000,84275.000000,233.544932)}
{pt3dadd(203832.000000,147276.000000,84200.000000,196.325788)}
{pt3dadd(203784.000000,147000.000000,84100.000000,185.387532)}
{pt3dadd(203772.000000,146784.000000,83925.000000,176.057390)}
{pt3dadd(203700.000000,146520.000000,83800.000000,163.394996)}
{pt3dadd(203676.000000,146292.000000,83750.000000,172.725138)}
{pt3dadd(203652.000000,146076.000000,83700.000000,193.783498)}
{pt3dadd(203604.000000,145836.000000,83550.000000,200.714674)}
{pt3dadd(203556.000000,145620.000000,83475.000000,212.199844)}
{pt3dadd(203520.000000,145404.000000,83450.000000,224.862238)}
{pt3dadd(203496.000000,145176.000000,83300.000000,231.655960)}
{pt3dadd(203484.000000,144936.000000,83225.000000,231.655960)}
{pt3dadd(203448.000000,144684.000000,83125.000000,259.425592)}
{pt3dadd(203484.000000,144396.000000,83000.000000,287.886584)}
{pt3dadd(203520.000000,144096.000000,82900.000000,311.708882)}
{pt3dadd(203388.000000,143796.000000,82850.000000,335.531180)}
{pt3dadd(203400.000000,143508.000000,82800.000000,358.219076)}
{pt3dadd(203448.000000,143220.000000,82675.000000,338.874332)}
{pt3dadd(203388.000000,142932.000000,82650.000000,315.052034)}
{pt3dadd(203256.000000,142668.000000,82475.000000,278.567342)}
{pt3dadd(203148.000000,142308.000000,82275.000000,242.082650)}
{pt3dadd(203040.000000,141972.000000,82125.000000,207.335324)}
{pt3dadd(202932.000000,141756.000000,81975.000000,209.711238)}
{pt3dadd(202872.000000,141492.000000,81825.000000,220.463764)}
{pt3dadd(202752.000000,141072.000000,81650.000000,228.487464)}
{pt3dadd(202632.000000,140652.000000,81600.000000,241.149858)}
{pt3dadd(202560.000000,140196.000000,81475.000000,250.946508)}
{pt3dadd(202476.000000,139836.000000,81300.000000,250.946508)}
{pt3dadd(202248.000000,139404.000000,81175.000000,235.555288)}
{pt3dadd(202104.000000,139188.000000,81050.000000,242.688698)}
{pt3dadd(202128.000000,138888.000000,80925.000000,242.688698)}
{pt3dadd(201912.000000,138492.000000,80850.000000,247.327392)}
{pt3dadd(201900.000000,138288.000000,80750.000000,244.951478)}
{pt3dadd(201792.000000,138060.000000,80725.000000,249.590172)}
{pt3dadd(201768.000000,137808.000000,80575.000000,257.847982)}
{pt3dadd(201588.000000,137592.000000,80550.000000,265.712568)}
{pt3dadd(201492.000000,137352.000000,80500.000000,276.465094)}
{pt3dadd(201444.000000,137112.000000,80425.000000,281.335724)}
{pt3dadd(201432.000000,136872.000000,80400.000000,292.088250)}
{pt3dadd(201384.000000,136632.000000,80375.000000,283.830440)}
{pt3dadd(201288.000000,136416.000000,80450.000000,283.830440)}
{pt3dadd(201300.000000,136188.000000,80375.000000,266.284192)}
{pt3dadd(201240.000000,135948.000000,80425.000000,247.665612)}
{pt3dadd(201216.000000,135672.000000,80375.000000,222.477742)}
{pt3dadd(201240.000000,135468.000000,80300.000000,209.182224)}
{pt3dadd(201168.000000,135228.000000,80350.000000,185.193774)}
{pt3dadd(201180.000000,135024.000000,80250.000000,175.863632)}
{pt3dadd(201120.000000,134796.000000,80275.000000,175.863632)}
{pt3dadd(201060.000000,134580.000000,80250.000000,174.175112)}
{pt3dadd(201036.000000,134376.000000,80175.000000,180.337220)}
{pt3dadd(200988.000000,134112.000000,80175.000000,198.955800)}
{pt3dadd(200904.000000,133896.000000,80200.000000,220.193830)}
{pt3dadd(200772.000000,133656.000000,80200.000000,238.812410)}
{pt3dadd(200736.000000,133440.000000,80150.000000,262.800860)}
{pt3dadd(200688.000000,133212.000000,80175.000000,278.192080)}
{pt3dadd(200628.000000,132972.000000,80150.000000,286.449890)}
{pt3dadd(200544.000000,132720.000000,80150.000000,289.200310)}
{pt3dadd(200568.000000,132504.000000,80100.000000,289.200310)}
{pt3dadd(200568.000000,132288.000000,80125.000000,295.120594)}
{pt3dadd(200544.000000,132060.000000,80200.000000,292.232654)}
{pt3dadd(200616.000000,131784.000000,80050.000000,274.686406)}
{pt3dadd(200640.000000,131520.000000,80125.000000,257.975690)}
{pt3dadd(200496.000000,131184.000000,80075.000000,248.687252)}
{pt3dadd(200424.000000,130752.000000,79825.000000,224.101580)}
{pt3dadd(200304.000000,130524.000000,79725.000000,213.861080)}
{pt3dadd(200268.000000,130260.000000,79650.000000,211.808672)}
{pt3dadd(200196.000000,130044.000000,79550.000000,213.861080)}
{pt3dadd(200052.000000,129768.000000,79425.000000,218.278888)}
{pt3dadd(199920.000000,129504.000000,79225.000000,239.832216)}
{pt3dadd(199836.000000,129180.000000,79225.000000,237.569436)}
{pt3dadd(199812.000000,128772.000000,79025.000000,244.039652)}
{pt3dadd(199428.000000,128268.000000,78575.000000,246.194680)}
{pt3dadd(198828.000000,127620.000000,78375.000000,251.065310)}
{pt3dadd(198552.000000,127056.000000,78425.000000,248.177370)}
{pt3dadd(198516.000000,126864.000000,78400.000000,263.568590)}
{pt3dadd(198576.000000,126636.000000,78425.000000,273.809090)}
{pt3dadd(198516.000000,126432.000000,78350.000000,273.809090)}
{pt3dadd(198432.000000,126264.000000,78375.000000,264.520652)}
{pt3dadd(198432.000000,126000.000000,78475.000000,237.392552)}
{pt3dadd(198264.000000,125724.000000,78450.000000,207.376512)}
{pt3dadd(198108.000000,125508.000000,78425.000000,185.076582)}
{pt3dadd(197988.000000,125244.000000,78375.000000,185.076582)}
{pt3dadd(197928.000000,125004.000000,78250.000000,187.231610)}
{pt3dadd(197796.000000,124728.000000,78125.000000,204.119210)}
{pt3dadd(197748.000000,124440.000000,77975.000000,234.135250)}
{pt3dadd(197808.000000,124116.000000,77725.000000,279.948836)}
{pt3dadd(197700.000000,123864.000000,77550.000000,308.409828)}
{pt3dadd(197688.000000,123432.000000,77325.000000,336.870820)}
{pt3dadd(197652.000000,123096.000000,77200.000000,324.811390)}
{pt3dadd(197544.000000,122748.000000,76950.000000,296.326886)}
{pt3dadd(197256.000000,122388.000000,76575.000000,244.226520)}
{pt3dadd(196944.000000,122052.000000,76250.000000,201.140708)}
{pt3dadd(196656.000000,121752.000000,76050.000000,156.596286)}
{pt3dadd(196632.000000,121704.000000,75875.000000,154.907766)}
{pt3dadd(196368.000000,121512.000000,75750.000000,158.204400)}
{pt3dadd(196200.000000,121092.000000,75350.000000,168.125722)}
{pt3dadd(196200.000000,121116.000000,74900.000000,178.543106)}
{pt3dadd(196056.000000,120696.000000,74300.000000,184.829886)}
{pt3dadd(195960.000000,120444.000000,74050.000000,190.152948)}
{pt3dadd(195516.000000,120120.000000,73625.000000,224.900274)}
{pt3dadd(195360.000000,120024.000000,73300.000000,275.409756)}
{pt3dadd(195144.000000,119724.000000,72875.000000,286.750602)}
{pt3dadd(195024.000000,119556.000000,72525.000000,277.751672)}
{pt3dadd(195036.000000,119616.000000,72125.000000,261.515342)}
{pt3dadd(194952.000000,119700.000000,71775.000000,223.471382)}
{pt3dadd(194844.000000,119856.000000,71300.000000,171.100308)}
{pt3dadd(194616.000000,119952.000000,70900.000000,157.804790)}
{pt3dadd(194436.000000,119988.000000,70525.000000,195.023934)}
{pt3dadd(194412.000000,119928.000000,70275.000000,245.883364)}
{pt3dadd(194196.000000,119760.000000,69800.000000,277.400212)}
{pt3dadd(194088.000000,119820.000000,69400.000000,292.557322)}
{pt3dadd(194064.000000,119724.000000,69025.000000,284.094610)}
{pt3dadd(194016.000000,120024.000000,68675.000000,254.185876)}
{pt3dadd(193932.000000,120204.000000,68325.000000,219.562776)}
{pt3dadd(193896.000000,120468.000000,68050.000000,191.342562)}
{pt3dadd(193764.000000,120636.000000,67725.000000,196.712432)}
{pt3dadd(193680.000000,120636.000000,67400.000000,221.090112)}
{pt3dadd(193644.000000,120732.000000,66975.000000,226.413174)}
{pt3dadd(193728.000000,120960.000000,66650.000000,230.420254)}
{pt3dadd(194064.000000,121380.000000,66275.000000,234.054796)}
{pt3dadd(194064.000000,121836.000000,66075.000000,239.975080)}
{pt3dadd(193776.000000,122328.000000,66025.000000,245.613440)}
{pt3dadd(193644.000000,122916.000000,65700.000000,251.775548)}
{pt3dadd(193752.000000,123264.000000,65600.000000,247.768468)}
{pt3dadd(193836.000000,123648.000000,65275.000000,251.775548)}
{pt3dadd(193764.000000,123708.000000,64950.000000,229.144548)}
{pt3dadd(193608.000000,123624.000000,64825.000000,199.128508)}
{pt3dadd(193572.000000,123876.000000,64700.000000,184.503688)}
{pt3dadd(193524.000000,124272.000000,64325.000000,179.180626)}
{pt3dadd(193440.000000,124704.000000,63925.000000,177.128218)}
{pt3dadd(193512.000000,124956.000000,63575.000000,177.128218)}
{pt3dadd(193584.000000,125304.000000,63275.000000,201.505898)}
{pt3dadd(193728.000000,125472.000000,63000.000000,228.633998)}
{pt3dadd(193644.000000,125928.000000,62675.000000,237.964140)}
{pt3dadd(193452.000000,126012.000000,62175.000000,222.115996)}
{pt3dadd(192792.000000,126372.000000,61475.000000,208.850852)}
{pt3dadd(192744.000000,126504.000000,61150.000000,176.699554)}
{pt3dadd(192672.000000,126600.000000,60775.000000,144.140694)}
{pt3dadd(192564.000000,126648.000000,60350.000000,134.810552)}
{pt3dadd(192540.000000,126660.000000,59950.000000,143.380962)}
{pt3dadd(192468.000000,126756.000000,59525.000000,152.829842)}
{pt3dadd(192264.000000,126852.000000,59125.000000,165.431630)}
{pt3dadd(192012.000000,126924.000000,58750.000000,210.437886)}
{pt3dadd(191532.000000,127020.000000,58400.000000,280.394088)}
{pt3dadd(190896.000000,126948.000000,57875.000000,336.226632)}
{pt3dadd(190320.000000,127248.000000,57375.000000,338.088224)}
{pt3dadd(189768.000000,127356.000000,56825.000000,338.088224)}
{pt3dadd(189180.000000,127260.000000,56525.000000,273.592260)}
{pt3dadd(189120.000000,127296.000000,56400.000000,177.294650)}

{create adhoc5}
{access adhoc5}
{connect adhoc5(1), adhoc4(0)}
{nseg = 1}
{strdef color color = "White"}
{pt3dclear()}
{pt3dadd(189120.000000,127296.000000,56400.000000,177.294650)}
{pt3dadd(188328.000000,127392.000000,56025.000000,151.818467)}
{pt3dadd(187992.000000,127656.000000,55900.000000,130.627811)}
{pt3dadd(187920.000000,127836.000000,55675.000000,119.168881)}
{pt3dadd(187824.000000,128040.000000,55575.000000,115.196731)}
{pt3dadd(187704.000000,128088.000000,55375.000000,106.645900)}
{pt3dadd(187440.000000,128232.000000,55175.000000,109.913797)}
{pt3dadd(187116.000000,128412.000000,54950.000000,121.739929)}
{pt3dadd(186696.000000,128544.000000,54750.000000,126.912079)}
{pt3dadd(186504.000000,128640.000000,54650.000000,124.569221)}
{pt3dadd(186336.000000,128712.000000,54675.000000,133.120052)}
{pt3dadd(186156.000000,128784.000000,54575.000000,138.292202)}
{pt3dadd(185988.000000,128976.000000,54550.000000,131.661442)}
{pt3dadd(185796.000000,129012.000000,54550.000000,124.258000)}
{pt3dadd(185640.000000,129084.000000,54525.000000,126.600858)}
{pt3dadd(185484.000000,129156.000000,54525.000000,118.050027)}
{pt3dadd(185304.000000,129336.000000,54550.000000,105.934229)}
{pt3dadd(185124.000000,129408.000000,54600.000000,109.717229)}
{pt3dadd(184932.000000,129516.000000,54600.000000,120.110817)}
{pt3dadd(184764.000000,129552.000000,54600.000000,122.693817)}
{pt3dadd(184572.000000,129684.000000,54675.000000,138.555058)}
{pt3dadd(184380.000000,129888.000000,54625.000000,169.017066)}
{pt3dadd(184176.000000,129996.000000,54650.000000,193.623056)}
{pt3dadd(183948.000000,130068.000000,54625.000000,208.979120)}
{pt3dadd(183648.000000,130104.000000,54650.000000,220.289592)}
{pt3dadd(183324.000000,130332.000000,54550.000000,227.567326)}
{pt3dadd(183168.000000,130560.000000,54550.000000,215.507896)}
{pt3dadd(183060.000000,130548.000000,54500.000000,187.118906)}
{pt3dadd(182880.000000,130740.000000,54450.000000,166.060546)}
{pt3dadd(182724.000000,130944.000000,54325.000000,153.427074)}
{pt3dadd(182568.000000,131064.000000,54225.000000,159.897290)}
{pt3dadd(182424.000000,131256.000000,54050.000000,185.085160)}
{pt3dadd(182064.000000,131388.000000,53700.000000,194.855570)}
{pt3dadd(182148.000000,131736.000000,53425.000000,183.866184)}
{pt3dadd(182328.000000,132048.000000,53175.000000,172.140102)}
{pt3dadd(182484.000000,132204.000000,52950.000000,148.621742)}
{pt3dadd(182508.000000,132300.000000,52875.000000,109.743650)}
{pt3dadd(182592.000000,132564.000000,52700.000000,105.145390)}
{pt3dadd(182616.000000,132888.000000,52450.000000,113.674776)}
{pt3dadd(182628.000000,132996.000000,52175.000000,122.940858)}
{pt3dadd(182460.000000,133104.000000,51925.000000,117.745486)}
{pt3dadd(182460.000000,133212.000000,51650.000000,114.781406)}
{pt3dadd(182472.000000,133356.000000,51300.000000,107.377964)}
{pt3dadd(182352.000000,133368.000000,51050.000000,107.377964)}
{pt3dadd(182256.000000,133500.000000,50750.000000,109.837964)}
{pt3dadd(182388.000000,133656.000000,50400.000000,130.126808)}
{pt3dadd(182376.000000,133608.000000,50050.000000,125.354483)}
{pt3dadd(181968.000000,133896.000000,49550.000000,114.580451)}
{pt3dadd(181848.000000,134088.000000,49375.000000,112.349159)}
{pt3dadd(181752.000000,134076.000000,49075.000000,128.989711)}
{pt3dadd(181560.000000,134100.000000,48675.000000,125.355169)}
{pt3dadd(181488.000000,134160.000000,48175.000000,125.355169)}
{pt3dadd(181428.000000,134424.000000,47825.000000,125.355169)}
{pt3dadd(181212.000000,134460.000000,47550.000000,117.618764)}
{pt3dadd(181068.000000,134424.000000,47300.000000,93.322840)}
{pt3dadd(181032.000000,134340.000000,47050.000000,68.858586)}
{pt3dadd(180888.000000,134340.000000,46725.000000,70.296897)}
{pt3dadd(180636.000000,134088.000000,46400.000000,76.358573)}
{pt3dadd(180252.000000,134136.000000,46150.000000,91.498420)}
{pt3dadd(180060.000000,134196.000000,45800.000000,106.464202)}
{pt3dadd(180000.000000,134172.000000,45525.000000,133.331520)}
{pt3dadd(179976.000000,134004.000000,45325.000000,168.852050)}

{create adhoc6}
{access adhoc6}
{connect adhoc6(1), adhoc4(0)}
{nseg = 1}
{strdef color color = "White"}
{pt3dclear()}
{pt3dadd(189120.000000,127296.000000,56400.000000,177.294650)}
{pt3dadd(188472.000000,126948.000000,56150.000000,151.818467)}
{pt3dadd(187800.000000,126528.000000,56000.000000,161.974632)}
{pt3dadd(187368.000000,126240.000000,55625.000000,165.609174)}
{pt3dadd(187164.000000,125880.000000,55350.000000,186.667534)}
{pt3dadd(186912.000000,125676.000000,55100.000000,192.954314)}
{pt3dadd(187008.000000,125520.000000,54850.000000,203.451270)}
{pt3dadd(187044.000000,125772.000000,54650.000000,177.294650)}

{create adhoc7}
{access adhoc7}
{connect adhoc7(1), adhoc6(0)}
{nseg = 1}
{strdef color color = "White"}
{pt3dclear()}
{pt3dadd(187044.000000,125772.000000,54650.000000,177.294650)}
{pt3dadd(186936.000000,126108.000000,54425.000000,203.451270)}
{pt3dadd(186684.000000,126408.000000,54200.000000,176.442912)}
{pt3dadd(186420.000000,126600.000000,54050.000000,166.183982)}
{pt3dadd(186432.000000,126780.000000,54000.000000,132.620250)}
{pt3dadd(186228.000000,126636.000000,54000.000000,126.000000)}

{create adhoc8}
{access adhoc8}
{connect adhoc8(1), adhoc7(0)}
{nseg = 1}
{strdef color color = "White"}
{pt3dclear()}
{pt3dadd(186228.000000,126636.000000,54000.000000,126.000000)}
{pt3dadd(185460.000000,126516.000000,53900.000000,118.281180)}
{pt3dadd(185172.000000,126396.000000,53850.000000,102.057363)}
{pt3dadd(184800.000000,126288.000000,53825.000000,93.913715)}
{pt3dadd(184428.000000,126156.000000,53775.000000,86.878925)}
{pt3dadd(184164.000000,125964.000000,53725.000000,81.683553)}
{pt3dadd(183948.000000,125808.000000,53700.000000,80.097815)}
{pt3dadd(183684.000000,125724.000000,53650.000000,85.810372)}
{pt3dadd(183324.000000,125568.000000,53725.000000,85.810372)}
{pt3dadd(182976.000000,125424.000000,53750.000000,86.547068)}
{pt3dadd(182616.000000,125280.000000,53750.000000,83.986585)}
{pt3dadd(182352.000000,125196.000000,53700.000000,82.548274)}
{pt3dadd(182052.000000,125124.000000,53675.000000,78.274028)}
{pt3dadd(181788.000000,125064.000000,53700.000000,76.688290)}
{pt3dadd(181548.000000,124992.000000,53700.000000,79.126845)}
{pt3dadd(181212.000000,124872.000000,53675.000000,92.054850)}
{pt3dadd(180876.000000,124800.000000,53675.000000,96.827175)}
{pt3dadd(180636.000000,124800.000000,53675.000000,118.588441)}
{pt3dadd(180324.000000,124740.000000,53600.000000,148.373407)}
{pt3dadd(180060.000000,124608.000000,53650.000000,204.180810)}
{pt3dadd(179712.000000,124452.000000,53725.000000,260.344806)}
{pt3dadd(179316.000000,124260.000000,53775.000000,350.453130)}
{pt3dadd(179016.000000,124044.000000,53750.000000,407.304350)}
{pt3dadd(178692.000000,123948.000000,53725.000000,447.384916)}
{pt3dadd(178392.000000,123936.000000,53800.000000,401.451344)}
{pt3dadd(178008.000000,123780.000000,53875.000000,345.337077)}
{pt3dadd(177720.000000,123660.000000,53950.000000,138.915000)}

{create adhoc9}
{access adhoc9}
{connect adhoc9(1), adhoc7(0)}
{nseg = 1}
{strdef color color = "White"}
{pt3dclear()}
{pt3dadd(186228.000000,126636.000000,54000.000000,126.000000)}
{pt3dadd(186600.000000,126972.000000,53825.000000,101.768300)}
{pt3dadd(186732.000000,127104.000000,53700.000000,96.193786)}
{pt3dadd(186948.000000,127320.000000,53550.000000,84.357884)}
{pt3dadd(187200.000000,127704.000000,53275.000000,119.690522)}
{pt3dadd(187488.000000,128148.000000,53275.000000,161.532694)}
{pt3dadd(187764.000000,128592.000000,53175.000000,187.262068)}
{pt3dadd(188076.000000,128832.000000,53075.000000,202.725240)}
{pt3dadd(188004.000000,128796.000000,52925.000000,228.286920)}
{pt3dadd(187980.000000,128808.000000,52825.000000,186.159400)}

{create adhoc10}
{access adhoc10}
{connect adhoc10(1), adhoc6(0)}
{nseg = 1}
{strdef color color = "White"}
{pt3dclear()}
{pt3dadd(187044.000000,125772.000000,54650.000000,177.294650)}
{pt3dadd(186804.000000,124776.000000,54650.000000,163.753310)}
{pt3dadd(186756.000000,124452.000000,54475.000000,157.710916)}
{pt3dadd(186708.000000,124104.000000,54350.000000,159.483866)}
{pt3dadd(186696.000000,123876.000000,54300.000000,169.901250)}
{pt3dadd(186660.000000,123600.000000,54275.000000,171.509364)}
{pt3dadd(186624.000000,123384.000000,54250.000000,188.439424)}
{pt3dadd(186612.000000,123024.000000,54250.000000,212.012573)}
{pt3dadd(186624.000000,122508.000000,54400.000000,261.944950)}

{create adhoc11}
{access adhoc11}
{connect adhoc11(1), adhoc10(0)}
{nseg = 1}
{strdef color color = "White"}
{pt3dclear()}
{pt3dadd(186624.000000,122508.000000,54400.000000,261.944950)}
{pt3dadd(186372.000000,122172.000000,54725.000000,238.093933)}
{pt3dadd(186204.000000,122088.000000,54900.000000,202.801656)}
{pt3dadd(185976.000000,121908.000000,55175.000000,165.883280)}
{pt3dadd(185892.000000,121824.000000,55325.000000,136.074840)}
{pt3dadd(185700.000000,121488.000000,55650.000000,132.778206)}
{pt3dadd(185340.000000,121152.000000,55900.000000,137.157502)}
{pt3dadd(185364.000000,120768.000000,56225.000000,135.625966)}
{pt3dadd(185520.000000,120420.000000,56525.000000,138.064521)}
{pt3dadd(185988.000000,119904.000000,56700.000000,167.872961)}
{pt3dadd(186480.000000,119316.000000,56925.000000,180.966245)}
{pt3dadd(186732.000000,118668.000000,57025.000000,166.713118)}
{pt3dadd(186672.000000,118404.000000,57250.000000,155.827218)}
{pt3dadd(186360.000000,117540.000000,57625.000000,160.775191)}
{pt3dadd(186108.000000,116940.000000,57700.000000,100.851952)}
{pt3dadd(185916.000000,116400.000000,57700.000000,114.285710)}

{create adhoc12}
{access adhoc12}
{connect adhoc12(1), adhoc10(0)}
{nseg = 1}
{strdef color color = "White"}
{pt3dclear()}
{pt3dadd(186624.000000,122508.000000,54400.000000,261.944950)}
{pt3dadd(186684.000000,121920.000000,54225.000000,284.822310)}
{pt3dadd(186840.000000,121296.000000,54075.000000,249.452868)}
{pt3dadd(187260.000000,120732.000000,53825.000000,229.226174)}
{pt3dadd(187296.000000,120264.000000,53775.000000,175.736658)}
{pt3dadd(187236.000000,119868.000000,53775.000000,172.275188)}
{pt3dadd(187068.000000,119388.000000,53775.000000,158.584966)}
{pt3dadd(186972.000000,119028.000000,53800.000000,160.739994)}
{pt3dadd(186696.000000,118656.000000,53875.000000,160.739994)}
{pt3dadd(186480.000000,118284.000000,53875.000000,158.156994)}
{pt3dadd(186228.000000,117852.000000,53825.000000,144.131444)}
{pt3dadd(186024.000000,117636.000000,53825.000000,150.145736)}
{pt3dadd(185544.000000,117264.000000,53775.000000,134.062306)}
{pt3dadd(185040.000000,117072.000000,53700.000000,118.956362)}
{pt3dadd(184704.000000,116700.000000,53500.000000,123.352503)}
{pt3dadd(184692.000000,116184.000000,53125.000000,85.281760)}

{create adhoc13}
{access adhoc13}
{connect adhoc13(1), adhoc1(0)}
{nseg = 1}
{strdef color color = "White"}
{pt3dclear()}
{pt3dadd(188808.000000,170124.000000,54650.000000,275.042200)}
{pt3dadd(188604.000000,170484.000000,54650.000000,205.514987)}
{pt3dadd(188508.000000,170964.000000,54275.000000,159.127330)}
{pt3dadd(188424.000000,171072.000000,54050.000000,121.175242)}
{pt3dadd(188376.000000,171384.000000,53750.000000,93.545304)}
{pt3dadd(188340.000000,171552.000000,53575.000000,115.863664)}
{pt3dadd(188208.000000,171888.000000,53250.000000,161.633639)}
{pt3dadd(188184.000000,172200.000000,53175.000000,201.483330)}
{pt3dadd(188196.000000,172680.000000,52950.000000,239.435418)}
{pt3dadd(188256.000000,173040.000000,52925.000000,281.723664)}
{pt3dadd(188184.000000,173244.000000,52900.000000,291.964164)}
{pt3dadd(188040.000000,173544.000000,52875.000000,275.803380)}
{pt3dadd(188016.000000,173892.000000,52975.000000,270.433510)}
{pt3dadd(188088.000000,174396.000000,52925.000000,267.814060)}
{pt3dadd(187896.000000,174732.000000,52800.000000,255.310780)}
{pt3dadd(187596.000000,175188.000000,52675.000000,264.415024)}
{pt3dadd(187164.000000,175752.000000,52450.000000,287.102920)}
{pt3dadd(187188.000000,176208.000000,52325.000000,287.102920)}
{pt3dadd(187200.000000,176748.000000,52250.000000,263.886080)}
{pt3dadd(187008.000000,177276.000000,52125.000000,252.400910)}
{pt3dadd(186636.000000,177696.000000,52075.000000,243.296666)}
{pt3dadd(186144.000000,178164.000000,51825.000000,254.362926)}
{pt3dadd(185796.000000,178560.000000,51700.000000,275.690508)}
{pt3dadd(185304.000000,178980.000000,51475.000000,296.412632)}
{pt3dadd(185328.000000,179424.000000,51425.000000,305.742774)}
{pt3dadd(184740.000000,179820.000000,51475.000000,297.878188)}
{pt3dadd(184332.000000,180192.000000,51600.000000,301.941818)}
{pt3dadd(183636.000000,180732.000000,51700.000000,305.627646)}
{pt3dadd(183216.000000,181044.000000,51750.000000,305.627646)}
{pt3dadd(182964.000000,181092.000000,51750.000000,293.157854)}
{pt3dadd(182640.000000,181368.000000,51700.000000,278.722510)}
{pt3dadd(182460.000000,181788.000000,51675.000000,204.930775)}
{pt3dadd(182172.000000,182280.000000,51425.000000,143.772520)}
{pt3dadd(182076.000000,182316.000000,51225.000000,154.525046)}
{pt3dadd(181920.000000,182592.000000,50850.000000,178.902726)}
{pt3dadd(181620.000000,182916.000000,50525.000000,175.606092)}
{pt3dadd(181320.000000,183060.000000,50350.000000,196.223977)}
{pt3dadd(181248.000000,183384.000000,50375.000000,217.211712)}
{pt3dadd(181068.000000,183744.000000,50400.000000,190.335322)}
{pt3dadd(181464.000000,184176.000000,50300.000000,176.375026)}
{pt3dadd(181644.000000,184404.000000,50300.000000,185.260874)}
{pt3dadd(181704.000000,184788.000000,50275.000000,192.192050)}
{pt3dadd(181764.000000,185184.000000,50200.000000,192.192050)}
{pt3dadd(182016.000000,185712.000000,50050.000000,187.593790)}
{pt3dadd(182016.000000,185952.000000,49925.000000,223.948046)}
{pt3dadd(181872.000000,186300.000000,49525.000000,276.983002)}
{pt3dadd(181572.000000,186672.000000,49075.000000,278.937674)}
{pt3dadd(181560.000000,187104.000000,48900.000000,277.164724)}
{pt3dadd(181320.000000,187548.000000,48625.000000,278.623334)}
{pt3dadd(181308.000000,187584.000000,48300.000000,233.383230)}
{pt3dadd(181188.000000,187848.000000,48025.000000,169.930890)}
{pt3dadd(180948.000000,188088.000000,47700.000000,167.976218)}
{pt3dadd(180852.000000,188388.000000,47475.000000,167.976218)}
{pt3dadd(180780.000000,188712.000000,47450.000000,156.150086)}
{pt3dadd(180672.000000,189048.000000,47400.000000,147.987790)}
{pt3dadd(180564.000000,189396.000000,47250.000000,154.588910)}
{pt3dadd(180276.000000,189672.000000,47100.000000,147.657734)}
{pt3dadd(180228.000000,189888.000000,46950.000000,155.656960)}
{pt3dadd(180108.000000,190188.000000,47000.000000,160.811480)}

{create adhoc14}
{access adhoc14}
{connect adhoc14(1), adhoc13(0)}
{nseg = 1}
{strdef color color = "White"}
{pt3dclear()}
{pt3dadd(180108.000000,190188.000000,47000.000000,160.811480)}
{pt3dadd(180192.000000,190392.000000,46700.000000,110.458333)}
{pt3dadd(180408.000000,190560.000000,46400.000000,79.128003)}
{pt3dadd(180384.000000,190452.000000,46175.000000,66.820490)}

{create adhoc15}
{access adhoc15}
{connect adhoc15(1), adhoc13(0)}
{nseg = 1}
{strdef color color = "White"}
{pt3dclear()}
{pt3dadd(180108.000000,190188.000000,47000.000000,160.811480)}
{pt3dadd(180000.000000,190344.000000,47200.000000,121.226053)}
{pt3dadd(179856.000000,190572.000000,47250.000000,112.413509)}
{pt3dadd(179676.000000,190932.000000,47500.000000,105.451213)}
{pt3dadd(179640.000000,191088.000000,47500.000000,100.678888)}
{pt3dadd(179652.000000,191352.000000,47575.000000,106.693180)}
{pt3dadd(179628.000000,191556.000000,47475.000000,116.567011)}
{pt3dadd(179628.000000,191796.000000,47450.000000,116.567011)}
{pt3dadd(179604.000000,192060.000000,47500.000000,113.135719)}
{pt3dadd(179652.000000,192360.000000,47325.000000,125.563416)}
{pt3dadd(179544.000000,192600.000000,47275.000000,171.496988)}
{pt3dadd(179328.000000,192888.000000,47175.000000,201.472848)}
{pt3dadd(179172.000000,193200.000000,47150.000000,211.866436)}
{pt3dadd(179256.000000,193620.000000,47100.000000,205.568342)}
{pt3dadd(179268.000000,193932.000000,46975.000000,197.912970)}
{pt3dadd(179172.000000,194448.000000,46925.000000,144.928501)}
{pt3dadd(178728.000000,195216.000000,47000.000000,116.341791)}
{pt3dadd(178668.000000,195444.000000,47050.000000,102.088664)}
{pt3dadd(178500.000000,195672.000000,47050.000000,111.818050)}
{pt3dadd(178452.000000,196020.000000,47125.000000,111.818050)}
{pt3dadd(178356.000000,196320.000000,47250.000000,105.118250)}
{pt3dadd(178296.000000,196704.000000,47325.000000,89.310198)}
{pt3dadd(178140.000000,197064.000000,47300.000000,93.169737)}
{pt3dadd(177900.000000,197292.000000,47250.000000,84.213882)}
{pt3dadd(177708.000000,197484.000000,47250.000000,80.879868)}
{pt3dadd(177588.000000,197712.000000,47325.000000,83.903917)}
{pt3dadd(177516.000000,197868.000000,47350.000000,92.308527)}
{pt3dadd(177408.000000,198144.000000,47350.000000,94.539819)}
{pt3dadd(177300.000000,198408.000000,47375.000000,95.352026)}
{pt3dadd(177180.000000,198696.000000,47450.000000,109.053562)}
{pt3dadd(177156.000000,198996.000000,47375.000000,147.005650)}
{pt3dadd(177144.000000,199320.000000,47400.000000,192.100046)}
{pt3dadd(177036.000000,199680.000000,47275.000000,245.502446)}
{pt3dadd(176952.000000,200004.000000,47300.000000,273.701674)}
{pt3dadd(176964.000000,200340.000000,47075.000000,287.630076)}
{pt3dadd(176748.000000,200652.000000,47150.000000,277.877216)}
{pt3dadd(176508.000000,201012.000000,47050.000000,256.269692)}
{pt3dadd(176112.000000,201336.000000,46925.000000,214.326222)}
{pt3dadd(176076.000000,201528.000000,46975.000000,202.841052)}
{pt3dadd(175860.000000,201756.000000,46950.000000,188.912650)}
{pt3dadd(175764.000000,201960.000000,47075.000000,170.117070)}
{pt3dadd(175584.000000,202176.000000,47125.000000,150.061490)}
{pt3dadd(175416.000000,202344.000000,47175.000000,137.459702)}
{pt3dadd(175260.000000,202560.000000,47225.000000,122.493920)}
{pt3dadd(175116.000000,202740.000000,47275.000000,113.066630)}
{pt3dadd(174924.000000,203004.000000,47300.000000,136.500904)}
{pt3dadd(174768.000000,203232.000000,47475.000000,174.980048)}
{pt3dadd(174624.000000,203460.000000,47425.000000,212.769706)}
{pt3dadd(174612.000000,203712.000000,47475.000000,241.483438)}
{pt3dadd(174540.000000,203928.000000,47475.000000,260.832050)}
{pt3dadd(174456.000000,204348.000000,47500.000000,244.708186)}
{pt3dadd(174192.000000,204648.000000,47325.000000,211.659802)}
{pt3dadd(174060.000000,204876.000000,47200.000000,169.817630)}
{pt3dadd(173952.000000,205188.000000,47125.000000,142.044130)}
{pt3dadd(173820.000000,205416.000000,47100.000000,135.112954)}
{pt3dadd(173604.000000,205548.000000,47100.000000,144.443096)}
{pt3dadd(173520.000000,205788.000000,47025.000000,168.820776)}
{pt3dadd(173316.000000,206088.000000,46900.000000,213.695292)}
{pt3dadd(173316.000000,206328.000000,46900.000000,251.709292)}
{pt3dadd(173304.000000,206676.000000,46850.000000,271.935986)}
{pt3dadd(173328.000000,206940.000000,46800.000000,274.091014)}
{pt3dadd(173400.000000,207204.000000,46850.000000,268.976848)}
{pt3dadd(173160.000000,207540.000000,46800.000000,234.469854)}
{pt3dadd(173076.000000,207912.000000,46825.000000,196.455854)}
{pt3dadd(173064.000000,208008.000000,47075.000000,164.685473)}
{pt3dadd(173004.000000,208416.000000,47125.000000,98.724300)}
