# Supplementary material for: Full reconstruction of large lobula plate tangential cells in Drosophila from a 3D EM dataset
Source: PLoS One. 2018 Nov 28;13(11):e0207828. doi: 10.1371/journal.pone.0207828 (PMC6261601; doi:10.1371/journal.pone.0207828)
Supplement: S1 Dataset — (ZIP) [file pone.0207828.s001.zip › Diameter hoc/Cell26_5skels_ck.001_corrected_sorted_diametered.hoc0001.hoc]

/* created with convertKnossosNmlToHoc.m */

{create adhoc1}
{access adhoc1}
{nseg = 1}
{strdef color color = "White"}
{pt3dclear()}
{pt3dadd(189276.000000,162060.000000,52600.000000,195.467360)}
{pt3dadd(189252.000000,162060.000000,53000.000000,207.411127)}
{pt3dadd(189240.000000,161988.000000,53525.000000,192.309316)}
{pt3dadd(189288.000000,162072.000000,54125.000000,180.998844)}
{pt3dadd(189144.000000,162072.000000,54600.000000,180.998844)}
{pt3dadd(189144.000000,161988.000000,54900.000000,193.058274)}
{pt3dadd(189144.000000,161856.000000,55125.000000,207.683094)}
{pt3dadd(189144.000000,161988.000000,55500.000000,205.910144)}
{pt3dadd(189180.000000,162060.000000,56150.000000,208.757904)}
{pt3dadd(189600.000000,162036.000000,56500.000000,194.322560)}
{pt3dadd(189936.000000,161796.000000,56975.000000,180.574610)}
{pt3dadd(190200.000000,161652.000000,57325.000000,174.412502)}
{pt3dadd(190572.000000,161616.000000,57650.000000,176.185452)}
{pt3dadd(190956.000000,161652.000000,58300.000000,195.448966)}
{pt3dadd(191184.000000,161604.000000,58650.000000,214.998476)}
{pt3dadd(191544.000000,161652.000000,59025.000000,207.688066)}
{pt3dadd(191748.000000,161460.000000,59450.000000,200.756890)}
{pt3dadd(191976.000000,161304.000000,59900.000000,187.525010)}
{pt3dadd(192300.000000,161172.000000,60425.000000,161.630736)}
{pt3dadd(192684.000000,161040.000000,61000.000000,137.253056)}
{pt3dadd(192972.000000,160884.000000,61550.000000,148.024936)}
{pt3dadd(193200.000000,160728.000000,61950.000000,151.321570)}
{pt3dadd(193836.000000,160680.000000,62150.000000,179.710560)}
{pt3dadd(193824.000000,160524.000000,62225.000000,200.966140)}
{pt3dadd(193884.000000,160476.000000,62300.000000,230.982180)}
{pt3dadd(193956.000000,160428.000000,62375.000000,263.956556)}
{pt3dadd(194028.000000,160380.000000,62450.000000,298.703882)}
{pt3dadd(194076.000000,160344.000000,62525.000000,301.323332)}
{pt3dadd(194196.000000,160284.000000,62575.000000,299.168304)}
{pt3dadd(194136.000000,160272.000000,62675.000000,286.039864)}
{pt3dadd(194136.000000,160224.000000,62750.000000,238.690750)}
{pt3dadd(194208.000000,160140.000000,62850.000000,200.646790)}
{pt3dadd(194232.000000,160056.000000,63000.000000,173.421350)}
{pt3dadd(194376.000000,160056.000000,63100.000000,171.368942)}
{pt3dadd(194544.000000,160056.000000,63150.000000,162.944054)}
{pt3dadd(194592.000000,160068.000000,63250.000000,183.187464)}
{pt3dadd(194628.000000,160008.000000,63325.000000,192.073312)}
{pt3dadd(194652.000000,160008.000000,63400.000000,209.545892)}
{pt3dadd(194688.000000,159996.000000,63475.000000,211.598300)}
{pt3dadd(194772.000000,159996.000000,63525.000000,213.552972)}
{pt3dadd(194808.000000,159936.000000,63625.000000,211.500564)}
{pt3dadd(194892.000000,159948.000000,63675.000000,211.500564)}
{pt3dadd(194964.000000,159936.000000,63750.000000,198.407280)}
{pt3dadd(195024.000000,159912.000000,63825.000000,187.469024)}
{pt3dadd(195060.000000,159864.000000,63900.000000,177.051640)}
{pt3dadd(195108.000000,159852.000000,63975.000000,175.096968)}
{pt3dadd(195144.000000,159852.000000,64075.000000,163.220974)}
{pt3dadd(195204.000000,159852.000000,64175.000000,163.220974)}
{pt3dadd(195264.000000,159840.000000,64250.000000,168.290558)}
{pt3dadd(195324.000000,159780.000000,64325.000000,176.753270)}
{pt3dadd(195348.000000,159732.000000,64425.000000,178.707942)}
{pt3dadd(195372.000000,159684.000000,64500.000000,183.306202)}
{pt3dadd(195444.000000,159588.000000,64575.000000,184.914316)}
{pt3dadd(195516.000000,159540.000000,64650.000000,179.844732)}
{pt3dadd(195540.000000,159552.000000,64750.000000,171.382020)}
{pt3dadd(195516.000000,159492.000000,64825.000000,167.565756)}
{pt3dadd(195528.000000,159492.000000,64900.000000,171.027226)}
{pt3dadd(195696.000000,159444.000000,65000.000000,178.304960)}
{pt3dadd(195804.000000,159408.000000,65100.000000,187.190808)}
{pt3dadd(195864.000000,159372.000000,65175.000000,201.815628)}
{pt3dadd(195960.000000,159360.000000,65250.000000,212.102108)}
{pt3dadd(196020.000000,159372.000000,65350.000000,215.918372)}
{pt3dadd(196140.000000,159312.000000,65425.000000,217.970780)}
{pt3dadd(196092.000000,159180.000000,65500.000000,220.023188)}
{pt3dadd(196152.000000,159204.000000,65575.000000,224.661882)}
{pt3dadd(196224.000000,159144.000000,65675.000000,224.661882)}
{pt3dadd(196236.000000,159096.000000,65750.000000,231.132098)}
{pt3dadd(196212.000000,158988.000000,65825.000000,237.925820)}
{pt3dadd(196188.000000,158928.000000,65925.000000,249.833708)}
{pt3dadd(196344.000000,158940.000000,66025.000000,257.698294)}
{pt3dadd(196656.000000,158544.000000,66125.000000,280.386190)}
{pt3dadd(196716.000000,158568.000000,66200.000000,290.626690)}
{pt3dadd(196764.000000,158520.000000,66275.000000,295.740856)}
{pt3dadd(196776.000000,158592.000000,66350.000000,298.491276)}
{pt3dadd(196812.000000,158616.000000,66425.000000,298.491276)}
{pt3dadd(196848.000000,158628.000000,66525.000000,288.931820)}
{pt3dadd(196908.000000,158748.000000,66600.000000,291.819760)}
{pt3dadd(196980.000000,158712.000000,66675.000000,303.674424)}
{pt3dadd(197052.000000,158676.000000,66750.000000,300.924004)}
{pt3dadd(197088.000000,158580.000000,66825.000000,295.554134)}
{pt3dadd(197208.000000,158496.000000,66900.000000,287.296324)}
{pt3dadd(197316.000000,158484.000000,66975.000000,284.408384)}
{pt3dadd(197460.000000,158484.000000,67050.000000,272.553720)}
{pt3dadd(197544.000000,158484.000000,67125.000000,262.800860)}
{pt3dadd(197640.000000,158556.000000,67200.000000,265.420310)}
{pt3dadd(197712.000000,158616.000000,67275.000000,276.710464)}
{pt3dadd(197808.000000,158700.000000,67325.000000,279.598404)}
{pt3dadd(197808.000000,158724.000000,67425.000000,285.236764)}
{pt3dadd(197868.000000,158796.000000,67500.000000,292.370174)}
{pt3dadd(198012.000000,158880.000000,67575.000000,284.880094)}
{pt3dadd(198072.000000,158928.000000,67650.000000,258.432830)}
{pt3dadd(198096.000000,158976.000000,67725.000000,229.948326)}
{pt3dadd(198132.000000,159024.000000,67800.000000,203.071936)}
{pt3dadd(198144.000000,159012.000000,67875.000000,191.731090)}
{pt3dadd(198192.000000,158988.000000,67950.000000,179.671660)}
{pt3dadd(198336.000000,159036.000000,68025.000000,181.533252)}
{pt3dadd(198420.000000,158988.000000,68125.000000,192.471508)}
{pt3dadd(198540.000000,159000.000000,68200.000000,199.749242)}
{pt3dadd(198528.000000,158988.000000,68275.000000,194.160028)}
{pt3dadd(198576.000000,159012.000000,68325.000000,195.932978)}
{pt3dadd(198636.000000,159036.000000,68400.000000,195.932978)}
{pt3dadd(198696.000000,159048.000000,68475.000000,190.064306)}
{pt3dadd(198756.000000,159060.000000,68550.000000,181.178458)}
{pt3dadd(198816.000000,159084.000000,68625.000000,182.951408)}
{pt3dadd(198864.000000,159072.000000,68700.000000,179.489938)}
{pt3dadd(198900.000000,159060.000000,68775.000000,171.027226)}
{pt3dadd(198984.000000,159060.000000,68850.000000,167.565756)}
{pt3dadd(199056.000000,159120.000000,68925.000000,169.173870)}
{pt3dadd(199116.000000,159144.000000,69000.000000,165.712400)}
{pt3dadd(199140.000000,159144.000000,69075.000000,172.990134)}
{pt3dadd(199164.000000,159144.000000,69150.000000,183.407518)}
{pt3dadd(199164.000000,159168.000000,69275.000000,186.868988)}
{pt3dadd(199224.000000,159192.000000,69375.000000,188.557508)}
{pt3dadd(199284.000000,159204.000000,69475.000000,190.246028)}
{pt3dadd(199344.000000,159216.000000,69550.000000,186.429764)}
{pt3dadd(199404.000000,159228.000000,69650.000000,180.840550)}
{pt3dadd(199464.000000,159252.000000,69725.000000,179.067600)}
{pt3dadd(199524.000000,159264.000000,69875.000000,186.709222)}
{pt3dadd(199572.000000,159276.000000,69950.000000,190.343764)}
{pt3dadd(199608.000000,159324.000000,70025.000000,188.570814)}
{pt3dadd(199584.000000,159348.000000,70100.000000,190.343764)}
{pt3dadd(199608.000000,159360.000000,70200.000000,188.655244)}
{pt3dadd(199668.000000,159372.000000,70275.000000,167.323400)}
{pt3dadd(199728.000000,159372.000000,70350.000000,154.689928)}
{pt3dadd(199800.000000,159372.000000,70425.000000,149.861758)}
{pt3dadd(199836.000000,159420.000000,70500.000000,146.400288)}
{pt3dadd(199812.000000,159444.000000,70575.000000,151.723350)}
{pt3dadd(199788.000000,159468.000000,70675.000000,165.413572)}
{pt3dadd(199812.000000,159492.000000,70775.000000,174.412502)}
{pt3dadd(199896.000000,159516.000000,70850.000000,177.552152)}
{pt3dadd(199980.000000,159540.000000,70975.000000,174.412502)}
{pt3dadd(200016.000000,159564.000000,71075.000000,169.089440)}
{pt3dadd(200028.000000,159588.000000,71200.000000,167.400920)}
{pt3dadd(200016.000000,159588.000000,71275.000000,164.104286)}
{pt3dadd(199980.000000,159636.000000,71375.000000,164.104286)}
{pt3dadd(199980.000000,159624.000000,71475.000000,164.104286)}
{pt3dadd(199980.000000,159696.000000,71550.000000,159.506026)}
{pt3dadd(199980.000000,159696.000000,71625.000000,159.506026)}
{pt3dadd(199968.000000,159708.000000,71725.000000,149.112438)}
{pt3dadd(200076.000000,159744.000000,71800.000000,162.860388)}
{pt3dadd(200292.000000,159852.000000,71925.000000,171.762463)}
{pt3dadd(200292.000000,159444.000000,72175.000000,237.591800)}

{create adhoc2}
{access adhoc2}
{connect adhoc2(1), adhoc1(0)}
{nseg = 1}
{strdef color color = "White"}
{pt3dclear()}
{pt3dadd(200292.000000,159444.000000,72175.000000,237.591800)}
{pt3dadd(200328.000000,159456.000000,72275.000000,298.322987)}
{pt3dadd(200364.000000,159456.000000,72375.000000,334.536194)}
{pt3dadd(200400.000000,159468.000000,72475.000000,385.805090)}
{pt3dadd(200424.000000,159468.000000,72575.000000,426.833486)}
{pt3dadd(200364.000000,159552.000000,72650.000000,442.719868)}
{pt3dadd(200436.000000,159492.000000,72750.000000,457.849758)}
{pt3dadd(200496.000000,159456.000000,72825.000000,462.116566)}
{pt3dadd(200556.000000,159504.000000,72925.000000,444.601826)}
{pt3dadd(200556.000000,159552.000000,73025.000000,431.150716)}
{pt3dadd(200544.000000,159576.000000,73125.000000,418.950162)}
{pt3dadd(200580.000000,159624.000000,73200.000000,403.820272)}
{pt3dadd(200604.000000,159612.000000,73300.000000,395.489834)}
{pt3dadd(200688.000000,159696.000000,73425.000000,395.489834)}
{pt3dadd(200748.000000,159720.000000,73500.000000,387.556088)}
{pt3dadd(200796.000000,159756.000000,73600.000000,383.870260)}
{pt3dadd(200820.000000,159792.000000,73675.000000,387.380576)}
{pt3dadd(200844.000000,159840.000000,73750.000000,376.314316)}
{pt3dadd(200868.000000,159876.000000,73850.000000,361.904904)}
{pt3dadd(200832.000000,159888.000000,73925.000000,361.904904)}
{pt3dadd(200928.000000,160032.000000,74000.000000,361.904904)}
{pt3dadd(201000.000000,160092.000000,74075.000000,355.051436)}
{pt3dadd(201036.000000,160128.000000,74175.000000,355.051436)}
{pt3dadd(201060.000000,160152.000000,74250.000000,358.394588)}
{pt3dadd(201084.000000,160176.000000,74350.000000,351.198444)}
{pt3dadd(201108.000000,160200.000000,74425.000000,347.688128)}
{pt3dadd(201108.000000,160224.000000,74500.000000,341.471824)}
{pt3dadd(201144.000000,160248.000000,74575.000000,331.912368)}
{pt3dadd(201108.000000,160356.000000,74625.000000,325.385256)}
{pt3dadd(201084.000000,160464.000000,74700.000000,322.042104)}
{pt3dadd(201108.000000,160404.000000,74750.000000,309.594708)}
{pt3dadd(201144.000000,160404.000000,74800.000000,306.706768)}
{pt3dadd(201168.000000,160404.000000,74875.000000,303.818828)}
{pt3dadd(201180.000000,160428.000000,74950.000000,307.002788)}
{pt3dadd(201264.000000,160428.000000,75000.000000,300.786484)}
{pt3dadd(201300.000000,160464.000000,75100.000000,306.706768)}
{pt3dadd(201288.000000,160476.000000,75175.000000,303.956348)}
{pt3dadd(201312.000000,160464.000000,75250.000000,298.586478)}
{pt3dadd(201192.000000,160416.000000,75325.000000,289.482234)}
{pt3dadd(201228.000000,160428.000000,75400.000000,286.594294)}
{pt3dadd(201204.000000,160476.000000,75500.000000,283.561950)}
{pt3dadd(201204.000000,160548.000000,75575.000000,292.232654)}
{pt3dadd(201216.000000,160596.000000,75650.000000,303.522808)}
{pt3dadd(201360.000000,160632.000000,75725.000000,306.410748)}
{pt3dadd(201516.000000,160692.000000,75825.000000,303.660328)}
{pt3dadd(201516.000000,160728.000000,75900.000000,292.907802)}
{pt3dadd(201528.000000,160752.000000,75975.000000,279.122932)}
{pt3dadd(201552.000000,160764.000000,76025.000000,262.962148)}
{pt3dadd(201576.000000,160764.000000,76100.000000,245.415900)}
{pt3dadd(201600.000000,160788.000000,76150.000000,233.508012)}
{pt3dadd(201624.000000,160800.000000,76225.000000,231.132098)}
{pt3dadd(201636.000000,160836.000000,76275.000000,236.246264)}
{pt3dadd(201660.000000,160860.000000,76350.000000,243.736344)}
{pt3dadd(201672.000000,160896.000000,76425.000000,253.024782)}
{pt3dadd(201684.000000,160932.000000,76500.000000,264.932670)}
{pt3dadd(201696.000000,160968.000000,76575.000000,269.803300)}
{pt3dadd(201684.000000,161016.000000,76650.000000,264.689134)}
{pt3dadd(201684.000000,161052.000000,76725.000000,257.199054)}
{pt3dadd(201684.000000,161100.000000,76800.000000,257.199054)}
{pt3dadd(201660.000000,161136.000000,76900.000000,257.199054)}
{pt3dadd(201624.000000,161184.000000,76950.000000,262.568924)}
{pt3dadd(201600.000000,161232.000000,77050.000000,267.683090)}
{pt3dadd(201588.000000,161256.000000,77125.000000,275.173170)}
{pt3dadd(201564.000000,161268.000000,77200.000000,277.792620)}
{pt3dadd(201552.000000,161292.000000,77275.000000,277.792620)}
{pt3dadd(201540.000000,161304.000000,77350.000000,280.680560)}
{pt3dadd(201492.000000,161340.000000,77425.000000,283.430980)}
{pt3dadd(201444.000000,161316.000000,77500.000000,283.430980)}
{pt3dadd(201456.000000,161376.000000,77600.000000,283.430980)}
{pt3dadd(201480.000000,161424.000000,77675.000000,283.430980)}
{pt3dadd(201444.000000,161388.000000,77775.000000,277.792620)}
{pt3dadd(201396.000000,161376.000000,77850.000000,275.042200)}
{pt3dadd(201348.000000,161364.000000,77925.000000,280.680560)}
{pt3dadd(201264.000000,161364.000000,78000.000000,280.680560)}
{pt3dadd(201240.000000,161340.000000,78050.000000,280.680560)}
{pt3dadd(201180.000000,161376.000000,78125.000000,273.190480)}
{pt3dadd(201168.000000,161364.000000,78200.000000,261.282592)}
{pt3dadd(201072.000000,161316.000000,78275.000000,255.644232)}
{pt3dadd(201024.000000,161256.000000,78325.000000,267.498896)}
{pt3dadd(201048.000000,161256.000000,78400.000000,270.249316)}
{pt3dadd(201048.000000,161304.000000,78500.000000,286.410100)}
{pt3dadd(200976.000000,161340.000000,78550.000000,317.026120)}
{pt3dadd(200916.000000,161388.000000,78625.000000,332.223936)}
{pt3dadd(200880.000000,161424.000000,78725.000000,335.567088)}
{pt3dadd(200856.000000,161448.000000,78825.000000,351.524800)}
{pt3dadd(200856.000000,161412.000000,78900.000000,351.524800)}
{pt3dadd(200844.000000,161376.000000,78975.000000,344.671332)}
{pt3dadd(200832.000000,161364.000000,79050.000000,348.181648)}
{pt3dadd(200808.000000,161412.000000,79100.000000,355.377792)}
{pt3dadd(200784.000000,161424.000000,79200.000000,359.063620)}
{pt3dadd(200772.000000,161472.000000,79300.000000,340.640056)}
{pt3dadd(200820.000000,161484.000000,79425.000000,333.433967)}
{pt3dadd(200820.000000,161556.000000,79925.000000,226.277900)}

{create adhoc3}
{access adhoc3}
{connect adhoc3(1), adhoc2(0)}
{nseg = 1}
{strdef color color = "White"}
{pt3dclear()}
{pt3dadd(200820.000000,161556.000000,79925.000000,226.277900)}
{pt3dadd(200772.000000,161796.000000,79975.000000,283.129240)}
{pt3dadd(200772.000000,162024.000000,80025.000000,294.203488)}
{pt3dadd(200688.000000,161880.000000,80100.000000,309.594708)}
{pt3dadd(200712.000000,161892.000000,80175.000000,312.482648)}
{pt3dadd(200748.000000,162024.000000,80250.000000,315.825800)}
{pt3dadd(200772.000000,162144.000000,80325.000000,319.009760)}
{pt3dadd(200748.000000,162276.000000,80425.000000,328.569216)}
{pt3dadd(200760.000000,162372.000000,80500.000000,331.601560)}
{pt3dadd(200772.000000,162480.000000,80575.000000,334.633904)}
{pt3dadd(200736.000000,162612.000000,80675.000000,325.074448)}
{pt3dadd(200700.000000,162684.000000,80750.000000,310.600334)}
{pt3dadd(200724.000000,162768.000000,80850.000000,301.040878)}
{pt3dadd(200748.000000,162840.000000,80925.000000,292.370174)}
{pt3dadd(200820.000000,162912.000000,81050.000000,289.337830)}
{pt3dadd(200892.000000,162984.000000,81125.000000,281.080020)}
{pt3dadd(200952.000000,163068.000000,81200.000000,281.080020)}
{pt3dadd(200976.000000,163188.000000,81300.000000,281.080020)}
{pt3dadd(201000.000000,163296.000000,81375.000000,289.750724)}
{pt3dadd(200988.000000,163428.000000,81450.000000,310.376440)}
{pt3dadd(200940.000000,163548.000000,81525.000000,343.323596)}
{pt3dadd(200904.000000,163680.000000,81600.000000,368.337006)}
{pt3dadd(200844.000000,163764.000000,81675.000000,393.026352)}
{pt3dadd(200892.000000,163728.000000,81750.000000,423.430308)}
{pt3dadd(200808.000000,163824.000000,81825.000000,431.760746)}
{pt3dadd(200880.000000,163848.000000,81900.000000,445.211856)}
{pt3dadd(200952.000000,163884.000000,81975.000000,457.412410)}
{pt3dadd(200940.000000,164004.000000,82050.000000,449.478664)}
{pt3dadd(200928.000000,164112.000000,82125.000000,429.112136)}
{pt3dadd(200964.000000,164196.000000,82200.000000,420.781698)}
{pt3dadd(201012.000000,164280.000000,82250.000000,403.266958)}
{pt3dadd(201048.000000,164352.000000,82325.000000,394.936520)}
{pt3dadd(201096.000000,164436.000000,82400.000000,398.806636)}
{pt3dadd(201132.000000,164508.000000,82475.000000,398.806636)}
{pt3dadd(201156.000000,164592.000000,82550.000000,381.213264)}
{pt3dadd(201168.000000,164676.000000,82600.000000,366.803852)}
{pt3dadd(201192.000000,164748.000000,82675.000000,349.210480)}
{pt3dadd(201204.000000,164832.000000,82750.000000,334.801068)}
{pt3dadd(201192.000000,164928.000000,82825.000000,327.947600)}
{pt3dadd(201180.000000,165024.000000,82900.000000,331.131560)}
{pt3dadd(201168.000000,165120.000000,82950.000000,327.947600)}
{pt3dadd(201156.000000,165216.000000,83025.000000,331.131560)}
{pt3dadd(201192.000000,165264.000000,83100.000000,322.027316)}
{pt3dadd(201072.000000,165360.000000,83150.000000,315.811012)}
{pt3dadd(201144.000000,165384.000000,83225.000000,306.706768)}
{pt3dadd(201132.000000,165444.000000,83300.000000,303.674424)}
{pt3dadd(201132.000000,165504.000000,83375.000000,303.674424)}
{pt3dadd(201060.000000,165612.000000,83450.000000,312.778668)}
{pt3dadd(201084.000000,165636.000000,83525.000000,315.811012)}
{pt3dadd(201132.000000,165648.000000,83600.000000,324.915256)}
{pt3dadd(201168.000000,165696.000000,83675.000000,327.947600)}
{pt3dadd(201204.000000,165768.000000,83750.000000,318.843356)}
{pt3dadd(201240.000000,165840.000000,83800.000000,315.659396)}
{pt3dadd(201240.000000,165912.000000,83875.000000,312.627052)}
{pt3dadd(201216.000000,165996.000000,83950.000000,309.443092)}
{pt3dadd(201204.000000,166056.000000,84025.000000,306.410748)}
{pt3dadd(201228.000000,166056.000000,84100.000000,309.298688)}
{pt3dadd(201180.000000,166152.000000,84150.000000,306.266344)}
{pt3dadd(201144.000000,166224.000000,84225.000000,306.266344)}
{pt3dadd(201192.000000,166248.000000,84300.000000,297.595640)}
{pt3dadd(201252.000000,166284.000000,84350.000000,300.627984)}
{pt3dadd(201324.000000,166356.000000,84400.000000,306.844288)}
{pt3dadd(201252.000000,166356.000000,84450.000000,313.060592)}
{pt3dadd(201288.000000,166296.000000,84500.000000,313.060592)}
{pt3dadd(201420.000000,166404.000000,84575.000000,310.441142)}
{pt3dadd(201396.000000,166476.000000,84625.000000,296.656272)}
{pt3dadd(201420.000000,166596.000000,84675.000000,282.182158)}
{pt3dadd(201444.000000,166572.000000,84775.000000,270.327494)}
{pt3dadd(201504.000000,166560.000000,84850.000000,267.439554)}
{pt3dadd(201540.000000,166632.000000,84925.000000,267.439554)}
{pt3dadd(201576.000000,166620.000000,85025.000000,269.934270)}
{pt3dadd(201588.000000,166716.000000,85150.000000,269.934270)}
{pt3dadd(201516.000000,166716.000000,85225.000000,275.572630)}
{pt3dadd(201564.000000,166644.000000,85300.000000,288.020026)}
{pt3dadd(201600.000000,166704.000000,85375.000000,309.347608)}
{pt3dadd(201624.000000,166764.000000,85475.000000,338.231134)}
{pt3dadd(201648.000000,166824.000000,85575.000000,367.114660)}
{pt3dadd(201672.000000,166884.000000,85650.000000,387.740376)}
{pt3dadd(201624.000000,166908.000000,85750.000000,394.936520)}
{pt3dadd(201576.000000,166932.000000,85850.000000,402.492464)}
{pt3dadd(201516.000000,166956.000000,85950.000000,402.492464)}
{pt3dadd(201528.000000,166980.000000,86050.000000,406.556094)}
{pt3dadd(201528.000000,167004.000000,86150.000000,410.619724)}
{pt3dadd(201540.000000,167016.000000,86225.000000,414.489840)}
{pt3dadd(201576.000000,167028.000000,86325.000000,403.423580)}
{pt3dadd(201576.000000,167028.000000,86425.000000,382.797864)}
{pt3dadd(201588.000000,167064.000000,86525.000000,361.140862)}
{pt3dadd(201612.000000,167064.000000,86625.000000,357.077232)}
{pt3dadd(201588.000000,167028.000000,86700.000000,361.140862)}
{pt3dadd(201552.000000,167076.000000,86800.000000,364.651178)}
{pt3dadd(201564.000000,167040.000000,86900.000000,381.406778)}
{pt3dadd(201660.000000,167064.000000,87000.000000,395.130034)}
{pt3dadd(201708.000000,167052.000000,87100.000000,403.460472)}
{pt3dadd(201720.000000,167124.000000,87200.000000,391.840898)}
{pt3dadd(201744.000000,167100.000000,87275.000000,388.330582)}
{pt3dadd(201756.000000,167124.000000,87400.000000,384.644754)}
{pt3dadd(201636.000000,167160.000000,87500.000000,377.448610)}
{pt3dadd(201636.000000,167184.000000,87575.000000,354.708760)}
{pt3dadd(201636.000000,167208.000000,87700.000000,344.671332)}
{pt3dadd(201648.000000,167196.000000,87800.000000,344.671332)}
{pt3dadd(201636.000000,167172.000000,87925.000000,341.161016)}
{pt3dadd(201696.000000,167256.000000,88000.000000,344.671332)}
{pt3dadd(201684.000000,167340.000000,88125.000000,348.014484)}
{pt3dadd(201648.000000,167400.000000,88200.000000,358.051912)}
{pt3dadd(201612.000000,167460.000000,88300.000000,365.248056)}
{pt3dadd(201636.000000,167556.000000,88400.000000,372.444200)}
{pt3dadd(201660.000000,167508.000000,88500.000000,376.130028)}
{pt3dadd(201636.000000,167520.000000,88575.000000,383.326172)}
{pt3dadd(201660.000000,167628.000000,88675.000000,376.472704)}
{pt3dadd(201648.000000,167604.000000,88775.000000,372.786876)}
{pt3dadd(201588.000000,167748.000000,88850.000000,363.303460)}
{pt3dadd(201504.000000,168012.000000,89150.000000,368.582860)}

{create adhoc4}
{access adhoc4}
{connect adhoc4(1), adhoc3(0)}
{nseg = 1}
{strdef color color = "White"}
{pt3dclear()}
{pt3dadd(201504.000000,168012.000000,89150.000000,368.582860)}
{pt3dadd(201492.000000,168072.000000,89225.000000,362.732333)}
{pt3dadd(201504.000000,168084.000000,89325.000000,348.181648)}
{pt3dadd(201540.000000,168084.000000,89400.000000,338.144220)}
{pt3dadd(201516.000000,168132.000000,89500.000000,334.633904)}
{pt3dadd(201528.000000,168156.000000,89600.000000,334.633904)}
{pt3dadd(201564.000000,168144.000000,89675.000000,334.633904)}
{pt3dadd(201600.000000,168084.000000,89750.000000,331.601560)}
{pt3dadd(201564.000000,168156.000000,89825.000000,334.785520)}
{pt3dadd(201564.000000,168204.000000,89925.000000,331.442368)}
{pt3dadd(201480.000000,168276.000000,90025.000000,331.442368)}
{pt3dadd(201540.000000,168276.000000,90100.000000,345.851780)}
{pt3dadd(201612.000000,168276.000000,90175.000000,362.607380)}
{pt3dadd(201600.000000,168324.000000,90250.000000,373.146676)}
{pt3dadd(201672.000000,168336.000000,90325.000000,383.685972)}
{pt3dadd(201528.000000,168468.000000,90450.000000,390.882116)}
{pt3dadd(201552.000000,168504.000000,90550.000000,383.326172)}
{pt3dadd(201576.000000,168552.000000,90625.000000,379.640344)}
{pt3dadd(201600.000000,168588.000000,90700.000000,375.954516)}
{pt3dadd(201576.000000,168600.000000,90775.000000,379.824632)}
{pt3dadd(201552.000000,168624.000000,90875.000000,379.824632)}
{pt3dadd(201600.000000,168684.000000,90950.000000,387.380576)}
{pt3dadd(201588.000000,168648.000000,91050.000000,394.936520)}
{pt3dadd(201624.000000,168708.000000,91150.000000,402.492464)}
{pt3dadd(201600.000000,168768.000000,91250.000000,398.622348)}
{pt3dadd(201564.000000,168804.000000,91350.000000,398.622348)}
{pt3dadd(201528.000000,168840.000000,91425.000000,394.752232)}
{pt3dadd(201528.000000,168864.000000,91525.000000,390.882116)}
{pt3dadd(201648.000000,168972.000000,91750.000000,370.256400)}
{pt3dadd(201744.000000,168960.000000,91850.000000,347.862440)}
{pt3dadd(201744.000000,168972.000000,91925.000000,320.354314)}
{pt3dadd(201756.000000,168984.000000,92025.000000,295.340904)}
{pt3dadd(201756.000000,168996.000000,92125.000000,267.832778)}
{pt3dadd(201768.000000,169092.000000,92200.000000,259.574968)}
{pt3dadd(201708.000000,169128.000000,92300.000000,254.460802)}
{pt3dadd(201636.000000,169164.000000,92400.000000,252.084888)}
{pt3dadd(201552.000000,169272.000000,92675.000000,242.796450)}
{pt3dadd(201528.000000,169320.000000,92750.000000,233.950320)}
{pt3dadd(201504.000000,169356.000000,92825.000000,220.654802)}
{pt3dadd(201480.000000,169404.000000,92900.000000,209.854000)}
{pt3dadd(201468.000000,169440.000000,92975.000000,203.383784)}
{pt3dadd(201444.000000,169488.000000,93075.000000,203.383784)}
{pt3dadd(201420.000000,169536.000000,93175.000000,203.383784)}
{pt3dadd(201396.000000,169572.000000,93250.000000,207.390864)}
{pt3dadd(201372.000000,169620.000000,93350.000000,218.191666)}
{pt3dadd(201348.000000,169656.000000,93450.000000,227.037796)}
{pt3dadd(201336.000000,169704.000000,93550.000000,244.584044)}
{pt3dadd(201312.000000,169740.000000,93650.000000,280.938300)}
{pt3dadd(201288.000000,169788.000000,93750.000000,308.044004)}
{pt3dadd(201192.000000,169824.000000,93825.000000,328.355986)}
{pt3dadd(201168.000000,169800.000000,93900.000000,348.667968)}
{pt3dadd(201144.000000,169776.000000,94000.000000,354.884272)}
{pt3dadd(201012.000000,169824.000000,94075.000000,341.161016)}
{pt3dadd(200844.000000,169860.000000,94175.000000,334.633904)}
{pt3dadd(200700.000000,169884.000000,94250.000000,334.633904)}
{pt3dadd(200688.000000,169884.000000,94350.000000,345.700164)}
{pt3dadd(200688.000000,169896.000000,94425.000000,356.239460)}
{pt3dadd(200688.000000,169896.000000,94525.000000,369.962716)}
{pt3dadd(200676.000000,169908.000000,94600.000000,330.283572)}
{pt3dadd(200676.000000,169908.000000,94700.000000,320.724116)}
{pt3dadd(200676.000000,169908.000000,94775.000000,303.130744)}
{pt3dadd(200676.000000,169920.000000,94850.000000,280.736784)}
{pt3dadd(200640.000000,169920.000000,94925.000000,255.723374)}
{pt3dadd(200568.000000,169932.000000,95000.000000,284.112364)}
{pt3dadd(200484.000000,169932.000000,95075.000000,273.359838)}
{pt3dadd(200412.000000,169944.000000,95150.000000,257.199054)}
{pt3dadd(200388.000000,169956.000000,95225.000000,245.291166)}
{pt3dadd(200364.000000,169980.000000,95300.000000,238.157756)}
{pt3dadd(200304.000000,170016.000000,95375.000000,238.157756)}
{pt3dadd(200244.000000,170064.000000,95450.000000,243.271922)}
{pt3dadd(200184.000000,170112.000000,95525.000000,250.762002)}
{pt3dadd(200232.000000,170136.000000,95625.000000,257.555724)}
{pt3dadd(200304.000000,170172.000000,95675.000000,275.979288)}
{pt3dadd(200316.000000,170172.000000,95750.000000,287.269442)}
{pt3dadd(200328.000000,170184.000000,95850.000000,299.124106)}
{pt3dadd(200340.000000,170184.000000,95925.000000,310.978770)}
{pt3dadd(200364.000000,170196.000000,95975.000000,327.947600)}
{pt3dadd(200388.000000,170196.000000,96050.000000,331.131560)}
{pt3dadd(200328.000000,170328.000000,96125.000000,337.658672)}
{pt3dadd(200280.000000,170316.000000,96200.000000,344.512140)}
{pt3dadd(200244.000000,170316.000000,96275.000000,341.328180)}
{pt3dadd(200208.000000,170316.000000,96325.000000,341.328180)}
{pt3dadd(200160.000000,170304.000000,96400.000000,338.144220)}
{pt3dadd(200124.000000,170304.000000,96475.000000,338.144220)}
{pt3dadd(200040.000000,170316.000000,96550.000000,334.633904)}
{pt3dadd(200016.000000,170328.000000,96625.000000,331.601560)}
{pt3dadd(199956.000000,170364.000000,96700.000000,325.385256)}
{pt3dadd(199896.000000,170388.000000,96775.000000,314.095102)}
{pt3dadd(199836.000000,170388.000000,96850.000000,293.783120)}
{pt3dadd(199848.000000,170400.000000,96950.000000,268.832444)}
{pt3dadd(199872.000000,170400.000000,97025.000000,249.233788)}
{pt3dadd(199884.000000,170448.000000,97100.000000,233.842568)}
{pt3dadd(199884.000000,170508.000000,97175.000000,228.971938)}
{pt3dadd(199884.000000,170568.000000,97250.000000,224.333244)}
{pt3dadd(199884.000000,170628.000000,97325.000000,222.178216)}
{pt3dadd(199872.000000,170688.000000,97375.000000,231.024346)}
{pt3dadd(199860.000000,170748.000000,97450.000000,238.157756)}
{pt3dadd(199836.000000,170784.000000,97525.000000,243.028386)}
{pt3dadd(199776.000000,170844.000000,97575.000000,252.781246)}
{pt3dadd(199752.000000,170808.000000,97650.000000,254.936274)}
{pt3dadd(199680.000000,170808.000000,97700.000000,252.560360)}
{pt3dadd(199620.000000,170844.000000,97800.000000,250.065644)}
{pt3dadd(199644.000000,170856.000000,97850.000000,250.065644)}
{pt3dadd(199608.000000,170928.000000,97925.000000,242.575564)}
{pt3dadd(199572.000000,171000.000000,98000.000000,247.214258)}
{pt3dadd(199524.000000,171036.000000,98075.000000,249.590172)}
{pt3dadd(199560.000000,171108.000000,98150.000000,252.084888)}
{pt3dadd(199488.000000,171288.000000,98275.000000,247.214258)}
{pt3dadd(199512.000000,171264.000000,98325.000000,236.927778)}
{pt3dadd(199572.000000,171216.000000,98400.000000,230.134056)}
{pt3dadd(199536.000000,171276.000000,98525.000000,227.758142)}
{pt3dadd(199500.000000,171348.000000,98600.000000,236.015952)}
{pt3dadd(199500.000000,171384.000000,98700.000000,249.144392)}
{pt3dadd(199440.000000,171468.000000,99000.000000,272.559312)}
{pt3dadd(199380.000000,171528.000000,99125.000000,290.105560)}
{pt3dadd(199332.000000,171600.000000,99200.000000,297.595640)}
{pt3dadd(199284.000000,171660.000000,99275.000000,294.707700)}
{pt3dadd(199248.000000,171732.000000,99350.000000,297.740044)}
{pt3dadd(199212.000000,171804.000000,99425.000000,303.956348)}
{pt3dadd(199236.000000,171816.000000,99475.000000,313.515804)}
{pt3dadd(199152.000000,171984.000000,99500.000000,348.110318)}
{pt3dadd(199176.000000,171948.000000,99550.000000,379.954412)}
{pt3dadd(199200.000000,171960.000000,99650.000000,415.686940)}
{pt3dadd(199284.000000,171900.000000,99700.000000,448.014770)}

{create adhoc5}
{access adhoc5}
{connect adhoc5(1), adhoc4(0)}
{nseg = 1}
{strdef color color = "White"}
{pt3dclear()}
{pt3dadd(199284.000000,171900.000000,99700.000000,448.014770)}
{pt3dadd(199284.000000,171576.000000,100700.000000,590.619457)}
{pt3dadd(199392.000000,171684.000000,100825.000000,639.329034)}
{pt3dadd(199368.000000,171516.000000,100900.000000,688.729668)}
{pt3dadd(199368.000000,171456.000000,100975.000000,695.348896)}
{pt3dadd(199320.000000,171420.000000,101050.000000,695.348896)}
{pt3dadd(199284.000000,171312.000000,101125.000000,682.425654)}
{pt3dadd(199236.000000,171180.000000,101200.000000,662.552228)}
{pt3dadd(199260.000000,171072.000000,101350.000000,643.625160)}
{pt3dadd(199164.000000,171048.000000,101425.000000,643.625160)}
{pt3dadd(199080.000000,171024.000000,101500.000000,637.321146)}
{pt3dadd(199080.000000,170928.000000,101575.000000,631.317320)}
{pt3dadd(199092.000000,170844.000000,101650.000000,631.317320)}
{pt3dadd(199092.000000,170760.000000,101725.000000,643.625160)}
{pt3dadd(199056.000000,170592.000000,101775.000000,624.698092)}
{pt3dadd(199020.000000,170616.000000,101850.000000,612.976340)}
{pt3dadd(199032.000000,170580.000000,101925.000000,607.258414)}
{pt3dadd(199044.000000,170532.000000,102000.000000,601.254588)}
{pt3dadd(199056.000000,170448.000000,102075.000000,583.228822)}
{pt3dadd(199044.000000,170304.000000,102150.000000,583.228822)}
{pt3dadd(198912.000000,170124.000000,102225.000000,588.946748)}
{pt3dadd(198804.000000,169932.000000,102300.000000,583.501106)}
{pt3dadd(198792.000000,169956.000000,102375.000000,572.337538)}
{pt3dadd(198768.000000,169872.000000,102450.000000,566.891896)}
{pt3dadd(198768.000000,169800.000000,102550.000000,561.173970)}
{pt3dadd(198792.000000,169788.000000,102625.000000,550.010402)}
{pt3dadd(198756.000000,169596.000000,102700.000000,544.824062)}
{pt3dadd(198756.000000,169464.000000,102775.000000,550.269704)}
{pt3dadd(198672.000000,169404.000000,102850.000000,567.437098)}
{pt3dadd(198588.000000,169428.000000,102950.000000,567.437098)}
{pt3dadd(198528.000000,169452.000000,103025.000000,562.250758)}
{pt3dadd(198540.000000,169416.000000,103125.000000,567.437098)}
{pt3dadd(198516.000000,169248.000000,103225.000000,561.991456)}
{pt3dadd(198504.000000,169092.000000,103325.000000,550.269704)}
{pt3dadd(198468.000000,169020.000000,103400.000000,550.269704)}
{pt3dadd(198408.000000,168972.000000,103525.000000,555.456044)}
{pt3dadd(198348.000000,168912.000000,103600.000000,566.619612)}
{pt3dadd(198240.000000,168972.000000,103675.000000,577.783180)}
{pt3dadd(198168.000000,168828.000000,103775.000000,589.504932)}
{pt3dadd(198144.000000,168912.000000,103900.000000,601.226684)}
{pt3dadd(198096.000000,168876.000000,103975.000000,618.394078)}
{pt3dadd(198120.000000,168840.000000,104075.000000,618.394078)}
{pt3dadd(198120.000000,168804.000000,104150.000000,612.676152)}
{pt3dadd(198144.000000,168708.000000,104275.000000,612.676152)}
{pt3dadd(198108.000000,168624.000000,104350.000000,618.980166)}
{pt3dadd(198072.000000,168540.000000,104450.000000,612.976340)}
{pt3dadd(198036.000000,168480.000000,104550.000000,612.976340)}
{pt3dadd(198012.000000,168408.000000,104625.000000,618.694266)}
{pt3dadd(197988.000000,168396.000000,104725.000000,601.526872)}
{pt3dadd(197976.000000,168372.000000,104825.000000,583.501106)}
{pt3dadd(197964.000000,168300.000000,104900.000000,577.783180)}
{pt3dadd(197916.000000,168252.000000,105000.000000,572.065254)}
{pt3dadd(197880.000000,168276.000000,105075.000000,572.065254)}
{pt3dadd(197868.000000,168204.000000,105175.000000,572.065254)}
{pt3dadd(197820.000000,168096.000000,105275.000000,561.433272)}
{pt3dadd(197772.000000,168000.000000,105350.000000,545.861934)}
{pt3dadd(197724.000000,167976.000000,105450.000000,540.416292)}
{pt3dadd(197700.000000,167952.000000,105550.000000,534.698366)}
{pt3dadd(197712.000000,167928.000000,105675.000000,540.144008)}
{pt3dadd(197736.000000,167832.000000,105775.000000,550.775990)}
{pt3dadd(197736.000000,167736.000000,105875.000000,572.065254)}
{pt3dadd(197724.000000,167640.000000,105975.000000,589.232648)}
{pt3dadd(197700.000000,167544.000000,106075.000000,594.950574)}
{pt3dadd(197664.000000,167448.000000,106175.000000,600.668500)}
{pt3dadd(197616.000000,167352.000000,106250.000000,612.390252)}
{pt3dadd(197568.000000,167160.000000,106350.000000,612.390252)}
{pt3dadd(197436.000000,167016.000000,106425.000000,600.668500)}
{pt3dadd(197304.000000,166872.000000,106525.000000,600.668500)}
{pt3dadd(197172.000000,166728.000000,106625.000000,600.668500)}
{pt3dadd(197052.000000,166656.000000,106750.000000,600.668500)}
{pt3dadd(196968.000000,166560.000000,106825.000000,612.976340)}
{pt3dadd(196896.000000,166476.000000,106925.000000,644.571518)}
{pt3dadd(196800.000000,166416.000000,107025.000000,670.448770)}
{pt3dadd(196620.000000,166464.000000,107150.000000,703.623702)}
{pt3dadd(196404.000000,166428.000000,107225.000000,738.457376)}
{pt3dadd(196296.000000,166272.000000,107350.000000,759.324468)}
{pt3dadd(196200.000000,166104.000000,107475.000000,790.778416)}
{pt3dadd(196116.000000,166044.000000,107450.000000,822.232364)}
{pt3dadd(196020.000000,165936.000000,107525.000000,846.388632)}
{pt3dadd(195924.000000,165900.000000,107575.000000,862.882332)}
{pt3dadd(195840.000000,165852.000000,107600.000000,895.908980)}
{pt3dadd(195768.000000,165816.000000,107650.000000,904.779360)}
{pt3dadd(195696.000000,165780.000000,107750.000000,913.649740)}
{pt3dadd(195624.000000,165900.000000,107800.000000,931.834020)}
{pt3dadd(195516.000000,165876.000000,107925.000000,940.704400)}
{pt3dadd(195432.000000,165888.000000,107875.000000,931.834020)}
{pt3dadd(195312.000000,165828.000000,107925.000000,932.129700)}
{pt3dadd(195216.000000,165768.000000,107950.000000,887.038600)}

{create adhoc6}
{access adhoc6}
{connect adhoc6(1), adhoc5(0)}
{nseg = 1}
{strdef color color = "White"}
{pt3dclear()}
{pt3dadd(195216.000000,165768.000000,107950.000000,887.038600)}
{pt3dadd(195264.000000,164736.000000,108100.000000,351.445892)}
{pt3dadd(195240.000000,164532.000000,108100.000000,240.475778)}
{pt3dadd(195240.000000,164376.000000,108175.000000,81.872686)}
{pt3dadd(195240.000000,164232.000000,108225.000000,77.384728)}
{pt3dadd(195168.000000,164076.000000,108250.000000,79.390934)}
{pt3dadd(195060.000000,164016.000000,108200.000000,84.831464)}
{pt3dadd(194952.000000,163944.000000,108200.000000,89.319422)}
{pt3dadd(194856.000000,163836.000000,108200.000000,85.248712)}
{pt3dadd(194760.000000,163764.000000,108125.000000,89.736670)}
{pt3dadd(194676.000000,163656.000000,108150.000000,94.747612)}
{pt3dadd(194592.000000,163536.000000,108175.000000,91.413598)}
{pt3dadd(194520.000000,163452.000000,108175.000000,87.737847)}
{pt3dadd(194520.000000,163380.000000,108150.000000,87.737847)}
{pt3dadd(194448.000000,163296.000000,108150.000000,81.739662)}
{pt3dadd(194376.000000,163260.000000,108150.000000,76.027105)}
{pt3dadd(194304.000000,163212.000000,108150.000000,76.800636)}
{pt3dadd(194244.000000,163176.000000,108150.000000,75.214898)}
{pt3dadd(194172.000000,163140.000000,108150.000000,79.285608)}
{pt3dadd(194064.000000,163068.000000,108125.000000,77.915788)}
{pt3dadd(193968.000000,163032.000000,108100.000000,81.792654)}
{pt3dadd(193872.000000,162936.000000,108075.000000,78.912607)}
{pt3dadd(193752.000000,162936.000000,108125.000000,76.806091)}
{pt3dadd(193656.000000,163032.000000,108200.000000,72.735381)}
{pt3dadd(193536.000000,163080.000000,108225.000000,72.735381)}
{pt3dadd(193428.000000,163092.000000,108250.000000,71.070357)}
{pt3dadd(193332.000000,163044.000000,108250.000000,76.510887)}
{pt3dadd(193236.000000,163008.000000,108275.000000,81.055958)}
{pt3dadd(193140.000000,162984.000000,108275.000000,88.263237)}
{pt3dadd(193044.000000,162876.000000,108300.000000,89.545845)}

{create adhoc7}
{access adhoc7}
{connect adhoc7(1), adhoc5(0)}
{nseg = 1}
{strdef color color = "White"}
{pt3dclear()}
{pt3dadd(195216.000000,165768.000000,107950.000000,887.038600)}
{pt3dadd(194952.000000,165804.000000,108025.000000,763.997100)}
{pt3dadd(194820.000000,165768.000000,108150.000000,764.901164)}
{pt3dadd(194736.000000,165816.000000,108125.000000,740.744896)}
{pt3dadd(194640.000000,165780.000000,108150.000000,773.919828)}
{pt3dadd(194544.000000,165768.000000,108175.000000,766.257260)}
{pt3dadd(194436.000000,165768.000000,108200.000000,766.257260)}
{pt3dadd(194328.000000,165804.000000,108250.000000,766.257260)}
{pt3dadd(194280.000000,165756.000000,108375.000000,766.257260)}
{pt3dadd(194220.000000,165828.000000,108500.000000,752.009396)}
{pt3dadd(194148.000000,165888.000000,108625.000000,744.711716)}
{pt3dadd(194064.000000,165960.000000,108725.000000,711.536784)}
{pt3dadd(193980.000000,165960.000000,108725.000000,667.198284)}
{pt3dadd(193896.000000,165840.000000,108800.000000,617.673444)}
{pt3dadd(193824.000000,165864.000000,108900.000000,582.396468)}
{pt3dadd(193752.000000,165924.000000,109025.000000,530.525796)}
{pt3dadd(193632.000000,165984.000000,109150.000000,491.721792)}
{pt3dadd(193524.000000,166044.000000,109250.000000,464.081356)}
{pt3dadd(193452.000000,166080.000000,109400.000000,437.757144)}
{pt3dadd(193380.000000,166104.000000,109575.000000,419.366678)}
{pt3dadd(193320.000000,166116.000000,109725.000000,414.886532)}
{pt3dadd(193248.000000,166152.000000,109850.000000,411.016416)}
{pt3dadd(193104.000000,166188.000000,109950.000000,407.146300)}
{pt3dadd(193032.000000,166224.000000,110100.000000,411.016416)}
{pt3dadd(192972.000000,166284.000000,110250.000000,403.082670)}
{pt3dadd(192888.000000,166212.000000,110350.000000,398.815862)}
{pt3dadd(192828.000000,166212.000000,110475.000000,415.496562)}
{pt3dadd(192744.000000,166272.000000,110600.000000,441.820774)}
{pt3dadd(192672.000000,166344.000000,110725.000000,469.461210)}
{pt3dadd(192576.000000,166284.000000,110725.000000,495.785422)}
{pt3dadd(192516.000000,166356.000000,110825.000000,519.362228)}
{pt3dadd(192432.000000,166392.000000,110875.000000,551.359474)}
{pt3dadd(192360.000000,166344.000000,110975.000000,556.545814)}
{pt3dadd(192300.000000,166464.000000,111100.000000,537.235816)}
{pt3dadd(192228.000000,166548.000000,111225.000000,523.112158)}
{pt3dadd(192168.000000,166632.000000,111300.000000,499.535352)}
{pt3dadd(192132.000000,166752.000000,111300.000000,458.791152)}
{pt3dadd(192060.000000,166656.000000,111325.000000,435.214346)}
{pt3dadd(191988.000000,166596.000000,111425.000000,426.883908)}
{pt3dadd(191916.000000,166584.000000,111500.000000,422.617100)}
{pt3dadd(191832.000000,166584.000000,111600.000000,422.617100)}
{pt3dadd(191676.000000,166608.000000,111725.000000,422.617100)}
{pt3dadd(191580.000000,166572.000000,111800.000000,422.617100)}
{pt3dadd(191484.000000,166560.000000,111900.000000,450.257536)}
{pt3dadd(191412.000000,166596.000000,112025.000000,479.279984)}
{pt3dadd(191292.000000,166608.000000,112100.000000,508.302432)}
{pt3dadd(191220.000000,166620.000000,112150.000000,537.324880)}
{pt3dadd(191148.000000,166632.000000,112225.000000,555.715346)}
{pt3dadd(191076.000000,166716.000000,112275.000000,555.715346)}
{pt3dadd(191004.000000,166800.000000,112425.000000,555.715346)}
{pt3dadd(190920.000000,166896.000000,112575.000000,561.433272)}
{pt3dadd(190836.000000,167004.000000,112650.000000,561.433272)}
{pt3dadd(190740.000000,167124.000000,112725.000000,566.619612)}
{pt3dadd(190668.000000,167160.000000,112800.000000,566.619612)}
{pt3dadd(190572.000000,167196.000000,112875.000000,555.987630)}
{pt3dadd(190488.000000,167220.000000,112925.000000,525.514064)}
{pt3dadd(190392.000000,167256.000000,113000.000000,496.491616)}
{pt3dadd(190308.000000,167196.000000,113200.000000,477.181618)}
{pt3dadd(190212.000000,167256.000000,113275.000000,453.604812)}
{pt3dadd(190140.000000,167352.000000,113375.000000,443.961300)}
{pt3dadd(190056.000000,167436.000000,113475.000000,443.961300)}
{pt3dadd(189972.000000,167520.000000,113575.000000,457.412410)}
{pt3dadd(189900.000000,167616.000000,113650.000000,461.892556)}
{pt3dadd(189816.000000,167712.000000,113725.000000,522.510182)}
{pt3dadd(189744.000000,167808.000000,113800.000000,560.811442)}
{pt3dadd(189672.000000,167904.000000,113875.000000,610.212076)}
{pt3dadd(189600.000000,168000.000000,113950.000000,664.676272)}
{pt3dadd(189504.000000,168108.000000,113975.000000,702.977532)}
{pt3dadd(189420.000000,168216.000000,114025.000000,683.104106)}
{pt3dadd(189324.000000,168324.000000,114050.000000,689.723334)}
{pt3dadd(189216.000000,168360.000000,114125.000000,670.796266)}
{pt3dadd(189132.000000,168324.000000,114175.000000,649.929174)}
{pt3dadd(189048.000000,168324.000000,114250.000000,626.457766)}
{pt3dadd(188964.000000,168348.000000,114275.000000,626.457766)}
{pt3dadd(188880.000000,168396.000000,114300.000000,619.838538)}
{pt3dadd(188784.000000,168468.000000,114300.000000,638.765606)}
{pt3dadd(188724.000000,168588.000000,114275.000000,645.384834)}
{pt3dadd(188640.000000,168696.000000,114250.000000,668.856242)}
{pt3dadd(188568.000000,168816.000000,114225.000000,668.856242)}
{pt3dadd(188472.000000,168828.000000,114400.000000,662.552228)}
{pt3dadd(188388.000000,168864.000000,114475.000000,649.628986)}
{pt3dadd(188280.000000,168900.000000,114500.000000,649.628986)}
{pt3dadd(188208.000000,168972.000000,114425.000000,663.198398)}
{pt3dadd(188100.000000,169092.000000,114450.000000,690.369504)}
{pt3dadd(188016.000000,169224.000000,114450.000000,725.203178)}
{pt3dadd(187944.000000,169308.000000,114525.000000,738.126420)}
{pt3dadd(187848.000000,169392.000000,114625.000000,752.374284)}
{pt3dadd(187752.000000,169380.000000,114500.000000,745.424100)}
{pt3dadd(187656.000000,169356.000000,114600.000000,738.126420)}
{pt3dadd(187572.000000,169452.000000,114725.000000,709.596760)}
{pt3dadd(187500.000000,169584.000000,114850.000000,696.673518)}
{pt3dadd(187404.000000,169692.000000,114900.000000,657.780660)}
{pt3dadd(187320.000000,169812.000000,114950.000000,638.853592)}
{pt3dadd(187224.000000,169896.000000,115050.000000,618.980166)}
{pt3dadd(187116.000000,169980.000000,115150.000000,590.322418)}
{pt3dadd(187008.000000,170052.000000,115250.000000,558.325172)}
{pt3dadd(186912.000000,170136.000000,115350.000000,533.569532)}
{pt3dadd(186792.000000,170148.000000,115475.000000,512.280268)}
{pt3dadd(186696.000000,170196.000000,115475.000000,480.283022)}
{pt3dadd(186612.000000,170244.000000,115500.000000,461.892556)}
{pt3dadd(186504.000000,170292.000000,115625.000000,453.145602)}
{pt3dadd(186408.000000,170340.000000,115775.000000,462.329904)}
{pt3dadd(186312.000000,170376.000000,115925.000000,462.329904)}
{pt3dadd(186180.000000,170484.000000,115950.000000,467.034060)}
{pt3dadd(186072.000000,170616.000000,116175.000000,490.610866)}
{pt3dadd(185988.000000,170628.000000,116275.000000,514.187672)}
{pt3dadd(185892.000000,170748.000000,116300.000000,524.313368)}
{pt3dadd(185808.000000,170784.000000,116350.000000,534.439064)}
{pt3dadd(185736.000000,170844.000000,116400.000000,544.564760)}
{pt3dadd(185664.000000,170916.000000,116475.000000,525.254762)}
{pt3dadd(185592.000000,170988.000000,116550.000000,510.424910)}
{pt3dadd(185520.000000,171000.000000,116700.000000,491.114912)}
{pt3dadd(185436.000000,171096.000000,116825.000000,467.538106)}
{pt3dadd(185340.000000,171156.000000,116875.000000,452.708254)}
{pt3dadd(185244.000000,171204.000000,116925.000000,452.708254)}
{pt3dadd(185172.000000,171264.000000,116975.000000,448.228108)}
{pt3dadd(185076.000000,171324.000000,117025.000000,462.351766)}
{pt3dadd(184992.000000,171384.000000,117075.000000,475.802876)}
{pt3dadd(184920.000000,171444.000000,117125.000000,471.322730)}
{pt3dadd(184872.000000,171504.000000,117150.000000,480.507032)}
{pt3dadd(184848.000000,171564.000000,117200.000000,480.507032)}
{pt3dadd(184812.000000,171624.000000,117250.000000,470.863520)}
{pt3dadd(184776.000000,171684.000000,117300.000000,470.863520)}
{pt3dadd(184716.000000,171732.000000,117350.000000,475.343666)}
{pt3dadd(184644.000000,171792.000000,117400.000000,470.639510)}
{pt3dadd(184572.000000,171852.000000,117450.000000,466.372702)}
{pt3dadd(184488.000000,171912.000000,117500.000000,466.372702)}
{pt3dadd(184392.000000,171972.000000,117525.000000,452.921592)}
{pt3dadd(184296.000000,172032.000000,117575.000000,440.111008)}
{pt3dadd(184188.000000,172092.000000,117625.000000,435.630862)}
{pt3dadd(184104.000000,172152.000000,117675.000000,439.897670)}
{pt3dadd(184020.000000,172212.000000,117725.000000,439.897670)}
{pt3dadd(183936.000000,172236.000000,117800.000000,444.164478)}
{pt3dadd(183840.000000,172236.000000,117850.000000,452.494916)}
{pt3dadd(183744.000000,172248.000000,117900.000000,452.494916)}
{pt3dadd(183648.000000,172248.000000,117950.000000,433.098218)}
{pt3dadd(183564.000000,172272.000000,117950.000000,412.731690)}
{pt3dadd(183468.000000,172332.000000,117900.000000,393.334992)}
{pt3dadd(183408.000000,172476.000000,117850.000000,373.938294)}
{pt3dadd(183348.000000,172572.000000,117925.000000,348.014484)}
{pt3dadd(183240.000000,172692.000000,117900.000000,344.671332)}
{pt3dadd(183168.000000,172800.000000,117875.000000,352.227276)}
{pt3dadd(183084.000000,172920.000000,117825.000000,359.423420)}
{pt3dadd(183012.000000,173040.000000,117875.000000,362.933736)}
{pt3dadd(182916.000000,173052.000000,117875.000000,369.460848)}
{pt3dadd(182820.000000,173064.000000,117875.000000,363.244544)}
{pt3dadd(182736.000000,173076.000000,117900.000000,359.374428)}
{pt3dadd(182652.000000,173088.000000,117900.000000,363.244544)}
{pt3dadd(182580.000000,173172.000000,118000.000000,370.800488)}
{pt3dadd(182508.000000,173232.000000,118100.000000,394.677332)}
{pt3dadd(182424.000000,173280.000000,118175.000000,415.303048)}
{pt3dadd(182364.000000,173412.000000,118125.000000,427.503602)}
{pt3dadd(182280.000000,173556.000000,118100.000000,435.834040)}
{pt3dadd(182220.000000,173688.000000,118150.000000,448.644624)}
{pt3dadd(182148.000000,173796.000000,118200.000000,458.288136)}
{pt3dadd(182076.000000,173904.000000,118250.000000,475.802876)}
{pt3dadd(181980.000000,174024.000000,118300.000000,467.472438)}
{pt3dadd(181884.000000,174060.000000,118300.000000,459.142000)}
{pt3dadd(181824.000000,174144.000000,118300.000000,454.661854)}
{pt3dadd(181752.000000,174216.000000,118300.000000,449.722498)}
{pt3dadd(181656.000000,174264.000000,118375.000000,440.538196)}
{pt3dadd(181572.000000,174312.000000,118425.000000,453.348780)}
{pt3dadd(181500.000000,174372.000000,118475.000000,457.412410)}
{pt3dadd(181428.000000,174420.000000,118525.000000,449.081972)}
{pt3dadd(181368.000000,174468.000000,118600.000000,427.697116)}
{pt3dadd(181284.000000,174540.000000,118625.000000,411.810734)}
{pt3dadd(181212.000000,174660.000000,118625.000000,399.000150)}
{pt3dadd(181128.000000,174792.000000,118625.000000,394.936520)}
{pt3dadd(181044.000000,174912.000000,118625.000000,403.266958)}
{pt3dadd(180960.000000,175008.000000,118650.000000,424.651814)}
{pt3dadd(180888.000000,175104.000000,118700.000000,449.722498)}
{pt3dadd(180792.000000,175176.000000,118725.000000,467.237238)}
{pt3dadd(180684.000000,175260.000000,118775.000000,480.047822)}
{pt3dadd(180600.000000,175320.000000,118825.000000,489.232124)}
{pt3dadd(180516.000000,175368.000000,118875.000000,499.357820)}
{pt3dadd(180432.000000,175428.000000,118925.000000,514.929158)}
{pt3dadd(180360.000000,175488.000000,118975.000000,530.500496)}
{pt3dadd(180276.000000,175548.000000,119025.000000,562.497742)}
{pt3dadd(180216.000000,175656.000000,119075.000000,578.069080)}
{pt3dadd(180132.000000,175764.000000,119100.000000,578.069080)}
{pt3dadd(180048.000000,175860.000000,119150.000000,578.069080)}
{pt3dadd(179976.000000,175968.000000,119200.000000,572.623438)}
{pt3dadd(179904.000000,176088.000000,119225.000000,540.626192)}
{pt3dadd(179820.000000,176208.000000,119250.000000,529.994210)}
{pt3dadd(179748.000000,176328.000000,119250.000000,529.994210)}
{pt3dadd(179652.000000,176388.000000,119325.000000,509.718716)}
{pt3dadd(179556.000000,176448.000000,119400.000000,515.164358)}
{pt3dadd(179484.000000,176508.000000,119450.000000,535.439852)}
{pt3dadd(179412.000000,176568.000000,119525.000000,517.049386)}
{pt3dadd(179316.000000,176616.000000,119600.000000,489.408950)}
{pt3dadd(179232.000000,176700.000000,119575.000000,499.052462)}
{pt3dadd(179136.000000,176808.000000,119575.000000,408.693868)}
{pt3dadd(179064.000000,176808.000000,119750.000000,393.122530)}
{pt3dadd(178956.000000,176892.000000,119750.000000,401.869484)}
{pt3dadd(178884.000000,176952.000000,119825.000000,419.384224)}
{pt3dadd(178800.000000,177024.000000,119850.000000,424.570564)}
{pt3dadd(178704.000000,177084.000000,119900.000000,494.653664)}
{pt3dadd(178608.000000,177096.000000,119975.000000,499.593020)}
{pt3dadd(178536.000000,177180.000000,119975.000000,504.297176)}
{pt3dadd(178452.000000,177228.000000,120075.000000,482.912320)}
{pt3dadd(178380.000000,177288.000000,120175.000000,463.602322)}
{pt3dadd(178116.000000,177348.000000,120275.000000,454.855368)}
{pt3dadd(178128.000000,177432.000000,120350.000000,432.401272)}
{pt3dadd(178068.000000,177504.000000,120425.000000,418.950162)}
{pt3dadd(178008.000000,177588.000000,120525.000000,418.950162)}
{pt3dadd(177972.000000,177612.000000,120600.000000,438.260160)}
{pt3dadd(177864.000000,177696.000000,120700.000000,447.007114)}
{pt3dadd(177744.000000,177792.000000,120775.000000,474.647550)}
{pt3dadd(177516.000000,177960.000000,120850.000000,483.394504)}
{pt3dadd(177276.000000,178140.000000,120925.000000,509.718716)}
{pt3dadd(177048.000000,178308.000000,121000.000000,504.532376)}
{pt3dadd(176808.000000,178488.000000,121100.000000,504.532376)}
{pt3dadd(176592.000000,178596.000000,121200.000000,509.978018)}
{pt3dadd(176436.000000,178680.000000,121275.000000,514.682174)}
{pt3dadd(176328.000000,178728.000000,121375.000000,505.038662)}
{pt3dadd(176244.000000,178776.000000,121475.000000,500.099306)}
{pt3dadd(176088.000000,178812.000000,121525.000000,509.742818)}
{pt3dadd(176004.000000,178956.000000,121600.000000,489.467324)}
{pt3dadd(175920.000000,179100.000000,121650.000000,484.763168)}
{pt3dadd(175776.000000,179292.000000,121700.000000,476.016214)}
{pt3dadd(175524.000000,179292.000000,121750.000000,444.092062)}
{pt3dadd(175356.000000,179400.000000,121800.000000,407.228554)}
{pt3dadd(175188.000000,179508.000000,121875.000000,386.862026)}
{pt3dadd(175056.000000,179652.000000,121950.000000,386.862026)}
{pt3dadd(174924.000000,179808.000000,122025.000000,395.608980)}
{pt3dadd(174792.000000,179952.000000,122100.000000,427.533132)}
{pt3dadd(174768.000000,180108.000000,122200.000000,450.272982)}
{pt3dadd(174756.000000,180252.000000,122275.000000,480.283022)}
{pt3dadd(174744.000000,180408.000000,122350.000000,475.802876)}
{pt3dadd(174708.000000,180528.000000,122450.000000,485.446388)}
{pt3dadd(174636.000000,180564.000000,122525.000000,495.572084)}
{pt3dadd(174684.000000,180552.000000,122600.000000,514.882082)}
{pt3dadd(174672.000000,180756.000000,122675.000000,514.882082)}
{pt3dadd(174636.000000,180864.000000,122725.000000,534.192080)}
{pt3dadd(174540.000000,180948.000000,122825.000000,534.192080)}
{pt3dadd(174564.000000,181044.000000,122900.000000,524.066384)}
{pt3dadd(174432.000000,181116.000000,122975.000000,524.066384)}
{pt3dadd(174348.000000,181200.000000,123000.000000,519.127028)}
{pt3dadd(174288.000000,181284.000000,122975.000000,513.940688)}
{pt3dadd(174252.000000,181380.000000,123000.000000,519.127028)}
{pt3dadd(174192.000000,181452.000000,123025.000000,524.066384)}
{pt3dadd(174120.000000,181536.000000,123075.000000,513.940688)}
{pt3dadd(174012.000000,181632.000000,123100.000000,504.756386)}
{pt3dadd(173832.000000,181716.000000,123175.000000,490.632728)}
{pt3dadd(173688.000000,181812.000000,123175.000000,462.992292)}
{pt3dadd(173568.000000,181980.000000,123200.000000,444.601826)}
{pt3dadd(173448.000000,182076.000000,123200.000000,439.897670)}
{pt3dadd(173340.000000,182148.000000,123150.000000,449.081972)}
{pt3dadd(173208.000000,182220.000000,123225.000000,468.391970)}
{pt3dadd(173076.000000,182316.000000,123250.000000,507.195974)}
{pt3dadd(172920.000000,182376.000000,123300.000000,560.863416)}
{pt3dadd(172812.000000,182676.000000,123275.000000,605.783904)}
{pt3dadd(172692.000000,182724.000000,123375.000000,646.000236)}
{pt3dadd(172620.000000,182772.000000,123375.000000,663.167630)}
{pt3dadd(172524.000000,182820.000000,123400.000000,669.171456)}
{pt3dadd(172428.000000,182832.000000,123425.000000,650.244388)}
{pt3dadd(172356.000000,182784.000000,123450.000000,637.321146)}
{pt3dadd(172272.000000,182844.000000,123425.000000,630.701918)}
{pt3dadd(172200.000000,182844.000000,123425.000000,624.698092)}
{pt3dadd(172128.000000,182832.000000,123425.000000,624.698092)}
{pt3dadd(172044.000000,182832.000000,123425.000000,637.005932)}
{pt3dadd(171960.000000,182832.000000,123425.000000,625.284180)}
{pt3dadd(171864.000000,182724.000000,123500.000000,601.812772)}
{pt3dadd(171780.000000,182760.000000,123525.000000,585.462864)}
{pt3dadd(171684.000000,182832.000000,123500.000000,553.465618)}
{pt3dadd(171600.000000,182856.000000,123525.000000,524.807870)}
{pt3dadd(171504.000000,182892.000000,123525.000000,519.362228)}
{pt3dadd(171432.000000,182976.000000,123525.000000,519.362228)}
{pt3dadd(171348.000000,183060.000000,123525.000000,529.994210)}
{pt3dadd(171276.000000,183264.000000,123550.000000,525.514064)}
{pt3dadd(171228.000000,183396.000000,123625.000000,520.574708)}
{pt3dadd(171156.000000,183528.000000,123725.000000,510.449012)}
{pt3dadd(171096.000000,183660.000000,123825.000000,491.139014)}
{pt3dadd(171000.000000,183732.000000,123900.000000,462.116566)}
{pt3dadd(170928.000000,183684.000000,124000.000000,462.116566)}
{pt3dadd(170844.000000,183696.000000,124025.000000,444.601826)}
{pt3dadd(170760.000000,183732.000000,124050.000000,416.020826)}
{pt3dadd(170688.000000,183780.000000,124050.000000,403.820272)}
{pt3dadd(170616.000000,183900.000000,124025.000000,388.690382)}
{pt3dadd(170556.000000,184044.000000,124100.000000,372.804000)}
{pt3dadd(170424.000000,184152.000000,124150.000000,365.248056)}
{pt3dadd(170364.000000,184272.000000,124225.000000,376.314316)}
{pt3dadd(170304.000000,184380.000000,124275.000000,372.628488)}
{pt3dadd(170220.000000,184500.000000,124350.000000,392.025186)}
{pt3dadd(170136.000000,184584.000000,124375.000000,412.391714)}
{pt3dadd(170052.000000,184620.000000,124425.000000,419.947658)}
{pt3dadd(169980.000000,184656.000000,124450.000000,412.391714)}
{pt3dadd(169920.000000,184704.000000,124475.000000,402.354286)}
{pt3dadd(169920.000000,184956.000000,124475.000000,373.398132)}
{pt3dadd(169956.000000,185016.000000,124475.000000,324.570612)}
{pt3dadd(169800.000000,185112.000000,124500.000000,337.381196)}
{pt3dadd(169644.000000,185172.000000,124525.000000,362.451880)}
{pt3dadd(169500.000000,185148.000000,124800.000000,413.131330)}
{pt3dadd(169296.000000,185112.000000,124875.000000,446.567630)}
{pt3dadd(168864.000000,185172.000000,124950.000000,500.099306)}
{pt3dadd(168576.000000,185364.000000,125050.000000,504.803462)}
{pt3dadd(168432.000000,185448.000000,125150.000000,487.288722)}
{pt3dadd(168336.000000,185520.000000,125225.000000,458.266274)}
{pt3dadd(168324.000000,185616.000000,125300.000000,449.519320)}
{pt3dadd(168312.000000,185712.000000,125400.000000,440.335018)}
{pt3dadd(168288.000000,185844.000000,125475.000000,431.150716)}
{pt3dadd(168252.000000,185904.000000,125550.000000,435.214346)}
{pt3dadd(168132.000000,185988.000000,125625.000000,435.214346)}
{pt3dadd(167976.000000,186120.000000,125700.000000,439.481154)}
{pt3dadd(167820.000000,186252.000000,125775.000000,431.150716)}
{pt3dadd(167652.000000,186384.000000,125850.000000,426.883908)}
{pt3dadd(167496.000000,186516.000000,125900.000000,426.883908)}
{pt3dadd(167376.000000,186588.000000,126000.000000,415.264334)}
{pt3dadd(167232.000000,186660.000000,126100.000000,399.377952)}
{pt3dadd(167076.000000,186720.000000,126175.000000,395.507836)}
{pt3dadd(166884.000000,186840.000000,126250.000000,380.377946)}
{pt3dadd(166680.000000,186948.000000,126325.000000,347.430790)}
{pt3dadd(166356.000000,187140.000000,126450.000000,328.722658)}
{pt3dadd(166044.000000,187440.000000,126550.000000,321.869190)}
{pt3dadd(165732.000000,187728.000000,126625.000000,318.183362)}
{pt3dadd(165540.000000,187860.000000,126725.000000,329.249622)}
{pt3dadd(165432.000000,187920.000000,126850.000000,366.463586)}
{pt3dadd(165336.000000,187968.000000,126925.000000,396.791292)}
{pt3dadd(165228.000000,188004.000000,127000.000000,400.134444)}
{pt3dadd(165072.000000,188076.000000,127075.000000,407.690388)}
{pt3dadd(164916.000000,188160.000000,127125.000000,407.690388)}
{pt3dadd(164772.000000,188196.000000,127200.000000,399.359950)}
{pt3dadd(164628.000000,188244.000000,127325.000000,412.811060)}
{pt3dadd(164496.000000,188280.000000,127400.000000,427.940950)}
{pt3dadd(164292.000000,188352.000000,127425.000000,436.271388)}
{pt3dadd(164028.000000,188484.000000,127475.000000,432.401272)}
{pt3dadd(163764.000000,188616.000000,127500.000000,440.731710)}
{pt3dadd(163620.000000,188688.000000,127600.000000,440.731710)}
{pt3dadd(163632.000000,188772.000000,127775.000000,449.478664)}
{pt3dadd(163344.000000,188928.000000,127800.000000,458.662966)}
{pt3dadd(163068.000000,189144.000000,127875.000000,475.343666)}
{pt3dadd(162840.000000,189384.000000,127975.000000,475.343666)}
{pt3dadd(162648.000000,189624.000000,128025.000000,461.892556)}
{pt3dadd(162408.000000,189780.000000,128100.000000,457.412410)}
{pt3dadd(162240.000000,189936.000000,128175.000000,443.961300)}
{pt3dadd(162084.000000,190044.000000,128275.000000,423.594772)}
{pt3dadd(162048.000000,190104.000000,128375.000000,415.264334)}
{pt3dadd(161928.000000,190176.000000,128425.000000,419.531142)}
{pt3dadd(161808.000000,190248.000000,128475.000000,403.644760)}
{pt3dadd(161712.000000,190416.000000,128550.000000,399.581130)}
{pt3dadd(161640.000000,190560.000000,128625.000000,407.137074)}
{pt3dadd(161388.000000,190596.000000,128675.000000,403.266958)}
{pt3dadd(161172.000000,190740.000000,128775.000000,391.066404)}
{pt3dadd(160992.000000,190908.000000,128850.000000,391.066404)}
{pt3dadd(160704.000000,190968.000000,128925.000000,380.000144)}
{pt3dadd(160632.000000,191088.000000,129025.000000,376.130028)}
{pt3dadd(160572.000000,191208.000000,129075.000000,372.444200)}
{pt3dadd(160500.000000,191328.000000,129150.000000,368.758372)}
{pt3dadd(160428.000000,191436.000000,129225.000000,376.314316)}
{pt3dadd(160284.000000,191472.000000,129300.000000,387.380576)}
{pt3dadd(160224.000000,191520.000000,129375.000000,399.581130)}
{pt3dadd(160164.000000,191580.000000,129475.000000,419.947658)}
{pt3dadd(159996.000000,191652.000000,129600.000000,449.957698)}
{pt3dadd(159780.000000,191808.000000,129650.000000,477.598134)}
{pt3dadd(159660.000000,192012.000000,129725.000000,495.112874)}
{pt3dadd(159564.000000,192156.000000,129775.000000,509.236532)}
{pt3dadd(159468.000000,192144.000000,129700.000000,524.066384)}
{pt3dadd(159396.000000,192252.000000,129700.000000,524.066384)}
{pt3dadd(159300.000000,192264.000000,129700.000000,509.236532)}
{pt3dadd(159228.000000,192264.000000,129725.000000,509.236532)}
{pt3dadd(159156.000000,192324.000000,129775.000000,514.422872)}
{pt3dadd(159072.000000,192396.000000,129800.000000,514.422872)}
{pt3dadd(158988.000000,192492.000000,129825.000000,509.483516)}
{pt3dadd(158904.000000,192588.000000,129825.000000,509.483516)}
{pt3dadd(158808.000000,192696.000000,129825.000000,504.779360)}
{pt3dadd(158724.000000,192720.000000,129775.000000,489.949508)}
{pt3dadd(158628.000000,192756.000000,129750.000000,475.119656)}
{pt3dadd(158508.000000,192732.000000,129750.000000,480.059012)}
{pt3dadd(158400.000000,192708.000000,129750.000000,484.763168)}
{pt3dadd(158340.000000,192744.000000,129725.000000,480.283022)}
{pt3dadd(158256.000000,192864.000000,129775.000000,449.879066)}
{pt3dadd(158196.000000,193020.000000,129750.000000,419.475110)}
{pt3dadd(158064.000000,193128.000000,129775.000000,379.427642)}
{pt3dadd(158004.000000,193212.000000,129850.000000,358.042786)}
{pt3dadd(157920.000000,193296.000000,129925.000000,349.712348)}
{pt3dadd(157824.000000,193392.000000,130000.000000,367.305720)}
{pt3dadd(157740.000000,193368.000000,130025.000000,388.962722)}
{pt3dadd(157668.000000,193428.000000,130025.000000,414.886532)}
{pt3dadd(157572.000000,193500.000000,130075.000000,418.756648)}
{pt3dadd(157512.000000,193572.000000,130150.000000,427.087086)}
{pt3dadd(157428.000000,193584.000000,130225.000000,439.897670)}
{pt3dadd(157344.000000,193620.000000,130275.000000,448.644624)}
{pt3dadd(157260.000000,193656.000000,130300.000000,457.828926)}
{pt3dadd(157176.000000,193680.000000,130325.000000,480.283022)}
{pt3dadd(157104.000000,193728.000000,130350.000000,499.593020)}
{pt3dadd(157032.000000,193788.000000,130375.000000,519.868514)}
{pt3dadd(156948.000000,193848.000000,130400.000000,534.698366)}
{pt3dadd(156864.000000,193908.000000,130400.000000,561.991456)}
{pt3dadd(156744.000000,193944.000000,130375.000000,584.345190)}
{pt3dadd(156660.000000,193932.000000,130475.000000,601.512584)}
{pt3dadd(156588.000000,193896.000000,130500.000000,607.230510)}
{pt3dadd(156492.000000,193896.000000,130500.000000,612.676152)}
{pt3dadd(156408.000000,193944.000000,130475.000000,595.508758)}
{pt3dadd(156312.000000,193980.000000,130450.000000,546.830812)}
{pt3dadd(156240.000000,194328.000000,130550.000000,487.613570)}
{pt3dadd(156144.000000,194484.000000,130625.000000,434.400154)}
{pt3dadd(156036.000000,194544.000000,130625.000000,405.377706)}
{pt3dadd(155892.000000,194712.000000,130700.000000,400.191366)}
{pt3dadd(155760.000000,194832.000000,130800.000000,426.515578)}
{pt3dadd(155688.000000,194964.000000,130875.000000,463.379086)}
{pt3dadd(155592.000000,195072.000000,130875.000000,495.303238)}
{pt3dadd(155496.000000,195168.000000,130900.000000,513.693704)}
{pt3dadd(155376.000000,195180.000000,130950.000000,504.050192)}
{pt3dadd(155280.000000,195252.000000,130975.000000,477.725980)}
{pt3dadd(155160.000000,195288.000000,130950.000000,455.271884)}
{pt3dadd(155064.000000,195336.000000,130950.000000,437.757144)}
{pt3dadd(155004.000000,195396.000000,130900.000000,432.817788)}
{pt3dadd(154596.000000,195408.000000,130775.000000,428.337642)}
{pt3dadd(154320.000000,195480.000000,130775.000000,396.190822)}
{pt3dadd(154032.000000,195768.000000,130625.000000,364.812580)}
{pt3dadd(153744.000000,195996.000000,130475.000000,324.588208)}
{pt3dadd(153588.000000,196092.000000,130325.000000,296.007208)}
{pt3dadd(153480.000000,196140.000000,130325.000000,287.676770)}
{pt3dadd(153300.000000,196344.000000,130400.000000,309.284294)}
{pt3dadd(153192.000000,196524.000000,130475.000000,329.596276)}
{pt3dadd(153084.000000,196656.000000,130450.000000,362.264704)}
{pt3dadd(153036.000000,196788.000000,130425.000000,365.775020)}
{pt3dadd(152976.000000,196920.000000,130375.000000,336.891494)}
{pt3dadd(152928.000000,197028.000000,130350.000000,333.707534)}
{pt3dadd(152832.000000,197040.000000,130250.000000,321.260138)}
{pt3dadd(152760.000000,197064.000000,130200.000000,324.945966)}
{pt3dadd(152232.000000,197472.000000,130125.000000,308.988254)}
{pt3dadd(152040.000000,197664.000000,130025.000000,311.607704)}
{pt3dadd(151920.000000,197880.000000,129925.000000,291.029112)}
{pt3dadd(151776.000000,198180.000000,129850.000000,276.370804)}
{pt3dadd(151488.000000,198396.000000,129775.000000,244.223984)}
{pt3dadd(151416.000000,198624.000000,129700.000000,229.565676)}
{pt3dadd(151272.000000,198804.000000,129600.000000,232.316096)}
{pt3dadd(151140.000000,198924.000000,129525.000000,236.733904)}
{pt3dadd(150684.000000,199176.000000,129675.000000,251.392212)}
{pt3dadd(150360.000000,199392.000000,129800.000000,256.030906)}
{pt3dadd(149916.000000,199536.000000,129900.000000,270.689214)}
{pt3dadd(149508.000000,199812.000000,129975.000000,276.609498)}
{pt3dadd(149100.000000,200076.000000,130075.000000,286.849998)}
{pt3dadd(148860.000000,200256.000000,130075.000000,284.099578)}
{pt3dadd(148596.000000,200448.000000,130075.000000,279.460884)}
{pt3dadd(148320.000000,200616.000000,130075.000000,262.750168)}
{pt3dadd(147984.000000,200868.000000,130250.000000,232.841434)}
{pt3dadd(147408.000000,201000.000000,130400.000000,224.976848)}
{pt3dadd(146940.000000,201204.000000,130400.000000,215.223988)}
{pt3dadd(146592.000000,201372.000000,130400.000000,213.068960)}
{pt3dadd(146364.000000,201708.000000,130650.000000,219.539176)}
{pt3dadd(145752.000000,201852.000000,130800.000000,228.869318)}
{pt3dadd(145620.000000,202164.000000,130975.000000,378.975044)}
{pt3dadd(144900.000000,202188.000000,131125.000000,484.364853)}
{pt3dadd(145224.000000,202368.000000,131300.000000,1000.000000)}

{create adhoc8}
{access adhoc8}
{connect adhoc8(1), adhoc4(0)}
{nseg = 1}
{strdef color color = "White"}
{pt3dclear()}
{pt3dadd(199284.000000,171900.000000,99700.000000,448.014770)}
{pt3dadd(199284.000000,172596.000000,99925.000000,532.349853)}
{pt3dadd(199032.000000,172848.000000,100050.000000,508.472670)}
{pt3dadd(198996.000000,172980.000000,99925.000000,504.205862)}
{pt3dadd(198948.000000,173100.000000,99875.000000,467.728470)}
{pt3dadd(198912.000000,173196.000000,99925.000000,434.208114)}
{pt3dadd(198888.000000,173304.000000,99950.000000,419.078224)}
{pt3dadd(198840.000000,173436.000000,99950.000000,382.214716)}
{pt3dadd(198804.000000,173544.000000,99875.000000,363.741674)}
{pt3dadd(198780.000000,173640.000000,99875.000000,347.855292)}
{pt3dadd(198780.000000,173712.000000,99875.000000,362.985182)}
{pt3dadd(198768.000000,173820.000000,99850.000000,370.181326)}
{pt3dadd(198732.000000,173904.000000,99800.000000,377.034794)}
{pt3dadd(198684.000000,174012.000000,99725.000000,383.888262)}
{pt3dadd(198648.000000,174096.000000,99675.000000,387.574090)}
{pt3dadd(198600.000000,174192.000000,99675.000000,375.954516)}
{pt3dadd(198540.000000,174288.000000,99675.000000,368.758372)}
{pt3dadd(198564.000000,174384.000000,99725.000000,372.444200)}
{pt3dadd(198564.000000,174480.000000,99700.000000,380.000144)}
{pt3dadd(198552.000000,174576.000000,99625.000000,383.870260)}
{pt3dadd(198540.000000,174648.000000,99550.000000,387.556088)}
{pt3dadd(198528.000000,174720.000000,99500.000000,367.244106)}
{pt3dadd(198516.000000,174792.000000,99400.000000,350.488506)}
{pt3dadd(198504.000000,174876.000000,99325.000000,326.974850)}
{pt3dadd(198504.000000,174960.000000,99300.000000,306.349134)}
{pt3dadd(198456.000000,175056.000000,99325.000000,295.809838)}
{pt3dadd(198420.000000,175140.000000,99325.000000,316.121820)}
{pt3dadd(198360.000000,175224.000000,99225.000000,325.681276)}
{pt3dadd(198288.000000,175296.000000,99150.000000,331.601560)}
{pt3dadd(198240.000000,175404.000000,99175.000000,337.817864)}
{pt3dadd(198276.000000,175476.000000,99025.000000,334.633904)}
{pt3dadd(198264.000000,175560.000000,99000.000000,331.290752)}
{pt3dadd(198276.000000,175644.000000,98875.000000,334.801068)}
{pt3dadd(198252.000000,175728.000000,98775.000000,344.838496)}
{pt3dadd(198228.000000,175824.000000,98675.000000,351.691964)}
{pt3dadd(198204.000000,175920.000000,98575.000000,369.285336)}
{pt3dadd(198180.000000,176016.000000,98475.000000,383.694748)}
{pt3dadd(198156.000000,176136.000000,98400.000000,383.694748)}
{pt3dadd(198180.000000,176232.000000,98375.000000,380.184432)}
{pt3dadd(198192.000000,176328.000000,98325.000000,380.184432)}
{pt3dadd(198204.000000,176424.000000,98275.000000,365.775020)}
{pt3dadd(198216.000000,176520.000000,98200.000000,348.181648)}
{pt3dadd(198240.000000,176592.000000,98100.000000,341.328180)}
{pt3dadd(198276.000000,176676.000000,98025.000000,334.801068)}
{pt3dadd(198312.000000,176760.000000,97925.000000,324.763640)}
{pt3dadd(198336.000000,176832.000000,97850.000000,315.659396)}
{pt3dadd(198396.000000,176928.000000,97775.000000,306.988692)}
{pt3dadd(198420.000000,177000.000000,97700.000000,295.134028)}
{pt3dadd(198456.000000,177084.000000,97675.000000,292.101684)}
{pt3dadd(198492.000000,177180.000000,97625.000000,283.430980)}
{pt3dadd(198528.000000,177252.000000,97525.000000,283.430980)}
{pt3dadd(198552.000000,177336.000000,97400.000000,286.181400)}
{pt3dadd(198588.000000,177432.000000,97300.000000,288.931820)}
{pt3dadd(198612.000000,177552.000000,97225.000000,286.043880)}
{pt3dadd(198648.000000,177660.000000,97225.000000,280.929714)}
{pt3dadd(198600.000000,177768.000000,97300.000000,280.929714)}
{pt3dadd(198528.000000,177852.000000,97300.000000,283.817654)}
{pt3dadd(198504.000000,177948.000000,97200.000000,292.921898)}
{pt3dadd(198480.000000,178056.000000,97175.000000,305.369294)}
{pt3dadd(198456.000000,178164.000000,97150.000000,329.191592)}
{pt3dadd(198444.000000,178272.000000,97150.000000,341.638988)}
{pt3dadd(198420.000000,178380.000000,97125.000000,358.394588)}
{pt3dadd(198516.000000,178452.000000,96975.000000,358.394588)}
{pt3dadd(198552.000000,178548.000000,96900.000000,351.867476)}
{pt3dadd(198600.000000,178644.000000,96800.000000,338.797704)}
{pt3dadd(198612.000000,178740.000000,96700.000000,335.454552)}
{pt3dadd(198612.000000,178860.000000,96625.000000,315.811012)}
{pt3dadd(198600.000000,178944.000000,96575.000000,306.706768)}
{pt3dadd(198600.000000,179040.000000,96525.000000,292.921898)}
{pt3dadd(198588.000000,179124.000000,96450.000000,284.664088)}
{pt3dadd(198588.000000,179208.000000,96400.000000,267.695258)}
{pt3dadd(198576.000000,179256.000000,96350.000000,257.454758)}
{pt3dadd(198576.000000,179292.000000,96275.000000,252.084888)}
{pt3dadd(198564.000000,179328.000000,96225.000000,259.949474)}
{pt3dadd(198564.000000,179376.000000,96175.000000,268.207284)}
{pt3dadd(198564.000000,179460.000000,96100.000000,273.321450)}
{pt3dadd(198552.000000,179544.000000,96050.000000,286.449890)}
{pt3dadd(198552.000000,179640.000000,96000.000000,300.924004)}
{pt3dadd(198540.000000,179724.000000,95925.000000,306.844288)}
{pt3dadd(198540.000000,179844.000000,95875.000000,323.599888)}
{pt3dadd(198528.000000,179940.000000,95850.000000,349.863964)}
{pt3dadd(198528.000000,180036.000000,95800.000000,370.489680)}
{pt3dadd(198528.000000,180096.000000,95800.000000,384.899092)}
{pt3dadd(198540.000000,180264.000000,95750.000000,410.822902)}
{pt3dadd(198576.000000,180348.000000,95675.000000,427.503602)}
{pt3dadd(198612.000000,180420.000000,95575.000000,431.567232)}
{pt3dadd(198660.000000,180516.000000,95600.000000,435.630862)}
{pt3dadd(198648.000000,180600.000000,95500.000000,439.694492)}
{pt3dadd(198708.000000,180684.000000,95500.000000,435.427684)}
{pt3dadd(198744.000000,180756.000000,95425.000000,426.680730)}
{pt3dadd(198792.000000,180840.000000,95375.000000,430.947538)}
{pt3dadd(198816.000000,180924.000000,95400.000000,435.214346)}
{pt3dadd(198756.000000,181044.000000,95500.000000,443.961300)}
{pt3dadd(198660.000000,181128.000000,95550.000000,436.027554)}
{pt3dadd(198576.000000,181200.000000,95475.000000,431.963924)}
{pt3dadd(198528.000000,181296.000000,95425.000000,436.444070)}
{pt3dadd(198540.000000,181380.000000,95350.000000,445.628372)}
{pt3dadd(198588.000000,181476.000000,95275.000000,455.271884)}
{pt3dadd(198732.000000,181560.000000,95250.000000,481.596096)}
{pt3dadd(198852.000000,181632.000000,95225.000000,509.236532)}
{pt3dadd(198960.000000,181728.000000,95200.000000,513.940688)}
{pt3dadd(199032.000000,181824.000000,95150.000000,513.940688)}
{pt3dadd(199104.000000,181896.000000,95100.000000,509.001332)}
{pt3dadd(199152.000000,181980.000000,95075.000000,514.187672)}
{pt3dadd(199152.000000,182052.000000,95000.000000,504.061976)}
{pt3dadd(199152.000000,182112.000000,94900.000000,490.610866)}
{pt3dadd(199284.000000,182220.000000,94825.000000,485.906710)}
{pt3dadd(199416.000000,182292.000000,94725.000000,501.478048)}
{pt3dadd(199572.000000,182376.000000,94725.000000,506.923690)}
{pt3dadd(199716.000000,182448.000000,94725.000000,493.472580)}
{pt3dadd(199740.000000,182556.000000,94675.000000,481.853006)}
{pt3dadd(199788.000000,182616.000000,94625.000000,473.106052)}
{pt3dadd(199824.000000,182700.000000,94575.000000,444.083604)}
{pt3dadd(199860.000000,182772.000000,94525.000000,407.127410)}
{pt3dadd(199920.000000,182856.000000,94475.000000,391.997520)}
{pt3dadd(199992.000000,182940.000000,94400.000000,395.683348)}
{pt3dadd(200016.000000,183012.000000,94325.000000,380.553458)}
{pt3dadd(200016.000000,183072.000000,94225.000000,345.111586)}
{pt3dadd(200016.000000,183156.000000,94125.000000,308.757330)}
{pt3dadd(199992.000000,183240.000000,93975.000000,299.197874)}
{pt3dadd(199992.000000,183312.000000,93800.000000,292.001730)}
{pt3dadd(199992.000000,183384.000000,93650.000000,303.067990)}
{pt3dadd(199992.000000,183456.000000,93475.000000,342.776670)}
{pt3dadd(199920.000000,183528.000000,93300.000000,391.331480)}
{pt3dadd(199836.000000,183600.000000,93125.000000,424.767780)}
{pt3dadd(199764.000000,183672.000000,92950.000000,448.644624)}
{pt3dadd(199680.000000,183756.000000,92775.000000,471.098720)}
{pt3dadd(199680.000000,183840.000000,92775.000000,475.578866)}
{pt3dadd(199620.000000,183924.000000,92650.000000,480.059012)}
{pt3dadd(199536.000000,183984.000000,92725.000000,484.763168)}
{pt3dadd(199536.000000,184056.000000,92625.000000,499.593020)}
{pt3dadd(199512.000000,184140.000000,92525.000000,515.942928)}
{pt3dadd(199416.000000,184236.000000,92425.000000,530.772780)}
{pt3dadd(199356.000000,184296.000000,92350.000000,526.292634)}
{pt3dadd(199320.000000,184368.000000,92275.000000,517.108332)}
{pt3dadd(199296.000000,184452.000000,92200.000000,497.798334)}
{pt3dadd(199296.000000,184524.000000,92275.000000,471.804914)}
{pt3dadd(199296.000000,184608.000000,92200.000000,452.494916)}
{pt3dadd(199164.000000,184704.000000,92075.000000,466.618574)}
{pt3dadd(199380.000000,184776.000000,92075.000000,475.802876)}
{pt3dadd(199236.000000,184848.000000,91900.000000,471.536068)}
{pt3dadd(199212.000000,184932.000000,91850.000000,476.240224)}
{pt3dadd(199188.000000,185028.000000,91825.000000,485.424526)}
{pt3dadd(199224.000000,185100.000000,91725.000000,485.424526)}
{pt3dadd(199212.000000,185172.000000,91625.000000,471.973416)}
{pt3dadd(199212.000000,185268.000000,91525.000000,467.909786)}
{pt3dadd(199164.000000,185340.000000,91400.000000,450.395046)}
{pt3dadd(199140.000000,185412.000000,91325.000000,436.943936)}
{pt3dadd(199116.000000,185496.000000,91225.000000,418.553470)}
{pt3dadd(199092.000000,185604.000000,91100.000000,418.553470)}
{pt3dadd(199068.000000,185676.000000,90950.000000,431.364054)}
{pt3dadd(198996.000000,185760.000000,90900.000000,444.174638)}
{pt3dadd(198936.000000,185832.000000,90850.000000,452.921592)}
{pt3dadd(199020.000000,185916.000000,90775.000000,457.188400)}
{pt3dadd(199032.000000,185976.000000,90650.000000,461.455208)}
{pt3dadd(199044.000000,186048.000000,90500.000000,452.708254)}
{pt3dadd(199044.000000,186120.000000,90350.000000,436.027554)}
{pt3dadd(199008.000000,186204.000000,90225.000000,431.547408)}
{pt3dadd(198972.000000,186276.000000,90100.000000,412.150710)}
{pt3dadd(198936.000000,186348.000000,89975.000000,399.950156)}
{pt3dadd(198912.000000,186444.000000,89850.000000,392.016410)}
{pt3dadd(198852.000000,186516.000000,89750.000000,384.820266)}
{pt3dadd(198804.000000,186588.000000,89675.000000,365.423568)}
{pt3dadd(198696.000000,186672.000000,89600.000000,372.619712)}
{pt3dadd(198588.000000,186744.000000,89475.000000,372.619712)}
{pt3dadd(198492.000000,186816.000000,89325.000000,389.300412)}
{pt3dadd(198432.000000,186888.000000,89200.000000,413.177256)}
{pt3dadd(198432.000000,186960.000000,89050.000000,441.758256)}
{pt3dadd(198456.000000,187032.000000,88900.000000,458.438956)}
{pt3dadd(198432.000000,187104.000000,88750.000000,475.119656)}
{pt3dadd(198408.000000,187176.000000,88575.000000,470.639510)}
{pt3dadd(198384.000000,187248.000000,88450.000000,457.828926)}
{pt3dadd(198372.000000,187332.000000,88325.000000,440.314186)}
{pt3dadd(198360.000000,187404.000000,88175.000000,423.633486)}
{pt3dadd(198312.000000,187500.000000,88150.000000,410.822902)}
{pt3dadd(198324.000000,187572.000000,88050.000000,410.822902)}
{pt3dadd(198396.000000,187656.000000,87875.000000,403.266958)}
{pt3dadd(198444.000000,187716.000000,87700.000000,395.711014)}
{pt3dadd(198444.000000,187776.000000,87525.000000,385.171718)}
{pt3dadd(198420.000000,187860.000000,87375.000000,377.615774)}
{pt3dadd(198588.000000,187956.000000,87250.000000,340.401810)}
{pt3dadd(198552.000000,188040.000000,87175.000000,324.444098)}
{pt3dadd(198552.000000,188124.000000,87075.000000,305.735966)}
{pt3dadd(198612.000000,188160.000000,86950.000000,288.767136)}
{pt3dadd(198552.000000,188280.000000,86875.000000,272.809424)}
{pt3dadd(198504.000000,188388.000000,86775.000000,275.428874)}
{pt3dadd(198504.000000,188400.000000,86675.000000,281.349158)}
{pt3dadd(198420.000000,188448.000000,86600.000000,281.349158)}
{pt3dadd(198336.000000,188496.000000,86500.000000,286.463324)}
{pt3dadd(198276.000000,188652.000000,86400.000000,295.567568)}
{pt3dadd(198168.000000,188748.000000,86325.000000,304.238272)}
{pt3dadd(198036.000000,188868.000000,86225.000000,310.765384)}
{pt3dadd(197892.000000,189000.000000,86125.000000,325.963200)}
{pt3dadd(197760.000000,189120.000000,86025.000000,334.633904)}
{pt3dadd(197628.000000,189240.000000,85900.000000,334.633904)}
{pt3dadd(197556.000000,189324.000000,85800.000000,344.671332)}
{pt3dadd(197544.000000,189336.000000,85700.000000,368.548176)}
{pt3dadd(197580.000000,189276.000000,85575.000000,387.944874)}
{pt3dadd(197604.000000,189228.000000,85500.000000,409.601876)}
{pt3dadd(197568.000000,189192.000000,85425.000000,441.526028)}
{pt3dadd(197292.000000,189264.000000,85350.000000,471.536068)}
{pt3dadd(197280.000000,189300.000000,85250.000000,476.240224)}
{pt3dadd(197196.000000,189348.000000,85175.000000,490.363882)}
{pt3dadd(197088.000000,189444.000000,85100.000000,503.814992)}
{pt3dadd(196992.000000,189528.000000,85000.000000,494.630690)}
{pt3dadd(196884.000000,189612.000000,84925.000000,480.507032)}
{pt3dadd(196656.000000,189672.000000,84825.000000,471.322730)}
{pt3dadd(196488.000000,189708.000000,84725.000000,452.932264)}
{pt3dadd(196440.000000,189780.000000,84650.000000,435.417524)}
{pt3dadd(196404.000000,189852.000000,84550.000000,427.087086)}
{pt3dadd(196380.000000,189936.000000,84450.000000,398.130932)}
{pt3dadd(196284.000000,189972.000000,84350.000000,369.174778)}
{pt3dadd(196308.000000,189972.000000,84250.000000,341.597492)}
{pt3dadd(196332.000000,189960.000000,84150.000000,315.333416)}
{pt3dadd(196224.000000,190080.000000,84050.000000,286.449890)}
{pt3dadd(196116.000000,190224.000000,83950.000000,280.811530)}
{pt3dadd(196104.000000,190248.000000,83875.000000,270.059004)}
{pt3dadd(196080.000000,190236.000000,83775.000000,275.979288)}
{pt3dadd(196032.000000,190224.000000,83675.000000,284.649992)}
{pt3dadd(195948.000000,190236.000000,83575.000000,299.124106)}
{pt3dadd(195876.000000,190248.000000,83475.000000,307.794810)}
{pt3dadd(195768.000000,190296.000000,83350.000000,310.289526)}
{pt3dadd(195732.000000,190332.000000,83225.000000,324.012782)}
{pt3dadd(195636.000000,190392.000000,83150.000000,330.539894)}
{pt3dadd(195540.000000,190464.000000,83025.000000,337.393362)}
{pt3dadd(195480.000000,190524.000000,82925.000000,347.430790)}
{pt3dadd(195504.000000,190548.000000,82825.000000,365.248056)}
{pt3dadd(195396.000000,190632.000000,82725.000000,361.562228)}
{pt3dadd(195300.000000,190704.000000,82625.000000,372.628488)}
{pt3dadd(195264.000000,190752.000000,82525.000000,380.184432)}
{pt3dadd(195216.000000,190836.000000,82425.000000,387.740376)}
{pt3dadd(195144.000000,190980.000000,82375.000000,394.936520)}
{pt3dadd(195096.000000,191088.000000,82300.000000,402.492464)}
{pt3dadd(195060.000000,191196.000000,82225.000000,388.083052)}
{pt3dadd(195048.000000,191256.000000,82150.000000,380.527108)}
{pt3dadd(195060.000000,191268.000000,82050.000000,369.460848)}
{pt3dadd(194940.000000,191400.000000,82000.000000,362.264704)}
{pt3dadd(194880.000000,191484.000000,81950.000000,358.394588)}
{pt3dadd(194856.000000,191520.000000,81875.000000,365.248056)}
{pt3dadd(194832.000000,191568.000000,81800.000000,372.804000)}
{pt3dadd(194760.000000,191640.000000,81725.000000,380.000144)}
{pt3dadd(194760.000000,191664.000000,81625.000000,383.510460)}
{pt3dadd(194664.000000,191748.000000,81575.000000,372.971164)}
{pt3dadd(194592.000000,191796.000000,81500.000000,366.117696)}
{pt3dadd(194568.000000,191808.000000,81400.000000,355.051436)}
{pt3dadd(194484.000000,191880.000000,81350.000000,358.921552)}
{pt3dadd(194412.000000,191928.000000,81275.000000,362.607380)}
{pt3dadd(194352.000000,191976.000000,81200.000000,373.146676)}
{pt3dadd(194316.000000,192060.000000,81125.000000,380.000144)}
{pt3dadd(194340.000000,192120.000000,81075.000000,373.473032)}
{pt3dadd(194352.000000,192192.000000,81025.000000,362.406772)}
{pt3dadd(194328.000000,192276.000000,80925.000000,348.683516)}
{pt3dadd(194292.000000,192372.000000,80850.000000,334.960260)}
{pt3dadd(194244.000000,192468.000000,80775.000000,328.106792)}
{pt3dadd(194208.000000,192540.000000,80700.000000,328.106792)}
{pt3dadd(194184.000000,192576.000000,80625.000000,321.579680)}
{pt3dadd(194124.000000,192648.000000,80550.000000,339.173052)}
{pt3dadd(194052.000000,192708.000000,80475.000000,349.210480)}
{pt3dadd(193980.000000,192780.000000,80400.000000,356.063948)}
{pt3dadd(193908.000000,192852.000000,80300.000000,369.787204)}
{pt3dadd(193848.000000,192912.000000,80225.000000,387.380576)}
{pt3dadd(193704.000000,193020.000000,80150.000000,383.510460)}
{pt3dadd(193632.000000,193092.000000,80050.000000,391.066404)}
{pt3dadd(193560.000000,193176.000000,79975.000000,398.622348)}
{pt3dadd(193488.000000,193248.000000,79900.000000,410.822902)}
{pt3dadd(193416.000000,193332.000000,79825.000000,423.633486)}
{pt3dadd(193428.000000,193308.000000,79750.000000,440.314186)}
{pt3dadd(193428.000000,193296.000000,79650.000000,457.828926)}
{pt3dadd(193428.000000,193284.000000,79575.000000,470.639510)}
{pt3dadd(193344.000000,193284.000000,79500.000000,475.119656)}
{pt3dadd(193260.000000,193296.000000,79425.000000,475.119656)}
{pt3dadd(193164.000000,193296.000000,79350.000000,475.119656)}
{pt3dadd(193080.000000,193296.000000,79275.000000,450.048972)}
{pt3dadd(193044.000000,193272.000000,79200.000000,441.302018)}
{pt3dadd(193092.000000,193308.000000,79125.000000,420.935490)}
{pt3dadd(193128.000000,193332.000000,79000.000000,374.370750)}
{pt3dadd(193152.000000,193368.000000,78925.000000,332.676640)}
{pt3dadd(193152.000000,193404.000000,78850.000000,308.854342)}
{pt3dadd(193140.000000,193380.000000,78775.000000,268.773776)}
{pt3dadd(193176.000000,193440.000000,78700.000000,245.898073)}
{pt3dadd(193200.000000,193488.000000,78600.000000,226.277900)}

{create adhoc9}
{access adhoc9}
{connect adhoc9(1), adhoc8(0)}
{nseg = 1}
{strdef color color = "White"}
{pt3dclear()}
{pt3dadd(193200.000000,193488.000000,78600.000000,226.277900)}
{pt3dadd(192684.000000,192888.000000,78600.000000,219.265507)}
{pt3dadd(192636.000000,192780.000000,78475.000000,210.118786)}
{pt3dadd(192588.000000,192756.000000,78375.000000,197.025502)}
{pt3dadd(192624.000000,192732.000000,78275.000000,189.747768)}
{pt3dadd(192576.000000,192696.000000,78200.000000,173.664338)}
{pt3dadd(192540.000000,192648.000000,78125.000000,159.735936)}
{pt3dadd(192564.000000,192588.000000,78050.000000,153.449156)}
{pt3dadd(192600.000000,192528.000000,77975.000000,149.069860)}
{pt3dadd(192624.000000,192468.000000,77900.000000,144.471600)}
{pt3dadd(192600.000000,192456.000000,77800.000000,140.499450)}
{pt3dadd(192540.000000,192456.000000,77725.000000,140.499450)}
{pt3dadd(192504.000000,192420.000000,77650.000000,146.786230)}
{pt3dadd(192576.000000,192372.000000,77575.000000,146.786230)}
{pt3dadd(192552.000000,192348.000000,77500.000000,149.776376)}
{pt3dadd(192552.000000,192324.000000,77425.000000,156.738672)}
{pt3dadd(192540.000000,192300.000000,77350.000000,154.026522)}
{pt3dadd(192492.000000,192264.000000,77300.000000,145.027592)}
{pt3dadd(192504.000000,192180.000000,77225.000000,145.027592)}
{pt3dadd(192492.000000,192156.000000,77150.000000,140.648296)}
{pt3dadd(192516.000000,192120.000000,77075.000000,137.658150)}
{pt3dadd(192468.000000,192108.000000,77025.000000,140.370300)}
{pt3dadd(192444.000000,192096.000000,76950.000000,144.541060)}
{pt3dadd(192456.000000,192048.000000,76875.000000,147.388820)}
{pt3dadd(192468.000000,192000.000000,76800.000000,150.236580)}
{pt3dadd(192408.000000,191976.000000,76700.000000,154.834840)}
{pt3dadd(192360.000000,191940.000000,76625.000000,162.894570)}
{pt3dadd(192324.000000,191892.000000,76550.000000,182.158084)}
{pt3dadd(192372.000000,191796.000000,76475.000000,199.045684)}
{pt3dadd(192432.000000,191616.000000,76400.000000,207.508396)}
{pt3dadd(192372.000000,191544.000000,76325.000000,212.831458)}
{pt3dadd(192264.000000,191496.000000,76225.000000,211.058508)}
{pt3dadd(192300.000000,191412.000000,76150.000000,202.212378)}
{pt3dadd(192336.000000,191340.000000,76075.000000,190.152948)}
{pt3dadd(192384.000000,191256.000000,76000.000000,186.518406)}
{pt3dadd(192372.000000,191220.000000,75925.000000,181.195344)}
{pt3dadd(192348.000000,191172.000000,75875.000000,184.829886)}
{pt3dadd(192312.000000,191112.000000,75775.000000,177.552152)}
{pt3dadd(192180.000000,191064.000000,75725.000000,179.325102)}
{pt3dadd(192072.000000,191064.000000,75650.000000,177.636582)}
{pt3dadd(192000.000000,191040.000000,75550.000000,186.966724)}
{pt3dadd(191952.000000,191016.000000,75475.000000,180.035548)}
{pt3dadd(192084.000000,190920.000000,75400.000000,181.724068)}
{pt3dadd(192156.000000,190872.000000,75325.000000,173.664338)}
{pt3dadd(192228.000000,190824.000000,75250.000000,163.893928)}
{pt3dadd(192288.000000,190884.000000,75150.000000,148.576376)}
{pt3dadd(192144.000000,190968.000000,75075.000000,145.586230)}
{pt3dadd(192180.000000,190920.000000,75000.000000,142.289596)}
{pt3dadd(192108.000000,190908.000000,74925.000000,137.117446)}
{pt3dadd(192204.000000,190860.000000,74850.000000,135.974588)}
{pt3dadd(192204.000000,190848.000000,74775.000000,134.651588)}
{pt3dadd(192120.000000,190860.000000,74700.000000,136.110198)}
{pt3dadd(192132.000000,190788.000000,74625.000000,134.578662)}
{pt3dadd(192132.000000,190716.000000,74575.000000,144.349072)}
{pt3dadd(192132.000000,190644.000000,74500.000000,156.950860)}
{pt3dadd(192084.000000,190608.000000,74450.000000,167.722740)}
{pt3dadd(192000.000000,190620.000000,74350.000000,169.254276)}
{pt3dadd(192048.000000,190596.000000,74275.000000,172.393926)}
{pt3dadd(192024.000000,190572.000000,74200.000000,169.254276)}
{pt3dadd(191988.000000,190512.000000,74150.000000,167.565756)}
{pt3dadd(191904.000000,190464.000000,74075.000000,162.496172)}
{pt3dadd(191952.000000,190368.000000,73975.000000,162.496172)}
{pt3dadd(191892.000000,190344.000000,73900.000000,160.888058)}
{pt3dadd(191892.000000,190272.000000,73850.000000,162.419594)}
{pt3dadd(191844.000000,190260.000000,73750.000000,157.821334)}
{pt3dadd(191808.000000,190248.000000,73675.000000,164.752510)}
{pt3dadd(191796.000000,190152.000000,73600.000000,164.752510)}
{pt3dadd(191748.000000,190104.000000,73525.000000,171.683686)}
{pt3dadd(191760.000000,190068.000000,73450.000000,178.614862)}
{pt3dadd(191736.000000,190020.000000,73375.000000,186.674592)}
{pt3dadd(191712.000000,190020.000000,73300.000000,186.674592)}
{pt3dadd(191676.000000,190020.000000,73225.000000,193.605768)}
{pt3dadd(191628.000000,190044.000000,73150.000000,193.605768)}
{pt3dadd(191520.000000,190032.000000,73075.000000,191.744176)}
{pt3dadd(191496.000000,189948.000000,73000.000000,193.605768)}
{pt3dadd(191400.000000,189912.000000,72925.000000,197.612848)}
{pt3dadd(191316.000000,189888.000000,72850.000000,206.037736)}
{pt3dadd(191232.000000,189852.000000,72775.000000,214.462624)}
{pt3dadd(191148.000000,189876.000000,72700.000000,224.749104)}
{pt3dadd(191064.000000,189864.000000,72600.000000,235.549906)}
{pt3dadd(190992.000000,189852.000000,72525.000000,235.549906)}
{pt3dadd(190908.000000,189840.000000,72450.000000,229.079690)}
{pt3dadd(190848.000000,189768.000000,72375.000000,222.609474)}
{pt3dadd(190824.000000,189684.000000,72300.000000,210.550044)}
{pt3dadd(190740.000000,189660.000000,72225.000000,192.818066)}
{pt3dadd(190728.000000,189600.000000,72150.000000,188.810986)}
{pt3dadd(190680.000000,189612.000000,72025.000000,186.856314)}
{pt3dadd(190656.000000,189588.000000,71950.000000,177.970466)}
{pt3dadd(190632.000000,189600.000000,71875.000000,173.142296)}
{pt3dadd(190548.000000,189564.000000,71775.000000,173.142296)}
{pt3dadd(190464.000000,189528.000000,71700.000000,169.507754)}
{pt3dadd(190380.000000,189528.000000,71625.000000,167.646162)}
{pt3dadd(190296.000000,189516.000000,71550.000000,180.739446)}
{pt3dadd(190224.000000,189516.000000,71475.000000,197.627046)}
{pt3dadd(190140.000000,189516.000000,71425.000000,208.565302)}
{pt3dadd(190032.000000,189516.000000,71325.000000,216.206924)}
{pt3dadd(189972.000000,189432.000000,71250.000000,220.023188)}
{pt3dadd(189936.000000,189348.000000,71150.000000,211.999488)}
{pt3dadd(189888.000000,189288.000000,71075.000000,205.529272)}
{pt3dadd(189780.000000,189228.000000,71000.000000,203.476864)}
{pt3dadd(189696.000000,189216.000000,70925.000000,207.894672)}
{pt3dadd(189612.000000,189204.000000,70850.000000,207.894672)}
{pt3dadd(189516.000000,189192.000000,70775.000000,211.710936)}
{pt3dadd(189432.000000,189180.000000,70700.000000,218.181152)}
{pt3dadd(189348.000000,189156.000000,70625.000000,224.651368)}
{pt3dadd(189324.000000,189132.000000,70525.000000,234.891868)}
{pt3dadd(189264.000000,189120.000000,70450.000000,246.232714)}
{pt3dadd(189192.000000,189204.000000,70350.000000,262.943430)}
{pt3dadd(189096.000000,189192.000000,70275.000000,267.814060)}
{pt3dadd(189168.000000,189192.000000,70200.000000,270.189974)}
{pt3dadd(189192.000000,189192.000000,70100.000000,267.439554)}
{pt3dadd(189192.000000,189144.000000,70025.000000,267.439554)}
{pt3dadd(189132.000000,189120.000000,69925.000000,262.069684)}
{pt3dadd(189060.000000,189096.000000,69875.000000,264.689134)}
{pt3dadd(188952.000000,189072.000000,69775.000000,260.050440)}
{pt3dadd(188976.000000,188976.000000,69700.000000,250.297580)}
{pt3dadd(188952.000000,188928.000000,69600.000000,247.802864)}
{pt3dadd(188916.000000,188904.000000,69525.000000,245.308148)}
{pt3dadd(188892.000000,188928.000000,69450.000000,237.818068)}
{pt3dadd(188916.000000,188904.000000,69375.000000,240.080848)}
{pt3dadd(188916.000000,188928.000000,69300.000000,242.343628)}
{pt3dadd(188868.000000,188952.000000,69275.000000,235.549906)}
{pt3dadd(188940.000000,188916.000000,69200.000000,228.756184)}
{pt3dadd(189036.000000,188868.000000,69150.000000,226.493404)}
{pt3dadd(188964.000000,188880.000000,69075.000000,228.869318)}
{pt3dadd(188868.000000,188892.000000,69025.000000,228.869318)}
{pt3dadd(188844.000000,188928.000000,68975.000000,226.816910)}
{pt3dadd(188808.000000,188844.000000,68925.000000,236.105348)}
{pt3dadd(188916.000000,188796.000000,68875.000000,248.608628)}
{pt3dadd(188880.000000,188880.000000,68825.000000,253.722794)}
{pt3dadd(188808.000000,188976.000000,68775.000000,256.098708)}
{pt3dadd(188808.000000,188904.000000,68700.000000,264.944838)}
{pt3dadd(188832.000000,188844.000000,68625.000000,267.564288)}
{pt3dadd(188796.000000,188820.000000,68575.000000,264.813868)}
{pt3dadd(188736.000000,188844.000000,68525.000000,262.194418)}
{pt3dadd(188712.000000,188892.000000,68475.000000,270.059004)}
{pt3dadd(188700.000000,188892.000000,68425.000000,275.173170)}
{pt3dadd(188712.000000,188892.000000,68400.000000,270.059004)}
{pt3dadd(188784.000000,188916.000000,68325.000000,262.568924)}
{pt3dadd(188928.000000,188760.000000,68300.000000,262.568924)}
{pt3dadd(188964.000000,188808.000000,68225.000000,259.818504)}
{pt3dadd(189000.000000,188796.000000,68175.000000,254.704338)}
{pt3dadd(188976.000000,188808.000000,68100.000000,259.818504)}
{pt3dadd(189072.000000,188724.000000,68050.000000,267.308584)}
{pt3dadd(188988.000000,188736.000000,67975.000000,264.813868)}
{pt3dadd(189072.000000,188772.000000,67925.000000,257.323788)}
{pt3dadd(189096.000000,188748.000000,67875.000000,239.591810)}
{pt3dadd(189084.000000,188664.000000,67800.000000,216.745666)}
{pt3dadd(189408.000000,188700.000000,67750.000000,192.367986)}
{pt3dadd(189408.000000,188652.000000,67650.000000,170.256712)}
{pt3dadd(189480.000000,188664.000000,67575.000000,151.910502)}
{pt3dadd(189444.000000,188712.000000,67500.000000,148.920356)}
{pt3dadd(189516.000000,188640.000000,67425.000000,147.388820)}
{pt3dadd(189456.000000,188640.000000,67375.000000,145.930210)}
{pt3dadd(189552.000000,188568.000000,67300.000000,148.777970)}
{pt3dadd(189516.000000,188556.000000,67250.000000,147.388820)}
{pt3dadd(189504.000000,188544.000000,67175.000000,145.999670)}
{pt3dadd(189504.000000,188532.000000,67100.000000,137.137618)}
{pt3dadd(189492.000000,188520.000000,67025.000000,130.822610)}
{pt3dadd(189552.000000,188484.000000,66975.000000,125.391850)}
{pt3dadd(189528.000000,188472.000000,66900.000000,124.068850)}
{pt3dadd(189672.000000,188400.000000,66850.000000,122.745850)}
{pt3dadd(189636.000000,188400.000000,66775.000000,127.437142)}
{pt3dadd(189648.000000,188436.000000,66700.000000,125.312103)}
{pt3dadd(189672.000000,188388.000000,66650.000000,127.895103)}
{pt3dadd(189600.000000,188364.000000,66550.000000,130.607253)}
{pt3dadd(189576.000000,188292.000000,66500.000000,130.607253)}
{pt3dadd(189624.000000,188220.000000,66425.000000,131.930253)}
{pt3dadd(189660.000000,188196.000000,66325.000000,141.828910)}
{pt3dadd(189708.000000,188148.000000,66275.000000,140.505910)}
{pt3dadd(189696.000000,188124.000000,66225.000000,140.505910)}
{pt3dadd(189660.000000,188064.000000,66150.000000,143.218060)}
{pt3dadd(189612.000000,188004.000000,66075.000000,149.205470)}
{pt3dadd(189576.000000,187944.000000,66025.000000,154.033640)}
{pt3dadd(189240.000000,188256.000000,65900.000000,159.735936)}
{pt3dadd(189228.000000,188232.000000,65800.000000,164.334196)}
{pt3dadd(189132.000000,188208.000000,65725.000000,165.792806)}
{pt3dadd(189012.000000,188208.000000,65650.000000,162.653156)}
{pt3dadd(188988.000000,188160.000000,65575.000000,152.394226)}
{pt3dadd(188880.000000,188184.000000,65500.000000,146.691930)}
{pt3dadd(188928.000000,188148.000000,65425.000000,145.083816)}
{pt3dadd(188832.000000,188100.000000,65375.000000,148.223466)}
{pt3dadd(188736.000000,188064.000000,65300.000000,153.051636)}
{pt3dadd(188652.000000,188040.000000,65250.000000,163.310566)}
{pt3dadd(188568.000000,188004.000000,65175.000000,172.309496)}
{pt3dadd(188448.000000,188028.000000,65100.000000,170.777960)}
{pt3dadd(188400.000000,188004.000000,65025.000000,166.179700)}
{pt3dadd(188292.000000,188028.000000,64975.000000,162.883066)}
{pt3dadd(188232.000000,188004.000000,64900.000000,161.194546)}
{pt3dadd(188148.000000,188028.000000,64825.000000,156.366376)}
{pt3dadd(188040.000000,188004.000000,64775.000000,175.629890)}
{pt3dadd(187872.000000,187980.000000,64700.000000,196.352014)}
{pt3dadd(187704.000000,187944.000000,64625.000000,216.578708)}
{pt3dadd(187668.000000,188004.000000,64575.000000,230.326658)}
{pt3dadd(187548.000000,188004.000000,64500.000000,238.789370)}
{pt3dadd(187368.000000,188028.000000,64425.000000,236.413456)}
{pt3dadd(187212.000000,188088.000000,64375.000000,234.037542)}
{pt3dadd(187140.000000,188088.000000,64300.000000,231.542826)}
{pt3dadd(187068.000000,188040.000000,64250.000000,227.125018)}
{pt3dadd(186984.000000,188004.000000,64200.000000,221.801956)}
{pt3dadd(186876.000000,187884.000000,64125.000000,206.445892)}
{pt3dadd(186780.000000,187776.000000,64075.000000,196.159412)}
{pt3dadd(186780.000000,187752.000000,64000.000000,185.358610)}
{pt3dadd(186696.000000,187776.000000,63950.000000,176.028468)}
{pt3dadd(186612.000000,187716.000000,63875.000000,177.716988)}
{pt3dadd(186504.000000,187692.000000,63800.000000,176.185452)}
{pt3dadd(186468.000000,187620.000000,63750.000000,169.584332)}
{pt3dadd(186408.000000,187596.000000,63675.000000,164.261270)}
{pt3dadd(186324.000000,187608.000000,63600.000000,169.584332)}
{pt3dadd(186228.000000,187620.000000,63525.000000,169.584332)}
{pt3dadd(186132.000000,187608.000000,63450.000000,172.723982)}
{pt3dadd(186168.000000,187548.000000,63400.000000,174.255518)}
{pt3dadd(186204.000000,187488.000000,63325.000000,179.578580)}
{pt3dadd(186084.000000,187500.000000,63250.000000,190.379382)}
{pt3dadd(185988.000000,187476.000000,63175.000000,202.438812)}
{pt3dadd(185796.000000,187476.000000,63125.000000,209.716546)}
{pt3dadd(185952.000000,187392.000000,63050.000000,216.647722)}
{pt3dadd(185760.000000,187404.000000,62975.000000,214.786130)}
{pt3dadd(185724.000000,187380.000000,62900.000000,200.350786)}
{pt3dadd(185628.000000,187440.000000,62825.000000,200.350786)}
{pt3dadd(185604.000000,187404.000000,62775.000000,211.691632)}
{pt3dadd(185652.000000,187308.000000,62700.000000,230.357020)}
{pt3dadd(185700.000000,187200.000000,62625.000000,253.771940)}
{pt3dadd(185640.000000,187128.000000,62575.000000,285.176114)}
{pt3dadd(185664.000000,187044.000000,62500.000000,298.304554)}
{pt3dadd(185616.000000,186960.000000,62425.000000,293.433924)}
{pt3dadd(185556.000000,186852.000000,62375.000000,293.433924)}
{pt3dadd(185592.000000,186780.000000,62275.000000,271.880596)}
{pt3dadd(185532.000000,186660.000000,62225.000000,244.110964)}
{pt3dadd(185460.000000,186552.000000,62150.000000,211.247164)}
{pt3dadd(185364.000000,186444.000000,62075.000000,213.623078)}
{pt3dadd(185280.000000,186336.000000,62000.000000,203.382578)}
{pt3dadd(185136.000000,186240.000000,61925.000000,219.297546)}
{pt3dadd(185064.000000,186096.000000,61875.000000,204.204074)}
{pt3dadd(184992.000000,186036.000000,61800.000000,195.225702)}
{pt3dadd(185124.000000,186024.000000,61725.000000,163.021780)}
{pt3dadd(185136.000000,186000.000000,61675.000000,94.023140)}

{create adhoc10}
{access adhoc10}
{connect adhoc10(1), adhoc8(0)}
{nseg = 1}
{strdef color color = "White"}
{pt3dclear()}
{pt3dadd(193200.000000,193488.000000,78600.000000,226.277900)}
{pt3dadd(193080.000000,193968.000000,78500.000000,254.421683)}
{pt3dadd(192948.000000,194112.000000,78425.000000,250.297580)}
{pt3dadd(192828.000000,194256.000000,78350.000000,250.297580)}
{pt3dadd(192720.000000,194400.000000,78250.000000,233.367520)}
{pt3dadd(192708.000000,194460.000000,78175.000000,223.614660)}
{pt3dadd(192648.000000,194508.000000,78100.000000,216.481250)}
{pt3dadd(192552.000000,194556.000000,78025.000000,218.744030)}
{pt3dadd(192456.000000,194592.000000,77950.000000,223.382724)}
{pt3dadd(192456.000000,194436.000000,77850.000000,240.312784)}
{pt3dadd(192420.000000,194412.000000,77775.000000,244.951478)}
{pt3dadd(192348.000000,194484.000000,77700.000000,249.590172)}
{pt3dadd(192276.000000,194592.000000,77650.000000,251.966086)}
{pt3dadd(192204.000000,194640.000000,77575.000000,262.718612)}
{pt3dadd(192180.000000,194676.000000,77500.000000,260.223896)}
{pt3dadd(192156.000000,194724.000000,77425.000000,265.338062)}
{pt3dadd(192072.000000,194736.000000,77350.000000,262.962148)}
{pt3dadd(192084.000000,194724.000000,77275.000000,265.456864)}
{pt3dadd(191988.000000,194784.000000,77200.000000,257.199054)}
{pt3dadd(191904.000000,194832.000000,77100.000000,257.199054)}
{pt3dadd(191820.000000,194952.000000,77025.000000,247.446194)}
{pt3dadd(191760.000000,195060.000000,76975.000000,245.183414)}
{pt3dadd(191700.000000,195132.000000,76875.000000,235.894976)}
{pt3dadd(191640.000000,195192.000000,76850.000000,235.894976)}
{pt3dadd(191568.000000,195276.000000,76825.000000,249.679846)}
{pt3dadd(191496.000000,195348.000000,76800.000000,268.103410)}
{pt3dadd(191424.000000,195432.000000,76750.000000,296.564402)}
{pt3dadd(191400.000000,195516.000000,76675.000000,338.799996)}
{pt3dadd(191376.000000,195588.000000,76575.000000,356.617262)}
{pt3dadd(191352.000000,195660.000000,76500.000000,370.340518)}
{pt3dadd(191316.000000,195720.000000,76400.000000,380.377946)}
{pt3dadd(191268.000000,195804.000000,76325.000000,384.063774)}
{pt3dadd(191196.000000,195876.000000,76325.000000,376.130028)}
{pt3dadd(191148.000000,195960.000000,76225.000000,387.196288)}
{pt3dadd(191124.000000,196032.000000,76200.000000,403.876988)}
{pt3dadd(191100.000000,196104.000000,76200.000000,415.496562)}
{pt3dadd(191088.000000,196188.000000,76150.000000,423.430308)}
{pt3dadd(191004.000000,196272.000000,76000.000000,427.300424)}
{pt3dadd(190896.000000,196344.000000,75950.000000,427.300424)}
{pt3dadd(190800.000000,196428.000000,75900.000000,418.553470)}
{pt3dadd(190776.000000,196500.000000,75750.000000,414.489840)}
{pt3dadd(190740.000000,196560.000000,75625.000000,402.870266)}
{pt3dadd(190572.000000,196632.000000,75625.000000,399.000150)}
{pt3dadd(190416.000000,196692.000000,75600.000000,395.130034)}
{pt3dadd(190332.000000,196764.000000,75625.000000,391.066404)}
{pt3dadd(190284.000000,196824.000000,75575.000000,383.510460)}
{pt3dadd(190248.000000,196908.000000,75575.000000,383.510460)}
{pt3dadd(190200.000000,196980.000000,75575.000000,379.824632)}
{pt3dadd(190152.000000,197052.000000,75550.000000,387.758378)}
{pt3dadd(190116.000000,197124.000000,75550.000000,387.758378)}
{pt3dadd(190068.000000,197196.000000,75525.000000,391.444206)}
{pt3dadd(190044.000000,197256.000000,75525.000000,391.444206)}
{pt3dadd(190020.000000,197340.000000,75500.000000,395.130034)}
{pt3dadd(190008.000000,197400.000000,75475.000000,367.552748)}
{pt3dadd(189948.000000,197484.000000,75475.000000,346.927032)}
{pt3dadd(189816.000000,197544.000000,75400.000000,333.203776)}
{pt3dadd(189780.000000,197604.000000,75400.000000,340.759720)}
{pt3dadd(189708.000000,197664.000000,75425.000000,348.693466)}
{pt3dadd(189696.000000,197760.000000,75500.000000,368.337006)}
{pt3dadd(189744.000000,197820.000000,75450.000000,381.406778)}
{pt3dadd(189624.000000,197904.000000,75525.000000,395.130034)}
{pt3dadd(189540.000000,197976.000000,75525.000000,387.574090)}
{pt3dadd(189516.000000,198060.000000,75525.000000,375.954516)}
{pt3dadd(189576.000000,198132.000000,75525.000000,372.268688)}
{pt3dadd(189552.000000,198204.000000,75475.000000,375.954516)}
{pt3dadd(189540.000000,198276.000000,75425.000000,379.824632)}
{pt3dadd(189528.000000,198360.000000,75350.000000,395.711014)}
{pt3dadd(189516.000000,198432.000000,75300.000000,411.597396)}
{pt3dadd(189492.000000,198516.000000,75225.000000,423.216970)}
{pt3dadd(189432.000000,198588.000000,75125.000000,423.216970)}
{pt3dadd(189372.000000,198660.000000,75000.000000,408.807558)}
{pt3dadd(189276.000000,198732.000000,74900.000000,382.669417)}
{pt3dadd(189252.000000,198828.000000,74850.000000,334.315520)}

{create adhoc11}
{access adhoc11}
{connect adhoc11(1), adhoc10(0)}
{nseg = 1}
{strdef color color = "White"}
{pt3dclear()}
{pt3dadd(189252.000000,198828.000000,74850.000000,334.315520)}
{pt3dadd(189324.000000,198912.000000,74775.000000,334.580840)}
{pt3dadd(189360.000000,198984.000000,74700.000000,338.144220)}
{pt3dadd(189408.000000,198708.000000,74450.000000,338.144220)}
{pt3dadd(189348.000000,198612.000000,74350.000000,338.144220)}
{pt3dadd(189204.000000,198636.000000,74250.000000,338.144220)}
{pt3dadd(189132.000000,198636.000000,74175.000000,316.816638)}
{pt3dadd(189144.000000,198684.000000,74075.000000,310.896354)}
{pt3dadd(189120.000000,198720.000000,74000.000000,285.081394)}
{pt3dadd(189132.000000,198744.000000,73925.000000,260.130718)}
{pt3dadd(189132.000000,198696.000000,73850.000000,239.552126)}
{pt3dadd(188976.000000,198552.000000,73775.000000,222.622066)}
{pt3dadd(188880.000000,198540.000000,73675.000000,203.956678)}
{pt3dadd(188784.000000,198528.000000,73600.000000,200.140414)}
{pt3dadd(188700.000000,198528.000000,73525.000000,188.655244)}
{pt3dadd(188616.000000,198516.000000,73450.000000,186.602836)}
{pt3dadd(188604.000000,198480.000000,73375.000000,181.774666)}
{pt3dadd(188604.000000,198504.000000,73300.000000,169.141194)}
{pt3dadd(188592.000000,198456.000000,73200.000000,169.141194)}
{pt3dadd(188568.000000,198456.000000,73125.000000,170.829714)}
{pt3dadd(188544.000000,198504.000000,73075.000000,160.412330)}
{pt3dadd(188508.000000,198588.000000,72975.000000,160.412330)}
{pt3dadd(188400.000000,198612.000000,72900.000000,166.114626)}
{pt3dadd(188280.000000,198684.000000,72825.000000,158.054896)}
{pt3dadd(188136.000000,198708.000000,72750.000000,151.768116)}
{pt3dadd(188004.000000,198780.000000,72700.000000,147.597356)}
{pt3dadd(187704.000000,198648.000000,72525.000000,147.597356)}
{pt3dadd(187632.000000,198504.000000,72425.000000,146.065820)}
{pt3dadd(187428.000000,198516.000000,72350.000000,144.676670)}
{pt3dadd(187164.000000,198576.000000,72275.000000,141.964520)}
{pt3dadd(186876.000000,198696.000000,72200.000000,140.704520)}
{pt3dadd(186708.000000,198840.000000,72125.000000,134.073760)}
{pt3dadd(186696.000000,198972.000000,72075.000000,131.226000)}
{pt3dadd(186684.000000,199104.000000,72000.000000,131.226000)}
{pt3dadd(186660.000000,199152.000000,71925.000000,133.938150)}
{pt3dadd(186720.000000,199248.000000,71850.000000,139.368910)}
{pt3dadd(186576.000000,199344.000000,71800.000000,145.999670)}
{pt3dadd(186408.000000,199428.000000,71750.000000,151.987080)}
{pt3dadd(186312.000000,199488.000000,71750.000000,163.297552)}
{pt3dadd(186228.000000,199584.000000,71700.000000,177.225954)}
{pt3dadd(186120.000000,199644.000000,71625.000000,189.695746)}
{pt3dadd(185952.000000,199716.000000,71550.000000,191.227282)}
{pt3dadd(185772.000000,199764.000000,71575.000000,209.845862)}
{pt3dadd(185436.000000,199728.000000,71625.000000,213.852942)}
{pt3dadd(185124.000000,199764.000000,71425.000000,211.800534)}
{pt3dadd(184872.000000,199872.000000,71350.000000,205.931862)}
{pt3dadd(184608.000000,200016.000000,71300.000000,205.931862)}
{pt3dadd(184440.000000,200112.000000,71225.000000,185.705168)}
{pt3dadd(184488.000000,200184.000000,71150.000000,170.387616)}
{pt3dadd(184476.000000,200280.000000,71075.000000,163.109882)}
{pt3dadd(184464.000000,200316.000000,71025.000000,163.109882)}
{pt3dadd(184416.000000,200316.000000,70950.000000,163.109882)}
{pt3dadd(184368.000000,200340.000000,70875.000000,166.406516)}
{pt3dadd(184284.000000,200352.000000,70825.000000,170.785812)}
{pt3dadd(184212.000000,200352.000000,70750.000000,170.785812)}
{pt3dadd(184164.000000,200352.000000,70675.000000,174.602076)}
{pt3dadd(184164.000000,200364.000000,70600.000000,185.540332)}
{pt3dadd(184152.000000,200364.000000,70500.000000,195.336982)}
{pt3dadd(184116.000000,200388.000000,70425.000000,208.430266)}
{pt3dadd(184068.000000,200412.000000,70350.000000,227.048846)}
{pt3dadd(183984.000000,200424.000000,70300.000000,233.519062)}
{pt3dadd(183888.000000,200424.000000,70225.000000,237.936870)}
{pt3dadd(183804.000000,200424.000000,70125.000000,242.575564)}
{pt3dadd(183804.000000,200400.000000,70050.000000,252.328424)}
{pt3dadd(183840.000000,200388.000000,69975.000000,263.618578)}
{pt3dadd(183864.000000,200388.000000,69900.000000,279.779362)}
{pt3dadd(183876.000000,200376.000000,69825.000000,302.467258)}
{pt3dadd(183756.000000,200388.000000,69750.000000,316.252128)}
{pt3dadd(183648.000000,200388.000000,69700.000000,319.002548)}
{pt3dadd(183528.000000,200376.000000,69625.000000,310.331844)}
{pt3dadd(183492.000000,200364.000000,69550.000000,301.661140)}
{pt3dadd(183468.000000,200352.000000,69475.000000,272.503028)}
{pt3dadd(183444.000000,200340.000000,69400.000000,244.282814)}
{pt3dadd(183504.000000,200172.000000,69325.000000,221.982884)}
{pt3dadd(183540.000000,200064.000000,69250.000000,204.206324)}
{pt3dadd(183576.000000,200016.000000,69175.000000,186.429764)}
{pt3dadd(183492.000000,200016.000000,69100.000000,180.840550)}
{pt3dadd(183384.000000,200052.000000,69025.000000,176.012380)}
{pt3dadd(183216.000000,200100.000000,68975.000000,169.725600)}
{pt3dadd(183084.000000,200184.000000,68925.000000,156.493720)}
{pt3dadd(182940.000000,200256.000000,68875.000000,143.261840)}
{pt3dadd(182772.000000,200340.000000,68825.000000,135.585910)}
{pt3dadd(182604.000000,200436.000000,68550.000000,130.155150)}
{pt3dadd(182472.000000,200496.000000,68450.000000,120.727860)}
{pt3dadd(182256.000000,200556.000000,68250.000000,125.900010)}
{pt3dadd(181944.000000,200664.000000,68175.000000,125.900010)}
{pt3dadd(181596.000000,200712.000000,68000.000000,124.577010)}
{pt3dadd(181332.000000,200808.000000,67825.000000,120.109113)}
{pt3dadd(181224.000000,200760.000000,67425.000000,124.364253)}
{pt3dadd(181188.000000,200784.000000,67325.000000,121.652103)}
{pt3dadd(181080.000000,200760.000000,67225.000000,122.852103)}
{pt3dadd(181152.000000,200832.000000,67150.000000,116.136963)}
{pt3dadd(181020.000000,200820.000000,67050.000000,115.149720)}
{pt3dadd(181020.000000,200820.000000,66975.000000,111.881823)}
{pt3dadd(181008.000000,200868.000000,66875.000000,111.881823)}
{pt3dadd(180948.000000,200892.000000,66825.000000,102.925968)}
{pt3dadd(180876.000000,200892.000000,66750.000000,106.038250)}
{pt3dadd(180780.000000,200844.000000,66675.000000,112.753390)}
{pt3dadd(180720.000000,200844.000000,66575.000000,110.825915)}
{pt3dadd(180828.000000,200796.000000,66500.000000,103.170543)}
{pt3dadd(180744.000000,200772.000000,66425.000000,107.658501)}
{pt3dadd(180672.000000,200820.000000,66350.000000,104.546219)}
{pt3dadd(180576.000000,200844.000000,66275.000000,99.854927)}
{pt3dadd(180468.000000,200820.000000,66200.000000,102.819007)}
{pt3dadd(180612.000000,200796.000000,66100.000000,104.746482)}
{pt3dadd(180684.000000,200808.000000,66000.000000,103.759239)}
{pt3dadd(180120.000000,201228.000000,65925.000000,105.783087)}
{pt3dadd(180096.000000,201276.000000,65825.000000,104.746482)}
{pt3dadd(179976.000000,201324.000000,65750.000000,103.709877)}
{pt3dadd(179916.000000,201324.000000,65675.000000,102.722634)}
{pt3dadd(179892.000000,201288.000000,65600.000000,102.722634)}
{pt3dadd(179856.000000,201276.000000,65525.000000,101.686029)}
{pt3dadd(179772.000000,201264.000000,65450.000000,102.722634)}
{pt3dadd(179664.000000,201264.000000,65350.000000,101.735391)}
{pt3dadd(179652.000000,201228.000000,65275.000000,100.795159)}
{pt3dadd(179544.000000,201240.000000,65200.000000,100.795159)}
{pt3dadd(179484.000000,201240.000000,65100.000000,99.807916)}
{pt3dadd(179424.000000,201240.000000,65000.000000,97.784068)}
{pt3dadd(179424.000000,201240.000000,64925.000000,97.784068)}
{pt3dadd(179424.000000,201228.000000,64825.000000,98.724300)}
{pt3dadd(179496.000000,201144.000000,64725.000000,102.979440)}
{pt3dadd(179448.000000,201096.000000,64675.000000,108.434580)}
{pt3dadd(179400.000000,201096.000000,64575.000000,107.494348)}
{pt3dadd(179352.000000,201096.000000,64500.000000,115.532488)}
{pt3dadd(179292.000000,201108.000000,64425.000000,131.246558)}
{pt3dadd(179244.000000,201108.000000,64325.000000,136.418708)}
{pt3dadd(179196.000000,201108.000000,64250.000000,135.218708)}
{pt3dadd(179148.000000,201120.000000,64175.000000,139.271222)}
{pt3dadd(179088.000000,201120.000000,64075.000000,135.488222)}
{pt3dadd(179040.000000,201120.000000,64000.000000,121.798000)}
{pt3dadd(179016.000000,201108.000000,63925.000000,119.085850)}
{pt3dadd(179100.000000,201024.000000,63825.000000,121.545850)}
{pt3dadd(179040.000000,201012.000000,63725.000000,126.471708)}
{pt3dadd(178980.000000,201000.000000,63650.000000,130.254708)}
{pt3dadd(178920.000000,200988.000000,63550.000000,131.343142)}
{pt3dadd(178860.000000,200964.000000,63450.000000,134.055292)}
{pt3dadd(178800.000000,201036.000000,63325.000000,141.365702)}
{pt3dadd(178800.000000,201024.000000,63250.000000,154.630846)}
{pt3dadd(178896.000000,200952.000000,63175.000000,160.618256)}
{pt3dadd(178908.000000,200940.000000,63100.000000,169.923410)}
{pt3dadd(178776.000000,201012.000000,63025.000000,169.923410)}
{pt3dadd(178752.000000,201036.000000,62925.000000,186.047274)}
{pt3dadd(178668.000000,201024.000000,62850.000000,190.254710)}
{pt3dadd(178620.000000,201048.000000,62750.000000,199.584852)}
{pt3dadd(178632.000000,201024.000000,62675.000000,219.811546)}
{pt3dadd(178656.000000,201012.000000,62575.000000,240.533670)}
{pt3dadd(178680.000000,201180.000000,62525.000000,233.739948)}
{pt3dadd(178728.000000,201120.000000,62450.000000,229.532512)}
{pt3dadd(178704.000000,201168.000000,62375.000000,223.663840)}
{pt3dadd(178788.000000,201180.000000,62275.000000,212.322994)}
{pt3dadd(178800.000000,201132.000000,62225.000000,207.684300)}
{pt3dadd(178668.000000,201084.000000,62150.000000,209.839328)}
{pt3dadd(178608.000000,200988.000000,62075.000000,206.023064)}
{pt3dadd(178608.000000,201048.000000,62000.000000,207.884656)}
{pt3dadd(178476.000000,201012.000000,61925.000000,202.295442)}
{pt3dadd(178452.000000,200928.000000,61850.000000,196.133334)}
{pt3dadd(178416.000000,200892.000000,61750.000000,184.648164)}
{pt3dadd(178404.000000,200808.000000,61650.000000,197.310558)}
{pt3dadd(178404.000000,200736.000000,61575.000000,208.111360)}
{pt3dadd(178392.000000,200760.000000,61475.000000,222.546704)}
{pt3dadd(178368.000000,200772.000000,61400.000000,226.553784)}
{pt3dadd(178356.000000,200904.000000,61300.000000,242.677648)}
{pt3dadd(178272.000000,200892.000000,61250.000000,242.677648)}
{pt3dadd(178212.000000,200736.000000,61150.000000,240.301734)}
{pt3dadd(178152.000000,200592.000000,61075.000000,235.663040)}
{pt3dadd(178056.000000,200496.000000,61000.000000,235.663040)}
{pt3dadd(177960.000000,200472.000000,60900.000000,235.663040)}
{pt3dadd(177876.000000,200460.000000,60825.000000,246.415566)}
{pt3dadd(177804.000000,200436.000000,60725.000000,256.656066)}
{pt3dadd(177780.000000,200364.000000,60650.000000,263.789476)}
{pt3dadd(177660.000000,200352.000000,60575.000000,270.583198)}
{pt3dadd(177576.000000,200280.000000,60500.000000,275.697364)}
{pt3dadd(177504.000000,200220.000000,60425.000000,262.568924)}
{pt3dadd(177480.000000,200136.000000,60350.000000,265.456864)}
{pt3dadd(177396.000000,200088.000000,60250.000000,276.747018)}
{pt3dadd(177384.000000,200028.000000,60175.000000,287.499544)}
{pt3dadd(177372.000000,199968.000000,60100.000000,277.746684)}
{pt3dadd(177300.000000,199908.000000,60025.000000,290.875124)}
{pt3dadd(177300.000000,199884.000000,59925.000000,287.987184)}
{pt3dadd(177288.000000,199872.000000,59850.000000,291.171144)}
{pt3dadd(177252.000000,199872.000000,59750.000000,297.387448)}
{pt3dadd(177228.000000,199860.000000,59675.000000,315.811012)}
{pt3dadd(177156.000000,199824.000000,59600.000000,329.008920)}
{pt3dadd(177096.000000,199800.000000,59550.000000,318.395720)}

{create adhoc12}
{access adhoc12}
{connect adhoc12(1), adhoc11(0)}
{nseg = 1}
{strdef color color = "White"}
{pt3dclear()}
{pt3dadd(177096.000000,199800.000000,59550.000000,318.395720)}
{pt3dadd(177036.000000,199764.000000,59450.000000,303.944547)}
{pt3dadd(176976.000000,199728.000000,59400.000000,278.423312)}
{pt3dadd(176964.000000,199656.000000,59300.000000,257.844720)}
{pt3dadd(176916.000000,199800.000000,59225.000000,243.884424)}
{pt3dadd(177096.000000,199344.000000,59275.000000,199.950140)}
{pt3dadd(176988.000000,199224.000000,59200.000000,184.035172)}
{pt3dadd(176808.000000,199128.000000,59025.000000,188.242608)}
{pt3dadd(176724.000000,199044.000000,58825.000000,192.660416)}
{pt3dadd(176712.000000,198960.000000,58775.000000,199.130632)}
{pt3dadd(176700.000000,198888.000000,58775.000000,218.479244)}
{pt3dadd(176688.000000,198804.000000,58700.000000,222.486324)}
{pt3dadd(176640.000000,198708.000000,58625.000000,209.393040)}
{pt3dadd(176592.000000,198600.000000,58500.000000,187.074680)}
{pt3dadd(176652.000000,198528.000000,58425.000000,173.326730)}
{pt3dadd(176424.000000,198084.000000,58300.000000,171.465138)}
{pt3dadd(176460.000000,197892.000000,58175.000000,167.458058)}
{pt3dadd(176280.000000,197772.000000,57925.000000,180.551342)}
{pt3dadd(176352.000000,197520.000000,57550.000000,187.513638)}
{pt3dadd(176352.000000,197340.000000,57450.000000,208.751668)}
{pt3dadd(176268.000000,196788.000000,56900.000000,223.908778)}
{pt3dadd(176172.000000,196344.000000,56550.000000,237.204296)}
{pt3dadd(176172.000000,196104.000000,56225.000000,241.842990)}
{pt3dadd(176184.000000,195888.000000,56050.000000,259.574968)}
{pt3dadd(176172.000000,195684.000000,55900.000000,233.738678)}
{pt3dadd(176208.000000,195636.000000,55750.000000,202.081791)}
{pt3dadd(176280.000000,195564.000000,55550.000000,183.463211)}
{pt3dadd(176484.000000,195540.000000,55400.000000,160.028937)}
{pt3dadd(176628.000000,195564.000000,55225.000000,136.594663)}
{pt3dadd(176712.000000,195396.000000,55075.000000,139.584809)}
{pt3dadd(176688.000000,195516.000000,54900.000000,156.084586)}
{pt3dadd(176640.000000,195504.000000,54700.000000,157.773106)}
{pt3dadd(176652.000000,195492.000000,54550.000000,165.083516)}
{pt3dadd(176616.000000,195444.000000,54400.000000,170.785812)}
{pt3dadd(176688.000000,195432.000000,54250.000000,160.392224)}
{pt3dadd(176772.000000,195444.000000,54100.000000,148.360344)}
{pt3dadd(176880.000000,195372.000000,53950.000000,143.532174)}
{pt3dadd(176952.000000,195264.000000,53800.000000,145.220694)}
{pt3dadd(176928.000000,195204.000000,53625.000000,145.220694)}
{pt3dadd(176952.000000,195132.000000,53475.000000,155.614282)}
{pt3dadd(177000.000000,194988.000000,53300.000000,152.182990)}
{pt3dadd(177036.000000,194952.000000,53150.000000,141.297090)}
{pt3dadd(177036.000000,194760.000000,53000.000000,131.038160)}
{pt3dadd(177132.000000,194820.000000,52825.000000,126.658864)}
{pt3dadd(177024.000000,194868.000000,52700.000000,119.696568)}
{pt3dadd(176928.000000,194916.000000,52525.000000,120.785002)}
{pt3dadd(176820.000000,194964.000000,52375.000000,128.823142)}
{pt3dadd(176832.000000,194964.000000,52200.000000,127.623142)}
{pt3dadd(176796.000000,195072.000000,52000.000000,132.002438)}
{pt3dadd(176688.000000,195144.000000,51850.000000,138.964734)}
{pt3dadd(176700.000000,195132.000000,51700.000000,146.738352)}
{pt3dadd(176700.000000,195108.000000,51550.000000,158.048824)}
{pt3dadd(176700.000000,195096.000000,51425.000000,163.220974)}
{pt3dadd(176712.000000,195072.000000,51275.000000,155.058678)}
{pt3dadd(176784.000000,195156.000000,51125.000000,152.068532)}
{pt3dadd(176856.000000,195192.000000,51000.000000,150.609922)}
{pt3dadd(176880.000000,195120.000000,50850.000000,136.716450)}
{pt3dadd(176880.000000,195144.000000,50700.000000,143.003230)}
{pt3dadd(176964.000000,195144.000000,50575.000000,151.165526)}
{pt3dadd(177072.000000,195144.000000,50425.000000,149.776376)}
{pt3dadd(177180.000000,195156.000000,50275.000000,161.652370)}
{pt3dadd(177384.000000,195036.000000,50125.000000,165.624520)}
{pt3dadd(177564.000000,195048.000000,49975.000000,160.796350)}
{pt3dadd(177468.000000,194952.000000,49825.000000,157.806204)}
{pt3dadd(177504.000000,194940.000000,49675.000000,160.653964)}
{pt3dadd(177576.000000,194916.000000,49550.000000,143.605820)}
{pt3dadd(177648.000000,194904.000000,49400.000000,132.342839)}
{pt3dadd(177720.000000,194892.000000,49275.000000,121.456939)}
{pt3dadd(177768.000000,194868.000000,49125.000000,113.016892)}
{pt3dadd(177816.000000,194880.000000,48975.000000,104.154840)}
{pt3dadd(177852.000000,194916.000000,48825.000000,100.886943)}
{pt3dadd(177888.000000,194940.000000,48700.000000,109.437774)}
{pt3dadd(177924.000000,194964.000000,48550.000000,114.892914)}
{pt3dadd(178008.000000,194940.000000,48400.000000,112.965439)}
{pt3dadd(178176.000000,194868.000000,48325.000000,112.965439)}
{pt3dadd(178356.000000,194868.000000,48200.000000,122.864096)}
{pt3dadd(178452.000000,194844.000000,48050.000000,121.604096)}
{pt3dadd(178644.000000,194808.000000,47875.000000,112.648241)}
{pt3dadd(178908.000000,194628.000000,47700.000000,113.588473)}
{pt3dadd(179124.000000,194592.000000,47475.000000,114.676907)}
{pt3dadd(179340.000000,194460.000000,47275.000000,116.208443)}
{pt3dadd(179484.000000,194460.000000,47100.000000,128.240323)}
{pt3dadd(179460.000000,194172.000000,46925.000000,139.779178)}
{pt3dadd(179388.000000,194016.000000,46725.000000,167.552678)}
{pt3dadd(179460.000000,193788.000000,46550.000000,199.703976)}
{pt3dadd(179532.000000,193416.000000,46375.000000,206.635152)}
{pt3dadd(179544.000000,193284.000000,46200.000000,208.496744)}
{pt3dadd(179232.000000,193032.000000,46025.000000,223.814296)}
{pt3dadd(179376.000000,192648.000000,45850.000000,202.755936)}
{pt3dadd(179280.000000,192528.000000,45675.000000,174.207496)}
{pt3dadd(179256.000000,192420.000000,45525.000000,159.114024)}
{pt3dadd(179196.000000,192324.000000,45450.000000,140.752655)}
{pt3dadd(179028.000000,192408.000000,45300.000000,115.561272)}
{pt3dadd(178920.000000,192336.000000,45150.000000,103.835190)}
{pt3dadd(178668.000000,192336.000000,44975.000000,99.143898)}
{pt3dadd(178428.000000,192312.000000,44750.000000,105.774658)}
{pt3dadd(178188.000000,192528.000000,44650.000000,104.787415)}
{pt3dadd(178008.000000,192528.000000,44400.000000,103.122391)}
{pt3dadd(177852.000000,192576.000000,44350.000000,109.120576)}
{pt3dadd(177828.000000,192576.000000,44200.000000,104.408220)}
{pt3dadd(177792.000000,192768.000000,44300.000000,90.021605)}
{pt3dadd(177720.000000,192792.000000,44125.000000,92.045453)}
{pt3dadd(177624.000000,192864.000000,43825.000000,95.546168)}
{pt3dadd(177420.000000,192936.000000,43650.000000,93.618693)}
{pt3dadd(177288.000000,193032.000000,43550.000000,92.032955)}
{pt3dadd(177120.000000,193092.000000,43450.000000,92.032955)}
{pt3dadd(177000.000000,193236.000000,43375.000000,107.496127)}
{pt3dadd(176736.000000,193152.000000,43200.000000,114.911065)}
{pt3dadd(176532.000000,193440.000000,43250.000000,186.159400)}

{create adhoc13}
{access adhoc13}
{connect adhoc13(1), adhoc11(0)}
{nseg = 1}
{strdef color color = "White"}
{pt3dclear()}
{pt3dadd(177096.000000,199800.000000,59550.000000,318.395720)}
{pt3dadd(176976.000000,199968.000000,59500.000000,242.067140)}
{pt3dadd(176916.000000,200460.000000,59425.000000,200.806284)}
{pt3dadd(176820.000000,200628.000000,58975.000000,163.587140)}
{pt3dadd(176640.000000,200676.000000,58650.000000,138.981150)}
{pt3dadd(176700.000000,200868.000000,58250.000000,135.009000)}
{pt3dadd(176640.000000,200856.000000,57950.000000,132.426000)}
{pt3dadd(176748.000000,200808.000000,57550.000000,123.447628)}
{pt3dadd(176688.000000,200760.000000,57200.000000,114.896797)}
{pt3dadd(176736.000000,200772.000000,56875.000000,106.858657)}
{pt3dadd(176760.000000,200796.000000,56525.000000,102.390760)}
{pt3dadd(176664.000000,200748.000000,56050.000000,106.362910)}
{pt3dadd(176712.000000,200904.000000,55775.000000,130.658834)}
{pt3dadd(176784.000000,200964.000000,55375.000000,151.843137)}
{pt3dadd(176820.000000,201000.000000,54975.000000,164.260573)}
{pt3dadd(176688.000000,201144.000000,54625.000000,171.311470)}
{pt3dadd(176448.000000,201192.000000,54125.000000,175.909730)}
{pt3dadd(175980.000000,201372.000000,53975.000000,166.579588)}
{pt3dadd(175764.000000,201612.000000,53700.000000,161.256526)}
{pt3dadd(175512.000000,201876.000000,53375.000000,159.724990)}
{pt3dadd(175080.000000,201912.000000,53200.000000,155.941990)}
{pt3dadd(174720.000000,201804.000000,52925.000000,143.940288)}
{pt3dadd(174492.000000,201924.000000,52675.000000,139.342028)}
{pt3dadd(174480.000000,201960.000000,52400.000000,137.733914)}
{pt3dadd(174336.000000,202176.000000,52075.000000,137.733914)}
{pt3dadd(174252.000000,202128.000000,51725.000000,144.364674)}
{pt3dadd(174300.000000,202104.000000,51400.000000,153.226726)}
{pt3dadd(174300.000000,202152.000000,51150.000000,151.837576)}
{pt3dadd(174300.000000,202296.000000,50800.000000,139.420140)}
{pt3dadd(174168.000000,202344.000000,50425.000000,146.021260)}
{pt3dadd(174132.000000,202500.000000,50075.000000,152.622380)}
{pt3dadd(174168.000000,202632.000000,49775.000000,159.223500)}
{pt3dadd(174276.000000,202860.000000,49450.000000,176.696080)}
{pt3dadd(174348.000000,203136.000000,49150.000000,187.581980)}
{pt3dadd(174420.000000,203340.000000,48850.000000,170.094960)}
{pt3dadd(174420.000000,203460.000000,48575.000000,170.094960)}
{pt3dadd(174420.000000,203544.000000,48325.000000,162.035230)}
{pt3dadd(174120.000000,203700.000000,48425.000000,141.979650)}
{pt3dadd(173868.000000,203760.000000,48450.000000,152.673383)}
{pt3dadd(173808.000000,203796.000000,48550.000000,126.000000)}

{create adhoc14}
{access adhoc14}
{connect adhoc14(1), adhoc10(0)}
{nseg = 1}
{strdef color color = "White"}
{pt3dclear()}
{pt3dadd(189252.000000,198828.000000,74850.000000,334.315520)}
{pt3dadd(189012.000000,198732.000000,75875.000000,250.879647)}
{pt3dadd(188556.000000,199080.000000,76075.000000,218.793410)}
{pt3dadd(188124.000000,199212.000000,76525.000000,171.675166)}
{pt3dadd(187668.000000,199392.000000,76825.000000,140.585520)}
{pt3dadd(187188.000000,199404.000000,76600.000000,130.815110)}
{pt3dadd(186792.000000,199476.000000,76600.000000,122.375063)}
{pt3dadd(186612.000000,199488.000000,76750.000000,106.138733)}
{pt3dadd(186096.000000,199656.000000,76750.000000,106.138733)}
{pt3dadd(185784.000000,199728.000000,76600.000000,115.117105)}
{pt3dadd(185544.000000,199728.000000,76200.000000,110.861965)}
{pt3dadd(185472.000000,199968.000000,76225.000000,107.186214)}
{pt3dadd(185484.000000,200400.000000,75925.000000,106.097780)}
{pt3dadd(185484.000000,200580.000000,75850.000000,115.525070)}
{pt3dadd(185388.000000,200748.000000,75850.000000,121.512480)}
{pt3dadd(185268.000000,200928.000000,75850.000000,129.550620)}
{pt3dadd(185112.000000,201072.000000,76100.000000,138.954268)}
{pt3dadd(184896.000000,201204.000000,76100.000000,146.357710)}
{pt3dadd(184668.000000,201384.000000,76100.000000,143.645560)}
{pt3dadd(184596.000000,201684.000000,76100.000000,133.875150)}
{pt3dadd(184416.000000,201888.000000,75950.000000,131.292150)}
{pt3dadd(184248.000000,202164.000000,75950.000000,131.292150)}
{pt3dadd(184116.000000,202512.000000,75950.000000,129.903000)}
{pt3dadd(184104.000000,202632.000000,75950.000000,129.903000)}
{pt3dadd(183972.000000,202740.000000,76025.000000,132.363000)}
{pt3dadd(183948.000000,202932.000000,76025.000000,133.623000)}
{pt3dadd(183840.000000,203172.000000,76025.000000,133.623000)}
{pt3dadd(183672.000000,203412.000000,76025.000000,132.300000)}
{pt3dadd(183468.000000,203676.000000,76025.000000,138.002296)}
{pt3dadd(183240.000000,203940.000000,76025.000000,138.002296)}
{pt3dadd(183132.000000,204180.000000,76025.000000,147.001226)}
{pt3dadd(182892.000000,204396.000000,75975.000000,163.641778)}
{pt3dadd(182940.000000,204660.000000,75825.000000,174.413658)}
{pt3dadd(182712.000000,204864.000000,75575.000000,183.299506)}
{pt3dadd(182472.000000,205068.000000,75575.000000,187.470266)}
{pt3dadd(182340.000000,205320.000000,75350.000000,177.211336)}
{pt3dadd(182328.000000,205500.000000,75150.000000,156.967926)}
{pt3dadd(182232.000000,205668.000000,74825.000000,141.504754)}
{pt3dadd(182112.000000,205884.000000,74600.000000,119.261238)}
{pt3dadd(181896.000000,206100.000000,74325.000000,115.090478)}
{pt3dadd(181656.000000,206352.000000,74150.000000,119.062628)}
{pt3dadd(181620.000000,206592.000000,73975.000000,131.664416)}
{pt3dadd(181704.000000,206796.000000,73850.000000,159.789982)}
{pt3dadd(181596.000000,207084.000000,73650.000000,184.085906)}
{pt3dadd(181488.000000,207276.000000,73425.000000,191.396316)}
{pt3dadd(181536.000000,207396.000000,73175.000000,192.854926)}
{pt3dadd(181500.000000,207444.000000,72900.000000,182.595996)}
{pt3dadd(181464.000000,207504.000000,72625.000000,163.332482)}
{pt3dadd(181320.000000,207504.000000,72400.000000,146.691930)}
{pt3dadd(181092.000000,207492.000000,72150.000000,136.921520)}
{pt3dadd(181020.000000,207504.000000,71925.000000,143.522640)}
{pt3dadd(180816.000000,207528.000000,71650.000000,137.127268)}
{pt3dadd(180744.000000,207804.000000,71375.000000,129.353650)}
{pt3dadd(180540.000000,208020.000000,71150.000000,125.750792)}
{pt3dadd(180240.000000,208212.000000,71000.000000,120.555420)}
{pt3dadd(179928.000000,208320.000000,70825.000000,103.068400)}
{pt3dadd(179664.000000,208428.000000,70650.000000,107.120914)}
{pt3dadd(179100.000000,208836.000000,70475.000000,102.344383)}
{pt3dadd(178752.000000,209112.000000,70150.000000,114.285710)}

{create adhoc15}
{access adhoc15}
{connect adhoc15(1), adhoc3(0)}
{nseg = 1}
{strdef color color = "White"}
{pt3dclear()}
{pt3dadd(201504.000000,168012.000000,89150.000000,368.582860)}
{pt3dadd(201108.000000,168900.000000,89150.000000,206.860953)}
{pt3dadd(201072.000000,168972.000000,89000.000000,175.776572)}
{pt3dadd(201060.000000,169092.000000,88900.000000,134.222296)}
{pt3dadd(201060.000000,169140.000000,88800.000000,139.653056)}
{pt3dadd(201048.000000,169176.000000,88700.000000,142.236056)}
{pt3dadd(200976.000000,169260.000000,88625.000000,142.236056)}
{pt3dadd(201000.000000,169320.000000,88550.000000,139.776056)}
{pt3dadd(200988.000000,169332.000000,88475.000000,138.244520)}
{pt3dadd(200940.000000,169464.000000,88375.000000,131.613760)}
{pt3dadd(200880.000000,169524.000000,88300.000000,129.030760)}
{pt3dadd(200832.000000,169512.000000,88225.000000,127.830760)}
{pt3dadd(200832.000000,169548.000000,88125.000000,127.830760)}
{pt3dadd(200784.000000,169548.000000,88050.000000,121.200000)}
{pt3dadd(200748.000000,169500.000000,87950.000000,117.932103)}
{pt3dadd(200760.000000,169512.000000,87875.000000,112.476963)}
{pt3dadd(200724.000000,169500.000000,87775.000000,110.245671)}
{pt3dadd(200652.000000,169548.000000,87700.000000,109.102813)}
{pt3dadd(200652.000000,169560.000000,87625.000000,102.159165)}
{pt3dadd(200664.000000,169584.000000,87525.000000,104.284204)}
{pt3dadd(200652.000000,169596.000000,87450.000000,107.396486)}
{pt3dadd(200568.000000,169692.000000,87375.000000,106.359881)}
{pt3dadd(200604.000000,169728.000000,87300.000000,107.502739)}
{pt3dadd(200496.000000,169812.000000,87225.000000,113.303529)}
{pt3dadd(200448.000000,169884.000000,87125.000000,110.191247)}
{pt3dadd(200472.000000,169956.000000,87050.000000,111.334105)}
{pt3dadd(200436.000000,170088.000000,86975.000000,110.346862)}
{pt3dadd(200400.000000,170196.000000,86900.000000,110.346862)}
{pt3dadd(200424.000000,170292.000000,86800.000000,118.120480)}
{pt3dadd(200256.000000,170376.000000,86675.000000,119.107723)}
{pt3dadd(200232.000000,170616.000000,86600.000000,120.307723)}
{pt3dadd(200232.000000,170712.000000,86550.000000,124.562863)}
{pt3dadd(200160.000000,170832.000000,86475.000000,120.307723)}
{pt3dadd(200052.000000,170964.000000,86400.000000,107.586132)}
{pt3dadd(199896.000000,171060.000000,86400.000000,106.598889)}
{pt3dadd(199872.000000,171204.000000,86400.000000,101.143749)}
{pt3dadd(199920.000000,171324.000000,86400.000000,104.926749)}
{pt3dadd(199980.000000,171468.000000,86400.000000,118.952299)}
{pt3dadd(199944.000000,171612.000000,86400.000000,134.813540)}
{pt3dadd(199968.000000,171732.000000,86425.000000,147.230976)}
{pt3dadd(199992.000000,171804.000000,86450.000000,156.658266)}
{pt3dadd(199956.000000,171900.000000,86425.000000,159.506026)}
{pt3dadd(199860.000000,171960.000000,86425.000000,157.897912)}
{pt3dadd(199836.000000,172032.000000,86450.000000,159.586432)}
{pt3dadd(199800.000000,172104.000000,86425.000000,156.596286)}
{pt3dadd(199860.000000,172176.000000,86400.000000,159.586432)}
{pt3dadd(199896.000000,172248.000000,86425.000000,162.726082)}
{pt3dadd(199836.000000,172320.000000,86400.000000,161.194546)}
{pt3dadd(199884.000000,172404.000000,86350.000000,156.366376)}
{pt3dadd(199896.000000,172476.000000,86300.000000,160.964636)}
{pt3dadd(199956.000000,172548.000000,86300.000000,156.585340)}
{pt3dadd(199944.000000,172620.000000,86300.000000,156.585340)}
{pt3dadd(199980.000000,172680.000000,86225.000000,149.954580)}
{pt3dadd(199992.000000,172776.000000,86100.000000,139.068680)}
{pt3dadd(200004.000000,172752.000000,85925.000000,123.207439)}
{pt3dadd(199980.000000,172836.000000,85800.000000,120.624439)}
{pt3dadd(199992.000000,172824.000000,85675.000000,112.054029)}
{pt3dadd(200052.000000,172776.000000,85550.000000,110.911171)}
{pt3dadd(200100.000000,172764.000000,85475.000000,112.935019)}
{pt3dadd(200100.000000,172968.000000,85200.000000,113.830478)}
{pt3dadd(200112.000000,173052.000000,84825.000000,125.862358)}
{pt3dadd(200136.000000,173172.000000,84375.000000,137.894238)}
{pt3dadd(199992.000000,173268.000000,83925.000000,152.268976)}
{pt3dadd(199872.000000,173304.000000,83575.000000,178.018628)}
{pt3dadd(199764.000000,173424.000000,83450.000000,211.602990)}
{pt3dadd(199632.000000,173616.000000,83150.000000,203.543260)}
{pt3dadd(199452.000000,173736.000000,82850.000000,196.942140)}
{pt3dadd(199416.000000,174156.000000,82475.000000,177.619429)}
{pt3dadd(199224.000000,174828.000000,82150.000000,150.833172)}
{pt3dadd(199104.000000,175296.000000,81825.000000,127.616332)}
{pt3dadd(198888.000000,175680.000000,81525.000000,133.903112)}
{pt3dadd(198612.000000,176148.000000,81425.000000,131.055352)}
{pt3dadd(198372.000000,176400.000000,81175.000000,146.916593)}
{pt3dadd(198120.000000,176904.000000,80900.000000,155.356640)}
{pt3dadd(197748.000000,177420.000000,80650.000000,150.184490)}
{pt3dadd(197676.000000,177744.000000,80375.000000,146.887856)}
{pt3dadd(197700.000000,177936.000000,80025.000000,146.887856)}
{pt3dadd(197712.000000,178116.000000,79700.000000,137.117446)}
{pt3dadd(197652.000000,178236.000000,79400.000000,129.714004)}
{pt3dadd(197472.000000,178272.000000,79050.000000,125.458864)}
{pt3dadd(197328.000000,178536.000000,78725.000000,114.028671)}
{pt3dadd(197100.000000,178872.000000,78325.000000,106.977774)}
{pt3dadd(196956.000000,179076.000000,77900.000000,115.140070)}
{pt3dadd(196848.000000,179232.000000,77475.000000,143.265636)}
{pt3dadd(196728.000000,179280.000000,77200.000000,155.683072)}
{pt3dadd(196656.000000,179460.000000,76825.000000,154.695829)}
{pt3dadd(196668.000000,179412.000000,76550.000000,169.669050)}
{pt3dadd(197172.000000,179556.000000,76250.000000,98.724300)}

{create adhoc16}
{access adhoc16}
{connect adhoc16(1), adhoc2(0)}
{nseg = 1}
{strdef color color = "White"}
{pt3dclear()}
{pt3dadd(200820.000000,161556.000000,79925.000000,226.277900)}
{pt3dadd(201060.000000,161148.000000,79925.000000,200.123557)}
{pt3dadd(201036.000000,161016.000000,79900.000000,181.408580)}
{pt3dadd(201108.000000,160932.000000,79850.000000,169.923410)}
{pt3dadd(201156.000000,160848.000000,79875.000000,162.645676)}
{pt3dadd(201132.000000,160764.000000,79900.000000,162.645676)}
{pt3dadd(201120.000000,160692.000000,79925.000000,168.932456)}
{pt3dadd(201168.000000,160596.000000,79950.000000,174.002040)}
{pt3dadd(201168.000000,160524.000000,79925.000000,174.002040)}
{pt3dadd(201120.000000,160428.000000,79925.000000,174.002040)}
{pt3dadd(201168.000000,160344.000000,79850.000000,175.690560)}
{pt3dadd(201180.000000,160248.000000,79875.000000,174.002040)}
{pt3dadd(201180.000000,160152.000000,79875.000000,175.863632)}
{pt3dadd(201132.000000,160068.000000,79850.000000,181.186694)}
{pt3dadd(201156.000000,159984.000000,79900.000000,181.186694)}
{pt3dadd(201144.000000,159912.000000,79900.000000,179.498174)}
{pt3dadd(201144.000000,159816.000000,79925.000000,174.899914)}
{pt3dadd(201168.000000,159732.000000,79850.000000,156.538545)}
{pt3dadd(201156.000000,159636.000000,79875.000000,141.445073)}
{pt3dadd(201216.000000,159540.000000,79925.000000,134.134663)}
{pt3dadd(201204.000000,159420.000000,79900.000000,126.824253)}
{pt3dadd(201228.000000,159324.000000,79875.000000,133.111033)}
{pt3dadd(201156.000000,159252.000000,79925.000000,153.427074)}
{pt3dadd(201096.000000,159180.000000,79900.000000,176.945434)}
{pt3dadd(201072.000000,159096.000000,79825.000000,198.003794)}
{pt3dadd(201096.000000,159012.000000,79800.000000,212.591938)}
{pt3dadd(201120.000000,158928.000000,79775.000000,210.903418)}
{pt3dadd(201108.000000,158832.000000,79775.000000,203.625684)}
{pt3dadd(201060.000000,158724.000000,79750.000000,181.307324)}
{pt3dadd(201108.000000,158628.000000,79750.000000,164.419724)}
{pt3dadd(201072.000000,158532.000000,79700.000000,151.154580)}
{pt3dadd(201060.000000,158424.000000,79675.000000,145.167170)}
{pt3dadd(201060.000000,158340.000000,79700.000000,139.179760)}
{pt3dadd(201060.000000,158244.000000,79725.000000,151.211640)}
{pt3dadd(201072.000000,158160.000000,79750.000000,152.743176)}
{pt3dadd(201084.000000,158052.000000,79775.000000,157.122472)}
{pt3dadd(201072.000000,157968.000000,79750.000000,161.501768)}
{pt3dadd(201048.000000,157884.000000,79725.000000,160.178768)}
{pt3dadd(201024.000000,157788.000000,79750.000000,146.946888)}
{pt3dadd(201012.000000,157680.000000,79725.000000,137.641734)}
{pt3dadd(201024.000000,157608.000000,79675.000000,130.679438)}
{pt3dadd(201036.000000,157524.000000,79675.000000,124.977142)}
{pt3dadd(201036.000000,157440.000000,79675.000000,127.689292)}
{pt3dadd(201012.000000,157332.000000,79700.000000,135.851588)}
{pt3dadd(200988.000000,157260.000000,79700.000000,152.087918)}
{pt3dadd(200976.000000,157164.000000,79650.000000,153.347918)}
{pt3dadd(200952.000000,157080.000000,79625.000000,157.518678)}
{pt3dadd(200940.000000,157008.000000,79575.000000,157.518678)}
{pt3dadd(200928.000000,156900.000000,79625.000000,157.518678)}
{pt3dadd(200904.000000,156840.000000,79650.000000,152.195616)}
{pt3dadd(201036.000000,156732.000000,79650.000000,161.194546)}
{pt3dadd(201072.000000,156648.000000,79650.000000,166.022716)}
{pt3dadd(201096.000000,156552.000000,79625.000000,172.309496)}
{pt3dadd(201096.000000,156456.000000,79575.000000,179.240672)}
{pt3dadd(201120.000000,156372.000000,79550.000000,180.929192)}
{pt3dadd(201156.000000,156300.000000,79550.000000,176.101022)}
{pt3dadd(201108.000000,156216.000000,79550.000000,167.102092)}
{pt3dadd(201180.000000,156120.000000,79525.000000,158.103162)}
{pt3dadd(201204.000000,156036.000000,79550.000000,144.209690)}
{pt3dadd(201192.000000,155964.000000,79575.000000,133.950760)}
{pt3dadd(201192.000000,155880.000000,79550.000000,132.492150)}
{pt3dadd(201252.000000,155808.000000,79550.000000,139.802560)}
{pt3dadd(201312.000000,155748.000000,79525.000000,154.390704)}
{pt3dadd(201360.000000,155676.000000,79525.000000,164.649634)}
{pt3dadd(201384.000000,155616.000000,79450.000000,170.080394)}
{pt3dadd(201432.000000,155544.000000,79500.000000,174.678654)}
{pt3dadd(201480.000000,155460.000000,79525.000000,171.539004)}
{pt3dadd(201432.000000,155400.000000,79475.000000,154.490860)}
{pt3dadd(201492.000000,155328.000000,79425.000000,143.031930)}
{pt3dadd(201540.000000,155232.000000,79375.000000,140.184170)}
{pt3dadd(201564.000000,155148.000000,79400.000000,137.044520)}
{pt3dadd(201624.000000,155088.000000,79400.000000,137.044520)}
{pt3dadd(201672.000000,155004.000000,79425.000000,142.216670)}
{pt3dadd(201708.000000,154932.000000,79400.000000,148.847430)}
{pt3dadd(201720.000000,154836.000000,79400.000000,154.834840)}
{pt3dadd(201732.000000,154764.000000,79350.000000,161.435960)}
{pt3dadd(201744.000000,154680.000000,79325.000000,176.060780)}
{pt3dadd(201816.000000,154596.000000,79300.000000,187.936774)}
{pt3dadd(201840.000000,154524.000000,79275.000000,207.200288)}
{pt3dadd(201876.000000,154440.000000,79250.000000,225.818868)}
{pt3dadd(201876.000000,154368.000000,79250.000000,238.481262)}
{pt3dadd(201888.000000,154284.000000,79225.000000,243.119956)}
{pt3dadd(201888.000000,154104.000000,79200.000000,254.460802)}
{pt3dadd(201732.000000,154032.000000,79150.000000,256.955518)}
{pt3dadd(201624.000000,153948.000000,79125.000000,254.460802)}
{pt3dadd(201612.000000,153876.000000,79125.000000,256.955518)}
{pt3dadd(201588.000000,153804.000000,79075.000000,250.161796)}
{pt3dadd(201552.000000,153732.000000,79075.000000,238.820950)}
{pt3dadd(201516.000000,153660.000000,78975.000000,231.687540)}
{pt3dadd(201468.000000,153576.000000,79000.000000,234.182256)}
{pt3dadd(201408.000000,153504.000000,78975.000000,229.311626)}
{pt3dadd(201384.000000,153432.000000,78950.000000,229.311626)}
{pt3dadd(201384.000000,153348.000000,78950.000000,229.311626)}
{pt3dadd(201408.000000,153288.000000,78925.000000,216.218342)}
{pt3dadd(201324.000000,153132.000000,78975.000000,194.460112)}
{pt3dadd(201324.000000,153048.000000,78975.000000,186.035224)}
{pt3dadd(201384.000000,152988.000000,78950.000000,183.982816)}
{pt3dadd(201432.000000,152916.000000,78925.000000,188.190252)}
{pt3dadd(201408.000000,152832.000000,78875.000000,199.128508)}
{pt3dadd(201420.000000,152772.000000,78850.000000,211.598300)}
{pt3dadd(201444.000000,152700.000000,78825.000000,215.605380)}
{pt3dadd(201492.000000,152628.000000,78850.000000,215.605380)}
{pt3dadd(201552.000000,152580.000000,78825.000000,204.120210)}
{pt3dadd(201516.000000,152508.000000,78850.000000,188.802658)}
{pt3dadd(201468.000000,152436.000000,78825.000000,174.874256)}
{pt3dadd(201444.000000,152352.000000,78775.000000,160.945854)}
{pt3dadd(201456.000000,152292.000000,78800.000000,153.668120)}
{pt3dadd(201552.000000,152208.000000,78750.000000,155.356640)}
{pt3dadd(201600.000000,152136.000000,78750.000000,168.621784)}
{pt3dadd(201660.000000,152064.000000,78700.000000,182.550186)}
{pt3dadd(201708.000000,151992.000000,78700.000000,192.471508)}
{pt3dadd(201732.000000,151908.000000,78700.000000,201.801650)}
{pt3dadd(201756.000000,151824.000000,78650.000000,209.443272)}
{pt3dadd(201768.000000,151740.000000,78650.000000,205.627008)}
{pt3dadd(201744.000000,151656.000000,78650.000000,205.627008)}
{pt3dadd(201768.000000,151572.000000,78650.000000,203.765416)}
{pt3dadd(201780.000000,151476.000000,78650.000000,189.837014)}
{pt3dadd(201780.000000,151392.000000,78650.000000,178.898758)}
{pt3dadd(201768.000000,151308.000000,78650.000000,178.898758)}
{pt3dadd(201816.000000,151212.000000,78650.000000,163.581206)}
{pt3dadd(201840.000000,151152.000000,78750.000000,154.132326)}
{pt3dadd(201852.000000,151068.000000,78800.000000,155.590936)}
{pt3dadd(201912.000000,150972.000000,78775.000000,149.888640)}
{pt3dadd(201888.000000,150888.000000,78775.000000,140.439760)}
{pt3dadd(201864.000000,150792.000000,78800.000000,139.116760)}
{pt3dadd(201864.000000,150696.000000,78800.000000,140.505910)}
{pt3dadd(201852.000000,150612.000000,78800.000000,140.505910)}
{pt3dadd(201912.000000,150516.000000,78825.000000,141.828910)}
{pt3dadd(201912.000000,150432.000000,78850.000000,141.828910)}
{pt3dadd(201876.000000,150348.000000,78875.000000,141.828910)}
{pt3dadd(201840.000000,150252.000000,78875.000000,140.439760)}
{pt3dadd(201924.000000,150132.000000,78925.000000,143.579410)}
{pt3dadd(202044.000000,150012.000000,79050.000000,156.844554)}
{pt3dadd(202128.000000,149916.000000,79050.000000,172.162106)}
{pt3dadd(202200.000000,149832.000000,79100.000000,186.750250)}
{pt3dadd(202260.000000,149712.000000,79100.000000,192.737660)}
{pt3dadd(202344.000000,149640.000000,79150.000000,191.129546)}
{pt3dadd(202368.000000,149556.000000,79175.000000,183.851812)}
{pt3dadd(202344.000000,149460.000000,79175.000000,174.521670)}
{pt3dadd(202356.000000,149388.000000,79150.000000,168.932456)}
{pt3dadd(202380.000000,149292.000000,79200.000000,168.932456)}
{pt3dadd(202368.000000,149196.000000,79250.000000,167.400920)}
{pt3dadd(202296.000000,149100.000000,79225.000000,161.413510)}
{pt3dadd(202308.000000,149004.000000,79200.000000,149.411808)}
{pt3dadd(202236.000000,148908.000000,79175.000000,134.684981)}
{pt3dadd(202200.000000,148824.000000,79175.000000,121.646674)}
{pt3dadd(202164.000000,148740.000000,79175.000000,112.784622)}
{pt3dadd(202188.000000,148644.000000,79200.000000,115.632382)}
{pt3dadd(202176.000000,148548.000000,79200.000000,123.035824)}
{pt3dadd(202164.000000,148452.000000,79225.000000,131.475871)}
{pt3dadd(202188.000000,148380.000000,79200.000000,141.374528)}
{pt3dadd(202188.000000,148296.000000,79200.000000,148.777970)}
{pt3dadd(202164.000000,148236.000000,79225.000000,145.930210)}
{pt3dadd(202128.000000,148140.000000,79250.000000,148.920356)}
{pt3dadd(202080.000000,148080.000000,79250.000000,148.920356)}
{pt3dadd(202164.000000,147996.000000,79200.000000,143.489596)}
{pt3dadd(202152.000000,147924.000000,79225.000000,139.517446)}
{pt3dadd(202140.000000,147840.000000,79250.000000,135.734446)}
{pt3dadd(202116.000000,147756.000000,79250.000000,126.429292)}
{pt3dadd(202116.000000,147672.000000,79250.000000,122.457142)}
{pt3dadd(202104.000000,147588.000000,79225.000000,125.040142)}
{pt3dadd(202080.000000,147516.000000,79200.000000,130.470902)}
{pt3dadd(202080.000000,147420.000000,79225.000000,135.643052)}
{pt3dadd(202080.000000,147324.000000,79225.000000,143.416670)}
{pt3dadd(202068.000000,147240.000000,79225.000000,147.388820)}
{pt3dadd(202020.000000,147156.000000,79225.000000,144.805820)}
{pt3dadd(201960.000000,147084.000000,79225.000000,144.805820)}
{pt3dadd(201948.000000,146988.000000,79300.000000,160.889250)}
{pt3dadd(201960.000000,146904.000000,79350.000000,177.776850)}
{pt3dadd(201984.000000,146832.000000,79375.000000,187.698172)}
{pt3dadd(201984.000000,146748.000000,79325.000000,205.598724)}
{pt3dadd(201936.000000,146676.000000,79275.000000,212.199844)}
{pt3dadd(201900.000000,146604.000000,79300.000000,204.176144)}
{pt3dadd(201900.000000,146520.000000,79275.000000,190.428194)}
{pt3dadd(202008.000000,146448.000000,79250.000000,183.497018)}
{pt3dadd(202020.000000,146388.000000,79200.000000,171.027226)}
{pt3dadd(202008.000000,146304.000000,79175.000000,162.967496)}
{pt3dadd(202044.000000,146232.000000,79175.000000,152.195616)}
{pt3dadd(202044.000000,146124.000000,79175.000000,146.208206)}
{pt3dadd(202056.000000,146028.000000,79200.000000,141.828910)}
{pt3dadd(202068.000000,145956.000000,79200.000000,141.828910)}
{pt3dadd(202080.000000,145896.000000,79200.000000,149.888640)}
{pt3dadd(202092.000000,145800.000000,79125.000000,157.199050)}
{pt3dadd(202128.000000,145728.000000,79075.000000,161.578346)}
{pt3dadd(202164.000000,145656.000000,79000.000000,165.957642)}
{pt3dadd(202176.000000,145572.000000,78975.000000,159.326882)}
{pt3dadd(202188.000000,145500.000000,78975.000000,151.267152)}
{pt3dadd(202188.000000,145428.000000,78950.000000,149.659038)}
{pt3dadd(202200.000000,145344.000000,79000.000000,145.279742)}
{pt3dadd(202236.000000,145284.000000,78975.000000,146.887856)}
{pt3dadd(202260.000000,145212.000000,79000.000000,158.346786)}
{pt3dadd(202296.000000,145140.000000,79050.000000,166.406516)}
{pt3dadd(202320.000000,145044.000000,79050.000000,175.292364)}
{pt3dadd(202284.000000,144984.000000,79075.000000,192.764944)}
{pt3dadd(202236.000000,144900.000000,79100.000000,204.250114)}
{pt3dadd(202188.000000,144840.000000,79125.000000,223.799624)}
{pt3dadd(202116.000000,144768.000000,79175.000000,241.576184)}
{pt3dadd(202056.000000,144684.000000,79225.000000,255.536480)}
{pt3dadd(202032.000000,144612.000000,79225.000000,260.175174)}
{pt3dadd(202020.000000,144540.000000,79225.000000,267.308584)}
{pt3dadd(201984.000000,144468.000000,79250.000000,262.194418)}
{pt3dadd(201960.000000,144396.000000,79250.000000,252.441558)}
{pt3dadd(201924.000000,144324.000000,79250.000000,247.327392)}
{pt3dadd(201900.000000,144240.000000,79225.000000,247.327392)}
{pt3dadd(201888.000000,144204.000000,79200.000000,235.986546)}
{pt3dadd(201852.000000,144132.000000,79200.000000,229.192824)}
{pt3dadd(201852.000000,144060.000000,79150.000000,229.192824)}
{pt3dadd(201852.000000,143988.000000,79175.000000,229.192824)}
{pt3dadd(201840.000000,143904.000000,79175.000000,211.460846)}
{pt3dadd(201840.000000,143844.000000,79175.000000,202.574998)}
{pt3dadd(201828.000000,143760.000000,79100.000000,196.706326)}
{pt3dadd(201864.000000,143688.000000,79100.000000,188.682626)}
{pt3dadd(201828.000000,143604.000000,79100.000000,179.836496)}
{pt3dadd(201804.000000,143532.000000,79150.000000,188.722344)}
{pt3dadd(201780.000000,143460.000000,79150.000000,204.078408)}
{pt3dadd(201744.000000,143388.000000,79150.000000,216.740802)}
{pt3dadd(201708.000000,143316.000000,79125.000000,229.403196)}
{pt3dadd(201672.000000,143232.000000,79100.000000,229.403196)}
{pt3dadd(201648.000000,143160.000000,79125.000000,212.355052)}
{pt3dadd(201720.000000,143028.000000,79125.000000,196.998988)}
{pt3dadd(201732.000000,142920.000000,79025.000000,176.276864)}
{pt3dadd(201744.000000,142860.000000,78925.000000,161.841520)}
{pt3dadd(201672.000000,142584.000000,79025.000000,152.955672)}
{pt3dadd(201612.000000,142488.000000,78925.000000,162.726082)}
{pt3dadd(201504.000000,142368.000000,78900.000000,161.194546)}
{pt3dadd(201564.000000,142308.000000,78950.000000,159.805396)}
{pt3dadd(201456.000000,142236.000000,78925.000000,150.806466)}
{pt3dadd(201480.000000,142164.000000,78925.000000,145.104170)}
{pt3dadd(201420.000000,142104.000000,78925.000000,136.533760)}
{pt3dadd(201372.000000,142044.000000,78925.000000,136.533760)}
{pt3dadd(201312.000000,141972.000000,78950.000000,139.381520)}
{pt3dadd(201288.000000,141900.000000,78925.000000,142.093670)}
{pt3dadd(201204.000000,141828.000000,78875.000000,149.404080)}
{pt3dadd(201192.000000,141756.000000,78900.000000,157.974490)}
{pt3dadd(201192.000000,141672.000000,78900.000000,159.506026)}
{pt3dadd(201252.000000,141600.000000,78950.000000,164.334196)}
{pt3dadd(201288.000000,141528.000000,78950.000000,170.620976)}
{pt3dadd(201240.000000,141456.000000,78925.000000,170.620976)}
{pt3dadd(201288.000000,141396.000000,79000.000000,172.309496)}
{pt3dadd(201192.000000,141336.000000,78975.000000,170.777960)}
{pt3dadd(201180.000000,141264.000000,78975.000000,164.491180)}
{pt3dadd(201108.000000,141180.000000,78950.000000,156.815250)}
{pt3dadd(201084.000000,141108.000000,78925.000000,150.827840)}
{pt3dadd(201060.000000,141036.000000,78950.000000,143.151910)}
{pt3dadd(200976.000000,140964.000000,78900.000000,138.981150)}
{pt3dadd(200940.000000,140916.000000,78975.000000,136.269000)}
{pt3dadd(200892.000000,140832.000000,79025.000000,136.269000)}
{pt3dadd(201012.000000,140760.000000,79075.000000,134.946000)}
{pt3dadd(201048.000000,140688.000000,79175.000000,137.793760)}
{pt3dadd(201108.000000,140592.000000,79225.000000,143.496056)}
{pt3dadd(200952.000000,140460.000000,79125.000000,156.129528)}
{pt3dadd(200904.000000,140400.000000,79100.000000,158.977288)}
{pt3dadd(200892.000000,140292.000000,79100.000000,163.148048)}
{pt3dadd(200808.000000,140208.000000,79050.000000,161.689438)}
{pt3dadd(200760.000000,140124.000000,79025.000000,157.310142)}
{pt3dadd(200784.000000,140016.000000,79025.000000,147.388820)}
{pt3dadd(200748.000000,139920.000000,79025.000000,144.541060)}
{pt3dadd(200652.000000,139836.000000,79025.000000,143.082450)}
{pt3dadd(200616.000000,139752.000000,78925.000000,146.072596)}
{pt3dadd(200532.000000,139656.000000,78875.000000,152.060006)}
{pt3dadd(200472.000000,139560.000000,78825.000000,158.346786)}
{pt3dadd(200448.000000,139476.000000,78850.000000,166.022716)}
{pt3dadd(200424.000000,139380.000000,78850.000000,169.012862)}
{pt3dadd(200388.000000,139296.000000,78825.000000,167.481326)}
{pt3dadd(200364.000000,139200.000000,78825.000000,160.170916)}
{pt3dadd(200328.000000,139116.000000,78775.000000,153.884136)}
{pt3dadd(200328.000000,139032.000000,78775.000000,147.597356)}
{pt3dadd(200364.000000,138948.000000,78875.000000,143.218060)}
{pt3dadd(200340.000000,138888.000000,78850.000000,137.787300)}
{pt3dadd(200364.000000,138816.000000,78875.000000,132.059403)}
{pt3dadd(200340.000000,138756.000000,78800.000000,129.347253)}
{pt3dadd(200304.000000,138684.000000,78800.000000,126.635103)}
{pt3dadd(200304.000000,138600.000000,78750.000000,125.312103)}
{pt3dadd(200304.000000,138516.000000,78725.000000,127.895103)}
{pt3dadd(200328.000000,138444.000000,78700.000000,137.793760)}
{pt3dadd(200304.000000,138360.000000,78700.000000,140.505910)}
{pt3dadd(200304.000000,138288.000000,78700.000000,143.218060)}
{pt3dadd(200280.000000,138204.000000,78650.000000,148.920356)}
{pt3dadd(200292.000000,138132.000000,78600.000000,151.768116)}
{pt3dadd(200304.000000,138048.000000,78600.000000,154.907766)}
{pt3dadd(200316.000000,137964.000000,78625.000000,159.506026)}
{pt3dadd(200256.000000,137880.000000,78625.000000,165.792806)}
{pt3dadd(200268.000000,137808.000000,78625.000000,165.792806)}
{pt3dadd(200292.000000,137724.000000,78575.000000,167.324342)}
{pt3dadd(200280.000000,137640.000000,78575.000000,165.716228)}
{pt3dadd(200256.000000,137544.000000,78500.000000,162.576578)}
{pt3dadd(200256.000000,137472.000000,78475.000000,160.888058)}
{pt3dadd(200244.000000,137400.000000,78450.000000,160.888058)}
{pt3dadd(200244.000000,137316.000000,78450.000000,171.826314)}
{pt3dadd(200256.000000,137244.000000,78400.000000,178.757490)}
{pt3dadd(200280.000000,137160.000000,78400.000000,183.585660)}
{pt3dadd(200292.000000,137100.000000,78375.000000,175.015250)}
{pt3dadd(200304.000000,137028.000000,78350.000000,169.312954)}
{pt3dadd(200280.000000,136944.000000,78325.000000,149.069544)}
{pt3dadd(200220.000000,136872.000000,78250.000000,130.708175)}
{pt3dadd(200160.000000,136788.000000,78175.000000,115.981348)}
{pt3dadd(200112.000000,136716.000000,78125.000000,114.781348)}
{pt3dadd(200112.000000,136632.000000,78150.000000,117.493498)}
{pt3dadd(200100.000000,136548.000000,78150.000000,125.267116)}
{pt3dadd(200148.000000,136440.000000,78150.000000,132.318013)}
{pt3dadd(200076.000000,136380.000000,78075.000000,140.758060)}
{pt3dadd(200028.000000,136248.000000,78050.000000,143.218060)}
{pt3dadd(199992.000000,136176.000000,78000.000000,146.208206)}
{pt3dadd(199896.000000,136032.000000,77900.000000,146.208206)}
{pt3dadd(199800.000000,135864.000000,77825.000000,152.195616)}
{pt3dadd(199704.000000,135672.000000,77775.000000,170.541826)}
{pt3dadd(199632.000000,135612.000000,77650.000000,201.840686)}
{pt3dadd(199596.000000,135492.000000,77550.000000,236.541494)}
{pt3dadd(199548.000000,135324.000000,77475.000000,266.557534)}
{pt3dadd(199512.000000,135096.000000,77400.000000,260.570124)}
{pt3dadd(199428.000000,134952.000000,77325.000000,243.682524)}
{pt3dadd(199476.000000,134628.000000,77450.000000,218.085960)}
{pt3dadd(199404.000000,134424.000000,77450.000000,192.271000)}
{pt3dadd(199308.000000,134280.000000,77400.000000,168.856080)}
{pt3dadd(199284.000000,134184.000000,77300.000000,174.843490)}
{pt3dadd(199224.000000,134124.000000,77350.000000,176.375026)}
{pt3dadd(199224.000000,134040.000000,77350.000000,177.983140)}
{pt3dadd(199248.000000,133968.000000,77375.000000,174.166876)}
{pt3dadd(199272.000000,133884.000000,77400.000000,172.393926)}
{pt3dadd(199284.000000,133800.000000,77375.000000,174.082446)}
{pt3dadd(199260.000000,133740.000000,77400.000000,179.152030)}
{pt3dadd(199224.000000,133656.000000,77350.000000,182.613500)}
{pt3dadd(199188.000000,133584.000000,77325.000000,182.613500)}
{pt3dadd(199140.000000,133488.000000,77275.000000,182.613500)}
{pt3dadd(199116.000000,133428.000000,77250.000000,182.613500)}
{pt3dadd(199104.000000,133320.000000,77400.000000,179.152030)}
{pt3dadd(199164.000000,133236.000000,77400.000000,179.152030)}
{pt3dadd(199152.000000,133116.000000,77300.000000,182.968294)}
{pt3dadd(199116.000000,133044.000000,77300.000000,176.681514)}
{pt3dadd(199092.000000,132960.000000,77300.000000,169.005584)}
{pt3dadd(199080.000000,132720.000000,77375.000000,165.865934)}
{pt3dadd(199116.000000,132516.000000,77375.000000,153.834054)}
{pt3dadd(199104.000000,132432.000000,77450.000000,139.245910)}
{pt3dadd(199092.000000,132360.000000,77525.000000,136.533760)}
{pt3dadd(199056.000000,132252.000000,77575.000000,135.210760)}
{pt3dadd(199056.000000,132168.000000,77600.000000,131.040000)}
{pt3dadd(199020.000000,132108.000000,77550.000000,132.300000)}
{pt3dadd(199032.000000,132036.000000,77550.000000,132.300000)}
{pt3dadd(198996.000000,131952.000000,77575.000000,132.300000)}
{pt3dadd(198972.000000,131880.000000,77550.000000,133.623000)}
{pt3dadd(198936.000000,131808.000000,77575.000000,133.623000)}
{pt3dadd(198888.000000,131736.000000,77600.000000,133.623000)}
{pt3dadd(198852.000000,131676.000000,77625.000000,134.946000)}
{pt3dadd(198780.000000,131604.000000,77600.000000,136.269000)}
{pt3dadd(198744.000000,131520.000000,77600.000000,134.946000)}
{pt3dadd(198672.000000,131436.000000,77575.000000,134.946000)}
{pt3dadd(198600.000000,131364.000000,77550.000000,131.343142)}
{pt3dadd(198528.000000,131268.000000,77550.000000,135.722438)}
{pt3dadd(198456.000000,131208.000000,77550.000000,138.570198)}
{pt3dadd(198408.000000,131124.000000,77575.000000,142.740958)}
{pt3dadd(198504.000000,131052.000000,77550.000000,148.443254)}
{pt3dadd(198492.000000,130992.000000,77500.000000,161.045042)}
{pt3dadd(198504.000000,130872.000000,77450.000000,161.045042)}
{pt3dadd(198516.000000,130800.000000,77375.000000,164.184692)}
{pt3dadd(198492.000000,130704.000000,77375.000000,164.184692)}
{pt3dadd(198492.000000,130620.000000,77350.000000,158.482396)}
{pt3dadd(198456.000000,130548.000000,77325.000000,147.023466)}
{pt3dadd(198456.000000,130464.000000,77275.000000,142.644170)}
{pt3dadd(198432.000000,130368.000000,77225.000000,136.656760)}
{pt3dadd(198384.000000,130308.000000,77175.000000,130.026000)}
{pt3dadd(198360.000000,130212.000000,77175.000000,134.196760)}
{pt3dadd(198348.000000,130140.000000,77125.000000,143.967170)}
{pt3dadd(198348.000000,130080.000000,77075.000000,153.416050)}
{pt3dadd(198324.000000,129996.000000,77050.000000,162.864930)}
{pt3dadd(198312.000000,129924.000000,77050.000000,176.096810)}
{pt3dadd(198288.000000,129864.000000,77025.000000,182.697930)}
{pt3dadd(198264.000000,129768.000000,77025.000000,189.975664)}
{pt3dadd(198240.000000,129696.000000,77050.000000,189.975664)}
{pt3dadd(198216.000000,129612.000000,77075.000000,186.514194)}
{pt3dadd(198156.000000,129528.000000,77050.000000,178.454464)}
{pt3dadd(198132.000000,129444.000000,77000.000000,170.394734)}
{pt3dadd(198084.000000,129372.000000,76975.000000,158.518740)}
{pt3dadd(198048.000000,129288.000000,76975.000000,149.069860)}
{pt3dadd(198024.000000,129216.000000,76950.000000,144.471600)}
{pt3dadd(198012.000000,129144.000000,76950.000000,144.471600)}
{pt3dadd(197976.000000,129072.000000,76950.000000,144.471600)}
{pt3dadd(197952.000000,129012.000000,76950.000000,147.461746)}
{pt3dadd(197880.000000,128928.000000,76950.000000,150.309506)}
{pt3dadd(197808.000000,128844.000000,76950.000000,164.237908)}
{pt3dadd(197784.000000,128748.000000,76975.000000,172.297638)}
{pt3dadd(197712.000000,128688.000000,77000.000000,178.584418)}
{pt3dadd(197724.000000,128604.000000,76950.000000,178.584418)}
{pt3dadd(197628.000000,128532.000000,76900.000000,174.413658)}
{pt3dadd(197580.000000,128460.000000,76900.000000,154.170248)}
{pt3dadd(197640.000000,128388.000000,76925.000000,140.938368)}
{pt3dadd(197652.000000,128292.000000,76900.000000,131.939438)}
{pt3dadd(197640.000000,128232.000000,76900.000000,128.949292)}
{pt3dadd(197592.000000,128160.000000,76875.000000,128.949292)}
{pt3dadd(197544.000000,128100.000000,76875.000000,133.875150)}
{pt3dadd(197532.000000,128028.000000,76800.000000,136.335150)}
{pt3dadd(197484.000000,127956.000000,76775.000000,140.505910)}
{pt3dadd(197448.000000,127896.000000,76775.000000,145.104170)}
{pt3dadd(197436.000000,127836.000000,76750.000000,149.274930)}
{pt3dadd(197436.000000,127716.000000,76675.000000,144.349072)}
{pt3dadd(197436.000000,127644.000000,76650.000000,137.633932)}
{pt3dadd(197424.000000,127572.000000,76600.000000,128.771880)}
{pt3dadd(197376.000000,127524.000000,76600.000000,119.001470)}
{pt3dadd(197280.000000,127452.000000,76600.000000,119.001470)}
{pt3dadd(197196.000000,127404.000000,76550.000000,126.775088)}
{pt3dadd(197136.000000,127332.000000,76475.000000,134.813228)}
{pt3dadd(197052.000000,127260.000000,76450.000000,148.503450)}
{pt3dadd(196980.000000,127188.000000,76450.000000,161.735330)}
{pt3dadd(196956.000000,127116.000000,76400.000000,174.205122)}
{pt3dadd(196896.000000,127044.000000,76300.000000,177.344772)}
{pt3dadd(196776.000000,126996.000000,76200.000000,183.332182)}
{pt3dadd(196728.000000,126936.000000,76100.000000,195.391612)}
{pt3dadd(196692.000000,126900.000000,76025.000000,197.253204)}
{pt3dadd(196608.000000,126804.000000,75975.000000,199.408232)}
{pt3dadd(196548.000000,126744.000000,75900.000000,223.396682)}
{pt3dadd(196488.000000,126624.000000,75825.000000,253.305416)}
{pt3dadd(196188.000000,126480.000000,75800.000000,266.433856)}
{pt3dadd(196068.000000,126360.000000,75700.000000,294.203488)}
{pt3dadd(196008.000000,126336.000000,75575.000000,319.154164)}
{pt3dadd(195936.000000,126168.000000,75500.000000,335.111876)}
{pt3dadd(195780.000000,126096.000000,75425.000000,335.111876)}
{pt3dadd(195708.000000,125916.000000,75375.000000,309.924006)}
{pt3dadd(195600.000000,125784.000000,75300.000000,270.843902)}
{pt3dadd(195468.000000,125712.000000,75150.000000,227.097646)}
{pt3dadd(195360.000000,125472.000000,75100.000000,178.581074)}
{pt3dadd(195192.000000,125280.000000,75100.000000,144.074080)}
{pt3dadd(195036.000000,125100.000000,75100.000000,136.398150)}
{pt3dadd(194904.000000,124908.000000,75100.000000,130.383858)}
{pt3dadd(194844.000000,124800.000000,75100.000000,126.781000)}
{pt3dadd(194736.000000,124704.000000,75050.000000,125.581000)}
{pt3dadd(194592.000000,124632.000000,75000.000000,117.140953)}
{pt3dadd(194328.000000,124488.000000,74850.000000,112.215095)}
{pt3dadd(194256.000000,124296.000000,74750.000000,115.646387)}
{pt3dadd(194124.000000,124176.000000,74675.000000,120.572245)}
{pt3dadd(194004.000000,124092.000000,74600.000000,121.772245)}
{pt3dadd(193980.000000,123972.000000,74525.000000,130.212292)}
{pt3dadd(193884.000000,123828.000000,74425.000000,136.527300)}
{pt3dadd(193788.000000,123708.000000,74375.000000,145.097710)}
{pt3dadd(193680.000000,123588.000000,74275.000000,147.945470)}
{pt3dadd(193512.000000,123444.000000,74225.000000,154.907766)}
{pt3dadd(193284.000000,123276.000000,74175.000000,154.907766)}
{pt3dadd(193164.000000,123180.000000,74125.000000,150.935616)}
{pt3dadd(193164.000000,123096.000000,74025.000000,152.624136)}
{pt3dadd(193080.000000,122928.000000,73975.000000,169.511736)}
{pt3dadd(192996.000000,122784.000000,73850.000000,182.605020)}
{pt3dadd(192996.000000,122664.000000,73725.000000,200.951230)}
{pt3dadd(192948.000000,122544.000000,73675.000000,223.269590)}
{pt3dadd(192852.000000,122496.000000,73575.000000,237.704934)}
{pt3dadd(192792.000000,122388.000000,73500.000000,237.704934)}
{pt3dadd(192720.000000,122280.000000,73400.000000,229.681234)}
{pt3dadd(192672.000000,122148.000000,73300.000000,212.793634)}
{pt3dadd(192576.000000,122088.000000,73225.000000,204.368746)}
{pt3dadd(192576.000000,122064.000000,73100.000000,183.646622)}
{pt3dadd(192684.000000,122028.000000,73025.000000,165.300412)}
{pt3dadd(192576.000000,121908.000000,72975.000000,158.699292)}
{pt3dadd(192660.000000,121956.000000,72875.000000,161.838942)}
{pt3dadd(192624.000000,121908.000000,72750.000000,158.204400)}
{pt3dadd(192672.000000,121824.000000,72700.000000,164.491180)}
{pt3dadd(192720.000000,121788.000000,72625.000000,169.089440)}
{pt3dadd(192708.000000,121740.000000,72550.000000,170.620976)}
{pt3dadd(192684.000000,121668.000000,72500.000000,164.633566)}
{pt3dadd(192648.000000,121608.000000,72425.000000,156.957636)}
{pt3dadd(192612.000000,121548.000000,72350.000000,155.269116)}
{pt3dadd(192540.000000,121512.000000,72275.000000,149.281706)}
{pt3dadd(192504.000000,121464.000000,72200.000000,143.579410)}
{pt3dadd(192468.000000,121248.000000,72125.000000,142.256410)}
{pt3dadd(192444.000000,121116.000000,72050.000000,139.673410)}
{pt3dadd(192408.000000,121044.000000,71975.000000,135.075150)}
{pt3dadd(192360.000000,120972.000000,71925.000000,139.454446)}
{pt3dadd(192360.000000,120900.000000,71825.000000,146.764856)}
{pt3dadd(192360.000000,120828.000000,71800.000000,146.764856)}
{pt3dadd(192336.000000,120756.000000,71750.000000,143.333564)}
{pt3dadd(192252.000000,120696.000000,71725.000000,141.944414)}
{pt3dadd(192192.000000,120624.000000,71700.000000,138.954268)}
{pt3dadd(192168.000000,120552.000000,71675.000000,134.356008)}
{pt3dadd(192084.000000,120468.000000,71650.000000,140.058304)}
{pt3dadd(192036.000000,120408.000000,71575.000000,152.060006)}
{pt3dadd(191988.000000,120336.000000,71500.000000,158.047416)}
{pt3dadd(191940.000000,120264.000000,71450.000000,158.047416)}
{pt3dadd(191904.000000,120204.000000,71400.000000,149.607369)}
{pt3dadd(191892.000000,120120.000000,71475.000000,143.905073)}
{pt3dadd(191844.000000,120048.000000,71475.000000,142.296959)}
{pt3dadd(191808.000000,119976.000000,71425.000000,139.157309)}
{pt3dadd(191772.000000,119916.000000,71400.000000,139.157309)}
{pt3dadd(191748.000000,119844.000000,71350.000000,150.587502)}
{pt3dadd(191724.000000,119784.000000,71325.000000,151.910502)}
{pt3dadd(191700.000000,119700.000000,71325.000000,147.531206)}
{pt3dadd(191604.000000,119664.000000,71325.000000,142.100446)}
{pt3dadd(191628.000000,119496.000000,71325.000000,158.183876)}
{pt3dadd(191592.000000,119364.000000,71325.000000,178.410570)}
{pt3dadd(191352.000000,119280.000000,71200.000000,205.636010)}
{pt3dadd(191400.000000,119172.000000,71150.000000,227.747284)}
{pt3dadd(191376.000000,119100.000000,71150.000000,252.441558)}
{pt3dadd(191340.000000,119016.000000,71125.000000,252.441558)}
{pt3dadd(191328.000000,118944.000000,71150.000000,241.100712)}
{pt3dadd(191172.000000,118752.000000,70975.000000,221.551202)}
{pt3dadd(191028.000000,118596.000000,70900.000000,208.888808)}
{pt3dadd(190896.000000,118524.000000,70825.000000,219.641334)}
{pt3dadd(190824.000000,118416.000000,70725.000000,248.102326)}
{pt3dadd(190800.000000,118116.000000,70775.000000,248.102326)}
{pt3dadd(190680.000000,117828.000000,70700.000000,257.898976)}
{pt3dadd(190572.000000,117552.000000,70600.000000,263.767648)}
{pt3dadd(190488.000000,117360.000000,70525.000000,230.903848)}
{pt3dadd(190560.000000,117360.000000,70450.000000,183.647276)}
{pt3dadd(190740.000000,116988.000000,70375.000000,173.229892)}
{pt3dadd(190896.000000,116688.000000,70300.000000,158.605072)}
{pt3dadd(190944.000000,116436.000000,70225.000000,152.736400)}
{pt3dadd(190920.000000,116256.000000,70125.000000,160.412330)}
{pt3dadd(190908.000000,116076.000000,70050.000000,163.124480)}
{pt3dadd(190908.000000,115968.000000,70000.000000,155.350862)}
{pt3dadd(191040.000000,115656.000000,69875.000000,146.488810)}
{pt3dadd(190980.000000,115308.000000,69825.000000,127.166099)}
{pt3dadd(190860.000000,114972.000000,69700.000000,116.907169)}
{pt3dadd(190716.000000,114432.000000,69550.000000,121.505429)}
{pt3dadd(190728.000000,113904.000000,69400.000000,132.418697)}
{pt3dadd(190920.000000,113484.000000,69200.000000,149.743461)}
{pt3dadd(190956.000000,112920.000000,69050.000000,177.089872)}
{pt3dadd(190932.000000,112344.000000,68875.000000,225.606444)}
{pt3dadd(190848.000000,111960.000000,68700.000000,258.699138)}
{pt3dadd(190644.000000,111804.000000,68500.000000,285.575528)}
{pt3dadd(190644.000000,111624.000000,68550.000000,296.376330)}
{pt3dadd(190560.000000,111480.000000,68450.000000,301.015024)}
{pt3dadd(190572.000000,111324.000000,68475.000000,272.554032)}
{pt3dadd(190596.000000,111180.000000,68450.000000,248.791480)}
{pt3dadd(190524.000000,111036.000000,68375.000000,229.192824)}
{pt3dadd(190464.000000,110892.000000,68325.000000,218.392022)}
{pt3dadd(190452.000000,110748.000000,68300.000000,209.545892)}
{pt3dadd(190428.000000,110604.000000,68225.000000,205.338456)}
{pt3dadd(190344.000000,110472.000000,68100.000000,194.400200)}
{pt3dadd(190188.000000,110328.000000,68025.000000,172.156684)}
{pt3dadd(190104.000000,110196.000000,67925.000000,163.693972)}
{pt3dadd(190044.000000,110076.000000,67850.000000,158.104758)}
{pt3dadd(190068.000000,109932.000000,67875.000000,149.218910)}
{pt3dadd(190056.000000,109812.000000,67900.000000,149.218910)}
{pt3dadd(190020.000000,109668.000000,67700.000000,164.184692)}
{pt3dadd(189996.000000,109512.000000,67600.000000,174.602076)}
{pt3dadd(189996.000000,109356.000000,67675.000000,191.532136)}
{pt3dadd(189972.000000,109212.000000,67550.000000,214.378280)}
{pt3dadd(189960.000000,109080.000000,67450.000000,225.316536)}
{pt3dadd(189936.000000,108948.000000,67325.000000,230.639598)}
{pt3dadd(189936.000000,108804.000000,67200.000000,220.222214)}
{pt3dadd(189924.000000,108684.000000,67100.000000,203.292154)}
{pt3dadd(189936.000000,108540.000000,67100.000000,175.305270)}
{pt3dadd(189648.000000,108288.000000,66750.000000,177.294650)}

{create adhoc17}
{access adhoc17}
{connect adhoc17(1), adhoc1(0)}
{nseg = 1}
{strdef color color = "White"}
{pt3dclear()}
{pt3dadd(200292.000000,159444.000000,72175.000000,237.591800)}
{pt3dadd(200292.000000,159312.000000,71975.000000,212.766627)}
{pt3dadd(200340.000000,159168.000000,71875.000000,203.985328)}
{pt3dadd(200316.000000,159036.000000,71800.000000,191.925898)}
{pt3dadd(200292.000000,159012.000000,71725.000000,186.336684)}
{pt3dadd(200304.000000,158964.000000,71650.000000,182.702142)}
{pt3dadd(200256.000000,158892.000000,71575.000000,180.840550)}
{pt3dadd(200268.000000,158832.000000,71500.000000,177.379080)}
{pt3dadd(200268.000000,158772.000000,71425.000000,175.690560)}
{pt3dadd(200256.000000,158700.000000,71350.000000,174.002040)}
{pt3dadd(200232.000000,158628.000000,71275.000000,172.313520)}
{pt3dadd(200220.000000,158568.000000,71200.000000,168.852050)}
{pt3dadd(200220.000000,158496.000000,71125.000000,168.852050)}
{pt3dadd(200244.000000,158388.000000,71075.000000,168.852050)}
{pt3dadd(200280.000000,158280.000000,71000.000000,170.540570)}
{pt3dadd(200316.000000,158172.000000,70950.000000,174.002040)}
{pt3dadd(200256.000000,158112.000000,70875.000000,179.325102)}
{pt3dadd(200232.000000,158076.000000,70800.000000,188.655244)}
{pt3dadd(200280.000000,158040.000000,70725.000000,197.985386)}
{pt3dadd(200220.000000,157932.000000,70650.000000,210.044816)}
{pt3dadd(200196.000000,157872.000000,70575.000000,218.068516)}
{pt3dadd(200172.000000,157812.000000,70525.000000,216.206924)}
{pt3dadd(200148.000000,157776.000000,70450.000000,212.199844)}
{pt3dadd(200196.000000,157764.000000,70350.000000,199.730052)}
{pt3dadd(200196.000000,157728.000000,70300.000000,184.373988)}
{pt3dadd(200196.000000,157692.000000,70225.000000,163.118408)}
{pt3dadd(200172.000000,157644.000000,70150.000000,152.346528)}
{pt3dadd(200160.000000,157608.000000,70075.000000,142.425206)}
{pt3dadd(200100.000000,157596.000000,70000.000000,139.577446)}
{pt3dadd(200064.000000,157620.000000,69925.000000,136.587300)}
{pt3dadd(200124.000000,157644.000000,69850.000000,139.047300)}
{pt3dadd(200136.000000,157632.000000,69775.000000,143.218060)}
{pt3dadd(200208.000000,157584.000000,69675.000000,144.676670)}
{pt3dadd(200160.000000,157584.000000,69600.000000,144.676670)}
{pt3dadd(200124.000000,157596.000000,69525.000000,146.135280)}
{pt3dadd(200088.000000,157536.000000,69425.000000,147.458280)}
{pt3dadd(200100.000000,157524.000000,69350.000000,144.610520)}
{pt3dadd(200196.000000,157488.000000,69275.000000,143.151910)}
{pt3dadd(200196.000000,157488.000000,69225.000000,145.999670)}
{pt3dadd(200304.000000,157440.000000,69125.000000,144.541060)}
{pt3dadd(200340.000000,157380.000000,69075.000000,152.216990)}
{pt3dadd(200340.000000,157308.000000,69000.000000,165.482134)}
{pt3dadd(200316.000000,157296.000000,68925.000000,177.358128)}
{pt3dadd(200280.000000,157248.000000,68850.000000,194.245728)}
{pt3dadd(200208.000000,157176.000000,68775.000000,217.462568)}
{pt3dadd(200232.000000,157068.000000,68700.000000,239.762498)}
{pt3dadd(200172.000000,156984.000000,68600.000000,265.577458)}
{pt3dadd(200112.000000,156900.000000,68525.000000,301.931714)}
{pt3dadd(199980.000000,156816.000000,68450.000000,331.815754)}
{pt3dadd(199860.000000,156744.000000,68350.000000,353.143336)}
{pt3dadd(199764.000000,156624.000000,68275.000000,365.590732)}
{pt3dadd(199740.000000,156504.000000,68200.000000,359.374428)}
{pt3dadd(199728.000000,156360.000000,68125.000000,336.980468)}
{pt3dadd(199704.000000,156216.000000,68075.000000,307.096428)}
{pt3dadd(199680.000000,156132.000000,67975.000000,278.635436)}
{pt3dadd(199656.000000,156024.000000,67900.000000,251.529732)}
{pt3dadd(199632.000000,155880.000000,67850.000000,233.983484)}
{pt3dadd(199620.000000,155712.000000,67775.000000,222.075596)}
{pt3dadd(199584.000000,155568.000000,67725.000000,219.812816)}
{pt3dadd(199524.000000,155436.000000,67650.000000,215.605380)}
{pt3dadd(199512.000000,155352.000000,67550.000000,211.598300)}
{pt3dadd(199512.000000,155256.000000,67475.000000,211.598300)}
{pt3dadd(199524.000000,155148.000000,67400.000000,207.591220)}
{pt3dadd(199500.000000,155004.000000,67325.000000,196.106050)}
{pt3dadd(199500.000000,154872.000000,67250.000000,187.220202)}
{pt3dadd(199488.000000,154836.000000,67175.000000,183.585660)}
{pt3dadd(199464.000000,154800.000000,67075.000000,183.585660)}
{pt3dadd(199452.000000,154776.000000,67000.000000,194.386462)}
{pt3dadd(199452.000000,154704.000000,66900.000000,213.005042)}
{pt3dadd(199404.000000,154596.000000,66850.000000,228.361106)}
{pt3dadd(199380.000000,154500.000000,66750.000000,256.581320)}
{pt3dadd(199368.000000,154416.000000,66700.000000,277.159912)}
{pt3dadd(199320.000000,154368.000000,66625.000000,285.024498)}
{pt3dadd(199320.000000,154332.000000,66550.000000,285.024498)}
{pt3dadd(199320.000000,154212.000000,66475.000000,278.554282)}
{pt3dadd(199344.000000,154116.000000,66400.000000,250.334068)}
{pt3dadd(199344.000000,154020.000000,66300.000000,218.817220)}
{pt3dadd(199332.000000,153948.000000,66200.000000,194.828770)}
{pt3dadd(199248.000000,153840.000000,66125.000000,171.611930)}
{pt3dadd(199092.000000,153804.000000,65950.000000,155.763786)}
{pt3dadd(198972.000000,153684.000000,65875.000000,143.161998)}
{pt3dadd(198888.000000,153468.000000,65800.000000,130.744562)}
{pt3dadd(198792.000000,153264.000000,65725.000000,118.742860)}
{pt3dadd(198708.000000,153108.000000,65675.000000,114.770710)}
{pt3dadd(198660.000000,153012.000000,65600.000000,112.427852)}
{pt3dadd(198624.000000,152796.000000,65550.000000,108.375338)}
{pt3dadd(198588.000000,152640.000000,65500.000000,106.539647)}
{pt3dadd(198576.000000,152484.000000,65425.000000,101.827291)}
{pt3dadd(198540.000000,152292.000000,65375.000000,96.372151)}
{pt3dadd(198516.000000,152160.000000,65300.000000,96.372151)}
{pt3dadd(198468.000000,151956.000000,65225.000000,104.027523)}
{pt3dadd(198336.000000,151872.000000,65225.000000,106.850457)}
{pt3dadd(198240.000000,151728.000000,65225.000000,116.254105)}
{pt3dadd(198132.000000,151548.000000,65100.000000,121.709245)}
{pt3dadd(198072.000000,151332.000000,65000.000000,122.852103)}
{pt3dadd(198048.000000,151116.000000,64925.000000,117.124206)}
{pt3dadd(197928.000000,150792.000000,64800.000000,113.448455)}
{pt3dadd(197868.000000,150552.000000,64700.000000,104.897624)}
{pt3dadd(197736.000000,150384.000000,64550.000000,97.606793)}
{pt3dadd(197688.000000,150180.000000,64375.000000,98.806793)}
{pt3dadd(197664.000000,149988.000000,64225.000000,95.131042)}
{pt3dadd(197640.000000,149808.000000,64125.000000,100.275868)}
{pt3dadd(197616.000000,149664.000000,64000.000000,85.281760)}
