# Supplementary material for: Full reconstruction of large lobula plate tangential cells in Drosophila from a 3D EM dataset
Source: PLoS One. 2018 Nov 28;13(11):e0207828. doi: 10.1371/journal.pone.0207828 (PMC6261601; doi:10.1371/journal.pone.0207828)
Supplement: S1 Dataset — (ZIP) [file pone.0207828.s001.zip › Diameter hoc/cell27_corrected_sorted_diametered.hoc0001.hoc]

/* created with convertKnossosNmlToHoc.m */

{create adhoc1}
{access adhoc1}
{nseg = 1}
{strdef color color = "White"}
{pt3dclear()}
{pt3dadd(191028.000000,132192.000000,44575.000000,153.153800)}
{pt3dadd(191292.000000,132492.000000,44750.000000,94.023140)}

{create adhoc2}
{access adhoc2}
{connect adhoc2(1), adhoc1(0)}
{nseg = 1}
{strdef color color = "White"}
{pt3dclear()}
{pt3dadd(191292.000000,132492.000000,44750.000000,94.023140)}
{pt3dadd(191280.000000,132180.000000,45025.000000,165.228433)}
{pt3dadd(191376.000000,131940.000000,45350.000000,168.424128)}
{pt3dadd(191472.000000,131700.000000,45650.000000,170.351603)}
{pt3dadd(191520.000000,131628.000000,45875.000000,143.495196)}
{pt3dadd(191460.000000,131376.000000,46200.000000,121.733930)}
{pt3dadd(191904.000000,131448.000000,46400.000000,90.459715)}
{pt3dadd(191772.000000,131280.000000,46400.000000,92.691007)}
{pt3dadd(191700.000000,131220.000000,46425.000000,99.741904)}
{pt3dadd(191640.000000,131100.000000,46525.000000,108.697759)}
{pt3dadd(191544.000000,130872.000000,46700.000000,126.997555)}
{pt3dadd(191544.000000,130800.000000,46875.000000,137.213410)}
{pt3dadd(191484.000000,130716.000000,47050.000000,148.672340)}
{pt3dadd(191448.000000,130692.000000,47225.000000,151.520100)}
{pt3dadd(191364.000000,130608.000000,47425.000000,156.950860)}
{pt3dadd(191292.000000,130632.000000,47600.000000,170.698810)}
{pt3dadd(191268.000000,130476.000000,47775.000000,187.339362)}
{pt3dadd(191256.000000,130452.000000,47975.000000,199.398792)}
{pt3dadd(191268.000000,130356.000000,48100.000000,232.447176)}
{pt3dadd(191304.000000,130164.000000,48250.000000,259.575276)}
{pt3dadd(191304.000000,130056.000000,48375.000000,267.065356)}
{pt3dadd(191280.000000,130116.000000,48575.000000,281.723664)}
{pt3dadd(191268.000000,130236.000000,48775.000000,281.723664)}
{pt3dadd(191232.000000,130320.000000,48975.000000,278.691320)}
{pt3dadd(191160.000000,130416.000000,49125.000000,273.321450)}
{pt3dadd(191136.000000,130428.000000,49325.000000,265.831370)}
{pt3dadd(191076.000000,130464.000000,49475.000000,297.675464)}
{pt3dadd(190992.000000,130524.000000,49600.000000,315.850507)}
{pt3dadd(190812.000000,130680.000000,49775.000000,448.014770)}

{create adhoc3}
{access adhoc3}
{connect adhoc3(1), adhoc2(0)}
{nseg = 1}
{strdef color color = "White"}
{pt3dclear()}
{pt3dadd(190812.000000,130680.000000,49775.000000,448.014770)}
{pt3dadd(190884.000000,130524.000000,50000.000000,408.575593)}
{pt3dadd(190908.000000,130476.000000,50275.000000,403.820272)}
{pt3dadd(190836.000000,130368.000000,50425.000000,413.004574)}
{pt3dadd(190812.000000,130092.000000,50625.000000,426.455684)}
{pt3dadd(190860.000000,129708.000000,50925.000000,459.976040)}
{pt3dadd(190884.000000,129552.000000,51000.000000,476.656740)}
{pt3dadd(190920.000000,129396.000000,51150.000000,465.590480)}
{pt3dadd(190860.000000,129204.000000,51350.000000,437.009480)}
{pt3dadd(190896.000000,128976.000000,51500.000000,415.624624)}
{pt3dadd(190884.000000,128772.000000,51650.000000,393.170528)}
{pt3dadd(190884.000000,128592.000000,51850.000000,365.950532)}
{pt3dadd(190908.000000,128484.000000,52050.000000,362.607380)}
{pt3dadd(190884.000000,128220.000000,52175.000000,377.737270)}
{pt3dadd(190848.000000,128088.000000,52325.000000,364.014014)}
{pt3dadd(190776.000000,127944.000000,52475.000000,343.388298)}
{pt3dadd(190620.000000,127680.000000,52650.000000,350.241766)}
{pt3dadd(190548.000000,127440.000000,52800.000000,364.651178)}
{pt3dadd(190464.000000,127320.000000,52975.000000,349.521288)}
{pt3dadd(190224.000000,127032.000000,53175.000000,371.178290)}
{pt3dadd(190164.000000,126912.000000,53300.000000,409.318746)}
{pt3dadd(190044.000000,126720.000000,53500.000000,429.685274)}
{pt3dadd(189972.000000,126372.000000,53700.000000,438.015712)}
{pt3dadd(189816.000000,126144.000000,53800.000000,453.145602)}
{pt3dadd(189744.000000,125928.000000,53750.000000,445.211856)}
{pt3dadd(189708.000000,125652.000000,53900.000000,423.827000)}
{pt3dadd(189720.000000,125340.000000,54100.000000,403.460472)}
{pt3dadd(189648.000000,125196.000000,54100.000000,380.868953)}
{pt3dadd(189576.000000,125064.000000,54100.000000,368.582860)}

{create adhoc4}
{access adhoc4}
{connect adhoc4(1), adhoc3(0)}
{nseg = 1}
{strdef color color = "White"}
{pt3dclear()}
{pt3dadd(189576.000000,125064.000000,54100.000000,368.582860)}
{pt3dadd(189516.000000,124932.000000,54125.000000,381.176100)}
{pt3dadd(189420.000000,124764.000000,54175.000000,344.773794)}
{pt3dadd(189336.000000,124488.000000,54275.000000,334.736366)}
{pt3dadd(189264.000000,124224.000000,54350.000000,298.719430)}
{pt3dadd(189240.000000,123984.000000,54500.000000,258.773268)}
{pt3dadd(189012.000000,123756.000000,54650.000000,222.877124)}
{pt3dadd(189000.000000,123660.000000,54800.000000,193.345276)}
{pt3dadd(188904.000000,123636.000000,54975.000000,149.410992)}
{pt3dadd(188844.000000,123468.000000,55150.000000,131.938412)}
{pt3dadd(188892.000000,123120.000000,55275.000000,122.168002)}
{pt3dadd(189000.000000,122964.000000,55475.000000,117.242144)}
{pt3dadd(189072.000000,122868.000000,55625.000000,125.015762)}
{pt3dadd(189072.000000,122856.000000,55875.000000,146.319046)}
{pt3dadd(189180.000000,122832.000000,56050.000000,134.006660)}
{pt3dadd(189300.000000,122568.000000,56225.000000,191.279176)}
{pt3dadd(189420.000000,122304.000000,56200.000000,245.824434)}
{pt3dadd(189480.000000,122040.000000,56350.000000,300.529820)}
{pt3dadd(189540.000000,121800.000000,56550.000000,344.817822)}
{pt3dadd(189552.000000,121644.000000,56625.000000,423.430308)}
{pt3dadd(189552.000000,121536.000000,56625.000000,440.945048)}
{pt3dadd(189540.000000,121440.000000,56675.000000,467.269260)}
{pt3dadd(189528.000000,121344.000000,56675.000000,476.016214)}
{pt3dadd(189576.000000,121224.000000,56750.000000,480.283022)}
{pt3dadd(189636.000000,121020.000000,56900.000000,480.283022)}
{pt3dadd(189588.000000,120900.000000,56900.000000,471.098720)}
{pt3dadd(189540.000000,120780.000000,56900.000000,471.098720)}
{pt3dadd(189480.000000,120684.000000,56900.000000,471.098720)}
{pt3dadd(189408.000000,120588.000000,57000.000000,471.098720)}
{pt3dadd(189336.000000,120528.000000,57000.000000,454.418020)}
{pt3dadd(189276.000000,120468.000000,57000.000000,438.531638)}
{pt3dadd(189204.000000,120408.000000,57000.000000,424.407980)}
{pt3dadd(189144.000000,120348.000000,57000.000000,419.927834)}
{pt3dadd(189072.000000,120288.000000,57075.000000,411.597396)}
{pt3dadd(189012.000000,120228.000000,57075.000000,419.531142)}
{pt3dadd(188940.000000,120168.000000,57075.000000,427.087086)}
{pt3dadd(188904.000000,120060.000000,57125.000000,441.210744)}
{pt3dadd(188832.000000,119952.000000,57125.000000,450.395046)}
{pt3dadd(188772.000000,119832.000000,57150.000000,463.205630)}
{pt3dadd(188628.000000,119700.000000,57175.000000,476.656740)}
{pt3dadd(188508.000000,119448.000000,57400.000000,480.720370)}
{pt3dadd(188496.000000,119328.000000,57400.000000,458.266274)}
{pt3dadd(188472.000000,119196.000000,57400.000000,436.881418)}
{pt3dadd(188448.000000,119064.000000,57400.000000,428.134464)}
{pt3dadd(188424.000000,118944.000000,57400.000000,423.430308)}
{pt3dadd(188436.000000,118836.000000,57425.000000,432.177262)}
{pt3dadd(188364.000000,118644.000000,57525.000000,459.817698)}
{pt3dadd(188352.000000,118464.000000,57575.000000,486.141910)}
{pt3dadd(188340.000000,118272.000000,57650.000000,499.593020)}
{pt3dadd(188352.000000,118104.000000,57700.000000,490.846066)}
{pt3dadd(188340.000000,117924.000000,57725.000000,490.846066)}
{pt3dadd(188316.000000,117756.000000,57850.000000,476.016214)}
{pt3dadd(188304.000000,117576.000000,57825.000000,453.562118)}
{pt3dadd(188256.000000,117468.000000,57975.000000,440.111008)}
{pt3dadd(188244.000000,117228.000000,58125.000000,436.047378)}
{pt3dadd(188280.000000,117084.000000,58225.000000,412.170534)}
{pt3dadd(188292.000000,116964.000000,58325.000000,375.846294)}
{pt3dadd(188280.000000,116832.000000,58475.000000,352.332638)}
{pt3dadd(188220.000000,116688.000000,58550.000000,324.755352)}
{pt3dadd(188124.000000,116568.000000,58700.000000,304.129636)}
{pt3dadd(187992.000000,116388.000000,58850.000000,294.570180)}
{pt3dadd(187980.000000,116220.000000,58900.000000,297.458120)}
{pt3dadd(187968.000000,116064.000000,59025.000000,300.346060)}
{pt3dadd(187860.000000,115884.000000,59050.000000,303.234000)}
{pt3dadd(187800.000000,115764.000000,58975.000000,306.266344)}
{pt3dadd(187800.000000,115584.000000,59050.000000,312.482648)}
{pt3dadd(187812.000000,115404.000000,59150.000000,315.514992)}
{pt3dadd(187824.000000,115248.000000,59275.000000,328.584764)}
{pt3dadd(187848.000000,115104.000000,59325.000000,334.801068)}
{pt3dadd(187752.000000,114840.000000,59425.000000,323.510914)}
{pt3dadd(187884.000000,114684.000000,59575.000000,320.326954)}
{pt3dadd(187968.000000,114540.000000,59700.000000,304.166170)}
{pt3dadd(188064.000000,114444.000000,59800.000000,280.343872)}
{pt3dadd(188148.000000,114492.000000,59900.000000,298.816914)}
{pt3dadd(188460.000000,114504.000000,60075.000000,304.581300)}
{pt3dadd(188616.000000,114564.000000,60325.000000,426.680730)}

{create adhoc5}
{access adhoc5}
{connect adhoc5(1), adhoc4(0)}
{nseg = 1}
{strdef color color = "White"}
{pt3dclear()}
{pt3dadd(188616.000000,114564.000000,60325.000000,426.680730)}
{pt3dadd(188520.000000,114528.000000,60550.000000,435.876337)}
{pt3dadd(188448.000000,114504.000000,60900.000000,416.514890)}
{pt3dadd(188364.000000,114456.000000,61100.000000,394.857888)}
{pt3dadd(188376.000000,114504.000000,61300.000000,351.079072)}
{pt3dadd(188412.000000,114540.000000,61525.000000,326.065662)}
{pt3dadd(188436.000000,114576.000000,61725.000000,297.182136)}
{pt3dadd(188436.000000,114636.000000,61925.000000,278.474004)}
{pt3dadd(188436.000000,114696.000000,62125.000000,278.474004)}
{pt3dadd(188496.000000,114768.000000,62275.000000,304.738080)}
{pt3dadd(188532.000000,114864.000000,62450.000000,341.952044)}
{pt3dadd(188592.000000,114960.000000,62675.000000,383.646154)}
{pt3dadd(188736.000000,115044.000000,62925.000000,422.720814)}
{pt3dadd(188736.000000,115140.000000,63225.000000,473.400264)}
{pt3dadd(188688.000000,115224.000000,63425.000000,501.040700)}
{pt3dadd(188640.000000,115344.000000,63625.000000,496.773892)}
{pt3dadd(188604.000000,115452.000000,63750.000000,483.963308)}
{pt3dadd(188568.000000,115632.000000,63925.000000,483.963308)}
{pt3dadd(188472.000000,115788.000000,64025.000000,468.391970)}
{pt3dadd(188352.000000,115908.000000,64125.000000,449.081972)}
{pt3dadd(188220.000000,115980.000000,64275.000000,453.348780)}
{pt3dadd(188220.000000,116076.000000,64325.000000,453.348780)}
{pt3dadd(188220.000000,116160.000000,64350.000000,426.128784)}
{pt3dadd(188220.000000,116256.000000,64400.000000,391.020672)}
{pt3dadd(188220.000000,116340.000000,64425.000000,359.176578)}
{pt3dadd(188220.000000,116436.000000,64425.000000,343.290196)}
{pt3dadd(188220.000000,116520.000000,64425.000000,319.776540)}
{pt3dadd(188160.000000,116580.000000,64450.000000,300.431796)}
{pt3dadd(188136.000000,116676.000000,64525.000000,284.271012)}
{pt3dadd(188124.000000,116760.000000,64575.000000,274.030512)}
{pt3dadd(188124.000000,116868.000000,64575.000000,255.322380)}
{pt3dadd(188124.000000,116988.000000,64650.000000,271.280092)}
{pt3dadd(188076.000000,117144.000000,64775.000000,301.164132)}
{pt3dadd(188040.000000,117300.000000,64875.000000,347.728872)}
{pt3dadd(188016.000000,117480.000000,65000.000000,385.546658)}
{pt3dadd(187956.000000,117576.000000,65075.000000,411.810734)}
{pt3dadd(187980.000000,117756.000000,65175.000000,419.366678)}
{pt3dadd(187992.000000,117948.000000,65225.000000,412.170534)}
{pt3dadd(188088.000000,118236.000000,65400.000000,395.489834)}
{pt3dadd(188208.000000,118464.000000,65525.000000,391.426204)}
{pt3dadd(188280.000000,118716.000000,65625.000000,404.236788)}
{pt3dadd(188316.000000,118956.000000,65750.000000,421.751528)}
{pt3dadd(188352.000000,119076.000000,65875.000000,441.148226)}
{pt3dadd(188460.000000,119208.000000,66000.000000,462.533082)}
{pt3dadd(188628.000000,119280.000000,66200.000000,490.173518)}
{pt3dadd(188676.000000,119436.000000,66350.000000,481.426564)}
{pt3dadd(188712.000000,119628.000000,66425.000000,476.722408)}
{pt3dadd(188748.000000,119820.000000,66500.000000,513.199800)}
{pt3dadd(188556.000000,120096.000000,66700.000000,534.489064)}
{pt3dadd(188496.000000,120300.000000,66925.000000,524.363368)}
{pt3dadd(188460.000000,120360.000000,67075.000000,537.814478)}
{pt3dadd(188460.000000,120456.000000,67300.000000,537.814478)}
{pt3dadd(188316.000000,120636.000000,67550.000000,489.136532)}
{pt3dadd(188124.000000,120840.000000,67725.000000,450.454593)}
{pt3dadd(187956.000000,120984.000000,67900.000000,387.012000)}

{create adhoc6}
{access adhoc6}
{connect adhoc6(1), adhoc5(0)}
{nseg = 1}
{strdef color color = "White"}
{pt3dclear()}
{pt3dadd(187956.000000,120984.000000,67900.000000,387.012000)}
{pt3dadd(187836.000000,121212.000000,68100.000000,346.574413)}
{pt3dadd(187824.000000,121284.000000,68300.000000,362.933736)}
{pt3dadd(187908.000000,121380.000000,68425.000000,370.867482)}
{pt3dadd(187884.000000,121596.000000,68650.000000,388.460854)}
{pt3dadd(187860.000000,121872.000000,68825.000000,415.680850)}
{pt3dadd(187728.000000,122160.000000,69025.000000,419.744480)}
{pt3dadd(187620.000000,122316.000000,69225.000000,423.430308)}
{pt3dadd(187488.000000,122364.000000,69400.000000,408.300418)}
{pt3dadd(187428.000000,122568.000000,69550.000000,397.234158)}
{pt3dadd(187404.000000,122724.000000,69750.000000,373.357314)}
{pt3dadd(187404.000000,122784.000000,69950.000000,354.884272)}
{pt3dadd(187392.000000,122892.000000,70100.000000,335.240732)}
{pt3dadd(187392.000000,123000.000000,70275.000000,331.897580)}
{pt3dadd(187380.000000,123096.000000,70450.000000,331.897580)}
{pt3dadd(187368.000000,123252.000000,70575.000000,342.963840)}
{pt3dadd(187308.000000,123336.000000,70775.000000,353.503136)}
{pt3dadd(187236.000000,123516.000000,70950.000000,377.016792)}
{pt3dadd(187140.000000,123756.000000,71125.000000,383.870260)}
{pt3dadd(186996.000000,123984.000000,71300.000000,358.919584)}
{pt3dadd(186936.000000,124188.000000,71425.000000,344.510172)}
{pt3dadd(186840.000000,124344.000000,71650.000000,340.824344)}
{pt3dadd(186648.000000,124536.000000,71975.000000,340.824344)}
{pt3dadd(186660.000000,124680.000000,72175.000000,344.510172)}
{pt3dadd(186600.000000,124860.000000,72275.000000,372.971164)}
{pt3dadd(186540.000000,125040.000000,72475.000000,400.191160)}
{pt3dadd(186456.000000,125268.000000,72700.000000,411.810734)}
{pt3dadd(186384.000000,125496.000000,72950.000000,411.810734)}
{pt3dadd(186276.000000,125640.000000,73200.000000,415.680850)}
{pt3dadd(186300.000000,125760.000000,73425.000000,415.680850)}
{pt3dadd(186168.000000,125868.000000,73575.000000,385.276894)}
{pt3dadd(186156.000000,125964.000000,73750.000000,363.619892)}
{pt3dadd(186228.000000,126192.000000,73875.000000,349.210480)}
{pt3dadd(186348.000000,126372.000000,74050.000000,338.144220)}
{pt3dadd(186540.000000,126528.000000,74200.000000,338.144220)}
{pt3dadd(186744.000000,126804.000000,74350.000000,351.867476)}
{pt3dadd(186804.000000,126972.000000,74525.000000,355.051436)}
{pt3dadd(186900.000000,127092.000000,74700.000000,358.394588)}
{pt3dadd(187116.000000,127308.000000,74875.000000,338.082606)}
{pt3dadd(187272.000000,127428.000000,75050.000000,309.621614)}
{pt3dadd(187572.000000,127536.000000,75575.000000,279.737574)}
{pt3dadd(187704.000000,127740.000000,75575.000000,260.392830)}
{pt3dadd(187860.000000,127848.000000,75575.000000,242.575564)}
{pt3dadd(188004.000000,127968.000000,75575.000000,242.575564)}
{pt3dadd(188124.000000,127956.000000,75775.000000,249.708974)}
{pt3dadd(188280.000000,128088.000000,75650.000000,269.053718)}
{pt3dadd(188496.000000,128184.000000,75625.000000,285.214502)}
{pt3dadd(188652.000000,128292.000000,75750.000000,293.472312)}
{pt3dadd(188844.000000,128424.000000,75825.000000,324.850554)}
{pt3dadd(189000.000000,128580.000000,75850.000000,362.064518)}
{pt3dadd(189216.000000,128748.000000,75975.000000,385.870450)}
{pt3dadd(189432.000000,128856.000000,76000.000000,448.014770)}

{create adhoc7}
{access adhoc7}
{connect adhoc7(1), adhoc6(0)}
{nseg = 1}
{strdef color color = "White"}
{pt3dclear()}
{pt3dadd(189432.000000,128856.000000,76000.000000,448.014770)}
{pt3dadd(189744.000000,129144.000000,76100.000000,479.021110)}
{pt3dadd(189912.000000,129216.000000,76100.000000,505.497872)}
{pt3dadd(190080.000000,129420.000000,76050.000000,514.682174)}
{pt3dadd(190212.000000,129612.000000,76000.000000,510.202028)}
{pt3dadd(190356.000000,129732.000000,75950.000000,496.078370)}
{pt3dadd(190488.000000,129912.000000,75900.000000,462.992292)}
{pt3dadd(190632.000000,130092.000000,75925.000000,436.668080)}
{pt3dadd(190800.000000,130236.000000,76000.000000,404.743928)}
{pt3dadd(190968.000000,130392.000000,76050.000000,372.899834)}
{pt3dadd(191112.000000,130572.000000,76025.000000,346.976024)}
{pt3dadd(191208.000000,130728.000000,76000.000000,332.566612)}
{pt3dadd(191376.000000,130800.000000,76025.000000,322.027316)}
{pt3dadd(191484.000000,130896.000000,75975.000000,322.027316)}
{pt3dadd(191640.000000,130944.000000,75900.000000,327.947600)}
{pt3dadd(191760.000000,131052.000000,75900.000000,331.131560)}
{pt3dadd(191868.000000,131160.000000,75900.000000,331.131560)}
{pt3dadd(191964.000000,131316.000000,75875.000000,331.131560)}
{pt3dadd(192072.000000,131472.000000,75875.000000,327.947600)}
{pt3dadd(192240.000000,131652.000000,75850.000000,334.474712)}
{pt3dadd(192408.000000,131796.000000,75850.000000,337.817864)}
{pt3dadd(192540.000000,131904.000000,75900.000000,341.161016)}
{pt3dadd(192672.000000,131964.000000,75925.000000,341.161016)}
{pt3dadd(192840.000000,132060.000000,75900.000000,347.688128)}
{pt3dadd(192996.000000,132144.000000,75900.000000,351.198444)}
{pt3dadd(193152.000000,132300.000000,75950.000000,362.264704)}
{pt3dadd(193308.000000,132468.000000,75975.000000,386.141548)}
{pt3dadd(193464.000000,132636.000000,76000.000000,413.361544)}
{pt3dadd(193644.000000,132804.000000,76075.000000,432.758242)}
{pt3dadd(193860.000000,132972.000000,76150.000000,448.644624)}
{pt3dadd(193992.000000,133140.000000,76225.000000,461.455208)}
{pt3dadd(194088.000000,133296.000000,76275.000000,452.708254)}
{pt3dadd(194268.000000,133464.000000,76350.000000,452.708254)}
{pt3dadd(194400.000000,133608.000000,76350.000000,436.821872)}
{pt3dadd(194544.000000,133776.000000,76525.000000,414.082022)}
{pt3dadd(194748.000000,134004.000000,76550.000000,386.862026)}
{pt3dadd(194832.000000,134136.000000,76575.000000,345.737967)}
{pt3dadd(194928.000000,134316.000000,76600.000000,334.315520)}

{create adhoc8}
{access adhoc8}
{connect adhoc8(1), adhoc7(0)}
{nseg = 1}
{strdef color color = "White"}
{pt3dclear()}
{pt3dadd(194928.000000,134316.000000,76600.000000,334.315520)}
{pt3dadd(195048.000000,134496.000000,76600.000000,334.315520)}
{pt3dadd(195180.000000,134640.000000,76675.000000,344.854816)}
{pt3dadd(195264.000000,134808.000000,76700.000000,344.854816)}
{pt3dadd(195348.000000,134952.000000,76775.000000,359.264228)}
{pt3dadd(195444.000000,135096.000000,76850.000000,373.673640)}
{pt3dadd(195552.000000,135300.000000,76925.000000,377.543756)}
{pt3dadd(195552.000000,135504.000000,76975.000000,396.016798)}
{pt3dadd(195540.000000,135660.000000,77000.000000,413.135297)}
{pt3dadd(195684.000000,135948.000000,77025.000000,426.680730)}

{create adhoc9}
{access adhoc9}
{connect adhoc9(1), adhoc8(0)}
{nseg = 1}
{strdef color color = "White"}
{pt3dclear()}
{pt3dadd(195684.000000,135948.000000,77025.000000,426.680730)}
{pt3dadd(195720.000000,136200.000000,77050.000000,441.258987)}
{pt3dadd(195864.000000,136584.000000,77275.000000,457.625748)}
{pt3dadd(195864.000000,136824.000000,77200.000000,466.372702)}
{pt3dadd(195960.000000,137040.000000,77250.000000,462.309072)}
{pt3dadd(196104.000000,137256.000000,77225.000000,453.562118)}
{pt3dadd(196116.000000,137520.000000,77300.000000,436.881418)}
{pt3dadd(196116.000000,137796.000000,77400.000000,447.007114)}
{pt3dadd(196080.000000,138048.000000,77300.000000,438.260160)}
{pt3dadd(196116.000000,138264.000000,77425.000000,446.590598)}
{pt3dadd(196236.000000,138528.000000,77525.000000,428.117556)}
{pt3dadd(196296.000000,138780.000000,77700.000000,414.394300)}
{pt3dadd(196356.000000,139080.000000,77850.000000,369.160492)}
{pt3dadd(196452.000000,139320.000000,77875.000000,344.471146)}
{pt3dadd(196512.000000,139560.000000,77900.000000,321.731296)}
{pt3dadd(196596.000000,139836.000000,78025.000000,312.627052)}
{pt3dadd(196596.000000,140028.000000,78125.000000,306.706768)}
{pt3dadd(196656.000000,140232.000000,78200.000000,300.786484)}
{pt3dadd(196692.000000,140460.000000,78275.000000,295.148124)}
{pt3dadd(196728.000000,140700.000000,78300.000000,280.674010)}
{pt3dadd(196812.000000,140916.000000,78475.000000,268.170730)}
{pt3dadd(196872.000000,141204.000000,78675.000000,265.420310)}
{pt3dadd(197028.000000,141552.000000,78675.000000,265.420310)}
{pt3dadd(197124.000000,141852.000000,78675.000000,268.170730)}
{pt3dadd(197268.000000,142092.000000,78575.000000,276.428540)}
{pt3dadd(197424.000000,142284.000000,78550.000000,288.931820)}
{pt3dadd(197544.000000,142596.000000,78575.000000,286.312370)}
{pt3dadd(197736.000000,142872.000000,78625.000000,276.071870)}
{pt3dadd(197892.000000,143076.000000,78675.000000,263.568590)}
{pt3dadd(197976.000000,143316.000000,78650.000000,257.930230)}
{pt3dadd(198048.000000,143544.000000,78500.000000,273.887942)}
{pt3dadd(198072.000000,143784.000000,78525.000000,320.286208)}
{pt3dadd(198144.000000,144084.000000,78525.000000,387.126442)}
{pt3dadd(198144.000000,144408.000000,78425.000000,440.658118)}
{pt3dadd(198252.000000,144744.000000,78350.000000,519.888510)}
{pt3dadd(198048.000000,145296.000000,78325.000000,493.936280)}

{create adhoc10}
{access adhoc10}
{connect adhoc10(1), adhoc9(0)}
{nseg = 1}
{strdef color color = "White"}
{pt3dclear()}
{pt3dadd(198048.000000,145296.000000,78325.000000,493.936280)}
{pt3dadd(198240.000000,145908.000000,78650.000000,538.544983)}
{pt3dadd(198444.000000,146136.000000,78925.000000,587.895710)}
{pt3dadd(198456.000000,146328.000000,79300.000000,635.062226)}
{pt3dadd(198504.000000,146532.000000,79500.000000,688.729668)}
{pt3dadd(198600.000000,146724.000000,79725.000000,682.110440)}
{pt3dadd(198696.000000,146892.000000,80025.000000,675.806426)}
{pt3dadd(198720.000000,147120.000000,80125.000000,652.335018)}
{pt3dadd(198732.000000,147336.000000,80300.000000,626.457766)}
{pt3dadd(198876.000000,147516.000000,80425.000000,586.241434)}
{pt3dadd(198912.000000,147780.000000,80675.000000,552.644330)}
{pt3dadd(198876.000000,147984.000000,80875.000000,530.290596)}
{pt3dadd(198936.000000,148200.000000,81250.000000,515.460744)}
{pt3dadd(198912.000000,148332.000000,81475.000000,484.987178)}
{pt3dadd(198876.000000,148488.000000,81775.000000,480.283022)}
{pt3dadd(198816.000000,148704.000000,82125.000000,480.283022)}
{pt3dadd(198768.000000,149004.000000,82375.000000,470.788850)}
{pt3dadd(198696.000000,149088.000000,82600.000000,493.936280)}

{create adhoc11}
{access adhoc11}
{connect adhoc11(1), adhoc10(0)}
{nseg = 1}
{strdef color color = "White"}
{pt3dclear()}
{pt3dadd(198696.000000,149088.000000,82600.000000,493.936280)}
{pt3dadd(198600.000000,149304.000000,82900.000000,546.294547)}
{pt3dadd(198432.000000,149556.000000,83150.000000,514.092080)}
{pt3dadd(198204.000000,149748.000000,83375.000000,514.092080)}
{pt3dadd(198060.000000,150120.000000,83700.000000,502.928512)}
{pt3dadd(197916.000000,150300.000000,84025.000000,514.092080)}
{pt3dadd(197748.000000,150588.000000,84300.000000,503.966384)}
{pt3dadd(197556.000000,150876.000000,84550.000000,520.647084)}
{pt3dadd(197376.000000,151116.000000,84875.000000,536.218422)}
{pt3dadd(197292.000000,151416.000000,85150.000000,531.032082)}
{pt3dadd(197196.000000,151512.000000,85500.000000,505.038662)}
{pt3dadd(197028.000000,151824.000000,85700.000000,476.457662)}
{pt3dadd(196776.000000,151980.000000,85950.000000,446.693280)}
{pt3dadd(196596.000000,152064.000000,86375.000000,351.031280)}

{create adhoc12}
{access adhoc12}
{connect adhoc12(1), adhoc11(0)}
{nseg = 1}
{strdef color color = "White"}
{pt3dclear()}
{pt3dadd(196596.000000,152064.000000,86375.000000,351.031280)}
{pt3dadd(197256.000000,153348.000000,87050.000000,189.542102)}
{pt3dadd(197256.000000,154092.000000,87275.000000,157.767152)}
{pt3dadd(197256.000000,154896.000000,87500.000000,106.960896)}
{pt3dadd(197256.000000,155184.000000,87550.000000,106.419490)}
{pt3dadd(197316.000000,155316.000000,87625.000000,101.324582)}
{pt3dadd(197436.000000,155520.000000,87625.000000,93.178375)}
{pt3dadd(197556.000000,155772.000000,87625.000000,92.114083)}
{pt3dadd(197676.000000,156024.000000,87625.000000,93.084083)}
{pt3dadd(197688.000000,156276.000000,87800.000000,99.678607)}
{pt3dadd(197796.000000,156756.000000,87900.000000,102.581802)}
{pt3dadd(197964.000000,157176.000000,87975.000000,107.523740)}
{pt3dadd(198144.000000,157620.000000,87975.000000,105.719802)}
{pt3dadd(198204.000000,157860.000000,87975.000000,101.305796)}
{pt3dadd(198324.000000,158172.000000,88050.000000,99.001773)}
{pt3dadd(198420.000000,158496.000000,88050.000000,96.518595)}
{pt3dadd(198444.000000,158928.000000,87925.000000,92.909920)}
{pt3dadd(198396.000000,159300.000000,87875.000000,95.684024)}
{pt3dadd(198228.000000,159636.000000,87875.000000,99.131360)}
{pt3dadd(198036.000000,159948.000000,87825.000000,99.018350)}
{pt3dadd(197916.000000,160356.000000,87825.000000,102.580752)}
{pt3dadd(197832.000000,160752.000000,87775.000000,106.183767)}
{pt3dadd(197808.000000,161148.000000,87700.000000,101.847188)}
{pt3dadd(197832.000000,161388.000000,87650.000000,106.137689)}
{pt3dadd(197808.000000,161664.000000,87650.000000,106.131137)}
{pt3dadd(197700.000000,161904.000000,87650.000000,101.760052)}
{pt3dadd(197700.000000,162096.000000,87700.000000,103.853638)}
{pt3dadd(197700.000000,162336.000000,87900.000000,106.381458)}
{pt3dadd(197700.000000,162588.000000,88050.000000,100.287019)}
{pt3dadd(197844.000000,162744.000000,88200.000000,99.507026)}
{pt3dadd(197904.000000,162924.000000,88300.000000,98.177656)}
{pt3dadd(198000.000000,162972.000000,88375.000000,99.962992)}
{pt3dadd(198072.000000,163356.000000,88575.000000,101.771751)}
{pt3dadd(198120.000000,163620.000000,88725.000000,105.560859)}
{pt3dadd(198204.000000,163728.000000,88725.000000,106.340852)}
{pt3dadd(198312.000000,163908.000000,88725.000000,122.760111)}
{pt3dadd(198468.000000,164136.000000,88725.000000,127.171521)}
{pt3dadd(198612.000000,164508.000000,88725.000000,136.893793)}
{pt3dadd(198732.000000,164916.000000,88725.000000,140.258276)}
{pt3dadd(198864.000000,165324.000000,88725.000000,153.265601)}
{pt3dadd(198936.000000,165504.000000,88950.000000,150.325017)}
{pt3dadd(198948.000000,165696.000000,89125.000000,150.325017)}
{pt3dadd(198864.000000,165828.000000,89225.000000,146.957445)}
{pt3dadd(198852.000000,165912.000000,89325.000000,149.494626)}
{pt3dadd(198768.000000,166224.000000,89525.000000,136.497900)}
{pt3dadd(198612.000000,166560.000000,89525.000000,133.686470)}
{pt3dadd(198528.000000,166932.000000,89525.000000,143.431798)}
{pt3dadd(198324.000000,167136.000000,89375.000000,134.302994)}
{pt3dadd(198240.000000,167256.000000,89275.000000,129.002182)}
{pt3dadd(198132.000000,167328.000000,89175.000000,123.098016)}
{pt3dadd(197916.000000,167436.000000,89050.000000,110.148510)}
{pt3dadd(197724.000000,167568.000000,89000.000000,88.977743)}
{pt3dadd(197604.000000,167784.000000,89000.000000,90.778351)}
{pt3dadd(197484.000000,168000.000000,89000.000000,84.752166)}
{pt3dadd(197400.000000,168180.000000,89100.000000,87.653999)}
{pt3dadd(197376.000000,168276.000000,89125.000000,79.815834)}

{create adhoc13}
{access adhoc13}
{connect adhoc13(1), adhoc11(0)}
{nseg = 1}
{strdef color color = "White"}
{pt3dclear()}
{pt3dadd(196596.000000,152064.000000,86375.000000,351.031280)}
{pt3dadd(196428.000000,152268.000000,86600.000000,368.875380)}
{pt3dadd(196248.000000,152232.000000,86900.000000,365.248056)}
{pt3dadd(195972.000000,152352.000000,87225.000000,350.050240)}
{pt3dadd(195900.000000,152484.000000,87425.000000,346.364412)}
{pt3dadd(195840.000000,152580.000000,87625.000000,353.920356)}
{pt3dadd(195792.000000,152784.000000,87875.000000,357.606184)}
{pt3dadd(195636.000000,152928.000000,88175.000000,361.116500)}
{pt3dadd(195648.000000,153120.000000,88275.000000,372.971164)}
{pt3dadd(195516.000000,153204.000000,88400.000000,346.772952)}
{pt3dadd(195444.000000,153324.000000,88600.000000,320.508876)}
{pt3dadd(195384.000000,153516.000000,88900.000000,313.312732)}
{pt3dadd(195384.000000,153660.000000,89225.000000,309.802416)}
{pt3dadd(195432.000000,153696.000000,89475.000000,332.542266)}
{pt3dadd(195408.000000,153792.000000,89775.000000,374.626860)}
{pt3dadd(195324.000000,154056.000000,90000.000000,404.954566)}
{pt3dadd(195264.000000,154212.000000,90225.000000,428.831410)}
{pt3dadd(195216.000000,154332.000000,90450.000000,436.027554)}
{pt3dadd(195120.000000,154476.000000,90700.000000,407.071400)}
{pt3dadd(195024.000000,154704.000000,90950.000000,378.115246)}
{pt3dadd(194940.000000,154920.000000,91175.000000,356.458244)}
{pt3dadd(194952.000000,154968.000000,91475.000000,320.134004)}
{pt3dadd(194856.000000,155160.000000,91750.000000,292.625878)}
{pt3dadd(194760.000000,155256.000000,91975.000000,271.072550)}
{pt3dadd(194832.000000,155436.000000,92275.000000,257.944110)}
{pt3dadd(194532.000000,155508.000000,92475.000000,249.273406)}
{pt3dadd(194460.000000,155688.000000,92650.000000,246.522986)}
{pt3dadd(194424.000000,155820.000000,92925.000000,260.307856)}
{pt3dadd(194400.000000,155832.000000,93125.000000,288.077488)}
{pt3dadd(194160.000000,155832.000000,93275.000000,321.831644)}
{pt3dadd(193932.000000,155832.000000,93475.000000,352.159350)}
{pt3dadd(193800.000000,155868.000000,93675.000000,378.423426)}
{pt3dadd(193656.000000,156144.000000,93875.000000,388.460854)}
{pt3dadd(193308.000000,156264.000000,94075.000000,371.492024)}
{pt3dadd(192912.000000,156264.000000,94350.000000,357.082612)}
{pt3dadd(192528.000000,156312.000000,94775.000000,335.425610)}
{pt3dadd(192384.000000,156492.000000,95200.000000,311.911954)}
{pt3dadd(192300.000000,156576.000000,95625.000000,290.584372)}
{pt3dadd(192228.000000,156564.000000,96000.000000,304.369242)}
{pt3dadd(191976.000000,156732.000000,96350.000000,289.895128)}
{pt3dadd(191796.000000,156780.000000,96750.000000,276.110258)}
{pt3dadd(191844.000000,156864.000000,96925.000000,270.740388)}
{pt3dadd(191856.000000,156780.000000,97100.000000,273.359838)}
{pt3dadd(191820.000000,156960.000000,97300.000000,273.359838)}
{pt3dadd(191724.000000,157104.000000,97500.000000,281.617648)}
{pt3dadd(191580.000000,157080.000000,97675.000000,289.482234)}
{pt3dadd(191628.000000,157224.000000,97875.000000,292.101684)}
{pt3dadd(191424.000000,157200.000000,98050.000000,294.852104)}
{pt3dadd(191292.000000,157380.000000,98250.000000,281.067234)}
{pt3dadd(191364.000000,157452.000000,98450.000000,270.314708)}
{pt3dadd(191208.000000,157476.000000,98675.000000,267.564288)}
{pt3dadd(191196.000000,157548.000000,98925.000000,267.564288)}
{pt3dadd(191112.000000,157668.000000,99100.000000,252.905980)}
{pt3dadd(191028.000000,157716.000000,99375.000000,244.059850)}
{pt3dadd(191004.000000,157764.000000,99700.000000,246.554566)}
{pt3dadd(190704.000000,157944.000000,99950.000000,230.639598)}
{pt3dadd(190716.000000,158076.000000,100325.000000,223.149518)}
{pt3dadd(190680.000000,158160.000000,100525.000000,225.304546)}
{pt3dadd(190680.000000,158232.000000,100750.000000,231.774762)}
{pt3dadd(190752.000000,158304.000000,100950.000000,224.641352)}
{pt3dadd(190836.000000,158316.000000,101175.000000,226.596024)}
{pt3dadd(190956.000000,158400.000000,101350.000000,224.333244)}
{pt3dadd(191124.000000,158472.000000,101575.000000,226.596024)}
{pt3dadd(191172.000000,158544.000000,101725.000000,226.596024)}
{pt3dadd(191268.000000,158520.000000,101875.000000,233.729434)}
{pt3dadd(191232.000000,158712.000000,102075.000000,250.440150)}
{pt3dadd(191280.000000,158736.000000,102300.000000,272.047674)}
{pt3dadd(191316.000000,158736.000000,102525.000000,285.176114)}
{pt3dadd(191364.000000,158820.000000,102700.000000,292.666194)}
{pt3dadd(191436.000000,158904.000000,102900.000000,290.171478)}
{pt3dadd(191496.000000,158964.000000,103125.000000,275.513170)}
{pt3dadd(191532.000000,159096.000000,103325.000000,256.168426)}
{pt3dadd(191532.000000,159168.000000,103550.000000,240.777206)}
{pt3dadd(191448.000000,159252.000000,103725.000000,235.663040)}
{pt3dadd(191496.000000,159312.000000,103950.000000,240.777206)}
{pt3dadd(191508.000000,159420.000000,104125.000000,267.882910)}
{pt3dadd(191580.000000,159408.000000,104350.000000,294.081122)}
{pt3dadd(191568.000000,159444.000000,104600.000000,315.688646)}
{pt3dadd(191604.000000,159540.000000,104800.000000,336.000628)}
{pt3dadd(191664.000000,159684.000000,104975.000000,354.708760)}
{pt3dadd(191736.000000,159816.000000,105175.000000,354.708760)}
{pt3dadd(191784.000000,159936.000000,105375.000000,351.198444)}
{pt3dadd(191736.000000,160056.000000,105600.000000,358.051912)}
{pt3dadd(191808.000000,160164.000000,105800.000000,354.708760)}
{pt3dadd(191844.000000,160272.000000,105975.000000,354.708760)}
{pt3dadd(191964.000000,160380.000000,106150.000000,354.708760)}
{pt3dadd(192024.000000,160356.000000,106400.000000,348.181648)}
{pt3dadd(192048.000000,160380.000000,106575.000000,335.111876)}
{pt3dadd(192120.000000,160428.000000,106775.000000,313.504352)}
{pt3dadd(192036.000000,160512.000000,106950.000000,297.546640)}
{pt3dadd(192000.000000,160692.000000,107075.000000,301.056956)}
{pt3dadd(191976.000000,160776.000000,107200.000000,314.780212)}
{pt3dadd(191952.000000,160908.000000,107400.000000,335.405928)}
{pt3dadd(191976.000000,160968.000000,107600.000000,375.486494)}
{pt3dadd(192012.000000,160956.000000,107800.000000,391.444206)}
{pt3dadd(191976.000000,161028.000000,108000.000000,391.444206)}
{pt3dadd(191928.000000,161112.000000,108275.000000,380.904910)}
{pt3dadd(191868.000000,161328.000000,108450.000000,347.150754)}
{pt3dadd(191844.000000,161580.000000,108650.000000,307.070188)}
{pt3dadd(191784.000000,161772.000000,108875.000000,276.454168)}
{pt3dadd(191688.000000,161868.000000,109100.000000,241.831068)}
{pt3dadd(191604.000000,161988.000000,109275.000000,222.486324)}
{pt3dadd(191556.000000,162084.000000,109475.000000,224.862238)}
{pt3dadd(191436.000000,162180.000000,109650.000000,227.125018)}
{pt3dadd(191280.000000,162324.000000,109875.000000,233.918740)}
{pt3dadd(191112.000000,162492.000000,110025.000000,249.833708)}
{pt3dadd(190896.000000,162576.000000,110225.000000,254.704338)}
{pt3dadd(190704.000000,162768.000000,110400.000000,262.568924)}
{pt3dadd(190392.000000,163020.000000,110650.000000,281.913668)}
{pt3dadd(190332.000000,163152.000000,110800.000000,295.698538)}
{pt3dadd(190188.000000,163188.000000,110950.000000,314.406670)}
{pt3dadd(190044.000000,163332.000000,111175.000000,332.223936)}
{pt3dadd(189852.000000,163368.000000,111475.000000,341.328180)}
{pt3dadd(189780.000000,163368.000000,111650.000000,332.223936)}
{pt3dadd(189624.000000,163380.000000,111900.000000,323.553232)}
{pt3dadd(189552.000000,163416.000000,112050.000000,304.845100)}
{pt3dadd(189432.000000,163452.000000,112225.000000,292.397704)}
{pt3dadd(189252.000000,163416.000000,112425.000000,277.923590)}
{pt3dadd(189216.000000,163380.000000,112600.000000,270.059004)}
{pt3dadd(189108.000000,163308.000000,112775.000000,264.944838)}
{pt3dadd(189060.000000,163308.000000,112825.000000,259.830672)}
{pt3dadd(188988.000000,163284.000000,112975.000000,241.165284)}
{pt3dadd(188916.000000,163296.000000,113100.000000,220.938590)}
{pt3dadd(188820.000000,163272.000000,113250.000000,203.206612)}
{pt3dadd(188760.000000,163236.000000,113400.000000,185.474634)}
{pt3dadd(188652.000000,163164.000000,113550.000000,180.835940)}
{pt3dadd(188568.000000,163188.000000,113725.000000,191.636742)}
{pt3dadd(188460.000000,163176.000000,113850.000000,202.574998)}
{pt3dadd(188328.000000,163152.000000,114000.000000,213.513254)}
{pt3dadd(188244.000000,163212.000000,114150.000000,224.451510)}
{pt3dadd(188256.000000,163236.000000,114275.000000,231.584920)}
{pt3dadd(188184.000000,163236.000000,114325.000000,231.584920)}
{pt3dadd(188124.000000,163236.000000,114400.000000,233.739948)}
{pt3dadd(188100.000000,163236.000000,114450.000000,235.894976)}
{pt3dadd(188052.000000,163260.000000,114575.000000,235.894976)}
{pt3dadd(187992.000000,163212.000000,114725.000000,218.964916)}
{pt3dadd(187836.000000,163044.000000,114900.000000,199.701402)}
{pt3dadd(187776.000000,163008.000000,115175.000000,197.546374)}
{pt3dadd(187632.000000,162876.000000,115450.000000,197.546374)}
{pt3dadd(187428.000000,162720.000000,115650.000000,197.546374)}
{pt3dadd(187356.000000,162576.000000,115750.000000,203.135588)}
{pt3dadd(187260.000000,162564.000000,115850.000000,222.399102)}
{pt3dadd(187200.000000,162516.000000,116025.000000,226.816910)}
{pt3dadd(187152.000000,162468.000000,116150.000000,239.320190)}
{pt3dadd(187116.000000,162456.000000,116275.000000,266.425894)}
{pt3dadd(186996.000000,162408.000000,116400.000000,302.780150)}
{pt3dadd(186876.000000,162300.000000,116525.000000,323.092132)}
{pt3dadd(186696.000000,162324.000000,116700.000000,345.780028)}
{pt3dadd(186528.000000,162324.000000,116825.000000,358.227424)}
{pt3dadd(186444.000000,162228.000000,116950.000000,358.227424)}
{pt3dadd(186324.000000,162120.000000,117075.000000,351.031280)}
{pt3dadd(186252.000000,162120.000000,117225.000000,358.227424)}
{pt3dadd(186168.000000,162096.000000,117375.000000,361.737740)}
{pt3dadd(186060.000000,162084.000000,117550.000000,361.737740)}
{pt3dadd(185952.000000,162084.000000,117675.000000,325.301894)}
{pt3dadd(185832.000000,161976.000000,117800.000000,300.351218)}
{pt3dadd(185628.000000,162000.000000,117950.000000,270.467178)}
{pt3dadd(185364.000000,161940.000000,118075.000000,251.759046)}
{pt3dadd(185268.000000,161832.000000,118175.000000,236.561230)}
{pt3dadd(185100.000000,161772.000000,118300.000000,255.179810)}
{pt3dadd(184956.000000,161748.000000,118425.000000,257.442590)}
{pt3dadd(184860.000000,161748.000000,118450.000000,245.383160)}
{pt3dadd(184668.000000,161580.000000,118650.000000,233.475272)}
{pt3dadd(184440.000000,161484.000000,118775.000000,210.629128)}
{pt3dadd(184188.000000,161424.000000,118925.000000,186.023138)}
{pt3dadd(184056.000000,161244.000000,119000.000000,163.704778)}
{pt3dadd(183804.000000,161304.000000,119075.000000,146.155017)}
{pt3dadd(183588.000000,161256.000000,119150.000000,132.226615)}
{pt3dadd(183360.000000,161256.000000,119225.000000,130.695079)}
{pt3dadd(183216.000000,161244.000000,119325.000000,146.012631)}
{pt3dadd(183060.000000,161232.000000,119375.000000,166.068211)}
{pt3dadd(182904.000000,161232.000000,119375.000000,189.207186)}
{pt3dadd(182760.000000,161220.000000,119375.000000,199.128508)}
{pt3dadd(182640.000000,161256.000000,119325.000000,209.545892)}
{pt3dadd(182376.000000,161196.000000,119475.000000,213.963700)}
{pt3dadd(182256.000000,161208.000000,119600.000000,199.338880)}
{pt3dadd(182148.000000,161196.000000,119675.000000,179.022839)}
{pt3dadd(181956.000000,161184.000000,119800.000000,156.985719)}
{pt3dadd(181680.000000,161184.000000,120000.000000,132.181720)}
{pt3dadd(181428.000000,161268.000000,120125.000000,98.027458)}
{pt3dadd(181176.000000,161244.000000,120275.000000,82.130616)}
{pt3dadd(180912.000000,161208.000000,120425.000000,261.398513)}
{pt3dadd(180636.000000,161076.000000,120700.000000,380.163360)}
{pt3dadd(180576.000000,161004.000000,120725.000000,1000.000000)}

{create adhoc14}
{access adhoc14}
{connect adhoc14(1), adhoc10(0)}
{nseg = 1}
{strdef color color = "White"}
{pt3dclear()}
{pt3dadd(198696.000000,149088.000000,82600.000000,493.936280)}
{pt3dadd(198936.000000,148896.000000,83025.000000,433.877553)}
{pt3dadd(199104.000000,148584.000000,83325.000000,317.281682)}
{pt3dadd(199056.000000,148332.000000,83700.000000,263.750006)}
{pt3dadd(198948.000000,147960.000000,83825.000000,171.440070)}
{pt3dadd(198948.000000,147660.000000,84050.000000,165.153290)}
{pt3dadd(198864.000000,147420.000000,84200.000000,169.532586)}
{pt3dadd(198792.000000,146952.000000,84575.000000,160.105296)}
{pt3dadd(198612.000000,146544.000000,84725.000000,153.943188)}
{pt3dadd(198588.000000,146088.000000,84925.000000,153.943188)}
{pt3dadd(198624.000000,145644.000000,84950.000000,156.933334)}
{pt3dadd(198480.000000,145212.000000,85100.000000,160.229968)}
{pt3dadd(198468.000000,144936.000000,85200.000000,175.944038)}
{pt3dadd(198504.000000,144624.000000,85300.000000,175.944038)}
{pt3dadd(198504.000000,144312.000000,85450.000000,185.274180)}
{pt3dadd(198492.000000,144060.000000,85500.000000,192.205356)}
{pt3dadd(198444.000000,143772.000000,85625.000000,184.529426)}
{pt3dadd(198432.000000,143568.000000,85600.000000,176.853496)}
{pt3dadd(198432.000000,143340.000000,85550.000000,174.991904)}
{pt3dadd(198540.000000,143148.000000,85550.000000,158.351352)}
{pt3dadd(198576.000000,142884.000000,85550.000000,154.716810)}
{pt3dadd(198504.000000,142560.000000,85550.000000,153.393810)}
{pt3dadd(198432.000000,142236.000000,85550.000000,154.782960)}
{pt3dadd(198216.000000,141480.000000,85750.000000,160.651632)}
{pt3dadd(198180.000000,141060.000000,86075.000000,191.950492)}
{pt3dadd(198144.000000,140784.000000,86175.000000,195.585034)}
{pt3dadd(198144.000000,140316.000000,86450.000000,224.133474)}
{pt3dadd(198036.000000,140004.000000,86450.000000,225.592084)}
{pt3dadd(198252.000000,139548.000000,86750.000000,211.663682)}
{pt3dadd(197892.000000,138252.000000,87150.000000,211.663682)}
{pt3dadd(197616.000000,137676.000000,87150.000000,233.217010)}
{pt3dadd(197508.000000,137256.000000,87400.000000,238.855370)}
{pt3dadd(197316.000000,136920.000000,87400.000000,247.318082)}
{pt3dadd(197064.000000,136680.000000,87750.000000,248.776692)}
{pt3dadd(196848.000000,136404.000000,88100.000000,216.217832)}
{pt3dadd(196728.000000,135948.000000,88525.000000,183.354032)}
{pt3dadd(196908.000000,135852.000000,89050.000000,161.800704)}
{pt3dadd(197184.000000,135576.000000,89525.000000,163.755376)}
{pt3dadd(197532.000000,135504.000000,89875.000000,180.642976)}
{pt3dadd(197976.000000,135408.000000,90325.000000,198.543528)}
{pt3dadd(198240.000000,135360.000000,90675.000000,231.407328)}
{pt3dadd(198420.000000,135348.000000,91125.000000,233.362000)}
{pt3dadd(198768.000000,135420.000000,91825.000000,224.476152)}
{pt3dadd(198924.000000,135936.000000,92375.000000,224.476152)}
{pt3dadd(199284.000000,136416.000000,92775.000000,218.607480)}
{pt3dadd(199632.000000,137016.000000,93275.000000,194.854227)}
{pt3dadd(199860.000000,137808.000000,93650.000000,186.159400)}

{create adhoc15}
{access adhoc15}
{connect adhoc15(1), adhoc14(0)}
{nseg = 1}
{strdef color color = "White"}
{pt3dclear()}
{pt3dadd(199860.000000,137808.000000,93650.000000,186.159400)}
{pt3dadd(200004.000000,137988.000000,94075.000000,145.860750)}

{create adhoc16}
{access adhoc16}
{connect adhoc16(1), adhoc14(0)}
{nseg = 1}
{strdef color color = "White"}
{pt3dclear()}
{pt3dadd(199860.000000,137808.000000,93650.000000,186.159400)}
{pt3dadd(200016.000000,139152.000000,93900.000000,146.453370)}
{pt3dadd(200208.000000,140052.000000,94000.000000,147.817318)}
{pt3dadd(200472.000000,140844.000000,94000.000000,134.585438)}
{pt3dadd(200640.000000,141168.000000,93950.000000,132.002438)}
{pt3dadd(200796.000000,141576.000000,93950.000000,139.776056)}
{pt3dadd(201216.000000,142356.000000,94025.000000,135.396760)}
{pt3dadd(201180.000000,143256.000000,93725.000000,143.072690)}
{pt3dadd(201024.000000,143772.000000,93450.000000,156.454483)}
{pt3dadd(200988.000000,144180.000000,93450.000000,177.294650)}

{create adhoc17}
{access adhoc17}
{connect adhoc17(1), adhoc9(0)}
{nseg = 1}
{strdef color color = "White"}
{pt3dclear()}
{pt3dadd(198048.000000,145296.000000,78325.000000,493.936280)}
{pt3dadd(197964.000000,145176.000000,78000.000000,444.311547)}
{pt3dadd(197868.000000,145200.000000,77675.000000,470.548476)}
{pt3dadd(197904.000000,145176.000000,77375.000000,480.674172)}
{pt3dadd(197916.000000,145212.000000,77100.000000,495.504024)}
{pt3dadd(198048.000000,145152.000000,76875.000000,530.700404)}
{pt3dadd(198012.000000,145116.000000,76700.000000,550.010402)}
{pt3dadd(197976.000000,145140.000000,76500.000000,550.010402)}
{pt3dadd(198012.000000,145020.000000,76325.000000,555.456044)}
{pt3dadd(198024.000000,144996.000000,76175.000000,578.927452)}
{pt3dadd(198108.000000,145008.000000,76000.000000,602.398860)}
{pt3dadd(198024.000000,145056.000000,75800.000000,613.562428)}
{pt3dadd(197940.000000,145176.000000,75575.000000,641.408733)}
{pt3dadd(198120.000000,145224.000000,75350.000000,600.382600)}

{create adhoc18}
{access adhoc18}
{connect adhoc18(1), adhoc17(0)}
{nseg = 1}
{strdef color color = "White"}
{pt3dclear()}
{pt3dadd(198120.000000,145224.000000,75350.000000,600.382600)}
{pt3dadd(198132.000000,145548.000000,75075.000000,620.895667)}
{pt3dadd(198192.000000,145920.000000,74750.000000,606.972514)}
{pt3dadd(198276.000000,146292.000000,74575.000000,585.683250)}
{pt3dadd(198468.000000,146508.000000,74350.000000,542.901844)}
{pt3dadd(198480.000000,146676.000000,74175.000000,512.428278)}
{pt3dadd(198444.000000,146868.000000,73925.000000,492.152784)}
{pt3dadd(198456.000000,147192.000000,73675.000000,461.679218)}
{pt3dadd(198384.000000,147612.000000,73450.000000,433.098218)}
{pt3dadd(198444.000000,147732.000000,73200.000000,417.211836)}
{pt3dadd(198540.000000,147792.000000,72900.000000,397.815138)}
{pt3dadd(198528.000000,148092.000000,72700.000000,361.490898)}
{pt3dadd(198492.000000,148332.000000,72475.000000,329.646804)}
{pt3dadd(198456.000000,148380.000000,72300.000000,329.646804)}
{pt3dadd(198384.000000,148464.000000,72050.000000,319.609376)}
{pt3dadd(198300.000000,148596.000000,71800.000000,292.503672)}
{pt3dadd(198228.000000,148728.000000,71575.000000,292.503672)}
{pt3dadd(198252.000000,149052.000000,71350.000000,320.080958)}
{pt3dadd(198252.000000,149280.000000,71125.000000,339.477656)}
{pt3dadd(198168.000000,149508.000000,70925.000000,374.585768)}
{pt3dadd(198012.000000,149844.000000,70750.000000,430.272472)}
{pt3dadd(197760.000000,150096.000000,70600.000000,476.240224)}
{pt3dadd(197604.000000,150192.000000,70400.000000,489.691334)}
{pt3dadd(197460.000000,150360.000000,70175.000000,473.804952)}
{pt3dadd(197436.000000,150864.000000,70025.000000,452.420096)}
{pt3dadd(197208.000000,151092.000000,69850.000000,434.905356)}
{pt3dadd(197100.000000,151356.000000,69625.000000,425.261844)}
{pt3dadd(196992.000000,151740.000000,69350.000000,465.478176)}
{pt3dadd(196920.000000,152256.000000,69075.000000,523.932007)}
{pt3dadd(196740.000000,152832.000000,68800.000000,695.017940)}

{create adhoc19}
{access adhoc19}
{connect adhoc19(1), adhoc18(0)}
{nseg = 1}
{strdef color color = "White"}
{pt3dclear()}
{pt3dadd(196740.000000,152832.000000,68800.000000,695.017940)}
{pt3dadd(196428.000000,153012.000000,68550.000000,632.404213)}
{pt3dadd(196116.000000,153192.000000,68300.000000,524.394188)}
{pt3dadd(195720.000000,153348.000000,68100.000000,452.253704)}
{pt3dadd(195408.000000,153696.000000,67900.000000,420.256458)}
{pt3dadd(195204.000000,154080.000000,67675.000000,387.170380)}
{pt3dadd(195000.000000,154500.000000,67500.000000,404.763752)}
{pt3dadd(194712.000000,154680.000000,67250.000000,408.827382)}
{pt3dadd(194424.000000,154908.000000,66975.000000,462.040798)}
{pt3dadd(194376.000000,155244.000000,66625.000000,482.316292)}
{pt3dadd(194316.000000,155532.000000,66250.000000,499.831032)}
{pt3dadd(194064.000000,156156.000000,66025.000000,527.471468)}
{pt3dadd(194016.000000,156312.000000,66000.000000,540.922578)}
{pt3dadd(193920.000000,156384.000000,65825.000000,524.572670)}
{pt3dadd(193800.000000,156516.000000,65675.000000,530.290596)}
{pt3dadd(193764.000000,156648.000000,65550.000000,545.861934)}
{pt3dadd(193704.000000,156744.000000,65325.000000,569.333342)}
{pt3dadd(193560.000000,156924.000000,65075.000000,596.626432)}
{pt3dadd(193476.000000,157140.000000,64925.000000,631.903408)}
{pt3dadd(193392.000000,157320.000000,64775.000000,644.211248)}
{pt3dadd(193296.000000,157452.000000,64575.000000,662.237014)}
{pt3dadd(193260.000000,157548.000000,64425.000000,649.929174)}
{pt3dadd(193104.000000,157656.000000,64275.000000,632.761780)}
{pt3dadd(192984.000000,157824.000000,64150.000000,602.671144)}
{pt3dadd(192948.000000,157980.000000,64050.000000,579.199736)}
{pt3dadd(192840.000000,158160.000000,63850.000000,566.891896)}
{pt3dadd(192744.000000,158316.000000,63675.000000,579.199736)}
{pt3dadd(192720.000000,158484.000000,63525.000000,584.645378)}
{pt3dadd(192624.000000,158664.000000,63375.000000,595.808946)}
{pt3dadd(192528.000000,158820.000000,63200.000000,612.976340)}
{pt3dadd(192588.000000,159000.000000,63000.000000,618.980166)}
{pt3dadd(192540.000000,159504.000000,62725.000000,595.508758)}
{pt3dadd(192504.000000,159708.000000,62650.000000,584.876776)}
{pt3dadd(192468.000000,159816.000000,62525.000000,558.883356)}
{pt3dadd(192432.000000,160080.000000,62450.000000,531.590266)}
{pt3dadd(192384.000000,160236.000000,62450.000000,514.422872)}
{pt3dadd(192312.000000,160404.000000,62375.000000,531.590266)}
{pt3dadd(192300.000000,160608.000000,62200.000000,566.867242)}
{pt3dadd(192072.000000,160920.000000,61875.000000,623.328143)}
{pt3dadd(191964.000000,161196.000000,61775.000000,695.017940)}

{create adhoc20}
{access adhoc20}
{connect adhoc20(1), adhoc19(0)}
{nseg = 1}
{strdef color color = "White"}
{pt3dclear()}
{pt3dadd(191964.000000,161196.000000,61775.000000,695.017940)}
{pt3dadd(191916.000000,161292.000000,61775.000000,706.601580)}
{pt3dadd(191856.000000,161388.000000,61700.000000,729.768860)}

{create adhoc21}
{access adhoc21}
{connect adhoc21(1), adhoc20(0)}
{nseg = 1}
{strdef color color = "White"}
{pt3dclear()}
{pt3dadd(191856.000000,161388.000000,61700.000000,729.768860)}
{pt3dadd(191796.000000,161580.000000,61475.000000,779.636353)}
{pt3dadd(191748.000000,161760.000000,61475.000000,834.067432)}
{pt3dadd(191724.000000,161976.000000,61475.000000,827.117248)}
{pt3dadd(191664.000000,162156.000000,61375.000000,805.206816)}
{pt3dadd(191604.000000,162360.000000,61275.000000,758.651390)}
{pt3dadd(191436.000000,162588.000000,61275.000000,712.095964)}
{pt3dadd(191280.000000,162696.000000,61225.000000,621.082958)}
{pt3dadd(191184.000000,162924.000000,61150.000000,608.159716)}
{pt3dadd(191160.000000,163056.000000,61125.000000,583.514722)}
{pt3dadd(191148.000000,163212.000000,61150.000000,578.069080)}
{pt3dadd(191136.000000,163356.000000,61175.000000,567.437098)}
{pt3dadd(191100.000000,163524.000000,61125.000000,561.991456)}
{pt3dadd(191112.000000,163728.000000,61000.000000,561.991456)}
{pt3dadd(191052.000000,163908.000000,60925.000000,573.713208)}
{pt3dadd(190896.000000,164064.000000,60750.000000,579.158850)}
{pt3dadd(190812.000000,164232.000000,60700.000000,589.790832)}
{pt3dadd(190728.000000,164376.000000,60600.000000,584.604492)}
{pt3dadd(190680.000000,164556.000000,60625.000000,578.600666)}
{pt3dadd(190524.000000,164688.000000,60575.000000,546.603420)}
{pt3dadd(190488.000000,164868.000000,60500.000000,526.327926)}
{pt3dadd(190452.000000,165012.000000,60425.000000,538.049678)}
{pt3dadd(190356.000000,165192.000000,60375.000000,543.236018)}
{pt3dadd(190320.000000,165348.000000,60300.000000,543.236018)}
{pt3dadd(190308.000000,165516.000000,60275.000000,569.229438)}
{pt3dadd(190248.000000,165684.000000,60300.000000,628.397790)}
{pt3dadd(190224.000000,165828.000000,60300.000000,634.701804)}
{pt3dadd(190248.000000,165912.000000,60300.000000,658.173212)}
{pt3dadd(190272.000000,166008.000000,60300.000000,670.481052)}
{pt3dadd(190308.000000,166128.000000,60300.000000,696.358304)}
{pt3dadd(190308.000000,166236.000000,60225.000000,669.187198)}
{pt3dadd(190320.000000,166356.000000,60225.000000,662.883184)}
{pt3dadd(190260.000000,166500.000000,60100.000000,669.502412)}
{pt3dadd(190320.000000,166644.000000,60000.000000,676.121640)}
{pt3dadd(190440.000000,166800.000000,59975.000000,676.121640)}
{pt3dadd(190512.000000,166968.000000,59875.000000,689.044882)}
{pt3dadd(190440.000000,167160.000000,59725.000000,723.878556)}
{pt3dadd(190320.000000,167340.000000,59700.000000,762.282688)}
{pt3dadd(190344.000000,167520.000000,59650.000000,769.232872)}
{pt3dadd(190308.000000,167712.000000,59475.000000,769.232872)}
{pt3dadd(190176.000000,167880.000000,59350.000000,750.305804)}
{pt3dadd(190104.000000,168096.000000,59300.000000,721.776144)}
{pt3dadd(189936.000000,168252.000000,59225.000000,658.727018)}
{pt3dadd(189864.000000,168372.000000,59150.000000,632.849766)}
{pt3dadd(189720.000000,168516.000000,59150.000000,606.972514)}
{pt3dadd(189660.000000,168660.000000,59100.000000,601.254588)}
{pt3dadd(189576.000000,168780.000000,59100.000000,583.228822)}
{pt3dadd(189516.000000,168924.000000,59100.000000,554.206374)}
{pt3dadd(189420.000000,169080.000000,59100.000000,528.212954)}
{pt3dadd(189240.000000,169248.000000,58975.000000,506.923690)}
{pt3dadd(189228.000000,169368.000000,58950.000000,463.677503)}
{pt3dadd(189180.000000,169476.000000,58950.000000,493.936280)}

{create adhoc22}
{access adhoc22}
{connect adhoc22(1), adhoc21(0)}
{nseg = 1}
{strdef color color = "White"}
{pt3dclear()}
{pt3dadd(189180.000000,169476.000000,58950.000000,493.936280)}
{pt3dadd(189132.000000,169560.000000,58950.000000,432.889100)}
{pt3dadd(189060.000000,169668.000000,58925.000000,443.419514)}
{pt3dadd(189060.000000,169740.000000,58925.000000,453.545210)}
{pt3dadd(189024.000000,169812.000000,58925.000000,479.538630)}
{pt3dadd(188964.000000,169860.000000,58925.000000,521.588478)}
{pt3dadd(188916.000000,169968.000000,58875.000000,505.702096)}
{pt3dadd(188892.000000,170184.000000,58825.000000,466.627436)}
{pt3dadd(188760.000000,170388.000000,58875.000000,398.762628)}
{pt3dadd(188616.000000,170664.000000,58900.000000,310.848404)}
{pt3dadd(188520.000000,170952.000000,58925.000000,241.028924)}
{pt3dadd(188520.000000,171192.000000,58975.000000,210.412904)}
{pt3dadd(188520.000000,171420.000000,59050.000000,200.660044)}
{pt3dadd(188520.000000,171648.000000,59125.000000,202.712452)}
{pt3dadd(188532.000000,171876.000000,59125.000000,213.650708)}
{pt3dadd(188508.000000,171936.000000,59125.000000,226.946226)}
{pt3dadd(188484.000000,172008.000000,59125.000000,236.234664)}
{pt3dadd(188448.000000,172104.000000,59125.000000,248.737944)}
{pt3dadd(188412.000000,172188.000000,59125.000000,255.531666)}
{pt3dadd(188376.000000,172284.000000,59125.000000,262.325388)}
{pt3dadd(188304.000000,172356.000000,59125.000000,255.191978)}
{pt3dadd(188268.000000,172392.000000,59125.000000,243.851132)}
{pt3dadd(188256.000000,172584.000000,59050.000000,229.192824)}
{pt3dadd(188172.000000,172644.000000,59050.000000,218.392022)}
{pt3dadd(188112.000000,172692.000000,59050.000000,205.729628)}
{pt3dadd(188052.000000,172752.000000,59050.000000,195.932978)}
{pt3dadd(187992.000000,172800.000000,59050.000000,195.932978)}
{pt3dadd(187932.000000,172884.000000,59050.000000,193.880570)}
{pt3dadd(187812.000000,173040.000000,59025.000000,207.176088)}
{pt3dadd(187776.000000,173136.000000,59025.000000,215.199788)}
{pt3dadd(187716.000000,173196.000000,59025.000000,222.841410)}
{pt3dadd(187656.000000,173256.000000,59025.000000,222.841410)}
{pt3dadd(187608.000000,173316.000000,59025.000000,220.886738)}
{pt3dadd(187572.000000,173352.000000,59025.000000,213.753328)}
{pt3dadd(187512.000000,173424.000000,59025.000000,238.704004)}
{pt3dadd(187476.000000,173616.000000,58950.000000,265.809708)}
{pt3dadd(187284.000000,173784.000000,58925.000000,272.279924)}
{pt3dadd(187164.000000,173976.000000,58900.000000,276.287004)}
{pt3dadd(187128.000000,174048.000000,58900.000000,280.925698)}
{pt3dadd(187128.000000,174132.000000,58900.000000,263.108432)}
{pt3dadd(187092.000000,174180.000000,58900.000000,253.548976)}
{pt3dadd(187080.000000,174264.000000,58900.000000,266.677416)}
{pt3dadd(187068.000000,174372.000000,58900.000000,275.965854)}
{pt3dadd(187056.000000,174480.000000,58900.000000,275.965854)}
{pt3dadd(187044.000000,174588.000000,58900.000000,278.585304)}
{pt3dadd(187008.000000,174696.000000,58900.000000,262.152840)}
{pt3dadd(186960.000000,174792.000000,58900.000000,275.042200)}

{create adhoc23}
{access adhoc23}
{connect adhoc23(1), adhoc22(0)}
{nseg = 1}
{strdef color color = "White"}
{pt3dclear()}
{pt3dadd(186960.000000,174792.000000,58900.000000,275.042200)}
{pt3dadd(186972.000000,174900.000000,58850.000000,377.489900)}
{pt3dadd(186936.000000,175008.000000,58850.000000,377.972712)}
{pt3dadd(186936.000000,175080.000000,58850.000000,386.643416)}
{pt3dadd(186672.000000,175248.000000,58500.000000,369.962716)}
{pt3dadd(186564.000000,175404.000000,58375.000000,353.207116)}
{pt3dadd(186528.000000,175596.000000,58375.000000,340.759720)}
{pt3dadd(186528.000000,175656.000000,58375.000000,314.495644)}
{pt3dadd(186480.000000,175776.000000,58350.000000,303.205490)}
{pt3dadd(186444.000000,175872.000000,58325.000000,280.811530)}
{pt3dadd(186420.000000,175956.000000,58175.000000,270.059004)}
{pt3dadd(186432.000000,176076.000000,58000.000000,264.689134)}
{pt3dadd(186396.000000,176244.000000,57825.000000,276.543798)}
{pt3dadd(186420.000000,176316.000000,57825.000000,284.801608)}
{pt3dadd(186408.000000,176448.000000,57825.000000,284.801608)}
{pt3dadd(186288.000000,176640.000000,57750.000000,295.554134)}
{pt3dadd(186300.000000,176760.000000,57725.000000,295.554134)}
{pt3dadd(186360.000000,176832.000000,57725.000000,322.774136)}
{pt3dadd(186372.000000,176928.000000,57725.000000,351.730290)}
{pt3dadd(186348.000000,177096.000000,57675.000000,395.509106)}
{pt3dadd(186360.000000,177312.000000,57650.000000,433.649562)}
{pt3dadd(186312.000000,177420.000000,57600.000000,475.343672)}
{pt3dadd(186300.000000,177528.000000,57600.000000,444.939710)}
{pt3dadd(186276.000000,177744.000000,57525.000000,419.015900)}
{pt3dadd(186132.000000,177996.000000,57475.000000,383.907788)}
{pt3dadd(186120.000000,178080.000000,57400.000000,328.221084)}
{pt3dadd(186132.000000,178188.000000,57400.000000,279.393564)}
{pt3dadd(186132.000000,178284.000000,57400.000000,270.722860)}
{pt3dadd(186120.000000,178404.000000,57400.000000,262.052156)}
{pt3dadd(186108.000000,178512.000000,57400.000000,259.019812)}
{pt3dadd(186108.000000,178584.000000,57400.000000,286.125516)}
{pt3dadd(186108.000000,178656.000000,57400.000000,318.272336)}
{pt3dadd(186108.000000,178716.000000,57400.000000,340.666296)}
{pt3dadd(186108.000000,178788.000000,57400.000000,359.374428)}
{pt3dadd(186108.000000,178848.000000,57400.000000,376.130028)}
{pt3dadd(186096.000000,178920.000000,57400.000000,383.326172)}
{pt3dadd(186096.000000,178980.000000,57400.000000,379.640344)}
{pt3dadd(186084.000000,179052.000000,57400.000000,379.640344)}
{pt3dadd(186084.000000,179112.000000,57400.000000,383.326172)}
{pt3dadd(186060.000000,179184.000000,57400.000000,376.130028)}
{pt3dadd(186024.000000,179256.000000,57400.000000,380.000144)}
{pt3dadd(185976.000000,179328.000000,57400.000000,391.619718)}
{pt3dadd(185940.000000,179400.000000,57400.000000,387.933890)}
{pt3dadd(185892.000000,179544.000000,57400.000000,387.933890)}
{pt3dadd(185844.000000,179676.000000,57400.000000,395.130034)}
{pt3dadd(185772.000000,179820.000000,57400.000000,399.193664)}
{pt3dadd(185712.000000,179952.000000,57400.000000,403.460472)}
{pt3dadd(185676.000000,180012.000000,57400.000000,407.146300)}
{pt3dadd(185508.000000,180204.000000,57350.000000,419.346854)}
{pt3dadd(185316.000000,180408.000000,57325.000000,431.547408)}
{pt3dadd(185304.000000,180612.000000,57275.000000,431.547408)}
{pt3dadd(185256.000000,180696.000000,57225.000000,419.346854)}
{pt3dadd(185112.000000,180876.000000,57175.000000,415.661026)}
{pt3dadd(184944.000000,180996.000000,57100.000000,396.264328)}
{pt3dadd(184824.000000,181164.000000,57000.000000,361.669814)}
{pt3dadd(184704.000000,181392.000000,56950.000000,326.227942)}
{pt3dadd(184572.000000,181428.000000,56925.000000,298.719816)}
{pt3dadd(184500.000000,181476.000000,56925.000000,268.103796)}
{pt3dadd(184428.000000,181584.000000,56925.000000,243.153120)}
{pt3dadd(184344.000000,181668.000000,56925.000000,229.192824)}
{pt3dadd(184212.000000,181752.000000,56925.000000,222.399102)}
{pt3dadd(184128.000000,181836.000000,56925.000000,215.605380)}
{pt3dadd(184032.000000,181920.000000,56925.000000,215.605380)}
{pt3dadd(183948.000000,181968.000000,56925.000000,211.397944)}
{pt3dadd(183864.000000,182040.000000,56925.000000,209.443272)}
{pt3dadd(183792.000000,182160.000000,56925.000000,209.443272)}
{pt3dadd(183720.000000,182232.000000,56925.000000,226.989520)}
{pt3dadd(183684.000000,182352.000000,56700.000000,233.783242)}
{pt3dadd(183588.000000,182496.000000,56625.000000,242.629372)}
{pt3dadd(183420.000000,182652.000000,56500.000000,253.430174)}
{pt3dadd(183348.000000,182784.000000,56500.000000,260.223896)}
{pt3dadd(183300.000000,182856.000000,56500.000000,249.471370)}
{pt3dadd(183252.000000,182952.000000,56500.000000,244.832676)}
{pt3dadd(183192.000000,183084.000000,56450.000000,247.327392)}
{pt3dadd(183120.000000,183180.000000,56450.000000,249.822108)}
{pt3dadd(183048.000000,183300.000000,56400.000000,257.686694)}
{pt3dadd(182976.000000,183372.000000,56400.000000,262.800860)}
{pt3dadd(182916.000000,183456.000000,56400.000000,269.934270)}
{pt3dadd(182880.000000,183564.000000,56400.000000,262.800860)}
{pt3dadd(182724.000000,183756.000000,56400.000000,260.306144)}
{pt3dadd(182676.000000,183864.000000,56375.000000,247.802864)}
{pt3dadd(182616.000000,183948.000000,56275.000000,231.887896)}
{pt3dadd(182532.000000,184056.000000,56275.000000,211.661202)}
{pt3dadd(182472.000000,184152.000000,56100.000000,211.661202)}
{pt3dadd(182424.000000,184356.000000,56100.000000,207.022508)}
{pt3dadd(182376.000000,184548.000000,56025.000000,222.413728)}
{pt3dadd(182340.000000,184632.000000,56025.000000,235.709246)}
{pt3dadd(182208.000000,184704.000000,55875.000000,267.226094)}
{pt3dadd(182088.000000,184836.000000,55875.000000,276.978954)}
{pt3dadd(181980.000000,184920.000000,55825.000000,281.617648)}
{pt3dadd(181884.000000,185004.000000,55725.000000,273.359838)}
{pt3dadd(181812.000000,185100.000000,55725.000000,275.979288)}
{pt3dadd(181728.000000,185148.000000,55725.000000,267.308584)}
{pt3dadd(181668.000000,185244.000000,55625.000000,267.308584)}
{pt3dadd(181632.000000,185340.000000,55625.000000,272.422750)}
{pt3dadd(181572.000000,185448.000000,55575.000000,280.680560)}
{pt3dadd(181512.000000,185544.000000,55575.000000,278.061110)}
{pt3dadd(181368.000000,185640.000000,55425.000000,275.441660)}
{pt3dadd(181308.000000,185724.000000,55350.000000,261.481364)}
{pt3dadd(181224.000000,185904.000000,55200.000000,258.861914)}
{pt3dadd(181140.000000,186036.000000,55200.000000,261.894258)}
{pt3dadd(181056.000000,186156.000000,55100.000000,270.152068)}
{pt3dadd(180888.000000,186408.000000,54975.000000,265.281438)}
{pt3dadd(180816.000000,186540.000000,54850.000000,258.003704)}
{pt3dadd(180732.000000,186720.000000,54675.000000,246.662858)}
{pt3dadd(180684.000000,186804.000000,54550.000000,226.084266)}
{pt3dadd(180636.000000,186924.000000,54550.000000,206.485610)}
{pt3dadd(180588.000000,187044.000000,54550.000000,200.015394)}
{pt3dadd(180576.000000,187224.000000,54325.000000,209.345536)}
{pt3dadd(180540.000000,187380.000000,54275.000000,218.191666)}
{pt3dadd(180540.000000,187512.000000,54200.000000,230.099554)}
{pt3dadd(180588.000000,187632.000000,54125.000000,252.730554)}
{pt3dadd(180600.000000,187656.000000,53975.000000,278.545514)}
{pt3dadd(180552.000000,187776.000000,53800.000000,302.308066)}
{pt3dadd(180528.000000,187788.000000,53575.000000,310.172652)}
{pt3dadd(180444.000000,187800.000000,53375.000000,300.419792)}
{pt3dadd(180396.000000,187944.000000,53225.000000,291.749088)}
{pt3dadd(180348.000000,188088.000000,53050.000000,274.780258)}
{pt3dadd(180324.000000,188172.000000,52900.000000,260.306144)}
{pt3dadd(180204.000000,188304.000000,52775.000000,250.065644)}
{pt3dadd(180012.000000,188400.000000,52675.000000,252.328424)}
{pt3dadd(179916.000000,188508.000000,52525.000000,252.328424)}
{pt3dadd(179880.000000,188628.000000,52350.000000,269.297254)}
{pt3dadd(179796.000000,188748.000000,52200.000000,294.310664)}
{pt3dadd(179700.000000,188928.000000,52125.000000,328.064820)}
{pt3dadd(179604.000000,188940.000000,52000.000000,361.818976)}
{pt3dadd(179424.000000,189012.000000,51825.000000,392.146682)}
{pt3dadd(179328.000000,189060.000000,51775.000000,399.000150)}
{pt3dadd(179220.000000,189096.000000,51625.000000,391.804006)}
{pt3dadd(179136.000000,189192.000000,51450.000000,382.098290)}
{pt3dadd(178896.000000,189276.000000,51225.000000,351.031280)}

{create adhoc24}
{access adhoc24}
{connect adhoc24(1), adhoc23(0)}
{nseg = 1}
{strdef color color = "White"}
{pt3dclear()}
{pt3dadd(178896.000000,189276.000000,51225.000000,351.031280)}
{pt3dadd(178716.000000,189312.000000,51025.000000,296.432317)}
{pt3dadd(178740.000000,189288.000000,50750.000000,270.854216)}
{pt3dadd(178728.000000,189228.000000,50550.000000,248.166320)}
{pt3dadd(178668.000000,189228.000000,50325.000000,254.086604)}
{pt3dadd(178692.000000,189228.000000,50100.000000,274.398586)}
{pt3dadd(178680.000000,189252.000000,49925.000000,291.367416)}
{pt3dadd(178548.000000,189240.000000,49725.000000,318.473120)}
{pt3dadd(178344.000000,189156.000000,49500.000000,345.459360)}
{pt3dadd(178224.000000,189180.000000,49325.000000,351.031280)}

{create adhoc25}
{access adhoc25}
{connect adhoc25(1), adhoc24(0)}
{nseg = 1}
{strdef color color = "White"}
{pt3dclear()}
{pt3dadd(178224.000000,189180.000000,49325.000000,351.031280)}
{pt3dadd(178152.000000,189012.000000,49225.000000,273.846947)}
{pt3dadd(178080.000000,188856.000000,49000.000000,227.550098)}
{pt3dadd(178044.000000,188688.000000,48850.000000,192.802772)}
{pt3dadd(178080.000000,188580.000000,48650.000000,165.577332)}
{pt3dadd(178272.000000,188544.000000,48250.000000,160.254270)}
{pt3dadd(178416.000000,188340.000000,48250.000000,161.687233)}
{pt3dadd(178440.000000,188304.000000,48350.000000,168.852050)}

{create adhoc26}
{access adhoc26}
{connect adhoc26(1), adhoc24(0)}
{nseg = 1}
{strdef color color = "White"}
{pt3dclear()}
{pt3dadd(178224.000000,189180.000000,49325.000000,351.031280)}
{pt3dadd(178104.000000,189432.000000,49200.000000,212.014828)}
{pt3dadd(177936.000000,189552.000000,49125.000000,167.975208)}
{pt3dadd(177804.000000,189672.000000,49100.000000,120.626094)}
{pt3dadd(177744.000000,189768.000000,48975.000000,109.315622)}
{pt3dadd(177636.000000,189924.000000,48825.000000,116.606453)}
{pt3dadd(177372.000000,190008.000000,48525.000000,123.897284)}
{pt3dadd(177288.000000,190092.000000,48425.000000,131.670902)}
{pt3dadd(177144.000000,190188.000000,48350.000000,156.332120)}
{pt3dadd(177108.000000,190380.000000,48125.000000,176.067480)}
{pt3dadd(176964.000000,190344.000000,47975.000000,205.875920)}
{pt3dadd(176808.000000,190560.000000,47725.000000,217.907800)}
{pt3dadd(176724.000000,190572.000000,47450.000000,219.439336)}
{pt3dadd(176652.000000,190776.000000,47225.000000,211.014448)}
{pt3dadd(176616.000000,190872.000000,47150.000000,206.596640)}
{pt3dadd(176580.000000,190932.000000,46950.000000,194.688752)}
{pt3dadd(176664.000000,190980.000000,46725.000000,198.505016)}
{pt3dadd(176844.000000,191064.000000,46500.000000,201.801650)}
{pt3dadd(176952.000000,190980.000000,46325.000000,193.338938)}
{pt3dadd(176904.000000,190956.000000,46200.000000,180.869146)}
{pt3dadd(176844.000000,190932.000000,46075.000000,150.496306)}
{pt3dadd(176784.000000,190824.000000,45900.000000,124.182080)}
{pt3dadd(176712.000000,190800.000000,45750.000000,100.844781)}
{pt3dadd(176652.000000,190812.000000,45675.000000,86.458166)}
{pt3dadd(176604.000000,190812.000000,45550.000000,77.596114)}
{pt3dadd(176604.000000,190884.000000,45325.000000,94.040552)}
{pt3dadd(176676.000000,190968.000000,45200.000000,111.975005)}
{pt3dadd(176676.000000,191028.000000,45175.000000,145.860750)}

{create adhoc27}
{access adhoc27}
{connect adhoc27(1), adhoc23(0)}
{nseg = 1}
{strdef color color = "White"}
{pt3dclear()}
{pt3dadd(178896.000000,189276.000000,51225.000000,351.031280)}
{pt3dadd(178836.000000,189372.000000,51225.000000,307.646200)}
{pt3dadd(178728.000000,189516.000000,51225.000000,239.218480)}
{pt3dadd(178632.000000,189648.000000,51225.000000,206.244104)}
{pt3dadd(178476.000000,189780.000000,51225.000000,182.481552)}
{pt3dadd(178464.000000,190008.000000,51375.000000,180.218772)}
{pt3dadd(178332.000000,190140.000000,51400.000000,181.750308)}
{pt3dadd(178200.000000,190260.000000,51400.000000,193.209238)}
{pt3dadd(178032.000000,190380.000000,51400.000000,189.747768)}
{pt3dadd(177900.000000,190560.000000,51175.000000,185.740688)}
{pt3dadd(177756.000000,190704.000000,51175.000000,177.716988)}
{pt3dadd(177552.000000,190848.000000,51175.000000,181.013622)}
{pt3dadd(177432.000000,190992.000000,51100.000000,177.716988)}
{pt3dadd(177360.000000,191100.000000,51050.000000,176.108874)}
{pt3dadd(177276.000000,191196.000000,51025.000000,167.646162)}
{pt3dadd(177168.000000,191328.000000,51025.000000,164.184692)}
{pt3dadd(177048.000000,191388.000000,51025.000000,173.981342)}
{pt3dadd(176976.000000,191580.000000,51025.000000,194.208036)}
{pt3dadd(176880.000000,191784.000000,51025.000000,232.251996)}
{pt3dadd(176724.000000,191976.000000,51025.000000,275.337808)}
{pt3dadd(176640.000000,192120.000000,50900.000000,318.969798)}
{pt3dadd(176532.000000,192240.000000,50900.000000,343.920474)}
{pt3dadd(176436.000000,192348.000000,50925.000000,346.539924)}
{pt3dadd(176328.000000,192456.000000,50925.000000,328.722658)}
{pt3dadd(176172.000000,192588.000000,50900.000000,298.106638)}
{pt3dadd(176064.000000,192684.000000,50900.000000,265.959818)}
{pt3dadd(175980.000000,192792.000000,50850.000000,238.854114)}
{pt3dadd(175920.000000,192888.000000,50900.000000,221.077554)}
{pt3dadd(175752.000000,192972.000000,50900.000000,200.850860)}
{pt3dadd(175692.000000,193056.000000,50900.000000,194.982188)}
{pt3dadd(175656.000000,193128.000000,50900.000000,181.888904)}
{pt3dadd(175584.000000,193200.000000,50900.000000,170.950648)}
{pt3dadd(175500.000000,193260.000000,50900.000000,165.881064)}
{pt3dadd(175404.000000,193332.000000,50900.000000,165.881064)}
{pt3dadd(175296.000000,193392.000000,50900.000000,150.417892)}
{pt3dadd(175176.000000,193452.000000,50900.000000,142.255596)}
{pt3dadd(175140.000000,193548.000000,50850.000000,139.265450)}
{pt3dadd(175116.000000,193608.000000,50850.000000,133.563154)}
{pt3dadd(175104.000000,193692.000000,50850.000000,126.600858)}
{pt3dadd(175032.000000,193800.000000,50850.000000,135.462910)}
{pt3dadd(174900.000000,193896.000000,50900.000000,145.233320)}
{pt3dadd(174780.000000,193968.000000,50925.000000,146.691930)}
{pt3dadd(174648.000000,194064.000000,50975.000000,150.862690)}
{pt3dadd(174576.000000,194172.000000,50975.000000,152.122690)}
{pt3dadd(174504.000000,194244.000000,51025.000000,149.274930)}
{pt3dadd(174444.000000,194364.000000,51025.000000,144.676670)}
{pt3dadd(174384.000000,194472.000000,51025.000000,141.828910)}
{pt3dadd(174312.000000,194568.000000,51025.000000,138.981150)}
{pt3dadd(174240.000000,194664.000000,51025.000000,140.304150)}
{pt3dadd(174120.000000,194808.000000,51050.000000,143.151910)}
{pt3dadd(174048.000000,194928.000000,51050.000000,140.439760)}
{pt3dadd(173988.000000,195024.000000,51050.000000,140.439760)}
{pt3dadd(173904.000000,195132.000000,51050.000000,134.425468)}
{pt3dadd(173820.000000,195204.000000,51025.000000,133.102468)}
{pt3dadd(173748.000000,195336.000000,51025.000000,131.643858)}
{pt3dadd(173664.000000,195456.000000,51025.000000,132.966858)}
{pt3dadd(173592.000000,195576.000000,51025.000000,129.183858)}
{pt3dadd(173484.000000,195720.000000,50975.000000,131.415150)}
{pt3dadd(173412.000000,195768.000000,50975.000000,137.117446)}
{pt3dadd(173328.000000,195828.000000,50975.000000,145.177176)}
{pt3dadd(173160.000000,196032.000000,50925.000000,149.556472)}
{pt3dadd(173136.000000,196152.000000,50825.000000,153.339472)}
{pt3dadd(173064.000000,196272.000000,50750.000000,158.511622)}
{pt3dadd(172968.000000,196344.000000,50750.000000,151.549326)}
{pt3dadd(172896.000000,196452.000000,50625.000000,138.317446)}
{pt3dadd(172764.000000,196584.000000,50550.000000,136.785910)}
{pt3dadd(172728.000000,196656.000000,50550.000000,152.103462)}
{pt3dadd(172680.000000,196716.000000,50550.000000,175.320302)}
{pt3dadd(172692.000000,196848.000000,50450.000000,210.767102)}
{pt3dadd(172608.000000,196896.000000,50450.000000,250.446246)}
{pt3dadd(172476.000000,197112.000000,50275.000000,280.462286)}
{pt3dadd(172428.000000,197244.000000,50225.000000,289.750724)}
{pt3dadd(172392.000000,197412.000000,50225.000000,292.370174)}
{pt3dadd(172416.000000,197508.000000,50025.000000,274.823926)}
{pt3dadd(172404.000000,197736.000000,50025.000000,256.400362)}
{pt3dadd(172392.000000,197832.000000,50025.000000,238.854114)}
{pt3dadd(172416.000000,197988.000000,49850.000000,223.697004)}
{pt3dadd(172464.000000,198120.000000,49750.000000,216.206924)}
{pt3dadd(172512.000000,198228.000000,49625.000000,214.154516)}
{pt3dadd(172584.000000,198336.000000,49525.000000,211.999488)}
{pt3dadd(172692.000000,198432.000000,49400.000000,214.154516)}
{pt3dadd(172740.000000,198516.000000,49325.000000,215.673793)}
{pt3dadd(172884.000000,198648.000000,49150.000000,226.277900)}

{create adhoc28}
{access adhoc28}
{connect adhoc28(1), adhoc27(0)}
{nseg = 1}
{strdef color color = "White"}
{pt3dclear()}
{pt3dadd(172884.000000,198648.000000,49150.000000,226.277900)}
{pt3dadd(172968.000000,198696.000000,49100.000000,163.051030)}
{pt3dadd(173088.000000,198744.000000,49025.000000,150.750618)}
{pt3dadd(173196.000000,198756.000000,49025.000000,133.278038)}
{pt3dadd(173304.000000,198792.000000,48925.000000,121.276336)}
{pt3dadd(173340.000000,198840.000000,48850.000000,123.203811)}
{pt3dadd(173412.000000,198840.000000,48775.000000,119.600953)}
{pt3dadd(173496.000000,198852.000000,48750.000000,114.909661)}
{pt3dadd(173556.000000,198864.000000,48750.000000,106.871521)}
{pt3dadd(173628.000000,198864.000000,48750.000000,110.302813)}
{pt3dadd(173700.000000,198864.000000,48750.000000,114.770710)}
{pt3dadd(173784.000000,198864.000000,48750.000000,118.373568)}
{pt3dadd(173856.000000,198948.000000,48625.000000,130.375270)}
{pt3dadd(173988.000000,198972.000000,48550.000000,142.792706)}
{pt3dadd(174096.000000,198996.000000,48550.000000,153.051636)}
{pt3dadd(174192.000000,199020.000000,48525.000000,158.482396)}
{pt3dadd(174276.000000,199044.000000,48500.000000,177.277976)}
{pt3dadd(174336.000000,199080.000000,48500.000000,182.601038)}
{pt3dadd(174468.000000,199068.000000,48425.000000,187.670622)}
{pt3dadd(174576.000000,199092.000000,48400.000000,189.443572)}
{pt3dadd(174720.000000,199116.000000,48350.000000,184.012812)}
{pt3dadd(174840.000000,199200.000000,48275.000000,161.614374)}
{pt3dadd(174948.000000,199152.000000,48175.000000,143.253005)}
{pt3dadd(175152.000000,199284.000000,48050.000000,131.221125)}
{pt3dadd(175284.000000,199284.000000,48000.000000,117.989245)}
{pt3dadd(175380.000000,199284.000000,47925.000000,120.572245)}
{pt3dadd(175452.000000,199320.000000,47875.000000,117.459963)}
{pt3dadd(175536.000000,199320.000000,47825.000000,114.637029)}
{pt3dadd(175596.000000,199416.000000,47725.000000,108.241657)}
{pt3dadd(175680.000000,199416.000000,47625.000000,107.098799)}
{pt3dadd(175716.000000,199416.000000,47550.000000,103.315799)}
{pt3dadd(175812.000000,199416.000000,47450.000000,103.315799)}
{pt3dadd(175872.000000,199416.000000,47350.000000,101.650775)}
{pt3dadd(175908.000000,199464.000000,47225.000000,105.703289)}
{pt3dadd(175968.000000,199464.000000,47125.000000,105.703289)}
{pt3dadd(176040.000000,199464.000000,47025.000000,100.507917)}
{pt3dadd(176136.000000,199464.000000,46900.000000,108.546057)}
{pt3dadd(176244.000000,199464.000000,46775.000000,142.196186)}
{pt3dadd(176340.000000,199464.000000,46650.000000,158.432516)}
{pt3dadd(176304.000000,199548.000000,46450.000000,176.623518)}
{pt3dadd(176340.000000,199488.000000,46275.000000,198.867034)}
{pt3dadd(176388.000000,199476.000000,46025.000000,212.132178)}
{pt3dadd(176460.000000,199488.000000,45900.000000,203.286048)}
{pt3dadd(176520.000000,199584.000000,45725.000000,203.286048)}
{pt3dadd(176616.000000,199608.000000,45575.000000,191.410054)}
{pt3dadd(176604.000000,199668.000000,45425.000000,176.821910)}
{pt3dadd(176772.000000,199728.000000,45275.000000,154.578394)}
{pt3dadd(176784.000000,199812.000000,45075.000000,135.298958)}
{pt3dadd(176760.000000,199956.000000,44925.000000,123.988486)}
{pt3dadd(176652.000000,199956.000000,44775.000000,118.816336)}
{pt3dadd(176568.000000,200100.000000,44575.000000,112.101196)}
{pt3dadd(176544.000000,200340.000000,44400.000000,128.755498)}
{pt3dadd(176460.000000,200556.000000,44275.000000,152.242370)}
{pt3dadd(176508.000000,200508.000000,44175.000000,191.322474)}
{pt3dadd(176568.000000,200508.000000,44025.000000,245.962690)}
{pt3dadd(176472.000000,200868.000000,43875.000000,334.315520)}

{create adhoc29}
{access adhoc29}
{connect adhoc29(1), adhoc28(0)}
{nseg = 1}
{strdef color color = "White"}
{pt3dclear()}
{pt3dadd(176472.000000,200868.000000,43875.000000,334.315520)}
{pt3dadd(176520.000000,201096.000000,43750.000000,304.885397)}
{pt3dadd(176436.000000,201264.000000,43875.000000,304.369242)}
{pt3dadd(176256.000000,201408.000000,43850.000000,301.185282)}
{pt3dadd(176124.000000,201612.000000,43950.000000,309.443092)}
{pt3dadd(175980.000000,201888.000000,44000.000000,312.627052)}
{pt3dadd(175920.000000,202128.000000,44000.000000,298.842182)}
{pt3dadd(175908.000000,202344.000000,44100.000000,271.714082)}
{pt3dadd(175824.000000,202656.000000,44225.000000,268.681738)}
{pt3dadd(175524.000000,202848.000000,44300.000000,257.929212)}
{pt3dadd(175296.000000,203028.000000,44225.000000,230.159580)}
{pt3dadd(175224.000000,203208.000000,44300.000000,215.724236)}
{pt3dadd(175152.000000,203376.000000,44375.000000,203.898104)}
{pt3dadd(175080.000000,203568.000000,44325.000000,165.020012)}
{pt3dadd(174888.000000,203652.000000,44750.000000,134.870598)}
{pt3dadd(174708.000000,203856.000000,44950.000000,100.530327)}
{pt3dadd(174648.000000,203940.000000,44975.000000,98.724300)}

{create adhoc30}
{access adhoc30}
{connect adhoc30(1), adhoc28(0)}
{nseg = 1}
{strdef color color = "White"}
{pt3dclear()}
{pt3dadd(176472.000000,200868.000000,43875.000000,334.315520)}
{pt3dadd(176580.000000,200748.000000,43500.000000,318.648413)}
{pt3dadd(176664.000000,200724.000000,43325.000000,288.833618)}
{pt3dadd(176784.000000,200772.000000,43100.000000,255.740924)}
{pt3dadd(176916.000000,200760.000000,42925.000000,211.338269)}
{pt3dadd(176988.000000,200592.000000,42650.000000,161.691428)}
{pt3dadd(177048.000000,200508.000000,42375.000000,132.159580)}
{pt3dadd(177012.000000,200616.000000,42300.000000,103.148145)}
{pt3dadd(177012.000000,200712.000000,42175.000000,85.621880)}
{pt3dadd(177012.000000,200796.000000,42075.000000,84.848349)}
{pt3dadd(177012.000000,200808.000000,41950.000000,86.286660)}
{pt3dadd(176976.000000,200952.000000,41875.000000,79.673664)}
{pt3dadd(177036.000000,201084.000000,41725.000000,78.642289)}
{pt3dadd(177036.000000,201132.000000,41675.000000,81.220726)}

{create adhoc31}
{access adhoc31}
{connect adhoc31(1), adhoc27(0)}
{nseg = 1}
{strdef color color = "White"}
{pt3dclear()}
{pt3dadd(172884.000000,198648.000000,49150.000000,226.277900)}
{pt3dadd(172776.000000,198564.000000,49075.000000,197.443367)}
{pt3dadd(172644.000000,198732.000000,48950.000000,157.955740)}
{pt3dadd(172512.000000,198732.000000,48900.000000,128.170774)}
{pt3dadd(172380.000000,198732.000000,48800.000000,91.600557)}
{pt3dadd(172284.000000,198780.000000,48775.000000,77.353070)}

{create adhoc32}
{access adhoc32}
{connect adhoc32(1), adhoc22(0)}
{nseg = 1}
{strdef color color = "White"}
{pt3dclear()}
{pt3dadd(186960.000000,174792.000000,58900.000000,275.042200)}
{pt3dadd(186852.000000,175056.000000,59200.000000,229.976217)}
{pt3dadd(186804.000000,175092.000000,59325.000000,212.449490)}
{pt3dadd(186696.000000,175128.000000,59450.000000,191.211460)}
{pt3dadd(186624.000000,175224.000000,59575.000000,177.463510)}
{pt3dadd(186564.000000,175356.000000,59650.000000,179.236460)}
{pt3dadd(186492.000000,175464.000000,59725.000000,181.098052)}
{pt3dadd(186408.000000,175536.000000,59800.000000,173.038322)}
{pt3dadd(186336.000000,175608.000000,59800.000000,164.467912)}
{pt3dadd(186300.000000,175668.000000,59900.000000,159.869652)}
{pt3dadd(186228.000000,175728.000000,59975.000000,154.800068)}
{pt3dadd(186168.000000,175824.000000,60025.000000,151.165526)}
{pt3dadd(186120.000000,175896.000000,60075.000000,155.763786)}
{pt3dadd(186084.000000,176028.000000,60200.000000,167.795666)}
{pt3dadd(186156.000000,176124.000000,60300.000000,170.785812)}
{pt3dadd(186216.000000,176232.000000,60375.000000,174.082446)}
{pt3dadd(186168.000000,176280.000000,60450.000000,181.724068)}
{pt3dadd(186168.000000,176400.000000,60550.000000,205.712518)}
{pt3dadd(186168.000000,176496.000000,60600.000000,223.489078)}
{pt3dadd(186228.000000,176592.000000,60600.000000,258.189886)}
{pt3dadd(186264.000000,176700.000000,60725.000000,289.594060)}
{pt3dadd(186336.000000,176808.000000,60825.000000,313.356612)}
{pt3dadd(186288.000000,176892.000000,60900.000000,310.606192)}
{pt3dadd(186288.000000,177024.000000,60925.000000,296.645896)}
{pt3dadd(186252.000000,177276.000000,61000.000000,265.241722)}
{pt3dadd(186240.000000,177384.000000,61000.000000,237.472090)}
{pt3dadd(186228.000000,177492.000000,61000.000000,211.657130)}
{pt3dadd(186132.000000,177660.000000,61025.000000,199.749242)}
{pt3dadd(186192.000000,177828.000000,61075.000000,192.471508)}
{pt3dadd(186228.000000,177984.000000,61100.000000,184.795578)}
{pt3dadd(186216.000000,178032.000000,61300.000000,174.874256)}
{pt3dadd(186204.000000,178236.000000,61325.000000,162.998262)}
{pt3dadd(186204.000000,178284.000000,61325.000000,146.357710)}
{pt3dadd(186060.000000,178380.000000,61350.000000,139.047300)}
{pt3dadd(185928.000000,178560.000000,61375.000000,129.173469)}
{pt3dadd(185892.000000,178620.000000,61400.000000,119.746179)}
{pt3dadd(185832.000000,178800.000000,61575.000000,112.342737)}
{pt3dadd(185664.000000,178944.000000,61700.000000,113.665737)}
{pt3dadd(185604.000000,179040.000000,61750.000000,116.377887)}
{pt3dadd(185568.000000,179148.000000,61775.000000,135.700598)}
{pt3dadd(185508.000000,179196.000000,61800.000000,141.155738)}
{pt3dadd(185460.000000,179400.000000,61975.000000,156.618910)}
{pt3dadd(185376.000000,179496.000000,62025.000000,164.294840)}
{pt3dadd(185304.000000,179616.000000,62050.000000,172.354570)}
{pt3dadd(185220.000000,179784.000000,62150.000000,168.893100)}
{pt3dadd(185208.000000,179916.000000,62225.000000,180.924980)}
{pt3dadd(185160.000000,180036.000000,62275.000000,180.924980)}
{pt3dadd(184992.000000,180216.000000,62300.000000,188.566602)}
{pt3dadd(184944.000000,180312.000000,62300.000000,188.566602)}
{pt3dadd(184896.000000,180384.000000,62300.000000,192.028072)}
{pt3dadd(184836.000000,180480.000000,62375.000000,190.255122)}
{pt3dadd(184812.000000,180552.000000,62375.000000,188.482172)}
{pt3dadd(184788.000000,180624.000000,62375.000000,179.152030)}
{pt3dadd(184740.000000,180696.000000,62375.000000,174.082446)}
{pt3dadd(184716.000000,180780.000000,62375.000000,182.106146)}
{pt3dadd(184656.000000,180876.000000,62375.000000,185.313810)}
{pt3dadd(184608.000000,181152.000000,62475.000000,226.277900)}

{create adhoc33}
{access adhoc33}
{connect adhoc33(1), adhoc32(0)}
{nseg = 1}
{strdef color color = "White"}
{pt3dclear()}
{pt3dadd(184608.000000,181152.000000,62475.000000,226.277900)}
{pt3dadd(184632.000000,181308.000000,62350.000000,196.577317)}
{pt3dadd(184656.000000,181464.000000,62350.000000,185.567616)}
{pt3dadd(184608.000000,181584.000000,62350.000000,177.543916)}
{pt3dadd(184560.000000,181656.000000,62350.000000,177.543916)}
{pt3dadd(184536.000000,181740.000000,62350.000000,171.257136)}
{pt3dadd(184560.000000,181884.000000,62325.000000,184.350420)}
{pt3dadd(184512.000000,182028.000000,62325.000000,189.939634)}
{pt3dadd(184572.000000,182172.000000,62375.000000,191.801226)}
{pt3dadd(184548.000000,182328.000000,62375.000000,191.801226)}
{pt3dadd(184548.000000,182448.000000,62350.000000,207.884656)}
{pt3dadd(184512.000000,182532.000000,62350.000000,207.884656)}
{pt3dadd(184464.000000,182592.000000,62350.000000,212.092092)}
{pt3dadd(184488.000000,182700.000000,62500.000000,212.092092)}
{pt3dadd(184476.000000,182844.000000,62550.000000,215.908356)}
{pt3dadd(184476.000000,182952.000000,62550.000000,204.423186)}
{pt3dadd(184488.000000,183012.000000,62550.000000,192.938016)}
{pt3dadd(184488.000000,183120.000000,62600.000000,190.782988)}
{pt3dadd(184512.000000,183168.000000,62600.000000,199.207876)}
{pt3dadd(184536.000000,183264.000000,62650.000000,208.054006)}
{pt3dadd(184584.000000,183372.000000,62800.000000,224.177870)}
{pt3dadd(184620.000000,183504.000000,62825.000000,237.925820)}
{pt3dadd(184692.000000,183612.000000,62850.000000,244.719542)}
{pt3dadd(184680.000000,183732.000000,62875.000000,244.719542)}
{pt3dadd(184656.000000,183888.000000,63025.000000,237.925820)}
{pt3dadd(184656.000000,184020.000000,63050.000000,231.132098)}
{pt3dadd(184632.000000,184116.000000,63050.000000,226.714290)}
{pt3dadd(184620.000000,184224.000000,63050.000000,219.920568)}
{pt3dadd(184572.000000,184296.000000,63050.000000,215.502760)}
{pt3dadd(184512.000000,184332.000000,63050.000000,224.791198)}
{pt3dadd(184464.000000,184404.000000,63050.000000,224.791198)}
{pt3dadd(184476.000000,184512.000000,63200.000000,231.584920)}
{pt3dadd(184428.000000,184572.000000,63275.000000,238.378642)}
{pt3dadd(184440.000000,184656.000000,63425.000000,240.533670)}
{pt3dadd(184440.000000,184836.000000,63625.000000,231.245232)}
{pt3dadd(184416.000000,184968.000000,63700.000000,225.376560)}
{pt3dadd(184416.000000,185088.000000,63800.000000,197.250994)}
{pt3dadd(184404.000000,185160.000000,63850.000000,169.125428)}
{pt3dadd(184380.000000,185292.000000,63950.000000,150.329848)}
{pt3dadd(184284.000000,185364.000000,63950.000000,133.689296)}
{pt3dadd(184224.000000,185496.000000,63950.000000,133.689296)}
{pt3dadd(184212.000000,185616.000000,63950.000000,157.176168)}
{pt3dadd(184188.000000,185700.000000,63950.000000,182.925820)}
{pt3dadd(184164.000000,185784.000000,63950.000000,193.697700)}
{pt3dadd(184128.000000,185856.000000,63975.000000,199.399996)}
{pt3dadd(184080.000000,186000.000000,63925.000000,197.627046)}
{pt3dadd(184056.000000,186060.000000,63975.000000,186.141876)}
{pt3dadd(183996.000000,186156.000000,64000.000000,167.795666)}
{pt3dadd(183996.000000,186240.000000,64000.000000,158.346786)}
{pt3dadd(183948.000000,186324.000000,63950.000000,158.346786)}
{pt3dadd(183912.000000,186408.000000,63950.000000,155.050152)}
{pt3dadd(183888.000000,186492.000000,63950.000000,153.442038)}
{pt3dadd(183876.000000,186552.000000,63950.000000,169.525468)}
{pt3dadd(183888.000000,186756.000000,63900.000000,182.790612)}
{pt3dadd(183792.000000,186864.000000,63975.000000,200.522590)}
{pt3dadd(183768.000000,187008.000000,64050.000000,226.119154)}
{pt3dadd(183768.000000,187104.000000,64050.000000,246.345848)}
{pt3dadd(183696.000000,187200.000000,64075.000000,253.479258)}
{pt3dadd(183708.000000,187296.000000,64150.000000,267.439554)}
{pt3dadd(183732.000000,187380.000000,64250.000000,275.304140)}
{pt3dadd(183756.000000,187500.000000,64300.000000,284.408384)}
{pt3dadd(183816.000000,187584.000000,64400.000000,289.778254)}
{pt3dadd(183900.000000,187668.000000,64525.000000,295.148124)}
{pt3dadd(184008.000000,187836.000000,64625.000000,279.233156)}
{pt3dadd(184104.000000,188016.000000,64800.000000,260.567768)}
{pt3dadd(184224.000000,188172.000000,64850.000000,216.561806)}
{pt3dadd(184236.000000,188292.000000,64950.000000,194.261876)}
{pt3dadd(184284.000000,188484.000000,65075.000000,168.665312)}
{pt3dadd(184260.000000,188688.000000,65150.000000,149.316700)}
{pt3dadd(184152.000000,188772.000000,65200.000000,124.255531)}
{pt3dadd(184116.000000,188820.000000,65325.000000,109.899098)}
{pt3dadd(184116.000000,188832.000000,65450.000000,70.161514)}

{create adhoc34}
{access adhoc34}
{connect adhoc34(1), adhoc32(0)}
{nseg = 1}
{strdef color color = "White"}
{pt3dclear()}
{pt3dadd(184608.000000,181152.000000,62475.000000,226.277900)}
{pt3dadd(184524.000000,181140.000000,62600.000000,153.550809)}
{pt3dadd(184476.000000,181140.000000,62700.000000,131.601099)}
{pt3dadd(184308.000000,181164.000000,62700.000000,92.857932)}
{pt3dadd(184176.000000,181128.000000,62675.000000,120.000000)}

{create adhoc35}
{access adhoc35}
{connect adhoc35(1), adhoc21(0)}
{nseg = 1}
{strdef color color = "White"}
{pt3dclear()}
{pt3dadd(189180.000000,169476.000000,58950.000000,493.936280)}
{pt3dadd(188796.000000,169632.000000,58525.000000,430.994110)}
{pt3dadd(188820.000000,169656.000000,58350.000000,362.343818)}
{pt3dadd(188652.000000,169716.000000,58200.000000,300.788442)}
{pt3dadd(188724.000000,169908.000000,58000.000000,261.079762)}
{pt3dadd(188640.000000,170052.000000,57875.000000,238.391866)}
{pt3dadd(188616.000000,170280.000000,57675.000000,235.503926)}
{pt3dadd(188508.000000,170532.000000,57525.000000,269.805774)}
{pt3dadd(188388.000000,170712.000000,57225.000000,290.332754)}
{pt3dadd(188208.000000,170700.000000,57000.000000,307.301584)}
{pt3dadd(187980.000000,170952.000000,56725.000000,337.185624)}
{pt3dadd(187980.000000,171084.000000,56625.000000,353.143336)}
{pt3dadd(187908.000000,171264.000000,56550.000000,330.749376)}
{pt3dadd(187872.000000,171372.000000,56450.000000,330.749376)}
{pt3dadd(187788.000000,171636.000000,56275.000000,321.645132)}
{pt3dadd(187776.000000,171828.000000,56300.000000,314.448988)}
{pt3dadd(187668.000000,171816.000000,56150.000000,301.379216)}
{pt3dadd(187656.000000,171912.000000,56000.000000,301.379216)}
{pt3dadd(187596.000000,172020.000000,55975.000000,293.514630)}
{pt3dadd(187536.000000,172152.000000,55975.000000,278.856322)}
{pt3dadd(187464.000000,172236.000000,55950.000000,253.905646)}
{pt3dadd(187392.000000,172344.000000,55950.000000,234.306990)}
{pt3dadd(187344.000000,172476.000000,55950.000000,229.192824)}
{pt3dadd(187368.000000,172572.000000,55950.000000,237.057410)}
{pt3dadd(187344.000000,172668.000000,55950.000000,257.636002)}
{pt3dadd(187332.000000,172716.000000,55925.000000,279.243526)}
{pt3dadd(187344.000000,172812.000000,55750.000000,285.713742)}
{pt3dadd(187200.000000,172836.000000,55600.000000,296.466268)}
{pt3dadd(187056.000000,173076.000000,55400.000000,286.225768)}
{pt3dadd(186972.000000,173244.000000,55350.000000,274.935614)}
{pt3dadd(186912.000000,173388.000000,55250.000000,257.966784)}
{pt3dadd(186816.000000,173496.000000,55175.000000,262.837414)}
{pt3dadd(186708.000000,173556.000000,55075.000000,257.199054)}
{pt3dadd(186660.000000,173652.000000,54975.000000,267.439554)}
{pt3dadd(186576.000000,173688.000000,54800.000000,267.439554)}
{pt3dadd(186468.000000,173748.000000,54700.000000,267.439554)}
{pt3dadd(186336.000000,173868.000000,54600.000000,272.809424)}
{pt3dadd(186288.000000,173988.000000,54475.000000,272.809424)}
{pt3dadd(186264.000000,174096.000000,54325.000000,272.809424)}
{pt3dadd(186168.000000,174132.000000,54200.000000,281.067234)}
{pt3dadd(186096.000000,174288.000000,54000.000000,286.181400)}
{pt3dadd(186024.000000,174396.000000,53850.000000,271.523092)}
{pt3dadd(186000.000000,174588.000000,53725.000000,264.592987)}
{pt3dadd(185976.000000,174708.000000,53575.000000,215.502760)}

{create adhoc36}
{access adhoc36}
{connect adhoc36(1), adhoc35(0)}
{nseg = 1}
{strdef color color = "White"}
{pt3dclear()}
{pt3dadd(185976.000000,174708.000000,53575.000000,215.502760)}
{pt3dadd(186000.000000,174864.000000,53450.000000,199.043173)}
{pt3dadd(186192.000000,174900.000000,53275.000000,226.823334)}
{pt3dadd(186372.000000,174948.000000,53150.000000,226.823334)}
{pt3dadd(186528.000000,174864.000000,53075.000000,232.692006)}
{pt3dadd(186672.000000,174852.000000,52750.000000,234.646678)}
{pt3dadd(186804.000000,174804.000000,52700.000000,227.513268)}
{pt3dadd(186900.000000,174744.000000,52600.000000,213.552972)}
{pt3dadd(186996.000000,174684.000000,52500.000000,237.315524)}
{pt3dadd(187128.000000,174696.000000,52325.000000,261.078076)}
{pt3dadd(187224.000000,174528.000000,52050.000000,286.893036)}
{pt3dadd(187272.000000,174432.000000,51900.000000,291.531730)}
{pt3dadd(187176.000000,174360.000000,51700.000000,305.492026)}
{pt3dadd(187080.000000,174348.000000,51550.000000,281.729474)}
{pt3dadd(186984.000000,174360.000000,51300.000000,260.121950)}
{pt3dadd(186912.000000,174444.000000,51075.000000,248.267286)}
{pt3dadd(186900.000000,174396.000000,50850.000000,248.267286)}
{pt3dadd(186948.000000,174396.000000,50675.000000,256.937990)}
{pt3dadd(186960.000000,174420.000000,50500.000000,280.969763)}
{pt3dadd(186936.000000,174492.000000,50325.000000,318.395720)}

{create adhoc37}
{access adhoc37}
{connect adhoc37(1), adhoc36(0)}
{nseg = 1}
{strdef color color = "White"}
{pt3dclear()}
{pt3dadd(186936.000000,174492.000000,50325.000000,318.395720)}
{pt3dadd(186888.000000,174444.000000,50100.000000,292.996380)}
{pt3dadd(186768.000000,174312.000000,49850.000000,257.991852)}
{pt3dadd(186720.000000,174180.000000,49550.000000,252.071568)}
{pt3dadd(186636.000000,174120.000000,49375.000000,226.256608)}
{pt3dadd(186540.000000,173976.000000,49175.000000,222.049172)}
{pt3dadd(186540.000000,173820.000000,48875.000000,219.996764)}
{pt3dadd(186504.000000,173712.000000,48825.000000,211.534052)}
{pt3dadd(186408.000000,173640.000000,48650.000000,182.947342)}
{pt3dadd(186396.000000,173484.000000,48500.000000,169.682198)}
{pt3dadd(186384.000000,173388.000000,48350.000000,162.404464)}
{pt3dadd(186432.000000,173256.000000,48300.000000,160.449792)}
{pt3dadd(186504.000000,173100.000000,48325.000000,182.208022)}
{pt3dadd(186492.000000,172932.000000,48200.000000,190.267752)}
{pt3dadd(186600.000000,172740.000000,48100.000000,210.003112)}
{pt3dadd(186624.000000,172560.000000,48025.000000,219.333254)}
{pt3dadd(186600.000000,172368.000000,47900.000000,225.495362)}
{pt3dadd(186576.000000,172176.000000,47800.000000,225.495362)}
{pt3dadd(186588.000000,171996.000000,47700.000000,220.425778)}
{pt3dadd(186528.000000,171780.000000,47550.000000,216.344777)}
{pt3dadd(186540.000000,171648.000000,47400.000000,160.811480)}

{create adhoc38}
{access adhoc38}
{connect adhoc38(1), adhoc37(0)}
{nseg = 1}
{strdef color color = "White"}
{pt3dclear()}
{pt3dadd(186540.000000,171648.000000,47400.000000,160.811480)}
{pt3dadd(186600.000000,171540.000000,47275.000000,177.710093)}
{pt3dadd(186552.000000,171312.000000,47100.000000,202.682640)}
{pt3dadd(186552.000000,171264.000000,46825.000000,222.909334)}
{pt3dadd(186648.000000,171096.000000,46775.000000,235.571728)}
{pt3dadd(186672.000000,170964.000000,46700.000000,250.728838)}
{pt3dadd(186636.000000,170868.000000,46600.000000,254.936274)}
{pt3dadd(186684.000000,170760.000000,46525.000000,260.574634)}
{pt3dadd(186732.000000,170712.000000,46500.000000,247.279116)}
{pt3dadd(186780.000000,170700.000000,46350.000000,234.616722)}
{pt3dadd(186840.000000,170556.000000,46225.000000,229.746092)}
{pt3dadd(186924.000000,170436.000000,46075.000000,227.591064)}
{pt3dadd(187044.000000,170220.000000,45900.000000,210.044816)}
{pt3dadd(187116.000000,170088.000000,45750.000000,225.959784)}
{pt3dadd(187080.000000,169956.000000,45650.000000,225.959784)}
{pt3dadd(187056.000000,169800.000000,45575.000000,219.489568)}
{pt3dadd(187008.000000,169656.000000,45400.000000,243.252120)}
{pt3dadd(187008.000000,169536.000000,45400.000000,270.357824)}
{pt3dadd(187008.000000,169404.000000,45400.000000,289.065956)}
{pt3dadd(187032.000000,169308.000000,45375.000000,329.236476)}
{pt3dadd(187008.000000,169176.000000,45350.000000,365.590732)}
{pt3dadd(187020.000000,169056.000000,45275.000000,372.444200)}
{pt3dadd(187032.000000,168936.000000,45200.000000,379.640344)}
{pt3dadd(187008.000000,168756.000000,45000.000000,360.932212)}
{pt3dadd(186960.000000,168672.000000,44925.000000,331.048172)}
{pt3dadd(186960.000000,168576.000000,44800.000000,298.901352)}
{pt3dadd(186960.000000,168468.000000,44750.000000,266.232924)}
{pt3dadd(186912.000000,168348.000000,44600.000000,229.878668)}
{pt3dadd(186912.000000,168216.000000,44500.000000,213.963700)}
{pt3dadd(186864.000000,168108.000000,44450.000000,207.493484)}
{pt3dadd(186828.000000,168024.000000,44325.000000,207.493484)}
{pt3dadd(186792.000000,167892.000000,44200.000000,216.339614)}
{pt3dadd(186768.000000,167856.000000,44050.000000,227.680460)}
{pt3dadd(186588.000000,167892.000000,43800.000000,243.595428)}
{pt3dadd(186444.000000,167796.000000,43625.000000,260.306144)}
{pt3dadd(186300.000000,167664.000000,43450.000000,275.697364)}
{pt3dadd(186300.000000,167556.000000,43325.000000,278.192080)}
{pt3dadd(186276.000000,167400.000000,43200.000000,273.321450)}
{pt3dadd(186252.000000,167220.000000,43100.000000,265.831370)}
{pt3dadd(186216.000000,167004.000000,42925.000000,249.120654)}
{pt3dadd(186264.000000,166836.000000,42825.000000,223.932784)}
{pt3dadd(186324.000000,166752.000000,42725.000000,208.775674)}
{pt3dadd(186444.000000,166668.000000,42525.000000,206.512894)}
{pt3dadd(186564.000000,166572.000000,42375.000000,202.095086)}
{pt3dadd(186696.000000,166500.000000,42125.000000,209.313353)}
{pt3dadd(186756.000000,166416.000000,41925.000000,215.502760)}

{create adhoc39}
{access adhoc39}
{connect adhoc39(1), adhoc37(0)}
{nseg = 1}
{strdef color color = "White"}
{pt3dclear()}
{pt3dadd(186540.000000,171648.000000,47400.000000,160.811480)}
{pt3dadd(186432.000000,171612.000000,47400.000000,156.192843)}
{pt3dadd(186336.000000,171576.000000,47400.000000,121.177336)}
{pt3dadd(186192.000000,171540.000000,47375.000000,101.742752)}
{pt3dadd(186060.000000,171516.000000,47375.000000,80.093973)}
{pt3dadd(185988.000000,171504.000000,47375.000000,63.305649)}
{pt3dadd(185856.000000,171456.000000,47375.000000,62.604034)}
{pt3dadd(185760.000000,171408.000000,47375.000000,63.240420)}
{pt3dadd(185664.000000,171348.000000,47375.000000,63.985128)}
{pt3dadd(185568.000000,171252.000000,47350.000000,66.820490)}

{create adhoc40}
{access adhoc40}
{connect adhoc40(1), adhoc36(0)}
{nseg = 1}
{strdef color color = "White"}
{pt3dclear()}
{pt3dadd(186936.000000,174492.000000,50325.000000,318.395720)}
{pt3dadd(186684.000000,174456.000000,50300.000000,274.316947)}
{pt3dadd(186516.000000,174660.000000,50200.000000,200.451148)}
{pt3dadd(186312.000000,174828.000000,50025.000000,159.629146)}
{pt3dadd(186228.000000,174924.000000,49900.000000,126.580762)}
{pt3dadd(186084.000000,174996.000000,49825.000000,118.521032)}
{pt3dadd(185916.000000,175020.000000,49750.000000,130.636830)}
{pt3dadd(185748.000000,175104.000000,49675.000000,125.864505)}
{pt3dadd(185724.000000,175188.000000,49650.000000,124.776071)}
{pt3dadd(185640.000000,175380.000000,49575.000000,112.949939)}
{pt3dadd(185424.000000,175440.000000,49425.000000,100.834141)}
{pt3dadd(185328.000000,175524.000000,49375.000000,87.906136)}
{pt3dadd(185244.000000,175596.000000,49350.000000,90.117978)}
{pt3dadd(185172.000000,175716.000000,49325.000000,88.094130)}
{pt3dadd(185160.000000,175836.000000,49300.000000,94.489502)}
{pt3dadd(185052.000000,176016.000000,49200.000000,103.893150)}
{pt3dadd(184992.000000,176136.000000,49150.000000,115.432005)}
{pt3dadd(184968.000000,176352.000000,49100.000000,126.970860)}
{pt3dadd(184884.000000,176580.000000,49075.000000,125.135169)}
{pt3dadd(184836.000000,176676.000000,49025.000000,123.935169)}
{pt3dadd(184728.000000,176772.000000,48850.000000,117.220029)}
{pt3dadd(184644.000000,176892.000000,48700.000000,108.241657)}
{pt3dadd(184560.000000,177096.000000,48550.000000,104.458657)}
{pt3dadd(184476.000000,177216.000000,48375.000000,102.020102)}
{pt3dadd(184596.000000,177396.000000,48225.000000,93.490716)}
{pt3dadd(184632.000000,177600.000000,48075.000000,89.216470)}
{pt3dadd(184620.000000,177720.000000,47900.000000,83.139554)}
{pt3dadd(184524.000000,177792.000000,47675.000000,77.048723)}
{pt3dadd(184428.000000,177960.000000,47475.000000,81.322969)}
{pt3dadd(184380.000000,178128.000000,47300.000000,83.969568)}
{pt3dadd(184428.000000,178212.000000,47175.000000,98.724300)}

{create adhoc41}
{access adhoc41}
{connect adhoc41(1), adhoc35(0)}
{nseg = 1}
{strdef color color = "White"}
{pt3dclear()}
{pt3dadd(185976.000000,174708.000000,53575.000000,215.502760)}
{pt3dadd(185892.000000,174852.000000,53600.000000,206.042643)}
{pt3dadd(185796.000000,174996.000000,53600.000000,180.253138)}
{pt3dadd(185832.000000,175104.000000,53625.000000,158.921294)}
{pt3dadd(185784.000000,175212.000000,53650.000000,127.831648)}
{pt3dadd(185688.000000,175308.000000,53575.000000,117.932991)}
{pt3dadd(185652.000000,175356.000000,53575.000000,94.633701)}
{pt3dadd(185604.000000,175452.000000,53525.000000,86.510477)}
{pt3dadd(185460.000000,175548.000000,53400.000000,79.475687)}
{pt3dadd(185424.000000,175644.000000,53375.000000,78.580228)}
{pt3dadd(185400.000000,175716.000000,53375.000000,69.969756)}
{pt3dadd(185352.000000,175872.000000,53300.000000,72.226348)}
{pt3dadd(185328.000000,175968.000000,53300.000000,71.264186)}
{pt3dadd(185292.000000,176040.000000,53300.000000,63.638560)}

{create adhoc42}
{access adhoc42}
{connect adhoc42(1), adhoc20(0)}
{nseg = 1}
{strdef color color = "White"}
{pt3dclear()}
{pt3dadd(191856.000000,161388.000000,61700.000000,729.768860)}
{pt3dadd(191640.000000,161316.000000,61375.000000,774.360387)}
{pt3dadd(191304.000000,161292.000000,61200.000000,648.455438)}
{pt3dadd(191172.000000,161316.000000,61175.000000,534.663962)}
{pt3dadd(190968.000000,161316.000000,61075.000000,385.617742)}
{pt3dadd(190800.000000,161220.000000,60975.000000,290.465262)}
{pt3dadd(190632.000000,161136.000000,60975.000000,196.547212)}
{pt3dadd(190344.000000,161148.000000,60775.000000,170.950648)}
{pt3dadd(190248.000000,161148.000000,60725.000000,176.020232)}
{pt3dadd(190152.000000,161148.000000,60625.000000,174.247282)}
{pt3dadd(189984.000000,161100.000000,60550.000000,178.063546)}
{pt3dadd(189864.000000,161136.000000,60475.000000,191.156830)}
{pt3dadd(189756.000000,161148.000000,60425.000000,198.088006)}
{pt3dadd(189672.000000,161184.000000,60375.000000,208.374486)}
{pt3dadd(189552.000000,161076.000000,60300.000000,210.147436)}
{pt3dadd(189480.000000,161040.000000,60275.000000,210.147436)}
{pt3dadd(189408.000000,161028.000000,60200.000000,200.350786)}
{pt3dadd(189348.000000,161004.000000,60175.000000,187.717314)}
{pt3dadd(189300.000000,160968.000000,60175.000000,165.398954)}
{pt3dadd(189228.000000,160992.000000,60050.000000,149.935782)}
{pt3dadd(189132.000000,160992.000000,60050.000000,128.632498)}
{pt3dadd(189036.000000,160992.000000,60025.000000,119.633568)}
{pt3dadd(188916.000000,161004.000000,59925.000000,125.335864)}
{pt3dadd(188844.000000,160968.000000,59825.000000,127.918864)}
{pt3dadd(188772.000000,160908.000000,59725.000000,135.322306)}
{pt3dadd(188736.000000,160920.000000,59625.000000,146.208206)}
{pt3dadd(188712.000000,160908.000000,59450.000000,155.207136)}
{pt3dadd(188676.000000,160884.000000,59350.000000,148.244840)}
{pt3dadd(188652.000000,160872.000000,59250.000000,140.206700)}
{pt3dadd(188616.000000,160860.000000,59150.000000,146.493480)}
{pt3dadd(188568.000000,160800.000000,58975.000000,153.094600)}
{pt3dadd(188496.000000,160752.000000,58900.000000,149.797966)}
{pt3dadd(188472.000000,160788.000000,58750.000000,174.492240)}
{pt3dadd(188472.000000,160788.000000,58600.000000,181.207380)}
{pt3dadd(188448.000000,160788.000000,58450.000000,173.531450)}
{pt3dadd(188436.000000,160728.000000,58300.000000,170.069980)}
{pt3dadd(188424.000000,160728.000000,58175.000000,171.678094)}
{pt3dadd(188424.000000,160728.000000,58050.000000,157.242750)}
{pt3dadd(188412.000000,160728.000000,57900.000000,162.945046)}
{pt3dadd(188400.000000,160728.000000,57800.000000,160.362046)}
{pt3dadd(188388.000000,160728.000000,57650.000000,158.753932)}
{pt3dadd(188364.000000,160692.000000,57525.000000,157.145818)}
{pt3dadd(188364.000000,160692.000000,57450.000000,152.317648)}
{pt3dadd(188364.000000,160692.000000,57350.000000,157.387232)}
{pt3dadd(188352.000000,160692.000000,57250.000000,152.919335)}
{pt3dadd(188340.000000,160692.000000,57150.000000,144.757039)}
{pt3dadd(188268.000000,160740.000000,57050.000000,139.054743)}
{pt3dadd(188196.000000,160776.000000,56925.000000,140.586279)}
{pt3dadd(188112.000000,160752.000000,56725.000000,137.124809)}
{pt3dadd(188016.000000,160704.000000,56550.000000,147.023466)}
{pt3dadd(187992.000000,160692.000000,56450.000000,147.023466)}
{pt3dadd(187920.000000,160692.000000,56375.000000,152.725762)}
{pt3dadd(187848.000000,160692.000000,56275.000000,149.735616)}
{pt3dadd(187788.000000,160692.000000,56200.000000,148.127502)}
{pt3dadd(187716.000000,160692.000000,56100.000000,151.267152)}
{pt3dadd(187632.000000,160692.000000,56025.000000,162.726082)}
{pt3dadd(187548.000000,160692.000000,55950.000000,166.022716)}
{pt3dadd(187428.000000,160680.000000,55850.000000,182.106146)}
{pt3dadd(187296.000000,160656.000000,55725.000000,204.952290)}
{pt3dadd(187212.000000,160620.000000,55550.000000,223.570870)}
{pt3dadd(187140.000000,160572.000000,55425.000000,240.500930)}
{pt3dadd(187044.000000,160548.000000,55175.000000,250.297580)}
{pt3dadd(186924.000000,160584.000000,54875.000000,235.672760)}
{pt3dadd(186888.000000,160584.000000,54700.000000,202.433028)}
{pt3dadd(186852.000000,160512.000000,54525.000000,164.076341)}
{pt3dadd(186840.000000,160488.000000,54325.000000,127.931496)}
{pt3dadd(186900.000000,160416.000000,54175.000000,99.732268)}
{pt3dadd(186984.000000,160296.000000,54000.000000,98.273658)}
{pt3dadd(187032.000000,160152.000000,53825.000000,105.677100)}
{pt3dadd(186984.000000,159948.000000,53600.000000,108.701149)}
{pt3dadd(186984.000000,159768.000000,53450.000000,123.087764)}
{pt3dadd(187020.000000,159648.000000,53325.000000,125.776272)}
{pt3dadd(187068.000000,159540.000000,53125.000000,118.372830)}
{pt3dadd(186984.000000,159348.000000,52975.000000,112.057822)}
{pt3dadd(186960.000000,159144.000000,52775.000000,111.245615)}
{pt3dadd(187008.000000,159048.000000,52575.000000,98.524024)}
{pt3dadd(187044.000000,158976.000000,52450.000000,95.835516)}
{pt3dadd(187008.000000,158880.000000,52325.000000,92.871436)}
{pt3dadd(187020.000000,158760.000000,52125.000000,87.070646)}
{pt3dadd(186996.000000,158640.000000,51950.000000,89.631129)}
{pt3dadd(186924.000000,158532.000000,51800.000000,96.921960)}
{pt3dadd(186924.000000,158496.000000,51700.000000,98.670236)}
{pt3dadd(187032.000000,158412.000000,51600.000000,98.670236)}
{pt3dadd(186996.000000,158328.000000,51375.000000,101.358744)}
{pt3dadd(187020.000000,158244.000000,51275.000000,118.013046)}
{pt3dadd(187020.000000,158232.000000,51125.000000,142.707320)}
{pt3dadd(186924.000000,158136.000000,50975.000000,197.619264)}
{pt3dadd(186864.000000,158172.000000,50825.000000,264.150782)}
{pt3dadd(186840.000000,158184.000000,50600.000000,338.489022)}
{pt3dadd(186852.000000,158028.000000,50425.000000,401.817348)}
{pt3dadd(186684.000000,157896.000000,50350.000000,441.526028)}
{pt3dadd(186576.000000,157800.000000,50325.000000,449.081972)}
{pt3dadd(186516.000000,157716.000000,50325.000000,437.462398)}
{pt3dadd(186420.000000,157632.000000,50325.000000,404.026098)}
{pt3dadd(186324.000000,157536.000000,50325.000000,357.627832)}
{pt3dadd(186204.000000,157440.000000,50350.000000,315.543238)}
{pt3dadd(186024.000000,157440.000000,50275.000000,281.789082)}
{pt3dadd(185940.000000,157344.000000,50250.000000,235.855510)}
{pt3dadd(185856.000000,157308.000000,50175.000000,194.953570)}
{pt3dadd(185700.000000,157224.000000,50100.000000,156.596883)}
{pt3dadd(185640.000000,157068.000000,50100.000000,122.442621)}
{pt3dadd(185580.000000,156972.000000,50100.000000,110.383191)}
{pt3dadd(185520.000000,156840.000000,50100.000000,114.762487)}
{pt3dadd(185508.000000,156696.000000,50125.000000,125.648387)}
{pt3dadd(185508.000000,156588.000000,50150.000000,148.847964)}
{pt3dadd(185460.000000,156444.000000,50050.000000,167.646162)}
{pt3dadd(185424.000000,156300.000000,50050.000000,162.817992)}
{pt3dadd(185424.000000,156180.000000,49900.000000,158.438696)}
{pt3dadd(185376.000000,155976.000000,49750.000000,161.578346)}
{pt3dadd(185244.000000,155844.000000,49700.000000,156.508762)}
{pt3dadd(185100.000000,155712.000000,49650.000000,161.578346)}
{pt3dadd(185124.000000,155556.000000,49575.000000,176.203166)}
{pt3dadd(185136.000000,155436.000000,49550.000000,200.809156)}
{pt3dadd(185136.000000,155232.000000,49450.000000,222.047186)}
{pt3dadd(185136.000000,155028.000000,49450.000000,223.655300)}
{pt3dadd(185076.000000,154872.000000,49400.000000,218.585716)}
{pt3dadd(184956.000000,154644.000000,49225.000000,199.790136)}
{pt3dadd(184896.000000,154536.000000,49175.000000,175.184146)}
{pt3dadd(184956.000000,154452.000000,49150.000000,144.008827)}
{pt3dadd(185004.000000,154332.000000,49150.000000,138.915000)}

{create adhoc43}
{access adhoc43}
{connect adhoc43(1), adhoc19(0)}
{nseg = 1}
{strdef color color = "White"}
{pt3dclear()}
{pt3dadd(191964.000000,161196.000000,61775.000000,695.017940)}
{pt3dadd(192252.000000,161244.000000,62150.000000,499.916320)}
{pt3dadd(192336.000000,161400.000000,62250.000000,369.674024)}
{pt3dadd(192348.000000,161568.000000,62250.000000,257.130436)}
{pt3dadd(192192.000000,161316.000000,62575.000000,178.517950)}
{pt3dadd(192288.000000,161520.000000,62600.000000,123.199257)}
{pt3dadd(192252.000000,161604.000000,62650.000000,96.227416)}
{pt3dadd(192240.000000,161736.000000,62725.000000,77.718286)}
{pt3dadd(192216.000000,161820.000000,62750.000000,64.622384)}
{pt3dadd(192168.000000,161868.000000,62775.000000,61.879482)}
{pt3dadd(192132.000000,161916.000000,62800.000000,63.689068)}
{pt3dadd(192108.000000,161940.000000,62825.000000,63.638560)}

{create adhoc44}
{access adhoc44}
{connect adhoc44(1), adhoc18(0)}
{nseg = 1}
{strdef color color = "White"}
{pt3dclear()}
{pt3dadd(196740.000000,152832.000000,68800.000000,695.017940)}
{pt3dadd(197016.000000,152988.000000,69175.000000,673.479203)}
{pt3dadd(197160.000000,153144.000000,69500.000000,554.337276)}
{pt3dadd(197256.000000,153216.000000,69550.000000,449.104098)}
{pt3dadd(197316.000000,153372.000000,69600.000000,343.870920)}
{pt3dadd(197376.000000,153516.000000,69650.000000,263.046154)}
{pt3dadd(197352.000000,153648.000000,69650.000000,205.605496)}
{pt3dadd(197316.000000,153804.000000,69675.000000,175.589456)}
{pt3dadd(197304.000000,153936.000000,69725.000000,168.279046)}
{pt3dadd(197304.000000,154056.000000,69775.000000,163.680786)}
{pt3dadd(197304.000000,154188.000000,69825.000000,152.195616)}
{pt3dadd(197376.000000,154380.000000,69975.000000,152.195616)}
{pt3dadd(197484.000000,154524.000000,70150.000000,164.665408)}
{pt3dadd(197676.000000,155016.000000,70425.000000,173.664338)}
{pt3dadd(197844.000000,155220.000000,70525.000000,185.540332)}
{pt3dadd(197916.000000,155400.000000,70675.000000,190.863394)}
{pt3dadd(197964.000000,155484.000000,70675.000000,199.749242)}
{pt3dadd(198000.000000,155556.000000,70675.000000,187.279450)}
{pt3dadd(198048.000000,155640.000000,70675.000000,187.279450)}
{pt3dadd(198120.000000,155688.000000,70750.000000,170.231306)}
{pt3dadd(198156.000000,155832.000000,70775.000000,157.597834)}
{pt3dadd(198240.000000,155964.000000,70925.000000,144.332690)}
{pt3dadd(198384.000000,156168.000000,71000.000000,147.472340)}
{pt3dadd(198516.000000,156372.000000,71125.000000,138.473410)}
{pt3dadd(198564.000000,156528.000000,71225.000000,134.218270)}
{pt3dadd(198600.000000,156612.000000,71325.000000,134.218270)}
{pt3dadd(198636.000000,156756.000000,71475.000000,153.953630)}
{pt3dadd(198672.000000,156852.000000,71675.000000,159.276692)}
{pt3dadd(198660.000000,156948.000000,71800.000000,160.599692)}
{pt3dadd(198720.000000,157044.000000,71950.000000,168.637832)}
{pt3dadd(198780.000000,157176.000000,72025.000000,171.349982)}
{pt3dadd(198828.000000,157320.000000,72100.000000,154.462382)}
{pt3dadd(198828.000000,157356.000000,72125.000000,144.541060)}
{pt3dadd(198756.000000,157428.000000,72175.000000,155.851532)}
{pt3dadd(198744.000000,157488.000000,72225.000000,154.528532)}
{pt3dadd(198744.000000,157560.000000,72275.000000,148.213524)}
{pt3dadd(198744.000000,157620.000000,72325.000000,142.782764)}
{pt3dadd(198744.000000,157692.000000,72375.000000,140.070614)}
{pt3dadd(198720.000000,157836.000000,72475.000000,128.760142)}
{pt3dadd(198720.000000,158040.000000,72600.000000,128.760142)}
{pt3dadd(198648.000000,158172.000000,72625.000000,141.361930)}
{pt3dadd(198636.000000,158232.000000,72650.000000,159.262482)}
{pt3dadd(198636.000000,158292.000000,72675.000000,171.895954)}
{pt3dadd(198636.000000,158352.000000,72700.000000,181.344834)}
{pt3dadd(198636.000000,158412.000000,72725.000000,193.978306)}
{pt3dadd(198636.000000,158472.000000,72750.000000,193.978306)}
{pt3dadd(198636.000000,158532.000000,72775.000000,184.648164)}
{pt3dadd(198636.000000,158592.000000,72800.000000,176.185452)}
{pt3dadd(198636.000000,158664.000000,72800.000000,164.153572)}
{pt3dadd(198552.000000,158820.000000,72900.000000,166.108244)}
{pt3dadd(198540.000000,159012.000000,72950.000000,178.167674)}
{pt3dadd(198456.000000,159144.000000,73075.000000,196.786254)}
{pt3dadd(198372.000000,159252.000000,73175.000000,209.256046)}
{pt3dadd(198408.000000,159372.000000,73200.000000,231.574406)}
{pt3dadd(198408.000000,159492.000000,73150.000000,242.915252)}
{pt3dadd(198444.000000,159612.000000,73100.000000,259.076036)}
{pt3dadd(198396.000000,159732.000000,73125.000000,273.550150)}
{pt3dadd(198372.000000,159876.000000,73125.000000,291.096398)}
{pt3dadd(198336.000000,160008.000000,73175.000000,310.441142)}
{pt3dadd(198300.000000,160152.000000,73250.000000,321.731296)}
{pt3dadd(198252.000000,160332.000000,73275.000000,331.768724)}
{pt3dadd(198216.000000,160512.000000,73275.000000,338.622192)}
{pt3dadd(198180.000000,160632.000000,73375.000000,359.247908)}
{pt3dadd(198108.000000,160800.000000,73400.000000,369.787204)}
{pt3dadd(198096.000000,160992.000000,73475.000000,383.510460)}
{pt3dadd(198084.000000,161148.000000,73475.000000,408.581144)}
{pt3dadd(198084.000000,161316.000000,73475.000000,412.266972)}
{pt3dadd(198072.000000,161556.000000,73500.000000,394.673600)}
{pt3dadd(198048.000000,161652.000000,73625.000000,380.950344)}
{pt3dadd(198012.000000,161820.000000,73625.000000,407.274556)}
{pt3dadd(198012.000000,162012.000000,73650.000000,393.823446)}
{pt3dadd(198024.000000,162156.000000,73750.000000,406.024000)}
{pt3dadd(198036.000000,162288.000000,73825.000000,427.681002)}
{pt3dadd(198036.000000,162420.000000,73875.000000,453.604812)}
{pt3dadd(198012.000000,162588.000000,73950.000000,448.665456)}
{pt3dadd(198060.000000,162684.000000,73950.000000,448.665456)}
{pt3dadd(198180.000000,162840.000000,73925.000000,436.464902)}
{pt3dadd(198204.000000,163008.000000,73875.000000,424.845328)}
{pt3dadd(198228.000000,163176.000000,73900.000000,412.644774)}
{pt3dadd(198240.000000,163344.000000,73925.000000,395.130034)}
{pt3dadd(198204.000000,163572.000000,73925.000000,403.876988)}
{pt3dadd(198180.000000,163788.000000,73925.000000,425.261844)}
{pt3dadd(198168.000000,163992.000000,73925.000000,455.271884)}
{pt3dadd(198204.000000,164088.000000,74000.000000,476.656740)}
{pt3dadd(198240.000000,164196.000000,74000.000000,489.467324)}
{pt3dadd(198240.000000,164304.000000,74000.000000,484.987178)}
{pt3dadd(198240.000000,164400.000000,74000.000000,475.802876)}
{pt3dadd(198240.000000,164508.000000,74000.000000,435.755408)}
{pt3dadd(198240.000000,164604.000000,74000.000000,403.831256)}
{pt3dadd(198216.000000,164700.000000,73900.000000,376.611260)}
{pt3dadd(198192.000000,164784.000000,73900.000000,347.655106)}
{pt3dadd(198168.000000,164868.000000,73900.000000,321.731296)}
{pt3dadd(198144.000000,164964.000000,73900.000000,321.731296)}
{pt3dadd(198120.000000,165060.000000,73900.000000,312.627052)}
{pt3dadd(198096.000000,165144.000000,73900.000000,306.410748)}
{pt3dadd(198072.000000,165240.000000,73900.000000,312.627052)}
{pt3dadd(198132.000000,165468.000000,73900.000000,308.781273)}
{pt3dadd(198108.000000,165660.000000,73825.000000,334.315520)}

{create adhoc45}
{access adhoc45}
{connect adhoc45(1), adhoc44(0)}
{nseg = 1}
{strdef color color = "White"}
{pt3dclear()}
{pt3dadd(198108.000000,165660.000000,73825.000000,334.315520)}
{pt3dadd(198060.000000,165792.000000,73825.000000,276.116847)}
{pt3dadd(198036.000000,165948.000000,73825.000000,256.289020)}
{pt3dadd(198144.000000,166152.000000,73975.000000,234.681496)}
{pt3dadd(198180.000000,166284.000000,74025.000000,216.016108)}
{pt3dadd(198192.000000,166380.000000,74050.000000,214.061436)}
{pt3dadd(198204.000000,166488.000000,74050.000000,210.054356)}
{pt3dadd(198204.000000,166584.000000,74050.000000,203.584140)}
{pt3dadd(198228.000000,166716.000000,74200.000000,199.376704)}
{pt3dadd(198300.000000,166860.000000,74225.000000,190.913992)}
{pt3dadd(198228.000000,167004.000000,74400.000000,179.603520)}
{pt3dadd(198276.000000,167148.000000,74425.000000,177.741928)}
{pt3dadd(198336.000000,167280.000000,74425.000000,173.925664)}
{pt3dadd(198396.000000,167412.000000,74425.000000,199.740624)}
{pt3dadd(198384.000000,167604.000000,74525.000000,239.316120)}
{pt3dadd(198384.000000,167760.000000,74650.000000,266.541560)}
{pt3dadd(198372.000000,167952.000000,74700.000000,279.203954)}
{pt3dadd(198336.000000,168048.000000,74775.000000,289.490434)}
{pt3dadd(198312.000000,168168.000000,74800.000000,275.016320)}
{pt3dadd(198324.000000,168300.000000,74850.000000,259.818504)}
{pt3dadd(198276.000000,168432.000000,74900.000000,254.704338)}
{pt3dadd(198300.000000,168600.000000,74925.000000,265.456864)}
{pt3dadd(198228.000000,168744.000000,74925.000000,281.617648)}
{pt3dadd(198276.000000,168900.000000,74950.000000,302.945230)}
{pt3dadd(198336.000000,169068.000000,74950.000000,314.799894)}
{pt3dadd(198288.000000,169236.000000,75000.000000,338.622192)}
{pt3dadd(198348.000000,169320.000000,75075.000000,351.691964)}
{pt3dadd(198384.000000,169416.000000,75075.000000,365.415220)}
{pt3dadd(198420.000000,169512.000000,75075.000000,346.707088)}
{pt3dadd(198444.000000,169656.000000,75200.000000,317.075864)}
{pt3dadd(198588.000000,169608.000000,75550.000000,278.818222)}
{pt3dadd(198792.000000,169800.000000,75900.000000,238.872060)}
{pt3dadd(198828.000000,169896.000000,76075.000000,196.928590)}
{pt3dadd(198852.000000,170064.000000,76175.000000,185.020702)}
{pt3dadd(198852.000000,170088.000000,76350.000000,190.889374)}
{pt3dadd(198792.000000,170184.000000,76525.000000,198.530996)}
{pt3dadd(198732.000000,170352.000000,76600.000000,210.016166)}
{pt3dadd(198696.000000,170412.000000,76725.000000,219.812816)}
{pt3dadd(198744.000000,170352.000000,76900.000000,234.471124)}
{pt3dadd(198660.000000,170340.000000,77025.000000,249.129432)}
{pt3dadd(198648.000000,170436.000000,77150.000000,300.111980)}
{pt3dadd(198600.000000,170568.000000,77275.000000,353.643656)}
{pt3dadd(198588.000000,170652.000000,77475.000000,372.067220)}
{pt3dadd(198612.000000,170820.000000,77550.000000,384.514616)}
{pt3dadd(198612.000000,170976.000000,77600.000000,400.472328)}
{pt3dadd(198684.000000,170988.000000,77775.000000,346.003287)}
{pt3dadd(198696.000000,171084.000000,77950.000000,368.582860)}

{create adhoc46}
{access adhoc46}
{connect adhoc46(1), adhoc45(0)}
{nseg = 1}
{strdef color color = "White"}
{pt3dclear()}
{pt3dadd(198696.000000,171084.000000,77950.000000,368.582860)}
{pt3dadd(198648.000000,171024.000000,78125.000000,285.601903)}
{pt3dadd(198612.000000,170940.000000,78075.000000,232.020072)}
{pt3dadd(198564.000000,170820.000000,78075.000000,183.503500)}
{pt3dadd(198480.000000,170700.000000,78075.000000,158.897510)}
{pt3dadd(198396.000000,170580.000000,78075.000000,147.412340)}
{pt3dadd(198324.000000,170532.000000,78125.000000,145.723820)}
{pt3dadd(198240.000000,170448.000000,78375.000000,154.294230)}
{pt3dadd(198180.000000,170460.000000,78375.000000,155.554230)}
{pt3dadd(198144.000000,170472.000000,78400.000000,154.231230)}
{pt3dadd(198156.000000,170472.000000,78450.000000,137.517172)}
{pt3dadd(198156.000000,170472.000000,78500.000000,116.627253)}
{pt3dadd(198144.000000,170472.000000,78550.000000,85.281760)}

{create adhoc47}
{access adhoc47}
{connect adhoc47(1), adhoc45(0)}
{nseg = 1}
{strdef color color = "White"}
{pt3dclear()}
{pt3dadd(198696.000000,171084.000000,77950.000000,368.582860)}
{pt3dadd(198552.000000,171228.000000,78125.000000,230.579420)}
{pt3dadd(198492.000000,171348.000000,78300.000000,196.761412)}
{pt3dadd(198420.000000,171492.000000,78300.000000,152.216990)}
{pt3dadd(198396.000000,171600.000000,78350.000000,138.526768)}
{pt3dadd(198336.000000,171708.000000,78500.000000,126.410970)}
{pt3dadd(198300.000000,171780.000000,78575.000000,115.525070)}
{pt3dadd(198192.000000,171780.000000,78650.000000,112.942070)}
{pt3dadd(198096.000000,171816.000000,78675.000000,108.969920)}
{pt3dadd(198048.000000,171852.000000,78725.000000,112.401212)}
{pt3dadd(198000.000000,171936.000000,78775.000000,118.202002)}
{pt3dadd(197988.000000,171924.000000,78900.000000,118.202002)}
{pt3dadd(197952.000000,172008.000000,79000.000000,118.202002)}
{pt3dadd(197904.000000,172068.000000,79025.000000,115.859144)}
{pt3dadd(197856.000000,172116.000000,79050.000000,111.391247)}
{pt3dadd(197832.000000,172176.000000,79075.000000,110.302813)}
{pt3dadd(197808.000000,172236.000000,79125.000000,110.302813)}
{pt3dadd(197748.000000,172308.000000,79175.000000,109.102813)}
{pt3dadd(197712.000000,172380.000000,79200.000000,111.445671)}
{pt3dadd(197664.000000,172452.000000,79225.000000,110.458428)}
{pt3dadd(197628.000000,172488.000000,79275.000000,110.458428)}
{pt3dadd(197592.000000,172560.000000,79400.000000,115.913568)}
{pt3dadd(197532.000000,172656.000000,79450.000000,115.913568)}
{pt3dadd(197484.000000,172668.000000,79450.000000,131.761712)}
{pt3dadd(197412.000000,172740.000000,79475.000000,150.413573)}
{pt3dadd(197304.000000,172788.000000,79575.000000,205.240720)}

{create adhoc48}
{access adhoc48}
{connect adhoc48(1), adhoc47(0)}
{nseg = 1}
{strdef color color = "White"}
{pt3dclear()}
{pt3dadd(197304.000000,172788.000000,79575.000000,205.240720)}
{pt3dadd(197184.000000,172812.000000,79550.000000,175.621227)}
{pt3dadd(197052.000000,172836.000000,79550.000000,174.602076)}
{pt3dadd(196920.000000,172848.000000,79550.000000,160.013932)}
{pt3dadd(196776.000000,172884.000000,79525.000000,147.596496)}
{pt3dadd(196692.000000,172908.000000,79550.000000,136.106317)}
{pt3dadd(196608.000000,172908.000000,79525.000000,98.724300)}

{create adhoc49}
{access adhoc49}
{connect adhoc49(1), adhoc47(0)}
{nseg = 1}
{strdef color color = "White"}
{pt3dclear()}
{pt3dadd(197304.000000,172788.000000,79575.000000,205.240720)}
{pt3dadd(197472.000000,172884.000000,79750.000000,198.725147)}
{pt3dadd(197568.000000,172980.000000,79800.000000,182.926968)}
{pt3dadd(197592.000000,173052.000000,79850.000000,161.623684)}
{pt3dadd(197640.000000,173136.000000,79950.000000,144.298920)}
{pt3dadd(197640.000000,173232.000000,80075.000000,134.377598)}
{pt3dadd(197628.000000,173316.000000,80175.000000,122.345718)}
{pt3dadd(197688.000000,173412.000000,80200.000000,116.617821)}
{pt3dadd(197652.000000,173448.000000,80275.000000,120.872961)}
{pt3dadd(197652.000000,173556.000000,80325.000000,132.874663)}
{pt3dadd(197652.000000,173688.000000,80425.000000,132.874663)}
{pt3dadd(197676.000000,173784.000000,80425.000000,134.134663)}
{pt3dadd(197676.000000,173832.000000,80400.000000,137.402560)}
{pt3dadd(197676.000000,173904.000000,80475.000000,152.496032)}
{pt3dadd(197664.000000,174012.000000,80525.000000,152.496032)}
{pt3dadd(197712.000000,174156.000000,80650.000000,153.954642)}
{pt3dadd(197772.000000,174264.000000,80700.000000,170.595194)}
{pt3dadd(197820.000000,174360.000000,80725.000000,194.113554)}
{pt3dadd(197904.000000,174504.000000,80725.000000,194.113554)}
{pt3dadd(197940.000000,174636.000000,80750.000000,201.391288)}
{pt3dadd(198000.000000,174684.000000,80850.000000,209.854000)}
{pt3dadd(198120.000000,174792.000000,80875.000000,202.212378)}
{pt3dadd(198168.000000,174864.000000,80900.000000,188.464428)}
{pt3dadd(198228.000000,175008.000000,80925.000000,184.829886)}
{pt3dadd(198252.000000,175056.000000,80950.000000,181.013622)}
{pt3dadd(198312.000000,175104.000000,81150.000000,174.082446)}
{pt3dadd(198324.000000,175224.000000,81175.000000,169.254276)}
{pt3dadd(198372.000000,175260.000000,81250.000000,167.646162)}
{pt3dadd(198420.000000,175344.000000,81275.000000,169.419112)}
{pt3dadd(198432.000000,175404.000000,81300.000000,165.957642)}
{pt3dadd(198444.000000,175488.000000,81325.000000,165.957642)}
{pt3dadd(198420.000000,175572.000000,81325.000000,174.420354)}
{pt3dadd(198396.000000,175656.000000,81325.000000,183.306202)}
{pt3dadd(198324.000000,175800.000000,81300.000000,198.463312)}
{pt3dadd(198168.000000,175932.000000,81225.000000,219.701342)}
{pt3dadd(198084.000000,176064.000000,81300.000000,226.632518)}
{pt3dadd(197988.000000,176184.000000,81375.000000,235.057406)}
{pt3dadd(197928.000000,176256.000000,81425.000000,235.057406)}
{pt3dadd(197916.000000,176376.000000,81500.000000,205.525558)}
{pt3dadd(197820.000000,176508.000000,81575.000000,171.249221)}
{pt3dadd(197736.000000,176652.000000,81725.000000,159.938749)}
{pt3dadd(197700.000000,176760.000000,81850.000000,147.879319)}
{pt3dadd(197604.000000,176964.000000,81850.000000,144.063055)}
{pt3dadd(197556.000000,177084.000000,81900.000000,147.665913)}
{pt3dadd(197484.000000,177216.000000,82025.000000,154.716810)}
{pt3dadd(197472.000000,177336.000000,82125.000000,159.096106)}
{pt3dadd(197472.000000,177492.000000,82225.000000,152.809326)}
{pt3dadd(197424.000000,177648.000000,82325.000000,146.208206)}
{pt3dadd(197424.000000,177804.000000,82375.000000,141.516914)}
{pt3dadd(197436.000000,177984.000000,82450.000000,135.952697)}
{pt3dadd(197376.000000,178116.000000,82600.000000,108.843540)}

{create adhoc50}
{access adhoc50}
{connect adhoc50(1), adhoc49(0)}
{nseg = 1}
{strdef color color = "White"}
{pt3dclear()}
{pt3dadd(197376.000000,178116.000000,82600.000000,108.843540)}
{pt3dadd(197376.000000,178116.000000,82725.000000,120.281180)}
{pt3dadd(197340.000000,178260.000000,82875.000000,129.123858)}
{pt3dadd(197328.000000,178296.000000,82850.000000,122.825764)}
{pt3dadd(197304.000000,178392.000000,82925.000000,113.096378)}
{pt3dadd(197208.000000,178440.000000,82975.000000,106.701006)}
{pt3dadd(197124.000000,178464.000000,82975.000000,95.438025)}
{pt3dadd(197100.000000,178536.000000,83025.000000,87.399885)}
{pt3dadd(197076.000000,178656.000000,83075.000000,90.733899)}
{pt3dadd(197016.000000,178764.000000,83125.000000,95.995388)}
{pt3dadd(196980.000000,178860.000000,83250.000000,98.959468)}
{pt3dadd(196968.000000,178920.000000,83275.000000,107.510299)}
{pt3dadd(196932.000000,178992.000000,83275.000000,121.535849)}
{pt3dadd(196884.000000,179076.000000,83275.000000,133.361981)}
{pt3dadd(196860.000000,179172.000000,83275.000000,146.400288)}
{pt3dadd(196764.000000,179196.000000,83325.000000,158.401990)}
{pt3dadd(196728.000000,179268.000000,83400.000000,165.712400)}
{pt3dadd(196680.000000,179352.000000,83425.000000,164.104286)}
{pt3dadd(196620.000000,179412.000000,83425.000000,165.635822)}
{pt3dadd(196560.000000,179472.000000,83425.000000,164.027708)}
{pt3dadd(196536.000000,179532.000000,83425.000000,160.888058)}
{pt3dadd(196536.000000,179628.000000,83425.000000,156.289798)}
{pt3dadd(196476.000000,179712.000000,83425.000000,151.910502)}
{pt3dadd(196476.000000,179784.000000,83425.000000,147.531206)}
{pt3dadd(196440.000000,179892.000000,83425.000000,152.600790)}
{pt3dadd(196404.000000,179964.000000,83425.000000,165.070582)}
{pt3dadd(196380.000000,180060.000000,83425.000000,188.287422)}
{pt3dadd(196392.000000,180168.000000,83425.000000,234.220994)}
{pt3dadd(196344.000000,180276.000000,83500.000000,283.840394)}
{pt3dadd(196308.000000,180432.000000,83575.000000,336.211468)}
{pt3dadd(196332.000000,180576.000000,83600.000000,382.713870)}
{pt3dadd(196320.000000,180744.000000,83600.000000,407.727280)}
{pt3dadd(196356.000000,180888.000000,83625.000000,411.413108)}
{pt3dadd(196272.000000,181044.000000,83625.000000,407.727280)}
{pt3dadd(196212.000000,181128.000000,83625.000000,395.526726)}
{pt3dadd(196164.000000,181272.000000,83650.000000,376.130028)}
{pt3dadd(196152.000000,181380.000000,83650.000000,362.406772)}
{pt3dadd(196176.000000,181524.000000,83700.000000,337.393362)}
{pt3dadd(196128.000000,181680.000000,83675.000000,306.777342)}
{pt3dadd(196020.000000,181824.000000,83700.000000,272.475494)}
{pt3dadd(195960.000000,181896.000000,83775.000000,245.369790)}
{pt3dadd(195864.000000,181980.000000,83775.000000,220.784118)}
{pt3dadd(195780.000000,181896.000000,83725.000000,200.557424)}
{pt3dadd(195672.000000,181824.000000,83675.000000,183.916872)}
{pt3dadd(195576.000000,181836.000000,83550.000000,159.620948)}
{pt3dadd(195456.000000,181848.000000,83550.000000,136.265256)}
{pt3dadd(195360.000000,181932.000000,83500.000000,122.371784)}
{pt3dadd(195204.000000,182184.000000,83500.000000,109.014116)}
{pt3dadd(195180.000000,182268.000000,83525.000000,101.358744)}
{pt3dadd(195168.000000,182412.000000,83550.000000,100.463285)}
{pt3dadd(195156.000000,182520.000000,83575.000000,95.452343)}
{pt3dadd(195120.000000,182568.000000,83575.000000,85.746192)}
{pt3dadd(195096.000000,182604.000000,83575.000000,73.669590)}

{create adhoc51}
{access adhoc51}
{connect adhoc51(1), adhoc49(0)}
{nseg = 1}
{strdef color color = "White"}
{pt3dclear()}
{pt3dadd(197376.000000,178116.000000,82600.000000,108.843540)}
{pt3dadd(197352.000000,178212.000000,82475.000000,102.837710)}
{pt3dadd(197328.000000,178368.000000,82375.000000,91.170462)}
{pt3dadd(197292.000000,178500.000000,82350.000000,84.135672)}
{pt3dadd(197244.000000,178596.000000,82325.000000,77.740300)}
{pt3dadd(197244.000000,178752.000000,82275.000000,80.915551)}
{pt3dadd(197232.000000,178836.000000,82225.000000,84.090802)}
{pt3dadd(197208.000000,178932.000000,82150.000000,95.816884)}
{pt3dadd(197172.000000,179040.000000,82150.000000,101.815069)}
{pt3dadd(197136.000000,179124.000000,82150.000000,100.919610)}
{pt3dadd(197076.000000,179196.000000,82125.000000,102.755301)}
{pt3dadd(197052.000000,179256.000000,82125.000000,97.310220)}
{pt3dadd(197028.000000,179316.000000,82050.000000,98.724300)}

{create adhoc52}
{access adhoc52}
{connect adhoc52(1), adhoc45(0)}
{nseg = 1}
{strdef color color = "White"}
{pt3dclear()}
{pt3dadd(198696.000000,171084.000000,77950.000000,368.582860)}
{pt3dadd(198660.000000,171216.000000,77800.000000,307.096077)}
{pt3dadd(198624.000000,171324.000000,77800.000000,284.164996)}
{pt3dadd(198588.000000,171444.000000,77700.000000,247.680304)}
{pt3dadd(198468.000000,171564.000000,77600.000000,235.017910)}
{pt3dadd(198360.000000,171672.000000,77500.000000,221.889470)}
{pt3dadd(198264.000000,171828.000000,77400.000000,226.760100)}
{pt3dadd(198204.000000,172032.000000,77225.000000,219.626690)}
{pt3dadd(198156.000000,172164.000000,77325.000000,223.442954)}
{pt3dadd(198060.000000,172344.000000,77325.000000,227.259218)}
{pt3dadd(198000.000000,172428.000000,77225.000000,222.841410)}
{pt3dadd(197928.000000,172524.000000,77225.000000,201.083180)}
{pt3dadd(197928.000000,172656.000000,77250.000000,178.684742)}
{pt3dadd(197808.000000,172728.000000,77125.000000,160.493740)}
{pt3dadd(197736.000000,172788.000000,77100.000000,141.214304)}
{pt3dadd(197700.000000,172848.000000,77100.000000,139.161896)}
{pt3dadd(197628.000000,172920.000000,77050.000000,151.631688)}
{pt3dadd(197568.000000,173004.000000,77050.000000,171.875098)}
{pt3dadd(197472.000000,173052.000000,77025.000000,178.190106)}
{pt3dadd(197388.000000,173136.000000,76950.000000,190.191808)}
{pt3dadd(197316.000000,173232.000000,76850.000000,184.602594)}
{pt3dadd(197256.000000,173316.000000,76825.000000,186.757622)}
{pt3dadd(197196.000000,173400.000000,76825.000000,182.750542)}
{pt3dadd(197124.000000,173448.000000,76750.000000,189.037322)}
{pt3dadd(197064.000000,173520.000000,76750.000000,190.725842)}
{pt3dadd(197016.000000,173568.000000,76725.000000,189.037322)}
{pt3dadd(196980.000000,173616.000000,76725.000000,177.552152)}
{pt3dadd(196944.000000,173676.000000,76725.000000,175.690560)}
{pt3dadd(196908.000000,173724.000000,76725.000000,177.463510)}
{pt3dadd(196872.000000,173784.000000,76725.000000,189.522940)}
{pt3dadd(196836.000000,173832.000000,76725.000000,225.958786)}
{pt3dadd(196800.000000,173892.000000,76725.000000,269.590776)}
{pt3dadd(196740.000000,174012.000000,76675.000000,309.761296)}
{pt3dadd(196596.000000,174156.000000,76600.000000,349.931816)}
{pt3dadd(196584.000000,174240.000000,76600.000000,379.815856)}
{pt3dadd(196572.000000,174396.000000,76600.000000,379.815856)}
{pt3dadd(196584.000000,174468.000000,76575.000000,366.092600)}
{pt3dadd(196536.000000,174516.000000,76525.000000,355.553304)}
{pt3dadd(196584.000000,174636.000000,76575.000000,328.045178)}
{pt3dadd(196584.000000,174744.000000,76650.000000,300.537052)}
{pt3dadd(196608.000000,174900.000000,76725.000000,280.225070)}
{pt3dadd(196620.000000,174972.000000,76725.000000,271.554366)}
{pt3dadd(196608.000000,175044.000000,76725.000000,259.699702)}
{pt3dadd(196620.000000,175092.000000,76750.000000,257.323788)}
{pt3dadd(196656.000000,175140.000000,76750.000000,250.530066)}
{pt3dadd(196644.000000,175200.000000,76750.000000,236.094722)}
{pt3dadd(196632.000000,175272.000000,76750.000000,222.134426)}
{pt3dadd(196620.000000,175344.000000,76750.000000,206.219458)}
{pt3dadd(196608.000000,175404.000000,76725.000000,199.749242)}
{pt3dadd(196632.000000,175512.000000,76775.000000,187.279450)}
{pt3dadd(196680.000000,175656.000000,76825.000000,209.579380)}
{pt3dadd(196716.000000,175800.000000,76825.000000,226.290096)}
{pt3dadd(196764.000000,175896.000000,76900.000000,250.875768)}
{pt3dadd(196752.000000,175980.000000,76900.000000,283.544196)}
{pt3dadd(196740.000000,176100.000000,76900.000000,316.592580)}
{pt3dadd(196764.000000,176172.000000,76900.000000,336.236120)}
{pt3dadd(196776.000000,176244.000000,76900.000000,363.813406)}
{pt3dadd(196788.000000,176376.000000,76900.000000,385.470408)}
{pt3dadd(196800.000000,176436.000000,76900.000000,397.089982)}
{pt3dadd(196848.000000,176592.000000,76900.000000,410.813238)}
{pt3dadd(196860.000000,176628.000000,76900.000000,432.198094)}
{pt3dadd(196848.000000,176724.000000,76900.000000,445.649204)}
{pt3dadd(196896.000000,176928.000000,76950.000000,441.585574)}
{pt3dadd(196788.000000,177108.000000,77000.000000,426.455684)}
{pt3dadd(196608.000000,177300.000000,76975.000000,404.061724)}
{pt3dadd(196428.000000,177468.000000,76975.000000,342.506348)}
{pt3dadd(196332.000000,177468.000000,77050.000000,280.950972)}
{pt3dadd(196212.000000,177480.000000,77050.000000,235.137386)}
{pt3dadd(196068.000000,177504.000000,77050.000000,202.163010)}
{pt3dadd(195924.000000,177528.000000,77050.000000,192.410150)}
{pt3dadd(195828.000000,177588.000000,77050.000000,232.580670)}
{pt3dadd(195636.000000,177756.000000,77000.000000,272.751190)}
{pt3dadd(195492.000000,177852.000000,76975.000000,307.498516)}
{pt3dadd(195348.000000,177912.000000,76950.000000,359.869590)}
{pt3dadd(195180.000000,177972.000000,76950.000000,404.216964)}
{pt3dadd(195144.000000,178104.000000,76900.000000,412.150710)}
{pt3dadd(195072.000000,178212.000000,76825.000000,416.020826)}
{pt3dadd(195036.000000,178356.000000,76825.000000,431.150716)}
{pt3dadd(195000.000000,178440.000000,76825.000000,408.410866)}
{pt3dadd(194940.000000,178656.000000,76800.000000,366.326272)}
{pt3dadd(194832.000000,178824.000000,76800.000000,320.083598)}
{pt3dadd(194736.000000,178884.000000,76750.000000,279.859226)}
{pt3dadd(194628.000000,178956.000000,76725.000000,246.912070)}
{pt3dadd(194412.000000,179232.000000,76600.000000,229.943240)}
{pt3dadd(194208.000000,179472.000000,76475.000000,240.183740)}
{pt3dadd(194136.000000,179520.000000,76475.000000,253.479258)}
{pt3dadd(194088.000000,179592.000000,76375.000000,253.479258)}
{pt3dadd(194028.000000,179676.000000,76350.000000,238.322148)}
{pt3dadd(193932.000000,179784.000000,76275.000000,222.198284)}
{pt3dadd(193872.000000,179808.000000,76250.000000,193.611574)}
{pt3dadd(193776.000000,179832.000000,76200.000000,169.005584)}
{pt3dadd(193728.000000,179904.000000,76150.000000,163.416370)}
{pt3dadd(193644.000000,180012.000000,76025.000000,161.643420)}
{pt3dadd(193572.000000,180084.000000,76000.000000,155.656010)}
{pt3dadd(193488.000000,180132.000000,75975.000000,155.656010)}
{pt3dadd(193452.000000,180192.000000,75950.000000,157.045160)}
{pt3dadd(193416.000000,180264.000000,75925.000000,149.369230)}
{pt3dadd(193356.000000,180300.000000,75925.000000,151.142180)}
{pt3dadd(193320.000000,180348.000000,75875.000000,153.989940)}
{pt3dadd(193248.000000,180408.000000,75800.000000,153.989940)}
{pt3dadd(193200.000000,180456.000000,75725.000000,153.989940)}
{pt3dadd(193116.000000,180564.000000,75675.000000,165.300412)}
{pt3dadd(192996.000000,180564.000000,75625.000000,171.169084)}
{pt3dadd(192924.000000,180612.000000,75575.000000,188.056684)}
{pt3dadd(192888.000000,180708.000000,75475.000000,208.778808)}
{pt3dadd(192840.000000,180780.000000,75475.000000,231.995648)}
{pt3dadd(192756.000000,180840.000000,75475.000000,228.361106)}
{pt3dadd(192708.000000,180972.000000,75450.000000,219.030964)}
{pt3dadd(192612.000000,181104.000000,75325.000000,197.972604)}
{pt3dadd(192540.000000,181176.000000,75425.000000,166.882958)}
{pt3dadd(192432.000000,181332.000000,75400.000000,131.550320)}
{pt3dadd(192252.000000,181524.000000,75300.000000,113.147742)}
{pt3dadd(192168.000000,181572.000000,75350.000000,97.286501)}
{pt3dadd(192084.000000,181620.000000,75350.000000,84.858804)}
{pt3dadd(191988.000000,181656.000000,75350.000000,82.298321)}
{pt3dadd(191940.000000,181668.000000,75350.000000,80.309362)}
{pt3dadd(191928.000000,181704.000000,75350.000000,81.220726)}

{create adhoc53}
{access adhoc53}
{connect adhoc53(1), adhoc44(0)}
{nseg = 1}
{strdef color color = "White"}
{pt3dclear()}
{pt3dadd(198108.000000,165660.000000,73825.000000,334.315520)}
{pt3dadd(197976.000000,165732.000000,73600.000000,274.179457)}
{pt3dadd(197904.000000,165792.000000,73525.000000,205.273985)}
{pt3dadd(197832.000000,165888.000000,73500.000000,157.215509)}
{pt3dadd(197832.000000,165960.000000,73450.000000,123.631147)}
{pt3dadd(197808.000000,166128.000000,73400.000000,102.375567)}
{pt3dadd(197796.000000,166272.000000,73350.000000,107.301425)}
{pt3dadd(197796.000000,166404.000000,73325.000000,115.852256)}
{pt3dadd(197784.000000,166524.000000,73275.000000,124.830628)}
{pt3dadd(197760.000000,166668.000000,73275.000000,131.226000)}
{pt3dadd(197724.000000,166788.000000,73275.000000,135.009000)}
{pt3dadd(197748.000000,166920.000000,73200.000000,136.398150)}
{pt3dadd(197808.000000,167016.000000,73175.000000,139.110300)}
{pt3dadd(197856.000000,167100.000000,73125.000000,133.096008)}
{pt3dadd(197904.000000,167244.000000,73075.000000,127.640868)}
{pt3dadd(197964.000000,167448.000000,73025.000000,117.767037)}
{pt3dadd(197964.000000,167544.000000,73000.000000,106.504056)}
{pt3dadd(197976.000000,167616.000000,72975.000000,101.331906)}
{pt3dadd(198012.000000,167676.000000,72925.000000,110.193958)}
{pt3dadd(197940.000000,167712.000000,72825.000000,109.253726)}
{pt3dadd(197856.000000,167808.000000,72700.000000,112.076660)}
{pt3dadd(197868.000000,167880.000000,72575.000000,115.936199)}
{pt3dadd(197832.000000,167916.000000,72500.000000,107.406813)}
{pt3dadd(197820.000000,167976.000000,72425.000000,98.544761)}
{pt3dadd(197760.000000,168048.000000,72300.000000,100.472236)}
{pt3dadd(197604.000000,168072.000000,72100.000000,106.200133)}
{pt3dadd(197556.000000,168120.000000,71900.000000,112.214425)}
{pt3dadd(197424.000000,168156.000000,71700.000000,132.202741)}
{pt3dadd(197184.000000,168228.000000,71550.000000,153.534585)}
{pt3dadd(197016.000000,168216.000000,71400.000000,173.850626)}
{pt3dadd(196872.000000,168276.000000,71250.000000,190.491178)}
{pt3dadd(196668.000000,168336.000000,71125.000000,205.808730)}
{pt3dadd(196476.000000,168468.000000,71025.000000,207.581680)}
{pt3dadd(196416.000000,168528.000000,70800.000000,199.940058)}
{pt3dadd(196320.000000,168624.000000,70700.000000,186.674914)}
{pt3dadd(196164.000000,168756.000000,70550.000000,174.205122)}
{pt3dadd(195960.000000,168852.000000,70425.000000,160.276720)}
{pt3dadd(195888.000000,168912.000000,70375.000000,145.976517)}
{pt3dadd(195756.000000,168972.000000,70350.000000,145.860750)}

{create adhoc54}
{access adhoc54}
{connect adhoc54(1), adhoc18(0)}
{nseg = 1}
{strdef color color = "White"}
{pt3dclear()}
{pt3dadd(196740.000000,152832.000000,68800.000000,695.017940)}
{pt3dadd(196920.000000,152640.000000,68200.000000,372.591457)}
{pt3dadd(196992.000000,152880.000000,68025.000000,290.818094)}
{pt3dadd(197160.000000,152964.000000,67850.000000,166.548424)}
{pt3dadd(197100.000000,153036.000000,67600.000000,155.118231)}
{pt3dadd(197040.000000,153120.000000,67425.000000,129.189241)}
{pt3dadd(196920.000000,153072.000000,67200.000000,108.130881)}
{pt3dadd(196944.000000,153024.000000,66975.000000,114.846021)}
{pt3dadd(196824.000000,153036.000000,66775.000000,126.572103)}
{pt3dadd(196752.000000,152988.000000,66550.000000,127.608708)}
{pt3dadd(196752.000000,152988.000000,66325.000000,124.481180)}
{pt3dadd(196704.000000,152904.000000,66100.000000,108.843540)}

{create adhoc55}
{access adhoc55}
{connect adhoc55(1), adhoc17(0)}
{nseg = 1}
{strdef color color = "White"}
{pt3dclear()}
{pt3dadd(198120.000000,145224.000000,75350.000000,600.382600)}
{pt3dadd(198312.000000,145056.000000,74950.000000,421.551710)}
{pt3dadd(198396.000000,144804.000000,74825.000000,314.265472)}
{pt3dadd(198420.000000,144612.000000,74825.000000,227.959362)}
{pt3dadd(198456.000000,144420.000000,74825.000000,170.406216)}
{pt3dadd(198456.000000,144168.000000,74700.000000,153.518616)}
{pt3dadd(198552.000000,143988.000000,74575.000000,150.528470)}
{pt3dadd(198624.000000,143844.000000,74400.000000,147.816320)}
{pt3dadd(198696.000000,143724.000000,74275.000000,134.778013)}
{pt3dadd(198696.000000,143568.000000,74100.000000,126.739873)}
{pt3dadd(198744.000000,143364.000000,73975.000000,114.913741)}
{pt3dadd(198744.000000,143304.000000,73850.000000,109.741591)}
{pt3dadd(198780.000000,143184.000000,73700.000000,102.086219)}
{pt3dadd(198768.000000,142992.000000,73550.000000,101.098976)}
{pt3dadd(198720.000000,142908.000000,73400.000000,105.354116)}
{pt3dadd(198684.000000,142836.000000,73275.000000,108.318196)}
{pt3dadd(198624.000000,142776.000000,73125.000000,110.778196)}
{pt3dadd(198552.000000,142692.000000,72975.000000,113.742276)}
{pt3dadd(198480.000000,142608.000000,72825.000000,115.766124)}
{pt3dadd(198372.000000,142536.000000,72650.000000,112.498227)}
{pt3dadd(198276.000000,142380.000000,72500.000000,110.474379)}
{pt3dadd(198096.000000,142248.000000,72350.000000,104.746482)}
{pt3dadd(198012.000000,142080.000000,72200.000000,108.177774)}
{pt3dadd(197928.000000,141936.000000,72125.000000,117.039826)}
{pt3dadd(197808.000000,141816.000000,72000.000000,126.938483)}
{pt3dadd(197676.000000,141720.000000,71925.000000,134.976623)}
{pt3dadd(197604.000000,141456.000000,71825.000000,146.406816)}
{pt3dadd(197484.000000,141360.000000,71775.000000,160.300288)}
{pt3dadd(197352.000000,141264.000000,71775.000000,170.717672)}
{pt3dadd(197316.000000,141180.000000,71700.000000,169.259062)}
{pt3dadd(197220.000000,141096.000000,71700.000000,180.569534)}
{pt3dadd(197124.000000,140976.000000,71600.000000,187.500710)}
{pt3dadd(197016.000000,140856.000000,71600.000000,183.866168)}
{pt3dadd(196908.000000,140760.000000,71525.000000,183.866168)}
{pt3dadd(196788.000000,140664.000000,71525.000000,204.588292)}
{pt3dadd(196764.000000,140472.000000,71350.000000,208.595372)}
{pt3dadd(196680.000000,140268.000000,71225.000000,233.181044)}
{pt3dadd(196596.000000,140064.000000,71075.000000,264.585218)}
{pt3dadd(196740.000000,139836.000000,70975.000000,284.183874)}
{pt3dadd(196608.000000,139740.000000,70875.000000,289.298040)}
{pt3dadd(196536.000000,139560.000000,70700.000000,296.091762)}
{pt3dadd(196452.000000,139380.000000,70725.000000,277.668198)}
{pt3dadd(196284.000000,139224.000000,70675.000000,258.323454)}
{pt3dadd(196164.000000,139080.000000,70625.000000,231.447064)}
{pt3dadd(195972.000000,138924.000000,70450.000000,215.532096)}
{pt3dadd(195888.000000,138828.000000,70500.000000,200.637070)}
{pt3dadd(195852.000000,138696.000000,70525.000000,195.467360)}

{create adhoc56}
{access adhoc56}
{connect adhoc56(1), adhoc55(0)}
{nseg = 1}
{strdef color color = "White"}
{pt3dclear()}
{pt3dadd(195852.000000,138696.000000,70525.000000,195.467360)}
{pt3dadd(195792.000000,138540.000000,70450.000000,164.827303)}
{pt3dadd(195696.000000,138372.000000,70350.000000,163.220974)}
{pt3dadd(195612.000000,138252.000000,70250.000000,157.897912)}
{pt3dadd(195564.000000,138132.000000,70150.000000,157.897912)}
{pt3dadd(195528.000000,138072.000000,70025.000000,162.726082)}
{pt3dadd(195480.000000,137976.000000,69875.000000,161.194546)}
{pt3dadd(195432.000000,137796.000000,69750.000000,161.194546)}
{pt3dadd(195372.000000,137700.000000,69650.000000,155.207136)}
{pt3dadd(195312.000000,137556.000000,69575.000000,153.817986)}
{pt3dadd(195264.000000,137484.000000,69525.000000,148.989816)}
{pt3dadd(195240.000000,137352.000000,69425.000000,136.268225)}
{pt3dadd(195204.000000,137256.000000,69275.000000,122.015098)}
{pt3dadd(195108.000000,137088.000000,69225.000000,113.036726)}
{pt3dadd(195024.000000,136968.000000,69200.000000,105.985829)}
{pt3dadd(194976.000000,136836.000000,69125.000000,99.355069)}
{pt3dadd(194916.000000,136692.000000,69125.000000,100.250528)}
{pt3dadd(194820.000000,136608.000000,68975.000000,101.145987)}
{pt3dadd(194724.000000,136500.000000,68925.000000,106.341359)}
{pt3dadd(194628.000000,136392.000000,68875.000000,116.240016)}
{pt3dadd(194520.000000,136332.000000,68875.000000,127.698946)}
{pt3dadd(194412.000000,136200.000000,68875.000000,163.902758)}
{pt3dadd(194280.000000,136092.000000,68850.000000,172.881130)}
{pt3dadd(194160.000000,135996.000000,68775.000000,186.113010)}
{pt3dadd(194064.000000,135924.000000,68625.000000,205.376524)}
{pt3dadd(193932.000000,135768.000000,68600.000000,217.435954)}
{pt3dadd(193680.000000,135528.000000,68400.000000,226.106658)}
{pt3dadd(193596.000000,135360.000000,68300.000000,262.002802)}
{pt3dadd(193524.000000,135288.000000,68200.000000,277.159912)}
{pt3dadd(193452.000000,135216.000000,68150.000000,272.521218)}
{pt3dadd(193392.000000,135156.000000,68125.000000,272.521218)}
{pt3dadd(193332.000000,135036.000000,68075.000000,256.360434)}
{pt3dadd(193272.000000,134928.000000,68050.000000,226.451700)}
{pt3dadd(193200.000000,134856.000000,68025.000000,204.693470)}
{pt3dadd(193164.000000,134736.000000,67975.000000,190.068650)}
{pt3dadd(193080.000000,134640.000000,67975.000000,170.333290)}
{pt3dadd(193008.000000,134544.000000,67975.000000,149.274930)}
{pt3dadd(192924.000000,134472.000000,67925.000000,143.287520)}
{pt3dadd(192840.000000,134400.000000,67875.000000,144.819056)}
{pt3dadd(192732.000000,134256.000000,67825.000000,146.350592)}
{pt3dadd(192600.000000,134148.000000,67725.000000,152.338002)}
{pt3dadd(192480.000000,134088.000000,67650.000000,158.040298)}
{pt3dadd(192336.000000,133920.000000,67475.000000,160.888058)}
{pt3dadd(192180.000000,133800.000000,67375.000000,162.496172)}
{pt3dadd(192084.000000,133740.000000,67300.000000,169.427348)}
{pt3dadd(192012.000000,133680.000000,67275.000000,169.427348)}
{pt3dadd(191892.000000,133608.000000,67175.000000,167.895812)}
{pt3dadd(191796.000000,133560.000000,67150.000000,166.437202)}
{pt3dadd(191676.000000,133476.000000,67075.000000,161.838942)}
{pt3dadd(191544.000000,133428.000000,66975.000000,161.838942)}
{pt3dadd(191424.000000,133380.000000,66850.000000,158.699292)}
{pt3dadd(191220.000000,133308.000000,66700.000000,171.169084)}
{pt3dadd(191040.000000,133296.000000,66600.000000,187.252514)}
{pt3dadd(190920.000000,133260.000000,66475.000000,199.128508)}
{pt3dadd(190740.000000,133224.000000,66450.000000,195.493966)}
{pt3dadd(190608.000000,133224.000000,66450.000000,200.322136)}
{pt3dadd(190476.000000,133224.000000,66425.000000,185.004584)}
{pt3dadd(190344.000000,133224.000000,66275.000000,168.921154)}
{pt3dadd(190236.000000,133164.000000,66225.000000,163.331940)}
{pt3dadd(190128.000000,133104.000000,66225.000000,166.966482)}
{pt3dadd(190032.000000,133104.000000,66225.000000,183.896542)}
{pt3dadd(189912.000000,133092.000000,66175.000000,203.631902)}
{pt3dadd(189720.000000,133176.000000,66125.000000,226.848742)}
{pt3dadd(189528.000000,133428.000000,66100.000000,236.645392)}
{pt3dadd(189336.000000,133536.000000,66075.000000,231.322330)}
{pt3dadd(189108.000000,133536.000000,65950.000000,224.188920)}
{pt3dadd(188904.000000,133524.000000,65900.000000,215.764032)}
{pt3dadd(188640.000000,133560.000000,65775.000000,213.269316)}
{pt3dadd(188376.000000,133560.000000,65700.000000,225.772596)}
{pt3dadd(188244.000000,133632.000000,65550.000000,249.761046)}
{pt3dadd(188136.000000,133620.000000,65225.000000,247.606018)}
{pt3dadd(188040.000000,133524.000000,65050.000000,237.684696)}
{pt3dadd(187920.000000,133416.000000,64850.000000,211.790422)}
{pt3dadd(187800.000000,133332.000000,64650.000000,183.203712)}
{pt3dadd(187764.000000,133308.000000,64475.000000,156.075612)}
{pt3dadd(187752.000000,133296.000000,64325.000000,139.435060)}
{pt3dadd(187824.000000,133272.000000,64125.000000,136.722910)}
{pt3dadd(187920.000000,133320.000000,63975.000000,143.353670)}
{pt3dadd(188016.000000,133344.000000,63825.000000,146.343816)}
{pt3dadd(188040.000000,133368.000000,63650.000000,160.968636)}
{pt3dadd(188124.000000,133416.000000,63450.000000,177.609188)}
{pt3dadd(188232.000000,133416.000000,63300.000000,190.242660)}
{pt3dadd(188208.000000,133404.000000,63150.000000,204.867480)}
{pt3dadd(188232.000000,133356.000000,63000.000000,215.805736)}
{pt3dadd(188280.000000,133296.000000,62850.000000,201.180916)}
{pt3dadd(188316.000000,133284.000000,62700.000000,187.252514)}
{pt3dadd(188376.000000,133404.000000,62550.000000,163.629656)}
{pt3dadd(188424.000000,133536.000000,62475.000000,133.844690)}
{pt3dadd(188568.000000,133644.000000,62300.000000,124.514548)}
{pt3dadd(188616.000000,133752.000000,62150.000000,126.046084)}
{pt3dadd(188664.000000,133896.000000,61950.000000,116.618794)}
{pt3dadd(188748.000000,134028.000000,61825.000000,131.778940)}
{pt3dadd(188760.000000,134268.000000,61650.000000,140.308326)}
{pt3dadd(188868.000000,134460.000000,61600.000000,130.537916)}
{pt3dadd(188892.000000,134640.000000,61550.000000,126.158620)}
{pt3dadd(188904.000000,134712.000000,61425.000000,138.576056)}
{pt3dadd(188904.000000,134760.000000,61425.000000,135.728296)}
{pt3dadd(188892.000000,134832.000000,61425.000000,138.188296)}
{pt3dadd(188880.000000,134892.000000,61425.000000,141.971296)}
{pt3dadd(188904.000000,134988.000000,61400.000000,153.281768)}
{pt3dadd(188952.000000,135144.000000,61400.000000,143.976614)}
{pt3dadd(188988.000000,135336.000000,61350.000000,142.653614)}
{pt3dadd(188964.000000,135492.000000,61400.000000,143.976614)}
{pt3dadd(188988.000000,135636.000000,61400.000000,143.976614)}
{pt3dadd(189000.000000,135708.000000,61400.000000,134.055292)}
{pt3dadd(189060.000000,135900.000000,61350.000000,138.981150)}
{pt3dadd(189036.000000,136080.000000,61325.000000,140.304150)}
{pt3dadd(189048.000000,136224.000000,61250.000000,144.683446)}
{pt3dadd(189084.000000,136368.000000,61200.000000,152.359376)}
{pt3dadd(189120.000000,136512.000000,61200.000000,168.442806)}
{pt3dadd(189144.000000,136656.000000,61200.000000,190.554080)}
{pt3dadd(189180.000000,136800.000000,61200.000000,215.160070)}
{pt3dadd(189048.000000,136932.000000,61175.000000,235.386764)}
{pt3dadd(189048.000000,137076.000000,61125.000000,239.021306)}
{pt3dadd(189048.000000,137232.000000,61100.000000,222.937876)}
{pt3dadd(189060.000000,137376.000000,61175.000000,200.826602)}
{pt3dadd(189000.000000,137580.000000,61175.000000,177.609762)}
{pt3dadd(189084.000000,137652.000000,61250.000000,143.545500)}
{pt3dadd(189132.000000,137772.000000,61250.000000,145.860750)}

{create adhoc57}
{access adhoc57}
{connect adhoc57(1), adhoc55(0)}
{nseg = 1}
{strdef color color = "White"}
{pt3dclear()}
{pt3dadd(195852.000000,138696.000000,70525.000000,195.467360)}
{pt3dadd(195684.000000,138684.000000,70600.000000,124.265822)}
{pt3dadd(195480.000000,138612.000000,70700.000000,109.774967)}
{pt3dadd(195324.000000,138576.000000,70800.000000,88.590664)}
{pt3dadd(195252.000000,138528.000000,70825.000000,86.663189)}
{pt3dadd(195180.000000,138468.000000,70825.000000,88.985623)}
{pt3dadd(195096.000000,138396.000000,70825.000000,86.297115)}
{pt3dadd(195000.000000,138396.000000,70875.000000,87.882853)}
{pt3dadd(194916.000000,138372.000000,70875.000000,92.830826)}
{pt3dadd(194808.000000,138312.000000,70875.000000,93.771058)}
{pt3dadd(194724.000000,138252.000000,70875.000000,96.459566)}
{pt3dadd(194628.000000,138204.000000,70875.000000,99.148074)}
{pt3dadd(194544.000000,138156.000000,70875.000000,102.823825)}
{pt3dadd(194424.000000,138060.000000,70875.000000,93.998986)}
{pt3dadd(194364.000000,138000.000000,70925.000000,88.988044)}
{pt3dadd(194268.000000,137952.000000,71000.000000,81.364815)}
{pt3dadd(194112.000000,137868.000000,71000.000000,76.353873)}
{pt3dadd(193980.000000,137796.000000,71000.000000,67.166180)}
{pt3dadd(193860.000000,137784.000000,71125.000000,66.497976)}
{pt3dadd(193716.000000,137712.000000,71125.000000,66.070711)}
{pt3dadd(193584.000000,137640.000000,71125.000000,66.820490)}

{create adhoc58}
{access adhoc58}
{connect adhoc58(1), adhoc8(0)}
{nseg = 1}
{strdef color color = "White"}
{pt3dclear()}
{pt3dadd(195684.000000,135948.000000,77025.000000,426.680730)}
{pt3dadd(196080.000000,136008.000000,77375.000000,497.469993)}
{pt3dadd(196116.000000,136116.000000,77475.000000,331.782493)}
{pt3dadd(196176.000000,136176.000000,77650.000000,259.174059)}
{pt3dadd(196224.000000,136068.000000,77800.000000,156.937096)}
{pt3dadd(196236.000000,136056.000000,77975.000000,76.059009)}
{pt3dadd(196284.000000,136056.000000,78125.000000,74.473271)}
{pt3dadd(196380.000000,136092.000000,78275.000000,75.835690)}
{pt3dadd(196416.000000,136056.000000,78450.000000,77.353070)}

{create adhoc59}
{access adhoc59}
{connect adhoc59(1), adhoc58(0)}
{nseg = 1}
{strdef color color = "White"}
{pt3dclear()}
{pt3dadd(196416.000000,136056.000000,78450.000000,77.353070)}
{pt3dadd(196416.000000,136020.000000,78600.000000,90.186477)}
{pt3dadd(196452.000000,136056.000000,78625.000000,89.077407)}
{pt3dadd(196500.000000,136092.000000,78675.000000,90.663145)}
{pt3dadd(196560.000000,136128.000000,78775.000000,85.401656)}
{pt3dadd(196584.000000,136128.000000,78850.000000,82.638863)}
{pt3dadd(196632.000000,136212.000000,78950.000000,77.353070)}

{create adhoc60}
{access adhoc60}
{connect adhoc60(1), adhoc58(0)}
{nseg = 1}
{strdef color color = "White"}
{pt3dclear()}
{pt3dadd(196416.000000,136056.000000,78450.000000,77.353070)}
{pt3dadd(196320.000000,135912.000000,78450.000000,71.553740)}
{pt3dadd(196308.000000,135816.000000,78500.000000,71.553740)}
{pt3dadd(196260.000000,135708.000000,78425.000000,77.353070)}

{create adhoc61}
{access adhoc61}
{connect adhoc61(1), adhoc7(0)}
{nseg = 1}
{strdef color color = "White"}
{pt3dclear()}
{pt3dadd(194928.000000,134316.000000,76600.000000,334.315520)}
{pt3dadd(195108.000000,134268.000000,76600.000000,279.500200)}
{pt3dadd(195372.000000,134232.000000,76675.000000,208.177083)}
{pt3dadd(195540.000000,134112.000000,76675.000000,171.944739)}
{pt3dadd(195552.000000,133968.000000,76675.000000,140.831955)}
{pt3dadd(195624.000000,133848.000000,76675.000000,157.719555)}
{pt3dadd(195732.000000,133752.000000,76650.000000,171.745105)}
{pt3dadd(195816.000000,133620.000000,76575.000000,190.106474)}
{pt3dadd(195984.000000,133464.000000,76450.000000,211.864704)}
{pt3dadd(196128.000000,133296.000000,76375.000000,227.779672)}
{pt3dadd(196272.000000,133212.000000,76350.000000,227.779672)}
{pt3dadd(196428.000000,133212.000000,76350.000000,219.209262)}
{pt3dadd(196416.000000,133020.000000,76400.000000,206.575790)}
{pt3dadd(196512.000000,132804.000000,76300.000000,165.297267)}
{pt3dadd(196560.000000,132708.000000,76400.000000,132.300000)}

{create adhoc62}
{access adhoc62}
{connect adhoc62(1), adhoc6(0)}
{nseg = 1}
{strdef color color = "White"}
{pt3dclear()}
{pt3dadd(189432.000000,128856.000000,76000.000000,448.014770)}
{pt3dadd(189636.000000,128544.000000,76200.000000,371.299210)}
{pt3dadd(189768.000000,128364.000000,76225.000000,285.572582)}
{pt3dadd(189780.000000,128232.000000,76250.000000,228.131924)}
{pt3dadd(189780.000000,128100.000000,76250.000000,161.831824)}
{pt3dadd(189780.000000,127992.000000,76250.000000,158.197282)}
{pt3dadd(189768.000000,127908.000000,76300.000000,163.025452)}
{pt3dadd(189756.000000,127776.000000,76300.000000,163.025452)}
{pt3dadd(189744.000000,127680.000000,76300.000000,169.956628)}
{pt3dadd(189744.000000,127572.000000,76300.000000,175.944038)}
{pt3dadd(189732.000000,127464.000000,76300.000000,172.647404)}
{pt3dadd(189768.000000,127344.000000,76350.000000,176.281946)}
{pt3dadd(189804.000000,127200.000000,76350.000000,187.220202)}
{pt3dadd(189804.000000,127068.000000,76350.000000,189.174874)}
{pt3dadd(189804.000000,126912.000000,76325.000000,190.863394)}
{pt3dadd(189768.000000,126780.000000,76375.000000,194.160028)}
{pt3dadd(189804.000000,126660.000000,76400.000000,190.525486)}
{pt3dadd(189816.000000,126552.000000,76450.000000,182.883864)}
{pt3dadd(189852.000000,126432.000000,76425.000000,180.929192)}
{pt3dadd(189840.000000,126288.000000,76425.000000,186.518406)}
{pt3dadd(189804.000000,126144.000000,76425.000000,198.577836)}
{pt3dadd(189912.000000,126000.000000,76475.000000,213.013180)}
{pt3dadd(190044.000000,125904.000000,76500.000000,227.448524)}
{pt3dadd(190116.000000,125772.000000,76500.000000,231.455604)}
{pt3dadd(190140.000000,125640.000000,76475.000000,225.866390)}
{pt3dadd(190212.000000,125508.000000,76475.000000,213.806960)}
{pt3dadd(190248.000000,125364.000000,76475.000000,203.006158)}
{pt3dadd(190284.000000,125304.000000,76475.000000,190.343764)}
{pt3dadd(190308.000000,125232.000000,76475.000000,182.702142)}
{pt3dadd(190416.000000,125100.000000,76450.000000,188.291356)}
{pt3dadd(190512.000000,124956.000000,76450.000000,195.932978)}
{pt3dadd(190596.000000,124860.000000,76400.000000,195.932978)}
{pt3dadd(190668.000000,124740.000000,76375.000000,201.801650)}
{pt3dadd(190728.000000,124608.000000,76400.000000,201.801650)}
{pt3dadd(190788.000000,124476.000000,76400.000000,203.854058)}
{pt3dadd(190836.000000,124356.000000,76350.000000,208.271866)}
{pt3dadd(190872.000000,124236.000000,76250.000000,221.567384)}
{pt3dadd(190980.000000,124116.000000,76150.000000,236.225692)}
{pt3dadd(191076.000000,124020.000000,76075.000000,270.973018)}
{pt3dadd(191184.000000,123852.000000,76175.000000,298.078722)}
{pt3dadd(191196.000000,123696.000000,76100.000000,324.276934)}
{pt3dadd(191304.000000,123504.000000,75950.000000,338.751048)}
{pt3dadd(191352.000000,123300.000000,75925.000000,351.198444)}
{pt3dadd(191388.000000,123108.000000,75950.000000,347.855292)}
{pt3dadd(191388.000000,122916.000000,75875.000000,338.295836)}
{pt3dadd(191376.000000,122772.000000,75850.000000,334.785520)}
{pt3dadd(191364.000000,122568.000000,75825.000000,345.324816)}
{pt3dadd(191364.000000,122328.000000,75800.000000,348.835132)}
{pt3dadd(191364.000000,122148.000000,75800.000000,334.361018)}
{pt3dadd(191376.000000,121992.000000,75775.000000,328.722658)}
{pt3dadd(191388.000000,121824.000000,75775.000000,301.616954)}
{pt3dadd(191400.000000,121656.000000,75775.000000,259.673484)}
{pt3dadd(191400.000000,121476.000000,75775.000000,219.727322)}
{pt3dadd(191400.000000,121296.000000,75775.000000,202.797262)}
{pt3dadd(191400.000000,121116.000000,75775.000000,186.882294)}
{pt3dadd(191448.000000,120972.000000,75775.000000,177.552152)}
{pt3dadd(191508.000000,120828.000000,75775.000000,181.186694)}
{pt3dadd(191556.000000,120672.000000,75775.000000,192.671864)}
{pt3dadd(191616.000000,120528.000000,75775.000000,207.107208)}
{pt3dadd(191676.000000,120372.000000,75775.000000,215.532096)}
{pt3dadd(191736.000000,120228.000000,75775.000000,229.280046)}
{pt3dadd(191796.000000,120072.000000,75775.000000,257.049678)}
{pt3dadd(191856.000000,119928.000000,75775.000000,293.066614)}
{pt3dadd(192012.000000,119784.000000,75625.000000,324.444856)}
{pt3dadd(192132.000000,119604.000000,75575.000000,347.132752)}
{pt3dadd(192132.000000,119400.000000,75525.000000,384.950538)}
{pt3dadd(192132.000000,119208.000000,75500.000000,395.489834)}
{pt3dadd(192276.000000,119016.000000,75450.000000,387.933890)}
{pt3dadd(192372.000000,118884.000000,75325.000000,370.340518)}
{pt3dadd(192384.000000,118800.000000,75375.000000,324.134262)}
{pt3dadd(192372.000000,118692.000000,75375.000000,302.477260)}
{pt3dadd(192372.000000,118596.000000,75375.000000,288.754004)}
{pt3dadd(192360.000000,118488.000000,75375.000000,281.900536)}
{pt3dadd(192348.000000,118380.000000,75375.000000,288.427648)}
{pt3dadd(192348.000000,118272.000000,75375.000000,334.633904)}
{pt3dadd(192336.000000,118176.000000,75375.000000,331.601560)}
{pt3dadd(192276.000000,118044.000000,75375.000000,317.816690)}
{pt3dadd(192216.000000,117948.000000,75375.000000,300.847860)}
{pt3dadd(192204.000000,117768.000000,75325.000000,273.742156)}
{pt3dadd(192192.000000,117612.000000,75300.000000,238.994830)}
{pt3dadd(192132.000000,117444.000000,75275.000000,213.806960)}
{pt3dadd(192036.000000,117300.000000,75275.000000,203.006158)}
{pt3dadd(191940.000000,117156.000000,75275.000000,192.205356)}
{pt3dadd(191844.000000,117024.000000,75275.000000,206.863664)}
{pt3dadd(191784.000000,116856.000000,75275.000000,229.163594)}
{pt3dadd(191844.000000,116676.000000,75175.000000,254.351464)}
{pt3dadd(191832.000000,116448.000000,75175.000000,273.016852)}
{pt3dadd(191664.000000,116256.000000,75225.000000,294.570180)}
{pt3dadd(191604.000000,116100.000000,75225.000000,291.819760)}
{pt3dadd(191616.000000,115944.000000,75225.000000,286.449890)}
{pt3dadd(191544.000000,115764.000000,75275.000000,289.482234)}
{pt3dadd(191484.000000,115620.000000,75275.000000,295.402518)}
{pt3dadd(191484.000000,115452.000000,75250.000000,301.618822)}
{pt3dadd(191508.000000,115344.000000,75250.000000,320.326954)}
{pt3dadd(191520.000000,115224.000000,75250.000000,341.654536)}
{pt3dadd(191544.000000,115116.000000,75250.000000,348.181648)}
{pt3dadd(191532.000000,115008.000000,75250.000000,354.708760)}
{pt3dadd(191520.000000,114888.000000,75250.000000,365.248056)}
{pt3dadd(191508.000000,114780.000000,75250.000000,365.248056)}
{pt3dadd(191460.000000,114684.000000,75250.000000,368.933884)}
{pt3dadd(191412.000000,114600.000000,75250.000000,376.130028)}
{pt3dadd(191364.000000,114516.000000,75250.000000,391.259918)}
{pt3dadd(191328.000000,114420.000000,75250.000000,380.720622)}
{pt3dadd(191244.000000,114372.000000,75525.000000,359.393040)}
{pt3dadd(191160.000000,114216.000000,75700.000000,331.884914)}
{pt3dadd(190932.000000,113592.000000,75825.000000,309.490954)}
{pt3dadd(190776.000000,113436.000000,75925.000000,274.049082)}
{pt3dadd(190692.000000,113256.000000,76025.000000,254.704338)}
{pt3dadd(190620.000000,113076.000000,76025.000000,239.547228)}
{pt3dadd(190536.000000,112980.000000,76150.000000,253.332098)}
{pt3dadd(190452.000000,112884.000000,76275.000000,241.424210)}
{pt3dadd(190332.000000,112716.000000,76400.000000,226.988866)}
{pt3dadd(190200.000000,112572.000000,76500.000000,214.929436)}
{pt3dadd(190080.000000,112416.000000,76575.000000,206.869706)}
{pt3dadd(189984.000000,112308.000000,76650.000000,175.352858)}
{pt3dadd(189864.000000,112236.000000,76650.000000,164.414602)}
{pt3dadd(189756.000000,112140.000000,76650.000000,186.714532)}
{pt3dadd(189648.000000,112056.000000,76650.000000,209.014462)}
{pt3dadd(189540.000000,111900.000000,76850.000000,240.489112)}
{pt3dadd(189396.000000,111780.000000,76850.000000,278.533072)}
{pt3dadd(189300.000000,111648.000000,76900.000000,313.233880)}
{pt3dadd(189072.000000,111504.000000,76950.000000,313.233880)}
{pt3dadd(188880.000000,111360.000000,77000.000000,325.681276)}
{pt3dadd(188748.000000,111252.000000,77025.000000,324.713700)}
{pt3dadd(188664.000000,111096.000000,77100.000000,351.031280)}

{create adhoc63}
{access adhoc63}
{connect adhoc63(1), adhoc62(0)}
{nseg = 1}
{strdef color color = "White"}
{pt3dclear()}
{pt3dadd(188664.000000,111096.000000,77100.000000,351.031280)}
{pt3dadd(188532.000000,111048.000000,76925.000000,260.849967)}
{pt3dadd(188472.000000,110928.000000,76925.000000,238.606268)}
{pt3dadd(188412.000000,110844.000000,76825.000000,199.030772)}
{pt3dadd(188316.000000,110712.000000,76750.000000,188.613388)}
{pt3dadd(188208.000000,110640.000000,76625.000000,171.140808)}
{pt3dadd(188136.000000,110568.000000,76600.000000,160.723424)}
{pt3dadd(188112.000000,110448.000000,76450.000000,151.837576)}
{pt3dadd(188148.000000,110340.000000,76325.000000,153.369112)}
{pt3dadd(188148.000000,110172.000000,76200.000000,151.910502)}
{pt3dadd(188196.000000,110076.000000,76100.000000,161.359382)}
{pt3dadd(188268.000000,110028.000000,75950.000000,164.499032)}
{pt3dadd(188292.000000,109896.000000,75775.000000,162.967496)}
{pt3dadd(188268.000000,109884.000000,75600.000000,164.575610)}
{pt3dadd(188304.000000,109884.000000,75425.000000,164.575610)}
{pt3dadd(188412.000000,109884.000000,75275.000000,159.506026)}
{pt3dadd(188580.000000,109944.000000,75050.000000,152.195616)}
{pt3dadd(188700.000000,109944.000000,74800.000000,158.796736)}
{pt3dadd(188832.000000,109872.000000,74425.000000,157.188622)}
{pt3dadd(189036.000000,109764.000000,74200.000000,173.272052)}
{pt3dadd(189180.000000,109548.000000,73900.000000,182.157900)}
{pt3dadd(189204.000000,109368.000000,73750.000000,200.953480)}
{pt3dadd(189096.000000,109128.000000,73575.000000,221.480460)}
{pt3dadd(189192.000000,108732.000000,73400.000000,234.573744)}
{pt3dadd(189180.000000,108504.000000,73250.000000,232.418716)}
{pt3dadd(189216.000000,108336.000000,73125.000000,222.001332)}
{pt3dadd(189252.000000,108276.000000,72975.000000,200.745752)}
{pt3dadd(189192.000000,108192.000000,72775.000000,165.844034)}
{pt3dadd(189192.000000,108144.000000,72575.000000,143.445596)}
{pt3dadd(189216.000000,108048.000000,72450.000000,126.805044)}
{pt3dadd(189276.000000,107904.000000,72300.000000,128.336580)}
{pt3dadd(189240.000000,107688.000000,72150.000000,143.430052)}
{pt3dadd(189372.000000,107484.000000,71800.000000,156.031840)}
{pt3dadd(189468.000000,107172.000000,71800.000000,172.268170)}
{pt3dadd(189480.000000,106896.000000,71775.000000,186.856314)}
{pt3dadd(189348.000000,106692.000000,71650.000000,202.212378)}
{pt3dadd(189288.000000,106464.000000,71675.000000,206.219458)}
{pt3dadd(189180.000000,106272.000000,71575.000000,211.808672)}
{pt3dadd(188964.000000,106104.000000,71475.000000,213.763344)}
{pt3dadd(188796.000000,105936.000000,71425.000000,213.763344)}
{pt3dadd(188640.000000,105756.000000,71425.000000,205.240720)}
{pt3dadd(188520.000000,105624.000000,71450.000000,205.240720)}

{create adhoc64}
{access adhoc64}
{connect adhoc64(1), adhoc63(0)}
{nseg = 1}
{strdef color color = "White"}
{pt3dclear()}
{pt3dadd(188520.000000,105624.000000,71450.000000,205.240720)}
{pt3dadd(188520.000000,105672.000000,71250.000000,153.358447)}
{pt3dadd(188472.000000,105504.000000,71125.000000,122.993131)}
{pt3dadd(188400.000000,105432.000000,70950.000000,99.001339)}
{pt3dadd(188244.000000,105420.000000,70725.000000,83.895395)}
{pt3dadd(188148.000000,105432.000000,70550.000000,84.835627)}
{pt3dadd(188040.000000,105456.000000,70350.000000,94.101709)}
{pt3dadd(187944.000000,105432.000000,70150.000000,104.317564)}
{pt3dadd(187908.000000,105372.000000,70000.000000,102.731826)}
{pt3dadd(187788.000000,105348.000000,69800.000000,102.731826)}
{pt3dadd(187464.000000,105228.000000,69575.000000,108.186966)}
{pt3dadd(187428.000000,105144.000000,69450.000000,111.969966)}
{pt3dadd(187272.000000,104952.000000,69325.000000,117.672262)}
{pt3dadd(187188.000000,104832.000000,69225.000000,129.984648)}
{pt3dadd(187176.000000,104700.000000,69100.000000,127.662214)}
{pt3dadd(187152.000000,104544.000000,69000.000000,125.319356)}
{pt3dadd(186972.000000,104268.000000,68825.000000,120.393498)}
{pt3dadd(186852.000000,104196.000000,68675.000000,103.701816)}
{pt3dadd(186648.000000,104004.000000,68600.000000,93.827985)}
{pt3dadd(186612.000000,103836.000000,68225.000000,95.338212)}
{pt3dadd(186636.000000,103836.000000,68075.000000,91.285698)}
{pt3dadd(186624.000000,103752.000000,67900.000000,87.233184)}
{pt3dadd(186612.000000,103764.000000,67750.000000,88.818922)}
{pt3dadd(186576.000000,103728.000000,67575.000000,92.678461)}
{pt3dadd(186504.000000,103704.000000,67425.000000,89.798414)}
{pt3dadd(186468.000000,103704.000000,67250.000000,89.798414)}
{pt3dadd(186540.000000,103860.000000,67100.000000,96.193786)}
{pt3dadd(186504.000000,103992.000000,66925.000000,106.920434)}
{pt3dadd(186540.000000,104196.000000,66750.000000,114.323876)}
{pt3dadd(186672.000000,104184.000000,66625.000000,128.742778)}
{pt3dadd(187020.000000,103824.000000,66575.000000,136.398150)}
{pt3dadd(187344.000000,103656.000000,66525.000000,129.107319)}
{pt3dadd(187416.000000,103668.000000,66275.000000,120.253615)}
{pt3dadd(187368.000000,103740.000000,66075.000000,89.545845)}

{create adhoc65}
{access adhoc65}
{connect adhoc65(1), adhoc63(0)}
{nseg = 1}
{strdef color color = "White"}
{pt3dclear()}
{pt3dadd(188520.000000,105624.000000,71450.000000,205.240720)}
{pt3dadd(188520.000000,105480.000000,71700.000000,121.649360)}
{pt3dadd(188484.000000,105264.000000,71850.000000,103.967679)}
{pt3dadd(188484.000000,105168.000000,71950.000000,77.653453)}
{pt3dadd(188484.000000,105132.000000,72000.000000,78.548912)}
{pt3dadd(188544.000000,105060.000000,72175.000000,80.760754)}
{pt3dadd(188592.000000,105012.000000,72325.000000,79.250527)}
{pt3dadd(188568.000000,104928.000000,72525.000000,90.976609)}
{pt3dadd(188508.000000,104904.000000,72675.000000,99.099833)}
{pt3dadd(188508.000000,104892.000000,72825.000000,99.099833)}
{pt3dadd(188532.000000,104868.000000,72975.000000,97.589606)}
{pt3dadd(188556.000000,104772.000000,73275.000000,97.589606)}
{pt3dadd(188496.000000,104772.000000,73475.000000,89.934234)}
{pt3dadd(188460.000000,104724.000000,73650.000000,80.454107)}
{pt3dadd(188412.000000,104700.000000,73825.000000,94.023140)}

{create adhoc66}
{access adhoc66}
{connect adhoc66(1), adhoc62(0)}
{nseg = 1}
{strdef color color = "White"}
{pt3dclear()}
{pt3dadd(188664.000000,111096.000000,77100.000000,351.031280)}
{pt3dadd(188460.000000,111048.000000,77325.000000,220.208643)}
{pt3dadd(188268.000000,110892.000000,77450.000000,177.893894)}
{pt3dadd(188148.000000,110784.000000,77575.000000,124.743990)}
{pt3dadd(188040.000000,110724.000000,77700.000000,104.755674)}
{pt3dadd(187908.000000,110664.000000,77800.000000,100.064382)}
{pt3dadd(187836.000000,110628.000000,77950.000000,105.236532)}
{pt3dadd(187788.000000,110592.000000,78125.000000,100.524176)}
{pt3dadd(187800.000000,110532.000000,78275.000000,105.236532)}
{pt3dadd(187800.000000,110496.000000,78425.000000,111.534626)}
{pt3dadd(187776.000000,110472.000000,78600.000000,111.534626)}
{pt3dadd(187836.000000,110436.000000,78750.000000,110.145476)}
{pt3dadd(187884.000000,110508.000000,78900.000000,122.261274)}
{pt3dadd(187980.000000,110532.000000,79100.000000,126.952566)}
{pt3dadd(188076.000000,110544.000000,79250.000000,139.025250)}
{pt3dadd(188112.000000,110436.000000,79250.000000,132.300000)}

{create adhoc67}
{access adhoc67}
{connect adhoc67(1), adhoc5(0)}
{nseg = 1}
{strdef color color = "White"}
{pt3dclear()}
{pt3dadd(187956.000000,120984.000000,67900.000000,387.012000)}
{pt3dadd(187848.000000,120936.000000,68000.000000,333.433967)}
{pt3dadd(187704.000000,120888.000000,68050.000000,261.292260)}
{pt3dadd(187560.000000,120852.000000,68050.000000,200.134005)}
{pt3dadd(187452.000000,120828.000000,68075.000000,138.975750)}
{pt3dadd(187356.000000,120816.000000,68075.000000,109.964316)}
{pt3dadd(187272.000000,120732.000000,68075.000000,86.764738)}
{pt3dadd(187200.000000,120660.000000,68075.000000,77.498656)}
{pt3dadd(187128.000000,120576.000000,68075.000000,75.988429)}
{pt3dadd(187056.000000,120528.000000,68075.000000,74.478202)}
{pt3dadd(186972.000000,120480.000000,68075.000000,73.704671)}
{pt3dadd(186912.000000,120408.000000,68075.000000,75.916513)}
{pt3dadd(186816.000000,120384.000000,68075.000000,74.546693)}
{pt3dadd(186720.000000,120348.000000,68075.000000,75.283389)}
{pt3dadd(186624.000000,120324.000000,68075.000000,76.020085)}
{pt3dadd(186564.000000,120288.000000,68075.000000,76.020085)}
{pt3dadd(186456.000000,120276.000000,68075.000000,77.685109)}
{pt3dadd(186360.000000,120276.000000,68025.000000,82.230180)}
{pt3dadd(186168.000000,120276.000000,68025.000000,84.668735)}
{pt3dadd(186012.000000,120288.000000,68025.000000,88.002749)}
{pt3dadd(185892.000000,120216.000000,68025.000000,90.441304)}
{pt3dadd(185784.000000,120192.000000,67900.000000,91.336763)}
{pt3dadd(185640.000000,120144.000000,67900.000000,91.336763)}
{pt3dadd(185520.000000,120120.000000,67900.000000,92.232222)}
{pt3dadd(185424.000000,120084.000000,67900.000000,92.232222)}
{pt3dadd(185268.000000,120048.000000,67850.000000,92.232222)}
{pt3dadd(185100.000000,120024.000000,67850.000000,89.671739)}
{pt3dadd(184968.000000,120012.000000,67900.000000,95.762570)}
{pt3dadd(184812.000000,120000.000000,67850.000000,104.740942)}
{pt3dadd(184608.000000,120000.000000,67825.000000,118.098610)}
{pt3dadd(184428.000000,119988.000000,67800.000000,129.361591)}
{pt3dadd(184296.000000,119988.000000,67800.000000,135.974588)}
{pt3dadd(184176.000000,119988.000000,67800.000000,138.434588)}
{pt3dadd(184032.000000,119964.000000,67850.000000,139.823738)}
{pt3dadd(183864.000000,119904.000000,67850.000000,138.292202)}
{pt3dadd(183780.000000,119880.000000,67850.000000,146.351932)}
{pt3dadd(183636.000000,119880.000000,67850.000000,160.726670)}
{pt3dadd(183492.000000,119832.000000,67875.000000,166.428966)}
{pt3dadd(183312.000000,119808.000000,67925.000000,169.419112)}
{pt3dadd(183168.000000,119796.000000,68000.000000,170.950648)}
{pt3dadd(183072.000000,119760.000000,68000.000000,181.237128)}
{pt3dadd(182964.000000,119748.000000,68000.000000,181.237128)}
{pt3dadd(182832.000000,119688.000000,67900.000000,178.246982)}
{pt3dadd(182712.000000,119652.000000,67900.000000,173.867686)}
{pt3dadd(182532.000000,119604.000000,67875.000000,172.336150)}
{pt3dadd(182424.000000,119628.000000,67875.000000,151.277790)}
{pt3dadd(182316.000000,119652.000000,67875.000000,136.903052)}
{pt3dadd(182244.000000,119652.000000,67850.000000,127.475762)}
{pt3dadd(182148.000000,119640.000000,67850.000000,119.437622)}
{pt3dadd(182076.000000,119688.000000,67850.000000,110.575570)}
{pt3dadd(181968.000000,119664.000000,67850.000000,116.277866)}
{pt3dadd(181848.000000,119652.000000,67850.000000,122.793107)}
{pt3dadd(181764.000000,119676.000000,67850.000000,160.811480)}

{create adhoc68}
{access adhoc68}
{connect adhoc68(1), adhoc67(0)}
{nseg = 1}
{strdef color color = "White"}
{pt3dclear()}
{pt3dadd(181764.000000,119676.000000,67850.000000,160.811480)}
{pt3dadd(181632.000000,119652.000000,67975.000000,122.426795)}
{pt3dadd(181344.000000,119604.000000,68150.000000,122.697101)}
{pt3dadd(181128.000000,119520.000000,68225.000000,131.582949)}
{pt3dadd(180912.000000,119436.000000,68225.000000,137.869729)}
{pt3dadd(180696.000000,119400.000000,68200.000000,168.848650)}
{pt3dadd(180588.000000,119364.000000,68300.000000,200.896396)}
{pt3dadd(180444.000000,119292.000000,68375.000000,222.134426)}
{pt3dadd(180444.000000,119292.000000,68575.000000,218.318162)}
{pt3dadd(180432.000000,119292.000000,68725.000000,199.915584)}
{pt3dadd(180588.000000,119280.000000,68900.000000,166.312647)}
{pt3dadd(180744.000000,119328.000000,69050.000000,139.526390)}
{pt3dadd(180660.000000,119496.000000,69250.000000,104.262810)}
{pt3dadd(180720.000000,119484.000000,69425.000000,83.275075)}
{pt3dadd(180888.000000,119640.000000,69650.000000,85.023351)}
{pt3dadd(180996.000000,119760.000000,69825.000000,89.558039)}
{pt3dadd(181056.000000,119832.000000,69925.000000,87.630564)}
{pt3dadd(180984.000000,119928.000000,70100.000000,85.794873)}
{pt3dadd(180984.000000,119928.000000,70275.000000,85.794873)}
{pt3dadd(181068.000000,119976.000000,70400.000000,77.984921)}
{pt3dadd(181116.000000,120084.000000,70575.000000,80.196763)}
{pt3dadd(181152.000000,120084.000000,70850.000000,92.022895)}
{pt3dadd(181152.000000,120084.000000,71075.000000,98.113726)}
{pt3dadd(181020.000000,120024.000000,71225.000000,99.778750)}
{pt3dadd(180876.000000,120132.000000,71400.000000,112.784074)}
{pt3dadd(180792.000000,120216.000000,71550.000000,109.848615)}
{pt3dadd(180792.000000,120240.000000,71725.000000,120.000000)}

{create adhoc69}
{access adhoc69}
{connect adhoc69(1), adhoc67(0)}
{nseg = 1}
{strdef color color = "White"}
{pt3dclear()}
{pt3dadd(181764.000000,119676.000000,67850.000000,160.811480)}
{pt3dadd(181680.000000,119748.000000,67775.000000,102.716887)}
{pt3dadd(181560.000000,119832.000000,67725.000000,93.344891)}
{pt3dadd(181452.000000,119880.000000,67575.000000,77.414462)}
{pt3dadd(181428.000000,119940.000000,67525.000000,81.220726)}

{create adhoc70}
{access adhoc70}
{connect adhoc70(1), adhoc4(0)}
{nseg = 1}
{strdef color color = "White"}
{pt3dclear()}
{pt3dadd(188616.000000,114564.000000,60325.000000,426.680730)}
{pt3dadd(188712.000000,114660.000000,60350.000000,401.464247)}
{pt3dadd(188808.000000,114744.000000,60350.000000,359.566132)}
{pt3dadd(188904.000000,114840.000000,60350.000000,321.748346)}
{pt3dadd(189012.000000,114924.000000,60350.000000,275.505672)}
{pt3dadd(189144.000000,115008.000000,60300.000000,237.461712)}
{pt3dadd(189276.000000,115080.000000,60300.000000,221.300928)}
{pt3dadd(189396.000000,115140.000000,60250.000000,226.939288)}
{pt3dadd(189528.000000,115188.000000,60250.000000,240.067728)}
{pt3dadd(189648.000000,115308.000000,60125.000000,253.363246)}
{pt3dadd(189816.000000,115464.000000,60050.000000,273.589940)}
{pt3dadd(189960.000000,115572.000000,59975.000000,271.327160)}
{pt3dadd(190092.000000,115644.000000,59875.000000,251.728504)}
{pt3dadd(190200.000000,115692.000000,59725.000000,226.540634)}
{pt3dadd(190272.000000,115764.000000,59650.000000,211.383524)}
{pt3dadd(190308.000000,115836.000000,59575.000000,191.156830)}
{pt3dadd(190368.000000,115908.000000,59450.000000,169.901250)}
{pt3dadd(190428.000000,115980.000000,59350.000000,147.657734)}
{pt3dadd(190584.000000,116124.000000,59175.000000,136.198804)}
{pt3dadd(190680.000000,116196.000000,59075.000000,121.824066)}
{pt3dadd(190740.000000,116220.000000,59075.000000,117.444770)}
{pt3dadd(190788.000000,116280.000000,59075.000000,122.616920)}
{pt3dadd(190776.000000,116364.000000,58900.000000,131.595292)}
{pt3dadd(190812.000000,116436.000000,58725.000000,136.767442)}
{pt3dadd(190824.000000,116520.000000,58575.000000,141.693300)}
{pt3dadd(190884.000000,116700.000000,58375.000000,146.072596)}
{pt3dadd(190896.000000,116700.000000,58225.000000,147.531206)}
{pt3dadd(190908.000000,116712.000000,58075.000000,147.531206)}
{pt3dadd(190932.000000,116772.000000,57900.000000,150.521352)}
{pt3dadd(191016.000000,116820.000000,57775.000000,163.786496)}
{pt3dadd(191088.000000,116892.000000,57625.000000,172.672344)}
{pt3dadd(191232.000000,117012.000000,57375.000000,174.203880)}
{pt3dadd(191256.000000,117156.000000,57150.000000,178.583176)}
{pt3dadd(191388.000000,117288.000000,56950.000000,172.880880)}
{pt3dadd(191472.000000,117288.000000,56725.000000,169.064616)}
{pt3dadd(191496.000000,117312.000000,56575.000000,173.272052)}
{pt3dadd(191448.000000,117432.000000,56350.000000,191.004030)}
{pt3dadd(191388.000000,117528.000000,56175.000000,211.230724)}
{pt3dadd(191376.000000,117648.000000,55950.000000,227.871276)}
{pt3dadd(191328.000000,117684.000000,55675.000000,226.098326)}
{pt3dadd(191208.000000,117612.000000,55525.000000,213.005042)}
{pt3dadd(191112.000000,117552.000000,55275.000000,218.119208)}
{pt3dadd(190980.000000,117504.000000,55075.000000,235.936474)}
{pt3dadd(190788.000000,117444.000000,54800.000000,282.438876)}
{pt3dadd(190596.000000,117360.000000,54675.000000,320.696518)}
{pt3dadd(190524.000000,117300.000000,54500.000000,355.397326)}
{pt3dadd(190476.000000,117168.000000,54300.000000,355.397326)}
{pt3dadd(190404.000000,117060.000000,54200.000000,342.949930)}
{pt3dadd(190308.000000,116904.000000,54200.000000,311.105836)}
{pt3dadd(190212.000000,116748.000000,54200.000000,280.489816)}
{pt3dadd(190128.000000,116544.000000,54200.000000,258.882292)}
{pt3dadd(190008.000000,116364.000000,54200.000000,241.105732)}
{pt3dadd(189888.000000,116172.000000,54200.000000,220.578752)}
{pt3dadd(189756.000000,116076.000000,54125.000000,205.920444)}
{pt3dadd(189636.000000,115968.000000,54125.000000,233.026148)}
{pt3dadd(189504.000000,115860.000000,54125.000000,242.779008)}
{pt3dadd(189384.000000,115764.000000,54125.000000,257.936118)}
{pt3dadd(189240.000000,115740.000000,54075.000000,265.959818)}
{pt3dadd(189096.000000,115728.000000,54075.000000,254.421683)}
{pt3dadd(188952.000000,115716.000000,54075.000000,226.277900)}

{create adhoc71}
{access adhoc71}
{connect adhoc71(1), adhoc70(0)}
{nseg = 1}
{strdef color color = "White"}
{pt3dclear()}
{pt3dadd(188952.000000,115716.000000,54075.000000,226.277900)}
{pt3dadd(189024.000000,115356.000000,53850.000000,219.094473)}
{pt3dadd(188988.000000,115140.000000,53750.000000,170.006172)}
{pt3dadd(189012.000000,114984.000000,53650.000000,136.083400)}
{pt3dadd(188940.000000,114876.000000,53550.000000,94.023140)}

{create adhoc72}
{access adhoc72}
{connect adhoc72(1), adhoc70(0)}
{nseg = 1}
{strdef color color = "White"}
{pt3dclear()}
{pt3dadd(188952.000000,115716.000000,54075.000000,226.277900)}
{pt3dadd(188832.000000,115728.000000,54075.000000,185.313810)}
{pt3dadd(188712.000000,115788.000000,54075.000000,180.582462)}
{pt3dadd(188580.000000,115836.000000,54075.000000,164.499032)}
{pt3dadd(188508.000000,115860.000000,54125.000000,158.511622)}
{pt3dadd(188436.000000,115896.000000,54175.000000,152.809326)}
{pt3dadd(188352.000000,115920.000000,54175.000000,148.430030)}
{pt3dadd(188232.000000,115932.000000,54225.000000,143.360446)}
{pt3dadd(188064.000000,115956.000000,54275.000000,144.819056)}
{pt3dadd(187932.000000,116040.000000,54325.000000,147.666816)}
{pt3dadd(187836.000000,116064.000000,54325.000000,150.378966)}
{pt3dadd(187740.000000,116016.000000,54325.000000,144.364674)}
{pt3dadd(187644.000000,115980.000000,54325.000000,135.952697)}
{pt3dadd(187512.000000,115980.000000,54325.000000,108.843540)}

{create adhoc73}
{access adhoc73}
{connect adhoc73(1), adhoc3(0)}
{nseg = 1}
{strdef color color = "White"}
{pt3dclear()}
{pt3dadd(189576.000000,125064.000000,54100.000000,368.582860)}
{pt3dadd(189300.000000,124992.000000,54275.000000,280.222970)}
{pt3dadd(189204.000000,125040.000000,54300.000000,219.074640)}
{pt3dadd(189108.000000,125076.000000,54300.000000,168.215210)}
{pt3dadd(189000.000000,125088.000000,54375.000000,127.313270)}
{pt3dadd(188892.000000,125100.000000,54375.000000,112.347488)}
{pt3dadd(188748.000000,125160.000000,54425.000000,104.944046)}
{pt3dadd(188676.000000,125232.000000,54425.000000,102.920198)}
{pt3dadd(188568.000000,125340.000000,54475.000000,100.530327)}
{pt3dadd(188472.000000,125436.000000,54500.000000,98.724300)}

{create adhoc74}
{access adhoc74}
{connect adhoc74(1), adhoc2(0)}
{nseg = 1}
{strdef color color = "White"}
{pt3dclear()}
{pt3dadd(190812.000000,130680.000000,49775.000000,448.014770)}
{pt3dadd(190668.000000,130800.000000,49825.000000,372.480590)}
{pt3dadd(190620.000000,130920.000000,49825.000000,345.359898)}
{pt3dadd(190584.000000,131052.000000,49825.000000,319.436088)}
{pt3dadd(190560.000000,131292.000000,49650.000000,306.988692)}
{pt3dadd(190476.000000,131604.000000,49475.000000,301.068408)}
{pt3dadd(190440.000000,131760.000000,49450.000000,298.448958)}
{pt3dadd(190416.000000,131940.000000,49400.000000,281.480128)}
{pt3dadd(190500.000000,132120.000000,49300.000000,267.695258)}
{pt3dadd(190512.000000,132312.000000,49250.000000,255.191978)}
{pt3dadd(190476.000000,132444.000000,49225.000000,229.595414)}
{pt3dadd(190476.000000,132600.000000,49275.000000,210.976834)}
{pt3dadd(190476.000000,132744.000000,49275.000000,204.183112)}
{pt3dadd(190560.000000,132912.000000,49275.000000,221.151942)}
{pt3dadd(190560.000000,133092.000000,49175.000000,221.151942)}
{pt3dadd(190596.000000,133236.000000,49000.000000,238.883920)}
{pt3dadd(190524.000000,133368.000000,48950.000000,252.631870)}
{pt3dadd(190500.000000,133512.000000,48900.000000,270.178118)}
{pt3dadd(190380.000000,133656.000000,48825.000000,273.521270)}
{pt3dadd(190392.000000,133752.000000,48800.000000,309.538206)}
{pt3dadd(190320.000000,133872.000000,48650.000000,349.246886)}
{pt3dadd(190260.000000,133944.000000,48650.000000,400.515782)}
{pt3dadd(190200.000000,134028.000000,48650.000000,429.471936)}
{pt3dadd(190140.000000,134136.000000,48650.000000,444.601826)}
{pt3dadd(190080.000000,134244.000000,48650.000000,444.601826)}
{pt3dadd(190020.000000,134340.000000,48650.000000,436.271388)}
{pt3dadd(189960.000000,134448.000000,48650.000000,407.690388)}
{pt3dadd(189888.000000,134532.000000,48650.000000,391.804006)}
{pt3dadd(189744.000000,134700.000000,48650.000000,376.674116)}
{pt3dadd(189660.000000,134760.000000,48650.000000,365.607856)}
{pt3dadd(189588.000000,134796.000000,48600.000000,351.198444)}
{pt3dadd(189516.000000,134844.000000,48600.000000,347.855292)}
{pt3dadd(189444.000000,134892.000000,48600.000000,341.001824)}
{pt3dadd(189384.000000,134964.000000,48600.000000,331.442368)}
{pt3dadd(189324.000000,135036.000000,48600.000000,321.882912)}
{pt3dadd(189264.000000,135108.000000,48600.000000,312.778668)}
{pt3dadd(189204.000000,135192.000000,48600.000000,312.778668)}
{pt3dadd(189144.000000,135264.000000,48600.000000,319.632136)}
{pt3dadd(189084.000000,135336.000000,48600.000000,319.632136)}
{pt3dadd(189060.000000,135420.000000,48600.000000,329.191592)}
{pt3dadd(189036.000000,135504.000000,48600.000000,345.149304)}
{pt3dadd(189012.000000,135588.000000,48600.000000,348.492456)}
{pt3dadd(189000.000000,135660.000000,48600.000000,348.492456)}
{pt3dadd(188976.000000,135744.000000,48600.000000,354.708760)}
{pt3dadd(188952.000000,135828.000000,48600.000000,345.149304)}
{pt3dadd(189060.000000,136140.000000,48650.000000,326.441172)}
{pt3dadd(189096.000000,136320.000000,48650.000000,301.490496)}
{pt3dadd(189048.000000,136476.000000,48650.000000,266.867396)}
{pt3dadd(189084.000000,136668.000000,48850.000000,239.097764)}
{pt3dadd(189168.000000,136776.000000,48950.000000,219.499108)}
{pt3dadd(189216.000000,136872.000000,48950.000000,207.591220)}
{pt3dadd(189264.000000,136920.000000,49025.000000,207.591220)}
{pt3dadd(189300.000000,136992.000000,49025.000000,213.753328)}
{pt3dadd(189312.000000,137064.000000,49025.000000,215.708000)}
{pt3dadd(189300.000000,137124.000000,49025.000000,210.118786)}
{pt3dadd(189324.000000,137232.000000,49025.000000,210.118786)}
{pt3dadd(189372.000000,137412.000000,49000.000000,219.871646)}
{pt3dadd(189408.000000,137532.000000,48950.000000,229.624506)}
{pt3dadd(189468.000000,137736.000000,48950.000000,240.965352)}
{pt3dadd(189456.000000,137808.000000,48950.000000,257.895412)}
{pt3dadd(189444.000000,137892.000000,48950.000000,267.183850)}
{pt3dadd(189444.000000,137988.000000,48950.000000,269.934270)}
{pt3dadd(189456.000000,138084.000000,48950.000000,267.314820)}
{pt3dadd(189468.000000,138180.000000,48950.000000,267.314820)}
{pt3dadd(189468.000000,138276.000000,48950.000000,267.314820)}
{pt3dadd(189480.000000,138372.000000,48950.000000,269.934270)}
{pt3dadd(189492.000000,138384.000000,49075.000000,269.934270)}
{pt3dadd(189504.000000,138408.000000,49075.000000,269.934270)}
{pt3dadd(189528.000000,138444.000000,49075.000000,265.063640)}
{pt3dadd(189540.000000,138576.000000,49075.000000,249.906530)}
{pt3dadd(189552.000000,138720.000000,49075.000000,242.416450)}
{pt3dadd(189564.000000,138852.000000,49075.000000,234.551864)}
{pt3dadd(189588.000000,138984.000000,49200.000000,234.551864)}
{pt3dadd(189600.000000,139116.000000,49200.000000,242.041944)}
{pt3dadd(189564.000000,139248.000000,49125.000000,252.328424)}
{pt3dadd(189540.000000,139392.000000,49125.000000,259.818504)}
{pt3dadd(189504.000000,139524.000000,49050.000000,253.024782)}
{pt3dadd(189480.000000,139716.000000,49050.000000,239.729264)}
{pt3dadd(189384.000000,139872.000000,49000.000000,220.179754)}
{pt3dadd(189360.000000,140208.000000,48775.000000,206.431804)}
{pt3dadd(189276.000000,140400.000000,48675.000000,183.585660)}
{pt3dadd(189216.000000,140604.000000,48550.000000,190.379382)}
{pt3dadd(189324.000000,140760.000000,48475.000000,203.674900)}
{pt3dadd(189300.000000,140952.000000,48350.000000,235.079074)}
{pt3dadd(189252.000000,141024.000000,48275.000000,253.697654)}
{pt3dadd(189192.000000,141216.000000,48200.000000,269.053718)}
{pt3dadd(189132.000000,141432.000000,48025.000000,271.548434)}
{pt3dadd(189120.000000,141540.000000,47975.000000,262.259996)}
{pt3dadd(189108.000000,141624.000000,47850.000000,242.915252)}
{pt3dadd(189024.000000,141828.000000,47825.000000,248.285122)}
{pt3dadd(189000.000000,141996.000000,47725.000000,250.661036)}
{pt3dadd(188940.000000,142272.000000,47575.000000,279.544562)}
{pt3dadd(188880.000000,142392.000000,47450.000000,317.716526)}
{pt3dadd(188844.000000,142356.000000,47200.000000,333.877310)}
{pt3dadd(188700.000000,142272.000000,46950.000000,342.981554)}
{pt3dadd(188448.000000,142332.000000,46775.000000,322.259430)}
{pt3dadd(188340.000000,142404.000000,46750.000000,276.445844)}
{pt3dadd(188232.000000,142440.000000,46675.000000,236.221472)}
{pt3dadd(188124.000000,142476.000000,46675.000000,206.312738)}
{pt3dadd(188004.000000,142512.000000,46675.000000,168.621784)}
{pt3dadd(187860.000000,142536.000000,46550.000000,173.220044)}
{pt3dadd(187716.000000,142596.000000,46325.000000,173.220044)}
{pt3dadd(187452.000000,142704.000000,46225.000000,169.403780)}
{pt3dadd(187200.000000,142872.000000,46000.000000,171.092300)}
{pt3dadd(187152.000000,143004.000000,45825.000000,182.968294)}
{pt3dadd(187116.000000,143148.000000,45625.000000,179.828644)}
{pt3dadd(187104.000000,143208.000000,45500.000000,194.263988)}
{pt3dadd(186900.000000,143328.000000,45350.000000,192.491038)}
{pt3dadd(186828.000000,143436.000000,45250.000000,200.132660)}
{pt3dadd(186828.000000,143556.000000,45100.000000,194.543446)}
{pt3dadd(186828.000000,143664.000000,44925.000000,194.543446)}
{pt3dadd(186828.000000,143736.000000,44775.000000,176.811468)}
{pt3dadd(186804.000000,143916.000000,44650.000000,169.135538)}
{pt3dadd(186792.000000,144024.000000,44525.000000,153.817986)}
{pt3dadd(186768.000000,144144.000000,44400.000000,142.359056)}
{pt3dadd(186888.000000,144204.000000,44300.000000,130.532924)}
{pt3dadd(186972.000000,144264.000000,44275.000000,132.141038)}
{pt3dadd(187068.000000,144360.000000,44250.000000,136.520334)}
{pt3dadd(187176.000000,144612.000000,44200.000000,140.899630)}
{pt3dadd(187296.000000,144756.000000,44175.000000,146.071780)}
{pt3dadd(187320.000000,144780.000000,44125.000000,155.050152)}
{pt3dadd(187392.000000,144852.000000,44125.000000,147.739742)}
{pt3dadd(187452.000000,144912.000000,44125.000000,138.434588)}
{pt3dadd(187536.000000,144972.000000,44100.000000,127.004395)}
{pt3dadd(187620.000000,145032.000000,44100.000000,121.832245)}
{pt3dadd(187704.000000,145080.000000,44100.000000,123.221395)}
{pt3dadd(187788.000000,145116.000000,44100.000000,124.544395)}
{pt3dadd(187908.000000,145212.000000,44050.000000,135.457663)}
{pt3dadd(188052.000000,145296.000000,44050.000000,150.184490)}
{pt3dadd(188172.000000,145392.000000,44025.000000,178.573480)}
{pt3dadd(188280.000000,145524.000000,44000.000000,196.919690)}
{pt3dadd(188436.000000,145668.000000,43925.000000,212.237242)}
{pt3dadd(188616.000000,145848.000000,43825.000000,219.514976)}
{pt3dadd(188772.000000,146016.000000,43725.000000,219.514976)}
{pt3dadd(188880.000000,146340.000000,43700.000000,208.174130)}
{pt3dadd(188952.000000,146472.000000,43575.000000,203.756322)}
{pt3dadd(189072.000000,146640.000000,43525.000000,213.044760)}
{pt3dadd(189240.000000,146844.000000,43550.000000,224.385606)}
{pt3dadd(189348.000000,146964.000000,43575.000000,236.445036)}
{pt3dadd(189408.000000,147240.000000,43400.000000,230.855822)}
{pt3dadd(189432.000000,147552.000000,43250.000000,228.803414)}
{pt3dadd(189384.000000,147696.000000,43075.000000,210.184834)}
{pt3dadd(189540.000000,147732.000000,42950.000000,191.566254)}
{pt3dadd(189600.000000,147768.000000,42775.000000,173.220044)}
{pt3dadd(189828.000000,147984.000000,42600.000000,165.544114)}
{pt3dadd(189888.000000,148068.000000,42500.000000,140.740115)}
{pt3dadd(189912.000000,148212.000000,42450.000000,133.429705)}
{pt3dadd(190032.000000,148356.000000,42275.000000,128.831445)}
{pt3dadd(190152.000000,148404.000000,42125.000000,142.759847)}
{pt3dadd(190308.000000,148440.000000,41975.000000,154.070319)}
{pt3dadd(190404.000000,148596.000000,41800.000000,166.998324)}
{pt3dadd(190572.000000,148752.000000,41550.000000,177.770204)}
{pt3dadd(190716.000000,148836.000000,41375.000000,187.691526)}
{pt3dadd(190692.000000,148920.000000,41050.000000,175.829170)}
{pt3dadd(190788.000000,148968.000000,40775.000000,195.467360)}

{create adhoc75}
{access adhoc75}
{connect adhoc75(1), adhoc1(0)}
{nseg = 1}
{strdef color color = "White"}
{pt3dclear()}
{pt3dadd(191292.000000,132492.000000,44750.000000,94.023140)}
{pt3dadd(191304.000000,132936.000000,44600.000000,89.281723)}
{pt3dadd(191016.000000,133224.000000,44400.000000,106.937133)}
{pt3dadd(190848.000000,133932.000000,44225.000000,112.334003)}
{pt3dadd(190860.000000,134400.000000,44050.000000,89.545845)}
