# Supplementary material for: Full reconstruction of large lobula plate tangential cells in Drosophila from a 3D EM dataset
Source: PLoS One. 2018 Nov 28;13(11):e0207828. doi: 10.1371/journal.pone.0207828 (PMC6261601; doi:10.1371/journal.pone.0207828)
Supplement: S1 Dataset — (ZIP) [file pone.0207828.s001.zip › Diameter hoc/Cell36_4skels_ck.001_corrected_sorted_diametered.hoc0001.hoc]

/* created with convertKnossosNmlToHoc.m */

{create adhoc1}
{access adhoc1}
{nseg = 1}
{strdef color color = "White"}
{pt3dclear()}
{pt3dadd(201132.000000,172308.000000,99050.000000,544.564760)}
{pt3dadd(201168.000000,172320.000000,99150.000000,489.853467)}
{pt3dadd(200376.000000,172368.000000,99325.000000,406.362580)}

{create adhoc2}
{access adhoc2}
{connect adhoc2(1), adhoc1(0)}
{nseg = 1}
{strdef color color = "White"}
{pt3dclear()}
{pt3dadd(200376.000000,172368.000000,99325.000000,406.362580)}
{pt3dadd(200256.000000,172308.000000,99000.000000,456.768527)}
{pt3dadd(200316.000000,172584.000000,98475.000000,492.146322)}
{pt3dadd(200364.000000,172656.000000,97975.000000,525.232400)}
{pt3dadd(200568.000000,172932.000000,97425.000000,545.083364)}
{pt3dadd(200820.000000,173292.000000,96925.000000,555.715346)}
{pt3dadd(201240.000000,173616.000000,96450.000000,529.391134)}
{pt3dadd(201360.000000,173892.000000,96050.000000,501.123243)}
{pt3dadd(201408.000000,174168.000000,95675.000000,387.012000)}

{create adhoc3}
{access adhoc3}
{connect adhoc3(1), adhoc2(0)}
{nseg = 1}
{strdef color color = "White"}
{pt3dclear()}
{pt3dadd(201408.000000,174168.000000,95675.000000,387.012000)}
{pt3dadd(201204.000000,174948.000000,95675.000000,295.237787)}
{pt3dadd(201120.000000,175440.000000,95675.000000,288.340176)}
{pt3dadd(200820.000000,176544.000000,95625.000000,260.832050)}
{pt3dadd(200568.000000,177240.000000,95975.000000,263.864394)}
{pt3dadd(200364.000000,177480.000000,96000.000000,277.159912)}
{pt3dadd(200400.000000,177792.000000,96000.000000,299.847808)}
{pt3dadd(200532.000000,178356.000000,96650.000000,303.031768)}
{pt3dadd(199908.000000,178656.000000,97300.000000,323.343750)}
{pt3dadd(199680.000000,178728.000000,97650.000000,340.937122)}
{pt3dadd(199560.000000,178584.000000,98025.000000,365.950532)}
{pt3dadd(199392.000000,178404.000000,98450.000000,381.080422)}
{pt3dadd(199176.000000,177768.000000,98750.000000,361.735678)}
{pt3dadd(199176.000000,177288.000000,99150.000000,336.785002)}
{pt3dadd(199176.000000,176952.000000,99175.000000,296.560630)}
{pt3dadd(199176.000000,176700.000000,99400.000000,264.413810)}
{pt3dadd(199140.000000,176484.000000,99600.000000,234.086104)}
{pt3dadd(199176.000000,176208.000000,99425.000000,223.799624)}
{pt3dadd(199344.000000,175596.000000,99350.000000,219.592188)}
{pt3dadd(199308.000000,174828.000000,99250.000000,228.438318)}
{pt3dadd(199392.000000,174144.000000,99250.000000,233.077012)}
{pt3dadd(199560.000000,173856.000000,99275.000000,244.931676)}
{pt3dadd(199476.000000,173568.000000,99075.000000,306.487052)}
{pt3dadd(199392.000000,173088.000000,99275.000000,332.302012)}
{pt3dadd(199344.000000,172776.000000,99275.000000,337.416178)}
{pt3dadd(199596.000000,172392.000000,99275.000000,339.910894)}
{pt3dadd(199848.000000,171924.000000,99275.000000,300.830790)}
{pt3dadd(200100.000000,171492.000000,99275.000000,243.091678)}
{pt3dadd(200352.000000,171144.000000,99175.000000,217.276718)}
{pt3dadd(200352.000000,170664.000000,99275.000000,225.947422)}
{pt3dadd(200604.000000,170112.000000,99275.000000,212.651904)}
{pt3dadd(200640.000000,169512.000000,98900.000000,212.651904)}
{pt3dadd(200556.000000,168912.000000,98650.000000,200.775910)}
{pt3dadd(200520.000000,168024.000000,98650.000000,198.821238)}
{pt3dadd(200772.000000,167508.000000,98700.000000,178.242646)}
{pt3dadd(200940.000000,167280.000000,98775.000000,184.404754)}
{pt3dadd(201108.000000,167076.000000,98825.000000,195.715226)}
{pt3dadd(201264.000000,166884.000000,98875.000000,205.636548)}
{pt3dadd(201312.000000,166632.000000,98875.000000,207.591220)}
{pt3dadd(201348.000000,166368.000000,98825.000000,193.662818)}
{pt3dadd(201396.000000,166128.000000,98825.000000,179.037998)}
{pt3dadd(201432.000000,165876.000000,98775.000000,172.106822)}
{pt3dadd(201516.000000,165612.000000,98775.000000,168.472280)}
{pt3dadd(201480.000000,165348.000000,98775.000000,168.472280)}
{pt3dadd(201516.000000,165120.000000,98700.000000,173.070540)}
{pt3dadd(201600.000000,164892.000000,98775.000000,183.487924)}
{pt3dadd(201600.000000,164604.000000,98725.000000,188.557508)}
{pt3dadd(201684.000000,164328.000000,98700.000000,192.192050)}
{pt3dadd(201732.000000,164028.000000,98650.000000,184.914316)}
{pt3dadd(201768.000000,163728.000000,98650.000000,183.306202)}
{pt3dadd(201852.000000,163464.000000,98700.000000,183.306202)}
{pt3dadd(201936.000000,163212.000000,98775.000000,172.534322)}
{pt3dadd(201900.000000,162864.000000,98650.000000,156.297992)}
{pt3dadd(201936.000000,162576.000000,98175.000000,156.297992)}
{pt3dadd(201984.000000,162312.000000,98225.000000,163.229168)}
{pt3dadd(201900.000000,162120.000000,98225.000000,145.038166)}
{pt3dadd(201852.000000,161868.000000,98175.000000,140.346874)}
{pt3dadd(201816.000000,161592.000000,98225.000000,142.689732)}
{pt3dadd(201900.000000,161364.000000,98225.000000,141.081618)}
{pt3dadd(201984.000000,161148.000000,98250.000000,129.771146)}
{pt3dadd(202068.000000,160992.000000,98350.000000,136.086154)}
{pt3dadd(202152.000000,160752.000000,98350.000000,142.100446)}
{pt3dadd(202188.000000,160488.000000,98375.000000,149.062742)}
{pt3dadd(202188.000000,160200.000000,98350.000000,143.360446)}
{pt3dadd(202236.000000,159864.000000,98375.000000,137.214728)}
{pt3dadd(202236.000000,159588.000000,98425.000000,123.513192)}
{pt3dadd(202308.000000,159420.000000,98475.000000,112.786544)}
{pt3dadd(202356.000000,159156.000000,98425.000000,97.680600)}
{pt3dadd(202392.000000,158892.000000,98475.000000,88.276952)}
{pt3dadd(202440.000000,158640.000000,98525.000000,95.811820)}
{pt3dadd(202440.000000,158388.000000,98525.000000,98.250375)}
{pt3dadd(202440.000000,158124.000000,98525.000000,101.926126)}
{pt3dadd(202476.000000,157896.000000,98525.000000,111.329774)}
{pt3dadd(202440.000000,157668.000000,98550.000000,111.329774)}
{pt3dadd(202356.000000,157392.000000,98700.000000,96.891542)}
{pt3dadd(202356.000000,157092.000000,98725.000000,91.710085)}
{pt3dadd(202392.000000,156864.000000,98875.000000,88.887151)}
{pt3dadd(202440.000000,156588.000000,99000.000000,81.231779)}
{pt3dadd(202392.000000,156324.000000,99125.000000,84.907530)}
{pt3dadd(202308.000000,156048.000000,99075.000000,94.173612)}
{pt3dadd(202308.000000,155796.000000,99125.000000,104.303042)}
{pt3dadd(202272.000000,155532.000000,99175.000000,105.198501)}
{pt3dadd(202152.000000,155292.000000,99225.000000,107.125976)}
{pt3dadd(202068.000000,155016.000000,99175.000000,108.162581)}
{pt3dadd(202020.000000,154776.000000,99250.000000,108.162581)}
{pt3dadd(201984.000000,154512.000000,99250.000000,108.162581)}
{pt3dadd(202104.000000,154320.000000,99300.000000,114.376417)}
{pt3dadd(202236.000000,154020.000000,99350.000000,114.285710)}

{create adhoc4}
{access adhoc4}
{connect adhoc4(1), adhoc2(0)}
{nseg = 1}
{strdef color color = "White"}
{pt3dclear()}
{pt3dadd(201408.000000,174168.000000,95675.000000,387.012000)}
{pt3dadd(201576.000000,174432.000000,95100.000000,468.939913)}
{pt3dadd(201612.000000,174780.000000,94525.000000,474.693514)}
{pt3dadd(201744.000000,174960.000000,94025.000000,478.563630)}
{pt3dadd(201828.000000,174972.000000,93550.000000,470.233192)}
{pt3dadd(201864.000000,175068.000000,93150.000000,429.591170)}
{pt3dadd(201996.000000,175128.000000,92650.000000,454.346810)}
{pt3dadd(201996.000000,175056.000000,92200.000000,464.978792)}
{pt3dadd(202032.000000,175320.000000,91675.000000,482.493532)}
{pt3dadd(201996.000000,175332.000000,91175.000000,486.557162)}
{pt3dadd(201864.000000,175476.000000,90450.000000,497.469993)}
{pt3dadd(201828.000000,175572.000000,89925.000000,426.680730)}

{create adhoc5}
{access adhoc5}
{connect adhoc5(1), adhoc4(0)}
{nseg = 1}
{strdef color color = "White"}
{pt3dclear()}
{pt3dadd(201828.000000,175572.000000,89925.000000,426.680730)}
{pt3dadd(201408.000000,177132.000000,89650.000000,307.857587)}
{pt3dadd(201408.000000,177432.000000,89700.000000,286.409496)}
{pt3dadd(201240.000000,177756.000000,89325.000000,246.328930)}
{pt3dadd(201204.000000,178032.000000,89200.000000,213.354554)}
{pt3dadd(201072.000000,178320.000000,89025.000000,219.641334)}
{pt3dadd(200820.000000,178584.000000,88850.000000,192.764944)}
{pt3dadd(200616.000000,178812.000000,88725.000000,185.487210)}
{pt3dadd(200364.000000,179028.000000,88450.000000,185.487210)}
{pt3dadd(200232.000000,179304.000000,88275.000000,180.417626)}
{pt3dadd(200160.000000,179580.000000,88250.000000,177.120992)}
{pt3dadd(200076.000000,179880.000000,88100.000000,190.868942)}
{pt3dadd(199992.000000,180144.000000,87900.000000,217.745332)}
{pt3dadd(200028.000000,180372.000000,87850.000000,239.352856)}
{pt3dadd(200076.000000,180636.000000,87625.000000,270.869704)}
{pt3dadd(200232.000000,180888.000000,87450.000000,277.800880)}
{pt3dadd(200196.000000,181152.000000,87325.000000,280.176794)}
{pt3dadd(200160.000000,181428.000000,87200.000000,267.048354)}
{pt3dadd(200160.000000,181656.000000,87100.000000,235.644180)}
{pt3dadd(200112.000000,181884.000000,86800.000000,213.013180)}
{pt3dadd(200076.000000,182208.000000,86725.000000,234.566508)}
{pt3dadd(199944.000000,182556.000000,86575.000000,251.535338)}
{pt3dadd(199944.000000,183276.000000,86300.000000,251.535338)}
{pt3dadd(199992.000000,183588.000000,86350.000000,273.835268)}
{pt3dadd(199824.000000,183912.000000,86350.000000,306.503696)}
{pt3dadd(199740.000000,184224.000000,86250.000000,286.905040)}
{pt3dadd(199440.000000,184500.000000,86050.000000,253.812346)}
{pt3dadd(198984.000000,184788.000000,85525.000000,247.342130)}
{pt3dadd(198780.000000,185052.000000,85025.000000,237.101630)}
{pt3dadd(198480.000000,185532.000000,84575.000000,208.640638)}
{pt3dadd(198156.000000,185964.000000,84200.000000,217.486768)}
{pt3dadd(197772.000000,186516.000000,83575.000000,222.809830)}
{pt3dadd(197316.000000,186828.000000,83275.000000,215.532096)}
{pt3dadd(196980.000000,187296.000000,82875.000000,217.908010)}
{pt3dadd(196776.000000,187572.000000,82675.000000,206.422840)}
{pt3dadd(196692.000000,187812.000000,82550.000000,197.576710)}
{pt3dadd(196560.000000,188040.000000,82325.000000,210.872228)}
{pt3dadd(196524.000000,188304.000000,82200.000000,218.149962)}
{pt3dadd(196476.000000,188592.000000,81975.000000,218.149962)}
{pt3dadd(196224.000000,188880.000000,81950.000000,236.768542)}
{pt3dadd(196104.000000,189192.000000,81725.000000,243.238758)}
{pt3dadd(196068.000000,189492.000000,81675.000000,245.858208)}
{pt3dadd(196020.000000,189768.000000,81475.000000,282.212464)}
{pt3dadd(195732.000000,189960.000000,81375.000000,295.997334)}
{pt3dadd(195228.000000,190704.000000,81125.000000,304.255144)}
{pt3dadd(195024.000000,190980.000000,81100.000000,309.125774)}
{pt3dadd(194892.000000,191256.000000,80925.000000,304.011608)}
{pt3dadd(194772.000000,191508.000000,80875.000000,281.617648)}
{pt3dadd(194556.000000,191736.000000,80475.000000,281.617648)}
{pt3dadd(194436.000000,191940.000000,80100.000000,278.729708)}
{pt3dadd(194304.000000,192072.000000,79775.000000,286.987518)}
{pt3dadd(194016.000000,192252.000000,79525.000000,278.141388)}
{pt3dadd(193896.000000,192516.000000,79225.000000,270.651308)}
{pt3dadd(193680.000000,192744.000000,79050.000000,239.134460)}
{pt3dadd(193428.000000,193008.000000,78575.000000,210.814080)}
{pt3dadd(193140.000000,193212.000000,78125.000000,189.617658)}
{pt3dadd(192948.000000,193464.000000,77975.000000,176.606160)}
{pt3dadd(192768.000000,193752.000000,77850.000000,168.538178)}
{pt3dadd(192624.000000,193944.000000,77700.000000,170.454602)}
{pt3dadd(192348.000000,194052.000000,77550.000000,170.454602)}
{pt3dadd(192060.000000,194088.000000,77325.000000,170.454602)}
{pt3dadd(191844.000000,194136.000000,77125.000000,178.200610)}
{pt3dadd(191700.000000,194220.000000,76925.000000,182.244272)}
{pt3dadd(191460.000000,194352.000000,76775.000000,198.515342)}
{pt3dadd(191364.000000,194436.000000,76625.000000,236.550398)}
{pt3dadd(191304.000000,194496.000000,76400.000000,255.386196)}
{pt3dadd(191148.000000,194640.000000,76200.000000,280.804022)}
{pt3dadd(190956.000000,194820.000000,76050.000000,341.983582)}
{pt3dadd(190668.000000,195060.000000,76050.000000,407.036432)}
{pt3dadd(190452.000000,195516.000000,75775.000000,417.671948)}
{pt3dadd(190308.000000,195852.000000,75250.000000,376.597842)}
{pt3dadd(190188.000000,195984.000000,75050.000000,331.789809)}
{pt3dadd(190068.000000,196068.000000,74800.000000,186.189281)}
{pt3dadd(190008.000000,196140.000000,74575.000000,81.962234)}

{create adhoc6}
{access adhoc6}
{connect adhoc6(1), adhoc4(0)}
{nseg = 1}
{strdef color color = "White"}
{pt3dclear()}
{pt3dadd(201828.000000,175572.000000,89925.000000,426.680730)}
{pt3dadd(201864.000000,174972.000000,89550.000000,370.675843)}
{pt3dadd(201828.000000,174708.000000,89175.000000,327.308220)}
{pt3dadd(201828.000000,174156.000000,88850.000000,294.361064)}
{pt3dadd(201828.000000,173844.000000,88500.000000,276.543798)}
{pt3dadd(201864.000000,173124.000000,88225.000000,266.310700)}
{pt3dadd(202284.000000,172572.000000,87900.000000,261.944950)}

{create adhoc7}
{access adhoc7}
{connect adhoc7(1), adhoc6(0)}
{nseg = 1}
{strdef color color = "White"}
{pt3dclear()}
{pt3dadd(202284.000000,172572.000000,87900.000000,261.944950)}
{pt3dadd(202404.000000,171048.000000,87825.000000,230.983490)}
{pt3dadd(202452.000000,170784.000000,87850.000000,217.149576)}
{pt3dadd(202452.000000,170520.000000,87725.000000,198.530996)}
{pt3dadd(202536.000000,170244.000000,87725.000000,187.592740)}
{pt3dadd(202536.000000,169992.000000,87575.000000,178.262598)}
{pt3dadd(202536.000000,169716.000000,87575.000000,161.622046)}
{pt3dadd(202704.000000,169500.000000,87575.000000,158.325412)}
{pt3dadd(202740.000000,169260.000000,87575.000000,155.185762)}
{pt3dadd(202872.000000,169008.000000,87575.000000,166.124018)}
{pt3dadd(203124.000000,168780.000000,87550.000000,167.812538)}
{pt3dadd(203244.000000,168564.000000,87575.000000,184.453090)}
{pt3dadd(203292.000000,168288.000000,87675.000000,189.522674)}
{pt3dadd(203292.000000,168060.000000,87575.000000,191.054210)}
{pt3dadd(203244.000000,167772.000000,87550.000000,178.584418)}
{pt3dadd(203292.000000,167496.000000,87575.000000,175.287784)}
{pt3dadd(203328.000000,167220.000000,87500.000000,156.187232)}
{pt3dadd(203328.000000,166944.000000,87575.000000,144.155352)}
{pt3dadd(203292.000000,166692.000000,87550.000000,161.887330)}
{pt3dadd(203364.000000,166404.000000,87500.000000,163.418866)}
{pt3dadd(203532.000000,166104.000000,87500.000000,170.350042)}
{pt3dadd(203496.000000,165804.000000,87375.000000,172.810042)}
{pt3dadd(203616.000000,165552.000000,87325.000000,172.810042)}
{pt3dadd(203700.000000,165252.000000,87325.000000,148.115768)}
{pt3dadd(203748.000000,165036.000000,87450.000000,141.153472)}
{pt3dadd(203784.000000,164808.000000,87400.000000,124.917142)}
{pt3dadd(203868.000000,164592.000000,87500.000000,130.619438)}
{pt3dadd(203952.000000,164328.000000,87625.000000,128.276580)}
{pt3dadd(204084.000000,164100.000000,87675.000000,135.238876)}
{pt3dadd(204036.000000,163836.000000,87625.000000,167.797736)}
{pt3dadd(204204.000000,163644.000000,87575.000000,182.172474)}
{pt3dadd(204288.000000,163356.000000,87575.000000,191.058322)}
{pt3dadd(204252.000000,163092.000000,87625.000000,213.456760)}
{pt3dadd(204288.000000,162780.000000,87625.000000,216.753394)}
{pt3dadd(204336.000000,162540.000000,87725.000000,192.764944)}
{pt3dadd(204372.000000,162252.000000,87800.000000,180.733064)}
{pt3dadd(204288.000000,161952.000000,87875.000000,164.884920)}
{pt3dadd(204252.000000,161700.000000,87925.000000,148.801490)}
{pt3dadd(204120.000000,161484.000000,87800.000000,163.236834)}
{pt3dadd(204000.000000,161304.000000,87575.000000,172.566976)}
{pt3dadd(203868.000000,161052.000000,87450.000000,190.467528)}
{pt3dadd(203784.000000,160860.000000,87200.000000,199.037938)}
{pt3dadd(203868.000000,160572.000000,87200.000000,199.037938)}
{pt3dadd(203832.000000,160284.000000,87050.000000,190.191808)}
{pt3dadd(203952.000000,160032.000000,86800.000000,217.297512)}
{pt3dadd(204036.000000,159900.000000,86575.000000,229.205400)}
{pt3dadd(204168.000000,159696.000000,86150.000000,262.298094)}
{pt3dadd(204204.000000,159444.000000,86150.000000,299.989048)}
{pt3dadd(203952.000000,159276.000000,85775.000000,332.657476)}
{pt3dadd(203868.000000,158940.000000,85550.000000,329.314324)}
{pt3dadd(203832.000000,158652.000000,85250.000000,332.064744)}
{pt3dadd(203916.000000,158376.000000,84775.000000,335.407896)}
{pt3dadd(203868.000000,158136.000000,84475.000000,353.880938)}
{pt3dadd(203916.000000,157872.000000,84250.000000,361.436882)}
{pt3dadd(203916.000000,157680.000000,83975.000000,368.290350)}
{pt3dadd(203916.000000,157416.000000,83975.000000,391.804006)}
{pt3dadd(203916.000000,157236.000000,83625.000000,420.385006)}
{pt3dadd(203952.000000,157020.000000,83325.000000,420.385006)}
{pt3dadd(204000.000000,156720.000000,83025.000000,402.791634)}
{pt3dadd(204000.000000,156432.000000,82800.000000,366.306942)}
{pt3dadd(203916.000000,156288.000000,82475.000000,348.713570)}
{pt3dadd(204036.000000,155940.000000,82175.000000,290.974458)}
{pt3dadd(204036.000000,155424.000000,81850.000000,241.097242)}
{pt3dadd(204000.000000,155136.000000,81625.000000,238.064898)}
{pt3dadd(204036.000000,154920.000000,81475.000000,241.881162)}
{pt3dadd(203952.000000,154692.000000,81175.000000,225.720378)}
{pt3dadd(203784.000000,154416.000000,81000.000000,227.772786)}
{pt3dadd(203700.000000,154176.000000,80875.000000,252.960656)}
{pt3dadd(203664.000000,153936.000000,80650.000000,252.960656)}
{pt3dadd(203700.000000,153684.000000,80525.000000,266.920952)}
{pt3dadd(203448.000000,153372.000000,80300.000000,254.861522)}
{pt3dadd(203292.000000,153156.000000,80050.000000,243.923266)}
{pt3dadd(203124.000000,152892.000000,79750.000000,212.448616)}
{pt3dadd(202956.000000,152676.000000,79575.000000,187.260746)}
{pt3dadd(202824.000000,152424.000000,79450.000000,169.484186)}
{pt3dadd(202788.000000,152100.000000,79300.000000,181.543616)}
{pt3dadd(202740.000000,151812.000000,79100.000000,188.474792)}
{pt3dadd(202656.000000,151512.000000,78950.000000,194.761572)}
{pt3dadd(202704.000000,151200.000000,78825.000000,198.396114)}
{pt3dadd(202788.000000,150912.000000,78800.000000,194.934644)}
{pt3dadd(202872.000000,150672.000000,78825.000000,173.876284)}
{pt3dadd(202824.000000,150384.000000,78825.000000,166.945108)}
{pt3dadd(202788.000000,150132.000000,78700.000000,159.269178)}
{pt3dadd(202740.000000,149856.000000,78750.000000,152.338002)}
{pt3dadd(202704.000000,149592.000000,78825.000000,135.623944)}
{pt3dadd(202704.000000,149220.000000,78675.000000,138.336094)}
{pt3dadd(202956.000000,148776.000000,78675.000000,141.632728)}
{pt3dadd(203004.000000,148284.000000,78675.000000,141.632728)}
{pt3dadd(203040.000000,148008.000000,78600.000000,133.470432)}
{pt3dadd(203088.000000,147768.000000,78650.000000,147.044840)}
{pt3dadd(203040.000000,147480.000000,78650.000000,145.655690)}
{pt3dadd(202920.000000,147216.000000,78675.000000,129.941620)}
{pt3dadd(202872.000000,146904.000000,78650.000000,131.330770)}
{pt3dadd(202920.000000,146652.000000,78675.000000,139.493066)}
{pt3dadd(202872.000000,146436.000000,78725.000000,136.645306)}
{pt3dadd(202956.000000,146184.000000,78675.000000,131.719448)}
{pt3dadd(203040.000000,145932.000000,78725.000000,147.433518)}
{pt3dadd(203172.000000,145716.000000,78725.000000,147.433518)}
{pt3dadd(203172.000000,145392.000000,78900.000000,147.433518)}
{pt3dadd(203256.000000,145212.000000,78775.000000,138.455146)}
{pt3dadd(203292.000000,144960.000000,78850.000000,156.646148)}
{pt3dadd(203340.000000,144720.000000,78900.000000,166.442798)}
{pt3dadd(203124.000000,144456.000000,79025.000000,182.526228)}
{pt3dadd(202872.000000,144144.000000,79175.000000,187.595812)}
{pt3dadd(202632.000000,143880.000000,79175.000000,232.470328)}
{pt3dadd(202668.000000,143592.000000,79250.000000,228.654064)}
{pt3dadd(202416.000000,143364.000000,79200.000000,222.491956)}
{pt3dadd(202332.000000,143076.000000,79175.000000,211.006786)}
{pt3dadd(202164.000000,142824.000000,79200.000000,201.557906)}
{pt3dadd(202080.000000,142560.000000,79250.000000,171.649172)}
{pt3dadd(202080.000000,142332.000000,79175.000000,168.187702)}
{pt3dadd(201960.000000,142044.000000,79125.000000,162.864640)}
{pt3dadd(201828.000000,141768.000000,79000.000000,172.194782)}
{pt3dadd(201708.000000,141468.000000,78825.000000,172.448428)}
{pt3dadd(201504.000000,141204.000000,78675.000000,171.133942)}
{pt3dadd(201384.000000,140988.000000,78625.000000,173.146186)}
{pt3dadd(201192.000000,140736.000000,78625.000000,176.947562)}
{pt3dadd(201072.000000,140436.000000,78625.000000,173.297388)}
{pt3dadd(200868.000000,140136.000000,78625.000000,184.711120)}
{pt3dadd(200700.000000,139800.000000,78625.000000,188.037850)}
{pt3dadd(200640.000000,139584.000000,78550.000000,186.333916)}
{pt3dadd(200556.000000,139320.000000,78500.000000,182.840850)}
{pt3dadd(200472.000000,139140.000000,78525.000000,184.813370)}
{pt3dadd(200472.000000,138996.000000,78425.000000,176.273396)}
{pt3dadd(200316.000000,138756.000000,78300.000000,176.273396)}
{pt3dadd(200124.000000,138516.000000,78150.000000,190.146856)}
{pt3dadd(200028.000000,138204.000000,78050.000000,195.518514)}
{pt3dadd(199896.000000,138120.000000,77875.000000,202.047796)}
{pt3dadd(199836.000000,137940.000000,77725.000000,203.593316)}
{pt3dadd(199668.000000,137664.000000,77475.000000,203.593316)}
{pt3dadd(199656.000000,137544.000000,77325.000000,197.064034)}
{pt3dadd(199692.000000,137148.000000,77100.000000,195.185442)}
{pt3dadd(199656.000000,136896.000000,76975.000000,183.015916)}
{pt3dadd(199596.000000,136860.000000,76850.000000,194.054032)}
{pt3dadd(199500.000000,136644.000000,76750.000000,192.350098)}
{pt3dadd(199584.000000,136020.000000,76075.000000,194.421240)}
{pt3dadd(199752.000000,135852.000000,75950.000000,189.305378)}
{pt3dadd(199692.000000,135516.000000,75850.000000,185.978648)}
{pt3dadd(199500.000000,135420.000000,75825.000000,170.521254)}
{pt3dadd(199452.000000,135348.000000,75600.000000,174.014320)}
{pt3dadd(199416.000000,135288.000000,75550.000000,163.440593)}
{pt3dadd(199464.000000,135180.000000,75425.000000,187.858930)}

{create adhoc8}
{access adhoc8}
{connect adhoc8(1), adhoc6(0)}
{nseg = 1}
{strdef color color = "White"}
{pt3dclear()}
{pt3dadd(202284.000000,172572.000000,87900.000000,261.944950)}
{pt3dadd(202164.000000,172596.000000,87525.000000,285.127623)}
{pt3dadd(202116.000000,172452.000000,87100.000000,278.729708)}
{pt3dadd(202164.000000,172320.000000,86700.000000,286.987518)}
{pt3dadd(202032.000000,172092.000000,86400.000000,289.737938)}
{pt3dadd(202080.000000,172032.000000,86150.000000,299.775366)}
{pt3dadd(202032.000000,171936.000000,85750.000000,310.527892)}
{pt3dadd(201912.000000,171804.000000,85375.000000,326.485604)}
{pt3dadd(201912.000000,171708.000000,85075.000000,323.597664)}
{pt3dadd(201780.000000,171480.000000,84650.000000,329.517948)}
{pt3dadd(201660.000000,171300.000000,84250.000000,310.809816)}
{pt3dadd(201576.000000,170952.000000,83875.000000,339.765970)}
{pt3dadd(201660.000000,170640.000000,83450.000000,336.255654)}
{pt3dadd(201612.000000,170292.000000,83075.000000,336.255654)}
{pt3dadd(201744.000000,170196.000000,82725.000000,324.965500)}
{pt3dadd(201612.000000,169848.000000,82350.000000,324.965500)}
{pt3dadd(201576.000000,169968.000000,81975.000000,305.568802)}
{pt3dadd(201576.000000,169824.000000,81700.000000,309.079118)}
{pt3dadd(201528.000000,169728.000000,81350.000000,292.368402)}
{pt3dadd(201444.000000,169668.000000,80950.000000,281.027556)}
{pt3dadd(201240.000000,169488.000000,80575.000000,283.777976)}
{pt3dadd(201240.000000,169308.000000,80250.000000,271.330580)}
{pt3dadd(201288.000000,169212.000000,79875.000000,245.132368)}
{pt3dadd(201360.000000,168948.000000,79550.000000,261.843084)}
{pt3dadd(201408.000000,168852.000000,79150.000000,270.689214)}
{pt3dadd(201576.000000,168756.000000,78750.000000,270.689214)}
{pt3dadd(201408.000000,168612.000000,78400.000000,262.824628)}
{pt3dadd(201360.000000,168432.000000,78075.000000,270.314708)}
{pt3dadd(201288.000000,168336.000000,77650.000000,260.074208)}
{pt3dadd(201072.000000,168156.000000,77275.000000,260.074208)}
{pt3dadd(200952.000000,168096.000000,76800.000000,252.209622)}
{pt3dadd(200868.000000,168084.000000,76425.000000,257.323788)}
{pt3dadd(200736.000000,167940.000000,76025.000000,265.994492)}
{pt3dadd(200400.000000,167808.000000,75625.000000,282.155276)}
{pt3dadd(200532.000000,167880.000000,75175.000000,305.977574)}
{pt3dadd(200316.000000,167820.000000,74750.000000,333.485700)}
{pt3dadd(200400.000000,167760.000000,74350.000000,352.193832)}
{pt3dadd(200280.000000,167628.000000,73925.000000,374.725907)}
{pt3dadd(200316.000000,167532.000000,73500.000000,368.582860)}

{create adhoc9}
{access adhoc9}
{connect adhoc9(1), adhoc8(0)}
{nseg = 1}
{strdef color color = "White"}
{pt3dclear()}
{pt3dadd(200316.000000,167532.000000,73500.000000,368.582860)}
{pt3dadd(200280.000000,167352.000000,73175.000000,321.614443)}
{pt3dadd(199944.000000,167208.000000,72875.000000,327.332038)}
{pt3dadd(199656.000000,166776.000000,72450.000000,294.663610)}
{pt3dadd(199440.000000,166716.000000,72075.000000,285.559366)}
{pt3dadd(199188.000000,166416.000000,71725.000000,293.817176)}
{pt3dadd(199116.000000,166104.000000,71325.000000,353.246896)}
{pt3dadd(199032.000000,165924.000000,70850.000000,399.606844)}
{pt3dadd(198948.000000,165660.000000,70500.000000,462.285312)}
{pt3dadd(198948.000000,165612.000000,69925.000000,573.132753)}
{pt3dadd(198732.000000,165720.000000,69525.000000,518.633060)}

{create adhoc10}
{access adhoc10}
{connect adhoc10(1), adhoc9(0)}
{nseg = 1}
{strdef color color = "White"}
{pt3dclear()}
{pt3dadd(198732.000000,165720.000000,69525.000000,518.633060)}
{pt3dadd(198864.000000,164244.000000,69275.000000,331.195587)}
{pt3dadd(198864.000000,163812.000000,68950.000000,291.491292)}
{pt3dadd(198732.000000,163416.000000,68725.000000,233.020260)}
{pt3dadd(198696.000000,163068.000000,68450.000000,214.354872)}
{pt3dadd(198648.000000,162828.000000,68350.000000,220.223544)}
{pt3dadd(198696.000000,162540.000000,68100.000000,222.599458)}
{pt3dadd(198780.000000,162288.000000,67800.000000,244.206982)}
{pt3dadd(198864.000000,162036.000000,67575.000000,251.340392)}
{pt3dadd(198984.000000,161796.000000,67150.000000,275.926064)}
{pt3dadd(198948.000000,161556.000000,66925.000000,275.926064)}
{pt3dadd(198780.000000,161196.000000,66800.000000,283.790650)}
{pt3dadd(198864.000000,160596.000000,66725.000000,262.183126)}
{pt3dadd(198780.000000,160152.000000,66875.000000,257.312496)}
{pt3dadd(198360.000000,159432.000000,66775.000000,220.093352)}
{pt3dadd(198312.000000,158520.000000,66775.000000,200.992800)}
{pt3dadd(198360.000000,157908.000000,66500.000000,175.396236)}
{pt3dadd(198312.000000,157296.000000,66275.000000,137.703827)}
{pt3dadd(198360.000000,156984.000000,66275.000000,160.811480)}

{create adhoc11}
{access adhoc11}
{connect adhoc11(1), adhoc9(0)}
{nseg = 1}
{strdef color color = "White"}
{pt3dclear()}
{pt3dadd(198732.000000,165720.000000,69525.000000,518.633060)}
{pt3dadd(198408.000000,166116.000000,69125.000000,528.120770)}
{pt3dadd(198288.000000,166356.000000,68750.000000,475.925180)}
{pt3dadd(198036.000000,166596.000000,68300.000000,439.061672)}
{pt3dadd(197700.000000,166668.000000,68075.000000,385.349878)}
{pt3dadd(197496.000000,166896.000000,67700.000000,360.279194)}
{pt3dadd(197196.000000,167100.000000,67350.000000,348.659620)}
{pt3dadd(196908.000000,167208.000000,67050.000000,345.149304)}
{pt3dadd(196740.000000,167532.000000,66625.000000,348.492456)}
{pt3dadd(196620.000000,167640.000000,66250.000000,354.708760)}
{pt3dadd(196200.000000,168048.000000,66000.000000,347.855292)}
{pt3dadd(195948.000000,168276.000000,65575.000000,341.001824)}
{pt3dadd(195744.000000,168432.000000,65200.000000,337.658672)}
{pt3dadd(195612.000000,168540.000000,64800.000000,337.658672)}
{pt3dadd(195408.000000,168696.000000,64375.000000,341.001824)}
{pt3dadd(195276.000000,169056.000000,64000.000000,351.541120)}
{pt3dadd(195156.000000,169092.000000,63625.000000,362.080416)}
{pt3dadd(195024.000000,169236.000000,63275.000000,358.896456)}
{pt3dadd(194868.000000,169356.000000,62825.000000,341.079190)}
{pt3dadd(194652.000000,169500.000000,62375.000000,352.145450)}
{pt3dadd(194448.000000,169824.000000,61950.000000,356.015566)}
{pt3dadd(194232.000000,169980.000000,61525.000000,352.329738)}
{pt3dadd(193992.000000,170376.000000,61125.000000,366.052994)}
{pt3dadd(193692.000000,170664.000000,60725.000000,412.451260)}
{pt3dadd(193608.000000,170808.000000,60325.000000,408.581144)}
{pt3dadd(193776.000000,171132.000000,59850.000000,431.035240)}
{pt3dadd(193824.000000,171240.000000,59450.000000,446.921622)}
{pt3dadd(193944.000000,171480.000000,59050.000000,459.122176)}
{pt3dadd(193740.000000,171840.000000,58575.000000,459.122176)}
{pt3dadd(193488.000000,172248.000000,58250.000000,480.507032)}
{pt3dadd(193272.000000,172440.000000,57875.000000,485.693372)}
{pt3dadd(193020.000000,172548.000000,57425.000000,481.426564)}
{pt3dadd(192648.000000,172620.000000,57000.000000,449.582470)}
{pt3dadd(192276.000000,172728.000000,56750.000000,381.425974)}
{pt3dadd(192276.000000,172932.000000,56400.000000,307.838718)}
{pt3dadd(192360.000000,173160.000000,56025.000000,215.169911)}
{pt3dadd(192228.000000,173028.000000,55675.000000,145.445619)}
{pt3dadd(191436.000000,173268.000000,55300.000000,106.663065)}
{pt3dadd(191448.000000,173448.000000,55125.000000,94.104978)}
{pt3dadd(191484.000000,173580.000000,54850.000000,102.983698)}
{pt3dadd(191520.000000,173712.000000,54575.000000,130.233593)}
{pt3dadd(191184.000000,173676.000000,54200.000000,200.736967)}
{pt3dadd(190944.000000,173820.000000,53925.000000,302.933427)}
{pt3dadd(190620.000000,173796.000000,53550.000000,352.334290)}
{pt3dadd(190140.000000,173880.000000,53300.000000,366.207750)}
{pt3dadd(189492.000000,173832.000000,53075.000000,404.728210)}
{pt3dadd(188952.000000,174204.000000,53050.000000,409.033972)}
{pt3dadd(188652.000000,174456.000000,52725.000000,367.312783)}
{pt3dadd(188160.000000,174588.000000,52275.000000,452.104950)}

{create adhoc12}
{access adhoc12}
{connect adhoc12(1), adhoc11(0)}
{nseg = 1}
{strdef color color = "White"}
{pt3dclear()}
{pt3dadd(188160.000000,174588.000000,52275.000000,452.104950)}
{pt3dadd(187980.000000,174348.000000,52100.000000,418.209647)}
{pt3dadd(187944.000000,174108.000000,51775.000000,371.266604)}
{pt3dadd(187896.000000,173748.000000,51400.000000,326.514358)}
{pt3dadd(187824.000000,173688.000000,51150.000000,288.351310)}
{pt3dadd(188160.000000,173376.000000,51100.000000,269.472384)}
{pt3dadd(188328.000000,172872.000000,51050.000000,280.107900)}
{pt3dadd(188520.000000,172344.000000,50975.000000,317.661610)}
{pt3dadd(188616.000000,171300.000000,50575.000000,322.342656)}
{pt3dadd(188784.000000,170664.000000,50300.000000,320.059220)}
{pt3dadd(188772.000000,170496.000000,50200.000000,312.500756)}
{pt3dadd(188892.000000,170016.000000,50200.000000,287.258984)}
{pt3dadd(189096.000000,169416.000000,50200.000000,278.852494)}
{pt3dadd(189300.000000,168744.000000,50200.000000,318.923694)}
{pt3dadd(189624.000000,168060.000000,50200.000000,400.486358)}
{pt3dadd(190032.000000,167364.000000,50200.000000,467.936818)}
{pt3dadd(190284.000000,166812.000000,50200.000000,524.976818)}
{pt3dadd(190380.000000,166032.000000,50200.000000,517.351888)}
{pt3dadd(190548.000000,165348.000000,50150.000000,479.798178)}
{pt3dadd(190608.000000,164736.000000,50050.000000,430.675822)}
{pt3dadd(190824.000000,164040.000000,50050.000000,386.120392)}
{pt3dadd(191172.000000,163368.000000,50050.000000,311.995766)}
{pt3dadd(191304.000000,162972.000000,49850.000000,307.898193)}
{pt3dadd(191052.000000,162636.000000,49550.000000,178.913270)}

{create adhoc13}
{access adhoc13}
{connect adhoc13(1), adhoc11(0)}
{nseg = 1}
{strdef color color = "White"}
{pt3dclear()}
{pt3dadd(188160.000000,174588.000000,52275.000000,452.104950)}
{pt3dadd(188556.000000,175404.000000,52250.000000,275.940937)}
{pt3dadd(188640.000000,175644.000000,52025.000000,216.667027)}
{pt3dadd(188628.000000,175884.000000,51900.000000,152.947605)}
{pt3dadd(188496.000000,175908.000000,51800.000000,149.454539)}
{pt3dadd(188076.000000,176472.000000,51725.000000,133.850200)}
{pt3dadd(187920.000000,176904.000000,51475.000000,133.850200)}
{pt3dadd(187680.000000,177156.000000,51175.000000,140.138021)}
{pt3dadd(187536.000000,177420.000000,50975.000000,140.183230)}

{create adhoc14}
{access adhoc14}
{connect adhoc14(1), adhoc8(0)}
{nseg = 1}
{strdef color color = "White"}
{pt3dclear()}
{pt3dadd(200316.000000,167532.000000,73500.000000,368.582860)}
{pt3dadd(200220.000000,167736.000000,72900.000000,233.534337)}
{pt3dadd(199920.000000,168024.000000,72550.000000,182.722604)}
{pt3dadd(199764.000000,168108.000000,72200.000000,131.863174)}
{pt3dadd(199440.000000,168252.000000,71850.000000,122.414294)}
{pt3dadd(199260.000000,168588.000000,71450.000000,112.987004)}
{pt3dadd(198984.000000,168816.000000,71100.000000,109.486289)}
{pt3dadd(198672.000000,169176.000000,70800.000000,105.433775)}
{pt3dadd(198600.000000,169488.000000,70525.000000,110.359633)}
{pt3dadd(198552.000000,169536.000000,70400.000000,104.345341)}
{pt3dadd(198552.000000,169764.000000,70350.000000,118.370891)}
{pt3dadd(198396.000000,169980.000000,70150.000000,132.757506)}
{pt3dadd(198084.000000,170748.000000,69775.000000,136.810020)}
{pt3dadd(197988.000000,171180.000000,69650.000000,135.487020)}
{pt3dadd(197640.000000,171852.000000,69575.000000,131.627481)}
{pt3dadd(197472.000000,172020.000000,69275.000000,112.043852)}
{pt3dadd(197280.000000,172416.000000,69100.000000,89.545845)}

{create adhoc15}
{access adhoc15}
{connect adhoc15(1), adhoc1(0)}
{nseg = 1}
{strdef color color = "White"}
{pt3dclear()}
{pt3dadd(200376.000000,172368.000000,99325.000000,406.362580)}
{pt3dadd(200496.000000,172020.000000,99600.000000,428.414287)}
{pt3dadd(200628.000000,172176.000000,100025.000000,419.593604)}
{pt3dadd(200496.000000,172032.000000,100350.000000,408.527344)}
{pt3dadd(200460.000000,171852.000000,100725.000000,380.886908)}
{pt3dadd(200460.000000,171636.000000,101150.000000,391.426204)}
{pt3dadd(200460.000000,171624.000000,101525.000000,404.236788)}
{pt3dadd(200544.000000,171312.000000,101925.000000,421.751528)}
{pt3dadd(200496.000000,171048.000000,102300.000000,471.621792)}
{pt3dadd(200292.000000,170784.000000,102675.000000,484.432376)}
{pt3dadd(200004.000000,170232.000000,103000.000000,496.632930)}
{pt3dadd(199704.000000,169884.000000,103500.000000,476.266402)}
{pt3dadd(199452.000000,169200.000000,103850.000000,458.751662)}
{pt3dadd(199752.000000,168936.000000,104250.000000,412.391714)}
{pt3dadd(199668.000000,168756.000000,104700.000000,395.711014)}
{pt3dadd(199668.000000,168444.000000,105075.000000,391.444206)}
{pt3dadd(199452.000000,168264.000000,105425.000000,391.444206)}
{pt3dadd(199416.000000,168120.000000,105800.000000,391.444206)}
{pt3dadd(199284.000000,167856.000000,106175.000000,403.063780)}
{pt3dadd(199128.000000,167676.000000,106675.000000,389.340524)}
{pt3dadd(198540.000000,167376.000000,107175.000000,398.087478)}
{pt3dadd(198204.000000,167364.000000,107575.000000,423.158162)}
{pt3dadd(197916.000000,167304.000000,107975.000000,440.672902)}
{pt3dadd(197784.000000,167040.000000,108275.000000,494.340344)}
{pt3dadd(197412.000000,166728.000000,108600.000000,504.377772)}
{pt3dadd(197280.000000,166548.000000,108925.000000,468.053532)}
{pt3dadd(196992.000000,166200.000000,109225.000000,427.025136)}
{pt3dadd(196824.000000,165768.000000,109550.000000,398.444136)}
{pt3dadd(196368.000000,165420.000000,110000.000000,306.958908)}
{pt3dadd(196068.000000,165036.000000,110525.000000,303.448592)}
{pt3dadd(195612.000000,164184.000000,111100.000000,300.698172)}
{pt3dadd(195192.000000,163584.000000,111375.000000,381.942900)}
{pt3dadd(194532.000000,163152.000000,111875.000000,431.813164)}
{pt3dadd(193656.000000,162720.000000,112200.000000,510.375150)}
{pt3dadd(193068.000000,162204.000000,112675.000000,572.553254)}
{pt3dadd(192768.000000,161940.000000,112600.000000,602.880960)}
{pt3dadd(192408.000000,161676.000000,112725.000000,530.740476)}
{pt3dadd(192108.000000,161376.000000,112925.000000,460.558230)}
{pt3dadd(191880.000000,160524.000000,113000.000000,379.733464)}
{pt3dadd(191616.000000,160344.000000,113150.000000,311.028248)}
{pt3dadd(191340.000000,160284.000000,113450.000000,283.450962)}
{pt3dadd(191040.000000,160572.000000,113975.000000,268.976848)}
{pt3dadd(190752.000000,160464.000000,114325.000000,279.729374)}
{pt3dadd(190464.000000,160164.000000,114600.000000,277.574346)}
{pt3dadd(189996.000000,159528.000000,114825.000000,254.943346)}
{pt3dadd(189420.000000,158844.000000,115350.000000,264.047590)}
{pt3dadd(189084.000000,159240.000000,115750.000000,320.571552)}
{pt3dadd(188664.000000,158976.000000,116125.000000,337.327152)}
{pt3dadd(188244.000000,158844.000000,116650.000000,388.309700)}
{pt3dadd(187908.000000,158832.000000,117050.000000,432.597702)}
{pt3dadd(187416.000000,158568.000000,117450.000000,428.036077)}
{pt3dadd(186996.000000,158628.000000,117600.000000,426.680730)}

{create adhoc16}
{access adhoc16}
{connect adhoc16(1), adhoc15(0)}
{nseg = 1}
{strdef color color = "White"}
{pt3dclear()}
{pt3dadd(186996.000000,158628.000000,117600.000000,426.680730)}
{pt3dadd(186120.000000,159456.000000,117425.000000,403.003673)}
{pt3dadd(186324.000000,159768.000000,117075.000000,451.481678)}
{pt3dadd(186744.000000,160092.000000,116550.000000,492.225878)}
{pt3dadd(187116.000000,160416.000000,116050.000000,529.089386)}
{pt3dadd(187452.000000,160608.000000,115625.000000,524.822578)}
{pt3dadd(187908.000000,160596.000000,115125.000000,505.425880)}
{pt3dadd(188328.000000,160752.000000,114550.000000,449.028504)}
{pt3dadd(188748.000000,160812.000000,114075.000000,393.154414)}
{pt3dadd(189084.000000,161016.000000,113750.000000,363.144374)}
{pt3dadd(189456.000000,161088.000000,113375.000000,359.080744)}
{pt3dadd(189708.000000,161232.000000,112975.000000,352.553632)}
{pt3dadd(190212.000000,161136.000000,112575.000000,352.553632)}
{pt3dadd(190752.000000,161328.000000,112175.000000,346.026520)}
{pt3dadd(191088.000000,161616.000000,111975.000000,330.068808)}
{pt3dadd(191124.000000,161952.000000,112075.000000,303.804732)}
{pt3dadd(191340.000000,162240.000000,111900.000000,290.019862)}
{pt3dadd(191592.000000,162564.000000,111850.000000,271.596298)}
{pt3dadd(191676.000000,162876.000000,111625.000000,278.123410)}
{pt3dadd(191760.000000,163128.000000,111500.000000,290.570806)}
{pt3dadd(191880.000000,163440.000000,111325.000000,312.964766)}
{pt3dadd(192000.000000,163764.000000,111200.000000,333.276748)}
{pt3dadd(192048.000000,164100.000000,110850.000000,351.700312)}
{pt3dadd(192000.000000,164400.000000,110600.000000,329.012416)}
{pt3dadd(191964.000000,164832.000000,110375.000000,308.700434)}
{pt3dadd(192048.000000,165060.000000,110100.000000,283.687024)}
{pt3dadd(192168.000000,165396.000000,109900.000000,258.736348)}
{pt3dadd(192300.000000,165648.000000,109900.000000,238.157756)}
{pt3dadd(192420.000000,165936.000000,109750.000000,243.028386)}
{pt3dadd(192588.000000,166236.000000,109575.000000,263.340368)}
{pt3dadd(192756.000000,166512.000000,109550.000000,300.554332)}
{pt3dadd(192888.000000,166824.000000,109450.000000,349.381852)}
{pt3dadd(193092.000000,167076.000000,109200.000000,402.423408)}
{pt3dadd(193212.000000,167352.000000,108975.000000,482.418778)}
{pt3dadd(193260.000000,167616.000000,108750.000000,497.548668)}
{pt3dadd(193548.000000,167904.000000,108575.000000,497.548668)}
{pt3dadd(193824.000000,167964.000000,108575.000000,484.738084)}
{pt3dadd(194064.000000,168000.000000,108525.000000,443.604416)}
{pt3dadd(194316.000000,167988.000000,108325.000000,371.866856)}
{pt3dadd(194520.000000,168096.000000,108050.000000,338.919700)}
{pt3dadd(194724.000000,168084.000000,107950.000000,309.963546)}
{pt3dadd(195012.000000,168072.000000,107925.000000,286.449890)}
{pt3dadd(195252.000000,168048.000000,107650.000000,295.120594)}
{pt3dadd(195480.000000,168000.000000,107525.000000,292.232654)}
{pt3dadd(195696.000000,167820.000000,107375.000000,317.246064)}
{pt3dadd(196020.000000,167556.000000,107175.000000,360.325876)}
{pt3dadd(196164.000000,167208.000000,106675.000000,369.430120)}
{pt3dadd(196380.000000,166980.000000,106150.000000,383.153376)}
{pt3dadd(196644.000000,166920.000000,105950.000000,399.111088)}
{pt3dadd(196848.000000,166788.000000,105600.000000,395.425260)}
{pt3dadd(197112.000000,166776.000000,105375.000000,358.561752)}
{pt3dadd(197412.000000,166800.000000,105100.000000,358.561752)}
{pt3dadd(197664.000000,166788.000000,104850.000000,354.875924)}
{pt3dadd(197988.000000,166860.000000,104725.000000,366.495498)}
{pt3dadd(198240.000000,166836.000000,104525.000000,356.458070)}
{pt3dadd(198492.000000,166824.000000,104350.000000,366.997366)}
{pt3dadd(198744.000000,166776.000000,104075.000000,377.536662)}
{pt3dadd(199008.000000,166800.000000,103775.000000,397.903190)}
{pt3dadd(199284.000000,166788.000000,103600.000000,426.925638)}
{pt3dadd(199560.000000,166776.000000,103225.000000,462.033750)}
{pt3dadd(199824.000000,166800.000000,102925.000000,488.357962)}
{pt3dadd(200100.000000,166824.000000,102675.000000,505.038662)}
{pt3dadd(200376.000000,166860.000000,102550.000000,484.672134)}
{pt3dadd(200508.000000,166836.000000,102175.000000,437.176644)}
{pt3dadd(200712.000000,166824.000000,101800.000000,396.148248)}
{pt3dadd(201000.000000,166692.000000,101425.000000,347.430076)}
{pt3dadd(201216.000000,166596.000000,101075.000000,305.735966)}
{pt3dadd(201468.000000,166572.000000,100825.000000,284.408384)}
{pt3dadd(201552.000000,166440.000000,100575.000000,267.439554)}
{pt3dadd(201636.000000,166344.000000,100200.000000,257.199054)}
{pt3dadd(201636.000000,166080.000000,99800.000000,249.708974)}
{pt3dadd(201672.000000,166020.000000,99450.000000,255.078844)}
{pt3dadd(201756.000000,165876.000000,99050.000000,260.448714)}
{pt3dadd(201840.000000,165780.000000,98675.000000,277.417544)}
{pt3dadd(201960.000000,165600.000000,98300.000000,315.235330)}
{pt3dadd(202044.000000,165552.000000,98050.000000,361.800070)}
{pt3dadd(202212.000000,165612.000000,97775.000000,407.767822)}
{pt3dadd(202464.000000,165432.000000,97550.000000,423.725534)}
{pt3dadd(202632.000000,165252.000000,97200.000000,423.725534)}
{pt3dadd(202884.000000,164868.000000,96850.000000,399.036188)}
{pt3dadd(203340.000000,164184.000000,96575.000000,354.847362)}
{pt3dadd(203592.000000,163752.000000,96275.000000,311.767550)}
{pt3dadd(203724.000000,163440.000000,95950.000000,290.439968)}
{pt3dadd(203676.000000,163056.000000,95575.000000,275.965854)}
{pt3dadd(203724.000000,162792.000000,95225.000000,262.837414)}
{pt3dadd(203844.000000,162396.000000,94950.000000,243.573900)}
{pt3dadd(203928.000000,161928.000000,94575.000000,235.316090)}
{pt3dadd(203892.000000,161688.000000,94400.000000,246.606244)}
{pt3dadd(203844.000000,161196.000000,94225.000000,251.976114)}
{pt3dadd(203964.000000,160680.000000,93950.000000,278.174326)}
{pt3dadd(203808.000000,160164.000000,93650.000000,314.406670)}
{pt3dadd(203760.000000,159852.000000,93400.000000,343.290196)}
{pt3dadd(203760.000000,159588.000000,93250.000000,360.883568)}
{pt3dadd(203808.000000,159336.000000,93050.000000,384.397224)}
{pt3dadd(203844.000000,159060.000000,92850.000000,388.083052)}
{pt3dadd(203844.000000,158748.000000,92425.000000,402.492464)}
{pt3dadd(203892.000000,158376.000000,92350.000000,402.492464)}
{pt3dadd(204012.000000,158088.000000,92025.000000,366.475528)}
{pt3dadd(203928.000000,157800.000000,91900.000000,332.721372)}
{pt3dadd(204096.000000,157464.000000,91525.000000,305.213246)}
{pt3dadd(203964.000000,157152.000000,91150.000000,267.041282)}
{pt3dadd(203844.000000,156744.000000,90850.000000,235.663040)}
{pt3dadd(203760.000000,156396.000000,90525.000000,237.925820)}
{pt3dadd(203724.000000,156084.000000,90175.000000,235.663040)}
{pt3dadd(203592.000000,155868.000000,89850.000000,221.227696)}
{pt3dadd(203556.000000,155556.000000,89500.000000,213.586074)}
{pt3dadd(203556.000000,155208.000000,89175.000000,208.947380)}
{pt3dadd(203424.000000,154992.000000,88800.000000,211.323294)}
{pt3dadd(203472.000000,154800.000000,88425.000000,211.323294)}
{pt3dadd(203508.000000,154668.000000,88075.000000,225.758638)}
{pt3dadd(203592.000000,154488.000000,87725.000000,231.347852)}
{pt3dadd(203808.000000,154176.000000,87350.000000,231.347852)}
{pt3dadd(204048.000000,153876.000000,87000.000000,228.971938)}
{pt3dadd(204048.000000,153480.000000,86700.000000,202.520986)}
{pt3dadd(204180.000000,153132.000000,86300.000000,181.798862)}
{pt3dadd(204132.000000,152496.000000,85925.000000,186.006298)}
{pt3dadd(204468.000000,152184.000000,85675.000000,181.798862)}
{pt3dadd(204516.000000,151716.000000,85250.000000,175.328646)}
{pt3dadd(204552.000000,151404.000000,84900.000000,197.572162)}
{pt3dadd(204468.000000,151128.000000,84800.000000,202.170422)}
{pt3dadd(204516.000000,150876.000000,84700.000000,197.962986)}
{pt3dadd(204468.000000,150564.000000,84550.000000,197.962986)}
{pt3dadd(204468.000000,150264.000000,84375.000000,206.809116)}
{pt3dadd(204516.000000,150000.000000,84350.000000,218.149962)}
{pt3dadd(204516.000000,149436.000000,83950.000000,234.273826)}
{pt3dadd(204516.000000,149184.000000,83800.000000,245.614672)}
{pt3dadd(204516.000000,148824.000000,83625.000000,262.325388)}
{pt3dadd(204468.000000,148548.000000,83375.000000,267.439554)}
{pt3dadd(204432.000000,148308.000000,83150.000000,300.386710)}
{pt3dadd(204300.000000,148056.000000,82975.000000,354.219048)}
{pt3dadd(204180.000000,147792.000000,82825.000000,383.102574)}
{pt3dadd(204132.000000,147528.000000,82625.000000,424.130970)}
{pt3dadd(204012.000000,147276.000000,82525.000000,458.725484)}
{pt3dadd(203892.000000,146952.000000,82200.000000,467.472438)}
{pt3dadd(203760.000000,146652.000000,82025.000000,437.462398)}
{pt3dadd(203724.000000,146352.000000,81825.000000,437.462398)}
{pt3dadd(203676.000000,146028.000000,81650.000000,379.723286)}
{pt3dadd(203556.000000,145752.000000,81500.000000,335.375912)}
{pt3dadd(203388.000000,145536.000000,81325.000000,280.386284)}
{pt3dadd(203172.000000,145272.000000,81075.000000,256.563986)}
{pt3dadd(203172.000000,144996.000000,80850.000000,210.750400)}
{pt3dadd(203172.000000,144696.000000,80525.000000,210.750400)}
{pt3dadd(203136.000000,144420.000000,80250.000000,223.253680)}
{pt3dadd(203088.000000,144120.000000,80025.000000,229.415788)}
{pt3dadd(203136.000000,143820.000000,79875.000000,234.529954)}
{pt3dadd(203052.000000,143628.000000,79725.000000,238.164496)}
{pt3dadd(202848.000000,143412.000000,79500.000000,240.216904)}
{pt3dadd(202716.000000,143136.000000,79275.000000,223.506188)}
{pt3dadd(202512.000000,142836.000000,79025.000000,230.639598)}
{pt3dadd(202296.000000,142644.000000,78800.000000,211.413812)}
{pt3dadd(202176.000000,142260.000000,78625.000000,222.670130)}
{pt3dadd(202068.000000,141924.000000,78550.000000,232.436858)}
{pt3dadd(201888.000000,141780.000000,78425.000000,286.330748)}
{pt3dadd(201756.000000,141492.000000,78275.000000,333.630894)}
{pt3dadd(201636.000000,141132.000000,78075.000000,419.021006)}
{pt3dadd(201432.000000,140652.000000,77850.000000,468.360352)}
{pt3dadd(201252.000000,140040.000000,77450.000000,510.435106)}
{pt3dadd(201024.000000,139680.000000,77150.000000,461.161816)}
{pt3dadd(200976.000000,139524.000000,76925.000000,407.141424)}
{pt3dadd(200880.000000,139236.000000,76825.000000,327.391556)}
{pt3dadd(200820.000000,138924.000000,76625.000000,271.196460)}
{pt3dadd(200712.000000,138672.000000,76400.000000,240.514936)}
{pt3dadd(200652.000000,138408.000000,76300.000000,242.798372)}
{pt3dadd(200604.000000,138120.000000,75925.000000,238.552526)}
{pt3dadd(200664.000000,137892.000000,75850.000000,247.479418)}
{pt3dadd(200460.000000,137652.000000,75775.000000,251.937558)}
{pt3dadd(200424.000000,137400.000000,75625.000000,233.345792)}
{pt3dadd(200364.000000,137160.000000,75475.000000,228.887652)}
{pt3dadd(200352.000000,136980.000000,75350.000000,235.416934)}
{pt3dadd(200280.000000,136824.000000,75225.000000,235.416934)}
{pt3dadd(200148.000000,136608.000000,75075.000000,240.332034)}
{pt3dadd(199968.000000,136260.000000,74875.000000,262.136826)}
{pt3dadd(199920.000000,136044.000000,74700.000000,268.992576)}
{pt3dadd(199860.000000,135792.000000,74550.000000,276.551040)}
{pt3dadd(199872.000000,135672.000000,74375.000000,276.551040)}
{pt3dadd(199956.000000,135444.000000,74275.000000,274.033550)}
{pt3dadd(199956.000000,135072.000000,74050.000000,262.070658)}
{pt3dadd(199956.000000,134640.000000,73825.000000,249.292654)}
{pt3dadd(199956.000000,134208.000000,73500.000000,241.734190)}
{pt3dadd(199956.000000,133740.000000,73200.000000,227.167054)}
{pt3dadd(199956.000000,133176.000000,73075.000000,203.518832)}
{pt3dadd(199956.000000,132552.000000,73125.000000,191.502228)}
{pt3dadd(199956.000000,132240.000000,73075.000000,206.797722)}
{pt3dadd(199836.000000,132000.000000,73050.000000,202.339582)}
{pt3dadd(199656.000000,131628.000000,73050.000000,212.225672)}
{pt3dadd(199644.000000,131112.000000,73050.000000,231.192848)}
{pt3dadd(199620.000000,130596.000000,73050.000000,233.367552)}
{pt3dadd(199596.000000,130164.000000,72950.000000,219.950650)}
{pt3dadd(199656.000000,129804.000000,72875.000000,200.675720)}
{pt3dadd(199752.000000,129420.000000,72800.000000,180.437040)}
{pt3dadd(199776.000000,129144.000000,72725.000000,168.847016)}
{pt3dadd(199776.000000,128688.000000,72575.000000,148.608336)}
{pt3dadd(199716.000000,128508.000000,72475.000000,141.613882)}
{pt3dadd(199632.000000,128316.000000,72375.000000,141.613882)}
{pt3dadd(199500.000000,128100.000000,72250.000000,148.639742)}
{pt3dadd(199368.000000,127920.000000,72150.000000,143.999502)}
{pt3dadd(199212.000000,127764.000000,72025.000000,164.238182)}
{pt3dadd(199128.000000,127548.000000,71925.000000,190.068434)}
{pt3dadd(199068.000000,127344.000000,71825.000000,243.958376)}
{pt3dadd(199104.000000,127116.000000,71600.000000,252.925350)}
{pt3dadd(198804.000000,126636.000000,71400.000000,248.916934)}
{pt3dadd(198384.000000,125760.000000,71200.000000,235.704114)}
{pt3dadd(198288.000000,125328.000000,71100.000000,206.856418)}
{pt3dadd(198000.000000,124620.000000,71000.000000,161.203290)}
{pt3dadd(197832.000000,124476.000000,70900.000000,152.236316)}
{pt3dadd(197676.000000,124176.000000,70900.000000,157.716656)}
{pt3dadd(197484.000000,123780.000000,70900.000000,161.043386)}
{pt3dadd(197232.000000,123348.000000,70900.000000,169.176692)}
{pt3dadd(197172.000000,122904.000000,70850.000000,178.143666)}
{pt3dadd(197124.000000,122568.000000,70850.000000,187.110640)}
{pt3dadd(196968.000000,122208.000000,70950.000000,217.400716)}
{pt3dadd(197076.000000,121980.000000,70825.000000,219.189848)}
{pt3dadd(197124.000000,121692.000000,70825.000000,212.528466)}
{pt3dadd(197136.000000,121452.000000,70850.000000,223.972848)}
{pt3dadd(197112.000000,121092.000000,70850.000000,222.000328)}
{pt3dadd(197016.000000,120876.000000,70725.000000,194.878568)}
{pt3dadd(196944.000000,120576.000000,70725.000000,188.217186)}
{pt3dadd(196860.000000,120276.000000,70725.000000,188.217186)}
{pt3dadd(196776.000000,119976.000000,70725.000000,163.386552)}
{pt3dadd(196680.000000,119676.000000,70725.000000,148.155284)}
{pt3dadd(196536.000000,119328.000000,70725.000000,139.506628)}
{pt3dadd(196524.000000,119052.000000,70650.000000,136.632870)}
{pt3dadd(196452.000000,118872.000000,70575.000000,138.178390)}
{pt3dadd(196356.000000,118632.000000,70575.000000,138.178390)}
{pt3dadd(196332.000000,118308.000000,70575.000000,144.869684)}
{pt3dadd(196224.000000,118176.000000,70550.000000,147.476266)}
{pt3dadd(196176.000000,117984.000000,70550.000000,144.869684)}
{pt3dadd(196020.000000,117720.000000,70550.000000,137.843824)}
{pt3dadd(195876.000000,117456.000000,70550.000000,139.245658)}
{pt3dadd(195660.000000,117192.000000,70550.000000,140.791178)}
{pt3dadd(195480.000000,116904.000000,70550.000000,135.820351)}
{pt3dadd(195384.000000,116616.000000,70550.000000,139.828767)}
{pt3dadd(195360.000000,116460.000000,70750.000000,139.828767)}
{pt3dadd(195264.000000,116136.000000,70750.000000,135.820351)}
{pt3dadd(195168.000000,115776.000000,70750.000000,130.065995)}
{pt3dadd(195048.000000,115332.000000,70750.000000,141.078896)}
{pt3dadd(195000.000000,115116.000000,70800.000000,145.719136)}
{pt3dadd(194940.000000,114732.000000,70800.000000,159.739450)}
{pt3dadd(194796.000000,114336.000000,70800.000000,175.732284)}
{pt3dadd(194736.000000,114156.000000,70925.000000,190.453614)}
{pt3dadd(194676.000000,113904.000000,70925.000000,192.157548)}
{pt3dadd(194640.000000,113616.000000,71025.000000,195.650614)}
{pt3dadd(194568.000000,113364.000000,71025.000000,190.278956)}
{pt3dadd(194544.000000,113196.000000,71075.000000,184.638712)}
{pt3dadd(194448.000000,113028.000000,71075.000000,193.565604)}
{pt3dadd(194352.000000,112860.000000,71075.000000,213.293594)}
{pt3dadd(194256.000000,112692.000000,71075.000000,213.293594)}
{pt3dadd(193932.000000,112392.000000,71075.000000,229.564664)}
{pt3dadd(193560.000000,112068.000000,71075.000000,227.860730)}
{pt3dadd(193164.000000,111696.000000,71075.000000,211.589660)}
{pt3dadd(192948.000000,111480.000000,71125.000000,185.517496)}
{pt3dadd(192732.000000,111156.000000,71175.000000,182.024430)}
{pt3dadd(192576.000000,110808.000000,71200.000000,148.067087)}
{pt3dadd(192504.000000,110712.000000,71250.000000,144.898771)}
{pt3dadd(192384.000000,110496.000000,71250.000000,136.250115)}
{pt3dadd(192396.000000,110268.000000,71250.000000,139.267559)}
{pt3dadd(192204.000000,109932.000000,71250.000000,139.267559)}
{pt3dadd(192048.000000,109548.000000,71250.000000,144.842559)}
{pt3dadd(191880.000000,109164.000000,71250.000000,138.151265)}
{pt3dadd(191844.000000,108912.000000,71300.000000,148.503855)}
{pt3dadd(191856.000000,108552.000000,71300.000000,166.397721)}
{pt3dadd(191688.000000,108036.000000,71300.000000,218.434229)}
{pt3dadd(191628.000000,107544.000000,71300.000000,291.408816)}
{pt3dadd(191520.000000,106824.000000,71075.000000,345.298758)}
{pt3dadd(191448.000000,106524.000000,70750.000000,373.776614)}
{pt3dadd(191316.000000,106176.000000,70475.000000,364.849722)}
{pt3dadd(191268.000000,106080.000000,70275.000000,322.228534)}
{pt3dadd(190980.000000,105492.000000,70250.000000,263.069154)}
{pt3dadd(190812.000000,105168.000000,70050.000000,220.742756)}
{pt3dadd(190704.000000,104916.000000,69900.000000,190.560966)}
{pt3dadd(190608.000000,104700.000000,69850.000000,181.593992)}
{pt3dadd(190500.000000,104376.000000,69850.000000,170.555876)}
{pt3dadd(190332.000000,103968.000000,69850.000000,164.211702)}
{pt3dadd(190176.000000,103560.000000,69850.000000,160.884972)}
{pt3dadd(190116.000000,103452.000000,69925.000000,157.716656)}
{pt3dadd(189972.000000,103032.000000,69925.000000,159.339452)}
{pt3dadd(189744.000000,102528.000000,69925.000000,160.962248)}
{pt3dadd(189396.000000,102180.000000,69925.000000,179.475948)}
{pt3dadd(189276.000000,102012.000000,70100.000000,177.930428)}
{pt3dadd(189204.000000,101844.000000,70175.000000,175.056670)}
{pt3dadd(189000.000000,101376.000000,70475.000000,170.416430)}
{pt3dadd(188928.000000,101388.000000,70775.000000,200.598220)}
{pt3dadd(188940.000000,101544.000000,71075.000000,247.588074)}
{pt3dadd(189096.000000,102324.000000,71225.000000,302.792898)}
{pt3dadd(189408.000000,103068.000000,70975.000000,314.206630)}
{pt3dadd(189396.000000,103332.000000,70450.000000,335.117940)}
{pt3dadd(189492.000000,104304.000000,70575.000000,308.429216)}
{pt3dadd(189504.000000,104904.000000,70300.000000,238.917246)}
{pt3dadd(189492.000000,105456.000000,69875.000000,186.880738)}
{pt3dadd(189360.000000,105468.000000,69400.000000,171.649470)}
{pt3dadd(189444.000000,105348.000000,68975.000000,158.871466)}
{pt3dadd(189396.000000,105264.000000,68575.000000,152.210084)}
{pt3dadd(189456.000000,104976.000000,68150.000000,160.858740)}
{pt3dadd(189444.000000,104616.000000,67750.000000,164.351806)}
{pt3dadd(189108.000000,104160.000000,67350.000000,181.555594)}
{pt3dadd(188616.000000,103956.000000,66950.000000,188.455673)}
{pt3dadd(188160.000000,103944.000000,66675.000000,207.114490)}

{create adhoc17}
{access adhoc17}
{connect adhoc17(1), adhoc15(0)}
{nseg = 1}
{strdef color color = "White"}
{pt3dclear()}
{pt3dadd(186996.000000,158628.000000,117600.000000,426.680730)}
{pt3dadd(186324.000000,158664.000000,117950.000000,531.844260)}
{pt3dadd(186120.000000,158604.000000,118175.000000,1000.000000)}
