# Supplementary material for: Full reconstruction of large lobula plate tangential cells in Drosophila from a 3D EM dataset
Source: PLoS One. 2018 Nov 28;13(11):e0207828. doi: 10.1371/journal.pone.0207828 (PMC6261601; doi:10.1371/journal.pone.0207828)
Supplement: S1 Dataset — (ZIP) [file pone.0207828.s001.zip › Diameter hoc/Cell41_3skels_ck.001_corrected_sorted_diametered.hoc0001.hoc]

/* created with convertKnossosNmlToHoc.m */

{create adhoc1}
{access adhoc1}
{nseg = 1}
{strdef color color = "White"}
{pt3dclear()}
{pt3dadd(199788.000000,145128.000000,81975.000000,145.860750)}
{pt3dadd(199884.000000,144852.000000,82050.000000,126.901430)}
{pt3dadd(199992.000000,144744.000000,81875.000000,114.562360)}
{pt3dadd(200304.000000,144732.000000,81700.000000,108.843540)}

{create adhoc2}
{access adhoc2}
{connect adhoc2(1), adhoc1(0)}
{nseg = 1}
{strdef color color = "White"}
{pt3dclear()}
{pt3dadd(200304.000000,144732.000000,81700.000000,108.843540)}
{pt3dadd(200520.000000,144732.000000,81625.000000,129.885007)}
{pt3dadd(200820.000000,144732.000000,81575.000000,170.782298)}
{pt3dadd(201000.000000,144960.000000,81625.000000,212.692734)}
{pt3dadd(201408.000000,145512.000000,81675.000000,266.095134)}
{pt3dadd(201540.000000,145776.000000,82025.000000,341.267813)}
{pt3dadd(201828.000000,146772.000000,81975.000000,387.012000)}

{create adhoc3}
{access adhoc3}
{connect adhoc3(1), adhoc2(0)}
{nseg = 1}
{strdef color color = "White"}
{pt3dclear()}
{pt3dadd(201828.000000,146772.000000,81975.000000,387.012000)}
{pt3dadd(201936.000000,147120.000000,82050.000000,375.018427)}
{pt3dadd(201888.000000,147276.000000,82125.000000,362.080416)}
{pt3dadd(201852.000000,147408.000000,82200.000000,351.541120)}
{pt3dadd(201852.000000,147408.000000,82300.000000,347.855292)}
{pt3dadd(201876.000000,147408.000000,82450.000000,344.512140)}
{pt3dadd(201924.000000,147504.000000,82525.000000,345.737967)}
{pt3dadd(202044.000000,147612.000000,82925.000000,334.315520)}

{create adhoc4}
{access adhoc4}
{connect adhoc4(1), adhoc3(0)}
{nseg = 1}
{strdef color color = "White"}
{pt3dclear()}
{pt3dadd(202044.000000,147612.000000,82925.000000,334.315520)}
{pt3dadd(202152.000000,147612.000000,83000.000000,521.699950)}
{pt3dadd(202152.000000,147720.000000,83075.000000,528.703270)}
{pt3dadd(202116.000000,147816.000000,83150.000000,576.198760)}
{pt3dadd(202128.000000,148032.000000,83200.000000,582.202586)}
{pt3dadd(202332.000000,148104.000000,83275.000000,576.198760)}
{pt3dadd(202428.000000,148332.000000,83350.000000,589.122002)}
{pt3dadd(202332.000000,148392.000000,83425.000000,631.903408)}
{pt3dadd(202224.000000,148284.000000,83525.000000,643.625160)}
{pt3dadd(202380.000000,148356.000000,83575.000000,637.621334)}
{pt3dadd(202344.000000,148440.000000,83725.000000,637.621334)}
{pt3dadd(202416.000000,148476.000000,83800.000000,624.698092)}
{pt3dadd(202440.000000,148620.000000,84000.000000,602.634044)}
{pt3dadd(202404.000000,148680.000000,84250.000000,592.390026)}
{pt3dadd(202548.000000,148848.000000,84475.000000,550.716086)}
{pt3dadd(202908.000000,150000.000000,85225.000000,517.078414)}
{pt3dadd(202932.000000,150108.000000,86700.000000,458.725168)}
{pt3dadd(203316.000000,150480.000000,87750.000000,443.703684)}
{pt3dadd(203520.000000,151008.000000,88700.000000,398.980808)}
{pt3dadd(203700.000000,151440.000000,89800.000000,391.691680)}
{pt3dadd(203520.000000,152064.000000,90825.000000,358.318786)}
{pt3dadd(203376.000000,152592.000000,91625.000000,349.096898)}
{pt3dadd(203292.000000,153024.000000,92525.000000,336.120782)}
{pt3dadd(203712.000000,153384.000000,93450.000000,355.768122)}
{pt3dadd(203808.000000,153804.000000,94375.000000,375.415462)}
{pt3dadd(203796.000000,153828.000000,95275.000000,378.068758)}
{pt3dadd(203688.000000,153768.000000,96175.000000,380.994020)}
{pt3dadd(203616.000000,153840.000000,97025.000000,363.173304)}
{pt3dadd(203580.000000,153768.000000,97800.000000,320.544898)}
{pt3dadd(203472.000000,153684.000000,98575.000000,316.222954)}
{pt3dadd(203352.000000,153780.000000,99350.000000,338.906284)}
{pt3dadd(202848.000000,153588.000000,100275.000000,325.608196)}
{pt3dadd(202296.000000,153312.000000,101100.000000,306.946566)}
{pt3dadd(202104.000000,153348.000000,101800.000000,300.392744)}
{pt3dadd(202032.000000,153516.000000,102400.000000,272.459108)}
{pt3dadd(201828.000000,153468.000000,103175.000000,309.892856)}
{pt3dadd(201204.000000,153504.000000,103900.000000,389.470010)}
{pt3dadd(200124.000000,153216.000000,104550.000000,471.339184)}
{pt3dadd(198864.000000,152952.000000,105200.000000,529.824390)}
{pt3dadd(198060.000000,153036.000000,105525.000000,545.988306)}
{pt3dadd(196932.000000,153180.000000,106150.000000,497.879078)}
{pt3dadd(196464.000000,152976.000000,106600.000000,434.671534)}
{pt3dadd(195684.000000,153336.000000,107275.000000,365.467206)}
{pt3dadd(195000.000000,154164.000000,107875.000000,313.535822)}
{pt3dadd(194604.000000,155196.000000,108500.000000,282.524186)}
{pt3dadd(194364.000000,155988.000000,108975.000000,267.863040)}
{pt3dadd(194100.000000,156960.000000,109475.000000,241.074026)}
{pt3dadd(193260.000000,157908.000000,110175.000000,224.147378)}
{pt3dadd(192948.000000,158592.000000,110700.000000,210.221780)}
{pt3dadd(192720.000000,159192.000000,111250.000000,214.696674)}
{pt3dadd(192204.000000,159564.000000,111925.000000,201.229352)}
{pt3dadd(191508.000000,160068.000000,112525.000000,219.235620)}
{pt3dadd(191100.000000,160908.000000,113125.000000,228.196060)}
{pt3dadd(190464.000000,161640.000000,113700.000000,220.791186)}
{pt3dadd(189804.000000,162252.000000,114350.000000,212.257432)}
{pt3dadd(189072.000000,163020.000000,115125.000000,216.316292)}
{pt3dadd(188556.000000,163716.000000,115725.000000,190.146150)}
{pt3dadd(187884.000000,164208.000000,116525.000000,175.524272)}
{pt3dadd(186924.000000,164688.000000,117200.000000,188.320990)}
{pt3dadd(185832.000000,165132.000000,118025.000000,179.748924)}
{pt3dadd(184512.000000,165360.000000,118950.000000,164.233440)}
{pt3dadd(183924.000000,165444.000000,119725.000000,158.994458)}
{pt3dadd(182544.000000,165312.000000,120425.000000,157.284120)}
{pt3dadd(181380.000000,165564.000000,121200.000000,165.817874)}
{pt3dadd(180840.000000,166044.000000,121725.000000,159.101434)}
{pt3dadd(179520.000000,166104.000000,122050.000000,181.498430)}
{pt3dadd(177888.000000,166368.000000,122475.000000,210.254258)}
{pt3dadd(176424.000000,166344.000000,122975.000000,213.760452)}
{pt3dadd(174864.000000,166656.000000,123475.000000,213.760452)}
{pt3dadd(173460.000000,166440.000000,123950.000000,227.163308)}
{pt3dadd(171948.000000,166560.000000,124450.000000,232.343554)}
{pt3dadd(169956.000000,166404.000000,125050.000000,243.779596)}
{pt3dadd(168060.000000,166776.000000,125525.000000,240.273402)}
{pt3dadd(165816.000000,166728.000000,125950.000000,233.719580)}
{pt3dadd(164652.000000,166704.000000,126300.000000,244.138984)}
{pt3dadd(163320.000000,166428.000000,126675.000000,224.336860)}
{pt3dadd(162288.000000,166224.000000,127050.000000,201.413428)}
{pt3dadd(160812.000000,165948.000000,127750.000000,231.708636)}
{pt3dadd(159516.000000,165696.000000,128350.000000,240.669076)}
{pt3dadd(157476.000000,165444.000000,129050.000000,248.255940)}
{pt3dadd(155796.000000,165084.000000,129800.000000,283.452266)}
{pt3dadd(154632.000000,165216.000000,130375.000000,283.452266)}
{pt3dadd(152880.000000,165144.000000,131175.000000,283.452266)}
{pt3dadd(151740.000000,165432.000000,131800.000000,274.491826)}
{pt3dadd(149928.000000,165540.000000,132275.000000,271.838530)}
{pt3dadd(148476.000000,165684.000000,132850.000000,400.725078)}
{pt3dadd(146808.000000,165660.000000,133425.000000,491.074197)}
{pt3dadd(145416.000000,166044.000000,134000.000000,1000.000000)}

{create adhoc5}
{access adhoc5}
{connect adhoc5(1), adhoc3(0)}
{nseg = 1}
{strdef color color = "White"}
{pt3dclear()}
{pt3dadd(202044.000000,147612.000000,82925.000000,334.315520)}
{pt3dadd(202020.000000,148332.000000,82875.000000,346.151713)}
{pt3dadd(202020.000000,149112.000000,82725.000000,274.634720)}
{pt3dadd(201792.000000,149496.000000,82725.000000,230.924116)}
{pt3dadd(201744.000000,149820.000000,82825.000000,203.445470)}
{pt3dadd(201612.000000,149988.000000,82825.000000,158.835740)}
{pt3dadd(201660.000000,150396.000000,82850.000000,149.720528)}
{pt3dadd(201612.000000,150972.000000,82725.000000,135.970714)}
{pt3dadd(201576.000000,151248.000000,82675.000000,145.396108)}
{pt3dadd(201564.000000,151440.000000,82675.000000,143.918650)}
{pt3dadd(201528.000000,151620.000000,82425.000000,128.255668)}
{pt3dadd(201600.000000,151716.000000,82275.000000,132.480320)}
{pt3dadd(201600.000000,151824.000000,82150.000000,147.781462)}
{pt3dadd(201492.000000,152088.000000,82025.000000,147.781462)}
{pt3dadd(201324.000000,152316.000000,81975.000000,157.830986)}
{pt3dadd(201288.000000,152616.000000,81975.000000,168.358880)}
{pt3dadd(201168.000000,152856.000000,81850.000000,173.249440)}
{pt3dadd(201132.000000,153204.000000,81850.000000,191.210550)}
{pt3dadd(201024.000000,153588.000000,81850.000000,198.231288)}
{pt3dadd(200688.000000,153984.000000,81675.000000,191.210550)}
{pt3dadd(200352.000000,154272.000000,81550.000000,185.434570)}
{pt3dadd(200256.000000,154476.000000,81450.000000,177.659452)}
{pt3dadd(200160.000000,154740.000000,81450.000000,163.037574)}
{pt3dadd(199920.000000,155016.000000,81450.000000,148.964574)}
{pt3dadd(199728.000000,155364.000000,81450.000000,141.912312)}
{pt3dadd(199608.000000,155628.000000,81275.000000,135.110398)}
{pt3dadd(199584.000000,155676.000000,81125.000000,126.016010)}
{pt3dadd(199608.000000,155652.000000,81050.000000,107.622087)}
{pt3dadd(199512.000000,155772.000000,80925.000000,95.238100)}

{create adhoc6}
{access adhoc6}
{connect adhoc6(1), adhoc2(0)}
{nseg = 1}
{strdef color color = "White"}
{pt3dclear()}
{pt3dadd(201828.000000,146772.000000,81975.000000,387.012000)}
{pt3dadd(201936.000000,146904.000000,81900.000000,357.996860)}
{pt3dadd(201888.000000,147072.000000,81825.000000,348.524324)}
{pt3dadd(201840.000000,147072.000000,81750.000000,341.328180)}
{pt3dadd(201792.000000,147048.000000,81675.000000,345.014008)}
{pt3dadd(201744.000000,147024.000000,81600.000000,358.737264)}
{pt3dadd(201732.000000,147000.000000,81525.000000,381.477114)}
{pt3dadd(201768.000000,146736.000000,81450.000000,408.697110)}
{pt3dadd(201804.000000,146496.000000,81375.000000,442.217466)}
{pt3dadd(201828.000000,146436.000000,81300.000000,463.602322)}
{pt3dadd(201828.000000,146388.000000,81225.000000,480.283022)}
{pt3dadd(201756.000000,146388.000000,81150.000000,476.016214)}
{pt3dadd(201648.000000,146400.000000,81050.000000,467.269260)}
{pt3dadd(201540.000000,146424.000000,80975.000000,457.625748)}
{pt3dadd(201540.000000,146424.000000,80900.000000,452.921592)}
{pt3dadd(201564.000000,146424.000000,80825.000000,452.921592)}
{pt3dadd(201576.000000,146424.000000,80750.000000,466.372702)}
{pt3dadd(201600.000000,146424.000000,80675.000000,479.823812)}
{pt3dadd(201600.000000,146412.000000,80625.000000,484.527968)}
{pt3dadd(201600.000000,146412.000000,80550.000000,494.171480)}
{pt3dadd(201588.000000,146412.000000,80500.000000,503.814992)}
{pt3dadd(201588.000000,146412.000000,80425.000000,519.386330)}
{pt3dadd(201588.000000,146412.000000,80350.000000,534.957668)}
{pt3dadd(201588.000000,146412.000000,80300.000000,545.083364)}
{pt3dadd(201588.000000,146400.000000,80225.000000,567.437098)}
{pt3dadd(201588.000000,146364.000000,80125.000000,562.497742)}
{pt3dadd(201624.000000,146076.000000,80050.000000,529.411664)}
{pt3dadd(201540.000000,145968.000000,79975.000000,504.656024)}
{pt3dadd(201444.000000,145860.000000,79900.000000,494.530328)}
{pt3dadd(201408.000000,146052.000000,79850.000000,467.237238)}
{pt3dadd(201492.000000,146028.000000,79700.000000,472.176594)}
{pt3dadd(201528.000000,145932.000000,79625.000000,499.817030)}
{pt3dadd(201576.000000,145848.000000,79550.000000,524.572670)}
{pt3dadd(201612.000000,145740.000000,79475.000000,534.698366)}
{pt3dadd(201660.000000,145632.000000,79375.000000,529.994210)}
{pt3dadd(201612.000000,145500.000000,79325.000000,529.994210)}
{pt3dadd(201504.000000,145404.000000,79225.000000,529.994210)}
{pt3dadd(201384.000000,145344.000000,79150.000000,519.362228)}
{pt3dadd(201276.000000,145272.000000,79100.000000,500.052230)}
{pt3dadd(201360.000000,145512.000000,79025.000000,491.305276)}
{pt3dadd(201384.000000,145248.000000,78950.000000,477.181618)}
{pt3dadd(201408.000000,145404.000000,78875.000000,462.351766)}
{pt3dadd(201420.000000,145548.000000,78800.000000,457.412410)}
{pt3dadd(201444.000000,145704.000000,78725.000000,453.145602)}
{pt3dadd(201468.000000,145788.000000,78650.000000,457.412410)}
{pt3dadd(201420.000000,145440.000000,78575.000000,471.536068)}
{pt3dadd(201312.000000,145068.000000,78500.000000,491.811562)}
{pt3dadd(201180.000000,144720.000000,78425.000000,501.937258)}
{pt3dadd(201024.000000,144432.000000,78350.000000,536.677632)}
{pt3dadd(201000.000000,145188.000000,78300.000000,561.433272)}
{pt3dadd(201036.000000,145020.000000,78250.000000,561.433272)}
{pt3dadd(200904.000000,145080.000000,78175.000000,567.151198)}
{pt3dadd(200772.000000,145188.000000,78075.000000,572.596840)}
{pt3dadd(200640.000000,145116.000000,78000.000000,572.596840)}
{pt3dadd(200556.000000,145008.000000,77925.000000,561.964858)}
{pt3dadd(200580.000000,144876.000000,77850.000000,557.025502)}
{pt3dadd(200616.000000,144744.000000,77725.000000,563.029328)}
{pt3dadd(200400.000000,144660.000000,76925.000000,547.657023)}
{pt3dadd(200268.000000,144108.000000,76525.000000,630.401730)}

{create adhoc7}
{access adhoc7}
{connect adhoc7(1), adhoc6(0)}
{nseg = 1}
{strdef color color = "White"}
{pt3dclear()}
{pt3dadd(200268.000000,144108.000000,76525.000000,630.401730)}
{pt3dadd(200112.000000,143520.000000,76125.000000,696.411100)}
{pt3dadd(199968.000000,143052.000000,76125.000000,652.281774)}
{pt3dadd(199824.000000,142344.000000,75475.000000,665.205016)}
{pt3dadd(199680.000000,142560.000000,75150.000000,581.880396)}
{pt3dadd(199548.000000,142440.000000,75250.000000,579.075470)}
{pt3dadd(199200.000000,141840.000000,74675.000000,470.415500)}

{create adhoc8}
{access adhoc8}
{connect adhoc8(1), adhoc7(0)}
{nseg = 1}
{strdef color color = "White"}
{pt3dclear()}
{pt3dadd(199200.000000,141840.000000,74675.000000,470.415500)}
{pt3dadd(198984.000000,141612.000000,73875.000000,355.558657)}
{pt3dadd(199032.000000,141732.000000,73750.000000,297.483890)}
{pt3dadd(199008.000000,141768.000000,73525.000000,244.448934)}
{pt3dadd(199020.000000,141804.000000,73300.000000,218.633974)}
{pt3dadd(198984.000000,141720.000000,73225.000000,209.345536)}
{pt3dadd(198936.000000,141696.000000,73050.000000,207.293128)}
{pt3dadd(198720.000000,141744.000000,72750.000000,218.633974)}
{pt3dadd(198600.000000,141432.000000,72525.000000,229.974820)}
{pt3dadd(198252.000000,141120.000000,72275.000000,238.820950)}
{pt3dadd(198252.000000,140916.000000,72125.000000,273.122798)}
{pt3dadd(198192.000000,140772.000000,71925.000000,330.861910)}
{pt3dadd(198060.000000,140868.000000,71700.000000,368.075874)}
{pt3dadd(197988.000000,140820.000000,71475.000000,409.769984)}
{pt3dadd(197856.000000,140676.000000,71225.000000,449.478664)}
{pt3dadd(197856.000000,140232.000000,71000.000000,492.152784)}
{pt3dadd(197724.000000,140196.000000,70825.000000,502.278480)}
{pt3dadd(197748.000000,140316.000000,70575.000000,521.588478)}
{pt3dadd(197628.000000,140328.000000,70425.000000,531.231990)}
{pt3dadd(197652.000000,140364.000000,70300.000000,555.987630)}
{pt3dadd(197520.000000,140352.000000,70150.000000,550.269704)}
{pt3dadd(197472.000000,140340.000000,69950.000000,535.439852)}
{pt3dadd(197496.000000,140244.000000,69825.000000,503.929300)}
{pt3dadd(197448.000000,140292.000000,69700.000000,477.605088)}
{pt3dadd(197400.000000,140304.000000,69625.000000,440.648894)}
{pt3dadd(197364.000000,140208.000000,69425.000000,403.692700)}
{pt3dadd(197232.000000,140160.000000,69225.000000,413.336212)}
{pt3dadd(197100.000000,140100.000000,69150.000000,450.292406)}
{pt3dadd(197136.000000,140076.000000,69025.000000,481.802958)}
{pt3dadd(197088.000000,140100.000000,68775.000000,498.483658)}
{pt3dadd(196920.000000,140136.000000,68600.000000,515.164358)}
{pt3dadd(196788.000000,139956.000000,68375.000000,515.164358)}
{pt3dadd(196656.000000,139992.000000,68325.000000,504.532376)}
{pt3dadd(196692.000000,139776.000000,68250.000000,499.346036)}
{pt3dadd(196404.000000,139884.000000,68125.000000,499.346036)}
{pt3dadd(196272.000000,139800.000000,68050.000000,499.346036)}
{pt3dadd(196260.000000,139836.000000,68000.000000,489.702524)}
{pt3dadd(196212.000000,139824.000000,67725.000000,480.059012)}
{pt3dadd(196104.000000,139812.000000,67650.000000,475.119656)}
{pt3dadd(196140.000000,139680.000000,67575.000000,479.823812)}
{pt3dadd(196008.000000,139572.000000,67450.000000,471.076858)}
{pt3dadd(195852.000000,139476.000000,67375.000000,462.329904)}
{pt3dadd(195720.000000,139812.000000,67300.000000,462.329904)}
{pt3dadd(195852.000000,139704.000000,67250.000000,441.258987)}
{pt3dadd(195888.000000,139728.000000,67175.000000,470.415500)}

{create adhoc9}
{access adhoc9}
{connect adhoc9(1), adhoc8(0)}
{nseg = 1}
{strdef color color = "White"}
{pt3dclear()}
{pt3dadd(195888.000000,139728.000000,67175.000000,470.415500)}
{pt3dadd(195588.000000,139116.000000,67175.000000,421.263360)}
{pt3dadd(195276.000000,138492.000000,67175.000000,371.445600)}
{pt3dadd(195192.000000,138348.000000,66950.000000,329.751490)}
{pt3dadd(195108.000000,138468.000000,66800.000000,299.867450)}
{pt3dadd(194988.000000,138312.000000,66325.000000,285.458038)}
{pt3dadd(194508.000000,138384.000000,66100.000000,291.985150)}
{pt3dadd(194316.000000,138252.000000,65700.000000,303.839814)}
{pt3dadd(194400.000000,138276.000000,65500.000000,309.209684)}
{pt3dadd(194556.000000,138252.000000,65250.000000,314.080314)}
{pt3dadd(194592.000000,138348.000000,64925.000000,310.896354)}
{pt3dadd(194508.000000,138144.000000,64800.000000,304.369242)}
{pt3dadd(194136.000000,137916.000000,64550.000000,289.895128)}
{pt3dadd(194280.000000,137724.000000,64425.000000,287.144708)}
{pt3dadd(194148.000000,137784.000000,64150.000000,289.764158)}
{pt3dadd(193908.000000,137724.000000,63950.000000,278.474004)}
{pt3dadd(193740.000000,137604.000000,63875.000000,267.183850)}
{pt3dadd(193512.000000,137556.000000,63650.000000,267.183850)}
{pt3dadd(193380.000000,137496.000000,63500.000000,269.934270)}
{pt3dadd(193080.000000,137232.000000,63275.000000,264.820104)}
{pt3dadd(192864.000000,137088.000000,63225.000000,259.949474)}
{pt3dadd(192660.000000,136944.000000,63150.000000,259.949474)}
{pt3dadd(192444.000000,136896.000000,63075.000000,255.078844)}
{pt3dadd(192660.000000,137208.000000,63000.000000,244.838344)}
{pt3dadd(192696.000000,137064.000000,62925.000000,249.952510)}
{pt3dadd(192684.000000,137100.000000,62850.000000,257.442590)}
{pt3dadd(192636.000000,137004.000000,62775.000000,271.916704)}
{pt3dadd(192432.000000,137232.000000,62700.000000,282.157204)}
{pt3dadd(192276.000000,136980.000000,62625.000000,289.647284)}
{pt3dadd(192264.000000,137304.000000,62550.000000,295.285644)}
{pt3dadd(192216.000000,137208.000000,62475.000000,290.171478)}
{pt3dadd(192144.000000,137496.000000,62400.000000,278.316814)}
{pt3dadd(191976.000000,136788.000000,62325.000000,263.658506)}
{pt3dadd(192192.000000,136872.000000,62250.000000,258.544340)}
{pt3dadd(191964.000000,136728.000000,62175.000000,236.991012)}
{pt3dadd(191748.000000,136932.000000,62100.000000,224.328618)}
{pt3dadd(191772.000000,136644.000000,62025.000000,208.413650)}
{pt3dadd(191616.000000,136416.000000,61950.000000,200.772028)}
{pt3dadd(191568.000000,136356.000000,61875.000000,186.336684)}
{pt3dadd(191436.000000,136368.000000,61825.000000,188.291356)}
{pt3dadd(191304.000000,136356.000000,61750.000000,192.107620)}
{pt3dadd(191412.000000,136440.000000,61675.000000,195.925363)}
{pt3dadd(191364.000000,136428.000000,61550.000000,205.240720)}

{create adhoc10}
{access adhoc10}
{connect adhoc10(1), adhoc9(0)}
{nseg = 1}
{strdef color color = "White"}
{pt3dclear()}
{pt3dadd(191364.000000,136428.000000,61550.000000,205.240720)}
{pt3dadd(191268.000000,136356.000000,61475.000000,195.622493)}
{pt3dadd(191112.000000,136440.000000,61300.000000,188.375786)}
{pt3dadd(190992.000000,136284.000000,61150.000000,181.098052)}
{pt3dadd(190896.000000,136344.000000,61075.000000,179.236460)}
{pt3dadd(190812.000000,136368.000000,61000.000000,185.105132)}
{pt3dadd(190932.000000,136296.000000,60925.000000,186.793652)}
{pt3dadd(190908.000000,136260.000000,60850.000000,192.662324)}
{pt3dadd(190872.000000,136284.000000,60750.000000,204.147494)}
{pt3dadd(190848.000000,136212.000000,60675.000000,210.016166)}
{pt3dadd(190728.000000,136284.000000,60575.000000,210.016166)}
{pt3dadd(190704.000000,136200.000000,60500.000000,219.812816)}
{pt3dadd(190668.000000,136116.000000,60425.000000,221.967844)}
{pt3dadd(190644.000000,136200.000000,60350.000000,217.760408)}
{pt3dadd(190620.000000,136272.000000,60275.000000,217.760408)}
{pt3dadd(190680.000000,136224.000000,60200.000000,232.418716)}
{pt3dadd(190656.000000,136188.000000,60100.000000,250.842280)}
{pt3dadd(190596.000000,136188.000000,60025.000000,255.480974)}
{pt3dadd(190572.000000,136164.000000,59775.000000,259.688410)}
{pt3dadd(190728.000000,136020.000000,59525.000000,274.346718)}
{pt3dadd(190596.000000,136044.000000,59275.000000,268.976848)}
{pt3dadd(190404.000000,135972.000000,59125.000000,255.191978)}
{pt3dadd(190440.000000,135828.000000,58875.000000,252.816064)}
{pt3dadd(190380.000000,135864.000000,58625.000000,255.078844)}
{pt3dadd(190404.000000,135816.000000,58475.000000,240.420536)}
{pt3dadd(190308.000000,135840.000000,58275.000000,225.263426)}
{pt3dadd(190380.000000,135984.000000,58175.000000,203.152152)}
{pt3dadd(190308.000000,135780.000000,57875.000000,186.264552)}
{pt3dadd(190320.000000,135756.000000,57625.000000,179.794336)}
{pt3dadd(190152.000000,135636.000000,57350.000000,189.082774)}
{pt3dadd(190008.000000,135420.000000,57200.000000,206.779823)}
{pt3dadd(189960.000000,135288.000000,56975.000000,261.944950)}

{create adhoc11}
{access adhoc11}
{connect adhoc11(1), adhoc10(0)}
{nseg = 1}
{strdef color color = "White"}
{pt3dclear()}
{pt3dadd(189960.000000,135288.000000,56975.000000,261.944950)}
{pt3dadd(189948.000000,135000.000000,57000.000000,238.346503)}
{pt3dadd(189696.000000,134784.000000,56825.000000,226.457487)}
{pt3dadd(189720.000000,134652.000000,56650.000000,226.277900)}

{create adhoc12}
{access adhoc12}
{connect adhoc12(1), adhoc11(0)}
{nseg = 1}
{strdef color color = "White"}
{pt3dclear()}
{pt3dadd(189720.000000,134652.000000,56650.000000,226.277900)}
{pt3dadd(189972.000000,135108.000000,56450.000000,261.944950)}

{create adhoc13}
{access adhoc13}
{connect adhoc13(1), adhoc11(0)}
{nseg = 1}
{strdef color color = "White"}
{pt3dclear()}
{pt3dadd(189720.000000,134652.000000,56650.000000,226.277900)}
{pt3dadd(189336.000000,133968.000000,56650.000000,254.847857)}
{pt3dadd(188736.000000,133692.000000,56425.000000,289.978074)}
{pt3dadd(188436.000000,133404.000000,56150.000000,308.401638)}
{pt3dadd(187752.000000,133080.000000,56075.000000,322.186508)}
{pt3dadd(187392.000000,133080.000000,55950.000000,328.106792)}
{pt3dadd(187056.000000,132852.000000,55825.000000,324.763640)}
{pt3dadd(186744.000000,132624.000000,55625.000000,312.908976)}
{pt3dadd(186480.000000,132612.000000,55500.000000,296.748192)}
{pt3dadd(186180.000000,132432.000000,55250.000000,299.932152)}
{pt3dadd(186060.000000,132264.000000,54950.000000,306.459264)}
{pt3dadd(185748.000000,132156.000000,54475.000000,294.604600)}
{pt3dadd(185472.000000,131988.000000,54025.000000,300.242960)}
{pt3dadd(185280.000000,131688.000000,53775.000000,326.441172)}
{pt3dadd(185100.000000,131544.000000,53600.000000,315.619687)}
{pt3dadd(184956.000000,131280.000000,53400.000000,368.582860)}

{create adhoc14}
{access adhoc14}
{connect adhoc14(1), adhoc13(0)}
{nseg = 1}
{strdef color color = "White"}
{pt3dclear()}
{pt3dadd(184956.000000,131280.000000,53400.000000,368.582860)}
{pt3dadd(184908.000000,131724.000000,53150.000000,258.342237)}
{pt3dadd(184728.000000,131832.000000,52950.000000,168.852050)}

{create adhoc15}
{access adhoc15}
{connect adhoc15(1), adhoc13(0)}
{nseg = 1}
{strdef color color = "White"}
{pt3dclear()}
{pt3dadd(184956.000000,131280.000000,53400.000000,368.582860)}
{pt3dadd(184704.000000,130548.000000,53225.000000,286.375940)}
{pt3dadd(184416.000000,130116.000000,52975.000000,276.603544)}
{pt3dadd(184188.000000,129636.000000,52750.000000,243.935116)}
{pt3dadd(184140.000000,129204.000000,52525.000000,207.731304)}
{pt3dadd(184068.000000,128868.000000,52300.000000,187.069603)}
{pt3dadd(184008.000000,128676.000000,52125.000000,94.023140)}

{create adhoc16}
{access adhoc16}
{connect adhoc16(1), adhoc10(0)}
{nseg = 1}
{strdef color color = "White"}
{pt3dclear()}
{pt3dadd(189960.000000,135288.000000,56975.000000,261.944950)}
{pt3dadd(190020.000000,135312.000000,56700.000000,253.827233)}
{pt3dadd(189912.000000,135516.000000,56475.000000,238.600064)}
{pt3dadd(189444.000000,135708.000000,56325.000000,231.466654)}
{pt3dadd(189108.000000,135948.000000,56175.000000,227.048846)}
{pt3dadd(188532.000000,135924.000000,55950.000000,199.859856)}
{pt3dadd(188088.000000,135996.000000,55900.000000,171.660628)}
{pt3dadd(187788.000000,136020.000000,55650.000000,185.620924)}
{pt3dadd(187500.000000,136128.000000,55700.000000,201.012144)}
{pt3dadd(187260.000000,136224.000000,55750.000000,207.805866)}
{pt3dadd(186936.000000,136248.000000,55675.000000,221.699338)}
{pt3dadd(186324.000000,136272.000000,55525.000000,243.736458)}
{pt3dadd(185976.000000,136296.000000,55400.000000,236.246378)}
{pt3dadd(185520.000000,136272.000000,55225.000000,211.058508)}
{pt3dadd(184992.000000,136440.000000,54975.000000,196.623164)}
{pt3dadd(184620.000000,136560.000000,54950.000000,192.988622)}
{pt3dadd(184152.000000,136788.000000,54725.000000,189.354080)}
{pt3dadd(183960.000000,136872.000000,54600.000000,169.618720)}
{pt3dadd(183576.000000,137100.000000,54400.000000,164.790550)}
{pt3dadd(183312.000000,137172.000000,54250.000000,187.090480)}
{pt3dadd(183180.000000,137136.000000,54200.000000,209.390410)}
{pt3dadd(182808.000000,137268.000000,54075.000000,234.578280)}
{pt3dadd(182520.000000,137472.000000,53875.000000,249.895832)}
{pt3dadd(182244.000000,137736.000000,53725.000000,242.122214)}
{pt3dadd(182028.000000,138060.000000,53575.000000,221.595234)}
{pt3dadd(181848.000000,138276.000000,53400.000000,184.568477)}
{pt3dadd(181548.000000,138600.000000,53275.000000,150.381677)}
{pt3dadd(181380.000000,138648.000000,53125.000000,139.443421)}
{pt3dadd(181128.000000,138792.000000,52900.000000,153.818159)}
{pt3dadd(180852.000000,138744.000000,52750.000000,168.975269)}
{pt3dadd(180648.000000,138948.000000,52600.000000,198.137440)}
{pt3dadd(180564.000000,139128.000000,52375.000000,232.324240)}
{pt3dadd(180456.000000,139224.000000,52075.000000,257.920804)}
{pt3dadd(180432.000000,139284.000000,51875.000000,278.447784)}
{pt3dadd(180480.000000,139392.000000,51675.000000,286.705594)}
{pt3dadd(180480.000000,139488.000000,51525.000000,279.911872)}
{pt3dadd(180672.000000,139764.000000,51775.000000,253.035482)}
{pt3dadd(180612.000000,139980.000000,51750.000000,230.735552)}
{pt3dadd(180540.000000,140124.000000,51575.000000,202.148842)}
{pt3dadd(180360.000000,140340.000000,51425.000000,184.602594)}
{pt3dadd(180444.000000,140520.000000,51225.000000,189.020402)}
{pt3dadd(180060.000000,140952.000000,51000.000000,179.249992)}
{pt3dadd(179928.000000,141336.000000,50725.000000,186.891614)}
{pt3dadd(180024.000000,141528.000000,50825.000000,189.881760)}
{pt3dadd(180144.000000,141792.000000,50875.000000,166.526068)}
{pt3dadd(180228.000000,141924.000000,50900.000000,158.346180)}
{pt3dadd(180156.000000,142032.000000,50900.000000,98.724300)}

{create adhoc17}
{access adhoc17}
{connect adhoc17(1), adhoc9(0)}
{nseg = 1}
{strdef color color = "White"}
{pt3dclear()}
{pt3dadd(191364.000000,136428.000000,61550.000000,205.240720)}
{pt3dadd(191208.000000,136260.000000,61525.000000,195.622493)}
{pt3dadd(191304.000000,135996.000000,61675.000000,148.905836)}
{pt3dadd(191160.000000,135876.000000,61600.000000,123.328306)}
{pt3dadd(190908.000000,135672.000000,61550.000000,103.979694)}
{pt3dadd(190716.000000,135552.000000,61425.000000,81.481732)}
{pt3dadd(190452.000000,135348.000000,61425.000000,82.421964)}
{pt3dadd(190404.000000,135216.000000,61350.000000,87.603421)}
{pt3dadd(190428.000000,135084.000000,61525.000000,89.189159)}
{pt3dadd(190224.000000,134964.000000,61450.000000,86.500651)}
{pt3dadd(190092.000000,134784.000000,61475.000000,87.237347)}
{pt3dadd(189900.000000,134676.000000,61500.000000,86.297115)}
{pt3dadd(189816.000000,134616.000000,61650.000000,86.297115)}
{pt3dadd(189648.000000,134580.000000,61675.000000,99.871523)}
{pt3dadd(189540.000000,134484.000000,61800.000000,111.987321)}
{pt3dadd(189252.000000,134352.000000,61925.000000,115.321335)}
{pt3dadd(189276.000000,134352.000000,61950.000000,125.688857)}
{pt3dadd(188940.000000,134244.000000,61975.000000,134.239688)}
{pt3dadd(188796.000000,134172.000000,62000.000000,122.413556)}
{pt3dadd(188508.000000,134040.000000,62025.000000,107.975324)}
{pt3dadd(188400.000000,134040.000000,62000.000000,103.904614)}
{pt3dadd(188292.000000,134076.000000,62000.000000,93.537092)}
{pt3dadd(188172.000000,134028.000000,62000.000000,96.249242)}
{pt3dadd(188076.000000,133980.000000,61975.000000,111.215024)}
{pt3dadd(187980.000000,133824.000000,61975.000000,131.940036)}
{pt3dadd(187764.000000,133680.000000,61975.000000,149.368414)}
{pt3dadd(187632.000000,133524.000000,62000.000000,166.022716)}
{pt3dadd(187500.000000,133416.000000,62000.000000,163.310566)}
{pt3dadd(187584.000000,133368.000000,62050.000000,148.344784)}
{pt3dadd(187464.000000,133200.000000,62150.000000,134.654562)}
{pt3dadd(187260.000000,132780.000000,62325.000000,126.492266)}
{pt3dadd(187044.000000,132660.000000,62325.000000,110.778196)}
{pt3dadd(186840.000000,132252.000000,62325.000000,110.778196)}
{pt3dadd(186480.000000,132012.000000,62325.000000,111.718428)}
{pt3dadd(186420.000000,132240.000000,62225.000000,111.718428)}
{pt3dadd(186312.000000,132120.000000,62150.000000,119.880724)}
{pt3dadd(186192.000000,132072.000000,62175.000000,130.766624)}
{pt3dadd(186084.000000,131928.000000,62125.000000,151.824984)}
{pt3dadd(186024.000000,131952.000000,62325.000000,177.335704)}
{pt3dadd(185916.000000,132048.000000,62350.000000,194.660468)}
{pt3dadd(185556.000000,131832.000000,62375.000000,197.957102)}
{pt3dadd(185580.000000,131760.000000,62475.000000,191.326342)}
{pt3dadd(185292.000000,131472.000000,62650.000000,164.254003)}
{pt3dadd(185304.000000,131400.000000,62800.000000,120.000000)}

{create adhoc18}
{access adhoc18}
{connect adhoc18(1), adhoc8(0)}
{nseg = 1}
{strdef color color = "White"}
{pt3dclear()}
{pt3dadd(195888.000000,139728.000000,67175.000000,470.415500)}
{pt3dadd(195684.000000,139872.000000,67275.000000,438.461020)}
{pt3dadd(195828.000000,140172.000000,67200.000000,375.843912)}
{pt3dadd(195924.000000,140424.000000,67250.000000,342.407612)}
{pt3dadd(195888.000000,140748.000000,67150.000000,317.336928)}
{pt3dadd(195768.000000,140952.000000,66925.000000,332.466818)}
{pt3dadd(195696.000000,141120.000000,67025.000000,383.620910)}
{pt3dadd(195720.000000,141348.000000,67000.000000,442.971064)}
{pt3dadd(195684.000000,141588.000000,66925.000000,481.111520)}
{pt3dadd(195660.000000,141804.000000,66725.000000,501.478048)}
{pt3dadd(195612.000000,142020.000000,66575.000000,510.225002)}
{pt3dadd(195576.000000,142296.000000,66475.000000,495.395150)}
{pt3dadd(195540.000000,142440.000000,66500.000000,501.113076)}
{pt3dadd(195564.000000,142692.000000,66475.000000,528.406166)}
{pt3dadd(195528.000000,142908.000000,66425.000000,548.681660)}
{pt3dadd(195492.000000,143064.000000,66325.000000,558.325172)}
{pt3dadd(195468.000000,143268.000000,66325.000000,584.318592)}
{pt3dadd(195096.000000,143664.000000,66275.000000,610.195844)}
{pt3dadd(195012.000000,143988.000000,66050.000000,610.195844)}
{pt3dadd(194916.000000,144276.000000,65700.000000,634.840838)}
{pt3dadd(194760.000000,144492.000000,65600.000000,670.117814)}
{pt3dadd(194784.000000,144696.000000,65475.000000,689.044882)}
{pt3dadd(194688.000000,145008.000000,65500.000000,696.342562)}
{pt3dadd(194604.000000,145140.000000,65675.000000,739.221946)}
{pt3dadd(194424.000000,145380.000000,65400.000000,761.132378)}
{pt3dadd(194376.000000,145620.000000,65350.000000,768.082562)}
{pt3dadd(194328.000000,145884.000000,65125.000000,749.155494)}
{pt3dadd(194220.000000,146040.000000,65125.000000,715.980562)}
{pt3dadd(194100.000000,146112.000000,65125.000000,686.024420)}
{pt3dadd(193968.000000,146256.000000,65100.000000,657.494760)}
{pt3dadd(193872.000000,146412.000000,65050.000000,625.899582)}
{pt3dadd(193788.000000,146556.000000,65000.000000,644.826650)}
{pt3dadd(193488.000000,146688.000000,64975.000000,657.134490)}
{pt3dadd(193308.000000,146856.000000,64725.000000,650.515262)}
{pt3dadd(193260.000000,147072.000000,64625.000000,657.134490)}
{pt3dadd(193212.000000,147228.000000,64500.000000,675.160256)}
{pt3dadd(193152.000000,147384.000000,64375.000000,668.541028)}
{pt3dadd(192852.000000,147780.000000,64250.000000,639.883280)}
{pt3dadd(192648.000000,148272.000000,64075.000000,633.579266)}
{pt3dadd(192516.000000,148572.000000,63650.000000,614.652198)}
{pt3dadd(192300.000000,148872.000000,63675.000000,596.626432)}
{pt3dadd(192168.000000,149220.000000,63675.000000,584.318592)}
{pt3dadd(192036.000000,149292.000000,63625.000000,606.672326)}
{pt3dadd(191916.000000,149316.000000,63575.000000,612.976340)}
{pt3dadd(191772.000000,149604.000000,63575.000000,638.853592)}
{pt3dadd(191640.000000,149700.000000,63550.000000,650.575344)}
{pt3dadd(191484.000000,149748.000000,63500.000000,669.502412)}
{pt3dadd(191232.000000,149796.000000,63475.000000,669.502412)}
{pt3dadd(191088.000000,149820.000000,63600.000000,683.071824)}
{pt3dadd(190824.000000,150300.000000,63625.000000,663.198398)}
{pt3dadd(190584.000000,150420.000000,63500.000000,640.844664)}
{pt3dadd(190440.000000,150540.000000,63325.000000,627.921422)}
{pt3dadd(190296.000000,150660.000000,63200.000000,640.844664)}
{pt3dadd(190104.000000,150960.000000,63225.000000,627.275252)}
{pt3dadd(189864.000000,151164.000000,63200.000000,647.148678)}
{pt3dadd(189516.000000,151272.000000,63175.000000,689.375838)}
{pt3dadd(189168.000000,151572.000000,63075.000000,689.375838)}
{pt3dadd(188760.000000,151824.000000,62925.000000,689.375838)}
{pt3dadd(188616.000000,152136.000000,62825.000000,671.350072)}
{pt3dadd(188460.000000,152280.000000,62775.000000,651.476646)}
{pt3dadd(188304.000000,152448.000000,62700.000000,651.476646)}
{pt3dadd(188388.000000,152796.000000,62525.000000,657.780660)}
{pt3dadd(188232.000000,152928.000000,62075.000000,672.028524)}
{pt3dadd(188100.000000,153156.000000,61750.000000,696.673518)}
{pt3dadd(188052.000000,153312.000000,62150.000000,679.506124)}
{pt3dadd(187896.000000,153540.000000,61975.000000,659.632698)}
{pt3dadd(187824.000000,153732.000000,61525.000000,636.161290)}
{pt3dadd(187716.000000,153828.000000,61300.000000,591.822790)}
{pt3dadd(187392.000000,154032.000000,61125.000000,561.732154)}
{pt3dadd(187296.000000,153852.000000,60975.000000,551.606458)}
{pt3dadd(187212.000000,154044.000000,60800.000000,534.439064)}
{pt3dadd(187164.000000,154296.000000,60725.000000,551.606458)}
{pt3dadd(187116.000000,154320.000000,60600.000000,562.770026)}
{pt3dadd(187116.000000,154320.000000,60525.000000,568.215668)}
{pt3dadd(187104.000000,154620.000000,60450.000000,573.155024)}
{pt3dadd(187104.000000,155040.000000,60375.000000,563.029328)}
{pt3dadd(186852.000000,155160.000000,60300.000000,563.029328)}
{pt3dadd(186600.000000,155160.000000,60250.000000,575.337168)}
{pt3dadd(186552.000000,154860.000000,60175.000000,587.058920)}
{pt3dadd(186696.000000,155004.000000,60100.000000,597.690902)}
{pt3dadd(186768.000000,155028.000000,60050.000000,607.816598)}
{pt3dadd(186504.000000,155052.000000,59900.000000,563.008768)}
{pt3dadd(186072.000000,155244.000000,59550.000000,524.707508)}
{pt3dadd(185724.000000,155376.000000,59250.000000,473.780947)}
{pt3dadd(185628.000000,155556.000000,59300.000000,470.415500)}

{create adhoc19}
{access adhoc19}
{connect adhoc19(1), adhoc18(0)}
{nseg = 1}
{strdef color color = "White"}
{pt3dclear()}
{pt3dadd(185628.000000,155556.000000,59300.000000,470.415500)}
{pt3dadd(185796.000000,155484.000000,59050.000000,336.227057)}
{pt3dadd(185772.000000,155460.000000,58825.000000,326.062178)}
{pt3dadd(185772.000000,155580.000000,58600.000000,279.497438)}
{pt3dadd(185640.000000,155676.000000,58375.000000,268.696636)}
{pt3dadd(185508.000000,155772.000000,58150.000000,254.038328)}
{pt3dadd(185532.000000,155820.000000,57925.000000,233.459736)}
{pt3dadd(185508.000000,155820.000000,57725.000000,213.861080)}
{pt3dadd(185412.000000,155892.000000,57500.000000,211.598300)}
{pt3dadd(185280.000000,156012.000000,57300.000000,224.893818)}
{pt3dadd(185232.000000,155988.000000,57075.000000,227.048846)}
{pt3dadd(184980.000000,156216.000000,56925.000000,233.842568)}
{pt3dadd(184932.000000,156204.000000,56725.000000,240.312784)}
{pt3dadd(184896.000000,156288.000000,56575.000000,255.704004)}
{pt3dadd(184872.000000,156384.000000,56475.000000,258.323454)}
{pt3dadd(184920.000000,156384.000000,56275.000000,270.826734)}
{pt3dadd(184968.000000,156552.000000,56150.000000,273.321450)}
{pt3dadd(184968.000000,156552.000000,56000.000000,275.697364)}
{pt3dadd(184860.000000,156648.000000,55925.000000,254.144036)}
{pt3dadd(184860.000000,156840.000000,55800.000000,232.906006)}
{pt3dadd(184860.000000,156996.000000,55725.000000,227.536136)}
{pt3dadd(184908.000000,157020.000000,55600.000000,230.155586)}
{pt3dadd(184860.000000,157092.000000,55400.000000,250.467568)}
{pt3dadd(184860.000000,157380.000000,55150.000000,278.237200)}
{pt3dadd(184656.000000,157584.000000,54950.000000,308.145934)}
{pt3dadd(184500.000000,157884.000000,54625.000000,322.620048)}
{pt3dadd(184380.000000,158148.000000,54475.000000,325.370468)}
{pt3dadd(184224.000000,158400.000000,54325.000000,322.027316)}
{pt3dadd(184044.000000,158568.000000,54200.000000,328.880784)}
{pt3dadd(183864.000000,158796.000000,54050.000000,325.848440)}
{pt3dadd(183768.000000,158892.000000,53900.000000,311.374326)}
{pt3dadd(183492.000000,159264.000000,53775.000000,320.478570)}
{pt3dadd(183492.000000,159264.000000,53650.000000,320.478570)}
{pt3dadd(183492.000000,159516.000000,53600.000000,332.098144)}
{pt3dadd(182988.000000,159408.000000,53450.000000,356.787490)}
{pt3dadd(182904.000000,159804.000000,53225.000000,403.185756)}
{pt3dadd(182736.000000,160080.000000,53150.000000,421.658798)}
{pt3dadd(182580.000000,160104.000000,53000.000000,425.001950)}
{pt3dadd(182424.000000,160296.000000,52775.000000,413.382376)}
{pt3dadd(182028.000000,160620.000000,52625.000000,413.382376)}
{pt3dadd(181884.000000,160668.000000,52525.000000,375.241920)}
{pt3dadd(181752.000000,160764.000000,52425.000000,360.112030)}
{pt3dadd(181692.000000,160860.000000,52350.000000,344.914214)}
{pt3dadd(181572.000000,160968.000000,52275.000000,344.914214)}
{pt3dadd(181500.000000,161040.000000,52200.000000,317.336928)}
{pt3dadd(181380.000000,161112.000000,52100.000000,346.293082)}
{pt3dadd(181308.000000,161184.000000,52025.000000,349.803398)}
{pt3dadd(180996.000000,161328.000000,52075.000000,355.441758)}
{pt3dadd(180744.000000,161400.000000,51950.000000,362.997702)}
{pt3dadd(180504.000000,161604.000000,51850.000000,386.511358)}
{pt3dadd(180072.000000,161796.000000,51675.000000,351.916844)}
{pt3dadd(179868.000000,162000.000000,51450.000000,355.602672)}
{pt3dadd(179724.000000,162192.000000,51250.000000,355.602672)}
{pt3dadd(179568.000000,162516.000000,51100.000000,332.089016)}
{pt3dadd(179076.000000,162912.000000,50375.000000,291.864644)}
{pt3dadd(178632.000000,163008.000000,49825.000000,272.315134)}
{pt3dadd(178200.000000,162984.000000,49425.000000,238.013286)}
{pt3dadd(177672.000000,162996.000000,49250.000000,199.346043)}
{pt3dadd(176052.000000,163512.000000,47225.000000,215.502760)}

{create adhoc20}
{access adhoc20}
{connect adhoc20(1), adhoc18(0)}
{nseg = 1}
{strdef color color = "White"}
{pt3dclear()}
{pt3dadd(185628.000000,155556.000000,59300.000000,470.415500)}
{pt3dadd(185688.000000,155544.000000,59750.000000,553.123240)}
{pt3dadd(185400.000000,156096.000000,59625.000000,534.464560)}
{pt3dadd(185124.000000,156360.000000,59625.000000,534.464560)}
{pt3dadd(184656.000000,156624.000000,59475.000000,529.760404)}
{pt3dadd(184392.000000,156876.000000,59525.000000,484.839916)}
{pt3dadd(184188.000000,157152.000000,59425.000000,426.172128)}
{pt3dadd(183984.000000,157440.000000,59425.000000,441.302018)}
{pt3dadd(183864.000000,157740.000000,59400.000000,436.821872)}
{pt3dadd(183756.000000,158028.000000,59125.000000,416.455344)}
{pt3dadd(183600.000000,158292.000000,58975.000000,416.455344)}
{pt3dadd(183372.000000,158556.000000,58825.000000,451.651724)}
{pt3dadd(183228.000000,158856.000000,58675.000000,470.042190)}
{pt3dadd(183120.000000,159144.000000,58500.000000,500.515756)}
{pt3dadd(183156.000000,159744.000000,58500.000000,487.445984)}
{pt3dadd(183192.000000,160596.000000,58500.000000,492.150140)}
{pt3dadd(183108.000000,161232.000000,58500.000000,492.150140)}
{pt3dadd(182760.000000,161976.000000,58325.000000,492.150140)}
{pt3dadd(182592.000000,162276.000000,58075.000000,492.150140)}
{pt3dadd(182592.000000,162612.000000,58025.000000,530.290596)}
{pt3dadd(182604.000000,162864.000000,58225.000000,535.229952)}
{pt3dadd(182580.000000,163140.000000,58050.000000,535.229952)}
{pt3dadd(182472.000000,163356.000000,58050.000000,535.229952)}
{pt3dadd(182460.000000,163620.000000,58000.000000,504.756386)}
{pt3dadd(182496.000000,163860.000000,58175.000000,491.305276)}
{pt3dadd(182088.000000,164592.000000,58175.000000,457.784920)}
{pt3dadd(181344.000000,165336.000000,58175.000000,442.955068)}
{pt3dadd(181044.000000,165588.000000,58150.000000,438.015712)}
{pt3dadd(180708.000000,165900.000000,58275.000000,452.139370)}
{pt3dadd(180324.000000,166572.000000,58275.000000,475.716176)}
{pt3dadd(180216.000000,166776.000000,58275.000000,495.112874)}
{pt3dadd(180120.000000,167064.000000,58275.000000,482.302290)}
{pt3dadd(180036.000000,167412.000000,58275.000000,477.598134)}
{pt3dadd(179952.000000,167844.000000,58275.000000,488.230116)}
{pt3dadd(179760.000000,168168.000000,58125.000000,493.675758)}
{pt3dadd(179748.000000,168456.000000,57950.000000,512.985756)}
{pt3dadd(179592.000000,168708.000000,57975.000000,505.429812)}
{pt3dadd(179352.000000,168972.000000,58000.000000,496.682858)}
{pt3dadd(179136.000000,169200.000000,58075.000000,486.050876)}
{pt3dadd(179076.000000,169452.000000,58100.000000,475.418894)}
{pt3dadd(179004.000000,169692.000000,58100.000000,465.293198)}
{pt3dadd(178920.000000,169896.000000,58100.000000,476.912772)}
{pt3dadd(178848.000000,170064.000000,58125.000000,455.255770)}
{pt3dadd(178680.000000,170232.000000,58175.000000,418.392262)}
{pt3dadd(178536.000000,170832.000000,58175.000000,384.871906)}
{pt3dadd(178464.000000,171132.000000,58275.000000,352.947754)}
{pt3dadd(178524.000000,171396.000000,58325.000000,357.214562)}
{pt3dadd(178548.000000,171588.000000,58375.000000,387.618518)}
{pt3dadd(178548.000000,171780.000000,58200.000000,410.358368)}
{pt3dadd(178560.000000,171996.000000,58050.000000,429.755066)}
{pt3dadd(178692.000000,172236.000000,58050.000000,440.294362)}
{pt3dadd(178704.000000,172476.000000,58075.000000,454.418020)}
{pt3dadd(178716.000000,172680.000000,58075.000000,434.051492)}
{pt3dadd(178752.000000,172944.000000,57900.000000,429.784684)}
{pt3dadd(178836.000000,173232.000000,57900.000000,443.908342)}
{pt3dadd(178932.000000,173520.000000,57775.000000,440.222514)}
{pt3dadd(178848.000000,173808.000000,57675.000000,456.572422)}
{pt3dadd(178752.000000,174096.000000,57775.000000,481.643106)}
{pt3dadd(178308.000000,174900.000000,57600.000000,485.909914)}
{pt3dadd(177720.000000,175692.000000,57600.000000,463.455818)}
{pt3dadd(177228.000000,176220.000000,57600.000000,456.602350)}
{pt3dadd(177000.000000,176736.000000,57600.000000,400.204974)}
{pt3dadd(176352.000000,177312.000000,57425.000000,395.500818)}
{pt3dadd(176076.000000,177864.000000,57425.000000,358.286854)}
{pt3dadd(175596.000000,178164.000000,57325.000000,329.403328)}
{pt3dadd(175260.000000,178428.000000,57325.000000,307.795804)}
{pt3dadd(174864.000000,178776.000000,57150.000000,291.635020)}
{pt3dadd(174696.000000,179028.000000,57125.000000,228.182680)}
{pt3dadd(174264.000000,179508.000000,57125.000000,213.025570)}
{pt3dadd(174132.000000,179796.000000,57000.000000,224.315724)}
{pt3dadd(173736.000000,180204.000000,56900.000000,228.954418)}
{pt3dadd(173412.000000,180432.000000,56675.000000,231.330332)}
{pt3dadd(172968.000000,180744.000000,56550.000000,264.378716)}
{pt3dadd(172680.000000,181008.000000,56375.000000,279.535826)}
{pt3dadd(172632.000000,181272.000000,56425.000000,270.865122)}
{pt3dadd(172548.000000,181584.000000,56375.000000,281.617648)}
{pt3dadd(172464.000000,181932.000000,56225.000000,292.370174)}
{pt3dadd(172596.000000,182316.000000,56225.000000,289.337830)}
{pt3dadd(172872.000000,182508.000000,56225.000000,282.204420)}
{pt3dadd(172848.000000,182880.000000,56050.000000,312.532126)}
{pt3dadd(173028.000000,183396.000000,55900.000000,329.287726)}
{pt3dadd(172740.000000,183720.000000,55700.000000,338.847182)}
{pt3dadd(172692.000000,184500.000000,55500.000000,341.879526)}
{pt3dadd(172536.000000,184788.000000,55475.000000,370.340518)}
{pt3dadd(172584.000000,185076.000000,55550.000000,340.012812)}
{pt3dadd(172536.000000,185352.000000,55750.000000,312.504686)}
{pt3dadd(172440.000000,185652.000000,55825.000000,305.977574)}
{pt3dadd(172440.000000,185916.000000,55825.000000,294.687420)}
{pt3dadd(172092.000000,186396.000000,55825.000000,270.865122)}
{pt3dadd(171708.000000,186996.000000,55825.000000,268.245672)}
{pt3dadd(171600.000000,187512.000000,55825.000000,270.740388)}
{pt3dadd(171420.000000,187764.000000,55550.000000,262.069684)}
{pt3dadd(171216.000000,188016.000000,55575.000000,264.689134)}
{pt3dadd(171120.000000,188232.000000,55500.000000,252.026740)}
{pt3dadd(171024.000000,188460.000000,55400.000000,235.096680)}
{pt3dadd(170892.000000,188688.000000,55425.000000,223.755834)}
{pt3dadd(170484.000000,189192.000000,55425.000000,214.002974)}
{pt3dadd(169776.000000,189612.000000,55425.000000,211.383524)}
{pt3dadd(169488.000000,189828.000000,55200.000000,231.910504)}
{pt3dadd(169272.000000,190080.000000,55325.000000,239.552126)}
{pt3dadd(168984.000000,190356.000000,55200.000000,237.597454)}
{pt3dadd(168612.000000,190608.000000,55150.000000,242.236148)}
{pt3dadd(168432.000000,190872.000000,55050.000000,227.079038)}
{pt3dadd(168216.000000,190920.000000,54875.000000,204.779108)}
{pt3dadd(168060.000000,191160.000000,54725.000000,200.772028)}
{pt3dadd(167808.000000,191688.000000,54575.000000,195.448966)}
{pt3dadd(167616.000000,192108.000000,54575.000000,184.648164)}
{pt3dadd(167556.000000,192636.000000,54575.000000,194.934644)}
{pt3dadd(167556.000000,192876.000000,54575.000000,233.192286)}
{pt3dadd(167520.000000,193284.000000,54525.000000,271.501214)}
{pt3dadd(167520.000000,193560.000000,54400.000000,301.409948)}
{pt3dadd(167604.000000,194052.000000,54300.000000,339.718876)}
{pt3dadd(167700.000000,194568.000000,54300.000000,352.847316)}
{pt3dadd(167880.000000,194700.000000,54325.000000,322.231296)}
{pt3dadd(167928.000000,194904.000000,54300.000000,302.587756)}
{pt3dadd(168144.000000,195144.000000,54425.000000,284.164192)}
{pt3dadd(168480.000000,195408.000000,54425.000000,264.520652)}
{pt3dadd(168612.000000,195600.000000,54375.000000,249.129432)}
{pt3dadd(168804.000000,195804.000000,54225.000000,272.891984)}
{pt3dadd(169044.000000,196008.000000,54150.000000,267.522114)}
{pt3dadd(169044.000000,196272.000000,53950.000000,259.498414)}
{pt3dadd(168852.000000,196596.000000,53800.000000,238.971434)}
{pt3dadd(168876.000000,196872.000000,53925.000000,229.174784)}
{pt3dadd(168624.000000,197316.000000,53950.000000,203.359824)}
{pt3dadd(168480.000000,197940.000000,53950.000000,196.226414)}
{pt3dadd(168276.000000,198192.000000,53800.000000,214.002974)}
{pt3dadd(168204.000000,198492.000000,53775.000000,240.450238)}
{pt3dadd(167988.000000,198756.000000,53725.000000,242.223188)}
{pt3dadd(167820.000000,199020.000000,53750.000000,231.805804)}
{pt3dadd(167664.000000,199236.000000,53875.000000,222.009154)}
{pt3dadd(167592.000000,199548.000000,53875.000000,202.459644)}
{pt3dadd(167496.000000,200028.000000,53875.000000,174.239430)}
{pt3dadd(167280.000000,200556.000000,53875.000000,167.638310)}
{pt3dadd(167064.000000,201096.000000,53875.000000,170.777960)}
{pt3dadd(167052.000000,201636.000000,53875.000000,198.998174)}
{pt3dadd(167016.000000,201876.000000,53700.000000,215.928234)}
{pt3dadd(167052.000000,202116.000000,53650.000000,214.239714)}
{pt3dadd(167088.000000,202344.000000,53600.000000,235.997944)}
{pt3dadd(166860.000000,202584.000000,53650.000000,241.321006)}
{pt3dadd(166764.000000,202800.000000,53525.000000,206.814012)}
{pt3dadd(166500.000000,203148.000000,53525.000000,178.425022)}
{pt3dadd(166236.000000,203424.000000,53525.000000,175.285372)}
{pt3dadd(166152.000000,203640.000000,53400.000000,158.355312)}
{pt3dadd(165876.000000,203928.000000,53525.000000,143.261840)}
{pt3dadd(165588.000000,204300.000000,53525.000000,143.261840)}
{pt3dadd(165204.000000,204540.000000,53600.000000,148.433990)}
{pt3dadd(164928.000000,204708.000000,53700.000000,137.240500)}
{pt3dadd(164712.000000,204864.000000,53750.000000,145.860750)}

{create adhoc21}
{access adhoc21}
{connect adhoc21(1), adhoc7(0)}
{nseg = 1}
{strdef color color = "White"}
{pt3dclear()}
{pt3dadd(199200.000000,141840.000000,74675.000000,470.415500)}
{pt3dadd(199308.000000,141564.000000,74650.000000,409.269787)}
{pt3dadd(199308.000000,141288.000000,74700.000000,376.104120)}
{pt3dadd(199224.000000,141096.000000,74500.000000,371.623974)}
{pt3dadd(199104.000000,140880.000000,74350.000000,340.245732)}
{pt3dadd(199104.000000,141072.000000,74725.000000,294.039476)}
{pt3dadd(199224.000000,141156.000000,75125.000000,251.092435)}
{pt3dadd(199104.000000,140736.000000,75075.000000,205.998039)}
{pt3dadd(198936.000000,140616.000000,75075.000000,140.395085)}
{pt3dadd(198912.000000,140304.000000,75075.000000,111.232914)}
{pt3dadd(199056.000000,139956.000000,75075.000000,107.965017)}
{pt3dadd(198972.000000,139632.000000,75075.000000,121.003324)}
{pt3dadd(199032.000000,139224.000000,75075.000000,133.005026)}
{pt3dadd(198888.000000,138936.000000,75075.000000,128.749886)}
{pt3dadd(198924.000000,138576.000000,75075.000000,133.217783)}
{pt3dadd(198972.000000,138372.000000,74750.000000,138.945680)}
{pt3dadd(198888.000000,138168.000000,74825.000000,120.645884)}
{pt3dadd(198816.000000,137856.000000,74900.000000,116.047624)}
{pt3dadd(198660.000000,137652.000000,74800.000000,121.502764)}
{pt3dadd(198576.000000,137424.000000,74850.000000,128.465060)}
{pt3dadd(198528.000000,137208.000000,74800.000000,132.635820)}
{pt3dadd(198492.000000,137004.000000,74775.000000,162.420786)}
{pt3dadd(198372.000000,136764.000000,74675.000000,180.766996)}
{pt3dadd(198240.000000,136644.000000,74575.000000,213.325856)}
{pt3dadd(198240.000000,136452.000000,74525.000000,248.026664)}
{pt3dadd(198240.000000,136260.000000,74500.000000,281.075048)}
{pt3dadd(198204.000000,136068.000000,74625.000000,290.827908)}
{pt3dadd(198096.000000,135792.000000,74475.000000,290.827908)}
{pt3dadd(198132.000000,135552.000000,74525.000000,290.827908)}
{pt3dadd(198096.000000,135192.000000,74400.000000,281.723664)}
{pt3dadd(198012.000000,135000.000000,74375.000000,267.938794)}
{pt3dadd(197928.000000,134820.000000,74350.000000,262.824628)}
{pt3dadd(197880.000000,134556.000000,74325.000000,267.695258)}
{pt3dadd(197784.000000,134424.000000,74325.000000,270.583198)}
{pt3dadd(197664.000000,134232.000000,74275.000000,286.540910)}
{pt3dadd(197592.000000,133920.000000,74200.000000,314.049036)}
{pt3dadd(197652.000000,133824.000000,74350.000000,349.490908)}
{pt3dadd(197700.000000,133704.000000,74575.000000,382.438064)}
{pt3dadd(197688.000000,133584.000000,74450.000000,407.127410)}
{pt3dadd(197652.000000,133428.000000,74425.000000,414.683354)}
{pt3dadd(197628.000000,133248.000000,74400.000000,410.997526)}
{pt3dadd(197592.000000,133128.000000,74375.000000,406.933896)}
{pt3dadd(197568.000000,133020.000000,74525.000000,399.000150)}
{pt3dadd(197544.000000,132936.000000,74550.000000,403.266958)}
{pt3dadd(197568.000000,132804.000000,74525.000000,411.597396)}
{pt3dadd(197520.000000,132708.000000,74550.000000,446.793776)}
{pt3dadd(197556.000000,132600.000000,74575.000000,479.879854)}
{pt3dadd(197592.000000,132396.000000,74575.000000,496.560554)}
{pt3dadd(197640.000000,132276.000000,74550.000000,488.230116)}
{pt3dadd(197700.000000,132156.000000,74500.000000,483.963308)}
{pt3dadd(197760.000000,132060.000000,74425.000000,448.766928)}
{pt3dadd(197712.000000,131892.000000,74375.000000,395.055134)}
{pt3dadd(197676.000000,131796.000000,74350.000000,358.730894)}
{pt3dadd(197628.000000,131676.000000,74400.000000,358.730894)}
{pt3dadd(197592.000000,131532.000000,74450.000000,334.041548)}
{pt3dadd(197364.000000,131328.000000,74775.000000,320.971776)}
{pt3dadd(197040.000000,130536.000000,74575.000000,310.219250)}
{pt3dadd(196764.000000,130332.000000,74350.000000,302.354664)}
{pt3dadd(196356.000000,129888.000000,74175.000000,270.976422)}
{pt3dadd(196068.000000,129540.000000,73850.000000,265.338062)}
{pt3dadd(195900.000000,129408.000000,73600.000000,278.407834)}
{pt3dadd(195756.000000,129072.000000,73500.000000,262.283970)}
{pt3dadd(195624.000000,128904.000000,73275.000000,246.160106)}
{pt3dadd(195468.000000,128712.000000,73000.000000,228.428128)}
{pt3dadd(195324.000000,128544.000000,72975.000000,208.878618)}
{pt3dadd(195192.000000,128340.000000,72800.000000,170.620976)}
{pt3dadd(195072.000000,128148.000000,72675.000000,174.082446)}
{pt3dadd(195036.000000,127968.000000,72600.000000,175.770966)}
{pt3dadd(194988.000000,127824.000000,72525.000000,177.379080)}
{pt3dadd(194952.000000,127656.000000,72375.000000,181.013622)}
{pt3dadd(194820.000000,127512.000000,72175.000000,184.648164)}
{pt3dadd(194784.000000,127332.000000,72225.000000,211.095428)}
{pt3dadd(194700.000000,127224.000000,72300.000000,230.644938)}
{pt3dadd(194496.000000,127068.000000,72150.000000,254.633388)}
{pt3dadd(194532.000000,126936.000000,71950.000000,276.186716)}
{pt3dadd(194652.000000,126816.000000,71925.000000,297.740044)}
{pt3dadd(194532.000000,126660.000000,71700.000000,281.579260)}
{pt3dadd(194568.000000,126516.000000,71550.000000,269.671372)}
{pt3dadd(194568.000000,126216.000000,71350.000000,269.671372)}
{pt3dadd(194544.000000,126096.000000,71150.000000,264.033012)}
{pt3dadd(194520.000000,125952.000000,70925.000000,261.145072)}
{pt3dadd(194568.000000,125748.000000,70725.000000,277.305856)}
{pt3dadd(194664.000000,125604.000000,70525.000000,286.594294)}
{pt3dadd(194676.000000,125388.000000,70300.000000,274.091014)}
{pt3dadd(194688.000000,125208.000000,70100.000000,289.288830)}
{pt3dadd(194664.000000,124908.000000,69850.000000,286.538410)}
{pt3dadd(194568.000000,124704.000000,69575.000000,277.867706)}
{pt3dadd(194244.000000,124632.000000,69325.000000,277.867706)}
{pt3dadd(194040.000000,124224.000000,68975.000000,277.867706)}
{pt3dadd(193776.000000,123996.000000,68800.000000,244.893330)}
{pt3dadd(193428.000000,123612.000000,68525.000000,223.655300)}
{pt3dadd(193500.000000,123480.000000,68375.000000,213.902440)}
{pt3dadd(193332.000000,123252.000000,68400.000000,195.283860)}
{pt3dadd(193080.000000,123024.000000,68375.000000,216.891384)}
{pt3dadd(192936.000000,123132.000000,68125.000000,243.338648)}
{pt3dadd(192708.000000,122976.000000,68025.000000,267.327098)}
{pt3dadd(192552.000000,122772.000000,67900.000000,279.830378)}
{pt3dadd(192420.000000,122580.000000,67850.000000,298.448958)}
{pt3dadd(192180.000000,122412.000000,67750.000000,272.633998)}
{pt3dadd(192048.000000,122436.000000,67625.000000,242.725264)}
{pt3dadd(191808.000000,122328.000000,67475.000000,218.736814)}
{pt3dadd(191664.000000,122100.000000,67475.000000,180.981607)}
{pt3dadd(191448.000000,122136.000000,67475.000000,168.852050)}

{create adhoc22}
{access adhoc22}
{connect adhoc22(1), adhoc21(0)}
{nseg = 1}
{strdef color color = "White"}
{pt3dclear()}
{pt3dadd(191448.000000,122136.000000,67475.000000,168.852050)}
{pt3dadd(191580.000000,122400.000000,67225.000000,194.579500)}
{pt3dadd(191148.000000,122172.000000,67050.000000,184.010920)}
{pt3dadd(190800.000000,121956.000000,66900.000000,213.919654)}
{pt3dadd(190584.000000,121944.000000,66675.000000,218.790284)}
{pt3dadd(190224.000000,121680.000000,66500.000000,213.962114)}
{pt3dadd(189888.000000,121560.000000,66375.000000,217.074396)}
{pt3dadd(189564.000000,121428.000000,66150.000000,188.360664)}
{pt3dadd(189324.000000,121296.000000,66225.000000,140.925665)}
{pt3dadd(189144.000000,121248.000000,66225.000000,138.430949)}
{pt3dadd(188868.000000,121092.000000,66225.000000,168.446989)}
{pt3dadd(188376.000000,120960.000000,65975.000000,197.978837)}
{pt3dadd(188244.000000,120828.000000,65900.000000,231.563199)}
{pt3dadd(188136.000000,120624.000000,65800.000000,265.213328)}
{pt3dadd(188040.000000,120492.000000,65725.000000,260.574634)}
{pt3dadd(187932.000000,120504.000000,65550.000000,243.028386)}
{pt3dadd(187788.000000,120456.000000,65300.000000,240.533670)}
{pt3dadd(187788.000000,120324.000000,65175.000000,235.663040)}
{pt3dadd(187536.000000,120024.000000,65025.000000,238.157756)}
{pt3dadd(187380.000000,119928.000000,64800.000000,242.796450)}
{pt3dadd(187236.000000,119784.000000,64675.000000,252.084888)}
{pt3dadd(187128.000000,119724.000000,64525.000000,257.199054)}
{pt3dadd(187080.000000,119712.000000,64300.000000,245.139624)}
{pt3dadd(187104.000000,119604.000000,64100.000000,226.521044)}
{pt3dadd(187032.000000,119556.000000,63925.000000,215.720242)}
{pt3dadd(187044.000000,119316.000000,63625.000000,193.962012)}
{pt3dadd(187056.000000,119292.000000,63400.000000,180.001716)}
{pt3dadd(187116.000000,119292.000000,63200.000000,185.590930)}
{pt3dadd(187200.000000,119328.000000,63025.000000,194.921072)}
{pt3dadd(187284.000000,119376.000000,62825.000000,194.921072)}
{pt3dadd(187428.000000,119388.000000,62700.000000,194.921072)}
{pt3dadd(187500.000000,119220.000000,62525.000000,184.503688)}
{pt3dadd(187452.000000,119136.000000,62350.000000,175.617840)}
{pt3dadd(187428.000000,119088.000000,62150.000000,157.717288)}
{pt3dadd(187404.000000,119028.000000,62000.000000,140.392524)}
{pt3dadd(187428.000000,118992.000000,61825.000000,134.961764)}
{pt3dadd(187560.000000,118968.000000,61625.000000,139.789934)}
{pt3dadd(187680.000000,118956.000000,61475.000000,134.087638)}
{pt3dadd(187692.000000,118716.000000,61350.000000,142.658048)}
{pt3dadd(187668.000000,118716.000000,61225.000000,151.520100)}
{pt3dadd(187572.000000,118548.000000,61025.000000,147.052203)}
{pt3dadd(187488.000000,118428.000000,60875.000000,135.593273)}
{pt3dadd(187464.000000,118308.000000,60800.000000,136.916273)}
{pt3dadd(187284.000000,118092.000000,60625.000000,130.928863)}
{pt3dadd(187212.000000,117792.000000,60575.000000,120.042963)}
{pt3dadd(187152.000000,117576.000000,60450.000000,131.473156)}
{pt3dadd(187068.000000,117432.000000,60500.000000,144.705036)}
{pt3dadd(186840.000000,117408.000000,60425.000000,154.153916)}
{pt3dadd(186696.000000,117312.000000,60350.000000,165.464388)}
{pt3dadd(186564.000000,117204.000000,60300.000000,182.951408)}
{pt3dadd(186432.000000,117252.000000,60250.000000,186.248042)}
{pt3dadd(186288.000000,117288.000000,60200.000000,222.732734)}
{pt3dadd(186228.000000,117288.000000,60100.000000,249.179998)}
{pt3dadd(186084.000000,117228.000000,59975.000000,287.488926)}
{pt3dadd(185976.000000,117120.000000,60050.000000,323.973618)}
{pt3dadd(185844.000000,117180.000000,60025.000000,362.231260)}
{pt3dadd(185724.000000,117120.000000,59975.000000,369.787204)}
{pt3dadd(185580.000000,117012.000000,59900.000000,387.380576)}
{pt3dadd(185448.000000,117000.000000,59950.000000,391.250692)}
{pt3dadd(185316.000000,116916.000000,59950.000000,398.806636)}
{pt3dadd(185160.000000,116904.000000,59900.000000,398.806636)}
{pt3dadd(184944.000000,116856.000000,59900.000000,391.250692)}
{pt3dadd(184776.000000,116820.000000,59900.000000,380.184432)}
{pt3dadd(184584.000000,116808.000000,59875.000000,369.118172)}
{pt3dadd(184428.000000,116724.000000,59850.000000,351.524800)}
{pt3dadd(184224.000000,116748.000000,59800.000000,344.671332)}
{pt3dadd(184008.000000,116532.000000,59625.000000,316.210340)}
{pt3dadd(183804.000000,116424.000000,59625.000000,287.052228)}
{pt3dadd(183660.000000,116304.000000,59675.000000,262.101552)}
{pt3dadd(183516.000000,116520.000000,59750.000000,256.181268)}
{pt3dadd(183456.000000,116496.000000,59700.000000,232.418716)}
{pt3dadd(183144.000000,116436.000000,59700.000000,220.933546)}
{pt3dadd(182892.000000,116484.000000,59750.000000,215.344332)}
{pt3dadd(182640.000000,116328.000000,59825.000000,205.547682)}
{pt3dadd(182400.000000,116388.000000,59925.000000,178.419582)}
{pt3dadd(182244.000000,116376.000000,59900.000000,158.176172)}
{pt3dadd(182100.000000,116412.000000,59875.000000,146.174470)}
{pt3dadd(181836.000000,116532.000000,59925.000000,137.175540)}
{pt3dadd(181608.000000,116700.000000,60000.000000,130.888760)}
{pt3dadd(181404.000000,116904.000000,60000.000000,118.167169)}
{pt3dadd(181272.000000,117000.000000,59975.000000,110.043945)}
{pt3dadd(181188.000000,116904.000000,59950.000000,112.275237)}
{pt3dadd(181116.000000,116904.000000,59925.000000,116.445997)}
{pt3dadd(181020.000000,116844.000000,59975.000000,132.529427)}
{pt3dadd(180792.000000,117108.000000,59900.000000,155.668402)}
{pt3dadd(180528.000000,117420.000000,59850.000000,171.565244)}
{pt3dadd(180396.000000,117636.000000,59900.000000,192.820824)}
{pt3dadd(180444.000000,117900.000000,59925.000000,203.238208)}
{pt3dadd(180504.000000,118260.000000,59675.000000,178.714731)}
{pt3dadd(180612.000000,118320.000000,59700.000000,162.866587)}
{pt3dadd(180420.000000,118320.000000,59900.000000,157.435827)}
{pt3dadd(180192.000000,118320.000000,60125.000000,131.925107)}
{pt3dadd(180084.000000,118476.000000,60225.000000,120.049113)}
{pt3dadd(179796.000000,118608.000000,60425.000000,115.561155)}
{pt3dadd(179448.000000,118608.000000,60550.000000,109.165783)}
{pt3dadd(179016.000000,118608.000000,60700.000000,101.874952)}
{pt3dadd(178824.000000,118728.000000,60775.000000,96.162395)}
{pt3dadd(178836.000000,118752.000000,60825.000000,80.354343)}
{pt3dadd(178704.000000,118800.000000,61000.000000,81.166550)}
{pt3dadd(178608.000000,118872.000000,61125.000000,91.534072)}
{pt3dadd(178524.000000,118944.000000,61250.000000,87.657206)}
{pt3dadd(178440.000000,119052.000000,61400.000000,84.619579)}
{pt3dadd(178416.000000,119196.000000,61550.000000,81.227977)}
{pt3dadd(178512.000000,119148.000000,61675.000000,88.171625)}
{pt3dadd(178632.000000,119148.000000,61800.000000,84.199475)}
{pt3dadd(178332.000000,119628.000000,61650.000000,95.367172)}
{pt3dadd(178092.000000,119880.000000,61600.000000,107.229638)}
{pt3dadd(177744.000000,120192.000000,61525.000000,116.061770)}
{pt3dadd(177672.000000,120300.000000,61425.000000,117.261770)}
{pt3dadd(177348.000000,120252.000000,61325.000000,109.970939)}
{pt3dadd(177288.000000,120252.000000,61275.000000,102.680108)}
{pt3dadd(177276.000000,120504.000000,61200.000000,96.879318)}
{pt3dadd(177276.000000,120576.000000,61100.000000,90.802402)}
{pt3dadd(177336.000000,120720.000000,61000.000000,76.073522)}
{pt3dadd(177408.000000,120984.000000,60575.000000,70.285984)}
{pt3dadd(177504.000000,121068.000000,60675.000000,58.867439)}
{pt3dadd(177660.000000,121308.000000,60775.000000,60.608154)}

{create adhoc23}
{access adhoc23}
{connect adhoc23(1), adhoc21(0)}
{nseg = 1}
{strdef color color = "White"}
{pt3dclear()}
{pt3dadd(191448.000000,122136.000000,67475.000000,168.852050)}
{pt3dadd(191232.000000,122052.000000,67575.000000,106.335350)}
{pt3dadd(191064.000000,121956.000000,67475.000000,110.029712)}
{pt3dadd(191196.000000,121764.000000,67575.000000,108.421598)}
{pt3dadd(191220.000000,121620.000000,67625.000000,122.759967)}
{pt3dadd(190956.000000,121392.000000,67700.000000,147.951350)}
{pt3dadd(190896.000000,121332.000000,67825.000000,168.126878)}
{pt3dadd(190752.000000,121080.000000,67950.000000,171.117024)}
{pt3dadd(190524.000000,120900.000000,68125.000000,168.126878)}
{pt3dadd(190368.000000,120744.000000,68250.000000,175.437288)}
{pt3dadd(190152.000000,120516.000000,68325.000000,171.430208)}
{pt3dadd(190008.000000,120240.000000,68450.000000,175.246472)}
{pt3dadd(189792.000000,120072.000000,68575.000000,188.339756)}
{pt3dadd(189588.000000,119928.000000,68525.000000,202.268158)}
{pt3dadd(189444.000000,119616.000000,68525.000000,202.268158)}
{pt3dadd(189288.000000,119508.000000,68650.000000,181.979314)}
{pt3dadd(189072.000000,119460.000000,68550.000000,180.024642)}
{pt3dadd(188988.000000,119328.000000,68600.000000,166.931358)}
{pt3dadd(188844.000000,119376.000000,68700.000000,159.289736)}
{pt3dadd(188652.000000,119148.000000,68875.000000,173.037686)}
{pt3dadd(188304.000000,118908.000000,69050.000000,191.899310)}
{pt3dadd(188064.000000,118524.000000,69200.000000,237.591800)}

{create adhoc24}
{access adhoc24}
{connect adhoc24(1), adhoc23(0)}
{nseg = 1}
{strdef color color = "White"}
{pt3dclear()}
{pt3dadd(188064.000000,118524.000000,69200.000000,237.591800)}
{pt3dadd(188016.000000,118260.000000,69350.000000,233.820500)}
{pt3dadd(187932.000000,117972.000000,69575.000000,205.292740)}
{pt3dadd(187584.000000,117720.000000,69725.000000,198.822524)}
{pt3dadd(187464.000000,117576.000000,69975.000000,194.404716)}
{pt3dadd(187272.000000,117420.000000,69950.000000,184.608066)}
{pt3dadd(187188.000000,117252.000000,70000.000000,171.514782)}
{pt3dadd(187020.000000,117096.000000,70025.000000,185.540332)}
{pt3dadd(186756.000000,116940.000000,70200.000000,168.492188)}
{pt3dadd(186624.000000,116784.000000,70275.000000,172.909996)}
{pt3dadd(186576.000000,116628.000000,70375.000000,182.706646)}
{pt3dadd(186192.000000,116292.000000,70525.000000,189.637822)}
{pt3dadd(186228.000000,116268.000000,70675.000000,188.029708)}
{pt3dadd(186084.000000,116112.000000,70825.000000,216.418698)}
{pt3dadd(185928.000000,115872.000000,70900.000000,221.289328)}
{pt3dadd(185820.000000,115764.000000,71025.000000,221.289328)}
{pt3dadd(185676.000000,115728.000000,71100.000000,234.584846)}
{pt3dadd(185520.000000,115512.000000,71125.000000,243.470694)}
{pt3dadd(185364.000000,115428.000000,71150.000000,223.244000)}
{pt3dadd(185208.000000,115224.000000,71275.000000,200.027160)}
{pt3dadd(185064.000000,115140.000000,71375.000000,185.402340)}
{pt3dadd(184752.000000,115032.000000,71425.000000,158.213350)}
{pt3dadd(184596.000000,114816.000000,71500.000000,135.074375)}
{pt3dadd(184464.000000,114840.000000,71525.000000,121.716707)}
{pt3dadd(184308.000000,114756.000000,71625.000000,111.349185)}
{pt3dadd(184176.000000,114648.000000,71725.000000,111.349185)}
{pt3dadd(184020.000000,114576.000000,71800.000000,112.609185)}
{pt3dadd(184032.000000,114516.000000,71875.000000,115.432119)}
{pt3dadd(183972.000000,114516.000000,72025.000000,124.410491)}
{pt3dadd(183888.000000,114504.000000,72200.000000,142.837743)}
{pt3dadd(183648.000000,114264.000000,72375.000000,136.206983)}
{pt3dadd(183648.000000,114120.000000,72525.000000,132.604125)}
{pt3dadd(183600.000000,114240.000000,72475.000000,140.148370)}
{pt3dadd(183456.000000,114096.000000,72450.000000,114.285710)}

{create adhoc25}
{access adhoc25}
{connect adhoc25(1), adhoc23(0)}
{nseg = 1}
{strdef color color = "White"}
{pt3dclear()}
{pt3dadd(188064.000000,118524.000000,69200.000000,237.591800)}
{pt3dadd(187920.000000,118464.000000,69175.000000,217.492750)}
{pt3dadd(187680.000000,118464.000000,69175.000000,221.438068)}
{pt3dadd(187464.000000,118560.000000,69125.000000,210.668913)}
{pt3dadd(187260.000000,118596.000000,69025.000000,249.471370)}

{create adhoc26}
{access adhoc26}
{connect adhoc26(1), adhoc6(0)}
{nseg = 1}
{strdef color color = "White"}
{pt3dclear()}
{pt3dadd(200268.000000,144108.000000,76525.000000,630.401730)}
{pt3dadd(199992.000000,144636.000000,76325.000000,703.519793)}
{pt3dadd(199680.000000,144912.000000,76050.000000,528.192436)}
{pt3dadd(199416.000000,145044.000000,75875.000000,469.839190)}
{pt3dadd(199188.000000,145320.000000,75875.000000,356.186004)}
{pt3dadd(198960.000000,145632.000000,75875.000000,259.043716)}
{pt3dadd(198648.000000,145956.000000,75900.000000,238.199212)}
{pt3dadd(198360.000000,146328.000000,75900.000000,244.753034)}
{pt3dadd(197928.000000,146568.000000,75900.000000,222.866300)}
{pt3dadd(197460.000000,146856.000000,76025.000000,210.836844)}
{pt3dadd(197232.000000,147132.000000,76025.000000,187.179352)}
{pt3dadd(196884.000000,147480.000000,76050.000000,173.070968)}
{pt3dadd(196644.000000,147900.000000,76050.000000,180.657832)}
{pt3dadd(196428.000000,148020.000000,76325.000000,169.024254)}
{pt3dadd(196332.000000,148500.000000,76400.000000,183.132638)}
{pt3dadd(196224.000000,148896.000000,76400.000000,202.731270)}
{pt3dadd(196260.000000,149340.000000,76400.000000,207.388950)}
{pt3dadd(196212.000000,149796.000000,76400.000000,189.382682)}
{pt3dadd(196212.000000,150252.000000,76400.000000,191.093020)}
{pt3dadd(196200.000000,150480.000000,76500.000000,181.642316)}
{pt3dadd(196080.000000,150804.000000,76500.000000,176.250472)}
{pt3dadd(195972.000000,151140.000000,76500.000000,195.109638)}
{pt3dadd(195828.000000,151368.000000,76600.000000,213.115906)}
{pt3dadd(195624.000000,151644.000000,76600.000000,259.521492)}
{pt3dadd(195456.000000,152040.000000,76600.000000,254.863812)}
{pt3dadd(195348.000000,152484.000000,76600.000000,271.196028)}
{pt3dadd(195108.000000,152928.000000,76525.000000,270.684707)}
{pt3dadd(194904.000000,153432.000000,76525.000000,252.695020)}

{create adhoc27}
{access adhoc27}
{connect adhoc27(1), adhoc26(0)}
{nseg = 1}
{strdef color color = "White"}
{pt3dclear()}
{pt3dadd(194904.000000,153432.000000,76525.000000,252.695020)}
{pt3dadd(195024.000000,153708.000000,76475.000000,227.307287)}
{pt3dadd(195036.000000,154032.000000,76475.000000,208.304142)}
{pt3dadd(195036.000000,154332.000000,76450.000000,187.314246)}
{pt3dadd(195000.000000,154728.000000,76400.000000,189.720864)}
{pt3dadd(194988.000000,155052.000000,76300.000000,197.848248)}
{pt3dadd(194928.000000,155376.000000,76150.000000,207.298952)}
{pt3dadd(194916.000000,155484.000000,76025.000000,215.426336)}
{pt3dadd(194856.000000,155424.000000,75850.000000,236.416232)}
{pt3dadd(194640.000000,155496.000000,75800.000000,236.416232)}
{pt3dadd(194664.000000,155568.000000,75550.000000,246.295116)}
{pt3dadd(194640.000000,155928.000000,75575.000000,253.176628)}
{pt3dadd(194640.000000,156204.000000,75525.000000,271.838258)}
{pt3dadd(194640.000000,156324.000000,75250.000000,285.801250)}
{pt3dadd(194592.000000,156552.000000,75175.000000,288.328200)}
{pt3dadd(194592.000000,156828.000000,75200.000000,291.114162)}
{pt3dadd(194628.000000,157164.000000,75200.000000,286.415524)}
{pt3dadd(194568.000000,157464.000000,75125.000000,245.066028)}
{pt3dadd(194544.000000,157944.000000,75100.000000,194.777658)}
{pt3dadd(194532.000000,158460.000000,75100.000000,169.853712)}
{pt3dadd(194664.000000,158916.000000,75100.000000,135.658626)}
{pt3dadd(194700.000000,159288.000000,75000.000000,157.545360)}
{pt3dadd(194724.000000,159660.000000,75000.000000,205.506312)}
{pt3dadd(194748.000000,159876.000000,74825.000000,247.011936)}
{pt3dadd(194784.000000,160128.000000,74700.000000,258.468560)}
{pt3dadd(194808.000000,160428.000000,74775.000000,284.697438)}
{pt3dadd(194868.000000,160752.000000,74775.000000,270.036292)}
{pt3dadd(194916.000000,160968.000000,74650.000000,223.232966)}
{pt3dadd(194784.000000,160836.000000,74475.000000,190.666216)}
{pt3dadd(194748.000000,161064.000000,74300.000000,175.377710)}
{pt3dadd(194664.000000,161280.000000,74200.000000,162.551688)}
{pt3dadd(194568.000000,161508.000000,74100.000000,165.204984)}
{pt3dadd(194340.000000,161772.000000,74000.000000,186.735224)}
{pt3dadd(194148.000000,162024.000000,73950.000000,209.423090)}
{pt3dadd(193872.000000,162180.000000,73950.000000,240.832214)}
{pt3dadd(193704.000000,162408.000000,73950.000000,264.549706)}
{pt3dadd(193248.000000,162732.000000,73725.000000,264.549706)}
{pt3dadd(192756.000000,163056.000000,73675.000000,283.211336)}
{pt3dadd(192312.000000,163392.000000,73675.000000,283.211336)}
{pt3dadd(191952.000000,163692.000000,73600.000000,298.605538)}
{pt3dadd(191544.000000,163980.000000,73600.000000,308.288516)}
{pt3dadd(191316.000000,164292.000000,73525.000000,311.074478)}
{pt3dadd(191076.000000,164616.000000,73525.000000,284.285464)}
{pt3dadd(190896.000000,165012.000000,73525.000000,265.247012)}
{pt3dadd(190728.000000,165444.000000,73575.000000,212.274150)}
{pt3dadd(190860.000000,165600.000000,73675.000000,173.738592)}
{pt3dadd(190776.000000,165756.000000,73800.000000,138.385880)}
{pt3dadd(190716.000000,165888.000000,73950.000000,142.251462)}
{pt3dadd(190596.000000,166092.000000,74325.000000,163.581934)}
{pt3dadd(190500.000000,166356.000000,74575.000000,193.573730)}
{pt3dadd(190344.000000,166704.000000,74725.000000,211.534840)}
{pt3dadd(190284.000000,167148.000000,74900.000000,252.884336)}
{pt3dadd(190044.000000,167592.000000,74900.000000,261.844776)}
{pt3dadd(189792.000000,168156.000000,74900.000000,247.919178)}
{pt3dadd(189648.000000,168576.000000,74900.000000,250.325796)}
{pt3dadd(189684.000000,169032.000000,75025.000000,237.499774)}
{pt3dadd(189672.000000,169440.000000,74850.000000,216.655270)}
{pt3dadd(189528.000000,169644.000000,74700.000000,202.033392)}
{pt3dadd(189384.000000,169800.000000,74575.000000,195.479333)}
{pt3dadd(189324.000000,169992.000000,74375.000000,179.585630)}

{create adhoc28}
{access adhoc28}
{connect adhoc28(1), adhoc26(0)}
{nseg = 1}
{strdef color color = "White"}
{pt3dclear()}
{pt3dadd(194904.000000,153432.000000,76525.000000,252.695020)}
{pt3dadd(195600.000000,152388.000000,76325.000000,163.714503)}
{pt3dadd(195528.000000,152232.000000,76150.000000,212.453164)}
{pt3dadd(195564.000000,152196.000000,75950.000000,207.754526)}
{pt3dadd(195408.000000,152064.000000,75825.000000,225.531062)}
{pt3dadd(195564.000000,151968.000000,75575.000000,233.771173)}
{pt3dadd(195756.000000,151812.000000,75475.000000,179.585630)}

{create adhoc29}
{access adhoc29}
{connect adhoc29(1), adhoc1(0)}
{nseg = 1}
{strdef color color = "White"}
{pt3dclear()}
{pt3dadd(200304.000000,144732.000000,81700.000000,108.843540)}
{pt3dadd(200472.000000,144348.000000,81700.000000,124.901430)}
{pt3dadd(200472.000000,144060.000000,81825.000000,132.031618)}
{pt3dadd(200424.000000,143796.000000,81950.000000,138.045910)}
{pt3dadd(200352.000000,143580.000000,81900.000000,143.218060)}
{pt3dadd(200340.000000,143304.000000,81900.000000,143.218060)}
{pt3dadd(200352.000000,142908.000000,81975.000000,143.218060)}
{pt3dadd(200520.000000,142680.000000,82125.000000,141.958060)}
{pt3dadd(200568.000000,142416.000000,82275.000000,129.645674)}
{pt3dadd(200568.000000,142224.000000,82350.000000,131.104284)}
{pt3dadd(200520.000000,141984.000000,82525.000000,137.391064)}
{pt3dadd(200472.000000,141720.000000,82650.000000,137.391064)}
{pt3dadd(200508.000000,141468.000000,82825.000000,145.961474)}
{pt3dadd(200364.000000,141156.000000,82950.000000,164.261270)}
{pt3dadd(200328.000000,140868.000000,83125.000000,176.731062)}
{pt3dadd(200352.000000,140652.000000,83225.000000,170.444282)}
{pt3dadd(200244.000000,140400.000000,83375.000000,167.596522)}
{pt3dadd(200184.000000,140112.000000,83600.000000,157.826112)}
{pt3dadd(200160.000000,139860.000000,83800.000000,169.311282)}
{pt3dadd(200004.000000,139560.000000,83950.000000,178.599720)}
{pt3dadd(199800.000000,139068.000000,84075.000000,201.816560)}
{pt3dadd(199644.000000,138828.000000,84375.000000,221.551920)}
{pt3dadd(199560.000000,138756.000000,84625.000000,247.446194)}
{pt3dadd(199668.000000,138564.000000,84900.000000,243.238758)}
{pt3dadd(199704.000000,138336.000000,85125.000000,223.012064)}
{pt3dadd(199812.000000,138132.000000,85350.000000,206.082004)}
{pt3dadd(199800.000000,137772.000000,85550.000000,197.657116)}
{pt3dadd(199608.000000,137412.000000,85775.000000,183.221772)}
{pt3dadd(199284.000000,136992.000000,85950.000000,205.852772)}
{pt3dadd(198840.000000,136524.000000,85950.000000,230.385910)}
{pt3dadd(198516.000000,136212.000000,86100.000000,318.395720)}
