# Supplementary material for: Full reconstruction of large lobula plate tangential cells in Drosophila from a 3D EM dataset
Source: PLoS One. 2018 Nov 28;13(11):e0207828. doi: 10.1371/journal.pone.0207828 (PMC6261601; doi:10.1371/journal.pone.0207828)
Supplement: S1 Dataset — (ZIP) [file pone.0207828.s001.zip › Diameter hoc/Cell45_6skels_ck.001_corrected_sorted_diametered.hoc0001.hoc]

/* created with convertKnossosNmlToHoc.m */

{create adhoc1}
{access adhoc1}
{nseg = 1}
{strdef color color = "White"}
{pt3dclear()}
{pt3dadd(168912.000000,153372.000000,127375.000000,406.362580)}
{pt3dadd(169176.000000,153240.000000,127225.000000,364.447053)}
{pt3dadd(169392.000000,152988.000000,127125.000000,337.073892)}
{pt3dadd(169656.000000,152664.000000,127150.000000,319.480520)}
{pt3dadd(169980.000000,152496.000000,127050.000000,315.970204)}
{pt3dadd(170136.000000,152292.000000,127000.000000,319.154164)}
{pt3dadd(170364.000000,152100.000000,126975.000000,335.111876)}
{pt3dadd(170568.000000,151944.000000,126925.000000,348.181648)}
{pt3dadd(170736.000000,151836.000000,126850.000000,358.219076)}
{pt3dadd(170928.000000,151704.000000,126800.000000,369.285336)}
{pt3dadd(171156.000000,151656.000000,126725.000000,379.824632)}
{pt3dadd(171444.000000,151524.000000,126700.000000,391.444206)}
{pt3dadd(171648.000000,151344.000000,126750.000000,403.063780)}
{pt3dadd(171924.000000,151272.000000,126775.000000,414.683354)}
{pt3dadd(172236.000000,151212.000000,126800.000000,418.746984)}
{pt3dadd(172428.000000,151092.000000,126800.000000,430.947538)}
{pt3dadd(172620.000000,150984.000000,126750.000000,435.214346)}
{pt3dadd(172872.000000,150936.000000,126700.000000,435.214346)}
{pt3dadd(173160.000000,150900.000000,126625.000000,443.961300)}
{pt3dadd(173388.000000,150780.000000,126575.000000,462.351766)}
{pt3dadd(173664.000000,150684.000000,126525.000000,481.661764)}
{pt3dadd(173976.000000,150648.000000,126525.000000,486.141910)}
{pt3dadd(174240.000000,150564.000000,126450.000000,499.593020)}
{pt3dadd(174492.000000,150588.000000,126375.000000,514.422872)}
{pt3dadd(174816.000000,150636.000000,126400.000000,514.422872)}
{pt3dadd(175128.000000,150600.000000,126300.000000,499.593020)}
{pt3dadd(175356.000000,150576.000000,126150.000000,504.297176)}
{pt3dadd(175656.000000,150564.000000,126000.000000,495.112874)}
{pt3dadd(175920.000000,150552.000000,125850.000000,471.536068)}
{pt3dadd(176232.000000,150516.000000,125725.000000,445.211856)}
{pt3dadd(176520.000000,150516.000000,125575.000000,432.401272)}
{pt3dadd(176784.000000,150408.000000,125450.000000,411.016416)}
{pt3dadd(177084.000000,150408.000000,125350.000000,385.092606)}
{pt3dadd(177444.000000,150144.000000,125200.000000,381.028976)}
{pt3dadd(177756.000000,149832.000000,124900.000000,384.899092)}
{pt3dadd(178068.000000,149556.000000,124600.000000,393.229530)}
{pt3dadd(178560.000000,149256.000000,124375.000000,414.614386)}
{pt3dadd(178968.000000,149112.000000,124075.000000,449.722498)}
{pt3dadd(179388.000000,148980.000000,123775.000000,462.533082)}
{pt3dadd(179664.000000,148764.000000,123525.000000,486.096020)}
{pt3dadd(180288.000000,148416.000000,123275.000000,470.415500)}

{create adhoc2}
{access adhoc2}
{connect adhoc2(1), adhoc1(0)}
{nseg = 1}
{strdef color color = "White"}
{pt3dclear()}
{pt3dadd(180288.000000,148416.000000,123275.000000,470.415500)}
{pt3dadd(180852.000000,148140.000000,123000.000000,495.131920)}
{pt3dadd(181404.000000,147912.000000,122600.000000,525.796340)}
{pt3dadd(181968.000000,147840.000000,122275.000000,546.071834)}
{pt3dadd(182436.000000,147504.000000,122025.000000,560.901686)}
{pt3dadd(182844.000000,147504.000000,121725.000000,566.347328)}
{pt3dadd(183336.000000,147312.000000,121475.000000,572.065254)}
{pt3dadd(183816.000000,147060.000000,121125.000000,583.787006)}
{pt3dadd(183948.000000,146892.000000,120800.000000,589.504932)}
{pt3dadd(184464.000000,146724.000000,120375.000000,606.672326)}
{pt3dadd(184800.000000,146736.000000,119900.000000,612.390252)}
{pt3dadd(185388.000000,146712.000000,119475.000000,612.390252)}
{pt3dadd(185772.000000,146688.000000,119025.000000,600.668500)}
{pt3dadd(186156.000000,146784.000000,118650.000000,600.668500)}
{pt3dadd(186504.000000,146772.000000,118275.000000,568.671254)}
{pt3dadd(187008.000000,146784.000000,117850.000000,568.671254)}
{pt3dadd(187212.000000,146760.000000,117475.000000,557.507686)}
{pt3dadd(187548.000000,146760.000000,117200.000000,552.062044)}
{pt3dadd(187860.000000,146616.000000,116950.000000,552.062044)}
{pt3dadd(188280.000000,146448.000000,116600.000000,578.055464)}
{pt3dadd(188364.000000,146388.000000,116275.000000,590.363304)}
{pt3dadd(188604.000000,146352.000000,115950.000000,558.852752)}
{pt3dadd(188832.000000,146328.000000,115625.000000,558.852752)}
{pt3dadd(188988.000000,146328.000000,115300.000000,537.563488)}
{pt3dadd(189252.000000,146208.000000,114950.000000,537.563488)}
{pt3dadd(189696.000000,145944.000000,114625.000000,537.563488)}
{pt3dadd(190092.000000,145956.000000,114075.000000,606.114860)}
{pt3dadd(190176.000000,145800.000000,113725.000000,643.155680)}
{pt3dadd(190344.000000,145680.000000,113400.000000,713.328154)}
{pt3dadd(190788.000000,145728.000000,112900.000000,762.211364)}
{pt3dadd(190956.000000,145800.000000,112550.000000,790.741024)}
{pt3dadd(191376.000000,145884.000000,112225.000000,798.038704)}
{pt3dadd(191520.000000,145980.000000,111750.000000,821.044662)}
{pt3dadd(191484.000000,145644.000000,111300.000000,829.492652)}
{pt3dadd(191628.000000,145488.000000,110950.000000,846.811022)}
{pt3dadd(191592.000000,145476.000000,110400.000000,871.662762)}
{pt3dadd(191868.000000,145476.000000,110000.000000,902.313050)}
{pt3dadd(192204.000000,145428.000000,109700.000000,894.267340)}
{pt3dadd(192300.000000,145248.000000,109475.000000,870.111072)}
{pt3dadd(192228.000000,145128.000000,109150.000000,844.746992)}
{pt3dadd(192552.000000,144972.000000,108850.000000,791.799153)}
{pt3dadd(192372.000000,144864.000000,108750.000000,804.570100)}

{create adhoc3}
{access adhoc3}
{connect adhoc3(1), adhoc2(0)}
{nseg = 1}
{strdef color color = "White"}
{pt3dclear()}
{pt3dadd(192372.000000,144864.000000,108750.000000,804.570100)}
{pt3dadd(192528.000000,143628.000000,108750.000000,472.515443)}
{pt3dadd(192804.000000,143040.000000,108750.000000,374.451684)}
{pt3dadd(192852.000000,142092.000000,108425.000000,263.431938)}
{pt3dadd(192900.000000,141720.000000,108450.000000,245.614672)}
{pt3dadd(193068.000000,141300.000000,108275.000000,253.872482)}
{pt3dadd(193152.000000,140724.000000,108150.000000,264.625008)}
{pt3dadd(193392.000000,139992.000000,108025.000000,284.223664)}
{pt3dadd(193440.000000,139464.000000,107800.000000,286.718380)}
{pt3dadd(193668.000000,138984.000000,107625.000000,286.718380)}
{pt3dadd(194112.000000,138096.000000,107425.000000,286.718380)}
{pt3dadd(194280.000000,137568.000000,107200.000000,292.934684)}
{pt3dadd(194292.000000,137148.000000,107075.000000,292.934684)}
{pt3dadd(194400.000000,136824.000000,107075.000000,292.934684)}
{pt3dadd(194460.000000,136476.000000,107050.000000,295.554134)}
{pt3dadd(194544.000000,136152.000000,106975.000000,284.801608)}
{pt3dadd(194520.000000,135864.000000,106950.000000,272.946944)}
{pt3dadd(194544.000000,135564.000000,106825.000000,275.979288)}
{pt3dadd(194460.000000,135228.000000,106725.000000,304.862814)}
{pt3dadd(194340.000000,134952.000000,106575.000000,327.256774)}
{pt3dadd(194472.000000,134640.000000,106475.000000,362.698646)}
{pt3dadd(194520.000000,134364.000000,106350.000000,393.026352)}
{pt3dadd(194736.000000,134088.000000,106300.000000,410.619724)}
{pt3dadd(194880.000000,133752.000000,106325.000000,418.950162)}
{pt3dadd(194880.000000,133500.000000,106150.000000,426.883908)}
{pt3dadd(194928.000000,133224.000000,106025.000000,411.754018)}
{pt3dadd(194856.000000,132888.000000,105900.000000,403.820272)}
{pt3dadd(194868.000000,132636.000000,105950.000000,380.306616)}
{pt3dadd(194880.000000,132396.000000,105850.000000,335.959242)}
{pt3dadd(194784.000000,132180.000000,105875.000000,298.141456)}
{pt3dadd(194664.000000,132024.000000,105850.000000,280.324190)}
{pt3dadd(194760.000000,131832.000000,105775.000000,257.930230)}
{pt3dadd(194700.000000,131652.000000,105725.000000,257.930230)}
{pt3dadd(194640.000000,131484.000000,105675.000000,251.768122)}
{pt3dadd(194580.000000,131304.000000,105625.000000,251.768122)}
{pt3dadd(194436.000000,130824.000000,105475.000000,249.273406)}
{pt3dadd(194520.000000,130476.000000,105425.000000,237.365518)}
{pt3dadd(194604.000000,130236.000000,105375.000000,231.995648)}
{pt3dadd(194568.000000,129912.000000,105325.000000,245.291166)}
{pt3dadd(194568.000000,129612.000000,105250.000000,250.161796)}
{pt3dadd(194436.000000,129384.000000,105075.000000,247.785882)}
{pt3dadd(194376.000000,128904.000000,104900.000000,252.203690)}
{pt3dadd(194352.000000,128652.000000,104700.000000,245.070280)}
{pt3dadd(194364.000000,128412.000000,104550.000000,245.070280)}
{pt3dadd(194328.000000,128184.000000,104375.000000,250.440150)}
{pt3dadd(194244.000000,127956.000000,104225.000000,243.969934)}
{pt3dadd(194160.000000,127680.000000,104075.000000,246.345848)}
{pt3dadd(194136.000000,127440.000000,104000.000000,258.849128)}
{pt3dadd(194148.000000,127212.000000,103925.000000,256.354412)}
{pt3dadd(194160.000000,126984.000000,103850.000000,253.603992)}
{pt3dadd(194172.000000,126768.000000,103675.000000,267.564288)}
{pt3dadd(194136.000000,126552.000000,103575.000000,272.678454)}
{pt3dadd(194100.000000,126300.000000,103500.000000,272.678454)}
{pt3dadd(194184.000000,126108.000000,103500.000000,283.430980)}
{pt3dadd(194232.000000,125880.000000,103500.000000,280.811530)}
{pt3dadd(194208.000000,125688.000000,103400.000000,292.666194)}
{pt3dadd(194136.000000,125460.000000,103325.000000,298.304554)}
{pt3dadd(194076.000000,125244.000000,103225.000000,295.554134)}
{pt3dadd(194040.000000,125016.000000,103150.000000,289.915774)}
{pt3dadd(194052.000000,124788.000000,103025.000000,289.915774)}
{pt3dadd(194172.000000,124572.000000,102950.000000,275.441660)}
{pt3dadd(194040.000000,124344.000000,102900.000000,267.183850)}
{pt3dadd(194076.000000,124140.000000,102850.000000,275.854554)}
{pt3dadd(194076.000000,123936.000000,102800.000000,291.052370)}
{pt3dadd(194100.000000,123720.000000,102750.000000,305.526484)}
{pt3dadd(193956.000000,123516.000000,102600.000000,316.816638)}
{pt3dadd(193944.000000,123312.000000,102475.000000,316.816638)}
{pt3dadd(194028.000000,123084.000000,102450.000000,288.596424)}
{pt3dadd(193944.000000,122892.000000,102425.000000,299.662684)}
{pt3dadd(193896.000000,122712.000000,102400.000000,296.478724)}
{pt3dadd(193848.000000,124524.000000,101675.000000,285.188570)}
{pt3dadd(193728.000000,124272.000000,101250.000000,280.317940)}
{pt3dadd(193704.000000,123972.000000,100925.000000,287.959562)}
{pt3dadd(193500.000000,123444.000000,100675.000000,245.780518)}
{pt3dadd(193380.000000,122712.000000,100450.000000,231.995648)}
{pt3dadd(193284.000000,122328.000000,100175.000000,237.365518)}
{pt3dadd(193308.000000,121644.000000,99875.000000,237.365518)}
{pt3dadd(193188.000000,121548.000000,99500.000000,244.159240)}
{pt3dadd(192984.000000,121284.000000,99175.000000,252.584128)}
{pt3dadd(192840.000000,121044.000000,98850.000000,250.208214)}
{pt3dadd(192600.000000,120756.000000,98475.000000,242.343628)}
{pt3dadd(192324.000000,120444.000000,98150.000000,249.833708)}
{pt3dadd(192228.000000,120108.000000,97875.000000,252.328424)}
{pt3dadd(192156.000000,119808.000000,97575.000000,257.199054)}
{pt3dadd(191940.000000,119496.000000,97375.000000,257.199054)}
{pt3dadd(191760.000000,119280.000000,97075.000000,265.063640)}
{pt3dadd(191592.000000,119028.000000,96825.000000,259.949474)}
{pt3dadd(191256.000000,118680.000000,96500.000000,259.949474)}
{pt3dadd(190992.000000,118356.000000,96375.000000,265.319344)}
{pt3dadd(190764.000000,118092.000000,96050.000000,275.559844)}
{pt3dadd(190584.000000,117996.000000,95750.000000,272.809424)}
{pt3dadd(190464.000000,117720.000000,95450.000000,289.778254)}
{pt3dadd(190200.000000,117456.000000,94875.000000,299.384007)}
{pt3dadd(190200.000000,117216.000000,94575.000000,334.315520)}

{create adhoc4}
{access adhoc4}
{connect adhoc4(1), adhoc3(0)}
{nseg = 1}
{strdef color color = "White"}
{pt3dclear()}
{pt3dadd(190200.000000,117216.000000,94575.000000,334.315520)}
{pt3dadd(190308.000000,116556.000000,94575.000000,290.860397)}
{pt3dadd(190224.000000,116160.000000,94300.000000,233.025717)}
{pt3dadd(190188.000000,115884.000000,94050.000000,160.811480)}

{create adhoc5}
{access adhoc5}
{connect adhoc5(1), adhoc4(0)}
{nseg = 1}
{strdef color color = "White"}
{pt3dclear()}
{pt3dadd(190188.000000,115884.000000,94050.000000,160.811480)}
{pt3dadd(190044.000000,115632.000000,94300.000000,145.610143)}
{pt3dadd(189912.000000,115608.000000,94625.000000,132.006317)}
{pt3dadd(189744.000000,115704.000000,94950.000000,120.000000)}

{create adhoc6}
{access adhoc6}
{connect adhoc6(1), adhoc4(0)}
{nseg = 1}
{strdef color color = "White"}
{pt3dclear()}
{pt3dadd(190188.000000,115884.000000,94050.000000,160.811480)}
{pt3dadd(190320.000000,115860.000000,93875.000000,129.885007)}
{pt3dadd(190308.000000,115776.000000,93650.000000,117.844498)}
{pt3dadd(190464.000000,115704.000000,93425.000000,107.450910)}
{pt3dadd(190512.000000,115608.000000,93175.000000,105.219618)}
{pt3dadd(190692.000000,115500.000000,92975.000000,111.233910)}
{pt3dadd(190872.000000,115308.000000,92800.000000,110.145476)}
{pt3dadd(190992.000000,115008.000000,92675.000000,113.821227)}
{pt3dadd(191160.000000,114792.000000,92600.000000,117.252519)}
{pt3dadd(191244.000000,114552.000000,92475.000000,123.266811)}
{pt3dadd(191340.000000,114192.000000,92425.000000,129.254221)}
{pt3dadd(191508.000000,113916.000000,92350.000000,133.945513)}
{pt3dadd(191604.000000,113604.000000,92375.000000,137.213410)}
{pt3dadd(191652.000000,113376.000000,92375.000000,133.782118)}
{pt3dadd(191724.000000,113028.000000,92400.000000,133.782118)}
{pt3dadd(191820.000000,112740.000000,92425.000000,130.642468)}
{pt3dadd(191964.000000,112452.000000,92400.000000,136.344764)}
{pt3dadd(191940.000000,112128.000000,92375.000000,147.803694)}
{pt3dadd(191940.000000,111816.000000,92425.000000,159.805396)}
{pt3dadd(192000.000000,111588.000000,92400.000000,167.481326)}
{pt3dadd(191964.000000,111348.000000,92375.000000,182.106146)}
{pt3dadd(192000.000000,111132.000000,92400.000000,207.702710)}
{pt3dadd(192072.000000,110928.000000,92350.000000,224.632770)}
{pt3dadd(192180.000000,110736.000000,92300.000000,243.251350)}
{pt3dadd(192156.000000,110520.000000,92250.000000,255.310780)}
{pt3dadd(192096.000000,110316.000000,92150.000000,249.148672)}
{pt3dadd(192000.000000,110136.000000,92125.000000,220.561962)}
{pt3dadd(191892.000000,109980.000000,92075.000000,195.955972)}
{pt3dadd(191736.000000,109392.000000,91800.000000,172.739132)}
{pt3dadd(191676.000000,109128.000000,91650.000000,162.452652)}
{pt3dadd(191508.000000,108804.000000,91425.000000,170.877540)}
{pt3dadd(191328.000000,108540.000000,91250.000000,178.937270)}
{pt3dadd(191100.000000,108144.000000,91075.000000,184.924680)}
{pt3dadd(190824.000000,107460.000000,90875.000000,192.984410)}
{pt3dadd(190536.000000,106848.000000,90675.000000,210.760970)}
{pt3dadd(190044.000000,106320.000000,90375.000000,202.336082)}
{pt3dadd(189732.000000,105828.000000,90175.000000,204.197674)}
{pt3dadd(189384.000000,105444.000000,90000.000000,204.197674)}
{pt3dadd(188964.000000,105072.000000,89800.000000,197.596554)}
{pt3dadd(188532.000000,104724.000000,89575.000000,164.356822)}
{pt3dadd(188256.000000,104484.000000,89375.000000,143.616463)}
{pt3dadd(187896.000000,104376.000000,89425.000000,108.843540)}

{create adhoc7}
{access adhoc7}
{connect adhoc7(1), adhoc3(0)}
{nseg = 1}
{strdef color color = "White"}
{pt3dclear()}
{pt3dadd(190200.000000,117216.000000,94575.000000,334.315520)}
{pt3dadd(189888.000000,117288.000000,94075.000000,255.791560)}
{pt3dadd(189552.000000,117336.000000,93700.000000,222.704276)}
{pt3dadd(189324.000000,117252.000000,93350.000000,193.073052)}
{pt3dadd(189036.000000,117060.000000,92975.000000,182.786572)}
{pt3dadd(188820.000000,116772.000000,92550.000000,177.463510)}
{pt3dadd(188616.000000,116448.000000,92175.000000,183.052724)}
{pt3dadd(188268.000000,116184.000000,91775.000000,199.176588)}
{pt3dadd(187968.000000,115992.000000,91475.000000,209.463068)}
{pt3dadd(187728.000000,115824.000000,91050.000000,217.486768)}
{pt3dadd(187368.000000,115716.000000,90700.000000,222.809830)}
{pt3dadd(187068.000000,115440.000000,90300.000000,227.017266)}
{pt3dadd(186864.000000,115368.000000,89800.000000,222.378572)}
{pt3dadd(186804.000000,115104.000000,89550.000000,207.022508)}
{pt3dadd(186756.000000,114960.000000,89300.000000,200.860400)}
{pt3dadd(186684.000000,114852.000000,89050.000000,204.867480)}
{pt3dadd(186636.000000,114768.000000,88775.000000,202.712452)}
{pt3dadd(186492.000000,114672.000000,88525.000000,192.915802)}
{pt3dadd(186324.000000,114648.000000,88275.000000,203.854058)}
{pt3dadd(186288.000000,114540.000000,88050.000000,196.922882)}
{pt3dadd(186204.000000,114384.000000,87825.000000,185.984626)}
{pt3dadd(186096.000000,114324.000000,87525.000000,181.977546)}
{pt3dadd(186012.000000,114300.000000,87250.000000,185.612088)}
{pt3dadd(185820.000000,114300.000000,86975.000000,176.281946)}
{pt3dadd(185688.000000,114252.000000,86650.000000,183.213122)}
{pt3dadd(185592.000000,114408.000000,86375.000000,190.144298)}
{pt3dadd(185520.000000,114384.000000,86100.000000,196.306406)}
{pt3dadd(185424.000000,114456.000000,85800.000000,204.731294)}
{pt3dadd(185400.000000,114360.000000,85600.000000,225.969324)}
{pt3dadd(185388.000000,114108.000000,85375.000000,241.884292)}
{pt3dadd(185100.000000,114012.000000,85150.000000,257.799260)}
{pt3dadd(185004.000000,113808.000000,84900.000000,255.644232)}
{pt3dadd(184944.000000,113376.000000,84625.000000,251.226424)}
{pt3dadd(184824.000000,113004.000000,84425.000000,239.318536)}
{pt3dadd(184656.000000,112596.000000,84350.000000,218.080506)}
{pt3dadd(184464.000000,112224.000000,84325.000000,204.120210)}
{pt3dadd(184320.000000,111864.000000,84225.000000,196.478588)}
{pt3dadd(184104.000000,111528.000000,84125.000000,192.471508)}
{pt3dadd(183936.000000,111156.000000,84000.000000,188.464428)}
{pt3dadd(183468.000000,110772.000000,84000.000000,186.856314)}
{pt3dadd(183084.000000,110472.000000,83950.000000,179.578580)}
{pt3dadd(182616.000000,110100.000000,83850.000000,185.167794)}
{pt3dadd(182172.000000,109812.000000,83925.000000,187.122466)}
{pt3dadd(181716.000000,109596.000000,83875.000000,177.201144)}
{pt3dadd(181284.000000,109320.000000,83900.000000,188.139400)}
{pt3dadd(180828.000000,109056.000000,83875.000000,197.469542)}
{pt3dadd(180660.000000,108744.000000,83900.000000,197.469542)}
{pt3dadd(180252.000000,108504.000000,83825.000000,188.583694)}
{pt3dadd(179880.000000,108216.000000,83800.000000,194.870474)}
{pt3dadd(179472.000000,107988.000000,83700.000000,183.932218)}
{pt3dadd(179016.000000,107784.000000,83725.000000,171.462426)}
{pt3dadd(178464.000000,107556.000000,83675.000000,162.576578)}
{pt3dadd(178068.000000,107232.000000,83550.000000,165.873212)}
{pt3dadd(177648.000000,106956.000000,83300.000000,161.045042)}
{pt3dadd(177396.000000,106656.000000,83075.000000,161.045042)}
{pt3dadd(177120.000000,106308.000000,82825.000000,165.873212)}
{pt3dadd(176808.000000,106020.000000,82550.000000,174.759060)}
{pt3dadd(176796.000000,105696.000000,82000.000000,178.393602)}
{pt3dadd(176820.000000,105372.000000,81800.000000,205.521702)}
{pt3dadd(176796.000000,105096.000000,81450.000000,234.006206)}
{pt3dadd(176676.000000,104712.000000,81200.000000,262.498553)}
{pt3dadd(176436.000000,104436.000000,80800.000000,303.234000)}

{create adhoc8}
{access adhoc8}
{connect adhoc8(1), adhoc7(0)}
{nseg = 1}
{strdef color color = "White"}
{pt3dclear()}
{pt3dadd(176436.000000,104436.000000,80800.000000,303.234000)}
{pt3dadd(176076.000000,104280.000000,80500.000000,228.589790)}
{pt3dadd(175644.000000,104472.000000,79925.000000,175.735505)}
{pt3dadd(175392.000000,104652.000000,79450.000000,130.559319)}
{pt3dadd(175224.000000,104796.000000,79225.000000,105.755320)}
{pt3dadd(174996.000000,104892.000000,79100.000000,90.041250)}
{pt3dadd(174588.000000,104748.000000,78650.000000,86.438392)}
{pt3dadd(174420.000000,104640.000000,78325.000000,97.173903)}
{pt3dadd(174348.000000,104592.000000,77950.000000,101.448149)}
{pt3dadd(174204.000000,104796.000000,77650.000000,104.948864)}
{pt3dadd(174240.000000,104928.000000,77275.000000,99.937922)}
{pt3dadd(174216.000000,104964.000000,76900.000000,90.444878)}
{pt3dadd(174120.000000,104712.000000,76475.000000,86.392364)}
{pt3dadd(174276.000000,104616.000000,76300.000000,95.819654)}
{pt3dadd(173904.000000,104316.000000,76050.000000,102.234793)}
{pt3dadd(173748.000000,104076.000000,75975.000000,145.860750)}

{create adhoc9}
{access adhoc9}
{connect adhoc9(1), adhoc7(0)}
{nseg = 1}
{strdef color color = "White"}
{pt3dclear()}
{pt3dadd(176436.000000,104436.000000,80800.000000,303.234000)}
{pt3dadd(175704.000000,103632.000000,80275.000000,237.905147)}
{pt3dadd(175128.000000,103464.000000,80125.000000,201.087388)}
{pt3dadd(174960.000000,103044.000000,80075.000000,174.210998)}
{pt3dadd(174996.000000,102612.000000,80150.000000,174.210998)}
{pt3dadd(175056.000000,102144.000000,80250.000000,168.621784)}
{pt3dadd(175008.000000,101796.000000,80300.000000,184.705214)}
{pt3dadd(174912.000000,101448.000000,80225.000000,198.633616)}
{pt3dadd(174744.000000,101088.000000,80125.000000,212.381566)}
{pt3dadd(174480.000000,100728.000000,80250.000000,206.792352)}
{pt3dadd(174180.000000,100428.000000,80450.000000,214.433974)}
{pt3dadd(173820.000000,100200.000000,80625.000000,201.340690)}
{pt3dadd(173400.000000,100020.000000,80700.000000,183.440138)}
{pt3dadd(172944.000000,99768.000000,80525.000000,169.692188)}
{pt3dadd(172656.000000,99360.000000,80300.000000,163.405408)}
{pt3dadd(172656.000000,98832.000000,80100.000000,149.477006)}
{pt3dadd(172680.000000,98460.000000,79875.000000,152.773640)}
{pt3dadd(172572.000000,97980.000000,79550.000000,164.805520)}
{pt3dadd(172452.000000,97476.000000,79450.000000,168.266990)}
{pt3dadd(172296.000000,97152.000000,79225.000000,176.326720)}
{pt3dadd(172152.000000,96840.000000,79125.000000,194.672930)}
{pt3dadd(171708.000000,96492.000000,78725.000000,216.972860)}
{pt3dadd(171588.000000,96120.000000,78425.000000,257.143380)}
{pt3dadd(171396.000000,95424.000000,78150.000000,277.670360)}
{pt3dadd(171468.000000,94752.000000,77950.000000,321.533533)}
{pt3dadd(171516.000000,94632.000000,77625.000000,288.794300)}

{create adhoc10}
{access adhoc10}
{connect adhoc10(1), adhoc9(0)}
{nseg = 1}
{strdef color color = "White"}
{pt3dclear()}
{pt3dadd(171516.000000,94632.000000,77625.000000,288.794300)}
{pt3dadd(171348.000000,94356.000000,78175.000000,213.729857)}
{pt3dadd(171348.000000,94092.000000,78450.000000,172.242542)}
{pt3dadd(171480.000000,93816.000000,78775.000000,149.942612)}
{pt3dadd(171348.000000,93348.000000,79150.000000,125.564932)}
{pt3dadd(171468.000000,92940.000000,79400.000000,149.187790)}
{pt3dadd(171636.000000,92724.000000,79700.000000,156.150086)}
{pt3dadd(171900.000000,92580.000000,80025.000000,180.446010)}
{pt3dadd(172080.000000,92352.000000,80350.000000,184.080552)}
{pt3dadd(172200.000000,92196.000000,80775.000000,175.218500)}
{pt3dadd(172212.000000,92220.000000,81250.000000,146.596148)}
{pt3dadd(172068.000000,92448.000000,81425.000000,118.888834)}
{pt3dadd(171960.000000,92688.000000,81600.000000,52.355602)}

{create adhoc11}
{access adhoc11}
{connect adhoc11(1), adhoc9(0)}
{nseg = 1}
{strdef color color = "White"}
{pt3dclear()}
{pt3dadd(171516.000000,94632.000000,77625.000000,288.794300)}
{pt3dadd(171288.000000,94320.000000,77425.000000,144.894738)}
{pt3dadd(171108.000000,94152.000000,77150.000000,92.729971)}
{pt3dadd(171120.000000,94056.000000,76950.000000,132.300000)}

{create adhoc12}
{access adhoc12}
{connect adhoc12(1), adhoc11(0)}
{nseg = 1}
{strdef color color = "White"}
{pt3dclear()}
{pt3dadd(171120.000000,94056.000000,76950.000000,132.300000)}
{pt3dadd(170976.000000,93804.000000,77000.000000,104.302718)}
{pt3dadd(170712.000000,93672.000000,76850.000000,99.382843)}
{pt3dadd(170472.000000,93432.000000,76750.000000,81.538071)}
{pt3dadd(170220.000000,92904.000000,76500.000000,98.724300)}

{create adhoc13}
{access adhoc13}
{connect adhoc13(1), adhoc11(0)}
{nseg = 1}
{strdef color color = "White"}
{pt3dclear()}
{pt3dadd(171120.000000,94056.000000,76950.000000,132.300000)}
{pt3dadd(170916.000000,94368.000000,76800.000000,105.435353)}
{pt3dadd(170856.000000,94392.000000,76550.000000,97.739990)}
{pt3dadd(170832.000000,94392.000000,76225.000000,81.751110)}
{pt3dadd(170916.000000,94596.000000,75950.000000,74.916497)}
{pt3dadd(171084.000000,94632.000000,75850.000000,52.355602)}

{create adhoc14}
{access adhoc14}
{connect adhoc14(1), adhoc2(0)}
{nseg = 1}
{strdef color color = "White"}
{pt3dclear()}
{pt3dadd(192372.000000,144864.000000,108750.000000,804.570100)}
{pt3dadd(192552.000000,145596.000000,108225.000000,755.281767)}
{pt3dadd(192828.000000,145812.000000,107725.000000,687.604174)}
{pt3dadd(193068.000000,145884.000000,107325.000000,659.074514)}
{pt3dadd(193332.000000,145848.000000,106950.000000,659.074514)}
{pt3dadd(193500.000000,145992.000000,106525.000000,689.030656)}
{pt3dadd(193464.000000,146460.000000,106200.000000,729.868156)}
{pt3dadd(193668.000000,146628.000000,105750.000000,761.463334)}
{pt3dadd(193764.000000,146796.000000,105300.000000,768.082562)}
{pt3dadd(193860.000000,146952.000000,104875.000000,760.784882)}
{pt3dadd(193824.000000,147072.000000,104450.000000,737.778924)}
{pt3dadd(193932.000000,147084.000000,104000.000000,702.945250)}
{pt3dadd(193932.000000,147096.000000,103650.000000,671.350072)}
{pt3dadd(193944.000000,147084.000000,103300.000000,658.426830)}
{pt3dadd(194232.000000,147072.000000,102900.000000,626.831652)}
{pt3dadd(194376.000000,147240.000000,102550.000000,606.958226)}
{pt3dadd(194352.000000,147264.000000,102175.000000,600.954400)}
{pt3dadd(194616.000000,147288.000000,101825.000000,625.599394)}
{pt3dadd(194496.000000,147312.000000,101425.000000,631.903408)}
{pt3dadd(194604.000000,147240.000000,101000.000000,656.548402)}
{pt3dadd(194532.000000,147252.000000,100650.000000,669.471644)}
{pt3dadd(194484.000000,147288.000000,100350.000000,688.398712)}
{pt3dadd(194436.000000,147348.000000,99925.000000,653.121736)}
{pt3dadd(194436.000000,147276.000000,99275.000000,635.095970)}
{pt3dadd(194412.000000,147264.000000,98950.000000,610.450976)}
{pt3dadd(194364.000000,147336.000000,98650.000000,591.523908)}
{pt3dadd(194268.000000,147396.000000,98225.000000,561.433272)}
{pt3dadd(194244.000000,147384.000000,98000.000000,572.065254)}
{pt3dadd(194112.000000,147396.000000,97825.000000,572.065254)}
{pt3dadd(194196.000000,147360.000000,97625.000000,561.433272)}
{pt3dadd(194244.000000,147420.000000,97450.000000,567.437098)}
{pt3dadd(194100.000000,147396.000000,97300.000000,590.908506)}
{pt3dadd(194100.000000,147492.000000,96975.000000,622.503684)}
{pt3dadd(194148.000000,147552.000000,96725.000000,647.148678)}
{pt3dadd(193932.000000,147756.000000,96400.000000,663.498586)}
{pt3dadd(193980.000000,147828.000000,96150.000000,641.144852)}
{pt3dadd(193944.000000,147912.000000,95950.000000,607.547748)}
{pt3dadd(193812.000000,148044.000000,95750.000000,570.506928)}
{pt3dadd(193692.000000,148176.000000,95525.000000,557.583686)}
{pt3dadd(193668.000000,148284.000000,95325.000000,551.865760)}
{pt3dadd(193884.000000,148380.000000,95150.000000,574.219494)}
{pt3dadd(193656.000000,148572.000000,94975.000000,621.386010)}
{pt3dadd(193320.000000,148920.000000,94750.000000,644.857418)}
{pt3dadd(193272.000000,149040.000000,94550.000000,674.030797)}
{pt3dadd(193140.000000,149052.000000,94275.000000,661.921800)}

{create adhoc15}
{access adhoc15}
{connect adhoc15(1), adhoc14(0)}
{nseg = 1}
{strdef color color = "White"}
{pt3dclear()}
{pt3dadd(193140.000000,149052.000000,94275.000000,661.921800)}
{pt3dadd(192744.000000,147720.000000,93950.000000,414.087490)}
{pt3dadd(192540.000000,147252.000000,93725.000000,339.934956)}
{pt3dadd(192384.000000,146892.000000,93450.000000,248.598740)}
{pt3dadd(192156.000000,146784.000000,93125.000000,224.013068)}
{pt3dadd(192060.000000,146424.000000,92950.000000,212.672222)}
{pt3dadd(192012.000000,146196.000000,92775.000000,199.376704)}
{pt3dadd(191976.000000,145980.000000,92600.000000,205.538812)}
{pt3dadd(191868.000000,145728.000000,92475.000000,222.249528)}
{pt3dadd(191808.000000,145572.000000,92300.000000,226.256608)}
{pt3dadd(191832.000000,145380.000000,92150.000000,240.216904)}
{pt3dadd(191784.000000,145176.000000,91950.000000,264.802576)}
{pt3dadd(191604.000000,145008.000000,91900.000000,277.305856)}
{pt3dadd(191688.000000,144852.000000,91775.000000,274.555436)}
{pt3dadd(191688.000000,144672.000000,91550.000000,295.134028)}
{pt3dadd(191592.000000,144504.000000,91425.000000,295.134028)}
{pt3dadd(191628.000000,144360.000000,91250.000000,289.213744)}
{pt3dadd(191556.000000,144204.000000,91100.000000,283.843874)}
{pt3dadd(191520.000000,144060.000000,90975.000000,289.482234)}
{pt3dadd(191556.000000,143928.000000,90850.000000,283.561950)}
{pt3dadd(191496.000000,143808.000000,90700.000000,286.312370)}
{pt3dadd(191520.000000,143664.000000,90600.000000,286.312370)}
{pt3dadd(191436.000000,143532.000000,90550.000000,288.931820)}
{pt3dadd(191448.000000,143400.000000,90525.000000,286.043880)}
{pt3dadd(191412.000000,143280.000000,90400.000000,283.293460)}
{pt3dadd(191352.000000,143136.000000,90300.000000,266.582744)}
{pt3dadd(191304.000000,143004.000000,90200.000000,254.079464)}
{pt3dadd(191244.000000,142884.000000,90100.000000,246.589384)}
{pt3dadd(191196.000000,142740.000000,90000.000000,231.931076)}
{pt3dadd(191100.000000,142608.000000,89925.000000,224.440996)}
{pt3dadd(191052.000000,142476.000000,89750.000000,233.287126)}
{pt3dadd(191040.000000,142332.000000,89650.000000,240.420536)}
{pt3dadd(190908.000000,142212.000000,89525.000000,245.291166)}
{pt3dadd(190848.000000,142116.000000,89425.000000,262.837414)}
{pt3dadd(190800.000000,141768.000000,89275.000000,267.708044)}
{pt3dadd(190908.000000,141564.000000,89075.000000,265.332130)}
{pt3dadd(190812.000000,141348.000000,88925.000000,273.589940)}
{pt3dadd(190740.000000,141180.000000,88750.000000,278.959810)}
{pt3dadd(190668.000000,141060.000000,88550.000000,278.959810)}
{pt3dadd(190632.000000,141012.000000,88375.000000,293.433924)}
{pt3dadd(190584.000000,140964.000000,88200.000000,312.778668)}
{pt3dadd(190560.000000,140796.000000,88050.000000,312.778668)}
{pt3dadd(190488.000000,140580.000000,87925.000000,325.226064)}
{pt3dadd(190428.000000,140376.000000,87775.000000,322.338124)}
{pt3dadd(190296.000000,140304.000000,87625.000000,300.730600)}
{pt3dadd(190164.000000,140220.000000,87475.000000,286.256486)}
{pt3dadd(190104.000000,140040.000000,87325.000000,292.472790)}
{pt3dadd(190080.000000,139884.000000,87200.000000,280.025394)}
{pt3dadd(190032.000000,139740.000000,87050.000000,277.274974)}
{pt3dadd(190068.000000,139536.000000,86950.000000,289.778254)}
{pt3dadd(190164.000000,139200.000000,86825.000000,304.252368)}
{pt3dadd(190140.000000,139056.000000,86650.000000,314.791664)}
{pt3dadd(190152.000000,138804.000000,86500.000000,323.895908)}
{pt3dadd(190164.000000,138540.000000,86350.000000,329.534268)}
{pt3dadd(190128.000000,138228.000000,86225.000000,326.783848)}
{pt3dadd(190068.000000,137892.000000,86100.000000,349.523698)}
{pt3dadd(189912.000000,137568.000000,85950.000000,322.015572)}
{pt3dadd(189768.000000,137208.000000,85825.000000,310.160908)}
{pt3dadd(189624.000000,136860.000000,85650.000000,310.160908)}
{pt3dadd(189468.000000,136512.000000,85450.000000,310.160908)}
{pt3dadd(189252.000000,136284.000000,85250.000000,284.237098)}
{pt3dadd(189072.000000,136044.000000,85075.000000,319.678970)}
{pt3dadd(188940.000000,135864.000000,84825.000000,325.317330)}
{pt3dadd(188784.000000,135756.000000,84525.000000,317.059520)}
{pt3dadd(188532.000000,135528.000000,84325.000000,317.059520)}
{pt3dadd(188316.000000,135360.000000,83975.000000,311.139236)}
{pt3dadd(188208.000000,135072.000000,83800.000000,283.561950)}
{pt3dadd(188220.000000,134796.000000,83625.000000,286.594294)}
{pt3dadd(188040.000000,134676.000000,83400.000000,294.852104)}
{pt3dadd(188040.000000,134688.000000,83225.000000,300.490464)}
{pt3dadd(187980.000000,134700.000000,83025.000000,309.594708)}
{pt3dadd(187932.000000,134676.000000,82875.000000,312.482648)}
{pt3dadd(187860.000000,134652.000000,82700.000000,303.811944)}
{pt3dadd(187788.000000,134616.000000,82550.000000,286.265696)}
{pt3dadd(187716.000000,134520.000000,82350.000000,283.377756)}
{pt3dadd(187644.000000,134424.000000,82175.000000,266.408926)}
{pt3dadd(187500.000000,134268.000000,82000.000000,251.017706)}
{pt3dadd(187320.000000,134220.000000,81800.000000,239.109818)}
{pt3dadd(187260.000000,134148.000000,81650.000000,262.872370)}
{pt3dadd(186972.000000,133932.000000,81400.000000,260.121950)}
{pt3dadd(186900.000000,133776.000000,81150.000000,245.686606)}
{pt3dadd(186636.000000,133680.000000,80950.000000,250.325300)}
{pt3dadd(186456.000000,133644.000000,80750.000000,262.233188)}
{pt3dadd(186240.000000,133548.000000,80550.000000,253.128944)}
{pt3dadd(186108.000000,133368.000000,80350.000000,250.509494)}
{pt3dadd(185964.000000,133296.000000,80175.000000,267.439554)}
{pt3dadd(185832.000000,133236.000000,80025.000000,260.645832)}
{pt3dadd(185688.000000,133152.000000,79825.000000,253.155752)}
{pt3dadd(185484.000000,132828.000000,79675.000000,236.445036)}
{pt3dadd(185316.000000,132576.000000,79525.000000,223.149518)}
{pt3dadd(185016.000000,132312.000000,79325.000000,216.016108)}
{pt3dadd(184836.000000,132072.000000,79200.000000,218.171136)}
{pt3dadd(184680.000000,131880.000000,79225.000000,220.547050)}
{pt3dadd(184512.000000,131796.000000,79125.000000,227.017266)}
{pt3dadd(184344.000000,131676.000000,79175.000000,237.818068)}
{pt3dadd(184200.000000,131592.000000,79050.000000,235.663040)}
{pt3dadd(184044.000000,131460.000000,79050.000000,233.508012)}
{pt3dadd(183876.000000,131316.000000,78925.000000,233.508012)}
{pt3dadd(183612.000000,131148.000000,78850.000000,249.668796)}
{pt3dadd(183468.000000,131076.000000,78800.000000,263.453666)}
{pt3dadd(183216.000000,131028.000000,78625.000000,284.032258)}
{pt3dadd(183000.000000,130788.000000,78450.000000,318.395720)}
{pt3dadd(182856.000000,130632.000000,78275.000000,318.395720)}

{create adhoc16}
{access adhoc16}
{connect adhoc16(1), adhoc15(0)}
{nseg = 1}
{strdef color color = "White"}
{pt3dclear()}
{pt3dadd(182856.000000,130632.000000,78275.000000,318.395720)}
{pt3dadd(182376.000000,130476.000000,78750.000000,250.484960)}
{pt3dadd(181968.000000,130320.000000,78750.000000,226.798050)}
{pt3dadd(181716.000000,130176.000000,78825.000000,198.577836)}
{pt3dadd(181560.000000,130032.000000,78875.000000,186.518406)}
{pt3dadd(181452.000000,129924.000000,79000.000000,197.319208)}
{pt3dadd(181272.000000,129840.000000,79050.000000,203.789424)}
{pt3dadd(181152.000000,129720.000000,79125.000000,215.848854)}
{pt3dadd(181032.000000,129576.000000,79225.000000,230.284198)}
{pt3dadd(180876.000000,129432.000000,79325.000000,242.343628)}
{pt3dadd(180720.000000,129348.000000,79400.000000,233.497498)}
{pt3dadd(180444.000000,128892.000000,79450.000000,246.625938)}
{pt3dadd(180360.000000,128520.000000,79600.000000,280.380094)}
{pt3dadd(180372.000000,128292.000000,79600.000000,315.821966)}
{pt3dadd(180384.000000,128016.000000,79600.000000,345.706006)}
{pt3dadd(180384.000000,127704.000000,79750.000000,374.864118)}
{pt3dadd(180228.000000,127476.000000,79800.000000,391.619718)}
{pt3dadd(180324.000000,127260.000000,79850.000000,391.619718)}
{pt3dadd(180348.000000,127116.000000,79950.000000,376.489828)}
{pt3dadd(180408.000000,126972.000000,79975.000000,362.766572)}
{pt3dadd(180432.000000,126792.000000,79925.000000,344.949306)}
{pt3dadd(180456.000000,126612.000000,79950.000000,319.935896)}
{pt3dadd(180576.000000,126444.000000,79925.000000,288.557654)}
{pt3dadd(180672.000000,126276.000000,79950.000000,265.869758)}
{pt3dadd(180744.000000,126144.000000,80050.000000,243.238758)}
{pt3dadd(180888.000000,126012.000000,80100.000000,231.897912)}
{pt3dadd(181020.000000,125772.000000,80125.000000,220.557066)}
{pt3dadd(181092.000000,125532.000000,80075.000000,213.763344)}
{pt3dadd(181104.000000,125376.000000,80025.000000,209.345536)}
{pt3dadd(181080.000000,125196.000000,80050.000000,205.529272)}
{pt3dadd(181044.000000,125040.000000,80050.000000,205.529272)}
{pt3dadd(180996.000000,124872.000000,80000.000000,203.574600)}
{pt3dadd(180996.000000,124728.000000,79925.000000,205.729628)}
{pt3dadd(180972.000000,124524.000000,80000.000000,205.729628)}
{pt3dadd(180864.000000,124356.000000,80000.000000,207.591220)}
{pt3dadd(180972.000000,124176.000000,79875.000000,203.774956)}
{pt3dadd(180864.000000,124020.000000,79850.000000,201.913364)}
{pt3dadd(180864.000000,123864.000000,79850.000000,195.751256)}
{pt3dadd(180900.000000,123708.000000,79900.000000,191.744176)}
{pt3dadd(180948.000000,123576.000000,79925.000000,186.421114)}
{pt3dadd(180972.000000,123444.000000,79950.000000,190.237378)}
{pt3dadd(180984.000000,123312.000000,80000.000000,202.899772)}
{pt3dadd(181032.000000,123156.000000,80000.000000,211.324660)}
{pt3dadd(181080.000000,123012.000000,80025.000000,217.486768)}
{pt3dadd(181032.000000,122856.000000,79975.000000,219.175288)}
{pt3dadd(181056.000000,122700.000000,79975.000000,215.359024)}
{pt3dadd(181116.000000,122568.000000,80050.000000,204.558222)}
{pt3dadd(181188.000000,122364.000000,79950.000000,196.133334)}
{pt3dadd(181200.000000,122184.000000,79875.000000,198.396114)}
{pt3dadd(181368.000000,122064.000000,79850.000000,208.192764)}
{pt3dadd(181380.000000,121908.000000,79750.000000,218.479244)}
{pt3dadd(181344.000000,121764.000000,79750.000000,231.774762)}
{pt3dadd(181392.000000,121620.000000,79775.000000,242.575564)}
{pt3dadd(181368.000000,121488.000000,79750.000000,255.704004)}
{pt3dadd(181368.000000,121356.000000,79675.000000,262.837414)}
{pt3dadd(181272.000000,121224.000000,79575.000000,270.327494)}
{pt3dadd(181272.000000,121104.000000,79525.000000,284.801608)}
{pt3dadd(181284.000000,120984.000000,79475.000000,312.309734)}
{pt3dadd(181260.000000,120852.000000,79425.000000,325.379506)}
{pt3dadd(181176.000000,120720.000000,79400.000000,350.392916)}
{pt3dadd(181104.000000,120576.000000,79400.000000,362.247580)}
{pt3dadd(181032.000000,120444.000000,79450.000000,369.101048)}
{pt3dadd(180960.000000,120324.000000,79500.000000,358.561752)}
{pt3dadd(180948.000000,120180.000000,79425.000000,342.604040)}
{pt3dadd(180948.000000,120048.000000,79400.000000,325.848440)}
{pt3dadd(180924.000000,119916.000000,79425.000000,313.993776)}
{pt3dadd(180852.000000,119784.000000,79425.000000,298.036064)}
{pt3dadd(180768.000000,119652.000000,79450.000000,294.852104)}
{pt3dadd(180696.000000,119496.000000,79450.000000,294.852104)}
{pt3dadd(180684.000000,119340.000000,79450.000000,294.852104)}
{pt3dadd(180684.000000,119196.000000,79475.000000,306.706768)}
{pt3dadd(180672.000000,119052.000000,79500.000000,315.811012)}
{pt3dadd(180672.000000,118896.000000,79550.000000,333.404384)}
{pt3dadd(180648.000000,118776.000000,79525.000000,333.404384)}
{pt3dadd(180612.000000,118644.000000,79525.000000,339.620688)}
{pt3dadd(180540.000000,118524.000000,79525.000000,339.620688)}
{pt3dadd(180432.000000,118368.000000,79500.000000,339.620688)}
{pt3dadd(180372.000000,118236.000000,79475.000000,301.448724)}
{pt3dadd(180192.000000,118116.000000,79450.000000,282.783336)}
{pt3dadd(179964.000000,117972.000000,79350.000000,253.152112)}
{pt3dadd(179928.000000,117828.000000,79325.000000,233.807368)}
{pt3dadd(179928.000000,117696.000000,79300.000000,210.044816)}
{pt3dadd(179892.000000,117564.000000,79250.000000,206.037736)}
{pt3dadd(179748.000000,117468.000000,79225.000000,207.992408)}
{pt3dadd(179604.000000,117324.000000,79200.000000,209.854000)}
{pt3dadd(179520.000000,117228.000000,79200.000000,199.567520)}
{pt3dadd(179448.000000,117072.000000,79175.000000,195.560440)}
{pt3dadd(179388.000000,116952.000000,79175.000000,193.698848)}
{pt3dadd(179328.000000,116784.000000,79150.000000,184.813000)}
{pt3dadd(179268.000000,116628.000000,79125.000000,181.178458)}
{pt3dadd(179196.000000,116496.000000,79150.000000,177.716988)}
{pt3dadd(179160.000000,116352.000000,79125.000000,175.855396)}
{pt3dadd(179040.000000,116220.000000,79075.000000,177.716988)}
{pt3dadd(178932.000000,116088.000000,79000.000000,181.013622)}
{pt3dadd(178860.000000,115956.000000,78900.000000,193.073052)}
{pt3dadd(178764.000000,115812.000000,78800.000000,209.196916)}
{pt3dadd(178620.000000,115656.000000,78700.000000,226.973476)}
{pt3dadd(178464.000000,115512.000000,78600.000000,237.774278)}
{pt3dadd(178296.000000,115404.000000,78500.000000,257.323788)}
{pt3dadd(178152.000000,115236.000000,78400.000000,267.564288)}
{pt3dadd(177984.000000,115116.000000,78325.000000,284.533118)}
{pt3dadd(177828.000000,114972.000000,78250.000000,284.533118)}
{pt3dadd(177708.000000,114660.000000,78150.000000,287.027834)}
{pt3dadd(177528.000000,114480.000000,78125.000000,267.478324)}
{pt3dadd(177492.000000,114360.000000,78150.000000,264.727904)}
{pt3dadd(177468.000000,114192.000000,78175.000000,247.759074)}
{pt3dadd(177216.000000,114000.000000,77975.000000,229.982514)}
{pt3dadd(177036.000000,113784.000000,77950.000000,220.694076)}
{pt3dadd(176448.000000,113436.000000,77550.000000,220.694076)}
{pt3dadd(176196.000000,113208.000000,77450.000000,202.917516)}
{pt3dadd(176016.000000,113004.000000,77375.000000,194.071386)}
{pt3dadd(175848.000000,112848.000000,77475.000000,194.071386)}
{pt3dadd(175764.000000,112644.000000,77450.000000,188.202714)}
{pt3dadd(175512.000000,112488.000000,77425.000000,189.975664)}
{pt3dadd(175524.000000,112308.000000,77475.000000,189.975664)}
{pt3dadd(175488.000000,112140.000000,77525.000000,184.386450)}
{pt3dadd(175392.000000,112008.000000,77500.000000,180.924980)}
{pt3dadd(175452.000000,111876.000000,77550.000000,175.855396)}
{pt3dadd(175356.000000,111732.000000,77525.000000,174.082446)}
{pt3dadd(175344.000000,111564.000000,77500.000000,172.309496)}
{pt3dadd(175272.000000,111408.000000,77450.000000,172.309496)}
{pt3dadd(175332.000000,111252.000000,77400.000000,173.998016)}
{pt3dadd(175260.000000,111096.000000,77425.000000,175.606130)}
{pt3dadd(175224.000000,110964.000000,77475.000000,175.606130)}
{pt3dadd(175284.000000,110844.000000,77450.000000,175.606130)}
{pt3dadd(175356.000000,110724.000000,77425.000000,169.319350)}
{pt3dadd(175380.000000,110592.000000,77350.000000,169.319350)}
{pt3dadd(175344.000000,110436.000000,77300.000000,174.642412)}
{pt3dadd(175320.000000,110304.000000,77200.000000,182.284034)}
{pt3dadd(175308.000000,110172.000000,77050.000000,189.925656)}
{pt3dadd(175296.000000,110016.000000,76975.000000,213.142496)}
{pt3dadd(175356.000000,109896.000000,76825.000000,216.777038)}
{pt3dadd(175404.000000,109788.000000,76675.000000,224.305023)}
{pt3dadd(175368.000000,109692.000000,76475.000000,195.467360)}

{create adhoc17}
{access adhoc17}
{connect adhoc17(1), adhoc15(0)}
{nseg = 1}
{strdef color color = "White"}
{pt3dclear()}
{pt3dadd(182856.000000,130632.000000,78275.000000,318.395720)}
{pt3dadd(182772.000000,130524.000000,77900.000000,298.568300)}
{pt3dadd(182616.000000,130440.000000,77625.000000,248.370320)}
{pt3dadd(182124.000000,130452.000000,77475.000000,216.853472)}
{pt3dadd(181872.000000,130404.000000,77275.000000,180.417626)}
{pt3dadd(181572.000000,130452.000000,77075.000000,170.620976)}
{pt3dadd(181248.000000,130452.000000,76900.000000,167.324342)}
{pt3dadd(180900.000000,130416.000000,76700.000000,164.184692)}
{pt3dadd(180468.000000,130332.000000,76500.000000,157.222396)}
{pt3dadd(180180.000000,130188.000000,76425.000000,151.234986)}
{pt3dadd(179856.000000,130020.000000,76250.000000,149.546466)}
{pt3dadd(179604.000000,129852.000000,76250.000000,164.902530)}
{pt3dadd(179292.000000,129660.000000,76250.000000,175.319914)}
{pt3dadd(179148.000000,129384.000000,76300.000000,183.890324)}
{pt3dadd(179016.000000,128844.000000,76175.000000,208.496314)}
{pt3dadd(178848.000000,128580.000000,76050.000000,235.372704)}
{pt3dadd(178812.000000,128388.000000,75925.000000,269.126860)}
{pt3dadd(178716.000000,128160.000000,75875.000000,294.941820)}
{pt3dadd(178716.000000,128088.000000,75500.000000,318.930270)}
{pt3dadd(178824.000000,128328.000000,75325.000000,295.713430)}
{pt3dadd(178680.000000,127452.000000,75625.000000,256.323523)}
{pt3dadd(178512.000000,127092.000000,75675.000000,145.860750)}

{create adhoc18}
{access adhoc18}
{connect adhoc18(1), adhoc14(0)}
{nseg = 1}
{strdef color color = "White"}
{pt3dclear()}
{pt3dadd(193140.000000,149052.000000,94275.000000,661.921800)}
{pt3dadd(192924.000000,149652.000000,94275.000000,844.798650)}

{create adhoc19}
{access adhoc19}
{connect adhoc19(1), adhoc18(0)}
{nseg = 1}
{strdef color color = "White"}
{pt3dclear()}
{pt3dadd(192924.000000,149652.000000,94275.000000,844.798650)}
{pt3dadd(192276.000000,149340.000000,93250.000000,645.074893)}
{pt3dadd(191616.000000,149088.000000,92900.000000,579.915292)}
{pt3dadd(191352.000000,149148.000000,92800.000000,509.742818)}
{pt3dadd(191244.000000,149088.000000,92700.000000,476.656740)}
{pt3dadd(191088.000000,149028.000000,92575.000000,467.013228)}
{pt3dadd(190956.000000,148908.000000,92550.000000,467.013228)}
{pt3dadd(190812.000000,148836.000000,92475.000000,454.202644)}
{pt3dadd(190668.000000,148824.000000,92400.000000,432.817788)}
{pt3dadd(190512.000000,148848.000000,92300.000000,441.148226)}
{pt3dadd(190368.000000,148908.000000,92175.000000,441.148226)}
{pt3dadd(190224.000000,148872.000000,91950.000000,431.963924)}
{pt3dadd(190068.000000,148872.000000,91900.000000,424.407980)}
{pt3dadd(189924.000000,148884.000000,91775.000000,413.868684)}
{pt3dadd(189504.000000,148932.000000,91400.000000,384.912530)}
{pt3dadd(189348.000000,148932.000000,91250.000000,345.837870)}
{pt3dadd(189252.000000,148944.000000,91025.000000,316.881716)}
{pt3dadd(189132.000000,148944.000000,90800.000000,310.028248)}
{pt3dadd(188976.000000,148944.000000,90600.000000,310.028248)}
{pt3dadd(188820.000000,148944.000000,90375.000000,319.587704)}
{pt3dadd(188688.000000,148944.000000,90150.000000,349.915410)}
{pt3dadd(188568.000000,148956.000000,89925.000000,362.985182)}
{pt3dadd(188436.000000,148956.000000,89700.000000,394.909334)}
{pt3dadd(188316.000000,148956.000000,89500.000000,413.382376)}
{pt3dadd(188184.000000,148956.000000,89275.000000,428.512266)}
{pt3dadd(188052.000000,148884.000000,89050.000000,428.512266)}
{pt3dadd(187716.000000,148680.000000,88775.000000,425.001950)}
{pt3dadd(187512.000000,148692.000000,88575.000000,389.893838)}
{pt3dadd(187512.000000,148824.000000,88350.000000,381.960092)}
{pt3dadd(187524.000000,148836.000000,88150.000000,366.830202)}
{pt3dadd(187512.000000,148908.000000,87975.000000,355.210628)}
{pt3dadd(187476.000000,148992.000000,87800.000000,362.406772)}
{pt3dadd(187440.000000,148992.000000,87650.000000,359.374428)}
{pt3dadd(187464.000000,149016.000000,87475.000000,336.980468)}
{pt3dadd(187380.000000,149076.000000,87325.000000,324.533072)}
{pt3dadd(187308.000000,149124.000000,87150.000000,321.022756)}
{pt3dadd(187308.000000,149220.000000,87000.000000,310.483460)}
{pt3dadd(187308.000000,149256.000000,86850.000000,313.515804)}
{pt3dadd(187464.000000,149292.000000,86700.000000,325.370468)}
{pt3dadd(187560.000000,149412.000000,86525.000000,325.370468)}
{pt3dadd(187716.000000,149496.000000,86375.000000,310.172652)}
{pt3dadd(187836.000000,149532.000000,86175.000000,286.410100)}
{pt3dadd(187944.000000,149568.000000,86025.000000,272.625230)}
{pt3dadd(187956.000000,149556.000000,85850.000000,275.968382)}
{pt3dadd(188064.000000,149616.000000,85675.000000,278.856322)}
{pt3dadd(188208.000000,149640.000000,85525.000000,278.856322)}
{pt3dadd(188352.000000,149676.000000,85375.000000,288.144760)}
{pt3dadd(188328.000000,149808.000000,85200.000000,301.929630)}
{pt3dadd(188328.000000,149952.000000,85025.000000,295.402518)}
{pt3dadd(188340.000000,150096.000000,84850.000000,298.434862)}
{pt3dadd(188352.000000,150240.000000,84675.000000,320.828822)}
{pt3dadd(188424.000000,150360.000000,84500.000000,345.842232)}
{pt3dadd(188472.000000,150492.000000,84325.000000,371.766042)}
{pt3dadd(188472.000000,150660.000000,84125.000000,389.359414)}
{pt3dadd(188472.000000,150840.000000,83950.000000,399.396842)}
{pt3dadd(188472.000000,151008.000000,83775.000000,399.396842)}
{pt3dadd(188472.000000,151176.000000,83625.000000,403.266958)}
{pt3dadd(188400.000000,151296.000000,83450.000000,394.936520)}
{pt3dadd(188292.000000,151404.000000,83250.000000,407.747104)}
{pt3dadd(188196.000000,151524.000000,83125.000000,432.817788)}
{pt3dadd(188088.000000,151632.000000,82925.000000,454.202644)}
{pt3dadd(187944.000000,151740.000000,82750.000000,471.717384)}
{pt3dadd(187776.000000,151932.000000,82575.000000,467.847268)}
{pt3dadd(187536.000000,152184.000000,82425.000000,459.100314)}
{pt3dadd(187332.000000,152460.000000,82250.000000,434.029630)}
{pt3dadd(187020.000000,152832.000000,82000.000000,416.514890)}
{pt3dadd(186720.000000,153204.000000,81675.000000,384.590738)}
{pt3dadd(186540.000000,153384.000000,81475.000000,364.947198)}
{pt3dadd(186384.000000,153504.000000,81300.000000,340.257852)}
{pt3dadd(186264.000000,153576.000000,81125.000000,321.549720)}
{pt3dadd(186156.000000,153648.000000,80875.000000,300.924004)}
{pt3dadd(186048.000000,153720.000000,80650.000000,294.707700)}
{pt3dadd(185952.000000,153792.000000,80425.000000,310.665412)}
{pt3dadd(185916.000000,153840.000000,80250.000000,327.421012)}
{pt3dadd(185880.000000,153888.000000,80050.000000,353.685088)}
{pt3dadd(185856.000000,153936.000000,79875.000000,378.374434)}
{pt3dadd(185784.000000,153984.000000,79675.000000,391.444206)}
{pt3dadd(185652.000000,154140.000000,79475.000000,387.933890)}
{pt3dadd(185496.000000,154308.000000,79300.000000,382.098290)}
{pt3dadd(185484.000000,154344.000000,79100.000000,351.031280)}

{create adhoc20}
{access adhoc20}
{connect adhoc20(1), adhoc19(0)}
{nseg = 1}
{strdef color color = "White"}
{pt3dclear()}
{pt3dadd(185484.000000,154344.000000,79100.000000,351.031280)}
{pt3dadd(185184.000000,155232.000000,79100.000000,264.621267)}
{pt3dadd(185100.000000,155580.000000,79025.000000,231.463570)}
{pt3dadd(185076.000000,155856.000000,78875.000000,196.716244)}
{pt3dadd(184956.000000,156048.000000,78875.000000,184.656814)}
{pt3dadd(184932.000000,156180.000000,78775.000000,175.770966)}
{pt3dadd(184932.000000,156288.000000,78500.000000,172.309496)}
{pt3dadd(184860.000000,156468.000000,78300.000000,170.620976)}
{pt3dadd(184836.000000,156612.000000,78100.000000,174.255518)}
{pt3dadd(184680.000000,156792.000000,77900.000000,179.844732)}
{pt3dadd(184512.000000,156852.000000,77700.000000,188.730580)}
{pt3dadd(184548.000000,156936.000000,77450.000000,196.008314)}
{pt3dadd(184428.000000,157140.000000,77275.000000,182.970007)}
{pt3dadd(184236.000000,157368.000000,77100.000000,157.240633)}
{pt3dadd(184044.000000,157596.000000,76950.000000,141.392489)}
{pt3dadd(183756.000000,157764.000000,76750.000000,118.253514)}
{pt3dadd(183636.000000,157884.000000,76500.000000,103.665370)}
{pt3dadd(183552.000000,158040.000000,76325.000000,112.105417)}
{pt3dadd(183564.000000,158412.000000,76100.000000,129.372079)}
{pt3dadd(183504.000000,158592.000000,75900.000000,143.265551)}
{pt3dadd(183408.000000,158940.000000,75750.000000,157.518678)}
{pt3dadd(183396.000000,159096.000000,75450.000000,152.827386)}
{pt3dadd(183444.000000,159228.000000,75275.000000,155.040793)}
{pt3dadd(183732.000000,159456.000000,75050.000000,108.843540)}

{create adhoc21}
{access adhoc21}
{connect adhoc21(1), adhoc19(0)}
{nseg = 1}
{strdef color color = "White"}
{pt3dclear()}
{pt3dadd(185484.000000,154344.000000,79100.000000,351.031280)}
{pt3dadd(185244.000000,154224.000000,78750.000000,279.751377)}
{pt3dadd(184944.000000,153876.000000,78500.000000,286.538410)}
{pt3dadd(184740.000000,153768.000000,78225.000000,286.538410)}
{pt3dadd(184548.000000,153756.000000,78000.000000,314.999402)}
{pt3dadd(184392.000000,153684.000000,77750.000000,336.326984)}
{pt3dadd(184212.000000,153552.000000,77550.000000,358.720944)}
{pt3dadd(184152.000000,153492.000000,77350.000000,365.248056)}
{pt3dadd(184068.000000,153396.000000,77175.000000,361.904904)}
{pt3dadd(183948.000000,153300.000000,77025.000000,340.577322)}
{pt3dadd(183852.000000,153192.000000,76850.000000,333.723854)}
{pt3dadd(183756.000000,153084.000000,76700.000000,320.000598)}
{pt3dadd(183672.000000,152952.000000,76575.000000,302.183332)}
{pt3dadd(183624.000000,152856.000000,76425.000000,293.079088)}
{pt3dadd(183564.000000,152724.000000,76275.000000,304.369242)}
{pt3dadd(183432.000000,152580.000000,76150.000000,292.514578)}
{pt3dadd(183324.000000,152460.000000,76000.000000,292.514578)}
{pt3dadd(183228.000000,152340.000000,75875.000000,303.804732)}
{pt3dadd(183144.000000,152208.000000,75725.000000,316.252128)}
{pt3dadd(183012.000000,152100.000000,75550.000000,329.975384)}
{pt3dadd(182964.000000,151992.000000,75400.000000,341.830048)}
{pt3dadd(182988.000000,151896.000000,75250.000000,341.830048)}
{pt3dadd(182904.000000,151800.000000,75075.000000,345.014008)}
{pt3dadd(182796.000000,151800.000000,74900.000000,352.210152)}
{pt3dadd(182724.000000,151908.000000,74725.000000,345.014008)}
{pt3dadd(182652.000000,152016.000000,74575.000000,328.045178)}
{pt3dadd(182556.000000,152016.000000,74425.000000,311.884394)}
{pt3dadd(182472.000000,151944.000000,74275.000000,300.029730)}
{pt3dadd(182304.000000,151836.000000,74125.000000,272.521604)}
{pt3dadd(182148.000000,151764.000000,73950.000000,237.774278)}
{pt3dadd(182040.000000,151680.000000,73800.000000,226.973476)}
{pt3dadd(181920.000000,151656.000000,73650.000000,216.686996)}
{pt3dadd(181896.000000,151620.000000,73475.000000,209.196916)}
{pt3dadd(181944.000000,151644.000000,73325.000000,206.821002)}
{pt3dadd(181908.000000,151656.000000,73175.000000,216.617652)}
{pt3dadd(181848.000000,151620.000000,73050.000000,218.572324)}
{pt3dadd(181800.000000,151596.000000,72900.000000,224.440996)}
{pt3dadd(181740.000000,151656.000000,72775.000000,217.970780)}
{pt3dadd(181680.000000,151680.000000,72675.000000,205.911350)}
{pt3dadd(181620.000000,151692.000000,72550.000000,194.426180)}
{pt3dadd(181596.000000,151692.000000,72425.000000,190.609916)}
{pt3dadd(181596.000000,151632.000000,72325.000000,181.279774)}
{pt3dadd(181716.000000,151584.000000,72200.000000,181.279774)}
{pt3dadd(181656.000000,151524.000000,72100.000000,186.868988)}
{pt3dadd(181620.000000,151464.000000,72000.000000,192.192050)}
{pt3dadd(181512.000000,151404.000000,71875.000000,194.053642)}
{pt3dadd(181416.000000,151380.000000,71750.000000,203.383784)}
{pt3dadd(181344.000000,151320.000000,71625.000000,203.383784)}
{pt3dadd(181404.000000,151344.000000,71475.000000,203.383784)}
{pt3dadd(181440.000000,151356.000000,71375.000000,209.545892)}
{pt3dadd(181404.000000,151332.000000,71250.000000,220.346694)}
{pt3dadd(181344.000000,151308.000000,71125.000000,229.635132)}
{pt3dadd(181344.000000,151284.000000,71025.000000,243.595428)}
{pt3dadd(181368.000000,151296.000000,70900.000000,247.802864)}
{pt3dadd(181272.000000,151320.000000,70775.000000,250.065644)}
{pt3dadd(181248.000000,151308.000000,70650.000000,252.560360)}
{pt3dadd(181224.000000,151308.000000,70525.000000,255.179810)}
{pt3dadd(181236.000000,151296.000000,70400.000000,252.560360)}
{pt3dadd(181140.000000,151332.000000,70300.000000,254.823140)}
{pt3dadd(181056.000000,151356.000000,70175.000000,250.405332)}
{pt3dadd(180996.000000,151344.000000,70050.000000,243.271922)}
{pt3dadd(181008.000000,151344.000000,69925.000000,235.781842)}
{pt3dadd(180972.000000,151368.000000,69800.000000,233.287126)}
{pt3dadd(180888.000000,151416.000000,69675.000000,233.287126)}
{pt3dadd(180780.000000,151476.000000,69575.000000,233.287126)}
{pt3dadd(180672.000000,151500.000000,69450.000000,237.925820)}
{pt3dadd(180564.000000,151488.000000,69325.000000,242.796450)}
{pt3dadd(180552.000000,151488.000000,69200.000000,240.420536)}
{pt3dadd(180516.000000,151476.000000,69050.000000,253.548976)}
{pt3dadd(180468.000000,151476.000000,68925.000000,265.456864)}
{pt3dadd(180324.000000,151476.000000,68825.000000,276.209390)}
{pt3dadd(180180.000000,151488.000000,68700.000000,287.499544)}
{pt3dadd(180120.000000,151500.000000,68575.000000,310.187440)}
{pt3dadd(180036.000000,151512.000000,68425.000000,310.187440)}
{pt3dadd(179964.000000,151512.000000,68325.000000,332.581400)}
{pt3dadd(179832.000000,151584.000000,68200.000000,345.651172)}
{pt3dadd(179700.000000,151644.000000,68050.000000,352.178284)}
{pt3dadd(179520.000000,151740.000000,67950.000000,355.688600)}
{pt3dadd(179340.000000,151788.000000,67800.000000,368.758372)}
{pt3dadd(179196.000000,151848.000000,67650.000000,343.744962)}
{pt3dadd(179076.000000,152064.000000,67525.000000,325.036830)}
{pt3dadd(178980.000000,152208.000000,67400.000000,315.477374)}
{pt3dadd(178764.000000,152280.000000,67275.000000,299.519662)}
{pt3dadd(178608.000000,152376.000000,67150.000000,296.009346)}
{pt3dadd(178428.000000,152460.000000,67000.000000,307.299500)}
{pt3dadd(178320.000000,152508.000000,66900.000000,326.007632)}
{pt3dadd(178176.000000,152568.000000,66775.000000,346.003287)}
{pt3dadd(178032.000000,152652.000000,66625.000000,368.582860)}

{create adhoc22}
{access adhoc22}
{connect adhoc22(1), adhoc21(0)}
{nseg = 1}
{strdef color color = "White"}
{pt3dclear()}
{pt3dadd(178032.000000,152652.000000,66625.000000,368.582860)}
{pt3dadd(177432.000000,153132.000000,66625.000000,259.850993)}
{pt3dadd(177012.000000,153384.000000,66625.000000,251.060450)}
{pt3dadd(176748.000000,153564.000000,66625.000000,218.392022)}
{pt3dadd(176556.000000,153756.000000,66625.000000,218.392022)}
{pt3dadd(176280.000000,153912.000000,66625.000000,222.399102)}
{pt3dadd(175956.000000,154008.000000,66625.000000,216.236994)}
{pt3dadd(175668.000000,154164.000000,66550.000000,203.574600)}
{pt3dadd(175404.000000,154200.000000,66450.000000,201.619928)}
{pt3dadd(175200.000000,154284.000000,66375.000000,197.612848)}
{pt3dadd(175056.000000,154356.000000,66300.000000,189.971226)}
{pt3dadd(174804.000000,154404.000000,66375.000000,191.925898)}
{pt3dadd(174672.000000,154524.000000,66375.000000,193.787490)}
{pt3dadd(174444.000000,154644.000000,66275.000000,188.464428)}
{pt3dadd(174216.000000,154824.000000,66200.000000,204.379396)}
{pt3dadd(173232.000000,155448.000000,65975.000000,235.783570)}
{pt3dadd(172668.000000,155364.000000,65775.000000,258.414570)}
{pt3dadd(172212.000000,155496.000000,65775.000000,293.037670)}
{pt3dadd(171852.000000,155784.000000,65625.000000,329.473516)}
{pt3dadd(171516.000000,156312.000000,65500.000000,341.328180)}
{pt3dadd(171480.000000,156864.000000,65375.000000,344.671332)}
{pt3dadd(171504.000000,157500.000000,65225.000000,344.671332)}
{pt3dadd(171528.000000,157776.000000,65225.000000,318.473120)}
{pt3dadd(171468.000000,158124.000000,65050.000000,289.315008)}
{pt3dadd(171336.000000,158412.000000,64875.000000,261.545376)}
{pt3dadd(171360.000000,158748.000000,64900.000000,249.097980)}
{pt3dadd(171432.000000,159060.000000,64900.000000,232.937196)}
{pt3dadd(171576.000000,159432.000000,64900.000000,226.466980)}
{pt3dadd(171648.000000,159756.000000,64900.000000,235.313110)}
{pt3dadd(171540.000000,160068.000000,64675.000000,239.320190)}
{pt3dadd(171600.000000,160344.000000,64675.000000,233.950320)}
{pt3dadd(171708.000000,160704.000000,64675.000000,233.950320)}
{pt3dadd(171648.000000,160932.000000,64600.000000,242.796450)}
{pt3dadd(171660.000000,161076.000000,64500.000000,247.910616)}
{pt3dadd(171708.000000,161208.000000,64450.000000,262.568924)}
{pt3dadd(171780.000000,161316.000000,64475.000000,260.074208)}
{pt3dadd(171852.000000,161424.000000,64500.000000,260.074208)}
{pt3dadd(171924.000000,161520.000000,64525.000000,262.568924)}
{pt3dadd(171996.000000,161616.000000,64450.000000,259.949474)}
{pt3dadd(172020.000000,161724.000000,64400.000000,254.579604)}
{pt3dadd(171972.000000,161832.000000,64350.000000,254.579604)}
{pt3dadd(172008.000000,161940.000000,64250.000000,252.316824)}
{pt3dadd(171900.000000,162144.000000,64100.000000,240.975978)}
{pt3dadd(171684.000000,162168.000000,63925.000000,246.345848)}
{pt3dadd(171816.000000,162300.000000,63650.000000,246.345848)}
{pt3dadd(171876.000000,162528.000000,63475.000000,230.221984)}
{pt3dadd(172056.000000,162780.000000,63525.000000,212.749404)}
{pt3dadd(172020.000000,163188.000000,63475.000000,200.873410)}
{pt3dadd(171984.000000,163524.000000,63475.000000,182.208022)}
{pt3dadd(171804.000000,163584.000000,63325.000000,172.919584)}
{pt3dadd(171780.000000,163908.000000,63325.000000,174.608104)}
{pt3dadd(171792.000000,164124.000000,63325.000000,182.284034)}
{pt3dadd(171780.000000,164328.000000,63350.000000,188.570814)}
{pt3dadd(171792.000000,164472.000000,63400.000000,183.247752)}
{pt3dadd(171840.000000,164580.000000,63275.000000,165.347200)}
{pt3dadd(171984.000000,164700.000000,63350.000000,160.519030)}
{pt3dadd(172104.000000,164772.000000,63500.000000,149.335283)}
{pt3dadd(172248.000000,164988.000000,63500.000000,153.153800)}

{create adhoc23}
{access adhoc23}
{connect adhoc23(1), adhoc21(0)}
{nseg = 1}
{strdef color color = "White"}
{pt3dclear()}
{pt3dadd(178032.000000,152652.000000,66625.000000,368.582860)}
{pt3dadd(177780.000000,152796.000000,66300.000000,299.364920)}
{pt3dadd(177264.000000,153264.000000,66050.000000,226.277900)}

{create adhoc24}
{access adhoc24}
{connect adhoc24(1), adhoc18(0)}
{nseg = 1}
{strdef color color = "White"}
{pt3dclear()}
{pt3dadd(192924.000000,149652.000000,94275.000000,844.798650)}
{pt3dadd(192576.000000,150720.000000,94275.000000,515.620403)}
{pt3dadd(192360.000000,151392.000000,94275.000000,468.424960)}
{pt3dadd(192144.000000,151860.000000,94275.000000,398.252486)}
{pt3dadd(192048.000000,152148.000000,94275.000000,422.129330)}
{pt3dadd(191964.000000,152424.000000,94050.000000,441.526028)}
{pt3dadd(192000.000000,152652.000000,93900.000000,457.412410)}
{pt3dadd(191940.000000,152880.000000,93900.000000,453.348780)}
{pt3dadd(191940.000000,153072.000000,93875.000000,428.278096)}
{pt3dadd(191988.000000,153192.000000,93750.000000,401.058100)}
{pt3dadd(191964.000000,153372.000000,93725.000000,381.661402)}
{pt3dadd(191940.000000,153528.000000,93725.000000,365.775020)}
{pt3dadd(191976.000000,153672.000000,93675.000000,361.904904)}
{pt3dadd(191988.000000,153828.000000,93675.000000,358.394588)}
{pt3dadd(192024.000000,154008.000000,93700.000000,355.210628)}
{pt3dadd(192096.000000,154152.000000,93625.000000,340.012812)}
{pt3dadd(192060.000000,154320.000000,93550.000000,311.551820)}
{pt3dadd(192132.000000,154464.000000,93550.000000,294.796220)}
{pt3dadd(192180.000000,154632.000000,93525.000000,291.453068)}
{pt3dadd(192144.000000,154776.000000,93500.000000,291.453068)}
{pt3dadd(192240.000000,154908.000000,93500.000000,300.123772)}
{pt3dadd(192300.000000,155040.000000,93525.000000,315.514992)}
{pt3dadd(192276.000000,155184.000000,93475.000000,321.731296)}
{pt3dadd(192288.000000,155328.000000,93450.000000,328.584764)}
{pt3dadd(192300.000000,155496.000000,93425.000000,358.988720)}
{pt3dadd(192420.000000,155640.000000,93450.000000,399.036188)}
{pt3dadd(192384.000000,155796.000000,93475.000000,442.116000)}
{pt3dadd(192480.000000,155916.000000,93475.000000,484.165848)}
{pt3dadd(192504.000000,156072.000000,93500.000000,500.052230)}
{pt3dadd(192540.000000,156204.000000,93500.000000,487.241646)}
{pt3dadd(192576.000000,156348.000000,93475.000000,468.851180)}
{pt3dadd(192576.000000,156504.000000,93425.000000,454.727522)}
{pt3dadd(192600.000000,156648.000000,93425.000000,449.541182)}
{pt3dadd(192612.000000,156780.000000,93400.000000,486.018574)}
{pt3dadd(192612.000000,156936.000000,93400.000000,494.349012)}
{pt3dadd(192600.000000,157080.000000,93350.000000,494.349012)}
{pt3dadd(192564.000000,157236.000000,93325.000000,490.082204)}
{pt3dadd(192576.000000,157380.000000,93350.000000,463.757992)}
{pt3dadd(192588.000000,157536.000000,93300.000000,427.280600)}
{pt3dadd(192636.000000,157668.000000,93275.000000,423.013792)}
{pt3dadd(192636.000000,157812.000000,93250.000000,431.760746)}
{pt3dadd(192648.000000,157956.000000,93225.000000,431.760746)}
{pt3dadd(192648.000000,158112.000000,93150.000000,431.760746)}
{pt3dadd(192648.000000,158292.000000,93100.000000,423.430308)}
{pt3dadd(192648.000000,158496.000000,93025.000000,408.300418)}
{pt3dadd(192612.000000,158700.000000,93025.000000,384.423574)}
{pt3dadd(192636.000000,158844.000000,92975.000000,351.476418)}
{pt3dadd(192588.000000,158988.000000,92925.000000,344.280274)}
{pt3dadd(192552.000000,159144.000000,92925.000000,326.686902)}
{pt3dadd(192672.000000,159276.000000,92875.000000,320.159790)}
{pt3dadd(192732.000000,159420.000000,92825.000000,310.600334)}
{pt3dadd(192768.000000,159576.000000,92825.000000,318.858144)}
{pt3dadd(192804.000000,159696.000000,92825.000000,309.298688)}
{pt3dadd(192828.000000,159864.000000,92800.000000,323.021944)}
{pt3dadd(192852.000000,160032.000000,92750.000000,336.745200)}
{pt3dadd(192876.000000,160188.000000,92700.000000,365.701354)}
{pt3dadd(192888.000000,160368.000000,92650.000000,399.137654)}
{pt3dadd(192912.000000,160524.000000,92600.000000,432.573954)}
{pt3dadd(192864.000000,160680.000000,92575.000000,449.254654)}
{pt3dadd(192804.000000,160836.000000,92575.000000,461.455208)}
{pt3dadd(192720.000000,160968.000000,92550.000000,480.765206)}
{pt3dadd(192636.000000,161088.000000,92500.000000,490.408718)}
{pt3dadd(192492.000000,161220.000000,92375.000000,522.405964)}
{pt3dadd(192348.000000,161376.000000,92350.000000,542.681458)}
{pt3dadd(192264.000000,161508.000000,92250.000000,551.865760)}
{pt3dadd(192180.000000,161652.000000,92175.000000,532.555762)}
{pt3dadd(192084.000000,161808.000000,92075.000000,506.231550)}
{pt3dadd(192000.000000,161940.000000,92050.000000,461.423720)}
{pt3dadd(191976.000000,162108.000000,92000.000000,428.337642)}
{pt3dadd(191952.000000,162252.000000,92025.000000,414.886532)}
{pt3dadd(191904.000000,162396.000000,92075.000000,402.685978)}
{pt3dadd(191820.000000,162516.000000,92000.000000,414.886532)}
{pt3dadd(191724.000000,162672.000000,91950.000000,418.950162)}
{pt3dadd(191592.000000,162816.000000,91900.000000,436.464902)}
{pt3dadd(191472.000000,162936.000000,91850.000000,436.464902)}
{pt3dadd(191328.000000,163092.000000,91800.000000,444.398648)}
{pt3dadd(191268.000000,163212.000000,91925.000000,428.512266)}
{pt3dadd(191232.000000,163356.000000,91975.000000,432.779074)}
{pt3dadd(191160.000000,163512.000000,91950.000000,432.779074)}
{pt3dadd(190992.000000,163644.000000,91900.000000,456.355880)}
{pt3dadd(190812.000000,163776.000000,91875.000000,474.746346)}
{pt3dadd(190668.000000,163920.000000,91850.000000,499.817030)}
{pt3dadd(190560.000000,164064.000000,91850.000000,513.940688)}
{pt3dadd(190488.000000,164208.000000,91850.000000,524.066384)}
{pt3dadd(190476.000000,164340.000000,91825.000000,518.880044)}
{pt3dadd(190548.000000,164532.000000,91850.000000,524.066384)}
{pt3dadd(190608.000000,164664.000000,91850.000000,524.066384)}
{pt3dadd(190464.000000,164784.000000,91825.000000,524.066384)}
{pt3dadd(190284.000000,164928.000000,91775.000000,524.066384)}
{pt3dadd(190188.000000,165060.000000,91800.000000,514.422872)}
{pt3dadd(190092.000000,165204.000000,91800.000000,486.782436)}
{pt3dadd(190008.000000,165360.000000,91775.000000,465.397580)}
{pt3dadd(189876.000000,165504.000000,91750.000000,447.007114)}
{pt3dadd(189744.000000,165636.000000,91725.000000,427.697116)}
{pt3dadd(189648.000000,165792.000000,91725.000000,414.886532)}
{pt3dadd(189540.000000,165936.000000,91700.000000,418.950162)}
{pt3dadd(189444.000000,166092.000000,91675.000000,426.883908)}
{pt3dadd(189336.000000,166260.000000,91675.000000,422.820278)}
{pt3dadd(189228.000000,166416.000000,91650.000000,410.619724)}
{pt3dadd(189132.000000,166584.000000,91650.000000,418.950162)}
{pt3dadd(189048.000000,166692.000000,91575.000000,423.216970)}
{pt3dadd(188964.000000,166836.000000,91500.000000,419.153340)}
{pt3dadd(188832.000000,166956.000000,91600.000000,401.559968)}
{pt3dadd(188652.000000,167088.000000,91525.000000,394.363824)}
{pt3dadd(188520.000000,167232.000000,91475.000000,378.477442)}
{pt3dadd(188412.000000,167328.000000,91450.000000,370.147004)}
{pt3dadd(188328.000000,167496.000000,91325.000000,366.276888)}
{pt3dadd(188220.000000,167640.000000,91225.000000,376.314316)}
{pt3dadd(188076.000000,167784.000000,91175.000000,372.971164)}
{pt3dadd(187920.000000,167928.000000,91150.000000,376.656992)}
{pt3dadd(187860.000000,168060.000000,91150.000000,362.247580)}
{pt3dadd(187788.000000,168192.000000,91125.000000,342.604040)}
{pt3dadd(187716.000000,168324.000000,91075.000000,342.604040)}
{pt3dadd(187596.000000,168444.000000,91050.000000,357.013452)}
{pt3dadd(187428.000000,168576.000000,91025.000000,369.214006)}
{pt3dadd(187308.000000,168708.000000,91050.000000,406.077514)}
{pt3dadd(187188.000000,168828.000000,91000.000000,447.105910)}
{pt3dadd(187176.000000,168972.000000,91050.000000,472.176594)}
{pt3dadd(187164.000000,169104.000000,91000.000000,480.507032)}
{pt3dadd(187152.000000,169236.000000,91000.000000,484.987178)}
{pt3dadd(187140.000000,169404.000000,90975.000000,484.987178)}
{pt3dadd(187068.000000,169560.000000,90950.000000,471.536068)}
{pt3dadd(186996.000000,169704.000000,90925.000000,462.351766)}
{pt3dadd(186912.000000,169848.000000,90900.000000,462.351766)}
{pt3dadd(186828.000000,169992.000000,90925.000000,471.995278)}
{pt3dadd(186756.000000,170136.000000,90975.000000,482.627260)}
{pt3dadd(186732.000000,170268.000000,90975.000000,511.649708)}
{pt3dadd(186696.000000,170472.000000,91000.000000,530.959706)}
{pt3dadd(186684.000000,170604.000000,91000.000000,540.144008)}
{pt3dadd(186684.000000,170760.000000,90975.000000,540.144008)}
{pt3dadd(186672.000000,170904.000000,91000.000000,529.512026)}
{pt3dadd(186672.000000,171036.000000,91025.000000,492.555832)}
{pt3dadd(186564.000000,171168.000000,91000.000000,473.245834)}
{pt3dadd(186468.000000,171324.000000,90975.000000,464.061532)}
{pt3dadd(186312.000000,171480.000000,90950.000000,454.418020)}
{pt3dadd(186192.000000,171636.000000,90900.000000,440.294362)}
{pt3dadd(186132.000000,171804.000000,90925.000000,456.975062)}
{pt3dadd(186144.000000,171960.000000,90950.000000,471.098720)}
{pt3dadd(186156.000000,172248.000000,90900.000000,480.283022)}
{pt3dadd(186072.000000,172404.000000,90850.000000,463.602322)}
{pt3dadd(185988.000000,172560.000000,90825.000000,468.082468)}
{pt3dadd(185892.000000,172716.000000,90750.000000,459.335514)}
{pt3dadd(185808.000000,172860.000000,90700.000000,445.211856)}
{pt3dadd(185700.000000,172992.000000,90675.000000,427.697116)}
{pt3dadd(185664.000000,173124.000000,90625.000000,439.897670)}
{pt3dadd(185616.000000,173232.000000,90525.000000,431.150716)}
{pt3dadd(185436.000000,173448.000000,90325.000000,431.150716)}
{pt3dadd(185340.000000,173580.000000,90350.000000,418.950162)}
{pt3dadd(185412.000000,173688.000000,90325.000000,431.760746)}
{pt3dadd(185304.000000,173796.000000,90300.000000,436.240892)}
{pt3dadd(185184.000000,173904.000000,90200.000000,440.507700)}
{pt3dadd(185124.000000,174024.000000,90200.000000,436.444070)}
{pt3dadd(185088.000000,174144.000000,90225.000000,448.644624)}
{pt3dadd(184992.000000,174348.000000,90175.000000,439.897670)}
{pt3dadd(184980.000000,174480.000000,90125.000000,427.087086)}
{pt3dadd(185028.000000,174600.000000,90050.000000,418.756648)}
{pt3dadd(185040.000000,174744.000000,89925.000000,411.200704)}
{pt3dadd(185028.000000,174876.000000,89875.000000,385.276894)}
{pt3dadd(184956.000000,175008.000000,89875.000000,360.587548)}
{pt3dadd(184848.000000,175128.000000,89950.000000,346.178136)}
{pt3dadd(184800.000000,175248.000000,89950.000000,342.308020)}
{pt3dadd(184728.000000,175368.000000,90050.000000,345.993848)}
{pt3dadd(184728.000000,175476.000000,90100.000000,376.397804)}
{pt3dadd(184728.000000,175596.000000,90200.000000,405.353958)}
{pt3dadd(184716.000000,175704.000000,90225.000000,428.093808)}
{pt3dadd(184740.000000,175824.000000,90225.000000,431.963924)}
{pt3dadd(184752.000000,175944.000000,90200.000000,435.834040)}
{pt3dadd(184716.000000,176064.000000,90175.000000,411.957196)}
{pt3dadd(184656.000000,176184.000000,90200.000000,389.217346)}
{pt3dadd(184560.000000,176316.000000,90200.000000,357.373252)}
{pt3dadd(184536.000000,176424.000000,90175.000000,319.201288)}
{pt3dadd(184560.000000,176544.000000,90075.000000,277.022244)}
{pt3dadd(184560.000000,176676.000000,90025.000000,244.047868)}
{pt3dadd(184548.000000,176808.000000,90025.000000,214.416644)}
{pt3dadd(184572.000000,176940.000000,90025.000000,217.304584)}
{pt3dadd(184620.000000,177072.000000,90075.000000,224.098306)}
{pt3dadd(184692.000000,177204.000000,90225.000000,234.899108)}
{pt3dadd(184692.000000,177336.000000,90175.000000,252.675668)}
{pt3dadd(184596.000000,177444.000000,90075.000000,276.090588)}
{pt3dadd(184560.000000,177564.000000,90075.000000,279.122932)}
{pt3dadd(184512.000000,177708.000000,90075.000000,292.907802)}
{pt3dadd(184488.000000,177828.000000,90100.000000,303.660328)}
{pt3dadd(184464.000000,177960.000000,90100.000000,306.410748)}
{pt3dadd(184404.000000,178080.000000,90100.000000,300.772388)}
{pt3dadd(184344.000000,178188.000000,90125.000000,303.956348)}
{pt3dadd(184296.000000,178320.000000,90175.000000,307.140308)}
{pt3dadd(184248.000000,178452.000000,90200.000000,316.699764)}
{pt3dadd(184272.000000,178572.000000,90200.000000,329.147160)}
{pt3dadd(184248.000000,178704.000000,90200.000000,351.541120)}
{pt3dadd(184200.000000,178824.000000,90275.000000,370.014162)}
{pt3dadd(184164.000000,178932.000000,90350.000000,373.357314)}
{pt3dadd(184080.000000,179064.000000,90300.000000,384.423574)}
{pt3dadd(183972.000000,179196.000000,90325.000000,399.553464)}
{pt3dadd(183900.000000,179328.000000,90325.000000,431.064016)}
{pt3dadd(183912.000000,179436.000000,90325.000000,439.810970)}
{pt3dadd(183828.000000,179556.000000,90325.000000,450.877230)}
{pt3dadd(183768.000000,179676.000000,90375.000000,439.810970)}
{pt3dadd(183708.000000,179796.000000,90425.000000,428.191396)}
{pt3dadd(183684.000000,179916.000000,90500.000000,389.484700)}
{pt3dadd(183708.000000,180036.000000,90525.000000,359.080744)}
{pt3dadd(183600.000000,180156.000000,90500.000000,341.487372)}
{pt3dadd(183552.000000,180300.000000,90500.000000,334.960260)}
{pt3dadd(183588.000000,180420.000000,90500.000000,313.632678)}
{pt3dadd(183564.000000,180564.000000,90600.000000,313.632678)}
{pt3dadd(183516.000000,180672.000000,90600.000000,323.670106)}
{pt3dadd(183420.000000,180804.000000,90650.000000,326.854066)}
{pt3dadd(183228.000000,180912.000000,90600.000000,336.891494)}
{pt3dadd(183108.000000,181080.000000,90550.000000,365.775020)}
{pt3dadd(182988.000000,181224.000000,90525.000000,380.904910)}
{pt3dadd(182904.000000,181344.000000,90525.000000,388.460854)}
{pt3dadd(182880.000000,181476.000000,90550.000000,402.870266)}
{pt3dadd(182760.000000,181596.000000,90475.000000,399.359950)}
{pt3dadd(182652.000000,181728.000000,90425.000000,395.489834)}
{pt3dadd(182544.000000,181848.000000,90425.000000,377.016792)}
{pt3dadd(182520.000000,182004.000000,90375.000000,369.460848)}
{pt3dadd(182424.000000,182124.000000,90350.000000,358.394588)}
{pt3dadd(182352.000000,182256.000000,90325.000000,351.867476)}
{pt3dadd(182280.000000,182388.000000,90300.000000,332.223936)}
{pt3dadd(182232.000000,182520.000000,90300.000000,332.223936)}
{pt3dadd(182136.000000,182640.000000,90200.000000,328.713620)}
{pt3dadd(181980.000000,182760.000000,90200.000000,322.186508)}
{pt3dadd(181932.000000,182880.000000,90150.000000,313.515804)}
{pt3dadd(181872.000000,183000.000000,90125.000000,310.765384)}
{pt3dadd(181836.000000,183132.000000,90025.000000,293.796554)}
{pt3dadd(181788.000000,183252.000000,90075.000000,266.690850)}
{pt3dadd(181764.000000,183372.000000,90000.000000,252.905980)}
{pt3dadd(181692.000000,183492.000000,90000.000000,247.791814)}
{pt3dadd(181620.000000,183612.000000,90000.000000,238.038954)}
{pt3dadd(181500.000000,183744.000000,89950.000000,235.663040)}
{pt3dadd(181476.000000,183888.000000,89900.000000,240.080848)}
{pt3dadd(181320.000000,184020.000000,89800.000000,240.080848)}
{pt3dadd(181236.000000,184164.000000,89750.000000,240.080848)}
{pt3dadd(181164.000000,184308.000000,89725.000000,247.214258)}
{pt3dadd(181104.000000,184452.000000,89650.000000,249.590172)}
{pt3dadd(180996.000000,184584.000000,89625.000000,245.172364)}
{pt3dadd(180912.000000,184728.000000,89500.000000,238.378642)}
{pt3dadd(180792.000000,184896.000000,89425.000000,222.254778)}
{pt3dadd(180696.000000,185028.000000,89300.000000,208.959260)}
{pt3dadd(180576.000000,185172.000000,89200.000000,206.583346)}
{pt3dadd(180456.000000,185316.000000,89100.000000,206.583346)}
{pt3dadd(180336.000000,185448.000000,89000.000000,211.001154)}
{pt3dadd(180204.000000,185592.000000,88900.000000,227.125018)}
{pt3dadd(180084.000000,185724.000000,88800.000000,237.925820)}
{pt3dadd(179964.000000,185880.000000,88700.000000,248.166320)}
{pt3dadd(179868.000000,186000.000000,88575.000000,268.744912)}
{pt3dadd(179760.000000,186132.000000,88450.000000,284.905696)}
{pt3dadd(179592.000000,186276.000000,88325.000000,308.727994)}
{pt3dadd(179460.000000,186420.000000,88175.000000,319.480520)}
{pt3dadd(179316.000000,186564.000000,88050.000000,335.438232)}
{pt3dadd(179160.000000,186696.000000,87900.000000,326.767528)}
{pt3dadd(179016.000000,186840.000000,87725.000000,323.735184)}
{pt3dadd(178872.000000,186984.000000,87550.000000,316.881716)}
{pt3dadd(178764.000000,187128.000000,87425.000000,326.441172)}
{pt3dadd(178644.000000,187260.000000,87350.000000,322.930856)}
{pt3dadd(178524.000000,187392.000000,87275.000000,345.324816)}
{pt3dadd(178464.000000,187548.000000,87275.000000,354.884272)}
{pt3dadd(178404.000000,187692.000000,87225.000000,333.276748)}
{pt3dadd(178248.000000,187836.000000,87125.000000,315.459482)}
{pt3dadd(178056.000000,187980.000000,87050.000000,300.261666)}
{pt3dadd(177936.000000,188100.000000,87025.000000,277.867706)}
{pt3dadd(177708.000000,188220.000000,86950.000000,257.555724)}
{pt3dadd(177588.000000,188364.000000,86950.000000,264.689134)}
{pt3dadd(177480.000000,188496.000000,87050.000000,262.194418)}
{pt3dadd(177444.000000,188628.000000,87050.000000,254.704338)}
{pt3dadd(177312.000000,188760.000000,87100.000000,238.789370)}
{pt3dadd(177180.000000,188880.000000,87075.000000,236.413456)}
{pt3dadd(177024.000000,189012.000000,87150.000000,227.125018)}
{pt3dadd(176868.000000,189144.000000,87075.000000,224.749104)}
{pt3dadd(176748.000000,189276.000000,87000.000000,227.125018)}
{pt3dadd(176688.000000,189408.000000,86900.000000,233.287126)}
{pt3dadd(176664.000000,189540.000000,86775.000000,233.287126)}
{pt3dadd(176640.000000,189672.000000,86700.000000,237.704934)}
{pt3dadd(176592.000000,189780.000000,86575.000000,233.287126)}
{pt3dadd(176496.000000,189900.000000,86475.000000,228.648432)}
{pt3dadd(176400.000000,190020.000000,86325.000000,226.493404)}
{pt3dadd(176304.000000,190140.000000,86225.000000,231.364034)}
{pt3dadd(176208.000000,190236.000000,86100.000000,241.604534)}
{pt3dadd(176004.000000,190356.000000,86000.000000,253.512422)}
{pt3dadd(175752.000000,190464.000000,85925.000000,258.151116)}
{pt3dadd(175620.000000,190560.000000,85800.000000,260.306144)}
{pt3dadd(175488.000000,190668.000000,85725.000000,251.017706)}
{pt3dadd(175356.000000,190776.000000,85550.000000,234.306990)}
{pt3dadd(175272.000000,190884.000000,85500.000000,216.530430)}
{pt3dadd(175176.000000,191004.000000,85475.000000,207.684300)}
{pt3dadd(175080.000000,191100.000000,85425.000000,205.529272)}
{pt3dadd(174924.000000,191208.000000,85400.000000,201.522192)}
{pt3dadd(174768.000000,191316.000000,85400.000000,201.522192)}
{pt3dadd(174612.000000,191412.000000,85375.000000,201.522192)}
{pt3dadd(174456.000000,191532.000000,85350.000000,197.705928)}
{pt3dadd(174300.000000,191640.000000,85350.000000,193.698848)}
{pt3dadd(174144.000000,191736.000000,85325.000000,193.698848)}
{pt3dadd(173988.000000,191844.000000,85300.000000,189.882584)}
{pt3dadd(173832.000000,191952.000000,85300.000000,188.109634)}
{pt3dadd(173688.000000,192048.000000,85250.000000,189.971226)}
{pt3dadd(173544.000000,192144.000000,85175.000000,193.978306)}
{pt3dadd(173304.000000,192228.000000,85025.000000,207.273824)}
{pt3dadd(173208.000000,192228.000000,84850.000000,236.905048)}
{pt3dadd(173088.000000,192252.000000,84675.000000,262.092918)}
{pt3dadd(172656.000000,192312.000000,84375.000000,283.646246)}
{pt3dadd(172452.000000,192264.000000,84025.000000,301.192494)}
{pt3dadd(172308.000000,192252.000000,83850.000000,296.321864)}
{pt3dadd(172152.000000,192300.000000,83700.000000,274.714340)}
{pt3dadd(172092.000000,192348.000000,83550.000000,255.115684)}
{pt3dadd(171972.000000,192444.000000,83425.000000,235.517028)}
{pt3dadd(171936.000000,192456.000000,83300.000000,215.918372)}
{pt3dadd(171984.000000,192336.000000,83175.000000,209.448156)}
{pt3dadd(171912.000000,192348.000000,83075.000000,205.240720)}
{pt3dadd(171852.000000,192348.000000,82975.000000,207.293128)}
{pt3dadd(171828.000000,192408.000000,82850.000000,209.345536)}
{pt3dadd(171816.000000,192396.000000,82725.000000,213.552972)}
{pt3dadd(171792.000000,192396.000000,82600.000000,213.552972)}
{pt3dadd(171624.000000,192360.000000,82475.000000,213.552972)}
{pt3dadd(171516.000000,192300.000000,82350.000000,211.500564)}
{pt3dadd(171480.000000,192276.000000,82225.000000,207.493484)}
{pt3dadd(171468.000000,192264.000000,82100.000000,197.696834)}
{pt3dadd(171456.000000,192264.000000,82000.000000,197.696834)}
{pt3dadd(171456.000000,192252.000000,81875.000000,206.542964)}
{pt3dadd(171372.000000,192216.000000,81750.000000,206.542964)}
{pt3dadd(171228.000000,192192.000000,81600.000000,208.497636)}
{pt3dadd(171192.000000,192168.000000,81500.000000,208.497636)}
{pt3dadd(171132.000000,192144.000000,81400.000000,208.497636)}
{pt3dadd(171048.000000,192192.000000,81275.000000,195.835242)}
{pt3dadd(170976.000000,192192.000000,81175.000000,204.681372)}
{pt3dadd(170916.000000,192204.000000,81050.000000,218.641668)}
{pt3dadd(170988.000000,192084.000000,80850.000000,238.191178)}
{pt3dadd(170928.000000,191976.000000,80725.000000,249.532024)}
{pt3dadd(170868.000000,191784.000000,80600.000000,230.209313)}
{pt3dadd(170652.000000,191784.000000,80450.000000,225.570619)}
{pt3dadd(170352.000000,191844.000000,80350.000000,225.570619)}
{pt3dadd(170244.000000,191760.000000,80175.000000,225.570619)}
{pt3dadd(170292.000000,191712.000000,80050.000000,216.282181)}
{pt3dadd(170208.000000,191772.000000,79925.000000,245.891372)}
{pt3dadd(170172.000000,191760.000000,79800.000000,243.736344)}
{pt3dadd(170148.000000,191772.000000,79675.000000,238.622178)}
{pt3dadd(170088.000000,191880.000000,79550.000000,226.714290)}
{pt3dadd(169968.000000,192012.000000,79425.000000,228.869318)}
{pt3dadd(169848.000000,192108.000000,79300.000000,226.606538)}
{pt3dadd(169752.000000,192192.000000,79175.000000,228.761566)}
{pt3dadd(169716.000000,192120.000000,79050.000000,224.122872)}
{pt3dadd(169692.000000,192132.000000,78925.000000,224.122872)}
{pt3dadd(169716.000000,192036.000000,78775.000000,226.385652)}
{pt3dadd(169728.000000,192012.000000,78650.000000,231.024346)}
{pt3dadd(169764.000000,192024.000000,78525.000000,233.287126)}
{pt3dadd(169824.000000,191988.000000,78400.000000,227.125018)}
{pt3dadd(169704.000000,191904.000000,78175.000000,227.125018)}
{pt3dadd(169764.000000,191952.000000,78000.000000,222.707210)}
{pt3dadd(169800.000000,192000.000000,77825.000000,227.821376)}
{pt3dadd(169800.000000,192120.000000,77450.000000,232.692006)}
{pt3dadd(169800.000000,192264.000000,77150.000000,245.987524)}
{pt3dadd(169716.000000,192384.000000,77000.000000,252.781246)}
{pt3dadd(169716.000000,192444.000000,76900.000000,262.069684)}
{pt3dadd(169800.000000,192528.000000,76775.000000,259.450234)}
{pt3dadd(169884.000000,192624.000000,76675.000000,254.579604)}
{pt3dadd(169920.000000,192684.000000,76550.000000,252.084888)}
{pt3dadd(169920.000000,192708.000000,76400.000000,249.708974)}
{pt3dadd(170076.000000,192864.000000,76275.000000,252.328424)}
{pt3dadd(170148.000000,193068.000000,76125.000000,249.833708)}
{pt3dadd(170172.000000,193212.000000,75975.000000,252.209622)}
{pt3dadd(170196.000000,193368.000000,75850.000000,249.833708)}
{pt3dadd(170184.000000,193596.000000,75700.000000,265.994492)}
{pt3dadd(170280.000000,193788.000000,75575.000000,288.388452)}
{pt3dadd(170388.000000,193824.000000,75400.000000,319.766694)}
{pt3dadd(170580.000000,194184.000000,75125.000000,347.274820)}
{pt3dadd(170640.000000,194376.000000,74975.000000,373.473032)}
{pt3dadd(170604.000000,194544.000000,74850.000000,380.000144)}
{pt3dadd(170616.000000,194688.000000,74700.000000,372.804000)}
{pt3dadd(170628.000000,194832.000000,74550.000000,361.737740)}
{pt3dadd(170556.000000,195024.000000,74425.000000,344.982140)}
{pt3dadd(170424.000000,195144.000000,74275.000000,352.538084)}
{pt3dadd(170280.000000,195312.000000,74150.000000,353.542620)}
{pt3dadd(170148.000000,195528.000000,74025.000000,406.362580)}

{create adhoc25}
{access adhoc25}
{connect adhoc25(1), adhoc24(0)}
{nseg = 1}
{strdef color color = "White"}
{pt3dclear()}
{pt3dadd(170148.000000,195528.000000,74025.000000,406.362580)}
{pt3dadd(169992.000000,195792.000000,73925.000000,347.970700)}
{pt3dadd(169872.000000,196128.000000,73825.000000,336.140708)}
{pt3dadd(169668.000000,196608.000000,73700.000000,325.074448)}
{pt3dadd(169536.000000,196860.000000,73750.000000,325.074448)}
{pt3dadd(169464.000000,196980.000000,73725.000000,331.290752)}
{pt3dadd(169488.000000,197088.000000,73725.000000,337.817864)}
{pt3dadd(169572.000000,197208.000000,73725.000000,347.855292)}
{pt3dadd(169524.000000,197304.000000,73675.000000,351.365608)}
{pt3dadd(169500.000000,197424.000000,73650.000000,358.219076)}
{pt3dadd(169344.000000,197544.000000,73650.000000,361.562228)}
{pt3dadd(169296.000000,197652.000000,73550.000000,355.035116)}
{pt3dadd(169224.000000,197772.000000,73500.000000,344.997688)}
{pt3dadd(169176.000000,197892.000000,73475.000000,338.144220)}
{pt3dadd(169080.000000,198012.000000,73425.000000,331.290752)}
{pt3dadd(168996.000000,198120.000000,73425.000000,324.763640)}
{pt3dadd(168900.000000,198240.000000,73425.000000,321.731296)}
{pt3dadd(168828.000000,198348.000000,73350.000000,321.731296)}
{pt3dadd(168864.000000,198456.000000,73325.000000,318.547336)}
{pt3dadd(168744.000000,198564.000000,73275.000000,312.331032)}
{pt3dadd(168588.000000,198684.000000,73225.000000,301.040878)}
{pt3dadd(168432.000000,198804.000000,73125.000000,292.783068)}
{pt3dadd(168264.000000,198936.000000,73100.000000,286.862784)}
{pt3dadd(168060.000000,199044.000000,73000.000000,280.942500)}
{pt3dadd(167976.000000,199176.000000,72875.000000,280.942500)}
{pt3dadd(167748.000000,199296.000000,72750.000000,289.200310)}
{pt3dadd(167580.000000,199428.000000,72700.000000,294.570180)}
{pt3dadd(167304.000000,199560.000000,72475.000000,289.200310)}
{pt3dadd(167028.000000,199668.000000,72225.000000,283.830440)}
{pt3dadd(166752.000000,199788.000000,72075.000000,275.572630)}
{pt3dadd(166620.000000,199908.000000,71900.000000,269.934270)}
{pt3dadd(166392.000000,200028.000000,71700.000000,262.069684)}
{pt3dadd(166116.000000,200148.000000,71400.000000,267.439554)}
{pt3dadd(165948.000000,200256.000000,71350.000000,264.944838)}
{pt3dadd(165864.000000,200364.000000,71175.000000,260.074208)}
{pt3dadd(165672.000000,200484.000000,71000.000000,248.166320)}
{pt3dadd(165396.000000,200616.000000,70825.000000,243.527626)}
{pt3dadd(165204.000000,200736.000000,70700.000000,228.869318)}
{pt3dadd(164916.000000,200844.000000,70475.000000,226.493404)}
{pt3dadd(164616.000000,200976.000000,70350.000000,218.068516)}
{pt3dadd(164436.000000,201108.000000,70225.000000,220.223544)}
{pt3dadd(164016.000000,201252.000000,69975.000000,220.223544)}
{pt3dadd(163536.000000,201432.000000,69900.000000,222.378572)}
{pt3dadd(163368.000000,201540.000000,69875.000000,217.960764)}
{pt3dadd(163128.000000,201672.000000,69800.000000,226.385652)}
{pt3dadd(162888.000000,201756.000000,69800.000000,226.385652)}
{pt3dadd(162624.000000,201900.000000,69700.000000,228.648432)}
{pt3dadd(162288.000000,201984.000000,69700.000000,222.486324)}
{pt3dadd(161928.000000,202116.000000,69575.000000,211.548068)}
{pt3dadd(161748.000000,202212.000000,69475.000000,197.800118)}
{pt3dadd(161520.000000,202344.000000,69400.000000,186.314948)}
{pt3dadd(161412.000000,202476.000000,69425.000000,174.255518)}
{pt3dadd(161280.000000,202572.000000,69375.000000,174.255518)}
{pt3dadd(161112.000000,202704.000000,69325.000000,175.863632)}
{pt3dadd(160896.000000,202800.000000,69375.000000,175.863632)}
{pt3dadd(160560.000000,202956.000000,69325.000000,174.255518)}
{pt3dadd(160404.000000,203064.000000,69325.000000,177.890060)}
{pt3dadd(160260.000000,203208.000000,69225.000000,177.890060)}
{pt3dadd(160164.000000,203340.000000,69325.000000,181.351530)}
{pt3dadd(160116.000000,203484.000000,69375.000000,188.629264)}
{pt3dadd(160032.000000,203592.000000,69400.000000,211.475408)}
{pt3dadd(159972.000000,203712.000000,69375.000000,217.637516)}
{pt3dadd(159624.000000,203784.000000,69425.000000,239.190844)}
{pt3dadd(159276.000000,203916.000000,69525.000000,279.361364)}
{pt3dadd(158964.000000,204012.000000,69350.000000,305.176324)}
{pt3dadd(158568.000000,204096.000000,69325.000000,317.030988)}
{pt3dadd(158400.000000,204264.000000,69425.000000,332.422208)}
{pt3dadd(158136.000000,204444.000000,69575.000000,341.981664)}
{pt3dadd(158208.000000,204528.000000,69650.000000,322.338124)}
{pt3dadd(158148.000000,204732.000000,69475.000000,307.864010)}
{pt3dadd(157920.000000,204840.000000,69350.000000,288.519266)}
{pt3dadd(158004.000000,204960.000000,69375.000000,270.973018)}
{pt3dadd(158076.000000,205080.000000,69450.000000,246.022342)}
{pt3dadd(157740.000000,205272.000000,69375.000000,238.157756)}
{pt3dadd(157644.000000,205392.000000,69350.000000,231.024346)}
{pt3dadd(157692.000000,205500.000000,69375.000000,238.514426)}
{pt3dadd(157680.000000,205584.000000,69375.000000,245.308148)}
{pt3dadd(157656.000000,205692.000000,69425.000000,252.441558)}
{pt3dadd(157524.000000,205800.000000,69325.000000,254.936274)}
{pt3dadd(157380.000000,206076.000000,69300.000000,259.574968)}
{pt3dadd(157356.000000,206196.000000,69350.000000,256.955518)}
{pt3dadd(157332.000000,206352.000000,69350.000000,252.316824)}
{pt3dadd(157248.000000,206508.000000,69300.000000,247.446194)}
{pt3dadd(157176.000000,206616.000000,69250.000000,238.157756)}
{pt3dadd(157164.000000,206760.000000,69275.000000,227.356954)}
{pt3dadd(157104.000000,206892.000000,69300.000000,212.199844)}
{pt3dadd(156984.000000,207072.000000,69250.000000,206.037736)}
{pt3dadd(156948.000000,207180.000000,69200.000000,201.619928)}
{pt3dadd(156912.000000,207300.000000,69150.000000,203.774956)}
{pt3dadd(156936.000000,207444.000000,69175.000000,207.782036)}
{pt3dadd(156876.000000,207540.000000,69175.000000,209.643628)}
{pt3dadd(156816.000000,207672.000000,69175.000000,228.309016)}
{pt3dadd(156756.000000,207792.000000,69175.000000,262.610864)}
{pt3dadd(156828.000000,207924.000000,69175.000000,298.627800)}
{pt3dadd(156864.000000,208032.000000,69175.000000,349.610348)}
{pt3dadd(156888.000000,208164.000000,69175.000000,414.243488)}
{pt3dadd(156984.000000,208272.000000,69150.000000,446.087582)}
{pt3dadd(157068.000000,208380.000000,69100.000000,454.021328)}
{pt3dadd(157080.000000,208476.000000,69075.000000,450.151212)}
{pt3dadd(157008.000000,208584.000000,69000.000000,450.151212)}
{pt3dadd(156852.000000,208668.000000,68950.000000,440.507700)}
{pt3dadd(156804.000000,208740.000000,69025.000000,442.614333)}
{pt3dadd(156804.000000,208896.000000,69075.000000,470.415500)}

{create adhoc26}
{access adhoc26}
{connect adhoc26(1), adhoc25(0)}
{nseg = 1}
{strdef color color = "White"}
{pt3dclear()}
{pt3dadd(156804.000000,208896.000000,69075.000000,470.415500)}
{pt3dadd(156804.000000,208980.000000,69000.000000,397.247673)}
{pt3dadd(156768.000000,209220.000000,68875.000000,351.384394)}
{pt3dadd(156864.000000,209388.000000,68825.000000,309.690284)}
{pt3dadd(156792.000000,209520.000000,68725.000000,282.182158)}
{pt3dadd(156756.000000,209688.000000,68700.000000,275.965854)}
{pt3dadd(156756.000000,209784.000000,68775.000000,278.998198)}
{pt3dadd(156792.000000,209928.000000,68800.000000,284.368068)}
{pt3dadd(156840.000000,210024.000000,68775.000000,289.737938)}
{pt3dadd(156888.000000,210144.000000,68725.000000,294.852104)}
{pt3dadd(156744.000000,210252.000000,68850.000000,291.964164)}
{pt3dadd(156684.000000,210360.000000,68975.000000,288.931820)}
{pt3dadd(156636.000000,210468.000000,69100.000000,316.509106)}
{pt3dadd(156768.000000,210552.000000,69100.000000,313.758686)}
{pt3dadd(156672.000000,210660.000000,69125.000000,301.850798)}
{pt3dadd(156612.000000,210792.000000,69100.000000,283.185410)}
{pt3dadd(156588.000000,210888.000000,69100.000000,265.639162)}
{pt3dadd(156576.000000,211020.000000,69100.000000,225.558596)}
{pt3dadd(156600.000000,211128.000000,69075.000000,225.558596)}
{pt3dadd(156516.000000,211236.000000,69075.000000,229.976404)}
{pt3dadd(156444.000000,211344.000000,69025.000000,233.983484)}
{pt3dadd(156420.000000,211440.000000,69100.000000,238.401292)}
{pt3dadd(156432.000000,211560.000000,69150.000000,243.039986)}
{pt3dadd(156480.000000,211668.000000,69125.000000,237.925820)}
{pt3dadd(156420.000000,211764.000000,69150.000000,237.925820)}
{pt3dadd(156324.000000,211908.000000,69125.000000,242.343628)}
{pt3dadd(156204.000000,212028.000000,69225.000000,244.719542)}
{pt3dadd(156144.000000,212148.000000,69225.000000,242.343628)}
{pt3dadd(156204.000000,212268.000000,69200.000000,244.838344)}
{pt3dadd(156180.000000,212376.000000,69250.000000,244.838344)}
{pt3dadd(156144.000000,212532.000000,69275.000000,247.214258)}
{pt3dadd(156048.000000,212652.000000,69275.000000,244.838344)}
{pt3dadd(156012.000000,212796.000000,69375.000000,242.575564)}
{pt3dadd(156048.000000,212916.000000,69400.000000,245.195014)}
{pt3dadd(156072.000000,213024.000000,69350.000000,250.065644)}
{pt3dadd(156108.000000,213132.000000,69300.000000,243.271922)}
{pt3dadd(156144.000000,213252.000000,69350.000000,248.142552)}
{pt3dadd(156180.000000,213372.000000,69375.000000,260.645832)}
{pt3dadd(156180.000000,213480.000000,69400.000000,263.396252)}
{pt3dadd(156180.000000,213612.000000,69425.000000,268.766122)}
{pt3dadd(156192.000000,213744.000000,69475.000000,275.559844)}
{pt3dadd(156156.000000,213864.000000,69500.000000,280.929714)}
{pt3dadd(156120.000000,213984.000000,69525.000000,278.179294)}
{pt3dadd(156096.000000,214116.000000,69575.000000,261.468578)}
{pt3dadd(156132.000000,214212.000000,69700.000000,237.480128)}
{pt3dadd(156168.000000,214344.000000,69775.000000,223.044784)}
{pt3dadd(156216.000000,214464.000000,69875.000000,210.541504)}
{pt3dadd(156204.000000,214584.000000,69875.000000,189.303474)}
{pt3dadd(156264.000000,214728.000000,69925.000000,177.427480)}
{pt3dadd(156240.000000,214848.000000,70000.000000,172.829220)}
{pt3dadd(156300.000000,214956.000000,70125.000000,166.542440)}
{pt3dadd(156168.000000,215124.000000,70350.000000,151.917620)}
{pt3dadd(156336.000000,215400.000000,70450.000000,148.777970)}
{pt3dadd(156468.000000,215736.000000,70475.000000,153.376230)}
{pt3dadd(156552.000000,215916.000000,70475.000000,161.435960)}
{pt3dadd(156684.000000,216048.000000,70500.000000,166.034220)}
{pt3dadd(156744.000000,216168.000000,70525.000000,178.504012)}
{pt3dadd(156768.000000,216300.000000,70575.000000,178.504012)}
{pt3dadd(156864.000000,216396.000000,70650.000000,173.905752)}
{pt3dadd(156780.000000,216504.000000,70775.000000,168.836168)}
{pt3dadd(156780.000000,216612.000000,70800.000000,174.159230)}
{pt3dadd(156828.000000,216720.000000,70775.000000,174.159230)}
{pt3dadd(156876.000000,216828.000000,70825.000000,184.576614)}
{pt3dadd(156924.000000,216936.000000,70850.000000,192.636344)}
{pt3dadd(156924.000000,217044.000000,70875.000000,203.574600)}
{pt3dadd(156984.000000,217152.000000,70925.000000,216.870118)}
{pt3dadd(157044.000000,217260.000000,70875.000000,221.287926)}
{pt3dadd(157080.000000,217356.000000,70875.000000,221.287926)}
{pt3dadd(157092.000000,217452.000000,70875.000000,225.104190)}
{pt3dadd(157032.000000,217560.000000,70900.000000,211.175788)}
{pt3dadd(157104.000000,217644.000000,70925.000000,190.949094)}
{pt3dadd(157092.000000,217752.000000,70900.000000,172.602884)}
{pt3dadd(157116.000000,217848.000000,70950.000000,174.655292)}
{pt3dadd(157044.000000,217956.000000,70950.000000,167.377558)}
{pt3dadd(157032.000000,218052.000000,70825.000000,171.975818)}
{pt3dadd(157104.000000,218280.000000,70925.000000,173.583932)}
{pt3dadd(157140.000000,218376.000000,70950.000000,178.182192)}
{pt3dadd(157104.000000,218544.000000,70950.000000,178.182192)}
{pt3dadd(157068.000000,218628.000000,70950.000000,191.930142)}
{pt3dadd(157008.000000,218748.000000,70975.000000,205.678092)}
{pt3dadd(157044.000000,218844.000000,70825.000000,219.426042)}
{pt3dadd(157116.000000,218964.000000,70725.000000,240.664072)}
{pt3dadd(157104.000000,219084.000000,70725.000000,255.322380)}
{pt3dadd(157092.000000,219204.000000,70725.000000,265.562880)}
{pt3dadd(157092.000000,219336.000000,70725.000000,251.814930)}
{pt3dadd(157104.000000,219432.000000,70650.000000,241.528450)}
{pt3dadd(156972.000000,219540.000000,70575.000000,223.751890)}
{pt3dadd(156984.000000,219648.000000,70575.000000,207.041174)}
{pt3dadd(156900.000000,219756.000000,70550.000000,188.375786)}
{pt3dadd(156864.000000,219864.000000,70575.000000,195.653520)}
{pt3dadd(156828.000000,219984.000000,70600.000000,201.522192)}
{pt3dadd(156792.000000,220092.000000,70600.000000,198.060722)}
{pt3dadd(156756.000000,220200.000000,70600.000000,196.106050)}
{pt3dadd(156684.000000,220320.000000,70600.000000,194.244458)}
{pt3dadd(156684.000000,220428.000000,70650.000000,190.428194)}
{pt3dadd(156660.000000,220536.000000,70625.000000,182.786572)}
{pt3dadd(156576.000000,220656.000000,70625.000000,182.786572)}
{pt3dadd(156408.000000,220884.000000,70625.000000,175.855396)}
{pt3dadd(156420.000000,221124.000000,70625.000000,166.406516)}
{pt3dadd(156360.000000,221316.000000,70600.000000,174.430216)}
{pt3dadd(156372.000000,221412.000000,70650.000000,184.226866)}
{pt3dadd(156384.000000,221556.000000,70575.000000,191.504600)}
{pt3dadd(156300.000000,221652.000000,70600.000000,194.801234)}
{pt3dadd(156192.000000,221784.000000,70600.000000,206.111706)}
{pt3dadd(156084.000000,221904.000000,70625.000000,198.088006)}
{pt3dadd(156060.000000,222048.000000,70600.000000,186.602836)}
{pt3dadd(155988.000000,222132.000000,70625.000000,193.073052)}
{pt3dadd(155916.000000,222276.000000,70600.000000,210.003112)}
{pt3dadd(155832.000000,222396.000000,70650.000000,218.428000)}
{pt3dadd(155772.000000,222516.000000,70675.000000,236.204560)}
{pt3dadd(155748.000000,222600.000000,70600.000000,254.823140)}
{pt3dadd(155724.000000,222744.000000,70650.000000,259.693770)}
{pt3dadd(155700.000000,222864.000000,70625.000000,265.063640)}
{pt3dadd(155640.000000,222972.000000,70675.000000,281.224424)}
{pt3dadd(155556.000000,223092.000000,70725.000000,289.895128)}
{pt3dadd(155520.000000,223296.000000,70750.000000,301.185282)}
{pt3dadd(155484.000000,223416.000000,70775.000000,309.443092)}
{pt3dadd(155508.000000,223536.000000,70775.000000,306.692672)}
{pt3dadd(155412.000000,223656.000000,70800.000000,300.772388)}
{pt3dadd(155316.000000,223788.000000,70875.000000,286.987518)}
{pt3dadd(155256.000000,223896.000000,70900.000000,270.826734)}
{pt3dadd(155124.000000,224028.000000,71000.000000,260.074208)}
{pt3dadd(155004.000000,224148.000000,71075.000000,257.454758)}
{pt3dadd(154896.000000,224244.000000,71200.000000,249.590172)}
{pt3dadd(154812.000000,224376.000000,71325.000000,244.951478)}
{pt3dadd(154716.000000,224460.000000,71400.000000,242.688698)}
{pt3dadd(154620.000000,224592.000000,71475.000000,233.842568)}
{pt3dadd(154560.000000,224688.000000,71450.000000,220.547050)}
{pt3dadd(154488.000000,224808.000000,71450.000000,213.753328)}
{pt3dadd(154308.000000,224916.000000,71475.000000,202.268158)}
{pt3dadd(154128.000000,225000.000000,71575.000000,181.012578)}
{pt3dadd(153972.000000,225108.000000,71675.000000,159.709294)}
{pt3dadd(153780.000000,225240.000000,71550.000000,142.384530)}
{pt3dadd(153576.000000,225432.000000,71550.000000,118.088606)}
{pt3dadd(153444.000000,225636.000000,71550.000000,104.063056)}
{pt3dadd(153264.000000,225840.000000,71550.000000,112.225352)}
{pt3dadd(153156.000000,226092.000000,71550.000000,118.940492)}
{pt3dadd(153060.000000,226272.000000,71450.000000,124.954784)}
{pt3dadd(152880.000000,226500.000000,71500.000000,127.918864)}
{pt3dadd(152724.000000,226680.000000,71425.000000,133.374004)}
{pt3dadd(152640.000000,226860.000000,71525.000000,134.982118)}
{pt3dadd(152496.000000,227004.000000,71475.000000,145.753998)}
{pt3dadd(152436.000000,227160.000000,71375.000000,153.429928)}
{pt3dadd(152316.000000,227304.000000,71350.000000,168.893100)}
{pt3dadd(152388.000000,227400.000000,71375.000000,188.948680)}
{pt3dadd(152208.000000,227640.000000,71350.000000,207.567260)}
{pt3dadd(152136.000000,227856.000000,71400.000000,220.229654)}
{pt3dadd(152064.000000,228012.000000,71450.000000,230.026304)}
{pt3dadd(152100.000000,228180.000000,71450.000000,231.887896)}
{pt3dadd(152100.000000,228324.000000,71450.000000,229.732868)}
{pt3dadd(151992.000000,228456.000000,71425.000000,218.392022)}
{pt3dadd(151860.000000,228600.000000,71350.000000,211.598300)}
{pt3dadd(151824.000000,228720.000000,71450.000000,198.505016)}
{pt3dadd(151788.000000,228780.000000,71525.000000,190.042304)}
{pt3dadd(151824.000000,228984.000000,71625.000000,184.173632)}
{pt3dadd(151968.000000,229152.000000,71825.000000,172.297638)}
{pt3dadd(152208.000000,229344.000000,72025.000000,161.724650)}
{pt3dadd(152304.000000,229584.000000,72275.000000,145.860750)}

{create adhoc27}
{access adhoc27}
{connect adhoc27(1), adhoc25(0)}
{nseg = 1}
{strdef color color = "White"}
{pt3dclear()}
{pt3dadd(156804.000000,208896.000000,69075.000000,470.415500)}
{pt3dadd(156648.000000,208836.000000,68875.000000,302.797178)}
{pt3dadd(156648.000000,208776.000000,68025.000000,239.642290)}
{pt3dadd(156684.000000,208800.000000,67600.000000,168.416332)}
{pt3dadd(156612.000000,208812.000000,67250.000000,146.808808)}
{pt3dadd(156672.000000,208860.000000,66925.000000,163.308585)}
{pt3dadd(156684.000000,208884.000000,66550.000000,167.776482)}
{pt3dadd(156660.000000,209028.000000,66125.000000,179.479100)}
{pt3dadd(156624.000000,209064.000000,65850.000000,126.000000)}

{create adhoc28}
{access adhoc28}
{connect adhoc28(1), adhoc24(0)}
{nseg = 1}
{strdef color color = "White"}
{pt3dclear()}
{pt3dadd(170148.000000,195528.000000,74025.000000,406.362580)}
{pt3dadd(169992.000000,195588.000000,73600.000000,304.945767)}
{pt3dadd(169692.000000,195540.000000,73175.000000,245.910020)}
{pt3dadd(169476.000000,195492.000000,72875.000000,205.685648)}
{pt3dadd(169236.000000,195324.000000,72575.000000,177.201144)}
{pt3dadd(168828.000000,195132.000000,72250.000000,165.325150)}
{pt3dadd(168324.000000,194940.000000,72050.000000,167.013670)}
{pt3dadd(167508.000000,194796.000000,71750.000000,178.889664)}
{pt3dadd(166632.000000,194652.000000,71450.000000,170.003816)}
{pt3dadd(165972.000000,194628.000000,71200.000000,176.934992)}
{pt3dadd(165480.000000,194520.000000,70650.000000,183.221772)}
{pt3dadd(165408.000000,194268.000000,70075.000000,181.533252)}
{pt3dadd(165264.000000,194016.000000,69450.000000,175.944038)}
{pt3dadd(165192.000000,193692.000000,68875.000000,164.513845)}
{pt3dadd(165024.000000,193476.000000,68300.000000,157.582669)}
{pt3dadd(164820.000000,193164.000000,67800.000000,157.582669)}
{pt3dadd(164628.000000,192960.000000,67300.000000,162.905731)}
{pt3dadd(164556.000000,192948.000000,66725.000000,168.494945)}
{pt3dadd(164448.000000,192600.000000,66150.000000,176.934992)}
{pt3dadd(163956.000000,192996.000000,66000.000000,180.231626)}
{pt3dadd(163572.000000,192768.000000,65525.000000,173.944846)}
{pt3dadd(163188.000000,192696.000000,65050.000000,168.621784)}
{pt3dadd(162828.000000,192900.000000,64375.000000,161.344050)}
{pt3dadd(162936.000000,193080.000000,63800.000000,161.344050)}
{pt3dadd(163008.000000,193212.000000,63300.000000,155.057270)}
{pt3dadd(163188.000000,193344.000000,62975.000000,158.047416)}
{pt3dadd(163296.000000,193464.000000,62450.000000,144.021866)}
{pt3dadd(163296.000000,193512.000000,61800.000000,133.108598)}
{pt3dadd(162876.000000,193704.000000,61275.000000,144.984592)}
{pt3dadd(162348.000000,193968.000000,60725.000000,144.984592)}
{pt3dadd(161928.000000,194124.000000,59950.000000,155.129060)}
{pt3dadd(161604.000000,194160.000000,59500.000000,145.860750)}

{create adhoc29}
{access adhoc29}
{connect adhoc29(1), adhoc1(0)}
{nseg = 1}
{strdef color color = "White"}
{pt3dclear()}
{pt3dadd(180288.000000,148416.000000,123275.000000,470.415500)}
{pt3dadd(179664.000000,148920.000000,123950.000000,489.517690)}
{pt3dadd(179328.000000,149208.000000,124400.000000,453.653970)}
{pt3dadd(178896.000000,149280.000000,124650.000000,420.557270)}
{pt3dadd(178632.000000,149304.000000,124925.000000,361.208116)}
{pt3dadd(178212.000000,149148.000000,125075.000000,321.277088)}
{pt3dadd(177480.000000,149256.000000,125075.000000,302.700604)}
{pt3dadd(176868.000000,149652.000000,125075.000000,295.808756)}
{pt3dadd(176400.000000,149976.000000,125075.000000,295.808756)}
{pt3dadd(176016.000000,150312.000000,125250.000000,309.670814)}
{pt3dadd(175512.000000,150660.000000,125325.000000,326.734660)}
{pt3dadd(175032.000000,151020.000000,125550.000000,333.626508)}
{pt3dadd(174456.000000,151500.000000,125550.000000,344.224816)}
{pt3dadd(173796.000000,151884.000000,125725.000000,364.966028)}
{pt3dadd(173376.000000,151836.000000,126000.000000,353.612652)}
{pt3dadd(172944.000000,151944.000000,126275.000000,334.159582)}
{pt3dadd(172296.000000,152040.000000,126475.000000,321.016622)}
{pt3dadd(172068.000000,152220.000000,126550.000000,307.216526)}
{pt3dadd(171600.000000,152412.000000,126700.000000,286.475314)}
{pt3dadd(171252.000000,152532.000000,126875.000000,297.828690)}
{pt3dadd(170808.000000,152700.000000,127150.000000,324.173608)}
{pt3dadd(170244.000000,153048.000000,127375.000000,341.023028)}
{pt3dadd(170064.000000,153324.000000,127625.000000,347.586688)}
{pt3dadd(170016.000000,153336.000000,127800.000000,341.916756)}
{pt3dadd(169704.000000,153576.000000,127925.000000,335.963320)}
{pt3dadd(168540.000000,154224.000000,128225.000000,314.516308)}
{pt3dadd(167928.000000,154572.000000,128325.000000,282.189482)}
{pt3dadd(167376.000000,154992.000000,128325.000000,259.374540)}
{pt3dadd(166824.000000,155448.000000,128325.000000,243.370452)}
{pt3dadd(166836.000000,155544.000000,128125.000000,226.566164)}
{pt3dadd(166584.000000,155700.000000,128025.000000,229.200284)}
{pt3dadd(166380.000000,155652.000000,127950.000000,257.820650)}
{pt3dadd(166236.000000,155808.000000,127825.000000,287.872028)}
{pt3dadd(165972.000000,156648.000000,127700.000000,326.395468)}
{pt3dadd(165804.000000,157020.000000,127475.000000,359.246828)}
{pt3dadd(165528.000000,157524.000000,127475.000000,362.012648)}
{pt3dadd(165420.000000,158376.000000,127400.000000,365.719108)}
{pt3dadd(165216.000000,159252.000000,127325.000000,365.719108)}
{pt3dadd(164868.000000,159480.000000,127325.000000,355.120800)}
{pt3dadd(164364.000000,159528.000000,127325.000000,328.775882)}
{pt3dadd(163752.000000,159720.000000,127325.000000,328.775882)}
{pt3dadd(163200.000000,159900.000000,127250.000000,318.177574)}
{pt3dadd(162336.000000,159960.000000,127200.000000,314.471114)}
{pt3dadd(161592.000000,160368.000000,127400.000000,328.961214)}
{pt3dadd(160836.000000,160548.000000,127600.000000,371.281466)}
{pt3dadd(160056.000000,161016.000000,127750.000000,391.034998)}
{pt3dadd(159288.000000,161436.000000,127825.000000,394.396870)}
{pt3dadd(158640.000000,161988.000000,128000.000000,390.866894)}
{pt3dadd(158244.000000,162276.000000,128375.000000,376.376794)}
{pt3dadd(157944.000000,162636.000000,128550.000000,344.354388)}
{pt3dadd(157488.000000,163032.000000,128725.000000,307.796568)}
{pt3dadd(157068.000000,163620.000000,128825.000000,292.513652)}
{pt3dadd(156600.000000,164196.000000,128825.000000,265.256166)}
{pt3dadd(155928.000000,164496.000000,128900.000000,268.618038)}
{pt3dadd(155520.000000,164856.000000,128900.000000,284.665110)}
{pt3dadd(155076.000000,165132.000000,128900.000000,317.516470)}
{pt3dadd(154800.000000,165180.000000,129075.000000,329.437514)}
{pt3dadd(154308.000000,165468.000000,129325.000000,353.333128)}
{pt3dadd(153408.000000,165996.000000,129725.000000,353.333128)}
{pt3dadd(152568.000000,166416.000000,130050.000000,349.803152)}
{pt3dadd(151644.000000,166836.000000,130325.000000,339.709516)}
{pt3dadd(151176.000000,166980.000000,130800.000000,330.554292)}
{pt3dadd(150792.000000,167220.000000,131000.000000,330.554292)}
{pt3dadd(150300.000000,167376.000000,131300.000000,345.768904)}
{pt3dadd(149904.000000,167424.000000,131625.000000,353.005340)}
{pt3dadd(149316.000000,167448.000000,131850.000000,370.697228)}
{pt3dadd(148740.000000,167580.000000,132050.000000,373.601340)}
{pt3dadd(148164.000000,167784.000000,132375.000000,364.446116)}
{pt3dadd(147552.000000,167928.000000,132575.000000,345.869632)}
{pt3dadd(147000.000000,168480.000000,132775.000000,338.633196)}
{pt3dadd(146688.000000,169092.000000,132775.000000,320.941308)}
{pt3dadd(146196.000000,169548.000000,132975.000000,330.554292)}
{pt3dadd(145608.000000,169728.000000,133175.000000,350.307824)}
{pt3dadd(145020.000000,169980.000000,133275.000000,364.797924)}
{pt3dadd(144384.000000,170268.000000,133375.000000,380.012536)}
{pt3dadd(144240.000000,170364.000000,133650.000000,390.106172)}
{pt3dadd(143856.000000,170568.000000,133850.000000,390.106172)}
{pt3dadd(143544.000000,170880.000000,134150.000000,375.949496)}
{pt3dadd(143136.000000,171192.000000,134350.000000,355.700448)}
{pt3dadd(142824.000000,171348.000000,134625.000000,327.936336)}
{pt3dadd(142332.000000,171588.000000,135100.000000,319.484008)}
{pt3dadd(142104.000000,171780.000000,135325.000000,314.561656)}
{pt3dadd(141804.000000,171960.000000,135550.000000,307.642308)}
{pt3dadd(141660.000000,172260.000000,135775.000000,297.884404)}
{pt3dadd(141540.000000,172524.000000,136000.000000,296.568810)}
{pt3dadd(141012.000000,172872.000000,136425.000000,296.598338)}
{pt3dadd(140616.000000,173316.000000,136700.000000,303.350358)}
{pt3dadd(140328.000000,173676.000000,136950.000000,322.641068)}
{pt3dadd(139908.000000,174096.000000,137275.000000,343.361894)}
{pt3dadd(139728.000000,174468.000000,137600.000000,359.403770)}
{pt3dadd(139536.000000,174984.000000,137925.000000,366.126262)}
{pt3dadd(140196.000000,175068.000000,138225.000000,366.138696)}
{pt3dadd(140136.000000,175596.000000,138825.000000,361.006050)}
{pt3dadd(139908.000000,175908.000000,139075.000000,348.162354)}
{pt3dadd(139704.000000,176112.000000,139325.000000,334.983978)}
{pt3dadd(139488.000000,176448.000000,139575.000000,328.250214)}
{pt3dadd(139116.000000,176664.000000,139850.000000,318.375668)}
{pt3dadd(138888.000000,176940.000000,140200.000000,304.479836)}
{pt3dadd(138696.000000,177216.000000,140525.000000,297.126946)}
{pt3dadd(138516.000000,177636.000000,140800.000000,294.279210)}
{pt3dadd(138396.000000,177900.000000,141175.000000,280.066734)}
{pt3dadd(138396.000000,178260.000000,141550.000000,280.366584)}
{pt3dadd(138444.000000,178488.000000,141825.000000,285.894110)}
{pt3dadd(138312.000000,178608.000000,142225.000000,290.399264)}
{pt3dadd(138180.000000,178908.000000,142625.000000,302.629258)}
{pt3dadd(138252.000000,179040.000000,142900.000000,314.013236)}
{pt3dadd(138168.000000,179316.000000,143375.000000,316.853006)}
{pt3dadd(137904.000000,179556.000000,143750.000000,319.144662)}
{pt3dadd(137808.000000,179628.000000,144100.000000,340.187008)}
{pt3dadd(137616.000000,179868.000000,144475.000000,363.646820)}
{pt3dadd(137544.000000,180204.000000,144925.000000,393.219890)}
{pt3dadd(137508.000000,180444.000000,145225.000000,408.562316)}
{pt3dadd(137544.000000,180672.000000,145525.000000,463.467366)}
{pt3dadd(137652.000000,180996.000000,145600.000000,487.561600)}
{pt3dadd(137424.000000,181284.000000,145750.000000,489.731670)}
{pt3dadd(137136.000000,181416.000000,145925.000000,475.127630)}
{pt3dadd(136812.000000,181320.000000,146200.000000,486.961524)}
{pt3dadd(136404.000000,181620.000000,146500.000000,447.082000)}
{pt3dadd(136284.000000,181896.000000,146800.000000,425.048400)}
{pt3dadd(136368.000000,181932.000000,147075.000000,406.467846)}
{pt3dadd(136176.000000,182208.000000,147325.000000,380.091700)}
{pt3dadd(136284.000000,182316.000000,147550.000000,329.759538)}
{pt3dadd(136356.000000,182556.000000,147800.000000,300.292802)}
{pt3dadd(136464.000000,182796.000000,148050.000000,283.006708)}
{pt3dadd(136596.000000,182868.000000,148275.000000,274.177332)}
{pt3dadd(136692.000000,182748.000000,148525.000000,304.813948)}
{pt3dadd(136680.000000,182952.000000,148900.000000,338.678202)}
{pt3dadd(136896.000000,182880.000000,149250.000000,368.109042)}
{pt3dadd(136908.000000,183000.000000,149625.000000,387.224122)}
{pt3dadd(137148.000000,183348.000000,150050.000000,396.074628)}
{pt3dadd(136956.000000,183588.000000,150400.000000,383.288970)}
{pt3dadd(137028.000000,183912.000000,150650.000000,375.865886)}
{pt3dadd(136752.000000,183888.000000,151025.000000,368.443976)}
{pt3dadd(136992.000000,184272.000000,151500.000000,351.085724)}
{pt3dadd(136980.000000,184680.000000,151850.000000,324.292990)}
{pt3dadd(137124.000000,184560.000000,152200.000000,306.456332)}
{pt3dadd(137088.000000,184800.000000,152550.000000,300.331234)}
{pt3dadd(137112.000000,184860.000000,153025.000000,305.111812)}
{pt3dadd(137052.000000,185088.000000,153325.000000,316.838550)}
{pt3dadd(136980.000000,185196.000000,153600.000000,351.828288)}
{pt3dadd(136812.000000,185292.000000,153850.000000,389.710820)}
{pt3dadd(136764.000000,185232.000000,154025.000000,410.666410)}
{pt3dadd(136800.000000,185268.000000,154350.000000,406.990722)}
{pt3dadd(136488.000000,185292.000000,154875.000000,421.451376)}
{pt3dadd(136332.000000,185364.000000,155300.000000,464.562154)}
{pt3dadd(136092.000000,186108.000000,155700.000000,455.441372)}
{pt3dadd(135996.000000,185376.000000,156275.000000,496.841953)}
{pt3dadd(135996.000000,185412.000000,157250.000000,401.178620)}

{create adhoc30}
{access adhoc30}
{connect adhoc30(1), adhoc29(0)}
{nseg = 1}
{strdef color color = "White"}
{pt3dclear()}
{pt3dadd(135996.000000,185412.000000,157250.000000,401.178620)}
{pt3dadd(136848.000000,184440.000000,157525.000000,333.067923)}
{pt3dadd(137388.000000,183948.000000,157900.000000,332.122816)}
{pt3dadd(137472.000000,183396.000000,158275.000000,318.229816)}
{pt3dadd(137412.000000,182604.000000,158375.000000,327.886946)}
{pt3dadd(137496.000000,182244.000000,158700.000000,332.726198)}
{pt3dadd(137364.000000,181800.000000,158925.000000,325.994300)}
{pt3dadd(137544.000000,181536.000000,159250.000000,365.909718)}
{pt3dadd(137592.000000,181128.000000,159725.000000,406.547964)}
{pt3dadd(137592.000000,180840.000000,160475.000000,426.141264)}
{pt3dadd(137628.000000,180780.000000,160725.000000,424.218442)}
{pt3dadd(137748.000000,180540.000000,161025.000000,427.502290)}
{pt3dadd(137940.000000,180348.000000,161350.000000,398.630696)}
{pt3dadd(138240.000000,180036.000000,161750.000000,365.163546)}
{pt3dadd(138552.000000,179664.000000,161900.000000,354.519122)}
{pt3dadd(138696.000000,179040.000000,162175.000000,371.050792)}
{pt3dadd(138972.000000,178392.000000,162300.000000,376.553672)}
{pt3dadd(139152.000000,177972.000000,162475.000000,390.738150)}
{pt3dadd(139680.000000,177264.000000,162700.000000,414.286190)}
{pt3dadd(139800.000000,176472.000000,162825.000000,406.860940)}
{pt3dadd(140280.000000,175632.000000,163050.000000,401.497592)}
{pt3dadd(140556.000000,174696.000000,163200.000000,401.121832)}
{pt3dadd(140688.000000,174216.000000,163225.000000,388.449450)}
{pt3dadd(140904.000000,172824.000000,163250.000000,367.416966)}
{pt3dadd(141480.000000,171588.000000,163150.000000,368.118340)}
{pt3dadd(141672.000000,170220.000000,162950.000000,353.739172)}
{pt3dadd(141792.000000,169272.000000,162700.000000,333.698846)}
{pt3dadd(141708.000000,168588.000000,162525.000000,323.847474)}
{pt3dadd(141732.000000,167916.000000,162325.000000,316.809986)}
{pt3dadd(141396.000000,167280.000000,162125.000000,319.717632)}
{pt3dadd(141396.000000,166980.000000,161950.000000,354.081928)}
{pt3dadd(141300.000000,166536.000000,161725.000000,394.644184)}
{pt3dadd(141240.000000,166104.000000,161450.000000,426.676434)}
{pt3dadd(141324.000000,165816.000000,161175.000000,432.590356)}
{pt3dadd(141072.000000,165588.000000,160650.000000,440.209450)}
{pt3dadd(140916.000000,165192.000000,160400.000000,374.529050)}

{create adhoc31}
{access adhoc31}
{connect adhoc31(1), adhoc30(0)}
{nseg = 1}
{strdef color color = "White"}
{pt3dclear()}
{pt3dadd(140916.000000,165192.000000,160400.000000,374.529050)}
{pt3dadd(140868.000000,165144.000000,160250.000000,431.005520)}

{create adhoc32}
{access adhoc32}
{connect adhoc32(1), adhoc30(0)}
{nseg = 1}
{strdef color color = "White"}
{pt3dclear()}
{pt3dadd(140916.000000,165192.000000,160400.000000,374.529050)}
{pt3dadd(141192.000000,164868.000000,160100.000000,462.199300)}

{create adhoc33}
{access adhoc33}
{connect adhoc33(1), adhoc32(0)}
{nseg = 1}
{strdef color color = "White"}
{pt3dclear()}
{pt3dadd(141192.000000,164868.000000,160100.000000,462.199300)}
{pt3dadd(141408.000000,164280.000000,160150.000000,400.358887)}
{pt3dadd(141648.000000,163548.000000,160150.000000,346.715056)}
{pt3dadd(141888.000000,162816.000000,160150.000000,308.307850)}
{pt3dadd(142080.000000,162216.000000,160150.000000,271.241804)}
{pt3dadd(142116.000000,161904.000000,160025.000000,270.493972)}
{pt3dadd(142236.000000,161280.000000,159925.000000,280.331862)}
{pt3dadd(142392.000000,160908.000000,159800.000000,263.092068)}
{pt3dadd(142584.000000,160476.000000,159675.000000,253.512214)}
{pt3dadd(142560.000000,160044.000000,159500.000000,245.479834)}
{pt3dadd(142620.000000,159864.000000,159375.000000,237.405864)}
{pt3dadd(142800.000000,159612.000000,159225.000000,227.887282)}
{pt3dadd(142692.000000,159204.000000,158975.000000,248.723068)}
{pt3dadd(142980.000000,158928.000000,158825.000000,277.046434)}
{pt3dadd(143340.000000,158520.000000,158425.000000,293.118322)}
{pt3dadd(143352.000000,158100.000000,158150.000000,297.896778)}
{pt3dadd(143304.000000,157716.000000,157875.000000,290.996514)}
{pt3dadd(143052.000000,157428.000000,157700.000000,262.652574)}
{pt3dadd(142884.000000,157092.000000,157475.000000,234.554662)}
{pt3dadd(142776.000000,156768.000000,157325.000000,219.869470)}
{pt3dadd(142464.000000,156528.000000,156875.000000,224.555770)}
{pt3dadd(142224.000000,156300.000000,156450.000000,214.464562)}
{pt3dadd(142116.000000,156132.000000,156150.000000,202.610085)}
{pt3dadd(141984.000000,156048.000000,155900.000000,185.388621)}
{pt3dadd(141948.000000,155952.000000,155650.000000,153.543705)}
{pt3dadd(141780.000000,155988.000000,155225.000000,137.983317)}
{pt3dadd(141624.000000,155856.000000,154450.000000,142.588911)}
{pt3dadd(141480.000000,155724.000000,153850.000000,153.716480)}
{pt3dadd(141312.000000,155820.000000,153550.000000,172.996517)}
{pt3dadd(141240.000000,155772.000000,153300.000000,170.563520)}

{create adhoc34}
{access adhoc34}
{connect adhoc34(1), adhoc32(0)}
{nseg = 1}
{strdef color color = "White"}
{pt3dclear()}
{pt3dadd(141192.000000,164868.000000,160100.000000,462.199300)}
{pt3dadd(140916.000000,164412.000000,159850.000000,361.641997)}
{pt3dadd(140664.000000,163980.000000,159600.000000,311.897362)}
{pt3dadd(140664.000000,163488.000000,159375.000000,288.449390)}
{pt3dadd(140472.000000,162696.000000,159225.000000,277.813642)}
{pt3dadd(140268.000000,162540.000000,159075.000000,302.888352)}
{pt3dadd(140136.000000,162048.000000,158925.000000,302.888352)}
{pt3dadd(140520.000000,161772.000000,158800.000000,312.710478)}
{pt3dadd(139908.000000,160512.000000,158575.000000,308.043182)}
{pt3dadd(139548.000000,159768.000000,158575.000000,305.264882)}
{pt3dadd(138984.000000,159156.000000,158575.000000,276.107694)}
{pt3dadd(138456.000000,158604.000000,158575.000000,271.645108)}
{pt3dadd(138168.000000,158112.000000,158500.000000,262.668604)}
{pt3dadd(137760.000000,157740.000000,158500.000000,247.353226)}
{pt3dadd(137088.000000,157404.000000,158500.000000,241.293192)}
{pt3dadd(136812.000000,157212.000000,158500.000000,249.381380)}
{pt3dadd(136692.000000,157128.000000,158250.000000,254.853180)}
{pt3dadd(136344.000000,157188.000000,158150.000000,261.402090)}
{pt3dadd(136092.000000,157116.000000,157950.000000,271.990666)}
{pt3dadd(135696.000000,156888.000000,157825.000000,282.357832)}
{pt3dadd(135540.000000,156744.000000,157675.000000,289.629363)}
{pt3dadd(135192.000000,156504.000000,157575.000000,299.365660)}

{create adhoc35}
{access adhoc35}
{connect adhoc35(1), adhoc29(0)}
{nseg = 1}
{strdef color color = "White"}
{pt3dclear()}
{pt3dadd(135996.000000,185412.000000,157250.000000,401.178620)}
{pt3dadd(135012.000000,187152.000000,157575.000000,354.336207)}
{pt3dadd(134820.000000,187728.000000,157775.000000,330.819156)}
{pt3dadd(134508.000000,187872.000000,157975.000000,301.388218)}
{pt3dadd(134196.000000,188280.000000,158275.000000,310.146810)}
{pt3dadd(133704.000000,188628.000000,158650.000000,299.023842)}
{pt3dadd(133224.000000,188832.000000,158800.000000,313.238710)}
{pt3dadd(132924.000000,189144.000000,158975.000000,311.644464)}
{pt3dadd(132660.000000,189288.000000,159275.000000,315.146374)}
{pt3dadd(132492.000000,189576.000000,159475.000000,293.169548)}
{pt3dadd(132180.000000,189768.000000,159700.000000,266.087270)}
{pt3dadd(132084.000000,190008.000000,160000.000000,239.999270)}
{pt3dadd(131964.000000,190032.000000,160225.000000,224.184460)}
{pt3dadd(132072.000000,190212.000000,160375.000000,210.402258)}
{pt3dadd(131976.000000,190320.000000,160525.000000,201.235076)}
{pt3dadd(132012.000000,190476.000000,160750.000000,201.626268)}
{pt3dadd(132048.000000,190692.000000,160975.000000,196.176986)}
{pt3dadd(132204.000000,190692.000000,161175.000000,192.371216)}
{pt3dadd(132024.000000,190932.000000,161375.000000,190.441476)}
{pt3dadd(132168.000000,191352.000000,161675.000000,199.811610)}
{pt3dadd(132216.000000,191700.000000,161975.000000,199.811610)}
{pt3dadd(132216.000000,192108.000000,162200.000000,192.267472)}
{pt3dadd(132324.000000,192348.000000,162450.000000,195.457998)}
{pt3dadd(132072.000000,192432.000000,162825.000000,197.387738)}
{pt3dadd(132600.000000,192624.000000,163050.000000,190.655358)}
{pt3dadd(132600.000000,192852.000000,163375.000000,218.012136)}
{pt3dadd(132516.000000,192912.000000,163750.000000,247.005556)}
{pt3dadd(132696.000000,193248.000000,164000.000000,266.256556)}
{pt3dadd(132252.000000,193764.000000,164275.000000,284.076362)}
{pt3dadd(131928.000000,193956.000000,164750.000000,290.605790)}
{pt3dadd(131928.000000,194148.000000,165125.000000,264.787560)}
{pt3dadd(132156.000000,193932.000000,165425.000000,245.252716)}
{pt3dadd(131964.000000,194016.000000,165725.000000,230.134516)}
{pt3dadd(132108.000000,194160.000000,165975.000000,217.273822)}
{pt3dadd(131892.000000,194208.000000,166375.000000,216.390262)}
{pt3dadd(132036.000000,194280.000000,166800.000000,216.185768)}
{pt3dadd(132060.000000,194664.000000,167125.000000,222.120612)}
{pt3dadd(132132.000000,195180.000000,167350.000000,225.425598)}
{pt3dadd(132108.000000,195480.000000,167625.000000,229.699038)}
{pt3dadd(132168.000000,195936.000000,167900.000000,232.913086)}
{pt3dadd(132036.000000,196380.000000,168175.000000,239.505250)}
{pt3dadd(132012.000000,196644.000000,168350.000000,238.862296)}
{pt3dadd(131844.000000,196944.000000,168700.000000,242.825170)}
{pt3dadd(131916.000000,197304.000000,169075.000000,244.788784)}
{pt3dadd(131820.000000,197424.000000,169525.000000,266.120656)}
{pt3dadd(131892.000000,197760.000000,170000.000000,299.039332)}
{pt3dadd(131832.000000,197844.000000,170325.000000,326.471794)}
{pt3dadd(131664.000000,198060.000000,170575.000000,350.780510)}
{pt3dadd(131544.000000,198120.000000,170875.000000,371.836016)}
{pt3dadd(131616.000000,198516.000000,171125.000000,368.692680)}
{pt3dadd(131520.000000,198540.000000,171300.000000,338.119612)}
{pt3dadd(131484.000000,198732.000000,171450.000000,320.501104)}
{pt3dadd(131352.000000,199092.000000,171675.000000,307.021282)}
{pt3dadd(131148.000000,199632.000000,171925.000000,283.502888)}
{pt3dadd(131064.000000,200520.000000,172200.000000,262.983864)}
{pt3dadd(130980.000000,201120.000000,172475.000000,248.565704)}
{pt3dadd(130620.000000,201600.000000,172700.000000,231.342470)}
{pt3dadd(130668.000000,202236.000000,172700.000000,198.880322)}
{pt3dadd(130896.000000,202836.000000,172775.000000,181.374550)}
{pt3dadd(131064.000000,203472.000000,172875.000000,173.139488)}
{pt3dadd(131280.000000,204252.000000,172875.000000,338.299876)}
{pt3dadd(131376.000000,205140.000000,172875.000000,324.752110)}
{pt3dadd(131340.000000,206100.000000,172875.000000,326.416704)}
{pt3dadd(131376.000000,207132.000000,172800.000000,326.738538)}
{pt3dadd(131364.000000,208320.000000,172800.000000,332.957042)}
{pt3dadd(131004.000000,208680.000000,172575.000000,171.367714)}
{pt3dadd(130992.000000,209520.000000,172475.000000,184.903714)}
{pt3dadd(130980.000000,210480.000000,172475.000000,199.827154)}
{pt3dadd(130800.000000,211488.000000,172350.000000,216.784566)}
{pt3dadd(130752.000000,212208.000000,172250.000000,230.510310)}
{pt3dadd(130872.000000,212976.000000,172125.000000,237.230744)}
{pt3dadd(130920.000000,213552.000000,172000.000000,278.740428)}
{pt3dadd(130908.000000,214104.000000,171875.000000,640.963648)}
{pt3dadd(130392.000000,216048.000000,171675.000000,1074.832602)}
{pt3dadd(130812.000000,218160.000000,171675.000000,1626.074240)}
{pt3dadd(130944.000000,219396.000000,171650.000000,2414.501000)}
