# Supplementary material for: Full reconstruction of large lobula plate tangential cells in Drosophila from a 3D EM dataset
Source: PLoS One. 2018 Nov 28;13(11):e0207828. doi: 10.1371/journal.pone.0207828 (PMC6261601; doi:10.1371/journal.pone.0207828)
Supplement: S1 Dataset — (ZIP) [file pone.0207828.s001.zip › Diameter hoc/Cell48_5skels_ck.001_corrected_sorted_diametered.hoc0001.hoc]

/* created with convertKnossosNmlToHoc.m */

{create adhoc1}
{access adhoc1}
{nseg = 1}
{strdef color color = "White"}
{pt3dclear()}
{pt3dadd(179676.000000,103980.000000,82100.000000,114.285710)}
{pt3dadd(179916.000000,104028.000000,82000.000000,126.252568)}
{pt3dadd(180096.000000,104076.000000,82025.000000,184.422098)}
{pt3dadd(180252.000000,104220.000000,82025.000000,288.794300)}

{create adhoc2}
{access adhoc2}
{connect adhoc2(1), adhoc1(0)}
{nseg = 1}
{strdef color color = "White"}
{pt3dclear()}
{pt3dadd(180252.000000,104220.000000,82025.000000,288.794300)}
{pt3dadd(180120.000000,104160.000000,81900.000000,294.077407)}
{pt3dadd(180204.000000,104016.000000,81775.000000,281.224424)}
{pt3dadd(180012.000000,104064.000000,81650.000000,264.513708)}
{pt3dadd(179988.000000,104100.000000,81650.000000,224.834564)}
{pt3dadd(179904.000000,104172.000000,81450.000000,193.826124)}
{pt3dadd(179748.000000,104184.000000,81325.000000,166.637134)}
{pt3dadd(179592.000000,104172.000000,81225.000000,139.448144)}
{pt3dadd(179364.000000,104208.000000,81100.000000,122.400000)}
{pt3dadd(179352.000000,104208.000000,81100.000000,127.572150)}
{pt3dadd(179196.000000,104280.000000,80975.000000,135.734446)}
{pt3dadd(179184.000000,104412.000000,80850.000000,145.993376)}
{pt3dadd(178992.000000,104748.000000,80750.000000,145.993376)}
{pt3dadd(179004.000000,104712.000000,80675.000000,143.762084)}
{pt3dadd(178932.000000,104760.000000,80650.000000,136.358642)}
{pt3dadd(178884.000000,104808.000000,80575.000000,127.053488)}
{pt3dadd(178848.000000,104892.000000,80525.000000,114.451700)}
{pt3dadd(178848.000000,104904.000000,80525.000000,111.020408)}
{pt3dadd(178872.000000,105024.000000,80500.000000,119.882460)}
{pt3dadd(178884.000000,105048.000000,80450.000000,124.573752)}
{pt3dadd(178848.000000,105180.000000,80425.000000,125.716610)}
{pt3dadd(178848.000000,105180.000000,80425.000000,128.059468)}
{pt3dadd(178836.000000,105192.000000,80375.000000,127.022863)}
{pt3dadd(178752.000000,105240.000000,80275.000000,125.564253)}
{pt3dadd(178776.000000,105336.000000,80150.000000,142.204805)}
{pt3dadd(178800.000000,105360.000000,80025.000000,168.099079)}
{pt3dadd(178764.000000,105456.000000,79950.000000,188.154659)}
{pt3dadd(178596.000000,105744.000000,79850.000000,217.316830)}
{pt3dadd(178524.000000,105900.000000,79750.000000,255.007784)}
{pt3dadd(178392.000000,106020.000000,79675.000000,310.694488)}
{pt3dadd(178320.000000,106188.000000,79500.000000,359.241057)}
{pt3dadd(177852.000000,106296.000000,79500.000000,493.936280)}

{create adhoc3}
{access adhoc3}
{connect adhoc3(1), adhoc2(0)}
{nseg = 1}
{strdef color color = "White"}
{pt3dclear()}
{pt3dadd(177852.000000,106296.000000,79500.000000,493.936280)}
{pt3dadd(178128.000000,106392.000000,79625.000000,478.104037)}
{pt3dadd(178272.000000,106968.000000,79725.000000,457.737892)}
{pt3dadd(178260.000000,107016.000000,79725.000000,440.223152)}
{pt3dadd(178164.000000,107328.000000,79800.000000,399.581130)}
{pt3dadd(178020.000000,107544.000000,79925.000000,403.266958)}
{pt3dadd(178008.000000,107544.000000,79925.000000,407.330588)}
{pt3dadd(177864.000000,107508.000000,79975.000000,421.454246)}
{pt3dadd(177888.000000,107604.000000,79975.000000,438.968986)}
{pt3dadd(177948.000000,107784.000000,80150.000000,474.165366)}
{pt3dadd(177984.000000,107880.000000,80325.000000,511.121560)}
{pt3dadd(177996.000000,108012.000000,80475.000000,534.698366)}
{pt3dadd(178080.000000,108036.000000,80650.000000,553.640830)}
{pt3dadd(178020.000000,108108.000000,80825.000000,544.564760)}

{create adhoc4}
{access adhoc4}
{connect adhoc4(1), adhoc3(0)}
{nseg = 1}
{strdef color color = "White"}
{pt3dclear()}
{pt3dadd(178020.000000,108108.000000,80825.000000,544.564760)}
{pt3dadd(178044.000000,108264.000000,80950.000000,519.044700)}
{pt3dadd(178104.000000,108336.000000,81075.000000,495.550222)}
{pt3dadd(178104.000000,108324.000000,81075.000000,490.363882)}
{pt3dadd(178104.000000,108228.000000,81175.000000,480.720370)}
{pt3dadd(178116.000000,108252.000000,81175.000000,452.139370)}
{pt3dadd(178152.000000,108312.000000,81275.000000,427.068686)}
{pt3dadd(178176.000000,108312.000000,81375.000000,415.449112)}
{pt3dadd(178176.000000,108360.000000,81500.000000,392.995016)}
{pt3dadd(178176.000000,108384.000000,81600.000000,353.920356)}
{pt3dadd(178140.000000,108528.000000,81700.000000,336.103090)}
{pt3dadd(178164.000000,108600.000000,81850.000000,323.033318)}
{pt3dadd(178164.000000,108600.000000,81850.000000,323.033318)}
{pt3dadd(178236.000000,108636.000000,81950.000000,308.623906)}
{pt3dadd(178104.000000,108564.000000,82050.000000,331.017866)}
{pt3dadd(178008.000000,108600.000000,82150.000000,352.345448)}
{pt3dadd(177984.000000,108660.000000,82225.000000,365.415220)}
{pt3dadd(178008.000000,108756.000000,82325.000000,369.101048)}
{pt3dadd(178032.000000,108816.000000,82425.000000,379.640344)}
{pt3dadd(178032.000000,108840.000000,82525.000000,372.444200)}
{pt3dadd(178020.000000,108864.000000,82650.000000,372.444200)}
{pt3dadd(177984.000000,108852.000000,82750.000000,372.444200)}
{pt3dadd(177960.000000,108984.000000,82850.000000,358.720944)}
{pt3dadd(178008.000000,109032.000000,82975.000000,358.720944)}
{pt3dadd(178056.000000,109044.000000,83100.000000,349.161488)}
{pt3dadd(178080.000000,109116.000000,83175.000000,342.308020)}
{pt3dadd(178128.000000,109128.000000,83275.000000,329.238248)}
{pt3dadd(178128.000000,109176.000000,83425.000000,323.317964)}
{pt3dadd(178128.000000,109188.000000,83550.000000,312.778668)}
{pt3dadd(178152.000000,109320.000000,83650.000000,315.811012)}
{pt3dadd(178188.000000,109416.000000,83750.000000,322.664480)}
{pt3dadd(178176.000000,109464.000000,83875.000000,332.223936)}
{pt3dadd(178260.000000,109476.000000,84000.000000,338.144220)}
{pt3dadd(178332.000000,109488.000000,84050.000000,348.683516)}
{pt3dadd(178404.000000,109584.000000,84225.000000,362.406772)}
{pt3dadd(178428.000000,109680.000000,84350.000000,366.092600)}
{pt3dadd(178536.000000,109752.000000,84500.000000,377.158860)}
{pt3dadd(178692.000000,109800.000000,84625.000000,387.196288)}
{pt3dadd(178800.000000,109908.000000,84725.000000,391.066404)}
{pt3dadd(179016.000000,110040.000000,84825.000000,391.066404)}
{pt3dadd(179160.000000,110136.000000,84975.000000,387.380576)}
{pt3dadd(179268.000000,110160.000000,85100.000000,383.510460)}
{pt3dadd(179388.000000,110196.000000,85225.000000,387.196288)}
{pt3dadd(179580.000000,110220.000000,85350.000000,379.640344)}
{pt3dadd(179676.000000,110388.000000,85475.000000,379.640344)}
{pt3dadd(179748.000000,110520.000000,85600.000000,387.196288)}
{pt3dadd(179940.000000,110640.000000,85725.000000,395.130034)}
{pt3dadd(179952.000000,110640.000000,85725.000000,403.063780)}
{pt3dadd(180048.000000,110772.000000,85900.000000,406.749608)}
{pt3dadd(180300.000000,110892.000000,86025.000000,406.749608)}
{pt3dadd(180420.000000,110976.000000,86150.000000,406.749608)}
{pt3dadd(180528.000000,111060.000000,86250.000000,406.749608)}
{pt3dadd(180516.000000,111060.000000,86325.000000,406.749608)}
{pt3dadd(180528.000000,111132.000000,86400.000000,414.683354)}
{pt3dadd(180648.000000,111156.000000,86525.000000,410.997526)}
{pt3dadd(180684.000000,111180.000000,86525.000000,407.127410)}
{pt3dadd(180828.000000,111276.000000,86675.000000,395.507836)}
{pt3dadd(180900.000000,111312.000000,86800.000000,380.377946)}
{pt3dadd(180900.000000,111312.000000,86800.000000,355.688600)}
{pt3dadd(180912.000000,111348.000000,86900.000000,348.835132)}
{pt3dadd(180936.000000,111408.000000,86975.000000,338.295836)}
{pt3dadd(180936.000000,111408.000000,86975.000000,325.226064)}
{pt3dadd(180936.000000,111420.000000,87050.000000,325.226064)}
{pt3dadd(180960.000000,111468.000000,87125.000000,319.587704)}
{pt3dadd(181032.000000,111540.000000,87225.000000,319.587704)}
{pt3dadd(181188.000000,111636.000000,87350.000000,338.060746)}
{pt3dadd(181296.000000,111684.000000,87450.000000,358.686462)}
{pt3dadd(181236.000000,111744.000000,87575.000000,365.882606)}
{pt3dadd(181272.000000,111720.000000,87575.000000,392.146682)}
{pt3dadd(181332.000000,111696.000000,87600.000000,395.489834)}
{pt3dadd(181404.000000,111756.000000,87725.000000,383.870260)}
{pt3dadd(181560.000000,111828.000000,87850.000000,401.385000)}
{pt3dadd(181596.000000,111924.000000,87975.000000,413.585554)}
{pt3dadd(181620.000000,111936.000000,88100.000000,409.715438)}
{pt3dadd(181668.000000,112020.000000,88250.000000,406.372286)}
{pt3dadd(181932.000000,112152.000000,88375.000000,402.861970)}
{pt3dadd(181980.000000,112224.000000,88525.000000,377.791286)}
{pt3dadd(182028.000000,112272.000000,88650.000000,369.460848)}
{pt3dadd(182040.000000,112272.000000,88650.000000,362.264704)}
{pt3dadd(182136.000000,112332.000000,88775.000000,385.004554)}
{pt3dadd(182292.000000,112332.000000,88950.000000,385.004554)}
{pt3dadd(182364.000000,112380.000000,89100.000000,392.560498)}
{pt3dadd(182508.000000,112392.000000,89225.000000,405.371082)}
{pt3dadd(182508.000000,112392.000000,89225.000000,412.567226)}
{pt3dadd(182640.000000,112440.000000,89375.000000,412.567226)}
{pt3dadd(182796.000000,112500.000000,89500.000000,441.148226)}
{pt3dadd(182940.000000,112596.000000,89675.000000,449.478664)}
{pt3dadd(183060.000000,112740.000000,89825.000000,432.797964)}
{pt3dadd(183168.000000,112872.000000,90000.000000,440.731710)}
{pt3dadd(183336.000000,112992.000000,90250.000000,465.487350)}
{pt3dadd(183324.000000,113196.000000,90275.000000,481.058688)}
{pt3dadd(183708.000000,113196.000000,90725.000000,505.814328)}
{pt3dadd(183972.000000,113376.000000,90900.000000,527.199184)}
{pt3dadd(184080.000000,113508.000000,90975.000000,545.589650)}
{pt3dadd(184176.000000,113664.000000,90950.000000,528.120770)}
{pt3dadd(184428.000000,113772.000000,90900.000000,518.633060)}

{create adhoc5}
{access adhoc5}
{connect adhoc5(1), adhoc4(0)}
{nseg = 1}
{strdef color color = "White"}
{pt3dclear()}
{pt3dadd(184428.000000,113772.000000,90900.000000,518.633060)}
{pt3dadd(184608.000000,113916.000000,90850.000000,535.920860)}
{pt3dadd(184704.000000,114036.000000,90875.000000,480.227432)}
{pt3dadd(184812.000000,114144.000000,90950.000000,461.836966)}
{pt3dadd(185064.000000,114264.000000,91100.000000,430.326414)}
{pt3dadd(185172.000000,114408.000000,91225.000000,420.200718)}
{pt3dadd(185460.000000,114528.000000,91350.000000,409.661422)}
{pt3dadd(185532.000000,114828.000000,91475.000000,409.661422)}
{pt3dadd(185640.000000,114768.000000,91300.000000,405.597792)}
{pt3dadd(185760.000000,114936.000000,91600.000000,413.531538)}
{pt3dadd(185916.000000,115056.000000,91675.000000,408.827382)}
{pt3dadd(186096.000000,115188.000000,91850.000000,450.877230)}
{pt3dadd(186264.000000,115356.000000,91900.000000,478.517666)}
{pt3dadd(186372.000000,115524.000000,91925.000000,517.321670)}
{pt3dadd(186456.000000,115548.000000,92025.000000,552.062044)}
{pt3dadd(186588.000000,115716.000000,92200.000000,578.055464)}
{pt3dadd(186744.000000,115956.000000,92275.000000,578.055464)}
{pt3dadd(186768.000000,115968.000000,92300.000000,578.055464)}
{pt3dadd(186840.000000,116124.000000,92350.000000,566.891896)}
{pt3dadd(186876.000000,116136.000000,92400.000000,561.173970)}
{pt3dadd(186984.000000,116352.000000,92550.000000,544.824062)}
{pt3dadd(187140.000000,116520.000000,92725.000000,539.637722)}
{pt3dadd(187248.000000,116688.000000,92900.000000,524.807870)}
{pt3dadd(187260.000000,116712.000000,92900.000000,514.682174)}
{pt3dadd(187488.000000,116856.000000,93025.000000,499.110836)}
{pt3dadd(187692.000000,117072.000000,93325.000000,489.467324)}
{pt3dadd(187776.000000,117312.000000,93475.000000,479.823812)}
{pt3dadd(187776.000000,117312.000000,93475.000000,479.823812)}
{pt3dadd(187812.000000,117588.000000,93575.000000,470.639510)}
{pt3dadd(187848.000000,117768.000000,93700.000000,475.578866)}
{pt3dadd(188004.000000,117984.000000,93775.000000,475.578866)}
{pt3dadd(188016.000000,118020.000000,93775.000000,466.831912)}
{pt3dadd(188220.000000,118224.000000,93850.000000,454.021328)}
{pt3dadd(188256.000000,118224.000000,93875.000000,449.754520)}
{pt3dadd(188448.000000,118356.000000,93975.000000,440.111008)}
{pt3dadd(188676.000000,118548.000000,94050.000000,440.111008)}
{pt3dadd(188808.000000,118716.000000,94125.000000,458.501474)}
{pt3dadd(188916.000000,118956.000000,94175.000000,480.955570)}
{pt3dadd(188916.000000,118980.000000,94175.000000,489.702524)}
{pt3dadd(189036.000000,119184.000000,94300.000000,509.978018)}
{pt3dadd(189216.000000,119340.000000,94275.000000,519.621530)}
{pt3dadd(189204.000000,119484.000000,94350.000000,519.621530)}
{pt3dadd(189204.000000,119508.000000,94350.000000,530.253512)}
{pt3dadd(189204.000000,119592.000000,94375.000000,556.246932)}
{pt3dadd(189204.000000,119796.000000,94325.000000,556.246932)}
{pt3dadd(189312.000000,119928.000000,94425.000000,556.246932)}
{pt3dadd(189312.000000,119952.000000,94425.000000,556.246932)}
{pt3dadd(189300.000000,120096.000000,94575.000000,556.246932)}
{pt3dadd(189300.000000,120096.000000,94575.000000,539.897024)}
{pt3dadd(189396.000000,120288.000000,94650.000000,539.897024)}
{pt3dadd(189552.000000,120516.000000,94675.000000,550.529006)}
{pt3dadd(189468.000000,120660.000000,94750.000000,532.138540)}
{pt3dadd(189324.000000,120900.000000,94750.000000,521.506558)}
{pt3dadd(189360.000000,120900.000000,94775.000000,532.138540)}
{pt3dadd(189624.000000,121068.000000,94975.000000,526.692898)}
{pt3dadd(189576.000000,121368.000000,95050.000000,526.692898)}
{pt3dadd(189552.000000,121572.000000,95025.000000,561.433272)}
{pt3dadd(189576.000000,121740.000000,95100.000000,577.783180)}
{pt3dadd(189588.000000,121800.000000,95100.000000,589.504932)}
{pt3dadd(189876.000000,121920.000000,95175.000000,612.976340)}
{pt3dadd(190068.000000,122076.000000,95200.000000,618.694266)}
{pt3dadd(190284.000000,122316.000000,95200.000000,612.976340)}
{pt3dadd(190284.000000,122316.000000,95200.000000,601.812772)}
{pt3dadd(190260.000000,122508.000000,95325.000000,590.091020)}
{pt3dadd(190140.000000,122724.000000,95400.000000,561.433272)}
{pt3dadd(190224.000000,122904.000000,95450.000000,545.083364)}
{pt3dadd(190236.000000,122928.000000,95450.000000,534.451382)}
{pt3dadd(190404.000000,123084.000000,95550.000000,529.265042)}
{pt3dadd(190440.000000,123252.000000,95600.000000,529.265042)}
{pt3dadd(190548.000000,123396.000000,95600.000000,529.265042)}
{pt3dadd(190656.000000,123480.000000,95650.000000,519.621530)}
{pt3dadd(190632.000000,123660.000000,95750.000000,509.978018)}
{pt3dadd(190848.000000,123780.000000,95900.000000,495.854360)}
{pt3dadd(190860.000000,123912.000000,95900.000000,475.578866)}
{pt3dadd(190932.000000,123960.000000,95900.000000,461.455208)}
{pt3dadd(191016.000000,124116.000000,96025.000000,461.455208)}
{pt3dadd(191016.000000,124152.000000,96025.000000,452.708254)}
{pt3dadd(191184.000000,124308.000000,95950.000000,444.377816)}
{pt3dadd(191196.000000,124308.000000,95950.000000,449.081972)}
{pt3dadd(191292.000000,124476.000000,95900.000000,440.751534)}
{pt3dadd(191328.000000,124500.000000,95925.000000,440.751534)}
{pt3dadd(191424.000000,124656.000000,96025.000000,464.328340)}
{pt3dadd(191496.000000,124836.000000,96125.000000,491.968776)}
{pt3dadd(191628.000000,124980.000000,96275.000000,478.517666)}
{pt3dadd(191532.000000,125172.000000,96300.000000,486.848104)}
{pt3dadd(191520.000000,125328.000000,96425.000000,478.101150)}
{pt3dadd(191556.000000,125436.000000,96550.000000,467.975454)}
{pt3dadd(191676.000000,125532.000000,96575.000000,453.145602)}
{pt3dadd(191664.000000,125532.000000,96575.000000,461.892556)}
{pt3dadd(191556.000000,125652.000000,96650.000000,466.372702)}
{pt3dadd(191496.000000,125772.000000,96675.000000,475.119656)}
{pt3dadd(191544.000000,125868.000000,96650.000000,475.119656)}
{pt3dadd(191544.000000,125868.000000,96675.000000,470.639510)}
{pt3dadd(191568.000000,126012.000000,96750.000000,466.159364)}
{pt3dadd(191484.000000,126144.000000,96825.000000,480.989216)}
{pt3dadd(191424.000000,126300.000000,96950.000000,485.693372)}
{pt3dadd(191508.000000,126384.000000,97000.000000,485.693372)}
{pt3dadd(191520.000000,126384.000000,97000.000000,499.817030)}
{pt3dadd(191544.000000,126528.000000,97000.000000,519.127028)}
{pt3dadd(191568.000000,126528.000000,97050.000000,524.572670)}
{pt3dadd(191604.000000,126636.000000,97075.000000,545.861934)}
{pt3dadd(191652.000000,126768.000000,97100.000000,545.861934)}
{pt3dadd(191676.000000,126768.000000,97125.000000,551.048274)}
{pt3dadd(191700.000000,126876.000000,97150.000000,562.211842)}
{pt3dadd(191772.000000,127032.000000,97200.000000,556.766200)}
{pt3dadd(191748.000000,127200.000000,97250.000000,540.416292)}
{pt3dadd(191724.000000,127344.000000,97325.000000,561.705556)}
{pt3dadd(191700.000000,127488.000000,97350.000000,567.151198)}
{pt3dadd(191784.000000,127680.000000,97400.000000,561.433272)}
{pt3dadd(191820.000000,127836.000000,97475.000000,572.596840)}
{pt3dadd(191856.000000,128004.000000,97525.000000,588.946748)}
{pt3dadd(191808.000000,128172.000000,97525.000000,588.946748)}
{pt3dadd(191796.000000,128304.000000,97525.000000,600.668500)}
{pt3dadd(191820.000000,128388.000000,97550.000000,606.386426)}
{pt3dadd(191844.000000,128508.000000,97600.000000,612.390252)}
{pt3dadd(191832.000000,128676.000000,97650.000000,606.672326)}
{pt3dadd(191820.000000,128832.000000,97725.000000,612.676152)}
{pt3dadd(191868.000000,129000.000000,97750.000000,618.980166)}
{pt3dadd(191832.000000,129156.000000,97825.000000,631.288006)}
{pt3dadd(191820.000000,129336.000000,97825.000000,625.284180)}
{pt3dadd(191916.000000,129504.000000,97825.000000,649.929174)}
{pt3dadd(191904.000000,129660.000000,97900.000000,662.852416)}
{pt3dadd(191844.000000,129840.000000,97950.000000,662.852416)}
{pt3dadd(191892.000000,129972.000000,98000.000000,676.421828)}
{pt3dadd(191904.000000,130152.000000,98050.000000,695.348896)}
{pt3dadd(191892.000000,130332.000000,98075.000000,695.348896)}
{pt3dadd(191892.000000,130332.000000,98075.000000,670.703902)}
{pt3dadd(191892.000000,130488.000000,98025.000000,647.232494)}
{pt3dadd(191928.000000,130488.000000,98075.000000,590.881676)}
{pt3dadd(192012.000000,130656.000000,98175.000000,529.280488)}
{pt3dadd(191976.000000,130836.000000,98250.000000,494.003512)}
{pt3dadd(191964.000000,130968.000000,98325.000000,473.728018)}
{pt3dadd(191952.000000,131112.000000,98325.000000,454.418020)}
{pt3dadd(191952.000000,131112.000000,98325.000000,454.418020)}
{pt3dadd(192012.000000,131220.000000,98325.000000,466.618574)}
{pt3dadd(192000.000000,131400.000000,98350.000000,461.679218)}
{pt3dadd(191988.000000,131556.000000,98375.000000,461.679218)}
{pt3dadd(192060.000000,131724.000000,98425.000000,461.679218)}
{pt3dadd(192072.000000,131832.000000,98475.000000,466.159364)}
{pt3dadd(192060.000000,131988.000000,98525.000000,485.469362)}
{pt3dadd(192024.000000,132132.000000,98600.000000,485.469362)}
{pt3dadd(192084.000000,132276.000000,98625.000000,485.469362)}
{pt3dadd(192084.000000,132276.000000,98625.000000,494.653664)}
{pt3dadd(192156.000000,132396.000000,98650.000000,499.357820)}
{pt3dadd(192168.000000,132528.000000,98650.000000,484.527968)}
{pt3dadd(192240.000000,132624.000000,98750.000000,479.823812)}
{pt3dadd(192312.000000,132804.000000,98825.000000,475.343666)}
{pt3dadd(192288.000000,132948.000000,98850.000000,457.828926)}
{pt3dadd(192276.000000,132948.000000,98850.000000,453.124770)}
{pt3dadd(192180.000000,133080.000000,98875.000000,462.768282)}
{pt3dadd(192168.000000,133200.000000,98900.000000,458.288136)}
{pt3dadd(192204.000000,133332.000000,98900.000000,467.472438)}
{pt3dadd(192216.000000,133464.000000,98900.000000,484.987178)}
{pt3dadd(192228.000000,133560.000000,98975.000000,489.691334)}
{pt3dadd(192252.000000,133692.000000,99050.000000,471.300868)}
{pt3dadd(192216.000000,133800.000000,99125.000000,485.424526)}
{pt3dadd(192228.000000,133800.000000,99150.000000,480.720370)}
{pt3dadd(192264.000000,133920.000000,99175.000000,480.720370)}
{pt3dadd(192300.000000,134100.000000,99200.000000,496.291708)}
{pt3dadd(192396.000000,134244.000000,99250.000000,509.742818)}
{pt3dadd(192420.000000,134364.000000,99275.000000,514.929158)}
{pt3dadd(192420.000000,134364.000000,99275.000000,524.572670)}
{pt3dadd(192420.000000,134472.000000,99300.000000,519.868514)}
{pt3dadd(192420.000000,134472.000000,99300.000000,504.297176)}
{pt3dadd(192420.000000,134652.000000,99350.000000,504.297176)}
{pt3dadd(192420.000000,134652.000000,99350.000000,480.720370)}
{pt3dadd(192432.000000,134808.000000,99400.000000,471.076858)}
{pt3dadd(192396.000000,134928.000000,99425.000000,466.596712)}
{pt3dadd(192408.000000,134928.000000,99450.000000,453.145602)}
{pt3dadd(192444.000000,135048.000000,99475.000000,431.760746)}
{pt3dadd(192480.000000,135192.000000,99600.000000,416.630856)}
{pt3dadd(192420.000000,135324.000000,99675.000000,396.264328)}
{pt3dadd(192468.000000,135480.000000,99675.000000,396.264328)}
{pt3dadd(192504.000000,135624.000000,99650.000000,384.644754)}
{pt3dadd(192552.000000,135624.000000,99700.000000,396.845308)}
{pt3dadd(192672.000000,135744.000000,99825.000000,420.722152)}
{pt3dadd(192612.000000,135900.000000,99850.000000,432.341726)}
{pt3dadd(192564.000000,135984.000000,99850.000000,420.141172)}
{pt3dadd(192564.000000,135984.000000,99850.000000,440.507700)}
{pt3dadd(192516.000000,136104.000000,99900.000000,444.987846)}
{pt3dadd(192444.000000,136224.000000,99875.000000,444.987846)}
{pt3dadd(192444.000000,136356.000000,99875.000000,463.378312)}
{pt3dadd(192468.000000,136500.000000,99900.000000,480.059012)}
{pt3dadd(192504.000000,136632.000000,99925.000000,480.059012)}
{pt3dadd(192528.000000,136764.000000,99950.000000,484.763168)}
{pt3dadd(192588.000000,136896.000000,100025.000000,484.763168)}
{pt3dadd(192528.000000,137064.000000,100075.000000,462.309072)}
{pt3dadd(192540.000000,137064.000000,100075.000000,467.013228)}
{pt3dadd(192564.000000,137208.000000,100200.000000,458.266274)}
{pt3dadd(192588.000000,137340.000000,100200.000000,440.751534)}
{pt3dadd(192588.000000,137340.000000,100200.000000,436.271388)}
{pt3dadd(192552.000000,137484.000000,100250.000000,449.081972)}
{pt3dadd(192492.000000,137628.000000,100275.000000,435.630862)}
{pt3dadd(192576.000000,137772.000000,100400.000000,444.377816)}
{pt3dadd(192624.000000,137892.000000,100400.000000,448.441446)}
{pt3dadd(192600.000000,138012.000000,100475.000000,429.044748)}
{pt3dadd(192588.000000,138168.000000,100500.000000,429.044748)}
{pt3dadd(192576.000000,138300.000000,100525.000000,417.425174)}
{pt3dadd(192588.000000,138300.000000,100525.000000,404.614590)}
{pt3dadd(192648.000000,138408.000000,100600.000000,400.550960)}
{pt3dadd(192648.000000,138552.000000,100625.000000,419.947658)}
{pt3dadd(192672.000000,138672.000000,100700.000000,407.137074)}
{pt3dadd(192672.000000,138672.000000,100700.000000,418.756648)}
{pt3dadd(192624.000000,138792.000000,100675.000000,414.886532)}
{pt3dadd(192660.000000,138948.000000,100725.000000,418.950162)}
{pt3dadd(192660.000000,138948.000000,100725.000000,414.683354)}
{pt3dadd(192696.000000,139092.000000,100825.000000,407.127410)}
{pt3dadd(192708.000000,139152.000000,100775.000000,388.654368)}
{pt3dadd(192696.000000,139224.000000,100725.000000,392.524484)}
{pt3dadd(192708.000000,139260.000000,100700.000000,374.051442)}
{pt3dadd(192744.000000,139344.000000,100775.000000,352.394440)}
{pt3dadd(192768.000000,139392.000000,100725.000000,345.540972)}
{pt3dadd(192792.000000,139560.000000,100775.000000,348.884124)}
{pt3dadd(192780.000000,139560.000000,100775.000000,320.000598)}
{pt3dadd(192756.000000,139716.000000,100800.000000,320.000598)}
{pt3dadd(192816.000000,139908.000000,100625.000000,311.329894)}
{pt3dadd(192792.000000,140184.000000,100625.000000,318.183362)}
{pt3dadd(192792.000000,140184.000000,100625.000000,305.735966)}
{pt3dadd(192828.000000,140472.000000,100625.000000,334.619492)}
{pt3dadd(192852.000000,140724.000000,100575.000000,376.669340)}
{pt3dadd(192864.000000,141084.000000,100575.000000,430.573852)}
{pt3dadd(192888.000000,141456.000000,100575.000000,482.937626)}
{pt3dadd(192888.000000,141468.000000,100575.000000,573.177083)}
{pt3dadd(192900.000000,141804.000000,100575.000000,630.401730)}

{create adhoc6}
{access adhoc6}
{connect adhoc6(1), adhoc5(0)}
{nseg = 1}
{strdef color color = "White"}
{pt3dclear()}
{pt3dadd(192900.000000,141804.000000,100575.000000,630.401730)}
{pt3dadd(193008.000000,141996.000000,100425.000000,555.889283)}
{pt3dadd(193008.000000,142020.000000,100425.000000,556.805116)}
{pt3dadd(193044.000000,142104.000000,100250.000000,563.109130)}
{pt3dadd(193068.000000,142140.000000,100050.000000,585.462864)}
{pt3dadd(193116.000000,142200.000000,99875.000000,601.812772)}
{pt3dadd(193152.000000,142212.000000,99675.000000,601.812772)}
{pt3dadd(193152.000000,142272.000000,99475.000000,619.838538)}
{pt3dadd(193224.000000,142308.000000,99250.000000,613.534524)}
{pt3dadd(193260.000000,142464.000000,99050.000000,601.812772)}
{pt3dadd(193200.000000,142476.000000,98850.000000,621.372167)}
{pt3dadd(193248.000000,142656.000000,98600.000000,571.792970)}

{create adhoc7}
{access adhoc7}
{connect adhoc7(1), adhoc6(0)}
{nseg = 1}
{strdef color color = "White"}
{pt3dclear()}
{pt3dadd(193248.000000,142656.000000,98600.000000,571.792970)}
{pt3dadd(193260.000000,142392.000000,98450.000000,507.735617)}
{pt3dadd(192984.000000,141852.000000,98350.000000,420.159090)}
{pt3dadd(192828.000000,141636.000000,97875.000000,369.479640)}
{pt3dadd(192816.000000,141444.000000,97725.000000,313.082264)}
{pt3dadd(192840.000000,141408.000000,97625.000000,300.634868)}
{pt3dadd(192828.000000,141408.000000,97625.000000,303.522808)}
{pt3dadd(192744.000000,141360.000000,97500.000000,309.443092)}
{pt3dadd(192756.000000,141348.000000,97400.000000,309.443092)}
{pt3dadd(192696.000000,141264.000000,97325.000000,306.410748)}
{pt3dadd(192672.000000,141180.000000,97250.000000,312.331032)}
{pt3dadd(192624.000000,141084.000000,97150.000000,315.363376)}
{pt3dadd(192552.000000,140988.000000,97050.000000,301.578506)}
{pt3dadd(192540.000000,140892.000000,96950.000000,298.546162)}
{pt3dadd(192600.000000,140796.000000,96850.000000,298.546162)}
{pt3dadd(192588.000000,140628.000000,96775.000000,298.546162)}
{pt3dadd(192528.000000,140580.000000,96650.000000,301.730122)}
{pt3dadd(192576.000000,140556.000000,96525.000000,315.514992)}
{pt3dadd(192528.000000,140496.000000,96400.000000,318.547336)}
{pt3dadd(192504.000000,140472.000000,96400.000000,321.579680)}
{pt3dadd(192468.000000,140412.000000,96275.000000,324.763640)}
{pt3dadd(192420.000000,140376.000000,96150.000000,324.763640)}
{pt3dadd(192336.000000,140316.000000,96050.000000,342.357012)}
{pt3dadd(192360.000000,140280.000000,95975.000000,364.014014)}
{pt3dadd(192276.000000,140172.000000,95875.000000,381.607386)}
{pt3dadd(192228.000000,140088.000000,95775.000000,392.146682)}
{pt3dadd(192096.000000,139896.000000,95650.000000,392.146682)}
{pt3dadd(192024.000000,139824.000000,95550.000000,392.146682)}
{pt3dadd(191988.000000,139752.000000,95450.000000,380.527108)}
{pt3dadd(191976.000000,139656.000000,95325.000000,384.590738)}
{pt3dadd(191988.000000,139692.000000,95325.000000,388.460854)}
{pt3dadd(192024.000000,139752.000000,95250.000000,399.000150)}
{pt3dadd(192048.000000,139716.000000,95200.000000,387.933890)}
{pt3dadd(191952.000000,139272.000000,95100.000000,381.080422)}
{pt3dadd(191976.000000,139212.000000,95000.000000,348.133266)}
{pt3dadd(191940.000000,139152.000000,94900.000000,324.619610)}
{pt3dadd(191928.000000,139176.000000,94800.000000,310.896354)}
{pt3dadd(191760.000000,138984.000000,94725.000000,298.448958)}
{pt3dadd(191628.000000,138852.000000,94625.000000,286.594294)}
{pt3dadd(191616.000000,138792.000000,94550.000000,279.460884)}
{pt3dadd(191568.000000,138684.000000,94450.000000,276.710464)}
{pt3dadd(191496.000000,138576.000000,94375.000000,268.039760)}
{pt3dadd(191460.000000,138492.000000,94300.000000,265.289340)}
{pt3dadd(191388.000000,138456.000000,94200.000000,280.487156)}
{pt3dadd(191256.000000,138336.000000,94100.000000,302.094680)}
{pt3dadd(191124.000000,138240.000000,93975.000000,324.488640)}
{pt3dadd(191112.000000,138240.000000,93975.000000,336.343304)}
{pt3dadd(190968.000000,138144.000000,93850.000000,366.671010)}
{pt3dadd(190872.000000,138072.000000,93750.000000,354.223614)}
{pt3dadd(190692.000000,137928.000000,93575.000000,357.566766)}
{pt3dadd(190464.000000,137916.000000,93450.000000,353.880938)}
{pt3dadd(190332.000000,137652.000000,93350.000000,364.420234)}
{pt3dadd(190356.000000,137508.000000,93225.000000,360.356604)}
{pt3dadd(190320.000000,137460.000000,93125.000000,387.933890)}
{pt3dadd(190368.000000,137448.000000,93050.000000,391.444206)}
{pt3dadd(190332.000000,137352.000000,93000.000000,372.736074)}
{pt3dadd(190272.000000,137388.000000,92925.000000,362.196778)}
{pt3dadd(190164.000000,137292.000000,92800.000000,344.603406)}
{pt3dadd(190068.000000,136968.000000,92750.000000,329.473516)}
{pt3dadd(190068.000000,136968.000000,92750.000000,329.473516)}
{pt3dadd(190176.000000,136884.000000,92625.000000,351.867476)}
{pt3dadd(190236.000000,136932.000000,92525.000000,342.763232)}
{pt3dadd(190128.000000,136860.000000,92400.000000,342.763232)}
{pt3dadd(190164.000000,136536.000000,92250.000000,330.315836)}
{pt3dadd(190176.000000,136500.000000,92150.000000,308.988254)}
{pt3dadd(190092.000000,136200.000000,91975.000000,305.302426)}
{pt3dadd(190116.000000,136212.000000,91975.000000,314.406670)}
{pt3dadd(190260.000000,136332.000000,91850.000000,320.933782)}
{pt3dadd(190164.000000,136140.000000,91725.000000,340.577322)}
{pt3dadd(190152.000000,136128.000000,91600.000000,355.051436)}
{pt3dadd(190116.000000,136008.000000,91425.000000,348.197968)}
{pt3dadd(190116.000000,136044.000000,91325.000000,358.737264)}
{pt3dadd(190164.000000,136032.000000,91250.000000,349.177808)}
{pt3dadd(190164.000000,136008.000000,91175.000000,341.981664)}
{pt3dadd(190140.000000,135972.000000,91050.000000,330.127000)}
{pt3dadd(190200.000000,135948.000000,90975.000000,312.856944)}
{pt3dadd(190176.000000,135828.000000,90875.000000,302.317648)}
{pt3dadd(190164.000000,135780.000000,90825.000000,294.059838)}
{pt3dadd(190188.000000,135708.000000,90725.000000,281.612442)}
{pt3dadd(190140.000000,135660.000000,90625.000000,287.250802)}
{pt3dadd(190116.000000,135600.000000,90525.000000,290.046744)}
{pt3dadd(190128.000000,135540.000000,90425.000000,278.192080)}
{pt3dadd(190164.000000,135492.000000,90325.000000,286.449890)}
{pt3dadd(190164.000000,135432.000000,90275.000000,292.370174)}
{pt3dadd(190200.000000,135384.000000,90200.000000,279.241734)}
{pt3dadd(190212.000000,135372.000000,90075.000000,272.108324)}
{pt3dadd(190128.000000,135300.000000,89975.000000,272.108324)}
{pt3dadd(190068.000000,135276.000000,89875.000000,266.469964)}
{pt3dadd(190020.000000,135288.000000,89700.000000,255.179810)}
{pt3dadd(190044.000000,135264.000000,89550.000000,265.420310)}
{pt3dadd(190104.000000,135216.000000,89425.000000,293.881302)}
{pt3dadd(190080.000000,135108.000000,89275.000000,316.275262)}
{pt3dadd(190092.000000,135060.000000,89100.000000,321.913622)}
{pt3dadd(190068.000000,135024.000000,88925.000000,333.203776)}
{pt3dadd(190056.000000,134952.000000,88725.000000,349.161488)}
{pt3dadd(190020.000000,134868.000000,88550.000000,345.651172)}
{pt3dadd(189972.000000,134796.000000,88400.000000,341.965344)}
{pt3dadd(189960.000000,134748.000000,88250.000000,348.181648)}
{pt3dadd(189948.000000,134652.000000,88100.000000,348.181648)}
{pt3dadd(189876.000000,134580.000000,87950.000000,348.181648)}
{pt3dadd(189804.000000,134484.000000,87800.000000,351.691964)}
{pt3dadd(189708.000000,134388.000000,87675.000000,351.691964)}
{pt3dadd(189648.000000,134292.000000,87575.000000,348.508004)}
{pt3dadd(189624.000000,134208.000000,87450.000000,348.508004)}
{pt3dadd(189636.000000,134136.000000,87325.000000,344.997688)}
{pt3dadd(189648.000000,134124.000000,87200.000000,344.997688)}
{pt3dadd(189624.000000,134136.000000,87075.000000,352.553632)}
{pt3dadd(189576.000000,134088.000000,86950.000000,370.147004)}
{pt3dadd(189480.000000,134064.000000,86800.000000,373.330964)}
{pt3dadd(189348.000000,133932.000000,86650.000000,384.397224)}
{pt3dadd(189228.000000,133824.000000,86525.000000,384.397224)}
{pt3dadd(189156.000000,133740.000000,86400.000000,380.527108)}
{pt3dadd(189120.000000,133752.000000,86300.000000,362.933736)}
{pt3dadd(189048.000000,133728.000000,86175.000000,369.787204)}
{pt3dadd(188928.000000,133608.000000,86075.000000,369.787204)}
{pt3dadd(188832.000000,133476.000000,85950.000000,381.406778)}
{pt3dadd(188748.000000,133368.000000,85825.000000,374.210634)}
{pt3dadd(188700.000000,133308.000000,85700.000000,368.290350)}
{pt3dadd(188628.000000,133236.000000,85575.000000,364.780034)}
{pt3dadd(188544.000000,133128.000000,85450.000000,357.224090)}
{pt3dadd(188448.000000,132984.000000,85350.000000,335.567088)}
{pt3dadd(188364.000000,132936.000000,85225.000000,329.039976)}
{pt3dadd(188292.000000,132924.000000,85075.000000,344.997688)}
{pt3dadd(188208.000000,132936.000000,84925.000000,360.127578)}
{pt3dadd(188112.000000,132852.000000,84775.000000,350.090150)}
{pt3dadd(187944.000000,132732.000000,84650.000000,380.494106)}
{pt3dadd(187824.000000,132576.000000,84525.000000,390.531534)}
{pt3dadd(187716.000000,132396.000000,84425.000000,398.087478)}
{pt3dadd(187644.000000,132264.000000,84300.000000,394.023848)}
{pt3dadd(187596.000000,132204.000000,84150.000000,397.207808)}
{pt3dadd(187548.000000,132168.000000,84000.000000,392.727662)}
{pt3dadd(187548.000000,132204.000000,83900.000000,396.413490)}
{pt3dadd(187440.000000,131988.000000,83800.000000,388.857546)}
{pt3dadd(187368.000000,131916.000000,83675.000000,374.448134)}
{pt3dadd(187296.000000,131868.000000,83550.000000,381.301602)}
{pt3dadd(187260.000000,131820.000000,83425.000000,385.781748)}
{pt3dadd(187152.000000,131676.000000,83300.000000,389.651864)}
{pt3dadd(187032.000000,131616.000000,83200.000000,379.614436)}
{pt3dadd(186912.000000,131568.000000,83075.000000,382.957588)}
{pt3dadd(186768.000000,131484.000000,82975.000000,379.447272)}
{pt3dadd(186684.000000,131376.000000,82875.000000,359.080744)}
{pt3dadd(186636.000000,131304.000000,82775.000000,355.210628)}
{pt3dadd(186624.000000,131256.000000,82650.000000,372.804000)}
{pt3dadd(186576.000000,131292.000000,82525.000000,376.314316)}
{pt3dadd(186444.000000,131172.000000,82450.000000,387.380576)}
{pt3dadd(186348.000000,131052.000000,82350.000000,391.066404)}
{pt3dadd(186252.000000,131052.000000,82275.000000,391.066404)}
{pt3dadd(186168.000000,131040.000000,82175.000000,380.000144)}
{pt3dadd(186144.000000,130956.000000,82050.000000,369.962716)}
{pt3dadd(186048.000000,130872.000000,81925.000000,355.553304)}
{pt3dadd(185928.000000,130764.000000,81825.000000,348.357160)}
{pt3dadd(185820.000000,130680.000000,81675.000000,334.580840)}
{pt3dadd(185904.000000,130680.000000,81600.000000,351.031280)}

{create adhoc8}
{access adhoc8}
{connect adhoc8(1), adhoc7(0)}
{nseg = 1}
{strdef color color = "White"}
{pt3dclear()}
{pt3dadd(185904.000000,130680.000000,81600.000000,351.031280)}
{pt3dadd(186012.000000,130908.000000,81600.000000,375.325573)}
{pt3dadd(186132.000000,131100.000000,81600.000000,326.106368)}
{pt3dadd(186228.000000,131232.000000,81600.000000,279.900112)}
{pt3dadd(186276.000000,131424.000000,81475.000000,225.928400)}
{pt3dadd(186288.000000,131688.000000,81475.000000,165.387987)}
{pt3dadd(186240.000000,131844.000000,81425.000000,122.440946)}
{pt3dadd(186216.000000,131976.000000,81350.000000,102.265418)}
{pt3dadd(186240.000000,132096.000000,81225.000000,92.297721)}
{pt3dadd(186120.000000,132168.000000,81125.000000,88.023475)}
{pt3dadd(186048.000000,132264.000000,81025.000000,87.036232)}
{pt3dadd(185952.000000,132444.000000,80900.000000,84.213298)}
{pt3dadd(185904.000000,132588.000000,80900.000000,85.066115)}
{pt3dadd(185880.000000,132828.000000,80900.000000,88.942981)}
{pt3dadd(185808.000000,132840.000000,80775.000000,88.942981)}
{pt3dadd(185808.000000,133188.000000,80650.000000,85.442266)}
{pt3dadd(185832.000000,133464.000000,80650.000000,81.565400)}
{pt3dadd(185808.000000,133512.000000,80500.000000,76.383943)}
{pt3dadd(185736.000000,133740.000000,80475.000000,78.219634)}
{pt3dadd(185760.000000,133812.000000,80500.000000,78.993165)}
{pt3dadd(185808.000000,133920.000000,80425.000000,82.493880)}
{pt3dadd(185832.000000,133956.000000,80400.000000,84.705722)}
{pt3dadd(185892.000000,134004.000000,80400.000000,89.887179)}
{pt3dadd(185880.000000,134148.000000,80375.000000,85.612933)}
{pt3dadd(185940.000000,134316.000000,80350.000000,88.173416)}
{pt3dadd(186096.000000,134568.000000,80350.000000,83.162474)}
{pt3dadd(186228.000000,134856.000000,80350.000000,81.652247)}
{pt3dadd(186240.000000,134940.000000,80325.000000,77.107176)}
{pt3dadd(186300.000000,135156.000000,80275.000000,78.692914)}
{pt3dadd(186432.000000,135384.000000,80275.000000,77.797455)}
{pt3dadd(186528.000000,135648.000000,80275.000000,80.119889)}
{pt3dadd(186648.000000,135756.000000,80175.000000,86.118074)}
{pt3dadd(186732.000000,135876.000000,80100.000000,96.753976)}
{pt3dadd(186828.000000,136320.000000,79975.000000,108.869774)}
{pt3dadd(187056.000000,136740.000000,80025.000000,110.705465)}
{pt3dadd(187248.000000,137040.000000,80025.000000,110.705465)}
{pt3dadd(187392.000000,137208.000000,80025.000000,107.029714)}
{pt3dadd(187584.000000,137352.000000,79925.000000,99.273859)}
{pt3dadd(187776.000000,137712.000000,79925.000000,86.345854)}
{pt3dadd(187920.000000,137988.000000,79875.000000,86.345854)}
{pt3dadd(188076.000000,138228.000000,79875.000000,93.289502)}
{pt3dadd(188256.000000,138288.000000,79925.000000,99.090292)}
{pt3dadd(188316.000000,138492.000000,80050.000000,98.316761)}
{pt3dadd(188436.000000,138600.000000,80100.000000,121.166088)}
{pt3dadd(188628.000000,138780.000000,80200.000000,132.051988)}
{pt3dadd(188772.000000,138912.000000,80200.000000,123.522602)}
{pt3dadd(188880.000000,139200.000000,80150.000000,116.909605)}
{pt3dadd(189012.000000,139524.000000,80150.000000,115.471294)}
{pt3dadd(189060.000000,139620.000000,80150.000000,90.410125)}
{pt3dadd(189156.000000,139728.000000,80150.000000,75.249979)}
{pt3dadd(189276.000000,139824.000000,80050.000000,78.583993)}
{pt3dadd(189396.000000,140028.000000,80100.000000,82.084708)}
{pt3dadd(189384.000000,140232.000000,80025.000000,80.174036)}
{pt3dadd(189408.000000,140376.000000,79950.000000,84.451865)}
{pt3dadd(189492.000000,140376.000000,79975.000000,60.608154)}

{create adhoc9}
{access adhoc9}
{connect adhoc9(1), adhoc7(0)}
{nseg = 1}
{strdef color color = "White"}
{pt3dclear()}
{pt3dadd(185904.000000,130680.000000,81600.000000,351.031280)}
{pt3dadd(185856.000000,130764.000000,81450.000000,349.505807)}
{pt3dadd(185844.000000,130800.000000,81300.000000,326.460862)}
{pt3dadd(185808.000000,130836.000000,81125.000000,319.933750)}
{pt3dadd(185616.000000,130680.000000,80950.000000,347.441876)}
{pt3dadd(185460.000000,130500.000000,80800.000000,331.555494)}
{pt3dadd(185076.000000,130332.000000,80650.000000,322.451250)}
{pt3dadd(184908.000000,130140.000000,80500.000000,320.075336)}
{pt3dadd(184920.000000,130044.000000,80350.000000,303.914552)}
{pt3dadd(184740.000000,129960.000000,80200.000000,278.901142)}
{pt3dadd(184584.000000,129852.000000,80075.000000,255.078844)}
{pt3dadd(184524.000000,129720.000000,80000.000000,247.214258)}
{pt3dadd(184512.000000,129732.000000,79850.000000,257.454758)}
{pt3dadd(184452.000000,129684.000000,79700.000000,262.325388)}
{pt3dadd(184308.000000,129528.000000,79600.000000,267.695258)}
{pt3dadd(184224.000000,129348.000000,79475.000000,278.447784)}
{pt3dadd(184284.000000,129324.000000,79350.000000,292.232654)}
{pt3dadd(184260.000000,129288.000000,79200.000000,292.232654)}
{pt3dadd(184164.000000,129192.000000,79050.000000,310.049920)}
{pt3dadd(184116.000000,129084.000000,78875.000000,322.497316)}
{pt3dadd(184020.000000,129072.000000,78725.000000,339.252916)}
{pt3dadd(183936.000000,129048.000000,78600.000000,360.909918)}
{pt3dadd(183804.000000,128964.000000,78450.000000,380.553458)}
{pt3dadd(183756.000000,128892.000000,78325.000000,374.026346)}
{pt3dadd(183744.000000,128712.000000,78175.000000,377.536662)}
{pt3dadd(183672.000000,128616.000000,77950.000000,370.340518)}
{pt3dadd(183492.000000,128472.000000,77750.000000,351.867476)}
{pt3dadd(183372.000000,128280.000000,77600.000000,348.181648)}
{pt3dadd(183252.000000,128088.000000,77425.000000,369.838650)}
{pt3dadd(183108.000000,127956.000000,77225.000000,377.394594)}
{pt3dadd(182988.000000,127884.000000,77050.000000,380.904910)}
{pt3dadd(182964.000000,127800.000000,76875.000000,359.297386)}
{pt3dadd(182952.000000,127644.000000,76725.000000,333.741113)}
{pt3dadd(182856.000000,127488.000000,76700.000000,226.277900)}

{create adhoc10}
{access adhoc10}
{connect adhoc10(1), adhoc9(0)}
{nseg = 1}
{strdef color color = "White"}
{pt3dclear()}
{pt3dadd(182856.000000,127488.000000,76700.000000,226.277900)}
{pt3dadd(182772.000000,127224.000000,76700.000000,143.853220)}
{pt3dadd(182712.000000,127008.000000,76700.000000,120.424636)}
{pt3dadd(182640.000000,126840.000000,76700.000000,89.902974)}
{pt3dadd(182568.000000,126648.000000,76700.000000,84.707602)}
{pt3dadd(182508.000000,126432.000000,76650.000000,91.651250)}
{pt3dadd(182484.000000,126264.000000,76650.000000,96.363606)}
{pt3dadd(182460.000000,126120.000000,76550.000000,94.777868)}
{pt3dadd(182448.000000,125964.000000,76425.000000,100.776053)}
{pt3dadd(182400.000000,125856.000000,76300.000000,101.716285)}
{pt3dadd(182388.000000,125712.000000,76250.000000,102.916285)}
{pt3dadd(182400.000000,125508.000000,76225.000000,100.892437)}
{pt3dadd(182376.000000,125424.000000,76125.000000,105.166683)}
{pt3dadd(182340.000000,125340.000000,76050.000000,115.065340)}
{pt3dadd(182268.000000,125220.000000,76050.000000,119.320480)}
{pt3dadd(182148.000000,125088.000000,75950.000000,124.751240)}
{pt3dadd(182160.000000,124968.000000,75975.000000,132.789380)}
{pt3dadd(182040.000000,124812.000000,75950.000000,145.206816)}
{pt3dadd(181932.000000,124656.000000,75900.000000,150.034986)}
{pt3dadd(181836.000000,124512.000000,75875.000000,163.266866)}
{pt3dadd(181692.000000,124344.000000,75900.000000,163.266866)}
{pt3dadd(181500.000000,124188.000000,75900.000000,172.715746)}
{pt3dadd(181404.000000,124044.000000,75900.000000,181.601594)}
{pt3dadd(181344.000000,123888.000000,75900.000000,185.236136)}
{pt3dadd(181224.000000,123732.000000,75875.000000,200.393246)}
{pt3dadd(181176.000000,123636.000000,75925.000000,208.855958)}
{pt3dadd(181116.000000,123504.000000,75950.000000,214.724630)}
{pt3dadd(181020.000000,123396.000000,75925.000000,205.838782)}
{pt3dadd(181032.000000,123252.000000,75850.000000,202.204240)}
{pt3dadd(180996.000000,123204.000000,75800.000000,195.070830)}
{pt3dadd(180756.000000,123084.000000,75550.000000,185.149508)}
{pt3dadd(180732.000000,123048.000000,75350.000000,183.144433)}
{pt3dadd(180648.000000,122940.000000,75250.000000,145.860750)}

{create adhoc11}
{access adhoc11}
{connect adhoc11(1), adhoc9(0)}
{nseg = 1}
{strdef color color = "White"}
{pt3dclear()}
{pt3dadd(182856.000000,127488.000000,76700.000000,226.277900)}
{pt3dadd(182832.000000,127500.000000,76525.000000,293.970503)}
{pt3dadd(182784.000000,127416.000000,76375.000000,278.909102)}
{pt3dadd(182784.000000,127404.000000,76225.000000,278.909102)}
{pt3dadd(182748.000000,127356.000000,76050.000000,282.594930)}
{pt3dadd(182784.000000,127356.000000,75850.000000,298.901352)}
{pt3dadd(182508.000000,127404.000000,75650.000000,301.277266)}
{pt3dadd(182412.000000,127380.000000,75500.000000,306.915626)}
{pt3dadd(182460.000000,127548.000000,75325.000000,322.306846)}
{pt3dadd(182580.000000,127992.000000,75200.000000,318.621018)}
{pt3dadd(182556.000000,128100.000000,75075.000000,311.767550)}
{pt3dadd(182436.000000,128280.000000,74925.000000,302.921420)}
{pt3dadd(182448.000000,128280.000000,74825.000000,283.322764)}
{pt3dadd(182328.000000,128352.000000,74700.000000,270.194324)}
{pt3dadd(182232.000000,128364.000000,74575.000000,243.996112)}
{pt3dadd(182124.000000,128364.000000,74400.000000,234.891868)}
{pt3dadd(181956.000000,128376.000000,74275.000000,248.852164)}
{pt3dadd(181848.000000,128400.000000,74125.000000,274.667124)}
{pt3dadd(181788.000000,128424.000000,74000.000000,284.907624)}
{pt3dadd(181728.000000,128424.000000,73875.000000,284.907624)}
{pt3dadd(181656.000000,128424.000000,73775.000000,284.907624)}
{pt3dadd(181620.000000,128412.000000,73675.000000,277.417544)}
{pt3dadd(181608.000000,128508.000000,73550.000000,274.233584)}
{pt3dadd(181548.000000,128508.000000,73375.000000,266.368998)}
{pt3dadd(181464.000000,128448.000000,73175.000000,276.609498)}
{pt3dadd(181476.000000,128508.000000,73025.000000,266.368998)}
{pt3dadd(181428.000000,128592.000000,72900.000000,266.368998)}
{pt3dadd(181296.000000,128580.000000,72750.000000,257.698294)}
{pt3dadd(181344.000000,128688.000000,72575.000000,257.698294)}
{pt3dadd(181224.000000,128724.000000,72375.000000,257.698294)}
{pt3dadd(181128.000000,128688.000000,72200.000000,280.386190)}
{pt3dadd(181068.000000,128760.000000,72000.000000,318.203976)}
{pt3dadd(181104.000000,128880.000000,71825.000000,344.468052)}
{pt3dadd(181068.000000,129024.000000,71650.000000,368.290350)}
{pt3dadd(180972.000000,129048.000000,71475.000000,387.933890)}
{pt3dadd(180864.000000,129108.000000,71325.000000,399.000150)}
{pt3dadd(180792.000000,129108.000000,71175.000000,380.527108)}
{pt3dadd(180708.000000,129168.000000,71025.000000,380.527108)}
{pt3dadd(180708.000000,129384.000000,70900.000000,382.346893)}
{pt3dadd(180684.000000,129540.000000,70750.000000,406.362580)}

{create adhoc12}
{access adhoc12}
{connect adhoc12(1), adhoc11(0)}
{nseg = 1}
{strdef color color = "White"}
{pt3dclear()}
{pt3dadd(180684.000000,129540.000000,70750.000000,406.362580)}
{pt3dadd(180648.000000,129300.000000,70750.000000,387.918813)}
{pt3dadd(180636.000000,128988.000000,70750.000000,348.406528)}
{pt3dadd(180708.000000,128664.000000,70750.000000,317.028286)}
{pt3dadd(180720.000000,128568.000000,70625.000000,294.340390)}
{pt3dadd(180732.000000,128532.000000,70425.000000,265.456864)}
{pt3dadd(180852.000000,128520.000000,70300.000000,251.496568)}
{pt3dadd(180840.000000,128388.000000,70175.000000,231.897912)}
{pt3dadd(180804.000000,128256.000000,70050.000000,225.104190)}
{pt3dadd(180672.000000,128076.000000,69925.000000,211.356240)}
{pt3dadd(180588.000000,127848.000000,69850.000000,196.199130)}
{pt3dadd(180420.000000,127704.000000,69725.000000,182.933986)}
{pt3dadd(180228.000000,127512.000000,69625.000000,177.344772)}
{pt3dadd(180060.000000,127368.000000,69475.000000,162.027220)}
{pt3dadd(179928.000000,127200.000000,69350.000000,165.488690)}
{pt3dadd(179796.000000,127080.000000,69250.000000,158.887570)}
{pt3dadd(179700.000000,126864.000000,69125.000000,156.304570)}
{pt3dadd(179568.000000,126648.000000,69000.000000,161.893784)}
{pt3dadd(179520.000000,126636.000000,68850.000000,173.204256)}
{pt3dadd(179244.000000,126288.000000,68800.000000,177.020520)}
{pt3dadd(179220.000000,126240.000000,68675.000000,185.483232)}
{pt3dadd(179196.000000,126024.000000,68550.000000,199.376704)}
{pt3dadd(179292.000000,125832.000000,68400.000000,208.222834)}
{pt3dadd(179388.000000,125736.000000,68275.000000,210.177506)}
{pt3dadd(179292.000000,125832.000000,68175.000000,210.177506)}
{pt3dadd(179268.000000,125772.000000,68025.000000,214.184586)}
{pt3dadd(179292.000000,125664.000000,67850.000000,208.861524)}
{pt3dadd(179376.000000,125448.000000,67700.000000,198.060722)}
{pt3dadd(179448.000000,125208.000000,67550.000000,192.471508)}
{pt3dadd(179460.000000,125076.000000,67375.000000,198.941724)}
{pt3dadd(179496.000000,124908.000000,67250.000000,196.889316)}
{pt3dadd(179520.000000,124848.000000,67125.000000,215.507896)}
{pt3dadd(179484.000000,124788.000000,67000.000000,219.514976)}
{pt3dadd(179436.000000,124692.000000,66850.000000,227.156598)}
{pt3dadd(179448.000000,124656.000000,66700.000000,224.893818)}
{pt3dadd(179496.000000,124536.000000,66575.000000,219.304604)}
{pt3dadd(179520.000000,124464.000000,66525.000000,200.686024)}
{pt3dadd(179484.000000,124368.000000,66400.000000,193.044402)}
{pt3dadd(179412.000000,124320.000000,66325.000000,177.726850)}
{pt3dadd(179388.000000,124272.000000,66200.000000,171.564742)}
{pt3dadd(179364.000000,124176.000000,66075.000000,173.337692)}
{pt3dadd(179112.000000,124476.000000,66025.000000,168.739432)}
{pt3dadd(179004.000000,124488.000000,65950.000000,168.739432)}
{pt3dadd(178980.000000,124380.000000,65825.000000,182.004576)}
{pt3dadd(178896.000000,124272.000000,65725.000000,186.011656)}
{pt3dadd(178836.000000,124200.000000,65600.000000,186.011656)}
{pt3dadd(178824.000000,124236.000000,65525.000000,206.733780)}
{pt3dadd(178788.000000,124224.000000,65425.000000,210.368322)}
{pt3dadd(178704.000000,124140.000000,65300.000000,212.420730)}
{pt3dadd(178656.000000,124044.000000,65200.000000,216.838538)}
{pt3dadd(178620.000000,124020.000000,65075.000000,224.862238)}
{pt3dadd(178560.000000,123912.000000,64950.000000,216.016108)}
{pt3dadd(178548.000000,123744.000000,64800.000000,217.970780)}
{pt3dadd(178512.000000,123660.000000,64675.000000,213.963700)}
{pt3dadd(178440.000000,123588.000000,64550.000000,216.339614)}
{pt3dadd(178332.000000,123528.000000,64375.000000,220.978308)}
{pt3dadd(178236.000000,123384.000000,64200.000000,232.319154)}
{pt3dadd(178164.000000,123216.000000,64050.000000,254.950154)}
{pt3dadd(178140.000000,123060.000000,63825.000000,265.750956)}
{pt3dadd(178044.000000,122928.000000,63650.000000,261.112262)}
{pt3dadd(177924.000000,122748.000000,63475.000000,256.473568)}
{pt3dadd(177888.000000,122616.000000,63275.000000,241.316458)}
{pt3dadd(177840.000000,122472.000000,63050.000000,222.892894)}
{pt3dadd(177636.000000,122208.000000,62950.000000,225.387610)}
{pt3dadd(177456.000000,121956.000000,62875.000000,212.294326)}
{pt3dadd(177432.000000,121692.000000,62775.000000,204.270626)}
{pt3dadd(177408.000000,121596.000000,62675.000000,210.139298)}
{pt3dadd(177456.000000,121212.000000,62575.000000,200.342648)}
{pt3dadd(177684.000000,120948.000000,62500.000000,187.047130)}
{pt3dadd(177900.000000,120672.000000,62500.000000,204.779108)}
{pt3dadd(177960.000000,120504.000000,62325.000000,210.647780)}
{pt3dadd(177912.000000,120168.000000,62175.000000,210.647780)}
{pt3dadd(177864.000000,119832.000000,62050.000000,227.577840)}
{pt3dadd(177900.000000,119604.000000,61925.000000,243.492808)}
{pt3dadd(177804.000000,119496.000000,61750.000000,248.606974)}
{pt3dadd(177672.000000,119304.000000,61575.000000,272.369526)}
{pt3dadd(177696.000000,119124.000000,61475.000000,302.985546)}
{pt3dadd(177732.000000,118944.000000,61350.000000,320.802812)}
{pt3dadd(177660.000000,118812.000000,61275.000000,336.000628)}
{pt3dadd(177684.000000,118644.000000,61300.000000,333.381178)}
{pt3dadd(177768.000000,118488.000000,61275.000000,318.907064)}
{pt3dadd(177780.000000,118320.000000,61275.000000,308.869636)}
{pt3dadd(177768.000000,118188.000000,61275.000000,279.711524)}
{pt3dadd(177804.000000,118044.000000,61325.000000,248.598740)}
{pt3dadd(177756.000000,117840.000000,61300.000000,233.441630)}
{pt3dadd(177672.000000,117624.000000,61300.000000,214.823050)}
{pt3dadd(177528.000000,117492.000000,61250.000000,188.375786)}
{pt3dadd(177492.000000,117300.000000,61300.000000,182.786572)}
{pt3dadd(177324.000000,117132.000000,61375.000000,179.152030)}
{pt3dadd(177240.000000,116952.000000,61350.000000,182.968294)}
{pt3dadd(177156.000000,116820.000000,61350.000000,188.291356)}
{pt3dadd(177060.000000,116664.000000,61375.000000,196.315056)}
{pt3dadd(177132.000000,116472.000000,61300.000000,208.374486)}
{pt3dadd(177072.000000,116304.000000,61275.000000,222.809830)}
{pt3dadd(177012.000000,116136.000000,61250.000000,237.780357)}
{pt3dadd(176904.000000,116040.000000,61200.000000,249.471370)}

{create adhoc13}
{access adhoc13}
{connect adhoc13(1), adhoc12(0)}
{nseg = 1}
{strdef color color = "White"}
{pt3dclear()}
{pt3dadd(176904.000000,116040.000000,61200.000000,249.471370)}
{pt3dadd(176844.000000,115956.000000,61125.000000,216.726483)}
{pt3dadd(176784.000000,115872.000000,61025.000000,180.435890)}
{pt3dadd(176808.000000,115776.000000,60950.000000,153.398758)}
{pt3dadd(176820.000000,115644.000000,60825.000000,146.121024)}
{pt3dadd(176820.000000,115524.000000,60650.000000,139.189848)}
{pt3dadd(176904.000000,115416.000000,60500.000000,149.448778)}
{pt3dadd(177012.000000,115284.000000,60375.000000,154.879538)}
{pt3dadd(177060.000000,115140.000000,60300.000000,164.184692)}
{pt3dadd(177108.000000,115116.000000,60250.000000,161.045042)}
{pt3dadd(177120.000000,115020.000000,60200.000000,159.513506)}
{pt3dadd(177132.000000,115080.000000,60125.000000,156.216872)}
{pt3dadd(177264.000000,114984.000000,60025.000000,159.356522)}
{pt3dadd(177324.000000,114924.000000,59925.000000,156.366376)}
{pt3dadd(177348.000000,114936.000000,59825.000000,153.518616)}
{pt3dadd(177432.000000,114816.000000,59675.000000,155.050152)}
{pt3dadd(177516.000000,114636.000000,59575.000000,148.087856)}
{pt3dadd(177588.000000,114516.000000,59475.000000,135.049549)}
{pt3dadd(177672.000000,114336.000000,59375.000000,127.646107)}
{pt3dadd(177612.000000,114060.000000,59250.000000,120.595210)}
{pt3dadd(177636.000000,113880.000000,59150.000000,116.215914)}
{pt3dadd(177600.000000,113700.000000,59000.000000,116.215914)}
{pt3dadd(177600.000000,113436.000000,58875.000000,126.114571)}
{pt3dadd(177564.000000,113232.000000,58700.000000,129.545863)}
{pt3dadd(177408.000000,113100.000000,58475.000000,130.582468)}
{pt3dadd(177336.000000,112884.000000,58350.000000,125.656610)}
{pt3dadd(177312.000000,112848.000000,58200.000000,119.261238)}
{pt3dadd(177312.000000,112740.000000,58050.000000,108.375338)}
{pt3dadd(177216.000000,112536.000000,57900.000000,101.979966)}
{pt3dadd(177216.000000,112500.000000,57750.000000,101.979966)}
{pt3dadd(177180.000000,112332.000000,57600.000000,97.031993)}
{pt3dadd(177096.000000,112212.000000,57450.000000,97.972225)}
{pt3dadd(177072.000000,112152.000000,57200.000000,96.136534)}
{pt3dadd(177024.000000,112128.000000,57125.000000,96.136534)}
{pt3dadd(177048.000000,111948.000000,57125.000000,106.530122)}
{pt3dadd(177048.000000,111888.000000,57125.000000,122.391363)}
{pt3dadd(176988.000000,111756.000000,57000.000000,133.277263)}
{pt3dadd(176964.000000,111696.000000,56950.000000,147.530390)}
{pt3dadd(176952.000000,111600.000000,56875.000000,160.888058)}
{pt3dadd(176856.000000,111360.000000,56825.000000,157.897912)}
{pt3dadd(176868.000000,111240.000000,56875.000000,154.758262)}
{pt3dadd(176760.000000,111108.000000,56800.000000,159.586432)}
{pt3dadd(176652.000000,111024.000000,56725.000000,168.472280)}
{pt3dadd(176760.000000,110916.000000,56800.000000,177.358128)}
{pt3dadd(176712.000000,110844.000000,56800.000000,187.279450)}
{pt3dadd(176724.000000,110760.000000,56775.000000,204.167050)}
{pt3dadd(176736.000000,110760.000000,56775.000000,216.226480)}
{pt3dadd(176784.000000,110640.000000,56800.000000,222.696696)}
{pt3dadd(176880.000000,110556.000000,56725.000000,222.696696)}
{pt3dadd(176976.000000,110436.000000,56675.000000,233.497498)}
{pt3dadd(176916.000000,110328.000000,56600.000000,230.767963)}
{pt3dadd(176952.000000,110340.000000,56525.000000,249.471370)}

{create adhoc14}
{access adhoc14}
{connect adhoc14(1), adhoc12(0)}
{nseg = 1}
{strdef color color = "White"}
{pt3dclear()}
{pt3dadd(176904.000000,116040.000000,61200.000000,249.471370)}
{pt3dadd(176976.000000,116040.000000,61425.000000,241.551657)}
{pt3dadd(176952.000000,116040.000000,61550.000000,221.438068)}
{pt3dadd(176928.000000,115932.000000,61675.000000,190.348422)}
{pt3dadd(176856.000000,115824.000000,61775.000000,159.074207)}
{pt3dadd(176688.000000,115740.000000,62000.000000,127.799992)}
{pt3dadd(176748.000000,115680.000000,62050.000000,111.951848)}
{pt3dadd(176664.000000,115620.000000,62125.000000,104.275918)}
{pt3dadd(176436.000000,115452.000000,62200.000000,124.564762)}
{pt3dadd(176400.000000,115344.000000,62250.000000,142.091027)}
{pt3dadd(176376.000000,115332.000000,62275.000000,161.305812)}
{pt3dadd(176364.000000,115332.000000,62275.000000,177.153956)}
{pt3dadd(176376.000000,115224.000000,62350.000000,186.602836)}
{pt3dadd(176376.000000,115224.000000,62400.000000,181.279774)}
{pt3dadd(176256.000000,115128.000000,62450.000000,192.764944)}
{pt3dadd(176208.000000,114996.000000,62500.000000,189.468310)}
{pt3dadd(176136.000000,114984.000000,62525.000000,179.050926)}
{pt3dadd(175932.000000,114828.000000,62700.000000,172.449806)}
{pt3dadd(175860.000000,114528.000000,62700.000000,170.841692)}
{pt3dadd(175740.000000,114408.000000,62700.000000,157.748408)}
{pt3dadd(175668.000000,114288.000000,62700.000000,157.748408)}
{pt3dadd(175524.000000,114120.000000,62700.000000,164.349528)}
{pt3dadd(175428.000000,113952.000000,62700.000000,169.177698)}
{pt3dadd(175392.000000,113868.000000,62750.000000,170.785812)}
{pt3dadd(175308.000000,113724.000000,62750.000000,169.254276)}
{pt3dadd(175140.000000,113628.000000,62725.000000,174.323860)}
{pt3dadd(175032.000000,113472.000000,62725.000000,169.254276)}
{pt3dadd(174972.000000,113424.000000,62825.000000,172.888818)}
{pt3dadd(174804.000000,113280.000000,62825.000000,168.290558)}
{pt3dadd(174660.000000,113076.000000,62575.000000,166.831948)}
{pt3dadd(174660.000000,112944.000000,62450.000000,162.396287)}
{pt3dadd(174828.000000,112920.000000,62275.000000,145.860750)}

{create adhoc15}
{access adhoc15}
{connect adhoc15(1), adhoc11(0)}
{nseg = 1}
{strdef color color = "White"}
{pt3dclear()}
{pt3dadd(180684.000000,129540.000000,70750.000000,406.362580)}
{pt3dadd(180588.000000,129780.000000,70750.000000,378.759103)}
{pt3dadd(180504.000000,129864.000000,70650.000000,334.652892)}
{pt3dadd(180420.000000,129984.000000,70700.000000,308.388816)}
{pt3dadd(180324.000000,130128.000000,70700.000000,278.061110)}
{pt3dadd(180348.000000,130296.000000,70625.000000,278.061110)}
{pt3dadd(180360.000000,130464.000000,70675.000000,266.720264)}
{pt3dadd(180336.000000,130560.000000,70625.000000,269.470684)}
{pt3dadd(180156.000000,130560.000000,70550.000000,264.356518)}
{pt3dadd(180108.000000,130668.000000,70500.000000,254.603658)}
{pt3dadd(180156.000000,130788.000000,70450.000000,237.057410)}
{pt3dadd(180156.000000,130920.000000,70375.000000,245.903540)}
{pt3dadd(180144.000000,131088.000000,70425.000000,238.038954)}
{pt3dadd(180000.000000,131232.000000,70325.000000,238.038954)}
{pt3dadd(179976.000000,131376.000000,70325.000000,247.791814)}
{pt3dadd(180072.000000,131520.000000,70325.000000,259.699702)}
{pt3dadd(180084.000000,131652.000000,70375.000000,273.484572)}
{pt3dadd(179952.000000,131772.000000,70300.000000,281.349158)}
{pt3dadd(179880.000000,131892.000000,70225.000000,281.349158)}
{pt3dadd(179940.000000,132024.000000,70225.000000,276.234992)}
{pt3dadd(179904.000000,132168.000000,70125.000000,278.985412)}
{pt3dadd(179904.000000,132300.000000,70050.000000,267.695258)}
{pt3dadd(179904.000000,132300.000000,70025.000000,262.325388)}
{pt3dadd(179832.000000,132432.000000,70000.000000,262.325388)}
{pt3dadd(179844.000000,132552.000000,69925.000000,255.531666)}
{pt3dadd(179748.000000,132660.000000,69900.000000,247.667080)}
{pt3dadd(179724.000000,132660.000000,69875.000000,253.036950)}
{pt3dadd(179856.000000,132780.000000,69825.000000,253.036950)}
{pt3dadd(179628.000000,132924.000000,69650.000000,258.151116)}
{pt3dadd(179556.000000,133032.000000,69400.000000,258.151116)}
{pt3dadd(179484.000000,133176.000000,69475.000000,255.775202)}
{pt3dadd(179376.000000,133236.000000,69250.000000,250.405332)}
{pt3dadd(179268.000000,133332.000000,68850.000000,241.116894)}
{pt3dadd(179208.000000,133332.000000,68650.000000,233.626814)}
{pt3dadd(179304.000000,133404.000000,68750.000000,242.915252)}
{pt3dadd(179208.000000,133500.000000,68475.000000,259.076036)}
{pt3dadd(179088.000000,133608.000000,68175.000000,259.076036)}
{pt3dadd(178992.000000,133668.000000,68150.000000,273.734344)}
{pt3dadd(178968.000000,133764.000000,68075.000000,289.895128)}
{pt3dadd(178872.000000,133788.000000,67925.000000,295.264998)}
{pt3dadd(178800.000000,133824.000000,67800.000000,308.988254)}
{pt3dadd(178680.000000,133884.000000,67700.000000,330.315836)}
{pt3dadd(178632.000000,133872.000000,67600.000000,339.420080)}
{pt3dadd(178560.000000,133848.000000,67500.000000,349.457508)}
{pt3dadd(178524.000000,133860.000000,67375.000000,357.160413)}
{pt3dadd(178428.000000,133848.000000,67300.000000,368.582860)}

{create adhoc16}
{access adhoc16}
{connect adhoc16(1), adhoc15(0)}
{nseg = 1}
{strdef color color = "White"}
{pt3dclear()}
{pt3dadd(178428.000000,133848.000000,67300.000000,368.582860)}
{pt3dadd(178464.000000,134052.000000,67300.000000,351.853813)}
{pt3dadd(178464.000000,134268.000000,67300.000000,321.260138)}
{pt3dadd(178452.000000,134496.000000,67300.000000,286.637038)}
{pt3dadd(178416.000000,134592.000000,67225.000000,256.021018)}
{pt3dadd(178344.000000,134760.000000,67175.000000,231.435346)}
{pt3dadd(178260.000000,134940.000000,67100.000000,212.769958)}
{pt3dadd(178200.000000,134976.000000,67050.000000,201.429112)}
{pt3dadd(178188.000000,135024.000000,67000.000000,203.383784)}
{pt3dadd(178176.000000,135036.000000,67000.000000,194.053642)}
{pt3dadd(178212.000000,135156.000000,66950.000000,188.730580)}
{pt3dadd(178224.000000,135216.000000,66850.000000,183.407518)}
{pt3dadd(178236.000000,135228.000000,66850.000000,179.591254)}
{pt3dadd(178260.000000,135312.000000,66725.000000,163.743110)}
{pt3dadd(178308.000000,135444.000000,66675.000000,162.134996)}
{pt3dadd(178416.000000,135516.000000,66575.000000,160.526882)}
{pt3dadd(178440.000000,135528.000000,66575.000000,157.387232)}
{pt3dadd(178464.000000,135564.000000,66525.000000,153.925762)}
{pt3dadd(178500.000000,135540.000000,66450.000000,165.957642)}
{pt3dadd(178476.000000,135600.000000,66325.000000,167.565756)}
{pt3dadd(178476.000000,135828.000000,66225.000000,164.575610)}
{pt3dadd(178476.000000,135876.000000,66225.000000,164.575610)}
{pt3dadd(178596.000000,135912.000000,66125.000000,155.955533)}
{pt3dadd(178620.000000,135924.000000,66125.000000,153.153800)}

{create adhoc17}
{access adhoc17}
{connect adhoc17(1), adhoc15(0)}
{nseg = 1}
{strdef color color = "White"}
{pt3dclear()}
{pt3dadd(178428.000000,133848.000000,67300.000000,368.582860)}
{pt3dadd(178368.000000,133776.000000,67100.000000,311.253937)}
{pt3dadd(178296.000000,133680.000000,66950.000000,284.164996)}
{pt3dadd(178284.000000,133680.000000,66800.000000,265.456864)}
{pt3dadd(178200.000000,133548.000000,66625.000000,265.456864)}
{pt3dadd(178164.000000,133500.000000,66625.000000,259.818504)}
{pt3dadd(178164.000000,133416.000000,66475.000000,262.194418)}
{pt3dadd(178164.000000,133404.000000,66475.000000,251.393616)}
{pt3dadd(178176.000000,133236.000000,66375.000000,221.585176)}
{pt3dadd(178104.000000,133152.000000,66250.000000,210.244330)}
{pt3dadd(178116.000000,132996.000000,66125.000000,194.329362)}
{pt3dadd(177804.000000,133296.000000,66100.000000,194.329362)}
{pt3dadd(177732.000000,133368.000000,66100.000000,192.467770)}
{pt3dadd(177744.000000,133332.000000,66025.000000,206.361242)}
{pt3dadd(177780.000000,133224.000000,65925.000000,200.772028)}
{pt3dadd(177804.000000,133164.000000,65825.000000,197.137486)}
{pt3dadd(177840.000000,133008.000000,65725.000000,184.475092)}
{pt3dadd(177792.000000,132912.000000,65625.000000,179.405508)}
{pt3dadd(177672.000000,132936.000000,65525.000000,181.360180)}
{pt3dadd(177660.000000,132948.000000,65450.000000,176.532010)}
{pt3dadd(177588.000000,132972.000000,65400.000000,171.703840)}
{pt3dadd(177516.000000,132936.000000,65300.000000,163.644110)}
{pt3dadd(177492.000000,132924.000000,65225.000000,163.644110)}
{pt3dadd(177528.000000,132924.000000,65125.000000,158.054896)}
{pt3dadd(177504.000000,132828.000000,65075.000000,158.054896)}
{pt3dadd(177468.000000,132864.000000,65025.000000,159.586432)}
{pt3dadd(177492.000000,132864.000000,64925.000000,165.873212)}
{pt3dadd(177432.000000,132876.000000,64850.000000,162.883066)}
{pt3dadd(177468.000000,132876.000000,64800.000000,153.884136)}
{pt3dadd(177576.000000,132744.000000,64725.000000,148.453376)}
{pt3dadd(177396.000000,132792.000000,64625.000000,148.453376)}
{pt3dadd(177360.000000,132792.000000,64625.000000,139.454446)}
{pt3dadd(177384.000000,132780.000000,64550.000000,136.742296)}
{pt3dadd(177444.000000,132780.000000,64500.000000,135.482296)}
{pt3dadd(177348.000000,132804.000000,64425.000000,133.139438)}
{pt3dadd(177312.000000,132852.000000,64325.000000,126.177142)}
{pt3dadd(177288.000000,132816.000000,64250.000000,126.177142)}
{pt3dadd(177384.000000,132768.000000,64175.000000,124.917142)}
{pt3dadd(177312.000000,132708.000000,64075.000000,127.500142)}
{pt3dadd(177324.000000,132696.000000,64000.000000,129.843000)}
{pt3dadd(177312.000000,132648.000000,63900.000000,127.500142)}
{pt3dadd(177264.000000,132636.000000,63825.000000,130.212292)}
{pt3dadd(177192.000000,132624.000000,63700.000000,134.184442)}
{pt3dadd(177240.000000,132624.000000,63575.000000,131.601442)}
{pt3dadd(177252.000000,132624.000000,63575.000000,125.206070)}
{pt3dadd(177192.000000,132636.000000,63450.000000,126.348928)}
{pt3dadd(177204.000000,132636.000000,63325.000000,120.033920)}
{pt3dadd(177192.000000,132600.000000,63200.000000,112.630478)}
{pt3dadd(177240.000000,132612.000000,63100.000000,106.235106)}
{pt3dadd(177144.000000,132552.000000,62975.000000,108.162581)}
{pt3dadd(177156.000000,132564.000000,62825.000000,104.894684)}
{pt3dadd(177084.000000,132492.000000,62700.000000,111.209692)}
{pt3dadd(177072.000000,132480.000000,62700.000000,109.185844)}
{pt3dadd(177060.000000,132492.000000,62600.000000,114.381216)}
{pt3dadd(177060.000000,132492.000000,62600.000000,121.432113)}
{pt3dadd(177036.000000,132516.000000,62500.000000,125.900010)}
{pt3dadd(177024.000000,132516.000000,62500.000000,124.510860)}
{pt3dadd(177084.000000,132468.000000,62375.000000,128.766000)}
{pt3dadd(177084.000000,132468.000000,62375.000000,127.623142)}
{pt3dadd(177072.000000,132444.000000,62325.000000,125.040142)}
{pt3dadd(177048.000000,132432.000000,62275.000000,126.300142)}
{pt3dadd(177060.000000,132504.000000,62150.000000,120.285850)}
{pt3dadd(177108.000000,132564.000000,62025.000000,120.285850)}
{pt3dadd(177168.000000,132528.000000,61950.000000,120.285850)}
{pt3dadd(177156.000000,132552.000000,61825.000000,115.817953)}
{pt3dadd(177132.000000,132576.000000,61700.000000,109.102813)}
{pt3dadd(177120.000000,132576.000000,61550.000000,104.390457)}
{pt3dadd(177228.000000,132672.000000,61375.000000,99.195085)}
{pt3dadd(177252.000000,132684.000000,61375.000000,104.120943)}
{pt3dadd(177324.000000,132708.000000,61200.000000,111.171840)}
{pt3dadd(177444.000000,132732.000000,61025.000000,123.589276)}
{pt3dadd(177576.000000,132732.000000,60800.000000,134.315924)}
{pt3dadd(177780.000000,132672.000000,60625.000000,141.971296)}
{pt3dadd(177972.000000,132696.000000,60500.000000,144.819056)}
{pt3dadd(177948.000000,132648.000000,60375.000000,158.084200)}
{pt3dadd(177948.000000,132636.000000,60375.000000,163.153784)}
{pt3dadd(178080.000000,132672.000000,60275.000000,180.626364)}
{pt3dadd(178116.000000,132684.000000,60275.000000,197.266916)}
{pt3dadd(178104.000000,132636.000000,60150.000000,214.154516)}
{pt3dadd(178224.000000,132576.000000,59975.000000,223.000646)}
{pt3dadd(178332.000000,132624.000000,59825.000000,223.000646)}
{pt3dadd(178332.000000,132780.000000,59650.000000,218.793210)}
{pt3dadd(178368.000000,132744.000000,59475.000000,211.151588)}
{pt3dadd(178332.000000,132732.000000,59325.000000,199.092158)}
{pt3dadd(178356.000000,132684.000000,59150.000000,182.968294)}
{pt3dadd(178392.000000,132684.000000,58950.000000,179.506824)}
{pt3dadd(178320.000000,132648.000000,58825.000000,167.630830)}
{pt3dadd(178308.000000,132648.000000,58825.000000,158.631900)}
{pt3dadd(178272.000000,132624.000000,58675.000000,153.803730)}
{pt3dadd(178308.000000,132672.000000,58525.000000,137.942489)}
{pt3dadd(178236.000000,132612.000000,58400.000000,123.916939)}
{pt3dadd(178200.000000,132600.000000,58250.000000,116.513497)}
{pt3dadd(178212.000000,132564.000000,58125.000000,112.910639)}
{pt3dadd(178128.000000,132612.000000,57975.000000,105.137021)}
{pt3dadd(178152.000000,132612.000000,57825.000000,110.084994)}
{pt3dadd(178152.000000,132612.000000,57825.000000,116.800134)}
{pt3dadd(178128.000000,132552.000000,57700.000000,128.801836)}
{pt3dadd(178116.000000,132444.000000,57550.000000,139.715104)}
{pt3dadd(178044.000000,132180.000000,57425.000000,146.030112)}
{pt3dadd(177996.000000,132060.000000,57275.000000,152.345120)}
{pt3dadd(177996.000000,131916.000000,57125.000000,158.047416)}
{pt3dadd(177936.000000,131676.000000,57000.000000,159.735936)}
{pt3dadd(177864.000000,131556.000000,56900.000000,165.058998)}
{pt3dadd(177816.000000,131292.000000,56725.000000,171.345778)}
{pt3dadd(177732.000000,131124.000000,56650.000000,177.632558)}
{pt3dadd(177624.000000,131052.000000,56550.000000,176.101022)}
{pt3dadd(177576.000000,131016.000000,56450.000000,174.412502)}
{pt3dadd(177528.000000,130860.000000,56375.000000,159.319030)}
{pt3dadd(177636.000000,130740.000000,56300.000000,144.592203)}
{pt3dadd(177396.000000,130404.000000,56050.000000,134.333273)}
{pt3dadd(177432.000000,130368.000000,55975.000000,126.559655)}
{pt3dadd(177408.000000,130248.000000,55875.000000,124.951541)}
{pt3dadd(177336.000000,130176.000000,55725.000000,134.721951)}
{pt3dadd(177264.000000,130092.000000,55575.000000,166.378838)}
{pt3dadd(177204.000000,130104.000000,55450.000000,198.937698)}
{pt3dadd(177228.000000,130080.000000,55350.000000,239.759700)}
{pt3dadd(177228.000000,130020.000000,55200.000000,262.605844)}
{pt3dadd(177228.000000,130008.000000,55200.000000,264.294364)}
{pt3dadd(177180.000000,129888.000000,55100.000000,259.423734)}
{pt3dadd(177096.000000,129696.000000,54950.000000,238.896754)}
{pt3dadd(176928.000000,129528.000000,54775.000000,200.348617)}
{pt3dadd(176880.000000,129492.000000,54775.000000,186.159400)}

{create adhoc18}
{access adhoc18}
{connect adhoc18(1), adhoc6(0)}
{nseg = 1}
{strdef color color = "White"}
{pt3dclear()}
{pt3dadd(193248.000000,142656.000000,98600.000000,571.792970)}
{pt3dadd(193464.000000,143124.000000,98450.000000,562.716900)}
{pt3dadd(193368.000000,143232.000000,98200.000000,583.787006)}
{pt3dadd(193392.000000,143340.000000,98000.000000,578.341364)}
{pt3dadd(193476.000000,143436.000000,97800.000000,572.895722)}
{pt3dadd(193500.000000,143628.000000,97625.000000,562.770026)}
{pt3dadd(193512.000000,143676.000000,97475.000000,541.480762)}
{pt3dadd(193572.000000,143616.000000,97300.000000,505.003370)}
{pt3dadd(193476.000000,143544.000000,97275.000000,505.003370)}
{pt3dadd(193464.000000,143544.000000,97275.000000,505.003370)}
{pt3dadd(193536.000000,143724.000000,97125.000000,520.574708)}
{pt3dadd(193596.000000,143772.000000,96975.000000,530.700404)}
{pt3dadd(193584.000000,143820.000000,96825.000000,530.700404)}
{pt3dadd(193608.000000,144048.000000,96700.000000,520.574708)}
{pt3dadd(193632.000000,144108.000000,96550.000000,531.738276)}
{pt3dadd(193692.000000,144264.000000,96475.000000,543.460028)}
{pt3dadd(193704.000000,144372.000000,96300.000000,548.905670)}
{pt3dadd(193656.000000,144528.000000,96175.000000,579.379236)}
{pt3dadd(193680.000000,144648.000000,96000.000000,619.595568)}
{pt3dadd(193680.000000,144660.000000,96000.000000,631.903408)}
{pt3dadd(193740.000000,144780.000000,95950.000000,620.181656)}
{pt3dadd(193764.000000,145020.000000,95875.000000,631.903408)}
{pt3dadd(193728.000000,145176.000000,95750.000000,626.185482)}
{pt3dadd(193668.000000,145428.000000,95700.000000,601.540488)}
{pt3dadd(193656.000000,145368.000000,95625.000000,578.069080)}
{pt3dadd(193620.000000,145500.000000,95550.000000,583.787006)}
{pt3dadd(193584.000000,145608.000000,95425.000000,577.783180)}
{pt3dadd(193740.000000,145752.000000,95350.000000,577.783180)}
{pt3dadd(193704.000000,145788.000000,95300.000000,557.507686)}
{pt3dadd(193704.000000,145812.000000,95225.000000,557.507686)}
{pt3dadd(193704.000000,146064.000000,95100.000000,522.767312)}
{pt3dadd(193800.000000,146160.000000,95000.000000,492.293746)}
{pt3dadd(193848.000000,146244.000000,94900.000000,476.722408)}
{pt3dadd(193716.000000,146388.000000,94750.000000,476.722408)}
{pt3dadd(193692.000000,146520.000000,94625.000000,461.892556)}
{pt3dadd(193752.000000,146664.000000,94350.000000,470.639510)}
{pt3dadd(193860.000000,146880.000000,94400.000000,484.763168)}
{pt3dadd(193872.000000,146988.000000,94200.000000,494.888864)}
{pt3dadd(193896.000000,147120.000000,94025.000000,494.888864)}
{pt3dadd(193908.000000,147120.000000,94000.000000,515.164358)}
{pt3dadd(193920.000000,147132.000000,93900.000000,524.807870)}
{pt3dadd(193920.000000,147132.000000,93875.000000,524.807870)}
{pt3dadd(193968.000000,147264.000000,93900.000000,509.978018)}
{pt3dadd(193932.000000,147408.000000,93950.000000,519.621530)}
{pt3dadd(193944.000000,147516.000000,93825.000000,525.339456)}
{pt3dadd(194004.000000,147660.000000,93650.000000,541.689364)}
{pt3dadd(194064.000000,147780.000000,93475.000000,558.039272)}
{pt3dadd(194076.000000,147936.000000,93375.000000,590.036518)}
{pt3dadd(194064.000000,148056.000000,93250.000000,612.390252)}
{pt3dadd(194064.000000,148200.000000,93300.000000,631.317320)}
{pt3dadd(194124.000000,148224.000000,93300.000000,650.244388)}
{pt3dadd(194136.000000,148344.000000,93200.000000,650.244388)}
{pt3dadd(194148.000000,148464.000000,93100.000000,644.240562)}
{pt3dadd(194112.000000,148584.000000,93100.000000,638.236736)}
{pt3dadd(194148.000000,148692.000000,92850.000000,598.020404)}
{pt3dadd(194244.000000,148800.000000,92775.000000,573.375410)}
{pt3dadd(194256.000000,148884.000000,92675.000000,573.375410)}
{pt3dadd(194244.000000,149016.000000,92725.000000,585.683250)}
{pt3dadd(194184.000000,149148.000000,92700.000000,604.610318)}
{pt3dadd(194160.000000,149220.000000,92450.000000,631.903408)}
{pt3dadd(194136.000000,149412.000000,92350.000000,656.548402)}
{pt3dadd(194220.000000,149580.000000,92125.000000,668.856242)}
{pt3dadd(194280.000000,149736.000000,91975.000000,650.830476)}
{pt3dadd(194172.000000,149784.000000,91850.000000,631.903408)}
{pt3dadd(194160.000000,149916.000000,91700.000000,638.207422)}
{pt3dadd(194124.000000,150000.000000,91650.000000,619.280354)}
{pt3dadd(194148.000000,150276.000000,91475.000000,606.972514)}
{pt3dadd(194088.000000,150312.000000,91375.000000,606.972514)}
{pt3dadd(193980.000000,150240.000000,91275.000000,606.972514)}
{pt3dadd(194040.000000,150336.000000,91125.000000,583.501106)}
{pt3dadd(193908.000000,150588.000000,91000.000000,567.151198)}
{pt3dadd(193944.000000,150588.000000,90950.000000,567.151198)}
{pt3dadd(193812.000000,150648.000000,90825.000000,572.869124)}
{pt3dadd(193776.000000,150768.000000,90700.000000,585.176964)}
{pt3dadd(193752.000000,150924.000000,90575.000000,590.622606)}
{pt3dadd(193656.000000,150972.000000,90475.000000,601.254588)}
{pt3dadd(193584.000000,151032.000000,90350.000000,607.258414)}
{pt3dadd(193620.000000,151152.000000,90200.000000,607.258414)}
{pt3dadd(193620.000000,151332.000000,90150.000000,578.600666)}
{pt3dadd(193596.000000,151428.000000,90025.000000,567.968684)}
{pt3dadd(193524.000000,151500.000000,89925.000000,567.968684)}
{pt3dadd(193488.000000,151524.000000,89775.000000,550.801290)}
{pt3dadd(193488.000000,151620.000000,89675.000000,539.637722)}
{pt3dadd(193512.000000,151860.000000,89550.000000,555.987630)}
{pt3dadd(193488.000000,152004.000000,89425.000000,578.341364)}
{pt3dadd(193320.000000,152052.000000,89300.000000,567.709382)}
{pt3dadd(193248.000000,152112.000000,89175.000000,584.876776)}
{pt3dadd(193164.000000,152172.000000,89075.000000,570.046924)}
{pt3dadd(193140.000000,152280.000000,88925.000000,548.757660)}
{pt3dadd(192984.000000,152436.000000,88900.000000,531.590266)}
{pt3dadd(192948.000000,152436.000000,88775.000000,521.946754)}
{pt3dadd(192816.000000,152628.000000,88675.000000,481.202554)}
{pt3dadd(192648.000000,152652.000000,88550.000000,507.195974)}
{pt3dadd(192624.000000,152628.000000,88475.000000,534.489064)}
{pt3dadd(192612.000000,152664.000000,88350.000000,551.656458)}
{pt3dadd(192516.000000,152808.000000,88200.000000,583.653704)}
{pt3dadd(192360.000000,152916.000000,88075.000000,630.701918)}
{pt3dadd(192192.000000,152988.000000,87950.000000,656.579170)}
{pt3dadd(192168.000000,152976.000000,87825.000000,676.452596)}
{pt3dadd(192180.000000,153072.000000,87650.000000,711.286270)}
{pt3dadd(192204.000000,153216.000000,87500.000000,738.457376)}
{pt3dadd(192204.000000,153240.000000,87500.000000,738.457376)}
{pt3dadd(192132.000000,153648.000000,87400.000000,745.755056)}
{pt3dadd(191976.000000,153828.000000,87300.000000,745.755056)}
{pt3dadd(191952.000000,153852.000000,87200.000000,738.092488)}
{pt3dadd(191880.000000,153924.000000,87125.000000,723.844624)}
{pt3dadd(191856.000000,153948.000000,87125.000000,717.540610)}
{pt3dadd(191784.000000,154020.000000,87000.000000,684.365678)}
{pt3dadd(191700.000000,154092.000000,86750.000000,670.796266)}
{pt3dadd(191688.000000,154104.000000,86750.000000,649.929174)}
{pt3dadd(191304.000000,154692.000000,86625.000000,649.929174)}
{pt3dadd(191148.000000,155064.000000,86575.000000,669.802600)}
{pt3dadd(191112.000000,155148.000000,86575.000000,669.802600)}
{pt3dadd(191052.000000,155088.000000,86475.000000,669.802600)}
{pt3dadd(190992.000000,155112.000000,86350.000000,676.421828)}
{pt3dadd(190884.000000,155208.000000,86250.000000,669.802600)}
{pt3dadd(190812.000000,155292.000000,86125.000000,662.852416)}
{pt3dadd(190716.000000,155472.000000,86050.000000,681.779484)}
{pt3dadd(190692.000000,155532.000000,86050.000000,681.779484)}
{pt3dadd(190608.000000,155724.000000,85950.000000,675.160256)}
{pt3dadd(190548.000000,155748.000000,85825.000000,681.779484)}
{pt3dadd(190488.000000,155988.000000,85700.000000,668.856242)}
{pt3dadd(190452.000000,156084.000000,85600.000000,655.933000)}
{pt3dadd(190344.000000,156132.000000,85425.000000,662.552228)}
{pt3dadd(190200.000000,156324.000000,85325.000000,611.440384)}
{pt3dadd(190092.000000,156480.000000,85225.000000,557.772942)}
{pt3dadd(189984.000000,156516.000000,85125.000000,525.775696)}
{pt3dadd(189864.000000,156564.000000,85025.000000,493.778450)}
{pt3dadd(189840.000000,156732.000000,84925.000000,448.857962)}
{pt3dadd(189780.000000,157020.000000,84800.000000,499.969806)}
{pt3dadd(189780.000000,157056.000000,84800.000000,528.992254)}
{pt3dadd(189792.000000,157176.000000,84675.000000,543.822106)}
{pt3dadd(189816.000000,157200.000000,84600.000000,558.651958)}
{pt3dadd(189840.000000,157236.000000,84525.000000,610.522630)}
{pt3dadd(189708.000000,157236.000000,84450.000000,617.141858)}
{pt3dadd(189384.000000,157392.000000,84325.000000,635.167624)}
{pt3dadd(189228.000000,157512.000000,84125.000000,665.258260)}
{pt3dadd(189120.000000,157560.000000,83925.000000,709.596760)}
{pt3dadd(189048.000000,158064.000000,83925.000000,696.027348)}
{pt3dadd(188988.000000,158352.000000,83925.000000,683.104106)}
{pt3dadd(188976.000000,158616.000000,83900.000000,686.193597)}
{pt3dadd(188916.000000,158856.000000,83825.000000,630.401730)}

{create adhoc19}
{access adhoc19}
{connect adhoc19(1), adhoc18(0)}
{nseg = 1}
{strdef color color = "White"}
{pt3dclear()}
{pt3dadd(188916.000000,158856.000000,83825.000000,630.401730)}
{pt3dadd(188880.000000,158856.000000,83525.000000,469.359660)}
{pt3dadd(188964.000000,158856.000000,83075.000000,338.570946)}
{pt3dadd(188916.000000,159000.000000,82925.000000,238.950600)}
{pt3dadd(188964.000000,159024.000000,82850.000000,146.657080)}
{pt3dadd(189036.000000,159036.000000,82750.000000,131.930253)}
{pt3dadd(189036.000000,159036.000000,82750.000000,125.615245)}
{pt3dadd(188976.000000,158988.000000,82625.000000,121.832245)}
{pt3dadd(189036.000000,158820.000000,82500.000000,121.832245)}
{pt3dadd(189084.000000,158784.000000,82400.000000,120.509245)}
{pt3dadd(189024.000000,158652.000000,82275.000000,127.560142)}
{pt3dadd(188988.000000,158592.000000,82175.000000,136.865296)}
{pt3dadd(188964.000000,158544.000000,82100.000000,145.027592)}
{pt3dadd(188952.000000,158496.000000,81975.000000,146.350592)}
{pt3dadd(188964.000000,158412.000000,81900.000000,149.062742)}
{pt3dadd(188892.000000,158220.000000,81775.000000,147.739742)}
{pt3dadd(188844.000000,158112.000000,81675.000000,144.749596)}
{pt3dadd(188820.000000,158124.000000,81575.000000,140.370300)}
{pt3dadd(188784.000000,158064.000000,81450.000000,139.047300)}
{pt3dadd(188712.000000,158040.000000,81325.000000,131.643858)}
{pt3dadd(188724.000000,157992.000000,81225.000000,126.952566)}
{pt3dadd(188724.000000,157932.000000,81100.000000,126.952566)}
{pt3dadd(188736.000000,157896.000000,80975.000000,125.629566)}
{pt3dadd(188676.000000,157872.000000,80850.000000,125.629566)}
{pt3dadd(188604.000000,157800.000000,80700.000000,127.860858)}
{pt3dadd(188556.000000,157764.000000,80600.000000,127.860858)}
{pt3dadd(188484.000000,157716.000000,80450.000000,122.688708)}
{pt3dadd(188484.000000,157620.000000,80325.000000,121.428708)}
{pt3dadd(188472.000000,157572.000000,80325.000000,121.428708)}
{pt3dadd(188496.000000,157596.000000,80250.000000,122.628708)}
{pt3dadd(188532.000000,157548.000000,80175.000000,116.330614)}
{pt3dadd(188556.000000,157584.000000,80075.000000,114.099322)}
{pt3dadd(188448.000000,157464.000000,79950.000000,108.644182)}
{pt3dadd(188388.000000,157452.000000,79825.000000,102.916285)}
{pt3dadd(188364.000000,157464.000000,79675.000000,94.772637)}
{pt3dadd(188244.000000,157404.000000,79525.000000,97.211192)}
{pt3dadd(188148.000000,157344.000000,79375.000000,96.174587)}
{pt3dadd(188100.000000,157344.000000,79250.000000,97.161830)}
{pt3dadd(188100.000000,157308.000000,79125.000000,91.163645)}
{pt3dadd(187992.000000,157212.000000,79025.000000,90.351438)}
{pt3dadd(188004.000000,157200.000000,78900.000000,91.246897)}
{pt3dadd(187980.000000,157188.000000,78825.000000,87.571146)}
{pt3dadd(187836.000000,157152.000000,78575.000000,87.571146)}
{pt3dadd(187812.000000,157116.000000,78500.000000,98.037228)}
{pt3dadd(187848.000000,157164.000000,78425.000000,99.702252)}
{pt3dadd(187740.000000,157032.000000,78325.000000,100.642484)}
{pt3dadd(187680.000000,156984.000000,78225.000000,104.318235)}
{pt3dadd(187656.000000,157056.000000,78100.000000,105.354840)}
{pt3dadd(187668.000000,157020.000000,77975.000000,98.959468)}
{pt3dadd(187812.000000,156984.000000,77850.000000,102.819007)}
{pt3dadd(187704.000000,156924.000000,77725.000000,103.806250)}
{pt3dadd(187644.000000,156828.000000,77650.000000,104.842855)}
{pt3dadd(187560.000000,156756.000000,77525.000000,103.806250)}
{pt3dadd(187584.000000,156816.000000,77350.000000,102.057974)}
{pt3dadd(187632.000000,156816.000000,77300.000000,101.021369)}
{pt3dadd(187656.000000,156780.000000,77175.000000,98.198435)}
{pt3dadd(187680.000000,156672.000000,77075.000000,94.338896)}
{pt3dadd(187764.000000,156624.000000,76925.000000,91.515962)}
{pt3dadd(187692.000000,156588.000000,76850.000000,91.515962)}
{pt3dadd(187692.000000,156552.000000,76725.000000,88.693028)}
{pt3dadd(187740.000000,156516.000000,76600.000000,94.783859)}
{pt3dadd(187848.000000,156492.000000,76475.000000,96.619550)}
{pt3dadd(187896.000000,156504.000000,76425.000000,101.567523)}
{pt3dadd(187872.000000,156492.000000,76275.000000,99.245089)}
{pt3dadd(187860.000000,156432.000000,76175.000000,102.068023)}
{pt3dadd(187800.000000,156492.000000,76050.000000,103.268023)}
{pt3dadd(187908.000000,156348.000000,75925.000000,120.755043)}
{pt3dadd(187992.000000,156300.000000,75850.000000,135.129781)}
{pt3dadd(187872.000000,156156.000000,75750.000000,157.627743)}
{pt3dadd(187848.000000,156156.000000,75625.000000,186.789914)}
{pt3dadd(187836.000000,156168.000000,75625.000000,213.978904)}
{pt3dadd(187788.000000,156084.000000,75450.000000,224.265384)}
{pt3dadd(187872.000000,156132.000000,75325.000000,236.927778)}
{pt3dadd(187920.000000,156192.000000,75200.000000,247.214258)}
{pt3dadd(187920.000000,156192.000000,75200.000000,238.368128)}
{pt3dadd(187836.000000,156180.000000,75075.000000,231.234718)}
{pt3dadd(187788.000000,156180.000000,75075.000000,231.234718)}
{pt3dadd(187776.000000,156204.000000,74950.000000,220.433916)}
{pt3dadd(187692.000000,156072.000000,74800.000000,212.009028)}
{pt3dadd(187704.000000,156060.000000,74675.000000,212.009028)}
{pt3dadd(187704.000000,156036.000000,74475.000000,193.213448)}
{pt3dadd(187596.000000,155832.000000,74400.000000,181.154018)}
{pt3dadd(187560.000000,155760.000000,74275.000000,172.691306)}
{pt3dadd(187512.000000,155520.000000,74025.000000,172.691306)}
{pt3dadd(187320.000000,155448.000000,73900.000000,168.875042)}
{pt3dadd(187248.000000,155292.000000,73750.000000,185.515594)}
{pt3dadd(187176.000000,155124.000000,73625.000000,187.288544)}
{pt3dadd(187092.000000,155040.000000,73475.000000,183.117784)}
{pt3dadd(186960.000000,154884.000000,73325.000000,171.807312)}
{pt3dadd(186828.000000,154764.000000,73175.000000,171.807312)}
{pt3dadd(186816.000000,154692.000000,72975.000000,164.165690)}
{pt3dadd(186624.000000,154524.000000,72850.000000,154.716810)}
{pt3dadd(186576.000000,154500.000000,72850.000000,158.887570)}
{pt3dadd(186480.000000,154428.000000,72725.000000,160.276720)}
{pt3dadd(186444.000000,154368.000000,72575.000000,156.815250)}
{pt3dadd(186432.000000,154260.000000,72450.000000,147.816320)}
{pt3dadd(186420.000000,154224.000000,72325.000000,150.664080)}
{pt3dadd(186336.000000,154164.000000,72200.000000,150.664080)}
{pt3dadd(186288.000000,154056.000000,72075.000000,153.654226)}
{pt3dadd(186228.000000,153924.000000,71950.000000,149.055966)}
{pt3dadd(186228.000000,153900.000000,71950.000000,153.226726)}
{pt3dadd(186168.000000,153756.000000,71800.000000,153.226726)}
{pt3dadd(186120.000000,153600.000000,71725.000000,153.226726)}
{pt3dadd(186096.000000,153564.000000,71575.000000,143.921572)}
{pt3dadd(186096.000000,153456.000000,71425.000000,137.606564)}
{pt3dadd(186096.000000,153348.000000,71250.000000,129.832946)}
{pt3dadd(186120.000000,153336.000000,71125.000000,122.059328)}
{pt3dadd(186120.000000,153336.000000,71125.000000,112.160671)}
{pt3dadd(186120.000000,153300.000000,71000.000000,111.072237)}
{pt3dadd(186096.000000,153228.000000,70850.000000,108.947198)}
{pt3dadd(185964.000000,153156.000000,70650.000000,104.894684)}
{pt3dadd(186000.000000,153120.000000,70550.000000,104.894684)}
{pt3dadd(185988.000000,153132.000000,70400.000000,102.967209)}
{pt3dadd(185976.000000,153144.000000,70400.000000,98.254853)}
{pt3dadd(185928.000000,153060.000000,70250.000000,103.982750)}
{pt3dadd(185808.000000,152916.000000,70100.000000,102.234474)}
{pt3dadd(185784.000000,152892.000000,70100.000000,93.409635)}
{pt3dadd(185760.000000,152856.000000,69950.000000,90.075621)}
{pt3dadd(185736.000000,152796.000000,69800.000000,97.019269)}
{pt3dadd(185700.000000,152676.000000,69650.000000,92.327977)}
{pt3dadd(185688.000000,152580.000000,69600.000000,91.515770)}
{pt3dadd(185736.000000,152412.000000,69600.000000,95.392636)}
{pt3dadd(185700.000000,152280.000000,69550.000000,98.726650)}
{pt3dadd(185700.000000,152280.000000,69550.000000,91.783002)}
{pt3dadd(185736.000000,152196.000000,69475.000000,87.923463)}
{pt3dadd(185736.000000,152172.000000,69475.000000,87.149932)}
{pt3dadd(185856.000000,152112.000000,69400.000000,87.149932)}
{pt3dadd(185904.000000,151836.000000,69300.000000,83.815918)}
{pt3dadd(185904.000000,151584.000000,69250.000000,81.493484)}
{pt3dadd(185904.000000,151548.000000,69250.000000,75.705946)}
{pt3dadd(185952.000000,151488.000000,69250.000000,72.963044)}
{pt3dadd(185952.000000,151476.000000,69175.000000,71.298020)}
{pt3dadd(185940.000000,151128.000000,69075.000000,70.561324)}
{pt3dadd(185940.000000,151080.000000,69075.000000,72.071551)}
{pt3dadd(185976.000000,151020.000000,69000.000000,78.703681)}
{pt3dadd(186024.000000,150792.000000,68900.000000,81.220726)}

{create adhoc20}
{access adhoc20}
{connect adhoc20(1), adhoc18(0)}
{nseg = 1}
{strdef color color = "White"}
{pt3dclear()}
{pt3dadd(188916.000000,158856.000000,83825.000000,630.401730)}
{pt3dadd(188916.000000,159156.000000,83800.000000,685.062823)}
{pt3dadd(188832.000000,159348.000000,83850.000000,683.071812)}
{pt3dadd(188796.000000,159504.000000,83875.000000,725.951196)}
{pt3dadd(188844.000000,159708.000000,83925.000000,733.248888)}
{pt3dadd(188988.000000,159876.000000,84100.000000,755.159320)}
{pt3dadd(188868.000000,160068.000000,84000.000000,798.038704)}
{pt3dadd(188892.000000,160236.000000,84000.000000,812.998952)}
{pt3dadd(188868.000000,160332.000000,84050.000000,789.992994)}
{pt3dadd(188916.000000,160464.000000,84075.000000,782.695314)}
{pt3dadd(188964.000000,160608.000000,84100.000000,754.165654)}
{pt3dadd(188892.000000,160740.000000,84125.000000,724.209512)}
{pt3dadd(188904.000000,160872.000000,84150.000000,689.375838)}
{pt3dadd(188916.000000,160968.000000,84150.000000,689.375838)}
{pt3dadd(188976.000000,161112.000000,84175.000000,669.502412)}
{pt3dadd(188928.000000,161244.000000,84200.000000,657.194572)}
{pt3dadd(188892.000000,161244.000000,84200.000000,650.575344)}
{pt3dadd(188868.000000,161376.000000,84200.000000,638.853592)}
{pt3dadd(188880.000000,161472.000000,84200.000000,625.284180)}
{pt3dadd(188880.000000,161544.000000,84175.000000,631.588194)}
{pt3dadd(188892.000000,161652.000000,84250.000000,631.588194)}
{pt3dadd(188892.000000,161652.000000,84250.000000,625.284180)}
{pt3dadd(188880.000000,161760.000000,84250.000000,637.005932)}
{pt3dadd(188856.000000,161868.000000,84250.000000,650.575344)}
{pt3dadd(188832.000000,161976.000000,84225.000000,644.271330)}
{pt3dadd(188844.000000,162096.000000,84225.000000,650.275156)}
{pt3dadd(188844.000000,162204.000000,84225.000000,656.579170)}
{pt3dadd(188832.000000,162324.000000,84225.000000,656.579170)}
{pt3dadd(188820.000000,162324.000000,84225.000000,630.701918)}
{pt3dadd(188688.000000,162456.000000,84125.000000,637.005932)}
{pt3dadd(188808.000000,162576.000000,84250.000000,649.929174)}
{pt3dadd(188880.000000,162720.000000,84350.000000,649.929174)}
{pt3dadd(188928.000000,162720.000000,84400.000000,643.925348)}
{pt3dadd(188808.000000,162888.000000,84300.000000,627.575440)}
{pt3dadd(188760.000000,162888.000000,84275.000000,615.267600)}
{pt3dadd(188676.000000,163020.000000,84225.000000,602.344358)}
{pt3dadd(188688.000000,163152.000000,84175.000000,590.036518)}
{pt3dadd(188640.000000,163284.000000,84225.000000,602.344358)}
{pt3dadd(188628.000000,163284.000000,84225.000000,631.002106)}
{pt3dadd(188544.000000,163404.000000,84175.000000,649.929174)}
{pt3dadd(188652.000000,163548.000000,84225.000000,656.233188)}
{pt3dadd(188676.000000,163680.000000,84325.000000,662.237014)}
{pt3dadd(188496.000000,163812.000000,84200.000000,668.856242)}
{pt3dadd(188400.000000,163812.000000,84150.000000,675.475470)}
{pt3dadd(188508.000000,163908.000000,84325.000000,668.856242)}
{pt3dadd(188508.000000,164040.000000,84325.000000,668.856242)}
{pt3dadd(188520.000000,164040.000000,84325.000000,662.852416)}
{pt3dadd(188424.000000,164148.000000,84250.000000,632.761780)}
{pt3dadd(188400.000000,164280.000000,84225.000000,613.834712)}
{pt3dadd(188388.000000,164400.000000,84150.000000,601.526872)}
{pt3dadd(188364.000000,164508.000000,84125.000000,578.055464)}
{pt3dadd(188448.000000,164628.000000,84300.000000,572.337538)}
{pt3dadd(188388.000000,164736.000000,84200.000000,583.501106)}
{pt3dadd(188304.000000,164808.000000,84225.000000,572.337538)}
{pt3dadd(188268.000000,164904.000000,84125.000000,578.341364)}
{pt3dadd(188256.000000,164904.000000,84125.000000,595.508758)}
{pt3dadd(188268.000000,165000.000000,84100.000000,613.534524)}
{pt3dadd(188220.000000,165120.000000,84200.000000,619.538350)}
{pt3dadd(188172.000000,165120.000000,84275.000000,649.628986)}
{pt3dadd(188280.000000,165216.000000,84250.000000,669.502412)}
{pt3dadd(188328.000000,165336.000000,84200.000000,704.336086)}
{pt3dadd(188340.000000,165336.000000,84175.000000,725.203178)}
{pt3dadd(188280.000000,165420.000000,84250.000000,768.082562)}
{pt3dadd(188316.000000,165504.000000,84275.000000,768.082562)}
{pt3dadd(188316.000000,165504.000000,84275.000000,761.132378)}
{pt3dadd(188220.000000,165624.000000,84250.000000,739.221946)}
{pt3dadd(188136.000000,165744.000000,84250.000000,712.050840)}
{pt3dadd(187980.000000,165864.000000,84250.000000,663.167630)}
{pt3dadd(187896.000000,165996.000000,84225.000000,656.548402)}
{pt3dadd(187884.000000,165996.000000,84225.000000,643.625160)}
{pt3dadd(187956.000000,166032.000000,84225.000000,630.701918)}
{pt3dadd(187968.000000,166164.000000,84225.000000,637.005932)}
{pt3dadd(187944.000000,166296.000000,84200.000000,649.313772)}
{pt3dadd(187908.000000,166452.000000,84175.000000,649.313772)}
{pt3dadd(187812.000000,166548.000000,84125.000000,655.617786)}
{pt3dadd(187692.000000,166680.000000,84125.000000,661.921800)}
{pt3dadd(187656.000000,166680.000000,84125.000000,655.617786)}
{pt3dadd(187596.000000,166800.000000,84150.000000,643.309946)}
{pt3dadd(187608.000000,166980.000000,84200.000000,631.002106)}
{pt3dadd(187656.000000,167160.000000,84150.000000,602.344358)}
{pt3dadd(187596.000000,167268.000000,84125.000000,578.872950)}
{pt3dadd(187524.000000,167412.000000,84100.000000,567.151198)}
{pt3dadd(187488.000000,167568.000000,84100.000000,555.987630)}
{pt3dadd(187260.000000,167700.000000,84150.000000,544.824062)}
{pt3dadd(187176.000000,167832.000000,84200.000000,550.010402)}
{pt3dadd(187128.000000,167976.000000,84175.000000,555.456044)}
{pt3dadd(187080.000000,168072.000000,84175.000000,544.824062)}
{pt3dadd(187020.000000,168072.000000,84175.000000,539.637722)}
{pt3dadd(186960.000000,168192.000000,84200.000000,524.807870)}
{pt3dadd(186936.000000,168192.000000,84200.000000,524.807870)}
{pt3dadd(186876.000000,168312.000000,84150.000000,504.532376)}
{pt3dadd(186888.000000,168420.000000,84175.000000,499.593020)}
{pt3dadd(186756.000000,168552.000000,84200.000000,489.949508)}
{pt3dadd(186636.000000,168660.000000,84200.000000,499.593020)}
{pt3dadd(186552.000000,168720.000000,84225.000000,484.763168)}
{pt3dadd(186540.000000,168804.000000,84150.000000,476.016214)}
{pt3dadd(186456.000000,168912.000000,84225.000000,462.565104)}
{pt3dadd(186372.000000,169020.000000,84300.000000,488.558524)}
{pt3dadd(186312.000000,169140.000000,84400.000000,483.619168)}
{pt3dadd(186276.000000,169272.000000,84475.000000,493.262680)}
{pt3dadd(186240.000000,169272.000000,84500.000000,502.009634)}
{pt3dadd(186180.000000,169404.000000,84475.000000,520.400100)}
{pt3dadd(186120.000000,169536.000000,84450.000000,509.236532)}
{pt3dadd(185964.000000,169692.000000,84500.000000,509.236532)}
{pt3dadd(185952.000000,169692.000000,84500.000000,509.236532)}
{pt3dadd(185892.000000,169776.000000,84550.000000,529.512026)}
{pt3dadd(185832.000000,169776.000000,84575.000000,534.698366)}
{pt3dadd(185856.000000,169848.000000,84625.000000,529.512026)}
{pt3dadd(185724.000000,169956.000000,84425.000000,539.637722)}
{pt3dadd(185664.000000,170076.000000,84475.000000,534.698366)}
{pt3dadd(185508.000000,170136.000000,84450.000000,529.252724)}
{pt3dadd(185364.000000,170220.000000,84425.000000,534.698366)}
{pt3dadd(185352.000000,170268.000000,84450.000000,525.054854)}
{pt3dadd(185100.000000,170352.000000,84375.000000,525.054854)}
{pt3dadd(185052.000000,170436.000000,84275.000000,546.344118)}
{pt3dadd(185040.000000,170520.000000,84250.000000,541.157778)}
{pt3dadd(185004.000000,170604.000000,84225.000000,546.875704)}
{pt3dadd(184836.000000,170712.000000,84175.000000,556.519216)}
{pt3dadd(184812.000000,170712.000000,84175.000000,556.519216)}
{pt3dadd(184680.000000,170820.000000,84175.000000,545.355648)}
{pt3dadd(184596.000000,170820.000000,84175.000000,540.416292)}
{pt3dadd(184752.000000,170940.000000,84150.000000,540.416292)}
{pt3dadd(184680.000000,171048.000000,84200.000000,562.770026)}
{pt3dadd(184584.000000,171168.000000,84025.000000,579.937420)}
{pt3dadd(184188.000000,171312.000000,83850.000000,603.408828)}
{pt3dadd(183984.000000,171540.000000,83800.000000,630.701918)}
{pt3dadd(183984.000000,171648.000000,83850.000000,630.701918)}
{pt3dadd(183888.000000,171780.000000,83900.000000,624.698092)}
{pt3dadd(183888.000000,171888.000000,83900.000000,610.388977)}
{pt3dadd(183912.000000,172020.000000,83950.000000,600.382600)}

{create adhoc21}
{access adhoc21}
{connect adhoc21(1), adhoc20(0)}
{nseg = 1}
{strdef color color = "White"}
{pt3dclear()}
{pt3dadd(183912.000000,172020.000000,83950.000000,600.382600)}
{pt3dadd(183828.000000,172452.000000,83675.000000,532.952100)}
{pt3dadd(183384.000000,172620.000000,83400.000000,456.840620)}
{pt3dadd(182976.000000,172788.000000,83250.000000,410.480672)}
{pt3dadd(182976.000000,172944.000000,83100.000000,373.524478)}
{pt3dadd(182712.000000,173040.000000,82975.000000,361.904904)}
{pt3dadd(182676.000000,173052.000000,82975.000000,355.377792)}
{pt3dadd(182484.000000,172956.000000,82825.000000,355.377792)}
{pt3dadd(182400.000000,173028.000000,82675.000000,348.524324)}
{pt3dadd(182160.000000,173112.000000,82525.000000,341.328180)}
{pt3dadd(182052.000000,173244.000000,82350.000000,328.258408)}
{pt3dadd(181836.000000,173244.000000,82200.000000,325.226064)}
{pt3dadd(181668.000000,173256.000000,82075.000000,328.569216)}
{pt3dadd(181692.000000,173316.000000,81925.000000,311.600386)}
{pt3dadd(181728.000000,173424.000000,81775.000000,302.040930)}
{pt3dadd(181668.000000,173436.000000,81600.000000,302.040930)}
{pt3dadd(181704.000000,173472.000000,81500.000000,288.912490)}
{pt3dadd(181644.000000,173496.000000,81375.000000,282.385378)}
{pt3dadd(181572.000000,173508.000000,81275.000000,302.697360)}
{pt3dadd(181560.000000,173544.000000,81175.000000,291.944834)}
{pt3dadd(181632.000000,173616.000000,81100.000000,268.529914)}
{pt3dadd(181584.000000,173640.000000,81000.000000,281.658354)}
{pt3dadd(181584.000000,173652.000000,80900.000000,288.185466)}
{pt3dadd(181668.000000,173688.000000,80775.000000,291.695782)}
{pt3dadd(181692.000000,173736.000000,80675.000000,305.480652)}
{pt3dadd(181704.000000,173808.000000,80550.000000,335.111876)}
{pt3dadd(181560.000000,173832.000000,80425.000000,344.671332)}
{pt3dadd(181536.000000,173904.000000,80325.000000,344.671332)}
{pt3dadd(181524.000000,173904.000000,80325.000000,334.633904)}
{pt3dadd(181536.000000,173916.000000,80200.000000,344.671332)}
{pt3dadd(181488.000000,173784.000000,80125.000000,359.080744)}
{pt3dadd(181536.000000,173820.000000,80075.000000,355.737592)}
{pt3dadd(181524.000000,173748.000000,79950.000000,355.737592)}
{pt3dadd(181548.000000,173748.000000,79875.000000,355.737592)}
{pt3dadd(181548.000000,173784.000000,79750.000000,337.029460)}
{pt3dadd(181416.000000,173868.000000,79650.000000,322.620048)}
{pt3dadd(181356.000000,173892.000000,79525.000000,310.765384)}
{pt3dadd(181356.000000,173892.000000,79525.000000,310.765384)}
{pt3dadd(181380.000000,173928.000000,79375.000000,313.949344)}
{pt3dadd(181356.000000,173880.000000,79275.000000,322.620048)}
{pt3dadd(181368.000000,173868.000000,79150.000000,310.765384)}
{pt3dadd(181392.000000,173904.000000,79050.000000,313.515804)}
{pt3dadd(181416.000000,173904.000000,78975.000000,301.068408)}
{pt3dadd(181320.000000,173904.000000,78850.000000,301.068408)}
{pt3dadd(181332.000000,173916.000000,78750.000000,301.068408)}
{pt3dadd(181296.000000,173952.000000,78675.000000,312.923072)}
{pt3dadd(181320.000000,173988.000000,78600.000000,325.370468)}
{pt3dadd(181320.000000,173916.000000,78525.000000,331.290752)}
{pt3dadd(181236.000000,173928.000000,78425.000000,322.186508)}
{pt3dadd(181248.000000,173892.000000,78350.000000,328.713620)}
{pt3dadd(181296.000000,173868.000000,78275.000000,335.567088)}
{pt3dadd(181320.000000,173832.000000,78175.000000,332.223936)}
{pt3dadd(181332.000000,173784.000000,78075.000000,329.191592)}
{pt3dadd(181344.000000,173736.000000,78025.000000,335.111876)}
{pt3dadd(181356.000000,173724.000000,77950.000000,338.622192)}
{pt3dadd(181356.000000,173748.000000,77850.000000,331.768724)}
{pt3dadd(181356.000000,173712.000000,77725.000000,328.584764)}
{pt3dadd(181296.000000,173688.000000,77600.000000,338.144220)}
{pt3dadd(181236.000000,173652.000000,77525.000000,344.671332)}
{pt3dadd(181248.000000,173652.000000,77400.000000,344.671332)}
{pt3dadd(181248.000000,173652.000000,77400.000000,341.487372)}
{pt3dadd(181260.000000,173592.000000,77300.000000,344.671332)}
{pt3dadd(181164.000000,173544.000000,77225.000000,338.144220)}
{pt3dadd(181140.000000,173508.000000,77100.000000,334.801068)}
{pt3dadd(181116.000000,173496.000000,77000.000000,331.290752)}
{pt3dadd(181008.000000,173472.000000,76875.000000,331.290752)}
{pt3dadd(181020.000000,173508.000000,76775.000000,322.186508)}
{pt3dadd(181032.000000,173424.000000,76700.000000,322.186508)}
{pt3dadd(181008.000000,173388.000000,76600.000000,319.002548)}
{pt3dadd(181044.000000,173328.000000,76475.000000,315.659396)}
{pt3dadd(181080.000000,173292.000000,76400.000000,312.627052)}
{pt3dadd(181080.000000,173280.000000,76400.000000,315.514992)}
{pt3dadd(181020.000000,173292.000000,76325.000000,309.594708)}
{pt3dadd(180996.000000,173256.000000,76225.000000,300.924004)}
{pt3dadd(180996.000000,173244.000000,76150.000000,294.707700)}
{pt3dadd(180960.000000,173208.000000,76050.000000,283.955174)}
{pt3dadd(180924.000000,173172.000000,75925.000000,283.955174)}
{pt3dadd(180900.000000,173124.000000,75850.000000,278.585304)}
{pt3dadd(180840.000000,172980.000000,75750.000000,271.095224)}
{pt3dadd(180768.000000,173004.000000,75675.000000,257.966784)}
{pt3dadd(180780.000000,173040.000000,75575.000000,249.120654)}
{pt3dadd(180708.000000,173064.000000,75450.000000,231.574406)}
{pt3dadd(180768.000000,172992.000000,75200.000000,229.079690)}
{pt3dadd(180768.000000,172968.000000,75075.000000,233.950320)}
{pt3dadd(180768.000000,172968.000000,75075.000000,244.190820)}
{pt3dadd(180816.000000,172956.000000,75025.000000,260.901536)}
{pt3dadd(180864.000000,172956.000000,74900.000000,272.809424)}
{pt3dadd(180732.000000,172944.000000,74825.000000,280.674010)}
{pt3dadd(180792.000000,172896.000000,74750.000000,291.964164)}
{pt3dadd(180792.000000,172896.000000,74750.000000,291.964164)}
{pt3dadd(180840.000000,172836.000000,74675.000000,284.099578)}
{pt3dadd(180816.000000,172836.000000,74575.000000,278.985412)}
{pt3dadd(180816.000000,172836.000000,74575.000000,273.615542)}
{pt3dadd(180792.000000,172824.000000,74525.000000,264.944838)}
{pt3dadd(181032.000000,172668.000000,74400.000000,264.944838)}
{pt3dadd(180792.000000,172740.000000,74150.000000,270.059004)}
{pt3dadd(180744.000000,172632.000000,74050.000000,280.811530)}
{pt3dadd(180732.000000,172596.000000,74050.000000,289.069340)}
{pt3dadd(180816.000000,172536.000000,73900.000000,297.740044)}
{pt3dadd(180888.000000,172500.000000,73825.000000,313.697756)}
{pt3dadd(180852.000000,172488.000000,73725.000000,332.405888)}
{pt3dadd(180816.000000,172488.000000,73600.000000,338.622192)}
{pt3dadd(180816.000000,172488.000000,73600.000000,341.654536)}
{pt3dadd(180792.000000,172404.000000,73525.000000,335.734252)}
{pt3dadd(180828.000000,172344.000000,73425.000000,319.776540)}
{pt3dadd(180852.000000,172260.000000,73325.000000,309.739112)}
{pt3dadd(180900.000000,172248.000000,73250.000000,306.555152)}
{pt3dadd(180972.000000,172212.000000,73150.000000,309.739112)}
{pt3dadd(180876.000000,172164.000000,73050.000000,304.369242)}
{pt3dadd(180888.000000,172068.000000,72975.000000,291.865962)}
{pt3dadd(181008.000000,171948.000000,72875.000000,285.945678)}
{pt3dadd(181056.000000,171888.000000,72775.000000,282.913334)}
{pt3dadd(181092.000000,171864.000000,72650.000000,279.729374)}
{pt3dadd(181044.000000,171840.000000,72500.000000,294.203488)}
{pt3dadd(181068.000000,171768.000000,72425.000000,301.336898)}
{pt3dadd(181092.000000,171708.000000,72325.000000,304.224838)}
{pt3dadd(181032.000000,171660.000000,72225.000000,310.441142)}
{pt3dadd(181008.000000,171660.000000,72125.000000,299.150988)}
{pt3dadd(181020.000000,171636.000000,72000.000000,282.182158)}
{pt3dadd(181044.000000,171612.000000,71875.000000,282.182158)}
{pt3dadd(181068.000000,171504.000000,71725.000000,279.294218)}
{pt3dadd(181068.000000,171444.000000,71500.000000,264.820104)}
{pt3dadd(181068.000000,171360.000000,71275.000000,264.820104)}
{pt3dadd(181020.000000,171324.000000,71100.000000,264.820104)}
{pt3dadd(180924.000000,171276.000000,70925.000000,255.531666)}
{pt3dadd(180876.000000,171264.000000,70775.000000,238.820950)}
{pt3dadd(180912.000000,171132.000000,70675.000000,247.078760)}
{pt3dadd(180864.000000,171192.000000,70575.000000,258.368914)}
{pt3dadd(180756.000000,171084.000000,70450.000000,278.680896)}
{pt3dadd(180708.000000,170976.000000,70325.000000,309.296916)}
{pt3dadd(180648.000000,171000.000000,70225.000000,323.257212)}
{pt3dadd(180624.000000,171012.000000,70225.000000,320.369272)}
{pt3dadd(180600.000000,170916.000000,70125.000000,306.584402)}
{pt3dadd(180588.000000,170856.000000,70000.000000,288.767136)}
{pt3dadd(180540.000000,170712.000000,69875.000000,258.151116)}
{pt3dadd(180444.000000,170616.000000,69775.000000,255.531666)}
{pt3dadd(180348.000000,170580.000000,69675.000000,250.161796)}
{pt3dadd(180348.000000,170592.000000,69575.000000,245.523102)}
{pt3dadd(180336.000000,170556.000000,69525.000000,238.389692)}
{pt3dadd(180276.000000,170472.000000,69475.000000,245.183414)}
{pt3dadd(180216.000000,170400.000000,69400.000000,242.688698)}
{pt3dadd(180180.000000,170388.000000,69350.000000,237.818068)}
{pt3dadd(180180.000000,170376.000000,69350.000000,240.080848)}
{pt3dadd(180180.000000,170412.000000,69300.000000,242.343628)}
{pt3dadd(180180.000000,170400.000000,69250.000000,237.704934)}
{pt3dadd(180120.000000,170388.000000,69200.000000,237.704934)}
{pt3dadd(180084.000000,170376.000000,69175.000000,231.234718)}
{pt3dadd(180072.000000,170376.000000,69175.000000,231.234718)}
{pt3dadd(180048.000000,170376.000000,69125.000000,220.948238)}
{pt3dadd(180036.000000,170376.000000,69125.000000,225.586932)}
{pt3dadd(180048.000000,170400.000000,69050.000000,223.211018)}
{pt3dadd(179940.000000,170388.000000,68975.000000,225.263426)}
{pt3dadd(179772.000000,170364.000000,68925.000000,213.203996)}
{pt3dadd(179700.000000,170352.000000,68850.000000,217.020260)}
{pt3dadd(179736.000000,170340.000000,68800.000000,224.884846)}
{pt3dadd(179712.000000,170328.000000,68750.000000,238.013286)}
{pt3dadd(179712.000000,170304.000000,68650.000000,249.921174)}
{pt3dadd(179544.000000,170208.000000,68525.000000,275.109044)}
{pt3dadd(179544.000000,170148.000000,68350.000000,297.740044)}
{pt3dadd(179556.000000,170088.000000,68225.000000,300.627984)}
{pt3dadd(179484.000000,170136.000000,68100.000000,306.844288)}
{pt3dadd(179424.000000,170112.000000,67950.000000,312.482648)}
{pt3dadd(179412.000000,170112.000000,67950.000000,304.224838)}
{pt3dadd(179352.000000,170100.000000,67825.000000,301.192494)}
{pt3dadd(179328.000000,170016.000000,67750.000000,307.408798)}
{pt3dadd(179220.000000,169992.000000,67650.000000,304.224838)}
{pt3dadd(179124.000000,169932.000000,67500.000000,317.294610)}
{pt3dadd(179064.000000,169932.000000,67400.000000,325.552420)}
{pt3dadd(179028.000000,169896.000000,67275.000000,319.914060)}
{pt3dadd(178980.000000,169884.000000,67150.000000,313.697756)}
{pt3dadd(178908.000000,169872.000000,67025.000000,302.407602)}
{pt3dadd(178812.000000,169824.000000,66950.000000,278.585304)}
{pt3dadd(178764.000000,169740.000000,66900.000000,270.327494)}
{pt3dadd(178800.000000,169632.000000,66850.000000,258.419606)}
{pt3dadd(178812.000000,169620.000000,66775.000000,240.873358)}
{pt3dadd(178812.000000,169620.000000,66775.000000,246.243228)}
{pt3dadd(178836.000000,169632.000000,66675.000000,248.737944)}
{pt3dadd(178800.000000,169656.000000,66550.000000,241.604534)}
{pt3dadd(178704.000000,169536.000000,66450.000000,248.398256)}
{pt3dadd(178644.000000,169560.000000,66350.000000,248.398256)}
{pt3dadd(178644.000000,169572.000000,66350.000000,233.739948)}
{pt3dadd(178560.000000,169524.000000,66275.000000,224.451510)}
{pt3dadd(178548.000000,169524.000000,66275.000000,216.427810)}
{pt3dadd(178452.000000,169536.000000,66200.000000,197.164296)}
{pt3dadd(178476.000000,169524.000000,66125.000000,187.834154)}
{pt3dadd(178188.000000,169848.000000,66000.000000,192.251962)}
{pt3dadd(178044.000000,169944.000000,65950.000000,196.669770)}
{pt3dadd(177900.000000,170004.000000,65850.000000,206.956250)}
{pt3dadd(177876.000000,170016.000000,65850.000000,240.004634)}
{pt3dadd(177840.000000,169992.000000,65750.000000,273.097328)}
{pt3dadd(177816.000000,170028.000000,65625.000000,289.258112)}
{pt3dadd(177720.000000,170016.000000,65475.000000,311.946008)}
{pt3dadd(177684.000000,170100.000000,65350.000000,341.830048)}
{pt3dadd(177552.000000,170124.000000,65225.000000,335.909764)}
{pt3dadd(177432.000000,170148.000000,65100.000000,321.435650)}
{pt3dadd(177336.000000,170244.000000,65025.000000,318.403306)}
{pt3dadd(177240.000000,170316.000000,64925.000000,303.205490)}
{pt3dadd(177264.000000,170448.000000,64825.000000,278.192080)}
{pt3dadd(177288.000000,170496.000000,64700.000000,278.192080)}
{pt3dadd(177300.000000,170568.000000,64575.000000,278.192080)}
{pt3dadd(177156.000000,170628.000000,64475.000000,291.261852)}
{pt3dadd(177024.000000,170760.000000,64350.000000,321.589558)}
{pt3dadd(176904.000000,170856.000000,64250.000000,354.536714)}
{pt3dadd(176808.000000,170928.000000,64100.000000,400.504466)}
{pt3dadd(176712.000000,171072.000000,63975.000000,421.832048)}
{pt3dadd(176604.000000,171204.000000,63850.000000,429.387992)}
{pt3dadd(176580.000000,171252.000000,63700.000000,438.134946)}
{pt3dadd(176520.000000,171312.000000,63575.000000,419.661904)}
{pt3dadd(176376.000000,171444.000000,63475.000000,389.651864)}
{pt3dadd(176364.000000,171468.000000,63475.000000,386.141548)}
{pt3dadd(176232.000000,171624.000000,63350.000000,378.585604)}
{pt3dadd(176184.000000,171804.000000,63225.000000,354.708760)}
{pt3dadd(176196.000000,171828.000000,63175.000000,342.854096)}
{pt3dadd(176148.000000,172020.000000,63075.000000,329.784324)}
{pt3dadd(176160.000000,172128.000000,62975.000000,314.586508)}
{pt3dadd(176076.000000,172308.000000,62825.000000,311.076192)}
{pt3dadd(175992.000000,172416.000000,62750.000000,304.549080)}
{pt3dadd(174660.000000,173892.000000,61375.000000,313.219784)}
{pt3dadd(174240.000000,174576.000000,60575.000000,313.219784)}
{pt3dadd(173700.000000,174996.000000,59600.000000,318.858144)}
{pt3dadd(172788.000000,175860.000000,58850.000000,308.287907)}
{pt3dadd(172284.000000,176340.000000,58600.000000,303.234000)}

{create adhoc22}
{access adhoc22}
{connect adhoc22(1), adhoc21(0)}
{nseg = 1}
{strdef color color = "White"}
{pt3dclear()}
{pt3dadd(172284.000000,176340.000000,58600.000000,303.234000)}
{pt3dadd(171108.000000,177960.000000,58950.000000,271.614723)}
{pt3dadd(170148.000000,178848.000000,59375.000000,214.636723)}
{pt3dadd(169524.000000,179616.000000,59300.000000,132.300000)}

{create adhoc23}
{access adhoc23}
{connect adhoc23(1), adhoc21(0)}
{nseg = 1}
{strdef color color = "White"}
{pt3dclear()}
{pt3dadd(172284.000000,176340.000000,58600.000000,303.234000)}
{pt3dadd(172188.000000,176388.000000,58075.000000,205.733093)}
{pt3dadd(171996.000000,176232.000000,57000.000000,196.303738)}
{pt3dadd(172068.000000,176040.000000,55950.000000,196.303738)}
{pt3dadd(171612.000000,175872.000000,54950.000000,201.131908)}
{pt3dadd(171156.000000,175908.000000,53925.000000,225.332003)}
{pt3dadd(170976.000000,175776.000000,53175.000000,177.294650)}

{create adhoc24}
{access adhoc24}
{connect adhoc24(1), adhoc20(0)}
{nseg = 1}
{strdef color color = "White"}
{pt3dclear()}
{pt3dadd(183912.000000,172020.000000,83950.000000,600.382600)}
{pt3dadd(184020.000000,172992.000000,84050.000000,559.599700)}
{pt3dadd(183948.000000,173136.000000,83850.000000,570.194934)}
{pt3dadd(183816.000000,173328.000000,83800.000000,539.721368)}
{pt3dadd(183900.000000,173496.000000,83950.000000,548.905670)}
{pt3dadd(184032.000000,173628.000000,84100.000000,508.161470)}
{pt3dadd(183972.000000,173784.000000,84125.000000,497.529488)}
{pt3dadd(184044.000000,173940.000000,84100.000000,462.789114)}
{pt3dadd(184092.000000,174120.000000,84150.000000,462.789114)}
{pt3dadd(184152.000000,174252.000000,84225.000000,445.274374)}
{pt3dadd(184140.000000,174420.000000,84250.000000,441.210744)}
{pt3dadd(184224.000000,174600.000000,84300.000000,407.690388)}
{pt3dadd(184188.000000,174840.000000,84325.000000,392.560498)}
{pt3dadd(184308.000000,174960.000000,84400.000000,384.230060)}
{pt3dadd(184344.000000,175092.000000,84425.000000,380.359944)}
{pt3dadd(184152.000000,175260.000000,84450.000000,372.804000)}
{pt3dadd(184152.000000,175428.000000,84475.000000,372.804000)}
{pt3dadd(184140.000000,175608.000000,84525.000000,372.804000)}
{pt3dadd(184104.000000,175680.000000,84525.000000,352.178284)}
{pt3dadd(184092.000000,175824.000000,84525.000000,352.178284)}
{pt3dadd(184080.000000,175956.000000,84625.000000,359.734228)}
{pt3dadd(184044.000000,176148.000000,84775.000000,383.611072)}
{pt3dadd(184020.000000,176304.000000,84925.000000,407.487916)}
{pt3dadd(184032.000000,176460.000000,84850.000000,472.921462)}
{pt3dadd(183924.000000,176604.000000,84825.000000,504.432014)}
{pt3dadd(183900.000000,176772.000000,84875.000000,526.886110)}
{pt3dadd(183972.000000,176952.000000,84825.000000,558.883356)}
{pt3dadd(183936.000000,177168.000000,84825.000000,584.876776)}
{pt3dadd(183900.000000,177348.000000,84825.000000,584.876776)}
{pt3dadd(183900.000000,177564.000000,84875.000000,614.967412)}
{pt3dadd(183840.000000,177708.000000,84925.000000,631.317320)}
{pt3dadd(183804.000000,177900.000000,84925.000000,619.595568)}
{pt3dadd(183720.000000,178092.000000,84925.000000,613.877642)}
{pt3dadd(183720.000000,178284.000000,84900.000000,586.584552)}
{pt3dadd(183612.000000,178428.000000,84875.000000,561.939558)}
{pt3dadd(183576.000000,178596.000000,84825.000000,545.589650)}
{pt3dadd(183492.000000,178728.000000,84825.000000,504.947628)}
{pt3dadd(183528.000000,178872.000000,84775.000000,464.305606)}
{pt3dadd(183468.000000,178968.000000,84750.000000,442.920750)}
{pt3dadd(183492.000000,179076.000000,84750.000000,437.475108)}
{pt3dadd(183516.000000,179208.000000,84775.000000,432.535752)}
{pt3dadd(183480.000000,179316.000000,84825.000000,452.902280)}
{pt3dadd(183516.000000,179424.000000,84850.000000,449.391964)}
{pt3dadd(183432.000000,179544.000000,84825.000000,435.668708)}
{pt3dadd(183324.000000,179640.000000,84725.000000,400.472328)}
{pt3dadd(183312.000000,179748.000000,84700.000000,365.364216)}
{pt3dadd(183288.000000,179868.000000,84675.000000,334.960260)}
{pt3dadd(183180.000000,179964.000000,84650.000000,342.156404)}
{pt3dadd(183108.000000,180084.000000,84625.000000,348.683516)}
{pt3dadd(183084.000000,180204.000000,84650.000000,332.725804)}
{pt3dadd(183060.000000,180336.000000,84675.000000,329.693460)}
{pt3dadd(183024.000000,180468.000000,84650.000000,321.022756)}
{pt3dadd(182976.000000,180600.000000,84700.000000,304.267156)}
{pt3dadd(182892.000000,180708.000000,84700.000000,289.069340)}
{pt3dadd(182856.000000,180852.000000,84700.000000,283.699470)}
{pt3dadd(182832.000000,180996.000000,84700.000000,275.441660)}
{pt3dadd(182796.000000,181116.000000,84650.000000,275.441660)}
{pt3dadd(182724.000000,181248.000000,84575.000000,288.511432)}
{pt3dadd(182652.000000,181356.000000,84550.000000,297.182136)}
{pt3dadd(182592.000000,181488.000000,84725.000000,311.656250)}
{pt3dadd(182496.000000,181632.000000,84675.000000,348.870214)}
{pt3dadd(182376.000000,181764.000000,84575.000000,375.134290)}
{pt3dadd(182328.000000,181920.000000,84600.000000,378.820118)}
{pt3dadd(182304.000000,182088.000000,84625.000000,385.347230)}
{pt3dadd(182244.000000,182232.000000,84625.000000,388.690382)}
{pt3dadd(182256.000000,182364.000000,84700.000000,372.804000)}
{pt3dadd(182148.000000,182532.000000,84700.000000,365.248056)}
{pt3dadd(182052.000000,182664.000000,84700.000000,340.234646)}
{pt3dadd(181944.000000,182844.000000,84700.000000,330.675190)}
{pt3dadd(181896.000000,183012.000000,84700.000000,318.227794)}
{pt3dadd(181968.000000,183168.000000,84750.000000,302.270082)}
{pt3dadd(181884.000000,183324.000000,84775.000000,295.416614)}
{pt3dadd(181860.000000,183468.000000,84750.000000,313.233880)}
{pt3dadd(181788.000000,183624.000000,84750.000000,326.303652)}
{pt3dadd(181740.000000,183792.000000,84750.000000,335.407896)}
{pt3dadd(181656.000000,183936.000000,84750.000000,351.365608)}
{pt3dadd(181560.000000,184044.000000,84750.000000,358.219076)}
{pt3dadd(181476.000000,184176.000000,84725.000000,369.285336)}
{pt3dadd(181464.000000,184296.000000,84750.000000,365.775020)}
{pt3dadd(181476.000000,184392.000000,84775.000000,397.699172)}
{pt3dadd(181512.000000,184524.000000,84775.000000,405.255116)}
{pt3dadd(181488.000000,184656.000000,84800.000000,405.255116)}
{pt3dadd(181428.000000,184764.000000,84775.000000,413.585554)}
{pt3dadd(181380.000000,184896.000000,84775.000000,442.166554)}
{pt3dadd(181272.000000,185004.000000,84800.000000,442.166554)}
{pt3dadd(181308.000000,185136.000000,84800.000000,454.977138)}
{pt3dadd(181308.000000,185268.000000,84825.000000,466.596712)}
{pt3dadd(181176.000000,185412.000000,84850.000000,471.076858)}
{pt3dadd(181116.000000,185532.000000,84850.000000,471.076858)}
{pt3dadd(181164.000000,185700.000000,84850.000000,457.625748)}
{pt3dadd(181200.000000,185880.000000,84875.000000,453.145602)}
{pt3dadd(181212.000000,186060.000000,84900.000000,441.526028)}
{pt3dadd(181212.000000,186216.000000,84950.000000,417.649184)}
{pt3dadd(181140.000000,186360.000000,85050.000000,400.134444)}
{pt3dadd(181068.000000,186516.000000,85100.000000,388.514870)}
{pt3dadd(180960.000000,186636.000000,85050.000000,384.248062)}
{pt3dadd(180996.000000,186780.000000,85050.000000,391.804006)}
{pt3dadd(180900.000000,186948.000000,85125.000000,391.804006)}
{pt3dadd(180816.000000,187092.000000,85150.000000,387.933890)}
{pt3dadd(180720.000000,187260.000000,85150.000000,395.489834)}
{pt3dadd(180732.000000,187392.000000,85175.000000,387.556088)}
{pt3dadd(180768.000000,187548.000000,85225.000000,383.685972)}
{pt3dadd(180792.000000,187668.000000,85275.000000,403.082670)}
{pt3dadd(180684.000000,187812.000000,85300.000000,406.952786)}
{pt3dadd(180600.000000,187944.000000,85325.000000,403.082670)}
{pt3dadd(180600.000000,188100.000000,85300.000000,399.396842)}
{pt3dadd(180588.000000,188244.000000,85300.000000,388.857546)}
{pt3dadd(180540.000000,188376.000000,85375.000000,369.460848)}
{pt3dadd(180552.000000,188520.000000,85325.000000,345.947192)}
{pt3dadd(180456.000000,188652.000000,85275.000000,329.191592)}
{pt3dadd(180276.000000,188772.000000,85250.000000,319.154164)}
{pt3dadd(180228.000000,188892.000000,85175.000000,312.937860)}
{pt3dadd(180276.000000,189000.000000,85150.000000,292.625878)}
{pt3dadd(180348.000000,189096.000000,85150.000000,282.385378)}
{pt3dadd(180312.000000,189216.000000,85175.000000,285.417722)}
{pt3dadd(180240.000000,189360.000000,85225.000000,271.632852)}
{pt3dadd(180156.000000,189492.000000,85275.000000,271.632852)}
{pt3dadd(180156.000000,189636.000000,85350.000000,274.127568)}
{pt3dadd(180048.000000,189744.000000,85300.000000,290.288352)}
{pt3dadd(180036.000000,189864.000000,85300.000000,296.815464)}
{pt3dadd(179952.000000,190032.000000,85300.000000,313.784294)}
{pt3dadd(179916.000000,190164.000000,85300.000000,320.000598)}
{pt3dadd(179904.000000,190320.000000,85375.000000,337.817864)}
{pt3dadd(179772.000000,190476.000000,85325.000000,347.855292)}
{pt3dadd(179724.000000,190632.000000,85325.000000,347.855292)}
{pt3dadd(179640.000000,190764.000000,85275.000000,354.708760)}
{pt3dadd(179592.000000,190920.000000,85250.000000,361.562228)}
{pt3dadd(179616.000000,191100.000000,85300.000000,361.562228)}
{pt3dadd(179580.000000,191244.000000,85325.000000,358.051912)}
{pt3dadd(179472.000000,191376.000000,85325.000000,361.562228)}
{pt3dadd(179424.000000,191532.000000,85325.000000,369.118172)}
{pt3dadd(179388.000000,191700.000000,85325.000000,380.737746)}
{pt3dadd(179352.000000,191880.000000,85325.000000,400.134444)}
{pt3dadd(179280.000000,192036.000000,85350.000000,403.644760)}
{pt3dadd(179196.000000,192192.000000,85350.000000,407.330588)}
{pt3dadd(179124.000000,192348.000000,85375.000000,399.774644)}
{pt3dadd(179040.000000,192528.000000,85450.000000,391.840898)}
{pt3dadd(178980.000000,192672.000000,85500.000000,379.640344)}
{pt3dadd(178968.000000,192816.000000,85500.000000,404.711028)}
{pt3dadd(178788.000000,192960.000000,85475.000000,401.025200)}
{pt3dadd(178668.000000,193104.000000,85475.000000,394.171732)}
{pt3dadd(178584.000000,193248.000000,85400.000000,377.416132)}
{pt3dadd(178608.000000,193404.000000,85350.000000,366.876836)}
{pt3dadd(178584.000000,193584.000000,85300.000000,345.491980)}
{pt3dadd(178560.000000,193776.000000,85275.000000,324.164398)}
{pt3dadd(178572.000000,193944.000000,85325.000000,317.948094)}
{pt3dadd(178500.000000,194112.000000,85200.000000,315.060154)}
{pt3dadd(178368.000000,194244.000000,85100.000000,298.091324)}
{pt3dadd(178248.000000,194424.000000,85150.000000,275.697364)}
{pt3dadd(178116.000000,194580.000000,85125.000000,275.697364)}
{pt3dadd(177972.000000,194724.000000,85075.000000,281.913668)}
{pt3dadd(177936.000000,194868.000000,85150.000000,279.163248)}
{pt3dadd(177840.000000,195000.000000,85175.000000,292.948118)}
{pt3dadd(177696.000000,195144.000000,85150.000000,281.040230)}
{pt3dadd(177636.000000,195288.000000,85150.000000,269.699384)}
{pt3dadd(177624.000000,195444.000000,85175.000000,248.091860)}
{pt3dadd(177540.000000,195600.000000,85200.000000,236.183972)}
{pt3dadd(177456.000000,195780.000000,85200.000000,217.760408)}
{pt3dadd(177300.000000,195924.000000,85150.000000,217.760408)}
{pt3dadd(177192.000000,196080.000000,85175.000000,226.606538)}
{pt3dadd(177024.000000,196212.000000,85125.000000,241.997758)}
{pt3dadd(176868.000000,196392.000000,85100.000000,256.656066)}
{pt3dadd(176772.000000,196536.000000,85100.000000,263.789476)}
{pt3dadd(176688.000000,196716.000000,85125.000000,278.447784)}
{pt3dadd(176508.000000,196860.000000,85150.000000,292.232654)}
{pt3dadd(176388.000000,197016.000000,85100.000000,286.594294)}
{pt3dadd(176280.000000,197184.000000,85075.000000,278.729708)}
{pt3dadd(176232.000000,197352.000000,85025.000000,284.099578)}
{pt3dadd(176148.000000,197472.000000,84950.000000,278.729708)}
{pt3dadd(176220.000000,197604.000000,84950.000000,272.809424)}
{pt3dadd(176160.000000,197736.000000,85025.000000,275.559844)}
{pt3dadd(176028.000000,197892.000000,84950.000000,283.424430)}
{pt3dadd(175920.000000,198072.000000,84825.000000,295.871826)}
{pt3dadd(175848.000000,198216.000000,84800.000000,307.161980)}
{pt3dadd(175740.000000,198336.000000,84675.000000,307.161980)}
{pt3dadd(175632.000000,198480.000000,84650.000000,310.049920)}
{pt3dadd(175536.000000,198636.000000,84575.000000,315.970204)}
{pt3dadd(175416.000000,198780.000000,84450.000000,303.522808)}
{pt3dadd(175344.000000,198936.000000,84425.000000,303.522808)}
{pt3dadd(175284.000000,199104.000000,84400.000000,312.627052)}
{pt3dadd(175224.000000,199236.000000,84325.000000,325.696824)}
{pt3dadd(175188.000000,199368.000000,84225.000000,332.223936)}
{pt3dadd(175164.000000,199536.000000,84200.000000,351.867476)}
{pt3dadd(175080.000000,199692.000000,84125.000000,348.835132)}
{pt3dadd(175032.000000,199836.000000,84025.000000,342.618828)}
{pt3dadd(174984.000000,199980.000000,83925.000000,323.910696)}
{pt3dadd(174900.000000,200112.000000,83900.000000,317.383584)}
{pt3dadd(174864.000000,200268.000000,83875.000000,300.627984)}
{pt3dadd(174852.000000,200436.000000,83850.000000,321.253700)}
{pt3dadd(174864.000000,200568.000000,83825.000000,327.470004)}
{pt3dadd(174900.000000,200736.000000,83850.000000,330.220424)}
{pt3dadd(174936.000000,200928.000000,83850.000000,307.589424)}
{pt3dadd(174744.000000,201084.000000,83825.000000,304.701484)}
{pt3dadd(174684.000000,201264.000000,83800.000000,287.108112)}
{pt3dadd(174624.000000,201456.000000,83800.000000,275.253448)}
{pt3dadd(174576.000000,201624.000000,83800.000000,275.253448)}
{pt3dadd(174504.000000,201792.000000,83750.000000,301.068408)}
{pt3dadd(174420.000000,201864.000000,83750.000000,306.988692)}
{pt3dadd(174288.000000,202104.000000,83600.000000,301.068408)}
{pt3dadd(174228.000000,202320.000000,83525.000000,309.739112)}
{pt3dadd(174204.000000,202536.000000,83425.000000,318.843356)}
{pt3dadd(174120.000000,202728.000000,83500.000000,306.988692)}
{pt3dadd(174132.000000,202908.000000,83375.000000,290.827908)}
{pt3dadd(174120.000000,203088.000000,83225.000000,296.748192)}
{pt3dadd(174096.000000,203232.000000,83100.000000,290.827908)}
{pt3dadd(174036.000000,203376.000000,83000.000000,294.171060)}
{pt3dadd(174024.000000,203496.000000,82875.000000,316.565020)}
{pt3dadd(174012.000000,203652.000000,82825.000000,358.649614)}
{pt3dadd(173952.000000,203772.000000,82800.000000,389.053570)}
{pt3dadd(173880.000000,204192.000000,82625.000000,408.697110)}
{pt3dadd(173784.000000,204288.000000,82525.000000,419.763370)}
{pt3dadd(173748.000000,204432.000000,82475.000000,416.077542)}
{pt3dadd(173664.000000,204564.000000,82425.000000,393.337692)}
{pt3dadd(173544.000000,204696.000000,82450.000000,349.148866)}
{pt3dadd(173604.000000,204684.000000,82175.000000,326.754906)}
{pt3dadd(173424.000000,204828.000000,82025.000000,309.161534)}
{pt3dadd(173292.000000,204900.000000,81850.000000,299.124106)}
{pt3dadd(173088.000000,204960.000000,81750.000000,287.269442)}
{pt3dadd(172896.000000,205044.000000,81625.000000,284.893528)}
{pt3dadd(172764.000000,205044.000000,81500.000000,290.531888)}
{pt3dadd(172752.000000,205092.000000,81400.000000,269.953296)}
{pt3dadd(172776.000000,205152.000000,81275.000000,264.033012)}
{pt3dadd(172812.000000,205140.000000,81150.000000,275.887676)}
{pt3dadd(172836.000000,205128.000000,81000.000000,292.048460)}
{pt3dadd(172776.000000,205092.000000,80850.000000,301.607916)}
{pt3dadd(172608.000000,205176.000000,80700.000000,319.154164)}
{pt3dadd(172404.000000,205128.000000,80575.000000,316.403744)}
{pt3dadd(172188.000000,205068.000000,80450.000000,299.434914)}
{pt3dadd(172152.000000,205104.000000,80375.000000,276.803914)}
{pt3dadd(171996.000000,205128.000000,80275.000000,264.356518)}
{pt3dadd(171804.000000,205236.000000,80175.000000,264.356518)}
{pt3dadd(171648.000000,205272.000000,80075.000000,269.994878)}
{pt3dadd(171648.000000,205200.000000,79950.000000,280.747404)}
{pt3dadd(171492.000000,205236.000000,79775.000000,297.458120)}
{pt3dadd(171336.000000,205212.000000,79575.000000,287.217620)}
{pt3dadd(171072.000000,205248.000000,79400.000000,284.329680)}
{pt3dadd(170844.000000,205296.000000,79200.000000,281.441740)}
{pt3dadd(170616.000000,205380.000000,79025.000000,287.658044)}
{pt3dadd(170364.000000,205524.000000,78900.000000,293.578328)}
{pt3dadd(170172.000000,205536.000000,78725.000000,309.739112)}
{pt3dadd(170004.000000,205464.000000,78550.000000,318.843356)}
{pt3dadd(169860.000000,205440.000000,78350.000000,327.947600)}
{pt3dadd(169728.000000,205608.000000,78200.000000,331.290752)}
{pt3dadd(169644.000000,205656.000000,78025.000000,337.817864)}
{pt3dadd(169548.000000,205716.000000,77900.000000,337.817864)}
{pt3dadd(169344.000000,205716.000000,77750.000000,344.671332)}
{pt3dadd(169248.000000,205800.000000,77575.000000,348.014484)}
{pt3dadd(169056.000000,205920.000000,77425.000000,348.014484)}
{pt3dadd(168888.000000,205980.000000,77325.000000,348.014484)}
{pt3dadd(168744.000000,206028.000000,77175.000000,344.982140)}
{pt3dadd(168624.000000,206196.000000,77050.000000,338.128672)}
{pt3dadd(168588.000000,206268.000000,76950.000000,338.128672)}
{pt3dadd(168420.000000,206364.000000,76800.000000,338.128672)}
{pt3dadd(168360.000000,206544.000000,76625.000000,345.324816)}
{pt3dadd(168252.000000,206640.000000,76450.000000,358.394588)}
{pt3dadd(168204.000000,206748.000000,76275.000000,372.804000)}
{pt3dadd(168216.000000,206988.000000,76175.000000,376.314316)}
{pt3dadd(168300.000000,207120.000000,76050.000000,363.866920)}
{pt3dadd(168120.000000,207228.000000,75900.000000,350.143664)}
{pt3dadd(167940.000000,207480.000000,75800.000000,337.073892)}
{pt3dadd(167880.000000,207492.000000,75625.000000,337.073892)}
{pt3dadd(167904.000000,207564.000000,75525.000000,308.612900)}
{pt3dadd(167916.000000,207576.000000,75425.000000,308.612900)}
{pt3dadd(167892.000000,207660.000000,75300.000000,302.692616)}
{pt3dadd(167988.000000,207828.000000,75125.000000,308.908920)}
{pt3dadd(167808.000000,208032.000000,74975.000000,301.352976)}
{pt3dadd(167796.000000,208140.000000,74825.000000,319.776540)}
{pt3dadd(167676.000000,208248.000000,74675.000000,314.406670)}
{pt3dadd(167496.000000,208356.000000,74525.000000,320.326954)}
{pt3dadd(167376.000000,208416.000000,74375.000000,300.982210)}
{pt3dadd(167280.000000,208440.000000,74225.000000,282.274078)}
{pt3dadd(167220.000000,208512.000000,74075.000000,264.840934)}
{pt3dadd(167112.000000,208644.000000,73875.000000,259.970304)}
{pt3dadd(166992.000000,208812.000000,73625.000000,273.693560)}
{pt3dadd(166992.000000,208920.000000,73350.000000,307.447716)}
{pt3dadd(166980.000000,209136.000000,73100.000000,307.447716)}
{pt3dadd(166860.000000,209472.000000,72900.000000,318.960576)}
{pt3dadd(166752.000000,209724.000000,72650.000000,326.450656)}
{pt3dadd(166632.000000,209916.000000,72450.000000,322.764828)}
{pt3dadd(166464.000000,209880.000000,72200.000000,293.881302)}
{pt3dadd(166356.000000,209892.000000,72000.000000,302.552006)}
{pt3dadd(166344.000000,209808.000000,71800.000000,322.195546)}
{pt3dadd(166212.000000,209928.000000,71525.000000,330.866250)}
{pt3dadd(166044.000000,210132.000000,71325.000000,324.012782)}
{pt3dadd(165888.000000,210300.000000,71200.000000,349.026192)}
{pt3dadd(165792.000000,210432.000000,71000.000000,362.749448)}
{pt3dadd(165756.000000,210600.000000,70825.000000,355.553304)}
{pt3dadd(165696.000000,210684.000000,70700.000000,369.276560)}
{pt3dadd(165624.000000,210804.000000,70550.000000,369.276560)}
{pt3dadd(165552.000000,210912.000000,70375.000000,373.146676)}
{pt3dadd(165456.000000,211116.000000,70125.000000,365.950532)}
{pt3dadd(165276.000000,211308.000000,69950.000000,362.607380)}
{pt3dadd(165036.000000,211440.000000,69825.000000,348.884124)}
{pt3dadd(165000.000000,211752.000000,69875.000000,337.029460)}
{pt3dadd(164892.000000,211908.000000,69800.000000,305.651218)}
{pt3dadd(164796.000000,212124.000000,69725.000000,320.781108)}
{pt3dadd(164484.000000,212280.000000,69550.000000,324.124260)}
{pt3dadd(164340.000000,212460.000000,69450.000000,327.308220)}
{pt3dadd(164160.000000,212640.000000,69350.000000,332.946580)}
{pt3dadd(164160.000000,212820.000000,69425.000000,328.307886)}
{pt3dadd(164124.000000,213000.000000,69475.000000,288.227320)}
{pt3dadd(163992.000000,213132.000000,69375.000000,267.915338)}
{pt3dadd(163944.000000,213264.000000,69325.000000,238.284114)}
{pt3dadd(163872.000000,213408.000000,69175.000000,235.396174)}
{pt3dadd(163788.000000,213612.000000,69075.000000,235.396174)}
{pt3dadd(163668.000000,213840.000000,69075.000000,242.529584)}
{pt3dadd(163452.000000,214080.000000,69000.000000,242.529584)}
{pt3dadd(163236.000000,214308.000000,69050.000000,252.816064)}
{pt3dadd(163020.000000,214512.000000,69050.000000,242.575564)}
{pt3dadd(162912.000000,214716.000000,69050.000000,238.368128)}
{pt3dadd(162624.000000,214920.000000,68925.000000,235.873412)}
{pt3dadd(162420.000000,215100.000000,68800.000000,229.079690)}
{pt3dadd(162372.000000,215280.000000,68750.000000,222.609474)}
{pt3dadd(162288.000000,215448.000000,68775.000000,214.184586)}
{pt3dadd(162204.000000,215640.000000,68775.000000,214.184586)}
{pt3dadd(162108.000000,215856.000000,68975.000000,203.383784)}
{pt3dadd(161928.000000,216024.000000,68925.000000,203.383784)}
{pt3dadd(161772.000000,216228.000000,68925.000000,207.591220)}
{pt3dadd(161604.000000,216408.000000,68850.000000,209.545892)}
{pt3dadd(161352.000000,216672.000000,68850.000000,213.753328)}
{pt3dadd(161160.000000,216828.000000,68850.000000,211.891736)}
{pt3dadd(160968.000000,216936.000000,68850.000000,209.839328)}
{pt3dadd(160884.000000,217044.000000,68750.000000,203.677220)}
{pt3dadd(160656.000000,217152.000000,68650.000000,212.523350)}
{pt3dadd(160428.000000,217272.000000,68550.000000,219.656760)}
{pt3dadd(160344.000000,217428.000000,68500.000000,234.813870)}
{pt3dadd(160332.000000,217596.000000,68525.000000,257.787090)}
{pt3dadd(160176.000000,217632.000000,68425.000000,261.944950)}

{create adhoc25}
{access adhoc25}
{connect adhoc25(1), adhoc24(0)}
{nseg = 1}
{strdef color color = "White"}
{pt3dclear()}
{pt3dadd(160176.000000,217632.000000,68425.000000,261.944950)}
{pt3dadd(159948.000000,217572.000000,68300.000000,187.223810)}
{pt3dadd(159696.000000,217752.000000,68150.000000,176.658878)}
{pt3dadd(159516.000000,217800.000000,68000.000000,159.728818)}
{pt3dadd(159504.000000,217824.000000,67850.000000,164.108114)}
{pt3dadd(159408.000000,217764.000000,67625.000000,155.945818)}
{pt3dadd(159228.000000,217920.000000,67400.000000,159.242452)}
{pt3dadd(159108.000000,217932.000000,67100.000000,151.080156)}
{pt3dadd(159180.000000,217908.000000,66850.000000,139.621226)}
{pt3dadd(158976.000000,217968.000000,66625.000000,138.089690)}
{pt3dadd(158988.000000,217860.000000,66475.000000,149.548620)}
{pt3dadd(158964.000000,217860.000000,66300.000000,143.261840)}
{pt3dadd(159024.000000,217920.000000,66150.000000,149.892600)}
{pt3dadd(158964.000000,217932.000000,66025.000000,164.986072)}
{pt3dadd(158868.000000,218292.000000,65900.000000,173.448784)}
{pt3dadd(158832.000000,218400.000000,65775.000000,179.037998)}
{pt3dadd(158976.000000,218376.000000,65600.000000,192.966400)}
{pt3dadd(159036.000000,218556.000000,65400.000000,207.591220)}
{pt3dadd(158988.000000,218568.000000,65200.000000,213.753328)}
{pt3dadd(158988.000000,218604.000000,65000.000000,222.178216)}
{pt3dadd(159144.000000,218676.000000,64800.000000,220.223544)}
{pt3dadd(159216.000000,218760.000000,64575.000000,212.581922)}
{pt3dadd(159264.000000,218724.000000,64325.000000,202.785272)}
{pt3dadd(159420.000000,218652.000000,64125.000000,191.300102)}
{pt3dadd(159468.000000,218640.000000,63875.000000,196.170732)}
{pt3dadd(159456.000000,218628.000000,63625.000000,206.971534)}
{pt3dadd(159492.000000,218580.000000,63375.000000,219.030964)}
{pt3dadd(159480.000000,218460.000000,63125.000000,220.803914)}
{pt3dadd(159492.000000,218472.000000,62925.000000,234.551864)}
{pt3dadd(159468.000000,218436.000000,62700.000000,219.394754)}
{pt3dadd(159384.000000,218352.000000,62450.000000,210.548624)}
{pt3dadd(159288.000000,218232.000000,62200.000000,204.078408)}
{pt3dadd(159300.000000,218124.000000,61975.000000,216.740802)}
{pt3dadd(159264.000000,218004.000000,61750.000000,221.611432)}
{pt3dadd(159324.000000,217824.000000,61500.000000,225.427696)}
{pt3dadd(159324.000000,217608.000000,61250.000000,229.635132)}
{pt3dadd(159228.000000,217260.000000,61000.000000,238.481262)}
{pt3dadd(159192.000000,217080.000000,60750.000000,222.357398)}
{pt3dadd(159084.000000,216840.000000,60525.000000,209.061880)}
{pt3dadd(158820.000000,216432.000000,60300.000000,217.908010)}
{pt3dadd(158568.000000,216012.000000,60075.000000,217.908010)}
{pt3dadd(158340.000000,215772.000000,59850.000000,205.245616)}
{pt3dadd(158148.000000,215592.000000,59575.000000,197.935206)}
{pt3dadd(158016.000000,215448.000000,59350.000000,204.097314)}
{pt3dadd(158064.000000,215436.000000,59100.000000,197.303592)}
{pt3dadd(158112.000000,215328.000000,58750.000000,197.303592)}
{pt3dadd(158100.000000,215304.000000,58575.000000,205.327292)}
{pt3dadd(158040.000000,215268.000000,58425.000000,214.326222)}
{pt3dadd(158052.000000,215208.000000,58300.000000,208.164114)}
{pt3dadd(158016.000000,215160.000000,58075.000000,198.833972)}
{pt3dadd(157872.000000,215004.000000,57850.000000,192.671864)}
{pt3dadd(157968.000000,214920.000000,57675.000000,186.509756)}
{pt3dadd(157800.000000,214716.000000,57675.000000,196.306406)}
{pt3dadd(157836.000000,214608.000000,57550.000000,190.983344)}
{pt3dadd(157740.000000,214368.000000,57450.000000,183.672934)}
{pt3dadd(157788.000000,214164.000000,57350.000000,185.627606)}
{pt3dadd(157800.000000,214080.000000,57200.000000,189.634686)}
{pt3dadd(157728.000000,214080.000000,57100.000000,185.427250)}
{pt3dadd(157656.000000,213876.000000,56975.000000,192.704984)}
{pt3dadd(157656.000000,213672.000000,56725.000000,229.924128)}
{pt3dadd(157596.000000,213384.000000,56550.000000,236.394344)}
{pt3dadd(157380.000000,213228.000000,56350.000000,238.549372)}
{pt3dadd(157200.000000,212928.000000,56250.000000,238.549372)}
{pt3dadd(157080.000000,212748.000000,56200.000000,231.271638)}
{pt3dadd(156984.000000,212628.000000,56125.000000,198.223254)}
{pt3dadd(156936.000000,212544.000000,56025.000000,174.704894)}
{pt3dadd(156948.000000,212460.000000,55925.000000,157.232314)}
{pt3dadd(156864.000000,212208.000000,55850.000000,140.184170)}
{pt3dadd(156936.000000,212064.000000,55725.000000,130.413760)}
{pt3dadd(156912.000000,211932.000000,55625.000000,123.783000)}
{pt3dadd(156852.000000,211812.000000,55500.000000,130.413760)}
{pt3dadd(156840.000000,211548.000000,55400.000000,134.793056)}
{pt3dadd(156816.000000,211440.000000,55300.000000,138.576056)}
{pt3dadd(156732.000000,211332.000000,55200.000000,141.036056)}
{pt3dadd(156684.000000,211212.000000,55100.000000,141.036056)}
{pt3dadd(156660.000000,210936.000000,55000.000000,135.605296)}
{pt3dadd(156672.000000,210744.000000,54925.000000,132.615150)}
{pt3dadd(156624.000000,210600.000000,54825.000000,132.615150)}
{pt3dadd(156636.000000,210444.000000,54775.000000,130.155150)}
{pt3dadd(156648.000000,210288.000000,54700.000000,135.327300)}
{pt3dadd(156564.000000,210096.000000,54600.000000,140.758060)}
{pt3dadd(156468.000000,209820.000000,54475.000000,140.758060)}
{pt3dadd(156444.000000,209652.000000,54375.000000,145.137356)}
{pt3dadd(156480.000000,209448.000000,54275.000000,145.137356)}
{pt3dadd(156516.000000,209340.000000,54175.000000,148.127502)}
{pt3dadd(156528.000000,209196.000000,54025.000000,145.279742)}
{pt3dadd(156540.000000,208980.000000,53850.000000,149.878002)}
{pt3dadd(156624.000000,208800.000000,53725.000000,148.346466)}
{pt3dadd(156768.000000,208692.000000,53575.000000,163.439938)}
{pt3dadd(156840.000000,208620.000000,53400.000000,160.449792)}
{pt3dadd(156888.000000,208416.000000,53200.000000,156.666792)}
{pt3dadd(157008.000000,208128.000000,53050.000000,146.896382)}
{pt3dadd(157152.000000,207948.000000,52925.000000,146.896382)}
{pt3dadd(157188.000000,207780.000000,52825.000000,145.034790)}
{pt3dadd(157284.000000,207540.000000,52700.000000,158.963192)}
{pt3dadd(157428.000000,207372.000000,52575.000000,172.195072)}
{pt3dadd(157416.000000,207204.000000,52450.000000,178.825832)}
{pt3dadd(157440.000000,207096.000000,52300.000000,187.288544)}
{pt3dadd(157644.000000,206880.000000,52100.000000,179.228814)}
{pt3dadd(157764.000000,206592.000000,51925.000000,173.360142)}
{pt3dadd(157728.000000,206400.000000,51800.000000,168.290558)}
{pt3dadd(157860.000000,206148.000000,51800.000000,164.119798)}
{pt3dadd(157968.000000,205908.000000,51800.000000,149.026326)}
{pt3dadd(158112.000000,205752.000000,51800.000000,145.054176)}
{pt3dadd(158292.000000,205668.000000,51800.000000,141.592706)}
{pt3dadd(158244.000000,205560.000000,51675.000000,138.602560)}
{pt3dadd(158304.000000,205404.000000,51550.000000,139.925560)}
{pt3dadd(158436.000000,205200.000000,51475.000000,151.384490)}
{pt3dadd(158628.000000,204984.000000,51350.000000,142.428635)}
{pt3dadd(158736.000000,204840.000000,51350.000000,127.462853)}
{pt3dadd(158832.000000,204624.000000,51225.000000,116.199872)}
{pt3dadd(159060.000000,204468.000000,51175.000000,111.274014)}
{pt3dadd(159228.000000,204372.000000,50975.000000,99.815084)}
{pt3dadd(159312.000000,204216.000000,50875.000000,104.303042)}
{pt3dadd(159396.000000,204156.000000,50700.000000,105.243274)}
{pt3dadd(159492.000000,204072.000000,50600.000000,111.334105)}
{pt3dadd(159612.000000,204024.000000,50525.000000,103.947577)}
{pt3dadd(159660.000000,203772.000000,50475.000000,98.752205)}
{pt3dadd(159732.000000,203568.000000,50400.000000,95.929271)}
{pt3dadd(159900.000000,203388.000000,50300.000000,86.974018)}
{pt3dadd(159984.000000,203292.000000,50250.000000,89.545845)}

{create adhoc26}
{access adhoc26}
{connect adhoc26(1), adhoc24(0)}
{nseg = 1}
{strdef color color = "White"}
{pt3dclear()}
{pt3dadd(160176.000000,217632.000000,68425.000000,261.944950)}
{pt3dadd(160044.000000,219180.000000,68625.000000,216.344777)}
{pt3dadd(159780.000000,220416.000000,68625.000000,192.749426)}
{pt3dadd(159660.000000,221436.000000,68275.000000,187.878796)}
{pt3dadd(159492.000000,222264.000000,68100.000000,194.809972)}
{pt3dadd(159000.000000,223524.000000,67900.000000,194.809972)}
{pt3dadd(158976.000000,224484.000000,67550.000000,219.779020)}
{pt3dadd(158772.000000,226464.000000,67300.000000,226.277900)}

{create adhoc27}
{access adhoc27}
{connect adhoc27(1), adhoc5(0)}
{nseg = 1}
{strdef color color = "White"}
{pt3dclear()}
{pt3dadd(192900.000000,141804.000000,100575.000000,630.401730)}
{pt3dadd(193068.000000,141936.000000,100750.000000,697.225643)}
{pt3dadd(192948.000000,142116.000000,100925.000000,683.419320)}
{pt3dadd(192888.000000,142020.000000,101150.000000,683.419320)}
{pt3dadd(192876.000000,142008.000000,101300.000000,676.800092)}
{pt3dadd(193008.000000,142356.000000,101425.000000,669.502412)}
{pt3dadd(192864.000000,142200.000000,101575.000000,669.502412)}
{pt3dadd(192864.000000,142380.000000,101750.000000,639.411776)}
{pt3dadd(192876.000000,142560.000000,101900.000000,645.715790)}
{pt3dadd(192852.000000,142584.000000,102075.000000,645.715790)}
{pt3dadd(192828.000000,142632.000000,102275.000000,619.838538)}
{pt3dadd(192864.000000,142776.000000,102500.000000,602.671144)}
{pt3dadd(192744.000000,142860.000000,102675.000000,602.671144)}
{pt3dadd(192732.000000,142956.000000,102850.000000,564.369884)}
{pt3dadd(192672.000000,142944.000000,103075.000000,530.772780)}
{pt3dadd(192624.000000,142932.000000,103250.000000,536.776606)}
{pt3dadd(192684.000000,143016.000000,103425.000000,521.946754)}
{pt3dadd(192612.000000,143232.000000,103525.000000,521.946754)}
{pt3dadd(192624.000000,143280.000000,103650.000000,531.590266)}
{pt3dadd(192516.000000,143220.000000,103825.000000,565.187370)}
{pt3dadd(192432.000000,143340.000000,103975.000000,548.019976)}
{pt3dadd(192396.000000,143448.000000,104100.000000,562.849828)}
{pt3dadd(192348.000000,143544.000000,104275.000000,557.663488)}
{pt3dadd(192336.000000,143652.000000,104475.000000,548.019976)}
{pt3dadd(192312.000000,143760.000000,104650.000000,505.238570)}
{pt3dadd(192276.000000,143808.000000,104825.000000,481.661764)}
{pt3dadd(192240.000000,143844.000000,104950.000000,454.021328)}
{pt3dadd(192204.000000,143892.000000,105125.000000,427.697116)}
{pt3dadd(192168.000000,143940.000000,105275.000000,432.401272)}
{pt3dadd(192132.000000,143964.000000,105450.000000,432.401272)}
{pt3dadd(192108.000000,144072.000000,105600.000000,436.668080)}
{pt3dadd(192132.000000,144252.000000,105725.000000,449.478664)}
{pt3dadd(192084.000000,144288.000000,105850.000000,470.863520)}
{pt3dadd(192084.000000,144288.000000,105850.000000,457.412410)}
{pt3dadd(192024.000000,144360.000000,105900.000000,482.168050)}
{pt3dadd(191976.000000,144456.000000,106025.000000,491.352352)}
{pt3dadd(191940.000000,144636.000000,106150.000000,491.352352)}
{pt3dadd(192048.000000,144444.000000,106275.000000,491.352352)}
{pt3dadd(192132.000000,144468.000000,106375.000000,500.099306)}
{pt3dadd(192180.000000,144456.000000,106550.000000,478.255760)}
{pt3dadd(192204.000000,144528.000000,106675.000000,470.415500)}

{create adhoc28}
{access adhoc28}
{connect adhoc28(1), adhoc27(0)}
{nseg = 1}
{strdef color color = "White"}
{pt3dclear()}
{pt3dadd(192204.000000,144528.000000,106675.000000,470.415500)}
{pt3dadd(192168.000000,144132.000000,106675.000000,463.677503)}
{pt3dadd(192084.000000,143712.000000,106675.000000,358.731536)}
{pt3dadd(192024.000000,143460.000000,106675.000000,287.505578)}
{pt3dadd(192060.000000,143436.000000,106775.000000,211.575464)}
{pt3dadd(192048.000000,143472.000000,106900.000000,149.096460)}
{pt3dadd(192000.000000,143628.000000,107050.000000,120.970894)}
{pt3dadd(192012.000000,143748.000000,107200.000000,111.072237)}
{pt3dadd(192000.000000,143832.000000,107250.000000,111.072237)}
{pt3dadd(191940.000000,143964.000000,107425.000000,108.947198)}
{pt3dadd(191940.000000,144096.000000,107550.000000,106.822159)}
{pt3dadd(191940.000000,144168.000000,107700.000000,106.822159)}
{pt3dadd(191940.000000,144372.000000,107800.000000,112.550056)}
{pt3dadd(191916.000000,144528.000000,107925.000000,116.152914)}
{pt3dadd(191928.000000,144612.000000,108025.000000,113.329980)}
{pt3dadd(191868.000000,144864.000000,108175.000000,114.366585)}
{pt3dadd(191880.000000,144996.000000,108250.000000,113.329980)}
{pt3dadd(191832.000000,145152.000000,108350.000000,108.638688)}
{pt3dadd(191748.000000,145344.000000,108475.000000,102.910791)}
{pt3dadd(191784.000000,145500.000000,108575.000000,102.910791)}
{pt3dadd(191844.000000,145548.000000,108675.000000,101.874186)}
{pt3dadd(191844.000000,145692.000000,108800.000000,101.874186)}
{pt3dadd(191880.000000,145776.000000,108925.000000,98.014647)}
{pt3dadd(191940.000000,146016.000000,109025.000000,99.051252)}
{pt3dadd(191892.000000,146124.000000,109150.000000,105.142083)}
{pt3dadd(191916.000000,146364.000000,109175.000000,106.129795)}
{pt3dadd(192036.000000,146580.000000,109175.000000,120.000000)}

{create adhoc29}
{access adhoc29}
{connect adhoc29(1), adhoc27(0)}
{nseg = 1}
{strdef color color = "White"}
{pt3dclear()}
{pt3dadd(192204.000000,144528.000000,106675.000000,470.415500)}
{pt3dadd(192108.000000,144732.000000,106875.000000,430.620760)}
{pt3dadd(191976.000000,144960.000000,107075.000000,374.027696)}
{pt3dadd(191988.000000,145164.000000,107225.000000,357.346996)}
{pt3dadd(192024.000000,145164.000000,107375.000000,344.536412)}
{pt3dadd(191964.000000,145152.000000,107400.000000,321.848516)}
{pt3dadd(191964.000000,145212.000000,107575.000000,318.960576)}
{pt3dadd(192072.000000,145344.000000,107725.000000,299.411066)}
{pt3dadd(192084.000000,145488.000000,107825.000000,263.056810)}
{pt3dadd(192096.000000,145980.000000,107925.000000,219.016174)}
{pt3dadd(192144.000000,146220.000000,108075.000000,216.753394)}
{pt3dadd(192156.000000,146232.000000,108175.000000,200.042678)}
{pt3dadd(192384.000000,146340.000000,108325.000000,205.631892)}
{pt3dadd(192432.000000,146676.000000,108400.000000,200.042678)}
{pt3dadd(192432.000000,146892.000000,108525.000000,212.705072)}
{pt3dadd(192504.000000,146940.000000,108675.000000,222.457932)}
{pt3dadd(192720.000000,147168.000000,108825.000000,245.088932)}
{pt3dadd(192756.000000,147204.000000,108825.000000,267.719932)}
{pt3dadd(192936.000000,147420.000000,109000.000000,299.124106)}
{pt3dadd(192744.000000,147468.000000,109400.000000,286.461712)}
{pt3dadd(192480.000000,147492.000000,109725.000000,295.132416)}
{pt3dadd(192396.000000,147588.000000,109925.000000,308.855672)}
{pt3dadd(192672.000000,148068.000000,109750.000000,308.855672)}
{pt3dadd(192816.000000,148284.000000,109575.000000,291.886842)}
{pt3dadd(192720.000000,148476.000000,109825.000000,315.301762)}
{pt3dadd(192492.000000,148656.000000,110000.000000,304.011608)}
{pt3dadd(192600.000000,148812.000000,110050.000000,300.325780)}
{pt3dadd(192516.000000,149016.000000,110175.000000,326.249590)}
{pt3dadd(192564.000000,149172.000000,110300.000000,365.958270)}
{pt3dadd(192612.000000,149340.000000,110275.000000,386.583986)}
{pt3dadd(192696.000000,149472.000000,110375.000000,407.911568)}
{pt3dadd(192684.000000,149604.000000,110550.000000,432.982252)}
{pt3dadd(192672.000000,149724.000000,110600.000000,428.715444)}
{pt3dadd(192720.000000,149844.000000,110600.000000,428.715444)}
{pt3dadd(192756.000000,149964.000000,110625.000000,437.045882)}
{pt3dadd(192732.000000,150144.000000,110800.000000,462.116566)}
{pt3dadd(192708.000000,150276.000000,110850.000000,472.242262)}
{pt3dadd(192636.000000,150420.000000,110975.000000,506.982636)}
{pt3dadd(192504.000000,150540.000000,111200.000000,498.652198)}
{pt3dadd(192516.000000,150684.000000,111250.000000,503.132344)}
{pt3dadd(192444.000000,150720.000000,111350.000000,471.208192)}
{pt3dadd(192456.000000,150876.000000,111475.000000,429.158344)}
{pt3dadd(192612.000000,151212.000000,111600.000000,382.798396)}
{pt3dadd(192624.000000,151284.000000,111725.000000,368.388984)}
{pt3dadd(192576.000000,151296.000000,111825.000000,344.512140)}
{pt3dadd(192420.000000,151212.000000,111950.000000,358.921552)}
{pt3dadd(192408.000000,151512.000000,112075.000000,362.264704)}
{pt3dadd(192288.000000,151560.000000,112225.000000,373.884278)}
{pt3dadd(192156.000000,151680.000000,112325.000000,384.423574)}
{pt3dadd(192048.000000,151692.000000,112450.000000,399.553464)}
{pt3dadd(191964.000000,151740.000000,112600.000000,417.068204)}
{pt3dadd(191928.000000,151704.000000,112650.000000,432.198094)}
{pt3dadd(191760.000000,151740.000000,112775.000000,432.198094)}
{pt3dadd(191664.000000,151716.000000,112875.000000,444.398648)}
{pt3dadd(191712.000000,151788.000000,113050.000000,436.464902)}
{pt3dadd(191652.000000,151860.000000,113200.000000,427.280600)}
{pt3dadd(191460.000000,151860.000000,113350.000000,402.591254)}
{pt3dadd(191256.000000,151812.000000,113500.000000,402.591254)}
{pt3dadd(191256.000000,151776.000000,113575.000000,365.377290)}
{pt3dadd(191136.000000,151836.000000,113700.000000,342.983330)}
{pt3dadd(190980.000000,151740.000000,113825.000000,305.769366)}
{pt3dadd(190884.000000,151776.000000,114000.000000,322.524966)}
{pt3dadd(190824.000000,151812.000000,114150.000000,284.707180)}
{pt3dadd(190728.000000,151836.000000,114275.000000,279.836550)}
{pt3dadd(190620.000000,151932.000000,114450.000000,267.928662)}
{pt3dadd(190572.000000,151908.000000,114625.000000,260.795252)}
{pt3dadd(190452.000000,151932.000000,114750.000000,228.648432)}
{pt3dadd(190260.000000,152268.000000,114825.000000,238.888932)}
{pt3dadd(189996.000000,152448.000000,114925.000000,252.017372)}
{pt3dadd(189768.000000,152844.000000,115025.000000,266.675680)}
{pt3dadd(189780.000000,152664.000000,115125.000000,282.066900)}
{pt3dadd(189876.000000,152328.000000,115175.000000,322.147466)}
{pt3dadd(189852.000000,152244.000000,115225.000000,353.991560)}
{pt3dadd(189864.000000,152496.000000,115325.000000,397.071372)}
{pt3dadd(189672.000000,152556.000000,115450.000000,443.039124)}
{pt3dadd(189588.000000,152628.000000,115500.000000,491.305276)}
{pt3dadd(189432.000000,152772.000000,115600.000000,514.882082)}
{pt3dadd(189276.000000,152700.000000,115775.000000,539.637722)}
{pt3dadd(189156.000000,152592.000000,115875.000000,574.914698)}
{pt3dadd(188868.000000,152568.000000,116150.000000,591.264606)}
{pt3dadd(188724.000000,152640.000000,116375.000000,602.428174)}
{pt3dadd(188628.000000,152796.000000,116575.000000,597.241834)}
{pt3dadd(188592.000000,153120.000000,116750.000000,591.796192)}
{pt3dadd(188436.000000,153168.000000,117000.000000,551.579860)}
{pt3dadd(188496.000000,153552.000000,117150.000000,516.839486)}
{pt3dadd(188364.000000,153612.000000,117375.000000,495.550222)}
{pt3dadd(188196.000000,153732.000000,117550.000000,490.610866)}
{pt3dadd(188076.000000,153792.000000,117700.000000,475.781014)}
{pt3dadd(187920.000000,154104.000000,117875.000000,471.076858)}
{pt3dadd(187620.000000,154272.000000,118050.000000,489.467324)}
{pt3dadd(187440.000000,154368.000000,118050.000000,489.467324)}
{pt3dadd(187272.000000,154488.000000,118100.000000,480.283022)}
{pt3dadd(187200.000000,154524.000000,118250.000000,475.802876)}
{pt3dadd(187044.000000,154524.000000,118400.000000,480.507032)}
{pt3dadd(187020.000000,154524.000000,118400.000000,485.693372)}
{pt3dadd(187032.000000,154620.000000,118475.000000,506.982636)}
{pt3dadd(186840.000000,154824.000000,118575.000000,537.456202)}
{pt3dadd(186780.000000,155088.000000,118700.000000,567.929768)}
{pt3dadd(186600.000000,155232.000000,118825.000000,589.219032)}
{pt3dadd(186348.000000,155496.000000,118950.000000,589.219032)}
{pt3dadd(186120.000000,155724.000000,119075.000000,583.501106)}
{pt3dadd(185868.000000,155844.000000,119225.000000,553.027540)}
{pt3dadd(185832.000000,155952.000000,119375.000000,514.223536)}
{pt3dadd(185736.000000,156144.000000,119550.000000,497.873628)}
{pt3dadd(185676.000000,156180.000000,119750.000000,459.166932)}
{pt3dadd(185424.000000,156348.000000,119750.000000,418.524910)}
{pt3dadd(185316.000000,156492.000000,119875.000000,414.258102)}
{pt3dadd(185136.000000,156852.000000,120025.000000,422.588540)}
{pt3dadd(185004.000000,156948.000000,120175.000000,400.134444)}
{pt3dadd(184860.000000,156972.000000,120300.000000,415.264334)}
{pt3dadd(184764.000000,156996.000000,120500.000000,422.820278)}
{pt3dadd(184716.000000,156936.000000,120775.000000,422.820278)}
{pt3dadd(184176.000000,157140.000000,120825.000000,442.130276)}
{pt3dadd(184056.000000,157332.000000,120925.000000,464.584372)}
{pt3dadd(183828.000000,157488.000000,121025.000000,482.974838)}
{pt3dadd(183648.000000,157452.000000,121200.000000,527.782668)}
{pt3dadd(183468.000000,157572.000000,121400.000000,562.523042)}
{pt3dadd(183156.000000,157728.000000,121575.000000,552.397346)}
{pt3dadd(182964.000000,157788.000000,121750.000000,568.747254)}
{pt3dadd(182784.000000,157800.000000,121875.000000,585.097162)}
{pt3dadd(182652.000000,157788.000000,122000.000000,573.375410)}
{pt3dadd(182352.000000,157884.000000,122100.000000,552.086146)}
{pt3dadd(182256.000000,157944.000000,122200.000000,552.086146)}
{pt3dadd(182052.000000,158040.000000,122300.000000,564.393986)}
{pt3dadd(181956.000000,158136.000000,122425.000000,521.719866)}
{pt3dadd(181704.000000,158244.000000,122500.000000,521.719866)}
{pt3dadd(181524.000000,158388.000000,122650.000000,496.649182)}
{pt3dadd(181404.000000,158388.000000,122725.000000,464.725030)}
{pt3dadd(181272.000000,158352.000000,122825.000000,409.743070)}
{pt3dadd(181104.000000,158400.000000,122925.000000,406.057242)}
{pt3dadd(180948.000000,158496.000000,123025.000000,352.345448)}
{pt3dadd(180888.000000,158544.000000,123050.000000,345.491980)}
{pt3dadd(180852.000000,158556.000000,123125.000000,363.965022)}
{pt3dadd(180744.000000,158604.000000,123200.000000,356.768878)}
{pt3dadd(180624.000000,158628.000000,123225.000000,343.699106)}
{pt3dadd(180516.000000,158640.000000,123225.000000,346.731450)}
{pt3dadd(180504.000000,158736.000000,123300.000000,361.140862)}
{pt3dadd(180516.000000,158736.000000,123375.000000,342.667820)}
{pt3dadd(180456.000000,158712.000000,123425.000000,349.863964)}
{pt3dadd(180204.000000,158796.000000,123525.000000,362.933736)}
{pt3dadd(180012.000000,158892.000000,123600.000000,362.933736)}
{pt3dadd(179940.000000,158856.000000,123750.000000,348.524324)}
{pt3dadd(179880.000000,158832.000000,123850.000000,371.264174)}
{pt3dadd(179892.000000,158844.000000,123925.000000,392.649030)}
{pt3dadd(179712.000000,158904.000000,124100.000000,392.649030)}
{pt3dadd(179688.000000,158904.000000,124100.000000,406.372286)}
{pt3dadd(179424.000000,158916.000000,124175.000000,424.845328)}
{pt3dadd(179376.000000,159000.000000,124300.000000,429.325474)}
{pt3dadd(179364.000000,159012.000000,124300.000000,415.874364)}
{pt3dadd(179232.000000,159180.000000,124425.000000,412.364048)}
{pt3dadd(178752.000000,159108.000000,124625.000000,395.608448)}
{pt3dadd(178608.000000,159072.000000,124750.000000,373.951446)}
{pt3dadd(178452.000000,159012.000000,124850.000000,357.270746)}
{pt3dadd(178428.000000,158928.000000,124925.000000,338.797704)}
{pt3dadd(178308.000000,158976.000000,125075.000000,353.927594)}
{pt3dadd(178008.000000,159000.000000,125175.000000,356.959938)}
{pt3dadd(177756.000000,159120.000000,125250.000000,374.553310)}
{pt3dadd(177708.000000,159084.000000,125400.000000,370.867482)}
{pt3dadd(177564.000000,159000.000000,125500.000000,377.720950)}
{pt3dadd(177516.000000,159096.000000,125525.000000,359.247908)}
{pt3dadd(177456.000000,159156.000000,125650.000000,362.431868)}
{pt3dadd(177264.000000,159180.000000,125750.000000,338.918212)}
{pt3dadd(177048.000000,159228.000000,125875.000000,332.064744)}
{pt3dadd(176724.000000,159312.000000,125950.000000,343.684318)}
{pt3dadd(176436.000000,159384.000000,126050.000000,350.537786)}
{pt3dadd(176088.000000,159324.000000,126150.000000,341.433542)}
{pt3dadd(175764.000000,159216.000000,126150.000000,361.077082)}
{pt3dadd(175512.000000,159072.000000,126300.000000,375.486494)}
{pt3dadd(175296.000000,159276.000000,126250.000000,375.486494)}
{pt3dadd(175092.000000,159240.000000,126475.000000,421.846442)}
{pt3dadd(174540.000000,159588.000000,126625.000000,453.690536)}
{pt3dadd(174324.000000,159648.000000,126450.000000,470.371236)}
{pt3dadd(174156.000000,159684.000000,126525.000000,483.181820)}
{pt3dadd(173916.000000,159744.000000,126600.000000,496.632930)}
{pt3dadd(173736.000000,159816.000000,126625.000000,475.343666)}
{pt3dadd(173592.000000,159900.000000,126625.000000,484.527968)}
{pt3dadd(173436.000000,159960.000000,126675.000000,494.171480)}
{pt3dadd(173280.000000,160020.000000,126600.000000,498.875636)}
{pt3dadd(173148.000000,160020.000000,126625.000000,494.171480)}
{pt3dadd(173004.000000,160020.000000,126625.000000,480.720370)}
{pt3dadd(172860.000000,160092.000000,126675.000000,467.269260)}
{pt3dadd(172776.000000,160224.000000,126700.000000,444.815164)}
{pt3dadd(172620.000000,160344.000000,126725.000000,440.111008)}
{pt3dadd(172476.000000,160236.000000,126600.000000,435.630862)}
{pt3dadd(172308.000000,160224.000000,126625.000000,449.081972)}
{pt3dadd(172164.000000,160284.000000,126575.000000,462.533082)}
{pt3dadd(171972.000000,160272.000000,126600.000000,448.123670)}
{pt3dadd(171840.000000,160320.000000,126600.000000,443.643524)}
{pt3dadd(171720.000000,160356.000000,126600.000000,443.643524)}
{pt3dadd(171576.000000,160476.000000,126575.000000,443.643524)}
{pt3dadd(171456.000000,160608.000000,126575.000000,430.192414)}
{pt3dadd(171300.000000,160740.000000,126600.000000,457.412410)}
{pt3dadd(171132.000000,160788.000000,126600.000000,453.145602)}
{pt3dadd(170940.000000,160848.000000,126625.000000,467.269260)}
{pt3dadd(170820.000000,160920.000000,126700.000000,458.084958)}
{pt3dadd(170472.000000,160980.000000,126675.000000,458.084958)}
{pt3dadd(170052.000000,161124.000000,126650.000000,445.274374)}
{pt3dadd(169920.000000,161316.000000,126725.000000,449.541182)}
{pt3dadd(169704.000000,161424.000000,126750.000000,427.087086)}
{pt3dadd(169548.000000,161532.000000,126725.000000,418.756648)}
{pt3dadd(169416.000000,161616.000000,126750.000000,432.207758)}
{pt3dadd(169164.000000,161700.000000,126750.000000,454.661854)}
{pt3dadd(168960.000000,161796.000000,126800.000000,431.922004)}
{pt3dadd(168636.000000,161952.000000,127000.000000,414.328632)}
{pt3dadd(167856.000000,162252.000000,127125.000000,380.574476)}
{pt3dadd(167604.000000,162396.000000,127175.000000,334.176210)}
{pt3dadd(167304.000000,162408.000000,127225.000000,277.967958)}
{pt3dadd(167268.000000,162420.000000,127350.000000,250.198326)}
{pt3dadd(166716.000000,162528.000000,127475.000000,217.149942)}
{pt3dadd(166260.000000,162708.000000,127675.000000,197.414582)}
{pt3dadd(165564.000000,163068.000000,127875.000000,178.796002)}
{pt3dadd(165240.000000,163332.000000,127875.000000,170.371114)}
{pt3dadd(164916.000000,163608.000000,127875.000000,176.533222)}
{pt3dadd(164532.000000,163800.000000,127875.000000,195.796736)}
{pt3dadd(164316.000000,163860.000000,127800.000000,207.107208)}
{pt3dadd(164172.000000,164088.000000,127700.000000,233.983598)}
{pt3dadd(163980.000000,164112.000000,127750.000000,252.648986)}
{pt3dadd(163824.000000,164172.000000,127800.000000,274.256510)}
{pt3dadd(163668.000000,164208.000000,127775.000000,294.568492)}
{pt3dadd(163464.000000,164232.000000,127800.000000,322.338124)}
{pt3dadd(163332.000000,164328.000000,127850.000000,328.554428)}
{pt3dadd(163152.000000,164388.000000,127950.000000,341.001824)}
{pt3dadd(162960.000000,164508.000000,128075.000000,334.785520)}
{pt3dadd(162816.000000,164568.000000,128125.000000,341.981664)}
{pt3dadd(162648.000000,164676.000000,128150.000000,341.981664)}
{pt3dadd(162468.000000,164724.000000,128200.000000,330.127000)}
{pt3dadd(162312.000000,164796.000000,128275.000000,320.567544)}
{pt3dadd(162456.000000,164688.000000,128375.000000,305.176324)}
{pt3dadd(162348.000000,164700.000000,128375.000000,273.029504)}
{pt3dadd(161820.000000,164964.000000,128500.000000,239.936810)}
{pt3dadd(161796.000000,164844.000000,128625.000000,222.160250)}
{pt3dadd(161412.000000,165132.000000,128750.000000,213.902440)}
{pt3dadd(161136.000000,165456.000000,128825.000000,205.878740)}
{pt3dadd(161136.000000,165504.000000,128925.000000,187.083160)}
{pt3dadd(160716.000000,165564.000000,129100.000000,182.484900)}
{pt3dadd(160500.000000,165636.000000,129125.000000,171.713020)}
{pt3dadd(160380.000000,165648.000000,129200.000000,145.784030)}
{pt3dadd(160152.000000,165564.000000,129200.000000,135.012150)}
{pt3dadd(159924.000000,165360.000000,129325.000000,133.752150)}
{pt3dadd(159780.000000,165300.000000,129475.000000,143.673472)}
{pt3dadd(159456.000000,165216.000000,129475.000000,169.602462)}
{pt3dadd(159288.000000,165096.000000,129225.000000,186.243014)}
{pt3dadd(159084.000000,165084.000000,129075.000000,207.301374)}
{pt3dadd(158616.000000,165132.000000,129175.000000,227.356954)}
{pt3dadd(158220.000000,165156.000000,129300.000000,227.356954)}
{pt3dadd(157932.000000,165084.000000,129450.000000,224.862238)}
{pt3dadd(157740.000000,165000.000000,129625.000000,229.280046)}
{pt3dadd(157404.000000,165000.000000,129700.000000,213.923982)}
{pt3dadd(157080.000000,165120.000000,129825.000000,202.438812)}
{pt3dadd(156804.000000,165084.000000,129925.000000,202.438812)}
{pt3dadd(156312.000000,165084.000000,130075.000000,184.706834)}
{pt3dadd(156096.000000,165288.000000,130175.000000,174.420354)}
{pt3dadd(155724.000000,165264.000000,130275.000000,183.306202)}
{pt3dadd(155544.000000,165372.000000,130350.000000,192.636344)}
{pt3dadd(155304.000000,165528.000000,130450.000000,205.931862)}
{pt3dadd(155052.000000,165528.000000,130600.000000,216.870118)}
{pt3dadd(154656.000000,165660.000000,130700.000000,210.268998)}
{pt3dadd(154572.000000,165684.000000,130700.000000,201.383150)}
{pt3dadd(154428.000000,165732.000000,130775.000000,188.913358)}
{pt3dadd(154164.000000,165864.000000,130900.000000,168.686664)}
{pt3dadd(153912.000000,166032.000000,131000.000000,156.216872)}
{pt3dadd(153684.000000,166080.000000,131125.000000,164.679584)}
{pt3dadd(153432.000000,166152.000000,131150.000000,166.287698)}
{pt3dadd(153264.000000,166284.000000,131250.000000,193.415798)}
{pt3dadd(153084.000000,166488.000000,131350.000000,211.147776)}
{pt3dadd(152856.000000,166644.000000,131500.000000,250.723272)}
{pt3dadd(152580.000000,166692.000000,131575.000000,272.276600)}
{pt3dadd(152304.000000,166812.000000,131675.000000,299.152990)}
{pt3dadd(152076.000000,166908.000000,131800.000000,299.152990)}
{pt3dadd(151932.000000,166944.000000,131925.000000,312.937860)}
{pt3dadd(151728.000000,167040.000000,132025.000000,300.490464)}
{pt3dadd(151512.000000,167112.000000,132100.000000,306.706768)}
{pt3dadd(151452.000000,167172.000000,132150.000000,312.923072)}
{pt3dadd(151452.000000,167160.000000,132250.000000,307.553202)}
{pt3dadd(151092.000000,167232.000000,132350.000000,296.263048)}
{pt3dadd(150828.000000,167376.000000,132500.000000,296.263048)}
{pt3dadd(150564.000000,167412.000000,132550.000000,284.408384)}
{pt3dadd(150348.000000,167568.000000,132550.000000,281.224424)}
{pt3dadd(150192.000000,167664.000000,132650.000000,302.552006)}
{pt3dadd(150024.000000,167724.000000,132725.000000,323.879588)}
{pt3dadd(149880.000000,167772.000000,132750.000000,318.509718)}
{pt3dadd(149724.000000,167808.000000,132750.000000,313.395552)}
{pt3dadd(149712.000000,167808.000000,132750.000000,348.503664)}
{pt3dadd(149580.000000,167856.000000,132800.000000,344.993348)}
{pt3dadd(149412.000000,168000.000000,132900.000000,356.612922)}
{pt3dadd(149232.000000,168060.000000,133000.000000,398.307032)}
{pt3dadd(149088.000000,168156.000000,133075.000000,457.325710)}
{pt3dadd(148932.000000,168144.000000,133050.000000,452.621554)}
{pt3dadd(149016.000000,168144.000000,133250.000000,463.687814)}
{pt3dadd(148716.000000,168132.000000,133425.000000,445.214772)}
{pt3dadd(148260.000000,168324.000000,133525.000000,406.140112)}
{pt3dadd(147936.000000,168444.000000,133675.000000,349.616150)}
{pt3dadd(147624.000000,168624.000000,133800.000000,325.739306)}
{pt3dadd(147396.000000,168912.000000,133950.000000,305.113590)}
{pt3dadd(147108.000000,169080.000000,134050.000000,308.456742)}
{pt3dadd(146928.000000,169308.000000,134100.000000,357.174914)}
{pt3dadd(146724.000000,169716.000000,134175.000000,365.432724)}
{pt3dadd(146340.000000,169812.000000,134250.000000,372.628868)}
{pt3dadd(146124.000000,170016.000000,134325.000000,366.990508)}
{pt3dadd(145896.000000,170328.000000,134450.000000,370.500824)}
{pt3dadd(145668.000000,170352.000000,134550.000000,324.533072)}
{pt3dadd(145452.000000,170424.000000,134650.000000,337.602844)}
{pt3dadd(145176.000000,170652.000000,134750.000000,299.293916)}
{pt3dadd(145092.000000,170628.000000,134875.000000,289.541056)}
{pt3dadd(144780.000000,170748.000000,135000.000000,258.925036)}
{pt3dadd(144468.000000,170940.000000,135100.000000,246.421756)}
{pt3dadd(144144.000000,171072.000000,135225.000000,211.798656)}
{pt3dadd(143976.000000,171132.000000,135225.000000,209.937064)}
{pt3dadd(143820.000000,171264.000000,135300.000000,219.689924)}
{pt3dadd(143868.000000,171204.000000,135400.000000,215.682844)}
{pt3dadd(143604.000000,171276.000000,135525.000000,217.945624)}
{pt3dadd(143388.000000,171552.000000,135725.000000,214.311082)}
{pt3dadd(143208.000000,171612.000000,135825.000000,224.597562)}
{pt3dadd(143040.000000,171672.000000,136000.000000,212.689674)}
{pt3dadd(142752.000000,171732.000000,136000.000000,225.985192)}
{pt3dadd(142596.000000,171708.000000,136125.000000,233.475272)}
{pt3dadd(142476.000000,171792.000000,136225.000000,250.405332)}
{pt3dadd(142344.000000,171828.000000,136350.000000,255.275962)}
{pt3dadd(142104.000000,171936.000000,136500.000000,264.564400)}
{pt3dadd(141828.000000,172056.000000,136575.000000,272.822210)}
{pt3dadd(141684.000000,172248.000000,136700.000000,278.460570)}
{pt3dadd(141540.000000,172320.000000,136825.000000,281.080020)}
{pt3dadd(141516.000000,172344.000000,136950.000000,286.449890)}
{pt3dadd(141504.000000,172356.000000,136950.000000,297.740044)}
{pt3dadd(141228.000000,172464.000000,137025.000000,307.299500)}
{pt3dadd(141084.000000,172452.000000,137150.000000,313.515804)}
{pt3dadd(140952.000000,172524.000000,137250.000000,328.713620)}
{pt3dadd(140736.000000,172728.000000,137375.000000,334.633904)}
{pt3dadd(140676.000000,172920.000000,137500.000000,341.161016)}
{pt3dadd(140676.000000,172956.000000,137600.000000,331.601560)}
{pt3dadd(140568.000000,173004.000000,137750.000000,342.140856)}
{pt3dadd(140520.000000,173076.000000,137900.000000,342.140856)}
{pt3dadd(140412.000000,173136.000000,137975.000000,355.864112)}
{pt3dadd(140832.000000,173220.000000,138075.000000,349.337000)}
{pt3dadd(140916.000000,173256.000000,138225.000000,349.337000)}
{pt3dadd(141096.000000,173484.000000,138350.000000,335.613744)}
{pt3dadd(140976.000000,173616.000000,138475.000000,315.301762)}
{pt3dadd(140868.000000,173832.000000,138600.000000,285.417722)}
{pt3dadd(140748.000000,173892.000000,138750.000000,279.497438)}
{pt3dadd(140544.000000,174060.000000,138875.000000,266.368998)}
{pt3dadd(140376.000000,174264.000000,139000.000000,250.208214)}
{pt3dadd(140280.000000,174480.000000,139150.000000,239.407412)}
{pt3dadd(140292.000000,174576.000000,139250.000000,234.989604)}
{pt3dadd(140172.000000,174720.000000,139375.000000,218.278888)}
{pt3dadd(139908.000000,174888.000000,139500.000000,220.654802)}
{pt3dadd(139788.000000,175032.000000,139675.000000,218.392022)}
{pt3dadd(139572.000000,175284.000000,139800.000000,218.392022)}
{pt3dadd(139536.000000,175332.000000,139800.000000,220.547050)}
{pt3dadd(139428.000000,175368.000000,139925.000000,234.507346)}
{pt3dadd(139200.000000,175680.000000,140050.000000,245.259872)}
{pt3dadd(138984.000000,175800.000000,140175.000000,255.012732)}
{pt3dadd(138828.000000,175908.000000,140300.000000,273.678120)}
{pt3dadd(138780.000000,176184.000000,140400.000000,280.811530)}
{pt3dadd(138708.000000,176292.000000,140500.000000,280.811530)}
{pt3dadd(138672.000000,176364.000000,140625.000000,275.173170)}
{pt3dadd(138588.000000,176460.000000,140675.000000,277.923590)}
{pt3dadd(138492.000000,176712.000000,140750.000000,280.811530)}
{pt3dadd(138504.000000,176892.000000,140825.000000,273.678120)}
{pt3dadd(138372.000000,176940.000000,140900.000000,271.058670)}
{pt3dadd(138312.000000,177000.000000,140975.000000,268.439220)}
{pt3dadd(138348.000000,177048.000000,141025.000000,274.359504)}
{pt3dadd(138360.000000,177120.000000,141100.000000,258.968284)}
{pt3dadd(138228.000000,177192.000000,141175.000000,263.606978)}
{pt3dadd(138144.000000,177312.000000,141325.000000,246.676918)}
{pt3dadd(138120.000000,177468.000000,141450.000000,233.381400)}
{pt3dadd(138048.000000,177696.000000,141550.000000,201.864552)}
{pt3dadd(137832.000000,177756.000000,141625.000000,193.840852)}
{pt3dadd(137808.000000,177876.000000,141725.000000,176.108874)}
{pt3dadd(137748.000000,178056.000000,141775.000000,179.743416)}
{pt3dadd(137736.000000,178164.000000,141850.000000,171.280704)}
{pt3dadd(137832.000000,178176.000000,141950.000000,172.888818)}
{pt3dadd(137784.000000,178284.000000,142050.000000,172.888818)}
{pt3dadd(137700.000000,178548.000000,142200.000000,172.888818)}
{pt3dadd(137736.000000,178704.000000,142325.000000,162.967496)}
{pt3dadd(137676.000000,178656.000000,142425.000000,166.107146)}
{pt3dadd(137664.000000,178668.000000,142525.000000,166.107146)}
{pt3dadd(137640.000000,178728.000000,142625.000000,183.883706)}
{pt3dadd(137652.000000,178848.000000,142750.000000,201.615684)}
{pt3dadd(137532.000000,179304.000000,142825.000000,222.337808)}
{pt3dadd(137580.000000,179400.000000,142975.000000,243.575838)}
{pt3dadd(137340.000000,179628.000000,143125.000000,273.484572)}
{pt3dadd(137352.000000,179736.000000,143225.000000,279.122932)}
{pt3dadd(137364.000000,179856.000000,143325.000000,306.631058)}
{pt3dadd(137184.000000,179844.000000,143450.000000,334.139184)}
{pt3dadd(137124.000000,179928.000000,143600.000000,342.809888)}
{pt3dadd(136980.000000,180000.000000,143750.000000,345.993848)}
{pt3dadd(136788.000000,180012.000000,143925.000000,359.063620)}
{pt3dadd(136872.000000,180000.000000,144100.000000,359.063620)}
{pt3dadd(136680.000000,180300.000000,144250.000000,359.063620)}
{pt3dadd(136548.000000,180408.000000,144400.000000,359.063620)}
{pt3dadd(136644.000000,180840.000000,144700.000000,359.063620)}
{pt3dadd(136224.000000,181116.000000,144825.000000,355.553304)}
{pt3dadd(135936.000000,181524.000000,144975.000000,338.797704)}
{pt3dadd(135780.000000,181680.000000,145100.000000,313.784294)}
{pt3dadd(135624.000000,181800.000000,145250.000000,313.784294)}
{pt3dadd(135624.000000,181956.000000,145350.000000,304.680050)}
{pt3dadd(135636.000000,182052.000000,145475.000000,286.862784)}
{pt3dadd(135456.000000,182148.000000,145600.000000,278.604974)}
{pt3dadd(135396.000000,182364.000000,145725.000000,289.895128)}
{pt3dadd(135252.000000,182400.000000,145800.000000,281.224424)}
{pt3dadd(135252.000000,182412.000000,145875.000000,278.474004)}
{pt3dadd(135240.000000,182412.000000,145875.000000,278.474004)}
{pt3dadd(135252.000000,182388.000000,145950.000000,278.474004)}
{pt3dadd(135252.000000,182328.000000,146050.000000,278.474004)}
{pt3dadd(135144.000000,182280.000000,146150.000000,287.144708)}
{pt3dadd(135024.000000,182448.000000,146250.000000,289.895128)}
{pt3dadd(134952.000000,182448.000000,146375.000000,289.895128)}
{pt3dadd(134928.000000,182520.000000,146475.000000,295.264998)}
{pt3dadd(134688.000000,182472.000000,146575.000000,286.594294)}
{pt3dadd(134688.000000,182556.000000,146675.000000,266.015702)}
{pt3dadd(134724.000000,182664.000000,146825.000000,253.512422)}
{pt3dadd(134676.000000,182652.000000,146925.000000,256.131872)}
{pt3dadd(134712.000000,182616.000000,147025.000000,250.762002)}
{pt3dadd(134832.000000,182460.000000,147125.000000,248.142552)}
{pt3dadd(134844.000000,182484.000000,147225.000000,254.936274)}
{pt3dadd(134844.000000,182484.000000,147225.000000,262.069684)}
{pt3dadd(134604.000000,182748.000000,147325.000000,259.450234)}
{pt3dadd(134664.000000,182784.000000,147475.000000,262.069684)}
{pt3dadd(134628.000000,182820.000000,147575.000000,259.574968)}
{pt3dadd(134580.000000,182952.000000,147675.000000,262.069684)}
{pt3dadd(134556.000000,183000.000000,147775.000000,267.439554)}
{pt3dadd(134424.000000,183036.000000,147900.000000,281.913668)}
{pt3dadd(134388.000000,183072.000000,148025.000000,287.552028)}
{pt3dadd(134388.000000,183072.000000,148025.000000,301.336898)}
{pt3dadd(134244.000000,183084.000000,148125.000000,306.706768)}
{pt3dadd(134304.000000,183120.000000,148275.000000,303.956348)}
{pt3dadd(134292.000000,183072.000000,148400.000000,297.740044)}
{pt3dadd(134232.000000,183060.000000,148550.000000,292.101684)}
{pt3dadd(134220.000000,183060.000000,148550.000000,289.069340)}
{pt3dadd(134148.000000,183024.000000,148650.000000,289.069340)}
{pt3dadd(134124.000000,183096.000000,148775.000000,294.707700)}
{pt3dadd(134136.000000,183132.000000,148900.000000,297.740044)}
{pt3dadd(134148.000000,183132.000000,148975.000000,300.490464)}
{pt3dadd(134208.000000,183180.000000,149125.000000,303.522808)}
{pt3dadd(134136.000000,183216.000000,149200.000000,306.410748)}
{pt3dadd(134088.000000,183144.000000,149300.000000,312.627052)}
{pt3dadd(134088.000000,183156.000000,149400.000000,309.594708)}
{pt3dadd(134112.000000,183192.000000,149475.000000,315.514992)}
{pt3dadd(134088.000000,183264.000000,149600.000000,312.482648)}
{pt3dadd(134112.000000,183372.000000,149700.000000,312.482648)}
{pt3dadd(134100.000000,183384.000000,149800.000000,319.336116)}
{pt3dadd(134004.000000,183444.000000,149925.000000,322.368460)}
{pt3dadd(133956.000000,183384.000000,150075.000000,325.552420)}
{pt3dadd(133824.000000,183408.000000,150225.000000,328.584764)}
{pt3dadd(133716.000000,183528.000000,150325.000000,338.144220)}
{pt3dadd(133512.000000,183552.000000,150475.000000,334.633904)}
{pt3dadd(133560.000000,183636.000000,150575.000000,328.713620)}
{pt3dadd(133524.000000,183684.000000,150675.000000,328.713620)}
{pt3dadd(133356.000000,183840.000000,150775.000000,328.713620)}
{pt3dadd(133248.000000,184008.000000,150900.000000,313.515804)}
{pt3dadd(133032.000000,183840.000000,150975.000000,317.026120)}
{pt3dadd(132888.000000,183708.000000,151100.000000,319.914060)}
{pt3dadd(132756.000000,183876.000000,151200.000000,323.257212)}
{pt3dadd(132744.000000,183888.000000,151200.000000,349.181022)}
{pt3dadd(132684.000000,183936.000000,151325.000000,388.255682)}
{pt3dadd(132576.000000,183936.000000,151475.000000,418.265722)}
{pt3dadd(132336.000000,183936.000000,151625.000000,442.955068)}
{pt3dadd(131964.000000,184080.000000,151750.000000,466.831912)}
{pt3dadd(131700.000000,184188.000000,151850.000000,450.945530)}
{pt3dadd(131376.000000,184200.000000,151950.000000,420.541574)}
{pt3dadd(131124.000000,183960.000000,152050.000000,398.087478)}
{pt3dadd(131028.000000,183912.000000,152125.000000,398.087478)}
{pt3dadd(130980.000000,183660.000000,152225.000000,377.720950)}
{pt3dadd(130980.000000,183624.000000,152225.000000,367.683522)}
{pt3dadd(130536.000000,183648.000000,152325.000000,364.651178)}
{pt3dadd(130164.000000,183672.000000,152450.000000,338.387102)}
{pt3dadd(129840.000000,183612.000000,152575.000000,313.697756)}
{pt3dadd(129696.000000,183576.000000,152625.000000,303.660328)}
{pt3dadd(129552.000000,183480.000000,152700.000000,297.740044)}
{pt3dadd(129288.000000,183420.000000,152800.000000,307.299500)}
{pt3dadd(128916.000000,183228.000000,152800.000000,329.693460)}
{pt3dadd(128784.000000,183156.000000,152900.000000,339.252916)}
{pt3dadd(128616.000000,183144.000000,152975.000000,342.436876)}
{pt3dadd(128520.000000,183384.000000,153100.000000,358.394588)}
{pt3dadd(128244.000000,183228.000000,153150.000000,361.904904)}
{pt3dadd(128112.000000,183120.000000,153150.000000,358.219076)}
{pt3dadd(127956.000000,183084.000000,153175.000000,358.219076)}
{pt3dadd(127836.000000,183084.000000,153200.000000,368.758372)}
{pt3dadd(127704.000000,183060.000000,153225.000000,365.248056)}
{pt3dadd(127596.000000,183012.000000,153250.000000,365.248056)}
{pt3dadd(127488.000000,182844.000000,153275.000000,365.248056)}
{pt3dadd(127344.000000,182748.000000,153225.000000,355.688600)}
{pt3dadd(127188.000000,182724.000000,153225.000000,345.149304)}
{pt3dadd(126972.000000,182652.000000,153350.000000,352.345448)}
{pt3dadd(126636.000000,182508.000000,153500.000000,352.345448)}
{pt3dadd(126600.000000,182496.000000,153500.000000,372.711976)}
{pt3dadd(126264.000000,182280.000000,153575.000000,401.668130)}
{pt3dadd(125844.000000,182004.000000,153575.000000,433.592282)}
{pt3dadd(125820.000000,181944.000000,153875.000000,454.977138)}
{pt3dadd(125568.000000,181848.000000,153925.000000,490.173518)}
{pt3dadd(125520.000000,181824.000000,153925.000000,477.362934)}
{pt3dadd(125184.000000,181740.000000,153925.000000,461.476552)}
{pt3dadd(124968.000000,181728.000000,154125.000000,452.292250)}
{pt3dadd(124728.000000,181704.000000,154350.000000,430.907394)}
{pt3dadd(124680.000000,181692.000000,154350.000000,392.200698)}
{pt3dadd(124416.000000,181632.000000,154525.000000,400.531136)}
{pt3dadd(124320.000000,181464.000000,154525.000000,412.150710)}
{pt3dadd(124104.000000,181356.000000,154525.000000,367.803336)}
{pt3dadd(123888.000000,181224.000000,154525.000000,337.919296)}
{pt3dadd(123744.000000,181164.000000,154600.000000,317.607314)}
{pt3dadd(123504.000000,181044.000000,154600.000000,280.393350)}
{pt3dadd(123264.000000,180780.000000,154650.000000,258.736348)}
{pt3dadd(123168.000000,180684.000000,154650.000000,280.343872)}
{pt3dadd(122928.000000,180444.000000,154650.000000,299.688616)}
{pt3dadd(122700.000000,180216.000000,154650.000000,343.877442)}
{pt3dadd(122604.000000,180084.000000,154650.000000,355.167596)}
{pt3dadd(122460.000000,180024.000000,154650.000000,355.167596)}
{pt3dadd(122112.000000,180060.000000,154800.000000,358.510748)}
{pt3dadd(121752.000000,180096.000000,154800.000000,349.406504)}
{pt3dadd(121428.000000,180048.000000,154800.000000,313.082264)}
{pt3dadd(120792.000000,180204.000000,154900.000000,316.266224)}
{pt3dadd(120216.000000,180108.000000,154975.000000,322.793336)}
{pt3dadd(119664.000000,180060.000000,155025.000000,313.233880)}
{pt3dadd(119208.000000,179976.000000,155025.000000,307.864010)}
{pt3dadd(119616.000000,180108.000000,155175.000000,320.311406)}
{pt3dadd(119340.000000,180180.000000,155300.000000,330.850702)}
{pt3dadd(118968.000000,180096.000000,155350.000000,315.652886)}
{pt3dadd(118932.000000,180084.000000,155350.000000,312.764946)}
{pt3dadd(118704.000000,180000.000000,155375.000000,349.978910)}
{pt3dadd(118356.000000,179748.000000,155425.000000,365.108800)}
{pt3dadd(117948.000000,179772.000000,155525.000000,373.042546)}
{pt3dadd(117588.000000,179952.000000,155625.000000,432.392700)}
{pt3dadd(117240.000000,180108.000000,155700.000000,473.421096)}
{pt3dadd(116904.000000,180108.000000,155700.000000,477.901242)}
{pt3dadd(116712.000000,180072.000000,155700.000000,486.648196)}
{pt3dadd(116448.000000,180048.000000,155800.000000,495.395150)}
{pt3dadd(116172.000000,179952.000000,155875.000000,466.372702)}
{pt3dadd(116160.000000,179940.000000,155875.000000,452.921592)}
{pt3dadd(116040.000000,180084.000000,155950.000000,444.174638)}
{pt3dadd(115908.000000,180144.000000,156075.000000,427.493938)}
{pt3dadd(115536.000000,180144.000000,156175.000000,427.493938)}
{pt3dadd(115092.000000,180096.000000,156225.000000,419.560192)}
{pt3dadd(114768.000000,180156.000000,156300.000000,411.626446)}
{pt3dadd(114456.000000,180252.000000,156375.000000,415.893254)}
{pt3dadd(114312.000000,180324.000000,156450.000000,402.169998)}
{pt3dadd(114168.000000,180276.000000,156525.000000,393.423044)}
{pt3dadd(114000.000000,180312.000000,156600.000000,397.293160)}
{pt3dadd(113904.000000,180396.000000,156700.000000,409.493714)}
{pt3dadd(113808.000000,180492.000000,156750.000000,405.226906)}
{pt3dadd(113772.000000,180480.000000,156825.000000,405.226906)}
{pt3dadd(113724.000000,180552.000000,156875.000000,383.569904)}
{pt3dadd(113772.000000,180516.000000,156950.000000,372.503644)}
{pt3dadd(113448.000000,180648.000000,157025.000000,356.617262)}
{pt3dadd(113244.000000,180780.000000,157125.000000,329.039976)}
{pt3dadd(113052.000000,180888.000000,157175.000000,312.879192)}
{pt3dadd(113052.000000,181008.000000,157250.000000,306.958908)}
{pt3dadd(112824.000000,181152.000000,157325.000000,289.141642)}
{pt3dadd(112620.000000,181308.000000,157375.000000,262.943430)}
{pt3dadd(112404.000000,181440.000000,157425.000000,248.285122)}
{pt3dadd(112416.000000,181524.000000,157500.000000,236.225692)}
{pt3dadd(112104.000000,181572.000000,157550.000000,230.855822)}
{pt3dadd(111900.000000,181632.000000,157575.000000,228.361106)}
{pt3dadd(111648.000000,181848.000000,157650.000000,219.936218)}
{pt3dadd(111396.000000,181932.000000,157750.000000,214.067546)}
{pt3dadd(111348.000000,181896.000000,157875.000000,221.709168)}
{pt3dadd(111072.000000,181944.000000,157950.000000,216.838538)}
{pt3dadd(110892.000000,181980.000000,158075.000000,227.591064)}
{pt3dadd(110724.000000,181980.000000,158125.000000,249.144392)}
{pt3dadd(110676.000000,181956.000000,158225.000000,285.629084)}
{pt3dadd(110580.000000,181932.000000,158375.000000,312.734788)}
{pt3dadd(110172.000000,181920.000000,158450.000000,328.895572)}
{pt3dadd(109896.000000,181872.000000,158525.000000,328.895572)}
{pt3dadd(109632.000000,181884.000000,158600.000000,318.143046)}
{pt3dadd(109608.000000,181896.000000,158650.000000,299.434914)}
{pt3dadd(109404.000000,181920.000000,158750.000000,276.747018)}
{pt3dadd(109176.000000,182064.000000,158850.000000,258.323454)}
{pt3dadd(108540.000000,182232.000000,158950.000000,250.065644)}
{pt3dadd(108240.000000,182232.000000,159025.000000,239.264842)}
{pt3dadd(108000.000000,182352.000000,159100.000000,247.935546)}
{pt3dadd(107760.000000,182436.000000,159175.000000,270.623442)}
{pt3dadd(107568.000000,182316.000000,159225.000000,292.230966)}
{pt3dadd(107424.000000,182256.000000,159250.000000,306.705080)}
{pt3dadd(107256.000000,182388.000000,159400.000000,331.290752)}
{pt3dadd(107028.000000,182460.000000,159525.000000,337.817864)}
{pt3dadd(106788.000000,182376.000000,159675.000000,331.290752)}
{pt3dadd(106476.000000,182376.000000,159850.000000,325.074448)}
{pt3dadd(105984.000000,182388.000000,160000.000000,315.970204)}
{pt3dadd(105792.000000,182424.000000,160100.000000,315.970204)}
{pt3dadd(105792.000000,182448.000000,160175.000000,295.658222)}
{pt3dadd(105792.000000,182388.000000,160225.000000,277.234658)}
{pt3dadd(105540.000000,182532.000000,160325.000000,271.596298)}
{pt3dadd(105180.000000,182568.000000,160400.000000,274.484238)}
{pt3dadd(104940.000000,182760.000000,160525.000000,281.011350)}
{pt3dadd(104532.000000,182892.000000,160550.000000,325.200176)}
{pt3dadd(104172.000000,182988.000000,160650.000000,346.807700)}
{pt3dadd(103980.000000,183012.000000,160750.000000,369.201660)}
{pt3dadd(103632.000000,182904.000000,160875.000000,375.417964)}
{pt3dadd(103140.000000,182892.000000,160975.000000,382.614108)}
{pt3dadd(102840.000000,182952.000000,161200.000000,358.737264)}
{pt3dadd(102744.000000,183072.000000,161250.000000,349.633020)}
{pt3dadd(102432.000000,183012.000000,161275.000000,339.093724)}
{pt3dadd(102276.000000,183000.000000,161400.000000,342.436876)}
{pt3dadd(101784.000000,183216.000000,161475.000000,346.306992)}
{pt3dadd(101640.000000,183168.000000,161575.000000,349.817308)}
{pt3dadd(101640.000000,183300.000000,161700.000000,358.921552)}
{pt3dadd(101412.000000,183300.000000,161825.000000,373.330964)}
{pt3dadd(101064.000000,183288.000000,161925.000000,384.397224)}
{pt3dadd(100584.000000,183276.000000,161925.000000,388.460854)}
{pt3dadd(100332.000000,183264.000000,162025.000000,396.016798)}
{pt3dadd(100092.000000,183216.000000,162000.000000,414.489840)}
{pt3dadd(99936.000000,183288.000000,162000.000000,418.553470)}
{pt3dadd(99780.000000,183276.000000,162025.000000,414.683354)}
{pt3dadd(99648.000000,183312.000000,162025.000000,414.683354)}
{pt3dadd(99516.000000,183324.000000,162025.000000,397.089982)}
{pt3dadd(99396.000000,183276.000000,162100.000000,389.156236)}
{pt3dadd(99216.000000,183312.000000,162150.000000,393.423044)}
{pt3dadd(99072.000000,183360.000000,162225.000000,405.623598)}
{pt3dadd(98928.000000,183348.000000,162300.000000,390.493708)}
{pt3dadd(98760.000000,183444.000000,162375.000000,400.531136)}
{pt3dadd(98604.000000,183516.000000,162450.000000,373.023010)}
{pt3dadd(98472.000000,183468.000000,162375.000000,347.099200)}
{pt3dadd(98280.000000,183504.000000,162550.000000,309.885236)}
{pt3dadd(98208.000000,183504.000000,162650.000000,313.395552)}
{pt3dadd(97968.000000,183552.000000,162750.000000,300.325780)}
{pt3dadd(97632.000000,183732.000000,162875.000000,317.294610)}
{pt3dadd(97524.000000,183840.000000,163025.000000,314.262266)}
{pt3dadd(97512.000000,183852.000000,163025.000000,319.632136)}
{pt3dadd(97368.000000,184104.000000,163100.000000,323.317964)}
{pt3dadd(96876.000000,184392.000000,163150.000000,320.430024)}
{pt3dadd(96708.000000,184488.000000,163275.000000,317.246064)}
{pt3dadd(96096.000000,184608.000000,163500.000000,330.315836)}
{pt3dadd(95652.000000,184848.000000,163500.000000,366.640076)}
{pt3dadd(95208.000000,185016.000000,163550.000000,378.840630)}
{pt3dadd(94800.000000,185316.000000,163550.000000,415.164870)}
{pt3dadd(94632.000000,185220.000000,163475.000000,450.272982)}
{pt3dadd(94500.000000,185412.000000,163425.000000,485.469362)}
{pt3dadd(94332.000000,185460.000000,163425.000000,490.173518)}
{pt3dadd(94164.000000,185544.000000,163375.000000,504.297176)}
{pt3dadd(93996.000000,185688.000000,163375.000000,504.297176)}
{pt3dadd(93996.000000,185688.000000,163375.000000,509.236532)}
{pt3dadd(93852.000000,185784.000000,163400.000000,514.682174)}
{pt3dadd(93708.000000,185940.000000,163400.000000,535.971438)}
{pt3dadd(93564.000000,186060.000000,163425.000000,558.325172)}
{pt3dadd(93408.000000,186156.000000,163400.000000,578.600666)}
{pt3dadd(93240.000000,186228.000000,163400.000000,594.950574)}
{pt3dadd(93096.000000,186312.000000,163400.000000,594.950574)}
{pt3dadd(93000.000000,186312.000000,163375.000000,607.258414)}
{pt3dadd(92880.000000,186396.000000,163350.000000,607.258414)}
{pt3dadd(92484.000000,186336.000000,163200.000000,607.258414)}
{pt3dadd(92400.000000,186276.000000,163325.000000,613.262240)}
{pt3dadd(92196.000000,186276.000000,163300.000000,602.630258)}
{pt3dadd(92028.000000,186192.000000,163200.000000,590.322418)}
{pt3dadd(91836.000000,186168.000000,163200.000000,578.600666)}
{pt3dadd(91680.000000,186324.000000,163175.000000,584.318592)}
{pt3dadd(91500.000000,186324.000000,163125.000000,590.622606)}
{pt3dadd(91320.000000,186408.000000,163100.000000,625.899582)}
{pt3dadd(91152.000000,186444.000000,163050.000000,644.826650)}
{pt3dadd(90984.000000,186456.000000,163100.000000,656.548402)}
{pt3dadd(90960.000000,186456.000000,163100.000000,668.856242)}
{pt3dadd(90816.000000,186396.000000,163050.000000,662.552228)}
{pt3dadd(90648.000000,186456.000000,163125.000000,649.628986)}
{pt3dadd(90528.000000,186408.000000,163175.000000,630.701918)}
{pt3dadd(90372.000000,186468.000000,163100.000000,624.698092)}
{pt3dadd(90216.000000,186600.000000,163150.000000,601.226684)}
{pt3dadd(90060.000000,186624.000000,163150.000000,584.059290)}
{pt3dadd(89916.000000,186732.000000,163275.000000,584.059290)}
{pt3dadd(89916.000000,186792.000000,163325.000000,596.367130)}
{pt3dadd(89724.000000,186828.000000,163250.000000,602.370956)}
{pt3dadd(89724.000000,186828.000000,163250.000000,632.461592)}
{pt3dadd(89556.000000,186924.000000,163275.000000,643.625160)}
{pt3dadd(89388.000000,187116.000000,163300.000000,581.223958)}
{pt3dadd(89388.000000,187140.000000,163325.000000,547.626854)}
{pt3dadd(89232.000000,187272.000000,163450.000000,515.629608)}
{pt3dadd(89040.000000,187344.000000,163525.000000,470.709120)}
{pt3dadd(88908.000000,187308.000000,163475.000000,444.715700)}
{pt3dadd(88764.000000,187368.000000,163575.000000,479.823812)}
{pt3dadd(88608.000000,187452.000000,163575.000000,484.763168)}
{pt3dadd(88452.000000,187488.000000,163650.000000,471.952584)}
{pt3dadd(88452.000000,187500.000000,163675.000000,486.782436)}
{pt3dadd(88308.000000,187476.000000,163675.000000,496.425948)}
{pt3dadd(88128.000000,187464.000000,163750.000000,506.551644)}
{pt3dadd(87912.000000,187488.000000,163775.000000,506.551644)}
{pt3dadd(87744.000000,187620.000000,163825.000000,539.637722)}
{pt3dadd(87528.000000,187644.000000,163800.000000,539.637722)}
{pt3dadd(87288.000000,187692.000000,163825.000000,555.987630)}
{pt3dadd(87168.000000,187704.000000,163775.000000,555.987630)}
{pt3dadd(87036.000000,187644.000000,163750.000000,578.341364)}
{pt3dadd(86856.000000,187680.000000,163775.000000,584.059290)}
{pt3dadd(86724.000000,187668.000000,163775.000000,595.222858)}
{pt3dadd(86496.000000,187740.000000,163750.000000,595.222858)}
{pt3dadd(86352.000000,187608.000000,163775.000000,612.390252)}
{pt3dadd(86208.000000,187668.000000,163875.000000,595.222858)}
{pt3dadd(86208.000000,187680.000000,163875.000000,578.872950)}
{pt3dadd(86064.000000,187524.000000,163825.000000,548.399384)}
{pt3dadd(85908.000000,187644.000000,163875.000000,537.235816)}
{pt3dadd(85728.000000,187584.000000,163875.000000,496.491616)}
{pt3dadd(85572.000000,187632.000000,163875.000000,481.661764)}
{pt3dadd(85404.000000,187632.000000,163950.000000,463.271298)}
{pt3dadd(85272.000000,187728.000000,164000.000000,454.940860)}
{pt3dadd(85092.000000,187680.000000,164000.000000,435.630862)}
{pt3dadd(84948.000000,187716.000000,164025.000000,431.567232)}
{pt3dadd(84732.000000,187716.000000,164025.000000,407.690388)}
{pt3dadd(84576.000000,187680.000000,164125.000000,399.756642)}
{pt3dadd(84420.000000,187668.000000,164000.000000,403.820272)}
{pt3dadd(84228.000000,187656.000000,164075.000000,387.933890)}
{pt3dadd(84048.000000,187692.000000,164075.000000,405.448630)}
{pt3dadd(83892.000000,187824.000000,164150.000000,449.600968)}
{pt3dadd(83700.000000,187860.000000,163975.000000,457.534714)}
{pt3dadd(83520.000000,187812.000000,164150.000000,442.404824)}
{pt3dadd(83352.000000,187848.000000,164250.000000,472.414864)}
{pt3dadd(83172.000000,187860.000000,164325.000000,472.414864)}
{pt3dadd(82656.000000,188040.000000,164450.000000,439.328786)}
{pt3dadd(82212.000000,188136.000000,164500.000000,435.265156)}
{pt3dadd(81852.000000,188184.000000,164625.000000,454.661854)}
{pt3dadd(81564.000000,188244.000000,164725.000000,440.538196)}
{pt3dadd(81384.000000,188328.000000,164575.000000,431.353894)}
{pt3dadd(81180.000000,188196.000000,164675.000000,431.353894)}
{pt3dadd(81024.000000,188220.000000,164675.000000,435.417524)}
{pt3dadd(80904.000000,188256.000000,164575.000000,427.087086)}
{pt3dadd(80676.000000,188196.000000,164625.000000,427.087086)}
{pt3dadd(80568.000000,188292.000000,164575.000000,431.567232)}
{pt3dadd(80400.000000,188208.000000,164725.000000,431.567232)}
{pt3dadd(80256.000000,188256.000000,164700.000000,435.834040)}
{pt3dadd(80124.000000,188196.000000,164950.000000,448.644624)}
{pt3dadd(79956.000000,188256.000000,164950.000000,444.377816)}
{pt3dadd(79800.000000,188304.000000,164975.000000,435.630862)}
{pt3dadd(79644.000000,188304.000000,164875.000000,443.961300)}
{pt3dadd(79500.000000,188220.000000,165025.000000,443.961300)}
{pt3dadd(79344.000000,188316.000000,164975.000000,431.150716)}
{pt3dadd(79068.000000,188400.000000,164900.000000,427.087086)}
{pt3dadd(78984.000000,188544.000000,164850.000000,435.834040)}
{pt3dadd(78840.000000,188592.000000,164950.000000,427.503602)}
{pt3dadd(78708.000000,188580.000000,164900.000000,423.236794)}
{pt3dadd(78612.000000,188616.000000,164925.000000,431.567232)}
{pt3dadd(78456.000000,188652.000000,165025.000000,449.081972)}
{pt3dadd(78288.000000,188676.000000,165125.000000,444.601826)}
{pt3dadd(78288.000000,188676.000000,165125.000000,457.412410)}
{pt3dadd(78132.000000,188784.000000,165100.000000,466.159364)}
{pt3dadd(78132.000000,188796.000000,165100.000000,461.892556)}
{pt3dadd(78060.000000,188892.000000,165225.000000,436.821872)}
{pt3dadd(78060.000000,188892.000000,165225.000000,432.555064)}
{pt3dadd(77928.000000,188904.000000,165175.000000,423.808110)}
{pt3dadd(77928.000000,188916.000000,165175.000000,419.327964)}
{pt3dadd(77772.000000,188952.000000,165125.000000,400.854922)}
{pt3dadd(77760.000000,188964.000000,165125.000000,404.540750)}
{pt3dadd(77604.000000,189024.000000,165100.000000,396.607004)}
{pt3dadd(77484.000000,189072.000000,165225.000000,381.477114)}
{pt3dadd(77484.000000,189096.000000,165275.000000,373.146676)}
{pt3dadd(77268.000000,189132.000000,165275.000000,387.556088)}
{pt3dadd(77112.000000,189228.000000,165325.000000,395.489834)}
{pt3dadd(76944.000000,189168.000000,165500.000000,403.423580)}
{pt3dadd(76884.000000,189060.000000,165650.000000,396.896468)}
{pt3dadd(76740.000000,189096.000000,165400.000000,405.226906)}
{pt3dadd(76584.000000,189060.000000,165450.000000,432.867342)}
{pt3dadd(76380.000000,189192.000000,165750.000000,437.134150)}
{pt3dadd(76176.000000,189252.000000,165800.000000,437.134150)}
{pt3dadd(75996.000000,189288.000000,165850.000000,447.171578)}
{pt3dadd(75804.000000,189432.000000,165800.000000,447.171578)}
{pt3dadd(75708.000000,189480.000000,165750.000000,408.464882)}
{pt3dadd(75708.000000,189480.000000,165750.000000,404.198074)}
{pt3dadd(75564.000000,189504.000000,165775.000000,404.198074)}
{pt3dadd(75468.000000,189540.000000,165775.000000,404.198074)}
{pt3dadd(75468.000000,189540.000000,165775.000000,391.997520)}
{pt3dadd(75384.000000,189576.000000,165800.000000,385.470408)}
{pt3dadd(75312.000000,189576.000000,165750.000000,370.340518)}
{pt3dadd(75108.000000,189660.000000,165700.000000,351.867476)}
{pt3dadd(74928.000000,189744.000000,165725.000000,355.553304)}
{pt3dadd(74760.000000,189852.000000,165850.000000,363.487050)}
{pt3dadd(74424.000000,189852.000000,166050.000000,370.014162)}
{pt3dadd(74160.000000,190020.000000,166300.000000,373.524478)}
{pt3dadd(74136.000000,190032.000000,166300.000000,376.867630)}
{pt3dadd(73596.000000,190056.000000,166300.000000,393.548330)}
{pt3dadd(73296.000000,190116.000000,166475.000000,389.484700)}
{pt3dadd(72936.000000,189912.000000,166550.000000,389.484700)}
{pt3dadd(72900.000000,189828.000000,166650.000000,401.104274)}
{pt3dadd(72708.000000,189828.000000,166750.000000,416.234164)}
{pt3dadd(72528.000000,189828.000000,166850.000000,411.754018)}
{pt3dadd(72408.000000,189816.000000,166925.000000,407.883902)}
{pt3dadd(72384.000000,189816.000000,166925.000000,423.013792)}
{pt3dadd(72180.000000,190068.000000,167050.000000,407.883902)}
{pt3dadd(72168.000000,190080.000000,167050.000000,416.630856)}
{pt3dadd(71904.000000,190236.000000,167150.000000,408.300418)}
{pt3dadd(71760.000000,190332.000000,167225.000000,408.300418)}
{pt3dadd(71736.000000,190344.000000,167225.000000,412.567226)}
{pt3dadd(71604.000000,190476.000000,167300.000000,436.444070)}
{pt3dadd(71640.000000,190620.000000,167400.000000,416.077542)}
{pt3dadd(71616.000000,190656.000000,167500.000000,408.521598)}
{pt3dadd(71256.000000,190668.000000,167650.000000,401.325454)}
{pt3dadd(71184.000000,190752.000000,167825.000000,385.439072)}
{pt3dadd(70944.000000,190848.000000,167850.000000,368.758372)}
{pt3dadd(70776.000000,190932.000000,167950.000000,355.688600)}
{pt3dadd(70692.000000,190764.000000,168075.000000,352.178284)}
{pt3dadd(70692.000000,190764.000000,168175.000000,481.972028)}
{pt3dadd(70728.000000,190680.000000,168225.000000,551.421760)}
{pt3dadd(70728.000000,190668.000000,168350.000000,1000.000000)}

{create adhoc30}
{access adhoc30}
{connect adhoc30(1), adhoc4(0)}
{nseg = 1}
{strdef color color = "White"}
{pt3dclear()}
{pt3dadd(184428.000000,113772.000000,90900.000000,518.633060)}
{pt3dadd(184488.000000,113352.000000,91025.000000,388.781070)}
{pt3dadd(184464.000000,112356.000000,91225.000000,306.479082)}
{pt3dadd(184668.000000,111876.000000,91375.000000,238.211400)}
{pt3dadd(184884.000000,111420.000000,91550.000000,177.898710)}
{pt3dadd(184860.000000,110856.000000,91350.000000,181.533252)}
{pt3dadd(184944.000000,110076.000000,91050.000000,185.740688)}
{pt3dadd(184872.000000,109800.000000,90850.000000,196.678944)}
{pt3dadd(184944.000000,109584.000000,90725.000000,200.313486)}
{pt3dadd(184848.000000,109380.000000,90600.000000,211.798656)}
{pt3dadd(184932.000000,109008.000000,90400.000000,220.223544)}
{pt3dadd(185076.000000,108756.000000,90275.000000,208.738374)}
{pt3dadd(184980.000000,108564.000000,90150.000000,204.731294)}
{pt3dadd(184968.000000,108324.000000,90025.000000,199.408232)}
{pt3dadd(184872.000000,108036.000000,89900.000000,193.246124)}
{pt3dadd(184680.000000,107292.000000,89775.000000,186.775908)}
{pt3dadd(184284.000000,106992.000000,89950.000000,190.237378)}
{pt3dadd(183972.000000,106788.000000,90075.000000,194.244458)}
{pt3dadd(183768.000000,106692.000000,90200.000000,197.705928)}
{pt3dadd(183636.000000,106536.000000,90325.000000,192.382866)}
{pt3dadd(183600.000000,106452.000000,90450.000000,186.793652)}
{pt3dadd(183468.000000,106392.000000,90575.000000,192.662324)}
{pt3dadd(183384.000000,106308.000000,90700.000000,181.724068)}
{pt3dadd(183288.000000,106104.000000,90825.000000,178.262598)}
{pt3dadd(183300.000000,105900.000000,90925.000000,173.664338)}
{pt3dadd(183144.000000,105708.000000,91050.000000,167.377558)}
{pt3dadd(183012.000000,105108.000000,91075.000000,150.737006)}
{pt3dadd(182976.000000,104448.000000,90925.000000,152.345120)}
{pt3dadd(182484.000000,103920.000000,90925.000000,157.668182)}
{pt3dadd(182064.000000,103140.000000,90925.000000,171.596584)}
{pt3dadd(181584.000000,102384.000000,90825.000000,193.274057)}
{pt3dadd(181380.000000,101988.000000,90700.000000,215.502760)}

{create adhoc31}
{access adhoc31}
{connect adhoc31(1), adhoc30(0)}
{nseg = 1}
{strdef color color = "White"}
{pt3dclear()}
{pt3dadd(181380.000000,101988.000000,90700.000000,215.502760)}
{pt3dadd(180552.000000,101676.000000,90825.000000,202.145827)}
{pt3dadd(179940.000000,101640.000000,90650.000000,178.242646)}
{pt3dadd(179736.000000,101652.000000,90450.000000,153.051263)}
{pt3dadd(179568.000000,101700.000000,90325.000000,149.416721)}
{pt3dadd(178920.000000,101592.000000,90100.000000,138.106249)}
{pt3dadd(178392.000000,101448.000000,90125.000000,135.251832)}
{pt3dadd(178212.000000,101448.000000,90325.000000,138.915000)}

{create adhoc32}
{access adhoc32}
{connect adhoc32(1), adhoc30(0)}
{nseg = 1}
{strdef color color = "White"}
{pt3dclear()}
{pt3dadd(181380.000000,101988.000000,90700.000000,215.502760)}
{pt3dadd(181032.000000,101568.000000,90375.000000,146.742353)}
{pt3dadd(181080.000000,101352.000000,90150.000000,130.546223)}
{pt3dadd(181008.000000,101412.000000,90050.000000,112.834685)}
{pt3dadd(180864.000000,101472.000000,89925.000000,103.660515)}

{create adhoc33}
{access adhoc33}
{connect adhoc33(1), adhoc3(0)}
{nseg = 1}
{strdef color color = "White"}
{pt3dclear()}
{pt3dadd(178020.000000,108108.000000,80825.000000,544.564760)}
{pt3dadd(177936.000000,108312.000000,80650.000000,378.939160)}
{pt3dadd(177876.000000,108684.000000,80325.000000,280.283496)}
{pt3dadd(177684.000000,108840.000000,79775.000000,200.542694)}
{pt3dadd(177636.000000,108912.000000,79250.000000,150.923294)}
{pt3dadd(177576.000000,108924.000000,78775.000000,147.107030)}
{pt3dadd(177588.000000,108936.000000,78350.000000,149.819180)}
{pt3dadd(177552.000000,109068.000000,77900.000000,151.142180)}
{pt3dadd(177528.000000,109296.000000,77450.000000,152.600790)}
{pt3dadd(177456.000000,109728.000000,76925.000000,156.980086)}
{pt3dadd(177600.000000,110016.000000,76525.000000,151.910502)}
{pt3dadd(177864.000000,110268.000000,76150.000000,158.258920)}
{pt3dadd(178188.000000,110568.000000,75850.000000,160.811480)}

{create adhoc34}
{access adhoc34}
{connect adhoc34(1), adhoc2(0)}
{nseg = 1}
{strdef color color = "White"}
{pt3dclear()}
{pt3dadd(177852.000000,106296.000000,79500.000000,493.936280)}
{pt3dadd(177816.000000,106212.000000,79350.000000,519.888510)}
{pt3dadd(177588.000000,106032.000000,79225.000000,500.323316)}
{pt3dadd(177492.000000,105804.000000,79100.000000,471.742316)}
{pt3dadd(177468.000000,105696.000000,79050.000000,430.713920)}
{pt3dadd(177240.000000,105432.000000,78925.000000,386.561582)}
{pt3dadd(177144.000000,105180.000000,78800.000000,311.774326)}
{pt3dadd(177120.000000,104988.000000,78725.000000,253.275193)}
{pt3dadd(177132.000000,104880.000000,78600.000000,120.000000)}

{create adhoc35}
{access adhoc35}
{connect adhoc35(1), adhoc34(0)}
{nseg = 1}
{strdef color color = "White"}
{pt3dclear()}
{pt3dadd(177132.000000,104880.000000,78600.000000,120.000000)}
{pt3dadd(176952.000000,104592.000000,78600.000000,161.439803)}
{pt3dadd(176964.000000,104280.000000,78600.000000,183.167606)}
{pt3dadd(176820.000000,103932.000000,78550.000000,214.176046)}
{pt3dadd(176652.000000,103452.000000,78550.000000,227.471564)}
{pt3dadd(176604.000000,103308.000000,78425.000000,246.090144)}
{pt3dadd(176544.000000,103176.000000,78450.000000,260.050440)}
{pt3dadd(176520.000000,103176.000000,78475.000000,269.803300)}
{pt3dadd(176484.000000,103008.000000,78450.000000,262.313220)}
{pt3dadd(176496.000000,102828.000000,78475.000000,262.313220)}
{pt3dadd(176472.000000,102612.000000,78375.000000,259.818504)}
{pt3dadd(176220.000000,102516.000000,78450.000000,245.858208)}
{pt3dadd(176112.000000,102384.000000,78450.000000,228.081648)}
{pt3dadd(175932.000000,102264.000000,78500.000000,225.818868)}
{pt3dadd(175908.000000,102264.000000,78500.000000,223.324152)}
{pt3dadd(175824.000000,102132.000000,78525.000000,218.685458)}
{pt3dadd(175812.000000,102132.000000,78525.000000,225.155674)}
{pt3dadd(175716.000000,102024.000000,78550.000000,235.442154)}
{pt3dadd(175692.000000,101916.000000,78550.000000,237.704934)}
{pt3dadd(175680.000000,101784.000000,78525.000000,230.911212)}
{pt3dadd(175608.000000,101664.000000,78550.000000,230.911212)}
{pt3dadd(175536.000000,101532.000000,78550.000000,230.911212)}
{pt3dadd(175440.000000,101424.000000,78575.000000,233.287126)}
{pt3dadd(175344.000000,101304.000000,78625.000000,238.157756)}
{pt3dadd(175368.000000,101196.000000,78650.000000,244.951478)}
{pt3dadd(175380.000000,101196.000000,78650.000000,227.478898)}
{pt3dadd(175380.000000,101076.000000,78625.000000,225.216118)}
{pt3dadd(175500.000000,100944.000000,78675.000000,218.422396)}
{pt3dadd(175512.000000,100824.000000,78750.000000,209.133958)}
{pt3dadd(175536.000000,100704.000000,78800.000000,189.870444)}
{pt3dadd(175548.000000,100584.000000,78850.000000,191.259594)}
{pt3dadd(175476.000000,100428.000000,78775.000000,171.204014)}
{pt3dadd(175452.000000,100320.000000,78775.000000,154.563462)}
{pt3dadd(175392.000000,100176.000000,78800.000000,137.922910)}
{pt3dadd(175440.000000,100020.000000,78825.000000,148.340294)}
{pt3dadd(175416.000000,99876.000000,78850.000000,179.814944)}
{pt3dadd(175332.000000,99756.000000,78875.000000,215.261744)}
{pt3dadd(175152.000000,99624.000000,78850.000000,255.664848)}
{pt3dadd(175128.000000,99468.000000,78850.000000,296.067952)}
{pt3dadd(175056.000000,99360.000000,78900.000000,323.955013)}
{pt3dadd(175104.000000,99252.000000,78950.000000,334.315520)}

{create adhoc36}
{access adhoc36}
{connect adhoc36(1), adhoc35(0)}
{nseg = 1}
{strdef color color = "White"}
{pt3dclear()}
{pt3dadd(175104.000000,99252.000000,78950.000000,334.315520)}
{pt3dadd(175368.000000,99204.000000,79075.000000,269.756407)}
{pt3dadd(175488.000000,99288.000000,79000.000000,223.115364)}
{pt3dadd(175584.000000,99276.000000,78975.000000,188.414556)}
{pt3dadd(175704.000000,99216.000000,79025.000000,178.174056)}
{pt3dadd(175836.000000,99048.000000,79075.000000,178.174056)}
{pt3dadd(175848.000000,99096.000000,79125.000000,181.313706)}
{pt3dadd(175896.000000,98988.000000,79225.000000,186.141876)}
{pt3dadd(175932.000000,98976.000000,79250.000000,164.450700)}
{pt3dadd(175920.000000,98976.000000,79250.000000,134.841509)}
{pt3dadd(175992.000000,98892.000000,79350.000000,113.080243)}
{pt3dadd(175908.000000,98856.000000,79425.000000,95.553979)}
{pt3dadd(175932.000000,98784.000000,79475.000000,74.127351)}
{pt3dadd(175980.000000,98700.000000,79500.000000,83.401091)}
{pt3dadd(176124.000000,98652.000000,79575.000000,86.224025)}
{pt3dadd(176184.000000,98592.000000,79625.000000,90.498271)}
{pt3dadd(176316.000000,98508.000000,79700.000000,94.986229)}
{pt3dadd(176388.000000,98472.000000,79750.000000,97.198071)}
{pt3dadd(176376.000000,98400.000000,79800.000000,92.923825)}
{pt3dadd(176436.000000,98340.000000,79850.000000,90.100891)}
{pt3dadd(176460.000000,98244.000000,79900.000000,89.160659)}
{pt3dadd(176520.000000,98184.000000,79925.000000,86.337725)}
{pt3dadd(176544.000000,98172.000000,79975.000000,94.093580)}
{pt3dadd(176568.000000,98136.000000,80000.000000,100.391674)}
{pt3dadd(176568.000000,98124.000000,80000.000000,103.214608)}
{pt3dadd(176652.000000,98136.000000,80075.000000,108.409980)}
{pt3dadd(176580.000000,97980.000000,80150.000000,114.500811)}
{pt3dadd(176556.000000,98028.000000,80150.000000,114.500811)}
{pt3dadd(176496.000000,98016.000000,80200.000000,119.192103)}
{pt3dadd(176472.000000,98016.000000,80200.000000,124.920000)}
{pt3dadd(176508.000000,97872.000000,80275.000000,126.120000)}
{pt3dadd(176460.000000,97812.000000,80350.000000,126.120000)}
{pt3dadd(176460.000000,97728.000000,80425.000000,128.580000)}
{pt3dadd(176448.000000,97692.000000,80425.000000,128.580000)}
{pt3dadd(176424.000000,97524.000000,80525.000000,135.890410)}
{pt3dadd(176352.000000,97392.000000,80575.000000,138.473410)}
{pt3dadd(176256.000000,97188.000000,80650.000000,153.566882)}
{pt3dadd(176196.000000,97068.000000,80725.000000,153.566882)}
{pt3dadd(176040.000000,96864.000000,80775.000000,156.279032)}
{pt3dadd(175920.000000,96780.000000,80850.000000,147.708622)}
{pt3dadd(175740.000000,96672.000000,80900.000000,147.708622)}
{pt3dadd(175368.000000,96528.000000,80950.000000,145.847030)}
{pt3dadd(175200.000000,96528.000000,81000.000000,150.017790)}
{pt3dadd(175140.000000,96528.000000,81000.000000,161.893784)}
{pt3dadd(175092.000000,96516.000000,81050.000000,172.152714)}
{pt3dadd(174780.000000,96504.000000,80925.000000,181.601594)}
{pt3dadd(174444.000000,96468.000000,80875.000000,181.601594)}
{pt3dadd(174408.000000,96468.000000,80875.000000,188.202714)}
{pt3dadd(174192.000000,96396.000000,80875.000000,186.248042)}
{pt3dadd(173964.000000,96252.000000,80800.000000,191.837256)}
{pt3dadd(173760.000000,96156.000000,80775.000000,178.605376)}
{pt3dadd(173676.000000,96060.000000,80700.000000,167.833496)}
{pt3dadd(173568.000000,95988.000000,80600.000000,154.601616)}
{pt3dadd(173340.000000,95904.000000,80450.000000,137.276852)}
{pt3dadd(173232.000000,95832.000000,80350.000000,119.085850)}
{pt3dadd(172980.000000,95772.000000,80200.000000,117.942992)}
{pt3dadd(172860.000000,95748.000000,80200.000000,114.340134)}
{pt3dadd(172632.000000,95616.000000,80125.000000,111.072237)}
{pt3dadd(172440.000000,95580.000000,80125.000000,110.743978)}
{pt3dadd(172296.000000,95580.000000,80125.000000,103.660515)}

{create adhoc37}
{access adhoc37}
{connect adhoc37(1), adhoc35(0)}
{nseg = 1}
{strdef color color = "White"}
{pt3dclear()}
{pt3dadd(175104.000000,99252.000000,78950.000000,334.315520)}
{pt3dadd(174852.000000,99168.000000,78875.000000,252.020260)}
{pt3dadd(174612.000000,98988.000000,78775.000000,220.936388)}
{pt3dadd(174408.000000,98808.000000,78725.000000,186.235580)}
{pt3dadd(174348.000000,98712.000000,78600.000000,173.142296)}
{pt3dadd(174180.000000,98544.000000,78550.000000,167.819234)}
{pt3dadd(174156.000000,98520.000000,78550.000000,181.114752)}
{pt3dadd(174108.000000,98424.000000,78500.000000,195.739572)}
{pt3dadd(174168.000000,98532.000000,78425.000000,206.677828)}
{pt3dadd(174084.000000,98436.000000,78300.000000,224.409806)}
{pt3dadd(174060.000000,98412.000000,78300.000000,238.157756)}
{pt3dadd(174120.000000,98364.000000,78200.000000,231.024346)}
{pt3dadd(174156.000000,98292.000000,78100.000000,235.663040)}
{pt3dadd(174108.000000,98232.000000,78025.000000,235.663040)}
{pt3dadd(174084.000000,98244.000000,77950.000000,235.663040)}
{pt3dadd(174096.000000,98196.000000,77850.000000,227.238152)}
{pt3dadd(174120.000000,98208.000000,77750.000000,223.030716)}
{pt3dadd(174132.000000,98172.000000,77650.000000,212.229914)}
{pt3dadd(174180.000000,98112.000000,77550.000000,198.725147)}
{pt3dadd(174144.000000,98112.000000,77425.000000,195.467360)}

{create adhoc38}
{access adhoc38}
{connect adhoc38(1), adhoc37(0)}
{nseg = 1}
{strdef color color = "White"}
{pt3dclear()}
{pt3dadd(174144.000000,98112.000000,77425.000000,195.467360)}
{pt3dadd(174408.000000,98136.000000,77425.000000,155.040793)}
{pt3dadd(174708.000000,98160.000000,77425.000000,140.216579)}
{pt3dadd(174948.000000,98148.000000,77425.000000,121.855210)}
{pt3dadd(175152.000000,98124.000000,77325.000000,110.425017)}
{pt3dadd(175236.000000,98004.000000,77300.000000,108.401169)}
{pt3dadd(175404.000000,97872.000000,77250.000000,109.437774)}
{pt3dadd(175428.000000,97848.000000,77250.000000,100.886943)}
{pt3dadd(175608.000000,97764.000000,77250.000000,99.899700)}
{pt3dadd(175644.000000,97668.000000,77225.000000,99.899700)}
{pt3dadd(175644.000000,97584.000000,77225.000000,97.310220)}
{pt3dadd(175668.000000,97476.000000,77300.000000,103.660515)}

{create adhoc39}
{access adhoc39}
{connect adhoc39(1), adhoc37(0)}
{nseg = 1}
{strdef color color = "White"}
{pt3dclear()}
{pt3dadd(174144.000000,98112.000000,77425.000000,195.467360)}
{pt3dadd(174060.000000,98076.000000,77325.000000,199.043173)}
{pt3dadd(174012.000000,98076.000000,77275.000000,195.751256)}
{pt3dadd(173928.000000,98076.000000,77225.000000,187.288544)}
{pt3dadd(173796.000000,98076.000000,77150.000000,176.516664)}
{pt3dadd(173700.000000,98040.000000,77075.000000,165.578408)}
{pt3dadd(173580.000000,98004.000000,77000.000000,163.716816)}
{pt3dadd(173508.000000,97980.000000,76925.000000,157.115696)}
{pt3dadd(173508.000000,97980.000000,76925.000000,161.943866)}
{pt3dadd(173400.000000,97896.000000,76850.000000,176.532010)}
{pt3dadd(173388.000000,97884.000000,76850.000000,181.601594)}
{pt3dadd(173352.000000,97776.000000,76750.000000,191.888074)}
{pt3dadd(173208.000000,97644.000000,76650.000000,200.350786)}
{pt3dadd(173160.000000,97548.000000,76550.000000,203.985328)}
{pt3dadd(173136.000000,97440.000000,76450.000000,198.396114)}
{pt3dadd(173148.000000,97380.000000,76400.000000,193.326530)}
{pt3dadd(173136.000000,97356.000000,76325.000000,179.578580)}
{pt3dadd(173112.000000,97308.000000,76250.000000,168.268108)}
{pt3dadd(173112.000000,97308.000000,76250.000000,162.945046)}
{pt3dadd(173076.000000,97260.000000,76175.000000,155.269116)}
{pt3dadd(173016.000000,97296.000000,76125.000000,148.894017)}
{pt3dadd(173028.000000,97320.000000,76025.000000,138.915000)}

{create adhoc40}
{access adhoc40}
{connect adhoc40(1), adhoc39(0)}
{nseg = 1}
{strdef color color = "White"}
{pt3dclear()}
{pt3dadd(173028.000000,97320.000000,76025.000000,138.915000)}
{pt3dadd(172788.000000,97344.000000,76025.000000,113.927227)}
{pt3dadd(172596.000000,97320.000000,76025.000000,105.332584)}
{pt3dadd(172416.000000,97356.000000,76025.000000,102.749584)}
{pt3dadd(172224.000000,97272.000000,75975.000000,98.890045)}
{pt3dadd(172068.000000,97260.000000,75975.000000,101.854125)}
{pt3dadd(171852.000000,97344.000000,76075.000000,108.467122)}
{pt3dadd(171708.000000,97320.000000,76150.000000,114.195019)}
{pt3dadd(171636.000000,97404.000000,76200.000000,116.778019)}
{pt3dadd(171540.000000,97356.000000,76225.000000,128.500237)}
{pt3dadd(171504.000000,97404.000000,76250.000000,138.915000)}

{create adhoc41}
{access adhoc41}
{connect adhoc41(1), adhoc39(0)}
{nseg = 1}
{strdef color color = "White"}
{pt3dclear()}
{pt3dadd(173028.000000,97320.000000,76025.000000,138.915000)}
{pt3dadd(173148.000000,97176.000000,76025.000000,120.681417)}
{pt3dadd(173232.000000,97092.000000,76025.000000,108.209861)}
{pt3dadd(173196.000000,97020.000000,75950.000000,102.195569)}
{pt3dadd(173244.000000,96924.000000,75850.000000,105.798427)}
{pt3dadd(173304.000000,96804.000000,75800.000000,102.834347)}
{pt3dadd(173316.000000,96744.000000,75675.000000,99.870267)}
{pt3dadd(173364.000000,96768.000000,75550.000000,103.747133)}
{pt3dadd(173520.000000,96684.000000,75450.000000,102.710528)}
{pt3dadd(173616.000000,96684.000000,75375.000000,95.743167)}
{pt3dadd(173616.000000,96624.000000,75250.000000,103.660515)}

{create adhoc42}
{access adhoc42}
{connect adhoc42(1), adhoc34(0)}
{nseg = 1}
{strdef color color = "White"}
{pt3dclear()}
{pt3dadd(177132.000000,104880.000000,78600.000000,120.000000)}
{pt3dadd(177108.000000,105000.000000,78475.000000,187.260220)}
{pt3dadd(177192.000000,105036.000000,78325.000000,200.712264)}
{pt3dadd(177240.000000,105084.000000,78225.000000,226.606538)}
{pt3dadd(177192.000000,105132.000000,78150.000000,228.761566)}
{pt3dadd(177096.000000,105048.000000,78075.000000,238.514426)}
{pt3dadd(177084.000000,105060.000000,78025.000000,250.422314)}
{pt3dadd(177096.000000,105108.000000,77950.000000,262.925594)}
{pt3dadd(177108.000000,105096.000000,77850.000000,273.678120)}
{pt3dadd(177096.000000,105120.000000,77775.000000,292.101684)}
{pt3dadd(177084.000000,105144.000000,77675.000000,300.772388)}
{pt3dadd(177012.000000,105120.000000,77575.000000,295.658222)}
{pt3dadd(177012.000000,105120.000000,77575.000000,295.658222)}
{pt3dadd(176940.000000,105120.000000,77450.000000,295.658222)}
{pt3dadd(176988.000000,105108.000000,77350.000000,295.658222)}
{pt3dadd(177048.000000,105096.000000,77250.000000,292.625878)}
{pt3dadd(177048.000000,105096.000000,77250.000000,306.410748)}
{pt3dadd(177012.000000,105096.000000,77125.000000,301.040878)}
{pt3dadd(176976.000000,105084.000000,77025.000000,295.402518)}
{pt3dadd(176976.000000,105084.000000,77025.000000,292.370174)}
{pt3dadd(176964.000000,105084.000000,76925.000000,286.731814)}
{pt3dadd(176952.000000,105072.000000,76825.000000,278.061110)}
{pt3dadd(176940.000000,105072.000000,76825.000000,278.061110)}
{pt3dadd(176892.000000,105084.000000,76725.000000,283.699470)}
{pt3dadd(176820.000000,105072.000000,76625.000000,272.946944)}
{pt3dadd(176736.000000,105060.000000,76525.000000,255.170384)}
{pt3dadd(176796.000000,105012.000000,76400.000000,241.210088)}
{pt3dadd(176784.000000,105000.000000,76250.000000,238.715372)}
{pt3dadd(176688.000000,105000.000000,76075.000000,230.457562)}
{pt3dadd(176664.000000,104988.000000,75850.000000,235.571728)}
{pt3dadd(176556.000000,104976.000000,75550.000000,248.234122)}
{pt3dadd(176544.000000,104976.000000,75550.000000,257.080252)}
{pt3dadd(176472.000000,105000.000000,75375.000000,264.944838)}
{pt3dadd(176460.000000,105000.000000,75375.000000,264.944838)}
{pt3dadd(176568.000000,105288.000000,75200.000000,259.830672)}
{pt3dadd(176604.000000,105432.000000,75050.000000,259.830672)}
{pt3dadd(176556.000000,105468.000000,74900.000000,262.325388)}
{pt3dadd(176484.000000,105456.000000,74750.000000,245.614672)}
{pt3dadd(176424.000000,105456.000000,74600.000000,238.481262)}
{pt3dadd(176328.000000,105420.000000,74425.000000,236.105348)}
{pt3dadd(176244.000000,105504.000000,74225.000000,236.105348)}
{pt3dadd(176196.000000,105564.000000,74000.000000,224.764502)}
{pt3dadd(176100.000000,105540.000000,73825.000000,228.971938)}
{pt3dadd(176136.000000,105540.000000,73675.000000,226.816910)}
{pt3dadd(176076.000000,105540.000000,73525.000000,229.192824)}
{pt3dadd(176076.000000,105552.000000,73400.000000,226.816910)}
{pt3dadd(176076.000000,105552.000000,73400.000000,233.287126)}
{pt3dadd(176004.000000,105516.000000,73325.000000,237.925820)}
{pt3dadd(175992.000000,105504.000000,73200.000000,242.343628)}
{pt3dadd(175968.000000,105444.000000,73075.000000,239.967714)}
{pt3dadd(175908.000000,105408.000000,72975.000000,250.208214)}
{pt3dadd(175860.000000,105384.000000,72875.000000,263.336654)}
{pt3dadd(175884.000000,105432.000000,72775.000000,268.450820)}
{pt3dadd(175848.000000,105456.000000,72625.000000,289.023500)}
{pt3dadd(175836.000000,105468.000000,72550.000000,275.042200)}

{create adhoc43}
{access adhoc43}
{connect adhoc43(1), adhoc42(0)}
{nseg = 1}
{strdef color color = "White"}
{pt3dclear()}
{pt3dadd(175836.000000,105468.000000,72550.000000,275.042200)}
{pt3dadd(176016.000000,105564.000000,72550.000000,251.775040)}
{pt3dadd(176124.000000,105720.000000,72550.000000,203.985024)}
{pt3dadd(176232.000000,105948.000000,72450.000000,171.833726)}
{pt3dadd(176244.000000,105972.000000,72450.000000,137.557389)}
{pt3dadd(176208.000000,106092.000000,72425.000000,111.979859)}
{pt3dadd(176328.000000,106248.000000,72400.000000,100.990473)}
{pt3dadd(176376.000000,106308.000000,72400.000000,87.258185)}
{pt3dadd(176352.000000,106416.000000,72350.000000,79.871657)}
{pt3dadd(176484.000000,106560.000000,72250.000000,77.944182)}
{pt3dadd(176640.000000,106728.000000,72250.000000,78.338257)}
{pt3dadd(176712.000000,106848.000000,72175.000000,94.023140)}

{create adhoc44}
{access adhoc44}
{connect adhoc44(1), adhoc42(0)}
{nseg = 1}
{strdef color color = "White"}
{pt3dclear()}
{pt3dadd(175836.000000,105468.000000,72550.000000,275.042200)}
{pt3dadd(175704.000000,105324.000000,72375.000000,331.552113)}
{pt3dadd(175656.000000,105240.000000,72250.000000,339.343780)}
{pt3dadd(175608.000000,105324.000000,72125.000000,361.737740)}
{pt3dadd(175524.000000,105360.000000,72000.000000,354.884272)}
{pt3dadd(175452.000000,105372.000000,71875.000000,348.357160)}
{pt3dadd(175440.000000,105372.000000,71750.000000,348.357160)}
{pt3dadd(175320.000000,105336.000000,71625.000000,351.867476)}
{pt3dadd(175320.000000,105312.000000,71475.000000,341.328180)}
{pt3dadd(175320.000000,105312.000000,71475.000000,332.223936)}
{pt3dadd(175260.000000,105264.000000,71350.000000,318.439066)}
{pt3dadd(175176.000000,105216.000000,71225.000000,293.488390)}
{pt3dadd(175056.000000,105060.000000,71125.000000,272.160808)}
{pt3dadd(175032.000000,105024.000000,71125.000000,260.306144)}
{pt3dadd(175044.000000,105024.000000,71025.000000,257.555724)}
{pt3dadd(174984.000000,104988.000000,70900.000000,260.050440)}
{pt3dadd(174936.000000,104904.000000,70775.000000,278.474004)}
{pt3dadd(174888.000000,104796.000000,70650.000000,292.948118)}
{pt3dadd(174804.000000,104664.000000,70475.000000,292.948118)}
{pt3dadd(174816.000000,104544.000000,70375.000000,290.328668)}
{pt3dadd(174804.000000,104532.000000,70250.000000,290.434223)}
{pt3dadd(174840.000000,104508.000000,70125.000000,261.944950)}

{create adhoc45}
{access adhoc45}
{connect adhoc45(1), adhoc44(0)}
{nseg = 1}
{strdef color color = "White"}
{pt3dclear()}
{pt3dadd(174840.000000,104508.000000,70125.000000,261.944950)}
{pt3dadd(174576.000000,104160.000000,70125.000000,194.650267)}
{pt3dadd(174504.000000,104040.000000,70125.000000,175.203920)}
{pt3dadd(174432.000000,103896.000000,70200.000000,156.585340)}
{pt3dadd(174228.000000,103824.000000,70225.000000,148.014930)}
{pt3dadd(174084.000000,103776.000000,70225.000000,132.854784)}
{pt3dadd(173868.000000,103608.000000,70225.000000,123.876412)}
{pt3dadd(173688.000000,103500.000000,70175.000000,127.016062)}
{pt3dadd(173580.000000,103428.000000,70175.000000,151.004512)}
{pt3dadd(173292.000000,103272.000000,70175.000000,178.193502)}
{pt3dadd(173208.000000,103032.000000,70175.000000,223.369688)}
{pt3dadd(173208.000000,102936.000000,70375.000000,254.459334)}
{pt3dadd(173208.000000,102960.000000,70000.000000,271.550107)}
{pt3dadd(173100.000000,102900.000000,69825.000000,249.471370)}

{create adhoc46}
{access adhoc46}
{connect adhoc46(1), adhoc45(0)}
{nseg = 1}
{strdef color color = "White"}
{pt3dclear()}
{pt3dadd(173100.000000,102900.000000,69825.000000,249.471370)}
{pt3dadd(172908.000000,102660.000000,69825.000000,262.152840)}
{pt3dadd(172884.000000,102636.000000,69825.000000,215.705464)}
{pt3dadd(172920.000000,102384.000000,69825.000000,191.011190)}
{pt3dadd(172932.000000,102144.000000,69725.000000,159.354303)}
{pt3dadd(172980.000000,101940.000000,69625.000000,123.150491)}
{pt3dadd(172992.000000,101892.000000,69625.000000,112.264591)}
{pt3dadd(173004.000000,101892.000000,69550.000000,105.213694)}
{pt3dadd(173124.000000,101736.000000,69450.000000,99.758554)}
{pt3dadd(173184.000000,101532.000000,69450.000000,101.883593)}
{pt3dadd(173256.000000,101340.000000,69350.000000,103.811068)}
{pt3dadd(173376.000000,101100.000000,69250.000000,104.798311)}
{pt3dadd(173484.000000,100944.000000,69225.000000,103.811068)}
{pt3dadd(173556.000000,100860.000000,69200.000000,100.310353)}
{pt3dadd(173556.000000,100848.000000,69200.000000,97.198071)}
{pt3dadd(173616.000000,100608.000000,69100.000000,96.210828)}
{pt3dadd(173628.000000,100584.000000,69025.000000,112.710605)}
{pt3dadd(173664.000000,100428.000000,68950.000000,130.197625)}
{pt3dadd(173880.000000,100092.000000,68850.000000,144.584240)}
{pt3dadd(173928.000000,100020.000000,68850.000000,158.609790)}
{pt3dadd(174024.000000,99780.000000,68775.000000,168.037080)}
{pt3dadd(174120.000000,99648.000000,68675.000000,180.699474)}
{pt3dadd(174192.000000,99624.000000,68600.000000,193.361868)}
{pt3dadd(174144.000000,99540.000000,68425.000000,201.824580)}
{pt3dadd(174168.000000,99492.000000,68275.000000,203.513100)}
{pt3dadd(174108.000000,99336.000000,68125.000000,206.503246)}
{pt3dadd(174180.000000,99180.000000,68000.000000,185.781122)}
{pt3dadd(174228.000000,99084.000000,67825.000000,173.118728)}
{pt3dadd(174228.000000,98868.000000,67750.000000,169.484186)}
{pt3dadd(174264.000000,98604.000000,67750.000000,173.118728)}
{pt3dadd(174216.000000,98304.000000,67750.000000,178.188312)}
{pt3dadd(174204.000000,98136.000000,67675.000000,192.116714)}
{pt3dadd(174216.000000,97944.000000,67575.000000,202.403194)}
{pt3dadd(174228.000000,97812.000000,67425.000000,214.462624)}
{pt3dadd(174228.000000,97800.000000,67425.000000,222.887512)}
{pt3dadd(174132.000000,97608.000000,67350.000000,238.044622)}
{pt3dadd(174048.000000,97524.000000,67300.000000,249.952510)}
{pt3dadd(174012.000000,97392.000000,67300.000000,239.666030)}
{pt3dadd(173952.000000,97272.000000,67275.000000,222.778430)}
{pt3dadd(173892.000000,97080.000000,67175.000000,205.890830)}
{pt3dadd(173784.000000,96948.000000,67150.000000,188.960770)}
{pt3dadd(173700.000000,96780.000000,67100.000000,166.114626)}
{pt3dadd(173568.000000,96696.000000,67100.000000,155.342746)}
{pt3dadd(173556.000000,96696.000000,67100.000000,149.911986)}
{pt3dadd(173352.000000,96648.000000,67100.000000,142.138368)}
{pt3dadd(173220.000000,96624.000000,67100.000000,129.536580)}
{pt3dadd(173112.000000,96648.000000,66975.000000,119.142992)}
{pt3dadd(172944.000000,96552.000000,66925.000000,112.471653)}
{pt3dadd(172860.000000,96492.000000,66825.000000,108.843540)}

{create adhoc47}
{access adhoc47}
{connect adhoc47(1), adhoc45(0)}
{nseg = 1}
{strdef color color = "White"}
{pt3dclear()}
{pt3dadd(173100.000000,102900.000000,69825.000000,249.471370)}
{pt3dadd(172872.000000,102828.000000,69825.000000,216.726483)}
{pt3dadd(172560.000000,102756.000000,69825.000000,170.802201)}
{pt3dadd(172392.000000,102780.000000,69825.000000,137.152072)}
{pt3dadd(172164.000000,102744.000000,69750.000000,114.908556)}
{pt3dadd(171900.000000,102720.000000,69675.000000,91.285698)}
{pt3dadd(171816.000000,102768.000000,69575.000000,86.337725)}
{pt3dadd(171708.000000,102816.000000,69500.000000,84.672701)}
{pt3dadd(171660.000000,102792.000000,69425.000000,93.628556)}
{pt3dadd(171600.000000,102744.000000,69350.000000,101.283928)}
{pt3dadd(171540.000000,102756.000000,69325.000000,111.013314)}
{pt3dadd(171492.000000,102768.000000,69250.000000,118.304145)}
{pt3dadd(171420.000000,102756.000000,69175.000000,128.100000)}
{pt3dadd(171396.000000,102756.000000,69125.000000,126.000000)}

{create adhoc48}
{access adhoc48}
{connect adhoc48(1), adhoc44(0)}
{nseg = 1}
{strdef color color = "White"}
{pt3dclear()}
{pt3dadd(174840.000000,104508.000000,70125.000000,261.944950)}
{pt3dadd(174852.000000,104448.000000,70025.000000,257.787090)}
{pt3dadd(174828.000000,104460.000000,69950.000000,241.842990)}
{pt3dadd(174900.000000,104484.000000,69800.000000,221.616296)}
{pt3dadd(174876.000000,104472.000000,69975.000000,208.953902)}
{pt3dadd(174936.000000,104532.000000,69725.000000,187.195672)}
{pt3dadd(174948.000000,104544.000000,69725.000000,187.195672)}
{pt3dadd(174936.000000,104496.000000,69600.000000,165.957642)}
{pt3dadd(174972.000000,104400.000000,69425.000000,167.565756)}
{pt3dadd(175032.000000,104340.000000,69275.000000,165.792806)}
{pt3dadd(175092.000000,104280.000000,69150.000000,165.792806)}
{pt3dadd(175104.000000,104280.000000,69150.000000,164.261270)}
{pt3dadd(175152.000000,104232.000000,69050.000000,162.653156)}
{pt3dadd(175236.000000,104196.000000,68950.000000,161.045042)}
{pt3dadd(175212.000000,104136.000000,68850.000000,157.748408)}
{pt3dadd(175212.000000,104124.000000,68850.000000,156.289798)}
{pt3dadd(175176.000000,104076.000000,68725.000000,156.289798)}
{pt3dadd(175332.000000,103992.000000,68625.000000,161.359382)}
{pt3dadd(175368.000000,104004.000000,68550.000000,146.253438)}
{pt3dadd(175344.000000,103884.000000,68450.000000,133.836002)}
{pt3dadd(175476.000000,103872.000000,68325.000000,131.123852)}
{pt3dadd(175476.000000,103824.000000,68200.000000,125.693092)}
{pt3dadd(175548.000000,103896.000000,68075.000000,108.206072)}
{pt3dadd(175488.000000,103800.000000,67825.000000,110.894580)}
{pt3dadd(175500.000000,103800.000000,67525.000000,115.149720)}
{pt3dadd(175500.000000,103764.000000,67300.000000,115.149720)}
{pt3dadd(175500.000000,103764.000000,67300.000000,116.409720)}
{pt3dadd(175524.000000,103728.000000,67075.000000,121.864860)}
{pt3dadd(175536.000000,103728.000000,67075.000000,126.120000)}
{pt3dadd(175572.000000,103752.000000,66925.000000,128.580000)}
{pt3dadd(175596.000000,103740.000000,66725.000000,141.213472)}
{pt3dadd(175728.000000,103740.000000,66575.000000,169.761912)}
{pt3dadd(175680.000000,103428.000000,66375.000000,202.320772)}
{pt3dadd(175596.000000,103152.000000,66200.000000,245.183876)}
{pt3dadd(175320.000000,103380.000000,65975.000000,292.440448)}
{pt3dadd(175128.000000,103320.000000,65800.000000,311.105836)}
{pt3dadd(175044.000000,103152.000000,65650.000000,303.615756)}
{pt3dadd(174948.000000,102864.000000,65500.000000,298.322987)}
{pt3dadd(174876.000000,102720.000000,65375.000000,237.591800)}

{create adhoc49}
{access adhoc49}
{connect adhoc49(1), adhoc48(0)}
{nseg = 1}
{strdef color color = "White"}
{pt3dclear()}
{pt3dadd(174876.000000,102720.000000,65375.000000,237.591800)}
{pt3dadd(174768.000000,102552.000000,65375.000000,179.581283)}
{pt3dadd(174864.000000,102228.000000,65375.000000,164.839530)}
{pt3dadd(174876.000000,102048.000000,65375.000000,143.781170)}
{pt3dadd(174888.000000,101988.000000,65275.000000,137.793760)}
{pt3dadd(174924.000000,101808.000000,65175.000000,139.116760)}
{pt3dadd(174960.000000,101640.000000,65175.000000,162.551034)}
{pt3dadd(174984.000000,101376.000000,65100.000000,184.309264)}
{pt3dadd(174972.000000,101232.000000,65175.000000,207.743538)}
{pt3dadd(174960.000000,101004.000000,65150.000000,232.349528)}
{pt3dadd(175044.000000,100860.000000,65075.000000,247.667080)}
{pt3dadd(175044.000000,100848.000000,65075.000000,238.820950)}
{pt3dadd(175044.000000,100692.000000,65000.000000,223.663840)}
{pt3dadd(175068.000000,100512.000000,64900.000000,202.941716)}
{pt3dadd(175080.000000,100368.000000,64900.000000,198.071086)}
{pt3dadd(175080.000000,100152.000000,64825.000000,202.488894)}
{pt3dadd(175032.000000,99972.000000,64825.000000,213.829740)}
{pt3dadd(175032.000000,99888.000000,64825.000000,228.986850)}
{pt3dadd(175116.000000,99768.000000,64825.000000,249.708974)}
{pt3dadd(175188.000000,99588.000000,64825.000000,239.422494)}
{pt3dadd(175272.000000,99408.000000,64850.000000,241.798408)}
{pt3dadd(175332.000000,99156.000000,64775.000000,236.927778)}
{pt3dadd(175284.000000,98988.000000,64675.000000,219.997718)}
{pt3dadd(175308.000000,98976.000000,64575.000000,197.886444)}
{pt3dadd(175260.000000,98664.000000,64575.000000,194.424974)}
{pt3dadd(175284.000000,98520.000000,64600.000000,172.313700)}
{pt3dadd(175308.000000,98256.000000,64600.000000,155.426100)}
{pt3dadd(175308.000000,98052.000000,64600.000000,163.067722)}
{pt3dadd(175260.000000,97956.000000,64525.000000,164.456872)}
{pt3dadd(175236.000000,97728.000000,64400.000000,158.469462)}
{pt3dadd(175212.000000,97536.000000,64400.000000,158.469462)}
{pt3dadd(175212.000000,97332.000000,64300.000000,153.038702)}
{pt3dadd(175188.000000,97224.000000,64225.000000,136.398150)}
{pt3dadd(175236.000000,97128.000000,64125.000000,133.686000)}
{pt3dadd(175236.000000,97128.000000,64125.000000,131.103000)}
{pt3dadd(175260.000000,96972.000000,64050.000000,128.520000)}
{pt3dadd(175344.000000,96840.000000,63975.000000,133.950760)}
{pt3dadd(175404.000000,96720.000000,63925.000000,133.950760)}
{pt3dadd(175428.000000,96636.000000,63825.000000,133.950760)}
{pt3dadd(175380.000000,96456.000000,63775.000000,140.913056)}
{pt3dadd(175236.000000,96204.000000,63725.000000,147.875352)}
{pt3dadd(175212.000000,96108.000000,63650.000000,164.762952)}
{pt3dadd(175116.000000,95928.000000,63600.000000,183.558532)}
{pt3dadd(175008.000000,95784.000000,63500.000000,192.557462)}
{pt3dadd(174840.000000,95592.000000,63450.000000,189.567316)}
{pt3dadd(174852.000000,95436.000000,63350.000000,188.035780)}
{pt3dadd(174684.000000,95364.000000,63025.000000,174.287830)}
{pt3dadd(174612.000000,95304.000000,63000.000000,153.032250)}
{pt3dadd(174528.000000,95220.000000,62925.000000,146.745470)}
{pt3dadd(174408.000000,95112.000000,62800.000000,139.342028)}
{pt3dadd(174420.000000,95124.000000,62700.000000,139.342028)}
{pt3dadd(174396.000000,95184.000000,62625.000000,137.733914)}
{pt3dadd(174396.000000,95208.000000,62500.000000,152.827386)}
{pt3dadd(174540.000000,95280.000000,62325.000000,162.748708)}
{pt3dadd(174780.000000,95280.000000,62100.000000,168.763000)}
{pt3dadd(174996.000000,95340.000000,61800.000000,164.592240)}
{pt3dadd(175068.000000,95208.000000,61600.000000,163.060704)}
{pt3dadd(175092.000000,95160.000000,61525.000000,141.456267)}
{pt3dadd(175164.000000,95172.000000,61425.000000,153.153800)}

{create adhoc50}
{access adhoc50}
{connect adhoc50(1), adhoc48(0)}
{nseg = 1}
{strdef color color = "White"}
{pt3dclear()}
{pt3dadd(174876.000000,102720.000000,65375.000000,237.591800)}
{pt3dadd(174960.000000,102684.000000,65275.000000,223.550320)}
{pt3dadd(175020.000000,102864.000000,65175.000000,206.994074)}
{pt3dadd(174996.000000,102960.000000,65100.000000,184.675714)}
{pt3dadd(175068.000000,103044.000000,65100.000000,161.157354)}
{pt3dadd(175104.000000,103128.000000,65025.000000,141.808742)}
{pt3dadd(175056.000000,103188.000000,64925.000000,125.572412)}
{pt3dadd(175080.000000,103212.000000,64825.000000,114.659144)}
{pt3dadd(175116.000000,103164.000000,64750.000000,111.227852)}
{pt3dadd(175128.000000,103140.000000,64700.000000,110.084994)}
{pt3dadd(175164.000000,103152.000000,64625.000000,113.197276)}
{pt3dadd(175104.000000,103200.000000,64550.000000,111.072237)}
{pt3dadd(175104.000000,103164.000000,64500.000000,111.072237)}
{pt3dadd(175068.000000,103212.000000,64425.000000,113.303529)}
{pt3dadd(175044.000000,103260.000000,64325.000000,116.906387)}
{pt3dadd(175044.000000,103260.000000,64325.000000,118.049245)}
{pt3dadd(174972.000000,103344.000000,64250.000000,121.317142)}
{pt3dadd(174972.000000,103344.000000,64250.000000,120.228708)}
{pt3dadd(174984.000000,103356.000000,64175.000000,116.960811)}
{pt3dadd(174912.000000,103320.000000,64075.000000,115.700811)}
{pt3dadd(174900.000000,103332.000000,64000.000000,115.700811)}
{pt3dadd(174888.000000,103368.000000,63925.000000,114.557953)}
{pt3dadd(174888.000000,103368.000000,63925.000000,115.646387)}
{pt3dadd(174888.000000,103416.000000,63850.000000,117.771426)}
{pt3dadd(174888.000000,103428.000000,63850.000000,116.571426)}
{pt3dadd(174864.000000,103404.000000,63775.000000,114.340134)}
{pt3dadd(174852.000000,103392.000000,63775.000000,113.251700)}
{pt3dadd(174840.000000,103416.000000,63625.000000,108.303727)}
{pt3dadd(174768.000000,103428.000000,63550.000000,98.810683)}
{pt3dadd(174756.000000,103416.000000,63450.000000,92.719852)}
{pt3dadd(174756.000000,103416.000000,63350.000000,92.719852)}
{pt3dadd(174840.000000,103476.000000,63275.000000,91.683247)}
{pt3dadd(174828.000000,103464.000000,63175.000000,95.542786)}
{pt3dadd(174804.000000,103488.000000,63075.000000,103.947396)}
{pt3dadd(174864.000000,103476.000000,62975.000000,110.038227)}
{pt3dadd(174840.000000,103464.000000,62875.000000,123.728449)}
{pt3dadd(174792.000000,103452.000000,62775.000000,144.044490)}
{pt3dadd(174852.000000,103512.000000,62700.000000,165.376334)}
{pt3dadd(174852.000000,103476.000000,62600.000000,184.655770)}
{pt3dadd(174852.000000,103500.000000,62500.000000,203.756322)}
{pt3dadd(174888.000000,103488.000000,62400.000000,211.397944)}
{pt3dadd(174924.000000,103464.000000,62275.000000,204.120210)}
{pt3dadd(174936.000000,103440.000000,62150.000000,193.181954)}
{pt3dadd(175092.000000,103488.000000,62050.000000,179.916810)}
{pt3dadd(175188.000000,103500.000000,61950.000000,163.276258)}
{pt3dadd(175272.000000,103560.000000,61800.000000,145.375706)}
{pt3dadd(175416.000000,103764.000000,61750.000000,148.837176)}
{pt3dadd(175548.000000,103884.000000,61650.000000,148.837176)}
{pt3dadd(175680.000000,104016.000000,61650.000000,145.054176)}
{pt3dadd(175836.000000,104148.000000,61600.000000,146.377176)}
{pt3dadd(175992.000000,104328.000000,61550.000000,154.947586)}
{pt3dadd(176172.000000,104436.000000,61525.000000,146.887856)}
{pt3dadd(176208.000000,104436.000000,61450.000000,139.925560)}
{pt3dadd(176340.000000,104532.000000,61325.000000,146.556320)}
{pt3dadd(176400.000000,104532.000000,61250.000000,141.671517)}
{pt3dadd(176436.000000,104580.000000,61200.000000,153.153800)}

{create adhoc51}
{access adhoc51}
{connect adhoc51(1), adhoc1(0)}
{nseg = 1}
{strdef color color = "White"}
{pt3dclear()}
{pt3dadd(180252.000000,104220.000000,82025.000000,288.794300)}
{pt3dadd(180492.000000,104136.000000,82050.000000,220.962357)}
{pt3dadd(181020.000000,104124.000000,82000.000000,198.130886)}
{pt3dadd(181140.000000,104196.000000,81925.000000,168.155026)}
{pt3dadd(181380.000000,104220.000000,81925.000000,148.875590)}
{pt3dadd(181644.000000,104184.000000,81925.000000,135.837283)}
{pt3dadd(181980.000000,104088.000000,81850.000000,119.600953)}
{pt3dadd(182244.000000,104028.000000,81775.000000,114.909661)}
{pt3dadd(182484.000000,103872.000000,81775.000000,107.858764)}
{pt3dadd(182688.000000,103800.000000,81825.000000,106.822159)}
{pt3dadd(182904.000000,103668.000000,81825.000000,110.090056)}
{pt3dadd(183072.000000,103536.000000,81850.000000,109.001622)}
{pt3dadd(183276.000000,103512.000000,81875.000000,106.977774)}
{pt3dadd(183276.000000,103512.000000,81875.000000,108.014379)}
{pt3dadd(183552.000000,103440.000000,81875.000000,109.050984)}
{pt3dadd(183768.000000,103428.000000,81775.000000,106.819692)}
{pt3dadd(183996.000000,103380.000000,81725.000000,105.783087)}
{pt3dadd(184224.000000,103260.000000,81675.000000,104.842855)}
{pt3dadd(184428.000000,103248.000000,81675.000000,100.983316)}
{pt3dadd(184668.000000,103188.000000,81575.000000,97.123777)}
{pt3dadd(184824.000000,103140.000000,81575.000000,95.099929)}
{pt3dadd(185016.000000,103080.000000,81625.000000,97.224968)}
{pt3dadd(185040.000000,103068.000000,81625.000000,102.420340)}
{pt3dadd(185208.000000,102960.000000,81625.000000,123.604643)}
{pt3dadd(185364.000000,102804.000000,81625.000000,166.342274)}
{pt3dadd(185556.000000,102528.000000,81700.000000,210.276558)}
{pt3dadd(185604.000000,102528.000000,81850.000000,251.098560)}
{pt3dadd(185628.000000,102528.000000,81850.000000,282.107000)}
{pt3dadd(185724.000000,102456.000000,81975.000000,303.660328)}
{pt3dadd(185736.000000,102444.000000,81975.000000,303.660328)}
{pt3dadd(185832.000000,102372.000000,82125.000000,275.440114)}
{pt3dadd(186108.000000,102360.000000,82275.000000,247.219900)}
{pt3dadd(186240.000000,102444.000000,82375.000000,235.312012)}
{pt3dadd(186240.000000,102444.000000,82375.000000,215.713356)}
{pt3dadd(186432.000000,102600.000000,82500.000000,199.346043)}
{pt3dadd(186588.000000,102672.000000,82650.000000,205.240720)}
