# Supplementary material for: Full reconstruction of large lobula plate tangential cells in Drosophila from a 3D EM dataset
Source: PLoS One. 2018 Nov 28;13(11):e0207828. doi: 10.1371/journal.pone.0207828 (PMC6261601; doi:10.1371/journal.pone.0207828)
Supplement: S1 Dataset — (ZIP) [file pone.0207828.s001.zip › Diameter hoc/Cell50_6skels_completed.hoc0001.hoc]

/* created with convertKnossosNmlToHoc.m */

{create adhoc1}
{access adhoc1}
{nseg = 1}
{strdef color color = "White"}
{pt3dclear()}
{pt3dadd(122364.000000,176196.000000,147025.000000,493.936280)}
{pt3dadd(121560.000000,175920.000000,147025.000000,440.418073)}
{pt3dadd(120312.000000,174972.000000,147050.000000,317.233844)}
{pt3dadd(120168.000000,174612.000000,147100.000000,246.229588)}
{pt3dadd(119688.000000,174204.000000,147100.000000,136.398150)}
{pt3dadd(119268.000000,173856.000000,147100.000000,147.170030)}
{pt3dadd(118860.000000,173604.000000,147050.000000,161.063502)}
{pt3dadd(118356.000000,173436.000000,146925.000000,172.373974)}
{pt3dadd(117936.000000,172968.000000,146825.000000,258.949568)}
{pt3dadd(117636.000000,172452.000000,146675.000000,320.909230)}
{pt3dadd(117204.000000,171720.000000,146550.000000,571.792970)}

{create adhoc2}
{access adhoc2}
{connect adhoc2(1), adhoc1(0)}
{nseg = 1}
{strdef color color = "White"}
{pt3dclear()}
{pt3dadd(117204.000000,171720.000000,146550.000000,571.792970)}
{pt3dadd(117300.000000,171612.000000,147075.000000,622.397837)}
{pt3dadd(117300.000000,171072.000000,147100.000000,687.604174)}
{pt3dadd(117408.000000,170508.000000,147100.000000,726.497032)}
{pt3dadd(117408.000000,169968.000000,147300.000000,775.380242)}
{pt3dadd(117228.000000,169356.000000,147100.000000,813.784374)}
{pt3dadd(117168.000000,168828.000000,147100.000000,778.950700)}
{pt3dadd(117396.000000,168432.000000,147100.000000,703.101648)}
{pt3dadd(117816.000000,168024.000000,147175.000000,610.496996)}
{pt3dadd(118368.000000,167256.000000,147200.000000,508.400370)}
{pt3dadd(118752.000000,167088.000000,147425.000000,420.595604)}
{pt3dadd(119496.000000,166812.000000,147550.000000,426.899618)}
{pt3dadd(119736.000000,166524.000000,147700.000000,488.500806)}
{pt3dadd(119784.000000,165852.000000,147625.000000,605.261726)}
{pt3dadd(120012.000000,165120.000000,147975.000000,724.676722)}
{pt3dadd(120240.000000,164400.000000,147700.000000,774.077356)}
{pt3dadd(120288.000000,163752.000000,147575.000000,767.773342)}
{pt3dadd(120468.000000,163092.000000,147450.000000,732.496366)}
{pt3dadd(120504.000000,162324.000000,146975.000000,675.165166)}
{pt3dadd(121128.000000,161736.000000,146500.000000,614.967412)}
{pt3dadd(121872.000000,161664.000000,146500.000000,553.366224)}
{pt3dadd(122520.000000,161424.000000,146425.000000,485.044738)}
{pt3dadd(123132.000000,161340.000000,146500.000000,490.231078)}
{pt3dadd(123768.000000,160968.000000,146700.000000,496.234904)}
{pt3dadd(124440.000000,160608.000000,147300.000000,447.556958)}
{pt3dadd(124668.000000,160548.000000,147775.000000,440.360814)}
{pt3dadd(125604.000000,160044.000000,148050.000000,456.148337)}
{pt3dadd(126696.000000,159696.000000,148900.000000,351.031280)}

{create adhoc3}
{access adhoc3}
{connect adhoc3(1), adhoc2(0)}
{nseg = 1}
{strdef color color = "White"}
{pt3dclear()}
{pt3dadd(126696.000000,159696.000000,148900.000000,351.031280)}
{pt3dadd(126564.000000,159756.000000,148550.000000,570.400623)}
{pt3dadd(126984.000000,159612.000000,148225.000000,601.320482)}
{pt3dadd(127380.000000,159228.000000,147850.000000,620.717180)}
{pt3dadd(128064.000000,158460.000000,147325.000000,603.549786)}
{pt3dadd(128520.000000,157944.000000,147000.000000,577.672534)}
{pt3dadd(129120.000000,157788.000000,146725.000000,532.752046)}
{pt3dadd(129576.000000,157536.000000,146475.000000,545.059886)}
{pt3dadd(130128.000000,157284.000000,146125.000000,594.460520)}
{pt3dadd(130692.000000,157080.000000,145925.000000,599.906162)}
{pt3dadd(131256.000000,156780.000000,145800.000000,578.616898)}
{pt3dadd(131844.000000,156216.000000,145700.000000,574.136752)}
{pt3dadd(132300.000000,155904.000000,145600.000000,567.832738)}
{pt3dadd(132864.000000,155628.000000,145925.000000,561.213510)}
{pt3dadd(133476.000000,155304.000000,146075.000000,561.213510)}
{pt3dadd(133956.000000,154920.000000,146025.000000,608.380026)}
{pt3dadd(134568.000000,153804.000000,145775.000000,679.691092)}
{pt3dadd(135300.000000,153468.000000,145775.000000,662.523698)}
{pt3dadd(135996.000000,153108.000000,146150.000000,656.219684)}
{pt3dadd(136812.000000,152604.000000,146725.000000,659.845530)}
{pt3dadd(137940.000000,151548.000000,146550.000000,630.401730)}

{create adhoc4}
{access adhoc4}
{connect adhoc4(1), adhoc3(0)}
{nseg = 1}
{strdef color color = "White"}
{pt3dclear()}
{pt3dadd(137940.000000,151548.000000,146550.000000,630.401730)}
{pt3dadd(138540.000000,151488.000000,146525.000000,844.798650)}

{create adhoc5}
{access adhoc5}
{connect adhoc5(1), adhoc4(0)}
{nseg = 1}
{strdef color color = "White"}
{pt3dclear()}
{pt3dadd(138540.000000,151488.000000,146525.000000,844.798650)}
{pt3dadd(139116.000000,151380.000000,146825.000000,858.878633)}
{pt3dadd(139752.000000,151476.000000,146800.000000,775.639546)}
{pt3dadd(140388.000000,151404.000000,146650.000000,726.756336)}
{pt3dadd(141276.000000,151308.000000,146025.000000,677.873126)}
{pt3dadd(141504.000000,151200.000000,145500.000000,639.468994)}
{pt3dadd(141444.000000,150996.000000,145050.000000,625.899582)}
{pt3dadd(140880.000000,150732.000000,144475.000000,650.544576)}
{pt3dadd(140340.000000,150696.000000,143975.000000,650.544576)}
{pt3dadd(139620.000000,150732.000000,143450.000000,639.381008)}
{pt3dadd(138852.000000,150636.000000,142825.000000,609.290372)}
{pt3dadd(138804.000000,150696.000000,142125.000000,585.818964)}
{pt3dadd(138864.000000,150600.000000,141500.000000,579.199736)}
{pt3dadd(138720.000000,150084.000000,140950.000000,598.126804)}
{pt3dadd(138408.000000,150264.000000,140350.000000,621.598212)}
{pt3dadd(138228.000000,150468.000000,139675.000000,632.761780)}
{pt3dadd(137976.000000,150696.000000,139225.000000,643.925348)}
{pt3dadd(137616.000000,151296.000000,138850.000000,625.899582)}
{pt3dadd(137016.000000,151476.000000,138425.000000,606.972514)}
{pt3dadd(135744.000000,151692.000000,137950.000000,573.375410)}
{pt3dadd(135204.000000,151344.000000,137375.000000,547.381990)}
{pt3dadd(135024.000000,151128.000000,136900.000000,536.218422)}
{pt3dadd(134916.000000,151116.000000,136375.000000,525.586440)}
{pt3dadd(134736.000000,150984.000000,135925.000000,544.513508)}
{pt3dadd(134592.000000,151296.000000,135450.000000,578.110612)}
{pt3dadd(134388.000000,151740.000000,134975.000000,616.411872)}
{pt3dadd(133992.000000,152232.000000,134675.000000,639.883280)}
{pt3dadd(133500.000000,153144.000000,134350.000000,682.110440)}
{pt3dadd(132636.000000,153984.000000,133950.000000,689.060624)}
{pt3dadd(132336.000000,154620.000000,133425.000000,709.927716)}
{pt3dadd(132096.000000,155292.000000,132850.000000,686.456308)}
{pt3dadd(131700.000000,155724.000000,132525.000000,652.859204)}
{pt3dadd(131064.000000,156564.000000,132100.000000,600.988532)}
{pt3dadd(130680.000000,157212.000000,131425.000000,575.111280)}
{pt3dadd(130668.000000,157884.000000,131075.000000,525.586440)}
{pt3dadd(131016.000000,158760.000000,130150.000000,497.946004)}
{pt3dadd(131400.000000,159444.000000,129600.000000,525.239094)}
{pt3dadd(132084.000000,159996.000000,129200.000000,534.882606)}
{pt3dadd(132708.000000,160176.000000,129150.000000,518.532698)}
{pt3dadd(133272.000000,160488.000000,129275.000000,523.719038)}
{pt3dadd(134040.000000,160860.000000,129275.000000,568.526868)}
{pt3dadd(134796.000000,161004.000000,129400.000000,574.830882)}
{pt3dadd(135444.000000,161160.000000,129450.000000,632.018290)}
{pt3dadd(136392.000000,161280.000000,129500.000000,681.543130)}
{pt3dadd(137040.000000,161568.000000,129625.000000,718.583950)}
{pt3dadd(137736.000000,161628.000000,129800.000000,691.290860)}
{pt3dadd(138420.000000,161520.000000,130350.000000,673.265094)}
{pt3dadd(139140.000000,161460.000000,130800.000000,626.709668)}
{pt3dadd(139968.000000,161316.000000,131025.000000,558.794362)}
{pt3dadd(140400.000000,161052.000000,131125.000000,470.599450)}
{pt3dadd(141156.000000,160740.000000,131450.000000,453.084710)}
{pt3dadd(141768.000000,160200.000000,131500.000000,447.639068)}
{pt3dadd(142512.000000,159864.000000,131500.000000,453.356994)}
{pt3dadd(143196.000000,159564.000000,131075.000000,476.933800)}
{pt3dadd(143736.000000,159264.000000,130600.000000,513.258040)}
{pt3dadd(144288.000000,158808.000000,130300.000000,530.772780)}
{pt3dadd(144840.000000,158208.000000,130000.000000,530.772780)}
{pt3dadd(145428.000000,157848.000000,129350.000000,500.299214)}
{pt3dadd(146076.000000,157392.000000,129175.000000,476.722408)}
{pt3dadd(146664.000000,156828.000000,129100.000000,502.715828)}
{pt3dadd(147324.000000,156000.000000,129125.000000,530.008918)}
{pt3dadd(147972.000000,155208.000000,129075.000000,541.172486)}
{pt3dadd(148608.000000,154716.000000,129025.000000,545.652632)}
{pt3dadd(149400.000000,154164.000000,129050.000000,541.589002)}
{pt3dadd(149988.000000,153516.000000,129225.000000,506.848628)}
{pt3dadd(150468.000000,153084.000000,129325.000000,470.371236)}
{pt3dadd(151068.000000,152532.000000,129575.000000,444.377816)}
{pt3dadd(151824.000000,151956.000000,129650.000000,444.377816)}
{pt3dadd(152592.000000,151356.000000,129700.000000,457.188400)}
{pt3dadd(153480.000000,150948.000000,129800.000000,491.928774)}
{pt3dadd(154068.000000,150528.000000,129750.000000,541.329408)}
{pt3dadd(154908.000000,150024.000000,129675.000000,573.326654)}
{pt3dadd(155568.000000,149604.000000,129700.000000,588.156506)}
{pt3dadd(156564.000000,149280.000000,129700.000000,602.986358)}
{pt3dadd(157260.000000,148836.000000,129800.000000,576.992938)}
{pt3dadd(158256.000000,148440.000000,129900.000000,541.715962)}
{pt3dadd(159132.000000,148140.000000,129875.000000,496.908132)}
{pt3dadd(159972.000000,147840.000000,129725.000000,486.782436)}
{pt3dadd(160668.000000,147528.000000,129725.000000,463.205630)}
{pt3dadd(161268.000000,147240.000000,129725.000000,467.909786)}
{pt3dadd(161940.000000,147084.000000,129600.000000,462.970430)}
{pt3dadd(162492.000000,146940.000000,129600.000000,496.056508)}
{pt3dadd(163104.000000,146784.000000,129425.000000,506.182204)}
{pt3dadd(164160.000000,146472.000000,129075.000000,519.633314)}
{pt3dadd(164784.000000,146436.000000,128875.000000,502.118574)}
{pt3dadd(165492.000000,146220.000000,128700.000000,463.978118)}
{pt3dadd(166092.000000,146160.000000,128750.000000,410.266324)}
{pt3dadd(166680.000000,145992.000000,128600.000000,365.032516)}
{pt3dadd(167292.000000,145824.000000,128500.000000,343.647660)}
{pt3dadd(167880.000000,145656.000000,128425.000000,356.458244)}
{pt3dadd(168360.000000,145584.000000,128400.000000,399.538056)}
{pt3dadd(169476.000000,145320.000000,128250.000000,471.275616)}
{pt3dadd(170088.000000,145032.000000,127925.000000,501.679572)}
{pt3dadd(171216.000000,144540.000000,127475.000000,550.357518)}
{pt3dadd(171720.000000,144516.000000,127275.000000,565.187370)}
{pt3dadd(172152.000000,144564.000000,127250.000000,538.863158)}
{pt3dadd(172560.000000,144420.000000,127150.000000,483.881198)}
{pt3dadd(172896.000000,144444.000000,127175.000000,475.134244)}
{pt3dadd(173280.000000,144396.000000,126950.000000,447.841154)}
{pt3dadd(174300.000000,144168.000000,126650.000000,412.644774)}
{pt3dadd(175008.000000,144060.000000,126200.000000,405.448630)}
{pt3dadd(175536.000000,144012.000000,125825.000000,391.725374)}
{pt3dadd(176220.000000,143832.000000,125575.000000,391.725374)}
{pt3dadd(177096.000000,143568.000000,125250.000000,378.274264)}
{pt3dadd(177900.000000,143364.000000,124925.000000,398.640792)}
{pt3dadd(178500.000000,143232.000000,124475.000000,413.770682)}
{pt3dadd(179052.000000,143028.000000,124000.000000,420.297794)}
{pt3dadd(179736.000000,142788.000000,123600.000000,405.167904)}
{pt3dadd(180444.000000,142536.000000,123075.000000,397.234158)}
{pt3dadd(181080.000000,142320.000000,122650.000000,380.553458)}
{pt3dadd(181644.000000,142272.000000,122200.000000,380.553458)}
{pt3dadd(182256.000000,142128.000000,121750.000000,395.683348)}
{pt3dadd(182904.000000,142104.000000,121275.000000,410.813238)}
{pt3dadd(183480.000000,141792.000000,120850.000000,418.746984)}
{pt3dadd(183996.000000,141672.000000,120400.000000,426.680730)}
{pt3dadd(184572.000000,141528.000000,119950.000000,435.427684)}
{pt3dadd(185244.000000,141372.000000,119350.000000,444.174638)}
{pt3dadd(185724.000000,141096.000000,118775.000000,448.441446)}
{pt3dadd(186156.000000,141108.000000,118225.000000,452.708254)}
{pt3dadd(186612.000000,140988.000000,117700.000000,456.975062)}
{pt3dadd(186936.000000,141012.000000,117125.000000,452.494916)}
{pt3dadd(187284.000000,140928.000000,116625.000000,448.014770)}
{pt3dadd(187824.000000,140940.000000,116000.000000,452.494916)}
{pt3dadd(188340.000000,140964.000000,115475.000000,488.972308)}
{pt3dadd(189012.000000,140940.000000,114725.000000,519.445874)}
{pt3dadd(189612.000000,140952.000000,114075.000000,544.201514)}
{pt3dadd(190176.000000,140856.000000,113500.000000,548.681660)}
{pt3dadd(190512.000000,140940.000000,112925.000000,528.315132)}
{pt3dadd(190920.000000,141084.000000,112425.000000,472.441042)}
{pt3dadd(191388.000000,141312.000000,111700.000000,419.227626)}
{pt3dadd(191616.000000,141324.000000,111150.000000,378.585604)}
{pt3dadd(191844.000000,141228.000000,110575.000000,361.904904)}
{pt3dadd(192504.000000,141204.000000,110075.000000,397.101284)}
{pt3dadd(193188.000000,140928.000000,109350.000000,430.621640)}
{pt3dadd(194088.000000,140868.000000,108600.000000,478.117130)}
{pt3dadd(194616.000000,140712.000000,108125.000000,508.127170)}
{pt3dadd(195084.000000,140508.000000,107450.000000,539.637722)}
{pt3dadd(195576.000000,140424.000000,106800.000000,539.637722)}
{pt3dadd(196092.000000,140736.000000,106125.000000,534.698366)}
{pt3dadd(196668.000000,140616.000000,105475.000000,524.066384)}
{pt3dadd(197016.000000,140604.000000,104725.000000,487.202876)}
{pt3dadd(197352.000000,140364.000000,104175.000000,459.562440)}
{pt3dadd(197868.000000,140184.000000,103575.000000,428.051888)}
{pt3dadd(198180.000000,139872.000000,103000.000000,410.537148)}
{pt3dadd(198528.000000,139608.000000,102525.000000,384.212936)}
{pt3dadd(198900.000000,139368.000000,102025.000000,387.556088)}
{pt3dadd(199104.000000,139332.000000,101525.000000,369.962716)}
{pt3dadd(199248.000000,139068.000000,101100.000000,366.276888)}
{pt3dadd(199536.000000,138780.000000,100675.000000,366.276888)}
{pt3dadd(199680.000000,138516.000000,100250.000000,378.477442)}
{pt3dadd(199968.000000,138312.000000,99800.000000,411.997798)}
{pt3dadd(200112.000000,137580.000000,99000.000000,447.105910)}
{pt3dadd(200328.000000,137340.000000,98025.000000,458.725484)}
{pt3dadd(200532.000000,137016.000000,97450.000000,471.536068)}
{pt3dadd(200556.000000,136416.000000,96750.000000,467.269260)}
{pt3dadd(200496.000000,135624.000000,96300.000000,495.927008)}
{pt3dadd(200172.000000,134928.000000,95700.000000,529.524112)}
{pt3dadd(200124.000000,134328.000000,95300.000000,570.268312)}
{pt3dadd(200256.000000,133656.000000,94825.000000,602.265558)}
{pt3dadd(200268.000000,132468.000000,94375.000000,643.009758)}
{pt3dadd(200328.000000,132000.000000,94075.000000,630.701918)}
{pt3dadd(200316.000000,131376.000000,93700.000000,618.394078)}
{pt3dadd(200100.000000,130872.000000,93350.000000,612.390252)}
{pt3dadd(200052.000000,130260.000000,93000.000000,612.390252)}
{pt3dadd(199812.000000,129672.000000,92525.000000,612.390252)}
{pt3dadd(199776.000000,129060.000000,92375.000000,638.267504)}
{pt3dadd(199632.000000,128184.000000,92225.000000,638.267504)}
{pt3dadd(199584.000000,127464.000000,91725.000000,638.267504)}
{pt3dadd(199368.000000,126864.000000,91350.000000,621.100110)}
{pt3dadd(199164.000000,126300.000000,91075.000000,634.023352)}
{pt3dadd(199092.000000,125700.000000,90700.000000,614.149926)}
{pt3dadd(198912.000000,125052.000000,90375.000000,663.033136)}
{pt3dadd(198876.000000,124500.000000,90150.000000,720.364336)}
{pt3dadd(198816.000000,123756.000000,89675.000000,780.411114)}
{pt3dadd(198672.000000,123156.000000,89600.000000,810.367256)}
{pt3dadd(198612.000000,122448.000000,89325.000000,830.240682)}
{pt3dadd(198348.000000,121740.000000,89275.000000,807.234724)}
{pt3dadd(198156.000000,121056.000000,88950.000000,762.211364)}
{pt3dadd(197940.000000,120432.000000,88475.000000,732.255222)}
{pt3dadd(197760.000000,119940.000000,88300.000000,702.299080)}
{pt3dadd(197628.000000,119376.000000,87900.000000,665.258260)}
{pt3dadd(197364.000000,118776.000000,87525.000000,633.663082)}
{pt3dadd(197220.000000,118116.000000,87050.000000,654.530174)}
{pt3dadd(196788.000000,117504.000000,86800.000000,676.440606)}
{pt3dadd(196656.000000,117000.000000,86425.000000,706.396748)}
{pt3dadd(196344.000000,116532.000000,86200.000000,750.735248)}
{pt3dadd(196128.000000,115920.000000,85925.000000,805.336384)}
{pt3dadd(195912.000000,115296.000000,85600.000000,821.044662)}
{pt3dadd(195900.000000,114720.000000,85375.000000,821.044662)}
{pt3dadd(195660.000000,114048.000000,85200.000000,831.389133)}
{pt3dadd(195492.000000,113772.000000,85175.000000,804.570100)}

{create adhoc6}
{access adhoc6}
{connect adhoc6(1), adhoc5(0)}
{nseg = 1}
{strdef color color = "White"}
{pt3dclear()}
{pt3dadd(195492.000000,113772.000000,85175.000000,804.570100)}
{pt3dadd(195360.000000,113112.000000,84725.000000,805.208670)}
{pt3dadd(194988.000000,112464.000000,84225.000000,789.628106)}
{pt3dadd(194448.000000,111732.000000,83800.000000,789.628106)}
{pt3dadd(194268.000000,111336.000000,83375.000000,781.582396)}
{pt3dadd(193788.000000,110880.000000,82875.000000,791.799153)}
{pt3dadd(193572.000000,110484.000000,82525.000000,804.570100)}

{create adhoc7}
{access adhoc7}
{connect adhoc7(1), adhoc6(0)}
{nseg = 1}
{strdef color color = "White"}
{pt3dclear()}
{pt3dadd(193572.000000,110484.000000,82525.000000,804.570100)}
{pt3dadd(193320.000000,110016.000000,82025.000000,721.580230)}
{pt3dadd(193032.000000,109596.000000,81700.000000,630.401730)}

{create adhoc8}
{access adhoc8}
{connect adhoc8(1), adhoc7(0)}
{nseg = 1}
{strdef color color = "White"}
{pt3dclear()}
{pt3dadd(193032.000000,109596.000000,81700.000000,630.401730)}
{pt3dadd(192564.000000,109164.000000,79800.000000,601.789407)}
{pt3dadd(192156.000000,108108.000000,79275.000000,675.987146)}
{pt3dadd(191724.000000,107904.000000,78825.000000,710.820820)}
{pt3dadd(191460.000000,107592.000000,78375.000000,755.159320)}
{pt3dadd(190812.000000,106968.000000,77875.000000,768.082562)}
{pt3dadd(190440.000000,106920.000000,77450.000000,775.380242)}
{pt3dadd(190224.000000,106824.000000,77000.000000,742.510820)}
{pt3dadd(189888.000000,106860.000000,76350.000000,766.257260)}

{create adhoc9}
{access adhoc9}
{connect adhoc9(1), adhoc8(0)}
{nseg = 1}
{strdef color color = "White"}
{pt3dclear()}
{pt3dadd(189888.000000,106860.000000,76350.000000,766.257260)}
{pt3dadd(189396.000000,107124.000000,75725.000000,687.219267)}
{pt3dadd(189216.000000,107352.000000,75475.000000,600.382600)}

{create adhoc10}
{access adhoc10}
{connect adhoc10(1), adhoc9(0)}
{nseg = 1}
{strdef color color = "White"}
{pt3dclear()}
{pt3dadd(189216.000000,107352.000000,75475.000000,600.382600)}
{pt3dadd(189216.000000,107304.000000,74825.000000,631.927713)}
{pt3dadd(189024.000000,107616.000000,74125.000000,600.382600)}

{create adhoc11}
{access adhoc11}
{connect adhoc11(1), adhoc10(0)}
{nseg = 1}
{strdef color color = "White"}
{pt3dclear()}
{pt3dadd(189024.000000,107616.000000,74125.000000,600.382600)}
{pt3dadd(189156.000000,107160.000000,73675.000000,452.592153)}
{pt3dadd(188976.000000,106932.000000,73100.000000,479.255500)}
{pt3dadd(188976.000000,106836.000000,72475.000000,457.966236)}
{pt3dadd(188916.000000,106644.000000,71925.000000,496.770240)}
{pt3dadd(188496.000000,106776.000000,71375.000000,558.948344)}
{pt3dadd(188328.000000,106872.000000,70775.000000,585.413560)}
{pt3dadd(188088.000000,106884.000000,70250.000000,661.921800)}

{create adhoc12}
{access adhoc12}
{connect adhoc12(1), adhoc11(0)}
{nseg = 1}
{strdef color color = "White"}
{pt3dclear()}
{pt3dadd(188088.000000,106884.000000,70250.000000,661.921800)}
{pt3dadd(187716.000000,107364.000000,69600.000000,592.759843)}
{pt3dadd(187380.000000,107520.000000,69250.000000,596.953218)}
{pt3dadd(186924.000000,107676.000000,68750.000000,584.645378)}
{pt3dadd(186516.000000,108240.000000,68225.000000,584.645378)}
{pt3dadd(186408.000000,108468.000000,67925.000000,563.170707)}
{pt3dadd(186360.000000,108576.000000,67625.000000,544.564760)}

{create adhoc13}
{access adhoc13}
{connect adhoc13(1), adhoc12(0)}
{nseg = 1}
{strdef color color = "White"}
{pt3dclear()}
{pt3dadd(186360.000000,108576.000000,67625.000000,544.564760)}
{pt3dadd(186528.000000,109608.000000,67625.000000,394.038093)}
{pt3dadd(186648.000000,109992.000000,67525.000000,338.706120)}
{pt3dadd(186708.000000,110364.000000,67425.000000,277.311528)}
{pt3dadd(186924.000000,110892.000000,67250.000000,249.541896)}
{pt3dadd(187164.000000,111408.000000,67100.000000,241.284086)}
{pt3dadd(187668.000000,111792.000000,66925.000000,232.437956)}
{pt3dadd(188232.000000,112188.000000,67000.000000,240.695766)}
{pt3dadd(188544.000000,112620.000000,67225.000000,240.695766)}
{pt3dadd(188784.000000,113040.000000,67425.000000,240.695766)}
{pt3dadd(189012.000000,113832.000000,67650.000000,229.354920)}
{pt3dadd(189216.000000,114684.000000,67650.000000,231.407328)}
{pt3dadd(189132.000000,115536.000000,67925.000000,213.861080)}
{pt3dadd(189012.000000,116232.000000,68050.000000,243.745120)}
{pt3dadd(189000.000000,117084.000000,68200.000000,257.040638)}
{pt3dadd(189180.000000,117780.000000,68175.000000,265.886768)}
{pt3dadd(189336.000000,118296.000000,68025.000000,272.680490)}
{pt3dadd(189084.000000,118920.000000,68025.000000,277.098298)}
{pt3dadd(188808.000000,119268.000000,67775.000000,235.154828)}
{pt3dadd(188532.000000,119556.000000,67650.000000,221.859310)}
{pt3dadd(188112.000000,119868.000000,67500.000000,215.065588)}
{pt3dadd(187524.000000,120132.000000,67250.000000,202.403194)}
{pt3dadd(187392.000000,120468.000000,67025.000000,190.343764)}
{pt3dadd(187608.000000,120816.000000,67050.000000,185.515594)}
{pt3dadd(187848.000000,121392.000000,66850.000000,181.881052)}
{pt3dadd(187764.000000,121752.000000,66850.000000,176.012380)}
{pt3dadd(187800.000000,122124.000000,66550.000000,179.828644)}
{pt3dadd(187788.000000,122364.000000,66275.000000,181.601594)}
{pt3dadd(187812.000000,122748.000000,66050.000000,203.359824)}
{pt3dadd(187644.000000,123348.000000,65750.000000,238.107150)}
{pt3dadd(187644.000000,123864.000000,65450.000000,261.522070)}
{pt3dadd(187644.000000,124512.000000,65125.000000,272.862916)}
{pt3dadd(187704.000000,124992.000000,65275.000000,267.793332)}
{pt3dadd(187764.000000,125328.000000,65675.000000,241.996810)}
{pt3dadd(188100.000000,125856.000000,65875.000000,160.811480)}

{create adhoc14}
{access adhoc14}
{connect adhoc14(1), adhoc12(0)}
{nseg = 1}
{strdef color color = "White"}
{pt3dclear()}
{pt3dadd(186360.000000,108576.000000,67625.000000,544.564760)}
{pt3dadd(186264.000000,108552.000000,67425.000000,519.848340)}
{pt3dadd(186348.000000,108984.000000,66700.000000,450.940380)}
{pt3dadd(186348.000000,109344.000000,65925.000000,413.240547)}
{pt3dadd(185760.000000,109992.000000,65025.000000,288.794300)}

{create adhoc15}
{access adhoc15}
{connect adhoc15(1), adhoc14(0)}
{nseg = 1}
{strdef color color = "White"}
{pt3dclear()}
{pt3dadd(185760.000000,109992.000000,65025.000000,288.794300)}
{pt3dadd(185604.000000,109824.000000,63650.000000,387.829933)}
{pt3dadd(185328.000000,110004.000000,62825.000000,419.013312)}
{pt3dadd(185316.000000,110148.000000,62500.000000,428.117556)}
{pt3dadd(185256.000000,110160.000000,62275.000000,388.408876)}
{pt3dadd(185148.000000,110388.000000,62000.000000,392.675684)}
{pt3dadd(184980.000000,110556.000000,61700.000000,377.845832)}
{pt3dadd(184956.000000,110304.000000,61400.000000,381.715948)}
{pt3dadd(184908.000000,110424.000000,61175.000000,396.125360)}
{pt3dadd(184824.000000,110568.000000,60875.000000,419.947658)}
{pt3dadd(184800.000000,110592.000000,60675.000000,397.207808)}
{pt3dadd(184812.000000,110736.000000,60325.000000,369.987812)}
{pt3dadd(184656.000000,110760.000000,60150.000000,358.921552)}
{pt3dadd(184692.000000,110904.000000,59825.000000,347.855292)}
{pt3dadd(184704.000000,110916.000000,59500.000000,344.344976)}
{pt3dadd(184476.000000,111036.000000,59150.000000,362.818018)}
{pt3dadd(184692.000000,111048.000000,58900.000000,381.291060)}
{pt3dadd(184656.000000,111192.000000,58650.000000,377.947908)}
{pt3dadd(184812.000000,111396.000000,58375.000000,381.458224)}
{pt3dadd(184908.000000,111420.000000,58125.000000,384.968540)}
{pt3dadd(185040.000000,111552.000000,57825.000000,360.279194)}
{pt3dadd(185124.000000,111516.000000,57550.000000,345.149304)}
{pt3dadd(185244.000000,111480.000000,57250.000000,355.688600)}
{pt3dadd(185328.000000,111576.000000,56950.000000,347.092427)}
{pt3dadd(185520.000000,111744.000000,56650.000000,387.012000)}

{create adhoc16}
{access adhoc16}
{connect adhoc16(1), adhoc15(0)}
{nseg = 1}
{strdef color color = "White"}
{pt3dclear()}
{pt3dadd(185520.000000,111744.000000,56650.000000,387.012000)}
{pt3dadd(186156.000000,112332.000000,55575.000000,303.841857)}
{pt3dadd(186300.000000,112896.000000,55300.000000,269.431268)}
{pt3dadd(186420.000000,113052.000000,55275.000000,255.708012)}
{pt3dadd(186576.000000,113244.000000,55300.000000,264.378716)}
{pt3dadd(186672.000000,113556.000000,55125.000000,272.243302)}
{pt3dadd(186828.000000,113808.000000,55100.000000,272.243302)}
{pt3dadd(187044.000000,114072.000000,55075.000000,287.400412)}
{pt3dadd(187320.000000,114216.000000,55125.000000,293.927524)}
{pt3dadd(187356.000000,114396.000000,55200.000000,293.927524)}
{pt3dadd(187536.000000,114588.000000,55125.000000,286.062938)}
{pt3dadd(187560.000000,114732.000000,55150.000000,271.627594)}
{pt3dadd(187740.000000,115104.000000,55150.000000,282.917748)}
{pt3dadd(188004.000000,115392.000000,55150.000000,273.358292)}
{pt3dadd(188148.000000,115896.000000,54750.000000,287.081548)}
{pt3dadd(188328.000000,116424.000000,54625.000000,335.974530)}
{pt3dadd(188568.000000,116700.000000,54725.000000,377.918000)}
{pt3dadd(188544.000000,117012.000000,54700.000000,384.445112)}
{pt3dadd(188832.000000,117408.000000,54700.000000,376.187302)}
{pt3dadd(188676.000000,117660.000000,54600.000000,351.173892)}
{pt3dadd(188736.000000,117948.000000,54700.000000,313.033436)}
{pt3dadd(188724.000000,118152.000000,54675.000000,280.886616)}
{pt3dadd(188604.000000,118284.000000,54675.000000,258.198720)}
{pt3dadd(188244.000000,118632.000000,54825.000000,237.972026)}
{pt3dadd(187716.000000,119028.000000,54975.000000,217.745332)}
{pt3dadd(187116.000000,119544.000000,54975.000000,204.616892)}
{pt3dadd(186768.000000,120216.000000,54975.000000,217.120172)}
{pt3dadd(186384.000000,120888.000000,54850.000000,200.232572)}
{pt3dadd(186024.000000,121632.000000,54800.000000,213.325856)}
{pt3dadd(185796.000000,122376.000000,54800.000000,222.211704)}
{pt3dadd(185640.000000,123132.000000,54450.000000,222.211704)}
{pt3dadd(185964.000000,123924.000000,53675.000000,211.971204)}
{pt3dadd(186192.000000,124320.000000,52925.000000,209.123444)}
{pt3dadd(186384.000000,124632.000000,52375.000000,196.030160)}
{pt3dadd(186552.000000,124860.000000,51925.000000,196.030160)}
{pt3dadd(186720.000000,125088.000000,51500.000000,196.030160)}
{pt3dadd(186912.000000,125520.000000,50925.000000,182.282210)}
{pt3dadd(187056.000000,125664.000000,50825.000000,189.958140)}
{pt3dadd(187320.000000,126108.000000,50550.000000,194.579500)}
{pt3dadd(187512.000000,126648.000000,50275.000000,177.294650)}

{create adhoc17}
{access adhoc17}
{connect adhoc17(1), adhoc15(0)}
{nseg = 1}
{strdef color color = "White"}
{pt3dclear()}
{pt3dadd(185520.000000,111744.000000,56650.000000,387.012000)}
{pt3dadd(185676.000000,111156.000000,55875.000000,253.701590)}
{pt3dadd(185856.000000,110796.000000,55375.000000,279.517628)}
{pt3dadd(185988.000000,110604.000000,54900.000000,252.009502)}
{pt3dadd(186072.000000,110316.000000,54700.000000,254.061910)}
{pt3dadd(186852.000000,109452.000000,54025.000000,257.523380)}
{pt3dadd(187068.000000,109032.000000,53625.000000,274.492210)}
{pt3dadd(187512.000000,108732.000000,52950.000000,254.848670)}
{pt3dadd(187680.000000,108540.000000,52525.000000,248.054948)}
{pt3dadd(187728.000000,108300.000000,52175.000000,246.002540)}
{pt3dadd(187704.000000,108060.000000,51975.000000,246.002540)}
{pt3dadd(187800.000000,108096.000000,51700.000000,224.395016)}
{pt3dadd(188004.000000,108396.000000,50225.000000,193.096156)}
{pt3dadd(188172.000000,108504.000000,49450.000000,183.766014)}
{pt3dadd(188268.000000,108804.000000,48700.000000,173.348630)}
{pt3dadd(188148.000000,109044.000000,47900.000000,163.899750)}
{pt3dadd(187896.000000,108660.000000,46625.000000,142.644170)}
{pt3dadd(187620.000000,108600.000000,45525.000000,153.416050)}
{pt3dadd(187488.000000,108840.000000,45275.000000,148.358133)}
{pt3dadd(187164.000000,109152.000000,44950.000000,186.159400)}

{create adhoc18}
{access adhoc18}
{connect adhoc18(1), adhoc14(0)}
{nseg = 1}
{strdef color color = "White"}
{pt3dclear()}
{pt3dadd(185760.000000,109992.000000,65025.000000,288.794300)}
{pt3dadd(185712.000000,111780.000000,64925.000000,373.945870)}
{pt3dadd(185400.000000,112716.000000,64700.000000,412.533722)}
{pt3dadd(185220.000000,113496.000000,64700.000000,444.377816)}
{pt3dadd(185352.000000,114276.000000,64450.000000,419.688470)}
{pt3dadd(185232.000000,114972.000000,64225.000000,423.752100)}
{pt3dadd(185076.000000,115596.000000,64125.000000,399.875256)}
{pt3dadd(185076.000000,116568.000000,63925.000000,383.194556)}
{pt3dadd(185280.000000,117168.000000,63750.000000,378.927748)}
{pt3dadd(185196.000000,117660.000000,63525.000000,407.883902)}
{pt3dadd(185376.000000,118104.000000,63325.000000,389.410860)}
{pt3dadd(185364.000000,118488.000000,63100.000000,408.807558)}
{pt3dadd(185268.000000,118956.000000,62875.000000,416.741304)}
{pt3dadd(185268.000000,119436.000000,62675.000000,405.121730)}
{pt3dadd(185304.000000,119928.000000,62375.000000,396.791292)}
{pt3dadd(185568.000000,120768.000000,62125.000000,419.531142)}
{pt3dadd(185760.000000,121524.000000,61925.000000,400.134444)}
{pt3dadd(185844.000000,122112.000000,61650.000000,388.514870)}
{pt3dadd(185940.000000,122772.000000,61500.000000,392.200698)}
{pt3dadd(185868.000000,123564.000000,61325.000000,381.134438)}
{pt3dadd(186012.000000,123948.000000,61200.000000,355.210628)}
{pt3dadd(186048.000000,124548.000000,60975.000000,351.867476)}
{pt3dadd(186288.000000,125388.000000,61000.000000,363.487050)}
{pt3dadd(186492.000000,126396.000000,61100.000000,352.947754)}
{pt3dadd(186696.000000,126888.000000,61300.000000,346.420642)}
{pt3dadd(186684.000000,127260.000000,61600.000000,356.458070)}
{pt3dadd(187140.000000,127704.000000,61750.000000,356.458070)}
{pt3dadd(187416.000000,128004.000000,62075.000000,344.838496)}
{pt3dadd(187992.000000,128364.000000,62675.000000,359.247908)}
{pt3dadd(188640.000000,128604.000000,62900.000000,362.431868)}
{pt3dadd(189252.000000,128964.000000,63150.000000,346.474156)}
{pt3dadd(189600.000000,129516.000000,63325.000000,322.711604)}
{pt3dadd(190080.000000,130008.000000,63850.000000,284.453962)}
{pt3dadd(190344.000000,130668.000000,64625.000000,255.570436)}
{pt3dadd(190536.000000,131040.000000,64850.000000,246.466192)}
{pt3dadd(191016.000000,131736.000000,65200.000000,246.466192)}
{pt3dadd(191352.000000,132168.000000,65325.000000,264.012440)}
{pt3dadd(191724.000000,132780.000000,65475.000000,283.561950)}
{pt3dadd(191772.000000,133056.000000,65725.000000,278.691320)}
{pt3dadd(191880.000000,133668.000000,65075.000000,298.334860)}
{pt3dadd(191916.000000,134328.000000,64800.000000,299.882000)}
{pt3dadd(191868.000000,135120.000000,64625.000000,387.012000)}

{create adhoc19}
{access adhoc19}
{connect adhoc19(1), adhoc11(0)}
{nseg = 1}
{strdef color color = "White"}
{pt3dclear()}
{pt3dadd(188088.000000,106884.000000,70250.000000,661.921800)}
{pt3dadd(186948.000000,105804.000000,70200.000000,330.790083)}
{pt3dadd(186732.000000,105504.000000,69975.000000,255.564810)}
{pt3dadd(186528.000000,105216.000000,69750.000000,170.698810)}
{pt3dadd(186084.000000,104796.000000,69625.000000,167.402176)}
{pt3dadd(185760.000000,104532.000000,69450.000000,170.541826)}
{pt3dadd(185352.000000,104424.000000,69225.000000,174.712586)}
{pt3dadd(184884.000000,104292.000000,69050.000000,176.244122)}
{pt3dadd(184668.000000,104328.000000,68850.000000,148.470622)}
{pt3dadd(184524.000000,104460.000000,68625.000000,137.563193)}
{pt3dadd(184332.000000,104472.000000,68425.000000,98.724300)}

{create adhoc20}
{access adhoc20}
{connect adhoc20(1), adhoc11(0)}
{nseg = 1}
{strdef color color = "White"}
{pt3dclear()}
{pt3dadd(188088.000000,106884.000000,70250.000000,661.921800)}
{pt3dadd(188496.000000,107796.000000,70375.000000,441.570043)}
{pt3dadd(188580.000000,108420.000000,70375.000000,306.872640)}
{pt3dadd(188760.000000,109044.000000,70550.000000,198.488280)}
{pt3dadd(188748.000000,109392.000000,70550.000000,126.161024)}
{pt3dadd(188712.000000,109704.000000,70550.000000,108.634759)}
{pt3dadd(188928.000000,109992.000000,70700.000000,113.896248)}
{pt3dadd(189096.000000,110304.000000,70725.000000,128.484392)}
{pt3dadd(189420.000000,110700.000000,70775.000000,132.267392)}
{pt3dadd(189780.000000,111024.000000,70850.000000,149.272078)}
{pt3dadd(190080.000000,111432.000000,70825.000000,138.915000)}

{create adhoc21}
{access adhoc21}
{connect adhoc21(1), adhoc10(0)}
{nseg = 1}
{strdef color color = "White"}
{pt3dclear()}
{pt3dadd(189024.000000,107616.000000,74125.000000,600.382600)}
{pt3dadd(188652.000000,108408.000000,74125.000000,469.269987)}
{pt3dadd(188580.000000,109056.000000,73775.000000,397.217232)}
{pt3dadd(188664.000000,109764.000000,73475.000000,358.413228)}
{pt3dadd(189144.000000,110712.000000,73175.000000,344.289570)}
{pt3dadd(189648.000000,111744.000000,72925.000000,363.933110)}
{pt3dadd(189672.000000,112224.000000,72700.000000,380.688710)}
{pt3dadd(189696.000000,112656.000000,72650.000000,389.359414)}
{pt3dadd(189876.000000,113136.000000,72525.000000,378.293154)}
{pt3dadd(189792.000000,113640.000000,72575.000000,369.962716)}
{pt3dadd(189756.000000,114084.000000,72625.000000,366.276888)}
{pt3dadd(189672.000000,114480.000000,72650.000000,374.210634)}
{pt3dadd(189756.000000,115032.000000,72975.000000,409.318746)}
{pt3dadd(189960.000000,115584.000000,73250.000000,420.385006)}
{pt3dadd(190092.000000,116148.000000,73475.000000,416.514890)}
{pt3dadd(190008.000000,116640.000000,73625.000000,429.103620)}
{pt3dadd(190068.000000,117096.000000,73750.000000,387.012000)}

{create adhoc22}
{access adhoc22}
{connect adhoc22(1), adhoc21(0)}
{nseg = 1}
{strdef color color = "White"}
{pt3dclear()}
{pt3dadd(190068.000000,117096.000000,73750.000000,387.012000)}
{pt3dadd(190188.000000,117744.000000,74200.000000,382.073933)}
{pt3dadd(190188.000000,118344.000000,74600.000000,391.982906)}
{pt3dadd(190404.000000,118872.000000,74875.000000,391.982906)}
{pt3dadd(190512.000000,119352.000000,74850.000000,394.870846)}
{pt3dadd(190656.000000,120072.000000,74975.000000,350.682020)}
{pt3dadd(190824.000000,120624.000000,74725.000000,308.446426)}
{pt3dadd(190956.000000,121104.000000,74900.000000,266.502956)}
{pt3dadd(191088.000000,121740.000000,75050.000000,218.272706)}
{pt3dadd(191076.000000,122220.000000,75100.000000,212.634346)}
{pt3dadd(191016.000000,122592.000000,74950.000000,217.748512)}
{pt3dadd(191232.000000,123420.000000,75025.000000,232.406820)}
{pt3dadd(191676.000000,124428.000000,75025.000000,244.466250)}
{pt3dadd(192132.000000,125196.000000,75025.000000,258.394652)}
{pt3dadd(192396.000000,125892.000000,75025.000000,238.845142)}
{pt3dadd(192672.000000,126588.000000,74800.000000,213.008852)}
{pt3dadd(192804.000000,127464.000000,74800.000000,205.144266)}
{pt3dadd(192972.000000,128052.000000,74925.000000,205.144266)}
{pt3dadd(192984.000000,128580.000000,75025.000000,222.690514)}
{pt3dadd(193788.000000,130008.000000,75325.000000,232.487164)}
{pt3dadd(193836.000000,130536.000000,75325.000000,242.408486)}
{pt3dadd(194316.000000,131028.000000,75175.000000,214.282920)}
{pt3dadd(194952.000000,131424.000000,75300.000000,214.282920)}
{pt3dadd(195612.000000,132036.000000,75250.000000,192.729592)}
{pt3dadd(195828.000000,132756.000000,75625.000000,179.636308)}
{pt3dadd(195984.000000,133416.000000,75625.000000,177.774716)}
{pt3dadd(196068.000000,133752.000000,75625.000000,188.168304)}
{pt3dadd(196248.000000,134700.000000,75850.000000,176.108874)}
{pt3dadd(196284.000000,135276.000000,76100.000000,180.115954)}
{pt3dadd(196284.000000,135576.000000,76275.000000,181.724068)}
{pt3dadd(196368.000000,136392.000000,76500.000000,187.216487)}
{pt3dadd(196644.000000,137352.000000,76350.000000,168.852050)}

{create adhoc23}
{access adhoc23}
{connect adhoc23(1), adhoc21(0)}
{nseg = 1}
{strdef color color = "White"}
{pt3dclear()}
{pt3dadd(190068.000000,117096.000000,73750.000000,387.012000)}
{pt3dadd(189852.000000,117636.000000,73750.000000,232.255023)}
{pt3dadd(189648.000000,118428.000000,73350.000000,193.983774)}
{pt3dadd(189672.000000,119064.000000,73175.000000,145.753524)}
{pt3dadd(189552.000000,119352.000000,72950.000000,144.665090)}
{pt3dadd(189420.000000,119760.000000,72850.000000,126.303721)}
{pt3dadd(189264.000000,119832.000000,72525.000000,130.086721)}
{pt3dadd(188928.000000,120132.000000,72125.000000,123.455961)}
{pt3dadd(188760.000000,120624.000000,71575.000000,113.088439)}
{pt3dadd(188736.000000,121344.000000,71175.000000,116.519731)}
{pt3dadd(188844.000000,121980.000000,70875.000000,143.305988)}
{pt3dadd(189036.000000,122340.000000,70650.000000,163.041348)}
{pt3dadd(189240.000000,123036.000000,70375.000000,174.500278)}
{pt3dadd(189336.000000,123576.000000,70050.000000,184.867800)}
{pt3dadd(189048.000000,123828.000000,70250.000000,183.667800)}
{pt3dadd(188796.000000,124128.000000,70475.000000,147.718467)}
{pt3dadd(188880.000000,124512.000000,70575.000000,120.000000)}

{create adhoc24}
{access adhoc24}
{connect adhoc24(1), adhoc9(0)}
{nseg = 1}
{strdef color color = "White"}
{pt3dclear()}
{pt3dadd(189216.000000,107352.000000,75475.000000,600.382600)}
{pt3dadd(189984.000000,108828.000000,75275.000000,310.107005)}
{pt3dadd(190308.000000,109296.000000,75000.000000,245.889778)}
{pt3dadd(190584.000000,109668.000000,74800.000000,166.861402)}
{pt3dadd(190668.000000,110328.000000,74575.000000,144.462964)}
{pt3dadd(190464.000000,110976.000000,74775.000000,171.249221)}
{pt3dadd(190500.000000,111432.000000,74975.000000,195.772698)}
{pt3dadd(190596.000000,111732.000000,75175.000000,190.449636)}
{pt3dadd(190620.000000,112416.000000,75050.000000,168.206120)}
{pt3dadd(190404.000000,112884.000000,75025.000000,162.405330)}
{pt3dadd(189924.000000,113052.000000,75100.000000,116.052317)}
{pt3dadd(189792.000000,112980.000000,75225.000000,85.281760)}

{create adhoc25}
{access adhoc25}
{connect adhoc25(1), adhoc8(0)}
{nseg = 1}
{strdef color color = "White"}
{pt3dclear()}
{pt3dadd(189888.000000,106860.000000,76350.000000,766.257260)}
{pt3dadd(188652.000000,107184.000000,76325.000000,368.121130)}
{pt3dadd(188016.000000,107436.000000,76625.000000,159.007043)}
{pt3dadd(187800.000000,107532.000000,76925.000000,138.915000)}

{create adhoc26}
{access adhoc26}
{connect adhoc26(1), adhoc7(0)}
{nseg = 1}
{strdef color color = "White"}
{pt3dclear()}
{pt3dadd(193032.000000,109596.000000,81700.000000,630.401730)}
{pt3dadd(193104.000000,108612.000000,83050.000000,531.584503)}
{pt3dadd(192960.000000,108108.000000,83200.000000,490.436202)}
{pt3dadd(192744.000000,107616.000000,83125.000000,441.758256)}
{pt3dadd(192552.000000,107136.000000,82975.000000,428.307146)}
{pt3dadd(192360.000000,106656.000000,83100.000000,411.626446)}
{pt3dadd(191844.000000,106056.000000,82950.000000,428.307146)}
{pt3dadd(191484.000000,105624.000000,82950.000000,437.950658)}
{pt3dadd(191244.000000,105168.000000,82925.000000,458.686853)}
{pt3dadd(190764.000000,104640.000000,83050.000000,518.633060)}

{create adhoc27}
{access adhoc27}
{connect adhoc27(1), adhoc26(0)}
{nseg = 1}
{strdef color color = "White"}
{pt3dclear()}
{pt3dadd(190764.000000,104640.000000,83050.000000,518.633060)}
{pt3dadd(190452.000000,104124.000000,82825.000000,547.657023)}
{pt3dadd(190200.000000,103632.000000,82575.000000,503.533314)}
{pt3dadd(189804.000000,103008.000000,82300.000000,456.210593)}
{pt3dadd(189444.000000,102396.000000,81975.000000,448.014770)}

{create adhoc28}
{access adhoc28}
{connect adhoc28(1), adhoc27(0)}
{nseg = 1}
{strdef color color = "White"}
{pt3dclear()}
{pt3dadd(189444.000000,102396.000000,81975.000000,448.014770)}
{pt3dadd(189264.000000,101988.000000,81825.000000,463.321940)}
{pt3dadd(188976.000000,101580.000000,81425.000000,448.665456)}
{pt3dadd(188772.000000,101196.000000,81125.000000,448.665456)}
{pt3dadd(188364.000000,100860.000000,80925.000000,440.335018)}
{pt3dadd(187992.000000,100536.000000,80575.000000,426.883908)}
{pt3dadd(187368.000000,100092.000000,80025.000000,427.019360)}
{pt3dadd(186816.000000,99576.000000,79600.000000,426.680730)}

{create adhoc29}
{access adhoc29}
{connect adhoc29(1), adhoc28(0)}
{nseg = 1}
{strdef color color = "White"}
{pt3dclear()}
{pt3dadd(186816.000000,99576.000000,79600.000000,426.680730)}
{pt3dadd(186744.000000,99648.000000,78350.000000,349.436817)}
{pt3dadd(186708.000000,99888.000000,77900.000000,376.270752)}
{pt3dadd(186564.000000,99804.000000,77425.000000,372.207122)}
{pt3dadd(186360.000000,99708.000000,76950.000000,413.135297)}
{pt3dadd(186036.000000,99564.000000,76600.000000,406.362580)}

{create adhoc30}
{access adhoc30}
{connect adhoc30(1), adhoc29(0)}
{nseg = 1}
{strdef color color = "White"}
{pt3dclear()}
{pt3dadd(186036.000000,99564.000000,76600.000000,406.362580)}
{pt3dadd(186084.000000,99576.000000,76175.000000,385.870450)}
{pt3dadd(185808.000000,99576.000000,75775.000000,375.445098)}
{pt3dadd(185568.000000,99432.000000,75275.000000,364.378838)}
{pt3dadd(186024.000000,99336.000000,74850.000000,381.134438)}
{pt3dadd(185592.000000,99144.000000,74350.000000,368.933884)}
{pt3dadd(185352.000000,98976.000000,73900.000000,368.933884)}
{pt3dadd(185160.000000,99000.000000,73575.000000,376.130028)}
{pt3dadd(184944.000000,98964.000000,73325.000000,379.640344)}
{pt3dadd(184620.000000,98844.000000,73000.000000,375.954516)}
{pt3dadd(184152.000000,98676.000000,72750.000000,368.758372)}
{pt3dadd(183996.000000,98712.000000,72425.000000,361.904904)}
{pt3dadd(183972.000000,98568.000000,72100.000000,365.775020)}
{pt3dadd(183828.000000,98556.000000,71675.000000,363.903127)}
{pt3dadd(183588.000000,98532.000000,71200.000000,406.362580)}

{create adhoc31}
{access adhoc31}
{connect adhoc31(1), adhoc30(0)}
{nseg = 1}
{strdef color color = "White"}
{pt3dclear()}
{pt3dadd(183588.000000,98532.000000,71200.000000,406.362580)}
{pt3dadd(183468.000000,98292.000000,69950.000000,341.472270)}
{pt3dadd(183096.000000,97920.000000,68975.000000,323.028503)}
{pt3dadd(182976.000000,97824.000000,68075.000000,351.031280)}

{create adhoc32}
{access adhoc32}
{connect adhoc32(1), adhoc31(0)}
{nseg = 1}
{strdef color color = "White"}
{pt3dclear()}
{pt3dadd(182976.000000,97824.000000,68075.000000,351.031280)}
{pt3dadd(183336.000000,97560.000000,67675.000000,287.888427)}
{pt3dadd(183264.000000,97584.000000,67100.000000,270.145690)}
{pt3dadd(184140.000000,97056.000000,66450.000000,247.457794)}
{pt3dadd(183444.000000,97872.000000,66000.000000,239.967714)}
{pt3dadd(183372.000000,97908.000000,65700.000000,244.838344)}
{pt3dadd(183324.000000,97992.000000,65400.000000,236.413456)}
{pt3dadd(183300.000000,97944.000000,65100.000000,223.751062)}
{pt3dadd(183324.000000,97944.000000,64700.000000,217.280846)}
{pt3dadd(183216.000000,97872.000000,64350.000000,200.393246)}
{pt3dadd(183168.000000,97824.000000,63950.000000,191.104808)}
{pt3dadd(183216.000000,97704.000000,63500.000000,218.874440)}
{pt3dadd(183252.000000,97500.000000,63050.000000,259.044960)}
{pt3dadd(183360.000000,97524.000000,62600.000000,291.713388)}
{pt3dadd(183588.000000,97356.000000,62150.000000,338.485028)}
{pt3dadd(183720.000000,97284.000000,61725.000000,369.101048)}
{pt3dadd(183780.000000,97272.000000,61325.000000,357.246384)}
{pt3dadd(183672.000000,97512.000000,60900.000000,337.602844)}
{pt3dadd(183708.000000,97668.000000,60525.000000,337.602844)}
{pt3dadd(183888.000000,98460.000000,60300.000000,317.959304)}
{pt3dadd(183948.000000,98868.000000,60025.000000,311.105836)}
{pt3dadd(184224.000000,99840.000000,59825.000000,308.486386)}
{pt3dadd(184512.000000,100476.000000,59550.000000,324.444098)}
{pt3dadd(184584.000000,101076.000000,59300.000000,311.374326)}
{pt3dadd(184560.000000,101724.000000,59025.000000,303.509740)}
{pt3dadd(184500.000000,101748.000000,58775.000000,270.417046)}
{pt3dadd(184560.000000,102204.000000,58450.000000,267.922330)}
{pt3dadd(184668.000000,102816.000000,58175.000000,223.377908)}
{pt3dadd(184764.000000,103104.000000,57900.000000,190.514108)}
{pt3dadd(185196.000000,103236.000000,57625.000000,169.791984)}
{pt3dadd(185220.000000,103320.000000,57375.000000,156.753677)}
{pt3dadd(185232.000000,103404.000000,57100.000000,144.091283)}
{pt3dadd(185268.000000,103392.000000,56425.000000,142.702133)}
{pt3dadd(185112.000000,103392.000000,56000.000000,147.081429)}
{pt3dadd(184980.000000,103140.000000,55475.000000,161.009831)}
{pt3dadd(184596.000000,102912.000000,55000.000000,177.509608)}
{pt3dadd(184404.000000,102708.000000,54725.000000,174.048138)}
{pt3dadd(184524.000000,102708.000000,54225.000000,189.365690)}
{pt3dadd(184500.000000,102792.000000,53925.000000,204.721754)}
{pt3dadd(184644.000000,103080.000000,53600.000000,181.366062)}
{pt3dadd(184860.000000,103032.000000,53200.000000,183.939620)}
{pt3dadd(184956.000000,102984.000000,52825.000000,98.724300)}

{create adhoc33}
{access adhoc33}
{connect adhoc33(1), adhoc31(0)}
{nseg = 1}
{strdef color color = "White"}
{pt3dclear()}
{pt3dadd(182976.000000,97824.000000,68075.000000,351.031280)}
{pt3dadd(182268.000000,97824.000000,67700.000000,168.852050)}

{create adhoc34}
{access adhoc34}
{connect adhoc34(1), adhoc33(0)}
{nseg = 1}
{strdef color color = "White"}
{pt3dclear()}
{pt3dadd(182268.000000,97824.000000,67700.000000,168.852050)}
{pt3dadd(181860.000000,97824.000000,67300.000000,211.647000)}
{pt3dadd(181500.000000,97860.000000,67050.000000,252.202896)}
{pt3dadd(181368.000000,98076.000000,66850.000000,255.664366)}
{pt3dadd(181344.000000,98556.000000,66600.000000,253.975846)}
{pt3dadd(180708.000000,98556.000000,66025.000000,231.675916)}
{pt3dadd(180180.000000,98676.000000,65750.000000,219.768028)}
{pt3dadd(179820.000000,98712.000000,65425.000000,183.332182)}
{pt3dadd(179520.000000,98664.000000,65150.000000,179.870712)}
{pt3dadd(178908.000000,98700.000000,64875.000000,189.200854)}
{pt3dadd(178632.000000,98796.000000,64775.000000,201.260284)}
{pt3dadd(178356.000000,99204.000000,64725.000000,215.918592)}
{pt3dadd(177828.000000,99696.000000,64550.000000,229.666542)}
{pt3dadd(177552.000000,100032.000000,64300.000000,241.151712)}
{pt3dadd(177600.000000,100212.000000,64050.000000,250.440150)}
{pt3dadd(177648.000000,100428.000000,63775.000000,233.552550)}
{pt3dadd(177708.000000,100632.000000,63475.000000,209.564100)}
{pt3dadd(177972.000000,100716.000000,63225.000000,182.777843)}
{pt3dadd(178380.000000,100692.000000,63225.000000,169.684559)}
{pt3dadd(178836.000000,100812.000000,63100.000000,152.754499)}
{pt3dadd(179208.000000,101028.000000,62875.000000,149.906739)}
{pt3dadd(179796.000000,101424.000000,62650.000000,173.895189)}
{pt3dadd(180504.000000,101796.000000,62475.000000,200.681446)}
{pt3dadd(181236.000000,102084.000000,62475.000000,205.751030)}
{pt3dadd(182160.000000,102648.000000,62275.000000,222.681090)}
{pt3dadd(182736.000000,103188.000000,62100.000000,227.060386)}
{pt3dadd(183168.000000,103920.000000,62025.000000,201.463822)}
{pt3dadd(183144.000000,104160.000000,61750.000000,189.404392)}
{pt3dadd(183036.000000,104400.000000,61575.000000,185.942922)}
{pt3dadd(182976.000000,104808.000000,61400.000000,172.647404)}
{pt3dadd(183024.000000,105024.000000,61175.000000,164.485108)}
{pt3dadd(183276.000000,105312.000000,61025.000000,161.439803)}
{pt3dadd(183480.000000,105612.000000,60875.000000,120.000000)}

{create adhoc35}
{access adhoc35}
{connect adhoc35(1), adhoc33(0)}
{nseg = 1}
{strdef color color = "White"}
{pt3dclear()}
{pt3dadd(182268.000000,97824.000000,67700.000000,168.852050)}
{pt3dadd(182040.000000,97620.000000,67550.000000,165.539803)}
{pt3dadd(181272.000000,97116.000000,67625.000000,160.658328)}
{pt3dadd(180576.000000,96636.000000,67950.000000,162.346848)}
{pt3dadd(179940.000000,96264.000000,68175.000000,162.346848)}
{pt3dadd(179472.000000,95880.000000,68275.000000,174.980320)}
{pt3dadd(179184.000000,95376.000000,68525.000000,189.409790)}
{pt3dadd(179136.000000,94860.000000,68800.000000,195.467360)}

{create adhoc36}
{access adhoc36}
{connect adhoc36(1), adhoc30(0)}
{nseg = 1}
{strdef color color = "White"}
{pt3dclear()}
{pt3dadd(183588.000000,98532.000000,71200.000000,406.362580)}
{pt3dadd(183708.000000,99216.000000,71250.000000,224.074443)}
{pt3dadd(183600.000000,99612.000000,71150.000000,210.770018)}
{pt3dadd(183468.000000,100080.000000,71150.000000,153.497502)}
{pt3dadd(183492.000000,100356.000000,71100.000000,144.231420)}
{pt3dadd(183564.000000,100584.000000,71125.000000,133.863898)}
{pt3dadd(183624.000000,100788.000000,71400.000000,95.897577)}
{pt3dadd(183744.000000,100944.000000,71600.000000,94.023140)}

{create adhoc37}
{access adhoc37}
{connect adhoc37(1), adhoc29(0)}
{nseg = 1}
{strdef color color = "White"}
{pt3dclear()}
{pt3dadd(186036.000000,99564.000000,76600.000000,406.362580)}
{pt3dadd(185328.000000,99648.000000,76725.000000,292.464620)}
{pt3dadd(184776.000000,99660.000000,76725.000000,227.138772)}
{pt3dadd(184536.000000,99480.000000,76775.000000,178.028552)}
{pt3dadd(184284.000000,99120.000000,76850.000000,126.626924)}
{pt3dadd(184044.000000,98916.000000,76850.000000,129.044873)}
{pt3dadd(184068.000000,98712.000000,77050.000000,94.023140)}

{create adhoc38}
{access adhoc38}
{connect adhoc38(1), adhoc28(0)}
{nseg = 1}
{strdef color color = "White"}
{pt3dclear()}
{pt3dadd(186816.000000,99576.000000,79600.000000,426.680730)}
{pt3dadd(185676.000000,99300.000000,79900.000000,349.515357)}
{pt3dadd(184980.000000,98688.000000,80150.000000,337.005888)}
{pt3dadd(184056.000000,98520.000000,80500.000000,299.188102)}
{pt3dadd(183048.000000,97812.000000,80775.000000,291.358390)}
{pt3dadd(182628.000000,97620.000000,81100.000000,237.591800)}

{create adhoc39}
{access adhoc39}
{connect adhoc39(1), adhoc38(0)}
{nseg = 1}
{strdef color color = "White"}
{pt3dclear()}
{pt3dadd(182628.000000,97620.000000,81100.000000,237.591800)}
{pt3dadd(182724.000000,97164.000000,81900.000000,202.082787)}
{pt3dadd(182832.000000,97068.000000,82275.000000,193.940482)}
{pt3dadd(182916.000000,96876.000000,82700.000000,177.052882)}
{pt3dadd(183024.000000,96744.000000,83025.000000,167.722740)}
{pt3dadd(183168.000000,96504.000000,83325.000000,189.480970)}
{pt3dadd(183144.000000,96576.000000,83675.000000,201.540400)}
{pt3dadd(183096.000000,96576.000000,84025.000000,216.697510)}
{pt3dadd(182916.000000,96528.000000,84350.000000,253.827233)}
{pt3dadd(182988.000000,96564.000000,84525.000000,261.944950)}

{create adhoc40}
{access adhoc40}
{connect adhoc40(1), adhoc39(0)}
{nseg = 1}
{strdef color color = "White"}
{pt3dclear()}
{pt3dadd(182988.000000,96564.000000,84525.000000,261.944950)}
{pt3dadd(182604.000000,96360.000000,84800.000000,221.202370)}
{pt3dadd(182556.000000,96396.000000,85150.000000,200.987044)}
{pt3dadd(182604.000000,96564.000000,85425.000000,189.646198)}
{pt3dadd(182460.000000,96756.000000,85675.000000,183.045078)}
{pt3dadd(182436.000000,97044.000000,85925.000000,173.714936)}
{pt3dadd(182388.000000,97212.000000,86250.000000,178.313196)}
{pt3dadd(182520.000000,97224.000000,86600.000000,180.267868)}
{pt3dadd(182592.000000,97284.000000,86875.000000,182.320276)}
{pt3dadd(182808.000000,97788.000000,87325.000000,179.472516)}
{pt3dadd(182856.000000,98424.000000,87550.000000,181.161036)}
{pt3dadd(182880.000000,98784.000000,87875.000000,181.161036)}
{pt3dadd(183180.000000,98916.000000,88250.000000,167.895892)}
{pt3dadd(183624.000000,99060.000000,88625.000000,144.540200)}
{pt3dadd(183960.000000,99336.000000,89000.000000,138.525908)}
{pt3dadd(184332.000000,99588.000000,89150.000000,125.924120)}
{pt3dadd(184548.000000,99792.000000,89250.000000,131.247182)}
{pt3dadd(184956.000000,100260.000000,89450.000000,121.373351)}
{pt3dadd(185244.000000,100512.000000,89650.000000,128.088491)}
{pt3dadd(185496.000000,100896.000000,90050.000000,143.551663)}
{pt3dadd(185700.000000,101124.000000,90350.000000,156.153451)}
{pt3dadd(185892.000000,101376.000000,90625.000000,149.222275)}
{pt3dadd(185928.000000,101556.000000,90925.000000,174.755177)}
{pt3dadd(185844.000000,101460.000000,91200.000000,160.811480)}

{create adhoc41}
{access adhoc41}
{connect adhoc41(1), adhoc39(0)}
{nseg = 1}
{strdef color color = "White"}
{pt3dclear()}
{pt3dadd(182988.000000,96564.000000,84525.000000,261.944950)}
{pt3dadd(183480.000000,97128.000000,84550.000000,167.696163)}
{pt3dadd(183432.000000,97440.000000,84550.000000,145.349801)}
{pt3dadd(183588.000000,97836.000000,84725.000000,109.204956)}
{pt3dadd(183792.000000,98280.000000,84850.000000,101.627080)}
{pt3dadd(183828.000000,98712.000000,85050.000000,81.220726)}

{create adhoc42}
{access adhoc42}
{connect adhoc42(1), adhoc38(0)}
{nseg = 1}
{strdef color color = "White"}
{pt3dclear()}
{pt3dadd(182628.000000,97620.000000,81100.000000,237.591800)}
{pt3dadd(182172.000000,97140.000000,80825.000000,209.663973)}
{pt3dadd(181644.000000,96492.000000,80650.000000,178.692783)}
{pt3dadd(181368.000000,96144.000000,80450.000000,160.346573)}
{pt3dadd(181008.000000,95604.000000,80200.000000,153.745453)}
{pt3dadd(180876.000000,95280.000000,79950.000000,146.467719)}
{pt3dadd(180552.000000,94836.000000,79725.000000,149.764353)}
{pt3dadd(180072.000000,94248.000000,79700.000000,162.802660)}
{pt3dadd(180000.000000,93900.000000,79425.000000,160.090510)}
{pt3dadd(179892.000000,93696.000000,79150.000000,164.918680)}
{pt3dadd(179820.000000,93564.000000,78950.000000,168.380150)}
{pt3dadd(179820.000000,93384.000000,78700.000000,170.153100)}
{pt3dadd(179844.000000,92940.000000,78525.000000,175.476162)}
{pt3dadd(179604.000000,92844.000000,78200.000000,194.271742)}
{pt3dadd(179640.000000,92832.000000,77900.000000,187.984962)}
{pt3dadd(179832.000000,93156.000000,77625.000000,189.202003)}
{pt3dadd(179652.000000,93216.000000,77350.000000,145.860750)}

{create adhoc43}
{access adhoc43}
{connect adhoc43(1), adhoc27(0)}
{nseg = 1}
{strdef color color = "White"}
{pt3dclear()}
{pt3dadd(189444.000000,102396.000000,81975.000000,448.014770)}
{pt3dadd(188604.000000,102420.000000,82325.000000,222.246357)}
{pt3dadd(188268.000000,102420.000000,82650.000000,162.182526)}
{pt3dadd(188136.000000,102420.000000,82925.000000,94.348280)}
{pt3dadd(188100.000000,102420.000000,83200.000000,105.234180)}
{pt3dadd(188016.000000,102420.000000,83400.000000,105.234180)}
{pt3dadd(187524.000000,102504.000000,83675.000000,130.963554)}
{pt3dadd(187356.000000,102504.000000,83825.000000,152.724820)}
{pt3dadd(186948.000000,102624.000000,84100.000000,176.211692)}
{pt3dadd(186492.000000,102624.000000,84300.000000,182.812812)}
{pt3dadd(185976.000000,102972.000000,84425.000000,192.583222)}
{pt3dadd(185832.000000,103284.000000,84200.000000,173.234610)}
{pt3dadd(185820.000000,103536.000000,84125.000000,156.734833)}
{pt3dadd(185688.000000,103728.000000,83900.000000,126.949867)}
{pt3dadd(185400.000000,103956.000000,84000.000000,103.750290)}
{pt3dadd(185088.000000,104076.000000,83950.000000,83.725033)}
{pt3dadd(184860.000000,104088.000000,84125.000000,70.161514)}

{create adhoc44}
{access adhoc44}
{connect adhoc44(1), adhoc26(0)}
{nseg = 1}
{strdef color color = "White"}
{pt3dclear()}
{pt3dadd(190764.000000,104640.000000,83050.000000,518.633060)}
{pt3dadd(189900.000000,104820.000000,83325.000000,294.895087)}
{pt3dadd(189384.000000,105300.000000,83525.000000,257.462086)}
{pt3dadd(189048.000000,105672.000000,83750.000000,185.897770)}
{pt3dadd(188856.000000,106284.000000,84000.000000,170.049626)}
{pt3dadd(189216.000000,106680.000000,84050.000000,161.887330)}
{pt3dadd(189492.000000,106884.000000,84000.000000,153.025278)}
{pt3dadd(189684.000000,107136.000000,84100.000000,135.293300)}
{pt3dadd(189888.000000,107388.000000,84200.000000,121.935632)}
{pt3dadd(190164.000000,107652.000000,84300.000000,116.480492)}
{pt3dadd(190296.000000,107856.000000,84500.000000,112.225352)}
{pt3dadd(190488.000000,108072.000000,84550.000000,97.157247)}
{pt3dadd(190572.000000,108336.000000,84575.000000,98.724300)}

{create adhoc45}
{access adhoc45}
{connect adhoc45(1), adhoc26(0)}
{nseg = 1}
{strdef color color = "White"}
{pt3dclear()}
{pt3dadd(190764.000000,104640.000000,83050.000000,518.633060)}
{pt3dadd(190644.000000,104760.000000,83300.000000,442.672610)}
{pt3dadd(190092.000000,104556.000000,83825.000000,375.751416)}
{pt3dadd(189672.000000,104616.000000,84350.000000,329.783664)}
{pt3dadd(189588.000000,104688.000000,84850.000000,260.680650)}
{pt3dadd(189492.000000,104760.000000,85250.000000,265.551280)}
{pt3dadd(189408.000000,104832.000000,85650.000000,262.800860)}
{pt3dadd(189324.000000,104904.000000,86100.000000,244.182280)}
{pt3dadd(189228.000000,104988.000000,86575.000000,231.679000)}
{pt3dadd(189396.000000,105204.000000,86975.000000,223.655300)}
{pt3dadd(189600.000000,105984.000000,87200.000000,206.725240)}
{pt3dadd(189672.000000,106236.000000,87750.000000,185.487210)}
{pt3dadd(189972.000000,106788.000000,88475.000000,177.435367)}
{pt3dadd(190116.000000,107136.000000,89025.000000,168.852050)}

{create adhoc46}
{access adhoc46}
{connect adhoc46(1), adhoc45(0)}
{nseg = 1}
{strdef color color = "White"}
{pt3dclear()}
{pt3dadd(190116.000000,107136.000000,89025.000000,168.852050)}
{pt3dadd(189924.000000,107100.000000,89775.000000,176.738520)}
{pt3dadd(189948.000000,107076.000000,90300.000000,188.530572)}
{pt3dadd(190164.000000,107064.000000,90800.000000,193.853634)}
{pt3dadd(190572.000000,107292.000000,91525.000000,202.634887)}
{pt3dadd(190572.000000,107424.000000,91725.000000,195.467360)}

{create adhoc47}
{access adhoc47}
{connect adhoc47(1), adhoc46(0)}
{nseg = 1}
{strdef color color = "White"}
{pt3dclear()}
{pt3dadd(190572.000000,107424.000000,91725.000000,195.467360)}
{pt3dadd(190236.000000,107364.000000,91800.000000,142.163887)}
{pt3dadd(189864.000000,107232.000000,92000.000000,149.929412)}
{pt3dadd(189660.000000,106860.000000,92250.000000,146.294870)}
{pt3dadd(189240.000000,106356.000000,92050.000000,166.816683)}
{pt3dadd(189024.000000,106296.000000,92325.000000,177.294650)}

{create adhoc48}
{access adhoc48}
{connect adhoc48(1), adhoc46(0)}
{nseg = 1}
{strdef color color = "White"}
{pt3dclear()}
{pt3dadd(190572.000000,107424.000000,91725.000000,195.467360)}
{pt3dadd(190872.000000,107700.000000,92025.000000,162.859613)}
{pt3dadd(191016.000000,108132.000000,92350.000000,156.060068)}
{pt3dadd(191052.000000,108660.000000,92775.000000,150.737006)}
{pt3dadd(190764.000000,108792.000000,93250.000000,161.675262)}
{pt3dadd(190692.000000,108792.000000,93675.000000,162.998262)}
{pt3dadd(190752.000000,109056.000000,94125.000000,181.344472)}
{pt3dadd(190812.000000,109800.000000,94650.000000,187.631252)}
{pt3dadd(190476.000000,110388.000000,95500.000000,206.249832)}
{pt3dadd(190500.000000,110256.000000,96200.000000,188.349280)}
{pt3dadd(191244.000000,110784.000000,96300.000000,187.026280)}
{pt3dadd(192984.000000,112596.000000,96525.000000,173.414983)}
{pt3dadd(193200.000000,112944.000000,96525.000000,132.300000)}

{create adhoc49}
{access adhoc49}
{connect adhoc49(1), adhoc45(0)}
{nseg = 1}
{strdef color color = "White"}
{pt3dclear()}
{pt3dadd(190116.000000,107136.000000,89025.000000,168.852050)}
{pt3dadd(190584.000000,107568.000000,88775.000000,180.538020)}
{pt3dadd(190884.000000,108384.000000,88850.000000,163.954962)}
{pt3dadd(190800.000000,109044.000000,88975.000000,157.876037)}
{pt3dadd(190896.000000,109608.000000,89075.000000,132.300000)}

{create adhoc50}
{access adhoc50}
{connect adhoc50(1), adhoc6(0)}
{nseg = 1}
{strdef color color = "White"}
{pt3dclear()}
{pt3dadd(193572.000000,110484.000000,82525.000000,804.570100)}
{pt3dadd(193224.000000,111624.000000,82350.000000,439.671237)}
{pt3dadd(193056.000000,112308.000000,82350.000000,323.748038)}
{pt3dadd(193152.000000,112656.000000,82350.000000,210.352378)}
{pt3dadd(193224.000000,113124.000000,82350.000000,184.154166)}
{pt3dadd(193284.000000,113364.000000,82275.000000,198.082568)}
{pt3dadd(193512.000000,113700.000000,82175.000000,211.347712)}
{pt3dadd(193524.000000,114024.000000,81925.000000,218.278888)}
{pt3dadd(193584.000000,114312.000000,81775.000000,198.543528)}
{pt3dadd(193608.000000,114552.000000,81625.000000,179.874360)}
{pt3dadd(193500.000000,114852.000000,81525.000000,138.915000)}

{create adhoc51}
{access adhoc51}
{connect adhoc51(1), adhoc50(0)}
{nseg = 1}
{strdef color color = "White"}
{pt3dclear()}
{pt3dadd(193500.000000,114852.000000,81525.000000,138.915000)}
{pt3dadd(193584.000000,115620.000000,81525.000000,134.462332)}
{pt3dadd(193656.000000,116244.000000,81525.000000,164.826095)}
{pt3dadd(193740.000000,116940.000000,81525.000000,166.215245)}
{pt3dadd(193560.000000,117480.000000,81700.000000,160.217060)}
{pt3dadd(193572.000000,117816.000000,82000.000000,145.011033)}
{pt3dadd(193704.000000,118116.000000,82225.000000,73.669590)}

{create adhoc52}
{access adhoc52}
{connect adhoc52(1), adhoc50(0)}
{nseg = 1}
{strdef color color = "White"}
{pt3dclear()}
{pt3dadd(193500.000000,114852.000000,81525.000000,138.915000)}
{pt3dadd(192948.000000,115080.000000,81350.000000,145.976517)}
{pt3dadd(192552.000000,115068.000000,81375.000000,131.330770)}
{pt3dadd(192324.000000,114972.000000,81525.000000,139.006700)}
{pt3dadd(192108.000000,114684.000000,81575.000000,131.233082)}
{pt3dadd(191892.000000,114372.000000,81725.000000,120.865560)}
{pt3dadd(191700.000000,114216.000000,81925.000000,119.722702)}
{pt3dadd(191424.000000,114132.000000,82050.000000,119.722702)}
{pt3dadd(191196.000000,113892.000000,82200.000000,104.008632)}
{pt3dadd(191100.000000,113724.000000,82200.000000,97.395635)}
{pt3dadd(191016.000000,113484.000000,82200.000000,92.889775)}
{pt3dadd(190824.000000,113328.000000,82075.000000,81.220726)}

{create adhoc53}
{access adhoc53}
{connect adhoc53(1), adhoc5(0)}
{nseg = 1}
{strdef color color = "White"}
{pt3dclear()}
{pt3dadd(195492.000000,113772.000000,85175.000000,804.570100)}
{pt3dadd(194748.000000,113844.000000,86100.000000,497.182893)}
{pt3dadd(194376.000000,113844.000000,86900.000000,429.785168)}
{pt3dadd(193812.000000,113844.000000,87675.000000,318.765422)}
{pt3dadd(193188.000000,113844.000000,88300.000000,274.221000)}
{pt3dadd(192948.000000,113712.000000,88650.000000,247.773736)}
{pt3dadd(192828.000000,113616.000000,89050.000000,193.830507)}
{pt3dadd(192840.000000,113676.000000,89375.000000,186.159400)}

{create adhoc54}
{access adhoc54}
{connect adhoc54(1), adhoc53(0)}
{nseg = 1}
{strdef color color = "White"}
{pt3dclear()}
{pt3dadd(192840.000000,113676.000000,89375.000000,186.159400)}
{pt3dadd(192888.000000,114168.000000,89550.000000,165.251350)}
{pt3dadd(193056.000000,114444.000000,89875.000000,164.704282)}
{pt3dadd(193188.000000,115008.000000,90150.000000,155.255402)}
{pt3dadd(193044.000000,115872.000000,90325.000000,167.888874)}
{pt3dadd(192576.000000,116400.000000,90275.000000,161.602094)}
{pt3dadd(192240.000000,116940.000000,90400.000000,159.142094)}
{pt3dadd(192084.000000,117228.000000,90675.000000,153.776037)}
{pt3dadd(191952.000000,117420.000000,90900.000000,120.000000)}

{create adhoc55}
{access adhoc55}
{connect adhoc55(1), adhoc53(0)}
{nseg = 1}
{strdef color color = "White"}
{pt3dclear()}
{pt3dadd(192840.000000,113676.000000,89375.000000,186.159400)}
{pt3dadd(192708.000000,113292.000000,89375.000000,156.978383)}
{pt3dadd(192504.000000,113100.000000,89675.000000,141.155738)}
{pt3dadd(192300.000000,112980.000000,89925.000000,136.086154)}
{pt3dadd(192252.000000,112884.000000,90150.000000,133.374004)}
{pt3dadd(192240.000000,112704.000000,90425.000000,133.374004)}
{pt3dadd(192216.000000,112416.000000,90650.000000,134.634004)}
{pt3dadd(192180.000000,112272.000000,90900.000000,173.512096)}
{pt3dadd(192300.000000,112272.000000,91175.000000,235.432900)}
{pt3dadd(192348.000000,112308.000000,91525.000000,269.619700)}
{pt3dadd(192468.000000,112656.000000,91875.000000,280.930172)}
{pt3dadd(192096.000000,112680.000000,92325.000000,278.470172)}
{pt3dadd(192288.000000,113004.000000,92625.000000,246.995522)}
{pt3dadd(192408.000000,113052.000000,92925.000000,174.681130)}
{pt3dadd(192576.000000,113088.000000,93175.000000,146.196626)}
{pt3dadd(192960.000000,113064.000000,93450.000000,144.335034)}
{pt3dadd(193104.000000,113088.000000,93675.000000,155.793964)}
{pt3dadd(193248.000000,112992.000000,93925.000000,157.252574)}
{pt3dadd(193392.000000,113160.000000,94200.000000,157.252574)}
{pt3dadd(193548.000000,113316.000000,94525.000000,147.947420)}
{pt3dadd(193644.000000,113376.000000,94850.000000,133.572682)}
{pt3dadd(193476.000000,113280.000000,95075.000000,120.970894)}
{pt3dadd(193440.000000,113616.000000,95550.000000,124.110544)}
{pt3dadd(193380.000000,113616.000000,96100.000000,124.110544)}
{pt3dadd(193248.000000,113892.000000,96425.000000,127.713402)}
{pt3dadd(193284.000000,114168.000000,96600.000000,127.713402)}
{pt3dadd(192972.000000,114168.000000,96950.000000,127.713402)}
{pt3dadd(192768.000000,114540.000000,97325.000000,121.725992)}
{pt3dadd(192396.000000,114660.000000,97650.000000,137.189164)}
{pt3dadd(192228.000000,114864.000000,97900.000000,147.961044)}
{pt3dadd(192108.000000,115152.000000,98025.000000,198.820474)}
{pt3dadd(192156.000000,115428.000000,98100.000000,201.163332)}
{pt3dadd(192012.000000,115992.000000,98150.000000,205.542628)}
{pt3dadd(192096.000000,116688.000000,98225.000000,215.829108)}
{pt3dadd(192240.000000,117372.000000,98225.000000,205.057228)}
{pt3dadd(192336.000000,118164.000000,98175.000000,153.109364)}
{pt3dadd(192540.000000,118728.000000,98125.000000,143.379978)}
{pt3dadd(192648.000000,119280.000000,98125.000000,127.461827)}
{pt3dadd(192696.000000,119724.000000,98200.000000,97.852636)}
{pt3dadd(193008.000000,120060.000000,98325.000000,82.706547)}
{pt3dadd(193308.000000,120492.000000,98325.000000,89.545845)}

{create adhoc56}
{access adhoc56}
{connect adhoc56(1), adhoc4(0)}
{nseg = 1}
{strdef color color = "White"}
{pt3dclear()}
{pt3dadd(138540.000000,151488.000000,146525.000000,844.798650)}
{pt3dadd(137784.000000,152460.000000,146200.000000,510.592410)}
{pt3dadd(137364.000000,152628.000000,145900.000000,640.951034)}
{pt3dadd(137148.000000,153636.000000,145900.000000,667.583304)}
{pt3dadd(136920.000000,154368.000000,145975.000000,749.857932)}
{pt3dadd(136800.000000,154956.000000,146025.000000,802.221706)}
{pt3dadd(136464.000000,155844.000000,145675.000000,849.496218)}
{pt3dadd(135840.000000,156444.000000,145175.000000,763.853697)}
{pt3dadd(135240.000000,156948.000000,144400.000000,931.390500)}

{create adhoc57}
{access adhoc57}
{connect adhoc57(1), adhoc56(0)}
{nseg = 1}
{strdef color color = "White"}
{pt3dclear()}
{pt3dadd(135240.000000,156948.000000,144400.000000,931.390500)}
{pt3dadd(135168.000000,157452.000000,144225.000000,876.346087)}
{pt3dadd(134508.000000,158256.000000,144125.000000,839.973124)}
{pt3dadd(134256.000000,158748.000000,143850.000000,779.028207)}
{pt3dadd(134244.000000,159516.000000,143725.000000,766.257260)}

{create adhoc58}
{access adhoc58}
{connect adhoc58(1), adhoc57(0)}
{nseg = 1}
{strdef color color = "White"}
{pt3dclear()}
{pt3dadd(134244.000000,159516.000000,143725.000000,766.257260)}
{pt3dadd(134796.000000,160416.000000,143800.000000,655.674153)}
{pt3dadd(135120.000000,161004.000000,143825.000000,607.564112)}
{pt3dadd(135372.000000,161652.000000,143800.000000,558.039272)}
{pt3dadd(135768.000000,162240.000000,143675.000000,552.321346)}
{pt3dadd(136608.000000,163416.000000,143075.000000,546.603420)}
{pt3dadd(137244.000000,164424.000000,142675.000000,558.911260)}
{pt3dadd(137532.000000,164952.000000,142400.000000,579.186754)}
{pt3dadd(137952.000000,165564.000000,141775.000000,574.247398)}
{pt3dadd(138360.000000,165576.000000,141275.000000,549.491758)}
{pt3dadd(138924.000000,165900.000000,140725.000000,524.736118)}
{pt3dadd(139632.000000,165996.000000,140250.000000,496.078370)}
{pt3dadd(140076.000000,166068.000000,139775.000000,455.436348)}
{pt3dadd(140376.000000,166080.000000,139300.000000,441.985238)}
{pt3dadd(140868.000000,166260.000000,138700.000000,484.766644)}
{pt3dadd(141408.000000,166392.000000,138275.000000,621.585890)}
{pt3dadd(141360.000000,166500.000000,137800.000000,793.076878)}
{pt3dadd(141876.000000,166452.000000,137225.000000,1056.706933)}
{pt3dadd(141732.000000,166152.000000,136800.000000,1376.088000)}

{create adhoc59}
{access adhoc59}
{connect adhoc59(1), adhoc58(0)}
{nseg = 1}
{strdef color color = "White"}
{pt3dclear()}
{pt3dadd(141732.000000,166152.000000,136800.000000,1376.088000)}
{pt3dadd(139656.000000,166152.000000,136375.000000,740.351853)}
{pt3dadd(138912.000000,166548.000000,136375.000000,560.706984)}
{pt3dadd(138384.000000,166692.000000,136050.000000,411.569730)}
{pt3dadd(137652.000000,166860.000000,135925.000000,440.150730)}
{pt3dadd(136692.000000,166896.000000,135925.000000,405.042618)}
{pt3dadd(136080.000000,166692.000000,136425.000000,375.158578)}
{pt3dadd(135264.000000,166092.000000,136850.000000,363.848106)}
{pt3dadd(135000.000000,166056.000000,137300.000000,259.536468)}
{pt3dadd(134856.000000,166128.000000,137625.000000,188.785858)}
{pt3dadd(134664.000000,166212.000000,137950.000000,150.536778)}
{pt3dadd(135192.000000,166164.000000,138025.000000,132.456898)}
{pt3dadd(135264.000000,166044.000000,138175.000000,144.124276)}
{pt3dadd(135288.000000,166044.000000,138350.000000,177.866212)}
{pt3dadd(135084.000000,165984.000000,138450.000000,231.844066)}
{pt3dadd(134904.000000,165936.000000,138550.000000,301.356036)}
{pt3dadd(134712.000000,165864.000000,138725.000000,371.606692)}
{pt3dadd(134508.000000,165852.000000,138825.000000,422.577304)}
{pt3dadd(134136.000000,165804.000000,138900.000000,471.740260)}
{pt3dadd(133812.000000,165936.000000,138975.000000,505.128400)}
{pt3dadd(133704.000000,165888.000000,139125.000000,496.301594)}
{pt3dadd(133560.000000,165696.000000,139350.000000,457.812938)}
{pt3dadd(133344.000000,165948.000000,139550.000000,417.741738)}
{pt3dadd(132948.000000,165804.000000,139725.000000,337.287248)}
{pt3dadd(132756.000000,165876.000000,139850.000000,226.282300)}
{pt3dadd(132744.000000,165780.000000,140000.000000,121.095550)}

{create adhoc60}
{access adhoc60}
{connect adhoc60(1), adhoc58(0)}
{nseg = 1}
{strdef color color = "White"}
{pt3dclear()}
{pt3dadd(141732.000000,166152.000000,136800.000000,1376.088000)}
{pt3dadd(143748.000000,166344.000000,136575.000000,847.173813)}
{pt3dadd(144216.000000,166236.000000,136600.000000,639.157344)}
{pt3dadd(144768.000000,166044.000000,136225.000000,430.802848)}
{pt3dadd(145284.000000,166008.000000,135925.000000,358.662364)}
{pt3dadd(145824.000000,165984.000000,135675.000000,322.338124)}
{pt3dadd(146328.000000,165948.000000,135350.000000,304.520858)}
{pt3dadd(146832.000000,165924.000000,135150.000000,329.210204)}
{pt3dadd(147420.000000,165828.000000,134825.000000,361.134356)}
{pt3dadd(147828.000000,165828.000000,134425.000000,414.347772)}
{pt3dadd(148560.000000,165540.000000,134050.000000,465.501864)}
{pt3dadd(148956.000000,165540.000000,133700.000000,522.025826)}
{pt3dadd(149412.000000,165444.000000,133275.000000,545.602632)}
{pt3dadd(151080.000000,165528.000000,132850.000000,566.891896)}
{pt3dadd(152220.000000,165780.000000,132425.000000,540.898476)}
{pt3dadd(153264.000000,165960.000000,132050.000000,509.387924)}
{pt3dadd(153996.000000,166104.000000,131625.000000,494.558072)}
{pt3dadd(154716.000000,166248.000000,131125.000000,446.291920)}
{pt3dadd(155892.000000,166440.000000,130625.000000,411.551546)}
{pt3dadd(156996.000000,166632.000000,130125.000000,407.071400)}
{pt3dadd(158280.000000,166788.000000,129750.000000,433.395612)}
{pt3dadd(158916.000000,166824.000000,129300.000000,428.915466)}
{pt3dadd(159336.000000,166896.000000,128875.000000,467.055922)}
{pt3dadd(160224.000000,167028.000000,128550.000000,462.992292)}
{pt3dadd(161100.000000,167040.000000,128125.000000,447.105910)}
{pt3dadd(162168.000000,166668.000000,127725.000000,420.781698)}
{pt3dadd(163824.000000,166704.000000,127050.000000,416.514890)}
{pt3dadd(164964.000000,166320.000000,126650.000000,421.454246)}
{pt3dadd(166224.000000,165696.000000,126375.000000,425.517876)}
{pt3dadd(167940.000000,165540.000000,126225.000000,433.073820)}
{pt3dadd(169416.000000,165840.000000,125825.000000,445.274374)}
{pt3dadd(170928.000000,165828.000000,125450.000000,445.274374)}
{pt3dadd(171828.000000,165780.000000,125050.000000,422.820278)}
{pt3dadd(172812.000000,165804.000000,124625.000000,414.886532)}
{pt3dadd(174096.000000,165708.000000,124250.000000,414.886532)}
{pt3dadd(175104.000000,165672.000000,123925.000000,434.196530)}
{pt3dadd(176100.000000,165552.000000,123650.000000,452.586996)}
{pt3dadd(177228.000000,165828.000000,123375.000000,460.917434)}
{pt3dadd(177648.000000,165996.000000,123275.000000,482.302290)}
{pt3dadd(178104.000000,166080.000000,123150.000000,471.236030)}
{pt3dadd(178680.000000,166164.000000,123025.000000,436.039650)}
{pt3dadd(179124.000000,166404.000000,122875.000000,409.715438)}
{pt3dadd(179712.000000,166596.000000,122725.000000,393.829056)}
{pt3dadd(180156.000000,166812.000000,122475.000000,365.248056)}
{pt3dadd(180696.000000,166836.000000,122250.000000,361.904904)}
{pt3dadd(181236.000000,166860.000000,122000.000000,373.524478)}
{pt3dadd(181680.000000,166860.000000,121800.000000,381.458224)}
{pt3dadd(182256.000000,166932.000000,121600.000000,393.077798)}
{pt3dadd(182784.000000,166968.000000,121225.000000,393.077798)}
{pt3dadd(183336.000000,166920.000000,120925.000000,396.420950)}
{pt3dadd(183852.000000,166872.000000,120425.000000,371.731604)}
{pt3dadd(184104.000000,166680.000000,119975.000000,360.112030)}
{pt3dadd(184596.000000,166680.000000,119550.000000,360.112030)}
{pt3dadd(184848.000000,166656.000000,119075.000000,383.988874)}
{pt3dadd(185244.000000,166392.000000,118550.000000,395.055134)}
{pt3dadd(185760.000000,166416.000000,118125.000000,408.124906)}
{pt3dadd(186552.000000,166248.000000,117525.000000,404.614590)}
{pt3dadd(186852.000000,166236.000000,117275.000000,392.995016)}
{pt3dadd(187296.000000,166212.000000,116875.000000,359.558716)}
{pt3dadd(187680.000000,166116.000000,116375.000000,341.965344)}
{pt3dadd(188088.000000,166008.000000,116025.000000,331.927916)}
{pt3dadd(188508.000000,165924.000000,115500.000000,355.804760)}
{pt3dadd(189012.000000,165792.000000,115000.000000,376.171288)}
{pt3dadd(189312.000000,165684.000000,114525.000000,382.387592)}
{pt3dadd(189816.000000,165576.000000,114100.000000,376.467308)}
{pt3dadd(190116.000000,165276.000000,113600.000000,376.467308)}
{pt3dadd(190476.000000,165168.000000,113150.000000,340.143068)}
{pt3dadd(190896.000000,165240.000000,112650.000000,303.818828)}
{pt3dadd(191388.000000,165024.000000,112025.000000,294.714584)}
{pt3dadd(191916.000000,165168.000000,111450.000000,297.602524)}
{pt3dadd(192456.000000,164784.000000,110950.000000,319.259526)}
{pt3dadd(192540.000000,164676.000000,110400.000000,387.581012)}
{pt3dadd(193008.000000,164676.000000,109900.000000,468.825740)}
{pt3dadd(193440.000000,164436.000000,109425.000000,537.147226)}
{pt3dadd(193956.000000,164196.000000,108750.000000,566.103380)}
{pt3dadd(194400.000000,164244.000000,108250.000000,562.039750)}
{pt3dadd(194748.000000,164424.000000,107700.000000,509.675976)}
{pt3dadd(195708.000000,164616.000000,107100.000000,444.388960)}
{pt3dadd(196092.000000,164712.000000,106850.000000,388.514870)}
{pt3dadd(196392.000000,164904.000000,106600.000000,388.514870)}
{pt3dadd(196560.000000,165204.000000,106275.000000,406.029610)}
{pt3dadd(196668.000000,165468.000000,105875.000000,446.671632)}
{pt3dadd(196968.000000,165468.000000,105475.000000,481.868012)}
{pt3dadd(197484.000000,165888.000000,105200.000000,537.742102)}
{pt3dadd(197880.000000,165936.000000,104825.000000,533.475294)}
{pt3dadd(198372.000000,165888.000000,104450.000000,533.475294)}
{pt3dadd(198852.000000,165708.000000,104050.000000,528.029652)}
{pt3dadd(199560.000000,165396.000000,103750.000000,508.719654)}
{pt3dadd(200220.000000,165348.000000,103400.000000,463.911824)}
{pt3dadd(200436.000000,165180.000000,103025.000000,468.178632)}
{pt3dadd(200532.000000,165132.000000,102550.000000,446.793776)}
{pt3dadd(200940.000000,165048.000000,102125.000000,427.483778)}
{pt3dadd(201456.000000,164868.000000,101750.000000,408.087080)}
{pt3dadd(201768.000000,164616.000000,101325.000000,404.216964)}
{pt3dadd(202020.000000,164016.000000,100925.000000,399.950156)}
{pt3dadd(202200.000000,163836.000000,100525.000000,392.754012)}
{pt3dadd(202368.000000,163488.000000,100125.000000,366.830202)}
{pt3dadd(202368.000000,163440.000000,99725.000000,341.879526)}
{pt3dadd(202440.000000,163188.000000,99300.000000,301.709006)}
{pt3dadd(202692.000000,162996.000000,98800.000000,268.761850)}
{pt3dadd(202728.000000,162864.000000,98350.000000,243.811174)}
{pt3dadd(202812.000000,162792.000000,97975.000000,269.734984)}
{pt3dadd(202992.000000,162456.000000,97750.000000,309.815550)}
{pt3dadd(203340.000000,162336.000000,97225.000000,366.991133)}
{pt3dadd(203556.000000,162060.000000,96800.000000,426.680730)}

{create adhoc61}
{access adhoc61}
{connect adhoc61(1), adhoc60(0)}
{nseg = 1}
{strdef color color = "White"}
{pt3dclear()}
{pt3dadd(203556.000000,162060.000000,96800.000000,426.680730)}
{pt3dadd(203544.000000,162756.000000,96525.000000,272.693617)}
{pt3dadd(203268.000000,163440.000000,96225.000000,263.880190)}
{pt3dadd(202896.000000,164364.000000,95875.000000,212.314454)}
{pt3dadd(202632.000000,165048.000000,95250.000000,208.852984)}
{pt3dadd(202488.000000,165420.000000,94825.000000,206.898312)}
{pt3dadd(202332.000000,165960.000000,94575.000000,192.938016)}
{pt3dadd(202188.000000,166212.000000,94300.000000,208.329236)}
{pt3dadd(201924.000000,166572.000000,93975.000000,241.421930)}
{pt3dadd(201996.000000,166848.000000,93675.000000,274.514624)}
{pt3dadd(202056.000000,166896.000000,93350.000000,309.137724)}
{pt3dadd(201936.000000,166944.000000,92950.000000,331.768724)}
{pt3dadd(201864.000000,167124.000000,92475.000000,303.284220)}
{pt3dadd(201660.000000,167136.000000,91975.000000,271.880046)}
{pt3dadd(201624.000000,167244.000000,91625.000000,224.761802)}
{pt3dadd(201528.000000,167292.000000,91300.000000,188.277110)}
{pt3dadd(201360.000000,167400.000000,90800.000000,160.056896)}
{pt3dadd(201336.000000,167448.000000,90425.000000,151.894600)}
{pt3dadd(201252.000000,167568.000000,90025.000000,139.292812)}
{pt3dadd(201084.000000,167760.000000,89550.000000,141.316660)}
{pt3dadd(200868.000000,167928.000000,89100.000000,136.247076)}
{pt3dadd(200892.000000,168252.000000,88750.000000,174.504718)}
{pt3dadd(200952.000000,168576.000000,88350.000000,205.513158)}
{pt3dadd(200964.000000,168912.000000,87675.000000,227.911596)}
{pt3dadd(201048.000000,169176.000000,87275.000000,287.415404)}
{pt3dadd(201216.000000,169500.000000,86850.000000,318.932252)}
{pt3dadd(200760.000000,170304.000000,85925.000000,300.224120)}
{pt3dadd(200544.000000,171228.000000,85150.000000,308.894824)}
{pt3dadd(200004.000000,172260.000000,85100.000000,302.732716)}
{pt3dadd(199680.000000,172836.000000,85000.000000,266.715780)}
{pt3dadd(199008.000000,173868.000000,84400.000000,232.208786)}
{pt3dadd(199224.000000,173616.000000,83675.000000,202.400346)}
{pt3dadd(199200.000000,173892.000000,83325.000000,156.630371)}
{pt3dadd(198996.000000,174024.000000,82975.000000,141.536899)}
{pt3dadd(198720.000000,174240.000000,82625.000000,163.144423)}
{pt3dadd(198336.000000,174372.000000,82375.000000,173.065745)}
{pt3dadd(197988.000000,174408.000000,82000.000000,190.966297)}
{pt3dadd(197952.000000,174408.000000,81550.000000,197.057128)}
{pt3dadd(198024.000000,174120.000000,81275.000000,197.057128)}
{pt3dadd(198144.000000,174012.000000,81000.000000,149.938884)}
{pt3dadd(198084.000000,173832.000000,80725.000000,128.754581)}
{pt3dadd(198012.000000,173640.000000,80450.000000,105.398889)}
{pt3dadd(197988.000000,173592.000000,80175.000000,101.143749)}
{pt3dadd(197964.000000,173508.000000,79875.000000,104.926749)}
{pt3dadd(197892.000000,173352.000000,79575.000000,103.986517)}
{pt3dadd(197868.000000,173292.000000,79325.000000,184.864604)}
{pt3dadd(197904.000000,173136.000000,79075.000000,235.326000)}
{pt3dadd(197664.000000,172932.000000,78275.000000,265.475414)}
{pt3dadd(197436.000000,172524.000000,77850.000000,265.475414)}
{pt3dadd(197280.000000,172656.000000,77475.000000,265.475414)}
{pt3dadd(196692.000000,172176.000000,77300.000000,185.492786)}
{pt3dadd(196560.000000,172080.000000,77150.000000,108.987093)}
{pt3dadd(196320.000000,171996.000000,76925.000000,94.023140)}

{create adhoc62}
{access adhoc62}
{connect adhoc62(1), adhoc60(0)}
{nseg = 1}
{strdef color color = "White"}
{pt3dclear()}
{pt3dadd(203556.000000,162060.000000,96800.000000,426.680730)}
{pt3dadd(203976.000000,161688.000000,96525.000000,325.499670)}
{pt3dadd(204312.000000,161148.000000,96125.000000,265.520096)}
{pt3dadd(204420.000000,160644.000000,95750.000000,223.284502)}
{pt3dadd(204552.000000,160008.000000,95350.000000,190.191808)}
{pt3dadd(204756.000000,159684.000000,95050.000000,171.091256)}
{pt3dadd(204816.000000,159348.000000,94575.000000,185.019658)}
{pt3dadd(204756.000000,158724.000000,94075.000000,204.618314)}
{pt3dadd(204660.000000,158184.000000,93675.000000,200.611234)}
{pt3dadd(204636.000000,157632.000000,93275.000000,200.611234)}
{pt3dadd(204564.000000,157404.000000,92900.000000,207.241994)}
{pt3dadd(204540.000000,157104.000000,92550.000000,191.924442)}
{pt3dadd(204492.000000,156624.000000,92150.000000,161.908402)}
{pt3dadd(204252.000000,156204.000000,91725.000000,161.908402)}
{pt3dadd(204108.000000,155736.000000,91250.000000,175.656352)}
{pt3dadd(204072.000000,155280.000000,90850.000000,194.919866)}
{pt3dadd(204108.000000,155040.000000,90425.000000,206.230338)}
{pt3dadd(204048.000000,154812.000000,90000.000000,209.369988)}
{pt3dadd(204192.000000,154512.000000,89650.000000,217.794876)}
{pt3dadd(204264.000000,154188.000000,89250.000000,225.284956)}
{pt3dadd(204216.000000,153804.000000,88800.000000,236.037482)}
{pt3dadd(204120.000000,153636.000000,88425.000000,246.838284)}
{pt3dadd(204096.000000,153312.000000,88075.000000,243.698634)}
{pt3dadd(204072.000000,153096.000000,87700.000000,216.912377)}
{pt3dadd(203964.000000,152796.000000,87325.000000,188.363937)}
{pt3dadd(203832.000000,152448.000000,87000.000000,156.889287)}
{pt3dadd(203808.000000,152280.000000,86775.000000,134.778013)}
{pt3dadd(203604.000000,152268.000000,86550.000000,130.607253)}
{pt3dadd(203628.000000,152232.000000,86225.000000,140.505910)}
{pt3dadd(203484.000000,152148.000000,85800.000000,169.054350)}
{pt3dadd(203244.000000,151848.000000,85425.000000,189.776474)}
{pt3dadd(203064.000000,151848.000000,85025.000000,209.511834)}
{pt3dadd(202860.000000,151680.000000,84675.000000,220.283714)}
{pt3dadd(202716.000000,151572.000000,84250.000000,221.815250)}
{pt3dadd(202524.000000,151212.000000,83900.000000,202.265740)}
{pt3dadd(202308.000000,151020.000000,83500.000000,186.141876)}
{pt3dadd(202320.000000,150852.000000,83175.000000,181.724068)}
{pt3dadd(202068.000000,150684.000000,82825.000000,225.764704)}
{pt3dadd(201960.000000,150504.000000,82575.000000,283.205362)}
{pt3dadd(201648.000000,150360.000000,82200.000000,317.952688)}
{pt3dadd(201660.000000,150036.000000,81875.000000,336.571268)}
{pt3dadd(201720.000000,149880.000000,81550.000000,334.518860)}
{pt3dadd(201612.000000,149712.000000,81025.000000,292.339816)}
{pt3dadd(201612.000000,149568.000000,80300.000000,241.830334)}
{pt3dadd(201600.000000,149244.000000,79500.000000,198.725147)}
{pt3dadd(201564.000000,149124.000000,79275.000000,195.467360)}

{create adhoc63}
{access adhoc63}
{connect adhoc63(1), adhoc57(0)}
{nseg = 1}
{strdef color color = "White"}
{pt3dclear()}
{pt3dadd(134244.000000,159516.000000,143725.000000,766.257260)}
{pt3dadd(134184.000000,159204.000000,143550.000000,684.074987)}
{pt3dadd(134316.000000,159312.000000,143375.000000,539.578378)}
{pt3dadd(133920.000000,159072.000000,143250.000000,420.405646)}
{pt3dadd(133716.000000,158928.000000,143150.000000,297.338496)}
{pt3dadd(133584.000000,158784.000000,143050.000000,194.306677)}
{pt3dadd(133560.000000,158556.000000,142975.000000,121.095550)}

{create adhoc64}
{access adhoc64}
{connect adhoc64(1), adhoc56(0)}
{nseg = 1}
{strdef color color = "White"}
{pt3dclear()}
{pt3dadd(135240.000000,156948.000000,144400.000000,931.390500)}
{pt3dadd(135288.000000,156792.000000,144075.000000,854.319547)}
{pt3dadd(135384.000000,156900.000000,143600.000000,655.879998)}
{pt3dadd(135336.000000,157200.000000,143225.000000,484.290883)}
{pt3dadd(135240.000000,157104.000000,143125.000000,264.336400)}

{create adhoc65}
{access adhoc65}
{connect adhoc65(1), adhoc3(0)}
{nseg = 1}
{strdef color color = "White"}
{pt3dclear()}
{pt3dadd(137940.000000,151548.000000,146550.000000,630.401730)}
{pt3dadd(137196.000000,152124.000000,147450.000000,651.201630)}
{pt3dadd(137112.000000,152220.000000,147900.000000,518.633060)}

{create adhoc66}
{access adhoc66}
{connect adhoc66(1), adhoc2(0)}
{nseg = 1}
{strdef color color = "White"}
{pt3dclear()}
{pt3dadd(126696.000000,159696.000000,148900.000000,351.031280)}
{pt3dadd(126972.000000,160104.000000,149450.000000,306.299457)}
{pt3dadd(127128.000000,160332.000000,149775.000000,377.109240)}
{pt3dadd(127272.000000,160620.000000,150075.000000,400.986084)}
{pt3dadd(127308.000000,160824.000000,150575.000000,428.494210)}
{pt3dadd(127260.000000,161100.000000,151050.000000,435.021322)}
{pt3dadd(126840.000000,161172.000000,151525.000000,415.624624)}
{pt3dadd(126840.000000,161352.000000,152000.000000,382.104268)}
{pt3dadd(126756.000000,161640.000000,152350.000000,373.357314)}
{pt3dadd(126900.000000,161940.000000,152675.000000,385.557868)}
{pt3dadd(126852.000000,162060.000000,153000.000000,400.687758)}
{pt3dadd(126744.000000,162156.000000,153400.000000,397.344606)}
{pt3dadd(126660.000000,162408.000000,153825.000000,416.741304)}
{pt3dadd(126840.000000,162468.000000,154250.000000,425.488258)}
{pt3dadd(127020.000000,162888.000000,154675.000000,425.488258)}
{pt3dadd(127116.000000,163092.000000,154900.000000,449.065064)}
{pt3dadd(127092.000000,163188.000000,155150.000000,496.560554)}
{pt3dadd(127224.000000,163104.000000,155400.000000,552.911372)}
{pt3dadd(127152.000000,163488.000000,156050.000000,615.375530)}
{pt3dadd(127404.000000,163740.000000,156550.000000,729.768860)}

{create adhoc67}
{access adhoc67}
{connect adhoc67(1), adhoc66(0)}
{nseg = 1}
{strdef color color = "White"}
{pt3dclear()}
{pt3dadd(127404.000000,163740.000000,156550.000000,729.768860)}
{pt3dadd(127728.000000,163680.000000,156975.000000,557.239970)}
{pt3dadd(127932.000000,163488.000000,157250.000000,536.857850)}
{pt3dadd(127872.000000,163656.000000,157550.000000,484.987178)}
{pt3dadd(127884.000000,163860.000000,157875.000000,509.742818)}
{pt3dadd(128016.000000,163980.000000,158275.000000,514.682174)}
{pt3dadd(127224.000000,163716.000000,158850.000000,493.297318)}
{pt3dadd(126936.000000,163800.000000,159300.000000,453.249850)}
{pt3dadd(126924.000000,163800.000000,159750.000000,419.813550)}
{pt3dadd(126948.000000,163848.000000,160200.000000,357.843946)}
{pt3dadd(126936.000000,163848.000000,160550.000000,306.506324)}
{pt3dadd(127032.000000,163824.000000,161050.000000,302.820496)}
{pt3dadd(127224.000000,163872.000000,161475.000000,316.543752)}
{pt3dadd(127608.000000,163740.000000,161900.000000,341.233098)}
{pt3dadd(127632.000000,163620.000000,162275.000000,382.927208)}
{pt3dadd(127644.000000,163500.000000,162725.000000,420.141172)}
{pt3dadd(127764.000000,163344.000000,163075.000000,472.504946)}
{pt3dadd(127968.000000,163452.000000,163525.000000,564.062276)}
{pt3dadd(128124.000000,163428.000000,163925.000000,611.110490)}
{pt3dadd(128268.000000,163908.000000,164625.000000,685.987120)}
{pt3dadd(128328.000000,163944.000000,165175.000000,765.343896)}
{pt3dadd(128196.000000,164148.000000,165725.000000,808.223280)}
{pt3dadd(128352.000000,164196.000000,166000.000000,844.635150)}
{pt3dadd(128376.000000,164292.000000,166450.000000,927.890970)}
{pt3dadd(128028.000000,164064.000000,166975.000000,954.523240)}
{pt3dadd(128064.000000,164172.000000,167575.000000,862.965910)}
{pt3dadd(127944.000000,164172.000000,167925.000000,771.408580)}
{pt3dadd(127308.000000,164172.000000,168475.000000,680.395574)}
{pt3dadd(126708.000000,164232.000000,168825.000000,584.831914)}
{pt3dadd(126420.000000,164088.000000,169075.000000,528.243502)}
{pt3dadd(126060.000000,163956.000000,169425.000000,604.092554)}
{pt3dadd(125928.000000,163872.000000,169900.000000,659.074514)}
{pt3dadd(126240.000000,163752.000000,170400.000000,630.052066)}
{pt3dadd(126108.000000,163632.000000,170900.000000,567.734406)}
{pt3dadd(125856.000000,163608.000000,171500.000000,510.003334)}
{pt3dadd(125796.000000,163596.000000,171975.000000,393.983762)}
{pt3dadd(125652.000000,163440.000000,172450.000000,313.988392)}
{pt3dadd(125496.000000,163284.000000,172950.000000,276.170606)}
{pt3dadd(125268.000000,163188.000000,173325.000000,259.459890)}
{pt3dadd(124884.000000,163116.000000,173700.000000,245.050478)}
{pt3dadd(124596.000000,163176.000000,174025.000000,311.545210)}
{pt3dadd(124152.000000,162972.000000,174325.000000,373.514814)}
{pt3dadd(123264.000000,162888.000000,174575.000000,452.076800)}
{pt3dadd(123048.000000,162888.000000,175050.000000,550.032244)}
{pt3dadd(123048.000000,162804.000000,175600.000000,636.420592)}
{pt3dadd(123072.000000,162540.000000,176100.000000,718.972080)}
{pt3dadd(123312.000000,162276.000000,176600.000000,809.985086)}
{pt3dadd(123156.000000,161400.000000,177025.000000,852.864470)}
{pt3dadd(123204.000000,161364.000000,177325.000000,828.219476)}
{pt3dadd(123048.000000,160848.000000,177875.000000,720.223604)}
{pt3dadd(123180.000000,160800.000000,178650.000000,581.463864)}
{pt3dadd(123180.000000,160872.000000,179250.000000,461.428410)}
{pt3dadd(123480.000000,160680.000000,179700.000000,386.551780)}
{pt3dadd(123600.000000,160332.000000,180100.000000,345.909758)}
{pt3dadd(123408.000000,160428.000000,180500.000000,348.172538)}
{pt3dadd(123336.000000,160440.000000,180850.000000,334.424588)}
{pt3dadd(123072.000000,160488.000000,181250.000000,292.188994)}
{pt3dadd(123060.000000,160392.000000,181700.000000,275.508294)}
{pt3dadd(122892.000000,160596.000000,182000.000000,300.578978)}
{pt3dadd(122544.000000,160584.000000,182300.000000,453.060618)}
{pt3dadd(122448.000000,160584.000000,182550.000000,626.982760)}
{pt3dadd(122316.000000,160512.000000,182775.000000,1000.000000)}

{create adhoc68}
{access adhoc68}
{connect adhoc68(1), adhoc66(0)}
{nseg = 1}
{strdef color color = "White"}
{pt3dclear()}
{pt3dadd(127404.000000,163740.000000,156550.000000,729.768860)}
{pt3dadd(127656.000000,164772.000000,156475.000000,361.395540)}
{pt3dadd(127836.000000,165516.000000,156475.000000,264.029427)}
{pt3dadd(128088.000000,166044.000000,156475.000000,138.807758)}
{pt3dadd(128148.000000,166524.000000,156475.000000,116.439309)}
{pt3dadd(128244.000000,166836.000000,156500.000000,112.656309)}
{pt3dadd(128316.000000,167052.000000,156575.000000,113.979309)}
{pt3dadd(128376.000000,167280.000000,156600.000000,125.409502)}
{pt3dadd(128496.000000,167508.000000,156700.000000,138.447809)}
{pt3dadd(128688.000000,168120.000000,156750.000000,140.572848)}
{pt3dadd(128820.000000,168468.000000,156975.000000,144.355848)}
{pt3dadd(129000.000000,169008.000000,157075.000000,141.772848)}
{pt3dadd(129060.000000,169524.000000,157125.000000,146.842432)}
{pt3dadd(128988.000000,169764.000000,157125.000000,245.456382)}
{pt3dadd(128652.000000,170148.000000,157275.000000,400.006960)}
{pt3dadd(127980.000000,170904.000000,157400.000000,549.631680)}
{pt3dadd(127848.000000,171360.000000,157700.000000,701.839400)}
{pt3dadd(127788.000000,171504.000000,158100.000000,803.611108)}
{pt3dadd(127764.000000,171576.000000,158500.000000,744.943320)}
{pt3dadd(127416.000000,171384.000000,158825.000000,648.808116)}
{pt3dadd(127164.000000,171492.000000,159050.000000,508.632276)}
{pt3dadd(127236.000000,172536.000000,159000.000000,372.272700)}
{pt3dadd(127140.000000,172896.000000,159175.000000,278.524692)}
{pt3dadd(127044.000000,173076.000000,159400.000000,231.268120)}
{pt3dadd(126912.000000,173328.000000,159625.000000,187.939540)}
{pt3dadd(126660.000000,173628.000000,159725.000000,132.300000)}

{create adhoc69}
{access adhoc69}
{connect adhoc69(1), adhoc1(0)}
{nseg = 1}
{strdef color color = "White"}
{pt3dclear()}
{pt3dadd(117204.000000,171720.000000,146550.000000,571.792970)}
{pt3dadd(116928.000000,172500.000000,146450.000000,312.328623)}
{pt3dadd(116880.000000,172992.000000,146450.000000,232.023024)}
{pt3dadd(116892.000000,173436.000000,146450.000000,145.447430)}
{pt3dadd(116844.000000,173736.000000,146450.000000,118.996478)}
{pt3dadd(116832.000000,174336.000000,146325.000000,117.673478)}
{pt3dadd(116688.000000,174852.000000,146275.000000,115.649630)}
{pt3dadd(116532.000000,175068.000000,146175.000000,113.524591)}
{pt3dadd(116424.000000,175284.000000,146175.000000,106.473694)}
{pt3dadd(116352.000000,175620.000000,146175.000000,102.015110)}
{pt3dadd(116316.000000,175932.000000,146200.000000,103.660515)}
