# Supplementary material for: Full reconstruction of large lobula plate tangential cells in Drosophila from a 3D EM dataset
Source: PLoS One. 2018 Nov 28;13(11):e0207828. doi: 10.1371/journal.pone.0207828 (PMC6261601; doi:10.1371/journal.pone.0207828)
Supplement: S1 Dataset — (ZIP) [file pone.0207828.s001.zip › Diameter hoc/Cell65_7skels_ck.001_corrected_sorted_diametered.hoc0001.hoc]

/* created with convertKnossosNmlToHoc.m */

{create adhoc1}
{access adhoc1}
{nseg = 1}
{strdef color color = "White"}
{pt3dclear()}
{pt3dadd(191748.000000,113388.000000,84475.000000,132.300000)}
{pt3dadd(192516.000000,115092.000000,84475.000000,351.708083)}
{pt3dadd(193296.000000,115656.000000,84475.000000,348.420566)}
{pt3dadd(194088.000000,116220.000000,84725.000000,399.362966)}
{pt3dadd(194688.000000,117420.000000,85325.000000,379.087472)}
{pt3dadd(195300.000000,118980.000000,85725.000000,391.941073)}
{pt3dadd(195504.000000,119676.000000,85725.000000,470.415500)}

{create adhoc2}
{access adhoc2}
{connect adhoc2(1), adhoc1(0)}
{nseg = 1}
{strdef color color = "White"}
{pt3dclear()}
{pt3dadd(195504.000000,119676.000000,85725.000000,470.415500)}
{pt3dadd(195648.000000,120360.000000,86325.000000,482.857017)}
{pt3dadd(196188.000000,121224.000000,86325.000000,461.199710)}
{pt3dadd(196728.000000,122100.000000,86775.000000,433.979714)}
{pt3dadd(197112.000000,122772.000000,86775.000000,393.337692)}
{pt3dadd(197496.000000,123456.000000,87325.000000,397.401322)}
{pt3dadd(197844.000000,124212.000000,87325.000000,418.786178)}
{pt3dadd(198180.000000,124980.000000,87325.000000,410.039224)}
{pt3dadd(198528.000000,125736.000000,87625.000000,441.963376)}
{pt3dadd(198708.000000,126420.000000,88225.000000,415.765164)}
{pt3dadd(198780.000000,127152.000000,88225.000000,371.477162)}
{pt3dadd(198660.000000,127848.000000,88225.000000,339.553010)}
{pt3dadd(198540.000000,128544.000000,88225.000000,331.619264)}
{pt3dadd(198720.000000,129228.000000,88225.000000,303.038264)}
{pt3dadd(198972.000000,129924.000000,88225.000000,332.922304)}
{pt3dadd(199092.000000,130728.000000,88625.000000,377.210306)}
{pt3dadd(199164.000000,131688.000000,89125.000000,374.026346)}
{pt3dadd(199512.000000,132228.000000,89125.000000,381.960092)}
{pt3dadd(199848.000000,132768.000000,89725.000000,378.616940)}
{pt3dadd(199776.000000,134040.000000,89725.000000,382.487056)}
{pt3dadd(199692.000000,135324.000000,90475.000000,378.423426)}
{pt3dadd(199740.000000,135888.000000,90475.000000,367.133272)}
{pt3dadd(199800.000000,136440.000000,90475.000000,319.029006)}
{pt3dadd(199848.000000,137004.000000,90875.000000,325.882474)}
{pt3dadd(199764.000000,137616.000000,90875.000000,338.693058)}
{pt3dadd(200196.000000,138372.000000,91000.000000,347.023496)}
{pt3dadd(200292.000000,138768.000000,91050.000000,429.004377)}
{pt3dadd(200244.000000,138984.000000,91175.000000,448.014770)}

{create adhoc3}
{access adhoc3}
{connect adhoc3(1), adhoc2(0)}
{nseg = 1}
{strdef color color = "White"}
{pt3dclear()}
{pt3dadd(200244.000000,138984.000000,91175.000000,448.014770)}
{pt3dadd(200472.000000,139164.000000,91375.000000,420.246643)}
{pt3dadd(200520.000000,139416.000000,91450.000000,407.137074)}
{pt3dadd(200652.000000,139524.000000,91575.000000,387.740376)}
{pt3dadd(200712.000000,139716.000000,91725.000000,370.147004)}
{pt3dadd(200736.000000,139836.000000,91775.000000,349.521288)}
{pt3dadd(200856.000000,140040.000000,91925.000000,326.007632)}
{pt3dadd(200880.000000,140208.000000,92075.000000,319.154164)}
{pt3dadd(200868.000000,140352.000000,92100.000000,315.811012)}
{pt3dadd(200964.000000,140544.000000,92225.000000,333.404384)}
{pt3dadd(200988.000000,140724.000000,92275.000000,366.840684)}
{pt3dadd(201024.000000,140916.000000,92425.000000,403.164924)}
{pt3dadd(200964.000000,141120.000000,92550.000000,440.028432)}
{pt3dadd(200964.000000,141240.000000,92625.000000,471.952584)}
{pt3dadd(200844.000000,141384.000000,92825.000000,494.406680)}
{pt3dadd(200760.000000,141636.000000,93000.000000,494.406680)}
{pt3dadd(200712.000000,141876.000000,93100.000000,494.328280)}
{pt3dadd(200688.000000,142212.000000,93225.000000,470.415500)}

{create adhoc4}
{access adhoc4}
{connect adhoc4(1), adhoc3(0)}
{nseg = 1}
{strdef color color = "White"}
{pt3dclear()}
{pt3dadd(200688.000000,142212.000000,93225.000000,470.415500)}
{pt3dadd(200712.000000,142344.000000,93350.000000,478.255760)}
{pt3dadd(200700.000000,142512.000000,93450.000000,470.639510)}
{pt3dadd(200724.000000,142680.000000,93575.000000,470.639510)}
{pt3dadd(200760.000000,142824.000000,93700.000000,465.935354)}
{pt3dadd(200820.000000,143016.000000,93825.000000,465.935354)}
{pt3dadd(200856.000000,143172.000000,93975.000000,465.935354)}
{pt3dadd(200880.000000,143316.000000,94100.000000,461.668546)}
{pt3dadd(200880.000000,143424.000000,94175.000000,455.837243)}
{pt3dadd(200868.000000,143604.000000,94275.000000,426.680730)}

{create adhoc5}
{access adhoc5}
{connect adhoc5(1), adhoc4(0)}
{nseg = 1}
{strdef color color = "White"}
{pt3dclear()}
{pt3dadd(200868.000000,143604.000000,94275.000000,426.680730)}
{pt3dadd(200844.000000,143724.000000,94450.000000,413.135297)}
{pt3dadd(200880.000000,143916.000000,94450.000000,402.685978)}
{pt3dadd(200940.000000,144036.000000,94625.000000,402.685978)}
{pt3dadd(200976.000000,144156.000000,94725.000000,411.016416)}
{pt3dadd(201024.000000,144336.000000,94875.000000,423.827000)}
{pt3dadd(201072.000000,144588.000000,95075.000000,450.151212)}
{pt3dadd(201000.000000,144768.000000,95250.000000,476.475424)}
{pt3dadd(201048.000000,144948.000000,95375.000000,500.052230)}
{pt3dadd(200988.000000,145128.000000,95575.000000,530.525796)}
{pt3dadd(201036.000000,145344.000000,95825.000000,554.526807)}
{pt3dadd(200724.000000,145524.000000,96950.000000,600.382600)}

{create adhoc6}
{access adhoc6}
{connect adhoc6(1), adhoc5(0)}
{nseg = 1}
{strdef color color = "White"}
{pt3dclear()}
{pt3dadd(200724.000000,145524.000000,96950.000000,600.382600)}
{pt3dadd(200736.000000,145728.000000,96950.000000,600.382600)}
{pt3dadd(200796.000000,145992.000000,96800.000000,638.236736)}
{pt3dadd(200904.000000,146256.000000,96700.000000,657.163804)}
{pt3dadd(201000.000000,146400.000000,96725.000000,683.041056)}
{pt3dadd(201036.000000,146604.000000,96625.000000,701.968124)}
{pt3dadd(201156.000000,146880.000000,96500.000000,701.968124)}
{pt3dadd(201204.000000,147156.000000,96575.000000,701.968124)}
{pt3dadd(201240.000000,147300.000000,96575.000000,708.918308)}
{pt3dadd(201252.000000,147588.000000,96650.000000,695.348896)}
{pt3dadd(201300.000000,148044.000000,96725.000000,676.421828)}
{pt3dadd(201264.000000,148272.000000,96775.000000,663.498586)}
{pt3dadd(201252.000000,148476.000000,96875.000000,644.571518)}
{pt3dadd(201192.000000,148668.000000,96850.000000,612.976340)}
{pt3dadd(201240.000000,148920.000000,96875.000000,600.668500)}
{pt3dadd(201324.000000,149268.000000,96800.000000,594.950574)}
{pt3dadd(201372.000000,149472.000000,96925.000000,594.950574)}
{pt3dadd(201336.000000,149616.000000,96825.000000,600.954400)}
{pt3dadd(201456.000000,149760.000000,96725.000000,618.980166)}
{pt3dadd(201552.000000,149964.000000,96700.000000,637.907234)}
{pt3dadd(201540.000000,150168.000000,96675.000000,662.447157)}
{pt3dadd(201576.000000,150408.000000,96750.000000,695.017940)}

{create adhoc7}
{access adhoc7}
{connect adhoc7(1), adhoc6(0)}
{nseg = 1}
{strdef color color = "White"}
{pt3dclear()}
{pt3dadd(201576.000000,150408.000000,96750.000000,695.017940)}
{pt3dadd(201624.000000,150672.000000,96650.000000,672.953847)}
{pt3dadd(201756.000000,150948.000000,96650.000000,688.729668)}
{pt3dadd(201936.000000,151140.000000,96575.000000,688.729668)}
{pt3dadd(201756.000000,151464.000000,96475.000000,695.348896)}
{pt3dadd(201828.000000,151608.000000,96425.000000,708.918308)}
{pt3dadd(201984.000000,151896.000000,96475.000000,708.918308)}
{pt3dadd(201804.000000,152100.000000,96325.000000,715.868492)}
{pt3dadd(201768.000000,152328.000000,96400.000000,729.768860)}
{pt3dadd(201816.000000,152592.000000,96425.000000,729.768860)}

{create adhoc8}
{access adhoc8}
{connect adhoc8(1), adhoc7(0)}
{nseg = 1}
{strdef color color = "White"}
{pt3dclear()}
{pt3dadd(201816.000000,152592.000000,96425.000000,729.768860)}
{pt3dadd(202092.000000,153012.000000,96275.000000,820.535370)}
{pt3dadd(202236.000000,153504.000000,96175.000000,830.240682)}
{pt3dadd(202296.000000,153888.000000,96025.000000,845.200930)}
{pt3dadd(202152.000000,154164.000000,95975.000000,845.200930)}
{pt3dadd(202176.000000,154440.000000,95950.000000,813.746982)}
{pt3dadd(202176.000000,154596.000000,95850.000000,783.790840)}
{pt3dadd(202164.000000,154824.000000,95825.000000,747.215470)}
{pt3dadd(202116.000000,155256.000000,95825.000000,718.685810)}
{pt3dadd(202176.000000,155484.000000,95800.000000,675.806426)}
{pt3dadd(202200.000000,155700.000000,95675.000000,655.933000)}
{pt3dadd(202068.000000,156000.000000,95675.000000,643.009758)}
{pt3dadd(202128.000000,156288.000000,95450.000000,643.009758)}
{pt3dadd(202188.000000,156516.000000,95275.000000,649.628986)}
{pt3dadd(202092.000000,156768.000000,95100.000000,662.552228)}
{pt3dadd(202068.000000,157164.000000,94850.000000,683.985893)}
{pt3dadd(202200.000000,157764.000000,94250.000000,695.017940)}

{create adhoc9}
{access adhoc9}
{connect adhoc9(1), adhoc8(0)}
{nseg = 1}
{strdef color color = "White"}
{pt3dclear()}
{pt3dadd(202200.000000,157764.000000,94250.000000,695.017940)}
{pt3dadd(201828.000000,157272.000000,92925.000000,460.121580)}
{pt3dadd(201732.000000,157104.000000,92875.000000,403.431236)}
{pt3dadd(201684.000000,156840.000000,92800.000000,325.074448)}
{pt3dadd(201600.000000,156684.000000,92650.000000,313.341813)}
{pt3dadd(201576.000000,156444.000000,92625.000000,303.234000)}

{create adhoc10}
{access adhoc10}
{connect adhoc10(1), adhoc9(0)}
{nseg = 1}
{strdef color color = "White"}
{pt3dclear()}
{pt3dadd(201576.000000,156444.000000,92625.000000,303.234000)}
{pt3dadd(201528.000000,156096.000000,92575.000000,298.420767)}
{pt3dadd(201492.000000,155880.000000,92425.000000,291.819760)}
{pt3dadd(201480.000000,155652.000000,92350.000000,283.561950)}
{pt3dadd(201456.000000,155460.000000,92375.000000,275.697364)}
{pt3dadd(201384.000000,155316.000000,92175.000000,264.944838)}
{pt3dadd(201264.000000,155112.000000,92150.000000,264.944838)}
{pt3dadd(201180.000000,154680.000000,91925.000000,267.832778)}
{pt3dadd(201144.000000,154464.000000,91925.000000,273.202648)}
{pt3dadd(201084.000000,154248.000000,91825.000000,286.987518)}
{pt3dadd(200964.000000,154008.000000,91625.000000,314.495644)}
{pt3dadd(200988.000000,153936.000000,91600.000000,333.203776)}
{pt3dadd(200988.000000,153576.000000,91550.000000,353.829492)}
{pt3dadd(200928.000000,153444.000000,91375.000000,362.933736)}
{pt3dadd(200892.000000,153204.000000,91250.000000,372.971164)}
{pt3dadd(200928.000000,153060.000000,91050.000000,362.431868)}
{pt3dadd(200976.000000,152892.000000,90950.000000,358.921552)}
{pt3dadd(200988.000000,152700.000000,90750.000000,344.512140)}
{pt3dadd(200952.000000,152580.000000,90675.000000,344.512140)}
{pt3dadd(200928.000000,152448.000000,90475.000000,337.658672)}
{pt3dadd(200952.000000,152280.000000,90350.000000,344.512140)}
{pt3dadd(200964.000000,152148.000000,90150.000000,359.642030)}
{pt3dadd(200964.000000,151980.000000,89975.000000,370.181326)}
{pt3dadd(200880.000000,151908.000000,89800.000000,370.181326)}
{pt3dadd(200892.000000,151920.000000,89625.000000,363.965022)}
{pt3dadd(200904.000000,151764.000000,89450.000000,353.927594)}
{pt3dadd(200868.000000,151644.000000,89325.000000,329.238248)}
{pt3dadd(200808.000000,151488.000000,89200.000000,308.287907)}
{pt3dadd(200748.000000,151392.000000,89050.000000,303.234000)}

{create adhoc11}
{access adhoc11}
{connect adhoc11(1), adhoc10(0)}
{nseg = 1}
{strdef color color = "White"}
{pt3dclear()}
{pt3dadd(200748.000000,151392.000000,89050.000000,303.234000)}
{pt3dadd(200628.000000,150768.000000,89050.000000,178.724047)}
{pt3dadd(200580.000000,150516.000000,89050.000000,152.499056)}
{pt3dadd(200532.000000,150036.000000,88975.000000,109.761425)}
{pt3dadd(200556.000000,149952.000000,88875.000000,99.887594)}
{pt3dadd(200556.000000,149808.000000,88825.000000,103.940108)}
{pt3dadd(200472.000000,149640.000000,88825.000000,98.212211)}
{pt3dadd(200412.000000,149484.000000,88725.000000,97.316752)}
{pt3dadd(200388.000000,149232.000000,88675.000000,104.607583)}
{pt3dadd(200340.000000,149052.000000,88700.000000,106.402120)}
{pt3dadd(200280.000000,148812.000000,88675.000000,126.000000)}

{create adhoc12}
{access adhoc12}
{connect adhoc12(1), adhoc11(0)}
{nseg = 1}
{strdef color color = "White"}
{pt3dclear()}
{pt3dadd(200280.000000,148812.000000,88675.000000,126.000000)}
{pt3dadd(200052.000000,148800.000000,88675.000000,94.983783)}
{pt3dadd(199980.000000,148740.000000,88675.000000,73.669590)}

{create adhoc13}
{access adhoc13}
{connect adhoc13(1), adhoc11(0)}
{nseg = 1}
{strdef color color = "White"}
{pt3dclear()}
{pt3dadd(200280.000000,148812.000000,88675.000000,126.000000)}
{pt3dadd(200280.000000,148488.000000,88675.000000,124.000000)}
{pt3dadd(200292.000000,148116.000000,88675.000000,119.132103)}
{pt3dadd(200292.000000,147720.000000,88675.000000,110.176248)}
{pt3dadd(200220.000000,147576.000000,88650.000000,102.885417)}
{pt3dadd(200280.000000,147384.000000,88650.000000,96.794586)}
{pt3dadd(200256.000000,147192.000000,88675.000000,97.994586)}
{pt3dadd(200292.000000,147072.000000,88725.000000,103.722483)}
{pt3dadd(200256.000000,146868.000000,88675.000000,107.223198)}
{pt3dadd(200280.000000,146688.000000,88650.000000,119.008100)}
{pt3dadd(200328.000000,146496.000000,88700.000000,98.724300)}

{create adhoc14}
{access adhoc14}
{connect adhoc14(1), adhoc13(0)}
{nseg = 1}
{strdef color color = "White"}
{pt3dclear()}
{pt3dadd(200328.000000,146496.000000,88700.000000,98.724300)}
{pt3dadd(200436.000000,146328.000000,88775.000000,86.522643)}
{pt3dadd(200532.000000,146148.000000,88875.000000,75.888040)}
{pt3dadd(200556.000000,146112.000000,88975.000000,66.820490)}

{create adhoc15}
{access adhoc15}
{connect adhoc15(1), adhoc13(0)}
{nseg = 1}
{strdef color color = "White"}
{pt3dclear()}
{pt3dadd(200328.000000,146496.000000,88700.000000,98.724300)}
{pt3dadd(200232.000000,146508.000000,88525.000000,80.965953)}
{pt3dadd(200184.000000,146328.000000,88450.000000,77.345793)}
{pt3dadd(200172.000000,146184.000000,88425.000000,70.328645)}
{pt3dadd(200196.000000,146112.000000,88375.000000,69.156555)}
{pt3dadd(200256.000000,146124.000000,88300.000000,63.638560)}

{create adhoc16}
{access adhoc16}
{connect adhoc16(1), adhoc10(0)}
{nseg = 1}
{strdef color color = "White"}
{pt3dclear()}
{pt3dadd(200748.000000,151392.000000,89050.000000,303.234000)}
{pt3dadd(200748.000000,151476.000000,88875.000000,294.524890)}
{pt3dadd(200700.000000,151548.000000,88750.000000,327.833906)}
{pt3dadd(200688.000000,151512.000000,88600.000000,348.459622)}
{pt3dadd(200652.000000,151548.000000,88550.000000,390.153732)}
{pt3dadd(200460.000000,151572.000000,88325.000000,411.810734)}
{pt3dadd(200436.000000,151560.000000,88200.000000,424.011288)}
{pt3dadd(200256.000000,151452.000000,87975.000000,435.630862)}
{pt3dadd(200136.000000,151536.000000,87850.000000,443.961300)}
{pt3dadd(199992.000000,151560.000000,87725.000000,439.481154)}
{pt3dadd(199836.000000,151560.000000,87500.000000,439.481154)}
{pt3dadd(199836.000000,151572.000000,87350.000000,440.903423)}
{pt3dadd(199740.000000,151584.000000,87200.000000,426.680730)}

{create adhoc17}
{access adhoc17}
{connect adhoc17(1), adhoc16(0)}
{nseg = 1}
{strdef color color = "White"}
{pt3dclear()}
{pt3dadd(199740.000000,151584.000000,87200.000000,426.680730)}
{pt3dadd(199536.000000,150876.000000,87200.000000,203.562263)}
{pt3dadd(199428.000000,150732.000000,87150.000000,160.686846)}
{pt3dadd(199344.000000,150636.000000,87150.000000,95.095560)}
{pt3dadd(199272.000000,150636.000000,87150.000000,104.522850)}
{pt3dadd(199296.000000,150504.000000,87175.000000,105.375667)}
{pt3dadd(199296.000000,150372.000000,87200.000000,102.687159)}
{pt3dadd(199284.000000,150216.000000,87100.000000,106.896118)}
{pt3dadd(199344.000000,150084.000000,87100.000000,85.281760)}

{create adhoc18}
{access adhoc18}
{connect adhoc18(1), adhoc16(0)}
{nseg = 1}
{strdef color color = "White"}
{pt3dclear()}
{pt3dadd(199740.000000,151584.000000,87200.000000,426.680730)}
{pt3dadd(199716.000000,151788.000000,87075.000000,456.210593)}
{pt3dadd(199548.000000,151908.000000,86950.000000,457.412410)}
{pt3dadd(199584.000000,152100.000000,86750.000000,455.481680)}
{pt3dadd(199452.000000,152352.000000,86625.000000,448.014770)}

{create adhoc19}
{access adhoc19}
{connect adhoc19(1), adhoc18(0)}
{nseg = 1}
{strdef color color = "White"}
{pt3dclear()}
{pt3dadd(199452.000000,152352.000000,86625.000000,448.014770)}
{pt3dadd(199536.000000,151668.000000,86525.000000,316.444957)}
{pt3dadd(199524.000000,151500.000000,86525.000000,276.170698)}
{pt3dadd(199644.000000,151296.000000,86350.000000,215.739894)}
{pt3dadd(199716.000000,151140.000000,86225.000000,188.514454)}
{pt3dadd(199692.000000,151056.000000,86075.000000,175.421170)}
{pt3dadd(199548.000000,150840.000000,85950.000000,171.604906)}
{pt3dadd(199512.000000,150684.000000,85950.000000,156.980086)}
{pt3dadd(199500.000000,150516.000000,85775.000000,163.266866)}
{pt3dadd(199464.000000,150180.000000,85625.000000,178.584418)}
{pt3dadd(199416.000000,149820.000000,85450.000000,196.316396)}
{pt3dadd(199416.000000,149592.000000,85325.000000,214.089593)}
{pt3dadd(199332.000000,149412.000000,85200.000000,249.471370)}

{create adhoc20}
{access adhoc20}
{connect adhoc20(1), adhoc19(0)}
{nseg = 1}
{strdef color color = "White"}
{pt3dclear()}
{pt3dadd(199332.000000,149412.000000,85200.000000,249.471370)}
{pt3dadd(199320.000000,149292.000000,85000.000000,257.994980)}
{pt3dadd(199368.000000,149196.000000,84925.000000,247.791814)}
{pt3dadd(199380.000000,149076.000000,84800.000000,238.148500)}
{pt3dadd(199440.000000,148968.000000,84675.000000,215.502760)}

{create adhoc21}
{access adhoc21}
{connect adhoc21(1), adhoc19(0)}
{nseg = 1}
{strdef color color = "White"}
{pt3dclear()}
{pt3dadd(199332.000000,149412.000000,85200.000000,249.471370)}
{pt3dadd(199068.000000,149004.000000,85125.000000,132.504195)}
{pt3dadd(199008.000000,148860.000000,85175.000000,113.777759)}
{pt3dadd(198888.000000,148740.000000,85175.000000,79.398900)}
{pt3dadd(198864.000000,148644.000000,85225.000000,94.023140)}

{create adhoc22}
{access adhoc22}
{connect adhoc22(1), adhoc18(0)}
{nseg = 1}
{strdef color color = "White"}
{pt3dclear()}
{pt3dadd(199452.000000,152352.000000,86625.000000,448.014770)}
{pt3dadd(199320.000000,152616.000000,86475.000000,470.788850)}
{pt3dadd(199332.000000,152736.000000,86475.000000,445.792836)}
{pt3dadd(199272.000000,152880.000000,86450.000000,429.906454)}
{pt3dadd(199464.000000,153432.000000,86400.000000,408.521598)}
{pt3dadd(199728.000000,154056.000000,86400.000000,374.725907)}
{pt3dadd(199908.000000,154440.000000,86375.000000,387.012000)}

{create adhoc23}
{access adhoc23}
{connect adhoc23(1), adhoc22(0)}
{nseg = 1}
{strdef color color = "White"}
{pt3dclear()}
{pt3dadd(199908.000000,154440.000000,86375.000000,387.012000)}
{pt3dadd(200208.000000,154476.000000,86450.000000,297.103020)}
{pt3dadd(200544.000000,154584.000000,86450.000000,215.502760)}

{create adhoc24}
{access adhoc24}
{connect adhoc24(1), adhoc23(0)}
{nseg = 1}
{strdef color color = "White"}
{pt3dclear()}
{pt3dadd(200544.000000,154584.000000,86450.000000,215.502760)}
{pt3dadd(200796.000000,154488.000000,86500.000000,158.139253)}
{pt3dadd(200832.000000,154428.000000,86625.000000,135.360515)}
{pt3dadd(200916.000000,154368.000000,86675.000000,109.316315)}
{pt3dadd(200940.000000,154308.000000,86700.000000,93.654946)}
{pt3dadd(200940.000000,154236.000000,86725.000000,81.538071)}
{pt3dadd(200964.000000,154200.000000,86900.000000,60.608154)}

{create adhoc25}
{access adhoc25}
{connect adhoc25(1), adhoc23(0)}
{nseg = 1}
{strdef color color = "White"}
{pt3dclear()}
{pt3dadd(200544.000000,154584.000000,86450.000000,215.502760)}
{pt3dadd(200508.000000,154716.000000,86400.000000,129.298883)}
{pt3dadd(200532.000000,154872.000000,86400.000000,103.156044)}
{pt3dadd(200580.000000,154944.000000,86375.000000,77.111844)}
{pt3dadd(200604.000000,155040.000000,86350.000000,76.171612)}
{pt3dadd(200628.000000,155208.000000,86375.000000,76.171612)}
{pt3dadd(200712.000000,155304.000000,86375.000000,80.871346)}
{pt3dadd(200772.000000,155412.000000,86375.000000,82.971152)}
{pt3dadd(200808.000000,155496.000000,86400.000000,81.220726)}

{create adhoc26}
{access adhoc26}
{connect adhoc26(1), adhoc22(0)}
{nseg = 1}
{strdef color color = "White"}
{pt3dclear()}
{pt3dadd(199908.000000,154440.000000,86375.000000,387.012000)}
{pt3dadd(199848.000000,154560.000000,86150.000000,295.237787)}
{pt3dadd(199860.000000,154512.000000,85900.000000,227.782814)}
{pt3dadd(199944.000000,154548.000000,85750.000000,169.185042)}
{pt3dadd(200064.000000,154512.000000,85575.000000,125.594594)}
{pt3dadd(200184.000000,154452.000000,85475.000000,109.358264)}
{pt3dadd(200196.000000,154368.000000,85400.000000,96.309182)}
{pt3dadd(200208.000000,154380.000000,85225.000000,85.573671)}
{pt3dadd(200208.000000,154428.000000,85075.000000,83.013188)}
{pt3dadd(200232.000000,154356.000000,84950.000000,82.200981)}
{pt3dadd(200232.000000,154272.000000,84775.000000,74.814453)}
{pt3dadd(200268.000000,154224.000000,84675.000000,79.931507)}
{pt3dadd(200172.000000,154140.000000,84675.000000,77.353070)}

{create adhoc27}
{access adhoc27}
{connect adhoc27(1), adhoc22(0)}
{nseg = 1}
{strdef color color = "White"}
{pt3dclear()}
{pt3dadd(199908.000000,154440.000000,86375.000000,387.012000)}
{pt3dadd(199848.000000,154728.000000,86375.000000,317.396983)}
{pt3dadd(199812.000000,155100.000000,86375.000000,289.470983)}
{pt3dadd(199788.000000,155328.000000,86400.000000,303.234000)}

{create adhoc28}
{access adhoc28}
{connect adhoc28(1), adhoc27(0)}
{nseg = 1}
{strdef color color = "White"}
{pt3dclear()}
{pt3dadd(199788.000000,155328.000000,86400.000000,303.234000)}
{pt3dadd(199656.000000,155424.000000,86200.000000,205.982267)}
{pt3dadd(199572.000000,155448.000000,86100.000000,145.860750)}

{create adhoc29}
{access adhoc29}
{connect adhoc29(1), adhoc27(0)}
{nseg = 1}
{strdef color color = "White"}
{pt3dclear()}
{pt3dadd(199788.000000,155328.000000,86400.000000,303.234000)}
{pt3dadd(199800.000000,155604.000000,86525.000000,261.944950)}

{create adhoc30}
{access adhoc30}
{connect adhoc30(1), adhoc29(0)}
{nseg = 1}
{strdef color color = "White"}
{pt3dclear()}
{pt3dadd(199800.000000,155604.000000,86525.000000,261.944950)}
{pt3dadd(199908.000000,155508.000000,86700.000000,221.839167)}
{pt3dadd(200160.000000,155676.000000,86825.000000,181.160642)}
{pt3dadd(200292.000000,155748.000000,86975.000000,147.576280)}
{pt3dadd(200472.000000,155748.000000,87000.000000,115.684798)}
{pt3dadd(200580.000000,155688.000000,87000.000000,90.198364)}
{pt3dadd(200712.000000,155652.000000,87000.000000,70.235370)}
{pt3dadd(200784.000000,155616.000000,87000.000000,49.862480)}

{create adhoc31}
{access adhoc31}
{connect adhoc31(1), adhoc29(0)}
{nseg = 1}
{strdef color color = "White"}
{pt3dclear()}
{pt3dadd(199800.000000,155604.000000,86525.000000,261.944950)}
{pt3dadd(199932.000000,155772.000000,86450.000000,211.361200)}
{pt3dadd(200100.000000,156000.000000,86450.000000,173.785428)}
{pt3dadd(200064.000000,156240.000000,86450.000000,152.027198)}
{pt3dadd(200016.000000,156636.000000,86450.000000,134.554618)}
{pt3dadd(199860.000000,156828.000000,86450.000000,127.151176)}
{pt3dadd(199800.000000,157104.000000,86450.000000,136.013228)}
{pt3dadd(199836.000000,157368.000000,86450.000000,142.975524)}
{pt3dadd(199944.000000,157548.000000,86425.000000,138.804764)}
{pt3dadd(199860.000000,157764.000000,86425.000000,132.790472)}
{pt3dadd(199764.000000,157896.000000,86425.000000,138.804764)}
{pt3dadd(199644.000000,158076.000000,86400.000000,135.957004)}
{pt3dadd(199608.000000,158268.000000,86400.000000,141.026588)}
{pt3dadd(199620.000000,158388.000000,86350.000000,130.810733)}
{pt3dadd(199632.000000,158640.000000,86275.000000,123.775943)}
{pt3dadd(199620.000000,158904.000000,86125.000000,111.463557)}
{pt3dadd(199536.000000,159000.000000,86025.000000,100.736909)}
{pt3dadd(199476.000000,159108.000000,85875.000000,89.965029)}
{pt3dadd(199416.000000,159228.000000,85775.000000,89.191498)}
{pt3dadd(199368.000000,159252.000000,85625.000000,98.311610)}
{pt3dadd(199380.000000,159132.000000,85575.000000,77.353070)}

{create adhoc32}
{access adhoc32}
{connect adhoc32(1), adhoc22(0)}
{nseg = 1}
{strdef color color = "White"}
{pt3dclear()}
{pt3dadd(199908.000000,154440.000000,86375.000000,387.012000)}
{pt3dadd(200124.000000,154440.000000,86675.000000,281.133267)}
{pt3dadd(200304.000000,154344.000000,86725.000000,153.153800)}

{create adhoc33}
{access adhoc33}
{connect adhoc33(1), adhoc18(0)}
{nseg = 1}
{strdef color color = "White"}
{pt3dclear()}
{pt3dadd(199452.000000,152352.000000,86625.000000,448.014770)}
{pt3dadd(199320.000000,152280.000000,86275.000000,413.796450)}
{pt3dadd(199296.000000,152628.000000,86100.000000,406.362580)}

{create adhoc34}
{access adhoc34}
{connect adhoc34(1), adhoc33(0)}
{nseg = 1}
{strdef color color = "White"}
{pt3dclear()}
{pt3dadd(199296.000000,152628.000000,86100.000000,406.362580)}
{pt3dadd(199344.000000,152196.000000,85975.000000,250.932640)}
{pt3dadd(199404.000000,152124.000000,85875.000000,190.096315)}
{pt3dadd(199464.000000,152076.000000,85775.000000,126.732968)}
{pt3dadd(199380.000000,152016.000000,85625.000000,98.959468)}
{pt3dadd(199296.000000,151980.000000,85600.000000,93.434905)}
{pt3dadd(199104.000000,152076.000000,85475.000000,89.830290)}
{pt3dadd(198996.000000,152052.000000,85475.000000,81.220726)}

{create adhoc35}
{access adhoc35}
{connect adhoc35(1), adhoc33(0)}
{nseg = 1}
{strdef color color = "White"}
{pt3dclear()}
{pt3dadd(199296.000000,152628.000000,86100.000000,406.362580)}
{pt3dadd(199140.000000,152928.000000,86075.000000,426.680730)}

{create adhoc36}
{access adhoc36}
{connect adhoc36(1), adhoc35(0)}
{nseg = 1}
{strdef color color = "White"}
{pt3dclear()}
{pt3dadd(199140.000000,152928.000000,86075.000000,426.680730)}
{pt3dadd(199404.000000,153096.000000,86000.000000,246.969263)}
{pt3dadd(199764.000000,153084.000000,86000.000000,184.684184)}
{pt3dadd(199824.000000,153096.000000,86025.000000,93.745810)}
{pt3dadd(199896.000000,153156.000000,86025.000000,73.669590)}

{create adhoc37}
{access adhoc37}
{connect adhoc37(1), adhoc35(0)}
{nseg = 1}
{strdef color color = "White"}
{pt3dclear()}
{pt3dadd(199140.000000,152928.000000,86075.000000,426.680730)}
{pt3dadd(198972.000000,152916.000000,85925.000000,235.830737)}
{pt3dadd(198900.000000,152988.000000,85825.000000,195.762000)}
{pt3dadd(198732.000000,153036.000000,85475.000000,130.439263)}
{pt3dadd(198732.000000,153084.000000,85300.000000,94.023140)}

{create adhoc38}
{access adhoc38}
{connect adhoc38(1), adhoc16(0)}
{nseg = 1}
{strdef color color = "White"}
{pt3dclear()}
{pt3dadd(199740.000000,151584.000000,87200.000000,426.680730)}
{pt3dadd(199620.000000,151572.000000,87975.000000,271.541893)}
{pt3dadd(199548.000000,151572.000000,88150.000000,149.517701)}
{pt3dadd(199512.000000,151548.000000,88350.000000,60.608154)}

{create adhoc39}
{access adhoc39}
{connect adhoc39(1), adhoc9(0)}
{nseg = 1}
{strdef color color = "White"}
{pt3dclear()}
{pt3dadd(201576.000000,156444.000000,92625.000000,303.234000)}
{pt3dadd(201084.000000,156480.000000,92425.000000,173.986100)}
{pt3dadd(200736.000000,156360.000000,92325.000000,161.346810)}
{pt3dadd(200448.000000,156300.000000,92150.000000,134.925250)}
{pt3dadd(200280.000000,156240.000000,92150.000000,145.860750)}

{create adhoc40}
{access adhoc40}
{connect adhoc40(1), adhoc39(0)}
{nseg = 1}
{strdef color color = "White"}
{pt3dclear()}
{pt3dadd(200280.000000,156240.000000,92150.000000,145.860750)}
{pt3dadd(200220.000000,155988.000000,92150.000000,130.815487)}
{pt3dadd(200232.000000,155820.000000,92150.000000,110.622490)}
{pt3dadd(200136.000000,155712.000000,92150.000000,85.281760)}

{create adhoc41}
{access adhoc41}
{connect adhoc41(1), adhoc39(0)}
{nseg = 1}
{strdef color color = "White"}
{pt3dclear()}
{pt3dadd(200280.000000,156240.000000,92150.000000,145.860750)}
{pt3dadd(200208.000000,156276.000000,92000.000000,140.319313)}
{pt3dadd(199836.000000,156228.000000,91925.000000,122.925506)}
{pt3dadd(199656.000000,156096.000000,91825.000000,107.117454)}
{pt3dadd(199560.000000,155796.000000,91800.000000,86.830027)}
{pt3dadd(199356.000000,155592.000000,91700.000000,66.820490)}

{create adhoc42}
{access adhoc42}
{connect adhoc42(1), adhoc8(0)}
{nseg = 1}
{strdef color color = "White"}
{pt3dclear()}
{pt3dadd(202200.000000,157764.000000,94250.000000,695.017940)}
{pt3dadd(202260.000000,158076.000000,94450.000000,781.462230)}
{pt3dadd(202164.000000,158280.000000,94475.000000,841.877058)}
{pt3dadd(202164.000000,158616.000000,94325.000000,903.265750)}
{pt3dadd(202212.000000,159036.000000,94250.000000,977.960000)}

{create adhoc43}
{access adhoc43}
{connect adhoc43(1), adhoc42(0)}
{nseg = 1}
{strdef color color = "White"}
{pt3dclear()}
{pt3dadd(202212.000000,159036.000000,94250.000000,977.960000)}
{pt3dadd(201648.000000,159036.000000,95725.000000,413.319113)}
{pt3dadd(201360.000000,159036.000000,96075.000000,123.613627)}
{pt3dadd(201252.000000,159096.000000,96175.000000,108.843540)}

{create adhoc44}
{access adhoc44}
{connect adhoc44(1), adhoc43(0)}
{nseg = 1}
{strdef color color = "White"}
{pt3dclear()}
{pt3dadd(201252.000000,159096.000000,96175.000000,108.843540)}
{pt3dadd(201132.000000,159336.000000,96225.000000,77.795361)}
{pt3dadd(201096.000000,159576.000000,96250.000000,71.035991)}
{pt3dadd(201108.000000,159720.000000,96300.000000,59.838641)}
{pt3dadd(201096.000000,159660.000000,96400.000000,54.973380)}

{create adhoc45}
{access adhoc45}
{connect adhoc45(1), adhoc43(0)}
{nseg = 1}
{strdef color color = "White"}
{pt3dclear()}
{pt3dadd(201252.000000,159096.000000,96175.000000,108.843540)}
{pt3dadd(201168.000000,158952.000000,96300.000000,93.406583)}
{pt3dadd(201072.000000,158808.000000,96375.000000,99.788810)}
{pt3dadd(201000.000000,158832.000000,96575.000000,103.220102)}
{pt3dadd(200856.000000,158712.000000,96675.000000,114.908100)}
{pt3dadd(200784.000000,158832.000000,96850.000000,126.000000)}

{create adhoc46}
{access adhoc46}
{connect adhoc46(1), adhoc45(0)}
{nseg = 1}
{strdef color color = "White"}
{pt3dclear()}
{pt3dadd(200784.000000,158832.000000,96850.000000,126.000000)}
{pt3dadd(200724.000000,158832.000000,97050.000000,98.922190)}
{pt3dadd(200628.000000,158832.000000,97325.000000,99.266808)}
{pt3dadd(200628.000000,158832.000000,97550.000000,92.871436)}
{pt3dadd(200604.000000,159000.000000,97700.000000,98.962267)}
{pt3dadd(200532.000000,159084.000000,97875.000000,105.575264)}
{pt3dadd(200352.000000,159120.000000,98000.000000,105.575264)}
{pt3dadd(200280.000000,159192.000000,98200.000000,102.462982)}
{pt3dadd(200064.000000,159144.000000,98325.000000,97.022452)}
{pt3dadd(199920.000000,159048.000000,98350.000000,83.608850)}
{pt3dadd(199752.000000,159120.000000,98450.000000,66.820490)}

{create adhoc47}
{access adhoc47}
{connect adhoc47(1), adhoc45(0)}
{nseg = 1}
{strdef color color = "White"}
{pt3dclear()}
{pt3dadd(200784.000000,158832.000000,96850.000000,126.000000)}
{pt3dadd(200820.000000,158988.000000,96950.000000,100.275868)}
{pt3dadd(200748.000000,159180.000000,96950.000000,85.281760)}

{create adhoc48}
{access adhoc48}
{connect adhoc48(1), adhoc47(0)}
{nseg = 1}
{strdef color color = "White"}
{pt3dclear()}
{pt3dadd(200748.000000,159180.000000,96950.000000,85.281760)}
{pt3dadd(200676.000000,159456.000000,96900.000000,82.574404)}
{pt3dadd(200616.000000,159672.000000,96950.000000,81.220726)}

{create adhoc49}
{access adhoc49}
{connect adhoc49(1), adhoc47(0)}
{nseg = 1}
{strdef color color = "White"}
{pt3dclear()}
{pt3dadd(200748.000000,159180.000000,96950.000000,85.281760)}
{pt3dadd(200832.000000,159360.000000,97050.000000,77.353070)}

{create adhoc50}
{access adhoc50}
{connect adhoc50(1), adhoc47(0)}
{nseg = 1}
{strdef color color = "White"}
{pt3dclear()}
{pt3dadd(200748.000000,159180.000000,96950.000000,85.281760)}
{pt3dadd(200652.000000,159084.000000,96800.000000,82.638863)}
{pt3dadd(200580.000000,159012.000000,96750.000000,85.281760)}

{create adhoc51}
{access adhoc51}
{connect adhoc51(1), adhoc42(0)}
{nseg = 1}
{strdef color color = "White"}
{pt3dclear()}
{pt3dadd(202212.000000,159036.000000,94250.000000,977.960000)}
{pt3dadd(202224.000000,159324.000000,94250.000000,1062.757300)}
{pt3dadd(202284.000000,159708.000000,94275.000000,1090.498780)}
{pt3dadd(202272.000000,160020.000000,94275.000000,1121.328980)}
{pt3dadd(202128.000000,160368.000000,94275.000000,1111.060400)}
{pt3dadd(202080.000000,160560.000000,94075.000000,1100.278380)}
{pt3dadd(201900.000000,160920.000000,94025.000000,1079.227780)}
{pt3dadd(201888.000000,161136.000000,94050.000000,1039.083680)}
{pt3dadd(201708.000000,161436.000000,94000.000000,998.939580)}
{pt3dadd(201576.000000,161700.000000,93900.000000,989.159980)}
{pt3dadd(201504.000000,161904.000000,93900.000000,959.797900)}
{pt3dadd(201312.000000,162384.000000,93800.000000,940.704400)}
{pt3dadd(201252.000000,162600.000000,93825.000000,940.704400)}
{pt3dadd(201192.000000,162864.000000,93925.000000,931.390500)}
{pt3dadd(201156.000000,162996.000000,93950.000000,931.390500)}

{create adhoc52}
{access adhoc52}
{connect adhoc52(1), adhoc51(0)}
{nseg = 1}
{strdef color color = "White"}
{pt3dclear()}
{pt3dadd(201156.000000,162996.000000,93950.000000,931.390500)}
{pt3dadd(201264.000000,162996.000000,95250.000000,416.851258)}
{pt3dadd(201084.000000,163044.000000,95475.000000,283.411252)}
{pt3dadd(201012.000000,163044.000000,95600.000000,115.042321)}
{pt3dadd(200892.000000,163164.000000,95700.000000,97.141769)}
{pt3dadd(200736.000000,163248.000000,95850.000000,97.141769)}
{pt3dadd(200604.000000,163248.000000,96000.000000,99.702252)}
{pt3dadd(200460.000000,163332.000000,96150.000000,104.414608)}
{pt3dadd(200304.000000,163440.000000,96225.000000,106.250299)}
{pt3dadd(200220.000000,163512.000000,96325.000000,103.907441)}
{pt3dadd(200004.000000,163656.000000,96450.000000,103.907441)}
{pt3dadd(199932.000000,163872.000000,96550.000000,102.159165)}
{pt3dadd(199728.000000,164004.000000,96650.000000,99.195085)}
{pt3dadd(199656.000000,164184.000000,96750.000000,94.321805)}
{pt3dadd(199596.000000,164328.000000,96975.000000,94.023140)}

{create adhoc53}
{access adhoc53}
{connect adhoc53(1), adhoc51(0)}
{nseg = 1}
{strdef color color = "White"}
{pt3dclear()}
{pt3dadd(201156.000000,162996.000000,93950.000000,931.390500)}
{pt3dadd(200952.000000,163212.000000,93900.000000,931.390500)}

{create adhoc54}
{access adhoc54}
{connect adhoc54(1), adhoc53(0)}
{nseg = 1}
{strdef color color = "White"}
{pt3dclear()}
{pt3dadd(200952.000000,163212.000000,93900.000000,931.390500)}
{pt3dadd(200040.000000,163212.000000,94075.000000,388.623857)}
{pt3dadd(199824.000000,163164.000000,94200.000000,73.669590)}

{create adhoc55}
{access adhoc55}
{connect adhoc55(1), adhoc53(0)}
{nseg = 1}
{strdef color color = "White"}
{pt3dclear()}
{pt3dadd(200952.000000,163212.000000,93900.000000,931.390500)}
{pt3dadd(201036.000000,163392.000000,93975.000000,946.913667)}
{pt3dadd(201000.000000,163584.000000,93875.000000,923.386030)}
{pt3dadd(200904.000000,163764.000000,93800.000000,906.067660)}
{pt3dadd(200844.000000,164004.000000,93800.000000,871.389680)}
{pt3dadd(200760.000000,164244.000000,93800.000000,854.071310)}
{pt3dadd(200664.000000,164460.000000,93800.000000,836.752940)}
{pt3dadd(200568.000000,164592.000000,93675.000000,836.752940)}
{pt3dadd(200484.000000,164784.000000,93525.000000,845.200930)}
{pt3dadd(200424.000000,164976.000000,93450.000000,870.565010)}
{pt3dadd(200304.000000,165156.000000,93475.000000,887.742583)}
{pt3dadd(200244.000000,165312.000000,93550.000000,931.390500)}

{create adhoc56}
{access adhoc56}
{connect adhoc56(1), adhoc55(0)}
{nseg = 1}
{strdef color color = "White"}
{pt3dclear()}
{pt3dadd(200244.000000,165312.000000,93550.000000,931.390500)}
{pt3dadd(199116.000000,165312.000000,93250.000000,138.915000)}

{create adhoc57}
{access adhoc57}
{connect adhoc57(1), adhoc56(0)}
{nseg = 1}
{strdef color color = "White"}
{pt3dclear()}
{pt3dadd(199116.000000,165312.000000,93250.000000,138.915000)}
{pt3dadd(198876.000000,165324.000000,93475.000000,102.202577)}
{pt3dadd(198672.000000,165324.000000,93675.000000,73.669590)}

{create adhoc58}
{access adhoc58}
{connect adhoc58(1), adhoc57(0)}
{nseg = 1}
{strdef color color = "White"}
{pt3dclear()}
{pt3dadd(198672.000000,165324.000000,93675.000000,73.669590)}
{pt3dadd(198408.000000,165204.000000,93550.000000,70.161514)}

{create adhoc59}
{access adhoc59}
{connect adhoc59(1), adhoc57(0)}
{nseg = 1}
{strdef color color = "White"}
{pt3dclear()}
{pt3dadd(198672.000000,165324.000000,93675.000000,73.669590)}
{pt3dadd(198660.000000,165396.000000,93800.000000,69.156555)}
{pt3dadd(198660.000000,165504.000000,93900.000000,70.161514)}

{create adhoc60}
{access adhoc60}
{connect adhoc60(1), adhoc56(0)}
{nseg = 1}
{strdef color color = "White"}
{pt3dclear()}
{pt3dadd(199116.000000,165312.000000,93250.000000,138.915000)}
{pt3dadd(198972.000000,165192.000000,93100.000000,98.427112)}
{pt3dadd(198948.000000,165096.000000,92975.000000,96.295589)}
{pt3dadd(198876.000000,164904.000000,92775.000000,94.972589)}
{pt3dadd(198768.000000,164712.000000,92575.000000,109.225716)}
{pt3dadd(198744.000000,164400.000000,92350.000000,150.870058)}
{pt3dadd(198768.000000,164316.000000,92225.000000,185.293718)}
{pt3dadd(198732.000000,164076.000000,91950.000000,215.914000)}
{pt3dadd(198780.000000,163860.000000,91850.000000,262.152840)}
{pt3dadd(198804.000000,163752.000000,91725.000000,261.944950)}

{create adhoc61}
{access adhoc61}
{connect adhoc61(1), adhoc60(0)}
{nseg = 1}
{strdef color color = "White"}
{pt3dclear()}
{pt3dadd(198804.000000,163752.000000,91725.000000,261.944950)}
{pt3dadd(199032.000000,163668.000000,91550.000000,156.421993)}
{pt3dadd(199176.000000,163668.000000,91300.000000,122.630320)}
{pt3dadd(199224.000000,163776.000000,91225.000000,82.515378)}
{pt3dadd(199248.000000,163860.000000,91025.000000,49.862480)}

{create adhoc62}
{access adhoc62}
{connect adhoc62(1), adhoc60(0)}
{nseg = 1}
{strdef color color = "White"}
{pt3dclear()}
{pt3dadd(198804.000000,163752.000000,91725.000000,261.944950)}
{pt3dadd(198816.000000,163452.000000,91750.000000,201.091020)}
{pt3dadd(198804.000000,163248.000000,91800.000000,180.599908)}
{pt3dadd(198744.000000,163008.000000,91775.000000,160.373214)}
{pt3dadd(198828.000000,162816.000000,91800.000000,155.050152)}
{pt3dadd(198828.000000,162648.000000,91825.000000,151.078002)}
{pt3dadd(198948.000000,162408.000000,91700.000000,152.467152)}
{pt3dadd(198888.000000,162204.000000,91750.000000,148.087856)}
{pt3dadd(198948.000000,162108.000000,91775.000000,146.556320)}
{pt3dadd(199020.000000,161844.000000,91875.000000,145.976517)}
{pt3dadd(198996.000000,161700.000000,91950.000000,153.153800)}

{create adhoc63}
{access adhoc63}
{connect adhoc63(1), adhoc62(0)}
{nseg = 1}
{strdef color color = "White"}
{pt3dclear()}
{pt3dadd(198996.000000,161700.000000,91950.000000,153.153800)}
{pt3dadd(199140.000000,161640.000000,91625.000000,103.909199)}
{pt3dadd(199248.000000,161556.000000,91500.000000,77.353070)}

{create adhoc64}
{access adhoc64}
{connect adhoc64(1), adhoc62(0)}
{nseg = 1}
{strdef color color = "White"}
{pt3dclear()}
{pt3dadd(198996.000000,161700.000000,91950.000000,153.153800)}
{pt3dadd(199008.000000,161616.000000,92225.000000,125.604772)}
{pt3dadd(199044.000000,161484.000000,92275.000000,107.851153)}
{pt3dadd(199152.000000,161352.000000,92525.000000,94.147151)}
{pt3dadd(199152.000000,161340.000000,92575.000000,81.220726)}

{create adhoc65}
{access adhoc65}
{connect adhoc65(1), adhoc55(0)}
{nseg = 1}
{strdef color color = "White"}
{pt3dclear()}
{pt3dadd(200244.000000,165312.000000,93550.000000,931.390500)}
{pt3dadd(200196.000000,165600.000000,93550.000000,916.606533)}
{pt3dadd(200220.000000,165804.000000,93475.000000,913.649740)}
{pt3dadd(200160.000000,165996.000000,93375.000000,904.779360)}
{pt3dadd(200208.000000,166224.000000,93350.000000,896.331370)}
{pt3dadd(200292.000000,166500.000000,93375.000000,872.958617)}
{pt3dadd(200136.000000,166884.000000,93400.000000,844.798650)}

{create adhoc66}
{access adhoc66}
{connect adhoc66(1), adhoc65(0)}
{nseg = 1}
{strdef color color = "White"}
{pt3dclear()}
{pt3dadd(200136.000000,166884.000000,93400.000000,844.798650)}
{pt3dadd(199296.000000,166884.000000,93700.000000,392.272933)}
{pt3dadd(198828.000000,166884.000000,93550.000000,166.957400)}
{pt3dadd(198348.000000,166944.000000,93275.000000,168.852050)}

{create adhoc67}
{access adhoc67}
{connect adhoc67(1), adhoc66(0)}
{nseg = 1}
{strdef color color = "White"}
{pt3dclear()}
{pt3dadd(198348.000000,166944.000000,93275.000000,168.852050)}
{pt3dadd(198168.000000,166992.000000,93025.000000,136.245313)}
{pt3dadd(198120.000000,166872.000000,92825.000000,107.034872)}
{pt3dadd(198036.000000,166764.000000,92725.000000,81.220726)}

{create adhoc68}
{access adhoc68}
{connect adhoc68(1), adhoc66(0)}
{nseg = 1}
{strdef color color = "White"}
{pt3dclear()}
{pt3dadd(198348.000000,166944.000000,93275.000000,168.852050)}
{pt3dadd(198432.000000,167280.000000,93350.000000,146.689017)}
{pt3dadd(198408.000000,167412.000000,93350.000000,136.528513)}
{pt3dadd(198276.000000,167544.000000,93475.000000,124.958505)}
{pt3dadd(198168.000000,167712.000000,93625.000000,103.660515)}

{create adhoc69}
{access adhoc69}
{connect adhoc69(1), adhoc68(0)}
{nseg = 1}
{strdef color color = "White"}
{pt3dclear()}
{pt3dadd(198168.000000,167712.000000,93625.000000,103.660515)}
{pt3dadd(198144.000000,167916.000000,93825.000000,101.075995)}
{pt3dadd(198120.000000,168144.000000,94075.000000,96.506577)}
{pt3dadd(198084.000000,168324.000000,94250.000000,93.683643)}
{pt3dadd(198072.000000,168456.000000,94450.000000,89.616915)}
{pt3dadd(198084.000000,168528.000000,94675.000000,89.545845)}

{create adhoc70}
{access adhoc70}
{connect adhoc70(1), adhoc68(0)}
{nseg = 1}
{strdef color color = "White"}
{pt3dclear()}
{pt3dadd(198168.000000,167712.000000,93625.000000,103.660515)}
{pt3dadd(198336.000000,167832.000000,93600.000000,107.461605)}
{pt3dadd(198300.000000,167940.000000,93625.000000,92.265519)}
{pt3dadd(198300.000000,168036.000000,93625.000000,79.222360)}
{pt3dadd(198312.000000,168180.000000,93750.000000,57.722054)}

{create adhoc71}
{access adhoc71}
{connect adhoc71(1), adhoc65(0)}
{nseg = 1}
{strdef color color = "White"}
{pt3dclear()}
{pt3dadd(200136.000000,166884.000000,93400.000000,844.798650)}
{pt3dadd(200220.000000,167112.000000,93150.000000,872.958617)}
{pt3dadd(200232.000000,167328.000000,92925.000000,861.694630)}
{pt3dadd(200172.000000,167592.000000,92975.000000,853.648920)}
{pt3dadd(200172.000000,167772.000000,92675.000000,853.648920)}
{pt3dadd(200172.000000,168024.000000,92675.000000,862.519300)}
{pt3dadd(200148.000000,168204.000000,92725.000000,919.981770)}
{pt3dadd(200160.000000,168384.000000,92625.000000,977.444240)}
{pt3dadd(200196.000000,168720.000000,92450.000000,1065.204167)}
{pt3dadd(200136.000000,169068.000000,92350.000000,1132.111000)}

{create adhoc72}
{access adhoc72}
{connect adhoc72(1), adhoc71(0)}
{nseg = 1}
{strdef color color = "White"}
{pt3dclear()}
{pt3dadd(200136.000000,169068.000000,92350.000000,1132.111000)}
{pt3dadd(198672.000000,169068.000000,92175.000000,474.610833)}
{pt3dadd(198288.000000,169068.000000,92000.000000,145.860750)}

{create adhoc73}
{access adhoc73}
{connect adhoc73(1), adhoc72(0)}
{nseg = 1}
{strdef color color = "White"}
{pt3dclear()}
{pt3dadd(198288.000000,169068.000000,92000.000000,145.860750)}
{pt3dadd(197976.000000,168576.000000,91800.000000,130.620250)}
{pt3dadd(197796.000000,168420.000000,91750.000000,130.279306)}
{pt3dadd(197736.000000,168228.000000,91650.000000,120.852016)}
{pt3dadd(197652.000000,167892.000000,91650.000000,108.973647)}
{pt3dadd(197580.000000,167604.000000,91650.000000,106.714645)}
{pt3dadd(197520.000000,167532.000000,91525.000000,60.608154)}

{create adhoc74}
{access adhoc74}
{connect adhoc74(1), adhoc72(0)}
{nseg = 1}
{strdef color color = "White"}
{pt3dclear()}
{pt3dadd(198288.000000,169068.000000,92000.000000,145.860750)}
{pt3dadd(197988.000000,169200.000000,91900.000000,108.601925)}
{pt3dadd(197748.000000,169224.000000,91750.000000,83.368847)}
{pt3dadd(197700.000000,169248.000000,91675.000000,70.161514)}

{create adhoc75}
{access adhoc75}
{connect adhoc75(1), adhoc71(0)}
{nseg = 1}
{strdef color color = "White"}
{pt3dclear()}
{pt3dadd(200136.000000,169068.000000,92350.000000,1132.111000)}
{pt3dadd(200040.000000,169296.000000,92250.000000,1209.471867)}
{pt3dadd(199920.000000,169476.000000,92025.000000,1248.152300)}
{pt3dadd(199836.000000,169632.000000,91850.000000,1248.152300)}

{create adhoc76}
{access adhoc76}
{connect adhoc76(1), adhoc75(0)}
{nseg = 1}
{strdef color color = "White"}
{pt3dclear()}
{pt3dadd(199836.000000,169632.000000,91850.000000,1248.152300)}
{pt3dadd(199464.000000,169632.000000,90450.000000,567.082287)}
{pt3dadd(199488.000000,169428.000000,90150.000000,215.502760)}

{create adhoc77}
{access adhoc77}
{connect adhoc77(1), adhoc76(0)}
{nseg = 1}
{strdef color color = "White"}
{pt3dclear()}
{pt3dadd(199488.000000,169428.000000,90150.000000,215.502760)}
{pt3dadd(199620.000000,169248.000000,89925.000000,212.082080)}
{pt3dadd(199620.000000,169056.000000,89750.000000,202.300960)}
{pt3dadd(199656.000000,168792.000000,89600.000000,186.159400)}

{create adhoc78}
{access adhoc78}
{connect adhoc78(1), adhoc77(0)}
{nseg = 1}
{strdef color color = "White"}
{pt3dclear()}
{pt3dadd(199656.000000,168792.000000,89600.000000,186.159400)}
{pt3dadd(199536.000000,169056.000000,89525.000000,129.514738)}
{pt3dadd(199464.000000,169056.000000,89450.000000,89.735102)}
{pt3dadd(199356.000000,169140.000000,89300.000000,66.820490)}

{create adhoc79}
{access adhoc79}
{connect adhoc79(1), adhoc77(0)}
{nseg = 1}
{strdef color color = "White"}
{pt3dclear()}
{pt3dadd(199656.000000,168792.000000,89600.000000,186.159400)}
{pt3dadd(199656.000000,168636.000000,89450.000000,198.880280)}
{pt3dadd(199692.000000,168516.000000,89350.000000,192.018978)}
{pt3dadd(199764.000000,168372.000000,89200.000000,185.417858)}
{pt3dadd(199752.000000,168300.000000,89050.000000,178.140124)}
{pt3dadd(199812.000000,168144.000000,88850.000000,169.254276)}
{pt3dadd(199824.000000,167952.000000,88700.000000,161.578346)}
{pt3dadd(199812.000000,167760.000000,88650.000000,174.240740)}
{pt3dadd(199608.000000,167328.000000,88650.000000,182.703452)}
{pt3dadd(199584.000000,167232.000000,88425.000000,201.322032)}
{pt3dadd(199620.000000,167112.000000,88250.000000,235.627893)}
{pt3dadd(199296.000000,166716.000000,88025.000000,261.944950)}

{create adhoc80}
{access adhoc80}
{connect adhoc80(1), adhoc79(0)}
{nseg = 1}
{strdef color color = "White"}
{pt3dclear()}
{pt3dadd(199296.000000,166716.000000,88025.000000,261.944950)}
{pt3dadd(199056.000000,166356.000000,88000.000000,144.237174)}
{pt3dadd(198816.000000,166176.000000,88000.000000,81.220726)}

{create adhoc81}
{access adhoc81}
{connect adhoc81(1), adhoc79(0)}
{nseg = 1}
{strdef color color = "White"}
{pt3dclear()}
{pt3dadd(199296.000000,166716.000000,88025.000000,261.944950)}
{pt3dadd(199200.000000,166572.000000,87825.000000,224.305023)}
{pt3dadd(199164.000000,166320.000000,87525.000000,213.609004)}
{pt3dadd(198996.000000,166044.000000,87350.000000,193.382310)}
{pt3dadd(198732.000000,165972.000000,87100.000000,180.748838)}
{pt3dadd(198672.000000,165840.000000,86925.000000,173.107216)}
{pt3dadd(198588.000000,165780.000000,86725.000000,178.430278)}
{pt3dadd(198528.000000,165468.000000,86375.000000,166.945108)}
{pt3dadd(198384.000000,165288.000000,86125.000000,180.538020)}
{pt3dadd(198408.000000,165084.000000,85900.000000,168.852050)}

{create adhoc82}
{access adhoc82}
{connect adhoc82(1), adhoc81(0)}
{nseg = 1}
{strdef color color = "White"}
{pt3dclear()}
{pt3dadd(198408.000000,165084.000000,85900.000000,168.852050)}
{pt3dadd(198228.000000,165276.000000,85900.000000,146.723280)}
{pt3dadd(198324.000000,165444.000000,85900.000000,121.334465)}
{pt3dadd(198324.000000,165564.000000,85900.000000,86.841875)}
{pt3dadd(198300.000000,165660.000000,85700.000000,81.220726)}

{create adhoc83}
{access adhoc83}
{connect adhoc83(1), adhoc81(0)}
{nseg = 1}
{strdef color color = "White"}
{pt3dclear()}
{pt3dadd(198408.000000,165084.000000,85900.000000,168.852050)}
{pt3dadd(198336.000000,164892.000000,85700.000000,183.492937)}
{pt3dadd(198180.000000,164736.000000,85550.000000,176.499792)}
{pt3dadd(197916.000000,164568.000000,85375.000000,175.829170)}
{pt3dadd(197904.000000,164580.000000,85225.000000,186.159400)}

{create adhoc84}
{access adhoc84}
{connect adhoc84(1), adhoc83(0)}
{nseg = 1}
{strdef color color = "White"}
{pt3dclear()}
{pt3dadd(197904.000000,164580.000000,85225.000000,186.159400)}
{pt3dadd(197652.000000,164808.000000,85225.000000,177.710093)}
{pt3dadd(197460.000000,165012.000000,85225.000000,146.115776)}
{pt3dadd(197400.000000,165240.000000,85225.000000,122.916199)}
{pt3dadd(197412.000000,165444.000000,85225.000000,89.203371)}
{pt3dadd(197424.000000,165540.000000,85200.000000,70.161514)}

{create adhoc85}
{access adhoc85}
{connect adhoc85(1), adhoc83(0)}
{nseg = 1}
{strdef color color = "White"}
{pt3dclear()}
{pt3dadd(197904.000000,164580.000000,85225.000000,186.159400)}
{pt3dadd(197700.000000,164496.000000,85075.000000,241.475023)}
{pt3dadd(197580.000000,164292.000000,84925.000000,252.282444)}
{pt3dadd(197328.000000,164316.000000,84725.000000,262.152840)}
{pt3dadd(197256.000000,164244.000000,84675.000000,275.042200)}

{create adhoc86}
{access adhoc86}
{connect adhoc86(1), adhoc85(0)}
{nseg = 1}
{strdef color color = "White"}
{pt3dclear()}
{pt3dadd(197256.000000,164244.000000,84675.000000,275.042200)}
{pt3dadd(197364.000000,163872.000000,84675.000000,189.037000)}
{pt3dadd(197460.000000,163656.000000,84675.000000,147.518401)}
{pt3dadd(197436.000000,163512.000000,84675.000000,113.242064)}
{pt3dadd(197532.000000,163392.000000,84650.000000,106.611304)}
{pt3dadd(197640.000000,163296.000000,84650.000000,92.192402)}
{pt3dadd(197700.000000,163176.000000,84650.000000,96.827002)}
{pt3dadd(197652.000000,163008.000000,84600.000000,66.820490)}

{create adhoc87}
{access adhoc87}
{connect adhoc87(1), adhoc85(0)}
{nseg = 1}
{strdef color color = "White"}
{pt3dclear()}
{pt3dadd(197256.000000,164244.000000,84675.000000,275.042200)}
{pt3dadd(197208.000000,164028.000000,84450.000000,207.887787)}
{pt3dadd(197196.000000,164088.000000,84275.000000,176.515672)}
{pt3dadd(197004.000000,163896.000000,84075.000000,153.669528)}
{pt3dadd(196944.000000,163788.000000,83900.000000,162.132240)}
{pt3dadd(196740.000000,163620.000000,83725.000000,158.497698)}
{pt3dadd(196824.000000,163536.000000,83500.000000,177.857830)}
{pt3dadd(196716.000000,163668.000000,83400.000000,177.294650)}

{create adhoc88}
{access adhoc88}
{connect adhoc88(1), adhoc87(0)}
{nseg = 1}
{strdef color color = "White"}
{pt3dclear()}
{pt3dadd(196716.000000,163668.000000,83400.000000,177.294650)}
{pt3dadd(196428.000000,163944.000000,83300.000000,154.023467)}
{pt3dadd(196284.000000,164052.000000,83250.000000,119.174095)}
{pt3dadd(196272.000000,164196.000000,83150.000000,93.220275)}
{pt3dadd(196200.000000,164292.000000,83125.000000,70.161514)}

{create adhoc89}
{access adhoc89}
{connect adhoc89(1), adhoc87(0)}
{nseg = 1}
{strdef color color = "White"}
{pt3dclear()}
{pt3dadd(196716.000000,163668.000000,83400.000000,177.294650)}
{pt3dadd(196920.000000,163452.000000,83275.000000,179.552720)}
{pt3dadd(197052.000000,163392.000000,83150.000000,177.125808)}
{pt3dadd(197196.000000,163356.000000,82950.000000,175.437288)}
{pt3dadd(197280.000000,163260.000000,82775.000000,160.119736)}
{pt3dadd(197316.000000,163200.000000,82625.000000,148.003938)}
{pt3dadd(197340.000000,163080.000000,82475.000000,131.312256)}
{pt3dadd(197424.000000,162996.000000,82325.000000,100.516610)}
{pt3dadd(197568.000000,162936.000000,82150.000000,77.353070)}

{create adhoc90}
{access adhoc90}
{connect adhoc90(1), adhoc76(0)}
{nseg = 1}
{strdef color color = "White"}
{pt3dclear()}
{pt3dadd(199488.000000,169428.000000,90150.000000,215.502760)}
{pt3dadd(199236.000000,169176.000000,90250.000000,169.190520)}
{pt3dadd(199068.000000,169032.000000,90250.000000,153.153800)}

{create adhoc91}
{access adhoc91}
{connect adhoc91(1), adhoc75(0)}
{nseg = 1}
{strdef color color = "White"}
{pt3dclear()}
{pt3dadd(199836.000000,169632.000000,91850.000000,1248.152300)}
{pt3dadd(199812.000000,169872.000000,91650.000000,1189.659967)}
{pt3dadd(199800.000000,170076.000000,91700.000000,1213.056900)}
{pt3dadd(199536.000000,170340.000000,91725.000000,1225.538420)}
{pt3dadd(199764.000000,170592.000000,91750.000000,1268.954833)}
{pt3dadd(199728.000000,170844.000000,91800.000000,1310.559900)}

{create adhoc92}
{access adhoc92}
{connect adhoc92(1), adhoc91(0)}
{nseg = 1}
{strdef color color = "White"}
{pt3dclear()}
{pt3dadd(199728.000000,170844.000000,91800.000000,1310.559900)}
{pt3dadd(198540.000000,170844.000000,90050.000000,587.884820)}
{pt3dadd(198468.000000,170976.000000,89900.000000,237.591800)}

{create adhoc93}
{access adhoc93}
{connect adhoc93(1), adhoc92(0)}
{nseg = 1}
{strdef color color = "White"}
{pt3dclear()}
{pt3dadd(198468.000000,170976.000000,89900.000000,237.591800)}
{pt3dadd(198156.000000,171180.000000,89900.000000,145.013467)}
{pt3dadd(197952.000000,171096.000000,89900.000000,128.521648)}
{pt3dadd(197748.000000,171144.000000,90000.000000,97.247433)}
{pt3dadd(197580.000000,171120.000000,90100.000000,97.247433)}
{pt3dadd(197520.000000,171240.000000,90250.000000,103.962573)}
{pt3dadd(197352.000000,171312.000000,90350.000000,103.962573)}
{pt3dadd(197160.000000,171444.000000,90450.000000,99.250217)}
{pt3dadd(197004.000000,171516.000000,90500.000000,97.038375)}
{pt3dadd(196764.000000,171528.000000,90650.000000,92.027433)}
{pt3dadd(196740.000000,171600.000000,90825.000000,86.299536)}
{pt3dadd(196704.000000,171636.000000,91000.000000,82.497206)}
{pt3dadd(196788.000000,171732.000000,91150.000000,103.660515)}

{create adhoc94}
{access adhoc94}
{connect adhoc94(1), adhoc92(0)}
{nseg = 1}
{strdef color color = "White"}
{pt3dclear()}
{pt3dadd(198468.000000,170976.000000,89900.000000,237.591800)}
{pt3dadd(198504.000000,170652.000000,89700.000000,183.852360)}
{pt3dadd(198444.000000,170532.000000,89525.000000,201.253834)}
{pt3dadd(198336.000000,170328.000000,89300.000000,208.743914)}
{pt3dadd(198312.000000,170136.000000,89175.000000,243.251430)}
{pt3dadd(198240.000000,169980.000000,88925.000000,275.042200)}

{create adhoc95}
{access adhoc95}
{connect adhoc95(1), adhoc94(0)}
{nseg = 1}
{strdef color color = "White"}
{pt3dclear()}
{pt3dadd(198240.000000,169980.000000,88925.000000,275.042200)}
{pt3dadd(198156.000000,170292.000000,88900.000000,168.852050)}

{create adhoc96}
{access adhoc96}
{connect adhoc96(1), adhoc94(0)}
{nseg = 1}
{strdef color color = "White"}
{pt3dclear()}
{pt3dadd(198240.000000,169980.000000,88925.000000,275.042200)}
{pt3dadd(198168.000000,169764.000000,88650.000000,288.794300)}

{create adhoc97}
{access adhoc97}
{connect adhoc97(1), adhoc96(0)}
{nseg = 1}
{strdef color color = "White"}
{pt3dclear()}
{pt3dadd(198168.000000,169764.000000,88650.000000,288.794300)}
{pt3dadd(197832.000000,169236.000000,88575.000000,153.600688)}
{pt3dadd(197580.000000,168888.000000,88575.000000,125.698959)}
{pt3dadd(197412.000000,168552.000000,88575.000000,83.410713)}
{pt3dadd(197268.000000,168264.000000,88575.000000,81.681933)}
{pt3dadd(197340.000000,168240.000000,88725.000000,77.353070)}

{create adhoc98}
{access adhoc98}
{connect adhoc98(1), adhoc96(0)}
{nseg = 1}
{strdef color color = "White"}
{pt3dclear()}
{pt3dadd(198168.000000,169764.000000,88650.000000,288.794300)}
{pt3dadd(198132.000000,169644.000000,88400.000000,334.315520)}

{create adhoc99}
{access adhoc99}
{connect adhoc99(1), adhoc98(0)}
{nseg = 1}
{strdef color color = "White"}
{pt3dclear()}
{pt3dadd(198132.000000,169644.000000,88400.000000,334.315520)}
{pt3dadd(197904.000000,169212.000000,88350.000000,166.939335)}
{pt3dadd(197832.000000,169044.000000,88350.000000,133.464098)}
{pt3dadd(197904.000000,168864.000000,88300.000000,85.405622)}
{pt3dadd(197856.000000,168720.000000,88225.000000,86.841875)}
{pt3dadd(197856.000000,168528.000000,88175.000000,94.023140)}

{create adhoc100}
{access adhoc100}
{connect adhoc100(1), adhoc98(0)}
{nseg = 1}
{strdef color color = "White"}
{pt3dclear()}
{pt3dadd(198132.000000,169644.000000,88400.000000,334.315520)}
{pt3dadd(197868.000000,169608.000000,88200.000000,286.900540)}
{pt3dadd(197724.000000,169608.000000,87975.000000,274.667124)}
{pt3dadd(197604.000000,169560.000000,87725.000000,255.322380)}
{pt3dadd(197544.000000,169512.000000,87525.000000,234.795400)}
{pt3dadd(197472.000000,169464.000000,87350.000000,232.931133)}
{pt3dadd(197388.000000,169512.000000,87150.000000,186.159400)}

{create adhoc101}
{access adhoc101}
{connect adhoc101(1), adhoc100(0)}
{nseg = 1}
{strdef color color = "White"}
{pt3dclear()}
{pt3dadd(197388.000000,169512.000000,87150.000000,186.159400)}
{pt3dadd(197772.000000,169260.000000,87000.000000,251.342163)}
{pt3dadd(197796.000000,169128.000000,86750.000000,225.357700)}
{pt3dadd(197988.000000,169236.000000,86525.000000,217.297970)}
{pt3dadd(198144.000000,169308.000000,86300.000000,188.135799)}
{pt3dadd(198324.000000,168972.000000,86075.000000,142.271972)}
{pt3dadd(198336.000000,168948.000000,85925.000000,103.660515)}

{create adhoc102}
{access adhoc102}
{connect adhoc102(1), adhoc100(0)}
{nseg = 1}
{strdef color color = "White"}
{pt3dclear()}
{pt3dadd(197388.000000,169512.000000,87150.000000,186.159400)}
{pt3dadd(196980.000000,169872.000000,87075.000000,166.957400)}
{pt3dadd(196836.000000,170004.000000,87075.000000,149.491582)}
{pt3dadd(196860.000000,169980.000000,86875.000000,138.479253)}
{pt3dadd(196812.000000,169980.000000,86675.000000,132.300000)}

{create adhoc103}
{access adhoc103}
{connect adhoc103(1), adhoc91(0)}
{nseg = 1}
{strdef color color = "White"}
{pt3dclear()}
{pt3dadd(199728.000000,170844.000000,91800.000000,1310.559900)}
{pt3dadd(199680.000000,171060.000000,91725.000000,1268.954833)}
{pt3dadd(199632.000000,171396.000000,91675.000000,1248.152300)}

{create adhoc104}
{access adhoc104}
{connect adhoc104(1), adhoc103(0)}
{nseg = 1}
{strdef color color = "White"}
{pt3dclear()}
{pt3dadd(199632.000000,171396.000000,91675.000000,1248.152300)}
{pt3dadd(199512.000000,171396.000000,92675.000000,854.601533)}
{pt3dadd(199212.000000,171396.000000,93050.000000,582.321472)}
{pt3dadd(199248.000000,171348.000000,93250.000000,366.461422)}
{pt3dadd(199008.000000,171420.000000,93300.000000,202.137966)}
{pt3dadd(198684.000000,171300.000000,93375.000000,168.797590)}
{pt3dadd(198420.000000,171264.000000,93525.000000,205.240720)}

{create adhoc105}
{access adhoc105}
{connect adhoc105(1), adhoc104(0)}
{nseg = 1}
{strdef color color = "White"}
{pt3dclear()}
{pt3dadd(198420.000000,171264.000000,93525.000000,205.240720)}
{pt3dadd(198324.000000,171216.000000,93350.000000,168.085090)}
{pt3dadd(198264.000000,171228.000000,93175.000000,145.860750)}

{create adhoc106}
{access adhoc106}
{connect adhoc106(1), adhoc105(0)}
{nseg = 1}
{strdef color color = "White"}
{pt3dclear()}
{pt3dadd(198264.000000,171228.000000,93175.000000,145.860750)}
{pt3dadd(198276.000000,170964.000000,93175.000000,102.767401)}
{pt3dadd(198240.000000,170892.000000,93175.000000,81.220726)}

{create adhoc107}
{access adhoc107}
{connect adhoc107(1), adhoc105(0)}
{nseg = 1}
{strdef color color = "White"}
{pt3dclear()}
{pt3dadd(198264.000000,171228.000000,93175.000000,145.860750)}
{pt3dadd(197916.000000,171192.000000,93200.000000,104.253222)}
{pt3dadd(197652.000000,171228.000000,93200.000000,86.974018)}
{pt3dadd(197496.000000,171216.000000,93000.000000,94.023140)}

{create adhoc108}
{access adhoc108}
{connect adhoc108(1), adhoc105(0)}
{nseg = 1}
{strdef color color = "White"}
{pt3dclear()}
{pt3dadd(198264.000000,171228.000000,93175.000000,145.860750)}
{pt3dadd(198168.000000,171408.000000,93200.000000,113.022370)}
{pt3dadd(198084.000000,171636.000000,93200.000000,110.415424)}
{pt3dadd(197988.000000,171840.000000,93200.000000,105.556842)}
{pt3dadd(197856.000000,171936.000000,93050.000000,114.285710)}

{create adhoc109}
{access adhoc109}
{connect adhoc109(1), adhoc104(0)}
{nseg = 1}
{strdef color color = "White"}
{pt3dclear()}
{pt3dadd(198420.000000,171264.000000,93525.000000,205.240720)}
{pt3dadd(198696.000000,171312.000000,93600.000000,182.189610)}
{pt3dadd(198828.000000,171252.000000,93600.000000,142.852312)}
{pt3dadd(198876.000000,171072.000000,93650.000000,104.517827)}
{pt3dadd(198852.000000,171024.000000,93750.000000,73.669590)}

{create adhoc110}
{access adhoc110}
{connect adhoc110(1), adhoc104(0)}
{nseg = 1}
{strdef color color = "White"}
{pt3dclear()}
{pt3dadd(198420.000000,171264.000000,93525.000000,205.240720)}
{pt3dadd(198348.000000,171264.000000,93700.000000,201.982933)}
{pt3dadd(198228.000000,171276.000000,93850.000000,216.726483)}
{pt3dadd(197964.000000,171312.000000,94050.000000,249.471370)}

{create adhoc111}
{access adhoc111}
{connect adhoc111(1), adhoc110(0)}
{nseg = 1}
{strdef color color = "White"}
{pt3dclear()}
{pt3dadd(197964.000000,171312.000000,94050.000000,249.471370)}
{pt3dadd(197712.000000,171468.000000,94075.000000,154.498170)}
{pt3dadd(197676.000000,171612.000000,94075.000000,120.095303)}
{pt3dadd(197724.000000,171768.000000,94200.000000,77.001715)}
{pt3dadd(197700.000000,171876.000000,94275.000000,66.820490)}

{create adhoc112}
{access adhoc112}
{connect adhoc112(1), adhoc110(0)}
{nseg = 1}
{strdef color color = "White"}
{pt3dclear()}
{pt3dadd(197964.000000,171312.000000,94050.000000,249.471370)}
{pt3dadd(197928.000000,171228.000000,94250.000000,205.240720)}

{create adhoc113}
{access adhoc113}
{connect adhoc113(1), adhoc112(0)}
{nseg = 1}
{strdef color color = "White"}
{pt3dclear()}
{pt3dadd(197928.000000,171228.000000,94250.000000,205.240720)}
{pt3dadd(198336.000000,171252.000000,94275.000000,141.321673)}
{pt3dadd(198552.000000,171300.000000,94275.000000,130.725107)}
{pt3dadd(198612.000000,171300.000000,94400.000000,109.461605)}
{pt3dadd(198660.000000,171300.000000,94400.000000,126.000000)}

{create adhoc114}
{access adhoc114}
{connect adhoc114(1), adhoc112(0)}
{nseg = 1}
{strdef color color = "White"}
{pt3dclear()}
{pt3dadd(197928.000000,171228.000000,94250.000000,205.240720)}
{pt3dadd(197976.000000,171252.000000,94425.000000,181.517973)}
{pt3dadd(197964.000000,171252.000000,94550.000000,153.153800)}

{create adhoc115}
{access adhoc115}
{connect adhoc115(1), adhoc114(0)}
{nseg = 1}
{strdef color color = "White"}
{pt3dclear()}
{pt3dadd(197964.000000,171252.000000,94550.000000,153.153800)}
{pt3dadd(197820.000000,171048.000000,94650.000000,98.994968)}
{pt3dadd(197772.000000,170904.000000,94650.000000,98.498268)}
{pt3dadd(197652.000000,170832.000000,94650.000000,89.725342)}
{pt3dadd(197580.000000,170724.000000,94450.000000,114.285710)}

{create adhoc116}
{access adhoc116}
{connect adhoc116(1), adhoc114(0)}
{nseg = 1}
{strdef color color = "White"}
{pt3dclear()}
{pt3dadd(197964.000000,171252.000000,94550.000000,153.153800)}
{pt3dadd(197952.000000,171300.000000,94725.000000,128.098770)}
{pt3dadd(197964.000000,171324.000000,94900.000000,104.121079)}
{pt3dadd(198048.000000,171432.000000,95025.000000,81.220726)}

{create adhoc117}
{access adhoc117}
{connect adhoc117(1), adhoc110(0)}
{nseg = 1}
{strdef color color = "White"}
{pt3dclear()}
{pt3dadd(197964.000000,171312.000000,94050.000000,249.471370)}
{pt3dadd(197616.000000,171300.000000,93900.000000,153.153800)}

{create adhoc118}
{access adhoc118}
{connect adhoc118(1), adhoc117(0)}
{nseg = 1}
{strdef color color = "White"}
{pt3dclear()}
{pt3dadd(197616.000000,171300.000000,93900.000000,153.153800)}
{pt3dadd(197472.000000,171120.000000,93900.000000,122.899882)}
{pt3dadd(197496.000000,170784.000000,93875.000000,89.545845)}

{create adhoc119}
{access adhoc119}
{connect adhoc119(1), adhoc117(0)}
{nseg = 1}
{strdef color color = "White"}
{pt3dclear()}
{pt3dadd(197616.000000,171300.000000,93900.000000,153.153800)}
{pt3dadd(197532.000000,171504.000000,93900.000000,139.251267)}
{pt3dadd(197340.000000,171648.000000,93900.000000,140.505910)}
{pt3dadd(197268.000000,171648.000000,93750.000000,136.335150)}
{pt3dadd(197112.000000,171804.000000,93800.000000,147.107030)}
{pt3dadd(197016.000000,171960.000000,93750.000000,161.695174)}
{pt3dadd(196968.000000,172188.000000,93650.000000,174.960318)}
{pt3dadd(196980.000000,172344.000000,93625.000000,198.880280)}
{pt3dadd(196956.000000,172416.000000,93450.000000,205.240720)}

{create adhoc120}
{access adhoc120}
{connect adhoc120(1), adhoc103(0)}
{nseg = 1}
{strdef color color = "White"}
{pt3dclear()}
{pt3dadd(199632.000000,171396.000000,91675.000000,1248.152300)}
{pt3dadd(199608.000000,171636.000000,91600.000000,1248.152300)}
{pt3dadd(199560.000000,171828.000000,91600.000000,1286.220960)}
{pt3dadd(199548.000000,172032.000000,91575.000000,1298.702480)}
{pt3dadd(199512.000000,172224.000000,91525.000000,1311.184000)}
{pt3dadd(199428.000000,172548.000000,91475.000000,1311.184000)}
{pt3dadd(199368.000000,172740.000000,91550.000000,1298.702480)}
{pt3dadd(199260.000000,172896.000000,91500.000000,1261.228200)}
{pt3dadd(199164.000000,173172.000000,91425.000000,1261.228200)}
{pt3dadd(199152.000000,173340.000000,91450.000000,1261.228200)}
{pt3dadd(199044.000000,173496.000000,91350.000000,1261.228200)}
{pt3dadd(199104.000000,173808.000000,91375.000000,1273.709720)}
{pt3dadd(199008.000000,174024.000000,91325.000000,1285.596860)}
{pt3dadd(198960.000000,174204.000000,91275.000000,1261.228200)}
{pt3dadd(198900.000000,174432.000000,91325.000000,1248.746680)}
{pt3dadd(198756.000000,174672.000000,91450.000000,1228.340400)}
{pt3dadd(198708.000000,174852.000000,91575.000000,1248.152300)}

{create adhoc121}
{access adhoc121}
{connect adhoc121(1), adhoc120(0)}
{nseg = 1}
{strdef color color = "White"}
{pt3dclear()}
{pt3dadd(198708.000000,174852.000000,91575.000000,1248.152300)}
{pt3dadd(198096.000000,174852.000000,92125.000000,674.365913)}
{pt3dadd(197820.000000,174876.000000,92325.000000,406.362580)}

{create adhoc122}
{access adhoc122}
{connect adhoc122(1), adhoc121(0)}
{nseg = 1}
{strdef color color = "White"}
{pt3dclear()}
{pt3dadd(197820.000000,174876.000000,92325.000000,406.362580)}
{pt3dadd(198108.000000,174324.000000,92325.000000,266.869177)}
{pt3dadd(197916.000000,174012.000000,92325.000000,209.673214)}
{pt3dadd(197736.000000,173844.000000,92275.000000,148.145558)}
{pt3dadd(197496.000000,173652.000000,92175.000000,116.488671)}
{pt3dadd(197292.000000,173460.000000,92175.000000,110.760774)}
{pt3dadd(197244.000000,173400.000000,91975.000000,105.236211)}
{pt3dadd(197124.000000,173136.000000,91925.000000,94.509563)}
{pt3dadd(197064.000000,172932.000000,91800.000000,98.764703)}
{pt3dadd(196944.000000,172716.000000,91725.000000,98.764703)}
{pt3dadd(196896.000000,172512.000000,91675.000000,111.803010)}
{pt3dadd(196692.000000,172344.000000,91625.000000,138.659417)}
{pt3dadd(196560.000000,172080.000000,91475.000000,153.765361)}
{pt3dadd(196464.000000,172068.000000,91275.000000,181.722097)}
{pt3dadd(196428.000000,172056.000000,91075.000000,160.811480)}

{create adhoc123}
{access adhoc123}
{connect adhoc123(1), adhoc121(0)}
{nseg = 1}
{strdef color color = "White"}
{pt3dclear()}
{pt3dadd(197820.000000,174876.000000,92325.000000,406.362580)}
{pt3dadd(197460.000000,174936.000000,92350.000000,298.195143)}
{pt3dadd(196980.000000,175056.000000,92400.000000,221.839167)}
{pt3dadd(196836.000000,175152.000000,92300.000000,177.294650)}

{create adhoc124}
{access adhoc124}
{connect adhoc124(1), adhoc120(0)}
{nseg = 1}
{strdef color color = "White"}
{pt3dclear()}
{pt3dadd(198708.000000,174852.000000,91575.000000,1248.152300)}
{pt3dadd(198744.000000,175056.000000,91400.000000,1228.340400)}
{pt3dadd(198612.000000,175248.000000,91250.000000,1188.716600)}

{create adhoc125}
{access adhoc125}
{connect adhoc125(1), adhoc124(0)}
{nseg = 1}
{strdef color color = "White"}
{pt3dclear()}
{pt3dadd(198612.000000,175248.000000,91250.000000,1188.716600)}
{pt3dadd(197472.000000,175248.000000,90075.000000,237.591800)}

{create adhoc126}
{access adhoc126}
{connect adhoc126(1), adhoc125(0)}
{nseg = 1}
{strdef color color = "White"}
{pt3dclear()}
{pt3dadd(197472.000000,175248.000000,90075.000000,237.591800)}
{pt3dadd(197328.000000,175248.000000,89750.000000,238.346503)}
{pt3dadd(197292.000000,175056.000000,89725.000000,215.502760)}

{create adhoc127}
{access adhoc127}
{connect adhoc127(1), adhoc126(0)}
{nseg = 1}
{strdef color color = "White"}
{pt3dclear()}
{pt3dadd(197292.000000,175056.000000,89725.000000,215.502760)}
{pt3dadd(197316.000000,174996.000000,89550.000000,209.313353)}
{pt3dadd(197316.000000,174912.000000,89375.000000,194.982188)}
{pt3dadd(197196.000000,174816.000000,89175.000000,185.652046)}
{pt3dadd(197160.000000,174804.000000,89000.000000,171.940977)}
{pt3dadd(197160.000000,174804.000000,88850.000000,168.852050)}

{create adhoc128}
{access adhoc128}
{connect adhoc128(1), adhoc127(0)}
{nseg = 1}
{strdef color color = "White"}
{pt3dclear()}
{pt3dadd(197160.000000,174804.000000,88850.000000,168.852050)}
{pt3dadd(197328.000000,174936.000000,88675.000000,200.123557)}
{pt3dadd(197352.000000,174972.000000,88500.000000,226.277900)}

{create adhoc129}
{access adhoc129}
{connect adhoc129(1), adhoc128(0)}
{nseg = 1}
{strdef color color = "White"}
{pt3dclear()}
{pt3dadd(197352.000000,174972.000000,88500.000000,226.277900)}
{pt3dadd(197412.000000,174696.000000,88400.000000,191.082927)}
{pt3dadd(197628.000000,174564.000000,88375.000000,151.363553)}
{pt3dadd(197616.000000,174396.000000,88300.000000,132.567973)}
{pt3dadd(197640.000000,174180.000000,88225.000000,115.080953)}
{pt3dadd(197688.000000,174024.000000,88100.000000,99.975009)}
{pt3dadd(197772.000000,173868.000000,88100.000000,100.870468)}
{pt3dadd(197868.000000,173748.000000,88100.000000,99.122192)}
{pt3dadd(197880.000000,173568.000000,88100.000000,86.694495)}
{pt3dadd(197796.000000,173508.000000,88000.000000,83.155471)}
{pt3dadd(197748.000000,173376.000000,87875.000000,70.161514)}

{create adhoc130}
{access adhoc130}
{connect adhoc130(1), adhoc128(0)}
{nseg = 1}
{strdef color color = "White"}
{pt3dclear()}
{pt3dadd(197352.000000,174972.000000,88500.000000,226.277900)}
{pt3dadd(197376.000000,175188.000000,88400.000000,212.186917)}
{pt3dadd(197376.000000,175392.000000,88325.000000,173.540652)}
{pt3dadd(197388.000000,175656.000000,88325.000000,156.068072)}
{pt3dadd(197484.000000,175920.000000,88325.000000,126.905901)}
{pt3dadd(197544.000000,176040.000000,88375.000000,110.214219)}
{pt3dadd(197496.000000,176172.000000,88400.000000,105.885579)}
{pt3dadd(197412.000000,176244.000000,88500.000000,91.447347)}
{pt3dadd(197316.000000,176328.000000,88500.000000,77.028445)}
{pt3dadd(197280.000000,176400.000000,88625.000000,71.766956)}
{pt3dadd(197088.000000,176472.000000,88600.000000,70.328645)}
{pt3dadd(196932.000000,176424.000000,88600.000000,71.445025)}
{pt3dadd(196848.000000,176364.000000,88600.000000,70.161514)}

{create adhoc131}
{access adhoc131}
{connect adhoc131(1), adhoc127(0)}
{nseg = 1}
{strdef color color = "White"}
{pt3dclear()}
{pt3dadd(197160.000000,174804.000000,88850.000000,168.852050)}
{pt3dadd(196968.000000,174612.000000,88850.000000,122.413812)}
{pt3dadd(196776.000000,174348.000000,88825.000000,108.843540)}

{create adhoc132}
{access adhoc132}
{connect adhoc132(1), adhoc131(0)}
{nseg = 1}
{strdef color color = "White"}
{pt3dclear()}
{pt3dadd(196776.000000,174348.000000,88825.000000,108.843540)}
{pt3dadd(196572.000000,174348.000000,88725.000000,86.741927)}
{pt3dadd(196476.000000,174396.000000,88725.000000,68.785207)}
{pt3dadd(196428.000000,174432.000000,88625.000000,54.973380)}

{create adhoc133}
{access adhoc133}
{connect adhoc133(1), adhoc131(0)}
{nseg = 1}
{strdef color color = "White"}
{pt3dclear()}
{pt3dadd(196776.000000,174348.000000,88825.000000,108.843540)}
{pt3dadd(196752.000000,174192.000000,88750.000000,83.111207)}
{pt3dadd(196764.000000,174072.000000,88700.000000,88.507996)}
{pt3dadd(196740.000000,173952.000000,88550.000000,85.543916)}
{pt3dadd(196752.000000,173772.000000,88500.000000,90.088987)}
{pt3dadd(196716.000000,173628.000000,88400.000000,95.743167)}
{pt3dadd(196668.000000,173532.000000,88400.000000,89.545845)}

{create adhoc134}
{access adhoc134}
{connect adhoc134(1), adhoc133(0)}
{nseg = 1}
{strdef color color = "White"}
{pt3dclear()}
{pt3dadd(196668.000000,173532.000000,88400.000000,89.545845)}
{pt3dadd(196536.000000,173580.000000,88400.000000,95.743167)}
{pt3dadd(196308.000000,173556.000000,88400.000000,91.678908)}
{pt3dadd(196200.000000,173532.000000,88400.000000,77.353070)}

{create adhoc135}
{access adhoc135}
{connect adhoc135(1), adhoc133(0)}
{nseg = 1}
{strdef color color = "White"}
{pt3dclear()}
{pt3dadd(196668.000000,173532.000000,88400.000000,89.545845)}
{pt3dadd(196692.000000,173376.000000,88400.000000,89.156705)}
{pt3dadd(196692.000000,173208.000000,88350.000000,102.411033)}
{pt3dadd(196728.000000,173076.000000,88350.000000,97.865962)}
{pt3dadd(196716.000000,172980.000000,88300.000000,99.872168)}
{pt3dadd(196716.000000,172836.000000,88225.000000,90.379124)}
{pt3dadd(196644.000000,172680.000000,88225.000000,75.239277)}
{pt3dadd(196644.000000,172548.000000,88225.000000,73.403586)}
{pt3dadd(196584.000000,172428.000000,88200.000000,75.509283)}
{pt3dadd(196488.000000,172368.000000,88075.000000,89.545845)}

{create adhoc136}
{access adhoc136}
{connect adhoc136(1), adhoc126(0)}
{nseg = 1}
{strdef color color = "White"}
{pt3dclear()}
{pt3dadd(197292.000000,175056.000000,89725.000000,215.502760)}
{pt3dadd(196992.000000,174876.000000,89700.000000,136.236373)}
{pt3dadd(196752.000000,174780.000000,89700.000000,128.329452)}
{pt3dadd(196572.000000,174756.000000,89700.000000,112.199552)}
{pt3dadd(196308.000000,174636.000000,89600.000000,138.915000)}

{create adhoc137}
{access adhoc137}
{connect adhoc137(1), adhoc136(0)}
{nseg = 1}
{strdef color color = "White"}
{pt3dclear()}
{pt3dadd(196308.000000,174636.000000,89600.000000,138.915000)}
{pt3dadd(196164.000000,174420.000000,89525.000000,97.005750)}
{pt3dadd(195972.000000,174204.000000,89475.000000,66.820490)}

{create adhoc138}
{access adhoc138}
{connect adhoc138(1), adhoc136(0)}
{nseg = 1}
{strdef color color = "White"}
{pt3dclear()}
{pt3dadd(196308.000000,174636.000000,89600.000000,138.915000)}
{pt3dadd(196152.000000,174732.000000,89725.000000,99.540786)}
{pt3dadd(196080.000000,174708.000000,89800.000000,89.545845)}

{create adhoc139}
{access adhoc139}
{connect adhoc139(1), adhoc125(0)}
{nseg = 1}
{strdef color color = "White"}
{pt3dclear()}
{pt3dadd(197472.000000,175248.000000,90075.000000,237.591800)}
{pt3dadd(197400.000000,175548.000000,90175.000000,196.907895)}
{pt3dadd(197196.000000,175860.000000,90175.000000,153.991808)}
{pt3dadd(197112.000000,176028.000000,90175.000000,108.843540)}

{create adhoc140}
{access adhoc140}
{connect adhoc140(1), adhoc139(0)}
{nseg = 1}
{strdef color color = "White"}
{pt3dclear()}
{pt3dadd(197112.000000,176028.000000,90175.000000,108.843540)}
{pt3dadd(197184.000000,176112.000000,90100.000000,110.229795)}
{pt3dadd(197244.000000,176184.000000,89975.000000,89.545845)}

{create adhoc141}
{access adhoc141}
{connect adhoc141(1), adhoc139(0)}
{nseg = 1}
{strdef color color = "White"}
{pt3dclear()}
{pt3dadd(197112.000000,176028.000000,90175.000000,108.843540)}
{pt3dadd(196956.000000,176016.000000,90075.000000,102.175732)}
{pt3dadd(196752.000000,176064.000000,90000.000000,104.894684)}
{pt3dadd(196596.000000,176124.000000,89925.000000,99.370121)}
{pt3dadd(196500.000000,176256.000000,89925.000000,99.370121)}
{pt3dadd(196320.000000,176460.000000,90000.000000,99.370121)}
{pt3dadd(196224.000000,176544.000000,89925.000000,94.882163)}
{pt3dadd(196044.000000,176652.000000,89950.000000,92.968127)}
{pt3dadd(195900.000000,176772.000000,89950.000000,81.220726)}

{create adhoc142}
{access adhoc142}
{connect adhoc142(1), adhoc124(0)}
{nseg = 1}
{strdef color color = "White"}
{pt3dclear()}
{pt3dadd(198612.000000,175248.000000,91250.000000,1188.716600)}
{pt3dadd(198576.000000,175440.000000,91225.000000,1228.340400)}
{pt3dadd(198456.000000,175656.000000,91175.000000,1224.378020)}
{pt3dadd(198456.000000,175824.000000,91225.000000,1236.265160)}
{pt3dadd(198552.000000,176004.000000,91300.000000,1224.378020)}
{pt3dadd(198612.000000,176232.000000,91350.000000,1212.490880)}
{pt3dadd(198684.000000,176460.000000,91400.000000,1200.603740)}
{pt3dadd(198756.000000,176628.000000,91375.000000,1200.603740)}
{pt3dadd(198768.000000,176796.000000,91400.000000,1188.716600)}
{pt3dadd(198768.000000,177000.000000,91400.000000,1188.716600)}
{pt3dadd(198804.000000,177192.000000,91425.000000,1200.603740)}
{pt3dadd(198768.000000,177348.000000,91575.000000,1200.603740)}
{pt3dadd(198696.000000,177588.000000,91625.000000,1200.603740)}
{pt3dadd(198636.000000,177864.000000,91900.000000,1212.490880)}
{pt3dadd(198708.000000,178092.000000,91900.000000,1224.378020)}
{pt3dadd(198684.000000,178320.000000,91975.000000,1224.378020)}
{pt3dadd(198672.000000,178560.000000,92125.000000,1248.746680)}
{pt3dadd(198672.000000,178860.000000,92275.000000,1286.220960)}
{pt3dadd(198384.000000,179052.000000,92500.000000,1311.600067)}
{pt3dadd(198372.000000,179304.000000,92500.000000,1376.088000)}

{create adhoc143}
{access adhoc143}
{connect adhoc143(1), adhoc142(0)}
{nseg = 1}
{strdef color color = "White"}
{pt3dclear()}
{pt3dadd(198372.000000,179304.000000,92500.000000,1376.088000)}
{pt3dadd(198024.000000,179304.000000,93775.000000,623.738333)}
{pt3dadd(197880.000000,179304.000000,94150.000000,452.523024)}
{pt3dadd(197772.000000,179280.000000,94325.000000,232.313864)}
{pt3dadd(197484.000000,179184.000000,94450.000000,222.147440)}
{pt3dadd(197376.000000,179112.000000,94550.000000,275.042200)}

{create adhoc144}
{access adhoc144}
{connect adhoc144(1), adhoc143(0)}
{nseg = 1}
{strdef color color = "White"}
{pt3dclear()}
{pt3dadd(197376.000000,179112.000000,94550.000000,275.042200)}
{pt3dadd(196728.000000,178920.000000,94550.000000,198.888387)}
{pt3dadd(196536.000000,178884.000000,94575.000000,160.811480)}

{create adhoc145}
{access adhoc145}
{connect adhoc145(1), adhoc144(0)}
{nseg = 1}
{strdef color color = "White"}
{pt3dclear()}
{pt3dadd(196536.000000,178884.000000,94575.000000,160.811480)}
{pt3dadd(196344.000000,179028.000000,94525.000000,149.207653)}
{pt3dadd(196188.000000,179124.000000,94400.000000,148.983522)}
{pt3dadd(196092.000000,179172.000000,94375.000000,142.021226)}
{pt3dadd(196020.000000,179280.000000,94325.000000,152.280156)}
{pt3dadd(195900.000000,179352.000000,94225.000000,149.290010)}
{pt3dadd(195708.000000,179520.000000,94225.000000,130.887432)}
{pt3dadd(195624.000000,179616.000000,94100.000000,123.943784)}
{pt3dadd(195564.000000,179820.000000,94100.000000,117.548412)}
{pt3dadd(195456.000000,179952.000000,94100.000000,88.195553)}
{pt3dadd(195360.000000,179988.000000,94050.000000,94.023140)}

{create adhoc146}
{access adhoc146}
{connect adhoc146(1), adhoc144(0)}
{nseg = 1}
{strdef color color = "White"}
{pt3dclear()}
{pt3dadd(196536.000000,178884.000000,94575.000000,160.811480)}
{pt3dadd(196488.000000,178608.000000,94575.000000,106.461759)}
{pt3dadd(196344.000000,178404.000000,94575.000000,103.554932)}
{pt3dadd(196272.000000,178200.000000,94525.000000,97.852636)}
{pt3dadd(196332.000000,177924.000000,94500.000000,108.842022)}
{pt3dadd(196380.000000,177792.000000,94550.000000,124.760173)}
{pt3dadd(196428.000000,177624.000000,94600.000000,128.619712)}
{pt3dadd(196476.000000,177540.000000,94650.000000,128.619712)}
{pt3dadd(196548.000000,177444.000000,94650.000000,120.068881)}
{pt3dadd(196656.000000,177336.000000,94700.000000,112.413509)}
{pt3dadd(196728.000000,177240.000000,94725.000000,98.160382)}
{pt3dadd(196812.000000,177120.000000,94725.000000,95.196302)}
{pt3dadd(196896.000000,177096.000000,94725.000000,96.284736)}
{pt3dadd(196944.000000,176928.000000,94725.000000,98.120427)}
{pt3dadd(196884.000000,176784.000000,94675.000000,99.060659)}
{pt3dadd(196872.000000,176640.000000,94675.000000,95.885408)}
{pt3dadd(196896.000000,176460.000000,94650.000000,91.814698)}
{pt3dadd(196824.000000,176364.000000,94550.000000,86.013908)}
{pt3dadd(196848.000000,176208.000000,94525.000000,82.513193)}
{pt3dadd(196824.000000,175980.000000,94425.000000,79.824685)}
{pt3dadd(196860.000000,175884.000000,94400.000000,81.334912)}
{pt3dadd(196836.000000,175752.000000,94375.000000,82.574404)}
{pt3dadd(196752.000000,175608.000000,94375.000000,81.220726)}

{create adhoc147}
{access adhoc147}
{connect adhoc147(1), adhoc143(0)}
{nseg = 1}
{strdef color color = "White"}
{pt3dclear()}
{pt3dadd(197376.000000,179112.000000,94550.000000,275.042200)}
{pt3dadd(197184.000000,179100.000000,94750.000000,250.263823)}
{pt3dadd(197028.000000,179088.000000,94875.000000,237.284448)}
{pt3dadd(197184.000000,179160.000000,95050.000000,214.438304)}
{pt3dadd(197064.000000,179220.000000,95325.000000,198.354874)}
{pt3dadd(196956.000000,179208.000000,95450.000000,177.632750)}
{pt3dadd(196884.000000,179232.000000,95650.000000,158.369236)}
{pt3dadd(196788.000000,179208.000000,95850.000000,160.230828)}
{pt3dadd(196620.000000,179220.000000,96075.000000,164.827303)}
{pt3dadd(196608.000000,179052.000000,96325.000000,195.467360)}

{create adhoc148}
{access adhoc148}
{connect adhoc148(1), adhoc147(0)}
{nseg = 1}
{strdef color color = "White"}
{pt3dclear()}
{pt3dadd(196608.000000,179052.000000,96325.000000,195.467360)}
{pt3dadd(196476.000000,178872.000000,96350.000000,145.117083)}
{pt3dadd(196476.000000,178632.000000,96350.000000,112.869397)}
{pt3dadd(196452.000000,178500.000000,96350.000000,98.724300)}

{create adhoc149}
{access adhoc149}
{connect adhoc149(1), adhoc147(0)}
{nseg = 1}
{strdef color color = "White"}
{pt3dclear()}
{pt3dadd(196608.000000,179052.000000,96325.000000,195.467360)}
{pt3dadd(196392.000000,179040.000000,96425.000000,195.622493)}
{pt3dadd(196320.000000,179052.000000,96525.000000,232.835332)}
{pt3dadd(195996.000000,179076.000000,96650.000000,263.948116)}
{pt3dadd(196056.000000,179124.000000,96800.000000,286.579116)}
{pt3dadd(195984.000000,179232.000000,96975.000000,340.152760)}
{pt3dadd(195924.000000,179328.000000,97000.000000,318.395720)}

{create adhoc150}
{access adhoc150}
{connect adhoc150(1), adhoc149(0)}
{nseg = 1}
{strdef color color = "White"}
{pt3dclear()}
{pt3dadd(195924.000000,179328.000000,97000.000000,318.395720)}
{pt3dadd(195480.000000,179592.000000,97000.000000,145.860750)}

{create adhoc151}
{access adhoc151}
{connect adhoc151(1), adhoc150(0)}
{nseg = 1}
{strdef color color = "White"}
{pt3dclear()}
{pt3dadd(195480.000000,179592.000000,97000.000000,145.860750)}
{pt3dadd(195204.000000,179688.000000,97000.000000,138.915000)}

{create adhoc152}
{access adhoc152}
{connect adhoc152(1), adhoc151(0)}
{nseg = 1}
{strdef color color = "White"}
{pt3dclear()}
{pt3dadd(195204.000000,179688.000000,97000.000000,138.915000)}
{pt3dadd(195204.000000,179796.000000,96900.000000,114.732253)}
{pt3dadd(195180.000000,179880.000000,96900.000000,85.281760)}

{create adhoc153}
{access adhoc153}
{connect adhoc153(1), adhoc151(0)}
{nseg = 1}
{strdef color color = "White"}
{pt3dclear()}
{pt3dadd(195204.000000,179688.000000,97000.000000,138.915000)}
{pt3dadd(195072.000000,179640.000000,97050.000000,132.300000)}

{create adhoc154}
{access adhoc154}
{connect adhoc154(1), adhoc153(0)}
{nseg = 1}
{strdef color color = "White"}
{pt3dclear()}
{pt3dadd(195072.000000,179640.000000,97050.000000,132.300000)}
{pt3dadd(194964.000000,179700.000000,97100.000000,113.536283)}
{pt3dadd(194892.000000,179808.000000,97150.000000,101.660316)}
{pt3dadd(194844.000000,179832.000000,97150.000000,87.238623)}
{pt3dadd(194736.000000,179892.000000,97175.000000,73.669590)}

{create adhoc155}
{access adhoc155}
{connect adhoc155(1), adhoc153(0)}
{nseg = 1}
{strdef color color = "White"}
{pt3dclear()}
{pt3dadd(195072.000000,179640.000000,97050.000000,132.300000)}
{pt3dadd(195108.000000,179508.000000,97225.000000,133.985007)}
{pt3dadd(195024.000000,179376.000000,97225.000000,118.312260)}
{pt3dadd(194904.000000,179340.000000,97275.000000,85.281760)}

{create adhoc156}
{access adhoc156}
{connect adhoc156(1), adhoc150(0)}
{nseg = 1}
{strdef color color = "White"}
{pt3dclear()}
{pt3dadd(195480.000000,179592.000000,97000.000000,145.860750)}
{pt3dadd(195516.000000,179676.000000,97175.000000,163.338823)}
{pt3dadd(195504.000000,179916.000000,97175.000000,130.530260)}
{pt3dadd(195492.000000,180060.000000,97175.000000,114.722208)}
{pt3dadd(195492.000000,180156.000000,97275.000000,76.485107)}
{pt3dadd(195468.000000,180204.000000,97275.000000,66.820490)}

{create adhoc157}
{access adhoc157}
{connect adhoc157(1), adhoc149(0)}
{nseg = 1}
{strdef color color = "White"}
{pt3dclear()}
{pt3dadd(195924.000000,179328.000000,97000.000000,318.395720)}
{pt3dadd(195972.000000,179376.000000,97200.000000,308.287907)}
{pt3dadd(195972.000000,179340.000000,97325.000000,295.513818)}
{pt3dadd(195948.000000,179280.000000,97450.000000,279.353034)}
{pt3dadd(195876.000000,179244.000000,97600.000000,271.095224)}
{pt3dadd(195804.000000,179208.000000,97725.000000,257.966784)}
{pt3dadd(195672.000000,179148.000000,97850.000000,236.413456)}
{pt3dadd(195540.000000,179076.000000,97975.000000,218.681478)}
{pt3dadd(195444.000000,179112.000000,98100.000000,196.363118)}
{pt3dadd(195228.000000,179028.000000,98175.000000,183.067600)}
{pt3dadd(195192.000000,178872.000000,98175.000000,183.067600)}
{pt3dadd(195132.000000,178800.000000,98375.000000,196.363118)}
{pt3dadd(194928.000000,178740.000000,98500.000000,219.209262)}
{pt3dadd(194940.000000,178704.000000,98750.000000,254.656062)}
{pt3dadd(194880.000000,178764.000000,98925.000000,282.425694)}
{pt3dadd(194916.000000,178728.000000,99050.000000,292.666194)}
{pt3dadd(194856.000000,178632.000000,99175.000000,275.736134)}
{pt3dadd(194700.000000,178572.000000,99225.000000,266.801490)}
{pt3dadd(194616.000000,178572.000000,99350.000000,177.294650)}

{create adhoc158}
{access adhoc158}
{connect adhoc158(1), adhoc157(0)}
{nseg = 1}
{strdef color color = "White"}
{pt3dclear()}
{pt3dadd(194616.000000,178572.000000,99350.000000,177.294650)}
{pt3dadd(194832.000000,178824.000000,99425.000000,181.983737)}
{pt3dadd(194736.000000,178980.000000,99550.000000,142.027173)}
{pt3dadd(194820.000000,179112.000000,99675.000000,105.779485)}
{pt3dadd(194868.000000,179220.000000,99750.000000,94.023140)}

{create adhoc159}
{access adhoc159}
{connect adhoc159(1), adhoc157(0)}
{nseg = 1}
{strdef color color = "White"}
{pt3dclear()}
{pt3dadd(194616.000000,178572.000000,99350.000000,177.294650)}
{pt3dadd(194400.000000,178308.000000,99400.000000,249.471370)}

{create adhoc160}
{access adhoc160}
{connect adhoc160(1), adhoc159(0)}
{nseg = 1}
{strdef color color = "White"}
{pt3dclear()}
{pt3dadd(194400.000000,178308.000000,99400.000000,249.471370)}
{pt3dadd(194268.000000,178152.000000,99525.000000,217.681307)}
{pt3dadd(194112.000000,177972.000000,99650.000000,217.734938)}
{pt3dadd(193944.000000,177756.000000,99675.000000,204.308473)}
{pt3dadd(193860.000000,177744.000000,99750.000000,249.471370)}

{create adhoc161}
{access adhoc161}
{connect adhoc161(1), adhoc160(0)}
{nseg = 1}
{strdef color color = "White"}
{pt3dclear()}
{pt3dadd(193860.000000,177744.000000,99750.000000,249.471370)}
{pt3dadd(193692.000000,177696.000000,99850.000000,210.668913)}
{pt3dadd(193596.000000,177612.000000,99975.000000,206.733780)}
{pt3dadd(193404.000000,177420.000000,99975.000000,211.847946)}
{pt3dadd(193284.000000,177240.000000,100050.000000,223.188792)}
{pt3dadd(193260.000000,177228.000000,100200.000000,237.624136)}
{pt3dadd(193104.000000,177180.000000,100375.000000,262.152840)}
{pt3dadd(193056.000000,177120.000000,100525.000000,249.471370)}

{create adhoc162}
{access adhoc162}
{connect adhoc162(1), adhoc161(0)}
{nseg = 1}
{strdef color color = "White"}
{pt3dclear()}
{pt3dadd(193056.000000,177120.000000,100525.000000,249.471370)}
{pt3dadd(192864.000000,177504.000000,100675.000000,132.797230)}
{pt3dadd(192816.000000,177636.000000,100700.000000,110.656401)}
{pt3dadd(192732.000000,177756.000000,100800.000000,82.530835)}
{pt3dadd(192684.000000,177900.000000,100875.000000,86.859475)}
{pt3dadd(192636.000000,177984.000000,100975.000000,91.782009)}
{pt3dadd(192648.000000,177936.000000,101150.000000,85.281760)}

{create adhoc163}
{access adhoc163}
{connect adhoc163(1), adhoc161(0)}
{nseg = 1}
{strdef color color = "White"}
{pt3dclear()}
{pt3dadd(193056.000000,177120.000000,100525.000000,249.471370)}
{pt3dadd(192948.000000,176880.000000,100625.000000,187.210257)}
{pt3dadd(192900.000000,176772.000000,100775.000000,196.474850)}
{pt3dadd(192936.000000,176700.000000,100925.000000,187.628720)}
{pt3dadd(193020.000000,176640.000000,101100.000000,189.490312)}
{pt3dadd(193140.000000,176484.000000,101300.000000,205.338456)}
{pt3dadd(193224.000000,176376.000000,101425.000000,209.756264)}
{pt3dadd(193260.000000,176268.000000,101500.000000,212.766627)}
{pt3dadd(193272.000000,176220.000000,101625.000000,237.591800)}

{create adhoc164}
{access adhoc164}
{connect adhoc164(1), adhoc163(0)}
{nseg = 1}
{strdef color color = "White"}
{pt3dclear()}
{pt3dadd(193272.000000,176220.000000,101625.000000,237.591800)}
{pt3dadd(193308.000000,176184.000000,101800.000000,249.471370)}

{create adhoc165}
{access adhoc165}
{connect adhoc165(1), adhoc164(0)}
{nseg = 1}
{strdef color color = "White"}
{pt3dclear()}
{pt3dadd(193308.000000,176184.000000,101800.000000,249.471370)}
{pt3dadd(193272.000000,176268.000000,101975.000000,267.392247)}
{pt3dadd(193236.000000,176328.000000,102075.000000,278.841008)}
{pt3dadd(193200.000000,176388.000000,102225.000000,283.955174)}
{pt3dadd(193176.000000,176472.000000,102350.000000,289.023500)}
{pt3dadd(193080.000000,176652.000000,102550.000000,275.042200)}

{create adhoc166}
{access adhoc166}
{connect adhoc166(1), adhoc165(0)}
{nseg = 1}
{strdef color color = "White"}
{pt3dclear()}
{pt3dadd(193080.000000,176652.000000,102550.000000,275.042200)}
{pt3dadd(192996.000000,176952.000000,102625.000000,167.558057)}
{pt3dadd(193032.000000,177204.000000,102550.000000,130.739366)}
{pt3dadd(193008.000000,177360.000000,102525.000000,92.787278)}
{pt3dadd(193008.000000,177408.000000,102375.000000,78.768140)}
{pt3dadd(193008.000000,177444.000000,102425.000000,85.281760)}

{create adhoc167}
{access adhoc167}
{connect adhoc167(1), adhoc165(0)}
{nseg = 1}
{strdef color color = "White"}
{pt3dclear()}
{pt3dadd(193080.000000,176652.000000,102550.000000,275.042200)}
{pt3dadd(193044.000000,176700.000000,102700.000000,284.210267)}
{pt3dadd(193032.000000,176700.000000,102900.000000,280.674010)}
{pt3dadd(192984.000000,176736.000000,102950.000000,268.766122)}
{pt3dadd(192936.000000,176724.000000,103100.000000,246.466192)}
{pt3dadd(192744.000000,176688.000000,103250.000000,225.939212)}
{pt3dadd(192660.000000,176712.000000,103375.000000,209.009152)}
{pt3dadd(192600.000000,176568.000000,103425.000000,183.412588)}
{pt3dadd(192552.000000,176460.000000,103600.000000,163.169178)}
{pt3dadd(192444.000000,176484.000000,103725.000000,327.710248)}
{pt3dadd(192324.000000,176448.000000,103750.000000,425.032397)}
{pt3dadd(192264.000000,176376.000000,103900.000000,1000.000000)}

{create adhoc168}
{access adhoc168}
{connect adhoc168(1), adhoc164(0)}
{nseg = 1}
{strdef color color = "White"}
{pt3dclear()}
{pt3dadd(193308.000000,176184.000000,101800.000000,249.471370)}
{pt3dadd(193428.000000,175716.000000,101875.000000,161.438303)}
{pt3dadd(193428.000000,175512.000000,102000.000000,158.197428)}
{pt3dadd(193428.000000,175368.000000,102175.000000,138.505257)}
{pt3dadd(193440.000000,175380.000000,102325.000000,145.860750)}

{create adhoc169}
{access adhoc169}
{connect adhoc169(1), adhoc163(0)}
{nseg = 1}
{strdef color color = "White"}
{pt3dclear()}
{pt3dadd(193272.000000,176220.000000,101625.000000,237.591800)}
{pt3dadd(193608.000000,175716.000000,101700.000000,127.140968)}
{pt3dadd(193716.000000,175656.000000,101625.000000,113.938610)}
{pt3dadd(193848.000000,175572.000000,101525.000000,82.664395)}
{pt3dadd(193932.000000,175428.000000,101400.000000,91.489234)}
{pt3dadd(193980.000000,175320.000000,101325.000000,97.487419)}
{pt3dadd(194136.000000,175176.000000,101250.000000,104.778250)}
{pt3dadd(194160.000000,175068.000000,101125.000000,109.033390)}
{pt3dadd(194256.000000,174996.000000,101100.000000,120.572245)}
{pt3dadd(194340.000000,174876.000000,101100.000000,113.959248)}
{pt3dadd(194496.000000,174756.000000,101000.000000,112.972005)}
{pt3dadd(194568.000000,174564.000000,100850.000000,109.540713)}
{pt3dadd(194736.000000,174480.000000,100800.000000,102.597065)}
{pt3dadd(194748.000000,174348.000000,100750.000000,97.616533)}
{pt3dadd(194700.000000,174348.000000,100575.000000,85.281760)}

{create adhoc170}
{access adhoc170}
{connect adhoc170(1), adhoc160(0)}
{nseg = 1}
{strdef color color = "White"}
{pt3dclear()}
{pt3dadd(193860.000000,177744.000000,99750.000000,249.471370)}
{pt3dadd(194016.000000,177900.000000,99900.000000,132.797230)}
{pt3dadd(194076.000000,177912.000000,99975.000000,73.027278)}
{pt3dadd(194232.000000,177960.000000,100025.000000,70.161514)}

{create adhoc171}
{access adhoc171}
{connect adhoc171(1), adhoc159(0)}
{nseg = 1}
{strdef color color = "White"}
{pt3dclear()}
{pt3dadd(194400.000000,178308.000000,99400.000000,249.471370)}
{pt3dadd(194448.000000,178212.000000,99200.000000,160.165223)}
{pt3dadd(194448.000000,178080.000000,99200.000000,115.103337)}
{pt3dadd(194412.000000,178020.000000,99200.000000,114.285710)}

{create adhoc172}
{access adhoc172}
{connect adhoc172(1), adhoc159(0)}
{nseg = 1}
{strdef color color = "White"}
{pt3dclear()}
{pt3dadd(194400.000000,178308.000000,99400.000000,249.471370)}
{pt3dadd(194280.000000,178464.000000,99250.000000,168.058553)}
{pt3dadd(194232.000000,178548.000000,99250.000000,131.206430)}
{pt3dadd(194160.000000,178512.000000,99225.000000,138.915000)}

{create adhoc173}
{access adhoc173}
{connect adhoc173(1), adhoc142(0)}
{nseg = 1}
{strdef color color = "White"}
{pt3dclear()}
{pt3dadd(198372.000000,179304.000000,92500.000000,1376.088000)}
{pt3dadd(198432.000000,179496.000000,92525.000000,1310.559900)}

{create adhoc174}
{access adhoc174}
{connect adhoc174(1), adhoc173(0)}
{nseg = 1}
{strdef color color = "White"}
{pt3dclear()}
{pt3dadd(198432.000000,179496.000000,92525.000000,1310.559900)}
{pt3dadd(197604.000000,179496.000000,91225.000000,542.256517)}
{pt3dadd(197340.000000,179496.000000,91075.000000,138.915000)}

{create adhoc175}
{access adhoc175}
{connect adhoc175(1), adhoc174(0)}
{nseg = 1}
{strdef color color = "White"}
{pt3dclear()}
{pt3dadd(197340.000000,179496.000000,91075.000000,138.915000)}
{pt3dadd(197256.000000,179388.000000,90975.000000,140.684253)}
{pt3dadd(197148.000000,179112.000000,90975.000000,133.727694)}
{pt3dadd(196980.000000,178848.000000,90925.000000,120.290473)}
{pt3dadd(196788.000000,178416.000000,90925.000000,132.300000)}

{create adhoc176}
{access adhoc176}
{connect adhoc176(1), adhoc175(0)}
{nseg = 1}
{strdef color color = "White"}
{pt3dclear()}
{pt3dadd(196788.000000,178416.000000,90925.000000,132.300000)}
{pt3dadd(196668.000000,178176.000000,90900.000000,118.048615)}
{pt3dadd(196392.000000,177972.000000,90875.000000,110.229795)}
{pt3dadd(196272.000000,177876.000000,90825.000000,108.843540)}

{create adhoc177}
{access adhoc177}
{connect adhoc177(1), adhoc175(0)}
{nseg = 1}
{strdef color color = "White"}
{pt3dclear()}
{pt3dadd(196788.000000,178416.000000,90925.000000,132.300000)}
{pt3dadd(196716.000000,178272.000000,91075.000000,106.856715)}
{pt3dadd(196752.000000,178200.000000,91175.000000,100.827826)}
{pt3dadd(196752.000000,178056.000000,91300.000000,89.101744)}
{pt3dadd(196740.000000,178020.000000,91450.000000,89.101744)}
{pt3dadd(196692.000000,177948.000000,91600.000000,87.313245)}
{pt3dadd(196692.000000,177852.000000,91725.000000,98.724300)}

{create adhoc178}
{access adhoc178}
{connect adhoc178(1), adhoc174(0)}
{nseg = 1}
{strdef color color = "White"}
{pt3dclear()}
{pt3dadd(197340.000000,179496.000000,91075.000000,138.915000)}
{pt3dadd(197196.000000,179604.000000,90925.000000,159.007043)}
{pt3dadd(196992.000000,179760.000000,90850.000000,177.294650)}

{create adhoc179}
{access adhoc179}
{connect adhoc179(1), adhoc178(0)}
{nseg = 1}
{strdef color color = "White"}
{pt3dclear()}
{pt3dadd(196992.000000,179760.000000,90850.000000,177.294650)}
{pt3dadd(196980.000000,179964.000000,90850.000000,115.582115)}
{pt3dadd(196956.000000,180036.000000,90850.000000,60.608154)}

{create adhoc180}
{access adhoc180}
{connect adhoc180(1), adhoc178(0)}
{nseg = 1}
{strdef color color = "White"}
{pt3dclear()}
{pt3dadd(196992.000000,179760.000000,90850.000000,177.294650)}
{pt3dadd(196920.000000,179664.000000,90775.000000,159.007043)}
{pt3dadd(196752.000000,179700.000000,90775.000000,135.881189)}
{pt3dadd(196524.000000,179640.000000,90700.000000,134.192669)}
{pt3dadd(196296.000000,179724.000000,90700.000000,132.661133)}
{pt3dadd(196056.000000,179772.000000,90700.000000,132.661133)}
{pt3dadd(195828.000000,179736.000000,90700.000000,131.673890)}
{pt3dadd(195744.000000,179760.000000,90800.000000,130.264367)}
{pt3dadd(195648.000000,179712.000000,90850.000000,98.724300)}

{create adhoc181}
{access adhoc181}
{connect adhoc181(1), adhoc173(0)}
{nseg = 1}
{strdef color color = "White"}
{pt3dclear()}
{pt3dadd(198432.000000,179496.000000,92525.000000,1310.559900)}
{pt3dadd(198432.000000,179676.000000,92600.000000,1376.088000)}

{create adhoc182}
{access adhoc182}
{connect adhoc182(1), adhoc181(0)}
{nseg = 1}
{strdef color color = "White"}
{pt3dclear()}
{pt3dadd(198432.000000,179676.000000,92600.000000,1376.088000)}
{pt3dadd(196692.000000,179760.000000,92375.000000,126.000000)}

{create adhoc183}
{access adhoc183}
{connect adhoc183(1), adhoc182(0)}
{nseg = 1}
{strdef color color = "White"}
{pt3dclear()}
{pt3dadd(196692.000000,179760.000000,92375.000000,126.000000)}
{pt3dadd(196512.000000,179688.000000,92250.000000,111.436283)}
{pt3dadd(196488.000000,179568.000000,92175.000000,94.023140)}

{create adhoc184}
{access adhoc184}
{connect adhoc184(1), adhoc183(0)}
{nseg = 1}
{strdef color color = "White"}
{pt3dclear()}
{pt3dadd(196488.000000,179568.000000,92175.000000,94.023140)}
{pt3dadd(196512.000000,179568.000000,92025.000000,74.222037)}
{pt3dadd(196512.000000,179568.000000,91825.000000,77.434495)}
{pt3dadd(196452.000000,179460.000000,91725.000000,103.660515)}

{create adhoc185}
{access adhoc185}
{connect adhoc185(1), adhoc183(0)}
{nseg = 1}
{strdef color color = "White"}
{pt3dclear()}
{pt3dadd(196488.000000,179568.000000,92175.000000,94.023140)}
{pt3dadd(196236.000000,179484.000000,92125.000000,131.249873)}
{pt3dadd(196188.000000,179304.000000,92025.000000,112.903238)}
{pt3dadd(196128.000000,179172.000000,91975.000000,112.903238)}
{pt3dadd(196056.000000,178968.000000,91750.000000,88.263237)}
{pt3dadd(195864.000000,178656.000000,91625.000000,94.023140)}

{create adhoc186}
{access adhoc186}
{connect adhoc186(1), adhoc185(0)}
{nseg = 1}
{strdef color color = "White"}
{pt3dclear()}
{pt3dadd(195864.000000,178656.000000,91625.000000,94.023140)}
{pt3dadd(195900.000000,178440.000000,91625.000000,108.349147)}
{pt3dadd(195792.000000,178272.000000,91725.000000,97.497778)}
{pt3dadd(195732.000000,178176.000000,91800.000000,95.749502)}
{pt3dadd(195636.000000,178080.000000,91800.000000,82.574404)}
{pt3dadd(195588.000000,177972.000000,91800.000000,85.281760)}

{create adhoc187}
{access adhoc187}
{connect adhoc187(1), adhoc186(0)}
{nseg = 1}
{strdef color color = "White"}
{pt3dclear()}
{pt3dadd(195588.000000,177972.000000,91800.000000,85.281760)}
{pt3dadd(195540.000000,178116.000000,91950.000000,78.768140)}
{pt3dadd(195504.000000,178176.000000,92000.000000,73.669590)}

{create adhoc188}
{access adhoc188}
{connect adhoc188(1), adhoc186(0)}
{nseg = 1}
{strdef color color = "White"}
{pt3dclear()}
{pt3dadd(195588.000000,177972.000000,91800.000000,85.281760)}
{pt3dadd(195600.000000,177816.000000,91825.000000,73.669590)}

{create adhoc189}
{access adhoc189}
{connect adhoc189(1), adhoc185(0)}
{nseg = 1}
{strdef color color = "White"}
{pt3dclear()}
{pt3dadd(195864.000000,178656.000000,91625.000000,94.023140)}
{pt3dadd(195888.000000,178356.000000,91400.000000,106.249147)}
{pt3dadd(195828.000000,178116.000000,91250.000000,98.295271)}
{pt3dadd(195840.000000,178032.000000,91200.000000,70.161514)}

{create adhoc190}
{access adhoc190}
{connect adhoc190(1), adhoc182(0)}
{nseg = 1}
{strdef color color = "White"}
{pt3dclear()}
{pt3dadd(196692.000000,179760.000000,92375.000000,126.000000)}
{pt3dadd(196716.000000,180024.000000,92650.000000,144.224077)}
{pt3dadd(196560.000000,180024.000000,92825.000000,128.008433)}
{pt3dadd(196428.000000,180084.000000,92975.000000,77.353070)}

{create adhoc191}
{access adhoc191}
{connect adhoc191(1), adhoc181(0)}
{nseg = 1}
{strdef color color = "White"}
{pt3dclear()}
{pt3dadd(198432.000000,179676.000000,92600.000000,1376.088000)}
{pt3dadd(198312.000000,180000.000000,92675.000000,1354.245300)}
{pt3dadd(198252.000000,180180.000000,92775.000000,1349.876760)}
{pt3dadd(198228.000000,180384.000000,92825.000000,1336.771140)}
{pt3dadd(198312.000000,180612.000000,92875.000000,1336.771140)}
{pt3dadd(198324.000000,180816.000000,93025.000000,1311.184000)}
{pt3dadd(198372.000000,181020.000000,93100.000000,1298.078380)}
{pt3dadd(198300.000000,181248.000000,93200.000000,1298.078380)}
{pt3dadd(198264.000000,181440.000000,93275.000000,1311.184000)}
{pt3dadd(198180.000000,181620.000000,93275.000000,1332.402600)}
{pt3dadd(198132.000000,181764.000000,93325.000000,1376.088000)}

{create adhoc192}
{access adhoc192}
{connect adhoc192(1), adhoc191(0)}
{nseg = 1}
{strdef color color = "White"}
{pt3dclear()}
{pt3dadd(198132.000000,181764.000000,93325.000000,1376.088000)}
{pt3dadd(197808.000000,181764.000000,91825.000000,249.471370)}

{create adhoc193}
{access adhoc193}
{connect adhoc193(1), adhoc192(0)}
{nseg = 1}
{strdef color color = "White"}
{pt3dclear()}
{pt3dadd(197808.000000,181764.000000,91825.000000,249.471370)}
{pt3dadd(197112.000000,181764.000000,91825.000000,142.854353)}
{pt3dadd(197016.000000,181836.000000,91925.000000,85.481587)}
{pt3dadd(196896.000000,181884.000000,91950.000000,77.353070)}

{create adhoc194}
{access adhoc194}
{connect adhoc194(1), adhoc192(0)}
{nseg = 1}
{strdef color color = "White"}
{pt3dclear()}
{pt3dadd(197808.000000,181764.000000,91825.000000,249.471370)}
{pt3dadd(197832.000000,181920.000000,91650.000000,199.364177)}
{pt3dadd(197868.000000,181860.000000,91425.000000,153.153800)}

{create adhoc195}
{access adhoc195}
{connect adhoc195(1), adhoc194(0)}
{nseg = 1}
{strdef color color = "White"}
{pt3dclear()}
{pt3dadd(197868.000000,181860.000000,91425.000000,153.153800)}
{pt3dadd(197820.000000,181656.000000,91375.000000,155.706360)}
{pt3dadd(197892.000000,181500.000000,91375.000000,128.042265)}
{pt3dadd(197832.000000,181584.000000,91550.000000,70.161514)}

{create adhoc196}
{access adhoc196}
{connect adhoc196(1), adhoc194(0)}
{nseg = 1}
{strdef color color = "White"}
{pt3dclear()}
{pt3dadd(197868.000000,181860.000000,91425.000000,153.153800)}
{pt3dadd(197736.000000,181812.000000,91250.000000,134.225022)}
{pt3dadd(197676.000000,181836.000000,91150.000000,142.453943)}
{pt3dadd(197652.000000,181920.000000,91025.000000,151.818467)}
{pt3dadd(197508.000000,181932.000000,90975.000000,132.300000)}

{create adhoc197}
{access adhoc197}
{connect adhoc197(1), adhoc196(0)}
{nseg = 1}
{strdef color color = "White"}
{pt3dclear()}
{pt3dadd(197508.000000,181932.000000,90975.000000,132.300000)}
{pt3dadd(197316.000000,182244.000000,91000.000000,103.660515)}

{create adhoc198}
{access adhoc198}
{connect adhoc198(1), adhoc197(0)}
{nseg = 1}
{strdef color color = "White"}
{pt3dclear()}
{pt3dadd(197316.000000,182244.000000,91000.000000,103.660515)}
{pt3dadd(197328.000000,182388.000000,90975.000000,99.722317)}
{pt3dadd(197412.000000,182748.000000,90975.000000,95.822395)}
{pt3dadd(197328.000000,182832.000000,90900.000000,98.076912)}
{pt3dadd(197280.000000,182868.000000,90800.000000,81.220726)}

{create adhoc199}
{access adhoc199}
{connect adhoc199(1), adhoc197(0)}
{nseg = 1}
{strdef color color = "White"}
{pt3dclear()}
{pt3dadd(197316.000000,182244.000000,91000.000000,103.660515)}
{pt3dadd(197220.000000,182304.000000,91000.000000,91.678908)}
{pt3dadd(197100.000000,182268.000000,90975.000000,77.353070)}

{create adhoc200}
{access adhoc200}
{connect adhoc200(1), adhoc196(0)}
{nseg = 1}
{strdef color color = "White"}
{pt3dclear()}
{pt3dadd(197508.000000,181932.000000,90975.000000,132.300000)}
{pt3dadd(197508.000000,181752.000000,90800.000000,132.720250)}
{pt3dadd(197460.000000,181692.000000,90625.000000,132.552150)}
{pt3dadd(197304.000000,181740.000000,90425.000000,133.875150)}
{pt3dadd(197136.000000,181740.000000,90250.000000,143.645560)}
{pt3dadd(197064.000000,181764.000000,90050.000000,161.991770)}
{pt3dadd(196896.000000,181728.000000,89850.000000,181.786283)}
{pt3dadd(196704.000000,181800.000000,89750.000000,237.591800)}

{create adhoc201}
{access adhoc201}
{connect adhoc201(1), adhoc200(0)}
{nseg = 1}
{strdef color color = "White"}
{pt3dclear()}
{pt3dadd(196704.000000,181800.000000,89750.000000,237.591800)}
{pt3dadd(196404.000000,181884.000000,89800.000000,164.098697)}
{pt3dadd(196272.000000,181824.000000,89825.000000,108.843540)}

{create adhoc202}
{access adhoc202}
{connect adhoc202(1), adhoc200(0)}
{nseg = 1}
{strdef color color = "White"}
{pt3dclear()}
{pt3dadd(196704.000000,181800.000000,89750.000000,237.591800)}
{pt3dadd(196620.000000,181824.000000,89550.000000,258.192983)}
{pt3dadd(196560.000000,181788.000000,89375.000000,247.689730)}
{pt3dadd(196476.000000,181716.000000,89225.000000,246.303967)}
{pt3dadd(196416.000000,181764.000000,89050.000000,226.277900)}

{create adhoc203}
{access adhoc203}
{connect adhoc203(1), adhoc202(0)}
{nseg = 1}
{strdef color color = "White"}
{pt3dclear()}
{pt3dadd(196416.000000,181764.000000,89050.000000,226.277900)}
{pt3dadd(196452.000000,181548.000000,89025.000000,163.583298)}
{pt3dadd(196440.000000,181320.000000,89050.000000,139.206331)}
{pt3dadd(196428.000000,181128.000000,89000.000000,113.695611)}
{pt3dadd(196392.000000,180960.000000,88925.000000,100.337943)}
{pt3dadd(196212.000000,180888.000000,88825.000000,96.662192)}
{pt3dadd(196188.000000,180744.000000,88700.000000,106.065840)}
{pt3dadd(196236.000000,180636.000000,88700.000000,106.065840)}
{pt3dadd(195984.000000,180348.000000,88600.000000,106.065840)}
{pt3dadd(196068.000000,180156.000000,88625.000000,107.006072)}
{pt3dadd(196056.000000,179952.000000,88550.000000,105.816200)}
{pt3dadd(196008.000000,179760.000000,88575.000000,98.724300)}

{create adhoc204}
{access adhoc204}
{connect adhoc204(1), adhoc202(0)}
{nseg = 1}
{strdef color color = "White"}
{pt3dclear()}
{pt3dadd(196416.000000,181764.000000,89050.000000,226.277900)}
{pt3dadd(196284.000000,181800.000000,88925.000000,153.153800)}

{create adhoc205}
{access adhoc205}
{connect adhoc205(1), adhoc204(0)}
{nseg = 1}
{strdef color color = "White"}
{pt3dclear()}
{pt3dadd(196284.000000,181800.000000,88925.000000,153.153800)}
{pt3dadd(196584.000000,181752.000000,88900.000000,120.240547)}
{pt3dadd(196740.000000,181728.000000,88900.000000,98.724300)}

{create adhoc206}
{access adhoc206}
{connect adhoc206(1), adhoc204(0)}
{nseg = 1}
{strdef color color = "White"}
{pt3dclear()}
{pt3dadd(196284.000000,181800.000000,88925.000000,153.153800)}
{pt3dadd(196140.000000,181824.000000,88825.000000,118.673493)}
{pt3dadd(196008.000000,181884.000000,88675.000000,110.740827)}
{pt3dadd(195924.000000,181872.000000,88475.000000,99.854927)}
{pt3dadd(195792.000000,181824.000000,88225.000000,98.802652)}
{pt3dadd(195756.000000,181728.000000,88150.000000,98.724300)}

{create adhoc207}
{access adhoc207}
{connect adhoc207(1), adhoc191(0)}
{nseg = 1}
{strdef color color = "White"}
{pt3dclear()}
{pt3dadd(198132.000000,181764.000000,93325.000000,1376.088000)}
{pt3dadd(198096.000000,181980.000000,93475.000000,1354.245300)}
{pt3dadd(198096.000000,182112.000000,93375.000000,1310.559900)}

{create adhoc208}
{access adhoc208}
{connect adhoc208(1), adhoc207(0)}
{nseg = 1}
{strdef color color = "White"}
{pt3dclear()}
{pt3dadd(198096.000000,182112.000000,93375.000000,1310.559900)}
{pt3dadd(196596.000000,182112.000000,93125.000000,525.800132)}
{pt3dadd(196512.000000,182052.000000,93000.000000,339.752202)}
{pt3dadd(196416.000000,182040.000000,92950.000000,70.302153)}
{pt3dadd(196368.000000,182004.000000,92900.000000,57.722054)}

{create adhoc209}
{access adhoc209}
{connect adhoc209(1), adhoc207(0)}
{nseg = 1}
{strdef color color = "White"}
{pt3dclear()}
{pt3dadd(198096.000000,182112.000000,93375.000000,1310.559900)}
{pt3dadd(198048.000000,182316.000000,93375.000000,1354.245300)}
{pt3dadd(198060.000000,182460.000000,93425.000000,1390.504100)}
{pt3dadd(198036.000000,182616.000000,93475.000000,1417.370580)}
{pt3dadd(198036.000000,182832.000000,93575.000000,1445.580380)}
{pt3dadd(197964.000000,183012.000000,93725.000000,1445.580380)}
{pt3dadd(197952.000000,183216.000000,93825.000000,1431.819520)}
{pt3dadd(197952.000000,183420.000000,94000.000000,1431.819520)}
{pt3dadd(197976.000000,183660.000000,94050.000000,1446.268460)}
{pt3dadd(197964.000000,183840.000000,94150.000000,1446.039100)}
{pt3dadd(197904.000000,183972.000000,94300.000000,1517.137000)}

{create adhoc210}
{access adhoc210}
{connect adhoc210(1), adhoc209(0)}
{nseg = 1}
{strdef color color = "White"}
{pt3dclear()}
{pt3dadd(197904.000000,183972.000000,94300.000000,1517.137000)}
{pt3dadd(196620.000000,183972.000000,94875.000000,668.128257)}
{pt3dadd(196272.000000,183876.000000,95000.000000,211.036173)}
{pt3dadd(196068.000000,183852.000000,95000.000000,145.860750)}

{create adhoc211}
{access adhoc211}
{connect adhoc211(1), adhoc210(0)}
{nseg = 1}
{strdef color color = "White"}
{pt3dclear()}
{pt3dadd(196068.000000,183852.000000,95000.000000,145.860750)}
{pt3dadd(195756.000000,183768.000000,95100.000000,133.521680)}
{pt3dadd(195432.000000,183660.000000,95175.000000,145.860750)}

{create adhoc212}
{access adhoc212}
{connect adhoc212(1), adhoc210(0)}
{nseg = 1}
{strdef color color = "White"}
{pt3dclear()}
{pt3dadd(196068.000000,183852.000000,95000.000000,145.860750)}
{pt3dadd(195888.000000,183780.000000,94725.000000,129.001430)}
{pt3dadd(195792.000000,183648.000000,94550.000000,123.169566)}
{pt3dadd(195804.000000,183516.000000,94550.000000,123.169566)}
{pt3dadd(195852.000000,183372.000000,94550.000000,121.909566)}
{pt3dadd(195888.000000,183144.000000,94550.000000,130.620250)}
{pt3dadd(195732.000000,182856.000000,94550.000000,126.000000)}

{create adhoc213}
{access adhoc213}
{connect adhoc213(1), adhoc212(0)}
{nseg = 1}
{strdef color color = "White"}
{pt3dclear()}
{pt3dadd(195732.000000,182856.000000,94550.000000,126.000000)}
{pt3dadd(195852.000000,182688.000000,94375.000000,113.003337)}
{pt3dadd(195936.000000,182640.000000,94250.000000,114.285710)}

{create adhoc214}
{access adhoc214}
{connect adhoc214(1), adhoc212(0)}
{nseg = 1}
{strdef color color = "White"}
{pt3dclear()}
{pt3dadd(195732.000000,182856.000000,94550.000000,126.000000)}
{pt3dadd(195660.000000,182964.000000,94750.000000,101.768300)}
{pt3dadd(195588.000000,182856.000000,94875.000000,108.142299)}
{pt3dadd(195540.000000,182772.000000,95025.000000,116.712709)}
{pt3dadd(195528.000000,182640.000000,95200.000000,119.401217)}
{pt3dadd(195516.000000,182604.000000,95525.000000,119.401217)}
{pt3dadd(195468.000000,182556.000000,95775.000000,120.533163)}
{pt3dadd(195456.000000,182484.000000,95900.000000,94.023140)}

{create adhoc215}
{access adhoc215}
{connect adhoc215(1), adhoc209(0)}
{nseg = 1}
{strdef color color = "White"}
{pt3dclear()}
{pt3dadd(197904.000000,183972.000000,94300.000000,1517.137000)}
{pt3dadd(197808.000000,184188.000000,94425.000000,1468.973867)}
{pt3dadd(197760.000000,184512.000000,94650.000000,1444.892300)}
{pt3dadd(197700.000000,184728.000000,94525.000000,1444.892300)}

{create adhoc216}
{access adhoc216}
{connect adhoc216(1), adhoc215(0)}
{nseg = 1}
{strdef color color = "White"}
{pt3dclear()}
{pt3dadd(197700.000000,184728.000000,94525.000000,1444.892300)}
{pt3dadd(197112.000000,184788.000000,93050.000000,608.108000)}
{pt3dadd(197052.000000,184788.000000,92625.000000,429.189392)}
{pt3dadd(197004.000000,184692.000000,92475.000000,179.304404)}
{pt3dadd(197004.000000,184716.000000,92300.000000,173.142296)}
{pt3dadd(196980.000000,184668.000000,92175.000000,179.743416)}
{pt3dadd(196812.000000,184632.000000,92000.000000,179.743416)}
{pt3dadd(196716.000000,184476.000000,91825.000000,179.743416)}
{pt3dadd(196524.000000,184548.000000,91700.000000,169.260787)}
{pt3dadd(196428.000000,184500.000000,91550.000000,160.811480)}

{create adhoc217}
{access adhoc217}
{connect adhoc217(1), adhoc216(0)}
{nseg = 1}
{strdef color color = "White"}
{pt3dclear()}
{pt3dadd(196428.000000,184500.000000,91550.000000,160.811480)}
{pt3dadd(196368.000000,184332.000000,91450.000000,144.008827)}
{pt3dadd(196428.000000,184188.000000,91450.000000,128.500237)}
{pt3dadd(196440.000000,184044.000000,91350.000000,114.285710)}

{create adhoc218}
{access adhoc218}
{connect adhoc218(1), adhoc216(0)}
{nseg = 1}
{strdef color color = "White"}
{pt3dclear()}
{pt3dadd(196428.000000,184500.000000,91550.000000,160.811480)}
{pt3dadd(196332.000000,184584.000000,91550.000000,134.503708)}
{pt3dadd(196212.000000,184584.000000,91450.000000,119.803512)}
{pt3dadd(196104.000000,184644.000000,91425.000000,115.424216)}
{pt3dadd(195912.000000,184632.000000,91200.000000,103.598084)}
{pt3dadd(195804.000000,184524.000000,91100.000000,101.933060)}
{pt3dadd(195828.000000,184380.000000,90950.000000,104.719622)}
{pt3dadd(195792.000000,184296.000000,90825.000000,81.220726)}

{create adhoc219}
{access adhoc219}
{connect adhoc219(1), adhoc215(0)}
{nseg = 1}
{strdef color color = "White"}
{pt3dclear()}
{pt3dadd(197700.000000,184728.000000,94525.000000,1444.892300)}
{pt3dadd(197664.000000,184944.000000,94675.000000,1468.973867)}
{pt3dadd(197616.000000,185124.000000,94800.000000,1517.137000)}

{create adhoc220}
{access adhoc220}
{connect adhoc220(1), adhoc219(0)}
{nseg = 1}
{strdef color color = "White"}
{pt3dclear()}
{pt3dadd(197616.000000,185124.000000,94800.000000,1517.137000)}
{pt3dadd(196356.000000,185124.000000,94000.000000,604.046647)}
{pt3dadd(195960.000000,185124.000000,93950.000000,415.347988)}
{pt3dadd(195756.000000,185124.000000,93850.000000,132.652691)}
{pt3dadd(195648.000000,185124.000000,93750.000000,112.477163)}
{pt3dadd(195588.000000,184956.000000,93700.000000,109.513083)}
{pt3dadd(195348.000000,184956.000000,93675.000000,94.321805)}
{pt3dadd(195120.000000,184884.000000,93675.000000,94.023140)}

{create adhoc221}
{access adhoc221}
{connect adhoc221(1), adhoc220(0)}
{nseg = 1}
{strdef color color = "White"}
{pt3dclear()}
{pt3dadd(195120.000000,184884.000000,93675.000000,94.023140)}
{pt3dadd(195276.000000,184860.000000,93500.000000,94.321805)}
{pt3dadd(195312.000000,184824.000000,93350.000000,85.281760)}

{create adhoc222}
{access adhoc222}
{connect adhoc222(1), adhoc220(0)}
{nseg = 1}
{strdef color color = "White"}
{pt3dclear()}
{pt3dadd(195120.000000,184884.000000,93675.000000,94.023140)}
{pt3dadd(195012.000000,184884.000000,93725.000000,88.263237)}
{pt3dadd(194928.000000,184800.000000,93825.000000,81.220726)}

{create adhoc223}
{access adhoc223}
{connect adhoc223(1), adhoc219(0)}
{nseg = 1}
{strdef color color = "White"}
{pt3dclear()}
{pt3dadd(197616.000000,185124.000000,94800.000000,1517.137000)}
{pt3dadd(197688.000000,185352.000000,94975.000000,1401.261633)}
{pt3dadd(197520.000000,185532.000000,95025.000000,1328.130760)}
{pt3dadd(197496.000000,185724.000000,95100.000000,1262.446680)}
{pt3dadd(197496.000000,185940.000000,95175.000000,1226.756900)}
{pt3dadd(197496.000000,186120.000000,95200.000000,1177.961500)}
{pt3dadd(197436.000000,186456.000000,95400.000000,1154.753240)}
{pt3dadd(197400.000000,186648.000000,95600.000000,1143.432120)}
{pt3dadd(197352.000000,186864.000000,95775.000000,1132.111000)}
{pt3dadd(197256.000000,187080.000000,95875.000000,1143.432120)}
{pt3dadd(197352.000000,187284.000000,96025.000000,1166.640380)}
{pt3dadd(197160.000000,187536.000000,96175.000000,1177.961500)}
{pt3dadd(197088.000000,187776.000000,96250.000000,1201.169760)}
{pt3dadd(196944.000000,187980.000000,96325.000000,1263.726020)}
{pt3dadd(196944.000000,188184.000000,96300.000000,1344.581480)}
{pt3dadd(196704.000000,188460.000000,96550.000000,1383.929480)}
{pt3dadd(196716.000000,188628.000000,96575.000000,1449.613560)}
{pt3dadd(196644.000000,188832.000000,96650.000000,1518.581880)}
{pt3dadd(196560.000000,189024.000000,96675.000000,1518.341067)}
{pt3dadd(196692.000000,189156.000000,96575.000000,1592.993900)}

{create adhoc224}
{access adhoc224}
{connect adhoc224(1), adhoc223(0)}
{nseg = 1}
{strdef color color = "White"}
{pt3dclear()}
{pt3dadd(196692.000000,189156.000000,96575.000000,1592.993900)}
{pt3dadd(197052.000000,189156.000000,94975.000000,919.475780)}
{pt3dadd(196668.000000,189792.000000,94975.000000,656.667847)}
{pt3dadd(196380.000000,190152.000000,94975.000000,804.570100)}

{create adhoc225}
{access adhoc225}
{connect adhoc225(1), adhoc224(0)}
{nseg = 1}
{strdef color color = "White"}
{pt3dclear()}
{pt3dadd(196380.000000,190152.000000,94975.000000,804.570100)}
{pt3dadd(195924.000000,190668.000000,94900.000000,542.145720)}
{pt3dadd(195432.000000,190680.000000,94900.000000,403.474376)}
{pt3dadd(195192.000000,190776.000000,94800.000000,283.608500)}
{pt3dadd(194952.000000,190776.000000,94750.000000,229.776162)}
{pt3dadd(194616.000000,190968.000000,94625.000000,221.518352)}
{pt3dadd(194100.000000,191124.000000,94525.000000,234.813870)}
{pt3dadd(193992.000000,191208.000000,94550.000000,245.614672)}
{pt3dadd(193788.000000,191340.000000,94625.000000,257.787090)}
{pt3dadd(193776.000000,191424.000000,94825.000000,249.471370)}

{create adhoc226}
{access adhoc226}
{connect adhoc226(1), adhoc225(0)}
{nseg = 1}
{strdef color color = "White"}
{pt3dclear()}
{pt3dadd(193776.000000,191424.000000,94825.000000,249.471370)}
{pt3dadd(193440.000000,191436.000000,94575.000000,199.364177)}
{pt3dadd(193224.000000,191400.000000,94575.000000,157.272535)}
{pt3dadd(193032.000000,191388.000000,94350.000000,130.235403)}
{pt3dadd(192876.000000,191364.000000,94300.000000,110.886791)}
{pt3dadd(192720.000000,191280.000000,94250.000000,96.500176)}
{pt3dadd(192624.000000,191256.000000,94075.000000,96.500176)}
{pt3dadd(192420.000000,191244.000000,93925.000000,102.591007)}
{pt3dadd(192432.000000,191100.000000,93750.000000,103.733865)}
{pt3dadd(192360.000000,191040.000000,93575.000000,112.908100)}
{pt3dadd(192396.000000,190908.000000,93450.000000,120.000000)}

{create adhoc227}
{access adhoc227}
{connect adhoc227(1), adhoc225(0)}
{nseg = 1}
{strdef color color = "White"}
{pt3dclear()}
{pt3dadd(193776.000000,191424.000000,94825.000000,249.471370)}
{pt3dadd(193296.000000,191712.000000,94850.000000,185.210257)}
{pt3dadd(193104.000000,191772.000000,95050.000000,167.753706)}
{pt3dadd(192948.000000,191820.000000,95150.000000,155.091312)}
{pt3dadd(192624.000000,191988.000000,95250.000000,155.091312)}
{pt3dadd(192420.000000,192168.000000,95425.000000,180.390283)}
{pt3dadd(192132.000000,192276.000000,95625.000000,186.159400)}

{create adhoc228}
{access adhoc228}
{connect adhoc228(1), adhoc224(0)}
{nseg = 1}
{strdef color color = "White"}
{pt3dclear()}
{pt3dadd(196380.000000,190152.000000,94975.000000,804.570100)}
{pt3dadd(196608.000000,189804.000000,94675.000000,617.655823)}
{pt3dadd(196644.000000,189756.000000,94425.000000,533.913020)}
{pt3dadd(196668.000000,189684.000000,94075.000000,450.401400)}
{pt3dadd(196524.000000,189636.000000,93700.000000,404.041452)}
{pt3dadd(196452.000000,189564.000000,93450.000000,399.774644)}
{pt3dadd(196284.000000,189588.000000,93150.000000,404.254790)}
{pt3dadd(196212.000000,189684.000000,92975.000000,424.621318)}
{pt3dadd(196056.000000,189768.000000,92750.000000,446.006174)}
{pt3dadd(195912.000000,189840.000000,92500.000000,471.076858)}
{pt3dadd(195840.000000,189948.000000,92150.000000,484.527968)}
{pt3dadd(195732.000000,190140.000000,91925.000000,493.936280)}
{pt3dadd(195516.000000,190272.000000,91575.000000,493.936280)}

{create adhoc229}
{access adhoc229}
{connect adhoc229(1), adhoc228(0)}
{nseg = 1}
{strdef color color = "White"}
{pt3dclear()}
{pt3dadd(195516.000000,190272.000000,91575.000000,493.936280)}
{pt3dadd(195084.000000,190704.000000,91575.000000,344.497507)}
{pt3dadd(194796.000000,191052.000000,91575.000000,268.032950)}
{pt3dadd(194580.000000,191280.000000,91525.000000,201.407990)}
{pt3dadd(194544.000000,191400.000000,91450.000000,163.717036)}
{pt3dadd(194256.000000,191568.000000,91525.000000,153.299652)}
{pt3dadd(193968.000000,191736.000000,91400.000000,154.758262)}
{pt3dadd(193836.000000,191904.000000,91475.000000,153.226726)}
{pt3dadd(193740.000000,192060.000000,91550.000000,156.523360)}
{pt3dadd(193380.000000,192156.000000,91550.000000,172.606790)}
{pt3dadd(193212.000000,192276.000000,91525.000000,185.076582)}
{pt3dadd(192972.000000,192216.000000,91575.000000,224.652078)}
{pt3dadd(192684.000000,192312.000000,91575.000000,267.737890)}
{pt3dadd(192228.000000,192300.000000,91550.000000,311.705633)}
{pt3dadd(192036.000000,192420.000000,91550.000000,368.582860)}

{create adhoc230}
{access adhoc230}
{connect adhoc230(1), adhoc229(0)}
{nseg = 1}
{strdef color color = "White"}
{pt3dclear()}
{pt3dadd(192036.000000,192420.000000,91550.000000,368.582860)}
{pt3dadd(191724.000000,192612.000000,91900.000000,261.944950)}

{create adhoc231}
{access adhoc231}
{connect adhoc231(1), adhoc230(0)}
{nseg = 1}
{strdef color color = "White"}
{pt3dclear()}
{pt3dadd(191724.000000,192612.000000,91900.000000,261.944950)}
{pt3dadd(191784.000000,192816.000000,92075.000000,203.522037)}
{pt3dadd(191700.000000,192960.000000,92100.000000,137.419907)}
{pt3dadd(191772.000000,193032.000000,92200.000000,63.638560)}

{create adhoc232}
{access adhoc232}
{connect adhoc232(1), adhoc230(0)}
{nseg = 1}
{strdef color color = "White"}
{pt3dclear()}
{pt3dadd(191724.000000,192612.000000,91900.000000,261.944950)}
{pt3dadd(191484.000000,192636.000000,92050.000000,161.868488)}
{pt3dadd(191280.000000,192624.000000,92075.000000,123.173755)}
{pt3dadd(191328.000000,192528.000000,92200.000000,145.860750)}

{create adhoc233}
{access adhoc233}
{connect adhoc233(1), adhoc229(0)}
{nseg = 1}
{strdef color color = "White"}
{pt3dclear()}
{pt3dadd(192036.000000,192420.000000,91550.000000,368.582860)}
{pt3dadd(191712.000000,192672.000000,91450.000000,297.698810)}
{pt3dadd(191580.000000,192780.000000,91450.000000,249.471370)}

{create adhoc234}
{access adhoc234}
{connect adhoc234(1), adhoc233(0)}
{nseg = 1}
{strdef color color = "White"}
{pt3dclear()}
{pt3dadd(191580.000000,192780.000000,91450.000000,249.471370)}
{pt3dadd(191436.000000,192948.000000,91400.000000,204.596927)}
{pt3dadd(191448.000000,193164.000000,91400.000000,185.551212)}
{pt3dadd(191388.000000,193248.000000,91325.000000,169.427348)}
{pt3dadd(191472.000000,193296.000000,91175.000000,164.104286)}
{pt3dadd(191412.000000,193392.000000,91025.000000,165.792806)}
{pt3dadd(191400.000000,193536.000000,90850.000000,170.862390)}
{pt3dadd(191436.000000,193680.000000,90625.000000,175.690560)}
{pt3dadd(191460.000000,193788.000000,90400.000000,161.665010)}
{pt3dadd(191484.000000,193896.000000,90225.000000,149.663308)}
{pt3dadd(191376.000000,194004.000000,90100.000000,134.936481)}
{pt3dadd(191268.000000,194256.000000,90000.000000,103.742785)}
{pt3dadd(191256.000000,194352.000000,89975.000000,103.660515)}

{create adhoc235}
{access adhoc235}
{connect adhoc235(1), adhoc233(0)}
{nseg = 1}
{strdef color color = "White"}
{pt3dclear()}
{pt3dadd(191580.000000,192780.000000,91450.000000,249.471370)}
{pt3dadd(191256.000000,192756.000000,91400.000000,217.365513)}
{pt3dadd(191112.000000,192828.000000,91350.000000,153.153800)}

{create adhoc236}
{access adhoc236}
{connect adhoc236(1), adhoc229(0)}
{nseg = 1}
{strdef color color = "White"}
{pt3dclear()}
{pt3dadd(192036.000000,192420.000000,91550.000000,368.582860)}
{pt3dadd(192168.000000,192156.000000,91450.000000,319.068647)}
{pt3dadd(192024.000000,192012.000000,91450.000000,275.589884)}
{pt3dadd(191928.000000,191916.000000,91325.000000,227.073312)}
{pt3dadd(191820.000000,191736.000000,91125.000000,182.067056)}
{pt3dadd(191700.000000,191496.000000,91025.000000,153.353324)}
{pt3dadd(191808.000000,191364.000000,91025.000000,115.341047)}
{pt3dadd(191916.000000,191136.000000,90975.000000,94.023140)}

{create adhoc237}
{access adhoc237}
{connect adhoc237(1), adhoc228(0)}
{nseg = 1}
{strdef color color = "White"}
{pt3dclear()}
{pt3dadd(195516.000000,190272.000000,91575.000000,493.936280)}
{pt3dadd(195480.000000,190128.000000,91225.000000,410.367333)}
{pt3dadd(195360.000000,190128.000000,91000.000000,397.339372)}
{pt3dadd(195276.000000,190068.000000,90825.000000,368.758372)}
{pt3dadd(195168.000000,190068.000000,90650.000000,365.248056)}
{pt3dadd(195120.000000,190080.000000,90475.000000,358.394588)}
{pt3dadd(195000.000000,190080.000000,90250.000000,345.324816)}
{pt3dadd(194940.000000,190128.000000,90075.000000,338.128672)}
{pt3dadd(194892.000000,190200.000000,89825.000000,357.525370)}
{pt3dadd(194844.000000,190272.000000,89575.000000,357.525370)}
{pt3dadd(194616.000000,190344.000000,89450.000000,354.341410)}
{pt3dadd(194376.000000,190428.000000,89325.000000,372.480590)}
{pt3dadd(194256.000000,190500.000000,89300.000000,318.395720)}

{create adhoc238}
{access adhoc238}
{connect adhoc238(1), adhoc237(0)}
{nseg = 1}
{strdef color color = "White"}
{pt3dclear()}
{pt3dadd(194256.000000,190500.000000,89300.000000,318.395720)}
{pt3dadd(193740.000000,190404.000000,89300.000000,219.907943)}
{pt3dadd(193620.000000,190248.000000,89300.000000,145.860750)}

{create adhoc239}
{access adhoc239}
{connect adhoc239(1), adhoc238(0)}
{nseg = 1}
{strdef color color = "White"}
{pt3dclear()}
{pt3dadd(193620.000000,190248.000000,89300.000000,145.860750)}
{pt3dadd(193668.000000,190092.000000,89300.000000,98.724300)}

{create adhoc240}
{access adhoc240}
{connect adhoc240(1), adhoc238(0)}
{nseg = 1}
{strdef color color = "White"}
{pt3dclear()}
{pt3dadd(193620.000000,190248.000000,89300.000000,145.860750)}
{pt3dadd(193392.000000,190092.000000,89250.000000,116.404607)}
{pt3dadd(193392.000000,189960.000000,89200.000000,112.343575)}
{pt3dadd(193332.000000,189876.000000,89175.000000,100.227777)}
{pt3dadd(193200.000000,189672.000000,89100.000000,101.001308)}
{pt3dadd(193236.000000,189600.000000,89100.000000,90.054334)}
{pt3dadd(193296.000000,189492.000000,89175.000000,81.220726)}

{create adhoc241}
{access adhoc241}
{connect adhoc241(1), adhoc237(0)}
{nseg = 1}
{strdef color color = "White"}
{pt3dclear()}
{pt3dadd(194256.000000,190500.000000,89300.000000,318.395720)}
{pt3dadd(194100.000000,190512.000000,89075.000000,268.872857)}
{pt3dadd(193956.000000,190548.000000,88900.000000,249.679846)}
{pt3dadd(193836.000000,190572.000000,88725.000000,227.048846)}
{pt3dadd(193704.000000,190536.000000,88650.000000,227.048846)}
{pt3dadd(193596.000000,190548.000000,88500.000000,242.440066)}
{pt3dadd(193416.000000,190512.000000,88350.000000,257.098374)}
{pt3dadd(193272.000000,190572.000000,88175.000000,272.489594)}
{pt3dadd(193104.000000,190620.000000,88025.000000,292.088250)}
{pt3dadd(192960.000000,190680.000000,87850.000000,306.562364)}
{pt3dadd(192864.000000,190716.000000,87700.000000,323.317964)}
{pt3dadd(192864.000000,190704.000000,87500.000000,355.162058)}
{pt3dadd(192780.000000,190812.000000,87250.000000,388.598358)}
{pt3dadd(192672.000000,190968.000000,87050.000000,409.224074)}
{pt3dadd(192648.000000,191016.000000,86850.000000,441.597617)}
{pt3dadd(192588.000000,191244.000000,86725.000000,406.362580)}

{create adhoc242}
{access adhoc242}
{connect adhoc242(1), adhoc241(0)}
{nseg = 1}
{strdef color color = "White"}
{pt3dclear()}
{pt3dadd(192588.000000,191244.000000,86725.000000,406.362580)}
{pt3dadd(192348.000000,191940.000000,86675.000000,393.769340)}
{pt3dadd(192336.000000,192240.000000,86525.000000,366.803852)}
{pt3dadd(192312.000000,192528.000000,86350.000000,346.178136)}
{pt3dadd(192276.000000,192804.000000,86075.000000,318.648413)}
{pt3dadd(192204.000000,192912.000000,85925.000000,303.234000)}

{create adhoc243}
{access adhoc243}
{connect adhoc243(1), adhoc242(0)}
{nseg = 1}
{strdef color color = "White"}
{pt3dclear()}
{pt3dadd(192204.000000,192912.000000,85925.000000,303.234000)}
{pt3dadd(192276.000000,192984.000000,85675.000000,256.806557)}
{pt3dadd(192204.000000,193032.000000,85500.000000,242.440066)}
{pt3dadd(192204.000000,193044.000000,85250.000000,242.440066)}
{pt3dadd(192108.000000,193068.000000,85000.000000,253.730220)}
{pt3dadd(192084.000000,193020.000000,84775.000000,267.690516)}
{pt3dadd(192024.000000,192924.000000,84575.000000,280.193796)}
{pt3dadd(191976.000000,192924.000000,84325.000000,292.101684)}
{pt3dadd(191880.000000,192936.000000,84175.000000,289.213744)}
{pt3dadd(191844.000000,192948.000000,84000.000000,277.923590)}
{pt3dadd(191760.000000,192948.000000,83800.000000,266.015702)}
{pt3dadd(191628.000000,192924.000000,83675.000000,263.265282)}
{pt3dadd(191628.000000,192936.000000,83450.000000,260.645832)}
{pt3dadd(191424.000000,192960.000000,83250.000000,255.275962)}
{pt3dadd(191304.000000,193008.000000,83075.000000,255.275962)}
{pt3dadd(191256.000000,193020.000000,82900.000000,261.944950)}
{pt3dadd(191076.000000,193092.000000,82700.000000,261.944950)}

{create adhoc244}
{access adhoc244}
{connect adhoc244(1), adhoc243(0)}
{nseg = 1}
{strdef color color = "White"}
{pt3dclear()}
{pt3dadd(191076.000000,193092.000000,82700.000000,261.944950)}
{pt3dadd(191052.000000,192744.000000,82525.000000,233.728183)}
{pt3dadd(190788.000000,192576.000000,82400.000000,211.154770)}
{pt3dadd(190680.000000,192480.000000,82200.000000,201.866332)}
{pt3dadd(190476.000000,192384.000000,82050.000000,199.371616)}
{pt3dadd(190344.000000,192348.000000,81900.000000,221.671546)}
{pt3dadd(190236.000000,192300.000000,81775.000000,236.106890)}
{pt3dadd(190044.000000,192276.000000,81650.000000,241.696104)}
{pt3dadd(189816.000000,192168.000000,81500.000000,234.054482)}
{pt3dadd(189684.000000,192096.000000,81375.000000,227.260760)}
{pt3dadd(189600.000000,192156.000000,81175.000000,206.733780)}
{pt3dadd(189516.000000,192024.000000,81100.000000,211.847946)}
{pt3dadd(189312.000000,191964.000000,80950.000000,218.318162)}
{pt3dadd(189228.000000,191964.000000,80850.000000,228.114812)}
{pt3dadd(189204.000000,191880.000000,80650.000000,246.303967)}
{pt3dadd(189168.000000,191904.000000,80525.000000,226.277900)}

{create adhoc245}
{access adhoc245}
{connect adhoc245(1), adhoc243(0)}
{nseg = 1}
{strdef color color = "White"}
{pt3dclear()}
{pt3dadd(191076.000000,193092.000000,82700.000000,261.944950)}
{pt3dadd(190956.000000,193200.000000,82700.000000,209.045950)}
{pt3dadd(190908.000000,193368.000000,82550.000000,184.049866)}
{pt3dadd(190692.000000,193440.000000,82425.000000,172.709020)}
{pt3dadd(190584.000000,193560.000000,82325.000000,158.084200)}
{pt3dadd(190440.000000,193584.000000,82100.000000,164.071610)}
{pt3dadd(190236.000000,193668.000000,81875.000000,182.867190)}
{pt3dadd(190032.000000,193776.000000,81675.000000,208.463754)}
{pt3dadd(189708.000000,193968.000000,81450.000000,225.174470)}
{pt3dadd(189408.000000,194160.000000,81250.000000,246.932700)}
{pt3dadd(189180.000000,194232.000000,81250.000000,256.262842)}
{pt3dadd(188844.000000,194364.000000,81250.000000,254.107814)}
{pt3dadd(188448.000000,194580.000000,81350.000000,228.511250)}
{pt3dadd(188220.000000,194784.000000,81400.000000,199.924540)}
{pt3dadd(188040.000000,194976.000000,81500.000000,182.994480)}
{pt3dadd(187812.000000,195180.000000,81550.000000,178.987400)}
{pt3dadd(187680.000000,195276.000000,81600.000000,169.657258)}
{pt3dadd(187608.000000,195492.000000,81650.000000,180.538020)}
{pt3dadd(187236.000000,195744.000000,81650.000000,168.852050)}

{create adhoc246}
{access adhoc246}
{connect adhoc246(1), adhoc245(0)}
{nseg = 1}
{strdef color color = "White"}
{pt3dclear()}
{pt3dadd(187236.000000,195744.000000,81650.000000,168.852050)}
{pt3dadd(187248.000000,195756.000000,81475.000000,153.987843)}
{pt3dadd(187152.000000,195768.000000,81425.000000,132.300000)}

{create adhoc247}
{access adhoc247}
{connect adhoc247(1), adhoc245(0)}
{nseg = 1}
{strdef color color = "White"}
{pt3dclear()}
{pt3dadd(187236.000000,195744.000000,81650.000000,168.852050)}
{pt3dadd(187080.000000,195852.000000,81575.000000,168.986060)}
{pt3dadd(186936.000000,195972.000000,81475.000000,158.346786)}
{pt3dadd(186720.000000,196116.000000,81450.000000,153.748526)}
{pt3dadd(186504.000000,196296.000000,81425.000000,157.383068)}
{pt3dadd(186240.000000,196428.000000,81425.000000,160.679702)}
{pt3dadd(185940.000000,196608.000000,81350.000000,165.277962)}
{pt3dadd(185808.000000,196776.000000,81400.000000,187.389236)}
{pt3dadd(185520.000000,197028.000000,81475.000000,205.735446)}
{pt3dadd(185352.000000,197076.000000,81525.000000,219.030964)}
{pt3dadd(185112.000000,197232.000000,81600.000000,249.669373)}
{pt3dadd(185148.000000,197256.000000,81750.000000,261.944950)}

{create adhoc248}
{access adhoc248}
{connect adhoc248(1), adhoc247(0)}
{nseg = 1}
{strdef color color = "White"}
{pt3dclear()}
{pt3dadd(185148.000000,197256.000000,81750.000000,261.944950)}
{pt3dadd(185028.000000,196896.000000,81750.000000,294.524890)}
{pt3dadd(185088.000000,196920.000000,81900.000000,277.574346)}
{pt3dadd(185232.000000,196956.000000,82025.000000,274.230927)}
{pt3dadd(185304.000000,197004.000000,82100.000000,215.502760)}

{create adhoc249}
{access adhoc249}
{connect adhoc249(1), adhoc248(0)}
{nseg = 1}
{strdef color color = "White"}
{pt3dclear()}
{pt3dadd(185304.000000,197004.000000,82100.000000,215.502760)}
{pt3dadd(185256.000000,196824.000000,82200.000000,226.825630)}
{pt3dadd(185196.000000,196836.000000,82275.000000,195.898288)}
{pt3dadd(185148.000000,196812.000000,82400.000000,182.828640)}
{pt3dadd(185160.000000,196836.000000,82500.000000,153.153800)}

{create adhoc250}
{access adhoc250}
{connect adhoc250(1), adhoc248(0)}
{nseg = 1}
{strdef color color = "White"}
{pt3dclear()}
{pt3dadd(185304.000000,197004.000000,82100.000000,215.502760)}
{pt3dadd(185508.000000,197136.000000,82125.000000,163.533317)}
{pt3dadd(185592.000000,197172.000000,82250.000000,114.285710)}

{create adhoc251}
{access adhoc251}
{connect adhoc251(1), adhoc250(0)}
{nseg = 1}
{strdef color color = "White"}
{pt3dclear()}
{pt3dadd(185592.000000,197172.000000,82250.000000,114.285710)}
{pt3dadd(185700.000000,197136.000000,82225.000000,118.095237)}
{pt3dadd(185772.000000,197148.000000,82200.000000,120.000000)}

{create adhoc252}
{access adhoc252}
{connect adhoc252(1), adhoc250(0)}
{nseg = 1}
{strdef color color = "White"}
{pt3dclear()}
{pt3dadd(185592.000000,197172.000000,82250.000000,114.285710)}
{pt3dadd(185556.000000,197292.000000,82175.000000,126.000000)}

{create adhoc253}
{access adhoc253}
{connect adhoc253(1), adhoc247(0)}
{nseg = 1}
{strdef color color = "White"}
{pt3dclear()}
{pt3dadd(185148.000000,197256.000000,81750.000000,261.944950)}
{pt3dadd(185004.000000,197520.000000,81750.000000,241.938217)}
{pt3dadd(184932.000000,197724.000000,81750.000000,219.715332)}
{pt3dadd(184836.000000,197928.000000,81950.000000,208.374486)}
{pt3dadd(184752.000000,198132.000000,81950.000000,196.315056)}
{pt3dadd(184488.000000,198336.000000,81975.000000,184.829886)}
{pt3dadd(184308.000000,198648.000000,82050.000000,176.367174)}
{pt3dadd(184260.000000,198816.000000,82050.000000,173.070540)}
{pt3dadd(184068.000000,199008.000000,82200.000000,164.184692)}
{pt3dadd(183960.000000,199140.000000,82275.000000,155.185762)}
{pt3dadd(183852.000000,199260.000000,82275.000000,149.198352)}
{pt3dadd(183756.000000,199380.000000,82275.000000,157.661064)}
{pt3dadd(183708.000000,199476.000000,82325.000000,156.129528)}
{pt3dadd(183708.000000,199680.000000,82325.000000,156.129528)}
{pt3dadd(183516.000000,199896.000000,82400.000000,156.129528)}
{pt3dadd(183444.000000,200028.000000,82425.000000,148.755093)}
{pt3dadd(183372.000000,200196.000000,82475.000000,132.300000)}

{create adhoc254}
{access adhoc254}
{connect adhoc254(1), adhoc242(0)}
{nseg = 1}
{strdef color color = "White"}
{pt3dclear()}
{pt3dadd(192204.000000,192912.000000,85925.000000,303.234000)}
{pt3dadd(191808.000000,192996.000000,85825.000000,166.246812)}
{pt3dadd(191556.000000,193020.000000,85825.000000,131.462846)}
{pt3dadd(191268.000000,193092.000000,85825.000000,79.931507)}
{pt3dadd(191052.000000,193176.000000,85825.000000,81.220726)}

{create adhoc255}
{access adhoc255}
{connect adhoc255(1), adhoc241(0)}
{nseg = 1}
{strdef color color = "White"}
{pt3dclear()}
{pt3dadd(192588.000000,191244.000000,86725.000000,406.362580)}
{pt3dadd(192576.000000,190716.000000,86675.000000,327.192403)}
{pt3dadd(192288.000000,190704.000000,86525.000000,168.852050)}

{create adhoc256}
{access adhoc256}
{connect adhoc256(1), adhoc255(0)}
{nseg = 1}
{strdef color color = "White"}
{pt3dclear()}
{pt3dadd(192288.000000,190704.000000,86525.000000,168.852050)}
{pt3dadd(192108.000000,190920.000000,86425.000000,127.287353)}
{pt3dadd(191976.000000,191040.000000,86425.000000,111.421185)}
{pt3dadd(191820.000000,191148.000000,86250.000000,91.322722)}
{pt3dadd(191712.000000,191160.000000,86150.000000,81.220726)}

{create adhoc257}
{access adhoc257}
{connect adhoc257(1), adhoc255(0)}
{nseg = 1}
{strdef color color = "White"}
{pt3dclear()}
{pt3dadd(192288.000000,190704.000000,86525.000000,168.852050)}
{pt3dadd(192384.000000,190440.000000,86500.000000,153.640283)}
{pt3dadd(192468.000000,190212.000000,86500.000000,150.806466)}
{pt3dadd(192672.000000,190020.000000,86500.000000,149.198352)}
{pt3dadd(192768.000000,189912.000000,86500.000000,176.326452)}
{pt3dadd(192828.000000,189792.000000,86500.000000,203.551892)}
{pt3dadd(192948.000000,189780.000000,86150.000000,218.907956)}
{pt3dadd(193056.000000,189684.000000,86025.000000,242.342230)}
{pt3dadd(193212.000000,189576.000000,85975.000000,260.074208)}
{pt3dadd(193368.000000,189420.000000,85850.000000,249.833708)}
{pt3dadd(193548.000000,189168.000000,85625.000000,258.504412)}
{pt3dadd(193536.000000,189048.000000,85500.000000,284.702624)}
{pt3dadd(193680.000000,188856.000000,85350.000000,316.080866)}
{pt3dadd(193824.000000,188688.000000,85225.000000,339.903164)}
{pt3dadd(193824.000000,188448.000000,85075.000000,377.720950)}
{pt3dadd(193836.000000,188316.000000,84875.000000,403.644760)}
{pt3dadd(193740.000000,187944.000000,84475.000000,415.264334)}
{pt3dadd(193680.000000,187848.000000,84300.000000,433.792077)}
{pt3dadd(193656.000000,187572.000000,84150.000000,426.680730)}

{create adhoc258}
{access adhoc258}
{connect adhoc258(1), adhoc257(0)}
{nseg = 1}
{strdef color color = "White"}
{pt3dclear()}
{pt3dadd(193656.000000,187572.000000,84150.000000,426.680730)}
{pt3dadd(193428.000000,188088.000000,84150.000000,305.741897)}
{pt3dadd(193296.000000,188184.000000,84150.000000,230.032766)}
{pt3dadd(193044.000000,188316.000000,84150.000000,165.428723)}
{pt3dadd(192924.000000,188400.000000,84000.000000,112.199552)}
{pt3dadd(192792.000000,188532.000000,83950.000000,103.660515)}

{create adhoc259}
{access adhoc259}
{connect adhoc259(1), adhoc257(0)}
{nseg = 1}
{strdef color color = "White"}
{pt3dclear()}
{pt3dadd(193656.000000,187572.000000,84150.000000,426.680730)}
{pt3dadd(193680.000000,187356.000000,83925.000000,406.685103)}
{pt3dadd(193608.000000,187200.000000,83800.000000,387.012000)}

{create adhoc260}
{access adhoc260}
{connect adhoc260(1), adhoc259(0)}
{nseg = 1}
{strdef color color = "White"}
{pt3dclear()}
{pt3dadd(193608.000000,187200.000000,83800.000000,387.012000)}
{pt3dadd(193584.000000,186828.000000,84050.000000,264.784733)}
{pt3dadd(193656.000000,186492.000000,84050.000000,215.825990)}
{pt3dadd(193764.000000,186360.000000,84050.000000,175.655470)}
{pt3dadd(193824.000000,186216.000000,84250.000000,170.541304)}
{pt3dadd(193884.000000,186108.000000,84375.000000,191.515257)}
{pt3dadd(193860.000000,185952.000000,84475.000000,249.471370)}

{create adhoc261}
{access adhoc261}
{connect adhoc261(1), adhoc260(0)}
{nseg = 1}
{strdef color color = "White"}
{pt3dclear()}
{pt3dadd(193860.000000,185952.000000,84475.000000,249.471370)}
{pt3dadd(193836.000000,185916.000000,84600.000000,257.787090)}
{pt3dadd(193836.000000,185892.000000,84725.000000,229.490808)}
{pt3dadd(193788.000000,185772.000000,84875.000000,208.768684)}
{pt3dadd(193716.000000,185688.000000,85000.000000,181.579694)}
{pt3dadd(193656.000000,185580.000000,85125.000000,155.650704)}
{pt3dadd(193656.000000,185520.000000,85325.000000,153.696032)}
{pt3dadd(193620.000000,185388.000000,85525.000000,152.087918)}
{pt3dadd(193728.000000,185292.000000,85700.000000,152.087918)}
{pt3dadd(193728.000000,185220.000000,85925.000000,167.379863)}
{pt3dadd(193824.000000,185040.000000,86125.000000,145.860750)}

{create adhoc262}
{access adhoc262}
{connect adhoc262(1), adhoc261(0)}
{nseg = 1}
{strdef color color = "White"}
{pt3dclear()}
{pt3dadd(193824.000000,185040.000000,86125.000000,145.860750)}
{pt3dadd(193968.000000,185208.000000,86175.000000,130.620250)}
{pt3dadd(194016.000000,185304.000000,86175.000000,116.921638)}
{pt3dadd(194004.000000,185412.000000,86275.000000,104.249147)}
{pt3dadd(194052.000000,185472.000000,86275.000000,94.023140)}

{create adhoc263}
{access adhoc263}
{connect adhoc263(1), adhoc261(0)}
{nseg = 1}
{strdef color color = "White"}
{pt3dclear()}
{pt3dadd(193824.000000,185040.000000,86125.000000,145.860750)}
{pt3dadd(193848.000000,184908.000000,86175.000000,123.173755)}
{pt3dadd(193872.000000,184824.000000,86150.000000,142.967078)}
{pt3dadd(193956.000000,184620.000000,86300.000000,205.240720)}

{create adhoc264}
{access adhoc264}
{connect adhoc264(1), adhoc263(0)}
{nseg = 1}
{strdef color color = "White"}
{pt3dclear()}
{pt3dadd(193956.000000,184620.000000,86300.000000,205.240720)}
{pt3dadd(193812.000000,184464.000000,86300.000000,156.038637)}
{pt3dadd(193896.000000,184332.000000,86225.000000,113.409420)}
{pt3dadd(193920.000000,184284.000000,86200.000000,77.353070)}

{create adhoc265}
{access adhoc265}
{connect adhoc265(1), adhoc263(0)}
{nseg = 1}
{strdef color color = "White"}
{pt3dclear()}
{pt3dadd(193956.000000,184620.000000,86300.000000,205.240720)}
{pt3dadd(194112.000000,184644.000000,86300.000000,151.587328)}
{pt3dadd(194220.000000,184512.000000,86425.000000,135.684500)}
{pt3dadd(194364.000000,184416.000000,86475.000000,106.180767)}
{pt3dadd(194544.000000,184416.000000,86600.000000,93.794190)}
{pt3dadd(194604.000000,184356.000000,86700.000000,57.722054)}

{create adhoc266}
{access adhoc266}
{connect adhoc266(1), adhoc260(0)}
{nseg = 1}
{strdef color color = "White"}
{pt3dclear()}
{pt3dadd(193860.000000,185952.000000,84475.000000,249.471370)}
{pt3dadd(193764.000000,185640.000000,84500.000000,140.079314)}
{pt3dadd(193788.000000,185472.000000,84375.000000,78.135044)}
{pt3dadd(193800.000000,185388.000000,84300.000000,63.638560)}

{create adhoc267}
{access adhoc267}
{connect adhoc267(1), adhoc259(0)}
{nseg = 1}
{strdef color color = "White"}
{pt3dclear()}
{pt3dadd(193608.000000,187200.000000,83800.000000,387.012000)}
{pt3dadd(193560.000000,186900.000000,83650.000000,259.315573)}
{pt3dadd(193512.000000,186756.000000,83450.000000,211.221494)}
{pt3dadd(193596.000000,186612.000000,83325.000000,171.050974)}
{pt3dadd(193596.000000,186468.000000,83150.000000,173.005646)}
{pt3dadd(193536.000000,186372.000000,83025.000000,174.960318)}
{pt3dadd(193440.000000,186264.000000,82875.000000,191.600870)}
{pt3dadd(193392.000000,186144.000000,82725.000000,207.684300)}
{pt3dadd(193416.000000,186192.000000,82600.000000,207.684300)}
{pt3dadd(193428.000000,186060.000000,82425.000000,202.095086)}
{pt3dadd(193332.000000,185904.000000,82300.000000,213.435932)}
{pt3dadd(193320.000000,185796.000000,82225.000000,228.094240)}
{pt3dadd(193332.000000,185580.000000,82100.000000,260.241060)}
{pt3dadd(193392.000000,185304.000000,81975.000000,289.872284)}
{pt3dadd(193320.000000,185136.000000,81850.000000,336.707273)}
{pt3dadd(193284.000000,184956.000000,81725.000000,334.315520)}

{create adhoc268}
{access adhoc268}
{connect adhoc268(1), adhoc267(0)}
{nseg = 1}
{strdef color color = "White"}
{pt3dclear()}
{pt3dadd(193284.000000,184956.000000,81725.000000,334.315520)}
{pt3dadd(192828.000000,184752.000000,81725.000000,262.470027)}
{pt3dadd(192516.000000,184476.000000,81725.000000,248.100928)}
{pt3dadd(192492.000000,184260.000000,81725.000000,236.246264)}
{pt3dadd(192468.000000,184020.000000,81625.000000,253.792512)}
{pt3dadd(192516.000000,183828.000000,81575.000000,271.956000)}
{pt3dadd(192480.000000,183696.000000,81450.000000,303.234000)}

{create adhoc269}
{access adhoc269}
{connect adhoc269(1), adhoc268(0)}
{nseg = 1}
{strdef color color = "White"}
{pt3dclear()}
{pt3dadd(192480.000000,183696.000000,81450.000000,303.234000)}
{pt3dadd(192156.000000,183804.000000,81350.000000,192.777063)}
{pt3dadd(191856.000000,183744.000000,81375.000000,158.775407)}
{pt3dadd(191664.000000,183720.000000,81475.000000,109.943852)}
{pt3dadd(191544.000000,183672.000000,81525.000000,89.545845)}

{create adhoc270}
{access adhoc270}
{connect adhoc270(1), adhoc268(0)}
{nseg = 1}
{strdef color color = "White"}
{pt3dclear()}
{pt3dadd(192480.000000,183696.000000,81450.000000,303.234000)}
{pt3dadd(192528.000000,183564.000000,81225.000000,216.460233)}
{pt3dadd(192564.000000,183528.000000,81100.000000,184.248290)}
{pt3dadd(192564.000000,183348.000000,80900.000000,139.845635)}
{pt3dadd(192696.000000,183120.000000,80850.000000,127.843933)}
{pt3dadd(192624.000000,182940.000000,80800.000000,115.242145)}
{pt3dadd(192624.000000,182868.000000,80600.000000,104.776063)}
{pt3dadd(192516.000000,182796.000000,80575.000000,88.331625)}
{pt3dadd(192360.000000,182652.000000,80475.000000,83.864620)}
{pt3dadd(192276.000000,182652.000000,80350.000000,63.638560)}

{create adhoc271}
{access adhoc271}
{connect adhoc271(1), adhoc267(0)}
{nseg = 1}
{strdef color color = "White"}
{pt3dclear()}
{pt3dadd(193284.000000,184956.000000,81725.000000,334.315520)}
{pt3dadd(193548.000000,184896.000000,81800.000000,165.843652)}
{pt3dadd(193632.000000,184788.000000,81775.000000,78.961675)}
{pt3dadd(193668.000000,184692.000000,81750.000000,73.669590)}

{create adhoc272}
{access adhoc272}
{connect adhoc272(1), adhoc267(0)}
{nseg = 1}
{strdef color color = "White"}
{pt3dclear()}
{pt3dadd(193284.000000,184956.000000,81725.000000,334.315520)}
{pt3dadd(193296.000000,185220.000000,81525.000000,250.879647)}
{pt3dadd(193200.000000,185268.000000,81375.000000,226.853140)}
{pt3dadd(193128.000000,185268.000000,81250.000000,183.492937)}
{pt3dadd(193092.000000,185172.000000,81125.000000,195.467360)}

{create adhoc273}
{access adhoc273}
{connect adhoc273(1), adhoc272(0)}
{nseg = 1}
{strdef color color = "White"}
{pt3dclear()}
{pt3dadd(193092.000000,185172.000000,81125.000000,195.467360)}
{pt3dadd(192744.000000,185088.000000,80950.000000,177.723820)}
{pt3dadd(192624.000000,185208.000000,80825.000000,175.863632)}
{pt3dadd(192528.000000,185352.000000,80700.000000,170.540570)}
{pt3dadd(192360.000000,185532.000000,80700.000000,167.400920)}
{pt3dadd(192216.000000,185760.000000,80650.000000,163.619300)}
{pt3dadd(192084.000000,185928.000000,80525.000000,153.153800)}

{create adhoc274}
{access adhoc274}
{connect adhoc274(1), adhoc273(0)}
{nseg = 1}
{strdef color color = "White"}
{pt3dclear()}
{pt3dadd(192084.000000,185928.000000,80525.000000,153.153800)}
{pt3dadd(192264.000000,185616.000000,80450.000000,153.640283)}
{pt3dadd(192336.000000,185484.000000,80350.000000,129.972625)}
{pt3dadd(192336.000000,185388.000000,80225.000000,128.514015)}
{pt3dadd(192396.000000,185316.000000,80050.000000,119.943605)}
{pt3dadd(192288.000000,185232.000000,79925.000000,119.047503)}
{pt3dadd(192192.000000,185244.000000,79925.000000,126.000000)}

{create adhoc275}
{access adhoc275}
{connect adhoc275(1), adhoc273(0)}
{nseg = 1}
{strdef color color = "White"}
{pt3dclear()}
{pt3dadd(192084.000000,185928.000000,80525.000000,153.153800)}
{pt3dadd(192048.000000,186168.000000,80500.000000,125.959367)}
{pt3dadd(191820.000000,186300.000000,80550.000000,114.125108)}
{pt3dadd(191664.000000,186396.000000,80550.000000,101.403517)}
{pt3dadd(191544.000000,186516.000000,80625.000000,90.937435)}
{pt3dadd(191364.000000,186564.000000,80600.000000,85.926493)}
{pt3dadd(191280.000000,186732.000000,80450.000000,78.961675)}
{pt3dadd(191172.000000,186864.000000,80275.000000,73.669590)}

{create adhoc276}
{access adhoc276}
{connect adhoc276(1), adhoc272(0)}
{nseg = 1}
{strdef color color = "White"}
{pt3dclear()}
{pt3dadd(193092.000000,185172.000000,81125.000000,195.467360)}
{pt3dadd(193152.000000,184968.000000,81025.000000,140.596833)}
{pt3dadd(193284.000000,184776.000000,81025.000000,114.388900)}
{pt3dadd(193224.000000,184788.000000,80875.000000,81.392380)}
{pt3dadd(193260.000000,184776.000000,80725.000000,60.608154)}

{create adhoc277}
{access adhoc277}
{connect adhoc277(1), adhoc257(0)}
{nseg = 1}
{strdef color color = "White"}
{pt3dclear()}
{pt3dadd(193656.000000,187572.000000,84150.000000,426.680730)}
{pt3dadd(193272.000000,187644.000000,84150.000000,273.159380)}
{pt3dadd(193104.000000,187452.000000,83800.000000,208.521478)}
{pt3dadd(192936.000000,187524.000000,83725.000000,133.474633)}
{pt3dadd(192864.000000,187548.000000,83650.000000,114.285710)}

{create adhoc278}
{access adhoc278}
{connect adhoc278(1), adhoc223(0)}
{nseg = 1}
{strdef color color = "White"}
{pt3dclear()}
{pt3dadd(196692.000000,189156.000000,96575.000000,1592.993900)}
{pt3dadd(196464.000000,189564.000000,96950.000000,1567.708267)}
{pt3dadd(196284.000000,189744.000000,97350.000000,1533.030820)}
{pt3dadd(196140.000000,189888.000000,97475.000000,1476.544020)}
{pt3dadd(195900.000000,190092.000000,97675.000000,1407.575700)}
{pt3dadd(195756.000000,190356.000000,97925.000000,1353.778760)}
{pt3dadd(195588.000000,190572.000000,98200.000000,1299.981820)}
{pt3dadd(195528.000000,190644.000000,98550.000000,1260.633820)}
{pt3dadd(195504.000000,190764.000000,98800.000000,1224.944040)}
{pt3dadd(195456.000000,190932.000000,98950.000000,1201.735780)}
{pt3dadd(195324.000000,191052.000000,99200.000000,1178.527520)}
{pt3dadd(195180.000000,191184.000000,99500.000000,1144.537240)}
{pt3dadd(195180.000000,191220.000000,99800.000000,1132.650100)}
{pt3dadd(194904.000000,191460.000000,100125.000000,1181.445500)}
{pt3dadd(194832.000000,191544.000000,100525.000000,1204.653760)}
{pt3dadd(194952.000000,191832.000000,100975.000000,1173.823560)}
{pt3dadd(194856.000000,191964.000000,101525.000000,1072.541974)}
{pt3dadd(194940.000000,192096.000000,102000.000000,905.004910)}
{pt3dadd(194808.000000,192360.000000,102450.000000,633.594750)}
{pt3dadd(194652.000000,192696.000000,102600.000000,351.031280)}

{create adhoc279}
{access adhoc279}
{connect adhoc279(1), adhoc7(0)}
{nseg = 1}
{strdef color color = "White"}
{pt3dclear()}
{pt3dadd(201816.000000,152592.000000,96425.000000,729.768860)}
{pt3dadd(201684.000000,152592.000000,97350.000000,517.211973)}
{pt3dadd(201336.000000,152592.000000,97625.000000,383.191066)}
{pt3dadd(200952.000000,152592.000000,97750.000000,272.696224)}
{pt3dadd(200664.000000,152592.000000,97950.000000,198.141762)}
{pt3dadd(200556.000000,152748.000000,98175.000000,176.588434)}
{pt3dadd(200460.000000,152844.000000,98375.000000,166.667112)}
{pt3dadd(200364.000000,152952.000000,98525.000000,165.058998)}
{pt3dadd(200220.000000,152928.000000,98725.000000,161.762364)}
{pt3dadd(200184.000000,153072.000000,98850.000000,166.360624)}
{pt3dadd(200148.000000,153120.000000,99050.000000,161.037562)}
{pt3dadd(200076.000000,153156.000000,99175.000000,158.325412)}
{pt3dadd(199920.000000,153204.000000,99300.000000,165.256588)}
{pt3dadd(199872.000000,153324.000000,99525.000000,165.256588)}
{pt3dadd(199824.000000,153468.000000,99725.000000,170.579650)}
{pt3dadd(199728.000000,153492.000000,99875.000000,170.579650)}
{pt3dadd(199656.000000,153792.000000,100175.000000,183.213122)}
{pt3dadd(199548.000000,153948.000000,100525.000000,187.220202)}
{pt3dadd(199464.000000,154020.000000,100725.000000,204.952180)}
{pt3dadd(199356.000000,154140.000000,100950.000000,220.147163)}
{pt3dadd(199272.000000,154296.000000,101175.000000,249.471370)}

{create adhoc280}
{access adhoc280}
{connect adhoc280(1), adhoc279(0)}
{nseg = 1}
{strdef color color = "White"}
{pt3dclear()}
{pt3dadd(199272.000000,154296.000000,101175.000000,249.471370)}
{pt3dadd(199128.000000,154464.000000,101325.000000,245.898073)}
{pt3dadd(199068.000000,154632.000000,101525.000000,255.191978)}
{pt3dadd(199056.000000,154800.000000,101650.000000,255.191978)}
{pt3dadd(199032.000000,155184.000000,101775.000000,267.695258)}
{pt3dadd(198996.000000,155520.000000,101775.000000,265.200542)}
{pt3dadd(198924.000000,155748.000000,101850.000000,260.561848)}
{pt3dadd(198804.000000,155964.000000,101950.000000,263.449788)}
{pt3dadd(198780.000000,156156.000000,101950.000000,256.656066)}
{pt3dadd(198672.000000,156348.000000,102000.000000,246.415566)}
{pt3dadd(198720.000000,156564.000000,101950.000000,241.776872)}
{pt3dadd(198720.000000,156780.000000,101825.000000,225.693442)}
{pt3dadd(198888.000000,157044.000000,101800.000000,187.903784)}
{pt3dadd(198960.000000,157320.000000,101775.000000,171.263232)}
{pt3dadd(199020.000000,157488.000000,101750.000000,154.375632)}
{pt3dadd(198984.000000,157680.000000,101900.000000,144.578982)}
{pt3dadd(198984.000000,157812.000000,102000.000000,146.037592)}
{pt3dadd(198936.000000,157992.000000,102075.000000,150.963450)}
{pt3dadd(198960.000000,158124.000000,102175.000000,156.454483)}
{pt3dadd(198888.000000,158280.000000,102275.000000,138.915000)}

{create adhoc281}
{access adhoc281}
{connect adhoc281(1), adhoc280(0)}
{nseg = 1}
{strdef color color = "White"}
{pt3dclear()}
{pt3dadd(198888.000000,158280.000000,102275.000000,138.915000)}
{pt3dadd(198852.000000,158400.000000,102525.000000,117.308337)}
{pt3dadd(198900.000000,158544.000000,102600.000000,114.285710)}

{create adhoc282}
{access adhoc282}
{connect adhoc282(1), adhoc280(0)}
{nseg = 1}
{strdef color color = "White"}
{pt3dclear()}
{pt3dadd(198888.000000,158280.000000,102275.000000,138.915000)}
{pt3dadd(198948.000000,158340.000000,102100.000000,103.430403)}
{pt3dadd(198996.000000,158448.000000,101975.000000,77.353070)}

{create adhoc283}
{access adhoc283}
{connect adhoc283(1), adhoc279(0)}
{nseg = 1}
{strdef color color = "White"}
{pt3dclear()}
{pt3dadd(199272.000000,154296.000000,101175.000000,249.471370)}
{pt3dadd(199260.000000,153660.000000,101175.000000,152.593407)}
{pt3dadd(199236.000000,153552.000000,101175.000000,94.023140)}

{create adhoc284}
{access adhoc284}
{connect adhoc284(1), adhoc6(0)}
{nseg = 1}
{strdef color color = "White"}
{pt3dclear()}
{pt3dadd(201576.000000,150408.000000,96750.000000,695.017940)}
{pt3dadd(201012.000000,150408.000000,97500.000000,310.885747)}
{pt3dadd(200676.000000,150408.000000,97850.000000,98.724300)}

{create adhoc285}
{access adhoc285}
{connect adhoc285(1), adhoc284(0)}
{nseg = 1}
{strdef color color = "White"}
{pt3dclear()}
{pt3dadd(200676.000000,150408.000000,97850.000000,98.724300)}
{pt3dadd(200484.000000,150408.000000,98050.000000,85.462000)}
{pt3dadd(200448.000000,150456.000000,98200.000000,83.894947)}
{pt3dadd(200436.000000,150504.000000,98250.000000,94.023140)}

{create adhoc286}
{access adhoc286}
{connect adhoc286(1), adhoc284(0)}
{nseg = 1}
{strdef color color = "White"}
{pt3dclear()}
{pt3dadd(200676.000000,150408.000000,97850.000000,98.724300)}
{pt3dadd(200520.000000,150288.000000,97775.000000,92.676400)}
{pt3dadd(200352.000000,150264.000000,97775.000000,84.577697)}
{pt3dadd(200208.000000,150264.000000,97775.000000,76.377248)}
{pt3dadd(200016.000000,150216.000000,97775.000000,74.054814)}
{pt3dadd(199980.000000,150228.000000,97775.000000,66.794597)}
{pt3dadd(199860.000000,150168.000000,97775.000000,63.278164)}
{pt3dadd(199764.000000,150060.000000,97525.000000,65.284370)}
{pt3dadd(199608.000000,150000.000000,97375.000000,72.544587)}
{pt3dadd(199596.000000,149928.000000,97250.000000,69.932300)}
{pt3dadd(199536.000000,149940.000000,97175.000000,73.858503)}
{pt3dadd(199548.000000,149976.000000,96975.000000,77.328121)}
{pt3dadd(199572.000000,150024.000000,96800.000000,77.353070)}

{create adhoc287}
{access adhoc287}
{connect adhoc287(1), adhoc5(0)}
{nseg = 1}
{strdef color color = "White"}
{pt3dclear()}
{pt3dadd(200724.000000,145524.000000,96950.000000,600.382600)}
{pt3dadd(200268.000000,145308.000000,97575.000000,590.852723)}
{pt3dadd(200220.000000,145308.000000,97825.000000,583.501106)}
{pt3dadd(200088.000000,145044.000000,97950.000000,572.337538)}
{pt3dadd(199944.000000,144888.000000,98025.000000,551.048274)}
{pt3dadd(199872.000000,144696.000000,98100.000000,522.025826)}
{pt3dadd(199716.000000,144480.000000,98200.000000,511.900130)}
{pt3dadd(199572.000000,144348.000000,98275.000000,485.906710)}
{pt3dadd(199416.000000,144144.000000,98325.000000,475.781014)}
{pt3dadd(199236.000000,143964.000000,98425.000000,475.781014)}
{pt3dadd(199248.000000,143820.000000,98600.000000,499.357820)}
{pt3dadd(199188.000000,143628.000000,98750.000000,509.483516)}
{pt3dadd(199092.000000,143412.000000,98775.000000,519.127028)}
{pt3dadd(199044.000000,143244.000000,98725.000000,519.127028)}
{pt3dadd(198972.000000,143076.000000,98825.000000,524.066384)}
{pt3dadd(198912.000000,142896.000000,98800.000000,509.236532)}
{pt3dadd(198792.000000,142704.000000,98900.000000,494.406680)}
{pt3dadd(198720.000000,142596.000000,98975.000000,484.763168)}
{pt3dadd(198636.000000,142416.000000,99025.000000,471.312058)}
{pt3dadd(198552.000000,142236.000000,99100.000000,461.668546)}
{pt3dadd(198396.000000,142044.000000,99200.000000,452.921592)}
{pt3dadd(198252.000000,141852.000000,99225.000000,448.441446)}
{pt3dadd(198060.000000,141624.000000,99450.000000,448.441446)}
{pt3dadd(197964.000000,141408.000000,99500.000000,448.370333)}
{pt3dadd(197772.000000,141156.000000,99600.000000,470.415500)}

{create adhoc288}
{access adhoc288}
{connect adhoc288(1), adhoc287(0)}
{nseg = 1}
{strdef color color = "White"}
{pt3dclear()}
{pt3dadd(197772.000000,141156.000000,99600.000000,470.415500)}
{pt3dadd(197652.000000,140880.000000,99925.000000,544.564760)}

{create adhoc289}
{access adhoc289}
{connect adhoc289(1), adhoc288(0)}
{nseg = 1}
{strdef color color = "White"}
{pt3dclear()}
{pt3dadd(197652.000000,140880.000000,99925.000000,544.564760)}
{pt3dadd(197244.000000,140880.000000,100525.000000,368.027047)}
{pt3dadd(196968.000000,140880.000000,100875.000000,282.150674)}
{pt3dadd(196704.000000,140880.000000,101100.000000,205.400018)}
{pt3dadd(196596.000000,141000.000000,101325.000000,146.984644)}
{pt3dadd(196560.000000,141108.000000,101500.000000,146.984644)}
{pt3dadd(196380.000000,141024.000000,101650.000000,142.750330)}
{pt3dadd(196272.000000,140988.000000,101825.000000,153.153800)}

{create adhoc290}
{access adhoc290}
{connect adhoc290(1), adhoc289(0)}
{nseg = 1}
{strdef color color = "White"}
{pt3dclear()}
{pt3dadd(196272.000000,140988.000000,101825.000000,153.153800)}
{pt3dadd(196260.000000,141192.000000,101900.000000,106.573131)}
{pt3dadd(196224.000000,141300.000000,101925.000000,92.008484)}
{pt3dadd(196248.000000,141432.000000,102000.000000,81.122584)}
{pt3dadd(196236.000000,141516.000000,102025.000000,80.085979)}
{pt3dadd(196224.000000,141612.000000,102075.000000,90.848776)}
{pt3dadd(196224.000000,141744.000000,102175.000000,103.660515)}

{create adhoc291}
{access adhoc291}
{connect adhoc291(1), adhoc289(0)}
{nseg = 1}
{strdef color color = "White"}
{pt3dclear()}
{pt3dadd(196272.000000,140988.000000,101825.000000,153.153800)}
{pt3dadd(196212.000000,140904.000000,101875.000000,120.487550)}
{pt3dadd(196152.000000,140796.000000,101925.000000,94.023140)}

{create adhoc292}
{access adhoc292}
{connect adhoc292(1), adhoc291(0)}
{nseg = 1}
{strdef color color = "White"}
{pt3dclear()}
{pt3dadd(196152.000000,140796.000000,101925.000000,94.023140)}
{pt3dadd(196068.000000,140772.000000,102050.000000,91.109347)}
{pt3dadd(196020.000000,140748.000000,102175.000000,84.324830)}
{pt3dadd(195864.000000,140808.000000,102325.000000,73.669590)}

{create adhoc293}
{access adhoc293}
{connect adhoc293(1), adhoc292(0)}
{nseg = 1}
{strdef color color = "White"}
{pt3dclear()}
{pt3dadd(195864.000000,140808.000000,102325.000000,73.669590)}
{pt3dadd(195672.000000,140784.000000,102325.000000,80.057359)}
{pt3dadd(195756.000000,140724.000000,102575.000000,102.406565)}
{pt3dadd(195756.000000,140640.000000,102775.000000,112.872647)}
{pt3dadd(195780.000000,140496.000000,102775.000000,132.620250)}
{pt3dadd(195780.000000,140628.000000,102975.000000,126.000000)}

{create adhoc294}
{access adhoc294}
{connect adhoc294(1), adhoc292(0)}
{nseg = 1}
{strdef color color = "White"}
{pt3dclear()}
{pt3dadd(195864.000000,140808.000000,102325.000000,73.669590)}
{pt3dadd(196068.000000,140832.000000,102325.000000,88.958650)}
{pt3dadd(196152.000000,140820.000000,102450.000000,96.964435)}
{pt3dadd(196140.000000,140652.000000,102475.000000,101.975377)}
{pt3dadd(196248.000000,140736.000000,102675.000000,92.237950)}
{pt3dadd(196344.000000,140784.000000,102800.000000,85.786065)}
{pt3dadd(196464.000000,140820.000000,103000.000000,54.973380)}

{create adhoc295}
{access adhoc295}
{connect adhoc295(1), adhoc291(0)}
{nseg = 1}
{strdef color color = "White"}
{pt3dclear()}
{pt3dadd(196152.000000,140796.000000,101925.000000,94.023140)}
{pt3dadd(196236.000000,140760.000000,101900.000000,88.195553)}
{pt3dadd(196236.000000,140580.000000,101900.000000,79.677347)}
{pt3dadd(196296.000000,140424.000000,101875.000000,73.600431)}
{pt3dadd(196320.000000,140292.000000,101875.000000,70.576382)}
{pt3dadd(196296.000000,140076.000000,101875.000000,65.641660)}
{pt3dadd(196284.000000,140016.000000,101825.000000,64.458359)}
{pt3dadd(196296.000000,139920.000000,101850.000000,62.830574)}
{pt3dadd(196332.000000,139884.000000,101875.000000,57.722054)}

{create adhoc296}
{access adhoc296}
{connect adhoc296(1), adhoc288(0)}
{nseg = 1}
{strdef color color = "White"}
{pt3dclear()}
{pt3dadd(197652.000000,140880.000000,99925.000000,544.564760)}
{pt3dadd(197532.000000,140664.000000,99950.000000,553.640830)}
{pt3dadd(197424.000000,140448.000000,99975.000000,561.173970)}
{pt3dadd(197412.000000,140244.000000,99925.000000,572.337538)}
{pt3dadd(197424.000000,139992.000000,99925.000000,556.766200)}
{pt3dadd(197400.000000,139740.000000,99925.000000,556.766200)}
{pt3dadd(197196.000000,139536.000000,99925.000000,556.766200)}
{pt3dadd(197232.000000,139368.000000,99900.000000,540.416292)}
{pt3dadd(197220.000000,139236.000000,100000.000000,524.066384)}
{pt3dadd(197136.000000,139104.000000,100125.000000,534.192080)}
{pt3dadd(197148.000000,138936.000000,100125.000000,534.192080)}
{pt3dadd(197136.000000,138756.000000,100075.000000,535.920860)}
{pt3dadd(197124.000000,138636.000000,100025.000000,544.564760)}

{create adhoc297}
{access adhoc297}
{connect adhoc297(1), adhoc296(0)}
{nseg = 1}
{strdef color color = "White"}
{pt3dclear()}
{pt3dadd(197124.000000,138636.000000,100025.000000,544.564760)}
{pt3dadd(196536.000000,138636.000000,99875.000000,245.401180)}
{pt3dadd(196392.000000,138636.000000,99750.000000,185.253561)}
{pt3dadd(196176.000000,138528.000000,99725.000000,89.139112)}
{pt3dadd(196092.000000,138372.000000,99675.000000,108.843540)}

{create adhoc298}
{access adhoc298}
{connect adhoc298(1), adhoc297(0)}
{nseg = 1}
{strdef color color = "White"}
{pt3dclear()}
{pt3dadd(196092.000000,138372.000000,99675.000000,108.843540)}
{pt3dadd(196056.000000,138348.000000,99825.000000,114.285710)}

{create adhoc299}
{access adhoc299}
{connect adhoc299(1), adhoc297(0)}
{nseg = 1}
{strdef color color = "White"}
{pt3dclear()}
{pt3dadd(196092.000000,138372.000000,99675.000000,108.843540)}
{pt3dadd(195900.000000,138252.000000,99725.000000,88.403292)}
{pt3dadd(195816.000000,138060.000000,99725.000000,83.678856)}
{pt3dadd(195684.000000,137964.000000,99725.000000,73.334965)}
{pt3dadd(195600.000000,137964.000000,99800.000000,89.545845)}

{create adhoc300}
{access adhoc300}
{connect adhoc300(1), adhoc296(0)}
{nseg = 1}
{strdef color color = "White"}
{pt3dclear()}
{pt3dadd(197124.000000,138636.000000,100025.000000,544.564760)}
{pt3dadd(197184.000000,138492.000000,100025.000000,553.640830)}
{pt3dadd(197220.000000,138312.000000,100025.000000,566.619612)}
{pt3dadd(197268.000000,138144.000000,100100.000000,577.783180)}
{pt3dadd(197280.000000,137988.000000,100175.000000,594.950574)}
{pt3dadd(197376.000000,137688.000000,100225.000000,612.976340)}
{pt3dadd(197400.000000,137532.000000,100275.000000,631.002106)}
{pt3dadd(197388.000000,137352.000000,100275.000000,651.415110)}
{pt3dadd(197364.000000,137040.000000,100375.000000,661.921800)}

{create adhoc301}
{access adhoc301}
{connect adhoc301(1), adhoc300(0)}
{nseg = 1}
{strdef color color = "White"}
{pt3dclear()}
{pt3dadd(197364.000000,137040.000000,100375.000000,661.921800)}
{pt3dadd(196968.000000,137040.000000,100700.000000,672.953847)}
{pt3dadd(196836.000000,137040.000000,100825.000000,461.134604)}
{pt3dadd(196716.000000,136872.000000,101075.000000,316.244427)}
{pt3dadd(196620.000000,136896.000000,101200.000000,126.000000)}

{create adhoc302}
{access adhoc302}
{connect adhoc302(1), adhoc301(0)}
{nseg = 1}
{strdef color color = "White"}
{pt3dclear()}
{pt3dadd(196620.000000,136896.000000,101200.000000,126.000000)}
{pt3dadd(196608.000000,137040.000000,101225.000000,97.500829)}
{pt3dadd(196572.000000,137112.000000,101300.000000,90.215256)}
{pt3dadd(196584.000000,137136.000000,101450.000000,81.285185)}
{pt3dadd(196572.000000,137196.000000,101500.000000,81.220726)}

{create adhoc303}
{access adhoc303}
{connect adhoc303(1), adhoc301(0)}
{nseg = 1}
{strdef color color = "White"}
{pt3dclear()}
{pt3dadd(196620.000000,136896.000000,101200.000000,126.000000)}
{pt3dadd(196632.000000,136728.000000,101200.000000,57.722054)}

{create adhoc304}
{access adhoc304}
{connect adhoc304(1), adhoc300(0)}
{nseg = 1}
{strdef color color = "White"}
{pt3dclear()}
{pt3dadd(197364.000000,137040.000000,100375.000000,661.921800)}
{pt3dadd(197436.000000,136860.000000,100375.000000,661.921800)}
{pt3dadd(197448.000000,136692.000000,100425.000000,682.110440)}
{pt3dadd(197424.000000,136476.000000,100425.000000,702.977532)}
{pt3dadd(197388.000000,136260.000000,100450.000000,730.348020)}
{pt3dadd(197376.000000,135984.000000,100450.000000,766.257260)}

{create adhoc305}
{access adhoc305}
{connect adhoc305(1), adhoc304(0)}
{nseg = 1}
{strdef color color = "White"}
{pt3dclear()}
{pt3dadd(197376.000000,135984.000000,100450.000000,766.257260)}
{pt3dadd(196620.000000,136032.000000,100225.000000,373.558340)}
{pt3dadd(196464.000000,135924.000000,100225.000000,281.090154)}
{pt3dadd(196392.000000,135804.000000,100075.000000,157.010852)}
{pt3dadd(196236.000000,135708.000000,99975.000000,143.082450)}
{pt3dadd(196248.000000,135564.000000,99875.000000,143.545500)}
{pt3dadd(196176.000000,135564.000000,99750.000000,145.860750)}

{create adhoc306}
{access adhoc306}
{connect adhoc306(1), adhoc305(0)}
{nseg = 1}
{strdef color color = "White"}
{pt3dclear()}
{pt3dadd(196176.000000,135564.000000,99750.000000,145.860750)}
{pt3dadd(196164.000000,135420.000000,99650.000000,182.189610)}
{pt3dadd(196236.000000,135252.000000,99575.000000,195.622493)}
{pt3dadd(196296.000000,135120.000000,99525.000000,186.159400)}

{create adhoc307}
{access adhoc307}
{connect adhoc307(1), adhoc306(0)}
{nseg = 1}
{strdef color color = "White"}
{pt3dclear()}
{pt3dadd(196296.000000,135120.000000,99525.000000,186.159400)}
{pt3dadd(196224.000000,135024.000000,99350.000000,198.880280)}
{pt3dadd(196176.000000,134976.000000,99325.000000,203.476864)}
{pt3dadd(196176.000000,134844.000000,99225.000000,208.661400)}
{pt3dadd(196140.000000,134748.000000,99125.000000,205.240720)}

{create adhoc308}
{access adhoc308}
{connect adhoc308(1), adhoc307(0)}
{nseg = 1}
{strdef color color = "White"}
{pt3dclear()}
{pt3dadd(196140.000000,134748.000000,99125.000000,205.240720)}
{pt3dadd(196176.000000,134556.000000,99000.000000,205.240720)}

{create adhoc309}
{access adhoc309}
{connect adhoc309(1), adhoc308(0)}
{nseg = 1}
{strdef color color = "White"}
{pt3dclear()}
{pt3dadd(196176.000000,134556.000000,99000.000000,205.240720)}
{pt3dadd(196152.000000,134400.000000,98900.000000,183.795807)}
{pt3dadd(196152.000000,134316.000000,98900.000000,168.852050)}

{create adhoc310}
{access adhoc310}
{connect adhoc310(1), adhoc309(0)}
{nseg = 1}
{strdef color color = "White"}
{pt3dclear()}
{pt3dadd(196152.000000,134316.000000,98900.000000,168.852050)}
{pt3dadd(196272.000000,134148.000000,98875.000000,141.888788)}
{pt3dadd(196344.000000,134016.000000,98875.000000,112.725518)}
{pt3dadd(196476.000000,134064.000000,99025.000000,80.540580)}
{pt3dadd(196500.000000,134112.000000,99125.000000,60.608154)}

{create adhoc311}
{access adhoc311}
{connect adhoc311(1), adhoc309(0)}
{nseg = 1}
{strdef color color = "White"}
{pt3dclear()}
{pt3dadd(196152.000000,134316.000000,98900.000000,168.852050)}
{pt3dadd(196176.000000,134112.000000,98700.000000,177.435367)}
{pt3dadd(196176.000000,133944.000000,98625.000000,189.564923)}
{pt3dadd(196248.000000,133860.000000,98525.000000,205.240720)}

{create adhoc312}
{access adhoc312}
{connect adhoc312(1), adhoc311(0)}
{nseg = 1}
{strdef color color = "White"}
{pt3dclear()}
{pt3dadd(196248.000000,133860.000000,98525.000000,205.240720)}
{pt3dadd(196032.000000,133920.000000,98475.000000,146.882438)}
{pt3dadd(195852.000000,133896.000000,98400.000000,114.407792)}
{pt3dadd(195756.000000,133884.000000,98225.000000,87.391951)}
{pt3dadd(195684.000000,133824.000000,98100.000000,67.184386)}
{pt3dadd(195624.000000,133788.000000,98075.000000,70.161514)}

{create adhoc313}
{access adhoc313}
{connect adhoc313(1), adhoc311(0)}
{nseg = 1}
{strdef color color = "White"}
{pt3dclear()}
{pt3dadd(196248.000000,133860.000000,98525.000000,205.240720)}
{pt3dadd(196308.000000,133764.000000,98450.000000,161.133823)}
{pt3dadd(196332.000000,133620.000000,98350.000000,147.621152)}
{pt3dadd(196332.000000,133488.000000,98275.000000,133.521680)}
{pt3dadd(196416.000000,133392.000000,98175.000000,108.843540)}

{create adhoc314}
{access adhoc314}
{connect adhoc314(1), adhoc313(0)}
{nseg = 1}
{strdef color color = "White"}
{pt3dclear()}
{pt3dadd(196416.000000,133392.000000,98175.000000,108.843540)}
{pt3dadd(196356.000000,133320.000000,98175.000000,114.285710)}

{create adhoc315}
{access adhoc315}
{connect adhoc315(1), adhoc314(0)}
{nseg = 1}
{strdef color color = "White"}
{pt3dclear()}
{pt3dadd(196356.000000,133320.000000,98175.000000,114.285710)}
{pt3dadd(196176.000000,133176.000000,98150.000000,77.353070)}

{create adhoc316}
{access adhoc316}
{connect adhoc316(1), adhoc314(0)}
{nseg = 1}
{strdef color color = "White"}
{pt3dclear()}
{pt3dadd(196356.000000,133320.000000,98175.000000,114.285710)}
{pt3dadd(196440.000000,133248.000000,98050.000000,88.436123)}
{pt3dadd(196440.000000,133164.000000,98025.000000,73.728058)}
{pt3dadd(196440.000000,132984.000000,98025.000000,70.161514)}

{create adhoc317}
{access adhoc317}
{connect adhoc317(1), adhoc316(0)}
{nseg = 1}
{strdef color color = "White"}
{pt3dclear()}
{pt3dadd(196440.000000,132984.000000,98025.000000,70.161514)}
{pt3dadd(196356.000000,132972.000000,98025.000000,63.529222)}
{pt3dadd(196236.000000,133020.000000,98025.000000,43.073082)}

{create adhoc318}
{access adhoc318}
{connect adhoc318(1), adhoc316(0)}
{nseg = 1}
{strdef color color = "White"}
{pt3dclear()}
{pt3dadd(196440.000000,132984.000000,98025.000000,70.161514)}
{pt3dadd(196428.000000,132864.000000,98025.000000,58.457214)}
{pt3dadd(196440.000000,132744.000000,98025.000000,50.899401)}
{pt3dadd(196404.000000,132672.000000,98025.000000,47.488075)}

{create adhoc319}
{access adhoc319}
{connect adhoc319(1), adhoc313(0)}
{nseg = 1}
{strdef color color = "White"}
{pt3dclear()}
{pt3dadd(196416.000000,133392.000000,98175.000000,108.843540)}
{pt3dadd(196524.000000,133452.000000,98175.000000,102.803670)}
{pt3dadd(196644.000000,133560.000000,98175.000000,117.512962)}
{pt3dadd(196716.000000,133656.000000,98175.000000,121.478520)}
{pt3dadd(196692.000000,133704.000000,98175.000000,153.153800)}

{create adhoc320}
{access adhoc320}
{connect adhoc320(1), adhoc308(0)}
{nseg = 1}
{strdef color color = "White"}
{pt3dclear()}
{pt3dadd(196176.000000,134556.000000,99000.000000,205.240720)}
{pt3dadd(195948.000000,134568.000000,99050.000000,144.107399)}
{pt3dadd(195840.000000,134484.000000,99050.000000,105.542440)}
{pt3dadd(195660.000000,134436.000000,99100.000000,89.545845)}

{create adhoc321}
{access adhoc321}
{connect adhoc321(1), adhoc320(0)}
{nseg = 1}
{strdef color color = "White"}
{pt3dclear()}
{pt3dadd(195660.000000,134436.000000,99100.000000,89.545845)}
{pt3dadd(195756.000000,134436.000000,99225.000000,70.161514)}

{create adhoc322}
{access adhoc322}
{connect adhoc322(1), adhoc320(0)}
{nseg = 1}
{strdef color color = "White"}
{pt3dclear()}
{pt3dadd(195660.000000,134436.000000,99100.000000,89.545845)}
{pt3dadd(195612.000000,134388.000000,99025.000000,66.820490)}

{create adhoc323}
{access adhoc323}
{connect adhoc323(1), adhoc307(0)}
{nseg = 1}
{strdef color color = "White"}
{pt3dclear()}
{pt3dadd(196140.000000,134748.000000,99125.000000,205.240720)}
{pt3dadd(195864.000000,134748.000000,99025.000000,128.751435)}
{pt3dadd(195756.000000,134856.000000,98975.000000,113.069199)}
{pt3dadd(195672.000000,134916.000000,98875.000000,94.250735)}
{pt3dadd(195588.000000,134880.000000,98825.000000,89.545845)}

{create adhoc324}
{access adhoc324}
{connect adhoc324(1), adhoc306(0)}
{nseg = 1}
{strdef color color = "White"}
{pt3dclear()}
{pt3dadd(196296.000000,135120.000000,99525.000000,186.159400)}
{pt3dadd(196392.000000,134940.000000,99525.000000,126.609663)}
{pt3dadd(196368.000000,134772.000000,99525.000000,97.482705)}
{pt3dadd(196320.000000,134592.000000,99650.000000,60.418041)}
{pt3dadd(196176.000000,134616.000000,99725.000000,49.862480)}

{create adhoc325}
{access adhoc325}
{connect adhoc325(1), adhoc305(0)}
{nseg = 1}
{strdef color color = "White"}
{pt3dclear()}
{pt3dadd(196176.000000,135564.000000,99750.000000,145.860750)}
{pt3dadd(195948.000000,135444.000000,99725.000000,117.276780)}
{pt3dadd(195888.000000,135504.000000,99725.000000,101.898408)}
{pt3dadd(195792.000000,135516.000000,99800.000000,92.471118)}
{pt3dadd(195684.000000,135492.000000,99875.000000,83.067470)}
{pt3dadd(195612.000000,135516.000000,99900.000000,83.804166)}
{pt3dadd(195588.000000,135492.000000,100025.000000,87.119710)}
{pt3dadd(195588.000000,135468.000000,100150.000000,77.353070)}

{create adhoc326}
{access adhoc326}
{connect adhoc326(1), adhoc304(0)}
{nseg = 1}
{strdef color color = "White"}
{pt3dclear()}
{pt3dadd(197376.000000,135984.000000,100450.000000,766.257260)}
{pt3dadd(197412.000000,135672.000000,100450.000000,730.348020)}
{pt3dadd(197376.000000,135456.000000,100500.000000,716.215988)}
{pt3dadd(197424.000000,135288.000000,100550.000000,695.348896)}
{pt3dadd(197412.000000,135084.000000,100500.000000,683.985893)}
{pt3dadd(197400.000000,134916.000000,100525.000000,661.921800)}

{create adhoc327}
{access adhoc327}
{connect adhoc327(1), adhoc326(0)}
{nseg = 1}
{strdef color color = "White"}
{pt3dclear()}
{pt3dadd(197400.000000,134916.000000,100525.000000,661.921800)}
{pt3dadd(196752.000000,134820.000000,100800.000000,298.286647)}
{pt3dadd(196632.000000,134856.000000,100825.000000,208.425568)}
{pt3dadd(196404.000000,134904.000000,100800.000000,93.097560)}
{pt3dadd(196224.000000,134904.000000,100900.000000,77.516553)}
{pt3dadd(196152.000000,134904.000000,100950.000000,85.281760)}

{create adhoc328}
{access adhoc328}
{connect adhoc328(1), adhoc327(0)}
{nseg = 1}
{strdef color color = "White"}
{pt3dclear()}
{pt3dadd(196152.000000,134904.000000,100950.000000,85.281760)}
{pt3dadd(196056.000000,135000.000000,101050.000000,78.768140)}
{pt3dadd(196020.000000,135048.000000,101175.000000,72.614383)}
{pt3dadd(195984.000000,135048.000000,101175.000000,66.820490)}

{create adhoc329}
{access adhoc329}
{connect adhoc329(1), adhoc327(0)}
{nseg = 1}
{strdef color color = "White"}
{pt3dclear()}
{pt3dadd(196152.000000,134904.000000,100950.000000,85.281760)}
{pt3dadd(195948.000000,135000.000000,100875.000000,68.880791)}
{pt3dadd(195804.000000,135000.000000,100725.000000,68.880791)}
{pt3dadd(195804.000000,134916.000000,100725.000000,85.281760)}

{create adhoc330}
{access adhoc330}
{connect adhoc330(1), adhoc326(0)}
{nseg = 1}
{strdef color color = "White"}
{pt3dclear()}
{pt3dadd(197400.000000,134916.000000,100525.000000,661.921800)}
{pt3dadd(197388.000000,134712.000000,100525.000000,630.902043)}
{pt3dadd(197364.000000,134532.000000,100550.000000,630.701918)}
{pt3dadd(197400.000000,134364.000000,100525.000000,630.701918)}
{pt3dadd(197340.000000,134172.000000,100475.000000,636.705744)}
{pt3dadd(197280.000000,133992.000000,100400.000000,643.009758)}
{pt3dadd(197244.000000,133824.000000,100425.000000,643.009758)}
{pt3dadd(197124.000000,133644.000000,100375.000000,637.005932)}
{pt3dadd(197076.000000,133464.000000,100400.000000,624.698092)}
{pt3dadd(196800.000000,132852.000000,100300.000000,612.976340)}
{pt3dadd(196752.000000,132696.000000,100275.000000,600.668500)}
{pt3dadd(196608.000000,132444.000000,100300.000000,590.852723)}
{pt3dadd(196464.000000,132192.000000,100325.000000,600.382600)}

{create adhoc331}
{access adhoc331}
{connect adhoc331(1), adhoc330(0)}
{nseg = 1}
{strdef color color = "White"}
{pt3dclear()}
{pt3dadd(196464.000000,132192.000000,100325.000000,600.382600)}
{pt3dadd(197148.000000,132156.000000,100075.000000,284.086900)}
{pt3dadd(197268.000000,132144.000000,100075.000000,212.969058)}
{pt3dadd(197400.000000,132036.000000,100075.000000,111.697166)}
{pt3dadd(197484.000000,131928.000000,100100.000000,94.430504)}
{pt3dadd(197556.000000,131940.000000,100225.000000,87.413356)}
{pt3dadd(197676.000000,131784.000000,100350.000000,74.827397)}
{pt3dadd(197724.000000,131844.000000,100400.000000,63.638560)}

{create adhoc332}
{access adhoc332}
{connect adhoc332(1), adhoc330(0)}
{nseg = 1}
{strdef color color = "White"}
{pt3dclear()}
{pt3dadd(196464.000000,132192.000000,100325.000000,600.382600)}
{pt3dadd(196392.000000,131940.000000,100325.000000,546.294547)}
{pt3dadd(196272.000000,131796.000000,100400.000000,545.602632)}
{pt3dadd(196296.000000,131688.000000,100375.000000,545.602632)}
{pt3dadd(196200.000000,131532.000000,100375.000000,556.766200)}
{pt3dadd(196044.000000,131340.000000,100375.000000,584.059290)}
{pt3dadd(196008.000000,131160.000000,100375.000000,595.222858)}
{pt3dadd(195948.000000,130968.000000,100350.000000,612.390252)}
{pt3dadd(195912.000000,130776.000000,100350.000000,606.672326)}
{pt3dadd(195912.000000,130548.000000,100350.000000,600.954400)}
{pt3dadd(195936.000000,130416.000000,100275.000000,591.329223)}
{pt3dadd(195888.000000,130296.000000,100275.000000,571.792970)}

{create adhoc333}
{access adhoc333}
{connect adhoc333(1), adhoc332(0)}
{nseg = 1}
{strdef color color = "White"}
{pt3dclear()}
{pt3dadd(195888.000000,130296.000000,100275.000000,571.792970)}
{pt3dadd(196104.000000,130296.000000,99850.000000,313.894923)}
{pt3dadd(196272.000000,130296.000000,99750.000000,235.529057)}
{pt3dadd(196356.000000,130296.000000,99700.000000,144.027605)}
{pt3dadd(196404.000000,130152.000000,99650.000000,116.748742)}
{pt3dadd(196440.000000,130044.000000,99600.000000,114.285710)}

{create adhoc334}
{access adhoc334}
{connect adhoc334(1), adhoc332(0)}
{nseg = 1}
{strdef color color = "White"}
{pt3dclear()}
{pt3dadd(195888.000000,130296.000000,100275.000000,571.792970)}
{pt3dadd(195888.000000,130128.000000,100300.000000,581.322847)}
{pt3dadd(195864.000000,129888.000000,100225.000000,601.254588)}
{pt3dadd(195852.000000,129720.000000,100200.000000,612.976340)}
{pt3dadd(195864.000000,129540.000000,100100.000000,618.980166)}
{pt3dadd(195816.000000,129360.000000,100125.000000,624.698092)}
{pt3dadd(195864.000000,129180.000000,100000.000000,630.701918)}
{pt3dadd(195852.000000,129000.000000,99925.000000,630.701918)}
{pt3dadd(195852.000000,128832.000000,99825.000000,630.701918)}
{pt3dadd(195828.000000,128664.000000,99700.000000,643.625160)}
{pt3dadd(195828.000000,128484.000000,99575.000000,669.502412)}
{pt3dadd(195840.000000,128220.000000,99450.000000,689.375838)}
{pt3dadd(195732.000000,128112.000000,99325.000000,702.945250)}
{pt3dadd(195696.000000,127968.000000,99250.000000,729.768860)}
{pt3dadd(195684.000000,127752.000000,99100.000000,729.768860)}

{create adhoc335}
{access adhoc335}
{connect adhoc335(1), adhoc334(0)}
{nseg = 1}
{strdef color color = "White"}
{pt3dclear()}
{pt3dadd(195684.000000,127752.000000,99100.000000,729.768860)}
{pt3dadd(194916.000000,127752.000000,98850.000000,301.810963)}
{pt3dadd(194808.000000,127800.000000,98800.000000,207.846593)}
{pt3dadd(194700.000000,127740.000000,98800.000000,66.873521)}
{pt3dadd(194640.000000,127704.000000,98925.000000,70.161514)}

{create adhoc336}
{access adhoc336}
{connect adhoc336(1), adhoc334(0)}
{nseg = 1}
{strdef color color = "White"}
{pt3dclear()}
{pt3dadd(195684.000000,127752.000000,99100.000000,729.768860)}
{pt3dadd(195756.000000,127596.000000,99100.000000,706.601580)}
{pt3dadd(195816.000000,127464.000000,99100.000000,688.729668)}
{pt3dadd(195864.000000,127380.000000,99050.000000,681.779484)}
{pt3dadd(195924.000000,127272.000000,98975.000000,668.856242)}
{pt3dadd(195960.000000,127104.000000,98850.000000,655.933000)}
{pt3dadd(195996.000000,126924.000000,98775.000000,651.940467)}
{pt3dadd(196056.000000,126756.000000,98700.000000,630.401730)}

{create adhoc337}
{access adhoc337}
{connect adhoc337(1), adhoc336(0)}
{nseg = 1}
{strdef color color = "White"}
{pt3dclear()}
{pt3dadd(196056.000000,126756.000000,98700.000000,630.401730)}
{pt3dadd(196620.000000,126756.000000,98300.000000,153.153800)}

{create adhoc338}
{access adhoc338}
{connect adhoc338(1), adhoc337(0)}
{nseg = 1}
{strdef color color = "White"}
{pt3dclear()}
{pt3dadd(196620.000000,126756.000000,98300.000000,153.153800)}
{pt3dadd(196824.000000,126756.000000,98075.000000,145.860750)}

{create adhoc339}
{access adhoc339}
{connect adhoc339(1), adhoc338(0)}
{nseg = 1}
{strdef color color = "White"}
{pt3dclear()}
{pt3dadd(196824.000000,126756.000000,98075.000000,145.860750)}
{pt3dadd(196788.000000,126852.000000,97975.000000,101.731068)}
{pt3dadd(196812.000000,126960.000000,97925.000000,84.761029)}
{pt3dadd(196812.000000,127044.000000,97900.000000,59.740031)}
{pt3dadd(196812.000000,127104.000000,97900.000000,54.973380)}

{create adhoc340}
{access adhoc340}
{connect adhoc340(1), adhoc338(0)}
{nseg = 1}
{strdef color color = "White"}
{pt3dclear()}
{pt3dadd(196824.000000,126756.000000,98075.000000,145.860750)}
{pt3dadd(196932.000000,126756.000000,98075.000000,138.915000)}

{create adhoc341}
{access adhoc341}
{connect adhoc341(1), adhoc340(0)}
{nseg = 1}
{strdef color color = "White"}
{pt3dclear()}
{pt3dadd(196932.000000,126756.000000,98075.000000,138.915000)}
{pt3dadd(196872.000000,126588.000000,98075.000000,121.746047)}
{pt3dadd(196896.000000,126480.000000,98075.000000,96.770016)}
{pt3dadd(196908.000000,126360.000000,97975.000000,79.981692)}
{pt3dadd(196932.000000,126324.000000,97925.000000,57.861773)}
{pt3dadd(196956.000000,126324.000000,97825.000000,54.973380)}

{create adhoc342}
{access adhoc342}
{connect adhoc342(1), adhoc340(0)}
{nseg = 1}
{strdef color color = "White"}
{pt3dclear()}
{pt3dadd(196932.000000,126756.000000,98075.000000,138.915000)}
{pt3dadd(197052.000000,126804.000000,98050.000000,94.248701)}
{pt3dadd(197124.000000,126828.000000,98000.000000,86.333285)}
{pt3dadd(197256.000000,126888.000000,97975.000000,79.282388)}
{pt3dadd(197400.000000,126972.000000,97900.000000,84.293330)}
{pt3dadd(197580.000000,127068.000000,97900.000000,87.317379)}
{pt3dadd(197760.000000,127140.000000,97875.000000,95.888858)}
{pt3dadd(197868.000000,127224.000000,97850.000000,85.281760)}

{create adhoc343}
{access adhoc343}
{connect adhoc343(1), adhoc337(0)}
{nseg = 1}
{strdef color color = "White"}
{pt3dclear()}
{pt3dadd(196620.000000,126756.000000,98300.000000,153.153800)}
{pt3dadd(196644.000000,126648.000000,98450.000000,143.057583)}
{pt3dadd(196728.000000,126648.000000,98675.000000,114.669262)}
{pt3dadd(196776.000000,126696.000000,98775.000000,101.094854)}
{pt3dadd(196764.000000,126708.000000,98875.000000,78.363636)}
{pt3dadd(196788.000000,126768.000000,99000.000000,73.352694)}
{pt3dadd(196872.000000,126828.000000,99100.000000,71.246178)}
{pt3dadd(196920.000000,126828.000000,99100.000000,68.042880)}
{pt3dadd(196968.000000,126840.000000,99175.000000,66.820490)}

{create adhoc344}
{access adhoc344}
{connect adhoc344(1), adhoc336(0)}
{nseg = 1}
{strdef color color = "White"}
{pt3dclear()}
{pt3dadd(196056.000000,126756.000000,98700.000000,630.401730)}
{pt3dadd(195948.000000,126576.000000,98625.000000,600.859100)}
{pt3dadd(195876.000000,126408.000000,98625.000000,589.232648)}
{pt3dadd(195744.000000,126216.000000,98575.000000,572.065254)}
{pt3dadd(195732.000000,126072.000000,98525.000000,566.347328)}
{pt3dadd(195672.000000,125964.000000,98500.000000,550.775990)}
{pt3dadd(195684.000000,125796.000000,98400.000000,535.204652)}
{pt3dadd(195576.000000,125640.000000,98325.000000,519.633314)}
{pt3dadd(195456.000000,125448.000000,98325.000000,509.507618)}
{pt3dadd(195276.000000,125280.000000,98300.000000,498.875636)}
{pt3dadd(195252.000000,125124.000000,98250.000000,509.001332)}
{pt3dadd(195132.000000,125028.000000,98125.000000,519.044700)}
{pt3dadd(195072.000000,124884.000000,98125.000000,544.564760)}

{create adhoc345}
{access adhoc345}
{connect adhoc345(1), adhoc344(0)}
{nseg = 1}
{strdef color color = "White"}
{pt3dclear()}
{pt3dadd(195072.000000,124884.000000,98125.000000,544.564760)}
{pt3dadd(194376.000000,124944.000000,98125.000000,299.858737)}
{pt3dadd(194136.000000,124920.000000,98000.000000,260.629752)}
{pt3dadd(194064.000000,124800.000000,97850.000000,188.948680)}
{pt3dadd(194028.000000,124836.000000,97700.000000,198.278822)}
{pt3dadd(194268.000000,124884.000000,97575.000000,202.095086)}
{pt3dadd(194268.000000,124860.000000,97350.000000,190.609916)}
{pt3dadd(194220.000000,124776.000000,97150.000000,196.199130)}
{pt3dadd(194244.000000,124740.000000,97000.000000,193.111163)}
{pt3dadd(194280.000000,124776.000000,96800.000000,205.240720)}

{create adhoc346}
{access adhoc346}
{connect adhoc346(1), adhoc345(0)}
{nseg = 1}
{strdef color color = "White"}
{pt3dclear()}
{pt3dadd(194280.000000,124776.000000,96800.000000,205.240720)}
{pt3dadd(193884.000000,124764.000000,96675.000000,121.524391)}
{pt3dadd(193788.000000,124764.000000,96675.000000,104.162085)}
{pt3dadd(193692.000000,124740.000000,96575.000000,153.153800)}

{create adhoc347}
{access adhoc347}
{connect adhoc347(1), adhoc346(0)}
{nseg = 1}
{strdef color color = "White"}
{pt3dclear()}
{pt3dadd(193692.000000,124740.000000,96575.000000,153.153800)}
{pt3dadd(193512.000000,124608.000000,96600.000000,118.673493)}
{pt3dadd(193212.000000,124488.000000,96600.000000,103.847183)}
{pt3dadd(193044.000000,124464.000000,96575.000000,87.248726)}
{pt3dadd(192960.000000,124404.000000,96625.000000,77.792316)}
{pt3dadd(192876.000000,124368.000000,96650.000000,70.161514)}

{create adhoc348}
{access adhoc348}
{connect adhoc348(1), adhoc346(0)}
{nseg = 1}
{strdef color color = "White"}
{pt3dclear()}
{pt3dadd(193692.000000,124740.000000,96575.000000,153.153800)}
{pt3dadd(193476.000000,124920.000000,96550.000000,123.700008)}
{pt3dadd(193428.000000,124932.000000,96450.000000,102.497357)}
{pt3dadd(193380.000000,124968.000000,96400.000000,89.545845)}

{create adhoc349}
{access adhoc349}
{connect adhoc349(1), adhoc345(0)}
{nseg = 1}
{strdef color color = "White"}
{pt3dclear()}
{pt3dadd(194280.000000,124776.000000,96800.000000,205.240720)}
{pt3dadd(194328.000000,124740.000000,96625.000000,192.667577)}
{pt3dadd(194364.000000,124596.000000,96525.000000,181.690236)}
{pt3dadd(194364.000000,124512.000000,96475.000000,163.499234)}
{pt3dadd(194472.000000,124476.000000,96325.000000,149.809012)}
{pt3dadd(194556.000000,124512.000000,96200.000000,139.887690)}
{pt3dadd(194628.000000,124536.000000,96075.000000,130.888760)}
{pt3dadd(194700.000000,124464.000000,95875.000000,126.718000)}
{pt3dadd(194772.000000,124488.000000,95775.000000,125.629566)}
{pt3dadd(194892.000000,124536.000000,95675.000000,122.665486)}
{pt3dadd(194916.000000,124572.000000,95550.000000,117.493336)}
{pt3dadd(194988.000000,124644.000000,95400.000000,107.622227)}
{pt3dadd(195048.000000,124644.000000,95250.000000,120.000000)}

{create adhoc350}
{access adhoc350}
{connect adhoc350(1), adhoc349(0)}
{nseg = 1}
{strdef color color = "White"}
{pt3dclear()}
{pt3dadd(195048.000000,124644.000000,95250.000000,120.000000)}
{pt3dadd(195144.000000,124644.000000,95225.000000,118.281180)}
{pt3dadd(195264.000000,124704.000000,95225.000000,106.184182)}
{pt3dadd(195324.000000,124776.000000,95225.000000,99.240534)}
{pt3dadd(195336.000000,124884.000000,95325.000000,87.119710)}
{pt3dadd(195300.000000,124956.000000,95450.000000,85.281760)}

{create adhoc351}
{access adhoc351}
{connect adhoc351(1), adhoc349(0)}
{nseg = 1}
{strdef color color = "White"}
{pt3dclear()}
{pt3dadd(195048.000000,124644.000000,95250.000000,120.000000)}
{pt3dadd(195000.000000,124716.000000,95225.000000,112.089357)}
{pt3dadd(195012.000000,124872.000000,95225.000000,77.353070)}

{create adhoc352}
{access adhoc352}
{connect adhoc352(1), adhoc345(0)}
{nseg = 1}
{strdef color color = "White"}
{pt3dclear()}
{pt3dadd(194280.000000,124776.000000,96800.000000,205.240720)}
{pt3dadd(194520.000000,124836.000000,96725.000000,146.882438)}
{pt3dadd(194628.000000,124884.000000,96675.000000,89.545845)}

{create adhoc353}
{access adhoc353}
{connect adhoc353(1), adhoc344(0)}
{nseg = 1}
{strdef color color = "White"}
{pt3dclear()}
{pt3dadd(195072.000000,124884.000000,98125.000000,544.564760)}
{pt3dadd(194976.000000,124656.000000,98125.000000,536.764670)}
{pt3dadd(195012.000000,124260.000000,97825.000000,540.144008)}
{pt3dadd(194940.000000,124020.000000,97725.000000,554.073000)}
{pt3dadd(194652.000000,123540.000000,97450.000000,518.633060)}

{create adhoc354}
{access adhoc354}
{connect adhoc354(1), adhoc353(0)}
{nseg = 1}
{strdef color color = "White"}
{pt3dclear()}
{pt3dadd(194652.000000,123540.000000,97450.000000,518.633060)}
{pt3dadd(194520.000000,123312.000000,97275.000000,527.276960)}
{pt3dadd(194352.000000,122940.000000,97050.000000,496.626183)}
{pt3dadd(194232.000000,122520.000000,96875.000000,426.680730)}

{create adhoc355}
{access adhoc355}
{connect adhoc355(1), adhoc354(0)}
{nseg = 1}
{strdef color color = "White"}
{pt3dclear()}
{pt3dadd(194232.000000,122520.000000,96875.000000,426.680730)}
{pt3dadd(193860.000000,121896.000000,96925.000000,260.564060)}
{pt3dadd(193824.000000,121656.000000,96925.000000,193.992465)}
{pt3dadd(193848.000000,121560.000000,97025.000000,124.126933)}
{pt3dadd(193908.000000,121488.000000,97050.000000,106.639913)}
{pt3dadd(193932.000000,121344.000000,97050.000000,100.652503)}
{pt3dadd(194004.000000,121248.000000,97050.000000,99.799686)}
{pt3dadd(194184.000000,121224.000000,97175.000000,107.640353)}
{pt3dadd(194328.000000,121248.000000,97150.000000,85.281760)}

{create adhoc356}
{access adhoc356}
{connect adhoc356(1), adhoc354(0)}
{nseg = 1}
{strdef color color = "White"}
{pt3dclear()}
{pt3dadd(194232.000000,122520.000000,96875.000000,426.680730)}
{pt3dadd(194196.000000,122280.000000,96700.000000,448.370333)}
{pt3dadd(194208.000000,122124.000000,96600.000000,476.475424)}
{pt3dadd(194088.000000,121668.000000,96500.000000,489.926534)}
{pt3dadd(193968.000000,121248.000000,96400.000000,510.400800)}
{pt3dadd(193788.000000,120996.000000,96275.000000,493.936280)}

{create adhoc357}
{access adhoc357}
{connect adhoc357(1), adhoc356(0)}
{nseg = 1}
{strdef color color = "White"}
{pt3dclear()}
{pt3dadd(193788.000000,120996.000000,96275.000000,493.936280)}
{pt3dadd(193788.000000,120852.000000,96075.000000,510.400800)}
{pt3dadd(193752.000000,120552.000000,95900.000000,524.066384)}
{pt3dadd(193716.000000,120408.000000,95800.000000,524.066384)}
{pt3dadd(193764.000000,120180.000000,95675.000000,514.422872)}
{pt3dadd(193704.000000,119892.000000,95525.000000,500.299214)}
{pt3dadd(193692.000000,119676.000000,95425.000000,485.469362)}
{pt3dadd(193752.000000,119484.000000,95350.000000,466.159364)}
{pt3dadd(193656.000000,119292.000000,95225.000000,452.708254)}
{pt3dadd(193632.000000,119124.000000,95125.000000,439.897670)}
{pt3dadd(193644.000000,118968.000000,95050.000000,427.697116)}
{pt3dadd(193584.000000,118788.000000,95000.000000,414.886532)}
{pt3dadd(193500.000000,118656.000000,95000.000000,414.886532)}
{pt3dadd(193488.000000,118536.000000,94900.000000,413.796450)}
{pt3dadd(193416.000000,118392.000000,94850.000000,448.014770)}

{create adhoc358}
{access adhoc358}
{connect adhoc358(1), adhoc357(0)}
{nseg = 1}
{strdef color color = "White"}
{pt3dclear()}
{pt3dadd(193416.000000,118392.000000,94850.000000,448.014770)}
{pt3dadd(193632.000000,118968.000000,94750.000000,279.586790)}
{pt3dadd(193548.000000,118992.000000,94675.000000,157.322109)}
{pt3dadd(193596.000000,118872.000000,94550.000000,81.220726)}

{create adhoc359}
{access adhoc359}
{connect adhoc359(1), adhoc357(0)}
{nseg = 1}
{strdef color color = "White"}
{pt3dclear()}
{pt3dadd(193416.000000,118392.000000,94850.000000,448.014770)}
{pt3dadd(193392.000000,118224.000000,94750.000000,440.903423)}
{pt3dadd(193344.000000,118140.000000,94700.000000,435.417524)}
{pt3dadd(193248.000000,118008.000000,94650.000000,435.417524)}
{pt3dadd(193284.000000,117852.000000,94650.000000,435.417524)}
{pt3dadd(193200.000000,117720.000000,94525.000000,439.684332)}
{pt3dadd(193164.000000,117576.000000,94450.000000,439.684332)}
{pt3dadd(193200.000000,117456.000000,94475.000000,439.684332)}
{pt3dadd(193200.000000,117348.000000,94425.000000,439.684332)}
{pt3dadd(193116.000000,117264.000000,94350.000000,444.164478)}
{pt3dadd(193152.000000,117108.000000,94375.000000,448.644624)}
{pt3dadd(193056.000000,116940.000000,94325.000000,448.644624)}
{pt3dadd(193044.000000,116748.000000,94300.000000,466.159364)}
{pt3dadd(192984.000000,116604.000000,94300.000000,480.283022)}
{pt3dadd(192972.000000,116400.000000,94275.000000,489.926534)}
{pt3dadd(192984.000000,116268.000000,94275.000000,494.630690)}
{pt3dadd(192972.000000,116088.000000,94225.000000,510.400800)}
{pt3dadd(193032.000000,115944.000000,94175.000000,493.936280)}

{create adhoc360}
{access adhoc360}
{connect adhoc360(1), adhoc359(0)}
{nseg = 1}
{strdef color color = "White"}
{pt3dclear()}
{pt3dadd(193032.000000,115944.000000,94175.000000,493.936280)}
{pt3dadd(193452.000000,115944.000000,93750.000000,242.740663)}
{pt3dadd(193632.000000,115980.000000,93700.000000,179.757102)}
{pt3dadd(193788.000000,116016.000000,93625.000000,101.701949)}
{pt3dadd(193968.000000,116004.000000,93600.000000,92.435867)}
{pt3dadd(194088.000000,116028.000000,93600.000000,84.312643)}
{pt3dadd(194184.000000,116004.000000,93600.000000,81.990209)}
{pt3dadd(194292.000000,115944.000000,93550.000000,78.966160)}
{pt3dadd(194400.000000,115860.000000,93550.000000,69.228733)}
{pt3dadd(194520.000000,115800.000000,93475.000000,66.268161)}
{pt3dadd(194544.000000,115752.000000,93400.000000,54.973380)}

{create adhoc361}
{access adhoc361}
{connect adhoc361(1), adhoc359(0)}
{nseg = 1}
{strdef color color = "White"}
{pt3dclear()}
{pt3dadd(193032.000000,115944.000000,94175.000000,493.936280)}
{pt3dadd(192948.000000,115800.000000,94175.000000,478.255760)}
{pt3dadd(192936.000000,115668.000000,94200.000000,453.562118)}
{pt3dadd(192888.000000,115536.000000,94125.000000,444.377816)}
{pt3dadd(192852.000000,115392.000000,94150.000000,427.697116)}
{pt3dadd(192864.000000,115260.000000,94150.000000,413.796450)}
{pt3dadd(192708.000000,115140.000000,94075.000000,387.012000)}

{create adhoc362}
{access adhoc362}
{connect adhoc362(1), adhoc361(0)}
{nseg = 1}
{strdef color color = "White"}
{pt3dclear()}
{pt3dadd(192708.000000,115140.000000,94075.000000,387.012000)}
{pt3dadd(192468.000000,114948.000000,93750.000000,347.092427)}
{pt3dadd(192384.000000,114852.000000,93600.000000,303.234000)}

{create adhoc363}
{access adhoc363}
{connect adhoc363(1), adhoc362(0)}
{nseg = 1}
{strdef color color = "White"}
{pt3dclear()}
{pt3dadd(192384.000000,114852.000000,93600.000000,303.234000)}
{pt3dadd(192024.000000,114540.000000,93600.000000,161.915710)}
{pt3dadd(191892.000000,114480.000000,93600.000000,73.669590)}

{create adhoc364}
{access adhoc364}
{connect adhoc364(1), adhoc363(0)}
{nseg = 1}
{strdef color color = "White"}
{pt3dclear()}
{pt3dadd(191892.000000,114480.000000,93600.000000,73.669590)}
{pt3dadd(191856.000000,114372.000000,93425.000000,73.669590)}
{pt3dadd(191676.000000,114240.000000,93425.000000,76.690044)}
{pt3dadd(191604.000000,114240.000000,93450.000000,74.683838)}
{pt3dadd(191436.000000,114144.000000,93450.000000,75.360004)}
{pt3dadd(191292.000000,114132.000000,93525.000000,63.638560)}

{create adhoc365}
{access adhoc365}
{connect adhoc365(1), adhoc363(0)}
{nseg = 1}
{strdef color color = "White"}
{pt3dclear()}
{pt3dadd(191892.000000,114480.000000,93600.000000,73.669590)}
{pt3dadd(191784.000000,114324.000000,93700.000000,73.669590)}
{pt3dadd(191760.000000,114264.000000,93700.000000,73.669590)}

{create adhoc366}
{access adhoc366}
{connect adhoc366(1), adhoc362(0)}
{nseg = 1}
{strdef color color = "White"}
{pt3dclear()}
{pt3dadd(192384.000000,114852.000000,93600.000000,303.234000)}
{pt3dadd(192456.000000,114756.000000,93475.000000,195.457253)}
{pt3dadd(192564.000000,114576.000000,93375.000000,158.936122)}
{pt3dadd(192600.000000,114516.000000,93350.000000,107.531520)}
{pt3dadd(192672.000000,114432.000000,93300.000000,114.285710)}

{create adhoc367}
{access adhoc367}
{connect adhoc367(1), adhoc366(0)}
{nseg = 1}
{strdef color color = "White"}
{pt3dclear()}
{pt3dadd(192672.000000,114432.000000,93300.000000,114.285710)}
{pt3dadd(192660.000000,114336.000000,93225.000000,97.205272)}
{pt3dadd(192696.000000,114252.000000,93175.000000,73.669590)}

{create adhoc368}
{access adhoc368}
{connect adhoc368(1), adhoc366(0)}
{nseg = 1}
{strdef color color = "White"}
{pt3dclear()}
{pt3dadd(192672.000000,114432.000000,93300.000000,114.285710)}
{pt3dadd(192756.000000,114372.000000,93225.000000,87.266765)}
{pt3dadd(192828.000000,114360.000000,93275.000000,70.384381)}
{pt3dadd(192828.000000,114396.000000,93300.000000,63.638560)}

{create adhoc369}
{access adhoc369}
{connect adhoc369(1), adhoc361(0)}
{nseg = 1}
{strdef color color = "White"}
{pt3dclear()}
{pt3dadd(192708.000000,115140.000000,94075.000000,387.012000)}
{pt3dadd(192672.000000,114852.000000,94125.000000,406.685103)}
{pt3dadd(192672.000000,114648.000000,94150.000000,395.130034)}
{pt3dadd(192672.000000,114444.000000,94150.000000,387.933890)}
{pt3dadd(192756.000000,114252.000000,94150.000000,370.340518)}
{pt3dadd(192732.000000,114036.000000,94125.000000,340.012812)}
{pt3dadd(192720.000000,113868.000000,94125.000000,336.502496)}
{pt3dadd(192768.000000,113748.000000,94150.000000,332.816668)}
{pt3dadd(192756.000000,113628.000000,94125.000000,329.473516)}
{pt3dadd(192780.000000,113484.000000,94125.000000,351.309887)}
{pt3dadd(192804.000000,113400.000000,94125.000000,334.315520)}

{create adhoc370}
{access adhoc370}
{connect adhoc370(1), adhoc369(0)}
{nseg = 1}
{strdef color color = "White"}
{pt3dclear()}
{pt3dadd(192804.000000,113400.000000,94125.000000,334.315520)}
{pt3dadd(193164.000000,113400.000000,94000.000000,171.776368)}
{pt3dadd(193248.000000,113424.000000,93950.000000,132.037678)}
{pt3dadd(193308.000000,113364.000000,93900.000000,83.979202)}
{pt3dadd(193404.000000,113316.000000,93825.000000,79.627475)}
{pt3dadd(193476.000000,113256.000000,93800.000000,94.023140)}

{create adhoc371}
{access adhoc371}
{connect adhoc371(1), adhoc370(0)}
{nseg = 1}
{strdef color color = "White"}
{pt3dclear()}
{pt3dadd(193476.000000,113256.000000,93800.000000,94.023140)}
{pt3dadd(193452.000000,113232.000000,93650.000000,79.008985)}
{pt3dadd(193476.000000,113160.000000,93600.000000,63.497296)}
{pt3dadd(193464.000000,113064.000000,93550.000000,47.488075)}

{create adhoc372}
{access adhoc372}
{connect adhoc372(1), adhoc370(0)}
{nseg = 1}
{strdef color color = "White"}
{pt3dclear()}
{pt3dadd(193476.000000,113256.000000,93800.000000,94.023140)}
{pt3dadd(193548.000000,113268.000000,93725.000000,68.995632)}
{pt3dadd(193620.000000,113256.000000,93775.000000,52.355602)}

{create adhoc373}
{access adhoc373}
{connect adhoc373(1), adhoc369(0)}
{nseg = 1}
{strdef color color = "White"}
{pt3dclear()}
{pt3dadd(192804.000000,113400.000000,94125.000000,334.315520)}
{pt3dadd(192780.000000,113244.000000,94100.000000,323.702320)}
{pt3dadd(192780.000000,113112.000000,94175.000000,318.395720)}
{pt3dadd(192780.000000,113040.000000,94200.000000,318.395720)}

{create adhoc374}
{access adhoc374}
{connect adhoc374(1), adhoc373(0)}
{nseg = 1}
{strdef color color = "White"}
{pt3dclear()}
{pt3dadd(192780.000000,113040.000000,94200.000000,318.395720)}
{pt3dadd(192936.000000,113040.000000,94450.000000,193.464353)}
{pt3dadd(193104.000000,113040.000000,94625.000000,153.867067)}
{pt3dadd(193128.000000,113076.000000,94675.000000,110.920026)}
{pt3dadd(193212.000000,113172.000000,94775.000000,110.920026)}
{pt3dadd(193332.000000,113304.000000,94900.000000,110.920026)}
{pt3dadd(193392.000000,113400.000000,94950.000000,116.720816)}
{pt3dadd(193428.000000,113472.000000,95025.000000,114.793341)}
{pt3dadd(193536.000000,113496.000000,95075.000000,115.829946)}
{pt3dadd(193608.000000,113472.000000,95075.000000,104.944046)}
{pt3dadd(193704.000000,113412.000000,94975.000000,100.231690)}
{pt3dadd(193740.000000,113244.000000,94975.000000,92.845162)}
{pt3dadd(193728.000000,113100.000000,94900.000000,92.845162)}
{pt3dadd(193704.000000,112968.000000,94800.000000,92.845162)}
{pt3dadd(193752.000000,112836.000000,94700.000000,93.406583)}
{pt3dadd(193764.000000,112776.000000,94650.000000,108.843540)}

{create adhoc375}
{access adhoc375}
{connect adhoc375(1), adhoc374(0)}
{nseg = 1}
{strdef color color = "White"}
{pt3dclear()}
{pt3dadd(193764.000000,112776.000000,94650.000000,108.843540)}
{pt3dadd(193896.000000,112800.000000,94650.000000,73.669590)}

{create adhoc376}
{access adhoc376}
{connect adhoc376(1), adhoc374(0)}
{nseg = 1}
{strdef color color = "White"}
{pt3dclear()}
{pt3dadd(193764.000000,112776.000000,94650.000000,108.843540)}
{pt3dadd(193728.000000,112716.000000,94625.000000,96.262855)}
{pt3dadd(193680.000000,112572.000000,94600.000000,88.735776)}
{pt3dadd(193704.000000,112464.000000,94575.000000,79.694780)}
{pt3dadd(193656.000000,112404.000000,94500.000000,72.842959)}
{pt3dadd(193656.000000,112320.000000,94450.000000,63.638560)}

{create adhoc377}
{access adhoc377}
{connect adhoc377(1), adhoc373(0)}
{nseg = 1}
{strdef color color = "White"}
{pt3dclear()}
{pt3dadd(192780.000000,113040.000000,94200.000000,318.395720)}
{pt3dadd(192756.000000,112908.000000,94200.000000,313.341813)}
{pt3dadd(192780.000000,112752.000000,94150.000000,303.660328)}
{pt3dadd(192708.000000,112632.000000,94150.000000,303.660328)}
{pt3dadd(192612.000000,112488.000000,94100.000000,303.660328)}
{pt3dadd(192504.000000,112356.000000,94050.000000,306.692672)}
{pt3dadd(192468.000000,112224.000000,94025.000000,315.363376)}
{pt3dadd(192432.000000,112092.000000,93975.000000,312.475436)}
{pt3dadd(192408.000000,111960.000000,93900.000000,309.443092)}
{pt3dadd(192240.000000,111816.000000,93825.000000,309.443092)}
{pt3dadd(192132.000000,111612.000000,93775.000000,323.166348)}
{pt3dadd(192036.000000,111468.000000,93750.000000,336.889604)}
{pt3dadd(191964.000000,111336.000000,93725.000000,364.139907)}
{pt3dadd(191892.000000,111216.000000,93675.000000,387.012000)}

{create adhoc378}
{access adhoc378}
{connect adhoc378(1), adhoc377(0)}
{nseg = 1}
{strdef color color = "White"}
{pt3dclear()}
{pt3dadd(191892.000000,111216.000000,93675.000000,387.012000)}
{pt3dadd(191844.000000,111084.000000,93650.000000,406.685103)}
{pt3dadd(191736.000000,110940.000000,93600.000000,406.749608)}
{pt3dadd(191640.000000,110820.000000,93575.000000,406.749608)}
{pt3dadd(191592.000000,110688.000000,93575.000000,402.685978)}
{pt3dadd(191508.000000,110568.000000,93675.000000,393.462193)}
{pt3dadd(191376.000000,110448.000000,93650.000000,406.362580)}

{create adhoc379}
{access adhoc379}
{connect adhoc379(1), adhoc378(0)}
{nseg = 1}
{strdef color color = "White"}
{pt3dclear()}
{pt3dadd(191376.000000,110448.000000,93650.000000,406.362580)}
{pt3dadd(190944.000000,110508.000000,93525.000000,243.172660)}
{pt3dadd(190824.000000,110508.000000,93300.000000,205.848892)}
{pt3dadd(190656.000000,110532.000000,93200.000000,146.345084)}
{pt3dadd(190512.000000,110568.000000,93200.000000,136.190007)}
{pt3dadd(190512.000000,110592.000000,93025.000000,108.843540)}

{create adhoc380}
{access adhoc380}
{connect adhoc380(1), adhoc378(0)}
{nseg = 1}
{strdef color color = "White"}
{pt3dclear()}
{pt3dadd(191376.000000,110448.000000,93650.000000,406.362580)}
{pt3dadd(191688.000000,110496.000000,93925.000000,280.339210)}
{pt3dadd(191736.000000,110592.000000,94100.000000,219.863526)}
{pt3dadd(191712.000000,110784.000000,94200.000000,158.335870)}
{pt3dadd(191664.000000,111072.000000,94400.000000,117.633362)}
{pt3dadd(191628.000000,111240.000000,94600.000000,103.335353)}
{pt3dadd(191712.000000,111336.000000,94775.000000,85.281760)}

{create adhoc381}
{access adhoc381}
{connect adhoc381(1), adhoc378(0)}
{nseg = 1}
{strdef color color = "White"}
{pt3dclear()}
{pt3dadd(191376.000000,110448.000000,93650.000000,406.362580)}
{pt3dadd(191412.000000,110268.000000,93650.000000,426.680730)}

{create adhoc382}
{access adhoc382}
{connect adhoc382(1), adhoc381(0)}
{nseg = 1}
{strdef color color = "White"}
{pt3dclear()}
{pt3dadd(191412.000000,110268.000000,93650.000000,426.680730)}
{pt3dadd(191568.000000,110160.000000,93125.000000,288.640110)}
{pt3dadd(191664.000000,110076.000000,93125.000000,206.037800)}
{pt3dadd(191856.000000,110028.000000,93075.000000,113.854440)}
{pt3dadd(191904.000000,110028.000000,93000.000000,60.608154)}

{create adhoc383}
{access adhoc383}
{connect adhoc383(1), adhoc381(0)}
{nseg = 1}
{strdef color color = "White"}
{pt3dclear()}
{pt3dadd(191412.000000,110268.000000,93650.000000,426.680730)}
{pt3dadd(191364.000000,110040.000000,93575.000000,376.134553)}
{pt3dadd(191292.000000,109536.000000,93500.000000,323.093366)}
{pt3dadd(191256.000000,109416.000000,93500.000000,287.651494)}
{pt3dadd(191232.000000,109224.000000,93500.000000,252.209622)}
{pt3dadd(191232.000000,109032.000000,93475.000000,249.590172)}
{pt3dadd(191184.000000,108900.000000,93450.000000,257.080252)}
{pt3dadd(191124.000000,108768.000000,93400.000000,257.080252)}
{pt3dadd(191052.000000,108600.000000,93375.000000,277.392234)}
{pt3dadd(190944.000000,108468.000000,93350.000000,282.506400)}
{pt3dadd(190776.000000,108372.000000,93225.000000,287.876270)}
{pt3dadd(190716.000000,108192.000000,93100.000000,296.546974)}
{pt3dadd(190620.000000,108060.000000,93075.000000,310.331844)}
{pt3dadd(190560.000000,107952.000000,93000.000000,303.804732)}
{pt3dadd(190464.000000,107844.000000,93000.000000,315.659396)}
{pt3dadd(190308.000000,107736.000000,92950.000000,323.702320)}
{pt3dadd(190236.000000,107628.000000,92975.000000,334.315520)}

{create adhoc384}
{access adhoc384}
{connect adhoc384(1), adhoc383(0)}
{nseg = 1}
{strdef color color = "White"}
{pt3dclear()}
{pt3dadd(190236.000000,107628.000000,92975.000000,334.315520)}
{pt3dadd(189708.000000,107628.000000,93125.000000,206.589773)}
{pt3dadd(189504.000000,107568.000000,93300.000000,174.894722)}
{pt3dadd(189444.000000,107568.000000,93375.000000,135.814618)}
{pt3dadd(189336.000000,107628.000000,93400.000000,129.099478)}
{pt3dadd(189300.000000,107676.000000,93500.000000,114.712863)}
{pt3dadd(189264.000000,107724.000000,93600.000000,113.676258)}
{pt3dadd(189216.000000,107832.000000,93750.000000,101.560460)}
{pt3dadd(189216.000000,107880.000000,93900.000000,91.686629)}
{pt3dadd(189168.000000,107940.000000,93975.000000,86.675687)}
{pt3dadd(189168.000000,108060.000000,94000.000000,84.463845)}
{pt3dadd(189144.000000,108156.000000,94050.000000,80.788094)}
{pt3dadd(189108.000000,108252.000000,94125.000000,79.202356)}
{pt3dadd(189168.000000,108468.000000,94225.000000,77.598781)}
{pt3dadd(189168.000000,108540.000000,94250.000000,77.353070)}

{create adhoc385}
{access adhoc385}
{connect adhoc385(1), adhoc383(0)}
{nseg = 1}
{strdef color color = "White"}
{pt3dclear()}
{pt3dadd(190236.000000,107628.000000,92975.000000,334.315520)}
{pt3dadd(190164.000000,107448.000000,92925.000000,363.303460)}
{pt3dadd(190080.000000,107328.000000,92925.000000,372.971164)}
{pt3dadd(190032.000000,107208.000000,92900.000000,387.380576)}
{pt3dadd(189888.000000,107052.000000,92850.000000,387.380576)}
{pt3dadd(189828.000000,106944.000000,92825.000000,380.184432)}
{pt3dadd(189744.000000,106812.000000,92750.000000,375.325573)}
{pt3dadd(189564.000000,106428.000000,92650.000000,351.031280)}

{create adhoc386}
{access adhoc386}
{connect adhoc386(1), adhoc385(0)}
{nseg = 1}
{strdef color color = "White"}
{pt3dclear()}
{pt3dadd(189564.000000,106428.000000,92650.000000,351.031280)}
{pt3dadd(189396.000000,106428.000000,93225.000000,188.351473)}
{pt3dadd(189348.000000,106356.000000,93275.000000,153.487847)}
{pt3dadd(189276.000000,106272.000000,93350.000000,105.050299)}
{pt3dadd(189216.000000,106236.000000,93400.000000,113.212595)}
{pt3dadd(189156.000000,106224.000000,93450.000000,110.652112)}
{pt3dadd(189072.000000,106200.000000,93500.000000,112.675960)}
{pt3dadd(189012.000000,106176.000000,93575.000000,116.958582)}
{pt3dadd(188952.000000,106200.000000,93625.000000,108.843540)}

{create adhoc387}
{access adhoc387}
{connect adhoc387(1), adhoc385(0)}
{nseg = 1}
{strdef color color = "White"}
{pt3dclear()}
{pt3dadd(189564.000000,106428.000000,92650.000000,351.031280)}
{pt3dadd(189516.000000,106212.000000,92375.000000,309.769160)}
{pt3dadd(189432.000000,106032.000000,92300.000000,290.639476)}
{pt3dadd(189348.000000,105912.000000,92275.000000,275.441660)}
{pt3dadd(189336.000000,105744.000000,92200.000000,269.803300)}
{pt3dadd(189168.000000,105564.000000,92025.000000,267.183850)}
{pt3dadd(189048.000000,105444.000000,92000.000000,275.441660)}
{pt3dadd(188964.000000,105408.000000,91900.000000,272.946944)}
{pt3dadd(188904.000000,105228.000000,91750.000000,270.327494)}
{pt3dadd(188808.000000,104868.000000,91625.000000,262.837414)}
{pt3dadd(188748.000000,104760.000000,91525.000000,260.342698)}
{pt3dadd(188688.000000,104652.000000,91425.000000,252.084888)}
{pt3dadd(188580.000000,104484.000000,91450.000000,257.199054)}
{pt3dadd(188544.000000,104376.000000,91450.000000,252.328424)}
{pt3dadd(188412.000000,104196.000000,91350.000000,258.192983)}
{pt3dadd(188352.000000,104040.000000,91350.000000,237.591800)}

{create adhoc388}
{access adhoc388}
{connect adhoc388(1), adhoc387(0)}
{nseg = 1}
{strdef color color = "White"}
{pt3dclear()}
{pt3dadd(188352.000000,104040.000000,91350.000000,237.591800)}
{pt3dadd(188724.000000,104064.000000,91350.000000,177.481283)}
{pt3dadd(188772.000000,103944.000000,91250.000000,143.728092)}
{pt3dadd(188832.000000,103920.000000,91175.000000,104.065537)}
{pt3dadd(188856.000000,103884.000000,91125.000000,77.353070)}

{create adhoc389}
{access adhoc389}
{connect adhoc389(1), adhoc387(0)}
{nseg = 1}
{strdef color color = "White"}
{pt3dclear()}
{pt3dadd(188352.000000,104040.000000,91350.000000,237.591800)}
{pt3dadd(188160.000000,103932.000000,91350.000000,222.865773)}
{pt3dadd(187848.000000,103788.000000,91225.000000,215.815752)}
{pt3dadd(187692.000000,103608.000000,91125.000000,205.529272)}
{pt3dadd(187572.000000,103488.000000,91150.000000,203.476864)}
{pt3dadd(187452.000000,103380.000000,91175.000000,194.146722)}
{pt3dadd(187392.000000,103260.000000,91150.000000,182.270728)}
{pt3dadd(187284.000000,103068.000000,91050.000000,174.992994)}
{pt3dadd(187176.000000,102936.000000,90950.000000,174.992994)}
{pt3dadd(187068.000000,102780.000000,90850.000000,174.992994)}
{pt3dadd(186960.000000,102780.000000,90825.000000,182.270728)}
{pt3dadd(186840.000000,102660.000000,90825.000000,198.354158)}
{pt3dadd(186720.000000,102552.000000,90825.000000,209.839328)}
{pt3dadd(186612.000000,102480.000000,90825.000000,215.708000)}
{pt3dadd(186468.000000,102420.000000,90725.000000,215.708000)}
{pt3dadd(186360.000000,102228.000000,90725.000000,210.118786)}
{pt3dadd(186240.000000,102144.000000,90725.000000,198.633616)}
{pt3dadd(186036.000000,101964.000000,90575.000000,184.008796)}
{pt3dadd(185880.000000,101808.000000,90550.000000,171.539004)}
{pt3dadd(185772.000000,101712.000000,90550.000000,158.386550)}
{pt3dadd(185664.000000,101640.000000,90525.000000,153.153800)}

{create adhoc390}
{access adhoc390}
{connect adhoc390(1), adhoc389(0)}
{nseg = 1}
{strdef color color = "White"}
{pt3dclear()}
{pt3dadd(185664.000000,101640.000000,90525.000000,153.153800)}
{pt3dadd(185556.000000,101520.000000,90550.000000,154.249483)}
{pt3dadd(185424.000000,101232.000000,90400.000000,156.950860)}
{pt3dadd(185352.000000,100980.000000,90300.000000,151.435283)}
{pt3dadd(185196.000000,100836.000000,90350.000000,168.852050)}

{create adhoc391}
{access adhoc391}
{connect adhoc391(1), adhoc390(0)}
{nseg = 1}
{strdef color color = "White"}
{pt3dclear()}
{pt3dadd(185196.000000,100836.000000,90350.000000,168.852050)}
{pt3dadd(185100.000000,100680.000000,90450.000000,146.689017)}
{pt3dadd(185040.000000,100596.000000,90475.000000,138.915000)}

{create adhoc392}
{access adhoc392}
{connect adhoc392(1), adhoc390(0)}
{nseg = 1}
{strdef color color = "White"}
{pt3dclear()}
{pt3dadd(185196.000000,100836.000000,90350.000000,168.852050)}
{pt3dadd(185100.000000,100620.000000,90075.000000,177.435367)}
{pt3dadd(185100.000000,100500.000000,89950.000000,177.379080)}
{pt3dadd(184932.000000,100332.000000,89875.000000,174.239430)}
{pt3dadd(184776.000000,100140.000000,89775.000000,186.901824)}
{pt3dadd(184680.000000,99960.000000,89675.000000,209.201754)}
{pt3dadd(184524.000000,99732.000000,89625.000000,255.015340)}
{pt3dadd(184440.000000,99600.000000,89625.000000,271.945400)}
{pt3dadd(184212.000000,99444.000000,89475.000000,319.033943)}
{pt3dadd(184044.000000,99156.000000,89300.000000,261.944950)}

{create adhoc393}
{access adhoc393}
{connect adhoc393(1), adhoc392(0)}
{nseg = 1}
{strdef color color = "White"}
{pt3dclear()}
{pt3dadd(184044.000000,99156.000000,89300.000000,261.944950)}
{pt3dadd(184212.000000,99624.000000,89275.000000,167.276280)}
{pt3dadd(184284.000000,99756.000000,89200.000000,129.337625)}
{pt3dadd(184284.000000,99876.000000,89100.000000,93.192780)}
{pt3dadd(184260.000000,99948.000000,89025.000000,78.754548)}
{pt3dadd(184188.000000,99984.000000,88950.000000,72.842959)}
{pt3dadd(184140.000000,99948.000000,88950.000000,73.669590)}

{create adhoc394}
{access adhoc394}
{connect adhoc394(1), adhoc392(0)}
{nseg = 1}
{strdef color color = "White"}
{pt3dclear()}
{pt3dadd(184044.000000,99156.000000,89300.000000,261.944950)}
{pt3dadd(183936.000000,99072.000000,89300.000000,234.575203)}
{pt3dadd(183768.000000,98928.000000,89250.000000,217.252196)}
{pt3dadd(183672.000000,98724.000000,89200.000000,200.322136)}
{pt3dadd(183516.000000,98580.000000,89200.000000,186.610007)}
{pt3dadd(183396.000000,98364.000000,89050.000000,177.294650)}

{create adhoc395}
{access adhoc395}
{connect adhoc395(1), adhoc394(0)}
{nseg = 1}
{strdef color color = "White"}
{pt3dclear()}
{pt3dadd(183396.000000,98364.000000,89050.000000,177.294650)}
{pt3dadd(183312.000000,98304.000000,89000.000000,174.480450)}
{pt3dadd(183204.000000,98088.000000,88925.000000,170.620976)}
{pt3dadd(183108.000000,97992.000000,88900.000000,161.622046)}
{pt3dadd(182964.000000,97884.000000,88800.000000,155.634636)}
{pt3dadd(182856.000000,97668.000000,88675.000000,145.375706)}
{pt3dadd(182784.000000,97560.000000,88550.000000,133.374004)}
{pt3dadd(182748.000000,97380.000000,88450.000000,120.016336)}
{pt3dadd(182616.000000,97200.000000,88275.000000,109.800481)}
{pt3dadd(182640.000000,97080.000000,88175.000000,99.926650)}
{pt3dadd(182712.000000,96888.000000,88075.000000,92.635819)}
{pt3dadd(182640.000000,96732.000000,87975.000000,90.611971)}
{pt3dadd(182700.000000,96624.000000,87875.000000,92.605330)}
{pt3dadd(182760.000000,96588.000000,87750.000000,98.724300)}

{create adhoc396}
{access adhoc396}
{connect adhoc396(1), adhoc394(0)}
{nseg = 1}
{strdef color color = "White"}
{pt3dclear()}
{pt3dadd(183396.000000,98364.000000,89050.000000,177.294650)}
{pt3dadd(183516.000000,98412.000000,88875.000000,134.539263)}
{pt3dadd(183552.000000,98436.000000,88750.000000,114.024055)}
{pt3dadd(183612.000000,98472.000000,88750.000000,94.809270)}
{pt3dadd(183648.000000,98460.000000,88600.000000,86.258439)}
{pt3dadd(183672.000000,98448.000000,88425.000000,86.258439)}
{pt3dadd(183756.000000,98472.000000,88325.000000,88.263237)}
{pt3dadd(183804.000000,98484.000000,88250.000000,94.023140)}

{create adhoc397}
{access adhoc397}
{connect adhoc397(1), adhoc389(0)}
{nseg = 1}
{strdef color color = "White"}
{pt3dclear()}
{pt3dadd(185664.000000,101640.000000,90525.000000,153.153800)}
{pt3dadd(185736.000000,101532.000000,90725.000000,135.451503)}
{pt3dadd(185628.000000,101592.000000,90850.000000,121.747865)}
{pt3dadd(185520.000000,101400.000000,91000.000000,109.921733)}
{pt3dadd(185484.000000,101400.000000,91150.000000,98.382878)}
{pt3dadd(185448.000000,101328.000000,91350.000000,96.257839)}
{pt3dadd(185412.000000,101268.000000,91550.000000,92.582088)}
{pt3dadd(185472.000000,101232.000000,91700.000000,89.081373)}
{pt3dadd(185412.000000,101256.000000,91800.000000,88.185914)}
{pt3dadd(185412.000000,101232.000000,91925.000000,88.998121)}
{pt3dadd(185460.000000,101280.000000,92100.000000,87.070646)}
{pt3dadd(185424.000000,101340.000000,92225.000000,86.258439)}
{pt3dadd(185244.000000,101376.000000,92375.000000,82.742006)}
{pt3dadd(185208.000000,101436.000000,92525.000000,75.303958)}
{pt3dadd(185220.000000,101424.000000,92675.000000,68.718726)}
{pt3dadd(185196.000000,101364.000000,92775.000000,76.374098)}
{pt3dadd(185148.000000,101364.000000,92950.000000,79.003735)}
{pt3dadd(185004.000000,101376.000000,93075.000000,132.300000)}

{create adhoc398}
{access adhoc398}
{connect adhoc398(1), adhoc377(0)}
{nseg = 1}
{strdef color color = "White"}
{pt3dclear()}
{pt3dadd(191892.000000,111216.000000,93675.000000,387.012000)}
{pt3dadd(192084.000000,111168.000000,93350.000000,207.164357)}
{pt3dadd(192288.000000,111132.000000,93350.000000,103.944713)}
{pt3dadd(192324.000000,111144.000000,93375.000000,77.353070)}

{create adhoc399}
{access adhoc399}
{connect adhoc399(1), adhoc356(0)}
{nseg = 1}
{strdef color color = "White"}
{pt3dclear()}
{pt3dadd(193788.000000,120996.000000,96275.000000,493.936280)}
{pt3dadd(193548.000000,120348.000000,96275.000000,318.395720)}

{create adhoc400}
{access adhoc400}
{connect adhoc400(1), adhoc399(0)}
{nseg = 1}
{strdef color color = "White"}
{pt3dclear()}
{pt3dadd(193548.000000,120348.000000,96275.000000,318.395720)}
{pt3dadd(193248.000000,120144.000000,96300.000000,198.697103)}
{pt3dadd(193188.000000,120036.000000,96300.000000,152.055193)}
{pt3dadd(193104.000000,119940.000000,96350.000000,91.009398)}
{pt3dadd(193128.000000,119904.000000,96375.000000,70.161514)}

{create adhoc401}
{access adhoc401}
{connect adhoc401(1), adhoc399(0)}
{nseg = 1}
{strdef color color = "White"}
{pt3dclear()}
{pt3dadd(193548.000000,120348.000000,96275.000000,318.395720)}
{pt3dadd(193512.000000,120204.000000,96350.000000,196.818977)}
{pt3dadd(193464.000000,120012.000000,96450.000000,149.881656)}
{pt3dadd(193488.000000,119892.000000,96525.000000,100.936430)}
{pt3dadd(193488.000000,119856.000000,96575.000000,77.540313)}
{pt3dadd(193584.000000,119760.000000,96650.000000,73.669590)}

{create adhoc402}
{access adhoc402}
{connect adhoc402(1), adhoc353(0)}
{nseg = 1}
{strdef color color = "White"}
{pt3dclear()}
{pt3dadd(194652.000000,123540.000000,97450.000000,518.633060)}
{pt3dadd(194508.000000,123684.000000,98225.000000,290.303653)}
{pt3dadd(194544.000000,123684.000000,98575.000000,225.149116)}
{pt3dadd(194544.000000,123696.000000,98825.000000,155.192914)}
{pt3dadd(194544.000000,123504.000000,99050.000000,135.137334)}
{pt3dadd(194496.000000,123444.000000,99225.000000,137.720334)}
{pt3dadd(194520.000000,123348.000000,99400.000000,141.772848)}
{pt3dadd(194580.000000,123264.000000,99500.000000,130.342655)}
{pt3dadd(194664.000000,123168.000000,99625.000000,123.032245)}
{pt3dadd(194604.000000,123384.000000,99725.000000,121.832245)}
{pt3dadd(194652.000000,123252.000000,99875.000000,116.906387)}
{pt3dadd(194532.000000,123396.000000,100000.000000,114.781348)}
{pt3dadd(194580.000000,123648.000000,100150.000000,112.648742)}
{pt3dadd(194556.000000,123852.000000,100200.000000,103.660515)}

{create adhoc403}
{access adhoc403}
{connect adhoc403(1), adhoc402(0)}
{nseg = 1}
{strdef color color = "White"}
{pt3dclear()}
{pt3dadd(194556.000000,123852.000000,100200.000000,103.660515)}
{pt3dadd(194556.000000,123564.000000,100275.000000,96.180585)}
{pt3dadd(194568.000000,123492.000000,100300.000000,103.660515)}

{create adhoc404}
{access adhoc404}
{connect adhoc404(1), adhoc402(0)}
{nseg = 1}
{strdef color color = "White"}
{pt3dclear()}
{pt3dadd(194556.000000,123852.000000,100200.000000,103.660515)}
{pt3dadd(194436.000000,124104.000000,100200.000000,94.891367)}
{pt3dadd(194400.000000,124272.000000,100325.000000,115.557116)}
{pt3dadd(194556.000000,124476.000000,100450.000000,122.608013)}
{pt3dadd(194580.000000,124848.000000,100550.000000,134.920399)}
{pt3dadd(194688.000000,125244.000000,100675.000000,146.213827)}
{pt3dadd(194736.000000,125316.000000,100700.000000,138.915000)}

{create adhoc405}
{access adhoc405}
{connect adhoc405(1), adhoc334(0)}
{nseg = 1}
{strdef color color = "White"}
{pt3dclear()}
{pt3dadd(195684.000000,127752.000000,99100.000000,729.768860)}
{pt3dadd(195576.000000,127908.000000,98425.000000,411.355307)}
{pt3dadd(195504.000000,127908.000000,98275.000000,195.172595)}
{pt3dadd(195516.000000,127728.000000,98175.000000,81.220726)}

{create adhoc406}
{access adhoc406}
{connect adhoc406(1), adhoc287(0)}
{nseg = 1}
{strdef color color = "White"}
{pt3dclear()}
{pt3dadd(197772.000000,141156.000000,99600.000000,470.415500)}
{pt3dadd(197088.000000,141228.000000,99750.000000,211.561390)}
{pt3dadd(196944.000000,141228.000000,99750.000000,60.608154)}

{create adhoc407}
{access adhoc407}
{connect adhoc407(1), adhoc4(0)}
{nseg = 1}
{strdef color color = "White"}
{pt3dclear()}
{pt3dadd(200868.000000,143604.000000,94275.000000,426.680730)}
{pt3dadd(200448.000000,143604.000000,94650.000000,207.539763)}
{pt3dadd(200208.000000,143604.000000,94875.000000,157.012148)}
{pt3dadd(200028.000000,143604.000000,94925.000000,89.585171)}
{pt3dadd(199860.000000,143484.000000,95000.000000,80.181523)}
{pt3dadd(199704.000000,143400.000000,95150.000000,85.349444)}
{pt3dadd(199596.000000,143544.000000,95300.000000,85.281760)}

{create adhoc408}
{access adhoc408}
{connect adhoc408(1), adhoc407(0)}
{nseg = 1}
{strdef color color = "White"}
{pt3dclear()}
{pt3dadd(199596.000000,143544.000000,95300.000000,85.281760)}
{pt3dadd(199680.000000,143484.000000,95450.000000,65.992398)}
{pt3dadd(199656.000000,143436.000000,95475.000000,57.722054)}

{create adhoc409}
{access adhoc409}
{connect adhoc409(1), adhoc407(0)}
{nseg = 1}
{strdef color color = "White"}
{pt3dclear()}
{pt3dadd(199596.000000,143544.000000,95300.000000,85.281760)}
{pt3dadd(199452.000000,143568.000000,95300.000000,81.411037)}
{pt3dadd(199296.000000,143496.000000,95425.000000,76.243023)}
{pt3dadd(199200.000000,143532.000000,95500.000000,70.217198)}
{pt3dadd(199080.000000,143508.000000,95625.000000,70.161514)}

{create adhoc410}
{access adhoc410}
{connect adhoc410(1), adhoc3(0)}
{nseg = 1}
{strdef color color = "White"}
{pt3dclear()}
{pt3dadd(200688.000000,142212.000000,93225.000000,470.415500)}
{pt3dadd(200604.000000,142848.000000,93225.000000,365.006433)}
{pt3dadd(200496.000000,143064.000000,93100.000000,270.786860)}
{pt3dadd(200304.000000,143256.000000,93075.000000,210.474170)}
{pt3dadd(200232.000000,143376.000000,93075.000000,142.589017)}
{pt3dadd(200136.000000,143460.000000,92900.000000,168.852050)}

{create adhoc411}
{access adhoc411}
{connect adhoc411(1), adhoc410(0)}
{nseg = 1}
{strdef color color = "White"}
{pt3dclear()}
{pt3dadd(200136.000000,143460.000000,92900.000000,168.852050)}
{pt3dadd(199920.000000,143232.000000,93050.000000,118.966110)}
{pt3dadd(199812.000000,143040.000000,93050.000000,108.093463)}
{pt3dadd(199752.000000,142884.000000,93150.000000,95.055156)}
{pt3dadd(199704.000000,142728.000000,93175.000000,100.250528)}
{pt3dadd(199548.000000,142536.000000,93175.000000,115.216310)}
{pt3dadd(199464.000000,142416.000000,93175.000000,127.042442)}
{pt3dadd(199500.000000,142344.000000,93325.000000,147.335283)}
{pt3dadd(199536.000000,142332.000000,93325.000000,153.153800)}

{create adhoc412}
{access adhoc412}
{connect adhoc412(1), adhoc411(0)}
{nseg = 1}
{strdef color color = "White"}
{pt3dclear()}
{pt3dadd(199536.000000,142332.000000,93325.000000,153.153800)}
{pt3dadd(199416.000000,142476.000000,93400.000000,115.759700)}
{pt3dadd(199368.000000,142524.000000,93500.000000,108.843540)}

{create adhoc413}
{access adhoc413}
{connect adhoc413(1), adhoc411(0)}
{nseg = 1}
{strdef color color = "White"}
{pt3dclear()}
{pt3dadd(199536.000000,142332.000000,93325.000000,153.153800)}
{pt3dadd(199596.000000,142332.000000,93325.000000,108.843540)}

{create adhoc414}
{access adhoc414}
{connect adhoc414(1), adhoc410(0)}
{nseg = 1}
{strdef color color = "White"}
{pt3dclear()}
{pt3dadd(200136.000000,143460.000000,92900.000000,168.852050)}
{pt3dadd(200004.000000,143568.000000,92800.000000,140.684253)}
{pt3dadd(199860.000000,143652.000000,92675.000000,153.804728)}
{pt3dadd(199752.000000,143640.000000,92550.000000,161.961960)}
{pt3dadd(199632.000000,143640.000000,92500.000000,160.811480)}

{create adhoc415}
{access adhoc415}
{connect adhoc415(1), adhoc414(0)}
{nseg = 1}
{strdef color color = "White"}
{pt3dclear()}
{pt3dadd(199632.000000,143640.000000,92500.000000,160.811480)}
{pt3dadd(199524.000000,143556.000000,92325.000000,113.585502)}
{pt3dadd(199488.000000,143484.000000,92200.000000,108.064795)}
{pt3dadd(199392.000000,143484.000000,92150.000000,108.064795)}
{pt3dadd(199320.000000,143436.000000,92100.000000,120.126317)}
{pt3dadd(199248.000000,143484.000000,92050.000000,160.811480)}

{create adhoc416}
{access adhoc416}
{connect adhoc416(1), adhoc414(0)}
{nseg = 1}
{strdef color color = "White"}
{pt3dclear()}
{pt3dadd(199632.000000,143640.000000,92500.000000,160.811480)}
{pt3dadd(199656.000000,143760.000000,92400.000000,116.584585)}
{pt3dadd(199716.000000,143904.000000,92325.000000,104.999524)}
{pt3dadd(199752.000000,144060.000000,92325.000000,88.307842)}
{pt3dadd(199716.000000,144072.000000,92175.000000,84.632091)}
{pt3dadd(199692.000000,144156.000000,92000.000000,92.775739)}
{pt3dadd(199716.000000,144288.000000,91900.000000,100.431111)}
{pt3dadd(199716.000000,144300.000000,91725.000000,114.527253)}
{pt3dadd(199740.000000,144360.000000,91625.000000,132.300000)}

{create adhoc417}
{access adhoc417}
{connect adhoc417(1), adhoc2(0)}
{nseg = 1}
{strdef color color = "White"}
{pt3dclear()}
{pt3dadd(200244.000000,138984.000000,91175.000000,448.014770)}
{pt3dadd(199836.000000,138984.000000,90600.000000,310.758810)}
{pt3dadd(199836.000000,138984.000000,90375.000000,252.387992)}
{pt3dadd(199740.000000,139152.000000,90075.000000,190.568038)}
{pt3dadd(199584.000000,139272.000000,89775.000000,156.192843)}
{pt3dadd(199488.000000,139332.000000,89525.000000,138.915000)}

{create adhoc418}
{access adhoc418}
{connect adhoc418(1), adhoc417(0)}
{nseg = 1}
{strdef color color = "White"}
{pt3dclear()}
{pt3dadd(199488.000000,139332.000000,89525.000000,138.915000)}
{pt3dadd(199596.000000,139404.000000,89300.000000,141.684397)}
{pt3dadd(199608.000000,139320.000000,89175.000000,113.390927)}
{pt3dadd(199512.000000,139212.000000,89150.000000,83.581662)}
{pt3dadd(199500.000000,139116.000000,89075.000000,52.355602)}

{create adhoc419}
{access adhoc419}
{connect adhoc419(1), adhoc417(0)}
{nseg = 1}
{strdef color color = "White"}
{pt3dclear()}
{pt3dadd(199488.000000,139332.000000,89525.000000,138.915000)}
{pt3dadd(199572.000000,139524.000000,89650.000000,170.559003)}
{pt3dadd(199632.000000,139716.000000,89600.000000,173.253262)}
{pt3dadd(199596.000000,139848.000000,89550.000000,177.632558)}
{pt3dadd(199620.000000,140028.000000,89525.000000,171.800260)}
{pt3dadd(199644.000000,140148.000000,89525.000000,160.811480)}

{create adhoc420}
{access adhoc420}
{connect adhoc420(1), adhoc419(0)}
{nseg = 1}
{strdef color color = "White"}
{pt3dclear()}
{pt3dadd(199644.000000,140148.000000,89525.000000,160.811480)}
{pt3dadd(199764.000000,140148.000000,89700.000000,154.702043)}
{pt3dadd(199836.000000,140220.000000,89700.000000,124.762698)}
{pt3dadd(199896.000000,140208.000000,89725.000000,95.235786)}
{pt3dadd(199932.000000,140208.000000,89750.000000,70.161514)}

{create adhoc421}
{access adhoc421}
{connect adhoc421(1), adhoc419(0)}
{nseg = 1}
{strdef color color = "White"}
{pt3dclear()}
{pt3dadd(199644.000000,140148.000000,89525.000000,160.811480)}
{pt3dadd(199584.000000,140316.000000,89400.000000,183.915400)}
{pt3dadd(199548.000000,140436.000000,89250.000000,196.550344)}
{pt3dadd(199548.000000,140544.000000,89200.000000,209.643628)}
{pt3dadd(199512.000000,140676.000000,89125.000000,222.939146)}
{pt3dadd(199440.000000,140820.000000,88975.000000,224.893818)}
{pt3dadd(199428.000000,140964.000000,88850.000000,224.893818)}
{pt3dadd(199344.000000,141096.000000,88575.000000,229.311626)}
{pt3dadd(199392.000000,141312.000000,88475.000000,231.574406)}
{pt3dadd(199296.000000,141264.000000,88300.000000,224.440996)}
{pt3dadd(199368.000000,141420.000000,88150.000000,226.493404)}
{pt3dadd(199392.000000,141588.000000,87950.000000,228.648432)}
{pt3dadd(199332.000000,141708.000000,87850.000000,222.178216)}
{pt3dadd(199308.000000,141792.000000,87650.000000,213.753328)}
{pt3dadd(199344.000000,141924.000000,87475.000000,208.995327)}
{pt3dadd(199332.000000,142032.000000,87350.000000,195.467360)}

{create adhoc422}
{access adhoc422}
{connect adhoc422(1), adhoc421(0)}
{nseg = 1}
{strdef color color = "White"}
{pt3dclear()}
{pt3dadd(199332.000000,142032.000000,87350.000000,195.467360)}
{pt3dadd(199512.000000,141732.000000,87225.000000,135.990472)}
{pt3dadd(199572.000000,141708.000000,87225.000000,107.115865)}
{pt3dadd(199584.000000,141648.000000,87150.000000,108.843540)}

{create adhoc423}
{access adhoc423}
{connect adhoc423(1), adhoc421(0)}
{nseg = 1}
{strdef color color = "White"}
{pt3dclear()}
{pt3dadd(199332.000000,142032.000000,87350.000000,195.467360)}
{pt3dadd(199308.000000,142104.000000,87175.000000,183.352220)}
{pt3dadd(199308.000000,142200.000000,87050.000000,188.570814)}
{pt3dadd(199332.000000,142296.000000,86950.000000,190.525486)}
{pt3dadd(199356.000000,142356.000000,86800.000000,198.167108)}
{pt3dadd(199344.000000,142452.000000,86675.000000,201.801650)}
{pt3dadd(199356.000000,142452.000000,86550.000000,205.436192)}
{pt3dadd(199368.000000,142488.000000,86475.000000,202.145827)}
{pt3dadd(199416.000000,142536.000000,86475.000000,195.467360)}

{create adhoc424}
{access adhoc424}
{connect adhoc424(1), adhoc423(0)}
{nseg = 1}
{strdef color color = "White"}
{pt3dclear()}
{pt3dadd(199416.000000,142536.000000,86475.000000,195.467360)}
{pt3dadd(199224.000000,142524.000000,86300.000000,165.064613)}
{pt3dadd(199104.000000,142464.000000,86175.000000,138.509382)}
{pt3dadd(199020.000000,142512.000000,86050.000000,127.198910)}
{pt3dadd(199008.000000,142380.000000,85925.000000,130.495544)}
{pt3dadd(198912.000000,142272.000000,85775.000000,145.813096)}
{pt3dadd(198828.000000,142092.000000,85650.000000,169.435954)}
{pt3dadd(198840.000000,142032.000000,85525.000000,190.691534)}
{pt3dadd(198828.000000,141888.000000,85350.000000,212.416007)}
{pt3dadd(198768.000000,141744.000000,85150.000000,226.277900)}

{create adhoc425}
{access adhoc425}
{connect adhoc425(1), adhoc424(0)}
{nseg = 1}
{strdef color color = "White"}
{pt3dclear()}
{pt3dadd(198768.000000,141744.000000,85150.000000,226.277900)}
{pt3dadd(198732.000000,141612.000000,85025.000000,146.429303)}
{pt3dadd(198852.000000,141468.000000,85025.000000,118.134030)}
{pt3dadd(198804.000000,141456.000000,84825.000000,84.422861)}
{pt3dadd(198768.000000,141420.000000,84725.000000,69.701431)}
{pt3dadd(198684.000000,141396.000000,84575.000000,57.722054)}

{create adhoc426}
{access adhoc426}
{connect adhoc426(1), adhoc424(0)}
{nseg = 1}
{strdef color color = "White"}
{pt3dclear()}
{pt3dadd(198768.000000,141744.000000,85150.000000,226.277900)}
{pt3dadd(198636.000000,141732.000000,84975.000000,170.577233)}
{pt3dadd(198636.000000,141756.000000,84825.000000,168.436030)}
{pt3dadd(198588.000000,141696.000000,84575.000000,160.412330)}
{pt3dadd(198564.000000,141636.000000,84450.000000,157.952330)}
{pt3dadd(198504.000000,141432.000000,84125.000000,161.151350)}
{pt3dadd(198348.000000,141312.000000,83925.000000,120.000000)}

{create adhoc427}
{access adhoc427}
{connect adhoc427(1), adhoc423(0)}
{nseg = 1}
{strdef color color = "White"}
{pt3dclear()}
{pt3dadd(199416.000000,142536.000000,86475.000000,195.467360)}
{pt3dadd(199512.000000,142680.000000,86425.000000,113.213640)}
{pt3dadd(199584.000000,142752.000000,86375.000000,98.132716)}
{pt3dadd(199656.000000,142860.000000,86275.000000,76.948413)}
{pt3dadd(199692.000000,142896.000000,86100.000000,88.784315)}
{pt3dadd(199668.000000,142884.000000,85925.000000,97.632972)}
{pt3dadd(199692.000000,142992.000000,85825.000000,126.000000)}

{create adhoc428}
{access adhoc428}
{connect adhoc428(1), adhoc427(0)}
{nseg = 1}
{strdef color color = "White"}
{pt3dclear()}
{pt3dadd(199692.000000,142992.000000,85825.000000,126.000000)}
{pt3dadd(199572.000000,143040.000000,85700.000000,96.211610)}
{pt3dadd(199476.000000,142980.000000,85525.000000,92.002208)}
{pt3dadd(199452.000000,143112.000000,85250.000000,81.536126)}
{pt3dadd(199488.000000,143196.000000,85025.000000,81.681933)}
{pt3dadd(199536.000000,143184.000000,84900.000000,73.669590)}

{create adhoc429}
{access adhoc429}
{connect adhoc429(1), adhoc427(0)}
{nseg = 1}
{strdef color color = "White"}
{pt3dclear()}
{pt3dadd(199692.000000,142992.000000,85825.000000,126.000000)}
{pt3dadd(199752.000000,143076.000000,85825.000000,104.980758)}
{pt3dadd(199836.000000,143148.000000,85825.000000,100.642484)}
{pt3dadd(199932.000000,143184.000000,85850.000000,87.564115)}
{pt3dadd(200028.000000,143232.000000,85850.000000,78.953643)}
{pt3dadd(200064.000000,143340.000000,85850.000000,70.254051)}
{pt3dadd(200112.000000,143364.000000,85800.000000,60.608154)}

{create adhoc430}
{access adhoc430}
{connect adhoc430(1), adhoc1(0)}
{nseg = 1}
{strdef color color = "White"}
{pt3dclear()}
{pt3dadd(195504.000000,119676.000000,85725.000000,470.415500)}
{pt3dadd(194772.000000,119892.000000,85725.000000,345.269033)}
{pt3dadd(194640.000000,119952.000000,85750.000000,309.970990)}
{pt3dadd(194448.000000,119940.000000,85775.000000,263.282877)}
{pt3dadd(194304.000000,119976.000000,85825.000000,275.800780)}

{create adhoc431}
{access adhoc431}
{connect adhoc431(1), adhoc430(0)}
{nseg = 1}
{strdef color color = "White"}
{pt3dclear()}
{pt3dadd(194304.000000,119976.000000,85825.000000,275.800780)}
{pt3dadd(194172.000000,119976.000000,85800.000000,229.138113)}
{pt3dadd(194016.000000,120024.000000,85850.000000,205.806780)}

{create adhoc432}
{access adhoc432}
{connect adhoc432(1), adhoc431(0)}
{nseg = 1}
{strdef color color = "White"}
{pt3dclear()}
{pt3dadd(194016.000000,120024.000000,85850.000000,205.806780)}
{pt3dadd(193932.000000,120252.000000,85900.000000,142.183213)}
{pt3dadd(193932.000000,120504.000000,86000.000000,124.955701)}
{pt3dadd(193980.000000,120816.000000,86000.000000,104.583627)}
{pt3dadd(194016.000000,120960.000000,86025.000000,100.790193)}
{pt3dadd(194100.000000,121164.000000,86100.000000,108.567439)}
{pt3dadd(194160.000000,121380.000000,86075.000000,114.869443)}
{pt3dadd(194244.000000,121488.000000,86025.000000,120.330960)}

{create adhoc433}
{access adhoc433}
{connect adhoc433(1), adhoc431(0)}
{nseg = 1}
{strdef color color = "White"}
{pt3dclear()}
{pt3dadd(194016.000000,120024.000000,85850.000000,205.806780)}
{pt3dadd(193908.000000,120252.000000,85825.000000,139.223753)}
{pt3dadd(193824.000000,120252.000000,85750.000000,106.714315)}
{pt3dadd(193704.000000,120360.000000,85675.000000,67.139095)}
{pt3dadd(193656.000000,120576.000000,85600.000000,55.125000)}

{create adhoc434}
{access adhoc434}
{connect adhoc434(1), adhoc430(0)}
{nseg = 1}
{strdef color color = "White"}
{pt3dclear()}
{pt3dadd(194304.000000,119976.000000,85825.000000,275.800780)}
{pt3dadd(194148.000000,119784.000000,85825.000000,176.165267)}
{pt3dadd(193992.000000,119616.000000,85900.000000,178.590450)}
{pt3dadd(193836.000000,119448.000000,85950.000000,163.601320)}
{pt3dadd(193704.000000,119280.000000,85925.000000,186.672820)}

{create adhoc435}
{access adhoc435}
{connect adhoc435(1), adhoc434(0)}
{nseg = 1}
{strdef color color = "White"}
{pt3dclear()}
{pt3dadd(193704.000000,119280.000000,85925.000000,186.672820)}
{pt3dadd(193776.000000,119280.000000,85825.000000,139.484273)}
{pt3dadd(193800.000000,119088.000000,85750.000000,108.000690)}
{pt3dadd(193848.000000,118968.000000,85675.000000,81.691126)}
{pt3dadd(193896.000000,118884.000000,85575.000000,67.213074)}
{pt3dadd(193992.000000,118704.000000,85475.000000,65.622962)}
{pt3dadd(194004.000000,118692.000000,85350.000000,77.534092)}
{pt3dadd(193896.000000,118620.000000,85100.000000,90.590048)}
{pt3dadd(193884.000000,118476.000000,84975.000000,120.330960)}

{create adhoc436}
{access adhoc436}
{connect adhoc436(1), adhoc434(0)}
{nseg = 1}
{strdef color color = "White"}
{pt3dclear()}
{pt3dadd(193704.000000,119280.000000,85925.000000,186.672820)}
{pt3dadd(193836.000000,119304.000000,86050.000000,161.254990)}

{create adhoc437}
{access adhoc437}
{connect adhoc437(1), adhoc436(0)}
{nseg = 1}
{strdef color color = "White"}
{pt3dclear()}
{pt3dadd(193836.000000,119304.000000,86050.000000,161.254990)}
{pt3dadd(193932.000000,119460.000000,86150.000000,119.827952)}
{pt3dadd(194028.000000,119664.000000,86250.000000,98.698683)}
{pt3dadd(194076.000000,119664.000000,86400.000000,79.210501)}
{pt3dadd(194124.000000,119724.000000,86550.000000,65.941213)}
{pt3dadd(194136.000000,119868.000000,86675.000000,63.814080)}

{create adhoc438}
{access adhoc438}
{connect adhoc438(1), adhoc436(0)}
{nseg = 1}
{strdef color color = "White"}
{pt3dclear()}
{pt3dadd(193836.000000,119304.000000,86050.000000,161.254990)}
{pt3dadd(193836.000000,119160.000000,86125.000000,106.755378)}
{pt3dadd(193800.000000,118944.000000,86200.000000,92.329326)}
{pt3dadd(193788.000000,118812.000000,86325.000000,72.982303)}
{pt3dadd(193824.000000,118836.000000,86425.000000,63.814080)}

{create adhoc439}
{access adhoc439}
{connect adhoc439(1), adhoc434(0)}
{nseg = 1}
{strdef color color = "White"}
{pt3dclear()}
{pt3dadd(193704.000000,119280.000000,85925.000000,186.672820)}
{pt3dadd(193524.000000,119256.000000,85950.000000,116.585401)}
{pt3dadd(193320.000000,119064.000000,85925.000000,108.883381)}
{pt3dadd(193188.000000,118836.000000,85975.000000,82.048817)}
{pt3dadd(193176.000000,118884.000000,86100.000000,82.386900)}
{pt3dadd(193164.000000,118884.000000,86225.000000,52.500000)}
