# Supplementary material for: Full reconstruction of large lobula plate tangential cells in Drosophila from a 3D EM dataset
Source: PLoS One. 2018 Nov 28;13(11):e0207828. doi: 10.1371/journal.pone.0207828 (PMC6261601; doi:10.1371/journal.pone.0207828)
Supplement: S1 Dataset — (ZIP) [file pone.0207828.s001.zip › Diameter hoc/Cell71_4skels_ck.001_corrected_sorted_diametered.hoc0001.hoc]

/* created with convertKnossosNmlToHoc.m */

{create adhoc1}
{access adhoc1}
{nseg = 1}
{strdef color color = "White"}
{pt3dclear()}
{pt3dadd(188736.000000,116676.000000,92100.000000,215.502760)}
{pt3dadd(188616.000000,116772.000000,92050.000000,317.437277)}
{pt3dadd(188580.000000,117132.000000,92125.000000,436.200680)}
{pt3dadd(188496.000000,117576.000000,92025.000000,571.792970)}

{create adhoc2}
{access adhoc2}
{connect adhoc2(1), adhoc1(0)}
{nseg = 1}
{strdef color color = "White"}
{pt3dclear()}
{pt3dadd(188496.000000,117576.000000,92025.000000,571.792970)}
{pt3dadd(188448.000000,118080.000000,92025.000000,483.557750)}
{pt3dadd(188604.000000,118416.000000,92025.000000,366.825160)}
{pt3dadd(188652.000000,118764.000000,92225.000000,278.926566)}
{pt3dadd(188616.000000,119136.000000,92250.000000,205.472544)}
{pt3dadd(188820.000000,119412.000000,92250.000000,162.609440)}
{pt3dadd(188916.000000,119688.000000,92275.000000,142.874080)}
{pt3dadd(189072.000000,119916.000000,92225.000000,154.750074)}
{pt3dadd(189216.000000,120288.000000,92150.000000,154.718573)}
{pt3dadd(189444.000000,120456.000000,92150.000000,205.240720)}

{create adhoc3}
{access adhoc3}
{connect adhoc3(1), adhoc2(0)}
{nseg = 1}
{strdef color color = "White"}
{pt3dclear()}
{pt3dadd(189444.000000,120456.000000,92150.000000,205.240720)}
{pt3dadd(189552.000000,120732.000000,92025.000000,141.062315)}
{pt3dadd(189828.000000,121116.000000,91900.000000,121.438601)}
{pt3dadd(189960.000000,121452.000000,91750.000000,100.135317)}
{pt3dadd(190092.000000,121596.000000,91575.000000,102.260356)}
{pt3dadd(190176.000000,121692.000000,91425.000000,126.921574)}
{pt3dadd(190236.000000,121944.000000,91375.000000,155.120802)}
{pt3dadd(190464.000000,122328.000000,91450.000000,193.134802)}
{pt3dadd(190776.000000,122640.000000,91325.000000,250.888000)}
{pt3dadd(190920.000000,122892.000000,91325.000000,288.794300)}

{create adhoc4}
{access adhoc4}
{connect adhoc4(1), adhoc3(0)}
{nseg = 1}
{strdef color color = "White"}
{pt3dclear()}
{pt3dadd(190920.000000,122892.000000,91325.000000,288.794300)}
{pt3dadd(190800.000000,123300.000000,91600.000000,340.976707)}
{pt3dadd(191292.000000,123672.000000,91625.000000,317.447354)}
{pt3dadd(191748.000000,124092.000000,91650.000000,290.319250)}
{pt3dadd(192036.000000,124668.000000,91600.000000,292.474278)}
{pt3dadd(192408.000000,125148.000000,91550.000000,185.575443)}
{pt3dadd(192612.000000,125328.000000,91475.000000,226.277900)}

{create adhoc5}
{access adhoc5}
{connect adhoc5(1), adhoc4(0)}
{nseg = 1}
{strdef color color = "White"}
{pt3dclear()}
{pt3dadd(192612.000000,125328.000000,91475.000000,226.277900)}
{pt3dadd(192876.000000,125604.000000,91675.000000,190.144550)}
{pt3dadd(192876.000000,125712.000000,91825.000000,161.023587)}
{pt3dadd(192900.000000,125808.000000,91925.000000,138.915010)}

{create adhoc6}
{access adhoc6}
{connect adhoc6(1), adhoc4(0)}
{nseg = 1}
{strdef color color = "White"}
{pt3dclear()}
{pt3dadd(192612.000000,125328.000000,91475.000000,226.277900)}
{pt3dadd(193212.000000,125688.000000,91250.000000,213.721450)}
{pt3dadd(193584.000000,125976.000000,91275.000000,162.345574)}
{pt3dadd(193968.000000,126144.000000,91225.000000,134.999163)}
{pt3dadd(194340.000000,126300.000000,91175.000000,106.285431)}
{pt3dadd(194604.000000,126468.000000,91125.000000,90.571361)}
{pt3dadd(194820.000000,126672.000000,91050.000000,92.319637)}
{pt3dadd(195168.000000,126912.000000,91050.000000,92.319637)}
{pt3dadd(195456.000000,127176.000000,91100.000000,96.179176)}
{pt3dadd(195624.000000,127356.000000,91100.000000,97.119408)}
{pt3dadd(195888.000000,127596.000000,91125.000000,102.574548)}
{pt3dadd(196056.000000,127788.000000,91150.000000,100.014065)}
{pt3dadd(196260.000000,127968.000000,91175.000000,100.014065)}
{pt3dadd(196296.000000,128160.000000,91275.000000,96.154526)}
{pt3dadd(196428.000000,128340.000000,91300.000000,111.868596)}
{pt3dadd(196632.000000,128544.000000,91325.000000,129.769148)}
{pt3dadd(196896.000000,128748.000000,91425.000000,190.927403)}
{pt3dadd(197124.000000,128868.000000,91525.000000,255.143567)}
{pt3dadd(197460.000000,129096.000000,91450.000000,304.097502)}
{pt3dadd(197508.000000,129108.000000,91075.000000,311.739124)}
{pt3dadd(197640.000000,129180.000000,90975.000000,300.800868)}
{pt3dadd(197940.000000,129300.000000,90975.000000,241.307637)}
{pt3dadd(198120.000000,129492.000000,90950.000000,184.035121)}
{pt3dadd(198360.000000,129636.000000,90850.000000,123.452442)}
{pt3dadd(198528.000000,129744.000000,90775.000000,120.000000)}

{create adhoc7}
{access adhoc7}
{connect adhoc7(1), adhoc6(0)}
{nseg = 1}
{strdef color color = "White"}
{pt3dclear()}
{pt3dadd(198528.000000,129744.000000,90775.000000,120.000000)}
{pt3dadd(198840.000000,129864.000000,90725.000000,105.168812)}
{pt3dadd(198864.000000,130128.000000,90625.000000,98.919625)}
{pt3dadd(198888.000000,130404.000000,90475.000000,94.664485)}
{pt3dadd(199008.000000,130560.000000,90325.000000,89.716512)}
{pt3dadd(199092.000000,130704.000000,90225.000000,94.204470)}
{pt3dadd(199332.000000,131016.000000,90150.000000,108.457597)}
{pt3dadd(199560.000000,131268.000000,90075.000000,104.580731)}
{pt3dadd(199800.000000,131544.000000,90025.000000,98.199969)}
{pt3dadd(199932.000000,131772.000000,89875.000000,88.905416)}
{pt3dadd(200016.000000,131892.000000,89825.000000,80.294944)}
{pt3dadd(200136.000000,132060.000000,89775.000000,64.376793)}
{pt3dadd(200256.000000,132288.000000,89750.000000,70.089350)}
{pt3dadd(200400.000000,132588.000000,89800.000000,85.897402)}
{pt3dadd(200544.000000,132924.000000,89800.000000,111.053196)}
{pt3dadd(200568.000000,133116.000000,89775.000000,120.700273)}
{pt3dadd(200592.000000,133308.000000,89725.000000,125.188231)}
{pt3dadd(200760.000000,133608.000000,89650.000000,134.615521)}
{pt3dadd(200844.000000,133908.000000,89525.000000,142.675251)}
{pt3dadd(200916.000000,134136.000000,89425.000000,161.293831)}
{pt3dadd(200940.000000,134400.000000,89275.000000,182.625675)}
{pt3dadd(200940.000000,134712.000000,89075.000000,202.941716)}
{pt3dadd(201060.000000,135156.000000,88800.000000,195.538274)}
{pt3dadd(201144.000000,135504.000000,88675.000000,178.051254)}
{pt3dadd(201180.000000,135780.000000,88550.000000,140.396182)}
{pt3dadd(201228.000000,135912.000000,88450.000000,110.023342)}
{pt3dadd(201336.000000,136164.000000,88525.000000,86.884367)}
{pt3dadd(201420.000000,136440.000000,88425.000000,79.849577)}
{pt3dadd(201504.000000,136608.000000,88350.000000,74.838635)}
{pt3dadd(201576.000000,136872.000000,88250.000000,76.348862)}
{pt3dadd(201696.000000,137160.000000,88200.000000,79.091764)}
{pt3dadd(201792.000000,137568.000000,88200.000000,85.182595)}
{pt3dadd(201828.000000,137952.000000,88150.000000,98.231677)}
{pt3dadd(201888.000000,138204.000000,88175.000000,118.956689)}
{pt3dadd(201888.000000,138516.000000,88125.000000,145.403217)}
{pt3dadd(201948.000000,138852.000000,88025.000000,177.294650)}

{create adhoc8}
{access adhoc8}
{connect adhoc8(1), adhoc7(0)}
{nseg = 1}
{strdef color color = "White"}
{pt3dclear()}
{pt3dadd(201948.000000,138852.000000,88025.000000,177.294650)}
{pt3dadd(201840.000000,138936.000000,87725.000000,170.932470)}
{pt3dadd(201516.000000,138816.000000,87150.000000,202.823502)}
{pt3dadd(201444.000000,138888.000000,86650.000000,231.043716)}
{pt3dadd(201252.000000,138912.000000,86175.000000,270.722860)}
{pt3dadd(201072.000000,138828.000000,85625.000000,285.381168)}
{pt3dadd(200916.000000,138396.000000,85325.000000,269.466200)}
{pt3dadd(200688.000000,138156.000000,84800.000000,271.728980)}
{pt3dadd(200316.000000,137736.000000,84425.000000,247.143308)}
{pt3dadd(200100.000000,137340.000000,84025.000000,209.924164)}
{pt3dadd(199908.000000,137064.000000,83600.000000,182.796064)}
{pt3dadd(199836.000000,136632.000000,83300.000000,174.333352)}
{pt3dadd(199716.000000,136200.000000,82950.000000,181.823432)}
{pt3dadd(199596.000000,135744.000000,82575.000000,190.248320)}
{pt3dadd(199512.000000,135372.000000,82200.000000,221.929267)}
{pt3dadd(199344.000000,134952.000000,81700.000000,237.591800)}

{create adhoc9}
{access adhoc9}
{connect adhoc9(1), adhoc8(0)}
{nseg = 1}
{strdef color color = "White"}
{pt3dclear()}
{pt3dadd(199344.000000,134952.000000,81700.000000,237.591800)}
{pt3dadd(199068.000000,134640.000000,81250.000000,303.234000)}

{create adhoc10}
{access adhoc10}
{connect adhoc10(1), adhoc9(0)}
{nseg = 1}
{strdef color color = "White"}
{pt3dclear()}
{pt3dadd(199068.000000,134640.000000,81250.000000,303.234000)}
{pt3dadd(198888.000000,134184.000000,81100.000000,236.559283)}
{pt3dadd(198360.000000,133644.000000,80925.000000,216.487972)}
{pt3dadd(198168.000000,133188.000000,80775.000000,193.073052)}
{pt3dadd(197712.000000,132648.000000,80675.000000,182.786572)}
{pt3dadd(197376.000000,132288.000000,80550.000000,189.262053)}
{pt3dadd(197136.000000,131880.000000,80425.000000,186.159400)}

{create adhoc11}
{access adhoc11}
{connect adhoc11(1), adhoc10(0)}
{nseg = 1}
{strdef color color = "White"}
{pt3dclear()}
{pt3dadd(197136.000000,131880.000000,80425.000000,186.159400)}
{pt3dadd(196692.000000,131616.000000,80300.000000,228.565383)}
{pt3dadd(196092.000000,131280.000000,80400.000000,228.081648)}
{pt3dadd(195696.000000,131040.000000,80450.000000,243.238758)}
{pt3dadd(195300.000000,130824.000000,80525.000000,231.897912)}
{pt3dadd(194940.000000,130476.000000,80575.000000,224.142130)}
{pt3dadd(194460.000000,130284.000000,80550.000000,205.240720)}

{create adhoc12}
{access adhoc12}
{connect adhoc12(1), adhoc11(0)}
{nseg = 1}
{strdef color color = "White"}
{pt3dclear()}
{pt3dadd(194460.000000,130284.000000,80550.000000,205.240720)}
{pt3dadd(194100.000000,130032.000000,80575.000000,196.531843)}
{pt3dadd(193692.000000,129792.000000,80550.000000,184.008796)}
{pt3dadd(193212.000000,129636.000000,80575.000000,180.192532)}
{pt3dadd(192792.000000,129468.000000,80450.000000,186.986254)}
{pt3dadd(192228.000000,129348.000000,80450.000000,196.316396)}
{pt3dadd(191772.000000,129072.000000,80400.000000,224.536610)}
{pt3dadd(191268.000000,129000.000000,80300.000000,254.552650)}
{pt3dadd(190848.000000,128724.000000,80225.000000,298.593286)}
{pt3dadd(190392.000000,128460.000000,80050.000000,342.782112)}
{pt3dadd(190032.000000,128160.000000,79925.000000,393.337360)}
{pt3dadd(189672.000000,127728.000000,79875.000000,470.415500)}

{create adhoc13}
{access adhoc13}
{connect adhoc13(1), adhoc12(0)}
{nseg = 1}
{strdef color color = "White"}
{pt3dclear()}
{pt3dadd(189672.000000,127728.000000,79875.000000,470.415500)}
{pt3dadd(189300.000000,127404.000000,79750.000000,441.597617)}
{pt3dadd(189024.000000,127188.000000,79725.000000,413.796450)}
{pt3dadd(188676.000000,126828.000000,79600.000000,387.012000)}

{create adhoc14}
{access adhoc14}
{connect adhoc14(1), adhoc13(0)}
{nseg = 1}
{strdef color color = "White"}
{pt3dclear()}
{pt3dadd(188676.000000,126828.000000,79600.000000,387.012000)}
{pt3dadd(188712.000000,126480.000000,79400.000000,269.585753)}
{pt3dadd(188664.000000,126144.000000,79325.000000,240.031476)}
{pt3dadd(188616.000000,125856.000000,79325.000000,199.860956)}
{pt3dadd(188640.000000,125568.000000,79375.000000,191.837256)}
{pt3dadd(188580.000000,125220.000000,79450.000000,189.975664)}
{pt3dadd(188400.000000,124944.000000,79500.000000,192.028072)}
{pt3dadd(188280.000000,124668.000000,79550.000000,207.185182)}
{pt3dadd(188184.000000,124452.000000,79525.000000,217.471662)}
{pt3dadd(188088.000000,124236.000000,79525.000000,230.134056)}
{pt3dadd(187980.000000,124020.000000,79525.000000,231.995648)}
{pt3dadd(187860.000000,123708.000000,79575.000000,221.057392)}
{pt3dadd(187620.000000,123420.000000,79500.000000,209.716546)}
{pt3dadd(187464.000000,123288.000000,79525.000000,199.430066)}
{pt3dadd(187224.000000,122952.000000,79550.000000,186.767672)}
{pt3dadd(187020.000000,122784.000000,79425.000000,200.063190)}
{pt3dadd(186744.000000,122496.000000,79350.000000,225.659754)}
{pt3dadd(186564.000000,122184.000000,79325.000000,298.970204)}
{pt3dadd(186324.000000,121800.000000,79275.000000,400.741912)}
{pt3dadd(186252.000000,121428.000000,79200.000000,489.590378)}
{pt3dadd(185952.000000,121392.000000,79200.000000,522.537534)}
{pt3dadd(185532.000000,120960.000000,79200.000000,522.537534)}
{pt3dadd(185592.000000,120336.000000,79275.000000,463.187380)}
{pt3dadd(185376.000000,120036.000000,79300.000000,384.830592)}
{pt3dadd(185412.000000,119628.000000,79325.000000,316.509106)}
{pt3dadd(185520.000000,119328.000000,79500.000000,316.509106)}
{pt3dadd(185580.000000,118872.000000,79550.000000,328.956502)}
{pt3dadd(185604.000000,118500.000000,79625.000000,355.502103)}
{pt3dadd(185628.000000,118080.000000,79650.000000,351.031280)}

{create adhoc15}
{access adhoc15}
{connect adhoc15(1), adhoc14(0)}
{nseg = 1}
{strdef color color = "White"}
{pt3dclear()}
{pt3dadd(185628.000000,118080.000000,79650.000000,351.031280)}
{pt3dadd(185604.000000,117684.000000,79675.000000,275.404960)}
{pt3dadd(185568.000000,117360.000000,79700.000000,243.523000)}
{pt3dadd(185676.000000,116892.000000,79900.000000,216.417296)}
{pt3dadd(185868.000000,116556.000000,80000.000000,221.287926)}
{pt3dadd(186156.000000,116316.000000,80025.000000,237.448710)}
{pt3dadd(186384.000000,116028.000000,79975.000000,260.863630)}
{pt3dadd(186564.000000,115752.000000,80025.000000,280.462286)}
{pt3dadd(186888.000000,115464.000000,80050.000000,282.617314)}
{pt3dadd(186780.000000,115188.000000,79975.000000,275.483904)}
{pt3dadd(186768.000000,114876.000000,79900.000000,250.898232)}
{pt3dadd(186816.000000,114540.000000,79825.000000,231.299576)}
{pt3dadd(186780.000000,114168.000000,79775.000000,220.547050)}
{pt3dadd(186660.000000,113868.000000,79675.000000,230.299910)}
{pt3dadd(186444.000000,113568.000000,79600.000000,242.803190)}
{pt3dadd(186312.000000,113268.000000,79650.000000,264.356518)}
{pt3dadd(186036.000000,112920.000000,79700.000000,289.023500)}
{pt3dadd(185676.000000,112692.000000,79700.000000,303.234000)}

{create adhoc16}
{access adhoc16}
{connect adhoc16(1), adhoc15(0)}
{nseg = 1}
{strdef color color = "White"}
{pt3dclear()}
{pt3dadd(185676.000000,112692.000000,79700.000000,303.234000)}
{pt3dadd(185988.000000,112452.000000,79825.000000,210.965843)}
{pt3dadd(186024.000000,112224.000000,79800.000000,178.362506)}
{pt3dadd(185844.000000,111984.000000,79900.000000,170.104696)}
{pt3dadd(185652.000000,111732.000000,80000.000000,203.197390)}
{pt3dadd(185544.000000,111492.000000,80175.000000,245.058490)}
{pt3dadd(185316.000000,111180.000000,80275.000000,334.315520)}

{create adhoc17}
{access adhoc17}
{connect adhoc17(1), adhoc16(0)}
{nseg = 1}
{strdef color color = "White"}
{pt3dclear()}
{pt3dadd(185316.000000,111180.000000,80275.000000,334.315520)}
{pt3dadd(185172.000000,110664.000000,80625.000000,363.303460)}
{pt3dadd(185040.000000,110268.000000,80925.000000,325.635210)}
{pt3dadd(185136.000000,110076.000000,81200.000000,289.402866)}
{pt3dadd(184944.000000,109800.000000,81400.000000,244.162762)}
{pt3dadd(184908.000000,109608.000000,81650.000000,198.229190)}
{pt3dadd(184932.000000,109356.000000,81850.000000,177.702210)}
{pt3dadd(184848.000000,108888.000000,82100.000000,153.007936)}
{pt3dadd(184752.000000,108624.000000,82225.000000,148.837176)}
{pt3dadd(184620.000000,108252.000000,82400.000000,148.153133)}
{pt3dadd(184440.000000,107904.000000,82500.000000,132.300000)}

{create adhoc18}
{access adhoc18}
{connect adhoc18(1), adhoc17(0)}
{nseg = 1}
{strdef color color = "White"}
{pt3dclear()}
{pt3dadd(184440.000000,107904.000000,82500.000000,132.300000)}
{pt3dadd(184320.000000,107544.000000,82650.000000,130.200000)}
{pt3dadd(184212.000000,107256.000000,82850.000000,124.052103)}
{pt3dadd(184104.000000,106968.000000,83050.000000,126.764253)}
{pt3dadd(183936.000000,106740.000000,83275.000000,128.024253)}
{pt3dadd(183900.000000,106620.000000,83550.000000,127.273755)}
{pt3dadd(183912.000000,106572.000000,83625.000000,132.300000)}

{create adhoc19}
{access adhoc19}
{connect adhoc19(1), adhoc18(0)}
{nseg = 1}
{strdef color color = "White"}
{pt3dclear()}
{pt3dadd(183912.000000,106572.000000,83625.000000,132.300000)}
{pt3dadd(183840.000000,106452.000000,83800.000000,122.568865)}
{pt3dadd(183780.000000,106224.000000,83975.000000,218.152713)}
{pt3dadd(183708.000000,106140.000000,84250.000000,289.639240)}
{pt3dadd(183768.000000,105996.000000,84500.000000,448.014770)}

{create adhoc20}
{access adhoc20}
{connect adhoc20(1), adhoc19(0)}
{nseg = 1}
{strdef color color = "White"}
{pt3dclear()}
{pt3dadd(183768.000000,105996.000000,84500.000000,448.014770)}
{pt3dadd(183252.000000,105444.000000,84650.000000,570.106390)}
{pt3dadd(182820.000000,105036.000000,84650.000000,496.793734)}
{pt3dadd(182472.000000,104748.000000,84625.000000,446.284252)}
{pt3dadd(182340.000000,104004.000000,84200.000000,343.072042)}
{pt3dadd(182088.000000,103728.000000,83975.000000,253.626282)}
{pt3dadd(182016.000000,103488.000000,83725.000000,193.313592)}
{pt3dadd(181932.000000,103164.000000,83600.000000,156.666792)}
{pt3dadd(181668.000000,102828.000000,83500.000000,144.033320)}
{pt3dadd(181440.000000,102456.000000,83300.000000,142.644170)}
{pt3dadd(181152.000000,102264.000000,83125.000000,128.257555)}
{pt3dadd(180876.000000,102072.000000,83000.000000,118.487145)}
{pt3dadd(180672.000000,101820.000000,82825.000000,113.291773)}
{pt3dadd(180408.000000,101580.000000,82650.000000,107.563876)}
{pt3dadd(180264.000000,101352.000000,82525.000000,100.512979)}
{pt3dadd(180108.000000,101076.000000,82400.000000,103.073462)}
{pt3dadd(179988.000000,100860.000000,82200.000000,99.805565)}
{pt3dadd(179760.000000,100596.000000,81925.000000,101.733040)}
{pt3dadd(179556.000000,100380.000000,81825.000000,101.733040)}
{pt3dadd(179316.000000,100152.000000,81650.000000,101.733040)}
{pt3dadd(179100.000000,99816.000000,81500.000000,116.698822)}
{pt3dadd(178812.000000,99528.000000,81425.000000,166.172975)}
{pt3dadd(178500.000000,99204.000000,81250.000000,230.777018)}
{pt3dadd(178260.000000,98880.000000,80850.000000,283.761487)}
{pt3dadd(178032.000000,98604.000000,80500.000000,320.788244)}
{pt3dadd(177912.000000,98472.000000,80150.000000,316.189984)}
{pt3dadd(177804.000000,98376.000000,79825.000000,266.715831)}
{pt3dadd(177828.000000,98184.000000,79525.000000,198.436037)}
{pt3dadd(177732.000000,98016.000000,79175.000000,144.464325)}
{pt3dadd(177624.000000,97932.000000,79000.000000,102.176079)}
{pt3dadd(177552.000000,97740.000000,78800.000000,100.786929)}
{pt3dadd(177504.000000,97620.000000,78675.000000,127.573186)}
{pt3dadd(177456.000000,97524.000000,78525.000000,209.304090)}
{pt3dadd(177312.000000,97212.000000,78325.000000,298.472182)}
{pt3dadd(177096.000000,96732.000000,78025.000000,372.604522)}
{pt3dadd(177192.000000,96408.000000,77875.000000,430.157668)}
{pt3dadd(177132.000000,96000.000000,77700.000000,460.041708)}
{pt3dadd(177036.000000,95676.000000,77500.000000,442.526968)}
{pt3dadd(176892.000000,95544.000000,77225.000000,381.132376)}
{pt3dadd(176904.000000,95280.000000,76975.000000,320.701572)}
{pt3dadd(176940.000000,94980.000000,76550.000000,263.271710)}
{pt3dadd(176868.000000,94944.000000,76375.000000,145.860750)}

{create adhoc21}
{access adhoc21}
{connect adhoc21(1), adhoc19(0)}
{nseg = 1}
{strdef color color = "White"}
{pt3dclear()}
{pt3dadd(183768.000000,105996.000000,84500.000000,448.014770)}
{pt3dadd(184116.000000,106236.000000,85075.000000,319.952510)}
{pt3dadd(184212.000000,106692.000000,85050.000000,227.186980)}
{pt3dadd(184332.000000,106884.000000,85075.000000,156.388654)}
{pt3dadd(184404.000000,106812.000000,85175.000000,101.653012)}
{pt3dadd(184620.000000,106836.000000,85300.000000,86.547068)}
{pt3dadd(184776.000000,106848.000000,85450.000000,84.711377)}
{pt3dadd(184740.000000,106968.000000,85575.000000,79.711883)}
{pt3dadd(184788.000000,106992.000000,85725.000000,70.879751)}
{pt3dadd(184872.000000,107124.000000,85850.000000,64.023754)}
{pt3dadd(184872.000000,107124.000000,85950.000000,57.962078)}
{pt3dadd(184812.000000,107196.000000,86075.000000,57.109261)}
{pt3dadd(184812.000000,107208.000000,86225.000000,66.383000)}
{pt3dadd(184860.000000,107244.000000,86325.000000,75.215132)}
{pt3dadd(184884.000000,107280.000000,86500.000000,79.964614)}
{pt3dadd(184956.000000,107280.000000,86700.000000,79.441058)}
{pt3dadd(184836.000000,107316.000000,86925.000000,73.379382)}
{pt3dadd(184788.000000,107328.000000,87150.000000,63.132137)}
{pt3dadd(184812.000000,107172.000000,87275.000000,57.691607)}
{pt3dadd(184824.000000,107148.000000,87425.000000,57.691607)}
{pt3dadd(184908.000000,107052.000000,87675.000000,63.464632)}
{pt3dadd(184932.000000,106920.000000,88025.000000,65.834054)}
{pt3dadd(184932.000000,106836.000000,88300.000000,66.308935)}
{pt3dadd(184848.000000,106692.000000,88625.000000,67.678755)}
{pt3dadd(184860.000000,106512.000000,88900.000000,68.346960)}
{pt3dadd(184776.000000,106476.000000,89250.000000,68.346960)}
{pt3dadd(184632.000000,106356.000000,89550.000000,82.765862)}
{pt3dadd(184596.000000,106332.000000,89850.000000,139.656470)}
{pt3dadd(184548.000000,106488.000000,90175.000000,210.258698)}
{pt3dadd(184728.000000,106656.000000,90500.000000,281.562541)}
{pt3dadd(184764.000000,106740.000000,90875.000000,374.231348)}
{pt3dadd(184704.000000,106824.000000,91325.000000,410.127492)}
{pt3dadd(184608.000000,106452.000000,91625.000000,363.996491)}
{pt3dadd(184644.000000,106392.000000,92025.000000,322.206998)}
{pt3dadd(184584.000000,106632.000000,92375.000000,103.660515)}

{create adhoc22}
{access adhoc22}
{connect adhoc22(1), adhoc18(0)}
{nseg = 1}
{strdef color color = "White"}
{pt3dclear()}
{pt3dadd(183912.000000,106572.000000,83625.000000,132.300000)}
{pt3dadd(183876.000000,106740.000000,83625.000000,89.545845)}

{create adhoc23}
{access adhoc23}
{connect adhoc23(1), adhoc17(0)}
{nseg = 1}
{strdef color color = "White"}
{pt3dclear()}
{pt3dadd(184440.000000,107904.000000,82500.000000,132.300000)}
{pt3dadd(184308.000000,107880.000000,82375.000000,84.697957)}
{pt3dadd(184140.000000,107916.000000,82350.000000,71.939003)}
{pt3dadd(184044.000000,107976.000000,82225.000000,94.023140)}

{create adhoc24}
{access adhoc24}
{connect adhoc24(1), adhoc16(0)}
{nseg = 1}
{strdef color color = "White"}
{pt3dclear()}
{pt3dadd(185316.000000,111180.000000,80275.000000,334.315520)}
{pt3dadd(184800.000000,110880.000000,80225.000000,211.216457)}
{pt3dadd(184692.000000,110868.000000,80025.000000,49.862480)}

{create adhoc25}
{access adhoc25}
{connect adhoc25(1), adhoc15(0)}
{nseg = 1}
{strdef color color = "White"}
{pt3dclear()}
{pt3dadd(185676.000000,112692.000000,79700.000000,303.234000)}
{pt3dadd(185412.000000,112584.000000,79650.000000,261.944950)}

{create adhoc26}
{access adhoc26}
{connect adhoc26(1), adhoc25(0)}
{nseg = 1}
{strdef color color = "White"}
{pt3dclear()}
{pt3dadd(185412.000000,112584.000000,79650.000000,261.944950)}
{pt3dadd(185028.000000,112548.000000,79375.000000,261.944950)}

{create adhoc27}
{access adhoc27}
{connect adhoc27(1), adhoc26(0)}
{nseg = 1}
{strdef color color = "White"}
{pt3dclear()}
{pt3dadd(185028.000000,112548.000000,79375.000000,261.944950)}
{pt3dadd(184584.000000,112428.000000,79200.000000,239.863767)}
{pt3dadd(184284.000000,112272.000000,78950.000000,189.610429)}
{pt3dadd(183924.000000,112140.000000,78725.000000,163.681439)}
{pt3dadd(183672.000000,111972.000000,78800.000000,135.094729)}
{pt3dadd(183336.000000,111672.000000,78575.000000,165.003463)}
{pt3dadd(182952.000000,111408.000000,78250.000000,198.852157)}
{pt3dadd(182448.000000,110976.000000,78150.000000,318.395720)}

{create adhoc28}
{access adhoc28}
{connect adhoc28(1), adhoc27(0)}
{nseg = 1}
{strdef color color = "White"}
{pt3dclear()}
{pt3dadd(182448.000000,110976.000000,78150.000000,318.395720)}
{pt3dadd(182028.000000,110460.000000,77950.000000,365.369243)}
{pt3dadd(181596.000000,110136.000000,77500.000000,285.469690)}
{pt3dadd(181320.000000,109932.000000,77175.000000,241.535406)}
{pt3dadd(181116.000000,109728.000000,76825.000000,191.658190)}
{pt3dadd(180792.000000,109728.000000,76625.000000,134.006317)}
{pt3dadd(180636.000000,109560.000000,76425.000000,177.294650)}

{create adhoc29}
{access adhoc29}
{connect adhoc29(1), adhoc28(0)}
{nseg = 1}
{strdef color color = "White"}
{pt3dclear()}
{pt3dadd(180636.000000,109560.000000,76425.000000,177.294650)}
{pt3dadd(180456.000000,109380.000000,76150.000000,186.610007)}
{pt3dadd(180432.000000,109212.000000,75875.000000,150.515492)}
{pt3dadd(180468.000000,109236.000000,75750.000000,131.300707)}
{pt3dadd(180636.000000,109392.000000,75475.000000,109.874080)}
{pt3dadd(180828.000000,109548.000000,75375.000000,83.368847)}
{pt3dadd(180948.000000,109596.000000,75275.000000,70.161514)}

{create adhoc30}
{access adhoc30}
{connect adhoc30(1), adhoc28(0)}
{nseg = 1}
{strdef color color = "White"}
{pt3dclear()}
{pt3dadd(180636.000000,109560.000000,76425.000000,177.294650)}
{pt3dadd(180612.000000,109392.000000,76600.000000,115.393488)}
{pt3dadd(180552.000000,109332.000000,76650.000000,70.161514)}

{create adhoc31}
{access adhoc31}
{connect adhoc31(1), adhoc27(0)}
{nseg = 1}
{strdef color color = "White"}
{pt3dclear()}
{pt3dadd(182448.000000,110976.000000,78150.000000,318.395720)}
{pt3dadd(182256.000000,110700.000000,78550.000000,237.591800)}

{create adhoc32}
{access adhoc32}
{connect adhoc32(1), adhoc31(0)}
{nseg = 1}
{strdef color color = "White"}
{pt3dclear()}
{pt3dadd(182256.000000,110700.000000,78550.000000,237.591800)}
{pt3dadd(182400.000000,110676.000000,78650.000000,85.281760)}

{create adhoc33}
{access adhoc33}
{connect adhoc33(1), adhoc31(0)}
{nseg = 1}
{strdef color color = "White"}
{pt3dclear()}
{pt3dadd(182256.000000,110700.000000,78550.000000,237.591800)}
{pt3dadd(181932.000000,110184.000000,78350.000000,183.250400)}
{pt3dadd(181884.000000,110256.000000,78425.000000,126.000000)}

{create adhoc34}
{access adhoc34}
{connect adhoc34(1), adhoc26(0)}
{nseg = 1}
{strdef color color = "White"}
{pt3dclear()}
{pt3dadd(185028.000000,112548.000000,79375.000000,261.944950)}
{pt3dadd(184776.000000,112536.000000,79675.000000,206.966921)}
{pt3dadd(184776.000000,112512.000000,79800.000000,70.161514)}

{create adhoc35}
{access adhoc35}
{connect adhoc35(1), adhoc25(0)}
{nseg = 1}
{strdef color color = "White"}
{pt3dclear()}
{pt3dadd(185412.000000,112584.000000,79650.000000,261.944950)}
{pt3dadd(184284.000000,112080.000000,79450.000000,148.958086)}
{pt3dadd(184044.000000,111996.000000,79500.000000,74.045819)}
{pt3dadd(184020.000000,111888.000000,79600.000000,37.208150)}

{create adhoc36}
{access adhoc36}
{connect adhoc36(1), adhoc15(0)}
{nseg = 1}
{strdef color color = "White"}
{pt3dclear()}
{pt3dadd(185676.000000,112692.000000,79700.000000,303.234000)}
{pt3dadd(185784.000000,112332.000000,79425.000000,224.416342)}
{pt3dadd(185676.000000,112116.000000,79375.000000,136.361195)}
{pt3dadd(185652.000000,112140.000000,79275.000000,39.068558)}

{create adhoc37}
{access adhoc37}
{connect adhoc37(1), adhoc14(0)}
{nseg = 1}
{strdef color color = "White"}
{pt3dclear()}
{pt3dadd(185628.000000,118080.000000,79650.000000,351.031280)}
{pt3dadd(185436.000000,117528.000000,79575.000000,209.016743)}
{pt3dadd(185172.000000,116952.000000,79475.000000,158.263780)}
{pt3dadd(185028.000000,116892.000000,79375.000000,102.791442)}
{pt3dadd(184896.000000,116820.000000,79175.000000,89.101220)}
{pt3dadd(184716.000000,116724.000000,79000.000000,97.139360)}
{pt3dadd(184500.000000,116652.000000,78650.000000,107.142710)}
{pt3dadd(184344.000000,116640.000000,78375.000000,138.915000)}

{create adhoc38}
{access adhoc38}
{connect adhoc38(1), adhoc37(0)}
{nseg = 1}
{strdef color color = "White"}
{pt3dclear()}
{pt3dadd(184344.000000,116640.000000,78375.000000,138.915000)}
{pt3dadd(184080.000000,116508.000000,78125.000000,256.480937)}
{pt3dadd(183648.000000,116376.000000,77775.000000,359.514193)}
{pt3dadd(183408.000000,116268.000000,77400.000000,448.014770)}

{create adhoc39}
{access adhoc39}
{connect adhoc39(1), adhoc38(0)}
{nseg = 1}
{strdef color color = "White"}
{pt3dclear()}
{pt3dadd(183408.000000,116268.000000,77400.000000,448.014770)}
{pt3dadd(183300.000000,116112.000000,76925.000000,246.694523)}
{pt3dadd(183144.000000,116040.000000,76625.000000,187.553445)}
{pt3dadd(182964.000000,115908.000000,76300.000000,116.755119)}
{pt3dadd(182868.000000,115908.000000,76025.000000,106.028471)}
{pt3dadd(182856.000000,115872.000000,75850.000000,93.306880)}
{pt3dadd(182700.000000,115908.000000,75700.000000,81.620125)}
{pt3dadd(182640.000000,115932.000000,75400.000000,73.351448)}
{pt3dadd(182544.000000,115848.000000,75200.000000,45.226738)}

{create adhoc40}
{access adhoc40}
{connect adhoc40(1), adhoc38(0)}
{nseg = 1}
{strdef color color = "White"}
{pt3dclear()}
{pt3dadd(183408.000000,116268.000000,77400.000000,448.014770)}
{pt3dadd(183132.000000,116628.000000,77325.000000,227.498613)}
{pt3dadd(182952.000000,116592.000000,77050.000000,160.811480)}

{create adhoc41}
{access adhoc41}
{connect adhoc41(1), adhoc37(0)}
{nseg = 1}
{strdef color color = "White"}
{pt3dclear()}
{pt3dadd(184344.000000,116640.000000,78375.000000,138.915000)}
{pt3dadd(184164.000000,116880.000000,78250.000000,114.732253)}
{pt3dadd(183984.000000,117084.000000,78425.000000,88.629971)}
{pt3dadd(183912.000000,117144.000000,78525.000000,60.608154)}

{create adhoc42}
{access adhoc42}
{connect adhoc42(1), adhoc13(0)}
{nseg = 1}
{strdef color color = "White"}
{pt3dclear()}
{pt3dadd(188676.000000,126828.000000,79600.000000,387.012000)}
{pt3dadd(188556.000000,126612.000000,79225.000000,196.676093)}
{pt3dadd(188460.000000,126396.000000,79100.000000,49.862480)}

{create adhoc43}
{access adhoc43}
{connect adhoc43(1), adhoc12(0)}
{nseg = 1}
{strdef color color = "White"}
{pt3dclear()}
{pt3dadd(189672.000000,127728.000000,79875.000000,470.415500)}
{pt3dadd(189660.000000,127584.000000,80325.000000,263.076009)}
{pt3dadd(189684.000000,127356.000000,80550.000000,81.220726)}

{create adhoc44}
{access adhoc44}
{connect adhoc44(1), adhoc11(0)}
{nseg = 1}
{strdef color color = "White"}
{pt3dclear()}
{pt3dadd(194460.000000,130284.000000,80550.000000,205.240720)}
{pt3dadd(194760.000000,130308.000000,80350.000000,351.031280)}

{create adhoc45}
{access adhoc45}
{connect adhoc45(1), adhoc10(0)}
{nseg = 1}
{strdef color color = "White"}
{pt3dclear()}
{pt3dadd(197136.000000,131880.000000,80425.000000,186.159400)}
{pt3dadd(196584.000000,131736.000000,80525.000000,251.551647)}
{pt3dadd(196536.000000,131832.000000,80800.000000,231.498513)}
{pt3dadd(196416.000000,131652.000000,80975.000000,126.000000)}

{create adhoc46}
{access adhoc46}
{connect adhoc46(1), adhoc9(0)}
{nseg = 1}
{strdef color color = "White"}
{pt3dclear()}
{pt3dadd(199068.000000,134640.000000,81250.000000,303.234000)}
{pt3dadd(198924.000000,135084.000000,81225.000000,163.834715)}
{pt3dadd(198720.000000,135204.000000,81125.000000,136.313682)}
{pt3dadd(198432.000000,135276.000000,80875.000000,86.661558)}
{pt3dadd(198120.000000,135288.000000,80725.000000,83.486307)}
{pt3dadd(197880.000000,135228.000000,80625.000000,81.650616)}
{pt3dadd(197592.000000,135144.000000,80525.000000,88.263613)}
{pt3dadd(197172.000000,134976.000000,80375.000000,89.352047)}
{pt3dadd(196824.000000,134904.000000,80275.000000,97.161999)}
{pt3dadd(196332.000000,134844.000000,80125.000000,104.196789)}
{pt3dadd(195924.000000,134808.000000,79950.000000,105.092248)}
{pt3dadd(195516.000000,134688.000000,79775.000000,101.039734)}
{pt3dadd(194904.000000,134592.000000,79550.000000,96.987220)}
{pt3dadd(194712.000000,134544.000000,79325.000000,94.426737)}
{pt3dadd(194448.000000,134496.000000,79100.000000,91.462657)}
{pt3dadd(194172.000000,134496.000000,78825.000000,87.391947)}
{pt3dadd(193920.000000,134604.000000,78350.000000,90.356027)}
{pt3dadd(193716.000000,134760.000000,78025.000000,105.321809)}
{pt3dadd(193524.000000,134760.000000,77800.000000,115.537664)}
{pt3dadd(193368.000000,134760.000000,77525.000000,117.465139)}
{pt3dadd(192936.000000,134772.000000,77175.000000,120.640390)}
{pt3dadd(192660.000000,134688.000000,77050.000000,115.928034)}
{pt3dadd(192192.000000,134640.000000,76925.000000,100.962252)}
{pt3dadd(191844.000000,134676.000000,76725.000000,94.247112)}
{pt3dadd(191520.000000,134844.000000,76475.000000,102.687159)}
{pt3dadd(191124.000000,134976.000000,76325.000000,106.546698)}
{pt3dadd(190788.000000,135132.000000,76200.000000,112.347488)}
{pt3dadd(190428.000000,135132.000000,75975.000000,122.996667)}
{pt3dadd(190212.000000,135168.000000,75825.000000,114.285710)}

{create adhoc47}
{access adhoc47}
{connect adhoc47(1), adhoc8(0)}
{nseg = 1}
{strdef color color = "White"}
{pt3dclear()}
{pt3dadd(199344.000000,134952.000000,81700.000000,237.591800)}
{pt3dadd(199176.000000,134808.000000,81975.000000,137.904983)}
{pt3dadd(198996.000000,134616.000000,82100.000000,37.208150)}

{create adhoc48}
{access adhoc48}
{connect adhoc48(1), adhoc7(0)}
{nseg = 1}
{strdef color color = "White"}
{pt3dclear()}
{pt3dadd(201948.000000,138852.000000,88025.000000,177.294650)}
{pt3dadd(202140.000000,139296.000000,88225.000000,242.459683)}
{pt3dadd(202236.000000,139788.000000,88500.000000,297.675060)}
{pt3dadd(202260.000000,140292.000000,88850.000000,339.618530)}
{pt3dadd(202404.000000,140724.000000,89100.000000,382.669417)}
{pt3dadd(202572.000000,141240.000000,89275.000000,387.012000)}

{create adhoc49}
{access adhoc49}
{connect adhoc49(1), adhoc48(0)}
{nseg = 1}
{strdef color color = "White"}
{pt3dclear()}
{pt3dadd(202572.000000,141240.000000,89275.000000,387.012000)}
{pt3dadd(202704.000000,141684.000000,89500.000000,295.237787)}
{pt3dadd(202728.000000,142080.000000,89850.000000,256.209096)}
{pt3dadd(202620.000000,142392.000000,90100.000000,216.038576)}
{pt3dadd(202608.000000,142608.000000,90350.000000,210.400216)}
{pt3dadd(202572.000000,143016.000000,90650.000000,248.709144)}
{pt3dadd(202728.000000,143448.000000,90950.000000,286.400098)}
{pt3dadd(202908.000000,143892.000000,91250.000000,279.606376)}
{pt3dadd(202980.000000,144432.000000,91500.000000,294.763486)}
{pt3dadd(203112.000000,145152.000000,91700.000000,300.401846)}
{pt3dadd(203136.000000,145800.000000,91825.000000,293.205702)}
{pt3dadd(203064.000000,146412.000000,92050.000000,273.860958)}
{pt3dadd(203064.000000,147288.000000,92325.000000,283.149396)}
{pt3dadd(203016.000000,148020.000000,92550.000000,267.992286)}
{pt3dadd(203136.000000,148476.000000,92550.000000,259.734476)}
{pt3dadd(203160.000000,148920.000000,92550.000000,256.391324)}
{pt3dadd(203172.000000,149436.000000,92550.000000,269.519764)}
{pt3dadd(203376.000000,149916.000000,92575.000000,287.337030)}
{pt3dadd(203496.000000,150372.000000,92550.000000,307.864010)}
{pt3dadd(203616.000000,150912.000000,92575.000000,319.154164)}
{pt3dadd(203700.000000,151500.000000,92450.000000,302.185334)}
{pt3dadd(203820.000000,151932.000000,92400.000000,299.297394)}
{pt3dadd(204012.000000,152172.000000,92225.000000,272.191690)}
{pt3dadd(204096.000000,152592.000000,92250.000000,264.327104)}
{pt3dadd(204288.000000,153024.000000,92225.000000,239.741432)}
{pt3dadd(204360.000000,153432.000000,92225.000000,235.102738)}
{pt3dadd(204240.000000,153900.000000,92125.000000,206.516028)}
{pt3dadd(204132.000000,154332.000000,92125.000000,206.516028)}
{pt3dadd(203964.000000,154848.000000,92100.000000,226.828010)}
{pt3dadd(203784.000000,155280.000000,91975.000000,269.007054)}
{pt3dadd(203700.000000,155652.000000,91825.000000,324.298873)}
{pt3dadd(203664.000000,156156.000000,91625.000000,406.362580)}

{create adhoc50}
{access adhoc50}
{connect adhoc50(1), adhoc49(0)}
{nseg = 1}
{strdef color color = "White"}
{pt3dclear()}
{pt3dadd(203664.000000,156156.000000,91625.000000,406.362580)}
{pt3dadd(203580.000000,156672.000000,91500.000000,273.439927)}
{pt3dadd(203592.000000,157080.000000,91450.000000,244.396388)}
{pt3dadd(203616.000000,157596.000000,91350.000000,208.379452)}
{pt3dadd(203724.000000,157920.000000,91250.000000,223.577268)}
{pt3dadd(203892.000000,158376.000000,91150.000000,273.196668)}
{pt3dadd(204060.000000,158892.000000,91150.000000,321.440393)}
{pt3dadd(204036.000000,159420.000000,91075.000000,387.012000)}

{create adhoc51}
{access adhoc51}
{connect adhoc51(1), adhoc50(0)}
{nseg = 1}
{strdef color color = "White"}
{pt3dclear()}
{pt3dadd(204036.000000,159420.000000,91075.000000,387.012000)}
{pt3dadd(204012.000000,159864.000000,91125.000000,329.171550)}
{pt3dadd(203892.000000,160260.000000,91250.000000,260.445490)}
{pt3dadd(203916.000000,160704.000000,91400.000000,230.561450)}
{pt3dadd(203916.000000,161064.000000,91575.000000,210.249468)}
{pt3dadd(203916.000000,161376.000000,91825.000000,194.125604)}
{pt3dadd(203748.000000,161808.000000,92050.000000,204.046926)}
{pt3dadd(203568.000000,162336.000000,92250.000000,209.369988)}
{pt3dadd(203400.000000,162816.000000,92475.000000,192.482388)}
{pt3dadd(203280.000000,163212.000000,92825.000000,167.788114)}
{pt3dadd(203208.000000,163644.000000,93075.000000,179.273284)}
{pt3dadd(203100.000000,163968.000000,93400.000000,177.411692)}
{pt3dadd(202980.000000,164280.000000,93750.000000,175.550100)}
{pt3dadd(202920.000000,164628.000000,94000.000000,199.532233)}
{pt3dadd(203004.000000,165000.000000,94100.000000,186.159400)}

{create adhoc52}
{access adhoc52}
{connect adhoc52(1), adhoc51(0)}
{nseg = 1}
{strdef color color = "White"}
{pt3dclear()}
{pt3dadd(203004.000000,165000.000000,94100.000000,186.159400)}
{pt3dadd(202944.000000,165372.000000,94425.000000,164.155667)}
{pt3dadd(202968.000000,165600.000000,94575.000000,173.045802)}
{pt3dadd(202944.000000,165984.000000,94850.000000,174.907394)}
{pt3dadd(202992.000000,166296.000000,94900.000000,181.508514)}
{pt3dadd(202884.000000,166620.000000,95075.000000,183.040050)}
{pt3dadd(202584.000000,167208.000000,95300.000000,180.812747)}
{pt3dadd(202344.000000,167388.000000,95450.000000,160.811480)}

{create adhoc53}
{access adhoc53}
{connect adhoc53(1), adhoc52(0)}
{nseg = 1}
{strdef color color = "White"}
{pt3dclear()}
{pt3dadd(202344.000000,167388.000000,95450.000000,160.811480)}
{pt3dadd(202248.000000,167628.000000,95675.000000,190.593867)}
{pt3dadd(202128.000000,167928.000000,95900.000000,227.392110)}
{pt3dadd(202008.000000,168156.000000,96225.000000,252.988674)}
{pt3dadd(201840.000000,168492.000000,96450.000000,299.231348)}
{pt3dadd(201900.000000,168816.000000,96700.000000,341.466942)}
{pt3dadd(202020.000000,169200.000000,96975.000000,355.941056)}
{pt3dadd(201912.000000,169692.000000,97175.000000,369.010828)}
{pt3dadd(201720.000000,170040.000000,97475.000000,358.770328)}
{pt3dadd(201468.000000,170484.000000,97700.000000,325.823172)}
{pt3dadd(201120.000000,170856.000000,98025.000000,281.535170)}
{pt3dadd(200784.000000,171132.000000,98300.000000,234.925823)}
{pt3dadd(200376.000000,171396.000000,98575.000000,205.240720)}

{create adhoc54}
{access adhoc54}
{connect adhoc54(1), adhoc53(0)}
{nseg = 1}
{strdef color color = "White"}
{pt3dclear()}
{pt3dadd(200376.000000,171396.000000,98575.000000,205.240720)}
{pt3dadd(200052.000000,171672.000000,98675.000000,186.159400)}

{create adhoc55}
{access adhoc55}
{connect adhoc55(1), adhoc54(0)}
{nseg = 1}
{strdef color color = "White"}
{pt3dclear()}
{pt3dadd(200052.000000,171672.000000,98675.000000,186.159400)}
{pt3dadd(199668.000000,171900.000000,98800.000000,186.307137)}
{pt3dadd(199260.000000,172152.000000,98850.000000,202.403194)}
{pt3dadd(198924.000000,172380.000000,98975.000000,204.264786)}
{pt3dadd(198552.000000,172644.000000,99200.000000,223.814296)}
{pt3dadd(198372.000000,172932.000000,99325.000000,239.729264)}
{pt3dadd(198240.000000,173280.000000,99675.000000,254.387572)}
{pt3dadd(198132.000000,173628.000000,100075.000000,249.969764)}
{pt3dadd(198084.000000,174024.000000,100450.000000,256.131872)}
{pt3dadd(197880.000000,174456.000000,100775.000000,231.754192)}
{pt3dadd(197652.000000,174996.000000,101075.000000,213.977632)}
{pt3dadd(197460.000000,175332.000000,101425.000000,189.989182)}
{pt3dadd(197280.000000,175836.000000,101675.000000,182.347560)}
{pt3dadd(197040.000000,176268.000000,102000.000000,189.480970)}
{pt3dadd(196596.000000,176820.000000,102225.000000,213.858650)}
{pt3dadd(196308.000000,177240.000000,102375.000000,240.305914)}
{pt3dadd(195924.000000,177504.000000,102775.000000,285.127623)}
{pt3dadd(195624.000000,177960.000000,103025.000000,318.395720)}

{create adhoc56}
{access adhoc56}
{connect adhoc56(1), adhoc55(0)}
{nseg = 1}
{strdef color color = "White"}
{pt3dclear()}
{pt3dadd(195624.000000,177960.000000,103025.000000,318.395720)}
{pt3dadd(195444.000000,178248.000000,103400.000000,344.623583)}
{pt3dadd(194916.000000,178416.000000,103775.000000,325.179810)}
{pt3dadd(194580.000000,178488.000000,104175.000000,342.773182)}
{pt3dadd(194304.000000,178560.000000,104525.000000,324.300140)}
{pt3dadd(193872.000000,178524.000000,104850.000000,360.624380)}
{pt3dadd(193740.000000,178680.000000,105200.000000,394.060680)}
{pt3dadd(193512.000000,179064.000000,105575.000000,403.164924)}
{pt3dadd(193224.000000,179472.000000,105925.000000,376.900848)}
{pt3dadd(192948.000000,179700.000000,106400.000000,362.426734)}
{pt3dadd(192516.000000,180012.000000,106775.000000,326.102494)}
{pt3dadd(192468.000000,180216.000000,107025.000000,284.408384)}
{pt3dadd(192360.000000,180480.000000,107375.000000,275.304140)}
{pt3dadd(191928.000000,181056.000000,107800.000000,287.158804)}
{pt3dadd(191772.000000,181332.000000,108150.000000,320.105960)}
{pt3dadd(191400.000000,181848.000000,108525.000000,326.026244)}
{pt3dadd(191304.000000,182040.000000,108975.000000,331.396114)}
{pt3dadd(191112.000000,182388.000000,109475.000000,314.685398)}
{pt3dadd(190944.000000,182736.000000,109775.000000,286.915766)}
{pt3dadd(190752.000000,183192.000000,110050.000000,230.751770)}
{pt3dadd(190584.000000,183456.000000,110525.000000,210.173178)}
{pt3dadd(190596.000000,183576.000000,110875.000000,204.803308)}
{pt3dadd(190428.000000,183624.000000,111075.000000,199.214094)}
{pt3dadd(190200.000000,183576.000000,111725.000000,193.891032)}
{pt3dadd(190092.000000,183552.000000,111975.000000,209.974462)}
{pt3dadd(190032.000000,183516.000000,112150.000000,212.129490)}
{pt3dadd(189876.000000,183576.000000,112325.000000,214.748940)}
{pt3dadd(189732.000000,183660.000000,112475.000000,234.298450)}
{pt3dadd(189684.000000,183660.000000,112600.000000,250.422314)}
{pt3dadd(189684.000000,183672.000000,112600.000000,250.422314)}
{pt3dadd(189504.000000,183624.000000,112750.000000,250.422314)}
{pt3dadd(189396.000000,183564.000000,112875.000000,240.669454)}
{pt3dadd(189228.000000,183624.000000,113000.000000,228.761566)}
{pt3dadd(189204.000000,183636.000000,113000.000000,219.915436)}
{pt3dadd(188964.000000,183732.000000,113175.000000,210.118786)}
{pt3dadd(188952.000000,183732.000000,113175.000000,207.963758)}
{pt3dadd(188784.000000,183792.000000,113300.000000,223.354978)}
{pt3dadd(188700.000000,183828.000000,113425.000000,238.013286)}
{pt3dadd(188580.000000,183852.000000,113600.000000,260.644286)}
{pt3dadd(188088.000000,184104.000000,113875.000000,302.587756)}
{pt3dadd(187992.000000,184212.000000,114000.000000,329.693460)}
{pt3dadd(187860.000000,184344.000000,114200.000000,324.055100)}
{pt3dadd(187656.000000,184524.000000,114425.000000,347.568756)}
{pt3dadd(187488.000000,184680.000000,114675.000000,361.292012)}
{pt3dadd(187308.000000,184896.000000,114950.000000,350.752716)}
{pt3dadd(187284.000000,184920.000000,114950.000000,347.409564)}
{pt3dadd(187044.000000,185208.000000,115025.000000,353.047924)}
{pt3dadd(186924.000000,185364.000000,115200.000000,332.422208)}
{pt3dadd(186828.000000,185496.000000,115475.000000,307.408798)}
{pt3dadd(186540.000000,185712.000000,115700.000000,288.064054)}
{pt3dadd(186156.000000,185964.000000,115875.000000,262.249094)}
{pt3dadd(185952.000000,186048.000000,116175.000000,259.361154)}
{pt3dadd(185640.000000,186144.000000,116375.000000,248.608628)}
{pt3dadd(185136.000000,186456.000000,116600.000000,259.898782)}
{pt3dadd(184920.000000,186564.000000,116750.000000,297.716568)}
{pt3dadd(184464.000000,186696.000000,116950.000000,334.070824)}
{pt3dadd(184296.000000,186792.000000,117175.000000,357.584480)}
{pt3dadd(184020.000000,186972.000000,117250.000000,393.026352)}
{pt3dadd(184020.000000,186972.000000,117250.000000,396.210312)}
{pt3dadd(183648.000000,187068.000000,117450.000000,377.737270)}
{pt3dadd(183228.000000,187356.000000,117600.000000,364.014014)}
{pt3dadd(182820.000000,187584.000000,117775.000000,330.259858)}
{pt3dadd(182244.000000,187644.000000,117975.000000,294.817986)}
{pt3dadd(181788.000000,187800.000000,118175.000000,275.473242)}
{pt3dadd(181608.000000,187836.000000,118325.000000,244.069068)}
{pt3dadd(181524.000000,187860.000000,118325.000000,212.552220)}
{pt3dadd(181320.000000,187920.000000,118500.000000,202.265740)}
{pt3dadd(181032.000000,187776.000000,118500.000000,199.889826)}
{pt3dadd(180828.000000,187608.000000,118500.000000,195.472018)}
{pt3dadd(180636.000000,187524.000000,118675.000000,209.907362)}
{pt3dadd(180564.000000,187620.000000,118750.000000,235.503926)}
{pt3dadd(180228.000000,187836.000000,118900.000000,271.988618)}
{pt3dadd(180168.000000,187836.000000,119050.000000,298.186830)}
{pt3dadd(180012.000000,188040.000000,119200.000000,332.488678)}
{pt3dadd(179808.000000,188160.000000,119350.000000,367.930550)}
{pt3dadd(179496.000000,188268.000000,119475.000000,399.774644)}
{pt3dadd(179280.000000,188328.000000,119600.000000,429.784684)}
{pt3dadd(179244.000000,188256.000000,119650.000000,454.855368)}
{pt3dadd(178920.000000,188232.000000,119750.000000,458.725484)}
{pt3dadd(178908.000000,188232.000000,119750.000000,472.176594)}
{pt3dadd(178512.000000,188412.000000,120025.000000,508.653986)}
{pt3dadd(178032.000000,188676.000000,120200.000000,525.003894)}
{pt3dadd(177480.000000,188748.000000,120350.000000,529.943250)}
{pt3dadd(177252.000000,188724.000000,120500.000000,542.753834)}
{pt3dadd(176868.000000,188652.000000,120675.000000,542.753834)}
{pt3dadd(176496.000000,188880.000000,120875.000000,490.390060)}
{pt3dadd(176160.000000,188832.000000,120975.000000,430.960340)}
{pt3dadd(175776.000000,188784.000000,121100.000000,384.992588)}
{pt3dadd(175752.000000,188796.000000,121225.000000,348.668348)}
{pt3dadd(175536.000000,188784.000000,121375.000000,299.775366)}
{pt3dadd(175332.000000,188784.000000,121500.000000,267.106938)}
{pt3dadd(175116.000000,188796.000000,121650.000000,247.508282)}
{pt3dadd(174972.000000,188748.000000,121825.000000,237.267782)}
{pt3dadd(174768.000000,188784.000000,121975.000000,224.764502)}
{pt3dadd(174408.000000,188628.000000,122125.000000,215.918372)}
{pt3dadd(174240.000000,188664.000000,122300.000000,222.388588)}
{pt3dadd(174000.000000,188736.000000,122525.000000,222.388588)}
{pt3dadd(173820.000000,188724.000000,122725.000000,217.970780)}
{pt3dadd(173724.000000,188664.000000,122800.000000,220.667380)}
{pt3dadd(173712.000000,188664.000000,122800.000000,239.190236)}
{pt3dadd(173616.000000,188880.000000,123025.000000,242.071876)}
{pt3dadd(173436.000000,189036.000000,123275.000000,250.046566)}
{pt3dadd(173100.000000,189180.000000,123450.000000,249.282014)}
{pt3dadd(172956.000000,189312.000000,123725.000000,256.895834)}
{pt3dadd(172680.000000,189468.000000,124025.000000,248.784508)}
{pt3dadd(172572.000000,189480.000000,124225.000000,271.898328)}
{pt3dadd(172536.000000,189648.000000,124400.000000,311.781094)}
{pt3dadd(172260.000000,189696.000000,124600.000000,376.426064)}
{pt3dadd(171948.000000,189684.000000,124925.000000,394.373884)}
{pt3dadd(171336.000000,190020.000000,125425.000000,413.832070)}
{pt3dadd(170520.000000,190296.000000,125800.000000,402.867804)}
{pt3dadd(169776.000000,190116.000000,126300.000000,382.942252)}
{pt3dadd(169044.000000,190020.000000,126450.000000,333.270626)}
{pt3dadd(168768.000000,190080.000000,126625.000000,335.786182)}
{pt3dadd(167688.000000,190020.000000,126625.000000,364.153326)}
{pt3dadd(166968.000000,190116.000000,126875.000000,403.490406)}
{pt3dadd(166236.000000,190068.000000,127125.000000,407.286524)}
{pt3dadd(165276.000000,189984.000000,127450.000000,440.488340)}
{pt3dadd(164904.000000,189996.000000,127725.000000,462.974510)}
{pt3dadd(164376.000000,189828.000000,127800.000000,477.158086)}
{pt3dadd(163716.000000,189936.000000,128275.000000,424.302698)}
{pt3dadd(162996.000000,189972.000000,128525.000000,400.549366)}
{pt3dadd(162468.000000,190008.000000,128850.000000,354.491006)}
{pt3dadd(161220.000000,190164.000000,129175.000000,294.570214)}
{pt3dadd(160572.000000,190188.000000,129425.000000,232.561308)}
{pt3dadd(159732.000000,190080.000000,129625.000000,261.717006)}
{pt3dadd(158904.000000,190200.000000,129950.000000,292.525012)}
{pt3dadd(157680.000000,189996.000000,130200.000000,321.586032)}
{pt3dadd(157320.000000,190080.000000,130500.000000,344.744812)}
{pt3dadd(156552.000000,189996.000000,130700.000000,362.265186)}
{pt3dadd(155748.000000,189996.000000,130825.000000,346.655922)}
{pt3dadd(155388.000000,190008.000000,131025.000000,315.847916)}
{pt3dadd(155076.000000,190020.000000,131025.000000,302.814096)}
{pt3dadd(154812.000000,189972.000000,131100.000000,299.404116)}
{pt3dadd(154296.000000,189972.000000,131250.000000,315.525502)}
{pt3dadd(153840.000000,190032.000000,131350.000000,312.820954)}
{pt3dadd(152856.000000,189792.000000,131500.000000,313.555166)}
{pt3dadd(151980.000000,189888.000000,131875.000000,303.475166)}
{pt3dadd(151476.000000,189720.000000,132100.000000,289.809866)}
{pt3dadd(151032.000000,189648.000000,132450.000000,256.168106)}
{pt3dadd(150588.000000,189492.000000,132625.000000,243.207138)}
{pt3dadd(150012.000000,189288.000000,132825.000000,245.170752)}
{pt3dadd(149592.000000,188916.000000,133075.000000,256.524286)}
{pt3dadd(148980.000000,188388.000000,133275.000000,259.846032)}
{pt3dadd(148308.000000,188124.000000,133475.000000,282.850118)}
{pt3dadd(147540.000000,187956.000000,133700.000000,298.504894)}
{pt3dadd(146532.000000,187812.000000,133875.000000,292.267840)}
{pt3dadd(145932.000000,187584.000000,134225.000000,281.988280)}
{pt3dadd(145320.000000,187344.000000,134375.000000,278.441080)}
{pt3dadd(144792.000000,187164.000000,134450.000000,244.297320)}
{pt3dadd(143748.000000,187140.000000,134450.000000,220.141052)}
{pt3dadd(143136.000000,187164.000000,134625.000000,206.409446)}
{pt3dadd(142752.000000,187236.000000,134600.000000,184.403310)}
{pt3dadd(142464.000000,187188.000000,134450.000000,168.750510)}
{pt3dadd(142020.000000,187248.000000,134700.000000,154.428364)}
{pt3dadd(141768.000000,187188.000000,135000.000000,150.847624)}
{pt3dadd(141360.000000,187116.000000,135075.000000,148.187536)}
{pt3dadd(140976.000000,187344.000000,135275.000000,184.396730)}
{pt3dadd(140688.000000,187392.000000,135525.000000,197.944496)}
{pt3dadd(140052.000000,187560.000000,135875.000000,214.282642)}
{pt3dadd(139524.000000,187980.000000,136375.000000,219.977204)}
{pt3dadd(138576.000000,187968.000000,136575.000000,224.065876)}
{pt3dadd(137664.000000,188076.000000,137150.000000,188.628844)}
{pt3dadd(137184.000000,188172.000000,137525.000000,187.745284)}
{pt3dadd(136824.000000,188196.000000,137650.000000,345.409284)}
{pt3dadd(136704.000000,188304.000000,137775.000000,452.840343)}
{pt3dadd(136536.000000,188448.000000,137925.000000,1000.000000)}

{create adhoc57}
{access adhoc57}
{connect adhoc57(1), adhoc55(0)}
{nseg = 1}
{strdef color color = "White"}
{pt3dclear()}
{pt3dadd(195624.000000,177960.000000,103025.000000,318.395720)}
{pt3dadd(195576.000000,178932.000000,102850.000000,318.395720)}

{create adhoc58}
{access adhoc58}
{connect adhoc58(1), adhoc57(0)}
{nseg = 1}
{strdef color color = "White"}
{pt3dclear()}
{pt3dadd(195576.000000,178932.000000,102850.000000,318.395720)}
{pt3dadd(195756.000000,179196.000000,102425.000000,216.805290)}
{pt3dadd(195840.000000,179544.000000,102100.000000,226.188904)}
{pt3dadd(195912.000000,179868.000000,101725.000000,210.028120)}
{pt3dadd(196164.000000,180264.000000,101425.000000,225.185230)}
{pt3dadd(196248.000000,180708.000000,101225.000000,239.113632)}
{pt3dadd(196356.000000,181044.000000,100925.000000,232.826852)}
{pt3dadd(196428.000000,181392.000000,100575.000000,211.273524)}
{pt3dadd(196296.000000,181608.000000,100175.000000,185.610290)}
{pt3dadd(196488.000000,181848.000000,99825.000000,195.467360)}

{create adhoc59}
{access adhoc59}
{connect adhoc59(1), adhoc58(0)}
{nseg = 1}
{strdef color color = "White"}
{pt3dclear()}
{pt3dadd(196488.000000,181848.000000,99825.000000,195.467360)}
{pt3dadd(196836.000000,181932.000000,99475.000000,301.687980)}
{pt3dadd(197088.000000,182112.000000,99175.000000,406.362580)}

{create adhoc60}
{access adhoc60}
{connect adhoc60(1), adhoc59(0)}
{nseg = 1}
{strdef color color = "White"}
{pt3dclear()}
{pt3dadd(197088.000000,182112.000000,99175.000000,406.362580)}
{pt3dadd(197304.000000,182328.000000,99400.000000,89.545845)}

{create adhoc61}
{access adhoc61}
{connect adhoc61(1), adhoc59(0)}
{nseg = 1}
{strdef color color = "White"}
{pt3dclear()}
{pt3dadd(197088.000000,182112.000000,99175.000000,406.362580)}
{pt3dadd(197244.000000,182244.000000,98750.000000,375.896700)}
{pt3dadd(197460.000000,182412.000000,98300.000000,341.606154)}
{pt3dadd(197616.000000,182544.000000,97925.000000,327.196742)}
{pt3dadd(197940.000000,182664.000000,97575.000000,343.877442)}
{pt3dadd(198300.000000,182700.000000,97250.000000,374.375580)}
{pt3dadd(198384.000000,182820.000000,96825.000000,470.415500)}

{create adhoc62}
{access adhoc62}
{connect adhoc62(1), adhoc61(0)}
{nseg = 1}
{strdef color color = "White"}
{pt3dclear()}
{pt3dadd(198384.000000,182820.000000,96825.000000,470.415500)}
{pt3dadd(198552.000000,182700.000000,96575.000000,403.697867)}
{pt3dadd(198624.000000,182628.000000,96350.000000,334.992660)}
{pt3dadd(198660.000000,182724.000000,96050.000000,278.141440)}
{pt3dadd(198576.000000,182760.000000,95625.000000,217.601027)}
{pt3dadd(198780.000000,182640.000000,95125.000000,172.506631)}
{pt3dadd(199044.000000,182532.000000,94675.000000,143.792899)}
{pt3dadd(199512.000000,182376.000000,94275.000000,117.341947)}
{pt3dadd(199776.000000,182388.000000,93925.000000,109.282217)}
{pt3dadd(199920.000000,182328.000000,93575.000000,120.712410)}
{pt3dadd(199908.000000,182256.000000,93175.000000,133.565123)}
{pt3dadd(199752.000000,182196.000000,92800.000000,160.811480)}

{create adhoc63}
{access adhoc63}
{connect adhoc63(1), adhoc62(0)}
{nseg = 1}
{strdef color color = "White"}
{pt3dclear()}
{pt3dadd(199752.000000,182196.000000,92800.000000,160.811480)}
{pt3dadd(199476.000000,182184.000000,92375.000000,208.227060)}
{pt3dadd(199344.000000,182160.000000,91800.000000,252.901352)}
{pt3dadd(198972.000000,182376.000000,91450.000000,268.257416)}
{pt3dadd(198720.000000,182364.000000,91000.000000,272.896110)}
{pt3dadd(198660.000000,182496.000000,90575.000000,283.136610)}
{pt3dadd(198480.000000,182724.000000,90175.000000,258.619157)}
{pt3dadd(198552.000000,182796.000000,89725.000000,288.794300)}

{create adhoc64}
{access adhoc64}
{connect adhoc64(1), adhoc63(0)}
{nseg = 1}
{strdef color color = "White"}
{pt3dclear()}
{pt3dadd(198552.000000,182796.000000,89725.000000,288.794300)}
{pt3dadd(198504.000000,182964.000000,89300.000000,315.390487)}
{pt3dadd(198540.000000,183000.000000,88775.000000,292.248732)}
{pt3dadd(198528.000000,183024.000000,88325.000000,286.878862)}
{pt3dadd(198240.000000,183156.000000,87800.000000,281.508992)}
{pt3dadd(198048.000000,183312.000000,87325.000000,255.310780)}
{pt3dadd(197940.000000,183540.000000,86825.000000,219.320628)}
{pt3dadd(198168.000000,183528.000000,86425.000000,192.869676)}
{pt3dadd(198312.000000,183744.000000,86150.000000,159.285314)}
{pt3dadd(198408.000000,183996.000000,85775.000000,127.628427)}
{pt3dadd(198228.000000,184056.000000,85350.000000,127.628427)}
{pt3dadd(198024.000000,184344.000000,85050.000000,163.618579)}
{pt3dadd(197640.000000,184440.000000,84700.000000,215.020207)}
{pt3dadd(197112.000000,184788.000000,84525.000000,226.846339)}
{pt3dadd(196716.000000,184692.000000,84200.000000,241.573166)}
{pt3dadd(196572.000000,184812.000000,83750.000000,223.226956)}
{pt3dadd(196116.000000,185112.000000,83425.000000,196.098856)}
{pt3dadd(195888.000000,185460.000000,83100.000000,178.281590)}
{pt3dadd(195660.000000,185820.000000,82775.000000,197.545104)}
{pt3dadd(195648.000000,186072.000000,82400.000000,221.523373)}
{pt3dadd(195468.000000,186312.000000,82050.000000,249.471370)}

{create adhoc65}
{access adhoc65}
{connect adhoc65(1), adhoc64(0)}
{nseg = 1}
{strdef color color = "White"}
{pt3dclear()}
{pt3dadd(195468.000000,186312.000000,82050.000000,249.471370)}
{pt3dadd(195204.000000,186576.000000,81675.000000,299.476107)}
{pt3dadd(194616.000000,186552.000000,81225.000000,324.297058)}
{pt3dadd(194472.000000,186588.000000,80975.000000,370.022990)}
{pt3dadd(194244.000000,186624.000000,80925.000000,275.042200)}

{create adhoc66}
{access adhoc66}
{connect adhoc66(1), adhoc65(0)}
{nseg = 1}
{strdef color color = "White"}
{pt3dclear()}
{pt3dadd(194244.000000,186624.000000,80925.000000,275.042200)}
{pt3dadd(193320.000000,186696.000000,80875.000000,224.481827)}
{pt3dadd(192924.000000,186624.000000,80875.000000,197.931026)}
{pt3dadd(192648.000000,186600.000000,80875.000000,175.084882)}
{pt3dadd(192384.000000,186444.000000,80800.000000,156.738672)}
{pt3dadd(191988.000000,186348.000000,80825.000000,145.308479)}
{pt3dadd(191724.000000,186144.000000,80625.000000,146.697629)}
{pt3dadd(191508.000000,186108.000000,80575.000000,133.007407)}
{pt3dadd(191136.000000,185832.000000,80400.000000,138.076991)}
{pt3dadd(190692.000000,185580.000000,80200.000000,146.136721)}
{pt3dadd(190356.000000,185304.000000,79925.000000,159.175028)}
{pt3dadd(189972.000000,184932.000000,79700.000000,162.165174)}
{pt3dadd(189672.000000,184812.000000,79500.000000,175.855396)}
{pt3dadd(189372.000000,184560.000000,79200.000000,186.141876)}
{pt3dadd(189156.000000,184380.000000,78975.000000,189.958140)}
{pt3dadd(188940.000000,184176.000000,78825.000000,206.709057)}
{pt3dadd(188664.000000,184020.000000,78575.000000,205.240720)}

{create adhoc67}
{access adhoc67}
{connect adhoc67(1), adhoc66(0)}
{nseg = 1}
{strdef color color = "White"}
{pt3dclear()}
{pt3dadd(188664.000000,184020.000000,78575.000000,205.240720)}
{pt3dadd(188448.000000,183960.000000,78375.000000,233.091913)}
{pt3dadd(188316.000000,183468.000000,78050.000000,256.359073)}
{pt3dadd(188256.000000,183060.000000,77850.000000,275.042200)}

{create adhoc68}
{access adhoc68}
{connect adhoc68(1), adhoc67(0)}
{nseg = 1}
{strdef color color = "White"}
{pt3dclear()}
{pt3dadd(188256.000000,183060.000000,77850.000000,275.042200)}
{pt3dadd(188100.000000,182652.000000,77650.000000,250.263823)}
{pt3dadd(187896.000000,182268.000000,77425.000000,232.645754)}
{pt3dadd(187764.000000,182064.000000,77275.000000,225.155674)}
{pt3dadd(187452.000000,181572.000000,77100.000000,225.155674)}
{pt3dadd(187188.000000,181104.000000,77075.000000,229.794368)}
{pt3dadd(187080.000000,180828.000000,77025.000000,210.998788)}
{pt3dadd(186948.000000,180420.000000,76850.000000,243.973164)}
{pt3dadd(186756.000000,179976.000000,76700.000000,246.349078)}
{pt3dadd(186516.000000,179412.000000,76475.000000,254.213664)}
{pt3dadd(186276.000000,179112.000000,76200.000000,259.327830)}
{pt3dadd(186300.000000,178824.000000,75850.000000,290.626690)}
{pt3dadd(186132.000000,178596.000000,75625.000000,287.283538)}
{pt3dadd(186240.000000,178272.000000,75325.000000,295.148124)}
{pt3dadd(186432.000000,177948.000000,74925.000000,301.068408)}
{pt3dadd(186516.000000,177612.000000,74650.000000,293.578328)}
{pt3dadd(186768.000000,177168.000000,74400.000000,281.593940)}
{pt3dadd(187116.000000,176820.000000,74150.000000,237.591800)}

{create adhoc69}
{access adhoc69}
{connect adhoc69(1), adhoc68(0)}
{nseg = 1}
{strdef color color = "White"}
{pt3dclear()}
{pt3dadd(187116.000000,176820.000000,74150.000000,237.591800)}
{pt3dadd(187452.000000,176508.000000,73925.000000,167.397267)}
{pt3dadd(187932.000000,176328.000000,73950.000000,182.925820)}
{pt3dadd(188460.000000,175968.000000,73800.000000,158.264602)}
{pt3dadd(188664.000000,175800.000000,73750.000000,154.661744)}
{pt3dadd(188952.000000,175728.000000,73550.000000,151.616440)}
{pt3dadd(189132.000000,175548.000000,73475.000000,114.285710)}

{create adhoc70}
{access adhoc70}
{connect adhoc70(1), adhoc69(0)}
{nseg = 1}
{strdef color color = "White"}
{pt3dclear()}
{pt3dadd(189132.000000,175548.000000,73475.000000,114.285710)}
{pt3dadd(189312.000000,175380.000000,73375.000000,110.184593)}
{pt3dadd(189780.000000,175032.000000,73200.000000,137.245143)}
{pt3dadd(190200.000000,174672.000000,73175.000000,195.467360)}

{create adhoc71}
{access adhoc71}
{connect adhoc71(1), adhoc70(0)}
{nseg = 1}
{strdef color color = "White"}
{pt3dclear()}
{pt3dadd(190200.000000,174672.000000,73175.000000,195.467360)}
{pt3dadd(190344.000000,174900.000000,72850.000000,195.622493)}
{pt3dadd(190392.000000,174924.000000,72850.000000,166.690638)}
{pt3dadd(190716.000000,175164.000000,72375.000000,154.057166)}
{pt3dadd(191040.000000,175260.000000,72100.000000,136.570146)}
{pt3dadd(191328.000000,175380.000000,71750.000000,114.326630)}
{pt3dadd(191628.000000,175464.000000,71550.000000,115.469488)}
{pt3dadd(191880.000000,175476.000000,71275.000000,116.792488)}
{pt3dadd(192048.000000,175404.000000,71025.000000,120.963248)}
{pt3dadd(192084.000000,175356.000000,70625.000000,148.736748)}
{pt3dadd(192144.000000,175272.000000,70175.000000,176.553533)}
{pt3dadd(192108.000000,175044.000000,69600.000000,237.591800)}

{create adhoc72}
{access adhoc72}
{connect adhoc72(1), adhoc71(0)}
{nseg = 1}
{strdef color color = "White"}
{pt3dclear()}
{pt3dadd(192108.000000,175044.000000,69600.000000,237.591800)}
{pt3dadd(192192.000000,174804.000000,69125.000000,168.323975)}
{pt3dadd(192096.000000,174636.000000,68775.000000,81.220726)}

{create adhoc73}
{access adhoc73}
{connect adhoc73(1), adhoc71(0)}
{nseg = 1}
{strdef color color = "White"}
{pt3dclear()}
{pt3dadd(192108.000000,175044.000000,69600.000000,237.591800)}
{pt3dadd(192300.000000,175272.000000,69700.000000,193.915840)}
{pt3dadd(192372.000000,175380.000000,69700.000000,154.718573)}
{pt3dadd(192252.000000,175500.000000,69550.000000,120.000000)}

{create adhoc74}
{access adhoc74}
{connect adhoc74(1), adhoc70(0)}
{nseg = 1}
{strdef color color = "White"}
{pt3dclear()}
{pt3dadd(190200.000000,174672.000000,73175.000000,195.467360)}
{pt3dadd(190296.000000,174204.000000,73225.000000,161.439803)}
{pt3dadd(190344.000000,173808.000000,73175.000000,138.525652)}
{pt3dadd(190464.000000,173472.000000,73125.000000,125.892180)}
{pt3dadd(190524.000000,173256.000000,73125.000000,111.866630)}
{pt3dadd(190620.000000,173016.000000,73150.000000,115.649630)}
{pt3dadd(190740.000000,172848.000000,73150.000000,131.885960)}
{pt3dadd(190860.000000,172428.000000,73200.000000,156.181884)}
{pt3dadd(190776.000000,172188.000000,73275.000000,161.884180)}
{pt3dadd(190932.000000,171888.000000,73250.000000,177.598250)}
{pt3dadd(190800.000000,171564.000000,73150.000000,188.908722)}
{pt3dadd(190728.000000,171288.000000,73100.000000,190.863394)}
{pt3dadd(190452.000000,170952.000000,72975.000000,183.221772)}
{pt3dadd(190356.000000,170508.000000,73000.000000,208.818336)}
{pt3dadd(190104.000000,170076.000000,72925.000000,240.222510)}
{pt3dadd(190104.000000,169836.000000,72825.000000,258.887898)}
{pt3dadd(190128.000000,169584.000000,72950.000000,299.112270)}
{pt3dadd(190188.000000,169140.000000,73050.000000,333.859596)}
{pt3dadd(190224.000000,168720.000000,73250.000000,321.356316)}
{pt3dadd(190224.000000,168576.000000,73075.000000,295.541356)}
{pt3dadd(190236.000000,168240.000000,73250.000000,257.527356)}
{pt3dadd(190284.000000,167892.000000,73375.000000,208.417136)}
{pt3dadd(190044.000000,167328.000000,73150.000000,173.669810)}
{pt3dadd(189984.000000,167064.000000,72975.000000,143.148148)}
{pt3dadd(189900.000000,166548.000000,72825.000000,126.100004)}
{pt3dadd(189924.000000,166056.000000,72725.000000,125.159772)}
{pt3dadd(189948.000000,165840.000000,72675.000000,126.767886)}
{pt3dadd(189936.000000,165552.000000,72500.000000,154.988100)}
{pt3dadd(190044.000000,165216.000000,72325.000000,207.117286)}
{pt3dadd(190164.000000,164952.000000,72250.000000,249.980390)}
{pt3dadd(190344.000000,164484.000000,72175.000000,329.008920)}
{pt3dadd(190380.000000,163932.000000,72075.000000,334.315520)}

{create adhoc75}
{access adhoc75}
{connect adhoc75(1), adhoc74(0)}
{nseg = 1}
{strdef color color = "White"}
{pt3dclear()}
{pt3dadd(190380.000000,163932.000000,72075.000000,334.315520)}
{pt3dadd(190596.000000,163548.000000,72150.000000,248.199457)}
{pt3dadd(190896.000000,162984.000000,72000.000000,218.643906)}
{pt3dadd(191076.000000,162540.000000,71825.000000,172.512905)}
{pt3dadd(191112.000000,162192.000000,71650.000000,154.780927)}
{pt3dadd(191136.000000,161868.000000,71500.000000,156.389041)}
{pt3dadd(191100.000000,161544.000000,71350.000000,154.527449)}
{pt3dadd(191040.000000,161340.000000,71150.000000,171.415049)}
{pt3dadd(190908.000000,161112.000000,70900.000000,189.776418)}
{pt3dadd(190728.000000,160800.000000,70675.000000,198.662266)}
{pt3dadd(190560.000000,160632.000000,70500.000000,212.766627)}
{pt3dadd(190416.000000,160416.000000,70250.000000,205.240720)}

{create adhoc76}
{access adhoc76}
{connect adhoc76(1), adhoc75(0)}
{nseg = 1}
{strdef color color = "White"}
{pt3dclear()}
{pt3dadd(190416.000000,160416.000000,70250.000000,205.240720)}
{pt3dadd(190320.000000,160200.000000,70050.000000,162.792827)}
{pt3dadd(190260.000000,160032.000000,70125.000000,140.176507)}
{pt3dadd(190200.000000,159816.000000,70150.000000,125.588363)}
{pt3dadd(190200.000000,159588.000000,70150.000000,125.588363)}
{pt3dadd(190260.000000,159300.000000,70125.000000,138.190151)}
{pt3dadd(190284.000000,159036.000000,70225.000000,137.153546)}
{pt3dadd(190380.000000,158772.000000,70125.000000,135.226071)}
{pt3dadd(190380.000000,158496.000000,70075.000000,124.992768)}
{pt3dadd(190404.000000,158196.000000,69975.000000,94.023140)}

{create adhoc77}
{access adhoc77}
{connect adhoc77(1), adhoc76(0)}
{nseg = 1}
{strdef color color = "White"}
{pt3dclear()}
{pt3dadd(190404.000000,158196.000000,69975.000000,94.023140)}
{pt3dadd(190644.000000,157824.000000,69825.000000,153.358447)}
{pt3dadd(190572.000000,157488.000000,69700.000000,160.811480)}

{create adhoc78}
{access adhoc78}
{connect adhoc78(1), adhoc77(0)}
{nseg = 1}
{strdef color color = "White"}
{pt3dclear()}
{pt3dadd(190572.000000,157488.000000,69700.000000,160.811480)}
{pt3dadd(190392.000000,157224.000000,69600.000000,155.656960)}
{pt3dadd(190200.000000,156852.000000,69450.000000,144.034318)}
{pt3dadd(190128.000000,156552.000000,69325.000000,130.676650)}
{pt3dadd(190056.000000,156276.000000,69150.000000,122.616920)}
{pt3dadd(189792.000000,155772.000000,68925.000000,113.350838)}
{pt3dadd(189444.000000,155376.000000,68725.000000,105.964310)}
{pt3dadd(189108.000000,154800.000000,68600.000000,94.425455)}
{pt3dadd(188772.000000,154464.000000,68450.000000,90.354745)}
{pt3dadd(188496.000000,153996.000000,68350.000000,73.304226)}
{pt3dadd(188244.000000,153648.000000,68250.000000,76.479477)}
{pt3dadd(187884.000000,153240.000000,68100.000000,74.372961)}
{pt3dadd(187668.000000,153036.000000,67925.000000,97.222288)}
{pt3dadd(187320.000000,152844.000000,67750.000000,119.720250)}
{pt3dadd(187080.000000,152688.000000,67575.000000,149.482417)}
{pt3dadd(186900.000000,152328.000000,67275.000000,186.159400)}

{create adhoc79}
{access adhoc79}
{connect adhoc79(1), adhoc78(0)}
{nseg = 1}
{strdef color color = "White"}
{pt3dclear()}
{pt3dadd(186900.000000,152328.000000,67275.000000,186.159400)}
{pt3dadd(186624.000000,151896.000000,67075.000000,166.106267)}
{pt3dadd(186324.000000,151416.000000,67350.000000,132.152050)}
{pt3dadd(186132.000000,151092.000000,67425.000000,96.147151)}
{pt3dadd(185952.000000,150984.000000,67600.000000,81.220726)}

{create adhoc80}
{access adhoc80}
{connect adhoc80(1), adhoc78(0)}
{nseg = 1}
{strdef color color = "White"}
{pt3dclear()}
{pt3dadd(186900.000000,152328.000000,67275.000000,186.159400)}
{pt3dadd(186540.000000,152280.000000,67100.000000,177.294650)}

{create adhoc81}
{access adhoc81}
{connect adhoc81(1), adhoc77(0)}
{nseg = 1}
{strdef color color = "White"}
{pt3dclear()}
{pt3dadd(190572.000000,157488.000000,69700.000000,160.811480)}
{pt3dadd(190788.000000,157224.000000,69775.000000,135.040253)}
{pt3dadd(190908.000000,157068.000000,69825.000000,39.068558)}

{create adhoc82}
{access adhoc82}
{connect adhoc82(1), adhoc76(0)}
{nseg = 1}
{strdef color color = "White"}
{pt3dclear()}
{pt3dadd(190404.000000,158196.000000,69975.000000,94.023140)}
{pt3dadd(190368.000000,158040.000000,70125.000000,334.315520)}

{create adhoc83}
{access adhoc83}
{connect adhoc83(1), adhoc75(0)}
{nseg = 1}
{strdef color color = "White"}
{pt3dclear()}
{pt3dadd(190416.000000,160416.000000,70250.000000,205.240720)}
{pt3dadd(190044.000000,160320.000000,69950.000000,136.357425)}
{pt3dadd(189852.000000,160356.000000,69875.000000,119.468484)}
{pt3dadd(189552.000000,160380.000000,69775.000000,99.152443)}
{pt3dadd(189276.000000,160380.000000,69675.000000,95.099929)}
{pt3dadd(189072.000000,160428.000000,69550.000000,97.922863)}
{pt3dadd(188856.000000,160452.000000,69500.000000,94.045997)}
{pt3dadd(188676.000000,160404.000000,69425.000000,90.545282)}
{pt3dadd(188352.000000,160416.000000,69350.000000,86.057324)}
{pt3dadd(188052.000000,160356.000000,69200.000000,78.797107)}
{pt3dadd(187740.000000,160260.000000,69100.000000,72.097307)}
{pt3dadd(187392.000000,160200.000000,69025.000000,70.186635)}
{pt3dadd(187104.000000,160248.000000,69000.000000,66.064120)}
{pt3dadd(186756.000000,160152.000000,69000.000000,66.064120)}
{pt3dadd(186540.000000,160032.000000,68900.000000,104.413984)}
{pt3dadd(186324.000000,159936.000000,68775.000000,130.433417)}
{pt3dadd(185820.000000,159780.000000,68600.000000,249.471370)}

{create adhoc84}
{access adhoc84}
{connect adhoc84(1), adhoc83(0)}
{nseg = 1}
{strdef color color = "White"}
{pt3dclear()}
{pt3dadd(185820.000000,159780.000000,68600.000000,249.471370)}
{pt3dadd(185448.000000,159816.000000,68400.000000,215.502760)}

{create adhoc85}
{access adhoc85}
{connect adhoc85(1), adhoc83(0)}
{nseg = 1}
{strdef color color = "White"}
{pt3dclear()}
{pt3dadd(185820.000000,159780.000000,68600.000000,249.471370)}
{pt3dadd(185352.000000,160044.000000,68625.000000,186.159400)}

{create adhoc86}
{access adhoc86}
{connect adhoc86(1), adhoc74(0)}
{nseg = 1}
{strdef color color = "White"}
{pt3dclear()}
{pt3dadd(190380.000000,163932.000000,72075.000000,334.315520)}
{pt3dadd(190020.000000,163788.000000,72250.000000,187.628980)}
{pt3dadd(189900.000000,163632.000000,72350.000000,137.604367)}
{pt3dadd(189744.000000,163584.000000,72475.000000,79.806868)}
{pt3dadd(189408.000000,163488.000000,72575.000000,70.161514)}

{create adhoc87}
{access adhoc87}
{connect adhoc87(1), adhoc69(0)}
{nseg = 1}
{strdef color color = "White"}
{pt3dclear()}
{pt3dadd(189132.000000,175548.000000,73475.000000,114.285710)}
{pt3dadd(189300.000000,175692.000000,73500.000000,261.944950)}

{create adhoc88}
{access adhoc88}
{connect adhoc88(1), adhoc68(0)}
{nseg = 1}
{strdef color color = "White"}
{pt3dclear()}
{pt3dadd(187116.000000,176820.000000,74150.000000,237.591800)}
{pt3dadd(187572.000000,176760.000000,74450.000000,103.660515)}

{create adhoc89}
{access adhoc89}
{connect adhoc89(1), adhoc67(0)}
{nseg = 1}
{strdef color color = "White"}
{pt3dclear()}
{pt3dadd(188256.000000,183060.000000,77850.000000,275.042200)}
{pt3dadd(188556.000000,182772.000000,77750.000000,108.843540)}

{create adhoc90}
{access adhoc90}
{connect adhoc90(1), adhoc66(0)}
{nseg = 1}
{strdef color color = "White"}
{pt3dclear()}
{pt3dadd(188664.000000,184020.000000,78575.000000,205.240720)}
{pt3dadd(188484.000000,184248.000000,78625.000000,85.281760)}

{create adhoc91}
{access adhoc91}
{connect adhoc91(1), adhoc65(0)}
{nseg = 1}
{strdef color color = "White"}
{pt3dclear()}
{pt3dadd(194244.000000,186624.000000,80925.000000,275.042200)}
{pt3dadd(193800.000000,187116.000000,80925.000000,154.332500)}
{pt3dadd(193704.000000,187320.000000,80700.000000,133.365811)}
{pt3dadd(193584.000000,187428.000000,80550.000000,104.817371)}
{pt3dadd(193404.000000,187536.000000,80325.000000,109.743229)}
{pt3dadd(193248.000000,187692.000000,80075.000000,113.813939)}
{pt3dadd(193056.000000,187728.000000,79775.000000,114.709398)}
{pt3dadd(192876.000000,187860.000000,79475.000000,109.761425)}
{pt3dadd(192684.000000,187908.000000,79100.000000,101.210594)}
{pt3dadd(192348.000000,188028.000000,78900.000000,93.172454)}
{pt3dadd(192132.000000,188268.000000,78800.000000,94.112686)}
{pt3dadd(191868.000000,188436.000000,78750.000000,94.112686)}
{pt3dadd(191616.000000,188712.000000,78675.000000,90.937435)}
{pt3dadd(191388.000000,188904.000000,78725.000000,102.200416)}
{pt3dadd(191208.000000,189084.000000,78650.000000,116.225966)}
{pt3dadd(190980.000000,189384.000000,78525.000000,166.687362)}
{pt3dadd(190716.000000,189552.000000,78575.000000,183.341664)}
{pt3dadd(190668.000000,189732.000000,78750.000000,185.664098)}
{pt3dadd(190656.000000,190116.000000,78425.000000,174.401117)}
{pt3dadd(190248.000000,190404.000000,78175.000000,163.487849)}
{pt3dadd(190020.000000,190536.000000,78175.000000,123.912353)}
{pt3dadd(189864.000000,190776.000000,78125.000000,110.222131)}
{pt3dadd(189708.000000,191136.000000,78175.000000,110.222131)}
{pt3dadd(189540.000000,191412.000000,78200.000000,109.369314)}
{pt3dadd(189360.000000,191628.000000,78200.000000,104.421341)}
{pt3dadd(189120.000000,191832.000000,78200.000000,96.647723)}
{pt3dadd(188880.000000,192060.000000,78100.000000,120.134595)}
{pt3dadd(188616.000000,192288.000000,78000.000000,144.126387)}
{pt3dadd(188172.000000,192756.000000,77875.000000,145.874663)}
{pt3dadd(187812.000000,192996.000000,77750.000000,147.710354)}
{pt3dadd(187404.000000,193296.000000,77725.000000,142.762381)}
{pt3dadd(187248.000000,193452.000000,77675.000000,118.238904)}
{pt3dadd(187092.000000,193680.000000,77650.000000,96.935620)}
{pt3dadd(186876.000000,193848.000000,77725.000000,99.899700)}
{pt3dadd(186720.000000,194172.000000,77775.000000,98.064009)}
{pt3dadd(186420.000000,194448.000000,77725.000000,125.410420)}
{pt3dadd(186192.000000,194652.000000,77575.000000,157.067307)}
{pt3dadd(185772.000000,194964.000000,77400.000000,192.589565)}
{pt3dadd(185412.000000,195240.000000,77125.000000,261.944950)}

{create adhoc92}
{access adhoc92}
{connect adhoc92(1), adhoc91(0)}
{nseg = 1}
{strdef color color = "White"}
{pt3dclear()}
{pt3dadd(185412.000000,195240.000000,77125.000000,261.944950)}
{pt3dadd(185076.000000,195588.000000,76825.000000,173.414983)}
{pt3dadd(184668.000000,195708.000000,76600.000000,143.726867)}
{pt3dadd(184284.000000,195864.000000,76450.000000,113.106585)}
{pt3dadd(184128.000000,195924.000000,76250.000000,113.106585)}
{pt3dadd(183924.000000,195996.000000,76075.000000,107.378688)}
{pt3dadd(183624.000000,196116.000000,75875.000000,104.414608)}
{pt3dadd(183276.000000,196164.000000,75775.000000,102.749584)}
{pt3dadd(183048.000000,196260.000000,75625.000000,96.451490)}
{pt3dadd(182760.000000,196404.000000,75525.000000,89.160659)}
{pt3dadd(182616.000000,196488.000000,75375.000000,82.706547)}
{pt3dadd(182592.000000,196560.000000,75250.000000,89.545845)}

{create adhoc93}
{access adhoc93}
{connect adhoc93(1), adhoc91(0)}
{nseg = 1}
{strdef color color = "White"}
{pt3dclear()}
{pt3dadd(185412.000000,195240.000000,77125.000000,261.944950)}
{pt3dadd(185472.000000,195612.000000,77275.000000,223.250217)}
{pt3dadd(185520.000000,195768.000000,77300.000000,145.860750)}

{create adhoc94}
{access adhoc94}
{connect adhoc94(1), adhoc64(0)}
{nseg = 1}
{strdef color color = "White"}
{pt3dclear()}
{pt3dadd(195468.000000,186312.000000,82050.000000,249.471370)}
{pt3dadd(195072.000000,186564.000000,82275.000000,138.915000)}

{create adhoc95}
{access adhoc95}
{connect adhoc95(1), adhoc63(0)}
{nseg = 1}
{strdef color color = "White"}
{pt3dclear()}
{pt3dadd(198552.000000,182796.000000,89725.000000,288.794300)}
{pt3dadd(198648.000000,182364.000000,89650.000000,137.442123)}
{pt3dadd(198648.000000,182268.000000,89550.000000,73.669590)}

{create adhoc96}
{access adhoc96}
{connect adhoc96(1), adhoc95(0)}
{nseg = 1}
{strdef color color = "White"}
{pt3dclear()}
{pt3dadd(198648.000000,182268.000000,89550.000000,73.669590)}
{pt3dadd(198816.000000,182352.000000,89375.000000,53.408741)}
{pt3dadd(198840.000000,182436.000000,89225.000000,53.212223)}
{pt3dadd(198852.000000,182448.000000,89025.000000,47.975920)}
{pt3dadd(198828.000000,182496.000000,88750.000000,51.107656)}
{pt3dadd(198780.000000,182448.000000,88600.000000,47.488075)}

{create adhoc97}
{access adhoc97}
{connect adhoc97(1), adhoc95(0)}
{nseg = 1}
{strdef color color = "White"}
{pt3dclear()}
{pt3dadd(198648.000000,182268.000000,89550.000000,73.669590)}
{pt3dadd(198600.000000,182100.000000,89600.000000,57.722054)}

{create adhoc98}
{access adhoc98}
{connect adhoc98(1), adhoc95(0)}
{nseg = 1}
{strdef color color = "White"}
{pt3dclear()}
{pt3dadd(198648.000000,182268.000000,89550.000000,73.669590)}
{pt3dadd(198516.000000,182340.000000,89400.000000,39.068558)}

{create adhoc99}
{access adhoc99}
{connect adhoc99(1), adhoc62(0)}
{nseg = 1}
{strdef color color = "White"}
{pt3dclear()}
{pt3dadd(199752.000000,182196.000000,92800.000000,160.811480)}
{pt3dadd(199860.000000,181968.000000,92675.000000,77.353070)}

{create adhoc100}
{access adhoc100}
{connect adhoc100(1), adhoc61(0)}
{nseg = 1}
{strdef color color = "White"}
{pt3dclear()}
{pt3dadd(198384.000000,182820.000000,96825.000000,470.415500)}
{pt3dadd(198588.000000,183504.000000,96850.000000,238.805167)}
{pt3dadd(198540.000000,183732.000000,96850.000000,199.113860)}
{pt3dadd(198528.000000,184032.000000,96825.000000,137.193056)}
{pt3dadd(198492.000000,184356.000000,96700.000000,131.102225)}
{pt3dadd(198540.000000,184668.000000,96675.000000,126.634328)}
{pt3dadd(198564.000000,185004.000000,96625.000000,138.666208)}
{pt3dadd(198612.000000,185340.000000,96625.000000,145.267328)}
{pt3dadd(198624.000000,185724.000000,96525.000000,150.336912)}
{pt3dadd(198768.000000,186096.000000,96300.000000,155.284885)}
{pt3dadd(198900.000000,186564.000000,96050.000000,146.674413)}
{pt3dadd(198732.000000,186888.000000,95700.000000,123.474836)}
{pt3dadd(198816.000000,187140.000000,95400.000000,102.487101)}
{pt3dadd(198780.000000,187176.000000,95300.000000,87.023929)}
{pt3dadd(198756.000000,187224.000000,95100.000000,83.911647)}
{pt3dadd(198480.000000,187284.000000,94950.000000,87.260630)}
{pt3dadd(198276.000000,187428.000000,94725.000000,88.698941)}
{pt3dadd(197964.000000,187560.000000,94450.000000,101.626946)}
{pt3dadd(197760.000000,187704.000000,94175.000000,100.188963)}
{pt3dadd(197532.000000,187896.000000,93825.000000,145.860750)}

{create adhoc101}
{access adhoc101}
{connect adhoc101(1), adhoc100(0)}
{nseg = 1}
{strdef color color = "White"}
{pt3dclear()}
{pt3dadd(197532.000000,187896.000000,93825.000000,145.860750)}
{pt3dadd(197412.000000,188004.000000,93500.000000,148.529077)}
{pt3dadd(197292.000000,188136.000000,93125.000000,130.173798)}
{pt3dadd(197124.000000,188328.000000,92825.000000,123.858790)}
{pt3dadd(196968.000000,188544.000000,92550.000000,116.896494)}
{pt3dadd(197016.000000,188712.000000,92275.000000,116.896494)}
{pt3dadd(197004.000000,188940.000000,91925.000000,150.655354)}
{pt3dadd(196968.000000,189192.000000,91525.000000,194.245802)}
{pt3dadd(196716.000000,189396.000000,91125.000000,218.907020)}
{pt3dadd(196500.000000,189516.000000,90700.000000,214.439123)}
{pt3dadd(196296.000000,189840.000000,90325.000000,210.656123)}
{pt3dadd(196104.000000,190416.000000,90075.000000,174.665971)}
{pt3dadd(196056.000000,190668.000000,90050.000000,131.075523)}
{pt3dadd(195984.000000,190788.000000,90175.000000,110.017163)}
{pt3dadd(196140.000000,190908.000000,90175.000000,100.279736)}
{pt3dadd(196320.000000,191196.000000,90075.000000,90.851713)}
{pt3dadd(196428.000000,191316.000000,89875.000000,54.973380)}

{create adhoc102}
{access adhoc102}
{connect adhoc102(1), adhoc100(0)}
{nseg = 1}
{strdef color color = "White"}
{pt3dclear()}
{pt3dadd(197532.000000,187896.000000,93825.000000,145.860750)}
{pt3dadd(197592.000000,188052.000000,93825.000000,126.000000)}

{create adhoc103}
{access adhoc103}
{connect adhoc103(1), adhoc58(0)}
{nseg = 1}
{strdef color color = "White"}
{pt3dclear()}
{pt3dadd(196488.000000,181848.000000,99825.000000,195.467360)}
{pt3dadd(196800.000000,182256.000000,99750.000000,117.304571)}
{pt3dadd(196848.000000,182340.000000,99900.000000,70.473245)}
{pt3dadd(196884.000000,182340.000000,99975.000000,54.973380)}

{create adhoc104}
{access adhoc104}
{connect adhoc104(1), adhoc57(0)}
{nseg = 1}
{strdef color color = "White"}
{pt3dclear()}
{pt3dadd(195576.000000,178932.000000,102850.000000,318.395720)}
{pt3dadd(195888.000000,178884.000000,102500.000000,290.367030)}
{pt3dadd(195912.000000,178800.000000,102375.000000,249.471370)}

{create adhoc105}
{access adhoc105}
{connect adhoc105(1), adhoc54(0)}
{nseg = 1}
{strdef color color = "White"}
{pt3dclear()}
{pt3dadd(200052.000000,171672.000000,98675.000000,186.159400)}
{pt3dadd(200064.000000,171624.000000,98475.000000,157.014367)}
{pt3dadd(199956.000000,171744.000000,98500.000000,98.724300)}

{create adhoc106}
{access adhoc106}
{connect adhoc106(1), adhoc53(0)}
{nseg = 1}
{strdef color color = "White"}
{pt3dclear()}
{pt3dadd(200376.000000,171396.000000,98575.000000,205.240720)}
{pt3dadd(200340.000000,171264.000000,98525.000000,52.355602)}

{create adhoc107}
{access adhoc107}
{connect adhoc107(1), adhoc52(0)}
{nseg = 1}
{strdef color color = "White"}
{pt3dclear()}
{pt3dadd(202344.000000,167388.000000,95450.000000,160.811480)}
{pt3dadd(202344.000000,167532.000000,95850.000000,167.379863)}
{pt3dadd(202356.000000,167484.000000,95900.000000,145.860750)}

{create adhoc108}
{access adhoc108}
{connect adhoc108(1), adhoc51(0)}
{nseg = 1}
{strdef color color = "White"}
{pt3dclear()}
{pt3dadd(203004.000000,165000.000000,94100.000000,186.159400)}
{pt3dadd(203640.000000,165264.000000,94250.000000,136.429550)}
{pt3dadd(203892.000000,165204.000000,94150.000000,115.634893)}
{pt3dadd(203988.000000,165000.000000,93950.000000,94.390508)}
{pt3dadd(203928.000000,164796.000000,93725.000000,70.161514)}

{create adhoc109}
{access adhoc109}
{connect adhoc109(1), adhoc50(0)}
{nseg = 1}
{strdef color color = "White"}
{pt3dclear()}
{pt3dadd(204036.000000,159420.000000,91075.000000,387.012000)}
{pt3dadd(203952.000000,159336.000000,90850.000000,326.816640)}
{pt3dadd(203880.000000,159288.000000,90700.000000,275.042200)}

{create adhoc110}
{access adhoc110}
{connect adhoc110(1), adhoc109(0)}
{nseg = 1}
{strdef color color = "White"}
{pt3dclear()}
{pt3dadd(203880.000000,159288.000000,90700.000000,275.042200)}
{pt3dadd(203928.000000,159432.000000,90625.000000,127.542245)}
{pt3dadd(204000.000000,159504.000000,90575.000000,49.862480)}

{create adhoc111}
{access adhoc111}
{connect adhoc111(1), adhoc109(0)}
{nseg = 1}
{strdef color color = "White"}
{pt3dclear()}
{pt3dadd(203880.000000,159288.000000,90700.000000,275.042200)}
{pt3dadd(203700.000000,159204.000000,90450.000000,150.790768)}
{pt3dadd(203640.000000,159204.000000,90300.000000,73.669590)}

{create adhoc112}
{access adhoc112}
{connect adhoc112(1), adhoc49(0)}
{nseg = 1}
{strdef color color = "White"}
{pt3dclear()}
{pt3dadd(203664.000000,156156.000000,91625.000000,406.362580)}
{pt3dadd(203844.000000,156276.000000,92150.000000,337.610193)}
{pt3dadd(204048.000000,156264.000000,92150.000000,303.234000)}

{create adhoc113}
{access adhoc113}
{connect adhoc113(1), adhoc48(0)}
{nseg = 1}
{strdef color color = "White"}
{pt3dclear()}
{pt3dadd(202572.000000,141240.000000,89275.000000,387.012000)}
{pt3dadd(202932.000000,141060.000000,89450.000000,103.660515)}

{create adhoc114}
{access adhoc114}
{connect adhoc114(1), adhoc6(0)}
{nseg = 1}
{strdef color color = "White"}
{pt3dclear()}
{pt3dadd(198528.000000,129744.000000,90775.000000,120.000000)}
{pt3dadd(198396.000000,129312.000000,90650.000000,87.943701)}
{pt3dadd(198228.000000,129012.000000,90600.000000,80.162622)}
{pt3dadd(198048.000000,128676.000000,90500.000000,70.896540)}
{pt3dadd(198000.000000,128376.000000,90575.000000,71.598155)}
{pt3dadd(198096.000000,128088.000000,90725.000000,72.334851)}
{pt3dadd(197928.000000,127992.000000,90850.000000,75.214898)}
{pt3dadd(197844.000000,127848.000000,90950.000000,76.653209)}
{pt3dadd(197784.000000,127584.000000,91100.000000,79.828460)}
{pt3dadd(197712.000000,127296.000000,91225.000000,82.706547)}
{pt3dadd(197616.000000,127032.000000,91350.000000,89.545845)}

{create adhoc115}
{access adhoc115}
{connect adhoc115(1), adhoc3(0)}
{nseg = 1}
{strdef color color = "White"}
{pt3dclear()}
{pt3dadd(190920.000000,122892.000000,91325.000000,288.794300)}
{pt3dadd(191148.000000,122964.000000,91025.000000,145.860750)}

{create adhoc116}
{access adhoc116}
{connect adhoc116(1), adhoc2(0)}
{nseg = 1}
{strdef color color = "White"}
{pt3dclear()}
{pt3dadd(189444.000000,120456.000000,92150.000000,205.240720)}
{pt3dadd(189264.000000,120444.000000,92350.000000,168.085090)}
{pt3dadd(189240.000000,120480.000000,92450.000000,145.860750)}

{create adhoc117}
{access adhoc117}
{connect adhoc117(1), adhoc1(0)}
{nseg = 1}
{strdef color color = "White"}
{pt3dclear()}
{pt3dadd(188496.000000,117576.000000,92025.000000,571.792970)}
{pt3dadd(188448.000000,117888.000000,92600.000000,263.505757)}
{pt3dadd(188748.000000,117876.000000,92825.000000,120.000000)}

{create adhoc118}
{access adhoc118}
{connect adhoc118(1), adhoc1(0)}
{nseg = 1}
{strdef color color = "White"}
{pt3dclear()}
{pt3dadd(188496.000000,117576.000000,92025.000000,571.792970)}
{pt3dadd(188472.000000,117552.000000,91500.000000,384.757443)}
{pt3dadd(188412.000000,117420.000000,91275.000000,259.315573)}
{pt3dadd(188676.000000,117456.000000,91175.000000,195.467360)}
