# Supplementary material for: Full reconstruction of large lobula plate tangential cells in Drosophila from a 3D EM dataset
Source: PLoS One. 2018 Nov 28;13(11):e0207828. doi: 10.1371/journal.pone.0207828 (PMC6261601; doi:10.1371/journal.pone.0207828)
Supplement: S1 Dataset — (ZIP) [file pone.0207828.s001.zip › Diameter hoc/Cell75_4skels_ck.001_corrected_sorted_diametered.hoc0001.hoc]

/* created with convertKnossosNmlToHoc.m */

{create adhoc1}
{access adhoc1}
{nseg = 1}
{strdef color color = "White"}
{pt3dclear()}
{pt3dadd(166032.000000,190752.000000,128300.000000,1000.000000)}
{pt3dadd(166632.000000,190800.000000,128250.000000,450.367157)}
{pt3dadd(167220.000000,190632.000000,127975.000000,343.258874)}
{pt3dadd(167904.000000,190308.000000,127775.000000,195.647864)}
{pt3dadd(168132.000000,190392.000000,127525.000000,221.484154)}
{pt3dadd(168528.000000,190452.000000,127425.000000,225.691590)}
{pt3dadd(169080.000000,190428.000000,127350.000000,217.667890)}
{pt3dadd(169584.000000,190644.000000,127075.000000,225.343820)}
{pt3dadd(169968.000000,190752.000000,126825.000000,190.863999)}
{pt3dadd(170304.000000,190644.000000,126625.000000,181.111139)}
{pt3dadd(170856.000000,190476.000000,126450.000000,225.458513)}
{pt3dadd(171348.000000,190584.000000,126300.000000,282.309733)}
{pt3dadd(171900.000000,190464.000000,126050.000000,307.497603)}
{pt3dadd(172128.000000,190596.000000,125800.000000,350.235234)}
{pt3dadd(172572.000000,190296.000000,125400.000000,350.235234)}
{pt3dadd(172512.000000,190440.000000,125275.000000,294.402690)}
{pt3dadd(172740.000000,190284.000000,125100.000000,230.950350)}
{pt3dadd(172992.000000,190284.000000,124875.000000,198.086550)}
{pt3dadd(173064.000000,190284.000000,124625.000000,163.899750)}
{pt3dadd(173280.000000,190332.000000,124475.000000,155.876050)}
{pt3dadd(173652.000000,190116.000000,124150.000000,167.361220)}
{pt3dadd(174132.000000,189912.000000,123850.000000,200.409604)}
{pt3dadd(174612.000000,189708.000000,123575.000000,253.899120)}
{pt3dadd(175080.000000,189504.000000,123375.000000,291.118264)}
{pt3dadd(175380.000000,189504.000000,123150.000000,308.894824)}
{pt3dadd(175908.000000,189468.000000,122775.000000,321.398104)}
{pt3dadd(176424.000000,189276.000000,122450.000000,321.398104)}
{pt3dadd(176976.000000,189252.000000,122125.000000,306.988692)}
{pt3dadd(177276.000000,189228.000000,121900.000000,293.203822)}
{pt3dadd(177792.000000,189144.000000,121625.000000,295.954242)}
{pt3dadd(178356.000000,188880.000000,121300.000000,301.874526)}
{pt3dadd(178992.000000,188580.000000,120950.000000,298.842182)}
{pt3dadd(179628.000000,188304.000000,120600.000000,289.737938)}
{pt3dadd(180096.000000,188220.000000,120275.000000,317.246064)}
{pt3dadd(180792.000000,188196.000000,120050.000000,336.889604)}
{pt3dadd(181212.000000,188052.000000,119775.000000,343.416716)}
{pt3dadd(181464.000000,188052.000000,119475.000000,360.172316)}
{pt3dadd(181716.000000,187848.000000,119100.000000,352.307730)}
{pt3dadd(182028.000000,187668.000000,118850.000000,320.160910)}
{pt3dadd(182136.000000,187428.000000,118600.000000,295.147500)}
{pt3dadd(182208.000000,187188.000000,118425.000000,277.330234)}
{pt3dadd(182592.000000,187020.000000,118150.000000,252.316824)}
{pt3dadd(182940.000000,186864.000000,117975.000000,243.470694)}
{pt3dadd(183228.000000,186792.000000,117875.000000,248.109388)}
{pt3dadd(183480.000000,186660.000000,117875.000000,240.975978)}
{pt3dadd(183732.000000,186576.000000,117775.000000,233.842568)}
{pt3dadd(183960.000000,186528.000000,117625.000000,231.347852)}
{pt3dadd(184236.000000,186516.000000,117550.000000,240.193982)}
{pt3dadd(184476.000000,186528.000000,117525.000000,245.308148)}
{pt3dadd(184860.000000,186564.000000,117500.000000,260.699368)}
{pt3dadd(185280.000000,186600.000000,117150.000000,273.202648)}
{pt3dadd(185592.000000,186648.000000,116975.000000,275.697364)}
{pt3dadd(185736.000000,186468.000000,116875.000000,286.449890)}
{pt3dadd(186336.000000,186396.000000,116400.000000,301.647706)}
{pt3dadd(186768.000000,186336.000000,116050.000000,301.647706)}
{pt3dadd(187260.000000,186432.000000,115575.000000,307.567990)}
{pt3dadd(187404.000000,186348.000000,115425.000000,318.858144)}
{pt3dadd(187620.000000,186312.000000,115100.000000,328.417600)}
{pt3dadd(187884.000000,186204.000000,114750.000000,325.074448)}
{pt3dadd(188016.000000,186156.000000,114450.000000,316.816638)}
{pt3dadd(188208.000000,186192.000000,114150.000000,310.896354)}
{pt3dadd(188532.000000,185952.000000,113850.000000,320.933782)}
{pt3dadd(188592.000000,185796.000000,113600.000000,328.129926)}
{pt3dadd(188856.000000,185772.000000,113250.000000,342.539338)}
{pt3dadd(188856.000000,185532.000000,112825.000000,353.829492)}
{pt3dadd(189192.000000,185244.000000,112575.000000,351.079072)}
{pt3dadd(189504.000000,185040.000000,112300.000000,320.463052)}
{pt3dadd(189840.000000,184860.000000,112075.000000,284.108796)}
{pt3dadd(190116.000000,184848.000000,111775.000000,255.225270)}
{pt3dadd(190392.000000,184536.000000,111625.000000,246.554566)}
{pt3dadd(190656.000000,184248.000000,111500.000000,234.646678)}
{pt3dadd(190932.000000,183852.000000,111325.000000,249.304986)}
{pt3dadd(191244.000000,183096.000000,111050.000000,271.935986)}
{pt3dadd(191664.000000,182532.000000,111000.000000,271.935986)}
{pt3dadd(191976.000000,182028.000000,110925.000000,262.183126)}
{pt3dadd(192252.000000,181788.000000,110825.000000,268.976848)}
{pt3dadd(192468.000000,181464.000000,110825.000000,284.934560)}
{pt3dadd(192816.000000,181248.000000,111000.000000,306.591562)}
{pt3dadd(193080.000000,181116.000000,111275.000000,352.989828)}
{pt3dadd(193452.000000,180852.000000,111625.000000,422.092842)}
{pt3dadd(193764.000000,181092.000000,111725.000000,492.275088)}
{pt3dadd(194196.000000,180744.000000,112075.000000,532.917110)}
{pt3dadd(194448.000000,180576.000000,112075.000000,532.917110)}
{pt3dadd(194232.000000,180192.000000,112075.000000,507.846426)}
{pt3dadd(194592.000000,179856.000000,112350.000000,451.246692)}
{pt3dadd(194904.000000,179556.000000,112325.000000,386.178612)}
{pt3dadd(194988.000000,179220.000000,112400.000000,338.683122)}
{pt3dadd(195084.000000,178920.000000,112400.000000,313.993776)}
{pt3dadd(195204.000000,178632.000000,112400.000000,300.924004)}
{pt3dadd(195348.000000,178284.000000,112475.000000,310.028248)}
{pt3dadd(195480.000000,177912.000000,112500.000000,325.226064)}
{pt3dadd(195684.000000,177480.000000,112600.000000,343.699106)}
{pt3dadd(195768.000000,177096.000000,112600.000000,372.655260)}
{pt3dadd(195852.000000,176760.000000,112575.000000,410.795716)}
{pt3dadd(195828.000000,176424.000000,112450.000000,438.015712)}
{pt3dadd(195912.000000,176064.000000,112425.000000,457.412410)}
{pt3dadd(195852.000000,175716.000000,112400.000000,449.478664)}
{pt3dadd(195792.000000,175332.000000,111975.000000,433.592282)}
{pt3dadd(195732.000000,175008.000000,111725.000000,401.668130)}
{pt3dadd(195600.000000,174492.000000,111425.000000,374.448134)}
{pt3dadd(195480.000000,173988.000000,111100.000000,351.708284)}
{pt3dadd(195480.000000,173772.000000,111000.000000,324.200158)}
{pt3dadd(195480.000000,173568.000000,110900.000000,300.377860)}
{pt3dadd(195480.000000,173376.000000,110650.000000,285.903746)}
{pt3dadd(195480.000000,173256.000000,110400.000000,264.296222)}
{pt3dadd(195492.000000,173052.000000,110125.000000,244.951478)}
{pt3dadd(195492.000000,172836.000000,109775.000000,250.065644)}
{pt3dadd(195696.000000,172752.000000,109400.000000,281.443886)}
{pt3dadd(195912.000000,172608.000000,109125.000000,310.327412)}
{pt3dadd(196236.000000,172500.000000,108825.000000,342.474232)}
{pt3dadd(196500.000000,172584.000000,108500.000000,372.358272)}
{pt3dadd(196776.000000,172572.000000,108300.000000,387.556088)}
{pt3dadd(197052.000000,172536.000000,108275.000000,358.672562)}
{pt3dadd(197232.000000,172548.000000,108000.000000,320.500598)}
{pt3dadd(197472.000000,172404.000000,107825.000000,295.487188)}
{pt3dadd(197724.000000,172248.000000,107625.000000,261.185340)}
{pt3dadd(198048.000000,172104.000000,107200.000000,238.497444)}
{pt3dadd(198228.000000,171960.000000,106775.000000,229.209006)}
{pt3dadd(198396.000000,171948.000000,106775.000000,243.867314)}
{pt3dadd(198636.000000,171900.000000,106500.000000,243.867314)}
{pt3dadd(198912.000000,171900.000000,106200.000000,270.973018)}
{pt3dadd(199152.000000,171732.000000,105825.000000,304.727174)}
{pt3dadd(199356.000000,171636.000000,105575.000000,339.029022)}
{pt3dadd(199536.000000,171456.000000,105275.000000,336.278602)}
{pt3dadd(199800.000000,171324.000000,104975.000000,336.278602)}
{pt3dadd(200100.000000,171048.000000,104700.000000,318.461336)}
{pt3dadd(200304.000000,170940.000000,104500.000000,297.835620)}
{pt3dadd(200436.000000,170676.000000,104225.000000,284.112364)}
{pt3dadd(200676.000000,170376.000000,103975.000000,295.967028)}
{pt3dadd(200904.000000,170124.000000,103750.000000,310.441142)}
{pt3dadd(201216.000000,169860.000000,103500.000000,331.768724)}
{pt3dadd(201420.000000,169536.000000,103250.000000,365.205024)}
{pt3dadd(201636.000000,169188.000000,102975.000000,415.884474)}
{pt3dadd(201840.000000,168852.000000,102675.000000,463.379964)}
{pt3dadd(202188.000000,168648.000000,102325.000000,457.163660)}
{pt3dadd(202284.000000,168492.000000,102025.000000,457.163660)}
{pt3dadd(202356.000000,168432.000000,101575.000000,436.797132)}
{pt3dadd(202488.000000,168180.000000,101125.000000,396.155110)}
{pt3dadd(202656.000000,167940.000000,100950.000000,352.002772)}
{pt3dadd(202728.000000,167700.000000,100700.000000,352.002772)}
{pt3dadd(202716.000000,167496.000000,100425.000000,333.294640)}
{pt3dadd(202860.000000,167004.000000,100175.000000,317.336928)}
{pt3dadd(202944.000000,166848.000000,99875.000000,298.628796)}
{pt3dadd(203172.000000,166584.000000,99550.000000,275.940900)}
{pt3dadd(203148.000000,166416.000000,99225.000000,267.683090)}
{pt3dadd(203256.000000,166224.000000,98925.000000,270.433510)}
{pt3dadd(203400.000000,166032.000000,98625.000000,276.353794)}
{pt3dadd(203472.000000,165960.000000,98375.000000,276.353794)}
{pt3dadd(203604.000000,165744.000000,98000.000000,295.698538)}
{pt3dadd(203688.000000,165708.000000,97800.000000,332.912502)}
{pt3dadd(203808.000000,165540.000000,97600.000000,369.236742)}
{pt3dadd(203928.000000,165336.000000,97275.000000,390.893744)}
{pt3dadd(204048.000000,165120.000000,96925.000000,425.488258)}
{pt3dadd(204060.000000,164832.000000,96550.000000,432.341726)}
{pt3dadd(204096.000000,164712.000000,96250.000000,416.455344)}
{pt3dadd(204180.000000,164556.000000,95950.000000,403.644760)}
{pt3dadd(204408.000000,164352.000000,95550.000000,385.171718)}
{pt3dadd(204504.000000,164184.000000,95150.000000,369.753653)}
{pt3dadd(204576.000000,164112.000000,94725.000000,334.315520)}

{create adhoc2}
{access adhoc2}
{connect adhoc2(1), adhoc1(0)}
{nseg = 1}
{strdef color color = "White"}
{pt3dclear()}
{pt3dadd(204576.000000,164112.000000,94725.000000,334.315520)}
{pt3dadd(204480.000000,164256.000000,94400.000000,255.278047)}
{pt3dadd(204468.000000,164340.000000,94275.000000,224.084688)}
{pt3dadd(204432.000000,164460.000000,93975.000000,212.230024)}
{pt3dadd(204456.000000,164664.000000,93750.000000,230.653588)}
{pt3dadd(204336.000000,164712.000000,93450.000000,247.364304)}
{pt3dadd(204312.000000,164676.000000,93200.000000,255.005926)}
{pt3dadd(204144.000000,164892.000000,92900.000000,253.317406)}
{pt3dadd(204180.000000,165024.000000,92575.000000,227.481116)}
{pt3dadd(204228.000000,165288.000000,92275.000000,199.260902)}
{pt3dadd(204192.000000,165588.000000,92000.000000,170.674192)}
{pt3dadd(203952.000000,165660.000000,91825.000000,170.674192)}
{pt3dadd(203688.000000,165924.000000,91600.000000,174.135662)}
{pt3dadd(203556.000000,166104.000000,91350.000000,186.011656)}
{pt3dadd(203424.000000,166476.000000,91025.000000,186.011656)}
{pt3dadd(203316.000000,166752.000000,90700.000000,189.001802)}
{pt3dadd(203232.000000,167460.000000,90400.000000,178.063546)}
{pt3dadd(203196.000000,167640.000000,90400.000000,179.925138)}
{pt3dadd(203160.000000,167820.000000,90400.000000,186.395354)}
{pt3dadd(203196.000000,167964.000000,90075.000000,208.695284)}
{pt3dadd(203220.000000,168108.000000,90075.000000,243.396092)}
{pt3dadd(203232.000000,168288.000000,90050.000000,263.622786)}
{pt3dadd(203052.000000,168540.000000,89650.000000,261.761194)}
{pt3dadd(202788.000000,168852.000000,89325.000000,246.405130)}
{pt3dadd(202668.000000,169116.000000,89125.000000,222.416680)}
{pt3dadd(202500.000000,169356.000000,88900.000000,191.012506)}
{pt3dadd(202416.000000,169596.000000,88575.000000,177.716988)}
{pt3dadd(202344.000000,169668.000000,88400.000000,165.685108)}
{pt3dadd(202236.000000,169812.000000,88075.000000,167.293222)}
{pt3dadd(201960.000000,170136.000000,87800.000000,168.981742)}
{pt3dadd(201780.000000,170280.000000,87525.000000,168.981742)}
{pt3dadd(201516.000000,170532.000000,87200.000000,179.782544)}
{pt3dadd(201384.000000,170748.000000,87200.000000,204.476818)}
{pt3dadd(201252.000000,171144.000000,86950.000000,215.961988)}
{pt3dadd(201240.000000,171420.000000,86950.000000,221.551202)}
{pt3dadd(200988.000000,171636.000000,86725.000000,225.185744)}
{pt3dadd(200808.000000,171840.000000,86625.000000,220.547050)}
{pt3dadd(200724.000000,172044.000000,86625.000000,211.700920)}
{pt3dadd(200628.000000,172188.000000,86500.000000,201.904270)}
{pt3dadd(200544.000000,172392.000000,86375.000000,194.626536)}
{pt3dadd(200496.000000,172644.000000,86250.000000,205.427338)}
{pt3dadd(200400.000000,172908.000000,86250.000000,217.930618)}
{pt3dadd(200280.000000,173136.000000,86050.000000,254.284874)}
{pt3dadd(200292.000000,173268.000000,85900.000000,296.228344)}
{pt3dadd(200256.000000,173412.000000,85700.000000,343.730450)}
{pt3dadd(200196.000000,173496.000000,85775.000000,364.042432)}
{pt3dadd(200184.000000,173580.000000,85725.000000,361.292012)}
{pt3dadd(200208.000000,173652.000000,85550.000000,331.407972)}
{pt3dadd(200292.000000,173772.000000,85575.000000,279.205572)}
{pt3dadd(200376.000000,173892.000000,85575.000000,235.164936)}
{pt3dadd(200340.000000,174216.000000,85325.000000,202.190560)}
{pt3dadd(200424.000000,174612.000000,85150.000000,177.812880)}
{pt3dadd(200472.000000,174948.000000,84975.000000,158.077520)}
{pt3dadd(200484.000000,175020.000000,84800.000000,160.660520)}
{pt3dadd(200472.000000,175224.000000,84575.000000,155.590936)}
{pt3dadd(200448.000000,175428.000000,84350.000000,152.129466)}
{pt3dadd(200520.000000,175536.000000,84125.000000,166.754286)}
{pt3dadd(200580.000000,175704.000000,83900.000000,168.143436)}
{pt3dadd(200592.000000,175896.000000,83600.000000,177.592316)}
{pt3dadd(200568.000000,176172.000000,83325.000000,182.661900)}
{pt3dadd(200472.000000,176388.000000,82975.000000,179.522250)}
{pt3dadd(200208.000000,176592.000000,82650.000000,168.037080)}
{pt3dadd(200172.000000,176820.000000,82375.000000,159.597033)}
{pt3dadd(200052.000000,176952.000000,82050.000000,145.222295)}
{pt3dadd(200052.000000,177216.000000,81750.000000,134.450415)}
{pt3dadd(199920.000000,177276.000000,81425.000000,141.051535)}
{pt3dadd(199788.000000,177312.000000,81100.000000,165.039985)}
{pt3dadd(199620.000000,177408.000000,80800.000000,211.170986)}
{pt3dadd(199476.000000,177456.000000,80575.000000,238.208118)}
{pt3dadd(199464.000000,177600.000000,80025.000000,245.518528)}
{pt3dadd(199428.000000,177876.000000,79700.000000,231.143790)}
{pt3dadd(199428.000000,178140.000000,79400.000000,197.384930)}
{pt3dadd(199476.000000,178368.000000,78925.000000,159.693976)}
{pt3dadd(199212.000000,178428.000000,78625.000000,147.031582)}
{pt3dadd(198972.000000,178452.000000,78325.000000,150.493052)}
{pt3dadd(198828.000000,178428.000000,78000.000000,161.406320)}
{pt3dadd(198768.000000,178500.000000,77725.000000,160.263462)}
{pt3dadd(198684.000000,178512.000000,77425.000000,150.836172)}
{pt3dadd(198588.000000,178584.000000,77150.000000,137.604292)}
{pt3dadd(198516.000000,178644.000000,76875.000000,123.229554)}
{pt3dadd(198432.000000,178764.000000,76575.000000,111.227852)}
{pt3dadd(198360.000000,178764.000000,76325.000000,129.418854)}
{pt3dadd(198396.000000,178848.000000,76000.000000,140.304754)}
{pt3dadd(198264.000000,178944.000000,75650.000000,159.405306)}
{pt3dadd(198372.000000,179148.000000,75350.000000,172.007094)}
{pt3dadd(198396.000000,179292.000000,74950.000000,182.400682)}
{pt3dadd(198060.000000,179388.000000,74500.000000,182.400682)}
{pt3dadd(197880.000000,179412.000000,74125.000000,199.288282)}
{pt3dadd(197820.000000,179316.000000,73750.000000,193.419610)}
{pt3dadd(197760.000000,179244.000000,73475.000000,179.729388)}
{pt3dadd(197580.000000,179256.000000,73100.000000,171.567092)}
{pt3dadd(197400.000000,179232.000000,72775.000000,158.301948)}
{pt3dadd(197172.000000,179172.000000,72475.000000,139.955738)}
{pt3dadd(196848.000000,179244.000000,72125.000000,134.886154)}
{pt3dadd(196524.000000,179268.000000,71925.000000,150.349326)}
{pt3dadd(196308.000000,179436.000000,71625.000000,165.442798)}
{pt3dadd(196224.000000,179508.000000,71375.000000,178.707942)}
{pt3dadd(196056.000000,179640.000000,71050.000000,194.791372)}
{pt3dadd(195888.000000,179832.000000,70775.000000,201.722548)}
{pt3dadd(195816.000000,180012.000000,70475.000000,199.949598)}
{pt3dadd(195576.000000,180120.000000,70175.000000,194.626536)}
{pt3dadd(195432.000000,180252.000000,69875.000000,180.038392)}
{pt3dadd(195228.000000,180360.000000,69600.000000,156.551520)}
{pt3dadd(195108.000000,180336.000000,69300.000000,146.630198)}
{pt3dadd(194964.000000,180444.000000,69000.000000,144.941678)}
{pt3dadd(194580.000000,180528.000000,68650.000000,171.818068)}
{pt3dadd(194352.000000,180708.000000,68375.000000,212.221172)}
{pt3dadd(194244.000000,180828.000000,68200.000000,251.099264)}
{pt3dadd(194124.000000,180804.000000,67925.000000,276.935554)}
{pt3dadd(193860.000000,180984.000000,67550.000000,288.420724)}
{pt3dadd(193584.000000,181188.000000,67175.000000,273.029504)}
{pt3dadd(193356.000000,181272.000000,66800.000000,247.214544)}
{pt3dadd(193116.000000,181380.000000,66450.000000,234.086104)}
{pt3dadd(192984.000000,181452.000000,66175.000000,236.836524)}
{pt3dadd(192588.000000,182004.000000,66000.000000,258.444048)}
{pt3dadd(192528.000000,182304.000000,65775.000000,268.196908)}
{pt3dadd(192336.000000,182388.000000,65500.000000,270.249316)}
{pt3dadd(192204.000000,182472.000000,65225.000000,270.249316)}
{pt3dadd(192072.000000,182556.000000,64975.000000,247.949386)}
{pt3dadd(191952.000000,182592.000000,64700.000000,216.545212)}
{pt3dadd(191832.000000,182736.000000,64450.000000,200.630244)}
{pt3dadd(191640.000000,182736.000000,64275.000000,198.577836)}
{pt3dadd(191400.000000,182844.000000,64025.000000,190.152948)}
{pt3dadd(191148.000000,183036.000000,63800.000000,188.464428)}
{pt3dadd(190920.000000,183108.000000,63650.000000,189.853377)}
{pt3dadd(190452.000000,183240.000000,63550.000000,168.852050)}

{create adhoc3}
{access adhoc3}
{connect adhoc3(1), adhoc2(0)}
{nseg = 1}
{strdef color color = "White"}
{pt3dclear()}
{pt3dadd(190452.000000,183240.000000,63550.000000,168.852050)}
{pt3dadd(190416.000000,184092.000000,62950.000000,166.433500)}
{pt3dadd(190212.000000,184464.000000,62950.000000,174.678654)}
{pt3dadd(189948.000000,184764.000000,62775.000000,188.426604)}
{pt3dadd(189876.000000,184884.000000,62875.000000,202.861948)}
{pt3dadd(189528.000000,185184.000000,62600.000000,219.749548)}
{pt3dadd(189180.000000,185484.000000,62600.000000,215.151288)}
{pt3dadd(188832.000000,185784.000000,62600.000000,196.960286)}
{pt3dadd(188748.000000,186108.000000,62225.000000,175.901926)}
{pt3dadd(188568.000000,186360.000000,62025.000000,171.263232)}
{pt3dadd(188352.000000,186732.000000,61725.000000,178.753312)}
{pt3dadd(187992.000000,187068.000000,61475.000000,197.099522)}
{pt3dadd(187608.000000,187296.000000,61175.000000,246.303967)}
{pt3dadd(187284.000000,187236.000000,60900.000000,237.591800)}

{create adhoc4}
{access adhoc4}
{connect adhoc4(1), adhoc3(0)}
{nseg = 1}
{strdef color color = "White"}
{pt3dclear()}
{pt3dadd(187284.000000,187236.000000,60900.000000,237.591800)}
{pt3dadd(187200.000000,187248.000000,60450.000000,181.250400)}
{pt3dadd(187344.000000,187440.000000,60225.000000,142.050737)}
{pt3dadd(187416.000000,187272.000000,59950.000000,110.776522)}
{pt3dadd(187404.000000,187188.000000,59675.000000,92.349270)}
{pt3dadd(187488.000000,187044.000000,59400.000000,87.153898)}
{pt3dadd(187500.000000,186840.000000,59175.000000,90.829649)}
{pt3dadd(187548.000000,186756.000000,58925.000000,93.390132)}
{pt3dadd(187668.000000,186684.000000,58725.000000,96.890847)}
{pt3dadd(187668.000000,186600.000000,58500.000000,92.820137)}
{pt3dadd(187824.000000,186648.000000,58025.000000,91.071861)}
{pt3dadd(187944.000000,186588.000000,57675.000000,92.108466)}
{pt3dadd(187944.000000,186504.000000,57250.000000,96.160980)}
{pt3dadd(187944.000000,186336.000000,56875.000000,95.220748)}
{pt3dadd(187836.000000,186144.000000,56625.000000,96.730975)}
{pt3dadd(187752.000000,186036.000000,56375.000000,95.918768)}
{pt3dadd(187752.000000,185892.000000,56125.000000,91.206412)}
{pt3dadd(187644.000000,185724.000000,55875.000000,84.593416)}
{pt3dadd(187644.000000,185604.000000,55600.000000,82.845140)}
{pt3dadd(187536.000000,185472.000000,55175.000000,95.773144)}
{pt3dadd(187476.000000,185460.000000,54875.000000,104.121079)}
{pt3dadd(187248.000000,185424.000000,54375.000000,145.860750)}

{create adhoc5}
{access adhoc5}
{connect adhoc5(1), adhoc3(0)}
{nseg = 1}
{strdef color color = "White"}
{pt3dclear()}
{pt3dadd(187284.000000,187236.000000,60900.000000,237.591800)}
{pt3dadd(186684.000000,187332.000000,60725.000000,156.205367)}
{pt3dadd(186408.000000,187344.000000,60750.000000,138.668080)}
{pt3dadd(186228.000000,187320.000000,60750.000000,110.894580)}
{pt3dadd(186048.000000,187320.000000,60750.000000,100.678725)}
{pt3dadd(185916.000000,187308.000000,60775.000000,97.178010)}
{pt3dadd(185772.000000,187320.000000,60775.000000,90.160862)}
{pt3dadd(185604.000000,187368.000000,60775.000000,78.324960)}
{pt3dadd(185388.000000,187476.000000,60800.000000,71.307812)}
{pt3dadd(185172.000000,187548.000000,60800.000000,72.120019)}
{pt3dadd(184944.000000,187620.000000,60800.000000,71.913603)}
{pt3dadd(184728.000000,187680.000000,60800.000000,85.281760)}

{create adhoc6}
{access adhoc6}
{connect adhoc6(1), adhoc5(0)}
{nseg = 1}
{strdef color color = "White"}
{pt3dclear()}
{pt3dadd(184728.000000,187680.000000,60800.000000,85.281760)}
{pt3dadd(184440.000000,187704.000000,60725.000000,114.527253)}
{pt3dadd(184188.000000,187704.000000,60575.000000,108.043763)}
{pt3dadd(183948.000000,187932.000000,60500.000000,109.645685)}
{pt3dadd(183792.000000,188028.000000,60325.000000,57.722054)}

{create adhoc7}
{access adhoc7}
{connect adhoc7(1), adhoc5(0)}
{nseg = 1}
{strdef color color = "White"}
{pt3dclear()}
{pt3dadd(184728.000000,187680.000000,60800.000000,85.281760)}
{pt3dadd(184548.000000,187776.000000,60900.000000,85.349444)}
{pt3dadd(184320.000000,188016.000000,60925.000000,90.680280)}
{pt3dadd(184104.000000,188352.000000,61025.000000,98.823928)}
{pt3dadd(183804.000000,188688.000000,61025.000000,94.947062)}
{pt3dadd(183492.000000,188916.000000,61025.000000,93.436835)}
{pt3dadd(183300.000000,189168.000000,61225.000000,97.711081)}
{pt3dadd(183048.000000,189768.000000,61450.000000,94.443184)}
{pt3dadd(182880.000000,189924.000000,61350.000000,86.299536)}
{pt3dadd(182796.000000,190176.000000,61350.000000,92.012093)}
{pt3dadd(182712.000000,190416.000000,61350.000000,93.522320)}
{pt3dadd(182604.000000,190788.000000,61200.000000,90.021605)}
{pt3dadd(182496.000000,191040.000000,61075.000000,82.017214)}
{pt3dadd(182460.000000,191220.000000,60950.000000,81.205008)}
{pt3dadd(182436.000000,191436.000000,60675.000000,84.317290)}
{pt3dadd(182256.000000,191652.000000,60400.000000,100.235440)}
{pt3dadd(182088.000000,191856.000000,60100.000000,118.772639)}
{pt3dadd(181920.000000,191988.000000,59775.000000,160.811480)}

{create adhoc8}
{access adhoc8}
{connect adhoc8(1), adhoc2(0)}
{nseg = 1}
{strdef color color = "White"}
{pt3dclear()}
{pt3dadd(190452.000000,183240.000000,63550.000000,168.852050)}
{pt3dadd(190200.000000,183300.000000,63375.000000,130.660433)}
{pt3dadd(189852.000000,183216.000000,63075.000000,113.361781)}
{pt3dadd(189516.000000,183228.000000,62850.000000,100.323474)}
{pt3dadd(189156.000000,183072.000000,62575.000000,98.198435)}
{pt3dadd(189048.000000,183012.000000,62500.000000,100.429727)}
{pt3dadd(188952.000000,183012.000000,62500.000000,112.545525)}
{pt3dadd(188736.000000,182868.000000,62350.000000,121.096356)}
{pt3dadd(188340.000000,182832.000000,62200.000000,130.995013)}
{pt3dadd(188208.000000,182796.000000,62200.000000,139.435060)}
{pt3dadd(187944.000000,182760.000000,62075.000000,130.168978)}
{pt3dadd(187776.000000,182724.000000,61975.000000,118.905997)}
{pt3dadd(187572.000000,182664.000000,61750.000000,108.690142)}
{pt3dadd(187368.000000,182616.000000,61750.000000,94.303527)}
{pt3dadd(187248.000000,182556.000000,61650.000000,80.601991)}
{pt3dadd(187116.000000,182604.000000,61650.000000,82.112219)}
{pt3dadd(186912.000000,182580.000000,61650.000000,88.203050)}
{pt3dadd(186852.000000,182496.000000,61450.000000,135.638048)}
{pt3dadd(186720.000000,182208.000000,61300.000000,186.257007)}
{pt3dadd(186204.000000,182496.000000,61375.000000,204.556803)}
{pt3dadd(186120.000000,182424.000000,60825.000000,205.369010)}
{pt3dadd(185892.000000,182244.000000,60500.000000,194.096722)}
{pt3dadd(185724.000000,182160.000000,60250.000000,140.888698)}
{pt3dadd(185532.000000,182124.000000,60075.000000,86.147225)}
{pt3dadd(185472.000000,182136.000000,59950.000000,70.285984)}
{pt3dadd(185352.000000,182112.000000,59700.000000,63.700753)}
{pt3dadd(185232.000000,181992.000000,59425.000000,81.603801)}
{pt3dadd(184992.000000,181944.000000,59175.000000,91.864783)}
{pt3dadd(184788.000000,181896.000000,59000.000000,115.202082)}
{pt3dadd(184392.000000,181824.000000,58775.000000,125.075913)}
{pt3dadd(184044.000000,181692.000000,58600.000000,137.461935)}
{pt3dadd(184044.000000,181548.000000,58400.000000,127.563278)}
{pt3dadd(183840.000000,181488.000000,58175.000000,123.075320)}
{pt3dadd(183744.000000,181500.000000,58025.000000,107.361250)}
{pt3dadd(183636.000000,181464.000000,57825.000000,98.382878)}
{pt3dadd(183624.000000,181404.000000,57500.000000,133.284596)}
{pt3dadd(183528.000000,181344.000000,57175.000000,164.941483)}
{pt3dadd(183588.000000,181392.000000,56900.000000,193.952918)}
{pt3dadd(183504.000000,181284.000000,56625.000000,201.991058)}
{pt3dadd(183468.000000,181332.000000,56400.000000,208.386430)}
{pt3dadd(183360.000000,181032.000000,56150.000000,171.359673)}
{pt3dadd(183240.000000,180828.000000,55950.000000,137.775311)}
{pt3dadd(183204.000000,180660.000000,55675.000000,113.251834)}
{pt3dadd(183144.000000,180408.000000,55450.000000,102.525186)}
{pt3dadd(183168.000000,180336.000000,55250.000000,100.182328)}
{pt3dadd(182868.000000,180144.000000,55050.000000,116.682105)}
{pt3dadd(182724.000000,179772.000000,54800.000000,161.556621)}
{pt3dadd(182640.000000,179652.000000,54625.000000,211.030774)}
{pt3dadd(182520.000000,179532.000000,54375.000000,251.733282)}
{pt3dadd(182424.000000,179448.000000,54075.000000,278.770414)}
{pt3dadd(182340.000000,179316.000000,53800.000000,280.632006)}
{pt3dadd(182280.000000,179304.000000,53550.000000,271.961302)}
{pt3dadd(182280.000000,179268.000000,53425.000000,256.763486)}
{pt3dadd(182580.000000,179016.000000,53250.000000,254.013066)}
{pt3dadd(182712.000000,178848.000000,53000.000000,236.281088)}
{pt3dadd(182760.000000,178572.000000,52650.000000,224.970616)}
{pt3dadd(182844.000000,178428.000000,52425.000000,202.124472)}
{pt3dadd(182892.000000,178044.000000,52450.000000,167.848135)}
{pt3dadd(183012.000000,177708.000000,52225.000000,145.001991)}
{pt3dadd(183072.000000,177372.000000,51975.000000,140.622695)}
{pt3dadd(182940.000000,177192.000000,51725.000000,133.571798)}
{pt3dadd(182844.000000,177048.000000,51525.000000,123.178210)}
{pt3dadd(182808.000000,176868.000000,51225.000000,123.178210)}
{pt3dadd(182664.000000,176628.000000,50950.000000,112.784622)}
{pt3dadd(182628.000000,176472.000000,50700.000000,124.095094)}
{pt3dadd(182520.000000,176316.000000,50500.000000,142.456463)}
{pt3dadd(182352.000000,176304.000000,50300.000000,161.735899)}
{pt3dadd(182292.000000,176148.000000,50075.000000,178.235676)}
{pt3dadd(182340.000000,175956.000000,49925.000000,193.698848)}
{pt3dadd(182424.000000,175668.000000,49700.000000,190.064306)}
{pt3dadd(182496.000000,175392.000000,49700.000000,172.739542)}
{pt3dadd(182472.000000,175272.000000,49700.000000,146.425316)}
{pt3dadd(182184.000000,174648.000000,49425.000000,136.976436)}
{pt3dadd(181956.000000,174240.000000,49275.000000,124.944556)}
{pt3dadd(181764.000000,174204.000000,49075.000000,111.254334)}
{pt3dadd(181476.000000,174012.000000,48825.000000,109.230486)}
{pt3dadd(181248.000000,173688.000000,48625.000000,116.265276)}
{pt3dadd(181140.000000,173544.000000,48475.000000,120.644572)}
{pt3dadd(181116.000000,173376.000000,48475.000000,130.903502)}
{pt3dadd(180912.000000,173160.000000,48400.000000,146.366674)}
{pt3dadd(180768.000000,172896.000000,48400.000000,169.722366)}
{pt3dadd(180660.000000,172872.000000,48400.000000,185.185538)}
{pt3dadd(180552.000000,172788.000000,48325.000000,183.654002)}
{pt3dadd(180324.000000,172788.000000,48400.000000,167.939932)}
{pt3dadd(180156.000000,172836.000000,48400.000000,146.012500)}
{pt3dadd(180000.000000,172812.000000,48350.000000,98.724300)}

{create adhoc9}
{access adhoc9}
{connect adhoc9(1), adhoc1(0)}
{nseg = 1}
{strdef color color = "White"}
{pt3dclear()}
{pt3dadd(204576.000000,164112.000000,94725.000000,334.315520)}
{pt3dadd(204588.000000,163632.000000,94500.000000,227.095467)}
{pt3dadd(204732.000000,163128.000000,94275.000000,210.721040)}
{pt3dadd(204912.000000,162672.000000,93975.000000,193.752210)}
{pt3dadd(204996.000000,162312.000000,93750.000000,211.528770)}
{pt3dadd(205116.000000,162000.000000,93350.000000,220.414618)}
{pt3dadd(205356.000000,161724.000000,93100.000000,222.276210)}
{pt3dadd(205392.000000,161520.000000,92875.000000,217.206626)}
{pt3dadd(205392.000000,161280.000000,92875.000000,204.544232)}
{pt3dadd(205392.000000,161028.000000,92875.000000,181.698088)}
{pt3dadd(205344.000000,160800.000000,92775.000000,185.905524)}
{pt3dadd(205332.000000,160548.000000,92775.000000,196.706326)}
{pt3dadd(205404.000000,160296.000000,92525.000000,219.552470)}
{pt3dadd(205548.000000,159792.000000,92325.000000,237.329030)}
{pt3dadd(205548.000000,159336.000000,92100.000000,262.925594)}
{pt3dadd(205428.000000,158904.000000,91850.000000,287.876270)}
{pt3dadd(205332.000000,158508.000000,91575.000000,290.370986)}
{pt3dadd(205236.000000,158208.000000,91375.000000,276.410690)}
{pt3dadd(205104.000000,157692.000000,91175.000000,252.033010)}
{pt3dadd(204876.000000,157368.000000,91025.000000,229.733080)}
{pt3dadd(204684.000000,157164.000000,90825.000000,187.309824)}
{pt3dadd(204564.000000,156924.000000,90625.000000,167.083130)}
{pt3dadd(204372.000000,156684.000000,90400.000000,158.197282)}
{pt3dadd(204276.000000,156384.000000,90150.000000,177.460796)}
{pt3dadd(204276.000000,156084.000000,89775.000000,183.050010)}
{pt3dadd(204312.000000,155724.000000,89500.000000,196.315154)}
{pt3dadd(204516.000000,155364.000000,89050.000000,207.253410)}
{pt3dadd(204336.000000,154992.000000,88675.000000,222.609474)}
{pt3dadd(204396.000000,154764.000000,88675.000000,222.609474)}
{pt3dadd(204468.000000,154596.000000,88450.000000,242.208130)}
{pt3dadd(204504.000000,154356.000000,88200.000000,256.168426)}
{pt3dadd(204528.000000,154152.000000,87950.000000,248.526804)}
{pt3dadd(204480.000000,153948.000000,87675.000000,231.639204)}
{pt3dadd(204504.000000,153624.000000,87325.000000,210.917080)}
{pt3dadd(204420.000000,153180.000000,87075.000000,182.432576)}
{pt3dadd(204228.000000,152568.000000,86825.000000,174.942496)}
{pt3dadd(204084.000000,152184.000000,86825.000000,200.130366)}
{pt3dadd(203916.000000,151980.000000,86450.000000,239.705862)}
{pt3dadd(203796.000000,151644.000000,86200.000000,271.180512)}
{pt3dadd(203904.000000,151320.000000,85925.000000,319.166427)}
{pt3dadd(203844.000000,151044.000000,85650.000000,303.234000)}

{create adhoc10}
{access adhoc10}
{connect adhoc10(1), adhoc9(0)}
{nseg = 1}
{strdef color color = "White"}
{pt3dclear()}
{pt3dadd(203844.000000,151044.000000,85650.000000,303.234000)}
{pt3dadd(203784.000000,150732.000000,85525.000000,241.325827)}
{pt3dadd(203784.000000,149796.000000,85250.000000,230.996600)}
{pt3dadd(203700.000000,149580.000000,85125.000000,213.450352)}
{pt3dadd(203508.000000,149160.000000,84800.000000,209.443272)}
{pt3dadd(203496.000000,148944.000000,84575.000000,200.557424)}
{pt3dadd(203448.000000,148668.000000,84475.000000,198.505016)}
{pt3dadd(203436.000000,147996.000000,84175.000000,205.298738)}
{pt3dadd(203532.000000,147828.000000,84175.000000,203.246330)}
{pt3dadd(203460.000000,147600.000000,83950.000000,224.799658)}
{pt3dadd(203496.000000,147420.000000,83950.000000,250.396222)}
{pt3dadd(203508.000000,147180.000000,83700.000000,264.356518)}
{pt3dadd(203520.000000,146784.000000,83500.000000,264.356518)}
{pt3dadd(203388.000000,146136.000000,83150.000000,270.826734)}
{pt3dadd(203280.000000,145908.000000,83150.000000,245.638864)}
{pt3dadd(203268.000000,145740.000000,82975.000000,211.880004)}
{pt3dadd(203160.000000,145464.000000,82775.000000,189.033860)}
{pt3dadd(203124.000000,145116.000000,82600.000000,184.395166)}
{pt3dadd(203076.000000,144768.000000,82600.000000,174.108686)}
{pt3dadd(202848.000000,144480.000000,82350.000000,172.420166)}
{pt3dadd(202716.000000,144120.000000,82150.000000,180.582462)}
{pt3dadd(202716.000000,143856.000000,81850.000000,180.582462)}
{pt3dadd(202716.000000,143628.000000,81650.000000,172.558762)}
{pt3dadd(202716.000000,143184.000000,81475.000000,174.420354)}
{pt3dadd(202692.000000,142860.000000,81325.000000,198.408804)}
{pt3dadd(202572.000000,142500.000000,81025.000000,221.254948)}
{pt3dadd(202488.000000,142128.000000,80725.000000,241.481642)}
{pt3dadd(202368.000000,141924.000000,80725.000000,256.638752)}
{pt3dadd(202248.000000,141708.000000,80725.000000,275.304140)}
{pt3dadd(202212.000000,141528.000000,80725.000000,267.439554)}
{pt3dadd(202248.000000,141348.000000,80725.000000,282.637370)}
{pt3dadd(202308.000000,141228.000000,80725.000000,282.637370)}
{pt3dadd(202128.000000,141240.000000,80300.000000,267.480260)}
{pt3dadd(202044.000000,141264.000000,80050.000000,238.893550)}
{pt3dadd(201900.000000,140484.000000,79575.000000,226.231156)}
{pt3dadd(201624.000000,139980.000000,79300.000000,205.919174)}
{pt3dadd(201384.000000,139548.000000,79025.000000,203.424458)}
{pt3dadd(201252.000000,139068.000000,78825.000000,221.201018)}
{pt3dadd(201060.000000,138444.000000,78525.000000,241.923142)}
{pt3dadd(201012.000000,138108.000000,78250.000000,243.784734)}
{pt3dadd(200952.000000,137616.000000,78075.000000,234.938604)}
{pt3dadd(200856.000000,137280.000000,77900.000000,224.137802)}
{pt3dadd(200688.000000,137004.000000,77725.000000,210.177506)}
{pt3dadd(200652.000000,136716.000000,77425.000000,201.331376)}
{pt3dadd(200592.000000,136368.000000,77200.000000,201.331376)}
{pt3dadd(200508.000000,135960.000000,76975.000000,197.515112)}
{pt3dadd(200436.000000,135624.000000,76725.000000,203.677220)}
{pt3dadd(200352.000000,135288.000000,76575.000000,215.018066)}
{pt3dadd(200292.000000,134976.000000,76325.000000,234.616722)}
{pt3dadd(200292.000000,134676.000000,76200.000000,253.282110)}
{pt3dadd(200196.000000,134364.000000,76100.000000,293.452630)}
{pt3dadd(199800.000000,133872.000000,75775.000000,329.469566)}
{pt3dadd(199656.000000,133572.000000,75775.000000,366.683530)}
{pt3dadd(199668.000000,133512.000000,75775.000000,372.899834)}
{pt3dadd(199548.000000,133236.000000,75575.000000,370.149414)}
{pt3dadd(199356.000000,132948.000000,75650.000000,328.205944)}
{pt3dadd(199248.000000,132804.000000,75625.000000,263.989780)}
{pt3dadd(199080.000000,132516.000000,75675.000000,217.487378)}
{pt3dadd(198876.000000,132084.000000,75600.000000,198.142634)}
{pt3dadd(198960.000000,131904.000000,75225.000000,186.234746)}
{pt3dadd(198864.000000,131556.000000,75225.000000,193.876368)}
{pt3dadd(198768.000000,131208.000000,75225.000000,222.075596)}
{pt3dadd(198708.000000,131004.000000,75225.000000,236.733904)}
{pt3dadd(198660.000000,130800.000000,75225.000000,249.862344)}
{pt3dadd(198600.000000,130596.000000,75225.000000,270.440936)}
{pt3dadd(198588.000000,130380.000000,75225.000000,294.203488)}
{pt3dadd(198576.000000,130152.000000,75225.000000,312.627052)}
{pt3dadd(198552.000000,129936.000000,75225.000000,318.547336)}
{pt3dadd(198516.000000,129744.000000,75225.000000,324.763640)}
{pt3dadd(198480.000000,129552.000000,75225.000000,321.731296)}
{pt3dadd(198456.000000,129408.000000,75100.000000,315.514992)}
{pt3dadd(198420.000000,129264.000000,75100.000000,312.482648)}
{pt3dadd(198384.000000,129120.000000,75100.000000,306.562364)}
{pt3dadd(198336.000000,128976.000000,75100.000000,297.458120)}
{pt3dadd(198276.000000,128760.000000,75100.000000,286.705594)}
{pt3dadd(198192.000000,128532.000000,75100.000000,271.314374)}
{pt3dadd(198180.000000,128328.000000,75100.000000,251.715718)}
{pt3dadd(198156.000000,128124.000000,75100.000000,227.727268)}
{pt3dadd(197988.000000,127872.000000,75050.000000,193.968408)}
{pt3dadd(197904.000000,127632.000000,75050.000000,163.818994)}
{pt3dadd(197808.000000,127404.000000,75050.000000,139.295517)}
{pt3dadd(197724.000000,127260.000000,75050.000000,118.979476)}
{pt3dadd(197640.000000,127116.000000,75050.000000,102.015110)}
{pt3dadd(197568.000000,126972.000000,75050.000000,103.660515)}

{create adhoc11}
{access adhoc11}
{connect adhoc11(1), adhoc10(0)}
{nseg = 1}
{strdef color color = "White"}
{pt3dclear()}
{pt3dadd(197568.000000,126972.000000,75050.000000,103.660515)}
{pt3dadd(197388.000000,127044.000000,74575.000000,155.993308)}
{pt3dadd(197268.000000,126972.000000,74250.000000,149.135103)}
{pt3dadd(197100.000000,126936.000000,73950.000000,156.186000)}
{pt3dadd(197004.000000,126972.000000,73600.000000,174.851388)}
{pt3dadd(196896.000000,127164.000000,73175.000000,218.483378)}
{pt3dadd(196812.000000,127248.000000,72875.000000,258.429540)}
{pt3dadd(196752.000000,127572.000000,72425.000000,314.063232)}
{pt3dadd(196692.000000,127536.000000,72150.000000,327.328376)}
{pt3dadd(196692.000000,127560.000000,71850.000000,305.028446)}
{pt3dadd(196668.000000,127752.000000,71550.000000,263.084976)}
{pt3dadd(196536.000000,128040.000000,71250.000000,230.416548)}
{pt3dadd(196428.000000,128184.000000,71050.000000,205.403138)}
{pt3dadd(196344.000000,128460.000000,70825.000000,228.034138)}
{pt3dadd(196224.000000,128592.000000,70600.000000,269.977608)}
{pt3dadd(196044.000000,128988.000000,70300.000000,266.680974)}
{pt3dadd(195996.000000,129144.000000,69925.000000,257.795126)}
{pt3dadd(196056.000000,129468.000000,69625.000000,248.506688)}
{pt3dadd(195984.000000,129504.000000,69300.000000,227.928096)}
{pt3dadd(195864.000000,129456.000000,68875.000000,198.044056)}
{pt3dadd(195876.000000,129744.000000,68625.000000,215.776034)}
{pt3dadd(195696.000000,129888.000000,68300.000000,224.661882)}
{pt3dadd(195756.000000,129972.000000,68000.000000,233.950320)}
{pt3dadd(195552.000000,130116.000000,67725.000000,243.238758)}
{pt3dadd(195384.000000,130224.000000,67425.000000,256.367198)}
{pt3dadd(195072.000000,130356.000000,67025.000000,267.119724)}
{pt3dadd(194736.000000,130464.000000,66800.000000,248.928722)}
{pt3dadd(194304.000000,130500.000000,66575.000000,210.572035)}
{pt3dadd(194220.000000,130524.000000,66300.000000,171.547143)}
{pt3dadd(193920.000000,130176.000000,66375.000000,125.634261)}
{pt3dadd(193656.000000,130092.000000,66350.000000,87.844603)}
{pt3dadd(193308.000000,129972.000000,66350.000000,94.159611)}
{pt3dadd(193608.000000,129588.000000,66025.000000,125.382888)}
{pt3dadd(193140.000000,129672.000000,65875.000000,147.477720)}
{pt3dadd(193092.000000,129348.000000,65575.000000,164.906098)}
{pt3dadd(192792.000000,129180.000000,65250.000000,185.149508)}
{pt3dadd(192576.000000,128628.000000,65100.000000,199.077910)}
{pt3dadd(192240.000000,128484.000000,64775.000000,196.922882)}
{pt3dadd(192120.000000,128232.000000,64775.000000,204.564504)}
{pt3dadd(192000.000000,128064.000000,64775.000000,215.502760)}
{pt3dadd(191904.000000,128004.000000,64775.000000,209.634088)}
{pt3dadd(191856.000000,127932.000000,64775.000000,233.396640)}
{pt3dadd(191820.000000,127836.000000,64575.000000,225.755018)}
{pt3dadd(191724.000000,127824.000000,64150.000000,232.548740)}
{pt3dadd(191676.000000,127560.000000,63975.000000,244.456628)}
{pt3dadd(191616.000000,127248.000000,63975.000000,252.480328)}
{pt3dadd(191580.000000,127056.000000,63975.000000,224.710696)}
{pt3dadd(191460.000000,127020.000000,64025.000000,230.299910)}
{pt3dadd(191340.000000,126972.000000,64025.000000,217.637516)}
{pt3dadd(191352.000000,126804.000000,64025.000000,205.729628)}
{pt3dadd(191364.000000,126636.000000,64025.000000,202.300960)}
{pt3dadd(191388.000000,126444.000000,64075.000000,215.502760)}

{create adhoc12}
{access adhoc12}
{connect adhoc12(1), adhoc11(0)}
{nseg = 1}
{strdef color color = "White"}
{pt3dclear()}
{pt3dadd(191388.000000,126444.000000,64075.000000,215.502760)}
{pt3dadd(191424.000000,126216.000000,64050.000000,164.885520)}
{pt3dadd(191424.000000,125940.000000,64250.000000,138.401926)}
{pt3dadd(191424.000000,125616.000000,64425.000000,119.301374)}
{pt3dadd(191424.000000,125292.000000,64600.000000,119.301374)}
{pt3dadd(191496.000000,125304.000000,64900.000000,141.619734)}
{pt3dadd(191496.000000,125112.000000,65125.000000,163.381000)}
{pt3dadd(191508.000000,124860.000000,65325.000000,170.011760)}
{pt3dadd(191520.000000,124608.000000,65650.000000,198.400750)}
{pt3dadd(191292.000000,124248.000000,66000.000000,231.449134)}
{pt3dadd(191220.000000,124368.000000,65675.000000,217.701184)}
{pt3dadd(191172.000000,124176.000000,65675.000000,215.928234)}
{pt3dadd(191244.000000,123684.000000,66100.000000,222.529354)}
{pt3dadd(190848.000000,123348.000000,66375.000000,199.312514)}
{pt3dadd(190488.000000,123000.000000,66600.000000,176.681514)}
{pt3dadd(190212.000000,122640.000000,66800.000000,178.370034)}
{pt3dadd(190116.000000,122376.000000,66875.000000,176.681514)}
{pt3dadd(190104.000000,122076.000000,66875.000000,186.967994)}
{pt3dadd(190092.000000,121896.000000,66875.000000,196.889316)}
{pt3dadd(189900.000000,121752.000000,67025.000000,196.889316)}
{pt3dadd(189792.000000,121500.000000,67025.000000,206.685966)}
{pt3dadd(189744.000000,121368.000000,67025.000000,227.923996)}
{pt3dadd(189684.000000,121320.000000,67025.000000,241.052436)}
{pt3dadd(189648.000000,120960.000000,67075.000000,262.605764)}
{pt3dadd(189600.000000,120600.000000,67075.000000,282.204420)}
{pt3dadd(189564.000000,120240.000000,67075.000000,286.843114)}
{pt3dadd(189456.000000,120072.000000,67075.000000,286.843114)}
{pt3dadd(189396.000000,119844.000000,67075.000000,247.965022)}
{pt3dadd(189324.000000,119604.000000,67075.000000,208.050325)}
{pt3dadd(189228.000000,119376.000000,66900.000000,172.603525)}
{pt3dadd(189120.000000,119148.000000,66900.000000,154.871547)}
{pt3dadd(189000.000000,119064.000000,66900.000000,129.035257)}
{pt3dadd(188820.000000,118824.000000,66650.000000,139.428845)}
{pt3dadd(188652.000000,118524.000000,66450.000000,155.928622)}
{pt3dadd(188472.000000,118224.000000,66450.000000,164.277210)}
{pt3dadd(188340.000000,118092.000000,66375.000000,186.159400)}

{create adhoc13}
{access adhoc13}
{connect adhoc13(1), adhoc12(0)}
{nseg = 1}
{strdef color color = "White"}
{pt3dclear()}
{pt3dadd(188340.000000,118092.000000,66375.000000,186.159400)}
{pt3dadd(188400.000000,117876.000000,66375.000000,128.575623)}
{pt3dadd(188484.000000,117660.000000,66375.000000,124.002516)}
{pt3dadd(188448.000000,117408.000000,66275.000000,106.515496)}
{pt3dadd(188484.000000,117228.000000,66275.000000,103.403214)}
{pt3dadd(188544.000000,117348.000000,65900.000000,101.817476)}
{pt3dadd(188580.000000,117300.000000,65875.000000,92.324432)}
{pt3dadd(188640.000000,117312.000000,65825.000000,79.868843)}
{pt3dadd(188700.000000,117372.000000,65725.000000,72.245614)}
{pt3dadd(188736.000000,117444.000000,65500.000000,61.716899)}
{pt3dadd(188688.000000,117468.000000,65350.000000,60.608154)}

{create adhoc14}
{access adhoc14}
{connect adhoc14(1), adhoc12(0)}
{nseg = 1}
{strdef color color = "White"}
{pt3dclear()}
{pt3dadd(188340.000000,118092.000000,66375.000000,186.159400)}
{pt3dadd(188256.000000,118200.000000,66350.000000,140.213490)}
{pt3dadd(187992.000000,118152.000000,66400.000000,122.160397)}
{pt3dadd(187680.000000,118032.000000,66500.000000,112.711517)}
{pt3dadd(187536.000000,117924.000000,66450.000000,96.019835)}
{pt3dadd(187368.000000,117792.000000,66400.000000,104.143059)}
{pt3dadd(186912.000000,117444.000000,66450.000000,135.366336)}
{pt3dadd(186492.000000,117180.000000,66450.000000,148.598216)}
{pt3dadd(186036.000000,116880.000000,66325.000000,149.987366)}
{pt3dadd(185568.000000,116568.000000,66225.000000,159.716752)}
{pt3dadd(185364.000000,116436.000000,66075.000000,163.319610)}
{pt3dadd(185160.000000,116328.000000,66075.000000,157.157502)}
{pt3dadd(184968.000000,116064.000000,66100.000000,142.782764)}
{pt3dadd(184596.000000,116052.000000,65775.000000,142.782764)}
{pt3dadd(183720.000000,115704.000000,65775.000000,154.814644)}
{pt3dadd(183180.000000,115488.000000,65625.000000,167.448116)}
{pt3dadd(182172.000000,115344.000000,65500.000000,154.814644)}
{pt3dadd(181800.000000,115248.000000,65700.000000,154.814644)}
{pt3dadd(180756.000000,115236.000000,65775.000000,154.814644)}
{pt3dadd(180132.000000,115308.000000,65900.000000,139.351472)}
{pt3dadd(179544.000000,115332.000000,65900.000000,126.718000)}
{pt3dadd(178920.000000,115188.000000,65775.000000,119.062628)}
{pt3dadd(178296.000000,115056.000000,65775.000000,114.114655)}
{pt3dadd(177660.000000,114876.000000,65775.000000,108.942505)}
{pt3dadd(177036.000000,114732.000000,65775.000000,120.944207)}
{pt3dadd(176328.000000,114636.000000,65775.000000,123.656357)}
{pt3dadd(176064.000000,114576.000000,65850.000000,130.051729)}
{pt3dadd(175836.000000,114528.000000,65825.000000,130.947188)}
{pt3dadd(175572.000000,114672.000000,65825.000000,127.679291)}
{pt3dadd(175380.000000,114876.000000,65950.000000,114.640984)}
{pt3dadd(175152.000000,114936.000000,65875.000000,104.273462)}
{pt3dadd(174972.000000,115008.000000,65875.000000,96.129814)}
{pt3dadd(174684.000000,115044.000000,65775.000000,93.569331)}
{pt3dadd(174468.000000,115068.000000,65800.000000,89.893580)}
{pt3dadd(174252.000000,115092.000000,65825.000000,84.632091)}
{pt3dadd(173976.000000,115080.000000,65800.000000,82.071608)}
{pt3dadd(173712.000000,115068.000000,65800.000000,85.747359)}
{pt3dadd(173496.000000,115008.000000,65875.000000,100.133974)}
{pt3dadd(173256.000000,114960.000000,65950.000000,108.277622)}
{pt3dadd(173040.000000,114900.000000,65975.000000,120.590008)}
{pt3dadd(172836.000000,114840.000000,66050.000000,130.805863)}
{pt3dadd(172488.000000,114792.000000,65975.000000,129.818620)}
{pt3dadd(172236.000000,114732.000000,65975.000000,118.932720)}
{pt3dadd(171900.000000,114432.000000,66100.000000,117.732720)}
{pt3dadd(171180.000000,114156.000000,66100.000000,123.720130)}
{pt3dadd(170940.000000,114060.000000,66050.000000,140.360682)}
{pt3dadd(170424.000000,113964.000000,66050.000000,149.787972)}
{pt3dadd(170088.000000,113868.000000,66050.000000,147.099464)}
{pt3dadd(169680.000000,113808.000000,66125.000000,153.730224)}
{pt3dadd(168756.000000,113880.000000,66025.000000,146.419814)}
{pt3dadd(168084.000000,113916.000000,66025.000000,124.051365)}
{pt3dadd(167460.000000,114192.000000,66025.000000,129.704772)}
{pt3dadd(167340.000000,113952.000000,66275.000000,103.660515)}

{create adhoc15}
{access adhoc15}
{connect adhoc15(1), adhoc11(0)}
{nseg = 1}
{strdef color color = "White"}
{pt3dclear()}
{pt3dadd(191388.000000,126444.000000,64075.000000,215.502760)}
{pt3dadd(191292.000000,126612.000000,63600.000000,143.007829)}
{pt3dadd(191232.000000,126456.000000,63250.000000,140.047697)}
{pt3dadd(191232.000000,126300.000000,62950.000000,126.119295)}
{pt3dadd(191232.000000,126228.000000,62650.000000,128.831445)}
{pt3dadd(191100.000000,126192.000000,62450.000000,125.951398)}
{pt3dadd(191100.000000,126240.000000,62200.000000,127.274398)}
{pt3dadd(190908.000000,126408.000000,61925.000000,125.951398)}
{pt3dadd(190920.000000,126276.000000,61650.000000,132.238178)}
{pt3dadd(191088.000000,126432.000000,61350.000000,127.066028)}
{pt3dadd(190896.000000,126600.000000,61075.000000,144.332690)}
{pt3dadd(190836.000000,126516.000000,60750.000000,150.320100)}
{pt3dadd(190644.000000,126648.000000,60500.000000,154.490860)}
{pt3dadd(190308.000000,126804.000000,60325.000000,148.204080)}
{pt3dadd(189972.000000,126984.000000,60050.000000,153.376230)}
{pt3dadd(189612.000000,127176.000000,60000.000000,150.528470)}
{pt3dadd(189276.000000,127236.000000,60000.000000,166.652334)}
{pt3dadd(189036.000000,127368.000000,60000.000000,185.915848)}
{pt3dadd(188868.000000,127524.000000,59975.000000,238.016214)}
{pt3dadd(188700.000000,127512.000000,60025.000000,256.362424)}
{pt3dadd(188520.000000,127776.000000,59875.000000,248.324284)}
{pt3dadd(188352.000000,127932.000000,59575.000000,209.424686)}
{pt3dadd(188304.000000,127980.000000,59375.000000,176.586764)}
{pt3dadd(188268.000000,128028.000000,59125.000000,107.435879)}
{pt3dadd(188256.000000,128124.000000,58875.000000,66.954431)}
{pt3dadd(188244.000000,128148.000000,58700.000000,60.608154)}

{create adhoc16}
{access adhoc16}
{connect adhoc16(1), adhoc10(0)}
{nseg = 1}
{strdef color color = "White"}
{pt3dclear()}
{pt3dadd(197568.000000,126972.000000,75050.000000,103.660515)}
{pt3dadd(197304.000000,126540.000000,75050.000000,91.475695)}
{pt3dadd(197292.000000,126348.000000,75175.000000,88.185914)}
{pt3dadd(197328.000000,126132.000000,75175.000000,82.924425)}
{pt3dadd(197352.000000,125952.000000,75200.000000,94.463280)}
{pt3dadd(197400.000000,125760.000000,75150.000000,101.754111)}
{pt3dadd(197484.000000,125388.000000,75150.000000,109.897759)}
{pt3dadd(197568.000000,125016.000000,75150.000000,111.562783)}
{pt3dadd(197496.000000,124692.000000,75250.000000,112.336314)}
{pt3dadd(197532.000000,124476.000000,75275.000000,99.287232)}
{pt3dadd(197556.000000,124272.000000,75275.000000,92.891860)}
{pt3dadd(197640.000000,124080.000000,75250.000000,84.748212)}
{pt3dadd(197652.000000,123888.000000,75475.000000,84.324830)}
{pt3dadd(197916.000000,123708.000000,75425.000000,85.281760)}

{create adhoc17}
{access adhoc17}
{connect adhoc17(1), adhoc9(0)}
{nseg = 1}
{strdef color color = "White"}
{pt3dclear()}
{pt3dadd(203844.000000,151044.000000,85650.000000,303.234000)}
{pt3dadd(203700.000000,151716.000000,85725.000000,212.538787)}
{pt3dadd(203508.000000,151956.000000,85450.000000,169.036840)}
{pt3dadd(203400.000000,152196.000000,85225.000000,125.446392)}
{pt3dadd(203232.000000,152352.000000,85050.000000,102.597065)}
{pt3dadd(203160.000000,152532.000000,84950.000000,95.546168)}
{pt3dadd(203148.000000,152712.000000,84825.000000,100.237460)}
{pt3dadd(203208.000000,152916.000000,84750.000000,109.664750)}
{pt3dadd(203244.000000,153000.000000,84650.000000,120.391398)}
{pt3dadd(203364.000000,153048.000000,84550.000000,131.930253)}
{pt3dadd(203412.000000,153084.000000,84450.000000,132.966858)}
{pt3dadd(203424.000000,153240.000000,84300.000000,127.238961)}
{pt3dadd(203388.000000,153288.000000,84200.000000,124.526811)}
{pt3dadd(203304.000000,153444.000000,84100.000000,123.203811)}
{pt3dadd(203244.000000,153588.000000,84000.000000,124.592961)}
{pt3dadd(203124.000000,153648.000000,83875.000000,133.455013)}
{pt3dadd(203028.000000,153816.000000,83725.000000,143.353670)}
{pt3dadd(202932.000000,153888.000000,83525.000000,150.664080)}
{pt3dadd(202584.000000,154176.000000,83250.000000,145.972788)}
{pt3dadd(202440.000000,154284.000000,83100.000000,136.545498)}
{pt3dadd(202008.000000,154428.000000,82875.000000,131.114738)}
{pt3dadd(201948.000000,154536.000000,82650.000000,117.540330)}
{pt3dadd(201888.000000,154644.000000,82425.000000,101.679089)}
{pt3dadd(201708.000000,154776.000000,82125.000000,106.370381)}
{pt3dadd(201648.000000,154860.000000,81800.000000,110.625521)}
{pt3dadd(201600.000000,154932.000000,81600.000000,111.885521)}
{pt3dadd(201684.000000,155124.000000,81475.000000,116.597877)}
{pt3dadd(201792.000000,155196.000000,81350.000000,115.745060)}
{pt3dadd(201840.000000,155328.000000,81075.000000,108.089688)}
{pt3dadd(201864.000000,155484.000000,80800.000000,101.998857)}
{pt3dadd(201888.000000,155724.000000,80650.000000,91.009471)}
{pt3dadd(201780.000000,155808.000000,80400.000000,91.009471)}
{pt3dadd(201744.000000,155952.000000,80125.000000,93.697979)}
{pt3dadd(201672.000000,155988.000000,79900.000000,102.676351)}
{pt3dadd(201624.000000,156012.000000,79600.000000,113.939332)}
{pt3dadd(201564.000000,156048.000000,79325.000000,145.987078)}
{pt3dadd(201372.000000,156072.000000,79050.000000,184.865170)}
{pt3dadd(201264.000000,156240.000000,78750.000000,215.014584)}
{pt3dadd(201168.000000,156300.000000,78475.000000,215.014584)}
{pt3dadd(201156.000000,156360.000000,78200.000000,213.625434)}
{pt3dadd(200964.000000,156564.000000,77900.000000,187.875782)}
{pt3dadd(200832.000000,156768.000000,77625.000000,156.401132)}
{pt3dadd(200784.000000,156972.000000,77250.000000,131.706858)}
{pt3dadd(200664.000000,157116.000000,76850.000000,126.901430)}
{pt3dadd(200436.000000,157104.000000,76625.000000,126.000000)}
