# Supplementary material for: Full reconstruction of large lobula plate tangential cells in Drosophila from a 3D EM dataset
Source: PLoS One. 2018 Nov 28;13(11):e0207828. doi: 10.1371/journal.pone.0207828 (PMC6261601; doi:10.1371/journal.pone.0207828)
Supplement: S1 Dataset — (ZIP) [file pone.0207828.s001.zip › Diameter hoc/Cell126_4skels_ck.001_corrected_sorted_diametered.hoc0001.hoc]

/* created with convertKnossosNmlToHoc.m */

{create adhoc1}
{access adhoc1}
{nseg = 1}
{strdef color color = "White"}
{pt3dclear()}
{pt3dadd(194580.000000,121680.000000,75900.000000,406.362580)}
{pt3dadd(194652.000000,121668.000000,76025.000000,389.119610)}
{pt3dadd(194796.000000,121548.000000,76325.000000,380.904910)}
{pt3dadd(195012.000000,121560.000000,76575.000000,342.732946)}
{pt3dadd(195156.000000,121404.000000,76775.000000,300.497352)}
{pt3dadd(195156.000000,121200.000000,77100.000000,272.727720)}
{pt3dadd(195120.000000,120960.000000,77325.000000,251.400138)}
{pt3dadd(195072.000000,120804.000000,77500.000000,218.731710)}
{pt3dadd(195048.000000,120780.000000,77750.000000,209.401568)}
{pt3dadd(195072.000000,120528.000000,78050.000000,205.394488)}
{pt3dadd(195168.000000,120324.000000,78250.000000,203.532896)}
{pt3dadd(195192.000000,120060.000000,78425.000000,194.244458)}
{pt3dadd(195216.000000,119808.000000,78675.000000,208.204754)}
{pt3dadd(195324.000000,119664.000000,78925.000000,241.297448)}
{pt3dadd(195360.000000,119316.000000,79200.000000,300.991232)}
{pt3dadd(195432.000000,119100.000000,79325.000000,327.438496)}
{pt3dadd(195492.000000,118716.000000,79650.000000,348.017088)}
{pt3dadd(195564.000000,118524.000000,79900.000000,353.655448)}
{pt3dadd(195684.000000,118236.000000,80175.000000,322.251274)}
{pt3dadd(195768.000000,118056.000000,80475.000000,260.695898)}
{pt3dadd(195876.000000,117744.000000,80825.000000,254.775614)}
{pt3dadd(195936.000000,117576.000000,81100.000000,251.743270)}
{pt3dadd(195792.000000,117324.000000,81500.000000,251.743270)}
{pt3dadd(195552.000000,117312.000000,81775.000000,279.963484)}
{pt3dadd(195612.000000,117060.000000,82225.000000,316.448176)}
{pt3dadd(195684.000000,116844.000000,82350.000000,311.078306)}
{pt3dadd(195852.000000,116760.000000,82625.000000,308.190366)}
{pt3dadd(195960.000000,116772.000000,82925.000000,305.302426)}
{pt3dadd(196104.000000,116676.000000,83275.000000,311.829538)}
{pt3dadd(196272.000000,116748.000000,83525.000000,301.792110)}
{pt3dadd(196464.000000,116796.000000,83825.000000,319.609376)}
{pt3dadd(196632.000000,116772.000000,84125.000000,347.186662)}
{pt3dadd(196812.000000,116724.000000,84400.000000,356.290906)}
{pt3dadd(197136.000000,116676.000000,84650.000000,343.843510)}
{pt3dadd(197496.000000,116460.000000,85075.000000,317.396246)}
{pt3dadd(197640.000000,116520.000000,85250.000000,279.352286)}
{pt3dadd(197724.000000,116400.000000,85475.000000,227.786550)}
{pt3dadd(197688.000000,116448.000000,85700.000000,200.016918)}
{pt3dadd(197640.000000,116520.000000,85950.000000,185.358610)}
{pt3dadd(197628.000000,116496.000000,86150.000000,195.645090)}
{pt3dadd(197496.000000,116424.000000,86425.000000,215.871784)}
{pt3dadd(197304.000000,116316.000000,86625.000000,234.490364)}
{pt3dadd(197100.000000,116244.000000,86925.000000,247.785882)}
{pt3dadd(196920.000000,116196.000000,87125.000000,262.444190)}
{pt3dadd(196716.000000,116064.000000,87275.000000,269.934270)}
{pt3dadd(196536.000000,115932.000000,87500.000000,269.934270)}
{pt3dadd(196356.000000,116112.000000,87800.000000,275.304140)}
{pt3dadd(196260.000000,116016.000000,87975.000000,289.778254)}
{pt3dadd(196224.000000,115704.000000,88150.000000,302.225650)}
{pt3dadd(196068.000000,115440.000000,88325.000000,324.713700)}
{pt3dadd(195804.000000,115092.000000,88425.000000,351.031280)}

{create adhoc2}
{access adhoc2}
{connect adhoc2(1), adhoc1(0)}
{nseg = 1}
{strdef color color = "White"}
{pt3dclear()}
{pt3dadd(195804.000000,115092.000000,88425.000000,351.031280)}
{pt3dadd(195840.000000,115260.000000,88700.000000,415.686940)}
{pt3dadd(195984.000000,115344.000000,88900.000000,428.618072)}
{pt3dadd(195912.000000,115644.000000,89100.000000,443.747962)}
{pt3dadd(195924.000000,115572.000000,89375.000000,443.747962)}
{pt3dadd(195864.000000,115596.000000,89600.000000,435.417524)}
{pt3dadd(195864.000000,115608.000000,89850.000000,423.216970)}
{pt3dadd(195732.000000,115608.000000,90050.000000,418.950162)}
{pt3dadd(195636.000000,115836.000000,90300.000000,423.216970)}
{pt3dadd(195648.000000,115884.000000,90500.000000,411.016416)}
{pt3dadd(195792.000000,115944.000000,90700.000000,411.016416)}
{pt3dadd(195780.000000,115968.000000,90875.000000,414.886532)}
{pt3dadd(195768.000000,116076.000000,91100.000000,399.756642)}
{pt3dadd(195756.000000,116124.000000,91325.000000,391.426204)}
{pt3dadd(195744.000000,116196.000000,91600.000000,387.740376)}
{pt3dadd(195744.000000,116148.000000,91850.000000,370.147004)}
{pt3dadd(195756.000000,116160.000000,92025.000000,355.737592)}
{pt3dadd(195720.000000,116148.000000,92175.000000,355.737592)}
{pt3dadd(195720.000000,116208.000000,92375.000000,338.144220)}
{pt3dadd(195732.000000,116376.000000,92550.000000,331.290752)}
{pt3dadd(195804.000000,116472.000000,92750.000000,341.328180)}
{pt3dadd(195804.000000,116604.000000,92875.000000,348.181648)}
{pt3dadd(195864.000000,116556.000000,93000.000000,348.181648)}
{pt3dadd(195888.000000,116640.000000,93150.000000,354.708760)}
{pt3dadd(195960.000000,116688.000000,93300.000000,337.739930)}
{pt3dadd(196020.000000,116796.000000,93500.000000,324.670158)}
{pt3dadd(196008.000000,116904.000000,93675.000000,321.159842)}
{pt3dadd(196248.000000,116856.000000,93875.000000,324.670158)}
{pt3dadd(196356.000000,117072.000000,94025.000000,321.327006)}
{pt3dadd(196416.000000,117252.000000,94150.000000,318.951092)}
{pt3dadd(196512.000000,117384.000000,94325.000000,299.352436)}
{pt3dadd(196500.000000,117480.000000,94500.000000,274.401760)}
{pt3dadd(196512.000000,117576.000000,94625.000000,250.579462)}
{pt3dadd(196632.000000,117672.000000,94750.000000,233.610632)}
{pt3dadd(196788.000000,117864.000000,94925.000000,229.192824)}
{pt3dadd(196776.000000,118020.000000,95025.000000,227.238152)}
{pt3dadd(196908.000000,118164.000000,95200.000000,221.076044)}
{pt3dadd(196896.000000,118188.000000,95375.000000,210.275242)}
{pt3dadd(196944.000000,118188.000000,95600.000000,199.474440)}
{pt3dadd(196944.000000,118212.000000,95725.000000,199.474440)}
{pt3dadd(196920.000000,118344.000000,95900.000000,203.481520)}
{pt3dadd(196944.000000,118428.000000,96075.000000,199.846978)}
{pt3dadd(196980.000000,118452.000000,96250.000000,196.212436)}
{pt3dadd(197016.000000,118512.000000,96425.000000,202.374544)}
{pt3dadd(197112.000000,118740.000000,96625.000000,200.322136)}
{pt3dadd(196896.000000,118800.000000,96825.000000,209.610574)}
{pt3dadd(196824.000000,118848.000000,97000.000000,241.014748)}
{pt3dadd(196656.000000,118836.000000,97150.000000,309.282430)}
{pt3dadd(196644.000000,118812.000000,97300.000000,367.753462)}
{pt3dadd(196656.000000,118980.000000,97475.000000,420.788418)}
{pt3dadd(196692.000000,119256.000000,97650.000000,467.186684)}
{pt3dadd(196776.000000,119460.000000,97850.000000,489.926534)}
{pt3dadd(196824.000000,119784.000000,97975.000000,475.802876)}
{pt3dadd(196884.000000,120048.000000,98150.000000,453.348780)}
{pt3dadd(196968.000000,120240.000000,98400.000000,422.944824)}
{pt3dadd(196992.000000,120384.000000,98550.000000,381.916428)}
{pt3dadd(196920.000000,120576.000000,98675.000000,339.831834)}
{pt3dadd(196848.000000,120684.000000,98825.000000,295.484460)}
{pt3dadd(196884.000000,120768.000000,99025.000000,259.467524)}
{pt3dadd(196944.000000,120912.000000,99175.000000,238.888932)}
{pt3dadd(197040.000000,121080.000000,99275.000000,236.138512)}
{pt3dadd(197088.000000,121392.000000,99450.000000,255.483256)}
{pt3dadd(197028.000000,121320.000000,99675.000000,283.944248)}
{pt3dadd(197028.000000,121608.000000,99875.000000,316.091068)}
{pt3dadd(196944.000000,122124.000000,100100.000000,346.707088)}
{pt3dadd(196932.000000,122508.000000,100250.000000,395.425260)}
{pt3dadd(196944.000000,122856.000000,100425.000000,413.898302)}
{pt3dadd(197016.000000,123132.000000,100550.000000,434.264830)}
{pt3dadd(196968.000000,123648.000000,100700.000000,455.649686)}
{pt3dadd(196944.000000,124008.000000,100800.000000,476.016214)}
{pt3dadd(196908.000000,124344.000000,100950.000000,481.202554)}
{pt3dadd(196836.000000,124488.000000,101100.000000,494.653664)}
{pt3dadd(196824.000000,124704.000000,101225.000000,504.297176)}
{pt3dadd(196716.000000,124920.000000,101500.000000,490.846066)}
{pt3dadd(196608.000000,125136.000000,101700.000000,478.035482)}
{pt3dadd(196704.000000,125364.000000,101825.000000,478.035482)}
{pt3dadd(196608.000000,125292.000000,101950.000000,488.161178)}
{pt3dadd(196560.000000,125004.000000,102050.000000,537.686018)}
{pt3dadd(196344.000000,124332.000000,102175.000000,629.757592)}
{pt3dadd(196092.000000,123996.000000,102300.000000,709.399096)}
{pt3dadd(195888.000000,124392.000000,102600.000000,753.737596)}
{pt3dadd(195912.000000,124800.000000,102775.000000,805.738664)}
{pt3dadd(195840.000000,125472.000000,102900.000000,813.401232)}
{pt3dadd(195660.000000,125976.000000,103025.000000,822.271612)}
{pt3dadd(195732.000000,126468.000000,103200.000000,800.361180)}
{pt3dadd(195984.000000,127020.000000,103350.000000,773.190074)}
{pt3dadd(195624.000000,127476.000000,103550.000000,738.356400)}
{pt3dadd(195540.000000,127692.000000,103750.000000,651.158952)}
{pt3dadd(195540.000000,128184.000000,103950.000000,554.483806)}
{pt3dadd(195372.000000,128844.000000,104100.000000,505.083172)}
{pt3dadd(195588.000000,129492.000000,104575.000000,487.915778)}
{pt3dadd(195588.000000,129780.000000,104725.000000,435.552004)}
{pt3dadd(195636.000000,130224.000000,104900.000000,451.438386)}
{pt3dadd(195828.000000,130548.000000,105075.000000,443.107948)}
{pt3dadd(195816.000000,130836.000000,105225.000000,462.417946)}
{pt3dadd(195876.000000,131496.000000,105375.000000,443.107948)}
{pt3dadd(195756.000000,132240.000000,105525.000000,463.474476)}
{pt3dadd(195708.000000,132780.000000,105675.000000,455.144038)}
{pt3dadd(195660.000000,133092.000000,105800.000000,447.588094)}
{pt3dadd(195684.000000,132876.000000,105975.000000,447.588094)}
{pt3dadd(195732.000000,133512.000000,106200.000000,461.711752)}
{pt3dadd(195852.000000,133224.000000,106400.000000,493.708998)}
{pt3dadd(195840.000000,133500.000000,106650.000000,532.513002)}
{pt3dadd(195912.000000,134316.000000,106825.000000,573.155024)}
{pt3dadd(196008.000000,134940.000000,107025.000000,553.845026)}
{pt3dadd(195804.000000,135576.000000,107200.000000,531.390930)}
{pt3dadd(195672.000000,136044.000000,107375.000000,499.393684)}
{pt3dadd(195624.000000,136320.000000,107475.000000,493.675758)}
{pt3dadd(195528.000000,136596.000000,107450.000000,488.230116)}
{pt3dadd(195444.000000,137160.000000,107650.000000,524.707508)}
{pt3dadd(195276.000000,137556.000000,107875.000000,552.347944)}
{pt3dadd(195216.000000,137796.000000,107825.000000,557.052100)}
{pt3dadd(195276.000000,138192.000000,108050.000000,546.420118)}
{pt3dadd(195240.000000,138468.000000,108075.000000,557.583686)}
{pt3dadd(195192.000000,138696.000000,108200.000000,563.887700)}
{pt3dadd(195120.000000,138948.000000,108450.000000,575.051268)}
{pt3dadd(195048.000000,139188.000000,108525.000000,585.176964)}
{pt3dadd(195240.000000,139404.000000,108700.000000,580.237608)}
{pt3dadd(195072.000000,139596.000000,108875.000000,554.244188)}
{pt3dadd(194964.000000,140052.000000,109050.000000,511.462782)}
{pt3dadd(194916.000000,140244.000000,109200.000000,495.112874)}
{pt3dadd(194880.000000,140532.000000,109375.000000,484.987178)}
{pt3dadd(194568.000000,140688.000000,109525.000000,532.153694)}
{pt3dadd(194664.000000,140964.000000,109650.000000,584.024366)}
{pt3dadd(194664.000000,141384.000000,109800.000000,620.501758)}
{pt3dadd(194256.000000,141996.000000,109950.000000,642.855492)}
{pt3dadd(194016.000000,142188.000000,110125.000000,647.794848)}
{pt3dadd(193764.000000,142440.000000,110300.000000,568.704180)}
{pt3dadd(193284.000000,142944.000000,110375.000000,486.429552)}
{pt3dadd(193476.000000,143160.000000,110625.000000,420.996006)}
{pt3dadd(193308.000000,143376.000000,110825.000000,384.518614)}
{pt3dadd(193212.000000,143556.000000,111025.000000,358.194402)}
{pt3dadd(193032.000000,143592.000000,111325.000000,376.667444)}
{pt3dadd(193044.000000,143808.000000,111575.000000,394.260816)}
{pt3dadd(192984.000000,144096.000000,111725.000000,411.016416)}
{pt3dadd(192696.000000,143976.000000,111950.000000,415.496562)}
{pt3dadd(192516.000000,144036.000000,112200.000000,432.177262)}
{pt3dadd(192360.000000,144036.000000,112425.000000,440.924216)}
{pt3dadd(192180.000000,144108.000000,112675.000000,449.254654)}
{pt3dadd(192024.000000,144060.000000,112925.000000,480.765206)}
{pt3dadd(191928.000000,144180.000000,113125.000000,467.954622)}
{pt3dadd(191700.000000,144144.000000,113350.000000,463.474476)}
{pt3dadd(191592.000000,144240.000000,113575.000000,463.474476)}
{pt3dadd(191376.000000,144120.000000,113800.000000,447.588094)}
{pt3dadd(191304.000000,144204.000000,114025.000000,405.538246)}
{pt3dadd(191196.000000,144360.000000,114250.000000,405.538246)}
{pt3dadd(191160.000000,144528.000000,114500.000000,386.141548)}
{pt3dadd(190944.000000,144672.000000,114750.000000,355.737592)}
{pt3dadd(190572.000000,144936.000000,114975.000000,345.700164)}
{pt3dadd(190464.000000,144492.000000,115175.000000,356.239460)}
{pt3dadd(190392.000000,144492.000000,115400.000000,332.725804)}
{pt3dadd(190188.000000,145428.000000,115675.000000,323.166348)}
{pt3dadd(189924.000000,145764.000000,115925.000000,326.350308)}
{pt3dadd(189768.000000,146124.000000,116250.000000,361.458420)}
{pt3dadd(189792.000000,146508.000000,116550.000000,361.458420)}
{pt3dadd(189912.000000,146928.000000,116850.000000,381.101960)}
{pt3dadd(189552.000000,146640.000000,116900.000000,414.538260)}
{pt3dadd(189300.000000,146784.000000,117150.000000,467.751676)}
{pt3dadd(189012.000000,146892.000000,117450.000000,472.691032)}
{pt3dadd(188712.000000,147036.000000,117775.000000,484.891586)}
{pt3dadd(188424.000000,147324.000000,118075.000000,462.497626)}
{pt3dadd(188172.000000,147672.000000,118350.000000,429.061326)}
{pt3dadd(187824.000000,148020.000000,118675.000000,379.191062)}
{pt3dadd(187476.000000,148296.000000,118975.000000,345.670706)}
{pt3dadd(187176.000000,148704.000000,119250.000000,329.784324)}
{pt3dadd(186864.000000,149112.000000,119475.000000,356.048400)}
{pt3dadd(186684.000000,149232.000000,119675.000000,394.188856)}
{pt3dadd(186084.000000,149760.000000,119900.000000,422.769856)}
{pt3dadd(185664.000000,149952.000000,120100.000000,422.769856)}
{pt3dadd(185352.000000,150432.000000,120275.000000,430.325800)}
{pt3dadd(185220.000000,150780.000000,120450.000000,447.840540)}
{pt3dadd(185052.000000,151080.000000,120700.000000,438.656238)}
{pt3dadd(184704.000000,151368.000000,120850.000000,429.471936)}
{pt3dadd(184572.000000,151584.000000,121075.000000,448.868634)}
{pt3dadd(184500.000000,151860.000000,121275.000000,444.998518)}
{pt3dadd(184356.000000,152100.000000,121450.000000,546.211262)}
{pt3dadd(184224.000000,152268.000000,121625.000000,611.675590)}
{pt3dadd(184140.000000,152604.000000,121850.000000,1000.000000)}

{create adhoc3}
{access adhoc3}
{connect adhoc3(1), adhoc1(0)}
{nseg = 1}
{strdef color color = "White"}
{pt3dclear()}
{pt3dadd(195804.000000,115092.000000,88425.000000,351.031280)}
{pt3dadd(195576.000000,114648.000000,88200.000000,293.514393)}
{pt3dadd(195348.000000,114336.000000,88100.000000,300.434580)}
{pt3dadd(195144.000000,114024.000000,88100.000000,287.987184)}
{pt3dadd(195108.000000,113652.000000,88000.000000,287.987184)}
{pt3dadd(195084.000000,113424.000000,87775.000000,306.410748)}
{pt3dadd(195036.000000,113052.000000,87575.000000,306.410748)}
{pt3dadd(194880.000000,112824.000000,87425.000000,306.410748)}
{pt3dadd(194796.000000,112452.000000,87275.000000,298.546162)}
{pt3dadd(194568.000000,112308.000000,87125.000000,283.154942)}
{pt3dadd(194340.000000,112020.000000,86975.000000,269.370072)}
{pt3dadd(194208.000000,111696.000000,86800.000000,263.449788)}
{pt3dadd(194100.000000,111504.000000,86750.000000,269.666092)}
{pt3dadd(193704.000000,111312.000000,86525.000000,293.488390)}
{pt3dadd(193512.000000,111156.000000,86300.000000,303.241250)}
{pt3dadd(193260.000000,110892.000000,86075.000000,313.993776)}
{pt3dadd(193020.000000,110544.000000,85825.000000,316.881716)}
{pt3dadd(192840.000000,110364.000000,85550.000000,323.735184)}
{pt3dadd(192612.000000,110184.000000,85300.000000,323.735184)}
{pt3dadd(192396.000000,110028.000000,85100.000000,326.485604)}
{pt3dadd(192228.000000,109884.000000,84950.000000,315.733078)}
{pt3dadd(192096.000000,109812.000000,84675.000000,290.545208)}
{pt3dadd(192084.000000,109692.000000,84450.000000,246.000786)}
{pt3dadd(192180.000000,109464.000000,84175.000000,211.377686)}
{pt3dadd(192084.000000,109296.000000,83925.000000,211.377686)}
{pt3dadd(191976.000000,109164.000000,83600.000000,213.872402)}
{pt3dadd(192060.000000,108972.000000,83300.000000,233.421912)}
{pt3dadd(191952.000000,108660.000000,82975.000000,274.456018)}
{pt3dadd(192048.000000,108312.000000,82675.000000,299.041690)}
{pt3dadd(192168.000000,107964.000000,82475.000000,318.685230)}
{pt3dadd(192060.000000,107688.000000,82250.000000,351.632386)}
{pt3dadd(191904.000000,107436.000000,82025.000000,381.960092)}
{pt3dadd(191916.000000,107292.000000,81875.000000,415.480448)}
{pt3dadd(191688.000000,107016.000000,81550.000000,425.517876)}
{pt3dadd(191340.000000,106872.000000,81300.000000,408.762276)}
{pt3dadd(190968.000000,106656.000000,81075.000000,375.815120)}
{pt3dadd(190680.000000,106560.000000,80850.000000,345.487414)}
{pt3dadd(190344.000000,106356.000000,80575.000000,289.279162)}
{pt3dadd(190224.000000,106128.000000,80425.000000,279.241734)}
{pt3dadd(190164.000000,105924.000000,80225.000000,279.241734)}
{pt3dadd(189864.000000,105768.000000,80025.000000,287.499544)}
{pt3dadd(189828.000000,105660.000000,79800.000000,299.354208)}
{pt3dadd(189504.000000,105660.000000,79550.000000,309.594708)}
{pt3dadd(189264.000000,105648.000000,79350.000000,316.121820)}
{pt3dadd(188952.000000,105696.000000,79150.000000,325.681276)}
{pt3dadd(188604.000000,105828.000000,78950.000000,331.897580)}
{pt3dadd(188352.000000,106032.000000,78725.000000,331.897580)}
{pt3dadd(188256.000000,106128.000000,78550.000000,347.855292)}
{pt3dadd(188064.000000,106200.000000,78325.000000,381.375648)}
{pt3dadd(187728.000000,106296.000000,78100.000000,366.177832)}
{pt3dadd(187380.000000,106344.000000,77875.000000,346.833088)}
{pt3dadd(187020.000000,106356.000000,77675.000000,340.616784)}
{pt3dadd(186780.000000,106404.000000,77525.000000,337.106468)}
{pt3dadd(186348.000000,106548.000000,77225.000000,297.285693)}
{pt3dadd(186048.000000,106560.000000,77200.000000,351.031280)}

{create adhoc4}
{access adhoc4}
{connect adhoc4(1), adhoc3(0)}
{nseg = 1}
{strdef color color = "White"}
{pt3dclear()}
{pt3dadd(186048.000000,106560.000000,77200.000000,351.031280)}
{pt3dadd(185628.000000,106692.000000,76875.000000,304.955927)}
{pt3dadd(185544.000000,106668.000000,76550.000000,285.987996)}
{pt3dadd(185304.000000,106728.000000,76175.000000,265.676014)}
{pt3dadd(185160.000000,106620.000000,75700.000000,260.306144)}
{pt3dadd(185160.000000,106812.000000,75225.000000,252.816064)}
{pt3dadd(185388.000000,106788.000000,75025.000000,246.653956)}
{pt3dadd(185352.000000,106800.000000,74725.000000,219.525856)}
{pt3dadd(185364.000000,106872.000000,74425.000000,208.725054)}
{pt3dadd(185340.000000,106908.000000,74225.000000,245.939018)}
{pt3dadd(185256.000000,106920.000000,73950.000000,279.693174)}
{pt3dadd(185220.000000,106956.000000,73700.000000,307.462806)}
{pt3dadd(185184.000000,107100.000000,73450.000000,347.038302)}
{pt3dadd(184968.000000,107028.000000,73150.000000,374.807934)}
{pt3dadd(184932.000000,107028.000000,72900.000000,352.068084)}
{pt3dadd(184692.000000,106872.000000,72700.000000,325.804008)}
{pt3dadd(184656.000000,106836.000000,72500.000000,306.459264)}
{pt3dadd(184428.000000,106824.000000,72275.000000,296.899808)}
{pt3dadd(184224.000000,106908.000000,72075.000000,296.899808)}
{pt3dadd(184020.000000,107028.000000,71775.000000,287.795564)}
{pt3dadd(183804.000000,107184.000000,71575.000000,290.545984)}
{pt3dadd(183684.000000,107208.000000,71375.000000,303.968040)}
{pt3dadd(183600.000000,107184.000000,71150.000000,288.794300)}

{create adhoc5}
{access adhoc5}
{connect adhoc5(1), adhoc3(0)}
{nseg = 1}
{strdef color color = "White"}
{pt3dclear()}
{pt3dadd(186048.000000,106560.000000,77200.000000,351.031280)}
{pt3dadd(185748.000000,106884.000000,77175.000000,279.751377)}
{pt3dadd(185616.000000,107016.000000,77225.000000,215.537938)}
{pt3dadd(185388.000000,107064.000000,77250.000000,162.388034)}
{pt3dadd(185160.000000,107064.000000,77250.000000,125.469658)}
{pt3dadd(184932.000000,107064.000000,77250.000000,97.270430)}
{pt3dadd(184704.000000,107064.000000,77250.000000,83.696022)}
{pt3dadd(184572.000000,107076.000000,77200.000000,89.496812)}
{pt3dadd(184380.000000,107100.000000,77175.000000,94.949743)}
{pt3dadd(184212.000000,107100.000000,77150.000000,114.285710)}
