# Supplementary material for: Full reconstruction of large lobula plate tangential cells in Drosophila from a 3D EM dataset
Source: PLoS One. 2018 Nov 28;13(11):e0207828. doi: 10.1371/journal.pone.0207828 (PMC6261601; doi:10.1371/journal.pone.0207828)
Supplement: S1 Dataset — (ZIP) [file pone.0207828.s001.zip › Diameter hoc/cell138_corrected_sorted_diametered.hoc0001.hoc]

/* created with convertKnossosNmlToHoc.m */

{create adhoc1}
{access adhoc1}
{nseg = 1}
{strdef color color = "White"}
{pt3dclear()}
{pt3dadd(167388.000000,182832.000000,126375.000000,571.792970)}
{pt3dadd(167676.000000,182796.000000,126200.000000,523.422223)}
{pt3dadd(167964.000000,182772.000000,126075.000000,537.324880)}
{pt3dadd(167904.000000,182940.000000,125925.000000,568.920058)}
{pt3dadd(168276.000000,182916.000000,125750.000000,597.942506)}
{pt3dadd(168636.000000,182892.000000,125600.000000,577.667012)}
{pt3dadd(169032.000000,183060.000000,125450.000000,529.400860)}
{pt3dadd(169644.000000,183528.000000,125275.000000,485.248522)}
{pt3dadd(170064.000000,183600.000000,125175.000000,406.157854)}
{pt3dadd(170448.000000,183696.000000,125075.000000,373.071776)}
{pt3dadd(170748.000000,183912.000000,124950.000000,345.851780)}
{pt3dadd(171000.000000,184128.000000,124850.000000,348.884124)}
{pt3dadd(171144.000000,184308.000000,124725.000000,364.014014)}
{pt3dadd(171252.000000,184404.000000,124600.000000,443.104682)}
{pt3dadd(171360.000000,184488.000000,124475.000000,500.835754)}
{pt3dadd(171468.000000,184560.000000,124350.000000,554.049170)}
{pt3dadd(171588.000000,184644.000000,124225.000000,610.446546)}
{pt3dadd(171708.000000,184704.000000,124075.000000,631.927713)}
{pt3dadd(171828.000000,184776.000000,123950.000000,600.382600)}

{create adhoc2}
{access adhoc2}
{connect adhoc2(1), adhoc1(0)}
{nseg = 1}
{strdef color color = "White"}
{pt3dclear()}
{pt3dadd(171828.000000,184776.000000,123950.000000,600.382600)}
{pt3dadd(171924.000000,184860.000000,123775.000000,583.139130)}
{pt3dadd(172032.000000,185004.000000,123675.000000,636.877844)}
{pt3dadd(172236.000000,185076.000000,123550.000000,631.159918)}
{pt3dadd(172548.000000,184920.000000,123450.000000,641.791900)}
{pt3dadd(172728.000000,184740.000000,123375.000000,641.791900)}
{pt3dadd(172824.000000,184668.000000,123225.000000,654.715142)}
{pt3dadd(172704.000000,184620.000000,123025.000000,613.877642)}
{pt3dadd(173052.000000,184644.000000,122925.000000,631.903408)}
{pt3dadd(173376.000000,184368.000000,122650.000000,649.929174)}
{pt3dadd(173748.000000,184296.000000,122500.000000,656.233188)}
{pt3dadd(174072.000000,184320.000000,122400.000000,631.588194)}
{pt3dadd(174396.000000,184344.000000,122300.000000,631.588194)}
{pt3dadd(174684.000000,184284.000000,122175.000000,593.286934)}
{pt3dadd(174840.000000,184260.000000,122075.000000,580.979094)}
{pt3dadd(174996.000000,184212.000000,121900.000000,568.671254)}
{pt3dadd(175356.000000,184380.000000,121800.000000,543.915614)}
{pt3dadd(175668.000000,184320.000000,121700.000000,513.442048)}
{pt3dadd(175860.000000,184212.000000,121550.000000,513.442048)}
{pt3dadd(176232.000000,184416.000000,121375.000000,507.724122)}
{pt3dadd(176340.000000,184320.000000,121275.000000,496.560554)}
{pt3dadd(176592.000000,184164.000000,121125.000000,521.316194)}
{pt3dadd(176928.000000,184248.000000,121025.000000,535.439852)}
{pt3dadd(177276.000000,184344.000000,120900.000000,561.433272)}
{pt3dadd(177828.000000,184440.000000,120825.000000,579.459038)}
{pt3dadd(177984.000000,184428.000000,120700.000000,609.549674)}
{pt3dadd(178044.000000,184404.000000,120575.000000,641.144852)}
{pt3dadd(177780.000000,184308.000000,120475.000000,676.421828)}
{pt3dadd(177996.000000,184344.000000,120325.000000,682.425654)}
{pt3dadd(178212.000000,184392.000000,120175.000000,703.292746)}
{pt3dadd(178428.000000,184428.000000,120075.000000,710.242930)}
{pt3dadd(178644.000000,184476.000000,119950.000000,717.540610)}
{pt3dadd(178860.000000,184524.000000,119850.000000,710.921382)}
{pt3dadd(178980.000000,184632.000000,119725.000000,753.800766)}
{pt3dadd(178968.000000,184656.000000,119600.000000,746.503086)}
{pt3dadd(179268.000000,184704.000000,119475.000000,764.984946)}
{pt3dadd(179484.000000,184656.000000,119375.000000,772.647514)}
{pt3dadd(179700.000000,184608.000000,119275.000000,786.216926)}
{pt3dadd(179664.000000,184368.000000,119175.000000,763.210968)}
{pt3dadd(179856.000000,184428.000000,119075.000000,749.641556)}
{pt3dadd(180012.000000,184524.000000,118975.000000,699.564518)}
{pt3dadd(180144.000000,184692.000000,118875.000000,612.367070)}
{pt3dadd(180108.000000,184872.000000,118750.000000,543.815698)}
{pt3dadd(180264.000000,185052.000000,118625.000000,468.068182)}
{pt3dadd(180588.000000,185268.000000,118525.000000,429.766922)}
{pt3dadd(180840.000000,185304.000000,118400.000000,441.488674)}
{pt3dadd(181116.000000,185292.000000,118275.000000,466.559358)}
{pt3dadd(181452.000000,185256.000000,118150.000000,474.493104)}
{pt3dadd(181728.000000,185184.000000,118050.000000,489.622994)}
{pt3dadd(181980.000000,185124.000000,117950.000000,504.452846)}
{pt3dadd(182304.000000,185172.000000,117850.000000,482.099112)}
{pt3dadd(182544.000000,185220.000000,117750.000000,515.696216)}
{pt3dadd(182784.000000,185316.000000,117650.000000,569.363658)}
{pt3dadd(183024.000000,185460.000000,117525.000000,610.107858)}
{pt3dadd(183108.000000,185532.000000,117375.000000,623.899312)}
{pt3dadd(183204.000000,185712.000000,117250.000000,659.176288)}
{pt3dadd(183444.000000,185556.000000,117150.000000,659.176288)}
{pt3dadd(183588.000000,185616.000000,117050.000000,618.959956)}
{pt3dadd(183576.000000,185772.000000,116950.000000,596.606222)}
{pt3dadd(183684.000000,185916.000000,116850.000000,572.689072)}
{pt3dadd(183888.000000,185832.000000,116775.000000,514.958000)}
{pt3dadd(184104.000000,185880.000000,116675.000000,443.220440)}
{pt3dadd(184248.000000,186036.000000,116550.000000,389.688764)}
{pt3dadd(184284.000000,186144.000000,116375.000000,333.480512)}
{pt3dadd(184524.000000,186336.000000,116150.000000,279.948836)}
{pt3dadd(184776.000000,186684.000000,115800.000000,251.065310)}
{pt3dadd(184932.000000,186876.000000,115675.000000,242.807500)}
{pt3dadd(185088.000000,186972.000000,115575.000000,242.807500)}
{pt3dadd(185196.000000,187008.000000,115475.000000,234.382612)}
{pt3dadd(185340.000000,186876.000000,115375.000000,239.021306)}
{pt3dadd(185484.000000,186744.000000,115250.000000,241.640756)}
{pt3dadd(185628.000000,186636.000000,115125.000000,236.770126)}
{pt3dadd(185784.000000,186516.000000,115025.000000,234.615098)}
{pt3dadd(185916.000000,186516.000000,114900.000000,238.622178)}
{pt3dadd(186048.000000,186528.000000,114775.000000,239.714116)}
{pt3dadd(186192.000000,186540.000000,114650.000000,251.568780)}
{pt3dadd(186348.000000,186528.000000,114525.000000,274.256676)}
{pt3dadd(186504.000000,186528.000000,114400.000000,329.943380)}
{pt3dadd(186660.000000,186528.000000,114275.000000,372.178974)}
{pt3dadd(186828.000000,186528.000000,114175.000000,406.528908)}
{pt3dadd(186960.000000,186576.000000,114075.000000,443.392416)}
{pt3dadd(187092.000000,186636.000000,113950.000000,493.262680)}
{pt3dadd(187236.000000,186684.000000,113850.000000,498.202036)}
{pt3dadd(187368.000000,186744.000000,113750.000000,538.946236)}
{pt3dadd(187500.000000,186792.000000,113650.000000,573.686610)}
{pt3dadd(187500.000000,186912.000000,113525.000000,602.344358)}
{pt3dadd(187644.000000,186972.000000,113400.000000,628.221610)}
{pt3dadd(187740.000000,187104.000000,113275.000000,663.498586)}
{pt3dadd(187788.000000,187200.000000,113150.000000,669.802600)}
{pt3dadd(187848.000000,187296.000000,113025.000000,688.729668)}
{pt3dadd(187980.000000,187320.000000,112925.000000,695.348896)}
{pt3dadd(188136.000000,187452.000000,112800.000000,675.475470)}
{pt3dadd(188064.000000,187500.000000,112650.000000,689.723334)}
{pt3dadd(188172.000000,187488.000000,112525.000000,689.723334)}
{pt3dadd(188280.000000,187488.000000,112400.000000,670.796266)}
{pt3dadd(188436.000000,187416.000000,112300.000000,664.177038)}
{pt3dadd(188436.000000,187488.000000,112175.000000,652.455286)}
{pt3dadd(188568.000000,187584.000000,112050.000000,631.588194)}
{pt3dadd(188712.000000,187692.000000,111925.000000,608.116786)}
{pt3dadd(188892.000000,187800.000000,111800.000000,608.116786)}
{pt3dadd(188988.000000,187896.000000,111700.000000,590.091020)}
{pt3dadd(189096.000000,187764.000000,111600.000000,584.645378)}
{pt3dadd(189144.000000,187788.000000,111475.000000,555.987630)}
{pt3dadd(189192.000000,187716.000000,111350.000000,561.433272)}
{pt3dadd(189228.000000,187584.000000,111250.000000,550.269704)}
{pt3dadd(189216.000000,187488.000000,111150.000000,581.864882)}
{pt3dadd(189252.000000,187596.000000,110975.000000,611.955518)}
{pt3dadd(189336.000000,187644.000000,110725.000000,654.182678)}
{pt3dadd(189432.000000,187704.000000,110600.000000,678.827672)}
{pt3dadd(189516.000000,187680.000000,110475.000000,730.828740)}
{pt3dadd(189600.000000,187656.000000,110375.000000,730.828740)}
{pt3dadd(189636.000000,187704.000000,110275.000000,737.778924)}
{pt3dadd(189684.000000,187668.000000,110150.000000,730.828740)}
{pt3dadd(189624.000000,187740.000000,110025.000000,745.076604)}
{pt3dadd(189744.000000,187740.000000,109900.000000,737.414036)}
{pt3dadd(189876.000000,187752.000000,109675.000000,744.711716)}
{pt3dadd(189984.000000,187764.000000,109575.000000,752.009396)}
{pt3dadd(190116.000000,187656.000000,109475.000000,790.413528)}
{pt3dadd(190224.000000,187668.000000,109350.000000,814.569796)}
{pt3dadd(190272.000000,187716.000000,109225.000000,830.278074)}
{pt3dadd(190320.000000,187728.000000,109100.000000,845.986352)}
{pt3dadd(190368.000000,187740.000000,108975.000000,853.648920)}
{pt3dadd(190392.000000,187776.000000,108825.000000,837.155220)}
{pt3dadd(190428.000000,187824.000000,108725.000000,805.701272)}
{pt3dadd(190488.000000,187812.000000,108575.000000,797.655562)}
{pt3dadd(190560.000000,187800.000000,108450.000000,797.655562)}
{pt3dadd(190524.000000,187908.000000,108350.000000,797.655562)}
{pt3dadd(190524.000000,187944.000000,108225.000000,789.992994)}
{pt3dadd(190548.000000,187908.000000,108100.000000,789.992994)}
{pt3dadd(190452.000000,187932.000000,108000.000000,755.159320)}
{pt3dadd(190488.000000,187896.000000,107875.000000,718.583950)}
{pt3dadd(190536.000000,187896.000000,107775.000000,672.028524)}
{pt3dadd(190608.000000,187752.000000,107650.000000,657.780660)}
{pt3dadd(190608.000000,187452.000000,107575.000000,644.211248)}
{pt3dadd(190608.000000,187320.000000,107450.000000,671.382354)}
{pt3dadd(190536.000000,187344.000000,107325.000000,699.912014)}
{pt3dadd(190416.000000,187464.000000,107200.000000,738.804872)}
{pt3dadd(190404.000000,187596.000000,107100.000000,738.804872)}
{pt3dadd(190476.000000,187680.000000,106975.000000,752.374284)}
{pt3dadd(190416.000000,187764.000000,106850.000000,752.374284)}
{pt3dadd(190512.000000,187800.000000,106725.000000,744.711716)}
{pt3dadd(190668.000000,187728.000000,106600.000000,723.844624)}
{pt3dadd(190776.000000,187680.000000,106500.000000,710.921382)}
{pt3dadd(190812.000000,187716.000000,106375.000000,718.219062)}
{pt3dadd(190668.000000,187704.000000,106275.000000,710.921382)}
{pt3dadd(190668.000000,187800.000000,106175.000000,718.583950)}
{pt3dadd(190728.000000,187860.000000,106075.000000,725.203178)}
{pt3dadd(190764.000000,188148.000000,105975.000000,738.126420)}
{pt3dadd(190788.000000,188196.000000,105850.000000,745.788988)}
{pt3dadd(190764.000000,188244.000000,105725.000000,777.242936)}
{pt3dadd(190920.000000,187752.000000,105625.000000,697.601432)}
{pt3dadd(191124.000000,187860.000000,105400.000000,639.870360)}
{pt3dadd(191484.000000,187968.000000,105075.000000,590.469726)}
{pt3dadd(191616.000000,188076.000000,104950.000000,420.246643)}
{pt3dadd(191904.000000,188124.000000,104750.000000,448.014770)}

{create adhoc3}
{access adhoc3}
{connect adhoc3(1), adhoc2(0)}
{nseg = 1}
{strdef color color = "White"}
{pt3dclear()}
{pt3dadd(191904.000000,188124.000000,104750.000000,448.014770)}
{pt3dadd(192108.000000,188232.000000,104600.000000,480.198100)}
{pt3dadd(192276.000000,188292.000000,104500.000000,439.597632)}
{pt3dadd(192396.000000,188268.000000,104350.000000,427.397078)}
{pt3dadd(192492.000000,188268.000000,104200.000000,392.200698)}
{pt3dadd(192804.000000,188496.000000,104050.000000,376.314316)}
{pt3dadd(192780.000000,188520.000000,103900.000000,372.444200)}
{pt3dadd(192804.000000,188532.000000,103775.000000,372.444200)}
{pt3dadd(192828.000000,188652.000000,103625.000000,358.720944)}
{pt3dadd(192972.000000,188904.000000,103475.000000,355.210628)}
{pt3dadd(192984.000000,188928.000000,103350.000000,362.766572)}
{pt3dadd(193116.000000,188940.000000,103225.000000,366.636688)}
{pt3dadd(193176.000000,188916.000000,103150.000000,377.702948)}
{pt3dadd(193296.000000,189120.000000,102975.000000,387.740376)}
{pt3dadd(193596.000000,189108.000000,102800.000000,407.137074)}
{pt3dadd(193932.000000,189228.000000,102550.000000,464.868146)}
{pt3dadd(194172.000000,189324.000000,102275.000000,529.549402)}
{pt3dadd(194424.000000,189612.000000,101925.000000,568.353406)}
{pt3dadd(194460.000000,189756.000000,101525.000000,558.315978)}
{pt3dadd(194676.000000,189708.000000,101150.000000,523.721464)}
{pt3dadd(194520.000000,189828.000000,101000.000000,432.236236)}
{pt3dadd(194136.000000,189996.000000,101000.000000,321.741394)}
{pt3dadd(193740.000000,190128.000000,100900.000000,249.183234)}
{pt3dadd(193584.000000,190248.000000,100900.000000,230.759670)}
{pt3dadd(193296.000000,190512.000000,100800.000000,213.721450)}
{pt3dadd(193296.000000,190452.000000,100425.000000,226.277900)}

{create adhoc4}
{access adhoc4}
{connect adhoc4(1), adhoc3(0)}
{nseg = 1}
{strdef color color = "White"}
{pt3dclear()}
{pt3dadd(193296.000000,190452.000000,100425.000000,226.277900)}
{pt3dadd(193440.000000,190332.000000,100000.000000,230.417343)}
{pt3dadd(193476.000000,190500.000000,100000.000000,220.444430)}
{pt3dadd(193464.000000,190656.000000,100000.000000,225.083124)}
{pt3dadd(193404.000000,190812.000000,100000.000000,223.030716)}
{pt3dadd(193344.000000,190920.000000,100050.000000,243.342698)}
{pt3dadd(193320.000000,190824.000000,99750.000000,267.928370)}
{pt3dadd(193248.000000,190968.000000,99450.000000,295.034074)}
{pt3dadd(193176.000000,191052.000000,99450.000000,326.412316)}
{pt3dadd(192948.000000,191436.000000,99450.000000,384.151428)}
{pt3dadd(192864.000000,191964.000000,99450.000000,417.671784)}
{pt3dadd(192804.000000,192492.000000,99450.000000,549.584640)}
{pt3dadd(192840.000000,192996.000000,99300.000000,741.490364)}
{pt3dadd(192984.000000,193452.000000,99000.000000,763.944460)}
{pt3dadd(192612.000000,193980.000000,99000.000000,746.429720)}
{pt3dadd(192300.000000,194964.000000,98650.000000,703.349908)}
{pt3dadd(192048.000000,195468.000000,98200.000000,589.030424)}
{pt3dadd(191736.000000,196008.000000,97800.000000,393.781548)}
{pt3dadd(191676.000000,196404.000000,97525.000000,345.063376)}
{pt3dadd(191640.000000,196320.000000,97025.000000,330.653964)}
{pt3dadd(191796.000000,196236.000000,96675.000000,355.343310)}
{pt3dadd(191856.000000,196140.000000,96375.000000,337.749938)}
{pt3dadd(191760.000000,196380.000000,96050.000000,328.645694)}
{pt3dadd(191472.000000,196584.000000,95825.000000,340.500358)}
{pt3dadd(191460.000000,196692.000000,95500.000000,340.500358)}
{pt3dadd(191304.000000,196968.000000,95175.000000,310.172652)}
{pt3dadd(191244.000000,197076.000000,94900.000000,310.172652)}
{pt3dadd(191004.000000,197232.000000,94700.000000,293.461936)}
{pt3dadd(190476.000000,197796.000000,94350.000000,269.699384)}
{pt3dadd(190152.000000,198372.000000,93375.000000,238.295210)}
{pt3dadd(189876.000000,198696.000000,93050.000000,228.542350)}
{pt3dadd(189564.000000,199020.000000,92825.000000,205.911350)}
{pt3dadd(189276.000000,199512.000000,92525.000000,200.322136)}
{pt3dadd(189132.000000,199908.000000,92250.000000,192.680514)}
{pt3dadd(188988.000000,200052.000000,92050.000000,194.453464)}
{pt3dadd(188868.000000,200124.000000,91900.000000,192.298436)}
{pt3dadd(188532.000000,200472.000000,91675.000000,206.258732)}
{pt3dadd(188112.000000,200904.000000,91450.000000,225.568120)}
{pt3dadd(187812.000000,201384.000000,91250.000000,275.042200)}

{create adhoc5}
{access adhoc5}
{connect adhoc5(1), adhoc4(0)}
{nseg = 1}
{strdef color color = "White"}
{pt3dclear()}
{pt3dadd(187812.000000,201384.000000,91250.000000,275.042200)}
{pt3dadd(187836.000000,201528.000000,90975.000000,254.035123)}
{pt3dadd(187788.000000,201816.000000,90650.000000,243.903536)}
{pt3dadd(187644.000000,202020.000000,90475.000000,215.355096)}
{pt3dadd(187524.000000,202200.000000,90300.000000,196.570770)}
{pt3dadd(187224.000000,202572.000000,90150.000000,132.300000)}

{create adhoc6}
{access adhoc6}
{connect adhoc6(1), adhoc5(0)}
{nseg = 1}
{strdef color color = "White"}
{pt3dclear()}
{pt3dadd(187224.000000,202572.000000,90150.000000,132.300000)}
{pt3dadd(187080.000000,202824.000000,90100.000000,136.710000)}
{pt3dadd(187020.000000,203028.000000,90000.000000,140.370300)}
{pt3dadd(186612.000000,203388.000000,89800.000000,143.082450)}
{pt3dadd(186408.000000,203508.000000,89750.000000,150.758380)}
{pt3dadd(186132.000000,203664.000000,89750.000000,155.137676)}
{pt3dadd(185928.000000,203844.000000,89800.000000,153.748526)}
{pt3dadd(185544.000000,204144.000000,89825.000000,153.748526)}
{pt3dadd(185268.000000,204612.000000,89750.000000,152.359376)}
{pt3dadd(184992.000000,204984.000000,89800.000000,144.683446)}
{pt3dadd(184812.000000,205284.000000,89675.000000,141.693300)}
{pt3dadd(184560.000000,205632.000000,89600.000000,144.541060)}
{pt3dadd(184308.000000,205932.000000,89525.000000,149.139320)}
{pt3dadd(184080.000000,206148.000000,89500.000000,160.449792)}
{pt3dadd(183816.000000,206508.000000,89525.000000,173.714936)}
{pt3dadd(183456.000000,206928.000000,89400.000000,205.189586)}
{pt3dadd(183084.000000,207564.000000,89350.000000,234.647360)}
{pt3dadd(182904.000000,207924.000000,89300.000000,303.234000)}

{create adhoc7}
{access adhoc7}
{connect adhoc7(1), adhoc6(0)}
{nseg = 1}
{strdef color color = "White"}
{pt3dclear()}
{pt3dadd(182904.000000,207924.000000,89300.000000,303.234000)}
{pt3dadd(182760.000000,208740.000000,89400.000000,304.197240)}
{pt3dadd(182712.000000,209220.000000,89425.000000,295.285644)}
{pt3dadd(182712.000000,209760.000000,89450.000000,301.501948)}
{pt3dadd(182640.000000,210012.000000,89450.000000,320.210080)}
{pt3dadd(182604.000000,210240.000000,89450.000000,305.735966)}
{pt3dadd(182616.000000,210504.000000,89375.000000,314.406670)}
{pt3dadd(182592.000000,210708.000000,89450.000000,314.406670)}
{pt3dadd(182508.000000,210960.000000,89175.000000,311.222710)}
{pt3dadd(182268.000000,211128.000000,89100.000000,304.369242)}
{pt3dadd(182112.000000,211428.000000,89025.000000,315.659396)}
{pt3dadd(182028.000000,211740.000000,89000.000000,318.843356)}
{pt3dadd(181968.000000,212028.000000,88850.000000,338.486896)}
{pt3dadd(181872.000000,212268.000000,88875.000000,348.524324)}
{pt3dadd(181692.000000,212412.000000,88875.000000,359.063620)}
{pt3dadd(181512.000000,212616.000000,88875.000000,384.987430)}
{pt3dadd(181296.000000,213144.000000,88750.000000,401.203210)}
{pt3dadd(181092.000000,213588.000000,88475.000000,448.014770)}

{create adhoc8}
{access adhoc8}
{connect adhoc8(1), adhoc7(0)}
{nseg = 1}
{strdef color color = "White"}
{pt3dclear()}
{pt3dadd(181092.000000,213588.000000,88475.000000,448.014770)}
{pt3dadd(180840.000000,213972.000000,88250.000000,383.359110)}
{pt3dadd(180876.000000,214248.000000,88075.000000,388.690382)}
{pt3dadd(180624.000000,214428.000000,88000.000000,362.766572)}
{pt3dadd(180348.000000,214680.000000,87900.000000,356.239460)}
{pt3dadd(180024.000000,214956.000000,87800.000000,338.422194)}
{pt3dadd(179892.000000,215028.000000,87775.000000,321.666594)}
{pt3dadd(179724.000000,215196.000000,87675.000000,301.040878)}
{pt3dadd(179364.000000,215436.000000,87575.000000,278.409878)}
{pt3dadd(178980.000000,215664.000000,87475.000000,262.249094)}
{pt3dadd(178608.000000,215880.000000,87375.000000,248.688840)}
{pt3dadd(178428.000000,216108.000000,87075.000000,237.591800)}

{create adhoc9}
{access adhoc9}
{connect adhoc9(1), adhoc8(0)}
{nseg = 1}
{strdef color color = "White"}
{pt3dclear()}
{pt3dadd(178428.000000,216108.000000,87075.000000,237.591800)}
{pt3dadd(178392.000000,216132.000000,86775.000000,253.827233)}
{pt3dadd(178404.000000,216312.000000,86550.000000,252.084888)}
{pt3dadd(178344.000000,216372.000000,86325.000000,252.084888)}
{pt3dadd(178368.000000,216384.000000,86050.000000,257.454758)}
{pt3dadd(178380.000000,216300.000000,85875.000000,254.960042)}
{pt3dadd(178452.000000,216192.000000,85675.000000,252.584128)}
{pt3dadd(178416.000000,216228.000000,85450.000000,255.078844)}
{pt3dadd(178452.000000,216168.000000,85250.000000,259.949474)}
{pt3dadd(178524.000000,216204.000000,85000.000000,257.199054)}
{pt3dadd(178500.000000,216156.000000,84850.000000,254.823140)}
{pt3dadd(178524.000000,216252.000000,84600.000000,248.352924)}
{pt3dadd(178548.000000,216396.000000,84475.000000,245.858208)}
{pt3dadd(178620.000000,216408.000000,84225.000000,238.724798)}
{pt3dadd(178752.000000,216492.000000,84025.000000,219.175288)}
{pt3dadd(178740.000000,216552.000000,83950.000000,203.819224)}
{pt3dadd(178740.000000,216636.000000,83875.000000,205.871632)}
{pt3dadd(178716.000000,216792.000000,83725.000000,219.656502)}
{pt3dadd(178656.000000,216912.000000,83675.000000,235.047722)}
{pt3dadd(178692.000000,217212.000000,83550.000000,235.047722)}
{pt3dadd(178596.000000,217248.000000,83400.000000,243.933570)}
{pt3dadd(178692.000000,217404.000000,83300.000000,243.933570)}
{pt3dadd(178764.000000,217620.000000,83225.000000,223.354978)}
{pt3dadd(178812.000000,217776.000000,83200.000000,199.940058)}
{pt3dadd(178848.000000,217944.000000,83025.000000,203.574600)}
{pt3dadd(178728.000000,217992.000000,82900.000000,203.574600)}
{pt3dadd(178632.000000,218088.000000,82850.000000,191.104808)}
{pt3dadd(178620.000000,218136.000000,82725.000000,185.236136)}
{pt3dadd(178524.000000,218148.000000,82600.000000,189.052400)}
{pt3dadd(178320.000000,218208.000000,82500.000000,189.052400)}
{pt3dadd(178236.000000,218280.000000,82375.000000,189.052400)}
{pt3dadd(178224.000000,218364.000000,82250.000000,201.522192)}
{pt3dadd(178128.000000,218352.000000,82100.000000,196.452608)}
{pt3dadd(178116.000000,218460.000000,81975.000000,190.863394)}
{pt3dadd(178128.000000,218472.000000,81875.000000,187.228852)}
{pt3dadd(178092.000000,218484.000000,81675.000000,181.639638)}
{pt3dadd(177924.000000,218568.000000,81475.000000,175.770966)}
{pt3dadd(177756.000000,218604.000000,81475.000000,179.067600)}
{pt3dadd(177624.000000,218664.000000,81475.000000,177.379080)}
{pt3dadd(177492.000000,218748.000000,81425.000000,182.968294)}
{pt3dadd(177312.000000,218844.000000,81300.000000,197.403638)}
{pt3dadd(177144.000000,218988.000000,81150.000000,215.180198)}
{pt3dadd(177012.000000,219000.000000,80925.000000,220.769412)}
{pt3dadd(176952.000000,219048.000000,80850.000000,264.401402)}
{pt3dadd(176760.000000,219084.000000,80625.000000,300.755658)}
{pt3dadd(176688.000000,219024.000000,80300.000000,332.133900)}
{pt3dadd(176520.000000,218928.000000,80025.000000,343.988564)}
{pt3dadd(176436.000000,218796.000000,79750.000000,366.619564)}
{pt3dadd(176340.000000,218664.000000,79500.000000,349.863964)}
{pt3dadd(176268.000000,218640.000000,79375.000000,322.355838)}
{pt3dadd(176172.000000,218520.000000,79200.000000,296.091762)}
{pt3dadd(176088.000000,218412.000000,79050.000000,286.987518)}
{pt3dadd(176076.000000,218220.000000,78850.000000,275.697364)}
{pt3dadd(176100.000000,218052.000000,78650.000000,270.059004)}
{pt3dadd(176076.000000,217908.000000,78525.000000,263.265282)}
{pt3dadd(176160.000000,217812.000000,78400.000000,250.829970)}
{pt3dadd(176136.000000,217620.000000,78225.000000,215.502760)}

{create adhoc10}
{access adhoc10}
{connect adhoc10(1), adhoc9(0)}
{nseg = 1}
{strdef color color = "White"}
{pt3dclear()}
{pt3dadd(176136.000000,217620.000000,78225.000000,215.502760)}
{pt3dadd(176124.000000,217704.000000,78025.000000,219.445093)}
{pt3dadd(176028.000000,218064.000000,77775.000000,204.357866)}
{pt3dadd(175872.000000,218268.000000,77700.000000,198.489194)}
{pt3dadd(175776.000000,218328.000000,77425.000000,192.018978)}
{pt3dadd(175680.000000,218388.000000,77225.000000,194.071386)}
{pt3dadd(175620.000000,218364.000000,77075.000000,208.506730)}
{pt3dadd(175512.000000,218460.000000,76950.000000,223.404950)}
{pt3dadd(175368.000000,218412.000000,76800.000000,249.471370)}

{create adhoc11}
{access adhoc11}
{connect adhoc11(1), adhoc9(0)}
{nseg = 1}
{strdef color color = "White"}
{pt3dclear()}
{pt3dadd(176136.000000,217620.000000,78225.000000,215.502760)}
{pt3dadd(175992.000000,217476.000000,78075.000000,193.031520)}
{pt3dadd(175860.000000,217320.000000,78075.000000,185.048252)}
{pt3dadd(175740.000000,217224.000000,78050.000000,174.109996)}
{pt3dadd(175716.000000,217116.000000,78025.000000,151.791636)}
{pt3dadd(175644.000000,216972.000000,77950.000000,155.763786)}
{pt3dadd(175584.000000,216852.000000,77900.000000,155.763786)}
{pt3dadd(175584.000000,216732.000000,77900.000000,152.624136)}
{pt3dadd(175608.000000,216600.000000,77900.000000,154.232250)}
{pt3dadd(175596.000000,216456.000000,77900.000000,170.080394)}
{pt3dadd(175596.000000,216288.000000,77900.000000,178.140124)}
{pt3dadd(175644.000000,216180.000000,77900.000000,183.729338)}
{pt3dadd(175752.000000,216096.000000,77850.000000,194.146722)}
{pt3dadd(175812.000000,215916.000000,77800.000000,197.608192)}
{pt3dadd(175812.000000,215760.000000,77775.000000,198.880280)}
{pt3dadd(175872.000000,215544.000000,77775.000000,186.159400)}

{create adhoc12}
{access adhoc12}
{connect adhoc12(1), adhoc8(0)}
{nseg = 1}
{strdef color color = "White"}
{pt3dclear()}
{pt3dadd(178428.000000,216108.000000,87075.000000,237.591800)}
{pt3dadd(178356.000000,216360.000000,87550.000000,277.009907)}
{pt3dadd(178284.000000,216552.000000,87725.000000,307.287488)}
{pt3dadd(178068.000000,216840.000000,87850.000000,341.267813)}
{pt3dadd(177744.000000,217212.000000,87975.000000,387.012000)}

{create adhoc13}
{access adhoc13}
{connect adhoc13(1), adhoc12(0)}
{nseg = 1}
{strdef color color = "White"}
{pt3dclear()}
{pt3dadd(177744.000000,217212.000000,87975.000000,387.012000)}
{pt3dadd(177576.000000,217260.000000,87925.000000,282.737867)}
{pt3dadd(177408.000000,217308.000000,87925.000000,262.416660)}
{pt3dadd(177240.000000,217356.000000,87925.000000,228.114812)}
{pt3dadd(177072.000000,217404.000000,87925.000000,218.361952)}
{pt3dadd(176880.000000,217440.000000,87925.000000,220.223544)}
{pt3dadd(176676.000000,217440.000000,87925.000000,210.426894)}
{pt3dadd(176784.000000,217464.000000,88000.000000,200.140414)}
{pt3dadd(176580.000000,217440.000000,87900.000000,206.934136)}
{pt3dadd(176484.000000,217488.000000,87900.000000,214.067546)}
{pt3dadd(176364.000000,217572.000000,87925.000000,224.868348)}
{pt3dadd(176268.000000,217632.000000,87900.000000,239.303692)}
{pt3dadd(176160.000000,217572.000000,87900.000000,245.172364)}
{pt3dadd(176052.000000,217596.000000,87850.000000,242.796450)}
{pt3dadd(175812.000000,217560.000000,87875.000000,235.663040)}
{pt3dadd(175668.000000,217620.000000,87750.000000,224.862238)}
{pt3dadd(175512.000000,217644.000000,87675.000000,218.068516)}
{pt3dadd(175332.000000,217632.000000,87550.000000,235.614764)}
{pt3dadd(175068.000000,217704.000000,87500.000000,251.775548)}
{pt3dadd(174912.000000,217812.000000,87475.000000,270.199112)}
{pt3dadd(174720.000000,217920.000000,87350.000000,270.199112)}
{pt3dadd(174504.000000,218076.000000,87225.000000,279.487550)}
{pt3dadd(174252.000000,218184.000000,87100.000000,276.599610)}
{pt3dadd(174072.000000,218220.000000,87100.000000,270.679326)}
{pt3dadd(173892.000000,218340.000000,86975.000000,267.646982)}
{pt3dadd(173628.000000,218460.000000,86925.000000,280.942500)}
{pt3dadd(173460.000000,218616.000000,86925.000000,280.942500)}
{pt3dadd(173292.000000,218856.000000,86925.000000,275.572630)}
{pt3dadd(172992.000000,219036.000000,86650.000000,267.708044)}
{pt3dadd(172824.000000,219324.000000,86550.000000,262.069684)}
{pt3dadd(172728.000000,219432.000000,86550.000000,240.311454)}
{pt3dadd(172656.000000,219516.000000,86550.000000,220.084760)}
{pt3dadd(172560.000000,219612.000000,86550.000000,204.927650)}
{pt3dadd(172524.000000,219684.000000,86550.000000,190.492306)}
{pt3dadd(172476.000000,219768.000000,86550.000000,172.715746)}
{pt3dadd(172404.000000,219900.000000,86550.000000,174.247282)}
{pt3dadd(172344.000000,219960.000000,86550.000000,175.855396)}
{pt3dadd(172200.000000,220056.000000,86450.000000,169.254276)}
{pt3dadd(171972.000000,220188.000000,86225.000000,179.050926)}
{pt3dadd(171768.000000,220296.000000,86175.000000,189.337406)}
{pt3dadd(171624.000000,220416.000000,86175.000000,220.854254)}
{pt3dadd(171528.000000,220548.000000,86000.000000,260.755140)}
{pt3dadd(171492.000000,220704.000000,85825.000000,318.395720)}

{create adhoc14}
{access adhoc14}
{connect adhoc14(1), adhoc13(0)}
{nseg = 1}
{strdef color color = "White"}
{pt3dclear()}
{pt3dadd(171492.000000,220704.000000,85825.000000,318.395720)}
{pt3dadd(171480.000000,220872.000000,85800.000000,248.387247)}
{pt3dadd(171504.000000,221052.000000,85775.000000,231.226372)}
{pt3dadd(171552.000000,221232.000000,85775.000000,208.595372)}
{pt3dadd(171624.000000,221412.000000,85775.000000,199.749242)}
{pt3dadd(171636.000000,221640.000000,85850.000000,205.338456)}
{pt3dadd(171636.000000,221820.000000,85850.000000,205.338456)}
{pt3dadd(171612.000000,221976.000000,85850.000000,205.338456)}
{pt3dadd(171516.000000,222216.000000,85725.000000,205.338456)}
{pt3dadd(171504.000000,222336.000000,85750.000000,198.060722)}
{pt3dadd(171480.000000,222444.000000,85750.000000,189.174874)}
{pt3dadd(171456.000000,222588.000000,85700.000000,183.851812)}
{pt3dadd(171420.000000,222732.000000,85700.000000,176.210190)}
{pt3dadd(171384.000000,222876.000000,85700.000000,172.393926)}
{pt3dadd(171384.000000,223008.000000,85675.000000,175.855396)}
{pt3dadd(171420.000000,223176.000000,85650.000000,182.786572)}
{pt3dadd(171468.000000,223260.000000,85650.000000,188.109634)}
{pt3dadd(171528.000000,223380.000000,85650.000000,186.421114)}
{pt3dadd(171552.000000,223440.000000,85650.000000,182.959644)}
{pt3dadd(171444.000000,223560.000000,85475.000000,177.890060)}
{pt3dadd(171300.000000,223764.000000,85350.000000,174.255518)}
{pt3dadd(171228.000000,223908.000000,85225.000000,176.210190)}
{pt3dadd(171156.000000,224052.000000,85175.000000,177.898710)}
{pt3dadd(171144.000000,224160.000000,85075.000000,181.360180)}
{pt3dadd(171168.000000,224196.000000,85000.000000,194.453464)}
{pt3dadd(171144.000000,224208.000000,84900.000000,219.641334)}
{pt3dadd(171120.000000,224328.000000,84725.000000,215.825070)}
{pt3dadd(171024.000000,224580.000000,84575.000000,227.884500)}
{pt3dadd(170640.000000,224808.000000,84200.000000,226.111550)}
{pt3dadd(170412.000000,225048.000000,84050.000000,223.956522)}
{pt3dadd(170088.000000,225300.000000,83900.000000,204.357866)}
{pt3dadd(170028.000000,225432.000000,83750.000000,208.174130)}
{pt3dadd(169956.000000,225600.000000,83675.000000,203.756322)}
{pt3dadd(170052.000000,225876.000000,83575.000000,207.390864)}
{pt3dadd(170100.000000,226224.000000,83450.000000,198.060722)}
{pt3dadd(170136.000000,226392.000000,83425.000000,194.244458)}
{pt3dadd(170172.000000,226572.000000,83400.000000,188.655244)}
{pt3dadd(170196.000000,226692.000000,83400.000000,177.716988)}
{pt3dadd(170196.000000,226776.000000,83400.000000,174.082446)}
{pt3dadd(170184.000000,226968.000000,83400.000000,179.405508)}
{pt3dadd(170100.000000,227208.000000,83450.000000,175.944038)}
{pt3dadd(170040.000000,227520.000000,83425.000000,172.647404)}
{pt3dadd(169980.000000,227820.000000,83425.000000,169.657258)}
{pt3dadd(169956.000000,228072.000000,83400.000000,166.360624)}
{pt3dadd(169896.000000,228156.000000,83400.000000,156.439302)}
{pt3dadd(169896.000000,228372.000000,83400.000000,153.299652)}
{pt3dadd(169800.000000,228588.000000,83475.000000,146.337356)}
{pt3dadd(169752.000000,228756.000000,83450.000000,142.365206)}
{pt3dadd(169656.000000,229032.000000,83525.000000,137.985910)}
{pt3dadd(169644.000000,229212.000000,83575.000000,140.976056)}
{pt3dadd(169656.000000,229320.000000,83575.000000,149.438768)}
{pt3dadd(169656.000000,229440.000000,83575.000000,163.332240)}
{pt3dadd(169656.000000,229608.000000,83625.000000,175.364120)}
{pt3dadd(169608.000000,229776.000000,83650.000000,183.040050)}
{pt3dadd(169500.000000,229848.000000,83650.000000,186.336684)}
{pt3dadd(169440.000000,229968.000000,83650.000000,177.873972)}
{pt3dadd(169380.000000,230088.000000,83650.000000,179.828644)}
{pt3dadd(169332.000000,230172.000000,83650.000000,185.697316)}
{pt3dadd(169164.000000,230388.000000,83450.000000,185.697316)}
{pt3dadd(169020.000000,230436.000000,83450.000000,179.410536)}
{pt3dadd(168924.000000,230544.000000,83400.000000,180.942072)}
{pt3dadd(168888.000000,230628.000000,83350.000000,161.322293)}
{pt3dadd(168828.000000,230724.000000,83350.000000,160.811480)}

{create adhoc15}
{access adhoc15}
{connect adhoc15(1), adhoc13(0)}
{nseg = 1}
{strdef color color = "White"}
{pt3dclear()}
{pt3dadd(171492.000000,220704.000000,85825.000000,318.395720)}
{pt3dadd(171300.000000,220704.000000,85875.000000,251.309907)}
{pt3dadd(171156.000000,220668.000000,85875.000000,192.447714)}
{pt3dadd(170964.000000,220680.000000,85875.000000,147.573198)}
{pt3dadd(170772.000000,220704.000000,85700.000000,106.671258)}
{pt3dadd(170604.000000,220740.000000,85650.000000,100.943361)}
{pt3dadd(170508.000000,220776.000000,85700.000000,95.142571)}
{pt3dadd(170364.000000,220776.000000,85650.000000,89.702041)}
{pt3dadd(170268.000000,220704.000000,85650.000000,86.368027)}
{pt3dadd(170160.000000,220656.000000,85625.000000,76.485107)}
{pt3dadd(170004.000000,220620.000000,85600.000000,77.353070)}

{create adhoc16}
{access adhoc16}
{connect adhoc16(1), adhoc12(0)}
{nseg = 1}
{strdef color color = "White"}
{pt3dclear()}
{pt3dadd(177744.000000,217212.000000,87975.000000,387.012000)}
{pt3dadd(177684.000000,217464.000000,88000.000000,256.821517)}
{pt3dadd(177660.000000,217560.000000,88075.000000,208.335910)}
{pt3dadd(177576.000000,217752.000000,88150.000000,157.393510)}
{pt3dadd(177492.000000,217860.000000,88150.000000,137.658150)}
{pt3dadd(177444.000000,217968.000000,88150.000000,137.658150)}
{pt3dadd(177372.000000,218076.000000,88150.000000,147.107030)}
{pt3dadd(177312.000000,218232.000000,88300.000000,154.417440)}
{pt3dadd(177312.000000,218412.000000,88450.000000,154.417440)}
{pt3dadd(177288.000000,218664.000000,88600.000000,158.796736)}
{pt3dadd(177300.000000,218856.000000,88625.000000,156.084586)}
{pt3dadd(177336.000000,219012.000000,88675.000000,145.312706)}
{pt3dadd(177408.000000,219120.000000,88675.000000,150.635768)}
{pt3dadd(177492.000000,219252.000000,88675.000000,165.223912)}
{pt3dadd(177576.000000,219372.000000,88675.000000,174.109760)}
{pt3dadd(177672.000000,219492.000000,88675.000000,184.881640)}
{pt3dadd(177480.000000,219588.000000,88425.000000,190.583936)}
{pt3dadd(177372.000000,219744.000000,88375.000000,177.950464)}
{pt3dadd(177204.000000,220044.000000,88175.000000,166.074470)}
{pt3dadd(177096.000000,220128.000000,88175.000000,155.657086)}
{pt3dadd(177012.000000,220260.000000,88175.000000,149.055966)}
{pt3dadd(176916.000000,220332.000000,88250.000000,150.664080)}
{pt3dadd(176664.000000,220524.000000,88400.000000,151.987080)}
{pt3dadd(176508.000000,220644.000000,88525.000000,156.585340)}
{pt3dadd(176400.000000,220764.000000,88575.000000,159.724990)}
{pt3dadd(176292.000000,221004.000000,88650.000000,178.988504)}
{pt3dadd(176292.000000,221340.000000,88725.000000,202.976954)}
{pt3dadd(176316.000000,221568.000000,88750.000000,214.287426)}
{pt3dadd(176328.000000,221784.000000,88750.000000,208.300016)}
{pt3dadd(176340.000000,222060.000000,88650.000000,206.691902)}
{pt3dadd(176340.000000,222264.000000,88700.000000,181.997628)}
{pt3dadd(176388.000000,222552.000000,88675.000000,149.438768)}
{pt3dadd(176376.000000,222648.000000,88675.000000,135.545296)}
{pt3dadd(176388.000000,222768.000000,88675.000000,132.962296)}
{pt3dadd(176448.000000,222924.000000,88650.000000,126.000000)}
{pt3dadd(176496.000000,223080.000000,88650.000000,127.260000)}
{pt3dadd(176556.000000,223200.000000,88650.000000,131.232150)}
{pt3dadd(176688.000000,223452.000000,88650.000000,135.204300)}
{pt3dadd(176760.000000,223728.000000,88650.000000,151.052444)}
{pt3dadd(176748.000000,224064.000000,88725.000000,166.900588)}
{pt3dadd(176712.000000,224244.000000,88800.000000,174.210998)}
{pt3dadd(176688.000000,224412.000000,88850.000000,177.201144)}
{pt3dadd(176628.000000,224700.000000,88925.000000,178.301417)}
{pt3dadd(176532.000000,224976.000000,88925.000000,160.811480)}

{create adhoc17}
{access adhoc17}
{connect adhoc17(1), adhoc16(0)}
{nseg = 1}
{strdef color color = "White"}
{pt3dclear()}
{pt3dadd(176532.000000,224976.000000,88925.000000,160.811480)}
{pt3dadd(176400.000000,225132.000000,88925.000000,166.305870)}
{pt3dadd(176268.000000,225240.000000,88925.000000,169.012862)}
{pt3dadd(176148.000000,225360.000000,88900.000000,175.944038)}
{pt3dadd(175968.000000,225444.000000,88900.000000,192.874098)}
{pt3dadd(175788.000000,225540.000000,88900.000000,201.759946)}
{pt3dadd(175704.000000,225660.000000,88900.000000,203.532896)}
{pt3dadd(175596.000000,225864.000000,88950.000000,217.781690)}
{pt3dadd(175500.000000,226092.000000,88950.000000,186.159400)}

{create adhoc18}
{access adhoc18}
{connect adhoc18(1), adhoc16(0)}
{nseg = 1}
{strdef color color = "White"}
{pt3dclear()}
{pt3dadd(176532.000000,224976.000000,88925.000000,160.811480)}
{pt3dadd(176520.000000,224988.000000,88675.000000,151.887843)}
{pt3dadd(176628.000000,225000.000000,88500.000000,150.103116)}
{pt3dadd(176700.000000,224940.000000,88325.000000,140.284017)}
{pt3dadd(176820.000000,224856.000000,88100.000000,168.852050)}

{create adhoc19}
{access adhoc19}
{connect adhoc19(1), adhoc7(0)}
{nseg = 1}
{strdef color color = "White"}
{pt3dclear()}
{pt3dadd(181092.000000,213588.000000,88475.000000,448.014770)}
{pt3dadd(181224.000000,213816.000000,88775.000000,303.072123)}
{pt3dadd(181272.000000,213900.000000,89050.000000,256.661828)}
{pt3dadd(181272.000000,213972.000000,89225.000000,200.829284)}
{pt3dadd(181344.000000,214092.000000,89325.000000,179.591254)}
{pt3dadd(181368.000000,214128.000000,89425.000000,171.531524)}
{pt3dadd(181404.000000,214284.000000,89650.000000,164.221114)}
{pt3dadd(181500.000000,214332.000000,89800.000000,152.345120)}
{pt3dadd(181512.000000,214464.000000,89975.000000,143.774710)}
{pt3dadd(181488.000000,214668.000000,90150.000000,140.635060)}
{pt3dadd(181644.000000,214836.000000,90325.000000,143.625206)}
{pt3dadd(181788.000000,215076.000000,90500.000000,144.948206)}
{pt3dadd(181836.000000,215196.000000,90550.000000,147.938352)}
{pt3dadd(181956.000000,215532.000000,90675.000000,154.900648)}
{pt3dadd(182004.000000,215784.000000,90775.000000,176.658878)}
{pt3dadd(182076.000000,216084.000000,90775.000000,187.597134)}
{pt3dadd(182052.000000,216288.000000,90650.000000,202.914686)}
{pt3dadd(181968.000000,216528.000000,90600.000000,206.211320)}
{pt3dadd(181800.000000,216768.000000,90475.000000,204.679784)}
{pt3dadd(181704.000000,216948.000000,90450.000000,180.073794)}
{pt3dadd(181596.000000,217140.000000,90450.000000,167.604002)}
{pt3dadd(181404.000000,217248.000000,90450.000000,150.963450)}
{pt3dadd(181284.000000,217392.000000,90550.000000,149.274930)}
{pt3dadd(181176.000000,217488.000000,90600.000000,146.427170)}
{pt3dadd(181104.000000,217680.000000,90725.000000,149.274930)}
{pt3dadd(180996.000000,217740.000000,90725.000000,149.274930)}
{pt3dadd(180852.000000,217812.000000,90775.000000,151.987080)}
{pt3dadd(180708.000000,218100.000000,90850.000000,145.999670)}
{pt3dadd(180612.000000,218244.000000,90875.000000,145.976517)}
{pt3dadd(180432.000000,218280.000000,90850.000000,138.915000)}

{create adhoc20}
{access adhoc20}
{connect adhoc20(1), adhoc6(0)}
{nseg = 1}
{strdef color color = "White"}
{pt3dclear()}
{pt3dadd(182904.000000,207924.000000,89300.000000,303.234000)}
{pt3dadd(182676.000000,207996.000000,89075.000000,203.180533)}
{pt3dadd(182424.000000,207948.000000,89100.000000,176.151320)}
{pt3dadd(182172.000000,207948.000000,88975.000000,141.456267)}
{pt3dadd(182028.000000,208032.000000,88825.000000,138.915000)}

{create adhoc21}
{access adhoc21}
{connect adhoc21(1), adhoc5(0)}
{nseg = 1}
{strdef color color = "White"}
{pt3dclear()}
{pt3dadd(187224.000000,202572.000000,90150.000000,132.300000)}
{pt3dadd(187368.000000,202452.000000,89825.000000,232.492983)}
{pt3dadd(187488.000000,202452.000000,89625.000000,283.761294)}
{pt3dadd(187464.000000,202536.000000,89525.000000,315.060154)}
{pt3dadd(187380.000000,202536.000000,89350.000000,296.441574)}
{pt3dadd(187212.000000,202536.000000,89100.000000,271.253704)}
{pt3dadd(187032.000000,202536.000000,89000.000000,226.013600)}
{pt3dadd(187068.000000,202368.000000,88850.000000,189.781256)}
{pt3dadd(187032.000000,202320.000000,88750.000000,167.481326)}
{pt3dadd(187008.000000,202320.000000,88675.000000,164.341676)}
{pt3dadd(186984.000000,202320.000000,88600.000000,161.045042)}
{pt3dadd(187020.000000,202164.000000,88450.000000,164.341676)}
{pt3dadd(187068.000000,202008.000000,88225.000000,170.942796)}
{pt3dadd(187104.000000,201888.000000,88075.000000,170.942796)}
{pt3dadd(187116.000000,201864.000000,88000.000000,175.770966)}
{pt3dadd(187176.000000,201792.000000,87925.000000,179.067600)}
{pt3dadd(187308.000000,201552.000000,87600.000000,186.709222)}
{pt3dadd(187476.000000,201384.000000,87350.000000,183.247752)}
{pt3dadd(187680.000000,200964.000000,87150.000000,179.951118)}
{pt3dadd(187752.000000,200820.000000,87000.000000,183.585660)}
{pt3dadd(187752.000000,200688.000000,86825.000000,176.163376)}
{pt3dadd(187764.000000,200616.000000,86800.000000,152.987946)}
{pt3dadd(187860.000000,200688.000000,86650.000000,145.092067)}
{pt3dadd(187920.000000,200736.000000,86575.000000,99.625610)}

{create adhoc22}
{access adhoc22}
{connect adhoc22(1), adhoc4(0)}
{nseg = 1}
{strdef color color = "White"}
{pt3dclear()}
{pt3dadd(187812.000000,201384.000000,91250.000000,275.042200)}
{pt3dadd(187644.000000,201576.000000,91600.000000,313.256467)}
{pt3dadd(187548.000000,201684.000000,91875.000000,280.727820)}
{pt3dadd(187356.000000,201888.000000,92075.000000,270.974960)}
{pt3dadd(186888.000000,202176.000000,92050.000000,261.640366)}
{pt3dadd(186624.000000,202128.000000,92100.000000,278.609196)}
{pt3dadd(186420.000000,202224.000000,92125.000000,288.849696)}
{pt3dadd(186180.000000,202344.000000,92150.000000,307.273260)}
{pt3dadd(185964.000000,202392.000000,92150.000000,309.536040)}
{pt3dadd(185724.000000,202500.000000,92250.000000,288.208458)}
{pt3dadd(185508.000000,202548.000000,92250.000000,279.104214)}
{pt3dadd(185388.000000,202560.000000,92375.000000,264.445906)}
{pt3dadd(185148.000000,202632.000000,92350.000000,250.661036)}
{pt3dadd(184980.000000,202704.000000,92350.000000,250.661036)}
{pt3dadd(184776.000000,202764.000000,92375.000000,239.320190)}
{pt3dadd(184560.000000,202824.000000,92375.000000,224.661882)}
{pt3dadd(184332.000000,202884.000000,92375.000000,224.661882)}
{pt3dadd(184188.000000,202944.000000,92350.000000,220.023188)}
{pt3dadd(183996.000000,202992.000000,92350.000000,222.399102)}
{pt3dadd(183768.000000,203076.000000,92350.000000,222.399102)}
{pt3dadd(183600.000000,203256.000000,92375.000000,226.816910)}
{pt3dadd(183432.000000,203196.000000,92325.000000,233.610632)}
{pt3dadd(183288.000000,203268.000000,92325.000000,231.455604)}
{pt3dadd(183012.000000,203280.000000,92400.000000,224.661882)}
{pt3dadd(182700.000000,203304.000000,92525.000000,226.714290)}
{pt3dadd(182352.000000,203304.000000,92700.000000,220.244074)}
{pt3dadd(182016.000000,203340.000000,92850.000000,211.397944)}
{pt3dadd(181716.000000,203292.000000,92975.000000,196.080392)}
{pt3dadd(181488.000000,203148.000000,93075.000000,192.073312)}
{pt3dadd(181200.000000,203088.000000,93200.000000,196.491120)}
{pt3dadd(181128.000000,202980.000000,93350.000000,202.961336)}
{pt3dadd(180972.000000,202860.000000,93375.000000,209.431552)}
{pt3dadd(180864.000000,202800.000000,93500.000000,229.166912)}
{pt3dadd(180648.000000,202776.000000,93525.000000,237.591800)}
{pt3dadd(180432.000000,202752.000000,93525.000000,239.967714)}
{pt3dadd(180144.000000,202764.000000,93625.000000,239.967714)}
{pt3dadd(179904.000000,202836.000000,93650.000000,237.704934)}
{pt3dadd(179760.000000,202884.000000,93675.000000,235.442154)}
{pt3dadd(179556.000000,202812.000000,93725.000000,225.155674)}
{pt3dadd(179376.000000,202836.000000,93850.000000,216.309544)}
{pt3dadd(179292.000000,202776.000000,94000.000000,209.839328)}
{pt3dadd(179124.000000,202656.000000,94075.000000,216.972738)}
{pt3dadd(178884.000000,202692.000000,94125.000000,224.106148)}
{pt3dadd(178392.000000,202764.000000,94250.000000,257.080524)}
{pt3dadd(178044.000000,202752.000000,94325.000000,284.358784)}
{pt3dadd(177840.000000,202716.000000,94350.000000,304.511120)}
{pt3dadd(177768.000000,202680.000000,94550.000000,332.888567)}
{pt3dadd(177504.000000,202716.000000,94750.000000,306.002400)}

{create adhoc23}
{access adhoc23}
{connect adhoc23(1), adhoc3(0)}
{nseg = 1}
{strdef color color = "White"}
{pt3dclear()}
{pt3dadd(193296.000000,190452.000000,100425.000000,226.277900)}
{pt3dadd(193548.000000,190356.000000,99550.000000,263.371467)}
{pt3dadd(193536.000000,190128.000000,99025.000000,272.404344)}
{pt3dadd(193404.000000,190080.000000,98825.000000,282.157204)}
{pt3dadd(193332.000000,190224.000000,98675.000000,274.667124)}
{pt3dadd(193296.000000,190320.000000,98550.000000,277.555064)}
{pt3dadd(193212.000000,190404.000000,98425.000000,268.450820)}
{pt3dadd(193104.000000,190488.000000,98275.000000,270.826734)}
{pt3dadd(193068.000000,190668.000000,98075.000000,258.918846)}
{pt3dadd(193116.000000,190716.000000,97850.000000,254.501038)}
{pt3dadd(193128.000000,190692.000000,97625.000000,234.902382)}
{pt3dadd(193116.000000,190740.000000,97350.000000,216.236994)}
{pt3dadd(193164.000000,190716.000000,97175.000000,205.436192)}
{pt3dadd(193236.000000,190560.000000,96950.000000,207.591220)}
{pt3dadd(193308.000000,190464.000000,96750.000000,198.261078)}
{pt3dadd(193356.000000,190356.000000,96600.000000,192.671864)}
{pt3dadd(193320.000000,190248.000000,96450.000000,185.740688)}
{pt3dadd(193356.000000,190152.000000,96300.000000,177.277976)}
{pt3dadd(193344.000000,190068.000000,96225.000000,171.115868)}
{pt3dadd(193164.000000,189960.000000,96050.000000,178.393602)}
{pt3dadd(193080.000000,189888.000000,95950.000000,183.982816)}
{pt3dadd(192996.000000,189876.000000,95825.000000,190.913992)}
{pt3dadd(192852.000000,189828.000000,95700.000000,199.376704)}
{pt3dadd(192708.000000,189792.000000,95575.000000,199.376704)}
{pt3dadd(192540.000000,189744.000000,95475.000000,201.429112)}
{pt3dadd(192468.000000,189696.000000,95350.000000,207.899328)}
{pt3dadd(192468.000000,189744.000000,95225.000000,211.906408)}
{pt3dadd(192300.000000,189600.000000,95100.000000,211.906408)}
{pt3dadd(192120.000000,189420.000000,94975.000000,210.044816)}
{pt3dadd(191940.000000,189288.000000,94775.000000,202.403194)}
{pt3dadd(191820.000000,189132.000000,94650.000000,188.655244)}
{pt3dadd(191688.000000,189060.000000,94550.000000,173.337692)}
{pt3dadd(191508.000000,188916.000000,94400.000000,160.704220)}
{pt3dadd(191448.000000,188796.000000,94275.000000,148.672340)}
{pt3dadd(191352.000000,188736.000000,94150.000000,142.385560)}
{pt3dadd(191376.000000,188676.000000,94025.000000,136.398150)}
{pt3dadd(191220.000000,188520.000000,93850.000000,144.074080)}
{pt3dadd(191016.000000,188352.000000,93725.000000,158.662224)}
{pt3dadd(190992.000000,188280.000000,93525.000000,176.562776)}
{pt3dadd(190848.000000,188172.000000,93375.000000,197.284900)}
{pt3dadd(190620.000000,188100.000000,93200.000000,217.020260)}
{pt3dadd(190416.000000,188064.000000,93100.000000,229.079690)}
{pt3dadd(190296.000000,188028.000000,92975.000000,235.549906)}
{pt3dadd(190260.000000,187944.000000,92875.000000,237.704934)}
{pt3dadd(190092.000000,187932.000000,92775.000000,233.820500)}
{pt3dadd(189936.000000,187944.000000,92750.000000,226.277900)}

{create adhoc24}
{access adhoc24}
{connect adhoc24(1), adhoc23(0)}
{nseg = 1}
{strdef color color = "White"}
{pt3dclear()}
{pt3dadd(189936.000000,187944.000000,92750.000000,226.277900)}
{pt3dadd(189756.000000,187932.000000,92750.000000,216.676367)}
{pt3dadd(189588.000000,187944.000000,92750.000000,212.199844)}
{pt3dadd(189420.000000,187968.000000,92750.000000,212.199844)}
{pt3dadd(189252.000000,187944.000000,92750.000000,222.486324)}
{pt3dadd(189084.000000,187860.000000,92750.000000,232.726824)}
{pt3dadd(188916.000000,187740.000000,92750.000000,251.392212)}
{pt3dadd(188796.000000,187704.000000,92750.000000,278.497916)}
{pt3dadd(188640.000000,187572.000000,92675.000000,306.958908)}
{pt3dadd(188460.000000,187548.000000,92775.000000,317.199408)}
{pt3dadd(188256.000000,187524.000000,92800.000000,311.829538)}
{pt3dadd(187692.000000,187344.000000,92800.000000,309.079118)}
{pt3dadd(187536.000000,187176.000000,92825.000000,288.767136)}
{pt3dadd(187320.000000,187044.000000,92825.000000,270.059004)}
{pt3dadd(187128.000000,186912.000000,92800.000000,272.946944)}
{pt3dadd(186996.000000,186864.000000,92925.000000,281.204754)}
{pt3dadd(186864.000000,186828.000000,93050.000000,281.204754)}
{pt3dadd(186684.000000,186732.000000,93150.000000,293.836733)}
{pt3dadd(186540.000000,186564.000000,93175.000000,275.042200)}

{create adhoc25}
{access adhoc25}
{connect adhoc25(1), adhoc24(0)}
{nseg = 1}
{strdef color color = "White"}
{pt3dclear()}
{pt3dadd(186540.000000,186564.000000,93175.000000,275.042200)}
{pt3dadd(186528.000000,186384.000000,93150.000000,258.192983)}
{pt3dadd(186492.000000,186180.000000,93150.000000,257.199054)}
{pt3dadd(186408.000000,185976.000000,93150.000000,239.422494)}
{pt3dadd(186336.000000,185760.000000,93150.000000,232.289084)}
{pt3dadd(186252.000000,185460.000000,93150.000000,227.871276)}
{pt3dadd(186132.000000,185352.000000,93050.000000,225.376560)}
{pt3dadd(186072.000000,185232.000000,92975.000000,233.241146)}
{pt3dadd(186036.000000,185088.000000,92775.000000,245.903540)}
{pt3dadd(186012.000000,184860.000000,92575.000000,232.810256)}
{pt3dadd(186012.000000,184572.000000,92375.000000,218.881854)}
{pt3dadd(186072.000000,184344.000000,92375.000000,201.149876)}
{pt3dadd(186048.000000,184152.000000,92350.000000,180.622896)}
{pt3dadd(185964.000000,183960.000000,92350.000000,162.890918)}
{pt3dadd(185964.000000,183768.000000,92350.000000,164.499032)}
{pt3dadd(186060.000000,183552.000000,92350.000000,165.957642)}
{pt3dadd(186096.000000,183396.000000,92325.000000,162.967496)}
{pt3dadd(186192.000000,183228.000000,92350.000000,154.907766)}
{pt3dadd(186252.000000,183048.000000,92325.000000,156.515880)}
{pt3dadd(186312.000000,182868.000000,92375.000000,153.376230)}
{pt3dadd(186360.000000,182760.000000,92375.000000,149.205470)}
{pt3dadd(186456.000000,182640.000000,92400.000000,150.664080)}
{pt3dadd(186516.000000,182520.000000,92475.000000,147.951930)}
{pt3dadd(186588.000000,182424.000000,92425.000000,143.353670)}
{pt3dadd(186684.000000,182316.000000,92375.000000,143.353670)}
{pt3dadd(186780.000000,182196.000000,92350.000000,150.664080)}
{pt3dadd(186912.000000,182076.000000,92275.000000,157.265200)}
{pt3dadd(187032.000000,181980.000000,92125.000000,183.194190)}
{pt3dadd(187116.000000,181848.000000,92075.000000,227.738612)}
{pt3dadd(187200.000000,181788.000000,92075.000000,317.184372)}
{pt3dadd(187368.000000,181668.000000,91925.000000,410.303470)}
{pt3dadd(187536.000000,181368.000000,91775.000000,600.382600)}

{create adhoc26}
{access adhoc26}
{connect adhoc26(1), adhoc25(0)}
{nseg = 1}
{strdef color color = "White"}
{pt3dclear()}
{pt3dadd(187536.000000,181368.000000,91775.000000,600.382600)}
{pt3dadd(187320.000000,181488.000000,91450.000000,532.952100)}
{pt3dadd(187428.000000,181128.000000,91250.000000,476.237318)}
{pt3dadd(187272.000000,180972.000000,91225.000000,403.679158)}
{pt3dadd(187152.000000,180828.000000,91225.000000,319.951324)}
{pt3dadd(187032.000000,180684.000000,91225.000000,262.398178)}
{pt3dadd(186864.000000,180564.000000,91225.000000,200.578224)}
{pt3dadd(186684.000000,180384.000000,91225.000000,161.498120)}
{pt3dadd(186504.000000,180300.000000,91175.000000,140.439760)}
{pt3dadd(186300.000000,180144.000000,91100.000000,135.009000)}
{pt3dadd(186120.000000,179916.000000,91025.000000,132.426000)}
{pt3dadd(185964.000000,179676.000000,91025.000000,129.843000)}
{pt3dadd(185820.000000,179568.000000,90900.000000,128.520000)}
{pt3dadd(185712.000000,179460.000000,90825.000000,131.232150)}
{pt3dadd(185664.000000,179352.000000,90750.000000,133.815150)}
{pt3dadd(185592.000000,179268.000000,90700.000000,135.075150)}
{pt3dadd(185532.000000,179172.000000,90650.000000,135.075150)}
{pt3dadd(185400.000000,179088.000000,90525.000000,129.347253)}
{pt3dadd(185340.000000,178980.000000,90475.000000,118.979731)}
{pt3dadd(185340.000000,178860.000000,90325.000000,114.053873)}
{pt3dadd(185280.000000,178692.000000,90200.000000,110.451015)}
{pt3dadd(185304.000000,178608.000000,90125.000000,108.108157)}
{pt3dadd(185292.000000,178488.000000,90000.000000,110.233196)}
{pt3dadd(185196.000000,178392.000000,89900.000000,115.428568)}
{pt3dadd(185148.000000,178188.000000,89725.000000,115.428568)}
{pt3dadd(185160.000000,178056.000000,89625.000000,115.428568)}
{pt3dadd(185148.000000,177996.000000,89575.000000,112.316286)}
{pt3dadd(185172.000000,177888.000000,89525.000000,114.659144)}
{pt3dadd(185160.000000,177696.000000,89325.000000,115.859144)}
{pt3dadd(185172.000000,177612.000000,89250.000000,118.202002)}
{pt3dadd(185196.000000,177528.000000,89200.000000,120.544860)}
{pt3dadd(185232.000000,177444.000000,89100.000000,126.000000)}
{pt3dadd(185232.000000,177324.000000,89025.000000,123.657142)}
{pt3dadd(185232.000000,177240.000000,88925.000000,122.457142)}
{pt3dadd(185232.000000,177240.000000,88800.000000,121.257142)}
{pt3dadd(185112.000000,177168.000000,88675.000000,117.825850)}
{pt3dadd(185220.000000,177132.000000,88450.000000,116.281180)}
{pt3dadd(185220.000000,177084.000000,88375.000000,108.843540)}

{create adhoc27}
{access adhoc27}
{connect adhoc27(1), adhoc25(0)}
{nseg = 1}
{strdef color color = "White"}
{pt3dclear()}
{pt3dadd(187536.000000,181368.000000,91775.000000,600.382600)}
{pt3dadd(187896.000000,181140.000000,91675.000000,466.476217)}
{pt3dadd(188028.000000,181008.000000,91675.000000,395.540970)}
{pt3dadd(188160.000000,180912.000000,91675.000000,318.565002)}
{pt3dadd(188304.000000,180828.000000,91675.000000,278.856322)}
{pt3dadd(188436.000000,180708.000000,91675.000000,269.296866)}
{pt3dadd(188616.000000,180540.000000,91575.000000,256.069377)}
{pt3dadd(188772.000000,180360.000000,91475.000000,303.234000)}

{create adhoc28}
{access adhoc28}
{connect adhoc28(1), adhoc27(0)}
{nseg = 1}
{strdef color color = "White"}
{pt3dclear()}
{pt3dadd(188772.000000,180360.000000,91475.000000,303.234000)}
{pt3dadd(188784.000000,180336.000000,91150.000000,439.404753)}
{pt3dadd(188604.000000,179964.000000,90900.000000,423.452062)}
{pt3dadd(188580.000000,179808.000000,90900.000000,423.153850)}
{pt3dadd(188580.000000,179688.000000,90900.000000,351.031280)}

{create adhoc29}
{access adhoc29}
{connect adhoc29(1), adhoc27(0)}
{nseg = 1}
{strdef color color = "White"}
{pt3dclear()}
{pt3dadd(188772.000000,180360.000000,91475.000000,303.234000)}
{pt3dadd(188880.000000,180372.000000,91450.000000,298.420767)}
{pt3dadd(189060.000000,180396.000000,91450.000000,282.066900)}
{pt3dadd(189240.000000,180420.000000,91450.000000,262.468244)}
{pt3dadd(189408.000000,180492.000000,91450.000000,240.104307)}
{pt3dadd(189480.000000,180528.000000,91425.000000,205.240720)}

{create adhoc30}
{access adhoc30}
{connect adhoc30(1), adhoc24(0)}
{nseg = 1}
{strdef color color = "White"}
{pt3dclear()}
{pt3dadd(186540.000000,186564.000000,93175.000000,275.042200)}
{pt3dadd(186516.000000,186504.000000,93500.000000,325.980193)}
{pt3dadd(186492.000000,186480.000000,93550.000000,275.920548)}
{pt3dadd(186360.000000,186528.000000,93625.000000,250.084258)}
{pt3dadd(186240.000000,186576.000000,93650.000000,208.421154)}
{pt3dadd(186144.000000,186816.000000,93775.000000,156.473290)}
{pt3dadd(185964.000000,187128.000000,93900.000000,149.872170)}
{pt3dadd(185868.000000,187236.000000,94000.000000,140.542028)}
{pt3dadd(185856.000000,187296.000000,94100.000000,142.000638)}
{pt3dadd(185868.000000,187380.000000,94250.000000,150.571048)}
{pt3dadd(185844.000000,187476.000000,94375.000000,160.964636)}
{pt3dadd(185844.000000,187692.000000,94500.000000,173.434428)}
{pt3dadd(185748.000000,187836.000000,94575.000000,170.294778)}
{pt3dadd(185628.000000,187944.000000,94675.000000,171.826314)}
{pt3dadd(185460.000000,187992.000000,94725.000000,173.514834)}
{pt3dadd(185376.000000,188124.000000,94850.000000,186.608118)}
{pt3dadd(185292.000000,188148.000000,94800.000000,207.186710)}
{pt3dadd(185196.000000,188208.000000,94925.000000,243.419054)}
{pt3dadd(185052.000000,188292.000000,95275.000000,310.044014)}
{pt3dadd(184848.000000,188436.000000,95475.000000,378.311696)}
{pt3dadd(184668.000000,188580.000000,95675.000000,431.843372)}
{pt3dadd(184536.000000,188592.000000,95875.000000,502.168540)}
{pt3dadd(184656.000000,188616.000000,96075.000000,493.936280)}

{create adhoc31}
{access adhoc31}
{connect adhoc31(1), adhoc30(0)}
{nseg = 1}
{strdef color color = "White"}
{pt3dclear()}
{pt3dadd(184656.000000,188616.000000,96075.000000,493.936280)}
{pt3dadd(184680.000000,188532.000000,96350.000000,404.516807)}
{pt3dadd(184644.000000,188448.000000,96525.000000,375.325573)}
{pt3dadd(184644.000000,188412.000000,96625.000000,406.362580)}

{create adhoc32}
{access adhoc32}
{connect adhoc32(1), adhoc30(0)}
{nseg = 1}
{strdef color color = "White"}
{pt3dclear()}
{pt3dadd(184656.000000,188616.000000,96075.000000,493.936280)}
{pt3dadd(184656.000000,188424.000000,96000.000000,430.994110)}
{pt3dadd(184632.000000,188304.000000,96000.000000,377.047010)}
{pt3dadd(184608.000000,188196.000000,96000.000000,316.306452)}
{pt3dadd(184608.000000,188076.000000,96000.000000,255.875648)}
{pt3dadd(184608.000000,187968.000000,96000.000000,204.474020)}
{pt3dadd(184608.000000,187860.000000,96000.000000,144.127972)}
{pt3dadd(184608.000000,187740.000000,96000.000000,122.824688)}
{pt3dadd(184632.000000,187632.000000,96025.000000,101.834342)}
{pt3dadd(184692.000000,187536.000000,96025.000000,88.906337)}
{pt3dadd(184776.000000,187452.000000,96050.000000,92.958851)}
{pt3dadd(184860.000000,187380.000000,96100.000000,92.958851)}
{pt3dadd(184908.000000,187320.000000,96125.000000,93.596065)}
{pt3dadd(184920.000000,187236.000000,96075.000000,85.281760)}

{create adhoc33}
{access adhoc33}
{connect adhoc33(1), adhoc23(0)}
{nseg = 1}
{strdef color color = "White"}
{pt3dclear()}
{pt3dadd(189936.000000,187944.000000,92750.000000,226.277900)}
{pt3dadd(189804.000000,187896.000000,92525.000000,190.144540)}
{pt3dadd(189756.000000,187968.000000,92400.000000,163.286724)}
{pt3dadd(189660.000000,188016.000000,92275.000000,150.193440)}
{pt3dadd(189492.000000,188136.000000,92225.000000,139.776056)}
{pt3dadd(189336.000000,188232.000000,92175.000000,142.623816)}
{pt3dadd(189240.000000,188292.000000,92175.000000,150.786112)}
{pt3dadd(189132.000000,188340.000000,92050.000000,157.748408)}
{pt3dadd(189048.000000,188400.000000,91950.000000,161.045042)}
{pt3dadd(188784.000000,188472.000000,91800.000000,165.873212)}
{pt3dadd(188652.000000,188532.000000,91750.000000,170.701382)}
{pt3dadd(188520.000000,188532.000000,91650.000000,177.632558)}
{pt3dadd(188400.000000,188544.000000,91600.000000,186.518406)}
{pt3dadd(188292.000000,188544.000000,91550.000000,190.152948)}
{pt3dadd(188244.000000,188556.000000,91450.000000,193.787490)}
{pt3dadd(188184.000000,188520.000000,91350.000000,216.087420)}
{pt3dadd(188100.000000,188508.000000,91250.000000,226.576340)}
{pt3dadd(188028.000000,188388.000000,91125.000000,288.794300)}

{create adhoc34}
{access adhoc34}
{connect adhoc34(1), adhoc33(0)}
{nseg = 1}
{strdef color color = "White"}
{pt3dclear()}
{pt3dadd(188028.000000,188388.000000,91125.000000,288.794300)}
{pt3dadd(188028.000000,188292.000000,91025.000000,275.260483)}
{pt3dadd(187884.000000,188208.000000,90775.000000,232.777516)}
{pt3dadd(187752.000000,188136.000000,90725.000000,207.180952)}
{pt3dadd(187740.000000,187932.000000,90475.000000,188.562372)}
{pt3dadd(187716.000000,187836.000000,90350.000000,172.647404)}
{pt3dadd(187704.000000,187716.000000,90225.000000,167.819234)}
{pt3dadd(187788.000000,187596.000000,90100.000000,167.819234)}
{pt3dadd(187824.000000,187488.000000,90000.000000,174.750410)}
{pt3dadd(187836.000000,187440.000000,89875.000000,174.750410)}
{pt3dadd(187800.000000,187344.000000,89750.000000,174.750410)}
{pt3dadd(187800.000000,187332.000000,89625.000000,187.220202)}
{pt3dadd(187800.000000,187332.000000,89500.000000,212.816766)}
{pt3dadd(187740.000000,187296.000000,89375.000000,234.370094)}
{pt3dadd(187656.000000,187296.000000,89275.000000,274.316256)}
{pt3dadd(187464.000000,187200.000000,89050.000000,355.299304)}
{pt3dadd(187332.000000,187140.000000,89050.000000,438.279098)}
{pt3dadd(187200.000000,187092.000000,89050.000000,512.904598)}
{pt3dadd(187044.000000,187020.000000,89050.000000,561.170750)}
{pt3dadd(186948.000000,186912.000000,88925.000000,568.726694)}
{pt3dadd(186780.000000,186792.000000,88675.000000,522.366746)}
{pt3dadd(186648.000000,186696.000000,88575.000000,439.836733)}
{pt3dadd(186528.000000,186612.000000,88575.000000,368.582860)}

{create adhoc35}
{access adhoc35}
{connect adhoc35(1), adhoc34(0)}
{nseg = 1}
{strdef color color = "White"}
{pt3dclear()}
{pt3dadd(186528.000000,186612.000000,88575.000000,368.582860)}
{pt3dadd(186468.000000,186516.000000,88325.000000,346.003287)}
{pt3dadd(186684.000000,186300.000000,88100.000000,317.749822)}
{pt3dadd(186960.000000,186180.000000,87925.000000,310.896354)}
{pt3dadd(187104.000000,186084.000000,87775.000000,299.606200)}
{pt3dadd(187176.000000,186024.000000,87675.000000,295.018257)}
{pt3dadd(187344.000000,185988.000000,87550.000000,261.944950)}

{create adhoc36}
{access adhoc36}
{connect adhoc36(1), adhoc35(0)}
{nseg = 1}
{strdef color color = "White"}
{pt3dclear()}
{pt3dadd(187344.000000,185988.000000,87550.000000,261.944950)}
{pt3dadd(187428.000000,185928.000000,87325.000000,211.568987)}
{pt3dadd(187572.000000,185844.000000,87225.000000,197.943682)}
{pt3dadd(187644.000000,185736.000000,87150.000000,181.013622)}
{pt3dadd(187668.000000,185568.000000,86975.000000,182.968294)}
{pt3dadd(187656.000000,185400.000000,86800.000000,190.609916)}
{pt3dadd(187656.000000,185268.000000,86675.000000,209.228496)}
{pt3dadd(187620.000000,185172.000000,86500.000000,232.643416)}
{pt3dadd(187512.000000,185028.000000,86275.000000,252.192926)}
{pt3dadd(187380.000000,184896.000000,86075.000000,274.823926)}
{pt3dadd(187248.000000,184752.000000,85950.000000,305.439946)}
{pt3dadd(187200.000000,184632.000000,85825.000000,319.914060)}
{pt3dadd(187140.000000,184548.000000,85550.000000,332.983832)}
{pt3dadd(186948.000000,184452.000000,85325.000000,332.983832)}
{pt3dadd(186744.000000,184332.000000,85125.000000,324.313128)}
{pt3dadd(186672.000000,184116.000000,84950.000000,300.490830)}
{pt3dadd(186612.000000,184008.000000,84800.000000,276.728278)}
{pt3dadd(186396.000000,183756.000000,84675.000000,246.672110)}
{pt3dadd(186144.000000,183600.000000,84625.000000,215.502760)}

{create adhoc37}
{access adhoc37}
{connect adhoc37(1), adhoc35(0)}
{nseg = 1}
{strdef color color = "White"}
{pt3dclear()}
{pt3dadd(187344.000000,185988.000000,87550.000000,261.944950)}
{pt3dadd(187248.000000,185940.000000,87325.000000,217.626557)}
{pt3dadd(187200.000000,185952.000000,87125.000000,211.290444)}
{pt3dadd(187200.000000,186012.000000,87000.000000,211.290444)}
{pt3dadd(187200.000000,186144.000000,86800.000000,219.715332)}
{pt3dadd(187068.000000,186324.000000,86675.000000,217.853740)}
{pt3dadd(187008.000000,186444.000000,86625.000000,221.488282)}
{pt3dadd(186972.000000,186528.000000,86625.000000,226.126976)}
{pt3dadd(186936.000000,186624.000000,86625.000000,218.993566)}
{pt3dadd(186936.000000,186732.000000,86625.000000,205.245616)}
{pt3dadd(186960.000000,186864.000000,86625.000000,215.532096)}
{pt3dadd(186996.000000,186948.000000,86625.000000,223.956984)}
{pt3dadd(186948.000000,187032.000000,86625.000000,223.956984)}
{pt3dadd(186912.000000,187128.000000,86625.000000,214.160334)}
{pt3dadd(186852.000000,187200.000000,86625.000000,221.438068)}
{pt3dadd(186780.000000,187296.000000,86625.000000,223.813982)}
{pt3dadd(186744.000000,187212.000000,86475.000000,231.304062)}
{pt3dadd(186564.000000,187248.000000,86375.000000,231.304062)}
{pt3dadd(186420.000000,187296.000000,86250.000000,243.363492)}
{pt3dadd(186384.000000,187332.000000,86125.000000,260.074208)}
{pt3dadd(186300.000000,187416.000000,86000.000000,260.074208)}
{pt3dadd(186216.000000,187416.000000,85825.000000,299.148868)}
{pt3dadd(186108.000000,187392.000000,85675.000000,330.527110)}
{pt3dadd(185904.000000,187308.000000,85425.000000,368.344896)}
{pt3dadd(185616.000000,187320.000000,85250.000000,409.373292)}
{pt3dadd(185364.000000,187452.000000,85175.000000,449.081972)}
{pt3dadd(185148.000000,187608.000000,84975.000000,418.678016)}
{pt3dadd(184980.000000,187836.000000,84925.000000,407.611756)}
{pt3dadd(184812.000000,187968.000000,84675.000000,389.138714)}
{pt3dadd(184656.000000,188136.000000,84675.000000,357.214562)}
{pt3dadd(184500.000000,188352.000000,84675.000000,334.474712)}
{pt3dadd(184404.000000,188496.000000,84600.000000,331.442368)}
{pt3dadd(184248.000000,188652.000000,84600.000000,313.625102)}
{pt3dadd(184080.000000,188808.000000,84600.000000,301.770438)}
{pt3dadd(184008.000000,189024.000000,84675.000000,287.296324)}
{pt3dadd(183804.000000,189216.000000,84525.000000,261.481364)}
{pt3dadd(183672.000000,189456.000000,84450.000000,232.996860)}
{pt3dadd(183480.000000,189552.000000,84525.000000,214.378280)}
{pt3dadd(183264.000000,189636.000000,84525.000000,193.140250)}
{pt3dadd(183036.000000,189708.000000,84525.000000,168.534260)}
{pt3dadd(182808.000000,189768.000000,84575.000000,162.945046)}
{pt3dadd(182640.000000,189924.000000,84650.000000,169.876222)}
{pt3dadd(182472.000000,190020.000000,84775.000000,173.337692)}
{pt3dadd(182328.000000,190032.000000,84775.000000,178.660754)}
{pt3dadd(182172.000000,190080.000000,84825.000000,191.925898)}
{pt3dadd(182004.000000,190128.000000,84825.000000,201.722548)}
{pt3dadd(181848.000000,190200.000000,84825.000000,223.275876)}
{pt3dadd(181704.000000,190308.000000,84825.000000,252.907100)}
{pt3dadd(181608.000000,190356.000000,84900.000000,287.530200)}
{pt3dadd(181512.000000,190440.000000,84900.000000,323.884456)}
{pt3dadd(181416.000000,190524.000000,84900.000000,348.835132)}
{pt3dadd(181308.000000,190620.000000,84900.000000,351.867476)}
{pt3dadd(181236.000000,190680.000000,84900.000000,351.867476)}
{pt3dadd(181152.000000,190776.000000,84900.000000,345.014008)}
{pt3dadd(181056.000000,190860.000000,84900.000000,348.884124)}
{pt3dadd(180972.000000,190944.000000,84900.000000,388.585148)}
{pt3dadd(180912.000000,190992.000000,84900.000000,399.295574)}
{pt3dadd(181680.000000,190620.000000,85250.000000,442.615610)}
{pt3dadd(181968.000000,190404.000000,85375.000000,371.947850)}

{create adhoc38}
{access adhoc38}
{connect adhoc38(1), adhoc37(0)}
{nseg = 1}
{strdef color color = "White"}
{pt3dclear()}
{pt3dadd(181968.000000,190404.000000,85375.000000,371.947850)}
{pt3dadd(181560.000000,190404.000000,85450.000000,313.715863)}
{pt3dadd(181584.000000,190440.000000,85600.000000,197.251890)}

{create adhoc39}
{access adhoc39}
{connect adhoc39(1), adhoc37(0)}
{nseg = 1}
{strdef color color = "White"}
{pt3dclear()}
{pt3dadd(181968.000000,190404.000000,85375.000000,371.947850)}
{pt3dadd(182208.000000,190248.000000,85475.000000,253.270550)}
{pt3dadd(182088.000000,190464.000000,85625.000000,251.671404)}
{pt3dadd(181908.000000,190620.000000,85775.000000,222.979657)}
{pt3dadd(181872.000000,190656.000000,85950.000000,291.430880)}

{create adhoc40}
{access adhoc40}
{connect adhoc40(1), adhoc34(0)}
{nseg = 1}
{strdef color color = "White"}
{pt3dclear()}
{pt3dadd(186528.000000,186612.000000,88575.000000,368.582860)}
{pt3dadd(186384.000000,186624.000000,88550.000000,321.614443)}
{pt3dadd(186252.000000,186636.000000,88550.000000,326.694874)}
{pt3dadd(186108.000000,186660.000000,88550.000000,298.233882)}
{pt3dadd(185976.000000,186672.000000,88550.000000,288.945444)}
{pt3dadd(185820.000000,186744.000000,88550.000000,255.852750)}
{pt3dadd(185616.000000,186804.000000,88550.000000,212.989646)}
{pt3dadd(185400.000000,186888.000000,88550.000000,173.909542)}
{pt3dadd(185184.000000,186960.000000,88550.000000,160.816258)}
{pt3dadd(185028.000000,186912.000000,88500.000000,165.234066)}
{pt3dadd(184824.000000,186852.000000,88500.000000,183.852646)}
{pt3dadd(184632.000000,186852.000000,88475.000000,214.861086)}
{pt3dadd(184452.000000,186840.000000,88475.000000,281.161186)}
{pt3dadd(184200.000000,186828.000000,88300.000000,369.075410)}
{pt3dadd(183900.000000,186876.000000,88125.000000,388.420154)}
{pt3dadd(183600.000000,186816.000000,87925.000000,402.894268)}
{pt3dadd(183348.000000,186864.000000,87575.000000,421.602400)}
{pt3dadd(183168.000000,186912.000000,87550.000000,394.382404)}
{pt3dadd(183012.000000,186996.000000,87675.000000,334.952684)}
{pt3dadd(182868.000000,187068.000000,87675.000000,309.137724)}
{pt3dadd(182724.000000,187152.000000,87675.000000,280.930080)}
{pt3dadd(182580.000000,187212.000000,87675.000000,205.240720)}

{create adhoc41}
{access adhoc41}
{connect adhoc41(1), adhoc33(0)}
{nseg = 1}
{strdef color color = "White"}
{pt3dclear()}
{pt3dadd(188028.000000,188388.000000,91125.000000,288.794300)}
{pt3dadd(187836.000000,188520.000000,90950.000000,281.593940)}
{pt3dadd(187740.000000,188628.000000,90950.000000,268.863714)}
{pt3dadd(187656.000000,188820.000000,90950.000000,258.623214)}
{pt3dadd(187572.000000,188976.000000,90975.000000,234.037542)}
{pt3dadd(187476.000000,189096.000000,90975.000000,223.751062)}
{pt3dadd(187392.000000,189132.000000,90975.000000,215.326174)}
{pt3dadd(187308.000000,189180.000000,90975.000000,193.567944)}
{pt3dadd(187224.000000,189228.000000,90975.000000,178.211880)}
{pt3dadd(187140.000000,189276.000000,90975.000000,169.749168)}
{pt3dadd(187068.000000,189348.000000,90975.000000,160.300288)}
{pt3dadd(186948.000000,189420.000000,91000.000000,154.977226)}
{pt3dadd(186840.000000,189516.000000,91025.000000,152.129466)}
{pt3dadd(186744.000000,189600.000000,91025.000000,146.427170)}
{pt3dadd(186600.000000,189708.000000,91075.000000,143.579410)}
{pt3dadd(186528.000000,189744.000000,91075.000000,144.968560)}
{pt3dadd(186456.000000,189792.000000,91075.000000,136.398150)}
{pt3dadd(186348.000000,189900.000000,91025.000000,137.787300)}
{pt3dadd(186252.000000,189996.000000,91025.000000,139.110300)}
{pt3dadd(186168.000000,190080.000000,91025.000000,145.097710)}
{pt3dadd(186096.000000,190140.000000,90975.000000,149.695970)}
{pt3dadd(186012.000000,190200.000000,90975.000000,159.954900)}
{pt3dadd(185976.000000,190272.000000,90975.000000,168.014630)}
{pt3dadd(185964.000000,190356.000000,90975.000000,172.393926)}
{pt3dadd(185952.000000,190428.000000,90975.000000,186.141876)}
{pt3dadd(185904.000000,190464.000000,90750.000000,202.265740)}
{pt3dadd(185772.000000,190548.000000,90750.000000,221.815250)}
{pt3dadd(185640.000000,190632.000000,90750.000000,236.972360)}
{pt3dadd(185520.000000,190752.000000,90750.000000,282.212464)}
{pt3dadd(185388.000000,190860.000000,90750.000000,295.340904)}
{pt3dadd(185280.000000,190908.000000,90725.000000,315.652886)}
{pt3dadd(185136.000000,190968.000000,90700.000000,324.323590)}
{pt3dadd(184992.000000,191004.000000,90700.000000,332.581400)}
{pt3dadd(184848.000000,191040.000000,90700.000000,322.042104)}
{pt3dadd(184704.000000,191100.000000,90700.000000,319.154164)}
{pt3dadd(184572.000000,191208.000000,90700.000000,301.336898)}
{pt3dadd(184428.000000,191292.000000,90700.000000,295.416614)}
{pt3dadd(184272.000000,191364.000000,90700.000000,298.448958)}
{pt3dadd(184128.000000,191448.000000,90700.000000,298.448958)}
{pt3dadd(183984.000000,191532.000000,90700.000000,318.092498)}
{pt3dadd(183912.000000,191604.000000,90500.000000,343.105908)}
{pt3dadd(183792.000000,191688.000000,90300.000000,362.749448)}
{pt3dadd(183648.000000,191760.000000,89975.000000,369.276560)}
{pt3dadd(183456.000000,191808.000000,89800.000000,369.276560)}
{pt3dadd(183264.000000,191892.000000,89750.000000,365.590732)}
{pt3dadd(183144.000000,192000.000000,89675.000000,348.835132)}
{pt3dadd(183012.000000,192096.000000,89675.000000,308.664612)}
{pt3dadd(182880.000000,192192.000000,89675.000000,309.305566)}
{pt3dadd(182712.000000,192312.000000,89650.000000,324.456962)}
{pt3dadd(183204.000000,191772.000000,89475.000000,341.161380)}
{pt3dadd(183312.000000,191784.000000,89350.000000,362.529080)}
{pt3dadd(183372.000000,191760.000000,89200.000000,403.406252)}
{pt3dadd(183372.000000,191760.000000,89100.000000,417.574237)}
{pt3dadd(183444.000000,191652.000000,89025.000000,390.545260)}

{create adhoc42}
{access adhoc42}
{connect adhoc42(1), adhoc2(0)}
{nseg = 1}
{strdef color color = "White"}
{pt3dclear()}
{pt3dadd(191904.000000,188124.000000,104750.000000,448.014770)}
{pt3dadd(191820.000000,187788.000000,104675.000000,456.210593)}
{pt3dadd(191724.000000,187452.000000,104675.000000,433.535566)}
{pt3dadd(191544.000000,187200.000000,104675.000000,410.795716)}
{pt3dadd(191628.000000,186888.000000,104675.000000,385.725032)}
{pt3dadd(191724.000000,186672.000000,104675.000000,364.068030)}
{pt3dadd(191820.000000,186468.000000,104675.000000,341.328180)}
{pt3dadd(191868.000000,186276.000000,104675.000000,344.838496)}
{pt3dadd(191940.000000,186120.000000,104675.000000,351.691964)}
{pt3dadd(191952.000000,186072.000000,104675.000000,338.622192)}
{pt3dadd(192120.000000,185880.000000,104575.000000,324.837322)}
{pt3dadd(192204.000000,185724.000000,104325.000000,307.868492)}
{pt3dadd(192420.000000,185496.000000,104225.000000,277.252472)}
{pt3dadd(192588.000000,185436.000000,104100.000000,248.791480)}
{pt3dadd(192708.000000,185316.000000,103975.000000,229.192824)}
{pt3dadd(192792.000000,185244.000000,103850.000000,218.392022)}
{pt3dadd(192888.000000,185148.000000,103725.000000,226.256608)}
{pt3dadd(192996.000000,184992.000000,103575.000000,235.545046)}
{pt3dadd(193056.000000,184872.000000,103525.000000,235.545046)}
{pt3dadd(193212.000000,184716.000000,103375.000000,249.505342)}
{pt3dadd(193260.000000,184644.000000,103200.000000,277.274974)}
{pt3dadd(193404.000000,184536.000000,103075.000000,280.162914)}
{pt3dadd(193476.000000,184368.000000,102925.000000,288.420724)}
{pt3dadd(193488.000000,184272.000000,102825.000000,306.844288)}
{pt3dadd(193560.000000,184140.000000,102725.000000,299.354208)}
{pt3dadd(193560.000000,184044.000000,102600.000000,296.170248)}
{pt3dadd(193572.000000,183948.000000,102450.000000,278.624000)}
{pt3dadd(193572.000000,183840.000000,102325.000000,281.656344)}
{pt3dadd(193500.000000,183648.000000,102175.000000,275.736060)}
{pt3dadd(193560.000000,183528.000000,102025.000000,285.976560)}
{pt3dadd(193524.000000,183384.000000,101900.000000,282.944216)}
{pt3dadd(193476.000000,183264.000000,101750.000000,297.602524)}
{pt3dadd(193560.000000,183012.000000,101650.000000,297.602524)}
{pt3dadd(193656.000000,182760.000000,101500.000000,297.602524)}
{pt3dadd(193680.000000,182484.000000,101350.000000,300.490464)}
{pt3dadd(193764.000000,182388.000000,101125.000000,303.474673)}
{pt3dadd(193932.000000,182328.000000,101000.000000,303.234000)}

{create adhoc43}
{access adhoc43}
{connect adhoc43(1), adhoc42(0)}
{nseg = 1}
{strdef color color = "White"}
{pt3dclear()}
{pt3dadd(193932.000000,182328.000000,101000.000000,303.234000)}
{pt3dadd(194028.000000,182148.000000,100800.000000,293.836733)}
{pt3dadd(194292.000000,181944.000000,100675.000000,254.861522)}
{pt3dadd(194460.000000,181824.000000,100475.000000,231.446602)}
{pt3dadd(194532.000000,181764.000000,100425.000000,219.538714)}
{pt3dadd(194616.000000,181644.000000,100325.000000,189.522674)}
{pt3dadd(194652.000000,181512.000000,100300.000000,175.594272)}
{pt3dadd(194628.000000,181368.000000,100375.000000,167.918342)}
{pt3dadd(194640.000000,181272.000000,100350.000000,164.456872)}
{pt3dadd(194568.000000,181176.000000,100300.000000,160.449792)}
{pt3dadd(194568.000000,181068.000000,100275.000000,163.589442)}
{pt3dadd(194544.000000,180972.000000,100225.000000,168.187702)}
{pt3dadd(194520.000000,180840.000000,100200.000000,179.498174)}
{pt3dadd(194628.000000,180744.000000,100175.000000,186.775908)}
{pt3dadd(194664.000000,180624.000000,100100.000000,192.938016)}
{pt3dadd(194616.000000,180528.000000,99800.000000,202.268158)}
{pt3dadd(194628.000000,180432.000000,99700.000000,205.729628)}
{pt3dadd(194628.000000,180372.000000,99650.000000,205.729628)}
{pt3dadd(194724.000000,180192.000000,99450.000000,205.729628)}
{pt3dadd(194724.000000,180072.000000,99325.000000,201.522192)}
{pt3dadd(194688.000000,179964.000000,99200.000000,193.880570)}
{pt3dadd(194652.000000,179868.000000,99150.000000,195.742162)}
{pt3dadd(194676.000000,179796.000000,99050.000000,204.167050)}
{pt3dadd(194676.000000,179688.000000,99025.000000,204.167050)}
{pt3dadd(194712.000000,179592.000000,98775.000000,206.219458)}
{pt3dadd(194712.000000,179496.000000,98675.000000,207.992408)}
{pt3dadd(194820.000000,179256.000000,98500.000000,209.947080)}
{pt3dadd(194904.000000,179172.000000,98300.000000,203.476864)}
{pt3dadd(194820.000000,179076.000000,98250.000000,203.476864)}
{pt3dadd(194916.000000,178968.000000,98075.000000,201.424456)}
{pt3dadd(195048.000000,178920.000000,97925.000000,207.293128)}
{pt3dadd(195156.000000,178848.000000,97750.000000,211.500564)}
{pt3dadd(195288.000000,178740.000000,97575.000000,217.970780)}
{pt3dadd(195312.000000,178656.000000,97475.000000,226.816910)}
{pt3dadd(195348.000000,178572.000000,97375.000000,233.287126)}
{pt3dadd(195456.000000,178452.000000,97275.000000,231.234718)}
{pt3dadd(195492.000000,178296.000000,97150.000000,240.987578)}
{pt3dadd(195564.000000,178188.000000,97050.000000,251.228078)}
{pt3dadd(195720.000000,178092.000000,96950.000000,259.092664)}
{pt3dadd(195816.000000,178008.000000,96825.000000,263.963294)}
{pt3dadd(196056.000000,177900.000000,96725.000000,280.674010)}
{pt3dadd(196236.000000,177744.000000,96575.000000,286.312370)}
{pt3dadd(196404.000000,177504.000000,96275.000000,292.232654)}
{pt3dadd(196440.000000,177444.000000,96225.000000,301.336898)}
{pt3dadd(196548.000000,177324.000000,96050.000000,326.350308)}
{pt3dadd(196644.000000,177192.000000,96025.000000,349.863964)}
{pt3dadd(196668.000000,177048.000000,95900.000000,378.820118)}
{pt3dadd(196788.000000,176928.000000,95825.000000,396.413490)}
{pt3dadd(196932.000000,176844.000000,95700.000000,406.952786)}
{pt3dadd(197100.000000,176748.000000,95625.000000,403.939956)}
{pt3dadd(197028.000000,176724.000000,95475.000000,368.336184)}
{pt3dadd(197232.000000,176652.000000,95325.000000,324.401974)}
{pt3dadd(197304.000000,177144.000000,95200.000000,286.623498)}
{pt3dadd(197436.000000,177324.000000,95000.000000,257.173278)}
{pt3dadd(197532.000000,177132.000000,94800.000000,226.277748)}
{pt3dadd(197604.000000,176952.000000,94650.000000,233.476284)}
{pt3dadd(197604.000000,176940.000000,94500.000000,235.759720)}
{pt3dadd(197796.000000,177432.000000,94450.000000,242.615470)}
{pt3dadd(197964.000000,177360.000000,94100.000000,250.173934)}
{pt3dadd(197916.000000,177420.000000,93900.000000,257.029684)}
{pt3dadd(197916.000000,177456.000000,93700.000000,259.673048)}
{pt3dadd(197952.000000,177552.000000,93275.000000,264.588148)}
{pt3dadd(197892.000000,177660.000000,93050.000000,264.546190)}
{pt3dadd(197760.000000,177720.000000,92925.000000,264.336400)}

{create adhoc44}
{access adhoc44}
{connect adhoc44(1), adhoc42(0)}
{nseg = 1}
{strdef color color = "White"}
{pt3dclear()}
{pt3dadd(193932.000000,182328.000000,101000.000000,303.234000)}
{pt3dadd(193776.000000,182076.000000,101025.000000,246.362560)}
{pt3dadd(193704.000000,181764.000000,101025.000000,224.142888)}
{pt3dadd(193644.000000,181548.000000,101025.000000,194.126848)}
{pt3dadd(193596.000000,181236.000000,101025.000000,165.578408)}
{pt3dadd(193620.000000,180984.000000,101025.000000,165.578408)}
{pt3dadd(193596.000000,180780.000000,101075.000000,173.602108)}
{pt3dadd(193512.000000,180564.000000,101075.000000,195.155436)}
{pt3dadd(193416.000000,180240.000000,101075.000000,201.756556)}
{pt3dadd(193440.000000,179964.000000,101075.000000,218.397108)}
{pt3dadd(193368.000000,179736.000000,101075.000000,225.328284)}
{pt3dadd(193380.000000,179544.000000,101075.000000,219.166176)}
{pt3dadd(193428.000000,179364.000000,101075.000000,193.978306)}
{pt3dadd(193476.000000,179196.000000,101075.000000,193.978306)}
{pt3dadd(193488.000000,179064.000000,101075.000000,186.336684)}
{pt3dadd(193596.000000,178920.000000,101075.000000,181.013622)}
{pt3dadd(193632.000000,178752.000000,101075.000000,177.379080)}
{pt3dadd(193656.000000,178620.000000,101075.000000,182.968294)}
{pt3dadd(193716.000000,178464.000000,101075.000000,181.195344)}
{pt3dadd(193764.000000,178296.000000,101075.000000,184.829886)}
{pt3dadd(193800.000000,178152.000000,101075.000000,180.231626)}
{pt3dadd(193944.000000,178044.000000,101075.000000,176.934992)}
{pt3dadd(194088.000000,177924.000000,101100.000000,185.781122)}
{pt3dadd(194160.000000,177732.000000,101175.000000,205.330632)}
{pt3dadd(194232.000000,177648.000000,101200.000000,218.626150)}
{pt3dadd(194292.000000,177468.000000,101200.000000,236.972360)}
{pt3dadd(194340.000000,177324.000000,101200.000000,257.199054)}
{pt3dadd(194508.000000,176940.000000,101225.000000,262.313220)}
{pt3dadd(194676.000000,176748.000000,101250.000000,254.823140)}
{pt3dadd(194736.000000,176664.000000,101125.000000,254.823140)}
{pt3dadd(194964.000000,176208.000000,101025.000000,257.199054)}
{pt3dadd(195000.000000,176028.000000,100975.000000,262.568924)}
{pt3dadd(195072.000000,175740.000000,100850.000000,262.568924)}
{pt3dadd(195096.000000,175500.000000,101000.000000,260.306144)}
{pt3dadd(195072.000000,175344.000000,101075.000000,253.172734)}
{pt3dadd(195096.000000,175212.000000,101100.000000,255.667450)}
{pt3dadd(195168.000000,175116.000000,101050.000000,245.426950)}
{pt3dadd(195180.000000,174972.000000,100925.000000,241.938217)}
{pt3dadd(195252.000000,174840.000000,100925.000000,237.591800)}

{create adhoc45}
{access adhoc45}
{connect adhoc45(1), adhoc44(0)}
{nseg = 1}
{strdef color color = "White"}
{pt3dclear()}
{pt3dadd(195252.000000,174840.000000,100925.000000,237.591800)}
{pt3dadd(195276.000000,174684.000000,100825.000000,262.558733)}
{pt3dadd(195444.000000,174408.000000,100725.000000,260.062040)}
{pt3dadd(195528.000000,174240.000000,100625.000000,255.644232)}
{pt3dadd(195480.000000,173760.000000,100575.000000,236.094722)}
{pt3dadd(195612.000000,173640.000000,100525.000000,210.129737)}
{pt3dadd(195648.000000,173460.000000,100550.000000,177.294650)}

{create adhoc46}
{access adhoc46}
{connect adhoc46(1), adhoc44(0)}
{nseg = 1}
{strdef color color = "White"}
{pt3dclear()}
{pt3dadd(195252.000000,174840.000000,100925.000000,237.591800)}
{pt3dadd(195228.000000,174816.000000,100575.000000,283.441743)}
{pt3dadd(195036.000000,174648.000000,100225.000000,311.759466)}
{pt3dadd(194964.000000,174456.000000,100025.000000,342.350158)}
{pt3dadd(194844.000000,174336.000000,99900.000000,358.453552)}
{pt3dadd(194988.000000,174156.000000,99725.000000,353.215954)}
{pt3dadd(194988.000000,174252.000000,99575.000000,352.535890)}
{pt3dadd(195312.000000,174288.000000,99375.000000,295.114560)}

{create adhoc47}
{access adhoc47}
{connect adhoc47(1), adhoc1(0)}
{nseg = 1}
{strdef color color = "White"}
{pt3dclear()}
{pt3dadd(171828.000000,184776.000000,123950.000000,600.382600)}
{pt3dadd(171384.000000,185196.000000,124125.000000,804.428467)}
{pt3dadd(171024.000000,185040.000000,124350.000000,824.067548)}
{pt3dadd(170712.000000,184992.000000,124525.000000,825.163794)}
{pt3dadd(170532.000000,184848.000000,124725.000000,777.466494)}
{pt3dadd(170196.000000,184524.000000,124875.000000,743.462474)}
{pt3dadd(169776.000000,184512.000000,125025.000000,664.124242)}
{pt3dadd(169104.000000,184236.000000,125200.000000,613.037650)}
{pt3dadd(168720.000000,184296.000000,125400.000000,556.125394)}
{pt3dadd(168348.000000,184140.000000,125600.000000,470.484594)}
{pt3dadd(167892.000000,183996.000000,125850.000000,390.671870)}
{pt3dadd(167508.000000,183864.000000,125950.000000,341.332524)}
{pt3dadd(167256.000000,183828.000000,126150.000000,291.236496)}
{pt3dadd(166716.000000,183828.000000,126425.000000,279.843266)}
{pt3dadd(166500.000000,184092.000000,126675.000000,282.240876)}
{pt3dadd(166140.000000,184152.000000,126875.000000,270.277984)}
{pt3dadd(165792.000000,184272.000000,127225.000000,267.880374)}
{pt3dadd(165204.000000,184332.000000,127475.000000,254.632074)}
{pt3dadd(164628.000000,184464.000000,127825.000000,257.275438)}
{pt3dadd(164148.000000,184680.000000,128200.000000,265.211824)}
{pt3dadd(163644.000000,184656.000000,128475.000000,267.987356)}
{pt3dadd(163368.000000,184680.000000,128675.000000,270.384966)}
{pt3dadd(162960.000000,184884.000000,128850.000000,275.300066)}
{pt3dadd(162612.000000,184692.000000,128900.000000,261.212320)}
{pt3dadd(162096.000000,184548.000000,129025.000000,261.212320)}
{pt3dadd(161712.000000,184404.000000,129025.000000,255.793424)}
{pt3dadd(161400.000000,184128.000000,129175.000000,255.793424)}
{pt3dadd(160788.000000,183672.000000,129325.000000,248.594888)}
{pt3dadd(160464.000000,183396.000000,129425.000000,255.124170)}
{pt3dadd(160020.000000,182988.000000,129625.000000,242.506738)}
{pt3dadd(159648.000000,182628.000000,129725.000000,237.591638)}
{pt3dadd(159264.000000,182196.000000,129850.000000,248.442328)}
{pt3dadd(159156.000000,181896.000000,129850.000000,253.123374)}
{pt3dadd(159000.000000,181680.000000,129850.000000,250.839938)}
{pt3dadd(158736.000000,181524.000000,129850.000000,255.520984)}
{pt3dadd(158448.000000,181380.000000,129850.000000,251.062844)}
{pt3dadd(158220.000000,181212.000000,129850.000000,237.814544)}
{pt3dadd(157992.000000,181008.000000,129850.000000,226.915132)}
{pt3dadd(157776.000000,180720.000000,129875.000000,234.113668)}
{pt3dadd(157608.000000,180372.000000,129875.000000,230.009878)}
{pt3dadd(157356.000000,180096.000000,129875.000000,227.938736)}
{pt3dadd(156996.000000,179748.000000,130000.000000,221.409454)}
{pt3dadd(156828.000000,179364.000000,130050.000000,234.826356)}
{pt3dadd(156468.000000,178872.000000,130225.000000,237.469720)}
{pt3dadd(156180.000000,178572.000000,130400.000000,246.734364)}
{pt3dadd(155880.000000,178260.000000,130500.000000,258.178746)}
{pt3dadd(155616.000000,177996.000000,130600.000000,269.623128)}
{pt3dadd(155160.000000,177456.000000,130650.000000,284.229384)}
{pt3dadd(154788.000000,177516.000000,130825.000000,289.919220)}
{pt3dadd(154476.000000,177084.000000,131025.000000,289.919220)}
{pt3dadd(153768.000000,176592.000000,131225.000000,289.919220)}
{pt3dadd(153372.000000,176316.000000,131450.000000,287.401730)}
{pt3dadd(153192.000000,176004.000000,131650.000000,275.438838)}
{pt3dadd(152976.000000,175764.000000,131725.000000,264.588148)}
{pt3dadd(152664.000000,175596.000000,131725.000000,259.427294)}
{pt3dadd(152376.000000,175404.000000,131825.000000,259.427294)}
{pt3dadd(151644.000000,175176.000000,131800.000000,259.427294)}
{pt3dadd(151008.000000,175200.000000,131800.000000,251.868830)}
{pt3dadd(150528.000000,174972.000000,131700.000000,249.471220)}
{pt3dadd(149856.000000,174840.000000,131650.000000,247.073610)}
{pt3dadd(149436.000000,174612.000000,131575.000000,244.556120)}
{pt3dadd(148908.000000,174372.000000,131575.000000,226.662254)}
{pt3dadd(148428.000000,174228.000000,131575.000000,222.204114)}
{pt3dadd(148032.000000,173892.000000,131575.000000,238.512444)}
{pt3dadd(147648.000000,173532.000000,131575.000000,254.820774)}
{pt3dadd(147216.000000,173148.000000,131475.000000,252.423164)}
{pt3dadd(146568.000000,172836.000000,131725.000000,270.317030)}
{pt3dadd(146172.000000,172452.000000,131925.000000,274.775170)}
{pt3dadd(145848.000000,172188.000000,132100.000000,251.937558)}
{pt3dadd(145476.000000,172044.000000,132325.000000,221.755768)}
{pt3dadd(145044.000000,171732.000000,132425.000000,215.226486)}
{pt3dadd(144852.000000,171408.000000,132475.000000,212.828876)}
{pt3dadd(144504.000000,171108.000000,132600.000000,220.387340)}
{pt3dadd(144348.000000,170832.000000,132750.000000,240.164922)}
{pt3dadd(144204.000000,170628.000000,133025.000000,243.657988)}
{pt3dadd(143916.000000,170352.000000,133225.000000,257.745734)}
{pt3dadd(143832.000000,170016.000000,133325.000000,260.143344)}
{pt3dadd(143436.000000,169788.000000,133500.000000,257.499980)}
{pt3dadd(143220.000000,169752.000000,133850.000000,244.251680)}
{pt3dadd(143040.000000,169704.000000,134075.000000,252.348638)}
{pt3dadd(142920.000000,169884.000000,134125.000000,240.332034)}
{pt3dadd(142476.000000,169344.000000,134275.000000,237.934424)}
{pt3dadd(142248.000000,169116.000000,134425.000000,249.327654)}
{pt3dadd(142116.000000,168984.000000,134625.000000,259.661650)}
{pt3dadd(142128.000000,168840.000000,134775.000000,269.503550)}
{pt3dadd(141888.000000,168516.000000,134775.000000,426.009510)}
{pt3dadd(141444.000000,168096.000000,134850.000000,436.343506)}
{pt3dadd(140988.000000,167676.000000,134850.000000,454.097496)}
{pt3dadd(140664.000000,167436.000000,134700.000000,457.011800)}
{pt3dadd(140208.000000,167004.000000,134475.000000,465.761666)}
{pt3dadd(140136.000000,166968.000000,134250.000000,316.111456)}
{pt3dadd(139620.000000,166500.000000,134250.000000,305.777460)}
{pt3dadd(139404.000000,166164.000000,134200.000000,274.112750)}
{pt3dadd(138984.000000,165876.000000,134200.000000,287.301840)}
{pt3dadd(138360.000000,165876.000000,134200.000000,287.301840)}
{pt3dadd(137940.000000,166008.000000,134075.000000,305.278454)}
{pt3dadd(137556.000000,165864.000000,134050.000000,318.526754)}
{pt3dadd(137148.000000,165756.000000,134025.000000,332.437474)}
{pt3dadd(136980.000000,165672.000000,133825.000000,328.895114)}
{pt3dadd(136872.000000,165696.000000,133700.000000,322.920780)}
{pt3dadd(136824.000000,165744.000000,133600.000000,312.880552)}
{pt3dadd(136620.000000,165492.000000,133500.000000,312.880552)}
{pt3dadd(136344.000000,165372.000000,133450.000000,306.906218)}
{pt3dadd(136056.000000,165228.000000,133375.000000,296.288053)}
{pt3dadd(135696.000000,165288.000000,133175.000000,291.430880)}

{create adhoc48}
{access adhoc48}
{connect adhoc48(1), adhoc47(0)}
{nseg = 1}
{strdef color color = "White"}
{pt3dclear()}
{pt3dadd(135696.000000,165288.000000,133175.000000,291.430880)}
{pt3dadd(135648.000000,165396.000000,133075.000000,219.401027)}
{pt3dadd(135684.000000,165372.000000,132875.000000,203.973918)}
{pt3dadd(135528.000000,165456.000000,132775.000000,183.175147)}
{pt3dadd(135552.000000,165492.000000,132650.000000,154.552020)}

{create adhoc49}
{access adhoc49}
{connect adhoc49(1), adhoc47(0)}
{nseg = 1}
{strdef color color = "White"}
{pt3dclear()}
{pt3dadd(135696.000000,165288.000000,133175.000000,291.430880)}
{pt3dadd(135420.000000,165000.000000,133225.000000,210.739360)}
{pt3dadd(135240.000000,164856.000000,133225.000000,198.094122)}
{pt3dadd(135144.000000,164796.000000,133125.000000,170.718350)}
{pt3dadd(135276.000000,164952.000000,133050.000000,164.676276)}
{pt3dadd(135312.000000,164976.000000,132925.000000,157.299124)}
{pt3dadd(135228.000000,164952.000000,132825.000000,157.299124)}
{pt3dadd(135108.000000,164940.000000,132800.000000,159.177716)}
{pt3dadd(135204.000000,164772.000000,132625.000000,165.839098)}
{pt3dadd(135276.000000,164760.000000,132450.000000,175.374238)}
{pt3dadd(135216.000000,164664.000000,132350.000000,182.751390)}
{pt3dadd(135060.000000,164568.000000,132250.000000,190.095568)}
{pt3dadd(135156.000000,164640.000000,132025.000000,173.711009)}
{pt3dadd(135000.000000,164484.000000,132025.000000,165.577703)}
{pt3dadd(134964.000000,164388.000000,131975.000000,162.084637)}
{pt3dadd(134892.000000,164136.000000,131975.000000,163.788571)}
{pt3dadd(134844.000000,163896.000000,131925.000000,153.276077)}
{pt3dadd(134832.000000,163572.000000,131875.000000,164.288978)}
{pt3dadd(134808.000000,163332.000000,131850.000000,172.422284)}
{pt3dadd(134772.000000,163092.000000,131850.000000,179.766462)}
{pt3dadd(134592.000000,162996.000000,131775.000000,187.477848)}
{pt3dadd(134580.000000,162888.000000,131675.000000,212.078088)}
{pt3dadd(134424.000000,162696.000000,131450.000000,223.668112)}
{pt3dadd(134244.000000,162528.000000,131225.000000,227.519224)}
{pt3dadd(134208.000000,162276.000000,130975.000000,218.552250)}
{pt3dadd(134208.000000,162072.000000,130750.000000,204.496690)}
{pt3dadd(134268.000000,162012.000000,130575.000000,178.424526)}
{pt3dadd(134232.000000,161892.000000,130350.000000,165.211706)}
{pt3dadd(134340.000000,162000.000000,130025.000000,153.227288)}
{pt3dadd(134256.000000,162000.000000,129900.000000,150.209844)}
{pt3dadd(134148.000000,162036.000000,129725.000000,151.681768)}
{pt3dadd(134184.000000,162060.000000,129600.000000,156.322008)}
{pt3dadd(134100.000000,162108.000000,129525.000000,154.776488)}
{pt3dadd(134100.000000,162144.000000,129350.000000,156.248412)}
{pt3dadd(134052.000000,162192.000000,129225.000000,159.832547)}
{pt3dadd(133980.000000,162204.000000,129075.000000,154.552020)}
