# Supplementary material for: Full reconstruction of large lobula plate tangential cells in Drosophila from a 3D EM dataset
Source: PLoS One. 2018 Nov 28;13(11):e0207828. doi: 10.1371/journal.pone.0207828 (PMC6261601; doi:10.1371/journal.pone.0207828)
Supplement: S1 Dataset — (ZIP) [file pone.0207828.s001.zip › Diameter hoc/Cell151_4skels_ck.001_corrected_sorted_diametered.hoc0001.hoc]

/* created with convertKnossosNmlToHoc.m */

{create adhoc1}
{access adhoc1}
{nseg = 1}
{strdef color color = "White"}
{pt3dclear()}
{pt3dadd(198840.000000,187128.000000,95200.000000,89.545845)}
{pt3dadd(198756.000000,187092.000000,95425.000000,95.017427)}
{pt3dadd(198768.000000,186996.000000,95575.000000,112.642606)}
{pt3dadd(198828.000000,186900.000000,95700.000000,135.781581)}
{pt3dadd(198900.000000,186768.000000,95800.000000,169.431710)}
{pt3dadd(198852.000000,186684.000000,95975.000000,194.092928)}
{pt3dadd(198840.000000,186504.000000,96075.000000,215.151288)}
{pt3dadd(198804.000000,186324.000000,96175.000000,238.368128)}
{pt3dadd(198768.000000,186168.000000,96250.000000,244.838344)}
{pt3dadd(198708.000000,186000.000000,96375.000000,213.748698)}
{pt3dadd(198672.000000,185832.000000,96475.000000,192.690338)}
{pt3dadd(198576.000000,185700.000000,96600.000000,177.334274)}
{pt3dadd(198576.000000,185568.000000,96625.000000,146.713992)}
{pt3dadd(198576.000000,185376.000000,96650.000000,117.104801)}
{pt3dadd(198576.000000,185220.000000,96650.000000,127.472323)}
{pt3dadd(198528.000000,185052.000000,96675.000000,128.795323)}
{pt3dadd(198516.000000,184824.000000,96675.000000,125.805177)}
{pt3dadd(198516.000000,184596.000000,96725.000000,129.236469)}
{pt3dadd(198516.000000,184368.000000,96775.000000,140.499450)}
{pt3dadd(198540.000000,184128.000000,96825.000000,133.096008)}
{pt3dadd(198552.000000,183876.000000,96825.000000,137.475304)}
{pt3dadd(198576.000000,183624.000000,96825.000000,149.351298)}
{pt3dadd(198516.000000,183384.000000,96825.000000,227.877910)}
{pt3dadd(198444.000000,183180.000000,96825.000000,297.493016)}
{pt3dadd(198384.000000,182976.000000,96825.000000,405.936687)}
{pt3dadd(198336.000000,182784.000000,96925.000000,493.936280)}

{create adhoc2}
{access adhoc2}
{connect adhoc2(1), adhoc1(0)}
{nseg = 1}
{strdef color color = "White"}
{pt3dclear()}
{pt3dadd(198336.000000,182784.000000,96925.000000,493.936280)}
{pt3dadd(198264.000000,182760.000000,97050.000000,429.103620)}
{pt3dadd(198216.000000,182748.000000,97125.000000,408.581144)}
{pt3dadd(198276.000000,182760.000000,97250.000000,380.000144)}
{pt3dadd(198228.000000,182796.000000,97350.000000,372.444200)}
{pt3dadd(198096.000000,182760.000000,97525.000000,350.050240)}
{pt3dadd(197904.000000,182712.000000,97575.000000,336.980468)}
{pt3dadd(197784.000000,182640.000000,97700.000000,317.336928)}
{pt3dadd(197700.000000,182580.000000,97850.000000,307.777472)}
{pt3dadd(197592.000000,182508.000000,97950.000000,300.924004)}
{pt3dadd(197472.000000,182448.000000,98025.000000,319.632136)}
{pt3dadd(197400.000000,182388.000000,98150.000000,344.321482)}
{pt3dadd(197352.000000,182340.000000,98375.000000,371.898768)}
{pt3dadd(197280.000000,182280.000000,98525.000000,392.524484)}
{pt3dadd(197220.000000,182256.000000,98700.000000,410.997526)}
{pt3dadd(197124.000000,182184.000000,98925.000000,410.997526)}
{pt3dadd(196992.000000,182076.000000,99050.000000,395.867636)}
{pt3dadd(196896.000000,181920.000000,99275.000000,374.210634)}
{pt3dadd(196836.000000,181872.000000,99450.000000,340.456478)}
{pt3dadd(196692.000000,181860.000000,99575.000000,302.638692)}
{pt3dadd(196500.000000,181860.000000,99750.000000,269.970264)}
{pt3dadd(196392.000000,181788.000000,99925.000000,230.394768)}
{pt3dadd(196308.000000,181704.000000,100050.000000,207.763768)}
{pt3dadd(196284.000000,181584.000000,100200.000000,205.500988)}
{pt3dadd(196344.000000,181512.000000,100350.000000,193.441558)}
{pt3dadd(196344.000000,181428.000000,100525.000000,189.625294)}
{pt3dadd(196320.000000,181320.000000,100775.000000,198.088006)}
{pt3dadd(196296.000000,181212.000000,100950.000000,206.934136)}
{pt3dadd(196212.000000,181128.000000,101100.000000,222.325356)}
{pt3dadd(196188.000000,180996.000000,101250.000000,247.513226)}
{pt3dadd(196116.000000,180864.000000,101400.000000,273.960490)}
{pt3dadd(196092.000000,180708.000000,101550.000000,292.625878)}
{pt3dadd(195972.000000,180516.000000,101650.000000,283.779748)}
{pt3dadd(195900.000000,180204.000000,101650.000000,258.591878)}
{pt3dadd(195852.000000,179940.000000,101800.000000,241.045630)}
{pt3dadd(195816.000000,179772.000000,101925.000000,211.136896)}
{pt3dadd(195768.000000,179604.000000,102025.000000,187.148446)}
{pt3dadd(195816.000000,179472.000000,102000.000000,195.994576)}
{pt3dadd(195804.000000,179292.000000,102150.000000,234.252218)}
{pt3dadd(195804.000000,179016.000000,102300.000000,285.234766)}
{pt3dadd(195768.000000,178692.000000,102425.000000,350.251612)}
{pt3dadd(195792.000000,178476.000000,102600.000000,397.753718)}
{pt3dadd(195768.000000,178284.000000,102850.000000,456.904787)}
{pt3dadd(195768.000000,178032.000000,102875.000000,406.362580)}

{create adhoc3}
{access adhoc3}
{connect adhoc3(1), adhoc2(0)}
{nseg = 1}
{strdef color color = "White"}
{pt3dclear()}
{pt3dadd(195768.000000,178032.000000,102875.000000,406.362580)}
{pt3dadd(195900.000000,177768.000000,102725.000000,371.986387)}
{pt3dadd(195912.000000,177588.000000,102625.000000,325.475096)}
{pt3dadd(196044.000000,177492.000000,102575.000000,287.303132)}
{pt3dadd(196164.000000,177336.000000,102475.000000,251.286196)}
{pt3dadd(196320.000000,177360.000000,102400.000000,229.732868)}
{pt3dadd(196392.000000,177192.000000,102375.000000,212.802808)}
{pt3dadd(196512.000000,177072.000000,102350.000000,210.426894)}
{pt3dadd(196584.000000,176892.000000,102300.000000,219.715332)}
{pt3dadd(196776.000000,176712.000000,102175.000000,221.978112)}
{pt3dadd(196872.000000,176520.000000,102000.000000,221.978112)}
{pt3dadd(196992.000000,176328.000000,101925.000000,231.774762)}
{pt3dadd(197076.000000,176208.000000,101800.000000,227.356954)}
{pt3dadd(197172.000000,176052.000000,101725.000000,212.199844)}
{pt3dadd(197292.000000,175884.000000,101675.000000,196.843780)}
{pt3dadd(197388.000000,175740.000000,101600.000000,193.209238)}
{pt3dadd(197388.000000,175572.000000,101500.000000,185.185538)}
{pt3dadd(197460.000000,175452.000000,101400.000000,179.316866)}
{pt3dadd(197484.000000,175320.000000,101300.000000,183.133130)}
{pt3dadd(197508.000000,175188.000000,101325.000000,200.865108)}
{pt3dadd(197604.000000,175044.000000,101200.000000,215.300452)}
{pt3dadd(197676.000000,174864.000000,101075.000000,227.962846)}
{pt3dadd(197772.000000,174672.000000,100925.000000,251.377766)}
{pt3dadd(197820.000000,174480.000000,100750.000000,270.976422)}
{pt3dadd(197856.000000,174288.000000,100600.000000,273.471138)}
{pt3dadd(197916.000000,174108.000000,100425.000000,281.335724)}
{pt3dadd(198084.000000,173952.000000,100275.000000,278.959810)}
{pt3dadd(198084.000000,173772.000000,100100.000000,268.207284)}
{pt3dadd(198144.000000,173532.000000,99875.000000,244.792364)}
{pt3dadd(198276.000000,173256.000000,99650.000000,233.451518)}
{pt3dadd(198204.000000,173136.000000,99500.000000,218.793210)}
{pt3dadd(198300.000000,173040.000000,99375.000000,221.169124)}
{pt3dadd(198372.000000,172944.000000,99300.000000,210.368322)}
{pt3dadd(198528.000000,172812.000000,99225.000000,216.236994)}
{pt3dadd(198660.000000,172644.000000,99125.000000,222.707210)}
{pt3dadd(198828.000000,172512.000000,99075.000000,224.862238)}
{pt3dadd(198936.000000,172428.000000,99075.000000,218.068516)}
{pt3dadd(199044.000000,172308.000000,99000.000000,220.023188)}
{pt3dadd(199260.000000,172152.000000,98925.000000,216.016108)}
{pt3dadd(199380.000000,172068.000000,98850.000000,211.598300)}
{pt3dadd(199524.000000,171960.000000,98850.000000,203.574600)}
{pt3dadd(199656.000000,171840.000000,98800.000000,203.574600)}
{pt3dadd(199824.000000,171732.000000,98750.000000,205.627008)}
{pt3dadd(200004.000000,171672.000000,98700.000000,209.634088)}
{pt3dadd(200160.000000,171576.000000,98675.000000,205.627008)}
{pt3dadd(200316.000000,171480.000000,98625.000000,213.650708)}
{pt3dadd(200460.000000,171408.000000,98500.000000,225.558596)}
{pt3dadd(200580.000000,171276.000000,98400.000000,234.847034)}
{pt3dadd(200700.000000,171132.000000,98300.000000,244.135472)}
{pt3dadd(200856.000000,171000.000000,98175.000000,260.050440)}
{pt3dadd(201012.000000,170856.000000,98150.000000,278.474004)}
{pt3dadd(201168.000000,170724.000000,98025.000000,300.867964)}
{pt3dadd(201324.000000,170580.000000,97950.000000,325.881374)}
{pt3dadd(201420.000000,170448.000000,97825.000000,347.208956)}
{pt3dadd(201576.000000,170304.000000,97725.000000,369.602916)}
{pt3dadd(201684.000000,170148.000000,97600.000000,379.640344)}
{pt3dadd(201756.000000,170028.000000,97450.000000,383.510460)}
{pt3dadd(201876.000000,169932.000000,97375.000000,376.314316)}
{pt3dadd(202008.000000,169728.000000,97275.000000,363.244544)}
{pt3dadd(202008.000000,169620.000000,97175.000000,352.705248)}
{pt3dadd(202032.000000,169524.000000,97100.000000,333.997116)}
{pt3dadd(202020.000000,169380.000000,97050.000000,289.956480)}
{pt3dadd(202032.000000,169236.000000,97050.000000,256.982104)}
{pt3dadd(202044.000000,169128.000000,96925.000000,230.105714)}
{pt3dadd(202056.000000,168984.000000,96850.000000,208.498190)}
{pt3dadd(202020.000000,168840.000000,96775.000000,203.384024)}
{pt3dadd(201984.000000,168696.000000,96575.000000,205.245616)}
{pt3dadd(201996.000000,168540.000000,96525.000000,203.472666)}
{pt3dadd(202068.000000,168408.000000,96425.000000,201.864552)}
{pt3dadd(202104.000000,168264.000000,96350.000000,188.771268)}
{pt3dadd(202200.000000,168132.000000,96200.000000,184.132574)}
{pt3dadd(202284.000000,168024.000000,96075.000000,200.047542)}
{pt3dadd(202212.000000,167844.000000,95950.000000,212.106972)}
{pt3dadd(202224.000000,167760.000000,95825.000000,220.992820)}
{pt3dadd(202260.000000,167628.000000,95700.000000,227.923996)}
{pt3dadd(202308.000000,167472.000000,95575.000000,218.127346)}
{pt3dadd(202380.000000,167352.000000,95500.000000,198.577836)}
{pt3dadd(202548.000000,167196.000000,95375.000000,190.152948)}
{pt3dadd(202632.000000,167088.000000,95300.000000,196.623164)}
{pt3dadd(202728.000000,166968.000000,95250.000000,205.048052)}
{pt3dadd(202860.000000,166764.000000,95175.000000,219.483396)}
{pt3dadd(202920.000000,166608.000000,95100.000000,239.032906)}
{pt3dadd(202956.000000,166428.000000,95025.000000,254.947874)}
{pt3dadd(202944.000000,166248.000000,94975.000000,274.292618)}
{pt3dadd(202932.000000,166056.000000,94825.000000,300.490830)}
{pt3dadd(202932.000000,165876.000000,94775.000000,320.802812)}
{pt3dadd(202968.000000,165720.000000,94650.000000,326.441172)}
{pt3dadd(203016.000000,165588.000000,94475.000000,312.480876)}
{pt3dadd(203040.000000,165492.000000,94350.000000,286.665916)}
{pt3dadd(203100.000000,165324.000000,94200.000000,258.204924)}
{pt3dadd(203088.000000,165132.000000,94150.000000,243.007108)}
{pt3dadd(203076.000000,164868.000000,94075.000000,225.460860)}
{pt3dadd(203040.000000,164616.000000,93975.000000,223.506188)}
{pt3dadd(203004.000000,164424.000000,93875.000000,219.689924)}
{pt3dadd(203028.000000,164316.000000,93775.000000,213.527816)}
{pt3dadd(202992.000000,164244.000000,93675.000000,190.681672)}
{pt3dadd(203064.000000,164112.000000,93625.000000,172.781120)}
{pt3dadd(203124.000000,164028.000000,93450.000000,153.432508)}
{pt3dadd(203100.000000,163920.000000,93375.000000,153.432508)}
{pt3dadd(203100.000000,163800.000000,93275.000000,149.797966)}
{pt3dadd(203196.000000,163716.000000,93175.000000,160.736222)}
{pt3dadd(203232.000000,163608.000000,93075.000000,178.636774)}
{pt3dadd(203280.000000,163488.000000,92900.000000,201.992466)}
{pt3dadd(203292.000000,163356.000000,92750.000000,214.654860)}
{pt3dadd(203304.000000,163236.000000,92675.000000,226.714290)}
{pt3dadd(203328.000000,163116.000000,92600.000000,231.132098)}
{pt3dadd(203352.000000,162972.000000,92525.000000,231.132098)}
{pt3dadd(203412.000000,162840.000000,92450.000000,225.263426)}
{pt3dadd(203436.000000,162708.000000,92400.000000,203.152152)}
{pt3dadd(203472.000000,162576.000000,92350.000000,186.264552)}
{pt3dadd(203520.000000,162396.000000,92325.000000,170.908488)}
{pt3dadd(203556.000000,162252.000000,92200.000000,165.039816)}
{pt3dadd(203628.000000,162084.000000,92175.000000,170.908488)}
{pt3dadd(203664.000000,161964.000000,92125.000000,190.643848)}
{pt3dadd(203700.000000,161832.000000,92075.000000,205.268668)}
{pt3dadd(203832.000000,161712.000000,92000.000000,220.624732)}
{pt3dadd(203844.000000,161520.000000,91875.000000,230.911212)}
{pt3dadd(203880.000000,161388.000000,91800.000000,228.858804)}
{pt3dadd(203868.000000,161244.000000,91725.000000,216.799374)}
{pt3dadd(203868.000000,161124.000000,91650.000000,205.314204)}
{pt3dadd(203880.000000,160980.000000,91575.000000,200.896396)}
{pt3dadd(203880.000000,160836.000000,91450.000000,198.633616)}
{pt3dadd(203928.000000,160644.000000,91325.000000,215.344332)}
{pt3dadd(203940.000000,160464.000000,91300.000000,234.893842)}
{pt3dadd(203964.000000,160248.000000,91225.000000,267.986536)}
{pt3dadd(204060.000000,160116.000000,91250.000000,298.602556)}
{pt3dadd(204108.000000,159924.000000,91200.000000,334.619492)}
{pt3dadd(204072.000000,159672.000000,91200.000000,358.133148)}
{pt3dadd(204132.000000,159492.000000,91125.000000,401.911964)}
{pt3dadd(204156.000000,159348.000000,91100.000000,416.321376)}
{pt3dadd(204156.000000,159216.000000,91075.000000,416.321376)}
{pt3dadd(204132.000000,159048.000000,91075.000000,398.728004)}
{pt3dadd(204108.000000,158892.000000,91125.000000,372.463928)}
{pt3dadd(204036.000000,158748.000000,91125.000000,326.065662)}
{pt3dadd(203952.000000,158616.000000,91150.000000,290.048726)}
{pt3dadd(203904.000000,158448.000000,91175.000000,257.380298)}
{pt3dadd(203820.000000,158316.000000,91200.000000,236.801706)}
{pt3dadd(203736.000000,158184.000000,91225.000000,224.893818)}
{pt3dadd(203724.000000,158052.000000,91225.000000,209.736708)}
{pt3dadd(203664.000000,157848.000000,91300.000000,205.529272)}
{pt3dadd(203616.000000,157704.000000,91350.000000,196.643424)}
{pt3dadd(203592.000000,157584.000000,91375.000000,181.325872)}
{pt3dadd(203652.000000,157452.000000,91475.000000,179.273464)}
{pt3dadd(203688.000000,157344.000000,91600.000000,181.135056)}
{pt3dadd(203712.000000,157116.000000,91650.000000,197.845772)}
{pt3dadd(203748.000000,156960.000000,91750.000000,239.400048)}
{pt3dadd(203736.000000,156732.000000,91700.000000,285.333620)}
{pt3dadd(203748.000000,156480.000000,91700.000000,318.002048)}
{pt3dadd(203772.000000,156336.000000,91650.000000,360.181092)}
{pt3dadd(203796.000000,156156.000000,91600.000000,376.138804)}
{pt3dadd(203784.000000,155976.000000,91650.000000,366.101376)}
{pt3dadd(203796.000000,155796.000000,91650.000000,347.393244)}
{pt3dadd(203808.000000,155676.000000,91650.000000,328.685112)}
{pt3dadd(203844.000000,155544.000000,91650.000000,294.930956)}
{pt3dadd(203832.000000,155376.000000,91750.000000,268.732744)}
{pt3dadd(203808.000000,155268.000000,91850.000000,260.062040)}
{pt3dadd(203796.000000,155124.000000,91850.000000,246.101744)}
{pt3dadd(203784.000000,154980.000000,91900.000000,232.141448)}
{pt3dadd(203856.000000,154896.000000,91950.000000,221.854968)}
{pt3dadd(203928.000000,154788.000000,92025.000000,213.430080)}
{pt3dadd(204024.000000,154668.000000,92025.000000,201.522192)}
{pt3dadd(204060.000000,154548.000000,92025.000000,218.232908)}
{pt3dadd(204084.000000,154392.000000,92075.000000,234.943624)}
{pt3dadd(204084.000000,154260.000000,92075.000000,238.759888)}
{pt3dadd(204132.000000,154008.000000,92100.000000,242.766968)}
{pt3dadd(204204.000000,153840.000000,92125.000000,244.921996)}
{pt3dadd(204276.000000,153696.000000,92150.000000,230.263688)}
{pt3dadd(204324.000000,153540.000000,92150.000000,201.676978)}
{pt3dadd(204252.000000,153360.000000,92150.000000,189.800984)}
{pt3dadd(204252.000000,153168.000000,92125.000000,171.900432)}
{pt3dadd(204204.000000,153024.000000,92150.000000,151.844852)}
{pt3dadd(204216.000000,152808.000000,92200.000000,140.906596)}
{pt3dadd(204168.000000,152640.000000,92200.000000,164.123436)}
{pt3dadd(204084.000000,152484.000000,92200.000000,198.630430)}
{pt3dadd(204000.000000,152244.000000,92225.000000,240.293534)}
{pt3dadd(203892.000000,152160.000000,92300.000000,281.956638)}
{pt3dadd(203844.000000,152052.000000,92325.000000,313.473486)}
{pt3dadd(203832.000000,151884.000000,92300.000000,324.763640)}
{pt3dadd(203772.000000,151704.000000,92300.000000,316.092936)}
{pt3dadd(203724.000000,151548.000000,92300.000000,306.988692)}
{pt3dadd(203688.000000,151356.000000,92250.000000,300.772388)}
{pt3dadd(203652.000000,151140.000000,92250.000000,284.611604)}
{pt3dadd(203628.000000,150864.000000,92250.000000,264.033012)}
{pt3dadd(203604.000000,150708.000000,92250.000000,279.230828)}
{pt3dadd(203568.000000,150504.000000,92275.000000,282.118768)}
{pt3dadd(203400.000000,150348.000000,92375.000000,291.678224)}
{pt3dadd(203304.000000,150156.000000,92375.000000,314.366120)}
{pt3dadd(203316.000000,150000.000000,92400.000000,338.128672)}
{pt3dadd(203292.000000,149844.000000,92500.000000,331.601560)}
{pt3dadd(203292.000000,149700.000000,92500.000000,325.963200)}
{pt3dadd(203220.000000,149556.000000,92575.000000,310.765384)}
{pt3dadd(203184.000000,149424.000000,92575.000000,283.659680)}
{pt3dadd(203184.000000,149256.000000,92525.000000,259.897128)}
{pt3dadd(203160.000000,149100.000000,92550.000000,241.473564)}
{pt3dadd(203136.000000,148920.000000,92575.000000,241.473564)}
{pt3dadd(203124.000000,148716.000000,92575.000000,241.473564)}
{pt3dadd(203100.000000,148440.000000,92525.000000,253.381452)}
{pt3dadd(203100.000000,148200.000000,92525.000000,277.144004)}
{pt3dadd(203088.000000,147960.000000,92525.000000,298.751528)}
{pt3dadd(203040.000000,147684.000000,92450.000000,313.949344)}
{pt3dadd(202992.000000,147396.000000,92450.000000,332.657476)}
{pt3dadd(203040.000000,147180.000000,92350.000000,347.855292)}
{pt3dadd(203052.000000,146976.000000,92350.000000,351.198444)}
{pt3dadd(203040.000000,146808.000000,92200.000000,354.541596)}
{pt3dadd(203076.000000,146652.000000,92125.000000,348.014484)}
{pt3dadd(202980.000000,146460.000000,92025.000000,344.504168)}
{pt3dadd(202932.000000,146340.000000,92025.000000,337.977056)}
{pt3dadd(202956.000000,146208.000000,91975.000000,334.633904)}
{pt3dadd(202980.000000,146088.000000,91900.000000,328.106792)}
{pt3dadd(202980.000000,145944.000000,91850.000000,316.816638)}
{pt3dadd(203028.000000,145848.000000,91825.000000,294.128742)}
{pt3dadd(203052.000000,145728.000000,91800.000000,277.967958)}
{pt3dadd(203112.000000,145560.000000,91800.000000,258.623214)}
{pt3dadd(203028.000000,145344.000000,91675.000000,238.044622)}
{pt3dadd(202992.000000,145236.000000,91625.000000,233.173992)}
{pt3dadd(202944.000000,145104.000000,91600.000000,240.664072)}
{pt3dadd(202980.000000,144960.000000,91600.000000,256.824856)}
{pt3dadd(202920.000000,144840.000000,91550.000000,272.985640)}
{pt3dadd(202944.000000,144612.000000,91500.000000,293.564232)}
{pt3dadd(202968.000000,144432.000000,91400.000000,312.908976)}
{pt3dadd(202980.000000,144288.000000,91350.000000,324.763640)}
{pt3dadd(202956.000000,144108.000000,91275.000000,321.731296)}
{pt3dadd(202932.000000,143928.000000,91150.000000,321.731296)}
{pt3dadd(202836.000000,143748.000000,91075.000000,315.811012)}
{pt3dadd(202836.000000,143616.000000,91025.000000,298.842182)}
{pt3dadd(202788.000000,143460.000000,91000.000000,295.658222)}
{pt3dadd(202716.000000,143304.000000,90975.000000,276.059566)}
{pt3dadd(202668.000000,143172.000000,90825.000000,255.480974)}
{pt3dadd(202608.000000,143040.000000,90725.000000,242.977694)}
{pt3dadd(202560.000000,142968.000000,90600.000000,245.472410)}
{pt3dadd(202548.000000,142836.000000,90550.000000,231.687540)}
{pt3dadd(202560.000000,142704.000000,90450.000000,231.687540)}
{pt3dadd(202584.000000,142584.000000,90325.000000,217.759138)}
{pt3dadd(202644.000000,142428.000000,90200.000000,207.962488)}
{pt3dadd(202704.000000,142248.000000,90100.000000,198.674050)}
{pt3dadd(202728.000000,142164.000000,89950.000000,191.880328)}
{pt3dadd(202740.000000,142056.000000,89825.000000,196.087764)}
{pt3dadd(202728.000000,141936.000000,89675.000000,212.171194)}
{pt3dadd(202716.000000,141792.000000,89625.000000,237.359064)}
{pt3dadd(202692.000000,141672.000000,89575.000000,264.464768)}
{pt3dadd(202680.000000,141552.000000,89475.000000,295.080788)}
{pt3dadd(202608.000000,141420.000000,89400.000000,339.428162)}
{pt3dadd(202572.000000,141228.000000,89300.000000,383.775536)}
{pt3dadd(202452.000000,141072.000000,89150.000000,408.464882)}
{pt3dadd(202476.000000,140916.000000,89050.000000,419.531142)}
{pt3dadd(202416.000000,140784.000000,89075.000000,419.531142)}
{pt3dadd(202428.000000,140616.000000,88975.000000,393.607332)}
{pt3dadd(202344.000000,140400.000000,88850.000000,367.683522)}
{pt3dadd(202356.000000,140244.000000,88750.000000,342.994176)}
{pt3dadd(202308.000000,140064.000000,88700.000000,319.480520)}
{pt3dadd(202284.000000,139896.000000,88600.000000,298.152938)}
{pt3dadd(202284.000000,139740.000000,88500.000000,279.729374)}
{pt3dadd(202260.000000,139620.000000,88400.000000,268.439220)}
{pt3dadd(202236.000000,139488.000000,88350.000000,257.686694)}
{pt3dadd(202176.000000,139320.000000,88225.000000,249.822108)}
{pt3dadd(202068.000000,139248.000000,88225.000000,253.629230)}
{pt3dadd(202020.000000,139056.000000,88125.000000,249.471370)}

{create adhoc4}
{access adhoc4}
{connect adhoc4(1), adhoc3(0)}
{nseg = 1}
{strdef color color = "White"}
{pt3dclear()}
{pt3dadd(202020.000000,139056.000000,88125.000000,249.471370)}
{pt3dadd(202032.000000,138864.000000,88125.000000,204.596927)}
{pt3dadd(201948.000000,138744.000000,88075.000000,169.726864)}
{pt3dadd(201888.000000,138552.000000,88075.000000,140.564693)}
{pt3dadd(201888.000000,138360.000000,88150.000000,121.216081)}
{pt3dadd(201840.000000,138180.000000,88175.000000,105.354840)}
{pt3dadd(201780.000000,138012.000000,88175.000000,97.211192)}
{pt3dadd(201756.000000,137868.000000,88175.000000,92.498836)}
{pt3dadd(201756.000000,137724.000000,88175.000000,88.823085)}
{pt3dadd(201732.000000,137532.000000,88200.000000,85.322370)}
{pt3dadd(201720.000000,137340.000000,88200.000000,86.217829)}
{pt3dadd(201684.000000,137148.000000,88200.000000,90.930185)}
{pt3dadd(201552.000000,136788.000000,88275.000000,89.344447)}
{pt3dadd(201468.000000,136596.000000,88325.000000,89.344447)}
{pt3dadd(201396.000000,136380.000000,88400.000000,97.100302)}
{pt3dadd(201324.000000,136224.000000,88475.000000,98.040534)}
{pt3dadd(201312.000000,136104.000000,88575.000000,96.016686)}
{pt3dadd(201204.000000,135948.000000,88550.000000,100.290932)}
{pt3dadd(201156.000000,135768.000000,88575.000000,106.091722)}
{pt3dadd(201108.000000,135648.000000,88675.000000,109.874722)}
{pt3dadd(201060.000000,135468.000000,88750.000000,122.292158)}
{pt3dadd(201048.000000,135288.000000,88825.000000,139.779178)}
{pt3dadd(201048.000000,135060.000000,88975.000000,161.082462)}
{pt3dadd(201012.000000,134892.000000,89050.000000,183.480900)}
{pt3dadd(200976.000000,134712.000000,89075.000000,198.798452)}
{pt3dadd(200964.000000,134544.000000,89125.000000,195.808306)}
{pt3dadd(200940.000000,134376.000000,89150.000000,185.036426)}
{pt3dadd(200880.000000,134196.000000,89225.000000,164.720385)}
{pt3dadd(200844.000000,134040.000000,89325.000000,142.321947)}
{pt3dadd(200820.000000,133872.000000,89500.000000,127.004395)}
{pt3dadd(200820.000000,133740.000000,89575.000000,118.564348)}
{pt3dadd(200700.000000,133572.000000,89625.000000,111.849208)}
{pt3dadd(200688.000000,133404.000000,89700.000000,110.861965)}
{pt3dadd(200580.000000,133224.000000,89725.000000,109.773531)}
{pt3dadd(200484.000000,133020.000000,89725.000000,104.847673)}
{pt3dadd(200448.000000,132840.000000,89825.000000,103.860430)}
{pt3dadd(200412.000000,132648.000000,89825.000000,102.920198)}
{pt3dadd(200316.000000,132468.000000,89825.000000,101.084507)}
{pt3dadd(200268.000000,132336.000000,89825.000000,97.224968)}
{pt3dadd(200220.000000,132264.000000,89800.000000,94.112686)}
{pt3dadd(200136.000000,132132.000000,89800.000000,90.611971)}
{pt3dadd(200100.000000,132048.000000,89825.000000,85.839646)}
{pt3dadd(200004.000000,131928.000000,89825.000000,84.986829)}
{pt3dadd(199992.000000,131796.000000,89825.000000,84.986829)}
{pt3dadd(199908.000000,131688.000000,89925.000000,95.872729)}
{pt3dadd(199812.000000,131556.000000,89925.000000,110.259344)}
{pt3dadd(199752.000000,131496.000000,90025.000000,115.971901)}
{pt3dadd(199680.000000,131424.000000,90075.000000,117.720177)}
{pt3dadd(199572.000000,131328.000000,90125.000000,121.579716)}
{pt3dadd(199500.000000,131184.000000,90125.000000,111.681059)}
{pt3dadd(199416.000000,131040.000000,90125.000000,100.795159)}
{pt3dadd(199284.000000,130908.000000,90200.000000,101.782402)}
{pt3dadd(199176.000000,130788.000000,90200.000000,102.722634)}
{pt3dadd(199068.000000,130680.000000,90200.000000,100.369705)}
{pt3dadd(199008.000000,130584.000000,90325.000000,98.724300)}

{create adhoc5}
{access adhoc5}
{connect adhoc5(1), adhoc3(0)}
{nseg = 1}
{strdef color color = "White"}
{pt3dclear()}
{pt3dadd(202020.000000,139056.000000,88125.000000,249.471370)}
{pt3dadd(201960.000000,139044.000000,88050.000000,196.261523)}
{pt3dadd(201900.000000,139044.000000,87975.000000,183.689620)}
{pt3dadd(201816.000000,139044.000000,87850.000000,162.967496)}
{pt3dadd(201792.000000,139020.000000,87725.000000,161.194546)}
{pt3dadd(201780.000000,138984.000000,87575.000000,169.657258)}
{pt3dadd(201768.000000,138936.000000,87425.000000,180.595514)}
{pt3dadd(201660.000000,138852.000000,87275.000000,189.925656)}
{pt3dadd(201552.000000,138732.000000,87175.000000,206.009086)}
{pt3dadd(201468.000000,138720.000000,87025.000000,215.805736)}
{pt3dadd(201384.000000,138744.000000,86875.000000,217.760408)}
{pt3dadd(201360.000000,138744.000000,86700.000000,217.760408)}
{pt3dadd(201324.000000,138804.000000,86550.000000,235.306656)}
{pt3dadd(201276.000000,138852.000000,86200.000000,245.059516)}
{pt3dadd(201240.000000,138864.000000,86025.000000,257.562796)}
{pt3dadd(201168.000000,138768.000000,85875.000000,280.193796)}
{pt3dadd(201096.000000,138720.000000,85700.000000,303.956348)}
{pt3dadd(201024.000000,138636.000000,85500.000000,306.988692)}
{pt3dadd(200976.000000,138444.000000,85325.000000,318.843356)}
{pt3dadd(200868.000000,138432.000000,85150.000000,331.290752)}
{pt3dadd(200772.000000,138360.000000,85025.000000,334.474712)}
{pt3dadd(200688.000000,138240.000000,84925.000000,325.370468)}
{pt3dadd(200652.000000,138132.000000,84775.000000,311.585598)}
{pt3dadd(200604.000000,138048.000000,84700.000000,292.240854)}
{pt3dadd(200484.000000,137988.000000,84600.000000,263.082742)}
{pt3dadd(200424.000000,137928.000000,84525.000000,235.313110)}
{pt3dadd(200340.000000,137784.000000,84425.000000,229.943240)}
{pt3dadd(200256.000000,137700.000000,84325.000000,223.149518)}
{pt3dadd(200208.000000,137580.000000,84225.000000,220.886738)}
{pt3dadd(200184.000000,137436.000000,84100.000000,234.847034)}
{pt3dadd(200088.000000,137328.000000,83975.000000,236.801706)}
{pt3dadd(200064.000000,137220.000000,83725.000000,221.644596)}
{pt3dadd(199944.000000,137064.000000,83575.000000,210.706340)}
{pt3dadd(199896.000000,136920.000000,83500.000000,193.233760)}
{pt3dadd(199848.000000,136776.000000,83425.000000,168.856080)}
{pt3dadd(199860.000000,136620.000000,83325.000000,159.970232)}
{pt3dadd(199824.000000,136500.000000,83250.000000,156.508762)}
{pt3dadd(199752.000000,136428.000000,83125.000000,150.806466)}
{pt3dadd(199716.000000,136296.000000,82950.000000,160.255346)}
{pt3dadd(199668.000000,136080.000000,82750.000000,172.725138)}
{pt3dadd(199704.000000,135948.000000,82625.000000,181.610986)}
{pt3dadd(199644.000000,135828.000000,82525.000000,197.734850)}
{pt3dadd(199584.000000,135624.000000,82375.000000,234.953994)}
{pt3dadd(199524.000000,135492.000000,82250.000000,255.480974)}
{pt3dadd(199476.000000,135372.000000,82150.000000,262.274696)}
{pt3dadd(199428.000000,135312.000000,82000.000000,281.873352)}
{pt3dadd(199332.000000,135168.000000,81925.000000,298.842182)}
{pt3dadd(199380.000000,135060.000000,81725.000000,308.879610)}
{pt3dadd(199368.000000,134940.000000,81575.000000,324.837322)}
{pt3dadd(199248.000000,134808.000000,81500.000000,341.806152)}
{pt3dadd(199128.000000,134676.000000,81400.000000,357.160413)}
{pt3dadd(198996.000000,134556.000000,81350.000000,334.315520)}

{create adhoc6}
{access adhoc6}
{connect adhoc6(1), adhoc5(0)}
{nseg = 1}
{strdef color color = "White"}
{pt3dclear()}
{pt3dadd(198996.000000,134556.000000,81350.000000,334.315520)}
{pt3dadd(198936.000000,134340.000000,81375.000000,299.831490)}
{pt3dadd(198864.000000,134196.000000,81350.000000,275.048748)}
{pt3dadd(198756.000000,134040.000000,81300.000000,245.417524)}
{pt3dadd(198648.000000,133884.000000,81225.000000,218.541134)}
{pt3dadd(198504.000000,133740.000000,81125.000000,205.245616)}
{pt3dadd(198408.000000,133620.000000,81025.000000,190.620796)}
{pt3dadd(198264.000000,133500.000000,81050.000000,171.357282)}
{pt3dadd(198252.000000,133320.000000,81050.000000,169.584332)}
{pt3dadd(198132.000000,133212.000000,80975.000000,173.045802)}
{pt3dadd(198012.000000,133092.000000,80875.000000,179.207910)}
{pt3dadd(197868.000000,132912.000000,80875.000000,191.677702)}
{pt3dadd(197748.000000,132756.000000,80750.000000,206.302522)}
{pt3dadd(197604.000000,132552.000000,80750.000000,218.361952)}
{pt3dadd(197472.000000,132420.000000,80650.000000,226.385652)}
{pt3dadd(197328.000000,132264.000000,80650.000000,218.361952)}
{pt3dadd(197172.000000,132084.000000,80650.000000,235.908200)}
{pt3dadd(196980.000000,131832.000000,80650.000000,243.041610)}
{pt3dadd(196860.000000,131688.000000,80550.000000,253.282110)}
{pt3dadd(196764.000000,131604.000000,80425.000000,263.034970)}
{pt3dadd(196680.000000,131496.000000,80400.000000,292.666194)}
{pt3dadd(196512.000000,131412.000000,80375.000000,281.913668)}
{pt3dadd(196368.000000,131328.000000,80350.000000,272.625230)}
{pt3dadd(196200.000000,131268.000000,80325.000000,253.959842)}
{pt3dadd(196044.000000,131172.000000,80350.000000,253.959842)}
{pt3dadd(195864.000000,131136.000000,80375.000000,242.105178)}
{pt3dadd(195708.000000,131100.000000,80450.000000,242.105178)}
{pt3dadd(195540.000000,130980.000000,80500.000000,248.898900)}
{pt3dadd(195432.000000,130848.000000,80525.000000,259.699702)}
{pt3dadd(195276.000000,130740.000000,80525.000000,257.080252)}
{pt3dadd(195108.000000,130608.000000,80525.000000,249.590172)}
{pt3dadd(194940.000000,130488.000000,80525.000000,247.214258)}
{pt3dadd(194760.000000,130368.000000,80575.000000,242.575564)}
{pt3dadd(194628.000000,130284.000000,80575.000000,235.781842)}
{pt3dadd(194436.000000,130224.000000,80600.000000,224.440996)}
{pt3dadd(194268.000000,130116.000000,80600.000000,216.016108)}
{pt3dadd(194112.000000,130032.000000,80575.000000,202.268158)}
{pt3dadd(193956.000000,129972.000000,80550.000000,194.244458)}
{pt3dadd(193848.000000,129876.000000,80525.000000,183.306202)}
{pt3dadd(193680.000000,129864.000000,80500.000000,177.716988)}
{pt3dadd(193548.000000,129768.000000,80500.000000,177.716988)}
{pt3dadd(193380.000000,129672.000000,80500.000000,183.040050)}
{pt3dadd(193248.000000,129672.000000,80525.000000,179.578580)}
{pt3dadd(193128.000000,129576.000000,80575.000000,170.273426)}
{pt3dadd(192996.000000,129468.000000,80550.000000,160.014496)}
{pt3dadd(192708.000000,129384.000000,80525.000000,141.653127)}
{pt3dadd(192480.000000,129264.000000,80525.000000,123.291758)}
{pt3dadd(192264.000000,129264.000000,80625.000000,106.577700)}
{pt3dadd(192000.000000,129156.000000,80625.000000,141.479418)}
{pt3dadd(191628.000000,129072.000000,80625.000000,186.485674)}
{pt3dadd(191088.000000,128700.000000,80375.000000,229.432715)}
{pt3dadd(190260.000000,128328.000000,80025.000000,278.906868)}
{pt3dadd(189804.000000,127956.000000,80025.000000,347.186662)}
{pt3dadd(189348.000000,127584.000000,80025.000000,341.816792)}
{pt3dadd(188832.000000,127260.000000,79525.000000,307.069466)}
{pt3dadd(188688.000000,126684.000000,79525.000000,282.483794)}
{pt3dadd(188616.000000,125796.000000,79475.000000,259.795898)}
{pt3dadd(188604.000000,125196.000000,79475.000000,219.715332)}
{pt3dadd(188220.000000,124536.000000,79475.000000,210.426894)}
{pt3dadd(188016.000000,124032.000000,79475.000000,214.061436)}
{pt3dadd(187668.000000,123588.000000,79475.000000,222.486324)}
{pt3dadd(187260.000000,123192.000000,79475.000000,248.684536)}
{pt3dadd(186852.000000,122424.000000,79475.000000,307.155568)}
{pt3dadd(186336.000000,121896.000000,79275.000000,374.935907)}
{pt3dadd(185748.000000,120972.000000,79275.000000,518.633060)}

{create adhoc7}
{access adhoc7}
{connect adhoc7(1), adhoc6(0)}
{nseg = 1}
{strdef color color = "White"}
{pt3dclear()}
{pt3dadd(185748.000000,120972.000000,79275.000000,518.633060)}
{pt3dadd(185364.000000,119196.000000,79575.000000,408.013593)}
{pt3dadd(185496.000000,118416.000000,79575.000000,340.297698)}
{pt3dadd(185568.000000,116832.000000,79925.000000,317.843602)}
{pt3dadd(186180.000000,116100.000000,79925.000000,299.420038)}
{pt3dadd(186468.000000,115572.000000,79925.000000,251.189788)}
{pt3dadd(186660.000000,115128.000000,79925.000000,243.548166)}
{pt3dadd(186780.000000,114600.000000,79925.000000,258.022280)}
{pt3dadd(186576.000000,113964.000000,79925.000000,219.156973)}
{pt3dadd(186168.000000,112860.000000,79825.000000,334.315520)}

{create adhoc8}
{access adhoc8}
{connect adhoc8(1), adhoc7(0)}
{nseg = 1}
{strdef color color = "White"}
{pt3dclear()}
{pt3dadd(186168.000000,112860.000000,79825.000000,334.315520)}
{pt3dadd(185472.000000,111456.000000,80125.000000,312.276760)}
{pt3dadd(185196.000000,110892.000000,80425.000000,322.527316)}
{pt3dadd(185124.000000,110508.000000,80675.000000,284.836362)}
{pt3dadd(185052.000000,110004.000000,81225.000000,268.195810)}
{pt3dadd(184836.000000,109236.000000,81825.000000,221.424170)}
{pt3dadd(184632.000000,108372.000000,82325.000000,166.878912)}
{pt3dadd(184356.000000,107796.000000,82525.000000,135.580052)}
{pt3dadd(183948.000000,106872.000000,83125.000000,180.124474)}
{pt3dadd(183828.000000,106536.000000,83575.000000,223.870730)}
{pt3dadd(183420.000000,105612.000000,84125.000000,283.971380)}
{pt3dadd(183168.000000,104976.000000,84125.000000,351.031280)}

{create adhoc9}
{access adhoc9}
{connect adhoc9(1), adhoc8(0)}
{nseg = 1}
{strdef color color = "White"}
{pt3dclear()}
{pt3dadd(183168.000000,104976.000000,84125.000000,351.031280)}
{pt3dadd(182184.000000,103800.000000,83975.000000,265.323337)}
{pt3dadd(181572.000000,102804.000000,83575.000000,199.960313)}
{pt3dadd(180660.000000,101760.000000,82825.000000,157.537057)}
{pt3dadd(179364.000000,100260.000000,81825.000000,201.725883)}
{pt3dadd(178704.000000,99396.000000,81425.000000,236.348983)}
{pt3dadd(178104.000000,98688.000000,80725.000000,261.540366)}
{pt3dadd(177852.000000,98316.000000,80275.000000,263.883224)}
{pt3dadd(177732.000000,98280.000000,79625.000000,330.183324)}
{pt3dadd(177456.000000,97632.000000,78800.000000,334.887480)}
{pt3dadd(177108.000000,96648.000000,78150.000000,338.573308)}
{pt3dadd(177108.000000,95940.000000,77600.000000,330.931686)}
{pt3dadd(176856.000000,95232.000000,77025.000000,352.747643)}
{pt3dadd(176796.000000,94836.000000,76425.000000,177.294650)}

{create adhoc10}
{access adhoc10}
{connect adhoc10(1), adhoc8(0)}
{nseg = 1}
{strdef color color = "White"}
{pt3dclear()}
{pt3dadd(183168.000000,104976.000000,84125.000000,351.031280)}
{pt3dadd(182964.000000,105000.000000,84550.000000,695.017940)}

{create adhoc11}
{access adhoc11}
{connect adhoc11(1), adhoc7(0)}
{nseg = 1}
{strdef color color = "White"}
{pt3dclear()}
{pt3dadd(186168.000000,112860.000000,79825.000000,334.315520)}
{pt3dadd(184404.000000,112416.000000,79450.000000,282.919710)}
{pt3dadd(183636.000000,112020.000000,78850.000000,252.710686)}
{pt3dadd(183300.000000,111648.000000,78600.000000,284.634838)}
{pt3dadd(182652.000000,111120.000000,78200.000000,296.254412)}
{pt3dadd(182244.000000,110652.000000,78200.000000,322.090702)}
{pt3dadd(181704.000000,110280.000000,77650.000000,334.122582)}
{pt3dadd(181248.000000,109884.000000,77225.000000,319.464274)}
{pt3dadd(180864.000000,109644.000000,76725.000000,261.725162)}
{pt3dadd(180480.000000,109344.000000,76075.000000,202.300960)}
{pt3dadd(180264.000000,109164.000000,75875.000000,205.240720)}

{create adhoc12}
{access adhoc12}
{connect adhoc12(1), adhoc6(0)}
{nseg = 1}
{strdef color color = "White"}
{pt3dclear()}
{pt3dadd(185748.000000,120972.000000,79275.000000,518.633060)}
{pt3dadd(185148.000000,121236.000000,78850.000000,493.936280)}

{create adhoc13}
{access adhoc13}
{connect adhoc13(1), adhoc5(0)}
{nseg = 1}
{strdef color color = "White"}
{pt3dclear()}
{pt3dadd(198996.000000,134556.000000,81350.000000,334.315520)}
{pt3dadd(198948.000000,134736.000000,81275.000000,369.446507)}
{pt3dadd(198888.000000,134880.000000,81200.000000,279.566004)}
{pt3dadd(198888.000000,135060.000000,81200.000000,235.560042)}
{pt3dadd(198660.000000,135216.000000,81050.000000,185.940642)}
{pt3dadd(198528.000000,135264.000000,80950.000000,136.321242)}
{pt3dadd(198396.000000,135300.000000,80825.000000,125.010770)}
{pt3dadd(198252.000000,135276.000000,80750.000000,122.450287)}
{pt3dadd(198072.000000,135264.000000,80700.000000,124.793145)}
{pt3dadd(197856.000000,135204.000000,80625.000000,116.755005)}
{pt3dadd(197700.000000,135132.000000,80575.000000,110.740713)}
{pt3dadd(197460.000000,135108.000000,80500.000000,109.417713)}
{pt3dadd(197340.000000,135072.000000,80425.000000,119.633568)}
{pt3dadd(197112.000000,135012.000000,80375.000000,116.202276)}
{pt3dadd(196896.000000,134916.000000,80325.000000,117.189519)}
{pt3dadd(196716.000000,134916.000000,80275.000000,126.051571)}
{pt3dadd(196536.000000,134904.000000,80250.000000,126.051571)}
{pt3dadd(196344.000000,134844.000000,80175.000000,121.360279)}
{pt3dadd(196176.000000,134844.000000,80100.000000,126.051571)}
{pt3dadd(196020.000000,134832.000000,80000.000000,134.491618)}
{pt3dadd(195852.000000,134772.000000,79925.000000,134.491618)}
{pt3dadd(195720.000000,134724.000000,79875.000000,138.662378)}
{pt3dadd(195600.000000,134724.000000,79800.000000,139.750812)}
{pt3dadd(195468.000000,134664.000000,79700.000000,132.095440)}
{pt3dadd(195348.000000,134640.000000,79675.000000,121.727918)}
{pt3dadd(195180.000000,134616.000000,79600.000000,116.297158)}
{pt3dadd(194964.000000,134580.000000,79550.000000,109.666398)}
{pt3dadd(194784.000000,134556.000000,79475.000000,108.577964)}
{pt3dadd(194712.000000,134556.000000,79300.000000,116.233336)}
{pt3dadd(194592.000000,134532.000000,79150.000000,120.285850)}
{pt3dadd(194376.000000,134508.000000,78975.000000,111.329995)}
{pt3dadd(194220.000000,134556.000000,78775.000000,108.062098)}
{pt3dadd(194160.000000,134544.000000,78625.000000,106.038250)}
{pt3dadd(194016.000000,134556.000000,78450.000000,101.346958)}
{pt3dadd(193896.000000,134652.000000,78300.000000,102.489816)}
{pt3dadd(193788.000000,134712.000000,78100.000000,106.977774)}
{pt3dadd(193704.000000,134760.000000,78000.000000,108.014379)}
{pt3dadd(193620.000000,134760.000000,77875.000000,118.900279)}
{pt3dadd(193560.000000,134760.000000,77700.000000,130.901981)}
{pt3dadd(193500.000000,134700.000000,77525.000000,139.064277)}
{pt3dadd(193368.000000,134736.000000,77425.000000,150.494470)}
{pt3dadd(193116.000000,134748.000000,77325.000000,151.582904)}
{pt3dadd(192972.000000,134760.000000,77250.000000,143.809286)}
{pt3dadd(192864.000000,134736.000000,77150.000000,131.807584)}
{pt3dadd(192732.000000,134688.000000,77100.000000,120.377391)}
{pt3dadd(192564.000000,134700.000000,77050.000000,108.947198)}
{pt3dadd(192372.000000,134688.000000,77000.000000,111.290056)}
{pt3dadd(192216.000000,134640.000000,76925.000000,113.632914)}
{pt3dadd(192036.000000,134640.000000,76800.000000,117.064206)}
{pt3dadd(191844.000000,134664.000000,76725.000000,122.792103)}
{pt3dadd(191724.000000,134712.000000,76675.000000,123.828708)}
{pt3dadd(191640.000000,134808.000000,76625.000000,127.800858)}
{pt3dadd(191508.000000,134808.000000,76475.000000,127.800858)}
{pt3dadd(191352.000000,134796.000000,76400.000000,131.773008)}
{pt3dadd(191268.000000,134916.000000,76400.000000,133.096008)}
{pt3dadd(191088.000000,134976.000000,76325.000000,146.786230)}
{pt3dadd(190980.000000,135096.000000,76300.000000,153.073010)}
{pt3dadd(190812.000000,135072.000000,76125.000000,154.333010)}
{pt3dadd(190644.000000,135072.000000,76075.000000,152.943860)}
{pt3dadd(190452.000000,135096.000000,76000.000000,149.160860)}
{pt3dadd(190308.000000,135144.000000,75900.000000,130.405000)}
{pt3dadd(190212.000000,135192.000000,75825.000000,120.000000)}

{create adhoc14}
{access adhoc14}
{connect adhoc14(1), adhoc2(0)}
{nseg = 1}
{strdef color color = "White"}
{pt3dclear()}
{pt3dadd(195768.000000,178032.000000,102875.000000,406.362580)}
{pt3dadd(195624.000000,178224.000000,103125.000000,489.853467)}
{pt3dadd(195372.000000,178296.000000,103275.000000,478.035482)}
{pt3dadd(195216.000000,178332.000000,103450.000000,463.626070)}
{pt3dadd(195060.000000,178368.000000,103675.000000,420.546258)}
{pt3dadd(194904.000000,178404.000000,103825.000000,372.280106)}
{pt3dadd(194760.000000,178440.000000,103975.000000,334.139650)}
{pt3dadd(194652.000000,178440.000000,104125.000000,312.482648)}
{pt3dadd(194532.000000,178488.000000,104250.000000,312.482648)}
{pt3dadd(194412.000000,178512.000000,104375.000000,325.552420)}
{pt3dadd(194280.000000,178500.000000,104500.000000,338.622192)}
{pt3dadd(194172.000000,178512.000000,104650.000000,348.181648)}
{pt3dadd(194064.000000,178536.000000,104750.000000,358.219076)}
{pt3dadd(194004.000000,178608.000000,104900.000000,365.072544)}
{pt3dadd(193860.000000,178668.000000,105075.000000,372.628488)}
{pt3dadd(193728.000000,178776.000000,105225.000000,392.995016)}
{pt3dadd(193596.000000,178836.000000,105325.000000,426.515372)}
{pt3dadd(193536.000000,178968.000000,105475.000000,456.525412)}
{pt3dadd(193464.000000,179100.000000,105625.000000,497.167434)}
{pt3dadd(193380.000000,179220.000000,105725.000000,509.978018)}
{pt3dadd(193308.000000,179352.000000,105800.000000,501.231064)}
{pt3dadd(193248.000000,179484.000000,106000.000000,471.221024)}
{pt3dadd(193176.000000,179568.000000,106275.000000,448.766928)}
{pt3dadd(193032.000000,179688.000000,106425.000000,404.614590)}
{pt3dadd(192864.000000,179808.000000,106525.000000,374.210634)}
{pt3dadd(192744.000000,179880.000000,106650.000000,341.263478)}
{pt3dadd(192528.000000,179964.000000,106800.000000,331.226050)}
{pt3dadd(192396.000000,180048.000000,106925.000000,304.961974)}
{pt3dadd(192312.000000,180204.000000,107050.000000,289.764158)}
{pt3dadd(192312.000000,180324.000000,107175.000000,299.801586)}
{pt3dadd(192300.000000,180444.000000,107325.000000,314.275700)}
{pt3dadd(192288.000000,180492.000000,107450.000000,314.275700)}
{pt3dadd(192228.000000,180576.000000,107550.000000,332.983832)}
{pt3dadd(192120.000000,180684.000000,107750.000000,332.983832)}
{pt3dadd(192036.000000,180876.000000,107850.000000,304.522840)}
{pt3dadd(191868.000000,180996.000000,107975.000000,298.306536)}
{pt3dadd(191712.000000,181116.000000,108200.000000,308.343964)}
{pt3dadd(191628.000000,181344.000000,108275.000000,312.029792)}
{pt3dadd(191592.000000,181584.000000,108400.000000,351.104452)}
{pt3dadd(191520.000000,181740.000000,108550.000000,404.636128)}
{pt3dadd(191412.000000,181860.000000,108725.000000,438.072428)}
{pt3dadd(191340.000000,182040.000000,108925.000000,449.692002)}
{pt3dadd(191316.000000,182208.000000,109150.000000,442.495858)}
{pt3dadd(191268.000000,182280.000000,109300.000000,409.059558)}
{pt3dadd(191232.000000,182376.000000,109450.000000,357.790662)}
{pt3dadd(191016.000000,182532.000000,109725.000000,321.466422)}
{pt3dadd(190824.000000,182688.000000,109950.000000,288.519266)}
{pt3dadd(190776.000000,182868.000000,110150.000000,261.413562)}
{pt3dadd(190740.000000,182988.000000,110300.000000,400.766762)}
{pt3dadd(190740.000000,183108.000000,110425.000000,492.482570)}
{pt3dadd(190680.000000,183156.000000,110550.000000,1000.000000)}

{create adhoc15}
{access adhoc15}
{connect adhoc15(1), adhoc1(0)}
{nseg = 1}
{strdef color color = "White"}
{pt3dclear()}
{pt3dadd(198336.000000,182784.000000,96925.000000,493.936280)}
{pt3dadd(198420.000000,182760.000000,96750.000000,463.321940)}
{pt3dadd(198456.000000,182664.000000,96575.000000,409.468596)}
{pt3dadd(198432.000000,182688.000000,96400.000000,339.853490)}
{pt3dadd(198504.000000,182700.000000,96250.000000,289.344008)}
{pt3dadd(198444.000000,182724.000000,96050.000000,238.834526)}
{pt3dadd(198468.000000,182748.000000,95850.000000,208.218506)}
{pt3dadd(198516.000000,182760.000000,95675.000000,193.560198)}
{pt3dadd(198540.000000,182772.000000,95525.000000,214.282322)}
{pt3dadd(198552.000000,182736.000000,95375.000000,214.282322)}
{pt3dadd(198600.000000,182748.000000,95225.000000,210.647780)}
{pt3dadd(198672.000000,182712.000000,95075.000000,194.007228)}
{pt3dadd(198768.000000,182676.000000,94900.000000,174.906676)}
{pt3dadd(198888.000000,182604.000000,94750.000000,152.795402)}
{pt3dadd(198996.000000,182556.000000,94625.000000,142.874080)}
{pt3dadd(199080.000000,182496.000000,94500.000000,123.659295)}
{pt3dadd(199236.000000,182448.000000,94400.000000,116.944155)}
{pt3dadd(199380.000000,182388.000000,94300.000000,120.727155)}
{pt3dadd(199560.000000,182388.000000,94175.000000,119.404155)}
{pt3dadd(199656.000000,182364.000000,94025.000000,118.015005)}
{pt3dadd(199728.000000,182328.000000,93925.000000,132.401620)}
{pt3dadd(199812.000000,182304.000000,93825.000000,137.856760)}
{pt3dadd(199896.000000,182328.000000,93675.000000,142.236056)}
{pt3dadd(199908.000000,182304.000000,93525.000000,147.938352)}
{pt3dadd(199896.000000,182328.000000,93375.000000,165.410932)}
{pt3dadd(199896.000000,182316.000000,93225.000000,177.880724)}
{pt3dadd(199836.000000,182268.000000,93075.000000,189.912604)}
{pt3dadd(199824.000000,182220.000000,92975.000000,196.843780)}
{pt3dadd(199716.000000,182196.000000,92850.000000,201.913364)}
{pt3dadd(199680.000000,182196.000000,92700.000000,201.913364)}
{pt3dadd(199584.000000,182196.000000,92550.000000,213.821252)}
{pt3dadd(199548.000000,182196.000000,92350.000000,243.452476)}
{pt3dadd(199464.000000,182184.000000,92150.000000,274.565260)}
{pt3dadd(199332.000000,182208.000000,91950.000000,311.049952)}
{pt3dadd(199224.000000,182244.000000,91750.000000,336.000628)}
{pt3dadd(199128.000000,182268.000000,91550.000000,358.394588)}
{pt3dadd(198972.000000,182256.000000,91375.000000,352.178284)}
{pt3dadd(198912.000000,182316.000000,91225.000000,327.227608)}
{pt3dadd(198864.000000,182352.000000,91050.000000,301.029396)}
{pt3dadd(198756.000000,182424.000000,90900.000000,266.282070)}
{pt3dadd(198720.000000,182508.000000,90700.000000,236.398030)}
{pt3dadd(198612.000000,182664.000000,90550.000000,223.269590)}
{pt3dadd(198492.000000,182700.000000,90375.000000,235.772870)}
{pt3dadd(198480.000000,182688.000000,90125.000000,248.901310)}
{pt3dadd(198492.000000,182736.000000,89925.000000,277.121524)}
{pt3dadd(198516.000000,182784.000000,89725.000000,290.249964)}
{pt3dadd(198528.000000,182832.000000,89550.000000,309.594708)}
{pt3dadd(198528.000000,182868.000000,89375.000000,325.552420)}
{pt3dadd(198540.000000,182904.000000,89175.000000,342.308020)}
{pt3dadd(198540.000000,182916.000000,88975.000000,356.031276)}
{pt3dadd(198528.000000,182940.000000,88800.000000,362.247580)}
{pt3dadd(198492.000000,182976.000000,88600.000000,350.392916)}
{pt3dadd(198456.000000,183012.000000,88400.000000,329.065334)}
{pt3dadd(198420.000000,183048.000000,88250.000000,306.671374)}
{pt3dadd(198348.000000,183096.000000,88050.000000,281.657964)}
{pt3dadd(198264.000000,183168.000000,87875.000000,267.183850)}
{pt3dadd(198132.000000,183228.000000,87675.000000,267.183850)}
{pt3dadd(198072.000000,183264.000000,87500.000000,255.843004)}
{pt3dadd(198084.000000,183300.000000,87325.000000,255.843004)}
{pt3dadd(198036.000000,183372.000000,87150.000000,261.212874)}
{pt3dadd(198060.000000,183408.000000,86900.000000,261.212874)}
{pt3dadd(198072.000000,183468.000000,86725.000000,243.436314)}
{pt3dadd(198048.000000,183528.000000,86550.000000,223.120273)}
{pt3dadd(198180.000000,183624.000000,86350.000000,197.283983)}
{pt3dadd(198288.000000,183744.000000,86125.000000,165.985123)}
{pt3dadd(198336.000000,183744.000000,85900.000000,136.453275)}
{pt3dadd(198336.000000,183864.000000,85750.000000,123.221395)}
{pt3dadd(198300.000000,183948.000000,85525.000000,123.221395)}
{pt3dadd(198204.000000,184068.000000,85325.000000,116.906387)}
{pt3dadd(198132.000000,184200.000000,85175.000000,114.446387)}
{pt3dadd(198000.000000,184320.000000,85050.000000,136.844825)}
{pt3dadd(197808.000000,184428.000000,84850.000000,165.233815)}
{pt3dadd(197604.000000,184464.000000,84750.000000,205.148512)}
{pt3dadd(197424.000000,184548.000000,84625.000000,256.007942)}
{pt3dadd(197256.000000,184620.000000,84550.000000,302.214198)}
{pt3dadd(197064.000000,184656.000000,84400.000000,309.347608)}
{pt3dadd(196896.000000,184716.000000,84200.000000,304.476978)}
{pt3dadd(196716.000000,184764.000000,83975.000000,281.062058)}
{pt3dadd(196536.000000,184836.000000,83850.000000,252.601066)}
{pt3dadd(196404.000000,184908.000000,83675.000000,216.165220)}
{pt3dadd(196236.000000,185064.000000,83525.000000,195.938526)}
{pt3dadd(196080.000000,185208.000000,83375.000000,177.592316)}
{pt3dadd(195924.000000,185340.000000,83150.000000,164.360436)}
{pt3dadd(195840.000000,185460.000000,83025.000000,148.277006)}
{pt3dadd(195708.000000,185640.000000,82800.000000,151.738476)}
{pt3dadd(195672.000000,185736.000000,82725.000000,169.470454)}
{pt3dadd(195612.000000,185880.000000,82575.000000,200.945104)}
{pt3dadd(195612.000000,185976.000000,82475.000000,229.334094)}
{pt3dadd(195564.000000,186072.000000,82275.000000,250.056218)}
{pt3dadd(195504.000000,186168.000000,82100.000000,265.213328)}
{pt3dadd(195456.000000,186324.000000,82025.000000,267.708044)}
{pt3dadd(195372.000000,186444.000000,81925.000000,264.820104)}
{pt3dadd(195252.000000,186516.000000,81750.000000,270.189974)}
{pt3dadd(195120.000000,186564.000000,81625.000000,287.158804)}
{pt3dadd(194940.000000,186612.000000,81625.000000,312.172214)}
{pt3dadd(194772.000000,186696.000000,81500.000000,341.055740)}
{pt3dadd(194592.000000,186780.000000,81375.000000,357.013452)}
{pt3dadd(194448.000000,186804.000000,81250.000000,376.656992)}
{pt3dadd(194256.000000,186840.000000,81200.000000,380.000144)}
{pt3dadd(194052.000000,186840.000000,81125.000000,363.244544)}
{pt3dadd(193920.000000,186864.000000,81075.000000,352.178284)}
{pt3dadd(193740.000000,186888.000000,81075.000000,335.098853)}
{pt3dadd(193704.000000,186924.000000,80925.000000,351.031280)}

{create adhoc16}
{access adhoc16}
{connect adhoc16(1), adhoc15(0)}
{nseg = 1}
{strdef color color = "White"}
{pt3dclear()}
{pt3dadd(193704.000000,186924.000000,80925.000000,351.031280)}
{pt3dadd(193428.000000,186804.000000,80900.000000,271.633660)}
{pt3dadd(193320.000000,186792.000000,80875.000000,221.950606)}
{pt3dadd(193236.000000,186684.000000,80825.000000,176.944350)}
{pt3dadd(193056.000000,186660.000000,80825.000000,158.148770)}
{pt3dadd(192864.000000,186624.000000,80825.000000,138.413410)}
{pt3dadd(192672.000000,186564.000000,80825.000000,138.413410)}
{pt3dadd(192480.000000,186516.000000,80825.000000,145.375706)}
{pt3dadd(192288.000000,186456.000000,80725.000000,155.634636)}
{pt3dadd(192096.000000,186372.000000,80725.000000,156.957636)}
{pt3dadd(191880.000000,186312.000000,80725.000000,154.374636)}
{pt3dadd(191700.000000,186204.000000,80650.000000,148.387226)}
{pt3dadd(191580.000000,186192.000000,80650.000000,148.387226)}
{pt3dadd(191412.000000,186048.000000,80500.000000,152.021768)}
{pt3dadd(191268.000000,185988.000000,80425.000000,154.869528)}
{pt3dadd(191172.000000,185904.000000,80375.000000,157.452528)}
{pt3dadd(191052.000000,185784.000000,80375.000000,163.439938)}
{pt3dadd(190944.000000,185688.000000,80275.000000,166.736572)}
{pt3dadd(190788.000000,185592.000000,80150.000000,161.413510)}
{pt3dadd(190632.000000,185520.000000,80075.000000,164.553160)}
{pt3dadd(190488.000000,185436.000000,79975.000000,172.229090)}
{pt3dadd(190332.000000,185328.000000,79850.000000,177.552152)}
{pt3dadd(190200.000000,185220.000000,79800.000000,187.348802)}
{pt3dadd(190080.000000,185100.000000,79750.000000,192.671864)}
{pt3dadd(189960.000000,185016.000000,79650.000000,197.994926)}
{pt3dadd(189816.000000,184956.000000,79600.000000,203.584140)}
{pt3dadd(189672.000000,184860.000000,79550.000000,203.584140)}
{pt3dadd(189588.000000,184740.000000,79400.000000,197.422032)}
{pt3dadd(189492.000000,184620.000000,79225.000000,197.422032)}
{pt3dadd(189396.000000,184536.000000,79125.000000,201.429112)}
{pt3dadd(189216.000000,184476.000000,79050.000000,210.275242)}
{pt3dadd(189252.000000,184308.000000,78925.000000,214.282322)}
{pt3dadd(189144.000000,184224.000000,78800.000000,222.707210)}
{pt3dadd(189012.000000,184140.000000,78700.000000,238.622178)}
{pt3dadd(188856.000000,184152.000000,78600.000000,247.910616)}
{pt3dadd(188712.000000,184152.000000,78475.000000,239.064486)}
{pt3dadd(188580.000000,184068.000000,78350.000000,239.064486)}
{pt3dadd(188532.000000,183960.000000,78225.000000,241.440400)}
{pt3dadd(188412.000000,183912.000000,78150.000000,236.326234)}
{pt3dadd(188316.000000,183840.000000,78175.000000,244.584044)}
{pt3dadd(188328.000000,183708.000000,78125.000000,258.544340)}
{pt3dadd(188280.000000,183552.000000,78050.000000,267.832778)}
{pt3dadd(188220.000000,183384.000000,78050.000000,272.946944)}
{pt3dadd(188196.000000,183252.000000,77975.000000,283.699470)}
{pt3dadd(188160.000000,183120.000000,77850.000000,280.811530)}
{pt3dadd(188052.000000,182952.000000,77750.000000,278.192080)}
{pt3dadd(187980.000000,182772.000000,77650.000000,278.192080)}
{pt3dadd(187932.000000,182616.000000,77550.000000,270.702000)}
{pt3dadd(187860.000000,182388.000000,77500.000000,255.310780)}
{pt3dadd(187788.000000,182196.000000,77375.000000,242.807500)}
{pt3dadd(187680.000000,182028.000000,77325.000000,231.466654)}
{pt3dadd(187644.000000,181896.000000,77225.000000,224.333244)}
{pt3dadd(187548.000000,181716.000000,77125.000000,229.203874)}
{pt3dadd(187452.000000,181524.000000,77125.000000,236.337284)}
{pt3dadd(187332.000000,181272.000000,77125.000000,246.090144)}
{pt3dadd(187188.000000,181080.000000,77100.000000,257.430990)}
{pt3dadd(187092.000000,180876.000000,77000.000000,269.934270)}
{pt3dadd(186960.000000,180648.000000,76925.000000,272.553720)}
{pt3dadd(186888.000000,180396.000000,76925.000000,253.935140)}
{pt3dadd(186864.000000,180240.000000,76850.000000,236.158580)}
{pt3dadd(186780.000000,180108.000000,76775.000000,221.001470)}
{pt3dadd(186756.000000,179988.000000,76725.000000,218.251050)}
{pt3dadd(186768.000000,179868.000000,76600.000000,230.105714)}
{pt3dadd(186744.000000,179736.000000,76550.000000,277.607820)}
{pt3dadd(186696.000000,179592.000000,76525.000000,292.764930)}
{pt3dadd(186660.000000,179436.000000,76500.000000,313.291910)}
{pt3dadd(186612.000000,179244.000000,76375.000000,332.000042)}
{pt3dadd(186552.000000,179076.000000,76325.000000,325.783738)}
{pt3dadd(186564.000000,178968.000000,76175.000000,318.227794)}
{pt3dadd(186660.000000,178812.000000,76025.000000,346.799907)}
{pt3dadd(186660.000000,178668.000000,75875.000000,368.582860)}

{create adhoc17}
{access adhoc17}
{connect adhoc17(1), adhoc15(0)}
{nseg = 1}
{strdef color color = "White"}
{pt3dclear()}
{pt3dadd(193704.000000,186924.000000,80925.000000,351.031280)}
{pt3dadd(193704.000000,187044.000000,80875.000000,250.579787)}
{pt3dadd(193704.000000,187200.000000,80825.000000,187.957128)}
{pt3dadd(193704.000000,187332.000000,80700.000000,136.555500)}
{pt3dadd(193632.000000,187392.000000,80575.000000,125.245028)}
{pt3dadd(193560.000000,187464.000000,80450.000000,111.979884)}
{pt3dadd(193464.000000,187488.000000,80300.000000,118.375256)}
{pt3dadd(193368.000000,187572.000000,80225.000000,124.770628)}
{pt3dadd(193272.000000,187632.000000,80125.000000,129.966000)}
{pt3dadd(193212.000000,187716.000000,79975.000000,127.383000)}
{pt3dadd(193128.000000,187788.000000,79825.000000,127.383000)}
{pt3dadd(192996.000000,187812.000000,79675.000000,125.040142)}
{pt3dadd(192924.000000,187860.000000,79500.000000,122.697284)}
{pt3dadd(192816.000000,187884.000000,79300.000000,122.697284)}
{pt3dadd(192696.000000,187884.000000,79150.000000,110.861382)}
{pt3dadd(192504.000000,187908.000000,78950.000000,99.322527)}
{pt3dadd(192384.000000,188028.000000,78925.000000,92.709530)}
{pt3dadd(192240.000000,188136.000000,78925.000000,89.597248)}
{pt3dadd(192132.000000,188292.000000,78925.000000,92.057248)}
{pt3dadd(192036.000000,188376.000000,78825.000000,101.550292)}
{pt3dadd(191940.000000,188400.000000,78750.000000,107.074855)}
{pt3dadd(191844.000000,188460.000000,78700.000000,112.599418)}
{pt3dadd(191772.000000,188580.000000,78725.000000,112.599418)}
{pt3dadd(191640.000000,188664.000000,78625.000000,105.884278)}
{pt3dadd(191496.000000,188808.000000,78625.000000,102.771996)}
{pt3dadd(191364.000000,188880.000000,78625.000000,98.912457)}
{pt3dadd(191292.000000,189048.000000,78650.000000,100.000891)}
{pt3dadd(191184.000000,189144.000000,78650.000000,106.716031)}
{pt3dadd(191088.000000,189240.000000,78625.000000,124.203051)}
{pt3dadd(190992.000000,189348.000000,78625.000000,138.228601)}
{pt3dadd(190872.000000,189396.000000,78600.000000,145.519432)}
{pt3dadd(190740.000000,189480.000000,78600.000000,143.394393)}
{pt3dadd(190620.000000,189588.000000,78525.000000,132.837522)}
{pt3dadd(190500.000000,189648.000000,78575.000000,103.660515)}
