# Supplementary material for: Full reconstruction of large lobula plate tangential cells in Drosophila from a 3D EM dataset
Source: PLoS One. 2018 Nov 28;13(11):e0207828. doi: 10.1371/journal.pone.0207828 (PMC6261601; doi:10.1371/journal.pone.0207828)
Supplement: S1 Dataset — (ZIP) [file pone.0207828.s001.zip › Diameter hoc/Cell153_4skels_ck.001_corrected_sorted_diametered.hoc0001.hoc]

/* created with convertKnossosNmlToHoc.m */

{create adhoc1}
{access adhoc1}
{nseg = 1}
{strdef color color = "White"}
{pt3dclear()}
{pt3dadd(176556.000000,106248.000000,86875.000000,103.660515)}
{pt3dadd(176628.000000,106284.000000,86850.000000,136.777582)}
{pt3dadd(176700.000000,106332.000000,86800.000000,164.162837)}
{pt3dadd(176760.000000,106392.000000,86800.000000,174.061494)}
{pt3dadd(176820.000000,106416.000000,86825.000000,175.520104)}
{pt3dadd(176892.000000,106380.000000,86800.000000,166.214950)}
{pt3dadd(176952.000000,106428.000000,86775.000000,152.949806)}
{pt3dadd(177012.000000,106392.000000,86775.000000,139.684662)}
{pt3dadd(177072.000000,106368.000000,86725.000000,135.513902)}
{pt3dadd(177120.000000,106392.000000,86650.000000,132.666142)}
{pt3dadd(177168.000000,106308.000000,86675.000000,129.553860)}
{pt3dadd(177216.000000,106272.000000,86725.000000,120.575488)}
{pt3dadd(177276.000000,106260.000000,86700.000000,113.524591)}
{pt3dadd(177372.000000,106308.000000,86675.000000,105.869219)}
{pt3dadd(177480.000000,106320.000000,86675.000000,95.995388)}
{pt3dadd(177588.000000,106380.000000,86675.000000,98.019236)}
{pt3dadd(177684.000000,106428.000000,86675.000000,106.997608)}
{pt3dadd(177804.000000,106476.000000,86675.000000,108.034213)}
{pt3dadd(177936.000000,106428.000000,86675.000000,108.034213)}
{pt3dadd(178104.000000,106488.000000,86675.000000,107.181396)}
{pt3dadd(178260.000000,106608.000000,86675.000000,100.883302)}
{pt3dadd(178440.000000,106572.000000,86675.000000,99.560302)}
{pt3dadd(178632.000000,106476.000000,86675.000000,109.953890)}
{pt3dadd(178812.000000,106392.000000,86675.000000,115.149262)}
{pt3dadd(178896.000000,106272.000000,86575.000000,119.861618)}
{pt3dadd(179076.000000,106320.000000,86575.000000,122.300173)}
{pt3dadd(179220.000000,106344.000000,86575.000000,114.644801)}
{pt3dadd(179340.000000,106380.000000,86450.000000,101.287133)}
{pt3dadd(179412.000000,106440.000000,86450.000000,96.091761)}
{pt3dadd(179484.000000,106404.000000,86425.000000,95.055156)}
{pt3dadd(179616.000000,106392.000000,86400.000000,98.914695)}
{pt3dadd(179676.000000,106428.000000,86375.000000,109.282217)}
{pt3dadd(179736.000000,106428.000000,86325.000000,113.334731)}
{pt3dadd(179796.000000,106428.000000,86300.000000,115.262206)}
{pt3dadd(179856.000000,106416.000000,86300.000000,116.298811)}
{pt3dadd(179916.000000,106428.000000,86250.000000,114.274963)}
{pt3dadd(179976.000000,106440.000000,86200.000000,102.159165)}
{pt3dadd(180036.000000,106476.000000,86200.000000,102.159165)}
{pt3dadd(180096.000000,106500.000000,86225.000000,103.195770)}
{pt3dadd(180144.000000,106524.000000,86125.000000,103.195770)}
{pt3dadd(180216.000000,106524.000000,86075.000000,104.183013)}
{pt3dadd(180288.000000,106512.000000,86075.000000,109.983803)}
{pt3dadd(180336.000000,106548.000000,86000.000000,107.858764)}
{pt3dadd(180384.000000,106572.000000,85950.000000,107.858764)}
{pt3dadd(180420.000000,106596.000000,85900.000000,107.858764)}
{pt3dadd(180504.000000,106608.000000,85875.000000,107.858764)}
{pt3dadd(180552.000000,106644.000000,85825.000000,109.001622)}
{pt3dadd(180600.000000,106704.000000,85800.000000,114.729519)}
{pt3dadd(180648.000000,106788.000000,85750.000000,122.132961)}
{pt3dadd(180732.000000,106788.000000,85725.000000,130.995013)}
{pt3dadd(180780.000000,106776.000000,85725.000000,139.435060)}
{pt3dadd(180864.000000,106764.000000,85725.000000,149.205470)}
{pt3dadd(180948.000000,106788.000000,85575.000000,159.977350)}
{pt3dadd(181008.000000,106788.000000,85600.000000,169.898672)}
{pt3dadd(181056.000000,106848.000000,85600.000000,178.361384)}
{pt3dadd(181128.000000,106848.000000,85625.000000,188.282706)}
{pt3dadd(181188.000000,106860.000000,85600.000000,197.612848)}
{pt3dadd(181284.000000,106860.000000,85600.000000,197.612848)}
{pt3dadd(181332.000000,106872.000000,85550.000000,201.619928)}
{pt3dadd(181416.000000,106872.000000,85500.000000,210.044816)}
{pt3dadd(181488.000000,106884.000000,85450.000000,218.469704)}
{pt3dadd(181560.000000,106932.000000,85475.000000,220.624732)}
{pt3dadd(181608.000000,106920.000000,85475.000000,228.648432)}
{pt3dadd(181692.000000,106956.000000,85450.000000,230.803460)}
{pt3dadd(181752.000000,106980.000000,85425.000000,230.803460)}
{pt3dadd(181836.000000,107076.000000,85375.000000,241.043960)}
{pt3dadd(181896.000000,107112.000000,85425.000000,248.177370)}
{pt3dadd(181992.000000,107196.000000,85550.000000,252.816064)}
{pt3dadd(182040.000000,107220.000000,85575.000000,257.454758)}
{pt3dadd(182160.000000,107232.000000,85625.000000,259.830672)}
{pt3dadd(182232.000000,107292.000000,85650.000000,259.830672)}
{pt3dadd(182304.000000,107352.000000,85650.000000,268.088482)}
{pt3dadd(182352.000000,107412.000000,85625.000000,270.583198)}
{pt3dadd(182424.000000,107424.000000,85575.000000,273.077914)}
{pt3dadd(182496.000000,107484.000000,85550.000000,262.277112)}
{pt3dadd(182544.000000,107508.000000,85575.000000,238.288662)}
{pt3dadd(182628.000000,107520.000000,85500.000000,214.873742)}
{pt3dadd(182892.000000,107664.000000,85425.000000,199.716632)}
{pt3dadd(182952.000000,107664.000000,85400.000000,181.098052)}
{pt3dadd(183024.000000,107700.000000,85350.000000,177.463510)}
{pt3dadd(183132.000000,107784.000000,85350.000000,172.865250)}
{pt3dadd(183276.000000,107880.000000,85375.000000,164.805520)}
{pt3dadd(183396.000000,108024.000000,85325.000000,159.735936)}
{pt3dadd(183600.000000,108180.000000,85175.000000,183.724386)}
{pt3dadd(183828.000000,108312.000000,85050.000000,191.366008)}
{pt3dadd(183972.000000,108420.000000,84750.000000,217.202298)}
{pt3dadd(184032.000000,108420.000000,84700.000000,245.789008)}
{pt3dadd(184116.000000,108432.000000,84675.000000,263.520986)}
{pt3dadd(184176.000000,108468.000000,84650.000000,266.408926)}
{pt3dadd(184272.000000,108528.000000,84600.000000,290.171478)}
{pt3dadd(184356.000000,108612.000000,84600.000000,302.026142)}
{pt3dadd(184428.000000,108672.000000,84600.000000,304.914082)}
{pt3dadd(184512.000000,108732.000000,84625.000000,310.028248)}
{pt3dadd(184584.000000,108780.000000,84650.000000,304.389888)}
{pt3dadd(184656.000000,108840.000000,84675.000000,287.421058)}
{pt3dadd(184728.000000,108936.000000,84650.000000,268.076314)}
{pt3dadd(184788.000000,109020.000000,84625.000000,238.060274)}
{pt3dadd(184848.000000,109092.000000,84575.000000,213.682594)}
{pt3dadd(184908.000000,109152.000000,84525.000000,190.836450)}
{pt3dadd(184980.000000,109176.000000,84500.000000,171.572936)}
{pt3dadd(185064.000000,109212.000000,84500.000000,154.685336)}
{pt3dadd(185136.000000,109272.000000,84500.000000,154.685336)}
{pt3dadd(185208.000000,109332.000000,84500.000000,150.514576)}
{pt3dadd(185280.000000,109380.000000,84500.000000,147.524430)}
{pt3dadd(185340.000000,109440.000000,84500.000000,149.055966)}
{pt3dadd(185400.000000,109500.000000,84500.000000,153.884136)}
{pt3dadd(185460.000000,109560.000000,84500.000000,157.023786)}
{pt3dadd(185520.000000,109596.000000,84500.000000,166.022716)}
{pt3dadd(185592.000000,109596.000000,84500.000000,172.309496)}
{pt3dadd(185652.000000,109644.000000,84450.000000,172.309496)}
{pt3dadd(185712.000000,109692.000000,84425.000000,167.481326)}
{pt3dadd(185796.000000,109704.000000,84425.000000,169.169846)}
{pt3dadd(185868.000000,109704.000000,84400.000000,170.942796)}
{pt3dadd(185940.000000,109716.000000,84400.000000,172.715746)}
{pt3dadd(186000.000000,109716.000000,84375.000000,174.323860)}
{pt3dadd(186060.000000,109776.000000,84350.000000,177.463510)}
{pt3dadd(186120.000000,109776.000000,84300.000000,179.236460)}
{pt3dadd(186192.000000,109812.000000,84300.000000,181.098052)}
{pt3dadd(186252.000000,109824.000000,84325.000000,177.636582)}
{pt3dadd(186324.000000,109848.000000,84325.000000,179.325102)}
{pt3dadd(186384.000000,109860.000000,84300.000000,181.013622)}
{pt3dadd(186456.000000,109884.000000,84300.000000,181.013622)}
{pt3dadd(186528.000000,109896.000000,84275.000000,179.152030)}
{pt3dadd(186588.000000,109908.000000,84275.000000,179.152030)}
{pt3dadd(186648.000000,109944.000000,84250.000000,175.855396)}
{pt3dadd(186708.000000,109968.000000,84250.000000,172.558762)}
{pt3dadd(186780.000000,109992.000000,84250.000000,167.489178)}
{pt3dadd(186852.000000,110040.000000,84250.000000,162.419594)}
{pt3dadd(186912.000000,110088.000000,84250.000000,157.821334)}
{pt3dadd(186984.000000,110124.000000,84275.000000,153.442038)}
{pt3dadd(187056.000000,110136.000000,84300.000000,147.739742)}
{pt3dadd(187116.000000,110196.000000,84325.000000,142.037446)}
{pt3dadd(187200.000000,110196.000000,84350.000000,136.335150)}
{pt3dadd(187284.000000,110220.000000,84350.000000,132.363000)}
{pt3dadd(187368.000000,110232.000000,84350.000000,129.780000)}
{pt3dadd(187440.000000,110256.000000,84350.000000,126.177142)}
{pt3dadd(187512.000000,110304.000000,84350.000000,131.879438)}
{pt3dadd(187596.000000,110292.000000,84350.000000,133.202438)}
{pt3dadd(187668.000000,110292.000000,84350.000000,132.002438)}
{pt3dadd(187752.000000,110292.000000,84350.000000,127.534541)}
{pt3dadd(187824.000000,110340.000000,84350.000000,122.586568)}
{pt3dadd(187896.000000,110388.000000,84350.000000,110.169132)}
{pt3dadd(187968.000000,110412.000000,84350.000000,103.118235)}
{pt3dadd(188040.000000,110436.000000,84350.000000,97.922863)}
{pt3dadd(188100.000000,110496.000000,84375.000000,94.247112)}
{pt3dadd(188184.000000,110532.000000,84375.000000,104.120943)}
{pt3dadd(188256.000000,110556.000000,84350.000000,110.836083)}
{pt3dadd(188316.000000,110568.000000,84325.000000,116.563980)}
{pt3dadd(188376.000000,110520.000000,84325.000000,125.542352)}
{pt3dadd(188448.000000,110556.000000,84350.000000,139.116760)}
{pt3dadd(188520.000000,110580.000000,84350.000000,141.964520)}
{pt3dadd(188592.000000,110568.000000,84375.000000,140.704520)}
{pt3dadd(188652.000000,110604.000000,84400.000000,142.027520)}
{pt3dadd(188712.000000,110640.000000,84400.000000,139.444520)}
{pt3dadd(188784.000000,110640.000000,84400.000000,134.013760)}
{pt3dadd(188856.000000,110652.000000,84400.000000,132.555150)}
{pt3dadd(188916.000000,110664.000000,84450.000000,133.815150)}
{pt3dadd(189000.000000,110688.000000,84425.000000,133.815150)}
{pt3dadd(189060.000000,110736.000000,84400.000000,132.615150)}
{pt3dadd(189120.000000,110760.000000,84300.000000,133.875150)}
{pt3dadd(189240.000000,110748.000000,84300.000000,123.507628)}
{pt3dadd(189408.000000,110760.000000,84300.000000,116.792488)}
{pt3dadd(189540.000000,110796.000000,84300.000000,108.754348)}
{pt3dadd(189684.000000,110700.000000,84300.000000,106.523056)}
{pt3dadd(189768.000000,110664.000000,84325.000000,107.846056)}
{pt3dadd(189828.000000,110688.000000,84400.000000,109.773531)}
{pt3dadd(189900.000000,110700.000000,84450.000000,110.760774)}
{pt3dadd(189960.000000,110628.000000,84375.000000,115.015914)}
{pt3dadd(190020.000000,110616.000000,84400.000000,115.015914)}
{pt3dadd(190080.000000,110604.000000,84450.000000,106.037542)}
{pt3dadd(190152.000000,110616.000000,84450.000000,108.162581)}
{pt3dadd(190224.000000,110616.000000,84400.000000,115.213478)}
{pt3dadd(190296.000000,110616.000000,84400.000000,116.413478)}
{pt3dadd(190368.000000,110604.000000,84425.000000,131.876650)}
{pt3dadd(190452.000000,110604.000000,84475.000000,152.165494)}
{pt3dadd(190524.000000,110604.000000,84525.000000,163.078762)}
{pt3dadd(190608.000000,110616.000000,84450.000000,172.527642)}
{pt3dadd(190656.000000,110628.000000,84375.000000,184.559522)}
{pt3dadd(190752.000000,110628.000000,84375.000000,194.846002)}
{pt3dadd(190812.000000,110664.000000,84325.000000,198.853082)}
{pt3dadd(190908.000000,110676.000000,84375.000000,206.130816)}
{pt3dadd(190992.000000,110664.000000,84375.000000,216.417296)}
{pt3dadd(191064.000000,110712.000000,84350.000000,234.193856)}
{pt3dadd(191172.000000,110556.000000,84325.000000,234.193856)}
{pt3dadd(191340.000000,110616.000000,84300.000000,251.740104)}
{pt3dadd(191496.000000,110676.000000,84275.000000,268.450820)}
{pt3dadd(191628.000000,110736.000000,84275.000000,273.321450)}
{pt3dadd(191724.000000,110796.000000,84275.000000,261.413562)}
{pt3dadd(191820.000000,110868.000000,84275.000000,263.789476)}
{pt3dadd(191844.000000,110952.000000,84250.000000,253.036950)}
{pt3dadd(191940.000000,111024.000000,84250.000000,245.172364)}
{pt3dadd(191976.000000,111084.000000,84300.000000,240.301734)}
{pt3dadd(192048.000000,111168.000000,84300.000000,232.660112)}
{pt3dadd(192108.000000,111240.000000,84300.000000,223.813982)}
{pt3dadd(192204.000000,111312.000000,84275.000000,214.967852)}
{pt3dadd(192300.000000,111384.000000,84275.000000,206.121722)}
{pt3dadd(192420.000000,111432.000000,84250.000000,199.651506)}
{pt3dadd(192528.000000,111492.000000,84250.000000,203.286048)}
{pt3dadd(192624.000000,111564.000000,84275.000000,201.331376)}
{pt3dadd(192660.000000,111612.000000,84275.000000,199.376704)}
{pt3dadd(192696.000000,111672.000000,84300.000000,197.422032)}
{pt3dadd(192732.000000,111756.000000,84325.000000,199.474440)}
{pt3dadd(192768.000000,111828.000000,84325.000000,210.275242)}
{pt3dadd(192852.000000,111900.000000,84300.000000,226.190210)}
{pt3dadd(192924.000000,111996.000000,84300.000000,247.743538)}
{pt3dadd(192996.000000,112068.000000,84300.000000,263.658506)}
{pt3dadd(193008.000000,112152.000000,84350.000000,275.566394)}
{pt3dadd(192972.000000,112212.000000,84350.000000,275.566394)}
{pt3dadd(193056.000000,112308.000000,84375.000000,278.316814)}
{pt3dadd(193128.000000,112380.000000,84325.000000,272.678454)}
{pt3dadd(193224.000000,112440.000000,84375.000000,270.059004)}
{pt3dadd(193236.000000,112512.000000,84400.000000,270.059004)}
{pt3dadd(193272.000000,112584.000000,84400.000000,275.173170)}
{pt3dadd(193296.000000,112656.000000,84425.000000,269.803300)}
{pt3dadd(193284.000000,112728.000000,84425.000000,260.050440)}
{pt3dadd(193272.000000,112800.000000,84450.000000,255.179810)}
{pt3dadd(193320.000000,112896.000000,84450.000000,250.065644)}
{pt3dadd(193368.000000,112968.000000,84450.000000,252.816064)}
{pt3dadd(193416.000000,113040.000000,84450.000000,258.185934)}
{pt3dadd(193428.000000,113124.000000,84475.000000,267.938794)}
{pt3dadd(193428.000000,113208.000000,84475.000000,272.809424)}
{pt3dadd(193416.000000,113280.000000,84475.000000,272.809424)}
{pt3dadd(193428.000000,113352.000000,84525.000000,262.568924)}
{pt3dadd(193476.000000,113424.000000,84525.000000,252.328424)}
{pt3dadd(193536.000000,113496.000000,84525.000000,240.420536)}
{pt3dadd(193596.000000,113568.000000,84500.000000,229.079690)}
{pt3dadd(193620.000000,113640.000000,84475.000000,216.417296)}
{pt3dadd(193644.000000,113700.000000,84450.000000,204.357866)}
{pt3dadd(193644.000000,113760.000000,84450.000000,190.609916)}
{pt3dadd(193692.000000,113820.000000,84475.000000,184.741244)}
{pt3dadd(193692.000000,113892.000000,84475.000000,186.793652)}
{pt3dadd(193740.000000,113964.000000,84500.000000,199.456046)}
{pt3dadd(193764.000000,114060.000000,84500.000000,213.891390)}
{pt3dadd(193812.000000,114144.000000,84500.000000,225.376560)}
{pt3dadd(193860.000000,114228.000000,84475.000000,231.245232)}
{pt3dadd(193908.000000,114312.000000,84475.000000,233.400260)}
{pt3dadd(193956.000000,114372.000000,84500.000000,228.761566)}
{pt3dadd(193992.000000,114444.000000,84525.000000,228.761566)}
{pt3dadd(194016.000000,114516.000000,84550.000000,224.554130)}
{pt3dadd(194028.000000,114564.000000,84475.000000,228.971938)}
{pt3dadd(194052.000000,114624.000000,84425.000000,233.610632)}
{pt3dadd(194028.000000,114744.000000,84475.000000,235.873412)}
{pt3dadd(194064.000000,114804.000000,84475.000000,238.368128)}
{pt3dadd(194100.000000,114888.000000,84500.000000,252.328424)}
{pt3dadd(194148.000000,114960.000000,84500.000000,254.704338)}
{pt3dadd(194172.000000,115032.000000,84500.000000,245.858208)}
{pt3dadd(194148.000000,115092.000000,84450.000000,245.858208)}
{pt3dadd(194208.000000,115164.000000,84450.000000,240.987578)}
{pt3dadd(194268.000000,115236.000000,84450.000000,233.497498)}
{pt3dadd(194316.000000,115308.000000,84475.000000,238.611664)}
{pt3dadd(194376.000000,115368.000000,84475.000000,252.571960)}
{pt3dadd(194424.000000,115428.000000,84475.000000,260.062040)}
{pt3dadd(194460.000000,115500.000000,84475.000000,262.437954)}
{pt3dadd(194484.000000,115560.000000,84500.000000,269.928034)}
{pt3dadd(194412.000000,115632.000000,84475.000000,258.020146)}
{pt3dadd(194352.000000,115692.000000,84475.000000,252.905980)}
{pt3dadd(194352.000000,115764.000000,84450.000000,235.129420)}
{pt3dadd(194400.000000,115860.000000,84450.000000,222.467026)}
{pt3dadd(194508.000000,115920.000000,84400.000000,202.917516)}
{pt3dadd(194604.000000,115992.000000,84375.000000,198.910436)}
{pt3dadd(194628.000000,116052.000000,84375.000000,192.116714)}
{pt3dadd(194664.000000,116124.000000,84400.000000,200.140414)}
{pt3dadd(194688.000000,116184.000000,84425.000000,206.009086)}
{pt3dadd(194712.000000,116268.000000,84450.000000,215.805736)}
{pt3dadd(194736.000000,116340.000000,84450.000000,221.967844)}
{pt3dadd(194724.000000,116412.000000,84425.000000,219.915436)}
{pt3dadd(194784.000000,116484.000000,84475.000000,211.891736)}
{pt3dadd(194880.000000,116556.000000,84500.000000,207.884656)}
{pt3dadd(194940.000000,116616.000000,84500.000000,201.722548)}
{pt3dadd(194976.000000,116676.000000,84525.000000,190.237378)}
{pt3dadd(195012.000000,116736.000000,84550.000000,184.648164)}
{pt3dadd(195036.000000,116808.000000,84525.000000,184.648164)}
{pt3dadd(195036.000000,116868.000000,84525.000000,179.325102)}
{pt3dadd(195048.000000,116940.000000,84550.000000,177.463510)}
{pt3dadd(195048.000000,117000.000000,84625.000000,182.786572)}
{pt3dadd(195060.000000,117072.000000,84600.000000,188.375786)}
{pt3dadd(195060.000000,117132.000000,84575.000000,186.602836)}
{pt3dadd(195072.000000,117204.000000,84550.000000,190.064306)}
{pt3dadd(195072.000000,117264.000000,84550.000000,184.994722)}
{pt3dadd(195108.000000,117324.000000,84525.000000,181.360180)}
{pt3dadd(195156.000000,117384.000000,84475.000000,177.543916)}
{pt3dadd(195156.000000,117444.000000,84475.000000,177.543916)}
{pt3dadd(195156.000000,117480.000000,84475.000000,177.543916)}
{pt3dadd(195144.000000,117528.000000,84500.000000,188.482172)}
{pt3dadd(195156.000000,117576.000000,84500.000000,202.917516)}
{pt3dadd(195204.000000,117624.000000,84525.000000,215.579910)}
{pt3dadd(195252.000000,117684.000000,84525.000000,225.376560)}
{pt3dadd(195252.000000,117732.000000,84475.000000,235.663040)}
{pt3dadd(195240.000000,117768.000000,84450.000000,250.321348)}
{pt3dadd(195228.000000,117816.000000,84500.000000,261.073874)}
{pt3dadd(195240.000000,117852.000000,84575.000000,271.826400)}
{pt3dadd(195300.000000,117900.000000,84575.000000,284.329680)}
{pt3dadd(195324.000000,117948.000000,84525.000000,294.570180)}
{pt3dadd(195324.000000,117996.000000,84575.000000,294.570180)}
{pt3dadd(195336.000000,118044.000000,84600.000000,291.682240)}
{pt3dadd(195360.000000,118092.000000,84700.000000,283.424430)}
{pt3dadd(195408.000000,118152.000000,84725.000000,275.559844)}
{pt3dadd(195468.000000,118212.000000,84775.000000,256.894456)}
{pt3dadd(195528.000000,118272.000000,84775.000000,242.236148)}
{pt3dadd(195588.000000,118320.000000,84800.000000,229.732868)}
{pt3dadd(195648.000000,118356.000000,84800.000000,218.392022)}
{pt3dadd(195708.000000,118404.000000,84825.000000,209.545892)}
{pt3dadd(195768.000000,118464.000000,84825.000000,211.500564)}
{pt3dadd(195792.000000,118536.000000,84825.000000,207.493484)}
{pt3dadd(195816.000000,118620.000000,84825.000000,199.469784)}
{pt3dadd(195852.000000,118704.000000,84875.000000,195.653520)}
{pt3dadd(195900.000000,118776.000000,84875.000000,195.653520)}
{pt3dadd(195936.000000,118860.000000,84875.000000,190.064306)}
{pt3dadd(195972.000000,118956.000000,84875.000000,188.202714)}
{pt3dadd(196008.000000,119040.000000,84850.000000,196.226414)}
{pt3dadd(196056.000000,119124.000000,84850.000000,208.888808)}
{pt3dadd(196116.000000,119220.000000,84850.000000,217.734938)}
{pt3dadd(196176.000000,119304.000000,84850.000000,237.284448)}
{pt3dadd(196236.000000,119388.000000,84875.000000,257.811428)}
{pt3dadd(196284.000000,119460.000000,84875.000000,273.202648)}
{pt3dadd(196296.000000,119520.000000,84900.000000,286.987518)}
{pt3dadd(196308.000000,119604.000000,84900.000000,300.772388)}
{pt3dadd(196308.000000,119676.000000,84900.000000,309.443092)}
{pt3dadd(196356.000000,119760.000000,84875.000000,312.331032)}
{pt3dadd(196428.000000,119832.000000,84900.000000,306.692672)}
{pt3dadd(196500.000000,119916.000000,84925.000000,295.402518)}
{pt3dadd(196548.000000,119988.000000,84925.000000,292.370174)}
{pt3dadd(196596.000000,120072.000000,84900.000000,295.554134)}
{pt3dadd(196644.000000,120168.000000,84900.000000,308.623906)}
{pt3dadd(196692.000000,120252.000000,84875.000000,320.478570)}
{pt3dadd(196740.000000,120312.000000,84875.000000,341.806152)}
{pt3dadd(196788.000000,120396.000000,84875.000000,338.918212)}
{pt3dadd(196836.000000,120492.000000,84925.000000,332.701908)}
{pt3dadd(196776.000000,120564.000000,85025.000000,322.664480)}
{pt3dadd(196836.000000,120648.000000,85000.000000,319.480520)}
{pt3dadd(196896.000000,120720.000000,84975.000000,300.772388)}
{pt3dadd(196944.000000,120780.000000,85025.000000,303.660328)}
{pt3dadd(197016.000000,120852.000000,85050.000000,309.876632)}
{pt3dadd(197088.000000,120936.000000,85050.000000,316.403744)}
{pt3dadd(197172.000000,120996.000000,85050.000000,310.483460)}
{pt3dadd(197184.000000,121080.000000,85125.000000,310.483460)}
{pt3dadd(197196.000000,121152.000000,85200.000000,299.730934)}
{pt3dadd(197244.000000,121236.000000,85225.000000,271.961302)}
{pt3dadd(197304.000000,121320.000000,85275.000000,242.803190)}
{pt3dadd(197364.000000,121404.000000,85300.000000,222.276210)}
{pt3dadd(197424.000000,121488.000000,85325.000000,206.361242)}
{pt3dadd(197520.000000,121560.000000,85375.000000,199.567520)}
{pt3dadd(197520.000000,121632.000000,85400.000000,195.932978)}
{pt3dadd(197580.000000,121716.000000,85425.000000,190.343764)}
{pt3dadd(197640.000000,121788.000000,85425.000000,183.742644)}
{pt3dadd(197736.000000,121872.000000,85425.000000,172.432172)}
{pt3dadd(197784.000000,121932.000000,85500.000000,152.188762)}
{pt3dadd(197820.000000,122004.000000,85550.000000,139.586974)}
{pt3dadd(197820.000000,122076.000000,85600.000000,125.896752)}
{pt3dadd(197844.000000,122160.000000,85600.000000,124.438142)}
{pt3dadd(197856.000000,122232.000000,85600.000000,127.285902)}
{pt3dadd(197844.000000,122316.000000,85600.000000,143.522232)}
{pt3dadd(197832.000000,122388.000000,85600.000000,165.920670)}
{pt3dadd(197856.000000,122472.000000,85625.000000,189.407542)}
{pt3dadd(197892.000000,122532.000000,85650.000000,205.490972)}
{pt3dadd(197904.000000,122604.000000,85675.000000,222.378572)}
{pt3dadd(197904.000000,122676.000000,85700.000000,238.293540)}
{pt3dadd(197928.000000,122748.000000,85725.000000,250.796820)}
{pt3dadd(198024.000000,122820.000000,85750.000000,269.220384)}
{pt3dadd(198108.000000,122868.000000,85750.000000,287.643948)}
{pt3dadd(198120.000000,122964.000000,85800.000000,295.134028)}
{pt3dadd(198144.000000,123036.000000,85825.000000,297.884448)}
{pt3dadd(198156.000000,123132.000000,85875.000000,300.772388)}
{pt3dadd(198144.000000,123216.000000,85950.000000,307.299500)}
{pt3dadd(198216.000000,123336.000000,85925.000000,304.267156)}
{pt3dadd(198228.000000,123408.000000,86000.000000,312.937860)}
{pt3dadd(198264.000000,123468.000000,86075.000000,318.858144)}
{pt3dadd(198384.000000,123576.000000,86075.000000,325.074448)}
{pt3dadd(198396.000000,123648.000000,86100.000000,318.547336)}
{pt3dadd(198396.000000,123708.000000,86125.000000,315.659396)}
{pt3dadd(198408.000000,123780.000000,86150.000000,304.369242)}
{pt3dadd(198408.000000,123852.000000,86175.000000,293.079088)}
{pt3dadd(198420.000000,123936.000000,86200.000000,278.604974)}
{pt3dadd(198420.000000,124020.000000,86225.000000,269.934270)}
{pt3dadd(198444.000000,124092.000000,86225.000000,269.934270)}
{pt3dadd(198516.000000,124188.000000,86250.000000,269.934270)}
{pt3dadd(198432.000000,124272.000000,86300.000000,269.934270)}
{pt3dadd(198456.000000,124320.000000,86350.000000,272.553720)}
{pt3dadd(198456.000000,124380.000000,86400.000000,269.934270)}
{pt3dadd(198528.000000,124476.000000,86375.000000,267.183850)}
{pt3dadd(198588.000000,124548.000000,86325.000000,272.553720)}
{pt3dadd(198648.000000,124644.000000,86375.000000,280.811530)}
{pt3dadd(198684.000000,124716.000000,86375.000000,292.666194)}
{pt3dadd(198720.000000,124800.000000,86400.000000,298.036064)}
{pt3dadd(198768.000000,124872.000000,86425.000000,303.674424)}
{pt3dadd(198768.000000,124956.000000,86450.000000,309.594708)}
{pt3dadd(198744.000000,125040.000000,86450.000000,309.594708)}
{pt3dadd(198708.000000,125124.000000,86450.000000,300.490464)}
{pt3dadd(198684.000000,125196.000000,86450.000000,297.740044)}
{pt3dadd(198660.000000,125268.000000,86450.000000,282.348824)}
{pt3dadd(198708.000000,125364.000000,86450.000000,271.058670)}
{pt3dadd(198756.000000,125424.000000,86425.000000,255.667450)}
{pt3dadd(198804.000000,125508.000000,86400.000000,245.426950)}
{pt3dadd(198852.000000,125580.000000,86425.000000,237.936870)}
{pt3dadd(198900.000000,125664.000000,86475.000000,247.689730)}
{pt3dadd(198960.000000,125736.000000,86500.000000,245.195014)}
{pt3dadd(198960.000000,125820.000000,86550.000000,254.947874)}
{pt3dadd(198984.000000,125904.000000,86525.000000,262.437954)}
{pt3dadd(199020.000000,125976.000000,86525.000000,267.308584)}
{pt3dadd(199044.000000,126048.000000,86525.000000,267.308584)}
{pt3dadd(199068.000000,126120.000000,86500.000000,272.422750)}
{pt3dadd(199092.000000,126192.000000,86500.000000,262.669890)}
{pt3dadd(199128.000000,126228.000000,86475.000000,250.762002)}
{pt3dadd(199116.000000,126312.000000,86500.000000,245.891372)}
{pt3dadd(199116.000000,126408.000000,86500.000000,229.976404)}
{pt3dadd(199176.000000,126516.000000,86500.000000,207.130260)}
{pt3dadd(199236.000000,126600.000000,86500.000000,191.046830)}
{pt3dadd(199248.000000,126684.000000,86500.000000,175.729278)}
{pt3dadd(199272.000000,126780.000000,86450.000000,157.383068)}
{pt3dadd(199248.000000,126852.000000,86475.000000,143.489596)}
{pt3dadd(199260.000000,126948.000000,86475.000000,137.787300)}
{pt3dadd(199308.000000,127032.000000,86500.000000,131.472292)}
{pt3dadd(199356.000000,127116.000000,86500.000000,127.689292)}
{pt3dadd(199404.000000,127188.000000,86475.000000,120.285850)}
{pt3dadd(199440.000000,127260.000000,86475.000000,121.545850)}
{pt3dadd(199464.000000,127344.000000,86450.000000,130.544780)}
{pt3dadd(199464.000000,127416.000000,86450.000000,152.943218)}
{pt3dadd(199476.000000,127488.000000,86450.000000,174.198798)}
{pt3dadd(199476.000000,127548.000000,86575.000000,195.530642)}
{pt3dadd(199500.000000,127620.000000,86525.000000,214.326222)}
{pt3dadd(199512.000000,127656.000000,86475.000000,216.099172)}
{pt3dadd(199524.000000,127704.000000,86450.000000,200.015742)}
{pt3dadd(199548.000000,127764.000000,86400.000000,183.932312)}
{pt3dadd(199560.000000,127848.000000,86350.000000,168.614760)}
{pt3dadd(199572.000000,127932.000000,86325.000000,152.531330)}
{pt3dadd(199560.000000,128040.000000,86325.000000,147.461746)}
{pt3dadd(199584.000000,128124.000000,86325.000000,147.461746)}
{pt3dadd(199608.000000,128220.000000,86300.000000,147.461746)}
{pt3dadd(199668.000000,128304.000000,86300.000000,146.138746)}
{pt3dadd(199728.000000,128388.000000,86300.000000,142.166596)}
{pt3dadd(199728.000000,128472.000000,86250.000000,142.166596)}
{pt3dadd(199740.000000,128556.000000,86200.000000,146.764856)}
{pt3dadd(199752.000000,128652.000000,86175.000000,156.686178)}
{pt3dadd(199704.000000,128784.000000,86175.000000,171.274322)}
{pt3dadd(199716.000000,129012.000000,86175.000000,198.463312)}
{pt3dadd(199536.000000,129372.000000,86175.000000,240.017588)}
{pt3dadd(199356.000000,130380.000000,86175.000000,291.583324)}
{pt3dadd(199344.000000,130584.000000,86250.000000,337.825998)}
{pt3dadd(199404.000000,130740.000000,86300.000000,374.180254)}
{pt3dadd(199464.000000,130908.000000,86350.000000,399.193664)}
{pt3dadd(199488.000000,131028.000000,86425.000000,410.813238)}
{pt3dadd(199560.000000,131172.000000,86475.000000,402.879492)}
{pt3dadd(199584.000000,131232.000000,86525.000000,394.945746)}
{pt3dadd(199560.000000,131304.000000,86600.000000,394.945746)}
{pt3dadd(199620.000000,131364.000000,86625.000000,402.879492)}
{pt3dadd(199716.000000,131424.000000,86675.000000,402.879492)}
{pt3dadd(199704.000000,131508.000000,86650.000000,410.813238)}
{pt3dadd(199656.000000,131556.000000,86650.000000,414.683354)}
{pt3dadd(199656.000000,131616.000000,86750.000000,418.553470)}
{pt3dadd(199656.000000,131664.000000,86850.000000,393.864124)}
{pt3dadd(199692.000000,131712.000000,86775.000000,375.391082)}
{pt3dadd(199740.000000,131772.000000,86700.000000,363.771508)}
{pt3dadd(199704.000000,131844.000000,86725.000000,340.257852)}
{pt3dadd(199716.000000,131916.000000,86800.000000,322.664480)}
{pt3dadd(199740.000000,132000.000000,86850.000000,319.776540)}
{pt3dadd(199740.000000,132060.000000,86925.000000,319.776540)}
{pt3dadd(199716.000000,132120.000000,87000.000000,312.923072)}
{pt3dadd(199764.000000,132192.000000,87050.000000,318.843356)}
{pt3dadd(199812.000000,132264.000000,87125.000000,310.172652)}
{pt3dadd(199860.000000,132336.000000,87175.000000,319.276896)}
{pt3dadd(199908.000000,132408.000000,87225.000000,319.276896)}
{pt3dadd(199872.000000,132480.000000,87325.000000,326.130364)}
{pt3dadd(199824.000000,132552.000000,87425.000000,326.130364)}
{pt3dadd(199800.000000,132624.000000,87525.000000,331.768724)}
{pt3dadd(199824.000000,132708.000000,87625.000000,342.308020)}
{pt3dadd(199944.000000,132780.000000,87650.000000,352.847316)}
{pt3dadd(200040.000000,132840.000000,87575.000000,356.533144)}
{pt3dadd(200112.000000,132924.000000,87600.000000,370.256400)}
{pt3dadd(200088.000000,132996.000000,87650.000000,390.882116)}
{pt3dadd(200052.000000,133056.000000,87725.000000,387.196288)}
{pt3dadd(200016.000000,133140.000000,87800.000000,383.510460)}
{pt3dadd(199992.000000,133224.000000,87825.000000,383.510460)}
{pt3dadd(199932.000000,133296.000000,87850.000000,391.444206)}
{pt3dadd(199932.000000,133368.000000,87875.000000,387.574090)}
{pt3dadd(199908.000000,133440.000000,87950.000000,391.259918)}
{pt3dadd(199908.000000,133512.000000,88000.000000,384.406450)}
{pt3dadd(199920.000000,133572.000000,88025.000000,373.867154)}
{pt3dadd(199920.000000,133644.000000,88075.000000,352.210152)}
{pt3dadd(199920.000000,133716.000000,88125.000000,335.454552)}
{pt3dadd(199920.000000,133800.000000,88175.000000,324.915256)}
{pt3dadd(199992.000000,133860.000000,88225.000000,328.258408)}
{pt3dadd(200052.000000,133932.000000,88275.000000,331.601560)}
{pt3dadd(200112.000000,133992.000000,88300.000000,353.258562)}
{pt3dadd(200172.000000,134052.000000,88325.000000,377.947908)}
{pt3dadd(200232.000000,134100.000000,88350.000000,388.487204)}
{pt3dadd(200256.000000,134196.000000,88375.000000,385.144052)}
{pt3dadd(200244.000000,134256.000000,88375.000000,392.340196)}
{pt3dadd(200244.000000,134340.000000,88375.000000,388.276566)}
{pt3dadd(200232.000000,134388.000000,88375.000000,384.212936)}
{pt3dadd(200316.000000,134460.000000,88300.000000,388.083052)}
{pt3dadd(200316.000000,134508.000000,88300.000000,402.492464)}
{pt3dadd(200304.000000,134592.000000,88325.000000,406.362580)}
{pt3dadd(200304.000000,134676.000000,88325.000000,419.173164)}
{pt3dadd(200304.000000,134760.000000,88400.000000,427.503602)}
{pt3dadd(200292.000000,134820.000000,88475.000000,445.018342)}
{pt3dadd(200280.000000,134892.000000,88525.000000,462.533082)}
{pt3dadd(200352.000000,134964.000000,88625.000000,490.173518)}
{pt3dadd(200316.000000,135048.000000,88650.000000,499.817030)}
{pt3dadd(200280.000000,135108.000000,88650.000000,513.940688)}
{pt3dadd(200256.000000,135168.000000,88650.000000,492.555832)}
{pt3dadd(200280.000000,135252.000000,88675.000000,471.170976)}
{pt3dadd(200304.000000,135336.000000,88700.000000,439.660424)}
{pt3dadd(200352.000000,135408.000000,88775.000000,413.336212)}
{pt3dadd(200352.000000,135480.000000,88850.000000,387.012000)}
{pt3dadd(200364.000000,135552.000000,88875.000000,387.012000)}
{pt3dadd(200364.000000,135648.000000,88850.000000,370.256400)}
{pt3dadd(200364.000000,135720.000000,88850.000000,359.717104)}
{pt3dadd(200304.000000,135828.000000,88825.000000,356.031276)}
{pt3dadd(200316.000000,135996.000000,88900.000000,352.345448)}
{pt3dadd(200340.000000,136176.000000,88950.000000,348.659620)}
{pt3dadd(200304.000000,136368.000000,89000.000000,361.729392)}
{pt3dadd(200268.000000,136572.000000,89075.000000,372.268688)}
{pt3dadd(200232.000000,136764.000000,89150.000000,375.954516)}
{pt3dadd(200196.000000,136944.000000,89225.000000,352.132218)}
{pt3dadd(200136.000000,137136.000000,89300.000000,319.463790)}
{pt3dadd(200124.000000,137364.000000,89350.000000,279.517628)}
{pt3dadd(200136.000000,137580.000000,89400.000000,239.347108)}
{pt3dadd(200172.000000,137760.000000,89475.000000,201.038180)}
{pt3dadd(200208.000000,137976.000000,89550.000000,194.244458)}
{pt3dadd(200280.000000,138180.000000,89625.000000,198.451894)}
{pt3dadd(200364.000000,138312.000000,89700.000000,203.774956)}
{pt3dadd(200388.000000,138372.000000,89775.000000,200.313486)}
{pt3dadd(200388.000000,138480.000000,89850.000000,196.678944)}
{pt3dadd(200388.000000,138612.000000,89925.000000,187.348802)}
{pt3dadd(200376.000000,138756.000000,90000.000000,172.723982)}
{pt3dadd(200376.000000,138900.000000,90075.000000,164.261270)}
{pt3dadd(200388.000000,138996.000000,90125.000000,158.273860)}
{pt3dadd(200412.000000,139104.000000,90200.000000,150.597930)}
{pt3dadd(200412.000000,139116.000000,90275.000000,144.610520)}
{pt3dadd(200436.000000,139200.000000,90375.000000,141.762760)}
{pt3dadd(200460.000000,139344.000000,90450.000000,146.590930)}
{pt3dadd(200520.000000,139464.000000,90525.000000,156.039810)}
{pt3dadd(200604.000000,139620.000000,90625.000000,167.350282)}
{pt3dadd(200700.000000,139704.000000,90675.000000,175.026212)}
{pt3dadd(200700.000000,139764.000000,90775.000000,190.343764)}
{pt3dadd(200724.000000,139896.000000,90850.000000,202.403194)}
{pt3dadd(200796.000000,140124.000000,90900.000000,198.941724)}
{pt3dadd(200892.000000,140112.000000,91000.000000,193.618662)}
{pt3dadd(200880.000000,140124.000000,91100.000000,203.415312)}
{pt3dadd(200880.000000,140280.000000,91200.000000,210.209034)}
{pt3dadd(200868.000000,140448.000000,91300.000000,217.699114)}
{pt3dadd(200868.000000,140616.000000,91350.000000,244.575504)}
{pt3dadd(200868.000000,140784.000000,91425.000000,271.451894)}
{pt3dadd(200820.000000,140940.000000,91475.000000,283.955174)}
{pt3dadd(200808.000000,141060.000000,91525.000000,286.449890)}
{pt3dadd(200784.000000,141168.000000,91600.000000,286.449890)}
{pt3dadd(200772.000000,141276.000000,91675.000000,283.561950)}
{pt3dadd(200808.000000,141372.000000,91750.000000,277.923590)}
{pt3dadd(200916.000000,141396.000000,91825.000000,277.923590)}
{pt3dadd(200844.000000,141444.000000,91900.000000,275.428874)}
{pt3dadd(200892.000000,141564.000000,91975.000000,278.179294)}
{pt3dadd(200940.000000,141684.000000,92050.000000,275.428874)}
{pt3dadd(200988.000000,141816.000000,92125.000000,270.314708)}
{pt3dadd(201036.000000,141936.000000,92200.000000,251.649320)}
{pt3dadd(201060.000000,142068.000000,92275.000000,254.144036)}
{pt3dadd(201096.000000,142200.000000,92350.000000,243.903536)}
{pt3dadd(201120.000000,142332.000000,92425.000000,238.789370)}
{pt3dadd(201108.000000,142452.000000,92500.000000,243.903536)}
{pt3dadd(201156.000000,142644.000000,92550.000000,257.199054)}
{pt3dadd(201264.000000,142824.000000,92625.000000,262.568924)}
{pt3dadd(201252.000000,142956.000000,92700.000000,285.256820)}
{pt3dadd(201228.000000,143088.000000,92775.000000,305.568802)}
{pt3dadd(201276.000000,143196.000000,92850.000000,324.276934)}
{pt3dadd(201324.000000,143292.000000,92900.000000,353.160460)}
{pt3dadd(201372.000000,143388.000000,92975.000000,372.804000)}
{pt3dadd(201420.000000,143496.000000,93050.000000,376.314316)}
{pt3dadd(201468.000000,143592.000000,93100.000000,372.971164)}
{pt3dadd(201516.000000,143700.000000,93175.000000,369.460848)}
{pt3dadd(201564.000000,143772.000000,93225.000000,351.867476)}
{pt3dadd(201564.000000,143820.000000,93275.000000,344.671332)}
{pt3dadd(201552.000000,143892.000000,93350.000000,344.671332)}
{pt3dadd(201564.000000,144012.000000,93425.000000,348.014484)}
{pt3dadd(201564.000000,144144.000000,93500.000000,351.524800)}
{pt3dadd(201576.000000,144276.000000,93550.000000,369.118172)}
{pt3dadd(201588.000000,144408.000000,93600.000000,380.184432)}
{pt3dadd(201588.000000,144540.000000,93650.000000,387.740376)}
{pt3dadd(201600.000000,144624.000000,93725.000000,387.740376)}
{pt3dadd(201624.000000,144720.000000,93800.000000,380.886908)}
{pt3dadd(201648.000000,144804.000000,93875.000000,354.622832)}
{pt3dadd(201672.000000,144876.000000,93950.000000,325.739306)}
{pt3dadd(201708.000000,144960.000000,94025.000000,299.475230)}
{pt3dadd(201732.000000,145044.000000,94100.000000,279.163248)}
{pt3dadd(201756.000000,145116.000000,94175.000000,264.689134)}
{pt3dadd(201792.000000,145188.000000,94250.000000,257.199054)}
{pt3dadd(201780.000000,145248.000000,94325.000000,247.910616)}
{pt3dadd(201792.000000,145332.000000,94400.000000,233.950320)}
{pt3dadd(201816.000000,145380.000000,94450.000000,223.149518)}
{pt3dadd(201840.000000,145428.000000,94525.000000,211.808672)}
{pt3dadd(201852.000000,145500.000000,94575.000000,203.383784)}
{pt3dadd(201852.000000,145560.000000,94650.000000,205.538812)}
{pt3dadd(201864.000000,145644.000000,94700.000000,196.652964)}
{pt3dadd(201864.000000,145740.000000,94775.000000,188.190252)}
{pt3dadd(201852.000000,145836.000000,94850.000000,176.314258)}
{pt3dadd(201876.000000,145944.000000,94900.000000,165.003786)}
{pt3dadd(201912.000000,146040.000000,94975.000000,153.518616)}
{pt3dadd(201936.000000,146124.000000,95050.000000,158.588200)}
{pt3dadd(201960.000000,146220.000000,95125.000000,167.050912)}
{pt3dadd(201996.000000,146364.000000,95175.000000,175.110642)}
{pt3dadd(201900.000000,146448.000000,95275.000000,188.375786)}
{pt3dadd(201924.000000,146580.000000,95350.000000,197.705928)}
{pt3dadd(201912.000000,146688.000000,95425.000000,207.992408)}
{pt3dadd(202020.000000,146904.000000,95475.000000,216.417296)}
{pt3dadd(202056.000000,147084.000000,95550.000000,229.079690)}
{pt3dadd(202152.000000,147300.000000,95625.000000,240.420536)}
{pt3dadd(202212.000000,147456.000000,95675.000000,255.078844)}
{pt3dadd(202272.000000,147564.000000,95750.000000,265.319344)}
{pt3dadd(202332.000000,147672.000000,95800.000000,275.559844)}
{pt3dadd(202392.000000,147768.000000,95875.000000,286.312370)}
{pt3dadd(202428.000000,147828.000000,95925.000000,291.682240)}
{pt3dadd(202464.000000,147900.000000,96000.000000,281.441740)}
{pt3dadd(202464.000000,147984.000000,96050.000000,268.938460)}
{pt3dadd(202452.000000,148068.000000,96125.000000,258.697960)}
{pt3dadd(202464.000000,148128.000000,96200.000000,258.697960)}
{pt3dadd(202488.000000,148200.000000,96250.000000,264.618244)}
{pt3dadd(202500.000000,148272.000000,96325.000000,277.746684)}
{pt3dadd(202464.000000,148356.000000,96375.000000,302.697360)}
{pt3dadd(202428.000000,148392.000000,96450.000000,328.895572)}
{pt3dadd(202356.000000,148488.000000,96525.000000,345.651172)}
{pt3dadd(202356.000000,148620.000000,96575.000000,355.688600)}
{pt3dadd(202380.000000,148716.000000,96625.000000,372.444200)}
{pt3dadd(202356.000000,148812.000000,96700.000000,375.954516)}
{pt3dadd(202284.000000,148920.000000,96775.000000,369.101048)}
{pt3dadd(202200.000000,149016.000000,96850.000000,352.345448)}
{pt3dadd(202164.000000,149124.000000,96925.000000,328.523150)}
{pt3dadd(202140.000000,149268.000000,97000.000000,296.376330)}
{pt3dadd(202116.000000,149412.000000,97075.000000,270.178118)}
{pt3dadd(202116.000000,149520.000000,97150.000000,248.570594)}
{pt3dadd(202128.000000,149628.000000,97200.000000,235.442154)}
{pt3dadd(202152.000000,149676.000000,97275.000000,237.936870)}
{pt3dadd(202188.000000,149724.000000,97350.000000,247.689730)}
{pt3dadd(202212.000000,149772.000000,97425.000000,270.377626)}
{pt3dadd(202224.000000,149796.000000,97500.000000,323.909302)}
{pt3dadd(202236.000000,149832.000000,97600.000000,365.993896)}
{pt3dadd(202164.000000,150156.000000,98000.000000,391.007306)}
{pt3dadd(202068.000000,150576.000000,98350.000000,442.987683)}
{pt3dadd(201936.000000,151116.000000,98500.000000,387.012000)}

{create adhoc2}
{access adhoc2}
{connect adhoc2(1), adhoc1(0)}
{nseg = 1}
{strdef color color = "White"}
{pt3dclear()}
{pt3dadd(201936.000000,151116.000000,98500.000000,387.012000)}
{pt3dadd(201744.000000,150300.000000,98500.000000,287.321900)}
{pt3dadd(201672.000000,149772.000000,98500.000000,271.200144)}
{pt3dadd(201588.000000,149448.000000,98500.000000,260.660848)}
{pt3dadd(201516.000000,149088.000000,98475.000000,263.548788)}
{pt3dadd(201432.000000,148776.000000,98450.000000,269.417460)}
{pt3dadd(201276.000000,148488.000000,98475.000000,273.624896)}
{pt3dadd(201264.000000,148188.000000,98450.000000,254.959508)}
{pt3dadd(201348.000000,147840.000000,98450.000000,223.555334)}
{pt3dadd(201312.000000,147456.000000,98375.000000,200.140414)}
{pt3dadd(201312.000000,147168.000000,98375.000000,200.140414)}
{pt3dadd(201276.000000,146916.000000,98325.000000,192.116714)}
{pt3dadd(201264.000000,146592.000000,98200.000000,208.031682)}
{pt3dadd(201228.000000,146280.000000,98075.000000,239.435856)}
{pt3dadd(201156.000000,145476.000000,98075.000000,269.067080)}
{pt3dadd(200988.000000,144516.000000,98075.000000,283.725388)}
{pt3dadd(200736.000000,143652.000000,98150.000000,304.252368)}
{pt3dadd(200496.000000,143064.000000,98150.000000,307.002788)}
{pt3dadd(200112.000000,142536.000000,98275.000000,297.898544)}
{pt3dadd(200004.000000,141852.000000,98275.000000,291.682240)}
{pt3dadd(199704.000000,141264.000000,98275.000000,304.129636)}
{pt3dadd(199668.000000,140700.000000,98275.000000,316.577032)}
{pt3dadd(199596.000000,140388.000000,98450.000000,308.712446)}
{pt3dadd(199548.000000,139896.000000,98575.000000,296.209166)}
{pt3dadd(199512.000000,139320.000000,98825.000000,272.794246)}
{pt3dadd(199272.000000,138648.000000,98825.000000,266.267134)}
{pt3dadd(199044.000000,138096.000000,98875.000000,273.463278)}
{pt3dadd(198768.000000,137196.000000,98875.000000,278.577444)}
{pt3dadd(198768.000000,136416.000000,98900.000000,303.528120)}
{pt3dadd(198900.000000,135432.000000,99425.000000,343.698640)}
{pt3dadd(198924.000000,134388.000000,99425.000000,369.622450)}
{pt3dadd(198960.000000,133236.000000,99225.000000,391.007306)}
{pt3dadd(198888.000000,132696.000000,99000.000000,425.601820)}
{pt3dadd(198960.000000,132048.000000,98925.000000,440.731710)}
{pt3dadd(198756.000000,131544.000000,98925.000000,457.412410)}
{pt3dadd(198672.000000,131052.000000,98750.000000,457.412410)}
{pt3dadd(198648.000000,130536.000000,98825.000000,439.897670)}
{pt3dadd(198768.000000,130200.000000,98950.000000,384.065126)}
{pt3dadd(198888.000000,129804.000000,98975.000000,339.777124)}
{pt3dadd(198888.000000,129192.000000,99225.000000,445.694024)}
{pt3dadd(198804.000000,128664.000000,99675.000000,433.493470)}
{pt3dadd(198744.000000,127908.000000,99725.000000,415.900098)}
{pt3dadd(198576.000000,127332.000000,99600.000000,442.776488)}
{pt3dadd(198276.000000,126708.000000,99550.000000,451.622618)}
{pt3dadd(198168.000000,126372.000000,99500.000000,301.516892)}
{pt3dadd(197952.000000,126012.000000,99500.000000,269.370072)}
{pt3dadd(197724.000000,125724.000000,99350.000000,258.079918)}
{pt3dadd(197412.000000,125436.000000,99425.000000,252.441558)}
{pt3dadd(196956.000000,125028.000000,99175.000000,260.306144)}
{pt3dadd(196596.000000,124824.000000,98900.000000,271.058670)}
{pt3dadd(196356.000000,124572.000000,98625.000000,259.573500)}
{pt3dadd(195756.000000,124212.000000,98275.000000,236.356660)}
{pt3dadd(195156.000000,123792.000000,98275.000000,210.520370)}
{pt3dadd(194580.000000,123048.000000,98200.000000,183.392270)}
{pt3dadd(194520.000000,122724.000000,98275.000000,172.639744)}
{pt3dadd(194448.000000,122376.000000,98425.000000,193.877774)}
{pt3dadd(194424.000000,121872.000000,98700.000000,225.352424)}
{pt3dadd(194700.000000,121332.000000,98875.000000,281.516420)}
{pt3dadd(194640.000000,120852.000000,98875.000000,328.288060)}
{pt3dadd(194592.000000,120336.000000,99000.000000,359.666302)}
{pt3dadd(194484.000000,119880.000000,98800.000000,374.864118)}
{pt3dadd(194412.000000,119472.000000,98600.000000,366.606308)}
{pt3dadd(194160.000000,119004.000000,98250.000000,341.916962)}
{pt3dadd(193860.000000,118404.000000,98175.000000,338.231134)}
{pt3dadd(193776.000000,117948.000000,98025.000000,320.637762)}
{pt3dadd(193632.000000,117564.000000,97925.000000,295.687086)}
{pt3dadd(193620.000000,117012.000000,97675.000000,275.460392)}
{pt3dadd(193656.000000,116508.000000,97525.000000,264.707866)}
{pt3dadd(193632.000000,115920.000000,97150.000000,245.999734)}
{pt3dadd(193620.000000,115248.000000,96800.000000,228.441683)}
{pt3dadd(193824.000000,114840.000000,96250.000000,275.042200)}

{create adhoc3}
{access adhoc3}
{connect adhoc3(1), adhoc2(0)}
{nseg = 1}
{strdef color color = "White"}
{pt3dclear()}
{pt3dadd(193824.000000,114840.000000,96250.000000,275.042200)}
{pt3dadd(193836.000000,114432.000000,95975.000000,267.142767)}
{pt3dadd(193776.000000,113808.000000,95825.000000,265.562880)}
{pt3dadd(193896.000000,113556.000000,95725.000000,258.072800)}
{pt3dadd(193872.000000,112716.000000,95425.000000,241.362084)}
{pt3dadd(193632.000000,112164.000000,95300.000000,232.937196)}
{pt3dadd(193464.000000,111936.000000,95200.000000,230.186776)}
{pt3dadd(193224.000000,111660.000000,95150.000000,240.427276)}
{pt3dadd(192972.000000,111408.000000,95075.000000,250.667776)}
{pt3dadd(192708.000000,110664.000000,95075.000000,262.008622)}
{pt3dadd(192528.000000,110448.000000,94975.000000,277.923590)}
{pt3dadd(192216.000000,110196.000000,94975.000000,266.015702)}
{pt3dadd(192024.000000,109956.000000,94900.000000,255.775202)}
{pt3dadd(191856.000000,109740.000000,94875.000000,250.405332)}
{pt3dadd(191712.000000,109548.000000,94900.000000,247.910616)}
{pt3dadd(191520.000000,109332.000000,94900.000000,242.796450)}
{pt3dadd(191328.000000,109128.000000,94950.000000,252.084888)}
{pt3dadd(191256.000000,108948.000000,95000.000000,247.667080)}
{pt3dadd(190716.000000,108288.000000,95025.000000,223.061090)}
{pt3dadd(190272.000000,107760.000000,95025.000000,199.626816)}
{pt3dadd(189948.000000,107076.000000,94975.000000,173.732542)}
{pt3dadd(189660.000000,106740.000000,94975.000000,151.974312)}
{pt3dadd(189528.000000,106704.000000,95175.000000,136.656760)}
{pt3dadd(189156.000000,106608.000000,95450.000000,141.036056)}
{pt3dadd(189444.000000,106524.000000,94675.000000,143.748206)}
{pt3dadd(189348.000000,106212.000000,94450.000000,148.920356)}
{pt3dadd(189072.000000,105852.000000,94200.000000,157.383068)}
{pt3dadd(188436.000000,105744.000000,94200.000000,160.230828)}
{pt3dadd(188184.000000,105096.000000,93900.000000,160.230828)}
{pt3dadd(187944.000000,104616.000000,93625.000000,170.152150)}
{pt3dadd(187572.000000,103980.000000,93300.000000,188.498360)}
{pt3dadd(187308.000000,103512.000000,93000.000000,207.163748)}
{pt3dadd(187044.000000,102852.000000,92825.000000,228.921978)}
{pt3dadd(186744.000000,102528.000000,92450.000000,230.530092)}
{pt3dadd(186696.000000,102288.000000,92075.000000,239.863767)}
{pt3dadd(186516.000000,101808.000000,91650.000000,168.852050)}

{create adhoc4}
{access adhoc4}
{connect adhoc4(1), adhoc3(0)}
{nseg = 1}
{strdef color color = "White"}
{pt3dclear()}
{pt3dadd(186516.000000,101808.000000,91650.000000,168.852050)}
{pt3dadd(186132.000000,101496.000000,91550.000000,125.473297)}
{pt3dadd(185760.000000,101136.000000,91600.000000,99.037895)}
{pt3dadd(185604.000000,101004.000000,91600.000000,89.545845)}

{create adhoc5}
{access adhoc5}
{connect adhoc5(1), adhoc3(0)}
{nseg = 1}
{strdef color color = "White"}
{pt3dclear()}
{pt3dadd(186516.000000,101808.000000,91650.000000,168.852050)}
{pt3dadd(186492.000000,101688.000000,91175.000000,166.171860)}
{pt3dadd(186540.000000,101808.000000,90800.000000,151.363116)}
{pt3dadd(186600.000000,101748.000000,90475.000000,141.592706)}
{pt3dadd(186468.000000,101628.000000,90125.000000,134.282296)}
{pt3dadd(186420.000000,101628.000000,89850.000000,132.750760)}
{pt3dadd(186300.000000,101436.000000,89475.000000,130.407902)}
{pt3dadd(186240.000000,101280.000000,89075.000000,122.752530)}
{pt3dadd(186132.000000,101148.000000,88650.000000,118.497390)}
{pt3dadd(186012.000000,101076.000000,88200.000000,121.209540)}
{pt3dadd(185976.000000,100944.000000,87775.000000,122.741076)}
{pt3dadd(185988.000000,100812.000000,87400.000000,126.343934)}
{pt3dadd(185964.000000,100596.000000,86975.000000,135.322306)}
{pt3dadd(185976.000000,100476.000000,86525.000000,140.777446)}
{pt3dadd(185952.000000,100488.000000,86075.000000,139.388296)}
{pt3dadd(185856.000000,100476.000000,85625.000000,135.009000)}
{pt3dadd(185904.000000,100368.000000,85250.000000,139.179760)}
{pt3dadd(185820.000000,100128.000000,84850.000000,139.179760)}
{pt3dadd(185748.000000,100032.000000,84350.000000,134.711863)}
{pt3dadd(185664.000000,99912.000000,83850.000000,129.786005)}
{pt3dadd(185628.000000,99780.000000,83400.000000,134.165301)}
{pt3dadd(185340.000000,99612.000000,82900.000000,142.628013)}
{pt3dadd(185112.000000,99336.000000,82400.000000,155.893157)}
{pt3dadd(184932.000000,99336.000000,81975.000000,176.209198)}
{pt3dadd(184668.000000,99180.000000,81475.000000,175.120764)}
{pt3dadd(184584.000000,99096.000000,80950.000000,169.418468)}
{pt3dadd(184572.000000,99228.000000,80425.000000,159.497146)}
{pt3dadd(184524.000000,99216.000000,80000.000000,185.312106)}
{pt3dadd(184548.000000,99120.000000,79475.000000,207.943106)}
{pt3dadd(184596.000000,99060.000000,79025.000000,243.933258)}
{pt3dadd(184488.000000,99252.000000,78525.000000,249.635554)}
{pt3dadd(184272.000000,98964.000000,78250.000000,243.320546)}
{pt3dadd(183864.000000,98628.000000,78550.000000,196.202302)}
{pt3dadd(183792.000000,98508.000000,78350.000000,153.255261)}
{pt3dadd(183456.000000,98472.000000,78050.000000,116.228504)}
{pt3dadd(183264.000000,98400.000000,77725.000000,100.310353)}
{pt3dadd(183096.000000,98364.000000,77375.000000,98.185314)}
{pt3dadd(182904.000000,98424.000000,77050.000000,93.911068)}
{pt3dadd(182760.000000,98304.000000,76775.000000,90.235317)}
{pt3dadd(182688.000000,98316.000000,76425.000000,88.765115)}
{pt3dadd(182616.000000,98256.000000,76075.000000,85.281760)}

{create adhoc6}
{access adhoc6}
{connect adhoc6(1), adhoc2(0)}
{nseg = 1}
{strdef color color = "White"}
{pt3dclear()}
{pt3dadd(193824.000000,114840.000000,96250.000000,275.042200)}
{pt3dadd(193860.000000,114732.000000,95925.000000,212.135237)}
{pt3dadd(193956.000000,114732.000000,95675.000000,182.847142)}
{pt3dadd(194124.000000,114636.000000,95375.000000,157.010852)}
{pt3dadd(194112.000000,114456.000000,94950.000000,139.110300)}
{pt3dadd(194148.000000,114252.000000,94525.000000,127.847319)}
{pt3dadd(193656.000000,114252.000000,94225.000000,125.264319)}
{pt3dadd(193428.000000,114384.000000,94200.000000,113.848615)}
{pt3dadd(193164.000000,114564.000000,94075.000000,126.000000)}

{create adhoc7}
{access adhoc7}
{connect adhoc7(1), adhoc1(0)}
{nseg = 1}
{strdef color color = "White"}
{pt3dclear()}
{pt3dadd(201936.000000,151116.000000,98500.000000,387.012000)}
{pt3dadd(202032.000000,151896.000000,98500.000000,291.744950)}
{pt3dadd(202044.000000,152556.000000,98500.000000,279.141954)}
{pt3dadd(202212.000000,153252.000000,98500.000000,271.945810)}
{pt3dadd(202128.000000,154032.000000,98175.000000,289.763076)}
{pt3dadd(202128.000000,154728.000000,98175.000000,296.896486)}
{pt3dadd(201960.000000,155928.000000,97825.000000,326.527710)}
{pt3dadd(201840.000000,156972.000000,97825.000000,340.937122)}
{pt3dadd(201744.000000,157332.000000,97450.000000,348.133266)}
{pt3dadd(201804.000000,157800.000000,97250.000000,344.790114)}
{pt3dadd(201768.000000,158268.000000,97125.000000,359.264228)}
{pt3dadd(201708.000000,158772.000000,97050.000000,369.803524)}
{pt3dadd(201756.000000,159108.000000,96900.000000,365.933408)}
{pt3dadd(201684.000000,159420.000000,96775.000000,373.867154)}
{pt3dadd(201756.000000,159684.000000,96650.000000,388.276566)}
{pt3dadd(201672.000000,160044.000000,96725.000000,395.130034)}
{pt3dadd(201708.000000,160416.000000,96700.000000,391.444206)}
{pt3dadd(201624.000000,160800.000000,96900.000000,380.904910)}
{pt3dadd(201624.000000,161160.000000,96875.000000,369.285336)}
{pt3dadd(201444.000000,161628.000000,96725.000000,369.285336)}
{pt3dadd(201360.000000,162072.000000,96725.000000,380.904910)}
{pt3dadd(201384.000000,162504.000000,96650.000000,392.524484)}
{pt3dadd(201444.000000,162888.000000,96525.000000,440.019974)}
{pt3dadd(201348.000000,163524.000000,96400.000000,475.051477)}
{pt3dadd(201096.000000,164064.000000,96375.000000,571.792970)}

{create adhoc8}
{access adhoc8}
{connect adhoc8(1), adhoc7(0)}
{nseg = 1}
{strdef color color = "White"}
{pt3dclear()}
{pt3dadd(201096.000000,164064.000000,96375.000000,571.792970)}
{pt3dadd(200496.000000,163956.000000,95875.000000,355.275997)}
{pt3dadd(200328.000000,163620.000000,95575.000000,276.108158)}
{pt3dadd(200160.000000,163452.000000,95275.000000,189.532564)}
{pt3dadd(200004.000000,163104.000000,94925.000000,163.936000)}
{pt3dadd(199908.000000,162876.000000,94600.000000,153.518616)}
{pt3dadd(199800.000000,162672.000000,94325.000000,153.518616)}
{pt3dadd(199716.000000,162468.000000,94000.000000,152.129466)}
{pt3dadd(199740.000000,162396.000000,93750.000000,146.115174)}
{pt3dadd(199752.000000,162312.000000,93450.000000,137.952878)}
{pt3dadd(199632.000000,162180.000000,93175.000000,135.105118)}
{pt3dadd(199656.000000,162096.000000,92875.000000,133.497004)}
{pt3dadd(199752.000000,161952.000000,92550.000000,137.876300)}
{pt3dadd(199860.000000,161916.000000,92300.000000,149.878002)}
{pt3dadd(200028.000000,161916.000000,91975.000000,161.336932)}
{pt3dadd(199992.000000,161796.000000,91725.000000,169.012862)}
{pt3dadd(200076.000000,161772.000000,91450.000000,170.620976)}
{pt3dadd(200112.000000,161904.000000,91225.000000,169.089440)}
{pt3dadd(200028.000000,161868.000000,91000.000000,165.949790)}
{pt3dadd(200028.000000,161832.000000,90725.000000,164.261270)}
{pt3dadd(199944.000000,161736.000000,90425.000000,159.433100)}
{pt3dadd(199944.000000,161784.000000,90125.000000,153.445690)}
{pt3dadd(199908.000000,161688.000000,89800.000000,154.977226)}
{pt3dadd(199788.000000,161496.000000,89525.000000,158.116876)}
{pt3dadd(199788.000000,161424.000000,89300.000000,156.508762)}
{pt3dadd(199752.000000,161280.000000,89075.000000,168.978554)}
{pt3dadd(199716.000000,161172.000000,88850.000000,201.842354)}
{pt3dadd(199740.000000,161136.000000,88600.000000,214.935638)}
{pt3dadd(199836.000000,161076.000000,88225.000000,210.337378)}
{pt3dadd(199944.000000,160992.000000,87950.000000,213.634012)}
{pt3dadd(200376.000000,161400.000000,87750.000000,205.992390)}
{pt3dadd(200688.000000,161568.000000,87500.000000,195.239864)}
{pt3dadd(200748.000000,161700.000000,87250.000000,202.373274)}
{pt3dadd(200736.000000,161748.000000,87000.000000,225.590114)}
{pt3dadd(200700.000000,161916.000000,86700.000000,240.025458)}
{pt3dadd(200736.000000,162276.000000,86500.000000,241.798408)}
{pt3dadd(200724.000000,162324.000000,86300.000000,227.363064)}
{pt3dadd(200856.000000,162408.000000,86125.000000,195.706177)}
{pt3dadd(200928.000000,162468.000000,85875.000000,171.100187)}
{pt3dadd(200940.000000,162540.000000,85050.000000,151.836673)}
{pt3dadd(200664.000000,162840.000000,84350.000000,146.767089)}
{pt3dadd(200196.000000,162840.000000,83675.000000,166.316599)}
{pt3dadd(199788.000000,162840.000000,83425.000000,196.335827)}
{pt3dadd(199536.000000,162840.000000,82850.000000,275.042200)}

{create adhoc9}
{access adhoc9}
{connect adhoc9(1), adhoc8(0)}
{nseg = 1}
{strdef color color = "White"}
{pt3dclear()}
{pt3dadd(199536.000000,162840.000000,82850.000000,275.042200)}
{pt3dadd(199392.000000,162552.000000,82400.000000,280.073717)}
{pt3dadd(199308.000000,162432.000000,82000.000000,219.011154)}
{pt3dadd(198972.000000,162552.000000,81725.000000,181.911883)}
{pt3dadd(198852.000000,162708.000000,81500.000000,150.254996)}
{pt3dadd(198960.000000,162708.000000,81225.000000,110.340299)}
{pt3dadd(198852.000000,163104.000000,81025.000000,105.961003)}
{pt3dadd(198756.000000,163356.000000,80875.000000,122.615305)}
{pt3dadd(198756.000000,163656.000000,80775.000000,135.336896)}
{pt3dadd(198780.000000,163920.000000,80775.000000,134.349653)}
{pt3dadd(198756.000000,164136.000000,80700.000000,143.057583)}
{pt3dadd(198852.000000,164448.000000,80375.000000,98.724300)}

{create adhoc10}
{access adhoc10}
{connect adhoc10(1), adhoc8(0)}
{nseg = 1}
{strdef color color = "White"}
{pt3dclear()}
{pt3dadd(199536.000000,162840.000000,82850.000000,275.042200)}
{pt3dadd(199308.000000,161832.000000,82750.000000,182.518255)}
{pt3dadd(199056.000000,161340.000000,82625.000000,146.750275)}
{pt3dadd(198876.000000,160740.000000,82625.000000,113.510543)}
{pt3dadd(198660.000000,160236.000000,82625.000000,102.597275)}
{pt3dadd(198312.000000,159780.000000,82750.000000,101.610032)}
{pt3dadd(198132.000000,159552.000000,82825.000000,107.284517)}
{pt3dadd(198096.000000,159252.000000,82725.000000,98.724300)}

{create adhoc11}
{access adhoc11}
{connect adhoc11(1), adhoc7(0)}
{nseg = 1}
{strdef color color = "White"}
{pt3dclear()}
{pt3dadd(201096.000000,164064.000000,96375.000000,571.792970)}
{pt3dadd(200952.000000,165000.000000,96350.000000,498.929537)}
{pt3dadd(200592.000000,165816.000000,96350.000000,452.639820)}
{pt3dadd(200292.000000,166416.000000,96500.000000,458.357746)}
{pt3dadd(200124.000000,167004.000000,96350.000000,458.357746)}
{pt3dadd(200064.000000,167556.000000,96575.000000,466.688184)}
{pt3dadd(200076.000000,168072.000000,96675.000000,501.796296)}
{pt3dadd(199824.000000,168648.000000,96800.000000,489.595742)}
{pt3dadd(199692.000000,169224.000000,96650.000000,459.122176)}
{pt3dadd(199500.000000,169704.000000,96650.000000,449.478664)}
{pt3dadd(199308.000000,170376.000000,96475.000000,445.211856)}
{pt3dadd(199152.000000,170928.000000,96350.000000,445.211856)}
{pt3dadd(198948.000000,171528.000000,96375.000000,457.412410)}
{pt3dadd(198492.000000,172116.000000,96475.000000,449.081972)}
{pt3dadd(198060.000000,172560.000000,96500.000000,412.757732)}
{pt3dadd(197736.000000,173148.000000,96500.000000,379.810576)}
{pt3dadd(197088.000000,173592.000000,96600.000000,347.886424)}
{pt3dadd(196620.000000,174120.000000,96725.000000,325.146574)}
{pt3dadd(196236.000000,174612.000000,97025.000000,314.080314)}
{pt3dadd(195984.000000,174960.000000,97225.000000,345.924408)}
{pt3dadd(195756.000000,175308.000000,97400.000000,367.251990)}
{pt3dadd(195636.000000,175680.000000,97625.000000,377.791286)}
{pt3dadd(195660.000000,176160.000000,97825.000000,363.317172)}
{pt3dadd(195552.000000,176616.000000,98025.000000,353.757716)}
{pt3dadd(195360.000000,177048.000000,98425.000000,321.913622)}
{pt3dadd(195480.000000,177468.000000,98725.000000,315.060154)}
{pt3dadd(195600.000000,177948.000000,99075.000000,287.552028)}
{pt3dadd(195576.000000,178500.000000,99250.000000,280.418618)}
{pt3dadd(195540.000000,179028.000000,99450.000000,270.021597)}
{pt3dadd(195564.000000,179076.000000,99675.000000,226.277900)}
