# Supplementary material for: Full reconstruction of large lobula plate tangential cells in Drosophila from a 3D EM dataset
Source: PLoS One. 2018 Nov 28;13(11):e0207828. doi: 10.1371/journal.pone.0207828 (PMC6261601; doi:10.1371/journal.pone.0207828)
Supplement: S1 Dataset — (ZIP) [file pone.0207828.s001.zip › Diameter hoc/Cell_VSLBD_11skels_ck001_corrected_sorted_diametered.hoc0001.hoc]

/* created with convertKnossosNmlToHoc.m */

{create adhoc1}
{access adhoc1}
{nseg = 1}
{strdef color color = "White"}
{pt3dclear()}
{pt3dadd(178428.000000,205092.000000,75475.000000,50.577007)}
{pt3dadd(178500.000000,205188.000000,75675.000000,167.309852)}
{pt3dadd(178500.000000,205728.000000,76350.000000,192.175789)}
{pt3dadd(178416.000000,206172.000000,76725.000000,218.027444)}
{pt3dadd(178644.000000,206412.000000,77150.000000,235.027774)}
{pt3dadd(178812.000000,206652.000000,77575.000000,201.739308)}
{pt3dadd(179052.000000,207120.000000,78025.000000,186.184816)}
{pt3dadd(179484.000000,207564.000000,78450.000000,175.572056)}
{pt3dadd(179880.000000,207696.000000,78900.000000,183.888102)}
{pt3dadd(180456.000000,207864.000000,79350.000000,183.176213)}
{pt3dadd(180804.000000,208272.000000,79775.000000,221.415510)}

{create adhoc2}
{access adhoc2}
{connect adhoc2(1), adhoc1(0)}
{nseg = 1}
{strdef color color = "White"}
{pt3dclear()}
{pt3dadd(180804.000000,208272.000000,79775.000000,221.415510)}
{pt3dadd(181152.000000,208596.000000,80225.000000,192.320797)}
{pt3dadd(181212.000000,209076.000000,80625.000000,231.251964)}
{pt3dadd(181500.000000,209424.000000,81225.000000,239.972390)}
{pt3dadd(181536.000000,209796.000000,81675.000000,256.135756)}
{pt3dadd(181476.000000,209820.000000,82150.000000,265.586460)}
{pt3dadd(181476.000000,210264.000000,82550.000000,278.884548)}
{pt3dadd(181332.000000,210588.000000,83000.000000,264.845882)}
{pt3dadd(181152.000000,211104.000000,83650.000000,246.049142)}
{pt3dadd(181176.000000,211476.000000,84125.000000,246.049142)}
{pt3dadd(181272.000000,211980.000000,84575.000000,248.232016)}
{pt3dadd(181380.000000,212160.000000,85050.000000,233.550656)}
{pt3dadd(181428.000000,212412.000000,85500.000000,236.074522)}
{pt3dadd(181680.000000,212724.000000,85925.000000,243.446298)}
{pt3dadd(181920.000000,213072.000000,86525.000000,240.899963)}
{pt3dadd(182052.000000,213300.000000,87550.000000,207.892820)}

{create adhoc3}
{access adhoc3}
{connect adhoc3(1), adhoc2(0)}
{nseg = 1}
{strdef color color = "White"}
{pt3dclear()}
{pt3dadd(182052.000000,213300.000000,87550.000000,207.892820)}
{pt3dadd(181908.000000,213084.000000,87550.000000,140.172997)}
{pt3dadd(181680.000000,212868.000000,87550.000000,124.103798)}
{pt3dadd(181356.000000,212796.000000,87625.000000,93.706121)}
{pt3dadd(181056.000000,212712.000000,87800.000000,90.243307)}
{pt3dadd(180900.000000,212700.000000,88025.000000,95.585675)}
{pt3dadd(180720.000000,212724.000000,88275.000000,93.382067)}
{pt3dadd(180756.000000,212748.000000,88675.000000,103.668633)}
{pt3dadd(180684.000000,212796.000000,89000.000000,88.981960)}

{create adhoc4}
{access adhoc4}
{connect adhoc4(1), adhoc2(0)}
{nseg = 1}
{strdef color color = "White"}
{pt3dclear()}
{pt3dadd(182052.000000,213300.000000,87550.000000,207.892820)}
{pt3dadd(182124.000000,213492.000000,87550.000000,218.815857)}
{pt3dadd(182364.000000,213816.000000,87900.000000,281.096836)}
{pt3dadd(182628.000000,213984.000000,88300.000000,380.318052)}
{pt3dadd(182808.000000,214320.000000,88575.000000,503.328666)}
{pt3dadd(182892.000000,214956.000000,88575.000000,641.334202)}
{pt3dadd(182700.000000,215664.000000,88575.000000,806.148040)}
{pt3dadd(182508.000000,216372.000000,88575.000000,933.802167)}
{pt3dadd(182340.000000,216960.000000,88575.000000,1047.771000)}

{create adhoc5}
{access adhoc5}
{connect adhoc5(1), adhoc4(0)}
{nseg = 1}
{strdef color color = "White"}
{pt3dclear()}
{pt3dadd(182340.000000,216960.000000,88575.000000,1047.771000)}
{pt3dadd(182208.000000,216900.000000,88350.000000,1089.561167)}
{pt3dadd(182052.000000,216648.000000,88000.000000,982.347000)}
{pt3dadd(181800.000000,216576.000000,87525.000000,900.502340)}
{pt3dadd(181668.000000,216468.000000,87050.000000,790.734800)}
{pt3dadd(181572.000000,216540.000000,86675.000000,643.709512)}
{pt3dadd(181308.000000,216600.000000,86275.000000,521.800000)}
{pt3dadd(181104.000000,216600.000000,85900.000000,483.537812)}
{pt3dadd(180960.000000,216420.000000,85550.000000,455.892042)}
{pt3dadd(180984.000000,216504.000000,85300.000000,450.888852)}
{pt3dadd(180840.000000,216504.000000,85025.000000,456.492636)}
{pt3dadd(180792.000000,216360.000000,84775.000000,453.451668)}
{pt3dadd(180744.000000,216300.000000,84475.000000,451.775310)}
{pt3dadd(180480.000000,216156.000000,84025.000000,415.374600)}

{create adhoc6}
{access adhoc6}
{connect adhoc6(1), adhoc5(0)}
{nseg = 1}
{strdef color color = "White"}
{pt3dclear()}
{pt3dadd(180480.000000,216156.000000,84025.000000,415.374600)}
{pt3dadd(180276.000000,216120.000000,83675.000000,538.483183)}
{pt3dadd(180192.000000,216108.000000,83375.000000,611.729450)}
{pt3dadd(180024.000000,216012.000000,83125.000000,662.749550)}
{pt3dadd(179748.000000,216000.000000,82850.000000,661.772410)}
{pt3dadd(179532.000000,216084.000000,82600.000000,678.972680)}
{pt3dadd(179364.000000,216048.000000,82400.000000,652.761060)}
{pt3dadd(179184.000000,216084.000000,82175.000000,627.797608)}
{pt3dadd(179040.000000,215988.000000,81950.000000,619.022708)}
{pt3dadd(178908.000000,215940.000000,81725.000000,616.232108)}
{pt3dadd(178692.000000,216024.000000,81500.000000,600.848247)}
{pt3dadd(178380.000000,216024.000000,81225.000000,596.762500)}

{create adhoc7}
{access adhoc7}
{connect adhoc7(1), adhoc6(0)}
{nseg = 1}
{strdef color color = "White"}
{pt3dclear()}
{pt3dadd(178380.000000,216024.000000,81225.000000,596.762500)}
{pt3dadd(177864.000000,216228.000000,80900.000000,608.843600)}
{pt3dadd(177648.000000,216348.000000,80700.000000,647.240940)}
{pt3dadd(177432.000000,216288.000000,80525.000000,678.272580)}
{pt3dadd(177132.000000,216204.000000,80325.000000,709.178810)}
{pt3dadd(176868.000000,216240.000000,80100.000000,750.544010)}
{pt3dadd(176760.000000,216168.000000,79900.000000,757.248770)}
{pt3dadd(176376.000000,216324.000000,79575.000000,751.495310)}
{pt3dadd(176064.000000,216372.000000,79375.000000,731.018640)}
{pt3dadd(175632.000000,216540.000000,79075.000000,687.989250)}
{pt3dadd(175416.000000,216564.000000,78900.000000,649.537350)}

{create adhoc8}
{access adhoc8}
{connect adhoc8(1), adhoc7(0)}
{nseg = 1}
{strdef color color = "White"}
{pt3dclear()}
{pt3dadd(175416.000000,216564.000000,78900.000000,649.537350)}
{pt3dadd(175476.000000,216240.000000,78575.000000,626.435217)}
{pt3dadd(175476.000000,216048.000000,78400.000000,494.127234)}
{pt3dadd(175476.000000,215772.000000,78150.000000,396.426770)}
{pt3dadd(175620.000000,215544.000000,77925.000000,306.308038)}
{pt3dadd(175620.000000,215316.000000,77700.000000,214.229006)}
{pt3dadd(175620.000000,215088.000000,77500.000000,179.079800)}
{pt3dadd(175620.000000,214932.000000,77225.000000,157.086078)}
{pt3dadd(175620.000000,214716.000000,76975.000000,149.189198)}
{pt3dadd(175524.000000,214572.000000,76800.000000,132.259162)}
{pt3dadd(175452.000000,214488.000000,76625.000000,127.020180)}
{pt3dadd(175236.000000,214428.000000,76475.000000,138.160468)}
{pt3dadd(175176.000000,214344.000000,76225.000000,145.532312)}
{pt3dadd(174960.000000,214152.000000,76025.000000,152.248752)}
{pt3dadd(174864.000000,214092.000000,75875.000000,165.998566)}
{pt3dadd(174648.000000,213996.000000,75675.000000,182.000516)}
{pt3dadd(174348.000000,213876.000000,75525.000000,184.122700)}
{pt3dadd(174396.000000,214068.000000,75200.000000,184.122700)}
{pt3dadd(174216.000000,214032.000000,74925.000000,194.674698)}
{pt3dadd(174168.000000,213936.000000,74650.000000,194.717828)}
{pt3dadd(174144.000000,213852.000000,74400.000000,181.207666)}
{pt3dadd(174060.000000,213612.000000,74125.000000,162.169214)}
{pt3dadd(173976.000000,213420.000000,73900.000000,141.176396)}
{pt3dadd(173904.000000,213108.000000,73600.000000,126.651714)}
{pt3dadd(173784.000000,213060.000000,73425.000000,128.159912)}
{pt3dadd(173736.000000,213072.000000,73125.000000,137.275124)}
{pt3dadd(173736.000000,213048.000000,72850.000000,141.499776)}
{pt3dadd(173712.000000,212988.000000,72600.000000,152.533408)}
{pt3dadd(173712.000000,212832.000000,72325.000000,130.802758)}
{pt3dadd(173772.000000,212688.000000,72150.000000,103.846230)}
{pt3dadd(173964.000000,212796.000000,71850.000000,26.616160)}

{create adhoc9}
{access adhoc9}
{connect adhoc9(1), adhoc7(0)}
{nseg = 1}
{strdef color color = "White"}
{pt3dclear()}
{pt3dadd(175416.000000,216564.000000,78900.000000,649.537350)}
{pt3dadd(175200.000000,216564.000000,78725.000000,658.558713)}
{pt3dadd(174984.000000,216648.000000,78625.000000,663.325268)}
{pt3dadd(174744.000000,216696.000000,78450.000000,655.045938)}
{pt3dadd(174576.000000,216768.000000,78375.000000,655.680268)}
{pt3dadd(174420.000000,216900.000000,78250.000000,654.455000)}
{pt3dadd(174240.000000,216924.000000,78125.000000,654.455000)}
{pt3dadd(174060.000000,217092.000000,78100.000000,654.455000)}
{pt3dadd(173880.000000,217224.000000,78025.000000,676.049840)}
{pt3dadd(173688.000000,217380.000000,78025.000000,679.603060)}
{pt3dadd(173496.000000,217380.000000,77925.000000,673.217580)}
{pt3dadd(173316.000000,217452.000000,77825.000000,666.832100)}
{pt3dadd(173172.000000,217692.000000,77750.000000,649.190167)}
{pt3dadd(173028.000000,217776.000000,77725.000000,638.547700)}

{create adhoc10}
{access adhoc10}
{connect adhoc10(1), adhoc9(0)}
{nseg = 1}
{strdef color color = "White"}
{pt3dclear()}
{pt3dadd(173028.000000,217776.000000,77725.000000,638.547700)}
{pt3dadd(172848.000000,217800.000000,77550.000000,615.336033)}
{pt3dadd(172668.000000,217884.000000,77475.000000,644.096420)}
{pt3dadd(172524.000000,218040.000000,77450.000000,656.523020)}
{pt3dadd(172380.000000,218088.000000,77375.000000,678.002420)}
{pt3dadd(172236.000000,218268.000000,77400.000000,683.020633)}
{pt3dadd(172104.000000,218316.000000,77300.000000,644.382300)}

{create adhoc11}
{access adhoc11}
{connect adhoc11(1), adhoc10(0)}
{nseg = 1}
{strdef color color = "White"}
{pt3dclear()}
{pt3dadd(172104.000000,218316.000000,77300.000000,644.382300)}
{pt3dadd(171948.000000,218340.000000,77225.000000,668.117050)}
{pt3dadd(171816.000000,218340.000000,77175.000000,696.549750)}
{pt3dadd(171648.000000,218472.000000,77050.000000,708.473070)}
{pt3dadd(171492.000000,218568.000000,76975.000000,703.276780)}
{pt3dadd(171252.000000,218592.000000,76975.000000,688.900020)}
{pt3dadd(171120.000000,218628.000000,76950.000000,662.688400)}
{pt3dadd(170988.000000,218664.000000,76925.000000,636.476780)}
{pt3dadd(170844.000000,218700.000000,76900.000000,615.612266)}
{pt3dadd(170724.000000,218736.000000,76900.000000,612.529226)}
{pt3dadd(170592.000000,218832.000000,76825.000000,595.139998)}
{pt3dadd(170484.000000,218856.000000,76825.000000,583.832170)}
{pt3dadd(170376.000000,218880.000000,76825.000000,578.829690)}
{pt3dadd(170268.000000,218904.000000,76825.000000,586.603964)}
{pt3dadd(170160.000000,218928.000000,76825.000000,592.685364)}
{pt3dadd(170052.000000,218952.000000,76825.000000,592.685364)}
{pt3dadd(169944.000000,218976.000000,76825.000000,598.990712)}
{pt3dadd(169848.000000,219096.000000,76825.000000,598.201380)}
{pt3dadd(169752.000000,219216.000000,76825.000000,586.328168)}
{pt3dadd(169668.000000,219288.000000,76825.000000,574.454956)}
{pt3dadd(169572.000000,219252.000000,76775.000000,584.069910)}
{pt3dadd(169476.000000,219216.000000,76750.000000,583.280578)}
{pt3dadd(169380.000000,219180.000000,76775.000000,577.764562)}
{pt3dadd(169260.000000,219300.000000,76775.000000,577.764562)}
{pt3dadd(169188.000000,219336.000000,76725.000000,577.066100)}
{pt3dadd(169104.000000,219336.000000,76675.000000,567.451146)}
{pt3dadd(168984.000000,219300.000000,76650.000000,573.242958)}
{pt3dadd(168876.000000,219384.000000,76600.000000,567.989606)}
{pt3dadd(168768.000000,219432.000000,76525.000000,555.757878)}
{pt3dadd(168660.000000,219468.000000,76450.000000,545.686972)}
{pt3dadd(168540.000000,219420.000000,76425.000000,545.686972)}
{pt3dadd(168432.000000,219384.000000,76400.000000,534.379144)}
{pt3dadd(168324.000000,219408.000000,76375.000000,548.664684)}
{pt3dadd(168204.000000,219444.000000,76300.000000,572.769624)}
{pt3dadd(168084.000000,219528.000000,76225.000000,595.412204)}
{pt3dadd(167964.000000,219564.000000,76125.000000,612.801432)}
{pt3dadd(167868.000000,219600.000000,76075.000000,634.067252)}
{pt3dadd(167760.000000,219588.000000,76050.000000,630.551080)}
{pt3dadd(167640.000000,219612.000000,76050.000000,618.677868)}
{pt3dadd(167520.000000,219684.000000,76000.000000,606.804656)}
{pt3dadd(167424.000000,219768.000000,75925.000000,597.500376)}
{pt3dadd(167280.000000,219852.000000,75850.000000,581.750572)}
{pt3dadd(167148.000000,219936.000000,75775.000000,581.750572)}
{pt3dadd(167016.000000,219984.000000,75725.000000,576.234556)}
{pt3dadd(166896.000000,220032.000000,75725.000000,574.067268)}
{pt3dadd(166776.000000,220032.000000,75700.000000,560.728968)}
{pt3dadd(166656.000000,220032.000000,75675.000000,566.520780)}
{pt3dadd(166536.000000,220032.000000,75650.000000,555.751412)}
{pt3dadd(166428.000000,220128.000000,75525.000000,554.215926)}
{pt3dadd(166296.000000,220176.000000,75450.000000,556.383214)}
{pt3dadd(166164.000000,220296.000000,75450.000000,567.152582)}
{pt3dadd(166032.000000,220332.000000,75425.000000,561.360770)}
{pt3dadd(165900.000000,220356.000000,75400.000000,565.078636)}
{pt3dadd(165768.000000,220380.000000,75325.000000,556.357580)}
{pt3dadd(165648.000000,220476.000000,75275.000000,540.585022)}
{pt3dadd(165540.000000,220596.000000,75275.000000,524.812464)}
{pt3dadd(165432.000000,220692.000000,75275.000000,498.751300)}
{pt3dadd(165336.000000,220716.000000,75250.000000,490.030244)}
{pt3dadd(165228.000000,220740.000000,75225.000000,490.030244)}
{pt3dadd(165132.000000,220740.000000,75050.000000,490.030244)}
{pt3dadd(165012.000000,220776.000000,74925.000000,487.378774)}
{pt3dadd(164892.000000,220824.000000,74800.000000,497.667380)}
{pt3dadd(164760.000000,220944.000000,74750.000000,497.667380)}
{pt3dadd(164628.000000,221076.000000,74725.000000,492.902438)}
{pt3dadd(164484.000000,221196.000000,74750.000000,498.573968)}
{pt3dadd(164340.000000,221316.000000,74750.000000,501.225438)}
{pt3dadd(164232.000000,221364.000000,74650.000000,501.225438)}
{pt3dadd(164136.000000,221364.000000,74550.000000,501.225438)}
{pt3dadd(164004.000000,221352.000000,74475.000000,515.048890)}
{pt3dadd(163896.000000,221340.000000,74400.000000,514.380550)}
{pt3dadd(163764.000000,221436.000000,74425.000000,535.944920)}
{pt3dadd(163644.000000,221508.000000,74475.000000,546.201462)}
{pt3dadd(163548.000000,221580.000000,74475.000000,561.275558)}
{pt3dadd(163428.000000,221568.000000,74400.000000,573.781418)}
{pt3dadd(163308.000000,221556.000000,74325.000000,602.809478)}
{pt3dadd(163200.000000,221544.000000,74350.000000,615.276358)}
{pt3dadd(163080.000000,221544.000000,74325.000000,643.121476)}
{pt3dadd(162972.000000,221592.000000,74275.000000,662.078630)}
{pt3dadd(162852.000000,221640.000000,74225.000000,688.290250)}
{pt3dadd(162744.000000,221688.000000,74175.000000,688.290250)}
{pt3dadd(162636.000000,221592.000000,74075.000000,665.267290)}
{pt3dadd(162480.000000,221544.000000,73975.000000,654.811400)}
{pt3dadd(162360.000000,221496.000000,73875.000000,661.516160)}
{pt3dadd(162228.000000,221412.000000,73800.000000,661.516160)}
{pt3dadd(162072.000000,221532.000000,73925.000000,688.145872)}
{pt3dadd(161928.000000,221556.000000,73900.000000,717.873592)}
{pt3dadd(161772.000000,221496.000000,73950.000000,738.003812)}
{pt3dadd(161616.000000,221520.000000,73825.000000,760.197372)}
{pt3dadd(161424.000000,221508.000000,73775.000000,771.031972)}
{pt3dadd(161268.000000,221580.000000,73825.000000,751.107020)}
{pt3dadd(161136.000000,221568.000000,73775.000000,758.147000)}
{pt3dadd(161004.000000,221592.000000,73725.000000,773.300580)}
{pt3dadd(160800.000000,221592.000000,73775.000000,764.602992)}
{pt3dadd(160644.000000,221532.000000,73700.000000,761.160382)}
{pt3dadd(160488.000000,221484.000000,73700.000000,791.503602)}
{pt3dadd(160332.000000,221520.000000,73750.000000,814.806842)}
{pt3dadd(160188.000000,221556.000000,73725.000000,824.122722)}
{pt3dadd(160032.000000,221544.000000,73725.000000,849.527130)}
{pt3dadd(159900.000000,221496.000000,73675.000000,865.438380)}
{pt3dadd(159768.000000,221544.000000,73675.000000,873.995540)}
{pt3dadd(159624.000000,221616.000000,73725.000000,848.634608)}
{pt3dadd(159504.000000,221640.000000,73725.000000,839.318728)}
{pt3dadd(159384.000000,221628.000000,73700.000000,830.761568)}
{pt3dadd(159228.000000,221520.000000,73625.000000,830.761568)}
{pt3dadd(159096.000000,221460.000000,73575.000000,802.872760)}
{pt3dadd(158964.000000,221400.000000,73550.000000,804.494872)}
{pt3dadd(158820.000000,221340.000000,73525.000000,783.930887)}
{pt3dadd(158688.000000,221256.000000,73500.000000,737.020900)}

{create adhoc12}
{access adhoc12}
{connect adhoc12(1), adhoc11(0)}
{nseg = 1}
{strdef color color = "White"}
{pt3dclear()}
{pt3dadd(158688.000000,221256.000000,73500.000000,737.020900)}
{pt3dadd(158328.000000,221316.000000,73500.000000,817.351633)}
{pt3dadd(158016.000000,221328.000000,73500.000000,686.383126)}
{pt3dadd(157596.000000,221400.000000,73500.000000,565.839396)}
{pt3dadd(157248.000000,221400.000000,73600.000000,416.746382)}
{pt3dadd(157116.000000,221316.000000,73725.000000,254.322974)}
{pt3dadd(157248.000000,221052.000000,73675.000000,129.635714)}
{pt3dadd(157236.000000,220764.000000,73750.000000,94.118472)}
{pt3dadd(157164.000000,220452.000000,73750.000000,82.928545)}
{pt3dadd(157020.000000,220164.000000,73750.000000,86.855509)}
{pt3dadd(156960.000000,219828.000000,73750.000000,84.503065)}
{pt3dadd(156900.000000,219468.000000,73750.000000,80.981505)}
{pt3dadd(156900.000000,219324.000000,73550.000000,83.290669)}
{pt3dadd(157128.000000,219072.000000,73650.000000,81.833772)}
{pt3dadd(157200.000000,218844.000000,73650.000000,78.617490)}
{pt3dadd(157248.000000,218580.000000,73650.000000,79.189355)}
{pt3dadd(157368.000000,218268.000000,73650.000000,73.772041)}
{pt3dadd(157440.000000,218040.000000,73650.000000,73.772041)}
{pt3dadd(157500.000000,217812.000000,73800.000000,75.228938)}
{pt3dadd(157476.000000,217452.000000,73800.000000,73.690807)}
{pt3dadd(157416.000000,217164.000000,73875.000000,73.118942)}
{pt3dadd(157428.000000,216804.000000,73800.000000,77.952936)}
{pt3dadd(157440.000000,216372.000000,73650.000000,77.242254)}
{pt3dadd(157548.000000,216084.000000,73525.000000,105.741339)}
{pt3dadd(157692.000000,215844.000000,73350.000000,111.402782)}
{pt3dadd(157776.000000,215712.000000,73000.000000,114.619064)}
{pt3dadd(157932.000000,215472.000000,73100.000000,112.848196)}
{pt3dadd(157944.000000,215172.000000,73100.000000,109.310397)}
{pt3dadd(157932.000000,214932.000000,73100.000000,83.281379)}
{pt3dadd(158136.000000,214704.000000,73050.000000,105.812323)}
{pt3dadd(158256.000000,214428.000000,72900.000000,102.596041)}
{pt3dadd(158448.000000,214068.000000,72775.000000,95.228985)}
{pt3dadd(158712.000000,213732.000000,72725.000000,94.590906)}
{pt3dadd(158580.000000,213468.000000,72550.000000,58.119587)}
{pt3dadd(158616.000000,213024.000000,72400.000000,50.188740)}

{create adhoc13}
{access adhoc13}
{connect adhoc13(1), adhoc11(0)}
{nseg = 1}
{strdef color color = "White"}
{pt3dclear()}
{pt3dadd(158688.000000,221256.000000,73500.000000,737.020900)}
{pt3dadd(158688.000000,221448.000000,73900.000000,629.507810)}
{pt3dadd(158688.000000,221604.000000,74325.000000,414.375209)}
{pt3dadd(158628.000000,221460.000000,74600.000000,292.147969)}
{pt3dadd(158616.000000,221340.000000,74825.000000,149.501959)}
{pt3dadd(158748.000000,221112.000000,75025.000000,116.026529)}
{pt3dadd(158808.000000,220788.000000,75025.000000,128.498014)}
{pt3dadd(158952.000000,220488.000000,75125.000000,124.059726)}
{pt3dadd(159096.000000,220200.000000,75200.000000,118.625216)}
{pt3dadd(159192.000000,219972.000000,75200.000000,104.143700)}
{pt3dadd(158964.000000,219660.000000,75475.000000,74.958543)}
{pt3dadd(158808.000000,219636.000000,75525.000000,43.354920)}

{create adhoc14}
{access adhoc14}
{connect adhoc14(1), adhoc11(0)}
{nseg = 1}
{strdef color color = "White"}
{pt3dclear()}
{pt3dadd(158688.000000,221256.000000,73500.000000,737.020900)}
{pt3dadd(158544.000000,221220.000000,73425.000000,780.096733)}
{pt3dadd(158412.000000,221208.000000,73250.000000,786.283130)}
{pt3dadd(158268.000000,221244.000000,73075.000000,786.718710)}
{pt3dadd(158136.000000,221184.000000,73050.000000,751.123856)}
{pt3dadd(158016.000000,221100.000000,73025.000000,733.839876)}
{pt3dadd(157872.000000,221016.000000,72875.000000,711.646316)}
{pt3dadd(157728.000000,220920.000000,72800.000000,690.509586)}
{pt3dadd(157572.000000,220884.000000,72675.000000,662.605092)}
{pt3dadd(157440.000000,221004.000000,72650.000000,636.642250)}
{pt3dadd(157308.000000,220968.000000,72475.000000,580.004517)}
{pt3dadd(157164.000000,221016.000000,72325.000000,469.862120)}

{create adhoc15}
{access adhoc15}
{connect adhoc15(1), adhoc14(0)}
{nseg = 1}
{strdef color color = "White"}
{pt3dclear()}
{pt3dadd(157164.000000,221016.000000,72325.000000,469.862120)}
{pt3dadd(157272.000000,220656.000000,72325.000000,542.985153)}
{pt3dadd(157236.000000,220344.000000,72325.000000,450.034038)}
{pt3dadd(157176.000000,220056.000000,72325.000000,415.268608)}
{pt3dadd(157032.000000,219852.000000,72200.000000,376.191532)}
{pt3dadd(156924.000000,219660.000000,72050.000000,322.290492)}
{pt3dadd(156864.000000,219540.000000,72050.000000,308.389908)}
{pt3dadd(156852.000000,219384.000000,72000.000000,318.346252)}
{pt3dadd(156780.000000,219228.000000,71975.000000,333.808386)}
{pt3dadd(156756.000000,219084.000000,71950.000000,324.125408)}
{pt3dadd(156744.000000,218952.000000,71900.000000,320.900304)}
{pt3dadd(156744.000000,218832.000000,71950.000000,329.275648)}
{pt3dadd(156720.000000,218700.000000,71950.000000,341.206038)}
{pt3dadd(156672.000000,218568.000000,71875.000000,327.967384)}
{pt3dadd(156612.000000,218484.000000,71800.000000,327.967384)}
{pt3dadd(156552.000000,218352.000000,71750.000000,321.023500)}
{pt3dadd(156444.000000,218220.000000,71675.000000,309.576634)}
{pt3dadd(156408.000000,218112.000000,71625.000000,320.252114)}
{pt3dadd(156276.000000,218016.000000,71575.000000,318.964000)}
{pt3dadd(156240.000000,217908.000000,71550.000000,358.771074)}
{pt3dadd(156120.000000,217776.000000,71425.000000,399.637480)}
{pt3dadd(156120.000000,217440.000000,71325.000000,506.187740)}

{create adhoc16}
{access adhoc16}
{connect adhoc16(1), adhoc15(0)}
{nseg = 1}
{strdef color color = "White"}
{pt3dclear()}
{pt3dadd(156120.000000,217440.000000,71325.000000,506.187740)}
{pt3dadd(155856.000000,217296.000000,71100.000000,448.958963)}
{pt3dadd(155688.000000,217176.000000,70925.000000,456.896330)}

{create adhoc17}
{access adhoc17}
{connect adhoc17(1), adhoc16(0)}
{nseg = 1}
{strdef color color = "White"}
{pt3dclear()}
{pt3dadd(155688.000000,217176.000000,70925.000000,456.896330)}
{pt3dadd(155556.000000,217320.000000,70925.000000,308.493967)}
{pt3dadd(155388.000000,217464.000000,70925.000000,218.357626)}
{pt3dadd(155136.000000,217668.000000,70925.000000,145.814060)}
{pt3dadd(154884.000000,217716.000000,70925.000000,91.978914)}
{pt3dadd(154728.000000,217740.000000,70825.000000,82.593096)}
{pt3dadd(154488.000000,217752.000000,70825.000000,82.219750)}
{pt3dadd(154236.000000,217956.000000,70850.000000,74.621540)}

{create adhoc18}
{access adhoc18}
{connect adhoc18(1), adhoc16(0)}
{nseg = 1}
{strdef color color = "White"}
{pt3dclear()}
{pt3dadd(155688.000000,217176.000000,70925.000000,456.896330)}
{pt3dadd(155628.000000,216924.000000,70700.000000,362.616120)}

{create adhoc19}
{access adhoc19}
{connect adhoc19(1), adhoc18(0)}
{nseg = 1}
{strdef color color = "White"}
{pt3dclear()}
{pt3dadd(155628.000000,216924.000000,70700.000000,362.616120)}
{pt3dadd(155676.000000,217188.000000,70600.000000,264.636413)}
{pt3dadd(155640.000000,217212.000000,70400.000000,182.925063)}
{pt3dadd(155664.000000,217248.000000,70250.000000,125.578909)}
{pt3dadd(155592.000000,217260.000000,70050.000000,75.990808)}
{pt3dadd(155496.000000,217260.000000,69850.000000,67.269073)}
{pt3dadd(155448.000000,217260.000000,69700.000000,66.764005)}
{pt3dadd(155412.000000,217188.000000,69475.000000,64.817381)}
{pt3dadd(155316.000000,217200.000000,69325.000000,63.620078)}
{pt3dadd(155196.000000,217236.000000,69150.000000,65.659467)}
{pt3dadd(154992.000000,217344.000000,69200.000000,72.133071)}
{pt3dadd(154908.000000,217452.000000,69175.000000,88.549560)}

{create adhoc20}
{access adhoc20}
{connect adhoc20(1), adhoc18(0)}
{nseg = 1}
{strdef color color = "White"}
{pt3dclear()}
{pt3dadd(155628.000000,216924.000000,70700.000000,362.616120)}
{pt3dadd(155640.000000,216624.000000,70500.000000,339.513573)}
{pt3dadd(155628.000000,216120.000000,70325.000000,276.313274)}
{pt3dadd(155580.000000,215952.000000,70200.000000,244.895260)}
{pt3dadd(155460.000000,215592.000000,70025.000000,215.525336)}
{pt3dadd(155472.000000,215364.000000,69800.000000,177.032787)}
{pt3dadd(155460.000000,215052.000000,69550.000000,170.439480)}

{create adhoc21}
{access adhoc21}
{connect adhoc21(1), adhoc20(0)}
{nseg = 1}
{strdef color color = "White"}
{pt3dclear()}
{pt3dadd(155460.000000,215052.000000,69550.000000,170.439480)}
{pt3dadd(155784.000000,215088.000000,69575.000000,95.303701)}
{pt3dadd(156072.000000,214716.000000,69350.000000,71.533150)}

{create adhoc22}
{access adhoc22}
{connect adhoc22(1), adhoc20(0)}
{nseg = 1}
{strdef color color = "White"}
{pt3dclear()}
{pt3dadd(155460.000000,215052.000000,69550.000000,170.439480)}
{pt3dadd(155244.000000,214908.000000,69475.000000,164.352587)}
{pt3dadd(155052.000000,214860.000000,69275.000000,166.501918)}
{pt3dadd(154920.000000,214836.000000,69100.000000,176.697124)}
{pt3dadd(154656.000000,214776.000000,69050.000000,163.772576)}
{pt3dadd(154428.000000,214776.000000,68900.000000,157.375968)}
{pt3dadd(154212.000000,214776.000000,68725.000000,167.903862)}
{pt3dadd(154020.000000,214824.000000,68600.000000,161.717176)}
{pt3dadd(153744.000000,214824.000000,68450.000000,157.032706)}
{pt3dadd(153204.000000,215100.000000,68225.000000,161.784620)}
{pt3dadd(153012.000000,215172.000000,68025.000000,165.434034)}
{pt3dadd(152880.000000,215280.000000,67800.000000,162.446326)}
{pt3dadd(152796.000000,215244.000000,67525.000000,137.814606)}
{pt3dadd(152712.000000,215364.000000,67150.000000,119.023433)}
{pt3dadd(152736.000000,215280.000000,66900.000000,75.109800)}

{create adhoc23}
{access adhoc23}
{connect adhoc23(1), adhoc15(0)}
{nseg = 1}
{strdef color color = "White"}
{pt3dclear()}
{pt3dadd(156120.000000,217440.000000,71325.000000,506.187740)}
{pt3dadd(156240.000000,217200.000000,71325.000000,391.774897)}
{pt3dadd(156420.000000,216960.000000,71325.000000,283.916852)}
{pt3dadd(156576.000000,216708.000000,71325.000000,217.824626)}
{pt3dadd(156768.000000,216552.000000,71375.000000,168.743028)}
{pt3dadd(156960.000000,216300.000000,71475.000000,155.917006)}
{pt3dadd(157164.000000,215976.000000,71725.000000,177.247478)}
{pt3dadd(157272.000000,215688.000000,71775.000000,202.781896)}
{pt3dadd(157296.000000,215364.000000,72000.000000,215.768960)}
{pt3dadd(157320.000000,214956.000000,72225.000000,223.140736)}
{pt3dadd(157392.000000,214728.000000,72425.000000,225.026386)}
{pt3dadd(157428.000000,214428.000000,72650.000000,213.419430)}
{pt3dadd(157320.000000,213996.000000,72850.000000,190.145138)}
{pt3dadd(157392.000000,213804.000000,72625.000000,183.591316)}
{pt3dadd(157308.000000,213204.000000,72475.000000,188.034798)}
{pt3dadd(157224.000000,212988.000000,72550.000000,190.718918)}
{pt3dadd(157248.000000,212784.000000,72525.000000,216.472270)}
{pt3dadd(157200.000000,212616.000000,72475.000000,211.413760)}

{create adhoc24}
{access adhoc24}
{connect adhoc24(1), adhoc14(0)}
{nseg = 1}
{strdef color color = "White"}
{pt3dclear()}
{pt3dadd(157164.000000,221016.000000,72325.000000,469.862120)}
{pt3dadd(157032.000000,221112.000000,72300.000000,463.748360)}
{pt3dadd(156876.000000,221076.000000,72325.000000,478.376556)}
{pt3dadd(156708.000000,221244.000000,72325.000000,470.321778)}
{pt3dadd(156564.000000,221280.000000,72200.000000,459.128690)}
{pt3dadd(156432.000000,221280.000000,72100.000000,450.690610)}
{pt3dadd(156288.000000,221280.000000,71950.000000,437.065688)}
{pt3dadd(156120.000000,221268.000000,71825.000000,436.462338)}
{pt3dadd(155988.000000,221316.000000,71700.000000,445.843520)}
{pt3dadd(155832.000000,221304.000000,71600.000000,458.819636)}
{pt3dadd(155688.000000,221388.000000,71575.000000,471.795752)}
{pt3dadd(155544.000000,221436.000000,71500.000000,496.428974)}
{pt3dadd(155412.000000,221460.000000,71475.000000,498.026720)}
{pt3dadd(155280.000000,221544.000000,71350.000000,512.381773)}
{pt3dadd(155148.000000,221568.000000,71275.000000,505.290830)}

{create adhoc25}
{access adhoc25}
{connect adhoc25(1), adhoc24(0)}
{nseg = 1}
{strdef color color = "White"}
{pt3dclear()}
{pt3dadd(155148.000000,221568.000000,71275.000000,505.290830)}
{pt3dadd(155064.000000,221760.000000,71350.000000,516.216210)}
{pt3dadd(154848.000000,221916.000000,71350.000000,488.196076)}
{pt3dadd(154752.000000,222144.000000,71350.000000,449.288984)}
{pt3dadd(154596.000000,222408.000000,71350.000000,376.710950)}
{pt3dadd(154464.000000,222672.000000,71350.000000,294.796490)}
{pt3dadd(154368.000000,222816.000000,71375.000000,204.850770)}
{pt3dadd(154272.000000,223056.000000,71475.000000,133.938512)}
{pt3dadd(154236.000000,223308.000000,71625.000000,67.934787)}
{pt3dadd(154332.000000,223332.000000,71825.000000,37.451610)}

{create adhoc26}
{access adhoc26}
{connect adhoc26(1), adhoc24(0)}
{nseg = 1}
{strdef color color = "White"}
{pt3dclear()}
{pt3dadd(155148.000000,221568.000000,71275.000000,505.290830)}
{pt3dadd(155040.000000,221532.000000,71200.000000,519.364500)}
{pt3dadd(154920.000000,221604.000000,71125.000000,536.239854)}
{pt3dadd(154788.000000,221568.000000,71100.000000,545.502000)}
{pt3dadd(154656.000000,221664.000000,71000.000000,546.076622)}
{pt3dadd(154512.000000,221748.000000,70900.000000,527.652594)}
{pt3dadd(154368.000000,221796.000000,70800.000000,514.166596)}
{pt3dadd(154236.000000,221832.000000,70700.000000,498.394038)}
{pt3dadd(154092.000000,221868.000000,70600.000000,483.372554)}
{pt3dadd(153960.000000,221832.000000,70375.000000,490.356642)}
{pt3dadd(153828.000000,221700.000000,70050.000000,493.008112)}
{pt3dadd(153708.000000,221688.000000,69925.000000,508.029596)}
{pt3dadd(153576.000000,221808.000000,70025.000000,523.802154)}
{pt3dadd(153420.000000,221808.000000,69900.000000,537.964106)}
{pt3dadd(153276.000000,221832.000000,69725.000000,545.141970)}
{pt3dadd(153132.000000,221868.000000,69575.000000,557.929813)}
{pt3dadd(153024.000000,221868.000000,69400.000000,547.303900)}

{create adhoc27}
{access adhoc27}
{connect adhoc27(1), adhoc26(0)}
{nseg = 1}
{strdef color color = "White"}
{pt3dclear()}
{pt3dadd(153024.000000,221868.000000,69400.000000,547.303900)}
{pt3dadd(152964.000000,222132.000000,69400.000000,522.417550)}
{pt3dadd(152928.000000,222468.000000,69400.000000,397.003878)}
{pt3dadd(152916.000000,222804.000000,69400.000000,312.520222)}
{pt3dadd(152892.000000,223056.000000,69400.000000,235.396156)}
{pt3dadd(152844.000000,223344.000000,69400.000000,155.332386)}
{pt3dadd(152676.000000,223572.000000,69400.000000,132.644520)}
{pt3dadd(152580.000000,223824.000000,69400.000000,133.283240)}
{pt3dadd(152472.000000,224100.000000,69400.000000,142.512904)}
{pt3dadd(152280.000000,224328.000000,69400.000000,171.430240)}
{pt3dadd(152364.000000,224628.000000,69400.000000,212.860714)}
{pt3dadd(152364.000000,224952.000000,69325.000000,260.012074)}
{pt3dadd(152196.000000,225360.000000,69225.000000,274.726326)}
{pt3dadd(152052.000000,225456.000000,69050.000000,299.024750)}
{pt3dadd(151896.000000,225744.000000,68900.000000,277.512288)}
{pt3dadd(151752.000000,226152.000000,68900.000000,251.956688)}
{pt3dadd(151764.000000,226392.000000,68625.000000,212.679394)}
{pt3dadd(151704.000000,226512.000000,68350.000000,186.415354)}
{pt3dadd(151680.000000,226548.000000,68050.000000,156.052150)}
{pt3dadd(151740.000000,226692.000000,67850.000000,155.845894)}
{pt3dadd(151716.000000,226764.000000,67625.000000,161.549584)}
{pt3dadd(151740.000000,226704.000000,67400.000000,178.655404)}
{pt3dadd(151824.000000,226800.000000,67175.000000,197.693856)}
{pt3dadd(151824.000000,226848.000000,67025.000000,217.627614)}
{pt3dadd(151884.000000,226956.000000,66825.000000,210.750488)}
{pt3dadd(151932.000000,226992.000000,66575.000000,193.578398)}
{pt3dadd(152076.000000,227328.000000,66400.000000,166.009410)}
{pt3dadd(152148.000000,227628.000000,66150.000000,122.032370)}

{create adhoc28}
{access adhoc28}
{connect adhoc28(1), adhoc26(0)}
{nseg = 1}
{strdef color color = "White"}
{pt3dclear()}
{pt3dadd(153024.000000,221868.000000,69400.000000,547.303900)}
{pt3dadd(152856.000000,221940.000000,69475.000000,515.013280)}
{pt3dadd(152712.000000,221964.000000,69275.000000,448.179092)}
{pt3dadd(152580.000000,221904.000000,69025.000000,420.944184)}
{pt3dadd(152448.000000,221844.000000,68725.000000,399.018536)}
{pt3dadd(152316.000000,221772.000000,68425.000000,394.480500)}
{pt3dadd(151824.000000,221916.000000,68275.000000,406.250220)}
{pt3dadd(151692.000000,221880.000000,68100.000000,409.066950)}
{pt3dadd(151596.000000,221820.000000,67900.000000,372.405040)}
{pt3dadd(151464.000000,221892.000000,67650.000000,332.202560)}
{pt3dadd(151416.000000,221928.000000,67400.000000,227.819810)}

{create adhoc29}
{access adhoc29}
{connect adhoc29(1), adhoc28(0)}
{nseg = 1}
{strdef color color = "White"}
{pt3dclear()}
{pt3dadd(151416.000000,221928.000000,67400.000000,227.819810)}
{pt3dadd(151620.000000,221328.000000,67175.000000,255.956080)}
{pt3dadd(151608.000000,220968.000000,66850.000000,269.947854)}
{pt3dadd(151632.000000,220716.000000,66600.000000,282.889104)}
{pt3dadd(151716.000000,220608.000000,66350.000000,276.077758)}
{pt3dadd(151620.000000,220572.000000,66075.000000,273.550808)}
{pt3dadd(151428.000000,220620.000000,65650.000000,265.808768)}
{pt3dadd(151380.000000,220404.000000,65425.000000,273.016110)}
{pt3dadd(151416.000000,220140.000000,65175.000000,277.297520)}
{pt3dadd(151440.000000,219888.000000,64925.000000,310.755370)}

{create adhoc30}
{access adhoc30}
{connect adhoc30(1), adhoc29(0)}
{nseg = 1}
{strdef color color = "White"}
{pt3dclear()}
{pt3dadd(151440.000000,219888.000000,64925.000000,310.755370)}
{pt3dadd(151728.000000,219888.000000,64925.000000,168.401971)}
{pt3dadd(152124.000000,219900.000000,64625.000000,50.837273)}

{create adhoc31}
{access adhoc31}
{connect adhoc31(1), adhoc29(0)}
{nseg = 1}
{strdef color color = "White"}
{pt3dclear()}
{pt3dadd(151440.000000,219888.000000,64925.000000,310.755370)}
{pt3dadd(151404.000000,219504.000000,64675.000000,313.432390)}
{pt3dadd(151356.000000,219252.000000,64425.000000,314.892136)}
{pt3dadd(151452.000000,218976.000000,64150.000000,303.280066)}
{pt3dadd(151416.000000,218376.000000,63800.000000,300.282252)}
{pt3dadd(151344.000000,218124.000000,63500.000000,273.245198)}
{pt3dadd(151260.000000,217776.000000,63200.000000,261.183440)}
{pt3dadd(150960.000000,217344.000000,63000.000000,225.987114)}
{pt3dadd(150924.000000,217068.000000,62775.000000,223.908486)}
{pt3dadd(150732.000000,216684.000000,62500.000000,205.530684)}
{pt3dadd(150732.000000,216408.000000,62350.000000,217.745944)}
{pt3dadd(150720.000000,216324.000000,62050.000000,224.627456)}
{pt3dadd(150612.000000,216024.000000,61725.000000,238.431190)}
{pt3dadd(150576.000000,215832.000000,61425.000000,234.711176)}
{pt3dadd(150516.000000,215604.000000,61225.000000,241.667043)}
{pt3dadd(150468.000000,215316.000000,61100.000000,223.701810)}

{create adhoc32}
{access adhoc32}
{connect adhoc32(1), adhoc31(0)}
{nseg = 1}
{strdef color color = "White"}
{pt3dclear()}
{pt3dadd(150468.000000,215316.000000,61100.000000,223.701810)}
{pt3dadd(150792.000000,215496.000000,60525.000000,160.017252)}
{pt3dadd(151008.000000,215544.000000,60425.000000,193.776363)}
{pt3dadd(151092.000000,215496.000000,60200.000000,190.614565)}
{pt3dadd(151308.000000,215592.000000,60050.000000,189.221887)}
{pt3dadd(151440.000000,215652.000000,59825.000000,211.264346)}
{pt3dadd(151584.000000,215616.000000,59550.000000,207.060342)}
{pt3dadd(151680.000000,215724.000000,59400.000000,198.792188)}
{pt3dadd(151788.000000,215712.000000,59125.000000,189.791518)}
{pt3dadd(151932.000000,215556.000000,58925.000000,177.634730)}
{pt3dadd(152112.000000,215556.000000,58725.000000,163.783276)}
{pt3dadd(152352.000000,215760.000000,58650.000000,135.683702)}
{pt3dadd(152376.000000,215844.000000,58475.000000,106.950518)}
{pt3dadd(152532.000000,215880.000000,58300.000000,89.296932)}
{pt3dadd(152628.000000,216084.000000,58100.000000,78.959840)}
{pt3dadd(152748.000000,216216.000000,57850.000000,71.075189)}
{pt3dadd(152796.000000,216540.000000,57800.000000,71.023488)}
{pt3dadd(152856.000000,216840.000000,57675.000000,79.884384)}

{create adhoc33}
{access adhoc33}
{connect adhoc33(1), adhoc31(0)}
{nseg = 1}
{strdef color color = "White"}
{pt3dclear()}
{pt3dadd(150468.000000,215316.000000,61100.000000,223.701810)}
{pt3dadd(150432.000000,215064.000000,60750.000000,285.506500)}

{create adhoc34}
{access adhoc34}
{connect adhoc34(1), adhoc33(0)}
{nseg = 1}
{strdef color color = "White"}
{pt3dclear()}
{pt3dadd(150432.000000,215064.000000,60750.000000,285.506500)}
{pt3dadd(150504.000000,215184.000000,60600.000000,219.715760)}

{create adhoc35}
{access adhoc35}
{connect adhoc35(1), adhoc33(0)}
{nseg = 1}
{strdef color color = "White"}
{pt3dclear()}
{pt3dadd(150432.000000,215064.000000,60750.000000,285.506500)}
{pt3dadd(150264.000000,214488.000000,60400.000000,264.870200)}
{pt3dadd(150180.000000,214164.000000,60100.000000,246.202324)}
{pt3dadd(150276.000000,213840.000000,59875.000000,217.941060)}
{pt3dadd(150240.000000,213492.000000,59600.000000,193.533733)}
{pt3dadd(150336.000000,213168.000000,59325.000000,144.200180)}

{create adhoc36}
{access adhoc36}
{connect adhoc36(1), adhoc35(0)}
{nseg = 1}
{strdef color color = "White"}
{pt3dclear()}
{pt3dadd(150336.000000,213168.000000,59325.000000,144.200180)}
{pt3dadd(150336.000000,213000.000000,59575.000000,129.261060)}
{pt3dadd(150432.000000,212796.000000,59875.000000,117.537285)}
{pt3dadd(150516.000000,212556.000000,59900.000000,97.062039)}
{pt3dadd(150420.000000,212280.000000,60125.000000,78.817872)}
{pt3dadd(150516.000000,212004.000000,60175.000000,64.728704)}
{pt3dadd(150672.000000,211572.000000,60150.000000,30.811533)}

{create adhoc37}
{access adhoc37}
{connect adhoc37(1), adhoc35(0)}
{nseg = 1}
{strdef color color = "White"}
{pt3dclear()}
{pt3dadd(150336.000000,213168.000000,59325.000000,144.200180)}
{pt3dadd(150432.000000,213108.000000,59050.000000,134.637358)}
{pt3dadd(150564.000000,212928.000000,58650.000000,152.616667)}
{pt3dadd(150852.000000,212676.000000,58375.000000,151.032469)}
{pt3dadd(151140.000000,212400.000000,58100.000000,166.830730)}
{pt3dadd(151296.000000,212100.000000,57900.000000,178.287354)}
{pt3dadd(151584.000000,211824.000000,57825.000000,176.577016)}
{pt3dadd(151836.000000,211464.000000,57625.000000,179.308296)}
{pt3dadd(152004.000000,211212.000000,57425.000000,200.874580)}
{pt3dadd(152052.000000,211068.000000,57200.000000,202.795527)}
{pt3dadd(152364.000000,210948.000000,57000.000000,244.110610)}

{create adhoc38}
{access adhoc38}
{connect adhoc38(1), adhoc37(0)}
{nseg = 1}
{strdef color color = "White"}
{pt3dclear()}
{pt3dadd(152364.000000,210948.000000,57000.000000,244.110610)}
{pt3dadd(152364.000000,211128.000000,57000.000000,263.046927)}
{pt3dadd(152412.000000,211344.000000,57000.000000,181.412744)}
{pt3dadd(152484.000000,211560.000000,57000.000000,127.750903)}
{pt3dadd(152484.000000,211728.000000,56800.000000,56.048090)}

{create adhoc39}
{access adhoc39}
{connect adhoc39(1), adhoc37(0)}
{nseg = 1}
{strdef color color = "White"}
{pt3dclear()}
{pt3dadd(152364.000000,210948.000000,57000.000000,244.110610)}
{pt3dadd(152508.000000,210756.000000,56775.000000,172.247257)}
{pt3dadd(152676.000000,210660.000000,56600.000000,168.504142)}
{pt3dadd(152772.000000,210528.000000,56350.000000,151.153196)}
{pt3dadd(152712.000000,210480.000000,56225.000000,167.754636)}
{pt3dadd(152868.000000,210180.000000,55950.000000,169.232090)}
{pt3dadd(153120.000000,209904.000000,55750.000000,174.367178)}
{pt3dadd(153168.000000,209604.000000,55550.000000,185.619804)}
{pt3dadd(153204.000000,209280.000000,55325.000000,199.988994)}
{pt3dadd(153444.000000,208812.000000,55075.000000,202.067922)}
{pt3dadd(153564.000000,208464.000000,54975.000000,199.183368)}
{pt3dadd(153336.000000,207984.000000,54850.000000,191.450782)}
{pt3dadd(153168.000000,207636.000000,54850.000000,173.145894)}
{pt3dadd(153300.000000,207240.000000,54850.000000,170.963020)}
{pt3dadd(153336.000000,206916.000000,54825.000000,159.883422)}
{pt3dadd(153492.000000,206736.000000,54925.000000,175.012786)}
{pt3dadd(153624.000000,206544.000000,54975.000000,195.571394)}
{pt3dadd(153744.000000,206232.000000,55200.000000,225.765012)}
{pt3dadd(153900.000000,205800.000000,55200.000000,221.706152)}
{pt3dadd(153972.000000,205536.000000,55400.000000,196.170894)}
{pt3dadd(153840.000000,205116.000000,55650.000000,161.570506)}
{pt3dadd(153624.000000,204480.000000,55650.000000,146.095918)}
{pt3dadd(153528.000000,204180.000000,55700.000000,84.630060)}
{pt3dadd(153540.000000,203844.000000,55675.000000,175.322080)}

{create adhoc40}
{access adhoc40}
{connect adhoc40(1), adhoc28(0)}
{nseg = 1}
{strdef color color = "White"}
{pt3dclear()}
{pt3dadd(151416.000000,221928.000000,67400.000000,227.819810)}
{pt3dadd(150876.000000,222444.000000,67275.000000,259.652873)}
{pt3dadd(150432.000000,222684.000000,67100.000000,288.020820)}
{pt3dadd(150336.000000,222756.000000,66825.000000,306.061094)}
{pt3dadd(150108.000000,222672.000000,66525.000000,334.673884)}
{pt3dadd(150096.000000,222924.000000,66300.000000,353.385632)}
{pt3dadd(150036.000000,222960.000000,66075.000000,375.322484)}
{pt3dadd(149640.000000,223296.000000,65850.000000,375.941324)}
{pt3dadd(149640.000000,223320.000000,65575.000000,376.839084)}
{pt3dadd(149580.000000,223272.000000,65250.000000,370.227628)}
{pt3dadd(149532.000000,223176.000000,65025.000000,331.921166)}
{pt3dadd(149352.000000,223164.000000,64700.000000,308.275152)}
{pt3dadd(149244.000000,223116.000000,64475.000000,301.359686)}
{pt3dadd(149196.000000,223116.000000,64175.000000,295.362902)}
{pt3dadd(149136.000000,222984.000000,63925.000000,292.291380)}
{pt3dadd(149220.000000,222972.000000,63725.000000,302.028874)}
{pt3dadd(149184.000000,222912.000000,63500.000000,297.741252)}
{pt3dadd(149148.000000,222828.000000,63275.000000,304.037878)}
{pt3dadd(149136.000000,222780.000000,63000.000000,312.732086)}
{pt3dadd(149220.000000,222732.000000,62700.000000,312.502564)}
{pt3dadd(149304.000000,222732.000000,62450.000000,326.879120)}
{pt3dadd(149388.000000,222468.000000,62150.000000,306.004760)}

{create adhoc41}
{access adhoc41}
{connect adhoc41(1), adhoc40(0)}
{nseg = 1}
{strdef color color = "White"}
{pt3dclear()}
{pt3dadd(149388.000000,222468.000000,62150.000000,306.004760)}
{pt3dadd(149616.000000,222528.000000,61850.000000,265.401057)}
{pt3dadd(149820.000000,222528.000000,61475.000000,221.367636)}
{pt3dadd(150000.000000,222528.000000,61175.000000,185.143808)}
{pt3dadd(150432.000000,222420.000000,60950.000000,161.788184)}
{pt3dadd(150672.000000,222288.000000,60725.000000,146.272700)}
{pt3dadd(150792.000000,222108.000000,60500.000000,141.033718)}
{pt3dadd(150936.000000,222000.000000,60200.000000,131.110810)}
{pt3dadd(151092.000000,221772.000000,59925.000000,159.199640)}
{pt3dadd(151260.000000,221544.000000,59650.000000,171.830566)}
{pt3dadd(151452.000000,221184.000000,59350.000000,185.267122)}
{pt3dadd(151440.000000,220920.000000,59125.000000,202.700350)}
{pt3dadd(151908.000000,220824.000000,58950.000000,211.444098)}
{pt3dadd(152160.000000,220680.000000,59050.000000,202.889128)}
{pt3dadd(152292.000000,220440.000000,59075.000000,196.088453)}
{pt3dadd(152700.000000,220320.000000,59575.000000,222.554920)}

{create adhoc42}
{access adhoc42}
{connect adhoc42(1), adhoc40(0)}
{nseg = 1}
{strdef color color = "White"}
{pt3dclear()}
{pt3dadd(149388.000000,222468.000000,62150.000000,306.004760)}
{pt3dadd(149268.000000,222564.000000,61925.000000,365.796480)}
{pt3dadd(149256.000000,222612.000000,61725.000000,376.207190)}
{pt3dadd(149328.000000,222528.000000,61475.000000,367.495924)}
{pt3dadd(149220.000000,222492.000000,61250.000000,339.674086)}
{pt3dadd(149136.000000,222456.000000,61050.000000,313.070624)}
{pt3dadd(149076.000000,222456.000000,60875.000000,276.277008)}
{pt3dadd(149076.000000,222540.000000,60650.000000,275.127654)}
{pt3dadd(149028.000000,222468.000000,60500.000000,287.139964)}
{pt3dadd(149028.000000,222456.000000,60250.000000,292.073532)}
{pt3dadd(149052.000000,222480.000000,60000.000000,282.194648)}
{pt3dadd(149040.000000,222348.000000,59700.000000,275.349256)}
{pt3dadd(148992.000000,222336.000000,59475.000000,258.725628)}
{pt3dadd(148980.000000,222396.000000,59275.000000,244.762636)}
{pt3dadd(148932.000000,222480.000000,59075.000000,239.829068)}
{pt3dadd(148968.000000,222516.000000,58850.000000,240.247924)}
{pt3dadd(149028.000000,222348.000000,58600.000000,256.315204)}
{pt3dadd(149064.000000,222336.000000,58350.000000,274.088186)}
{pt3dadd(149160.000000,222324.000000,58075.000000,288.051178)}
{pt3dadd(149292.000000,222276.000000,57775.000000,298.958586)}
{pt3dadd(149364.000000,222204.000000,57350.000000,311.204576)}
{pt3dadd(149436.000000,222012.000000,56950.000000,301.982688)}
{pt3dadd(149580.000000,222060.000000,56575.000000,299.057426)}
{pt3dadd(149712.000000,222000.000000,56225.000000,289.499162)}
{pt3dadd(149856.000000,221904.000000,55925.000000,295.400902)}
{pt3dadd(150000.000000,221664.000000,55650.000000,308.843330)}
{pt3dadd(150120.000000,221532.000000,55375.000000,319.721510)}
{pt3dadd(150252.000000,221664.000000,55100.000000,359.738200)}

{create adhoc43}
{access adhoc43}
{connect adhoc43(1), adhoc42(0)}
{nseg = 1}
{strdef color color = "White"}
{pt3dclear()}
{pt3dadd(150252.000000,221664.000000,55100.000000,359.738200)}
{pt3dadd(150672.000000,221568.000000,55100.000000,269.865700)}
{pt3dadd(151104.000000,221472.000000,55100.000000,226.853483)}
{pt3dadd(151284.000000,221424.000000,55075.000000,230.701550)}

{create adhoc44}
{access adhoc44}
{connect adhoc44(1), adhoc42(0)}
{nseg = 1}
{strdef color color = "White"}
{pt3dclear()}
{pt3dadd(150252.000000,221664.000000,55100.000000,359.738200)}
{pt3dadd(150468.000000,221580.000000,54700.000000,316.251623)}
{pt3dadd(150696.000000,221304.000000,54350.000000,306.900698)}
{pt3dadd(150792.000000,220992.000000,54125.000000,294.803174)}
{pt3dadd(150984.000000,220644.000000,53850.000000,288.969318)}
{pt3dadd(151020.000000,220368.000000,53550.000000,288.969318)}
{pt3dadd(151032.000000,220080.000000,53300.000000,283.789072)}
{pt3dadd(151008.000000,219744.000000,52950.000000,297.923392)}
{pt3dadd(151092.000000,219420.000000,52675.000000,273.399450)}
{pt3dadd(151080.000000,219396.000000,52425.000000,269.049953)}
{pt3dadd(151152.000000,219480.000000,52050.000000,176.630870)}

{create adhoc45}
{access adhoc45}
{connect adhoc45(1), adhoc10(0)}
{nseg = 1}
{strdef color color = "White"}
{pt3dclear()}
{pt3dadd(172104.000000,218316.000000,77300.000000,644.382300)}
{pt3dadd(172104.000000,218784.000000,77325.000000,560.953820)}
{pt3dadd(172104.000000,219192.000000,77300.000000,408.748818)}
{pt3dadd(172104.000000,219624.000000,77325.000000,315.380582)}
{pt3dadd(172104.000000,219912.000000,77225.000000,206.160872)}
{pt3dadd(172104.000000,220188.000000,76975.000000,201.220504)}
{pt3dadd(172140.000000,220344.000000,76775.000000,215.073297)}
{pt3dadd(172272.000000,220428.000000,76550.000000,267.824220)}

{create adhoc46}
{access adhoc46}
{connect adhoc46(1), adhoc45(0)}
{nseg = 1}
{strdef color color = "White"}
{pt3dclear()}
{pt3dadd(172272.000000,220428.000000,76550.000000,267.824220)}
{pt3dadd(172536.000000,220404.000000,76500.000000,278.538747)}
{pt3dadd(172668.000000,220284.000000,76325.000000,248.755906)}
{pt3dadd(172740.000000,220140.000000,76150.000000,225.550914)}
{pt3dadd(172704.000000,220056.000000,75975.000000,186.654183)}
{pt3dadd(172872.000000,219876.000000,75850.000000,151.799260)}

{create adhoc47}
{access adhoc47}
{connect adhoc47(1), adhoc45(0)}
{nseg = 1}
{strdef color color = "White"}
{pt3dclear()}
{pt3dadd(172272.000000,220428.000000,76550.000000,267.824220)}
{pt3dadd(172188.000000,220632.000000,76500.000000,181.854950)}
{pt3dadd(171768.000000,220860.000000,76325.000000,130.435552)}
{pt3dadd(171624.000000,220692.000000,76150.000000,113.566025)}

{create adhoc48}
{access adhoc48}
{connect adhoc48(1), adhoc9(0)}
{nseg = 1}
{strdef color color = "White"}
{pt3dclear()}
{pt3dadd(173028.000000,217776.000000,77725.000000,638.547700)}
{pt3dadd(173376.000000,218424.000000,78100.000000,473.090933)}
{pt3dadd(173652.000000,218820.000000,78500.000000,314.449391)}
{pt3dadd(173520.000000,219288.000000,78750.000000,87.741385)}
{pt3dadd(173568.000000,219696.000000,79000.000000,78.352615)}

{create adhoc49}
{access adhoc49}
{connect adhoc49(1), adhoc6(0)}
{nseg = 1}
{strdef color color = "White"}
{pt3dclear()}
{pt3dadd(178380.000000,216024.000000,81225.000000,596.762500)}
{pt3dadd(178536.000000,215712.000000,81225.000000,539.749517)}
{pt3dadd(178608.000000,215376.000000,81225.000000,415.963162)}
{pt3dadd(178596.000000,215016.000000,81225.000000,317.112100)}
{pt3dadd(178596.000000,214656.000000,81225.000000,231.726280)}
{pt3dadd(178572.000000,214356.000000,81225.000000,164.240404)}
{pt3dadd(178584.000000,214080.000000,81225.000000,113.994708)}
{pt3dadd(178608.000000,213864.000000,81275.000000,111.123442)}
{pt3dadd(178752.000000,213648.000000,81325.000000,119.290640)}
{pt3dadd(178836.000000,213492.000000,81325.000000,90.643670)}

{create adhoc50}
{access adhoc50}
{connect adhoc50(1), adhoc5(0)}
{nseg = 1}
{strdef color color = "White"}
{pt3dclear()}
{pt3dadd(180480.000000,216156.000000,84025.000000,415.374600)}
{pt3dadd(180144.000000,216180.000000,84025.000000,346.036577)}
{pt3dadd(179880.000000,216276.000000,84025.000000,246.762536)}
{pt3dadd(179604.000000,216252.000000,83850.000000,186.111062)}
{pt3dadd(179412.000000,216204.000000,83850.000000,135.646518)}
{pt3dadd(179160.000000,216156.000000,83850.000000,135.981337)}
{pt3dadd(178836.000000,216072.000000,83950.000000,190.826780)}

{create adhoc51}
{access adhoc51}
{connect adhoc51(1), adhoc50(0)}
{nseg = 1}
{strdef color color = "White"}
{pt3dclear()}
{pt3dadd(178836.000000,216072.000000,83950.000000,190.826780)}
{pt3dadd(178656.000000,216144.000000,84175.000000,113.298567)}
{pt3dadd(178344.000000,216132.000000,84325.000000,74.151630)}

{create adhoc52}
{access adhoc52}
{connect adhoc52(1), adhoc51(0)}
{nseg = 1}
{strdef color color = "White"}
{pt3dclear()}
{pt3dadd(178344.000000,216132.000000,84325.000000,74.151630)}
{pt3dadd(178044.000000,216108.000000,84450.000000,50.837273)}

{create adhoc53}
{access adhoc53}
{connect adhoc53(1), adhoc51(0)}
{nseg = 1}
{strdef color color = "White"}
{pt3dclear()}
{pt3dadd(178344.000000,216132.000000,84325.000000,74.151630)}
{pt3dadd(178440.000000,215928.000000,84050.000000,80.317060)}

{create adhoc54}
{access adhoc54}
{connect adhoc54(1), adhoc50(0)}
{nseg = 1}
{strdef color color = "White"}
{pt3dclear()}
{pt3dadd(178836.000000,216072.000000,83950.000000,190.826780)}
{pt3dadd(178908.000000,216336.000000,84200.000000,144.478497)}
{pt3dadd(179040.000000,216648.000000,84300.000000,117.723090)}

{create adhoc55}
{access adhoc55}
{connect adhoc55(1), adhoc4(0)}
{nseg = 1}
{strdef color color = "White"}
{pt3dclear()}
{pt3dadd(182340.000000,216960.000000,88575.000000,1047.771000)}
{pt3dadd(182160.000000,217656.000000,88575.000000,1036.240700)}

{create adhoc56}
{access adhoc56}
{connect adhoc56(1), adhoc55(0)}
{nseg = 1}
{strdef color color = "White"}
{pt3dclear()}
{pt3dadd(182160.000000,217656.000000,88575.000000,1036.240700)}
{pt3dadd(182052.000000,218124.000000,88575.000000,1023.719613)}
{pt3dadd(181920.000000,218424.000000,88475.000000,1010.942336)}
{pt3dadd(181872.000000,218652.000000,88425.000000,968.176850)}
{pt3dadd(181776.000000,218856.000000,88475.000000,932.211962)}
{pt3dadd(181644.000000,219036.000000,88400.000000,879.418312)}
{pt3dadd(181548.000000,219204.000000,88275.000000,826.624662)}
{pt3dadd(181416.000000,219372.000000,88350.000000,812.027934)}
{pt3dadd(181368.000000,219552.000000,88300.000000,802.777030)}
{pt3dadd(181356.000000,219720.000000,88200.000000,773.878710)}
{pt3dadd(181212.000000,219900.000000,88175.000000,759.446740)}
{pt3dadd(181080.000000,220068.000000,88175.000000,756.272436)}
{pt3dadd(181080.000000,220224.000000,88125.000000,709.893536)}
{pt3dadd(181032.000000,220380.000000,88075.000000,688.756806)}
{pt3dadd(180996.000000,220536.000000,88150.000000,688.756806)}
{pt3dadd(180960.000000,220716.000000,88225.000000,692.325812)}
{pt3dadd(180780.000000,220896.000000,88250.000000,681.664276)}
{pt3dadd(180708.000000,221064.000000,88250.000000,695.350636)}
{pt3dadd(180612.000000,221208.000000,88200.000000,711.934327)}
{pt3dadd(180600.000000,221364.000000,88200.000000,706.979500)}

{create adhoc57}
{access adhoc57}
{connect adhoc57(1), adhoc56(0)}
{nseg = 1}
{strdef color color = "White"}
{pt3dclear()}
{pt3dadd(180600.000000,221364.000000,88200.000000,706.979500)}
{pt3dadd(180492.000000,221364.000000,88450.000000,722.422717)}
{pt3dadd(180360.000000,221364.000000,88750.000000,479.317692)}
{pt3dadd(180144.000000,221436.000000,89200.000000,335.159687)}
{pt3dadd(179940.000000,221628.000000,89600.000000,107.880890)}

{create adhoc58}
{access adhoc58}
{connect adhoc58(1), adhoc57(0)}
{nseg = 1}
{strdef color color = "White"}
{pt3dclear()}
{pt3dadd(179940.000000,221628.000000,89600.000000,107.880890)}
{pt3dadd(179772.000000,221448.000000,89475.000000,75.574773)}
{pt3dadd(179556.000000,221316.000000,89325.000000,60.478312)}
{pt3dadd(179412.000000,221172.000000,89175.000000,62.591507)}

{create adhoc59}
{access adhoc59}
{connect adhoc59(1), adhoc57(0)}
{nseg = 1}
{strdef color color = "White"}
{pt3dclear()}
{pt3dadd(179940.000000,221628.000000,89600.000000,107.880890)}
{pt3dadd(179760.000000,221760.000000,90050.000000,91.062430)}

{create adhoc60}
{access adhoc60}
{connect adhoc60(1), adhoc59(0)}
{nseg = 1}
{strdef color color = "White"}
{pt3dclear()}
{pt3dadd(179760.000000,221760.000000,90050.000000,91.062430)}
{pt3dadd(179688.000000,221916.000000,90200.000000,88.981960)}

{create adhoc61}
{access adhoc61}
{connect adhoc61(1), adhoc59(0)}
{nseg = 1}
{strdef color color = "White"}
{pt3dclear()}
{pt3dadd(179760.000000,221760.000000,90050.000000,91.062430)}
{pt3dadd(179796.000000,221556.000000,90175.000000,84.076325)}
{pt3dadd(179808.000000,221424.000000,90350.000000,63.237812)}

{create adhoc62}
{access adhoc62}
{connect adhoc62(1), adhoc56(0)}
{nseg = 1}
{strdef color color = "White"}
{pt3dclear()}
{pt3dadd(180600.000000,221364.000000,88200.000000,706.979500)}
{pt3dadd(180624.000000,221520.000000,88325.000000,684.285700)}
{pt3dadd(180576.000000,221688.000000,88225.000000,685.466220)}
{pt3dadd(180444.000000,221928.000000,88125.000000,696.749190)}
{pt3dadd(180300.000000,222120.000000,88150.000000,724.662030)}
{pt3dadd(180252.000000,222276.000000,88000.000000,773.926910)}
{pt3dadd(180120.000000,222432.000000,88000.000000,820.852670)}
{pt3dadd(180120.000000,222600.000000,87900.000000,878.956700)}
{pt3dadd(180072.000000,222756.000000,87875.000000,905.103900)}

{create adhoc63}
{access adhoc63}
{connect adhoc63(1), adhoc62(0)}
{nseg = 1}
{strdef color color = "White"}
{pt3dclear()}
{pt3dadd(180072.000000,222756.000000,87875.000000,905.103900)}
{pt3dadd(179868.000000,222936.000000,87775.000000,996.587167)}
{pt3dadd(179772.000000,223152.000000,87700.000000,1024.404360)}
{pt3dadd(179676.000000,223356.000000,87600.000000,1058.218080)}
{pt3dadd(179580.000000,223536.000000,87525.000000,1078.659960)}
{pt3dadd(179400.000000,223704.000000,87325.000000,1068.753980)}
{pt3dadd(179088.000000,223872.000000,87075.000000,1068.753980)}
{pt3dadd(178908.000000,224040.000000,87000.000000,1057.575460)}
{pt3dadd(178740.000000,224172.000000,86875.000000,1061.167620)}
{pt3dadd(178572.000000,224424.000000,86700.000000,1050.246280)}
{pt3dadd(178380.000000,224652.000000,86600.000000,1060.152260)}
{pt3dadd(178200.000000,224904.000000,86425.000000,1069.737440)}
{pt3dadd(178008.000000,225108.000000,86275.000000,1080.915960)}
{pt3dadd(177864.000000,225192.000000,86225.000000,1080.915960)}
{pt3dadd(177720.000000,225252.000000,86175.000000,1070.514700)}
{pt3dadd(177588.000000,225336.000000,86150.000000,1061.447540)}
{pt3dadd(177456.000000,225432.000000,86075.000000,1041.956380)}
{pt3dadd(177324.000000,225516.000000,86000.000000,1031.555120)}
{pt3dadd(177192.000000,225540.000000,85925.000000,1011.247880)}
{pt3dadd(177060.000000,225564.000000,85875.000000,984.564606)}
{pt3dadd(176928.000000,225684.000000,85800.000000,948.599706)}
{pt3dadd(176832.000000,225816.000000,85725.000000,913.473626)}
{pt3dadd(176724.000000,225948.000000,85675.000000,876.591226)}
{pt3dadd(176616.000000,226032.000000,85725.000000,851.178594)}
{pt3dadd(176496.000000,226116.000000,85625.000000,840.979468)}
{pt3dadd(176364.000000,226284.000000,85525.000000,840.979468)}
{pt3dadd(176208.000000,226512.000000,85450.000000,833.217878)}
{pt3dadd(176100.000000,226608.000000,85375.000000,813.662110)}
{pt3dadd(175992.000000,226728.000000,85425.000000,781.755102)}
{pt3dadd(175848.000000,226920.000000,85400.000000,745.274870)}
{pt3dadd(175716.000000,227076.000000,85375.000000,710.531790)}
{pt3dadd(175596.000000,227160.000000,85325.000000,672.854680)}
{pt3dadd(175452.000000,227256.000000,85350.000000,641.251300)}

{create adhoc64}
{access adhoc64}
{connect adhoc64(1), adhoc63(0)}
{nseg = 1}
{strdef color color = "White"}
{pt3dclear()}
{pt3dadd(175452.000000,227256.000000,85350.000000,641.251300)}
{pt3dadd(175500.000000,227304.000000,85625.000000,542.275683)}
{pt3dadd(175500.000000,227496.000000,86275.000000,393.778986)}
{pt3dadd(175380.000000,227628.000000,86525.000000,293.421838)}
{pt3dadd(175260.000000,227688.000000,86650.000000,172.025938)}
{pt3dadd(175068.000000,227628.000000,86875.000000,138.356688)}
{pt3dadd(174852.000000,227760.000000,87175.000000,147.807392)}
{pt3dadd(174624.000000,227868.000000,87475.000000,161.799900)}
{pt3dadd(174504.000000,228180.000000,87750.000000,166.951520)}
{pt3dadd(174348.000000,228132.000000,87800.000000,208.169200)}
{pt3dadd(174216.000000,228240.000000,87900.000000,165.223660)}

{create adhoc65}
{access adhoc65}
{connect adhoc65(1), adhoc64(0)}
{nseg = 1}
{strdef color color = "White"}
{pt3dclear()}
{pt3dadd(174216.000000,228240.000000,87900.000000,165.223660)}
{pt3dadd(174048.000000,227964.000000,87900.000000,157.850870)}
{pt3dadd(173820.000000,227928.000000,87950.000000,127.178207)}
{pt3dadd(173688.000000,227916.000000,88075.000000,73.205670)}

{create adhoc66}
{access adhoc66}
{connect adhoc66(1), adhoc64(0)}
{nseg = 1}
{strdef color color = "White"}
{pt3dclear()}
{pt3dadd(174216.000000,228240.000000,87900.000000,165.223660)}
{pt3dadd(174108.000000,228600.000000,88125.000000,185.310287)}
{pt3dadd(173976.000000,228660.000000,88325.000000,179.835280)}

{create adhoc67}
{access adhoc67}
{connect adhoc67(1), adhoc66(0)}
{nseg = 1}
{strdef color color = "White"}
{pt3dclear()}
{pt3dadd(173976.000000,228660.000000,88325.000000,179.835280)}
{pt3dadd(174108.000000,228888.000000,88325.000000,109.685295)}
{pt3dadd(174252.000000,229164.000000,88325.000000,79.679620)}

{create adhoc68}
{access adhoc68}
{connect adhoc68(1), adhoc66(0)}
{nseg = 1}
{strdef color color = "White"}
{pt3dclear()}
{pt3dadd(173976.000000,228660.000000,88325.000000,179.835280)}
{pt3dadd(173808.000000,228924.000000,88675.000000,121.732258)}
{pt3dadd(173784.000000,228948.000000,88900.000000,55.904434)}

{create adhoc69}
{access adhoc69}
{connect adhoc69(1), adhoc63(0)}
{nseg = 1}
{strdef color color = "White"}
{pt3dclear()}
{pt3dadd(175452.000000,227256.000000,85350.000000,641.251300)}
{pt3dadd(175332.000000,227376.000000,85200.000000,693.939533)}
{pt3dadd(175140.000000,227592.000000,85025.000000,742.350400)}
{pt3dadd(174972.000000,227676.000000,84825.000000,776.484490)}
{pt3dadd(174828.000000,227868.000000,84650.000000,799.204130)}
{pt3dadd(174696.000000,228120.000000,84625.000000,814.357710)}
{pt3dadd(174636.000000,228180.000000,84575.000000,859.389770)}
{pt3dadd(174528.000000,228444.000000,84550.000000,896.946330)}
{pt3dadd(174360.000000,228732.000000,84450.000000,882.401740)}
{pt3dadd(174228.000000,228900.000000,84350.000000,867.248160)}
{pt3dadd(174060.000000,229236.000000,84300.000000,828.580340)}
{pt3dadd(173892.000000,229428.000000,84225.000000,751.096740)}
{pt3dadd(173736.000000,229716.000000,84175.000000,671.178467)}
{pt3dadd(173592.000000,229848.000000,84150.000000,652.709000)}

{create adhoc70}
{access adhoc70}
{connect adhoc70(1), adhoc69(0)}
{nseg = 1}
{strdef color color = "White"}
{pt3dclear()}
{pt3dadd(173592.000000,229848.000000,84150.000000,652.709000)}
{pt3dadd(173592.000000,229272.000000,84275.000000,729.095777)}
{pt3dadd(173592.000000,228528.000000,84225.000000,726.784236)}
{pt3dadd(173388.000000,228528.000000,84225.000000,765.003416)}
{pt3dadd(173208.000000,228456.000000,84125.000000,792.224090)}
{pt3dadd(173004.000000,228492.000000,84025.000000,808.930910)}
{pt3dadd(172884.000000,228444.000000,83975.000000,830.067640)}
{pt3dadd(172740.000000,228432.000000,83925.000000,843.596870)}
{pt3dadd(172584.000000,228456.000000,83900.000000,837.829230)}
{pt3dadd(172464.000000,228444.000000,83800.000000,837.829230)}
{pt3dadd(172320.000000,228396.000000,83700.000000,813.360820)}
{pt3dadd(172188.000000,228360.000000,83625.000000,805.794930)}
{pt3dadd(172044.000000,228348.000000,83575.000000,792.265700)}
{pt3dadd(171888.000000,228372.000000,83525.000000,784.504110)}
{pt3dadd(171720.000000,228372.000000,83475.000000,761.200870)}
{pt3dadd(171576.000000,228360.000000,83400.000000,761.018300)}
{pt3dadd(171456.000000,228348.000000,83325.000000,761.192200)}
{pt3dadd(171336.000000,228336.000000,83275.000000,753.800210)}
{pt3dadd(171228.000000,228324.000000,83225.000000,739.368240)}
{pt3dadd(171132.000000,228312.000000,83175.000000,724.814960)}
{pt3dadd(171024.000000,228300.000000,83125.000000,710.565560)}
{pt3dadd(170904.000000,228300.000000,83100.000000,703.525580)}
{pt3dadd(170808.000000,228336.000000,83050.000000,696.485600)}
{pt3dadd(170688.000000,228372.000000,83000.000000,694.525880)}
{pt3dadd(170556.000000,228408.000000,82950.000000,688.948940)}
{pt3dadd(170448.000000,228444.000000,82900.000000,682.244180)}
{pt3dadd(170340.000000,228480.000000,82850.000000,663.072540)}
{pt3dadd(170232.000000,228504.000000,82875.000000,642.208026)}
{pt3dadd(170100.000000,228588.000000,82925.000000,631.077506)}
{pt3dadd(169992.000000,228672.000000,82875.000000,631.077506)}
{pt3dadd(169884.000000,228708.000000,82775.000000,618.610626)}
{pt3dadd(169776.000000,228732.000000,82650.000000,622.914518)}
{pt3dadd(169668.000000,228756.000000,82500.000000,630.688792)}
{pt3dadd(169548.000000,228756.000000,82400.000000,630.688792)}
{pt3dadd(169428.000000,228720.000000,82300.000000,630.688792)}
{pt3dadd(169296.000000,228720.000000,82225.000000,634.992684)}
{pt3dadd(169176.000000,228756.000000,82175.000000,656.900412)}
{pt3dadd(169008.000000,228912.000000,82100.000000,669.990652)}
{pt3dadd(168888.000000,229032.000000,82050.000000,697.512862)}
{pt3dadd(168708.000000,229020.000000,82000.000000,707.968752)}
{pt3dadd(168528.000000,228984.000000,82000.000000,729.876480)}
{pt3dadd(168348.000000,229044.000000,81950.000000,722.836500)}
{pt3dadd(168216.000000,229128.000000,81850.000000,745.030060)}
{pt3dadd(168060.000000,229212.000000,81800.000000,766.997330)}
{pt3dadd(167880.000000,229248.000000,81750.000000,808.532060)}
{pt3dadd(167748.000000,229284.000000,81700.000000,823.685640)}
{pt3dadd(167580.000000,229320.000000,81650.000000,845.879200)}
{pt3dadd(167412.000000,229356.000000,81600.000000,845.687460)}
{pt3dadd(167232.000000,229320.000000,81550.000000,816.328200)}
{pt3dadd(167064.000000,229284.000000,81575.000000,799.621380)}
{pt3dadd(166920.000000,229284.000000,81575.000000,807.771040)}
{pt3dadd(166788.000000,229284.000000,81525.000000,799.073452)}
{pt3dadd(166668.000000,229272.000000,81500.000000,799.265192)}
{pt3dadd(166524.000000,229296.000000,81425.000000,831.125592)}
{pt3dadd(166380.000000,229356.000000,81450.000000,839.275252)}
{pt3dadd(166260.000000,229392.000000,81500.000000,830.142792)}
{pt3dadd(166128.000000,229416.000000,81500.000000,838.840380)}
{pt3dadd(166020.000000,229416.000000,81500.000000,838.840380)}
{pt3dadd(165888.000000,229416.000000,81500.000000,806.979980)}
{pt3dadd(165792.000000,229404.000000,81475.000000,783.960900)}
{pt3dadd(165708.000000,229392.000000,81450.000000,769.790120)}
{pt3dadd(165612.000000,229380.000000,81425.000000,747.596560)}
{pt3dadd(165504.000000,229368.000000,81325.000000,718.698240)}
{pt3dadd(165384.000000,229356.000000,81300.000000,732.869020)}
{pt3dadd(165276.000000,229380.000000,81325.000000,732.584860)}
{pt3dadd(165168.000000,229404.000000,81350.000000,732.584860)}
{pt3dadd(165072.000000,229392.000000,81375.000000,739.624840)}
{pt3dadd(164964.000000,229392.000000,81400.000000,737.758460)}
{pt3dadd(164856.000000,229392.000000,81425.000000,716.547700)}
{pt3dadd(164784.000000,229380.000000,81425.000000,709.507720)}
{pt3dadd(164688.000000,229368.000000,81375.000000,702.467740)}
{pt3dadd(164580.000000,229368.000000,81400.000000,695.698380)}
{pt3dadd(164472.000000,229368.000000,81425.000000,711.309500)}
{pt3dadd(164376.000000,229368.000000,81400.000000,711.309500)}
{pt3dadd(164280.000000,229428.000000,81275.000000,711.309500)}
{pt3dadd(164172.000000,229356.000000,81250.000000,724.805472)}
{pt3dadd(164076.000000,229320.000000,81250.000000,724.534852)}
{pt3dadd(163980.000000,229308.000000,81200.000000,710.790112)}
{pt3dadd(163884.000000,229260.000000,81150.000000,704.085352)}
{pt3dadd(163788.000000,229212.000000,81100.000000,703.236366)}
{pt3dadd(163680.000000,229164.000000,81050.000000,676.650154)}
{pt3dadd(163584.000000,229116.000000,81000.000000,657.478514)}
{pt3dadd(163464.000000,229068.000000,80950.000000,623.447264)}
{pt3dadd(163344.000000,229020.000000,80900.000000,574.391788)}
{pt3dadd(163212.000000,228972.000000,80850.000000,532.884894)}
{pt3dadd(163104.000000,229032.000000,80925.000000,504.891340)}
{pt3dadd(162996.000000,228888.000000,80850.000000,471.999050)}
{pt3dadd(162912.000000,228480.000000,80550.000000,498.579930)}

{create adhoc71}
{access adhoc71}
{connect adhoc71(1), adhoc70(0)}
{nseg = 1}
{strdef color color = "White"}
{pt3dclear()}
{pt3dadd(162912.000000,228480.000000,80550.000000,498.579930)}
{pt3dadd(162792.000000,228144.000000,80375.000000,432.581163)}
{pt3dadd(162732.000000,227976.000000,80225.000000,416.540538)}
{pt3dadd(162612.000000,227880.000000,80125.000000,389.701892)}
{pt3dadd(162468.000000,227832.000000,80050.000000,398.630740)}
{pt3dadd(162360.000000,227724.000000,80050.000000,390.977156)}
{pt3dadd(162216.000000,227652.000000,80000.000000,398.630740)}
{pt3dadd(162096.000000,227640.000000,80000.000000,388.831248)}
{pt3dadd(161976.000000,227592.000000,80000.000000,387.067360)}
{pt3dadd(161856.000000,227556.000000,79900.000000,375.297640)}
{pt3dadd(161736.000000,227508.000000,79900.000000,379.031092)}
{pt3dadd(161628.000000,227496.000000,79925.000000,376.665220)}
{pt3dadd(161496.000000,227424.000000,79850.000000,375.255452)}
{pt3dadd(161400.000000,227352.000000,79700.000000,382.544580)}
{pt3dadd(161280.000000,227304.000000,79675.000000,394.314300)}
{pt3dadd(161160.000000,227160.000000,79575.000000,382.542432)}
{pt3dadd(161052.000000,227160.000000,79525.000000,364.016066)}
{pt3dadd(160920.000000,227160.000000,79475.000000,345.968568)}
{pt3dadd(160776.000000,227196.000000,79475.000000,328.996462)}
{pt3dadd(160656.000000,227220.000000,79450.000000,322.904880)}
{pt3dadd(160524.000000,227172.000000,79350.000000,330.943296)}
{pt3dadd(160428.000000,227076.000000,79250.000000,347.915402)}
{pt3dadd(160332.000000,226968.000000,79125.000000,377.172160)}
{pt3dadd(160212.000000,226920.000000,79050.000000,391.286706)}
{pt3dadd(160104.000000,226872.000000,78950.000000,393.262152)}
{pt3dadd(160008.000000,226860.000000,78850.000000,405.031872)}
{pt3dadd(159900.000000,226764.000000,78750.000000,421.928120)}
{pt3dadd(159792.000000,226788.000000,78725.000000,439.551472)}
{pt3dadd(159672.000000,226848.000000,78775.000000,454.767244)}
{pt3dadd(159564.000000,226836.000000,78800.000000,477.511492)}
{pt3dadd(159456.000000,226800.000000,78600.000000,465.741772)}
{pt3dadd(159372.000000,226788.000000,78550.000000,469.113988)}
{pt3dadd(159252.000000,226680.000000,78500.000000,440.281376)}
{pt3dadd(159144.000000,226584.000000,78450.000000,401.593684)}
{pt3dadd(159036.000000,226572.000000,78450.000000,328.651184)}
{pt3dadd(158928.000000,226524.000000,78475.000000,258.851687)}
{pt3dadd(158820.000000,226512.000000,78475.000000,160.622300)}

{create adhoc72}
{access adhoc72}
{connect adhoc72(1), adhoc71(0)}
{nseg = 1}
{strdef color color = "White"}
{pt3dclear()}
{pt3dadd(158820.000000,226512.000000,78475.000000,160.622300)}
{pt3dadd(158748.000000,226212.000000,79125.000000,166.544960)}
{pt3dadd(158652.000000,226056.000000,79325.000000,159.689958)}
{pt3dadd(158556.000000,225888.000000,79475.000000,152.800530)}
{pt3dadd(158448.000000,225792.000000,79675.000000,141.043906)}
{pt3dadd(158364.000000,225744.000000,79950.000000,165.321190)}
{pt3dadd(158268.000000,225780.000000,80200.000000,175.930347)}
{pt3dadd(158076.000000,225540.000000,80475.000000,269.131960)}

{create adhoc73}
{access adhoc73}
{connect adhoc73(1), adhoc72(0)}
{nseg = 1}
{strdef color color = "White"}
{pt3dclear()}
{pt3dadd(158076.000000,225540.000000,80475.000000,269.131960)}
{pt3dadd(157932.000000,225300.000000,80475.000000,188.333000)}
{pt3dadd(157872.000000,224880.000000,80275.000000,142.848416)}
{pt3dadd(157872.000000,224580.000000,80175.000000,103.592013)}
{pt3dadd(157872.000000,224172.000000,80150.000000,93.450549)}
{pt3dadd(157872.000000,223860.000000,80175.000000,106.545607)}
{pt3dadd(158040.000000,223656.000000,80175.000000,117.146931)}
{pt3dadd(158244.000000,223344.000000,80175.000000,113.492958)}
{pt3dadd(158304.000000,223176.000000,80125.000000,115.231494)}
{pt3dadd(158340.000000,222972.000000,80100.000000,88.507487)}
{pt3dadd(158376.000000,222768.000000,80150.000000,81.542625)}

{create adhoc74}
{access adhoc74}
{connect adhoc74(1), adhoc72(0)}
{nseg = 1}
{strdef color color = "White"}
{pt3dclear()}
{pt3dadd(158076.000000,225540.000000,80475.000000,269.131960)}
{pt3dadd(158016.000000,225792.000000,80625.000000,173.520970)}
{pt3dadd(158280.000000,226020.000000,80800.000000,147.875316)}
{pt3dadd(158544.000000,226272.000000,80925.000000,102.831953)}
{pt3dadd(158616.000000,226512.000000,81225.000000,95.018200)}
{pt3dadd(158724.000000,226620.000000,81425.000000,83.886809)}
{pt3dadd(158868.000000,226728.000000,81500.000000,67.229879)}
{pt3dadd(159024.000000,227016.000000,81700.000000,83.768411)}
{pt3dadd(159252.000000,227076.000000,81800.000000,106.011948)}
{pt3dadd(159468.000000,227256.000000,82100.000000,110.341425)}
{pt3dadd(159420.000000,227472.000000,82225.000000,120.628842)}
{pt3dadd(159372.000000,227700.000000,82400.000000,119.476595)}
{pt3dadd(159324.000000,227892.000000,82650.000000,96.163118)}
{pt3dadd(159336.000000,228072.000000,82825.000000,58.699654)}

{create adhoc75}
{access adhoc75}
{connect adhoc75(1), adhoc71(0)}
{nseg = 1}
{strdef color color = "White"}
{pt3dclear()}
{pt3dadd(158820.000000,226512.000000,78475.000000,160.622300)}
{pt3dadd(158820.000000,226596.000000,78025.000000,328.884753)}
{pt3dadd(158640.000000,226644.000000,77875.000000,374.952392)}
{pt3dadd(158448.000000,226644.000000,77725.000000,430.280732)}
{pt3dadd(158268.000000,226560.000000,77525.000000,438.157844)}
{pt3dadd(158112.000000,226476.000000,77375.000000,442.273980)}
{pt3dadd(157944.000000,226476.000000,77325.000000,455.250096)}
{pt3dadd(157788.000000,226500.000000,77275.000000,446.288432)}
{pt3dadd(157656.000000,226488.000000,77075.000000,454.134460)}
{pt3dadd(157536.000000,226404.000000,77025.000000,458.672496)}
{pt3dadd(157392.000000,226404.000000,76900.000000,454.556360)}
{pt3dadd(157284.000000,226392.000000,76800.000000,442.804284)}
{pt3dadd(157176.000000,226308.000000,76650.000000,444.619550)}
{pt3dadd(157080.000000,226188.000000,76500.000000,444.507446)}
{pt3dadd(156972.000000,226176.000000,76400.000000,444.809843)}
{pt3dadd(156648.000000,226284.000000,76450.000000,475.933620)}

{create adhoc76}
{access adhoc76}
{connect adhoc76(1), adhoc75(0)}
{nseg = 1}
{strdef color color = "White"}
{pt3dclear()}
{pt3dadd(156648.000000,226284.000000,76450.000000,475.933620)}
{pt3dadd(156636.000000,226560.000000,76525.000000,462.211303)}
{pt3dadd(156528.000000,226956.000000,76625.000000,321.636908)}
{pt3dadd(156384.000000,227460.000000,76625.000000,249.163389)}
{pt3dadd(156264.000000,227988.000000,76775.000000,175.089423)}
{pt3dadd(155952.000000,228492.000000,76925.000000,107.214385)}
{pt3dadd(155856.000000,228576.000000,76925.000000,86.526500)}

{create adhoc77}
{access adhoc77}
{connect adhoc77(1), adhoc75(0)}
{nseg = 1}
{strdef color color = "White"}
{pt3dclear()}
{pt3dadd(156648.000000,226284.000000,76450.000000,475.933620)}
{pt3dadd(156480.000000,226020.000000,76550.000000,502.175357)}
{pt3dadd(156456.000000,225840.000000,76225.000000,391.606916)}
{pt3dadd(156360.000000,225516.000000,76150.000000,317.275787)}
{pt3dadd(156384.000000,225204.000000,75975.000000,253.696530)}

{create adhoc78}
{access adhoc78}
{connect adhoc78(1), adhoc77(0)}
{nseg = 1}
{strdef color color = "White"}
{pt3dclear()}
{pt3dadd(156384.000000,225204.000000,75975.000000,253.696530)}
{pt3dadd(156504.000000,224940.000000,75975.000000,164.520240)}
{pt3dadd(156744.000000,224664.000000,75975.000000,167.207164)}
{pt3dadd(156924.000000,224364.000000,76100.000000,138.044036)}
{pt3dadd(157080.000000,224232.000000,76375.000000,156.855880)}
{pt3dadd(157296.000000,224088.000000,76600.000000,138.319615)}
{pt3dadd(157380.000000,224028.000000,76800.000000,121.842197)}
{pt3dadd(157584.000000,223980.000000,77175.000000,98.379284)}
{pt3dadd(157776.000000,223980.000000,77350.000000,73.708687)}
{pt3dadd(157836.000000,223980.000000,77525.000000,62.271065)}

{create adhoc79}
{access adhoc79}
{connect adhoc79(1), adhoc78(0)}
{nseg = 1}
{strdef color color = "White"}
{pt3dclear()}
{pt3dadd(157836.000000,223980.000000,77525.000000,62.271065)}
{pt3dadd(157800.000000,223980.000000,77775.000000,79.978098)}
{pt3dadd(157692.000000,223980.000000,78025.000000,77.686811)}
{pt3dadd(157548.000000,223980.000000,78275.000000,83.212748)}
{pt3dadd(157368.000000,223980.000000,78525.000000,79.466837)}
{pt3dadd(157188.000000,223980.000000,78775.000000,89.900750)}

{create adhoc80}
{access adhoc80}
{connect adhoc80(1), adhoc78(0)}
{nseg = 1}
{strdef color color = "White"}
{pt3dclear()}
{pt3dadd(157836.000000,223980.000000,77525.000000,62.271065)}
{pt3dadd(157848.000000,223812.000000,77850.000000,77.212390)}
{pt3dadd(157980.000000,223620.000000,77900.000000,79.298350)}
{pt3dadd(158076.000000,223380.000000,77850.000000,81.674463)}
{pt3dadd(158160.000000,222972.000000,77875.000000,79.668737)}
{pt3dadd(158208.000000,222696.000000,77775.000000,74.151630)}

{create adhoc81}
{access adhoc81}
{connect adhoc81(1), adhoc77(0)}
{nseg = 1}
{strdef color color = "White"}
{pt3dclear()}
{pt3dadd(156384.000000,225204.000000,75975.000000,253.696530)}
{pt3dadd(156036.000000,225204.000000,75975.000000,169.965800)}
{pt3dadd(155796.000000,225144.000000,75975.000000,133.633297)}
{pt3dadd(155508.000000,225096.000000,75975.000000,80.179778)}
{pt3dadd(155304.000000,225132.000000,75875.000000,104.338780)}

{create adhoc82}
{access adhoc82}
{connect adhoc82(1), adhoc75(0)}
{nseg = 1}
{strdef color color = "White"}
{pt3dclear()}
{pt3dadd(156648.000000,226284.000000,76450.000000,475.933620)}
{pt3dadd(156396.000000,226440.000000,76200.000000,512.728640)}

{create adhoc83}
{access adhoc83}
{connect adhoc83(1), adhoc82(0)}
{nseg = 1}
{strdef color color = "White"}
{pt3dclear()}
{pt3dadd(156396.000000,226440.000000,76200.000000,512.728640)}
{pt3dadd(156660.000000,226308.000000,75925.000000,314.246650)}
{pt3dadd(156540.000000,226188.000000,75700.000000,190.828270)}
{pt3dadd(156324.000000,226164.000000,75425.000000,142.473500)}

{create adhoc84}
{access adhoc84}
{connect adhoc84(1), adhoc83(0)}
{nseg = 1}
{strdef color color = "White"}
{pt3dclear()}
{pt3dadd(156324.000000,226164.000000,75425.000000,142.473500)}
{pt3dadd(156324.000000,226176.000000,75075.000000,120.548360)}
{pt3dadd(156324.000000,226032.000000,74725.000000,105.611412)}
{pt3dadd(156168.000000,225924.000000,74250.000000,102.374007)}
{pt3dadd(156168.000000,225708.000000,73825.000000,98.633960)}

{create adhoc85}
{access adhoc85}
{connect adhoc85(1), adhoc84(0)}
{nseg = 1}
{strdef color color = "White"}
{pt3dclear()}
{pt3dadd(156168.000000,225708.000000,73825.000000,98.633960)}
{pt3dadd(156132.000000,225672.000000,73600.000000,116.966783)}
{pt3dadd(155988.000000,225684.000000,73300.000000,132.155523)}
{pt3dadd(155832.000000,225684.000000,73050.000000,144.200180)}

{create adhoc86}
{access adhoc86}
{connect adhoc86(1), adhoc85(0)}
{nseg = 1}
{strdef color color = "White"}
{pt3dclear()}
{pt3dadd(155832.000000,225684.000000,73050.000000,144.200180)}
{pt3dadd(155676.000000,225684.000000,72800.000000,182.240237)}
{pt3dadd(155508.000000,225636.000000,72400.000000,174.810376)}
{pt3dadd(155508.000000,225624.000000,72075.000000,173.791962)}
{pt3dadd(155376.000000,225600.000000,71825.000000,157.230408)}
{pt3dadd(155220.000000,225636.000000,71500.000000,136.191083)}
{pt3dadd(155064.000000,225684.000000,71375.000000,121.719600)}

{create adhoc87}
{access adhoc87}
{connect adhoc87(1), adhoc86(0)}
{nseg = 1}
{strdef color color = "White"}
{pt3dclear()}
{pt3dadd(155064.000000,225684.000000,71375.000000,121.719600)}
{pt3dadd(154992.000000,225744.000000,70975.000000,103.889670)}
{pt3dadd(154872.000000,225888.000000,70825.000000,136.490260)}
{pt3dadd(154716.000000,226212.000000,70700.000000,155.864522)}
{pt3dadd(154536.000000,226404.000000,70475.000000,172.864374)}
{pt3dadd(154392.000000,226584.000000,70400.000000,191.504748)}
{pt3dadd(154212.000000,226584.000000,70075.000000,185.728768)}
{pt3dadd(154056.000000,226644.000000,70000.000000,177.967560)}
{pt3dadd(153900.000000,226656.000000,69875.000000,168.456166)}
{pt3dadd(154140.000000,226572.000000,69400.000000,163.321078)}
{pt3dadd(154056.000000,226572.000000,69075.000000,167.002584)}
{pt3dadd(153864.000000,226572.000000,68900.000000,170.803398)}
{pt3dadd(153672.000000,226572.000000,68650.000000,185.118428)}
{pt3dadd(153660.000000,226776.000000,68650.000000,188.624622)}
{pt3dadd(153696.000000,227040.000000,68675.000000,185.595836)}
{pt3dadd(153732.000000,227244.000000,68750.000000,170.036854)}
{pt3dadd(153720.000000,227436.000000,68700.000000,156.166847)}
{pt3dadd(153552.000000,227592.000000,68475.000000,120.204133)}
{pt3dadd(153468.000000,227820.000000,68350.000000,88.236739)}
{pt3dadd(153588.000000,228048.000000,68275.000000,60.848362)}

{create adhoc88}
{access adhoc88}
{connect adhoc88(1), adhoc86(0)}
{nseg = 1}
{strdef color color = "White"}
{pt3dclear()}
{pt3dadd(155064.000000,225684.000000,71375.000000,121.719600)}
{pt3dadd(155004.000000,225720.000000,71500.000000,110.919773)}
{pt3dadd(154872.000000,225756.000000,71500.000000,109.186560)}
{pt3dadd(154584.000000,226128.000000,71625.000000,116.519960)}

{create adhoc89}
{access adhoc89}
{connect adhoc89(1), adhoc85(0)}
{nseg = 1}
{strdef color color = "White"}
{pt3dclear()}
{pt3dadd(155832.000000,225684.000000,73050.000000,144.200180)}
{pt3dadd(155940.000000,225384.000000,73000.000000,94.887853)}
{pt3dadd(156024.000000,225132.000000,72950.000000,71.857727)}
{pt3dadd(156024.000000,224916.000000,72825.000000,75.109800)}

{create adhoc90}
{access adhoc90}
{connect adhoc90(1), adhoc84(0)}
{nseg = 1}
{strdef color color = "White"}
{pt3dclear()}
{pt3dadd(156168.000000,225708.000000,73825.000000,98.633960)}
{pt3dadd(156348.000000,225540.000000,74000.000000,37.935555)}

{create adhoc91}
{access adhoc91}
{connect adhoc91(1), adhoc83(0)}
{nseg = 1}
{strdef color color = "White"}
{pt3dclear()}
{pt3dadd(156324.000000,226164.000000,75425.000000,142.473500)}
{pt3dadd(156504.000000,225996.000000,75100.000000,96.883030)}
{pt3dadd(156624.000000,225744.000000,74975.000000,67.466340)}

{create adhoc92}
{access adhoc92}
{connect adhoc92(1), adhoc82(0)}
{nseg = 1}
{strdef color color = "White"}
{pt3dclear()}
{pt3dadd(156396.000000,226440.000000,76200.000000,512.728640)}
{pt3dadd(156012.000000,226632.000000,75900.000000,331.114273)}
{pt3dadd(155472.000000,226668.000000,75725.000000,234.771997)}
{pt3dadd(154836.000000,226716.000000,75475.000000,223.701810)}

{create adhoc93}
{access adhoc93}
{connect adhoc93(1), adhoc92(0)}
{nseg = 1}
{strdef color color = "White"}
{pt3dclear()}
{pt3dadd(154836.000000,226716.000000,75475.000000,223.701810)}
{pt3dadd(154548.000000,226968.000000,75250.000000,182.356353)}
{pt3dadd(154152.000000,226992.000000,75075.000000,186.725426)}
{pt3dadd(153972.000000,226956.000000,74800.000000,170.029260)}
{pt3dadd(153828.000000,227004.000000,74550.000000,168.594424)}
{pt3dadd(153516.000000,227088.000000,74275.000000,191.201178)}
{pt3dadd(153192.000000,227244.000000,74025.000000,209.207446)}
{pt3dadd(153024.000000,227412.000000,73775.000000,229.565180)}
{pt3dadd(152904.000000,227604.000000,73600.000000,262.252100)}
{pt3dadd(152736.000000,228168.000000,73475.000000,265.026530)}
{pt3dadd(152496.000000,228420.000000,73450.000000,268.624823)}
{pt3dadd(152412.000000,228708.000000,73550.000000,202.437060)}

{create adhoc94}
{access adhoc94}
{connect adhoc94(1), adhoc93(0)}
{nseg = 1}
{strdef color color = "White"}
{pt3dclear()}
{pt3dadd(152412.000000,228708.000000,73550.000000,202.437060)}
{pt3dadd(152760.000000,228720.000000,73300.000000,167.610617)}
{pt3dadd(152712.000000,228948.000000,73075.000000,162.860429)}
{pt3dadd(152664.000000,229236.000000,72875.000000,166.678402)}
{pt3dadd(152844.000000,229416.000000,72675.000000,105.416145)}

{create adhoc95}
{access adhoc95}
{connect adhoc95(1), adhoc93(0)}
{nseg = 1}
{strdef color color = "White"}
{pt3dclear()}
{pt3dadd(152412.000000,228708.000000,73550.000000,202.437060)}
{pt3dadd(152028.000000,228816.000000,73550.000000,180.288233)}
{pt3dadd(151836.000000,229140.000000,73625.000000,173.296122)}
{pt3dadd(151692.000000,229356.000000,73700.000000,151.256534)}
{pt3dadd(151692.000000,229584.000000,73700.000000,139.285010)}
{pt3dadd(151716.000000,229836.000000,73725.000000,92.239120)}

{create adhoc96}
{access adhoc96}
{connect adhoc96(1), adhoc92(0)}
{nseg = 1}
{strdef color color = "White"}
{pt3dclear()}
{pt3dadd(154836.000000,226716.000000,75475.000000,223.701810)}
{pt3dadd(154524.000000,227124.000000,76250.000000,146.278193)}
{pt3dadd(154272.000000,227220.000000,76400.000000,140.219050)}
{pt3dadd(154092.000000,227376.000000,76400.000000,108.421962)}
{pt3dadd(153876.000000,227628.000000,76525.000000,101.066209)}
{pt3dadd(153864.000000,227760.000000,76675.000000,89.339306)}
{pt3dadd(153684.000000,228012.000000,76650.000000,62.591507)}

{create adhoc97}
{access adhoc97}
{connect adhoc97(1), adhoc70(0)}
{nseg = 1}
{strdef color color = "White"}
{pt3dclear()}
{pt3dadd(162912.000000,228480.000000,80550.000000,498.579930)}
{pt3dadd(162912.000000,229296.000000,80750.000000,206.532753)}
{pt3dadd(162732.000000,229824.000000,80900.000000,256.148748)}
{pt3dadd(162528.000000,229944.000000,81200.000000,215.624262)}
{pt3dadd(162288.000000,229944.000000,81225.000000,278.367989)}
{pt3dadd(162036.000000,230016.000000,81225.000000,344.492304)}
{pt3dadd(161796.000000,230148.000000,81375.000000,362.313020)}
{pt3dadd(161592.000000,230196.000000,81350.000000,372.515760)}
{pt3dadd(161352.000000,230304.000000,81425.000000,408.623088)}
{pt3dadd(161148.000000,230376.000000,81325.000000,429.252788)}
{pt3dadd(160992.000000,230496.000000,81250.000000,455.917168)}
{pt3dadd(160896.000000,230532.000000,81250.000000,467.566880)}
{pt3dadd(160788.000000,230484.000000,81150.000000,494.704000)}
{pt3dadd(160668.000000,230568.000000,81175.000000,499.468942)}
{pt3dadd(160548.000000,230556.000000,81125.000000,504.233884)}
{pt3dadd(160476.000000,230544.000000,81075.000000,496.579224)}
{pt3dadd(160356.000000,230496.000000,80975.000000,489.045648)}
{pt3dadd(160224.000000,230616.000000,80950.000000,474.739480)}
{pt3dadd(160092.000000,230700.000000,80900.000000,461.114558)}
{pt3dadd(159960.000000,230700.000000,80825.000000,459.721832)}
{pt3dadd(159756.000000,230772.000000,80700.000000,444.632244)}
{pt3dadd(159588.000000,230892.000000,80575.000000,436.595976)}
{pt3dadd(159432.000000,230928.000000,80550.000000,428.157896)}
{pt3dadd(159300.000000,230988.000000,80500.000000,423.545378)}
{pt3dadd(159144.000000,231024.000000,80450.000000,403.427618)}
{pt3dadd(159000.000000,231156.000000,80325.000000,403.330778)}
{pt3dadd(158868.000000,231264.000000,80225.000000,404.342477)}
{pt3dadd(158568.000000,231396.000000,80200.000000,411.129360)}

{create adhoc98}
{access adhoc98}
{connect adhoc98(1), adhoc97(0)}
{nseg = 1}
{strdef color color = "White"}
{pt3dclear()}
{pt3dadd(158568.000000,231396.000000,80200.000000,411.129360)}
{pt3dadd(158412.000000,231540.000000,80100.000000,391.412247)}
{pt3dadd(158292.000000,231612.000000,80100.000000,399.492772)}
{pt3dadd(158124.000000,231864.000000,80075.000000,390.896752)}
{pt3dadd(157968.000000,231912.000000,80025.000000,384.404956)}
{pt3dadd(157812.000000,231972.000000,79875.000000,377.115828)}
{pt3dadd(157728.000000,232008.000000,79675.000000,362.520216)}
{pt3dadd(157320.000000,232284.000000,79400.000000,349.090210)}
{pt3dadd(157080.000000,232416.000000,79175.000000,343.187458)}
{pt3dadd(156960.000000,232596.000000,79000.000000,331.179608)}
{pt3dadd(156732.000000,232812.000000,78775.000000,321.496630)}
{pt3dadd(156564.000000,232956.000000,78575.000000,318.860906)}
{pt3dadd(156408.000000,233040.000000,78400.000000,332.290912)}
{pt3dadd(156336.000000,233088.000000,78200.000000,346.886524)}
{pt3dadd(156216.000000,233208.000000,77925.000000,374.906800)}
{pt3dadd(155976.000000,233268.000000,77700.000000,397.215840)}
{pt3dadd(155844.000000,233304.000000,77500.000000,416.336253)}
{pt3dadd(155688.000000,233364.000000,77350.000000,418.697570)}

{create adhoc99}
{access adhoc99}
{connect adhoc99(1), adhoc98(0)}
{nseg = 1}
{strdef color color = "White"}
{pt3dclear()}
{pt3dadd(155688.000000,233364.000000,77350.000000,418.697570)}
{pt3dadd(155688.000000,233496.000000,77825.000000,306.718217)}
{pt3dadd(155688.000000,233784.000000,78325.000000,102.697480)}

{create adhoc100}
{access adhoc100}
{connect adhoc100(1), adhoc99(0)}
{nseg = 1}
{strdef color color = "White"}
{pt3dclear()}
{pt3dadd(155688.000000,233784.000000,78325.000000,102.697480)}
{pt3dadd(155340.000000,233892.000000,78450.000000,93.609663)}
{pt3dadd(155112.000000,234084.000000,78450.000000,98.616514)}
{pt3dadd(154860.000000,234264.000000,78450.000000,91.528560)}
{pt3dadd(154728.000000,234504.000000,78450.000000,95.508808)}
{pt3dadd(154644.000000,234804.000000,78450.000000,92.031293)}
{pt3dadd(154536.000000,235116.000000,78450.000000,76.732649)}
{pt3dadd(154380.000000,235260.000000,78525.000000,75.234195)}
{pt3dadd(154212.000000,235416.000000,78675.000000,45.057410)}

{create adhoc101}
{access adhoc101}
{connect adhoc101(1), adhoc99(0)}
{nseg = 1}
{strdef color color = "White"}
{pt3dclear()}
{pt3dadd(155688.000000,233784.000000,78325.000000,102.697480)}
{pt3dadd(155556.000000,233868.000000,78575.000000,115.961017)}
{pt3dadd(155412.000000,233916.000000,78600.000000,137.317250)}
{pt3dadd(155196.000000,233988.000000,78650.000000,147.775926)}
{pt3dadd(155136.000000,234108.000000,78950.000000,172.701172)}
{pt3dadd(155004.000000,234348.000000,78825.000000,164.826253)}
{pt3dadd(154812.000000,234552.000000,78775.000000,198.777860)}

{create adhoc102}
{access adhoc102}
{connect adhoc102(1), adhoc98(0)}
{nseg = 1}
{strdef color color = "White"}
{pt3dclear()}
{pt3dadd(155688.000000,233364.000000,77350.000000,418.697570)}
{pt3dadd(155400.000000,233556.000000,77150.000000,461.614140)}

{create adhoc103}
{access adhoc103}
{connect adhoc103(1), adhoc102(0)}
{nseg = 1}
{strdef color color = "White"}
{pt3dclear()}
{pt3dadd(155400.000000,233556.000000,77150.000000,461.614140)}
{pt3dadd(155328.000000,233160.000000,77275.000000,334.410517)}
{pt3dadd(155196.000000,232956.000000,77275.000000,234.357518)}
{pt3dadd(155040.000000,232728.000000,77275.000000,77.672310)}
{pt3dadd(154884.000000,232536.000000,77275.000000,87.846790)}

{create adhoc104}
{access adhoc104}
{connect adhoc104(1), adhoc102(0)}
{nseg = 1}
{strdef color color = "White"}
{pt3dclear()}
{pt3dadd(155400.000000,233556.000000,77150.000000,461.614140)}
{pt3dadd(155196.000000,233712.000000,76850.000000,448.090163)}
{pt3dadd(154776.000000,233940.000000,76550.000000,450.078450)}
{pt3dadd(154752.000000,234120.000000,76325.000000,467.579000)}

{create adhoc105}
{access adhoc105}
{connect adhoc105(1), adhoc104(0)}
{nseg = 1}
{strdef color color = "White"}
{pt3dclear()}
{pt3dadd(154752.000000,234120.000000,76325.000000,467.579000)}
{pt3dadd(154668.000000,233700.000000,76325.000000,376.732930)}
{pt3dadd(154440.000000,233304.000000,76325.000000,288.166760)}
{pt3dadd(154260.000000,232992.000000,76325.000000,222.188238)}
{pt3dadd(154056.000000,233028.000000,76525.000000,146.552300)}
{pt3dadd(153648.000000,233028.000000,76700.000000,138.284532)}
{pt3dadd(153528.000000,232800.000000,77025.000000,126.706638)}
{pt3dadd(153240.000000,232704.000000,77125.000000,122.198838)}
{pt3dadd(153156.000000,232920.000000,76975.000000,105.871178)}
{pt3dadd(152928.000000,232848.000000,76925.000000,95.418210)}
{pt3dadd(152724.000000,232752.000000,76925.000000,56.048090)}

{create adhoc106}
{access adhoc106}
{connect adhoc106(1), adhoc104(0)}
{nseg = 1}
{strdef color color = "White"}
{pt3dclear()}
{pt3dadd(154752.000000,234120.000000,76325.000000,467.579000)}
{pt3dadd(154464.000000,234276.000000,76025.000000,447.525487)}
{pt3dadd(153948.000000,234396.000000,75650.000000,468.377470)}
{pt3dadd(153456.000000,234996.000000,75075.000000,530.134950)}

{create adhoc107}
{access adhoc107}
{connect adhoc107(1), adhoc106(0)}
{nseg = 1}
{strdef color color = "White"}
{pt3dclear()}
{pt3dadd(153456.000000,234996.000000,75075.000000,530.134950)}
{pt3dadd(153300.000000,235032.000000,75375.000000,432.967130)}
{pt3dadd(153000.000000,235308.000000,75375.000000,306.237846)}
{pt3dadd(152640.000000,235644.000000,75375.000000,179.813403)}
{pt3dadd(152304.000000,236112.000000,75550.000000,104.153850)}

{create adhoc108}
{access adhoc108}
{connect adhoc108(1), adhoc106(0)}
{nseg = 1}
{strdef color color = "White"}
{pt3dclear()}
{pt3dadd(153456.000000,234996.000000,75075.000000,530.134950)}
{pt3dadd(153288.000000,235200.000000,74800.000000,401.388110)}
{pt3dadd(152928.000000,235584.000000,74550.000000,341.729700)}

{create adhoc109}
{access adhoc109}
{connect adhoc109(1), adhoc108(0)}
{nseg = 1}
{strdef color color = "White"}
{pt3dclear()}
{pt3dadd(152928.000000,235584.000000,74550.000000,341.729700)}
{pt3dadd(152976.000000,235860.000000,74475.000000,319.225940)}
{pt3dadd(152964.000000,236136.000000,74475.000000,227.037234)}
{pt3dadd(152952.000000,236424.000000,74475.000000,185.324426)}
{pt3dadd(152892.000000,236724.000000,74475.000000,126.014535)}
{pt3dadd(152676.000000,236976.000000,74550.000000,87.970541)}
{pt3dadd(152616.000000,237276.000000,74675.000000,87.448119)}
{pt3dadd(152472.000000,237504.000000,74675.000000,75.109800)}

{create adhoc110}
{access adhoc110}
{connect adhoc110(1), adhoc108(0)}
{nseg = 1}
{strdef color color = "White"}
{pt3dclear()}
{pt3dadd(152928.000000,235584.000000,74550.000000,341.729700)}
{pt3dadd(152724.000000,235716.000000,74250.000000,391.361763)}
{pt3dadd(152592.000000,235764.000000,74000.000000,352.385008)}
{pt3dadd(152532.000000,235752.000000,73825.000000,343.841772)}
{pt3dadd(152472.000000,235692.000000,73600.000000,324.195362)}
{pt3dadd(152376.000000,235704.000000,73375.000000,312.986102)}
{pt3dadd(152232.000000,235716.000000,73175.000000,318.825306)}
{pt3dadd(152184.000000,235704.000000,72850.000000,331.540052)}
{pt3dadd(152100.000000,235656.000000,72575.000000,345.392253)}
{pt3dadd(151956.000000,235440.000000,72225.000000,328.903500)}

{create adhoc111}
{access adhoc111}
{connect adhoc111(1), adhoc110(0)}
{nseg = 1}
{strdef color color = "White"}
{pt3dclear()}
{pt3dadd(151956.000000,235440.000000,72225.000000,328.903500)}
{pt3dadd(151800.000000,235452.000000,72025.000000,292.696490)}
{pt3dadd(151560.000000,235560.000000,71825.000000,299.058706)}
{pt3dadd(151356.000000,235656.000000,71575.000000,307.859298)}
{pt3dadd(151296.000000,235704.000000,71300.000000,330.036840)}
{pt3dadd(151032.000000,235716.000000,70950.000000,372.906460)}

{create adhoc112}
{access adhoc112}
{connect adhoc112(1), adhoc111(0)}
{nseg = 1}
{strdef color color = "White"}
{pt3dclear()}
{pt3dadd(151032.000000,235716.000000,70950.000000,372.906460)}
{pt3dadd(150828.000000,235800.000000,70575.000000,372.475503)}
{pt3dadd(150648.000000,235716.000000,70325.000000,334.923802)}
{pt3dadd(150636.000000,235704.000000,70200.000000,317.297466)}
{pt3dadd(150540.000000,235668.000000,70075.000000,294.625768)}
{pt3dadd(150480.000000,235716.000000,69900.000000,294.625768)}
{pt3dadd(150480.000000,235788.000000,69725.000000,300.336992)}
{pt3dadd(150396.000000,235776.000000,69575.000000,309.709118)}
{pt3dadd(150360.000000,235824.000000,69425.000000,311.259374)}
{pt3dadd(150276.000000,235788.000000,69225.000000,317.256158)}
{pt3dadd(150216.000000,235812.000000,69075.000000,324.198186)}
{pt3dadd(150132.000000,235860.000000,68875.000000,334.530952)}
{pt3dadd(150036.000000,235968.000000,68700.000000,337.166676)}
{pt3dadd(149940.000000,235992.000000,68500.000000,360.984176)}
{pt3dadd(149772.000000,236040.000000,68325.000000,382.921028)}
{pt3dadd(149688.000000,236028.000000,68125.000000,386.986434)}
{pt3dadd(149688.000000,236016.000000,67950.000000,397.545906)}
{pt3dadd(149604.000000,235956.000000,67725.000000,404.487934)}
{pt3dadd(149604.000000,235980.000000,67525.000000,400.567802)}
{pt3dadd(149592.000000,235980.000000,67325.000000,390.083174)}
{pt3dadd(149640.000000,235860.000000,67100.000000,382.462092)}
{pt3dadd(149604.000000,235884.000000,66900.000000,361.569854)}
{pt3dadd(149604.000000,235848.000000,66700.000000,345.405938)}
{pt3dadd(149712.000000,235524.000000,66500.000000,332.094734)}
{pt3dadd(149700.000000,235440.000000,66325.000000,334.543094)}
{pt3dadd(149580.000000,235404.000000,66075.000000,331.156742)}
{pt3dadd(149352.000000,235680.000000,65850.000000,337.453368)}
{pt3dadd(149280.000000,235596.000000,65575.000000,335.626356)}
{pt3dadd(149304.000000,235392.000000,65350.000000,329.040192)}
{pt3dadd(149208.000000,235308.000000,65150.000000,315.139608)}
{pt3dadd(149196.000000,235188.000000,64900.000000,311.914504)}
{pt3dadd(149328.000000,235104.000000,64650.000000,310.119880)}
{pt3dadd(149352.000000,235032.000000,64475.000000,321.168780)}
{pt3dadd(149436.000000,234768.000000,64250.000000,330.390668)}
{pt3dadd(149508.000000,234588.000000,63975.000000,318.954626)}
{pt3dadd(149580.000000,234576.000000,63775.000000,294.057064)}
{pt3dadd(149520.000000,234396.000000,63575.000000,265.837570)}
{pt3dadd(149568.000000,234384.000000,63350.000000,239.689034)}
{pt3dadd(149568.000000,234300.000000,63100.000000,211.560566)}
{pt3dadd(149640.000000,234384.000000,62875.000000,201.888862)}
{pt3dadd(149628.000000,234432.000000,62650.000000,210.416814)}
{pt3dadd(149568.000000,234600.000000,62450.000000,223.242836)}
{pt3dadd(149700.000000,234396.000000,62150.000000,243.094746)}
{pt3dadd(149784.000000,234504.000000,61900.000000,260.451070)}
{pt3dadd(149880.000000,234324.000000,61725.000000,284.783920)}
{pt3dadd(149880.000000,234420.000000,61575.000000,318.974246)}
{pt3dadd(149964.000000,234492.000000,61325.000000,354.874090)}
{pt3dadd(150132.000000,234540.000000,61125.000000,377.592022)}
{pt3dadd(150288.000000,234612.000000,60850.000000,399.039646)}
{pt3dadd(150360.000000,234600.000000,60600.000000,409.715126)}
{pt3dadd(150492.000000,234516.000000,60375.000000,391.894410)}
{pt3dadd(150600.000000,234324.000000,60175.000000,389.002322)}
{pt3dadd(150648.000000,234120.000000,59950.000000,379.523044)}
{pt3dadd(150648.000000,233916.000000,59700.000000,359.625676)}
{pt3dadd(150840.000000,233628.000000,59475.000000,331.762100)}
{pt3dadd(150924.000000,233172.000000,59275.000000,308.365314)}
{pt3dadd(150972.000000,232908.000000,59050.000000,272.950940)}
{pt3dadd(150996.000000,232812.000000,58850.000000,234.198938)}
{pt3dadd(151236.000000,232584.000000,58600.000000,215.154728)}
{pt3dadd(151380.000000,232308.000000,58325.000000,199.951412)}
{pt3dadd(151428.000000,232152.000000,58100.000000,184.523027)}
{pt3dadd(151536.000000,231672.000000,57750.000000,176.678440)}

{create adhoc113}
{access adhoc113}
{connect adhoc113(1), adhoc112(0)}
{nseg = 1}
{strdef color color = "White"}
{pt3dclear()}
{pt3dadd(151536.000000,231672.000000,57750.000000,176.678440)}
{pt3dadd(151464.000000,231504.000000,57750.000000,124.995260)}
{pt3dadd(151404.000000,231408.000000,57625.000000,149.931456)}
{pt3dadd(151452.000000,231288.000000,57425.000000,151.160010)}
{pt3dadd(151332.000000,231072.000000,57150.000000,175.479498)}
{pt3dadd(151308.000000,230796.000000,56800.000000,203.179274)}
{pt3dadd(151296.000000,230568.000000,56525.000000,220.034852)}
{pt3dadd(151332.000000,230352.000000,56150.000000,206.510510)}
{pt3dadd(151284.000000,230088.000000,55825.000000,205.001514)}
{pt3dadd(151332.000000,229968.000000,55475.000000,188.867970)}
{pt3dadd(151440.000000,229812.000000,55200.000000,175.276230)}

{create adhoc114}
{access adhoc114}
{connect adhoc114(1), adhoc112(0)}
{nseg = 1}
{strdef color color = "White"}
{pt3dclear()}
{pt3dadd(151536.000000,231672.000000,57750.000000,176.678440)}
{pt3dadd(151992.000000,231264.000000,57500.000000,186.018703)}
{pt3dadd(152208.000000,231084.000000,57450.000000,188.922836)}
{pt3dadd(152292.000000,230604.000000,57175.000000,197.417668)}
{pt3dadd(152508.000000,230232.000000,56950.000000,188.692430)}
{pt3dadd(152664.000000,230040.000000,56800.000000,162.290936)}
{pt3dadd(152880.000000,229752.000000,56650.000000,141.632203)}
{pt3dadd(153144.000000,229248.000000,56450.000000,75.885350)}

{create adhoc115}
{access adhoc115}
{connect adhoc115(1), adhoc111(0)}
{nseg = 1}
{strdef color color = "White"}
{pt3dclear()}
{pt3dadd(151032.000000,235716.000000,70950.000000,372.906460)}
{pt3dadd(150864.000000,235872.000000,71050.000000,253.830723)}
{pt3dadd(150708.000000,236088.000000,71125.000000,191.789585)}
{pt3dadd(150516.000000,236196.000000,71150.000000,90.692432)}
{pt3dadd(150240.000000,236292.000000,71225.000000,122.345955)}

{create adhoc116}
{access adhoc116}
{connect adhoc116(1), adhoc110(0)}
{nseg = 1}
{strdef color color = "White"}
{pt3dclear()}
{pt3dadd(151956.000000,235440.000000,72225.000000,328.903500)}
{pt3dadd(152196.000000,235548.000000,72225.000000,233.200700)}
{pt3dadd(152280.000000,235704.000000,72225.000000,163.102385)}
{pt3dadd(152460.000000,235956.000000,72225.000000,73.636608)}
{pt3dadd(152628.000000,236184.000000,72225.000000,65.721085)}

{create adhoc117}
{access adhoc117}
{connect adhoc117(1), adhoc97(0)}
{nseg = 1}
{strdef color color = "White"}
{pt3dclear()}
{pt3dadd(158568.000000,231396.000000,80200.000000,411.129360)}
{pt3dadd(158376.000000,231312.000000,79900.000000,377.725100)}

{create adhoc118}
{access adhoc118}
{connect adhoc118(1), adhoc117(0)}
{nseg = 1}
{strdef color color = "White"}
{pt3dclear()}
{pt3dadd(158376.000000,231312.000000,79900.000000,377.725100)}
{pt3dadd(158484.000000,231048.000000,79800.000000,262.958830)}
{pt3dadd(158460.000000,230916.000000,79675.000000,165.524680)}
{pt3dadd(158412.000000,230772.000000,79675.000000,85.422650)}

{create adhoc119}
{access adhoc119}
{connect adhoc119(1), adhoc117(0)}
{nseg = 1}
{strdef color color = "White"}
{pt3dclear()}
{pt3dadd(158376.000000,231312.000000,79900.000000,377.725100)}
{pt3dadd(157824.000000,231312.000000,79725.000000,248.713540)}
{pt3dadd(157488.000000,231180.000000,79725.000000,196.690750)}
{pt3dadd(157152.000000,230940.000000,79650.000000,146.065362)}
{pt3dadd(156888.000000,230796.000000,79650.000000,122.236904)}
{pt3dadd(156720.000000,230604.000000,79575.000000,106.935762)}
{pt3dadd(156540.000000,230424.000000,79550.000000,108.151268)}
{pt3dadd(156372.000000,230376.000000,79550.000000,103.637083)}
{pt3dadd(156264.000000,230280.000000,79550.000000,98.038023)}
{pt3dadd(156144.000000,230160.000000,79550.000000,99.366553)}
{pt3dadd(155952.000000,230016.000000,79550.000000,94.273615)}
{pt3dadd(155832.000000,229920.000000,79550.000000,93.026410)}

{create adhoc120}
{access adhoc120}
{connect adhoc120(1), adhoc119(0)}
{nseg = 1}
{strdef color color = "White"}
{pt3dclear()}
{pt3dadd(155832.000000,229920.000000,79550.000000,93.026410)}
{pt3dadd(155868.000000,229920.000000,79700.000000,105.199627)}
{pt3dadd(155796.000000,229920.000000,79925.000000,111.959812)}
{pt3dadd(155712.000000,229920.000000,80175.000000,125.150670)}
{pt3dadd(155712.000000,229920.000000,80450.000000,134.393627)}
{pt3dadd(155820.000000,229920.000000,80700.000000,158.980700)}

{create adhoc121}
{access adhoc121}
{connect adhoc121(1), adhoc120(0)}
{nseg = 1}
{strdef color color = "White"}
{pt3dclear()}
{pt3dadd(155820.000000,229920.000000,80700.000000,158.980700)}
{pt3dadd(155880.000000,229704.000000,80700.000000,138.968717)}
{pt3dadd(155964.000000,229452.000000,80700.000000,110.127647)}
{pt3dadd(156048.000000,229188.000000,80700.000000,72.457490)}

{create adhoc122}
{access adhoc122}
{connect adhoc122(1), adhoc120(0)}
{nseg = 1}
{strdef color color = "White"}
{pt3dclear()}
{pt3dadd(155820.000000,229920.000000,80700.000000,158.980700)}
{pt3dadd(155916.000000,229920.000000,80925.000000,141.875300)}
{pt3dadd(156096.000000,230172.000000,81125.000000,142.864402)}
{pt3dadd(156324.000000,230352.000000,81575.000000,137.026202)}
{pt3dadd(156468.000000,230376.000000,81750.000000,146.131993)}
{pt3dadd(156516.000000,230640.000000,81900.000000,125.808809)}
{pt3dadd(156708.000000,230688.000000,82125.000000,113.449312)}
{pt3dadd(156972.000000,230964.000000,82250.000000,86.948990)}

{create adhoc123}
{access adhoc123}
{connect adhoc123(1), adhoc119(0)}
{nseg = 1}
{strdef color color = "White"}
{pt3dclear()}
{pt3dadd(155832.000000,229920.000000,79550.000000,93.026410)}
{pt3dadd(155652.000000,229872.000000,79475.000000,52.886929)}
{pt3dadd(155520.000000,229716.000000,79375.000000,36.879070)}

{create adhoc124}
{access adhoc124}
{connect adhoc124(1), adhoc69(0)}
{nseg = 1}
{strdef color color = "White"}
{pt3dclear()}
{pt3dadd(173592.000000,229848.000000,84150.000000,652.709000)}
{pt3dadd(173472.000000,230604.000000,83850.000000,567.101117)}
{pt3dadd(173340.000000,231204.000000,83500.000000,542.032886)}
{pt3dadd(173112.000000,231372.000000,83400.000000,503.059977)}
{pt3dadd(172884.000000,231324.000000,83375.000000,493.355220)}

{create adhoc125}
{access adhoc125}
{connect adhoc125(1), adhoc62(0)}
{nseg = 1}
{strdef color color = "White"}
{pt3dclear()}
{pt3dadd(180072.000000,222756.000000,87875.000000,905.103900)}
{pt3dadd(179928.000000,222708.000000,88125.000000,869.731433)}
{pt3dadd(179712.000000,222708.000000,88375.000000,756.765472)}
{pt3dadd(179472.000000,222708.000000,88625.000000,616.955522)}
{pt3dadd(179172.000000,222708.000000,88925.000000,460.229070)}
{pt3dadd(178704.000000,222708.000000,88950.000000,206.054150)}

{create adhoc126}
{access adhoc126}
{connect adhoc126(1), adhoc125(0)}
{nseg = 1}
{strdef color color = "White"}
{pt3dclear()}
{pt3dadd(178704.000000,222708.000000,88950.000000,206.054150)}
{pt3dadd(178404.000000,222660.000000,89000.000000,229.547317)}
{pt3dadd(178128.000000,222708.000000,89000.000000,204.513072)}
{pt3dadd(177852.000000,222792.000000,89000.000000,194.133422)}
{pt3dadd(177696.000000,222996.000000,89125.000000,152.424198)}
{pt3dadd(177492.000000,223200.000000,89125.000000,140.017703)}
{pt3dadd(177288.000000,223440.000000,89125.000000,103.007740)}

{create adhoc127}
{access adhoc127}
{connect adhoc127(1), adhoc126(0)}
{nseg = 1}
{strdef color color = "White"}
{pt3dclear()}
{pt3dadd(177288.000000,223440.000000,89125.000000,103.007740)}
{pt3dadd(177240.000000,223620.000000,89100.000000,95.851688)}
{pt3dadd(177204.000000,223824.000000,89100.000000,113.014175)}

{create adhoc128}
{access adhoc128}
{connect adhoc128(1), adhoc126(0)}
{nseg = 1}
{strdef color color = "White"}
{pt3dclear()}
{pt3dadd(177288.000000,223440.000000,89125.000000,103.007740)}
{pt3dadd(177108.000000,223440.000000,89050.000000,77.063460)}

{create adhoc129}
{access adhoc129}
{connect adhoc129(1), adhoc125(0)}
{nseg = 1}
{strdef color color = "White"}
{pt3dclear()}
{pt3dadd(178704.000000,222708.000000,88950.000000,206.054150)}
{pt3dadd(178536.000000,222540.000000,88950.000000,234.620430)}
{pt3dadd(178488.000000,222324.000000,89025.000000,219.751987)}
{pt3dadd(178260.000000,221820.000000,89225.000000,161.448820)}

{create adhoc130}
{access adhoc130}
{connect adhoc130(1), adhoc129(0)}
{nseg = 1}
{strdef color color = "White"}
{pt3dclear()}
{pt3dadd(178260.000000,221820.000000,89225.000000,161.448820)}
{pt3dadd(178128.000000,221700.000000,89200.000000,123.833750)}
{pt3dadd(177996.000000,221820.000000,89250.000000,93.317088)}
{pt3dadd(177840.000000,221940.000000,89275.000000,69.898834)}

{create adhoc131}
{access adhoc131}
{connect adhoc131(1), adhoc129(0)}
{nseg = 1}
{strdef color color = "White"}
{pt3dclear()}
{pt3dadd(178260.000000,221820.000000,89225.000000,161.448820)}
{pt3dadd(178428.000000,221688.000000,89375.000000,132.783967)}
{pt3dadd(178392.000000,221520.000000,89575.000000,118.718000)}
{pt3dadd(178452.000000,221556.000000,89775.000000,104.179011)}
{pt3dadd(178452.000000,221604.000000,90050.000000,103.324027)}
{pt3dadd(178512.000000,221664.000000,90375.000000,88.723835)}
{pt3dadd(178572.000000,221652.000000,90600.000000,80.078304)}
{pt3dadd(178716.000000,221580.000000,90700.000000,72.133181)}
{pt3dadd(178824.000000,221424.000000,90725.000000,56.772343)}

{create adhoc132}
{access adhoc132}
{connect adhoc132(1), adhoc55(0)}
{nseg = 1}
{strdef color color = "White"}
{pt3dclear()}
{pt3dadd(182160.000000,217656.000000,88575.000000,1036.240700)}
{pt3dadd(182736.000000,216840.000000,88900.000000,1053.193200)}
{pt3dadd(183024.000000,216504.000000,89250.000000,1086.440380)}
{pt3dadd(183888.000000,215868.000000,89775.000000,1130.458020)}
{pt3dadd(184320.000000,215712.000000,90225.000000,1176.317067)}
{pt3dadd(184632.000000,215172.000000,90625.000000,1256.328900)}

{create adhoc133}
{access adhoc133}
{connect adhoc133(1), adhoc132(0)}
{nseg = 1}
{strdef color color = "White"}
{pt3dclear()}
{pt3dadd(184632.000000,215172.000000,90625.000000,1256.328900)}
{pt3dadd(184632.000000,215304.000000,91575.000000,1221.915713)}
{pt3dadd(184632.000000,215424.000000,92350.000000,859.684394)}
{pt3dadd(184632.000000,215460.000000,93150.000000,669.776824)}
{pt3dadd(184632.000000,215256.000000,93850.000000,427.117348)}
{pt3dadd(184428.000000,214884.000000,94125.000000,282.089672)}
{pt3dadd(184236.000000,214716.000000,94225.000000,240.035050)}
{pt3dadd(184020.000000,214668.000000,94250.000000,243.575998)}
{pt3dadd(183828.000000,214368.000000,94250.000000,219.464640)}
{pt3dadd(183516.000000,214164.000000,94450.000000,258.366670)}

{create adhoc134}
{access adhoc134}
{connect adhoc134(1), adhoc133(0)}
{nseg = 1}
{strdef color color = "White"}
{pt3dclear()}
{pt3dadd(183516.000000,214164.000000,94450.000000,258.366670)}
{pt3dadd(183612.000000,213912.000000,94225.000000,197.645220)}
{pt3dadd(183408.000000,213672.000000,94050.000000,184.442122)}
{pt3dadd(183348.000000,213480.000000,93850.000000,148.141980)}
{pt3dadd(183228.000000,213372.000000,93600.000000,127.733523)}
{pt3dadd(183084.000000,212976.000000,93325.000000,93.022922)}
{pt3dadd(183084.000000,212748.000000,93125.000000,61.492767)}

{create adhoc135}
{access adhoc135}
{connect adhoc135(1), adhoc133(0)}
{nseg = 1}
{strdef color color = "White"}
{pt3dclear()}
{pt3dadd(183516.000000,214164.000000,94450.000000,258.366670)}
{pt3dadd(183228.000000,214200.000000,94625.000000,213.710743)}
{pt3dadd(182784.000000,214332.000000,94800.000000,240.195924)}
{pt3dadd(182484.000000,214368.000000,94800.000000,234.321006)}
{pt3dadd(182172.000000,214452.000000,95075.000000,228.868526)}
{pt3dadd(181908.000000,214608.000000,95075.000000,225.641664)}
{pt3dadd(181740.000000,214848.000000,95050.000000,189.453643)}
{pt3dadd(181524.000000,215016.000000,95075.000000,191.758510)}

{create adhoc136}
{access adhoc136}
{connect adhoc136(1), adhoc132(0)}
{nseg = 1}
{strdef color color = "White"}
{pt3dclear()}
{pt3dadd(184632.000000,215172.000000,90625.000000,1256.328900)}
{pt3dadd(185004.000000,214728.000000,91050.000000,1258.979567)}
{pt3dadd(185400.000000,214536.000000,91450.000000,1261.702120)}
{pt3dadd(185688.000000,214176.000000,91825.000000,1248.574300)}
{pt3dadd(185700.000000,213960.000000,92150.000000,1238.123920)}
{pt3dadd(185640.000000,213828.000000,92450.000000,1264.041660)}
{pt3dadd(185652.000000,213516.000000,92775.000000,1291.255300)}
{pt3dadd(185748.000000,213300.000000,93025.000000,1312.987000)}
{pt3dadd(185832.000000,213048.000000,93325.000000,1327.705220)}
{pt3dadd(186036.000000,212688.000000,93800.000000,1316.237820)}
{pt3dadd(185880.000000,212436.000000,94275.000000,1266.811900)}
{pt3dadd(185868.000000,212280.000000,94750.000000,1180.816240)}
{pt3dadd(185652.000000,212004.000000,95225.000000,1059.068920)}
{pt3dadd(185556.000000,211476.000000,95700.000000,947.012520)}
{pt3dadd(185808.000000,210084.000000,96050.000000,872.896270)}
{pt3dadd(185856.000000,209784.000000,96675.000000,778.211030)}
{pt3dadd(185700.000000,209484.000000,97025.000000,698.726450)}
{pt3dadd(185544.000000,209160.000000,97175.000000,687.834150)}
{pt3dadd(185328.000000,208836.000000,97625.000000,653.004367)}
{pt3dadd(185508.000000,208584.000000,97400.000000,649.537400)}

{create adhoc137}
{access adhoc137}
{connect adhoc137(1), adhoc136(0)}
{nseg = 1}
{strdef color color = "White"}
{pt3dclear()}
{pt3dadd(185508.000000,208584.000000,97400.000000,649.537400)}
{pt3dadd(185508.000000,208404.000000,97150.000000,535.593320)}
{pt3dadd(185508.000000,208164.000000,96825.000000,387.756538)}
{pt3dadd(185508.000000,207900.000000,96500.000000,283.873708)}
{pt3dadd(185580.000000,207528.000000,96250.000000,192.730190)}
{pt3dadd(185580.000000,207384.000000,96200.000000,156.029656)}
{pt3dadd(185580.000000,207120.000000,96175.000000,138.481024)}
{pt3dadd(185580.000000,206856.000000,96125.000000,128.198372)}
{pt3dadd(185568.000000,206688.000000,96075.000000,128.975636)}
{pt3dadd(185580.000000,206532.000000,96050.000000,120.554780)}
{pt3dadd(185544.000000,206304.000000,95825.000000,107.698778)}
{pt3dadd(185652.000000,206136.000000,95775.000000,115.215860)}
{pt3dadd(185496.000000,206076.000000,95550.000000,90.852820)}

{create adhoc138}
{access adhoc138}
{connect adhoc138(1), adhoc136(0)}
{nseg = 1}
{strdef color color = "White"}
{pt3dclear()}
{pt3dadd(185508.000000,208584.000000,97400.000000,649.537400)}
{pt3dadd(185712.000000,208296.000000,97450.000000,626.703800)}
{pt3dadd(185712.000000,208032.000000,97625.000000,644.531600)}
{pt3dadd(185748.000000,207756.000000,97775.000000,640.233400)}
{pt3dadd(185652.000000,207444.000000,97950.000000,669.667900)}
{pt3dadd(185484.000000,207144.000000,98425.000000,704.951700)}
{pt3dadd(185676.000000,206868.000000,98675.000000,743.852080)}
{pt3dadd(185736.000000,206616.000000,98825.000000,776.455340)}
{pt3dadd(185544.000000,206208.000000,99200.000000,784.941080)}
{pt3dadd(185556.000000,205980.000000,99550.000000,771.196340)}
{pt3dadd(185508.000000,205728.000000,99625.000000,742.298020)}
{pt3dadd(185460.000000,205500.000000,99700.000000,692.805080)}
{pt3dadd(185460.000000,205224.000000,99775.000000,660.201820)}
{pt3dadd(185520.000000,204972.000000,99875.000000,653.816340)}
{pt3dadd(185616.000000,204708.000000,99925.000000,630.041632)}
{pt3dadd(185616.000000,204480.000000,100000.000000,619.953484)}
{pt3dadd(185736.000000,204264.000000,99875.000000,611.374404)}
{pt3dadd(185652.000000,204024.000000,100000.000000,607.671736)}
{pt3dadd(185748.000000,203796.000000,100075.000000,582.799122)}
{pt3dadd(185868.000000,203520.000000,100200.000000,580.786563)}
{pt3dadd(185928.000000,203304.000000,100200.000000,514.184630)}

{create adhoc139}
{access adhoc139}
{connect adhoc139(1), adhoc138(0)}
{nseg = 1}
{strdef color color = "White"}
{pt3dclear()}
{pt3dadd(185928.000000,203304.000000,100200.000000,514.184630)}
{pt3dadd(186144.000000,203304.000000,99700.000000,595.920837)}
{pt3dadd(186348.000000,203304.000000,99200.000000,436.233514)}
{pt3dadd(186408.000000,203304.000000,98750.000000,381.103278)}
{pt3dadd(186168.000000,203280.000000,98525.000000,276.990476)}
{pt3dadd(185796.000000,203280.000000,98350.000000,216.525338)}
{pt3dadd(185736.000000,203064.000000,98200.000000,195.535442)}
{pt3dadd(185736.000000,202788.000000,97950.000000,204.772872)}
{pt3dadd(185916.000000,202728.000000,97825.000000,198.644746)}
{pt3dadd(186144.000000,202584.000000,97800.000000,173.631374)}
{pt3dadd(186180.000000,202284.000000,97575.000000,162.174750)}
{pt3dadd(186228.000000,201960.000000,97425.000000,172.699266)}
{pt3dadd(186300.000000,201708.000000,97150.000000,174.918460)}
{pt3dadd(186540.000000,201360.000000,97075.000000,179.180262)}
{pt3dadd(186780.000000,201000.000000,96900.000000,190.086448)}
{pt3dadd(187044.000000,200592.000000,96725.000000,195.848694)}
{pt3dadd(187080.000000,200268.000000,96700.000000,193.627397)}
{pt3dadd(187128.000000,200052.000000,96675.000000,169.521270)}

{create adhoc140}
{access adhoc140}
{connect adhoc140(1), adhoc139(0)}
{nseg = 1}
{strdef color color = "White"}
{pt3dclear()}
{pt3dadd(187128.000000,200052.000000,96675.000000,169.521270)}
{pt3dadd(187212.000000,200148.000000,96475.000000,218.544317)}
{pt3dadd(187224.000000,199956.000000,96275.000000,223.791176)}
{pt3dadd(187296.000000,199764.000000,96075.000000,233.158294)}
{pt3dadd(187476.000000,199428.000000,95925.000000,212.171344)}
{pt3dadd(187500.000000,199104.000000,95750.000000,195.315766)}
{pt3dadd(187632.000000,198924.000000,95675.000000,178.430339)}
{pt3dadd(187668.000000,198708.000000,95700.000000,137.134485)}
{pt3dadd(187680.000000,198516.000000,95825.000000,102.142032)}
{pt3dadd(187716.000000,198372.000000,96025.000000,58.850500)}

{create adhoc141}
{access adhoc141}
{connect adhoc141(1), adhoc139(0)}
{nseg = 1}
{strdef color color = "White"}
{pt3dclear()}
{pt3dadd(187128.000000,200052.000000,96675.000000,169.521270)}
{pt3dadd(187200.000000,199656.000000,96775.000000,209.423480)}
{pt3dadd(187236.000000,199140.000000,96875.000000,240.150516)}
{pt3dadd(187464.000000,198936.000000,96950.000000,259.977268)}
{pt3dadd(187488.000000,198780.000000,97000.000000,277.271650)}
{pt3dadd(187524.000000,198612.000000,97025.000000,285.237858)}
{pt3dadd(187656.000000,198384.000000,97000.000000,276.873338)}
{pt3dadd(187860.000000,198408.000000,96850.000000,260.709972)}
{pt3dadd(188100.000000,198180.000000,96725.000000,242.896092)}
{pt3dadd(188352.000000,197928.000000,96725.000000,215.417446)}
{pt3dadd(188496.000000,197748.000000,96650.000000,175.959854)}
{pt3dadd(188616.000000,197508.000000,96550.000000,130.442168)}
{pt3dadd(188856.000000,197520.000000,96450.000000,108.677753)}
{pt3dadd(188988.000000,197448.000000,96175.000000,90.511402)}
{pt3dadd(189024.000000,197448.000000,95900.000000,67.395360)}
{pt3dadd(188964.000000,197292.000000,95675.000000,88.753876)}

{create adhoc142}
{access adhoc142}
{connect adhoc142(1), adhoc138(0)}
{nseg = 1}
{strdef color color = "White"}
{pt3dclear()}
{pt3dadd(185928.000000,203304.000000,100200.000000,514.184630)}
{pt3dadd(186072.000000,203052.000000,100275.000000,537.221477)}
{pt3dadd(186084.000000,202824.000000,100300.000000,532.716968)}
{pt3dadd(186084.000000,202644.000000,100525.000000,535.635282)}
{pt3dadd(186228.000000,202416.000000,100850.000000,537.042610)}
{pt3dadd(186240.000000,202200.000000,101000.000000,526.273242)}
{pt3dadd(186444.000000,201984.000000,101100.000000,521.019890)}
{pt3dadd(186708.000000,201732.000000,101475.000000,523.293380)}
{pt3dadd(186924.000000,201444.000000,101500.000000,539.166280)}
{pt3dadd(187068.000000,201204.000000,101475.000000,561.808860)}
{pt3dadd(187044.000000,201024.000000,101675.000000,584.451440)}
{pt3dadd(187128.000000,200880.000000,101825.000000,608.959020)}
{pt3dadd(187224.000000,200712.000000,101875.000000,640.716780)}
{pt3dadd(187308.000000,200592.000000,101775.000000,682.081980)}
{pt3dadd(187392.000000,200388.000000,101850.000000,725.515440)}
{pt3dadd(187368.000000,200184.000000,102125.000000,775.964714)}
{pt3dadd(187368.000000,199944.000000,102325.000000,854.415574)}
{pt3dadd(187380.000000,199680.000000,102300.000000,918.439974)}
{pt3dadd(187692.000000,199368.000000,102250.000000,953.566054)}
{pt3dadd(187704.000000,199080.000000,102375.000000,972.344274)}
{pt3dadd(187704.000000,198804.000000,102500.000000,934.985240)}
{pt3dadd(187704.000000,198456.000000,102550.000000,861.054860)}
{pt3dadd(187872.000000,198120.000000,102650.000000,818.167190)}
{pt3dadd(188304.000000,197808.000000,102625.000000,786.228836)}
{pt3dadd(188532.000000,197448.000000,102700.000000,776.007776)}
{pt3dadd(188928.000000,197148.000000,102700.000000,833.327416)}
{pt3dadd(189252.000000,196752.000000,102900.000000,897.351816)}
{pt3dadd(189336.000000,196476.000000,103075.000000,964.818606)}
{pt3dadd(189480.000000,196152.000000,103125.000000,1006.662940)}
{pt3dadd(189828.000000,195828.000000,103375.000000,989.956120)}
{pt3dadd(190008.000000,195504.000000,103800.000000,947.068450)}
{pt3dadd(190188.000000,195192.000000,104175.000000,872.955902)}
{pt3dadd(190356.000000,195108.000000,104675.000000,732.580074)}
{pt3dadd(190560.000000,194796.000000,105100.000000,629.621634)}
{pt3dadd(190728.000000,194748.000000,105325.000000,566.692064)}
{pt3dadd(191292.000000,194352.000000,105600.000000,509.878474)}
{pt3dadd(191436.000000,194076.000000,105825.000000,513.581142)}
{pt3dadd(191364.000000,193944.000000,106250.000000,565.353450)}
{pt3dadd(191220.000000,193776.000000,106675.000000,560.350260)}
{pt3dadd(190980.000000,193440.000000,107100.000000,588.832650)}
{pt3dadd(191040.000000,193020.000000,107525.000000,631.214270)}
{pt3dadd(191076.000000,192768.000000,107950.000000,674.647730)}
{pt3dadd(190980.000000,192348.000000,108350.000000,738.672130)}
{pt3dadd(190908.000000,192120.000000,108850.000000,858.465900)}
{pt3dadd(190872.000000,191868.000000,109225.000000,959.267740)}
{pt3dadd(190764.000000,191388.000000,109625.000000,1036.894620)}
{pt3dadd(190632.000000,190908.000000,110075.000000,1045.451780)}
{pt3dadd(190584.000000,190572.000000,110425.000000,1064.385160)}
{pt3dadd(190584.000000,190092.000000,110800.000000,1073.875620)}
{pt3dadd(190704.000000,189672.000000,111325.000000,1052.553020)}
{pt3dadd(190704.000000,189588.000000,111675.000000,1042.151760)}
{pt3dadd(190620.000000,189192.000000,112125.000000,1063.464210)}
{pt3dadd(190524.000000,188976.000000,112550.000000,1054.436810)}
{pt3dadd(190296.000000,188580.000000,113000.000000,1033.114210)}
{pt3dadd(190224.000000,188220.000000,113475.000000,1043.515470)}
{pt3dadd(190008.000000,187776.000000,113925.000000,1059.970170)}
{pt3dadd(189768.000000,187332.000000,114300.000000,1099.772960)}
{pt3dadd(189588.000000,187008.000000,114675.000000,1144.603740)}
{pt3dadd(189396.000000,186564.000000,115100.000000,1177.393740)}
{pt3dadd(189228.000000,186228.000000,115475.000000,1209.654460)}
{pt3dadd(189012.000000,185844.000000,115850.000000,1225.989760)}
{pt3dadd(188676.000000,185376.000000,116275.000000,1225.989760)}
{pt3dadd(188448.000000,184848.000000,116675.000000,1213.948980)}
{pt3dadd(188064.000000,184368.000000,117175.000000,1221.831360)}
{pt3dadd(187704.000000,183972.000000,117725.000000,1224.000160)}
{pt3dadd(187164.000000,183588.000000,118250.000000,1248.683740)}
{pt3dadd(186888.000000,183384.000000,118725.000000,1248.683740)}
{pt3dadd(186408.000000,183276.000000,119125.000000,1227.219800)}
{pt3dadd(185616.000000,182832.000000,119675.000000,1219.337420)}
{pt3dadd(185052.000000,182388.000000,120100.000000,1184.907900)}
{pt3dadd(184356.000000,181944.000000,120625.000000,1137.835580)}
{pt3dadd(183516.000000,181788.000000,121100.000000,1105.926300)}
{pt3dadd(183000.000000,181512.000000,121500.000000,1115.922840)}
{pt3dadd(182268.000000,181392.000000,121950.000000,1140.606420)}
{pt3dadd(181680.000000,181080.000000,122300.000000,1175.035940)}
{pt3dadd(180924.000000,181056.000000,122725.000000,1198.444240)}
{pt3dadd(180276.000000,180888.000000,123150.000000,1218.886120)}
{pt3dadd(179352.000000,180552.000000,123700.000000,1218.886120)}
{pt3dadd(178536.000000,180168.000000,124250.000000,1194.202540)}
{pt3dadd(177552.000000,179868.000000,124775.000000,1193.257780)}
{pt3dadd(176880.000000,179676.000000,125200.000000,1204.279000)}
{pt3dadd(176496.000000,179424.000000,125625.000000,1215.746400)}
{pt3dadd(175404.000000,179148.000000,125950.000000,1175.083568)}
{pt3dadd(174564.000000,179076.000000,126350.000000,1080.050236)}
{pt3dadd(173700.000000,178800.000000,126725.000000,1036.164216)}
{pt3dadd(172644.000000,178572.000000,127100.000000,1001.734696)}
{pt3dadd(171948.000000,178380.000000,127275.000000,990.267296)}
{pt3dadd(171096.000000,177936.000000,127600.000000,1054.140848)}
{pt3dadd(170316.000000,177372.000000,127925.000000,1161.214960)}
{pt3dadd(169848.000000,176760.000000,128300.000000,1161.214960)}
{pt3dadd(168756.000000,176088.000000,128650.000000,1122.488460)}
{pt3dadd(167652.000000,175704.000000,129025.000000,1090.065280)}
{pt3dadd(167352.000000,175476.000000,129400.000000,1026.191728)}
{pt3dadd(166932.000000,175200.000000,129825.000000,953.035708)}
{pt3dadd(166176.000000,174684.000000,130250.000000,916.153308)}
{pt3dadd(165240.000000,173952.000000,130725.000000,907.394836)}
{pt3dadd(164604.000000,173448.000000,131150.000000,858.309776)}
{pt3dadd(164328.000000,173004.000000,131400.000000,824.856358)}
{pt3dadd(163716.000000,172224.000000,131775.000000,792.995958)}
{pt3dadd(163320.000000,171612.000000,132200.000000,760.693018)}
{pt3dadd(162816.000000,171300.000000,132600.000000,730.551110)}
{pt3dadd(162528.000000,170880.000000,133025.000000,716.806370)}
{pt3dadd(162000.000000,170208.000000,133350.000000,695.669640)}
{pt3dadd(161616.000000,169764.000000,133800.000000,685.995310)}
{pt3dadd(161364.000000,169668.000000,134175.000000,687.955030)}
{pt3dadd(161148.000000,169512.000000,134500.000000,694.995010)}
{pt3dadd(160836.000000,169320.000000,134850.000000,708.739750)}
{pt3dadd(160212.000000,169140.000000,135200.000000,692.474638)}
{pt3dadd(159936.000000,168924.000000,135575.000000,670.145536)}
{pt3dadd(159624.000000,168816.000000,135975.000000,663.440776)}
{pt3dadd(159372.000000,168732.000000,136325.000000,631.437344)}
{pt3dadd(159120.000000,168744.000000,136725.000000,611.847844)}
{pt3dadd(158808.000000,168636.000000,137175.000000,609.854264)}
{pt3dadd(158580.000000,168588.000000,137650.000000,609.854264)}
{pt3dadd(158364.000000,168612.000000,137950.000000,623.599004)}
{pt3dadd(158988.000000,168312.000000,138350.000000,655.050066)}
{pt3dadd(158508.000000,168180.000000,138775.000000,654.509346)}
{pt3dadd(158292.000000,167868.000000,139225.000000,672.768038)}
{pt3dadd(158136.000000,167952.000000,139650.000000,704.771470)}
{pt3dadd(157800.000000,168180.000000,140150.000000,710.831990)}
{pt3dadd(157572.000000,168360.000000,140575.000000,718.776350)}
{pt3dadd(157260.000000,168288.000000,141100.000000,725.161830)}
{pt3dadd(157188.000000,168132.000000,141600.000000,725.161830)}
{pt3dadd(157188.000000,168000.000000,142000.000000,733.211050)}
{pt3dadd(157188.000000,167700.000000,142500.000000,750.453770)}
{pt3dadd(157332.000000,167340.000000,142900.000000,803.247420)}
{pt3dadd(156996.000000,166944.000000,143325.000000,877.177800)}
{pt3dadd(157308.000000,166548.000000,143725.000000,965.781320)}
{pt3dadd(157056.000000,166104.000000,144075.000000,1039.240340)}
{pt3dadd(156912.000000,165720.000000,144525.000000,1097.445340)}
{pt3dadd(156840.000000,165444.000000,144850.000000,1118.767940)}
{pt3dadd(156900.000000,165360.000000,145100.000000,1156.267660)}
{pt3dadd(156780.000000,165084.000000,145400.000000,1186.425300)}
{pt3dadd(156792.000000,164520.000000,145825.000000,1235.851220)}
{pt3dadd(156780.000000,164520.000000,146150.000000,1272.002200)}
{pt3dadd(156468.000000,164016.000000,146600.000000,1279.509220)}
{pt3dadd(156516.000000,163944.000000,147050.000000,1274.799500)}
{pt3dadd(156120.000000,163284.000000,147450.000000,1251.291320)}
{pt3dadd(156072.000000,162888.000000,147825.000000,1201.865400)}
{pt3dadd(156000.000000,162444.000000,148275.000000,1177.581540)}
{pt3dadd(156084.000000,162060.000000,148725.000000,1170.074520)}
{pt3dadd(156096.000000,161844.000000,149225.000000,1182.115300)}
{pt3dadd(156108.000000,161712.000000,149700.000000,1171.193960)}
{pt3dadd(156168.000000,161508.000000,150075.000000,1169.751400)}
{pt3dadd(155832.000000,161412.000000,150400.000000,1157.884280)}
{pt3dadd(155916.000000,161016.000000,150800.000000,1146.962940)}
{pt3dadd(155808.000000,160764.000000,151225.000000,1159.605740)}
{pt3dadd(155700.000000,160428.000000,151650.000000,1205.008140)}
{pt3dadd(155568.000000,160044.000000,152100.000000,1229.958880)}
{pt3dadd(155688.000000,159744.000000,152525.000000,1279.384800)}
{pt3dadd(155616.000000,159528.000000,152975.000000,1339.732060)}
{pt3dadd(155736.000000,159192.000000,153400.000000,1357.078000)}
{pt3dadd(155664.000000,158688.000000,153850.000000,1385.961560)}
{pt3dadd(155784.000000,158220.000000,154350.000000,1425.818000)}
{pt3dadd(155808.000000,157800.000000,154725.000000,1439.756700)}
{pt3dadd(155904.000000,157272.000000,155200.000000,1436.657220)}
{pt3dadd(155844.000000,156996.000000,155575.000000,1446.524920)}
{pt3dadd(155844.000000,156924.000000,156050.000000,1432.586220)}
{pt3dadd(156012.000000,156540.000000,156450.000000,1418.647520)}
{pt3dadd(156300.000000,156276.000000,156925.000000,1405.171540)}
{pt3dadd(156336.000000,156060.000000,157500.000000,1382.353280)}
{pt3dadd(156516.000000,155976.000000,158075.000000,1318.988660)}
{pt3dadd(156264.000000,155760.000000,158650.000000,1258.641400)}
{pt3dadd(155808.000000,155628.000000,159150.000000,1189.255620)}
{pt3dadd(155640.000000,154980.000000,159625.000000,1128.445640)}
{pt3dadd(155784.000000,154476.000000,160125.000000,1094.016120)}
{pt3dadd(156048.000000,153936.000000,160550.000000,1094.016120)}
{pt3dadd(156504.000000,153432.000000,160950.000000,1114.890200)}
{pt3dadd(156732.000000,153048.000000,161350.000000,1134.850060)}
{pt3dadd(157152.000000,152832.000000,161850.000000,1145.771400)}
{pt3dadd(157332.000000,152496.000000,162325.000000,1156.692740)}
{pt3dadd(157644.000000,151956.000000,162775.000000,1168.559860)}
{pt3dadd(158256.000000,151512.000000,163200.000000,1194.758100)}
{pt3dadd(158568.000000,151068.000000,163725.000000,1244.184020)}
{pt3dadd(158832.000000,150504.000000,164225.000000,1307.548640)}
{pt3dadd(158976.000000,150192.000000,164725.000000,1358.800760)}
{pt3dadd(159180.000000,149760.000000,165175.000000,1396.359560)}
{pt3dadd(159528.000000,149004.000000,165675.000000,1396.359560)}
{pt3dadd(159924.000000,148668.000000,166150.000000,1383.084620)}
{pt3dadd(160236.000000,147876.000000,166525.000000,1344.884600)}
{pt3dadd(160380.000000,147144.000000,166900.000000,1317.140660)}
{pt3dadd(160644.000000,147012.000000,167275.000000,1303.865720)}
{pt3dadd(160908.000000,146940.000000,167600.000000,1303.865720)}
{pt3dadd(161196.000000,146688.000000,167975.000000,1329.238280)}
{pt3dadd(161124.000000,146472.000000,168350.000000,1361.959500)}
{pt3dadd(161412.000000,146244.000000,168800.000000,1431.819000)}
{pt3dadd(161484.000000,145836.000000,169225.000000,1489.035700)}
{pt3dadd(161376.000000,145632.000000,169650.000000,1544.222580)}
{pt3dadd(161724.000000,145200.000000,170025.000000,1576.066720)}
{pt3dadd(161784.000000,144912.000000,170375.000000,1581.545520)}
{pt3dadd(161892.000000,144516.000000,170750.000000,1566.178080)}
{pt3dadd(161964.000000,144060.000000,171075.000000,1534.333940)}
{pt3dadd(162120.000000,143748.000000,171425.000000,1492.422000)}
{pt3dadd(162276.000000,143316.000000,171825.000000,1462.418940)}
{pt3dadd(162348.000000,143088.000000,172175.000000,1448.480240)}
{pt3dadd(162384.000000,142740.000000,172550.000000,1397.680700)}
{pt3dadd(162588.000000,142260.000000,172900.000000,1359.665340)}
{pt3dadd(162444.000000,141840.000000,173250.000000,1321.706820)}
{pt3dadd(162348.000000,141528.000000,173525.000000,1273.326300)}
{pt3dadd(162144.000000,141180.000000,173825.000000,1225.402800)}
{pt3dadd(162024.000000,140868.000000,174150.000000,1193.329867)}
{pt3dadd(161388.000000,140520.000000,174450.000000,1154.252100)}

{create adhoc143}
{access adhoc143}
{connect adhoc143(1), adhoc142(0)}
{nseg = 1}
{strdef color color = "White"}
{pt3dclear()}
{pt3dadd(161388.000000,140520.000000,174450.000000,1154.252100)}
{pt3dadd(161076.000000,139728.000000,174450.000000,863.086900)}
{pt3dadd(160896.000000,139008.000000,174450.000000,683.891702)}
{pt3dadd(160776.000000,138240.000000,174450.000000,498.151372)}
{pt3dadd(160776.000000,137448.000000,174450.000000,360.919800)}
{pt3dadd(160944.000000,136932.000000,174450.000000,262.444160)}
{pt3dadd(160920.000000,136296.000000,174450.000000,191.722480)}
{pt3dadd(160812.000000,135552.000000,174450.000000,166.441096)}
{pt3dadd(160416.000000,134868.000000,174450.000000,169.463392)}
{pt3dadd(160080.000000,134496.000000,174450.000000,165.631510)}
{pt3dadd(159852.000000,134040.000000,174450.000000,206.981006)}
{pt3dadd(159876.000000,133440.000000,174450.000000,303.785214)}
{pt3dadd(160176.000000,132816.000000,174450.000000,471.466768)}
{pt3dadd(160392.000000,132012.000000,174450.000000,612.019550)}
{pt3dadd(160644.000000,131496.000000,174450.000000,767.409584)}
{pt3dadd(160764.000000,131016.000000,175175.000000,886.593000)}
{pt3dadd(160896.000000,130812.000000,175075.000000,921.333160)}
{pt3dadd(160980.000000,130548.000000,175050.000000,857.308760)}
{pt3dadd(160980.000000,130272.000000,175100.000000,823.855342)}
{pt3dadd(160980.000000,130080.000000,175125.000000,697.843616)}
{pt3dadd(161232.000000,129840.000000,175400.000000,562.290590)}
{pt3dadd(161592.000000,129576.000000,175725.000000,439.279976)}
{pt3dadd(161748.000000,129396.000000,175850.000000,330.484831)}
{pt3dadd(161868.000000,129096.000000,176075.000000,184.255726)}
{pt3dadd(162072.000000,128880.000000,176250.000000,137.391510)}
{pt3dadd(162084.000000,128808.000000,176500.000000,45.013226)}

{create adhoc144}
{access adhoc144}
{connect adhoc144(1), adhoc142(0)}
{nseg = 1}
{strdef color color = "White"}
{pt3dclear()}
{pt3dadd(161388.000000,140520.000000,174450.000000,1154.252100)}
{pt3dadd(161052.000000,140052.000000,174775.000000,1172.238833)}
{pt3dadd(161040.000000,140136.000000,175100.000000,1110.455128)}
{pt3dadd(161196.000000,140052.000000,175475.000000,1057.306918)}
{pt3dadd(161388.000000,139728.000000,175850.000000,993.862198)}
{pt3dadd(161460.000000,139440.000000,176150.000000,944.214358)}
{pt3dadd(161508.000000,139488.000000,176575.000000,914.472866)}
{pt3dadd(161616.000000,139200.000000,176950.000000,910.894158)}
{pt3dadd(161700.000000,139020.000000,177300.000000,904.334948)}
{pt3dadd(161640.000000,138876.000000,177650.000000,904.334948)}
{pt3dadd(161484.000000,138876.000000,177975.000000,922.754208)}
{pt3dadd(161280.000000,138840.000000,178300.000000,948.352900)}
{pt3dadd(161160.000000,138756.000000,178625.000000,981.673100)}
{pt3dadd(161160.000000,138672.000000,178950.000000,1039.878100)}
{pt3dadd(161148.000000,138504.000000,179250.000000,1100.993340)}
{pt3dadd(161112.000000,138384.000000,179600.000000,1152.918760)}
{pt3dadd(161052.000000,138204.000000,179950.000000,1191.491080)}
{pt3dadd(160956.000000,137916.000000,180275.000000,1265.777040)}
{pt3dadd(160944.000000,137772.000000,180600.000000,1329.141660)}
{pt3dadd(160860.000000,137568.000000,180900.000000,1377.784480)}
{pt3dadd(160716.000000,137364.000000,181250.000000,1435.087880)}
{pt3dadd(160404.000000,137244.000000,181625.000000,1473.103240)}
{pt3dadd(160176.000000,137160.000000,182000.000000,1380.390620)}
{pt3dadd(160164.000000,137028.000000,182375.000000,1330.366300)}
{pt3dadd(160092.000000,136848.000000,182625.000000,1000.000000)}

{create adhoc145}
{access adhoc145}
{connect adhoc145(1), adhoc1(0)}
{nseg = 1}
{strdef color color = "White"}
{pt3dclear()}
{pt3dadd(180804.000000,208272.000000,79775.000000,221.415510)}
{pt3dadd(179856.000000,208092.000000,79975.000000,165.010607)}
{pt3dadd(179688.000000,208368.000000,80250.000000,112.502363)}
{pt3dadd(179664.000000,208452.000000,80425.000000,63.890780)}
