# Supplementary material for: Full reconstruction of large lobula plate tangential cells in Drosophila from a 3D EM dataset
Source: PLoS One. 2018 Nov 28;13(11):e0207828. doi: 10.1371/journal.pone.0207828 (PMC6261601; doi:10.1371/journal.pone.0207828)
Supplement: S1 Dataset — (ZIP) [file pone.0207828.s001.zip › Diameter hoc/Cell_Y_3skels_ck_was_2012-06-26_C80_11__explorational__vschuhbeck__4903f6_49.hoc0001.hoc]

/* created with convertKnossosNmlToHoc.m */

{create adhoc1}
{access adhoc1}
{nseg = 1}
{strdef color color = "White"}
{pt3dclear()}
{pt3dadd(108396.000000,154704.000000,155550.000000,162.279620)}
{pt3dadd(108336.000000,154632.000000,155775.000000,131.804357)}
{pt3dadd(108420.000000,154704.000000,156025.000000,122.585351)}
{pt3dadd(108468.000000,154464.000000,156300.000000,116.830995)}
{pt3dadd(108588.000000,154368.000000,156450.000000,111.050805)}
{pt3dadd(108744.000000,154332.000000,156500.000000,109.198356)}
{pt3dadd(108924.000000,154308.000000,156975.000000,113.093130)}
{pt3dadd(109044.000000,154140.000000,157075.000000,131.157106)}
{pt3dadd(109176.000000,154032.000000,157200.000000,157.322818)}
{pt3dadd(109392.000000,154092.000000,157275.000000,197.601920)}
{pt3dadd(109596.000000,154188.000000,157450.000000,225.197991)}
{pt3dadd(109776.000000,154080.000000,157675.000000,237.309264)}
{pt3dadd(109908.000000,153804.000000,157900.000000,235.238122)}
{pt3dadd(109992.000000,153540.000000,158150.000000,228.039586)}
{pt3dadd(110268.000000,153120.000000,158400.000000,219.706386)}
{pt3dadd(110220.000000,152940.000000,158575.000000,217.531682)}
{pt3dadd(110076.000000,152760.000000,158800.000000,226.947002)}
{pt3dadd(109944.000000,152568.000000,159025.000000,219.602824)}
{pt3dadd(110052.000000,152016.000000,159225.000000,215.356978)}
{pt3dadd(110280.000000,151452.000000,159400.000000,200.061484)}
{pt3dadd(110352.000000,151140.000000,159550.000000,192.350098)}
{pt3dadd(110364.000000,150684.000000,159750.000000,186.427844)}
{pt3dadd(110220.000000,150144.000000,159975.000000,200.301304)}
{pt3dadd(110292.000000,149676.000000,160175.000000,209.228196)}
{pt3dadd(110112.000000,148776.000000,160350.000000,222.006200)}
{pt3dadd(110184.000000,148428.000000,160600.000000,241.734190)}
{pt3dadd(110244.000000,148260.000000,160850.000000,252.114584)}
{pt3dadd(110160.000000,147996.000000,161050.000000,257.029684)}
{pt3dadd(110160.000000,147816.000000,161250.000000,240.758614)}
{pt3dadd(110196.000000,147720.000000,161525.000000,226.191478)}
{pt3dadd(110208.000000,147408.000000,161775.000000,194.899944)}
{pt3dadd(110196.000000,147240.000000,161950.000000,170.013583)}
{pt3dadd(110244.000000,147024.000000,162175.000000,137.071425)}
{pt3dadd(110292.000000,146640.000000,162175.000000,126.058524)}
{pt3dadd(110340.000000,146220.000000,162175.000000,110.200992)}
{pt3dadd(110388.000000,145800.000000,162175.000000,106.903260)}
{pt3dadd(110412.000000,145536.000000,162175.000000,108.056551)}
{pt3dadd(110436.000000,145320.000000,162250.000000,116.168075)}
{pt3dadd(110472.000000,145152.000000,162275.000000,119.803824)}
{pt3dadd(110616.000000,144540.000000,162450.000000,139.329080)}
{pt3dadd(110760.000000,144432.000000,162500.000000,161.901742)}
{pt3dadd(110892.000000,144132.000000,162625.000000,171.761352)}
{pt3dadd(111024.000000,144072.000000,162650.000000,181.296492)}
{pt3dadd(111168.000000,144108.000000,162650.000000,184.033404)}
{pt3dadd(111288.000000,144096.000000,162550.000000,197.450306)}
{pt3dadd(111432.000000,144084.000000,162600.000000,353.956266)}
{pt3dadd(111552.000000,144156.000000,162650.000000,359.327924)}
{pt3dadd(111684.000000,144096.000000,162700.000000,361.206516)}
{pt3dadd(111804.000000,144084.000000,162625.000000,387.278680)}
{pt3dadd(111972.000000,144156.000000,162550.000000,384.761190)}
{pt3dadd(112152.000000,144360.000000,162425.000000,205.682568)}
{pt3dadd(112284.000000,144384.000000,162375.000000,185.208496)}
{pt3dadd(112536.000000,144540.000000,162225.000000,172.459686)}
{pt3dadd(112776.000000,144804.000000,162225.000000,158.371940)}
{pt3dadd(113016.000000,145068.000000,162225.000000,158.371940)}
{pt3dadd(113268.000000,145308.000000,162225.000000,190.317842)}
{pt3dadd(113460.000000,145500.000000,162100.000000,219.293716)}
{pt3dadd(113604.000000,145704.000000,162075.000000,245.459428)}
{pt3dadd(113820.000000,145944.000000,162100.000000,256.903810)}
{pt3dadd(114360.000000,146160.000000,161925.000000,250.048060)}
{pt3dadd(114504.000000,146472.000000,161775.000000,252.691424)}
{pt3dadd(114648.000000,146580.000000,161675.000000,252.691424)}
{pt3dadd(114804.000000,146724.000000,161550.000000,252.691424)}
{pt3dadd(114936.000000,146892.000000,161475.000000,252.691424)}
{pt3dadd(115080.000000,147024.000000,161450.000000,254.866128)}
{pt3dadd(115224.000000,147180.000000,161375.000000,247.307664)}
{pt3dadd(115356.000000,147372.000000,161275.000000,247.307664)}
{pt3dadd(115488.000000,147348.000000,161250.000000,242.392564)}
{pt3dadd(115620.000000,147420.000000,161350.000000,235.194028)}
{pt3dadd(115740.000000,147516.000000,161425.000000,245.035928)}
{pt3dadd(115884.000000,147756.000000,161400.000000,255.369924)}
{pt3dadd(116016.000000,147948.000000,161350.000000,268.618224)}
{pt3dadd(116136.000000,147996.000000,161275.000000,278.952220)}
{pt3dadd(116268.000000,148116.000000,161275.000000,288.794120)}
{pt3dadd(116364.000000,148248.000000,161250.000000,288.794120)}
{pt3dadd(116472.000000,148380.000000,161225.000000,301.355154)}
{pt3dadd(116580.000000,148512.000000,161200.000000,298.440850)}
{pt3dadd(116688.000000,148560.000000,161150.000000,301.355154)}
{pt3dadd(116796.000000,148692.000000,161100.000000,293.796690)}
{pt3dadd(116952.000000,148824.000000,161025.000000,291.153326)}
{pt3dadd(117096.000000,149220.000000,161025.000000,268.258296)}
{pt3dadd(117228.000000,149280.000000,161125.000000,249.422498)}
{pt3dadd(117384.000000,149316.000000,161125.000000,238.571808)}
{pt3dadd(117528.000000,149436.000000,161050.000000,230.070006)}
{pt3dadd(117672.000000,149556.000000,160975.000000,227.552516)}
{pt3dadd(117804.000000,149556.000000,161100.000000,225.269080)}
{pt3dadd(117948.000000,149652.000000,161100.000000,227.241600)}
{pt3dadd(118080.000000,149748.000000,161100.000000,227.241600)}
{pt3dadd(118236.000000,149844.000000,161100.000000,240.658502)}
{pt3dadd(118368.000000,149820.000000,161125.000000,238.260892)}
{pt3dadd(118500.000000,149868.000000,161025.000000,238.260892)}
{pt3dadd(118632.000000,149904.000000,161000.000000,221.057104)}
{pt3dadd(118740.000000,150000.000000,161100.000000,197.408882)}
{pt3dadd(118896.000000,150096.000000,161200.000000,175.452006)}
{pt3dadd(119004.000000,150192.000000,161200.000000,173.168570)}
{pt3dadd(119148.000000,150288.000000,161200.000000,168.922724)}
{pt3dadd(119268.000000,150312.000000,161200.000000,188.197654)}
{pt3dadd(119400.000000,150276.000000,161200.000000,209.448266)}
{pt3dadd(119520.000000,150300.000000,161175.000000,242.798372)}
{pt3dadd(119652.000000,150384.000000,161225.000000,245.081808)}
{pt3dadd(119796.000000,150540.000000,161125.000000,256.526190)}
{pt3dadd(119928.000000,150600.000000,161125.000000,268.542794)}
{pt3dadd(120084.000000,150732.000000,161000.000000,270.940404)}
{pt3dadd(120228.000000,150876.000000,160950.000000,264.966070)}
{pt3dadd(120372.000000,150984.000000,160825.000000,252.796544)}
{pt3dadd(120504.000000,150984.000000,160700.000000,239.379642)}
{pt3dadd(120660.000000,150852.000000,160425.000000,234.218788)}
{pt3dadd(120756.000000,150780.000000,160275.000000,242.155174)}
{pt3dadd(120888.000000,150828.000000,160200.000000,254.716208)}
{pt3dadd(121020.000000,150816.000000,160150.000000,286.407090)}
{pt3dadd(121176.000000,150756.000000,160100.000000,302.467356)}
{pt3dadd(121332.000000,150696.000000,159975.000000,307.628210)}
{pt3dadd(121488.000000,150612.000000,159750.000000,310.542514)}
{pt3dadd(121632.000000,150612.000000,159525.000000,317.804356)}
{pt3dadd(121824.000000,150504.000000,159375.000000,324.720390)}
{pt3dadd(121956.000000,150672.000000,159200.000000,340.056956)}
{pt3dadd(122112.000000,150720.000000,159175.000000,355.393522)}
{pt3dadd(122244.000000,150624.000000,159125.000000,376.207542)}
{pt3dadd(122376.000000,150696.000000,159125.000000,368.945700)}
{pt3dadd(122508.000000,150804.000000,159125.000000,384.977120)}
{pt3dadd(122640.000000,150816.000000,159050.000000,404.550900)}
{pt3dadd(122772.000000,150756.000000,158975.000000,438.377290)}
{pt3dadd(122892.000000,150696.000000,158925.000000,477.535556)}
{pt3dadd(123012.000000,150768.000000,158850.000000,522.090986)}
{pt3dadd(123144.000000,150672.000000,158750.000000,541.577276)}
{pt3dadd(123264.000000,150612.000000,158775.000000,566.558926)}
{pt3dadd(123384.000000,150684.000000,158825.000000,577.287966)}
{pt3dadd(123516.000000,150828.000000,158825.000000,566.022480)}
{pt3dadd(123660.000000,150768.000000,158800.000000,584.212820)}
{pt3dadd(123780.000000,150864.000000,158775.000000,614.578172)}
{pt3dadd(123924.000000,150900.000000,158625.000000,646.461792)}
{pt3dadd(124044.000000,150852.000000,158425.000000,671.331784)}
{pt3dadd(124152.000000,150864.000000,158425.000000,695.017484)}
{pt3dadd(124260.000000,150876.000000,158425.000000,701.697136)}
{pt3dadd(124368.000000,150888.000000,158425.000000,695.017484)}
{pt3dadd(124488.000000,150900.000000,158400.000000,681.324204)}
{pt3dadd(124632.000000,150912.000000,158500.000000,674.644552)}
{pt3dadd(124776.000000,150936.000000,158475.000000,645.725172)}
{pt3dadd(124920.000000,151044.000000,158450.000000,632.683948)}
{pt3dadd(125064.000000,151020.000000,158325.000000,603.764568)}
{pt3dadd(125208.000000,151092.000000,158425.000000,585.574228)}
{pt3dadd(125364.000000,151104.000000,158350.000000,561.888528)}
{pt3dadd(125484.000000,151152.000000,158375.000000,561.888528)}
{pt3dadd(125616.000000,151200.000000,158375.000000,534.346256)}
{pt3dadd(125760.000000,151188.000000,158375.000000,524.614690)}
{pt3dadd(125916.000000,151116.000000,158375.000000,499.633040)}
{pt3dadd(126060.000000,151224.000000,158300.000000,475.840988)}
{pt3dadd(126228.000000,151332.000000,158225.000000,453.181888)}
{pt3dadd(126372.000000,151284.000000,158200.000000,435.507252)}
{pt3dadd(126504.000000,151236.000000,158175.000000,430.986208)}
{pt3dadd(126624.000000,151188.000000,158150.000000,430.986208)}
{pt3dadd(126780.000000,151176.000000,158125.000000,422.980032)}
{pt3dadd(126924.000000,151140.000000,158075.000000,431.386522)}
{pt3dadd(127080.000000,151080.000000,158025.000000,444.314056)}
{pt3dadd(127224.000000,151044.000000,158075.000000,453.582202)}
{pt3dadd(127368.000000,151176.000000,157925.000000,462.850348)}
{pt3dadd(127488.000000,151224.000000,157950.000000,490.737976)}
{pt3dadd(127608.000000,151212.000000,157900.000000,504.990586)}
{pt3dadd(127740.000000,151164.000000,157900.000000,509.737688)}
{pt3dadd(127860.000000,151116.000000,157900.000000,519.955832)}
{pt3dadd(128004.000000,151248.000000,157875.000000,524.940296)}
{pt3dadd(128136.000000,151236.000000,157775.000000,509.364606)}
{pt3dadd(128244.000000,151200.000000,157625.000000,490.806234)}
{pt3dadd(128400.000000,151176.000000,157475.000000,477.232326)}
{pt3dadd(128520.000000,151284.000000,157450.000000,453.440274)}
{pt3dadd(128640.000000,151296.000000,157250.000000,469.939440)}
{pt3dadd(128772.000000,151236.000000,156975.000000,489.425730)}
{pt3dadd(128928.000000,151296.000000,156900.000000,513.217782)}
{pt3dadd(129060.000000,151200.000000,156950.000000,537.009834)}
{pt3dadd(129192.000000,151224.000000,156925.000000,550.583742)}
{pt3dadd(129348.000000,151092.000000,156925.000000,544.813616)}
{pt3dadd(129516.000000,151140.000000,156900.000000,529.848370)}
{pt3dadd(129636.000000,151164.000000,156875.000000,529.848370)}
{pt3dadd(129756.000000,151092.000000,156925.000000,529.848370)}
{pt3dadd(129900.000000,151164.000000,156975.000000,545.561874)}
{pt3dadd(130044.000000,151236.000000,156975.000000,545.561874)}
{pt3dadd(130176.000000,151308.000000,156975.000000,560.527120)}
{pt3dadd(130320.000000,151536.000000,156950.000000,555.293440)}
{pt3dadd(130488.000000,151596.000000,156925.000000,555.293440)}
{pt3dadd(130644.000000,151692.000000,156900.000000,544.564400)}
{pt3dadd(130800.000000,151692.000000,156875.000000,533.835360)}
{pt3dadd(130932.000000,151584.000000,157000.000000,533.835360)}
{pt3dadd(131064.000000,151620.000000,157025.000000,544.564400)}
{pt3dadd(131196.000000,151692.000000,157000.000000,539.330720)}
{pt3dadd(131388.000000,151764.000000,156975.000000,544.564400)}
{pt3dadd(131520.000000,151620.000000,156925.000000,555.293440)}
{pt3dadd(131676.000000,151692.000000,157000.000000,566.558926)}
{pt3dadd(131820.000000,151764.000000,157075.000000,591.428918)}
{pt3dadd(132012.000000,151788.000000,157125.000000,634.041578)}
{pt3dadd(132192.000000,151812.000000,157150.000000,671.420558)}
{pt3dadd(132432.000000,151908.000000,157075.000000,665.925198)}
{pt3dadd(132564.000000,151908.000000,157075.000000,665.925198)}
{pt3dadd(132732.000000,151920.000000,156900.000000,646.825332)}
{pt3dadd(132852.000000,151860.000000,157000.000000,670.041332)}
{pt3dadd(132996.000000,151800.000000,157000.000000,685.138172)}
{pt3dadd(133188.000000,151584.000000,157150.000000,756.763543)}
{pt3dadd(133332.000000,151644.000000,157325.000000,811.915500)}

{create adhoc2}
{access adhoc2}
{connect adhoc2(1), adhoc1(0)}
{nseg = 1}
{strdef color color = "White"}
{pt3dclear()}
{pt3dadd(133332.000000,151644.000000,157325.000000,811.915500)}
{pt3dadd(133464.000000,151884.000000,157425.000000,762.177177)}
{pt3dadd(133632.000000,151944.000000,157500.000000,709.266166)}
{pt3dadd(133740.000000,152220.000000,157625.000000,709.266166)}
{pt3dadd(133872.000000,152508.000000,157650.000000,739.495794)}
{pt3dadd(134016.000000,152604.000000,157600.000000,739.495794)}
{pt3dadd(134136.000000,152616.000000,157575.000000,754.592634)}
{pt3dadd(134256.000000,152604.000000,157525.000000,812.302134)}
{pt3dadd(134376.000000,152760.000000,157575.000000,790.191666)}
{pt3dadd(134508.000000,152916.000000,157625.000000,759.962038)}
{pt3dadd(134628.000000,153108.000000,157575.000000,759.962038)}
{pt3dadd(134760.000000,153204.000000,157600.000000,744.865198)}
{pt3dadd(134856.000000,153396.000000,157675.000000,729.768358)}
{pt3dadd(134988.000000,153516.000000,157700.000000,744.146300)}
{pt3dadd(135108.000000,153612.000000,157825.000000,774.375928)}
{pt3dadd(135240.000000,153708.000000,158000.000000,782.108454)}
{pt3dadd(135396.000000,154008.000000,157950.000000,789.472768)}
{pt3dadd(135540.000000,154056.000000,157950.000000,769.417916)}
{pt3dadd(135648.000000,154104.000000,157950.000000,730.169982)}
{pt3dadd(135768.000000,154260.000000,158025.000000,682.372128)}
{pt3dadd(135876.000000,154620.000000,158125.000000,647.220436)}
{pt3dadd(136020.000000,154980.000000,158225.000000,592.258998)}
{pt3dadd(136152.000000,154980.000000,158150.000000,592.258998)}
{pt3dadd(136284.000000,155076.000000,158175.000000,598.029124)}
{pt3dadd(136392.000000,155172.000000,158200.000000,596.497484)}
{pt3dadd(136548.000000,155268.000000,158225.000000,590.438842)}
{pt3dadd(136644.000000,155328.000000,158175.000000,611.922472)}
{pt3dadd(136764.000000,155388.000000,158125.000000,605.863830)}
{pt3dadd(136896.000000,155460.000000,158125.000000,600.093704)}
{pt3dadd(137040.000000,155640.000000,158225.000000,606.152346)}
{pt3dadd(137184.000000,155832.000000,158175.000000,594.886860)}
{pt3dadd(137328.000000,156048.000000,158300.000000,594.886860)}
{pt3dadd(137664.000000,156192.000000,158125.000000,607.307074)}
{pt3dadd(137832.000000,156324.000000,158200.000000,613.077200)}
{pt3dadd(138000.000000,156444.000000,158275.000000,595.753072)}
{pt3dadd(138168.000000,156612.000000,158350.000000,590.519392)}
{pt3dadd(138360.000000,156756.000000,158300.000000,584.749266)}
{pt3dadd(138552.000000,156876.000000,158250.000000,566.558926)}
{pt3dadd(138708.000000,156984.000000,158150.000000,560.788800)}
{pt3dadd(138804.000000,157104.000000,158200.000000,566.284160)}
{pt3dadd(138900.000000,157260.000000,158275.000000,577.013200)}
{pt3dadd(138996.000000,157356.000000,158350.000000,577.013200)}
{pt3dadd(139104.000000,157488.000000,158300.000000,577.013200)}
{pt3dadd(139212.000000,157596.000000,158250.000000,582.783326)}
{pt3dadd(139344.000000,157716.000000,158200.000000,600.973666)}
{pt3dadd(139512.000000,157824.000000,158200.000000,640.221600)}
{pt3dadd(139608.000000,157956.000000,158250.000000,672.105220)}
{pt3dadd(139680.000000,158088.000000,158275.000000,683.933988)}
{pt3dadd(139752.000000,158232.000000,158225.000000,696.354202)}
{pt3dadd(139800.000000,158340.000000,158250.000000,710.047482)}
{pt3dadd(139872.000000,158460.000000,158325.000000,702.683168)}
{pt3dadd(139872.000000,158580.000000,158350.000000,710.047482)}
{pt3dadd(139872.000000,158664.000000,158375.000000,723.088706)}
{pt3dadd(139872.000000,158760.000000,158400.000000,710.668492)}
{pt3dadd(139968.000000,158904.000000,158375.000000,668.055832)}
{pt3dadd(140268.000000,159012.000000,158300.000000,620.458708)}
{pt3dadd(140376.000000,159132.000000,158350.000000,581.210774)}
{pt3dadd(140436.000000,159252.000000,158375.000000,562.110908)}
{pt3dadd(140496.000000,159360.000000,158400.000000,556.340782)}
{pt3dadd(140592.000000,159516.000000,158500.000000,578.898590)}
{pt3dadd(140700.000000,159636.000000,158500.000000,606.440862)}
{pt3dadd(140808.000000,159804.000000,158500.000000,606.440862)}
{pt3dadd(140904.000000,159924.000000,158600.000000,625.540728)}
{pt3dadd(140952.000000,160092.000000,158625.000000,657.424348)}
{pt3dadd(141000.000000,160224.000000,158650.000000,670.465572)}
{pt3dadd(141048.000000,160356.000000,158675.000000,690.520424)}
{pt3dadd(141060.000000,160476.000000,158675.000000,717.163464)}
{pt3dadd(141108.000000,160596.000000,158675.000000,739.273932)}
{pt3dadd(141168.000000,160728.000000,158675.000000,754.370772)}
{pt3dadd(141156.000000,160860.000000,158700.000000,784.600400)}
{pt3dadd(141060.000000,161016.000000,158725.000000,786.462100)}
{pt3dadd(141072.000000,161172.000000,158725.000000,765.589186)}
{pt3dadd(141204.000000,161340.000000,158750.000000,724.378852)}
{pt3dadd(141264.000000,161460.000000,158825.000000,666.669352)}
{pt3dadd(141324.000000,161616.000000,158775.000000,600.840692)}
{pt3dadd(141480.000000,161784.000000,158850.000000,551.381868)}
{pt3dadd(141432.000000,161928.000000,158900.000000,551.381868)}
{pt3dadd(141384.000000,162120.000000,158950.000000,516.324330)}
{pt3dadd(141480.000000,162276.000000,159025.000000,493.665230)}
{pt3dadd(141756.000000,162456.000000,158900.000000,504.394270)}
{pt3dadd(141708.000000,162612.000000,158925.000000,520.107774)}
{pt3dadd(141660.000000,162792.000000,158950.000000,503.608608)}
{pt3dadd(141612.000000,162948.000000,158975.000000,557.766012)}
{pt3dadd(141564.000000,163104.000000,159000.000000,609.344492)}
{pt3dadd(141516.000000,163260.000000,159025.000000,634.214484)}
{pt3dadd(141648.000000,163416.000000,159050.000000,634.214484)}
{pt3dadd(141744.000000,163572.000000,159000.000000,669.813516)}
{pt3dadd(141804.000000,163692.000000,158925.000000,656.772292)}
{pt3dadd(141852.000000,163836.000000,158925.000000,656.772292)}
{pt3dadd(141852.000000,163980.000000,158950.000000,621.173260)}
{pt3dadd(141852.000000,164124.000000,158975.000000,610.444220)}
{pt3dadd(141864.000000,164268.000000,158950.000000,580.078868)}
{pt3dadd(142020.000000,164424.000000,158825.000000,557.521060)}
{pt3dadd(142212.000000,164616.000000,158900.000000,545.100846)}
{pt3dadd(142236.000000,164796.000000,158750.000000,574.020226)}
{pt3dadd(142416.000000,164964.000000,158825.000000,596.578034)}
{pt3dadd(142428.000000,165120.000000,158850.000000,620.263734)}
{pt3dadd(142440.000000,165276.000000,158875.000000,649.183114)}
{pt3dadd(142536.000000,165408.000000,158900.000000,655.241756)}
{pt3dadd(142452.000000,165552.000000,158975.000000,642.821542)}
{pt3dadd(142332.000000,165696.000000,159000.000000,670.240708)}
{pt3dadd(142440.000000,165876.000000,159025.000000,683.933988)}
{pt3dadd(142380.000000,166044.000000,159025.000000,704.991582)}
{pt3dadd(142320.000000,166236.000000,159025.000000,725.046434)}
{pt3dadd(142320.000000,166440.000000,159100.000000,766.256768)}
{pt3dadd(142320.000000,166584.000000,159175.000000,773.989294)}
{pt3dadd(142320.000000,166740.000000,159200.000000,797.205294)}
{pt3dadd(142332.000000,166884.000000,159125.000000,821.582088)}
{pt3dadd(142344.000000,167064.000000,159050.000000,871.673502)}
{pt3dadd(142284.000000,167208.000000,159150.000000,906.668076)}
{pt3dadd(142116.000000,167376.000000,159250.000000,923.312344)}
{pt3dadd(142080.000000,167508.000000,159300.000000,931.837452)}
{pt3dadd(142044.000000,167664.000000,159350.000000,923.312344)}
{pt3dadd(142008.000000,167784.000000,159425.000000,904.962038)}
{pt3dadd(141996.000000,167916.000000,159525.000000,869.967464)}
{pt3dadd(141984.000000,168060.000000,159525.000000,838.226356)}
{pt3dadd(141984.000000,168204.000000,159475.000000,806.485248)}
{pt3dadd(141876.000000,168360.000000,159625.000000,790.633562)}
{pt3dadd(141768.000000,168492.000000,159775.000000,758.892454)}
{pt3dadd(141708.000000,168624.000000,159825.000000,701.182954)}
{pt3dadd(141648.000000,168780.000000,159875.000000,681.128102)}
{pt3dadd(141588.000000,168936.000000,159925.000000,655.014608)}
{pt3dadd(141528.000000,169116.000000,159950.000000,655.014608)}
{pt3dadd(141516.000000,169296.000000,160125.000000,634.959756)}
{pt3dadd(141504.000000,169464.000000,160125.000000,670.558788)}
{pt3dadd(141492.000000,169620.000000,160125.000000,653.234660)}
{pt3dadd(141384.000000,169776.000000,160200.000000,641.969174)}
{pt3dadd(141372.000000,169920.000000,160325.000000,608.491366)}
{pt3dadd(141252.000000,170064.000000,160350.000000,567.375186)}
{pt3dadd(141168.000000,170244.000000,160425.000000,531.776154)}
{pt3dadd(141132.000000,170436.000000,160550.000000,512.289864)}
{pt3dadd(141120.000000,170592.000000,160575.000000,488.497812)}
{pt3dadd(141144.000000,170712.000000,160675.000000,445.434098)}
{pt3dadd(141168.000000,170856.000000,160775.000000,433.708440)}
{pt3dadd(141048.000000,170988.000000,160775.000000,403.424410)}
{pt3dadd(140928.000000,171108.000000,160775.000000,391.112472)}
{pt3dadd(140952.000000,171252.000000,160775.000000,395.418234)}
{pt3dadd(141012.000000,171432.000000,160850.000000,407.730172)}
{pt3dadd(140856.000000,171540.000000,160850.000000,415.355102)}
{pt3dadd(140688.000000,171660.000000,160850.000000,422.980032)}
{pt3dadd(140712.000000,171828.000000,160850.000000,435.291970)}
{pt3dadd(140736.000000,171912.000000,160850.000000,426.885480)}
{pt3dadd(140760.000000,172056.000000,160850.000000,418.478990)}
{pt3dadd(140676.000000,172176.000000,160875.000000,414.573542)}
{pt3dadd(140580.000000,172308.000000,160875.000000,414.573542)}
{pt3dadd(140484.000000,172452.000000,160875.000000,402.261604)}
{pt3dadd(140388.000000,172596.000000,160875.000000,398.356156)}
{pt3dadd(140352.000000,172740.000000,160900.000000,398.356156)}
{pt3dadd(140316.000000,172884.000000,160925.000000,415.189138)}
{pt3dadd(140280.000000,173028.000000,160950.000000,428.116672)}
{pt3dadd(140160.000000,173160.000000,160975.000000,436.122848)}
{pt3dadd(140052.000000,173292.000000,160975.000000,436.122848)}
{pt3dadd(139992.000000,173448.000000,160950.000000,444.529338)}
{pt3dadd(139980.000000,173616.000000,160850.000000,449.276440)}
{pt3dadd(139800.000000,173784.000000,160825.000000,440.449634)}
{pt3dadd(139620.000000,173952.000000,160800.000000,432.443458)}
{pt3dadd(139620.000000,174120.000000,160775.000000,428.723976)}
{pt3dadd(139464.000000,174312.000000,160800.000000,416.412038)}
{pt3dadd(139308.000000,174468.000000,160800.000000,402.838130)}
{pt3dadd(139320.000000,174624.000000,160800.000000,402.838130)}
{pt3dadd(139236.000000,174756.000000,160700.000000,402.838130)}
{pt3dadd(138948.000000,174936.000000,160600.000000,395.922096)}
{pt3dadd(138852.000000,175116.000000,160625.000000,392.202614)}
{pt3dadd(138756.000000,175272.000000,160650.000000,373.560922)}
{pt3dadd(138660.000000,175404.000000,160675.000000,354.919230)}
{pt3dadd(138624.000000,175560.000000,160600.000000,341.070688)}
{pt3dadd(138588.000000,175692.000000,160525.000000,334.797632)}
{pt3dadd(138660.000000,175824.000000,160450.000000,327.881598)}
{pt3dadd(138600.000000,175968.000000,160550.000000,324.668572)}
{pt3dadd(138624.000000,176100.000000,160550.000000,321.455546)}
{pt3dadd(138588.000000,176280.000000,160550.000000,321.455546)}
{pt3dadd(138504.000000,176400.000000,160500.000000,327.728602)}
{pt3dadd(138420.000000,176544.000000,160525.000000,338.364118)}
{pt3dadd(138336.000000,176712.000000,160550.000000,356.118108)}
{pt3dadd(138216.000000,176856.000000,160475.000000,396.531198)}
{pt3dadd(138060.000000,177012.000000,160400.000000,393.471168)}
{pt3dadd(138108.000000,177180.000000,160275.000000,393.471168)}
{pt3dadd(138156.000000,177312.000000,160150.000000,420.035716)}
{pt3dadd(138204.000000,177468.000000,160025.000000,447.928496)}
{pt3dadd(138120.000000,177672.000000,159950.000000,483.527528)}
{pt3dadd(138036.000000,177792.000000,159875.000000,527.000648)}
{pt3dadd(137952.000000,177960.000000,159800.000000,574.929752)}
{pt3dadd(137940.000000,178140.000000,159550.000000,617.542412)}
{pt3dadd(137832.000000,178320.000000,159900.000000,654.921392)}
{pt3dadd(137796.000000,178368.000000,159625.000000,654.921392)}
{pt3dadd(137952.000000,178548.000000,159400.000000,677.479200)}
{pt3dadd(137844.000000,178608.000000,159200.000000,724.459660)}
{pt3dadd(138024.000000,178608.000000,158975.000000,724.459660)}
{pt3dadd(138300.000000,179064.000000,158750.000000,724.459660)}
{pt3dadd(138372.000000,179412.000000,158500.000000,740.792388)}
{pt3dadd(138120.000000,179472.000000,158250.000000,792.588348)}
{pt3dadd(137832.000000,179832.000000,158000.000000,777.491508)}
{pt3dadd(137676.000000,179820.000000,157750.000000,800.707508)}
{pt3dadd(137556.000000,179952.000000,157525.000000,793.693880)}
{pt3dadd(137400.000000,179952.000000,157300.000000,799.471620)}
{pt3dadd(137244.000000,180252.000000,157025.000000,754.037232)}
{pt3dadd(137124.000000,180588.000000,156750.000000,716.658252)}
{pt3dadd(137004.000000,180972.000000,156500.000000,667.328758)}
{pt3dadd(137004.000000,181500.000000,156225.000000,626.745262)}
{pt3dadd(136992.000000,182028.000000,155975.000000,579.764802)}
{pt3dadd(136992.000000,182712.000000,155725.000000,561.574462)}
{pt3dadd(137100.000000,182040.000000,155450.000000,549.858022)}
{pt3dadd(137052.000000,182148.000000,155150.000000,562.278236)}
{pt3dadd(136908.000000,182448.000000,154900.000000,572.496380)}
{pt3dadd(136812.000000,182556.000000,154650.000000,590.686720)}
{pt3dadd(136800.000000,182472.000000,154475.000000,596.456846)}
{pt3dadd(136608.000000,183300.000000,154200.000000,615.127346)}
{pt3dadd(136464.000000,182808.000000,153975.000000,591.441646)}
{pt3dadd(136428.000000,182976.000000,153775.000000,586.207966)}
{pt3dadd(136332.000000,182964.000000,153550.000000,562.522266)}
{pt3dadd(136452.000000,183036.000000,153300.000000,536.291534)}
{pt3dadd(136464.000000,183156.000000,153050.000000,501.444694)}
{pt3dadd(136428.000000,183252.000000,152775.000000,473.551914)}
{pt3dadd(136428.000000,183276.000000,152525.000000,431.618390)}
{pt3dadd(136548.000000,183288.000000,152300.000000,410.072500)}

{create adhoc3}
{access adhoc3}
{connect adhoc3(1), adhoc2(0)}
{nseg = 1}
{strdef color color = "White"}
{pt3dclear()}
{pt3dadd(136548.000000,183288.000000,152300.000000,410.072500)}
{pt3dadd(136488.000000,183168.000000,152050.000000,410.397967)}
{pt3dadd(136980.000000,183564.000000,151800.000000,414.768822)}
{pt3dadd(137196.000000,183312.000000,151625.000000,414.768822)}
{pt3dadd(137412.000000,183336.000000,151425.000000,428.342730)}
{pt3dadd(137484.000000,183324.000000,151250.000000,432.248178)}
{pt3dadd(137472.000000,183168.000000,151050.000000,453.828262)}
{pt3dadd(137712.000000,183048.000000,150800.000000,434.254482)}
{pt3dadd(137784.000000,182724.000000,150575.000000,451.929118)}
{pt3dadd(138000.000000,182640.000000,150300.000000,456.913582)}
{pt3dadd(138060.000000,182496.000000,150050.000000,469.841116)}
{pt3dadd(137988.000000,182328.000000,149800.000000,448.261032)}
{pt3dadd(137880.000000,182448.000000,149500.000000,463.529050)}
{pt3dadd(137832.000000,182460.000000,149275.000000,463.529050)}
{pt3dadd(137628.000000,182424.000000,149000.000000,444.970678)}
{pt3dadd(137652.000000,182532.000000,148750.000000,449.717780)}
{pt3dadd(137664.000000,182688.000000,148500.000000,487.011368)}
{pt3dadd(137496.000000,182808.000000,148300.000000,491.317130)}
{pt3dadd(137712.000000,182928.000000,148050.000000,447.138638)}
{pt3dadd(137592.000000,182868.000000,147800.000000,447.138638)}
{pt3dadd(137388.000000,183024.000000,147525.000000,425.558554)}
{pt3dadd(137460.000000,183012.000000,147275.000000,405.097948)}
{pt3dadd(137472.000000,183060.000000,147050.000000,389.066528)}
{pt3dadd(137304.000000,183192.000000,146800.000000,433.245020)}
{pt3dadd(137268.000000,183144.000000,146550.000000,437.550782)}
{pt3dadd(137400.000000,183240.000000,146275.000000,464.115330)}
{pt3dadd(137532.000000,183336.000000,146025.000000,473.846896)}
{pt3dadd(137496.000000,183324.000000,145775.000000,499.146462)}
{pt3dadd(137376.000000,183324.000000,145525.000000,499.146462)}
{pt3dadd(137544.000000,183336.000000,145250.000000,490.739972)}
{pt3dadd(137496.000000,183132.000000,145000.000000,495.973652)}
{pt3dadd(137556.000000,183264.000000,144775.000000,477.415280)}
{pt3dadd(137628.000000,183204.000000,144550.000000,468.147134)}
{pt3dadd(137760.000000,183288.000000,144300.000000,446.567050)}
{pt3dadd(137880.000000,183396.000000,144050.000000,450.667778)}
{pt3dadd(138072.000000,183492.000000,143750.000000,431.181488)}
{pt3dadd(138240.000000,183612.000000,143525.000000,435.487250)}
{pt3dadd(138864.000000,183684.000000,143200.000000,440.008294)}
{pt3dadd(138888.000000,183684.000000,142975.000000,436.288812)}
{pt3dadd(138912.000000,183672.000000,142725.000000,421.020794)}
{pt3dadd(139020.000000,183696.000000,142475.000000,401.447014)}
{pt3dadd(139296.000000,183660.000000,142225.000000,378.499560)}
{pt3dadd(139452.000000,183708.000000,141975.000000,344.758006)}
{pt3dadd(139584.000000,183648.000000,141725.000000,337.841972)}
{pt3dadd(139644.000000,183612.000000,141450.000000,337.841972)}
{pt3dadd(139836.000000,183708.000000,141200.000000,341.384332)}
{pt3dadd(139836.000000,183720.000000,140925.000000,348.300366)}
{pt3dadd(140004.000000,183204.000000,140675.000000,361.489456)}
{pt3dadd(140268.000000,183264.000000,140425.000000,384.436910)}
{pt3dadd(140448.000000,183108.000000,140175.000000,391.698752)}
{pt3dadd(140832.000000,183060.000000,139875.000000,416.998318)}
{pt3dadd(140820.000000,183132.000000,139650.000000,437.550782)}
{pt3dadd(141252.000000,182988.000000,139425.000000,478.563852)}
{pt3dadd(141576.000000,183204.000000,139225.000000,483.084896)}
{pt3dadd(141708.000000,183108.000000,138950.000000,504.664980)}
{pt3dadd(141756.000000,183108.000000,138700.000000,532.207252)}
{pt3dadd(141816.000000,182964.000000,138425.000000,552.667858)}
{pt3dadd(141276.000000,183108.000000,138050.000000,564.496626)}
{pt3dadd(141552.000000,182988.000000,137850.000000,469.854592)}
{pt3dadd(141804.000000,182844.000000,137575.000000,491.338222)}
{pt3dadd(141804.000000,182472.000000,137325.000000,479.509454)}
{pt3dadd(141936.000000,182256.000000,137125.000000,479.509454)}
{pt3dadd(142404.000000,181980.000000,136925.000000,410.564222)}
{pt3dadd(143016.000000,181872.000000,136700.000000,449.714600)}
{pt3dadd(142800.000000,181620.000000,136475.000000,384.052478)}
{pt3dadd(142620.000000,181404.000000,136275.000000,336.123374)}
{pt3dadd(142860.000000,181368.000000,136250.000000,298.829786)}
{pt3dadd(143028.000000,181488.000000,136150.000000,314.933180)}
{pt3dadd(143220.000000,181620.000000,136175.000000,357.497302)}
{pt3dadd(143448.000000,181332.000000,135975.000000,369.460194)}
{pt3dadd(143616.000000,181392.000000,135900.000000,388.101886)}
{pt3dadd(143760.000000,181248.000000,135825.000000,357.945014)}
{pt3dadd(143928.000000,181104.000000,135750.000000,354.402654)}
{pt3dadd(144084.000000,180960.000000,135650.000000,330.674330)}
{pt3dadd(144228.000000,180816.000000,135550.000000,311.152974)}
{pt3dadd(144420.000000,180756.000000,135450.000000,277.905026)}
{pt3dadd(144576.000000,180588.000000,135275.000000,291.153326)}
{pt3dadd(144732.000000,180540.000000,135400.000000,270.655906)}
{pt3dadd(145332.000000,180288.000000,135100.000000,273.570210)}
{pt3dadd(145596.000000,180096.000000,134825.000000,287.917917)}
{pt3dadd(145860.000000,179892.000000,134550.000000,306.002400)}

{create adhoc4}
{access adhoc4}
{connect adhoc4(1), adhoc3(0)}
{nseg = 1}
{strdef color color = "White"}
{pt3dclear()}
{pt3dadd(145860.000000,179892.000000,134550.000000,306.002400)}
{pt3dadd(146064.000000,180024.000000,134375.000000,317.223110)}
{pt3dadd(146268.000000,179772.000000,134300.000000,346.737936)}
{pt3dadd(146448.000000,179844.000000,134050.000000,412.768864)}
{pt3dadd(146652.000000,179688.000000,133900.000000,457.324294)}
{pt3dadd(146844.000000,179628.000000,133625.000000,514.440758)}
{pt3dadd(147240.000000,179616.000000,133925.000000,549.958468)}
{pt3dadd(147156.000000,179472.000000,133675.000000,549.958468)}
{pt3dadd(147396.000000,179292.000000,133425.000000,508.842288)}
{pt3dadd(147900.000000,179124.000000,133150.000000,464.286858)}
{pt3dadd(148248.000000,179004.000000,132950.000000,426.993270)}
{pt3dadd(148704.000000,178512.000000,132675.000000,387.933200)}
{pt3dadd(148872.000000,178296.000000,132350.000000,351.587444)}
{pt3dadd(149016.000000,178128.000000,132375.000000,326.672696)}
{pt3dadd(149160.000000,178044.000000,132300.000000,314.111662)}
{pt3dadd(149304.000000,177960.000000,132225.000000,288.869890)}
{pt3dadd(149424.000000,177876.000000,132150.000000,282.283190)}
{pt3dadd(149556.000000,177756.000000,132175.000000,292.125090)}
{pt3dadd(149700.000000,177708.000000,132025.000000,283.791890)}
{pt3dadd(149832.000000,177672.000000,131975.000000,246.427092)}
{pt3dadd(149964.000000,177468.000000,132000.000000,233.010190)}
{pt3dadd(150084.000000,177300.000000,131850.000000,229.950160)}
{pt3dadd(150240.000000,177288.000000,131875.000000,235.639996)}
{pt3dadd(150420.000000,177168.000000,131725.000000,250.246252)}
{pt3dadd(150588.000000,176916.000000,131225.000000,293.585384)}
{pt3dadd(150708.000000,176796.000000,131175.000000,315.335486)}
{pt3dadd(150864.000000,176808.000000,131125.000000,315.335486)}
{pt3dadd(150996.000000,176772.000000,131075.000000,295.557904)}
{pt3dadd(151152.000000,176628.000000,131025.000000,267.534746)}
{pt3dadd(151308.000000,176484.000000,131025.000000,248.942980)}
{pt3dadd(151476.000000,176376.000000,130950.000000,255.216036)}
{pt3dadd(151608.000000,176208.000000,130975.000000,264.862766)}
{pt3dadd(151752.000000,175980.000000,130950.000000,297.829438)}
{pt3dadd(151896.000000,175860.000000,130900.000000,344.494288)}
{pt3dadd(152040.000000,175764.000000,130900.000000,384.940772)}
{pt3dadd(152172.000000,175644.000000,130925.000000,403.582464)}
{pt3dadd(152304.000000,175740.000000,130900.000000,410.844306)}
{pt3dadd(152424.000000,175416.000000,130775.000000,426.875726)}
{pt3dadd(152520.000000,175464.000000,130775.000000,431.181488)}
{pt3dadd(152628.000000,175452.000000,130800.000000,449.739860)}
{pt3dadd(152736.000000,175440.000000,130775.000000,463.313768)}
{pt3dadd(152844.000000,175428.000000,130750.000000,475.625706)}
{pt3dadd(152976.000000,175380.000000,130700.000000,475.625706)}
{pt3dadd(153084.000000,175260.000000,130700.000000,480.146750)}
{pt3dadd(153228.000000,175212.000000,130550.000000,475.162286)}
{pt3dadd(153348.000000,175152.000000,130550.000000,475.162286)}
{pt3dadd(153456.000000,174996.000000,130625.000000,500.143936)}
{pt3dadd(153612.000000,174900.000000,130575.000000,519.630226)}
{pt3dadd(153768.000000,174948.000000,130475.000000,564.960824)}
{pt3dadd(153912.000000,174840.000000,130450.000000,592.503096)}
{pt3dadd(154080.000000,174636.000000,130400.000000,626.406940)}
{pt3dadd(154248.000000,174696.000000,130350.000000,638.235708)}
{pt3dadd(154404.000000,174696.000000,130375.000000,655.559836)}
{pt3dadd(154536.000000,174612.000000,130375.000000,648.880184)}
{pt3dadd(154656.000000,174516.000000,130375.000000,648.880184)}
{pt3dadd(154764.000000,174456.000000,130350.000000,630.689844)}
{pt3dadd(154896.000000,174288.000000,130300.000000,624.631202)}
{pt3dadd(155052.000000,174468.000000,130150.000000,618.572560)}
{pt3dadd(155172.000000,174360.000000,130125.000000,606.152346)}
{pt3dadd(155304.000000,174252.000000,130100.000000,612.513918)}
{pt3dadd(155484.000000,174144.000000,130075.000000,607.018558)}
{pt3dadd(155604.000000,174036.000000,130050.000000,576.266782)}
{pt3dadd(155712.000000,174024.000000,130000.000000,545.515006)}
{pt3dadd(155844.000000,174024.000000,129950.000000,514.763230)}
{pt3dadd(156000.000000,174024.000000,129875.000000,467.285478)}
{pt3dadd(156168.000000,173856.000000,129725.000000,439.392698)}
{pt3dadd(156324.000000,173760.000000,129675.000000,443.913742)}
{pt3dadd(156468.000000,173772.000000,129675.000000,435.507252)}
{pt3dadd(156600.000000,173616.000000,129800.000000,423.195314)}
{pt3dadd(157056.000000,173364.000000,129575.000000,411.469656)}
{pt3dadd(157320.000000,173184.000000,129350.000000,411.469656)}
{pt3dadd(158100.000000,172752.000000,129125.000000,394.636674)}
{pt3dadd(158400.000000,172428.000000,128900.000000,373.822654)}
{pt3dadd(158904.000000,171984.000000,128650.000000,381.828830)}
{pt3dadd(159096.000000,171960.000000,128450.000000,374.912796)}
{pt3dadd(159588.000000,171768.000000,128225.000000,374.912796)}
{pt3dadd(159828.000000,171540.000000,128025.000000,367.650954)}
{pt3dadd(160176.000000,171168.000000,127850.000000,388.464974)}
{pt3dadd(160848.000000,170844.000000,127600.000000,376.739316)}
{pt3dadd(161304.000000,170532.000000,127375.000000,395.381008)}
{pt3dadd(161808.000000,170364.000000,127100.000000,380.840044)}
{pt3dadd(162312.000000,169968.000000,126800.000000,396.108062)}
{pt3dadd(162612.000000,169680.000000,126525.000000,381.567098)}
{pt3dadd(163080.000000,169404.000000,126225.000000,381.567098)}
{pt3dadd(163236.000000,169392.000000,126100.000000,362.925406)}
{pt3dadd(163392.000000,169404.000000,126100.000000,377.466370)}
{pt3dadd(163524.000000,169356.000000,125950.000000,362.198352)}
{pt3dadd(163680.000000,169404.000000,125900.000000,380.840044)}
{pt3dadd(163824.000000,169320.000000,125825.000000,380.840044)}
{pt3dadd(163944.000000,169236.000000,125750.000000,380.840044)}
{pt3dadd(164088.000000,169176.000000,125700.000000,389.246534)}
{pt3dadd(164208.000000,169188.000000,125725.000000,413.341358)}
{pt3dadd(164328.000000,169188.000000,125550.000000,417.647120)}
{pt3dadd(164472.000000,169068.000000,125500.000000,410.731086)}
{pt3dadd(164580.000000,169068.000000,125425.000000,421.366602)}
{pt3dadd(164712.000000,169008.000000,125400.000000,409.054664)}
{pt3dadd(164856.000000,169008.000000,125375.000000,392.221682)}
{pt3dadd(164952.000000,168792.000000,125400.000000,357.311336)}
{pt3dadd(165360.000000,168480.000000,125200.000000,331.260698)}
{pt3dadd(166032.000000,168444.000000,125050.000000,294.574544)}
{pt3dadd(166932.000000,168288.000000,124800.000000,262.134236)}
{pt3dadd(167172.000000,168228.000000,124625.000000,245.225664)}
{pt3dadd(168012.000000,168000.000000,124425.000000,248.001196)}
{pt3dadd(168516.000000,167832.000000,124225.000000,280.967868)}
{pt3dadd(168708.000000,167676.000000,124000.000000,317.654022)}
{pt3dadd(169272.000000,167340.000000,123800.000000,342.832488)}
{pt3dadd(170292.000000,167112.000000,123575.000000,359.741060)}
{pt3dadd(170448.000000,166992.000000,123425.000000,368.928420)}
{pt3dadd(170604.000000,166872.000000,123275.000000,368.928420)}
{pt3dadd(170784.000000,166788.000000,123250.000000,358.292904)}
{pt3dadd(170940.000000,166704.000000,123225.000000,354.919230)}
{pt3dadd(171072.000000,166620.000000,123200.000000,347.657388)}
{pt3dadd(171252.000000,166536.000000,123175.000000,341.384332)}
{pt3dadd(171372.000000,166452.000000,123150.000000,345.103814)}
{pt3dadd(171516.000000,166368.000000,123125.000000,352.019848)}
{pt3dadd(171672.000000,166284.000000,123100.000000,358.935882)}
{pt3dadd(171780.000000,166200.000000,123075.000000,370.103172)}
{pt3dadd(171924.000000,166116.000000,123050.000000,379.749902)}
{pt3dadd(172104.000000,166176.000000,122975.000000,369.114386)}
{pt3dadd(172248.000000,166020.000000,123075.000000,353.010992)}
{pt3dadd(172416.000000,166020.000000,123125.000000,336.907598)}
{pt3dadd(172608.000000,166068.000000,123050.000000,310.403742)}
{pt3dadd(172800.000000,166116.000000,122975.000000,300.757012)}
{pt3dadd(172932.000000,165948.000000,123100.000000,294.483956)}
{pt3dadd(173076.000000,166008.000000,122925.000000,313.132876)}
{pt3dadd(173256.000000,165996.000000,123000.000000,319.107210)}
{pt3dadd(173436.000000,165888.000000,122950.000000,337.986136)}
{pt3dadd(173616.000000,165708.000000,122850.000000,371.727690)}
{pt3dadd(173736.000000,165624.000000,122850.000000,384.916780)}
{pt3dadd(173892.000000,165696.000000,122925.000000,369.182164)}
{pt3dadd(174060.000000,165756.000000,122675.000000,363.207830)}
{pt3dadd(174192.000000,165372.000000,122625.000000,356.291796)}
{pt3dadd(174372.000000,165084.000000,122625.000000,316.860406)}
{pt3dadd(174540.000000,165108.000000,122625.000000,303.671316)}
{pt3dadd(174672.000000,165000.000000,122625.000000,328.586064)}
{pt3dadd(174816.000000,164892.000000,122625.000000,337.773424)}
{pt3dadd(174960.000000,164784.000000,122625.000000,344.689458)}
{pt3dadd(175092.000000,164724.000000,122650.000000,379.599804)}
{pt3dadd(175212.000000,164664.000000,122675.000000,392.788894)}
{pt3dadd(175356.000000,164604.000000,122700.000000,384.782718)}
{pt3dadd(175512.000000,164568.000000,122625.000000,412.251216)}
{pt3dadd(175632.000000,164472.000000,122825.000000,415.970698)}
{pt3dadd(175764.000000,164376.000000,122850.000000,411.664936)}
{pt3dadd(175908.000000,164292.000000,122775.000000,427.696356)}
{pt3dadd(176040.000000,164244.000000,122825.000000,431.601804)}
{pt3dadd(176184.000000,164196.000000,122875.000000,436.348906)}
{pt3dadd(176328.000000,164148.000000,122925.000000,448.660844)}
{pt3dadd(176484.000000,164004.000000,122875.000000,436.935186)}
{pt3dadd(176688.000000,163884.000000,122825.000000,428.528696)}
{pt3dadd(176832.000000,163836.000000,122725.000000,424.623248)}
{pt3dadd(176988.000000,163788.000000,122725.000000,403.043164)}
{pt3dadd(177132.000000,163740.000000,122725.000000,387.011744)}
{pt3dadd(177264.000000,163596.000000,122725.000000,373.822654)}
{pt3dadd(177408.000000,163452.000000,122675.000000,342.157944)}
{pt3dadd(177540.000000,163332.000000,122575.000000,316.916172)}
{pt3dadd(177708.000000,163272.000000,122525.000000,294.317764)}
{pt3dadd(177864.000000,163008.000000,122300.000000,294.317764)}
{pt3dadd(178032.000000,162960.000000,122150.000000,288.627928)}
{pt3dadd(178464.000000,163020.000000,121900.000000,286.230318)}
{pt3dadd(178692.000000,162972.000000,121625.000000,294.563518)}
{pt3dadd(178848.000000,163044.000000,121400.000000,306.526410)}
{pt3dadd(179028.000000,163104.000000,121175.000000,314.151340)}
{pt3dadd(179376.000000,162960.000000,120950.000000,333.030266)}
{pt3dadd(179544.000000,162648.000000,120725.000000,349.338596)}
{pt3dadd(179760.000000,162732.000000,120475.000000,349.338596)}
{pt3dadd(180000.000000,162516.000000,120200.000000,343.065540)}
{pt3dadd(180300.000000,162540.000000,119925.000000,313.918320)}
{pt3dadd(180732.000000,162528.000000,119625.000000,297.814926)}
{pt3dadd(180780.000000,162444.000000,119375.000000,281.506596)}
{pt3dadd(181020.000000,162408.000000,119150.000000,281.506596)}
{pt3dadd(181320.000000,162312.000000,118850.000000,273.173396)}
{pt3dadd(181620.000000,162228.000000,118575.000000,294.695686)}
{pt3dadd(182064.000000,162108.000000,118275.000000,307.256720)}
{pt3dadd(182472.000000,162012.000000,118025.000000,312.171820)}
{pt3dadd(182856.000000,161868.000000,117750.000000,301.321130)}
{pt3dadd(183192.000000,161832.000000,117450.000000,298.803640)}
{pt3dadd(183264.000000,161772.000000,117175.000000,261.985856)}
{pt3dadd(183504.000000,161892.000000,116925.000000,241.488436)}
{pt3dadd(183888.000000,161748.000000,116650.000000,226.192942)}
{pt3dadd(184128.000000,161724.000000,116350.000000,203.879798)}
{pt3dadd(184368.000000,161700.000000,116075.000000,184.440412)}
{pt3dadd(184608.000000,161664.000000,115750.000000,182.651280)}
{pt3dadd(184944.000000,161580.000000,115500.000000,214.315990)}
{pt3dadd(185184.000000,161376.000000,115275.000000,247.845930)}
{pt3dadd(185364.000000,162204.000000,115275.000000,410.072500)}

{create adhoc5}
{access adhoc5}
{connect adhoc5(1), adhoc4(0)}
{nseg = 1}
{strdef color color = "White"}
{pt3dclear()}
{pt3dadd(185364.000000,162204.000000,115275.000000,410.072500)}
{pt3dadd(185532.000000,162120.000000,115075.000000,446.364773)}
{pt3dadd(185700.000000,162132.000000,114850.000000,448.660844)}
{pt3dadd(185868.000000,162144.000000,114625.000000,452.761572)}
{pt3dadd(186024.000000,162144.000000,114375.000000,457.746036)}
{pt3dadd(186312.000000,162156.000000,114150.000000,457.746036)}
{pt3dadd(186600.000000,162180.000000,113925.000000,467.014182)}
{pt3dadd(186864.000000,162228.000000,113700.000000,497.765958)}
{pt3dadd(187104.000000,162228.000000,113450.000000,521.558010)}
{pt3dadd(187332.000000,162180.000000,113250.000000,521.558010)}
{pt3dadd(187608.000000,162252.000000,113025.000000,545.350062)}
{pt3dadd(187716.000000,162360.000000,112825.000000,550.334526)}
{pt3dadd(187824.000000,162408.000000,112625.000000,533.835360)}
{pt3dadd(188292.000000,162396.000000,112400.000000,528.601680)}
{pt3dadd(188760.000000,162384.000000,112125.000000,523.617216)}
{pt3dadd(188832.000000,162456.000000,111875.000000,513.399072)}
{pt3dadd(188988.000000,162420.000000,111650.000000,535.956880)}
{pt3dadd(189048.000000,162264.000000,111425.000000,530.972416)}
{pt3dadd(189120.000000,162264.000000,111175.000000,541.701456)}
{pt3dadd(189180.000000,162084.000000,110950.000000,563.185086)}
{pt3dadd(189276.000000,162156.000000,110750.000000,573.403230)}
{pt3dadd(189396.000000,162060.000000,110525.000000,600.822396)}
{pt3dadd(189516.000000,161964.000000,110325.000000,642.884367)}
{pt3dadd(189588.000000,161868.000000,110125.000000,773.252870)}

{create adhoc6}
{access adhoc6}
{connect adhoc6(1), adhoc5(0)}
{nseg = 1}
{strdef color color = "White"}
{pt3dclear()}
{pt3dadd(189588.000000,161868.000000,110125.000000,773.252870)}
{pt3dadd(189528.000000,161784.000000,109925.000000,692.458270)}
{pt3dadd(189660.000000,161808.000000,109700.000000,703.718516)}
{pt3dadd(189816.000000,161712.000000,109500.000000,696.354202)}
{pt3dadd(189840.000000,161616.000000,109250.000000,684.525434)}
{pt3dadd(189864.000000,161520.000000,109025.000000,684.525434)}
{pt3dadd(189888.000000,161424.000000,108775.000000,666.335094)}
{pt3dadd(189876.000000,161256.000000,108575.000000,638.915928)}
{pt3dadd(189864.000000,161088.000000,108400.000000,607.032308)}
{pt3dadd(189852.000000,160920.000000,108200.000000,591.318804)}
{pt3dadd(189888.000000,160872.000000,107950.000000,567.633104)}
{pt3dadd(189804.000000,160644.000000,107725.000000,562.137744)}
{pt3dadd(189696.000000,160644.000000,107500.000000,550.308976)}
{pt3dadd(189732.000000,160440.000000,107275.000000,556.079102)}
{pt3dadd(189744.000000,160164.000000,107050.000000,561.063566)}
{pt3dadd(189636.000000,160020.000000,106800.000000,546.098320)}
{pt3dadd(189528.000000,159900.000000,106625.000000,514.300092)}
{pt3dadd(189444.000000,159852.000000,106425.000000,498.586588)}
{pt3dadd(189408.000000,159696.000000,106200.000000,472.355856)}
{pt3dadd(189348.000000,159696.000000,105950.000000,435.155792)}
{pt3dadd(189252.000000,159528.000000,105700.000000,407.687294)}
{pt3dadd(189132.000000,159360.000000,105450.000000,393.838752)}
{pt3dadd(189036.000000,159252.000000,105125.000000,352.435792)}
{pt3dadd(188880.000000,158976.000000,104900.000000,343.608986)}
{pt3dadd(188772.000000,159024.000000,104675.000000,340.395960)}
{pt3dadd(188712.000000,158748.000000,104450.000000,340.395960)}
{pt3dadd(188664.000000,158400.000000,104225.000000,358.149950)}
{pt3dadd(188652.000000,158244.000000,104000.000000,377.972826)}
{pt3dadd(188724.000000,158160.000000,103775.000000,385.372686)}
{pt3dadd(188820.000000,157992.000000,103525.000000,416.054210)}
{pt3dadd(188820.000000,157788.000000,103275.000000,419.427884)}
{pt3dadd(188760.000000,157440.000000,103000.000000,419.427884)}
{pt3dadd(188652.000000,157356.000000,102775.000000,423.333332)}
{pt3dadd(188640.000000,157260.000000,102550.000000,394.078754)}
{pt3dadd(188556.000000,157188.000000,102325.000000,403.810320)}
{pt3dadd(188340.000000,156984.000000,102125.000000,419.078338)}
{pt3dadd(188184.000000,156924.000000,101875.000000,432.005872)}
{pt3dadd(188196.000000,156696.000000,101675.000000,459.898652)}
{pt3dadd(188028.000000,156492.000000,101475.000000,486.059132)}
{pt3dadd(187992.000000,156336.000000,101275.000000,459.494584)}
{pt3dadd(187992.000000,156108.000000,100925.000000,455.393856)}
{pt3dadd(188112.000000,155940.000000,100700.000000,442.466322)}
{pt3dadd(187968.000000,155664.000000,100425.000000,432.248178)}
{pt3dadd(187800.000000,155388.000000,100175.000000,436.769222)}
{pt3dadd(187740.000000,155412.000000,99875.000000,440.674670)}
{pt3dadd(187680.000000,154992.000000,99600.000000,436.769222)}
{pt3dadd(187560.000000,154788.000000,99350.000000,440.869950)}
{pt3dadd(187548.000000,154680.000000,99000.000000,431.601804)}
{pt3dadd(187332.000000,154452.000000,98675.000000,422.774998)}
{pt3dadd(187320.000000,154344.000000,98400.000000,427.964228)}
{pt3dadd(187308.000000,154236.000000,98125.000000,435.970404)}
{pt3dadd(187272.000000,154056.000000,97850.000000,435.970404)}
{pt3dadd(187212.000000,153840.000000,97525.000000,431.664642)}
{pt3dadd(187176.000000,153660.000000,97225.000000,445.238550)}
{pt3dadd(187128.000000,153576.000000,97000.000000,452.976854)}
{pt3dadd(187044.000000,153408.000000,96725.000000,457.282616)}
{pt3dadd(186924.000000,153228.000000,96475.000000,461.588378)}
{pt3dadd(186804.000000,153048.000000,96200.000000,480.146750)}
{pt3dadd(186660.000000,152712.000000,95925.000000,458.566666)}
{pt3dadd(186660.000000,152592.000000,95625.000000,464.573844)}
{pt3dadd(186660.000000,152448.000000,95250.000000,469.094888)}
{pt3dadd(187092.000000,152304.000000,95000.000000,460.688398)}
{pt3dadd(186924.000000,152112.000000,94625.000000,406.364588)}
{pt3dadd(186720.000000,151944.000000,94350.000000,386.541712)}
{pt3dadd(186060.000000,151692.000000,94500.000000,346.792980)}
{pt3dadd(185928.000000,151512.000000,94425.000000,316.111456)}
{pt3dadd(185712.000000,151356.000000,94350.000000,312.206008)}
{pt3dadd(185652.000000,151236.000000,94350.000000,343.870718)}
{pt3dadd(185640.000000,151092.000000,94125.000000,363.693594)}
{pt3dadd(185580.000000,150960.000000,93975.000000,392.914104)}
{pt3dadd(185556.000000,150804.000000,93825.000000,423.595628)}
{pt3dadd(185532.000000,150660.000000,93675.000000,435.907566)}
{pt3dadd(185508.000000,150516.000000,93525.000000,448.835100)}
{pt3dadd(185400.000000,150372.000000,93450.000000,461.147038)}
{pt3dadd(185364.000000,150252.000000,93325.000000,465.668082)}
{pt3dadd(185292.000000,150072.000000,93000.000000,475.399648)}
{pt3dadd(185220.000000,149940.000000,92725.000000,506.151424)}
{pt3dadd(185268.000000,149808.000000,92650.000000,521.116670)}
{pt3dadd(185388.000000,149784.000000,92375.000000,564.288660)}
{pt3dadd(185448.000000,149592.000000,92125.000000,602.939606)}
{pt3dadd(185472.000000,149448.000000,91875.000000,619.438772)}
{pt3dadd(185436.000000,149244.000000,91625.000000,631.858986)}
{pt3dadd(185316.000000,148980.000000,91400.000000,669.237966)}
{pt3dadd(185244.000000,148788.000000,91175.000000,669.237966)}
{pt3dadd(185232.000000,148644.000000,90950.000000,675.917618)}
{pt3dadd(185088.000000,148308.000000,90725.000000,702.031112)}
{pt3dadd(184908.000000,148296.000000,90475.000000,708.710764)}
{pt3dadd(184764.000000,147960.000000,90250.000000,695.017484)}
{pt3dadd(184704.000000,147708.000000,90050.000000,666.098104)}
{pt3dadd(184392.000000,147504.000000,89775.000000,635.732752)}
{pt3dadd(184500.000000,147372.000000,89550.000000,635.732752)}
{pt3dadd(184248.000000,147060.000000,89300.000000,616.632886)}
{pt3dadd(184116.000000,146844.000000,89075.000000,573.460896)}
{pt3dadd(184032.000000,146820.000000,88850.000000,589.960062)}
{pt3dadd(183924.000000,146580.000000,88625.000000,595.455422)}
{pt3dadd(183900.000000,146436.000000,88400.000000,558.076442)}
{pt3dadd(183864.000000,146292.000000,88150.000000,552.306316)}
{pt3dadd(183552.000000,146160.000000,87925.000000,595.478306)}
{pt3dadd(183468.000000,145944.000000,87675.000000,595.478306)}
{pt3dadd(183492.000000,145836.000000,87400.000000,595.478306)}
{pt3dadd(183408.000000,145788.000000,87175.000000,619.164006)}
{pt3dadd(183252.000000,145668.000000,87000.000000,644.033998)}
{pt3dadd(183228.000000,145596.000000,86750.000000,657.727278)}
{pt3dadd(183132.000000,145656.000000,86525.000000,676.827144)}
{pt3dadd(182988.000000,145584.000000,86350.000000,708.710764)}
{pt3dadd(182820.000000,145476.000000,86125.000000,708.710764)}
{pt3dadd(182808.000000,145296.000000,85900.000000,715.724392)}
{pt3dadd(182712.000000,145152.000000,85650.000000,723.088706)}
{pt3dadd(182652.000000,144912.000000,85400.000000,730.102334)}
{pt3dadd(182496.000000,144912.000000,85150.000000,723.088706)}
{pt3dadd(182304.000000,144816.000000,84950.000000,716.727134)}
{pt3dadd(182112.000000,144720.000000,84725.000000,690.613640)}
{pt3dadd(181932.000000,144588.000000,84525.000000,669.556046)}
{pt3dadd(181752.000000,144444.000000,84350.000000,649.501194)}
{pt3dadd(181680.000000,144264.000000,84150.000000,624.631202)}
{pt3dadd(181512.000000,144012.000000,83825.000000,602.073394)}
{pt3dadd(181476.000000,143856.000000,83625.000000,580.589764)}
{pt3dadd(181332.000000,143916.000000,83450.000000,556.904064)}
{pt3dadd(181320.000000,143748.000000,83225.000000,563.265636)}
{pt3dadd(181248.000000,143616.000000,82975.000000,581.455976)}
{pt3dadd(181176.000000,143508.000000,82775.000000,586.689656)}
{pt3dadd(181104.000000,143424.000000,82575.000000,596.907800)}
{pt3dadd(181032.000000,143316.000000,82425.000000,581.942554)}
{pt3dadd(180972.000000,143220.000000,82275.000000,575.580982)}
{pt3dadd(180936.000000,143124.000000,82100.000000,541.677138)}
{pt3dadd(180912.000000,143124.000000,81900.000000,559.001266)}
{pt3dadd(180888.000000,143124.000000,81725.000000,553.767586)}
{pt3dadd(180780.000000,142896.000000,81550.000000,592.418532)}
{pt3dadd(180684.000000,142860.000000,81375.000000,586.359890)}
{pt3dadd(180588.000000,142752.000000,81050.000000,613.902162)}
{pt3dadd(180492.000000,142644.000000,80850.000000,620.263734)}
{pt3dadd(180396.000000,142536.000000,80700.000000,642.821542)}
{pt3dadd(180228.000000,142500.000000,80525.000000,649.501194)}
{pt3dadd(180060.000000,142464.000000,80350.000000,682.979002)}
{pt3dadd(179892.000000,142404.000000,80200.000000,689.340574)}
{pt3dadd(179448.000000,142020.000000,79725.000000,710.398168)}
{pt3dadd(179088.000000,141936.000000,79525.000000,716.759740)}
{pt3dadd(179016.000000,141732.000000,79300.000000,703.718516)}
{pt3dadd(178944.000000,141528.000000,79100.000000,682.660922)}
{pt3dadd(178800.000000,141372.000000,78900.000000,670.240708)}
{pt3dadd(178656.000000,141216.000000,78700.000000,636.762900)}
{pt3dadd(178416.000000,141204.000000,78475.000000,624.342686)}
{pt3dadd(178428.000000,141024.000000,78225.000000,651.761852)}
{pt3dadd(178356.000000,140808.000000,78000.000000,680.551972)}
{pt3dadd(178776.000000,140580.000000,77800.000000,699.651838)}
{pt3dadd(178332.000000,140448.000000,77600.000000,699.651838)}
{pt3dadd(178200.000000,140208.000000,77350.000000,693.881712)}
{pt3dadd(178200.000000,139920.000000,77200.000000,649.138418)}
{pt3dadd(178212.000000,139812.000000,76975.000000,627.027950)}
{pt3dadd(178140.000000,139668.000000,76800.000000,586.444454)}
{pt3dadd(178068.000000,139548.000000,76625.000000,583.115080)}
{pt3dadd(178176.000000,139416.000000,76475.000000,498.445680)}

{create adhoc7}
{access adhoc7}
{connect adhoc7(1), adhoc6(0)}
{nseg = 1}
{strdef color color = "White"}
{pt3dclear()}
{pt3dadd(178176.000000,139416.000000,76475.000000,498.445680)}
{pt3dadd(178128.000000,139284.000000,76675.000000,433.656557)}
{pt3dadd(177936.000000,139164.000000,77000.000000,424.418214)}
{pt3dadd(178044.000000,139032.000000,77100.000000,385.929558)}
{pt3dadd(178008.000000,138876.000000,77050.000000,377.923382)}
{pt3dadd(177924.000000,138732.000000,77025.000000,356.401092)}
{pt3dadd(177780.000000,138576.000000,77050.000000,349.139250)}
{pt3dadd(177744.000000,138444.000000,77125.000000,318.534666)}
{pt3dadd(177660.000000,138324.000000,77075.000000,310.201466)}
{pt3dadd(177624.000000,138228.000000,77025.000000,290.378590)}
{pt3dadd(177684.000000,138132.000000,77000.000000,298.711790)}
{pt3dadd(177648.000000,138024.000000,77025.000000,292.125090)}
{pt3dadd(177588.000000,137928.000000,76950.000000,297.814926)}
{pt3dadd(177552.000000,137820.000000,76950.000000,315.794856)}
{pt3dadd(177492.000000,137736.000000,76975.000000,310.375960)}
{pt3dadd(177468.000000,137580.000000,76875.000000,307.461656)}
{pt3dadd(177396.000000,137460.000000,76875.000000,298.711790)}
{pt3dadd(177324.000000,137352.000000,76875.000000,287.861100)}
{pt3dadd(177264.000000,137244.000000,76825.000000,275.300066)}
{pt3dadd(177156.000000,137124.000000,76950.000000,289.906322)}
{pt3dadd(177168.000000,137028.000000,76850.000000,292.820626)}
{pt3dadd(177192.000000,136932.000000,76900.000000,304.783518)}
{pt3dadd(177120.000000,136824.000000,76850.000000,318.694238)}
{pt3dadd(177024.000000,136728.000000,76875.000000,324.668572)}
{pt3dadd(177036.000000,136608.000000,76825.000000,315.481212)}
{pt3dadd(177048.000000,136488.000000,76775.000000,309.791376)}
{pt3dadd(177060.000000,136380.000000,76725.000000,306.578350)}
{pt3dadd(177072.000000,136260.000000,76675.000000,292.667630)}
{pt3dadd(177012.000000,136164.000000,76700.000000,271.901160)}
{pt3dadd(176952.000000,136056.000000,76725.000000,266.482264)}
{pt3dadd(176892.000000,135972.000000,76750.000000,278.445156)}
{pt3dadd(176928.000000,135852.000000,76650.000000,278.445156)}
{pt3dadd(176964.000000,135756.000000,76550.000000,283.606010)}
{pt3dadd(177000.000000,135636.000000,76450.000000,301.312450)}
{pt3dadd(176904.000000,135540.000000,76400.000000,306.731346)}
{pt3dadd(176964.000000,135420.000000,76350.000000,287.209990)}
{pt3dadd(177012.000000,135288.000000,76375.000000,273.299270)}
{pt3dadd(177036.000000,135192.000000,76275.000000,270.655906)}
{pt3dadd(177060.000000,135060.000000,76225.000000,259.805216)}
{pt3dadd(176952.000000,134952.000000,76250.000000,272.366250)}
{pt3dadd(176844.000000,134856.000000,76250.000000,310.529298)}
{pt3dadd(176820.000000,134748.000000,76225.000000,331.026718)}
{pt3dadd(176880.000000,134652.000000,76200.000000,352.549008)}
{pt3dadd(176808.000000,134544.000000,76125.000000,366.459728)}
{pt3dadd(176724.000000,134436.000000,76050.000000,377.627018)}
{pt3dadd(176688.000000,134316.000000,76000.000000,362.359000)}
{pt3dadd(176724.000000,134184.000000,75950.000000,369.620842)}
{pt3dadd(176652.000000,134052.000000,75850.000000,377.245772)}
{pt3dadd(176616.000000,133932.000000,75700.000000,377.245772)}
{pt3dadd(176436.000000,133800.000000,75550.000000,377.245772)}
{pt3dadd(176436.000000,133668.000000,75500.000000,384.507614)}
{pt3dadd(176532.000000,133560.000000,75475.000000,364.684738)}
{pt3dadd(176484.000000,133476.000000,75275.000000,328.338982)}
{pt3dadd(176508.000000,133092.000000,75175.000000,319.589116)}
{pt3dadd(176532.000000,132708.000000,75175.000000,305.048152)}
{pt3dadd(176580.000000,132264.000000,75175.000000,282.449744)}
{pt3dadd(176628.000000,131820.000000,75175.000000,279.674212)}
{pt3dadd(176628.000000,131280.000000,75175.000000,298.265978)}
{pt3dadd(176628.000000,130740.000000,75175.000000,320.864386)}
{pt3dadd(176460.000000,130320.000000,75175.000000,314.591330)}
{pt3dadd(176496.000000,130188.000000,75275.000000,337.189738)}
{pt3dadd(176496.000000,130032.000000,75325.000000,359.788146)}
{pt3dadd(176340.000000,129900.000000,75450.000000,381.642864)}
{pt3dadd(176304.000000,129756.000000,75350.000000,393.954802)}
{pt3dadd(176220.000000,129624.000000,75400.000000,432.443458)}
{pt3dadd(176256.000000,129504.000000,75425.000000,436.348906)}
{pt3dadd(176184.000000,129396.000000,75425.000000,440.254354)}
{pt3dadd(176208.000000,129300.000000,75400.000000,440.254354)}
{pt3dadd(176292.000000,129168.000000,75425.000000,431.847864)}
{pt3dadd(176304.000000,129012.000000,75400.000000,422.579718)}
{pt3dadd(176232.000000,128856.000000,75400.000000,430.986208)}
{pt3dadd(176184.000000,128736.000000,75400.000000,407.257884)}
{pt3dadd(176364.000000,128580.000000,75275.000000,374.009936)}
{pt3dadd(176364.000000,128436.000000,75150.000000,342.345226)}
{pt3dadd(176424.000000,128316.000000,75150.000000,307.434880)}
{pt3dadd(176412.000000,128148.000000,75125.000000,278.214370)}
{pt3dadd(176400.000000,128016.000000,75125.000000,294.317764)}
{pt3dadd(176388.000000,127908.000000,75125.000000,308.924020)}
{pt3dadd(176376.000000,127800.000000,75125.000000,319.774710)}
{pt3dadd(176304.000000,127680.000000,75100.000000,328.524576)}
{pt3dadd(176304.000000,127548.000000,75100.000000,341.713666)}
{pt3dadd(176316.000000,127476.000000,75125.000000,357.745086)}
{pt3dadd(176244.000000,127320.000000,75025.000000,368.380602)}
{pt3dadd(176160.000000,127176.000000,74925.000000,371.440632)}
{pt3dadd(176076.000000,127068.000000,74825.000000,368.380602)}
{pt3dadd(176004.000000,126900.000000,74850.000000,352.277208)}
{pt3dadd(175932.000000,126780.000000,74725.000000,320.142394)}
{pt3dadd(175908.000000,126588.000000,74700.000000,300.319518)}
{pt3dadd(175764.000000,126420.000000,74625.000000,294.345184)}
{pt3dadd(175800.000000,126288.000000,74675.000000,294.345184)}
{pt3dadd(175632.000000,126168.000000,74575.000000,294.345184)}
{pt3dadd(175572.000000,126084.000000,74550.000000,303.532544)}
{pt3dadd(175464.000000,125928.000000,74450.000000,319.635938)}
{pt3dadd(175320.000000,125808.000000,74400.000000,311.699552)}
{pt3dadd(175176.000000,125688.000000,74350.000000,293.993112)}
{pt3dadd(175236.000000,125592.000000,74425.000000,288.574216)}
{pt3dadd(175332.000000,125472.000000,74425.000000,271.450470)}
{pt3dadd(175140.000000,125376.000000,74325.000000,271.450470)}
{pt3dadd(174948.000000,125244.000000,74250.000000,285.361190)}
{pt3dadd(174828.000000,125076.000000,74175.000000,300.153326)}
{pt3dadd(174744.000000,124980.000000,74175.000000,311.546556)}
{pt3dadd(174576.000000,124872.000000,74175.000000,322.397246)}
{pt3dadd(174552.000000,124716.000000,74025.000000,315.481212)}
{pt3dadd(174564.000000,124632.000000,73950.000000,312.421182)}
{pt3dadd(174552.000000,124512.000000,73950.000000,315.335486)}
{pt3dadd(174492.000000,124368.000000,73900.000000,306.585620)}
{pt3dadd(174300.000000,124272.000000,73800.000000,291.053884)}
{pt3dadd(174228.000000,124188.000000,73725.000000,271.532528)}
{pt3dadd(174180.000000,124092.000000,73675.000000,253.826088)}
{pt3dadd(174108.000000,123996.000000,73500.000000,236.119648)}
{pt3dadd(174048.000000,123864.000000,73400.000000,220.059382)}
{pt3dadd(174036.000000,123768.000000,73375.000000,206.846562)}
{pt3dadd(174048.000000,123672.000000,73300.000000,183.113492)}
{pt3dadd(173976.000000,123576.000000,73475.000000,162.685271)}
{pt3dadd(173904.000000,123456.000000,73525.000000,148.629711)}
{pt3dadd(173712.000000,123312.000000,73325.000000,146.751119)}
{pt3dadd(173520.000000,123144.000000,73175.000000,143.733675)}
{pt3dadd(173328.000000,123012.000000,73025.000000,153.593285)}
{pt3dadd(173136.000000,122892.000000,72875.000000,158.564112)}
{pt3dadd(173148.000000,122748.000000,72700.000000,168.576010)}
{pt3dadd(173040.000000,122640.000000,72600.000000,161.914628)}
{pt3dadd(172764.000000,122520.000000,72400.000000,159.177716)}
{pt3dadd(172632.000000,122400.000000,72225.000000,153.135642)}
{pt3dadd(172524.000000,122304.000000,72175.000000,154.537476)}
{pt3dadd(172416.000000,122160.000000,72275.000000,165.436888)}
{pt3dadd(172284.000000,122064.000000,72225.000000,178.020524)}
{pt3dadd(172140.000000,121932.000000,72100.000000,204.186236)}
{pt3dadd(172056.000000,121968.000000,71975.000000,221.818334)}
{pt3dadd(171984.000000,121860.000000,72000.000000,247.890498)}
{pt3dadd(171888.000000,121848.000000,71975.000000,255.826884)}
{pt3dadd(171720.000000,121932.000000,71950.000000,283.180054)}
{pt3dadd(171552.000000,121908.000000,71825.000000,288.598950)}
{pt3dadd(171420.000000,121920.000000,71700.000000,307.190716)}
{pt3dadd(171324.000000,121896.000000,71525.000000,299.632252)}
{pt3dadd(171204.000000,121908.000000,71350.000000,296.856720)}
{pt3dadd(171108.000000,121848.000000,71175.000000,293.483046)}
{pt3dadd(171024.000000,121860.000000,71125.000000,302.670406)}
{pt3dadd(170916.000000,121824.000000,71050.000000,302.670406)}
{pt3dadd(170820.000000,121692.000000,70850.000000,318.978736)}
{pt3dadd(170724.000000,121644.000000,70675.000000,330.941628)}
{pt3dadd(170580.000000,121680.000000,70650.000000,306.962132)}
{pt3dadd(170496.000000,121716.000000,70525.000000,282.982636)}
{pt3dadd(170400.000000,121776.000000,70200.000000,251.178050)}
{pt3dadd(170292.000000,121692.000000,70025.000000,220.996260)}
{pt3dadd(170136.000000,121620.000000,69800.000000,201.474904)}
{pt3dadd(170052.000000,121464.000000,69750.000000,208.330654)}
{pt3dadd(169944.000000,121452.000000,69575.000000,210.505358)}
{pt3dadd(169824.000000,121332.000000,69375.000000,230.916714)}
{pt3dadd(169680.000000,121200.000000,69175.000000,249.705274)}
{pt3dadd(169584.000000,121104.000000,69175.000000,252.102884)}
{pt3dadd(169476.000000,121152.000000,69025.000000,252.102884)}
{pt3dadd(169356.000000,121164.000000,68850.000000,256.783930)}
{pt3dadd(169236.000000,121176.000000,68675.000000,262.202826)}
{pt3dadd(169140.000000,121164.000000,68475.000000,255.004290)}
{pt3dadd(169008.000000,121224.000000,68250.000000,248.148540)}
{pt3dadd(168924.000000,121356.000000,67950.000000,245.750930)}
{pt3dadd(168768.000000,121428.000000,67625.000000,256.601620)}
{pt3dadd(168684.000000,121356.000000,67450.000000,251.182724)}
{pt3dadd(168504.000000,121320.000000,67150.000000,255.863770)}
{pt3dadd(168360.000000,121308.000000,66925.000000,262.719520)}
{pt3dadd(168264.000000,121392.000000,66700.000000,282.240876)}
{pt3dadd(168240.000000,121344.000000,66450.000000,285.300906)}
{pt3dadd(168048.000000,121428.000000,66250.000000,306.823196)}
{pt3dadd(167676.000000,121728.000000,66050.000000,320.733916)}
{pt3dadd(167484.000000,121884.000000,65825.000000,341.231336)}
{pt3dadd(167328.000000,121836.000000,65575.000000,329.268444)}
{pt3dadd(167220.000000,121764.000000,65325.000000,332.481470)}
{pt3dadd(167208.000000,121752.000000,65050.000000,340.106400)}
{pt3dadd(167208.000000,121716.000000,64825.000000,341.664467)}
{pt3dadd(167232.000000,121632.000000,64575.000000,410.072500)}

{create adhoc8}
{access adhoc8}
{connect adhoc8(1), adhoc7(0)}
{nseg = 1}
{strdef color color = "White"}
{pt3dclear()}
{pt3dadd(167232.000000,121632.000000,64575.000000,410.072500)}
{pt3dadd(166944.000000,121704.000000,64300.000000,410.397967)}
{pt3dadd(166920.000000,121668.000000,64075.000000,368.580530)}
{pt3dadd(166896.000000,121632.000000,63875.000000,330.060070)}
{pt3dadd(166824.000000,121704.000000,63725.000000,295.445058)}
{pt3dadd(166716.000000,121812.000000,63475.000000,245.112484)}
{pt3dadd(166548.000000,121920.000000,63225.000000,201.633318)}
{pt3dadd(166392.000000,121932.000000,63050.000000,183.119618)}
{pt3dadd(166320.000000,121992.000000,62850.000000,183.119618)}
{pt3dadd(166248.000000,122040.000000,62625.000000,177.197364)}
{pt3dadd(166188.000000,122052.000000,62425.000000,182.837608)}
{pt3dadd(166092.000000,122064.000000,62225.000000,195.421244)}
{pt3dadd(165876.000000,122064.000000,61975.000000,221.493408)}
{pt3dadd(165828.000000,122136.000000,61700.000000,223.668112)}
{pt3dadd(165804.000000,122196.000000,61475.000000,231.765070)}
{pt3dadd(165756.000000,122172.000000,61275.000000,236.010916)}
{pt3dadd(165600.000000,122100.000000,61100.000000,253.717356)}
{pt3dadd(165468.000000,122112.000000,60900.000000,251.073992)}
{pt3dadd(165612.000000,122016.000000,60650.000000,258.272528)}
{pt3dadd(165636.000000,121968.000000,60425.000000,268.114428)}
{pt3dadd(165540.000000,121968.000000,60200.000000,293.292894)}
{pt3dadd(165576.000000,122016.000000,60000.000000,299.565950)}
{pt3dadd(165528.000000,122028.000000,59775.000000,317.545880)}
{pt3dadd(165432.000000,122004.000000,59525.000000,342.787652)}
{pt3dadd(165456.000000,122064.000000,59275.000000,369.291508)}
{pt3dadd(165432.000000,122076.000000,58950.000000,388.865288)}
{pt3dadd(165408.000000,122004.000000,58750.000000,399.500804)}
{pt3dadd(165384.000000,121932.000000,58525.000000,419.074584)}
{pt3dadd(165360.000000,121860.000000,58350.000000,422.980032)}
{pt3dadd(165336.000000,121788.000000,58175.000000,419.074584)}
{pt3dadd(165312.000000,121716.000000,57975.000000,396.127130)}
{pt3dadd(165276.000000,121644.000000,57825.000000,361.512118)}
{pt3dadd(165216.000000,121512.000000,57650.000000,315.127713)}
{pt3dadd(165228.000000,121464.000000,57450.000000,217.470200)}

{create adhoc9}
{access adhoc9}
{connect adhoc9(1), adhoc8(0)}
{nseg = 1}
{strdef color color = "White"}
{pt3dclear()}
{pt3dadd(165228.000000,121464.000000,57450.000000,217.470200)}
{pt3dadd(165288.000000,121848.000000,57225.000000,161.601250)}
{pt3dadd(165300.000000,122076.000000,56950.000000,176.237444)}
{pt3dadd(165276.000000,122292.000000,56775.000000,170.315190)}
{pt3dadd(165204.000000,122400.000000,56575.000000,174.734468)}
{pt3dadd(165132.000000,122484.000000,56350.000000,176.005972)}
{pt3dadd(164976.000000,122568.000000,56150.000000,163.289137)}
{pt3dadd(165048.000000,122628.000000,55975.000000,144.014207)}
{pt3dadd(164808.000000,122604.000000,55775.000000,127.363799)}
{pt3dadd(164772.000000,122700.000000,55600.000000,110.519729)}
{pt3dadd(164784.000000,122748.000000,55425.000000,109.248225)}
{pt3dadd(164736.000000,122856.000000,55250.000000,112.883974)}
{pt3dadd(164640.000000,122988.000000,55100.000000,108.589986)}
{pt3dadd(164676.000000,123060.000000,54900.000000,115.705254)}
{pt3dadd(164628.000000,123072.000000,54700.000000,134.172120)}
{pt3dadd(164616.000000,123048.000000,54500.000000,141.197980)}
{pt3dadd(164616.000000,123096.000000,54325.000000,143.934892)}
{pt3dadd(164724.000000,123144.000000,54125.000000,163.460148)}
{pt3dadd(164772.000000,123216.000000,53975.000000,181.092246)}
{pt3dadd(164760.000000,123264.000000,53800.000000,175.050172)}
{pt3dadd(164772.000000,123336.000000,53625.000000,169.295816)}
{pt3dadd(164760.000000,123336.000000,53425.000000,157.930009)}
{pt3dadd(164724.000000,123468.000000,53200.000000,134.872078)}
{pt3dadd(164784.000000,123624.000000,53025.000000,121.659258)}
{pt3dadd(164844.000000,123696.000000,52850.000000,127.701332)}
{pt3dadd(164880.000000,123804.000000,52650.000000,142.422662)}
{pt3dadd(164964.000000,123984.000000,52475.000000,172.302169)}
{pt3dadd(165072.000000,124248.000000,52250.000000,206.259512)}
{pt3dadd(165204.000000,124452.000000,52025.000000,203.242068)}
{pt3dadd(165300.000000,124440.000000,51800.000000,198.601828)}
{pt3dadd(165252.000000,124224.000000,51625.000000,196.629308)}
{pt3dadd(165336.000000,124344.000000,51400.000000,181.133052)}
{pt3dadd(165432.000000,124380.000000,51225.000000,157.484830)}
{pt3dadd(165504.000000,124344.000000,51000.000000,163.829004)}
{pt3dadd(165516.000000,124284.000000,50850.000000,170.173178)}
{pt3dadd(165624.000000,124296.000000,50675.000000,161.633204)}
{pt3dadd(165588.000000,124224.000000,50500.000000,158.615760)}
{pt3dadd(165672.000000,124068.000000,50325.000000,169.485978)}
{pt3dadd(165792.000000,123936.000000,50150.000000,160.404892)}
{pt3dadd(165876.000000,123696.000000,50000.000000,155.532642)}
{pt3dadd(166056.000000,123516.000000,49775.000000,144.547360)}
{pt3dadd(166164.000000,123252.000000,49550.000000,129.977312)}
{pt3dadd(166296.000000,123192.000000,49400.000000,106.565937)}
{pt3dadd(166404.000000,123144.000000,49250.000000,81.589942)}
{pt3dadd(166524.000000,123120.000000,49025.000000,70.802055)}

{create adhoc10}
{access adhoc10}
{connect adhoc10(1), adhoc8(0)}
{nseg = 1}
{strdef color color = "White"}
{pt3dclear()}
{pt3dadd(165228.000000,121464.000000,57450.000000,217.470200)}
{pt3dadd(165180.000000,120900.000000,57325.000000,176.015677)}
{pt3dadd(165180.000000,120564.000000,57150.000000,170.598530)}
{pt3dadd(165300.000000,120372.000000,56925.000000,156.542970)}
{pt3dadd(165360.000000,120120.000000,56675.000000,151.902730)}
{pt3dadd(165420.000000,119904.000000,56450.000000,161.437870)}
{pt3dadd(165420.000000,119808.000000,56250.000000,163.141804)}
{pt3dadd(165468.000000,119652.000000,56000.000000,169.803186)}
{pt3dadd(165528.000000,119472.000000,55800.000000,183.858746)}
{pt3dadd(165648.000000,119388.000000,55575.000000,190.202920)}
{pt3dadd(165840.000000,119004.000000,55350.000000,205.498414)}
{pt3dadd(166020.000000,118884.000000,55125.000000,222.583040)}
{pt3dadd(166164.000000,118620.000000,54950.000000,235.361044)}
{pt3dadd(166308.000000,118224.000000,54750.000000,244.734284)}
{pt3dadd(166308.000000,117864.000000,54575.000000,267.237806)}
{pt3dadd(166320.000000,117576.000000,54400.000000,262.322706)}
{pt3dadd(166476.000000,117444.000000,54225.000000,265.176060)}
{pt3dadd(166656.000000,117336.000000,54000.000000,239.760900)}

{create adhoc11}
{access adhoc11}
{connect adhoc11(1), adhoc10(0)}
{nseg = 1}
{strdef color color = "White"}
{pt3dclear()}
{pt3dadd(166656.000000,117336.000000,54000.000000,239.760900)}
{pt3dadd(166344.000000,117168.000000,54425.000000,205.308687)}
{pt3dadd(166368.000000,117012.000000,54450.000000,179.325260)}
{pt3dadd(166416.000000,116892.000000,54425.000000,158.074648)}
{pt3dadd(166380.000000,116748.000000,54425.000000,145.325838)}
{pt3dadd(166392.000000,116592.000000,54450.000000,129.468306)}
{pt3dadd(166356.000000,116448.000000,54450.000000,115.641680)}
{pt3dadd(166272.000000,116340.000000,54450.000000,107.916418)}
{pt3dadd(166344.000000,116220.000000,54450.000000,102.136228)}
{pt3dadd(166320.000000,116100.000000,54500.000000,100.864724)}
{pt3dadd(166344.000000,115980.000000,54475.000000,108.976248)}
{pt3dadd(166368.000000,115872.000000,54425.000000,118.794458)}
{pt3dadd(166416.000000,115740.000000,54500.000000,122.883971)}
{pt3dadd(166344.000000,115608.000000,54525.000000,126.181703)}
{pt3dadd(166344.000000,115476.000000,54450.000000,123.817458)}
{pt3dadd(166356.000000,115344.000000,54475.000000,126.691216)}
{pt3dadd(166428.000000,115236.000000,54525.000000,124.326970)}
{pt3dadd(166416.000000,115116.000000,54600.000000,119.333825)}
{pt3dadd(166296.000000,114960.000000,54625.000000,118.180533)}
{pt3dadd(166236.000000,114828.000000,54675.000000,119.333825)}
{pt3dadd(166200.000000,114696.000000,54675.000000,113.853485)}
{pt3dadd(166104.000000,114576.000000,54825.000000,120.226146)}
{pt3dadd(166092.000000,114444.000000,54775.000000,130.190119)}
{pt3dadd(166044.000000,114288.000000,54800.000000,142.906954)}
{pt3dadd(165960.000000,114156.000000,54875.000000,152.766564)}
{pt3dadd(165948.000000,114000.000000,55075.000000,152.766564)}
{pt3dadd(165888.000000,113856.000000,55075.000000,154.238488)}
{pt3dadd(165636.000000,113712.000000,55225.000000,165.652220)}
{pt3dadd(165528.000000,113532.000000,55375.000000,165.652220)}
{pt3dadd(165408.000000,113472.000000,55500.000000,154.639319)}
{pt3dadd(165264.000000,113472.000000,55625.000000,153.428365)}
{pt3dadd(165120.000000,113424.000000,55950.000000,146.737071)}
{pt3dadd(164952.000000,113268.000000,56250.000000,120.772800)}
{pt3dadd(164796.000000,113136.000000,56550.000000,99.150557)}
{pt3dadd(164784.000000,113100.000000,56800.000000,96.009860)}
{pt3dadd(164688.000000,113016.000000,56950.000000,92.712128)}
{pt3dadd(164568.000000,113016.000000,57200.000000,92.712128)}
{pt3dadd(164448.000000,113004.000000,57400.000000,110.136425)}
{pt3dadd(164304.000000,113004.000000,57550.000000,119.041833)}
{pt3dadd(164160.000000,113016.000000,57750.000000,122.182530)}
{pt3dadd(164016.000000,113040.000000,58125.000000,142.684050)}
{pt3dadd(163896.000000,113112.000000,58400.000000,154.247594)}
{pt3dadd(163740.000000,113136.000000,58525.000000,164.760088)}
{pt3dadd(163584.000000,113148.000000,58750.000000,181.144647)}
{pt3dadd(163440.000000,113196.000000,59050.000000,206.031008)}
{pt3dadd(163296.000000,113184.000000,59175.000000,206.031008)}
{pt3dadd(163188.000000,113256.000000,59225.000000,218.200534)}
{pt3dadd(163032.000000,113292.000000,59375.000000,229.644916)}
{pt3dadd(162936.000000,113220.000000,59475.000000,229.644916)}
{pt3dadd(162804.000000,113256.000000,59550.000000,223.115634)}
{pt3dadd(162684.000000,113160.000000,59650.000000,234.560016)}
{pt3dadd(162552.000000,113112.000000,59775.000000,224.179622)}
{pt3dadd(162432.000000,113184.000000,59800.000000,203.768266)}
{pt3dadd(162312.000000,113220.000000,59850.000000,193.756368)}
{pt3dadd(162192.000000,113124.000000,60025.000000,170.406143)}
{pt3dadd(162036.000000,113040.000000,60200.000000,140.604682)}
{pt3dadd(161928.000000,112944.000000,60425.000000,127.252006)}
{pt3dadd(161832.000000,112740.000000,60775.000000,122.832728)}
{pt3dadd(161748.000000,112764.000000,61125.000000,120.095816)}
{pt3dadd(161628.000000,112680.000000,61525.000000,130.059789)}
{pt3dadd(161556.000000,112596.000000,61750.000000,137.904374)}
{pt3dadd(161436.000000,112524.000000,61975.000000,159.354008)}
{pt3dadd(161316.000000,112416.000000,62175.000000,170.767740)}
{pt3dadd(161160.000000,112380.000000,62450.000000,185.489070)}
{pt3dadd(161124.000000,112476.000000,62675.000000,196.902802)}
{pt3dadd(160956.000000,112416.000000,62900.000000,203.564184)}
{pt3dadd(160824.000000,112248.000000,63075.000000,201.389480)}
{pt3dadd(160668.000000,112248.000000,63300.000000,209.891282)}
{pt3dadd(160524.000000,112260.000000,63500.000000,206.040170)}
{pt3dadd(160380.000000,112236.000000,63725.000000,214.541972)}
{pt3dadd(160200.000000,112236.000000,63950.000000,214.541972)}
{pt3dadd(159984.000000,112296.000000,64200.000000,212.470830)}
{pt3dadd(159756.000000,112404.000000,64425.000000,188.737760)}
{pt3dadd(159576.000000,112392.000000,64625.000000,173.133421)}
{pt3dadd(159264.000000,112224.000000,64875.000000,146.102619)}
{pt3dadd(158964.000000,112236.000000,65075.000000,131.596652)}
{pt3dadd(158820.000000,112140.000000,65300.000000,105.042186)}
{pt3dadd(158676.000000,112128.000000,65500.000000,97.215522)}
{pt3dadd(158508.000000,112032.000000,65675.000000,90.116508)}
{pt3dadd(158292.000000,111960.000000,65875.000000,86.407200)}
{pt3dadd(157944.000000,111876.000000,66050.000000,75.573677)}
{pt3dadd(157932.000000,111720.000000,66250.000000,74.865656)}
{pt3dadd(157812.000000,111636.000000,66425.000000,71.959316)}
{pt3dadd(157728.000000,111504.000000,66650.000000,71.251295)}
{pt3dadd(157680.000000,111516.000000,66850.000000,67.525332)}
{pt3dadd(157620.000000,111396.000000,67050.000000,67.525332)}
{pt3dadd(157572.000000,111372.000000,67225.000000,68.976775)}
{pt3dadd(157560.000000,111348.000000,67450.000000,71.883115)}
{pt3dadd(157488.000000,111324.000000,67625.000000,72.591136)}
{pt3dadd(157464.000000,111264.000000,67825.000000,73.265440)}
{pt3dadd(157404.000000,111228.000000,68025.000000,75.193555)}
{pt3dadd(157392.000000,111216.000000,68225.000000,75.193555)}
{pt3dadd(157344.000000,111312.000000,68425.000000,74.412962)}
{pt3dadd(157236.000000,111516.000000,68600.000000,71.194335)}
{pt3dadd(157164.000000,111600.000000,68800.000000,69.266220)}
{pt3dadd(157092.000000,111612.000000,69125.000000,67.949719)}
{pt3dadd(156984.000000,111648.000000,69350.000000,63.987671)}
{pt3dadd(156912.000000,111552.000000,69550.000000,58.942534)}
{pt3dadd(156876.000000,111528.000000,69725.000000,60.778836)}
{pt3dadd(156828.000000,111696.000000,69900.000000,62.032647)}
{pt3dadd(156708.000000,111768.000000,70125.000000,63.349148)}
{pt3dadd(156660.000000,111792.000000,70350.000000,66.567774)}
{pt3dadd(156588.000000,111828.000000,70550.000000,72.393503)}
{pt3dadd(156492.000000,111900.000000,70775.000000,72.393503)}
{pt3dadd(156444.000000,111888.000000,70975.000000,71.139693)}
{pt3dadd(156384.000000,111960.000000,71175.000000,68.629087)}
{pt3dadd(156276.000000,112020.000000,71350.000000,65.410460)}
{pt3dadd(156108.000000,112068.000000,71525.000000,60.667819)}
{pt3dadd(156024.000000,112008.000000,71700.000000,59.414008)}
{pt3dadd(155928.000000,112128.000000,71925.000000,62.050144)}
{pt3dadd(155880.000000,112140.000000,72100.000000,71.321717)}
{pt3dadd(155748.000000,112188.000000,72275.000000,74.540343)}
{pt3dadd(155664.000000,112248.000000,72525.000000,79.282985)}
{pt3dadd(155580.000000,112308.000000,72725.000000,82.662543)}
{pt3dadd(155424.000000,112368.000000,72975.000000,68.094111)}
{pt3dadd(155268.000000,112428.000000,73150.000000,58.267786)}
{pt3dadd(155184.000000,112440.000000,73375.000000,59.791801)}
{pt3dadd(155064.000000,112488.000000,73575.000000,58.267786)}
{pt3dadd(154920.000000,112572.000000,73775.000000,57.524364)}
{pt3dadd(154800.000000,112644.000000,73975.000000,67.791082)}
{pt3dadd(154680.000000,112752.000000,74200.000000,67.172636)}
{pt3dadd(154524.000000,112800.000000,74375.000000,52.833588)}

{create adhoc12}
{access adhoc12}
{connect adhoc12(1), adhoc11(0)}
{nseg = 1}
{strdef color color = "White"}
{pt3dclear()}
{pt3dadd(154524.000000,112800.000000,74375.000000,52.833588)}
{pt3dadd(154356.000000,112752.000000,74525.000000,64.018113)}
{pt3dadd(154020.000000,112788.000000,74750.000000,72.875987)}
{pt3dadd(153720.000000,112920.000000,74950.000000,77.177702)}
{pt3dadd(153516.000000,112980.000000,75125.000000,92.982052)}
{pt3dadd(153408.000000,112980.000000,75175.000000,105.406844)}
{pt3dadd(153408.000000,113064.000000,75375.000000,107.259293)}
{pt3dadd(153276.000000,113160.000000,75450.000000,113.932665)}
{pt3dadd(153204.000000,113268.000000,75675.000000,118.989355)}
{pt3dadd(153108.000000,113304.000000,75900.000000,110.877831)}
{pt3dadd(153036.000000,113412.000000,76100.000000,108.271249)}
{pt3dadd(152928.000000,113436.000000,76325.000000,110.313574)}
{pt3dadd(152796.000000,113472.000000,76550.000000,105.320428)}
{pt3dadd(152712.000000,113556.000000,76800.000000,108.461125)}
{pt3dadd(152604.000000,113640.000000,77075.000000,110.503449)}
{pt3dadd(152400.000000,113640.000000,77275.000000,117.529309)}
{pt3dadd(152292.000000,113700.000000,77475.000000,133.133649)}
{pt3dadd(152148.000000,113700.000000,77700.000000,141.762544)}
{pt3dadd(152064.000000,113664.000000,77875.000000,154.479379)}
{pt3dadd(151968.000000,113712.000000,78125.000000,155.577751)}
{pt3dadd(151776.000000,113796.000000,78375.000000,145.089274)}
{pt3dadd(151716.000000,113844.000000,78600.000000,135.554134)}
{pt3dadd(151512.000000,113844.000000,78850.000000,136.889212)}
{pt3dadd(151416.000000,113796.000000,79100.000000,138.678344)}
{pt3dadd(151164.000000,113832.000000,79325.000000,151.395179)}
{pt3dadd(150996.000000,113916.000000,79525.000000,160.338136)}
{pt3dadd(150696.000000,114036.000000,79750.000000,169.873276)}
{pt3dadd(150420.000000,114132.000000,79975.000000,181.287008)}
{pt3dadd(150264.000000,114192.000000,80025.000000,171.751868)}
{pt3dadd(150120.000000,114276.000000,80075.000000,183.921394)}
{pt3dadd(150000.000000,114348.000000,80225.000000,198.679734)}
{pt3dadd(149868.000000,114336.000000,80275.000000,213.975228)}
{pt3dadd(149748.000000,114348.000000,80450.000000,218.018890)}
{pt3dadd(149616.000000,114396.000000,80475.000000,237.934424)}
{pt3dadd(149496.000000,114420.000000,80550.000000,240.332034)}
{pt3dadd(149352.000000,114468.000000,80625.000000,245.013080)}
{pt3dadd(149244.000000,114552.000000,80750.000000,231.596178)}
{pt3dadd(149124.000000,114636.000000,80925.000000,236.054318)}
{pt3dadd(148992.000000,114540.000000,81025.000000,240.969418)}
{pt3dadd(148836.000000,114672.000000,81175.000000,246.130272)}
{pt3dadd(148716.000000,114732.000000,81325.000000,241.449226)}
{pt3dadd(148584.000000,114792.000000,81500.000000,245.492888)}
{pt3dadd(148428.000000,114864.000000,81650.000000,247.890498)}
{pt3dadd(148296.000000,114936.000000,81800.000000,253.309394)}
{pt3dadd(148152.000000,114948.000000,81950.000000,250.666030)}
{pt3dadd(148020.000000,114936.000000,82050.000000,240.779940)}
{pt3dadd(147900.000000,115092.000000,82150.000000,244.893517)}
{pt3dadd(147816.000000,115260.000000,82125.000000,178.913270)}

{create adhoc13}
{access adhoc13}
{connect adhoc13(1), adhoc12(0)}
{nseg = 1}
{strdef color color = "White"}
{pt3dclear()}
{pt3dadd(147816.000000,115260.000000,82125.000000,178.913270)}
{pt3dadd(147696.000000,114960.000000,82225.000000,197.878453)}
{pt3dadd(147564.000000,114900.000000,82350.000000,195.749236)}
{pt3dadd(147456.000000,114900.000000,82450.000000,181.934029)}
{pt3dadd(147336.000000,114828.000000,82525.000000,162.408773)}
{pt3dadd(147228.000000,114840.000000,82675.000000,143.133843)}
{pt3dadd(147108.000000,114804.000000,82850.000000,120.895535)}
{pt3dadd(147000.000000,114792.000000,82850.000000,103.248871)}
{pt3dadd(146892.000000,114720.000000,82925.000000,100.257730)}
{pt3dadd(146784.000000,114684.000000,82975.000000,94.493019)}
{pt3dadd(146676.000000,114624.000000,82975.000000,84.434320)}
{pt3dadd(146496.000000,114552.000000,82975.000000,93.923818)}
{pt3dadd(146328.000000,114468.000000,82975.000000,91.703983)}
{pt3dadd(146112.000000,114360.000000,82975.000000,133.507840)}

{create adhoc14}
{access adhoc14}
{connect adhoc14(1), adhoc13(0)}
{nseg = 1}
{strdef color color = "White"}
{pt3dclear()}
{pt3dadd(146112.000000,114360.000000,82975.000000,133.507840)}
{pt3dadd(145980.000000,114240.000000,83200.000000,101.848421)}
{pt3dadd(145860.000000,114012.000000,83300.000000,90.137896)}
{pt3dadd(145752.000000,113880.000000,83400.000000,78.304760)}
{pt3dadd(145632.000000,113736.000000,83375.000000,70.227292)}
{pt3dadd(145536.000000,113520.000000,83425.000000,74.813858)}
{pt3dadd(145428.000000,113388.000000,83425.000000,74.813858)}
{pt3dadd(145296.000000,113316.000000,83500.000000,77.045894)}
{pt3dadd(145188.000000,113268.000000,83550.000000,80.250135)}
{pt3dadd(145080.000000,113184.000000,83550.000000,87.331347)}
{pt3dadd(144972.000000,113124.000000,83550.000000,92.324493)}
{pt3dadd(144864.000000,113052.000000,83600.000000,91.616472)}
{pt3dadd(144744.000000,112980.000000,83650.000000,93.296698)}
{pt3dadd(144612.000000,112896.000000,83550.000000,86.873830)}
{pt3dadd(144492.000000,112764.000000,83600.000000,83.341155)}
{pt3dadd(144372.000000,112632.000000,83575.000000,74.435747)}
{pt3dadd(144264.000000,112560.000000,83550.000000,77.487406)}
{pt3dadd(144132.000000,112416.000000,83600.000000,78.391039)}
{pt3dadd(144048.000000,112320.000000,83625.000000,93.442802)}
{pt3dadd(143928.000000,112236.000000,83675.000000,100.116174)}
{pt3dadd(143832.000000,112092.000000,83650.000000,104.028436)}
{pt3dadd(143724.000000,112128.000000,83625.000000,104.028436)}
{pt3dadd(143628.000000,112056.000000,83650.000000,97.896040)}
{pt3dadd(143496.000000,111936.000000,83675.000000,86.062904)}
{pt3dadd(143400.000000,111852.000000,83675.000000,74.092138)}
{pt3dadd(143292.000000,111828.000000,83675.000000,68.863375)}
{pt3dadd(143208.000000,111684.000000,83650.000000,63.883601)}
{pt3dadd(143112.000000,111600.000000,83650.000000,67.432138)}
{pt3dadd(143016.000000,111312.000000,83675.000000,73.485084)}
{pt3dadd(142920.000000,111072.000000,83700.000000,80.462704)}
{pt3dadd(142812.000000,110808.000000,83775.000000,78.713847)}
{pt3dadd(142728.000000,110652.000000,83875.000000,78.131356)}
{pt3dadd(142788.000000,110364.000000,84175.000000,73.971206)}
{pt3dadd(142860.000000,110244.000000,84150.000000,63.616545)}
{pt3dadd(142992.000000,110112.000000,84325.000000,56.638925)}
{pt3dadd(143076.000000,110040.000000,84350.000000,56.638925)}
{pt3dadd(143160.000000,109848.000000,84450.000000,62.201190)}
{pt3dadd(143268.000000,109716.000000,84550.000000,64.129305)}
{pt3dadd(143376.000000,109560.000000,84675.000000,69.955034)}
{pt3dadd(143460.000000,109392.000000,84725.000000,73.020392)}
{pt3dadd(143568.000000,109164.000000,84800.000000,78.317786)}
{pt3dadd(143664.000000,109020.000000,84850.000000,79.178389)}
{pt3dadd(143760.000000,108696.000000,84950.000000,84.943100)}
{pt3dadd(143880.000000,108384.000000,85250.000000,102.629373)}
{pt3dadd(143856.000000,108324.000000,85325.000000,124.251616)}
{pt3dadd(143844.000000,108084.000000,85725.000000,132.644549)}
{pt3dadd(143916.000000,107736.000000,85950.000000,148.650596)}
{pt3dadd(143952.000000,107364.000000,86050.000000,158.163954)}
{pt3dadd(144024.000000,107076.000000,86050.000000,138.953666)}
{pt3dadd(144168.000000,106980.000000,86250.000000,121.576374)}
{pt3dadd(144276.000000,106476.000000,86350.000000,114.863667)}
{pt3dadd(144420.000000,106104.000000,86550.000000,95.091577)}
{pt3dadd(144552.000000,105744.000000,86725.000000,84.641108)}
{pt3dadd(144600.000000,105420.000000,86925.000000,71.533150)}

{create adhoc15}
{access adhoc15}
{connect adhoc15(1), adhoc13(0)}
{nseg = 1}
{strdef color color = "White"}
{pt3dclear()}
{pt3dadd(146112.000000,114360.000000,82975.000000,133.507840)}
{pt3dadd(145788.000000,114372.000000,83050.000000,96.624725)}
{pt3dadd(145272.000000,114636.000000,83200.000000,99.031187)}
{pt3dadd(144948.000000,114780.000000,83275.000000,96.329619)}
{pt3dadd(144396.000000,114924.000000,83400.000000,97.699439)}
{pt3dadd(143760.000000,115092.000000,83400.000000,92.517982)}
{pt3dadd(143328.000000,115296.000000,83400.000000,92.517982)}
{pt3dadd(142860.000000,115464.000000,83400.000000,86.427151)}
{pt3dadd(142548.000000,115668.000000,83400.000000,78.671296)}
{pt3dadd(142356.000000,115800.000000,83325.000000,84.669481)}
{pt3dadd(142140.000000,115920.000000,83175.000000,91.686629)}
{pt3dadd(141840.000000,116004.000000,83000.000000,98.630277)}
{pt3dadd(141528.000000,116184.000000,82775.000000,100.465968)}
{pt3dadd(140964.000000,116172.000000,82500.000000,119.680753)}
{pt3dadd(140172.000000,116028.000000,82275.000000,121.805792)}
{pt3dadd(139704.000000,115860.000000,82075.000000,116.794850)}
{pt3dadd(139272.000000,115644.000000,81825.000000,112.539710)}
{pt3dadd(138576.000000,115260.000000,81575.000000,109.851202)}
{pt3dadd(137940.000000,115080.000000,81400.000000,89.126190)}
{pt3dadd(137508.000000,114984.000000,81225.000000,82.513193)}
{pt3dadd(136968.000000,115008.000000,81000.000000,68.079275)}
{pt3dadd(136680.000000,115056.000000,80950.000000,66.839470)}
{pt3dadd(136524.000000,115056.000000,80950.000000,65.394972)}
{pt3dadd(136260.000000,115080.000000,80850.000000,80.099534)}
{pt3dadd(136044.000000,115188.000000,80700.000000,103.305767)}
{pt3dadd(135852.000000,115332.000000,80550.000000,156.051327)}
{pt3dadd(135720.000000,115380.000000,80200.000000,185.498452)}
{pt3dadd(135660.000000,115476.000000,79825.000000,205.122234)}
{pt3dadd(135612.000000,115572.000000,79550.000000,227.055627)}
{pt3dadd(135624.000000,115692.000000,79300.000000,176.178180)}

{create adhoc16}
{access adhoc16}
{connect adhoc16(1), adhoc12(0)}
{nseg = 1}
{strdef color color = "White"}
{pt3dclear()}
{pt3dadd(147816.000000,115260.000000,82125.000000,178.913270)}
{pt3dadd(147732.000000,115980.000000,82025.000000,137.348907)}
{pt3dadd(147600.000000,116136.000000,82050.000000,119.458323)}
{pt3dadd(147480.000000,116232.000000,82125.000000,107.894779)}
{pt3dadd(147348.000000,116328.000000,82150.000000,108.891035)}
{pt3dadd(147216.000000,116508.000000,82175.000000,95.033377)}
{pt3dadd(147084.000000,116556.000000,82300.000000,92.449518)}
{pt3dadd(146964.000000,116724.000000,82400.000000,89.988699)}
{pt3dadd(146832.000000,117060.000000,82500.000000,84.745895)}
{pt3dadd(146700.000000,117504.000000,82625.000000,80.216964)}
{pt3dadd(146592.000000,117732.000000,82700.000000,95.409700)}
{pt3dadd(146472.000000,117996.000000,82725.000000,113.095973)}
{pt3dadd(146340.000000,118188.000000,82775.000000,136.934497)}
{pt3dadd(146256.000000,118344.000000,82625.000000,145.994837)}
{pt3dadd(146220.000000,118488.000000,82625.000000,152.668209)}
{pt3dadd(146136.000000,118644.000000,82700.000000,157.087487)}
{pt3dadd(146052.000000,118800.000000,82750.000000,147.227877)}
{pt3dadd(146052.000000,118920.000000,82700.000000,131.996609)}
{pt3dadd(145968.000000,119052.000000,82525.000000,120.352410)}
{pt3dadd(145908.000000,119328.000000,82550.000000,126.725071)}
{pt3dadd(145860.000000,119484.000000,82450.000000,119.699211)}
{pt3dadd(145896.000000,119664.000000,82400.000000,118.545920)}
{pt3dadd(145956.000000,119820.000000,82325.000000,117.392628)}
{pt3dadd(145920.000000,119952.000000,82300.000000,127.701750)}
{pt3dadd(145908.000000,120108.000000,82350.000000,132.341990)}
{pt3dadd(145896.000000,120228.000000,82225.000000,146.362304)}
{pt3dadd(145896.000000,120480.000000,82100.000000,166.790525)}
{pt3dadd(145896.000000,120816.000000,81925.000000,176.180630)}
{pt3dadd(145896.000000,121164.000000,81775.000000,163.639473)}
{pt3dadd(145956.000000,121728.000000,81650.000000,146.772823)}
{pt3dadd(145932.000000,122220.000000,81550.000000,121.482856)}
{pt3dadd(145908.000000,122556.000000,81375.000000,96.061489)}
{pt3dadd(145764.000000,122796.000000,81225.000000,79.217419)}
{pt3dadd(145680.000000,123192.000000,81050.000000,79.741563)}
{pt3dadd(145704.000000,123420.000000,80900.000000,78.059270)}

{create adhoc17}
{access adhoc17}
{connect adhoc17(1), adhoc11(0)}
{nseg = 1}
{strdef color color = "White"}
{pt3dclear()}
{pt3dadd(154524.000000,112800.000000,74375.000000,52.833588)}
{pt3dadd(154512.000000,112956.000000,74525.000000,57.605128)}
{pt3dadd(154524.000000,113160.000000,74725.000000,55.207145)}
{pt3dadd(154488.000000,113400.000000,74925.000000,45.639637)}

{create adhoc18}
{access adhoc18}
{connect adhoc18(1), adhoc10(0)}
{nseg = 1}
{strdef color color = "White"}
{pt3dclear()}
{pt3dadd(166656.000000,117336.000000,54000.000000,239.760900)}
{pt3dadd(167316.000000,117216.000000,53225.000000,135.605681)}
{pt3dadd(167424.000000,117120.000000,53000.000000,121.213653)}
{pt3dadd(167376.000000,116976.000000,52800.000000,95.228920)}
{pt3dadd(167448.000000,116952.000000,52625.000000,93.376471)}
{pt3dadd(167496.000000,116808.000000,52400.000000,100.811742)}
{pt3dadd(167508.000000,116736.000000,52150.000000,101.807998)}
{pt3dadd(167496.000000,116664.000000,51925.000000,97.494730)}
{pt3dadd(167520.000000,116616.000000,51750.000000,91.919730)}
{pt3dadd(167424.000000,116616.000000,51600.000000,99.277121)}
{pt3dadd(167376.000000,116556.000000,51375.000000,105.057311)}
{pt3dadd(167364.000000,116544.000000,51225.000000,102.208606)}
{pt3dadd(167340.000000,116580.000000,51075.000000,106.521874)}
{pt3dadd(167280.000000,116484.000000,50925.000000,107.341497)}
{pt3dadd(167304.000000,116376.000000,50725.000000,99.984106)}
{pt3dadd(167412.000000,116196.000000,50550.000000,96.348357)}
{pt3dadd(167544.000000,116148.000000,50375.000000,97.251990)}
{pt3dadd(167760.000000,116112.000000,50200.000000,97.251990)}
{pt3dadd(167928.000000,116112.000000,50075.000000,105.469984)}
{pt3dadd(168120.000000,116112.000000,49900.000000,119.853235)}
{pt3dadd(168312.000000,116112.000000,49725.000000,134.359202)}
{pt3dadd(168432.000000,116352.000000,49550.000000,152.954682)}
{pt3dadd(168576.000000,116472.000000,49375.000000,165.485484)}
{pt3dadd(169008.000000,116760.000000,49200.000000,181.478318)}
{pt3dadd(169140.000000,116904.000000,48975.000000,186.594180)}
{pt3dadd(169272.000000,117024.000000,48825.000000,173.241504)}
{pt3dadd(169404.000000,117180.000000,48575.000000,155.594840)}
{pt3dadd(169680.000000,117384.000000,48425.000000,141.211589)}
{pt3dadd(169908.000000,117600.000000,48425.000000,120.710069)}
{pt3dadd(170016.000000,117672.000000,48425.000000,99.530730)}
{pt3dadd(170124.000000,117852.000000,48300.000000,93.384293)}
{pt3dadd(170244.000000,117984.000000,48175.000000,86.945278)}
{pt3dadd(170316.000000,118104.000000,48100.000000,88.797727)}
{pt3dadd(170760.000000,118248.000000,47625.000000,85.806503)}
{pt3dadd(171120.000000,118368.000000,47500.000000,99.625610)}

{create adhoc19}
{access adhoc19}
{connect adhoc19(1), adhoc7(0)}
{nseg = 1}
{strdef color color = "White"}
{pt3dclear()}
{pt3dadd(167232.000000,121632.000000,64575.000000,410.072500)}
{pt3dadd(166860.000000,120456.000000,64400.000000,180.321786)}
{pt3dadd(166932.000000,120144.000000,64225.000000,133.448536)}
{pt3dadd(166956.000000,119844.000000,64000.000000,63.083841)}
{pt3dadd(167004.000000,119640.000000,63725.000000,59.996937)}
{pt3dadd(167040.000000,119544.000000,63475.000000,63.249924)}
{pt3dadd(166992.000000,119424.000000,63175.000000,61.486451)}
{pt3dadd(166944.000000,119256.000000,62975.000000,62.623693)}
{pt3dadd(166728.000000,119112.000000,62725.000000,61.513523)}
{pt3dadd(166548.000000,118920.000000,62575.000000,58.614782)}
{pt3dadd(166344.000000,118608.000000,62275.000000,52.698177)}

{create adhoc20}
{access adhoc20}
{connect adhoc20(1), adhoc6(0)}
{nseg = 1}
{strdef color color = "White"}
{pt3dclear()}
{pt3dadd(178176.000000,139416.000000,76475.000000,498.445680)}
{pt3dadd(177684.000000,140112.000000,76050.000000,416.030560)}
{pt3dadd(177456.000000,140148.000000,75775.000000,426.154554)}
{pt3dadd(177360.000000,140340.000000,75475.000000,412.580646)}
{pt3dadd(177180.000000,140940.000000,75175.000000,432.437164)}
{pt3dadd(177048.000000,141204.000000,74800.000000,446.732244)}
{pt3dadd(176868.000000,141444.000000,74275.000000,460.306152)}
{pt3dadd(176508.000000,141816.000000,73825.000000,510.157794)}
{pt3dadd(176256.000000,142224.000000,73050.000000,557.742518)}
{pt3dadd(175740.000000,142860.000000,72675.000000,575.179588)}
{pt3dadd(175236.000000,143436.000000,72175.000000,610.237126)}
{pt3dadd(174948.000000,143556.000000,71625.000000,620.455270)}
{pt3dadd(174780.000000,143640.000000,71225.000000,572.292946)}
{pt3dadd(174576.000000,143832.000000,70875.000000,509.440204)}
{pt3dadd(174048.000000,144048.000000,70300.000000,484.458554)}
{pt3dadd(173844.000000,144204.000000,70025.000000,449.401016)}
{pt3dadd(173628.000000,144336.000000,69625.000000,407.893882)}
{pt3dadd(173352.000000,144468.000000,69250.000000,376.984054)}
{pt3dadd(173016.000000,144264.000000,68775.000000,370.397354)}
{pt3dadd(172860.000000,144348.000000,68500.000000,347.449900)}
{pt3dadd(172800.000000,144480.000000,68175.000000,352.269926)}
{pt3dadd(172296.000000,144708.000000,67800.000000,374.290770)}
{pt3dadd(172200.000000,144672.000000,67450.000000,428.492930)}
{pt3dadd(171924.000000,144528.000000,67025.000000,497.825400)}
{pt3dadd(171840.000000,144420.000000,66700.000000,529.329012)}
{pt3dadd(171204.000000,144504.000000,66250.000000,538.082894)}
{pt3dadd(170448.000000,144516.000000,65600.000000,547.351040)}
{pt3dadd(170304.000000,144420.000000,65200.000000,536.622000)}
{pt3dadd(170208.000000,144564.000000,64800.000000,497.292966)}
{pt3dadd(169716.000000,144408.000000,64375.000000,508.223098)}
{pt3dadd(169368.000000,144144.000000,63975.000000,523.936602)}
{pt3dadd(169092.000000,144108.000000,63600.000000,545.420232)}
{pt3dadd(168828.000000,144060.000000,63250.000000,557.734084)}
{pt3dadd(168612.000000,144012.000000,62800.000000,578.872778)}
{pt3dadd(168612.000000,144000.000000,62625.000000,603.974288)}
{pt3dadd(168492.000000,144024.000000,62425.000000,612.331470)}
{pt3dadd(168408.000000,144048.000000,62025.000000,675.043950)}

{create adhoc21}
{access adhoc21}
{connect adhoc21(1), adhoc20(0)}
{nseg = 1}
{strdef color color = "White"}
{pt3dclear()}
{pt3dadd(168408.000000,144048.000000,62025.000000,675.043950)}
{pt3dadd(167916.000000,143832.000000,61725.000000,503.951490)}
{pt3dadd(168312.000000,144528.000000,61475.000000,410.748818)}
{pt3dadd(168168.000000,144732.000000,61175.000000,328.607308)}
{pt3dadd(168048.000000,144936.000000,60925.000000,261.985442)}
{pt3dadd(167928.000000,145140.000000,60550.000000,266.145894)}
{pt3dadd(167964.000000,145320.000000,60275.000000,280.752150)}
{pt3dadd(167880.000000,145308.000000,59975.000000,299.631076)}
{pt3dadd(167568.000000,145344.000000,59725.000000,317.849922)}
{pt3dadd(167220.000000,145452.000000,59525.000000,362.988158)}
{pt3dadd(166932.000000,145680.000000,59175.000000,390.747420)}
{pt3dadd(166932.000000,145944.000000,58875.000000,418.215918)}
{pt3dadd(166728.000000,146124.000000,58600.000000,431.124194)}
{pt3dadd(166596.000000,146172.000000,58325.000000,434.427638)}
{pt3dadd(166452.000000,146220.000000,58075.000000,420.853730)}
{pt3dadd(166260.000000,146340.000000,57850.000000,403.945158)}
{pt3dadd(166248.000000,146568.000000,57575.000000,378.625424)}
{pt3dadd(165984.000000,146736.000000,57325.000000,352.528058)}
{pt3dadd(165960.000000,146916.000000,57100.000000,345.612024)}
{pt3dadd(165924.000000,147300.000000,56850.000000,320.697276)}
{pt3dadd(166056.000000,147264.000000,56475.000000,344.123136)}
{pt3dadd(165888.000000,147384.000000,56425.000000,369.442870)}
{pt3dadd(165612.000000,147444.000000,56100.000000,409.191602)}
{pt3dadd(165492.000000,147636.000000,55900.000000,441.407202)}
{pt3dadd(165456.000000,147792.000000,55875.000000,480.232046)}
{pt3dadd(165480.000000,147936.000000,55875.000000,477.620206)}
{pt3dadd(165468.000000,148140.000000,55875.000000,464.692672)}
{pt3dadd(165336.000000,148320.000000,55675.000000,441.852512)}
{pt3dadd(165192.000000,148632.000000,55200.000000,422.759896)}
{pt3dadd(165216.000000,148752.000000,55200.000000,422.423708)}
{pt3dadd(165168.000000,148896.000000,55225.000000,430.830198)}
{pt3dadd(165060.000000,149064.000000,55050.000000,443.757732)}
{pt3dadd(164976.000000,149256.000000,54900.000000,450.275020)}
{pt3dadd(165000.000000,149520.000000,54725.000000,444.068070)}
{pt3dadd(164964.000000,149688.000000,54500.000000,439.320968)}
{pt3dadd(164964.000000,150024.000000,54475.000000,416.373514)}
{pt3dadd(164832.000000,150252.000000,54250.000000,407.837114)}
{pt3dadd(164712.000000,150480.000000,53975.000000,405.225274)}
{pt3dadd(164688.000000,150744.000000,53825.000000,405.225274)}
{pt3dadd(164676.000000,151020.000000,53650.000000,377.756776)}
{pt3dadd(164544.000000,151260.000000,53475.000000,390.879760)}
{pt3dadd(164304.000000,151512.000000,53250.000000,382.583178)}
{pt3dadd(164376.000000,151704.000000,53050.000000,371.415888)}
{pt3dadd(164268.000000,151896.000000,52850.000000,386.088306)}
{pt3dadd(164124.000000,152172.000000,52450.000000,397.711120)}
{pt3dadd(164196.000000,152352.000000,52300.000000,387.961810)}
{pt3dadd(163944.000000,152520.000000,52125.000000,391.867258)}
{pt3dadd(164064.000000,152652.000000,52100.000000,388.493584)}
{pt3dadd(163932.000000,152808.000000,52100.000000,375.817216)}
{pt3dadd(163956.000000,152964.000000,52100.000000,357.921346)}
{pt3dadd(164016.000000,153096.000000,52075.000000,348.274616)}
{pt3dadd(164040.000000,153228.000000,52050.000000,333.733652)}
{pt3dadd(163968.000000,153348.000000,52025.000000,353.087656)}
{pt3dadd(163884.000000,153528.000000,51975.000000,362.817264)}
{pt3dadd(163800.000000,153720.000000,51775.000000,401.305920)}
{pt3dadd(163788.000000,153876.000000,51825.000000,410.952650)}
{pt3dadd(163764.000000,154140.000000,51700.000000,433.764190)}
{pt3dadd(163752.000000,154344.000000,51575.000000,425.045702)}
{pt3dadd(163728.000000,154560.000000,51475.000000,443.604074)}
{pt3dadd(163176.000000,154812.000000,51150.000000,414.762148)}
{pt3dadd(163008.000000,155256.000000,50950.000000,412.090698)}
{pt3dadd(163044.000000,155424.000000,50725.000000,407.920850)}
{pt3dadd(163200.000000,155940.000000,50575.000000,450.984564)}
{pt3dadd(163140.000000,156144.000000,50400.000000,456.218244)}
{pt3dadd(163176.000000,156324.000000,50225.000000,485.884760)}
{pt3dadd(162996.000000,156600.000000,50050.000000,503.824228)}
{pt3dadd(162876.000000,156816.000000,49850.000000,514.974130)}
{pt3dadd(162828.000000,157032.000000,49600.000000,493.905990)}
{pt3dadd(162840.000000,157332.000000,49550.000000,477.538994)}
{pt3dadd(162840.000000,157560.000000,49500.000000,455.134320)}
{pt3dadd(162840.000000,157788.000000,49450.000000,468.708228)}
{pt3dadd(162840.000000,158016.000000,49400.000000,464.455098)}
{pt3dadd(162852.000000,158340.000000,49325.000000,451.350313)}
{pt3dadd(162852.000000,158688.000000,49300.000000,465.060000)}

{create adhoc22}
{access adhoc22}
{connect adhoc22(1), adhoc21(0)}
{nseg = 1}
{strdef color color = "White"}
{pt3dclear()}
{pt3dadd(162852.000000,158688.000000,49300.000000,465.060000)}
{pt3dadd(162768.000000,158916.000000,49400.000000,386.521577)}
{pt3dadd(162720.000000,159180.000000,49400.000000,327.931480)}
{pt3dadd(162672.000000,159444.000000,49400.000000,294.923392)}
{pt3dadd(162624.000000,159708.000000,49400.000000,273.150236)}
{pt3dadd(162576.000000,159972.000000,49400.000000,252.383766)}
{pt3dadd(162528.000000,160236.000000,49400.000000,257.544620)}
{pt3dadd(162480.000000,160500.000000,49400.000000,268.568912)}
{pt3dadd(162432.000000,160764.000000,49400.000000,259.987260)}
{pt3dadd(162384.000000,161028.000000,49400.000000,252.102334)}
{pt3dadd(162228.000000,161256.000000,49400.000000,257.166592)}
{pt3dadd(162060.000000,161472.000000,49425.000000,260.678860)}
{pt3dadd(162096.000000,162048.000000,49650.000000,259.496468)}
{pt3dadd(162084.000000,162468.000000,49875.000000,262.235068)}
{pt3dadd(162288.000000,162900.000000,50150.000000,270.119994)}
{pt3dadd(162252.000000,163080.000000,50475.000000,274.428976)}
{pt3dadd(162252.000000,163260.000000,50525.000000,268.273344)}
{pt3dadd(162288.000000,163416.000000,50725.000000,269.909288)}
{pt3dadd(162312.000000,163632.000000,50925.000000,268.615708)}
{pt3dadd(162156.000000,163884.000000,50950.000000,259.242468)}
{pt3dadd(161988.000000,164004.000000,50925.000000,277.222398)}
{pt3dadd(161652.000000,164256.000000,50875.000000,311.182658)}
{pt3dadd(161544.000000,164472.000000,51150.000000,340.151298)}
{pt3dadd(161256.000000,164664.000000,51125.000000,386.973154)}
{pt3dadd(161256.000000,164892.000000,51125.000000,448.152714)}
{pt3dadd(161256.000000,165120.000000,51125.000000,457.325768)}
{pt3dadd(161256.000000,165348.000000,51125.000000,444.887798)}
{pt3dadd(161256.000000,165576.000000,51125.000000,419.973050)}
{pt3dadd(161256.000000,165804.000000,51125.000000,381.484394)}
{pt3dadd(161256.000000,166032.000000,51125.000000,341.602842)}
{pt3dadd(161256.000000,166260.000000,51125.000000,317.093222)}
{pt3dadd(161256.000000,166488.000000,51100.000000,313.550862)}
{pt3dadd(161256.000000,166692.000000,51175.000000,326.739952)}
{pt3dadd(161256.000000,166896.000000,51275.000000,354.192572)}
{pt3dadd(161244.000000,167088.000000,51375.000000,347.686700)}
{pt3dadd(161256.000000,167280.000000,51350.000000,359.649592)}
{pt3dadd(161256.000000,167448.000000,51525.000000,356.275918)}
{pt3dadd(161244.000000,167544.000000,51500.000000,354.242628)}
{pt3dadd(161016.000000,167688.000000,51425.000000,329.850038)}
{pt3dadd(160968.000000,167844.000000,51600.000000,342.411072)}
{pt3dadd(161088.000000,168060.000000,51575.000000,349.327106)}
{pt3dadd(161052.000000,168264.000000,51425.000000,351.654766)}
{pt3dadd(160872.000000,168408.000000,51325.000000,350.145696)}
{pt3dadd(160824.000000,168552.000000,51325.000000,356.732396)}
{pt3dadd(160776.000000,168660.000000,51325.000000,338.752466)}
{pt3dadd(160728.000000,168816.000000,51325.000000,349.206688)}
{pt3dadd(160788.000000,168948.000000,51325.000000,350.252702)}
{pt3dadd(160848.000000,169128.000000,51325.000000,346.879028)}
{pt3dadd(160824.000000,169320.000000,51150.000000,366.452808)}
{pt3dadd(160788.000000,169500.000000,50975.000000,381.460564)}
{pt3dadd(160752.000000,169764.000000,50825.000000,374.725824)}
{pt3dadd(160416.000000,169944.000000,50625.000000,374.725824)}
{pt3dadd(160356.000000,170508.000000,50625.000000,374.725824)}
{pt3dadd(160128.000000,170940.000000,50625.000000,345.380884)}
{pt3dadd(159924.000000,171144.000000,50625.000000,351.895418)}
{pt3dadd(159888.000000,171384.000000,50625.000000,355.800866)}
{pt3dadd(159696.000000,171852.000000,50625.000000,371.068884)}
{pt3dadd(159732.000000,172332.000000,50375.000000,374.298508)}
{pt3dadd(159636.000000,172668.000000,50550.000000,363.572248)}
{pt3dadd(159744.000000,173160.000000,50550.000000,332.676718)}
{pt3dadd(159876.000000,173760.000000,50675.000000,292.085116)}
{pt3dadd(159588.000000,174108.000000,50675.000000,271.599168)}
{pt3dadd(159588.000000,174516.000000,50675.000000,259.182184)}
{pt3dadd(159768.000000,174984.000000,50775.000000,279.679604)}
{pt3dadd(160284.000000,175044.000000,51125.000000,310.575134)}
{pt3dadd(160404.000000,175392.000000,51125.000000,359.158108)}
{pt3dadd(160356.000000,175692.000000,51125.000000,393.217964)}
{pt3dadd(160284.000000,175980.000000,51125.000000,425.352778)}
{pt3dadd(160212.000000,176268.000000,51125.000000,432.614620)}
{pt3dadd(160392.000000,176532.000000,51125.000000,439.028664)}
{pt3dadd(160464.000000,176736.000000,51125.000000,419.870002)}
{pt3dadd(160572.000000,177252.000000,51125.000000,398.289918)}
{pt3dadd(160824.000000,178272.000000,50850.000000,385.977980)}
{pt3dadd(160956.000000,178716.000000,50600.000000,403.596288)}
{pt3dadd(160956.000000,178824.000000,50550.000000,408.907902)}
{pt3dadd(160956.000000,178980.000000,50500.000000,405.534228)}
{pt3dadd(160968.000000,179136.000000,50475.000000,405.534228)}
{pt3dadd(160992.000000,179292.000000,50450.000000,402.430072)}
{pt3dadd(161064.000000,179460.000000,50375.000000,381.092282)}
{pt3dadd(161124.000000,179592.000000,50300.000000,359.237564)}
{pt3dadd(161196.000000,179760.000000,50250.000000,359.237564)}
{pt3dadd(161196.000000,179928.000000,50225.000000,360.513686)}
{pt3dadd(161340.000000,180084.000000,50325.000000,349.769300)}
{pt3dadd(161460.000000,180324.000000,50475.000000,346.226940)}
{pt3dadd(161352.000000,180552.000000,50250.000000,349.439966)}
{pt3dadd(161400.000000,180684.000000,50250.000000,353.235222)}
{pt3dadd(161448.000000,180840.000000,50250.000000,344.697258)}
{pt3dadd(161400.000000,180984.000000,50250.000000,354.826318)}
{pt3dadd(161352.000000,181128.000000,50250.000000,343.506800)}
{pt3dadd(161244.000000,181320.000000,50225.000000,342.187580)}
{pt3dadd(161124.000000,181536.000000,50375.000000,353.611684)}
{pt3dadd(161040.000000,181704.000000,50150.000000,357.154044)}
{pt3dadd(161124.000000,181860.000000,50200.000000,373.185464)}
{pt3dadd(161052.000000,182004.000000,50200.000000,395.672272)}
{pt3dadd(161100.000000,182196.000000,50300.000000,411.155932)}
{pt3dadd(160992.000000,182604.000000,50300.000000,402.852606)}
{pt3dadd(160956.000000,182988.000000,50300.000000,414.578264)}
{pt3dadd(160920.000000,183372.000000,50300.000000,402.266326)}
{pt3dadd(160896.000000,183756.000000,50300.000000,396.225922)}
{pt3dadd(160848.000000,184116.000000,50300.000000,382.061482)}
{pt3dadd(160800.000000,184476.000000,50300.000000,382.061482)}
{pt3dadd(160656.000000,185112.000000,50300.000000,386.367244)}
{pt3dadd(160404.000000,185796.000000,50300.000000,397.115852)}
{pt3dadd(160140.000000,186444.000000,50075.000000,388.615292)}
{pt3dadd(160224.000000,186852.000000,49850.000000,399.250808)}
{pt3dadd(160032.000000,187296.000000,49875.000000,410.976466)}
{pt3dadd(159864.000000,187860.000000,49800.000000,399.940650)}
{pt3dadd(159660.000000,188364.000000,49550.000000,378.556526)}
{pt3dadd(159408.000000,189228.000000,49275.000000,375.343500)}
{pt3dadd(159192.000000,189840.000000,49150.000000,375.343500)}
{pt3dadd(159012.000000,190476.000000,49025.000000,378.796796)}
{pt3dadd(158844.000000,190488.000000,49150.000000,389.832612)}
{pt3dadd(158652.000000,191196.000000,48875.000000,393.206286)}
{pt3dadd(158400.000000,191796.000000,48525.000000,403.335346)}
{pt3dadd(158148.000000,192432.000000,48175.000000,385.523194)}
{pt3dadd(157920.000000,192756.000000,48175.000000,357.155150)}
{pt3dadd(157716.000000,193116.000000,48100.000000,337.581370)}
{pt3dadd(157428.000000,193644.000000,47700.000000,319.601440)}
{pt3dadd(157164.000000,194484.000000,47025.000000,305.354234)}
{pt3dadd(156936.000000,194712.000000,46875.000000,293.009514)}
{pt3dadd(156720.000000,194916.000000,46650.000000,290.095210)}
{pt3dadd(156444.000000,195108.000000,46525.000000,255.030654)}
{pt3dadd(156276.000000,195276.000000,46550.000000,240.045942)}
{pt3dadd(156012.000000,195480.000000,46500.000000,215.686232)}
{pt3dadd(155808.000000,195624.000000,46425.000000,203.516706)}
{pt3dadd(155592.000000,195792.000000,46425.000000,186.653428)}
{pt3dadd(155376.000000,195960.000000,46425.000000,192.636304)}
{pt3dadd(155160.000000,196128.000000,46425.000000,212.179352)}
{pt3dadd(154944.000000,196296.000000,46425.000000,233.089734)}
{pt3dadd(154728.000000,196464.000000,46425.000000,252.817724)}
{pt3dadd(154512.000000,196632.000000,46425.000000,272.595306)}
{pt3dadd(154308.000000,196860.000000,46425.000000,286.340420)}
{pt3dadd(154080.000000,197100.000000,46425.000000,274.961300)}
{pt3dadd(153852.000000,197448.000000,46525.000000,255.840050)}
{pt3dadd(153684.000000,197736.000000,46575.000000,245.998150)}
{pt3dadd(153504.000000,198060.000000,46500.000000,228.291710)}
{pt3dadd(153312.000000,198420.000000,46600.000000,218.970404)}
{pt3dadd(153084.000000,198588.000000,46625.000000,231.210084)}
{pt3dadd(152820.000000,198888.000000,46775.000000,238.149282)}
{pt3dadd(152700.000000,199248.000000,46925.000000,248.310830)}
{pt3dadd(152556.000000,200340.000000,47450.000000,222.554920)}

{create adhoc23}
{access adhoc23}
{connect adhoc23(1), adhoc22(0)}
{nseg = 1}
{strdef color color = "White"}
{pt3dclear()}
{pt3dadd(152556.000000,200340.000000,47450.000000,222.554920)}
{pt3dadd(152568.000000,200976.000000,47350.000000,216.280333)}
{pt3dadd(152712.000000,201516.000000,47250.000000,170.711953)}
{pt3dadd(152916.000000,201804.000000,47200.000000,146.126091)}
{pt3dadd(153120.000000,202224.000000,47150.000000,112.104513)}
{pt3dadd(153192.000000,202356.000000,46975.000000,102.780396)}
{pt3dadd(153420.000000,202560.000000,46975.000000,108.849595)}
{pt3dadd(153624.000000,202764.000000,46975.000000,121.102867)}
{pt3dadd(153828.000000,202968.000000,46975.000000,137.220071)}
{pt3dadd(154032.000000,203184.000000,46975.000000,156.147890)}

{create adhoc24}
{access adhoc24}
{connect adhoc24(1), adhoc23(0)}
{nseg = 1}
{strdef color color = "White"}
{pt3dclear()}
{pt3dadd(154032.000000,203184.000000,46975.000000,156.147890)}
{pt3dadd(154176.000000,203364.000000,46975.000000,167.704530)}
{pt3dadd(154356.000000,203484.000000,46975.000000,184.357552)}
{pt3dadd(154524.000000,203556.000000,46900.000000,188.382322)}
{pt3dadd(154704.000000,204036.000000,46975.000000,197.983866)}
{pt3dadd(154800.000000,204180.000000,46975.000000,208.364260)}
{pt3dadd(154896.000000,204192.000000,46950.000000,208.364260)}
{pt3dadd(155016.000000,204312.000000,46900.000000,214.454458)}
{pt3dadd(155184.000000,204348.000000,46925.000000,227.152290)}
{pt3dadd(155316.000000,204576.000000,46925.000000,249.989902)}
{pt3dadd(155460.000000,204732.000000,46950.000000,260.323898)}
{pt3dadd(155556.000000,204840.000000,47025.000000,270.539388)}
{pt3dadd(155748.000000,204960.000000,47000.000000,272.160576)}
{pt3dadd(155892.000000,205164.000000,47000.000000,265.631294)}
{pt3dadd(156060.000000,205020.000000,46975.000000,256.881428)}
{pt3dadd(156216.000000,205116.000000,46900.000000,249.967084)}
{pt3dadd(156336.000000,205200.000000,47000.000000,232.589068)}
{pt3dadd(156504.000000,205260.000000,47150.000000,246.120217)}
{pt3dadd(156636.000000,205308.000000,47150.000000,203.948270)}

{create adhoc25}
{access adhoc25}
{connect adhoc25(1), adhoc24(0)}
{nseg = 1}
{strdef color color = "White"}
{pt3dclear()}
{pt3dadd(156636.000000,205308.000000,47150.000000,203.948270)}
{pt3dadd(156876.000000,205452.000000,47225.000000,232.209463)}
{pt3dadd(156996.000000,205572.000000,47200.000000,244.952748)}
{pt3dadd(157104.000000,205620.000000,47275.000000,257.030374)}
{pt3dadd(157248.000000,205836.000000,47300.000000,254.855670)}
{pt3dadd(157368.000000,206028.000000,47325.000000,249.843074)}
{pt3dadd(157560.000000,206244.000000,47225.000000,258.283764)}
{pt3dadd(157764.000000,206388.000000,47200.000000,248.910524)}
{pt3dadd(157836.000000,206580.000000,47050.000000,233.615030)}
{pt3dadd(157992.000000,206808.000000,46950.000000,235.696882)}
{pt3dadd(158064.000000,206976.000000,46800.000000,200.686108)}
{pt3dadd(158256.000000,207144.000000,46500.000000,159.410750)}
{pt3dadd(158328.000000,207240.000000,46200.000000,134.893016)}
{pt3dadd(158364.000000,207204.000000,45975.000000,117.723054)}
{pt3dadd(158268.000000,207180.000000,45675.000000,93.068540)}
{pt3dadd(158544.000000,207180.000000,45425.000000,104.443740)}
{pt3dadd(158736.000000,207132.000000,45250.000000,111.220186)}
{pt3dadd(158808.000000,207096.000000,45100.000000,109.420954)}
{pt3dadd(158916.000000,207072.000000,44875.000000,123.097850)}
{pt3dadd(159084.000000,207024.000000,44650.000000,136.255192)}
{pt3dadd(159168.000000,206988.000000,44275.000000,130.541137)}
{pt3dadd(159252.000000,207096.000000,44000.000000,119.824931)}
{pt3dadd(159432.000000,207276.000000,43700.000000,123.313308)}
{pt3dadd(159444.000000,207348.000000,43550.000000,100.160028)}
{pt3dadd(159576.000000,207396.000000,43300.000000,87.002686)}
{pt3dadd(159732.000000,207492.000000,43150.000000,84.109485)}
{pt3dadd(159972.000000,207396.000000,42950.000000,84.516570)}
{pt3dadd(160056.000000,207420.000000,42950.000000,75.657727)}
{pt3dadd(160188.000000,207408.000000,42875.000000,73.018182)}
{pt3dadd(160440.000000,207360.000000,42750.000000,59.033043)}

{create adhoc26}
{access adhoc26}
{connect adhoc26(1), adhoc25(0)}
{nseg = 1}
{strdef color color = "White"}
{pt3dclear()}
{pt3dadd(160440.000000,207360.000000,42750.000000,59.033043)}
{pt3dadd(160368.000000,207480.000000,42750.000000,86.173821)}
{pt3dadd(160236.000000,207660.000000,42750.000000,98.394357)}
{pt3dadd(160308.000000,207756.000000,42775.000000,102.199602)}
{pt3dadd(160188.000000,207864.000000,42800.000000,108.653360)}
{pt3dadd(160140.000000,207924.000000,42775.000000,109.699429)}
{pt3dadd(160068.000000,208092.000000,42750.000000,108.263979)}
{pt3dadd(159996.000000,208236.000000,42850.000000,112.494593)}
{pt3dadd(159888.000000,208368.000000,42825.000000,119.948558)}
{pt3dadd(159804.000000,208524.000000,42850.000000,121.220062)}
{pt3dadd(159768.000000,208644.000000,42875.000000,117.996787)}
{pt3dadd(159732.000000,208740.000000,42875.000000,117.180574)}
{pt3dadd(159696.000000,208860.000000,42875.000000,114.698116)}
{pt3dadd(159660.000000,208980.000000,42875.000000,105.118404)}
{pt3dadd(159588.000000,209160.000000,42875.000000,100.395946)}
{pt3dadd(159432.000000,209340.000000,43075.000000,112.562178)}
{pt3dadd(159252.000000,209664.000000,43250.000000,110.519853)}
{pt3dadd(159048.000000,210000.000000,43425.000000,122.083397)}
{pt3dadd(158892.000000,210360.000000,43575.000000,123.473618)}
{pt3dadd(158652.000000,210552.000000,43700.000000,126.924572)}
{pt3dadd(158232.000000,211140.000000,43850.000000,114.086841)}
{pt3dadd(157980.000000,211380.000000,43850.000000,112.234392)}
{pt3dadd(157848.000000,211524.000000,43850.000000,96.133119)}
{pt3dadd(157644.000000,211692.000000,43725.000000,124.750831)}
{pt3dadd(157320.000000,211800.000000,43725.000000,154.831411)}
{pt3dadd(157032.000000,211836.000000,43725.000000,192.269382)}
{pt3dadd(157032.000000,211968.000000,43700.000000,222.174349)}
{pt3dadd(157104.000000,212100.000000,43675.000000,250.704886)}
{pt3dadd(157176.000000,212256.000000,43700.000000,244.782632)}
{pt3dadd(157224.000000,212556.000000,43850.000000,237.224168)}
{pt3dadd(157236.000000,213108.000000,43875.000000,232.063314)}
{pt3dadd(157224.000000,213660.000000,43850.000000,237.912066)}
{pt3dadd(157260.000000,214080.000000,44225.000000,257.173684)}
{pt3dadd(157404.000000,214500.000000,44200.000000,280.802378)}
{pt3dadd(157392.000000,214920.000000,44575.000000,294.050678)}
{pt3dadd(157392.000000,215364.000000,44725.000000,302.756124)}
{pt3dadd(157356.000000,215784.000000,44875.000000,294.598476)}
{pt3dadd(157356.000000,216204.000000,45025.000000,270.618980)}
{pt3dadd(157092.000000,216636.000000,45175.000000,273.679010)}
{pt3dadd(156840.000000,216696.000000,45325.000000,277.070190)}
{pt3dadd(156660.000000,216984.000000,45550.000000,265.967134)}
{pt3dadd(156468.000000,217248.000000,45675.000000,270.648180)}
{pt3dadd(156300.000000,217680.000000,46000.000000,272.822884)}
{pt3dadd(156132.000000,217836.000000,46325.000000,247.710192)}
{pt3dadd(155916.000000,217908.000000,46625.000000,235.985812)}
{pt3dadd(155736.000000,218328.000000,46750.000000,235.985812)}
{pt3dadd(155496.000000,218472.000000,46875.000000,231.304766)}
{pt3dadd(155400.000000,218808.000000,47025.000000,217.925786)}
{pt3dadd(155220.000000,218808.000000,47025.000000,206.814614)}
{pt3dadd(155184.000000,219108.000000,47175.000000,186.403258)}
{pt3dadd(155172.000000,219216.000000,47500.000000,172.529798)}
{pt3dadd(155148.000000,219384.000000,47700.000000,158.820814)}
{pt3dadd(155208.000000,219528.000000,47900.000000,160.609770)}
{pt3dadd(155268.000000,219744.000000,48075.000000,185.440404)}
{pt3dadd(154848.000000,219888.000000,48550.000000,190.556266)}
{pt3dadd(154788.000000,220404.000000,48800.000000,198.760298)}
{pt3dadd(154740.000000,220692.000000,49050.000000,194.837184)}
{pt3dadd(154812.000000,220488.000000,49275.000000,188.795110)}
{pt3dadd(154788.000000,220608.000000,49700.000000,168.383754)}
{pt3dadd(154788.000000,220872.000000,50100.000000,168.480588)}
{pt3dadd(154980.000000,220848.000000,50350.000000,169.691876)}
{pt3dadd(155220.000000,221040.000000,50475.000000,197.165874)}
{pt3dadd(155412.000000,221208.000000,50725.000000,243.518798)}
{pt3dadd(155640.000000,221148.000000,50625.000000,257.679606)}
{pt3dadd(155940.000000,221316.000000,50675.000000,272.878266)}
{pt3dadd(156156.000000,221268.000000,50675.000000,277.336406)}
{pt3dadd(156348.000000,221580.000000,50825.000000,259.397548)}
{pt3dadd(156540.000000,221736.000000,50925.000000,213.349170)}
{pt3dadd(156744.000000,222132.000000,51275.000000,202.515092)}
{pt3dadd(156744.000000,222480.000000,51250.000000,187.219598)}
{pt3dadd(156744.000000,222828.000000,51250.000000,167.304064)}
{pt3dadd(156828.000000,223092.000000,51275.000000,147.991566)}
{pt3dadd(156816.000000,223404.000000,51400.000000,140.571752)}
{pt3dadd(156804.000000,223596.000000,51525.000000,130.219162)}
{pt3dadd(156648.000000,223824.000000,51575.000000,114.614823)}
{pt3dadd(156756.000000,224028.000000,51600.000000,122.269123)}
{pt3dadd(156984.000000,224232.000000,51525.000000,134.920239)}
{pt3dadd(157104.000000,224328.000000,51775.000000,149.781515)}
{pt3dadd(157452.000000,224496.000000,51975.000000,163.801829)}
{pt3dadd(157776.000000,224724.000000,52250.000000,172.586540)}
{pt3dadd(158364.000000,224928.000000,52525.000000,163.597162)}
{pt3dadd(158736.000000,225252.000000,52525.000000,160.723404)}
{pt3dadd(159000.000000,225396.000000,52600.000000,151.642318)}
{pt3dadd(159240.000000,225528.000000,52625.000000,142.968484)}
{pt3dadd(159348.000000,225876.000000,52675.000000,149.788112)}
{pt3dadd(159360.000000,226236.000000,52700.000000,162.536922)}
{pt3dadd(159348.000000,226440.000000,52825.000000,177.994316)}
{pt3dadd(159348.000000,226572.000000,52825.000000,183.252508)}
{pt3dadd(159384.000000,226632.000000,52950.000000,188.258618)}
{pt3dadd(159240.000000,227232.000000,53225.000000,218.160368)}
{pt3dadd(159216.000000,227856.000000,53550.000000,231.577270)}
{pt3dadd(159180.000000,228396.000000,53925.000000,260.586930)}
{pt3dadd(159072.000000,228708.000000,54250.000000,276.579350)}
{pt3dadd(159072.000000,229092.000000,54625.000000,318.905748)}
{pt3dadd(159012.000000,229284.000000,54975.000000,315.692722)}
{pt3dadd(158940.000000,229440.000000,55250.000000,308.179868)}
{pt3dadd(159072.000000,229752.000000,55575.000000,312.873313)}
{pt3dadd(158928.000000,229944.000000,55925.000000,226.772130)}

{create adhoc27}
{access adhoc27}
{connect adhoc27(1), adhoc25(0)}
{nseg = 1}
{strdef color color = "White"}
{pt3dclear()}
{pt3dadd(160440.000000,207360.000000,42750.000000,59.033043)}
{pt3dadd(160656.000000,207276.000000,42600.000000,66.935246)}
{pt3dadd(160704.000000,207156.000000,42600.000000,55.261857)}
{pt3dadd(160812.000000,207036.000000,42600.000000,49.059004)}
{pt3dadd(160920.000000,206940.000000,42575.000000,48.350983)}
{pt3dadd(160944.000000,206856.000000,42525.000000,53.841183)}
{pt3dadd(161088.000000,206736.000000,42350.000000,65.225742)}
{pt3dadd(161256.000000,206604.000000,42200.000000,77.559723)}
{pt3dadd(161388.000000,206508.000000,42200.000000,90.932273)}
{pt3dadd(161268.000000,206400.000000,42075.000000,94.844535)}
{pt3dadd(161340.000000,206292.000000,42000.000000,91.853591)}
{pt3dadd(161340.000000,206196.000000,41975.000000,85.191759)}
{pt3dadd(161220.000000,206040.000000,41975.000000,88.332456)}
{pt3dadd(161196.000000,205908.000000,41775.000000,101.812074)}
{pt3dadd(161412.000000,205644.000000,41500.000000,124.008689)}
{pt3dadd(161520.000000,205572.000000,41225.000000,153.692071)}
{pt3dadd(161712.000000,205296.000000,41000.000000,187.128519)}
{pt3dadd(161976.000000,205044.000000,40675.000000,231.536236)}
{pt3dadd(162108.000000,205080.000000,40175.000000,238.835884)}
{pt3dadd(162312.000000,204948.000000,39775.000000,246.518776)}
{pt3dadd(162552.000000,204888.000000,39375.000000,244.344072)}
{pt3dadd(162768.000000,204696.000000,39125.000000,242.169368)}
{pt3dadd(162948.000000,204768.000000,38900.000000,212.171326)}
{pt3dadd(163188.000000,204564.000000,38475.000000,213.838652)}
{pt3dadd(163428.000000,204600.000000,38100.000000,203.458258)}
{pt3dadd(163692.000000,204636.000000,37925.000000,201.387116)}
{pt3dadd(163932.000000,204528.000000,37750.000000,198.682730)}
{pt3dadd(164184.000000,204468.000000,37550.000000,204.701276)}
{pt3dadd(164364.000000,204564.000000,37450.000000,194.188782)}
{pt3dadd(164556.000000,204504.000000,37350.000000,198.039894)}
{pt3dadd(164724.000000,204660.000000,37375.000000,194.479448)}
{pt3dadd(164940.000000,204756.000000,37275.000000,228.079364)}
{pt3dadd(165072.000000,204732.000000,37025.000000,245.785804)}
{pt3dadd(165468.000000,204828.000000,36725.000000,256.298298)}
{pt3dadd(165984.000000,204768.000000,36375.000000,251.777988)}
{pt3dadd(166752.000000,204288.000000,36050.000000,241.952182)}
{pt3dadd(167196.000000,204156.000000,35825.000000,205.134398)}
{pt3dadd(167640.000000,203676.000000,35525.000000,183.384296)}
{pt3dadd(168108.000000,203376.000000,35225.000000,186.955862)}
{pt3dadd(168288.000000,203160.000000,34925.000000,195.722018)}
{pt3dadd(168792.000000,202800.000000,34625.000000,213.354116)}
{pt3dadd(168996.000000,202488.000000,34275.000000,211.564984)}
{pt3dadd(169452.000000,202176.000000,33950.000000,203.666648)}
{pt3dadd(169644.000000,201756.000000,33700.000000,198.122562)}
{pt3dadd(169956.000000,201468.000000,33475.000000,191.904196)}
{pt3dadd(170268.000000,201300.000000,33300.000000,185.685830)}
{pt3dadd(170496.000000,200868.000000,33250.000000,188.254878)}
{pt3dadd(170724.000000,200760.000000,33150.000000,195.420763)}
{pt3dadd(170940.000000,200340.000000,33075.000000,191.758510)}

{create adhoc28}
{access adhoc28}
{connect adhoc28(1), adhoc24(0)}
{nseg = 1}
{strdef color color = "White"}
{pt3dclear()}
{pt3dadd(156636.000000,205308.000000,47150.000000,203.948270)}
{pt3dadd(156732.000000,205560.000000,47150.000000,140.972823)}
{pt3dadd(156864.000000,205632.000000,47225.000000,134.481362)}
{pt3dadd(156840.000000,205812.000000,47350.000000,117.309364)}
{pt3dadd(156780.000000,205944.000000,47375.000000,122.525540)}
{pt3dadd(156900.000000,206100.000000,47400.000000,118.088280)}

{create adhoc29}
{access adhoc29}
{connect adhoc29(1), adhoc23(0)}
{nseg = 1}
{strdef color color = "White"}
{pt3dclear()}
{pt3dadd(154032.000000,203184.000000,46975.000000,156.147890)}
{pt3dadd(154416.000000,202920.000000,46900.000000,208.084170)}
{pt3dadd(154296.000000,202608.000000,46850.000000,185.674464)}
{pt3dadd(153804.000000,202236.000000,46700.000000,176.412333)}
{pt3dadd(153648.000000,201948.000000,46700.000000,142.393394)}
{pt3dadd(153636.000000,201768.000000,46675.000000,113.417520)}
{pt3dadd(153492.000000,201360.000000,46300.000000,101.422602)}
{pt3dadd(153468.000000,201168.000000,46000.000000,100.600404)}
{pt3dadd(153480.000000,200964.000000,45750.000000,89.929295)}
{pt3dadd(153492.000000,200616.000000,45525.000000,98.838640)}
{pt3dadd(153540.000000,200304.000000,45250.000000,56.481690)}

{create adhoc30}
{access adhoc30}
{connect adhoc30(1), adhoc22(0)}
{nseg = 1}
{strdef color color = "White"}
{pt3dclear()}
{pt3dadd(152556.000000,200340.000000,47450.000000,222.554920)}
{pt3dadd(152388.000000,200208.000000,47350.000000,243.818667)}
{pt3dadd(152088.000000,200244.000000,47725.000000,238.607362)}
{pt3dadd(151884.000000,200664.000000,47900.000000,233.546756)}
{pt3dadd(151764.000000,201972.000000,48425.000000,212.832366)}
{pt3dadd(151932.000000,202716.000000,48850.000000,206.910112)}
{pt3dadd(151920.000000,203640.000000,49500.000000,196.039252)}
{pt3dadd(151680.000000,203916.000000,49650.000000,179.673054)}
{pt3dadd(151452.000000,204276.000000,49700.000000,181.645574)}
{pt3dadd(151224.000000,204624.000000,49825.000000,181.645574)}
{pt3dadd(151020.000000,204780.000000,49950.000000,198.735824)}
{pt3dadd(150648.000000,205560.000000,50225.000000,230.373154)}
{pt3dadd(150348.000000,206052.000000,50350.000000,259.117710)}
{pt3dadd(150072.000000,206244.000000,50550.000000,268.044602)}
{pt3dadd(150132.000000,206616.000000,50775.000000,287.720836)}
{pt3dadd(150192.000000,207000.000000,51025.000000,283.408590)}
{pt3dadd(150192.000000,207156.000000,51200.000000,269.497870)}
{pt3dadd(150108.000000,207408.000000,51325.000000,258.647180)}
{pt3dadd(150060.000000,207576.000000,51525.000000,251.679958)}
{pt3dadd(150228.000000,207924.000000,51850.000000,252.718114)}
{pt3dadd(150132.000000,208200.000000,52150.000000,243.791222)}
{pt3dadd(150420.000000,208788.000000,52450.000000,236.935472)}
{pt3dadd(150576.000000,209364.000000,52550.000000,228.436304)}
{pt3dadd(150828.000000,209796.000000,52550.000000,235.403526)}
{pt3dadd(150708.000000,210048.000000,52550.000000,218.540248)}
{pt3dadd(150720.000000,210384.000000,52550.000000,218.540248)}
{pt3dadd(151020.000000,210984.000000,52650.000000,220.597904)}
{pt3dadd(151212.000000,211488.000000,52800.000000,222.241322)}
{pt3dadd(151332.000000,212148.000000,52925.000000,217.560276)}
{pt3dadd(151272.000000,212736.000000,53075.000000,215.587756)}
{pt3dadd(151380.000000,213576.000000,53250.000000,217.336618)}
{pt3dadd(151464.000000,214260.000000,53250.000000,224.652202)}
{pt3dadd(151296.000000,214368.000000,53250.000000,231.507952)}
{pt3dadd(151296.000000,214848.000000,53425.000000,219.917928)}
{pt3dadd(151332.000000,215376.000000,53075.000000,202.099174)}
{pt3dadd(151488.000000,215688.000000,53175.000000,176.139484)}
{pt3dadd(151584.000000,215856.000000,53100.000000,137.432615)}
{pt3dadd(151644.000000,216228.000000,53150.000000,98.795733)}
{pt3dadd(151692.000000,216408.000000,53150.000000,71.808982)}
{pt3dadd(151692.000000,216600.000000,53175.000000,58.564540)}

{create adhoc31}
{access adhoc31}
{connect adhoc31(1), adhoc21(0)}
{nseg = 1}
{strdef color color = "White"}
{pt3dclear()}
{pt3dadd(162852.000000,158688.000000,49300.000000,465.060000)}
{pt3dadd(162888.000000,158676.000000,48875.000000,388.854460)}
{pt3dadd(162900.000000,158724.000000,48550.000000,346.166546)}
{pt3dadd(162900.000000,158940.000000,48450.000000,294.577444)}
{pt3dadd(162888.000000,159168.000000,48350.000000,248.345598)}
{pt3dadd(162924.000000,159384.000000,48075.000000,226.426686)}
{pt3dadd(162924.000000,159636.000000,47850.000000,182.898912)}
{pt3dadd(162924.000000,159900.000000,47600.000000,171.999500)}
{pt3dadd(162936.000000,160056.000000,47450.000000,183.443882)}
{pt3dadd(163176.000000,160308.000000,47350.000000,191.865868)}
{pt3dadd(163476.000000,160476.000000,47175.000000,205.848394)}
{pt3dadd(163740.000000,160692.000000,46850.000000,242.382732)}
{pt3dadd(163968.000000,160896.000000,46550.000000,264.132834)}
{pt3dadd(164244.000000,161148.000000,46075.000000,264.570134)}
{pt3dadd(164556.000000,161448.000000,45600.000000,257.937280)}
{pt3dadd(164976.000000,161664.000000,45125.000000,249.010388)}
{pt3dadd(165084.000000,161892.000000,44625.000000,254.700224)}
{pt3dadd(165264.000000,162036.000000,44275.000000,244.672138)}
{pt3dadd(165468.000000,162156.000000,44500.000000,246.878202)}
{pt3dadd(165684.000000,162204.000000,44325.000000,252.800456)}
{pt3dadd(165936.000000,162420.000000,44175.000000,252.800456)}
{pt3dadd(166200.000000,162768.000000,44000.000000,250.368276)}
{pt3dadd(166380.000000,163080.000000,43650.000000,231.651806)}
{pt3dadd(166380.000000,163380.000000,43300.000000,229.008442)}
{pt3dadd(166752.000000,163608.000000,43400.000000,252.987938)}
{pt3dadd(166704.000000,163848.000000,42975.000000,309.530610)}
{pt3dadd(166776.000000,164052.000000,42725.000000,341.183300)}
{pt3dadd(166848.000000,164196.000000,42475.000000,399.148366)}
{pt3dadd(167028.000000,164388.000000,42450.000000,428.295586)}
{pt3dadd(167112.000000,164556.000000,42425.000000,434.113310)}
{pt3dadd(167184.000000,164772.000000,42425.000000,409.544583)}
{pt3dadd(166764.000000,165024.000000,42450.000000,366.456300)}

{create adhoc32}
{access adhoc32}
{connect adhoc32(1), adhoc31(0)}
{nseg = 1}
{strdef color color = "White"}
{pt3dclear()}
{pt3dadd(166764.000000,165024.000000,42450.000000,366.456300)}
{pt3dadd(166320.000000,166476.000000,42100.000000,409.544583)}
{pt3dadd(165684.000000,167256.000000,41850.000000,385.484700)}
{pt3dadd(165540.000000,167712.000000,41650.000000,370.479616)}
{pt3dadd(165564.000000,167952.000000,41450.000000,334.133860)}
{pt3dadd(165324.000000,168048.000000,41425.000000,314.560080)}
{pt3dadd(165132.000000,168264.000000,41300.000000,296.472660)}
{pt3dadd(164976.000000,168684.000000,41275.000000,280.429200)}
{pt3dadd(164928.000000,168936.000000,41275.000000,275.010304)}
{pt3dadd(164724.000000,169128.000000,41275.000000,287.627736)}
{pt3dadd(164436.000000,169308.000000,41300.000000,282.090906)}
{pt3dadd(164256.000000,169500.000000,41250.000000,300.178326)}
{pt3dadd(164148.000000,169704.000000,41200.000000,318.158256)}
{pt3dadd(164088.000000,169896.000000,41300.000000,331.750400)}
{pt3dadd(164148.000000,170016.000000,41350.000000,342.040128)}
{pt3dadd(164232.000000,170184.000000,41400.000000,358.744248)}
{pt3dadd(164112.000000,170364.000000,41425.000000,352.157548)}
{pt3dadd(163956.000000,170544.000000,41225.000000,339.596514)}
{pt3dadd(163728.000000,170724.000000,41150.000000,331.770104)}
{pt3dadd(163380.000000,170940.000000,41125.000000,321.480376)}
{pt3dadd(163200.000000,171108.000000,41250.000000,292.333156)}
{pt3dadd(162792.000000,171348.000000,41300.000000,276.024826)}
{pt3dadd(162468.000000,171480.000000,41300.000000,268.911044)}
{pt3dadd(162348.000000,171540.000000,41300.000000,258.230210)}
{pt3dadd(162264.000000,171708.000000,41300.000000,255.454678)}
{pt3dadd(162180.000000,171876.000000,41300.000000,250.539578)}
{pt3dadd(162036.000000,172044.000000,41300.000000,252.706036)}
{pt3dadd(161868.000000,172212.000000,41300.000000,245.027682)}
{pt3dadd(161772.000000,172608.000000,41525.000000,249.942782)}
{pt3dadd(161364.000000,173352.000000,41725.000000,240.100882)}
{pt3dadd(161160.000000,173724.000000,41775.000000,238.338040)}
{pt3dadd(160908.000000,174072.000000,41825.000000,236.171582)}
{pt3dadd(160656.000000,174348.000000,41850.000000,250.963718)}
{pt3dadd(160380.000000,174744.000000,41925.000000,253.607082)}
{pt3dadd(160104.000000,175140.000000,41975.000000,275.639412)}
{pt3dadd(159912.000000,175656.000000,41975.000000,279.799864)}
{pt3dadd(159672.000000,175932.000000,41975.000000,287.358328)}
{pt3dadd(159444.000000,175968.000000,41975.000000,279.421942)}
{pt3dadd(159264.000000,176100.000000,42050.000000,274.677560)}
{pt3dadd(159084.000000,176376.000000,42125.000000,250.470526)}
{pt3dadd(158904.000000,176772.000000,42225.000000,255.631380)}
{pt3dadd(158628.000000,177108.000000,42325.000000,255.631380)}
{pt3dadd(158412.000000,177456.000000,42475.000000,274.192330)}
{pt3dadd(158244.000000,177492.000000,42475.000000,301.535120)}
{pt3dadd(158292.000000,177828.000000,42475.000000,305.993260)}
{pt3dadd(158268.000000,177960.000000,42475.000000,298.434796)}
{pt3dadd(158040.000000,177996.000000,42475.000000,295.969712)}
{pt3dadd(157944.000000,178428.000000,42775.000000,285.345148)}
{pt3dadd(157728.000000,178716.000000,42825.000000,257.585886)}
{pt3dadd(157524.000000,179064.000000,42950.000000,255.302450)}
{pt3dadd(157344.000000,179256.000000,42975.000000,266.118570)}
{pt3dadd(157200.000000,179364.000000,42875.000000,256.567050)}
{pt3dadd(157080.000000,179616.000000,42925.000000,248.630664)}
{pt3dadd(156816.000000,179808.000000,42800.000000,251.148154)}
{pt3dadd(156564.000000,180000.000000,42700.000000,274.055314)}
{pt3dadd(156324.000000,180432.000000,42850.000000,270.797658)}
{pt3dadd(156060.000000,180660.000000,42800.000000,285.589794)}
{pt3dadd(155892.000000,180732.000000,42800.000000,306.087214)}
{pt3dadd(155772.000000,180840.000000,42800.000000,325.344690)}
{pt3dadd(155652.000000,181104.000000,42800.000000,317.969266)}
{pt3dadd(155640.000000,181236.000000,42800.000000,317.969266)}
{pt3dadd(155592.000000,181428.000000,42800.000000,310.032880)}
{pt3dadd(155436.000000,181584.000000,42800.000000,289.951932)}
{pt3dadd(155292.000000,181740.000000,42800.000000,263.495920)}
{pt3dadd(155184.000000,181872.000000,42800.000000,260.581616)}
{pt3dadd(155088.000000,182004.000000,42800.000000,266.271452)}
{pt3dadd(154992.000000,182136.000000,42800.000000,267.094056)}
{pt3dadd(154944.000000,182292.000000,42800.000000,264.279974)}
{pt3dadd(154884.000000,182448.000000,42800.000000,276.897406)}
{pt3dadd(154824.000000,182604.000000,42800.000000,271.478510)}
{pt3dadd(154776.000000,182892.000000,43075.000000,254.698510)}
{pt3dadd(154728.000000,183180.000000,43075.000000,264.726596)}
{pt3dadd(154584.000000,183336.000000,43075.000000,277.974896)}
{pt3dadd(154524.000000,183588.000000,42975.000000,287.162256)}
{pt3dadd(154524.000000,184032.000000,42875.000000,288.288348)}
{pt3dadd(154524.000000,184488.000000,42950.000000,311.341404)}
{pt3dadd(154524.000000,184632.000000,42800.000000,320.988134)}
{pt3dadd(154536.000000,184980.000000,42675.000000,324.048164)}
{pt3dadd(154524.000000,185316.000000,42550.000000,325.150532)}
{pt3dadd(154536.000000,185628.000000,42350.000000,316.825904)}
{pt3dadd(154728.000000,185820.000000,42175.000000,310.552848)}
{pt3dadd(154728.000000,185988.000000,41850.000000,317.814690)}
{pt3dadd(154968.000000,186132.000000,41275.000000,306.834770)}
{pt3dadd(155208.000000,185976.000000,40475.000000,320.983537)}
{pt3dadd(155412.000000,185844.000000,39900.000000,266.402950)}

{create adhoc33}
{access adhoc33}
{connect adhoc33(1), adhoc32(0)}
{nseg = 1}
{strdef color color = "White"}
{pt3dclear()}
{pt3dadd(155412.000000,185844.000000,39900.000000,266.402950)}
{pt3dadd(155616.000000,185856.000000,39300.000000,256.633617)}
{pt3dadd(155880.000000,185856.000000,39000.000000,243.066384)}
{pt3dadd(156108.000000,185796.000000,38650.000000,216.487362)}
{pt3dadd(156576.000000,185628.000000,38475.000000,190.356682)}
{pt3dadd(156984.000000,185388.000000,38475.000000,164.226002)}
{pt3dadd(157200.000000,185040.000000,38475.000000,128.335878)}
{pt3dadd(157260.000000,184896.000000,38475.000000,131.992188)}
{pt3dadd(157608.000000,184740.000000,38225.000000,135.119183)}
{pt3dadd(157596.000000,184368.000000,38175.000000,186.159400)}

{create adhoc34}
{access adhoc34}
{connect adhoc34(1), adhoc33(0)}
{nseg = 1}
{strdef color color = "White"}
{pt3dclear()}
{pt3dadd(157596.000000,184368.000000,38175.000000,186.159400)}
{pt3dadd(157776.000000,184032.000000,38125.000000,202.300960)}
{pt3dadd(157812.000000,183612.000000,37950.000000,236.512593)}
{pt3dadd(157932.000000,183216.000000,37725.000000,288.794300)}

{create adhoc35}
{access adhoc35}
{connect adhoc35(1), adhoc33(0)}
{nseg = 1}
{strdef color color = "White"}
{pt3dclear()}
{pt3dadd(157596.000000,184368.000000,38175.000000,186.159400)}
{pt3dadd(157452.000000,184608.000000,38375.000000,168.852050)}

{create adhoc36}
{access adhoc36}
{connect adhoc36(1), adhoc32(0)}
{nseg = 1}
{strdef color color = "White"}
{pt3dclear()}
{pt3dadd(155412.000000,185844.000000,39900.000000,266.402950)}
{pt3dadd(155628.000000,186696.000000,39500.000000,183.261367)}
{pt3dadd(155772.000000,186876.000000,39400.000000,163.423530)}
{pt3dadd(155940.000000,187092.000000,39225.000000,133.346013)}
{pt3dadd(156132.000000,187176.000000,39025.000000,125.165666)}
{pt3dadd(156360.000000,187668.000000,38775.000000,133.814322)}
{pt3dadd(156528.000000,188160.000000,38525.000000,137.822738)}
{pt3dadd(156708.000000,188520.000000,38275.000000,139.928878)}
{pt3dadd(156876.000000,188748.000000,38300.000000,137.647183)}
{pt3dadd(157056.000000,188964.000000,38300.000000,141.282932)}
{pt3dadd(157248.000000,189708.000000,38450.000000,133.905780)}
{pt3dadd(157464.000000,189792.000000,38300.000000,131.183048)}
{pt3dadd(157680.000000,190272.000000,38475.000000,123.007709)}
{pt3dadd(157836.000000,190548.000000,38450.000000,128.787899)}
{pt3dadd(158064.000000,190992.000000,38725.000000,121.062637)}
{pt3dadd(158124.000000,191172.000000,39025.000000,103.950481)}
{pt3dadd(158088.000000,191460.000000,39350.000000,94.446803)}
{pt3dadd(158304.000000,191952.000000,39650.000000,88.051199)}
{pt3dadd(158508.000000,192384.000000,40050.000000,70.622208)}
{pt3dadd(158352.000000,192840.000000,40475.000000,77.859210)}

{create adhoc37}
{access adhoc37}
{connect adhoc37(1), adhoc31(0)}
{nseg = 1}
{strdef color color = "White"}
{pt3dclear()}
{pt3dadd(166764.000000,165024.000000,42450.000000,366.456300)}
{pt3dadd(167136.000000,164280.000000,42075.000000,226.943013)}
{pt3dadd(167448.000000,164256.000000,41975.000000,165.263769)}
{pt3dadd(167772.000000,164292.000000,41800.000000,117.402573)}
{pt3dadd(168000.000000,164268.000000,41625.000000,94.787373)}
{pt3dadd(168228.000000,164208.000000,41450.000000,98.472684)}
{pt3dadd(168384.000000,164172.000000,41250.000000,109.562398)}
{pt3dadd(168552.000000,164184.000000,41050.000000,114.148964)}
{pt3dadd(168732.000000,164136.000000,40825.000000,109.120724)}
{pt3dadd(168864.000000,164172.000000,40600.000000,108.544576)}
{pt3dadd(169008.000000,164184.000000,40475.000000,107.684824)}
{pt3dadd(169140.000000,164136.000000,40125.000000,104.186329)}
{pt3dadd(169284.000000,164076.000000,39875.000000,110.332766)}
{pt3dadd(169296.000000,163944.000000,39675.000000,119.369422)}
{pt3dadd(169332.000000,163812.000000,39600.000000,128.505210)}
{pt3dadd(169344.000000,163668.000000,39275.000000,131.353751)}
{pt3dadd(169464.000000,163656.000000,38900.000000,129.072056)}
{pt3dadd(169572.000000,163656.000000,38600.000000,127.918765)}
{pt3dadd(169764.000000,163656.000000,38425.000000,121.546104)}
{pt3dadd(169956.000000,163668.000000,38250.000000,110.055912)}
{pt3dadd(170160.000000,163644.000000,38075.000000,113.037950)}
{pt3dadd(170316.000000,163644.000000,37850.000000,111.092878)}
{pt3dadd(170460.000000,163680.000000,37575.000000,111.092878)}
{pt3dadd(170592.000000,163692.000000,37375.000000,114.100015)}
{pt3dadd(170700.000000,163680.000000,37275.000000,118.119174)}
{pt3dadd(170808.000000,163692.000000,36975.000000,111.003906)}
{pt3dadd(170940.000000,163680.000000,36650.000000,117.457664)}
{pt3dadd(170916.000000,163680.000000,36550.000000,116.666793)}
{pt3dadd(170964.000000,163416.000000,36275.000000,110.518959)}
{pt3dadd(170976.000000,163344.000000,36000.000000,101.395422)}
{pt3dadd(171024.000000,163212.000000,35700.000000,101.395422)}
{pt3dadd(171156.000000,163140.000000,35350.000000,97.283185)}
{pt3dadd(171480.000000,163188.000000,34900.000000,91.400684)}
{pt3dadd(171492.000000,163248.000000,34625.000000,83.707858)}
{pt3dadd(171492.000000,163284.000000,34375.000000,84.350054)}
{pt3dadd(171492.000000,163380.000000,34025.000000,68.435055)}
{pt3dadd(171492.000000,163476.000000,33825.000000,50.958013)}
{pt3dadd(171756.000000,163716.000000,33425.000000,37.222116)}
{pt3dadd(171888.000000,163956.000000,33125.000000,19.203920)}

{create adhoc38}
{access adhoc38}
{connect adhoc38(1), adhoc20(0)}
{nseg = 1}
{strdef color color = "White"}
{pt3dclear()}
{pt3dadd(168408.000000,144048.000000,62025.000000,675.043950)}
{pt3dadd(168420.000000,142872.000000,61500.000000,427.649427)}
{pt3dadd(168420.000000,142128.000000,61175.000000,423.230496)}
{pt3dadd(168444.000000,141372.000000,60275.000000,355.695242)}
{pt3dadd(168072.000000,140832.000000,60100.000000,363.247762)}
{pt3dadd(167988.000000,140592.000000,59875.000000,366.162066)}
{pt3dadd(167784.000000,140328.000000,59625.000000,347.802246)}
{pt3dadd(167628.000000,140040.000000,59125.000000,328.636986)}
{pt3dadd(167484.000000,139644.000000,58675.000000,327.470410)}
{pt3dadd(167256.000000,139860.000000,58375.000000,309.490480)}
{pt3dadd(167064.000000,139596.000000,58075.000000,301.157280)}
{pt3dadd(166920.000000,139296.000000,57750.000000,298.703080)}
{pt3dadd(166776.000000,139356.000000,57650.000000,290.242120)}
{pt3dadd(166572.000000,139260.000000,57425.000000,281.671830)}
{pt3dadd(166452.000000,139140.000000,57175.000000,293.065060)}
{pt3dadd(166296.000000,138876.000000,56900.000000,304.458290)}
{pt3dadd(166080.000000,138684.000000,56600.000000,310.421574)}
{pt3dadd(165924.000000,138564.000000,56350.000000,306.288734)}
{pt3dadd(165732.000000,138396.000000,55625.000000,311.701544)}
{pt3dadd(165564.000000,138348.000000,55400.000000,302.951678)}
{pt3dadd(165360.000000,138192.000000,55175.000000,282.331884)}
{pt3dadd(165156.000000,138060.000000,55025.000000,243.436674)}
{pt3dadd(165036.000000,137940.000000,54550.000000,220.251376)}
{pt3dadd(165048.000000,137844.000000,54075.000000,192.884550)}
{pt3dadd(165060.000000,137736.000000,53600.000000,185.326086)}
{pt3dadd(164964.000000,137700.000000,53250.000000,197.196014)}
{pt3dadd(164988.000000,137688.000000,52800.000000,226.028760)}
{pt3dadd(165048.000000,137484.000000,52325.000000,257.547258)}
{pt3dadd(164892.000000,137196.000000,52000.000000,292.611814)}
{pt3dadd(164748.000000,136908.000000,51750.000000,305.860114)}
{pt3dadd(164964.000000,136992.000000,51250.000000,307.173304)}
{pt3dadd(164832.000000,136896.000000,50900.000000,302.939284)}
{pt3dadd(164688.000000,136740.000000,50625.000000,289.690984)}
{pt3dadd(164724.000000,136608.000000,50475.000000,264.512518)}
{pt3dadd(165192.000000,136860.000000,50225.000000,263.709474)}
{pt3dadd(165192.000000,136716.000000,49875.000000,262.396284)}
{pt3dadd(165192.000000,136752.000000,49425.000000,262.396284)}
{pt3dadd(165324.000000,136584.000000,49025.000000,272.730280)}
{pt3dadd(165480.000000,136392.000000,48750.000000,281.771336)}
{pt3dadd(165552.000000,135960.000000,48400.000000,276.884544)}
{pt3dadd(165444.000000,135744.000000,48150.000000,272.167122)}
{pt3dadd(165636.000000,135912.000000,47825.000000,268.356110)}
{pt3dadd(165468.000000,136032.000000,47425.000000,253.966110)}

{create adhoc39}
{access adhoc39}
{connect adhoc39(1), adhoc38(0)}
{nseg = 1}
{strdef color color = "White"}
{pt3dclear()}
{pt3dadd(165468.000000,136032.000000,47425.000000,253.966110)}
{pt3dadd(165600.000000,136656.000000,46550.000000,268.154490)}
{pt3dadd(165636.000000,136944.000000,46325.000000,242.790540)}
{pt3dadd(165552.000000,137232.000000,46075.000000,235.491358)}
{pt3dadd(165588.000000,137544.000000,45825.000000,187.619582)}
{pt3dadd(165576.000000,137868.000000,45575.000000,175.112753)}
{pt3dadd(165600.000000,138192.000000,45325.000000,170.001517)}
{pt3dadd(165612.000000,138624.000000,45025.000000,174.088183)}
{pt3dadd(165876.000000,139260.000000,45050.000000,158.630789)}
{pt3dadd(166044.000000,139548.000000,44850.000000,154.035778)}
{pt3dadd(166212.000000,139824.000000,44550.000000,163.288629)}
{pt3dadd(166680.000000,140148.000000,44550.000000,161.316109)}
{pt3dadd(167076.000000,140484.000000,44375.000000,147.295795)}
{pt3dadd(167652.000000,141060.000000,44150.000000,141.408302)}
{pt3dadd(168048.000000,141540.000000,43950.000000,143.704629)}
{pt3dadd(168564.000000,142092.000000,43650.000000,133.216152)}
{pt3dadd(168912.000000,142320.000000,43475.000000,121.802420)}
{pt3dadd(169200.000000,142524.000000,43475.000000,124.351998)}
{pt3dadd(169296.000000,142776.000000,43325.000000,160.489021)}
{pt3dadd(169500.000000,143172.000000,43350.000000,175.720289)}
{pt3dadd(169848.000000,143556.000000,43350.000000,197.246882)}
{pt3dadd(169980.000000,143868.000000,43350.000000,210.548910)}
{pt3dadd(169800.000000,144744.000000,43050.000000,232.919058)}
{pt3dadd(169656.000000,145464.000000,42850.000000,214.083260)}
{pt3dadd(169404.000000,145812.000000,42675.000000,207.088806)}
{pt3dadd(169236.000000,146040.000000,42575.000000,200.611832)}
{pt3dadd(169104.000000,146520.000000,42450.000000,187.309804)}
{pt3dadd(169416.000000,147096.000000,42225.000000,195.246190)}
{pt3dadd(169728.000000,147432.000000,42025.000000,201.464556)}
{pt3dadd(170088.000000,148008.000000,41850.000000,222.373738)}
{pt3dadd(170376.000000,148236.000000,41600.000000,238.223952)}
{pt3dadd(170544.000000,148440.000000,41375.000000,255.856050)}
{pt3dadd(170556.000000,148656.000000,41050.000000,235.141660)}
{pt3dadd(170328.000000,148524.000000,40700.000000,210.351756)}
{pt3dadd(170184.000000,148476.000000,40375.000000,177.908028)}
{pt3dadd(170244.000000,148260.000000,40100.000000,145.962126)}
{pt3dadd(170268.000000,148104.000000,39775.000000,118.366055)}
{pt3dadd(170352.000000,147984.000000,39500.000000,94.511577)}
{pt3dadd(170508.000000,147864.000000,39100.000000,97.851847)}
{pt3dadd(170700.000000,147756.000000,38850.000000,95.906775)}
{pt3dadd(170856.000000,147720.000000,38575.000000,105.895801)}
{pt3dadd(171396.000000,147636.000000,38250.000000,117.211808)}
{pt3dadd(172068.000000,147696.000000,37975.000000,128.924564)}
{pt3dadd(172488.000000,147852.000000,37725.000000,138.784174)}
{pt3dadd(172884.000000,147636.000000,37425.000000,157.379654)}
{pt3dadd(172920.000000,147420.000000,37150.000000,173.475024)}
{pt3dadd(173088.000000,147300.000000,37000.000000,183.536722)}
{pt3dadd(173400.000000,147252.000000,37000.000000,195.678444)}
{pt3dadd(173724.000000,147204.000000,37000.000000,209.551904)}
{pt3dadd(173940.000000,147144.000000,37000.000000,207.516502)}
{pt3dadd(174132.000000,146928.000000,36725.000000,188.547374)}
{pt3dadd(174336.000000,146868.000000,36475.000000,181.552920)}
{pt3dadd(174648.000000,146664.000000,36275.000000,191.933314)}
{pt3dadd(174912.000000,146628.000000,36100.000000,186.372546)}
{pt3dadd(175236.000000,146640.000000,35850.000000,204.665860)}
{pt3dadd(175404.000000,146460.000000,35525.000000,211.957060)}

{create adhoc40}
{access adhoc40}
{connect adhoc40(1), adhoc38(0)}
{nseg = 1}
{strdef color color = "White"}
{pt3dclear()}
{pt3dadd(165468.000000,136032.000000,47425.000000,253.966110)}
{pt3dadd(165612.000000,135600.000000,45700.000000,279.868353)}
{pt3dadd(166020.000000,135300.000000,45350.000000,307.917772)}
{pt3dadd(165876.000000,134988.000000,44975.000000,340.428783)}
{pt3dadd(165900.000000,134916.000000,44625.000000,362.616120)}

{create adhoc41}
{access adhoc41}
{connect adhoc41(1), adhoc40(0)}
{nseg = 1}
{strdef color color = "White"}
{pt3dclear()}
{pt3dadd(165900.000000,134916.000000,44625.000000,362.616120)}
{pt3dadd(166236.000000,135096.000000,44950.000000,216.356860)}

{create adhoc42}
{access adhoc42}
{connect adhoc42(1), adhoc40(0)}
{nseg = 1}
{strdef color color = "White"}
{pt3dclear()}
{pt3dadd(165900.000000,134916.000000,44625.000000,362.616120)}
{pt3dadd(164808.000000,134832.000000,44425.000000,203.620663)}
{pt3dadd(164076.000000,134820.000000,44700.000000,176.100456)}
{pt3dadd(163212.000000,134808.000000,45000.000000,131.613878)}
{pt3dadd(162756.000000,134712.000000,45275.000000,131.613878)}
{pt3dadd(161916.000000,134712.000000,45700.000000,126.108936)}
{pt3dadd(161520.000000,134940.000000,46250.000000,135.355926)}
{pt3dadd(160932.000000,135132.000000,47150.000000,143.543234)}
{pt3dadd(160668.000000,135144.000000,47825.000000,147.962512)}
{pt3dadd(160428.000000,135288.000000,48100.000000,151.780048)}
{pt3dadd(159504.000000,135240.000000,48525.000000,156.513414)}
{pt3dadd(158832.000000,135108.000000,48750.000000,141.197225)}
{pt3dadd(158364.000000,134988.000000,49125.000000,124.330575)}
{pt3dadd(157884.000000,134976.000000,49500.000000,116.093761)}
{pt3dadd(157344.000000,135000.000000,49850.000000,123.202437)}
{pt3dadd(157320.000000,134820.000000,50250.000000,132.622669)}
{pt3dadd(157344.000000,134760.000000,50600.000000,143.111146)}
{pt3dadd(157044.000000,134712.000000,51025.000000,158.355000)}
{pt3dadd(156804.000000,134676.000000,51375.000000,187.962282)}
{pt3dadd(156396.000000,134520.000000,51850.000000,208.327604)}
{pt3dadd(156072.000000,134532.000000,52225.000000,208.327604)}
{pt3dadd(155568.000000,133980.000000,52700.000000,211.654334)}
{pt3dadd(155316.000000,133812.000000,52950.000000,218.346228)}
{pt3dadd(155016.000000,133764.000000,53250.000000,193.958316)}
{pt3dadd(154788.000000,133776.000000,53550.000000,161.513491)}
{pt3dadd(154548.000000,133764.000000,53875.000000,150.500590)}
{pt3dadd(154308.000000,133764.000000,54200.000000,133.356250)}
{pt3dadd(154092.000000,133764.000000,54525.000000,120.910000)}
{pt3dadd(153744.000000,133872.000000,54800.000000,120.910000)}
{pt3dadd(153480.000000,134004.000000,55000.000000,130.300106)}
{pt3dadd(153216.000000,134004.000000,55250.000000,136.379743)}
{pt3dadd(152952.000000,133992.000000,55525.000000,153.524082)}
{pt3dadd(152664.000000,134004.000000,55800.000000,159.278438)}
{pt3dadd(152328.000000,134088.000000,56050.000000,166.971854)}
{pt3dadd(152004.000000,134088.000000,56275.000000,159.945994)}
{pt3dadd(151776.000000,134088.000000,56600.000000,160.239018)}
{pt3dadd(151536.000000,134076.000000,56800.000000,155.366768)}
{pt3dadd(151320.000000,134364.000000,56950.000000,153.364872)}
{pt3dadd(151056.000000,134340.000000,57150.000000,144.269622)}
{pt3dadd(150888.000000,134436.000000,57450.000000,149.749962)}
{pt3dadd(150660.000000,134532.000000,57675.000000,149.749962)}
{pt3dadd(150468.000000,134616.000000,57925.000000,147.093102)}
{pt3dadd(150300.000000,134688.000000,58175.000000,140.858184)}
{pt3dadd(150096.000000,134640.000000,58400.000000,138.251602)}
{pt3dadd(149904.000000,134592.000000,58575.000000,124.553268)}
{pt3dadd(149724.000000,134616.000000,58650.000000,113.562612)}
{pt3dadd(149556.000000,134652.000000,58725.000000,100.920922)}
{pt3dadd(149412.000000,134808.000000,58975.000000,104.738458)}
{pt3dadd(149232.000000,134964.000000,59325.000000,102.374213)}
{pt3dadd(149100.000000,135120.000000,59825.000000,120.588627)}
{pt3dadd(148992.000000,135108.000000,59825.000000,122.065925)}
{pt3dadd(148824.000000,135312.000000,60175.000000,137.364475)}
{pt3dadd(148644.000000,135420.000000,60525.000000,143.406549)}
{pt3dadd(148440.000000,135504.000000,60800.000000,159.088448)}
{pt3dadd(148164.000000,135492.000000,61225.000000,145.629411)}
{pt3dadd(147972.000000,135612.000000,61675.000000,151.134353)}
{pt3dadd(147828.000000,135744.000000,62150.000000,142.191396)}
{pt3dadd(147660.000000,135840.000000,62500.000000,135.368514)}
{pt3dadd(147492.000000,135960.000000,62775.000000,114.693469)}
{pt3dadd(147288.000000,136068.000000,62975.000000,115.791841)}
{pt3dadd(146856.000000,136296.000000,63125.000000,111.283155)}
{pt3dadd(146652.000000,136476.000000,63500.000000,115.880576)}
{pt3dadd(146496.000000,136488.000000,63975.000000,144.135382)}
{pt3dadd(146436.000000,136632.000000,64325.000000,184.348885)}
{pt3dadd(146448.000000,136704.000000,64625.000000,198.854852)}
{pt3dadd(146220.000000,136788.000000,64775.000000,214.361376)}
{pt3dadd(146172.000000,136836.000000,65100.000000,221.875228)}
{pt3dadd(146040.000000,137040.000000,65525.000000,185.340890)}
{pt3dadd(145440.000000,137196.000000,65825.000000,146.031020)}
{pt3dadd(145032.000000,137220.000000,66100.000000,135.787322)}
{pt3dadd(144804.000000,136680.000000,66425.000000,124.789484)}
{pt3dadd(144516.000000,136728.000000,66725.000000,128.282550)}
{pt3dadd(144336.000000,136908.000000,67050.000000,136.007812)}
{pt3dadd(144120.000000,136944.000000,67525.000000,141.226208)}
{pt3dadd(143796.000000,137088.000000,68025.000000,144.808524)}
{pt3dadd(143532.000000,137184.000000,68475.000000,153.457180)}
{pt3dadd(143184.000000,137148.000000,68925.000000,155.335772)}
{pt3dadd(143028.000000,137088.000000,69400.000000,158.627292)}
{pt3dadd(142500.000000,137328.000000,69875.000000,187.299870)}
{pt3dadd(141696.000000,137424.000000,70200.000000,205.842462)}
{pt3dadd(140892.000000,137544.000000,70550.000000,220.522273)}
{pt3dadd(140616.000000,137820.000000,70650.000000,247.264980)}

{create adhoc43}
{access adhoc43}
{connect adhoc43(1), adhoc42(0)}
{nseg = 1}
{strdef color color = "White"}
{pt3dclear()}
{pt3dadd(140616.000000,137820.000000,70650.000000,247.264980)}
{pt3dadd(140628.000000,137160.000000,70875.000000,191.674040)}
{pt3dadd(140280.000000,136440.000000,71100.000000,172.616396)}
{pt3dadd(139692.000000,135984.000000,71250.000000,148.593464)}
{pt3dadd(139104.000000,135540.000000,71250.000000,138.211854)}
{pt3dadd(138840.000000,135024.000000,71175.000000,146.014866)}
{pt3dadd(138552.000000,134760.000000,71075.000000,163.056642)}
{pt3dadd(138348.000000,134232.000000,70900.000000,177.777972)}
{pt3dadd(138156.000000,133920.000000,71075.000000,188.892748)}
{pt3dadd(137940.000000,133572.000000,71200.000000,195.781292)}
{pt3dadd(137712.000000,133176.000000,71150.000000,185.428702)}
{pt3dadd(137472.000000,132816.000000,71250.000000,167.459338)}
{pt3dadd(137232.000000,132612.000000,71375.000000,155.474920)}
{pt3dadd(137016.000000,132456.000000,71425.000000,146.966726)}
{pt3dadd(136764.000000,132336.000000,71525.000000,145.343930)}
{pt3dadd(136572.000000,132036.000000,71500.000000,145.292228)}
{pt3dadd(136224.000000,132024.000000,71450.000000,144.747892)}
{pt3dadd(135864.000000,131880.000000,71375.000000,136.230790)}
{pt3dadd(135624.000000,131832.000000,71325.000000,124.586591)}
{pt3dadd(135420.000000,131916.000000,71300.000000,132.743679)}
{pt3dadd(135240.000000,131808.000000,71175.000000,143.147971)}
{pt3dadd(135012.000000,131664.000000,71075.000000,153.159869)}
{pt3dadd(134868.000000,131508.000000,70975.000000,175.732531)}
{pt3dadd(134700.000000,131448.000000,70950.000000,193.975572)}
{pt3dadd(134580.000000,131400.000000,70875.000000,191.245128)}
{pt3dadd(134424.000000,131340.000000,70800.000000,185.144456)}
{pt3dadd(134244.000000,131220.000000,70775.000000,173.730724)}
{pt3dadd(134040.000000,130896.000000,70625.000000,169.687062)}
{pt3dadd(133860.000000,130812.000000,70575.000000,180.720318)}
{pt3dadd(133596.000000,130452.000000,70500.000000,176.949010)}
{pt3dadd(133464.000000,130224.000000,70450.000000,173.968596)}
{pt3dadd(133188.000000,130104.000000,70450.000000,171.362014)}
{pt3dadd(132996.000000,130080.000000,70400.000000,151.836758)}
{pt3dadd(132852.000000,130044.000000,70400.000000,133.300710)}
{pt3dadd(132720.000000,129996.000000,70425.000000,120.110828)}
{pt3dadd(132336.000000,129972.000000,70125.000000,111.481933)}
{pt3dadd(132072.000000,130104.000000,70125.000000,103.263939)}
{pt3dadd(131784.000000,130296.000000,70125.000000,103.938144)}
{pt3dadd(131376.000000,130404.000000,70125.000000,109.261372)}
{pt3dadd(131196.000000,130440.000000,69975.000000,129.762892)}
{pt3dadd(131076.000000,130404.000000,69875.000000,142.600623)}
{pt3dadd(130836.000000,130692.000000,69675.000000,153.651785)}
{pt3dadd(130512.000000,130692.000000,69675.000000,143.619176)}
{pt3dadd(130296.000000,130980.000000,69550.000000,118.947709)}
{pt3dadd(130308.000000,131244.000000,69750.000000,77.690678)}
{pt3dadd(130536.000000,131400.000000,70300.000000,38.922287)}

{create adhoc44}
{access adhoc44}
{connect adhoc44(1), adhoc42(0)}
{nseg = 1}
{strdef color color = "White"}
{pt3dclear()}
{pt3dadd(140616.000000,137820.000000,70650.000000,247.264980)}
{pt3dadd(140364.000000,137820.000000,70550.000000,170.998137)}
{pt3dadd(140160.000000,137892.000000,70675.000000,141.500310)}
{pt3dadd(139992.000000,137940.000000,70725.000000,109.259384)}
{pt3dadd(139836.000000,138084.000000,70700.000000,101.073964)}
{pt3dadd(139692.000000,138336.000000,70725.000000,96.911155)}
{pt3dadd(139416.000000,138360.000000,70750.000000,96.911155)}
{pt3dadd(139188.000000,138564.000000,70600.000000,96.911155)}
{pt3dadd(139008.000000,138840.000000,70500.000000,99.522199)}
{pt3dadd(138804.000000,139116.000000,70475.000000,96.722337)}
{pt3dadd(138672.000000,139200.000000,70500.000000,100.617111)}
{pt3dadd(138588.000000,139284.000000,70500.000000,107.070869)}
{pt3dadd(138336.000000,139608.000000,70400.000000,108.894534)}
{pt3dadd(138000.000000,140028.000000,70400.000000,114.501484)}
{pt3dadd(137604.000000,140436.000000,70400.000000,116.543809)}
{pt3dadd(137592.000000,140628.000000,70725.000000,110.188216)}
{pt3dadd(137280.000000,140928.000000,71025.000000,97.701426)}
{pt3dadd(137232.000000,141192.000000,71250.000000,97.920086)}
{pt3dadd(137256.000000,141324.000000,71475.000000,87.358454)}
{pt3dadd(137244.000000,141420.000000,71725.000000,81.783454)}
{pt3dadd(137256.000000,141516.000000,72125.000000,76.957661)}
{pt3dadd(137280.000000,141876.000000,72500.000000,87.080205)}
{pt3dadd(137424.000000,142020.000000,72650.000000,100.895413)}
{pt3dadd(137364.000000,142764.000000,72875.000000,118.482905)}
{pt3dadd(137328.000000,142920.000000,73100.000000,127.658266)}
{pt3dadd(137496.000000,143112.000000,73350.000000,156.322583)}
{pt3dadd(137448.000000,143352.000000,73425.000000,172.707142)}
{pt3dadd(137460.000000,143556.000000,73650.000000,164.961134)}
{pt3dadd(137472.000000,143832.000000,73700.000000,166.062958)}
{pt3dadd(137460.000000,144120.000000,73450.000000,174.573870)}
{pt3dadd(137448.000000,144588.000000,73400.000000,159.342602)}
{pt3dadd(137460.000000,144852.000000,73225.000000,147.928870)}
{pt3dadd(137352.000000,145188.000000,73150.000000,152.466114)}
{pt3dadd(137388.000000,145572.000000,73275.000000,146.945012)}
{pt3dadd(137412.000000,146088.000000,73275.000000,145.322216)}
{pt3dadd(137616.000000,146544.000000,73275.000000,155.181826)}
{pt3dadd(137736.000000,146892.000000,73275.000000,156.133626)}
{pt3dadd(137796.000000,147324.000000,73125.000000,149.920670)}
{pt3dadd(138012.000000,147732.000000,72925.000000,149.046833)}
{pt3dadd(138168.000000,147828.000000,72750.000000,131.804670)}

{create adhoc45}
{access adhoc45}
{connect adhoc45(1), adhoc40(0)}
{nseg = 1}
{strdef color color = "White"}
{pt3dclear()}
{pt3dadd(165900.000000,134916.000000,44625.000000,362.616120)}
{pt3dadd(165792.000000,134592.000000,44625.000000,258.742923)}
{pt3dadd(165816.000000,134472.000000,44500.000000,197.154923)}
{pt3dadd(166236.000000,134568.000000,44125.000000,141.688051)}
{pt3dadd(166380.000000,134364.000000,43750.000000,112.070364)}
{pt3dadd(166740.000000,134172.000000,43575.000000,111.859920)}
{pt3dadd(167160.000000,133992.000000,43325.000000,123.318850)}
{pt3dadd(167676.000000,133716.000000,43100.000000,125.154541)}
{pt3dadd(168024.000000,133464.000000,42800.000000,123.568803)}
{pt3dadd(168492.000000,133176.000000,42200.000000,124.605408)}
{pt3dadd(168708.000000,132996.000000,42000.000000,110.352281)}
{pt3dadd(169356.000000,132708.000000,41825.000000,94.638211)}
{pt3dadd(170100.000000,132528.000000,41675.000000,105.524111)}
{pt3dadd(170892.000000,132264.000000,41675.000000,122.215793)}
{pt3dadd(171408.000000,132024.000000,41625.000000,137.563193)}
{pt3dadd(172116.000000,131844.000000,41350.000000,160.811480)}

{create adhoc46}
{access adhoc46}
{connect adhoc46(1), adhoc5(0)}
{nseg = 1}
{strdef color color = "White"}
{pt3dclear()}
{pt3dadd(189588.000000,161868.000000,110125.000000,773.252870)}
{pt3dadd(189984.000000,161460.000000,110125.000000,450.509690)}
{pt3dadd(190224.000000,161352.000000,110075.000000,318.305814)}
{pt3dadd(190404.000000,161124.000000,110000.000000,188.855240)}
{pt3dadd(190560.000000,160992.000000,110125.000000,149.977148)}
{pt3dadd(190788.000000,160896.000000,110125.000000,116.737416)}
{pt3dadd(190932.000000,160788.000000,110000.000000,112.482276)}
{pt3dadd(190848.000000,160452.000000,109975.000000,109.214379)}
{pt3dadd(190728.000000,160152.000000,110000.000000,108.014379)}
{pt3dadd(190524.000000,159864.000000,110050.000000,106.977774)}
{pt3dadd(190464.000000,159588.000000,109950.000000,106.977774)}
{pt3dadd(190404.000000,159288.000000,109875.000000,117.863674)}
{pt3dadd(190488.000000,159048.000000,109850.000000,138.179715)}
{pt3dadd(190584.000000,158820.000000,109850.000000,155.227859)}
{pt3dadd(190812.000000,158592.000000,109850.000000,166.658052)}
{pt3dadd(191076.000000,158292.000000,109875.000000,182.121224)}
{pt3dadd(191304.000000,157968.000000,109800.000000,194.591016)}
{pt3dadd(191472.000000,157680.000000,109775.000000,203.437146)}
{pt3dadd(191640.000000,157392.000000,109750.000000,205.489554)}
{pt3dadd(191904.000000,157116.000000,109700.000000,220.845618)}
{pt3dadd(192036.000000,156780.000000,109700.000000,222.707210)}
{pt3dadd(192204.000000,156516.000000,109675.000000,216.838538)}
{pt3dadd(192288.000000,156240.000000,109625.000000,200.714674)}
{pt3dadd(192288.000000,156012.000000,109525.000000,193.073052)}
{pt3dadd(192264.000000,155760.000000,109575.000000,181.013622)}
{pt3dadd(192216.000000,155448.000000,109550.000000,179.152030)}
{pt3dadd(192144.000000,155100.000000,109375.000000,185.020702)}
{pt3dadd(192096.000000,154728.000000,109225.000000,203.639282)}
{pt3dadd(191856.000000,154380.000000,109325.000000,220.569342)}
{pt3dadd(191784.000000,154008.000000,109200.000000,237.499402)}
{pt3dadd(191748.000000,153660.000000,109050.000000,245.523102)}
{pt3dadd(191604.000000,153288.000000,108975.000000,249.940910)}
{pt3dadd(191604.000000,152940.000000,108950.000000,240.652472)}
{pt3dadd(191496.000000,152604.000000,108925.000000,243.271922)}
{pt3dadd(191376.000000,152256.000000,108950.000000,245.891372)}
{pt3dadd(191256.000000,151944.000000,108875.000000,250.530066)}
{pt3dadd(191136.000000,151584.000000,108875.000000,273.217962)}
{pt3dadd(191016.000000,151320.000000,109075.000000,293.796554)}
{pt3dadd(190896.000000,150984.000000,109250.000000,305.651218)}
{pt3dadd(190764.000000,150612.000000,109375.000000,303.031768)}
{pt3dadd(190584.000000,150252.000000,109425.000000,308.145934)}
{pt3dadd(190404.000000,149892.000000,109475.000000,308.145934)}
{pt3dadd(190236.000000,149460.000000,109550.000000,302.225650)}
{pt3dadd(190092.000000,149016.000000,109600.000000,287.751536)}
{pt3dadd(189984.000000,148608.000000,109625.000000,282.880906)}
{pt3dadd(189876.000000,148200.000000,109625.000000,268.920610)}
{pt3dadd(189876.000000,147780.000000,109550.000000,256.473214)}
{pt3dadd(190056.000000,147420.000000,109650.000000,239.762498)}
{pt3dadd(190236.000000,147048.000000,109575.000000,226.466980)}
{pt3dadd(190368.000000,146640.000000,109475.000000,218.042092)}
{pt3dadd(190512.000000,146244.000000,109425.000000,222.249528)}
{pt3dadd(190680.000000,145848.000000,109475.000000,219.499108)}
{pt3dadd(190764.000000,145488.000000,109500.000000,228.345238)}
{pt3dadd(190776.000000,145116.000000,109500.000000,249.898566)}
{pt3dadd(190752.000000,144744.000000,109475.000000,277.668198)}
{pt3dadd(190728.000000,144396.000000,109400.000000,306.129190)}
{pt3dadd(190704.000000,144132.000000,109350.000000,345.203850)}
{pt3dadd(190656.000000,143796.000000,109100.000000,369.026148)}
{pt3dadd(190704.000000,143424.000000,108800.000000,375.242452)}
{pt3dadd(190788.000000,143148.000000,108775.000000,355.897708)}
{pt3dadd(190704.000000,142848.000000,108375.000000,334.570126)}
{pt3dadd(190608.000000,142692.000000,108025.000000,285.742606)}
{pt3dadd(190440.000000,142620.000000,107700.000000,278.889138)}
{pt3dadd(190440.000000,142536.000000,107425.000000,264.415024)}
{pt3dadd(190404.000000,142428.000000,107050.000000,257.944808)}
{pt3dadd(190440.000000,142176.000000,106700.000000,253.074178)}
{pt3dadd(190320.000000,142260.000000,106325.000000,260.207588)}
{pt3dadd(190104.000000,142308.000000,106000.000000,248.352924)}
{pt3dadd(190080.000000,142068.000000,105700.000000,228.126230)}
{pt3dadd(190068.000000,141768.000000,105275.000000,219.240382)}
{pt3dadd(189852.000000,141456.000000,104925.000000,212.770166)}
{pt3dadd(189588.000000,141144.000000,104475.000000,201.429320)}
{pt3dadd(189264.000000,140844.000000,104025.000000,207.067680)}
{pt3dadd(188988.000000,140496.000000,103650.000000,222.423744)}
{pt3dadd(188664.000000,140160.000000,103275.000000,242.650438)}
{pt3dadd(188496.000000,139812.000000,102850.000000,253.991284)}
{pt3dadd(188436.000000,139464.000000,102475.000000,265.332130)}
{pt3dadd(188388.000000,139104.000000,102100.000000,259.693770)}
{pt3dadd(188244.000000,138876.000000,101725.000000,285.891982)}
{pt3dadd(188124.000000,138600.000000,101325.000000,303.709248)}
{pt3dadd(188052.000000,138312.000000,100950.000000,311.967058)}
{pt3dadd(187932.000000,137988.000000,100600.000000,314.586508)}
{pt3dadd(187836.000000,137652.000000,100175.000000,326.441172)}
{pt3dadd(187788.000000,137328.000000,99825.000000,305.113590)}
{pt3dadd(187788.000000,136932.000000,99500.000000,289.915774)}
{pt3dadd(187776.000000,136512.000000,99200.000000,281.657964)}
{pt3dadd(187644.000000,136104.000000,98950.000000,263.881404)}
{pt3dadd(187488.000000,135660.000000,98675.000000,240.118852)}
{pt3dadd(187272.000000,135228.000000,98375.000000,218.360622)}
{pt3dadd(187128.000000,134820.000000,98025.000000,215.741172)}
{pt3dadd(187032.000000,134352.000000,97875.000000,218.360622)}
{pt3dadd(186804.000000,133944.000000,97700.000000,244.807886)}
{pt3dadd(186600.000000,133512.000000,97425.000000,256.715774)}
{pt3dadd(186492.000000,133068.000000,97250.000000,289.764158)}
{pt3dadd(186444.000000,132636.000000,97025.000000,298.021968)}
{pt3dadd(186372.000000,132264.000000,96775.000000,288.269108)}
{pt3dadd(186372.000000,131892.000000,96550.000000,267.690516)}
{pt3dadd(186300.000000,131616.000000,96400.000000,260.200436)}
{pt3dadd(186108.000000,131280.000000,96175.000000,251.529732)}
{pt3dadd(185940.000000,130920.000000,95950.000000,251.529732)}
{pt3dadd(185808.000000,130536.000000,95775.000000,266.920952)}
{pt3dadd(185616.000000,130152.000000,95550.000000,297.536972)}
{pt3dadd(185448.000000,129684.000000,95375.000000,327.421012)}
{pt3dadd(185208.000000,129240.000000,95325.000000,349.814972)}
{pt3dadd(185160.000000,128772.000000,95250.000000,359.374428)}
{pt3dadd(185076.000000,128340.000000,95125.000000,353.736068)}
{pt3dadd(184968.000000,127980.000000,95125.000000,361.292012)}
{pt3dadd(184824.000000,127608.000000,95050.000000,361.292012)}
{pt3dadd(184680.000000,127260.000000,94925.000000,354.095868)}
{pt3dadd(184572.000000,126936.000000,94825.000000,333.783886)}
{pt3dadd(184512.000000,126492.000000,94650.000000,326.293806)}
{pt3dadd(184560.000000,126072.000000,94650.000000,297.410280)}
{pt3dadd(184560.000000,125724.000000,94725.000000,265.263460)}
{pt3dadd(184500.000000,125316.000000,94750.000000,242.575564)}
{pt3dadd(184536.000000,124872.000000,94825.000000,245.070280)}
{pt3dadd(184452.000000,124428.000000,95075.000000,249.940910)}
{pt3dadd(184368.000000,124044.000000,95175.000000,252.560360)}
{pt3dadd(184272.000000,123672.000000,95300.000000,257.199054)}
{pt3dadd(184128.000000,123216.000000,95375.000000,262.069684)}
{pt3dadd(183948.000000,122724.000000,95325.000000,273.359838)}
{pt3dadd(183756.000000,122244.000000,95325.000000,273.359838)}
{pt3dadd(183528.000000,121800.000000,95275.000000,276.110258)}
{pt3dadd(183312.000000,121332.000000,95250.000000,283.974844)}
{pt3dadd(183144.000000,120888.000000,95100.000000,292.232654)}
{pt3dadd(182868.000000,120396.000000,94900.000000,283.561950)}
{pt3dadd(182688.000000,119976.000000,94675.000000,276.428540)}
{pt3dadd(182544.000000,119604.000000,94625.000000,282.348824)}
{pt3dadd(182364.000000,119304.000000,94575.000000,276.978954)}
{pt3dadd(182184.000000,118956.000000,94350.000000,261.587734)}
{pt3dadd(182040.000000,118548.000000,94250.000000,258.968284)}
{pt3dadd(181776.000000,118140.000000,94025.000000,249.171634)}
{pt3dadd(181452.000000,117768.000000,93825.000000,226.540634)}
{pt3dadd(181212.000000,117408.000000,93675.000000,213.245116)}
{pt3dadd(180900.000000,117060.000000,93375.000000,205.221416)}
{pt3dadd(180624.000000,116784.000000,93050.000000,191.925898)}
{pt3dadd(180384.000000,116496.000000,92825.000000,206.361242)}
{pt3dadd(180024.000000,116124.000000,92600.000000,212.831458)}
{pt3dadd(179652.000000,115812.000000,92325.000000,216.838538)}
{pt3dadd(179364.000000,115392.000000,92100.000000,229.500932)}
{pt3dadd(179004.000000,115092.000000,91875.000000,245.415900)}
{pt3dadd(178668.000000,114840.000000,91600.000000,247.910616)}
{pt3dadd(178500.000000,114588.000000,91375.000000,243.492808)}
{pt3dadd(178224.000000,114336.000000,91100.000000,270.598512)}
{pt3dadd(177876.000000,114012.000000,90825.000000,284.383382)}
{pt3dadd(177492.000000,113592.000000,90450.000000,284.383382)}
{pt3dadd(177204.000000,113148.000000,90075.000000,295.673536)}
{pt3dadd(176952.000000,112860.000000,89775.000000,302.467258)}
{pt3dadd(176628.000000,112344.000000,89400.000000,279.779362)}
{pt3dadd(176484.000000,111852.000000,89025.000000,268.489208)}
{pt3dadd(176340.000000,111600.000000,88675.000000,265.869758)}
{pt3dadd(176112.000000,111420.000000,88225.000000,241.284086)}
{pt3dadd(175908.000000,111084.000000,87850.000000,246.398252)}
{pt3dadd(175824.000000,110688.000000,87550.000000,253.888332)}
{pt3dadd(175488.000000,110352.000000,87350.000000,249.017702)}
{pt3dadd(175152.000000,109992.000000,87075.000000,241.884292)}
{pt3dadd(174900.000000,109644.000000,86550.000000,243.838964)}
{pt3dadd(174576.000000,109284.000000,86025.000000,231.931076)}
{pt3dadd(174444.000000,109248.000000,85725.000000,217.970780)}
{pt3dadd(174312.000000,108936.000000,85400.000000,201.083180)}
{pt3dadd(174036.000000,108684.000000,85075.000000,194.921072)}
{pt3dadd(173820.000000,108396.000000,84775.000000,192.966400)}
{pt3dadd(173640.000000,108096.000000,84400.000000,192.966400)}
{pt3dadd(173400.000000,107628.000000,84075.000000,192.966400)}
{pt3dadd(173184.000000,107232.000000,83750.000000,205.436192)}
{pt3dadd(172896.000000,106848.000000,83500.000000,200.113130)}
{pt3dadd(172668.000000,106524.000000,83325.000000,213.408648)}
{pt3dadd(172536.000000,106188.000000,83150.000000,228.066956)}
{pt3dadd(172368.000000,105840.000000,82900.000000,276.621766)}
{pt3dadd(172104.000000,105528.000000,82525.000000,332.308470)}
{pt3dadd(171936.000000,105132.000000,82400.000000,372.254632)}
{pt3dadd(171792.000000,104676.000000,82325.000000,369.759916)}
{pt3dadd(171624.000000,104280.000000,82150.000000,369.759916)}
{pt3dadd(171324.000000,103884.000000,81925.000000,330.051236)}
{pt3dadd(171096.000000,103488.000000,81775.000000,272.312124)}
{pt3dadd(170916.000000,103080.000000,81500.000000,239.643696)}
{pt3dadd(170628.000000,102696.000000,81450.000000,237.267782)}
{pt3dadd(170316.000000,102312.000000,81175.000000,234.517362)}
{pt3dadd(170088.000000,101916.000000,80850.000000,245.269888)}
{pt3dadd(169908.000000,101544.000000,80775.000000,251.740104)}
{pt3dadd(169572.000000,101244.000000,80550.000000,260.586234)}
{pt3dadd(169368.000000,100848.000000,80225.000000,250.299754)}
{pt3dadd(169164.000000,100500.000000,79825.000000,250.299754)}
{pt3dadd(168888.000000,100152.000000,79375.000000,237.171314)}
{pt3dadd(168492.000000,99852.000000,78850.000000,242.041944)}
{pt3dadd(168180.000000,99540.000000,78350.000000,237.403250)}
{pt3dadd(167772.000000,99204.000000,77925.000000,252.560360)}
{pt3dadd(167316.000000,98832.000000,77500.000000,242.807500)}
{pt3dadd(166932.000000,98496.000000,77250.000000,245.183414)}
{pt3dadd(166752.000000,98172.000000,76750.000000,259.657528)}
{pt3dadd(166512.000000,97884.000000,76375.000000,269.410388)}
{pt3dadd(166272.000000,97788.000000,76000.000000,260.121950)}
{pt3dadd(166152.000000,97632.000000,75675.000000,255.914514)}
{pt3dadd(166056.000000,97512.000000,75350.000000,251.275820)}
{pt3dadd(166020.000000,97692.000000,74975.000000,234.306990)}
{pt3dadd(165972.000000,97740.000000,74575.000000,253.015122)}
{pt3dadd(165600.000000,97680.000000,74175.000000,276.777674)}
{pt3dadd(165444.000000,97596.000000,73775.000000,309.446102)}
{pt3dadd(165300.000000,97548.000000,73400.000000,331.053626)}
{pt3dadd(165348.000000,97632.000000,73025.000000,341.806152)}
{pt3dadd(165336.000000,97644.000000,72700.000000,303.548510)}
{pt3dadd(165024.000000,97608.000000,72400.000000,270.455816)}
{pt3dadd(165048.000000,97716.000000,72075.000000,239.839796)}
{pt3dadd(165048.000000,97800.000000,71800.000000,208.435622)}
{pt3dadd(165084.000000,97920.000000,71475.000000,193.044402)}
{pt3dadd(165132.000000,97836.000000,71150.000000,196.678944)}
{pt3dadd(165156.000000,97944.000000,70825.000000,202.002006)}
{pt3dadd(165192.000000,98112.000000,70525.000000,199.949598)}
{pt3dadd(165216.000000,98268.000000,70250.000000,205.538812)}
{pt3dadd(165168.000000,98316.000000,69950.000000,205.538812)}
{pt3dadd(165216.000000,98472.000000,69650.000000,211.700920)}
{pt3dadd(165216.000000,98628.000000,69375.000000,217.863028)}
{pt3dadd(165252.000000,98664.000000,69075.000000,214.046764)}
{pt3dadd(165360.000000,98808.000000,68775.000000,214.046764)}
{pt3dadd(165336.000000,98808.000000,68500.000000,221.180174)}
{pt3dadd(165288.000000,98868.000000,68175.000000,239.603738)}
{pt3dadd(165252.000000,99048.000000,67925.000000,283.951112)}
{pt3dadd(165132.000000,99216.000000,67625.000000,324.121632)}
{pt3dadd(164976.000000,99252.000000,67300.000000,356.790060)}
{pt3dadd(164808.000000,99252.000000,66975.000000,403.188326)}
{pt3dadd(164820.000000,99408.000000,66650.000000,413.225754)}
{pt3dadd(164928.000000,99564.000000,66300.000000,373.517074)}
{pt3dadd(165096.000000,99732.000000,66000.000000,348.503664)}
{pt3dadd(164904.000000,100200.000000,65725.000000,310.246022)}
{pt3dadd(164820.000000,100392.000000,65400.000000,256.714346)}
{pt3dadd(164784.000000,100548.000000,65075.000000,232.892048)}
{pt3dadd(164772.000000,100596.000000,64725.000000,243.644574)}
{pt3dadd(164724.000000,100656.000000,64500.000000,243.644574)}
{pt3dadd(164736.000000,100716.000000,64250.000000,249.233788)}
{pt3dadd(164784.000000,100800.000000,63875.000000,261.737068)}
{pt3dadd(164856.000000,100956.000000,63575.000000,269.601654)}
{pt3dadd(164928.000000,101208.000000,63250.000000,263.963294)}
{pt3dadd(165048.000000,101508.000000,62975.000000,261.468578)}
{pt3dadd(165132.000000,101688.000000,62700.000000,284.099578)}
{pt3dadd(165312.000000,101892.000000,62400.000000,278.729708)}
{pt3dadd(165456.000000,102096.000000,62150.000000,268.489208)}
{pt3dadd(165552.000000,102288.000000,61850.000000,258.736348)}
{pt3dadd(165648.000000,102468.000000,61500.000000,263.850514)}
{pt3dadd(165672.000000,102552.000000,61175.000000,257.930230)}
{pt3dadd(165708.000000,102720.000000,60825.000000,253.059600)}
{pt3dadd(165924.000000,102984.000000,60475.000000,260.549680)}
{pt3dadd(166056.000000,103140.000000,60100.000000,267.683090)}
{pt3dadd(166212.000000,103296.000000,59800.000000,265.063640)}
{pt3dadd(166548.000000,103500.000000,59500.000000,248.352924)}
{pt3dadd(166968.000000,103836.000000,59175.000000,248.352924)}
{pt3dadd(167316.000000,104292.000000,58875.000000,236.445036)}
{pt3dadd(167568.000000,104544.000000,58550.000000,231.574406)}
{pt3dadd(167964.000000,104964.000000,58300.000000,234.193856)}
{pt3dadd(168204.000000,105300.000000,57975.000000,248.154152)}
{pt3dadd(168360.000000,105240.000000,57625.000000,255.644232)}
{pt3dadd(168576.000000,105156.000000,57350.000000,264.932670)}
{pt3dadd(168864.000000,105072.000000,57075.000000,239.183018)}
{pt3dadd(169740.000000,104820.000000,56875.000000,205.943286)}
{pt3dadd(170328.000000,104556.000000,56700.000000,170.679706)}
{pt3dadd(170784.000000,104424.000000,56525.000000,147.833562)}
{pt3dadd(171132.000000,104220.000000,56300.000000,117.213280)}
{pt3dadd(171840.000000,103896.000000,56050.000000,127.606868)}
{pt3dadd(172620.000000,103560.000000,55850.000000,129.838160)}
{pt3dadd(172884.000000,103116.000000,55625.000000,143.863710)}
{pt3dadd(173040.000000,102864.000000,55500.000000,135.701414)}
{pt3dadd(173328.000000,102660.000000,55625.000000,141.715706)}
{pt3dadd(173460.000000,102204.000000,55700.000000,133.553410)}
{pt3dadd(173472.000000,101748.000000,55525.000000,133.553410)}
{pt3dadd(173400.000000,101508.000000,55525.000000,127.566000)}
{pt3dadd(173328.000000,101220.000000,55350.000000,125.334708)}
{pt3dadd(173112.000000,100944.000000,55250.000000,110.279420)}
{pt3dadd(172776.000000,100656.000000,54950.000000,86.605199)}
{pt3dadd(172692.000000,100428.000000,54725.000000,58.036998)}
{pt3dadd(172608.000000,100344.000000,54475.000000,1.628895)}

{create adhoc47}
{access adhoc47}
{connect adhoc47(1), adhoc4(0)}
{nseg = 1}
{strdef color color = "White"}
{pt3dclear()}
{pt3dadd(185364.000000,162204.000000,115275.000000,410.072500)}
{pt3dadd(185196.000000,162312.000000,115300.000000,403.563420)}
{pt3dadd(185052.000000,162348.000000,115525.000000,406.948612)}
{pt3dadd(184896.000000,162348.000000,115750.000000,415.355102)}
{pt3dadd(184740.000000,162444.000000,115950.000000,441.919650)}
{pt3dadd(184608.000000,162552.000000,116100.000000,441.919650)}
{pt3dadd(184476.000000,162516.000000,116200.000000,438.377290)}
{pt3dadd(184344.000000,162588.000000,116225.000000,418.803510)}
{pt3dadd(184188.000000,162672.000000,116450.000000,423.324554)}
{pt3dadd(184068.000000,162720.000000,116550.000000,400.665454)}
{pt3dadd(183912.000000,162756.000000,116725.000000,409.071944)}
{pt3dadd(183744.000000,162852.000000,116850.000000,437.913870)}
{pt3dadd(183612.000000,162948.000000,117000.000000,457.487650)}
{pt3dadd(183480.000000,162972.000000,117175.000000,448.660844)}
{pt3dadd(183336.000000,163020.000000,117300.000000,444.755396)}
{pt3dadd(183228.000000,163080.000000,117350.000000,436.348906)}
{pt3dadd(183096.000000,163092.000000,117400.000000,411.049340)}
{pt3dadd(182976.000000,163068.000000,117550.000000,430.535630)}
{pt3dadd(182844.000000,163128.000000,117575.000000,465.593168)}
{pt3dadd(182700.000000,163212.000000,118050.000000,458.331326)}
{pt3dadd(182544.000000,163320.000000,118000.000000,454.425878)}
{pt3dadd(182352.000000,163404.000000,118250.000000,489.943588)}
{pt3dadd(182052.000000,163548.000000,118525.000000,470.457298)}
{pt3dadd(181848.000000,163692.000000,118850.000000,453.958132)}
{pt3dadd(181548.000000,163740.000000,119075.000000,469.226150)}
{pt3dadd(181464.000000,163692.000000,119350.000000,486.059132)}
{pt3dadd(181392.000000,163680.000000,119600.000000,466.572842)}
{pt3dadd(181248.000000,163692.000000,119475.000000,458.166352)}
{pt3dadd(181080.000000,163644.000000,119700.000000,427.882322)}
{pt3dadd(181008.000000,163608.000000,119975.000000,412.614304)}
{pt3dadd(180696.000000,163536.000000,120150.000000,399.686770)}
{pt3dadd(180504.000000,163512.000000,120400.000000,395.381008)}
{pt3dadd(180480.000000,163512.000000,120650.000000,440.597916)}
{pt3dadd(180336.000000,163464.000000,120825.000000,452.323574)}
{pt3dadd(180072.000000,163608.000000,121100.000000,455.865934)}
{pt3dadd(179880.000000,163656.000000,121300.000000,483.758714)}
{pt3dadd(179760.000000,163716.000000,121550.000000,518.816252)}
{pt3dadd(179568.000000,163800.000000,121850.000000,531.857476)}
{pt3dadd(179328.000000,164016.000000,122000.000000,600.392822)}
{pt3dadd(179160.000000,164088.000000,122200.000000,688.386352)}
{pt3dadd(178980.000000,164256.000000,122325.000000,740.862172)}
{pt3dadd(178776.000000,164232.000000,122425.000000,774.339980)}
{pt3dadd(178632.000000,164664.000000,122450.000000,781.353608)}
{pt3dadd(178464.000000,164748.000000,122450.000000,773.989294)}
{pt3dadd(178308.000000,164628.000000,122475.000000,758.892454)}
{pt3dadd(178152.000000,164880.000000,122575.000000,730.102334)}
{pt3dadd(177996.000000,164784.000000,122500.000000,696.624526)}
{pt3dadd(177852.000000,164940.000000,122600.000000,664.740906)}
{pt3dadd(177696.000000,165108.000000,122550.000000,627.361926)}
{pt3dadd(177516.000000,165156.000000,122675.000000,584.749266)}
{pt3dadd(177348.000000,165204.000000,122600.000000,578.387694)}
{pt3dadd(177204.000000,165204.000000,122550.000000,584.446336)}
{pt3dadd(177048.000000,165336.000000,122500.000000,623.694270)}
{pt3dadd(176844.000000,165408.000000,122450.000000,654.059622)}
{pt3dadd(176700.000000,165480.000000,122400.000000,704.036596)}
{pt3dadd(176568.000000,165552.000000,122350.000000,724.091448)}
{pt3dadd(176388.000000,165636.000000,122500.000000,775.887408)}
{pt3dadd(176244.000000,165708.000000,122575.000000,761.509466)}
{pt3dadd(176124.000000,165636.000000,122525.000000,775.887408)}
{pt3dadd(175968.000000,165696.000000,122375.000000,727.233514)}
{pt3dadd(175812.000000,165672.000000,122275.000000,720.219886)}
{pt3dadd(175632.000000,165792.000000,122175.000000,662.365284)}
{pt3dadd(175452.000000,166056.000000,121975.000000,631.999932)}
{pt3dadd(175260.000000,166152.000000,122000.000000,604.580766)}
{pt3dadd(175092.000000,166212.000000,122075.000000,608.491366)}
{pt3dadd(174900.000000,166320.000000,122250.000000,595.450142)}
{pt3dadd(174756.000000,166356.000000,122375.000000,584.184656)}
{pt3dadd(174588.000000,166500.000000,122400.000000,573.966512)}
{pt3dadd(174432.000000,166644.000000,122450.000000,573.966512)}
{pt3dadd(174252.000000,166788.000000,122450.000000,611.345492)}
{pt3dadd(174084.000000,166836.000000,122475.000000,599.516724)}
{pt3dadd(173904.000000,166848.000000,122475.000000,616.840852)}
{pt3dadd(173748.000000,166716.000000,122425.000000,657.424348)}
{pt3dadd(173592.000000,166740.000000,122425.000000,663.785920)}
{pt3dadd(173448.000000,166728.000000,122475.000000,643.731068)}
{pt3dadd(173292.000000,166944.000000,122500.000000,649.501194)}
{pt3dadd(173148.000000,166992.000000,122525.000000,637.672426)}
{pt3dadd(172980.000000,166956.000000,122425.000000,612.802434)}
{pt3dadd(172776.000000,167016.000000,122500.000000,574.151488)}
{pt3dadd(172608.000000,167172.000000,122450.000000,537.341070)}
{pt3dadd(172464.000000,167208.000000,122400.000000,498.182804)}
{pt3dadd(172320.000000,167292.000000,122500.000000,468.895392)}
{pt3dadd(172176.000000,167184.000000,122500.000000,439.607980)}
{pt3dadd(172068.000000,167316.000000,122500.000000,440.808054)}
{pt3dadd(171924.000000,167496.000000,122475.000000,460.294344)}
{pt3dadd(171780.000000,167424.000000,122625.000000,464.395072)}
{pt3dadd(171624.000000,167472.000000,122675.000000,477.968980)}
{pt3dadd(171492.000000,167532.000000,122600.000000,486.795786)}
{pt3dadd(171336.000000,167652.000000,122625.000000,490.342814)}
{pt3dadd(171204.000000,167736.000000,122650.000000,470.856524)}
{pt3dadd(171036.000000,167820.000000,122675.000000,459.130866)}
{pt3dadd(170880.000000,167628.000000,122850.000000,441.456230)}
{pt3dadd(170688.000000,167808.000000,122775.000000,441.456230)}
{pt3dadd(170544.000000,167868.000000,122800.000000,423.781594)}
{pt3dadd(170412.000000,168096.000000,122875.000000,433.049740)}
{pt3dadd(170256.000000,168156.000000,122875.000000,429.507380)}
{pt3dadd(170088.000000,168228.000000,122925.000000,433.608108)}
{pt3dadd(169908.000000,168300.000000,122975.000000,420.680574)}
{pt3dadd(169764.000000,168360.000000,123025.000000,420.680574)}
{pt3dadd(169620.000000,168420.000000,123075.000000,395.381008)}
{pt3dadd(169464.000000,168396.000000,123300.000000,395.381008)}
{pt3dadd(169308.000000,168468.000000,123300.000000,376.739316)}
{pt3dadd(169152.000000,168504.000000,123275.000000,355.925296)}
{pt3dadd(169008.000000,168828.000000,123475.000000,344.758006)}
{pt3dadd(168840.000000,168948.000000,123525.000000,334.628946)}
{pt3dadd(168696.000000,168876.000000,123600.000000,316.649016)}
{pt3dadd(168588.000000,168936.000000,123725.000000,316.649016)}
{pt3dadd(168456.000000,169032.000000,123700.000000,337.463036)}
{pt3dadd(168312.000000,169092.000000,123800.000000,344.724878)}
{pt3dadd(168156.000000,169104.000000,123875.000000,341.664848)}
{pt3dadd(167988.000000,169260.000000,123950.000000,347.083744)}
{pt3dadd(167832.000000,169332.000000,124025.000000,340.810688)}
{pt3dadd(167688.000000,169440.000000,124050.000000,323.056698)}
{pt3dadd(167544.000000,169392.000000,124175.000000,315.794856)}
{pt3dadd(167388.000000,169476.000000,124375.000000,332.703428)}
{pt3dadd(167232.000000,169572.000000,124400.000000,364.838242)}
{pt3dadd(167076.000000,169632.000000,124500.000000,385.652262)}
{pt3dadd(166944.000000,169692.000000,124600.000000,395.781322)}
{pt3dadd(166812.000000,169716.000000,124625.000000,434.841392)}
{pt3dadd(166680.000000,169740.000000,124650.000000,461.405940)}
{pt3dadd(166524.000000,169836.000000,124750.000000,445.374520)}
{pt3dadd(166392.000000,169992.000000,124850.000000,449.475248)}
{pt3dadd(166260.000000,170076.000000,124800.000000,457.100178)}
{pt3dadd(166128.000000,170208.000000,124925.000000,421.582468)}
{pt3dadd(165984.000000,170064.000000,125025.000000,395.017920)}
{pt3dadd(165840.000000,170148.000000,124975.000000,411.049340)}
{pt3dadd(165708.000000,170208.000000,125075.000000,403.043164)}
{pt3dadd(165552.000000,170124.000000,125150.000000,407.143892)}
{pt3dadd(165396.000000,170160.000000,125300.000000,400.227858)}
{pt3dadd(165300.000000,170148.000000,125375.000000,389.592342)}
{pt3dadd(165180.000000,170268.000000,125450.000000,366.644888)}
{pt3dadd(165084.000000,170256.000000,125425.000000,362.925406)}
{pt3dadd(164964.000000,170244.000000,125425.000000,362.925406)}
{pt3dadd(164856.000000,170292.000000,125500.000000,390.393904)}
{pt3dadd(164724.000000,170328.000000,125575.000000,422.609504)}
{pt3dadd(164616.000000,170352.000000,125700.000000,470.538608)}
{pt3dadd(164496.000000,170448.000000,125750.000000,529.742018)}
{pt3dadd(164388.000000,170520.000000,125800.000000,553.534070)}
{pt3dadd(164268.000000,170544.000000,125850.000000,563.265636)}
{pt3dadd(164208.000000,170484.000000,125850.000000,573.483780)}
{pt3dadd(164112.000000,170544.000000,125875.000000,557.770276)}
{pt3dadd(164016.000000,170604.000000,125900.000000,514.598286)}
{pt3dadd(163896.000000,170664.000000,125925.000000,468.951516)}
{pt3dadd(163800.000000,170700.000000,126000.000000,431.751452)}
{pt3dadd(163704.000000,170760.000000,126075.000000,412.265162)}
{pt3dadd(163596.000000,170820.000000,126150.000000,373.776506)}
{pt3dadd(163320.000000,170820.000000,126350.000000,369.470744)}
{pt3dadd(163068.000000,170820.000000,126500.000000,379.599804)}
{pt3dadd(162720.000000,170820.000000,126625.000000,386.515838)}
{pt3dadd(162312.000000,170820.000000,126825.000000,395.783984)}
{pt3dadd(162180.000000,171240.000000,127100.000000,429.525538)}
{pt3dadd(161928.000000,171492.000000,127350.000000,429.525538)}
{pt3dadd(161172.000000,171756.000000,127525.000000,459.809568)}
{pt3dadd(160824.000000,172152.000000,127800.000000,471.535226)}
{pt3dadd(160272.000000,172608.000000,128075.000000,449.955142)}
{pt3dadd(160128.000000,172668.000000,128150.000000,437.027608)}
{pt3dadd(159960.000000,172560.000000,128250.000000,425.301950)}
{pt3dadd(159792.000000,172512.000000,128325.000000,384.888860)}
{pt3dadd(159480.000000,173244.000000,128525.000000,408.680912)}
{pt3dadd(159216.000000,173424.000000,128650.000000,435.245460)}
{pt3dadd(159012.000000,173724.000000,128900.000000,443.651950)}
{pt3dadd(158844.000000,173880.000000,129000.000000,464.204414)}
{pt3dadd(158040.000000,174168.000000,129175.000000,504.617504)}
{pt3dadd(157800.000000,174516.000000,129400.000000,469.099794)}
{pt3dadd(157644.000000,174588.000000,129525.000000,459.368228)}
{pt3dadd(157476.000000,174720.000000,129525.000000,450.961738)}
{pt3dadd(157272.000000,174768.000000,129575.000000,446.440694)}
{pt3dadd(157080.000000,174816.000000,129625.000000,427.882322)}
{pt3dadd(156900.000000,174924.000000,129850.000000,443.913742)}
{pt3dadd(156732.000000,175068.000000,129925.000000,410.172188)}
{pt3dadd(156576.000000,175128.000000,129925.000000,402.547258)}
{pt3dadd(156420.000000,175164.000000,129950.000000,376.386778)}
{pt3dadd(156264.000000,175104.000000,129975.000000,354.532060)}
{pt3dadd(156120.000000,175224.000000,129875.000000,334.958280)}
{pt3dadd(155964.000000,175308.000000,129950.000000,344.605010)}
{pt3dadd(155820.000000,175368.000000,130025.000000,360.636430)}
{pt3dadd(155616.000000,175320.000000,130075.000000,386.796910)}
{pt3dadd(155436.000000,175392.000000,130025.000000,404.550900)}
{pt3dadd(155280.000000,175464.000000,129975.000000,404.550900)}
{pt3dadd(155136.000000,175536.000000,130000.000000,397.964200)}
{pt3dadd(154992.000000,175692.000000,130025.000000,375.016746)}
{pt3dadd(154860.000000,175752.000000,130075.000000,340.106400)}
{pt3dadd(154704.000000,175812.000000,130000.000000,319.292380)}
{pt3dadd(154548.000000,175932.000000,130050.000000,298.794960)}
{pt3dadd(154380.000000,176004.000000,130100.000000,287.401730)}
{pt3dadd(154236.000000,176004.000000,130125.000000,270.277984)}
{pt3dadd(154116.000000,176028.000000,130125.000000,282.240876)}
{pt3dadd(153984.000000,176088.000000,130100.000000,303.054896)}
{pt3dadd(153852.000000,176148.000000,130075.000000,334.719606)}
{pt3dadd(153708.000000,176256.000000,130100.000000,359.961378)}
{pt3dadd(153540.000000,176268.000000,130025.000000,377.085124)}
{pt3dadd(153384.000000,176292.000000,130100.000000,380.458798)}
{pt3dadd(153216.000000,176292.000000,130175.000000,376.553350)}
{pt3dadd(153084.000000,176268.000000,130150.000000,380.654078)}
{pt3dadd(152952.000000,176412.000000,130200.000000,380.654078)}
{pt3dadd(152784.000000,176496.000000,130275.000000,377.441052)}
{pt3dadd(152616.000000,176472.000000,130300.000000,374.067378)}
{pt3dadd(152436.000000,176652.000000,130350.000000,377.972826)}
{pt3dadd(152292.000000,176736.000000,130350.000000,362.704808)}
{pt3dadd(152112.000000,176676.000000,130350.000000,366.610256)}
{pt3dadd(151956.000000,176616.000000,130350.000000,380.458798)}
{pt3dadd(151800.000000,176724.000000,130350.000000,387.374832)}
{pt3dadd(151656.000000,176772.000000,130400.000000,383.469384)}
{pt3dadd(151500.000000,176712.000000,130325.000000,387.011744)}
{pt3dadd(151404.000000,176832.000000,130350.000000,383.106296)}
{pt3dadd(151272.000000,176868.000000,130325.000000,379.386814)}
{pt3dadd(151044.000000,176880.000000,130400.000000,387.011744)}
{pt3dadd(150912.000000,176880.000000,130375.000000,379.749902)}
{pt3dadd(150732.000000,176952.000000,130475.000000,379.749902)}
{pt3dadd(150588.000000,177036.000000,130575.000000,376.030420)}
{pt3dadd(150420.000000,177084.000000,130700.000000,362.841330)}
{pt3dadd(150252.000000,177108.000000,130775.000000,358.935882)}
{pt3dadd(150108.000000,177060.000000,130825.000000,374.203900)}
{pt3dadd(149952.000000,177216.000000,130875.000000,370.661540)}
{pt3dadd(149784.000000,177228.000000,131025.000000,367.119180)}
{pt3dadd(149592.000000,177240.000000,131050.000000,400.860734)}
{pt3dadd(149436.000000,177360.000000,131125.000000,400.860734)}
{pt3dadd(149244.000000,177480.000000,131225.000000,396.760006)}
{pt3dadd(149088.000000,177408.000000,131325.000000,407.927296)}
{pt3dadd(148920.000000,177552.000000,131325.000000,415.189138)}
{pt3dadd(148764.000000,177552.000000,131350.000000,415.189138)}
{pt3dadd(148632.000000,177588.000000,131400.000000,432.022120)}
{pt3dadd(148488.000000,177660.000000,131525.000000,432.022120)}
{pt3dadd(148356.000000,177708.000000,131575.000000,432.022120)}
{pt3dadd(148164.000000,177816.000000,131700.000000,428.302638)}
{pt3dadd(148008.000000,177840.000000,131825.000000,397.621114)}
{pt3dadd(147852.000000,177936.000000,132025.000000,366.939590)}
{pt3dadd(147696.000000,178020.000000,132050.000000,349.185600)}
{pt3dadd(147564.000000,178128.000000,132100.000000,338.018310)}
{pt3dadd(147432.000000,178128.000000,132150.000000,338.018310)}
{pt3dadd(147264.000000,178200.000000,132200.000000,348.147370)}
{pt3dadd(147108.000000,178500.000000,132550.000000,358.276430)}
{pt3dadd(146940.000000,178836.000000,132800.000000,368.405490)}
{pt3dadd(146748.000000,178800.000000,133050.000000,355.844456)}
{pt3dadd(146556.000000,178800.000000,133150.000000,352.302096)}
{pt3dadd(146364.000000,178860.000000,133175.000000,364.027754)}
{pt3dadd(146244.000000,178956.000000,133325.000000,339.987974)}
{pt3dadd(146016.000000,179004.000000,133600.000000,336.445614)}
{pt3dadd(145596.000000,179292.000000,133875.000000,352.549008)}
{pt3dadd(145380.000000,179328.000000,134075.000000,342.902278)}
{pt3dadd(144972.000000,179628.000000,134325.000000,307.136840)}
{pt3dadd(144780.000000,179772.000000,134575.000000,312.297694)}
{pt3dadd(144420.000000,179832.000000,134850.000000,275.529204)}
{pt3dadd(144228.000000,180036.000000,135050.000000,240.590012)}
{pt3dadd(144036.000000,180240.000000,135325.000000,225.058276)}
{pt3dadd(143736.000000,180204.000000,135550.000000,218.202526)}
{pt3dadd(143508.000000,180348.000000,135725.000000,218.202526)}
{pt3dadd(143280.000000,180492.000000,135900.000000,221.695592)}
{pt3dadd(143244.000000,180600.000000,136075.000000,227.627450)}
{pt3dadd(143088.000000,180780.000000,136275.000000,187.858930)}

{create adhoc48}
{access adhoc48}
{connect adhoc48(1), adhoc3(0)}
{nseg = 1}
{strdef color color = "White"}
{pt3dclear()}
{pt3dadd(145860.000000,179892.000000,134550.000000,306.002400)}
{pt3dadd(148608.000000,181560.000000,134550.000000,208.366300)}
{pt3dadd(149040.000000,181872.000000,134550.000000,196.926082)}
{pt3dadd(149460.000000,182232.000000,134550.000000,171.508256)}
{pt3dadd(149964.000000,182676.000000,134550.000000,168.901674)}
{pt3dadd(150360.000000,182940.000000,134550.000000,159.820588)}
{pt3dadd(150516.000000,183276.000000,134550.000000,149.332111)}
{pt3dadd(150768.000000,183672.000000,134550.000000,125.493587)}
{pt3dadd(150816.000000,183984.000000,134550.000000,117.747579)}
{pt3dadd(150372.000000,183888.000000,134775.000000,119.019083)}
{pt3dadd(150156.000000,184284.000000,134975.000000,107.185947)}
{pt3dadd(149316.000000,184452.000000,135250.000000,108.284319)}
{pt3dadd(148884.000000,184656.000000,135425.000000,140.624645)}
{pt3dadd(148320.000000,184764.000000,135425.000000,156.082039)}
{pt3dadd(148116.000000,184860.000000,135550.000000,172.874511)}
{pt3dadd(147900.000000,184764.000000,135650.000000,203.674823)}
{pt3dadd(147672.000000,184848.000000,135775.000000,224.103044)}
{pt3dadd(147480.000000,184896.000000,135800.000000,219.644904)}
{pt3dadd(147312.000000,184980.000000,135775.000000,213.722650)}
{pt3dadd(147144.000000,184920.000000,135775.000000,206.011264)}
{pt3dadd(147012.000000,184860.000000,135775.000000,194.421240)}
{pt3dadd(146844.000000,184968.000000,135825.000000,186.709854)}
{pt3dadd(146688.000000,184980.000000,135825.000000,177.294534)}
{pt3dadd(146508.000000,184992.000000,135875.000000,190.072538)}
{pt3dadd(146352.000000,185052.000000,135875.000000,204.639674)}
{pt3dadd(146172.000000,184956.000000,135925.000000,226.071598)}
{pt3dadd(146004.000000,184728.000000,135800.000000,251.489424)}
{pt3dadd(145848.000000,184704.000000,135725.000000,273.623004)}
{pt3dadd(145692.000000,184680.000000,135775.000000,266.767254)}
{pt3dadd(145560.000000,184500.000000,135750.000000,274.703640)}
{pt3dadd(145284.000000,184284.000000,135625.000000,262.687036)}
{pt3dadd(145116.000000,184440.000000,135700.000000,249.438736)}
{pt3dadd(144948.000000,184368.000000,135700.000000,248.737080)}
{pt3dadd(144828.000000,184176.000000,135675.000000,260.753684)}
{pt3dadd(144636.000000,184020.000000,135750.000000,250.419688)}
{pt3dadd(144444.000000,184164.000000,135875.000000,265.211824)}
{pt3dadd(144276.000000,184056.000000,135900.000000,275.545820)}
{pt3dadd(144120.000000,184092.000000,135900.000000,263.529216)}
{pt3dadd(143952.000000,183924.000000,135900.000000,263.529216)}
{pt3dadd(143808.000000,184008.000000,135900.000000,273.863212)}
{pt3dadd(143640.000000,183948.000000,135975.000000,286.424246)}
{pt3dadd(143472.000000,183612.000000,135850.000000,278.487860)}
{pt3dadd(143304.000000,183480.000000,136025.000000,282.946000)}
{pt3dadd(143136.000000,183480.000000,135875.000000,265.007142)}
{pt3dadd(142968.000000,183372.000000,135900.000000,252.389710)}
{pt3dadd(142800.000000,183516.000000,135800.000000,234.409780)}
{pt3dadd(142608.000000,183348.000000,135950.000000,251.533526)}
{pt3dadd(142440.000000,183300.000000,136000.000000,261.867522)}
{pt3dadd(142296.000000,183396.000000,136075.000000,279.806380)}
{pt3dadd(142140.000000,183288.000000,136150.000000,301.611172)}
{pt3dadd(141972.000000,183120.000000,136075.000000,316.217428)}
{pt3dadd(141804.000000,183168.000000,136075.000000,299.093682)}
{pt3dadd(141636.000000,183168.000000,136175.000000,305.068016)}
{pt3dadd(141456.000000,183180.000000,136225.000000,307.843548)}
{pt3dadd(141312.000000,183012.000000,136200.000000,283.864052)}
{pt3dadd(141168.000000,182904.000000,136250.000000,274.676692)}
{pt3dadd(141036.000000,182796.000000,136250.000000,260.109556)}
{pt3dadd(140916.000000,182688.000000,136250.000000,251.359690)}
{pt3dadd(140796.000000,182496.000000,136250.000000,257.334024)}
{pt3dadd(140652.000000,182484.000000,136250.000000,275.040464)}
{pt3dadd(140532.000000,182388.000000,136225.000000,260.248328)}
{pt3dadd(140436.000000,182292.000000,136200.000000,265.888572)}
{pt3dadd(140316.000000,182400.000000,136175.000000,258.330108)}
{pt3dadd(140196.000000,182436.000000,136150.000000,239.738342)}
{pt3dadd(140100.000000,182472.000000,136125.000000,234.048506)}
{pt3dadd(139968.000000,182304.000000,136375.000000,230.004844)}
{pt3dadd(139836.000000,182232.000000,136200.000000,234.250690)}
{pt3dadd(139716.000000,182292.000000,135975.000000,239.165790)}
{pt3dadd(139584.000000,182220.000000,136000.000000,239.165790)}
{pt3dadd(139452.000000,182148.000000,136025.000000,221.226932)}
{pt3dadd(139272.000000,182040.000000,136000.000000,219.348340)}
{pt3dadd(139176.000000,182088.000000,135875.000000,209.462250)}
{pt3dadd(139056.000000,181992.000000,135850.000000,179.660789)}
{pt3dadd(138900.000000,181896.000000,135825.000000,181.944225)}
{pt3dadd(138756.000000,181884.000000,135825.000000,173.810919)}
{pt3dadd(138612.000000,181896.000000,135800.000000,172.021787)}
{pt3dadd(138036.000000,181032.000000,135550.000000,164.275779)}
{pt3dadd(137904.000000,180564.000000,135350.000000,178.781746)}
{pt3dadd(138024.000000,180336.000000,135175.000000,174.323606)}
{pt3dadd(138024.000000,179952.000000,134950.000000,180.667780)}
{pt3dadd(138072.000000,179736.000000,134800.000000,194.747467)}
{pt3dadd(138228.000000,179472.000000,134600.000000,178.913270)}

{create adhoc49}
{access adhoc49}
{connect adhoc49(1), adhoc2(0)}
{nseg = 1}
{strdef color color = "White"}
{pt3dclear()}
{pt3dadd(136548.000000,183288.000000,152300.000000,410.072500)}
{pt3dadd(136836.000000,184392.000000,152300.000000,1.500000)}

{create adhoc50}
{access adhoc50}
{connect adhoc50(1), adhoc1(0)}
{nseg = 1}
{strdef color color = "White"}
{pt3dclear()}
{pt3dadd(133332.000000,151644.000000,157325.000000,811.915500)}
{pt3dadd(133692.000000,151524.000000,157275.000000,497.171793)}
{pt3dadd(133572.000000,151284.000000,157275.000000,365.448428)}
{pt3dadd(133536.000000,150948.000000,157100.000000,238.847982)}
{pt3dadd(133296.000000,150288.000000,157050.000000,207.853936)}
{pt3dadd(133056.000000,149832.000000,157050.000000,171.085446)}
{pt3dadd(132636.000000,149520.000000,156700.000000,164.288978)}
{pt3dadd(132564.000000,149184.000000,156475.000000,170.950360)}
{pt3dadd(132396.000000,149076.000000,156225.000000,174.618084)}
{pt3dadd(132228.000000,149088.000000,155925.000000,179.989742)}
{pt3dadd(132180.000000,148920.000000,155650.000000,183.482808)}
{pt3dadd(132012.000000,148788.000000,155650.000000,189.826982)}
{pt3dadd(131880.000000,148764.000000,155650.000000,202.604986)}
{pt3dadd(132060.000000,148980.000000,155350.000000,227.415118)}
{pt3dadd(131952.000000,148800.000000,155225.000000,249.165220)}
{pt3dadd(131904.000000,148884.000000,155025.000000,261.943224)}
{pt3dadd(131964.000000,148836.000000,154775.000000,279.027850)}
{pt3dadd(131832.000000,148956.000000,154550.000000,270.100958)}
{pt3dadd(131784.000000,149208.000000,154300.000000,233.877094)}
{pt3dadd(131868.000000,149028.000000,154100.000000,200.713260)}
{pt3dadd(131748.000000,148920.000000,153850.000000,170.288592)}
{pt3dadd(131928.000000,149064.000000,153625.000000,138.342690)}
{pt3dadd(131760.000000,149100.000000,153450.000000,123.621360)}
{pt3dadd(131796.000000,149208.000000,153225.000000,121.014778)}
{pt3dadd(131640.000000,149196.000000,153050.000000,118.408196)}
{pt3dadd(131568.000000,149232.000000,152875.000000,127.921554)}
{pt3dadd(131568.000000,149280.000000,152675.000000,132.430240)}
{pt3dadd(131520.000000,149568.000000,152450.000000,132.430240)}
{pt3dadd(131448.000000,149652.000000,152225.000000,130.065995)}
{pt3dadd(131280.000000,149904.000000,151975.000000,125.557309)}
{pt3dadd(131232.000000,150000.000000,151775.000000,110.987261)}
{pt3dadd(131148.000000,150000.000000,151550.000000,107.524644)}
{pt3dadd(131076.000000,149928.000000,151350.000000,102.790522)}
{pt3dadd(130944.000000,149916.000000,151150.000000,102.790522)}
{pt3dadd(130980.000000,149760.000000,150975.000000,104.934963)}
{pt3dadd(130848.000000,149688.000000,150750.000000,113.132350)}
{pt3dadd(130476.000000,149556.000000,150550.000000,111.090025)}
{pt3dadd(130464.000000,149328.000000,150375.000000,120.032982)}
{pt3dadd(130296.000000,149232.000000,150225.000000,113.359610)}
{pt3dadd(130032.000000,149148.000000,150025.000000,118.330438)}
{pt3dadd(129792.000000,148800.000000,149825.000000,132.836405)}
{pt3dadd(129600.000000,148620.000000,149675.000000,150.483069)}
{pt3dadd(129456.000000,148536.000000,149475.000000,163.066705)}
{pt3dadd(129312.000000,148464.000000,149250.000000,194.626438)}
{pt3dadd(129156.000000,148464.000000,149075.000000,212.258536)}
{pt3dadd(129060.000000,148272.000000,148850.000000,235.887230)}
{pt3dadd(129060.000000,148260.000000,148650.000000,248.665234)}
{pt3dadd(129312.000000,148332.000000,148425.000000,248.665234)}
{pt3dadd(129420.000000,148404.000000,148250.000000,222.680501)}
{pt3dadd(129420.000000,148344.000000,148050.000000,189.855667)}
{pt3dadd(129360.000000,148140.000000,147875.000000,147.631493)}
{pt3dadd(129408.000000,148020.000000,147675.000000,121.500813)}
{pt3dadd(129444.000000,147756.000000,147500.000000,96.983079)}
{pt3dadd(129312.000000,147576.000000,147325.000000,92.227702)}
{pt3dadd(129360.000000,147348.000000,147150.000000,110.294196)}
{pt3dadd(129348.000000,147252.000000,147000.000000,114.383709)}
{pt3dadd(129288.000000,147288.000000,146800.000000,105.776453)}
{pt3dadd(129216.000000,147108.000000,146575.000000,101.668579)}
{pt3dadd(129144.000000,147048.000000,146350.000000,89.243508)}
{pt3dadd(129216.000000,146868.000000,146200.000000,74.342160)}
