# Supplementary material for: Full reconstruction of large lobula plate tangential cells in Drosophila from a 3D EM dataset
Source: PLoS One. 2018 Nov 28;13(11):e0207828. doi: 10.1371/journal.pone.0207828 (PMC6261601; doi:10.1371/journal.pone.0207828)
Supplement: S1 Dataset — (ZIP) [file pone.0207828.s001.zip › Diameter hoc/Cell_Z_5skels_ck.001_corrected_sorted_diametered.hoc0001.hoc]

/* created with convertKnossosNmlToHoc.m */

{create adhoc1}
{access adhoc1}
{nseg = 1}
{strdef color color = "White"}
{pt3dclear()}
{pt3dadd(162048.000000,190008.000000,50125.000000,69.968544)}
{pt3dadd(162372.000000,189480.000000,50075.000000,73.120437)}
{pt3dadd(162432.000000,189096.000000,50175.000000,106.431155)}
{pt3dadd(162612.000000,188916.000000,50100.000000,131.887824)}
{pt3dadd(163020.000000,188136.000000,49925.000000,154.945756)}
{pt3dadd(163416.000000,187680.000000,49800.000000,162.381027)}
{pt3dadd(163680.000000,187092.000000,49725.000000,164.275105)}
{pt3dadd(163848.000000,187068.000000,49675.000000,165.106557)}
{pt3dadd(163980.000000,186984.000000,49775.000000,153.692825)}
{pt3dadd(164112.000000,186900.000000,49825.000000,172.528623)}
{pt3dadd(164244.000000,186744.000000,49800.000000,215.867755)}
{pt3dadd(164460.000000,186336.000000,49725.000000,301.913510)}
{pt3dadd(164688.000000,186084.000000,49725.000000,387.423277)}
{pt3dadd(164604.000000,186060.000000,49500.000000,549.536400)}

{create adhoc2}
{access adhoc2}
{connect adhoc2(1), adhoc1(0)}
{nseg = 1}
{strdef color color = "White"}
{pt3dclear()}
{pt3dadd(164604.000000,186060.000000,49500.000000,549.536400)}
{pt3dadd(164712.000000,185868.000000,49950.000000,457.863067)}
{pt3dadd(165204.000000,185220.000000,50475.000000,484.314256)}
{pt3dadd(165660.000000,184512.000000,50975.000000,460.522204)}
{pt3dadd(166140.000000,184044.000000,51475.000000,431.301694)}
{pt3dadd(166680.000000,183756.000000,52075.000000,443.027352)}
{pt3dadd(167280.000000,183348.000000,52550.000000,443.027352)}
{pt3dadd(168060.000000,183180.000000,53075.000000,415.134572)}
{pt3dadd(168408.000000,183024.000000,53425.000000,428.708480)}
{pt3dadd(168708.000000,182892.000000,53800.000000,477.415280)}
{pt3dadd(169008.000000,182736.000000,54200.000000,524.893032)}
{pt3dadd(169368.000000,182448.000000,54625.000000,535.111176)}
{pt3dadd(169392.000000,182100.000000,55100.000000,600.382936)}
{pt3dadd(169656.000000,181704.000000,55625.000000,640.966432)}
{pt3dadd(170028.000000,181380.000000,56075.000000,646.461792)}
{pt3dadd(170388.000000,181068.000000,56500.000000,622.776092)}
{pt3dadd(170640.000000,180720.000000,57050.000000,617.542412)}
{pt3dadd(171024.000000,180480.000000,57475.000000,549.972533)}
{pt3dadd(171444.000000,179412.000000,57850.000000,523.368000)}

{create adhoc3}
{access adhoc3}
{connect adhoc3(1), adhoc2(0)}
{nseg = 1}
{strdef color color = "White"}
{pt3dclear()}
{pt3dadd(171444.000000,179412.000000,57850.000000,523.368000)}
{pt3dadd(171588.000000,179244.000000,58250.000000,677.684057)}
{pt3dadd(171732.000000,179136.000000,58700.000000,655.014608)}
{pt3dadd(171900.000000,179088.000000,59150.000000,671.513774)}
{pt3dadd(172008.000000,179100.000000,59525.000000,671.513774)}
{pt3dadd(172260.000000,179232.000000,59925.000000,661.660177)}
{pt3dadd(172692.000000,179316.000000,60350.000000,773.252870)}

{create adhoc4}
{access adhoc4}
{connect adhoc4(1), adhoc3(0)}
{nseg = 1}
{strdef color color = "White"}
{pt3dclear()}
{pt3dadd(172692.000000,179316.000000,60350.000000,773.252870)}
{pt3dadd(173052.000000,179100.000000,60950.000000,692.458270)}
{pt3dadd(173244.000000,178932.000000,61375.000000,748.360322)}
{pt3dadd(173724.000000,178788.000000,61875.000000,756.092848)}
{pt3dadd(173964.000000,178572.000000,62375.000000,783.512014)}
{pt3dadd(174324.000000,178536.000000,62950.000000,812.302134)}
{pt3dadd(174492.000000,178560.000000,63300.000000,820.421294)}
{pt3dadd(175020.000000,178380.000000,63825.000000,804.569608)}
{pt3dadd(175392.000000,178164.000000,64325.000000,812.688768)}
{pt3dadd(175740.000000,178044.000000,64775.000000,828.540454)}
{pt3dadd(176412.000000,178056.000000,65425.000000,828.540454)}
{pt3dadd(176784.000000,177804.000000,65850.000000,828.540454)}
{pt3dadd(177624.000000,177276.000000,66425.000000,852.917248)}
{pt3dadd(178032.000000,177108.000000,66900.000000,861.442356)}
{pt3dadd(178440.000000,177012.000000,67400.000000,853.323196)}
{pt3dadd(178872.000000,176820.000000,67875.000000,838.226356)}
{pt3dadd(179640.000000,176604.000000,68400.000000,815.010356)}
{pt3dadd(180372.000000,176316.000000,68875.000000,806.485248)}
{pt3dadd(180780.000000,176280.000000,69350.000000,774.744140)}
{pt3dadd(181248.000000,176088.000000,69825.000000,767.011614)}
{pt3dadd(181716.000000,175920.000000,70375.000000,767.011614)}
{pt3dadd(182436.000000,175668.000000,70925.000000,774.375928)}
{pt3dadd(182904.000000,175500.000000,71500.000000,791.852408)}
{pt3dadd(183756.000000,175176.000000,72100.000000,832.544888)}
{pt3dadd(184332.000000,175008.000000,72625.000000,865.873054)}
{pt3dadd(184500.000000,175020.000000,73100.000000,906.565534)}
{pt3dadd(184764.000000,174936.000000,73550.000000,914.298060)}
{pt3dadd(185280.000000,174744.000000,73975.000000,896.821580)}
{pt3dadd(185520.000000,174504.000000,74425.000000,887.870208)}
{pt3dadd(185604.000000,174444.000000,74775.000000,878.918836)}
{pt3dadd(185664.000000,174336.000000,75200.000000,845.590670)}
{pt3dadd(185604.000000,174216.000000,75550.000000,837.858144)}
{pt3dadd(185856.000000,174396.000000,75925.000000,814.642144)}
{pt3dadd(185904.000000,174336.000000,76275.000000,790.265350)}
{pt3dadd(186144.000000,174456.000000,76600.000000,765.888556)}
{pt3dadd(186216.000000,174516.000000,77000.000000,773.621082)}
{pt3dadd(186324.000000,174600.000000,77325.000000,781.353608)}
{pt3dadd(186372.000000,174768.000000,77725.000000,804.569608)}
{pt3dadd(186564.000000,174936.000000,78025.000000,901.828534)}
{pt3dadd(186648.000000,175008.000000,78250.000000,1038.794680)}
{pt3dadd(186792.000000,174768.000000,78600.000000,1168.028300)}
{pt3dadd(187116.000000,174840.000000,78875.000000,1311.842760)}
{pt3dadd(187248.000000,174972.000000,79075.000000,1419.070700)}
{pt3dadd(187272.000000,175020.000000,79400.000000,1459.240800)}
{pt3dadd(187284.000000,175080.000000,79725.000000,1388.651000)}

{create adhoc5}
{access adhoc5}
{connect adhoc5(1), adhoc4(0)}
{nseg = 1}
{strdef color color = "White"}
{pt3dclear()}
{pt3dadd(187284.000000,175080.000000,79725.000000,1388.651000)}
{pt3dadd(187404.000000,175524.000000,80125.000000,1262.596333)}
{pt3dadd(187452.000000,175704.000000,80350.000000,1299.792960)}
{pt3dadd(187440.000000,176004.000000,80725.000000,1286.567720)}
{pt3dadd(187644.000000,176268.000000,81050.000000,1298.563420)}
{pt3dadd(187656.000000,176508.000000,81400.000000,1310.559120)}
{pt3dadd(187644.000000,176856.000000,81700.000000,1284.738420)}
{pt3dadd(187692.000000,177276.000000,82125.000000,1284.738420)}
{pt3dadd(187692.000000,177636.000000,82525.000000,1272.142960)}
{pt3dadd(187728.000000,177936.000000,82875.000000,1272.142960)}
{pt3dadd(187728.000000,178308.000000,83250.000000,1311.850180)}
{pt3dadd(187812.000000,178668.000000,83575.000000,1324.445640)}
{pt3dadd(187860.000000,179088.000000,83925.000000,1337.670880)}
{pt3dadd(187956.000000,179448.000000,84350.000000,1389.753133)}
{pt3dadd(188160.000000,179604.000000,84825.000000,1388.651000)}

{create adhoc6}
{access adhoc6}
{connect adhoc6(1), adhoc5(0)}
{nseg = 1}
{strdef color color = "White"}
{pt3dclear()}
{pt3dadd(188160.000000,179604.000000,84825.000000,1388.651000)}
{pt3dadd(188208.000000,179904.000000,85125.000000,1344.566867)}
{pt3dadd(188280.000000,180168.000000,85475.000000,1310.559120)}
{pt3dadd(188364.000000,180492.000000,85775.000000,1261.318260)}
{pt3dadd(188412.000000,180900.000000,86250.000000,1248.722800)}
{pt3dadd(188580.000000,181140.000000,86675.000000,1248.722800)}
{pt3dadd(188592.000000,181272.000000,87050.000000,1261.318260)}
{pt3dadd(188604.000000,181488.000000,87400.000000,1261.318260)}
{pt3dadd(188616.000000,181704.000000,87800.000000,1354.336360)}
{pt3dadd(188580.000000,182124.000000,88200.000000,1396.536500)}
{pt3dadd(188496.000000,182412.000000,88650.000000,1607.537200)}

{create adhoc7}
{access adhoc7}
{connect adhoc7(1), adhoc6(0)}
{nseg = 1}
{strdef color color = "White"}
{pt3dclear()}
{pt3dadd(188496.000000,182412.000000,88650.000000,1607.537200)}
{pt3dadd(188424.000000,182424.000000,89075.000000,1532.202867)}
{pt3dadd(188520.000000,182268.000000,89475.000000,1488.668640)}
{pt3dadd(188568.000000,182484.000000,89950.000000,1473.358760)}
{pt3dadd(188820.000000,182460.000000,90300.000000,1458.777920)}
{pt3dadd(188856.000000,182508.000000,90850.000000,1458.777920)}
{pt3dadd(188928.000000,182532.000000,91400.000000,1458.777920)}
{pt3dadd(189096.000000,182568.000000,91800.000000,1472.664440)}
{pt3dadd(189120.000000,182412.000000,92350.000000,1472.664440)}
{pt3dadd(189204.000000,182400.000000,92875.000000,1487.245280)}
{pt3dadd(189312.000000,182376.000000,93425.000000,1501.826120)}
{pt3dadd(189528.000000,182376.000000,94050.000000,1497.443220)}
{pt3dadd(189828.000000,182436.000000,94700.000000,1483.556700)}
{pt3dadd(190032.000000,182232.000000,95125.000000,1441.864100)}
{pt3dadd(189984.000000,182520.000000,95775.000000,1375.580340)}
{pt3dadd(190116.000000,182676.000000,96175.000000,1321.292280)}
{pt3dadd(190272.000000,182724.000000,96575.000000,1325.675180)}
{pt3dadd(190560.000000,182604.000000,96950.000000,1305.733367)}
{pt3dadd(190632.000000,182784.000000,97500.000000,1458.083600)}

{create adhoc8}
{access adhoc8}
{connect adhoc8(1), adhoc7(0)}
{nseg = 1}
{strdef color color = "White"}
{pt3dclear()}
{pt3dadd(190632.000000,182784.000000,97500.000000,1458.083600)}
{pt3dadd(190788.000000,182856.000000,97850.000000,1587.127033)}
{pt3dadd(190872.000000,182856.000000,98400.000000,1755.312000)}
{pt3dadd(190992.000000,182856.000000,98725.000000,1835.880320)}
{pt3dadd(191028.000000,182976.000000,99075.000000,1920.477040)}
{pt3dadd(191196.000000,183132.000000,99500.000000,1956.809380)}
{pt3dadd(191328.000000,183036.000000,99875.000000,1898.143680)}
{pt3dadd(191520.000000,182904.000000,100150.000000,1898.143680)}
{pt3dadd(191652.000000,182688.000000,100575.000000,1863.541460)}
{pt3dadd(191712.000000,182604.000000,100950.000000,1827.209120)}
{pt3dadd(191784.000000,182568.000000,101400.000000,1808.599880)}
{pt3dadd(191808.000000,182640.000000,101750.000000,1773.997660)}
{pt3dadd(191844.000000,182628.000000,102050.000000,1756.274560)}
{pt3dadd(191868.000000,182568.000000,102300.000000,1790.876780)}
{pt3dadd(191856.000000,182532.000000,102575.000000,1827.209120)}
{pt3dadd(191808.000000,182436.000000,102975.000000,1865.358120)}
{pt3dadd(191748.000000,182292.000000,103375.000000,1958.626040)}
{pt3dadd(191784.000000,182112.000000,103675.000000,2035.014840)}
{pt3dadd(191808.000000,181896.000000,104100.000000,2093.680540)}
{pt3dadd(191808.000000,181644.000000,104475.000000,2154.253700)}
{pt3dadd(191640.000000,181212.000000,105000.000000,2154.253700)}

{create adhoc9}
{access adhoc9}
{connect adhoc9(1), adhoc8(0)}
{nseg = 1}
{strdef color color = "White"}
{pt3dclear()}
{pt3dadd(191640.000000,181212.000000,105000.000000,2154.253700)}
{pt3dadd(191520.000000,181200.000000,105400.000000,2309.005400)}
{pt3dadd(191424.000000,180972.000000,105775.000000,2335.429040)}
{pt3dadd(191292.000000,180828.000000,106175.000000,2379.591200)}
{pt3dadd(190872.000000,180828.000000,106550.000000,2401.133720)}
{pt3dadd(190524.000000,181080.000000,106875.000000,2329.825220)}
{pt3dadd(190356.000000,180468.000000,107450.000000,2307.205580)}
{pt3dadd(190308.000000,180156.000000,107875.000000,2204.377720)}
{pt3dadd(190092.000000,180120.000000,108200.000000,2160.215560)}
{pt3dadd(190128.000000,179940.000000,108600.000000,2080.007340)}
{pt3dadd(190008.000000,180192.000000,109000.000000,1958.701367)}
{pt3dadd(189972.000000,180144.000000,109375.000000,1860.925200)}

{create adhoc10}
{access adhoc10}
{connect adhoc10(1), adhoc9(0)}
{nseg = 1}
{strdef color color = "White"}
{pt3dclear()}
{pt3dadd(189972.000000,180144.000000,109375.000000,1860.925200)}
{pt3dadd(189768.000000,180276.000000,109925.000000,1524.033667)}
{pt3dadd(189648.000000,180468.000000,110350.000000,1543.619740)}
{pt3dadd(189600.000000,180624.000000,110725.000000,1492.942140)}
{pt3dadd(189648.000000,180708.000000,111075.000000,1467.121440)}
{pt3dadd(189552.000000,180924.000000,111475.000000,1508.814040)}
{pt3dadd(189372.000000,181032.000000,111875.000000,1492.738660)}
{pt3dadd(188904.000000,181272.000000,112425.000000,1507.319500)}
{pt3dadd(188604.000000,181296.000000,112975.000000,1477.428780)}
{pt3dadd(188268.000000,181200.000000,113400.000000,1517.136000)}
{pt3dadd(187980.000000,181140.000000,113775.000000,1532.445880)}
{pt3dadd(187476.000000,181236.000000,114325.000000,1475.443400)}
{pt3dadd(187140.000000,181176.000000,114600.000000,1409.159640)}
{pt3dadd(186696.000000,181224.000000,115100.000000,1357.456720)}
{pt3dadd(186108.000000,181308.000000,115625.000000,1330.344960)}
{pt3dadd(185748.000000,181296.000000,116075.000000,1273.342480)}
{pt3dadd(185268.000000,181368.000000,116625.000000,1286.567720)}
{pt3dadd(184920.000000,181236.000000,117025.000000,1298.563420)}
{pt3dadd(184452.000000,181284.000000,117350.000000,1298.563420)}
{pt3dadd(184116.000000,181284.000000,117700.000000,1311.788660)}
{pt3dadd(183600.000000,181368.000000,118025.000000,1311.788660)}
{pt3dadd(182964.000000,181452.000000,118525.000000,1298.563420)}
{pt3dadd(182160.000000,181956.000000,119075.000000,1384.236740)}
{pt3dadd(181560.000000,182328.000000,119525.000000,1435.939660)}
{pt3dadd(180744.000000,182292.000000,119950.000000,1365.456020)}
{pt3dadd(180108.000000,182460.000000,120350.000000,1318.559940)}
{pt3dadd(179412.000000,182424.000000,120700.000000,1242.033720)}
{pt3dadd(178560.000000,182544.000000,121025.000000,1066.834000)}
{pt3dadd(177564.000000,182904.000000,121475.000000,963.196020)}
{pt3dadd(176760.000000,183432.000000,121900.000000,953.327134)}
{pt3dadd(175860.000000,183708.000000,122300.000000,933.095928)}
{pt3dadd(174972.000000,183948.000000,122800.000000,952.363748)}
{pt3dadd(174156.000000,184536.000000,123300.000000,997.227208)}
{pt3dadd(173592.000000,184944.000000,123675.000000,1006.626142)}
{pt3dadd(172824.000000,185184.000000,124175.000000,997.227208)}
{pt3dadd(172308.000000,185316.000000,124550.000000,962.232634)}
{pt3dadd(171672.000000,185340.000000,124950.000000,925.488334)}
{pt3dadd(170784.000000,185268.000000,125350.000000,906.220514)}
{pt3dadd(169884.000000,185256.000000,125750.000000,926.451720)}
{pt3dadd(168684.000000,185220.000000,126200.000000,893.123554)}
{pt3dadd(167316.000000,185304.000000,126625.000000,851.913220)}
{pt3dadd(166536.000000,185592.000000,127075.000000,815.003940)}
{pt3dadd(165684.000000,185544.000000,127500.000000,774.311460)}
{pt3dadd(164868.000000,185844.000000,128000.000000,703.988840)}
{pt3dadd(164532.000000,185964.000000,128250.000000,703.988840)}
{pt3dadd(164064.000000,185952.000000,128450.000000,723.088706)}
{pt3dadd(163740.000000,185952.000000,128525.000000,759.997986)}
{pt3dadd(163404.000000,186024.000000,128775.000000,767.362300)}
{pt3dadd(163152.000000,186144.000000,128700.000000,790.578300)}
{pt3dadd(162840.000000,186024.000000,128575.000000,790.578300)}
{pt3dadd(162492.000000,185976.000000,128575.000000,783.898648)}
{pt3dadd(162168.000000,185964.000000,128550.000000,760.682648)}
{pt3dadd(161868.000000,185964.000000,128525.000000,753.318334)}
{pt3dadd(161484.000000,186180.000000,128750.000000,698.218714)}
{pt3dadd(161136.000000,186264.000000,128925.000000,690.854400)}
{pt3dadd(160812.000000,186348.000000,129050.000000,704.547680)}
{pt3dadd(160464.000000,186396.000000,129250.000000,661.935020)}
{pt3dadd(160128.000000,186336.000000,129375.000000,609.590794)}
{pt3dadd(159768.000000,186408.000000,129575.000000,589.130188)}
{pt3dadd(159456.000000,186324.000000,129650.000000,569.075336)}
{pt3dadd(159060.000000,186372.000000,129800.000000,549.020484)}
{pt3dadd(158688.000000,186372.000000,129950.000000,584.619516)}
{pt3dadd(158340.000000,186312.000000,129950.000000,668.704850)}
{pt3dadd(157932.000000,186396.000000,130050.000000,721.049076)}
{pt3dadd(157596.000000,186588.000000,130225.000000,734.090300)}
{pt3dadd(157248.000000,186612.000000,130350.000000,740.451872)}
{pt3dadd(156924.000000,186492.000000,130475.000000,686.294468)}
{pt3dadd(156576.000000,186576.000000,130675.000000,602.209134)}
{pt3dadd(156180.000000,186492.000000,130975.000000,570.325514)}
{pt3dadd(155748.000000,186576.000000,131225.000000,529.742018)}
{pt3dadd(155280.000000,186480.000000,131500.000000,511.551678)}
{pt3dadd(154944.000000,186420.000000,131600.000000,565.709082)}
{pt3dadd(154560.000000,186468.000000,131800.000000,597.998456)}
{pt3dadd(154164.000000,186516.000000,131925.000000,609.827224)}
{pt3dadd(153792.000000,186564.000000,132050.000000,631.310854)}
{pt3dadd(153384.000000,186516.000000,132300.000000,631.310854)}
{pt3dadd(153036.000000,186468.000000,132525.000000,618.269630)}
{pt3dadd(152760.000000,186456.000000,132725.000000,624.631202)}
{pt3dadd(152364.000000,186576.000000,132875.000000,659.782894)}
{pt3dadd(152016.000000,186264.000000,133000.000000,678.882760)}
{pt3dadd(151716.000000,186120.000000,133325.000000,742.507488)}
{pt3dadd(151368.000000,185952.000000,133650.000000,777.659180)}
{pt3dadd(151056.000000,186024.000000,133925.000000,771.297608)}
{pt3dadd(150684.000000,186024.000000,134075.000000,736.145916)}
{pt3dadd(150372.000000,185880.000000,134375.000000,705.780564)}
{pt3dadd(150012.000000,185748.000000,134650.000000,626.442332)}
{pt3dadd(149544.000000,185604.000000,134875.000000,597.652212)}
{pt3dadd(149196.000000,185592.000000,134975.000000,632.803904)}
{pt3dadd(148836.000000,185748.000000,135175.000000,605.261632)}
{pt3dadd(148320.000000,185868.000000,135425.000000,590.296386)}
{pt3dadd(148272.000000,185868.000000,135525.000000,585.549284)}
{pt3dadd(147792.000000,185808.000000,135625.000000,546.898338)}
{pt3dadd(147576.000000,185832.000000,135800.000000,462.624290)}
{pt3dadd(147108.000000,185892.000000,136075.000000,433.782364)}
{pt3dadd(147012.000000,185796.000000,136275.000000,391.707610)}
{pt3dadd(146676.000000,185700.000000,136475.000000,374.874628)}
{pt3dadd(145944.000000,185640.000000,136800.000000,344.193104)}
{pt3dadd(145572.000000,185508.000000,136925.000000,311.752796)}
{pt3dadd(145440.000000,185580.000000,137075.000000,286.574330)}
{pt3dadd(145308.000000,185556.000000,137200.000000,291.993226)}
{pt3dadd(145128.000000,185484.000000,137300.000000,275.084654)}
{pt3dadd(144804.000000,185436.000000,137425.000000,281.671354)}
{pt3dadd(144636.000000,185508.000000,137625.000000,317.223110)}
{pt3dadd(144528.000000,185532.000000,138000.000000,354.236050)}

{create adhoc11}
{access adhoc11}
{connect adhoc11(1), adhoc9(0)}
{nseg = 1}
{strdef color color = "White"}
{pt3dclear()}
{pt3dadd(189972.000000,180144.000000,109375.000000,1860.925200)}
{pt3dadd(190440.000000,178092.000000,109375.000000,1305.093667)}
{pt3dadd(190380.000000,178152.000000,109800.000000,943.560998)}
{pt3dadd(190248.000000,178260.000000,110225.000000,645.765528)}
{pt3dadd(190212.000000,178404.000000,110725.000000,434.510002)}
{pt3dadd(190080.000000,178548.000000,111225.000000,434.510002)}
{pt3dadd(189900.000000,178740.000000,111625.000000,426.503826)}
{pt3dadd(189588.000000,178896.000000,112150.000000,426.503826)}
{pt3dadd(189144.000000,179028.000000,112725.000000,413.314736)}
{pt3dadd(188820.000000,179148.000000,113425.000000,385.846238)}
{pt3dadd(188340.000000,179424.000000,113950.000000,355.562208)}
{pt3dadd(188244.000000,179520.000000,114250.000000,359.467656)}
{pt3dadd(187932.000000,179676.000000,114750.000000,375.499076)}
{pt3dadd(187620.000000,179940.000000,115125.000000,392.407648)}
{pt3dadd(187392.000000,180024.000000,115550.000000,392.407648)}
{pt3dadd(187164.000000,180300.000000,115850.000000,382.278588)}
{pt3dadd(186876.000000,180540.000000,116300.000000,386.379316)}
{pt3dadd(186672.000000,180888.000000,116775.000000,374.067378)}
{pt3dadd(186360.000000,181296.000000,117250.000000,366.805536)}
{pt3dadd(185892.000000,181572.000000,117700.000000,377.441052)}
{pt3dadd(185208.000000,181884.000000,118100.000000,412.869678)}
{pt3dadd(184800.000000,182244.000000,118500.000000,431.428050)}
{pt3dadd(184380.000000,182688.000000,118800.000000,474.491764)}
{pt3dadd(183912.000000,183132.000000,119075.000000,489.759782)}
{pt3dadd(183420.000000,183444.000000,119225.000000,475.911240)}
{pt3dadd(182784.000000,183696.000000,119500.000000,466.643094)}
{pt3dadd(182124.000000,183792.000000,119750.000000,426.230004)}
{pt3dadd(181236.000000,183972.000000,119875.000000,383.166290)}
{pt3dadd(180768.000000,184092.000000,120000.000000,355.337238)}
{pt3dadd(179976.000000,184416.000000,120250.000000,355.337238)}
{pt3dadd(179460.000000,184596.000000,120500.000000,335.763458)}
{pt3dadd(178836.000000,184824.000000,120875.000000,338.976484)}
{pt3dadd(178356.000000,184968.000000,121250.000000,331.714642)}
{pt3dadd(177600.000000,185184.000000,121550.000000,351.537518)}
{pt3dadd(176448.000000,185436.000000,122000.000000,377.697998)}
{pt3dadd(175296.000000,185856.000000,122400.000000,397.271778)}
{pt3dadd(174432.000000,186012.000000,122850.000000,415.913470)}
{pt3dadd(173484.000000,186180.000000,123150.000000,472.297668)}
{pt3dadd(172860.000000,186312.000000,123425.000000,472.297668)}
{pt3dadd(171996.000000,186480.000000,124000.000000,476.818712)}
{pt3dadd(171216.000000,186504.000000,124475.000000,460.787292)}
{pt3dadd(170556.000000,186456.000000,124775.000000,449.061634)}
{pt3dadd(170076.000000,186552.000000,125025.000000,396.219796)}
{pt3dadd(169416.000000,186648.000000,125375.000000,392.500314)}
{pt3dadd(168732.000000,186780.000000,125700.000000,397.247416)}
{pt3dadd(168108.000000,186732.000000,126100.000000,444.030612)}
{pt3dadd(167700.000000,186528.000000,126400.000000,496.872450)}
{pt3dadd(166788.000000,186756.000000,126825.000000,522.172016)}
{pt3dadd(165888.000000,187032.000000,127400.000000,547.471582)}
{pt3dadd(165540.000000,187008.000000,127725.000000,529.796946)}
{pt3dadd(164880.000000,187284.000000,128000.000000,486.733232)}
{pt3dadd(164112.000000,187332.000000,128200.000000,449.922814)}
{pt3dadd(163032.000000,187344.000000,128475.000000,445.175712)}
{pt3dadd(162132.000000,187356.000000,128700.000000,427.501076)}
{pt3dadd(161544.000000,187632.000000,128975.000000,427.501076)}
{pt3dadd(160680.000000,187752.000000,129325.000000,476.623432)}
{pt3dadd(160032.000000,187800.000000,129575.000000,468.216942)}
{pt3dadd(159312.000000,187800.000000,129900.000000,463.695898)}
{pt3dadd(158520.000000,187740.000000,130125.000000,472.102388)}
{pt3dadd(157392.000000,188040.000000,130500.000000,485.029922)}
{pt3dadd(156060.000000,188052.000000,130875.000000,467.705794)}
{pt3dadd(154812.000000,187980.000000,131225.000000,495.598574)}
{pt3dadd(153672.000000,187812.000000,131625.000000,538.770564)}
{pt3dadd(152496.000000,187608.000000,132000.000000,569.522340)}
{pt3dadd(151824.000000,187548.000000,132525.000000,629.230880)}
{pt3dadd(151200.000000,187500.000000,132900.000000,640.496366)}
{pt3dadd(150600.000000,187188.000000,133425.000000,670.861718)}
{pt3dadd(150120.000000,187008.000000,133825.000000,677.541370)}
{pt3dadd(150108.000000,186804.000000,134200.000000,666.275884)}
{pt3dadd(149196.000000,186744.000000,134425.000000,638.856718)}
{pt3dadd(147984.000000,186540.000000,134775.000000,651.276932)}
{pt3dadd(147228.000000,186492.000000,135125.000000,620.911580)}
{pt3dadd(146508.000000,186360.000000,135425.000000,590.546228)}
{pt3dadd(146376.000000,186300.000000,135600.000000,627.925208)}
{pt3dadd(145968.000000,186132.000000,135850.000000,571.541010)}
{pt3dadd(145464.000000,186012.000000,136175.000000,483.616774)}
{pt3dadd(145392.000000,185808.000000,136475.000000,431.995670)}
{pt3dadd(144048.000000,185400.000000,136925.000000,389.561926)}
{pt3dadd(142824.000000,185040.000000,137575.000000,337.217700)}
{pt3dadd(142296.000000,184728.000000,137900.000000,348.384990)}
{pt3dadd(142872.000000,184524.000000,138300.000000,402.405382)}
{pt3dadd(141720.000000,184344.000000,138875.000000,454.026486)}
{pt3dadd(141012.000000,184128.000000,139475.000000,513.784358)}
{pt3dadd(140412.000000,183948.000000,139725.000000,518.531460)}
{pt3dadd(139596.000000,183948.000000,140200.000000,557.689726)}
{pt3dadd(139236.000000,184284.000000,140750.000000,579.173356)}
{pt3dadd(139020.000000,184536.000000,141175.000000,602.859056)}
{pt3dadd(138756.000000,184788.000000,141625.000000,561.742876)}
{pt3dadd(138228.000000,185064.000000,142300.000000,561.742876)}
{pt3dadd(137880.000000,185268.000000,142850.000000,561.742876)}
{pt3dadd(137388.000000,185424.000000,143525.000000,580.842742)}
{pt3dadd(137268.000000,185568.000000,144125.000000,542.191796)}
{pt3dadd(136584.000000,185268.000000,145200.000000,530.466138)}
{pt3dadd(136560.000000,185256.000000,145800.000000,551.949768)}
{pt3dadd(136224.000000,185040.000000,146425.000000,530.466138)}
{pt3dadd(135624.000000,184692.000000,146600.000000,476.308734)}
{pt3dadd(135648.000000,184404.000000,147150.000000,463.381200)}
{pt3dadd(135492.000000,184632.000000,147725.000000,529.264262)}
{pt3dadd(135396.000000,184704.000000,148325.000000,541.817704)}
{pt3dadd(135372.000000,184800.000000,149100.000000,588.817740)}
{pt3dadd(135360.000000,184740.000000,149400.000000,575.111442)}
{pt3dadd(135432.000000,184896.000000,149825.000000,583.606942)}
{pt3dadd(135624.000000,185100.000000,150200.000000,546.775630)}
{pt3dadd(135828.000000,185736.000000,150650.000000,525.949142)}
{pt3dadd(135912.000000,186180.000000,151375.000000,481.663340)}
{pt3dadd(135708.000000,186528.000000,152050.000000,556.687550)}
{pt3dadd(135768.000000,186720.000000,152675.000000,636.084924)}
{pt3dadd(135900.000000,187140.000000,153300.000000,850.366084)}
{pt3dadd(137436.000000,188808.000000,153450.000000,1445.618804)}
{pt3dadd(138000.000000,190104.000000,153925.000000,1543.215434)}
{pt3dadd(138684.000000,193644.000000,154650.000000,2043.124867)}
{pt3dadd(138408.000000,195072.000000,155800.000000,1000.000000)}

{create adhoc12}
{access adhoc12}
{connect adhoc12(1), adhoc8(0)}
{nseg = 1}
{strdef color color = "White"}
{pt3dclear()}
{pt3dadd(191640.000000,181212.000000,105000.000000,2154.253700)}
{pt3dadd(191592.000000,180816.000000,104950.000000,1635.870133)}
{pt3dadd(191556.000000,180432.000000,104900.000000,1365.766960)}
{pt3dadd(191832.000000,180096.000000,104850.000000,1132.488200)}
{pt3dadd(191964.000000,179760.000000,104825.000000,1058.615640)}
{pt3dadd(191916.000000,179364.000000,105025.000000,995.121080)}
{pt3dadd(191772.000000,179040.000000,105275.000000,1009.405040)}
{pt3dadd(191688.000000,178680.000000,105600.000000,1034.009300)}
{pt3dadd(191604.000000,178332.000000,106050.000000,1015.643228)}
{pt3dadd(192180.000000,177828.000000,105825.000000,951.746468)}
{pt3dadd(192432.000000,177432.000000,105675.000000,916.893768)}
{pt3dadd(192396.000000,177084.000000,105600.000000,845.287588)}
{pt3dadd(192564.000000,176724.000000,105475.000000,775.992138)}
{pt3dadd(192756.000000,176268.000000,105350.000000,742.338562)}
{pt3dadd(192912.000000,175872.000000,105025.000000,735.060954)}
{pt3dadd(192996.000000,175548.000000,104775.000000,713.040114)}
{pt3dadd(193032.000000,175128.000000,104500.000000,711.966102)}
{pt3dadd(193152.000000,174756.000000,104125.000000,725.006300)}
{pt3dadd(193152.000000,173820.000000,103650.000000,749.361342)}
{pt3dadd(193116.000000,172908.000000,103200.000000,754.341970)}
{pt3dadd(193032.000000,172212.000000,102850.000000,762.071130)}
{pt3dadd(193116.000000,171540.000000,102500.000000,779.641342)}
{pt3dadd(193032.000000,170772.000000,102125.000000,759.582406)}
{pt3dadd(193068.000000,169968.000000,101850.000000,752.220064)}
{pt3dadd(193116.000000,169248.000000,101550.000000,762.158552)}
{pt3dadd(193080.000000,168432.000000,101125.000000,766.021832)}
{pt3dadd(192912.000000,167784.000000,100825.000000,755.971492)}
{pt3dadd(192732.000000,166752.000000,100425.000000,752.789290)}
{pt3dadd(192696.000000,165972.000000,100125.000000,758.739278)}
{pt3dadd(192984.000000,164868.000000,99725.000000,782.169570)}
{pt3dadd(192768.000000,163848.000000,99350.000000,801.545440)}
{pt3dadd(192852.000000,163008.000000,98925.000000,845.127720)}
{pt3dadd(192876.000000,162144.000000,98550.000000,905.471922)}
{pt3dadd(192912.000000,161796.000000,98550.000000,906.787950)}
{pt3dadd(192864.000000,161388.000000,98400.000000,919.463730)}
{pt3dadd(192936.000000,161004.000000,98075.000000,923.052160)}
{pt3dadd(192972.000000,160632.000000,98000.000000,939.952360)}
{pt3dadd(192912.000000,160224.000000,97975.000000,935.474688)}
{pt3dadd(192948.000000,159876.000000,97825.000000,968.415312)}
{pt3dadd(193020.000000,159480.000000,97700.000000,979.291012)}
{pt3dadd(193020.000000,159072.000000,97625.000000,1014.149672)}
{pt3dadd(193044.000000,158724.000000,97475.000000,1018.827512)}
{pt3dadd(193080.000000,158436.000000,97375.000000,1029.503938)}
{pt3dadd(193080.000000,158112.000000,97325.000000,1018.874706)}
{pt3dadd(193320.000000,157716.000000,97275.000000,1008.993466)}
{pt3dadd(193404.000000,157356.000000,97125.000000,989.112810)}
{pt3dadd(193368.000000,157200.000000,97150.000000,987.859900)}

{create adhoc13}
{access adhoc13}
{connect adhoc13(1), adhoc12(0)}
{nseg = 1}
{strdef color color = "White"}
{pt3dclear()}
{pt3dadd(193368.000000,157200.000000,97150.000000,987.859900)}
{pt3dadd(193404.000000,156816.000000,97400.000000,802.488487)}
{pt3dadd(194028.000000,156264.000000,97175.000000,707.645786)}
{pt3dadd(194052.000000,155724.000000,97175.000000,622.973526)}
{pt3dadd(194256.000000,155340.000000,96950.000000,572.028574)}
{pt3dadd(194220.000000,154920.000000,96700.000000,606.819794)}
{pt3dadd(194184.000000,154656.000000,96525.000000,632.860500)}
{pt3dadd(194220.000000,154320.000000,96475.000000,669.766608)}
{pt3dadd(194124.000000,153960.000000,96375.000000,688.220948)}
{pt3dadd(194112.000000,153648.000000,96150.000000,704.956122)}
{pt3dadd(193980.000000,153216.000000,95950.000000,735.217692)}
{pt3dadd(193812.000000,152796.000000,95825.000000,766.016804)}
{pt3dadd(193464.000000,152376.000000,95625.000000,740.004736)}
{pt3dadd(193368.000000,152004.000000,95650.000000,780.693716)}
{pt3dadd(193272.000000,151620.000000,95650.000000,796.263562)}
{pt3dadd(193056.000000,151128.000000,95375.000000,759.317480)}
{pt3dadd(192840.000000,150672.000000,95275.000000,743.422468)}
{pt3dadd(192720.000000,150228.000000,95250.000000,708.423148)}
{pt3dadd(192420.000000,149964.000000,95100.000000,636.168658)}
{pt3dadd(192288.000000,149676.000000,94875.000000,575.791982)}
{pt3dadd(192072.000000,149340.000000,94650.000000,560.610474)}
{pt3dadd(191976.000000,148968.000000,94575.000000,553.901054)}
{pt3dadd(191928.000000,148524.000000,94250.000000,580.156388)}
{pt3dadd(191952.000000,148152.000000,93725.000000,592.697858)}
{pt3dadd(191820.000000,147816.000000,93375.000000,601.478162)}
{pt3dadd(191712.000000,147348.000000,93075.000000,550.875242)}
{pt3dadd(191736.000000,146928.000000,92700.000000,463.935858)}
{pt3dadd(191772.000000,146448.000000,92300.000000,424.740094)}
{pt3dadd(191868.000000,146148.000000,91775.000000,434.677848)}
{pt3dadd(191952.000000,145932.000000,91450.000000,463.188320)}
{pt3dadd(191892.000000,145488.000000,90975.000000,548.076480)}
{pt3dadd(191760.000000,145020.000000,90550.000000,617.613624)}
{pt3dadd(191796.000000,144756.000000,90150.000000,640.295314)}
{pt3dadd(191916.000000,144612.000000,89825.000000,635.752933)}
{pt3dadd(191904.000000,144276.000000,89425.000000,523.889900)}

{create adhoc14}
{access adhoc14}
{connect adhoc14(1), adhoc13(0)}
{nseg = 1}
{strdef color color = "White"}
{pt3dclear()}
{pt3dadd(191904.000000,144276.000000,89425.000000,523.889900)}
{pt3dadd(191868.000000,144132.000000,89050.000000,542.316347)}
{pt3dadd(191820.000000,144156.000000,88650.000000,556.422304)}
{pt3dadd(191868.000000,144060.000000,88250.000000,577.377904)}
{pt3dadd(191652.000000,144060.000000,87900.000000,555.368384)}
{pt3dadd(191760.000000,144276.000000,87550.000000,620.568736)}
{pt3dadd(191868.000000,144432.000000,87150.000000,672.697248)}
{pt3dadd(191976.000000,144468.000000,86600.000000,678.474600)}
{pt3dadd(192024.000000,144456.000000,86325.000000,706.852020)}
{pt3dadd(192228.000000,144480.000000,85850.000000,723.367640)}
{pt3dadd(192228.000000,144216.000000,85425.000000,673.804680)}
{pt3dadd(192216.000000,144240.000000,85075.000000,619.628500)}
{pt3dadd(192012.000000,144120.000000,84625.000000,596.353326)}
{pt3dadd(192012.000000,144036.000000,84275.000000,545.683646)}
{pt3dadd(191916.000000,143976.000000,83875.000000,538.434106)}
{pt3dadd(191688.000000,143916.000000,83500.000000,519.482386)}
{pt3dadd(191640.000000,143940.000000,83200.000000,513.325633)}
{pt3dadd(191592.000000,144072.000000,82900.000000,452.550000)}

{create adhoc15}
{access adhoc15}
{connect adhoc15(1), adhoc14(0)}
{nseg = 1}
{strdef color color = "White"}
{pt3dclear()}
{pt3dadd(191592.000000,144072.000000,82900.000000,452.550000)}
{pt3dadd(191508.000000,143856.000000,82450.000000,403.684607)}
{pt3dadd(191076.000000,143556.000000,82100.000000,425.011772)}
{pt3dadd(190980.000000,143736.000000,81800.000000,454.248032)}
{pt3dadd(190896.000000,143604.000000,81350.000000,514.458700)}
{pt3dadd(190728.000000,143508.000000,80975.000000,533.306644)}
{pt3dadd(190392.000000,143196.000000,80600.000000,541.364852)}
{pt3dadd(190248.000000,143088.000000,80150.000000,517.106130)}
{pt3dadd(189960.000000,142872.000000,79750.000000,506.821590)}
{pt3dadd(189696.000000,142692.000000,79425.000000,491.763762)}
{pt3dadd(189468.000000,142404.000000,78950.000000,538.820708)}
{pt3dadd(189168.000000,142044.000000,78600.000000,566.289980)}
{pt3dadd(189060.000000,141696.000000,78150.000000,625.534066)}
{pt3dadd(188772.000000,141396.000000,77875.000000,628.433576)}
{pt3dadd(188424.000000,140916.000000,77425.000000,631.060516)}
{pt3dadd(187920.000000,140004.000000,76850.000000,631.208762)}
{pt3dadd(187764.000000,139560.000000,76500.000000,639.951202)}
{pt3dadd(187584.000000,138912.000000,76050.000000,628.612490)}
{pt3dadd(186984.000000,138444.000000,75625.000000,614.269686)}
{pt3dadd(186720.000000,138120.000000,75100.000000,557.299854)}
{pt3dadd(186732.000000,137652.000000,74650.000000,471.706223)}
{pt3dadd(186648.000000,137316.000000,74300.000000,321.618840)}

{create adhoc16}
{access adhoc16}
{connect adhoc16(1), adhoc15(0)}
{nseg = 1}
{strdef color color = "White"}
{pt3dclear()}
{pt3dadd(186648.000000,137316.000000,74300.000000,321.618840)}
{pt3dadd(186360.000000,137028.000000,73975.000000,522.631113)}
{pt3dadd(185880.000000,136500.000000,73575.000000,559.642980)}
{pt3dadd(185460.000000,136164.000000,73200.000000,629.839292)}
{pt3dadd(185160.000000,135864.000000,72850.000000,645.656044)}
{pt3dadd(185016.000000,135684.000000,72550.000000,639.962932)}
{pt3dadd(184812.000000,135372.000000,72200.000000,635.935752)}
{pt3dadd(184656.000000,135036.000000,71850.000000,605.802134)}
{pt3dadd(184524.000000,134652.000000,71425.000000,586.799774)}
{pt3dadd(184308.000000,134292.000000,71025.000000,575.461062)}
{pt3dadd(184272.000000,133980.000000,70575.000000,569.394828)}
{pt3dadd(184008.000000,133512.000000,70200.000000,554.978858)}
{pt3dadd(183876.000000,133248.000000,69800.000000,566.560804)}
{pt3dadd(183780.000000,133080.000000,69425.000000,590.747064)}
{pt3dadd(183648.000000,132816.000000,69025.000000,614.157358)}
{pt3dadd(183132.000000,132348.000000,68675.000000,602.327024)}
{pt3dadd(182880.000000,131988.000000,68375.000000,606.671194)}
{pt3dadd(182424.000000,131556.000000,67850.000000,591.718160)}
{pt3dadd(182040.000000,130956.000000,67400.000000,539.559292)}
{pt3dadd(181464.000000,130596.000000,67025.000000,517.481130)}
{pt3dadd(181236.000000,130344.000000,66750.000000,523.535658)}
{pt3dadd(180876.000000,130140.000000,66275.000000,541.791720)}
{pt3dadd(180144.000000,130020.000000,65825.000000,577.581240)}

{create adhoc17}
{access adhoc17}
{connect adhoc17(1), adhoc16(0)}
{nseg = 1}
{strdef color color = "White"}
{pt3dclear()}
{pt3dadd(180144.000000,130020.000000,65825.000000,577.581240)}
{pt3dadd(179928.000000,129936.000000,65525.000000,597.019100)}
{pt3dadd(179748.000000,129852.000000,65250.000000,553.446126)}
{pt3dadd(179316.000000,129672.000000,64875.000000,547.945344)}
{pt3dadd(179088.000000,129468.000000,64400.000000,524.447218)}
{pt3dadd(178884.000000,129132.000000,64050.000000,492.225558)}
{pt3dadd(178704.000000,128772.000000,63625.000000,514.902066)}
{pt3dadd(178488.000000,128304.000000,63175.000000,489.976867)}
{pt3dadd(178152.000000,127956.000000,62850.000000,535.053470)}

{create adhoc18}
{access adhoc18}
{connect adhoc18(1), adhoc17(0)}
{nseg = 1}
{strdef color color = "White"}
{pt3dclear()}
{pt3dadd(178152.000000,127956.000000,62850.000000,535.053470)}
{pt3dadd(178068.000000,127776.000000,62525.000000,514.117400)}
{pt3dadd(177948.000000,127692.000000,62125.000000,445.833840)}
{pt3dadd(177804.000000,127620.000000,61850.000000,405.502346)}
{pt3dadd(177588.000000,127596.000000,61500.000000,360.405326)}
{pt3dadd(177696.000000,127620.000000,61125.000000,348.588004)}
{pt3dadd(177684.000000,127476.000000,60700.000000,313.346322)}
{pt3dadd(177720.000000,127140.000000,60325.000000,349.376232)}
{pt3dadd(177744.000000,127044.000000,59850.000000,387.473672)}
{pt3dadd(177660.000000,126324.000000,59475.000000,396.670192)}
{pt3dadd(177348.000000,125820.000000,59175.000000,377.669088)}
{pt3dadd(176928.000000,125520.000000,58750.000000,399.195767)}
{pt3dadd(176448.000000,125256.000000,58275.000000,336.000000)}

{create adhoc19}
{access adhoc19}
{connect adhoc19(1), adhoc18(0)}
{nseg = 1}
{strdef color color = "White"}
{pt3dclear()}
{pt3dadd(176448.000000,125256.000000,58275.000000,336.000000)}
{pt3dadd(176400.000000,125088.000000,57975.000000,322.089257)}
{pt3dadd(176268.000000,124752.000000,57550.000000,369.956044)}
{pt3dadd(176076.000000,124416.000000,57150.000000,398.753407)}
{pt3dadd(175896.000000,124128.000000,56750.000000,492.577730)}

{create adhoc20}
{access adhoc20}
{connect adhoc20(1), adhoc19(0)}
{nseg = 1}
{strdef color color = "White"}
{pt3dclear()}
{pt3dadd(175896.000000,124128.000000,56750.000000,492.577730)}
{pt3dadd(175764.000000,124008.000000,56400.000000,404.378277)}
{pt3dadd(175956.000000,124008.000000,55925.000000,337.315378)}
{pt3dadd(175632.000000,123780.000000,55475.000000,279.137960)}
{pt3dadd(175536.000000,123636.000000,55100.000000,213.950412)}
{pt3dadd(175512.000000,123492.000000,54675.000000,226.371754)}
{pt3dadd(175332.000000,123336.000000,54250.000000,216.812816)}
{pt3dadd(175284.000000,123144.000000,53825.000000,203.819396)}
{pt3dadd(175140.000000,122952.000000,53425.000000,187.724530)}
{pt3dadd(175020.000000,122724.000000,52975.000000,171.386384)}
{pt3dadd(175116.000000,122268.000000,52525.000000,169.289334)}
{pt3dadd(175152.000000,122172.000000,52075.000000,172.888540)}
{pt3dadd(175248.000000,122136.000000,51650.000000,195.931844)}
{pt3dadd(175332.000000,121968.000000,51250.000000,241.348446)}
{pt3dadd(175440.000000,121872.000000,50825.000000,268.584752)}
{pt3dadd(175368.000000,121776.000000,50425.000000,274.592588)}
{pt3dadd(175560.000000,121644.000000,50125.000000,274.195116)}
{pt3dadd(175560.000000,121512.000000,49725.000000,257.400204)}
{pt3dadd(175800.000000,121380.000000,49250.000000,237.246306)}
{pt3dadd(175932.000000,121284.000000,48800.000000,236.932146)}
{pt3dadd(176124.000000,121320.000000,48325.000000,240.746436)}
{pt3dadd(176472.000000,121524.000000,47875.000000,234.527932)}
{pt3dadd(176712.000000,121704.000000,47500.000000,226.453544)}
{pt3dadd(177060.000000,121884.000000,47150.000000,221.625832)}
{pt3dadd(177276.000000,122268.000000,46675.000000,206.315088)}
{pt3dadd(177864.000000,122676.000000,46225.000000,194.033598)}
{pt3dadd(178128.000000,123036.000000,45800.000000,197.340368)}
{pt3dadd(178392.000000,123444.000000,45450.000000,235.076740)}
{pt3dadd(178824.000000,124056.000000,45000.000000,239.421320)}
{pt3dadd(179016.000000,124488.000000,44575.000000,242.336558)}
{pt3dadd(179568.000000,124536.000000,44075.000000,233.245162)}
{pt3dadd(179928.000000,124332.000000,43625.000000,238.590800)}
{pt3dadd(180312.000000,124068.000000,43200.000000,194.971592)}
{pt3dadd(180828.000000,123732.000000,42825.000000,175.707107)}
{pt3dadd(181044.000000,123348.000000,42475.000000,136.488740)}

{create adhoc21}
{access adhoc21}
{connect adhoc21(1), adhoc19(0)}
{nseg = 1}
{strdef color color = "White"}
{pt3dclear()}
{pt3dadd(175896.000000,124128.000000,56750.000000,492.577730)}
{pt3dadd(175620.000000,123684.000000,56675.000000,407.146083)}
{pt3dadd(175260.000000,123216.000000,56525.000000,383.288780)}
{pt3dadd(175044.000000,122820.000000,56425.000000,343.586124)}
{pt3dadd(174852.000000,122388.000000,56350.000000,325.468290)}
{pt3dadd(174684.000000,122028.000000,56400.000000,341.947796)}
{pt3dadd(174588.000000,121704.000000,56275.000000,340.207250)}
{pt3dadd(174480.000000,121356.000000,55975.000000,336.489390)}
{pt3dadd(174300.000000,120912.000000,55700.000000,358.316500)}
{pt3dadd(174216.000000,120624.000000,55550.000000,339.491002)}
{pt3dadd(174060.000000,120288.000000,55325.000000,311.440496)}
{pt3dadd(173928.000000,119856.000000,54875.000000,299.130426)}
{pt3dadd(173976.000000,119496.000000,54675.000000,305.444246)}
{pt3dadd(174072.000000,119124.000000,54475.000000,291.146970)}
{pt3dadd(174144.000000,118824.000000,54275.000000,295.123358)}
{pt3dadd(174600.000000,118428.000000,53925.000000,292.837058)}
{pt3dadd(175128.000000,118404.000000,53525.000000,287.827238)}
{pt3dadd(175368.000000,118188.000000,53225.000000,271.047708)}
{pt3dadd(175536.000000,118044.000000,53225.000000,270.382016)}
{pt3dadd(175800.000000,117984.000000,52900.000000,297.383580)}
{pt3dadd(175896.000000,117636.000000,52600.000000,340.129760)}
{pt3dadd(175896.000000,117540.000000,52325.000000,351.281736)}
{pt3dadd(176148.000000,117048.000000,51900.000000,327.728030)}
{pt3dadd(176628.000000,116472.000000,51500.000000,298.632592)}
{pt3dadd(177264.000000,115764.000000,51000.000000,265.072308)}
{pt3dadd(177384.000000,115200.000000,50600.000000,223.300840)}
{pt3dadd(177720.000000,114840.000000,50175.000000,201.720784)}
{pt3dadd(178056.000000,114504.000000,49725.000000,260.954380)}
{pt3dadd(178512.000000,114348.000000,49300.000000,298.836546)}
{pt3dadd(178536.000000,113940.000000,48750.000000,305.081106)}
{pt3dadd(178344.000000,113784.000000,48375.000000,279.067775)}
{pt3dadd(178224.000000,113688.000000,47975.000000,264.053842)}
{pt3dadd(178284.000000,113700.000000,47600.000000,193.348497)}
{pt3dadd(178392.000000,113712.000000,47200.000000,147.684737)}
{pt3dadd(178476.000000,113784.000000,46800.000000,123.482760)}
{pt3dadd(178740.000000,113844.000000,46450.000000,144.000000)}

{create adhoc22}
{access adhoc22}
{connect adhoc22(1), adhoc18(0)}
{nseg = 1}
{strdef color color = "White"}
{pt3dclear()}
{pt3dadd(176448.000000,125256.000000,58275.000000,336.000000)}
{pt3dadd(176280.000000,125976.000000,58275.000000,286.754620)}
{pt3dadd(175836.000000,126324.000000,58075.000000,276.349198)}
{pt3dadd(175680.000000,126648.000000,57800.000000,263.206150)}
{pt3dadd(175596.000000,127296.000000,57500.000000,254.454510)}
{pt3dadd(175716.000000,127560.000000,57300.000000,303.437278)}
{pt3dadd(175776.000000,127692.000000,57175.000000,325.701732)}
{pt3dadd(175908.000000,127992.000000,57125.000000,351.924112)}
{pt3dadd(175884.000000,128412.000000,57175.000000,384.068264)}
{pt3dadd(175836.000000,128856.000000,57200.000000,393.366744)}
{pt3dadd(176004.000000,129300.000000,57150.000000,400.972473)}
{pt3dadd(175992.000000,129540.000000,57150.000000,352.800000)}

{create adhoc23}
{access adhoc23}
{connect adhoc23(1), adhoc17(0)}
{nseg = 1}
{strdef color color = "White"}
{pt3dclear()}
{pt3dadd(178152.000000,127956.000000,62850.000000,535.053470)}
{pt3dadd(178140.000000,127800.000000,62850.000000,555.222773)}
{pt3dadd(178128.000000,127596.000000,62875.000000,438.819272)}
{pt3dadd(178068.000000,127368.000000,62875.000000,387.094186)}
{pt3dadd(177924.000000,127140.000000,62725.000000,341.738412)}
{pt3dadd(177864.000000,126876.000000,62700.000000,276.653364)}
{pt3dadd(177744.000000,126564.000000,62700.000000,295.233412)}
{pt3dadd(177576.000000,126336.000000,62575.000000,292.600764)}
{pt3dadd(177528.000000,126192.000000,62600.000000,276.804876)}
{pt3dadd(177288.000000,125808.000000,62650.000000,254.470128)}
{pt3dadd(177096.000000,125580.000000,62625.000000,240.744384)}
{pt3dadd(176868.000000,125340.000000,62650.000000,215.301750)}
{pt3dadd(176616.000000,125028.000000,62575.000000,211.134694)}
{pt3dadd(176424.000000,124728.000000,62625.000000,234.194528)}
{pt3dadd(176304.000000,124428.000000,62625.000000,263.864960)}
{pt3dadd(176280.000000,124176.000000,62600.000000,287.037752)}
{pt3dadd(176100.000000,123924.000000,62575.000000,303.087898)}
{pt3dadd(176088.000000,123648.000000,62575.000000,304.359040)}
{pt3dadd(176076.000000,123384.000000,62525.000000,286.487740)}
{pt3dadd(175908.000000,123120.000000,62450.000000,250.713140)}
{pt3dadd(175920.000000,122808.000000,62425.000000,238.668814)}
{pt3dadd(176076.000000,122436.000000,62425.000000,242.585254)}
{pt3dadd(176124.000000,122160.000000,62475.000000,277.075718)}
{pt3dadd(176184.000000,121872.000000,62600.000000,312.633188)}
{pt3dadd(176304.000000,121512.000000,62700.000000,379.978723)}
{pt3dadd(176316.000000,121236.000000,62675.000000,401.178620)}

{create adhoc24}
{access adhoc24}
{connect adhoc24(1), adhoc23(0)}
{nseg = 1}
{strdef color color = "White"}
{pt3dclear()}
{pt3dadd(176316.000000,121236.000000,62675.000000,401.178620)}
{pt3dadd(176136.000000,120972.000000,62400.000000,276.593087)}
{pt3dadd(175944.000000,120720.000000,62225.000000,193.035103)}
{pt3dadd(175884.000000,120528.000000,62100.000000,150.504670)}

{create adhoc25}
{access adhoc25}
{connect adhoc25(1), adhoc24(0)}
{nseg = 1}
{strdef color color = "White"}
{pt3dclear()}
{pt3dadd(175884.000000,120528.000000,62100.000000,150.504670)}
{pt3dadd(175896.000000,120348.000000,62000.000000,130.487605)}
{pt3dadd(175860.000000,120192.000000,61950.000000,112.652715)}
{pt3dadd(175836.000000,119976.000000,61950.000000,97.000000)}

{create adhoc26}
{access adhoc26}
{connect adhoc26(1), adhoc24(0)}
{nseg = 1}
{strdef color color = "White"}
{pt3dclear()}
{pt3dadd(175884.000000,120528.000000,62100.000000,150.504670)}
{pt3dadd(175788.000000,120240.000000,62250.000000,126.721728)}
{pt3dadd(175776.000000,119676.000000,62450.000000,159.010327)}
{pt3dadd(175632.000000,119268.000000,62575.000000,174.164973)}
{pt3dadd(175656.000000,118992.000000,62500.000000,194.220553)}
{pt3dadd(175548.000000,118620.000000,62800.000000,202.660600)}
{pt3dadd(175356.000000,118128.000000,62925.000000,196.373820)}
{pt3dadd(175428.000000,117588.000000,62825.000000,181.017756)}
{pt3dadd(175320.000000,117096.000000,62550.000000,183.280536)}
{pt3dadd(175272.000000,116700.000000,62325.000000,175.256836)}
{pt3dadd(175332.000000,115944.000000,62200.000000,195.978960)}
{pt3dadd(175416.000000,115512.000000,62200.000000,227.453610)}
{pt3dadd(175428.000000,114756.000000,61975.000000,232.523194)}
{pt3dadd(175548.000000,114264.000000,61850.000000,228.105386)}
{pt3dadd(175620.000000,113664.000000,61850.000000,284.956606)}
{pt3dadd(175524.000000,112944.000000,61750.000000,349.420926)}
{pt3dadd(175176.000000,112176.000000,61675.000000,370.046642)}
{pt3dadd(175092.000000,111492.000000,61425.000000,378.070342)}
{pt3dadd(174900.000000,110940.000000,61425.000000,365.600550)}
{pt3dadd(174504.000000,110916.000000,61625.000000,303.679746)}
{pt3dadd(174180.000000,110580.000000,61875.000000,211.089860)}
{pt3dadd(173892.000000,110328.000000,62100.000000,148.621972)}
{pt3dadd(173304.000000,109800.000000,62200.000000,132.538542)}
{pt3dadd(173052.000000,109236.000000,62200.000000,129.690782)}
{pt3dadd(173112.000000,108816.000000,62350.000000,123.988486)}
{pt3dadd(173244.000000,108780.000000,62575.000000,123.988486)}
{pt3dadd(173232.000000,108516.000000,62825.000000,142.415738)}
{pt3dadd(173244.000000,107976.000000,63175.000000,143.874348)}
{pt3dadd(173292.000000,107904.000000,63500.000000,153.323228)}
{pt3dadd(173424.000000,107592.000000,63825.000000,160.633638)}
{pt3dadd(173508.000000,107496.000000,64150.000000,176.096810)}
{pt3dadd(173628.000000,107376.000000,64450.000000,180.390283)}
{pt3dadd(173940.000000,107040.000000,64800.000000,186.159400)}

{create adhoc27}
{access adhoc27}
{connect adhoc27(1), adhoc23(0)}
{nseg = 1}
{strdef color color = "White"}
{pt3dclear()}
{pt3dadd(176316.000000,121236.000000,62675.000000,401.178620)}
{pt3dadd(176604.000000,121224.000000,63100.000000,214.688420)}
{pt3dadd(176784.000000,120792.000000,63350.000000,186.341986)}
{pt3dadd(176748.000000,120408.000000,63550.000000,130.349524)}
{pt3dadd(176724.000000,120228.000000,63600.000000,130.349524)}
{pt3dadd(176724.000000,120012.000000,63725.000000,138.142286)}
{pt3dadd(176700.000000,119856.000000,63825.000000,144.761020)}
{pt3dadd(176580.000000,119700.000000,63825.000000,147.870152)}
{pt3dadd(176568.000000,119520.000000,63850.000000,166.177608)}
{pt3dadd(176556.000000,119328.000000,63900.000000,186.316866)}
{pt3dadd(176496.000000,119184.000000,63925.000000,206.193700)}
{pt3dadd(176448.000000,118968.000000,64075.000000,228.176818)}
{pt3dadd(176388.000000,118752.000000,64225.000000,243.393852)}
{pt3dadd(176412.000000,118536.000000,64325.000000,243.825140)}
{pt3dadd(176400.000000,118332.000000,64450.000000,245.610182)}
{pt3dadd(176568.000000,118104.000000,64525.000000,233.450697)}
{pt3dadd(176604.000000,117912.000000,64600.000000,233.442060)}

{create adhoc28}
{access adhoc28}
{connect adhoc28(1), adhoc16(0)}
{nseg = 1}
{strdef color color = "White"}
{pt3dclear()}
{pt3dadd(180144.000000,130020.000000,65825.000000,577.581240)}
{pt3dadd(180084.000000,129576.000000,65675.000000,506.829793)}
{pt3dadd(179916.000000,129216.000000,65850.000000,363.000510)}
{pt3dadd(179712.000000,129012.000000,65900.000000,267.857758)}
{pt3dadd(179460.000000,128664.000000,65825.000000,168.245974)}
{pt3dadd(179016.000000,128220.000000,65800.000000,136.969655)}
{pt3dadd(178644.000000,127980.000000,65825.000000,133.071133)}
{pt3dadd(178572.000000,127776.000000,65825.000000,136.508659)}
{pt3dadd(178440.000000,127584.000000,65900.000000,157.183307)}
{pt3dadd(178428.000000,127356.000000,65975.000000,166.171155)}
{pt3dadd(178116.000000,127164.000000,65800.000000,197.598774)}
{pt3dadd(178080.000000,126768.000000,65725.000000,222.728936)}
{pt3dadd(178044.000000,126252.000000,65825.000000,219.682170)}
{pt3dadd(178116.000000,126228.000000,66000.000000,221.734578)}
{pt3dadd(178260.000000,125868.000000,66100.000000,214.092956)}
{pt3dadd(178260.000000,125700.000000,66300.000000,183.084516)}
{pt3dadd(178152.000000,125604.000000,66600.000000,162.362392)}
{pt3dadd(177972.000000,125508.000000,66800.000000,179.249992)}
{pt3dadd(177828.000000,125280.000000,67100.000000,206.355696)}
{pt3dadd(177840.000000,124812.000000,67425.000000,252.169282)}
{pt3dadd(177900.000000,124356.000000,67625.000000,269.217426)}
{pt3dadd(178104.000000,124380.000000,67900.000000,277.277156)}
{pt3dadd(178128.000000,124056.000000,68125.000000,272.859348)}
{pt3dadd(178524.000000,123780.000000,68325.000000,236.423502)}
{pt3dadd(178644.000000,123720.000000,68550.000000,185.781746)}
{pt3dadd(178752.000000,123684.000000,68675.000000,176.895898)}
{pt3dadd(178860.000000,123756.000000,68900.000000,176.895898)}
{pt3dadd(178728.000000,123444.000000,69175.000000,160.255346)}
{pt3dadd(178608.000000,123288.000000,69400.000000,160.255346)}
{pt3dadd(178512.000000,122964.000000,69650.000000,157.407586)}
{pt3dadd(178248.000000,122640.000000,69875.000000,157.407586)}
{pt3dadd(178188.000000,122364.000000,70150.000000,149.347856)}
{pt3dadd(177984.000000,122088.000000,70400.000000,140.797025)}
{pt3dadd(178272.000000,121752.000000,70650.000000,132.072692)}
{pt3dadd(178044.000000,121152.000000,70925.000000,89.545845)}

{create adhoc29}
{access adhoc29}
{connect adhoc29(1), adhoc15(0)}
{nseg = 1}
{strdef color color = "White"}
{pt3dclear()}
{pt3dadd(186648.000000,137316.000000,74300.000000,321.618840)}
{pt3dadd(186456.000000,136872.000000,74275.000000,393.021713)}
{pt3dadd(186372.000000,136536.000000,74150.000000,307.407480)}
{pt3dadd(185784.000000,136104.000000,74275.000000,278.901592)}
{pt3dadd(185508.000000,135708.000000,74275.000000,236.649140)}
{pt3dadd(185376.000000,135336.000000,74325.000000,197.001312)}
{pt3dadd(185148.000000,135024.000000,74425.000000,197.832914)}
{pt3dadd(185004.000000,134640.000000,74550.000000,218.111942)}
{pt3dadd(185064.000000,134328.000000,74675.000000,239.053858)}
{pt3dadd(184872.000000,133944.000000,74900.000000,237.122650)}
{pt3dadd(184848.000000,133416.000000,75200.000000,250.742340)}
{pt3dadd(184848.000000,133224.000000,75250.000000,192.000000)}

{create adhoc30}
{access adhoc30}
{connect adhoc30(1), adhoc14(0)}
{nseg = 1}
{strdef color color = "White"}
{pt3dclear()}
{pt3dadd(191592.000000,144072.000000,82900.000000,452.550000)}
{pt3dadd(191928.000000,144324.000000,82900.000000,346.444763)}
{pt3dadd(192084.000000,144972.000000,82825.000000,279.642196)}
{pt3dadd(192072.000000,145152.000000,82775.000000,231.468196)}
{pt3dadd(192120.000000,145428.000000,82700.000000,182.877976)}
{pt3dadd(192096.000000,145608.000000,82625.000000,195.913672)}
{pt3dadd(192168.000000,145776.000000,82625.000000,200.342344)}
{pt3dadd(192180.000000,145932.000000,82600.000000,201.237310)}
{pt3dadd(192132.000000,146100.000000,82575.000000,193.014014)}
{pt3dadd(192084.000000,146352.000000,82600.000000,198.937470)}
{pt3dadd(192072.000000,146592.000000,82550.000000,224.609468)}
{pt3dadd(192048.000000,146856.000000,82450.000000,258.487644)}
{pt3dadd(191988.000000,147036.000000,82425.000000,261.352960)}
{pt3dadd(191988.000000,147300.000000,82350.000000,276.249470)}
{pt3dadd(191880.000000,147528.000000,82275.000000,276.619594)}
{pt3dadd(191808.000000,147804.000000,82125.000000,262.330128)}
{pt3dadd(191808.000000,148020.000000,82050.000000,233.190462)}
{pt3dadd(191820.000000,148248.000000,81900.000000,235.288226)}
{pt3dadd(191556.000000,148464.000000,81625.000000,218.031012)}
{pt3dadd(191352.000000,148632.000000,81625.000000,192.735006)}
{pt3dadd(191100.000000,148812.000000,81475.000000,168.312094)}
{pt3dadd(190884.000000,148968.000000,81500.000000,170.417128)}
{pt3dadd(190656.000000,148980.000000,81300.000000,166.302456)}
{pt3dadd(190452.000000,148944.000000,81150.000000,172.961128)}
{pt3dadd(190200.000000,149004.000000,81025.000000,180.586754)}
{pt3dadd(189948.000000,149052.000000,80950.000000,186.460368)}
{pt3dadd(189708.000000,149364.000000,80850.000000,176.837500)}
{pt3dadd(189648.000000,149628.000000,80825.000000,186.005338)}
{pt3dadd(189468.000000,149964.000000,80850.000000,215.135486)}
{pt3dadd(189336.000000,150228.000000,80850.000000,255.965940)}
{pt3dadd(189348.000000,150564.000000,80900.000000,273.194578)}
{pt3dadd(189324.000000,150852.000000,80950.000000,256.844007)}
{pt3dadd(189408.000000,151092.000000,80925.000000,237.578041)}
{pt3dadd(189456.000000,151356.000000,80675.000000,192.495147)}
{pt3dadd(189432.000000,151572.000000,80525.000000,166.708393)}
{pt3dadd(189204.000000,151692.000000,80300.000000,137.690949)}
{pt3dadd(188856.000000,151752.000000,80025.000000,163.664388)}
{pt3dadd(188496.000000,151896.000000,79800.000000,164.209484)}
{pt3dadd(187908.000000,152172.000000,79550.000000,180.737504)}
{pt3dadd(187584.000000,152340.000000,79300.000000,178.157116)}
{pt3dadd(187392.000000,152496.000000,79025.000000,212.340560)}
{pt3dadd(187080.000000,152856.000000,78750.000000,214.799924)}
{pt3dadd(187056.000000,153084.000000,78525.000000,241.714803)}
{pt3dadd(186984.000000,153420.000000,78300.000000,234.560820)}

{create adhoc31}
{access adhoc31}
{connect adhoc31(1), adhoc13(0)}
{nseg = 1}
{strdef color color = "White"}
{pt3dclear()}
{pt3dadd(191904.000000,144276.000000,89425.000000,523.889900)}
{pt3dadd(191904.000000,143940.000000,89450.000000,560.218433)}
{pt3dadd(191916.000000,143568.000000,89425.000000,459.718620)}
{pt3dadd(191820.000000,143268.000000,89300.000000,403.971886)}
{pt3dadd(191796.000000,142944.000000,89225.000000,333.804306)}
{pt3dadd(191856.000000,142656.000000,89075.000000,274.873218)}
{pt3dadd(191832.000000,142476.000000,89100.000000,268.205658)}
{pt3dadd(191832.000000,142284.000000,89075.000000,250.894070)}
{pt3dadd(191832.000000,142116.000000,89000.000000,244.627936)}
{pt3dadd(191868.000000,141840.000000,88850.000000,243.109610)}
{pt3dadd(191976.000000,141672.000000,88800.000000,253.171252)}
{pt3dadd(191904.000000,141480.000000,88625.000000,250.008298)}
{pt3dadd(191916.000000,141336.000000,88650.000000,258.885176)}
{pt3dadd(191940.000000,141204.000000,88525.000000,267.594038)}
{pt3dadd(191940.000000,141012.000000,88600.000000,261.304150)}
{pt3dadd(191904.000000,140808.000000,88575.000000,260.449964)}
{pt3dadd(191904.000000,140544.000000,88650.000000,270.263918)}
{pt3dadd(191892.000000,140400.000000,88650.000000,269.005324)}
{pt3dadd(191940.000000,140232.000000,88625.000000,274.553378)}
{pt3dadd(191892.000000,140040.000000,88700.000000,269.777598)}
{pt3dadd(191952.000000,139800.000000,88600.000000,254.219858)}
{pt3dadd(191916.000000,139620.000000,88525.000000,243.671692)}
{pt3dadd(191916.000000,139500.000000,88475.000000,230.300240)}
{pt3dadd(191952.000000,139320.000000,88425.000000,212.067430)}
{pt3dadd(191916.000000,139164.000000,88400.000000,211.421424)}
{pt3dadd(191880.000000,138960.000000,88375.000000,215.556084)}
{pt3dadd(191724.000000,138756.000000,88400.000000,207.788222)}
{pt3dadd(191688.000000,138564.000000,88425.000000,216.998654)}
{pt3dadd(191700.000000,138444.000000,88425.000000,232.242090)}
{pt3dadd(191652.000000,138228.000000,88450.000000,252.455644)}
{pt3dadd(191604.000000,138108.000000,88500.000000,264.742652)}
{pt3dadd(191604.000000,137964.000000,88500.000000,297.001500)}
{pt3dadd(191568.000000,137772.000000,88450.000000,325.670724)}
{pt3dadd(191484.000000,137580.000000,88475.000000,352.278070)}
{pt3dadd(191460.000000,137436.000000,88500.000000,366.143488)}
{pt3dadd(191484.000000,137196.000000,88550.000000,380.301552)}
{pt3dadd(191460.000000,137016.000000,88575.000000,356.045504)}
{pt3dadd(191424.000000,136836.000000,88625.000000,332.516212)}
{pt3dadd(191376.000000,136692.000000,88650.000000,296.329012)}
{pt3dadd(191376.000000,136500.000000,88650.000000,256.501912)}
{pt3dadd(191364.000000,136284.000000,88700.000000,241.479920)}
{pt3dadd(191352.000000,136080.000000,88800.000000,232.542148)}
{pt3dadd(191316.000000,135864.000000,88825.000000,222.740146)}
{pt3dadd(191220.000000,135672.000000,88900.000000,213.293926)}
{pt3dadd(191184.000000,135384.000000,89050.000000,212.343648)}
{pt3dadd(191160.000000,135192.000000,89250.000000,186.994288)}
{pt3dadd(191136.000000,135012.000000,89400.000000,178.998638)}
{pt3dadd(191160.000000,134796.000000,89550.000000,160.817464)}
{pt3dadd(191100.000000,134604.000000,89600.000000,145.214214)}
{pt3dadd(191004.000000,134388.000000,89775.000000,132.665442)}
{pt3dadd(190896.000000,134136.000000,89850.000000,135.458534)}
{pt3dadd(190788.000000,133944.000000,89925.000000,163.007316)}
{pt3dadd(190680.000000,133596.000000,90300.000000,198.282564)}
{pt3dadd(190656.000000,133068.000000,90650.000000,219.814478)}
{pt3dadd(190776.000000,132696.000000,90975.000000,246.871332)}
{pt3dadd(190824.000000,132480.000000,91000.000000,251.948998)}
{pt3dadd(190716.000000,132276.000000,91075.000000,249.097894)}
{pt3dadd(190620.000000,132060.000000,91250.000000,246.393346)}
{pt3dadd(190512.000000,131832.000000,91150.000000,257.178762)}
{pt3dadd(190488.000000,131568.000000,91050.000000,256.042300)}
{pt3dadd(190560.000000,131364.000000,91025.000000,269.869934)}
{pt3dadd(190620.000000,131196.000000,90950.000000,255.195672)}
{pt3dadd(190488.000000,131016.000000,90850.000000,239.775340)}
{pt3dadd(190536.000000,130836.000000,90900.000000,231.742443)}
{pt3dadd(190740.000000,130632.000000,90800.000000,222.264000)}

{create adhoc32}
{access adhoc32}
{connect adhoc32(1), adhoc12(0)}
{nseg = 1}
{strdef color color = "White"}
{pt3dclear()}
{pt3dadd(193368.000000,157200.000000,97150.000000,987.859900)}
{pt3dadd(193356.000000,157572.000000,96675.000000,710.582183)}
{pt3dadd(194268.000000,157224.000000,96325.000000,525.031738)}
{pt3dadd(194568.000000,157020.000000,96000.000000,381.766454)}
{pt3dadd(194700.000000,157092.000000,95650.000000,261.197388)}
{pt3dadd(194940.000000,157164.000000,95300.000000,264.034098)}
{pt3dadd(195216.000000,157164.000000,95200.000000,276.348930)}
{pt3dadd(195300.000000,157248.000000,94800.000000,278.484630)}
{pt3dadd(195372.000000,157236.000000,94375.000000,285.130314)}
{pt3dadd(195324.000000,157176.000000,93950.000000,296.523130)}
{pt3dadd(195156.000000,157056.000000,93525.000000,309.361060)}
{pt3dadd(195228.000000,157092.000000,93150.000000,344.721600)}
{pt3dadd(194940.000000,156792.000000,92700.000000,372.279564)}
{pt3dadd(194700.000000,156612.000000,92375.000000,387.742156)}
{pt3dadd(194484.000000,156636.000000,92000.000000,399.339126)}
{pt3dadd(194172.000000,156744.000000,91650.000000,403.730196)}
{pt3dadd(193860.000000,157068.000000,91350.000000,395.952420)}
{pt3dadd(193416.000000,157320.000000,90950.000000,385.832473)}
{pt3dadd(193200.000000,157752.000000,90450.000000,401.178620)}

{create adhoc33}
{access adhoc33}
{connect adhoc33(1), adhoc32(0)}
{nseg = 1}
{strdef color color = "White"}
{pt3dclear()}
{pt3dadd(193200.000000,157752.000000,90450.000000,401.178620)}
{pt3dadd(193152.000000,158088.000000,89600.000000,205.484233)}
{pt3dadd(193092.000000,158196.000000,89350.000000,175.240388)}
{pt3dadd(192984.000000,158292.000000,89000.000000,115.378160)}
{pt3dadd(192852.000000,158304.000000,88750.000000,131.118368)}
{pt3dadd(192576.000000,158256.000000,88400.000000,128.228498)}
{pt3dadd(192696.000000,158472.000000,88025.000000,125.281774)}
{pt3dadd(192552.000000,158592.000000,87675.000000,122.427012)}
{pt3dadd(192456.000000,158484.000000,87400.000000,128.044148)}
{pt3dadd(192300.000000,158496.000000,87100.000000,115.172170)}
{pt3dadd(192264.000000,158352.000000,86825.000000,109.835849)}
{pt3dadd(192108.000000,158556.000000,86525.000000,99.548543)}
{pt3dadd(191844.000000,158496.000000,86225.000000,99.548543)}
{pt3dadd(191784.000000,158424.000000,86050.000000,102.357911)}
{pt3dadd(191676.000000,158256.000000,85800.000000,142.370289)}
{pt3dadd(191436.000000,158208.000000,85525.000000,195.701056)}
{pt3dadd(191172.000000,158220.000000,85175.000000,262.277486)}
{pt3dadd(191004.000000,158268.000000,84800.000000,308.088986)}
{pt3dadd(190872.000000,158520.000000,84475.000000,309.389920)}
{pt3dadd(190308.000000,159156.000000,84100.000000,268.754266)}
{pt3dadd(189984.000000,159732.000000,83700.000000,220.652192)}
{pt3dadd(190008.000000,160080.000000,83300.000000,120.672010)}
{pt3dadd(190104.000000,160104.000000,82900.000000,112.289630)}

{create adhoc34}
{access adhoc34}
{connect adhoc34(1), adhoc32(0)}
{nseg = 1}
{strdef color color = "White"}
{pt3dclear()}
{pt3dadd(193200.000000,157752.000000,90450.000000,401.178620)}
{pt3dadd(193248.000000,158028.000000,90450.000000,357.492667)}
{pt3dadd(193128.000000,158256.000000,90225.000000,381.990070)}
{pt3dadd(193296.000000,158472.000000,90150.000000,368.433546)}
{pt3dadd(193332.000000,158904.000000,90300.000000,392.491056)}
{pt3dadd(193572.000000,159312.000000,90350.000000,367.459142)}
{pt3dadd(193740.000000,159708.000000,90525.000000,328.078558)}
{pt3dadd(193776.000000,160032.000000,90650.000000,307.989470)}
{pt3dadd(193968.000000,160404.000000,90875.000000,292.769944)}
{pt3dadd(194016.000000,160596.000000,91050.000000,289.819190)}
{pt3dadd(194100.000000,160908.000000,91150.000000,293.141364)}
{pt3dadd(194124.000000,161244.000000,91250.000000,323.202528)}
{pt3dadd(194184.000000,161688.000000,91325.000000,329.934426)}
{pt3dadd(194196.000000,161976.000000,91325.000000,354.504128)}
{pt3dadd(194172.000000,162348.000000,91425.000000,381.844882)}
{pt3dadd(194244.000000,162576.000000,91450.000000,427.213986)}
{pt3dadd(194388.000000,162924.000000,91525.000000,476.818728)}
{pt3dadd(194388.000000,163152.000000,91525.000000,471.950618)}
{pt3dadd(194412.000000,163284.000000,91675.000000,452.671296)}
{pt3dadd(194484.000000,163608.000000,91925.000000,419.800416)}
{pt3dadd(194400.000000,163920.000000,91975.000000,362.547418)}
{pt3dadd(194292.000000,164268.000000,92150.000000,311.451606)}
{pt3dadd(194040.000000,164664.000000,92450.000000,319.961292)}
{pt3dadd(193944.000000,165108.000000,92600.000000,311.211238)}
{pt3dadd(193596.000000,165576.000000,92800.000000,304.763892)}
{pt3dadd(193320.000000,165912.000000,92850.000000,298.258792)}
{pt3dadd(193092.000000,166416.000000,93150.000000,266.326878)}
{pt3dadd(192996.000000,166776.000000,93475.000000,231.211616)}
{pt3dadd(193020.000000,167136.000000,93800.000000,208.667040)}
{pt3dadd(192948.000000,167340.000000,93850.000000,193.229140)}
{pt3dadd(192792.000000,167484.000000,94000.000000,184.291368)}
{pt3dadd(192672.000000,167700.000000,94150.000000,205.178554)}
{pt3dadd(192564.000000,167868.000000,94225.000000,220.977600)}
{pt3dadd(192468.000000,168048.000000,94550.000000,255.093176)}
{pt3dadd(192384.000000,168264.000000,94500.000000,265.756194)}
{pt3dadd(192312.000000,168420.000000,94525.000000,288.003134)}
{pt3dadd(192276.000000,168624.000000,94625.000000,307.983036)}
{pt3dadd(192132.000000,168816.000000,94725.000000,338.142172)}
{pt3dadd(192048.000000,169008.000000,94800.000000,363.243172)}
{pt3dadd(191952.000000,169188.000000,94950.000000,382.946280)}
{pt3dadd(191880.000000,169392.000000,95050.000000,382.957020)}
{pt3dadd(191724.000000,169608.000000,95200.000000,347.556786)}
{pt3dadd(191640.000000,169860.000000,95225.000000,313.583360)}
{pt3dadd(191604.000000,170076.000000,95375.000000,273.384148)}
{pt3dadd(191520.000000,170292.000000,95450.000000,237.609548)}
{pt3dadd(191436.000000,170532.000000,95500.000000,213.626622)}
{pt3dadd(191292.000000,170724.000000,95550.000000,202.513422)}
{pt3dadd(191136.000000,170940.000000,95575.000000,175.201057)}
{pt3dadd(191208.000000,171144.000000,95575.000000,166.698000)}

{create adhoc35}
{access adhoc35}
{connect adhoc35(1), adhoc7(0)}
{nseg = 1}
{strdef color color = "White"}
{pt3dclear()}
{pt3dadd(190632.000000,182784.000000,97500.000000,1458.083600)}
{pt3dadd(190596.000000,183084.000000,97550.000000,1326.297767)}
{pt3dadd(190668.000000,183252.000000,97575.000000,1276.874000)}
{pt3dadd(190548.000000,183492.000000,97600.000000,1186.985840)}
{pt3dadd(190536.000000,183720.000000,97625.000000,1124.577420)}
{pt3dadd(190524.000000,183972.000000,97650.000000,1039.602760)}
{pt3dadd(190428.000000,184200.000000,97675.000000,941.631500)}
{pt3dadd(190260.000000,184404.000000,97675.000000,814.375688)}
{pt3dadd(190296.000000,184704.000000,97625.000000,726.115708)}
{pt3dadd(190332.000000,184968.000000,97575.000000,639.675060)}
{pt3dadd(190368.000000,185208.000000,97525.000000,579.836874)}
{pt3dadd(190272.000000,185460.000000,97525.000000,541.703664)}
{pt3dadd(190128.000000,185700.000000,97475.000000,537.225736)}
{pt3dadd(189876.000000,185988.000000,97425.000000,531.822464)}
{pt3dadd(189780.000000,186252.000000,97350.000000,533.224538)}
{pt3dadd(189564.000000,186528.000000,97300.000000,564.389304)}
{pt3dadd(189252.000000,186744.000000,97050.000000,622.660360)}
{pt3dadd(189000.000000,187032.000000,96950.000000,696.408468)}
{pt3dadd(188796.000000,187464.000000,96625.000000,764.370160)}
{pt3dadd(188532.000000,187884.000000,96350.000000,792.975954)}
{pt3dadd(188472.000000,188208.000000,96300.000000,773.968614)}
{pt3dadd(188136.000000,188520.000000,96050.000000,729.953068)}
{pt3dadd(187956.000000,188844.000000,95875.000000,663.417920)}
{pt3dadd(187620.000000,189216.000000,95500.000000,617.426960)}
{pt3dadd(187320.000000,189528.000000,95200.000000,615.343530)}
{pt3dadd(187152.000000,189984.000000,94775.000000,656.104270)}
{pt3dadd(186984.000000,190824.000000,94325.000000,656.995010)}
{pt3dadd(186948.000000,191124.000000,93775.000000,624.773350)}
{pt3dadd(186564.000000,191724.000000,93375.000000,598.178630)}
{pt3dadd(186552.000000,191952.000000,93475.000000,580.782800)}
{pt3dadd(186372.000000,192168.000000,93425.000000,515.334506)}
{pt3dadd(186240.000000,192360.000000,93375.000000,492.839566)}
{pt3dadd(185760.000000,192576.000000,92800.000000,498.936834)}
{pt3dadd(185580.000000,192768.000000,92450.000000,490.532234)}
{pt3dadd(185544.000000,192972.000000,92425.000000,468.425122)}
{pt3dadd(185376.000000,193188.000000,92325.000000,483.317876)}
{pt3dadd(185364.000000,193380.000000,92325.000000,492.764650)}
{pt3dadd(185352.000000,193536.000000,92325.000000,490.621682)}
{pt3dadd(185352.000000,193680.000000,92325.000000,503.650270)}
{pt3dadd(185268.000000,193800.000000,92325.000000,512.015382)}
{pt3dadd(185184.000000,193944.000000,92325.000000,506.281668)}
{pt3dadd(185100.000000,194100.000000,92325.000000,513.008426)}
{pt3dadd(185088.000000,194292.000000,92300.000000,532.924266)}
{pt3dadd(185076.000000,194472.000000,92275.000000,526.745592)}
{pt3dadd(184944.000000,194676.000000,92175.000000,526.122232)}
{pt3dadd(184776.000000,194892.000000,92025.000000,536.220078)}
{pt3dadd(184608.000000,195096.000000,91925.000000,541.075266)}
{pt3dadd(184464.000000,195228.000000,91825.000000,538.206966)}
{pt3dadd(184404.000000,195444.000000,91675.000000,522.135102)}
{pt3dadd(184188.000000,195708.000000,91575.000000,505.411538)}
{pt3dadd(183960.000000,195960.000000,91300.000000,473.987654)}
{pt3dadd(183876.000000,196164.000000,91300.000000,436.569580)}
{pt3dadd(183780.000000,196320.000000,91100.000000,415.121360)}
{pt3dadd(183576.000000,196524.000000,91175.000000,429.095140)}
{pt3dadd(183612.000000,196656.000000,91050.000000,438.076952)}
{pt3dadd(183432.000000,196872.000000,90900.000000,480.633704)}
{pt3dadd(183300.000000,197184.000000,90925.000000,518.627258)}
{pt3dadd(183156.000000,197472.000000,90950.000000,557.972046)}
{pt3dadd(183036.000000,197856.000000,90650.000000,576.728196)}
{pt3dadd(182820.000000,198156.000000,90625.000000,589.708774)}
{pt3dadd(182616.000000,198492.000000,90500.000000,560.473674)}
{pt3dadd(182352.000000,198840.000000,90500.000000,516.442774)}
{pt3dadd(182088.000000,199188.000000,90400.000000,439.484486)}
{pt3dadd(181788.000000,199572.000000,90125.000000,386.635074)}
{pt3dadd(181560.000000,199908.000000,90000.000000,349.028538)}
{pt3dadd(181296.000000,200220.000000,90025.000000,349.028538)}
{pt3dadd(181032.000000,200484.000000,90025.000000,358.846218)}
{pt3dadd(180972.000000,200844.000000,89925.000000,386.238618)}
{pt3dadd(180720.000000,201276.000000,89925.000000,392.952260)}
{pt3dadd(180360.000000,201732.000000,89850.000000,417.578218)}
{pt3dadd(180156.000000,202164.000000,89800.000000,445.013566)}
{pt3dadd(180192.000000,202572.000000,89775.000000,499.702806)}
{pt3dadd(180048.000000,202896.000000,89675.000000,552.605938)}
{pt3dadd(179760.000000,203256.000000,89650.000000,595.131808)}
{pt3dadd(179640.000000,203712.000000,89550.000000,596.612466)}
{pt3dadd(179424.000000,204120.000000,89425.000000,585.646928)}
{pt3dadd(179136.000000,204420.000000,89250.000000,565.170908)}
{pt3dadd(178800.000000,204720.000000,89125.000000,536.878746)}
{pt3dadd(178356.000000,205092.000000,88975.000000,541.690206)}
{pt3dadd(178116.000000,205380.000000,88850.000000,571.555820)}
{pt3dadd(177708.000000,205800.000000,88700.000000,559.611570)}
{pt3dadd(177468.000000,206268.000000,88675.000000,571.940233)}
{pt3dadd(177312.000000,206640.000000,88575.000000,475.183600)}

{create adhoc36}
{access adhoc36}
{connect adhoc36(1), adhoc35(0)}
{nseg = 1}
{strdef color color = "White"}
{pt3dclear()}
{pt3dadd(177312.000000,206640.000000,88575.000000,475.183600)}
{pt3dadd(177072.000000,206376.000000,87775.000000,386.652517)}
{pt3dadd(176772.000000,206280.000000,87400.000000,406.095330)}
{pt3dadd(176400.000000,206532.000000,87150.000000,431.740150)}
{pt3dadd(176100.000000,206772.000000,87025.000000,462.697688)}
{pt3dadd(175740.000000,207120.000000,86800.000000,485.644576)}
{pt3dadd(175440.000000,207456.000000,86550.000000,483.570122)}
{pt3dadd(175188.000000,207936.000000,86450.000000,483.570122)}
{pt3dadd(174852.000000,208356.000000,86400.000000,441.075526)}
{pt3dadd(174612.000000,208824.000000,86125.000000,414.451198)}
{pt3dadd(174432.000000,209220.000000,85825.000000,384.616310)}
{pt3dadd(174276.000000,209616.000000,85975.000000,358.509694)}
{pt3dadd(173976.000000,210000.000000,85475.000000,363.182818)}
{pt3dadd(173856.000000,210336.000000,85100.000000,365.635874)}
{pt3dadd(173568.000000,210480.000000,84750.000000,388.947034)}
{pt3dadd(173340.000000,210516.000000,84475.000000,395.835034)}
{pt3dadd(173172.000000,210756.000000,84200.000000,411.439604)}
{pt3dadd(172944.000000,210732.000000,83925.000000,414.301646)}
{pt3dadd(172620.000000,210840.000000,83525.000000,421.714722)}
{pt3dadd(172440.000000,211032.000000,83200.000000,391.076694)}
{pt3dadd(172404.000000,211140.000000,82875.000000,381.625323)}
{pt3dadd(171960.000000,211008.000000,82425.000000,299.365660)}

{create adhoc37}
{access adhoc37}
{connect adhoc37(1), adhoc36(0)}
{nseg = 1}
{strdef color color = "White"}
{pt3dclear()}
{pt3dadd(171960.000000,211008.000000,82425.000000,299.365660)}
{pt3dadd(172044.000000,210804.000000,82050.000000,278.501567)}
{pt3dadd(172044.000000,210696.000000,81675.000000,268.096048)}
{pt3dadd(171924.000000,210696.000000,81425.000000,269.483646)}
{pt3dadd(171828.000000,210564.000000,81025.000000,268.194822)}
{pt3dadd(171744.000000,210384.000000,80725.000000,276.436568)}
{pt3dadd(171528.000000,210216.000000,80325.000000,262.461080)}
{pt3dadd(171276.000000,210120.000000,79950.000000,265.529714)}
{pt3dadd(171000.000000,210000.000000,79625.000000,261.578328)}
{pt3dadd(170652.000000,210000.000000,79200.000000,257.067652)}
{pt3dadd(170292.000000,209952.000000,78825.000000,277.661472)}
{pt3dadd(170124.000000,209892.000000,78400.000000,291.636960)}
{pt3dadd(170148.000000,209892.000000,78100.000000,292.279914)}
{pt3dadd(170052.000000,209616.000000,77800.000000,274.460290)}
{pt3dadd(170016.000000,209376.000000,77450.000000,269.430896)}
{pt3dadd(169800.000000,209388.000000,77150.000000,251.202684)}
{pt3dadd(169692.000000,209172.000000,76825.000000,243.808152)}
{pt3dadd(169572.000000,209160.000000,76475.000000,240.104578)}
{pt3dadd(169560.000000,209028.000000,76125.000000,258.959158)}
{pt3dadd(169392.000000,208932.000000,75700.000000,267.718498)}
{pt3dadd(169356.000000,208848.000000,75350.000000,254.787926)}
{pt3dadd(169080.000000,209208.000000,75200.000000,245.005236)}
{pt3dadd(168552.000000,209304.000000,74750.000000,236.726076)}
{pt3dadd(168060.000000,209616.000000,74350.000000,225.057216)}
{pt3dadd(167820.000000,209724.000000,73975.000000,203.563162)}
{pt3dadd(167436.000000,209952.000000,73525.000000,202.463098)}
{pt3dadd(167328.000000,209976.000000,73200.000000,205.653624)}
{pt3dadd(167124.000000,210120.000000,72875.000000,208.700564)}
{pt3dadd(167040.000000,210300.000000,72525.000000,213.745784)}
{pt3dadd(166836.000000,210384.000000,72075.000000,216.224044)}
{pt3dadd(166584.000000,210576.000000,71675.000000,221.644512)}
{pt3dadd(166596.000000,210984.000000,71525.000000,226.455618)}
{pt3dadd(166596.000000,211356.000000,71350.000000,203.967718)}
{pt3dadd(166560.000000,211596.000000,71375.000000,172.617058)}
{pt3dadd(166524.000000,211920.000000,71325.000000,153.614632)}
{pt3dadd(166416.000000,212196.000000,71325.000000,140.110554)}
{pt3dadd(166284.000000,212496.000000,71350.000000,135.914692)}
{pt3dadd(166032.000000,212784.000000,71400.000000,153.519980)}
{pt3dadd(165612.000000,213120.000000,71575.000000,184.480333)}
{pt3dadd(165372.000000,213336.000000,71550.000000,182.907970)}

{create adhoc38}
{access adhoc38}
{connect adhoc38(1), adhoc36(0)}
{nseg = 1}
{strdef color color = "White"}
{pt3dclear()}
{pt3dadd(171960.000000,211008.000000,82425.000000,299.365660)}
{pt3dadd(171984.000000,211452.000000,82425.000000,335.268553)}
{pt3dadd(171684.000000,211776.000000,82325.000000,324.732132)}
{pt3dadd(171156.000000,212100.000000,82350.000000,321.881028)}
{pt3dadd(170772.000000,212328.000000,82325.000000,330.376688)}
{pt3dadd(170388.000000,212568.000000,82300.000000,332.137568)}
{pt3dadd(170112.000000,212796.000000,82225.000000,316.137568)}
{pt3dadd(169788.000000,213012.000000,82100.000000,308.026242)}
{pt3dadd(169644.000000,213252.000000,81925.000000,316.681246)}
{pt3dadd(169536.000000,213432.000000,81950.000000,291.406930)}
{pt3dadd(169320.000000,213792.000000,81700.000000,269.833712)}
{pt3dadd(168864.000000,214104.000000,81350.000000,259.442968)}
{pt3dadd(168684.000000,214392.000000,81275.000000,232.743156)}
{pt3dadd(168672.000000,214656.000000,81100.000000,204.675380)}
{pt3dadd(168636.000000,214980.000000,81075.000000,176.833874)}
{pt3dadd(168576.000000,215388.000000,81025.000000,155.568660)}
{pt3dadd(168540.000000,215700.000000,81000.000000,176.303704)}
{pt3dadd(168504.000000,216048.000000,80975.000000,206.400982)}
{pt3dadd(168516.000000,216228.000000,80900.000000,218.049498)}
{pt3dadd(168480.000000,216408.000000,80875.000000,277.938166)}
{pt3dadd(168396.000000,216564.000000,80875.000000,345.166598)}
{pt3dadd(168360.000000,216780.000000,80950.000000,371.923732)}
{pt3dadd(168264.000000,216984.000000,81000.000000,412.103312)}
{pt3dadd(168144.000000,217188.000000,81050.000000,436.359360)}
{pt3dadd(167916.000000,217476.000000,81075.000000,388.467060)}
{pt3dadd(167796.000000,217800.000000,80950.000000,379.788180)}
{pt3dadd(167652.000000,218124.000000,81025.000000,352.445606)}
{pt3dadd(167484.000000,218244.000000,81325.000000,318.055686)}
{pt3dadd(167328.000000,218592.000000,81375.000000,314.748122)}
{pt3dadd(166800.000000,219588.000000,81850.000000,340.147020)}
{pt3dadd(166572.000000,220212.000000,81975.000000,316.121820)}
{pt3dadd(166572.000000,221004.000000,82150.000000,316.121820)}
{pt3dadd(166692.000000,221832.000000,82150.000000,305.369294)}
{pt3dadd(166716.000000,222564.000000,82125.000000,267.325334)}
{pt3dadd(166548.000000,223344.000000,82050.000000,267.325334)}
{pt3dadd(166560.000000,223968.000000,81825.000000,270.357678)}
{pt3dadd(166128.000000,224820.000000,80950.000000,260.117178)}
{pt3dadd(165948.000000,225324.000000,80000.000000,260.117178)}
{pt3dadd(165720.000000,225876.000000,79200.000000,282.963322)}
{pt3dadd(164640.000000,226512.000000,78550.000000,261.355798)}
{pt3dadd(163680.000000,226632.000000,77850.000000,226.848804)}
{pt3dadd(163296.000000,226380.000000,77150.000000,260.602960)}
{pt3dadd(162852.000000,226248.000000,76450.000000,268.467546)}
{pt3dadd(162300.000000,226284.000000,75875.000000,258.714686)}
{pt3dadd(161784.000000,227112.000000,75600.000000,268.467546)}
{pt3dadd(161076.000000,227496.000000,75700.000000,320.567912)}
{pt3dadd(160368.000000,228540.000000,74750.000000,297.054256)}
{pt3dadd(160140.000000,229152.000000,74450.000000,289.189670)}
{pt3dadd(160356.000000,228564.000000,73525.000000,293.828364)}
{pt3dadd(160224.000000,228432.000000,72625.000000,302.499068)}
{pt3dadd(159996.000000,228048.000000,71900.000000,262.274696)}
{pt3dadd(159504.000000,227892.000000,71175.000000,239.974766)}
{pt3dadd(159264.000000,227664.000000,70575.000000,233.643697)}
{pt3dadd(158664.000000,228612.000000,69700.000000,177.294650)}

{create adhoc39}
{access adhoc39}
{connect adhoc39(1), adhoc35(0)}
{nseg = 1}
{strdef color color = "White"}
{pt3dclear()}
{pt3dadd(177312.000000,206640.000000,88575.000000,475.183600)}
{pt3dadd(177420.000000,206880.000000,88900.000000,546.078833)}
{pt3dadd(177432.000000,207204.000000,88925.000000,508.668460)}
{pt3dadd(177360.000000,207468.000000,88850.000000,491.424140)}
{pt3dadd(177252.000000,207660.000000,88775.000000,445.058306)}
{pt3dadd(177120.000000,207972.000000,88700.000000,407.619102)}
{pt3dadd(176976.000000,208320.000000,88775.000000,397.344826)}
{pt3dadd(176796.000000,208608.000000,88775.000000,384.626066)}
{pt3dadd(176700.000000,208980.000000,88900.000000,399.247846)}
{pt3dadd(176652.000000,209340.000000,88925.000000,410.294060)}
{pt3dadd(176448.000000,209700.000000,89000.000000,414.904684)}
{pt3dadd(176268.000000,210060.000000,89075.000000,407.077890)}
{pt3dadd(176220.000000,210468.000000,89275.000000,415.486594)}
{pt3dadd(176172.000000,210828.000000,89275.000000,415.955294)}
{pt3dadd(176184.000000,211164.000000,89325.000000,412.368638)}
{pt3dadd(176064.000000,211572.000000,89400.000000,404.504804)}
{pt3dadd(176088.000000,211944.000000,89550.000000,397.791162)}
{pt3dadd(176004.000000,212268.000000,89600.000000,369.934358)}
{pt3dadd(175848.000000,212604.000000,89625.000000,339.918268)}
{pt3dadd(175608.000000,212916.000000,89650.000000,330.600404)}
{pt3dadd(175380.000000,213264.000000,89575.000000,325.024238)}
{pt3dadd(175032.000000,213720.000000,89625.000000,308.586722)}
{pt3dadd(174816.000000,214104.000000,89550.000000,319.553054)}
{pt3dadd(174672.000000,214476.000000,89650.000000,313.420554)}
{pt3dadd(174432.000000,214860.000000,89725.000000,275.683278)}
{pt3dadd(174360.000000,215232.000000,89925.000000,241.654640)}
{pt3dadd(174288.000000,215436.000000,90000.000000,228.215206)}
{pt3dadd(174240.000000,215628.000000,90125.000000,190.505130)}
{pt3dadd(174312.000000,215832.000000,90200.000000,181.528626)}
{pt3dadd(174312.000000,216036.000000,90200.000000,220.777094)}
{pt3dadd(174276.000000,216288.000000,90250.000000,280.045592)}
{pt3dadd(174360.000000,216576.000000,90400.000000,342.245680)}
{pt3dadd(174504.000000,216900.000000,90500.000000,373.194678)}
{pt3dadd(174588.000000,217212.000000,90650.000000,369.902048)}
{pt3dadd(174684.000000,217488.000000,90750.000000,339.808996)}
{pt3dadd(174720.000000,217920.000000,90725.000000,296.391970)}
{pt3dadd(174828.000000,218232.000000,90775.000000,249.856356)}
{pt3dadd(174936.000000,218532.000000,90875.000000,244.328830)}
{pt3dadd(174924.000000,218844.000000,90950.000000,270.781534)}
{pt3dadd(174936.000000,219168.000000,90950.000000,308.276374)}
{pt3dadd(174924.000000,219480.000000,91025.000000,348.610046)}
{pt3dadd(174852.000000,219828.000000,91100.000000,377.767234)}
{pt3dadd(174720.000000,220176.000000,91250.000000,400.980930)}
{pt3dadd(174624.000000,220536.000000,91200.000000,406.113576)}
{pt3dadd(174576.000000,220752.000000,91225.000000,406.518460)}
{pt3dadd(174444.000000,220896.000000,91300.000000,381.486546)}
{pt3dadd(174372.000000,221064.000000,91300.000000,356.412546)}
{pt3dadd(174324.000000,221232.000000,91400.000000,327.636496)}
{pt3dadd(174252.000000,221364.000000,91425.000000,298.498154)}
{pt3dadd(174192.000000,221508.000000,91425.000000,268.662430)}
{pt3dadd(174060.000000,221688.000000,91525.000000,245.802044)}
{pt3dadd(173916.000000,221916.000000,91600.000000,246.995840)}
{pt3dadd(173844.000000,222240.000000,91800.000000,236.471410)}
{pt3dadd(173772.000000,222576.000000,91950.000000,231.895246)}
{pt3dadd(173508.000000,222876.000000,92050.000000,229.495246)}
{pt3dadd(173196.000000,223188.000000,92300.000000,276.936640)}
{pt3dadd(172848.000000,223488.000000,92400.000000,281.438364)}
{pt3dadd(172584.000000,223860.000000,92475.000000,281.967326)}
{pt3dadd(172320.000000,224220.000000,92550.000000,284.104114)}
{pt3dadd(172056.000000,224556.000000,92575.000000,282.779554)}
{pt3dadd(171936.000000,224856.000000,92600.000000,248.731094)}
{pt3dadd(171720.000000,225216.000000,92475.000000,240.388898)}
{pt3dadd(171408.000000,225516.000000,92450.000000,276.717092)}
{pt3dadd(171336.000000,225828.000000,92250.000000,299.444304)}
{pt3dadd(171252.000000,226092.000000,92300.000000,302.026636)}
{pt3dadd(171288.000000,226452.000000,92175.000000,282.530900)}
{pt3dadd(170772.000000,226668.000000,91775.000000,246.450340)}
{pt3dadd(170244.000000,226572.000000,91275.000000,192.351771)}
{pt3dadd(169716.000000,226704.000000,90775.000000,155.239177)}
{pt3dadd(169368.000000,226824.000000,90500.000000,136.068811)}
{pt3dadd(169020.000000,226872.000000,90175.000000,125.460390)}
{pt3dadd(168480.000000,226932.000000,89850.000000,136.050196)}
{pt3dadd(167928.000000,226992.000000,89625.000000,137.114932)}
{pt3dadd(167712.000000,227160.000000,89400.000000,137.142850)}

{create adhoc40}
{access adhoc40}
{connect adhoc40(1), adhoc6(0)}
{nseg = 1}
{strdef color color = "White"}
{pt3dclear()}
{pt3dadd(188496.000000,182412.000000,88650.000000,1607.537200)}
{pt3dadd(188112.000000,183468.000000,88650.000000,1108.253633)}
{pt3dadd(187428.000000,184212.000000,88250.000000,847.218116)}
{pt3dadd(186984.000000,184464.000000,87825.000000,627.625630)}
{pt3dadd(186096.000000,185184.000000,87225.000000,501.067010)}
{pt3dadd(185544.000000,185592.000000,86625.000000,515.633800)}
{pt3dadd(185124.000000,185988.000000,86100.000000,534.827610)}
{pt3dadd(184476.000000,186528.000000,85525.000000,552.326904)}
{pt3dadd(184032.000000,186900.000000,84950.000000,562.741970)}
{pt3dadd(183684.000000,187272.000000,84450.000000,559.562084)}
{pt3dadd(183372.000000,187560.000000,83950.000000,547.138262)}
{pt3dadd(182940.000000,187776.000000,83425.000000,556.058172)}
{pt3dadd(182304.000000,188016.000000,82850.000000,529.446052)}
{pt3dadd(181548.000000,188268.000000,82375.000000,491.204032)}
{pt3dadd(180936.000000,188544.000000,81850.000000,447.748508)}
{pt3dadd(180384.000000,188820.000000,81325.000000,437.013740)}
{pt3dadd(180204.000000,188940.000000,80825.000000,410.418630)}
{pt3dadd(180036.000000,189192.000000,80200.000000,408.406456)}
{pt3dadd(179940.000000,189264.000000,79650.000000,422.331956)}
{pt3dadd(179988.000000,189480.000000,79150.000000,441.557286)}
{pt3dadd(180024.000000,189528.000000,78750.000000,446.640506)}
{pt3dadd(180132.000000,189732.000000,78275.000000,449.334266)}
{pt3dadd(179928.000000,190008.000000,77850.000000,456.997988)}
{pt3dadd(179916.000000,190176.000000,77450.000000,457.444368)}
{pt3dadd(179832.000000,190560.000000,77050.000000,440.618232)}
{pt3dadd(179652.000000,190848.000000,76575.000000,451.501182)}
{pt3dadd(179772.000000,190932.000000,76100.000000,458.078022)}
{pt3dadd(179724.000000,190656.000000,75725.000000,465.407508)}
{pt3dadd(179832.000000,190728.000000,75200.000000,438.209148)}
{pt3dadd(179856.000000,190596.000000,74750.000000,446.026500)}
{pt3dadd(179628.000000,190452.000000,74350.000000,448.641320)}
{pt3dadd(179280.000000,190284.000000,73925.000000,473.350860)}
{pt3dadd(178584.000000,189996.000000,73450.000000,517.004510)}
{pt3dadd(178152.000000,189996.000000,72950.000000,598.731300)}

{create adhoc41}
{access adhoc41}
{connect adhoc41(1), adhoc40(0)}
{nseg = 1}
{strdef color color = "White"}
{pt3dclear()}
{pt3dadd(178152.000000,189996.000000,72950.000000,598.731300)}
{pt3dadd(178140.000000,189096.000000,73425.000000,315.029337)}
{pt3dadd(178236.000000,188784.000000,73625.000000,241.201222)}
{pt3dadd(178308.000000,188568.000000,73575.000000,141.922584)}
{pt3dadd(178416.000000,188232.000000,73675.000000,118.896904)}
{pt3dadd(178524.000000,188064.000000,73725.000000,135.447296)}
{pt3dadd(178716.000000,187716.000000,73650.000000,164.004708)}
{pt3dadd(178728.000000,187332.000000,73550.000000,190.008958)}
{pt3dadd(178752.000000,186948.000000,73550.000000,205.359674)}
{pt3dadd(178824.000000,186876.000000,73675.000000,210.191912)}
{pt3dadd(178812.000000,186516.000000,73825.000000,209.144232)}
{pt3dadd(178776.000000,186276.000000,73925.000000,194.178624)}
{pt3dadd(178740.000000,186036.000000,74075.000000,179.475860)}
{pt3dadd(178752.000000,185808.000000,74275.000000,175.409522)}
{pt3dadd(178596.000000,185544.000000,74500.000000,178.359358)}
{pt3dadd(178524.000000,185424.000000,74700.000000,162.643179)}
{pt3dadd(178308.000000,185340.000000,74875.000000,140.395852)}
{pt3dadd(178212.000000,185340.000000,74925.000000,120.477706)}
{pt3dadd(178068.000000,185244.000000,75000.000000,97.476177)}
{pt3dadd(178068.000000,185136.000000,75225.000000,84.193820)}

{create adhoc42}
{access adhoc42}
{connect adhoc42(1), adhoc40(0)}
{nseg = 1}
{strdef color color = "White"}
{pt3dclear()}
{pt3dadd(178152.000000,189996.000000,72950.000000,598.731300)}
{pt3dadd(177648.000000,190212.000000,72400.000000,500.977427)}
{pt3dadd(177216.000000,190128.000000,71800.000000,450.615490)}
{pt3dadd(176880.000000,190260.000000,71275.000000,406.898606)}
{pt3dadd(176664.000000,190308.000000,70775.000000,374.898132)}
{pt3dadd(176184.000000,190332.000000,70425.000000,363.158344)}
{pt3dadd(175740.000000,190416.000000,69900.000000,366.619782)}
{pt3dadd(175404.000000,190704.000000,69500.000000,362.760304)}
{pt3dadd(174924.000000,190728.000000,69150.000000,355.691808)}
{pt3dadd(174168.000000,190836.000000,68650.000000,365.011932)}
{pt3dadd(173688.000000,191028.000000,68300.000000,367.030888)}
{pt3dadd(173328.000000,190908.000000,67900.000000,366.998332)}
{pt3dadd(172464.000000,190944.000000,67450.000000,392.212194)}
{pt3dadd(171876.000000,191136.000000,67050.000000,403.487038)}
{pt3dadd(171288.000000,191328.000000,66550.000000,407.591852)}
{pt3dadd(170568.000000,191928.000000,66075.000000,411.262288)}
{pt3dadd(170040.000000,192600.000000,65625.000000,429.901838)}
{pt3dadd(169680.000000,193008.000000,65425.000000,403.527844)}
{pt3dadd(169512.000000,193416.000000,65175.000000,373.692120)}
{pt3dadd(169212.000000,193872.000000,64850.000000,320.671600)}
{pt3dadd(169128.000000,194268.000000,64550.000000,328.844384)}
{pt3dadd(168912.000000,194688.000000,64300.000000,323.997008)}
{pt3dadd(168516.000000,195096.000000,63750.000000,335.981132)}
{pt3dadd(167820.000000,195492.000000,63375.000000,365.411972)}
{pt3dadd(167340.000000,195936.000000,63075.000000,424.645568)}
{pt3dadd(166788.000000,196320.000000,62650.000000,430.707134)}
{pt3dadd(166440.000000,196740.000000,62425.000000,408.830622)}
{pt3dadd(165996.000000,197112.000000,61975.000000,385.140890)}
{pt3dadd(165600.000000,197328.000000,61575.000000,391.511154)}
{pt3dadd(165252.000000,197736.000000,61275.000000,384.863094)}
{pt3dadd(164796.000000,198528.000000,60600.000000,374.129404)}
{pt3dadd(164412.000000,199116.000000,60200.000000,373.308812)}
{pt3dadd(164040.000000,199788.000000,60000.000000,351.321044)}
{pt3dadd(163608.000000,200328.000000,59625.000000,323.463494)}
{pt3dadd(163248.000000,200832.000000,59350.000000,304.376574)}
{pt3dadd(162924.000000,201672.000000,59100.000000,283.782754)}
{pt3dadd(162576.000000,202260.000000,58600.000000,275.844754)}
{pt3dadd(162432.000000,202452.000000,58050.000000,287.815450)}
{pt3dadd(162432.000000,202620.000000,57625.000000,271.321160)}
{pt3dadd(162216.000000,202728.000000,57200.000000,271.533480)}

{create adhoc43}
{access adhoc43}
{connect adhoc43(1), adhoc42(0)}
{nseg = 1}
{strdef color color = "White"}
{pt3dclear()}
{pt3dadd(162216.000000,202728.000000,57200.000000,271.533480)}
{pt3dadd(162192.000000,203472.000000,57075.000000,237.439570)}
{pt3dadd(161808.000000,203844.000000,57075.000000,228.792218)}
{pt3dadd(161268.000000,204336.000000,57025.000000,201.213718)}
{pt3dadd(160788.000000,204660.000000,56875.000000,182.241768)}
{pt3dadd(160656.000000,204756.000000,56875.000000,178.671700)}
{pt3dadd(160500.000000,204888.000000,56800.000000,158.382492)}
{pt3dadd(160404.000000,205056.000000,56825.000000,160.405816)}
{pt3dadd(160320.000000,205272.000000,56850.000000,178.808726)}
{pt3dadd(160152.000000,205536.000000,56850.000000,190.788742)}
{pt3dadd(159936.000000,205824.000000,56850.000000,210.539138)}
{pt3dadd(159816.000000,206160.000000,56900.000000,227.759712)}
{pt3dadd(159672.000000,206424.000000,56925.000000,243.471654)}
{pt3dadd(159696.000000,206832.000000,56900.000000,245.036974)}
{pt3dadd(159696.000000,207120.000000,56900.000000,235.452446)}
{pt3dadd(159744.000000,207504.000000,56900.000000,223.639510)}
{pt3dadd(159816.000000,207828.000000,56900.000000,165.902920)}

{create adhoc44}
{access adhoc44}
{connect adhoc44(1), adhoc42(0)}
{nseg = 1}
{strdef color color = "White"}
{pt3dclear()}
{pt3dadd(162216.000000,202728.000000,57200.000000,271.533480)}
{pt3dadd(162168.000000,202764.000000,56675.000000,298.883660)}
{pt3dadd(162240.000000,202980.000000,56225.000000,329.054050)}
{pt3dadd(162288.000000,203064.000000,55750.000000,362.044650)}

{create adhoc45}
{access adhoc45}
{connect adhoc45(1), adhoc44(0)}
{nseg = 1}
{strdef color color = "White"}
{pt3dclear()}
{pt3dadd(162288.000000,203064.000000,55750.000000,362.044650)}
{pt3dadd(162168.000000,204120.000000,55625.000000,231.948487)}
{pt3dadd(161844.000000,204492.000000,55425.000000,248.394086)}
{pt3dadd(161472.000000,204708.000000,55425.000000,228.904480)}
{pt3dadd(161256.000000,204828.000000,55450.000000,235.914484)}
{pt3dadd(161172.000000,204936.000000,55325.000000,243.404166)}
{pt3dadd(161076.000000,205092.000000,55275.000000,223.631953)}
{pt3dadd(160968.000000,205128.000000,55350.000000,182.907970)}

{create adhoc46}
{access adhoc46}
{connect adhoc46(1), adhoc45(0)}
{nseg = 1}
{strdef color color = "White"}
{pt3dclear()}
{pt3dadd(160968.000000,205128.000000,55350.000000,182.907970)}
{pt3dadd(161112.000000,205188.000000,55050.000000,154.706150)}

{create adhoc47}
{access adhoc47}
{connect adhoc47(1), adhoc45(0)}
{nseg = 1}
{strdef color color = "White"}
{pt3dclear()}
{pt3dadd(160968.000000,205128.000000,55350.000000,182.907970)}
{pt3dadd(160848.000000,205392.000000,55475.000000,166.698000)}

{create adhoc48}
{access adhoc48}
{connect adhoc48(1), adhoc44(0)}
{nseg = 1}
{strdef color color = "White"}
{pt3dclear()}
{pt3dadd(162288.000000,203064.000000,55750.000000,362.044650)}
{pt3dadd(162360.000000,202896.000000,55350.000000,437.280417)}
{pt3dadd(162432.000000,202884.000000,54975.000000,400.806214)}
{pt3dadd(162420.000000,202848.000000,54550.000000,382.703980)}
{pt3dadd(162336.000000,202812.000000,54200.000000,337.176340)}
{pt3dadd(162204.000000,202716.000000,53850.000000,338.126280)}
{pt3dadd(162060.000000,202572.000000,53475.000000,332.813860)}
{pt3dadd(161964.000000,202596.000000,53200.000000,372.318800)}

{create adhoc49}
{access adhoc49}
{connect adhoc49(1), adhoc48(0)}
{nseg = 1}
{strdef color color = "White"}
{pt3dclear()}
{pt3dadd(161964.000000,202596.000000,53200.000000,372.318800)}
{pt3dadd(161844.000000,202476.000000,52825.000000,346.501267)}
{pt3dadd(161640.000000,202428.000000,52300.000000,359.959512)}
{pt3dadd(161460.000000,202680.000000,51850.000000,367.592042)}
{pt3dadd(161676.000000,202980.000000,51375.000000,377.378174)}
{pt3dadd(161616.000000,203172.000000,50925.000000,384.680738)}
{pt3dadd(161412.000000,203328.000000,50550.000000,358.408408)}
{pt3dadd(161208.000000,203676.000000,50100.000000,353.296892)}
{pt3dadd(161064.000000,204024.000000,49650.000000,349.851706)}
{pt3dadd(161136.000000,204216.000000,49200.000000,308.115758)}
{pt3dadd(161052.000000,204288.000000,48750.000000,308.115758)}
{pt3dadd(161052.000000,204288.000000,48325.000000,311.278712)}
{pt3dadd(161376.000000,204324.000000,47875.000000,297.960852)}
{pt3dadd(161424.000000,204432.000000,47425.000000,266.221912)}
{pt3dadd(161664.000000,204456.000000,47100.000000,262.386940)}
{pt3dadd(161940.000000,204576.000000,46725.000000,234.560820)}

{create adhoc50}
{access adhoc50}
{connect adhoc50(1), adhoc49(0)}
{nseg = 1}
{strdef color color = "White"}
{pt3dclear()}
{pt3dadd(161940.000000,204576.000000,46725.000000,234.560820)}
{pt3dadd(162012.000000,205008.000000,46625.000000,143.172877)}
{pt3dadd(162012.000000,205224.000000,46625.000000,130.160812)}
{pt3dadd(162012.000000,205440.000000,46625.000000,109.246502)}
{pt3dadd(162012.000000,205656.000000,46625.000000,119.606332)}
{pt3dadd(162060.000000,205872.000000,46625.000000,130.071546)}
{pt3dadd(162072.000000,206112.000000,46625.000000,134.152841)}
{pt3dadd(162072.000000,206292.000000,46650.000000,157.146515)}
{pt3dadd(162072.000000,206640.000000,46675.000000,176.862947)}
{pt3dadd(162072.000000,207096.000000,46625.000000,201.870743)}
{pt3dadd(162072.000000,207624.000000,46700.000000,247.894137)}
{pt3dadd(161940.000000,207708.000000,46875.000000,308.567378)}
{pt3dadd(161844.000000,207936.000000,46975.000000,305.274748)}
{pt3dadd(161844.000000,208128.000000,47025.000000,301.915498)}
{pt3dadd(161796.000000,208524.000000,47175.000000,276.747478)}
{pt3dadd(161892.000000,208920.000000,47225.000000,235.147768)}
{pt3dadd(161976.000000,209376.000000,47225.000000,185.745852)}
{pt3dadd(161952.000000,209856.000000,47225.000000,186.994396)}
{pt3dadd(161964.000000,210216.000000,47175.000000,174.107198)}
{pt3dadd(161844.000000,210264.000000,47275.000000,177.876826)}
{pt3dadd(161856.000000,210420.000000,47325.000000,196.862510)}
{pt3dadd(161808.000000,210744.000000,47450.000000,207.731202)}
{pt3dadd(161700.000000,211236.000000,47525.000000,201.003448)}
{pt3dadd(161592.000000,211548.000000,47650.000000,213.871610)}
{pt3dadd(161448.000000,212076.000000,47700.000000,213.349818)}
{pt3dadd(161340.000000,212460.000000,47700.000000,204.426562)}
{pt3dadd(161232.000000,212628.000000,47525.000000,207.721490)}
{pt3dadd(161316.000000,212772.000000,47525.000000,229.997064)}
{pt3dadd(161256.000000,212880.000000,47550.000000,256.641112)}
{pt3dadd(161184.000000,213000.000000,47575.000000,281.372500)}
{pt3dadd(161112.000000,213120.000000,47475.000000,321.577422)}
{pt3dadd(160788.000000,213576.000000,47575.000000,375.487556)}
{pt3dadd(160728.000000,213756.000000,47575.000000,366.207296)}
{pt3dadd(160668.000000,214032.000000,47575.000000,364.427248)}
{pt3dadd(160572.000000,214380.000000,47575.000000,341.798362)}
{pt3dadd(160512.000000,214596.000000,47775.000000,277.443266)}
{pt3dadd(160476.000000,214836.000000,47875.000000,204.237763)}
{pt3dadd(160452.000000,215040.000000,48075.000000,92.002720)}

{create adhoc51}
{access adhoc51}
{connect adhoc51(1), adhoc49(0)}
{nseg = 1}
{strdef color color = "White"}
{pt3dclear()}
{pt3dadd(161940.000000,204576.000000,46725.000000,234.560820)}
{pt3dadd(162456.000000,204516.000000,46200.000000,298.961740)}
{pt3dadd(162876.000000,204564.000000,45775.000000,335.640910)}
{pt3dadd(163260.000000,204840.000000,45275.000000,340.973646)}
{pt3dadd(163692.000000,204756.000000,44825.000000,338.731166)}
{pt3dadd(164040.000000,204720.000000,44550.000000,333.770286)}
{pt3dadd(164328.000000,204840.000000,44175.000000,318.078854)}
{pt3dadd(164364.000000,204732.000000,43800.000000,283.265688)}
{pt3dadd(164496.000000,204804.000000,43475.000000,269.431460)}
{pt3dadd(164568.000000,204468.000000,43150.000000,252.622740)}
{pt3dadd(164772.000000,204288.000000,42875.000000,227.022740)}
{pt3dadd(164880.000000,204204.000000,42525.000000,201.878664)}
{pt3dadd(164952.000000,204120.000000,42225.000000,187.715044)}
{pt3dadd(165024.000000,204036.000000,41975.000000,174.752620)}
{pt3dadd(165216.000000,203868.000000,41725.000000,174.227970)}

{create adhoc52}
{access adhoc52}
{connect adhoc52(1), adhoc51(0)}
{nseg = 1}
{strdef color color = "White"}
{pt3dclear()}
{pt3dadd(165216.000000,203868.000000,41725.000000,174.227970)}
{pt3dadd(165084.000000,204324.000000,41750.000000,252.057047)}
{pt3dadd(165120.000000,204672.000000,41650.000000,213.355078)}
{pt3dadd(164976.000000,204840.000000,41375.000000,195.738717)}
{pt3dadd(164820.000000,204948.000000,41150.000000,133.477795)}
{pt3dadd(164664.000000,205152.000000,41200.000000,87.351645)}
{pt3dadd(164520.000000,205428.000000,41250.000000,68.947920)}

{create adhoc53}
{access adhoc53}
{connect adhoc53(1), adhoc51(0)}
{nseg = 1}
{strdef color color = "White"}
{pt3dclear()}
{pt3dadd(165216.000000,203868.000000,41725.000000,174.227970)}
{pt3dadd(165216.000000,203688.000000,41375.000000,189.853363)}
{pt3dadd(165204.000000,203532.000000,41075.000000,184.132312)}
{pt3dadd(165348.000000,203112.000000,40550.000000,177.069718)}
{pt3dadd(165516.000000,202944.000000,40050.000000,188.945712)}
{pt3dadd(165672.000000,202620.000000,39600.000000,182.151990)}
{pt3dadd(166188.000000,201540.000000,38525.000000,230.382240)}
{pt3dadd(166740.000000,200640.000000,38050.000000,236.852456)}
{pt3dadd(167472.000000,200664.000000,37375.000000,242.839866)}
{pt3dadd(167952.000000,200616.000000,36725.000000,249.310082)}
{pt3dadd(168876.000000,200220.000000,36225.000000,243.441410)}
{pt3dadd(169452.000000,199980.000000,35900.000000,223.797870)}
{pt3dadd(169764.000000,199764.000000,35325.000000,210.049920)}
{pt3dadd(170628.000000,199272.000000,35025.000000,208.441806)}
{pt3dadd(170964.000000,199056.000000,34375.000000,206.152610)}
{pt3dadd(171600.000000,198780.000000,33900.000000,160.811480)}

{create adhoc54}
{access adhoc54}
{connect adhoc54(1), adhoc48(0)}
{nseg = 1}
{strdef color color = "White"}
{pt3dclear()}
{pt3dadd(161964.000000,202596.000000,53200.000000,372.318800)}
{pt3dadd(161892.000000,202140.000000,53425.000000,182.253192)}
{pt3dadd(161748.000000,201576.000000,53350.000000,134.348099)}
{pt3dadd(161592.000000,201228.000000,53250.000000,71.796300)}
{pt3dadd(161472.000000,200976.000000,53125.000000,61.513576)}
{pt3dadd(161484.000000,200868.000000,53025.000000,59.559807)}

{create adhoc55}
{access adhoc55}
{connect adhoc55(1), adhoc5(0)}
{nseg = 1}
{strdef color color = "White"}
{pt3dclear()}
{pt3dadd(188160.000000,179604.000000,84825.000000,1388.651000)}
{pt3dadd(188148.000000,179160.000000,84800.000000,1147.588933)}
{pt3dadd(188400.000000,178632.000000,84800.000000,922.683600)}
{pt3dadd(188352.000000,178380.000000,84775.000000,696.436212)}
{pt3dadd(188448.000000,178020.000000,84700.000000,493.892408)}
{pt3dadd(188508.000000,177744.000000,84800.000000,361.622308)}
{pt3dadd(188556.000000,177480.000000,84850.000000,212.264868)}
{pt3dadd(188772.000000,177144.000000,85050.000000,225.861952)}
{pt3dadd(188856.000000,176844.000000,85100.000000,220.093426)}
{pt3dadd(188928.000000,176532.000000,85150.000000,220.894842)}
{pt3dadd(189048.000000,176160.000000,85225.000000,230.494228)}
{pt3dadd(189132.000000,175824.000000,85250.000000,220.269996)}
{pt3dadd(189108.000000,175428.000000,85325.000000,191.020112)}
{pt3dadd(189108.000000,174996.000000,85200.000000,183.705826)}
{pt3dadd(189168.000000,174708.000000,85050.000000,168.089430)}
{pt3dadd(189228.000000,174384.000000,85000.000000,144.843027)}
{pt3dadd(189264.000000,174024.000000,84850.000000,148.859963)}
{pt3dadd(189468.000000,173688.000000,84825.000000,154.889895)}
{pt3dadd(189468.000000,173244.000000,84850.000000,153.619369)}
{pt3dadd(189324.000000,172872.000000,84675.000000,190.999903)}
{pt3dadd(189264.000000,172548.000000,84700.000000,199.924446)}
{pt3dadd(189168.000000,172164.000000,84750.000000,218.303017)}
{pt3dadd(189168.000000,171780.000000,84700.000000,168.387630)}

{create adhoc56}
{access adhoc56}
{connect adhoc56(1), adhoc4(0)}
{nseg = 1}
{strdef color color = "White"}
{pt3dclear()}
{pt3dadd(187284.000000,175080.000000,79725.000000,1388.651000)}
{pt3dadd(187392.000000,174612.000000,79425.000000,1133.557500)}
{pt3dadd(187248.000000,173532.000000,79100.000000,1112.940390)}
{pt3dadd(186792.000000,173352.000000,78825.000000,1059.870230)}
{pt3dadd(186420.000000,172836.000000,78500.000000,1046.160950)}
{pt3dadd(186660.000000,172500.000000,78325.000000,1125.353610)}
{pt3dadd(186504.000000,172164.000000,78125.000000,1164.283780)}
{pt3dadd(186360.000000,171828.000000,77875.000000,1119.573660)}
{pt3dadd(186204.000000,171564.000000,77625.000000,1114.488980)}
{pt3dadd(186300.000000,171312.000000,77350.000000,1135.867720)}
{pt3dadd(186288.000000,171000.000000,77375.000000,1139.068300)}
{pt3dadd(186228.000000,170604.000000,77300.000000,1173.678860)}
{pt3dadd(186144.000000,170256.000000,77200.000000,1193.920420)}
{pt3dadd(186000.000000,169908.000000,77000.000000,1206.531560)}
{pt3dadd(185940.000000,169512.000000,76650.000000,1192.515880)}
{pt3dadd(185928.000000,169140.000000,76700.000000,1183.206360)}
{pt3dadd(185904.000000,168780.000000,76425.000000,1178.567100)}
{pt3dadd(185880.000000,168432.000000,76275.000000,1181.429080)}
{pt3dadd(185856.000000,168132.000000,76150.000000,1145.820100)}
{pt3dadd(185736.000000,167856.000000,75875.000000,1096.558652)}
{pt3dadd(185580.000000,167520.000000,75650.000000,1057.039532)}
{pt3dadd(185640.000000,167196.000000,75425.000000,992.321232)}
{pt3dadd(185604.000000,166884.000000,75300.000000,986.427152)}
{pt3dadd(185472.000000,166560.000000,75100.000000,1028.790832)}
{pt3dadd(185460.000000,166272.000000,75050.000000,1059.608600)}
{pt3dadd(185568.000000,165984.000000,75050.000000,1085.112040)}
{pt3dadd(185592.000000,165624.000000,75100.000000,1139.360420)}
{pt3dadd(185508.000000,165312.000000,74975.000000,1153.777120)}
{pt3dadd(185352.000000,165012.000000,74925.000000,1172.720880)}
{pt3dadd(185304.000000,164652.000000,74825.000000,1192.315760)}
{pt3dadd(185208.000000,164340.000000,74725.000000,1113.061086)}
{pt3dadd(185244.000000,163992.000000,74550.000000,1005.338406)}
{pt3dadd(185148.000000,163656.000000,74125.000000,887.011666)}
{pt3dadd(184884.000000,163284.000000,73500.000000,763.926926)}
{pt3dadd(184800.000000,162624.000000,72850.000000,672.584166)}
{pt3dadd(184752.000000,162396.000000,72400.000000,657.327180)}
{pt3dadd(184740.000000,162132.000000,71925.000000,678.803060)}
{pt3dadd(184620.000000,161856.000000,71500.000000,713.776860)}
{pt3dadd(184572.000000,161412.000000,70975.000000,718.680620)}
{pt3dadd(183876.000000,161076.000000,70450.000000,725.400954)}
{pt3dadd(183600.000000,160848.000000,70050.000000,719.706214)}
{pt3dadd(183456.000000,160524.000000,69575.000000,694.685794)}
{pt3dadd(183036.000000,160272.000000,69025.000000,666.318654)}
{pt3dadd(182688.000000,159996.000000,68625.000000,640.658734)}
{pt3dadd(182400.000000,159636.000000,68150.000000,623.925188)}
{pt3dadd(182040.000000,159408.000000,67700.000000,623.284148)}
{pt3dadd(181680.000000,159192.000000,67200.000000,620.573736)}
{pt3dadd(181440.000000,158952.000000,66700.000000,615.484850)}
{pt3dadd(180696.000000,159132.000000,66125.000000,622.122330)}
{pt3dadd(180432.000000,159084.000000,65600.000000,603.377434)}
{pt3dadd(180396.000000,158844.000000,65150.000000,610.388022)}
{pt3dadd(180312.000000,158520.000000,64625.000000,599.332974)}
{pt3dadd(180156.000000,158352.000000,64350.000000,592.581448)}
{pt3dadd(180048.000000,158232.000000,64025.000000,585.943968)}
{pt3dadd(179892.000000,158076.000000,63600.000000,584.341270)}
{pt3dadd(179856.000000,157860.000000,63200.000000,557.596032)}
{pt3dadd(179568.000000,157608.000000,62725.000000,532.457572)}
{pt3dadd(179436.000000,157452.000000,62325.000000,504.828773)}
{pt3dadd(179160.000000,157272.000000,61900.000000,444.528000)}

{create adhoc57}
{access adhoc57}
{connect adhoc57(1), adhoc56(0)}
{nseg = 1}
{strdef color color = "White"}
{pt3dclear()}
{pt3dadd(179160.000000,157272.000000,61900.000000,444.528000)}
{pt3dadd(179052.000000,156864.000000,61500.000000,494.326967)}
{pt3dadd(179112.000000,156696.000000,61125.000000,529.811020)}
{pt3dadd(179076.000000,156420.000000,60750.000000,568.262080)}
{pt3dadd(178920.000000,156084.000000,60375.000000,592.127180)}
{pt3dadd(178740.000000,155820.000000,60075.000000,629.096580)}
{pt3dadd(178560.000000,155568.000000,59725.000000,637.895774)}
{pt3dadd(178440.000000,155160.000000,59425.000000,651.200914)}
{pt3dadd(178200.000000,155004.000000,59075.000000,658.644474)}
{pt3dadd(178020.000000,154680.000000,58800.000000,663.581514)}
{pt3dadd(177792.000000,154476.000000,58325.000000,668.171700)}
{pt3dadd(177732.000000,154548.000000,57950.000000,665.257000)}

{create adhoc58}
{access adhoc58}
{connect adhoc58(1), adhoc57(0)}
{nseg = 1}
{strdef color color = "White"}
{pt3dclear()}
{pt3dadd(177732.000000,154548.000000,57950.000000,665.257000)}
{pt3dadd(177564.000000,154764.000000,57625.000000,633.578100)}
{pt3dadd(177360.000000,154884.000000,57175.000000,554.078726)}
{pt3dadd(177036.000000,155004.000000,56750.000000,477.761616)}
{pt3dadd(176808.000000,155088.000000,56225.000000,432.763292)}
{pt3dadd(176712.000000,155100.000000,55750.000000,404.920336)}
{pt3dadd(176460.000000,155112.000000,55250.000000,419.671624)}
{pt3dadd(176184.000000,155112.000000,54775.000000,423.724072)}
{pt3dadd(176076.000000,155112.000000,54300.000000,440.503602)}
{pt3dadd(175992.000000,155004.000000,53850.000000,430.242926)}
{pt3dadd(175824.000000,155028.000000,53425.000000,459.041822)}
{pt3dadd(175668.000000,154860.000000,53100.000000,446.443154)}
{pt3dadd(175464.000000,154740.000000,52675.000000,482.023260)}
{pt3dadd(175320.000000,154740.000000,52350.000000,497.865946)}
{pt3dadd(175164.000000,154680.000000,51975.000000,522.476916)}
{pt3dadd(175008.000000,154440.000000,51625.000000,489.158936)}
{pt3dadd(174756.000000,154380.000000,51250.000000,463.115324)}
{pt3dadd(174600.000000,154416.000000,50825.000000,408.129072)}
{pt3dadd(174456.000000,154500.000000,50425.000000,380.034086)}
{pt3dadd(174204.000000,154392.000000,50100.000000,326.581160)}
{pt3dadd(174084.000000,154428.000000,49625.000000,306.307600)}

{create adhoc59}
{access adhoc59}
{connect adhoc59(1), adhoc58(0)}
{nseg = 1}
{strdef color color = "White"}
{pt3dclear()}
{pt3dadd(174084.000000,154428.000000,49625.000000,306.307600)}
{pt3dadd(174228.000000,154428.000000,49300.000000,335.815180)}
{pt3dadd(174468.000000,154260.000000,48925.000000,359.200268)}
{pt3dadd(174660.000000,154164.000000,48500.000000,387.993174)}
{pt3dadd(174864.000000,153816.000000,48150.000000,409.959098)}
{pt3dadd(174804.000000,153552.000000,47700.000000,455.747443)}
{pt3dadd(174696.000000,153132.000000,47300.000000,464.414400)}

{create adhoc60}
{access adhoc60}
{connect adhoc60(1), adhoc59(0)}
{nseg = 1}
{strdef color color = "White"}
{pt3dclear()}
{pt3dadd(174696.000000,153132.000000,47300.000000,464.414400)}
{pt3dadd(174360.000000,153120.000000,46950.000000,405.783997)}
{pt3dadd(174156.000000,152976.000000,46625.000000,393.997714)}
{pt3dadd(174012.000000,152952.000000,46225.000000,370.094882)}
{pt3dadd(173844.000000,152820.000000,45825.000000,352.973874)}
{pt3dadd(173844.000000,152796.000000,45500.000000,337.811982)}
{pt3dadd(173844.000000,152784.000000,45075.000000,310.036634)}
{pt3dadd(173952.000000,152916.000000,44675.000000,276.309078)}
{pt3dadd(174036.000000,152904.000000,44350.000000,255.329030)}
{pt3dadd(174156.000000,152868.000000,43850.000000,225.876280)}
{pt3dadd(174252.000000,152964.000000,43400.000000,240.242152)}
{pt3dadd(174108.000000,153192.000000,43050.000000,250.288030)}
{pt3dadd(173976.000000,153372.000000,42675.000000,260.871354)}
{pt3dadd(173988.000000,153516.000000,42275.000000,267.178050)}
{pt3dadd(174060.000000,153648.000000,41950.000000,288.263398)}
{pt3dadd(174108.000000,153756.000000,41550.000000,297.997296)}
{pt3dadd(174204.000000,153768.000000,41225.000000,313.906137)}
{pt3dadd(174216.000000,153852.000000,40925.000000,357.437160)}

{create adhoc61}
{access adhoc61}
{connect adhoc61(1), adhoc60(0)}
{nseg = 1}
{strdef color color = "White"}
{pt3dclear()}
{pt3dadd(174216.000000,153852.000000,40925.000000,357.437160)}
{pt3dadd(174432.000000,154116.000000,40600.000000,282.532467)}
{pt3dadd(174660.000000,154452.000000,40100.000000,243.440934)}
{pt3dadd(174720.000000,154632.000000,39925.000000,190.424559)}
{pt3dadd(174816.000000,154812.000000,39950.000000,166.161587)}
{pt3dadd(175056.000000,155004.000000,39825.000000,194.944773)}
{pt3dadd(175164.000000,155160.000000,39800.000000,203.056099)}
{pt3dadd(175248.000000,155352.000000,39675.000000,244.918911)}
{pt3dadd(175260.000000,155616.000000,39550.000000,301.175434)}
{pt3dadd(175392.000000,155844.000000,39500.000000,323.803234)}
{pt3dadd(175524.000000,156012.000000,39425.000000,290.463634)}
{pt3dadd(175848.000000,156276.000000,39325.000000,281.292634)}
{pt3dadd(175944.000000,156456.000000,39225.000000,269.212942)}
{pt3dadd(176508.000000,156612.000000,38850.000000,248.518016)}
{pt3dadd(176700.000000,156756.000000,38525.000000,249.130354)}
{pt3dadd(176664.000000,156744.000000,38275.000000,272.218374)}
{pt3dadd(176796.000000,156900.000000,38000.000000,267.301980)}
{pt3dadd(176796.000000,157212.000000,37625.000000,279.381672)}
{pt3dadd(176868.000000,157512.000000,37325.000000,260.188630)}
{pt3dadd(177300.000000,157884.000000,37050.000000,262.993416)}
{pt3dadd(177252.000000,158052.000000,36775.000000,261.129628)}
{pt3dadd(177324.000000,158328.000000,36300.000000,256.581266)}
{pt3dadd(177312.000000,158400.000000,35975.000000,230.656674)}
{pt3dadd(177432.000000,158412.000000,35475.000000,233.236536)}
{pt3dadd(177432.000000,158688.000000,35000.000000,227.110004)}
{pt3dadd(177624.000000,159048.000000,34650.000000,239.225372)}
{pt3dadd(177696.000000,159204.000000,34325.000000,246.290128)}
{pt3dadd(177960.000000,159768.000000,33950.000000,256.899342)}
{pt3dadd(178788.000000,160476.000000,33600.000000,273.527542)}
{pt3dadd(179016.000000,160764.000000,33200.000000,251.761480)}
{pt3dadd(179184.000000,160884.000000,32850.000000,270.238370)}

{create adhoc62}
{access adhoc62}
{connect adhoc62(1), adhoc60(0)}
{nseg = 1}
{strdef color color = "White"}
{pt3dclear()}
{pt3dadd(174216.000000,153852.000000,40925.000000,357.437160)}
{pt3dadd(174360.000000,153288.000000,40750.000000,245.676873)}
{pt3dadd(174360.000000,153072.000000,40450.000000,210.832404)}
{pt3dadd(174732.000000,152808.000000,40125.000000,168.144972)}
{pt3dadd(175176.000000,152616.000000,39850.000000,164.201778)}
{pt3dadd(175680.000000,152448.000000,39475.000000,176.217346)}
{pt3dadd(175992.000000,152436.000000,39075.000000,195.734392)}
{pt3dadd(176460.000000,152148.000000,38625.000000,206.085526)}
{pt3dadd(177024.000000,151776.000000,38275.000000,240.165410)}
{pt3dadd(177108.000000,151296.000000,37825.000000,217.687070)}

{create adhoc63}
{access adhoc63}
{connect adhoc63(1), adhoc59(0)}
{nseg = 1}
{strdef color color = "White"}
{pt3dclear()}
{pt3dadd(174696.000000,153132.000000,47300.000000,464.414400)}
{pt3dadd(174612.000000,152856.000000,47225.000000,327.832375)}
{pt3dadd(174408.000000,152556.000000,47250.000000,248.188859)}
{pt3dadd(174396.000000,152316.000000,47300.000000,180.184503)}
{pt3dadd(174240.000000,152064.000000,47400.000000,131.540555)}
{pt3dadd(174336.000000,151572.000000,47550.000000,128.901975)}
{pt3dadd(174288.000000,151380.000000,47575.000000,134.241671)}
{pt3dadd(174324.000000,151188.000000,47650.000000,132.103688)}
{pt3dadd(174252.000000,150984.000000,47725.000000,133.640980)}

{create adhoc64}
{access adhoc64}
{connect adhoc64(1), adhoc58(0)}
{nseg = 1}
{strdef color color = "White"}
{pt3dclear()}
{pt3dadd(174084.000000,154428.000000,49625.000000,306.307600)}
{pt3dadd(173256.000000,154704.000000,49625.000000,258.298733)}
{pt3dadd(173088.000000,154788.000000,49400.000000,218.916746)}
{pt3dadd(172824.000000,154872.000000,49125.000000,185.719832)}
{pt3dadd(172716.000000,155112.000000,48800.000000,161.310464)}
{pt3dadd(172608.000000,155340.000000,48500.000000,145.559516)}
{pt3dadd(172644.000000,155532.000000,48275.000000,146.555010)}
{pt3dadd(172668.000000,155604.000000,48025.000000,136.473528)}
{pt3dadd(172620.000000,155784.000000,47750.000000,165.718266)}
{pt3dadd(172584.000000,155928.000000,47425.000000,199.902444)}
{pt3dadd(172560.000000,156168.000000,47075.000000,213.799878)}
{pt3dadd(172404.000000,156444.000000,46700.000000,206.278026)}
{pt3dadd(172236.000000,156672.000000,46325.000000,218.095508)}
{pt3dadd(172104.000000,156996.000000,45925.000000,181.253786)}
{pt3dadd(172056.000000,157188.000000,45675.000000,168.836762)}
{pt3dadd(172008.000000,157656.000000,45375.000000,174.521094)}
{pt3dadd(171972.000000,158184.000000,45025.000000,192.480034)}
{pt3dadd(171936.000000,158352.000000,45000.000000,186.138440)}
{pt3dadd(171936.000000,158508.000000,44975.000000,208.988538)}
{pt3dadd(171948.000000,158772.000000,45000.000000,187.221384)}
{pt3dadd(171984.000000,159024.000000,45000.000000,175.891184)}
{pt3dadd(171912.000000,159288.000000,44875.000000,169.307258)}
{pt3dadd(171864.000000,159504.000000,44650.000000,170.667814)}
{pt3dadd(171876.000000,159732.000000,44475.000000,163.931688)}
{pt3dadd(171888.000000,159984.000000,44025.000000,161.515325)}
{pt3dadd(171840.000000,160176.000000,43650.000000,158.877571)}
{pt3dadd(171840.000000,160248.000000,43375.000000,167.273003)}
{pt3dadd(171984.000000,160296.000000,43000.000000,176.927419)}
{pt3dadd(172068.000000,160440.000000,42600.000000,194.619260)}
{pt3dadd(172020.000000,160704.000000,42225.000000,206.274860)}

{create adhoc65}
{access adhoc65}
{connect adhoc65(1), adhoc57(0)}
{nseg = 1}
{strdef color color = "White"}
{pt3dclear()}
{pt3dadd(177732.000000,154548.000000,57950.000000,665.257000)}
{pt3dadd(177816.000000,154272.000000,58150.000000,606.273147)}
{pt3dadd(177828.000000,154032.000000,57925.000000,587.155148)}
{pt3dadd(177756.000000,153744.000000,57750.000000,560.682434)}
{pt3dadd(177780.000000,153372.000000,57750.000000,512.655186)}
{pt3dadd(177708.000000,153132.000000,57750.000000,545.494746)}
{pt3dadd(177708.000000,152904.000000,57725.000000,512.118866)}
{pt3dadd(177384.000000,152640.000000,57675.000000,489.965896)}
{pt3dadd(177156.000000,152388.000000,57650.000000,455.796140)}
{pt3dadd(177096.000000,152184.000000,57650.000000,433.393084)}
{pt3dadd(176964.000000,151920.000000,57725.000000,406.471784)}
{pt3dadd(176712.000000,151632.000000,57800.000000,408.743628)}
{pt3dadd(176640.000000,151392.000000,57825.000000,401.110138)}
{pt3dadd(176532.000000,151116.000000,57775.000000,409.341208)}
{pt3dadd(176424.000000,150912.000000,57525.000000,417.354264)}
{pt3dadd(176232.000000,150660.000000,57425.000000,393.340764)}
{pt3dadd(176100.000000,150384.000000,57275.000000,402.829820)}
{pt3dadd(175656.000000,150060.000000,57250.000000,452.210860)}
{pt3dadd(175728.000000,150144.000000,56875.000000,474.490208)}
{pt3dadd(175644.000000,149940.000000,56650.000000,488.078758)}
{pt3dadd(175548.000000,149712.000000,56500.000000,531.602306)}
{pt3dadd(175380.000000,149508.000000,56350.000000,526.489466)}
{pt3dadd(175344.000000,149352.000000,56250.000000,505.048996)}
{pt3dadd(175320.000000,149208.000000,56150.000000,499.208164)}
{pt3dadd(175272.000000,149076.000000,56075.000000,479.286350)}
{pt3dadd(175092.000000,148944.000000,55975.000000,476.071188)}
{pt3dadd(175068.000000,148824.000000,55900.000000,480.691896)}
{pt3dadd(175044.000000,148500.000000,55725.000000,456.475470)}
{pt3dadd(174984.000000,148248.000000,55575.000000,431.805884)}
{pt3dadd(174984.000000,147900.000000,55525.000000,417.616180)}
{pt3dadd(175032.000000,147600.000000,55400.000000,390.497302)}
{pt3dadd(174984.000000,147336.000000,55375.000000,382.818920)}
{pt3dadd(174924.000000,147012.000000,55275.000000,386.728266)}
{pt3dadd(175008.000000,146688.000000,55225.000000,402.779216)}
{pt3dadd(175068.000000,146364.000000,55175.000000,458.395784)}
{pt3dadd(175188.000000,146112.000000,55100.000000,506.305384)}
{pt3dadd(175128.000000,145884.000000,55050.000000,540.792718)}
{pt3dadd(175212.000000,145596.000000,54900.000000,598.400408)}
{pt3dadd(175236.000000,145284.000000,54850.000000,635.039636)}
{pt3dadd(175320.000000,144960.000000,54750.000000,640.461656)}
{pt3dadd(175320.000000,144636.000000,54675.000000,604.719054)}
{pt3dadd(175368.000000,144300.000000,54525.000000,540.446214)}
{pt3dadd(175440.000000,144036.000000,54550.000000,518.688742)}
{pt3dadd(175440.000000,143724.000000,54325.000000,511.589182)}
{pt3dadd(175476.000000,143340.000000,54125.000000,486.760196)}
{pt3dadd(175368.000000,143040.000000,53950.000000,497.545798)}
{pt3dadd(175332.000000,142716.000000,53825.000000,539.861432)}
{pt3dadd(175308.000000,142428.000000,53750.000000,492.831880)}
{pt3dadd(175332.000000,142092.000000,53825.000000,450.861708)}
{pt3dadd(175464.000000,141648.000000,53525.000000,399.374430)}
{pt3dadd(175428.000000,141180.000000,53200.000000,340.942680)}
{pt3dadd(175296.000000,141012.000000,52800.000000,283.734300)}
{pt3dadd(175320.000000,140880.000000,52475.000000,254.281550)}
{pt3dadd(175140.000000,140904.000000,52150.000000,233.818174)}
{pt3dadd(174876.000000,140952.000000,51800.000000,223.750026)}
{pt3dadd(174900.000000,140952.000000,51425.000000,221.330116)}
{pt3dadd(174960.000000,141144.000000,51000.000000,221.330116)}
{pt3dadd(175008.000000,141108.000000,50650.000000,213.205510)}
{pt3dadd(175044.000000,141132.000000,50250.000000,190.810872)}
{pt3dadd(175044.000000,141036.000000,49875.000000,191.004158)}
{pt3dadd(175356.000000,141000.000000,49475.000000,191.202922)}
{pt3dadd(175356.000000,140916.000000,49075.000000,186.844668)}
{pt3dadd(175548.000000,140880.000000,48800.000000,200.193480)}
{pt3dadd(175620.000000,140760.000000,48525.000000,209.358118)}
{pt3dadd(175764.000000,140724.000000,48175.000000,213.286424)}
{pt3dadd(175860.000000,140748.000000,47800.000000,229.362502)}
{pt3dadd(175740.000000,140724.000000,47475.000000,233.495302)}
{pt3dadd(175824.000000,140688.000000,47100.000000,219.294762)}
{pt3dadd(176088.000000,140808.000000,46675.000000,264.996726)}
{pt3dadd(176436.000000,140652.000000,46225.000000,300.374766)}
{pt3dadd(176592.000000,140244.000000,45875.000000,313.801364)}
{pt3dadd(176436.000000,140016.000000,45525.000000,338.328612)}
{pt3dadd(176448.000000,139776.000000,45150.000000,386.889726)}
{pt3dadd(176640.000000,139632.000000,44700.000000,345.527202)}
{pt3dadd(176580.000000,139596.000000,44400.000000,316.096362)}
{pt3dadd(176592.000000,139620.000000,44050.000000,278.696250)}
{pt3dadd(176544.000000,139452.000000,43700.000000,252.052202)}
{pt3dadd(176652.000000,139452.000000,43300.000000,215.476004)}
{pt3dadd(176808.000000,139404.000000,42750.000000,218.058336)}
{pt3dadd(177252.000000,139200.000000,42350.000000,188.022676)}
{pt3dadd(177924.000000,139068.000000,41900.000000,181.183883)}
{pt3dadd(178368.000000,138792.000000,41450.000000,191.500843)}
{pt3dadd(178548.000000,138168.000000,41075.000000,186.834935)}
{pt3dadd(178572.000000,137364.000000,40625.000000,174.158757)}
{pt3dadd(178860.000000,137376.000000,40300.000000,205.515077)}
{pt3dadd(179364.000000,137184.000000,39975.000000,221.100222)}
{pt3dadd(180192.000000,136788.000000,39475.000000,197.247262)}
{pt3dadd(180432.000000,136308.000000,39150.000000,201.431313)}
{pt3dadd(180504.000000,135480.000000,38725.000000,144.000000)}

{create adhoc66}
{access adhoc66}
{connect adhoc66(1), adhoc65(0)}
{nseg = 1}
{strdef color color = "White"}
{pt3dclear()}
{pt3dadd(180504.000000,135480.000000,38725.000000,144.000000)}
{pt3dadd(181056.000000,135288.000000,38475.000000,142.552073)}
{pt3dadd(181200.000000,135336.000000,38225.000000,163.519830)}
{pt3dadd(181632.000000,135384.000000,37850.000000,182.648570)}
{pt3dadd(181920.000000,135396.000000,37475.000000,175.032900)}

{create adhoc67}
{access adhoc67}
{connect adhoc67(1), adhoc65(0)}
{nseg = 1}
{strdef color color = "White"}
{pt3dclear()}
{pt3dadd(180504.000000,135480.000000,38725.000000,144.000000)}
{pt3dadd(180300.000000,135108.000000,38700.000000,167.890590)}
{pt3dadd(180444.000000,134784.000000,38825.000000,163.638036)}
{pt3dadd(180468.000000,134544.000000,38775.000000,198.838036)}
{pt3dadd(180720.000000,134256.000000,38725.000000,226.922482)}
{pt3dadd(180948.000000,133980.000000,38550.000000,259.593008)}
{pt3dadd(181344.000000,133788.000000,38475.000000,285.265006)}
{pt3dadd(181524.000000,133620.000000,38550.000000,317.006148)}
{pt3dadd(181548.000000,133452.000000,38350.000000,310.544913)}
{pt3dadd(181692.000000,133272.000000,38225.000000,271.533480)}

{create adhoc68}
{access adhoc68}
{connect adhoc68(1), adhoc56(0)}
{nseg = 1}
{strdef color color = "White"}
{pt3dclear()}
{pt3dadd(179160.000000,157272.000000,61900.000000,444.528000)}
{pt3dadd(178356.000000,158100.000000,61900.000000,392.780047)}
{pt3dadd(177840.000000,158268.000000,61550.000000,331.678880)}
{pt3dadd(177372.000000,158508.000000,61150.000000,261.224500)}

{create adhoc69}
{access adhoc69}
{connect adhoc69(1), adhoc68(0)}
{nseg = 1}
{strdef color color = "White"}
{pt3dclear()}
{pt3dadd(177372.000000,158508.000000,61150.000000,261.224500)}
{pt3dadd(177168.000000,158580.000000,61000.000000,235.779133)}
{pt3dadd(176820.000000,158664.000000,60750.000000,208.667480)}
{pt3dadd(176580.000000,158736.000000,60500.000000,186.509986)}
{pt3dadd(176448.000000,158736.000000,60250.000000,161.381674)}
{pt3dadd(176280.000000,158880.000000,59950.000000,154.884016)}
{pt3dadd(176040.000000,159060.000000,59450.000000,145.284016)}
{pt3dadd(175704.000000,159264.000000,58975.000000,163.396180)}
{pt3dadd(175380.000000,159372.000000,58500.000000,176.626494)}
{pt3dadd(175212.000000,159516.000000,58000.000000,185.351724)}
{pt3dadd(174624.000000,159648.000000,57600.000000,184.239616)}
{pt3dadd(174192.000000,159792.000000,57075.000000,189.117142)}
{pt3dadd(173856.000000,160008.000000,56500.000000,173.805534)}
{pt3dadd(173784.000000,160080.000000,55875.000000,162.088370)}
{pt3dadd(173844.000000,160464.000000,55225.000000,166.888268)}
{pt3dadd(174216.000000,161028.000000,54950.000000,197.575744)}
{pt3dadd(174192.000000,161436.000000,54550.000000,198.737830)}
{pt3dadd(174204.000000,161832.000000,54475.000000,197.377274)}
{pt3dadd(174072.000000,162108.000000,54525.000000,190.536580)}
{pt3dadd(174000.000000,162384.000000,54625.000000,164.805474)}
{pt3dadd(173796.000000,162672.000000,54700.000000,123.999770)}
{pt3dadd(173400.000000,163116.000000,54925.000000,97.000000)}

{create adhoc70}
{access adhoc70}
{connect adhoc70(1), adhoc68(0)}
{nseg = 1}
{strdef color color = "White"}
{pt3dclear()}
{pt3dadd(177372.000000,158508.000000,61150.000000,261.224500)}
{pt3dadd(177300.000000,158700.000000,61100.000000,189.007629)}
{pt3dadd(177168.000000,158880.000000,61075.000000,164.888845)}
{pt3dadd(177156.000000,159096.000000,61050.000000,159.556109)}
{pt3dadd(177096.000000,159264.000000,60975.000000,160.494681)}
{pt3dadd(177000.000000,159636.000000,60850.000000,198.657342)}
{pt3dadd(176940.000000,160032.000000,60825.000000,212.114436)}
{pt3dadd(176820.000000,160332.000000,60750.000000,236.875808)}
{pt3dadd(176688.000000,160596.000000,60625.000000,241.684304)}
{pt3dadd(176484.000000,160896.000000,60625.000000,252.685180)}
{pt3dadd(176472.000000,161064.000000,60625.000000,256.381180)}
{pt3dadd(176364.000000,161304.000000,60525.000000,295.999346)}
{pt3dadd(176280.000000,161640.000000,60325.000000,295.189880)}
{pt3dadd(176100.000000,161916.000000,60250.000000,283.789220)}
{pt3dadd(176136.000000,162288.000000,60250.000000,282.943598)}
{pt3dadd(176196.000000,162552.000000,60275.000000,272.765626)}
{pt3dadd(176316.000000,162804.000000,60300.000000,253.587474)}
{pt3dadd(176460.000000,163128.000000,60450.000000,256.289854)}
{pt3dadd(176652.000000,163392.000000,60700.000000,275.842986)}
{pt3dadd(177036.000000,163680.000000,60950.000000,280.651482)}
{pt3dadd(177204.000000,163932.000000,61200.000000,248.507978)}
{pt3dadd(177432.000000,164340.000000,61375.000000,223.614738)}
{pt3dadd(177516.000000,164748.000000,61650.000000,233.543884)}
{pt3dadd(177564.000000,164916.000000,61875.000000,236.537542)}
{pt3dadd(177732.000000,165288.000000,62000.000000,266.563930)}
{pt3dadd(177708.000000,165768.000000,62275.000000,314.333950)}

{create adhoc71}
{access adhoc71}
{connect adhoc71(1), adhoc3(0)}
{nseg = 1}
{strdef color color = "White"}
{pt3dclear()}
{pt3dadd(172692.000000,179316.000000,60350.000000,773.252870)}
{pt3dadd(172860.000000,179736.000000,60175.000000,480.624817)}
{pt3dadd(172752.000000,180036.000000,60175.000000,393.198662)}
{pt3dadd(172512.000000,180324.000000,60050.000000,287.570922)}
{pt3dadd(172380.000000,180636.000000,59950.000000,265.462646)}
{pt3dadd(172128.000000,180924.000000,59875.000000,262.185956)}
{pt3dadd(172056.000000,181260.000000,59875.000000,254.619956)}
{pt3dadd(172092.000000,181536.000000,59925.000000,257.607084)}
{pt3dadd(172032.000000,181860.000000,59900.000000,269.064250)}
{pt3dadd(171924.000000,182100.000000,59800.000000,315.347554)}
{pt3dadd(171936.000000,182376.000000,59725.000000,325.639492)}
{pt3dadd(171972.000000,182712.000000,59725.000000,325.639492)}
{pt3dadd(172248.000000,183132.000000,59750.000000,307.072118)}
{pt3dadd(172944.000000,183468.000000,59550.000000,286.930246)}
{pt3dadd(173280.000000,183732.000000,59325.000000,221.185840)}
{pt3dadd(173724.000000,183936.000000,59000.000000,190.032610)}
{pt3dadd(173676.000000,183972.000000,58425.000000,175.372210)}
{pt3dadd(173256.000000,183924.000000,57975.000000,182.219178)}
{pt3dadd(172536.000000,183960.000000,57700.000000,194.884060)}
{pt3dadd(171108.000000,184068.000000,57425.000000,209.061300)}
{pt3dadd(170832.000000,183948.000000,57350.000000,239.393938)}
{pt3dadd(170652.000000,183900.000000,57325.000000,260.911478)}
{pt3dadd(170496.000000,183960.000000,57350.000000,278.731284)}
{pt3dadd(170364.000000,183876.000000,57375.000000,282.488070)}
{pt3dadd(170244.000000,183924.000000,57300.000000,277.002650)}
{pt3dadd(169980.000000,184140.000000,57250.000000,257.951450)}
{pt3dadd(169584.000000,184308.000000,57175.000000,250.006474)}
{pt3dadd(168948.000000,184824.000000,57125.000000,243.382834)}
{pt3dadd(168636.000000,185100.000000,56975.000000,219.962638)}
{pt3dadd(168528.000000,185208.000000,56775.000000,200.006045)}
{pt3dadd(168132.000000,185448.000000,56600.000000,184.645157)}
{pt3dadd(167880.000000,185628.000000,56400.000000,172.739573)}
{pt3dadd(167532.000000,185700.000000,56200.000000,150.110825)}
{pt3dadd(167328.000000,185892.000000,55950.000000,160.308639)}
{pt3dadd(167076.000000,186348.000000,55625.000000,173.484728)}
{pt3dadd(166524.000000,186900.000000,55400.000000,161.231580)}
{pt3dadd(166116.000000,187272.000000,55250.000000,160.337704)}
{pt3dadd(165696.000000,187572.000000,55000.000000,146.180630)}
{pt3dadd(165264.000000,187836.000000,54775.000000,170.563520)}

{create adhoc72}
{access adhoc72}
{connect adhoc72(1), adhoc2(0)}
{nseg = 1}
{strdef color color = "White"}
{pt3dclear()}
{pt3dadd(171444.000000,179412.000000,57850.000000,523.368000)}
{pt3dadd(171096.000000,178500.000000,57500.000000,491.858223)}
{pt3dadd(171132.000000,178428.000000,57150.000000,412.009142)}
{pt3dadd(170940.000000,178260.000000,56700.000000,374.876362)}
{pt3dadd(170688.000000,178080.000000,56275.000000,384.834222)}
{pt3dadd(170364.000000,177816.000000,55875.000000,414.775558)}
{pt3dadd(169980.000000,177648.000000,55475.000000,496.468917)}
{pt3dadd(169800.000000,177360.000000,55125.000000,589.896500)}

{create adhoc73}
{access adhoc73}
{connect adhoc73(1), adhoc72(0)}
{nseg = 1}
{strdef color color = "White"}
{pt3dclear()}
{pt3dadd(169800.000000,177360.000000,55125.000000,589.896500)}
{pt3dadd(169440.000000,177240.000000,54600.000000,530.843633)}
{pt3dadd(169320.000000,177072.000000,54250.000000,456.642954)}
{pt3dadd(169092.000000,177048.000000,53950.000000,423.765088)}
{pt3dadd(168984.000000,177084.000000,53600.000000,379.425240)}
{pt3dadd(168804.000000,177024.000000,53250.000000,378.271746)}
{pt3dadd(168564.000000,176772.000000,52850.000000,403.848686)}
{pt3dadd(168264.000000,176772.000000,52350.000000,435.188286)}
{pt3dadd(168180.000000,176652.000000,52050.000000,436.287956)}
{pt3dadd(168144.000000,176532.000000,51775.000000,447.410924)}
{pt3dadd(168060.000000,176388.000000,51275.000000,427.365050)}
{pt3dadd(167988.000000,176220.000000,50925.000000,401.755554)}
{pt3dadd(168048.000000,176088.000000,50550.000000,385.769652)}
{pt3dadd(167940.000000,175980.000000,50225.000000,377.755492)}
{pt3dadd(167868.000000,175920.000000,49875.000000,381.595492)}
{pt3dadd(167700.000000,175848.000000,49550.000000,386.748620)}
{pt3dadd(167736.000000,175668.000000,49175.000000,390.754662)}
{pt3dadd(167736.000000,175620.000000,48825.000000,369.293236)}
{pt3dadd(167664.000000,175596.000000,48425.000000,351.281102)}
{pt3dadd(167616.000000,175452.000000,48025.000000,343.082588)}
{pt3dadd(167844.000000,175380.000000,47725.000000,367.134374)}
{pt3dadd(167892.000000,175368.000000,47350.000000,364.233222)}
{pt3dadd(168084.000000,175560.000000,46975.000000,358.693336)}
{pt3dadd(168156.000000,175752.000000,46675.000000,361.068080)}
{pt3dadd(168096.000000,175908.000000,46300.000000,345.648622)}
{pt3dadd(168084.000000,175968.000000,46000.000000,302.699076)}
{pt3dadd(168024.000000,176076.000000,45625.000000,298.165304)}
{pt3dadd(167976.000000,176232.000000,45300.000000,324.353354)}
{pt3dadd(168144.000000,176400.000000,44950.000000,336.267560)}
{pt3dadd(168312.000000,176532.000000,44575.000000,343.570124)}
{pt3dadd(168480.000000,176568.000000,44275.000000,355.544944)}
{pt3dadd(168864.000000,176460.000000,43925.000000,359.006382)}
{pt3dadd(169152.000000,176388.000000,43550.000000,346.311478)}
{pt3dadd(169596.000000,176304.000000,43250.000000,333.109238)}
{pt3dadd(169980.000000,176136.000000,42825.000000,339.344646)}
{pt3dadd(170232.000000,175956.000000,42400.000000,344.579992)}
{pt3dadd(170292.000000,175956.000000,42075.000000,344.914672)}
{pt3dadd(170124.000000,175776.000000,41750.000000,338.635372)}
{pt3dadd(170076.000000,175764.000000,41400.000000,375.392278)}
{pt3dadd(169932.000000,175812.000000,40975.000000,414.847744)}
{pt3dadd(169812.000000,176028.000000,40600.000000,426.743578)}
{pt3dadd(169560.000000,175944.000000,40150.000000,438.639412)}
{pt3dadd(169728.000000,175812.000000,39725.000000,424.066304)}
{pt3dadd(169560.000000,175464.000000,39350.000000,378.967878)}
{pt3dadd(169476.000000,175260.000000,39025.000000,318.709458)}
{pt3dadd(170040.000000,175392.000000,38625.000000,290.771748)}
{pt3dadd(171348.000000,176016.000000,38300.000000,246.430956)}
{pt3dadd(171708.000000,176028.000000,38300.000000,260.694924)}
{pt3dadd(172140.000000,176160.000000,38175.000000,289.456944)}
{pt3dadd(172476.000000,176316.000000,38075.000000,314.761702)}
{pt3dadd(172788.000000,176472.000000,38125.000000,362.827007)}
{pt3dadd(173064.000000,176724.000000,38100.000000,375.309020)}

{create adhoc74}
{access adhoc74}
{connect adhoc74(1), adhoc72(0)}
{nseg = 1}
{strdef color color = "White"}
{pt3dclear()}
{pt3dadd(169800.000000,177360.000000,55125.000000,589.896500)}
{pt3dadd(169704.000000,176760.000000,55125.000000,324.974543)}
{pt3dadd(169800.000000,176028.000000,54750.000000,261.399242)}
{pt3dadd(169800.000000,175536.000000,54625.000000,170.148138)}
{pt3dadd(169656.000000,174120.000000,54275.000000,160.645296)}
{pt3dadd(169536.000000,173304.000000,54100.000000,142.702246)}
{pt3dadd(169404.000000,173376.000000,53925.000000,127.146217)}
{pt3dadd(169212.000000,173028.000000,53725.000000,102.338110)}

{create adhoc75}
{access adhoc75}
{connect adhoc75(1), adhoc1(0)}
{nseg = 1}
{strdef color color = "White"}
{pt3dclear()}
{pt3dadd(164604.000000,186060.000000,49500.000000,549.536400)}
{pt3dadd(164460.000000,186312.000000,49050.000000,427.494427)}
{pt3dadd(164496.000000,186540.000000,48525.000000,392.486488)}
{pt3dadd(164400.000000,186852.000000,48125.000000,346.903800)}
{pt3dadd(164376.000000,187140.000000,47725.000000,328.064460)}
{pt3dadd(164388.000000,187452.000000,47350.000000,306.067738)}
{pt3dadd(164364.000000,188076.000000,46825.000000,301.955478)}
{pt3dadd(164496.000000,188736.000000,46375.000000,280.402632)}
{pt3dadd(164664.000000,189156.000000,45900.000000,256.398040)}
{pt3dadd(165072.000000,189144.000000,45350.000000,268.181380)}
{pt3dadd(165528.000000,189300.000000,44925.000000,251.757982)}
{pt3dadd(165996.000000,189636.000000,44525.000000,264.096852)}
{pt3dadd(166092.000000,189732.000000,44175.000000,302.105186)}
{pt3dadd(166188.000000,190248.000000,43750.000000,321.382976)}
{pt3dadd(166416.000000,190776.000000,43400.000000,296.296242)}
{pt3dadd(166428.000000,191220.000000,42900.000000,319.947716)}
{pt3dadd(166488.000000,191520.000000,42475.000000,285.361906)}
{pt3dadd(166596.000000,191712.000000,42100.000000,241.931786)}
{pt3dadd(166836.000000,192024.000000,41725.000000,208.331850)}
{pt3dadd(166836.000000,192420.000000,41325.000000,187.913990)}
{pt3dadd(166896.000000,193164.000000,40950.000000,148.041760)}
{pt3dadd(167232.000000,193344.000000,40375.000000,108.976267)}
{pt3dadd(167592.000000,193548.000000,39925.000000,106.942500)}
