# Supplementary material for: Full reconstruction of large lobula plate tangential cells in Drosophila from a 3D EM dataset
Source: PLoS One. 2018 Nov 28;13(11):e0207828. doi: 10.1371/journal.pone.0207828 (PMC6261601; doi:10.1371/journal.pone.0207828)
Supplement: S1 Dataset — (ZIP) [file pone.0207828.s001.zip › Diameter hoc/CellX_7skels_completed.hoc0001.hoc]

/* created with convertKnossosNmlToHoc.m */

{create adhoc1}
{access adhoc1}
{nseg = 1}
{strdef color color = "White"}
{pt3dclear()}
{pt3dadd(159240.000000,227772.000000,64575.000000,114.211030)}
{pt3dadd(159384.000000,227280.000000,64200.000000,182.648317)}
{pt3dadd(159336.000000,227100.000000,64050.000000,203.879168)}
{pt3dadd(159516.000000,226884.000000,63950.000000,216.819616)}
{pt3dadd(159408.000000,226512.000000,63725.000000,222.673324)}
{pt3dadd(159276.000000,226056.000000,63475.000000,205.787914)}
{pt3dadd(159192.000000,225672.000000,63250.000000,185.376558)}
{pt3dadd(158964.000000,224484.000000,62400.000000,174.864064)}
{pt3dadd(158760.000000,224016.000000,61875.000000,182.241878)}
{pt3dadd(158784.000000,223584.000000,61125.000000,170.043996)}
{pt3dadd(158676.000000,223404.000000,60725.000000,162.666844)}
{pt3dadd(158760.000000,223320.000000,60150.000000,165.993574)}
{pt3dadd(158868.000000,223212.000000,59650.000000,164.529576)}
{pt3dadd(158964.000000,223164.000000,59425.000000,158.940894)}
{pt3dadd(159060.000000,222876.000000,58475.000000,158.940894)}
{pt3dadd(159240.000000,222876.000000,58175.000000,177.908070)}
{pt3dadd(159180.000000,222624.000000,57925.000000,197.823256)}
{pt3dadd(159168.000000,222492.000000,57650.000000,207.827228)}
{pt3dadd(159132.000000,222360.000000,57300.000000,215.924186)}
{pt3dadd(159132.000000,222432.000000,57025.000000,222.268360)}
{pt3dadd(159096.000000,222432.000000,56675.000000,211.207660)}
{pt3dadd(159084.000000,222360.000000,56375.000000,193.081606)}
{pt3dadd(159096.000000,222348.000000,56050.000000,201.583408)}
{pt3dadd(159048.000000,222180.000000,55650.000000,217.115144)}
{pt3dadd(159120.000000,222036.000000,55225.000000,234.637056)}
{pt3dadd(159144.000000,221856.000000,54500.000000,274.418582)}
{pt3dadd(159228.000000,221616.000000,53875.000000,280.340836)}
{pt3dadd(159384.000000,221412.000000,53775.000000,261.827136)}
{pt3dadd(159468.000000,221520.000000,53400.000000,237.434664)}
{pt3dadd(159588.000000,221556.000000,53200.000000,223.580476)}
{pt3dadd(159660.000000,221304.000000,52700.000000,175.892474)}
{pt3dadd(159828.000000,221256.000000,52625.000000,166.477154)}
{pt3dadd(160020.000000,220992.000000,51800.000000,163.406706)}
{pt3dadd(160152.000000,220944.000000,51775.000000,159.054622)}
{pt3dadd(160272.000000,220764.000000,51500.000000,149.669768)}
{pt3dadd(160356.000000,220728.000000,51300.000000,163.258876)}
{pt3dadd(160488.000000,220584.000000,51100.000000,165.434950)}
{pt3dadd(160560.000000,220440.000000,50925.000000,170.385170)}
{pt3dadd(160620.000000,220320.000000,50750.000000,165.712246)}
{pt3dadd(160776.000000,219816.000000,50475.000000,205.852978)}
{pt3dadd(160596.000000,219312.000000,50250.000000,226.209102)}
{pt3dadd(160644.000000,219132.000000,50025.000000,256.817412)}
{pt3dadd(160800.000000,219048.000000,49775.000000,286.145960)}
{pt3dadd(161016.000000,218868.000000,49525.000000,305.881320)}
{pt3dadd(161172.000000,218736.000000,49275.000000,293.433924)}
{pt3dadd(161364.000000,218604.000000,49025.000000,293.433924)}
{pt3dadd(161484.000000,218496.000000,48800.000000,276.465094)}
{pt3dadd(161592.000000,218376.000000,48550.000000,256.866438)}
{pt3dadd(161820.000000,218280.000000,48350.000000,267.106938)}
{pt3dadd(162012.000000,218064.000000,48150.000000,259.242352)}
{pt3dadd(162048.000000,217896.000000,47925.000000,248.489826)}
{pt3dadd(162132.000000,217752.000000,47675.000000,248.489826)}
{pt3dadd(162216.000000,217524.000000,47450.000000,250.542234)}
{pt3dadd(162312.000000,217284.000000,47225.000000,235.883926)}
{pt3dadd(162312.000000,216924.000000,47000.000000,221.448582)}
{pt3dadd(162396.000000,216732.000000,46750.000000,202.185068)}
{pt3dadd(162468.000000,216504.000000,46500.000000,175.147936)}
{pt3dadd(162492.000000,216312.000000,46225.000000,162.678144)}
{pt3dadd(162528.000000,216084.000000,46050.000000,151.739888)}
{pt3dadd(162612.000000,215856.000000,45850.000000,153.512838)}
{pt3dadd(162696.000000,215760.000000,45600.000000,175.271068)}
{pt3dadd(162828.000000,215520.000000,45425.000000,197.669506)}
{pt3dadd(162900.000000,215268.000000,45325.000000,208.086890)}
{pt3dadd(162960.000000,215016.000000,45275.000000,228.313584)}
{pt3dadd(163020.000000,214764.000000,45250.000000,246.090144)}
{pt3dadd(163140.000000,214536.000000,45200.000000,274.973670)}
{pt3dadd(163260.000000,214308.000000,45025.000000,303.434662)}
{pt3dadd(163392.000000,214068.000000,44900.000000,320.145378)}
{pt3dadd(163524.000000,213840.000000,44775.000000,313.011968)}
{pt3dadd(163644.000000,213612.000000,44625.000000,293.462458)}
{pt3dadd(163680.000000,213384.000000,44475.000000,249.421822)}
{pt3dadd(163740.000000,213108.000000,44225.000000,225.599524)}
{pt3dadd(163764.000000,212880.000000,44225.000000,206.934136)}
{pt3dadd(163860.000000,212652.000000,44050.000000,211.572830)}
{pt3dadd(164016.000000,212304.000000,43850.000000,231.122340)}
{pt3dadd(164100.000000,212064.000000,43700.000000,246.279450)}
{pt3dadd(164148.000000,211836.000000,43550.000000,246.279450)}
{pt3dadd(164268.000000,211620.000000,43425.000000,259.574968)}
{pt3dadd(164376.000000,211332.000000,43275.000000,267.439554)}
{pt3dadd(164448.000000,211068.000000,43075.000000,270.189974)}
{pt3dadd(164520.000000,210828.000000,43000.000000,311.884084)}
{pt3dadd(164556.000000,210540.000000,42975.000000,335.706382)}
{pt3dadd(164604.000000,210300.000000,42875.000000,357.033964)}
{pt3dadd(164616.000000,210012.000000,42800.000000,380.547620)}
{pt3dadd(164640.000000,209748.000000,42800.000000,392.995016)}
{pt3dadd(164628.000000,209520.000000,42800.000000,359.558716)}
{pt3dadd(164664.000000,209256.000000,42725.000000,343.601004)}
{pt3dadd(164760.000000,209016.000000,42575.000000,340.090688)}
{pt3dadd(164916.000000,208752.000000,42525.000000,329.024428)}
{pt3dadd(165000.000000,208512.000000,42625.000000,336.220572)}
{pt3dadd(165156.000000,208296.000000,42600.000000,356.846288)}
{pt3dadd(165276.000000,207948.000000,42575.000000,380.359944)}
{pt3dadd(165276.000000,207684.000000,42575.000000,404.236788)}
{pt3dadd(165336.000000,207456.000000,42500.000000,400.893636)}
{pt3dadd(165348.000000,207228.000000,42400.000000,381.250096)}
{pt3dadd(165444.000000,206988.000000,42275.000000,357.736440)}
{pt3dadd(165444.000000,206712.000000,42200.000000,361.800070)}
{pt3dadd(165432.000000,206484.000000,42175.000000,345.119370)}
{pt3dadd(165384.000000,206160.000000,42175.000000,345.119370)}
{pt3dadd(165492.000000,205872.000000,42175.000000,348.007310)}
{pt3dadd(165588.000000,205644.000000,42225.000000,348.007310)}
{pt3dadd(165852.000000,205344.000000,42250.000000,323.317964)}
{pt3dadd(165960.000000,205092.000000,42275.000000,303.674424)}
{pt3dadd(166068.000000,204864.000000,42275.000000,297.458120)}
{pt3dadd(166164.000000,204576.000000,42250.000000,307.017576)}
{pt3dadd(166200.000000,204312.000000,42150.000000,322.975288)}
{pt3dadd(166248.000000,204084.000000,41975.000000,332.534744)}
{pt3dadd(166332.000000,203688.000000,41850.000000,332.534744)}
{pt3dadd(166356.000000,203352.000000,41825.000000,338.751048)}
{pt3dadd(166380.000000,203052.000000,41800.000000,329.191592)}
{pt3dadd(166500.000000,202788.000000,41625.000000,332.877420)}
{pt3dadd(166680.000000,202500.000000,41450.000000,326.350308)}
{pt3dadd(166752.000000,202200.000000,41300.000000,338.797704)}
{pt3dadd(166728.000000,201912.000000,41300.000000,338.797704)}
{pt3dadd(166836.000000,201636.000000,41200.000000,341.830048)}
{pt3dadd(167004.000000,201348.000000,41075.000000,316.816638)}
{pt3dadd(167088.000000,201060.000000,40975.000000,316.816638)}
{pt3dadd(167100.000000,200760.000000,40950.000000,324.012782)}
{pt3dadd(167076.000000,200508.000000,40925.000000,330.866250)}
{pt3dadd(167184.000000,200220.000000,40825.000000,340.903678)}
{pt3dadd(167268.000000,199992.000000,40800.000000,373.850834)}
{pt3dadd(167448.000000,199716.000000,40675.000000,370.818490)}
{pt3dadd(167604.000000,199440.000000,40600.000000,370.818490)}
{pt3dadd(167712.000000,199188.000000,40500.000000,352.110358)}
{pt3dadd(167832.000000,198924.000000,40425.000000,330.782776)}
{pt3dadd(167940.000000,198672.000000,40325.000000,297.835620)}
{pt3dadd(167976.000000,198372.000000,40150.000000,304.051924)}
{pt3dadd(168144.000000,198096.000000,39925.000000,316.252478)}
{pt3dadd(168264.000000,197844.000000,39675.000000,342.516554)}
{pt3dadd(168288.000000,197520.000000,39575.000000,375.463710)}
{pt3dadd(168312.000000,197280.000000,39425.000000,400.477120)}
{pt3dadd(168336.000000,197052.000000,39375.000000,411.016416)}
{pt3dadd(168396.000000,196824.000000,39300.000000,398.815862)}
{pt3dadd(168504.000000,196524.000000,39075.000000,402.879492)}
{pt3dadd(168444.000000,196212.000000,38825.000000,375.302206)}
{pt3dadd(168504.000000,195984.000000,38750.000000,358.546606)}
{pt3dadd(168552.000000,195636.000000,38550.000000,351.350462)}
{pt3dadd(168864.000000,195408.000000,38400.000000,337.627206)}
{pt3dadd(169068.000000,195264.000000,38150.000000,315.970204)}
{pt3dadd(169272.000000,195180.000000,37900.000000,310.600334)}
{pt3dadd(169572.000000,194988.000000,37600.000000,299.847808)}
{pt3dadd(169572.000000,194700.000000,37450.000000,293.320696)}
{pt3dadd(169620.000000,194460.000000,37325.000000,303.358124)}
{pt3dadd(169668.000000,194232.000000,37175.000000,309.885236)}
{pt3dadd(169752.000000,193992.000000,37100.000000,327.702502)}
{pt3dadd(169728.000000,193764.000000,36975.000000,348.014484)}
{pt3dadd(169716.000000,193536.000000,37000.000000,361.737740)}
{pt3dadd(169800.000000,193320.000000,36825.000000,369.293684)}
{pt3dadd(169980.000000,193080.000000,36700.000000,380.359944)}
{pt3dadd(170124.000000,192852.000000,36550.000000,395.489834)}
{pt3dadd(170160.000000,192612.000000,36425.000000,406.556094)}
{pt3dadd(170184.000000,192264.000000,36350.000000,376.672054)}
{pt3dadd(170208.000000,191964.000000,36125.000000,359.078682)}
{pt3dadd(170160.000000,191760.000000,35875.000000,359.078682)}
{pt3dadd(170352.000000,191544.000000,35875.000000,337.421680)}
{pt3dadd(170484.000000,191316.000000,35800.000000,333.551564)}
{pt3dadd(170664.000000,191076.000000,35700.000000,356.239460)}
{pt3dadd(170772.000000,190848.000000,35675.000000,347.568756)}
{pt3dadd(170868.000000,190608.000000,35600.000000,324.055100)}
{pt3dadd(171012.000000,190368.000000,35500.000000,349.978910)}
{pt3dadd(171240.000000,190152.000000,35475.000000,346.293082)}
{pt3dadd(171348.000000,189828.000000,35350.000000,361.422972)}
{pt3dadd(171384.000000,189600.000000,35175.000000,383.816932)}
{pt3dadd(171480.000000,189336.000000,35000.000000,411.394218)}
{pt3dadd(171516.000000,189084.000000,34925.000000,403.063780)}
{pt3dadd(171564.000000,188844.000000,34875.000000,406.749608)}
{pt3dadd(171576.000000,188604.000000,34925.000000,398.815862)}
{pt3dadd(171540.000000,188364.000000,34925.000000,411.016416)}
{pt3dadd(171576.000000,188124.000000,34925.000000,419.763370)}
{pt3dadd(171732.000000,187884.000000,34900.000000,419.763370)}
{pt3dadd(171792.000000,187668.000000,34850.000000,446.087582)}
{pt3dadd(171888.000000,187428.000000,34800.000000,449.957698)}
{pt3dadd(171996.000000,187200.000000,34675.000000,459.142000)}
{pt3dadd(172104.000000,186936.000000,34575.000000,479.417494)}
{pt3dadd(172212.000000,186564.000000,34525.000000,518.221498)}
{pt3dadd(172272.000000,186336.000000,34600.000000,546.879246)}
{pt3dadd(172260.000000,186096.000000,34650.000000,597.991090)}
{pt3dadd(172272.000000,185868.000000,34650.000000,631.588194)}
{pt3dadd(172296.000000,185568.000000,34650.000000,663.183372)}
{pt3dadd(172284.000000,185340.000000,34675.000000,669.187198)}
{pt3dadd(172188.000000,185124.000000,34800.000000,656.879358)}
{pt3dadd(172152.000000,184872.000000,34825.000000,656.879358)}
{pt3dadd(172092.000000,184584.000000,34800.000000,644.571518)}
{pt3dadd(172104.000000,184320.000000,34850.000000,612.976340)}
{pt3dadd(172080.000000,184044.000000,34875.000000,606.972514)}
{pt3dadd(172080.000000,183780.000000,34900.000000,590.622606)}
{pt3dadd(172104.000000,183468.000000,34925.000000,557.025502)}
{pt3dadd(172092.000000,183192.000000,34900.000000,545.861934)}
{pt3dadd(172068.000000,182808.000000,34925.000000,535.229952)}
{pt3dadd(172140.000000,182496.000000,34975.000000,518.880044)}
{pt3dadd(172152.000000,182268.000000,35000.000000,504.756386)}
{pt3dadd(172176.000000,181968.000000,35075.000000,483.371530)}
{pt3dadd(172320.000000,181728.000000,35275.000000,438.137722)}
{pt3dadd(172440.000000,181452.000000,35450.000000,401.274214)}
{pt3dadd(172500.000000,181164.000000,35700.000000,361.226746)}
{pt3dadd(172572.000000,180816.000000,35900.000000,329.382652)}
{pt3dadd(172656.000000,180624.000000,36175.000000,297.235832)}
{pt3dadd(172656.000000,180444.000000,36425.000000,294.203488)}
{pt3dadd(172716.000000,180240.000000,36700.000000,304.742784)}
{pt3dadd(172716.000000,180000.000000,37050.000000,296.072080)}
{pt3dadd(172692.000000,179676.000000,37250.000000,293.321660)}
{pt3dadd(172776.000000,179532.000000,37525.000000,287.159552)}
{pt3dadd(172812.000000,179292.000000,37800.000000,278.901742)}
{pt3dadd(173052.000000,179244.000000,38050.000000,265.178486)}
{pt3dadd(173304.000000,179100.000000,38250.000000,267.928906)}
{pt3dadd(173496.000000,178980.000000,38475.000000,276.599610)}
{pt3dadd(173664.000000,178836.000000,38750.000000,304.369242)}
{pt3dadd(173952.000000,178740.000000,39050.000000,306.988692)}
{pt3dadd(174324.000000,178716.000000,39350.000000,310.172652)}
{pt3dadd(174636.000000,178716.000000,39350.000000,322.620048)}
{pt3dadd(174960.000000,178680.000000,39525.000000,336.343304)}
{pt3dadd(175392.000000,178644.000000,39725.000000,336.343304)}
{pt3dadd(175752.000000,178644.000000,39875.000000,341.981664)}
{pt3dadd(176100.000000,178584.000000,40075.000000,332.877420)}
{pt3dadd(176424.000000,178584.000000,40200.000000,317.679604)}
{pt3dadd(176784.000000,178680.000000,40275.000000,298.036064)}
{pt3dadd(177132.000000,178680.000000,40375.000000,281.067234)}
{pt3dadd(177468.000000,178680.000000,40525.000000,294.137006)}
{pt3dadd(177828.000000,178680.000000,40725.000000,306.584402)}
{pt3dadd(178152.000000,178644.000000,40825.000000,312.222762)}
{pt3dadd(178596.000000,178644.000000,41000.000000,312.222762)}
{pt3dadd(178968.000000,178680.000000,41175.000000,317.336928)}
{pt3dadd(179352.000000,178620.000000,41300.000000,298.628796)}
{pt3dadd(179784.000000,178632.000000,41325.000000,278.316814)}
{pt3dadd(180144.000000,178680.000000,41450.000000,267.564288)}
{pt3dadd(180564.000000,178740.000000,41525.000000,259.699702)}
{pt3dadd(180972.000000,178716.000000,41550.000000,257.080252)}
{pt3dadd(181380.000000,178740.000000,41525.000000,249.590172)}
{pt3dadd(181728.000000,178764.000000,41675.000000,249.590172)}
{pt3dadd(182124.000000,178776.000000,41800.000000,252.084888)}
{pt3dadd(182376.000000,178800.000000,41850.000000,275.907186)}
{pt3dadd(182652.000000,178872.000000,41925.000000,278.526636)}
{pt3dadd(183000.000000,178800.000000,41800.000000,286.016716)}
{pt3dadd(183084.000000,178752.000000,42050.000000,291.130882)}
{pt3dadd(183276.000000,178740.000000,42375.000000,283.997472)}
{pt3dadd(183660.000000,178668.000000,42625.000000,251.329044)}
{pt3dadd(183876.000000,178560.000000,42900.000000,243.838964)}
{pt3dadd(184008.000000,178476.000000,43150.000000,241.219514)}
{pt3dadd(184080.000000,178404.000000,43500.000000,241.219514)}
{pt3dadd(184152.000000,178320.000000,43775.000000,233.195814)}
{pt3dadd(184212.000000,178140.000000,44075.000000,237.403250)}
{pt3dadd(184320.000000,178176.000000,44425.000000,232.985442)}
{pt3dadd(184392.000000,178236.000000,44775.000000,228.114812)}
{pt3dadd(184476.000000,178248.000000,45150.000000,212.199844)}
{pt3dadd(184632.000000,178152.000000,45425.000000,208.738374)}
{pt3dadd(184752.000000,178248.000000,45700.000000,198.941724)}
{pt3dadd(185052.000000,178308.000000,45975.000000,208.230162)}
{pt3dadd(185064.000000,178308.000000,46225.000000,208.230162)}
{pt3dadd(185328.000000,178392.000000,46500.000000,226.895550)}
{pt3dadd(185580.000000,178404.000000,46800.000000,253.771940)}
{pt3dadd(185640.000000,178332.000000,47025.000000,273.321450)}
{pt3dadd(185736.000000,178248.000000,47275.000000,287.795564)}
{pt3dadd(185928.000000,178116.000000,47625.000000,292.666194)}
{pt3dadd(185832.000000,177768.000000,47900.000000,290.434223)}
{pt3dadd(185820.000000,177480.000000,48325.000000,261.944950)}

{create adhoc2}
{access adhoc2}
{connect adhoc2(1), adhoc1(0)}
{nseg = 1}
{strdef color color = "White"}
{pt3dclear()}
{pt3dadd(185820.000000,177480.000000,48325.000000,261.944950)}
{pt3dadd(185688.000000,177480.000000,48600.000000,339.179937)}
{pt3dadd(185520.000000,177564.000000,48850.000000,362.560680)}
{pt3dadd(184968.000000,177636.000000,49175.000000,383.888262)}
{pt3dadd(184716.000000,177684.000000,49425.000000,367.132662)}
{pt3dadd(184476.000000,177768.000000,49675.000000,351.174950)}
{pt3dadd(184452.000000,177876.000000,50025.000000,326.485604)}
{pt3dadd(184272.000000,177912.000000,50300.000000,310.527892)}
{pt3dadd(184020.000000,177996.000000,50725.000000,291.819760)}
{pt3dadd(184116.000000,178104.000000,51000.000000,286.181400)}
{pt3dadd(184068.000000,178200.000000,51325.000000,292.101684)}
{pt3dadd(184128.000000,178308.000000,51600.000000,308.857284)}
{pt3dadd(184152.000000,178380.000000,51875.000000,326.816640)}
{pt3dadd(184212.000000,178416.000000,52250.000000,387.012000)}

{create adhoc3}
{access adhoc3}
{connect adhoc3(1), adhoc2(0)}
{nseg = 1}
{strdef color color = "White"}
{pt3dclear()}
{pt3dadd(184212.000000,178416.000000,52250.000000,387.012000)}
{pt3dadd(184524.000000,178464.000000,52600.000000,459.863843)}
{pt3dadd(184860.000000,178368.000000,52850.000000,468.788662)}
{pt3dadd(185040.000000,178368.000000,53125.000000,485.469362)}
{pt3dadd(185244.000000,178296.000000,53400.000000,485.469362)}
{pt3dadd(185304.000000,178236.000000,53675.000000,504.779360)}
{pt3dadd(185184.000000,178116.000000,53950.000000,520.350698)}
{pt3dadd(185232.000000,178176.000000,54275.000000,525.054854)}
{pt3dadd(185532.000000,178140.000000,54500.000000,545.330348)}
{pt3dadd(185700.000000,178020.000000,54750.000000,562.497742)}
{pt3dadd(185892.000000,177948.000000,55000.000000,573.661310)}
{pt3dadd(186108.000000,177816.000000,55250.000000,573.661310)}
{pt3dadd(186396.000000,177612.000000,55525.000000,583.787006)}
{pt3dadd(186672.000000,177276.000000,55775.000000,578.341364)}
{pt3dadd(186972.000000,177144.000000,56050.000000,546.344118)}
{pt3dadd(187032.000000,177036.000000,56325.000000,529.994210)}
{pt3dadd(187140.000000,176928.000000,56600.000000,514.422872)}
{pt3dadd(187452.000000,176604.000000,56875.000000,531.590266)}
{pt3dadd(187716.000000,176448.000000,57125.000000,555.061674)}
{pt3dadd(187812.000000,176364.000000,57350.000000,587.058920)}
{pt3dadd(187992.000000,176004.000000,57625.000000,603.408828)}
{pt3dadd(188112.000000,175836.000000,57925.000000,618.980166)}
{pt3dadd(188016.000000,175668.000000,58175.000000,596.626432)}
{pt3dadd(188016.000000,175356.000000,58425.000000,553.845026)}
{pt3dadd(187848.000000,175164.000000,58675.000000,509.037196)}
{pt3dadd(187716.000000,174984.000000,58950.000000,462.677248)}
{pt3dadd(187680.000000,174780.000000,59225.000000,411.997798)}
{pt3dadd(187740.000000,174552.000000,59525.000000,378.477442)}
{pt3dadd(187668.000000,174372.000000,59775.000000,359.080744)}
{pt3dadd(187860.000000,174228.000000,60050.000000,338.455028)}
{pt3dadd(188136.000000,174048.000000,60325.000000,322.497316)}
{pt3dadd(188472.000000,173880.000000,60600.000000,313.826612)}
{pt3dadd(188748.000000,173760.000000,60925.000000,293.514630)}
{pt3dadd(189084.000000,173496.000000,61175.000000,281.067234)}
{pt3dadd(189348.000000,173448.000000,61400.000000,281.067234)}
{pt3dadd(189660.000000,173268.000000,61525.000000,293.514630)}
{pt3dadd(189912.000000,173220.000000,61550.000000,352.864784)}
{pt3dadd(190140.000000,173100.000000,61750.000000,429.050856)}
{pt3dadd(190368.000000,173004.000000,62000.000000,510.295584)}
{pt3dadd(190608.000000,172872.000000,62125.000000,595.602556)}
{pt3dadd(190872.000000,172908.000000,62075.000000,671.350072)}
{pt3dadd(191124.000000,172764.000000,62375.000000,717.905498)}
{pt3dadd(191388.000000,172476.000000,62625.000000,760.784882)}
{pt3dadd(191496.000000,172212.000000,62825.000000,782.695314)}
{pt3dadd(191592.000000,171960.000000,62975.000000,782.695314)}
{pt3dadd(191688.000000,171732.000000,63325.000000,769.125902)}
{pt3dadd(191784.000000,171492.000000,63400.000000,740.596242)}
{pt3dadd(191892.000000,171264.000000,63500.000000,691.713032)}
{pt3dadd(192012.000000,170988.000000,63775.000000,656.879358)}
{pt3dadd(192108.000000,170748.000000,64075.000000,619.838538)}
{pt3dadd(192252.000000,170508.000000,64150.000000,607.530698)}
{pt3dadd(192540.000000,170280.000000,64275.000000,595.222858)}
{pt3dadd(192732.000000,170052.000000,64450.000000,601.226684)}
{pt3dadd(192912.000000,169812.000000,64625.000000,595.222858)}
{pt3dadd(193128.000000,169500.000000,64700.000000,618.694266)}
{pt3dadd(193236.000000,169272.000000,64775.000000,607.530698)}
{pt3dadd(193500.000000,168996.000000,65000.000000,607.530698)}
{pt3dadd(193788.000000,168564.000000,65375.000000,613.834712)}
{pt3dadd(194052.000000,168288.000000,65475.000000,647.009644)}
{pt3dadd(194256.000000,168048.000000,65500.000000,700.903384)}
{pt3dadd(194376.000000,167808.000000,65625.000000,760.950162)}
{pt3dadd(194604.000000,167484.000000,65850.000000,818.281362)}
{pt3dadd(194652.000000,167160.000000,66100.000000,854.856732)}
{pt3dadd(194772.000000,166800.000000,66025.000000,862.519300)}
{pt3dadd(194952.000000,166440.000000,66050.000000,845.200930)}
{pt3dadd(195060.000000,166152.000000,66050.000000,845.200930)}
{pt3dadd(195132.000000,165900.000000,66125.000000,828.707230)}
{pt3dadd(195276.000000,165660.000000,66225.000000,837.155220)}
{pt3dadd(195480.000000,165360.000000,66450.000000,853.648920)}
{pt3dadd(195600.000000,165048.000000,66625.000000,853.648920)}
{pt3dadd(195672.000000,164772.000000,66675.000000,837.940642)}
{pt3dadd(195756.000000,164376.000000,66725.000000,830.278074)}
{pt3dadd(195804.000000,164064.000000,66775.000000,798.824126)}
{pt3dadd(195816.000000,163824.000000,66775.000000,782.330426)}
{pt3dadd(195972.000000,163560.000000,66800.000000,759.324468)}
{pt3dadd(195924.000000,163320.000000,66850.000000,752.026788)}
{pt3dadd(196008.000000,163080.000000,66900.000000,724.855682)}
{pt3dadd(196212.000000,162816.000000,66975.000000,693.260504)}
{pt3dadd(196464.000000,162588.000000,67050.000000,646.705078)}
{pt3dadd(196608.000000,162312.000000,67050.000000,615.109900)}
{pt3dadd(196824.000000,162048.000000,67075.000000,583.514722)}
{pt3dadd(196920.000000,161808.000000,67150.000000,577.510896)}
{pt3dadd(196968.000000,161556.000000,67150.000000,602.155890)}
{pt3dadd(196728.000000,161328.000000,67200.000000,620.181656)}
{pt3dadd(196620.000000,161016.000000,67350.000000,644.826650)}
{pt3dadd(196668.000000,160680.000000,67625.000000,669.471644)}
{pt3dadd(196764.000000,160428.000000,67800.000000,695.348896)}
{pt3dadd(196836.000000,160176.000000,67900.000000,676.421828)}
{pt3dadd(196968.000000,159900.000000,67950.000000,664.113988)}
{pt3dadd(197040.000000,159636.000000,68025.000000,645.186920)}
{pt3dadd(197184.000000,159384.000000,68225.000000,626.259852)}
{pt3dadd(197424.000000,159156.000000,68275.000000,589.219032)}
{pt3dadd(197472.000000,158916.000000,68450.000000,595.222858)}
{pt3dadd(197748.000000,158688.000000,68550.000000,607.530698)}
{pt3dadd(197820.000000,158436.000000,68575.000000,607.530698)}
{pt3dadd(198060.000000,157908.000000,68675.000000,630.902043)}
{pt3dadd(198372.000000,157188.000000,68475.000000,600.382600)}

{create adhoc4}
{access adhoc4}
{connect adhoc4(1), adhoc3(0)}
{nseg = 1}
{strdef color color = "White"}
{pt3dclear()}
{pt3dadd(198372.000000,157188.000000,68475.000000,600.382600)}
{pt3dadd(198684.000000,157056.000000,68675.000000,653.517730)}
{pt3dadd(198912.000000,156792.000000,69025.000000,677.067998)}
{pt3dadd(199128.000000,156612.000000,69225.000000,677.067998)}
{pt3dadd(199332.000000,156588.000000,69550.000000,683.372012)}
{pt3dadd(199632.000000,156564.000000,69925.000000,676.421828)}
{pt3dadd(199848.000000,156324.000000,70175.000000,663.498586)}
{pt3dadd(199932.000000,156120.000000,70450.000000,649.929174)}
{pt3dadd(200076.000000,155820.000000,70700.000000,683.104106)}
{pt3dadd(200376.000000,155772.000000,71050.000000,696.673518)}
{pt3dadd(200556.000000,155604.000000,71325.000000,710.921382)}
{pt3dadd(200676.000000,155568.000000,71600.000000,723.844624)}
{pt3dadd(200784.000000,155592.000000,71950.000000,717.540610)}
{pt3dadd(200928.000000,155520.000000,72200.000000,684.365678)}
{pt3dadd(201000.000000,155460.000000,72475.000000,658.488426)}
{pt3dadd(201252.000000,155364.000000,72800.000000,631.317320)}
{pt3dadd(201372.000000,155280.000000,73150.000000,618.394078)}
{pt3dadd(201456.000000,155196.000000,73450.000000,631.317320)}
{pt3dadd(201552.000000,155100.000000,73725.000000,657.194572)}
{pt3dadd(201564.000000,155184.000000,74000.000000,676.121640)}
{pt3dadd(201600.000000,155124.000000,74275.000000,676.121640)}
{pt3dadd(201696.000000,155064.000000,74575.000000,689.044882)}
{pt3dadd(201744.000000,155052.000000,74925.000000,664.399888)}
{pt3dadd(201672.000000,154752.000000,75200.000000,644.526462)}
{pt3dadd(201564.000000,154440.000000,75450.000000,604.310130)}
{pt3dadd(201540.000000,154368.000000,75725.000000,587.142736)}
{pt3dadd(201672.000000,154332.000000,76000.000000,562.497742)}
{pt3dadd(201780.000000,154200.000000,76225.000000,557.052100)}
{pt3dadd(201756.000000,154032.000000,76525.000000,525.054854)}
{pt3dadd(201840.000000,154032.000000,76850.000000,515.870552)}
{pt3dadd(201804.000000,153936.000000,77175.000000,510.684212)}
{pt3dadd(201840.000000,153840.000000,77475.000000,481.661764)}
{pt3dadd(201924.000000,153828.000000,77750.000000,466.831912)}
{pt3dadd(202008.000000,153876.000000,78025.000000,450.151212)}
{pt3dadd(202080.000000,153984.000000,78375.000000,445.884404)}
{pt3dadd(202152.000000,154056.000000,78625.000000,419.560192)}
{pt3dadd(202188.000000,154008.000000,78925.000000,415.496562)}
{pt3dadd(202356.000000,153864.000000,79225.000000,415.496562)}
{pt3dadd(202332.000000,154020.000000,79475.000000,484.047934)}
{pt3dadd(202248.000000,153888.000000,79850.000000,537.715376)}
{pt3dadd(202236.000000,154092.000000,80225.000000,637.720696)}
{pt3dadd(202464.000000,153984.000000,80650.000000,770.608467)}
{pt3dadd(202524.000000,153984.000000,81175.000000,887.038600)}

{create adhoc5}
{access adhoc5}
{connect adhoc5(1), adhoc4(0)}
{nseg = 1}
{strdef color color = "White"}
{pt3dclear()}
{pt3dadd(202524.000000,153984.000000,81175.000000,887.038600)}
{pt3dadd(202704.000000,154500.000000,81275.000000,858.878633)}
{pt3dadd(202728.000000,154788.000000,81550.000000,837.538362)}
{pt3dadd(202728.000000,155256.000000,82025.000000,813.382094)}
{pt3dadd(202620.000000,155496.000000,82250.000000,797.673816)}
{pt3dadd(202788.000000,155856.000000,82625.000000,774.667858)}
{pt3dadd(202788.000000,156120.000000,82525.000000,753.800766)}
{pt3dadd(202800.000000,156396.000000,82925.000000,710.921382)}
{pt3dadd(202848.000000,156744.000000,83175.000000,656.457186)}
{pt3dadd(202860.000000,156996.000000,83475.000000,592.808688)}
{pt3dadd(202740.000000,157320.000000,83600.000000,540.938016)}
{pt3dadd(202764.000000,157656.000000,83725.000000,507.340912)}
{pt3dadd(202680.000000,157944.000000,83900.000000,470.863520)}
{pt3dadd(202620.000000,158196.000000,84075.000000,480.989216)}
{pt3dadd(202632.000000,158496.000000,84250.000000,500.299214)}
{pt3dadd(202560.000000,158760.000000,84475.000000,515.129066)}
{pt3dadd(202536.000000,159048.000000,84700.000000,520.068422)}
{pt3dadd(202428.000000,159312.000000,84825.000000,529.252724)}
{pt3dadd(202308.000000,159588.000000,85150.000000,524.066384)}
{pt3dadd(202212.000000,159876.000000,85375.000000,518.880044)}
{pt3dadd(202152.000000,160152.000000,85650.000000,504.050192)}
{pt3dadd(202140.000000,160452.000000,85950.000000,485.659726)}
{pt3dadd(202104.000000,160728.000000,86125.000000,468.144986)}
{pt3dadd(202176.000000,160968.000000,86425.000000,438.134946)}
{pt3dadd(202236.000000,161220.000000,86450.000000,392.167194)}
{pt3dadd(202368.000000,161436.000000,86600.000000,368.290350)}
{pt3dadd(202416.000000,161772.000000,86850.000000,356.670776)}
{pt3dadd(202380.000000,161988.000000,86925.000000,374.185516)}
{pt3dadd(202500.000000,162204.000000,87150.000000,394.552044)}
{pt3dadd(202512.000000,162456.000000,87350.000000,440.519796)}
{pt3dadd(202596.000000,162660.000000,87500.000000,455.649686)}
{pt3dadd(202704.000000,162900.000000,87750.000000,463.205630)}
{pt3dadd(202836.000000,163140.000000,87975.000000,441.820774)}
{pt3dadd(202908.000000,163368.000000,88150.000000,425.140074)}
{pt3dadd(202884.000000,163620.000000,88175.000000,398.815862)}
{pt3dadd(202800.000000,163836.000000,88175.000000,390.882116)}
{pt3dadd(202860.000000,164184.000000,88450.000000,390.882116)}
{pt3dadd(202728.000000,164436.000000,88650.000000,390.882116)}
{pt3dadd(202776.000000,164652.000000,88975.000000,383.685972)}
{pt3dadd(202620.000000,164880.000000,89175.000000,383.685972)}
{pt3dadd(202572.000000,165084.000000,89425.000000,387.556088)}
{pt3dadd(202500.000000,165420.000000,89875.000000,351.539152)}
{pt3dadd(202404.000000,165672.000000,89825.000000,319.392332)}
{pt3dadd(202308.000000,166044.000000,89825.000000,292.286628)}
{pt3dadd(202068.000000,166716.000000,90000.000000,264.778502)}
{pt3dadd(202104.000000,166956.000000,90175.000000,228.761566)}
{pt3dadd(202008.000000,167172.000000,90450.000000,231.024346)}
{pt3dadd(201936.000000,167292.000000,90725.000000,223.000646)}
{pt3dadd(201828.000000,167460.000000,90975.000000,217.131974)}
{pt3dadd(201864.000000,167628.000000,91250.000000,202.696630)}
{pt3dadd(201720.000000,167760.000000,91550.000000,186.613200)}
{pt3dadd(201648.000000,167760.000000,91850.000000,166.877840)}
{pt3dadd(201588.000000,167832.000000,92100.000000,160.276720)}
{pt3dadd(201456.000000,167940.000000,92350.000000,152.216990)}
{pt3dadd(201396.000000,168060.000000,92625.000000,147.388820)}
{pt3dadd(201408.000000,168120.000000,93025.000000,151.987080)}
{pt3dadd(201420.000000,168264.000000,93275.000000,159.663010)}
{pt3dadd(201456.000000,168324.000000,93525.000000,174.287830)}
{pt3dadd(201516.000000,168528.000000,93775.000000,175.746440)}
{pt3dadd(201684.000000,168768.000000,93950.000000,177.277976)}
{pt3dadd(201768.000000,168996.000000,94350.000000,169.967566)}
{pt3dadd(201732.000000,169212.000000,94625.000000,175.556780)}
{pt3dadd(201720.000000,169320.000000,94875.000000,177.819560)}
{pt3dadd(201588.000000,169728.000000,95075.000000,202.197240)}
{pt3dadd(201372.000000,169896.000000,95275.000000,230.681744)}
{pt3dadd(201204.000000,170052.000000,95600.000000,241.453624)}
{pt3dadd(201024.000000,170328.000000,95775.000000,229.577630)}
{pt3dadd(200844.000000,170712.000000,96150.000000,217.518200)}
{pt3dadd(200760.000000,170820.000000,96450.000000,203.557904)}
{pt3dadd(200604.000000,170988.000000,96675.000000,178.370034)}
{pt3dadd(200484.000000,171252.000000,96725.000000,178.370034)}
{pt3dadd(200364.000000,171420.000000,97000.000000,181.360180)}
{pt3dadd(200220.000000,171612.000000,97150.000000,179.671660)}
{pt3dadd(200088.000000,171864.000000,97375.000000,167.795666)}
{pt3dadd(199884.000000,172044.000000,97575.000000,169.568616)}
{pt3dadd(199716.000000,172260.000000,97700.000000,171.430208)}
{pt3dadd(199524.000000,172488.000000,97800.000000,173.038322)}
{pt3dadd(199320.000000,172692.000000,98075.000000,171.430208)}
{pt3dadd(199104.000000,172824.000000,98100.000000,183.306202)}
{pt3dadd(198924.000000,173040.000000,98225.000000,191.329902)}
{pt3dadd(198708.000000,173184.000000,98400.000000,195.336982)}
{pt3dadd(198456.000000,173328.000000,98575.000000,204.667124)}
{pt3dadd(198240.000000,173484.000000,98825.000000,209.736708)}
{pt3dadd(198024.000000,173640.000000,98975.000000,202.458974)}
{pt3dadd(198012.000000,173880.000000,99250.000000,198.251538)}
{pt3dadd(198000.000000,174072.000000,99425.000000,192.382866)}
{pt3dadd(197988.000000,174300.000000,99575.000000,184.741244)}
{pt3dadd(197916.000000,174516.000000,99750.000000,181.279774)}
{pt3dadd(197796.000000,174624.000000,99875.000000,184.741244)}
{pt3dadd(197736.000000,174840.000000,100050.000000,182.786572)}
{pt3dadd(197700.000000,175044.000000,100200.000000,188.655244)}
{pt3dadd(197496.000000,175236.000000,100325.000000,198.451894)}
{pt3dadd(197292.000000,175380.000000,100425.000000,212.199844)}
{pt3dadd(197088.000000,175632.000000,100575.000000,218.068516)}
{pt3dadd(196884.000000,175848.000000,100700.000000,222.075596)}
{pt3dadd(196680.000000,176004.000000,100800.000000,222.075596)}
{pt3dadd(196500.000000,176148.000000,100950.000000,229.209006)}
{pt3dadd(196284.000000,176292.000000,101075.000000,229.209006)}
{pt3dadd(196044.000000,176556.000000,101250.000000,233.626814)}
{pt3dadd(195744.000000,176856.000000,101325.000000,235.781842)}
{pt3dadd(195528.000000,177072.000000,101475.000000,229.913170)}
{pt3dadd(195336.000000,177264.000000,101725.000000,220.624732)}
{pt3dadd(195168.000000,177540.000000,101800.000000,220.624732)}
{pt3dadd(195024.000000,177768.000000,101975.000000,220.624732)}
{pt3dadd(194772.000000,178068.000000,102200.000000,214.462624)}
{pt3dadd(194604.000000,178308.000000,102400.000000,229.619734)}
{pt3dadd(194484.000000,178596.000000,102625.000000,234.037542)}
{pt3dadd(194400.000000,178860.000000,102800.000000,220.289592)}
{pt3dadd(194328.000000,179076.000000,103025.000000,203.401992)}
{pt3dadd(194376.000000,179304.000000,103275.000000,192.091520)}
{pt3dadd(194412.000000,179592.000000,103475.000000,178.796002)}
{pt3dadd(194388.000000,179796.000000,103675.000000,176.533222)}
{pt3dadd(194256.000000,179964.000000,103925.000000,185.863364)}
{pt3dadd(194196.000000,180144.000000,104150.000000,200.488184)}
{pt3dadd(194172.000000,180300.000000,104375.000000,236.384328)}
{pt3dadd(194028.000000,180504.000000,104550.000000,260.970000)}
{pt3dadd(193812.000000,180684.000000,104775.000000,282.577524)}
{pt3dadd(193596.000000,180960.000000,104900.000000,294.485412)}
{pt3dadd(193404.000000,181080.000000,105025.000000,299.124106)}
{pt3dadd(193260.000000,181248.000000,105175.000000,282.963322)}
{pt3dadd(193164.000000,181476.000000,105375.000000,269.178452)}
{pt3dadd(193152.000000,181716.000000,105525.000000,254.704338)}
{pt3dadd(193068.000000,181944.000000,105600.000000,249.590172)}
{pt3dadd(192900.000000,182196.000000,105750.000000,263.375042)}
{pt3dadd(192792.000000,182400.000000,106000.000000,289.573254)}
{pt3dadd(192720.000000,182592.000000,106275.000000,313.395552)}
{pt3dadd(192468.000000,182892.000000,106350.000000,327.869666)}
{pt3dadd(192252.000000,183084.000000,106475.000000,332.983832)}
{pt3dadd(192000.000000,183216.000000,106575.000000,312.405240)}
{pt3dadd(191664.000000,183456.000000,106700.000000,302.367812)}
{pt3dadd(191412.000000,183660.000000,106775.000000,271.751792)}
{pt3dadd(191220.000000,183864.000000,107000.000000,243.982160)}
{pt3dadd(190944.000000,183948.000000,107100.000000,219.604480)}
{pt3dadd(190716.000000,184056.000000,107150.000000,213.735808)}
{pt3dadd(190524.000000,184248.000000,107250.000000,187.288544)}
{pt3dadd(190404.000000,184344.000000,107450.000000,181.419872)}
{pt3dadd(190188.000000,184464.000000,107700.000000,176.096810)}
{pt3dadd(190020.000000,184608.000000,107975.000000,206.112850)}
{pt3dadd(189564.000000,184632.000000,108150.000000,235.744074)}
{pt3dadd(189408.000000,184704.000000,108400.000000,243.767774)}
{pt3dadd(189204.000000,184824.000000,108675.000000,243.767774)}
{pt3dadd(189060.000000,185040.000000,108775.000000,251.045508)}
{pt3dadd(189000.000000,185256.000000,108975.000000,231.446852)}
{pt3dadd(188940.000000,185376.000000,109125.000000,209.839328)}
{pt3dadd(188688.000000,185508.000000,109350.000000,216.972738)}
{pt3dadd(188568.000000,185700.000000,109550.000000,222.841410)}
{pt3dadd(188484.000000,185988.000000,109850.000000,219.025146)}
{pt3dadd(188352.000000,186156.000000,110075.000000,217.070474)}
{pt3dadd(188304.000000,186324.000000,110350.000000,214.915446)}
{pt3dadd(188328.000000,186408.000000,110800.000000,210.044816)}
{pt3dadd(188292.000000,186720.000000,110900.000000,221.952704)}
{pt3dadd(188244.000000,186900.000000,111150.000000,242.479684)}
{pt3dadd(187992.000000,187104.000000,111525.000000,261.145072)}
{pt3dadd(187920.000000,187176.000000,111750.000000,267.938794)}
{pt3dadd(187752.000000,187248.000000,112050.000000,270.314708)}
{pt3dadd(187596.000000,187404.000000,112300.000000,267.695258)}
{pt3dadd(187548.000000,187548.000000,112525.000000,253.036950)}
{pt3dadd(187368.000000,187680.000000,112750.000000,250.286530)}
{pt3dadd(187188.000000,187764.000000,113000.000000,258.151116)}
{pt3dadd(186924.000000,187932.000000,113200.000000,268.903642)}
{pt3dadd(186588.000000,187932.000000,113425.000000,293.917052)}
{pt3dadd(186336.000000,188028.000000,113675.000000,328.218900)}
{pt3dadd(185832.000000,188160.000000,113900.000000,350.612860)}
{pt3dadd(185616.000000,188328.000000,114150.000000,366.570572)}
{pt3dadd(185436.000000,188508.000000,114400.000000,363.682632)}
{pt3dadd(185184.000000,188676.000000,114625.000000,329.380784)}
{pt3dadd(184884.000000,188784.000000,114850.000000,297.233964)}
{pt3dadd(184740.000000,188964.000000,115050.000000,265.087144)}
{pt3dadd(184596.000000,189012.000000,115275.000000,238.888932)}
{pt3dadd(184368.000000,189036.000000,115500.000000,226.385652)}
{pt3dadd(184164.000000,189108.000000,115725.000000,230.803460)}
{pt3dadd(183888.000000,189228.000000,115950.000000,240.556320)}
{pt3dadd(183624.000000,189396.000000,116175.000000,250.309180)}
{pt3dadd(183360.000000,189480.000000,116425.000000,260.549680)}
{pt3dadd(183000.000000,189564.000000,116675.000000,282.157204)}
{pt3dadd(182664.000000,189600.000000,116900.000000,298.317988)}
{pt3dadd(182196.000000,189672.000000,117225.000000,301.068408)}
{pt3dadd(181956.000000,189672.000000,117350.000000,301.068408)}
{pt3dadd(181752.000000,189708.000000,117450.000000,298.317988)}
{pt3dadd(181524.000000,189780.000000,117575.000000,274.555436)}
{pt3dadd(181320.000000,189828.000000,117725.000000,251.924436)}
{pt3dadd(181104.000000,189876.000000,117800.000000,231.397456)}
{pt3dadd(180900.000000,189924.000000,117950.000000,211.847946)}
{pt3dadd(180648.000000,189948.000000,118175.000000,192.298436)}
{pt3dadd(180420.000000,190032.000000,118325.000000,182.968294)}
{pt3dadd(180204.000000,190116.000000,118475.000000,172.550910)}
{pt3dadd(180000.000000,190164.000000,118725.000000,176.367174)}
{pt3dadd(179868.000000,190188.000000,118875.000000,186.163824)}
{pt3dadd(179664.000000,190092.000000,119100.000000,198.223254)}
{pt3dadd(179484.000000,190176.000000,119325.000000,219.461284)}
{pt3dadd(179292.000000,190164.000000,119550.000000,246.589384)}
{pt3dadd(178920.000000,190032.000000,119775.000000,266.188040)}
{pt3dadd(178620.000000,190032.000000,119900.000000,278.691320)}
{pt3dadd(178308.000000,189972.000000,120125.000000,283.561950)}
{pt3dadd(178080.000000,189960.000000,120300.000000,278.447784)}
{pt3dadd(177852.000000,189888.000000,120475.000000,281.335724)}
{pt3dadd(177432.000000,189816.000000,120675.000000,281.335724)}
{pt3dadd(177156.000000,189864.000000,120975.000000,284.223664)}
{pt3dadd(176928.000000,189924.000000,121050.000000,292.481474)}
{pt3dadd(176700.000000,189996.000000,121150.000000,316.303772)}
{pt3dadd(176496.000000,189960.000000,121175.000000,333.059372)}
{pt3dadd(176184.000000,190032.000000,121300.000000,342.618828)}
{pt3dadd(175968.000000,190104.000000,121450.000000,352.178284)}
{pt3dadd(175716.000000,190152.000000,121575.000000,355.210628)}
{pt3dadd(175428.000000,190176.000000,121650.000000,348.357160)}
{pt3dadd(175164.000000,190200.000000,121700.000000,318.473120)}
{pt3dadd(174900.000000,190248.000000,121825.000000,306.025724)}
{pt3dadd(174696.000000,190200.000000,121875.000000,281.075048)}
{pt3dadd(174456.000000,190236.000000,122000.000000,260.496456)}
{pt3dadd(174240.000000,190260.000000,122100.000000,232.726824)}
{pt3dadd(174048.000000,190296.000000,122225.000000,228.309016)}
{pt3dadd(173784.000000,190428.000000,122375.000000,207.782036)}
{pt3dadd(173592.000000,190560.000000,122475.000000,194.688752)}
{pt3dadd(173484.000000,190608.000000,122700.000000,182.218960)}
{pt3dadd(173340.000000,190668.000000,122950.000000,176.895898)}
{pt3dadd(173124.000000,190692.000000,123100.000000,167.565756)}
{pt3dadd(173064.000000,190800.000000,123325.000000,171.382020)}
{pt3dadd(172728.000000,190896.000000,123525.000000,194.228164)}
{pt3dadd(172620.000000,190980.000000,123800.000000,218.605844)}
{pt3dadd(172344.000000,190932.000000,124025.000000,237.224424)}
{pt3dadd(172092.000000,191052.000000,124250.000000,264.100814)}
{pt3dadd(171804.000000,191172.000000,124475.000000,278.061110)}
{pt3dadd(171492.000000,191088.000000,124625.000000,280.811530)}
{pt3dadd(171312.000000,191076.000000,124850.000000,275.697364)}
{pt3dadd(171048.000000,191184.000000,125000.000000,278.316814)}
{pt3dadd(170832.000000,191292.000000,125200.000000,267.564288)}
{pt3dadd(170436.000000,191580.000000,125325.000000,260.074208)}
{pt3dadd(170232.000000,191676.000000,125450.000000,260.074208)}
{pt3dadd(170016.000000,191760.000000,125600.000000,265.188374)}
{pt3dadd(169800.000000,191820.000000,125725.000000,265.188374)}
{pt3dadd(169596.000000,191868.000000,125850.000000,275.940900)}
{pt3dadd(169380.000000,192012.000000,125950.000000,289.069340)}
{pt3dadd(169152.000000,192072.000000,126100.000000,286.318920)}
{pt3dadd(168888.000000,192132.000000,126225.000000,298.173584)}
{pt3dadd(168660.000000,192180.000000,126300.000000,303.811944)}
{pt3dadd(168468.000000,192384.000000,126400.000000,303.811944)}
{pt3dadd(168024.000000,192540.000000,126550.000000,298.173584)}
{pt3dadd(167832.000000,192780.000000,126650.000000,303.811944)}
{pt3dadd(167568.000000,192912.000000,126825.000000,289.337830)}
{pt3dadd(167244.000000,192924.000000,126950.000000,281.080020)}
{pt3dadd(167040.000000,193020.000000,127075.000000,275.441660)}
{pt3dadd(166704.000000,193032.000000,127200.000000,270.327494)}
{pt3dadd(166488.000000,193128.000000,127375.000000,264.689134)}
{pt3dadd(166212.000000,193164.000000,127425.000000,259.818504)}
{pt3dadd(165924.000000,193116.000000,127575.000000,238.060274)}
{pt3dadd(165684.000000,193056.000000,127650.000000,232.946108)}
{pt3dadd(165420.000000,192984.000000,127650.000000,249.914938)}
{pt3dadd(165204.000000,193116.000000,127750.000000,255.553298)}
{pt3dadd(164988.000000,193332.000000,127850.000000,278.241194)}
{pt3dadd(164652.000000,193344.000000,128050.000000,317.816690)}
{pt3dadd(164448.000000,193308.000000,128250.000000,334.785520)}
{pt3dadd(164172.000000,193272.000000,128325.000000,322.930856)}
{pt3dadd(163896.000000,193224.000000,128375.000000,314.673046)}
{pt3dadd(163620.000000,193188.000000,128450.000000,291.985150)}
{pt3dadd(163332.000000,193164.000000,128450.000000,257.237824)}
{pt3dadd(162924.000000,193044.000000,128475.000000,221.005480)}
{pt3dadd(162672.000000,192840.000000,128450.000000,193.780040)}
{pt3dadd(162408.000000,192768.000000,128400.000000,176.849980)}
{pt3dadd(162132.000000,192720.000000,128400.000000,168.425092)}
{pt3dadd(161856.000000,192636.000000,128450.000000,190.725022)}
{pt3dadd(161592.000000,192576.000000,128475.000000,207.612622)}
{pt3dadd(161316.000000,192432.000000,128500.000000,227.347982)}
{pt3dadd(161100.000000,192264.000000,128450.000000,244.278042)}
{pt3dadd(160896.000000,192144.000000,128475.000000,237.346866)}
{pt3dadd(160644.000000,192072.000000,128500.000000,229.482280)}
{pt3dadd(160476.000000,191796.000000,128550.000000,245.643064)}
{pt3dadd(160080.000000,192120.000000,128725.000000,253.133144)}
{pt3dadd(159564.000000,192084.000000,128950.000000,250.638428)}
{pt3dadd(159276.000000,191892.000000,128975.000000,268.370406)}
{pt3dadd(159060.000000,191736.000000,129000.000000,263.731712)}
{pt3dadd(158856.000000,191616.000000,129050.000000,249.946842)}
{pt3dadd(158604.000000,191472.000000,129075.000000,252.697262)}
{pt3dadd(158304.000000,191352.000000,129075.000000,292.405942)}
{pt3dadd(158004.000000,191280.000000,129125.000000,332.114622)}
{pt3dadd(157740.000000,191256.000000,129225.000000,390.585654)}
{pt3dadd(157488.000000,191148.000000,129250.000000,444.417992)}
{pt3dadd(157176.000000,191076.000000,129300.000000,485.446388)}
{pt3dadd(156936.000000,191040.000000,129325.000000,489.926534)}
{pt3dadd(156600.000000,191040.000000,129375.000000,485.659726)}
{pt3dadd(156360.000000,190896.000000,129400.000000,467.269260)}
{pt3dadd(156120.000000,190848.000000,129425.000000,457.625748)}
{pt3dadd(155844.000000,190848.000000,129525.000000,444.174638)}
{pt3dadd(155628.000000,190812.000000,129625.000000,416.954642)}
{pt3dadd(155340.000000,190740.000000,129650.000000,389.377356)}
{pt3dadd(155112.000000,190716.000000,129725.000000,361.800070)}
{pt3dadd(154896.000000,190704.000000,129775.000000,331.396114)}
{pt3dadd(154596.000000,190680.000000,129875.000000,323.462368)}
{pt3dadd(154368.000000,190680.000000,129875.000000,326.805520)}
{pt3dadd(154128.000000,190728.000000,129950.000000,335.909764)}
{pt3dadd(153912.000000,190704.000000,129975.000000,351.867476)}
{pt3dadd(153636.000000,190728.000000,130050.000000,358.394588)}
{pt3dadd(153372.000000,190860.000000,130025.000000,351.198444)}
{pt3dadd(153132.000000,190908.000000,129950.000000,347.855292)}
{pt3dadd(152868.000000,190908.000000,129975.000000,362.264704)}
{pt3dadd(152664.000000,190920.000000,129950.000000,378.151086)}
{pt3dadd(152424.000000,190920.000000,129825.000000,397.547784)}
{pt3dadd(152112.000000,190908.000000,129750.000000,412.677674)}
{pt3dadd(151848.000000,190860.000000,129725.000000,439.897670)}
{pt3dadd(151560.000000,190848.000000,129700.000000,448.228108)}
{pt3dadd(151272.000000,190812.000000,129700.000000,439.897670)}
{pt3dadd(151008.000000,190800.000000,129750.000000,435.630862)}
{pt3dadd(150780.000000,190692.000000,129800.000000,431.567232)}
{pt3dadd(150552.000000,190572.000000,129900.000000,422.820278)}
{pt3dadd(150336.000000,190524.000000,130025.000000,418.553470)}
{pt3dadd(149964.000000,190608.000000,130200.000000,426.883908)}
{pt3dadd(149604.000000,190596.000000,130325.000000,440.335018)}
{pt3dadd(149388.000000,190584.000000,130500.000000,457.849758)}
{pt3dadd(149040.000000,190620.000000,130625.000000,476.240224)}
{pt3dadd(148716.000000,190656.000000,130700.000000,499.817030)}
{pt3dadd(148440.000000,190608.000000,130800.000000,519.127028)}
{pt3dadd(148176.000000,190536.000000,130825.000000,529.252724)}
{pt3dadd(147924.000000,190452.000000,130825.000000,534.192080)}
{pt3dadd(147624.000000,190416.000000,130850.000000,534.192080)}
{pt3dadd(147336.000000,190320.000000,130825.000000,539.637722)}
{pt3dadd(147048.000000,190224.000000,130825.000000,534.451382)}
{pt3dadd(146748.000000,190128.000000,130750.000000,529.265042)}
{pt3dadd(146508.000000,190020.000000,130725.000000,529.265042)}
{pt3dadd(146292.000000,189912.000000,130750.000000,534.451382)}
{pt3dadd(146064.000000,189768.000000,130725.000000,501.365304)}
{pt3dadd(145740.000000,189816.000000,130825.000000,471.355264)}
{pt3dadd(145500.000000,189804.000000,130925.000000,448.901168)}
{pt3dadd(145224.000000,189780.000000,130925.000000,439.257656)}
{pt3dadd(144948.000000,189816.000000,130950.000000,407.747104)}
{pt3dadd(144636.000000,189864.000000,131025.000000,393.337692)}
{pt3dadd(144420.000000,189924.000000,131125.000000,397.023520)}
{pt3dadd(144132.000000,189972.000000,131125.000000,379.430148)}
{pt3dadd(143880.000000,190116.000000,131150.000000,328.447600)}
{pt3dadd(143652.000000,190128.000000,131000.000000,306.053640)}
{pt3dadd(143436.000000,190164.000000,131000.000000,306.053640)}
{pt3dadd(143196.000000,190248.000000,130875.000000,295.514344)}
{pt3dadd(142932.000000,190344.000000,130700.000000,298.698304)}
{pt3dadd(142668.000000,190428.000000,130525.000000,336.870268)}
{pt3dadd(142392.000000,190548.000000,130550.000000,348.724932)}
{pt3dadd(142116.000000,190644.000000,130525.000000,342.508628)}
{pt3dadd(141900.000000,190740.000000,130500.000000,333.404384)}
{pt3dadd(141696.000000,190824.000000,130575.000000,318.930270)}
{pt3dadd(141420.000000,191016.000000,130700.000000,295.416614)}
{pt3dadd(141204.000000,191172.000000,130850.000000,283.561950)}
{pt3dadd(141072.000000,191316.000000,131075.000000,283.561950)}
{pt3dadd(140868.000000,191556.000000,131225.000000,286.449890)}
{pt3dadd(140712.000000,191832.000000,131425.000000,300.924004)}
{pt3dadd(140640.000000,192156.000000,131600.000000,320.567544)}
{pt3dadd(140520.000000,192372.000000,131700.000000,346.831620)}
{pt3dadd(140316.000000,192672.000000,131800.000000,359.901392)}
{pt3dadd(140208.000000,192924.000000,131875.000000,369.460848)}
{pt3dadd(140028.000000,193200.000000,131975.000000,376.314316)}
{pt3dadd(139824.000000,193380.000000,131975.000000,372.628488)}
{pt3dadd(139620.000000,193584.000000,132000.000000,352.002772)}
{pt3dadd(139368.000000,193788.000000,132000.000000,348.492456)}
{pt3dadd(139152.000000,193872.000000,132050.000000,341.965344)}
{pt3dadd(138936.000000,193968.000000,132075.000000,326.007632)}
{pt3dadd(138720.000000,194064.000000,132050.000000,310.049920)}
{pt3dadd(138420.000000,194172.000000,132050.000000,304.411560)}
{pt3dadd(138108.000000,194280.000000,132100.000000,289.213744)}
{pt3dadd(137856.000000,194448.000000,132075.000000,283.293460)}
{pt3dadd(137604.000000,194652.000000,132075.000000,286.181400)}
{pt3dadd(137352.000000,194760.000000,132100.000000,280.811530)}
{pt3dadd(137136.000000,194892.000000,132125.000000,273.321450)}
{pt3dadd(136896.000000,194880.000000,132125.000000,273.321450)}
{pt3dadd(136596.000000,194856.000000,132225.000000,265.456864)}
{pt3dadd(136392.000000,194868.000000,132275.000000,247.910616)}
{pt3dadd(136152.000000,194940.000000,132275.000000,232.753506)}
{pt3dadd(135912.000000,195000.000000,132250.000000,230.490726)}
{pt3dadd(135696.000000,195024.000000,132225.000000,225.376560)}
{pt3dadd(135492.000000,195216.000000,132200.000000,223.000646)}
{pt3dadd(135264.000000,195432.000000,132225.000000,227.418454)}
{pt3dadd(135048.000000,195564.000000,132150.000000,229.280046)}
{pt3dadd(134832.000000,195840.000000,132125.000000,214.655226)}
{pt3dadd(134604.000000,196164.000000,132050.000000,200.219882)}
{pt3dadd(134424.000000,196320.000000,131950.000000,191.794994)}
{pt3dadd(134328.000000,196548.000000,131925.000000,189.532214)}
{pt3dadd(134172.000000,196800.000000,131925.000000,191.486886)}
{pt3dadd(134124.000000,197028.000000,131800.000000,213.245116)}
{pt3dadd(134028.000000,197244.000000,131800.000000,230.175176)}
{pt3dadd(133884.000000,197484.000000,131825.000000,238.600064)}
{pt3dadd(133884.000000,197712.000000,131850.000000,243.238758)}
{pt3dadd(133680.000000,197952.000000,132000.000000,254.579604)}
{pt3dadd(133632.000000,198180.000000,132050.000000,257.199054)}
{pt3dadd(133512.000000,198456.000000,132100.000000,254.704338)}
{pt3dadd(133416.000000,198696.000000,132075.000000,262.194418)}
{pt3dadd(133380.000000,199020.000000,132125.000000,264.689134)}
{pt3dadd(133236.000000,199344.000000,132225.000000,270.059004)}
{pt3dadd(133116.000000,199560.000000,132325.000000,275.697364)}
{pt3dadd(133080.000000,199776.000000,132350.000000,286.449890)}
{pt3dadd(132972.000000,199992.000000,132425.000000,286.449890)}
{pt3dadd(132876.000000,200220.000000,132425.000000,294.707700)}
{pt3dadd(132732.000000,200460.000000,132475.000000,300.627984)}
{pt3dadd(132696.000000,200688.000000,132550.000000,313.697756)}
{pt3dadd(132648.000000,200940.000000,132625.000000,323.257212)}
{pt3dadd(132492.000000,201228.000000,132725.000000,335.111876)}
{pt3dadd(132324.000000,201456.000000,132725.000000,329.473516)}
{pt3dadd(132156.000000,201744.000000,132775.000000,323.553232)}
{pt3dadd(131928.000000,201972.000000,132775.000000,313.515804)}
{pt3dadd(131700.000000,202200.000000,132875.000000,310.172652)}
{pt3dadd(131484.000000,202488.000000,132900.000000,303.956348)}
{pt3dadd(131256.000000,202620.000000,132950.000000,303.956348)}
{pt3dadd(131028.000000,202740.000000,133000.000000,291.453068)}
{pt3dadd(130812.000000,202848.000000,133075.000000,282.782364)}
{pt3dadd(130596.000000,202848.000000,133250.000000,263.437620)}
{pt3dadd(130524.000000,202812.000000,133475.000000,248.046400)}
{pt3dadd(130380.000000,202920.000000,133700.000000,228.496890)}
{pt3dadd(130332.000000,203112.000000,133925.000000,230.759670)}
{pt3dadd(130320.000000,203316.000000,134175.000000,216.799374)}
{pt3dadd(130140.000000,203448.000000,134400.000000,206.512894)}
{pt3dadd(129912.000000,203532.000000,134625.000000,211.151588)}
{pt3dadd(129660.000000,203544.000000,134875.000000,225.586932)}
{pt3dadd(129408.000000,203676.000000,135050.000000,251.785144)}
{pt3dadd(129192.000000,203736.000000,135225.000000,296.073146)}
{pt3dadd(128808.000000,204036.000000,135325.000000,344.177412)}
{pt3dadd(128688.000000,204516.000000,135550.000000,379.619284)}
{pt3dadd(128640.000000,204756.000000,135625.000000,403.441582)}
{pt3dadd(128532.000000,204984.000000,135700.000000,390.371810)}
{pt3dadd(128424.000000,205248.000000,135800.000000,362.794524)}
{pt3dadd(128292.000000,205560.000000,135800.000000,332.466818)}
{pt3dadd(128196.000000,205860.000000,135875.000000,302.139112)}
{pt3dadd(128064.000000,206088.000000,135975.000000,283.430980)}
{pt3dadd(127920.000000,206328.000000,136075.000000,277.792620)}
{pt3dadd(127908.000000,206556.000000,136125.000000,272.422750)}
{pt3dadd(127884.000000,206820.000000,136300.000000,267.308584)}
{pt3dadd(127836.000000,207048.000000,136525.000000,264.689134)}
{pt3dadd(127788.000000,207276.000000,136700.000000,262.069684)}
{pt3dadd(127776.000000,207504.000000,136900.000000,254.579604)}
{pt3dadd(127764.000000,207756.000000,137075.000000,241.284086)}
{pt3dadd(127896.000000,207960.000000,137225.000000,216.589812)}
{pt3dadd(127812.000000,208200.000000,137375.000000,189.400822)}
{pt3dadd(127824.000000,208476.000000,137475.000000,337.011832)}
{pt3dadd(127860.000000,208740.000000,137550.000000,417.333333)}
{pt3dadd(127776.000000,208776.000000,137775.000000,1000.000000)}

{create adhoc6}
{access adhoc6}
{connect adhoc6(1), adhoc4(0)}
{nseg = 1}
{strdef color color = "White"}
{pt3dclear()}
{pt3dadd(202524.000000,153984.000000,81175.000000,887.038600)}
{pt3dadd(202524.000000,152556.000000,81350.000000,820.535370)}
{pt3dadd(202752.000000,152196.000000,81675.000000,738.478088)}
{pt3dadd(202980.000000,151752.000000,81850.000000,659.857624)}
{pt3dadd(202944.000000,151056.000000,82000.000000,572.170410)}
{pt3dadd(203040.000000,150528.000000,82225.000000,503.619038)}
{pt3dadd(203112.000000,150108.000000,82225.000000,444.401796)}
{pt3dadd(202992.000000,149628.000000,82325.000000,401.727676)}
{pt3dadd(202980.000000,149124.000000,82225.000000,417.299014)}
{pt3dadd(202920.000000,148728.000000,82150.000000,456.103018)}
{pt3dadd(202728.000000,148236.000000,82125.000000,498.777138)}
{pt3dadd(202632.000000,147720.000000,81900.000000,525.997134)}
{pt3dadd(202512.000000,147228.000000,81775.000000,547.381990)}
{pt3dadd(202716.000000,146640.000000,81900.000000,518.359542)}
{pt3dadd(202512.000000,146148.000000,81875.000000,475.685422)}
{pt3dadd(202344.000000,145644.000000,81550.000000,440.945048)}
{pt3dadd(202440.000000,145284.000000,81600.000000,432.198094)}
{pt3dadd(202212.000000,144864.000000,81575.000000,427.493938)}
{pt3dadd(202248.000000,144408.000000,81425.000000,409.020896)}
{pt3dadd(202272.000000,144060.000000,81475.000000,398.481600)}
{pt3dadd(202224.000000,143556.000000,81450.000000,380.008558)}
{pt3dadd(202128.000000,143124.000000,81425.000000,368.388984)}
{pt3dadd(202104.000000,142632.000000,81275.000000,383.218836)}
{pt3dadd(201852.000000,142116.000000,81150.000000,420.082344)}
{pt3dadd(201612.000000,141624.000000,81100.000000,467.577834)}
{pt3dadd(201564.000000,141264.000000,81075.000000,515.073324)}
{pt3dadd(201456.000000,140760.000000,81000.000000,550.269704)}
{pt3dadd(201492.000000,140184.000000,81000.000000,561.433272)}
{pt3dadd(201372.000000,139716.000000,81025.000000,561.433272)}
{pt3dadd(201300.000000,139212.000000,80850.000000,567.151198)}
{pt3dadd(201096.000000,138732.000000,80875.000000,572.869124)}
{pt3dadd(201000.000000,138168.000000,80800.000000,567.682784)}
{pt3dadd(200796.000000,137628.000000,80650.000000,556.519216)}
{pt3dadd(200544.000000,137280.000000,80550.000000,567.151198)}
{pt3dadd(200616.000000,136872.000000,80600.000000,567.151198)}
{pt3dadd(200316.000000,136344.000000,80375.000000,561.433272)}
{pt3dadd(200304.000000,135924.000000,80400.000000,577.783180)}
{pt3dadd(200076.000000,135384.000000,80250.000000,588.946748)}
{pt3dadd(199932.000000,135060.000000,80250.000000,583.501106)}
{pt3dadd(199920.000000,134616.000000,80150.000000,572.337538)}
{pt3dadd(199716.000000,134232.000000,80025.000000,584.059290)}
{pt3dadd(199668.000000,133896.000000,79975.000000,590.063116)}
{pt3dadd(199608.000000,133500.000000,79800.000000,584.345190)}
{pt3dadd(199428.000000,132984.000000,79700.000000,569.515338)}
{pt3dadd(199404.000000,132528.000000,79600.000000,569.515338)}
{pt3dadd(199224.000000,132096.000000,79600.000000,552.347944)}
{pt3dadd(199092.000000,131676.000000,79400.000000,535.180550)}
{pt3dadd(199056.000000,131256.000000,79325.000000,540.898476)}
{pt3dadd(198936.000000,130860.000000,79375.000000,566.891896)}
{pt3dadd(198900.000000,130500.000000,79250.000000,578.055464)}
{pt3dadd(198732.000000,129996.000000,79150.000000,615.096284)}
{pt3dadd(198552.000000,129600.000000,79025.000000,638.567692)}
{pt3dadd(198408.000000,129180.000000,79000.000000,638.567692)}
{pt3dadd(198420.000000,128748.000000,78850.000000,612.574272)}
{pt3dadd(198264.000000,128340.000000,78775.000000,577.833898)}
{pt3dadd(198060.000000,127872.000000,78600.000000,517.216272)}
{pt3dadd(197844.000000,127584.000000,78450.000000,474.434866)}
{pt3dadd(197628.000000,127176.000000,78225.000000,448.441446)}
{pt3dadd(197532.000000,126828.000000,78050.000000,463.271298)}
{pt3dadd(197484.000000,126408.000000,77850.000000,472.018252)}
{pt3dadd(197400.000000,126048.000000,77600.000000,480.765206)}
{pt3dadd(197208.000000,125700.000000,77225.000000,480.765206)}
{pt3dadd(197124.000000,125292.000000,77000.000000,476.285060)}
{pt3dadd(197028.000000,124908.000000,76675.000000,481.730702)}
{pt3dadd(196908.000000,124584.000000,76325.000000,502.006196)}
{pt3dadd(196800.000000,124236.000000,75850.000000,527.999616)}
{pt3dadd(196680.000000,123876.000000,75600.000000,577.400250)}
{pt3dadd(196476.000000,123552.000000,75275.000000,641.048748)}
{pt3dadd(196296.000000,123252.000000,75050.000000,659.074514)}
{pt3dadd(195912.000000,122844.000000,74925.000000,670.796266)}
{pt3dadd(195684.000000,122340.000000,74650.000000,659.632698)}
{pt3dadd(195396.000000,121860.000000,74300.000000,629.542062)}
{pt3dadd(195120.000000,121416.000000,73675.000000,575.077866)}
{pt3dadd(194712.000000,121128.000000,73375.000000,541.480762)}
{pt3dadd(194568.000000,120588.000000,73000.000000,524.313368)}
{pt3dadd(194268.000000,120696.000000,72750.000000,524.313368)}
{pt3dadd(194136.000000,120456.000000,72375.000000,535.476936)}
{pt3dadd(193944.000000,120144.000000,72075.000000,582.643452)}
{pt3dadd(193716.000000,119916.000000,71800.000000,622.859784)}
{pt3dadd(193620.000000,119616.000000,71525.000000,659.900604)}
{pt3dadd(193512.000000,119448.000000,71275.000000,683.372012)}
{pt3dadd(193464.000000,119316.000000,70975.000000,683.372012)}
{pt3dadd(193332.000000,119004.000000,70675.000000,657.494760)}
{pt3dadd(193320.000000,118752.000000,70375.000000,638.567692)}
{pt3dadd(193116.000000,118488.000000,69950.000000,624.998280)}
{pt3dadd(192792.000000,118188.000000,69650.000000,620.895667)}
{pt3dadd(192444.000000,117840.000000,69325.000000,661.921800)}

{create adhoc7}
{access adhoc7}
{connect adhoc7(1), adhoc6(0)}
{nseg = 1}
{strdef color color = "White"}
{pt3dclear()}
{pt3dadd(192444.000000,117840.000000,69325.000000,661.921800)}
{pt3dadd(192108.000000,118008.000000,68675.000000,640.908420)}
{pt3dadd(191892.000000,117996.000000,68050.000000,637.005932)}
{pt3dadd(191712.000000,118068.000000,67675.000000,613.534524)}
{pt3dadd(191544.000000,118140.000000,67300.000000,591.180790)}
{pt3dadd(191472.000000,118308.000000,66925.000000,579.459038)}
{pt3dadd(191448.000000,118476.000000,66675.000000,561.433272)}
{pt3dadd(191352.000000,118596.000000,66400.000000,545.083364)}
{pt3dadd(191268.000000,118740.000000,66150.000000,556.246932)}
{pt3dadd(190980.000000,119208.000000,65900.000000,556.246932)}
{pt3dadd(190836.000000,119448.000000,65625.000000,545.614950)}
{pt3dadd(190872.000000,119604.000000,65375.000000,534.982968)}
{pt3dadd(190824.000000,119796.000000,65150.000000,530.043612)}
{pt3dadd(190788.000000,120036.000000,64900.000000,518.880044)}
{pt3dadd(190956.000000,120168.000000,64625.000000,529.512026)}
{pt3dadd(190956.000000,120324.000000,64375.000000,540.144008)}
{pt3dadd(190848.000000,120456.000000,64000.000000,550.775990)}
{pt3dadd(190800.000000,120564.000000,63675.000000,533.261250)}
{pt3dadd(190944.000000,120648.000000,63275.000000,509.684444)}
{pt3dadd(190968.000000,120816.000000,62800.000000,468.278760)}
{pt3dadd(190920.000000,121044.000000,62500.000000,426.680730)}

{create adhoc8}
{access adhoc8}
{connect adhoc8(1), adhoc7(0)}
{nseg = 1}
{strdef color color = "White"}
{pt3dclear()}
{pt3dadd(190920.000000,121044.000000,62500.000000,426.680730)}
{pt3dadd(190476.000000,120924.000000,62150.000000,394.187320)}
{pt3dadd(189924.000000,120708.000000,61800.000000,465.501864)}
{pt3dadd(189252.000000,120768.000000,61450.000000,500.242238)}
{pt3dadd(188724.000000,120792.000000,61175.000000,586.856836)}
{pt3dadd(188628.000000,120816.000000,60900.000000,608.146100)}
{pt3dadd(188280.000000,120924.000000,60550.000000,619.309668)}
{pt3dadd(187632.000000,121032.000000,60300.000000,625.313494)}
{pt3dadd(187344.000000,121032.000000,60025.000000,610.388977)}
{pt3dadd(187056.000000,121080.000000,59875.000000,630.401730)}

{create adhoc9}
{access adhoc9}
{connect adhoc9(1), adhoc8(0)}
{nseg = 1}
{strdef color color = "White"}
{pt3dclear()}
{pt3dadd(187056.000000,121080.000000,59875.000000,630.401730)}
{pt3dadd(186780.000000,121284.000000,59575.000000,804.570100)}

{create adhoc10}
{access adhoc10}
{connect adhoc10(1), adhoc9(0)}
{nseg = 1}
{strdef color color = "White"}
{pt3dclear()}
{pt3dadd(186780.000000,121284.000000,59575.000000,804.570100)}
{pt3dadd(186432.000000,121464.000000,59450.000000,670.352220)}
{pt3dadd(186288.000000,121944.000000,59150.000000,581.417240)}
{pt3dadd(186144.000000,122232.000000,59025.000000,514.586320)}
{pt3dadd(185892.000000,122472.000000,58925.000000,467.538106)}
{pt3dadd(185820.000000,122760.000000,58800.000000,452.708254)}
{pt3dadd(185856.000000,122988.000000,58775.000000,452.708254)}
{pt3dadd(185808.000000,123276.000000,58825.000000,448.441446)}
{pt3dadd(185712.000000,123504.000000,58725.000000,418.037490)}
{pt3dadd(185688.000000,123792.000000,58525.000000,399.564448)}
{pt3dadd(185580.000000,124032.000000,58400.000000,395.084302)}
{pt3dadd(185364.000000,124320.000000,58325.000000,399.564448)}
{pt3dadd(185076.000000,124584.000000,58175.000000,413.015558)}
{pt3dadd(184932.000000,124860.000000,58250.000000,458.249366)}
{pt3dadd(184908.000000,125148.000000,58200.000000,480.989216)}
{pt3dadd(184776.000000,125472.000000,58275.000000,458.249366)}
{pt3dadd(184488.000000,125712.000000,58300.000000,441.568666)}
{pt3dadd(184380.000000,125940.000000,58500.000000,409.644514)}
{pt3dadd(184092.000000,126204.000000,58575.000000,374.448134)}
{pt3dadd(183900.000000,126444.000000,58675.000000,370.181326)}
{pt3dadd(183696.000000,126660.000000,58725.000000,397.401322)}
{pt3dadd(183408.000000,126912.000000,58825.000000,390.205178)}
{pt3dadd(183144.000000,127128.000000,58775.000000,381.100934)}
{pt3dadd(182868.000000,127368.000000,58650.000000,374.247466)}
{pt3dadd(182628.000000,127620.000000,58400.000000,349.558120)}
{pt3dadd(182400.000000,127632.000000,58500.000000,308.781273)}
{pt3dadd(182112.000000,127824.000000,58575.000000,303.234000)}

{create adhoc11}
{access adhoc11}
{connect adhoc11(1), adhoc10(0)}
{nseg = 1}
{strdef color color = "White"}
{pt3dclear()}
{pt3dadd(182112.000000,127824.000000,58575.000000,303.234000)}
{pt3dadd(181908.000000,127956.000000,58850.000000,298.420767)}
{pt3dadd(181944.000000,128112.000000,59125.000000,281.579260)}
{pt3dadd(181848.000000,128268.000000,59375.000000,256.391390)}
{pt3dadd(181704.000000,128520.000000,59625.000000,241.000170)}
{pt3dadd(181560.000000,128748.000000,59775.000000,228.496890)}
{pt3dadd(181392.000000,128904.000000,60025.000000,212.581922)}
{pt3dadd(181128.000000,129048.000000,60250.000000,208.164114)}
{pt3dadd(180972.000000,129204.000000,60525.000000,233.351984)}
{pt3dadd(180732.000000,129444.000000,60675.000000,240.485394)}
{pt3dadd(180600.000000,129648.000000,60900.000000,250.238254)}
{pt3dadd(180504.000000,129828.000000,61200.000000,258.663142)}
{pt3dadd(180396.000000,129792.000000,61425.000000,265.456864)}
{pt3dadd(180444.000000,129804.000000,61650.000000,250.065644)}
{pt3dadd(180444.000000,129852.000000,61950.000000,245.195014)}
{pt3dadd(180408.000000,129900.000000,62175.000000,235.442154)}
{pt3dadd(180480.000000,129972.000000,62425.000000,237.818068)}
{pt3dadd(180504.000000,130008.000000,62675.000000,227.017266)}
{pt3dadd(180648.000000,129936.000000,62950.000000,229.280046)}
{pt3dadd(180780.000000,129888.000000,63175.000000,227.017266)}
{pt3dadd(180852.000000,129900.000000,63425.000000,222.809830)}
{pt3dadd(180936.000000,129984.000000,63675.000000,218.171136)}
{pt3dadd(181044.000000,130092.000000,63925.000000,218.171136)}
{pt3dadd(181032.000000,130212.000000,64150.000000,209.746248)}
{pt3dadd(181140.000000,130356.000000,64375.000000,212.009028)}
{pt3dadd(181140.000000,130428.000000,64625.000000,216.216464)}
{pt3dadd(181176.000000,130524.000000,64875.000000,220.855158)}
{pt3dadd(181224.000000,130596.000000,65075.000000,234.150676)}
{pt3dadd(181404.000000,130680.000000,65300.000000,255.704004)}
{pt3dadd(181476.000000,130824.000000,65525.000000,249.233788)}
{pt3dadd(181560.000000,130980.000000,65725.000000,237.748618)}
{pt3dadd(181656.000000,131100.000000,65975.000000,228.902488)}
{pt3dadd(182112.000000,130956.000000,66050.000000,210.283908)}
{pt3dadd(182280.000000,130968.000000,66300.000000,185.096038)}
{pt3dadd(182292.000000,131124.000000,66525.000000,183.141366)}
{pt3dadd(182328.000000,131352.000000,66750.000000,186.602836)}
{pt3dadd(182520.000000,131592.000000,66975.000000,177.716988)}
{pt3dadd(182664.000000,131808.000000,67125.000000,183.040050)}
{pt3dadd(182868.000000,132048.000000,67300.000000,192.836700)}
{pt3dadd(183048.000000,132288.000000,67425.000000,208.751668)}
{pt3dadd(183240.000000,132588.000000,67675.000000,238.382892)}
{pt3dadd(183432.000000,132804.000000,67850.000000,266.867396)}
{pt3dadd(183756.000000,133056.000000,68050.000000,288.420724)}
{pt3dadd(183936.000000,133212.000000,68225.000000,300.924004)}
{pt3dadd(184164.000000,133428.000000,68450.000000,306.562364)}
{pt3dadd(184272.000000,133620.000000,68675.000000,289.593534)}
{pt3dadd(184356.000000,133848.000000,68950.000000,272.047286)}
{pt3dadd(184428.000000,134040.000000,69175.000000,252.448630)}
{pt3dadd(184500.000000,134232.000000,69425.000000,231.921650)}
{pt3dadd(184620.000000,134412.000000,69650.000000,214.375402)}
{pt3dadd(184728.000000,134556.000000,69900.000000,207.581680)}
{pt3dadd(184920.000000,134784.000000,70125.000000,209.736708)}
{pt3dadd(185148.000000,134916.000000,70200.000000,226.447424)}
{pt3dadd(185364.000000,134952.000000,70500.000000,239.109818)}
{pt3dadd(185616.000000,135168.000000,70725.000000,239.109818)}
{pt3dadd(185844.000000,135384.000000,70950.000000,245.903540)}
{pt3dadd(186072.000000,135588.000000,71125.000000,253.036950)}
{pt3dadd(186228.000000,135828.000000,71450.000000,250.286530)}
{pt3dadd(186360.000000,136068.000000,71575.000000,247.910616)}
{pt3dadd(186564.000000,136308.000000,71800.000000,262.568924)}
{pt3dadd(186732.000000,136500.000000,72050.000000,270.433510)}
{pt3dadd(187020.000000,136620.000000,72275.000000,281.723664)}
{pt3dadd(187212.000000,136716.000000,72525.000000,281.723664)}
{pt3dadd(187356.000000,136896.000000,72775.000000,294.852104)}
{pt3dadd(187476.000000,137016.000000,73000.000000,303.956348)}
{pt3dadd(187572.000000,137148.000000,73200.000000,306.844288)}
{pt3dadd(187632.000000,137352.000000,73450.000000,303.811944)}
{pt3dadd(187788.000000,137532.000000,73700.000000,298.697778)}
{pt3dadd(187908.000000,137664.000000,73950.000000,279.099122)}
{pt3dadd(187860.000000,137892.000000,74175.000000,249.467898)}
{pt3dadd(187896.000000,137976.000000,74450.000000,231.921650)}
{pt3dadd(187932.000000,137988.000000,74675.000000,221.169124)}
{pt3dadd(188136.000000,138156.000000,74900.000000,226.283290)}
{pt3dadd(188232.000000,138192.000000,75125.000000,237.624136)}
{pt3dadd(188220.000000,138204.000000,75375.000000,262.152840)}
{pt3dadd(188160.000000,138276.000000,75625.000000,261.944950)}

{create adhoc12}
{access adhoc12}
{connect adhoc12(1), adhoc11(0)}
{nseg = 1}
{strdef color color = "White"}
{pt3dclear()}
{pt3dadd(188160.000000,138276.000000,75625.000000,261.944950)}
{pt3dadd(188496.000000,138492.000000,75825.000000,245.898073)}
{pt3dadd(188628.000000,138708.000000,75950.000000,213.471550)}
{pt3dadd(188640.000000,139068.000000,76075.000000,213.471550)}
{pt3dadd(188652.000000,139116.000000,76275.000000,215.966266)}
{pt3dadd(188724.000000,139368.000000,76525.000000,215.966266)}
{pt3dadd(188832.000000,139644.000000,76700.000000,236.192960)}
{pt3dadd(188976.000000,139860.000000,76800.000000,257.430990)}
{pt3dadd(189168.000000,140004.000000,77000.000000,254.936274)}
{pt3dadd(189288.000000,140232.000000,77100.000000,250.065644)}
{pt3dadd(189432.000000,140436.000000,77175.000000,240.268994)}
{pt3dadd(189528.000000,140604.000000,77375.000000,220.042300)}
{pt3dadd(189624.000000,140820.000000,77525.000000,222.792720)}
{pt3dadd(189756.000000,141084.000000,77625.000000,236.577590)}
{pt3dadd(189840.000000,141312.000000,77800.000000,249.706030)}
{pt3dadd(189900.000000,141564.000000,77900.000000,261.765460)}
{pt3dadd(189960.000000,141816.000000,77875.000000,263.373574)}
{pt3dadd(190032.000000,142080.000000,77975.000000,242.846594)}
{pt3dadd(190104.000000,142308.000000,78025.000000,222.268002)}
{pt3dadd(190068.000000,142644.000000,77900.000000,202.669346)}
{pt3dadd(189840.000000,142956.000000,77900.000000,192.382866)}
{pt3dadd(189780.000000,143196.000000,77825.000000,206.130816)}
{pt3dadd(189720.000000,143448.000000,77775.000000,214.154516)}
{pt3dadd(189696.000000,143676.000000,77775.000000,210.147436)}
{pt3dadd(189780.000000,143916.000000,77850.000000,204.558222)}
{pt3dadd(189828.000000,144144.000000,77925.000000,201.096752)}
{pt3dadd(189888.000000,144408.000000,77975.000000,187.348802)}
{pt3dadd(189996.000000,144720.000000,78025.000000,189.611582)}
{pt3dadd(190056.000000,145044.000000,78100.000000,198.036470)}
{pt3dadd(190116.000000,145416.000000,78150.000000,214.966530)}
{pt3dadd(190224.000000,145692.000000,78025.000000,226.451700)}
{pt3dadd(190236.000000,145908.000000,78150.000000,235.781842)}
{pt3dadd(190320.000000,146136.000000,78175.000000,227.356954)}
{pt3dadd(190404.000000,146400.000000,78200.000000,218.932066)}
{pt3dadd(190428.000000,146712.000000,78200.000000,216.437350)}
{pt3dadd(190500.000000,147060.000000,78175.000000,228.940630)}
{pt3dadd(190584.000000,147372.000000,78175.000000,238.229068)}
{pt3dadd(190632.000000,147684.000000,78175.000000,254.144036)}
{pt3dadd(190692.000000,148044.000000,78150.000000,275.697364)}
{pt3dadd(190692.000000,148368.000000,78150.000000,283.561950)}
{pt3dadd(190644.000000,148728.000000,78150.000000,278.192080)}
{pt3dadd(190560.000000,148944.000000,78075.000000,275.697364)}
{pt3dadd(190440.000000,149232.000000,78225.000000,281.335724)}
{pt3dadd(190452.000000,149460.000000,78275.000000,278.447784)}
{pt3dadd(190464.000000,149688.000000,78350.000000,287.552028)}
{pt3dadd(190536.000000,149916.000000,78400.000000,312.565438)}
{pt3dadd(190632.000000,150144.000000,78525.000000,329.534268)}
{pt3dadd(190740.000000,150408.000000,78625.000000,326.646328)}
{pt3dadd(190884.000000,150636.000000,78725.000000,326.646328)}
{pt3dadd(191040.000000,150984.000000,78800.000000,314.791664)}
{pt3dadd(191184.000000,151224.000000,78925.000000,284.907624)}
{pt3dadd(191232.000000,151452.000000,79050.000000,273.052960)}
{pt3dadd(191292.000000,151668.000000,79250.000000,260.549680)}
{pt3dadd(191280.000000,151920.000000,79400.000000,252.685094)}
{pt3dadd(191352.000000,152292.000000,79625.000000,245.195014)}
{pt3dadd(191244.000000,152616.000000,79900.000000,226.848804)}
{pt3dadd(191184.000000,152904.000000,80075.000000,207.299294)}
{pt3dadd(191304.000000,153144.000000,80200.000000,201.137186)}
{pt3dadd(191280.000000,153372.000000,80325.000000,190.336384)}
{pt3dadd(191292.000000,153624.000000,80400.000000,181.911496)}
{pt3dadd(191376.000000,153840.000000,80475.000000,191.832818)}
{pt3dadd(191484.000000,154116.000000,80600.000000,191.832818)}
{pt3dadd(191568.000000,154356.000000,80725.000000,191.832818)}
{pt3dadd(191532.000000,154584.000000,80850.000000,191.832818)}
{pt3dadd(191772.000000,154692.000000,80950.000000,176.739346)}
{pt3dadd(191940.000000,154908.000000,81150.000000,160.503016)}
{pt3dadd(192144.000000,155124.000000,81325.000000,162.275966)}
{pt3dadd(192264.000000,155364.000000,81550.000000,149.642494)}
{pt3dadd(192360.000000,155508.000000,81700.000000,138.332022)}
{pt3dadd(192408.000000,155796.000000,81775.000000,142.115022)}
{pt3dadd(192492.000000,156060.000000,81900.000000,143.257880)}
{pt3dadd(192600.000000,156276.000000,81950.000000,133.809000)}
{pt3dadd(192684.000000,156456.000000,82100.000000,136.521150)}
{pt3dadd(192768.000000,156720.000000,82250.000000,142.508560)}
{pt3dadd(192828.000000,156936.000000,82325.000000,151.957440)}
{pt3dadd(192828.000000,157236.000000,82450.000000,167.050912)}
{pt3dadd(192852.000000,157464.000000,82625.000000,174.726842)}
{pt3dadd(192900.000000,157716.000000,82800.000000,168.411834)}
{pt3dadd(192936.000000,157944.000000,82850.000000,166.803720)}
{pt3dadd(192972.000000,158160.000000,83050.000000,160.202600)}
{pt3dadd(193056.000000,158352.000000,83275.000000,160.202600)}
{pt3dadd(193200.000000,158424.000000,83575.000000,169.999250)}
{pt3dadd(193416.000000,158304.000000,83850.000000,192.397688)}
{pt3dadd(193548.000000,158244.000000,84075.000000,199.328864)}
{pt3dadd(193740.000000,158232.000000,84325.000000,205.929984)}
{pt3dadd(193860.000000,158304.000000,84550.000000,207.884656)}
{pt3dadd(193980.000000,158520.000000,84750.000000,199.860956)}
{pt3dadd(194040.000000,158628.000000,84975.000000,183.777526)}
{pt3dadd(194100.000000,158724.000000,85225.000000,168.684054)}
{pt3dadd(194052.000000,158700.000000,85500.000000,157.912174)}
{pt3dadd(194088.000000,158880.000000,85675.000000,147.494790)}
{pt3dadd(194052.000000,158964.000000,85900.000000,134.262910)}
{pt3dadd(194028.000000,158928.000000,86125.000000,130.290760)}
{pt3dadd(194028.000000,158952.000000,86425.000000,127.022863)}
{pt3dadd(194100.000000,159036.000000,86700.000000,129.735013)}
{pt3dadd(194064.000000,159108.000000,86975.000000,124.304253)}
{pt3dadd(194184.000000,159312.000000,87200.000000,132.466549)}
{pt3dadd(194304.000000,159468.000000,87350.000000,146.360021)}
{pt3dadd(194388.000000,159552.000000,87550.000000,162.859798)}
{pt3dadd(194400.000000,159696.000000,87775.000000,169.146578)}
{pt3dadd(194436.000000,159852.000000,88025.000000,179.405508)}
{pt3dadd(194508.000000,159948.000000,88300.000000,179.405508)}
{pt3dadd(194460.000000,160020.000000,88525.000000,168.095036)}
{pt3dadd(194412.000000,160080.000000,88825.000000,163.025452)}
{pt3dadd(194532.000000,160104.000000,89075.000000,166.659994)}
{pt3dadd(194664.000000,160212.000000,89300.000000,156.401064)}
{pt3dadd(194796.000000,160344.000000,89500.000000,152.021768)}
{pt3dadd(194880.000000,160500.000000,89725.000000,153.410918)}
{pt3dadd(195036.000000,160692.000000,89925.000000,150.420772)}
{pt3dadd(195036.000000,160824.000000,90125.000000,140.499450)}
{pt3dadd(195060.000000,160956.000000,90350.000000,138.156592)}
{pt3dadd(195060.000000,161100.000000,90600.000000,142.535888)}
{pt3dadd(195072.000000,161208.000000,90825.000000,147.134148)}
{pt3dadd(195084.000000,161340.000000,91075.000000,143.161998)}
{pt3dadd(195108.000000,161496.000000,91275.000000,136.846990)}
{pt3dadd(195192.000000,161700.000000,91475.000000,134.721951)}
{pt3dadd(195276.000000,161868.000000,91675.000000,125.416797)}
{pt3dadd(195348.000000,162060.000000,91750.000000,120.818537)}
{pt3dadd(195336.000000,162228.000000,91875.000000,124.790687)}
{pt3dadd(195384.000000,162432.000000,91950.000000,124.790687)}
{pt3dadd(195300.000000,162588.000000,92100.000000,134.689344)}
{pt3dadd(195264.000000,162780.000000,92200.000000,159.350562)}
{pt3dadd(195180.000000,162972.000000,92350.000000,190.825212)}
{pt3dadd(195024.000000,163188.000000,92625.000000,214.042052)}
{pt3dadd(194988.000000,163488.000000,92725.000000,223.347206)}
{pt3dadd(194904.000000,163716.000000,92950.000000,221.888596)}
{pt3dadd(194832.000000,163968.000000,93025.000000,198.370236)}
{pt3dadd(194652.000000,164148.000000,93175.000000,142.224077)}
{pt3dadd(194472.000000,164232.000000,93300.000000,120.000000)}

{create adhoc13}
{access adhoc13}
{connect adhoc13(1), adhoc11(0)}
{nseg = 1}
{strdef color color = "White"}
{pt3dclear()}
{pt3dadd(188160.000000,138276.000000,75625.000000,261.944950)}
{pt3dadd(188160.000000,137880.000000,75850.000000,168.843333)}
{pt3dadd(188184.000000,137652.000000,76000.000000,167.395690)}
{pt3dadd(188220.000000,137424.000000,76075.000000,142.789700)}
{pt3dadd(188316.000000,137208.000000,76300.000000,155.207136)}
{pt3dadd(188364.000000,136980.000000,76425.000000,152.494986)}
{pt3dadd(188484.000000,136824.000000,76575.000000,155.634636)}
{pt3dadd(188580.000000,136620.000000,76700.000000,147.958706)}
{pt3dadd(188688.000000,136476.000000,76825.000000,152.338002)}
{pt3dadd(188760.000000,136260.000000,76925.000000,153.946116)}
{pt3dadd(188832.000000,136044.000000,77000.000000,153.946116)}
{pt3dadd(188796.000000,135828.000000,77125.000000,140.907809)}
{pt3dadd(188724.000000,135600.000000,77225.000000,133.856912)}
{pt3dadd(188796.000000,135420.000000,77300.000000,125.694616)}
{pt3dadd(188820.000000,135276.000000,77400.000000,122.554966)}
{pt3dadd(188940.000000,135156.000000,77600.000000,135.188438)}
{pt3dadd(189036.000000,135012.000000,77725.000000,153.549807)}
{pt3dadd(189108.000000,134796.000000,77850.000000,171.911176)}
{pt3dadd(189072.000000,134664.000000,78050.000000,181.681586)}
{pt3dadd(189036.000000,134376.000000,78175.000000,178.833826)}
{pt3dadd(189000.000000,134124.000000,78250.000000,180.788498)}
{pt3dadd(189000.000000,133896.000000,78350.000000,175.465436)}
{pt3dadd(189012.000000,133812.000000,78600.000000,173.603844)}
{pt3dadd(188988.000000,133620.000000,78825.000000,173.603844)}
{pt3dadd(189060.000000,133404.000000,78925.000000,186.868988)}
{pt3dadd(189012.000000,133308.000000,79150.000000,191.076424)}
{pt3dadd(189072.000000,133200.000000,79375.000000,212.314454)}
{pt3dadd(189084.000000,133020.000000,79600.000000,214.176046)}
{pt3dadd(189180.000000,132876.000000,79825.000000,214.176046)}
{pt3dadd(189300.000000,132696.000000,80125.000000,205.290198)}
{pt3dadd(189492.000000,132528.000000,80250.000000,193.805028)}
{pt3dadd(189624.000000,132408.000000,80350.000000,163.996588)}
{pt3dadd(189708.000000,132264.000000,80575.000000,152.686116)}
{pt3dadd(189816.000000,132036.000000,80750.000000,148.087856)}
{pt3dadd(189876.000000,131856.000000,80850.000000,143.708560)}
{pt3dadd(190008.000000,131712.000000,80950.000000,140.568910)}
{pt3dadd(190020.000000,131556.000000,81175.000000,144.541060)}
{pt3dadd(189984.000000,131388.000000,81400.000000,144.541060)}
{pt3dadd(190008.000000,131124.000000,81625.000000,141.828910)}
{pt3dadd(190020.000000,130848.000000,81700.000000,151.277790)}
{pt3dadd(189996.000000,130644.000000,81775.000000,161.695174)}
{pt3dadd(189936.000000,130380.000000,81900.000000,175.623576)}
{pt3dadd(189960.000000,130104.000000,81925.000000,190.941128)}
{pt3dadd(189924.000000,129840.000000,81950.000000,207.581680)}
{pt3dadd(189948.000000,129624.000000,81975.000000,215.605380)}
{pt3dadd(189888.000000,129348.000000,81950.000000,217.657788)}
{pt3dadd(189840.000000,129132.000000,81975.000000,211.789116)}
{pt3dadd(189768.000000,128904.000000,81975.000000,199.319324)}
{pt3dadd(189780.000000,128700.000000,81975.000000,185.390922)}
{pt3dadd(189804.000000,128484.000000,82050.000000,162.992484)}
{pt3dadd(189780.000000,128280.000000,82175.000000,145.091932)}
{pt3dadd(189732.000000,128052.000000,82300.000000,140.022348)}
{pt3dadd(189744.000000,127836.000000,82500.000000,137.174588)}
{pt3dadd(189648.000000,127632.000000,82625.000000,134.462438)}
{pt3dadd(189540.000000,127428.000000,82775.000000,136.805296)}
{pt3dadd(189468.000000,127248.000000,82975.000000,132.405000)}
{pt3dadd(189396.000000,127068.000000,83175.000000,126.000000)}

{create adhoc14}
{access adhoc14}
{connect adhoc14(1), adhoc13(0)}
{nseg = 1}
{strdef color color = "White"}
{pt3dclear()}
{pt3dadd(189396.000000,127068.000000,83175.000000,126.000000)}
{pt3dadd(189240.000000,126876.000000,83400.000000,130.620250)}
{pt3dadd(189144.000000,126660.000000,83475.000000,130.401442)}
{pt3dadd(189060.000000,126480.000000,83600.000000,124.946302)}
{pt3dadd(189108.000000,126264.000000,83750.000000,122.715010)}
{pt3dadd(189072.000000,125988.000000,83850.000000,114.274963)}
{pt3dadd(188964.000000,125832.000000,83800.000000,112.885813)}
{pt3dadd(188880.000000,125640.000000,83800.000000,112.885813)}
{pt3dadd(188820.000000,125436.000000,83825.000000,118.340953)}
{pt3dadd(188712.000000,125232.000000,83825.000000,118.340953)}
{pt3dadd(188688.000000,125028.000000,83950.000000,124.068850)}
{pt3dadd(188592.000000,124920.000000,84000.000000,125.458000)}
{pt3dadd(188484.000000,124728.000000,84075.000000,133.231618)}
{pt3dadd(188412.000000,124524.000000,84200.000000,135.814618)}
{pt3dadd(188352.000000,124356.000000,84450.000000,134.778013)}
{pt3dadd(188340.000000,124128.000000,84550.000000,132.318013)}
{pt3dadd(188292.000000,123900.000000,84675.000000,132.318013)}
{pt3dadd(188196.000000,123648.000000,84750.000000,133.849549)}
{pt3dadd(188208.000000,123420.000000,84750.000000,139.836959)}
{pt3dadd(188220.000000,123192.000000,84775.000000,148.277006)}
{pt3dadd(188160.000000,122940.000000,84825.000000,152.060006)}
{pt3dadd(188172.000000,122772.000000,85000.000000,149.347856)}
{pt3dadd(188172.000000,122508.000000,85100.000000,144.968560)}
{pt3dadd(188064.000000,122304.000000,85175.000000,134.055292)}
{pt3dadd(188016.000000,122172.000000,85250.000000,142.115022)}
{pt3dadd(187908.000000,121956.000000,85275.000000,155.380166)}
{pt3dadd(187860.000000,121728.000000,85275.000000,161.082462)}
{pt3dadd(187656.000000,121536.000000,85375.000000,172.392934)}
{pt3dadd(187764.000000,121296.000000,85350.000000,188.629264)}
{pt3dadd(187728.000000,121080.000000,85425.000000,185.167794)}
{pt3dadd(187692.000000,120864.000000,85450.000000,178.198370)}
{pt3dadd(187644.000000,120636.000000,85450.000000,173.328026)}
{pt3dadd(187188.000000,120204.000000,85625.000000,154.159676)}
{pt3dadd(187116.000000,120144.000000,85650.000000,140.496268)}
{pt3dadd(187008.000000,119988.000000,85650.000000,128.693305)}
{pt3dadd(186912.000000,119880.000000,85700.000000,110.494087)}
{pt3dadd(186828.000000,119748.000000,85775.000000,101.274808)}
{pt3dadd(186696.000000,119568.000000,85825.000000,99.422359)}
{pt3dadd(186600.000000,119436.000000,85800.000000,91.204365)}
{pt3dadd(186480.000000,119244.000000,85825.000000,88.116074)}
{pt3dadd(186384.000000,119124.000000,85775.000000,96.455682)}
{pt3dadd(186300.000000,118968.000000,85725.000000,99.304387)}
{pt3dadd(186180.000000,118812.000000,85675.000000,92.881519)}
{pt3dadd(186072.000000,118620.000000,85650.000000,95.748715)}
{pt3dadd(186012.000000,118560.000000,85650.000000,94.942232)}
{pt3dadd(185868.000000,118068.000000,85575.000000,91.644500)}
{pt3dadd(185652.000000,117660.000000,85450.000000,90.648244)}
{pt3dadd(185196.000000,117300.000000,85350.000000,99.139993)}
{pt3dadd(185124.000000,117156.000000,85350.000000,92.546834)}
{pt3dadd(185064.000000,117144.000000,85350.000000,94.399283)}
{pt3dadd(184980.000000,117024.000000,85325.000000,89.870352)}
{pt3dadd(184836.000000,116916.000000,85225.000000,83.297099)}
{pt3dadd(184680.000000,116892.000000,85075.000000,81.481204)}
{pt3dadd(184464.000000,116724.000000,84925.000000,90.132489)}
{pt3dadd(184272.000000,116628.000000,84750.000000,91.128745)}
{pt3dadd(184068.000000,116640.000000,84600.000000,95.819527)}
{pt3dadd(183744.000000,116592.000000,84500.000000,106.686768)}
{pt3dadd(183288.000000,116580.000000,84425.000000,102.521520)}
{pt3dadd(182868.000000,116556.000000,84300.000000,98.456801)}
{pt3dadd(182640.000000,116616.000000,84100.000000,103.426835)}
{pt3dadd(182556.000000,116592.000000,83925.000000,104.042324)}
{pt3dadd(182400.000000,116532.000000,83725.000000,109.438005)}
{pt3dadd(182316.000000,116424.000000,83525.000000,108.493590)}

{create adhoc15}
{access adhoc15}
{connect adhoc15(1), adhoc14(0)}
{nseg = 1}
{strdef color color = "White"}
{pt3dclear()}
{pt3dadd(182316.000000,116424.000000,83525.000000,108.493590)}
{pt3dadd(182304.000000,116304.000000,83525.000000,86.726130)}

{create adhoc16}
{access adhoc16}
{connect adhoc16(1), adhoc14(0)}
{nseg = 1}
{strdef color color = "White"}
{pt3dclear()}
{pt3dadd(182316.000000,116424.000000,83525.000000,108.493590)}
{pt3dadd(181932.000000,116316.000000,82550.000000,94.818230)}
{pt3dadd(181872.000000,116220.000000,82475.000000,86.627802)}
{pt3dadd(181572.000000,116280.000000,82175.000000,77.772994)}
{pt3dadd(181428.000000,116148.000000,82100.000000,74.761544)}
{pt3dadd(181332.000000,116100.000000,81925.000000,67.876447)}
{pt3dadd(181152.000000,116028.000000,81775.000000,62.592339)}
{pt3dadd(180984.000000,116016.000000,81625.000000,57.787447)}
{pt3dadd(180876.000000,115932.000000,81400.000000,55.488770)}
{pt3dadd(180780.000000,115920.000000,81350.000000,50.321829)}
{pt3dadd(180792.000000,115944.000000,81200.000000,52.726166)}

{create adhoc17}
{access adhoc17}
{connect adhoc17(1), adhoc13(0)}
{nseg = 1}
{strdef color color = "White"}
{pt3dclear()}
{pt3dadd(189396.000000,127068.000000,83175.000000,126.000000)}
{pt3dadd(189648.000000,127044.000000,83700.000000,93.061468)}
{pt3dadd(189768.000000,127032.000000,83925.000000,84.437644)}
{pt3dadd(189888.000000,127080.000000,84025.000000,78.042272)}
{pt3dadd(190032.000000,127164.000000,84250.000000,78.678658)}
{pt3dadd(190176.000000,127248.000000,84425.000000,79.574117)}
{pt3dadd(190308.000000,127404.000000,84475.000000,82.763624)}
{pt3dadd(190596.000000,127536.000000,84625.000000,78.171073)}
{pt3dadd(190752.000000,127536.000000,84875.000000,73.669590)}

{create adhoc18}
{access adhoc18}
{connect adhoc18(1), adhoc10(0)}
{nseg = 1}
{strdef color color = "White"}
{pt3dclear()}
{pt3dadd(182112.000000,127824.000000,58575.000000,303.234000)}
{pt3dadd(181572.000000,127956.000000,58325.000000,320.203720)}
{pt3dadd(181284.000000,127992.000000,58325.000000,307.584068)}
{pt3dadd(181008.000000,127920.000000,58250.000000,307.584068)}
{pt3dadd(180756.000000,128088.000000,58025.000000,304.833648)}
{pt3dadd(180384.000000,128364.000000,57875.000000,291.763876)}
{pt3dadd(180120.000000,128400.000000,57700.000000,301.516736)}
{pt3dadd(179868.000000,128472.000000,57600.000000,284.439467)}
{pt3dadd(179580.000000,128640.000000,57500.000000,275.042200)}

{create adhoc19}
{access adhoc19}
{connect adhoc19(1), adhoc18(0)}
{nseg = 1}
{strdef color color = "White"}
{pt3dclear()}
{pt3dadd(179580.000000,128640.000000,57500.000000,275.042200)}
{pt3dadd(179220.000000,128808.000000,57200.000000,328.212927)}
{pt3dadd(178944.000000,128880.000000,57150.000000,406.362580)}

{create adhoc20}
{access adhoc20}
{connect adhoc20(1), adhoc19(0)}
{nseg = 1}
{strdef color color = "White"}
{pt3dclear()}
{pt3dadd(178944.000000,128880.000000,57150.000000,406.362580)}
{pt3dadd(178620.000000,129012.000000,57250.000000,304.620147)}
{pt3dadd(178296.000000,129084.000000,57275.000000,138.915000)}

{create adhoc21}
{access adhoc21}
{connect adhoc21(1), adhoc19(0)}
{nseg = 1}
{strdef color color = "White"}
{pt3dclear()}
{pt3dadd(178944.000000,128880.000000,57150.000000,406.362580)}
{pt3dadd(178740.000000,129360.000000,56950.000000,269.341580)}
{pt3dadd(178632.000000,129588.000000,56725.000000,244.582238)}
{pt3dadd(178524.000000,129756.000000,56525.000000,215.698712)}
{pt3dadd(178452.000000,129804.000000,56300.000000,222.492434)}
{pt3dadd(178404.000000,129984.000000,56050.000000,232.778914)}
{pt3dadd(178368.000000,130092.000000,55800.000000,247.214258)}
{pt3dadd(178260.000000,130248.000000,55550.000000,236.927778)}
{pt3dadd(178296.000000,130356.000000,55300.000000,219.997718)}
{pt3dadd(178344.000000,130512.000000,55000.000000,196.563444)}
{pt3dadd(178440.000000,130800.000000,54875.000000,181.207380)}
{pt3dadd(178572.000000,131088.000000,54725.000000,163.475402)}
{pt3dadd(178572.000000,131256.000000,54525.000000,149.100664)}
{pt3dadd(178680.000000,131448.000000,54350.000000,152.735206)}
{pt3dadd(178800.000000,131568.000000,54075.000000,161.734136)}
{pt3dadd(178872.000000,131844.000000,53925.000000,179.466114)}
{pt3dadd(178824.000000,132048.000000,53675.000000,202.312258)}
{pt3dadd(178824.000000,132336.000000,53475.000000,226.973476)}
{pt3dadd(178872.000000,132612.000000,53275.000000,240.268994)}
{pt3dadd(178800.000000,132828.000000,53175.000000,247.910616)}
{pt3dadd(178656.000000,133128.000000,53000.000000,255.775202)}
{pt3dadd(178716.000000,133416.000000,52950.000000,253.155752)}
{pt3dadd(178596.000000,133512.000000,52700.000000,269.316536)}
{pt3dadd(178416.000000,133704.000000,52525.000000,274.686406)}
{pt3dadd(178308.000000,133836.000000,52350.000000,283.974844)}
{pt3dadd(178008.000000,133944.000000,52100.000000,263.447864)}
{pt3dadd(177684.000000,134016.000000,52025.000000,244.829284)}
{pt3dadd(177552.000000,134172.000000,51925.000000,206.350140)}
{pt3dadd(177396.000000,134364.000000,51700.000000,180.753576)}
{pt3dadd(177216.000000,134520.000000,51400.000000,178.258860)}
{pt3dadd(177108.000000,134688.000000,51250.000000,171.657740)}
{pt3dadd(176952.000000,134832.000000,51025.000000,161.887330)}
{pt3dadd(176844.000000,135000.000000,51000.000000,168.849626)}
{pt3dadd(176760.000000,135144.000000,50875.000000,175.780802)}
{pt3dadd(176592.000000,135180.000000,50725.000000,168.987080)}
{pt3dadd(176412.000000,135192.000000,50475.000000,190.745310)}
{pt3dadd(176268.000000,135432.000000,50300.000000,212.000890)}
{pt3dadd(176004.000000,135672.000000,50125.000000,225.094174)}
{pt3dadd(175776.000000,135768.000000,49975.000000,241.009142)}
{pt3dadd(175572.000000,135864.000000,49800.000000,245.426950)}
{pt3dadd(175320.000000,135972.000000,49600.000000,240.556320)}
{pt3dadd(175044.000000,136068.000000,49450.000000,242.819100)}
{pt3dadd(174828.000000,136176.000000,49350.000000,261.242664)}
{pt3dadd(174588.000000,136344.000000,49175.000000,247.282368)}
{pt3dadd(174372.000000,136500.000000,49125.000000,240.812152)}
{pt3dadd(174108.000000,136620.000000,49000.000000,243.188066)}
{pt3dadd(173820.000000,136824.000000,48900.000000,218.526848)}
{pt3dadd(173640.000000,136980.000000,48825.000000,188.618114)}
{pt3dadd(173328.000000,137076.000000,48750.000000,183.028900)}
{pt3dadd(173040.000000,137220.000000,48625.000000,175.751166)}
{pt3dadd(172836.000000,137436.000000,48475.000000,146.588995)}
{pt3dadd(172500.000000,137508.000000,48350.000000,154.362613)}
{pt3dadd(172392.000000,137616.000000,48100.000000,152.754499)}
{pt3dadd(172308.000000,137796.000000,47900.000000,147.926329)}
{pt3dadd(172296.000000,138084.000000,47800.000000,147.926329)}
{pt3dadd(172248.000000,138300.000000,47725.000000,162.653156)}
{pt3dadd(172200.000000,138552.000000,47625.000000,161.194546)}
{pt3dadd(172104.000000,138792.000000,47575.000000,161.194546)}
{pt3dadd(172080.000000,138972.000000,47475.000000,162.726082)}
{pt3dadd(172092.000000,139152.000000,47375.000000,164.414602)}
{pt3dadd(172056.000000,139332.000000,47300.000000,158.127822)}
{pt3dadd(171948.000000,139500.000000,47200.000000,164.414602)}
{pt3dadd(171876.000000,139680.000000,47150.000000,160.035306)}
{pt3dadd(171840.000000,139872.000000,46975.000000,150.730152)}
{pt3dadd(171924.000000,140028.000000,46875.000000,137.039930)}
{pt3dadd(171960.000000,140160.000000,46725.000000,131.867780)}
{pt3dadd(171852.000000,140268.000000,46600.000000,118.177558)}
{pt3dadd(171792.000000,140412.000000,46450.000000,105.865172)}
{pt3dadd(171948.000000,140592.000000,46375.000000,102.065537)}
{pt3dadd(171972.000000,140820.000000,46375.000000,77.353070)}

{create adhoc22}
{access adhoc22}
{connect adhoc22(1), adhoc18(0)}
{nseg = 1}
{strdef color color = "White"}
{pt3dclear()}
{pt3dadd(179580.000000,128640.000000,57500.000000,275.042200)}
{pt3dadd(178800.000000,128880.000000,57500.000000,194.878950)}
{pt3dadd(178632.000000,128952.000000,57600.000000,149.454336)}
{pt3dadd(178464.000000,128916.000000,57650.000000,112.355065)}
{pt3dadd(178356.000000,128868.000000,57750.000000,94.805304)}
{pt3dadd(178236.000000,128892.000000,57950.000000,89.077407)}
{pt3dadd(178164.000000,128772.000000,58075.000000,94.878197)}
{pt3dadd(177972.000000,128688.000000,58150.000000,116.639463)}
{pt3dadd(177924.000000,128724.000000,58375.000000,135.962174)}
{pt3dadd(177732.000000,128712.000000,58500.000000,153.511935)}
{pt3dadd(177492.000000,128724.000000,58600.000000,170.011712)}
{pt3dadd(177240.000000,128640.000000,58700.000000,186.248042)}
{pt3dadd(177000.000000,128592.000000,58725.000000,168.761022)}
{pt3dadd(176796.000000,128544.000000,58775.000000,157.989142)}
{pt3dadd(176568.000000,128544.000000,58800.000000,143.262315)}
{pt3dadd(176316.000000,128520.000000,58825.000000,123.939604)}
{pt3dadd(176112.000000,128520.000000,58725.000000,103.650760)}
{pt3dadd(175908.000000,128472.000000,58700.000000,104.638003)}
{pt3dadd(175788.000000,128412.000000,58600.000000,111.948413)}
{pt3dadd(175572.000000,128328.000000,58550.000000,130.309782)}
{pt3dadd(175368.000000,128328.000000,58575.000000,144.562909)}
{pt3dadd(175140.000000,128364.000000,58575.000000,149.758281)}
{pt3dadd(174936.000000,128388.000000,58550.000000,168.119650)}
{pt3dadd(174720.000000,128388.000000,58550.000000,169.808170)}
{pt3dadd(174516.000000,128448.000000,58600.000000,173.815250)}
{pt3dadd(174348.000000,128604.000000,58650.000000,163.421662)}
{pt3dadd(174144.000000,128760.000000,58675.000000,160.153765)}
{pt3dadd(173928.000000,128928.000000,58800.000000,147.520293)}
{pt3dadd(173772.000000,128976.000000,59000.000000,136.061363)}
{pt3dadd(173700.000000,129072.000000,59150.000000,111.765439)}
{pt3dadd(173664.000000,129216.000000,59250.000000,104.730649)}
{pt3dadd(173652.000000,129336.000000,59325.000000,98.030849)}
{pt3dadd(173676.000000,129480.000000,59450.000000,90.375477)}
{pt3dadd(173688.000000,129576.000000,59650.000000,83.431829)}
{pt3dadd(173712.000000,129684.000000,59800.000000,84.372061)}
{pt3dadd(173832.000000,129732.000000,60000.000000,86.694495)}
{pt3dadd(173952.000000,129756.000000,60175.000000,86.026290)}
{pt3dadd(173832.000000,129636.000000,60325.000000,79.343293)}
{pt3dadd(173832.000000,129540.000000,60475.000000,80.196110)}
{pt3dadd(173832.000000,129492.000000,60650.000000,75.921864)}
{pt3dadd(173832.000000,129480.000000,60825.000000,75.109657)}
{pt3dadd(173892.000000,129456.000000,61075.000000,79.654728)}
{pt3dadd(174000.000000,129516.000000,61225.000000,83.003711)}
{pt3dadd(174096.000000,129588.000000,61450.000000,79.828460)}
{pt3dadd(174132.000000,129708.000000,61550.000000,81.414198)}
{pt3dadd(174252.000000,129816.000000,61625.000000,79.202356)}
{pt3dadd(174348.000000,129876.000000,61775.000000,76.027105)}
{pt3dadd(174432.000000,129900.000000,61950.000000,78.465660)}
{pt3dadd(174504.000000,129900.000000,62075.000000,79.975887)}
{pt3dadd(174588.000000,129828.000000,62150.000000,81.478720)}
{pt3dadd(174708.000000,129804.000000,62250.000000,81.220726)}

{create adhoc23}
{access adhoc23}
{connect adhoc23(1), adhoc9(0)}
{nseg = 1}
{strdef color color = "White"}
{pt3dclear()}
{pt3dadd(186780.000000,121284.000000,59575.000000,804.570100)}
{pt3dadd(185688.000000,120672.000000,59575.000000,471.309273)}
{pt3dadd(185328.000000,120564.000000,59150.000000,413.638620)}
{pt3dadd(185016.000000,120492.000000,59025.000000,310.483460)}
{pt3dadd(184692.000000,120396.000000,58875.000000,307.864010)}
{pt3dadd(184380.000000,120240.000000,58750.000000,311.207162)}
{pt3dadd(184092.000000,120084.000000,58675.000000,307.864010)}
{pt3dadd(183840.000000,119964.000000,58550.000000,307.864010)}
{pt3dadd(183588.000000,119880.000000,58425.000000,316.968254)}
{pt3dadd(183288.000000,119772.000000,58275.000000,322.338124)}
{pt3dadd(183072.000000,119712.000000,58075.000000,302.026142)}
{pt3dadd(182856.000000,119520.000000,57950.000000,278.263590)}
{pt3dadd(182580.000000,119400.000000,57825.000000,265.135150)}
{pt3dadd(182304.000000,119268.000000,57675.000000,245.790406)}
{pt3dadd(182016.000000,119136.000000,57575.000000,230.228787)}
{pt3dadd(181644.000000,119172.000000,57575.000000,237.591800)}

{create adhoc24}
{access adhoc24}
{connect adhoc24(1), adhoc23(0)}
{nseg = 1}
{strdef color color = "White"}
{pt3dclear()}
{pt3dadd(181644.000000,119172.000000,57575.000000,237.591800)}
{pt3dadd(181236.000000,119232.000000,57525.000000,223.550320)}
{pt3dadd(180912.000000,119280.000000,57450.000000,229.166912)}
{pt3dadd(180648.000000,119328.000000,57200.000000,222.696696)}
{pt3dadd(180336.000000,119364.000000,57075.000000,217.373634)}
{pt3dadd(180048.000000,119340.000000,57000.000000,217.373634)}
{pt3dadd(179796.000000,119400.000000,56825.000000,215.110854)}
{pt3dadd(179580.000000,119520.000000,56675.000000,206.685966)}
{pt3dadd(179328.000000,119580.000000,56550.000000,201.096752)}
{pt3dadd(179100.000000,119628.000000,56450.000000,204.558222)}
{pt3dadd(178872.000000,119676.000000,56300.000000,179.897004)}
{pt3dadd(178656.000000,119724.000000,56175.000000,163.813574)}
{pt3dadd(178428.000000,119712.000000,56150.000000,163.813574)}
{pt3dadd(178140.000000,119676.000000,56000.000000,169.402788)}
{pt3dadd(177912.000000,119604.000000,55850.000000,179.689268)}
{pt3dadd(177696.000000,119520.000000,55675.000000,195.925598)}
{pt3dadd(177480.000000,119472.000000,55600.000000,212.009028)}
{pt3dadd(177324.000000,119448.000000,55375.000000,220.433916)}
{pt3dadd(177072.000000,119472.000000,55225.000000,231.774762)}
{pt3dadd(176844.000000,119520.000000,55075.000000,231.774762)}
{pt3dadd(176592.000000,119544.000000,54900.000000,242.575564)}
{pt3dadd(176364.000000,119496.000000,54750.000000,252.328424)}
{pt3dadd(176148.000000,119460.000000,54500.000000,252.328424)}
{pt3dadd(175896.000000,119364.000000,54275.000000,245.195014)}
{pt3dadd(175692.000000,119328.000000,54150.000000,245.195014)}
{pt3dadd(175488.000000,119328.000000,54125.000000,242.819100)}
{pt3dadd(175248.000000,119280.000000,53975.000000,233.066240)}
{pt3dadd(174996.000000,119172.000000,53825.000000,222.779760)}
{pt3dadd(174768.000000,119052.000000,53750.000000,218.572324)}
{pt3dadd(174552.000000,119028.000000,53625.000000,206.512894)}
{pt3dadd(174336.000000,119028.000000,53350.000000,204.250114)}
{pt3dadd(174108.000000,118980.000000,53175.000000,202.937757)}
{pt3dadd(173820.000000,118968.000000,53075.000000,226.277900)}

{create adhoc25}
{access adhoc25}
{connect adhoc25(1), adhoc24(0)}
{nseg = 1}
{strdef color color = "White"}
{pt3dclear()}
{pt3dadd(173820.000000,118968.000000,53075.000000,226.277900)}
{pt3dadd(173568.000000,118932.000000,52950.000000,181.579100)}
{pt3dadd(173304.000000,118872.000000,52650.000000,187.227484)}
{pt3dadd(173076.000000,118788.000000,52475.000000,187.227484)}
{pt3dadd(172860.000000,118716.000000,52325.000000,221.414284)}
{pt3dadd(172692.000000,118788.000000,52075.000000,223.275876)}
{pt3dadd(172440.000000,118764.000000,51850.000000,229.746092)}
{pt3dadd(172224.000000,118740.000000,51725.000000,214.282920)}
{pt3dadd(172056.000000,118596.000000,51600.000000,206.259220)}
{pt3dadd(171864.000000,118452.000000,51575.000000,177.774716)}
{pt3dadd(171696.000000,118596.000000,51350.000000,170.843540)}
{pt3dadd(171588.000000,118704.000000,51200.000000,168.580760)}
{pt3dadd(171468.000000,118824.000000,51025.000000,182.270982)}
{pt3dadd(171300.000000,118920.000000,50800.000000,172.822102)}
{pt3dadd(171132.000000,118992.000000,50600.000000,176.118736)}
{pt3dadd(170976.000000,119136.000000,50375.000000,181.188320)}
{pt3dadd(170904.000000,119256.000000,50275.000000,171.391670)}
{pt3dadd(170880.000000,119448.000000,50125.000000,168.095036)}
{pt3dadd(170916.000000,119652.000000,50000.000000,159.116664)}
{pt3dadd(170844.000000,119796.000000,49875.000000,142.462362)}
{pt3dadd(170880.000000,119892.000000,49700.000000,130.430482)}
{pt3dadd(170928.000000,119964.000000,49475.000000,127.133848)}
{pt3dadd(170916.000000,120072.000000,49350.000000,134.065024)}
{pt3dadd(170904.000000,120204.000000,49250.000000,150.719326)}
{pt3dadd(170880.000000,120384.000000,49125.000000,154.771840)}
{pt3dadd(170904.000000,120432.000000,48850.000000,151.340548)}
{pt3dadd(170964.000000,120408.000000,48575.000000,137.087421)}
{pt3dadd(171228.000000,120456.000000,48450.000000,123.193949)}
{pt3dadd(171444.000000,120516.000000,48350.000000,107.479879)}
{pt3dadd(171672.000000,120576.000000,48225.000000,104.367597)}
{pt3dadd(171912.000000,120636.000000,48200.000000,102.343749)}
{pt3dadd(172044.000000,120768.000000,48125.000000,107.291722)}
{pt3dadd(172140.000000,120816.000000,47875.000000,107.291722)}
{pt3dadd(172260.000000,120888.000000,47750.000000,111.546862)}
{pt3dadd(172356.000000,121056.000000,47700.000000,111.546862)}
{pt3dadd(172524.000000,121212.000000,47500.000000,119.585002)}
{pt3dadd(172716.000000,121272.000000,47375.000000,117.459963)}
{pt3dadd(172980.000000,121380.000000,47325.000000,117.459963)}
{pt3dadd(173148.000000,121536.000000,47300.000000,127.230373)}
{pt3dadd(173340.000000,121680.000000,47175.000000,142.944443)}
{pt3dadd(173496.000000,121800.000000,47100.000000,148.931853)}
{pt3dadd(173616.000000,121944.000000,47025.000000,154.659750)}
{pt3dadd(173832.000000,122064.000000,46925.000000,160.090510)}
{pt3dadd(174024.000000,122196.000000,46825.000000,152.780100)}
{pt3dadd(174216.000000,122280.000000,46750.000000,137.066030)}
{pt3dadd(174420.000000,122376.000000,46675.000000,126.152762)}
{pt3dadd(174552.000000,122508.000000,46625.000000,115.163376)}
{pt3dadd(174684.000000,122592.000000,46550.000000,115.163376)}
{pt3dadd(174852.000000,122676.000000,46425.000000,138.597650)}
{pt3dadd(174960.000000,122736.000000,46150.000000,161.953342)}
{pt3dadd(174996.000000,122892.000000,45875.000000,186.614560)}
{pt3dadd(175020.000000,123060.000000,45575.000000,204.914356)}
{pt3dadd(174972.000000,123372.000000,45675.000000,215.331740)}
{pt3dadd(174972.000000,123648.000000,45825.000000,202.669346)}
{pt3dadd(175140.000000,123960.000000,45975.000000,207.087154)}
{pt3dadd(175296.000000,124152.000000,46150.000000,209.463068)}
{pt3dadd(175392.000000,124488.000000,46150.000000,196.424761)}
{pt3dadd(175380.000000,124776.000000,46200.000000,189.147027)}
{pt3dadd(175284.000000,125136.000000,46250.000000,189.147027)}
{pt3dadd(175176.000000,125316.000000,46500.000000,184.729219)}
{pt3dadd(175056.000000,125640.000000,46700.000000,165.465705)}
{pt3dadd(174948.000000,125916.000000,46875.000000,184.938653)}
{pt3dadd(175032.000000,126132.000000,47075.000000,153.153800)}

{create adhoc26}
{access adhoc26}
{connect adhoc26(1), adhoc24(0)}
{nseg = 1}
{strdef color color = "White"}
{pt3dclear()}
{pt3dadd(173820.000000,118968.000000,53075.000000,226.277900)}
{pt3dadd(173160.000000,118704.000000,53325.000000,157.425967)}
{pt3dadd(172896.000000,118656.000000,53325.000000,154.400876)}
{pt3dadd(172764.000000,118572.000000,53400.000000,129.877399)}
{pt3dadd(172560.000000,118584.000000,53475.000000,124.422259)}
{pt3dadd(172308.000000,118632.000000,53575.000000,116.666404)}
{pt3dadd(172080.000000,118704.000000,53725.000000,112.287108)}
{pt3dadd(171864.000000,118704.000000,53800.000000,104.248968)}
{pt3dadd(171636.000000,118776.000000,53900.000000,105.285573)}
{pt3dadd(171480.000000,118896.000000,54025.000000,112.000713)}
{pt3dadd(171288.000000,118896.000000,54150.000000,126.387328)}
{pt3dadd(171084.000000,118908.000000,54300.000000,120.373036)}
{pt3dadd(170724.000000,118908.000000,54400.000000,134.398586)}
{pt3dadd(170520.000000,118920.000000,54525.000000,146.400288)}
{pt3dadd(170268.000000,119004.000000,54600.000000,148.849213)}
{pt3dadd(170088.000000,119196.000000,54650.000000,168.852050)}

{create adhoc27}
{access adhoc27}
{connect adhoc27(1), adhoc23(0)}
{nseg = 1}
{strdef color color = "White"}
{pt3dclear()}
{pt3dadd(181644.000000,119172.000000,57575.000000,237.591800)}
{pt3dadd(181776.000000,118812.000000,57275.000000,267.142767)}
{pt3dadd(181692.000000,118572.000000,57100.000000,261.145072)}
{pt3dadd(181608.000000,118332.000000,57025.000000,266.015702)}
{pt3dadd(181572.000000,118176.000000,56950.000000,268.766122)}
{pt3dadd(181524.000000,117996.000000,56675.000000,288.409662)}
{pt3dadd(181476.000000,117828.000000,56550.000000,304.367374)}
{pt3dadd(181452.000000,117564.000000,56300.000000,338.669222)}
{pt3dadd(181356.000000,117252.000000,56150.000000,359.996804)}
{pt3dadd(181140.000000,116916.000000,56025.000000,369.101048)}
{pt3dadd(181068.000000,116652.000000,55850.000000,352.345448)}
{pt3dadd(181104.000000,116436.000000,55675.000000,342.308020)}
{pt3dadd(181056.000000,116184.000000,55575.000000,342.308020)}
{pt3dadd(180948.000000,115860.000000,55425.000000,345.993848)}
{pt3dadd(180708.000000,115584.000000,55250.000000,356.533144)}
{pt3dadd(180456.000000,115236.000000,55100.000000,362.749448)}
{pt3dadd(180360.000000,114876.000000,55025.000000,372.786876)}
{pt3dadd(180240.000000,114600.000000,54925.000000,365.590732)}
{pt3dadd(180036.000000,114372.000000,54775.000000,340.577322)}
{pt3dadd(179880.000000,114168.000000,54675.000000,327.186363)}
{pt3dadd(179772.000000,113940.000000,54525.000000,261.944950)}

{create adhoc28}
{access adhoc28}
{connect adhoc28(1), adhoc27(0)}
{nseg = 1}
{strdef color color = "White"}
{pt3dclear()}
{pt3dadd(179772.000000,113940.000000,54525.000000,261.944950)}
{pt3dadd(179700.000000,113724.000000,54625.000000,280.073717)}
{pt3dadd(179616.000000,113436.000000,54625.000000,289.337830)}
{pt3dadd(179472.000000,113112.000000,54550.000000,289.337830)}
{pt3dadd(179400.000000,112896.000000,54450.000000,281.080020)}
{pt3dadd(179220.000000,112680.000000,54425.000000,289.750724)}
{pt3dadd(179208.000000,112452.000000,54400.000000,286.862784)}
{pt3dadd(179172.000000,112176.000000,54275.000000,283.974844)}
{pt3dadd(179052.000000,111972.000000,54200.000000,292.232654)}
{pt3dadd(178992.000000,111768.000000,54075.000000,303.522808)}
{pt3dadd(178884.000000,111540.000000,54000.000000,294.852104)}
{pt3dadd(178776.000000,111312.000000,53925.000000,286.987518)}
{pt3dadd(178776.000000,111096.000000,53850.000000,284.237098)}
{pt3dadd(178692.000000,110844.000000,53775.000000,278.598738)}
{pt3dadd(178572.000000,110592.000000,53700.000000,275.566394)}
{pt3dadd(178524.000000,110328.000000,53650.000000,281.204754)}
{pt3dadd(178380.000000,110004.000000,53675.000000,283.699470)}
{pt3dadd(178416.000000,109764.000000,53775.000000,273.946610)}
{pt3dadd(178392.000000,109560.000000,53875.000000,262.038722)}
{pt3dadd(178212.000000,109332.000000,53975.000000,244.492474)}
{pt3dadd(178104.000000,109152.000000,54200.000000,229.101254)}
{pt3dadd(178020.000000,108948.000000,54325.000000,221.967844)}
{pt3dadd(177804.000000,108720.000000,54400.000000,237.359064)}
{pt3dadd(177804.000000,108504.000000,54575.000000,249.266952)}
{pt3dadd(177744.000000,108216.000000,54625.000000,266.813200)}
{pt3dadd(177792.000000,107940.000000,54750.000000,282.204420)}
{pt3dadd(177648.000000,107688.000000,54925.000000,293.836733)}
{pt3dadd(177504.000000,107520.000000,55050.000000,303.234000)}

{create adhoc29}
{access adhoc29}
{connect adhoc29(1), adhoc28(0)}
{nseg = 1}
{strdef color color = "White"}
{pt3dclear()}
{pt3dadd(177504.000000,107520.000000,55050.000000,303.234000)}
{pt3dadd(177480.000000,107148.000000,55075.000000,263.432390)}
{pt3dadd(177492.000000,106884.000000,55125.000000,238.773944)}
{pt3dadd(177528.000000,106620.000000,55175.000000,210.289440)}
{pt3dadd(177612.000000,106404.000000,55100.000000,199.488638)}
{pt3dadd(177516.000000,106116.000000,55050.000000,193.018422)}
{pt3dadd(177468.000000,105876.000000,54875.000000,178.393602)}
{pt3dadd(177504.000000,105648.000000,54750.000000,178.393602)}
{pt3dadd(177564.000000,105492.000000,54600.000000,180.001716)}
{pt3dadd(177504.000000,105276.000000,54325.000000,184.008796)}
{pt3dadd(177456.000000,105048.000000,54125.000000,195.349642)}
{pt3dadd(177324.000000,104784.000000,53975.000000,214.613156)}
{pt3dadd(177264.000000,104592.000000,53750.000000,242.306360)}
{pt3dadd(177240.000000,104364.000000,53625.000000,249.471370)}

{create adhoc30}
{access adhoc30}
{connect adhoc30(1), adhoc29(0)}
{nseg = 1}
{strdef color color = "White"}
{pt3dclear()}
{pt3dadd(177240.000000,104364.000000,53625.000000,249.471370)}
{pt3dadd(177384.000000,104040.000000,53825.000000,187.812217)}
{pt3dadd(177480.000000,103812.000000,53950.000000,169.642480)}
{pt3dadd(177600.000000,103596.000000,54000.000000,148.920356)}
{pt3dadd(177684.000000,103416.000000,54150.000000,165.807956)}
{pt3dadd(177660.000000,103200.000000,54225.000000,178.901240)}
{pt3dadd(177696.000000,102984.000000,54250.000000,180.290390)}
{pt3dadd(177768.000000,102768.000000,54325.000000,173.975382)}
{pt3dadd(177852.000000,102624.000000,54525.000000,171.263232)}
{pt3dadd(177816.000000,102492.000000,54650.000000,148.944872)}
{pt3dadd(177756.000000,102384.000000,54750.000000,132.861442)}
{pt3dadd(177624.000000,102192.000000,54925.000000,130.149292)}
{pt3dadd(177504.000000,101988.000000,55125.000000,135.075150)}
{pt3dadd(177432.000000,101808.000000,55250.000000,136.398150)}
{pt3dadd(177348.000000,101628.000000,55350.000000,132.966858)}
{pt3dadd(177252.000000,101388.000000,55450.000000,132.966858)}
{pt3dadd(177132.000000,101172.000000,55500.000000,143.738738)}
{pt3dadd(177060.000000,100956.000000,55525.000000,170.964178)}
{pt3dadd(177000.000000,100704.000000,55625.000000,180.413058)}
{pt3dadd(177096.000000,100404.000000,55750.000000,181.501492)}
{pt3dadd(177096.000000,100164.000000,55925.000000,178.789342)}
{pt3dadd(177048.000000,100056.000000,56175.000000,165.557462)}
{pt3dadd(177000.000000,99840.000000,56375.000000,142.711318)}
{pt3dadd(177036.000000,99660.000000,56550.000000,139.249848)}
{pt3dadd(177012.000000,99480.000000,56675.000000,138.161414)}
{pt3dadd(177084.000000,99324.000000,56825.000000,138.161414)}
{pt3dadd(177192.000000,99144.000000,57025.000000,153.254886)}
{pt3dadd(177252.000000,98952.000000,57150.000000,164.193142)}
{pt3dadd(177096.000000,98736.000000,57375.000000,173.523284)}
{pt3dadd(176940.000000,98508.000000,57625.000000,183.916872)}
{pt3dadd(176808.000000,98400.000000,57875.000000,185.239872)}
{pt3dadd(176652.000000,98352.000000,58050.000000,173.929400)}
{pt3dadd(176424.000000,98352.000000,58300.000000,152.597556)}
{pt3dadd(176244.000000,98388.000000,58500.000000,135.957004)}
{pt3dadd(176064.000000,98364.000000,58675.000000,135.957004)}
{pt3dadd(175908.000000,98316.000000,58875.000000,135.957004)}
{pt3dadd(175740.000000,98268.000000,59075.000000,132.174004)}
{pt3dadd(175596.000000,98148.000000,59300.000000,127.461648)}
{pt3dadd(175476.000000,98016.000000,59475.000000,119.806276)}
{pt3dadd(175392.000000,97956.000000,59625.000000,106.448608)}
{pt3dadd(175260.000000,98064.000000,59875.000000,105.125608)}
{pt3dadd(174984.000000,98052.000000,60200.000000,102.894316)}
{pt3dadd(174852.000000,98040.000000,60325.000000,106.570067)}
{pt3dadd(174624.000000,98028.000000,60500.000000,110.622581)}
{pt3dadd(174360.000000,97980.000000,60575.000000,108.929922)}
{pt3dadd(174072.000000,97908.000000,60600.000000,114.285710)}

{create adhoc31}
{access adhoc31}
{connect adhoc31(1), adhoc30(0)}
{nseg = 1}
{strdef color color = "White"}
{pt3dclear()}
{pt3dadd(174072.000000,97908.000000,60600.000000,114.285710)}
{pt3dadd(173772.000000,98100.000000,60800.000000,213.557270)}
{pt3dadd(173532.000000,98160.000000,60800.000000,243.875607)}
{pt3dadd(173544.000000,98412.000000,60800.000000,205.240720)}

{create adhoc32}
{access adhoc32}
{connect adhoc32(1), adhoc30(0)}
{nseg = 1}
{strdef color color = "White"}
{pt3dclear()}
{pt3dadd(174072.000000,97908.000000,60600.000000,114.285710)}
{pt3dadd(173724.000000,97644.000000,60600.000000,118.476417)}
{pt3dadd(173628.000000,97404.000000,60550.000000,112.550056)}
{pt3dadd(173460.000000,97260.000000,60400.000000,106.749266)}
{pt3dadd(173340.000000,97068.000000,60300.000000,104.725418)}
{pt3dadd(173208.000000,97020.000000,60175.000000,101.122560)}
{pt3dadd(173076.000000,96912.000000,60050.000000,96.634602)}
{pt3dadd(172968.000000,96756.000000,59975.000000,98.759641)}
{pt3dadd(172848.000000,96636.000000,59850.000000,110.875439)}
{pt3dadd(172740.000000,96540.000000,59725.000000,118.913579)}
{pt3dadd(172500.000000,96360.000000,59525.000000,126.687197)}
{pt3dadd(172332.000000,96180.000000,59600.000000,135.643052)}
{pt3dadd(172152.000000,96024.000000,59625.000000,137.985910)}
{pt3dadd(171984.000000,95880.000000,59650.000000,131.670902)}
{pt3dadd(171792.000000,95856.000000,59700.000000,129.087902)}
{pt3dadd(171636.000000,95748.000000,59800.000000,120.225850)}
{pt3dadd(171444.000000,95592.000000,59900.000000,115.757953)}
{pt3dadd(171276.000000,95520.000000,59975.000000,111.290056)}
{pt3dadd(171120.000000,95484.000000,60050.000000,108.177774)}
{pt3dadd(170940.000000,95436.000000,60100.000000,109.437774)}
{pt3dadd(170724.000000,95424.000000,60175.000000,106.473694)}
{pt3dadd(170436.000000,95352.000000,60175.000000,103.650760)}
{pt3dadd(170196.000000,95376.000000,60175.000000,98.389271)}
{pt3dadd(170112.000000,95508.000000,60025.000000,86.974018)}
{pt3dadd(170100.000000,95640.000000,59950.000000,77.353070)}

{create adhoc33}
{access adhoc33}
{connect adhoc33(1), adhoc29(0)}
{nseg = 1}
{strdef color color = "White"}
{pt3dclear()}
{pt3dadd(177240.000000,104364.000000,53625.000000,249.471370)}
{pt3dadd(177120.000000,104256.000000,53375.000000,149.051675)}
{pt3dadd(177048.000000,104136.000000,53175.000000,130.944573)}
{pt3dadd(176952.000000,104004.000000,53075.000000,101.782402)}
{pt3dadd(176832.000000,103944.000000,52825.000000,107.510299)}
{pt3dadd(176772.000000,103860.000000,52575.000000,107.510299)}
{pt3dadd(176652.000000,103800.000000,52325.000000,104.009584)}
{pt3dadd(176676.000000,103668.000000,52200.000000,98.485021)}
{pt3dadd(176808.000000,103608.000000,52050.000000,95.662087)}
{pt3dadd(176832.000000,103524.000000,51850.000000,87.111256)}
{pt3dadd(176844.000000,103440.000000,51600.000000,98.937388)}
{pt3dadd(176952.000000,103344.000000,51475.000000,104.461951)}
{pt3dadd(177048.000000,103248.000000,51250.000000,120.380102)}
{pt3dadd(177060.000000,103200.000000,51000.000000,124.239641)}
{pt3dadd(177132.000000,103092.000000,50775.000000,121.064390)}
{pt3dadd(177360.000000,102972.000000,50625.000000,112.202338)}
{pt3dadd(177516.000000,102912.000000,50525.000000,111.165733)}
{pt3dadd(177672.000000,102876.000000,50475.000000,93.737355)}
{pt3dadd(177804.000000,102816.000000,50400.000000,89.877816)}
{pt3dadd(177912.000000,102720.000000,50250.000000,96.912606)}
{pt3dadd(177984.000000,102612.000000,50175.000000,96.912606)}
{pt3dadd(178104.000000,102516.000000,50075.000000,90.212806)}
{pt3dadd(178188.000000,102480.000000,50000.000000,90.949502)}
{pt3dadd(178248.000000,102420.000000,49875.000000,95.897475)}
{pt3dadd(178344.000000,102336.000000,49725.000000,87.266765)}
{pt3dadd(178500.000000,102264.000000,49625.000000,114.285710)}

{create adhoc34}
{access adhoc34}
{connect adhoc34(1), adhoc28(0)}
{nseg = 1}
{strdef color color = "White"}
{pt3dclear()}
{pt3dadd(177504.000000,107520.000000,55050.000000,303.234000)}
{pt3dadd(177192.000000,107544.000000,55075.000000,170.185010)}
{pt3dadd(177108.000000,107568.000000,55275.000000,161.081416)}
{pt3dadd(176988.000000,107640.000000,55550.000000,137.666496)}
{pt3dadd(176892.000000,107664.000000,55800.000000,149.096689)}
{pt3dadd(176700.000000,107664.000000,56025.000000,151.221728)}
{pt3dadd(176652.000000,107724.000000,56275.000000,143.078080)}
{pt3dadd(176604.000000,107784.000000,56525.000000,135.767670)}
{pt3dadd(176376.000000,107796.000000,56575.000000,126.318790)}
{pt3dadd(176184.000000,107808.000000,56750.000000,131.388374)}
{pt3dadd(176076.000000,107784.000000,56950.000000,142.301642)}
{pt3dadd(175896.000000,107736.000000,57075.000000,159.015700)}
{pt3dadd(175740.000000,107724.000000,57200.000000,166.326110)}
{pt3dadd(175608.000000,107712.000000,57375.000000,165.003110)}
{pt3dadd(175452.000000,107676.000000,57500.000000,159.933526)}
{pt3dadd(175236.000000,107748.000000,57550.000000,163.394996)}
{pt3dadd(175056.000000,107832.000000,57625.000000,163.394996)}
{pt3dadd(174840.000000,107928.000000,57700.000000,157.407586)}
{pt3dadd(174624.000000,108000.000000,57750.000000,160.119736)}
{pt3dadd(174396.000000,107988.000000,57750.000000,157.129590)}
{pt3dadd(174192.000000,108000.000000,57775.000000,167.416070)}
{pt3dadd(173916.000000,107916.000000,57800.000000,174.693804)}
{pt3dadd(173652.000000,107868.000000,57875.000000,196.805078)}
{pt3dadd(173436.000000,107904.000000,58025.000000,230.767963)}
{pt3dadd(173232.000000,107892.000000,58250.000000,249.471370)}

{create adhoc35}
{access adhoc35}
{connect adhoc35(1), adhoc34(0)}
{nseg = 1}
{strdef color color = "White"}
{pt3dclear()}
{pt3dadd(173232.000000,107892.000000,58250.000000,249.471370)}
{pt3dadd(173244.000000,107928.000000,58525.000000,190.312910)}
{pt3dadd(173220.000000,107868.000000,58800.000000,171.550042)}
{pt3dadd(173064.000000,107784.000000,59025.000000,153.818064)}
{pt3dadd(172944.000000,107832.000000,59275.000000,143.896742)}
{pt3dadd(172752.000000,107796.000000,59425.000000,141.553884)}
{pt3dadd(172512.000000,107760.000000,59525.000000,138.122592)}
{pt3dadd(172332.000000,107748.000000,59625.000000,132.420296)}
{pt3dadd(172080.000000,107820.000000,59675.000000,122.026708)}
{pt3dadd(171816.000000,107808.000000,59775.000000,111.659186)}
{pt3dadd(171564.000000,107748.000000,59800.000000,110.570752)}
{pt3dadd(171264.000000,107712.000000,59850.000000,111.659186)}
{pt3dadd(170964.000000,107700.000000,59850.000000,105.717463)}
{pt3dadd(170664.000000,107664.000000,59775.000000,114.285710)}

{create adhoc36}
{access adhoc36}
{connect adhoc36(1), adhoc35(0)}
{nseg = 1}
{strdef color color = "White"}
{pt3dclear()}
{pt3dadd(170664.000000,107664.000000,59775.000000,114.285710)}
{pt3dadd(170388.000000,107640.000000,59725.000000,148.244720)}
{pt3dadd(170016.000000,107760.000000,59700.000000,147.785164)}
{pt3dadd(169812.000000,107928.000000,59800.000000,147.785164)}
{pt3dadd(169692.000000,108144.000000,59850.000000,140.011546)}
{pt3dadd(169476.000000,108192.000000,59825.000000,133.724766)}
{pt3dadd(169284.000000,108276.000000,59825.000000,118.631294)}
{pt3dadd(169128.000000,108432.000000,59900.000000,115.942786)}
{pt3dadd(168900.000000,108576.000000,59925.000000,110.994813)}
{pt3dadd(168648.000000,108684.000000,60000.000000,103.608285)}
{pt3dadd(168456.000000,108756.000000,60050.000000,84.060225)}
{pt3dadd(168252.000000,108864.000000,60100.000000,77.353070)}

{create adhoc37}
{access adhoc37}
{connect adhoc37(1), adhoc35(0)}
{nseg = 1}
{strdef color color = "White"}
{pt3dclear()}
{pt3dadd(170664.000000,107664.000000,59775.000000,114.285710)}
{pt3dadd(170388.000000,107472.000000,59925.000000,124.400237)}
{pt3dadd(170256.000000,107376.000000,60025.000000,141.044172)}
{pt3dadd(170088.000000,107220.000000,60175.000000,147.359180)}
{pt3dadd(169992.000000,107064.000000,60350.000000,151.142180)}
{pt3dadd(169776.000000,107004.000000,60575.000000,140.415532)}
{pt3dadd(169524.000000,107028.000000,60600.000000,130.988242)}
{pt3dadd(169200.000000,107052.000000,60600.000000,112.560990)}
{pt3dadd(168984.000000,107052.000000,60775.000000,105.157548)}
{pt3dadd(168756.000000,107040.000000,60850.000000,92.108466)}
{pt3dadd(168588.000000,107052.000000,60925.000000,91.296259)}
{pt3dadd(168420.000000,107064.000000,60975.000000,87.795544)}
{pt3dadd(168144.000000,107076.000000,61000.000000,91.848058)}
{pt3dadd(167940.000000,107136.000000,61050.000000,94.079350)}
{pt3dadd(167712.000000,107196.000000,61100.000000,97.254601)}
{pt3dadd(167604.000000,107304.000000,61275.000000,98.919625)}
{pt3dadd(167544.000000,107448.000000,61400.000000,95.403192)}
{pt3dadd(167412.000000,107556.000000,61525.000000,80.910083)}
{pt3dadd(167220.000000,107544.000000,61600.000000,63.638560)}

{create adhoc38}
{access adhoc38}
{connect adhoc38(1), adhoc34(0)}
{nseg = 1}
{strdef color color = "White"}
{pt3dclear()}
{pt3dadd(173232.000000,107892.000000,58250.000000,249.471370)}
{pt3dadd(172908.000000,108060.000000,58225.000000,207.854713)}
{pt3dadd(172812.000000,108084.000000,58225.000000,181.667978)}
{pt3dadd(172728.000000,108108.000000,58250.000000,152.505807)}
{pt3dadd(172632.000000,108108.000000,58275.000000,132.189766)}
{pt3dadd(172584.000000,108144.000000,58300.000000,119.151459)}
{pt3dadd(172500.000000,108204.000000,58350.000000,113.979309)}
{pt3dadd(172404.000000,108264.000000,58375.000000,104.105478)}
{pt3dadd(172356.000000,108276.000000,58450.000000,96.737473)}
{pt3dadd(172368.000000,108336.000000,58550.000000,90.739288)}
{pt3dadd(172284.000000,108408.000000,58625.000000,87.916354)}
{pt3dadd(172320.000000,108444.000000,58700.000000,81.825523)}
{pt3dadd(172356.000000,108480.000000,58800.000000,81.825523)}
{pt3dadd(172332.000000,108504.000000,58875.000000,89.193528)}
{pt3dadd(172356.000000,108588.000000,58975.000000,89.930224)}
{pt3dadd(172380.000000,108624.000000,59050.000000,96.021055)}
{pt3dadd(172428.000000,108696.000000,59125.000000,104.571886)}
{pt3dadd(172500.000000,108768.000000,59200.000000,108.431425)}
{pt3dadd(172524.000000,108804.000000,59250.000000,114.159322)}
{pt3dadd(172596.000000,108876.000000,59300.000000,126.471708)}
{pt3dadd(172656.000000,108972.000000,59350.000000,123.203811)}
{pt3dadd(172680.000000,109044.000000,59375.000000,121.943811)}
{pt3dadd(172704.000000,109104.000000,59425.000000,126.635103)}
{pt3dadd(172776.000000,109128.000000,59475.000000,126.635103)}
{pt3dadd(172836.000000,109200.000000,59525.000000,125.312103)}
{pt3dadd(172908.000000,109212.000000,59550.000000,127.437142)}
{pt3dadd(172980.000000,109236.000000,59600.000000,131.409292)}
{pt3dadd(173052.000000,109260.000000,59650.000000,137.111588)}
{pt3dadd(173148.000000,109320.000000,59700.000000,144.421998)}
{pt3dadd(173232.000000,109320.000000,59775.000000,147.134148)}
{pt3dadd(173316.000000,109332.000000,59800.000000,154.907766)}
{pt3dadd(173400.000000,109344.000000,59850.000000,154.907766)}
{pt3dadd(173472.000000,109368.000000,59925.000000,156.515880)}
{pt3dadd(173580.000000,109404.000000,59975.000000,151.917620)}
{pt3dadd(173676.000000,109356.000000,60050.000000,146.745470)}
{pt3dadd(173772.000000,109380.000000,60075.000000,135.859570)}
{pt3dadd(173868.000000,109380.000000,60075.000000,128.456128)}
{pt3dadd(173964.000000,109464.000000,60125.000000,116.454426)}
{pt3dadd(174060.000000,109500.000000,60150.000000,112.482276)}
{pt3dadd(174144.000000,109512.000000,60150.000000,106.391445)}
{pt3dadd(174264.000000,109536.000000,60200.000000,103.702937)}
{pt3dadd(174360.000000,109524.000000,60250.000000,103.702937)}
{pt3dadd(174444.000000,109536.000000,60325.000000,100.738857)}
{pt3dadd(174588.000000,109536.000000,60400.000000,92.595209)}
{pt3dadd(174684.000000,109548.000000,60375.000000,92.595209)}
{pt3dadd(174768.000000,109584.000000,60450.000000,91.009471)}
{pt3dadd(174864.000000,109560.000000,60550.000000,91.009471)}
{pt3dadd(174972.000000,109584.000000,60600.000000,92.936946)}
{pt3dadd(175056.000000,109524.000000,60675.000000,94.685222)}
{pt3dadd(175152.000000,109536.000000,60725.000000,92.246667)}
{pt3dadd(175224.000000,109524.000000,60800.000000,100.776053)}
{pt3dadd(175284.000000,109536.000000,60925.000000,99.739448)}
{pt3dadd(175380.000000,109500.000000,61025.000000,99.739448)}
{pt3dadd(175476.000000,109572.000000,61125.000000,100.679680)}
{pt3dadd(175512.000000,109632.000000,61200.000000,109.209066)}
{pt3dadd(175596.000000,109680.000000,61250.000000,110.409066)}
{pt3dadd(175692.000000,109764.000000,61325.000000,110.409066)}
{pt3dadd(175776.000000,109836.000000,61350.000000,108.481591)}
{pt3dadd(175872.000000,109920.000000,61425.000000,106.645900)}
{pt3dadd(175932.000000,110004.000000,61450.000000,100.555069)}
{pt3dadd(176004.000000,110112.000000,61500.000000,95.099929)}
{pt3dadd(176076.000000,110220.000000,61625.000000,97.224968)}
{pt3dadd(176112.000000,110328.000000,61675.000000,100.851952)}
{pt3dadd(176148.000000,110424.000000,61700.000000,114.285710)}

{create adhoc39}
{access adhoc39}
{connect adhoc39(1), adhoc38(0)}
{nseg = 1}
{strdef color color = "White"}
{pt3dclear()}
{pt3dadd(176148.000000,110424.000000,61700.000000,114.285710)}
{pt3dadd(176256.000000,110496.000000,61700.000000,112.648742)}
{pt3dadd(176352.000000,110568.000000,61725.000000,97.938284)}
{pt3dadd(176460.000000,110580.000000,61825.000000,87.202773)}
{pt3dadd(176568.000000,110580.000000,61925.000000,79.198382)}
{pt3dadd(176652.000000,110544.000000,62050.000000,67.926094)}
{pt3dadd(176640.000000,110544.000000,62150.000000,62.628425)}
{pt3dadd(176652.000000,110508.000000,62250.000000,63.638560)}

{create adhoc40}
{access adhoc40}
{connect adhoc40(1), adhoc38(0)}
{nseg = 1}
{strdef color color = "White"}
{pt3dclear()}
{pt3dadd(176148.000000,110424.000000,61700.000000,114.285710)}
{pt3dadd(176112.000000,110532.000000,61675.000000,92.823455)}
{pt3dadd(176064.000000,110652.000000,61650.000000,93.706926)}
{pt3dadd(175980.000000,110760.000000,61600.000000,84.213882)}
{pt3dadd(175968.000000,110832.000000,61525.000000,80.143172)}
{pt3dadd(175896.000000,110904.000000,61475.000000,84.020038)}
{pt3dadd(175860.000000,110976.000000,61400.000000,84.020038)}
{pt3dadd(175836.000000,111072.000000,61350.000000,84.832245)}
{pt3dadd(175848.000000,111180.000000,61275.000000,90.272775)}
{pt3dadd(175908.000000,111288.000000,61250.000000,96.270960)}
{pt3dadd(175968.000000,111456.000000,61200.000000,103.561791)}
{pt3dadd(175968.000000,111564.000000,61075.000000,107.894552)}
{pt3dadd(175968.000000,111708.000000,61000.000000,126.000000)}

{create adhoc41}
{access adhoc41}
{connect adhoc41(1), adhoc27(0)}
{nseg = 1}
{strdef color color = "White"}
{pt3dclear()}
{pt3dadd(179772.000000,113940.000000,54525.000000,261.944950)}
{pt3dadd(179628.000000,113808.000000,54000.000000,201.091020)}
{pt3dadd(179544.000000,113808.000000,53750.000000,193.345422)}
{pt3dadd(179472.000000,113676.000000,53450.000000,180.049904)}
{pt3dadd(179412.000000,113532.000000,53225.000000,173.118728)}
{pt3dadd(179364.000000,113388.000000,52975.000000,177.716988)}
{pt3dadd(179340.000000,113220.000000,52775.000000,172.647404)}
{pt3dadd(179232.000000,113124.000000,52500.000000,164.971474)}
{pt3dadd(179172.000000,113052.000000,52225.000000,158.040298)}
{pt3dadd(179160.000000,112908.000000,52075.000000,163.109882)}
{pt3dadd(179148.000000,112860.000000,51800.000000,176.857832)}
{pt3dadd(179148.000000,112704.000000,51600.000000,185.743680)}
{pt3dadd(179280.000000,112560.000000,51400.000000,187.132830)}
{pt3dadd(179292.000000,112416.000000,51225.000000,198.071086)}
{pt3dadd(179292.000000,112188.000000,51125.000000,210.733480)}
{pt3dadd(179280.000000,111972.000000,50900.000000,215.604110)}
{pt3dadd(179340.000000,111756.000000,50625.000000,202.338966)}
{pt3dadd(179532.000000,111648.000000,50450.000000,214.214960)}
{pt3dadd(179616.000000,111492.000000,50200.000000,208.346288)}
{pt3dadd(179796.000000,111252.000000,50200.000000,195.683894)}
{pt3dadd(179904.000000,110940.000000,50100.000000,182.388376)}
{pt3dadd(180096.000000,110712.000000,50000.000000,188.375786)}
{pt3dadd(180252.000000,110580.000000,49825.000000,172.527642)}
{pt3dadd(180264.000000,110292.000000,49725.000000,198.974906)}
{pt3dadd(180288.000000,110076.000000,49450.000000,206.998606)}
{pt3dadd(180192.000000,109788.000000,49400.000000,213.160714)}
{pt3dadd(180396.000000,109344.000000,49200.000000,226.908664)}
{pt3dadd(180576.000000,109152.000000,48950.000000,244.809216)}
{pt3dadd(180756.000000,108864.000000,48900.000000,218.361952)}
{pt3dadd(180936.000000,108600.000000,48700.000000,214.154516)}
{pt3dadd(180984.000000,108408.000000,48425.000000,206.130816)}
{pt3dadd(181068.000000,108240.000000,48275.000000,185.072456)}
{pt3dadd(181164.000000,108096.000000,48125.000000,159.028256)}
{pt3dadd(181344.000000,108072.000000,47875.000000,141.541236)}
{pt3dadd(181488.000000,107976.000000,47750.000000,128.276092)}
{pt3dadd(181500.000000,107916.000000,47475.000000,132.092356)}
{pt3dadd(181608.000000,107928.000000,47200.000000,139.402766)}
{pt3dadd(181692.000000,107772.000000,46950.000000,171.002590)}
{pt3dadd(181776.000000,107544.000000,46775.000000,168.852050)}

{create adhoc42}
{access adhoc42}
{connect adhoc42(1), adhoc41(0)}
{nseg = 1}
{strdef color color = "White"}
{pt3dclear()}
{pt3dadd(181776.000000,107544.000000,46775.000000,168.852050)}
{pt3dadd(181932.000000,107652.000000,46550.000000,169.388417)}
{pt3dadd(182112.000000,107808.000000,46400.000000,166.647930)}
{pt3dadd(182232.000000,107844.000000,46150.000000,160.660520)}
{pt3dadd(182448.000000,107988.000000,45975.000000,163.800170)}
{pt3dadd(182616.000000,108120.000000,46000.000000,163.800170)}
{pt3dadd(182784.000000,108312.000000,46025.000000,169.668842)}
{pt3dadd(183048.000000,108456.000000,45925.000000,175.656252)}
{pt3dadd(183276.000000,108540.000000,45875.000000,178.504012)}
{pt3dadd(183504.000000,108684.000000,45875.000000,178.504012)}
{pt3dadd(183744.000000,108744.000000,45875.000000,180.365604)}
{pt3dadd(183972.000000,108888.000000,45750.000000,182.520632)}
{pt3dadd(184188.000000,109068.000000,45625.000000,191.850774)}
{pt3dadd(184368.000000,109284.000000,45525.000000,191.850774)}
{pt3dadd(184596.000000,109404.000000,45475.000000,184.540364)}
{pt3dadd(184896.000000,109488.000000,45375.000000,168.304034)}
{pt3dadd(185088.000000,109608.000000,45100.000000,156.818864)}
{pt3dadd(185244.000000,109776.000000,44775.000000,144.349072)}
{pt3dadd(185388.000000,109812.000000,44525.000000,145.430520)}
{pt3dadd(185400.000000,109848.000000,44275.000000,153.153800)}

{create adhoc43}
{access adhoc43}
{connect adhoc43(1), adhoc42(0)}
{nseg = 1}
{strdef color color = "White"}
{pt3dclear()}
{pt3dadd(185400.000000,109848.000000,44275.000000,153.153800)}
{pt3dadd(185472.000000,109620.000000,44100.000000,123.700008)}
{pt3dadd(185532.000000,109500.000000,43950.000000,123.420005)}
{pt3dadd(185544.000000,109356.000000,43800.000000,115.646387)}
{pt3dadd(185532.000000,109188.000000,43575.000000,115.646387)}
{pt3dadd(185556.000000,109080.000000,43350.000000,125.545044)}
{pt3dadd(185532.000000,109032.000000,43100.000000,117.401396)}
{pt3dadd(185628.000000,108876.000000,42950.000000,114.133499)}
{pt3dadd(185676.000000,108768.000000,42800.000000,109.185526)}
{pt3dadd(185724.000000,108528.000000,42700.000000,108.097092)}
{pt3dadd(185760.000000,108432.000000,42600.000000,100.683300)}
{pt3dadd(185652.000000,108408.000000,42500.000000,108.843540)}

{create adhoc44}
{access adhoc44}
{connect adhoc44(1), adhoc42(0)}
{nseg = 1}
{strdef color color = "White"}
{pt3dclear()}
{pt3dadd(185400.000000,109848.000000,44275.000000,153.153800)}
{pt3dadd(185340.000000,110064.000000,44300.000000,127.332447)}
{pt3dadd(185364.000000,110292.000000,44150.000000,118.655820)}
{pt3dadd(185400.000000,110472.000000,44025.000000,112.025060)}
{pt3dadd(185460.000000,110604.000000,43850.000000,110.001212)}
{pt3dadd(185532.000000,110808.000000,43775.000000,108.858354)}
{pt3dadd(185544.000000,110964.000000,43600.000000,110.118354)}
{pt3dadd(185508.000000,111156.000000,43500.000000,112.806862)}
{pt3dadd(185460.000000,111348.000000,43425.000000,115.266862)}
{pt3dadd(185412.000000,111516.000000,43325.000000,118.379144)}
{pt3dadd(185304.000000,111672.000000,43275.000000,114.326630)}
{pt3dadd(185292.000000,111828.000000,43250.000000,107.611490)}
{pt3dadd(185256.000000,111972.000000,43150.000000,111.866630)}
{pt3dadd(185244.000000,112176.000000,43075.000000,105.151490)}
{pt3dadd(185304.000000,112392.000000,43000.000000,108.754348)}
{pt3dadd(185424.000000,112584.000000,42925.000000,111.718428)}
{pt3dadd(185556.000000,112692.000000,42875.000000,115.973568)}
{pt3dadd(185688.000000,112812.000000,42850.000000,113.742276)}
{pt3dadd(185808.000000,112968.000000,42850.000000,115.766124)}
{pt3dadd(185868.000000,113136.000000,42725.000000,109.050984)}
{pt3dadd(185976.000000,113280.000000,42625.000000,106.086904)}
{pt3dadd(186024.000000,113412.000000,42475.000000,100.891532)}
{pt3dadd(186036.000000,113484.000000,42300.000000,95.366969)}
{pt3dadd(186084.000000,113676.000000,42175.000000,89.068875)}
{pt3dadd(186084.000000,113760.000000,42025.000000,85.568160)}
{pt3dadd(186084.000000,113796.000000,41850.000000,85.568160)}
{pt3dadd(186132.000000,113880.000000,41650.000000,86.508392)}
{pt3dadd(186168.000000,113952.000000,41525.000000,90.009107)}
{pt3dadd(186192.000000,114060.000000,41325.000000,90.009107)}
{pt3dadd(186180.000000,114192.000000,41175.000000,87.129060)}
{pt3dadd(186168.000000,114432.000000,41150.000000,89.056535)}
{pt3dadd(186060.000000,114540.000000,41075.000000,93.311675)}
{pt3dadd(185988.000000,114684.000000,40975.000000,98.766815)}
{pt3dadd(185856.000000,114816.000000,40900.000000,116.553505)}
{pt3dadd(185784.000000,114888.000000,40800.000000,126.000000)}

{create adhoc45}
{access adhoc45}
{connect adhoc45(1), adhoc41(0)}
{nseg = 1}
{strdef color color = "White"}
{pt3dclear()}
{pt3dadd(181776.000000,107544.000000,46775.000000,168.852050)}
{pt3dadd(181848.000000,107316.000000,46750.000000,115.981247)}
{pt3dadd(181884.000000,107088.000000,46750.000000,105.407086)}
{pt3dadd(181956.000000,106872.000000,46750.000000,89.545845)}
{pt3dadd(182028.000000,106644.000000,46825.000000,88.693028)}
{pt3dadd(182148.000000,106500.000000,46950.000000,93.641001)}
{pt3dadd(182172.000000,106320.000000,46950.000000,97.500540)}
{pt3dadd(182184.000000,106104.000000,47025.000000,94.325289)}
{pt3dadd(182208.000000,105912.000000,47100.000000,97.148223)}
{pt3dadd(182340.000000,105732.000000,47150.000000,96.336016)}
{pt3dadd(182544.000000,105696.000000,47125.000000,86.183610)}
{pt3dadd(182760.000000,105708.000000,47100.000000,81.220726)}

{create adhoc46}
{access adhoc46}
{connect adhoc46(1), adhoc8(0)}
{nseg = 1}
{strdef color color = "White"}
{pt3dclear()}
{pt3dadd(187056.000000,121080.000000,59875.000000,630.401730)}
{pt3dadd(186108.000000,120936.000000,60000.000000,389.555800)}
{pt3dadd(185748.000000,120876.000000,60075.000000,303.127656)}
{pt3dadd(185424.000000,120720.000000,60200.000000,210.817720)}
{pt3dadd(185196.000000,120600.000000,60225.000000,192.152332)}
{pt3dadd(184896.000000,120456.000000,60325.000000,179.489938)}
{pt3dadd(184620.000000,120360.000000,60425.000000,185.358610)}
{pt3dadd(184368.000000,120336.000000,60575.000000,198.451894)}
{pt3dadd(184128.000000,120300.000000,60650.000000,207.782036)}
{pt3dadd(183912.000000,120288.000000,60600.000000,204.147494)}
{pt3dadd(183624.000000,120336.000000,60725.000000,190.915614)}
{pt3dadd(183360.000000,120372.000000,60775.000000,178.445822)}
{pt3dadd(183108.000000,120324.000000,60875.000000,178.445822)}
{pt3dadd(182880.000000,120288.000000,60875.000000,169.115680)}
{pt3dadd(182616.000000,120204.000000,60975.000000,176.757302)}
{pt3dadd(182328.000000,120168.000000,61000.000000,198.012882)}
{pt3dadd(182124.000000,120084.000000,61175.000000,217.276396)}
{pt3dadd(181896.000000,120096.000000,61225.000000,224.409806)}
{pt3dadd(181668.000000,120036.000000,61275.000000,229.732868)}
{pt3dadd(181452.000000,120012.000000,61350.000000,225.725788)}
{pt3dadd(181164.000000,119940.000000,61375.000000,219.563680)}
{pt3dadd(180936.000000,119916.000000,61475.000000,203.439816)}
{pt3dadd(180732.000000,119880.000000,61525.000000,188.282706)}
{pt3dadd(180456.000000,119808.000000,61600.000000,190.237378)}
{pt3dadd(180228.000000,119724.000000,61675.000000,190.237378)}
{pt3dadd(180012.000000,119616.000000,61625.000000,184.914316)}
{pt3dadd(179796.000000,119580.000000,61700.000000,184.914316)}
{pt3dadd(179544.000000,119544.000000,61725.000000,179.844732)}
{pt3dadd(179316.000000,119424.000000,61925.000000,169.427348)}
{pt3dadd(179112.000000,119280.000000,62050.000000,167.565756)}
{pt3dadd(178992.000000,119148.000000,62300.000000,160.255346)}
{pt3dadd(178860.000000,119016.000000,62550.000000,154.267936)}
{pt3dadd(178824.000000,118848.000000,62750.000000,157.564570)}
{pt3dadd(178740.000000,118668.000000,62950.000000,157.564570)}
{pt3dadd(178548.000000,118464.000000,63125.000000,159.426162)}
{pt3dadd(178500.000000,118308.000000,63450.000000,172.059634)}
{pt3dadd(178356.000000,118176.000000,63550.000000,196.665624)}
{pt3dadd(178212.000000,118080.000000,63775.000000,218.965554)}
{pt3dadd(178140.000000,117936.000000,63975.000000,246.093654)}
{pt3dadd(178104.000000,117744.000000,64225.000000,279.844517)}
{pt3dadd(178152.000000,117468.000000,64425.000000,288.794300)}

{create adhoc47}
{access adhoc47}
{connect adhoc47(1), adhoc46(0)}
{nseg = 1}
{strdef color color = "White"}
{pt3dclear()}
{pt3dadd(178152.000000,117468.000000,64425.000000,288.794300)}
{pt3dadd(178236.000000,117264.000000,64650.000000,229.834127)}
{pt3dadd(178320.000000,117096.000000,64750.000000,210.173178)}
{pt3dadd(178356.000000,116976.000000,64850.000000,180.197318)}
{pt3dadd(178368.000000,116832.000000,65075.000000,171.311470)}
{pt3dadd(178272.000000,116664.000000,65225.000000,161.390148)}
{pt3dadd(178152.000000,116628.000000,65425.000000,158.677998)}
{pt3dadd(178044.000000,116616.000000,65650.000000,141.007510)}
{pt3dadd(177888.000000,116640.000000,65825.000000,138.654574)}
{pt3dadd(178116.000000,116460.000000,66075.000000,149.986318)}
{pt3dadd(177948.000000,116364.000000,66475.000000,154.892888)}
{pt3dadd(177780.000000,116340.000000,66950.000000,166.004674)}
{pt3dadd(177684.000000,116256.000000,67100.000000,175.629856)}
{pt3dadd(177600.000000,116172.000000,67300.000000,184.278512)}
{pt3dadd(177504.000000,116052.000000,67425.000000,182.207370)}
{pt3dadd(177384.000000,115992.000000,67550.000000,193.797394)}
{pt3dadd(177264.000000,115944.000000,67850.000000,198.530818)}
{pt3dadd(177144.000000,115968.000000,68000.000000,199.258226)}
{pt3dadd(176964.000000,116016.000000,68100.000000,196.089910)}
{pt3dadd(176772.000000,116064.000000,68300.000000,188.745732)}
{pt3dadd(176484.000000,115968.000000,68700.000000,174.146684)}
{pt3dadd(176316.000000,115944.000000,69150.000000,162.751878)}
{pt3dadd(176220.000000,116028.000000,69450.000000,150.035043)}
{pt3dadd(176232.000000,116172.000000,69700.000000,160.547537)}
{pt3dadd(176304.000000,116124.000000,69825.000000,171.602859)}
{pt3dadd(176364.000000,116064.000000,70025.000000,186.201907)}
{pt3dadd(176448.000000,116076.000000,70275.000000,194.741881)}
{pt3dadd(176508.000000,115944.000000,70450.000000,204.131986)}
{pt3dadd(176508.000000,115836.000000,70750.000000,194.586928)}
{pt3dadd(176628.000000,115476.000000,70950.000000,180.363290)}
{pt3dadd(176772.000000,115308.000000,71125.000000,168.773266)}
{pt3dadd(176928.000000,115236.000000,71325.000000,160.233292)}
{pt3dadd(177372.000000,115320.000000,71525.000000,157.299436)}
{pt3dadd(177492.000000,115368.000000,71600.000000,154.860076)}
{pt3dadd(177672.000000,115392.000000,71675.000000,153.388152)}
{pt3dadd(177792.000000,115428.000000,71800.000000,155.092086)}
{pt3dadd(177936.000000,115512.000000,71875.000000,161.084270)}
{pt3dadd(178128.000000,115584.000000,71925.000000,152.483580)}
{pt3dadd(178392.000000,115716.000000,72125.000000,145.012547)}
{pt3dadd(178656.000000,115932.000000,72325.000000,138.639886)}
{pt3dadd(179064.000000,115908.000000,72400.000000,133.217084)}
{pt3dadd(179256.000000,115956.000000,72600.000000,121.170252)}
{pt3dadd(179376.000000,115860.000000,72625.000000,128.006452)}
{pt3dadd(179520.000000,115896.000000,72650.000000,136.949409)}
{pt3dadd(179688.000000,115932.000000,72725.000000,144.793994)}
{pt3dadd(179808.000000,115920.000000,72775.000000,141.425750)}
{pt3dadd(180000.000000,115944.000000,72800.000000,133.782064)}
{pt3dadd(180120.000000,115920.000000,72825.000000,143.596272)}
{pt3dadd(180228.000000,116052.000000,73000.000000,156.179908)}
{pt3dadd(180324.000000,116004.000000,73125.000000,149.613424)}
{pt3dadd(180456.000000,116016.000000,73350.000000,150.658462)}
{pt3dadd(180804.000000,116100.000000,73550.000000,164.356796)}
{pt3dadd(180972.000000,116112.000000,73725.000000,156.223490)}
{pt3dadd(181248.000000,116052.000000,73925.000000,146.305010)}
{pt3dadd(181452.000000,115908.000000,74150.000000,154.417014)}
{pt3dadd(181608.000000,115824.000000,74325.000000,160.459088)}
{pt3dadd(181824.000000,115632.000000,74525.000000,158.987164)}
{pt3dadd(182040.000000,115512.000000,74675.000000,166.928122)}
{pt3dadd(182256.000000,115248.000000,74825.000000,164.262966)}
{pt3dadd(182424.000000,115068.000000,74950.000000,158.508610)}
{pt3dadd(182616.000000,114468.000000,75175.000000,148.649000)}
{pt3dadd(182640.000000,113712.000000,75300.000000,141.291172)}
{pt3dadd(182544.000000,113580.000000,75500.000000,130.613302)}
{pt3dadd(182532.000000,113544.000000,75650.000000,126.404466)}
{pt3dadd(182544.000000,113388.000000,75825.000000,123.922008)}
{pt3dadd(182604.000000,113196.000000,75975.000000,124.046818)}
{pt3dadd(182484.000000,113064.000000,76100.000000,121.192856)}
{pt3dadd(182460.000000,112980.000000,76300.000000,118.835208)}
{pt3dadd(182484.000000,113112.000000,76475.000000,118.835208)}
{pt3dadd(182460.000000,113148.000000,76675.000000,122.652744)}
{pt3dadd(182640.000000,113208.000000,76875.000000,125.010392)}
{pt3dadd(182652.000000,113256.000000,77100.000000,134.417534)}
{pt3dadd(182688.000000,113352.000000,77375.000000,145.856268)}
{pt3dadd(182844.000000,113304.000000,77575.000000,156.726486)}
{pt3dadd(182916.000000,113160.000000,77775.000000,172.183880)}
{pt3dadd(182856.000000,113112.000000,77950.000000,204.537548)}
{pt3dadd(182832.000000,112980.000000,78225.000000,226.253506)}
{pt3dadd(182796.000000,112836.000000,78575.000000,233.964892)}
{pt3dadd(182988.000000,112848.000000,78650.000000,232.175760)}
{pt3dadd(183108.000000,112776.000000,78900.000000,213.916752)}
{pt3dadd(183216.000000,112680.000000,79075.000000,184.299996)}
{pt3dadd(183300.000000,112644.000000,79300.000000,169.732860)}
{pt3dadd(183408.000000,112668.000000,79375.000000,157.149224)}
{pt3dadd(183480.000000,112704.000000,79800.000000,142.942748)}
{pt3dadd(183600.000000,112668.000000,79875.000000,150.432094)}
{pt3dadd(183708.000000,112680.000000,79950.000000,151.447640)}
{pt3dadd(183540.000000,112680.000000,80125.000000,141.556398)}
{pt3dadd(183492.000000,112836.000000,80500.000000,126.257848)}
{pt3dadd(183360.000000,112860.000000,80675.000000,122.205997)}
{pt3dadd(183216.000000,112872.000000,80900.000000,106.304973)}
{pt3dadd(183204.000000,112836.000000,81050.000000,97.217953)}
{pt3dadd(183192.000000,112812.000000,81250.000000,95.670461)}
{pt3dadd(183252.000000,112860.000000,81450.000000,97.099351)}
{pt3dadd(183228.000000,112836.000000,81725.000000,97.787510)}
{pt3dadd(183192.000000,112740.000000,81975.000000,101.778426)}
{pt3dadd(183324.000000,112740.000000,82200.000000,100.336542)}
{pt3dadd(183348.000000,112656.000000,82350.000000,99.058441)}
{pt3dadd(183420.000000,112488.000000,82525.000000,100.994003)}
{pt3dadd(183504.000000,112272.000000,82675.000000,112.069285)}
{pt3dadd(183636.000000,112212.000000,82875.000000,108.203959)}
{pt3dadd(183840.000000,112176.000000,83100.000000,108.688363)}
{pt3dadd(183936.000000,112116.000000,83250.000000,84.744720)}

{create adhoc48}
{access adhoc48}
{connect adhoc48(1), adhoc47(0)}
{nseg = 1}
{strdef color color = "White"}
{pt3dclear()}
{pt3dadd(183936.000000,112116.000000,83250.000000,84.744720)}
{pt3dadd(184092.000000,111996.000000,83775.000000,115.134293)}
{pt3dadd(184152.000000,111900.000000,84275.000000,123.797750)}
{pt3dadd(184176.000000,112068.000000,84500.000000,133.578730)}
{pt3dadd(184212.000000,112140.000000,84825.000000,143.093150)}

{create adhoc49}
{access adhoc49}
{connect adhoc49(1), adhoc48(0)}
{nseg = 1}
{strdef color color = "White"}
{pt3dclear()}
{pt3dadd(184212.000000,112140.000000,84825.000000,143.093150)}
{pt3dadd(184356.000000,112248.000000,85025.000000,148.279190)}
{pt3dadd(184644.000000,112248.000000,85400.000000,163.523820)}
{pt3dadd(184608.000000,112416.000000,85600.000000,188.827040)}

{create adhoc50}
{access adhoc50}
{connect adhoc50(1), adhoc49(0)}
{nseg = 1}
{strdef color color = "White"}
{pt3dclear()}
{pt3dadd(184608.000000,112416.000000,85600.000000,188.827040)}
{pt3dadd(184812.000000,112404.000000,86225.000000,174.097443)}
{pt3dadd(184848.000000,112476.000000,86325.000000,162.825064)}
{pt3dadd(184824.000000,112248.000000,86425.000000,149.278766)}
{pt3dadd(184848.000000,112152.000000,86475.000000,145.952036)}
{pt3dadd(185208.000000,112080.000000,87075.000000,139.260742)}
{pt3dadd(185280.000000,111996.000000,87125.000000,133.588602)}
{pt3dadd(185292.000000,111864.000000,87300.000000,128.423835)}
{pt3dadd(185448.000000,111756.000000,87525.000000,119.581335)}
{pt3dadd(185472.000000,111672.000000,87900.000000,95.615555)}

{create adhoc51}
{access adhoc51}
{connect adhoc51(1), adhoc50(0)}
{nseg = 1}
{strdef color color = "White"}
{pt3dclear()}
{pt3dadd(185472.000000,111672.000000,87900.000000,95.615555)}
{pt3dadd(185508.000000,111528.000000,88725.000000,98.288925)}
{pt3dadd(185700.000000,111432.000000,89025.000000,110.595935)}
{pt3dadd(185760.000000,111276.000000,89225.000000,116.902888)}
{pt3dadd(185724.000000,111168.000000,89225.000000,121.196876)}
{pt3dadd(185724.000000,111060.000000,89375.000000,126.898552)}
{pt3dadd(185700.000000,110940.000000,89475.000000,124.925146)}
{pt3dadd(185712.000000,110844.000000,89475.000000,121.627414)}
{pt3dadd(185688.000000,110760.000000,89525.000000,124.233996)}
{pt3dadd(185640.000000,110616.000000,89525.000000,132.304650)}
{pt3dadd(185580.000000,110460.000000,89625.000000,125.654158)}
{pt3dadd(185556.000000,110256.000000,89675.000000,123.289913)}
{pt3dadd(185520.000000,110052.000000,89800.000000,124.335982)}
{pt3dadd(185388.000000,109944.000000,89950.000000,123.555174)}
{pt3dadd(185316.000000,109836.000000,90050.000000,108.477480)}
{pt3dadd(185292.000000,109728.000000,90050.000000,101.150979)}
{pt3dadd(185244.000000,109596.000000,90150.000000,98.010282)}
{pt3dadd(185220.000000,109512.000000,90200.000000,95.165946)}
{pt3dadd(185160.000000,109416.000000,90375.000000,92.129218)}
{pt3dadd(185160.000000,109308.000000,90450.000000,99.136258)}
{pt3dadd(185124.000000,109176.000000,90425.000000,115.523099)}
{pt3dadd(185172.000000,109344.000000,90725.000000,127.475817)}
{pt3dadd(185280.000000,109260.000000,91075.000000,136.389352)}
{pt3dadd(185232.000000,109116.000000,91325.000000,143.080646)}
{pt3dadd(185232.000000,109092.000000,91450.000000,140.828983)}
{pt3dadd(185328.000000,109140.000000,91525.000000,139.357205)}
{pt3dadd(185208.000000,109080.000000,91675.000000,136.917845)}
{pt3dadd(185196.000000,109068.000000,91975.000000,141.096629)}
{pt3dadd(185160.000000,109008.000000,92050.000000,147.031297)}
{pt3dadd(185076.000000,109068.000000,92025.000000,161.077150)}

{create adhoc52}
{access adhoc52}
{connect adhoc52(1), adhoc50(0)}
{nseg = 1}
{strdef color color = "White"}
{pt3dclear()}
{pt3dadd(185472.000000,111672.000000,87900.000000,95.615555)}
{pt3dadd(185544.000000,111780.000000,88500.000000,119.637698)}
{pt3dadd(185424.000000,111552.000000,87575.000000,129.789700)}

{create adhoc53}
{access adhoc53}
{connect adhoc53(1), adhoc49(0)}
{nseg = 1}
{strdef color color = "White"}
{pt3dclear()}
{pt3dadd(184608.000000,112416.000000,85600.000000,188.827040)}
{pt3dadd(184476.000000,112536.000000,85575.000000,200.177897)}
{pt3dadd(184404.000000,112608.000000,85500.000000,194.236450)}

{create adhoc54}
{access adhoc54}
{connect adhoc54(1), adhoc48(0)}
{nseg = 1}
{strdef color color = "White"}
{pt3dclear()}
{pt3dadd(184212.000000,112140.000000,84825.000000,143.093150)}
{pt3dadd(184140.000000,112248.000000,85025.000000,180.204753)}
{pt3dadd(184044.000000,112368.000000,85175.000000,162.979482)}
{pt3dadd(184008.000000,112404.000000,85250.000000,91.417336)}

{create adhoc55}
{access adhoc55}
{connect adhoc55(1), adhoc47(0)}
{nseg = 1}
{strdef color color = "White"}
{pt3dclear()}
{pt3dadd(183936.000000,112116.000000,83250.000000,84.744720)}
{pt3dadd(183960.000000,111960.000000,83375.000000,105.499730)}

{create adhoc56}
{access adhoc56}
{connect adhoc56(1), adhoc46(0)}
{nseg = 1}
{strdef color color = "White"}
{pt3dclear()}
{pt3dadd(178152.000000,117468.000000,64425.000000,288.794300)}
{pt3dadd(177720.000000,117336.000000,64400.000000,155.961997)}
{pt3dadd(177444.000000,117276.000000,64350.000000,138.522058)}
{pt3dadd(177108.000000,117228.000000,64375.000000,100.508058)}
{pt3dadd(176904.000000,117204.000000,64400.000000,104.367597)}
{pt3dadd(176700.000000,117036.000000,64425.000000,110.458428)}
{pt3dadd(176484.000000,117024.000000,64425.000000,111.445671)}
{pt3dadd(176244.000000,116976.000000,64425.000000,114.028671)}
{pt3dadd(176016.000000,116904.000000,64400.000000,123.455961)}
{pt3dadd(175848.000000,116808.000000,64250.000000,125.687253)}
{pt3dadd(175632.000000,116712.000000,64225.000000,124.544395)}
{pt3dadd(175416.000000,116592.000000,64250.000000,121.721461)}
{pt3dadd(175212.000000,116544.000000,64275.000000,123.110611)}
{pt3dadd(175104.000000,116436.000000,64375.000000,121.721461)}
{pt3dadd(174900.000000,116364.000000,64400.000000,117.466321)}
{pt3dadd(174672.000000,116244.000000,64400.000000,112.518348)}
{pt3dadd(174468.000000,116220.000000,64450.000000,119.809179)}
{pt3dadd(174348.000000,116124.000000,64550.000000,124.407439)}
{pt3dadd(174216.000000,116064.000000,64625.000000,115.429067)}
{pt3dadd(174000.000000,115968.000000,64625.000000,120.884207)}
{pt3dadd(173784.000000,115932.000000,64675.000000,122.719898)}
{pt3dadd(173592.000000,115920.000000,64750.000000,126.692048)}
{pt3dadd(173376.000000,115848.000000,64800.000000,122.093788)}
{pt3dadd(173160.000000,115716.000000,64875.000000,125.057868)}
{pt3dadd(173028.000000,115632.000000,64900.000000,123.857868)}
{pt3dadd(172824.000000,115548.000000,64975.000000,133.285158)}
{pt3dadd(172644.000000,115452.000000,65025.000000,133.285158)}
{pt3dadd(172428.000000,115416.000000,65150.000000,125.881716)}
{pt3dadd(172224.000000,115392.000000,65200.000000,125.881716)}
{pt3dadd(171984.000000,115368.000000,65275.000000,116.615634)}
{pt3dadd(171780.000000,115404.000000,65350.000000,109.212192)}
{pt3dadd(171516.000000,115392.000000,65425.000000,99.784902)}
{pt3dadd(171276.000000,115332.000000,65450.000000,90.743906)}
{pt3dadd(171144.000000,115260.000000,65550.000000,82.339296)}
{pt3dadd(170964.000000,115260.000000,65625.000000,84.661730)}
{pt3dadd(170820.000000,115260.000000,65675.000000,79.137167)}
{pt3dadd(170604.000000,115272.000000,65800.000000,80.124410)}
{pt3dadd(170436.000000,115188.000000,65875.000000,89.165406)}
{pt3dadd(170292.000000,115080.000000,65825.000000,98.658450)}
{pt3dadd(170076.000000,115020.000000,65800.000000,100.406726)}
{pt3dadd(169788.000000,115008.000000,65775.000000,100.406726)}
{pt3dadd(169560.000000,114948.000000,65825.000000,92.402335)}
{pt3dadd(169344.000000,114864.000000,65800.000000,91.365730)}
{pt3dadd(169128.000000,114900.000000,65800.000000,82.839934)}
{pt3dadd(168924.000000,114960.000000,65950.000000,103.660515)}

{create adhoc57}
{access adhoc57}
{connect adhoc57(1), adhoc7(0)}
{nseg = 1}
{strdef color color = "White"}
{pt3dclear()}
{pt3dadd(190920.000000,121044.000000,62500.000000,426.680730)}
{pt3dadd(191028.000000,122088.000000,62350.000000,279.054057)}
{pt3dadd(191088.000000,122364.000000,62300.000000,243.757786)}
{pt3dadd(191136.000000,122700.000000,62075.000000,193.880570)}
{pt3dadd(191124.000000,122940.000000,61825.000000,188.291356)}
{pt3dadd(191280.000000,123156.000000,61750.000000,179.405508)}
{pt3dadd(191364.000000,123372.000000,61675.000000,169.484186)}
{pt3dadd(191400.000000,123600.000000,61575.000000,158.712306)}
{pt3dadd(191544.000000,123852.000000,61550.000000,148.453376)}
{pt3dadd(191676.000000,124104.000000,61400.000000,134.763154)}
{pt3dadd(191868.000000,124272.000000,61225.000000,130.383858)}
{pt3dadd(192072.000000,124464.000000,60925.000000,122.980416)}
{pt3dadd(192204.000000,124728.000000,60775.000000,118.867360)}
{pt3dadd(192204.000000,124704.000000,60500.000000,108.843540)}

{create adhoc58}
{access adhoc58}
{connect adhoc58(1), adhoc6(0)}
{nseg = 1}
{strdef color color = "White"}
{pt3dclear()}
{pt3dadd(192444.000000,117840.000000,69325.000000,661.921800)}
{pt3dadd(192228.000000,116700.000000,69175.000000,422.796600)}
{pt3dadd(192072.000000,116268.000000,69300.000000,390.747320)}
{pt3dadd(191976.000000,115908.000000,69150.000000,303.618540)}
{pt3dadd(191904.000000,115584.000000,69075.000000,297.980180)}
{pt3dadd(191796.000000,115248.000000,69025.000000,278.545207)}
{pt3dadd(191664.000000,114984.000000,68875.000000,275.042200)}

{create adhoc59}
{access adhoc59}
{connect adhoc59(1), adhoc58(0)}
{nseg = 1}
{strdef color color = "White"}
{pt3dclear()}
{pt3dadd(191664.000000,114984.000000,68875.000000,275.042200)}
{pt3dadd(191544.000000,114672.000000,68850.000000,250.829970)}
{pt3dadd(191220.000000,114372.000000,68925.000000,260.645832)}
{pt3dadd(190920.000000,114168.000000,68975.000000,263.396252)}
{pt3dadd(190752.000000,113880.000000,68950.000000,277.870366)}
{pt3dadd(190608.000000,113652.000000,68850.000000,301.632918)}
{pt3dadd(190560.000000,113412.000000,68875.000000,307.002788)}
{pt3dadd(190308.000000,113088.000000,68750.000000,301.632918)}
{pt3dadd(190092.000000,112872.000000,68650.000000,296.263048)}
{pt3dadd(189840.000000,112620.000000,68650.000000,287.158804)}
{pt3dadd(189624.000000,112296.000000,68600.000000,272.684690)}
{pt3dadd(189492.000000,112032.000000,68775.000000,260.181410)}
{pt3dadd(189396.000000,111768.000000,68750.000000,260.181410)}
{pt3dadd(189216.000000,111564.000000,68775.000000,265.551280)}
{pt3dadd(189108.000000,111288.000000,68925.000000,268.439220)}
{pt3dadd(188964.000000,110988.000000,68900.000000,279.729374)}
{pt3dadd(188880.000000,110712.000000,69050.000000,303.474673)}
{pt3dadd(188760.000000,110484.000000,69100.000000,318.395720)}

{create adhoc60}
{access adhoc60}
{connect adhoc60(1), adhoc59(0)}
{nseg = 1}
{strdef color color = "White"}
{pt3dclear()}
{pt3dadd(188760.000000,110484.000000,69100.000000,318.395720)}
{pt3dadd(188724.000000,110184.000000,69050.000000,280.761873)}
{pt3dadd(188844.000000,109956.000000,68800.000000,253.207364)}
{pt3dadd(188940.000000,109716.000000,68750.000000,224.987150)}
{pt3dadd(189024.000000,109404.000000,68625.000000,208.057090)}
{pt3dadd(189036.000000,109128.000000,68475.000000,191.127030)}
{pt3dadd(189108.000000,108804.000000,68350.000000,184.656814)}
{pt3dadd(189096.000000,108588.000000,68125.000000,192.680514)}
{pt3dadd(189060.000000,108360.000000,67875.000000,207.115858)}
{pt3dadd(189048.000000,108144.000000,67575.000000,226.665368)}
{pt3dadd(189024.000000,107940.000000,67425.000000,248.965298)}
{pt3dadd(189012.000000,107628.000000,67200.000000,265.676014)}
{pt3dadd(188940.000000,107424.000000,66950.000000,275.428874)}
{pt3dadd(188916.000000,107160.000000,66875.000000,262.766480)}
{pt3dadd(188916.000000,106860.000000,66850.000000,246.851512)}
{pt3dadd(188856.000000,106536.000000,66850.000000,234.348232)}
{pt3dadd(188700.000000,106296.000000,66875.000000,219.689924)}
{pt3dadd(188532.000000,106020.000000,67050.000000,191.141484)}
{pt3dadd(188736.000000,105816.000000,67075.000000,186.071900)}
{pt3dadd(188832.000000,105600.000000,67125.000000,186.071900)}
{pt3dadd(188940.000000,105336.000000,67300.000000,176.275250)}
{pt3dadd(189024.000000,105060.000000,67450.000000,172.268170)}
{pt3dadd(189048.000000,104772.000000,67550.000000,195.702444)}
{pt3dadd(188988.000000,104532.000000,67550.000000,218.548588)}
{pt3dadd(188940.000000,104292.000000,67600.000000,237.213976)}
{pt3dadd(189024.000000,104004.000000,67725.000000,265.434190)}
{pt3dadd(189024.000000,103740.000000,67975.000000,284.099578)}
{pt3dadd(188892.000000,103500.000000,68100.000000,275.253448)}
{pt3dadd(188616.000000,103332.000000,68350.000000,259.338480)}
{pt3dadd(188364.000000,103332.000000,68575.000000,229.362620)}
{pt3dadd(188280.000000,103260.000000,68825.000000,194.855626)}
{pt3dadd(188208.000000,103392.000000,69050.000000,161.096766)}
{pt3dadd(188148.000000,103560.000000,69275.000000,141.817330)}
{pt3dadd(188172.000000,103716.000000,69575.000000,130.506858)}
{pt3dadd(188244.000000,103812.000000,69800.000000,130.506858)}
{pt3dadd(188280.000000,103860.000000,70025.000000,122.066811)}
{pt3dadd(188208.000000,103800.000000,70300.000000,124.526811)}
{pt3dadd(188184.000000,103800.000000,70550.000000,141.851575)}
{pt3dadd(188196.000000,103668.000000,70800.000000,171.827435)}
{pt3dadd(188376.000000,103536.000000,71050.000000,204.691235)}
{pt3dadd(188388.000000,103452.000000,71300.000000,219.418062)}
{pt3dadd(188328.000000,103452.000000,71550.000000,228.416992)}
{pt3dadd(188472.000000,103404.000000,71800.000000,230.371664)}
{pt3dadd(188592.000000,103404.000000,72050.000000,209.844684)}
{pt3dadd(188748.000000,103380.000000,72275.000000,182.968294)}
{pt3dadd(188916.000000,103428.000000,72450.000000,176.681514)}
{pt3dadd(189036.000000,103368.000000,72675.000000,161.954687)}
{pt3dadd(189144.000000,103380.000000,72925.000000,147.366543)}
{pt3dadd(189156.000000,103416.000000,73150.000000,139.306813)}
{pt3dadd(189252.000000,103488.000000,73350.000000,136.167163)}
{pt3dadd(189360.000000,103500.000000,73525.000000,130.995013)}
{pt3dadd(189456.000000,103440.000000,73775.000000,136.722910)}
{pt3dadd(189420.000000,103404.000000,74000.000000,140.893670)}
{pt3dadd(189444.000000,103464.000000,74200.000000,140.893670)}
{pt3dadd(189432.000000,103548.000000,74450.000000,138.045910)}
{pt3dadd(189348.000000,103620.000000,74700.000000,144.676670)}
{pt3dadd(189300.000000,103584.000000,74925.000000,153.675600)}
{pt3dadd(189132.000000,103500.000000,75225.000000,156.815250)}
{pt3dadd(189084.000000,103464.000000,75575.000000,158.273860)}
{pt3dadd(189192.000000,103404.000000,75775.000000,156.950860)}
{pt3dadd(189408.000000,103452.000000,75925.000000,152.780100)}
{pt3dadd(189468.000000,103584.000000,76100.000000,140.178312)}
{pt3dadd(189504.000000,103596.000000,76350.000000,130.407902)}
{pt3dadd(189504.000000,103572.000000,76600.000000,121.545850)}
{pt3dadd(189552.000000,103692.000000,76750.000000,125.716610)}
{pt3dadd(189540.000000,103752.000000,77025.000000,128.428760)}
{pt3dadd(189432.000000,103704.000000,77225.000000,141.030548)}
{pt3dadd(189420.000000,103608.000000,77450.000000,169.419538)}
{pt3dadd(189372.000000,103608.000000,77700.000000,197.545104)}
{pt3dadd(189408.000000,103692.000000,77975.000000,229.570323)}
{pt3dadd(189516.000000,103728.000000,78200.000000,249.471370)}

{create adhoc61}
{access adhoc61}
{connect adhoc61(1), adhoc60(0)}
{nseg = 1}
{strdef color color = "White"}
{pt3dclear()}
{pt3dadd(189516.000000,103728.000000,78200.000000,249.471370)}
{pt3dadd(189504.000000,103596.000000,78450.000000,241.740213)}
{pt3dadd(189432.000000,103488.000000,78700.000000,198.532030)}
{pt3dadd(189516.000000,103560.000000,78950.000000,168.382616)}
{pt3dadd(189684.000000,103800.000000,78925.000000,144.948342)}
{pt3dadd(189684.000000,103944.000000,79100.000000,123.692762)}
{pt3dadd(189732.000000,104208.000000,79275.000000,117.062002)}
{pt3dadd(189840.000000,104352.000000,79450.000000,124.835620)}
{pt3dadd(189876.000000,104520.000000,79600.000000,132.873760)}
{pt3dadd(189840.000000,104676.000000,79775.000000,129.270902)}
{pt3dadd(189936.000000,104904.000000,79950.000000,128.128044)}
{pt3dadd(189972.000000,105084.000000,80175.000000,134.758804)}
{pt3dadd(190044.000000,105204.000000,80375.000000,130.588044)}
{pt3dadd(190164.000000,105288.000000,80600.000000,134.967340)}
{pt3dadd(190224.000000,105384.000000,80850.000000,138.570198)}
{pt3dadd(190368.000000,105492.000000,81125.000000,140.913056)}
{pt3dadd(190536.000000,105588.000000,81350.000000,134.282296)}
{pt3dadd(190680.000000,105708.000000,81450.000000,139.984592)}
{pt3dadd(190788.000000,105828.000000,81625.000000,127.567156)}
{pt3dadd(190920.000000,106020.000000,81725.000000,122.875864)}
{pt3dadd(190980.000000,106224.000000,81775.000000,119.444572)}
{pt3dadd(191136.000000,106464.000000,81775.000000,119.444572)}
{pt3dadd(191256.000000,106644.000000,81875.000000,106.086904)}
{pt3dadd(191256.000000,106836.000000,82075.000000,108.110752)}
{pt3dadd(191328.000000,107004.000000,82200.000000,100.374347)}
{pt3dadd(191460.000000,107208.000000,82300.000000,94.849784)}
{pt3dadd(191580.000000,107364.000000,82450.000000,87.093929)}
{pt3dadd(191712.000000,107532.000000,82550.000000,87.093929)}
{pt3dadd(191832.000000,107676.000000,82625.000000,83.234390)}
{pt3dadd(191892.000000,107844.000000,82800.000000,86.258439)}
{pt3dadd(191904.000000,108060.000000,82950.000000,86.258439)}
{pt3dadd(191976.000000,108192.000000,83100.000000,91.783002)}
{pt3dadd(192072.000000,108324.000000,83225.000000,92.723234)}
{pt3dadd(192192.000000,108444.000000,83325.000000,94.558925)}
{pt3dadd(192252.000000,108576.000000,83425.000000,94.558925)}
{pt3dadd(192372.000000,108732.000000,83500.000000,97.119408)}
{pt3dadd(192420.000000,108828.000000,83650.000000,92.676400)}
{pt3dadd(192480.000000,108912.000000,83775.000000,94.023140)}

{create adhoc62}
{access adhoc62}
{connect adhoc62(1), adhoc60(0)}
{nseg = 1}
{strdef color color = "White"}
{pt3dclear()}
{pt3dadd(189516.000000,103728.000000,78200.000000,249.471370)}
{pt3dadd(189708.000000,104412.000000,78200.000000,180.513390)}
{pt3dadd(189780.000000,104652.000000,78100.000000,155.500137)}
{pt3dadd(189792.000000,104868.000000,78075.000000,127.374571)}
{pt3dadd(189804.000000,105072.000000,78000.000000,113.800163)}
{pt3dadd(189744.000000,105168.000000,77800.000000,103.073515)}
{pt3dadd(189744.000000,105324.000000,77625.000000,101.813515)}
{pt3dadd(189756.000000,105444.000000,77400.000000,116.540342)}
{pt3dadd(189804.000000,105588.000000,77175.000000,118.771634)}
{pt3dadd(189840.000000,105708.000000,76950.000000,122.447385)}
{pt3dadd(189900.000000,105852.000000,76800.000000,127.159741)}
{pt3dadd(189984.000000,105948.000000,76675.000000,122.691844)}
{pt3dadd(190092.000000,106056.000000,76500.000000,107.965017)}
{pt3dadd(190248.000000,106152.000000,76350.000000,100.209162)}
{pt3dadd(190332.000000,106260.000000,76225.000000,110.107819)}
{pt3dadd(190308.000000,106560.000000,76075.000000,117.511261)}
{pt3dadd(190308.000000,106788.000000,76025.000000,119.636300)}
{pt3dadd(190344.000000,107064.000000,76025.000000,126.687197)}
{pt3dadd(190500.000000,107244.000000,75950.000000,131.175155)}
{pt3dadd(190632.000000,107484.000000,75975.000000,118.953742)}
{pt3dadd(190692.000000,107688.000000,76175.000000,103.660515)}

{create adhoc63}
{access adhoc63}
{connect adhoc63(1), adhoc59(0)}
{nseg = 1}
{strdef color color = "White"}
{pt3dclear()}
{pt3dadd(188760.000000,110484.000000,69100.000000,318.395720)}
{pt3dadd(188208.000000,110448.000000,69600.000000,209.382930)}
{pt3dadd(187932.000000,110352.000000,69825.000000,195.023934)}
{pt3dadd(187752.000000,110220.000000,69900.000000,157.804790)}
{pt3dadd(187608.000000,110100.000000,70025.000000,168.718058)}
{pt3dadd(187428.000000,109992.000000,70150.000000,172.725138)}
{pt3dadd(187284.000000,109836.000000,70250.000000,170.952188)}
{pt3dadd(187092.000000,109644.000000,70350.000000,177.883364)}
{pt3dadd(186888.000000,109488.000000,70475.000000,186.882294)}
{pt3dadd(186648.000000,109332.000000,70550.000000,192.205356)}
{pt3dadd(186432.000000,109224.000000,70650.000000,184.563734)}
{pt3dadd(186216.000000,109068.000000,70725.000000,186.336684)}
{pt3dadd(185952.000000,108960.000000,70825.000000,186.336684)}
{pt3dadd(185724.000000,108840.000000,70925.000000,193.978306)}
{pt3dadd(185424.000000,108696.000000,71000.000000,195.932978)}
{pt3dadd(185196.000000,108552.000000,71000.000000,194.244458)}
{pt3dadd(184992.000000,108432.000000,71000.000000,196.106050)}
{pt3dadd(184776.000000,108348.000000,71100.000000,202.268158)}
{pt3dadd(184536.000000,108252.000000,71150.000000,206.685966)}
{pt3dadd(184236.000000,108204.000000,71175.000000,206.685966)}
{pt3dadd(183960.000000,108132.000000,71200.000000,225.304546)}
{pt3dadd(183660.000000,108036.000000,71200.000000,246.857874)}
{pt3dadd(183348.000000,107916.000000,71100.000000,262.249094)}
{pt3dadd(183036.000000,107856.000000,71050.000000,289.470983)}
{pt3dadd(182748.000000,107772.000000,70975.000000,303.234000)}

{create adhoc64}
{access adhoc64}
{connect adhoc64(1), adhoc63(0)}
{nseg = 1}
{strdef color color = "White"}
{pt3dclear()}
{pt3dadd(182748.000000,107772.000000,70975.000000,303.234000)}
{pt3dadd(182748.000000,107508.000000,71075.000000,226.516080)}
{pt3dadd(182460.000000,107376.000000,71025.000000,220.659888)}
{pt3dadd(182340.000000,107160.000000,71100.000000,205.268668)}
{pt3dadd(182112.000000,107016.000000,71175.000000,205.268668)}
{pt3dadd(181908.000000,106848.000000,71300.000000,220.624732)}
{pt3dadd(181716.000000,106632.000000,71350.000000,225.495362)}
{pt3dadd(181476.000000,106452.000000,71425.000000,233.519062)}
{pt3dadd(181248.000000,106332.000000,71450.000000,233.519062)}
{pt3dadd(181032.000000,106224.000000,71450.000000,233.519062)}
{pt3dadd(180828.000000,106104.000000,71425.000000,225.094174)}
{pt3dadd(180564.000000,106020.000000,71475.000000,211.798656)}
{pt3dadd(180336.000000,105960.000000,71500.000000,214.061436)}
{pt3dadd(180120.000000,105888.000000,71500.000000,221.194846)}
{pt3dadd(179832.000000,105792.000000,71550.000000,219.142438)}
{pt3dadd(179568.000000,105732.000000,71550.000000,202.906108)}
{pt3dadd(179316.000000,105696.000000,71700.000000,187.812636)}
{pt3dadd(178968.000000,105612.000000,71725.000000,170.925036)}
{pt3dadd(179160.000000,105636.000000,72050.000000,147.708196)}
{pt3dadd(179328.000000,105684.000000,72250.000000,138.822348)}
{pt3dadd(179352.000000,105684.000000,72500.000000,139.965206)}
{pt3dadd(179280.000000,105732.000000,72750.000000,139.965206)}
{pt3dadd(179352.000000,105708.000000,72975.000000,130.066549)}
{pt3dadd(179484.000000,105684.000000,73175.000000,121.626502)}
{pt3dadd(179508.000000,105612.000000,73425.000000,128.557678)}
{pt3dadd(179508.000000,105528.000000,73675.000000,145.605822)}
{pt3dadd(179544.000000,105600.000000,73900.000000,160.699294)}
{pt3dadd(179568.000000,105468.000000,74125.000000,173.737601)}
{pt3dadd(179556.000000,105288.000000,74350.000000,196.106050)}
{pt3dadd(179472.000000,105072.000000,74575.000000,190.782988)}
{pt3dadd(179388.000000,104772.000000,74700.000000,180.365604)}
{pt3dadd(179424.000000,104616.000000,74825.000000,178.504012)}
{pt3dadd(179316.000000,104436.000000,74900.000000,185.781746)}
{pt3dadd(179304.000000,104280.000000,75025.000000,178.140124)}
{pt3dadd(179376.000000,104160.000000,75200.000000,183.463186)}
{pt3dadd(179268.000000,104340.000000,75425.000000,184.994722)}
{pt3dadd(179196.000000,104412.000000,75600.000000,176.934992)}
{pt3dadd(179040.000000,104460.000000,75825.000000,155.631708)}
{pt3dadd(178896.000000,104520.000000,75950.000000,139.917638)}
{pt3dadd(178812.000000,104592.000000,76100.000000,121.556269)}
{pt3dadd(178716.000000,104628.000000,76275.000000,108.198601)}
{pt3dadd(178608.000000,104544.000000,76350.000000,109.657211)}
{pt3dadd(178392.000000,104484.000000,76375.000000,115.112351)}
{pt3dadd(178368.000000,104520.000000,76625.000000,110.838105)}
{pt3dadd(178344.000000,104556.000000,76825.000000,118.835623)}
{pt3dadd(178272.000000,104676.000000,77050.000000,77.353070)}

{create adhoc65}
{access adhoc65}
{connect adhoc65(1), adhoc63(0)}
{nseg = 1}
{strdef color color = "White"}
{pt3dclear()}
{pt3dadd(182748.000000,107772.000000,70975.000000,303.234000)}
{pt3dadd(182424.000000,107988.000000,70825.000000,159.353868)}
{pt3dadd(182220.000000,108012.000000,70850.000000,134.161809)}
{pt3dadd(182076.000000,108060.000000,70825.000000,96.372151)}
{pt3dadd(181908.000000,108168.000000,70750.000000,102.462982)}
{pt3dadd(181716.000000,108240.000000,70700.000000,99.438933)}
{pt3dadd(181524.000000,108372.000000,70650.000000,94.666608)}
{pt3dadd(181368.000000,108456.000000,70525.000000,90.392362)}
{pt3dadd(181248.000000,108456.000000,70450.000000,83.779365)}
{pt3dadd(181104.000000,108456.000000,70325.000000,75.249979)}
{pt3dadd(181032.000000,108480.000000,70200.000000,80.022304)}
{pt3dadd(180900.000000,108480.000000,70100.000000,88.847143)}
{pt3dadd(180756.000000,108456.000000,69975.000000,90.432881)}
{pt3dadd(180636.000000,108420.000000,69900.000000,90.432881)}
{pt3dadd(180432.000000,108456.000000,69775.000000,88.994570)}
{pt3dadd(180300.000000,108480.000000,69725.000000,82.917654)}
{pt3dadd(180216.000000,108432.000000,69625.000000,71.673600)}
{pt3dadd(179988.000000,108360.000000,69550.000000,63.638560)}

{create adhoc66}
{access adhoc66}
{connect adhoc66(1), adhoc58(0)}
{nseg = 1}
{strdef color color = "White"}
{pt3dclear()}
{pt3dadd(191664.000000,114984.000000,68875.000000,275.042200)}
{pt3dadd(191532.000000,114720.000000,68175.000000,192.064750)}
{pt3dadd(191496.000000,114600.000000,67925.000000,171.866402)}
{pt3dadd(191436.000000,114420.000000,67750.000000,139.715104)}
{pt3dadd(191352.000000,114312.000000,67500.000000,132.404694)}
{pt3dadd(191316.000000,114156.000000,67375.000000,129.944694)}
{pt3dadd(191208.000000,114156.000000,67200.000000,125.346434)}
{pt3dadd(191136.000000,114060.000000,66925.000000,130.272292)}
{pt3dadd(191052.000000,114048.000000,66675.000000,135.198150)}
{pt3dadd(191088.000000,113940.000000,66425.000000,139.368910)}
{pt3dadd(191040.000000,113796.000000,66175.000000,132.425262)}
{pt3dadd(191076.000000,113904.000000,65925.000000,125.783520)}
{pt3dadd(191100.000000,113940.000000,65600.000000,85.281760)}

{create adhoc67}
{access adhoc67}
{connect adhoc67(1), adhoc3(0)}
{nseg = 1}
{strdef color color = "White"}
{pt3dclear()}
{pt3dadd(198372.000000,157188.000000,68475.000000,600.382600)}
{pt3dadd(198360.000000,156876.000000,68075.000000,484.581353)}
{pt3dadd(198216.000000,156480.000000,67800.000000,445.737900)}
{pt3dadd(198084.000000,156360.000000,67550.000000,403.063780)}
{pt3dadd(198036.000000,156396.000000,67275.000000,384.590738)}
{pt3dadd(197952.000000,156288.000000,67025.000000,366.117696)}
{pt3dadd(197736.000000,156228.000000,66775.000000,351.708284)}
{pt3dadd(197544.000000,156060.000000,66500.000000,344.854816)}
{pt3dadd(197460.000000,155964.000000,66225.000000,337.658672)}
{pt3dadd(197124.000000,156372.000000,66000.000000,352.068084)}
{pt3dadd(196872.000000,156372.000000,65700.000000,370.541126)}
{pt3dadd(196764.000000,156240.000000,65325.000000,384.950538)}
{pt3dadd(196548.000000,156216.000000,65050.000000,384.950538)}
{pt3dadd(196380.000000,156228.000000,64750.000000,369.752722)}
{pt3dadd(196212.000000,156228.000000,64500.000000,369.752722)}
{pt3dadd(196116.000000,156264.000000,64250.000000,365.689092)}
{pt3dadd(195984.000000,156144.000000,63950.000000,369.752722)}
{pt3dadd(195924.000000,156168.000000,63700.000000,388.225764)}
{pt3dadd(195744.000000,156228.000000,63450.000000,422.820278)}
{pt3dadd(195660.000000,156252.000000,63175.000000,431.150716)}
{pt3dadd(195516.000000,156288.000000,62925.000000,439.481154)}
{pt3dadd(195420.000000,156336.000000,62650.000000,452.932264)}
{pt3dadd(195228.000000,156420.000000,62400.000000,471.322730)}
{pt3dadd(195072.000000,156456.000000,62125.000000,490.632728)}
{pt3dadd(194892.000000,156528.000000,61850.000000,515.388368)}
{pt3dadd(194832.000000,156648.000000,61600.000000,551.865760)}
{pt3dadd(194712.000000,156852.000000,61250.000000,567.437098)}
{pt3dadd(194592.000000,157140.000000,60975.000000,591.329223)}
{pt3dadd(194520.000000,157380.000000,60725.000000,571.792970)}

{create adhoc68}
{access adhoc68}
{connect adhoc68(1), adhoc67(0)}
{nseg = 1}
{strdef color color = "White"}
{pt3dclear()}
{pt3dadd(194520.000000,157380.000000,60725.000000,571.792970)}
{pt3dadd(194304.000000,157560.000000,60350.000000,488.046550)}
{pt3dadd(194088.000000,158304.000000,60350.000000,402.975780)}
{pt3dadd(193932.000000,158580.000000,60150.000000,346.376046)}
{pt3dadd(193752.000000,158868.000000,59825.000000,290.501956)}
{pt3dadd(193680.000000,159072.000000,59575.000000,301.792110)}
{pt3dadd(193524.000000,159336.000000,59350.000000,319.609376)}
{pt3dadd(193344.000000,159588.000000,59175.000000,314.239506)}
{pt3dadd(193164.000000,159792.000000,58975.000000,299.581198)}
{pt3dadd(193056.000000,159960.000000,58725.000000,266.606822)}
{pt3dadd(192804.000000,160068.000000,58550.000000,250.446038)}
{pt3dadd(192732.000000,160152.000000,58275.000000,223.340334)}
{pt3dadd(192624.000000,160212.000000,57975.000000,218.469704)}
{pt3dadd(192444.000000,160284.000000,57725.000000,220.624732)}
{pt3dadd(192312.000000,160356.000000,57475.000000,235.781842)}
{pt3dadd(192180.000000,160512.000000,57200.000000,233.519062)}
{pt3dadd(192072.000000,160560.000000,56925.000000,225.877440)}
{pt3dadd(191988.000000,160656.000000,56650.000000,219.407224)}
{pt3dadd(191652.000000,160740.000000,56500.000000,213.245116)}
{pt3dadd(191496.000000,160860.000000,56175.000000,198.088006)}
{pt3dadd(191280.000000,160908.000000,55950.000000,191.925898)}
{pt3dadd(191064.000000,160872.000000,55850.000000,195.560440)}
{pt3dadd(190860.000000,160848.000000,55550.000000,191.744176)}
{pt3dadd(190656.000000,160896.000000,55400.000000,188.109634)}
{pt3dadd(190428.000000,160920.000000,55175.000000,208.636614)}
{pt3dadd(190248.000000,160776.000000,55100.000000,217.061502)}
{pt3dadd(190080.000000,160644.000000,54825.000000,227.862304)}
{pt3dadd(189900.000000,160452.000000,54575.000000,235.886004)}
{pt3dadd(189780.000000,160272.000000,54325.000000,243.527626)}
{pt3dadd(189756.000000,160056.000000,54300.000000,233.287126)}
{pt3dadd(189588.000000,159828.000000,54025.000000,221.227696)}
{pt3dadd(189588.000000,159744.000000,53750.000000,206.792352)}
{pt3dadd(189540.000000,159600.000000,53575.000000,195.307182)}
{pt3dadd(189564.000000,159360.000000,53450.000000,193.254774)}
{pt3dadd(189588.000000,159276.000000,53200.000000,195.630688)}
{pt3dadd(189588.000000,159168.000000,52925.000000,205.427338)}
{pt3dadd(189456.000000,159096.000000,52675.000000,217.486768)}
{pt3dadd(189420.000000,159084.000000,52400.000000,238.724798)}
{pt3dadd(189468.000000,158940.000000,52100.000000,247.570928)}
{pt3dadd(189492.000000,158844.000000,51775.000000,255.435514)}
{pt3dadd(189456.000000,158820.000000,51500.000000,270.826734)}
{pt3dadd(189696.000000,158844.000000,51250.000000,270.826734)}
{pt3dadd(189816.000000,158796.000000,51000.000000,263.336654)}
{pt3dadd(189996.000000,158808.000000,50725.000000,265.831370)}
{pt3dadd(190020.000000,158808.000000,50450.000000,255.590870)}
{pt3dadd(189996.000000,158820.000000,50100.000000,249.952510)}
{pt3dadd(189876.000000,158796.000000,49850.000000,243.482294)}
{pt3dadd(189672.000000,158712.000000,49575.000000,243.482294)}
{pt3dadd(189756.000000,158568.000000,49325.000000,248.852164)}
{pt3dadd(189708.000000,158484.000000,49050.000000,246.589384)}
{pt3dadd(189672.000000,158388.000000,48700.000000,230.674416)}
{pt3dadd(189636.000000,158220.000000,48450.000000,226.858152)}
{pt3dadd(189600.000000,158208.000000,48200.000000,211.502088)}
{pt3dadd(189432.000000,158100.000000,47950.000000,194.791372)}
{pt3dadd(189336.000000,158016.000000,47700.000000,201.924782)}
{pt3dadd(189204.000000,157932.000000,47450.000000,220.590170)}
{pt3dadd(189000.000000,157752.000000,47200.000000,244.005090)}
{pt3dadd(188904.000000,157608.000000,46925.000000,272.489594)}
{pt3dadd(188796.000000,157464.000000,46675.000000,268.673330)}
{pt3dadd(188580.000000,157392.000000,46500.000000,263.802700)}
{pt3dadd(188340.000000,157188.000000,46350.000000,249.144392)}
{pt3dadd(188124.000000,157164.000000,46225.000000,236.015952)}
{pt3dadd(187908.000000,157152.000000,46025.000000,220.624732)}
{pt3dadd(187680.000000,157080.000000,45900.000000,235.781842)}
{pt3dadd(187428.000000,157068.000000,45775.000000,240.652472)}
{pt3dadd(187128.000000,157056.000000,45675.000000,242.807500)}
{pt3dadd(186888.000000,157020.000000,45575.000000,238.389692)}
{pt3dadd(186672.000000,156912.000000,45500.000000,232.227584)}
{pt3dadd(186456.000000,156888.000000,45475.000000,225.094174)}
{pt3dadd(186240.000000,156828.000000,45375.000000,211.798656)}
{pt3dadd(185988.000000,156792.000000,45225.000000,209.643628)}
{pt3dadd(185796.000000,156732.000000,45175.000000,211.798656)}
{pt3dadd(185484.000000,156624.000000,45150.000000,217.960764)}
{pt3dadd(185220.000000,156588.000000,45125.000000,222.599458)}
{pt3dadd(184992.000000,156516.000000,45050.000000,228.761566)}
{pt3dadd(184680.000000,156504.000000,44925.000000,230.916594)}
{pt3dadd(184392.000000,156372.000000,44900.000000,230.916594)}
{pt3dadd(184128.000000,156288.000000,44825.000000,238.050004)}
{pt3dadd(183864.000000,156192.000000,44750.000000,258.361986)}
{pt3dadd(183624.000000,156084.000000,44650.000000,270.865266)}
{pt3dadd(183408.000000,156012.000000,44550.000000,289.288830)}
{pt3dadd(183180.000000,155880.000000,44450.000000,321.435650)}
{pt3dadd(182964.000000,155760.000000,44400.000000,342.763232)}
{pt3dadd(182616.000000,155664.000000,44375.000000,327.565416)}
{pt3dadd(182400.000000,155520.000000,44275.000000,327.565416)}
{pt3dadd(182172.000000,155448.000000,44225.000000,311.404632)}
{pt3dadd(181908.000000,155388.000000,44200.000000,277.102784)}
{pt3dadd(181668.000000,155328.000000,44150.000000,240.618092)}
{pt3dadd(181428.000000,155292.000000,44075.000000,226.657796)}
{pt3dadd(181128.000000,155268.000000,43950.000000,204.357866)}
{pt3dadd(180792.000000,155292.000000,43925.000000,176.584366)}
{pt3dadd(180528.000000,155292.000000,43975.000000,154.215917)}
{pt3dadd(180360.000000,155208.000000,44125.000000,144.767037)}
{pt3dadd(180084.000000,155112.000000,44275.000000,132.891043)}
{pt3dadd(179880.000000,155004.000000,44400.000000,119.200821)}
{pt3dadd(179664.000000,154992.000000,44500.000000,125.915961)}
{pt3dadd(179460.000000,154968.000000,44525.000000,125.915961)}
{pt3dadd(179160.000000,154896.000000,44625.000000,124.592961)}
{pt3dadd(178944.000000,154896.000000,44750.000000,123.203811)}
{pt3dadd(178656.000000,154824.000000,44850.000000,120.239731)}
{pt3dadd(178452.000000,154752.000000,44975.000000,120.239731)}
{pt3dadd(178236.000000,154752.000000,45025.000000,130.138388)}
{pt3dadd(177936.000000,154632.000000,45100.000000,132.850538)}
{pt3dadd(177732.000000,154584.000000,45225.000000,137.229834)}
{pt3dadd(177492.000000,154500.000000,45400.000000,152.195616)}
{pt3dadd(177396.000000,154500.000000,45625.000000,154.907766)}
{pt3dadd(177240.000000,154428.000000,45900.000000,144.021866)}
{pt3dadd(177024.000000,154392.000000,46050.000000,137.812367)}
{pt3dadd(176868.000000,154416.000000,46250.000000,98.724300)}

{create adhoc69}
{access adhoc69}
{connect adhoc69(1), adhoc68(0)}
{nseg = 1}
{strdef color color = "White"}
{pt3dclear()}
{pt3dadd(176868.000000,154416.000000,46250.000000,98.724300)}
{pt3dadd(176652.000000,154476.000000,46200.000000,108.843540)}

{create adhoc70}
{access adhoc70}
{connect adhoc70(1), adhoc68(0)}
{nseg = 1}
{strdef color color = "White"}
{pt3dclear()}
{pt3dadd(176868.000000,154416.000000,46250.000000,98.724300)}
{pt3dadd(176496.000000,154248.000000,46175.000000,130.611927)}
{pt3dadd(176292.000000,154140.000000,46150.000000,131.350156)}
{pt3dadd(176232.000000,154032.000000,46325.000000,131.350156)}
{pt3dadd(176160.000000,153888.000000,46550.000000,154.196300)}
{pt3dadd(176004.000000,153756.000000,46675.000000,188.383100)}
{pt3dadd(175944.000000,153492.000000,46775.000000,218.191540)}
{pt3dadd(175956.000000,153264.000000,46825.000000,267.810940)}
{pt3dadd(175860.000000,153036.000000,46900.000000,311.745224)}
{pt3dadd(175692.000000,152808.000000,46950.000000,309.125774)}
{pt3dadd(175740.000000,152556.000000,46875.000000,303.487414)}
{pt3dadd(175716.000000,152316.000000,46900.000000,298.373248)}
{pt3dadd(175644.000000,152100.000000,46825.000000,268.489208)}
{pt3dadd(175632.000000,151884.000000,46775.000000,250.065644)}
{pt3dadd(175608.000000,151656.000000,46825.000000,242.932234)}
{pt3dadd(175488.000000,151428.000000,46900.000000,235.442154)}
{pt3dadd(175392.000000,151200.000000,47025.000000,219.318290)}
{pt3dadd(175296.000000,150972.000000,47125.000000,212.848074)}
{pt3dadd(175260.000000,150708.000000,47100.000000,206.685966)}
{pt3dadd(175092.000000,150468.000000,47100.000000,200.523858)}
{pt3dadd(175056.000000,150228.000000,46950.000000,186.775908)}
{pt3dadd(175128.000000,150048.000000,46825.000000,192.098970)}
{pt3dadd(175236.000000,149892.000000,46725.000000,181.681586)}
{pt3dadd(175248.000000,149664.000000,46600.000000,171.760264)}
{pt3dadd(175272.000000,149448.000000,46475.000000,164.827303)}
{pt3dadd(175344.000000,149268.000000,46450.000000,145.860750)}

{create adhoc71}
{access adhoc71}
{connect adhoc71(1), adhoc67(0)}
{nseg = 1}
{strdef color color = "White"}
{pt3dclear()}
{pt3dadd(194520.000000,157380.000000,60725.000000,571.792970)}
{pt3dadd(194484.000000,156888.000000,59950.000000,397.807563)}
{pt3dadd(194640.000000,156804.000000,59700.000000,357.090198)}
{pt3dadd(194664.000000,156636.000000,59450.000000,306.410748)}
{pt3dadd(194640.000000,156384.000000,59175.000000,306.410748)}
{pt3dadd(194568.000000,156156.000000,58925.000000,309.443092)}
{pt3dadd(194460.000000,155928.000000,58625.000000,306.555152)}
{pt3dadd(194352.000000,155724.000000,58450.000000,298.690566)}
{pt3dadd(194268.000000,155496.000000,58250.000000,282.529782)}
{pt3dadd(194280.000000,155244.000000,58175.000000,268.744912)}
{pt3dadd(194208.000000,155016.000000,58025.000000,257.454758)}
{pt3dadd(194148.000000,154788.000000,57875.000000,240.744042)}
{pt3dadd(194100.000000,154584.000000,57825.000000,231.897912)}
{pt3dadd(194040.000000,154344.000000,57925.000000,223.473024)}
{pt3dadd(193944.000000,154104.000000,57950.000000,207.349160)}
{pt3dadd(193908.000000,153900.000000,57900.000000,190.419100)}
{pt3dadd(193776.000000,153624.000000,57600.000000,184.829886)}
{pt3dadd(193716.000000,153372.000000,57575.000000,182.875214)}
{pt3dadd(193656.000000,153240.000000,57325.000000,182.875214)}
{pt3dadd(193728.000000,152928.000000,57300.000000,196.623164)}
{pt3dadd(193596.000000,152700.000000,57300.000000,204.264786)}
{pt3dadd(193656.000000,152376.000000,57300.000000,211.906408)}
{pt3dadd(193752.000000,152052.000000,57125.000000,220.331296)}
{pt3dadd(193824.000000,151776.000000,57075.000000,244.916968)}
{pt3dadd(194004.000000,151656.000000,56825.000000,271.115180)}
{pt3dadd(194172.000000,151308.000000,56575.000000,301.731200)}
{pt3dadd(194304.000000,151164.000000,56325.000000,301.731200)}
{pt3dadd(194568.000000,150984.000000,56225.000000,295.260984)}
{pt3dadd(194736.000000,150696.000000,56125.000000,283.970830)}
{pt3dadd(194808.000000,150444.000000,55850.000000,268.013118)}
{pt3dadd(194832.000000,150108.000000,55750.000000,271.698946)}
{pt3dadd(194700.000000,149904.000000,55575.000000,286.357254)}
{pt3dadd(194496.000000,149724.000000,55475.000000,284.402582)}
{pt3dadd(194280.000000,149460.000000,55350.000000,269.245472)}
{pt3dadd(194196.000000,149184.000000,55200.000000,285.203184)}
{pt3dadd(194124.000000,148896.000000,55100.000000,271.479928)}
{pt3dadd(193896.000000,148680.000000,54950.000000,266.110058)}
{pt3dadd(193680.000000,148452.000000,54750.000000,257.647346)}
{pt3dadd(193572.000000,148236.000000,54600.000000,248.198466)}
{pt3dadd(193620.000000,147924.000000,54500.000000,203.654044)}
{pt3dadd(193560.000000,147696.000000,54325.000000,166.434900)}
{pt3dadd(193404.000000,147480.000000,54200.000000,140.505910)}
{pt3dadd(193308.000000,147288.000000,53975.000000,150.923294)}
{pt3dadd(193212.000000,147144.000000,53725.000000,156.910704)}
{pt3dadd(193068.000000,146916.000000,53525.000000,164.970434)}
{pt3dadd(193032.000000,146700.000000,53425.000000,175.742314)}
{pt3dadd(193008.000000,146412.000000,53250.000000,186.514194)}
{pt3dadd(192900.000000,146160.000000,52975.000000,188.566602)}
{pt3dadd(192744.000000,146076.000000,52725.000000,197.896744)}
{pt3dadd(192588.000000,146028.000000,52450.000000,203.765416)}
{pt3dadd(192516.000000,146040.000000,52225.000000,207.581680)}
{pt3dadd(192468.000000,145968.000000,51950.000000,217.868160)}
{pt3dadd(192408.000000,145776.000000,51675.000000,222.285968)}
{pt3dadd(192372.000000,145536.000000,51425.000000,211.347712)}
{pt3dadd(192360.000000,145440.000000,51125.000000,200.409456)}
{pt3dadd(192420.000000,145272.000000,50825.000000,182.218454)}
{pt3dadd(192420.000000,145200.000000,50575.000000,154.444954)}
{pt3dadd(192456.000000,145068.000000,50300.000000,124.835763)}
{pt3dadd(192480.000000,144960.000000,50050.000000,133.721611)}
{pt3dadd(192468.000000,144816.000000,49800.000000,144.659867)}
{pt3dadd(192384.000000,144672.000000,49550.000000,159.034605)}
{pt3dadd(192132.000000,144492.000000,49350.000000,184.545325)}
{pt3dadd(192000.000000,144312.000000,49175.000000,216.530430)}
{pt3dadd(191916.000000,144084.000000,48900.000000,239.161430)}
{pt3dadd(191796.000000,143928.000000,48650.000000,262.923982)}
{pt3dadd(191664.000000,143700.000000,48375.000000,270.947682)}
{pt3dadd(191484.000000,143436.000000,48125.000000,270.947682)}
{pt3dadd(191328.000000,143340.000000,47775.000000,258.285288)}
{pt3dadd(191112.000000,143316.000000,47575.000000,237.706696)}
{pt3dadd(190908.000000,143208.000000,47400.000000,211.891736)}
{pt3dadd(190764.000000,143064.000000,47250.000000,214.154516)}
{pt3dadd(190632.000000,143148.000000,47100.000000,218.793210)}
{pt3dadd(190476.000000,143100.000000,46775.000000,245.240474)}
{pt3dadd(190356.000000,143052.000000,46500.000000,247.395502)}
{pt3dadd(190344.000000,142812.000000,46450.000000,249.447910)}
{pt3dadd(190104.000000,142764.000000,46200.000000,241.023022)}
{pt3dadd(189912.000000,142656.000000,45975.000000,220.300898)}
{pt3dadd(189708.000000,142524.000000,45875.000000,181.821754)}
{pt3dadd(189480.000000,142416.000000,45750.000000,163.026174)}
{pt3dadd(189288.000000,142272.000000,45625.000000,153.696032)}
{pt3dadd(189084.000000,142176.000000,45500.000000,155.650704)}
{pt3dadd(188880.000000,142188.000000,45325.000000,176.372828)}
{pt3dadd(188664.000000,142188.000000,45200.000000,183.335124)}
{pt3dadd(188424.000000,142164.000000,45125.000000,189.037420)}
{pt3dadd(188100.000000,142200.000000,44925.000000,181.727010)}
{pt3dadd(187884.000000,142092.000000,44775.000000,167.138866)}
{pt3dadd(187692.000000,142068.000000,44600.000000,143.704592)}
{pt3dadd(187488.000000,141960.000000,44425.000000,143.704592)}
{pt3dadd(187308.000000,141840.000000,44250.000000,148.774176)}
{pt3dadd(187176.000000,141672.000000,44125.000000,159.546056)}
{pt3dadd(186972.000000,141540.000000,44000.000000,172.179528)}
{pt3dadd(186732.000000,141516.000000,43925.000000,200.727968)}
{pt3dadd(186480.000000,141576.000000,43875.000000,229.212472)}
{pt3dadd(186372.000000,141456.000000,43625.000000,239.498952)}
{pt3dadd(186156.000000,141288.000000,43575.000000,260.025932)}
{pt3dadd(185940.000000,141264.000000,43400.000000,266.188040)}
{pt3dadd(185652.000000,141132.000000,43250.000000,261.073874)}
{pt3dadd(185448.000000,141000.000000,43000.000000,235.886004)}
{pt3dadd(185160.000000,140964.000000,43050.000000,222.138054)}
{pt3dadd(185040.000000,140712.000000,42925.000000,190.839194)}
{pt3dadd(184812.000000,140628.000000,42950.000000,174.755764)}
{pt3dadd(184548.000000,140556.000000,42925.000000,163.954962)}
{pt3dadd(184248.000000,140448.000000,42925.000000,162.266442)}
{pt3dadd(184020.000000,140424.000000,42950.000000,171.596584)}
{pt3dadd(183780.000000,140328.000000,42925.000000,186.184728)}
{pt3dadd(183576.000000,140232.000000,42900.000000,196.106050)}
{pt3dadd(183360.000000,140148.000000,42825.000000,190.782988)}
{pt3dadd(183132.000000,140100.000000,42750.000000,192.471508)}
{pt3dadd(182916.000000,140040.000000,42650.000000,181.533252)}
{pt3dadd(182688.000000,139908.000000,42575.000000,172.647404)}
{pt3dadd(182484.000000,139896.000000,42550.000000,164.184692)}
{pt3dadd(182208.000000,139776.000000,42450.000000,165.873212)}
{pt3dadd(181980.000000,139716.000000,42400.000000,167.646162)}
{pt3dadd(181764.000000,139596.000000,42325.000000,190.492306)}
{pt3dadd(181476.000000,139476.000000,42250.000000,199.378154)}
{pt3dadd(181428.000000,139296.000000,42175.000000,204.206324)}
{pt3dadd(181212.000000,139152.000000,42150.000000,205.979274)}
{pt3dadd(180996.000000,138960.000000,42150.000000,207.840866)}
{pt3dadd(180708.000000,138876.000000,42125.000000,186.602836)}
{pt3dadd(180432.000000,138696.000000,42125.000000,182.786572)}
{pt3dadd(180144.000000,138492.000000,42100.000000,205.086502)}
{pt3dadd(179928.000000,138348.000000,41925.000000,249.127138)}
{pt3dadd(179748.000000,138252.000000,41725.000000,280.239922)}
{pt3dadd(179400.000000,138048.000000,41575.000000,307.116312)}
{pt3dadd(179124.000000,137940.000000,41325.000000,322.273422)}
{pt3dadd(178956.000000,137724.000000,41200.000000,299.973492)}
{pt3dadd(178740.000000,137544.000000,40950.000000,252.471386)}
{pt3dadd(178524.000000,137328.000000,40925.000000,214.427426)}
{pt3dadd(178452.000000,137052.000000,40800.000000,181.563626)}
{pt3dadd(178320.000000,136896.000000,40575.000000,166.406516)}
{pt3dadd(178260.000000,136716.000000,40450.000000,164.717996)}
{pt3dadd(178224.000000,136536.000000,40175.000000,161.578346)}
{pt3dadd(178296.000000,136476.000000,39925.000000,152.273192)}
{pt3dadd(178476.000000,136548.000000,39675.000000,149.690192)}
{pt3dadd(178512.000000,136392.000000,39300.000000,141.630462)}
{pt3dadd(178488.000000,136320.000000,39050.000000,138.490812)}
{pt3dadd(178392.000000,136224.000000,38800.000000,146.953524)}
{pt3dadd(178332.000000,136176.000000,38525.000000,165.144526)}
{pt3dadd(178296.000000,136104.000000,38300.000000,185.200106)}
{pt3dadd(178296.000000,136092.000000,38050.000000,191.486886)}
{pt3dadd(178332.000000,136104.000000,37825.000000,198.088006)}
{pt3dadd(178260.000000,136176.000000,37550.000000,189.625294)}
{pt3dadd(178200.000000,136440.000000,37500.000000,180.739446)}
{pt3dadd(178212.000000,136644.000000,37300.000000,169.254276)}
{pt3dadd(178296.000000,136788.000000,37125.000000,181.313706)}
{pt3dadd(178440.000000,136896.000000,37025.000000,177.852236)}
{pt3dadd(178596.000000,137052.000000,36850.000000,188.269620)}
{pt3dadd(178680.000000,137232.000000,36800.000000,211.115764)}
{pt3dadd(178800.000000,137412.000000,36625.000000,229.734344)}
{pt3dadd(178920.000000,137568.000000,36475.000000,232.110258)}
{pt3dadd(179148.000000,137640.000000,36450.000000,235.571728)}
{pt3dadd(179316.000000,137676.000000,36275.000000,217.380726)}
{pt3dadd(179460.000000,137808.000000,36025.000000,187.572286)}
{pt3dadd(179592.000000,137856.000000,35800.000000,142.148370)}
{pt3dadd(179568.000000,137964.000000,35675.000000,126.000000)}

{create adhoc72}
{access adhoc72}
{connect adhoc72(1), adhoc2(0)}
{nseg = 1}
{strdef color color = "White"}
{pt3dclear()}
{pt3dadd(184212.000000,178416.000000,52250.000000,387.012000)}
{pt3dadd(184056.000000,179220.000000,52250.000000,262.573360)}
{pt3dadd(183924.000000,179448.000000,52300.000000,228.461876)}
{pt3dadd(183864.000000,179676.000000,52175.000000,183.221772)}
{pt3dadd(183684.000000,179928.000000,52250.000000,171.345778)}
{pt3dadd(183504.000000,180144.000000,52300.000000,162.883066)}
{pt3dadd(183300.000000,180312.000000,52300.000000,172.679716)}
{pt3dadd(183120.000000,180552.000000,52250.000000,178.268930)}
{pt3dadd(182916.000000,180720.000000,52200.000000,185.200106)}
{pt3dadd(182688.000000,181008.000000,52150.000000,203.546316)}
{pt3dadd(182628.000000,181296.000000,52150.000000,220.433916)}
{pt3dadd(182388.000000,181452.000000,52075.000000,220.433916)}
{pt3dadd(182352.000000,181680.000000,52075.000000,231.774762)}
{pt3dadd(182304.000000,181944.000000,52075.000000,253.328090)}
{pt3dadd(182124.000000,182208.000000,52000.000000,266.456530)}
{pt3dadd(182016.000000,182436.000000,52025.000000,273.946610)}
{pt3dadd(181836.000000,182736.000000,52050.000000,273.946610)}
{pt3dadd(181644.000000,183024.000000,52050.000000,276.566060)}
{pt3dadd(181428.000000,183216.000000,51875.000000,256.967404)}
{pt3dadd(181296.000000,183444.000000,51925.000000,273.723004)}
{pt3dadd(181176.000000,183672.000000,51775.000000,288.920820)}
{pt3dadd(180900.000000,183804.000000,51650.000000,307.344384)}
{pt3dadd(180684.000000,184116.000000,51575.000000,312.982744)}
{pt3dadd(180600.000000,184764.000000,51450.000000,335.613744)}
{pt3dadd(180528.000000,185004.000000,51375.000000,313.219784)}
{pt3dadd(180432.000000,185292.000000,51400.000000,298.021968)}
{pt3dadd(180300.000000,185580.000000,51425.000000,281.861184)}
{pt3dadd(180192.000000,185808.000000,51475.000000,273.603374)}
{pt3dadd(180120.000000,186072.000000,51450.000000,267.683090)}
{pt3dadd(180036.000000,186312.000000,51400.000000,276.353794)}
{pt3dadd(179964.000000,186528.000000,51375.000000,281.992154)}
{pt3dadd(179808.000000,186876.000000,51350.000000,304.680050)}
{pt3dadd(179640.000000,187104.000000,51225.000000,304.680050)}
{pt3dadd(179472.000000,187344.000000,51150.000000,305.403410)}
{pt3dadd(179184.000000,187452.000000,51125.000000,261.944950)}

{create adhoc73}
{access adhoc73}
{connect adhoc73(1), adhoc72(0)}
{nseg = 1}
{strdef color color = "White"}
{pt3dclear()}
{pt3dadd(179184.000000,187452.000000,51125.000000,261.944950)}
{pt3dadd(178908.000000,187548.000000,51025.000000,180.966705)}
{pt3dadd(178572.000000,187656.000000,51000.000000,151.080834)}
{pt3dadd(178332.000000,187692.000000,51000.000000,119.423947)}
{pt3dadd(178128.000000,187704.000000,50975.000000,102.769645)}
{pt3dadd(177912.000000,187716.000000,50975.000000,101.782402)}
{pt3dadd(177660.000000,187728.000000,50975.000000,101.782402)}
{pt3dadd(177456.000000,187740.000000,50975.000000,108.833299)}
{pt3dadd(177240.000000,187776.000000,51000.000000,109.869904)}
{pt3dadd(177036.000000,187788.000000,50975.000000,109.869904)}
{pt3dadd(176832.000000,187824.000000,50950.000000,119.297194)}
{pt3dadd(176628.000000,187860.000000,51025.000000,134.760366)}
{pt3dadd(176364.000000,187884.000000,51000.000000,142.436296)}
{pt3dadd(176136.000000,187944.000000,50975.000000,151.298348)}
{pt3dadd(175908.000000,187968.000000,50975.000000,166.264130)}
{pt3dadd(175704.000000,187968.000000,50950.000000,169.254276)}
{pt3dadd(175500.000000,187932.000000,50950.000000,162.653156)}
{pt3dadd(175224.000000,187908.000000,50950.000000,148.962934)}
{pt3dadd(175008.000000,187872.000000,50900.000000,139.064277)}
{pt3dadd(174780.000000,187776.000000,50825.000000,125.038727)}
{pt3dadd(174564.000000,187764.000000,50825.000000,112.621291)}
{pt3dadd(174348.000000,187752.000000,50800.000000,100.795159)}
{pt3dadd(174120.000000,187728.000000,50750.000000,96.082803)}
{pt3dadd(173904.000000,187716.000000,50700.000000,95.095560)}
{pt3dadd(173700.000000,187716.000000,50675.000000,93.259869)}
{pt3dadd(173484.000000,187656.000000,50650.000000,95.283717)}
{pt3dadd(173256.000000,187608.000000,50625.000000,94.388258)}
{pt3dadd(172944.000000,187596.000000,50600.000000,107.962666)}
{pt3dadd(172716.000000,187584.000000,50550.000000,116.000806)}
{pt3dadd(172440.000000,187596.000000,50600.000000,124.551637)}
{pt3dadd(172200.000000,187608.000000,50600.000000,129.242929)}
{pt3dadd(171972.000000,187596.000000,50600.000000,143.496056)}
{pt3dadd(171756.000000,187572.000000,50575.000000,131.669924)}
{pt3dadd(171432.000000,187560.000000,50575.000000,131.669924)}
{pt3dadd(171228.000000,187452.000000,50600.000000,155.104198)}
{pt3dadd(170952.000000,187392.000000,50525.000000,181.033188)}
{pt3dadd(170712.000000,187368.000000,50575.000000,196.389252)}
{pt3dadd(170424.000000,187428.000000,50625.000000,225.102984)}
{pt3dadd(170172.000000,187464.000000,50650.000000,249.708974)}
{pt3dadd(169908.000000,187464.000000,50675.000000,249.708974)}
{pt3dadd(169608.000000,187452.000000,50700.000000,249.708974)}
{pt3dadd(169296.000000,187416.000000,50725.000000,257.199054)}
{pt3dadd(169008.000000,187344.000000,50725.000000,270.327494)}
{pt3dadd(168732.000000,187236.000000,50725.000000,278.585304)}
{pt3dadd(168444.000000,187164.000000,50750.000000,273.946612)}
{pt3dadd(168084.000000,187092.000000,50725.000000,273.946612)}
{pt3dadd(167760.000000,187020.000000,50650.000000,271.327162)}
{pt3dadd(167400.000000,186960.000000,50600.000000,265.688802)}
{pt3dadd(167064.000000,186972.000000,50700.000000,260.050442)}
{pt3dadd(166740.000000,186972.000000,50725.000000,278.474004)}
{pt3dadd(166404.000000,186948.000000,50775.000000,289.764158)}
{pt3dadd(166008.000000,186888.000000,50700.000000,284.893528)}
{pt3dadd(165624.000000,186780.000000,50675.000000,272.985638)}
{pt3dadd(165180.000000,186636.000000,50600.000000,288.183454)}
{pt3dadd(164808.000000,186576.000000,50550.000000,285.151110)}
{pt3dadd(164352.000000,186612.000000,50675.000000,285.151110)}
{pt3dadd(163956.000000,186696.000000,50825.000000,301.311894)}
{pt3dadd(163656.000000,186780.000000,50800.000000,318.858144)}
{pt3dadd(163332.000000,186948.000000,50825.000000,306.410748)}
{pt3dadd(162960.000000,187020.000000,50825.000000,300.772388)}
{pt3dadd(162648.000000,187032.000000,50800.000000,292.101684)}
{pt3dadd(162312.000000,186984.000000,50850.000000,283.430980)}
{pt3dadd(161952.000000,186972.000000,50925.000000,275.042200)}
{pt3dadd(161508.000000,186876.000000,50975.000000,275.042200)}

{create adhoc74}
{access adhoc74}
{connect adhoc74(1), adhoc73(0)}
{nseg = 1}
{strdef color color = "White"}
{pt3dclear()}
{pt3dadd(161508.000000,186876.000000,50975.000000,275.042200)}
{pt3dadd(161208.000000,186684.000000,51000.000000,207.062967)}
{pt3dadd(160992.000000,186564.000000,50975.000000,175.178638)}
{pt3dadd(160692.000000,186468.000000,50925.000000,147.953198)}
{pt3dadd(160392.000000,186384.000000,50875.000000,147.953198)}
{pt3dadd(160092.000000,186348.000000,50825.000000,149.726148)}
{pt3dadd(159804.000000,186312.000000,50825.000000,157.785878)}
{pt3dadd(159516.000000,186300.000000,50775.000000,179.117722)}
{pt3dadd(159216.000000,186324.000000,50700.000000,192.382866)}
{pt3dadd(158880.000000,186336.000000,50675.000000,197.705928)}
{pt3dadd(158592.000000,186336.000000,50650.000000,210.368322)}
{pt3dadd(158316.000000,186360.000000,50700.000000,212.229914)}
{pt3dadd(157980.000000,186372.000000,50800.000000,216.647722)}
{pt3dadd(157644.000000,186384.000000,50850.000000,223.117938)}
{pt3dadd(157284.000000,186360.000000,50925.000000,241.783326)}
{pt3dadd(156888.000000,186264.000000,51100.000000,246.897492)}
{pt3dadd(156528.000000,186240.000000,51275.000000,253.059600)}
{pt3dadd(156240.000000,186240.000000,51375.000000,236.172000)}
{pt3dadd(155904.000000,186288.000000,51550.000000,212.653640)}
{pt3dadd(155640.000000,186348.000000,51625.000000,176.663488)}
{pt3dadd(155340.000000,186420.000000,51550.000000,140.459676)}
{pt3dadd(155088.000000,186528.000000,51550.000000,114.008724)}
{pt3dadd(154848.000000,186648.000000,51600.000000,103.122824)}
{pt3dadd(154572.000000,186708.000000,51625.000000,98.867684)}
{pt3dadd(154308.000000,186732.000000,51650.000000,97.157247)}
{pt3dadd(154080.000000,186756.000000,51700.000000,98.724300)}

{create adhoc75}
{access adhoc75}
{connect adhoc75(1), adhoc73(0)}
{nseg = 1}
{strdef color color = "White"}
{pt3dclear()}
{pt3dadd(161508.000000,186876.000000,50975.000000,275.042200)}
{pt3dadd(161424.000000,187140.000000,50850.000000,162.515418)}
{pt3dadd(161424.000000,187392.000000,50875.000000,144.701354)}
{pt3dadd(161400.000000,187620.000000,50900.000000,123.463324)}
{pt3dadd(161364.000000,187908.000000,50975.000000,129.191221)}
{pt3dadd(161328.000000,188160.000000,51000.000000,127.167373)}
{pt3dadd(161268.000000,188388.000000,51050.000000,127.167373)}
{pt3dadd(161100.000000,188532.000000,51050.000000,121.439476)}
{pt3dadd(161004.000000,188688.000000,51075.000000,107.413926)}
{pt3dadd(160884.000000,188904.000000,51025.000000,110.126076)}
{pt3dadd(160776.000000,189096.000000,51025.000000,131.429360)}
{pt3dadd(160656.000000,189252.000000,51000.000000,171.344057)}
{pt3dadd(160596.000000,189480.000000,50975.000000,228.014354)}
{pt3dadd(160416.000000,189708.000000,50950.000000,258.163768)}
{pt3dadd(160260.000000,189960.000000,50975.000000,313.239123)}
{pt3dadd(159960.000000,190044.000000,50975.000000,249.471370)}

{create adhoc76}
{access adhoc76}
{connect adhoc76(1), adhoc75(0)}
{nseg = 1}
{strdef color color = "White"}
{pt3dclear()}
{pt3dadd(159960.000000,190044.000000,50975.000000,249.471370)}
{pt3dadd(159720.000000,190152.000000,50850.000000,262.152840)}
{pt3dadd(159720.000000,190404.000000,50975.000000,254.421683)}
{pt3dadd(159432.000000,190308.000000,50950.000000,226.277900)}

{create adhoc77}
{access adhoc77}
{connect adhoc77(1), adhoc75(0)}
{nseg = 1}
{strdef color color = "White"}
{pt3dclear()}
{pt3dadd(159960.000000,190044.000000,50975.000000,249.471370)}
{pt3dadd(160284.000000,190284.000000,51100.000000,287.587090)}
{pt3dadd(160464.000000,190428.000000,51200.000000,229.507404)}
{pt3dadd(160596.000000,190596.000000,51325.000000,204.813130)}
{pt3dadd(160704.000000,190800.000000,51400.000000,151.410730)}
{pt3dadd(160788.000000,190968.000000,51525.000000,138.317446)}
{pt3dadd(160824.000000,191244.000000,51575.000000,145.993376)}
{pt3dadd(160764.000000,191544.000000,51600.000000,150.591636)}
{pt3dadd(160908.000000,191748.000000,51650.000000,154.563786)}
{pt3dadd(161004.000000,191952.000000,51650.000000,162.726082)}
{pt3dadd(161160.000000,192144.000000,51650.000000,152.332494)}
{pt3dadd(161316.000000,192360.000000,51650.000000,137.605667)}
{pt3dadd(161532.000000,192564.000000,51700.000000,125.603965)}
{pt3dadd(161760.000000,192684.000000,51725.000000,127.062575)}
{pt3dadd(162000.000000,192720.000000,51725.000000,116.668987)}
{pt3dadd(162312.000000,192828.000000,51700.000000,115.632382)}
{pt3dadd(162600.000000,192864.000000,51700.000000,124.072429)}
{pt3dadd(162768.000000,193008.000000,51700.000000,128.763721)}
{pt3dadd(162996.000000,193056.000000,51575.000000,127.273755)}
{pt3dadd(163224.000000,193056.000000,51550.000000,132.300000)}

{create adhoc78}
{access adhoc78}
{connect adhoc78(1), adhoc72(0)}
{nseg = 1}
{strdef color color = "White"}
{pt3dclear()}
{pt3dadd(179184.000000,187452.000000,51125.000000,261.944950)}
{pt3dadd(179652.000000,187932.000000,51050.000000,169.314983)}
{pt3dadd(179724.000000,188112.000000,50850.000000,170.818330)}
{pt3dadd(179832.000000,188292.000000,50675.000000,155.661220)}
{pt3dadd(179976.000000,188508.000000,50575.000000,156.921220)}
{pt3dadd(180036.000000,188724.000000,50425.000000,163.551980)}
{pt3dadd(180120.000000,189000.000000,50350.000000,163.551980)}
{pt3dadd(180036.000000,189156.000000,50300.000000,154.249483)}
{pt3dadd(179928.000000,189348.000000,50250.000000,177.294650)}

{create adhoc79}
{access adhoc79}
{connect adhoc79(1), adhoc1(0)}
{nseg = 1}
{strdef color color = "White"}
{pt3dclear()}
{pt3dadd(185820.000000,177480.000000,48325.000000,261.944950)}
{pt3dadd(185928.000000,177000.000000,48200.000000,259.005717)}
{pt3dadd(186072.000000,176760.000000,48075.000000,268.170730)}
{pt3dadd(185976.000000,176532.000000,47950.000000,285.987996)}
{pt3dadd(185988.000000,176304.000000,47800.000000,295.740856)}
{pt3dadd(186036.000000,176088.000000,47550.000000,292.990436)}
{pt3dadd(186048.000000,175788.000000,47375.000000,295.740856)}
{pt3dadd(186072.000000,175596.000000,47175.000000,292.990436)}
{pt3dadd(186072.000000,175296.000000,47050.000000,300.186580)}
{pt3dadd(186180.000000,174996.000000,46900.000000,330.514286)}
{pt3dadd(186252.000000,174732.000000,46750.000000,369.588946)}
{pt3dadd(186408.000000,174384.000000,46675.000000,385.546658)}
{pt3dadd(186408.000000,174108.000000,46725.000000,420.141172)}
{pt3dadd(186456.000000,173868.000000,46625.000000,436.821872)}
{pt3dadd(186552.000000,173616.000000,46475.000000,445.568826)}
{pt3dadd(186552.000000,173340.000000,46350.000000,432.758242)}
{pt3dadd(186660.000000,173016.000000,46300.000000,419.688470)}
{pt3dadd(186648.000000,172680.000000,46200.000000,390.732316)}
{pt3dadd(186588.000000,172452.000000,46050.000000,351.657656)}
{pt3dadd(186540.000000,172236.000000,45875.000000,309.963546)}
{pt3dadd(186552.000000,172008.000000,45725.000000,286.449890)}
{pt3dadd(186576.000000,171792.000000,45550.000000,278.192080)}
{pt3dadd(186600.000000,171588.000000,45325.000000,281.224424)}
{pt3dadd(186624.000000,171372.000000,45050.000000,283.974844)}
{pt3dadd(186708.000000,171240.000000,44800.000000,289.344714)}
{pt3dadd(186840.000000,171024.000000,44550.000000,301.792110)}
{pt3dadd(187020.000000,170796.000000,44350.000000,323.119692)}
{pt3dadd(187056.000000,170472.000000,44150.000000,336.842948)}
{pt3dadd(186984.000000,170268.000000,43925.000000,349.290344)}
{pt3dadd(186744.000000,170064.000000,43700.000000,385.614584)}
{pt3dadd(186684.000000,169812.000000,43625.000000,400.744474)}
{pt3dadd(186432.000000,169596.000000,43425.000000,412.364048)}
{pt3dadd(186384.000000,169380.000000,43275.000000,424.564602)}
{pt3dadd(186300.000000,169152.000000,43175.000000,439.694492)}
{pt3dadd(186288.000000,168888.000000,43100.000000,406.258192)}
{pt3dadd(186360.000000,168684.000000,43000.000000,375.930486)}
{pt3dadd(186408.000000,168420.000000,42850.000000,357.457444)}
{pt3dadd(186336.000000,168192.000000,42850.000000,317.748764)}
{pt3dadd(186228.000000,167952.000000,42900.000000,284.801608)}
{pt3dadd(186000.000000,167712.000000,43050.000000,284.801608)}
{pt3dadd(185724.000000,167568.000000,43000.000000,299.999424)}
{pt3dadd(185520.000000,167376.000000,43000.000000,290.895180)}
{pt3dadd(185328.000000,167136.000000,42950.000000,304.680050)}
{pt3dadd(185160.000000,166920.000000,42975.000000,297.546640)}
{pt3dadd(184896.000000,166644.000000,43000.000000,286.794114)}
{pt3dadd(184656.000000,166512.000000,43075.000000,271.596298)}
{pt3dadd(184416.000000,166344.000000,43100.000000,271.596298)}
{pt3dadd(184176.000000,166236.000000,43075.000000,262.925594)}
{pt3dadd(183996.000000,166068.000000,43025.000000,265.188374)}
{pt3dadd(183780.000000,165876.000000,42975.000000,262.812460)}
{pt3dadd(183480.000000,165624.000000,43050.000000,255.322380)}
{pt3dadd(183252.000000,165504.000000,43050.000000,247.457794)}
{pt3dadd(183000.000000,165336.000000,43050.000000,229.681234)}
{pt3dadd(182748.000000,165096.000000,43000.000000,215.933284)}
{pt3dadd(182556.000000,164940.000000,42975.000000,199.045684)}
{pt3dadd(182304.000000,164796.000000,42975.000000,188.759204)}
{pt3dadd(182148.000000,164556.000000,42975.000000,174.323860)}
{pt3dadd(181956.000000,164412.000000,43000.000000,178.140124)}
{pt3dadd(181692.000000,164256.000000,42950.000000,183.463186)}
{pt3dadd(181404.000000,164148.000000,42875.000000,210.591286)}
{pt3dadd(181248.000000,164004.000000,42850.000000,231.118266)}
{pt3dadd(180960.000000,163836.000000,42775.000000,243.177696)}
{pt3dadd(180636.000000,163668.000000,42675.000000,268.992656)}
{pt3dadd(180396.000000,163644.000000,42575.000000,282.288174)}
{pt3dadd(180060.000000,163668.000000,42400.000000,272.047674)}
{pt3dadd(179832.000000,163584.000000,42250.000000,257.389366)}
{pt3dadd(179580.000000,163524.000000,42100.000000,248.964478)}
{pt3dadd(179328.000000,163416.000000,41950.000000,219.333254)}
{pt3dadd(179040.000000,163356.000000,41775.000000,200.714674)}
{pt3dadd(178836.000000,163296.000000,41575.000000,185.358610)}
{pt3dadd(178548.000000,163224.000000,41525.000000,177.716988)}
{pt3dadd(178284.000000,163164.000000,41400.000000,170.785812)}
{pt3dadd(178080.000000,163116.000000,41175.000000,167.324342)}
{pt3dadd(177864.000000,163068.000000,41025.000000,169.012862)}
{pt3dadd(177648.000000,163020.000000,40875.000000,182.106146)}
{pt3dadd(177432.000000,162924.000000,40825.000000,194.165576)}
{pt3dadd(177216.000000,162912.000000,40700.000000,211.897554)}
{pt3dadd(176988.000000,162864.000000,40525.000000,221.227696)}
{pt3dadd(176688.000000,162804.000000,40375.000000,235.663040)}
{pt3dadd(176436.000000,162684.000000,40175.000000,237.925820)}
{pt3dadd(176220.000000,162624.000000,40050.000000,231.455604)}
{pt3dadd(176004.000000,162588.000000,39925.000000,229.079690)}
{pt3dadd(175752.000000,162540.000000,39775.000000,225.072610)}
{pt3dadd(175476.000000,162504.000000,39625.000000,212.410216)}
{pt3dadd(175260.000000,162480.000000,39450.000000,217.280846)}
{pt3dadd(175068.000000,162456.000000,39275.000000,233.991562)}
{pt3dadd(174924.000000,162492.000000,38975.000000,241.481642)}
{pt3dadd(174768.000000,162504.000000,38700.000000,254.777160)}
{pt3dadd(174648.000000,162480.000000,38425.000000,260.645832)}
{pt3dadd(174396.000000,162504.000000,38125.000000,238.887602)}
{pt3dadd(174168.000000,162384.000000,37875.000000,208.911742)}
{pt3dadd(174072.000000,162276.000000,37625.000000,180.363302)}
{pt3dadd(173976.000000,162144.000000,37425.000000,157.146462)}
{pt3dadd(173952.000000,162036.000000,37250.000000,135.814618)}
{pt3dadd(173820.000000,162012.000000,36975.000000,131.643858)}
{pt3dadd(173748.000000,161952.000000,36700.000000,133.033008)}
{pt3dadd(173676.000000,161904.000000,36425.000000,138.735304)}
{pt3dadd(173724.000000,161916.000000,36075.000000,134.763154)}
{pt3dadd(173724.000000,161832.000000,35800.000000,146.764856)}
{pt3dadd(173628.000000,161688.000000,35525.000000,150.935616)}
{pt3dadd(173604.000000,161520.000000,35325.000000,152.394226)}
{pt3dadd(173460.000000,161460.000000,35050.000000,150.862690)}
{pt3dadd(173424.000000,161364.000000,34800.000000,150.862690)}
{pt3dadd(173592.000000,161220.000000,34625.000000,139.949422)}
{pt3dadd(173844.000000,161124.000000,34500.000000,133.318662)}
{pt3dadd(174060.000000,161064.000000,34425.000000,134.850198)}
{pt3dadd(174312.000000,160968.000000,34275.000000,139.678368)}
{pt3dadd(174552.000000,160956.000000,34150.000000,157.578920)}
{pt3dadd(174840.000000,160932.000000,34000.000000,175.769922)}
{pt3dadd(175140.000000,160908.000000,33825.000000,189.001802)}
{pt3dadd(175392.000000,160872.000000,33575.000000,189.001802)}
{pt3dadd(175644.000000,160836.000000,33400.000000,184.173632)}
{pt3dadd(175848.000000,160800.000000,33250.000000,167.533080)}
{pt3dadd(176076.000000,160812.000000,33075.000000,157.115696)}
{pt3dadd(176220.000000,160848.000000,32800.000000,150.514576)}
{pt3dadd(176520.000000,160908.000000,32625.000000,143.552280)}
{pt3dadd(176736.000000,160956.000000,32475.000000,145.083816)}
{pt3dadd(177036.000000,160980.000000,32350.000000,168.518090)}
{pt3dadd(177252.000000,160968.000000,32225.000000,176.980802)}
{pt3dadd(177444.000000,160992.000000,31975.000000,183.581922)}
{pt3dadd(177624.000000,161028.000000,31825.000000,183.581922)}
{pt3dadd(177780.000000,161100.000000,31675.000000,177.879626)}
{pt3dadd(177996.000000,161172.000000,31375.000000,160.147648)}
{pt3dadd(178200.000000,161232.000000,31175.000000,154.824586)}
{pt3dadd(178200.000000,161292.000000,30900.000000,158.640850)}
{pt3dadd(178224.000000,161352.000000,30625.000000,167.211260)}
{pt3dadd(178344.000000,161436.000000,30400.000000,181.799404)}
{pt3dadd(178644.000000,161556.000000,30300.000000,185.096038)}
{pt3dadd(178848.000000,161676.000000,30000.000000,188.557508)}
{pt3dadd(179088.000000,161820.000000,29900.000000,175.292364)}
{pt3dadd(179364.000000,161964.000000,29800.000000,164.379096)}
{pt3dadd(179568.000000,162132.000000,29700.000000,144.063055)}
{pt3dadd(179796.000000,162216.000000,29575.000000,133.804125)}
{pt3dadd(180048.000000,162288.000000,29550.000000,119.429387)}
{pt3dadd(180312.000000,162324.000000,29450.000000,114.648742)}
{pt3dadd(180600.000000,162288.000000,29400.000000,114.285710)}
