# Supplementary material for: Full reconstruction of large lobula plate tangential cells in Drosophila from a 3D EM dataset
Source: PLoS One. 2018 Nov 28;13(11):e0207828. doi: 10.1371/journal.pone.0207828 (PMC6261601; doi:10.1371/journal.pone.0207828)
Supplement: S1 Dataset — (ZIP) [file pone.0207828.s001.zip › Diameter hoc/corrected_hw_DCH_cell3_28_70_127_ck_node_size_changed.hoc0001.hoc]

/* created with convertKnossosNmlToHoc.m */

{create adhoc1}
{access adhoc1}
{nseg = 1}
{strdef color color = "White"}
{pt3dclear()}
{pt3dadd(132936.000000,131628.000000,162475.000000,107.177345)}
{pt3dadd(132912.000000,131664.000000,162350.000000,88.953665)}
{pt3dadd(132912.000000,131712.000000,162350.000000,86.561217)}
{pt3dadd(132864.000000,131748.000000,162350.000000,100.000000)}

{create adhoc2}
{access adhoc2}
{connect adhoc2(1), adhoc1(0)}
{nseg = 1}
{strdef color color = "White"}
{pt3dclear()}
{pt3dadd(132864.000000,131748.000000,162350.000000,100.000000)}
{pt3dadd(132924.000000,131880.000000,162325.000000,98.864545)}
{pt3dadd(132912.000000,131892.000000,162200.000000,94.224434)}
{pt3dadd(132888.000000,131868.000000,162125.000000,94.929732)}
{pt3dadd(132900.000000,131952.000000,162100.000000,92.428933)}
{pt3dadd(132936.000000,132060.000000,162100.000000,84.321004)}
{pt3dadd(132972.000000,132192.000000,162100.000000,84.321005)}
{pt3dadd(132960.000000,132300.000000,162100.000000,84.979072)}
{pt3dadd(132960.000000,132420.000000,162100.000000,79.430940)}
{pt3dadd(132972.000000,132504.000000,162050.000000,77.253869)}
{pt3dadd(132864.000000,132564.000000,162025.000000,78.556877)}
{pt3dadd(132852.000000,132660.000000,161975.000000,76.952686)}
{pt3dadd(132828.000000,132768.000000,161975.000000,69.945403)}
{pt3dadd(132768.000000,132828.000000,161950.000000,69.429094)}
{pt3dadd(132708.000000,132912.000000,161950.000000,71.606165)}
{pt3dadd(132648.000000,133008.000000,161950.000000,75.229014)}
{pt3dadd(132588.000000,133092.000000,161875.000000,79.248817)}
{pt3dadd(132528.000000,133152.000000,161875.000000,90.721515)}
{pt3dadd(132468.000000,133260.000000,161825.000000,104.364930)}
{pt3dadd(132420.000000,133380.000000,161825.000000,122.369022)}
{pt3dadd(132384.000000,133488.000000,161825.000000,133.835366)}
{pt3dadd(132312.000000,133596.000000,161750.000000,152.317607)}
{pt3dadd(132276.000000,133716.000000,161850.000000,141.421360)}

{create adhoc3}
{access adhoc3}
{connect adhoc3(1), adhoc2(0)}
{nseg = 1}
{strdef color color = "White"}
{pt3dclear()}
{pt3dadd(132276.000000,133716.000000,161850.000000,141.421360)}
{pt3dadd(132300.000000,133812.000000,161850.000000,150.340667)}
{pt3dadd(132300.000000,133968.000000,161800.000000,172.202352)}
{pt3dadd(132264.000000,134088.000000,161750.000000,179.968098)}
{pt3dadd(132252.000000,134244.000000,161750.000000,170.116384)}
{pt3dadd(132264.000000,134400.000000,161750.000000,161.150839)}
{pt3dadd(132300.000000,134508.000000,161775.000000,129.843762)}
{pt3dadd(132348.000000,134676.000000,161775.000000,106.988823)}
{pt3dadd(132360.000000,134832.000000,161775.000000,90.257532)}
{pt3dadd(132372.000000,134940.000000,161775.000000,91.096278)}
{pt3dadd(132408.000000,135036.000000,161775.000000,89.188561)}
{pt3dadd(132432.000000,135144.000000,161775.000000,117.418642)}
{pt3dadd(132420.000000,135288.000000,161775.000000,140.273581)}
{pt3dadd(132444.000000,135384.000000,161675.000000,152.338218)}
{pt3dadd(132444.000000,135540.000000,161575.000000,155.036134)}
{pt3dadd(132468.000000,135648.000000,161525.000000,156.285784)}
{pt3dadd(132504.000000,135732.000000,161575.000000,128.055703)}
{pt3dadd(132552.000000,135888.000000,161575.000000,122.320017)}
{pt3dadd(132576.000000,136032.000000,161575.000000,125.758673)}
{pt3dadd(132588.000000,136176.000000,161575.000000,157.001297)}
{pt3dadd(132612.000000,136320.000000,161575.000000,207.984677)}
{pt3dadd(132576.000000,136440.000000,161550.000000,256.110550)}
{pt3dadd(132696.000000,136620.000000,161550.000000,303.071126)}
{pt3dadd(132792.000000,136692.000000,161550.000000,349.476130)}
{pt3dadd(132900.000000,136752.000000,161650.000000,386.374540)}

{create adhoc4}
{access adhoc4}
{connect adhoc4(1), adhoc3(0)}
{nseg = 1}
{strdef color color = "White"}
{pt3dclear()}
{pt3dadd(132900.000000,136752.000000,161650.000000,386.374540)}
{pt3dadd(132984.000000,136776.000000,161650.000000,371.438050)}
{pt3dadd(133092.000000,136848.000000,161750.000000,328.677146)}
{pt3dadd(133188.000000,136920.000000,161825.000000,298.970522)}
{pt3dadd(133308.000000,136980.000000,161925.000000,272.717870)}
{pt3dadd(133416.000000,137028.000000,162075.000000,270.579800)}
{pt3dadd(133512.000000,137028.000000,162200.000000,266.791576)}
{pt3dadd(133644.000000,137064.000000,162325.000000,266.791576)}
{pt3dadd(133740.000000,137052.000000,162450.000000,277.786720)}
{pt3dadd(133848.000000,137016.000000,162525.000000,270.463956)}
{pt3dadd(133956.000000,136980.000000,162575.000000,257.403580)}
{pt3dadd(134064.000000,136944.000000,162650.000000,253.869040)}
{pt3dadd(134172.000000,136908.000000,162700.000000,267.389994)}
{pt3dadd(134280.000000,136896.000000,162775.000000,261.606882)}
{pt3dadd(134388.000000,136884.000000,162825.000000,268.929646)}
{pt3dadd(134496.000000,136884.000000,162875.000000,284.128092)}
{pt3dadd(134604.000000,136896.000000,162975.000000,293.445744)}
{pt3dadd(134688.000000,136908.000000,163100.000000,293.445744)}
{pt3dadd(134820.000000,136932.000000,163200.000000,303.432158)}
{pt3dadd(134916.000000,136920.000000,163325.000000,301.505226)}
{pt3dadd(135060.000000,136920.000000,163450.000000,321.559688)}
{pt3dadd(135156.000000,136848.000000,163525.000000,332.640300)}
{pt3dadd(135276.000000,136800.000000,163575.000000,337.145280)}
{pt3dadd(135384.000000,136752.000000,163650.000000,337.145280)}
{pt3dadd(135504.000000,136704.000000,163675.000000,345.270402)}
{pt3dadd(135624.000000,136656.000000,163750.000000,332.093260)}
{pt3dadd(135744.000000,136608.000000,163800.000000,334.549256)}
{pt3dadd(135888.000000,136608.000000,163850.000000,341.920186)}
{pt3dadd(136044.000000,136596.000000,163925.000000,356.428364)}
{pt3dadd(136224.000000,136560.000000,163975.000000,356.428364)}
{pt3dadd(136416.000000,136512.000000,164025.000000,364.059222)}
{pt3dadd(136596.000000,136464.000000,164075.000000,352.587846)}
{pt3dadd(136752.000000,136404.000000,164175.000000,350.045242)}
{pt3dadd(136884.000000,136332.000000,164275.000000,329.338874)}
{pt3dadd(137064.000000,136380.000000,164400.000000,315.817920)}
{pt3dadd(137244.000000,136380.000000,164475.000000,301.309742)}
{pt3dadd(137448.000000,136368.000000,164550.000000,280.968410)}
{pt3dadd(137652.000000,136356.000000,164650.000000,313.833650)}

{create adhoc5}
{access adhoc5}
{connect adhoc5(1), adhoc4(0)}
{nseg = 1}
{strdef color color = "White"}
{pt3dclear()}
{pt3dadd(137652.000000,136356.000000,164650.000000,313.833650)}
{pt3dadd(137724.000000,136464.000000,164525.000000,274.676643)}
{pt3dadd(137832.000000,136572.000000,164525.000000,203.571010)}
{pt3dadd(137904.000000,136692.000000,164525.000000,154.946416)}
{pt3dadd(137988.000000,136812.000000,164525.000000,108.958613)}
{pt3dadd(138060.000000,136944.000000,164525.000000,83.793065)}
{pt3dadd(138168.000000,137076.000000,164525.000000,79.170177)}
{pt3dadd(138276.000000,137184.000000,164525.000000,85.733339)}
{pt3dadd(138420.000000,137316.000000,164575.000000,94.565170)}
{pt3dadd(138528.000000,137436.000000,164625.000000,95.081479)}
{pt3dadd(138696.000000,137508.000000,164650.000000,96.861440)}
{pt3dadd(138732.000000,137628.000000,164700.000000,100.645582)}
{pt3dadd(138768.000000,137676.000000,164900.000000,98.600944)}
{pt3dadd(138792.000000,137688.000000,165025.000000,93.651986)}
{pt3dadd(138840.000000,137616.000000,165175.000000,100.686210)}
{pt3dadd(138816.000000,137496.000000,165300.000000,109.051359)}
{pt3dadd(138900.000000,137448.000000,165425.000000,108.241184)}
{pt3dadd(138888.000000,137424.000000,165525.000000,108.899250)}
{pt3dadd(138852.000000,137400.000000,165625.000000,106.031407)}
{pt3dadd(138840.000000,137280.000000,165750.000000,101.251027)}
{pt3dadd(138744.000000,137244.000000,165775.000000,106.244233)}
{pt3dadd(138792.000000,137160.000000,165925.000000,115.760364)}
{pt3dadd(138768.000000,137088.000000,166075.000000,140.824418)}
{pt3dadd(138672.000000,137172.000000,166200.000000,161.717270)}
{pt3dadd(138564.000000,137184.000000,166375.000000,184.306260)}
{pt3dadd(138528.000000,137124.000000,166500.000000,205.703212)}
{pt3dadd(138420.000000,136980.000000,166600.000000,224.195538)}
{pt3dadd(138324.000000,136908.000000,166800.000000,232.593074)}
{pt3dadd(138384.000000,136968.000000,166900.000000,249.323372)}
{pt3dadd(138420.000000,137052.000000,167100.000000,252.194310)}
{pt3dadd(138492.000000,137160.000000,167200.000000,243.796774)}
{pt3dadd(138516.000000,137496.000000,167350.000000,224.197714)}
{pt3dadd(138564.000000,137568.000000,167500.000000,192.122696)}
{pt3dadd(138720.000000,137700.000000,167700.000000,160.785737)}
{pt3dadd(138780.000000,137748.000000,167775.000000,103.526490)}

{create adhoc6}
{access adhoc6}
{connect adhoc6(1), adhoc4(0)}
{nseg = 1}
{strdef color color = "White"}
{pt3dclear()}
{pt3dadd(137652.000000,136356.000000,164650.000000,313.833650)}
{pt3dadd(137832.000000,136344.000000,164700.000000,293.286277)}
{pt3dadd(137988.000000,136308.000000,164775.000000,266.302480)}
{pt3dadd(138144.000000,136212.000000,164800.000000,249.483684)}
{pt3dadd(138288.000000,136116.000000,164850.000000,233.791194)}
{pt3dadd(138480.000000,136020.000000,164850.000000,226.717870)}
{pt3dadd(138648.000000,135924.000000,164850.000000,228.283024)}
{pt3dadd(138792.000000,135792.000000,164850.000000,231.580866)}
{pt3dadd(138876.000000,135648.000000,164850.000000,246.261592)}
{pt3dadd(138948.000000,135588.000000,165000.000000,268.370848)}
{pt3dadd(139044.000000,135468.000000,165075.000000,266.750498)}
{pt3dadd(139056.000000,135300.000000,165125.000000,279.365992)}
{pt3dadd(139116.000000,135156.000000,165150.000000,292.886946)}
{pt3dadd(139212.000000,135012.000000,165150.000000,301.902326)}
{pt3dadd(139380.000000,134976.000000,165175.000000,311.564772)}
{pt3dadd(139488.000000,134880.000000,165125.000000,335.260878)}
{pt3dadd(139620.000000,134796.000000,165125.000000,346.341490)}
{pt3dadd(139740.000000,134724.000000,165100.000000,348.554954)}
{pt3dadd(139848.000000,134640.000000,165050.000000,346.182624)}
{pt3dadd(139920.000000,134568.000000,165050.000000,328.108524)}
{pt3dadd(139992.000000,134484.000000,165050.000000,309.446908)}
{pt3dadd(140124.000000,134412.000000,165025.000000,294.444476)}
{pt3dadd(140160.000000,134328.000000,165050.000000,296.735992)}
{pt3dadd(140208.000000,134232.000000,165100.000000,286.032822)}
{pt3dadd(140304.000000,134136.000000,165125.000000,292.231006)}
{pt3dadd(140424.000000,134040.000000,165150.000000,295.890190)}
{pt3dadd(140532.000000,133944.000000,165175.000000,292.231006)}
{pt3dadd(140640.000000,133836.000000,165200.000000,280.651260)}
{pt3dadd(140664.000000,133716.000000,165225.000000,254.912120)}

{create adhoc7}
{access adhoc7}
{connect adhoc7(1), adhoc6(0)}
{nseg = 1}
{strdef color color = "White"}
{pt3dclear()}
{pt3dadd(140664.000000,133716.000000,165225.000000,254.912120)}
{pt3dadd(140772.000000,133716.000000,165300.000000,283.624187)}
{pt3dadd(140916.000000,133716.000000,165300.000000,205.021946)}
{pt3dadd(141060.000000,133728.000000,165300.000000,166.350966)}
{pt3dadd(141204.000000,133740.000000,165300.000000,121.413988)}
{pt3dadd(141360.000000,133812.000000,165300.000000,76.992696)}
{pt3dadd(141504.000000,133884.000000,165300.000000,73.698408)}
{pt3dadd(141648.000000,133944.000000,165300.000000,79.556272)}
{pt3dadd(141780.000000,133992.000000,165300.000000,98.628192)}
{pt3dadd(141948.000000,134016.000000,165300.000000,117.758534)}
{pt3dadd(142116.000000,134028.000000,165300.000000,143.675647)}
{pt3dadd(142284.000000,134028.000000,165300.000000,174.110120)}

{create adhoc8}
{access adhoc8}
{connect adhoc8(1), adhoc7(0)}
{nseg = 1}
{strdef color color = "White"}
{pt3dclear()}
{pt3dadd(142284.000000,134028.000000,165300.000000,174.110120)}
{pt3dadd(142416.000000,134028.000000,165300.000000,178.203433)}
{pt3dadd(142524.000000,134088.000000,165200.000000,141.287760)}
{pt3dadd(142632.000000,134208.000000,165025.000000,118.357807)}
{pt3dadd(142716.000000,134244.000000,164900.000000,77.096285)}
{pt3dadd(142848.000000,134304.000000,164875.000000,59.460354)}

{create adhoc9}
{access adhoc9}
{connect adhoc9(1), adhoc7(0)}
{nseg = 1}
{strdef color color = "White"}
{pt3dclear()}
{pt3dadd(142284.000000,134028.000000,165300.000000,174.110120)}
{pt3dadd(143124.000000,134784.000000,165300.000000,159.327323)}
{pt3dadd(143976.000000,135540.000000,165300.000000,141.421360)}

{create adhoc10}
{access adhoc10}
{connect adhoc10(1), adhoc6(0)}
{nseg = 1}
{strdef color color = "White"}
{pt3dclear()}
{pt3dadd(140664.000000,133716.000000,165225.000000,254.912120)}
{pt3dadd(140796.000000,133632.000000,165125.000000,264.652713)}
{pt3dadd(140868.000000,133548.000000,165125.000000,264.352260)}
{pt3dadd(140928.000000,133464.000000,165125.000000,269.938376)}
{pt3dadd(141012.000000,133344.000000,165125.000000,273.472916)}
{pt3dadd(141096.000000,133236.000000,165125.000000,275.538148)}
{pt3dadd(141132.000000,133116.000000,165125.000000,275.538148)}
{pt3dadd(141168.000000,133008.000000,165125.000000,283.386492)}
{pt3dadd(141216.000000,132888.000000,165125.000000,287.446612)}
{pt3dadd(141240.000000,132780.000000,165125.000000,291.234836)}
{pt3dadd(141336.000000,132636.000000,165150.000000,293.372906)}
{pt3dadd(141348.000000,132504.000000,165150.000000,297.161130)}
{pt3dadd(141360.000000,132396.000000,165100.000000,285.778246)}
{pt3dadd(141384.000000,132264.000000,165075.000000,272.717870)}
{pt3dadd(141432.000000,132144.000000,165075.000000,268.929646)}
{pt3dadd(141480.000000,132036.000000,165075.000000,260.804524)}
{pt3dadd(141528.000000,131916.000000,165075.000000,245.646580)}
{pt3dadd(141576.000000,131808.000000,165075.000000,237.811400)}
{pt3dadd(141648.000000,131676.000000,165075.000000,225.065136)}
{pt3dadd(141720.000000,131556.000000,165075.000000,212.284820)}
{pt3dadd(141828.000000,131448.000000,165125.000000,200.514150)}
{pt3dadd(141912.000000,131400.000000,165125.000000,199.103554)}
{pt3dadd(141960.000000,131352.000000,165125.000000,192.514978)}
{pt3dadd(142044.000000,131256.000000,165200.000000,192.514978)}
{pt3dadd(142140.000000,131160.000000,165225.000000,205.295294)}
{pt3dadd(142224.000000,131052.000000,165225.000000,203.834952)}
{pt3dadd(142332.000000,130992.000000,165325.000000,196.325050)}
{pt3dadd(142452.000000,130932.000000,165325.000000,198.824350)}
{pt3dadd(142572.000000,130860.000000,165325.000000,216.782646)}
{pt3dadd(142680.000000,130848.000000,165375.000000,204.319557)}
{pt3dadd(142812.000000,130848.000000,165425.000000,263.901580)}

{create adhoc11}
{access adhoc11}
{connect adhoc11(1), adhoc10(0)}
{nseg = 1}
{strdef color color = "White"}
{pt3dclear()}
{pt3dadd(142812.000000,130848.000000,165425.000000,263.901580)}
{pt3dadd(142644.000000,130908.000000,165475.000000,253.410717)}
{pt3dadd(142488.000000,130992.000000,165475.000000,257.684098)}
{pt3dadd(142236.000000,131076.000000,165475.000000,265.532442)}
{pt3dadd(141984.000000,131172.000000,165475.000000,322.031554)}
{pt3dadd(141840.000000,131256.000000,165500.000000,326.383088)}
{pt3dadd(141672.000000,131412.000000,165500.000000,346.278880)}
{pt3dadd(141492.000000,131664.000000,165525.000000,332.757926)}
{pt3dadd(141528.000000,131664.000000,165725.000000,302.443598)}
{pt3dadd(141588.000000,131688.000000,165900.000000,236.588746)}
{pt3dadd(141648.000000,131640.000000,166050.000000,199.892824)}
{pt3dadd(141516.000000,131676.000000,166175.000000,158.561563)}
{pt3dadd(141492.000000,131712.000000,166300.000000,131.507177)}
{pt3dadd(141288.000000,131640.000000,166450.000000,132.576209)}
{pt3dadd(141180.000000,131508.000000,166500.000000,133.608827)}
{pt3dadd(141072.000000,131400.000000,166575.000000,134.606269)}
{pt3dadd(141000.000000,131352.000000,166575.000000,150.492120)}
{pt3dadd(140916.000000,131184.000000,166625.000000,174.248664)}
{pt3dadd(140844.000000,131004.000000,166700.000000,184.275896)}
{pt3dadd(140760.000000,131040.000000,166725.000000,204.943988)}
{pt3dadd(140580.000000,131112.000000,166825.000000,228.442590)}
{pt3dadd(140400.000000,131184.000000,166850.000000,241.955560)}
{pt3dadd(140280.000000,131316.000000,166975.000000,263.901580)}

{create adhoc12}
{access adhoc12}
{connect adhoc12(1), adhoc11(0)}
{nseg = 1}
{strdef color color = "White"}
{pt3dclear()}
{pt3dadd(140280.000000,131316.000000,166975.000000,263.901580)}
{pt3dadd(140220.000000,131448.000000,167025.000000,250.488113)}
{pt3dadd(140124.000000,131580.000000,167025.000000,209.888914)}
{pt3dadd(140028.000000,131724.000000,167025.000000,177.108598)}
{pt3dadd(139896.000000,131856.000000,167025.000000,141.127644)}
{pt3dadd(139776.000000,131880.000000,167025.000000,115.074634)}
{pt3dadd(139728.000000,131976.000000,167025.000000,102.171312)}
{pt3dadd(139632.000000,132108.000000,167025.000000,86.550000)}
{pt3dadd(139476.000000,132192.000000,167025.000000,82.241682)}
{pt3dadd(139332.000000,132264.000000,167075.000000,76.776101)}
{pt3dadd(139200.000000,132336.000000,167125.000000,78.618833)}
{pt3dadd(139068.000000,132408.000000,167125.000000,79.245702)}
{pt3dadd(138948.000000,132516.000000,167125.000000,93.303300)}

{create adhoc13}
{access adhoc13}
{connect adhoc13(1), adhoc11(0)}
{nseg = 1}
{strdef color color = "White"}
{pt3dclear()}
{pt3dadd(140280.000000,131316.000000,166975.000000,263.901580)}
{pt3dadd(140388.000000,131328.000000,167125.000000,386.374540)}

{create adhoc14}
{access adhoc14}
{connect adhoc14(1), adhoc13(0)}
{nseg = 1}
{strdef color color = "White"}
{pt3dclear()}
{pt3dadd(140388.000000,131328.000000,167125.000000,386.374540)}
{pt3dadd(140484.000000,131292.000000,167450.000000,249.030413)}
{pt3dadd(140460.000000,131304.000000,167650.000000,202.237081)}
{pt3dadd(140556.000000,131412.000000,167850.000000,148.746315)}
{pt3dadd(140640.000000,131496.000000,167975.000000,129.450004)}
{pt3dadd(140664.000000,131568.000000,168150.000000,121.948790)}
{pt3dadd(140700.000000,131544.000000,168325.000000,131.896685)}
{pt3dadd(140736.000000,131556.000000,168475.000000,117.331249)}
{pt3dadd(140844.000000,131508.000000,168575.000000,118.169995)}
{pt3dadd(140868.000000,131472.000000,168775.000000,120.144986)}
{pt3dadd(140808.000000,131532.000000,169025.000000,119.214338)}
{pt3dadd(140832.000000,131544.000000,169250.000000,115.151778)}
{pt3dadd(140844.000000,131568.000000,169575.000000,131.969706)}
{pt3dadd(140736.000000,131568.000000,169675.000000,133.736976)}
{pt3dadd(140676.000000,131676.000000,169950.000000,133.736976)}
{pt3dadd(140664.000000,131712.000000,170075.000000,131.969706)}
{pt3dadd(140676.000000,131904.000000,170400.000000,143.286356)}
{pt3dadd(140772.000000,132024.000000,170700.000000,149.650500)}
{pt3dadd(140784.000000,132000.000000,170900.000000,148.751554)}
{pt3dadd(140724.000000,132036.000000,171025.000000,153.374442)}
{pt3dadd(140760.000000,131952.000000,171175.000000,153.374442)}
{pt3dadd(140868.000000,131904.000000,171500.000000,128.397390)}
{pt3dadd(140844.000000,131952.000000,171650.000000,104.843630)}
{pt3dadd(140784.000000,131964.000000,171750.000000,68.302010)}

{create adhoc15}
{access adhoc15}
{connect adhoc15(1), adhoc13(0)}
{nseg = 1}
{strdef color color = "White"}
{pt3dclear()}
{pt3dadd(140388.000000,131328.000000,167125.000000,386.374540)}
{pt3dadd(140376.000000,131244.000000,167400.000000,226.468450)}
{pt3dadd(140280.000000,131172.000000,167400.000000,166.729918)}
{pt3dadd(140208.000000,131088.000000,167400.000000,104.612176)}
{pt3dadd(140100.000000,131016.000000,167400.000000,80.885851)}
{pt3dadd(139932.000000,130908.000000,167400.000000,74.512719)}
{pt3dadd(139812.000000,130836.000000,167400.000000,80.791022)}
{pt3dadd(139740.000000,130716.000000,167300.000000,88.883482)}
{pt3dadd(139644.000000,130656.000000,167250.000000,90.544244)}
{pt3dadd(139524.000000,130536.000000,167250.000000,98.767276)}
{pt3dadd(139440.000000,130464.000000,167225.000000,117.406284)}
{pt3dadd(139308.000000,130380.000000,167225.000000,130.792835)}
{pt3dadd(139176.000000,130308.000000,167225.000000,148.419289)}
{pt3dadd(139092.000000,130200.000000,167125.000000,171.601361)}
{pt3dadd(138984.000000,130080.000000,167100.000000,183.665998)}
{pt3dadd(138948.000000,129900.000000,166900.000000,176.897694)}
{pt3dadd(138828.000000,129828.000000,167000.000000,168.465832)}
{pt3dadd(138732.000000,129732.000000,167000.000000,160.691092)}
{pt3dadd(138576.000000,129588.000000,167000.000000,197.966000)}
{pt3dadd(138504.000000,129468.000000,167000.000000,228.834870)}
{pt3dadd(138384.000000,129324.000000,167075.000000,386.374540)}

{create adhoc16}
{access adhoc16}
{connect adhoc16(1), adhoc10(0)}
{nseg = 1}
{strdef color color = "White"}
{pt3dclear()}
{pt3dadd(142812.000000,130848.000000,165425.000000,263.901580)}
{pt3dadd(142872.000000,130824.000000,165425.000000,243.432297)}
{pt3dadd(143028.000000,130788.000000,165450.000000,239.687934)}
{pt3dadd(143184.000000,130740.000000,165575.000000,226.907618)}
{pt3dadd(143340.000000,130680.000000,165575.000000,207.088030)}
{pt3dadd(143508.000000,130620.000000,165575.000000,209.861172)}
{pt3dadd(143676.000000,130548.000000,165575.000000,203.486334)}
{pt3dadd(143712.000000,130500.000000,165650.000000,192.739410)}
{pt3dadd(143880.000000,130428.000000,165650.000000,205.519726)}
{pt3dadd(144012.000000,130332.000000,165700.000000,221.680130)}
{pt3dadd(144120.000000,130272.000000,165775.000000,226.217468)}
{pt3dadd(144180.000000,130164.000000,165775.000000,215.836628)}
{pt3dadd(144276.000000,130056.000000,165750.000000,219.522092)}
{pt3dadd(144348.000000,129924.000000,165750.000000,192.932253)}
{pt3dadd(144408.000000,129792.000000,165750.000000,186.606600)}

{create adhoc17}
{access adhoc17}
{connect adhoc17(1), adhoc16(0)}
{nseg = 1}
{strdef color color = "White"}
{pt3dclear()}
{pt3dadd(144408.000000,129792.000000,165750.000000,186.606600)}
{pt3dadd(144480.000000,129660.000000,165750.000000,162.323738)}
{pt3dadd(144540.000000,129516.000000,165750.000000,172.440695)}
{pt3dadd(144576.000000,129360.000000,165750.000000,164.401089)}
{pt3dadd(144600.000000,129168.000000,165625.000000,159.783548)}
{pt3dadd(144612.000000,128976.000000,165600.000000,145.768982)}
{pt3dadd(144588.000000,128820.000000,165525.000000,133.640100)}
{pt3dadd(144576.000000,128664.000000,165525.000000,164.984438)}
{pt3dadd(144588.000000,128508.000000,165525.000000,184.948500)}
{pt3dadd(144636.000000,128352.000000,165400.000000,196.414844)}
{pt3dadd(144684.000000,128208.000000,165350.000000,202.106288)}
{pt3dadd(144516.000000,128160.000000,165250.000000,211.462028)}
{pt3dadd(144372.000000,128040.000000,165250.000000,174.766106)}
{pt3dadd(144288.000000,127956.000000,165250.000000,169.903110)}
{pt3dadd(144252.000000,127848.000000,165250.000000,184.489776)}
{pt3dadd(144204.000000,127704.000000,165175.000000,186.665542)}
{pt3dadd(144216.000000,127548.000000,165075.000000,190.899026)}
{pt3dadd(144204.000000,127452.000000,164925.000000,186.398896)}
{pt3dadd(144156.000000,127320.000000,164900.000000,166.639004)}
{pt3dadd(144228.000000,127176.000000,164825.000000,154.082398)}
{pt3dadd(144180.000000,127080.000000,164825.000000,147.083512)}
{pt3dadd(144084.000000,127008.000000,164750.000000,126.403964)}
{pt3dadd(144048.000000,126864.000000,164750.000000,120.644831)}
{pt3dadd(144072.000000,126708.000000,164750.000000,133.343263)}
{pt3dadd(144072.000000,126600.000000,164750.000000,126.002898)}
{pt3dadd(144156.000000,126492.000000,164650.000000,130.533827)}
{pt3dadd(144288.000000,126396.000000,164575.000000,114.869835)}

{create adhoc18}
{access adhoc18}
{connect adhoc18(1), adhoc17(0)}
{nseg = 1}
{strdef color color = "White"}
{pt3dclear()}
{pt3dadd(144288.000000,126396.000000,164575.000000,114.869835)}
{pt3dadd(144348.000000,126300.000000,164575.000000,112.439012)}
{pt3dadd(144408.000000,126204.000000,164575.000000,121.561881)}
{pt3dadd(144492.000000,126084.000000,164575.000000,134.637932)}
{pt3dadd(144576.000000,125952.000000,164575.000000,133.827757)}
{pt3dadd(144612.000000,125856.000000,164650.000000,125.868065)}
{pt3dadd(144648.000000,125808.000000,164425.000000,115.279002)}
{pt3dadd(144708.000000,125712.000000,164475.000000,103.625330)}
{pt3dadd(144756.000000,125592.000000,164475.000000,83.820360)}
{pt3dadd(144792.000000,125448.000000,164475.000000,75.487250)}
{pt3dadd(144840.000000,125304.000000,164475.000000,82.577608)}
{pt3dadd(144924.000000,125136.000000,164275.000000,73.204285)}

{create adhoc19}
{access adhoc19}
{connect adhoc19(1), adhoc17(0)}
{nseg = 1}
{strdef color color = "White"}
{pt3dclear()}
{pt3dadd(144288.000000,126396.000000,164575.000000,114.869835)}
{pt3dadd(144192.000000,126516.000000,164475.000000,137.364792)}
{pt3dadd(144108.000000,126588.000000,164450.000000,118.468893)}
{pt3dadd(143964.000000,126720.000000,164325.000000,101.121511)}
{pt3dadd(143964.000000,126876.000000,164200.000000,90.125046)}

{create adhoc20}
{access adhoc20}
{connect adhoc20(1), adhoc16(0)}
{nseg = 1}
{strdef color color = "White"}
{pt3dclear()}
{pt3dadd(144408.000000,129792.000000,165750.000000,186.606600)}
{pt3dadd(144420.000000,130020.000000,165900.000000,225.500760)}
{pt3dadd(144528.000000,130128.000000,165975.000000,247.815434)}
{pt3dadd(144636.000000,130236.000000,166025.000000,246.544132)}
{pt3dadd(144684.000000,130272.000000,166175.000000,254.379312)}
{pt3dadd(144804.000000,130212.000000,166250.000000,236.448226)}
{pt3dadd(144888.000000,130152.000000,166325.000000,199.294284)}
{pt3dadd(144984.000000,130092.000000,166450.000000,193.744666)}
{pt3dadd(145044.000000,129984.000000,166500.000000,190.184746)}
{pt3dadd(145140.000000,129840.000000,166550.000000,186.886904)}
{pt3dadd(145200.000000,129720.000000,166575.000000,192.632230)}
{pt3dadd(145200.000000,129588.000000,166600.000000,190.456464)}
{pt3dadd(145140.000000,129432.000000,166675.000000,181.419416)}
{pt3dadd(145188.000000,129552.000000,166800.000000,169.634616)}
{pt3dadd(145296.000000,129672.000000,166875.000000,151.970954)}
{pt3dadd(145368.000000,129756.000000,166925.000000,126.248834)}
{pt3dadd(145452.000000,129816.000000,167000.000000,119.718644)}
{pt3dadd(145464.000000,129864.000000,167125.000000,113.625762)}
{pt3dadd(145596.000000,129900.000000,167200.000000,112.920462)}
{pt3dadd(145536.000000,130092.000000,167325.000000,99.793356)}
{pt3dadd(145572.000000,130104.000000,167450.000000,103.324086)}
{pt3dadd(145680.000000,130200.000000,167575.000000,123.922724)}
{pt3dadd(145716.000000,130128.000000,167675.000000,136.218893)}
{pt3dadd(145728.000000,130092.000000,167800.000000,221.913900)}

{create adhoc21}
{access adhoc21}
{connect adhoc21(1), adhoc20(0)}
{nseg = 1}
{strdef color color = "White"}
{pt3dclear()}
{pt3dadd(145728.000000,130092.000000,167800.000000,221.913900)}
{pt3dadd(145560.000000,130068.000000,167700.000000,143.154829)}
{pt3dadd(145380.000000,130056.000000,167825.000000,123.917906)}
{pt3dadd(145284.000000,130140.000000,167900.000000,92.730205)}
{pt3dadd(145212.000000,130212.000000,167925.000000,84.680951)}
{pt3dadd(145236.000000,130284.000000,167950.000000,76.849208)}
{pt3dadd(145176.000000,130392.000000,168000.000000,72.019277)}
{pt3dadd(145176.000000,130572.000000,168000.000000,64.706997)}
{pt3dadd(145164.000000,130680.000000,168100.000000,65.975395)}

{create adhoc22}
{access adhoc22}
{connect adhoc22(1), adhoc20(0)}
{nseg = 1}
{strdef color color = "White"}
{pt3dclear()}
{pt3dadd(145728.000000,130092.000000,167800.000000,221.913900)}
{pt3dadd(145788.000000,130104.000000,167900.000000,244.832090)}
{pt3dadd(145776.000000,130092.000000,168050.000000,282.842700)}

{create adhoc23}
{access adhoc23}
{connect adhoc23(1), adhoc22(0)}
{nseg = 1}
{strdef color color = "White"}
{pt3dclear()}
{pt3dadd(145776.000000,130092.000000,168050.000000,282.842700)}
{pt3dadd(145716.000000,129960.000000,168050.000000,220.759679)}
{pt3dadd(145656.000000,129840.000000,168050.000000,171.397115)}
{pt3dadd(145656.000000,129684.000000,168025.000000,127.574181)}
{pt3dadd(145620.000000,129588.000000,168025.000000,87.823569)}
{pt3dadd(145572.000000,129492.000000,168025.000000,83.662008)}
{pt3dadd(145548.000000,129420.000000,168025.000000,74.534500)}
{pt3dadd(145416.000000,129456.000000,168050.000000,75.785830)}

{create adhoc24}
{access adhoc24}
{connect adhoc24(1), adhoc22(0)}
{nseg = 1}
{strdef color color = "White"}
{pt3dclear()}
{pt3dadd(145776.000000,130092.000000,168050.000000,282.842700)}
{pt3dadd(145824.000000,130116.000000,168175.000000,293.650570)}
{pt3dadd(145800.000000,130044.000000,168250.000000,308.442246)}
{pt3dadd(145800.000000,130080.000000,168375.000000,329.148614)}
{pt3dadd(145800.000000,129996.000000,168500.000000,337.273736)}
{pt3dadd(145800.000000,129936.000000,168625.000000,345.522247)}
{pt3dadd(145764.000000,129828.000000,168700.000000,313.833650)}

{create adhoc25}
{access adhoc25}
{connect adhoc25(1), adhoc24(0)}
{nseg = 1}
{strdef color color = "White"}
{pt3dclear()}
{pt3dadd(145764.000000,129828.000000,168700.000000,313.833650)}
{pt3dadd(145860.000000,129648.000000,168775.000000,263.267400)}
{pt3dadd(145944.000000,129528.000000,168775.000000,214.234680)}
{pt3dadd(146028.000000,129408.000000,168775.000000,166.625116)}
{pt3dadd(146088.000000,129300.000000,168775.000000,130.574419)}
{pt3dadd(146148.000000,129180.000000,168775.000000,97.821564)}
{pt3dadd(146208.000000,129036.000000,168775.000000,81.023147)}
{pt3dadd(146256.000000,128892.000000,168775.000000,75.899665)}
{pt3dadd(146304.000000,128748.000000,168775.000000,80.061226)}
{pt3dadd(146388.000000,128640.000000,168775.000000,83.684075)}
{pt3dadd(146484.000000,128508.000000,168775.000000,89.149656)}
{pt3dadd(146508.000000,128400.000000,168775.000000,84.175710)}
{pt3dadd(146508.000000,128268.000000,168675.000000,84.175710)}
{pt3dadd(146496.000000,128076.000000,168675.000000,81.102031)}
{pt3dadd(146520.000000,127908.000000,168650.000000,84.284103)}
{pt3dadd(146520.000000,127716.000000,168650.000000,78.369049)}
{pt3dadd(146532.000000,127608.000000,168675.000000,81.651090)}
{pt3dadd(146520.000000,127500.000000,168750.000000,63.728030)}

{create adhoc26}
{access adhoc26}
{connect adhoc26(1), adhoc24(0)}
{nseg = 1}
{strdef color color = "White"}
{pt3dclear()}
{pt3dadd(145764.000000,129828.000000,168700.000000,313.833650)}
{pt3dadd(145620.000000,129912.000000,168900.000000,263.901580)}

{create adhoc27}
{access adhoc27}
{connect adhoc27(1), adhoc26(0)}
{nseg = 1}
{strdef color color = "White"}
{pt3dclear()}
{pt3dadd(145620.000000,129912.000000,168900.000000,263.901580)}
{pt3dadd(145788.000000,129948.000000,168850.000000,298.321493)}
{pt3dadd(145872.000000,129960.000000,168850.000000,240.524492)}
{pt3dadd(146004.000000,129984.000000,168850.000000,204.562104)}
{pt3dadd(146148.000000,130044.000000,168850.000000,154.236791)}
{pt3dadd(146280.000000,130032.000000,168900.000000,111.328653)}
{pt3dadd(146412.000000,129996.000000,168950.000000,83.098572)}
{pt3dadd(146532.000000,129924.000000,169000.000000,80.129595)}
{pt3dadd(146628.000000,129864.000000,169075.000000,76.506746)}
{pt3dadd(146748.000000,129804.000000,169075.000000,70.848421)}
{pt3dadd(146856.000000,129732.000000,169075.000000,71.330155)}
{pt3dadd(146988.000000,129732.000000,169075.000000,70.831434)}
{pt3dadd(147132.000000,129696.000000,169075.000000,70.831435)}
{pt3dadd(147264.000000,129672.000000,169075.000000,70.381962)}
{pt3dadd(147432.000000,129672.000000,169075.000000,71.878726)}
{pt3dadd(147600.000000,129684.000000,169075.000000,70.048034)}
{pt3dadd(147768.000000,129648.000000,169075.000000,76.611196)}
{pt3dadd(147888.000000,129648.000000,169050.000000,80.238241)}
{pt3dadd(148020.000000,129636.000000,168950.000000,99.982733)}
{pt3dadd(148152.000000,129660.000000,168850.000000,106.261036)}
{pt3dadd(148248.000000,129624.000000,168750.000000,114.654890)}
{pt3dadd(148440.000000,129612.000000,168700.000000,119.440804)}
{pt3dadd(148620.000000,129648.000000,168575.000000,126.512235)}
{pt3dadd(148752.000000,129768.000000,168475.000000,109.713819)}
{pt3dadd(148848.000000,129768.000000,168275.000000,112.621753)}
{pt3dadd(148980.000000,129756.000000,168175.000000,78.458410)}

{create adhoc28}
{access adhoc28}
{connect adhoc28(1), adhoc26(0)}
{nseg = 1}
{strdef color color = "White"}
{pt3dclear()}
{pt3dadd(145620.000000,129912.000000,168900.000000,263.901580)}
{pt3dadd(145452.000000,129936.000000,168975.000000,222.021857)}
{pt3dadd(145296.000000,129948.000000,168950.000000,171.943421)}
{pt3dadd(145104.000000,129948.000000,168950.000000,135.408153)}
{pt3dadd(144948.000000,129912.000000,169000.000000,108.436383)}
{pt3dadd(144792.000000,129924.000000,169050.000000,85.581444)}
{pt3dadd(144696.000000,129864.000000,169125.000000,80.751514)}
{pt3dadd(144588.000000,129756.000000,169150.000000,73.001947)}
{pt3dadd(144480.000000,129684.000000,169225.000000,65.975395)}

{create adhoc29}
{access adhoc29}
{connect adhoc29(1), adhoc28(0)}
{nseg = 1}
{strdef color color = "White"}
{pt3dclear()}
{pt3dadd(144480.000000,129684.000000,169225.000000,65.975395)}
{pt3dadd(144360.000000,129708.000000,169275.000000,85.719828)}
{pt3dadd(144228.000000,129744.000000,169275.000000,85.501559)}
{pt3dadd(144204.000000,129876.000000,169300.000000,78.025446)}
{pt3dadd(144084.000000,129960.000000,169300.000000,114.869835)}

{create adhoc30}
{access adhoc30}
{connect adhoc30(1), adhoc28(0)}
{nseg = 1}
{strdef color color = "White"}
{pt3dclear()}
{pt3dadd(144480.000000,129684.000000,169225.000000,65.975395)}
{pt3dadd(144264.000000,129588.000000,169375.000000,84.343482)}
{pt3dadd(144192.000000,129480.000000,169450.000000,86.701675)}
{pt3dadd(144108.000000,129396.000000,169475.000000,90.324525)}
{pt3dadd(143964.000000,129348.000000,169575.000000,90.324525)}
{pt3dadd(143820.000000,129288.000000,169575.000000,95.104903)}
{pt3dadd(143676.000000,129348.000000,169625.000000,96.453861)}
{pt3dadd(143544.000000,129276.000000,169675.000000,95.643686)}
{pt3dadd(143400.000000,129240.000000,169775.000000,93.466614)}
{pt3dadd(143316.000000,129144.000000,169875.000000,87.127016)}
{pt3dadd(143208.000000,129084.000000,170000.000000,76.827700)}
{pt3dadd(142920.000000,129096.000000,170150.000000,75.478742)}
{pt3dadd(142728.000000,129048.000000,170200.000000,63.106529)}
{pt3dadd(142596.000000,129060.000000,170150.000000,61.557220)}

{create adhoc31}
{access adhoc31}
{connect adhoc31(1), adhoc3(0)}
{nseg = 1}
{strdef color color = "White"}
{pt3dclear()}
{pt3dadd(132900.000000,136752.000000,161650.000000,386.374540)}
{pt3dadd(132792.000000,136860.000000,161550.000000,386.993560)}
{pt3dadd(132756.000000,136932.000000,161425.000000,406.703564)}
{pt3dadd(132768.000000,136920.000000,161300.000000,424.565222)}
{pt3dadd(132768.000000,136908.000000,161150.000000,432.465186)}
{pt3dadd(132804.000000,136908.000000,161025.000000,439.836863)}
{pt3dadd(132840.000000,136860.000000,160875.000000,400.000000)}

{create adhoc32}
{access adhoc32}
{connect adhoc32(1), adhoc31(0)}
{nseg = 1}
{strdef color color = "White"}
{pt3dclear()}
{pt3dadd(132840.000000,136860.000000,160875.000000,400.000000)}
{pt3dadd(132744.000000,136944.000000,160900.000000,416.298677)}
{pt3dadd(132636.000000,136992.000000,160800.000000,412.600398)}
{pt3dadd(132528.000000,137028.000000,160725.000000,421.365958)}
{pt3dadd(132396.000000,137040.000000,160550.000000,409.050584)}
{pt3dadd(132240.000000,137052.000000,160525.000000,411.682852)}
{pt3dadd(132144.000000,137088.000000,160275.000000,414.603536)}
{pt3dadd(132036.000000,137112.000000,160275.000000,417.424728)}
{pt3dadd(131904.000000,137148.000000,160200.000000,405.934076)}
{pt3dadd(131772.000000,137184.000000,160225.000000,395.212920)}
{pt3dadd(131592.000000,137196.000000,160250.000000,378.566672)}
{pt3dadd(131448.000000,137160.000000,160200.000000,347.466404)}
{pt3dadd(131316.000000,137124.000000,160100.000000,327.411942)}
{pt3dadd(131196.000000,137100.000000,160025.000000,322.237070)}
{pt3dadd(131040.000000,137100.000000,159975.000000,322.237070)}
{pt3dadd(130920.000000,137052.000000,159950.000000,324.375140)}
{pt3dadd(130776.000000,137028.000000,159900.000000,330.362192)}
{pt3dadd(130632.000000,137004.000000,159850.000000,318.577886)}
{pt3dadd(130500.000000,136968.000000,159750.000000,307.106510)}
{pt3dadd(130464.000000,136944.000000,159650.000000,293.569902)}
{pt3dadd(130296.000000,136932.000000,159575.000000,295.783366)}
{pt3dadd(130140.000000,136968.000000,159500.000000,309.797346)}
{pt3dadd(129984.000000,136980.000000,159425.000000,308.060698)}
{pt3dadd(129888.000000,136932.000000,159300.000000,302.073646)}
{pt3dadd(129708.000000,136980.000000,159225.000000,291.078502)}
{pt3dadd(129516.000000,137028.000000,159200.000000,278.878624)}
{pt3dadd(129348.000000,137064.000000,159125.000000,269.216178)}
{pt3dadd(129216.000000,137124.000000,159075.000000,284.950596)}
{pt3dadd(129060.000000,137256.000000,159025.000000,302.409024)}
{pt3dadd(129072.000000,137280.000000,158900.000000,313.404168)}
{pt3dadd(129156.000000,137256.000000,158800.000000,340.623852)}
{pt3dadd(129336.000000,137268.000000,158675.000000,384.926878)}
{pt3dadd(129408.000000,137388.000000,158550.000000,425.507316)}
{pt3dadd(129504.000000,137484.000000,158425.000000,543.680412)}
{pt3dadd(129360.000000,137568.000000,158300.000000,610.650444)}
{pt3dadd(129144.000000,137640.000000,158300.000000,690.650444)}
{pt3dadd(128976.000000,137712.000000,158300.000000,706.900684)}
{pt3dadd(128808.000000,137772.000000,158300.000000,740.628132)}
{pt3dadd(128652.000000,137832.000000,158300.000000,708.035900)}
{pt3dadd(128544.000000,137940.000000,158275.000000,696.440400)}

{create adhoc33}
{access adhoc33}
{connect adhoc33(1), adhoc32(0)}
{nseg = 1}
{strdef color color = "White"}
{pt3dclear()}
{pt3dadd(128544.000000,137940.000000,158275.000000,696.440400)}
{pt3dadd(128328.000000,137916.000000,158375.000000,776.840800)}
{pt3dadd(128052.000000,137916.000000,158500.000000,769.939580)}
{pt3dadd(127764.000000,137868.000000,158600.000000,722.547368)}
{pt3dadd(127476.000000,137832.000000,158725.000000,694.301528)}
{pt3dadd(127128.000000,137832.000000,158775.000000,694.301528)}
{pt3dadd(126840.000000,137868.000000,158775.000000,679.559668)}
{pt3dadd(126588.000000,137868.000000,158825.000000,654.970236)}
{pt3dadd(126348.000000,137868.000000,158925.000000,697.617788)}
{pt3dadd(126108.000000,137868.000000,158975.000000,678.292896)}
{pt3dadd(125868.000000,137880.000000,159100.000000,663.551036)}
{pt3dadd(125628.000000,137916.000000,159200.000000,658.968004)}
{pt3dadd(125448.000000,137952.000000,159275.000000,658.968004)}
{pt3dadd(125172.000000,138024.000000,159350.000000,645.681904)}
{pt3dadd(124896.000000,138084.000000,159400.000000,659.921590)}
{pt3dadd(124656.000000,138084.000000,159450.000000,669.578244)}
{pt3dadd(124440.000000,138048.000000,159550.000000,678.905936)}
{pt3dadd(124224.000000,138012.000000,159625.000000,693.145622)}
{pt3dadd(124032.000000,138036.000000,159675.000000,721.173582)}
{pt3dadd(123828.000000,138024.000000,159775.000000,694.100368)}
{pt3dadd(123624.000000,138012.000000,159875.000000,694.100368)}
{pt3dadd(123468.000000,138012.000000,159975.000000,699.012362)}
{pt3dadd(123324.000000,138072.000000,160075.000000,694.100368)}
{pt3dadd(123132.000000,138072.000000,160200.000000,689.015162)}
{pt3dadd(122976.000000,138048.000000,160250.000000,697.421762)}
{pt3dadd(122832.000000,138096.000000,160325.000000,697.421762)}
{pt3dadd(122712.000000,138168.000000,160325.000000,662.504908)}
{pt3dadd(122604.000000,138228.000000,160325.000000,648.750276)}
{pt3dadd(122484.000000,138252.000000,160350.000000,625.807522)}
{pt3dadd(122328.000000,138276.000000,160425.000000,602.238912)}
{pt3dadd(122196.000000,138300.000000,160475.000000,563.599470)}
{pt3dadd(122076.000000,138252.000000,160500.000000,563.599470)}
{pt3dadd(121944.000000,138252.000000,160550.000000,543.626654)}
{pt3dadd(121800.000000,138252.000000,160600.000000,531.652554)}
{pt3dadd(121680.000000,138288.000000,160650.000000,531.652554)}
{pt3dadd(121560.000000,138336.000000,160700.000000,531.652554)}
{pt3dadd(121452.000000,138360.000000,160725.000000,524.334184)}
{pt3dadd(121344.000000,138420.000000,160750.000000,531.910632)}
{pt3dadd(121248.000000,138456.000000,160750.000000,539.754272)}
{pt3dadd(121080.000000,138504.000000,160775.000000,543.350054)}
{pt3dadd(120912.000000,138540.000000,160800.000000,550.926502)}
{pt3dadd(120768.000000,138636.000000,160925.000000,558.244880)}
{pt3dadd(120636.000000,138708.000000,161025.000000,547.072650)}
{pt3dadd(120528.000000,138756.000000,161100.000000,555.479250)}
{pt3dadd(120396.000000,138756.000000,161100.000000,563.055698)}
{pt3dadd(120252.000000,138816.000000,161150.000000,555.479250)}
{pt3dadd(120132.000000,138816.000000,161200.000000,555.479242)}
{pt3dadd(120012.000000,138816.000000,161275.000000,574.771712)}
{pt3dadd(119844.000000,138912.000000,161325.000000,583.781672)}
{pt3dadd(119748.000000,139020.000000,161425.000000,591.901912)}
{pt3dadd(119640.000000,139140.000000,161550.000000,591.901912)}
{pt3dadd(119520.000000,139200.000000,161675.000000,608.152152)}
{pt3dadd(119412.000000,139248.000000,161750.000000,612.428292)}
{pt3dadd(119280.000000,139248.000000,161825.000000,595.011732)}
{pt3dadd(119124.000000,139272.000000,162050.000000,603.714800)}
{pt3dadd(119016.000000,139284.000000,162250.000000,583.896044)}
{pt3dadd(118896.000000,139296.000000,162475.000000,571.499664)}
{pt3dadd(118728.000000,139356.000000,162625.000000,559.103284)}
{pt3dadd(118584.000000,139464.000000,162775.000000,537.112990)}
{pt3dadd(118488.000000,139560.000000,162950.000000,509.117452)}
{pt3dadd(118344.000000,139656.000000,163125.000000,548.909036)}
{pt3dadd(118212.000000,139752.000000,163275.000000,548.909036)}
{pt3dadd(118044.000000,139740.000000,163500.000000,565.732344)}
{pt3dadd(117996.000000,139716.000000,163600.000000,591.853098)}
{pt3dadd(117888.000000,139740.000000,163750.000000,619.848636)}
{pt3dadd(117756.000000,139788.000000,163850.000000,619.848636)}
{pt3dadd(117624.000000,139812.000000,163975.000000,645.999636)}
{pt3dadd(117432.000000,139908.000000,164100.000000,650.582668)}
{pt3dadd(117300.000000,139896.000000,164250.000000,650.582668)}
{pt3dadd(117192.000000,139920.000000,164450.000000,646.155740)}
{pt3dadd(117072.000000,139896.000000,164650.000000,650.582668)}
{pt3dadd(116820.000000,139932.000000,164725.000000,641.254976)}
{pt3dadd(116640.000000,139944.000000,164825.000000,636.671944)}
{pt3dadd(116484.000000,139932.000000,164925.000000,640.948072)}
{pt3dadd(116328.000000,139932.000000,164975.000000,645.375000)}
{pt3dadd(116256.000000,139932.000000,165150.000000,645.375000)}
{pt3dadd(116040.000000,139848.000000,165275.000000,624.697832)}
{pt3dadd(115932.000000,139824.000000,165375.000000,600.298076)}
{pt3dadd(115788.000000,139884.000000,165550.000000,576.729478)}
{pt3dadd(115656.000000,139908.000000,165700.000000,563.895950)}
{pt3dadd(115524.000000,139908.000000,165825.000000,555.192882)}
{pt3dadd(115404.000000,139872.000000,165875.000000,551.470294)}
{pt3dadd(115284.000000,139812.000000,165950.000000,541.046228)}
{pt3dadd(115176.000000,139716.000000,166100.000000,556.208238)}
{pt3dadd(115116.000000,139800.000000,166250.000000,527.846938)}
{pt3dadd(115032.000000,139764.000000,166375.000000,486.589618)}
{pt3dadd(114984.000000,139704.000000,166500.000000,506.562446)}
{pt3dadd(114780.000000,139620.000000,166575.000000,528.552740)}
{pt3dadd(114588.000000,139452.000000,166650.000000,509.917432)}
{pt3dadd(114444.000000,139356.000000,166775.000000,523.116722)}
{pt3dadd(114264.000000,139416.000000,166900.000000,560.243582)}
{pt3dadd(114096.000000,139452.000000,166975.000000,547.847202)}
{pt3dadd(113880.000000,139668.000000,167100.000000,540.003562)}
{pt3dadd(113676.000000,139812.000000,167175.000000,540.003562)}
{pt3dadd(113544.000000,139860.000000,167325.000000,551.175792)}
{pt3dadd(113400.000000,139920.000000,167425.000000,532.540484)}
{pt3dadd(113184.000000,139932.000000,167525.000000,544.936864)}
{pt3dadd(113004.000000,139992.000000,167625.000000,552.780504)}
{pt3dadd(112800.000000,140076.000000,167700.000000,567.426032)}
{pt3dadd(112620.000000,140184.000000,167750.000000,564.038552)}
{pt3dadd(112404.000000,140232.000000,167875.000000,582.673860)}
{pt3dadd(112116.000000,140244.000000,167975.000000,552.276966)}
{pt3dadd(111852.000000,140244.000000,168050.000000,512.425014)}
{pt3dadd(111588.000000,140220.000000,168150.000000,501.252784)}
{pt3dadd(111384.000000,140124.000000,168225.000000,480.268744)}
{pt3dadd(111228.000000,140064.000000,168350.000000,455.037752)}
{pt3dadd(111024.000000,139992.000000,168400.000000,451.797054)}
{pt3dadd(110784.000000,139992.000000,168500.000000,476.486996)}
{pt3dadd(110520.000000,139956.000000,168500.000000,466.418014)}
{pt3dadd(110280.000000,139932.000000,168575.000000,472.789020)}
{pt3dadd(110040.000000,139908.000000,168675.000000,479.384704)}
{pt3dadd(109860.000000,139920.000000,168725.000000,482.625402)}
{pt3dadd(109716.000000,139908.000000,168800.000000,466.402428)}
{pt3dadd(109608.000000,139872.000000,168850.000000,463.272120)}
{pt3dadd(109500.000000,139884.000000,168900.000000,456.901114)}
{pt3dadd(109356.000000,139872.000000,168900.000000,447.175122)}
{pt3dadd(109212.000000,139848.000000,168925.000000,434.859748)}
{pt3dadd(109104.000000,139824.000000,168975.000000,437.883432)}
{pt3dadd(108984.000000,139836.000000,169025.000000,466.244732)}
{pt3dadd(108840.000000,139800.000000,169100.000000,475.970724)}
{pt3dadd(108696.000000,139716.000000,169125.000000,496.488384)}
{pt3dadd(108576.000000,139704.000000,169200.000000,519.227824)}
{pt3dadd(108468.000000,139752.000000,169250.000000,536.022896)}
{pt3dadd(108348.000000,139740.000000,169275.000000,510.791904)}
{pt3dadd(108228.000000,139704.000000,169250.000000,507.436918)}
{pt3dadd(108096.000000,139644.000000,169250.000000,500.118542)}
{pt3dadd(107940.000000,139596.000000,169250.000000,493.049462)}
{pt3dadd(107772.000000,139524.000000,169275.000000,482.625396)}
{pt3dadd(107676.000000,139476.000000,169375.000000,485.866094)}
{pt3dadd(107580.000000,139380.000000,169375.000000,473.550720)}
{pt3dadd(107424.000000,139308.000000,169400.000000,446.228516)}
{pt3dadd(107292.000000,139200.000000,169400.000000,425.011872)}
{pt3dadd(107112.000000,139080.000000,169400.000000,418.640866)}
{pt3dadd(106932.000000,138972.000000,169400.000000,406.325492)}
{pt3dadd(106752.000000,138864.000000,169400.000000,403.504300)}
{pt3dadd(106560.000000,138780.000000,169400.000000,430.826510)}
{pt3dadd(106392.000000,138732.000000,169550.000000,470.678462)}
{pt3dadd(106224.000000,138684.000000,169675.000000,499.039762)}
{pt3dadd(106140.000000,138576.000000,169850.000000,518.183420)}
{pt3dadd(105960.000000,138516.000000,169875.000000,530.079288)}
{pt3dadd(105852.000000,138456.000000,169975.000000,513.856314)}
{pt3dadd(105672.000000,138372.000000,170050.000000,491.866020)}
{pt3dadd(105576.000000,138264.000000,170050.000000,476.704010)}
{pt3dadd(105444.000000,138132.000000,170100.000000,463.504720)}
{pt3dadd(105300.000000,138060.000000,170200.000000,473.573702)}
{pt3dadd(105120.000000,137964.000000,170225.000000,493.392458)}
{pt3dadd(104880.000000,137784.000000,170275.000000,503.816524)}
{pt3dadd(104688.000000,137736.000000,170300.000000,507.412306)}
{pt3dadd(104508.000000,137580.000000,170300.000000,513.783312)}
{pt3dadd(104340.000000,137436.000000,170325.000000,517.379094)}
{pt3dadd(104160.000000,137340.000000,170375.000000,528.945322)}
{pt3dadd(103980.000000,137232.000000,170400.000000,525.349540)}
{pt3dadd(103812.000000,137112.000000,170425.000000,514.925474)}
{pt3dadd(103488.000000,137040.000000,170550.000000,521.753758)}
{pt3dadd(103332.000000,136896.000000,170650.000000,518.157976)}
{pt3dadd(103212.000000,136848.000000,170625.000000,502.995966)}
{pt3dadd(103080.000000,136704.000000,170625.000000,518.157976)}
{pt3dadd(102960.000000,136608.000000,170675.000000,536.158490)}
{pt3dadd(102804.000000,136488.000000,170675.000000,539.754272)}
{pt3dadd(102612.000000,136392.000000,170675.000000,526.554982)}
{pt3dadd(102384.000000,136356.000000,170600.000000,504.590132)}
{pt3dadd(102144.000000,136332.000000,170600.000000,464.738180)}
{pt3dadd(101940.000000,136248.000000,170600.000000,426.243740)}
{pt3dadd(101796.000000,136104.000000,170600.000000,390.327148)}
{pt3dadd(101640.000000,135972.000000,170600.000000,371.205628)}
{pt3dadd(101496.000000,135828.000000,170600.000000,368.480536)}
{pt3dadd(101292.000000,135756.000000,170650.000000,374.026820)}
{pt3dadd(101112.000000,135672.000000,170650.000000,416.511040)}
{pt3dadd(100920.000000,135696.000000,170800.000000,476.827388)}
{pt3dadd(100716.000000,135684.000000,171025.000000,516.466568)}
{pt3dadd(100608.000000,135564.000000,171250.000000,527.957220)}
{pt3dadd(100488.000000,135420.000000,171400.000000,558.273108)}
{pt3dadd(100308.000000,135348.000000,171400.000000,543.111098)}
{pt3dadd(100200.000000,135348.000000,171375.000000,526.287790)}
{pt3dadd(100056.000000,135336.000000,171375.000000,526.287798)}
{pt3dadd(99948.000000,135312.000000,171400.000000,523.264114)}
{pt3dadd(99852.000000,135324.000000,171400.000000,523.264114)}
{pt3dadd(99744.000000,135240.000000,171425.000000,530.582484)}
{pt3dadd(99600.000000,135192.000000,171450.000000,526.728624)}
{pt3dadd(99444.000000,135144.000000,171475.000000,526.728616)}
{pt3dadd(99336.000000,135096.000000,171550.000000,536.123306)}
{pt3dadd(99228.000000,135060.000000,171550.000000,532.269446)}
{pt3dadd(99108.000000,135000.000000,171600.000000,532.269446)}
{pt3dadd(98964.000000,134904.000000,171650.000000,532.269446)}
{pt3dadd(98856.000000,134892.000000,171675.000000,521.477778)}
{pt3dadd(98736.000000,134856.000000,171725.000000,531.901844)}
{pt3dadd(98592.000000,134784.000000,171750.000000,517.755190)}
{pt3dadd(98568.000000,134700.000000,171800.000000,514.032602)}
{pt3dadd(98436.000000,134664.000000,171875.000000,506.714232)}
{pt3dadd(98328.000000,134580.000000,171950.000000,510.187530)}
{pt3dadd(98232.000000,134592.000000,171975.000000,506.591748)}
{pt3dadd(98100.000000,134568.000000,172050.000000,517.015814)}
{pt3dadd(98004.000000,134544.000000,172075.000000,513.420032)}
{pt3dadd(97908.000000,134484.000000,172200.000000,486.097822)}
{pt3dadd(97752.000000,134436.000000,172225.000000,466.954164)}
{pt3dadd(97620.000000,134388.000000,172275.000000,450.731190)}
{pt3dadd(97476.000000,134304.000000,172275.000000,443.662110)}
{pt3dadd(97332.000000,134220.000000,172350.000000,447.257892)}
{pt3dadd(97188.000000,134088.000000,172350.000000,461.380812)}
{pt3dadd(97080.000000,134004.000000,172525.000000,461.380812)}
{pt3dadd(96960.000000,133956.000000,172500.000000,461.380812)}
{pt3dadd(96852.000000,133932.000000,172525.000000,445.710452)}
{pt3dadd(96744.000000,133872.000000,172575.000000,422.971012)}
{pt3dadd(96660.000000,133764.000000,172625.000000,417.026644)}
{pt3dadd(96528.000000,133716.000000,172700.000000,414.205452)}
{pt3dadd(96360.000000,133620.000000,172675.000000,420.359444)}
{pt3dadd(96180.000000,133512.000000,172675.000000,414.813160)}
{pt3dadd(96048.000000,133392.000000,172675.000000,406.634608)}
{pt3dadd(95916.000000,133284.000000,172775.000000,409.555292)}
{pt3dadd(95796.000000,133188.000000,172775.000000,394.535486)}
{pt3dadd(95700.000000,133056.000000,172775.000000,367.619812)}
{pt3dadd(95568.000000,132912.000000,172775.000000,367.619812)}
{pt3dadd(95388.000000,132840.000000,172825.000000,378.719048)}
{pt3dadd(95232.000000,132756.000000,172975.000000,384.873040)}
{pt3dadd(95064.000000,132660.000000,173075.000000,421.857696)}
{pt3dadd(94896.000000,132576.000000,173200.000000,478.134822)}
{pt3dadd(94764.000000,132576.000000,173300.000000,513.996994)}
{pt3dadd(94632.000000,132504.000000,173375.000000,553.788578)}
{pt3dadd(94500.000000,132444.000000,173525.000000,583.150030)}
{pt3dadd(94320.000000,132480.000000,173575.000000,602.442500)}
{pt3dadd(94212.000000,132408.000000,173625.000000,602.442500)}
{pt3dadd(94080.000000,132336.000000,173650.000000,602.442500)}
{pt3dadd(93960.000000,132276.000000,173675.000000,606.869428)}
{pt3dadd(93828.000000,132216.000000,173725.000000,640.161928)}
{pt3dadd(93660.000000,132156.000000,173800.000000,673.454428)}
{pt3dadd(93516.000000,132084.000000,173900.000000,706.746928)}
{pt3dadd(93360.000000,132000.000000,174025.000000,710.736708)}
{pt3dadd(93216.000000,131928.000000,174125.000000,697.903180)}
{pt3dadd(93060.000000,131856.000000,174250.000000,673.313748)}
{pt3dadd(92904.000000,131784.000000,174275.000000,610.659796)}
{pt3dadd(92760.000000,131712.000000,174325.000000,595.398056)}
{pt3dadd(92580.000000,131664.000000,174375.000000,622.471270)}
{pt3dadd(92316.000000,131604.000000,174375.000000,644.632490)}
{pt3dadd(92100.000000,131580.000000,174450.000000,603.437662)}
{pt3dadd(91872.000000,131520.000000,174450.000000,637.075254)}
{pt3dadd(91644.000000,131460.000000,174500.000000,627.747562)}
{pt3dadd(91416.000000,131400.000000,174600.000000,609.080948)}
{pt3dadd(91188.000000,131340.000000,174650.000000,586.919728)}
{pt3dadd(91116.000000,131292.000000,174775.000000,593.290734)}
{pt3dadd(90972.000000,131184.000000,174950.000000,569.722124)}
{pt3dadd(90864.000000,131088.000000,175050.000000,552.898816)}
{pt3dadd(90672.000000,131028.000000,175075.000000,540.502436)}
{pt3dadd(90504.000000,130920.000000,175100.000000,557.918996)}
{pt3dadd(90324.000000,130812.000000,175125.000000,584.039750)}
{pt3dadd(90168.000000,130692.000000,175250.000000,595.211980)}
{pt3dadd(90060.000000,130560.000000,175300.000000,587.635532)}
{pt3dadd(89952.000000,130428.000000,175350.000000,569.635018)}
{pt3dadd(89844.000000,130368.000000,175475.000000,530.228164)}
{pt3dadd(89700.000000,130320.000000,175625.000000,522.107924)}
{pt3dadd(89616.000000,130248.000000,175800.000000,530.228164)}
{pt3dadd(89508.000000,130104.000000,175825.000000,533.950752)}
{pt3dadd(89328.000000,129984.000000,175875.000000,537.305738)}
{pt3dadd(89220.000000,129936.000000,175875.000000,514.269208)}
{pt3dadd(89076.000000,129804.000000,175950.000000,475.774768)}
{pt3dadd(89016.000000,129744.000000,176050.000000,426.617484)}
{pt3dadd(88992.000000,129708.000000,176150.000000,400.155456)}
{pt3dadd(88764.000000,129564.000000,176150.000000,371.307944)}
{pt3dadd(88656.000000,129492.000000,176200.000000,373.850548)}
{pt3dadd(88560.000000,129396.000000,176325.000000,394.344474)}
{pt3dadd(88452.000000,129288.000000,176375.000000,420.735990)}
{pt3dadd(88344.000000,129264.000000,176475.000000,402.894992)}
{pt3dadd(88224.000000,129192.000000,176550.000000,402.894992)}
{pt3dadd(88116.000000,129060.000000,176650.000000,423.388918)}
{pt3dadd(87996.000000,129000.000000,176750.000000,411.073544)}
{pt3dadd(87816.000000,128904.000000,176750.000000,398.323868)}
{pt3dadd(87648.000000,128808.000000,176750.000000,419.085550)}
{pt3dadd(87528.000000,128724.000000,176825.000000,424.084150)}
{pt3dadd(87408.000000,128604.000000,176875.000000,406.222492)}
{pt3dadd(87300.000000,128604.000000,176925.000000,412.166860)}
{pt3dadd(87180.000000,128472.000000,176975.000000,387.053644)}
{pt3dadd(87108.000000,128328.000000,176975.000000,352.294192)}
{pt3dadd(87036.000000,128160.000000,176975.000000,323.599486)}
{pt3dadd(86880.000000,127980.000000,176975.000000,283.645898)}
{pt3dadd(86760.000000,127800.000000,176975.000000,232.201658)}
{pt3dadd(86652.000000,127596.000000,176975.000000,204.063096)}
{pt3dadd(86568.000000,127440.000000,177050.000000,187.902692)}
{pt3dadd(86460.000000,127308.000000,177050.000000,179.276078)}
{pt3dadd(86352.000000,127200.000000,177050.000000,178.004776)}
{pt3dadd(86172.000000,127116.000000,177075.000000,178.004776)}
{pt3dadd(86040.000000,126996.000000,177075.000000,181.564696)}
{pt3dadd(85920.000000,126888.000000,177075.000000,184.063996)}
{pt3dadd(85752.000000,126840.000000,177175.000000,211.722870)}
{pt3dadd(85608.000000,126924.000000,177375.000000,234.236280)}
{pt3dadd(85440.000000,126948.000000,177525.000000,259.681690)}
{pt3dadd(85248.000000,126936.000000,177625.000000,272.877448)}
{pt3dadd(85164.000000,126756.000000,177625.000000,302.827838)}
{pt3dadd(84996.000000,126528.000000,177625.000000,302.827838)}
{pt3dadd(84768.000000,126552.000000,177700.000000,311.536120)}
{pt3dadd(84660.000000,126420.000000,177725.000000,309.398050)}
{pt3dadd(84504.000000,126348.000000,177775.000000,329.796314)}
{pt3dadd(84324.000000,126300.000000,177825.000000,334.624640)}
{pt3dadd(84168.000000,126216.000000,177800.000000,328.207874)}
{pt3dadd(84072.000000,126108.000000,177850.000000,333.036200)}
{pt3dadd(83928.000000,126012.000000,177850.000000,361.173100)}
{pt3dadd(83748.000000,125916.000000,177850.000000,365.715040)}
{pt3dadd(83592.000000,125772.000000,177850.000000,443.827800)}

{create adhoc34}
{access adhoc34}
{connect adhoc34(1), adhoc33(0)}
{nseg = 1}
{strdef color color = "White"}
{pt3dclear()}
{pt3dadd(83592.000000,125772.000000,177850.000000,443.827800)}
{pt3dadd(83436.000000,125700.000000,177900.000000,443.827800)}
{pt3dadd(83232.000000,125604.000000,177900.000000,432.835188)}
{pt3dadd(83028.000000,125496.000000,177900.000000,435.965496)}
{pt3dadd(82824.000000,125532.000000,177900.000000,430.021128)}
{pt3dadd(82608.000000,125580.000000,177975.000000,426.997438)}
{pt3dadd(82524.000000,125628.000000,178175.000000,447.491364)}
{pt3dadd(82452.000000,125664.000000,178325.000000,450.732062)}
{pt3dadd(82404.000000,125700.000000,178525.000000,436.111102)}
{pt3dadd(82332.000000,125700.000000,178675.000000,445.185778)}
{pt3dadd(82260.000000,125712.000000,178825.000000,436.718816)}
{pt3dadd(82236.000000,125724.000000,178975.000000,416.224890)}
{pt3dadd(82176.000000,125760.000000,179075.000000,409.853884)}
{pt3dadd(82020.000000,125676.000000,179150.000000,421.344536)}
{pt3dadd(81876.000000,125568.000000,179175.000000,390.077328)}
{pt3dadd(81756.000000,125460.000000,179200.000000,357.185200)}
{pt3dadd(81612.000000,125352.000000,179200.000000,328.490494)}
{pt3dadd(81480.000000,125220.000000,179200.000000,282.595872)}
{pt3dadd(81300.000000,125160.000000,179275.000000,231.151632)}
{pt3dadd(81120.000000,125100.000000,179275.000000,204.158828)}
{pt3dadd(80940.000000,125040.000000,179275.000000,227.047758)}
{pt3dadd(80760.000000,124908.000000,179275.000000,235.741432)}
{pt3dadd(80640.000000,124836.000000,179400.000000,243.852918)}
{pt3dadd(80496.000000,124764.000000,179600.000000,273.803308)}
{pt3dadd(80388.000000,124752.000000,179725.000000,320.167452)}
{pt3dadd(80316.000000,124716.000000,179900.000000,335.716942)}
{pt3dadd(80112.000000,124668.000000,179950.000000,355.717974)}
{pt3dadd(79896.000000,124620.000000,180125.000000,369.715744)}
{pt3dadd(79680.000000,124512.000000,180150.000000,367.424228)}
{pt3dadd(79512.000000,124440.000000,180275.000000,352.404422)}
{pt3dadd(79368.000000,124344.000000,180350.000000,341.683258)}
{pt3dadd(79224.000000,124272.000000,180400.000000,358.936486)}
{pt3dadd(79092.000000,124200.000000,180525.000000,358.936486)}
{pt3dadd(78948.000000,124092.000000,180500.000000,354.584952)}
{pt3dadd(78804.000000,124008.000000,180600.000000,338.850534)}
{pt3dadd(78672.000000,123924.000000,180600.000000,317.732922)}
{pt3dadd(78528.000000,123828.000000,180600.000000,267.247650)}
{pt3dadd(78396.000000,123768.000000,180675.000000,291.033016)}
{pt3dadd(78252.000000,123708.000000,180825.000000,288.967784)}
{pt3dadd(78120.000000,123648.000000,180950.000000,284.104788)}
{pt3dadd(77976.000000,123600.000000,181075.000000,285.902680)}
{pt3dadd(77820.000000,123588.000000,181150.000000,299.133692)}
{pt3dadd(77664.000000,123552.000000,181200.000000,256.316066)}
{pt3dadd(77496.000000,123528.000000,181200.000000,235.073958)}
{pt3dadd(77292.000000,123456.000000,181200.000000,241.673602)}
{pt3dadd(77088.000000,123444.000000,181175.000000,236.461570)}
{pt3dadd(76980.000000,123492.000000,181375.000000,246.800156)}
{pt3dadd(76908.000000,123528.000000,181550.000000,265.832416)}
{pt3dadd(76944.000000,123528.000000,181700.000000,305.786004)}
{pt3dadd(76860.000000,123516.000000,181850.000000,332.078488)}
{pt3dadd(76704.000000,123456.000000,181925.000000,367.331396)}
{pt3dadd(76476.000000,123444.000000,181925.000000,391.116762)}
{pt3dadd(76428.000000,123480.000000,182050.000000,418.032436)}
{pt3dadd(76212.000000,123456.000000,182150.000000,426.499404)}
{pt3dadd(76116.000000,123432.000000,182275.000000,434.966372)}
{pt3dadd(76008.000000,123408.000000,182400.000000,454.110030)}
{pt3dadd(75792.000000,123348.000000,182475.000000,565.344470)}
{pt3dadd(75576.000000,123288.000000,182600.000000,646.177877)}
{pt3dadd(75360.000000,123240.000000,182775.000000,1000.000000)}

{create adhoc35}
{access adhoc35}
{connect adhoc35(1), adhoc33(0)}
{nseg = 1}
{strdef color color = "White"}
{pt3dclear()}
{pt3dadd(83592.000000,125772.000000,177850.000000,443.827800)}
{pt3dadd(84432.000000,126540.000000,177850.000000,443.827800)}

{create adhoc36}
{access adhoc36}
{connect adhoc36(1), adhoc32(0)}
{nseg = 1}
{strdef color color = "White"}
{pt3dclear()}
{pt3dadd(128544.000000,137940.000000,158275.000000,696.440400)}
{pt3dadd(128760.000000,138000.000000,158175.000000,855.588253)}
{pt3dadd(128928.000000,137928.000000,158100.000000,908.265952)}
{pt3dadd(129192.000000,137868.000000,158025.000000,940.461624)}
{pt3dadd(129348.000000,137844.000000,157850.000000,915.830872)}
{pt3dadd(129588.000000,137904.000000,157725.000000,886.588952)}
{pt3dadd(129804.000000,137820.000000,157700.000000,814.755772)}
{pt3dadd(129948.000000,137796.000000,157675.000000,796.606412)}
{pt3dadd(130104.000000,137772.000000,157600.000000,796.606412)}
{pt3dadd(130224.000000,137784.000000,157500.000000,796.606412)}
{pt3dadd(130344.000000,137808.000000,157375.000000,796.606412)}
{pt3dadd(130488.000000,137820.000000,157300.000000,854.301432)}
{pt3dadd(130632.000000,137724.000000,157225.000000,854.301432)}
{pt3dadd(130812.000000,137712.000000,157075.000000,842.817680)}
{pt3dadd(130932.000000,137676.000000,156875.000000,821.375374)}
{pt3dadd(131004.000000,137664.000000,156775.000000,826.825554)}
{pt3dadd(131160.000000,137676.000000,156725.000000,755.375914)}
{pt3dadd(131352.000000,137724.000000,156575.000000,715.266994)}
{pt3dadd(131580.000000,137856.000000,156475.000000,709.816814)}
{pt3dadd(131844.000000,137988.000000,156325.000000,720.166560)}
{pt3dadd(132228.000000,138072.000000,156150.000000,714.716380)}
{pt3dadd(132768.000000,138240.000000,155975.000000,749.182920)}
{pt3dadd(133080.000000,138336.000000,155900.000000,789.291840)}
{pt3dadd(133344.000000,138372.000000,155825.000000,845.863280)}
{pt3dadd(133752.000000,138420.000000,155525.000000,933.828100)}
{pt3dadd(133968.000000,138468.000000,155350.000000,1032.130467)}
{pt3dadd(134592.000000,138264.000000,155025.000000,1212.573200)}

{create adhoc37}
{access adhoc37}
{connect adhoc37(1), adhoc36(0)}
{nseg = 1}
{strdef color color = "White"}
{pt3dclear()}
{pt3dadd(134592.000000,138264.000000,155025.000000,1212.573200)}
{pt3dadd(134532.000000,138312.000000,155275.000000,1299.603900)}

{create adhoc38}
{access adhoc38}
{connect adhoc38(1), adhoc37(0)}
{nseg = 1}
{strdef color color = "White"}
{pt3dclear()}
{pt3dadd(134532.000000,138312.000000,155275.000000,1299.603900)}
{pt3dadd(134940.000000,139944.000000,155275.000000,678.749613)}
{pt3dadd(134940.000000,139848.000000,155675.000000,506.689246)}
{pt3dadd(135300.000000,140112.000000,156075.000000,297.750890)}
{pt3dadd(135468.000000,140304.000000,156300.000000,271.752060)}
{pt3dadd(135756.000000,140424.000000,156525.000000,280.460342)}
{pt3dadd(135912.000000,140580.000000,156850.000000,296.152832)}
{pt3dadd(136200.000000,140628.000000,157050.000000,306.856002)}
{pt3dadd(136356.000000,140724.000000,157275.000000,316.502238)}
{pt3dadd(136560.000000,140784.000000,157400.000000,325.835544)}
{pt3dadd(136764.000000,140676.000000,157600.000000,317.127262)}
{pt3dadd(137040.000000,140376.000000,157700.000000,328.207874)}
{pt3dadd(137184.000000,139992.000000,157800.000000,323.702894)}
{pt3dadd(137388.000000,139812.000000,158025.000000,380.201094)}
{pt3dadd(137796.000000,138960.000000,158250.000000,421.238138)}
{pt3dadd(138252.000000,138768.000000,158450.000000,479.801570)}
{pt3dadd(138360.000000,138684.000000,158675.000000,535.690990)}
{pt3dadd(138288.000000,138672.000000,158875.000000,571.415812)}
{pt3dadd(138348.000000,138684.000000,159100.000000,567.426032)}
{pt3dadd(138756.000000,138648.000000,159300.000000,556.253802)}
{pt3dadd(138936.000000,138648.000000,159500.000000,513.769582)}
{pt3dadd(139236.000000,138588.000000,159775.000000,460.336158)}
{pt3dadd(139452.000000,138540.000000,160050.000000,431.488646)}
{pt3dadd(139680.000000,138432.000000,160300.000000,360.644527)}
{pt3dadd(139920.000000,138324.000000,160400.000000,348.220200)}

{create adhoc39}
{access adhoc39}
{connect adhoc39(1), adhoc38(0)}
{nseg = 1}
{strdef color color = "White"}
{pt3dclear()}
{pt3dadd(139920.000000,138324.000000,160400.000000,348.220200)}
{pt3dadd(140280.000000,138456.000000,160575.000000,315.443070)}
{pt3dadd(140772.000000,138360.000000,160800.000000,365.873332)}
{pt3dadd(141396.000000,138372.000000,161000.000000,391.365858)}
{pt3dadd(141684.000000,138276.000000,161150.000000,460.929084)}
{pt3dadd(141840.000000,138336.000000,161350.000000,492.029352)}
{pt3dadd(141828.000000,138492.000000,161525.000000,509.282580)}
{pt3dadd(142092.000000,138420.000000,161700.000000,481.960370)}
{pt3dadd(142356.000000,138384.000000,161875.000000,451.803998)}
{pt3dadd(142548.000000,138420.000000,162100.000000,415.752130)}
{pt3dadd(142752.000000,138636.000000,162300.000000,396.857310)}
{pt3dadd(143016.000000,138768.000000,162500.000000,492.457760)}

{create adhoc40}
{access adhoc40}
{connect adhoc40(1), adhoc39(0)}
{nseg = 1}
{strdef color color = "White"}
{pt3dclear()}
{pt3dadd(143016.000000,138768.000000,162500.000000,492.457760)}
{pt3dadd(142884.000000,138708.000000,162775.000000,412.961387)}
{pt3dadd(142716.000000,138852.000000,163025.000000,389.520908)}
{pt3dadd(142500.000000,139032.000000,163275.000000,353.796086)}
{pt3dadd(142500.000000,139656.000000,163425.000000,340.851343)}
{pt3dadd(142440.000000,140004.000000,163600.000000,313.833650)}

{create adhoc41}
{access adhoc41}
{connect adhoc41(1), adhoc40(0)}
{nseg = 1}
{strdef color color = "White"}
{pt3dclear()}
{pt3dadd(142440.000000,140004.000000,163600.000000,313.833650)}
{pt3dadd(142656.000000,139032.000000,163725.000000,177.322648)}
{pt3dadd(142692.000000,138744.000000,163975.000000,179.853063)}
{pt3dadd(142632.000000,138396.000000,164175.000000,154.407653)}
{pt3dadd(142356.000000,138300.000000,164400.000000,159.362342)}
{pt3dadd(142344.000000,138108.000000,164650.000000,164.491756)}
{pt3dadd(142404.000000,138036.000000,164950.000000,157.954008)}
{pt3dadd(142320.000000,137880.000000,165200.000000,151.806652)}
{pt3dadd(142452.000000,137616.000000,165475.000000,149.307352)}
{pt3dadd(142548.000000,137556.000000,165750.000000,161.554648)}
{pt3dadd(142692.000000,137472.000000,166075.000000,176.582620)}
{pt3dadd(142572.000000,137436.000000,166350.000000,193.187270)}

{create adhoc42}
{access adhoc42}
{connect adhoc42(1), adhoc41(0)}
{nseg = 1}
{strdef color color = "White"}
{pt3dclear()}
{pt3dadd(142572.000000,137436.000000,166350.000000,193.187270)}
{pt3dadd(142164.000000,137028.000000,166600.000000,179.265592)}
{pt3dadd(142020.000000,136956.000000,166775.000000,167.872587)}
{pt3dadd(141996.000000,137124.000000,166950.000000,169.235133)}
{pt3dadd(141852.000000,137268.000000,167225.000000,186.261166)}
{pt3dadd(141888.000000,137268.000000,167450.000000,183.184170)}
{pt3dadd(142176.000000,137184.000000,167725.000000,249.588826)}
{pt3dadd(142128.000000,137148.000000,167950.000000,232.791815)}
{pt3dadd(141972.000000,137040.000000,168225.000000,219.181973)}
{pt3dadd(141828.000000,137136.000000,168500.000000,193.822830)}
{pt3dadd(141768.000000,137160.000000,168800.000000,187.001910)}
{pt3dadd(141372.000000,137016.000000,169100.000000,139.488822)}
{pt3dadd(141036.000000,136824.000000,169350.000000,158.785133)}
{pt3dadd(140964.000000,136752.000000,169550.000000,173.805571)}
{pt3dadd(140892.000000,136500.000000,169775.000000,233.807354)}
{pt3dadd(141168.000000,136176.000000,169925.000000,283.499212)}
{pt3dadd(141468.000000,135924.000000,170100.000000,316.391340)}
{pt3dadd(141576.000000,135924.000000,170350.000000,396.099040)}
{pt3dadd(141564.000000,135972.000000,170625.000000,386.374540)}

{create adhoc43}
{access adhoc43}
{connect adhoc43(1), adhoc42(0)}
{nseg = 1}
{strdef color color = "White"}
{pt3dclear()}
{pt3dadd(141564.000000,135972.000000,170625.000000,386.374540)}
{pt3dadd(141396.000000,135132.000000,170725.000000,177.594370)}
{pt3dadd(141420.000000,134868.000000,170725.000000,153.387557)}
{pt3dadd(141432.000000,134676.000000,170850.000000,99.086616)}
{pt3dadd(141240.000000,134760.000000,171025.000000,101.263687)}
{pt3dadd(141192.000000,134604.000000,171250.000000,101.263687)}
{pt3dadd(141168.000000,134448.000000,171475.000000,124.118626)}
{pt3dadd(141240.000000,134256.000000,171500.000000,112.514672)}
{pt3dadd(141072.000000,134568.000000,171825.000000,180.250090)}

{create adhoc44}
{access adhoc44}
{connect adhoc44(1), adhoc43(0)}
{nseg = 1}
{strdef color color = "White"}
{pt3dclear()}
{pt3dadd(141072.000000,134568.000000,171825.000000,180.250090)}
{pt3dadd(141276.000000,134904.000000,171950.000000,110.880580)}
{pt3dadd(141168.000000,134916.000000,172175.000000,108.833917)}
{pt3dadd(140880.000000,134760.000000,172475.000000,174.110100)}

{create adhoc45}
{access adhoc45}
{connect adhoc45(1), adhoc43(0)}
{nseg = 1}
{strdef color color = "White"}
{pt3dclear()}
{pt3dadd(141072.000000,134568.000000,171825.000000,180.250090)}
{pt3dadd(140748.000000,134472.000000,171950.000000,109.746735)}
{pt3dadd(140592.000000,134304.000000,171950.000000,91.354564)}
{pt3dadd(140496.000000,134172.000000,171950.000000,73.329555)}
{pt3dadd(140400.000000,133956.000000,171950.000000,72.830834)}
{pt3dadd(140412.000000,133848.000000,171950.000000,75.603707)}
{pt3dadd(140352.000000,133548.000000,172125.000000,70.710680)}

{create adhoc46}
{access adhoc46}
{connect adhoc46(1), adhoc42(0)}
{nseg = 1}
{strdef color color = "White"}
{pt3dclear()}
{pt3dadd(141564.000000,135972.000000,170625.000000,386.374540)}
{pt3dadd(141792.000000,136356.000000,170800.000000,222.135267)}
{pt3dadd(141792.000000,136680.000000,170950.000000,168.186868)}
{pt3dadd(141732.000000,136980.000000,170950.000000,107.729888)}
{pt3dadd(141552.000000,137136.000000,170950.000000,88.657968)}
{pt3dadd(141276.000000,137316.000000,170775.000000,84.740378)}
{pt3dadd(141012.000000,137328.000000,170600.000000,113.648002)}
{pt3dadd(140628.000000,137292.000000,170425.000000,134.308377)}
{pt3dadd(140376.000000,137244.000000,170300.000000,237.841420)}

{create adhoc47}
{access adhoc47}
{connect adhoc47(1), adhoc41(0)}
{nseg = 1}
{strdef color color = "White"}
{pt3dclear()}
{pt3dadd(142572.000000,137436.000000,166350.000000,193.187270)}
{pt3dadd(142380.000000,136584.000000,166675.000000,134.077675)}
{pt3dadd(142608.000000,136572.000000,166825.000000,103.015252)}
{pt3dadd(142560.000000,136920.000000,166975.000000,100.000000)}

{create adhoc48}
{access adhoc48}
{connect adhoc48(1), adhoc40(0)}
{nseg = 1}
{strdef color color = "White"}
{pt3dclear()}
{pt3dadd(142440.000000,140004.000000,163600.000000,313.833650)}
{pt3dadd(142440.000000,140292.000000,163575.000000,311.753963)}
{pt3dadd(142428.000000,140520.000000,163575.000000,313.794022)}
{pt3dadd(142428.000000,140676.000000,163500.000000,325.669932)}
{pt3dadd(142416.000000,140844.000000,163425.000000,328.125928)}
{pt3dadd(142404.000000,141000.000000,163400.000000,345.584356)}
{pt3dadd(142380.000000,141156.000000,163425.000000,371.975872)}
{pt3dadd(142356.000000,141276.000000,163425.000000,382.314458)}
{pt3dadd(142332.000000,141432.000000,163450.000000,382.314458)}
{pt3dadd(142272.000000,141540.000000,163525.000000,362.994738)}
{pt3dadd(142200.000000,141672.000000,163575.000000,345.536310)}
{pt3dadd(142140.000000,141828.000000,163500.000000,296.290534)}
{pt3dadd(141792.000000,141852.000000,163475.000000,280.556116)}
{pt3dadd(141384.000000,142068.000000,163400.000000,258.693792)}
{pt3dadd(141288.000000,142284.000000,163450.000000,273.185186)}
{pt3dadd(141144.000000,142452.000000,163500.000000,282.163003)}
{pt3dadd(140904.000000,142608.000000,163600.000000,336.358550)}

{create adhoc49}
{access adhoc49}
{connect adhoc49(1), adhoc48(0)}
{nseg = 1}
{strdef color color = "White"}
{pt3dclear()}
{pt3dadd(140904.000000,142608.000000,163600.000000,336.358550)}
{pt3dadd(140640.000000,142620.000000,163925.000000,257.173587)}
{pt3dadd(140484.000000,142680.000000,164200.000000,244.634866)}
{pt3dadd(140424.000000,142764.000000,164450.000000,230.143472)}
{pt3dadd(140400.000000,142872.000000,164575.000000,246.873770)}
{pt3dadd(140532.000000,143064.000000,164850.000000,265.535386)}
{pt3dadd(140736.000000,143052.000000,165075.000000,292.007787)}
{pt3dadd(140700.000000,143064.000000,165325.000000,348.220200)}

{create adhoc50}
{access adhoc50}
{connect adhoc50(1), adhoc49(0)}
{nseg = 1}
{strdef color color = "White"}
{pt3dclear()}
{pt3dadd(140700.000000,143064.000000,165325.000000,348.220200)}
{pt3dadd(141024.000000,142884.000000,165625.000000,303.143300)}

{create adhoc51}
{access adhoc51}
{connect adhoc51(1), adhoc50(0)}
{nseg = 1}
{strdef color color = "White"}
{pt3dclear()}
{pt3dadd(141024.000000,142884.000000,165625.000000,303.143300)}
{pt3dadd(141624.000000,143052.000000,165575.000000,185.576405)}
{pt3dadd(141828.000000,143184.000000,165575.000000,169.185848)}
{pt3dadd(141948.000000,143292.000000,165600.000000,126.582197)}
{pt3dadd(142056.000000,143376.000000,165600.000000,126.441690)}
{pt3dadd(142128.000000,143484.000000,165600.000000,90.125046)}

{create adhoc52}
{access adhoc52}
{connect adhoc52(1), adhoc50(0)}
{nseg = 1}
{strdef color color = "White"}
{pt3dclear()}
{pt3dadd(141024.000000,142884.000000,165625.000000,303.143300)}
{pt3dadd(141096.000000,142896.000000,165900.000000,233.155260)}
{pt3dadd(141288.000000,143076.000000,166125.000000,222.913390)}
{pt3dadd(141432.000000,143076.000000,166375.000000,200.922184)}
{pt3dadd(141240.000000,142716.000000,166625.000000,178.770674)}
{pt3dadd(141060.000000,142632.000000,166875.000000,208.789394)}
{pt3dadd(140868.000000,142836.000000,167175.000000,213.022878)}
{pt3dadd(140868.000000,143040.000000,167450.000000,203.462118)}
{pt3dadd(140904.000000,143292.000000,167800.000000,220.557610)}
{pt3dadd(141096.000000,143568.000000,168025.000000,174.110100)}

{create adhoc53}
{access adhoc53}
{connect adhoc53(1), adhoc52(0)}
{nseg = 1}
{strdef color color = "White"}
{pt3dclear()}
{pt3dadd(141096.000000,143568.000000,168025.000000,174.110100)}
{pt3dadd(140784.000000,143808.000000,167925.000000,140.557023)}
{pt3dadd(140472.000000,144132.000000,168050.000000,110.956950)}

{create adhoc54}
{access adhoc54}
{connect adhoc54(1), adhoc53(0)}
{nseg = 1}
{strdef color color = "White"}
{pt3dclear()}
{pt3dadd(140472.000000,144132.000000,168050.000000,110.956950)}
{pt3dadd(140772.000000,144456.000000,168175.000000,108.999127)}
{pt3dadd(140748.000000,144792.000000,168300.000000,120.926794)}
{pt3dadd(140772.000000,145104.000000,168350.000000,138.735404)}
{pt3dadd(140796.000000,145380.000000,168400.000000,159.212197)}
{pt3dadd(140676.000000,145608.000000,168400.000000,200.000000)}

{create adhoc55}
{access adhoc55}
{connect adhoc55(1), adhoc54(0)}
{nseg = 1}
{strdef color color = "White"}
{pt3dclear()}
{pt3dadd(140676.000000,145608.000000,168400.000000,200.000000)}
{pt3dadd(140688.000000,145524.000000,168075.000000,136.723163)}
{pt3dadd(140520.000000,145284.000000,167850.000000,123.114440)}

{create adhoc56}
{access adhoc56}
{connect adhoc56(1), adhoc54(0)}
{nseg = 1}
{strdef color color = "White"}
{pt3dclear()}
{pt3dadd(140676.000000,145608.000000,168400.000000,200.000000)}
{pt3dadd(140676.000000,145668.000000,168700.000000,160.010420)}
{pt3dadd(140484.000000,145968.000000,168900.000000,124.009378)}
{pt3dadd(140304.000000,146052.000000,169100.000000,105.444847)}
{pt3dadd(140160.000000,146268.000000,169325.000000,105.444847)}
{pt3dadd(139992.000000,146448.000000,169625.000000,114.184192)}
{pt3dadd(139896.000000,146520.000000,169925.000000,156.916820)}

{create adhoc57}
{access adhoc57}
{connect adhoc57(1), adhoc53(0)}
{nseg = 1}
{strdef color color = "White"}
{pt3dclear()}
{pt3dadd(140472.000000,144132.000000,168050.000000,110.956950)}
{pt3dadd(140268.000000,143856.000000,168200.000000,122.774157)}
{pt3dadd(140100.000000,143916.000000,168450.000000,151.037076)}
{pt3dadd(139956.000000,144096.000000,168500.000000,158.127400)}
{pt3dadd(139584.000000,144276.000000,168525.000000,145.663614)}
{pt3dadd(139476.000000,144348.000000,168750.000000,152.753938)}
{pt3dadd(139428.000000,144588.000000,168175.000000,179.144096)}
{pt3dadd(139008.000000,144792.000000,168050.000000,164.799930)}
{pt3dadd(138828.000000,144948.000000,168050.000000,263.901580)}

{create adhoc58}
{access adhoc58}
{connect adhoc58(1), adhoc52(0)}
{nseg = 1}
{strdef color color = "White"}
{pt3dclear()}
{pt3dadd(141096.000000,143568.000000,168025.000000,174.110100)}
{pt3dadd(141204.000000,143664.000000,168325.000000,189.256560)}
{pt3dadd(141384.000000,143928.000000,168625.000000,285.037688)}
{pt3dadd(141564.000000,144132.000000,168825.000000,322.315704)}
{pt3dadd(141600.000000,144144.000000,169100.000000,352.266094)}
{pt3dadd(141540.000000,144192.000000,169300.000000,356.803432)}
{pt3dadd(141468.000000,144276.000000,169575.000000,308.866133)}
{pt3dadd(141324.000000,144348.000000,169800.000000,229.739670)}

{create adhoc59}
{access adhoc59}
{connect adhoc59(1), adhoc49(0)}
{nseg = 1}
{strdef color color = "White"}
{pt3dclear()}
{pt3dadd(140700.000000,143064.000000,165325.000000,348.220200)}
{pt3dadd(141156.000000,142956.000000,165100.000000,208.499037)}
{pt3dadd(141456.000000,142800.000000,165000.000000,173.893796)}
{pt3dadd(141624.000000,142704.000000,165000.000000,109.353837)}
{pt3dadd(141720.000000,142512.000000,165000.000000,156.916820)}

{create adhoc60}
{access adhoc60}
{connect adhoc60(1), adhoc48(0)}
{nseg = 1}
{strdef color color = "White"}
{pt3dclear()}
{pt3dadd(140904.000000,142608.000000,163600.000000,336.358550)}
{pt3dadd(140844.000000,142836.000000,163400.000000,193.120252)}
{pt3dadd(140592.000000,142992.000000,163450.000000,216.461693)}
{pt3dadd(140160.000000,143136.000000,163450.000000,193.572763)}
{pt3dadd(139836.000000,143340.000000,163450.000000,230.822576)}
{pt3dadd(139668.000000,143604.000000,163450.000000,238.862182)}
{pt3dadd(139224.000000,142956.000000,163375.000000,230.454400)}
{pt3dadd(139272.000000,143508.000000,163825.000000,186.606600)}

{create adhoc61}
{access adhoc61}
{connect adhoc61(1), adhoc39(0)}
{nseg = 1}
{strdef color color = "White"}
{pt3dclear()}
{pt3dadd(143016.000000,138768.000000,162500.000000,492.457760)}
{pt3dadd(143736.000000,138780.000000,162425.000000,254.721177)}
{pt3dadd(144240.000000,138756.000000,162425.000000,122.766469)}
{pt3dadd(144384.000000,138816.000000,162425.000000,96.593636)}

{create adhoc62}
{access adhoc62}
{connect adhoc62(1), adhoc38(0)}
{nseg = 1}
{strdef color color = "White"}
{pt3dclear()}
{pt3dadd(139920.000000,138324.000000,160400.000000,348.220200)}
{pt3dadd(139524.000000,137952.000000,160475.000000,184.460178)}
{pt3dadd(139680.000000,137856.000000,160750.000000,159.015448)}
{pt3dadd(139884.000000,137844.000000,160900.000000,104.012265)}
{pt3dadd(139812.000000,137628.000000,160900.000000,104.966997)}
{pt3dadd(139704.000000,137520.000000,161150.000000,73.204285)}

{create adhoc63}
{access adhoc63}
{connect adhoc63(1), adhoc62(0)}
{nseg = 1}
{strdef color color = "White"}
{pt3dclear()}
{pt3dadd(139704.000000,137520.000000,161150.000000,73.204285)}
{pt3dadd(139836.000000,137604.000000,161400.000000,84.957305)}
{pt3dadd(140124.000000,137568.000000,161625.000000,80.095087)}
{pt3dadd(140376.000000,137688.000000,161875.000000,77.346301)}
{pt3dadd(140484.000000,137844.000000,162125.000000,90.524969)}
{pt3dadd(140412.000000,137892.000000,162125.000000,83.847616)}
{pt3dadd(140460.000000,137964.000000,162275.000000,136.604020)}

{create adhoc64}
{access adhoc64}
{connect adhoc64(1), adhoc62(0)}
{nseg = 1}
{strdef color color = "White"}
{pt3dclear()}
{pt3dadd(139704.000000,137520.000000,161150.000000,73.204285)}
{pt3dadd(139356.000000,137376.000000,161500.000000,81.449658)}
{pt3dadd(138972.000000,137460.000000,161725.000000,108.188522)}
{pt3dadd(138648.000000,137328.000000,161825.000000,116.521632)}
{pt3dadd(138480.000000,137136.000000,161975.000000,112.898783)}
{pt3dadd(138384.000000,136980.000000,161900.000000,126.871137)}
{pt3dadd(138228.000000,136860.000000,161900.000000,104.282147)}
{pt3dadd(138132.000000,136632.000000,161900.000000,104.282147)}
{pt3dadd(138192.000000,136452.000000,162150.000000,113.521835)}
{pt3dadd(138252.000000,136344.000000,162200.000000,96.593636)}

{create adhoc65}
{access adhoc65}
{connect adhoc65(1), adhoc37(0)}
{nseg = 1}
{strdef color color = "White"}
{pt3dclear()}
{pt3dadd(134532.000000,138312.000000,155275.000000,1299.603900)}
{pt3dadd(134988.000000,137724.000000,155275.000000,838.363747)}
{pt3dadd(135744.000000,137124.000000,155450.000000,754.235956)}
{pt3dadd(136056.000000,136824.000000,155575.000000,607.452256)}
{pt3dadd(136248.000000,136608.000000,155525.000000,598.749188)}
{pt3dadd(136452.000000,136620.000000,155600.000000,594.895328)}
{pt3dadd(136728.000000,136488.000000,155650.000000,582.921228)}
{pt3dadd(136908.000000,136308.000000,155675.000000,570.087700)}
{pt3dadd(137076.000000,136128.000000,155725.000000,601.150694)}
{pt3dadd(137232.000000,135948.000000,155750.000000,605.426834)}
{pt3dadd(137400.000000,135912.000000,155800.000000,630.687034)}
{pt3dadd(137532.000000,135792.000000,155900.000000,665.603888)}
{pt3dadd(137688.000000,135672.000000,155975.000000,687.765108)}
{pt3dadd(137844.000000,135528.000000,156075.000000,682.853114)}
{pt3dadd(137988.000000,135384.000000,155825.000000,696.607734)}
{pt3dadd(138144.000000,135252.000000,155850.000000,696.607734)}
{pt3dadd(138312.000000,135120.000000,155900.000000,712.407660)}
{pt3dadd(138468.000000,135000.000000,155975.000000,733.119580)}
{pt3dadd(138648.000000,134880.000000,156025.000000,743.116780)}
{pt3dadd(138780.000000,134628.000000,156075.000000,748.028774)}
{pt3dadd(138936.000000,134448.000000,155975.000000,762.770634)}
{pt3dadd(139104.000000,134412.000000,155875.000000,742.058714)}
{pt3dadd(139284.000000,134268.000000,156025.000000,707.592174)}
{pt3dadd(139428.000000,134100.000000,155925.000000,692.850314)}
{pt3dadd(139572.000000,133896.000000,155925.000000,669.907560)}
{pt3dadd(139764.000000,133692.000000,155900.000000,633.759360)}
{pt3dadd(139980.000000,133740.000000,155850.000000,614.896367)}
{pt3dadd(140160.000000,133704.000000,155975.000000,565.685400)}

{create adhoc66}
{access adhoc66}
{connect adhoc66(1), adhoc65(0)}
{nseg = 1}
{strdef color color = "White"}
{pt3dclear()}
{pt3dadd(140160.000000,133704.000000,155975.000000,565.685400)}
{pt3dadd(139512.000000,134100.000000,155150.000000,397.909890)}
{pt3dadd(139956.000000,134028.000000,154875.000000,276.770943)}
{pt3dadd(139992.000000,133776.000000,154575.000000,189.125075)}
{pt3dadd(140016.000000,133764.000000,154225.000000,105.860369)}
{pt3dadd(140112.000000,133620.000000,153925.000000,127.456060)}

{create adhoc67}
{access adhoc67}
{connect adhoc67(1), adhoc65(0)}
{nseg = 1}
{strdef color color = "White"}
{pt3dclear()}
{pt3dadd(140160.000000,133704.000000,155975.000000,565.685400)}
{pt3dadd(140448.000000,133416.000000,156300.000000,629.401480)}
{pt3dadd(140664.000000,133248.000000,156375.000000,680.705468)}
{pt3dadd(140868.000000,133128.000000,156500.000000,711.768462)}
{pt3dadd(141036.000000,133044.000000,156775.000000,726.510322)}
{pt3dadd(141204.000000,132972.000000,157050.000000,785.027457)}
{pt3dadd(141432.000000,132936.000000,157325.000000,746.426400)}

{create adhoc68}
{access adhoc68}
{connect adhoc68(1), adhoc67(0)}
{nseg = 1}
{strdef color color = "White"}
{pt3dclear()}
{pt3dadd(141432.000000,132936.000000,157325.000000,746.426400)}
{pt3dadd(141972.000000,132828.000000,157600.000000,697.556247)}
{pt3dadd(142272.000000,132672.000000,157775.000000,730.608288)}
{pt3dadd(142440.000000,132648.000000,158025.000000,683.287858)}
{pt3dadd(142848.000000,132504.000000,158300.000000,690.065650)}
{pt3dadd(143244.000000,132312.000000,158500.000000,509.824250)}

{create adhoc69}
{access adhoc69}
{connect adhoc69(1), adhoc68(0)}
{nseg = 1}
{strdef color color = "White"}
{pt3dclear()}
{pt3dadd(143244.000000,132312.000000,158500.000000,509.824250)}
{pt3dadd(142884.000000,132216.000000,158825.000000,525.196730)}
{pt3dadd(142992.000000,132084.000000,159025.000000,549.371758)}
{pt3dadd(143148.000000,131772.000000,159300.000000,552.967540)}
{pt3dadd(143124.000000,131568.000000,159550.000000,566.357253)}
{pt3dadd(143136.000000,131424.000000,159825.000000,527.803160)}

{create adhoc70}
{access adhoc70}
{connect adhoc70(1), adhoc69(0)}
{nseg = 1}
{strdef color color = "White"}
{pt3dclear()}
{pt3dadd(143136.000000,131424.000000,159825.000000,527.803160)}
{pt3dadd(142944.000000,131184.000000,160175.000000,522.225673)}
{pt3dadd(142884.000000,131040.000000,160400.000000,539.609564)}
{pt3dadd(142764.000000,130716.000000,160475.000000,555.306252)}
{pt3dadd(142644.000000,130464.000000,160675.000000,585.311112)}
{pt3dadd(142656.000000,130236.000000,161050.000000,631.019634)}
{pt3dadd(142644.000000,129984.000000,161125.000000,667.167834)}
{pt3dadd(142596.000000,129768.000000,161175.000000,698.230828)}
{pt3dadd(142668.000000,129588.000000,161225.000000,754.504628)}
{pt3dadd(142632.000000,129408.000000,161300.000000,736.473868)}
{pt3dadd(142728.000000,129228.000000,161350.000000,738.314190)}
{pt3dadd(142716.000000,129120.000000,161300.000000,606.286600)}

{create adhoc71}
{access adhoc71}
{connect adhoc71(1), adhoc70(0)}
{nseg = 1}
{strdef color color = "White"}
{pt3dclear()}
{pt3dadd(142716.000000,129120.000000,161300.000000,606.286600)}
{pt3dadd(143184.000000,129000.000000,160950.000000,468.922367)}
{pt3dadd(143496.000000,128736.000000,160875.000000,436.274648)}
{pt3dadd(143760.000000,128448.000000,160925.000000,389.659968)}
{pt3dadd(143868.000000,128160.000000,160850.000000,384.113684)}
{pt3dadd(143904.000000,127908.000000,160875.000000,384.113684)}
{pt3dadd(144000.000000,127692.000000,161025.000000,376.993842)}
{pt3dadd(144192.000000,127476.000000,161075.000000,363.816690)}
{pt3dadd(144408.000000,127284.000000,161200.000000,377.939610)}
{pt3dadd(144672.000000,127092.000000,161275.000000,375.307342)}
{pt3dadd(144936.000000,126900.000000,161350.000000,367.676474)}
{pt3dadd(145188.000000,126720.000000,161450.000000,379.971188)}
{pt3dadd(145452.000000,126516.000000,161525.000000,408.818700)}
{pt3dadd(145584.000000,126312.000000,161675.000000,409.017500)}
{pt3dadd(145716.000000,126144.000000,161800.000000,492.457760)}

{create adhoc72}
{access adhoc72}
{connect adhoc72(1), adhoc71(0)}
{nseg = 1}
{strdef color color = "White"}
{pt3dclear()}
{pt3dadd(145716.000000,126144.000000,161800.000000,492.457760)}
{pt3dadd(146076.000000,126072.000000,161525.000000,229.920050)}
{pt3dadd(146520.000000,126180.000000,161325.000000,186.941600)}
{pt3dadd(146892.000000,126468.000000,161150.000000,109.885517)}
{pt3dadd(146964.000000,126840.000000,160875.000000,113.941260)}
{pt3dadd(146784.000000,127236.000000,160550.000000,143.484535)}
{pt3dadd(146784.000000,127404.000000,160250.000000,181.342665)}
{pt3dadd(146916.000000,127716.000000,159950.000000,219.371540)}
{pt3dadd(146808.000000,127860.000000,159700.000000,292.817140)}

{create adhoc73}
{access adhoc73}
{connect adhoc73(1), adhoc72(0)}
{nseg = 1}
{strdef color color = "White"}
{pt3dclear()}
{pt3dadd(146808.000000,127860.000000,159700.000000,292.817140)}
{pt3dadd(146664.000000,127836.000000,159575.000000,90.125046)}

{create adhoc74}
{access adhoc74}
{connect adhoc74(1), adhoc73(0)}
{nseg = 1}
{strdef color color = "White"}
{pt3dclear()}
{pt3dadd(146664.000000,127836.000000,159575.000000,90.125046)}
{pt3dadd(146856.000000,127404.000000,159500.000000,95.267955)}
{pt3dadd(146592.000000,127092.000000,159325.000000,63.728030)}

{create adhoc75}
{access adhoc75}
{connect adhoc75(1), adhoc73(0)}
{nseg = 1}
{strdef color color = "White"}
{pt3dclear()}
{pt3dadd(146664.000000,127836.000000,159575.000000,90.125046)}
{pt3dadd(146544.000000,128100.000000,159325.000000,168.179280)}

{create adhoc76}
{access adhoc76}
{connect adhoc76(1), adhoc72(0)}
{nseg = 1}
{strdef color color = "White"}
{pt3dclear()}
{pt3dadd(146808.000000,127860.000000,159700.000000,292.817140)}
{pt3dadd(146460.000000,128136.000000,160050.000000,190.909013)}
{pt3dadd(146496.000000,128148.000000,160275.000000,93.303300)}

{create adhoc77}
{access adhoc77}
{connect adhoc77(1), adhoc71(0)}
{nseg = 1}
{strdef color color = "White"}
{pt3dclear()}
{pt3dadd(145716.000000,126144.000000,161800.000000,492.457760)}
{pt3dadd(145896.000000,126108.000000,161950.000000,336.358550)}

{create adhoc78}
{access adhoc78}
{connect adhoc78(1), adhoc77(0)}
{nseg = 1}
{strdef color color = "White"}
{pt3dclear()}
{pt3dadd(145896.000000,126108.000000,161950.000000,336.358550)}
{pt3dadd(146280.000000,126252.000000,162225.000000,168.179280)}

{create adhoc79}
{access adhoc79}
{connect adhoc79(1), adhoc78(0)}
{nseg = 1}
{strdef color color = "White"}
{pt3dclear()}
{pt3dadd(146280.000000,126252.000000,162225.000000,168.179280)}
{pt3dadd(146580.000000,126240.000000,162225.000000,110.209920)}
{pt3dadd(146712.000000,126324.000000,162250.000000,107.561421)}
{pt3dadd(146808.000000,126384.000000,162350.000000,87.585967)}
{pt3dadd(146952.000000,126468.000000,162450.000000,92.046217)}
{pt3dadd(147132.000000,126528.000000,162500.000000,95.801169)}
{pt3dadd(147396.000000,126576.000000,162550.000000,90.610748)}
{pt3dadd(147576.000000,126660.000000,162650.000000,123.391064)}
{pt3dadd(147720.000000,126660.000000,162725.000000,147.051982)}
{pt3dadd(147912.000000,126660.000000,162850.000000,163.668004)}
{pt3dadd(148020.000000,126780.000000,162850.000000,179.718022)}
{pt3dadd(148104.000000,126804.000000,162950.000000,202.110428)}
{pt3dadd(148188.000000,126840.000000,163100.000000,186.651432)}
{pt3dadd(148356.000000,126912.000000,163225.000000,189.330112)}
{pt3dadd(148416.000000,126924.000000,163275.000000,193.264623)}
{pt3dadd(148416.000000,126900.000000,163375.000000,200.000000)}

{create adhoc80}
{access adhoc80}
{connect adhoc80(1), adhoc79(0)}
{nseg = 1}
{strdef color color = "White"}
{pt3dclear()}
{pt3dadd(148416.000000,126900.000000,163375.000000,200.000000)}
{pt3dadd(148428.000000,126924.000000,163475.000000,243.552853)}
{pt3dadd(148716.000000,126900.000000,163525.000000,219.767568)}
{pt3dadd(148944.000000,126924.000000,163625.000000,208.051840)}
{pt3dadd(149136.000000,126948.000000,163675.000000,190.797888)}
{pt3dadd(149316.000000,127068.000000,163800.000000,160.518732)}
{pt3dadd(149508.000000,127176.000000,163850.000000,154.154588)}
{pt3dadd(149556.000000,127248.000000,163975.000000,151.902096)}
{pt3dadd(149820.000000,127320.000000,163900.000000,155.505820)}
{pt3dadd(150000.000000,127356.000000,163825.000000,156.916820)}

{create adhoc81}
{access adhoc81}
{connect adhoc81(1), adhoc79(0)}
{nseg = 1}
{strdef color color = "White"}
{pt3dclear()}
{pt3dadd(148416.000000,126900.000000,163375.000000,200.000000)}
{pt3dadd(148632.000000,126900.000000,163400.000000,150.792770)}
{pt3dadd(148824.000000,126912.000000,163400.000000,141.859026)}
{pt3dadd(149016.000000,126936.000000,163400.000000,127.350238)}
{pt3dadd(149220.000000,126936.000000,163400.000000,126.386770)}
{pt3dadd(149352.000000,126840.000000,163300.000000,137.831238)}
{pt3dadd(149448.000000,126756.000000,163225.000000,147.112952)}
{pt3dadd(149532.000000,126684.000000,163075.000000,144.013860)}
{pt3dadd(149580.000000,126804.000000,163075.000000,147.804362)}
{pt3dadd(149604.000000,127032.000000,162925.000000,137.894568)}
{pt3dadd(149628.000000,127020.000000,162825.000000,125.694179)}
{pt3dadd(149748.000000,127260.000000,162725.000000,109.607544)}
{pt3dadd(149712.000000,127356.000000,162625.000000,94.518351)}
{pt3dadd(149760.000000,127416.000000,162525.000000,79.709378)}
{pt3dadd(149652.000000,127416.000000,162350.000000,65.975395)}

{create adhoc82}
{access adhoc82}
{connect adhoc82(1), adhoc78(0)}
{nseg = 1}
{strdef color color = "White"}
{pt3dclear()}
{pt3dadd(146280.000000,126252.000000,162225.000000,168.179280)}
{pt3dadd(146196.000000,126060.000000,162475.000000,204.189360)}
{pt3dadd(146340.000000,125760.000000,162700.000000,182.638430)}
{pt3dadd(146304.000000,125580.000000,162925.000000,103.526490)}

{create adhoc83}
{access adhoc83}
{connect adhoc83(1), adhoc82(0)}
{nseg = 1}
{strdef color color = "White"}
{pt3dclear()}
{pt3dadd(146304.000000,125580.000000,162925.000000,103.526490)}
{pt3dadd(146472.000000,125184.000000,163000.000000,99.117203)}
{pt3dadd(146616.000000,124860.000000,163200.000000,103.271490)}
{pt3dadd(146688.000000,124572.000000,163375.000000,96.572173)}
{pt3dadd(146808.000000,124152.000000,163650.000000,131.950790)}

{create adhoc84}
{access adhoc84}
{connect adhoc84(1), adhoc83(0)}
{nseg = 1}
{strdef color color = "White"}
{pt3dclear()}
{pt3dadd(146808.000000,124152.000000,163650.000000,131.950790)}
{pt3dadd(146724.000000,123864.000000,163775.000000,110.956950)}

{create adhoc85}
{access adhoc85}
{connect adhoc85(1), adhoc83(0)}
{nseg = 1}
{strdef color color = "White"}
{pt3dclear()}
{pt3dadd(146808.000000,124152.000000,163650.000000,131.950790)}
{pt3dadd(146748.000000,124512.000000,163800.000000,115.063425)}
{pt3dadd(146784.000000,124992.000000,164050.000000,103.266993)}
{pt3dadd(146820.000000,125160.000000,164300.000000,94.901844)}
{pt3dadd(146712.000000,125184.000000,164575.000000,144.921596)}
{pt3dadd(146868.000000,125148.000000,164875.000000,183.464432)}
{pt3dadd(146868.000000,125208.000000,165100.000000,373.213200)}

{create adhoc86}
{access adhoc86}
{connect adhoc86(1), adhoc82(0)}
{nseg = 1}
{strdef color color = "White"}
{pt3dclear()}
{pt3dadd(146304.000000,125580.000000,162925.000000,103.526490)}
{pt3dadd(146424.000000,125616.000000,163050.000000,77.224029)}
{pt3dadd(146448.000000,125736.000000,163325.000000,57.434917)}

{create adhoc87}
{access adhoc87}
{connect adhoc87(1), adhoc77(0)}
{nseg = 1}
{strdef color color = "White"}
{pt3dclear()}
{pt3dadd(145896.000000,126108.000000,161950.000000,336.358550)}
{pt3dadd(145632.000000,125640.000000,161425.000000,245.452850)}
{pt3dadd(145704.000000,125136.000000,161325.000000,229.269662)}
{pt3dadd(145668.000000,124872.000000,161250.000000,194.488050)}
{pt3dadd(145644.000000,124644.000000,161250.000000,194.488050)}
{pt3dadd(145680.000000,124464.000000,161275.000000,184.802382)}
{pt3dadd(145668.000000,124272.000000,161300.000000,184.802382)}
{pt3dadd(145668.000000,124068.000000,161250.000000,180.265044)}
{pt3dadd(145644.000000,123864.000000,161250.000000,173.266158)}
{pt3dadd(145692.000000,123636.000000,161275.000000,158.757370)}
{pt3dadd(145608.000000,123456.000000,161275.000000,157.724752)}
{pt3dadd(145596.000000,123240.000000,161325.000000,149.959006)}
{pt3dadd(145632.000000,123012.000000,161350.000000,144.598428)}
{pt3dadd(145692.000000,122772.000000,161400.000000,145.497374)}
{pt3dadd(145632.000000,122520.000000,161425.000000,151.389526)}
{pt3dadd(145512.000000,122292.000000,161400.000000,162.107812)}
{pt3dadd(145632.000000,122052.000000,161475.000000,181.391824)}
{pt3dadd(145584.000000,121800.000000,161600.000000,186.752402)}
{pt3dadd(145524.000000,121608.000000,161550.000000,196.412262)}
{pt3dadd(145608.000000,121392.000000,161575.000000,197.518996)}
{pt3dadd(145596.000000,121200.000000,161550.000000,200.389934)}
{pt3dadd(145752.000000,121008.000000,161500.000000,185.685090)}
{pt3dadd(145824.000000,120804.000000,161600.000000,214.354690)}

{create adhoc88}
{access adhoc88}
{connect adhoc88(1), adhoc87(0)}
{nseg = 1}
{strdef color color = "White"}
{pt3dclear()}
{pt3dadd(145824.000000,120804.000000,161600.000000,214.354690)}
{pt3dadd(146388.000000,120768.000000,161600.000000,186.461010)}
{pt3dadd(146556.000000,120852.000000,161700.000000,277.639868)}
{pt3dadd(146640.000000,120864.000000,162000.000000,344.052150)}
{pt3dadd(146868.000000,120840.000000,162250.000000,458.410803)}
{pt3dadd(146976.000000,120864.000000,162450.000000,546.416100)}

{create adhoc89}
{access adhoc89}
{connect adhoc89(1), adhoc88(0)}
{nseg = 1}
{strdef color color = "White"}
{pt3dclear()}
{pt3dadd(146976.000000,120864.000000,162450.000000,546.416100)}
{pt3dadd(147084.000000,120912.000000,162475.000000,324.900970)}

{create adhoc90}
{access adhoc90}
{connect adhoc90(1), adhoc89(0)}
{nseg = 1}
{strdef color color = "White"}
{pt3dclear()}
{pt3dadd(147084.000000,120912.000000,162475.000000,324.900970)}
{pt3dadd(147288.000000,120012.000000,162475.000000,198.464447)}
{pt3dadd(147192.000000,119988.000000,162200.000000,118.920710)}

{create adhoc91}
{access adhoc91}
{connect adhoc91(1), adhoc89(0)}
{nseg = 1}
{strdef color color = "White"}
{pt3dclear()}
{pt3dadd(147084.000000,120912.000000,162475.000000,324.900970)}
{pt3dadd(147300.000000,120900.000000,162750.000000,237.841420)}

{create adhoc92}
{access adhoc92}
{connect adhoc92(1), adhoc88(0)}
{nseg = 1}
{strdef color color = "White"}
{pt3dclear()}
{pt3dadd(146976.000000,120864.000000,162450.000000,546.416100)}
{pt3dadd(146160.000000,120852.000000,162450.000000,273.426910)}
{pt3dadd(145752.000000,120792.000000,162450.000000,217.831630)}
{pt3dadd(145104.000000,120852.000000,162300.000000,122.208812)}
{pt3dadd(144660.000000,120888.000000,162125.000000,115.901065)}
{pt3dadd(144252.000000,120696.000000,161950.000000,126.459871)}
{pt3dadd(144012.000000,120324.000000,161750.000000,121.140645)}
{pt3dadd(143652.000000,120024.000000,161650.000000,180.250090)}

{create adhoc93}
{access adhoc93}
{connect adhoc93(1), adhoc92(0)}
{nseg = 1}
{strdef color color = "White"}
{pt3dclear()}
{pt3dadd(143652.000000,120024.000000,161650.000000,180.250090)}
{pt3dadd(143556.000000,119988.000000,161350.000000,35.355340)}

{create adhoc94}
{access adhoc94}
{connect adhoc94(1), adhoc92(0)}
{nseg = 1}
{strdef color color = "White"}
{pt3dclear()}
{pt3dadd(143652.000000,120024.000000,161650.000000,180.250090)}
{pt3dadd(143316.000000,120048.000000,161875.000000,128.414990)}
{pt3dadd(142860.000000,120096.000000,162075.000000,240.123788)}
{pt3dadd(142488.000000,120156.000000,162150.000000,310.081268)}
{pt3dadd(142320.000000,120384.000000,162325.000000,585.634300)}

{create adhoc95}
{access adhoc95}
{connect adhoc95(1), adhoc87(0)}
{nseg = 1}
{strdef color color = "White"}
{pt3dclear()}
{pt3dadd(145824.000000,120804.000000,161600.000000,214.354690)}
{pt3dadd(145200.000000,120444.000000,161425.000000,258.139073)}
{pt3dadd(145056.000000,120192.000000,161350.000000,313.224392)}
{pt3dadd(144840.000000,119964.000000,161325.000000,335.333648)}
{pt3dadd(144780.000000,119736.000000,161225.000000,348.854602)}
{pt3dadd(144780.000000,119604.000000,161000.000000,338.868188)}
{pt3dadd(144780.000000,119376.000000,160975.000000,257.930444)}
{pt3dadd(144648.000000,119160.000000,160950.000000,234.431842)}
{pt3dadd(144456.000000,119004.000000,160750.000000,200.835012)}
{pt3dadd(144288.000000,118776.000000,160675.000000,172.890302)}
{pt3dadd(144216.000000,118572.000000,160600.000000,145.601198)}
{pt3dadd(144096.000000,118428.000000,160525.000000,150.260024)}
{pt3dadd(143988.000000,118200.000000,160450.000000,170.224086)}
{pt3dadd(143940.000000,118044.000000,160325.000000,170.224086)}
{pt3dadd(143748.000000,117888.000000,160350.000000,166.785430)}
{pt3dadd(143628.000000,117720.000000,160300.000000,187.242152)}
{pt3dadd(143436.000000,117600.000000,160225.000000,202.343218)}
{pt3dadd(143400.000000,117468.000000,160200.000000,200.665726)}
{pt3dadd(143328.000000,117324.000000,160150.000000,216.850646)}
{pt3dadd(143208.000000,117180.000000,160000.000000,232.532247)}
{pt3dadd(143136.000000,117012.000000,159950.000000,237.841420)}

{create adhoc96}
{access adhoc96}
{connect adhoc96(1), adhoc95(0)}
{nseg = 1}
{strdef color color = "White"}
{pt3dclear()}
{pt3dadd(143136.000000,117012.000000,159950.000000,237.841420)}
{pt3dadd(143196.000000,116760.000000,159825.000000,221.397830)}
{pt3dadd(143376.000000,116352.000000,159600.000000,186.413452)}
{pt3dadd(143364.000000,116184.000000,159500.000000,160.280637)}
{pt3dadd(143496.000000,115776.000000,159350.000000,128.935790)}
{pt3dadd(143784.000000,115296.000000,159350.000000,202.006324)}
{pt3dadd(143856.000000,114792.000000,159150.000000,237.894670)}
{pt3dadd(144000.000000,114216.000000,159050.000000,323.779685)}
{pt3dadd(144156.000000,113676.000000,158900.000000,336.358550)}

{create adhoc97}
{access adhoc97}
{connect adhoc97(1), adhoc96(0)}
{nseg = 1}
{strdef color color = "White"}
{pt3dclear()}
{pt3dadd(144156.000000,113676.000000,158900.000000,336.358550)}
{pt3dadd(144252.000000,112488.000000,158700.000000,212.611662)}
{pt3dadd(144456.000000,112164.000000,158450.000000,204.898295)}
{pt3dadd(144540.000000,111912.000000,158225.000000,165.910857)}
{pt3dadd(144504.000000,111456.000000,158000.000000,185.807828)}
{pt3dadd(144480.000000,111012.000000,157800.000000,192.869288)}
{pt3dadd(144408.000000,110424.000000,157675.000000,204.356862)}
{pt3dadd(144432.000000,109848.000000,157550.000000,190.899026)}
{pt3dadd(144420.000000,109512.000000,157300.000000,190.899026)}
{pt3dadd(144576.000000,109140.000000,157100.000000,164.273136)}
{pt3dadd(144708.000000,108768.000000,156950.000000,136.708284)}
{pt3dadd(145056.000000,108564.000000,157150.000000,110.655274)}
{pt3dadd(145272.000000,108492.000000,157400.000000,90.910782)}
{pt3dadd(145536.000000,108456.000000,157675.000000,104.037106)}
{pt3dadd(145800.000000,108336.000000,157875.000000,137.037834)}
{pt3dadd(145980.000000,108324.000000,158125.000000,169.465682)}
{pt3dadd(145956.000000,108228.000000,158450.000000,211.211182)}
{pt3dadd(145812.000000,108072.000000,158675.000000,224.855734)}
{pt3dadd(145452.000000,108204.000000,158875.000000,196.190744)}
{pt3dadd(145272.000000,108420.000000,159125.000000,161.087104)}
{pt3dadd(145140.000000,108972.000000,159350.000000,133.276797)}
{pt3dadd(145236.000000,109356.000000,159625.000000,80.538685)}
{pt3dadd(145224.000000,109296.000000,159950.000000,107.177345)}

{create adhoc98}
{access adhoc98}
{connect adhoc98(1), adhoc96(0)}
{nseg = 1}
{strdef color color = "White"}
{pt3dclear()}
{pt3dadd(144156.000000,113676.000000,158900.000000,336.358550)}
{pt3dadd(144552.000000,113844.000000,158650.000000,156.916820)}

{create adhoc99}
{access adhoc99}
{connect adhoc99(1), adhoc95(0)}
{nseg = 1}
{strdef color color = "White"}
{pt3dclear()}
{pt3dadd(143136.000000,117012.000000,159950.000000,237.841420)}
{pt3dadd(142980.000000,117012.000000,159775.000000,139.508232)}
{pt3dadd(142776.000000,116928.000000,159700.000000,110.657240)}
{pt3dadd(142632.000000,116880.000000,159700.000000,74.981027)}
{pt3dadd(142488.000000,116820.000000,159700.000000,69.804436)}
{pt3dadd(142296.000000,116784.000000,159700.000000,68.678190)}
{pt3dadd(142104.000000,116700.000000,159700.000000,68.179469)}
{pt3dadd(141948.000000,116592.000000,159700.000000,83.188829)}
{pt3dadd(141804.000000,116472.000000,159700.000000,87.541806)}
{pt3dadd(141732.000000,116388.000000,159600.000000,88.040527)}
{pt3dadd(141660.000000,116496.000000,159475.000000,90.373854)}
{pt3dadd(141564.000000,116532.000000,159375.000000,93.642728)}
{pt3dadd(141504.000000,116460.000000,159300.000000,90.106066)}
{pt3dadd(141264.000000,116400.000000,159200.000000,85.753089)}
{pt3dadd(141168.000000,116340.000000,159025.000000,87.357280)}
{pt3dadd(141240.000000,116424.000000,158875.000000,86.535435)}
{pt3dadd(141372.000000,116376.000000,158775.000000,81.225240)}

{create adhoc100}
{access adhoc100}
{connect adhoc100(1), adhoc70(0)}
{nseg = 1}
{strdef color color = "White"}
{pt3dclear()}
{pt3dadd(142716.000000,129120.000000,161300.000000,606.286600)}
{pt3dadd(142488.000000,129276.000000,161650.000000,545.249567)}
{pt3dadd(142464.000000,128976.000000,161900.000000,480.895494)}
{pt3dadd(142344.000000,128628.000000,162125.000000,468.921394)}
{pt3dadd(141924.000000,128208.000000,162300.000000,412.423194)}
{pt3dadd(141624.000000,127812.000000,162500.000000,391.486790)}
{pt3dadd(141660.000000,127440.000000,162700.000000,303.143300)}

{create adhoc101}
{access adhoc101}
{connect adhoc101(1), adhoc100(0)}
{nseg = 1}
{strdef color color = "White"}
{pt3dclear()}
{pt3dadd(141660.000000,127440.000000,162700.000000,303.143300)}
{pt3dadd(141072.000000,127980.000000,162700.000000,354.243680)}
{pt3dadd(140592.000000,128364.000000,162700.000000,339.287852)}
{pt3dadd(140064.000000,128472.000000,162950.000000,329.641616)}
{pt3dadd(139800.000000,128496.000000,163000.000000,319.979170)}
{pt3dadd(139572.000000,128520.000000,163050.000000,319.979170)}
{pt3dadd(139332.000000,128496.000000,163050.000000,325.154042)}
{pt3dadd(139080.000000,128484.000000,163075.000000,337.784144)}
{pt3dadd(138816.000000,128484.000000,163075.000000,345.365148)}
{pt3dadd(138552.000000,128472.000000,163100.000000,338.516743)}
{pt3dadd(138312.000000,128460.000000,163125.000000,292.817140)}

{create adhoc102}
{access adhoc102}
{connect adhoc102(1), adhoc101(0)}
{nseg = 1}
{strdef color color = "White"}
{pt3dclear()}
{pt3dadd(138312.000000,128460.000000,163125.000000,292.817140)}
{pt3dadd(138252.000000,128448.000000,163725.000000,218.928980)}
{pt3dadd(138516.000000,128268.000000,163975.000000,251.409414)}
{pt3dadd(138336.000000,128040.000000,164175.000000,251.409414)}
{pt3dadd(138264.000000,127920.000000,164400.000000,297.692423)}
{pt3dadd(138180.000000,127692.000000,164600.000000,292.817140)}

{create adhoc103}
{access adhoc103}
{connect adhoc103(1), adhoc102(0)}
{nseg = 1}
{strdef color color = "White"}
{pt3dclear()}
{pt3dadd(138180.000000,127692.000000,164600.000000,292.817140)}
{pt3dadd(138372.000000,127032.000000,164450.000000,207.536143)}
{pt3dadd(138468.000000,126864.000000,164150.000000,298.287426)}
{pt3dadd(138480.000000,126948.000000,163850.000000,270.038330)}
{pt3dadd(138372.000000,126864.000000,163600.000000,340.133453)}
{pt3dadd(138192.000000,126708.000000,163600.000000,151.571660)}

{create adhoc104}
{access adhoc104}
{connect adhoc104(1), adhoc103(0)}
{nseg = 1}
{strdef color color = "White"}
{pt3dclear()}
{pt3dadd(138192.000000,126708.000000,163600.000000,151.571660)}
{pt3dadd(138060.000000,126828.000000,163325.000000,90.125046)}

{create adhoc105}
{access adhoc105}
{connect adhoc105(1), adhoc103(0)}
{nseg = 1}
{strdef color color = "White"}
{pt3dclear()}
{pt3dadd(138192.000000,126708.000000,163600.000000,151.571660)}
{pt3dadd(137748.000000,126156.000000,163400.000000,132.173170)}
{pt3dadd(137484.000000,125820.000000,163275.000000,114.151336)}
{pt3dadd(137304.000000,125616.000000,163275.000000,108.459892)}
{pt3dadd(137052.000000,125472.000000,163075.000000,112.377482)}
{pt3dadd(136776.000000,125232.000000,162975.000000,116.585123)}
{pt3dadd(136572.000000,125112.000000,163125.000000,123.114440)}

{create adhoc106}
{access adhoc106}
{connect adhoc106(1), adhoc102(0)}
{nseg = 1}
{strdef color color = "White"}
{pt3dclear()}
{pt3dadd(138180.000000,127692.000000,164600.000000,292.817140)}
{pt3dadd(138192.000000,127860.000000,164900.000000,256.547720)}
{pt3dadd(138132.000000,127884.000000,165175.000000,275.258790)}
{pt3dadd(138048.000000,127776.000000,165400.000000,288.795398)}
{pt3dadd(138096.000000,127692.000000,165600.000000,329.708842)}
{pt3dadd(138168.000000,127536.000000,165825.000000,352.597772)}
{pt3dadd(138180.000000,127464.000000,166050.000000,385.446023)}
{pt3dadd(138012.000000,127428.000000,166275.000000,336.358550)}

{create adhoc107}
{access adhoc107}
{connect adhoc107(1), adhoc106(0)}
{nseg = 1}
{strdef color color = "White"}
{pt3dclear()}
{pt3dadd(138012.000000,127428.000000,166275.000000,336.358550)}
{pt3dadd(138144.000000,127128.000000,166575.000000,223.622530)}
{pt3dadd(138096.000000,126864.000000,166800.000000,278.478822)}
{pt3dadd(138204.000000,126948.000000,167075.000000,271.835772)}
{pt3dadd(138216.000000,127188.000000,167250.000000,341.556607)}
{pt3dadd(138372.000000,127296.000000,167475.000000,303.143300)}

{create adhoc108}
{access adhoc108}
{connect adhoc108(1), adhoc107(0)}
{nseg = 1}
{strdef color color = "White"}
{pt3dclear()}
{pt3dadd(138372.000000,127296.000000,167475.000000,303.143300)}
{pt3dadd(138912.000000,126816.000000,167625.000000,185.576405)}
{pt3dadd(139140.000000,126480.000000,167625.000000,166.118769)}
{pt3dadd(139248.000000,126204.000000,167625.000000,128.464076)}
{pt3dadd(139200.000000,125964.000000,167525.000000,122.156329)}
{pt3dadd(139296.000000,125748.000000,167550.000000,126.212072)}
{pt3dadd(139332.000000,125544.000000,167625.000000,115.591018)}
{pt3dadd(139488.000000,125328.000000,167625.000000,107.510816)}
{pt3dadd(139536.000000,125064.000000,167625.000000,110.927007)}
{pt3dadd(139584.000000,124764.000000,167625.000000,116.237312)}
{pt3dadd(139704.000000,124548.000000,167625.000000,110.746100)}
{pt3dadd(139776.000000,124356.000000,167625.000000,120.369712)}
{pt3dadd(139956.000000,124140.000000,167825.000000,129.348860)}
{pt3dadd(139944.000000,123948.000000,168025.000000,126.742844)}
{pt3dadd(139776.000000,123948.000000,168250.000000,137.096026)}
{pt3dadd(139608.000000,123792.000000,168525.000000,137.096026)}
{pt3dadd(139260.000000,123504.000000,168775.000000,126.836763)}
{pt3dadd(138936.000000,123144.000000,168950.000000,125.937817)}
{pt3dadd(138792.000000,122808.000000,169125.000000,158.722215)}
{pt3dadd(138600.000000,122316.000000,169250.000000,133.745163)}
{pt3dadd(138648.000000,121908.000000,169400.000000,364.812083)}
{pt3dadd(138804.000000,121608.000000,169675.000000,524.318194)}
{pt3dadd(139128.000000,121368.000000,169825.000000,664.469362)}
{pt3dadd(139440.000000,121260.000000,169825.000000,625.311832)}
{pt3dadd(139704.000000,121236.000000,169825.000000,625.311832)}
{pt3dadd(139896.000000,121188.000000,169825.000000,394.950210)}
{pt3dadd(140160.000000,121104.000000,169825.000000,242.041978)}
{pt3dadd(140388.000000,120984.000000,169825.000000,98.314313)}
{pt3dadd(140604.000000,120864.000000,169650.000000,123.114440)}

{create adhoc109}
{access adhoc109}
{connect adhoc109(1), adhoc107(0)}
{nseg = 1}
{strdef color color = "White"}
{pt3dclear()}
{pt3dadd(138372.000000,127296.000000,167475.000000,303.143300)}
{pt3dadd(137868.000000,126864.000000,167475.000000,181.508955)}
{pt3dadd(137544.000000,126732.000000,167525.000000,152.706541)}
{pt3dadd(137160.000000,126672.000000,167525.000000,107.769563)}
{pt3dadd(136764.000000,126708.000000,167525.000000,91.544717)}
{pt3dadd(136452.000000,126672.000000,167400.000000,97.609158)}
{pt3dadd(136104.000000,126408.000000,167300.000000,95.355314)}
{pt3dadd(135864.000000,126024.000000,167200.000000,111.836094)}
{pt3dadd(135192.000000,125652.000000,167050.000000,116.144412)}
{pt3dadd(134652.000000,125268.000000,166900.000000,122.517544)}
{pt3dadd(134292.000000,124980.000000,166800.000000,149.380530)}
{pt3dadd(133860.000000,124572.000000,166675.000000,180.171298)}
{pt3dadd(133464.000000,124344.000000,166675.000000,168.683724)}
{pt3dadd(133428.000000,124692.000000,167000.000000,208.165970)}
{pt3dadd(133392.000000,124860.000000,167275.000000,156.916820)}

{create adhoc110}
{access adhoc110}
{connect adhoc110(1), adhoc106(0)}
{nseg = 1}
{strdef color color = "White"}
{pt3dclear()}
{pt3dadd(138012.000000,127428.000000,166275.000000,336.358550)}
{pt3dadd(137472.000000,126552.000000,166125.000000,162.680272)}
{pt3dadd(137484.000000,126288.000000,165950.000000,93.046109)}
{pt3dadd(137076.000000,125808.000000,165775.000000,127.456060)}

{create adhoc111}
{access adhoc111}
{connect adhoc111(1), adhoc110(0)}
{nseg = 1}
{strdef color color = "White"}
{pt3dclear()}
{pt3dadd(137076.000000,125808.000000,165775.000000,127.456060)}
{pt3dadd(136620.000000,125112.000000,165525.000000,167.188720)}
{pt3dadd(136332.000000,124632.000000,165325.000000,156.118776)}
{pt3dadd(136152.000000,124164.000000,165125.000000,165.449584)}
{pt3dadd(136152.000000,124140.000000,164825.000000,158.911836)}
{pt3dadd(136044.000000,123852.000000,164575.000000,147.196108)}
{pt3dadd(136176.000000,123624.000000,164300.000000,152.317607)}
{pt3dadd(136272.000000,123648.000000,164225.000000,141.421360)}

{create adhoc112}
{access adhoc112}
{connect adhoc112(1), adhoc110(0)}
{nseg = 1}
{strdef color color = "White"}
{pt3dclear()}
{pt3dadd(137076.000000,125808.000000,165775.000000,127.456060)}
{pt3dadd(137004.000000,125880.000000,165550.000000,104.331841)}
{pt3dadd(136884.000000,126084.000000,165325.000000,53.588673)}

{create adhoc113}
{access adhoc113}
{connect adhoc113(1), adhoc101(0)}
{nseg = 1}
{strdef color color = "White"}
{pt3dclear()}
{pt3dadd(138312.000000,128460.000000,163125.000000,292.817140)}
{pt3dadd(137772.000000,128364.000000,163100.000000,241.281943)}
{pt3dadd(137316.000000,128292.000000,163100.000000,237.841420)}

{create adhoc114}
{access adhoc114}
{connect adhoc114(1), adhoc113(0)}
{nseg = 1}
{strdef color color = "White"}
{pt3dclear()}
{pt3dadd(137316.000000,128292.000000,163100.000000,237.841420)}
{pt3dadd(136584.000000,128496.000000,163350.000000,166.373275)}
{pt3dadd(136092.000000,128544.000000,163525.000000,141.019117)}
{pt3dadd(135768.000000,128508.000000,163550.000000,119.840991)}
{pt3dadd(135540.000000,128412.000000,163600.000000,109.219937)}
{pt3dadd(135300.000000,128400.000000,163675.000000,106.951268)}
{pt3dadd(135024.000000,128304.000000,163525.000000,117.824530)}
{pt3dadd(134760.000000,128244.000000,163575.000000,139.988322)}
{pt3dadd(134520.000000,128196.000000,163600.000000,161.166448)}
{pt3dadd(134268.000000,128160.000000,163650.000000,181.143242)}
{pt3dadd(134076.000000,128028.000000,163650.000000,200.437944)}
{pt3dadd(133848.000000,127944.000000,163725.000000,213.564268)}
{pt3dadd(133692.000000,127920.000000,163775.000000,207.616334)}
{pt3dadd(133500.000000,127872.000000,163825.000000,185.539262)}
{pt3dadd(133284.000000,127872.000000,163875.000000,189.772746)}
{pt3dadd(133080.000000,127848.000000,163975.000000,185.822764)}
{pt3dadd(132792.000000,127812.000000,163975.000000,165.847637)}
{pt3dadd(132504.000000,127824.000000,163975.000000,155.129351)}
{pt3dadd(132288.000000,127776.000000,163975.000000,148.298799)}
{pt3dadd(132036.000000,127656.000000,164075.000000,130.050749)}
{pt3dadd(131772.000000,127572.000000,164075.000000,124.315063)}
{pt3dadd(131496.000000,127488.000000,164075.000000,129.269752)}
{pt3dadd(131208.000000,127440.000000,164175.000000,152.768354)}
{pt3dadd(130872.000000,127404.000000,164250.000000,161.428498)}
{pt3dadd(131172.000000,127668.000000,164550.000000,153.623538)}
{pt3dadd(131208.000000,127620.000000,164800.000000,149.699364)}
{pt3dadd(131172.000000,127968.000000,164800.000000,145.500596)}
{pt3dadd(131232.000000,128184.000000,164975.000000,108.999127)}
{pt3dadd(131376.000000,128220.000000,165150.000000,110.956950)}

{create adhoc115}
{access adhoc115}
{connect adhoc115(1), adhoc113(0)}
{nseg = 1}
{strdef color color = "White"}
{pt3dclear()}
{pt3dadd(137316.000000,128292.000000,163100.000000,237.841420)}
{pt3dadd(136956.000000,128400.000000,162600.000000,206.334833)}
{pt3dadd(136644.000000,128484.000000,162325.000000,206.895548)}
{pt3dadd(136296.000000,128340.000000,162075.000000,213.968872)}
{pt3dadd(136128.000000,128304.000000,161850.000000,205.537010)}
{pt3dadd(135864.000000,128280.000000,161625.000000,211.694698)}
{pt3dadd(135684.000000,128340.000000,161425.000000,224.251304)}
{pt3dadd(135672.000000,128424.000000,161200.000000,215.853768)}
{pt3dadd(135564.000000,128316.000000,161000.000000,204.083098)}
{pt3dadd(135396.000000,128316.000000,160775.000000,223.640874)}
{pt3dadd(135216.000000,128148.000000,160575.000000,208.562688)}
{pt3dadd(134952.000000,127956.000000,160425.000000,202.181617)}
{pt3dadd(134916.000000,127716.000000,160300.000000,162.450490)}

{create adhoc116}
{access adhoc116}
{connect adhoc116(1), adhoc115(0)}
{nseg = 1}
{strdef color color = "White"}
{pt3dclear()}
{pt3dadd(134916.000000,127716.000000,160300.000000,162.450490)}
{pt3dadd(134232.000000,127428.000000,160350.000000,164.360087)}
{pt3dadd(134028.000000,127380.000000,160350.000000,139.211768)}
{pt3dadd(133860.000000,127332.000000,160400.000000,124.132680)}
{pt3dadd(133692.000000,127284.000000,160425.000000,109.157484)}
{pt3dadd(133572.000000,127284.000000,160425.000000,97.372684)}
{pt3dadd(133428.000000,127248.000000,160425.000000,81.834018)}
{pt3dadd(133308.000000,127212.000000,160375.000000,91.713964)}
{pt3dadd(133152.000000,127152.000000,160375.000000,100.693112)}
{pt3dadd(133008.000000,127092.000000,160375.000000,114.522550)}
{pt3dadd(132864.000000,127056.000000,160375.000000,139.765186)}
{pt3dadd(132744.000000,127044.000000,160375.000000,168.430176)}
{pt3dadd(132624.000000,127068.000000,160375.000000,204.802214)}
{pt3dadd(132492.000000,126996.000000,160375.000000,231.192372)}
{pt3dadd(132372.000000,126936.000000,160375.000000,225.092432)}
{pt3dadd(132168.000000,126888.000000,160325.000000,204.635710)}
{pt3dadd(132024.000000,126864.000000,160375.000000,212.470890)}
{pt3dadd(132048.000000,126876.000000,160500.000000,204.889886)}
{pt3dadd(132192.000000,126996.000000,160525.000000,198.057504)}
{pt3dadd(132372.000000,127008.000000,160475.000000,193.858736)}
{pt3dadd(132516.000000,127092.000000,160525.000000,195.688328)}
{pt3dadd(132672.000000,127176.000000,160600.000000,159.100213)}
{pt3dadd(132852.000000,127212.000000,160600.000000,136.604020)}

{create adhoc117}
{access adhoc117}
{connect adhoc117(1), adhoc115(0)}
{nseg = 1}
{strdef color color = "White"}
{pt3dclear()}
{pt3dadd(134916.000000,127716.000000,160300.000000,162.450490)}
{pt3dadd(135288.000000,127884.000000,160225.000000,128.175442)}
{pt3dadd(135672.000000,127836.000000,160075.000000,121.528153)}
{pt3dadd(135768.000000,127704.000000,159925.000000,110.473524)}
{pt3dadd(136008.000000,127512.000000,159775.000000,108.693563)}
{pt3dadd(136236.000000,127356.000000,159600.000000,108.693563)}
{pt3dadd(136596.000000,127044.000000,159250.000000,102.095684)}
{pt3dadd(136740.000000,126864.000000,159250.000000,110.379956)}
{pt3dadd(136872.000000,126636.000000,159250.000000,110.379956)}
{pt3dadd(137064.000000,126504.000000,159250.000000,111.545918)}
{pt3dadd(137460.000000,126264.000000,159475.000000,117.645858)}
{pt3dadd(137496.000000,126240.000000,159775.000000,128.902563)}
{pt3dadd(137424.000000,126192.000000,160150.000000,125.241179)}
{pt3dadd(137340.000000,126096.000000,160450.000000,120.623638)}
{pt3dadd(137184.000000,125868.000000,160725.000000,119.457676)}
{pt3dadd(137136.000000,125628.000000,161025.000000,116.249292)}
{pt3dadd(137244.000000,125448.000000,161325.000000,103.907817)}
{pt3dadd(137004.000000,125412.000000,161625.000000,146.408570)}

{create adhoc118}
{access adhoc118}
{connect adhoc118(1), adhoc100(0)}
{nseg = 1}
{strdef color color = "White"}
{pt3dclear()}
{pt3dadd(141660.000000,127440.000000,162700.000000,303.143300)}
{pt3dadd(141552.000000,126960.000000,162700.000000,274.193407)}
{pt3dadd(141600.000000,126648.000000,162625.000000,288.356294)}
{pt3dadd(141540.000000,126408.000000,162625.000000,292.707828)}
{pt3dadd(141552.000000,126120.000000,162725.000000,304.090712)}
{pt3dadd(141540.000000,125856.000000,162800.000000,297.017388)}
{pt3dadd(141492.000000,125592.000000,162825.000000,297.017388)}
{pt3dadd(141468.000000,125328.000000,162775.000000,365.982308)}
{pt3dadd(141528.000000,125064.000000,162850.000000,368.273824)}
{pt3dadd(141612.000000,124812.000000,162950.000000,353.593098)}
{pt3dadd(141588.000000,124548.000000,163050.000000,371.005008)}
{pt3dadd(141516.000000,124320.000000,163125.000000,383.733298)}
{pt3dadd(141240.000000,123936.000000,163275.000000,335.474746)}
{pt3dadd(141120.000000,123684.000000,163275.000000,345.477944)}
{pt3dadd(141012.000000,123432.000000,163375.000000,379.530010)}
{pt3dadd(141084.000000,123264.000000,163500.000000,397.371008)}
{pt3dadd(141156.000000,123036.000000,163550.000000,375.934436)}
{pt3dadd(141216.000000,122796.000000,163500.000000,373.302168)}
{pt3dadd(141204.000000,122544.000000,163550.000000,361.007454)}
{pt3dadd(141204.000000,122292.000000,163500.000000,335.649062)}
{pt3dadd(141264.000000,122076.000000,163500.000000,327.470510)}
{pt3dadd(141180.000000,121848.000000,163450.000000,357.672642)}
{pt3dadd(140964.000000,121692.000000,163375.000000,343.658662)}
{pt3dadd(140712.000000,121548.000000,163275.000000,361.499660)}
{pt3dadd(140400.000000,121404.000000,163225.000000,395.623612)}
{pt3dadd(140268.000000,121236.000000,163250.000000,383.747702)}
{pt3dadd(140124.000000,121080.000000,163325.000000,390.589137)}
{pt3dadd(139944.000000,120912.000000,163325.000000,313.833650)}

{create adhoc119}
{access adhoc119}
{connect adhoc119(1), adhoc118(0)}
{nseg = 1}
{strdef color color = "White"}
{pt3dclear()}
{pt3dadd(139944.000000,120912.000000,163325.000000,313.833650)}
{pt3dadd(139356.000000,120468.000000,163125.000000,214.953523)}
{pt3dadd(139140.000000,119892.000000,162900.000000,199.664424)}
{pt3dadd(139272.000000,119568.000000,162675.000000,172.947712)}
{pt3dadd(139224.000000,119484.000000,162400.000000,176.386368)}
{pt3dadd(139452.000000,119040.000000,162125.000000,167.954506)}
{pt3dadd(139548.000000,118548.000000,161875.000000,164.164004)}
{pt3dadd(139692.000000,117840.000000,161775.000000,154.136772)}
{pt3dadd(139704.000000,117372.000000,161600.000000,162.469534)}
{pt3dadd(139620.000000,116976.000000,161350.000000,168.762260)}
{pt3dadd(139584.000000,116772.000000,161175.000000,221.913900)}

{create adhoc120}
{access adhoc120}
{connect adhoc120(1), adhoc119(0)}
{nseg = 1}
{strdef color color = "White"}
{pt3dclear()}
{pt3dadd(139584.000000,116772.000000,161175.000000,221.913900)}
{pt3dadd(139608.000000,116532.000000,160950.000000,219.190810)}
{pt3dadd(139788.000000,116088.000000,160875.000000,247.106460)}
{pt3dadd(139932.000000,115692.000000,160900.000000,240.045000)}
{pt3dadd(140076.000000,115452.000000,160975.000000,238.183708)}
{pt3dadd(140232.000000,115176.000000,161000.000000,275.337650)}
{pt3dadd(140244.000000,114936.000000,161075.000000,264.257038)}
{pt3dadd(140172.000000,114684.000000,161125.000000,269.291528)}
{pt3dadd(140400.000000,114504.000000,161100.000000,282.952632)}
{pt3dadd(140484.000000,114300.000000,161100.000000,282.952632)}
{pt3dadd(140412.000000,114108.000000,161175.000000,276.075322)}
{pt3dadd(140460.000000,113880.000000,161100.000000,247.826226)}
{pt3dadd(140568.000000,113676.000000,161025.000000,222.335014)}
{pt3dadd(140520.000000,113424.000000,161025.000000,236.332784)}
{pt3dadd(140544.000000,113292.000000,160700.000000,272.318028)}
{pt3dadd(140544.000000,113040.000000,160700.000000,284.193938)}
{pt3dadd(140532.000000,112716.000000,160600.000000,328.522246)}
{pt3dadd(140532.000000,112524.000000,160425.000000,396.751400)}
{pt3dadd(140784.000000,112308.000000,160375.000000,373.213200)}

{create adhoc121}
{access adhoc121}
{connect adhoc121(1), adhoc120(0)}
{nseg = 1}
{strdef color color = "White"}
{pt3dclear()}
{pt3dadd(140784.000000,112308.000000,160375.000000,373.213200)}
{pt3dadd(140856.000000,112092.000000,160325.000000,267.779353)}
{pt3dadd(140460.000000,112416.000000,160025.000000,156.916820)}

{create adhoc122}
{access adhoc122}
{connect adhoc122(1), adhoc120(0)}
{nseg = 1}
{strdef color color = "White"}
{pt3dclear()}
{pt3dadd(140784.000000,112308.000000,160375.000000,373.213200)}
{pt3dadd(139992.000000,112488.000000,160300.000000,174.426078)}
{pt3dadd(139776.000000,112512.000000,160300.000000,146.391907)}
{pt3dadd(139668.000000,112644.000000,160300.000000,97.240479)}
{pt3dadd(139440.000000,112824.000000,160375.000000,112.045787)}
{pt3dadd(139332.000000,112968.000000,160475.000000,127.456060)}

{create adhoc123}
{access adhoc123}
{connect adhoc123(1), adhoc119(0)}
{nseg = 1}
{strdef color color = "White"}
{pt3dclear()}
{pt3dadd(139584.000000,116772.000000,161175.000000,221.913900)}
{pt3dadd(139236.000000,116964.000000,161500.000000,127.199183)}
{pt3dadd(139200.000000,116916.000000,161825.000000,78.458410)}

{create adhoc124}
{access adhoc124}
{connect adhoc124(1), adhoc118(0)}
{nseg = 1}
{strdef color color = "White"}
{pt3dclear()}
{pt3dadd(139944.000000,120912.000000,163325.000000,313.833650)}
{pt3dadd(138756.000000,120900.000000,163625.000000,214.541647)}
{pt3dadd(138192.000000,120960.000000,163800.000000,200.825024)}
{pt3dadd(137712.000000,120900.000000,163975.000000,176.695748)}
{pt3dadd(137160.000000,120912.000000,164100.000000,176.695748)}
{pt3dadd(136644.000000,120948.000000,164275.000000,160.249684)}
{pt3dadd(136224.000000,120936.000000,164450.000000,142.224675)}
{pt3dadd(135948.000000,120900.000000,164425.000000,126.174657)}
{pt3dadd(135684.000000,120876.000000,164425.000000,123.587221)}
{pt3dadd(135432.000000,120900.000000,164425.000000,121.757629)}
{pt3dadd(135108.000000,120888.000000,164425.000000,122.540206)}
{pt3dadd(134832.000000,120876.000000,164425.000000,144.515197)}
{pt3dadd(134616.000000,120864.000000,164425.000000,140.760245)}
{pt3dadd(134352.000000,120900.000000,164650.000000,128.494369)}
{pt3dadd(133932.000000,120876.000000,164800.000000,137.825177)}
{pt3dadd(133644.000000,120852.000000,165000.000000,143.135482)}
{pt3dadd(133392.000000,120840.000000,165000.000000,127.758370)}
{pt3dadd(133104.000000,120936.000000,164900.000000,170.076750)}
{pt3dadd(132744.000000,120948.000000,164900.000000,171.783820)}
{pt3dadd(132408.000000,121128.000000,164750.000000,168.345164)}
{pt3dadd(132072.000000,121296.000000,164750.000000,172.550990)}
{pt3dadd(131712.000000,121560.000000,164725.000000,208.556762)}
{pt3dadd(131184.000000,121608.000000,164575.000000,217.265044)}
{pt3dadd(130908.000000,121632.000000,164400.000000,248.342372)}
{pt3dadd(130908.000000,121512.000000,164200.000000,271.600616)}
{pt3dadd(130716.000000,121500.000000,163900.000000,304.090712)}
{pt3dadd(129984.000000,121320.000000,163750.000000,266.436019)}
{pt3dadd(129636.000000,121092.000000,163525.000000,237.659615)}
{pt3dadd(129348.000000,120828.000000,163425.000000,114.869835)}

{create adhoc125}
{access adhoc125}
{connect adhoc125(1), adhoc69(0)}
{nseg = 1}
{strdef color color = "White"}
{pt3dclear()}
{pt3dadd(143136.000000,131424.000000,159825.000000,527.803160)}
{pt3dadd(143952.000000,131784.000000,159925.000000,240.542760)}
{pt3dadd(144528.000000,131628.000000,159925.000000,204.136558)}
{pt3dadd(144744.000000,131532.000000,159775.000000,117.894653)}
{pt3dadd(145176.000000,131388.000000,159825.000000,108.428931)}
{pt3dadd(145572.000000,131424.000000,160050.000000,115.722264)}
{pt3dadd(145908.000000,131376.000000,160275.000000,116.685732)}
{pt3dadd(146268.000000,131376.000000,160400.000000,119.017654)}
{pt3dadd(146508.000000,131292.000000,160625.000000,140.902935)}
{pt3dadd(146604.000000,131148.000000,160775.000000,174.110100)}

{create adhoc126}
{access adhoc126}
{connect adhoc126(1), adhoc125(0)}
{nseg = 1}
{strdef color color = "White"}
{pt3dclear()}
{pt3dadd(146604.000000,131148.000000,160775.000000,174.110100)}
{pt3dadd(147216.000000,130884.000000,161000.000000,119.399913)}
{pt3dadd(147432.000000,130404.000000,161000.000000,100.000000)}

{create adhoc127}
{access adhoc127}
{connect adhoc127(1), adhoc126(0)}
{nseg = 1}
{strdef color color = "White"}
{pt3dclear()}
{pt3dadd(147432.000000,130404.000000,161000.000000,100.000000)}
{pt3dadd(147528.000000,130548.000000,160650.000000,84.089640)}

{create adhoc128}
{access adhoc128}
{connect adhoc128(1), adhoc126(0)}
{nseg = 1}
{strdef color color = "White"}
{pt3dclear()}
{pt3dadd(147432.000000,130404.000000,161000.000000,100.000000)}
{pt3dadd(147540.000000,130164.000000,161125.000000,117.861972)}
{pt3dadd(147624.000000,129744.000000,161125.000000,102.402594)}
{pt3dadd(147480.000000,129576.000000,161050.000000,103.107892)}
{pt3dadd(147324.000000,129384.000000,161050.000000,107.163635)}
{pt3dadd(147180.000000,129192.000000,161050.000000,99.761520)}
{pt3dadd(147432.000000,128880.000000,160750.000000,127.456060)}

{create adhoc129}
{access adhoc129}
{connect adhoc129(1), adhoc128(0)}
{nseg = 1}
{strdef color color = "White"}
{pt3dclear()}
{pt3dadd(147432.000000,128880.000000,160750.000000,127.456060)}
{pt3dadd(147516.000000,128988.000000,160450.000000,84.089640)}

{create adhoc130}
{access adhoc130}
{connect adhoc130(1), adhoc128(0)}
{nseg = 1}
{strdef color color = "White"}
{pt3dclear()}
{pt3dadd(147432.000000,128880.000000,160750.000000,127.456060)}
{pt3dadd(147192.000000,128484.000000,160650.000000,108.095283)}
{pt3dadd(147012.000000,128088.000000,160775.000000,99.209512)}
{pt3dadd(146916.000000,127644.000000,160775.000000,97.502442)}
{pt3dadd(146964.000000,127548.000000,160600.000000,97.502442)}
{pt3dadd(147000.000000,127452.000000,160275.000000,98.160509)}
{pt3dadd(147096.000000,127536.000000,159975.000000,132.280165)}
{pt3dadd(147204.000000,127596.000000,159625.000000,156.588483)}
{pt3dadd(147120.000000,128076.000000,159475.000000,159.194499)}
{pt3dadd(146844.000000,128316.000000,159250.000000,169.872565)}
{pt3dadd(146796.000000,128484.000000,158950.000000,162.955870)}
{pt3dadd(146616.000000,128808.000000,158900.000000,156.916820)}

{create adhoc131}
{access adhoc131}
{connect adhoc131(1), adhoc130(0)}
{nseg = 1}
{strdef color color = "White"}
{pt3dclear()}
{pt3dadd(146616.000000,128808.000000,158900.000000,156.916820)}
{pt3dadd(146232.000000,129096.000000,159000.000000,183.891687)}
{pt3dadd(145968.000000,129444.000000,159125.000000,182.478352)}
{pt3dadd(145488.000000,129768.000000,159350.000000,199.519373)}
{pt3dadd(145296.000000,130032.000000,159575.000000,186.606600)}

{create adhoc132}
{access adhoc132}
{connect adhoc132(1), adhoc130(0)}
{nseg = 1}
{strdef color color = "White"}
{pt3dclear()}
{pt3dadd(146616.000000,128808.000000,158900.000000,156.916820)}
{pt3dadd(147108.000000,128544.000000,158625.000000,195.208733)}
{pt3dadd(147360.000000,128484.000000,158400.000000,240.508840)}
{pt3dadd(147300.000000,128352.000000,158125.000000,292.817140)}

{create adhoc133}
{access adhoc133}
{connect adhoc133(1), adhoc132(0)}
{nseg = 1}
{strdef color color = "White"}
{pt3dclear()}
{pt3dadd(147300.000000,128352.000000,158125.000000,292.817140)}
{pt3dadd(147780.000000,128316.000000,157925.000000,232.713360)}
{pt3dadd(147816.000000,128136.000000,157650.000000,173.856954)}
{pt3dadd(147840.000000,128004.000000,157350.000000,148.929382)}
{pt3dadd(147864.000000,128124.000000,157025.000000,150.790674)}
{pt3dadd(147612.000000,128268.000000,156600.000000,176.147457)}
{pt3dadd(147840.000000,128316.000000,156400.000000,273.208040)}

{create adhoc134}
{access adhoc134}
{connect adhoc134(1), adhoc132(0)}
{nseg = 1}
{strdef color color = "White"}
{pt3dclear()}
{pt3dadd(147300.000000,128352.000000,158125.000000,292.817140)}
{pt3dadd(146760.000000,128100.000000,157975.000000,205.342587)}
{pt3dadd(146640.000000,127824.000000,157750.000000,170.337812)}
{pt3dadd(146592.000000,127608.000000,157500.000000,127.466066)}
{pt3dadd(146460.000000,127368.000000,157250.000000,143.016200)}
{pt3dadd(146316.000000,127140.000000,156950.000000,125.634247)}
{pt3dadd(145968.000000,126924.000000,156850.000000,214.354690)}

{create adhoc135}
{access adhoc135}
{connect adhoc135(1), adhoc125(0)}
{nseg = 1}
{strdef color color = "White"}
{pt3dclear()}
{pt3dadd(146604.000000,131148.000000,160775.000000,174.110100)}
{pt3dadd(146496.000000,131244.000000,161050.000000,148.268780)}
{pt3dadd(146484.000000,131148.000000,161375.000000,84.089640)}

{create adhoc136}
{access adhoc136}
{connect adhoc136(1), adhoc68(0)}
{nseg = 1}
{strdef color color = "White"}
{pt3dclear()}
{pt3dadd(143244.000000,132312.000000,158500.000000,509.824250)}
{pt3dadd(144012.000000,132540.000000,158600.000000,255.053197)}
{pt3dadd(144432.000000,132744.000000,158550.000000,225.175258)}
{pt3dadd(144876.000000,132828.000000,158350.000000,156.846264)}
{pt3dadd(145356.000000,132960.000000,158200.000000,176.298660)}
{pt3dadd(145812.000000,133044.000000,158225.000000,168.179280)}

{create adhoc137}
{access adhoc137}
{connect adhoc137(1), adhoc136(0)}
{nseg = 1}
{strdef color color = "White"}
{pt3dclear()}
{pt3dadd(145812.000000,133044.000000,158225.000000,168.179280)}
{pt3dadd(146376.000000,133404.000000,158500.000000,194.177990)}
{pt3dadd(146592.000000,133308.000000,158725.000000,200.000000)}

{create adhoc138}
{access adhoc138}
{connect adhoc138(1), adhoc137(0)}
{nseg = 1}
{strdef color color = "White"}
{pt3dclear()}
{pt3dadd(146592.000000,133308.000000,158725.000000,200.000000)}
{pt3dadd(147084.000000,132804.000000,158625.000000,175.032033)}
{pt3dadd(147324.000000,132624.000000,158625.000000,150.184577)}
{pt3dadd(147660.000000,132552.000000,158575.000000,135.675789)}
{pt3dadd(148260.000000,132288.000000,158450.000000,126.483815)}
{pt3dadd(148332.000000,131856.000000,158275.000000,125.338057)}
{pt3dadd(148620.000000,131760.000000,158100.000000,177.006730)}
{pt3dadd(149028.000000,131496.000000,157925.000000,215.540213)}
{pt3dadd(149256.000000,131316.000000,157650.000000,373.213200)}

{create adhoc139}
{access adhoc139}
{connect adhoc139(1), adhoc137(0)}
{nseg = 1}
{strdef color color = "White"}
{pt3dclear()}
{pt3dadd(146592.000000,133308.000000,158725.000000,200.000000)}
{pt3dadd(146460.000000,133656.000000,158950.000000,151.841577)}
{pt3dadd(146604.000000,133884.000000,159200.000000,129.129955)}
{pt3dadd(146580.000000,134220.000000,159425.000000,107.154964)}
{pt3dadd(146616.000000,134376.000000,159675.000000,102.025550)}
{pt3dadd(146568.000000,134604.000000,159925.000000,95.059336)}
{pt3dadd(146604.000000,134592.000000,160200.000000,93.719996)}
{pt3dadd(146472.000000,134736.000000,160525.000000,103.015791)}
{pt3dadd(146580.000000,134652.000000,160825.000000,119.812802)}
{pt3dadd(146772.000000,134496.000000,161125.000000,125.905684)}
{pt3dadd(147012.000000,134196.000000,161475.000000,132.061723)}
{pt3dadd(147420.000000,133992.000000,161825.000000,143.715395)}
{pt3dadd(147384.000000,133836.000000,162200.000000,133.212519)}
{pt3dadd(147444.000000,133848.000000,162650.000000,113.031356)}
{pt3dadd(147648.000000,133992.000000,162900.000000,141.315624)}
{pt3dadd(147984.000000,134304.000000,163200.000000,162.724437)}
{pt3dadd(148140.000000,134496.000000,163550.000000,155.384072)}
{pt3dadd(148332.000000,134616.000000,163850.000000,165.886948)}
{pt3dadd(148536.000000,134760.000000,164150.000000,172.681560)}
{pt3dadd(148248.000000,135060.000000,164450.000000,134.773680)}
{pt3dadd(148104.000000,135276.000000,164625.000000,111.826369)}
{pt3dadd(147792.000000,135504.000000,164850.000000,102.552663)}
{pt3dadd(147708.000000,135600.000000,165100.000000,107.177345)}

{create adhoc140}
{access adhoc140}
{connect adhoc140(1), adhoc136(0)}
{nseg = 1}
{strdef color color = "White"}
{pt3dclear()}
{pt3dadd(145812.000000,133044.000000,158225.000000,168.179280)}
{pt3dadd(145488.000000,133008.000000,157875.000000,196.172753)}
{pt3dadd(145116.000000,132996.000000,157675.000000,174.110100)}

{create adhoc141}
{access adhoc141}
{connect adhoc141(1), adhoc67(0)}
{nseg = 1}
{strdef color color = "White"}
{pt3dclear()}
{pt3dadd(141432.000000,132936.000000,157325.000000,746.426400)}
{pt3dadd(141432.000000,132372.000000,158175.000000,679.532767)}
{pt3dadd(141192.000000,132144.000000,158375.000000,542.361268)}
{pt3dadd(140940.000000,131904.000000,158475.000000,348.807080)}
{pt3dadd(140760.000000,131724.000000,158475.000000,400.000000)}

{create adhoc142}
{access adhoc142}
{connect adhoc142(1), adhoc141(0)}
{nseg = 1}
{strdef color color = "White"}
{pt3dclear()}
{pt3dadd(140760.000000,131724.000000,158475.000000,400.000000)}
{pt3dadd(140316.000000,131736.000000,158475.000000,219.681375)}
{pt3dadd(139992.000000,131820.000000,158475.000000,239.230749)}
{pt3dadd(139656.000000,131940.000000,158475.000000,217.794177)}
{pt3dadd(139368.000000,131940.000000,158575.000000,259.104110)}
{pt3dadd(139140.000000,131928.000000,158575.000000,270.996792)}
{pt3dadd(138912.000000,132036.000000,158600.000000,247.738548)}
{pt3dadd(138588.000000,132072.000000,158750.000000,227.324673)}
{pt3dadd(138252.000000,132072.000000,158750.000000,156.916820)}

{create adhoc143}
{access adhoc143}
{connect adhoc143(1), adhoc142(0)}
{nseg = 1}
{strdef color color = "White"}
{pt3dclear()}
{pt3dadd(138252.000000,132072.000000,158750.000000,156.916820)}
{pt3dadd(138408.000000,132348.000000,159000.000000,151.990443)}
{pt3dadd(138360.000000,132612.000000,159025.000000,145.875754)}
{pt3dadd(138252.000000,132924.000000,159025.000000,135.197688)}
{pt3dadd(138108.000000,133164.000000,159025.000000,137.529610)}
{pt3dadd(137976.000000,133344.000000,159025.000000,148.846260)}
{pt3dadd(137628.000000,133320.000000,158925.000000,156.969202)}
{pt3dadd(137340.000000,133440.000000,158925.000000,153.760818)}
{pt3dadd(137328.000000,134076.000000,158750.000000,151.716180)}
{pt3dadd(137568.000000,134304.000000,158550.000000,130.427843)}
{pt3dadd(137736.000000,134400.000000,158525.000000,93.303300)}

{create adhoc144}
{access adhoc144}
{connect adhoc144(1), adhoc142(0)}
{nseg = 1}
{strdef color color = "White"}
{pt3dclear()}
{pt3dadd(138252.000000,132072.000000,158750.000000,156.916820)}
{pt3dadd(137748.000000,131928.000000,158875.000000,173.122437)}
{pt3dadd(137388.000000,131856.000000,159125.000000,195.990176)}
{pt3dadd(137196.000000,131892.000000,159400.000000,213.852588)}
{pt3dadd(136872.000000,131568.000000,159650.000000,234.481248)}
{pt3dadd(136632.000000,131268.000000,159675.000000,300.482702)}
{pt3dadd(136452.000000,131196.000000,159750.000000,283.727024)}
{pt3dadd(136308.000000,130992.000000,159850.000000,269.140358)}
{pt3dadd(136164.000000,130812.000000,159825.000000,248.178854)}
{pt3dadd(136092.000000,130524.000000,159675.000000,230.421132)}
{pt3dadd(135924.000000,130344.000000,159750.000000,166.751600)}
{pt3dadd(135756.000000,129900.000000,159500.000000,175.672098)}
{pt3dadd(135528.000000,129636.000000,159550.000000,193.335760)}
{pt3dadd(135264.000000,129372.000000,159475.000000,192.372292)}
{pt3dadd(135036.000000,129216.000000,159375.000000,210.130014)}
{pt3dadd(134820.000000,129072.000000,159300.000000,229.949602)}
{pt3dadd(134724.000000,128616.000000,159300.000000,225.860326)}
{pt3dadd(134448.000000,128316.000000,159300.000000,225.860326)}
{pt3dadd(134292.000000,128232.000000,159100.000000,231.029620)}
{pt3dadd(134100.000000,128004.000000,159100.000000,228.964388)}
{pt3dadd(133908.000000,127680.000000,159100.000000,228.964388)}
{pt3dadd(133716.000000,127344.000000,159100.000000,254.409798)}
{pt3dadd(133524.000000,127008.000000,159100.000000,254.409798)}
{pt3dadd(133560.000000,126564.000000,158875.000000,266.302480)}
{pt3dadd(133788.000000,126072.000000,158700.000000,279.839088)}
{pt3dadd(133956.000000,125352.000000,158500.000000,323.689032)}
{pt3dadd(134088.000000,124812.000000,158400.000000,358.290613)}
{pt3dadd(133968.000000,124356.000000,158300.000000,492.457760)}

{create adhoc145}
{access adhoc145}
{connect adhoc145(1), adhoc144(0)}
{nseg = 1}
{strdef color color = "White"}
{pt3dclear()}
{pt3dadd(133968.000000,124356.000000,158300.000000,492.457760)}
{pt3dadd(134340.000000,124104.000000,158550.000000,280.504950)}
{pt3dadd(134604.000000,124008.000000,158550.000000,209.301946)}
{pt3dadd(134652.000000,123780.000000,158675.000000,134.594536)}
{pt3dadd(134844.000000,123648.000000,158675.000000,162.733098)}
{pt3dadd(135132.000000,123564.000000,158675.000000,150.034666)}
{pt3dadd(135408.000000,123396.000000,158675.000000,154.201047)}
{pt3dadd(135672.000000,123252.000000,158675.000000,155.011222)}
{pt3dadd(135960.000000,123204.000000,158675.000000,145.369216)}
{pt3dadd(136392.000000,123216.000000,158675.000000,108.524698)}
{pt3dadd(136740.000000,123312.000000,158675.000000,104.607108)}
{pt3dadd(137028.000000,123504.000000,158675.000000,107.038606)}
{pt3dadd(137496.000000,123732.000000,158500.000000,96.914866)}
{pt3dadd(137820.000000,123876.000000,158250.000000,127.155510)}
{pt3dadd(138192.000000,123936.000000,158000.000000,132.653082)}
{pt3dadd(138576.000000,123996.000000,157750.000000,145.541493)}
{pt3dadd(138420.000000,124560.000000,157450.000000,146.408570)}

{create adhoc146}
{access adhoc146}
{connect adhoc146(1), adhoc144(0)}
{nseg = 1}
{strdef color color = "White"}
{pt3dclear()}
{pt3dadd(133968.000000,124356.000000,158300.000000,492.457760)}
{pt3dadd(133344.000000,124248.000000,158250.000000,384.572427)}
{pt3dadd(132816.000000,124044.000000,158500.000000,392.001738)}
{pt3dadd(131988.000000,124080.000000,158650.000000,380.883320)}
{pt3dadd(131448.000000,123996.000000,158825.000000,313.833650)}

{create adhoc147}
{access adhoc147}
{connect adhoc147(1), adhoc146(0)}
{nseg = 1}
{strdef color color = "White"}
{pt3dclear()}
{pt3dadd(131448.000000,123996.000000,158825.000000,313.833650)}
{pt3dadd(131268.000000,123588.000000,158450.000000,200.554527)}
{pt3dadd(131280.000000,123264.000000,158200.000000,129.276643)}
{pt3dadd(131400.000000,123348.000000,158100.000000,100.000000)}

{create adhoc148}
{access adhoc148}
{connect adhoc148(1), adhoc146(0)}
{nseg = 1}
{strdef color color = "White"}
{pt3dclear()}
{pt3dadd(131448.000000,123996.000000,158825.000000,313.833650)}
{pt3dadd(130968.000000,124044.000000,159025.000000,248.638170)}
{pt3dadd(130956.000000,123888.000000,159125.000000,221.996490)}
{pt3dadd(130752.000000,123552.000000,159075.000000,197.867214)}
{pt3dadd(130416.000000,123420.000000,159225.000000,214.730938)}
{pt3dadd(130272.000000,123324.000000,159475.000000,215.917102)}
{pt3dadd(130236.000000,123084.000000,159700.000000,262.438784)}
{pt3dadd(130260.000000,122460.000000,159800.000000,304.361796)}
{pt3dadd(130164.000000,122400.000000,160050.000000,357.620210)}
{pt3dadd(130044.000000,122412.000000,160250.000000,401.113250)}
{pt3dadd(129912.000000,122376.000000,160400.000000,452.033106)}
{pt3dadd(129768.000000,122352.000000,160550.000000,449.895036)}
{pt3dadd(129636.000000,122292.000000,160725.000000,388.724804)}
{pt3dadd(129684.000000,122160.000000,160875.000000,306.153093)}
{pt3dadd(129588.000000,122100.000000,160950.000000,186.606600)}

{create adhoc149}
{access adhoc149}
{connect adhoc149(1), adhoc141(0)}
{nseg = 1}
{strdef color color = "White"}
{pt3dclear()}
{pt3dadd(140760.000000,131724.000000,158475.000000,400.000000)}
{pt3dadd(140856.000000,131208.000000,158475.000000,276.236460)}
{pt3dadd(141000.000000,130884.000000,158275.000000,246.371016)}
{pt3dadd(141276.000000,130560.000000,158150.000000,203.692336)}
{pt3dadd(141624.000000,130056.000000,157900.000000,196.871416)}
{pt3dadd(141840.000000,129696.000000,157650.000000,255.965328)}
{pt3dadd(142092.000000,129288.000000,157475.000000,254.287836)}
{pt3dadd(142224.000000,128928.000000,157475.000000,328.465104)}
{pt3dadd(142344.000000,128664.000000,157475.000000,347.712324)}
{pt3dadd(142428.000000,128388.000000,157300.000000,338.983110)}
{pt3dadd(142428.000000,127644.000000,157125.000000,288.000684)}
{pt3dadd(142560.000000,126972.000000,156975.000000,277.753720)}
{pt3dadd(142860.000000,126636.000000,156925.000000,219.761372)}
{pt3dadd(143148.000000,126360.000000,156750.000000,192.474546)}
{pt3dadd(143916.000000,126264.000000,156550.000000,203.791196)}
{pt3dadd(144492.000000,126576.000000,156425.000000,182.090486)}
{pt3dadd(144792.000000,126624.000000,156425.000000,190.717100)}
{pt3dadd(145056.000000,126732.000000,156425.000000,190.717100)}
{pt3dadd(145356.000000,126816.000000,156425.000000,185.219528)}
{pt3dadd(145584.000000,126912.000000,156200.000000,189.453012)}
{pt3dadd(146124.000000,126888.000000,156375.000000,203.042236)}
{pt3dadd(146580.000000,126924.000000,156375.000000,193.144320)}
{pt3dadd(146976.000000,127008.000000,156625.000000,234.341596)}
{pt3dadd(147432.000000,127020.000000,156825.000000,261.539878)}
{pt3dadd(147912.000000,126912.000000,157050.000000,238.668940)}
{pt3dadd(148368.000000,126828.000000,157225.000000,224.082274)}
{pt3dadd(148728.000000,126492.000000,157225.000000,213.523468)}
{pt3dadd(149064.000000,126528.000000,157225.000000,155.072240)}
{pt3dadd(149388.000000,126660.000000,157225.000000,129.581028)}
{pt3dadd(149664.000000,126708.000000,157225.000000,135.971186)}
{pt3dadd(149952.000000,126756.000000,157225.000000,127.686914)}
{pt3dadd(150228.000000,126732.000000,157225.000000,139.517022)}
{pt3dadd(150948.000000,126480.000000,157400.000000,138.484404)}
{pt3dadd(151140.000000,126480.000000,157525.000000,145.483290)}
{pt3dadd(151512.000000,126336.000000,157675.000000,161.964070)}
{pt3dadd(151896.000000,126252.000000,157925.000000,174.404583)}
{pt3dadd(152232.000000,126024.000000,158125.000000,214.354690)}

{create adhoc150}
{access adhoc150}
{connect adhoc150(1), adhoc149(0)}
{nseg = 1}
{strdef color color = "White"}
{pt3dclear()}
{pt3dadd(152232.000000,126024.000000,158125.000000,214.354690)}
{pt3dadd(152388.000000,125460.000000,158150.000000,142.162243)}
{pt3dadd(152436.000000,125244.000000,158150.000000,94.280907)}
{pt3dadd(152388.000000,124968.000000,158150.000000,70.710680)}

{create adhoc151}
{access adhoc151}
{connect adhoc151(1), adhoc149(0)}
{nseg = 1}
{strdef color color = "White"}
{pt3dclear()}
{pt3dadd(152232.000000,126024.000000,158125.000000,214.354690)}
{pt3dadd(152472.000000,126096.000000,158125.000000,153.664127)}
{pt3dadd(152424.000000,126276.000000,158275.000000,138.272323)}
{pt3dadd(152172.000000,126336.000000,158575.000000,168.179280)}

{create adhoc152}
{access adhoc152}
{connect adhoc152(1), adhoc36(0)}
{nseg = 1}
{strdef color color = "White"}
{pt3dclear()}
{pt3dadd(134592.000000,138264.000000,155025.000000,1212.573200)}
{pt3dadd(134496.000000,138336.000000,154850.000000,1380.360933)}
{pt3dadd(134388.000000,138408.000000,154625.000000,1313.537200)}
{pt3dadd(134280.000000,138468.000000,154400.000000,1322.089480)}
{pt3dadd(134196.000000,138600.000000,154150.000000,1251.061860)}
{pt3dadd(134184.000000,138780.000000,153950.000000,1222.582500)}
{pt3dadd(134184.000000,138960.000000,153725.000000,1190.082020)}
{pt3dadd(134136.000000,139140.000000,153500.000000,1159.758000)}
{pt3dadd(134076.000000,139284.000000,153250.000000,1142.944800)}
{pt3dadd(133836.000000,139680.000000,153000.000000,1167.737560)}
{pt3dadd(133800.000000,139752.000000,152675.000000,1111.746480)}
{pt3dadd(133764.000000,139788.000000,152500.000000,1153.100820)}
{pt3dadd(133728.000000,139836.000000,152375.000000,1183.424840)}
{pt3dadd(133668.000000,139908.000000,152250.000000,1167.737560)}
{pt3dadd(133572.000000,140028.000000,152125.000000,1176.591420)}
{pt3dadd(133488.000000,140148.000000,151975.000000,1232.582500)}
{pt3dadd(133500.000000,140328.000000,151825.000000,1251.237900)}
{pt3dadd(133500.000000,140496.000000,151650.000000,1330.696233)}
{pt3dadd(133500.000000,140652.000000,151475.000000,1392.880900)}

{create adhoc153}
{access adhoc153}
{connect adhoc153(1), adhoc152(0)}
{nseg = 1}
{strdef color color = "White"}
{pt3dclear()}
{pt3dadd(133500.000000,140652.000000,151475.000000,1392.880900)}
{pt3dadd(133440.000000,140628.000000,151175.000000,1259.862100)}
{pt3dadd(133536.000000,140772.000000,150850.000000,1232.685620)}
{pt3dadd(133572.000000,140988.000000,150625.000000,1188.363160)}
{pt3dadd(133464.000000,141144.000000,150400.000000,1171.549960)}
{pt3dadd(133368.000000,141408.000000,150150.000000,1205.196580)}
{pt3dadd(133272.000000,141720.000000,149975.000000,1167.925960)}
{pt3dadd(133296.000000,141852.000000,149725.000000,1129.341020)}
{pt3dadd(133200.000000,141948.000000,149500.000000,1136.571380)}
{pt3dadd(133008.000000,142176.000000,149250.000000,1128.591820)}
{pt3dadd(132864.000000,142488.000000,149050.000000,1111.185680)}
{pt3dadd(132756.000000,142656.000000,148875.000000,1174.123360)}
{pt3dadd(132648.000000,142776.000000,148675.000000,1204.447380)}
{pt3dadd(132588.000000,142764.000000,148500.000000,1270.749400)}
{pt3dadd(132564.000000,142908.000000,148325.000000,1313.562080)}
{pt3dadd(132576.000000,143064.000000,148150.000000,1330.968220)}
{pt3dadd(132720.000000,143220.000000,147925.000000,1340.134280)}
{pt3dadd(132768.000000,143232.000000,147725.000000,1365.801340)}
{pt3dadd(132816.000000,143268.000000,147550.000000,1314.880667)}
{pt3dadd(132816.000000,143436.000000,147325.000000,1299.603900)}

{create adhoc154}
{access adhoc154}
{connect adhoc154(1), adhoc153(0)}
{nseg = 1}
{strdef color color = "White"}
{pt3dclear()}
{pt3dadd(132816.000000,143436.000000,147325.000000,1299.603900)}
{pt3dadd(132900.000000,143412.000000,147050.000000,1300.124233)}
{pt3dadd(132804.000000,143556.000000,146850.000000,1309.717640)}
{pt3dadd(132684.000000,143760.000000,146700.000000,1300.863780)}
{pt3dadd(132552.000000,143952.000000,146550.000000,1328.373040)}
{pt3dadd(132780.000000,143976.000000,146350.000000,1277.852640)}
{pt3dadd(132840.000000,143988.000000,146175.000000,1277.852640)}
{pt3dadd(132828.000000,144096.000000,146000.000000,1277.852640)}
{pt3dadd(132828.000000,144360.000000,145850.000000,1305.361900)}
{pt3dadd(132696.000000,144540.000000,145650.000000,1315.185860)}
{pt3dadd(132780.000000,144660.000000,145475.000000,1365.706260)}
{pt3dadd(132792.000000,144648.000000,145300.000000,1393.215520)}
{pt3dadd(132756.000000,144768.000000,145125.000000,1365.706260)}
{pt3dadd(132864.000000,144888.000000,144900.000000,1338.197000)}
{pt3dadd(132720.000000,145032.000000,144750.000000,1318.883700)}
{pt3dadd(132600.000000,145032.000000,144625.000000,1318.883700)}
{pt3dadd(132852.000000,145308.000000,144450.000000,1337.609300)}
{pt3dadd(132744.000000,145320.000000,144250.000000,1394.328480)}
{pt3dadd(132900.000000,145368.000000,144050.000000,1412.348400)}
{pt3dadd(132900.000000,145500.000000,143850.000000,1412.348400)}
{pt3dadd(132780.000000,145704.000000,143675.000000,1463.261560)}
{pt3dadd(132804.000000,145932.000000,143525.000000,1497.244540)}
{pt3dadd(132924.000000,146232.000000,143350.000000,1520.743200)}
{pt3dadd(133140.000000,146436.000000,143175.000000,1520.743200)}
{pt3dadd(133200.000000,146688.000000,143000.000000,1540.056500)}
{pt3dadd(133164.000000,147048.000000,142875.000000,1471.123420)}
{pt3dadd(133008.000000,147444.000000,142700.000000,1374.092380)}
{pt3dadd(133068.000000,147852.000000,142375.000000,1246.737320)}
{pt3dadd(133200.000000,148308.000000,142150.000000,1196.216920)}
{pt3dadd(133416.000000,149784.000000,141825.000000,1118.938040)}
{pt3dadd(133440.000000,149988.000000,141525.000000,1086.437560)}
{pt3dadd(133548.000000,150180.000000,141450.000000,1070.750280)}
{pt3dadd(133776.000000,150336.000000,141500.000000,1101.074300)}
{pt3dadd(133800.000000,150600.000000,141375.000000,1116.761580)}
{pt3dadd(133800.000000,150780.000000,141400.000000,1124.206760)}
{pt3dadd(133980.000000,150936.000000,141275.000000,1165.561100)}
{pt3dadd(134172.000000,151116.000000,141175.000000,1216.081500)}
{pt3dadd(134184.000000,151284.000000,141100.000000,1232.894700)}
{pt3dadd(134196.000000,151440.000000,141075.000000,1217.207420)}
{pt3dadd(134304.000000,151584.000000,141100.000000,1241.155620)}
{pt3dadd(134484.000000,151716.000000,141000.000000,1223.749480)}
{pt3dadd(134676.000000,151884.000000,140925.000000,1188.916360)}
{pt3dadd(134868.000000,152064.000000,140850.000000,1180.364080)}
{pt3dadd(135060.000000,152220.000000,140775.000000,1188.071800)}
{pt3dadd(135252.000000,152388.000000,140775.000000,1129.348900)}
{pt3dadd(135576.000000,152496.000000,140825.000000,1090.763960)}
{pt3dadd(135684.000000,152976.000000,140450.000000,1107.577160)}
{pt3dadd(135864.000000,153012.000000,140275.000000,1083.628960)}
{pt3dadd(135996.000000,153096.000000,140275.000000,1108.421720)}
{pt3dadd(136188.000000,153180.000000,140250.000000,1143.196420)}
{pt3dadd(136344.000000,153264.000000,140225.000000,1227.666860)}
{pt3dadd(136512.000000,153444.000000,140050.000000,1160.391680)}
{pt3dadd(136680.000000,153624.000000,139875.000000,1192.892160)}
{pt3dadd(136848.000000,153912.000000,139775.000000,1168.099400)}
{pt3dadd(137016.000000,153852.000000,139850.000000,1192.047600)}
{pt3dadd(137160.000000,153924.000000,139750.000000,1129.921620)}
{pt3dadd(137328.000000,154008.000000,139575.000000,1180.383600)}
{pt3dadd(137508.000000,154104.000000,139375.000000,1189.237460)}
{pt3dadd(137724.000000,154200.000000,139200.000000,1241.539480)}
{pt3dadd(137916.000000,154284.000000,139050.000000,1250.091760)}
{pt3dadd(138024.000000,154476.000000,139025.000000,1283.738380)}
{pt3dadd(138192.000000,154572.000000,139150.000000,1337.884800)}
{pt3dadd(138360.000000,154524.000000,139100.000000,1320.478660)}
{pt3dadd(138552.000000,154500.000000,139125.000000,1301.823260)}
{pt3dadd(138744.000000,154476.000000,139125.000000,1319.843180)}
{pt3dadd(138912.000000,154668.000000,139200.000000,1329.009240)}
{pt3dadd(139068.000000,154716.000000,139175.000000,1291.676020)}
{pt3dadd(139248.000000,154752.000000,139175.000000,1327.737560)}
{pt3dadd(139428.000000,154812.000000,139075.000000,1318.883700)}
{pt3dadd(139644.000000,154872.000000,138975.000000,1309.717640)}
{pt3dadd(139812.000000,154992.000000,138875.000000,1259.197240)}
{pt3dadd(139980.000000,155112.000000,138775.000000,1286.706500)}
{pt3dadd(140196.000000,155160.000000,138725.000000,1268.051100)}
{pt3dadd(140388.000000,155184.000000,138600.000000,1276.904960)}
{pt3dadd(140556.000000,155076.000000,138450.000000,1276.904960)}
{pt3dadd(140748.000000,155052.000000,138425.000000,1336.914700)}
{pt3dadd(140952.000000,155040.000000,138325.000000,1318.259300)}
{pt3dadd(141132.000000,155028.000000,138225.000000,1300.853160)}
{pt3dadd(141336.000000,155016.000000,138125.000000,1310.019220)}
{pt3dadd(141516.000000,155004.000000,138025.000000,1301.165360)}
{pt3dadd(141672.000000,154968.000000,138150.000000,1265.103820)}
{pt3dadd(141840.000000,154956.000000,138125.000000,1256.249960)}
{pt3dadd(142056.000000,155088.000000,138075.000000,1282.822160)}
{pt3dadd(142236.000000,155028.000000,138125.000000,1282.822160)}
{pt3dadd(142464.000000,155028.000000,138050.000000,1282.822160)}
{pt3dadd(142704.000000,155016.000000,138000.000000,1300.228300)}
{pt3dadd(142956.000000,155004.000000,137925.000000,1327.737560)}
{pt3dadd(143184.000000,154992.000000,137850.000000,1337.226900)}
{pt3dadd(143436.000000,154980.000000,137775.000000,1328.060840)}
{pt3dadd(143652.000000,154968.000000,137700.000000,1328.060840)}
{pt3dadd(143904.000000,154968.000000,137625.000000,1337.226900)}
{pt3dadd(144084.000000,154956.000000,137550.000000,1327.737560)}
{pt3dadd(144288.000000,154944.000000,137450.000000,1309.082160)}
{pt3dadd(144492.000000,154932.000000,137375.000000,1300.228300)}
{pt3dadd(144720.000000,154920.000000,137275.000000,1318.248220)}
{pt3dadd(144828.000000,154908.000000,137200.000000,1327.737560)}
{pt3dadd(144888.000000,154896.000000,137125.000000,1309.717640)}
{pt3dadd(145068.000000,154920.000000,137175.000000,1309.717640)}
{pt3dadd(145248.000000,154932.000000,137225.000000,1318.571500)}
{pt3dadd(145404.000000,154956.000000,137275.000000,1337.884800)}
{pt3dadd(145560.000000,154920.000000,137175.000000,1293.562340)}
{pt3dadd(145728.000000,154860.000000,136925.000000,1285.010060)}
{pt3dadd(145884.000000,154848.000000,136775.000000,1285.010060)}
{pt3dadd(146052.000000,154872.000000,136875.000000,1259.343000)}
{pt3dadd(146208.000000,154932.000000,136700.000000,1213.457500)}
{pt3dadd(146376.000000,154920.000000,136450.000000,1248.290620)}
{pt3dadd(146544.000000,154776.000000,136125.000000,1256.842900)}
{pt3dadd(146712.000000,154632.000000,135975.000000,1256.842900)}
{pt3dadd(146868.000000,154536.000000,135900.000000,1265.103820)}
{pt3dadd(147036.000000,154368.000000,135800.000000,1282.509960)}
{pt3dadd(147216.000000,154308.000000,135700.000000,1282.509960)}
{pt3dadd(147396.000000,154380.000000,135675.000000,1340.542680)}
{pt3dadd(147564.000000,154308.000000,135500.000000,1369.022040)}
{pt3dadd(147732.000000,154248.000000,135375.000000,1414.907540)}
{pt3dadd(147924.000000,154188.000000,135225.000000,1424.073600)}
{pt3dadd(148140.000000,154116.000000,135075.000000,1424.073600)}
{pt3dadd(148344.000000,154056.000000,134950.000000,1349.227680)}
{pt3dadd(148524.000000,153996.000000,134800.000000,1295.081260)}
{pt3dadd(148752.000000,153924.000000,134650.000000,1266.601900)}
{pt3dadd(148932.000000,153852.000000,134750.000000,1231.768780)}
{pt3dadd(149112.000000,153816.000000,134700.000000,1213.748860)}
{pt3dadd(149316.000000,153792.000000,134675.000000,1248.581980)}
{pt3dadd(149484.000000,153768.000000,134625.000000,1292.904440)}
{pt3dadd(149664.000000,153708.000000,134475.000000,1292.904440)}
{pt3dadd(149844.000000,153492.000000,134325.000000,1337.226900)}
{pt3dadd(150036.000000,153468.000000,134150.000000,1346.080760)}
{pt3dadd(150240.000000,153588.000000,134100.000000,1355.570100)}
{pt3dadd(150420.000000,153720.000000,134050.000000,1365.394060)}
{pt3dadd(150612.000000,153684.000000,133950.000000,1374.560120)}
{pt3dadd(150792.000000,153648.000000,133850.000000,1374.560120)}
{pt3dadd(150996.000000,153600.000000,133750.000000,1365.706260)}
{pt3dadd(151188.000000,153708.000000,133650.000000,1454.713560)}
{pt3dadd(151404.000000,153804.000000,133575.000000,1475.413060)}
{pt3dadd(151596.000000,153900.000000,133475.000000,1457.393140)}
{pt3dadd(151824.000000,153996.000000,133400.000000,1467.217100)}
{pt3dadd(152028.000000,154092.000000,133300.000000,1494.726360)}
{pt3dadd(152244.000000,154188.000000,133225.000000,1415.543020)}
{pt3dadd(152460.000000,154044.000000,133250.000000,1449.410880)}
{pt3dadd(152676.000000,153900.000000,133275.000000,1529.628720)}
{pt3dadd(152892.000000,153804.000000,133100.000000,1621.774840)}
{pt3dadd(153084.000000,153756.000000,133025.000000,1603.119440)}
{pt3dadd(153288.000000,153708.000000,132925.000000,1613.289860)}
{pt3dadd(153492.000000,153660.000000,132850.000000,1625.384600)}
{pt3dadd(153660.000000,153612.000000,132775.000000,1536.614480)}
{pt3dadd(153852.000000,153552.000000,132675.000000,1465.167860)}
{pt3dadd(154020.000000,153504.000000,132600.000000,1503.817640)}
{pt3dadd(154188.000000,153588.000000,132650.000000,1493.647220)}
{pt3dadd(154380.000000,153612.000000,132575.000000,1417.161160)}
{pt3dadd(154560.000000,153552.000000,132675.000000,1494.646520)}
{pt3dadd(154716.000000,153492.000000,132775.000000,1369.338620)}
{pt3dadd(154932.000000,153432.000000,132850.000000,1369.338620)}
{pt3dadd(155148.000000,153384.000000,132775.000000,1264.730220)}
{pt3dadd(155364.000000,153360.000000,132725.000000,1204.720480)}
{pt3dadd(155568.000000,153336.000000,132700.000000,1144.641260)}
{pt3dadd(155772.000000,153324.000000,132725.000000,1220.770300)}
{pt3dadd(155964.000000,153312.000000,132700.000000,1191.286580)}
{pt3dadd(156156.000000,153300.000000,132675.000000,1306.065400)}
{pt3dadd(156348.000000,153288.000000,132675.000000,1396.598600)}
{pt3dadd(156528.000000,153276.000000,132650.000000,1467.962580)}
{pt3dadd(156732.000000,153276.000000,132625.000000,1459.108720)}
{pt3dadd(156912.000000,153252.000000,132525.000000,1432.536520)}
{pt3dadd(157092.000000,153228.000000,132425.000000,1330.949060)}
{pt3dadd(157308.000000,153204.000000,132325.000000,1218.832520)}
{pt3dadd(157536.000000,153204.000000,132375.000000,1147.468540)}
{pt3dadd(157728.000000,153204.000000,132425.000000,1165.488460)}
{pt3dadd(157920.000000,153084.000000,132250.000000,1182.894600)}
{pt3dadd(158076.000000,153000.000000,132275.000000,1254.998340)}
{pt3dadd(158256.000000,153000.000000,132200.000000,1300.529880)}
{pt3dadd(158460.000000,153000.000000,132150.000000,1274.862820)}
{pt3dadd(158676.000000,153012.000000,132100.000000,1209.705680)}
{pt3dadd(158880.000000,153012.000000,132050.000000,1176.059060)}
{pt3dadd(159072.000000,152988.000000,132075.000000,1185.548400)}
{pt3dadd(159312.000000,152964.000000,132100.000000,1194.100680)}
{pt3dadd(159516.000000,153036.000000,132050.000000,1228.933800)}
{pt3dadd(159744.000000,153108.000000,132025.000000,1276.071020)}
{pt3dadd(160008.000000,153180.000000,132000.000000,1292.311500)}
{pt3dadd(160200.000000,153240.000000,131975.000000,1247.989040)}
{pt3dadd(160392.000000,153156.000000,131725.000000,1239.436760)}
{pt3dadd(160584.000000,153168.000000,131975.000000,1196.624080)}
{pt3dadd(160764.000000,153120.000000,131900.000000,1164.123600)}
{pt3dadd(160956.000000,153192.000000,131800.000000,1132.730220)}
{pt3dadd(161160.000000,153264.000000,131725.000000,1109.597760)}
{pt3dadd(161364.000000,153360.000000,131750.000000,1085.649560)}
{pt3dadd(161556.000000,153396.000000,131750.000000,1077.941840)}
{pt3dadd(161760.000000,153444.000000,131675.000000,1101.890040)}
{pt3dadd(161940.000000,153492.000000,131600.000000,1087.751880)}
{pt3dadd(162108.000000,153504.000000,131525.000000,1102.904780)}
{pt3dadd(162324.000000,153480.000000,131575.000000,1088.268040)}
{pt3dadd(162540.000000,153540.000000,131600.000000,1088.268040)}
{pt3dadd(162720.000000,153660.000000,131475.000000,1072.027560)}
{pt3dadd(162912.000000,153804.000000,131375.000000,1134.965240)}
{pt3dadd(163128.000000,153936.000000,131300.000000,1187.267260)}
{pt3dadd(163320.000000,153888.000000,131400.000000,1243.258340)}
{pt3dadd(163548.000000,153804.000000,131425.000000,1293.778740)}
{pt3dadd(163776.000000,153708.000000,131300.000000,1366.075140)}
{pt3dadd(164040.000000,153636.000000,131150.000000,1404.724920)}
{pt3dadd(164220.000000,153852.000000,131000.000000,1404.724920)}
{pt3dadd(164412.000000,153972.000000,130900.000000,1413.890980)}
{pt3dadd(164604.000000,154104.000000,130775.000000,1404.724920)}
{pt3dadd(164820.000000,154284.000000,130750.000000,1394.554500)}
{pt3dadd(165000.000000,154464.000000,130725.000000,1322.258100)}
{pt3dadd(165216.000000,154440.000000,130625.000000,1254.803180)}
{pt3dadd(165408.000000,154416.000000,130550.000000,1204.282780)}
{pt3dadd(165600.000000,154392.000000,130475.000000,1170.636160)}
{pt3dadd(165792.000000,154368.000000,130375.000000,1100.802460)}
{pt3dadd(165972.000000,154344.000000,130300.000000,1108.782020)}
{pt3dadd(166176.000000,154428.000000,130200.000000,1131.914480)}
{pt3dadd(166356.000000,154512.000000,130100.000000,1131.914480)}
{pt3dadd(166548.000000,154608.000000,130000.000000,1131.914480)}
{pt3dadd(166740.000000,154704.000000,129900.000000,1117.277740)}
{pt3dadd(166920.000000,154800.000000,129800.000000,1086.953720)}
{pt3dadd(167112.000000,154896.000000,129700.000000,1056.629700)}
{pt3dadd(167328.000000,154884.000000,129550.000000,982.263334)}
{pt3dadd(167532.000000,154872.000000,129425.000000,927.472926)}
{pt3dadd(167760.000000,154812.000000,129475.000000,920.526326)}
{pt3dadd(167964.000000,154824.000000,129450.000000,942.870786)}
{pt3dadd(168180.000000,154968.000000,129200.000000,935.924186)}
{pt3dadd(168360.000000,154992.000000,128975.000000,988.707212)}
{pt3dadd(168540.000000,155004.000000,128875.000000,1014.206560)}
{pt3dadd(168756.000000,154944.000000,128800.000000,1007.496592)}
{pt3dadd(168924.000000,154872.000000,128775.000000,971.495564)}
{pt3dadd(169128.000000,154848.000000,128675.000000,993.078904)}
{pt3dadd(169320.000000,154824.000000,128600.000000,967.579556)}
{pt3dadd(169488.000000,154836.000000,128475.000000,1013.111096)}
{pt3dadd(169644.000000,154860.000000,128350.000000,1049.112124)}
{pt3dadd(169836.000000,154872.000000,128225.000000,1101.353632)}
{pt3dadd(170004.000000,154896.000000,128025.000000,1181.357752)}
{pt3dadd(170196.000000,154884.000000,127850.000000,1236.148160)}
{pt3dadd(170388.000000,154872.000000,127675.000000,1219.907680)}
{pt3dadd(170580.000000,154860.000000,127475.000000,1204.754780)}
{pt3dadd(170760.000000,154800.000000,127375.000000,1180.806580)}
{pt3dadd(170964.000000,154728.000000,127275.000000,1093.357280)}
{pt3dadd(171180.000000,154740.000000,127200.000000,1085.649560)}
{pt3dadd(171348.000000,154704.000000,127275.000000,1077.941840)}
{pt3dadd(171552.000000,154680.000000,127125.000000,1117.887500)}
{pt3dadd(171792.000000,154656.000000,126975.000000,1141.835700)}
{pt3dadd(171996.000000,154752.000000,126825.000000,1209.290620)}
{pt3dadd(172188.000000,154824.000000,126825.000000,1269.300360)}
{pt3dadd(172404.000000,154884.000000,126825.000000,1339.134060)}
{pt3dadd(172656.000000,154860.000000,126725.000000,1347.987920)}
{pt3dadd(172872.000000,154824.000000,126500.000000,1331.747440)}
{pt3dadd(173064.000000,154884.000000,126275.000000,1236.963000)}
{pt3dadd(173220.000000,154968.000000,126225.000000,1155.369920)}
{pt3dadd(173424.000000,155052.000000,126175.000000,1032.612160)}
{pt3dadd(173652.000000,155148.000000,126125.000000,1061.091520)}
{pt3dadd(173844.000000,155220.000000,125975.000000,1103.904200)}
{pt3dadd(174084.000000,155208.000000,125875.000000,1131.233720)}
{pt3dadd(174288.000000,155196.000000,125800.000000,1152.817060)}
{pt3dadd(174480.000000,155184.000000,125700.000000,1213.448840)}
{pt3dadd(174660.000000,155184.000000,125625.000000,1203.624880)}
{pt3dadd(174852.000000,155244.000000,125550.000000,1112.069160)}
{pt3dadd(175044.000000,155376.000000,125425.000000,1119.514340)}
{pt3dadd(175272.000000,155508.000000,125350.000000,1040.235980)}
{pt3dadd(175560.000000,155472.000000,125375.000000,963.247100)}
{pt3dadd(175776.000000,155544.000000,125325.000000,833.956200)}
{pt3dadd(176052.000000,155616.000000,125275.000000,890.678800)}
{pt3dadd(176208.000000,155688.000000,125225.000000,890.678800)}
{pt3dadd(176352.000000,155748.000000,125200.000000,928.921840)}
{pt3dadd(176520.000000,155832.000000,125125.000000,1005.910720)}
{pt3dadd(176808.000000,155916.000000,125050.000000,1075.191880)}
{pt3dadd(176976.000000,156012.000000,124975.000000,1092.005080)}
{pt3dadd(177120.000000,156120.000000,124900.000000,1133.359420)}
{pt3dadd(177396.000000,156216.000000,124825.000000,1287.113060)}
{pt3dadd(177552.000000,156240.000000,124675.000000,1271.960160)}
{pt3dadd(177768.000000,156276.000000,124575.000000,1373.393720)}
{pt3dadd(177960.000000,156312.000000,124450.000000,1364.841440)}
{pt3dadd(178152.000000,156360.000000,124325.000000,1364.841440)}
{pt3dadd(178308.000000,156348.000000,124275.000000,1284.623600)}
{pt3dadd(178500.000000,156396.000000,124200.000000,1270.485440)}
{pt3dadd(178692.000000,156432.000000,124125.000000,1140.758572)}
{pt3dadd(178872.000000,156480.000000,124050.000000,1196.814492)}
{pt3dadd(179040.000000,156516.000000,123975.000000,1140.823412)}
{pt3dadd(179220.000000,156528.000000,123800.000000,1093.686192)}
{pt3dadd(179388.000000,156528.000000,123600.000000,1093.686192)}
{pt3dadd(179508.000000,156420.000000,123375.000000,1107.342760)}
{pt3dadd(179676.000000,156396.000000,123325.000000,1128.772200)}
{pt3dadd(179808.000000,156372.000000,123275.000000,1159.096220)}
{pt3dadd(179952.000000,156348.000000,123150.000000,1197.681160)}
{pt3dadd(180096.000000,156324.000000,123050.000000,1178.229180)}
{pt3dadd(180252.000000,156348.000000,122875.000000,1151.830600)}
{pt3dadd(180408.000000,156336.000000,122650.000000,991.830600)}
{pt3dadd(180552.000000,156324.000000,122425.000000,983.851040)}
{pt3dadd(180744.000000,156312.000000,122200.000000,992.403320)}
{pt3dadd(180912.000000,156276.000000,122025.000000,969.422020)}
{pt3dadd(181092.000000,156228.000000,121875.000000,951.890900)}
{pt3dadd(181236.000000,156192.000000,121725.000000,951.890900)}
{pt3dadd(181392.000000,156156.000000,121575.000000,891.259120)}
{pt3dadd(181572.000000,156120.000000,121425.000000,844.121900)}
{pt3dadd(181740.000000,156084.000000,121250.000000,873.363820)}
{pt3dadd(181944.000000,156048.000000,121125.000000,884.847572)}
{pt3dadd(182124.000000,155988.000000,121050.000000,902.378692)}
{pt3dadd(182304.000000,156072.000000,120900.000000,914.267432)}
{pt3dadd(182448.000000,156120.000000,120650.000000,928.904172)}
{pt3dadd(182604.000000,156192.000000,120500.000000,979.366152)}
{pt3dadd(182772.000000,156192.000000,120425.000000,1034.156560)}
{pt3dadd(182952.000000,156192.000000,120375.000000,1022.267820)}
{pt3dadd(183108.000000,156156.000000,120325.000000,1016.220452)}
{pt3dadd(183276.000000,156168.000000,120225.000000,981.445752)}
{pt3dadd(183252.000000,156156.000000,119950.000000,1007.112812)}
{pt3dadd(183432.000000,156156.000000,119750.000000,1007.112812)}
{pt3dadd(183756.000000,156180.000000,119550.000000,1075.724152)}
{pt3dadd(183864.000000,156216.000000,119350.000000,1146.755040)}
{pt3dadd(183972.000000,156240.000000,119150.000000,1134.447052)}
{pt3dadd(184080.000000,156276.000000,118975.000000,1100.800432)}
{pt3dadd(184188.000000,156300.000000,118775.000000,1085.647532)}
{pt3dadd(184368.000000,156252.000000,118600.000000,1022.877564)}
{pt3dadd(184656.000000,156180.000000,118425.000000,984.292624)}
{pt3dadd(184860.000000,156120.000000,118250.000000,996.600612)}
{pt3dadd(185028.000000,156072.000000,118075.000000,930.326452)}
{pt3dadd(185184.000000,156036.000000,117900.000000,937.771632)}
{pt3dadd(185448.000000,156012.000000,117750.000000,970.217580)}
{pt3dadd(185592.000000,156024.000000,117550.000000,1000.541600)}
{pt3dadd(185748.000000,156024.000000,117375.000000,1007.022992)}
{pt3dadd(185892.000000,156012.000000,117200.000000,1001.572812)}
{pt3dadd(186084.000000,155904.000000,117000.000000,954.490124)}
{pt3dadd(186300.000000,155736.000000,116850.000000,993.075064)}
{pt3dadd(186552.000000,155592.000000,116650.000000,924.463724)}
{pt3dadd(186768.000000,155652.000000,116500.000000,888.740412)}
{pt3dadd(186984.000000,155712.000000,116325.000000,894.190592)}
{pt3dadd(186984.000000,155676.000000,116150.000000,900.237960)}
{pt3dadd(187152.000000,155676.000000,115975.000000,900.237960)}
{pt3dadd(187308.000000,155664.000000,115825.000000,912.126700)}
{pt3dadd(187452.000000,155640.000000,115625.000000,859.541730)}
{pt3dadd(187584.000000,155616.000000,115475.000000,968.628570)}
{pt3dadd(187728.000000,155592.000000,115300.000000,951.097450)}
{pt3dadd(187956.000000,155592.000000,115125.000000,942.836530)}
{pt3dadd(187932.000000,155592.000000,114850.000000,983.871850)}
{pt3dadd(188184.000000,155520.000000,114675.000000,1041.907000)}
{pt3dadd(188376.000000,155496.000000,114450.000000,938.462540)}
{pt3dadd(188556.000000,155508.000000,114275.000000,927.747820)}
{pt3dadd(188736.000000,155508.000000,114050.000000,936.008740)}
{pt3dadd(188892.000000,155568.000000,113825.000000,856.730380)}
{pt3dadd(189036.000000,155556.000000,113650.000000,1005.830020)}
{pt3dadd(189168.000000,155544.000000,113475.000000,979.475720)}
{pt3dadd(189312.000000,155532.000000,113300.000000,984.740260)}
{pt3dadd(189444.000000,155544.000000,113125.000000,867.759080)}
{pt3dadd(189660.000000,155592.000000,112950.000000,1007.047180)}
{pt3dadd(189744.000000,155592.000000,112700.000000,837.235620)}
{pt3dadd(189816.000000,155652.000000,112475.000000,957.868320)}
{pt3dadd(189984.000000,155748.000000,112300.000000,937.861920)}
{pt3dadd(190176.000000,155784.000000,112125.000000,1046.582180)}
{pt3dadd(190272.000000,155784.000000,111900.000000,902.549420)}
{pt3dadd(190404.000000,155796.000000,111725.000000,897.804760)}
{pt3dadd(190500.000000,155880.000000,111500.000000,792.433800)}
{pt3dadd(190392.000000,155940.000000,111300.000000,861.820080)}
{pt3dadd(190452.000000,155988.000000,111075.000000,887.487140)}
{pt3dadd(190512.000000,156024.000000,110900.000000,936.735460)}
{pt3dadd(190704.000000,156072.000000,110750.000000,962.192040)}
{pt3dadd(190896.000000,156108.000000,110575.000000,956.927500)}
{pt3dadd(190716.000000,156252.000000,110375.000000,892.285880)}
{pt3dadd(190596.000000,156264.000000,110150.000000,781.650380)}
{pt3dadd(190764.000000,156324.000000,109975.000000,757.858640)}
{pt3dadd(190944.000000,156276.000000,109775.000000,769.342392)}
{pt3dadd(191124.000000,156240.000000,109625.000000,888.000472)}
{pt3dadd(191304.000000,156336.000000,109425.000000,952.642092)}
{pt3dadd(191352.000000,156432.000000,109225.000000,1063.277592)}
{pt3dadd(191412.000000,156528.000000,109050.000000,1093.550724)}
{pt3dadd(191472.000000,156588.000000,108800.000000,1173.133892)}
{pt3dadd(191532.000000,156588.000000,108575.000000,1082.721652)}
{pt3dadd(191412.000000,156564.000000,108375.000000,1056.323072)}
{pt3dadd(191400.000000,156516.000000,108200.000000,980.194032)}
{pt3dadd(191388.000000,156456.000000,108000.000000,1016.195060)}
{pt3dadd(191280.000000,156540.000000,107750.000000,936.611892)}
{pt3dadd(191100.000000,156696.000000,107600.000000,930.564524)}
{pt3dadd(191040.000000,156768.000000,107425.000000,924.517156)}
{pt3dadd(190968.000000,156840.000000,107225.000000,966.999576)}
{pt3dadd(190908.000000,156912.000000,107025.000000,937.708516)}
{pt3dadd(190884.000000,156912.000000,106825.000000,1064.795324)}
{pt3dadd(190860.000000,156912.000000,106650.000000,1119.585732)}
{pt3dadd(190740.000000,157044.000000,106425.000000,1078.062368)}
{pt3dadd(190632.000000,157440.000000,106300.000000,1062.909468)}
{pt3dadd(190668.000000,157728.000000,106150.000000,1010.126442)}
{pt3dadd(190656.000000,157872.000000,105975.000000,855.755956)}
{pt3dadd(190560.000000,158040.000000,105800.000000,880.548716)}
{pt3dadd(190500.000000,158160.000000,105575.000000,928.119448)}
{pt3dadd(190428.000000,158292.000000,105350.000000,951.251908)}
{pt3dadd(190368.000000,158328.000000,105175.000000,1049.566474)}
{pt3dadd(190284.000000,158508.000000,105025.000000,1147.881040)}
{pt3dadd(190212.000000,158532.000000,104850.000000,1156.734900)}
{pt3dadd(190212.000000,158568.000000,104650.000000,1221.718420)}
{pt3dadd(190188.000000,158640.000000,104475.000000,1191.394400)}
{pt3dadd(190164.000000,158820.000000,104300.000000,1145.862860)}
{pt3dadd(190248.000000,158880.000000,104125.000000,1114.469480)}
{pt3dadd(190320.000000,158844.000000,103925.000000,1038.340440)}
{pt3dadd(190248.000000,158820.000000,103725.000000,973.356920)}
{pt3dadd(190248.000000,158904.000000,103550.000000,1003.680940)}
{pt3dadd(190236.000000,158988.000000,103400.000000,955.983120)}
{pt3dadd(190224.000000,159048.000000,103225.000000,987.376500)}
{pt3dadd(190344.000000,158916.000000,103000.000000,924.842080)}
{pt3dadd(190284.000000,158868.000000,102775.000000,868.568280)}
{pt3dadd(190236.000000,158820.000000,102625.000000,852.881000)}
{pt3dadd(190188.000000,158772.000000,102425.000000,824.853040)}
{pt3dadd(190212.000000,158664.000000,102275.000000,712.298788)}
{pt3dadd(190200.000000,158676.000000,102050.000000,809.607908)}
{pt3dadd(190176.000000,158700.000000,101850.000000,809.607908)}
{pt3dadd(190116.000000,158724.000000,101650.000000,842.108388)}
{pt3dadd(190092.000000,158772.000000,101450.000000,842.108388)}
{pt3dadd(190008.000000,158844.000000,101300.000000,833.405320)}
{pt3dadd(189972.000000,158904.000000,101100.000000,825.960140)}
{pt3dadd(189936.000000,158868.000000,100900.000000,821.829680)}
{pt3dadd(189900.000000,158832.000000,100725.000000,797.036920)}
{pt3dadd(189864.000000,158796.000000,100550.000000,924.203800)}
{pt3dadd(189816.000000,158760.000000,100375.000000,1131.370800)}

{create adhoc155}
{access adhoc155}
{connect adhoc155(1), adhoc154(0)}
{nseg = 1}
{strdef color color = "White"}
{pt3dclear()}
{pt3dadd(189816.000000,158760.000000,100375.000000,1131.370800)}
{pt3dadd(189708.000000,158208.000000,100075.000000,841.417200)}
{pt3dadd(189708.000000,158208.000000,99875.000000,770.307714)}
{pt3dadd(189600.000000,158268.000000,99725.000000,661.160414)}
{pt3dadd(189552.000000,158328.000000,99550.000000,638.999194)}
{pt3dadd(189468.000000,158364.000000,99400.000000,620.968434)}
{pt3dadd(189504.000000,158412.000000,99250.000000,605.271746)}
{pt3dadd(189576.000000,158460.000000,99125.000000,591.032060)}
{pt3dadd(189612.000000,158520.000000,98975.000000,595.162520)}
{pt3dadd(189480.000000,158496.000000,98825.000000,591.172740)}
{pt3dadd(189384.000000,158472.000000,98675.000000,609.203500)}
{pt3dadd(189300.000000,158484.000000,98475.000000,647.842942)}
{pt3dadd(189252.000000,158460.000000,98325.000000,662.082628)}
{pt3dadd(189144.000000,158400.000000,98175.000000,666.358768)}
{pt3dadd(188964.000000,158400.000000,98025.000000,678.755148)}
{pt3dadd(188880.000000,158400.000000,97825.000000,678.755148)}
{pt3dadd(188820.000000,158484.000000,97650.000000,683.840354)}
{pt3dadd(188748.000000,158568.000000,97475.000000,678.928360)}
{pt3dadd(188688.000000,158640.000000,97325.000000,713.394900)}
{pt3dadd(188628.000000,158724.000000,97150.000000,742.411260)}
{pt3dadd(188556.000000,158808.000000,96975.000000,742.411260)}
{pt3dadd(188448.000000,158880.000000,96800.000000,737.326054)}
{pt3dadd(188292.000000,158952.000000,96600.000000,727.998362)}
{pt3dadd(188208.000000,159000.000000,96425.000000,677.281582)}
{pt3dadd(188136.000000,159036.000000,96250.000000,624.696612)}
{pt3dadd(188052.000000,159084.000000,96100.000000,602.535392)}
{pt3dadd(187980.000000,159132.000000,96025.000000,597.623398)}
{pt3dadd(187896.000000,159168.000000,95950.000000,593.196470)}
{pt3dadd(187824.000000,159216.000000,95825.000000,601.040110)}
{pt3dadd(187752.000000,159252.000000,95750.000000,629.035648)}
{pt3dadd(187668.000000,159300.000000,95650.000000,625.045868)}
{pt3dadd(187608.000000,159408.000000,95575.000000,629.957862)}
{pt3dadd(187584.000000,159516.000000,95475.000000,629.957862)}
{pt3dadd(187560.000000,159636.000000,95375.000000,652.119082)}
{pt3dadd(187572.000000,159540.000000,95250.000000,652.119082)}
{pt3dadd(187560.000000,159540.000000,95150.000000,683.182076)}
{pt3dadd(187536.000000,159672.000000,95075.000000,678.270082)}
{pt3dadd(187500.000000,159780.000000,94950.000000,687.280042)}
{pt3dadd(187392.000000,159816.000000,94875.000000,673.525422)}
{pt3dadd(187272.000000,159864.000000,94775.000000,698.114854)}
{pt3dadd(187248.000000,159912.000000,94675.000000,667.051860)}
{pt3dadd(187224.000000,159960.000000,94550.000000,649.021100)}
{pt3dadd(187212.000000,159972.000000,94450.000000,620.038312)}
{pt3dadd(187200.000000,159972.000000,94350.000000,643.790132)}
{pt3dadd(187188.000000,159972.000000,94275.000000,578.005872)}
{pt3dadd(187140.000000,160044.000000,94175.000000,574.152012)}
{pt3dadd(187092.000000,160116.000000,94050.000000,566.031772)}
{pt3dadd(187068.000000,160104.000000,93925.000000,555.607706)}
{pt3dadd(187032.000000,160092.000000,93850.000000,508.287276)}
{pt3dadd(186924.000000,160056.000000,93750.000000,525.082348)}
{pt3dadd(186828.000000,160020.000000,93650.000000,521.359760)}
{pt3dadd(186816.000000,160080.000000,93550.000000,510.187530)}
{pt3dadd(186804.000000,160128.000000,93450.000000,524.334184)}
{pt3dadd(186708.000000,160152.000000,93350.000000,566.569408)}
{pt3dadd(186624.000000,160164.000000,93250.000000,615.558596)}
{pt3dadd(186528.000000,160188.000000,93150.000000,669.997964)}
{pt3dadd(186504.000000,160212.000000,93050.000000,677.316334)}
{pt3dadd(186504.000000,160260.000000,92950.000000,681.170194)}
{pt3dadd(186492.000000,160284.000000,92850.000000,671.513540)}
{pt3dadd(186480.000000,160320.000000,92750.000000,622.524352)}
{pt3dadd(186468.000000,160344.000000,92675.000000,564.489202)}
{pt3dadd(186336.000000,160344.000000,92600.000000,599.406056)}
{pt3dadd(186228.000000,160344.000000,92475.000000,607.526296)}
{pt3dadd(186204.000000,160380.000000,92375.000000,598.516336)}
{pt3dadd(186192.000000,160428.000000,92275.000000,647.505524)}
{pt3dadd(186168.000000,160464.000000,92175.000000,675.501062)}
{pt3dadd(186144.000000,160512.000000,92075.000000,675.501062)}
{pt3dadd(186156.000000,160572.000000,91950.000000,708.793562)}
{pt3dadd(186168.000000,160632.000000,91875.000000,717.803522)}
{pt3dadd(186120.000000,160668.000000,91775.000000,693.214090)}
{pt3dadd(186072.000000,160716.000000,91550.000000,676.390782)}
{pt3dadd(186012.000000,160764.000000,91400.000000,671.478788)}
{pt3dadd(185904.000000,160812.000000,91300.000000,656.217048)}
{pt3dadd(185796.000000,160860.000000,91150.000000,651.634016)}
{pt3dadd(185700.000000,160896.000000,91025.000000,647.207088)}
{pt3dadd(185688.000000,160908.000000,90875.000000,668.613428)}
{pt3dadd(185676.000000,160908.000000,90725.000000,650.582668)}
{pt3dadd(185664.000000,160908.000000,90600.000000,641.254976)}
{pt3dadd(185604.000000,161004.000000,90475.000000,650.582668)}
{pt3dadd(185544.000000,161100.000000,90350.000000,659.592628)}
{pt3dadd(185472.000000,161196.000000,90250.000000,659.592628)}
{pt3dadd(185412.000000,161292.000000,90125.000000,640.300158)}
{pt3dadd(185352.000000,161388.000000,90000.000000,623.476850)}
{pt3dadd(185220.000000,161460.000000,89875.000000,609.722230)}
{pt3dadd(185208.000000,161424.000000,89725.000000,600.712270)}
{pt3dadd(185196.000000,161472.000000,89625.000000,554.934410)}
{pt3dadd(185196.000000,161484.000000,89475.000000,562.252780)}
{pt3dadd(185184.000000,161496.000000,89350.000000,541.011568)}
{pt3dadd(185184.000000,161496.000000,89200.000000,504.243668)}
{pt3dadd(185172.000000,161496.000000,89075.000000,491.847288)}
{pt3dadd(185100.000000,161484.000000,88925.000000,520.208588)}
{pt3dadd(185004.000000,161460.000000,88775.000000,506.061934)}
{pt3dadd(184920.000000,161400.000000,88625.000000,544.126454)}
{pt3dadd(184848.000000,161340.000000,88500.000000,580.894354)}
{pt3dadd(184776.000000,161268.000000,88325.000000,589.014594)}
{pt3dadd(184692.000000,161208.000000,88200.000000,546.530374)}
{pt3dadd(184620.000000,161148.000000,88050.000000,537.135684)}
{pt3dadd(184536.000000,161184.000000,87900.000000,520.312376)}
{pt3dadd(184524.000000,161172.000000,87775.000000,477.600108)}
{pt3dadd(184524.000000,161172.000000,87650.000000,533.873908)}
{pt3dadd(184512.000000,161160.000000,87525.000000,536.506176)}
{pt3dadd(184500.000000,161148.000000,87400.000000,580.724688)}
{pt3dadd(184488.000000,161136.000000,87250.000000,593.121068)}
{pt3dadd(184476.000000,161124.000000,87100.000000,593.121068)}
{pt3dadd(184464.000000,161112.000000,86975.000000,510.726514)}
{pt3dadd(184356.000000,161112.000000,86825.000000,563.411994)}
{pt3dadd(184296.000000,161064.000000,86700.000000,563.411994)}
{pt3dadd(184188.000000,161088.000000,86575.000000,555.005394)}
{pt3dadd(184068.000000,161100.000000,86450.000000,616.384276)}
{pt3dadd(183948.000000,161124.000000,86325.000000,665.447784)}
{pt3dadd(183828.000000,161136.000000,86175.000000,624.252956)}
{pt3dadd(183720.000000,161148.000000,86050.000000,596.257418)}
{pt3dadd(183600.000000,161172.000000,85900.000000,613.673978)}
{pt3dadd(183492.000000,161016.000000,85775.000000,595.007364)}
{pt3dadd(183456.000000,160932.000000,85600.000000,536.549166)}
{pt3dadd(183420.000000,160860.000000,85475.000000,533.525482)}
{pt3dadd(183384.000000,160776.000000,85325.000000,561.521020)}
{pt3dadd(183240.000000,160848.000000,85200.000000,515.743160)}
{pt3dadd(183108.000000,160884.000000,85050.000000,464.852340)}
{pt3dadd(183000.000000,160872.000000,84875.000000,484.671096)}
{pt3dadd(182904.000000,160860.000000,84725.000000,481.750412)}
{pt3dadd(182868.000000,160860.000000,84550.000000,477.323484)}
{pt3dadd(182820.000000,160872.000000,84375.000000,465.832832)}
{pt3dadd(182784.000000,160872.000000,84225.000000,493.155042)}
{pt3dadd(182748.000000,160848.000000,84100.000000,467.594410)}
{pt3dadd(182712.000000,160824.000000,83925.000000,462.048126)}
{pt3dadd(182568.000000,160728.000000,83775.000000,462.048126)}
{pt3dadd(182400.000000,160644.000000,83625.000000,454.417258)}
{pt3dadd(182412.000000,160608.000000,83475.000000,435.273600)}
{pt3dadd(182496.000000,160572.000000,83325.000000,432.548508)}
{pt3dadd(182532.000000,160512.000000,83175.000000,453.765152)}
{pt3dadd(182508.000000,160452.000000,83025.000000,405.506600)}
{pt3dadd(182388.000000,160404.000000,82875.000000,427.758428)}
{pt3dadd(182268.000000,160356.000000,82750.000000,422.212144)}
{pt3dadd(182220.000000,160260.000000,82600.000000,436.833104)}
{pt3dadd(182172.000000,160176.000000,82475.000000,427.107112)}
{pt3dadd(182016.000000,160104.000000,82325.000000,479.792592)}
{pt3dadd(182076.000000,160104.000000,82200.000000,470.717916)}
{pt3dadd(182004.000000,160044.000000,82025.000000,468.085648)}
{pt3dadd(181836.000000,159996.000000,81900.000000,501.723240)}
{pt3dadd(181716.000000,159924.000000,81800.000000,530.084540)}
{pt3dadd(181740.000000,159924.000000,81625.000000,544.324226)}
{pt3dadd(181656.000000,159924.000000,81475.000000,582.760354)}
{pt3dadd(181572.000000,159876.000000,81325.000000,629.375034)}
{pt3dadd(181596.000000,159792.000000,81200.000000,669.483954)}
{pt3dadd(181548.000000,159684.000000,81075.000000,691.645174)}
{pt3dadd(181356.000000,159648.000000,80925.000000,664.571960)}
{pt3dadd(181284.000000,159720.000000,80750.000000,677.858060)}
{pt3dadd(181212.000000,159720.000000,80625.000000,636.600740)}
{pt3dadd(181152.000000,159660.000000,80475.000000,562.854228)}
{pt3dadd(181080.000000,159636.000000,80300.000000,522.057700)}
{pt3dadd(181020.000000,159624.000000,80150.000000,484.930840)}
{pt3dadd(181008.000000,159516.000000,80025.000000,433.208612)}
{pt3dadd(180996.000000,159408.000000,79900.000000,427.851252)}
{pt3dadd(180984.000000,159312.000000,79750.000000,475.243464)}
{pt3dadd(180828.000000,159180.000000,79625.000000,498.009232)}
{pt3dadd(180792.000000,159276.000000,79475.000000,500.830424)}
{pt3dadd(180744.000000,159312.000000,79325.000000,495.284140)}
{pt3dadd(180672.000000,159300.000000,79200.000000,485.621694)}
{pt3dadd(180552.000000,159180.000000,79050.000000,390.716394)}
{pt3dadd(180432.000000,159060.000000,78900.000000,378.742294)}
{pt3dadd(180264.000000,159060.000000,78775.000000,358.687832)}
{pt3dadd(180156.000000,159060.000000,78600.000000,320.050378)}
{pt3dadd(180048.000000,159048.000000,78425.000000,351.145673)}
{pt3dadd(179820.000000,158904.000000,78425.000000,193.187270)}

{create adhoc156}
{access adhoc156}
{connect adhoc156(1), adhoc155(0)}
{nseg = 1}
{strdef color color = "White"}
{pt3dclear()}
{pt3dadd(179820.000000,158904.000000,78425.000000,193.187270)}
{pt3dadd(180252.000000,159312.000000,78150.000000,323.372283)}
{pt3dadd(180144.000000,159420.000000,77900.000000,346.488602)}
{pt3dadd(180120.000000,159396.000000,77725.000000,399.747016)}
{pt3dadd(180048.000000,159468.000000,77575.000000,425.239542)}
{pt3dadd(179976.000000,159540.000000,77425.000000,434.634232)}
{pt3dadd(179916.000000,159612.000000,77275.000000,423.913076)}
{pt3dadd(179784.000000,159660.000000,77125.000000,440.010912)}
{pt3dadd(179616.000000,159684.000000,76975.000000,428.115044)}
{pt3dadd(179532.000000,159684.000000,76800.000000,412.978478)}
{pt3dadd(179532.000000,159804.000000,76650.000000,397.841912)}
{pt3dadd(179520.000000,159852.000000,76525.000000,408.563068)}
{pt3dadd(179424.000000,159864.000000,76375.000000,417.957758)}
{pt3dadd(179304.000000,159984.000000,76225.000000,417.957758)}
{pt3dadd(179340.000000,160092.000000,76075.000000,426.723318)}
{pt3dadd(179316.000000,160176.000000,75975.000000,524.254438)}
{pt3dadd(179232.000000,160332.000000,75850.000000,558.560106)}
{pt3dadd(178932.000000,160404.000000,75700.000000,607.623614)}
{pt3dadd(178884.000000,160740.000000,75575.000000,671.823688)}
{pt3dadd(178824.000000,161004.000000,75425.000000,737.607948)}
{pt3dadd(178728.000000,161172.000000,75275.000000,681.334148)}
{pt3dadd(178632.000000,161544.000000,75150.000000,677.344368)}
{pt3dadd(178596.000000,161796.000000,75000.000000,663.104682)}
{pt3dadd(178560.000000,161940.000000,74850.000000,640.161928)}
{pt3dadd(178536.000000,162072.000000,74700.000000,584.103660)}
{pt3dadd(178440.000000,162180.000000,74550.000000,534.946376)}
{pt3dadd(178308.000000,162312.000000,74425.000000,489.081006)}
{pt3dadd(178044.000000,162480.000000,74250.000000,484.654078)}
{pt3dadd(177768.000000,162648.000000,74125.000000,458.533324)}
{pt3dadd(177600.000000,163056.000000,73975.000000,448.807332)}
{pt3dadd(177456.000000,163332.000000,73850.000000,485.990516)}
{pt3dadd(177204.000000,163536.000000,73725.000000,535.845666)}
{pt3dadd(176688.000000,163836.000000,73600.000000,531.569526)}
{pt3dadd(176460.000000,164064.000000,73450.000000,585.718240)}
{pt3dadd(176244.000000,164256.000000,73300.000000,614.079540)}
{pt3dadd(176112.000000,164304.000000,73100.000000,634.756708)}
{pt3dadd(175932.000000,164364.000000,72975.000000,630.766928)}
{pt3dadd(175656.000000,164604.000000,72850.000000,608.001160)}
{pt3dadd(175380.000000,164856.000000,72775.000000,569.315033)}
{pt3dadd(174912.000000,165336.000000,72775.000000,492.457760)}

{create adhoc157}
{access adhoc157}
{connect adhoc157(1), adhoc156(0)}
{nseg = 1}
{strdef color color = "White"}
{pt3dclear()}
{pt3dadd(174912.000000,165336.000000,72775.000000,492.457760)}
{pt3dadd(174480.000000,165648.000000,72500.000000,528.648773)}
{pt3dadd(174228.000000,165900.000000,72350.000000,582.010804)}
{pt3dadd(174108.000000,166068.000000,72175.000000,578.655818)}
{pt3dadd(174024.000000,166236.000000,72025.000000,575.060036)}
{pt3dadd(173808.000000,166548.000000,71925.000000,563.887806)}
{pt3dadd(173688.000000,166908.000000,71775.000000,559.143146)}
{pt3dadd(173568.000000,167184.000000,71650.000000,554.867006)}
{pt3dadd(173460.000000,167460.000000,71525.000000,551.626308)}
{pt3dadd(173604.000000,167544.000000,71375.000000,544.798024)}
{pt3dadd(173616.000000,167592.000000,71250.000000,522.833174)}
{pt3dadd(173496.000000,167664.000000,71125.000000,497.572974)}
{pt3dadd(173292.000000,167736.000000,71000.000000,497.572974)}
{pt3dadd(173076.000000,167880.000000,70700.000000,466.305766)}
{pt3dadd(172848.000000,168132.000000,70575.000000,429.732628)}
{pt3dadd(172632.000000,168324.000000,70450.000000,400.715052)}
{pt3dadd(172404.000000,168516.000000,70325.000000,352.060492)}
{pt3dadd(172212.000000,168732.000000,70200.000000,352.060492)}
{pt3dadd(172152.000000,168780.000000,70050.000000,380.197392)}
{pt3dadd(171924.000000,168972.000000,69825.000000,374.414280)}
{pt3dadd(171864.000000,169080.000000,69800.000000,440.558716)}
{pt3dadd(171792.000000,169212.000000,69700.000000,442.696786)}
{pt3dadd(171756.000000,169344.000000,69650.000000,427.000098)}
{pt3dadd(171768.000000,169476.000000,69575.000000,387.480314)}
{pt3dadd(171636.000000,169584.000000,69450.000000,426.595866)}
{pt3dadd(171444.000000,169692.000000,69350.000000,355.416940)}
{pt3dadd(171336.000000,169812.000000,69400.000000,332.650210)}
{pt3dadd(171240.000000,169932.000000,69425.000000,278.072002)}
{pt3dadd(171108.000000,170052.000000,69400.000000,323.962792)}
{pt3dadd(170916.000000,170136.000000,69425.000000,252.772222)}
{pt3dadd(170712.000000,170244.000000,69400.000000,281.466928)}
{pt3dadd(170556.000000,170352.000000,69375.000000,281.466928)}
{pt3dadd(170388.000000,170460.000000,69375.000000,281.466928)}
{pt3dadd(170244.000000,170568.000000,69400.000000,263.605270)}
{pt3dadd(170112.000000,170736.000000,69350.000000,364.157292)}
{pt3dadd(169896.000000,170856.000000,69325.000000,324.336672)}
{pt3dadd(169668.000000,170952.000000,69525.000000,349.316866)}
{pt3dadd(169572.000000,171072.000000,69600.000000,361.101172)}
{pt3dadd(169476.000000,171192.000000,69750.000000,366.647456)}
{pt3dadd(169296.000000,171324.000000,69575.000000,325.390136)}
{pt3dadd(169128.000000,171456.000000,69450.000000,434.768190)}
{pt3dadd(169128.000000,171564.000000,69425.000000,439.432036)}
{pt3dadd(169080.000000,171684.000000,69250.000000,433.233846)}
{pt3dadd(168996.000000,171816.000000,69150.000000,413.179384)}
{pt3dadd(168888.000000,171900.000000,69325.000000,428.315950)}
{pt3dadd(168984.000000,171984.000000,69375.000000,379.252442)}
{pt3dadd(169164.000000,172092.000000,69225.000000,386.883310)}
{pt3dadd(169104.000000,172176.000000,69175.000000,407.589678)}
{pt3dadd(169044.000000,172260.000000,69125.000000,443.314500)}
{pt3dadd(169104.000000,172380.000000,69075.000000,436.943494)}
{pt3dadd(169104.000000,172464.000000,68975.000000,424.628120)}
{pt3dadd(169116.000000,172536.000000,68900.000000,433.095088)}
{pt3dadd(169176.000000,172632.000000,68825.000000,427.920216)}
{pt3dadd(169104.000000,172716.000000,68700.000000,384.070272)}
{pt3dadd(169044.000000,172800.000000,68600.000000,378.125904)}
{pt3dadd(169140.000000,172896.000000,68525.000000,372.579620)}
{pt3dadd(169092.000000,173004.000000,68475.000000,358.937780)}
{pt3dadd(168996.000000,173124.000000,68325.000000,375.603304)}
{pt3dadd(168936.000000,173232.000000,68275.000000,383.728426)}
{pt3dadd(168924.000000,173328.000000,68325.000000,355.548842)}
{pt3dadd(168900.000000,173424.000000,68250.000000,352.916574)}
{pt3dadd(168864.000000,173532.000000,68200.000000,320.084963)}
{pt3dadd(168828.000000,173640.000000,68200.000000,373.213200)}

{create adhoc158}
{access adhoc158}
{connect adhoc158(1), adhoc157(0)}
{nseg = 1}
{strdef color color = "White"}
{pt3dclear()}
{pt3dadd(168828.000000,173640.000000,68200.000000,373.213200)}
{pt3dadd(168648.000000,174648.000000,68050.000000,259.512047)}
{pt3dadd(168672.000000,174840.000000,68100.000000,230.349868)}
{pt3dadd(168588.000000,174984.000000,68000.000000,204.953004)}
{pt3dadd(168504.000000,175128.000000,68000.000000,199.740972)}
{pt3dadd(168432.000000,175236.000000,67975.000000,206.278720)}
{pt3dadd(168348.000000,175380.000000,67950.000000,225.525940)}
{pt3dadd(168276.000000,175488.000000,67900.000000,244.773160)}
{pt3dadd(168240.000000,175620.000000,67875.000000,254.090812)}
{pt3dadd(168204.000000,175740.000000,67800.000000,295.288088)}
{pt3dadd(168108.000000,175836.000000,67775.000000,330.110108)}
{pt3dadd(168036.000000,175944.000000,67725.000000,334.170228)}
{pt3dadd(168060.000000,176052.000000,67800.000000,325.169972)}
{pt3dadd(168000.000000,176136.000000,67800.000000,315.852320)}
{pt3dadd(167940.000000,176232.000000,67750.000000,283.655300)}
{pt3dadd(167880.000000,176328.000000,67750.000000,291.286168)}
{pt3dadd(167880.000000,176436.000000,67725.000000,319.423068)}
{pt3dadd(167892.000000,176556.000000,67725.000000,332.483444)}
{pt3dadd(167748.000000,176652.000000,67675.000000,366.058860)}
{pt3dadd(167604.000000,176748.000000,67600.000000,430.747640)}
{pt3dadd(167472.000000,176856.000000,67550.000000,433.472732)}
{pt3dadd(167460.000000,176964.000000,67525.000000,424.707172)}
{pt3dadd(167436.000000,177060.000000,67500.000000,446.899704)}
{pt3dadd(167400.000000,177144.000000,67525.000000,449.820388)}
{pt3dadd(167352.000000,177240.000000,67550.000000,389.191728)}
{pt3dadd(167316.000000,177336.000000,67550.000000,383.834368)}
{pt3dadd(167256.000000,177408.000000,67525.000000,368.814562)}
{pt3dadd(167196.000000,177504.000000,67500.000000,327.403966)}
{pt3dadd(167136.000000,177588.000000,67475.000000,327.403966)}
{pt3dadd(167076.000000,177684.000000,67450.000000,329.542036)}
{pt3dadd(167016.000000,177780.000000,67400.000000,324.543436)}
{pt3dadd(167052.000000,177888.000000,67425.000000,322.329972)}
{pt3dadd(166980.000000,177984.000000,67400.000000,320.919376)}
{pt3dadd(166872.000000,178080.000000,67375.000000,295.806160)}
{pt3dadd(166764.000000,178176.000000,67375.000000,300.311140)}
{pt3dadd(166752.000000,178272.000000,67350.000000,269.304554)}
{pt3dadd(166740.000000,178368.000000,67350.000000,249.408762)}
{pt3dadd(166668.000000,178452.000000,67325.000000,260.391186)}
{pt3dadd(166596.000000,178560.000000,67300.000000,249.008302)}
{pt3dadd(166620.000000,178656.000000,67275.000000,219.057912)}
{pt3dadd(166608.000000,178740.000000,67225.000000,220.420458)}
{pt3dadd(166584.000000,178824.000000,67175.000000,220.420458)}
{pt3dadd(166548.000000,178920.000000,67125.000000,239.082074)}
{pt3dadd(166524.000000,179016.000000,67100.000000,311.093618)}
{pt3dadd(166488.000000,179112.000000,67150.000000,321.340582)}
{pt3dadd(166464.000000,179184.000000,67100.000000,332.323006)}
{pt3dadd(166440.000000,179268.000000,67025.000000,342.232384)}
{pt3dadd(166416.000000,179364.000000,66975.000000,321.834120)}
{pt3dadd(166320.000000,179460.000000,66975.000000,249.822576)}
{pt3dadd(166224.000000,179556.000000,66950.000000,262.882952)}
{pt3dadd(166128.000000,179640.000000,66900.000000,249.221848)}
{pt3dadd(165996.000000,179748.000000,66900.000000,245.687308)}
{pt3dadd(165888.000000,179844.000000,66825.000000,253.010072)}
{pt3dadd(165768.000000,179940.000000,66750.000000,295.660164)}
{pt3dadd(165648.000000,180036.000000,66625.000000,302.303214)}
{pt3dadd(165480.000000,180108.000000,66625.000000,353.747454)}
{pt3dadd(165432.000000,180204.000000,66625.000000,381.776586)}
{pt3dadd(165396.000000,180288.000000,66625.000000,392.479756)}
{pt3dadd(165252.000000,180360.000000,66550.000000,361.212548)}
{pt3dadd(165060.000000,180456.000000,66425.000000,327.576694)}
{pt3dadd(164868.000000,180564.000000,66325.000000,291.591450)}
{pt3dadd(164532.000000,180672.000000,66225.000000,233.635269)}
{pt3dadd(164316.000000,180768.000000,66200.000000,236.007599)}
{pt3dadd(164100.000000,180888.000000,66125.000000,252.653847)}
{pt3dadd(163980.000000,181020.000000,66050.000000,266.586275)}
{pt3dadd(163860.000000,181104.000000,66000.000000,261.374243)}
{pt3dadd(163740.000000,181224.000000,65875.000000,272.369848)}
{pt3dadd(163572.000000,181296.000000,65700.000000,272.369848)}
{pt3dadd(163356.000000,181272.000000,65550.000000,249.736548)}
{pt3dadd(163092.000000,181332.000000,65450.000000,248.116198)}
{pt3dadd(162996.000000,181440.000000,65325.000000,253.328230)}
{pt3dadd(163008.000000,181464.000000,65225.000000,277.655506)}
{pt3dadd(163020.000000,181476.000000,65125.000000,275.283176)}
{pt3dadd(163008.000000,181404.000000,65000.000000,275.283176)}
{pt3dadd(162864.000000,181416.000000,64900.000000,267.972696)}
{pt3dadd(162864.000000,181476.000000,64775.000000,264.438156)}
{pt3dadd(162840.000000,181440.000000,64675.000000,255.744482)}
{pt3dadd(162696.000000,181476.000000,64575.000000,231.343710)}
{pt3dadd(162600.000000,181476.000000,64500.000000,215.339556)}
{pt3dadd(162624.000000,181524.000000,64350.000000,218.112698)}
{pt3dadd(162564.000000,181524.000000,64250.000000,213.249702)}
{pt3dadd(162540.000000,181596.000000,64150.000000,204.623088)}
{pt3dadd(162516.000000,181668.000000,64050.000000,203.162746)}
{pt3dadd(162480.000000,181668.000000,63925.000000,215.507716)}
{pt3dadd(162420.000000,181680.000000,63825.000000,228.738728)}
{pt3dadd(162360.000000,181680.000000,63700.000000,227.226886)}
{pt3dadd(162396.000000,181716.000000,63575.000000,239.151342)}
{pt3dadd(162336.000000,181740.000000,63475.000000,239.151342)}
{pt3dadd(162264.000000,181788.000000,63350.000000,232.551698)}
{pt3dadd(162192.000000,181800.000000,63250.000000,223.858024)}
{pt3dadd(162108.000000,181836.000000,63150.000000,245.967280)}
{pt3dadd(162132.000000,181896.000000,63050.000000,263.993214)}
{pt3dadd(162060.000000,182004.000000,62950.000000,262.582618)}
{pt3dadd(161892.000000,182172.000000,62825.000000,301.021030)}
{pt3dadd(161820.000000,182328.000000,62725.000000,297.944034)}
{pt3dadd(161820.000000,182316.000000,62625.000000,287.605448)}
{pt3dadd(161808.000000,182340.000000,62525.000000,278.897166)}
{pt3dadd(161808.000000,182364.000000,62425.000000,295.465706)}
{pt3dadd(161760.000000,182460.000000,62350.000000,342.604902)}
{pt3dadd(161676.000000,182520.000000,62225.000000,369.378004)}
{pt3dadd(161436.000000,182664.000000,62125.000000,369.378004)}
{pt3dadd(161184.000000,182808.000000,62025.000000,338.135380)}
{pt3dadd(161040.000000,182880.000000,61875.000000,367.308716)}
{pt3dadd(160908.000000,183060.000000,61775.000000,304.620038)}
{pt3dadd(160776.000000,183228.000000,61675.000000,293.539426)}
{pt3dadd(160608.000000,183312.000000,61550.000000,313.540458)}
{pt3dadd(160488.000000,183276.000000,61425.000000,335.465430)}
{pt3dadd(160308.000000,183444.000000,61300.000000,297.291838)}
{pt3dadd(160128.000000,183600.000000,61225.000000,292.786858)}
{pt3dadd(159936.000000,183672.000000,61100.000000,292.786858)}
{pt3dadd(159828.000000,183780.000000,60950.000000,274.712758)}
{pt3dadd(159708.000000,183840.000000,60850.000000,346.724302)}
{pt3dadd(159588.000000,183888.000000,60750.000000,353.797626)}
{pt3dadd(159492.000000,184104.000000,60650.000000,358.302606)}
{pt3dadd(159396.000000,184224.000000,60625.000000,360.367838)}
{pt3dadd(159288.000000,184380.000000,60550.000000,360.367838)}
{pt3dadd(159180.000000,184488.000000,60500.000000,311.210554)}
{pt3dadd(159084.000000,184608.000000,60450.000000,326.212986)}
{pt3dadd(158976.000000,184644.000000,60375.000000,347.706836)}
{pt3dadd(158880.000000,184704.000000,60375.000000,338.060600)}
{pt3dadd(158796.000000,184692.000000,60350.000000,330.737836)}
{pt3dadd(158688.000000,184656.000000,60250.000000,307.883576)}
{pt3dadd(158592.000000,184740.000000,60275.000000,296.802964)}
{pt3dadd(158508.000000,184884.000000,60275.000000,266.600832)}
{pt3dadd(158412.000000,185064.000000,60350.000000,274.181836)}
{pt3dadd(158340.000000,185304.000000,60425.000000,274.181836)}
{pt3dadd(158220.000000,185544.000000,60075.000000,274.181836)}
{pt3dadd(158040.000000,185532.000000,60125.000000,290.261048)}
{pt3dadd(157956.000000,185520.000000,60200.000000,314.518812)}
{pt3dadd(157860.000000,185892.000000,59950.000000,320.935578)}
{pt3dadd(157752.000000,186012.000000,59975.000000,324.470118)}
{pt3dadd(157620.000000,185952.000000,59825.000000,333.787770)}
{pt3dadd(157524.000000,186156.000000,59925.000000,288.426844)}
{pt3dadd(157440.000000,186324.000000,59900.000000,264.169080)}
{pt3dadd(157332.000000,186408.000000,59650.000000,255.757426)}
{pt3dadd(157272.000000,186504.000000,59425.000000,253.959534)}
{pt3dadd(157164.000000,186636.000000,59350.000000,251.964646)}
{pt3dadd(156876.000000,186696.000000,59175.000000,264.093528)}
{pt3dadd(156756.000000,186804.000000,59050.000000,258.310416)}
{pt3dadd(156672.000000,186828.000000,58925.000000,235.377732)}
{pt3dadd(156564.000000,186852.000000,58800.000000,212.679580)}
{pt3dadd(156468.000000,186840.000000,58650.000000,190.933060)}
{pt3dadd(156288.000000,186792.000000,58550.000000,177.806736)}
{pt3dadd(156156.000000,186792.000000,58425.000000,197.126456)}
{pt3dadd(156036.000000,186768.000000,58300.000000,238.133240)}
{pt3dadd(155880.000000,186720.000000,58150.000000,281.949004)}
{pt3dadd(155688.000000,186696.000000,58050.000000,316.771024)}
{pt3dadd(155604.000000,186660.000000,57925.000000,332.869532)}
{pt3dadd(155520.000000,186624.000000,57800.000000,315.411104)}
{pt3dadd(155412.000000,186624.000000,57700.000000,280.768464)}
{pt3dadd(155352.000000,186636.000000,57575.000000,278.312468)}
{pt3dadd(155208.000000,186648.000000,57500.000000,243.490448)}
{pt3dadd(155100.000000,186612.000000,57400.000000,237.745122)}
{pt3dadd(155064.000000,186660.000000,57125.000000,225.974452)}
{pt3dadd(154968.000000,186672.000000,56975.000000,235.220228)}
{pt3dadd(154860.000000,186732.000000,56825.000000,211.524122)}
{pt3dadd(154908.000000,186720.000000,56650.000000,222.650036)}
{pt3dadd(154836.000000,186816.000000,56525.000000,220.062600)}
{pt3dadd(154908.000000,186792.000000,56375.000000,220.062600)}
{pt3dadd(154884.000000,186792.000000,56250.000000,199.101096)}
{pt3dadd(154860.000000,186792.000000,56125.000000,187.975182)}
{pt3dadd(154968.000000,186696.000000,55975.000000,164.218638)}
{pt3dadd(154908.000000,186756.000000,55875.000000,177.414396)}
{pt3dadd(154896.000000,186744.000000,55725.000000,187.323774)}
{pt3dadd(154860.000000,186744.000000,55575.000000,190.422866)}
{pt3dadd(154752.000000,186852.000000,55475.000000,212.169386)}
{pt3dadd(154704.000000,186804.000000,55350.000000,224.800016)}
{pt3dadd(154752.000000,186672.000000,55225.000000,230.195848)}
{pt3dadd(154668.000000,186576.000000,55100.000000,205.699804)}
{pt3dadd(154548.000000,186588.000000,54975.000000,234.945100)}
{pt3dadd(154440.000000,186696.000000,54875.000000,243.356754)}
{pt3dadd(154524.000000,186612.000000,54725.000000,265.103274)}
{pt3dadd(154584.000000,186552.000000,54600.000000,305.598232)}
{pt3dadd(154512.000000,186612.000000,54525.000000,363.055836)}
{pt3dadd(154476.000000,186564.000000,54425.000000,349.995460)}
{pt3dadd(154512.000000,186540.000000,54250.000000,383.506818)}
{pt3dadd(154452.000000,186480.000000,54150.000000,376.184054)}
{pt3dadd(154296.000000,186516.000000,54050.000000,383.012338)}
{pt3dadd(154176.000000,186564.000000,53900.000000,383.012338)}
{pt3dadd(154044.000000,186684.000000,53825.000000,421.185930)}
{pt3dadd(153972.000000,186684.000000,53725.000000,361.331832)}
{pt3dadd(153828.000000,186708.000000,53600.000000,392.086056)}
{pt3dadd(153684.000000,186792.000000,53475.000000,336.069140)}
{pt3dadd(153480.000000,186828.000000,53375.000000,301.309688)}
{pt3dadd(153516.000000,186876.000000,53225.000000,266.550236)}
{pt3dadd(153300.000000,186948.000000,53125.000000,282.554390)}
{pt3dadd(153096.000000,187020.000000,53000.000000,257.195998)}
{pt3dadd(153012.000000,187200.000000,52900.000000,303.143932)}
{pt3dadd(153144.000000,187188.000000,52800.000000,317.141702)}
{pt3dadd(153024.000000,187248.000000,52700.000000,331.139472)}
{pt3dadd(153036.000000,187296.000000,52550.000000,324.066148)}
{pt3dadd(152916.000000,187464.000000,52450.000000,346.699448)}
{pt3dadd(152928.000000,187596.000000,52325.000000,313.367008)}
{pt3dadd(152952.000000,187788.000000,52225.000000,331.208006)}
{pt3dadd(152940.000000,187908.000000,52100.000000,351.969688)}
{pt3dadd(152904.000000,188040.000000,51975.000000,381.676312)}
{pt3dadd(152940.000000,188112.000000,51850.000000,379.044044)}
{pt3dadd(152988.000000,188184.000000,51750.000000,429.763836)}
{pt3dadd(153024.000000,188148.000000,51625.000000,424.217552)}
{pt3dadd(153072.000000,188100.000000,51525.000000,430.371544)}
{pt3dadd(153132.000000,188124.000000,51425.000000,448.233202)}
{pt3dadd(153108.000000,188280.000000,51300.000000,448.233202)}
{pt3dadd(153132.000000,188316.000000,51175.000000,413.592622)}
{pt3dadd(153144.000000,188340.000000,51025.000000,425.083274)}
{pt3dadd(153108.000000,188400.000000,50900.000000,405.287442)}
{pt3dadd(153036.000000,188196.000000,50650.000000,370.779536)}
{pt3dadd(153048.000000,188352.000000,50500.000000,368.236932)}
{pt3dadd(152880.000000,188496.000000,50375.000000,337.977072)}
{pt3dadd(152760.000000,188472.000000,50225.000000,296.779796)}
{pt3dadd(152580.000000,188484.000000,50075.000000,277.460076)}
{pt3dadd(152484.000000,188460.000000,49975.000000,271.473024)}
{pt3dadd(152424.000000,188520.000000,49825.000000,238.010442)}
{pt3dadd(152412.000000,188532.000000,49675.000000,252.191090)}
{pt3dadd(152400.000000,188580.000000,49500.000000,243.260260)}
{pt3dadd(152388.000000,188688.000000,49375.000000,288.971496)}
{pt3dadd(152448.000000,188760.000000,49200.000000,301.601598)}
{pt3dadd(152388.000000,188856.000000,49050.000000,335.064180)}
{pt3dadd(152280.000000,188988.000000,48875.000000,371.637318)}
{pt3dadd(152340.000000,189060.000000,48675.000000,387.641472)}
{pt3dadd(152364.000000,189168.000000,48475.000000,330.560516)}
{pt3dadd(152364.000000,189240.000000,48300.000000,319.857346)}
{pt3dadd(152364.000000,189336.000000,48175.000000,306.320738)}
{pt3dadd(152364.000000,189420.000000,48000.000000,271.812832)}
{pt3dadd(152412.000000,189528.000000,47800.000000,271.812832)}
{pt3dadd(152544.000000,189528.000000,47650.000000,270.402236)}
{pt3dadd(152520.000000,189648.000000,47475.000000,270.402236)}
{pt3dadd(152688.000000,189648.000000,47375.000000,242.153140)}
{pt3dadd(152640.000000,189756.000000,47150.000000,267.266356)}
{pt3dadd(152568.000000,189888.000000,47050.000000,255.495686)}
{pt3dadd(152484.000000,190020.000000,46950.000000,310.632252)}
{pt3dadd(152412.000000,190152.000000,46800.000000,316.830442)}
{pt3dadd(152496.000000,190248.000000,46675.000000,327.926706)}
{pt3dadd(152640.000000,190236.000000,46550.000000,363.442150)}
{pt3dadd(152544.000000,190356.000000,46425.000000,392.671248)}
{pt3dadd(152448.000000,190536.000000,46325.000000,389.430550)}
{pt3dadd(152568.000000,190656.000000,46150.000000,406.663820)}
{pt3dadd(152700.000000,190788.000000,46000.000000,450.995100)}
{pt3dadd(152724.000000,190812.000000,45850.000000,388.301208)}
{pt3dadd(152616.000000,190788.000000,45700.000000,381.181366)}
{pt3dadd(152484.000000,190944.000000,45375.000000,356.557208)}
{pt3dadd(152400.000000,191100.000000,45200.000000,346.201248)}
{pt3dadd(152508.000000,191148.000000,45050.000000,335.102012)}
{pt3dadd(152544.000000,191124.000000,44925.000000,351.181224)}
{pt3dadd(152580.000000,191208.000000,44800.000000,358.301066)}
{pt3dadd(152724.000000,191244.000000,44675.000000,371.029356)}
{pt3dadd(152808.000000,191244.000000,44550.000000,357.953856)}
{pt3dadd(152868.000000,191196.000000,44400.000000,396.448296)}
{pt3dadd(152880.000000,191160.000000,44275.000000,378.374196)}
{pt3dadd(152892.000000,191112.000000,44125.000000,395.039720)}
{pt3dadd(153012.000000,191208.000000,44000.000000,403.805280)}
{pt3dadd(153108.000000,191136.000000,43850.000000,396.482516)}
{pt3dadd(153168.000000,191016.000000,43700.000000,366.166628)}
{pt3dadd(153228.000000,190896.000000,43600.000000,368.161516)}
{pt3dadd(153360.000000,190896.000000,43475.000000,313.031812)}
{pt3dadd(153480.000000,190944.000000,43375.000000,270.214186)}
{pt3dadd(153552.000000,190980.000000,43250.000000,252.351774)}
{pt3dadd(153660.000000,190920.000000,43150.000000,215.478520)}
{pt3dadd(153600.000000,190920.000000,43025.000000,219.681822)}
{pt3dadd(153744.000000,190908.000000,42900.000000,255.690006)}
{pt3dadd(153708.000000,190980.000000,42775.000000,266.310612)}
{pt3dadd(153828.000000,190944.000000,42675.000000,304.571288)}
{pt3dadd(153864.000000,191028.000000,42550.000000,333.265990)}
{pt3dadd(153984.000000,191112.000000,42450.000000,359.264820)}
{pt3dadd(154044.000000,191160.000000,42350.000000,381.516648)}
{pt3dadd(154080.000000,191100.000000,42225.000000,426.912958)}
{pt3dadd(154068.000000,191112.000000,42100.000000,462.829550)}
{pt3dadd(154176.000000,191112.000000,42000.000000,462.829550)}
{pt3dadd(154296.000000,191112.000000,41900.000000,491.190850)}
{pt3dadd(154368.000000,191160.000000,41825.000000,497.786534)}
{pt3dadd(154452.000000,191220.000000,41750.000000,475.821684)}
{pt3dadd(154416.000000,191232.000000,41675.000000,444.903692)}
{pt3dadd(154416.000000,191244.000000,41600.000000,456.002928)}
{pt3dadd(154452.000000,191292.000000,41525.000000,456.002928)}
{pt3dadd(154404.000000,191304.000000,41425.000000,466.794596)}
{pt3dadd(154488.000000,191328.000000,41275.000000,481.931162)}
{pt3dadd(154656.000000,191388.000000,41200.000000,493.030398)}
{pt3dadd(154752.000000,191436.000000,41075.000000,487.288522)}
{pt3dadd(155004.000000,191436.000000,40975.000000,475.722294)}
{pt3dadd(155136.000000,191508.000000,40825.000000,452.170847)}
{pt3dadd(155676.000000,191544.000000,40800.000000,527.803160)}

{create adhoc159}
{access adhoc159}
{connect adhoc159(1), adhoc158(0)}
{nseg = 1}
{strdef color color = "White"}
{pt3dclear()}
{pt3dadd(155676.000000,191544.000000,40800.000000,527.803160)}
{pt3dadd(156264.000000,191184.000000,40800.000000,253.533353)}
{pt3dadd(156372.000000,190968.000000,40650.000000,247.570692)}
{pt3dadd(156600.000000,190884.000000,40475.000000,180.647514)}
{pt3dadd(156420.000000,190812.000000,40325.000000,176.723340)}
{pt3dadd(156588.000000,190704.000000,40175.000000,206.426226)}
{pt3dadd(156576.000000,190524.000000,40050.000000,172.187724)}
{pt3dadd(156696.000000,190308.000000,39950.000000,169.855802)}
{pt3dadd(156816.000000,190248.000000,39875.000000,142.705331)}
{pt3dadd(156828.000000,190056.000000,39750.000000,165.560949)}
{pt3dadd(156828.000000,189972.000000,39625.000000,178.176443)}
{pt3dadd(156840.000000,189888.000000,39525.000000,182.100617)}
{pt3dadd(157008.000000,189768.000000,39425.000000,235.352395)}
{pt3dadd(157008.000000,189612.000000,39325.000000,266.736350)}
{pt3dadd(157368.000000,189528.000000,39200.000000,239.681964)}
{pt3dadd(157236.000000,189420.000000,39150.000000,203.309926)}
{pt3dadd(157164.000000,189300.000000,39075.000000,191.020603)}
{pt3dadd(157140.000000,189180.000000,38925.000000,123.303736)}
{pt3dadd(156996.000000,188916.000000,38775.000000,105.924010)}
{pt3dadd(157068.000000,188796.000000,38600.000000,126.603558)}
{pt3dadd(156936.000000,188484.000000,38475.000000,129.035056)}
{pt3dadd(156888.000000,188220.000000,38375.000000,140.291761)}
{pt3dadd(156936.000000,188064.000000,38275.000000,154.756850)}
{pt3dadd(156972.000000,187788.000000,38125.000000,153.049780)}
{pt3dadd(156996.000000,187488.000000,38000.000000,126.996770)}
{pt3dadd(157104.000000,187284.000000,37875.000000,132.688214)}
{pt3dadd(157212.000000,186972.000000,37775.000000,149.354434)}
{pt3dadd(157380.000000,186708.000000,37650.000000,155.501790)}
{pt3dadd(157440.000000,186540.000000,37550.000000,191.499533)}
{pt3dadd(157440.000000,186276.000000,37550.000000,193.187270)}

{create adhoc160}
{access adhoc160}
{connect adhoc160(1), adhoc158(0)}
{nseg = 1}
{strdef color color = "White"}
{pt3dclear()}
{pt3dadd(155676.000000,191544.000000,40800.000000,527.803160)}
{pt3dadd(155760.000000,192216.000000,40675.000000,339.148240)}
{pt3dadd(155736.000000,192528.000000,40525.000000,236.671119)}
{pt3dadd(155952.000000,192840.000000,40375.000000,165.932507)}
{pt3dadd(156144.000000,193224.000000,40275.000000,123.609271)}
{pt3dadd(156252.000000,193560.000000,40400.000000,124.606713)}
{pt3dadd(156360.000000,193812.000000,40400.000000,189.449547)}
{pt3dadd(156504.000000,193980.000000,40400.000000,251.424538)}
{pt3dadd(156564.000000,194088.000000,40175.000000,286.246558)}
{pt3dadd(156624.000000,194196.000000,40000.000000,328.569794)}
{pt3dadd(156600.000000,194196.000000,39875.000000,326.608884)}
{pt3dadd(156672.000000,194244.000000,39725.000000,260.751020)}
{pt3dadd(156660.000000,194256.000000,39575.000000,208.071824)}
{pt3dadd(156816.000000,194508.000000,39625.000000,155.245712)}
{pt3dadd(157032.000000,194652.000000,39475.000000,111.092884)}
{pt3dadd(157032.000000,194796.000000,39275.000000,116.262178)}
{pt3dadd(157152.000000,194952.000000,39250.000000,138.170060)}
{pt3dadd(157260.000000,195096.000000,39275.000000,139.133528)}
{pt3dadd(157392.000000,195204.000000,39250.000000,149.636404)}
{pt3dadd(157524.000000,195300.000000,39150.000000,142.805852)}
{pt3dadd(157752.000000,195336.000000,39150.000000,166.884294)}
{pt3dadd(157956.000000,195492.000000,39150.000000,160.115990)}
{pt3dadd(158064.000000,195432.000000,39000.000000,217.573594)}
{pt3dadd(158268.000000,195432.000000,38775.000000,239.498566)}
{pt3dadd(158448.000000,195432.000000,38500.000000,245.460794)}
{pt3dadd(158628.000000,195432.000000,38275.000000,220.275618)}
{pt3dadd(158796.000000,195288.000000,37775.000000,205.136040)}
{pt3dadd(158976.000000,195204.000000,37600.000000,156.715484)}
{pt3dadd(159096.000000,195144.000000,37450.000000,143.519726)}
{pt3dadd(159024.000000,194928.000000,37325.000000,171.677154)}
{pt3dadd(159000.000000,194832.000000,37200.000000,173.929646)}
{pt3dadd(159168.000000,194676.000000,37075.000000,172.533116)}
{pt3dadd(159252.000000,194520.000000,36950.000000,165.269630)}
{pt3dadd(159216.000000,194364.000000,36850.000000,63.728030)}

{create adhoc161}
{access adhoc161}
{connect adhoc161(1), adhoc157(0)}
{nseg = 1}
{strdef color color = "White"}
{pt3dclear()}
{pt3dadd(168828.000000,173640.000000,68200.000000,373.213200)}
{pt3dadd(168624.000000,173688.000000,67750.000000,386.529247)}
{pt3dadd(168348.000000,173820.000000,67475.000000,355.000008)}
{pt3dadd(168228.000000,173904.000000,67275.000000,352.457404)}
{pt3dadd(168096.000000,173940.000000,67125.000000,349.732312)}
{pt3dadd(167772.000000,173892.000000,66900.000000,347.100044)}
{pt3dadd(167748.000000,173952.000000,66725.000000,331.568548)}
{pt3dadd(167652.000000,173928.000000,66575.000000,345.566318)}
{pt3dadd(167484.000000,173952.000000,66425.000000,350.741190)}
{pt3dadd(167352.000000,173976.000000,66250.000000,324.448706)}
{pt3dadd(167280.000000,174000.000000,66125.000000,297.374350)}
{pt3dadd(167064.000000,174492.000000,65950.000000,303.572540)}
{pt3dadd(166812.000000,174576.000000,65800.000000,313.234986)}
{pt3dadd(166704.000000,174660.000000,65650.000000,260.582966)}
{pt3dadd(166536.000000,174732.000000,65500.000000,272.367272)}
{pt3dadd(166320.000000,174684.000000,65350.000000,283.362416)}
{pt3dadd(166272.000000,174768.000000,65200.000000,283.362416)}
{pt3dadd(166164.000000,174816.000000,65075.000000,269.348436)}
{pt3dadd(166092.000000,174840.000000,64900.000000,297.505864)}
{pt3dadd(165972.000000,174888.000000,64775.000000,295.367794)}
{pt3dadd(165876.000000,174984.000000,64625.000000,291.445974)}
{pt3dadd(165792.000000,175068.000000,64475.000000,300.779280)}
{pt3dadd(165768.000000,175212.000000,64325.000000,289.396396)}
{pt3dadd(165612.000000,175296.000000,64200.000000,269.106178)}
{pt3dadd(165480.000000,175320.000000,64050.000000,259.459942)}
{pt3dadd(165312.000000,175296.000000,63950.000000,243.455788)}
{pt3dadd(165156.000000,175212.000000,63800.000000,225.997360)}
{pt3dadd(165108.000000,175092.000000,63675.000000,219.622522)}
{pt3dadd(164988.000000,175068.000000,63525.000000,217.446756)}
{pt3dadd(164916.000000,174936.000000,63375.000000,223.032872)}
{pt3dadd(164820.000000,174924.000000,63200.000000,235.377842)}
{pt3dadd(164652.000000,174876.000000,63050.000000,222.146830)}
{pt3dadd(164532.000000,174780.000000,62925.000000,225.223826)}
{pt3dadd(164328.000000,174756.000000,62800.000000,267.009530)}
{pt3dadd(164280.000000,174672.000000,62650.000000,250.440990)}
{pt3dadd(164208.000000,174576.000000,62500.000000,242.329504)}
{pt3dadd(164004.000000,174516.000000,62350.000000,299.410460)}
{pt3dadd(163848.000000,174408.000000,62200.000000,310.031066)}
{pt3dadd(163716.000000,174360.000000,62000.000000,305.202740)}
{pt3dadd(163632.000000,174312.000000,61800.000000,350.944616)}
{pt3dadd(163416.000000,174276.000000,61650.000000,373.053872)}
{pt3dadd(163284.000000,174336.000000,61500.000000,423.847600)}
{pt3dadd(163200.000000,174288.000000,61325.000000,459.174928)}
{pt3dadd(163116.000000,174276.000000,61175.000000,461.547258)}
{pt3dadd(162996.000000,174252.000000,61050.000000,443.077092)}
{pt3dadd(162888.000000,174216.000000,60900.000000,450.196934)}
{pt3dadd(162840.000000,174216.000000,60750.000000,351.894078)}
{pt3dadd(162672.000000,174216.000000,60600.000000,345.740086)}
{pt3dadd(162504.000000,174252.000000,60475.000000,309.731902)}
{pt3dadd(162408.000000,174264.000000,60325.000000,290.028476)}
{pt3dadd(162492.000000,174180.000000,60200.000000,297.928440)}
{pt3dadd(162588.000000,174144.000000,60050.000000,319.046052)}
{pt3dadd(162420.000000,174216.000000,59875.000000,307.946816)}
{pt3dadd(162264.000000,174192.000000,59725.000000,306.801058)}
{pt3dadd(162192.000000,174132.000000,59575.000000,319.861434)}
{pt3dadd(162156.000000,174048.000000,59400.000000,322.682626)}
{pt3dadd(162096.000000,174012.000000,59250.000000,277.903394)}
{pt3dadd(162000.000000,173940.000000,59100.000000,257.902362)}
{pt3dadd(161892.000000,173928.000000,58925.000000,283.975692)}
{pt3dadd(161772.000000,173916.000000,58775.000000,276.127348)}
{pt3dadd(161664.000000,173904.000000,58550.000000,242.551932)}
{pt3dadd(161544.000000,173904.000000,58375.000000,256.641724)}
{pt3dadd(161448.000000,173832.000000,58225.000000,233.383480)}
{pt3dadd(161412.000000,173712.000000,58050.000000,244.464092)}
{pt3dadd(161388.000000,173652.000000,57900.000000,221.998108)}
{pt3dadd(161328.000000,173604.000000,57750.000000,231.315760)}
{pt3dadd(161100.000000,173352.000000,57400.000000,240.887588)}
{pt3dadd(160896.000000,173352.000000,57025.000000,225.195906)}
{pt3dadd(160704.000000,173352.000000,56550.000000,196.962462)}
{pt3dadd(160548.000000,173352.000000,56275.000000,221.289738)}
{pt3dadd(160332.000000,173352.000000,55925.000000,211.972086)}
{pt3dadd(160140.000000,173028.000000,55725.000000,202.400258)}
{pt3dadd(160080.000000,173076.000000,55575.000000,228.119172)}
{pt3dadd(159948.000000,173016.000000,55425.000000,263.983484)}
{pt3dadd(159756.000000,173088.000000,55325.000000,265.910416)}
{pt3dadd(159624.000000,173160.000000,55200.000000,252.714658)}
{pt3dadd(159444.000000,173280.000000,55125.000000,257.251996)}
{pt3dadd(159276.000000,173340.000000,55000.000000,254.478854)}
{pt3dadd(159144.000000,173412.000000,54900.000000,251.846586)}
{pt3dadd(159204.000000,173424.000000,54800.000000,228.913902)}
{pt3dadd(159024.000000,173472.000000,54700.000000,272.863884)}
{pt3dadd(158940.000000,173556.000000,54600.000000,252.407162)}
{pt3dadd(158820.000000,173604.000000,54475.000000,238.392596)}
{pt3dadd(158784.000000,173592.000000,54375.000000,185.941346)}
{pt3dadd(158760.000000,173592.000000,54275.000000,193.716086)}
{pt3dadd(158748.000000,173544.000000,54175.000000,174.344746)}
{pt3dadd(158604.000000,173436.000000,54075.000000,216.125244)}
{pt3dadd(158592.000000,173484.000000,53975.000000,248.070896)}
{pt3dadd(158376.000000,173484.000000,53625.000000,303.154414)}
{pt3dadd(158112.000000,173484.000000,53375.000000,322.372478)}
{pt3dadd(157956.000000,173508.000000,53225.000000,331.387858)}
{pt3dadd(157872.000000,173592.000000,53125.000000,315.098572)}
{pt3dadd(157776.000000,173676.000000,53000.000000,321.296762)}
{pt3dadd(157644.000000,173748.000000,52875.000000,321.296762)}
{pt3dadd(157452.000000,173820.000000,52750.000000,373.805182)}
{pt3dadd(157344.000000,173820.000000,52500.000000,381.436050)}
{pt3dadd(157188.000000,173820.000000,52325.000000,402.553662)}
{pt3dadd(156912.000000,173820.000000,52100.000000,402.553662)}
{pt3dadd(156744.000000,173820.000000,51875.000000,399.921394)}
{pt3dadd(156708.000000,173712.000000,51750.000000,358.884350)}
{pt3dadd(156648.000000,173688.000000,51650.000000,330.855218)}
{pt3dadd(156636.000000,173664.000000,51550.000000,315.323722)}
{pt3dadd(156624.000000,173640.000000,51450.000000,309.125532)}
{pt3dadd(156576.000000,173688.000000,51350.000000,299.463086)}
{pt3dadd(156516.000000,173724.000000,51225.000000,258.746414)}
{pt3dadd(156444.000000,173724.000000,51125.000000,260.483062)}
{pt3dadd(156432.000000,173712.000000,51025.000000,245.325118)}
{pt3dadd(156432.000000,173688.000000,50925.000000,218.038292)}
{pt3dadd(156432.000000,173676.000000,50825.000000,197.440878)}
{pt3dadd(156456.000000,173688.000000,50750.000000,197.440878)}
{pt3dadd(156468.000000,173676.000000,50650.000000,183.779774)}
{pt3dadd(156444.000000,173676.000000,50550.000000,193.351602)}
{pt3dadd(156420.000000,173688.000000,50450.000000,220.638428)}
{pt3dadd(156408.000000,173688.000000,50300.000000,232.824188)}
{pt3dadd(156396.000000,173604.000000,50200.000000,231.755156)}
{pt3dadd(156348.000000,173568.000000,50075.000000,251.002376)}
{pt3dadd(156216.000000,173568.000000,49975.000000,256.588492)}
{pt3dadd(156156.000000,173388.000000,49850.000000,237.341272)}
{pt3dadd(156144.000000,173376.000000,49725.000000,213.262830)}
{pt3dadd(156096.000000,173448.000000,49625.000000,213.262830)}
{pt3dadd(156048.000000,173388.000000,49525.000000,195.331744)}
{pt3dadd(156144.000000,173352.000000,49425.000000,176.084524)}
{pt3dadd(156120.000000,173232.000000,49325.000000,184.711138)}
{pt3dadd(156144.000000,173124.000000,49200.000000,184.711138)}
{pt3dadd(156204.000000,173028.000000,49075.000000,240.138682)}
{pt3dadd(156228.000000,172968.000000,48950.000000,273.601264)}
{pt3dadd(156252.000000,172848.000000,48800.000000,310.922584)}
{pt3dadd(156276.000000,172728.000000,48700.000000,319.616258)}
{pt3dadd(156300.000000,172596.000000,48600.000000,375.891720)}
{pt3dadd(156360.000000,172524.000000,48475.000000,355.130038)}
{pt3dadd(156396.000000,172476.000000,48350.000000,345.796732)}
{pt3dadd(156324.000000,172416.000000,48250.000000,325.795700)}
{pt3dadd(156264.000000,172332.000000,48150.000000,331.782752)}
{pt3dadd(156240.000000,172248.000000,48050.000000,368.550652)}
{pt3dadd(156240.000000,172200.000000,47950.000000,398.707024)}
{pt3dadd(156444.000000,172140.000000,47850.000000,461.473754)}
{pt3dadd(156636.000000,172104.000000,47750.000000,505.323698)}
{pt3dadd(156720.000000,172080.000000,47625.000000,524.695038)}
{pt3dadd(156468.000000,172152.000000,47500.000000,516.288438)}
{pt3dadd(156264.000000,172164.000000,47375.000000,516.288438)}
{pt3dadd(156300.000000,172104.000000,47275.000000,455.735172)}
{pt3dadd(156336.000000,172056.000000,47175.000000,437.243620)}
{pt3dadd(156324.000000,171888.000000,47100.000000,411.885228)}
{pt3dadd(156300.000000,171732.000000,47025.000000,316.949758)}
{pt3dadd(156276.000000,171576.000000,46950.000000,243.248661)}
{pt3dadd(156264.000000,171408.000000,46875.000000,206.552739)}
{pt3dadd(156264.000000,171204.000000,46800.000000,152.043951)}
{pt3dadd(156264.000000,171000.000000,46750.000000,122.893555)}
{pt3dadd(156300.000000,170808.000000,46675.000000,129.983879)}
{pt3dadd(156276.000000,170748.000000,46575.000000,121.743489)}
{pt3dadd(156252.000000,170772.000000,46475.000000,113.459217)}
{pt3dadd(156240.000000,170628.000000,46425.000000,103.659687)}
{pt3dadd(156276.000000,170244.000000,46400.000000,115.489795)}
{pt3dadd(156276.000000,170016.000000,46300.000000,109.992223)}
{pt3dadd(156300.000000,169896.000000,46175.000000,146.042920)}
{pt3dadd(156396.000000,169776.000000,45975.000000,166.042920)}
{pt3dadd(156588.000000,169668.000000,45925.000000,233.172430)}
{pt3dadd(156744.000000,169548.000000,45675.000000,230.673130)}
{pt3dadd(156876.000000,169440.000000,45525.000000,223.706916)}
{pt3dadd(157032.000000,169380.000000,45350.000000,218.843920)}
{pt3dadd(157152.000000,169260.000000,45175.000000,226.412204)}
{pt3dadd(157212.000000,169368.000000,44900.000000,215.691048)}
{pt3dadd(157296.000000,169428.000000,44750.000000,220.869028)}
{pt3dadd(157404.000000,169392.000000,44650.000000,230.441258)}
{pt3dadd(157416.000000,169188.000000,44650.000000,228.929416)}
{pt3dadd(157680.000000,169344.000000,44275.000000,237.929672)}
{pt3dadd(157680.000000,169392.000000,43925.000000,216.812060)}
{pt3dadd(157824.000000,169536.000000,43600.000000,212.862078)}
{pt3dadd(157872.000000,169644.000000,43425.000000,235.717696)}
{pt3dadd(157776.000000,169752.000000,43300.000000,260.118468)}
{pt3dadd(157896.000000,169860.000000,43175.000000,252.795704)}
{pt3dadd(158016.000000,169872.000000,43050.000000,271.457320)}
{pt3dadd(157788.000000,170040.000000,42950.000000,310.049942)}
{pt3dadd(157836.000000,170076.000000,42850.000000,315.445774)}
{pt3dadd(157752.000000,170088.000000,42725.000000,306.737492)}
{pt3dadd(157872.000000,170148.000000,42625.000000,314.060256)}
{pt3dadd(157944.000000,170148.000000,42525.000000,339.552782)}
{pt3dadd(158016.000000,170160.000000,42425.000000,309.292922)}
{pt3dadd(158028.000000,170232.000000,42325.000000,300.599248)}
{pt3dadd(158028.000000,170328.000000,42225.000000,293.018244)}
{pt3dadd(158016.000000,170424.000000,42125.000000,297.078364)}
{pt3dadd(158064.000000,170508.000000,42000.000000,256.583406)}
{pt3dadd(158160.000000,170604.000000,41925.000000,239.521430)}
{pt3dadd(158220.000000,170712.000000,41800.000000,220.894300)}
{pt3dadd(158232.000000,170832.000000,41675.000000,214.294656)}
{pt3dadd(158256.000000,171012.000000,41600.000000,179.157208)}
{pt3dadd(158292.000000,171192.000000,41500.000000,177.295916)}
{pt3dadd(158268.000000,171384.000000,41400.000000,172.949079)}
{pt3dadd(158208.000000,171528.000000,41350.000000,188.499213)}
{pt3dadd(158172.000000,171648.000000,41350.000000,200.684973)}
{pt3dadd(158088.000000,171744.000000,41300.000000,270.330327)}
{pt3dadd(157956.000000,171840.000000,41225.000000,268.532435)}
{pt3dadd(157944.000000,171948.000000,41000.000000,340.695034)}
{pt3dadd(157824.000000,172068.000000,41000.000000,380.645288)}
{pt3dadd(157728.000000,172164.000000,41025.000000,409.818624)}
{pt3dadd(157596.000000,172284.000000,41000.000000,375.310718)}
{pt3dadd(157632.000000,172392.000000,40950.000000,407.149486)}
{pt3dadd(157680.000000,172500.000000,40900.000000,366.654528)}
{pt3dadd(157584.000000,172620.000000,40925.000000,385.364886)}
{pt3dadd(157608.000000,172728.000000,40825.000000,360.251670)}
{pt3dadd(157668.000000,172800.000000,40675.000000,315.868058)}
{pt3dadd(157740.000000,172908.000000,40500.000000,287.688474)}
{pt3dadd(157692.000000,172992.000000,40750.000000,269.096884)}
{pt3dadd(157572.000000,172548.000000,40475.000000,200.055432)}
{pt3dadd(157836.000000,172992.000000,40375.000000,164.917984)}
{pt3dadd(157860.000000,173208.000000,40200.000000,205.241476)}
{pt3dadd(157848.000000,173436.000000,40075.000000,189.237322)}
{pt3dadd(157752.000000,173604.000000,39975.000000,170.598314)}
{pt3dadd(157968.000000,173868.000000,39875.000000,175.429536)}
{pt3dadd(158088.000000,174036.000000,39750.000000,183.574180)}
{pt3dadd(158208.000000,174084.000000,39625.000000,152.496852)}
{pt3dadd(158352.000000,174048.000000,39500.000000,134.564696)}
{pt3dadd(158532.000000,174072.000000,39375.000000,154.475006)}
{pt3dadd(158724.000000,174180.000000,39275.000000,142.644898)}
{pt3dadd(159012.000000,174204.000000,39225.000000,124.166208)}
{pt3dadd(159192.000000,174156.000000,39125.000000,184.416872)}
{pt3dadd(159336.000000,174192.000000,39000.000000,199.761592)}
{pt3dadd(159288.000000,174216.000000,38875.000000,197.262292)}
{pt3dadd(159324.000000,174276.000000,38775.000000,202.085412)}
{pt3dadd(159336.000000,174396.000000,38675.000000,232.876180)}
{pt3dadd(159372.000000,174468.000000,38575.000000,183.184322)}
{pt3dadd(159420.000000,174528.000000,38475.000000,174.455108)}
{pt3dadd(159456.000000,174516.000000,38350.000000,172.123186)}
{pt3dadd(159504.000000,174624.000000,38275.000000,177.858872)}
{pt3dadd(159420.000000,174612.000000,38050.000000,163.294302)}
{pt3dadd(159420.000000,174660.000000,37675.000000,154.565088)}
{pt3dadd(159420.000000,174840.000000,37525.000000,163.294302)}
{pt3dadd(159228.000000,174936.000000,37350.000000,200.448244)}
{pt3dadd(159636.000000,174672.000000,37225.000000,234.042266)}
{pt3dadd(159948.000000,174408.000000,37150.000000,250.227186)}
{pt3dadd(160056.000000,174216.000000,37025.000000,246.690524)}
{pt3dadd(160320.000000,174048.000000,36975.000000,239.922220)}
{pt3dadd(160692.000000,173988.000000,36850.000000,206.328198)}
{pt3dadd(160944.000000,173712.000000,36775.000000,182.632092)}
{pt3dadd(161088.000000,173508.000000,36700.000000,169.885828)}
{pt3dadd(161256.000000,173544.000000,36600.000000,263.228546)}
{pt3dadd(161724.000000,173448.000000,36500.000000,329.083398)}
{pt3dadd(161772.000000,173496.000000,36400.000000,398.594012)}
{pt3dadd(161940.000000,173436.000000,36325.000000,398.594012)}
{pt3dadd(162120.000000,173388.000000,36225.000000,389.263204)}
{pt3dadd(162264.000000,173340.000000,36150.000000,287.293510)}
{pt3dadd(162276.000000,173280.000000,36050.000000,211.475671)}
{pt3dadd(162264.000000,173100.000000,35975.000000,139.550895)}
{pt3dadd(162240.000000,172860.000000,35900.000000,103.955610)}
{pt3dadd(162168.000000,172572.000000,35825.000000,105.512054)}
{pt3dadd(161988.000000,172608.000000,35550.000000,51.763245)}

{create adhoc162}
{access adhoc162}
{connect adhoc162(1), adhoc156(0)}
{nseg = 1}
{strdef color color = "White"}
{pt3dclear()}
{pt3dadd(174912.000000,165336.000000,72775.000000,492.457760)}
{pt3dadd(174540.000000,165684.000000,73050.000000,468.878487)}
{pt3dadd(174840.000000,165732.000000,73225.000000,336.149112)}
{pt3dadd(174804.000000,165804.000000,73350.000000,220.161547)}
{pt3dadd(175188.000000,165852.000000,73450.000000,100.000000)}

{create adhoc163}
{access adhoc163}
{connect adhoc163(1), adhoc155(0)}
{nseg = 1}
{strdef color color = "White"}
{pt3dclear()}
{pt3dadd(179820.000000,158904.000000,78425.000000,193.187270)}
{pt3dadd(179700.000000,158436.000000,78275.000000,294.235037)}
{pt3dadd(179484.000000,158340.000000,78100.000000,313.456772)}
{pt3dadd(179400.000000,158304.000000,77900.000000,346.919354)}
{pt3dadd(179328.000000,158232.000000,77775.000000,341.744482)}
{pt3dadd(179160.000000,158136.000000,77625.000000,339.679250)}
{pt3dadd(179112.000000,158052.000000,77475.000000,335.174270)}
{pt3dadd(178944.000000,158016.000000,77325.000000,326.158890)}
{pt3dadd(178776.000000,157980.000000,77175.000000,300.006788)}
{pt3dadd(178596.000000,157956.000000,77025.000000,280.687068)}
{pt3dadd(178500.000000,157836.000000,76875.000000,289.395350)}
{pt3dadd(178428.000000,157812.000000,76725.000000,285.192048)}
{pt3dadd(178368.000000,157788.000000,76550.000000,294.207428)}
{pt3dadd(178308.000000,157728.000000,76425.000000,334.001370)}
{pt3dadd(178236.000000,157656.000000,76275.000000,364.042246)}
{pt3dadd(178092.000000,157584.000000,76150.000000,374.045444)}
{pt3dadd(177984.000000,157488.000000,76000.000000,382.753726)}
{pt3dadd(177864.000000,157464.000000,75850.000000,382.753726)}
{pt3dadd(177600.000000,157392.000000,75700.000000,406.295070)}
{pt3dadd(177480.000000,157320.000000,75525.000000,432.757098)}
{pt3dadd(177360.000000,157260.000000,75375.000000,457.447040)}
{pt3dadd(177312.000000,157428.000000,75150.000000,467.450238)}
{pt3dadd(177192.000000,157440.000000,75000.000000,462.786392)}
{pt3dadd(177108.000000,157392.000000,74875.000000,412.066600)}
{pt3dadd(177012.000000,157344.000000,74750.000000,357.424988)}
{pt3dadd(176928.000000,157380.000000,74625.000000,330.102778)}
{pt3dadd(176832.000000,157404.000000,74500.000000,290.149190)}
{pt3dadd(176712.000000,157332.000000,74325.000000,274.414772)}
{pt3dadd(176628.000000,157332.000000,74200.000000,274.414772)}
{pt3dadd(176640.000000,157320.000000,74050.000000,261.183760)}
{pt3dadd(176592.000000,157296.000000,73900.000000,229.412058)}
{pt3dadd(176436.000000,157332.000000,73750.000000,269.365646)}
{pt3dadd(176424.000000,157308.000000,73600.000000,292.219906)}
{pt3dadd(176280.000000,157236.000000,73475.000000,300.928188)}
{pt3dadd(176136.000000,157200.000000,73350.000000,329.161632)}
{pt3dadd(176076.000000,157164.000000,73200.000000,339.071010)}
{pt3dadd(176016.000000,157200.000000,73075.000000,324.562832)}
{pt3dadd(175944.000000,157116.000000,72950.000000,305.243112)}
{pt3dadd(175740.000000,156996.000000,72825.000000,310.071438)}
{pt3dadd(175512.000000,156876.000000,72675.000000,289.673174)}
{pt3dadd(175332.000000,156780.000000,72525.000000,308.992894)}
{pt3dadd(175248.000000,156696.000000,72350.000000,323.501072)}
{pt3dadd(175104.000000,156552.000000,72200.000000,318.289040)}
{pt3dadd(174960.000000,156408.000000,72050.000000,308.955734)}
{pt3dadd(174864.000000,156312.000000,71900.000000,318.273386)}
{pt3dadd(174660.000000,156204.000000,71750.000000,286.173350)}
{pt3dadd(174540.000000,156144.000000,71600.000000,259.880866)}
{pt3dadd(174468.000000,156168.000000,71400.000000,279.584292)}
{pt3dadd(174204.000000,156024.000000,71300.000000,261.200342)}
{pt3dadd(173940.000000,155988.000000,71150.000000,259.205454)}
{pt3dadd(173736.000000,155904.000000,70950.000000,296.480362)}
{pt3dadd(173688.000000,155880.000000,70800.000000,317.597974)}
{pt3dadd(173640.000000,155832.000000,70650.000000,306.894804)}
{pt3dadd(173388.000000,155832.000000,70475.000000,342.512024)}
{pt3dadd(173256.000000,155772.000000,70300.000000,335.189260)}
{pt3dadd(173124.000000,155700.000000,70175.000000,320.681082)}
{pt3dadd(173052.000000,155604.000000,70050.000000,328.581046)}
{pt3dadd(172920.000000,155616.000000,69900.000000,341.656546)}
{pt3dadd(172896.000000,155604.000000,69775.000000,338.931454)}
{pt3dadd(172776.000000,155556.000000,69650.000000,402.822758)}
{pt3dadd(172656.000000,155508.000000,69500.000000,435.192594)}
{pt3dadd(172704.000000,155424.000000,69350.000000,460.753226)}
{pt3dadd(172692.000000,155376.000000,69200.000000,500.392406)}
{pt3dadd(172680.000000,155424.000000,69050.000000,518.254064)}
{pt3dadd(172680.000000,155460.000000,68875.000000,514.400204)}
{pt3dadd(172668.000000,155508.000000,68725.000000,522.838343)}
{pt3dadd(172644.000000,155556.000000,68525.000000,546.416100)}

{create adhoc164}
{access adhoc164}
{connect adhoc164(1), adhoc163(0)}
{nseg = 1}
{strdef color color = "White"}
{pt3dclear()}
{pt3dadd(172644.000000,155556.000000,68525.000000,546.416100)}
{pt3dadd(172596.000000,154536.000000,68625.000000,328.085840)}
{pt3dadd(172404.000000,154128.000000,68300.000000,249.357226)}
{pt3dadd(172284.000000,153888.000000,68100.000000,178.711460)}
{pt3dadd(172080.000000,153612.000000,67950.000000,171.143176)}
{pt3dadd(171948.000000,153408.000000,67750.000000,169.780630)}
{pt3dadd(171780.000000,153252.000000,67600.000000,182.337236)}
{pt3dadd(171660.000000,153120.000000,67425.000000,200.145846)}
{pt3dadd(171516.000000,153036.000000,67250.000000,212.490816)}
{pt3dadd(171420.000000,152832.000000,67100.000000,202.805148)}
{pt3dadd(171348.000000,152724.000000,66925.000000,205.578290)}
{pt3dadd(171132.000000,152568.000000,66750.000000,201.344806)}
{pt3dadd(171096.000000,152472.000000,66575.000000,199.982260)}
{pt3dadd(171132.000000,152196.000000,66425.000000,194.947770)}
{pt3dadd(171036.000000,152160.000000,66250.000000,205.371403)}
{pt3dadd(171096.000000,152016.000000,66125.000000,229.739670)}

{create adhoc165}
{access adhoc165}
{connect adhoc165(1), adhoc163(0)}
{nseg = 1}
{strdef color color = "White"}
{pt3dclear()}
{pt3dadd(172644.000000,155556.000000,68525.000000,546.416100)}
{pt3dadd(172644.000000,155988.000000,68275.000000,313.673627)}
{pt3dadd(172776.000000,156276.000000,68075.000000,282.057538)}
{pt3dadd(172680.000000,156396.000000,67800.000000,231.337746)}
{pt3dadd(172680.000000,156540.000000,67600.000000,290.424294)}
{pt3dadd(172632.000000,156828.000000,67400.000000,342.689922)}
{pt3dadd(172464.000000,157056.000000,67250.000000,367.090694)}
{pt3dadd(172428.000000,157152.000000,67050.000000,404.873830)}
{pt3dadd(172356.000000,157248.000000,66900.000000,377.693766)}
{pt3dadd(172224.000000,157404.000000,66725.000000,317.379220)}
{pt3dadd(172176.000000,157536.000000,66575.000000,289.514364)}
{pt3dadd(172152.000000,157668.000000,66400.000000,287.222848)}
{pt3dadd(171996.000000,157824.000000,66275.000000,237.094742)}
{pt3dadd(171936.000000,158100.000000,66125.000000,243.032698)}
{pt3dadd(171648.000000,158688.000000,65975.000000,266.774106)}
{pt3dadd(171468.000000,158940.000000,65750.000000,240.912992)}
{pt3dadd(171300.000000,159204.000000,65625.000000,255.932798)}
{pt3dadd(171144.000000,159468.000000,65475.000000,297.295344)}
{pt3dadd(170988.000000,159744.000000,65300.000000,324.954218)}
{pt3dadd(170820.000000,159900.000000,65150.000000,319.171106)}
{pt3dadd(170544.000000,160128.000000,65000.000000,312.582530)}
{pt3dadd(170364.000000,160248.000000,64825.000000,267.404550)}
{pt3dadd(170196.000000,160296.000000,64650.000000,221.040406)}
{pt3dadd(170052.000000,160452.000000,64500.000000,200.442992)}
{pt3dadd(169908.000000,160476.000000,64350.000000,187.662676)}
{pt3dadd(169752.000000,160620.000000,64200.000000,207.482264)}
{pt3dadd(169716.000000,160692.000000,64050.000000,206.296100)}
{pt3dadd(169572.000000,160716.000000,63900.000000,212.660244)}
{pt3dadd(169272.000000,160704.000000,63750.000000,226.840892)}
{pt3dadd(169152.000000,160752.000000,63575.000000,222.890910)}
{pt3dadd(169032.000000,160788.000000,63350.000000,222.890910)}
{pt3dadd(168852.000000,160884.000000,63100.000000,213.039196)}
{pt3dadd(168708.000000,160920.000000,62875.000000,215.910134)}
{pt3dadd(168444.000000,160944.000000,62675.000000,204.914990)}
{pt3dadd(168312.000000,161028.000000,62450.000000,190.372273)}
{pt3dadd(168108.000000,161052.000000,62200.000000,237.841420)}

{create adhoc166}
{access adhoc166}
{connect adhoc166(1), adhoc165(0)}
{nseg = 1}
{strdef color color = "White"}
{pt3dclear()}
{pt3dadd(168108.000000,161052.000000,62200.000000,237.841420)}
{pt3dadd(168036.000000,161652.000000,62125.000000,142.807653)}
{pt3dadd(168108.000000,161988.000000,62000.000000,120.841758)}
{pt3dadd(168120.000000,162204.000000,61950.000000,100.594278)}
{pt3dadd(167748.000000,162492.000000,61950.000000,109.170694)}
{pt3dadd(167508.000000,162756.000000,61800.000000,119.080488)}
{pt3dadd(167064.000000,162996.000000,61650.000000,136.413420)}
{pt3dadd(166860.000000,163308.000000,61525.000000,159.284358)}
{pt3dadd(166692.000000,163560.000000,61350.000000,152.668852)}
{pt3dadd(166572.000000,163764.000000,61200.000000,148.878350)}
{pt3dadd(166224.000000,164124.000000,61100.000000,157.607564)}
{pt3dadd(166452.000000,164052.000000,60875.000000,156.500830)}
{pt3dadd(166476.000000,164112.000000,60675.000000,154.874323)}
{pt3dadd(166344.000000,163932.000000,60550.000000,156.916820)}

{create adhoc167}
{access adhoc167}
{connect adhoc167(1), adhoc165(0)}
{nseg = 1}
{strdef color color = "White"}
{pt3dclear()}
{pt3dadd(168108.000000,161052.000000,62200.000000,237.841420)}
{pt3dadd(167700.000000,160860.000000,61975.000000,194.749997)}
{pt3dadd(167556.000000,160836.000000,61800.000000,175.448602)}
{pt3dadd(167400.000000,160752.000000,61600.000000,165.201638)}
{pt3dadd(167172.000000,160788.000000,61450.000000,163.839092)}
{pt3dadd(167040.000000,160716.000000,61325.000000,171.878698)}
{pt3dadd(167064.000000,160692.000000,61200.000000,179.644444)}
{pt3dadd(166956.000000,160656.000000,61075.000000,195.278046)}
{pt3dadd(166716.000000,160620.000000,60950.000000,220.723456)}
{pt3dadd(166584.000000,160632.000000,60775.000000,291.369222)}
{pt3dadd(166416.000000,160644.000000,60675.000000,310.616442)}
{pt3dadd(166212.000000,160620.000000,60525.000000,331.134964)}
{pt3dadd(166020.000000,160656.000000,60375.000000,394.470250)}
{pt3dadd(165804.000000,160680.000000,60250.000000,403.803556)}
{pt3dadd(165960.000000,160656.000000,60075.000000,361.792046)}
{pt3dadd(165936.000000,160632.000000,59925.000000,372.495216)}
{pt3dadd(165948.000000,160584.000000,59775.000000,344.210948)}
{pt3dadd(165912.000000,160536.000000,59625.000000,271.379487)}
{pt3dadd(165912.000000,160452.000000,59475.000000,141.421360)}

{create adhoc168}
{access adhoc168}
{connect adhoc168(1), adhoc167(0)}
{nseg = 1}
{strdef color color = "White"}
{pt3dclear()}
{pt3dadd(165912.000000,160452.000000,59475.000000,141.421360)}
{pt3dadd(166236.000000,160044.000000,59575.000000,95.303776)}
{pt3dadd(166260.000000,159756.000000,59450.000000,85.559924)}
{pt3dadd(166368.000000,159480.000000,59350.000000,76.314447)}
{pt3dadd(166416.000000,159360.000000,59225.000000,51.763245)}

{create adhoc169}
{access adhoc169}
{connect adhoc169(1), adhoc167(0)}
{nseg = 1}
{strdef color color = "White"}
{pt3dclear()}
{pt3dadd(165912.000000,160452.000000,59475.000000,141.421360)}
{pt3dadd(165876.000000,160500.000000,59250.000000,151.207413)}
{pt3dadd(165888.000000,160584.000000,59075.000000,176.672382)}
{pt3dadd(165816.000000,160728.000000,58925.000000,177.669824)}
{pt3dadd(165696.000000,160776.000000,58775.000000,168.940610)}
{pt3dadd(165588.000000,160836.000000,58650.000000,178.600470)}
{pt3dadd(165468.000000,160884.000000,58525.000000,167.882184)}
{pt3dadd(165396.000000,160956.000000,58350.000000,148.324408)}
{pt3dadd(165312.000000,161016.000000,58175.000000,156.364014)}
{pt3dadd(165420.000000,160980.000000,58025.000000,176.611494)}
{pt3dadd(165360.000000,160980.000000,57875.000000,155.718642)}
{pt3dadd(165372.000000,160980.000000,57750.000000,149.410895)}
{pt3dadd(165360.000000,161028.000000,57625.000000,152.302451)}
{pt3dadd(165252.000000,161088.000000,57425.000000,144.262845)}
{pt3dadd(165264.000000,161040.000000,57250.000000,147.676985)}
{pt3dadd(165132.000000,161100.000000,57075.000000,163.903183)}
{pt3dadd(164844.000000,161232.000000,56925.000000,178.250536)}
{pt3dadd(164868.000000,161244.000000,56750.000000,180.352186)}
{pt3dadd(164748.000000,161220.000000,56600.000000,191.070472)}
{pt3dadd(164592.000000,161232.000000,56450.000000,162.279438)}
{pt3dadd(164376.000000,161244.000000,56200.000000,160.177788)}
{pt3dadd(164280.000000,161352.000000,56075.000000,168.804402)}
{pt3dadd(164196.000000,161388.000000,55950.000000,173.471056)}
{pt3dadd(164088.000000,161376.000000,55825.000000,181.039340)}
{pt3dadd(163908.000000,161412.000000,55675.000000,189.162282)}
{pt3dadd(163776.000000,161424.000000,55525.000000,214.522176)}
{pt3dadd(163680.000000,161424.000000,55350.000000,208.574242)}
{pt3dadd(163500.000000,161472.000000,55175.000000,215.395162)}
{pt3dadd(163380.000000,161496.000000,55000.000000,196.111150)}
{pt3dadd(163368.000000,161460.000000,54850.000000,224.360246)}
{pt3dadd(163368.000000,161508.000000,54675.000000,217.286922)}
{pt3dadd(163332.000000,161460.000000,54525.000000,228.269346)}
{pt3dadd(163320.000000,161472.000000,54375.000000,234.644184)}
{pt3dadd(163272.000000,161424.000000,54225.000000,250.742692)}
{pt3dadd(163236.000000,161376.000000,54125.000000,229.500584)}
{pt3dadd(163176.000000,161328.000000,53950.000000,215.568156)}
{pt3dadd(163152.000000,161256.000000,53825.000000,188.369874)}
{pt3dadd(163116.000000,161208.000000,53700.000000,171.614196)}
{pt3dadd(163032.000000,161148.000000,53575.000000,151.854304)}
{pt3dadd(162960.000000,161172.000000,53450.000000,153.170438)}
{pt3dadd(162852.000000,161160.000000,53350.000000,150.917946)}
{pt3dadd(162804.000000,161124.000000,53225.000000,185.697232)}
{pt3dadd(162768.000000,161040.000000,53075.000000,193.207134)}
{pt3dadd(162624.000000,161004.000000,52950.000000,209.994842)}
{pt3dadd(162600.000000,160992.000000,52750.000000,220.603164)}
{pt3dadd(162636.000000,160980.000000,52600.000000,269.219800)}
{pt3dadd(162528.000000,160992.000000,52450.000000,261.638796)}
{pt3dadd(162432.000000,161040.000000,52300.000000,280.202224)}
{pt3dadd(162516.000000,160992.000000,52150.000000,378.079708)}
{pt3dadd(162480.000000,161064.000000,52025.000000,434.394564)}
{pt3dadd(162372.000000,161160.000000,51875.000000,381.715368)}
{pt3dadd(162216.000000,161244.000000,51725.000000,354.517086)}
{pt3dadd(162168.000000,161232.000000,51575.000000,307.049353)}
{pt3dadd(162228.000000,161052.000000,51400.000000,103.667735)}
{pt3dadd(162192.000000,160920.000000,51225.000000,55.478474)}

{create adhoc170}
{access adhoc170}
{connect adhoc170(1), adhoc154(0)}
{nseg = 1}
{strdef color color = "White"}
{pt3dclear()}
{pt3dadd(189816.000000,158760.000000,100375.000000,1131.370800)}
{pt3dadd(189624.000000,159516.000000,100200.000000,825.871047)}
{pt3dadd(189576.000000,159744.000000,99975.000000,794.130788)}
{pt3dadd(189540.000000,159876.000000,99775.000000,717.141908)}
{pt3dadd(189624.000000,159888.000000,99625.000000,736.466800)}
{pt3dadd(189528.000000,159912.000000,99475.000000,731.722140)}
{pt3dadd(189420.000000,159936.000000,99350.000000,721.687340)}
{pt3dadd(189312.000000,159948.000000,99200.000000,736.949080)}
{pt3dadd(189216.000000,159972.000000,99000.000000,722.207220)}
{pt3dadd(189108.000000,159996.000000,98800.000000,702.882328)}
{pt3dadd(189000.000000,159936.000000,98650.000000,717.624188)}
{pt3dadd(188880.000000,159888.000000,98450.000000,712.538982)}
{pt3dadd(188772.000000,159840.000000,98300.000000,702.189236)}
{pt3dadd(188652.000000,159792.000000,98175.000000,706.933896)}
{pt3dadd(188724.000000,159828.000000,98050.000000,716.261588)}
{pt3dadd(188772.000000,159876.000000,97925.000000,701.519728)}
{pt3dadd(188700.000000,159960.000000,97800.000000,701.519728)}
{pt3dadd(188532.000000,160008.000000,97650.000000,682.853114)}
{pt3dadd(188436.000000,160032.000000,97475.000000,687.765108)}
{pt3dadd(188328.000000,160104.000000,97350.000000,719.960780)}
{pt3dadd(188304.000000,160248.000000,97200.000000,745.417360)}
{pt3dadd(188268.000000,160392.000000,97025.000000,761.217286)}
{pt3dadd(188124.000000,160464.000000,96875.000000,784.969106)}
{pt3dadd(187968.000000,160452.000000,96600.000000,818.300152)}
{pt3dadd(187788.000000,160512.000000,96450.000000,812.458780)}
{pt3dadd(187752.000000,160560.000000,96300.000000,801.744060)}
{pt3dadd(187728.000000,160620.000000,96150.000000,785.944134)}
{pt3dadd(187692.000000,160668.000000,96000.000000,753.785714)}
{pt3dadd(187644.000000,160776.000000,95825.000000,725.539874)}
{pt3dadd(187464.000000,160872.000000,95700.000000,677.024354)}
{pt3dadd(187392.000000,160992.000000,95550.000000,644.865934)}
{pt3dadd(187332.000000,161100.000000,95375.000000,613.802940)}
{pt3dadd(187332.000000,161184.000000,95250.000000,626.636468)}
{pt3dadd(187320.000000,161220.000000,95100.000000,598.608508)}
{pt3dadd(187368.000000,161292.000000,94975.000000,587.042280)}
{pt3dadd(187296.000000,161448.000000,94850.000000,614.115494)}
{pt3dadd(187188.000000,161544.000000,94725.000000,626.511874)}
{pt3dadd(187116.000000,161592.000000,94575.000000,640.751560)}
{pt3dadd(187056.000000,161652.000000,94425.000000,645.027700)}
{pt3dadd(187020.000000,161580.000000,94250.000000,699.467068)}
{pt3dadd(186996.000000,161544.000000,94100.000000,660.827626)}
{pt3dadd(186888.000000,161652.000000,93950.000000,656.551486)}
{pt3dadd(186744.000000,161712.000000,93750.000000,677.993792)}
{pt3dadd(186684.000000,161700.000000,93575.000000,682.420720)}
{pt3dadd(186672.000000,161748.000000,93400.000000,635.557800)}
{pt3dadd(186636.000000,161796.000000,93275.000000,679.282448)}
{pt3dadd(186600.000000,161820.000000,93125.000000,723.667508)}
{pt3dadd(186540.000000,161832.000000,93000.000000,679.282448)}
{pt3dadd(186456.000000,161844.000000,92850.000000,709.322060)}
{pt3dadd(186372.000000,161856.000000,92700.000000,717.442300)}
{pt3dadd(186300.000000,161952.000000,92575.000000,693.690480)}
{pt3dadd(186228.000000,162060.000000,92450.000000,672.248174)}
{pt3dadd(186240.000000,162120.000000,92275.000000,672.248174)}
{pt3dadd(186180.000000,162144.000000,92125.000000,637.781634)}
{pt3dadd(186120.000000,162180.000000,91975.000000,676.524314)}
{pt3dadd(186060.000000,162204.000000,91775.000000,672.248174)}
{pt3dadd(186000.000000,162240.000000,91650.000000,672.248174)}
{pt3dadd(185940.000000,162264.000000,91525.000000,695.190928)}
{pt3dadd(185880.000000,162288.000000,91375.000000,724.207288)}
{pt3dadd(185820.000000,162324.000000,91250.000000,694.167676)}
{pt3dadd(185760.000000,162348.000000,91125.000000,727.460176)}
{pt3dadd(185700.000000,162384.000000,91000.000000,692.543322)}
{pt3dadd(185640.000000,162408.000000,90900.000000,697.628528)}
{pt3dadd(185580.000000,162432.000000,90800.000000,682.366788)}
{pt3dadd(185520.000000,162468.000000,90725.000000,686.949820)}
{pt3dadd(185460.000000,162492.000000,90625.000000,666.943420)}
{pt3dadd(185400.000000,162516.000000,90550.000000,687.620588)}
{pt3dadd(185340.000000,162552.000000,90475.000000,672.878728)}
{pt3dadd(185280.000000,162576.000000,90400.000000,639.151280)}
{pt3dadd(185256.000000,162684.000000,90325.000000,643.895940)}
{pt3dadd(185232.000000,162792.000000,90250.000000,634.885980)}
{pt3dadd(185208.000000,162900.000000,90175.000000,649.125666)}
{pt3dadd(185184.000000,163008.000000,90075.000000,631.709106)}
{pt3dadd(185124.000000,163044.000000,90000.000000,639.285554)}
{pt3dadd(185064.000000,163068.000000,89900.000000,609.280694)}
{pt3dadd(185004.000000,163092.000000,89825.000000,596.884314)}
{pt3dadd(184944.000000,163128.000000,89750.000000,612.684240)}
{pt3dadd(184896.000000,163152.000000,89675.000000,604.840600)}
{pt3dadd(184836.000000,163188.000000,89600.000000,608.830380)}
{pt3dadd(184776.000000,163224.000000,89525.000000,629.507548)}
{pt3dadd(184764.000000,163368.000000,89450.000000,676.370468)}
{pt3dadd(184752.000000,163440.000000,89375.000000,637.627788)}
{pt3dadd(184692.000000,163476.000000,89275.000000,649.601888)}
{pt3dadd(184632.000000,163512.000000,89175.000000,641.758248)}
{pt3dadd(184548.000000,163548.000000,89100.000000,633.055180)}
{pt3dadd(184476.000000,163584.000000,89000.000000,612.343260)}
{pt3dadd(184392.000000,163620.000000,88900.000000,621.046328)}
{pt3dadd(184368.000000,163704.000000,88800.000000,659.789008)}
{pt3dadd(184332.000000,163788.000000,88700.000000,685.049208)}
{pt3dadd(184332.000000,163908.000000,88600.000000,698.335308)}
{pt3dadd(184320.000000,164040.000000,88475.000000,719.047228)}
{pt3dadd(184320.000000,164160.000000,88350.000000,714.620300)}
{pt3dadd(184356.000000,164184.000000,88250.000000,684.580688)}
{pt3dadd(184392.000000,164208.000000,88125.000000,710.037268)}
{pt3dadd(184320.000000,164364.000000,88025.000000,705.454236)}
{pt3dadd(184344.000000,164424.000000,87925.000000,658.591316)}
{pt3dadd(184368.000000,164496.000000,87825.000000,650.184716)}
{pt3dadd(184356.000000,164556.000000,87725.000000,637.351188)}
{pt3dadd(184356.000000,164616.000000,87625.000000,594.478048)}
{pt3dadd(184344.000000,164688.000000,87525.000000,577.654740)}
{pt3dadd(184344.000000,164748.000000,87425.000000,613.802940)}
{pt3dadd(184332.000000,164808.000000,87350.000000,626.636468)}
{pt3dadd(184320.000000,164880.000000,87250.000000,635.043068)}
{pt3dadd(184320.000000,164940.000000,87150.000000,652.459628)}
{pt3dadd(184308.000000,165000.000000,87075.000000,664.856008)}
{pt3dadd(184308.000000,165072.000000,86975.000000,636.828048)}
{pt3dadd(184296.000000,165132.000000,86900.000000,636.828048)}
{pt3dadd(184296.000000,165192.000000,86800.000000,624.431668)}
{pt3dadd(184284.000000,165264.000000,86700.000000,603.025328)}
{pt3dadd(184272.000000,165324.000000,86625.000000,586.775088)}
{pt3dadd(184152.000000,165684.000000,86550.000000,662.500868)}
{pt3dadd(184260.000000,165972.000000,86475.000000,645.677560)}
{pt3dadd(184176.000000,166236.000000,86375.000000,667.083900)}
{pt3dadd(183960.000000,166404.000000,86225.000000,725.430572)}
{pt3dadd(183744.000000,166584.000000,86075.000000,714.638904)}
{pt3dadd(183612.000000,166860.000000,85900.000000,666.941084)}
{pt3dadd(183504.000000,167112.000000,85650.000000,663.087224)}
{pt3dadd(183456.000000,167280.000000,85450.000000,667.831884)}
{pt3dadd(183408.000000,167448.000000,85275.000000,650.897952)}
{pt3dadd(183360.000000,167604.000000,85125.000000,665.543480)}
{pt3dadd(183108.000000,167832.000000,84975.000000,625.541420)}
{pt3dadd(182928.000000,168264.000000,84825.000000,628.283533)}
{pt3dadd(182856.000000,168528.000000,84700.000000,546.416100)}

{create adhoc171}
{access adhoc171}
{connect adhoc171(1), adhoc170(0)}
{nseg = 1}
{strdef color color = "White"}
{pt3dclear()}
{pt3dadd(182856.000000,168528.000000,84700.000000,546.416100)}
{pt3dadd(182616.000000,168792.000000,84475.000000,580.878047)}
{pt3dadd(182484.000000,168996.000000,84300.000000,556.881480)}
{pt3dadd(182364.000000,169152.000000,84300.000000,536.363820)}
{pt3dadd(182256.000000,169272.000000,84250.000000,544.207460)}
{pt3dadd(182160.000000,169416.000000,84225.000000,516.211922)}
{pt3dadd(182076.000000,169536.000000,84200.000000,558.924190)}
{pt3dadd(182004.000000,169656.000000,84125.000000,554.648050)}
{pt3dadd(181932.000000,169800.000000,84100.000000,575.165710)}
{pt3dadd(181860.000000,169920.000000,84050.000000,540.860042)}
{pt3dadd(181764.000000,170016.000000,84025.000000,598.895192)}
{pt3dadd(181668.000000,170148.000000,84025.000000,622.647012)}
{pt3dadd(181632.000000,170304.000000,84075.000000,626.923152)}
{pt3dadd(181560.000000,170424.000000,84050.000000,634.766792)}
{pt3dadd(181500.000000,170568.000000,84050.000000,653.910450)}
{pt3dadd(181416.000000,170712.000000,83975.000000,643.195730)}
{pt3dadd(181320.000000,170868.000000,84000.000000,643.195730)}
{pt3dadd(181236.000000,171000.000000,83950.000000,643.195730)}
{pt3dadd(181116.000000,171120.000000,83875.000000,675.354150)}
{pt3dadd(180996.000000,171252.000000,83825.000000,698.922760)}
{pt3dadd(180984.000000,171384.000000,83750.000000,721.121232)}
{pt3dadd(180984.000000,171540.000000,83675.000000,711.124032)}
{pt3dadd(181020.000000,171684.000000,83550.000000,694.873792)}
{pt3dadd(180972.000000,171828.000000,83425.000000,675.548900)}
{pt3dadd(180828.000000,171924.000000,83300.000000,684.558860)}
{pt3dadd(180684.000000,172080.000000,83300.000000,643.035496)}
{pt3dadd(180600.000000,172200.000000,83175.000000,583.747416)}
{pt3dadd(180576.000000,172368.000000,83125.000000,576.429046)}
{pt3dadd(180552.000000,172512.000000,83050.000000,585.756738)}
{pt3dadd(180528.000000,172692.000000,83000.000000,560.496538)}
{pt3dadd(180504.000000,172836.000000,82925.000000,556.069610)}
{pt3dadd(180456.000000,172968.000000,82875.000000,574.561162)}
{pt3dadd(180444.000000,173112.000000,82825.000000,593.853632)}
{pt3dadd(180468.000000,173256.000000,82900.000000,563.848772)}
{pt3dadd(180492.000000,173376.000000,82925.000000,567.702632)}
{pt3dadd(180516.000000,173508.000000,82950.000000,537.305738)}
{pt3dadd(180456.000000,173628.000000,82925.000000,540.779036)}
{pt3dadd(180480.000000,173748.000000,82875.000000,502.342908)}
{pt3dadd(180516.000000,173904.000000,82875.000000,460.331398)}
{pt3dadd(180432.000000,174060.000000,82825.000000,427.194318)}
{pt3dadd(180348.000000,174168.000000,82750.000000,441.340972)}
{pt3dadd(180276.000000,174312.000000,82700.000000,444.936754)}
{pt3dadd(180168.000000,174432.000000,82750.000000,467.676194)}
{pt3dadd(180072.000000,174552.000000,82875.000000,525.937944)}
{pt3dadd(180012.000000,174672.000000,82900.000000,567.195264)}
{pt3dadd(180012.000000,174792.000000,82950.000000,525.183754)}
{pt3dadd(180060.000000,174912.000000,82825.000000,502.444314)}
{pt3dadd(180012.000000,175032.000000,82750.000000,474.158590)}
{pt3dadd(179928.000000,175152.000000,82700.000000,440.520998)}
{pt3dadd(179952.000000,175284.000000,82725.000000,436.390538)}
{pt3dadd(179916.000000,175380.000000,82700.000000,461.014696)}
{pt3dadd(179820.000000,175524.000000,82775.000000,463.935380)}
{pt3dadd(179604.000000,175656.000000,82750.000000,503.787332)}
{pt3dadd(179640.000000,175788.000000,82850.000000,533.148784)}
{pt3dadd(179724.000000,175908.000000,82900.000000,488.121960)}
{pt3dadd(179460.000000,176172.000000,82750.000000,470.868732)}
{pt3dadd(179280.000000,176292.000000,82725.000000,465.126856)}
{pt3dadd(179148.000000,176460.000000,82800.000000,443.136562)}
{pt3dadd(179016.000000,176580.000000,82875.000000,451.839630)}
{pt3dadd(178884.000000,176688.000000,82975.000000,474.876160)}
{pt3dadd(178668.000000,176808.000000,82975.000000,549.518800)}
{pt3dadd(178536.000000,176964.000000,82900.000000,575.079432)}
{pt3dadd(178332.000000,177060.000000,82925.000000,581.907716)}
{pt3dadd(178056.000000,177192.000000,82925.000000,547.083894)}
{pt3dadd(177804.000000,177348.000000,82950.000000,557.507960)}
{pt3dadd(177660.000000,177516.000000,82950.000000,485.497588)}
{pt3dadd(177660.000000,177672.000000,82975.000000,471.832824)}
{pt3dadd(177660.000000,177828.000000,82975.000000,471.832824)}
{pt3dadd(177660.000000,177972.000000,82975.000000,478.661108)}
{pt3dadd(177480.000000,178128.000000,82875.000000,507.643896)}
{pt3dadd(177324.000000,178284.000000,82775.000000,532.333838)}
{pt3dadd(177372.000000,178440.000000,82700.000000,520.437970)}
{pt3dadd(177312.000000,178620.000000,82650.000000,527.756340)}
{pt3dadd(177228.000000,178752.000000,82600.000000,514.557050)}
{pt3dadd(177144.000000,178932.000000,82550.000000,478.505182)}
{pt3dadd(177072.000000,179088.000000,82500.000000,451.182972)}
{pt3dadd(176988.000000,179244.000000,82450.000000,492.440292)}
{pt3dadd(176904.000000,179412.000000,82425.000000,573.430204)}
{pt3dadd(176796.000000,179544.000000,82400.000000,556.764680)}
{pt3dadd(176688.000000,179688.000000,82375.000000,567.556348)}
{pt3dadd(176496.000000,179832.000000,82375.000000,610.040568)}
{pt3dadd(176436.000000,179964.000000,82275.000000,618.743636)}
{pt3dadd(176388.000000,180132.000000,82175.000000,549.727824)}
{pt3dadd(176376.000000,180300.000000,82125.000000,549.727824)}
{pt3dadd(176364.000000,180444.000000,82150.000000,515.087244)}
{pt3dadd(176352.000000,180612.000000,82175.000000,532.503804)}
{pt3dadd(176304.000000,180768.000000,82200.000000,482.543416)}
{pt3dadd(176172.000000,180900.000000,82200.000000,435.928736)}
{pt3dadd(176076.000000,181068.000000,82175.000000,431.100410)}
{pt3dadd(175980.000000,181224.000000,82150.000000,451.594336)}
{pt3dadd(175884.000000,181392.000000,82125.000000,405.816476)}
{pt3dadd(175776.000000,181572.000000,82125.000000,411.558352)}
{pt3dadd(175824.000000,181716.000000,82175.000000,425.681272)}
{pt3dadd(175872.000000,181884.000000,82300.000000,453.546128)}
{pt3dadd(175704.000000,182028.000000,82300.000000,450.305430)}
{pt3dadd(175680.000000,182184.000000,82250.000000,459.663323)}
{pt3dadd(175608.000000,182304.000000,82225.000000,459.479340)}

{create adhoc172}
{access adhoc172}
{connect adhoc172(1), adhoc171(0)}
{nseg = 1}
{strdef color color = "White"}
{pt3dclear()}
{pt3dadd(175608.000000,182304.000000,82225.000000,459.479340)}
{pt3dadd(175440.000000,182424.000000,82225.000000,447.505597)}
{pt3dadd(175308.000000,182604.000000,81900.000000,470.405998)}
{pt3dadd(175200.000000,182748.000000,81925.000000,473.646696)}
{pt3dadd(175152.000000,182880.000000,81925.000000,494.140622)}
{pt3dadd(175176.000000,182988.000000,81925.000000,484.071640)}
{pt3dadd(175128.000000,183108.000000,81925.000000,459.700120)}
{pt3dadd(175068.000000,183192.000000,81900.000000,453.755752)}
{pt3dadd(175020.000000,183264.000000,81900.000000,450.515054)}
{pt3dadd(174972.000000,183348.000000,81875.000000,432.653396)}
{pt3dadd(174840.000000,183432.000000,81900.000000,432.653396)}
{pt3dadd(174708.000000,183528.000000,81950.000000,435.783704)}
{pt3dadd(174696.000000,183612.000000,81925.000000,430.237420)}
{pt3dadd(174660.000000,183708.000000,81900.000000,421.162744)}
{pt3dadd(174624.000000,183804.000000,81900.000000,415.987872)}
{pt3dadd(174588.000000,183888.000000,81900.000000,412.857564)}
{pt3dadd(174552.000000,183960.000000,81875.000000,434.098776)}
{pt3dadd(174456.000000,184032.000000,81825.000000,424.095578)}
{pt3dadd(174360.000000,184092.000000,81750.000000,424.095578)}
{pt3dadd(174252.000000,184152.000000,81700.000000,434.816734)}
{pt3dadd(174180.000000,184248.000000,81700.000000,426.051174)}
{pt3dadd(174096.000000,184332.000000,81725.000000,375.680824)}
{pt3dadd(174012.000000,184416.000000,81725.000000,425.535974)}
{pt3dadd(173928.000000,184500.000000,81725.000000,448.275414)}
{pt3dadd(173916.000000,184584.000000,81725.000000,478.591302)}
{pt3dadd(173844.000000,184656.000000,81675.000000,504.151934)}
{pt3dadd(173784.000000,184716.000000,81600.000000,516.027844)}
{pt3dadd(173712.000000,184788.000000,81550.000000,466.172694)}
{pt3dadd(173640.000000,184872.000000,81500.000000,435.254702)}
{pt3dadd(173592.000000,184956.000000,81525.000000,394.217658)}
{pt3dadd(173568.000000,185028.000000,81500.000000,365.931934)}
{pt3dadd(173544.000000,185112.000000,81500.000000,358.561004)}
{pt3dadd(173532.000000,185196.000000,81500.000000,377.031170)}
{pt3dadd(173508.000000,185268.000000,81500.000000,423.645850)}
{pt3dadd(173448.000000,185340.000000,81425.000000,468.672674)}
{pt3dadd(173340.000000,185424.000000,81325.000000,489.889318)}
{pt3dadd(173208.000000,185508.000000,81275.000000,502.617608)}
{pt3dadd(173076.000000,185604.000000,81250.000000,594.406852)}
{pt3dadd(172992.000000,185688.000000,81225.000000,590.276392)}
{pt3dadd(172872.000000,185760.000000,81100.000000,603.109920)}
{pt3dadd(172752.000000,185844.000000,81000.000000,596.514236)}
{pt3dadd(172632.000000,185916.000000,80950.000000,625.797456)}
{pt3dadd(172644.000000,186180.000000,80575.000000,528.266336)}
{pt3dadd(172584.000000,186324.000000,80425.000000,528.266336)}
{pt3dadd(172464.000000,186396.000000,80275.000000,528.266336)}
{pt3dadd(172380.000000,186396.000000,80150.000000,516.370468)}
{pt3dadd(172296.000000,186396.000000,80025.000000,537.047636)}
{pt3dadd(172260.000000,186396.000000,79900.000000,606.332916)}
{pt3dadd(172128.000000,186396.000000,79775.000000,606.332916)}
{pt3dadd(171996.000000,186384.000000,79675.000000,630.922348)}
{pt3dadd(171936.000000,186420.000000,79575.000000,664.059428)}
{pt3dadd(171852.000000,186492.000000,79475.000000,683.384320)}
{pt3dadd(171768.000000,186564.000000,79350.000000,639.659672)}
{pt3dadd(171672.000000,186636.000000,79250.000000,648.066272)}
{pt3dadd(171588.000000,186708.000000,79125.000000,642.801732)}
{pt3dadd(171408.000000,186792.000000,79050.000000,624.801218)}
{pt3dadd(171240.000000,186912.000000,78950.000000,564.281498)}
{pt3dadd(171132.000000,186948.000000,78800.000000,519.349526)}
{pt3dadd(171012.000000,186996.000000,78675.000000,476.637258)}
{pt3dadd(170904.000000,187032.000000,78575.000000,476.637258)}
{pt3dadd(170952.000000,186996.000000,78425.000000,536.050512)}
{pt3dadd(170988.000000,186996.000000,78325.000000,556.568172)}
{pt3dadd(170868.000000,187140.000000,78275.000000,645.224792)}
{pt3dadd(170748.000000,187272.000000,78175.000000,671.686820)}
{pt3dadd(170556.000000,187488.000000,78000.000000,676.951360)}
{pt3dadd(170448.000000,187620.000000,77950.000000,614.297408)}
{pt3dadd(170364.000000,187728.000000,77850.000000,585.014188)}
{pt3dadd(170268.000000,187824.000000,77725.000000,513.003816)}
{pt3dadd(170184.000000,187932.000000,77650.000000,505.685446)}
{pt3dadd(170112.000000,188148.000000,77550.000000,453.100476)}
{pt3dadd(170040.000000,188424.000000,77500.000000,449.970168)}
{pt3dadd(169968.000000,188688.000000,77475.000000,455.712044)}
{pt3dadd(169800.000000,188700.000000,77375.000000,522.637210)}
{pt3dadd(169692.000000,188820.000000,77350.000000,598.203480)}
{pt3dadd(169596.000000,189000.000000,77150.000000,686.511762)}
{pt3dadd(169488.000000,189144.000000,77225.000000,775.277322)}
{pt3dadd(169404.000000,189324.000000,77225.000000,815.068906)}
{pt3dadd(169344.000000,189492.000000,77225.000000,738.140542)}
{pt3dadd(169248.000000,189684.000000,77150.000000,666.170054)}
{pt3dadd(169164.000000,189876.000000,77125.000000,597.154242)}
{pt3dadd(169044.000000,189972.000000,77100.000000,521.587972)}
{pt3dadd(168924.000000,190032.000000,77050.000000,509.191592)}
{pt3dadd(168816.000000,190176.000000,77000.000000,537.056448)}
{pt3dadd(168720.000000,190356.000000,76975.000000,540.779036)}
{pt3dadd(168612.000000,190524.000000,76975.000000,529.261443)}
{pt3dadd(168516.000000,190644.000000,76925.000000,546.416100)}

{create adhoc173}
{access adhoc173}
{connect adhoc173(1), adhoc172(0)}
{nseg = 1}
{strdef color color = "White"}
{pt3dclear()}
{pt3dadd(168516.000000,190644.000000,76925.000000,546.416100)}
{pt3dadd(168648.000000,189384.000000,76450.000000,266.264803)}
{pt3dadd(168792.000000,189312.000000,76450.000000,211.847544)}
{pt3dadd(168972.000000,189216.000000,76450.000000,129.885128)}
{pt3dadd(168828.000000,189048.000000,76250.000000,125.104748)}
{pt3dadd(168768.000000,189012.000000,76075.000000,110.480878)}
{pt3dadd(168696.000000,188952.000000,75875.000000,156.372422)}
{pt3dadd(168540.000000,188940.000000,75800.000000,149.327526)}
{pt3dadd(168444.000000,188880.000000,75700.000000,151.288436)}
{pt3dadd(168432.000000,188784.000000,75525.000000,157.661568)}
{pt3dadd(168300.000000,188856.000000,75375.000000,164.706464)}
{pt3dadd(168276.000000,188904.000000,75175.000000,121.067412)}
{pt3dadd(168120.000000,188880.000000,74975.000000,123.652058)}
{pt3dadd(168000.000000,188892.000000,74875.000000,109.527510)}
{pt3dadd(167952.000000,188940.000000,74750.000000,98.938447)}
{pt3dadd(167916.000000,188976.000000,74600.000000,98.938447)}
{pt3dadd(167880.000000,189000.000000,74475.000000,84.621318)}
{pt3dadd(167772.000000,189084.000000,74375.000000,84.067952)}
{pt3dadd(167652.000000,189120.000000,74275.000000,82.571188)}
{pt3dadd(167580.000000,189108.000000,74150.000000,87.401118)}
{pt3dadd(167568.000000,189096.000000,74050.000000,80.356222)}
{pt3dadd(167484.000000,189108.000000,73950.000000,77.855423)}
{pt3dadd(167316.000000,189072.000000,73900.000000,91.445455)}
{pt3dadd(167196.000000,189084.000000,73800.000000,99.976443)}
{pt3dadd(167076.000000,189192.000000,73725.000000,112.265766)}
{pt3dadd(166968.000000,189204.000000,73650.000000,131.095462)}
{pt3dadd(166872.000000,189192.000000,73550.000000,154.277534)}
{pt3dadd(166800.000000,189204.000000,73475.000000,147.969787)}
{pt3dadd(166680.000000,189192.000000,73425.000000,154.062669)}
{pt3dadd(166572.000000,189192.000000,73350.000000,148.371225)}
{pt3dadd(166452.000000,189180.000000,73275.000000,151.931145)}
{pt3dadd(166320.000000,189180.000000,73225.000000,166.572753)}
{pt3dadd(166236.000000,189168.000000,73150.000000,194.581210)}
{pt3dadd(166152.000000,189168.000000,73100.000000,220.938546)}
{pt3dadd(166080.000000,189192.000000,73025.000000,236.315658)}
{pt3dadd(166008.000000,189204.000000,72950.000000,216.510688)}
{pt3dadd(165972.000000,189168.000000,72875.000000,192.183412)}
{pt3dadd(165924.000000,189132.000000,72825.000000,184.071926)}
{pt3dadd(165876.000000,189096.000000,72775.000000,190.058978)}
{pt3dadd(165804.000000,189072.000000,72750.000000,202.839294)}
{pt3dadd(165732.000000,189036.000000,72700.000000,230.977026)}
{pt3dadd(165672.000000,189024.000000,72650.000000,229.944408)}
{pt3dadd(165624.000000,189036.000000,72550.000000,219.563568)}
{pt3dadd(165636.000000,189096.000000,72475.000000,188.216622)}
{pt3dadd(165576.000000,189084.000000,72425.000000,161.826464)}
{pt3dadd(165540.000000,189108.000000,72350.000000,138.879153)}
{pt3dadd(165540.000000,189120.000000,72275.000000,134.220327)}
{pt3dadd(165564.000000,189120.000000,72175.000000,128.120387)}
{pt3dadd(165564.000000,189168.000000,72100.000000,126.159477)}
{pt3dadd(165612.000000,189156.000000,72025.000000,116.587247)}
{pt3dadd(165660.000000,189156.000000,71975.000000,117.343168)}
{pt3dadd(165648.000000,189144.000000,71875.000000,125.210378)}
{pt3dadd(165660.000000,189156.000000,71800.000000,119.165693)}
{pt3dadd(165672.000000,189096.000000,71725.000000,162.450490)}

{create adhoc174}
{access adhoc174}
{connect adhoc174(1), adhoc172(0)}
{nseg = 1}
{strdef color color = "White"}
{pt3dclear()}
{pt3dadd(168516.000000,190644.000000,76925.000000,546.416100)}
{pt3dadd(168408.000000,190896.000000,76875.000000,414.285500)}
{pt3dadd(168300.000000,191052.000000,76825.000000,387.943046)}
{pt3dadd(168192.000000,191148.000000,76750.000000,355.934734)}
{pt3dadd(168084.000000,191268.000000,76700.000000,353.562404)}
{pt3dadd(167988.000000,191376.000000,76650.000000,361.193272)}
{pt3dadd(167880.000000,191472.000000,76600.000000,414.626696)}
{pt3dadd(167844.000000,191568.000000,76525.000000,427.354986)}
{pt3dadd(167808.000000,191676.000000,76500.000000,475.613538)}
{pt3dadd(167760.000000,191784.000000,76450.000000,542.885248)}
{pt3dadd(167712.000000,191880.000000,76400.000000,530.590534)}
{pt3dadd(167628.000000,191964.000000,76375.000000,472.328784)}
{pt3dadd(167556.000000,192036.000000,76325.000000,466.971424)}
{pt3dadd(167484.000000,192132.000000,76275.000000,512.921716)}
{pt3dadd(167448.000000,192204.000000,76200.000000,522.578370)}
{pt3dadd(167412.000000,192288.000000,76125.000000,534.873084)}
{pt3dadd(167376.000000,192360.000000,76050.000000,542.244014)}
{pt3dadd(167340.000000,192456.000000,75950.000000,671.531074)}
{pt3dadd(167280.000000,192564.000000,75900.000000,602.012172)}
{pt3dadd(167232.000000,192660.000000,75850.000000,648.085230)}
{pt3dadd(167184.000000,192732.000000,75800.000000,687.937182)}
{pt3dadd(167172.000000,192912.000000,75725.000000,734.551862)}
{pt3dadd(167160.000000,193020.000000,75500.000000,597.893872)}
{pt3dadd(167112.000000,193140.000000,75175.000000,541.876956)}
{pt3dadd(167076.000000,193248.000000,75050.000000,390.794940)}
{pt3dadd(167028.000000,193356.000000,74925.000000,229.739670)}

{create adhoc175}
{access adhoc175}
{connect adhoc175(1), adhoc174(0)}
{nseg = 1}
{strdef color color = "White"}
{pt3dclear()}
{pt3dadd(167028.000000,193356.000000,74925.000000,229.739670)}
{pt3dadd(166800.000000,194280.000000,74925.000000,155.038300)}
{pt3dadd(166800.000000,194628.000000,74925.000000,127.889018)}
{pt3dadd(166740.000000,194748.000000,74925.000000,95.136163)}
{pt3dadd(166704.000000,194916.000000,74925.000000,114.735223)}
{pt3dadd(166668.000000,195096.000000,74925.000000,116.454551)}
{pt3dadd(166740.000000,195420.000000,75125.000000,128.302604)}
{pt3dadd(166608.000000,195684.000000,75125.000000,177.039193)}
{pt3dadd(166524.000000,195780.000000,75250.000000,177.986250)}
{pt3dadd(166380.000000,195912.000000,75250.000000,160.639682)}
{pt3dadd(166296.000000,196080.000000,75400.000000,168.719884)}
{pt3dadd(166224.000000,196308.000000,75400.000000,160.288022)}
{pt3dadd(166356.000000,196368.000000,75250.000000,142.528710)}
{pt3dadd(166428.000000,196176.000000,75700.000000,131.950790)}

{create adhoc176}
{access adhoc176}
{connect adhoc176(1), adhoc174(0)}
{nseg = 1}
{strdef color color = "White"}
{pt3dclear()}
{pt3dadd(167028.000000,193356.000000,74925.000000,229.739670)}
{pt3dadd(166944.000000,193476.000000,74675.000000,294.352330)}
{pt3dadd(166812.000000,193500.000000,74525.000000,280.748222)}
{pt3dadd(166692.000000,193524.000000,74400.000000,277.671226)}
{pt3dadd(166560.000000,193548.000000,74275.000000,279.736458)}
{pt3dadd(166428.000000,193572.000000,74150.000000,256.882198)}
{pt3dadd(166320.000000,193608.000000,74025.000000,317.440518)}
{pt3dadd(166224.000000,193644.000000,73900.000000,379.155454)}
{pt3dadd(166116.000000,193680.000000,73775.000000,403.556226)}
{pt3dadd(166008.000000,193704.000000,73650.000000,415.027602)}
{pt3dadd(165900.000000,193740.000000,73525.000000,420.423434)}
{pt3dadd(165792.000000,193848.000000,73425.000000,363.925234)}
{pt3dadd(165732.000000,193836.000000,73325.000000,324.286054)}
{pt3dadd(165684.000000,193836.000000,73200.000000,337.014344)}
{pt3dadd(165552.000000,193896.000000,73075.000000,327.681038)}
{pt3dadd(165408.000000,193884.000000,73000.000000,333.668090)}
{pt3dadd(165204.000000,193944.000000,72900.000000,340.311140)}
{pt3dadd(165000.000000,194004.000000,72775.000000,340.311140)}
{pt3dadd(164796.000000,194052.000000,72650.000000,352.207008)}
{pt3dadd(164592.000000,194112.000000,72525.000000,372.261470)}
{pt3dadd(164388.000000,194148.000000,72425.000000,381.276850)}
{pt3dadd(164172.000000,194196.000000,72350.000000,378.985334)}
{pt3dadd(163992.000000,194184.000000,72150.000000,372.108024)}
{pt3dadd(163872.000000,194076.000000,72075.000000,352.312192)}
{pt3dadd(163728.000000,194184.000000,72075.000000,330.119660)}
{pt3dadd(163632.000000,194232.000000,72125.000000,313.255936)}
{pt3dadd(163536.000000,194148.000000,72025.000000,289.686338)}
{pt3dadd(163428.000000,194124.000000,72000.000000,265.557062)}
{pt3dadd(163320.000000,194280.000000,72150.000000,241.025310)}
{pt3dadd(163212.000000,194256.000000,72075.000000,236.965190)}
{pt3dadd(163068.000000,194244.000000,71975.000000,240.753414)}
{pt3dadd(162828.000000,194268.000000,71800.000000,353.892638)}
{pt3dadd(162696.000000,194208.000000,71650.000000,407.151052)}
{pt3dadd(162624.000000,194592.000000,71450.000000,465.143400)}
{pt3dadd(162528.000000,194796.000000,71475.000000,503.711426)}
{pt3dadd(162432.000000,195012.000000,71500.000000,529.964078)}
{pt3dadd(162324.000000,195180.000000,71475.000000,455.414258)}
{pt3dadd(162216.000000,195372.000000,71475.000000,449.260266)}
{pt3dadd(162120.000000,195564.000000,71475.000000,420.974542)}
{pt3dadd(162000.000000,195720.000000,71600.000000,411.579852)}
{pt3dadd(161880.000000,195840.000000,71650.000000,438.041880)}
{pt3dadd(161784.000000,195864.000000,71775.000000,467.325100)}
{pt3dadd(161724.000000,195996.000000,72025.000000,487.143856)}
{pt3dadd(161604.000000,196128.000000,71975.000000,462.649264)}
{pt3dadd(161520.000000,196284.000000,71950.000000,478.872238)}
{pt3dadd(161424.000000,196392.000000,71925.000000,475.149650)}
{pt3dadd(161316.000000,196464.000000,71950.000000,443.141338)}
{pt3dadd(161232.000000,196488.000000,72050.000000,402.560900)}
{pt3dadd(161148.000000,196560.000000,72175.000000,444.917150)}
{pt3dadd(161076.000000,196956.000000,72375.000000,392.198076)}
{pt3dadd(161112.000000,197160.000000,72525.000000,335.883220)}
{pt3dadd(160980.000000,197340.000000,72700.000000,307.854088)}
{pt3dadd(161112.000000,197580.000000,72775.000000,325.695086)}
{pt3dadd(161148.000000,197868.000000,72850.000000,339.841740)}
{pt3dadd(160884.000000,198192.000000,72475.000000,357.867674)}
{pt3dadd(160716.000000,198324.000000,72500.000000,359.604322)}
{pt3dadd(160548.000000,198468.000000,72475.000000,396.100422)}
{pt3dadd(160584.000000,198612.000000,72525.000000,376.045960)}
{pt3dadd(160620.000000,198720.000000,72575.000000,311.145520)}
{pt3dadd(160644.000000,198840.000000,72625.000000,398.423630)}
{pt3dadd(160536.000000,198984.000000,72625.000000,390.312144)}
{pt3dadd(160464.000000,199116.000000,72600.000000,396.466136)}
{pt3dadd(160464.000000,199212.000000,72525.000000,390.267946)}
{pt3dadd(160536.000000,199344.000000,72500.000000,480.428586)}
{pt3dadd(160536.000000,199488.000000,72400.000000,431.439398)}
{pt3dadd(160356.000000,199608.000000,72375.000000,474.310336)}
{pt3dadd(160164.000000,199764.000000,72275.000000,457.057108)}
{pt3dadd(159912.000000,199992.000000,72250.000000,495.625134)}
{pt3dadd(159708.000000,200160.000000,72175.000000,463.046564)}
{pt3dadd(159576.000000,200316.000000,72100.000000,466.769152)}
{pt3dadd(159360.000000,200424.000000,72050.000000,466.769152)}
{pt3dadd(159276.000000,200532.000000,72000.000000,517.659972)}
{pt3dadd(159144.000000,200640.000000,71950.000000,548.056866)}
{pt3dadd(159060.000000,200664.000000,71900.000000,567.349336)}
{pt3dadd(158940.000000,200784.000000,71875.000000,540.887308)}
{pt3dadd(158856.000000,200868.000000,71925.000000,549.353287)}
{pt3dadd(158652.000000,201012.000000,71925.000000,414.105960)}

{create adhoc177}
{access adhoc177}
{connect adhoc177(1), adhoc176(0)}
{nseg = 1}
{strdef color color = "White"}
{pt3dclear()}
{pt3dadd(158652.000000,201012.000000,71925.000000,414.105960)}
{pt3dadd(158940.000000,201324.000000,72100.000000,391.535380)}
{pt3dadd(158940.000000,201504.000000,72125.000000,348.058308)}
{pt3dadd(158928.000000,201600.000000,72125.000000,332.508826)}
{pt3dadd(158844.000000,201684.000000,72050.000000,303.279728)}
{pt3dadd(158832.000000,201780.000000,72075.000000,266.150666)}
{pt3dadd(158832.000000,201852.000000,71975.000000,298.347686)}
{pt3dadd(158772.000000,201936.000000,71850.000000,289.347430)}
{pt3dadd(158700.000000,202044.000000,71800.000000,274.856036)}
{pt3dadd(158652.000000,202140.000000,71875.000000,274.856036)}
{pt3dadd(158592.000000,202212.000000,71875.000000,290.548526)}
{pt3dadd(158508.000000,202296.000000,71825.000000,293.678834)}
{pt3dadd(158520.000000,202368.000000,71750.000000,306.739210)}
{pt3dadd(158532.000000,202452.000000,71675.000000,342.724454)}
{pt3dadd(158520.000000,202536.000000,71600.000000,379.853516)}
{pt3dadd(158496.000000,202620.000000,71650.000000,390.934128)}
{pt3dadd(158508.000000,202692.000000,71625.000000,379.038260)}
{pt3dadd(158544.000000,202800.000000,71550.000000,376.973028)}
{pt3dadd(158520.000000,202884.000000,71425.000000,344.776008)}
{pt3dadd(158448.000000,203004.000000,71400.000000,315.758432)}
{pt3dadd(158448.000000,203100.000000,71375.000000,297.096816)}
{pt3dadd(158472.000000,203196.000000,71325.000000,294.371724)}
{pt3dadd(158412.000000,203280.000000,71200.000000,303.080006)}
{pt3dadd(158424.000000,203388.000000,71075.000000,290.894246)}
{pt3dadd(158364.000000,203496.000000,71025.000000,304.892016)}
{pt3dadd(158400.000000,203580.000000,71075.000000,314.538252)}
{pt3dadd(158388.000000,203652.000000,71000.000000,309.363380)}
{pt3dadd(158340.000000,203736.000000,70950.000000,309.363380)}
{pt3dadd(158364.000000,203832.000000,70975.000000,309.363380)}
{pt3dadd(158400.000000,203916.000000,70975.000000,314.027226)}
{pt3dadd(158388.000000,204012.000000,70975.000000,318.378760)}
{pt3dadd(158364.000000,204096.000000,70925.000000,293.847008)}
{pt3dadd(158316.000000,204180.000000,70875.000000,279.355614)}
{pt3dadd(158256.000000,204264.000000,70825.000000,293.536262)}
{pt3dadd(158220.000000,204348.000000,70800.000000,274.874646)}
{pt3dadd(158220.000000,204432.000000,70875.000000,272.661182)}
{pt3dadd(158232.000000,204516.000000,70925.000000,287.859628)}
{pt3dadd(158232.000000,204600.000000,70975.000000,326.975180)}
{pt3dadd(158292.000000,204684.000000,71000.000000,354.153628)}
{pt3dadd(158256.000000,204780.000000,71025.000000,405.136054)}
{pt3dadd(158268.000000,204864.000000,71025.000000,440.860876)}
{pt3dadd(158220.000000,204948.000000,70975.000000,440.860876)}
{pt3dadd(158160.000000,205044.000000,70925.000000,437.730568)}
{pt3dadd(158076.000000,205128.000000,70875.000000,473.246012)}
{pt3dadd(158004.000000,205200.000000,70900.000000,457.023038)}
{pt3dadd(157884.000000,205284.000000,70925.000000,419.160146)}
{pt3dadd(157812.000000,205368.000000,70950.000000,412.961956)}
{pt3dadd(157812.000000,205440.000000,70950.000000,409.938272)}
{pt3dadd(157812.000000,205524.000000,70950.000000,360.780988)}
{pt3dadd(157800.000000,205620.000000,70975.000000,327.819428)}
{pt3dadd(157800.000000,205704.000000,70975.000000,332.170962)}
{pt3dadd(157764.000000,205776.000000,71050.000000,340.582616)}
{pt3dadd(157728.000000,205848.000000,71050.000000,334.840740)}
{pt3dadd(157692.000000,205920.000000,71025.000000,307.123484)}
{pt3dadd(157608.000000,205992.000000,70975.000000,388.886588)}
{pt3dadd(157524.000000,206064.000000,70975.000000,365.316990)}
{pt3dadd(157452.000000,206160.000000,71025.000000,341.747392)}
{pt3dadd(157392.000000,206232.000000,71050.000000,324.514122)}
{pt3dadd(157428.000000,206316.000000,71150.000000,323.002280)}
{pt3dadd(157404.000000,206388.000000,71275.000000,231.329798)}
{pt3dadd(157440.000000,206496.000000,71400.000000,264.561842)}
{pt3dadd(157464.000000,206556.000000,71475.000000,295.251282)}
{pt3dadd(157464.000000,206628.000000,71525.000000,321.250112)}
{pt3dadd(157380.000000,206712.000000,71550.000000,364.121050)}
{pt3dadd(157308.000000,206784.000000,71575.000000,410.015672)}
{pt3dadd(157236.000000,206868.000000,71625.000000,437.337882)}
{pt3dadd(157176.000000,206964.000000,71650.000000,389.021988)}
{pt3dadd(157224.000000,207048.000000,71750.000000,343.127366)}
{pt3dadd(157272.000000,207108.000000,71850.000000,320.152220)}
{pt3dadd(157248.000000,207180.000000,72000.000000,329.878212)}
{pt3dadd(157116.000000,207252.000000,72150.000000,297.557402)}
{pt3dadd(156996.000000,207312.000000,72150.000000,338.753454)}
{pt3dadd(156876.000000,207396.000000,72150.000000,352.451056)}
{pt3dadd(156816.000000,207468.000000,72100.000000,378.449886)}
{pt3dadd(156756.000000,207552.000000,72025.000000,359.958334)}
{pt3dadd(156720.000000,207612.000000,72000.000000,357.586004)}
{pt3dadd(156672.000000,207696.000000,71975.000000,341.851586)}
{pt3dadd(156612.000000,207756.000000,72075.000000,341.851586)}
{pt3dadd(156696.000000,207828.000000,72125.000000,307.727634)}
{pt3dadd(156720.000000,207900.000000,72150.000000,284.296174)}
{pt3dadd(156684.000000,207960.000000,72225.000000,268.006888)}
{pt3dadd(156720.000000,208044.000000,72250.000000,290.861148)}
{pt3dadd(156792.000000,208116.000000,72275.000000,306.392644)}
{pt3dadd(156840.000000,208200.000000,72275.000000,319.022746)}
{pt3dadd(156780.000000,208260.000000,72250.000000,339.729114)}
{pt3dadd(156732.000000,208332.000000,72250.000000,358.390730)}
{pt3dadd(156672.000000,208392.000000,72225.000000,353.562404)}
{pt3dadd(156624.000000,208452.000000,72225.000000,353.562404)}
{pt3dadd(156564.000000,208500.000000,72225.000000,355.934734)}
{pt3dadd(156516.000000,208536.000000,72200.000000,370.555694)}
{pt3dadd(156504.000000,208596.000000,72200.000000,383.732846)}
{pt3dadd(156480.000000,208644.000000,72225.000000,388.561172)}
{pt3dadd(156456.000000,208692.000000,72250.000000,386.105176)}
{pt3dadd(156432.000000,208740.000000,72225.000000,360.843916)}
{pt3dadd(156408.000000,208788.000000,72275.000000,333.928242)}
{pt3dadd(156456.000000,208992.000000,72275.000000,325.749690)}
{pt3dadd(156372.000000,209052.000000,72275.000000,328.292294)}
{pt3dadd(156528.000000,209136.000000,72250.000000,333.290894)}
{pt3dadd(156480.000000,209208.000000,72350.000000,334.856048)}
{pt3dadd(156408.000000,209268.000000,72350.000000,320.858278)}
{pt3dadd(156336.000000,209328.000000,72450.000000,315.859678)}
{pt3dadd(156216.000000,209376.000000,72425.000000,321.217038)}
{pt3dadd(156216.000000,209436.000000,72375.000000,305.137826)}
{pt3dadd(156204.000000,209496.000000,72400.000000,310.172316)}
{pt3dadd(156180.000000,209568.000000,72400.000000,361.154742)}
{pt3dadd(156168.000000,209628.000000,72425.000000,371.510702)}
{pt3dadd(156156.000000,209688.000000,72425.000000,366.153342)}
{pt3dadd(156132.000000,209748.000000,72450.000000,368.218574)}
{pt3dadd(156048.000000,209796.000000,72425.000000,419.201000)}
{pt3dadd(155952.000000,209832.000000,72400.000000,415.727702)}
{pt3dadd(155844.000000,209868.000000,72400.000000,424.493262)}
{pt3dadd(155724.000000,209904.000000,72400.000000,444.987188)}
{pt3dadd(155736.000000,209988.000000,72450.000000,470.100404)}
{pt3dadd(155736.000000,210048.000000,72475.000000,437.779594)}
{pt3dadd(155724.000000,210084.000000,72500.000000,425.029918)}
{pt3dadd(155724.000000,210132.000000,72500.000000,445.547578)}
{pt3dadd(155664.000000,210192.000000,72525.000000,448.902564)}
{pt3dadd(155592.000000,210228.000000,72525.000000,430.432398)}
{pt3dadd(155520.000000,210264.000000,72475.000000,425.768552)}
{pt3dadd(155472.000000,210300.000000,72400.000000,435.163242)}
{pt3dadd(155460.000000,210348.000000,72375.000000,421.016588)}
{pt3dadd(155388.000000,210408.000000,72325.000000,379.093576)}
{pt3dadd(155328.000000,210468.000000,72300.000000,386.464506)}
{pt3dadd(155400.000000,210516.000000,72325.000000,398.759220)}
{pt3dadd(155436.000000,210576.000000,72375.000000,386.443846)}
{pt3dadd(155376.000000,210624.000000,72375.000000,344.087596)}
{pt3dadd(155340.000000,210672.000000,72375.000000,335.087340)}
{pt3dadd(155328.000000,210732.000000,72325.000000,325.424894)}
{pt3dadd(155280.000000,210792.000000,72325.000000,315.421696)}
{pt3dadd(155268.000000,210840.000000,72300.000000,278.548438)}
{pt3dadd(155244.000000,210888.000000,72300.000000,297.868158)}
{pt3dadd(155220.000000,210936.000000,72275.000000,319.943914)}
{pt3dadd(155184.000000,210996.000000,72275.000000,315.592380)}
{pt3dadd(155160.000000,211056.000000,72275.000000,308.949330)}
{pt3dadd(155196.000000,211104.000000,72300.000000,319.569936)}
{pt3dadd(155196.000000,211164.000000,72300.000000,312.450094)}
{pt3dadd(155160.000000,211224.000000,72275.000000,305.572784)}
{pt3dadd(155124.000000,211272.000000,72275.000000,303.507552)}
{pt3dadd(155112.000000,211332.000000,72275.000000,325.348136)}
{pt3dadd(155064.000000,211392.000000,72250.000000,363.916162)}
{pt3dadd(155016.000000,211440.000000,72250.000000,376.210876)}
{pt3dadd(154992.000000,211488.000000,72250.000000,422.727366)}
{pt3dadd(154968.000000,211536.000000,72250.000000,424.792598)}
{pt3dadd(154944.000000,211584.000000,72225.000000,414.423390)}
{pt3dadd(154884.000000,211632.000000,72200.000000,382.053554)}
{pt3dadd(154812.000000,211680.000000,72200.000000,349.161426)}
{pt3dadd(154740.000000,211728.000000,72200.000000,328.643766)}
{pt3dadd(154668.000000,211776.000000,72175.000000,363.151672)}
{pt3dadd(154644.000000,211824.000000,72200.000000,396.612268)}
{pt3dadd(154632.000000,211884.000000,72225.000000,416.666730)}
{pt3dadd(154620.000000,211932.000000,72250.000000,437.264144)}
{pt3dadd(154656.000000,211980.000000,72275.000000,415.770294)}
{pt3dadd(154656.000000,212028.000000,72275.000000,415.770294)}
{pt3dadd(154656.000000,212076.000000,72275.000000,415.770294)}
{pt3dadd(154632.000000,212124.000000,72275.000000,412.949102)}
{pt3dadd(154584.000000,212172.000000,72250.000000,430.790100)}
{pt3dadd(154548.000000,212220.000000,72250.000000,446.339582)}
{pt3dadd(154500.000000,212268.000000,72250.000000,425.845656)}
{pt3dadd(154476.000000,212316.000000,72275.000000,422.249874)}
{pt3dadd(154404.000000,212376.000000,72300.000000,407.230068)}
{pt3dadd(154368.000000,212424.000000,72275.000000,419.545442)}
{pt3dadd(154320.000000,212472.000000,72275.000000,431.860816)}
{pt3dadd(154308.000000,212520.000000,72325.000000,449.114044)}
{pt3dadd(154332.000000,212568.000000,72325.000000,445.640746)}
{pt3dadd(154308.000000,212616.000000,72300.000000,482.625402)}
{pt3dadd(154248.000000,212664.000000,72300.000000,482.625402)}
{pt3dadd(154368.000000,212724.000000,72325.000000,482.625402)}
{pt3dadd(154380.000000,212772.000000,72375.000000,500.012754)}
{pt3dadd(154332.000000,212820.000000,72375.000000,503.486052)}
{pt3dadd(154284.000000,212880.000000,72400.000000,484.342394)}
{pt3dadd(154236.000000,212916.000000,72400.000000,484.342394)}
{pt3dadd(154176.000000,212976.000000,72425.000000,469.205828)}
{pt3dadd(154140.000000,213024.000000,72425.000000,451.818476)}
{pt3dadd(154104.000000,213072.000000,72425.000000,421.953662)}
{pt3dadd(154104.000000,213120.000000,72425.000000,404.112664)}
{pt3dadd(154080.000000,213168.000000,72425.000000,404.112664)}
{pt3dadd(154104.000000,213216.000000,72425.000000,416.008532)}
{pt3dadd(154116.000000,213264.000000,72425.000000,412.878224)}
{pt3dadd(154068.000000,213312.000000,72425.000000,435.914754)}
{pt3dadd(154056.000000,213360.000000,72425.000000,456.676436)}
{pt3dadd(154044.000000,213408.000000,72425.000000,436.182510)}
{pt3dadd(154008.000000,213468.000000,72450.000000,418.929282)}
{pt3dadd(154056.000000,213528.000000,72500.000000,402.263758)}
{pt3dadd(154080.000000,213588.000000,72575.000000,395.892752)}
{pt3dadd(154044.000000,213648.000000,72575.000000,402.046744)}
{pt3dadd(153996.000000,213708.000000,72550.000000,404.679012)}
{pt3dadd(154020.000000,213780.000000,72550.000000,402.136408)}
{pt3dadd(153984.000000,213840.000000,72550.000000,390.665032)}
{pt3dadd(153960.000000,213912.000000,72575.000000,379.174380)}
{pt3dadd(153936.000000,213984.000000,72600.000000,364.553420)}
{pt3dadd(153912.000000,214044.000000,72625.000000,367.278512)}
{pt3dadd(153888.000000,214092.000000,72650.000000,372.453384)}
{pt3dadd(153888.000000,214152.000000,72675.000000,386.467364)}
{pt3dadd(153888.000000,214212.000000,72700.000000,389.192456)}
{pt3dadd(153888.000000,214272.000000,72725.000000,391.917548)}
{pt3dadd(153888.000000,214332.000000,72750.000000,347.967566)}
{pt3dadd(153900.000000,214392.000000,72750.000000,342.792694)}
{pt3dadd(153900.000000,214440.000000,72775.000000,304.200072)}
{pt3dadd(153900.000000,214500.000000,72800.000000,280.768612)}
{pt3dadd(153888.000000,214548.000000,72825.000000,238.089932)}
{pt3dadd(153864.000000,214596.000000,72850.000000,274.139950)}
{pt3dadd(153852.000000,214644.000000,72875.000000,260.603342)}
{pt3dadd(153828.000000,214716.000000,72900.000000,301.828232)}
{pt3dadd(153888.000000,214764.000000,73025.000000,334.025252)}
{pt3dadd(153948.000000,214824.000000,73150.000000,385.469492)}
{pt3dadd(153984.000000,214872.000000,73225.000000,418.930088)}
{pt3dadd(153996.000000,214932.000000,73250.000000,403.237598)}
{pt3dadd(153948.000000,214980.000000,73200.000000,408.783882)}
{pt3dadd(153960.000000,215040.000000,73150.000000,362.889260)}
{pt3dadd(153972.000000,215088.000000,73125.000000,312.761154)}
{pt3dadd(153984.000000,215148.000000,73125.000000,240.836378)}
{pt3dadd(153984.000000,215208.000000,73175.000000,235.286760)}
{pt3dadd(153984.000000,215256.000000,73200.000000,192.465568)}
{pt3dadd(153996.000000,215316.000000,73250.000000,185.644648)}
{pt3dadd(153996.000000,215364.000000,73300.000000,235.772754)}
{pt3dadd(153996.000000,215424.000000,73350.000000,319.263758)}
{pt3dadd(153996.000000,215484.000000,73375.000000,416.485858)}
{pt3dadd(153996.000000,215532.000000,73425.000000,474.977410)}
{pt3dadd(154008.000000,215592.000000,73475.000000,527.692952)}
{pt3dadd(153948.000000,215652.000000,73450.000000,484.875326)}
{pt3dadd(153888.000000,215712.000000,73400.000000,416.994242)}
{pt3dadd(153840.000000,215760.000000,73350.000000,341.014250)}
{pt3dadd(153804.000000,215820.000000,73275.000000,331.288258)}
{pt3dadd(153768.000000,215880.000000,73200.000000,341.014250)}
{pt3dadd(153720.000000,215940.000000,73200.000000,369.708956)}
{pt3dadd(153768.000000,215988.000000,73225.000000,368.031464)}
{pt3dadd(153732.000000,216036.000000,73225.000000,407.959588)}
{pt3dadd(153744.000000,216096.000000,73250.000000,444.727488)}
{pt3dadd(153720.000000,216156.000000,73200.000000,455.519156)}
{pt3dadd(153660.000000,216204.000000,73150.000000,455.519156)}
{pt3dadd(153600.000000,216264.000000,73125.000000,503.087438)}
{pt3dadd(153564.000000,216324.000000,73125.000000,506.560736)}
{pt3dadd(153540.000000,216384.000000,73150.000000,472.923144)}
{pt3dadd(153516.000000,216444.000000,73175.000000,469.200556)}
{pt3dadd(153492.000000,216504.000000,73150.000000,455.186576)}
{pt3dadd(153504.000000,216672.000000,73150.000000,465.610642)}
{pt3dadd(153480.000000,216756.000000,73100.000000,472.929012)}
{pt3dadd(153420.000000,216852.000000,73075.000000,453.133180)}
{pt3dadd(153324.000000,216924.000000,73025.000000,396.818324)}
{pt3dadd(153276.000000,216996.000000,73100.000000,466.150052)}
{pt3dadd(153300.000000,217056.000000,73150.000000,411.571844)}
{pt3dadd(153312.000000,217104.000000,73100.000000,349.856908)}
{pt3dadd(153300.000000,217164.000000,73025.000000,412.300292)}
{pt3dadd(153288.000000,217224.000000,73075.000000,461.546068)}
{pt3dadd(153252.000000,217296.000000,73125.000000,486.135500)}
{pt3dadd(153228.000000,217368.000000,73175.000000,530.289642)}
{pt3dadd(153180.000000,217428.000000,73200.000000,577.857924)}
{pt3dadd(153096.000000,217488.000000,73175.000000,568.847964)}
{pt3dadd(153048.000000,217548.000000,73150.000000,595.889872)}
{pt3dadd(153048.000000,217608.000000,73100.000000,490.585828)}
{pt3dadd(152988.000000,217668.000000,73050.000000,427.939360)}
{pt3dadd(152928.000000,217716.000000,73000.000000,400.074504)}
{pt3dadd(152760.000000,217752.000000,72925.000000,309.363064)}
{pt3dadd(152592.000000,217800.000000,72775.000000,224.306380)}
{pt3dadd(152496.000000,217848.000000,72650.000000,174.110100)}

{create adhoc178}
{access adhoc178}
{connect adhoc178(1), adhoc177(0)}
{nseg = 1}
{strdef color color = "White"}
{pt3dclear()}
{pt3dadd(152496.000000,217848.000000,72650.000000,174.110100)}
{pt3dadd(152616.000000,218388.000000,72775.000000,141.481577)}
{pt3dadd(152592.000000,218604.000000,72675.000000,149.951274)}
{pt3dadd(152484.000000,218796.000000,72675.000000,175.757914)}
{pt3dadd(152316.000000,218964.000000,72575.000000,186.004878)}
{pt3dadd(152244.000000,219108.000000,72525.000000,192.577999)}
{pt3dadd(152184.000000,219240.000000,72375.000000,187.797619)}
{pt3dadd(152136.000000,219372.000000,72275.000000,163.587341)}
{pt3dadd(152124.000000,219504.000000,72250.000000,121.619341)}
{pt3dadd(152076.000000,219600.000000,72225.000000,93.369784)}
{pt3dadd(152040.000000,219708.000000,72175.000000,97.835199)}
{pt3dadd(151956.000000,219816.000000,72150.000000,98.449198)}
{pt3dadd(151944.000000,219924.000000,72175.000000,98.449198)}
{pt3dadd(151920.000000,220020.000000,72225.000000,99.107266)}
{pt3dadd(151872.000000,220140.000000,72300.000000,106.178696)}
{pt3dadd(151956.000000,220236.000000,72350.000000,109.715358)}
{pt3dadd(151932.000000,220332.000000,72350.000000,117.181561)}
{pt3dadd(151932.000000,220440.000000,72350.000000,119.956370)}
{pt3dadd(151932.000000,220560.000000,72375.000000,129.919357)}
{pt3dadd(151920.000000,220656.000000,72400.000000,124.964668)}
{pt3dadd(151920.000000,220752.000000,72450.000000,129.027228)}
{pt3dadd(151968.000000,220848.000000,72450.000000,128.158904)}
{pt3dadd(152040.000000,220944.000000,72500.000000,151.106215)}
{pt3dadd(152076.000000,221076.000000,72550.000000,148.214659)}
{pt3dadd(151980.000000,221172.000000,72525.000000,157.093522)}
{pt3dadd(151932.000000,221304.000000,72525.000000,173.278442)}
{pt3dadd(151896.000000,221376.000000,72500.000000,190.066150)}
{pt3dadd(151992.000000,221508.000000,72550.000000,183.004690)}
{pt3dadd(152052.000000,221580.000000,72600.000000,184.898804)}
{pt3dadd(152004.000000,221688.000000,72650.000000,177.558439)}
{pt3dadd(151920.000000,221760.000000,72700.000000,143.650557)}
{pt3dadd(151836.000000,221844.000000,72675.000000,127.731173)}
{pt3dadd(151764.000000,221964.000000,72675.000000,118.694125)}
{pt3dadd(151752.000000,222060.000000,72725.000000,120.724185)}
{pt3dadd(151704.000000,222180.000000,72775.000000,124.140376)}
{pt3dadd(151680.000000,222288.000000,72850.000000,135.971186)}
{pt3dadd(151644.000000,222408.000000,72850.000000,137.800778)}
{pt3dadd(151680.000000,222528.000000,72875.000000,136.837310)}
{pt3dadd(151692.000000,222636.000000,72900.000000,135.804692)}
{pt3dadd(151596.000000,222756.000000,72950.000000,164.056142)}
{pt3dadd(151608.000000,222864.000000,73025.000000,166.849202)}
{pt3dadd(151632.000000,222984.000000,73175.000000,174.350418)}
{pt3dadd(151584.000000,223080.000000,73300.000000,216.673654)}
{pt3dadd(151512.000000,223188.000000,73400.000000,215.676212)}
{pt3dadd(151416.000000,223272.000000,73500.000000,219.598032)}
{pt3dadd(151416.000000,223404.000000,73650.000000,251.942420)}
{pt3dadd(151440.000000,223524.000000,73750.000000,266.366176)}
{pt3dadd(151452.000000,223620.000000,73875.000000,255.285564)}
{pt3dadd(151524.000000,223752.000000,73975.000000,267.001292)}
{pt3dadd(151536.000000,223836.000000,74050.000000,265.006404)}
{pt3dadd(151572.000000,223944.000000,74150.000000,243.015198)}
{pt3dadd(151584.000000,224040.000000,74275.000000,233.769422)}
{pt3dadd(151572.000000,224172.000000,74350.000000,204.487708)}
{pt3dadd(151584.000000,224268.000000,74425.000000,207.358646)}
{pt3dadd(151596.000000,224388.000000,74450.000000,171.495404)}
{pt3dadd(151668.000000,224184.000000,74700.000000,147.000086)}
{pt3dadd(151560.000000,224280.000000,74775.000000,129.530620)}
{pt3dadd(151392.000000,224580.000000,74950.000000,70.710680)}

{create adhoc179}
{access adhoc179}
{connect adhoc179(1), adhoc177(0)}
{nseg = 1}
{strdef color color = "White"}
{pt3dclear()}
{pt3dadd(152496.000000,217848.000000,72650.000000,174.110100)}
{pt3dadd(152436.000000,217908.000000,72550.000000,192.653290)}
{pt3dadd(152364.000000,217992.000000,72625.000000,239.977940)}
{pt3dadd(152292.000000,218064.000000,72650.000000,229.778808)}
{pt3dadd(152208.000000,218124.000000,72650.000000,232.278108)}
{pt3dadd(151944.000000,218364.000000,72525.000000,224.967628)}
{pt3dadd(151824.000000,218424.000000,72075.000000,223.860894)}
{pt3dadd(151692.000000,218532.000000,71775.000000,164.455124)}
{pt3dadd(151680.000000,218652.000000,71725.000000,167.153040)}
{pt3dadd(151620.000000,218724.000000,71675.000000,289.831720)}
{pt3dadd(151632.000000,218808.000000,71600.000000,405.744086)}
{pt3dadd(151596.000000,218880.000000,71525.000000,499.894182)}
{pt3dadd(151560.000000,218952.000000,71450.000000,516.649860)}
{pt3dadd(151524.000000,219012.000000,71400.000000,561.429092)}
{pt3dadd(151512.000000,219072.000000,71475.000000,473.529128)}
{pt3dadd(151500.000000,219132.000000,71450.000000,373.620916)}
{pt3dadd(151452.000000,219192.000000,71375.000000,315.359166)}
{pt3dadd(151308.000000,219252.000000,71225.000000,313.681674)}
{pt3dadd(151224.000000,219336.000000,71200.000000,289.149922)}
{pt3dadd(151332.000000,219288.000000,70925.000000,254.371206)}
{pt3dadd(151356.000000,219156.000000,70750.000000,230.043930)}
{pt3dadd(151224.000000,219252.000000,70625.000000,187.395108)}
{pt3dadd(151032.000000,219336.000000,70500.000000,162.018214)}
{pt3dadd(150960.000000,219468.000000,70400.000000,144.764262)}
{pt3dadd(150840.000000,219696.000000,70375.000000,146.080396)}
{pt3dadd(150768.000000,219792.000000,70225.000000,187.866100)}
{pt3dadd(150684.000000,219852.000000,70075.000000,258.379778)}
{pt3dadd(150600.000000,219888.000000,69925.000000,316.188388)}
{pt3dadd(150504.000000,219828.000000,69825.000000,323.195376)}
{pt3dadd(150432.000000,219792.000000,69775.000000,321.879242)}
{pt3dadd(150372.000000,219792.000000,69725.000000,265.470888)}
{pt3dadd(150300.000000,219804.000000,69675.000000,200.648654)}
{pt3dadd(150216.000000,219816.000000,69600.000000,142.840044)}
{pt3dadd(150132.000000,219840.000000,69525.000000,140.340744)}
{pt3dadd(149916.000000,219660.000000,69350.000000,152.265200)}
{pt3dadd(149688.000000,219660.000000,69025.000000,167.956882)}
{pt3dadd(149580.000000,219672.000000,68850.000000,177.642550)}
{pt3dadd(149532.000000,219684.000000,68725.000000,218.217890)}
{pt3dadd(149460.000000,219756.000000,68625.000000,212.677584)}
{pt3dadd(149400.000000,219780.000000,68500.000000,192.713522)}
{pt3dadd(149340.000000,219804.000000,68400.000000,235.972798)}
{pt3dadd(149268.000000,219864.000000,68300.000000,228.462896)}
{pt3dadd(149208.000000,219912.000000,68200.000000,220.337774)}
{pt3dadd(149148.000000,219972.000000,68075.000000,231.056060)}
{pt3dadd(149076.000000,220032.000000,67975.000000,260.337774)}
{pt3dadd(149016.000000,220092.000000,67825.000000,238.475450)}
{pt3dadd(148932.000000,220080.000000,67725.000000,237.368716)}
{pt3dadd(148848.000000,220056.000000,67625.000000,222.727108)}
{pt3dadd(148848.000000,219996.000000,67525.000000,214.110472)}
{pt3dadd(148812.000000,219948.000000,67425.000000,196.957640)}
{pt3dadd(148752.000000,219948.000000,67300.000000,202.740752)}
{pt3dadd(148704.000000,219924.000000,67175.000000,214.228326)}
{pt3dadd(148620.000000,219972.000000,67050.000000,212.865780)}
{pt3dadd(148548.000000,220020.000000,66925.000000,220.119870)}
{pt3dadd(148596.000000,219912.000000,66800.000000,211.199372)}
{pt3dadd(148656.000000,219816.000000,66675.000000,177.258832)}
{pt3dadd(148572.000000,219732.000000,66550.000000,162.672166)}
{pt3dadd(148620.000000,219540.000000,66450.000000,142.695372)}
{pt3dadd(148572.000000,219516.000000,66325.000000,127.842060)}
{pt3dadd(148512.000000,219552.000000,66175.000000,117.543352)}
{pt3dadd(148488.000000,219528.000000,66025.000000,134.331060)}
{pt3dadd(148248.000000,219924.000000,65900.000000,133.367592)}
{pt3dadd(148128.000000,219924.000000,65775.000000,175.335592)}
{pt3dadd(148104.000000,219864.000000,65625.000000,204.331766)}
{pt3dadd(148044.000000,219804.000000,65525.000000,249.412086)}
{pt3dadd(147996.000000,219756.000000,65400.000000,288.001490)}
{pt3dadd(147936.000000,219696.000000,65250.000000,323.447416)}
{pt3dadd(147888.000000,219648.000000,65100.000000,334.918792)}
{pt3dadd(147828.000000,219588.000000,64975.000000,333.120900)}
{pt3dadd(147876.000000,219516.000000,64825.000000,382.976050)}
{pt3dadd(147792.000000,219408.000000,64700.000000,359.544590)}
{pt3dadd(147780.000000,219516.000000,64575.000000,347.760284)}
{pt3dadd(147804.000000,219588.000000,64450.000000,308.150346)}
{pt3dadd(147840.000000,219660.000000,64325.000000,285.452194)}
{pt3dadd(147744.000000,219684.000000,64175.000000,199.708698)}
{pt3dadd(147792.000000,219576.000000,64050.000000,165.331548)}
{pt3dadd(147828.000000,219468.000000,63900.000000,139.840336)}
{pt3dadd(147720.000000,219492.000000,63775.000000,160.130554)}
{pt3dadd(147600.000000,219504.000000,63675.000000,153.281751)}
{pt3dadd(147480.000000,219588.000000,63575.000000,174.678703)}
{pt3dadd(147528.000000,219492.000000,63475.000000,191.124767)}
{pt3dadd(147576.000000,219492.000000,63350.000000,187.069024)}
{pt3dadd(147564.000000,219504.000000,63200.000000,148.929565)}
{pt3dadd(147564.000000,219528.000000,63050.000000,149.685486)}
{pt3dadd(147624.000000,219456.000000,62925.000000,122.396382)}
{pt3dadd(147372.000000,220188.000000,62625.000000,110.149086)}
{pt3dadd(147252.000000,220344.000000,62325.000000,117.995331)}
{pt3dadd(147096.000000,220476.000000,62000.000000,141.991928)}
{pt3dadd(147048.000000,220608.000000,62000.000000,205.542414)}
{pt3dadd(146964.000000,220704.000000,61700.000000,216.101220)}
{pt3dadd(146892.000000,220824.000000,61525.000000,234.093842)}
{pt3dadd(146844.000000,220944.000000,61450.000000,238.447984)}
{pt3dadd(146856.000000,221064.000000,61450.000000,241.221126)}
{pt3dadd(146820.000000,221160.000000,61325.000000,185.793582)}
{pt3dadd(146784.000000,221256.000000,61275.000000,189.743564)}
{pt3dadd(146760.000000,221352.000000,61200.000000,180.182804)}
{pt3dadd(146724.000000,221424.000000,61125.000000,186.546948)}
{pt3dadd(146700.000000,221496.000000,61200.000000,189.519132)}
{pt3dadd(146724.000000,221556.000000,61100.000000,187.489072)}
{pt3dadd(146724.000000,221640.000000,61100.000000,170.463039)}
{pt3dadd(146748.000000,221712.000000,60925.000000,157.832409)}
{pt3dadd(146724.000000,221784.000000,60850.000000,138.537707)}
{pt3dadd(146700.000000,221880.000000,60850.000000,174.154927)}
{pt3dadd(146664.000000,221964.000000,60825.000000,168.062045)}
{pt3dadd(146640.000000,222048.000000,60850.000000,161.906006)}
{pt3dadd(146652.000000,222132.000000,60800.000000,155.406298)}
{pt3dadd(146628.000000,222216.000000,60750.000000,159.323888)}
{pt3dadd(146604.000000,222312.000000,60725.000000,144.304082)}
{pt3dadd(146604.000000,222348.000000,60350.000000,180.676120)}
{pt3dadd(146592.000000,222408.000000,60225.000000,192.142464)}
{pt3dadd(146604.000000,222384.000000,60125.000000,216.450782)}
{pt3dadd(146604.000000,222432.000000,60000.000000,290.319446)}
{pt3dadd(146664.000000,222420.000000,59900.000000,249.123394)}
{pt3dadd(146676.000000,222492.000000,59775.000000,231.970562)}
{pt3dadd(146700.000000,222504.000000,59675.000000,231.970562)}
{pt3dadd(146760.000000,222528.000000,59600.000000,228.020580)}
{pt3dadd(146820.000000,222552.000000,59500.000000,159.843360)}
{pt3dadd(146880.000000,222576.000000,59400.000000,165.340932)}
{pt3dadd(146772.000000,222648.000000,59300.000000,158.752356)}
{pt3dadd(146796.000000,222672.000000,59175.000000,222.363952)}
{pt3dadd(146844.000000,222576.000000,59075.000000,239.094250)}
{pt3dadd(146844.000000,222564.000000,58925.000000,280.879954)}
{pt3dadd(146820.000000,222420.000000,58825.000000,328.873148)}
{pt3dadd(146820.000000,222288.000000,58725.000000,371.326036)}
{pt3dadd(146844.000000,222240.000000,58600.000000,392.567248)}
{pt3dadd(146856.000000,222180.000000,58500.000000,441.751782)}
{pt3dadd(146880.000000,222132.000000,58375.000000,475.212378)}
{pt3dadd(146904.000000,222072.000000,58275.000000,507.220690)}
{pt3dadd(146928.000000,222024.000000,58175.000000,492.712512)}
{pt3dadd(146940.000000,221964.000000,58025.000000,438.138860)}
{pt3dadd(146964.000000,221916.000000,57925.000000,398.940740)}
{pt3dadd(146988.000000,221856.000000,57775.000000,348.021716)}
{pt3dadd(147012.000000,221808.000000,57700.000000,306.010206)}
{pt3dadd(147024.000000,221748.000000,57625.000000,299.812016)}
{pt3dadd(147048.000000,221700.000000,57575.000000,290.494364)}
{pt3dadd(147072.000000,221640.000000,57525.000000,292.707828)}
{pt3dadd(147096.000000,221580.000000,57500.000000,307.710260)}
{pt3dadd(147120.000000,221532.000000,57450.000000,301.067210)}
{pt3dadd(147132.000000,221472.000000,57400.000000,301.067210)}
{pt3dadd(147156.000000,221424.000000,57350.000000,343.717302)}
{pt3dadd(147108.000000,221436.000000,57275.000000,316.058428)}
{pt3dadd(147084.000000,221424.000000,57200.000000,290.797168)}
{pt3dadd(147072.000000,221424.000000,57150.000000,282.948824)}
{pt3dadd(147084.000000,221376.000000,57100.000000,296.024324)}
{pt3dadd(147096.000000,221328.000000,57050.000000,264.757116)}
{pt3dadd(147108.000000,221280.000000,56975.000000,322.572362)}
{pt3dadd(147132.000000,221196.000000,56925.000000,309.572946)}
{pt3dadd(147168.000000,221112.000000,56850.000000,302.740564)}
{pt3dadd(147192.000000,221064.000000,56750.000000,300.368234)}
{pt3dadd(147204.000000,221052.000000,56650.000000,273.375430)}
{pt3dadd(147216.000000,221052.000000,56550.000000,206.523136)}
{pt3dadd(147216.000000,221112.000000,56475.000000,204.421486)}
{pt3dadd(147192.000000,221124.000000,56400.000000,264.034184)}
{pt3dadd(147288.000000,221076.000000,56275.000000,255.325902)}
{pt3dadd(147420.000000,221208.000000,56200.000000,257.740064)}
{pt3dadd(147396.000000,221436.000000,56125.000000,257.740064)}
{pt3dadd(147408.000000,221088.000000,55850.000000,255.779154)}
{pt3dadd(147540.000000,221088.000000,55700.000000,194.601302)}
{pt3dadd(147564.000000,221172.000000,55475.000000,176.037874)}
{pt3dadd(147672.000000,221220.000000,55375.000000,238.479408)}
{pt3dadd(147852.000000,221316.000000,55300.000000,256.143070)}
{pt3dadd(147996.000000,221400.000000,55200.000000,276.390550)}
{pt3dadd(148164.000000,221496.000000,55150.000000,266.829790)}
{pt3dadd(148296.000000,221748.000000,55100.000000,279.610106)}
{pt3dadd(148392.000000,221748.000000,55050.000000,235.760162)}
{pt3dadd(148416.000000,221676.000000,54950.000000,250.440888)}
{pt3dadd(148428.000000,221592.000000,54875.000000,280.084307)}
{pt3dadd(148332.000000,221568.000000,54800.000000,303.143300)}

{create adhoc180}
{access adhoc180}
{connect adhoc180(1), adhoc176(0)}
{nseg = 1}
{strdef color color = "White"}
{pt3dclear()}
{pt3dadd(158652.000000,201012.000000,71925.000000,414.105960)}
{pt3dadd(158652.000000,200532.000000,71650.000000,515.153720)}
{pt3dadd(158988.000000,200136.000000,71375.000000,456.011180)}
{pt3dadd(159000.000000,200148.000000,71225.000000,453.189988)}
{pt3dadd(159024.000000,200100.000000,71100.000000,336.793384)}
{pt3dadd(158868.000000,200040.000000,70975.000000,313.486044)}
{pt3dadd(158712.000000,199992.000000,70850.000000,276.211136)}
{pt3dadd(158820.000000,199956.000000,70725.000000,269.333826)}
{pt3dadd(158736.000000,199944.000000,70625.000000,225.383844)}
{pt3dadd(158616.000000,199944.000000,70500.000000,220.520848)}
{pt3dadd(158508.000000,199956.000000,70400.000000,243.828188)}
{pt3dadd(158412.000000,199968.000000,70250.000000,256.608504)}
{pt3dadd(158328.000000,199992.000000,70125.000000,241.410058)}
{pt3dadd(158388.000000,199932.000000,70025.000000,268.126770)}
{pt3dadd(158340.000000,199896.000000,69900.000000,278.385598)}
{pt3dadd(158280.000000,199944.000000,69775.000000,274.325478)}
{pt3dadd(158232.000000,199992.000000,69650.000000,260.182616)}
{pt3dadd(158100.000000,199992.000000,69550.000000,258.562266)}
{pt3dadd(158076.000000,199944.000000,69450.000000,234.432990)}
{pt3dadd(158052.000000,199884.000000,69325.000000,249.435422)}
{pt3dadd(157968.000000,199968.000000,69250.000000,251.430310)}
{pt3dadd(158028.000000,200040.000000,69150.000000,267.434464)}
{pt3dadd(158100.000000,200124.000000,69050.000000,278.055070)}
{pt3dadd(158052.000000,200112.000000,68975.000000,304.397810)}
{pt3dadd(157968.000000,200148.000000,68900.000000,293.317198)}
{pt3dadd(157872.000000,200196.000000,68825.000000,295.382430)}
{pt3dadd(157812.000000,200244.000000,68700.000000,293.521138)}
{pt3dadd(157848.000000,200220.000000,68625.000000,306.596638)}
{pt3dadd(157824.000000,200244.000000,68525.000000,316.259084)}
{pt3dadd(157776.000000,200292.000000,68450.000000,343.437532)}
{pt3dadd(157728.000000,200352.000000,68350.000000,339.377412)}
{pt3dadd(157632.000000,200376.000000,68275.000000,351.577290)}
{pt3dadd(157524.000000,200400.000000,68150.000000,367.675126)}
{pt3dadd(157488.000000,200364.000000,68050.000000,349.601026)}
{pt3dadd(157404.000000,200352.000000,67950.000000,316.639466)}
{pt3dadd(157308.000000,200352.000000,67850.000000,329.714966)}
{pt3dadd(157164.000000,200388.000000,67750.000000,353.500332)}
{pt3dadd(157080.000000,200400.000000,67650.000000,359.654324)}
{pt3dadd(157044.000000,200388.000000,67550.000000,412.369004)}
{pt3dadd(156960.000000,200412.000000,67425.000000,468.871908)}
{pt3dadd(156828.000000,200532.000000,67325.000000,479.227868)}
{pt3dadd(156696.000000,200652.000000,67200.000000,479.227868)}
{pt3dadd(156612.000000,200700.000000,67100.000000,526.620080)}
{pt3dadd(156528.000000,200748.000000,67000.000000,491.979500)}
{pt3dadd(156444.000000,200796.000000,66925.000000,457.338920)}
{pt3dadd(156456.000000,200724.000000,66850.000000,466.104480)}
{pt3dadd(156468.000000,200652.000000,66750.000000,433.907460)}
{pt3dadd(156432.000000,200628.000000,66650.000000,361.891090)}
{pt3dadd(156300.000000,200676.000000,66575.000000,361.891090)}
{pt3dadd(156180.000000,200616.000000,66475.000000,338.230874)}
{pt3dadd(156120.000000,200520.000000,66400.000000,302.245630)}
{pt3dadd(156024.000000,200436.000000,66300.000000,296.659514)}
{pt3dadd(155844.000000,200448.000000,66200.000000,287.951232)}
{pt3dadd(155652.000000,200472.000000,66125.000000,280.580302)}
{pt3dadd(155580.000000,200424.000000,66025.000000,280.580302)}
{pt3dadd(155184.000000,200808.000000,65875.000000,272.182766)}
{pt3dadd(155256.000000,200760.000000,65775.000000,288.472052)}
{pt3dadd(155148.000000,200700.000000,65700.000000,274.291404)}
{pt3dadd(155052.000000,200652.000000,65600.000000,267.648354)}
{pt3dadd(154920.000000,200592.000000,65525.000000,259.536868)}
{pt3dadd(154788.000000,200544.000000,65450.000000,258.025026)}
{pt3dadd(154872.000000,200604.000000,65325.000000,260.397356)}
{pt3dadd(154812.000000,200592.000000,65200.000000,280.994770)}
{pt3dadd(154668.000000,200448.000000,65125.000000,295.008750)}
{pt3dadd(154476.000000,200400.000000,65050.000000,317.118006)}
{pt3dadd(154392.000000,200364.000000,64950.000000,341.518778)}
{pt3dadd(154380.000000,200280.000000,64850.000000,343.974774)}
{pt3dadd(154272.000000,200256.000000,64750.000000,367.760140)}
{pt3dadd(154152.000000,200244.000000,64625.000000,381.883060)}
{pt3dadd(154032.000000,200376.000000,64550.000000,399.724058)}
{pt3dadd(153984.000000,200484.000000,64425.000000,407.094988)}
{pt3dadd(153828.000000,200592.000000,64325.000000,420.736828)}
{pt3dadd(153828.000000,200592.000000,64225.000000,406.613908)}
{pt3dadd(153828.000000,200508.000000,64125.000000,376.411776)}
{pt3dadd(153828.000000,200424.000000,64025.000000,363.234624)}
{pt3dadd(153828.000000,200340.000000,63925.000000,363.234624)}
{pt3dadd(153792.000000,200448.000000,63825.000000,344.764458)}
{pt3dadd(153888.000000,200472.000000,63750.000000,310.121818)}
{pt3dadd(153828.000000,200412.000000,63650.000000,316.538584)}
{pt3dadd(153828.000000,200280.000000,63575.000000,294.462828)}
{pt3dadd(153828.000000,200148.000000,63475.000000,265.768122)}
{pt3dadd(153912.000000,199980.000000,63400.000000,259.125072)}
{pt3dadd(153888.000000,199836.000000,63325.000000,271.905388)}
{pt3dadd(153864.000000,199716.000000,63225.000000,245.562648)}
{pt3dadd(153828.000000,199704.000000,63125.000000,230.484462)}
{pt3dadd(153864.000000,199668.000000,63050.000000,237.316844)}
{pt3dadd(153900.000000,199632.000000,62950.000000,215.325638)}
{pt3dadd(153852.000000,199560.000000,62850.000000,217.186930)}
{pt3dadd(153828.000000,199500.000000,62750.000000,261.370668)}
{pt3dadd(153816.000000,199500.000000,62650.000000,283.522178)}
{pt3dadd(153804.000000,199500.000000,62525.000000,343.878942)}
{pt3dadd(153780.000000,199500.000000,62425.000000,374.885528)}
{pt3dadd(153768.000000,199500.000000,62350.000000,422.208770)}
{pt3dadd(153744.000000,199500.000000,62250.000000,397.951006)}
{pt3dadd(153732.000000,199512.000000,62150.000000,445.274248)}
{pt3dadd(153672.000000,199440.000000,62075.000000,390.700596)}
{pt3dadd(153600.000000,199380.000000,62000.000000,395.699196)}
{pt3dadd(153624.000000,199356.000000,61900.000000,333.734346)}
{pt3dadd(153624.000000,199344.000000,61800.000000,344.814958)}
{pt3dadd(153624.000000,199344.000000,61725.000000,322.850108)}
{pt3dadd(153636.000000,199332.000000,61650.000000,329.266874)}
{pt3dadd(153612.000000,199272.000000,61550.000000,343.389794)}
{pt3dadd(153600.000000,199200.000000,61475.000000,361.953222)}
{pt3dadd(153612.000000,199248.000000,61375.000000,364.409218)}
{pt3dadd(153732.000000,199152.000000,61300.000000,327.280156)}
{pt3dadd(153636.000000,199092.000000,61200.000000,318.868502)}
{pt3dadd(153540.000000,199104.000000,61100.000000,272.973880)}
{pt3dadd(153564.000000,199092.000000,61025.000000,303.176012)}
{pt3dadd(153468.000000,199188.000000,60950.000000,298.347686)}
{pt3dadd(153372.000000,199212.000000,60875.000000,320.456942)}
{pt3dadd(153264.000000,199224.000000,60800.000000,343.888402)}
{pt3dadd(153360.000000,199152.000000,60700.000000,357.586004)}
{pt3dadd(153216.000000,199212.000000,60625.000000,333.800638)}
{pt3dadd(153192.000000,199164.000000,60525.000000,352.636722)}
{pt3dadd(153192.000000,199212.000000,60425.000000,400.793608)}
{pt3dadd(153216.000000,199188.000000,60350.000000,400.793608)}
{pt3dadd(153168.000000,199212.000000,60250.000000,388.607848)}
{pt3dadd(153132.000000,199224.000000,60150.000000,412.393214)}
{pt3dadd(153096.000000,199248.000000,60075.000000,415.050980)}
{pt3dadd(153048.000000,199272.000000,60000.000000,390.679460)}
{pt3dadd(153000.000000,199296.000000,59900.000000,343.169558)}
{pt3dadd(152964.000000,199308.000000,59825.000000,378.786778)}
{pt3dadd(152916.000000,199332.000000,59750.000000,367.296126)}
{pt3dadd(152868.000000,199356.000000,59675.000000,314.580584)}
{pt3dadd(152760.000000,199464.000000,59600.000000,282.383564)}
{pt3dadd(152652.000000,199572.000000,59525.000000,329.893466)}
{pt3dadd(152532.000000,199680.000000,59475.000000,283.529322)}
{pt3dadd(152424.000000,199776.000000,59425.000000,244.891868)}
{pt3dadd(152316.000000,199884.000000,59325.000000,276.113560)}
{pt3dadd(152208.000000,199992.000000,59225.000000,305.286896)}
{pt3dadd(152220.000000,200100.000000,59125.000000,253.571168)}
{pt3dadd(152136.000000,200220.000000,59050.000000,282.702042)}
{pt3dadd(151932.000000,200220.000000,58950.000000,300.633128)}
{pt3dadd(151920.000000,200244.000000,58825.000000,274.772014)}
{pt3dadd(151860.000000,200340.000000,58750.000000,220.413502)}
{pt3dadd(151776.000000,200424.000000,58675.000000,214.320620)}
{pt3dadd(151692.000000,200568.000000,58575.000000,177.944048)}
{pt3dadd(151596.000000,200712.000000,58500.000000,148.696312)}
{pt3dadd(151500.000000,200856.000000,58425.000000,126.604443)}
{pt3dadd(151416.000000,201000.000000,58325.000000,115.926377)}
{pt3dadd(151320.000000,201144.000000,58200.000000,199.295619)}
{pt3dadd(151188.000000,201180.000000,58050.000000,218.853395)}
{pt3dadd(151056.000000,201168.000000,57775.000000,226.354611)}
{pt3dadd(150924.000000,201276.000000,57700.000000,292.777760)}
{pt3dadd(150804.000000,201360.000000,57600.000000,326.714070)}
{pt3dadd(150864.000000,201372.000000,57500.000000,261.153438)}
{pt3dadd(150708.000000,201432.000000,57425.000000,303.971064)}
{pt3dadd(150648.000000,201360.000000,57350.000000,286.560054)}
{pt3dadd(150672.000000,201324.000000,57275.000000,245.200958)}
{pt3dadd(150432.000000,201372.000000,57175.000000,233.430288)}
{pt3dadd(150372.000000,201516.000000,57075.000000,248.071896)}
{pt3dadd(150372.000000,201600.000000,57000.000000,188.588050)}
{pt3dadd(150204.000000,201852.000000,56925.000000,236.157234)}
{pt3dadd(150084.000000,202056.000000,56825.000000,234.645392)}
{pt3dadd(149976.000000,202272.000000,56750.000000,226.596474)}
{pt3dadd(149880.000000,202500.000000,56675.000000,239.226576)}
{pt3dadd(149916.000000,202524.000000,56600.000000,308.436414)}
{pt3dadd(149796.000000,202800.000000,56525.000000,286.327158)}
{pt3dadd(149796.000000,202932.000000,56450.000000,300.024760)}
{pt3dadd(149676.000000,203088.000000,56375.000000,285.908038)}
{pt3dadd(149724.000000,203172.000000,56250.000000,267.882104)}
{pt3dadd(149676.000000,203496.000000,56175.000000,258.156112)}
{pt3dadd(149592.000000,203664.000000,56225.000000,289.927814)}
{pt3dadd(149640.000000,203760.000000,56275.000000,298.339468)}
{pt3dadd(149664.000000,203880.000000,56300.000000,340.400900)}
{pt3dadd(149724.000000,203940.000000,56300.000000,386.291690)}
{pt3dadd(149772.000000,204012.000000,56300.000000,348.508554)}
{pt3dadd(149760.000000,204084.000000,56225.000000,369.002480)}
{pt3dadd(149748.000000,204156.000000,56150.000000,373.666326)}
{pt3dadd(149724.000000,204240.000000,56050.000000,396.641472)}
{pt3dadd(149712.000000,204312.000000,55975.000000,381.504906)}
{pt3dadd(149652.000000,204396.000000,55975.000000,391.151142)}
{pt3dadd(149712.000000,204468.000000,56100.000000,350.656184)}
{pt3dadd(149772.000000,204540.000000,56150.000000,348.283854)}
{pt3dadd(149772.000000,204612.000000,56100.000000,319.110518)}
{pt3dadd(149760.000000,204684.000000,56050.000000,288.356294)}
{pt3dadd(149712.000000,204744.000000,56050.000000,267.727634)}
{pt3dadd(149760.000000,204960.000000,56100.000000,271.649454)}
{pt3dadd(149820.000000,205152.000000,56150.000000,243.015198)}
{pt3dadd(149832.000000,205296.000000,56075.000000,226.446658)}
{pt3dadd(149928.000000,205428.000000,56150.000000,213.250900)}
{pt3dadd(149964.000000,205560.000000,56025.000000,214.661496)}
{pt3dadd(149928.000000,205596.000000,55450.000000,195.767690)}
{pt3dadd(149868.000000,205596.000000,55050.000000,207.052980)}

{create adhoc181}
{access adhoc181}
{connect adhoc181(1), adhoc180(0)}
{nseg = 1}
{strdef color color = "White"}
{pt3dclear()}
{pt3dadd(149868.000000,205596.000000,55050.000000,207.052980)}
{pt3dadd(149340.000000,205680.000000,54775.000000,316.532003)}
{pt3dadd(149256.000000,205560.000000,54475.000000,354.047460)}
{pt3dadd(149232.000000,205452.000000,54300.000000,371.200292)}
{pt3dadd(149268.000000,205320.000000,54100.000000,344.483580)}
{pt3dadd(149280.000000,205272.000000,54000.000000,274.986752)}
{pt3dadd(149244.000000,205080.000000,53700.000000,178.352320)}
{pt3dadd(149268.000000,204996.000000,53550.000000,150.122239)}
{pt3dadd(149292.000000,204660.000000,53475.000000,134.429749)}
{pt3dadd(149328.000000,204336.000000,53400.000000,120.571121)}
{pt3dadd(149340.000000,204216.000000,53175.000000,153.571849)}
{pt3dadd(149424.000000,204000.000000,53050.000000,167.586415)}
{pt3dadd(149424.000000,203928.000000,52900.000000,181.229830)}
{pt3dadd(149472.000000,203784.000000,52725.000000,155.769902)}
{pt3dadd(149556.000000,203592.000000,52625.000000,160.899316)}
{pt3dadd(149616.000000,203364.000000,52475.000000,203.549408)}
{pt3dadd(149664.000000,203244.000000,52325.000000,197.402052)}
{pt3dadd(149652.000000,203136.000000,52200.000000,203.939800)}
{pt3dadd(149712.000000,203016.000000,52000.000000,220.164646)}
{pt3dadd(149760.000000,202884.000000,51825.000000,225.333940)}
{pt3dadd(149688.000000,202848.000000,51675.000000,172.075526)}
{pt3dadd(149784.000000,202884.000000,51550.000000,164.208316)}
{pt3dadd(149868.000000,202920.000000,51425.000000,154.877508)}
{pt3dadd(149952.000000,202944.000000,51300.000000,147.631810)}
{pt3dadd(150036.000000,202860.000000,51150.000000,138.115679)}
{pt3dadd(150144.000000,202836.000000,51000.000000,119.478225)}
{pt3dadd(150228.000000,202836.000000,50825.000000,124.137051)}
{pt3dadd(150228.000000,202776.000000,50625.000000,132.281695)}
{pt3dadd(150300.000000,202800.000000,50425.000000,136.205869)}
{pt3dadd(150360.000000,202836.000000,50250.000000,144.615266)}
{pt3dadd(150444.000000,202920.000000,50175.000000,155.998630)}
{pt3dadd(150528.000000,203076.000000,50100.000000,225.208468)}
{pt3dadd(150552.000000,203076.000000,49950.000000,232.983208)}
{pt3dadd(150672.000000,203244.000000,49825.000000,288.410752)}
{pt3dadd(150768.000000,203268.000000,49700.000000,277.027388)}
{pt3dadd(150912.000000,203328.000000,49800.000000,270.266912)}
{pt3dadd(150936.000000,203472.000000,49725.000000,217.723294)}
{pt3dadd(151068.000000,203592.000000,49600.000000,285.595918)}
{pt3dadd(151200.000000,203724.000000,49525.000000,271.954078)}
{pt3dadd(151128.000000,203880.000000,49475.000000,302.936502)}
{pt3dadd(151056.000000,204036.000000,49450.000000,303.804826)}
{pt3dadd(151020.000000,204156.000000,49400.000000,282.479780)}
{pt3dadd(150996.000000,204288.000000,49350.000000,168.494207)}
{pt3dadd(151092.000000,204348.000000,49300.000000,123.114440)}

{create adhoc182}
{access adhoc182}
{connect adhoc182(1), adhoc180(0)}
{nseg = 1}
{strdef color color = "White"}
{pt3dclear()}
{pt3dadd(149868.000000,205596.000000,55050.000000,207.052980)}
{pt3dadd(149328.000000,205956.000000,54600.000000,340.712300)}
{pt3dadd(149244.000000,206124.000000,54675.000000,372.742407)}
{pt3dadd(149064.000000,206316.000000,54800.000000,303.143300)}

{create adhoc183}
{access adhoc183}
{connect adhoc183(1), adhoc171(0)}
{nseg = 1}
{strdef color color = "White"}
{pt3dclear()}
{pt3dadd(175608.000000,182304.000000,82225.000000,459.479340)}
{pt3dadd(175944.000000,182040.000000,82775.000000,329.094167)}
{pt3dadd(175752.000000,182352.000000,82750.000000,294.025040)}
{pt3dadd(175656.000000,182496.000000,82750.000000,242.129172)}
{pt3dadd(175488.000000,182748.000000,82700.000000,235.296790)}
{pt3dadd(175344.000000,182904.000000,82725.000000,226.899254)}
{pt3dadd(175200.000000,183084.000000,82750.000000,228.894142)}
{pt3dadd(175056.000000,183216.000000,82775.000000,222.529998)}
{pt3dadd(174924.000000,183372.000000,82725.000000,217.352018)}
{pt3dadd(174840.000000,183528.000000,82650.000000,206.226104)}
{pt3dadd(174720.000000,183672.000000,82650.000000,200.480778)}
{pt3dadd(174612.000000,183792.000000,82650.000000,191.163126)}
{pt3dadd(174504.000000,183936.000000,82650.000000,206.773046)}
{pt3dadd(174384.000000,184092.000000,82650.000000,222.933450)}
{pt3dadd(174408.000000,184236.000000,82650.000000,218.425762)}
{pt3dadd(174384.000000,184356.000000,82650.000000,262.609500)}
{pt3dadd(174360.000000,184500.000000,82650.000000,256.234662)}
{pt3dadd(174336.000000,184644.000000,82675.000000,281.631526)}
{pt3dadd(174300.000000,184800.000000,82650.000000,256.140314)}
{pt3dadd(174264.000000,184908.000000,82600.000000,258.316080)}
{pt3dadd(174168.000000,185040.000000,82600.000000,247.594924)}
{pt3dadd(174036.000000,185172.000000,82550.000000,290.465862)}
{pt3dadd(173892.000000,185316.000000,82475.000000,283.094932)}
{pt3dadd(173760.000000,185484.000000,82400.000000,320.370450)}
{pt3dadd(173664.000000,185640.000000,82350.000000,338.862776)}
{pt3dadd(173604.000000,185796.000000,82300.000000,331.742934)}
{pt3dadd(173628.000000,185976.000000,82300.000000,296.983482)}
{pt3dadd(173616.000000,186120.000000,82300.000000,268.349226)}
{pt3dadd(173556.000000,186264.000000,82250.000000,248.453434)}
{pt3dadd(173484.000000,186372.000000,82200.000000,240.341948)}
{pt3dadd(173364.000000,186492.000000,82075.000000,212.683074)}
{pt3dadd(173292.000000,186588.000000,81950.000000,231.344690)}
{pt3dadd(173196.000000,186684.000000,81825.000000,253.335896)}
{pt3dadd(173100.000000,186780.000000,81750.000000,251.875554)}
{pt3dadd(173004.000000,186900.000000,81725.000000,245.054634)}
{pt3dadd(172932.000000,187008.000000,81650.000000,242.555334)}
{pt3dadd(172848.000000,187104.000000,81575.000000,203.225626)}
{pt3dadd(172812.000000,187224.000000,81550.000000,195.377282)}
{pt3dadd(172764.000000,187344.000000,81575.000000,193.966686)}
{pt3dadd(172728.000000,187464.000000,81525.000000,196.554122)}
{pt3dadd(172680.000000,187584.000000,81475.000000,191.013816)}
{pt3dadd(172572.000000,187692.000000,81350.000000,196.749502)}
{pt3dadd(172440.000000,187800.000000,81325.000000,183.969186)}
{pt3dadd(172284.000000,187920.000000,81300.000000,186.840124)}
{pt3dadd(172236.000000,188064.000000,81250.000000,183.024690)}
{pt3dadd(172212.000000,188184.000000,81125.000000,199.690910)}
{pt3dadd(172164.000000,188316.000000,81075.000000,216.421208)}
{pt3dadd(172008.000000,188436.000000,81000.000000,237.049868)}
{pt3dadd(171924.000000,188544.000000,80925.000000,271.453838)}
{pt3dadd(171900.000000,188664.000000,80875.000000,269.121916)}
{pt3dadd(171876.000000,188772.000000,80825.000000,261.811436)}
{pt3dadd(171792.000000,188892.000000,80725.000000,254.979054)}
{pt3dadd(171720.000000,188988.000000,80550.000000,227.986250)}
{pt3dadd(171600.000000,189096.000000,80500.000000,209.274770)}
{pt3dadd(171528.000000,189192.000000,80500.000000,251.427312)}
{pt3dadd(171480.000000,189312.000000,80475.000000,269.358398)}
{pt3dadd(171432.000000,189420.000000,80450.000000,300.685372)}
{pt3dadd(171348.000000,189540.000000,80350.000000,334.321226)}
{pt3dadd(171228.000000,189648.000000,80325.000000,326.740222)}
{pt3dadd(171084.000000,189756.000000,80325.000000,317.077776)}
{pt3dadd(170940.000000,189876.000000,80325.000000,313.289552)}
{pt3dadd(170832.000000,189996.000000,80350.000000,303.286354)}
{pt3dadd(170748.000000,190128.000000,80400.000000,277.425240)}
{pt3dadd(170676.000000,190236.000000,80425.000000,267.853412)}
{pt3dadd(170592.000000,190368.000000,80425.000000,253.855642)}
{pt3dadd(170520.000000,190500.000000,80475.000000,241.075326)}
{pt3dadd(170520.000000,190608.000000,80500.000000,230.372156)}
{pt3dadd(170508.000000,190728.000000,80550.000000,227.599014)}
{pt3dadd(170508.000000,190836.000000,80575.000000,221.010438)}
{pt3dadd(170448.000000,190956.000000,80575.000000,210.028014)}
{pt3dadd(170352.000000,191100.000000,80575.000000,206.078032)}
{pt3dadd(170400.000000,191208.000000,80575.000000,174.132380)}
{pt3dadd(170376.000000,191328.000000,80600.000000,160.986138)}
{pt3dadd(170340.000000,191820.000000,80700.000000,177.146542)}
{pt3dadd(170280.000000,192276.000000,80800.000000,189.926858)}
{pt3dadd(170208.000000,192444.000000,80675.000000,212.440268)}
{pt3dadd(170148.000000,192576.000000,80725.000000,248.446040)}
{pt3dadd(170064.000000,192696.000000,80750.000000,273.937252)}
{pt3dadd(170076.000000,192792.000000,80825.000000,275.735144)}
{pt3dadd(169992.000000,192924.000000,80900.000000,283.583488)}
{pt3dadd(169944.000000,193044.000000,80925.000000,283.583488)}
{pt3dadd(169920.000000,193188.000000,81000.000000,281.518256)}
{pt3dadd(169884.000000,193308.000000,81050.000000,273.406770)}
{pt3dadd(169836.000000,193428.000000,81150.000000,277.194994)}
{pt3dadd(169764.000000,193572.000000,81225.000000,267.548758)}
{pt3dadd(169596.000000,193680.000000,81200.000000,314.545962)}
{pt3dadd(169536.000000,193800.000000,81275.000000,325.626574)}
{pt3dadd(169476.000000,193920.000000,81350.000000,320.076956)}
{pt3dadd(169416.000000,194028.000000,81400.000000,293.822748)}
{pt3dadd(169356.000000,194124.000000,81475.000000,273.154656)}
{pt3dadd(169248.000000,194208.000000,81525.000000,189.785414)}
{pt3dadd(169140.000000,194292.000000,81600.000000,160.141374)}
{pt3dadd(169212.000000,194400.000000,81650.000000,146.604196)}
{pt3dadd(169332.000000,194496.000000,81700.000000,133.700874)}
{pt3dadd(169272.000000,194784.000000,81700.000000,124.822011)}
{pt3dadd(169140.000000,194964.000000,81700.000000,119.448549)}
{pt3dadd(169068.000000,195180.000000,81700.000000,144.428743)}
{pt3dadd(169008.000000,195456.000000,81700.000000,163.515539)}
{pt3dadd(169056.000000,195732.000000,81700.000000,192.052463)}
{pt3dadd(169272.000000,195816.000000,81875.000000,214.999774)}
{pt3dadd(169332.000000,195936.000000,81900.000000,230.671944)}
{pt3dadd(169416.000000,196044.000000,81925.000000,230.671944)}
{pt3dadd(169392.000000,196164.000000,81925.000000,225.122326)}
{pt3dadd(169368.000000,196260.000000,81925.000000,239.803052)}
{pt3dadd(169344.000000,196332.000000,81925.000000,221.810430)}
{pt3dadd(169644.000000,196716.000000,82050.000000,219.634664)}
{pt3dadd(170016.000000,197208.000000,82225.000000,183.936184)}
{pt3dadd(170304.000000,197436.000000,82350.000000,238.510732)}
{pt3dadd(170388.000000,197592.000000,82425.000000,213.932090)}
{pt3dadd(170472.000000,197820.000000,82525.000000,273.283808)}
{pt3dadd(170616.000000,197916.000000,82625.000000,305.736206)}
{pt3dadd(170652.000000,197916.000000,82750.000000,362.196368)}
{pt3dadd(170712.000000,197940.000000,82850.000000,317.868784)}
{pt3dadd(170784.000000,197940.000000,82975.000000,319.140086)}
{pt3dadd(170748.000000,198000.000000,83075.000000,263.712542)}
{pt3dadd(170712.000000,198060.000000,83175.000000,265.926006)}
{pt3dadd(170796.000000,198060.000000,83300.000000,234.825738)}
{pt3dadd(170892.000000,198036.000000,83425.000000,230.128392)}
{pt3dadd(170976.000000,198012.000000,83525.000000,226.442928)}
{pt3dadd(170928.000000,198192.000000,83650.000000,214.789256)}
{pt3dadd(170892.000000,198408.000000,83775.000000,163.951198)}
{pt3dadd(170808.000000,198612.000000,83950.000000,130.014888)}
{pt3dadd(170724.000000,198936.000000,84050.000000,118.527314)}
{pt3dadd(170760.000000,199140.000000,84150.000000,127.762396)}
{pt3dadd(170652.000000,199416.000000,84225.000000,125.346784)}
{pt3dadd(170568.000000,199596.000000,84325.000000,133.396038)}
{pt3dadd(170400.000000,199788.000000,84400.000000,138.181952)}
{pt3dadd(170208.000000,200028.000000,84500.000000,130.582730)}
{pt3dadd(169908.000000,200256.000000,84575.000000,122.533812)}
{pt3dadd(169752.000000,200484.000000,84550.000000,120.929621)}
{pt3dadd(169596.000000,200580.000000,84600.000000,137.375685)}
{pt3dadd(169488.000000,200664.000000,84675.000000,156.267253)}
{pt3dadd(169392.000000,200736.000000,84725.000000,151.801838)}
{pt3dadd(169308.000000,200784.000000,84775.000000,133.224866)}
{pt3dadd(169188.000000,200892.000000,84825.000000,137.902736)}
{pt3dadd(169044.000000,200952.000000,84875.000000,118.584010)}
{pt3dadd(168888.000000,201024.000000,84925.000000,92.861890)}
{pt3dadd(168756.000000,201108.000000,84900.000000,95.734552)}
{pt3dadd(168648.000000,201192.000000,84950.000000,118.126958)}
{pt3dadd(168528.000000,201276.000000,85000.000000,115.053279)}
{pt3dadd(168396.000000,201360.000000,85050.000000,118.708519)}
{pt3dadd(168276.000000,201444.000000,85100.000000,124.670747)}
{pt3dadd(168192.000000,201528.000000,85175.000000,125.453324)}
{pt3dadd(168180.000000,201612.000000,85250.000000,111.438758)}
{pt3dadd(168156.000000,201720.000000,85325.000000,124.475424)}
{pt3dadd(167964.000000,201876.000000,85350.000000,122.206755)}
{pt3dadd(167880.000000,202032.000000,85425.000000,128.967231)}
{pt3dadd(167724.000000,202212.000000,85525.000000,116.345913)}
{pt3dadd(167496.000000,202368.000000,85625.000000,120.007297)}
{pt3dadd(167424.000000,202500.000000,85725.000000,126.775601)}
{pt3dadd(167280.000000,202632.000000,85625.000000,129.044270)}
{pt3dadd(167352.000000,202788.000000,85625.000000,124.051064)}
{pt3dadd(167460.000000,202968.000000,85625.000000,137.482557)}
{pt3dadd(167520.000000,203124.000000,85625.000000,146.519605)}
{pt3dadd(167532.000000,203292.000000,85625.000000,165.111195)}
{pt3dadd(167556.000000,203460.000000,85625.000000,167.628440)}
{pt3dadd(167628.000000,203652.000000,85625.000000,165.022424)}
{pt3dadd(167652.000000,203784.000000,85600.000000,161.238282)}
{pt3dadd(167760.000000,203868.000000,85575.000000,158.738982)}
{pt3dadd(167736.000000,203952.000000,85575.000000,146.968312)}
{pt3dadd(167664.000000,204048.000000,85550.000000,165.859880)}
{pt3dadd(167604.000000,204120.000000,85475.000000,176.897758)}
{pt3dadd(167616.000000,204228.000000,85600.000000,181.520646)}
{pt3dadd(167616.000000,204312.000000,85650.000000,188.109222)}
{pt3dadd(167664.000000,204372.000000,85675.000000,194.484060)}
{pt3dadd(167676.000000,204528.000000,85500.000000,190.101280)}
{pt3dadd(167712.000000,204624.000000,85400.000000,222.550970)}
{pt3dadd(167808.000000,204744.000000,85325.000000,248.910506)}
{pt3dadd(167988.000000,204852.000000,85225.000000,262.141518)}
{pt3dadd(168120.000000,204984.000000,85100.000000,245.385840)}
{pt3dadd(168264.000000,205092.000000,85000.000000,230.877052)}
{pt3dadd(168168.000000,205428.000000,84875.000000,189.995500)}
{pt3dadd(168084.000000,205536.000000,84750.000000,162.797218)}
{pt3dadd(167952.000000,205596.000000,84625.000000,145.476930)}
{pt3dadd(167784.000000,205668.000000,84525.000000,149.036850)}
{pt3dadd(167808.000000,206040.000000,84650.000000,149.036850)}
{pt3dadd(167772.000000,206316.000000,84650.000000,165.517630)}
{pt3dadd(167736.000000,206484.000000,84725.000000,198.302028)}
{pt3dadd(167820.000000,206772.000000,84825.000000,197.030726)}
{pt3dadd(167748.000000,206832.000000,84875.000000,200.980708)}
{pt3dadd(167736.000000,206964.000000,84800.000000,219.872276)}
{pt3dadd(167664.000000,207096.000000,84925.000000,193.819266)}
{pt3dadd(167652.000000,207240.000000,85000.000000,152.942408)}
{pt3dadd(167520.000000,207372.000000,85200.000000,135.553050)}
{pt3dadd(167556.000000,207504.000000,85325.000000,119.337192)}
{pt3dadd(167568.000000,207624.000000,85425.000000,117.825350)}
{pt3dadd(167604.000000,207732.000000,85475.000000,135.829442)}
{pt3dadd(167652.000000,207840.000000,85600.000000,153.773616)}
{pt3dadd(167772.000000,207936.000000,85775.000000,149.255092)}
{pt3dadd(167796.000000,208020.000000,85900.000000,142.288878)}
{pt3dadd(167760.000000,208104.000000,86050.000000,142.288878)}
{pt3dadd(167760.000000,208200.000000,86075.000000,143.516876)}
{pt3dadd(167784.000000,208284.000000,86150.000000,148.518474)}
{pt3dadd(167844.000000,208356.000000,86275.000000,170.426356)}
{pt3dadd(167856.000000,208440.000000,86300.000000,208.250036)}
{pt3dadd(168024.000000,208512.000000,86475.000000,194.660812)}
{pt3dadd(168108.000000,208596.000000,86550.000000,206.179078)}
{pt3dadd(168096.000000,208692.000000,86600.000000,204.862944)}
{pt3dadd(168204.000000,208764.000000,86800.000000,213.195706)}
{pt3dadd(168264.000000,208848.000000,86900.000000,213.195706)}
{pt3dadd(168300.000000,208932.000000,86900.000000,203.913992)}
{pt3dadd(168312.000000,209004.000000,86950.000000,181.836920)}
{pt3dadd(168384.000000,209076.000000,87075.000000,168.299742)}
{pt3dadd(168420.000000,209160.000000,87175.000000,157.552818)}
{pt3dadd(168432.000000,209232.000000,87175.000000,134.294574)}
{pt3dadd(168408.000000,209328.000000,87200.000000,161.862858)}
{pt3dadd(168396.000000,209412.000000,87200.000000,176.371646)}
{pt3dadd(168384.000000,209508.000000,87150.000000,189.908824)}
{pt3dadd(168324.000000,209580.000000,87225.000000,197.683564)}
{pt3dadd(168264.000000,209676.000000,87175.000000,183.711210)}
{pt3dadd(168264.000000,209796.000000,87200.000000,156.848224)}
{pt3dadd(168204.000000,209952.000000,87275.000000,144.169028)}
{pt3dadd(168264.000000,210072.000000,87425.000000,136.129422)}
{pt3dadd(168408.000000,210156.000000,87425.000000,114.718826)}
{pt3dadd(168420.000000,210240.000000,87500.000000,129.797914)}
{pt3dadd(168348.000000,210312.000000,87550.000000,133.715504)}
{pt3dadd(168300.000000,210384.000000,87550.000000,211.955332)}
{pt3dadd(168288.000000,210456.000000,87650.000000,206.457760)}
{pt3dadd(168240.000000,210540.000000,87625.000000,214.742032)}
{pt3dadd(168168.000000,210600.000000,87600.000000,267.993810)}
{pt3dadd(168072.000000,210672.000000,87625.000000,338.507488)}
{pt3dadd(167988.000000,210732.000000,87625.000000,275.817794)}
{pt3dadd(167964.000000,210804.000000,87625.000000,306.675260)}
{pt3dadd(167880.000000,210864.000000,87625.000000,315.712308)}
{pt3dadd(167832.000000,210924.000000,87625.000000,268.607886)}
{pt3dadd(167772.000000,210984.000000,87650.000000,217.854100)}
{pt3dadd(167808.000000,211044.000000,87650.000000,239.963356)}
{pt3dadd(167736.000000,211092.000000,87675.000000,241.890288)}
{pt3dadd(167796.000000,211140.000000,87675.000000,253.814744)}
{pt3dadd(167808.000000,211188.000000,87675.000000,233.837950)}
{pt3dadd(167712.000000,211224.000000,87650.000000,233.837950)}
{pt3dadd(167616.000000,211368.000000,87725.000000,202.493612)}
{pt3dadd(167460.000000,211428.000000,87725.000000,161.132160)}
{pt3dadd(167232.000000,211536.000000,87925.000000,168.179280)}

{create adhoc184}
{access adhoc184}
{connect adhoc184(1), adhoc170(0)}
{nseg = 1}
{strdef color color = "White"}
{pt3dclear()}
{pt3dadd(182856.000000,168528.000000,84700.000000,546.416100)}
{pt3dadd(182604.000000,167400.000000,84250.000000,302.393120)}
{pt3dadd(182376.000000,167700.000000,84000.000000,273.447896)}
{pt3dadd(182328.000000,167952.000000,83875.000000,193.446390)}
{pt3dadd(182196.000000,168096.000000,83725.000000,193.446390)}
{pt3dadd(182004.000000,168564.000000,83625.000000,194.479008)}
{pt3dadd(181644.000000,168996.000000,83550.000000,162.134620)}
{pt3dadd(181536.000000,169248.000000,83500.000000,169.388710)}
{pt3dadd(181500.000000,169392.000000,83450.000000,171.490360)}
{pt3dadd(181428.000000,169512.000000,83450.000000,167.256876)}
{pt3dadd(181344.000000,169632.000000,83400.000000,168.325908)}
{pt3dadd(181296.000000,169752.000000,83325.000000,160.746934)}
{pt3dadd(181248.000000,169872.000000,83325.000000,140.134489)}
{pt3dadd(181164.000000,169980.000000,83300.000000,130.942515)}
{pt3dadd(181200.000000,170088.000000,83300.000000,113.010359)}
{pt3dadd(181176.000000,170196.000000,83325.000000,108.947799)}
{pt3dadd(181140.000000,170304.000000,83325.000000,116.526773)}
{pt3dadd(181068.000000,170424.000000,83325.000000,132.137620)}
{pt3dadd(180984.000000,170532.000000,83250.000000,145.996248)}
{pt3dadd(180960.000000,170640.000000,83225.000000,155.605282)}
{pt3dadd(180924.000000,170736.000000,83175.000000,165.605798)}
{pt3dadd(180900.000000,170832.000000,83150.000000,174.642846)}
{pt3dadd(180864.000000,170940.000000,83000.000000,182.417586)}
{pt3dadd(180816.000000,171036.000000,82900.000000,170.990456)}
{pt3dadd(180792.000000,171156.000000,82875.000000,166.167336)}
{pt3dadd(180816.000000,171264.000000,82875.000000,150.281485)}
{pt3dadd(180792.000000,171360.000000,82850.000000,137.583053)}
{pt3dadd(180744.000000,171492.000000,82800.000000,129.808313)}
{pt3dadd(180648.000000,171600.000000,82725.000000,159.827033)}
{pt3dadd(180492.000000,171708.000000,82625.000000,171.657141)}
{pt3dadd(180420.000000,171828.000000,82550.000000,182.711770)}
{pt3dadd(180432.000000,171960.000000,82550.000000,198.088882)}
{pt3dadd(180288.000000,172068.000000,82450.000000,190.843184)}
{pt3dadd(180180.000000,172176.000000,82425.000000,167.584940)}
{pt3dadd(180120.000000,172284.000000,82375.000000,153.237587)}
{pt3dadd(179988.000000,172416.000000,82275.000000,159.384943)}
{pt3dadd(179892.000000,172524.000000,82200.000000,145.775101)}
{pt3dadd(179604.000000,172668.000000,82075.000000,151.875041)}
{pt3dadd(179532.000000,172800.000000,81925.000000,145.982889)}
{pt3dadd(179424.000000,172980.000000,81800.000000,161.646376)}
{pt3dadd(179376.000000,173040.000000,81650.000000,146.793064)}
{pt3dadd(179232.000000,173124.000000,81475.000000,142.594296)}
{pt3dadd(179028.000000,173040.000000,81350.000000,133.078165)}
{pt3dadd(178824.000000,173064.000000,81225.000000,136.868667)}
{pt3dadd(178764.000000,173052.000000,81100.000000,126.515485)}
{pt3dadd(178776.000000,172920.000000,80975.000000,119.549271)}
{pt3dadd(178752.000000,172764.000000,80825.000000,125.642153)}
{pt3dadd(178704.000000,172656.000000,80700.000000,136.304042)}
{pt3dadd(178584.000000,172572.000000,80550.000000,202.158894)}
{pt3dadd(178476.000000,172440.000000,80525.000000,184.970317)}
{pt3dadd(178428.000000,172284.000000,80375.000000,233.113528)}
{pt3dadd(178404.000000,172176.000000,80150.000000,55.478474)}

{create adhoc185}
{access adhoc185}
{connect adhoc185(1), adhoc153(0)}
{nseg = 1}
{strdef color color = "White"}
{pt3dclear()}
{pt3dadd(132816.000000,143436.000000,147325.000000,1299.603900)}
{pt3dadd(134100.000000,144660.000000,147300.000000,493.862933)}
{pt3dadd(134256.000000,144780.000000,147400.000000,399.817358)}
{pt3dadd(134484.000000,144864.000000,147525.000000,198.652133)}
{pt3dadd(134580.000000,144900.000000,147550.000000,303.143300)}

{create adhoc186}
{access adhoc186}
{connect adhoc186(1), adhoc152(0)}
{nseg = 1}
{strdef color color = "White"}
{pt3dclear()}
{pt3dadd(133500.000000,140652.000000,151475.000000,1392.880900)}
{pt3dadd(133152.000000,138840.000000,151475.000000,534.612617)}
{pt3dadd(133272.000000,138444.000000,151475.000000,375.935076)}
{pt3dadd(133476.000000,138252.000000,151525.000000,123.749054)}
{pt3dadd(133524.000000,137940.000000,151575.000000,135.929440)}
{pt3dadd(133572.000000,137808.000000,151675.000000,131.950790)}

{create adhoc187}
{access adhoc187}
{connect adhoc187(1), adhoc186(0)}
{nseg = 1}
{strdef color color = "White"}
{pt3dclear()}
{pt3dadd(133572.000000,137808.000000,151675.000000,131.950790)}
{pt3dadd(133464.000000,137664.000000,151675.000000,175.991597)}
{pt3dadd(133488.000000,137364.000000,151775.000000,146.462894)}
{pt3dadd(133548.000000,137148.000000,151950.000000,154.894756)}
{pt3dadd(133692.000000,136920.000000,152175.000000,131.217274)}
{pt3dadd(133836.000000,136740.000000,152350.000000,128.885352)}
{pt3dadd(134160.000000,136632.000000,152475.000000,134.075773)}
{pt3dadd(134340.000000,136380.000000,152625.000000,138.734599)}
{pt3dadd(134544.000000,136056.000000,152775.000000,141.233899)}
{pt3dadd(134652.000000,135696.000000,152950.000000,150.842933)}
{pt3dadd(134760.000000,135384.000000,153150.000000,164.300769)}
{pt3dadd(134808.000000,135216.000000,153425.000000,188.813234)}
{pt3dadd(134880.000000,135144.000000,153675.000000,205.479454)}
{pt3dadd(134928.000000,135048.000000,153900.000000,214.106068)}
{pt3dadd(135000.000000,135120.000000,153975.000000,238.433344)}
{pt3dadd(135156.000000,135216.000000,154075.000000,255.252140)}
{pt3dadd(135324.000000,135300.000000,154175.000000,247.941660)}
{pt3dadd(135372.000000,135336.000000,154300.000000,260.076320)}
{pt3dadd(135444.000000,135252.000000,154425.000000,193.187270)}

{create adhoc188}
{access adhoc188}
{connect adhoc188(1), adhoc186(0)}
{nseg = 1}
{strdef color color = "White"}
{pt3dclear()}
{pt3dadd(133572.000000,137808.000000,151675.000000,131.950790)}
{pt3dadd(134052.000000,137796.000000,151625.000000,131.609348)}
{pt3dadd(134256.000000,137460.000000,151675.000000,164.236023)}
{pt3dadd(134604.000000,137280.000000,151775.000000,165.166669)}
{pt3dadd(134700.000000,137100.000000,151925.000000,170.572528)}
{pt3dadd(134700.000000,137112.000000,152150.000000,207.726470)}
{pt3dadd(134832.000000,137220.000000,152375.000000,204.093427)}
{pt3dadd(135192.000000,137148.000000,152650.000000,348.220200)}

{create adhoc189}
{access adhoc189}
{connect adhoc189(1), adhoc31(0)}
{nseg = 1}
{strdef color color = "White"}
{pt3dclear()}
{pt3dadd(132840.000000,136860.000000,160875.000000,400.000000)}
{pt3dadd(132936.000000,136752.000000,160875.000000,297.693417)}
{pt3dadd(133032.000000,136656.000000,160875.000000,213.482088)}
{pt3dadd(133104.000000,136536.000000,160875.000000,148.122945)}
{pt3dadd(133176.000000,136428.000000,160875.000000,96.337830)}
{pt3dadd(133200.000000,136272.000000,160875.000000,78.393656)}
{pt3dadd(133236.000000,136116.000000,160875.000000,70.060546)}
{pt3dadd(133272.000000,135960.000000,160875.000000,71.828877)}
{pt3dadd(133296.000000,135744.000000,160875.000000,71.330156)}
{pt3dadd(133272.000000,135564.000000,160875.000000,71.795479)}
{pt3dadd(133260.000000,135456.000000,160900.000000,69.298876)}
{pt3dadd(133212.000000,135360.000000,160900.000000,69.815185)}
{pt3dadd(133200.000000,135240.000000,160900.000000,69.349862)}
{pt3dadd(133224.000000,135108.000000,160900.000000,70.364892)}
{pt3dadd(133224.000000,134952.000000,160900.000000,68.596561)}
{pt3dadd(133260.000000,134808.000000,160900.000000,67.712926)}
{pt3dadd(133296.000000,134664.000000,160900.000000,72.555760)}
{pt3dadd(133320.000000,134520.000000,160900.000000,75.605729)}
{pt3dadd(133332.000000,134412.000000,160900.000000,75.089420)}
{pt3dadd(133332.000000,134280.000000,160875.000000,83.197349)}
{pt3dadd(133344.000000,134148.000000,160875.000000,93.859872)}
{pt3dadd(133344.000000,134052.000000,160875.000000,88.500729)}
{pt3dadd(133332.000000,133968.000000,160875.000000,96.024707)}
{pt3dadd(133272.000000,133884.000000,160800.000000,73.204285)}

{create adhoc190}
{access adhoc190}
{connect adhoc190(1), adhoc2(0)}
{nseg = 1}
{strdef color color = "White"}
{pt3dclear()}
{pt3dadd(132276.000000,133716.000000,161850.000000,141.421360)}
{pt3dadd(132396.000000,133716.000000,161875.000000,120.433710)}
{pt3dadd(132540.000000,133728.000000,161900.000000,105.323202)}
{pt3dadd(132660.000000,133764.000000,161925.000000,91.181066)}
{pt3dadd(132780.000000,133776.000000,161925.000000,79.141842)}
{pt3dadd(132876.000000,133812.000000,161925.000000,77.592296)}
{pt3dadd(133008.000000,133848.000000,161975.000000,75.988105)}
{pt3dadd(133140.000000,133896.000000,161975.000000,87.454449)}
{pt3dadd(133224.000000,133944.000000,161975.000000,92.631040)}
{pt3dadd(133284.000000,133956.000000,162100.000000,97.821461)}
{pt3dadd(133452.000000,134088.000000,162225.000000,102.998052)}
{pt3dadd(133644.000000,134112.000000,162450.000000,109.062493)}
{pt3dadd(133728.000000,134112.000000,162425.000000,96.469903)}
{pt3dadd(133800.000000,134076.000000,162525.000000,91.293312)}
{pt3dadd(133848.000000,133968.000000,162550.000000,93.641985)}
{pt3dadd(133908.000000,133932.000000,162600.000000,93.641985)}
{pt3dadd(134028.000000,133920.000000,162650.000000,90.347699)}
{pt3dadd(134148.000000,133956.000000,162675.000000,87.851096)}
{pt3dadd(134232.000000,133956.000000,162825.000000,83.208030)}
{pt3dadd(134364.000000,134004.000000,162925.000000,65.975395)}

{create adhoc191}
{access adhoc191}
{connect adhoc191(1), adhoc1(0)}
{nseg = 1}
{strdef color color = "White"}
{pt3dclear()}
{pt3dadd(132864.000000,131748.000000,162350.000000,100.000000)}
{pt3dadd(133944.000000,132252.000000,162350.000000,100.000000)}
