# Supplementary material for: Full reconstruction of large lobula plate tangential cells in Drosophila from a 3D EM dataset
Source: PLoS One. 2018 Nov 28;13(11):e0207828. doi: 10.1371/journal.pone.0207828 (PMC6261601; doi:10.1371/journal.pone.0207828)
Supplement: S1 Dataset — (ZIP) [file pone.0207828.s001.zip › Diameter hoc/Neuropil outline/Lobula outline 17Sep13.008_0002.hoc]

/* created with convertKnossosNmlToHoc.m */

{create adhoc1}
{access adhoc1}
{nseg = 1}
{strdef color color = "White"}
{pt3dclear()}
{pt3dadd(134640.000000,151320.000000,52500.000000,24.500000)}
{pt3dadd(136488.000000,151512.000000,52500.000000,24.500000)}
{pt3dadd(138192.000000,152748.000000,52500.000000,24.500000)}
{pt3dadd(138804.000000,155196.000000,52500.000000,24.500000)}
{pt3dadd(139668.000000,158796.000000,52500.000000,24.500000)}
{pt3dadd(139608.000000,162720.000000,52500.000000,24.500000)}
{pt3dadd(138768.000000,166932.000000,52500.000000,24.500000)}
{pt3dadd(137820.000000,171432.000000,52500.000000,24.500000)}
{pt3dadd(135744.000000,176316.000000,52500.000000,24.500000)}
{pt3dadd(133908.000000,178812.000000,52500.000000,24.500000)}
{pt3dadd(132732.000000,180096.000000,52500.000000,24.500000)}
{pt3dadd(131124.000000,180144.000000,52500.000000,24.500000)}
{pt3dadd(128940.000000,179964.000000,52500.000000,24.500000)}
{pt3dadd(127092.000000,179040.000000,52500.000000,24.500000)}
{pt3dadd(126204.000000,176316.000000,52500.000000,24.500000)}
{pt3dadd(125244.000000,173256.000000,52500.000000,24.500000)}
{pt3dadd(125292.000000,169164.000000,52500.000000,24.500000)}
{pt3dadd(125292.000000,165036.000000,52500.000000,24.500000)}
{pt3dadd(125856.000000,160632.000000,52500.000000,24.500000)}
{pt3dadd(127080.000000,156132.000000,52500.000000,24.500000)}
{pt3dadd(128976.000000,152724.000000,52500.000000,24.500000)}
{pt3dadd(131076.000000,151584.000000,52500.000000,24.500000)}
{pt3dadd(132720.000000,151176.000000,52500.000000,24.500000)}
{pt3dadd(134628.000000,151248.000000,52500.000000,24.500000)}
{pt3dadd(140640.000000,124368.000000,62500.000000,24.500000)}
{pt3dadd(143748.000000,125208.000000,62500.000000,24.500000)}
{pt3dadd(146820.000000,126348.000000,62500.000000,24.500000)}
{pt3dadd(150264.000000,128148.000000,62500.000000,24.500000)}
{pt3dadd(152148.000000,129408.000000,62500.000000,24.500000)}
{pt3dadd(152952.000000,132792.000000,62500.000000,24.500000)}
{pt3dadd(153720.000000,135036.000000,62500.000000,24.500000)}
{pt3dadd(153192.000000,139476.000000,62500.000000,24.500000)}
{pt3dadd(152532.000000,144900.000000,62500.000000,24.500000)}
{pt3dadd(151860.000000,150372.000000,62500.000000,24.500000)}
{pt3dadd(152196.000000,155484.000000,62500.000000,24.500000)}
{pt3dadd(153048.000000,160572.000000,62500.000000,24.500000)}
{pt3dadd(153912.000000,165936.000000,62500.000000,24.500000)}
{pt3dadd(152460.000000,171588.000000,62500.000000,24.500000)}
{pt3dadd(149172.000000,177528.000000,62500.000000,24.500000)}
{pt3dadd(145260.000000,183204.000000,62500.000000,24.500000)}
{pt3dadd(143688.000000,186912.000000,62500.000000,24.500000)}
{pt3dadd(138888.000000,195108.000000,62500.000000,24.500000)}
{pt3dadd(135480.000000,200028.000000,62500.000000,24.500000)}
{pt3dadd(131652.000000,204828.000000,62500.000000,24.500000)}
{pt3dadd(130596.000000,206304.000000,62500.000000,24.500000)}
{pt3dadd(128700.000000,206352.000000,62500.000000,24.500000)}
{pt3dadd(126792.000000,204324.000000,62500.000000,24.500000)}
{pt3dadd(124224.000000,201288.000000,62500.000000,24.500000)}
{pt3dadd(121260.000000,198036.000000,62500.000000,24.500000)}
{pt3dadd(118008.000000,193848.000000,62500.000000,24.500000)}
{pt3dadd(116868.000000,188136.000000,62500.000000,24.500000)}
{pt3dadd(115812.000000,181728.000000,62500.000000,24.500000)}
{pt3dadd(115956.000000,174840.000000,62500.000000,24.500000)}
{pt3dadd(117444.000000,169596.000000,62500.000000,24.500000)}
{pt3dadd(118608.000000,163764.000000,62500.000000,24.500000)}
{pt3dadd(120036.000000,157908.000000,62500.000000,24.500000)}
{pt3dadd(121200.000000,151956.000000,62500.000000,24.500000)}
{pt3dadd(121788.000000,146004.000000,62500.000000,24.500000)}
{pt3dadd(123300.000000,140148.000000,62500.000000,24.500000)}
{pt3dadd(125472.000000,134376.000000,62500.000000,24.500000)}
{pt3dadd(127872.000000,129828.000000,62500.000000,24.500000)}
{pt3dadd(131844.000000,125868.000000,62500.000000,24.500000)}
{pt3dadd(135504.000000,124248.000000,62500.000000,24.500000)}
{pt3dadd(138324.000000,124008.000000,62500.000000,24.500000)}
{pt3dadd(140460.000000,124356.000000,62500.000000,24.500000)}
{pt3dadd(147108.000000,95496.000000,72500.000000,24.500000)}
{pt3dadd(150900.000000,96732.000000,72500.000000,24.500000)}
{pt3dadd(152976.000000,99552.000000,72500.000000,24.500000)}
{pt3dadd(154524.000000,103716.000000,72500.000000,24.500000)}
{pt3dadd(156624.000000,108216.000000,72500.000000,24.500000)}
{pt3dadd(158172.000000,113472.000000,72500.000000,24.500000)}
{pt3dadd(159624.000000,119220.000000,72500.000000,24.500000)}
{pt3dadd(159852.000000,123684.000000,72500.000000,24.500000)}
{pt3dadd(160428.000000,126516.000000,72500.000000,24.500000)}
{pt3dadd(162660.000000,129684.000000,72500.000000,24.500000)}
{pt3dadd(164412.000000,132936.000000,72500.000000,24.500000)}
{pt3dadd(164568.000000,138240.000000,72500.000000,24.500000)}
{pt3dadd(164760.000000,143520.000000,72500.000000,24.500000)}
{pt3dadd(164856.000000,149352.000000,72500.000000,24.500000)}
{pt3dadd(165048.000000,155208.000000,72500.000000,24.500000)}
{pt3dadd(165324.000000,161160.000000,72500.000000,24.500000)}
{pt3dadd(165156.000000,167208.000000,72500.000000,24.500000)}
{pt3dadd(164232.000000,173436.000000,72500.000000,24.500000)}
{pt3dadd(162156.000000,177456.000000,72500.000000,24.500000)}
{pt3dadd(160236.000000,181860.000000,72500.000000,24.500000)}
{pt3dadd(158316.000000,186636.000000,72500.000000,24.500000)}
{pt3dadd(156120.000000,191724.000000,72500.000000,24.500000)}
{pt3dadd(153912.000000,197088.000000,72500.000000,24.500000)}
{pt3dadd(151788.000000,202836.000000,72500.000000,24.500000)}
{pt3dadd(149124.000000,208680.000000,72500.000000,24.500000)}
{pt3dadd(145788.000000,214632.000000,72500.000000,24.500000)}
{pt3dadd(142152.000000,220488.000000,72500.000000,24.500000)}
{pt3dadd(139152.000000,225144.000000,72500.000000,24.500000)}
{pt3dadd(136272.000000,224664.000000,72500.000000,24.500000)}
{pt3dadd(133476.000000,222984.000000,72500.000000,24.500000)}
{pt3dadd(130692.000000,220428.000000,72500.000000,24.500000)}
{pt3dadd(127908.000000,217188.000000,72500.000000,24.500000)}
{pt3dadd(124752.000000,213732.000000,72500.000000,24.500000)}
{pt3dadd(121956.000000,211296.000000,72500.000000,24.500000)}
{pt3dadd(120744.000000,208248.000000,72500.000000,24.500000)}
{pt3dadd(119136.000000,205452.000000,72500.000000,24.500000)}
{pt3dadd(118152.000000,202584.000000,72500.000000,24.500000)}
{pt3dadd(117648.000000,199332.000000,72500.000000,24.500000)}
{pt3dadd(117264.000000,195972.000000,72500.000000,24.500000)}
{pt3dadd(116976.000000,192516.000000,72500.000000,24.500000)}
{pt3dadd(116772.000000,188976.000000,72500.000000,24.500000)}
{pt3dadd(115560.000000,185424.000000,72500.000000,24.500000)}
{pt3dadd(114312.000000,181872.000000,72500.000000,24.500000)}
{pt3dadd(113064.000000,178224.000000,72500.000000,24.500000)}
{pt3dadd(111912.000000,174204.000000,72500.000000,24.500000)}
{pt3dadd(111408.000000,170640.000000,72500.000000,24.500000)}
{pt3dadd(112776.000000,167088.000000,72500.000000,24.500000)}
{pt3dadd(114120.000000,163248.000000,72500.000000,24.500000)}
{pt3dadd(114912.000000,159408.000000,72500.000000,24.500000)}
{pt3dadd(115776.000000,155568.000000,72500.000000,24.500000)}
{pt3dadd(115068.000000,152100.000000,72500.000000,24.500000)}
{pt3dadd(113472.000000,148644.000000,72500.000000,24.500000)}
{pt3dadd(114048.000000,145224.000000,72500.000000,24.500000)}
{pt3dadd(115476.000000,141492.000000,72500.000000,24.500000)}
{pt3dadd(116544.000000,137292.000000,72500.000000,24.500000)}
{pt3dadd(117696.000000,132972.000000,72500.000000,24.500000)}
{pt3dadd(119028.000000,128472.000000,72500.000000,24.500000)}
{pt3dadd(120372.000000,123960.000000,72500.000000,24.500000)}
{pt3dadd(122736.000000,119904.000000,72500.000000,24.500000)}
{pt3dadd(125688.000000,116148.000000,72500.000000,24.500000)}
{pt3dadd(128208.000000,111756.000000,72500.000000,24.500000)}
{pt3dadd(132000.000000,107532.000000,72500.000000,24.500000)}
{pt3dadd(136116.000000,103404.000000,72500.000000,24.500000)}
{pt3dadd(139308.000000,100104.000000,72500.000000,24.500000)}
{pt3dadd(142848.000000,97020.000000,72500.000000,24.500000)}
{pt3dadd(144648.000000,95712.000000,72500.000000,24.500000)}
{pt3dadd(146928.000000,95388.000000,72500.000000,24.500000)}
{pt3dadd(142212.000000,89796.000000,82500.000000,24.500000)}
{pt3dadd(143136.000000,89784.000000,82500.000000,24.500000)}
{pt3dadd(145116.000000,89592.000000,82500.000000,24.500000)}
{pt3dadd(146952.000000,89028.000000,82500.000000,24.500000)}
{pt3dadd(149604.000000,88452.000000,82500.000000,24.500000)}
{pt3dadd(152760.000000,88248.000000,82500.000000,24.500000)}
{pt3dadd(155736.000000,89256.000000,82500.000000,24.500000)}
{pt3dadd(158712.000000,90588.000000,82500.000000,24.500000)}
{pt3dadd(160860.000000,93324.000000,82500.000000,24.500000)}
{pt3dadd(162780.000000,96756.000000,82500.000000,24.500000)}
{pt3dadd(164148.000000,100764.000000,82500.000000,24.500000)}
{pt3dadd(165492.000000,104976.000000,82500.000000,24.500000)}
{pt3dadd(166836.000000,109296.000000,82500.000000,24.500000)}
{pt3dadd(168180.000000,113712.000000,82500.000000,24.500000)}
{pt3dadd(169524.000000,118128.000000,82500.000000,24.500000)}
{pt3dadd(170688.000000,122628.000000,82500.000000,24.500000)}
{pt3dadd(170916.000000,125292.000000,82500.000000,24.500000)}
{pt3dadd(170832.000000,128628.000000,82500.000000,24.500000)}
{pt3dadd(170088.000000,132264.000000,82500.000000,24.500000)}
{pt3dadd(170148.000000,134292.000000,82500.000000,24.500000)}
{pt3dadd(170544.000000,135432.000000,82500.000000,24.500000)}
{pt3dadd(171672.000000,136956.000000,82500.000000,24.500000)}
{pt3dadd(172632.000000,138948.000000,82500.000000,24.500000)}
{pt3dadd(173784.000000,141336.000000,82500.000000,24.500000)}
{pt3dadd(174288.000000,144480.000000,82500.000000,24.500000)}
{pt3dadd(174396.000000,148200.000000,82500.000000,24.500000)}
{pt3dadd(174120.000000,152124.000000,82500.000000,24.500000)}
{pt3dadd(173280.000000,156528.000000,82500.000000,24.500000)}
{pt3dadd(173340.000000,160944.000000,82500.000000,24.500000)}
{pt3dadd(172332.000000,165444.000000,82500.000000,24.500000)}
{pt3dadd(171372.000000,169956.000000,82500.000000,24.500000)}
{pt3dadd(170412.000000,174564.000000,82500.000000,24.500000)}
{pt3dadd(168612.000000,178704.000000,82500.000000,24.500000)}
{pt3dadd(168000.000000,183024.000000,82500.000000,24.500000)}
{pt3dadd(166764.000000,187344.000000,82500.000000,24.500000)}
{pt3dadd(165612.000000,192120.000000,82500.000000,24.500000)}
{pt3dadd(164364.000000,197016.000000,82500.000000,24.500000)}
{pt3dadd(162840.000000,201912.000000,82500.000000,24.500000)}
{pt3dadd(160848.000000,205236.000000,82500.000000,24.500000)}
{pt3dadd(159108.000000,209520.000000,82500.000000,24.500000)}
{pt3dadd(155988.000000,213648.000000,82500.000000,24.500000)}
{pt3dadd(154212.000000,217776.000000,82500.000000,24.500000)}
{pt3dadd(151464.000000,221628.000000,82500.000000,24.500000)}
{pt3dadd(149424.000000,226212.000000,82500.000000,24.500000)}
{pt3dadd(146208.000000,230820.000000,82500.000000,24.500000)}
{pt3dadd(142944.000000,235152.000000,82500.000000,24.500000)}
{pt3dadd(139404.000000,237984.000000,82500.000000,24.500000)}
{pt3dadd(135384.000000,240684.000000,82500.000000,24.500000)}
{pt3dadd(133476.000000,241332.000000,82500.000000,24.500000)}
{pt3dadd(131472.000000,240348.000000,82500.000000,24.500000)}
{pt3dadd(129732.000000,238548.000000,82500.000000,24.500000)}
{pt3dadd(127728.000000,235248.000000,82500.000000,24.500000)}
{pt3dadd(124788.000000,232164.000000,82500.000000,24.500000)}
{pt3dadd(121992.000000,229092.000000,82500.000000,24.500000)}
{pt3dadd(119304.000000,225924.000000,82500.000000,24.500000)}
{pt3dadd(116796.000000,222108.000000,82500.000000,24.500000)}
{pt3dadd(114024.000000,217716.000000,82500.000000,24.500000)}
{pt3dadd(111336.000000,213216.000000,82500.000000,24.500000)}
{pt3dadd(108924.000000,208332.000000,82500.000000,24.500000)}
{pt3dadd(106524.000000,203244.000000,82500.000000,24.500000)}
{pt3dadd(105324.000000,197880.000000,82500.000000,24.500000)}
{pt3dadd(103524.000000,193716.000000,82500.000000,24.500000)}
{pt3dadd(102072.000000,189492.000000,82500.000000,24.500000)}
{pt3dadd(101280.000000,186012.000000,82500.000000,24.500000)}
{pt3dadd(101904.000000,182268.000000,82500.000000,24.500000)}
{pt3dadd(102480.000000,178152.000000,82500.000000,24.500000)}
{pt3dadd(103056.000000,173844.000000,82500.000000,24.500000)}
{pt3dadd(103992.000000,169524.000000,82500.000000,24.500000)}
{pt3dadd(105696.000000,165204.000000,82500.000000,24.500000)}
{pt3dadd(106872.000000,160428.000000,82500.000000,24.500000)}
{pt3dadd(107280.000000,155340.000000,82500.000000,24.500000)}
{pt3dadd(108864.000000,150252.000000,82500.000000,24.500000)}
{pt3dadd(110400.000000,145260.000000,82500.000000,24.500000)}
{pt3dadd(111852.000000,140268.000000,82500.000000,24.500000)}
{pt3dadd(112824.000000,135276.000000,82500.000000,24.500000)}
{pt3dadd(112680.000000,130752.000000,82500.000000,24.500000)}
{pt3dadd(112680.000000,126240.000000,82500.000000,24.500000)}
{pt3dadd(113328.000000,121452.000000,82500.000000,24.500000)}
{pt3dadd(114264.000000,116652.000000,82500.000000,24.500000)}
{pt3dadd(115512.000000,111936.000000,82500.000000,24.500000)}
{pt3dadd(117396.000000,107424.000000,82500.000000,24.500000)}
{pt3dadd(121824.000000,103740.000000,82500.000000,24.500000)}
{pt3dadd(126696.000000,99996.000000,82500.000000,24.500000)}
{pt3dadd(131316.000000,95976.000000,82500.000000,24.500000)}
{pt3dadd(136200.000000,92220.000000,82500.000000,24.500000)}
{pt3dadd(139524.000000,90612.000000,82500.000000,24.500000)}
{pt3dadd(142056.000000,89724.000000,82500.000000,24.500000)}
{pt3dadd(141492.000000,91068.000000,92500.000000,24.500000)}
{pt3dadd(143604.000000,90744.000000,92500.000000,24.500000)}
{pt3dadd(146172.000000,90180.000000,92500.000000,24.500000)}
{pt3dadd(149040.000000,89892.000000,92500.000000,24.500000)}
{pt3dadd(152484.000000,90156.000000,92500.000000,24.500000)}
{pt3dadd(156216.000000,90072.000000,92500.000000,24.500000)}
{pt3dadd(159120.000000,90072.000000,92500.000000,24.500000)}
{pt3dadd(162288.000000,91368.000000,92500.000000,24.500000)}
{pt3dadd(165456.000000,92616.000000,92500.000000,24.500000)}
{pt3dadd(166308.000000,93948.000000,92500.000000,24.500000)}
{pt3dadd(166692.000000,94728.000000,92500.000000,24.500000)}
{pt3dadd(168888.000000,98160.000000,92500.000000,24.500000)}
{pt3dadd(171000.000000,101616.000000,92500.000000,24.500000)}
{pt3dadd(172644.000000,105720.000000,92500.000000,24.500000)}
{pt3dadd(174000.000000,110400.000000,92500.000000,24.500000)}
{pt3dadd(174876.000000,115380.000000,92500.000000,24.500000)}
{pt3dadd(175656.000000,120552.000000,92500.000000,24.500000)}
{pt3dadd(176892.000000,123420.000000,92500.000000,24.500000)}
{pt3dadd(177852.000000,126300.000000,92500.000000,24.500000)}
{pt3dadd(178812.000000,130476.000000,92500.000000,24.500000)}
{pt3dadd(178572.000000,134892.000000,92500.000000,24.500000)}
{pt3dadd(179028.000000,138288.000000,92500.000000,24.500000)}
{pt3dadd(179616.000000,140004.000000,92500.000000,24.500000)}
{pt3dadd(181152.000000,143796.000000,92500.000000,24.500000)}
{pt3dadd(182136.000000,147996.000000,92500.000000,24.500000)}
{pt3dadd(182640.000000,152412.000000,92500.000000,24.500000)}
{pt3dadd(182376.000000,157008.000000,92500.000000,24.500000)}
{pt3dadd(182376.000000,160224.000000,92500.000000,24.500000)}
{pt3dadd(181356.000000,164232.000000,92500.000000,24.500000)}
{pt3dadd(180204.000000,168444.000000,92500.000000,24.500000)}
{pt3dadd(179424.000000,173316.000000,92500.000000,24.500000)}
{pt3dadd(178656.000000,178212.000000,92500.000000,24.500000)}
{pt3dadd(176868.000000,183012.000000,92500.000000,24.500000)}
{pt3dadd(174864.000000,188100.000000,92500.000000,24.500000)}
{pt3dadd(173124.000000,193548.000000,92500.000000,24.500000)}
{pt3dadd(171588.000000,199212.000000,92500.000000,24.500000)}
{pt3dadd(169308.000000,205056.000000,92500.000000,24.500000)}
{pt3dadd(167280.000000,211008.000000,92500.000000,24.500000)}
{pt3dadd(165264.000000,216960.000000,92500.000000,24.500000)}
{pt3dadd(163248.000000,222912.000000,92500.000000,24.500000)}
{pt3dadd(160764.000000,229044.000000,92500.000000,24.500000)}
{pt3dadd(157536.000000,234636.000000,92500.000000,24.500000)}
{pt3dadd(154356.000000,238356.000000,92500.000000,24.500000)}
{pt3dadd(152304.000000,241260.000000,92500.000000,24.500000)}
{pt3dadd(150564.000000,243960.000000,92500.000000,24.500000)}
{pt3dadd(148836.000000,246552.000000,92500.000000,24.500000)}
{pt3dadd(146280.000000,247944.000000,92500.000000,24.500000)}
{pt3dadd(143688.000000,248460.000000,92500.000000,24.500000)}
{pt3dadd(140448.000000,248664.000000,92500.000000,24.500000)}
{pt3dadd(136908.000000,248388.000000,92500.000000,24.500000)}
{pt3dadd(133356.000000,247368.000000,92500.000000,24.500000)}
{pt3dadd(129432.000000,245292.000000,92500.000000,24.500000)}
{pt3dadd(125580.000000,242904.000000,92500.000000,24.500000)}
{pt3dadd(121836.000000,239952.000000,92500.000000,24.500000)}
{pt3dadd(118092.000000,236232.000000,92500.000000,24.500000)}
{pt3dadd(114444.000000,232212.000000,92500.000000,24.500000)}
{pt3dadd(111348.000000,227532.000000,92500.000000,24.500000)}
{pt3dadd(108180.000000,222744.000000,92500.000000,24.500000)}
{pt3dadd(105384.000000,217476.000000,92500.000000,24.500000)}
{pt3dadd(103716.000000,211644.000000,92500.000000,24.500000)}
{pt3dadd(102732.000000,204948.000000,92500.000000,24.500000)}
{pt3dadd(102228.000000,197772.000000,92500.000000,24.500000)}
{pt3dadd(103224.000000,190668.000000,92500.000000,24.500000)}
{pt3dadd(105576.000000,183564.000000,92500.000000,24.500000)}
{pt3dadd(107508.000000,175992.000000,92500.000000,24.500000)}
{pt3dadd(109896.000000,168408.000000,92500.000000,24.500000)}
{pt3dadd(111000.000000,162672.000000,92500.000000,24.500000)}
{pt3dadd(112152.000000,156732.000000,92500.000000,24.500000)}
{pt3dadd(113208.000000,150504.000000,92500.000000,24.500000)}
{pt3dadd(113988.000000,144168.000000,92500.000000,24.500000)}
{pt3dadd(114384.000000,137832.000000,92500.000000,24.500000)}
{pt3dadd(114396.000000,131400.000000,92500.000000,24.500000)}
{pt3dadd(114312.000000,124968.000000,92500.000000,24.500000)}
{pt3dadd(114312.000000,120396.000000,92500.000000,24.500000)}
{pt3dadd(115416.000000,115236.000000,92500.000000,24.500000)}
{pt3dadd(116748.000000,109956.000000,92500.000000,24.500000)}
{pt3dadd(118740.000000,104952.000000,92500.000000,24.500000)}
{pt3dadd(122796.000000,100704.000000,92500.000000,24.500000)}
{pt3dadd(125988.000000,97128.000000,92500.000000,24.500000)}
{pt3dadd(129900.000000,93936.000000,92500.000000,24.500000)}
{pt3dadd(134112.000000,92256.000000,92500.000000,24.500000)}
{pt3dadd(138156.000000,91548.000000,92500.000000,24.500000)}
{pt3dadd(141348.000000,91056.000000,92500.000000,24.500000)}
{pt3dadd(141204.000000,93600.000000,102500.000000,24.500000)}
{pt3dadd(142776.000000,93324.000000,102500.000000,24.500000)}
{pt3dadd(145140.000000,93504.000000,102500.000000,24.500000)}
{pt3dadd(147636.000000,93228.000000,102500.000000,24.500000)}
{pt3dadd(151140.000000,93036.000000,102500.000000,24.500000)}
{pt3dadd(155436.000000,93396.000000,102500.000000,24.500000)}
{pt3dadd(160404.000000,94332.000000,102500.000000,24.500000)}
{pt3dadd(165672.000000,95208.000000,102500.000000,24.500000)}
{pt3dadd(168636.000000,96528.000000,102500.000000,24.500000)}
{pt3dadd(171708.000000,98424.000000,102500.000000,24.500000)}
{pt3dadd(174312.000000,101184.000000,102500.000000,24.500000)}
{pt3dadd(175236.000000,102840.000000,102500.000000,24.500000)}
{pt3dadd(176208.000000,104424.000000,102500.000000,24.500000)}
{pt3dadd(177168.000000,106596.000000,102500.000000,24.500000)}
{pt3dadd(178500.000000,108804.000000,102500.000000,24.500000)}
{pt3dadd(179748.000000,111108.000000,102500.000000,24.500000)}
{pt3dadd(180720.000000,113688.000000,102500.000000,24.500000)}
{pt3dadd(181500.000000,116376.000000,102500.000000,24.500000)}
{pt3dadd(182172.000000,119532.000000,102500.000000,24.500000)}
{pt3dadd(182892.000000,123480.000000,102500.000000,24.500000)}
{pt3dadd(183828.000000,125736.000000,102500.000000,24.500000)}
{pt3dadd(184236.000000,128784.000000,102500.000000,24.500000)}
{pt3dadd(184716.000000,132036.000000,102500.000000,24.500000)}
{pt3dadd(185196.000000,135396.000000,102500.000000,24.500000)}
{pt3dadd(185484.000000,138936.000000,102500.000000,24.500000)}
{pt3dadd(185772.000000,142488.000000,102500.000000,24.500000)}
{pt3dadd(185604.000000,146136.000000,102500.000000,24.500000)}
{pt3dadd(185136.000000,149880.000000,102500.000000,24.500000)}
{pt3dadd(184932.000000,153996.000000,102500.000000,24.500000)}
{pt3dadd(185388.000000,158112.000000,102500.000000,24.500000)}
{pt3dadd(185676.000000,162336.000000,102500.000000,24.500000)}
{pt3dadd(185508.000000,166656.000000,102500.000000,24.500000)}
{pt3dadd(185688.000000,171156.000000,102500.000000,24.500000)}
{pt3dadd(185508.000000,175764.000000,102500.000000,24.500000)}
{pt3dadd(184764.000000,180192.000000,102500.000000,24.500000)}
{pt3dadd(183168.000000,184320.000000,102500.000000,24.500000)}
{pt3dadd(182088.000000,188820.000000,102500.000000,24.500000)}
{pt3dadd(181128.000000,193704.000000,102500.000000,24.500000)}
{pt3dadd(180816.000000,198600.000000,102500.000000,24.500000)}
{pt3dadd(179508.000000,203496.000000,102500.000000,24.500000)}
{pt3dadd(177972.000000,208392.000000,102500.000000,24.500000)}
{pt3dadd(176436.000000,213288.000000,102500.000000,24.500000)}
{pt3dadd(174624.000000,218184.000000,102500.000000,24.500000)}
{pt3dadd(172896.000000,223080.000000,102500.000000,24.500000)}
{pt3dadd(171168.000000,227976.000000,102500.000000,24.500000)}
{pt3dadd(168240.000000,231948.000000,102500.000000,24.500000)}
{pt3dadd(166560.000000,234864.000000,102500.000000,24.500000)}
{pt3dadd(162984.000000,236916.000000,102500.000000,24.500000)}
{pt3dadd(159336.000000,239304.000000,102500.000000,24.500000)}
{pt3dadd(154848.000000,241608.000000,102500.000000,24.500000)}
{pt3dadd(149976.000000,243912.000000,102500.000000,24.500000)}
{pt3dadd(145080.000000,246216.000000,102500.000000,24.500000)}
{pt3dadd(140460.000000,247596.000000,102500.000000,24.500000)}
{pt3dadd(136776.000000,245796.000000,102500.000000,24.500000)}
{pt3dadd(132108.000000,244344.000000,102500.000000,24.500000)}
{pt3dadd(127500.000000,242808.000000,102500.000000,24.500000)}
{pt3dadd(124092.000000,240900.000000,102500.000000,24.500000)}
{pt3dadd(120732.000000,238800.000000,102500.000000,24.500000)}
{pt3dadd(117648.000000,236136.000000,102500.000000,24.500000)}
{pt3dadd(115500.000000,232332.000000,102500.000000,24.500000)}
{pt3dadd(112836.000000,228132.000000,102500.000000,24.500000)}
{pt3dadd(110424.000000,223812.000000,102500.000000,24.500000)}
{pt3dadd(108948.000000,219216.000000,102500.000000,24.500000)}
{pt3dadd(107412.000000,214608.000000,102500.000000,24.500000)}
{pt3dadd(106248.000000,209904.000000,102500.000000,24.500000)}
{pt3dadd(105744.000000,205200.000000,102500.000000,24.500000)}
{pt3dadd(106656.000000,200496.000000,102500.000000,24.500000)}
{pt3dadd(108540.000000,195888.000000,102500.000000,24.500000)}
{pt3dadd(110364.000000,191280.000000,102500.000000,24.500000)}
{pt3dadd(112188.000000,186672.000000,102500.000000,24.500000)}
{pt3dadd(114372.000000,181968.000000,102500.000000,24.500000)}
{pt3dadd(116496.000000,177084.000000,102500.000000,24.500000)}
{pt3dadd(118884.000000,172188.000000,102500.000000,24.500000)}
{pt3dadd(121008.000000,167100.000000,102500.000000,24.500000)}
{pt3dadd(122652.000000,161832.000000,102500.000000,24.500000)}
{pt3dadd(124188.000000,156552.000000,102500.000000,24.500000)}
{pt3dadd(124992.000000,151272.000000,102500.000000,24.500000)}
{pt3dadd(126408.000000,146088.000000,102500.000000,24.500000)}
{pt3dadd(125904.000000,141636.000000,102500.000000,24.500000)}
{pt3dadd(124872.000000,137508.000000,102500.000000,24.500000)}
{pt3dadd(123348.000000,133656.000000,102500.000000,24.500000)}
{pt3dadd(121452.000000,130176.000000,102500.000000,24.500000)}
{pt3dadd(119712.000000,126540.000000,102500.000000,24.500000)}
{pt3dadd(119832.000000,122340.000000,102500.000000,24.500000)}
{pt3dadd(119832.000000,118212.000000,102500.000000,24.500000)}
{pt3dadd(120948.000000,114084.000000,102500.000000,24.500000)}
{pt3dadd(123396.000000,110040.000000,102500.000000,24.500000)}
{pt3dadd(126072.000000,105828.000000,102500.000000,24.500000)}
{pt3dadd(128580.000000,101508.000000,102500.000000,24.500000)}
{pt3dadd(131436.000000,97464.000000,102500.000000,24.500000)}
{pt3dadd(133212.000000,95928.000000,102500.000000,24.500000)}
{pt3dadd(135588.000000,94956.000000,102500.000000,24.500000)}
{pt3dadd(137988.000000,94080.000000,102500.000000,24.500000)}
{pt3dadd(141132.000000,93588.000000,102500.000000,24.500000)}
{pt3dadd(141648.000000,102036.000000,112500.000000,24.500000)}
{pt3dadd(142656.000000,101844.000000,112500.000000,24.500000)}
{pt3dadd(144264.000000,101280.000000,112500.000000,24.500000)}
{pt3dadd(146088.000000,100524.000000,112500.000000,24.500000)}
{pt3dadd(148272.000000,99756.000000,112500.000000,24.500000)}
{pt3dadd(151320.000000,99636.000000,112500.000000,24.500000)}
{pt3dadd(155316.000000,100464.000000,112500.000000,24.500000)}
{pt3dadd(159432.000000,101412.000000,112500.000000,24.500000)}
{pt3dadd(163560.000000,102840.000000,112500.000000,24.500000)}
{pt3dadd(167040.000000,104652.000000,112500.000000,24.500000)}
{pt3dadd(169860.000000,106836.000000,112500.000000,24.500000)}
{pt3dadd(171996.000000,108684.000000,112500.000000,24.500000)}
{pt3dadd(174108.000000,109572.000000,112500.000000,24.500000)}
{pt3dadd(176028.000000,111372.000000,112500.000000,24.500000)}
{pt3dadd(177864.000000,113652.000000,112500.000000,24.500000)}
{pt3dadd(179688.000000,116148.000000,112500.000000,24.500000)}
{pt3dadd(181320.000000,118920.000000,112500.000000,24.500000)}
{pt3dadd(183144.000000,121704.000000,112500.000000,24.500000)}
{pt3dadd(185148.000000,124116.000000,112500.000000,24.500000)}
{pt3dadd(186792.000000,127164.000000,112500.000000,24.500000)}
{pt3dadd(187680.000000,130692.000000,112500.000000,24.500000)}
{pt3dadd(188184.000000,134436.000000,112500.000000,24.500000)}
{pt3dadd(188844.000000,138180.000000,112500.000000,24.500000)}
{pt3dadd(189516.000000,141924.000000,112500.000000,24.500000)}
{pt3dadd(188712.000000,145764.000000,112500.000000,24.500000)}
{pt3dadd(188040.000000,149784.000000,112500.000000,24.500000)}
{pt3dadd(187740.000000,153816.000000,112500.000000,24.500000)}
{pt3dadd(186888.000000,157848.000000,112500.000000,24.500000)}
{pt3dadd(186216.000000,161880.000000,112500.000000,24.500000)}
{pt3dadd(185544.000000,165912.000000,112500.000000,24.500000)}
{pt3dadd(185148.000000,170124.000000,112500.000000,24.500000)}
{pt3dadd(184944.000000,174624.000000,112500.000000,24.500000)}
{pt3dadd(184752.000000,179136.000000,112500.000000,24.500000)}
{pt3dadd(184380.000000,183840.000000,112500.000000,24.500000)}
{pt3dadd(183900.000000,187152.000000,112500.000000,24.500000)}
{pt3dadd(183420.000000,190512.000000,112500.000000,24.500000)}
{pt3dadd(182664.000000,194148.000000,112500.000000,24.500000)}
{pt3dadd(182172.000000,197796.000000,112500.000000,24.500000)}
{pt3dadd(181044.000000,200700.000000,112500.000000,24.500000)}
{pt3dadd(180816.000000,204324.000000,112500.000000,24.500000)}
{pt3dadd(180348.000000,208068.000000,112500.000000,24.500000)}
{pt3dadd(179868.000000,211812.000000,112500.000000,24.500000)}
{pt3dadd(178644.000000,215736.000000,112500.000000,24.500000)}
{pt3dadd(177312.000000,219672.000000,112500.000000,24.500000)}
{pt3dadd(175416.000000,223608.000000,112500.000000,24.500000)}
{pt3dadd(174144.000000,227268.000000,112500.000000,24.500000)}
{pt3dadd(173532.000000,229716.000000,112500.000000,24.500000)}
{pt3dadd(171948.000000,231840.000000,112500.000000,24.500000)}
{pt3dadd(168828.000000,233388.000000,112500.000000,24.500000)}
{pt3dadd(165384.000000,235392.000000,112500.000000,24.500000)}
{pt3dadd(161748.000000,237588.000000,112500.000000,24.500000)}
{pt3dadd(157260.000000,239436.000000,112500.000000,24.500000)}
{pt3dadd(152016.000000,240972.000000,112500.000000,24.500000)}
{pt3dadd(146640.000000,242424.000000,112500.000000,24.500000)}
{pt3dadd(143124.000000,243492.000000,112500.000000,24.500000)}
{pt3dadd(138732.000000,243708.000000,112500.000000,24.500000)}
{pt3dadd(134316.000000,242892.000000,112500.000000,24.500000)}
{pt3dadd(130092.000000,241008.000000,112500.000000,24.500000)}
{pt3dadd(126888.000000,237888.000000,112500.000000,24.500000)}
{pt3dadd(123624.000000,234264.000000,112500.000000,24.500000)}
{pt3dadd(121464.000000,230244.000000,112500.000000,24.500000)}
{pt3dadd(120276.000000,226212.000000,112500.000000,24.500000)}
{pt3dadd(120516.000000,221904.000000,112500.000000,24.500000)}
{pt3dadd(121164.000000,217680.000000,112500.000000,24.500000)}
{pt3dadd(121836.000000,213264.000000,112500.000000,24.500000)}
{pt3dadd(122508.000000,208848.000000,112500.000000,24.500000)}
{pt3dadd(122628.000000,204156.000000,112500.000000,24.500000)}
{pt3dadd(122724.000000,199452.000000,112500.000000,24.500000)}
{pt3dadd(124488.000000,195120.000000,112500.000000,24.500000)}
{pt3dadd(126312.000000,190800.000000,112500.000000,24.500000)}
{pt3dadd(128220.000000,186480.000000,112500.000000,24.500000)}
{pt3dadd(130512.000000,182160.000000,112500.000000,24.500000)}
{pt3dadd(132072.000000,177192.000000,112500.000000,24.500000)}
{pt3dadd(133608.000000,172200.000000,112500.000000,24.500000)}
{pt3dadd(134868.000000,167208.000000,112500.000000,24.500000)}
{pt3dadd(135384.000000,162120.000000,112500.000000,24.500000)}
{pt3dadd(136140.000000,157032.000000,112500.000000,24.500000)}
{pt3dadd(136440.000000,151944.000000,112500.000000,24.500000)}
{pt3dadd(136644.000000,146856.000000,112500.000000,24.500000)}
{pt3dadd(136644.000000,141768.000000,112500.000000,24.500000)}
{pt3dadd(136560.000000,136680.000000,112500.000000,24.500000)}
{pt3dadd(135996.000000,131592.000000,112500.000000,24.500000)}
{pt3dadd(134688.000000,126504.000000,112500.000000,24.500000)}
{pt3dadd(133344.000000,121416.000000,112500.000000,24.500000)}
{pt3dadd(132924.000000,116328.000000,112500.000000,24.500000)}
{pt3dadd(133836.000000,111240.000000,112500.000000,24.500000)}
{pt3dadd(135804.000000,106440.000000,112500.000000,24.500000)}
{pt3dadd(138936.000000,103488.000000,112500.000000,24.500000)}
{pt3dadd(141540.000000,101988.000000,112500.000000,24.500000)}
{pt3dadd(154272.000000,110436.000000,122500.000000,24.500000)}
{pt3dadd(156036.000000,110712.000000,122500.000000,24.500000)}
{pt3dadd(158220.000000,111828.000000,122500.000000,24.500000)}
{pt3dadd(160716.000000,113436.000000,122500.000000,24.500000)}
{pt3dadd(163296.000000,115536.000000,122500.000000,24.500000)}
{pt3dadd(167100.000000,117648.000000,122500.000000,24.500000)}
{pt3dadd(170940.000000,120408.000000,122500.000000,24.500000)}
{pt3dadd(174312.000000,124296.000000,122500.000000,24.500000)}
{pt3dadd(176928.000000,129348.000000,122500.000000,24.500000)}
{pt3dadd(179616.000000,135360.000000,122500.000000,24.500000)}
{pt3dadd(181836.000000,142428.000000,122500.000000,24.500000)}
{pt3dadd(180720.000000,148692.000000,122500.000000,24.500000)}
{pt3dadd(178824.000000,154104.000000,122500.000000,24.500000)}
{pt3dadd(176724.000000,159108.000000,122500.000000,24.500000)}
{pt3dadd(175728.000000,160956.000000,122500.000000,24.500000)}
{pt3dadd(173928.000000,163056.000000,122500.000000,24.500000)}
{pt3dadd(172020.000000,165252.000000,122500.000000,24.500000)}
{pt3dadd(170556.000000,168108.000000,122500.000000,24.500000)}
{pt3dadd(169488.000000,171828.000000,122500.000000,24.500000)}
{pt3dadd(169908.000000,176220.000000,122500.000000,24.500000)}
{pt3dadd(171588.000000,179520.000000,122500.000000,24.500000)}
{pt3dadd(171276.000000,183336.000000,122500.000000,24.500000)}
{pt3dadd(171888.000000,188556.000000,122500.000000,24.500000)}
{pt3dadd(171636.000000,193932.000000,122500.000000,24.500000)}
{pt3dadd(171264.000000,199584.000000,122500.000000,24.500000)}
{pt3dadd(170328.000000,205428.000000,122500.000000,24.500000)}
{pt3dadd(168528.000000,211476.000000,122500.000000,24.500000)}
{pt3dadd(166344.000000,217800.000000,122500.000000,24.500000)}
{pt3dadd(164136.000000,224136.000000,122500.000000,24.500000)}
{pt3dadd(162204.000000,226488.000000,122500.000000,24.500000)}
{pt3dadd(159264.000000,228420.000000,122500.000000,24.500000)}
{pt3dadd(156564.000000,230616.000000,122500.000000,24.500000)}
{pt3dadd(153324.000000,231816.000000,122500.000000,24.500000)}
{pt3dadd(149688.000000,231576.000000,122500.000000,24.500000)}
{pt3dadd(145848.000000,231852.000000,122500.000000,24.500000)}
{pt3dadd(141552.000000,231300.000000,122500.000000,24.500000)}
{pt3dadd(137976.000000,229248.000000,122500.000000,24.500000)}
{pt3dadd(135156.000000,225468.000000,122500.000000,24.500000)}
{pt3dadd(134232.000000,221268.000000,122500.000000,24.500000)}
{pt3dadd(133920.000000,217140.000000,122500.000000,24.500000)}
{pt3dadd(133716.000000,213012.000000,122500.000000,24.500000)}
{pt3dadd(134076.000000,208884.000000,122500.000000,24.500000)}
{pt3dadd(134364.000000,204660.000000,122500.000000,24.500000)}
{pt3dadd(136296.000000,202572.000000,122500.000000,24.500000)}
{pt3dadd(140472.000000,200496.000000,122500.000000,24.500000)}
{pt3dadd(142188.000000,195144.000000,122500.000000,24.500000)}
{pt3dadd(144372.000000,189036.000000,122500.000000,24.500000)}
{pt3dadd(145908.000000,184968.000000,122500.000000,24.500000)}
{pt3dadd(147192.000000,181812.000000,122500.000000,24.500000)}
{pt3dadd(146688.000000,177720.000000,122500.000000,24.500000)}
{pt3dadd(147324.000000,173412.000000,122500.000000,24.500000)}
{pt3dadd(146688.000000,168912.000000,122500.000000,24.500000)}
{pt3dadd(146580.000000,164304.000000,122500.000000,24.500000)}
{pt3dadd(146484.000000,159696.000000,122500.000000,24.500000)}
{pt3dadd(146664.000000,154992.000000,122500.000000,24.500000)}
{pt3dadd(146484.000000,150204.000000,122500.000000,24.500000)}
{pt3dadd(147036.000000,145404.000000,122500.000000,24.500000)}
{pt3dadd(147516.000000,140604.000000,122500.000000,24.500000)}
{pt3dadd(147792.000000,138216.000000,122500.000000,24.500000)}
{pt3dadd(147480.000000,133032.000000,122500.000000,24.500000)}
{pt3dadd(147096.000000,128136.000000,122500.000000,24.500000)}
{pt3dadd(146160.000000,123336.000000,122500.000000,24.500000)}
{pt3dadd(145932.000000,118536.000000,122500.000000,24.500000)}
{pt3dadd(147504.000000,115032.000000,122500.000000,24.500000)}
{pt3dadd(149964.000000,111936.000000,122500.000000,24.500000)}
{pt3dadd(151992.000000,110064.000000,122500.000000,24.500000)}
{pt3dadd(154284.000000,110460.000000,122500.000000,24.500000)}
{pt3dadd(156192.000000,132228.000000,128750.000000,16333.333333)}
{pt3dadd(159240.000000,132732.000000,128750.000000,24.500000)}
{pt3dadd(161940.000000,134508.000000,128750.000000,24.500000)}
{pt3dadd(164076.000000,137628.000000,128750.000000,24.500000)}
{pt3dadd(166188.000000,140976.000000,128750.000000,24.500000)}
{pt3dadd(166260.000000,144516.000000,128750.000000,24.500000)}
{pt3dadd(168024.000000,147420.000000,128750.000000,24.500000)}
{pt3dadd(167712.000000,149748.000000,128750.000000,24.500000)}
{pt3dadd(165492.000000,151308.000000,128750.000000,24.500000)}
{pt3dadd(162996.000000,153132.000000,128750.000000,24.500000)}
{pt3dadd(160320.000000,154668.000000,128750.000000,24.500000)}
{pt3dadd(159948.000000,157416.000000,128750.000000,24.500000)}
{pt3dadd(159468.000000,160200.000000,128750.000000,24.500000)}
{pt3dadd(158712.000000,163260.000000,128750.000000,24.500000)}
{pt3dadd(157848.000000,166332.000000,128750.000000,24.500000)}
{pt3dadd(157356.000000,169500.000000,128750.000000,24.500000)}
{pt3dadd(158268.000000,173316.000000,128750.000000,24.500000)}
{pt3dadd(160332.000000,176688.000000,128750.000000,24.500000)}
{pt3dadd(160776.000000,179676.000000,128750.000000,24.500000)}
{pt3dadd(161256.000000,182844.000000,128750.000000,24.500000)}
{pt3dadd(161460.000000,184716.000000,128750.000000,24.500000)}
{pt3dadd(162576.000000,185328.000000,128750.000000,24.500000)}
{pt3dadd(164376.000000,187116.000000,128750.000000,24.500000)}
{pt3dadd(165732.000000,189300.000000,128750.000000,24.500000)}
{pt3dadd(165408.000000,191700.000000,128750.000000,24.500000)}
{pt3dadd(164844.000000,194100.000000,128750.000000,24.500000)}
{pt3dadd(163440.000000,196356.000000,128750.000000,24.500000)}
{pt3dadd(160644.000000,197760.000000,128750.000000,24.500000)}
{pt3dadd(157956.000000,198828.000000,128750.000000,24.500000)}
{pt3dadd(155268.000000,199332.000000,128750.000000,24.500000)}
{pt3dadd(150360.000000,199992.000000,128750.000000,24.500000)}
{pt3dadd(146388.000000,200016.000000,128750.000000,24.500000)}
{pt3dadd(143280.000000,199092.000000,128750.000000,24.500000)}
{pt3dadd(140856.000000,196932.000000,128750.000000,24.500000)}
{pt3dadd(140496.000000,193608.000000,128750.000000,24.500000)}
{pt3dadd(140880.000000,188400.000000,128750.000000,24.500000)}
{pt3dadd(140892.000000,183132.000000,128750.000000,24.500000)}
{pt3dadd(140892.000000,177852.000000,128750.000000,24.500000)}
{pt3dadd(140808.000000,172848.000000,128750.000000,24.500000)}
{pt3dadd(140712.000000,167856.000000,128750.000000,24.500000)}
{pt3dadd(140340.000000,162864.000000,128750.000000,24.500000)}
{pt3dadd(139584.000000,157872.000000,128750.000000,24.500000)}
{pt3dadd(138636.000000,152880.000000,128750.000000,24.500000)}
{pt3dadd(137676.000000,147888.000000,128750.000000,24.500000)}
{pt3dadd(138936.000000,144468.000000,128750.000000,24.500000)}
{pt3dadd(143040.000000,142032.000000,128750.000000,24.500000)}
{pt3dadd(147168.000000,138804.000000,128750.000000,24.500000)}
{pt3dadd(150936.000000,135264.000000,128750.000000,24.500000)}
{pt3dadd(154128.000000,132540.000000,128750.000000,24.500000)}
{pt3dadd(156084.000000,132168.000000,128750.000000,24.500000)}
