# Supplementary material for: Full reconstruction of large lobula plate tangential cells in Drosophila from a 3D EM dataset
Source: PLoS One. 2018 Nov 28;13(11):e0207828. doi: 10.1371/journal.pone.0207828 (PMC6261601; doi:10.1371/journal.pone.0207828)
Supplement: S1 Dataset — (ZIP) [file pone.0207828.s001.zip › Diameter hoc/Neuropil outline/Medulla outline ck 17Sep13.008_0002.hoc]

/* created with convertKnossosNmlToHoc.m */

{create adhoc1}
{access adhoc1}
{nseg = 1}
{strdef color color = "White"}
{pt3dclear()}
{pt3dadd(147960.000000,62496.000000,25.000000,24.500000)}
{pt3dadd(151008.000000,63240.000000,25.000000,24.500000)}
{pt3dadd(155988.000000,63648.000000,25.000000,24.500000)}
{pt3dadd(160056.000000,66072.000000,25.000000,24.500000)}
{pt3dadd(164916.000000,67548.000000,25.000000,24.500000)}
{pt3dadd(170088.000000,69444.000000,25.000000,24.500000)}
{pt3dadd(174996.000000,72012.000000,25.000000,24.500000)}
{pt3dadd(180084.000000,76548.000000,25.000000,24.500000)}
{pt3dadd(183588.000000,83004.000000,25.000000,24.500000)}
{pt3dadd(188532.000000,89256.000000,25.000000,24.500000)}
{pt3dadd(190560.000000,96696.000000,25.000000,24.500000)}
{pt3dadd(192672.000000,104280.000000,25.000000,24.500000)}
{pt3dadd(194508.000000,112968.000000,25.000000,24.500000)}
{pt3dadd(195492.000000,122256.000000,25.000000,24.500000)}
{pt3dadd(196176.000000,131856.000000,25.000000,24.500000)}
{pt3dadd(196944.000000,141264.000000,25.000000,24.500000)}
{pt3dadd(195768.000000,150672.000000,25.000000,24.500000)}
{pt3dadd(194520.000000,157584.000000,25.000000,24.500000)}
{pt3dadd(193368.000000,161628.000000,25.000000,24.500000)}
{pt3dadd(192036.000000,166032.000000,25.000000,24.500000)}
{pt3dadd(190788.000000,170448.000000,25.000000,24.500000)}
{pt3dadd(189444.000000,174864.000000,25.000000,24.500000)}
{pt3dadd(187908.000000,179364.000000,25.000000,24.500000)}
{pt3dadd(186468.000000,183876.000000,25.000000,24.500000)}
{pt3dadd(184380.000000,188580.000000,25.000000,24.500000)}
{pt3dadd(181896.000000,193560.000000,25.000000,24.500000)}
{pt3dadd(179220.000000,198732.000000,25.000000,24.500000)}
{pt3dadd(176532.000000,204288.000000,25.000000,24.500000)}
{pt3dadd(172080.000000,209856.000000,25.000000,24.500000)}
{pt3dadd(167664.000000,215424.000000,25.000000,24.500000)}
{pt3dadd(163164.000000,220896.000000,25.000000,24.500000)}
{pt3dadd(157908.000000,224340.000000,25.000000,24.500000)}
{pt3dadd(153744.000000,224736.000000,25.000000,24.500000)}
{pt3dadd(149424.000000,225588.000000,25.000000,24.500000)}
{pt3dadd(144360.000000,225984.000000,25.000000,24.500000)}
{pt3dadd(138996.000000,225996.000000,25.000000,24.500000)}
{pt3dadd(132600.000000,225636.000000,25.000000,24.500000)}
{pt3dadd(125244.000000,225156.000000,25.000000,24.500000)}
{pt3dadd(117576.000000,224400.000000,25.000000,24.500000)}
{pt3dadd(111936.000000,221040.000000,25.000000,24.500000)}
{pt3dadd(107016.000000,215916.000000,25.000000,24.500000)}
{pt3dadd(102120.000000,210828.000000,25.000000,24.500000)}
{pt3dadd(97680.000000,205464.000000,25.000000,24.500000)}
{pt3dadd(94200.000000,200088.000000,25.000000,24.500000)}
{pt3dadd(91764.000000,191820.000000,25.000000,24.500000)}
{pt3dadd(90084.000000,184704.000000,25.000000,24.500000)}
{pt3dadd(88728.000000,176688.000000,25.000000,24.500000)}
{pt3dadd(87384.000000,166956.000000,25.000000,24.500000)}
{pt3dadd(87060.000000,157068.000000,25.000000,24.500000)}
{pt3dadd(87696.000000,147372.000000,25.000000,24.500000)}
{pt3dadd(87156.000000,141936.000000,25.000000,24.500000)}
{pt3dadd(87972.000000,135444.000000,25.000000,24.500000)}
{pt3dadd(89208.000000,128352.000000,25.000000,24.500000)}
{pt3dadd(89988.000000,120792.000000,25.000000,24.500000)}
{pt3dadd(92328.000000,113112.000000,25.000000,24.500000)}
{pt3dadd(96480.000000,105432.000000,25.000000,24.500000)}
{pt3dadd(100704.000000,97668.000000,25.000000,24.500000)}
{pt3dadd(106416.000000,90168.000000,25.000000,24.500000)}
{pt3dadd(112728.000000,82680.000000,25.000000,24.500000)}
{pt3dadd(121104.000000,75936.000000,25.000000,24.500000)}
{pt3dadd(124548.000000,72540.000000,25.000000,24.500000)}
{pt3dadd(130500.000000,69456.000000,25.000000,24.500000)}
{pt3dadd(135984.000000,65640.000000,25.000000,24.500000)}
{pt3dadd(142392.000000,62916.000000,25.000000,24.500000)}
{pt3dadd(144468.000000,62076.000000,25.000000,24.500000)}
{pt3dadd(147876.000000,62412.000000,25.000000,24.500000)}
{pt3dadd(147996.000000,59184.000000,10000.000000,24.500000)}
{pt3dadd(150036.000000,58800.000000,10000.000000,24.500000)}
{pt3dadd(152880.000000,59988.000000,10000.000000,24.500000)}
{pt3dadd(157524.000000,60672.000000,10000.000000,24.500000)}
{pt3dadd(161208.000000,61260.000000,10000.000000,24.500000)}
{pt3dadd(165408.000000,62196.000000,10000.000000,24.500000)}
{pt3dadd(167316.000000,63444.000000,10000.000000,24.500000)}
{pt3dadd(170628.000000,65424.000000,10000.000000,24.500000)}
{pt3dadd(173808.000000,67992.000000,10000.000000,24.500000)}
{pt3dadd(176328.000000,71796.000000,10000.000000,24.500000)}
{pt3dadd(180024.000000,75720.000000,10000.000000,24.500000)}
{pt3dadd(184416.000000,80484.000000,10000.000000,24.500000)}
{pt3dadd(186600.000000,87324.000000,10000.000000,24.500000)}
{pt3dadd(188808.000000,94332.000000,10000.000000,24.500000)}
{pt3dadd(191760.000000,101244.000000,10000.000000,24.500000)}
{pt3dadd(195576.000000,109260.000000,10000.000000,24.500000)}
{pt3dadd(200340.000000,117888.000000,10000.000000,24.500000)}
{pt3dadd(202728.000000,126900.000000,10000.000000,24.500000)}
{pt3dadd(203736.000000,135828.000000,10000.000000,24.500000)}
{pt3dadd(203592.000000,140124.000000,10000.000000,24.500000)}
{pt3dadd(203028.000000,144720.000000,10000.000000,24.500000)}
{pt3dadd(202092.000000,149880.000000,10000.000000,24.500000)}
{pt3dadd(200664.000000,155628.000000,10000.000000,24.500000)}
{pt3dadd(199968.000000,162396.000000,10000.000000,24.500000)}
{pt3dadd(198828.000000,169116.000000,10000.000000,24.500000)}
{pt3dadd(196932.000000,175752.000000,10000.000000,24.500000)}
{pt3dadd(195108.000000,183108.000000,10000.000000,24.500000)}
{pt3dadd(193932.000000,190596.000000,10000.000000,24.500000)}
{pt3dadd(192972.000000,192720.000000,10000.000000,24.500000)}
{pt3dadd(191448.000000,194460.000000,10000.000000,24.500000)}
{pt3dadd(189636.000000,196560.000000,10000.000000,24.500000)}
{pt3dadd(187908.000000,198672.000000,10000.000000,24.500000)}
{pt3dadd(185160.000000,200592.000000,10000.000000,24.500000)}
{pt3dadd(182196.000000,202980.000000,10000.000000,24.500000)}
{pt3dadd(178752.000000,205008.000000,10000.000000,24.500000)}
{pt3dadd(175020.000000,206928.000000,10000.000000,24.500000)}
{pt3dadd(172116.000000,209688.000000,10000.000000,24.500000)}
{pt3dadd(169320.000000,212844.000000,10000.000000,24.500000)}
{pt3dadd(167376.000000,216288.000000,10000.000000,24.500000)}
{pt3dadd(165456.000000,220020.000000,10000.000000,24.500000)}
{pt3dadd(163344.000000,223764.000000,10000.000000,24.500000)}
{pt3dadd(160776.000000,227508.000000,10000.000000,24.500000)}
{pt3dadd(157812.000000,231156.000000,10000.000000,24.500000)}
{pt3dadd(154560.000000,234348.000000,10000.000000,24.500000)}
{pt3dadd(153420.000000,235284.000000,10000.000000,24.500000)}
{pt3dadd(151620.000000,235044.000000,10000.000000,24.500000)}
{pt3dadd(149520.000000,234852.000000,10000.000000,24.500000)}
{pt3dadd(145740.000000,234576.000000,10000.000000,24.500000)}
{pt3dadd(141624.000000,235020.000000,10000.000000,24.500000)}
{pt3dadd(137412.000000,235500.000000,10000.000000,24.500000)}
{pt3dadd(133188.000000,235884.000000,10000.000000,24.500000)}
{pt3dadd(128124.000000,234696.000000,10000.000000,24.500000)}
{pt3dadd(122388.000000,232992.000000,10000.000000,24.500000)}
{pt3dadd(117924.000000,231360.000000,10000.000000,24.500000)}
{pt3dadd(112680.000000,229908.000000,10000.000000,24.500000)}
{pt3dadd(107400.000000,228096.000000,10000.000000,24.500000)}
{pt3dadd(103788.000000,225072.000000,10000.000000,24.500000)}
{pt3dadd(100692.000000,223848.000000,10000.000000,24.500000)}
{pt3dadd(97524.000000,222600.000000,10000.000000,24.500000)}
{pt3dadd(94356.000000,221352.000000,10000.000000,24.500000)}
{pt3dadd(91104.000000,219648.000000,10000.000000,24.500000)}
{pt3dadd(88020.000000,217740.000000,10000.000000,24.500000)}
{pt3dadd(84768.000000,212856.000000,10000.000000,24.500000)}
{pt3dadd(83256.000000,206664.000000,10000.000000,24.500000)}
{pt3dadd(81348.000000,200232.000000,10000.000000,24.500000)}
{pt3dadd(79812.000000,193440.000000,10000.000000,24.500000)}
{pt3dadd(78552.000000,186432.000000,10000.000000,24.500000)}
{pt3dadd(77304.000000,179424.000000,10000.000000,24.500000)}
{pt3dadd(76884.000000,172332.000000,10000.000000,24.500000)}
{pt3dadd(77052.000000,165228.000000,10000.000000,24.500000)}
{pt3dadd(77148.000000,158124.000000,10000.000000,24.500000)}
{pt3dadd(78072.000000,151020.000000,10000.000000,24.500000)}
{pt3dadd(78936.000000,143916.000000,10000.000000,24.500000)}
{pt3dadd(80544.000000,136812.000000,10000.000000,24.500000)}
{pt3dadd(82548.000000,129708.000000,10000.000000,24.500000)}
{pt3dadd(84564.000000,122232.000000,10000.000000,24.500000)}
{pt3dadd(87228.000000,114744.000000,10000.000000,24.500000)}
{pt3dadd(90840.000000,107256.000000,10000.000000,24.500000)}
{pt3dadd(94680.000000,99864.000000,10000.000000,24.500000)}
{pt3dadd(99348.000000,92472.000000,10000.000000,24.500000)}
{pt3dadd(105156.000000,85728.000000,10000.000000,24.500000)}
{pt3dadd(111576.000000,79008.000000,10000.000000,24.500000)}
{pt3dadd(118272.000000,73212.000000,10000.000000,24.500000)}
{pt3dadd(126012.000000,67908.000000,10000.000000,24.500000)}
{pt3dadd(130176.000000,64104.000000,10000.000000,24.500000)}
{pt3dadd(136248.000000,62496.000000,10000.000000,24.500000)}
{pt3dadd(141384.000000,60024.000000,10000.000000,24.500000)}
{pt3dadd(145908.000000,59016.000000,10000.000000,24.500000)}
{pt3dadd(147924.000000,59160.000000,10000.000000,24.500000)}
{pt3dadd(147444.000000,57216.000000,20000.000000,24.500000)}
{pt3dadd(153168.000000,57984.000000,20000.000000,24.500000)}
{pt3dadd(158832.000000,60048.000000,20000.000000,24.500000)}
{pt3dadd(163200.000000,62436.000000,20000.000000,24.500000)}
{pt3dadd(168168.000000,65016.000000,20000.000000,24.500000)}
{pt3dadd(172788.000000,68724.000000,20000.000000,24.500000)}
{pt3dadd(176376.000000,73764.000000,20000.000000,24.500000)}
{pt3dadd(181044.000000,78660.000000,20000.000000,24.500000)}
{pt3dadd(185100.000000,83832.000000,20000.000000,24.500000)}
{pt3dadd(188856.000000,89664.000000,20000.000000,24.500000)}
{pt3dadd(192684.000000,95520.000000,20000.000000,24.500000)}
{pt3dadd(195696.000000,101940.000000,20000.000000,24.500000)}
{pt3dadd(198672.000000,108828.000000,20000.000000,24.500000)}
{pt3dadd(201648.000000,116016.000000,20000.000000,24.500000)}
{pt3dadd(202224.000000,123492.000000,20000.000000,24.500000)}
{pt3dadd(200940.000000,130980.000000,20000.000000,24.500000)}
{pt3dadd(198588.000000,138192.000000,20000.000000,24.500000)}
{pt3dadd(196740.000000,145764.000000,20000.000000,24.500000)}
{pt3dadd(194268.000000,153348.000000,20000.000000,24.500000)}
{pt3dadd(192420.000000,161112.000000,20000.000000,24.500000)}
{pt3dadd(190692.000000,168888.000000,20000.000000,24.500000)}
{pt3dadd(188868.000000,176664.000000,20000.000000,24.500000)}
{pt3dadd(187608.000000,184908.000000,20000.000000,24.500000)}
{pt3dadd(186996.000000,193536.000000,20000.000000,24.500000)}
{pt3dadd(186060.000000,202176.000000,20000.000000,24.500000)}
{pt3dadd(184356.000000,206184.000000,20000.000000,24.500000)}
{pt3dadd(181524.000000,210120.000000,20000.000000,24.500000)}
{pt3dadd(178272.000000,214152.000000,20000.000000,24.500000)}
{pt3dadd(174636.000000,218268.000000,20000.000000,24.500000)}
{pt3dadd(169788.000000,221940.000000,20000.000000,24.500000)}
{pt3dadd(164052.000000,225684.000000,20000.000000,24.500000)}
{pt3dadd(160800.000000,230256.000000,20000.000000,24.500000)}
{pt3dadd(157068.000000,234312.000000,20000.000000,24.500000)}
{pt3dadd(152772.000000,238152.000000,20000.000000,24.500000)}
{pt3dadd(147348.000000,240888.000000,20000.000000,24.500000)}
{pt3dadd(140016.000000,242556.000000,20000.000000,24.500000)}
{pt3dadd(131796.000000,242160.000000,20000.000000,24.500000)}
{pt3dadd(123444.000000,241032.000000,20000.000000,24.500000)}
{pt3dadd(115284.000000,238956.000000,20000.000000,24.500000)}
{pt3dadd(113136.000000,238056.000000,20000.000000,24.500000)}
{pt3dadd(109824.000000,236076.000000,20000.000000,24.500000)}
{pt3dadd(106092.000000,234156.000000,20000.000000,24.500000)}
{pt3dadd(102348.000000,232236.000000,20000.000000,24.500000)}
{pt3dadd(98232.000000,230316.000000,20000.000000,24.500000)}
{pt3dadd(94104.000000,228396.000000,20000.000000,24.500000)}
{pt3dadd(89976.000000,225912.000000,20000.000000,24.500000)}
{pt3dadd(87708.000000,223416.000000,20000.000000,24.500000)}
{pt3dadd(85500.000000,219912.000000,20000.000000,24.500000)}
{pt3dadd(82920.000000,216072.000000,20000.000000,24.500000)}
{pt3dadd(80700.000000,211872.000000,20000.000000,24.500000)}
{pt3dadd(78948.000000,206532.000000,20000.000000,24.500000)}
{pt3dadd(76668.000000,200136.000000,20000.000000,24.500000)}
{pt3dadd(75012.000000,192876.000000,20000.000000,24.500000)}
{pt3dadd(73836.000000,184380.000000,20000.000000,24.500000)}
{pt3dadd(72876.000000,175836.000000,20000.000000,24.500000)}
{pt3dadd(72924.000000,167292.000000,20000.000000,24.500000)}
{pt3dadd(72924.000000,158652.000000,20000.000000,24.500000)}
{pt3dadd(72840.000000,154092.000000,20000.000000,24.500000)}
{pt3dadd(74688.000000,148284.000000,20000.000000,24.500000)}
{pt3dadd(76416.000000,142056.000000,20000.000000,24.500000)}
{pt3dadd(78696.000000,135264.000000,20000.000000,24.500000)}
{pt3dadd(79800.000000,128256.000000,20000.000000,24.500000)}
{pt3dadd(82332.000000,121164.000000,20000.000000,24.500000)}
{pt3dadd(84924.000000,113964.000000,20000.000000,24.500000)}
{pt3dadd(88080.000000,106764.000000,20000.000000,24.500000)}
{pt3dadd(91524.000000,99564.000000,20000.000000,24.500000)}
{pt3dadd(96276.000000,92736.000000,20000.000000,24.500000)}
{pt3dadd(100980.000000,85920.000000,20000.000000,24.500000)}
{pt3dadd(105768.000000,79104.000000,20000.000000,24.500000)}
{pt3dadd(110016.000000,74412.000000,20000.000000,24.500000)}
{pt3dadd(115260.000000,69804.000000,20000.000000,24.500000)}
{pt3dadd(120816.000000,65016.000000,20000.000000,24.500000)}
{pt3dadd(128052.000000,61044.000000,20000.000000,24.500000)}
{pt3dadd(130716.000000,59880.000000,20000.000000,24.500000)}
{pt3dadd(133680.000000,59280.000000,20000.000000,24.500000)}
{pt3dadd(136752.000000,58152.000000,20000.000000,24.500000)}
{pt3dadd(140100.000000,57552.000000,20000.000000,24.500000)}
{pt3dadd(143928.000000,57264.000000,20000.000000,24.500000)}
{pt3dadd(147396.000000,57156.000000,20000.000000,24.500000)}
{pt3dadd(141372.000000,59052.000000,30000.000000,24.500000)}
{pt3dadd(143784.000000,59772.000000,30000.000000,24.500000)}
{pt3dadd(146184.000000,60540.000000,30000.000000,24.500000)}
{pt3dadd(149880.000000,61584.000000,30000.000000,24.500000)}
{pt3dadd(153528.000000,63012.000000,30000.000000,24.500000)}
{pt3dadd(156996.000000,65184.000000,30000.000000,24.500000)}
{pt3dadd(160536.000000,67392.000000,30000.000000,24.500000)}
{pt3dadd(164460.000000,69600.000000,30000.000000,24.500000)}
{pt3dadd(168300.000000,71808.000000,30000.000000,24.500000)}
{pt3dadd(171864.000000,74580.000000,30000.000000,24.500000)}
{pt3dadd(174192.000000,76248.000000,30000.000000,24.500000)}
{pt3dadd(177180.000000,77748.000000,30000.000000,24.500000)}
{pt3dadd(180348.000000,79740.000000,30000.000000,24.500000)}
{pt3dadd(183228.000000,82500.000000,30000.000000,24.500000)}
{pt3dadd(185556.000000,85836.000000,30000.000000,24.500000)}
{pt3dadd(187680.000000,89664.000000,30000.000000,24.500000)}
{pt3dadd(189600.000000,94152.000000,30000.000000,24.500000)}
{pt3dadd(191520.000000,98652.000000,30000.000000,24.500000)}
{pt3dadd(192888.000000,103812.000000,30000.000000,24.500000)}
{pt3dadd(192648.000000,105900.000000,30000.000000,24.500000)}
{pt3dadd(191556.000000,107880.000000,30000.000000,24.500000)}
{pt3dadd(189756.000000,110448.000000,30000.000000,24.500000)}
{pt3dadd(187848.000000,113232.000000,30000.000000,24.500000)}
{pt3dadd(184440.000000,116100.000000,30000.000000,24.500000)}
{pt3dadd(180900.000000,119448.000000,30000.000000,24.500000)}
{pt3dadd(176508.000000,122628.000000,30000.000000,24.500000)}
{pt3dadd(175056.000000,124212.000000,30000.000000,24.500000)}
{pt3dadd(174264.000000,126864.000000,30000.000000,24.500000)}
{pt3dadd(172752.000000,130200.000000,30000.000000,24.500000)}
{pt3dadd(171408.000000,133932.000000,30000.000000,24.500000)}
{pt3dadd(169416.000000,138048.000000,30000.000000,24.500000)}
{pt3dadd(166164.000000,140676.000000,30000.000000,24.500000)}
{pt3dadd(162780.000000,144204.000000,30000.000000,24.500000)}
{pt3dadd(159324.000000,148860.000000,30000.000000,24.500000)}
{pt3dadd(156708.000000,155316.000000,30000.000000,24.500000)}
{pt3dadd(154116.000000,161748.000000,30000.000000,24.500000)}
{pt3dadd(152448.000000,168924.000000,30000.000000,24.500000)}
{pt3dadd(152016.000000,176496.000000,30000.000000,24.500000)}
{pt3dadd(154308.000000,183888.000000,30000.000000,24.500000)}
{pt3dadd(158376.000000,190356.000000,30000.000000,24.500000)}
{pt3dadd(162864.000000,193824.000000,30000.000000,24.500000)}
{pt3dadd(163764.000000,197016.000000,30000.000000,24.500000)}
{pt3dadd(165288.000000,200268.000000,30000.000000,24.500000)}
{pt3dadd(167184.000000,203724.000000,30000.000000,24.500000)}
{pt3dadd(169380.000000,207456.000000,30000.000000,24.500000)}
{pt3dadd(171684.000000,211944.000000,30000.000000,24.500000)}
{pt3dadd(172692.000000,214872.000000,30000.000000,24.500000)}
{pt3dadd(173100.000000,217944.000000,30000.000000,24.500000)}
{pt3dadd(172104.000000,221292.000000,30000.000000,24.500000)}
{pt3dadd(170400.000000,224652.000000,30000.000000,24.500000)}
{pt3dadd(168768.000000,228012.000000,30000.000000,24.500000)}
{pt3dadd(166392.000000,231192.000000,30000.000000,24.500000)}
{pt3dadd(162888.000000,232968.000000,30000.000000,24.500000)}
{pt3dadd(158868.000000,234228.000000,30000.000000,24.500000)}
{pt3dadd(154932.000000,235944.000000,30000.000000,24.500000)}
{pt3dadd(150996.000000,237768.000000,30000.000000,24.500000)}
{pt3dadd(147240.000000,240048.000000,30000.000000,24.500000)}
{pt3dadd(145344.000000,241608.000000,30000.000000,24.500000)}
{pt3dadd(143520.000000,243144.000000,30000.000000,24.500000)}
{pt3dadd(141696.000000,244680.000000,30000.000000,24.500000)}
{pt3dadd(140616.000000,246216.000000,30000.000000,24.500000)}
{pt3dadd(138636.000000,247848.000000,30000.000000,24.500000)}
{pt3dadd(136440.000000,249108.000000,30000.000000,24.500000)}
{pt3dadd(133860.000000,249984.000000,30000.000000,24.500000)}
{pt3dadd(130704.000000,250392.000000,30000.000000,24.500000)}
{pt3dadd(126984.000000,250320.000000,30000.000000,24.500000)}
{pt3dadd(122964.000000,249948.000000,30000.000000,24.500000)}
{pt3dadd(119112.000000,249192.000000,30000.000000,24.500000)}
{pt3dadd(115368.000000,247956.000000,30000.000000,24.500000)}
{pt3dadd(111624.000000,246708.000000,30000.000000,24.500000)}
{pt3dadd(107880.000000,245460.000000,30000.000000,24.500000)}
{pt3dadd(104508.000000,243012.000000,30000.000000,24.500000)}
{pt3dadd(101148.000000,240612.000000,30000.000000,24.500000)}
{pt3dadd(97788.000000,238212.000000,30000.000000,24.500000)}
{pt3dadd(94428.000000,235812.000000,30000.000000,24.500000)}
{pt3dadd(91992.000000,232956.000000,30000.000000,24.500000)}
{pt3dadd(89592.000000,229980.000000,30000.000000,24.500000)}
{pt3dadd(87096.000000,227004.000000,30000.000000,24.500000)}
{pt3dadd(84600.000000,224028.000000,30000.000000,24.500000)}
{pt3dadd(82392.000000,219660.000000,30000.000000,24.500000)}
{pt3dadd(80088.000000,214692.000000,30000.000000,24.500000)}
{pt3dadd(77784.000000,209700.000000,30000.000000,24.500000)}
{pt3dadd(75480.000000,204060.000000,30000.000000,24.500000)}
{pt3dadd(73824.000000,197196.000000,30000.000000,24.500000)}
{pt3dadd(72840.000000,189636.000000,30000.000000,24.500000)}
{pt3dadd(71508.000000,181872.000000,30000.000000,24.500000)}
{pt3dadd(70620.000000,173628.000000,30000.000000,24.500000)}
{pt3dadd(71148.000000,165096.000000,30000.000000,24.500000)}
{pt3dadd(71160.000000,156552.000000,30000.000000,24.500000)}
{pt3dadd(71352.000000,151620.000000,30000.000000,24.500000)}
{pt3dadd(72276.000000,145800.000000,30000.000000,24.500000)}
{pt3dadd(74160.000000,139668.000000,30000.000000,24.500000)}
{pt3dadd(76356.000000,133236.000000,30000.000000,24.500000)}
{pt3dadd(76812.000000,129120.000000,30000.000000,24.500000)}
{pt3dadd(78588.000000,123696.000000,30000.000000,24.500000)}
{pt3dadd(80688.000000,117768.000000,30000.000000,24.500000)}
{pt3dadd(82608.000000,111348.000000,30000.000000,24.500000)}
{pt3dadd(84720.000000,104916.000000,30000.000000,24.500000)}
{pt3dadd(88032.000000,98484.000000,30000.000000,24.500000)}
{pt3dadd(90648.000000,93348.000000,30000.000000,24.500000)}
{pt3dadd(95100.000000,88260.000000,30000.000000,24.500000)}
{pt3dadd(99048.000000,82992.000000,30000.000000,24.500000)}
{pt3dadd(103632.000000,77616.000000,30000.000000,24.500000)}
{pt3dadd(108792.000000,72432.000000,30000.000000,24.500000)}
{pt3dadd(113328.000000,69192.000000,30000.000000,24.500000)}
{pt3dadd(118404.000000,65652.000000,30000.000000,24.500000)}
{pt3dadd(121824.000000,62460.000000,30000.000000,24.500000)}
{pt3dadd(127776.000000,60228.000000,30000.000000,24.500000)}
{pt3dadd(134652.000000,58200.000000,30000.000000,24.500000)}
{pt3dadd(138228.000000,58224.000000,30000.000000,24.500000)}
{pt3dadd(141324.000000,58956.000000,30000.000000,24.500000)}
{pt3dadd(140244.000000,62508.000000,40000.000000,24.500000)}
{pt3dadd(141912.000000,63108.000000,40000.000000,24.500000)}
{pt3dadd(143640.000000,63960.000000,40000.000000,24.500000)}
{pt3dadd(145176.000000,65100.000000,40000.000000,24.500000)}
{pt3dadd(146628.000000,66708.000000,40000.000000,24.500000)}
{pt3dadd(148368.000000,68292.000000,40000.000000,24.500000)}
{pt3dadd(150108.000000,70176.000000,40000.000000,24.500000)}
{pt3dadd(152664.000000,70788.000000,40000.000000,24.500000)}
{pt3dadd(157116.000000,71184.000000,40000.000000,24.500000)}
{pt3dadd(160416.000000,72120.000000,40000.000000,24.500000)}
{pt3dadd(164148.000000,73728.000000,40000.000000,24.500000)}
{pt3dadd(168444.000000,75264.000000,40000.000000,24.500000)}
{pt3dadd(171924.000000,78096.000000,40000.000000,24.500000)}
{pt3dadd(175764.000000,81348.000000,40000.000000,24.500000)}
{pt3dadd(179604.000000,84612.000000,40000.000000,24.500000)}
{pt3dadd(182232.000000,88248.000000,40000.000000,24.500000)}
{pt3dadd(182700.000000,92088.000000,40000.000000,24.500000)}
{pt3dadd(181704.000000,95736.000000,40000.000000,24.500000)}
{pt3dadd(178512.000000,99384.000000,40000.000000,24.500000)}
{pt3dadd(174984.000000,103032.000000,40000.000000,24.500000)}
{pt3dadd(171060.000000,106680.000000,40000.000000,24.500000)}
{pt3dadd(167496.000000,110796.000000,40000.000000,24.500000)}
{pt3dadd(164220.000000,114828.000000,40000.000000,24.500000)}
{pt3dadd(160584.000000,118764.000000,40000.000000,24.500000)}
{pt3dadd(156660.000000,122880.000000,40000.000000,24.500000)}
{pt3dadd(153372.000000,127572.000000,40000.000000,24.500000)}
{pt3dadd(151776.000000,130884.000000,40000.000000,24.500000)}
{pt3dadd(151008.000000,133392.000000,40000.000000,24.500000)}
{pt3dadd(149892.000000,136380.000000,40000.000000,24.500000)}
{pt3dadd(148368.000000,139632.000000,40000.000000,24.500000)}
{pt3dadd(147396.000000,143364.000000,40000.000000,24.500000)}
{pt3dadd(145788.000000,146556.000000,40000.000000,24.500000)}
{pt3dadd(142524.000000,150468.000000,40000.000000,24.500000)}
{pt3dadd(140892.000000,153792.000000,40000.000000,24.500000)}
{pt3dadd(138624.000000,157620.000000,40000.000000,24.500000)}
{pt3dadd(136596.000000,162756.000000,40000.000000,24.500000)}
{pt3dadd(134856.000000,168492.000000,40000.000000,24.500000)}
{pt3dadd(134892.000000,172020.000000,40000.000000,24.500000)}
{pt3dadd(134700.000000,175572.000000,40000.000000,24.500000)}
{pt3dadd(134700.000000,179964.000000,40000.000000,24.500000)}
{pt3dadd(135252.000000,184656.000000,40000.000000,24.500000)}
{pt3dadd(136476.000000,189444.000000,40000.000000,24.500000)}
{pt3dadd(136980.000000,194892.000000,40000.000000,24.500000)}
{pt3dadd(137640.000000,200556.000000,40000.000000,24.500000)}
{pt3dadd(139524.000000,203352.000000,40000.000000,24.500000)}
{pt3dadd(143292.000000,206508.000000,40000.000000,24.500000)}
{pt3dadd(147408.000000,209952.000000,40000.000000,24.500000)}
{pt3dadd(151812.000000,213132.000000,40000.000000,24.500000)}
{pt3dadd(156228.000000,216660.000000,40000.000000,24.500000)}
{pt3dadd(160080.000000,220764.000000,40000.000000,24.500000)}
{pt3dadd(162348.000000,223512.000000,40000.000000,24.500000)}
{pt3dadd(162708.000000,225276.000000,40000.000000,24.500000)}
{pt3dadd(163284.000000,227100.000000,40000.000000,24.500000)}
{pt3dadd(163860.000000,229572.000000,40000.000000,24.500000)}
{pt3dadd(164436.000000,232152.000000,40000.000000,24.500000)}
{pt3dadd(164172.000000,234744.000000,40000.000000,24.500000)}
{pt3dadd(162876.000000,236412.000000,40000.000000,24.500000)}
{pt3dadd(161064.000000,237672.000000,40000.000000,24.500000)}
{pt3dadd(159156.000000,238836.000000,40000.000000,24.500000)}
{pt3dadd(156396.000000,240072.000000,40000.000000,24.500000)}
{pt3dadd(153612.000000,241320.000000,40000.000000,24.500000)}
{pt3dadd(150456.000000,242112.000000,40000.000000,24.500000)}
{pt3dadd(147012.000000,242976.000000,40000.000000,24.500000)}
{pt3dadd(144024.000000,244572.000000,40000.000000,24.500000)}
{pt3dadd(141144.000000,246396.000000,40000.000000,24.500000)}
{pt3dadd(138168.000000,248220.000000,40000.000000,24.500000)}
{pt3dadd(135192.000000,250044.000000,40000.000000,24.500000)}
{pt3dadd(132492.000000,252600.000000,40000.000000,24.500000)}
{pt3dadd(129804.000000,255192.000000,40000.000000,24.500000)}
{pt3dadd(125820.000000,256860.000000,40000.000000,24.500000)}
{pt3dadd(121044.000000,257292.000000,40000.000000,24.500000)}
{pt3dadd(115968.000000,256476.000000,40000.000000,24.500000)}
{pt3dadd(110796.000000,255612.000000,40000.000000,24.500000)}
{pt3dadd(106716.000000,253452.000000,40000.000000,24.500000)}
{pt3dadd(102960.000000,250968.000000,40000.000000,24.500000)}
{pt3dadd(99588.000000,248016.000000,40000.000000,24.500000)}
{pt3dadd(96228.000000,245040.000000,40000.000000,24.500000)}
{pt3dadd(93144.000000,241692.000000,40000.000000,24.500000)}
{pt3dadd(90072.000000,238332.000000,40000.000000,24.500000)}
{pt3dadd(87096.000000,234792.000000,40000.000000,24.500000)}
{pt3dadd(84576.000000,230028.000000,40000.000000,24.500000)}
{pt3dadd(82176.000000,224400.000000,40000.000000,24.500000)}
{pt3dadd(79128.000000,218640.000000,40000.000000,24.500000)}
{pt3dadd(76608.000000,211224.000000,40000.000000,24.500000)}
{pt3dadd(74208.000000,203832.000000,40000.000000,24.500000)}
{pt3dadd(71808.000000,196152.000000,40000.000000,24.500000)}
{pt3dadd(70332.000000,187920.000000,40000.000000,24.500000)}
{pt3dadd(69732.000000,178920.000000,40000.000000,24.500000)}
{pt3dadd(69336.000000,169896.000000,40000.000000,24.500000)}
{pt3dadd(69684.000000,160788.000000,40000.000000,24.500000)}
{pt3dadd(70260.000000,151668.000000,40000.000000,24.500000)}
{pt3dadd(71484.000000,142632.000000,40000.000000,24.500000)}
{pt3dadd(73188.000000,133704.000000,40000.000000,24.500000)}
{pt3dadd(75924.000000,127068.000000,40000.000000,24.500000)}
{pt3dadd(78444.000000,118248.000000,40000.000000,24.500000)}
{pt3dadd(81216.000000,109416.000000,40000.000000,24.500000)}
{pt3dadd(85476.000000,101136.000000,40000.000000,24.500000)}
{pt3dadd(89976.000000,92976.000000,40000.000000,24.500000)}
{pt3dadd(95508.000000,84996.000000,40000.000000,24.500000)}
{pt3dadd(102192.000000,77496.000000,40000.000000,24.500000)}
{pt3dadd(106956.000000,72408.000000,40000.000000,24.500000)}
{pt3dadd(113892.000000,67608.000000,40000.000000,24.500000)}
{pt3dadd(121452.000000,62808.000000,40000.000000,24.500000)}
{pt3dadd(125052.000000,62352.000000,40000.000000,24.500000)}
{pt3dadd(129252.000000,61872.000000,40000.000000,24.500000)}
{pt3dadd(133020.000000,61944.000000,40000.000000,24.500000)}
{pt3dadd(136764.000000,62136.000000,40000.000000,24.500000)}
{pt3dadd(140136.000000,62508.000000,40000.000000,24.500000)}
{pt3dadd(139740.000000,71724.000000,50000.000000,24.500000)}
{pt3dadd(142416.000000,72060.000000,50000.000000,24.500000)}
{pt3dadd(144924.000000,71988.000000,50000.000000,24.500000)}
{pt3dadd(147600.000000,72348.000000,50000.000000,24.500000)}
{pt3dadd(150288.000000,73008.000000,50000.000000,24.500000)}
{pt3dadd(153720.000000,73680.000000,50000.000000,24.500000)}
{pt3dadd(157356.000000,74724.000000,50000.000000,24.500000)}
{pt3dadd(160908.000000,76248.000000,50000.000000,24.500000)}
{pt3dadd(164460.000000,78060.000000,50000.000000,24.500000)}
{pt3dadd(167736.000000,80532.000000,50000.000000,24.500000)}
{pt3dadd(170544.000000,83484.000000,50000.000000,24.500000)}
{pt3dadd(172212.000000,87012.000000,50000.000000,24.500000)}
{pt3dadd(172452.000000,88716.000000,50000.000000,24.500000)}
{pt3dadd(172104.000000,89796.000000,50000.000000,24.500000)}
{pt3dadd(170700.000000,90576.000000,50000.000000,24.500000)}
{pt3dadd(169536.000000,91896.000000,50000.000000,24.500000)}
{pt3dadd(168480.000000,93336.000000,50000.000000,24.500000)}
{pt3dadd(167328.000000,94776.000000,50000.000000,24.500000)}
{pt3dadd(166356.000000,96420.000000,50000.000000,24.500000)}
{pt3dadd(164364.000000,99348.000000,50000.000000,24.500000)}
{pt3dadd(162360.000000,102228.000000,50000.000000,24.500000)}
{pt3dadd(160344.000000,105108.000000,50000.000000,24.500000)}
{pt3dadd(158328.000000,107988.000000,50000.000000,24.500000)}
{pt3dadd(156216.000000,110868.000000,50000.000000,24.500000)}
{pt3dadd(154668.000000,113016.000000,50000.000000,24.500000)}
{pt3dadd(152760.000000,115128.000000,50000.000000,24.500000)}
{pt3dadd(150648.000000,117612.000000,50000.000000,24.500000)}
{pt3dadd(148164.000000,118992.000000,50000.000000,24.500000)}
{pt3dadd(145668.000000,120888.000000,50000.000000,24.500000)}
{pt3dadd(143268.000000,123084.000000,50000.000000,24.500000)}
{pt3dadd(140964.000000,125856.000000,50000.000000,24.500000)}
{pt3dadd(138660.000000,128640.000000,50000.000000,24.500000)}
{pt3dadd(136080.000000,131796.000000,50000.000000,24.500000)}
{pt3dadd(133392.000000,134964.000000,50000.000000,24.500000)}
{pt3dadd(130428.000000,138780.000000,50000.000000,24.500000)}
{pt3dadd(128928.000000,142428.000000,50000.000000,24.500000)}
{pt3dadd(127392.000000,146352.000000,50000.000000,24.500000)}
{pt3dadd(125484.000000,150288.000000,50000.000000,24.500000)}
{pt3dadd(123948.000000,154500.000000,50000.000000,24.500000)}
{pt3dadd(122688.000000,158724.000000,50000.000000,24.500000)}
{pt3dadd(121812.000000,163500.000000,50000.000000,24.500000)}
{pt3dadd(120852.000000,168300.000000,50000.000000,24.500000)}
{pt3dadd(120444.000000,172920.000000,50000.000000,24.500000)}
{pt3dadd(120060.000000,177528.000000,50000.000000,24.500000)}
{pt3dadd(119676.000000,182136.000000,50000.000000,24.500000)}
{pt3dadd(119292.000000,186744.000000,50000.000000,24.500000)}
{pt3dadd(119640.000000,188664.000000,50000.000000,24.500000)}
{pt3dadd(120300.000000,191052.000000,50000.000000,24.500000)}
{pt3dadd(122460.000000,193908.000000,50000.000000,24.500000)}
{pt3dadd(124572.000000,196980.000000,50000.000000,24.500000)}
{pt3dadd(126312.000000,200424.000000,50000.000000,24.500000)}
{pt3dadd(128316.000000,203880.000000,50000.000000,24.500000)}
{pt3dadd(131532.000000,207240.000000,50000.000000,24.500000)}
{pt3dadd(134892.000000,210600.000000,50000.000000,24.500000)}
{pt3dadd(138156.000000,214236.000000,50000.000000,24.500000)}
{pt3dadd(141240.000000,217980.000000,50000.000000,24.500000)}
{pt3dadd(144216.000000,221724.000000,50000.000000,24.500000)}
{pt3dadd(147288.000000,225468.000000,50000.000000,24.500000)}
{pt3dadd(150360.000000,229212.000000,50000.000000,24.500000)}
{pt3dadd(153240.000000,233136.000000,50000.000000,24.500000)}
{pt3dadd(154548.000000,237540.000000,50000.000000,24.500000)}
{pt3dadd(154692.000000,242040.000000,50000.000000,24.500000)}
{pt3dadd(152844.000000,245172.000000,50000.000000,24.500000)}
{pt3dadd(150468.000000,247044.000000,50000.000000,24.500000)}
{pt3dadd(147792.000000,248400.000000,50000.000000,24.500000)}
{pt3dadd(144828.000000,249276.000000,50000.000000,24.500000)}
{pt3dadd(141852.000000,248664.000000,50000.000000,24.500000)}
{pt3dadd(138684.000000,248832.000000,50000.000000,24.500000)}
{pt3dadd(136080.000000,249576.000000,50000.000000,24.500000)}
{pt3dadd(133764.000000,251088.000000,50000.000000,24.500000)}
{pt3dadd(131460.000000,253176.000000,50000.000000,24.500000)}
{pt3dadd(129156.000000,255564.000000,50000.000000,24.500000)}
{pt3dadd(127128.000000,258144.000000,50000.000000,24.500000)}
{pt3dadd(125760.000000,260364.000000,50000.000000,24.500000)}
{pt3dadd(124872.000000,262212.000000,50000.000000,24.500000)}
{pt3dadd(122808.000000,262740.000000,50000.000000,24.500000)}
{pt3dadd(120240.000000,262848.000000,50000.000000,24.500000)}
{pt3dadd(117456.000000,262116.000000,50000.000000,24.500000)}
{pt3dadd(114672.000000,261444.000000,50000.000000,24.500000)}
{pt3dadd(111804.000000,260496.000000,50000.000000,24.500000)}
{pt3dadd(108636.000000,259068.000000,50000.000000,24.500000)}
{pt3dadd(105384.000000,256800.000000,50000.000000,24.500000)}
{pt3dadd(101748.000000,254592.000000,50000.000000,24.500000)}
{pt3dadd(98100.000000,252384.000000,50000.000000,24.500000)}
{pt3dadd(94908.000000,248688.000000,50000.000000,24.500000)}
{pt3dadd(91740.000000,244944.000000,50000.000000,24.500000)}
{pt3dadd(88572.000000,241200.000000,50000.000000,24.500000)}
{pt3dadd(84948.000000,237456.000000,50000.000000,24.500000)}
{pt3dadd(81300.000000,233436.000000,50000.000000,24.500000)}
{pt3dadd(78948.000000,228480.000000,50000.000000,24.500000)}
{pt3dadd(76920.000000,222384.000000,50000.000000,24.500000)}
{pt3dadd(74808.000000,216888.000000,50000.000000,24.500000)}
{pt3dadd(73440.000000,210204.000000,50000.000000,24.500000)}
{pt3dadd(72000.000000,203484.000000,50000.000000,24.500000)}
{pt3dadd(70932.000000,195936.000000,50000.000000,24.500000)}
{pt3dadd(70428.000000,188076.000000,50000.000000,24.500000)}
{pt3dadd(70044.000000,180108.000000,50000.000000,24.500000)}
{pt3dadd(68820.000000,172332.000000,50000.000000,24.500000)}
{pt3dadd(68868.000000,164364.000000,50000.000000,24.500000)}
{pt3dadd(69612.000000,156216.000000,50000.000000,24.500000)}
{pt3dadd(70104.000000,148056.000000,50000.000000,24.500000)}
{pt3dadd(72060.000000,140172.000000,50000.000000,24.500000)}
{pt3dadd(74256.000000,132300.000000,50000.000000,24.500000)}
{pt3dadd(75540.000000,125544.000000,50000.000000,24.500000)}
{pt3dadd(78000.000000,118536.000000,50000.000000,24.500000)}
{pt3dadd(80580.000000,111528.000000,50000.000000,24.500000)}
{pt3dadd(83364.000000,104340.000000,50000.000000,24.500000)}
{pt3dadd(87624.000000,97416.000000,50000.000000,24.500000)}
{pt3dadd(91848.000000,90600.000000,50000.000000,24.500000)}
{pt3dadd(96624.000000,85452.000000,50000.000000,24.500000)}
{pt3dadd(101616.000000,79992.000000,50000.000000,24.500000)}
{pt3dadd(107064.000000,74328.000000,50000.000000,24.500000)}
{pt3dadd(111240.000000,70884.000000,50000.000000,24.500000)}
{pt3dadd(116016.000000,69288.000000,50000.000000,24.500000)}
{pt3dadd(121836.000000,68208.000000,50000.000000,24.500000)}
{pt3dadd(124548.000000,68904.000000,50000.000000,24.500000)}
{pt3dadd(127980.000000,69576.000000,50000.000000,24.500000)}
{pt3dadd(131892.000000,70248.000000,50000.000000,24.500000)}
{pt3dadd(135732.000000,70920.000000,50000.000000,24.500000)}
{pt3dadd(139668.000000,71688.000000,50000.000000,24.500000)}
{pt3dadd(138768.000000,75288.000000,60000.000000,24.500000)}
{pt3dadd(140916.000000,75300.000000,60000.000000,24.500000)}
{pt3dadd(143208.000000,75024.000000,60000.000000,24.500000)}
{pt3dadd(145980.000000,75024.000000,60000.000000,24.500000)}
{pt3dadd(149592.000000,75480.000000,60000.000000,24.500000)}
{pt3dadd(153432.000000,76788.000000,60000.000000,24.500000)}
{pt3dadd(155976.000000,78600.000000,60000.000000,24.500000)}
{pt3dadd(158280.000000,80784.000000,60000.000000,24.500000)}
{pt3dadd(159384.000000,83556.000000,60000.000000,24.500000)}
{pt3dadd(159144.000000,86892.000000,60000.000000,24.500000)}
{pt3dadd(158676.000000,90432.000000,60000.000000,24.500000)}
{pt3dadd(158196.000000,93984.000000,60000.000000,24.500000)}
{pt3dadd(157260.000000,97632.000000,60000.000000,24.500000)}
{pt3dadd(155364.000000,101100.000000,60000.000000,24.500000)}
{pt3dadd(151968.000000,104184.000000,60000.000000,24.500000)}
{pt3dadd(149808.000000,106332.000000,60000.000000,24.500000)}
{pt3dadd(147504.000000,108264.000000,60000.000000,24.500000)}
{pt3dadd(145332.000000,108948.000000,60000.000000,24.500000)}
{pt3dadd(143220.000000,109524.000000,60000.000000,24.500000)}
{pt3dadd(140652.000000,110556.000000,60000.000000,24.500000)}
{pt3dadd(138060.000000,112164.000000,60000.000000,24.500000)}
{pt3dadd(135840.000000,114720.000000,60000.000000,24.500000)}
{pt3dadd(133536.000000,117504.000000,60000.000000,24.500000)}
{pt3dadd(131040.000000,120660.000000,60000.000000,24.500000)}
{pt3dadd(128736.000000,124752.000000,60000.000000,24.500000)}
{pt3dadd(126432.000000,128964.000000,60000.000000,24.500000)}
{pt3dadd(123012.000000,133560.000000,60000.000000,24.500000)}
{pt3dadd(120396.000000,139092.000000,60000.000000,24.500000)}
{pt3dadd(117888.000000,144852.000000,60000.000000,24.500000)}
{pt3dadd(117252.000000,147924.000000,60000.000000,24.500000)}
{pt3dadd(116580.000000,152016.000000,60000.000000,24.500000)}
{pt3dadd(116088.000000,156504.000000,60000.000000,24.500000)}
{pt3dadd(115152.000000,159636.000000,60000.000000,24.500000)}
{pt3dadd(114192.000000,163812.000000,60000.000000,24.500000)}
{pt3dadd(112944.000000,168228.000000,60000.000000,24.500000)}
{pt3dadd(112344.000000,171996.000000,60000.000000,24.500000)}
{pt3dadd(112236.000000,174720.000000,60000.000000,24.500000)}
{pt3dadd(113436.000000,177228.000000,60000.000000,24.500000)}
{pt3dadd(113808.000000,178164.000000,60000.000000,24.500000)}
{pt3dadd(114576.000000,182040.000000,60000.000000,24.500000)}
{pt3dadd(114144.000000,186432.000000,60000.000000,24.500000)}
{pt3dadd(114216.000000,190752.000000,60000.000000,24.500000)}
{pt3dadd(114780.000000,195072.000000,60000.000000,24.500000)}
{pt3dadd(116652.000000,199488.000000,60000.000000,24.500000)}
{pt3dadd(118836.000000,203904.000000,60000.000000,24.500000)}
{pt3dadd(121044.000000,208320.000000,60000.000000,24.500000)}
{pt3dadd(123624.000000,212736.000000,60000.000000,24.500000)}
{pt3dadd(126684.000000,217236.000000,60000.000000,24.500000)}
{pt3dadd(129564.000000,219720.000000,60000.000000,24.500000)}
{pt3dadd(134028.000000,222216.000000,60000.000000,24.500000)}
{pt3dadd(136308.000000,224892.000000,60000.000000,24.500000)}
{pt3dadd(138984.000000,227400.000000,60000.000000,24.500000)}
{pt3dadd(141672.000000,230076.000000,60000.000000,24.500000)}
{pt3dadd(143532.000000,233040.000000,60000.000000,24.500000)}
{pt3dadd(144420.000000,235560.000000,60000.000000,24.500000)}
{pt3dadd(144828.000000,238980.000000,60000.000000,24.500000)}
{pt3dadd(144840.000000,241416.000000,60000.000000,24.500000)}
{pt3dadd(144840.000000,243816.000000,60000.000000,24.500000)}
{pt3dadd(144840.000000,246216.000000,60000.000000,24.500000)}
{pt3dadd(144564.000000,247776.000000,60000.000000,24.500000)}
{pt3dadd(143724.000000,248952.000000,60000.000000,24.500000)}
{pt3dadd(142404.000000,249636.000000,60000.000000,24.500000)}
{pt3dadd(141060.000000,250308.000000,60000.000000,24.500000)}
{pt3dadd(139620.000000,250800.000000,60000.000000,24.500000)}
{pt3dadd(137904.000000,250812.000000,60000.000000,24.500000)}
{pt3dadd(135996.000000,250632.000000,60000.000000,24.500000)}
{pt3dadd(134076.000000,250536.000000,60000.000000,24.500000)}
{pt3dadd(132156.000000,250440.000000,60000.000000,24.500000)}
{pt3dadd(130236.000000,250896.000000,60000.000000,24.500000)}
{pt3dadd(128040.000000,251280.000000,60000.000000,24.500000)}
{pt3dadd(125640.000000,251856.000000,60000.000000,24.500000)}
{pt3dadd(123612.000000,252792.000000,60000.000000,24.500000)}
{pt3dadd(121320.000000,254040.000000,60000.000000,24.500000)}
{pt3dadd(118824.000000,255648.000000,60000.000000,24.500000)}
{pt3dadd(117912.000000,257376.000000,60000.000000,24.500000)}
{pt3dadd(115740.000000,259104.000000,60000.000000,24.500000)}
{pt3dadd(112428.000000,259716.000000,60000.000000,24.500000)}
{pt3dadd(107772.000000,258912.000000,60000.000000,24.500000)}
{pt3dadd(102696.000000,257868.000000,60000.000000,24.500000)}
{pt3dadd(98256.000000,255420.000000,60000.000000,24.500000)}
{pt3dadd(94404.000000,251820.000000,60000.000000,24.500000)}
{pt3dadd(89904.000000,247248.000000,60000.000000,24.500000)}
{pt3dadd(85404.000000,241896.000000,60000.000000,24.500000)}
{pt3dadd(81348.000000,234948.000000,60000.000000,24.500000)}
{pt3dadd(77784.000000,226740.000000,60000.000000,24.500000)}
{pt3dadd(74316.000000,218112.000000,60000.000000,24.500000)}
{pt3dadd(72348.000000,208452.000000,60000.000000,24.500000)}
{pt3dadd(70800.000000,198576.000000,60000.000000,24.500000)}
{pt3dadd(69720.000000,188508.000000,60000.000000,24.500000)}
{pt3dadd(69864.000000,178236.000000,60000.000000,24.500000)}
{pt3dadd(70608.000000,167964.000000,60000.000000,24.500000)}
{pt3dadd(70824.000000,157608.000000,60000.000000,24.500000)}
{pt3dadd(71100.000000,147240.000000,60000.000000,24.500000)}
{pt3dadd(72780.000000,144648.000000,60000.000000,24.500000)}
{pt3dadd(74136.000000,140664.000000,60000.000000,24.500000)}
{pt3dadd(75480.000000,135984.000000,60000.000000,24.500000)}
{pt3dadd(76452.000000,130908.000000,60000.000000,24.500000)}
{pt3dadd(77508.000000,125640.000000,60000.000000,24.500000)}
{pt3dadd(78840.000000,120264.000000,60000.000000,24.500000)}
{pt3dadd(81012.000000,114804.000000,60000.000000,24.500000)}
{pt3dadd(84060.000000,109332.000000,60000.000000,24.500000)}
{pt3dadd(87684.000000,103860.000000,60000.000000,24.500000)}
{pt3dadd(91236.000000,98292.000000,60000.000000,24.500000)}
{pt3dadd(93492.000000,94296.000000,60000.000000,24.500000)}
{pt3dadd(97188.000000,91092.000000,60000.000000,24.500000)}
{pt3dadd(101856.000000,88488.000000,60000.000000,24.500000)}
{pt3dadd(107484.000000,86076.000000,60000.000000,24.500000)}
{pt3dadd(113328.000000,83580.000000,60000.000000,24.500000)}
{pt3dadd(117240.000000,81180.000000,60000.000000,24.500000)}
{pt3dadd(122568.000000,79248.000000,60000.000000,24.500000)}
{pt3dadd(128400.000000,77232.000000,60000.000000,24.500000)}
{pt3dadd(133608.000000,75120.000000,60000.000000,24.500000)}
{pt3dadd(136572.000000,74952.000000,60000.000000,24.500000)}
{pt3dadd(138720.000000,75312.000000,60000.000000,24.500000)}
{pt3dadd(138876.000000,79740.000000,70000.000000,24.500000)}
{pt3dadd(139992.000000,79920.000000,70000.000000,24.500000)}
{pt3dadd(141144.000000,80016.000000,70000.000000,24.500000)}
{pt3dadd(142476.000000,80856.000000,70000.000000,24.500000)}
{pt3dadd(143820.000000,81804.000000,70000.000000,24.500000)}
{pt3dadd(145164.000000,83508.000000,70000.000000,24.500000)}
{pt3dadd(145488.000000,85140.000000,70000.000000,24.500000)}
{pt3dadd(145224.000000,87240.000000,70000.000000,24.500000)}
{pt3dadd(144384.000000,89436.000000,70000.000000,24.500000)}
{pt3dadd(142500.000000,91464.000000,70000.000000,24.500000)}
{pt3dadd(140220.000000,93756.000000,70000.000000,24.500000)}
{pt3dadd(138840.000000,96528.000000,70000.000000,24.500000)}
{pt3dadd(136752.000000,99312.000000,70000.000000,24.500000)}
{pt3dadd(133908.000000,102096.000000,70000.000000,24.500000)}
{pt3dadd(131028.000000,104880.000000,70000.000000,24.500000)}
{pt3dadd(128700.000000,108396.000000,70000.000000,24.500000)}
{pt3dadd(126300.000000,112596.000000,70000.000000,24.500000)}
{pt3dadd(124548.000000,117012.000000,70000.000000,24.500000)}
{pt3dadd(122544.000000,121788.000000,70000.000000,24.500000)}
{pt3dadd(119700.000000,126960.000000,70000.000000,24.500000)}
{pt3dadd(116820.000000,132144.000000,70000.000000,24.500000)}
{pt3dadd(115236.000000,135204.000000,70000.000000,24.500000)}
{pt3dadd(114156.000000,139380.000000,70000.000000,24.500000)}
{pt3dadd(112908.000000,143796.000000,70000.000000,24.500000)}
{pt3dadd(111756.000000,148392.000000,70000.000000,24.500000)}
{pt3dadd(110976.000000,153180.000000,70000.000000,24.500000)}
{pt3dadd(109740.000000,158448.000000,70000.000000,24.500000)}
{pt3dadd(108588.000000,163728.000000,70000.000000,24.500000)}
{pt3dadd(107712.000000,169008.000000,70000.000000,24.500000)}
{pt3dadd(107220.000000,172716.000000,70000.000000,24.500000)}
{pt3dadd(106644.000000,177564.000000,70000.000000,24.500000)}
{pt3dadd(106812.000000,179964.000000,70000.000000,24.500000)}
{pt3dadd(107184.000000,182820.000000,70000.000000,24.500000)}
{pt3dadd(107664.000000,185988.000000,70000.000000,24.500000)}
{pt3dadd(108144.000000,189336.000000,70000.000000,24.500000)}
{pt3dadd(108804.000000,193068.000000,70000.000000,24.500000)}
{pt3dadd(109848.000000,197088.000000,70000.000000,24.500000)}
{pt3dadd(111648.000000,201396.000000,70000.000000,24.500000)}
{pt3dadd(112908.000000,206820.000000,70000.000000,24.500000)}
{pt3dadd(114900.000000,212664.000000,70000.000000,24.500000)}
{pt3dadd(118212.000000,218616.000000,70000.000000,24.500000)}
{pt3dadd(122400.000000,224844.000000,70000.000000,24.500000)}
{pt3dadd(126072.000000,229140.000000,70000.000000,24.500000)}
{pt3dadd(129624.000000,231792.000000,70000.000000,24.500000)}
{pt3dadd(133368.000000,234948.000000,70000.000000,24.500000)}
{pt3dadd(134328.000000,237096.000000,70000.000000,24.500000)}
{pt3dadd(134364.000000,240504.000000,70000.000000,24.500000)}
{pt3dadd(134556.000000,244140.000000,70000.000000,24.500000)}
{pt3dadd(134196.000000,246864.000000,70000.000000,24.500000)}
{pt3dadd(132516.000000,248628.000000,70000.000000,24.500000)}
{pt3dadd(130788.000000,249984.000000,70000.000000,24.500000)}
{pt3dadd(128604.000000,250584.000000,70000.000000,24.500000)}
{pt3dadd(126300.000000,251076.000000,70000.000000,24.500000)}
{pt3dadd(123996.000000,251004.000000,70000.000000,24.500000)}
{pt3dadd(121416.000000,250260.000000,70000.000000,24.500000)}
{pt3dadd(118824.000000,249312.000000,70000.000000,24.500000)}
{pt3dadd(117252.000000,249000.000000,70000.000000,24.500000)}
{pt3dadd(116448.000000,249636.000000,70000.000000,24.500000)}
{pt3dadd(115500.000000,250572.000000,70000.000000,24.500000)}
{pt3dadd(113976.000000,251448.000000,70000.000000,24.500000)}
{pt3dadd(112440.000000,252588.000000,70000.000000,24.500000)}
{pt3dadd(111372.000000,254196.000000,70000.000000,24.500000)}
{pt3dadd(109476.000000,255276.000000,70000.000000,24.500000)}
{pt3dadd(107100.000000,255684.000000,70000.000000,24.500000)}
{pt3dadd(104520.000000,255792.000000,70000.000000,24.500000)}
{pt3dadd(101928.000000,256356.000000,70000.000000,24.500000)}
{pt3dadd(98964.000000,256188.000000,70000.000000,24.500000)}
{pt3dadd(95712.000000,255348.000000,70000.000000,24.500000)}
{pt3dadd(93744.000000,253188.000000,70000.000000,24.500000)}
{pt3dadd(91632.000000,249876.000000,70000.000000,24.500000)}
{pt3dadd(89148.000000,246516.000000,70000.000000,24.500000)}
{pt3dadd(86652.000000,243156.000000,70000.000000,24.500000)}
{pt3dadd(84252.000000,239796.000000,70000.000000,24.500000)}
{pt3dadd(82128.000000,236160.000000,70000.000000,24.500000)}
{pt3dadd(80760.000000,231864.000000,70000.000000,24.500000)}
{pt3dadd(79140.000000,226992.000000,70000.000000,24.500000)}
{pt3dadd(77040.000000,222096.000000,70000.000000,24.500000)}
{pt3dadd(75576.000000,216552.000000,70000.000000,24.500000)}
{pt3dadd(74604.000000,210240.000000,70000.000000,24.500000)}
{pt3dadd(73548.000000,203904.000000,70000.000000,24.500000)}
{pt3dadd(73140.000000,197568.000000,70000.000000,24.500000)}
{pt3dadd(72756.000000,191232.000000,70000.000000,24.500000)}
{pt3dadd(72924.000000,185172.000000,70000.000000,24.500000)}
{pt3dadd(72924.000000,180984.000000,70000.000000,24.500000)}
{pt3dadd(73668.000000,176568.000000,70000.000000,24.500000)}
{pt3dadd(74160.000000,171972.000000,70000.000000,24.500000)}
{pt3dadd(73992.000000,167364.000000,70000.000000,24.500000)}
{pt3dadd(74640.000000,162852.000000,70000.000000,24.500000)}
{pt3dadd(76044.000000,158340.000000,70000.000000,24.500000)}
{pt3dadd(78312.000000,154284.000000,70000.000000,24.500000)}
{pt3dadd(79044.000000,150996.000000,70000.000000,24.500000)}
{pt3dadd(80832.000000,148752.000000,70000.000000,24.500000)}
{pt3dadd(82092.000000,145980.000000,70000.000000,24.500000)}
{pt3dadd(83340.000000,143196.000000,70000.000000,24.500000)}
{pt3dadd(84036.000000,140040.000000,70000.000000,24.500000)}
{pt3dadd(85272.000000,136872.000000,70000.000000,24.500000)}
{pt3dadd(87348.000000,133800.000000,70000.000000,24.500000)}
{pt3dadd(89364.000000,130728.000000,70000.000000,24.500000)}
{pt3dadd(91104.000000,127560.000000,70000.000000,24.500000)}
{pt3dadd(93204.000000,124392.000000,70000.000000,24.500000)}
{pt3dadd(95316.000000,121140.000000,70000.000000,24.500000)}
{pt3dadd(97152.000000,117600.000000,70000.000000,24.500000)}
{pt3dadd(98976.000000,114048.000000,70000.000000,24.500000)}
{pt3dadd(100800.000000,110496.000000,70000.000000,24.500000)}
{pt3dadd(103176.000000,107028.000000,70000.000000,24.500000)}
{pt3dadd(106032.000000,103668.000000,70000.000000,24.500000)}
{pt3dadd(109380.000000,100404.000000,70000.000000,24.500000)}
{pt3dadd(112836.000000,97140.000000,70000.000000,24.500000)}
{pt3dadd(116292.000000,93876.000000,70000.000000,24.500000)}
{pt3dadd(120024.000000,90612.000000,70000.000000,24.500000)}
{pt3dadd(123768.000000,87348.000000,70000.000000,24.500000)}
{pt3dadd(127512.000000,83988.000000,70000.000000,24.500000)}
{pt3dadd(130056.000000,81828.000000,70000.000000,24.500000)}
{pt3dadd(132828.000000,80736.000000,70000.000000,24.500000)}
{pt3dadd(135420.000000,79956.000000,70000.000000,24.500000)}
{pt3dadd(138852.000000,79740.000000,70000.000000,24.500000)}
{pt3dadd(100824.000000,169032.000000,80000.000000,16333.333333)}
{pt3dadd(101940.000000,169584.000000,80000.000000,24.500000)}
{pt3dadd(102540.000000,170520.000000,80000.000000,24.500000)}
{pt3dadd(102552.000000,172500.000000,80000.000000,24.500000)}
{pt3dadd(102552.000000,174516.000000,80000.000000,24.500000)}
{pt3dadd(102468.000000,176628.000000,80000.000000,24.500000)}
{pt3dadd(102276.000000,178824.000000,80000.000000,24.500000)}
{pt3dadd(102084.000000,181032.000000,80000.000000,24.500000)}
{pt3dadd(101892.000000,183240.000000,80000.000000,24.500000)}
{pt3dadd(101892.000000,185544.000000,80000.000000,24.500000)}
{pt3dadd(101892.000000,187944.000000,80000.000000,24.500000)}
{pt3dadd(102072.000000,190440.000000,80000.000000,24.500000)}
{pt3dadd(102348.000000,193212.000000,80000.000000,24.500000)}
{pt3dadd(102636.000000,195996.000000,80000.000000,24.500000)}
{pt3dadd(102924.000000,198780.000000,80000.000000,24.500000)}
{pt3dadd(103404.000000,201936.000000,80000.000000,24.500000)}
{pt3dadd(105084.000000,205752.000000,80000.000000,24.500000)}
{pt3dadd(106716.000000,209592.000000,80000.000000,24.500000)}
{pt3dadd(108444.000000,213432.000000,80000.000000,24.500000)}
{pt3dadd(110268.000000,217272.000000,80000.000000,24.500000)}
{pt3dadd(112740.000000,221292.000000,80000.000000,24.500000)}
{pt3dadd(114768.000000,225780.000000,80000.000000,24.500000)}
{pt3dadd(116880.000000,230292.000000,80000.000000,24.500000)}
{pt3dadd(118992.000000,234900.000000,80000.000000,24.500000)}
{pt3dadd(121476.000000,238308.000000,80000.000000,24.500000)}
{pt3dadd(123036.000000,241848.000000,80000.000000,24.500000)}
{pt3dadd(122820.000000,243000.000000,80000.000000,24.500000)}
{pt3dadd(121248.000000,243408.000000,80000.000000,24.500000)}
{pt3dadd(119064.000000,243792.000000,80000.000000,24.500000)}
{pt3dadd(116664.000000,244176.000000,80000.000000,24.500000)}
{pt3dadd(114168.000000,243732.000000,80000.000000,24.500000)}
{pt3dadd(112140.000000,242424.000000,80000.000000,24.500000)}
{pt3dadd(110220.000000,240984.000000,80000.000000,24.500000)}
{pt3dadd(108300.000000,239172.000000,80000.000000,24.500000)}
{pt3dadd(106380.000000,237444.000000,80000.000000,24.500000)}
{pt3dadd(104640.000000,235260.000000,80000.000000,24.500000)}
{pt3dadd(102912.000000,233052.000000,80000.000000,24.500000)}
{pt3dadd(101376.000000,230376.000000,80000.000000,24.500000)}
{pt3dadd(100020.000000,227040.000000,80000.000000,24.500000)}
{pt3dadd(97752.000000,223500.000000,80000.000000,24.500000)}
{pt3dadd(95724.000000,219948.000000,80000.000000,24.500000)}
{pt3dadd(94176.000000,216204.000000,80000.000000,24.500000)}
{pt3dadd(92640.000000,212460.000000,80000.000000,24.500000)}
{pt3dadd(91560.000000,208620.000000,80000.000000,24.500000)}
{pt3dadd(90408.000000,204696.000000,80000.000000,24.500000)}
{pt3dadd(89724.000000,200568.000000,80000.000000,24.500000)}
{pt3dadd(89052.000000,196440.000000,80000.000000,24.500000)}
{pt3dadd(88836.000000,192504.000000,80000.000000,24.500000)}
{pt3dadd(89196.000000,188292.000000,80000.000000,24.500000)}
{pt3dadd(90876.000000,183972.000000,80000.000000,24.500000)}
{pt3dadd(92508.000000,179652.000000,80000.000000,24.500000)}
{pt3dadd(94608.000000,175332.000000,80000.000000,24.500000)}
{pt3dadd(96804.000000,171936.000000,80000.000000,24.500000)}
{pt3dadd(98556.000000,170052.000000,80000.000000,24.500000)}
{pt3dadd(99732.000000,169344.000000,80000.000000,24.500000)}
{pt3dadd(100692.000000,169044.000000,80000.000000,24.500000)}
