# Supplementary material for: Full reconstruction of large lobula plate tangential cells in Drosophila from a 3D EM dataset
Source: PLoS One. 2018 Nov 28;13(11):e0207828. doi: 10.1371/journal.pone.0207828 (PMC6261601; doi:10.1371/journal.pone.0207828)
Supplement: S1 Dataset — (ZIP) [file pone.0207828.s001.zip › Diameter hoc/Neuropil outline/Outline LP ck 17Sep13.008_0002.hoc]

/* created with convertKnossosNmlToHoc.m */

{create adhoc1}
{access adhoc1}
{nseg = 1}
{strdef color color = "White"}
{pt3dclear()}
{pt3dadd(185112.000000,159420.000000,25225.000000,24.500000)}
{pt3dadd(186864.000000,160992.000000,25225.000000,24.500000)}
{pt3dadd(187800.000000,162840.000000,25225.000000,24.500000)}
{pt3dadd(188304.000000,165120.000000,25225.000000,24.500000)}
{pt3dadd(188508.000000,167892.000000,25225.000000,24.500000)}
{pt3dadd(187776.000000,170856.000000,25225.000000,24.500000)}
{pt3dadd(187008.000000,173088.000000,25225.000000,24.500000)}
{pt3dadd(185772.000000,174744.000000,25225.000000,24.500000)}
{pt3dadd(184812.000000,176748.000000,25225.000000,24.500000)}
{pt3dadd(183936.000000,177468.000000,25225.000000,24.500000)}
{pt3dadd(182616.000000,176568.000000,25225.000000,24.500000)}
{pt3dadd(180804.000000,175524.000000,25225.000000,24.500000)}
{pt3dadd(179724.000000,173628.000000,25225.000000,24.500000)}
{pt3dadd(179772.000000,170880.000000,25225.000000,24.500000)}
{pt3dadd(179868.000000,167724.000000,25225.000000,24.500000)}
{pt3dadd(179964.000000,164556.000000,25225.000000,24.500000)}
{pt3dadd(180708.000000,161760.000000,25225.000000,24.500000)}
{pt3dadd(182496.000000,159996.000000,25225.000000,24.500000)}
{pt3dadd(185052.000000,159384.000000,25225.000000,24.500000)}
{pt3dadd(187260.000000,116592.000000,35225.000000,24.500000)}
{pt3dadd(189240.000000,116400.000000,35225.000000,24.500000)}
{pt3dadd(190704.000000,117132.000000,35225.000000,24.500000)}
{pt3dadd(192516.000000,118728.000000,35225.000000,24.500000)}
{pt3dadd(193968.000000,121200.000000,35225.000000,24.500000)}
{pt3dadd(194940.000000,124800.000000,35225.000000,24.500000)}
{pt3dadd(195900.000000,128916.000000,35225.000000,24.500000)}
{pt3dadd(196584.000000,132948.000000,35225.000000,24.500000)}
{pt3dadd(196800.000000,137532.000000,35225.000000,24.500000)}
{pt3dadd(196344.000000,142512.000000,35225.000000,24.500000)}
{pt3dadd(196236.000000,147600.000000,35225.000000,24.500000)}
{pt3dadd(196236.000000,153048.000000,35225.000000,24.500000)}
{pt3dadd(195492.000000,158520.000000,35225.000000,24.500000)}
{pt3dadd(193800.000000,163992.000000,35225.000000,24.500000)}
{pt3dadd(191892.000000,169380.000000,35225.000000,24.500000)}
{pt3dadd(189972.000000,174756.000000,35225.000000,24.500000)}
{pt3dadd(188700.000000,180408.000000,35225.000000,24.500000)}
{pt3dadd(187452.000000,186072.000000,35225.000000,24.500000)}
{pt3dadd(185280.000000,191184.000000,35225.000000,24.500000)}
{pt3dadd(182976.000000,196272.000000,35225.000000,24.500000)}
{pt3dadd(180120.000000,201360.000000,35225.000000,24.500000)}
{pt3dadd(177888.000000,204312.000000,35225.000000,24.500000)}
{pt3dadd(175392.000000,206544.000000,35225.000000,24.500000)}
{pt3dadd(173088.000000,207372.000000,35225.000000,24.500000)}
{pt3dadd(170688.000000,208044.000000,35225.000000,24.500000)}
{pt3dadd(168192.000000,208164.000000,35225.000000,24.500000)}
{pt3dadd(166536.000000,207336.000000,35225.000000,24.500000)}
{pt3dadd(165456.000000,205092.000000,35225.000000,24.500000)}
{pt3dadd(163932.000000,201864.000000,35225.000000,24.500000)}
{pt3dadd(162396.000000,198600.000000,35225.000000,24.500000)}
{pt3dadd(161880.000000,194688.000000,35225.000000,24.500000)}
{pt3dadd(161868.000000,190560.000000,35225.000000,24.500000)}
{pt3dadd(161676.000000,185784.000000,35225.000000,24.500000)}
{pt3dadd(161484.000000,180900.000000,35225.000000,24.500000)}
{pt3dadd(162132.000000,175908.000000,35225.000000,24.500000)}
{pt3dadd(163440.000000,170544.000000,35225.000000,24.500000)}
{pt3dadd(164604.000000,164244.000000,35225.000000,24.500000)}
{pt3dadd(165480.000000,157452.000000,35225.000000,24.500000)}
{pt3dadd(166524.000000,150636.000000,35225.000000,24.500000)}
{pt3dadd(170076.000000,143724.000000,35225.000000,24.500000)}
{pt3dadd(173448.000000,136440.000000,35225.000000,24.500000)}
{pt3dadd(176160.000000,128688.000000,35225.000000,24.500000)}
{pt3dadd(179124.000000,120912.000000,35225.000000,24.500000)}
{pt3dadd(182004.000000,118224.000000,35225.000000,24.500000)}
{pt3dadd(185172.000000,116928.000000,35225.000000,24.500000)}
{pt3dadd(187224.000000,116412.000000,35225.000000,24.500000)}
{pt3dadd(181080.000000,99216.000000,45225.000000,24.500000)}
{pt3dadd(182676.000000,99228.000000,45225.000000,24.500000)}
{pt3dadd(184308.000000,100884.000000,45225.000000,24.500000)}
{pt3dadd(186312.000000,102060.000000,45225.000000,24.500000)}
{pt3dadd(188604.000000,103212.000000,45225.000000,24.500000)}
{pt3dadd(189612.000000,104736.000000,45225.000000,24.500000)}
{pt3dadd(190296.000000,106824.000000,45225.000000,24.500000)}
{pt3dadd(191532.000000,109212.000000,45225.000000,24.500000)}
{pt3dadd(192684.000000,111612.000000,45225.000000,24.500000)}
{pt3dadd(193464.000000,114468.000000,45225.000000,24.500000)}
{pt3dadd(193584.000000,118188.000000,45225.000000,24.500000)}
{pt3dadd(193956.000000,122484.000000,45225.000000,24.500000)}
{pt3dadd(194532.000000,126804.000000,45225.000000,24.500000)}
{pt3dadd(195468.000000,131124.000000,45225.000000,24.500000)}
{pt3dadd(195972.000000,135900.000000,45225.000000,24.500000)}
{pt3dadd(195336.000000,140892.000000,45225.000000,24.500000)}
{pt3dadd(194760.000000,145884.000000,45225.000000,24.500000)}
{pt3dadd(194928.000000,151152.000000,45225.000000,24.500000)}
{pt3dadd(194748.000000,156528.000000,45225.000000,24.500000)}
{pt3dadd(194376.000000,158568.000000,45225.000000,24.500000)}
{pt3dadd(193440.000000,160680.000000,45225.000000,24.500000)}
{pt3dadd(192192.000000,163620.000000,45225.000000,24.500000)}
{pt3dadd(191316.000000,167520.000000,45225.000000,24.500000)}
{pt3dadd(190824.000000,172104.000000,45225.000000,24.500000)}
{pt3dadd(190440.000000,177540.000000,45225.000000,24.500000)}
{pt3dadd(188388.000000,182652.000000,45225.000000,24.500000)}
{pt3dadd(184980.000000,184956.000000,45225.000000,24.500000)}
{pt3dadd(183660.000000,186516.000000,45225.000000,24.500000)}
{pt3dadd(182772.000000,188988.000000,45225.000000,24.500000)}
{pt3dadd(181824.000000,191112.000000,45225.000000,24.500000)}
{pt3dadd(180576.000000,194052.000000,45225.000000,24.500000)}
{pt3dadd(179328.000000,197400.000000,45225.000000,24.500000)}
{pt3dadd(178080.000000,200856.000000,45225.000000,24.500000)}
{pt3dadd(176832.000000,204396.000000,45225.000000,24.500000)}
{pt3dadd(175584.000000,207948.000000,45225.000000,24.500000)}
{pt3dadd(173784.000000,211500.000000,45225.000000,24.500000)}
{pt3dadd(172800.000000,215520.000000,45225.000000,24.500000)}
{pt3dadd(170904.000000,218904.000000,45225.000000,24.500000)}
{pt3dadd(166032.000000,222444.000000,45225.000000,24.500000)}
{pt3dadd(161688.000000,225444.000000,45225.000000,24.500000)}
{pt3dadd(160608.000000,224352.000000,45225.000000,24.500000)}
{pt3dadd(159276.000000,222744.000000,45225.000000,24.500000)}
{pt3dadd(157740.000000,218052.000000,45225.000000,24.500000)}
{pt3dadd(155376.000000,213816.000000,45225.000000,24.500000)}
{pt3dadd(152976.000000,209496.000000,45225.000000,24.500000)}
{pt3dadd(152064.000000,206376.000000,45225.000000,24.500000)}
{pt3dadd(152388.000000,201912.000000,45225.000000,24.500000)}
{pt3dadd(152676.000000,197496.000000,45225.000000,24.500000)}
{pt3dadd(153528.000000,192996.000000,45225.000000,24.500000)}
{pt3dadd(153828.000000,187920.000000,45225.000000,24.500000)}
{pt3dadd(154116.000000,182832.000000,45225.000000,24.500000)}
{pt3dadd(154968.000000,177660.000000,45225.000000,24.500000)}
{pt3dadd(157128.000000,173028.000000,45225.000000,24.500000)}
{pt3dadd(158772.000000,167868.000000,45225.000000,24.500000)}
{pt3dadd(159576.000000,162216.000000,45225.000000,24.500000)}
{pt3dadd(160440.000000,156552.000000,45225.000000,24.500000)}
{pt3dadd(161388.000000,150612.000000,45225.000000,24.500000)}
{pt3dadd(162816.000000,144660.000000,45225.000000,24.500000)}
{pt3dadd(164256.000000,138708.000000,45225.000000,24.500000)}
{pt3dadd(165696.000000,132756.000000,45225.000000,24.500000)}
{pt3dadd(167688.000000,126804.000000,45225.000000,24.500000)}
{pt3dadd(170076.000000,121596.000000,45225.000000,24.500000)}
{pt3dadd(173304.000000,116220.000000,45225.000000,24.500000)}
{pt3dadd(174816.000000,113628.000000,45225.000000,24.500000)}
{pt3dadd(175512.000000,109644.000000,45225.000000,24.500000)}
{pt3dadd(175356.000000,104688.000000,45225.000000,24.500000)}
{pt3dadd(176736.000000,100344.000000,45225.000000,24.500000)}
{pt3dadd(178548.000000,99264.000000,45225.000000,24.500000)}
{pt3dadd(181020.000000,99132.000000,45225.000000,24.500000)}
{pt3dadd(179628.000000,94224.000000,55225.000000,24.500000)}
{pt3dadd(181524.000000,94968.000000,55225.000000,24.500000)}
{pt3dadd(183804.000000,96480.000000,55225.000000,24.500000)}
{pt3dadd(186012.000000,98844.000000,55225.000000,24.500000)}
{pt3dadd(188136.000000,101616.000000,55225.000000,24.500000)}
{pt3dadd(189324.000000,105504.000000,55225.000000,24.500000)}
{pt3dadd(190560.000000,110268.000000,55225.000000,24.500000)}
{pt3dadd(191904.000000,115536.000000,55225.000000,24.500000)}
{pt3dadd(193068.000000,120816.000000,55225.000000,24.500000)}
{pt3dadd(193476.000000,126648.000000,55225.000000,24.500000)}
{pt3dadd(194052.000000,132972.000000,55225.000000,24.500000)}
{pt3dadd(194988.000000,139584.000000,55225.000000,24.500000)}
{pt3dadd(195864.000000,146208.000000,55225.000000,24.500000)}
{pt3dadd(196080.000000,152916.000000,55225.000000,24.500000)}
{pt3dadd(195900.000000,159636.000000,55225.000000,24.500000)}
{pt3dadd(195624.000000,166356.000000,55225.000000,24.500000)}
{pt3dadd(194772.000000,169656.000000,55225.000000,24.500000)}
{pt3dadd(194280.000000,173844.000000,55225.000000,24.500000)}
{pt3dadd(192132.000000,178344.000000,55225.000000,24.500000)}
{pt3dadd(189564.000000,182772.000000,55225.000000,24.500000)}
{pt3dadd(187344.000000,187188.000000,55225.000000,24.500000)}
{pt3dadd(187164.000000,188268.000000,55225.000000,24.500000)}
{pt3dadd(186792.000000,191088.000000,55225.000000,24.500000)}
{pt3dadd(185940.000000,193776.000000,55225.000000,24.500000)}
{pt3dadd(184344.000000,195996.000000,55225.000000,24.500000)}
{pt3dadd(181692.000000,198024.000000,55225.000000,24.500000)}
{pt3dadd(179928.000000,200508.000000,55225.000000,24.500000)}
{pt3dadd(178200.000000,203004.000000,55225.000000,24.500000)}
{pt3dadd(176472.000000,205500.000000,55225.000000,24.500000)}
{pt3dadd(174840.000000,208176.000000,55225.000000,24.500000)}
{pt3dadd(173664.000000,211236.000000,55225.000000,24.500000)}
{pt3dadd(171768.000000,214308.000000,55225.000000,24.500000)}
{pt3dadd(170412.000000,217008.000000,55225.000000,24.500000)}
{pt3dadd(169440.000000,219696.000000,55225.000000,24.500000)}
{pt3dadd(168564.000000,222384.000000,55225.000000,24.500000)}
{pt3dadd(167700.000000,225072.000000,55225.000000,24.500000)}
{pt3dadd(166104.000000,227208.000000,55225.000000,24.500000)}
{pt3dadd(164568.000000,229320.000000,55225.000000,24.500000)}
{pt3dadd(162936.000000,231156.000000,55225.000000,24.500000)}
{pt3dadd(160752.000000,232236.000000,55225.000000,24.500000)}
{pt3dadd(158352.000000,233100.000000,55225.000000,24.500000)}
{pt3dadd(155772.000000,233784.000000,55225.000000,24.500000)}
{pt3dadd(152988.000000,232512.000000,55225.000000,24.500000)}
{pt3dadd(150672.000000,229788.000000,55225.000000,24.500000)}
{pt3dadd(148644.000000,226176.000000,55225.000000,24.500000)}
{pt3dadd(147924.000000,221880.000000,55225.000000,24.500000)}
{pt3dadd(147624.000000,216732.000000,55225.000000,24.500000)}
{pt3dadd(147420.000000,211548.000000,55225.000000,24.500000)}
{pt3dadd(147228.000000,206364.000000,55225.000000,24.500000)}
{pt3dadd(148428.000000,201636.000000,55225.000000,24.500000)}
{pt3dadd(150972.000000,196932.000000,55225.000000,24.500000)}
{pt3dadd(152448.000000,191496.000000,55225.000000,24.500000)}
{pt3dadd(154992.000000,186108.000000,55225.000000,24.500000)}
{pt3dadd(157128.000000,180456.000000,55225.000000,24.500000)}
{pt3dadd(159048.000000,174696.000000,55225.000000,24.500000)}
{pt3dadd(160788.000000,168756.000000,55225.000000,24.500000)}
{pt3dadd(162324.000000,162528.000000,55225.000000,24.500000)}
{pt3dadd(163860.000000,156288.000000,55225.000000,24.500000)}
{pt3dadd(164844.000000,149952.000000,55225.000000,24.500000)}
{pt3dadd(165444.000000,143520.000000,55225.000000,24.500000)}
{pt3dadd(166296.000000,137184.000000,55225.000000,24.500000)}
{pt3dadd(165588.000000,133260.000000,55225.000000,24.500000)}
{pt3dadd(165840.000000,128484.000000,55225.000000,24.500000)}
{pt3dadd(166212.000000,123696.000000,55225.000000,24.500000)}
{pt3dadd(166416.000000,118608.000000,55225.000000,24.500000)}
{pt3dadd(166416.000000,113340.000000,55225.000000,24.500000)}
{pt3dadd(166416.000000,108060.000000,55225.000000,24.500000)}
{pt3dadd(166608.000000,102684.000000,55225.000000,24.500000)}
{pt3dadd(166800.000000,99900.000000,55225.000000,24.500000)}
{pt3dadd(167820.000000,96840.000000,55225.000000,24.500000)}
{pt3dadd(169152.000000,93768.000000,55225.000000,24.500000)}
{pt3dadd(171324.000000,92460.000000,55225.000000,24.500000)}
{pt3dadd(173532.000000,92040.000000,55225.000000,24.500000)}
{pt3dadd(175836.000000,92208.000000,55225.000000,24.500000)}
{pt3dadd(178416.000000,93420.000000,55225.000000,24.500000)}
{pt3dadd(179712.000000,94200.000000,55225.000000,24.500000)}
{pt3dadd(169860.000000,90060.000000,65225.000000,24.500000)}
{pt3dadd(172752.000000,89916.000000,65225.000000,24.500000)}
{pt3dadd(175620.000000,90840.000000,65225.000000,24.500000)}
{pt3dadd(178500.000000,92160.000000,65225.000000,24.500000)}
{pt3dadd(181104.000000,93876.000000,65225.000000,24.500000)}
{pt3dadd(183696.000000,95784.000000,65225.000000,24.500000)}
{pt3dadd(186480.000000,97704.000000,65225.000000,24.500000)}
{pt3dadd(188988.000000,100464.000000,65225.000000,24.500000)}
{pt3dadd(190368.000000,105192.000000,65225.000000,24.500000)}
{pt3dadd(191532.000000,110448.000000,65225.000000,24.500000)}
{pt3dadd(192684.000000,115728.000000,65225.000000,24.500000)}
{pt3dadd(193644.000000,121476.000000,65225.000000,24.500000)}
{pt3dadd(194700.000000,127416.000000,65225.000000,24.500000)}
{pt3dadd(196128.000000,133464.000000,65225.000000,24.500000)}
{pt3dadd(197100.000000,139788.000000,65225.000000,24.500000)}
{pt3dadd(198156.000000,146124.000000,65225.000000,24.500000)}
{pt3dadd(198564.000000,152832.000000,65225.000000,24.500000)}
{pt3dadd(198576.000000,159540.000000,65225.000000,24.500000)}
{pt3dadd(197652.000000,166260.000000,65225.000000,24.500000)}
{pt3dadd(197352.000000,173268.000000,65225.000000,24.500000)}
{pt3dadd(195852.000000,177036.000000,65225.000000,24.500000)}
{pt3dadd(194136.000000,181428.000000,65225.000000,24.500000)}
{pt3dadd(191856.000000,186204.000000,65225.000000,24.500000)}
{pt3dadd(189552.000000,191376.000000,65225.000000,24.500000)}
{pt3dadd(189000.000000,195636.000000,65225.000000,24.500000)}
{pt3dadd(187872.000000,198468.000000,65225.000000,24.500000)}
{pt3dadd(185892.000000,201264.000000,65225.000000,24.500000)}
{pt3dadd(182760.000000,204048.000000,65225.000000,24.500000)}
{pt3dadd(179592.000000,206916.000000,65225.000000,24.500000)}
{pt3dadd(177444.000000,210444.000000,65225.000000,24.500000)}
{pt3dadd(176076.000000,214740.000000,65225.000000,24.500000)}
{pt3dadd(174636.000000,218964.000000,65225.000000,24.500000)}
{pt3dadd(173016.000000,223380.000000,65225.000000,24.500000)}
{pt3dadd(171012.000000,227796.000000,65225.000000,24.500000)}
{pt3dadd(168072.000000,231840.000000,65225.000000,24.500000)}
{pt3dadd(164256.000000,234480.000000,65225.000000,24.500000)}
{pt3dadd(159408.000000,236616.000000,65225.000000,24.500000)}
{pt3dadd(154236.000000,237708.000000,65225.000000,24.500000)}
{pt3dadd(152328.000000,235944.000000,65225.000000,24.500000)}
{pt3dadd(149820.000000,234288.000000,65225.000000,24.500000)}
{pt3dadd(148068.000000,230988.000000,65225.000000,24.500000)}
{pt3dadd(147264.000000,226884.000000,65225.000000,24.500000)}
{pt3dadd(147600.000000,222204.000000,65225.000000,24.500000)}
{pt3dadd(148824.000000,217224.000000,65225.000000,24.500000)}
{pt3dadd(150996.000000,212232.000000,65225.000000,24.500000)}
{pt3dadd(153108.000000,206964.000000,65225.000000,24.500000)}
{pt3dadd(155304.000000,201132.000000,65225.000000,24.500000)}
{pt3dadd(157332.000000,195180.000000,65225.000000,24.500000)}
{pt3dadd(159348.000000,189048.000000,65225.000000,24.500000)}
{pt3dadd(161736.000000,182904.000000,65225.000000,24.500000)}
{pt3dadd(164412.000000,176760.000000,65225.000000,24.500000)}
{pt3dadd(167376.000000,170520.000000,65225.000000,24.500000)}
{pt3dadd(169608.000000,163632.000000,65225.000000,24.500000)}
{pt3dadd(169416.000000,160608.000000,65225.000000,24.500000)}
{pt3dadd(169968.000000,156060.000000,65225.000000,24.500000)}
{pt3dadd(168780.000000,151920.000000,65225.000000,24.500000)}
{pt3dadd(169020.000000,147696.000000,65225.000000,24.500000)}
{pt3dadd(169860.000000,143472.000000,65225.000000,24.500000)}
{pt3dadd(169428.000000,138972.000000,65225.000000,24.500000)}
{pt3dadd(169500.000000,134088.000000,65225.000000,24.500000)}
{pt3dadd(169500.000000,129192.000000,65225.000000,24.500000)}
{pt3dadd(169500.000000,124296.000000,65225.000000,24.500000)}
{pt3dadd(169044.000000,119400.000000,65225.000000,24.500000)}
{pt3dadd(167268.000000,116076.000000,65225.000000,24.500000)}
{pt3dadd(166464.000000,111972.000000,65225.000000,24.500000)}
{pt3dadd(166068.000000,107196.000000,65225.000000,24.500000)}
{pt3dadd(165864.000000,102036.000000,65225.000000,24.500000)}
{pt3dadd(165672.000000,96852.000000,65225.000000,24.500000)}
{pt3dadd(164832.000000,93336.000000,65225.000000,24.500000)}
{pt3dadd(166380.000000,90984.000000,65225.000000,24.500000)}
{pt3dadd(169668.000000,89976.000000,65225.000000,24.500000)}
{pt3dadd(170160.000000,89196.000000,75225.000000,24.500000)}
{pt3dadd(172860.000000,89256.000000,75225.000000,24.500000)}
{pt3dadd(176292.000000,89904.000000,75225.000000,24.500000)}
{pt3dadd(179376.000000,91596.000000,75225.000000,24.500000)}
{pt3dadd(183096.000000,94152.000000,75225.000000,24.500000)}
{pt3dadd(186840.000000,98964.000000,75225.000000,24.500000)}
{pt3dadd(191232.000000,105348.000000,75225.000000,24.500000)}
{pt3dadd(195084.000000,113256.000000,75225.000000,24.500000)}
{pt3dadd(197904.000000,122424.000000,75225.000000,24.500000)}
{pt3dadd(199776.000000,132468.000000,75225.000000,24.500000)}
{pt3dadd(201408.000000,142740.000000,75225.000000,24.500000)}
{pt3dadd(202212.000000,153012.000000,75225.000000,24.500000)}
{pt3dadd(202152.000000,156612.000000,75225.000000,24.500000)}
{pt3dadd(201588.000000,161652.000000,75225.000000,24.500000)}
{pt3dadd(200928.000000,166740.000000,75225.000000,24.500000)}
{pt3dadd(200532.000000,172752.000000,75225.000000,24.500000)}
{pt3dadd(198756.000000,178884.000000,75225.000000,24.500000)}
{pt3dadd(196476.000000,185316.000000,75225.000000,24.500000)}
{pt3dadd(192876.000000,191832.000000,75225.000000,24.500000)}
{pt3dadd(191448.000000,195948.000000,75225.000000,24.500000)}
{pt3dadd(190656.000000,200640.000000,75225.000000,24.500000)}
{pt3dadd(188688.000000,205152.000000,75225.000000,24.500000)}
{pt3dadd(185556.000000,207912.000000,75225.000000,24.500000)}
{pt3dadd(182388.000000,210696.000000,75225.000000,24.500000)}
{pt3dadd(180432.000000,214584.000000,75225.000000,24.500000)}
{pt3dadd(177672.000000,218520.000000,75225.000000,24.500000)}
{pt3dadd(175080.000000,222456.000000,75225.000000,24.500000)}
{pt3dadd(172860.000000,226116.000000,75225.000000,24.500000)}
{pt3dadd(170004.000000,229860.000000,75225.000000,24.500000)}
{pt3dadd(167124.000000,233604.000000,75225.000000,24.500000)}
{pt3dadd(165720.000000,235776.000000,75225.000000,24.500000)}
{pt3dadd(163908.000000,236868.000000,75225.000000,24.500000)}
{pt3dadd(160704.000000,237276.000000,75225.000000,24.500000)}
{pt3dadd(157344.000000,238404.000000,75225.000000,24.500000)}
{pt3dadd(152688.000000,238164.000000,75225.000000,24.500000)}
{pt3dadd(151272.000000,236868.000000,75225.000000,24.500000)}
{pt3dadd(148596.000000,235668.000000,75225.000000,24.500000)}
{pt3dadd(148872.000000,232668.000000,75225.000000,24.500000)}
{pt3dadd(150084.000000,229320.000000,75225.000000,24.500000)}
{pt3dadd(152532.000000,222996.000000,75225.000000,24.500000)}
{pt3dadd(155208.000000,216204.000000,75225.000000,24.500000)}
{pt3dadd(158916.000000,209484.000000,75225.000000,24.500000)}
{pt3dadd(162288.000000,202764.000000,75225.000000,24.500000)}
{pt3dadd(162132.000000,198996.000000,75225.000000,24.500000)}
{pt3dadd(162960.000000,194148.000000,75225.000000,24.500000)}
{pt3dadd(166044.000000,189528.000000,75225.000000,24.500000)}
{pt3dadd(169212.000000,183900.000000,75225.000000,24.500000)}
{pt3dadd(171912.000000,176664.000000,75225.000000,24.500000)}
{pt3dadd(174780.000000,168912.000000,75225.000000,24.500000)}
{pt3dadd(177756.000000,160944.000000,75225.000000,24.500000)}
{pt3dadd(177768.000000,155568.000000,75225.000000,24.500000)}
{pt3dadd(177864.000000,149916.000000,75225.000000,24.500000)}
{pt3dadd(177864.000000,143976.000000,75225.000000,24.500000)}
{pt3dadd(177216.000000,138120.000000,75225.000000,24.500000)}
{pt3dadd(176640.000000,132264.000000,75225.000000,24.500000)}
{pt3dadd(176064.000000,126408.000000,75225.000000,24.500000)}
{pt3dadd(173916.000000,120828.000000,75225.000000,24.500000)}
{pt3dadd(171804.000000,115260.000000,75225.000000,24.500000)}
{pt3dadd(170256.000000,109224.000000,75225.000000,24.500000)}
{pt3dadd(168720.000000,102900.000000,75225.000000,24.500000)}
{pt3dadd(167736.000000,96384.000000,75225.000000,24.500000)}
{pt3dadd(168432.000000,90684.000000,75225.000000,24.500000)}
{pt3dadd(170124.000000,89184.000000,75225.000000,24.500000)}
{pt3dadd(172128.000000,91692.000000,85225.000000,24.500000)}
{pt3dadd(174432.000000,91776.000000,85225.000000,24.500000)}
{pt3dadd(176832.000000,92616.000000,85225.000000,24.500000)}
{pt3dadd(179508.000000,93480.000000,85225.000000,24.500000)}
{pt3dadd(182292.000000,95076.000000,85225.000000,24.500000)}
{pt3dadd(185160.000000,97632.000000,85225.000000,24.500000)}
{pt3dadd(187956.000000,99768.000000,85225.000000,24.500000)}
{pt3dadd(191112.000000,102612.000000,85225.000000,24.500000)}
{pt3dadd(192984.000000,106428.000000,85225.000000,24.500000)}
{pt3dadd(194892.000000,110724.000000,85225.000000,24.500000)}
{pt3dadd(197460.000000,115500.000000,85225.000000,24.500000)}
{pt3dadd(199320.000000,120948.000000,85225.000000,24.500000)}
{pt3dadd(201048.000000,126612.000000,85225.000000,24.500000)}
{pt3dadd(202308.000000,129588.000000,85225.000000,24.500000)}
{pt3dadd(202356.000000,134412.000000,85225.000000,24.500000)}
{pt3dadd(204216.000000,140052.000000,85225.000000,24.500000)}
{pt3dadd(204276.000000,145344.000000,85225.000000,24.500000)}
{pt3dadd(205200.000000,151548.000000,85225.000000,24.500000)}
{pt3dadd(204408.000000,157512.000000,85225.000000,24.500000)}
{pt3dadd(203544.000000,163464.000000,85225.000000,24.500000)}
{pt3dadd(202596.000000,169236.000000,85225.000000,24.500000)}
{pt3dadd(201816.000000,175272.000000,85225.000000,24.500000)}
{pt3dadd(200496.000000,181404.000000,85225.000000,24.500000)}
{pt3dadd(198408.000000,187188.000000,85225.000000,24.500000)}
{pt3dadd(195744.000000,192948.000000,85225.000000,24.500000)}
{pt3dadd(194352.000000,195744.000000,85225.000000,24.500000)}
{pt3dadd(194208.000000,199728.000000,85225.000000,24.500000)}
{pt3dadd(193644.000000,203760.000000,85225.000000,24.500000)}
{pt3dadd(191412.000000,207696.000000,85225.000000,24.500000)}
{pt3dadd(187908.000000,211536.000000,85225.000000,24.500000)}
{pt3dadd(185184.000000,212880.000000,85225.000000,24.500000)}
{pt3dadd(184716.000000,215892.000000,85225.000000,24.500000)}
{pt3dadd(183132.000000,218964.000000,85225.000000,24.500000)}
{pt3dadd(181308.000000,222036.000000,85225.000000,24.500000)}
{pt3dadd(178836.000000,225660.000000,85225.000000,24.500000)}
{pt3dadd(175512.000000,229212.000000,85225.000000,24.500000)}
{pt3dadd(173268.000000,232212.000000,85225.000000,24.500000)}
{pt3dadd(169476.000000,234540.000000,85225.000000,24.500000)}
{pt3dadd(165360.000000,236472.000000,85225.000000,24.500000)}
{pt3dadd(161148.000000,237840.000000,85225.000000,24.500000)}
{pt3dadd(159240.000000,235764.000000,85225.000000,24.500000)}
{pt3dadd(158520.000000,233280.000000,85225.000000,24.500000)}
{pt3dadd(158952.000000,229956.000000,85225.000000,24.500000)}
{pt3dadd(158880.000000,226596.000000,85225.000000,24.500000)}
{pt3dadd(159528.000000,223056.000000,85225.000000,24.500000)}
{pt3dadd(162048.000000,219960.000000,85225.000000,24.500000)}
{pt3dadd(163980.000000,215784.000000,85225.000000,24.500000)}
{pt3dadd(165816.000000,210072.000000,85225.000000,24.500000)}
{pt3dadd(167352.000000,204132.000000,85225.000000,24.500000)}
{pt3dadd(167592.000000,201792.000000,85225.000000,24.500000)}
{pt3dadd(170388.000000,198000.000000,85225.000000,24.500000)}
{pt3dadd(172248.000000,193236.000000,85225.000000,24.500000)}
{pt3dadd(174432.000000,187980.000000,85225.000000,24.500000)}
{pt3dadd(176640.000000,182700.000000,85225.000000,24.500000)}
{pt3dadd(178488.000000,176772.000000,85225.000000,24.500000)}
{pt3dadd(180492.000000,170820.000000,85225.000000,24.500000)}
{pt3dadd(182412.000000,164772.000000,85225.000000,24.500000)}
{pt3dadd(182304.000000,158352.000000,85225.000000,24.500000)}
{pt3dadd(183132.000000,151836.000000,85225.000000,24.500000)}
{pt3dadd(182700.000000,149004.000000,85225.000000,24.500000)}
{pt3dadd(182964.000000,145764.000000,85225.000000,24.500000)}
{pt3dadd(183240.000000,142308.000000,85225.000000,24.500000)}
{pt3dadd(182976.000000,138396.000000,85225.000000,24.500000)}
{pt3dadd(182136.000000,134184.000000,85225.000000,24.500000)}
{pt3dadd(180624.000000,129768.000000,85225.000000,24.500000)}
{pt3dadd(179364.000000,124704.000000,85225.000000,24.500000)}
{pt3dadd(178116.000000,119616.000000,85225.000000,24.500000)}
{pt3dadd(176688.000000,114624.000000,85225.000000,24.500000)}
{pt3dadd(175344.000000,109632.000000,85225.000000,24.500000)}
{pt3dadd(174828.000000,108252.000000,85225.000000,24.500000)}
{pt3dadd(173604.000000,105696.000000,85225.000000,24.500000)}
{pt3dadd(172452.000000,103020.000000,85225.000000,24.500000)}
{pt3dadd(171120.000000,100332.000000,85225.000000,24.500000)}
{pt3dadd(168756.000000,97272.000000,85225.000000,24.500000)}
{pt3dadd(167844.000000,94104.000000,85225.000000,24.500000)}
{pt3dadd(170208.000000,92796.000000,85225.000000,24.500000)}
{pt3dadd(171960.000000,91452.000000,85225.000000,24.500000)}
{pt3dadd(181368.000000,106272.000000,100225.000000,24.500000)}
{pt3dadd(184884.000000,107604.000000,100225.000000,24.500000)}
{pt3dadd(186768.000000,111900.000000,100225.000000,24.500000)}
{pt3dadd(190440.000000,115296.000000,100225.000000,24.500000)}
{pt3dadd(194736.000000,119580.000000,100225.000000,24.500000)}
{pt3dadd(197760.000000,125100.000000,100225.000000,24.500000)}
{pt3dadd(199632.000000,131784.000000,100225.000000,24.500000)}
{pt3dadd(199968.000000,138408.000000,100225.000000,24.500000)}
{pt3dadd(201552.000000,145488.000000,100225.000000,24.500000)}
{pt3dadd(203088.000000,152784.000000,100225.000000,24.500000)}
{pt3dadd(203148.000000,160452.000000,100225.000000,24.500000)}
{pt3dadd(203340.000000,165720.000000,100225.000000,24.500000)}
{pt3dadd(201588.000000,171552.000000,100225.000000,24.500000)}
{pt3dadd(199860.000000,176580.000000,100225.000000,24.500000)}
{pt3dadd(198408.000000,181944.000000,100225.000000,24.500000)}
{pt3dadd(196968.000000,187776.000000,100225.000000,24.500000)}
{pt3dadd(194136.000000,193548.000000,100225.000000,24.500000)}
{pt3dadd(194940.000000,195792.000000,100225.000000,24.500000)}
{pt3dadd(194988.000000,198084.000000,100225.000000,24.500000)}
{pt3dadd(194256.000000,201684.000000,100225.000000,24.500000)}
{pt3dadd(194232.000000,204588.000000,100225.000000,24.500000)}
{pt3dadd(193308.000000,207288.000000,100225.000000,24.500000)}
{pt3dadd(189192.000000,208212.000000,100225.000000,24.500000)}
{pt3dadd(185064.000000,209172.000000,100225.000000,24.500000)}
{pt3dadd(183528.000000,212724.000000,100225.000000,24.500000)}
{pt3dadd(180612.000000,215352.000000,100225.000000,24.500000)}
{pt3dadd(177732.000000,218040.000000,100225.000000,24.500000)}
{pt3dadd(174108.000000,219804.000000,100225.000000,24.500000)}
{pt3dadd(173700.000000,217920.000000,100225.000000,24.500000)}
{pt3dadd(173964.000000,215544.000000,100225.000000,24.500000)}
{pt3dadd(174708.000000,213048.000000,100225.000000,24.500000)}
{pt3dadd(175476.000000,210552.000000,100225.000000,24.500000)}
{pt3dadd(176424.000000,208056.000000,100225.000000,24.500000)}
{pt3dadd(177672.000000,205560.000000,100225.000000,24.500000)}
{pt3dadd(178920.000000,202788.000000,100225.000000,24.500000)}
{pt3dadd(180168.000000,199272.000000,100225.000000,24.500000)}
{pt3dadd(181320.000000,195432.000000,100225.000000,24.500000)}
{pt3dadd(182472.000000,191232.000000,100225.000000,24.500000)}
{pt3dadd(183432.000000,186912.000000,100225.000000,24.500000)}
{pt3dadd(184212.000000,182412.000000,100225.000000,24.500000)}
{pt3dadd(184800.000000,177708.000000,100225.000000,24.500000)}
{pt3dadd(185376.000000,173004.000000,100225.000000,24.500000)}
{pt3dadd(185952.000000,168300.000000,100225.000000,24.500000)}
{pt3dadd(186612.000000,163596.000000,100225.000000,24.500000)}
{pt3dadd(187104.000000,158712.000000,100225.000000,24.500000)}
{pt3dadd(187116.000000,153624.000000,100225.000000,24.500000)}
{pt3dadd(187116.000000,148536.000000,100225.000000,24.500000)}
{pt3dadd(187116.000000,143448.000000,100225.000000,24.500000)}
{pt3dadd(187116.000000,138360.000000,100225.000000,24.500000)}
{pt3dadd(187032.000000,133272.000000,100225.000000,24.500000)}
{pt3dadd(185172.000000,128376.000000,100225.000000,24.500000)}
{pt3dadd(183072.000000,123576.000000,100225.000000,24.500000)}
{pt3dadd(180960.000000,118776.000000,100225.000000,24.500000)}
{pt3dadd(178848.000000,113976.000000,100225.000000,24.500000)}
{pt3dadd(177480.000000,109632.000000,100225.000000,24.500000)}
{pt3dadd(178908.000000,107256.000000,100225.000000,24.500000)}
{pt3dadd(181368.000000,106152.000000,100225.000000,24.500000)}
{pt3dadd(190692.000000,140952.000000,110225.000000,16333.333333)}
{pt3dadd(193020.000000,143964.000000,110225.000000,24.500000)}
{pt3dadd(194400.000000,148332.000000,110225.000000,24.500000)}
{pt3dadd(194724.000000,154320.000000,110225.000000,24.500000)}
{pt3dadd(194736.000000,160644.000000,110225.000000,24.500000)}
{pt3dadd(195756.000000,166056.000000,110225.000000,24.500000)}
{pt3dadd(196068.000000,171708.000000,110225.000000,24.500000)}
{pt3dadd(195072.000000,174036.000000,110225.000000,24.500000)}
{pt3dadd(192624.000000,175320.000000,110225.000000,24.500000)}
{pt3dadd(189852.000000,174996.000000,110225.000000,24.500000)}
{pt3dadd(187440.000000,173424.000000,110225.000000,24.500000)}
{pt3dadd(186804.000000,170772.000000,110225.000000,24.500000)}
{pt3dadd(187236.000000,167616.000000,110225.000000,24.500000)}
{pt3dadd(187620.000000,164448.000000,110225.000000,24.500000)}
{pt3dadd(188100.000000,160452.000000,110225.000000,24.500000)}
{pt3dadd(188580.000000,156324.000000,110225.000000,24.500000)}
{pt3dadd(188964.000000,151920.000000,110225.000000,24.500000)}
{pt3dadd(189348.000000,147228.000000,110225.000000,24.500000)}
{pt3dadd(189732.000000,142524.000000,110225.000000,24.500000)}
{pt3dadd(190668.000000,140688.000000,110225.000000,24.500000)}
