# Supplementary material for: Full reconstruction of large lobula plate tangential cells in Drosophila from a 3D EM dataset
Source: PLoS One. 2018 Nov 28;13(11):e0207828. doi: 10.1371/journal.pone.0207828 (PMC6261601; doi:10.1371/journal.pone.0207828)
Supplement: S1 Dataset — (ZIP) [file pone.0207828.s001.zip › Diameter hoc/plotCompleteSkeletons/vs1_1_0001.hoc]

/* created with convertKnossosNmlToHoc.m */

{create adhoc1}
{access adhoc1}
{nseg = 1}
{strdef color color = "White"}
{pt3dclear()}
{pt3dadd(110595.344407,146192.381206,208975.000000,945.863961)}
{pt3dadd(110550.220742,145875.478414,208758.333333,917.258276)}
{pt3dadd(110664.324267,145426.659947,208291.666667,869.644986)}
{pt3dadd(110987.984589,145147.971321,207775.000000,827.564021)}
{pt3dadd(111423.072968,144997.233280,207241.666667,793.134141)}
{pt3dadd(111593.280423,144966.636653,206758.333333,773.318210)}
{pt3dadd(111761.909155,144558.897011,206291.666667,760.348759)}
{pt3dadd(111505.848354,144259.359799,205825.000000,778.961133)}
{pt3dadd(111798.103434,143935.824685,205341.666667,795.578312)}
{pt3dadd(112017.795229,144019.509711,204858.333333,765.022106)}
{pt3dadd(112331.111035,143611.599604,204375.000000,727.214981)}
{pt3dadd(112364.641109,143785.854997,203875.000000,710.316414)}
{pt3dadd(112592.479328,143394.358694,203391.666667,706.942829)}
{pt3dadd(112989.425718,143877.109903,202891.666667,710.175775)}
{pt3dadd(113168.571012,143547.061948,202391.666667,726.232990)}
{pt3dadd(113344.227278,143529.722752,201841.666667,759.850192)}
{pt3dadd(113548.425085,142996.284370,201308.333333,813.435448)}
{pt3dadd(113834.718649,142944.412560,200775.000000,897.621572)}
{pt3dadd(114164.253174,143092.214019,200241.666667,910.058150)}
{pt3dadd(118321.856895,141715.424749,199791.666667,885.135316)}
{pt3dadd(122202.044064,140023.998843,199375.000000,868.802257)}
{pt3dadd(126439.517232,137803.694224,198925.000000,944.672582)}
{pt3dadd(126951.178771,137393.795688,198225.000000,1087.623105)}
{pt3dadd(127860.682412,136633.903241,197441.666667,1179.757509)}
{pt3dadd(128462.065962,136020.368018,196768.750000,1242.281141)}

{create adhoc2}
{access adhoc2}
{connect adhoc2(1), adhoc1(0)}
{nseg = 1}
{strdef color color = "White"}
{pt3dclear()}
{pt3dadd(128462.065962,136020.368018,196768.750000,1242.281141)}
{pt3dadd(129825.643462,134224.468172,196591.666667,1350.177146)}
{pt3dadd(131409.919575,132824.486844,196291.666667,1468.947046)}
{pt3dadd(132567.885150,131383.381591,195975.000000,1571.423101)}

{create adhoc3}
{access adhoc3}
{connect adhoc3(1), adhoc2(0)}
{nseg = 1}
{strdef color color = "White"}
{pt3dclear()}
{pt3dadd(132567.885150,131383.381591,195975.000000,1571.423101)}
{pt3dadd(133395.168471,131091.917867,195025.000000,1703.042409)}
{pt3dadd(133605.756463,130923.461274,194375.000000,1823.617176)}
{pt3dadd(134026.241648,130861.679874,193841.666667,1952.934817)}
{pt3dadd(134786.788732,131378.000579,193308.333333,2070.844003)}
{pt3dadd(135329.820277,131484.647858,192775.000000,2199.354992)}
{pt3dadd(135542.911363,131753.438675,192241.666667,2305.864435)}
{pt3dadd(137467.649705,131125.120765,191816.666667,2291.026415)}
{pt3dadd(139521.000465,130772.111636,191408.333333,2274.869250)}
{pt3dadd(141584.443571,130399.610577,191000.000000,2243.874065)}
{pt3dadd(141539.282816,130474.678821,190500.000000,2229.036044)}
{pt3dadd(141616.103647,130601.454170,190000.000000,2229.036044)}
{pt3dadd(141876.395427,131015.210980,189500.000000,2229.036044)}
{pt3dadd(142511.719995,131258.943227,189008.333333,2229.036044)}
{pt3dadd(142973.524018,131269.489871,188525.000000,2214.198024)}
{pt3dadd(143605.334662,130968.069863,188050.000000,2182.188988)}
{pt3dadd(143703.552685,131083.441254,187583.333333,2147.334192)}
{pt3dadd(143909.498185,131727.760560,187133.333333,2100.487135)}
{pt3dadd(144227.986542,132427.895058,186691.666667,2080.470360)}
{pt3dadd(144687.547238,132832.482976,186241.666667,2060.453585)}
{pt3dadd(145113.397082,132856.421266,185791.666667,2028.444549)}
{pt3dadd(145214.840859,132752.688839,185350.000000,1981.597492)}
{pt3dadd(145353.836167,132641.269763,184925.000000,2012.829273)}
{pt3dadd(145315.147318,132817.623252,184516.666667,2044.061053)}
{pt3dadd(145390.007311,133016.680640,184108.333333,2075.292834)}
{pt3dadd(145595.768077,133243.191785,183725.000000,2116.431140)}
{pt3dadd(146158.134609,133364.289417,183233.333333,2167.475971)}
{pt3dadd(147783.870061,133786.527980,182941.666667,2228.427328)}
{pt3dadd(149260.539101,134371.112219,182641.666667,2331.294247)}
{pt3dadd(150500.000000,134836.000000,182525.000000,2422.168904)}
{pt3dadd(150604.000000,134984.000000,181991.666667,2525.035822)}
{pt3dadd(150832.000000,135316.000000,181316.666667,2615.910479)}
{pt3dadd(151084.000000,135760.000000,180441.666667,2706.785137)}
{pt3dadd(151272.000000,136292.000000,179650.000000,2799.745530)}
{pt3dadd(151456.000000,136544.000000,178891.666667,2886.927117)}
{pt3dadd(151672.000000,136648.000000,178075.000000,2915.220753)}
{pt3dadd(151924.000000,136736.000000,177300.000000,2949.173118)}
{pt3dadd(152036.000000,137016.000000,176500.000000,2990.670451)}
{pt3dadd(151964.000000,137380.000000,175858.333333,3026.444015)}
{pt3dadd(151902.000000,137586.000000,175525.000000,3054.040764)}

{create adhoc4}
{access adhoc4}
{connect adhoc4(1), adhoc2(0)}
{nseg = 1}
{strdef color color = "White"}
{pt3dclear()}
{pt3dadd(132567.885150,131383.381591,195975.000000,1571.423101)}
{pt3dadd(132513.669550,130718.543198,196608.333333,1624.320675)}
{pt3dadd(131799.020038,129608.755344,197408.333333,1686.197712)}
{pt3dadd(130853.983989,128726.148134,198191.666667,1720.749806)}
{pt3dadd(130026.475323,127676.833098,198958.333333,1728.754263)}
{pt3dadd(125884.025947,128264.830442,199466.666667,1751.446623)}
{pt3dadd(122280.623133,129460.856621,199808.333333,1760.497354)}
{pt3dadd(118542.910381,130478.629862,200075.000000,1702.637142)}
{pt3dadd(118203.308453,130498.197783,200366.666667,1689.010590)}
{pt3dadd(117631.427185,129861.028173,200608.333333,1676.496589)}
{pt3dadd(117206.924433,129687.932341,200850.000000,1649.500973)}
{pt3dadd(116787.232575,129706.710377,201141.666667,1540.405517)}
{pt3dadd(116784.046470,129682.731203,201491.666667,1444.953180)}
{pt3dadd(116758.777226,128552.892273,201966.666667,1422.721841)}
{pt3dadd(117018.250207,126757.000468,202291.666667,1427.011253)}
{pt3dadd(117465.836489,124753.109079,202308.333333,1446.949280)}
{pt3dadd(118539.052608,123007.842533,201643.750000,1434.073242)}

{create adhoc5}
{access adhoc5}
{connect adhoc5(1), adhoc4(0)}
{nseg = 1}
{strdef color color = "White"}
{pt3dclear()}
{pt3dadd(118539.052608,123007.842533,201643.750000,1434.073242)}
{pt3dadd(119763.949247,121239.618400,201708.333333,1452.383424)}
{pt3dadd(121983.994299,119290.584028,201291.666667,1472.321452)}
{pt3dadd(124595.973503,118053.549797,200675.000000,1449.900679)}
{pt3dadd(129590.216882,115779.316691,200008.333333,1349.909817)}
{pt3dadd(133701.912091,113731.951927,199508.333333,1322.503055)}
{pt3dadd(138209.531758,111507.123083,198908.333333,1217.230102)}
{pt3dadd(139984.972580,110401.035194,198041.666667,1189.692553)}
{pt3dadd(141604.959995,109837.597945,196991.666667,1136.841035)}
{pt3dadd(142376.398666,108857.978053,195800.000000,1059.485881)}

{create adhoc6}
{access adhoc6}
{connect adhoc6(1), adhoc5(0)}
{nseg = 1}
{strdef color color = "White"}
{pt3dclear()}
{pt3dadd(142376.398666,108857.978053,195800.000000,1059.485881)}
{pt3dadd(143776.716479,105965.078893,195208.333333,1069.404241)}
{pt3dadd(145479.772682,103070.540438,194943.750000,1049.195663)}

{create adhoc7}
{access adhoc7}
{connect adhoc7(1), adhoc6(0)}
{nseg = 1}
{strdef color color = "White"}
{pt3dclear()}
{pt3dadd(145479.772682,103070.540438,194943.750000,1049.195663)}
{pt3dadd(146111.732485,101770.597463,195791.666667,1014.916210)}
{pt3dadd(146333.223179,100864.219230,196658.333333,983.208284)}
{pt3dadd(146272.113422,99380.209557,197341.666667,952.981241)}
{pt3dadd(146417.357823,98157.510394,197608.333333,871.745806)}
{pt3dadd(146720.751253,96971.382611,197841.666667,773.782494)}
{pt3dadd(147382.665093,95455.617648,198041.666667,703.347598)}
{pt3dadd(147714.129297,94695.769961,198458.333333,663.895634)}
{pt3dadd(148172.791719,93285.014002,198675.000000,759.763668)}
{pt3dadd(148996.433397,93240.119402,198808.333333,724.517826)}
{pt3dadd(150200.709037,92480.389427,198825.000000,696.284595)}
{pt3dadd(151229.605116,91845.248140,198908.333333,672.967076)}
{pt3dadd(151943.069454,90327.836737,198941.666667,662.982462)}
{pt3dadd(152704.916861,89239.975191,198950.000000,644.040485)}

{create adhoc8}
{access adhoc8}
{connect adhoc8(1), adhoc7(0)}
{nseg = 1}
{strdef color color = "White"}
{pt3dclear()}
{pt3dadd(152704.916861,89239.975191,198950.000000,644.040485)}
{pt3dadd(152818.931509,89809.284651,198425.000000,674.904056)}
{pt3dadd(152918.535574,90246.193917,197958.333333,710.755177)}
{pt3dadd(152953.646601,90737.620464,197658.333333,736.628392)}
{pt3dadd(153053.525942,90600.634783,197500.000000,806.563567)}

{create adhoc9}
{access adhoc9}
{connect adhoc9(1), adhoc7(0)}
{nseg = 1}
{strdef color color = "White"}
{pt3dclear()}
{pt3dadd(152704.916861,89239.975191,198950.000000,644.040485)}
{pt3dadd(149234.714292,90267.119074,199366.666667,630.494519)}
{pt3dadd(145899.910116,91208.592449,199691.666667,632.560265)}
{pt3dadd(142474.022438,92688.690736,199933.333333,633.024560)}
{pt3dadd(142800.211676,91693.418422,200233.333333,631.753552)}
{pt3dadd(142953.087134,91584.527562,200516.666667,595.564829)}
{pt3dadd(143161.839096,90583.369081,200733.333333,502.801891)}
{pt3dadd(143466.000108,90229.046411,200900.000000,467.722154)}
{pt3dadd(143803.803572,89488.786714,201033.333333,438.709549)}
{pt3dadd(143820.330771,89070.711609,201200.000000,413.184740)}
{pt3dadd(143990.159309,88687.719383,201416.666667,413.184740)}
{pt3dadd(144310.345303,87892.202082,201625.000000,390.201864)}
{pt3dadd(144929.043120,87168.930818,201841.666667,384.313498)}
{pt3dadd(145270.072429,86953.842269,202050.000000,388.454304)}
{pt3dadd(145499.179350,86782.685990,202308.333333,400.986100)}
{pt3dadd(145752.718537,86095.114348,202575.000000,395.803942)}
{pt3dadd(146217.932248,85200.466748,202875.000000,391.957611)}
{pt3dadd(146601.698383,84621.598192,203191.666667,393.120991)}
{pt3dadd(146789.524325,84886.213557,203491.666667,397.134661)}
{pt3dadd(146482.068535,84764.414132,203766.666667,407.229311)}
{pt3dadd(146257.497762,84583.023434,203991.666667,399.705332)}
{pt3dadd(146080.594246,83696.749581,204258.333333,386.100373)}
{pt3dadd(146291.026686,83168.871092,204525.000000,365.934209)}
{pt3dadd(146386.958978,83058.988021,204791.666667,359.312604)}
{pt3dadd(146422.608186,83363.496243,205016.666667,370.304710)}
{pt3dadd(146466.246347,83247.378132,205225.000000,364.223730)}
{pt3dadd(146726.255979,82751.254058,205433.333333,357.602126)}
{pt3dadd(146995.848344,82373.564302,205650.000000,350.409145)}
{pt3dadd(147260.037454,81849.447237,205850.000000,348.130891)}
{pt3dadd(147409.391046,81250.821136,206050.000000,348.130891)}
{pt3dadd(147575.022073,80539.888550,206241.666667,339.246931)}
{pt3dadd(147652.581942,80190.114601,206433.333333,334.332204)}
{pt3dadd(147833.287387,80293.071743,206616.666667,325.177813)}
{pt3dadd(147988.273659,80738.444173,206791.666667,321.375087)}
{pt3dadd(147988.560322,81051.419867,206983.333333,326.134141)}
{pt3dadd(147625.818814,80680.240303,207183.333333,328.139156)}
{pt3dadd(147220.222935,80271.788848,207391.666667,326.975775)}
{pt3dadd(147006.500653,79930.390469,207600.000000,314.062247)}
{pt3dadd(146876.079769,80170.785687,207800.000000,320.143227)}
{pt3dadd(146793.543786,79802.904705,208025.000000,321.357221)}
{pt3dadd(146394.808270,78795.743489,208216.666667,329.764197)}
{pt3dadd(146011.179176,77160.972492,208400.000000,327.671949)}
{pt3dadd(145852.073223,76069.432301,208408.333333,338.667656)}
{pt3dadd(145955.607689,75145.096723,208466.666667,348.765611)}
{pt3dadd(146005.815617,74581.641973,208483.333333,354.795211)}
{pt3dadd(145632.131214,74337.043114,208641.666667,352.090405)}
{pt3dadd(145305.999961,74146.114874,208800.000000,344.033934)}
{pt3dadd(144555.527631,76609.387927,209000.000000,335.261210)}
{pt3dadd(143945.548878,78284.957157,209208.333333,334.237359)}
{pt3dadd(143192.183174,80973.236716,209391.666667,336.614734)}
{pt3dadd(143157.167296,80370.499485,209566.666667,346.709384)}
{pt3dadd(142928.369234,80206.305552,209741.666667,346.709384)}
{pt3dadd(143017.893253,79644.167973,209875.000000,343.217135)}
{pt3dadd(142985.038472,79457.574615,210033.333333,339.724886)}
{pt3dadd(143153.059258,78899.343643,210175.000000,344.095388)}
{pt3dadd(143104.204507,78254.421140,210358.333333,342.773461)}
{pt3dadd(143052.424641,77792.716884,210525.000000,346.741625)}
{pt3dadd(143121.502334,77568.700904,210700.000000,346.667549)}
{pt3dadd(143075.148229,77860.803773,210866.666667,354.726386)}
{pt3dadd(142997.417844,77575.362068,211058.333333,364.396989)}
{pt3dadd(142755.542142,77572.323695,211291.666667,373.667825)}
{pt3dadd(142569.187776,76722.477478,211550.000000,382.134058)}
{pt3dadd(142419.623989,76838.253117,211687.500000,1000.000000)}

{create adhoc10}
{access adhoc10}
{connect adhoc10(1), adhoc6(0)}
{nseg = 1}
{strdef color color = "White"}
{pt3dclear()}
{pt3dadd(145479.772682,103070.540438,194943.750000,1049.195663)}
{pt3dadd(146505.131406,101906.442414,194441.666667,1068.263434)}
{pt3dadd(147144.321690,102127.661998,194116.666667,1133.594768)}
{pt3dadd(147763.267409,102478.862244,193733.333333,1192.813729)}
{pt3dadd(148569.477291,102541.291868,193533.333333,1242.806891)}
{pt3dadd(149758.643996,102264.683535,193408.333333,1213.081127)}
{pt3dadd(151100.002899,103063.663933,193350.000000,1296.998204)}
{pt3dadd(152265.464897,103499.897380,193100.000000,1257.546241)}
{pt3dadd(152557.199969,103948.503978,192775.000000,1188.360842)}
{pt3dadd(152704.711296,103478.802562,192466.666667,1174.210336)}
{pt3dadd(152920.630875,103977.832903,192158.333333,1167.567775)}
{pt3dadd(153084.376063,103706.110310,191891.666667,1191.748324)}
{pt3dadd(154865.399513,103477.434465,191708.333333,1185.578304)}
{pt3dadd(156431.422540,102721.393861,191516.666667,1227.503364)}
{pt3dadd(158287.774976,102663.030350,191450.000000,1200.396001)}

{create adhoc11}
{access adhoc11}
{connect adhoc11(1), adhoc5(0)}
{nseg = 1}
{strdef color color = "White"}
{pt3dclear()}
{pt3dadd(142376.398666,108857.978053,195800.000000,1059.485881)}
{pt3dadd(142434.100915,110809.289897,195558.333333,1052.959071)}
{pt3dadd(142731.369736,111415.248576,195191.666667,1003.843796)}
{pt3dadd(143080.065816,112059.481198,194983.333333,870.254943)}
{pt3dadd(143371.776753,112359.080800,194750.000000,823.597376)}
{pt3dadd(143577.436109,112530.212499,194525.000000,692.927427)}
{pt3dadd(143822.156782,112744.619848,194300.000000,555.847681)}
{pt3dadd(144202.659820,112646.086059,194075.000000,484.423355)}
{pt3dadd(144478.390705,112943.485114,193850.000000,486.904155)}
{pt3dadd(144702.696024,113209.546631,193616.666667,489.182409)}
{pt3dadd(144832.459772,113416.327752,193383.333333,491.663208)}
{pt3dadd(144966.171589,113522.756582,193150.000000,476.620452)}
{pt3dadd(144984.993836,113608.680540,192916.666667,457.252411)}
{pt3dadd(144948.763133,113399.333404,192683.333333,440.872286)}
{pt3dadd(145145.341060,112974.064620,192475.000000,418.161861)}
{pt3dadd(145409.617386,112626.967251,192341.666667,410.310544)}
{pt3dadd(145809.274452,112577.111086,192241.666667,440.585362)}
{pt3dadd(146065.042160,113339.695947,192166.666667,470.860180)}
{pt3dadd(146046.341541,113205.789525,192041.666667,497.495465)}
{pt3dadd(146444.005654,113730.668586,191950.000000,552.502300)}
{pt3dadd(146943.940336,113164.461249,191841.666667,619.381396)}
{pt3dadd(147888.719320,112753.738579,191766.666667,660.208890)}
{pt3dadd(148675.018404,112125.276579,191741.666667,697.702993)}
{pt3dadd(149568.693897,111915.301054,191708.333333,720.173747)}
{pt3dadd(151966.918604,112208.113346,191666.666667,726.739406)}
{pt3dadd(153887.116486,111977.999350,191483.333333,767.554846)}
{pt3dadd(155481.259536,111774.698268,191216.666667,808.310012)}
{pt3dadd(155375.313562,111067.596106,190908.333333,865.445600)}
{pt3dadd(155306.477892,110830.560389,190633.333333,913.814830)}
{pt3dadd(155341.679243,111056.326701,190433.333333,912.321397)}
{pt3dadd(155311.776273,111350.784462,190337.500000,910.401270)}

{create adhoc12}
{access adhoc12}
{connect adhoc12(1), adhoc4(0)}
{nseg = 1}
{strdef color color = "White"}
{pt3dclear()}
{pt3dadd(118539.052608,123007.842533,201643.750000,1434.073242)}
{pt3dadd(118616.184342,122836.323129,201000.000000,1431.917690)}
{pt3dadd(118739.999225,122620.746891,200512.500000,1372.278964)}

{create adhoc13}
{access adhoc13}
{connect adhoc13(1), adhoc1(0)}
{nseg = 1}
{strdef color color = "White"}
{pt3dclear()}
{pt3dadd(128462.065962,136020.368018,196768.750000,1242.281141)}
{pt3dadd(128051.209553,136607.303726,196408.333333,1129.902290)}
{pt3dadd(127731.364063,137297.309457,196150.000000,978.017928)}
{pt3dadd(127561.720312,137847.066394,195891.666667,779.277796)}
{pt3dadd(127494.664867,137924.041814,195633.333333,647.486258)}
{pt3dadd(127549.982217,138220.650881,195366.666667,595.115826)}
{pt3dadd(127695.011446,138071.677031,195100.000000,536.196556)}
{pt3dadd(127581.305901,138122.756017,194825.000000,529.581591)}
{pt3dadd(127479.950431,137874.474515,194550.000000,519.003522)}
{pt3dadd(127419.756179,138026.910800,194275.000000,526.854839)}
{pt3dadd(127466.868084,137970.188045,194000.000000,541.479059)}
{pt3dadd(127552.671447,138210.920022,193733.333333,539.976991)}
{pt3dadd(127661.735959,137967.290726,193466.666667,553.577496)}
{pt3dadd(127827.002772,138196.596455,193200.000000,556.780528)}
{pt3dadd(128072.944798,137902.786372,192941.666667,569.292969)}
{pt3dadd(128286.980295,137811.437718,192683.333333,573.256074)}
{pt3dadd(128583.297632,137402.472350,192391.666667,576.895607)}
{pt3dadd(128640.646406,137036.870119,192091.666667,580.535140)}
{pt3dadd(130828.123671,137078.833560,191825.000000,576.895607)}
{pt3dadd(132963.492989,136968.330056,191633.333333,569.292969)}
{pt3dadd(135220.986197,137094.234069,191441.666667,558.347947)}
{pt3dadd(135151.626312,136933.572941,191225.000000,536.323274)}
{pt3dadd(135005.144681,136634.461404,190983.333333,519.943149)}
{pt3dadd(134786.472881,136190.677953,190750.000000,491.843591)}
{pt3dadd(134717.954788,135904.758958,190516.666667,478.029005)}
{pt3dadd(134680.209910,135563.309206,190266.666667,457.862841)}
{pt3dadd(134667.318127,135243.885362,190025.000000,443.189486)}
{pt3dadd(134793.686239,134637.916077,189800.000000,414.496902)}
{pt3dadd(135123.263745,134415.825444,189583.333333,385.804317)}
{pt3dadd(135579.169618,134106.101347,189358.333333,357.268301)}
{pt3dadd(136060.360647,134161.586986,189125.000000,334.303369)}
{pt3dadd(136520.444743,133807.700533,188900.000000,313.213423)}
{pt3dadd(136935.722257,133682.874562,188691.666667,293.888024)}
{pt3dadd(137330.934759,133148.602449,188491.666667,287.999659)}
{pt3dadd(137638.804032,133326.217693,188300.000000,304.678028)}
{pt3dadd(137946.494916,133066.665933,188091.666667,319.351383)}
{pt3dadd(138416.180678,132777.025403,187866.666667,329.885206)}
{pt3dadd(138929.186608,132729.463973,187641.666667,335.914806)}
{pt3dadd(139425.455355,132591.912058,187425.000000,334.974547)}
{pt3dadd(139519.010489,132804.782040,187216.666667,326.458189)}
{pt3dadd(139800.990599,132048.580249,186991.666667,328.222737)}
{pt3dadd(139996.876868,132273.444130,186758.333333,340.081934)}
{pt3dadd(140355.689546,132249.948638,186516.666667,353.158936)}
{pt3dadd(140813.853337,132349.986077,186308.333333,363.253586)}
{pt3dadd(141281.548600,131917.470268,186133.333333,372.524052)}
{pt3dadd(141847.237200,131624.357704,186000.000000,380.029970)}
{pt3dadd(142147.181834,131558.830204,185850.000000,396.863358)}
{pt3dadd(142456.981759,131942.547149,185691.666667,423.030757)}
{pt3dadd(142603.302955,131515.685374,185533.333333,443.858673)}
{pt3dadd(142823.174987,131563.765018,185400.000000,485.082957)}
{pt3dadd(143262.384104,130670.447413,185241.666667,532.652780)}
{pt3dadd(143736.226550,130441.831537,185050.000000,591.957678)}
{pt3dadd(143990.975536,130350.904667,184808.333333,664.027546)}
{pt3dadd(144023.236887,130512.879869,184558.333333,723.332444)}
{pt3dadd(143947.055790,130471.698324,184291.666667,772.542692)}
{pt3dadd(144119.011050,129891.533413,184025.000000,817.735140)}
{pt3dadd(144197.188091,129437.331726,183750.000000,851.530575)}
{pt3dadd(144631.976869,129091.553059,183475.000000,894.530045)}
{pt3dadd(144878.674208,129123.519116,183200.000000,946.129409)}
{pt3dadd(145036.706339,129154.533195,182925.000000,981.141127)}
{pt3dadd(145065.909656,129577.083153,182683.333333,997.511540)}
{pt3dadd(144996.808652,129628.668328,182562.500000,1028.475394)}
