# Supplementary material for: Full reconstruction of large lobula plate tangential cells in Drosophila from a 3D EM dataset
Source: PLoS One. 2018 Nov 28;13(11):e0207828. doi: 10.1371/journal.pone.0207828 (PMC6261601; doi:10.1371/journal.pone.0207828)
Supplement: S1 Dataset — (ZIP) [file pone.0207828.s001.zip › Diameter hoc/plotCompleteSkeletons/vs2_1_0001.hoc]

/* created with convertKnossosNmlToHoc.m */

{create adhoc1}
{access adhoc1}
{nseg = 1}
{strdef color color = "White"}
{pt3dclear()}
{pt3dadd(103875.306907,157966.173429,225912.500000,1000.000000)}
{pt3dadd(103841.856160,157959.680091,225850.000000,703.638952)}
{pt3dadd(103703.202605,158345.556484,225683.333333,758.265400)}
{pt3dadd(103736.216654,158350.837997,225483.333333,801.966559)}
{pt3dadd(103719.157320,158510.169482,225216.666667,837.722052)}
{pt3dadd(103661.521011,158527.829809,224916.666667,876.373736)}
{pt3dadd(103560.147103,158247.684832,224625.000000,900.904756)}
{pt3dadd(103534.260111,157823.472892,224366.666667,934.277723)}
{pt3dadd(103606.180520,157243.952573,224141.666667,965.909577)}
{pt3dadd(103637.919940,156715.197805,223900.000000,1001.476544)}
{pt3dadd(103734.893083,156398.126195,223666.666667,981.209450)}
{pt3dadd(103943.301368,156144.879926,223433.333333,943.703164)}
{pt3dadd(104158.434399,156134.444265,223200.000000,881.806229)}
{pt3dadd(104464.287242,156219.178505,222933.333333,826.515002)}
{pt3dadd(104760.298010,156183.528975,222725.000000,777.304753)}
{pt3dadd(105048.534489,156392.177234,222533.333333,729.937569)}
{pt3dadd(105635.099154,156148.480085,222375.000000,658.704395)}
{pt3dadd(106211.072985,156101.626406,222183.333333,617.412095)}
{pt3dadd(106871.030820,156123.053101,222000.000000,572.448728)}
{pt3dadd(106926.698762,156149.815721,221825.000000,535.659612)}
{pt3dadd(107001.575123,156189.264590,221666.666667,516.504247)}
{pt3dadd(106932.940482,155964.870217,221516.666667,534.095663)}
{pt3dadd(107074.898577,155938.718320,221383.333333,538.999207)}
{pt3dadd(107039.652387,155726.605534,221183.333333,563.769485)}
{pt3dadd(107119.956533,155366.870165,221008.333333,601.275771)}
{pt3dadd(107316.307973,155106.669725,220841.666667,637.410809)}
{pt3dadd(107699.183221,155416.903304,220716.666667,656.362071)}
{pt3dadd(107938.222944,155401.839015,220550.000000,665.592821)}
{pt3dadd(108067.517033,155699.632352,220366.666667,661.953287)}
{pt3dadd(108137.908070,155044.827966,220200.000000,671.627068)}
{pt3dadd(108371.547503,154996.266531,220033.333333,661.912649)}
{pt3dadd(108521.193355,154481.827709,219866.666667,657.409465)}
{pt3dadd(108908.795560,154608.216014,219683.333333,657.409465)}
{pt3dadd(109205.542770,154555.331766,219466.666667,662.313009)}
{pt3dadd(109549.334068,154627.958981,219183.333333,621.679236)}
{pt3dadd(109667.571001,154796.086309,218891.666667,588.573651)}
{pt3dadd(109833.314436,154753.219553,218600.000000,552.903609)}
{pt3dadd(109700.229174,154697.959684,218316.666667,525.787036)}
{pt3dadd(109523.686749,154151.141430,218066.666667,522.890437)}
{pt3dadd(109203.772333,153542.432233,217843.750000,522.890437)}

{create adhoc2}
{access adhoc2}
{connect adhoc2(1), adhoc1(0)}
{nseg = 1}
{strdef color color = "White"}
{pt3dclear()}
{pt3dadd(109203.772333,153542.432233,217843.750000,522.890437)}
{pt3dadd(109420.938444,153869.777912,217633.333333,533.158705)}
{pt3dadd(109762.858710,154025.032430,217350.000000,547.837762)}
{pt3dadd(110415.344332,154617.688963,217041.666667,594.513734)}
{pt3dadd(110613.452841,154348.558229,216791.666667,650.254236)}
{pt3dadd(110736.569018,154117.369025,216500.000000,691.947105)}
{pt3dadd(110860.712228,153654.096847,216150.000000,715.583809)}
{pt3dadd(111132.989642,153640.480178,215733.333333,683.429188)}
{pt3dadd(111476.562454,154100.338709,215291.666667,667.947574)}
{pt3dadd(111590.184839,154333.255442,214891.666667,652.465961)}
{pt3dadd(111849.601155,154349.593761,214416.666667,642.751542)}
{pt3dadd(111847.272368,153977.595927,213958.333333,653.329611)}
{pt3dadd(111975.583739,153809.277305,213441.666667,676.988160)}
{pt3dadd(111897.263239,153769.301017,212950.000000,706.721594)}
{pt3dadd(112024.465890,153227.567587,212450.000000,711.625139)}
{pt3dadd(112047.997531,152968.031929,211891.666667,711.625139)}
{pt3dadd(112040.684446,152452.779834,211341.666667,711.625139)}
{pt3dadd(111644.083622,152464.623673,210758.333333,714.470344)}
{pt3dadd(111089.774949,151731.944739,210233.333333,719.373888)}
{pt3dadd(110635.502631,151452.424397,209816.666667,746.679722)}
{pt3dadd(110647.208894,151545.266190,209516.666667,769.427616)}
{pt3dadd(111025.640772,149826.582596,209325.000000,784.909230)}
{pt3dadd(111362.641096,147710.737495,209100.000000,800.390843)}
{pt3dadd(111710.394392,145536.146541,208858.333333,814.608445)}
{pt3dadd(111964.411768,145438.812635,208575.000000,840.370342)}
{pt3dadd(112420.005813,145955.749886,208291.666667,846.976873)}
{pt3dadd(112810.157977,145772.787302,207933.333333,840.909740)}
{pt3dadd(113107.852625,145657.584550,207466.666667,855.161561)}
{pt3dadd(113248.770983,145307.205014,206916.666667,869.413382)}
{pt3dadd(113193.181591,145199.378562,206283.333333,901.288517)}
{pt3dadd(113004.325365,144966.473784,205675.000000,924.989401)}
{pt3dadd(113053.315328,144670.348388,205050.000000,965.049224)}
{pt3dadd(113492.056666,144436.560352,204500.000000,1005.825333)}
{pt3dadd(114127.679235,144136.549697,203900.000000,1064.192857)}
{pt3dadd(114569.850723,143587.397581,203216.666667,1113.153653)}
{pt3dadd(114800.384036,143036.352549,202391.666667,1153.213476)}
{pt3dadd(115429.090948,142587.311574,201516.666667,1198.176843)}
{pt3dadd(116090.374746,142072.399526,200658.333333,1226.279287)}
{pt3dadd(116760.408782,141938.592490,200058.333333,1219.672756)}
{pt3dadd(120575.985401,140273.081247,199691.666667,1243.373640)}
{pt3dadd(124478.140748,138527.948095,199483.333333,1261.007390)}
{pt3dadd(128580.892874,136900.410120,199225.000000,1286.815393)}
{pt3dadd(129094.197618,136300.625663,198866.666667,1310.573333)}
{pt3dadd(129573.351201,136420.617368,198483.333333,1327.648557)}
{pt3dadd(129988.740571,135632.743497,198066.666667,1256.625125)}
{pt3dadd(130289.995635,135623.101961,197600.000000,1205.271677)}
{pt3dadd(130628.220870,135059.326430,197116.666667,1163.204051)}
{pt3dadd(131048.131444,135345.117541,196625.000000,1117.525333)}
{pt3dadd(131491.356511,135618.441587,196175.000000,1079.103058)}
{pt3dadd(131383.482296,135928.580928,195743.750000,1047.490640)}

{create adhoc3}
{access adhoc3}
{connect adhoc3(1), adhoc2(0)}
{nseg = 1}
{strdef color color = "White"}
{pt3dclear()}
{pt3dadd(131383.482296,135928.580928,195743.750000,1047.490640)}
{pt3dadd(129982.892234,136752.595081,195725.000000,959.314082)}
{pt3dadd(128518.892234,137188.595081,195725.000000,901.408595)}
{pt3dadd(127538.892234,137448.595081,195725.000000,871.828981)}
{pt3dadd(126755.238757,137850.551186,195691.666667,825.910330)}
{pt3dadd(126128.044280,138428.346639,195525.000000,732.677269)}
{pt3dadd(125116.060661,139267.917056,195241.666667,576.852085)}
{pt3dadd(124103.730519,140057.531367,194991.666667,506.818517)}
{pt3dadd(122790.495368,140823.500777,194808.333333,533.110395)}
{pt3dadd(122158.969589,141206.121855,194566.666667,557.103151)}
{pt3dadd(121917.231518,141679.647720,194175.000000,559.871317)}
{pt3dadd(122198.529696,141781.511098,193766.666667,547.545595)}
{pt3dadd(122367.612524,141976.681863,193575.000000,549.739302)}

{create adhoc4}
{access adhoc4}
{connect adhoc4(1), adhoc2(0)}
{nseg = 1}
{strdef color color = "White"}
{pt3dclear()}
{pt3dadd(131383.482296,135928.580928,195743.750000,1047.490640)}
{pt3dadd(132368.029621,135427.714915,195300.000000,1079.103058)}
{pt3dadd(132855.987890,135066.307343,194841.666667,1137.816592)}
{pt3dadd(133334.899998,135103.223042,194350.000000,1167.775311)}
{pt3dadd(133755.404155,135126.467219,193858.333333,1210.147688)}
{pt3dadd(134201.826594,135440.338730,193383.333333,1268.054801)}
{pt3dadd(134525.349035,135782.865123,192958.333333,1325.100472)}
{pt3dadd(135218.660853,136146.157246,192533.333333,1316.199499)}
{pt3dadd(135891.054762,135696.029186,192158.333333,1307.298526)}
{pt3dadd(136558.386613,135294.352664,191858.333333,1283.540586)}
{pt3dadd(138763.329250,134839.598318,191683.333333,1266.465362)}
{pt3dadd(140975.105755,135068.106868,191541.666667,1270.298694)}
{pt3dadd(143130.951193,135193.673471,191333.333333,1270.298694)}
{pt3dadd(143257.953643,135015.843843,191091.666667,1253.223470)}
{pt3dadd(143266.586553,134386.403940,190791.666667,1234.021999)}
{pt3dadd(143330.029433,133908.680356,190508.333333,1205.919555)}
{pt3dadd(143497.155273,133340.497730,190216.666667,1205.919555)}
{pt3dadd(143703.350542,133392.289532,189933.333333,1202.086223)}
{pt3dadd(144284.326093,133167.430435,189591.666667,1191.059003)}
{pt3dadd(144791.503379,133448.018742,189241.666667,1182.884752)}
{pt3dadd(145462.011706,133381.304943,188866.666667,1174.710500)}
{pt3dadd(145770.431041,133353.374675,188541.666667,1177.430443)}
{pt3dadd(146202.640300,133227.101050,188191.666667,1177.430443)}
{pt3dadd(146494.706974,133035.149242,187858.333333,1185.604695)}
{pt3dadd(146884.137882,133046.136732,187483.333333,1167.970944)}
{pt3dadd(147010.222213,133043.312827,187041.666667,1176.145196)}
{pt3dadd(147244.542828,133050.620237,186608.333333,1247.040895)}
{pt3dadd(147573.360563,133205.067145,186158.333333,1339.751367)}
{pt3dadd(148412.532428,133008.934749,185850.000000,1430.364960)}
{pt3dadd(149079.449541,132833.484141,185425.000000,1645.453291)}
{pt3dadd(149691.148677,132513.275637,185025.000000,1708.719347)}
{pt3dadd(150029.709177,131637.462552,184562.500000,1764.549191)}

{create adhoc5}
{access adhoc5}
{connect adhoc5(1), adhoc4(0)}
{nseg = 1}
{strdef color color = "White"}
{pt3dclear()}
{pt3dadd(150029.709177,131637.462552,184562.500000,1764.549191)}
{pt3dadd(150186.851853,131749.058081,183983.333333,1861.571668)}
{pt3dadd(150436.246146,131385.576209,183441.666667,1962.945940)}
{pt3dadd(151197.374673,131335.258446,182925.000000,2067.915741)}

{create adhoc6}
{access adhoc6}
{connect adhoc6(1), adhoc5(0)}
{nseg = 1}
{strdef color color = "White"}
{pt3dclear()}
{pt3dadd(151197.374673,131335.258446,182925.000000,2067.915741)}
{pt3dadd(150756.360150,131203.221166,182725.000000,2128.458176)}

{create adhoc7}
{access adhoc7}
{connect adhoc7(1), adhoc5(0)}
{nseg = 1}
{strdef color color = "White"}
{pt3dclear()}
{pt3dadd(151197.374673,131335.258446,182925.000000,2067.915741)}
{pt3dadd(152309.184056,131804.899187,182375.000000,2177.655497)}
{pt3dadd(153176.000000,132108.000000,181675.000000,2280.753587)}
{pt3dadd(153304.000000,132360.000000,180866.666667,2434.245459)}
{pt3dadd(153508.000000,132800.000000,180083.333333,2537.218477)}
{pt3dadd(153852.000000,133420.000000,178766.666667,2629.900777)}
{pt3dadd(154216.000000,134156.000000,177041.666667,2677.305472)}
{pt3dadd(154452.000000,134574.000000,176037.500000,2722.266507)}

{create adhoc8}
{access adhoc8}
{connect adhoc8(1), adhoc4(0)}
{nseg = 1}
{strdef color color = "White"}
{pt3dclear()}
{pt3dadd(150029.709177,131637.462552,184562.500000,1764.549191)}
{pt3dadd(150479.165679,130752.541701,184891.666667,1727.450105)}
{pt3dadd(151026.763645,129202.504090,185308.333333,1686.228897)}
{pt3dadd(151237.976865,128867.903245,185791.666667,1481.259603)}
{pt3dadd(151212.773291,128435.487703,186250.000000,1415.420677)}
{pt3dadd(151031.910439,128317.651436,186733.333333,1400.293481)}
{pt3dadd(151108.934725,127883.089087,187233.333333,1418.840765)}
{pt3dadd(151027.827359,127384.113302,187816.666667,1442.598705)}
{pt3dadd(150891.513099,126796.991000,188391.666667,1416.728583)}
{pt3dadd(150653.843596,126307.040639,188941.666667,1405.484737)}
{pt3dadd(150374.651390,125755.011939,189500.000000,1405.823991)}
{pt3dadd(150676.605793,125574.439427,190041.666667,1396.923018)}
{pt3dadd(151000.993761,125012.859950,190616.666667,1388.022046)}
{pt3dadd(151478.771549,124897.152305,191125.000000,1379.847794)}
{pt3dadd(149297.253879,124896.765876,191550.000000,1403.605734)}
{pt3dadd(146929.486290,124708.284984,191983.333333,1427.363674)}
{pt3dadd(144895.200194,124568.891138,192400.000000,1444.438898)}
{pt3dadd(144934.063500,124132.889993,192891.666667,1444.438898)}
{pt3dadd(145280.393370,123868.442383,193333.333333,1401.493552)}
{pt3dadd(145406.719305,123107.094168,193858.333333,1384.418327)}
{pt3dadd(145697.807908,122298.679347,194400.000000,1384.418327)}
{pt3dadd(145904.572986,121410.948457,194966.666667,1410.288449)}
{pt3dadd(146257.629816,120839.485925,195475.000000,1416.493813)}
{pt3dadd(146603.620716,120083.403910,195975.000000,1419.762186)}
{pt3dadd(146889.323091,119683.086421,196400.000000,1414.739585)}
{pt3dadd(147083.382031,118856.765639,196816.666667,1406.513224)}
{pt3dadd(147251.748322,118571.819757,197200.000000,1399.145881)}
{pt3dadd(146691.857253,116792.255766,197531.250000,1288.717505)}

{create adhoc9}
{access adhoc9}
{connect adhoc9(1), adhoc8(0)}
{nseg = 1}
{strdef color color = "White"}
{pt3dclear()}
{pt3dadd(146691.857253,116792.255766,197531.250000,1288.717505)}
{pt3dadd(145481.173397,114541.571098,197191.666667,1228.665559)}
{pt3dadd(144525.237976,112181.526677,196758.333333,1156.193084)}
{pt3dadd(144743.930736,111329.582424,196300.000000,1061.752441)}
{pt3dadd(145085.161856,110829.285545,195925.000000,1002.266107)}
{pt3dadd(145824.436955,109846.579481,195481.250000,934.655071)}

{create adhoc10}
{access adhoc10}
{connect adhoc10(1), adhoc9(0)}
{nseg = 1}
{strdef color color = "White"}
{pt3dclear()}
{pt3dadd(145824.436955,109846.579481,195481.250000,934.655071)}
{pt3dadd(145761.835828,110090.320396,194916.666667,808.757905)}
{pt3dadd(146250.657453,109850.014103,194300.000000,718.797178)}
{pt3dadd(146936.094036,110090.439927,193800.000000,694.317969)}
{pt3dadd(147814.991765,110292.441744,193433.333333,632.991956)}
{pt3dadd(148858.552131,110429.196313,193216.666667,587.265084)}
{pt3dadd(149754.622255,110075.785902,193025.000000,554.895313)}
{pt3dadd(150411.811514,109817.638041,192741.666667,499.670000)}
{pt3dadd(150743.170837,109992.908084,192433.333333,464.533180)}
{pt3dadd(150888.091983,110141.633592,192250.000000,448.108836)}

{create adhoc11}
{access adhoc11}
{connect adhoc11(1), adhoc9(0)}
{nseg = 1}
{strdef color color = "White"}
{pt3dclear()}
{pt3dadd(145824.436955,109846.579481,195481.250000,934.655071)}
{pt3dadd(147091.889102,108270.220410,195616.666667,824.046782)}
{pt3dadd(148204.351989,106937.326021,195700.000000,785.733762)}
{pt3dadd(149185.766205,106335.972294,196033.333333,784.778476)}
{pt3dadd(149666.362818,106396.459234,196158.333333,817.596510)}
{pt3dadd(150702.029349,105773.783444,195956.250000,838.576636)}

{create adhoc12}
{access adhoc12}
{connect adhoc12(1), adhoc11(0)}
{nseg = 1}
{strdef color color = "White"}
{pt3dclear()}
{pt3dadd(150702.029349,105773.783444,195956.250000,838.576636)}
{pt3dadd(151175.099628,105700.386169,195250.000000,805.780493)}
{pt3dadd(151644.437783,105319.381649,194862.500000,738.334637)}

{create adhoc13}
{access adhoc13}
{connect adhoc13(1), adhoc11(0)}
{nseg = 1}
{strdef color color = "White"}
{pt3dclear()}
{pt3dadd(150702.029349,105773.783444,195956.250000,838.576636)}
{pt3dadd(150756.423318,104802.395210,196025.000000,825.829459)}
{pt3dadd(151181.766291,103703.790009,195991.666667,788.283827)}
{pt3dadd(151119.109264,102621.184807,195958.333333,796.702990)}
{pt3dadd(150744.452237,101302.579606,195925.000000,813.304306)}
{pt3dadd(150184.797854,99748.947449,195941.666667,841.467322)}
{pt3dadd(149840.196238,98225.493231,196041.666667,822.353920)}
{pt3dadd(150143.594621,96970.039014,196141.666667,778.791344)}
{pt3dadd(150334.252405,95458.786990,196425.000000,767.953928)}
{pt3dadd(150631.889715,94262.885405,196741.666667,798.977847)}
{pt3dadd(150757.279344,93509.155408,197233.333333,842.745660)}
{pt3dadd(150933.187796,93277.769581,197437.500000,899.018563)}

{create adhoc14}
{access adhoc14}
{connect adhoc14(1), adhoc8(0)}
{nseg = 1}
{strdef color color = "White"}
{pt3dclear()}
{pt3dadd(146691.857253,116792.255766,197531.250000,1288.717505)}
{pt3dadd(147121.471853,118028.191811,198275.000000,1278.473032)}
{pt3dadd(146798.640978,117622.206563,198925.000000,1283.958533)}
{pt3dadd(143263.266535,119068.034166,199500.000000,1313.001522)}
{pt3dadd(140115.966738,120071.967012,199775.000000,1340.754703)}
{pt3dadd(136746.449105,121396.714175,200050.000000,1369.850247)}
{pt3dadd(136697.322828,121021.124863,200358.333333,1379.522982)}
{pt3dadd(136564.613372,120861.998829,200550.000000,1326.088195)}

{create adhoc15}
{access adhoc15}
{connect adhoc15(1), adhoc1(0)}
{nseg = 1}
{strdef color color = "White"}
{pt3dclear()}
{pt3dadd(109203.772333,153542.432233,217843.750000,522.890437)}
{pt3dadd(109045.830671,153063.677460,217825.000000,518.770914)}
{pt3dadd(108710.160289,152580.309404,217800.000000,507.833420)}
{pt3dadd(108226.160289,152196.309404,217800.000000,511.263286)}
{pt3dadd(107642.160289,151692.309404,217800.000000,494.449269)}
{pt3dadd(107338.160289,151448.309404,217800.000000,438.156379)}
