# Supplementary material for: Full reconstruction of large lobula plate tangential cells in Drosophila from a 3D EM dataset
Source: PLoS One. 2018 Nov 28;13(11):e0207828. doi: 10.1371/journal.pone.0207828 (PMC6261601; doi:10.1371/journal.pone.0207828)
Supplement: S1 Dataset — (ZIP) [file pone.0207828.s001.zip › Diameter hoc/plotCompleteSkeletons/vs3_1_0001.hoc]

/* created with convertKnossosNmlToHoc.m */

{create adhoc1}
{access adhoc1}
{nseg = 1}
{strdef color color = "White"}
{pt3dclear()}
{pt3dadd(144253.248951,121313.142935,198550.000000,1408.265913)}
{pt3dadd(144180.978676,120792.099499,198025.000000,1316.393468)}

{create adhoc2}
{access adhoc2}
{connect adhoc2(1), adhoc1(0)}
{nseg = 1}
{strdef color color = "White"}
{pt3dclear()}
{pt3dadd(144180.978676,120792.099499,198025.000000,1316.393468)}
{pt3dadd(144231.297738,121674.318818,197191.666667,1453.065144)}
{pt3dadd(143926.084025,122116.054509,196525.000000,1585.947393)}
{pt3dadd(143601.016627,122562.180533,195958.333333,1691.436860)}
{pt3dadd(143229.799857,123295.742994,195408.333333,1712.799032)}
{pt3dadd(143139.651984,123915.949607,194858.333333,1786.227721)}
{pt3dadd(143022.029028,124703.164325,194325.000000,1880.098988)}
{pt3dadd(142759.096552,125325.949861,193775.000000,1880.098988)}
{pt3dadd(142424.447028,125364.367913,193241.666667,1899.687289)}
{pt3dadd(142099.822163,125857.243494,192725.000000,1915.401120)}
{pt3dadd(141682.260232,126534.258146,192258.333333,1873.395672)}
{pt3dadd(143388.762651,126604.711099,191825.000000,1812.309926)}
{pt3dadd(144718.486969,126513.223345,191241.666667,1758.421494)}
{pt3dadd(146082.977479,127007.028587,190575.000000,1723.192034)}
{pt3dadd(145499.710094,128896.656634,189975.000000,1703.612262)}

{create adhoc3}
{access adhoc3}
{connect adhoc3(1), adhoc2(0)}
{nseg = 1}
{strdef color color = "White"}
{pt3dclear()}
{pt3dadd(145499.710094,128896.656634,189975.000000,1703.612262)}
{pt3dadd(146095.938930,129168.218482,189241.666667,1728.298799)}
{pt3dadd(147910.502385,129692.240777,188508.333333,1723.892810)}
{pt3dadd(149546.027195,130228.379092,187608.333333,1726.168113)}
{pt3dadd(151234.054069,130847.610393,186641.666667,1694.870159)}
{pt3dadd(151799.849908,131658.660479,185825.000000,1748.597154)}
{pt3dadd(151993.221871,132400.852557,185175.000000,1801.212783)}
{pt3dadd(151906.035137,133055.860141,184625.000000,1821.661965)}
{pt3dadd(151993.232876,133131.495147,184075.000000,1805.033961)}
{pt3dadd(152470.637256,133501.441110,183558.333333,1805.307194)}
{pt3dadd(153754.403670,133878.573689,183141.666667,1835.526247)}
{pt3dadd(154844.939112,134458.510003,182875.000000,1876.758454)}
{pt3dadd(155700.000000,134980.000000,182691.666667,1906.977507)}
{pt3dadd(155708.000000,135264.000000,182366.666667,1925.204299)}
{pt3dadd(155716.000000,135532.000000,181850.000000,1960.344706)}
{pt3dadd(155692.000000,135748.000000,181233.333333,2025.334854)}
{pt3dadd(155736.000000,135992.000000,180700.000000,2081.424029)}
{pt3dadd(155752.000000,136352.000000,180233.333333,2146.414176)}
{pt3dadd(155784.000000,136656.000000,179725.000000,2138.158737)}
{pt3dadd(155840.000000,136932.000000,179233.333333,2121.647860)}
{pt3dadd(155948.000000,137104.000000,178725.000000,2119.584000)}
{pt3dadd(156096.000000,137316.000000,178191.666667,2117.144894)}
{pt3dadd(156192.000000,137604.000000,177483.333333,2114.217965)}
{pt3dadd(156256.000000,137896.000000,176733.333333,2110.640609)}
{pt3dadd(156236.000000,138256.000000,176000.000000,2106.168913)}
{pt3dadd(156240.000000,138408.000000,175675.000000,2100.419589)}

{create adhoc4}
{access adhoc4}
{connect adhoc4(1), adhoc2(0)}
{nseg = 1}
{strdef color color = "White"}
{pt3dclear()}
{pt3dadd(145499.710094,128896.656634,189975.000000,1703.612262)}
{pt3dadd(144806.709960,130489.219847,190291.666667,1661.159867)}
{pt3dadd(145012.701005,131700.301799,190758.333333,1605.280492)}
{pt3dadd(145234.086495,131859.453021,191175.000000,1560.323999)}
{pt3dadd(143369.319394,132021.132636,191491.666667,1464.109196)}
{pt3dadd(141107.277658,132272.820680,191741.666667,1355.490678)}
{pt3dadd(138769.551225,132639.292394,192025.000000,1216.937171)}
{pt3dadd(138654.936481,133454.567778,192425.000000,1153.194735)}
{pt3dadd(138244.943925,134077.846946,192891.666667,1127.386733)}
{pt3dadd(137815.336158,134302.459634,193375.000000,1146.588204)}
{pt3dadd(137091.515692,134080.218201,193875.000000,1157.615423)}
{pt3dadd(136565.562835,133496.563608,194375.000000,1138.287880)}
{pt3dadd(136023.426331,133536.888270,194891.666667,1110.203254)}
{pt3dadd(135422.629561,134242.318956,195425.000000,1071.361717)}
{pt3dadd(134707.971985,134549.273700,195941.666667,1012.101856)}
{pt3dadd(133895.181234,135125.464756,196441.666667,965.744906)}
{pt3dadd(132666.590983,135998.815979,196931.250000,927.477251)}

{create adhoc5}
{access adhoc5}
{connect adhoc5(1), adhoc4(0)}
{nseg = 1}
{strdef color color = "White"}
{pt3dclear()}
{pt3dadd(132666.590983,135998.815979,196931.250000,927.477251)}
{pt3dadd(132280.825344,136172.939095,197541.666667,919.687970)}
{pt3dadd(131595.017001,136724.486231,198125.000000,929.260978)}
{pt3dadd(131101.504773,136909.398540,198675.000000,954.753840)}
{pt3dadd(130683.178461,137115.514774,199158.333333,985.821518)}
{pt3dadd(126686.485070,138551.773839,199475.000000,1011.156372)}
{pt3dadd(122844.428315,140514.321968,199708.333333,1001.922487)}
{pt3dadd(118974.345069,142162.395523,199975.000000,965.133371)}
{pt3dadd(118698.171442,142434.027346,200408.333333,915.666820)}
{pt3dadd(118076.440195,142687.630420,200925.000000,874.374520)}
{pt3dadd(117643.317404,142954.018255,201458.333333,837.585405)}
{pt3dadd(117282.401807,143380.207159,202041.666667,818.430040)}
{pt3dadd(117302.015566,143024.172271,202591.666667,813.526495)}
{pt3dadd(116702.970976,142675.867993,203225.000000,821.711183)}
{pt3dadd(116227.426146,142824.503726,203791.666667,829.895870)}
{pt3dadd(115608.436435,143141.316675,204408.333333,835.963004)}
{pt3dadd(115392.651565,143767.956084,205058.333333,822.874772)}
{pt3dadd(115091.234480,144085.186312,205675.000000,792.609692)}
{pt3dadd(114935.326692,144494.253993,206225.000000,756.269726)}
{pt3dadd(114859.591420,144827.941746,206675.000000,727.684622)}
{pt3dadd(114664.895226,144864.545573,207175.000000,723.181438)}
{pt3dadd(114129.136527,144818.560469,207791.666667,727.684622)}
{pt3dadd(113459.145063,144316.382093,208391.666667,721.609736)}
{pt3dadd(113152.985904,144065.332231,208875.000000,717.106552)}
{pt3dadd(112527.325889,145916.625221,209125.000000,717.092351)}
{pt3dadd(111958.427754,148541.732495,209325.000000,706.514282)}
{pt3dadd(111408.068836,150608.854765,209591.666667,675.866064)}
{pt3dadd(111458.316369,150535.004156,209991.666667,658.274649)}
{pt3dadd(111637.920943,150116.246439,210425.000000,644.022828)}
{pt3dadd(111620.189077,150040.349805,210875.000000,644.022828)}
{pt3dadd(111520.176122,150611.634980,211325.000000,648.526012)}
{pt3dadd(111260.122148,151334.323046,211791.666667,663.986955)}
{pt3dadd(110967.166442,152005.244773,212308.333333,687.653255)}
{pt3dadd(110688.949287,152388.832099,212841.666667,674.596453)}
{pt3dadd(110559.948178,152208.065965,213391.666667,647.345376)}
{pt3dadd(110459.479065,152400.625338,213875.000000,621.788407)}
{pt3dadd(110237.496278,152392.700920,214408.333333,593.688849)}
{pt3dadd(109973.823743,152510.875462,214941.666667,561.100308)}
{pt3dadd(109517.978029,152217.108768,215508.333333,544.427300)}
{pt3dadd(109205.097577,152230.348544,215991.666667,527.543228)}
{pt3dadd(108877.155733,152711.219351,216350.000000,492.263538)}
{pt3dadd(108576.441283,153193.644078,216583.333333,452.915935)}
{pt3dadd(108534.105290,153511.227060,216700.000000,411.877973)}
{pt3dadd(108440.485369,153331.967974,216816.666667,368.132493)}
{pt3dadd(108533.738029,153373.019912,216950.000000,318.572580)}
{pt3dadd(108323.080461,152806.761359,217150.000000,256.205571)}
{pt3dadd(108161.384180,152613.669875,217358.333333,236.827813)}
{pt3dadd(107879.070245,151968.076674,217566.666667,225.379934)}
{pt3dadd(107767.432800,151990.596210,217733.333333,223.191628)}
{pt3dadd(107777.110114,152186.978284,217883.333333,215.414828)}
{pt3dadd(107954.319381,152026.198648,217991.666667,205.693827)}
{pt3dadd(108046.893355,152016.091186,218050.000000,1000.000000)}

{create adhoc6}
{access adhoc6}
{connect adhoc6(1), adhoc4(0)}
{nseg = 1}
{strdef color color = "White"}
{pt3dclear()}
{pt3dadd(132666.590983,135998.815979,196931.250000,927.477251)}
{pt3dadd(131698.617733,137238.851693,196841.666667,898.789771)}
{pt3dadd(130535.345314,138119.864075,196791.666667,864.171353)}
{pt3dadd(129416.919873,138515.203187,196750.000000,818.640974)}
{pt3dadd(128470.494431,138854.542299,196708.333333,737.910889)}
{pt3dadd(127657.941527,139299.553336,196550.000000,650.513517)}
{pt3dadd(126949.923327,139925.427393,196366.666667,519.335978)}
{pt3dadd(126415.978193,140317.707799,196116.666667,449.944120)}
{pt3dadd(125984.777477,140718.858727,195908.333333,417.789498)}
{pt3dadd(125876.059563,140341.777994,195675.000000,400.229512)}
{pt3dadd(125635.944618,140400.718899,195441.666667,403.571896)}
{pt3dadd(125457.933894,140602.492215,195183.333333,415.545165)}
{pt3dadd(125242.415434,140827.403414,194875.000000,431.671454)}
{pt3dadd(125090.745234,140485.104649,194550.000000,426.004662)}
{pt3dadd(124689.486178,140252.251843,194283.333333,422.662278)}
{pt3dadd(124302.204651,140372.173279,194066.666667,410.692933)}
{pt3dadd(123763.529378,140621.630088,193825.000000,404.189122)}
{pt3dadd(123404.313070,140336.365672,193758.333333,421.151054)}
{pt3dadd(123001.472458,139795.674300,193833.333333,443.282048)}
{pt3dadd(122783.050448,138727.995109,194075.000000,465.061943)}
{pt3dadd(122475.573815,138480.961120,194266.666667,486.546831)}
{pt3dadd(122320.133577,138115.717881,194362.500000,504.231453)}

{create adhoc7}
{access adhoc7}
{connect adhoc7(1), adhoc1(0)}
{nseg = 1}
{strdef color color = "White"}
{pt3dclear()}
{pt3dadd(144180.978676,120792.099499,198025.000000,1316.393468)}
{pt3dadd(144117.723125,119478.585961,197758.333333,1211.057661)}
{pt3dadd(144076.926961,117611.900738,197575.000000,1100.887169)}
{pt3dadd(144092.963618,115592.979194,197450.000000,1028.879557)}

{create adhoc8}
{access adhoc8}
{connect adhoc8(1), adhoc7(0)}
{nseg = 1}
{strdef color color = "White"}
{pt3dclear()}
{pt3dadd(144092.963618,115592.979194,197450.000000,1028.879557)}
{pt3dadd(143191.185336,114885.862580,198075.000000,964.767862)}
{pt3dadd(142183.413459,113860.167069,198591.666667,924.310394)}
{pt3dadd(141443.847738,113694.600165,199008.333333,819.681698)}
{pt3dadd(137852.594191,114890.682790,199333.333333,714.008602)}
{pt3dadd(134468.959944,116215.201603,199616.666667,586.137846)}
{pt3dadd(131002.585849,117420.030564,199841.666667,457.261056)}
{pt3dadd(130270.622900,117330.562104,200150.000000,352.430654)}
{pt3dadd(129310.322880,116998.816310,200466.666667,315.971871)}
{pt3dadd(128310.856703,117246.269764,200800.000000,291.947674)}
{pt3dadd(127771.313409,117426.998923,201033.333333,279.065524)}
{pt3dadd(127545.077772,117962.025815,201162.500000,280.468352)}

{create adhoc9}
{access adhoc9}
{connect adhoc9(1), adhoc7(0)}
{nseg = 1}
{strdef color color = "White"}
{pt3dclear()}
{pt3dadd(144092.963618,115592.979194,197450.000000,1028.879557)}
{pt3dadd(145243.591154,114503.276825,196762.500000,1002.048509)}

{create adhoc10}
{access adhoc10}
{connect adhoc10(1), adhoc9(0)}
{nseg = 1}
{strdef color color = "White"}
{pt3dclear()}
{pt3dadd(145243.591154,114503.276825,196762.500000,1002.048509)}
{pt3dadd(145608.521383,114529.897042,196075.000000,1025.553094)}
{pt3dadd(146055.403293,113932.552248,195525.000000,1026.698843)}
{pt3dadd(146468.060463,113200.311752,195091.666667,994.417981)}
{pt3dadd(146583.979919,112782.384060,194900.000000,989.842485)}

{create adhoc11}
{access adhoc11}
{connect adhoc11(1), adhoc9(0)}
{nseg = 1}
{strdef color color = "White"}
{pt3dclear()}
{pt3dadd(145243.591154,114503.276825,196762.500000,1002.048509)}
{pt3dadd(145732.577258,112335.001450,196891.666667,991.478406)}
{pt3dadd(146004.577258,110223.001450,196891.666667,973.299394)}
{pt3dadd(145840.424771,108830.610477,196675.000000,975.041582)}
{pt3dadd(145868.815328,107580.304004,196241.666667,956.187906)}
{pt3dadd(146331.251283,106558.890769,195791.666667,932.738012)}
{pt3dadd(147326.771320,104884.713889,195541.666667,906.480636)}
{pt3dadd(148794.984766,103216.625131,195375.000000,953.243992)}
{pt3dadd(150567.440684,101657.259305,195208.333333,1032.978454)}
{pt3dadd(152091.229365,100046.259926,195075.000000,1053.836806)}
{pt3dadd(152886.542678,98424.449828,195191.666667,1042.050125)}
{pt3dadd(153249.435248,97003.801679,195491.666667,1028.120410)}
{pt3dadd(153485.584840,95709.334621,195991.666667,1042.215902)}
{pt3dadd(153823.336428,94994.669824,196625.000000,1084.853547)}
{pt3dadd(153979.341476,94518.078472,197308.333333,1140.086994)}
{pt3dadd(154028.994029,94733.233797,197675.000000,1181.502590)}
