# Supplementary material for: Full reconstruction of large lobula plate tangential cells in Drosophila from a 3D EM dataset
Source: PLoS One. 2018 Nov 28;13(11):e0207828. doi: 10.1371/journal.pone.0207828 (PMC6261601; doi:10.1371/journal.pone.0207828)
Supplement: S1 Dataset — (ZIP) [file pone.0207828.s001.zip › Diameter hoc/plotCompleteSkeletons/vs4_1_0001.hoc]

/* created with convertKnossosNmlToHoc.m */

{create adhoc1}
{access adhoc1}
{nseg = 1}
{strdef color color = "White"}
{pt3dclear()}
{pt3dadd(143767.883758,110420.960981,198550.000000,512.966748)}
{pt3dadd(144108.413936,110389.088567,198525.000000,492.427255)}
{pt3dadd(144689.757317,110750.132433,198393.750000,479.378670)}

{create adhoc2}
{access adhoc2}
{connect adhoc2(1), adhoc1(0)}
{nseg = 1}
{strdef color color = "White"}
{pt3dclear()}
{pt3dadd(144689.757317,110750.132433,198393.750000,479.378670)}
{pt3dadd(145401.474293,111213.343738,198475.000000,510.760641)}
{pt3dadd(146209.474293,111985.343738,198475.000000,575.156290)}
{pt3dadd(147525.966877,113195.687197,198308.333333,638.421338)}
{pt3dadd(149160.804233,114175.219466,198125.000000,678.627192)}
{pt3dadd(150654.811275,115131.371847,197691.666667,711.742568)}
{pt3dadd(151365.492276,115652.990699,197175.000000,724.066934)}
{pt3dadd(151378.262699,116954.643513,196375.000000,848.694182)}
{pt3dadd(151109.545940,118582.052446,195708.333333,958.787568)}
{pt3dadd(150708.890422,120319.755605,195091.666667,1098.483432)}
{pt3dadd(149884.481919,121760.446612,194591.666667,1206.911608)}
{pt3dadd(149018.767844,123638.084031,194008.333333,1275.094379)}
{pt3dadd(148480.763208,126558.335850,193631.250000,1315.811813)}

{create adhoc3}
{access adhoc3}
{connect adhoc3(1), adhoc2(0)}
{nseg = 1}
{strdef color color = "White"}
{pt3dclear()}
{pt3dadd(148480.763208,126558.335850,193631.250000,1315.811813)}
{pt3dadd(149519.973375,127670.567943,193241.666667,1404.851215)}
{pt3dadd(150300.766492,128439.244853,192841.666667,1483.905461)}
{pt3dadd(150532.030397,128083.992670,192258.333333,1514.606487)}
{pt3dadd(152013.278477,127609.831176,191541.666667,1545.940225)}
{pt3dadd(153690.839580,127617.321677,190725.000000,1610.878480)}
{pt3dadd(155661.570630,127801.122469,189825.000000,1662.785778)}
{pt3dadd(156275.354458,128159.700169,188891.666667,1694.717970)}
{pt3dadd(156807.911099,128411.284067,188008.333333,1712.080168)}
{pt3dadd(157519.036565,128981.762994,187175.000000,1643.498194)}
{pt3dadd(158249.248066,129688.357108,186258.333333,1572.008028)}
{pt3dadd(158710.099780,130196.836187,185291.666667,1571.203720)}
{pt3dadd(159393.702812,131123.482383,184158.333333,1576.653307)}
{pt3dadd(160051.435994,131819.053704,183258.333333,1637.479091)}
{pt3dadd(161188.939112,131918.510003,182966.666667,1706.604059)}
{pt3dadd(161748.000000,131688.000000,183008.333333,1811.219176)}
{pt3dadd(162204.000000,131216.000000,183200.000000,1904.370514)}
{pt3dadd(162348.000000,131484.000000,183058.333333,1991.222730)}
{pt3dadd(162500.000000,131720.000000,182966.666667,2071.775824)}
{pt3dadd(162628.000000,131928.000000,182925.000000,2146.029796)}
{pt3dadd(162732.000000,132136.000000,182941.666667,2220.283768)}
{pt3dadd(162744.000000,132364.000000,183008.333333,2300.933482)}
{pt3dadd(162756.000000,132576.000000,182975.000000,2443.769428)}
{pt3dadd(162752.000000,132768.000000,182841.666667,2546.350907)}
{pt3dadd(162840.000000,133012.000000,182500.000000,2608.310296)}
{pt3dadd(162952.000000,133264.000000,182108.333333,2660.863873)}
{pt3dadd(163132.000000,133636.000000,181658.333333,2704.011636)}
{pt3dadd(163300.000000,133932.000000,181183.333333,2737.753587)}
{pt3dadd(163436.000000,134408.000000,180683.333333,2752.183200)}
{pt3dadd(163460.000000,134892.000000,180183.333333,2772.911935)}
{pt3dadd(163524.000000,135396.000000,179716.666667,2799.939792)}
{pt3dadd(163568.000000,135748.000000,179233.333333,2833.266771)}
{pt3dadd(163636.000000,135980.000000,178725.000000,2854.730906)}
{pt3dadd(163608.000000,136168.000000,178200.000000,2858.033075)}
{pt3dadd(163580.000000,136432.000000,177691.666667,2881.561071)}
{pt3dadd(163580.000000,136696.000000,177191.666667,2909.366886)}
{pt3dadd(163600.000000,136908.000000,176675.000000,2942.733863)}
{pt3dadd(163540.000000,137068.000000,176166.666667,2969.206299)}
{pt3dadd(163508.000000,137240.000000,175650.000000,2986.198740)}
{pt3dadd(163446.000000,137394.000000,175400.000000,2989.648331)}

{create adhoc4}
{access adhoc4}
{connect adhoc4(1), adhoc2(0)}
{nseg = 1}
{strdef color color = "White"}
{pt3dclear()}
{pt3dadd(148480.763208,126558.335850,193631.250000,1315.811813)}
{pt3dadd(147404.590154,128384.237761,193691.666667,1333.655688)}
{pt3dadd(146030.668094,130193.541349,193883.333333,1324.182383)}
{pt3dadd(144254.224497,131165.281010,194208.333333,1287.602164)}
{pt3dadd(142254.012260,131957.711317,194416.666667,1236.389149)}
{pt3dadd(140573.680416,131924.578583,194908.333333,1197.906008)}
{pt3dadd(138927.676296,131928.273546,195450.000000,1080.760339)}
{pt3dadd(137537.190579,132202.938281,196191.666667,930.643424)}
{pt3dadd(136480.602174,132877.379164,196825.000000,842.880065)}
{pt3dadd(136030.072877,133265.466721,197383.333333,793.177953)}
{pt3dadd(135522.162280,133428.401812,198033.333333,748.435347)}
{pt3dadd(134420.327197,133764.807441,198743.750000,701.521128)}

{create adhoc5}
{access adhoc5}
{connect adhoc5(1), adhoc4(0)}
{nseg = 1}
{strdef color color = "White"}
{pt3dclear()}
{pt3dadd(134420.327197,133764.807441,198743.750000,701.521128)}
{pt3dadd(129308.710871,136024.028731,199191.666667,687.363303)}
{pt3dadd(124684.482757,138447.468456,199608.333333,666.013253)}
{pt3dadd(120659.390177,140363.643773,199991.666667,633.137898)}
{pt3dadd(120351.407032,140664.696058,200325.000000,610.901273)}
{pt3dadd(119755.254219,140384.392795,200658.333333,620.271779)}
{pt3dadd(119249.596334,140262.474640,201100.000000,597.666093)}
{pt3dadd(118591.705399,140131.028265,201683.333333,589.481406)}
{pt3dadd(118385.347600,139871.354980,202391.666667,594.384950)}
{pt3dadd(117898.486580,139396.510292,203108.333333,583.806881)}
{pt3dadd(117360.134239,139650.093176,203633.333333,569.589278)}
{pt3dadd(116517.431030,139835.141841,204008.333333,550.468132)}
{pt3dadd(115931.357263,140381.385969,204416.666667,563.556363)}
{pt3dadd(115478.697342,140452.707938,204933.333333,574.134433)}
{pt3dadd(115170.645384,140400.841461,205483.333333,599.667449)}
{pt3dadd(114905.703691,140919.178517,205883.333333,610.220125)}
{pt3dadd(114642.958575,141100.333971,206241.666667,612.498379)}
{pt3dadd(114065.729601,141669.822643,206625.000000,603.598520)}
{pt3dadd(113639.297676,141628.935396,207091.666667,591.625251)}
{pt3dadd(113271.632823,141847.313718,207591.666667,572.673989)}
{pt3dadd(113009.676470,141873.000481,208058.333333,535.167702)}
{pt3dadd(112693.888546,142385.376289,208516.666667,497.661416)}
{pt3dadd(112493.212955,142514.521259,208883.333333,473.795427)}
{pt3dadd(112161.317665,144546.625241,209133.333333,446.975067)}
{pt3dadd(111797.632316,146196.616279,209316.666667,420.154708)}
{pt3dadd(111367.889280,148669.864341,209516.666667,367.283602)}
{pt3dadd(111456.661254,149241.520799,209791.666667,331.148564)}
{pt3dadd(111697.644839,149410.355186,210100.000000,289.316993)}
{pt3dadd(112125.833258,149113.006431,210475.000000,270.931853)}
{pt3dadd(112482.799659,149295.634848,210833.333333,277.553458)}
{pt3dadd(112590.334106,149464.562899,211100.000000,292.865187)}
{pt3dadd(112700.956944,149840.521039,211316.666667,300.697651)}
{pt3dadd(112301.990536,150237.850040,211516.666667,325.723798)}
{pt3dadd(112208.733172,150131.076009,211733.333333,358.326541)}
{pt3dadd(111942.903773,150200.448754,211941.666667,386.426099)}
{pt3dadd(112037.072813,149908.744101,212158.333333,384.735119)}
{pt3dadd(112133.797473,150715.906539,212416.666667,406.722609)}
{pt3dadd(112153.973170,151110.583912,212716.666667,416.840648)}
{pt3dadd(112252.740595,151593.166742,213066.666667,451.319139)}
{pt3dadd(112257.254775,151641.695461,213383.333333,486.885910)}
{pt3dadd(112434.490949,151853.824559,213608.333333,495.218341)}
{pt3dadd(112679.834798,152505.108765,213762.500000,507.440581)}

{create adhoc6}
{access adhoc6}
{connect adhoc6(1), adhoc5(0)}
{nseg = 1}
{strdef color color = "White"}
{pt3dclear()}
{pt3dadd(112679.834798,152505.108765,213762.500000,507.440581)}
{pt3dadd(113139.782857,153922.783801,213758.333333,502.060527)}
{pt3dadd(113585.604472,155358.641704,213800.000000,500.051918)}
{pt3dadd(113963.423368,156296.625984,213816.666667,507.555279)}
{pt3dadd(114246.354153,156654.892081,213831.250000,495.945909)}

{create adhoc7}
{access adhoc7}
{connect adhoc7(1), adhoc6(0)}
{nseg = 1}
{strdef color color = "White"}
{pt3dclear()}
{pt3dadd(114246.354153,156654.892081,213831.250000,495.945909)}
{pt3dadd(114147.693781,156578.203962,213575.000000,494.281409)}

{create adhoc8}
{access adhoc8}
{connect adhoc8(1), adhoc6(0)}
{nseg = 1}
{strdef color color = "White"}
{pt3dclear()}
{pt3dadd(114246.354153,156654.892081,213831.250000,495.945909)}
{pt3dadd(114610.434947,157356.811135,214300.000000,494.281409)}
{pt3dadd(114816.545067,157190.673652,214625.000000,457.793478)}
{pt3dadd(114888.137495,157300.729058,214775.000000,1000.000000)}

{create adhoc9}
{access adhoc9}
{connect adhoc9(1), adhoc5(0)}
{nseg = 1}
{strdef color color = "White"}
{pt3dclear()}
{pt3dadd(112679.834798,152505.108765,213762.500000,507.440581)}
{pt3dadd(112533.806400,151474.768053,213925.000000,512.962520)}
{pt3dadd(112461.107603,151119.640155,214025.000000,526.556973)}

{create adhoc10}
{access adhoc10}
{connect adhoc10(1), adhoc4(0)}
{nseg = 1}
{strdef color color = "White"}
{pt3dclear()}
{pt3dadd(134420.327197,133764.807441,198743.750000,701.521128)}
{pt3dadd(134835.952471,133130.730337,199025.000000,684.873096)}

{create adhoc11}
{access adhoc11}
{connect adhoc11(1), adhoc10(0)}
{nseg = 1}
{strdef color color = "White"}
{pt3dclear()}
{pt3dadd(134835.952471,133130.730337,199025.000000,684.873096)}
{pt3dadd(135070.677459,133285.291816,199175.000000,684.973094)}

{create adhoc12}
{access adhoc12}
{connect adhoc12(1), adhoc10(0)}
{nseg = 1}
{strdef color color = "White"}
{pt3dclear()}
{pt3dadd(134835.952471,133130.730337,199025.000000,684.873096)}
{pt3dadd(134413.277264,132362.597649,198991.666667,655.744984)}
{pt3dadd(133967.843886,131625.396614,198950.000000,614.210511)}
{pt3dadd(133690.920345,130976.916218,199041.666667,557.771959)}
{pt3dadd(133642.578351,130366.074623,199208.333333,482.520557)}
{pt3dadd(133633.215539,130132.490889,199416.666667,365.597330)}
{pt3dadd(129973.246989,131638.954190,199541.666667,336.551679)}
{pt3dadd(128048.461532,132561.995371,199587.500000,373.717009)}

{create adhoc13}
{access adhoc13}
{connect adhoc13(1), adhoc1(0)}
{nseg = 1}
{strdef color color = "White"}
{pt3dclear()}
{pt3dadd(144689.757317,110750.132433,198393.750000,479.378670)}
{pt3dadd(144624.522173,110441.237829,198175.000000,459.835106)}
{pt3dadd(144563.038066,110006.966724,197883.333333,450.679076)}
{pt3dadd(144543.058621,109000.658503,197606.250000,438.970107)}

{create adhoc14}
{access adhoc14}
{connect adhoc14(1), adhoc13(0)}
{nseg = 1}
{strdef color color = "White"}
{pt3dclear()}
{pt3dadd(144543.058621,109000.658503,197606.250000,438.970107)}
{pt3dadd(144503.632851,110076.546350,197366.666667,457.340594)}
{pt3dadd(144452.938290,110603.554314,197250.000000,475.307845)}

{create adhoc15}
{access adhoc15}
{connect adhoc15(1), adhoc13(0)}
{nseg = 1}
{strdef color color = "White"}
{pt3dclear()}
{pt3dadd(144543.058621,109000.658503,197606.250000,438.970107)}
{pt3dadd(144805.127606,107410.338537,197566.666667,446.367703)}
{pt3dadd(145020.410091,106128.023722,197533.333333,435.767626)}
{pt3dadd(145361.895983,104750.523984,197500.000000,411.941520)}
{pt3dadd(145843.969022,103626.162355,197483.333333,413.407036)}
{pt3dadd(146422.336434,102673.297084,197416.666667,359.535355)}
{pt3dadd(147401.633885,101880.158207,197391.666667,321.065142)}
{pt3dadd(148693.316345,101810.601429,197358.333333,354.373843)}
{pt3dadd(149867.100989,101397.107884,197375.000000,406.552337)}
{pt3dadd(150531.055377,101777.700327,197333.333333,461.853950)}
{pt3dadd(150648.819804,101547.557082,197175.000000,478.431338)}
{pt3dadd(150907.258738,101593.333689,196937.500000,481.557904)}

{create adhoc16}
{access adhoc16}
{connect adhoc16(1), adhoc15(0)}
{nseg = 1}
{strdef color color = "White"}
{pt3dclear()}
{pt3dadd(150907.258738,101593.333689,196937.500000,481.557904)}
{pt3dadd(150812.220231,101570.658426,196725.000000,506.192461)}
{pt3dadd(150790.900605,101592.812402,196637.500000,527.712935)}

{create adhoc17}
{access adhoc17}
{connect adhoc17(1), adhoc15(0)}
{nseg = 1}
{strdef color color = "White"}
{pt3dclear()}
{pt3dadd(150907.258738,101593.333689,196937.500000,481.557904)}
{pt3dadd(151528.565593,101255.420503,196883.333333,484.038698)}
{pt3dadd(152100.851762,100815.342685,196825.000000,487.294893)}
{pt3dadd(152545.032038,100057.177190,196881.250000,484.038698)}

{create adhoc18}
{access adhoc18}
{connect adhoc18(1), adhoc17(0)}
{nseg = 1}
{strdef color color = "White"}
{pt3dclear()}
{pt3dadd(152545.032038,100057.177190,196881.250000,484.038698)}
{pt3dadd(152467.022683,100101.034994,197416.666667,506.843241)}
{pt3dadd(152378.456692,99959.254585,197825.000000,550.752824)}
{pt3dadd(152390.239515,100186.148928,197925.000000,626.413525)}
{pt3dadd(152382.741971,100109.684982,197975.000000,688.272271)}

{create adhoc19}
{access adhoc19}
{connect adhoc19(1), adhoc17(0)}
{nseg = 1}
{strdef color color = "White"}
{pt3dclear()}
{pt3dadd(152545.032038,100057.177190,196881.250000,484.038698)}
{pt3dadd(153077.568645,99372.901618,196241.666667,491.814587)}
{pt3dadd(153538.622209,98556.711254,195883.333333,510.913385)}
{pt3dadd(153991.703545,98709.032515,195658.333333,548.056578)}
{pt3dadd(154067.283073,98559.518358,195591.666667,587.726808)}
{pt3dadd(154187.983629,99252.222943,195541.666667,581.021852)}
{pt3dadd(154063.345464,99142.084095,195500.000000,520.093349)}
{pt3dadd(154194.285371,99047.226219,195433.333333,453.614625)}
{pt3dadd(154132.937882,98653.009488,195400.000000,380.411254)}
