# Supplementary material for: Full reconstruction of large lobula plate tangential cells in Drosophila from a 3D EM dataset
Source: PLoS One. 2018 Nov 28;13(11):e0207828. doi: 10.1371/journal.pone.0207828 (PMC6261601; doi:10.1371/journal.pone.0207828)
Supplement: S1 Dataset — (ZIP) [file pone.0207828.s001.zip › Diameter hoc/plotCompleteSkeletons/vs5_1_0001.hoc]

/* created with convertKnossosNmlToHoc.m */

{create adhoc1}
{access adhoc1}
{nseg = 1}
{strdef color color = "White"}
{pt3dclear()}
{pt3dadd(143219.519431,123468.651146,198412.500000,820.019812)}
{pt3dadd(143292.538866,123425.964046,198375.000000,799.826972)}
{pt3dadd(143209.591887,123688.571916,198233.333333,775.346596)}
{pt3dadd(143162.772337,123656.510173,197950.000000,751.030901)}
{pt3dadd(143110.412871,124265.288117,197566.666667,715.733045)}
{pt3dadd(143190.216968,124164.989060,197191.666667,680.520527)}
{pt3dadd(143419.006760,124044.581434,196908.333333,650.725320)}
{pt3dadd(143725.416270,123599.456345,196716.666667,657.331026)}
{pt3dadd(144181.296765,123924.802641,196583.333333,663.924930)}
{pt3dadd(144340.257787,124621.018170,196500.000000,633.984056)}
{pt3dadd(144446.969517,124812.232893,196441.666667,580.384633)}
{pt3dadd(144496.517003,125481.979669,196408.333333,497.005064)}
{pt3dadd(144627.060962,125082.007528,196375.000000,407.005686)}
{pt3dadd(144623.030641,125054.624469,196350.000000,353.406263)}
{pt3dadd(144594.444906,124514.740512,196325.000000,318.126572)}
{pt3dadd(144709.385195,124949.734416,196300.000000,288.921768)}
{pt3dadd(144814.390383,124894.462117,196275.000000,263.356496)}
{pt3dadd(144794.563022,125267.278900,196250.000000,252.191372)}
{pt3dadd(144723.569738,124791.636490,196225.000000,241.881534)}
{pt3dadd(144884.296377,125161.269564,196200.000000,235.979064)}
{pt3dadd(145078.965554,124702.686923,196175.000000,227.092194)}
{pt3dadd(145035.837597,125273.468894,196150.000000,220.498290)}
{pt3dadd(144949.430780,125053.750371,196125.000000,213.904386)}
{pt3dadd(144982.366915,124903.125363,196091.666667,207.310482)}
{pt3dadd(145124.102732,124862.400925,196050.000000,204.688722)}
{pt3dadd(145203.737181,125201.735989,196008.333333,202.407558)}
{pt3dadd(145229.308055,125281.039142,195975.000000,195.813654)}
{pt3dadd(145211.520024,125179.627101,195950.000000,199.461490)}
{pt3dadd(145206.319186,125001.522326,195925.000000,200.828163)}
{pt3dadd(145238.133766,125434.345456,195900.000000,206.166978)}
{pt3dadd(145333.552113,125204.939683,195875.000000,210.139122)}
{pt3dadd(145311.048434,125410.953237,195850.000000,220.448960)}
{pt3dadd(145340.073835,125042.284493,195825.000000,222.819134)}
{pt3dadd(145478.057277,125186.657965,195800.000000,225.100298)}
{pt3dadd(145484.842382,125203.955762,195766.666667,236.608929)}
{pt3dadd(145546.474299,125269.232801,195733.333333,245.044149)}
{pt3dadd(145439.116225,125392.220611,195700.000000,249.947073)}
{pt3dadd(145735.322602,124772.898947,195675.000000,252.568833)}
{pt3dadd(145659.927237,125096.918922,195650.000000,248.253934)}
{pt3dadd(145746.788103,124665.065560,195625.000000,253.156858)}
{pt3dadd(145563.016723,124925.935560,195591.666667,254.847837)}
{pt3dadd(145733.426959,125005.548673,195550.000000,257.129001)}
{pt3dadd(145730.933647,125123.998442,195508.333333,255.438022)}
{pt3dadd(145734.454230,125348.069215,195475.000000,251.465878)}
{pt3dadd(145708.234709,124857.877939,195450.000000,249.624562)}
{pt3dadd(145758.110189,125213.559215,195425.000000,251.315542)}
{pt3dadd(145891.553952,125465.132416,195375.000000,276.872510)}
{pt3dadd(145920.081104,125865.964965,195325.000000,319.490073)}
{pt3dadd(146012.177374,125559.291302,195275.000000,388.881931)}
{pt3dadd(145863.583553,125539.894444,195250.000000,461.806085)}
{pt3dadd(145975.970148,125848.064477,195225.000000,545.185654)}
{pt3dadd(145930.117255,126090.582667,195133.333333,641.781095)}
{pt3dadd(145988.429115,126043.494565,194916.666667,722.879500)}
{pt3dadd(145832.658584,125800.130257,194608.333333,783.085455)}
{pt3dadd(145794.118241,126066.563644,194225.000000,752.959425)}
{pt3dadd(145850.104418,126135.971247,193841.666667,717.704546)}
{pt3dadd(145890.598728,126190.884506,193425.000000,788.980771)}
{pt3dadd(145918.379092,126682.858453,193041.666667,849.220790)}
{pt3dadd(145967.108443,126898.218247,192650.000000,927.913956)}
{pt3dadd(145921.120569,127214.792481,192200.000000,960.867382)}

{create adhoc2}
{access adhoc2}
{connect adhoc2(1), adhoc1(0)}
{nseg = 1}
{strdef color color = "White"}
{pt3dclear()}
{pt3dadd(145921.120569,127214.792481,192200.000000,960.867382)}
{pt3dadd(144988.464139,127757.517671,192066.666667,995.306905)}
{pt3dadd(144292.140811,128682.930718,191900.000000,1000.402477)}
{pt3dadd(143897.762943,129777.225967,191783.333333,1002.188753)}
{pt3dadd(145041.352849,130687.413721,191650.000000,977.389815)}

{create adhoc3}
{access adhoc3}
{connect adhoc3(1), adhoc2(0)}
{nseg = 1}
{strdef color color = "White"}
{pt3dclear()}
{pt3dadd(145041.352849,130687.413721,191650.000000,977.389815)}
{pt3dadd(148344.381560,130277.558306,191466.666667,1023.476277)}
{pt3dadd(150600.041037,130159.838072,191250.000000,1093.464137)}
{pt3dadd(150328.101199,130088.461716,190958.333333,1115.317418)}
{pt3dadd(150055.585150,130213.520089,190558.333333,1169.475186)}
{pt3dadd(150223.860289,130140.868120,190050.000000,1230.929131)}
{pt3dadd(150698.986874,129873.418907,189516.666667,1292.597654)}
{pt3dadd(151465.951606,129985.462985,188991.666667,1332.657477)}
{pt3dadd(151979.715968,130343.913344,188533.333333,1324.483225)}
{pt3dadd(152658.848855,130547.325867,188066.666667,1332.657477)}
{pt3dadd(153035.762553,130644.273298,187616.666667,1317.800510)}
{pt3dadd(153524.872907,130778.601444,187141.666667,1317.800510)}
{pt3dadd(153800.638401,131373.596600,186683.333333,1291.930388)}
{pt3dadd(154378.504589,131389.560904,186200.000000,1291.930388)}
{pt3dadd(154813.367046,131629.623125,185733.333333,1323.862579)}
{pt3dadd(154984.545277,131720.412697,185241.666667,1279.038546)}
{pt3dadd(154847.131023,132284.103941,184766.666667,1240.176983)}
{pt3dadd(154743.757851,132038.196897,184183.333333,1207.950772)}
{pt3dadd(155137.628691,131826.996603,183641.666667,1193.387132)}
{pt3dadd(155614.678668,131467.360445,183050.000000,1174.431623)}
{pt3dadd(156737.214110,132395.296759,182816.666667,1153.937215)}
{pt3dadd(157479.056044,133227.914924,181633.333333,1141.617058)}
{pt3dadd(158184.000000,134076.000000,180516.666667,1128.289958)}
{pt3dadd(158152.000000,134236.000000,178991.666667,1102.020417)}
{pt3dadd(158180.000000,134456.000000,178283.333333,1051.182911)}
{pt3dadd(158220.000000,134700.000000,177483.333333,1010.508245)}
{pt3dadd(158268.000000,134852.000000,176683.333333,959.664913)}
{pt3dadd(158268.000000,134916.000000,176312.500000,866.703403)}

{create adhoc4}
{access adhoc4}
{connect adhoc4(1), adhoc2(0)}
{nseg = 1}
{strdef color color = "White"}
{pt3dclear()}
{pt3dadd(145041.352849,130687.413721,191650.000000,977.389815)}
{pt3dadd(142374.620814,131583.012299,191750.000000,968.160341)}
{pt3dadd(141544.545330,132396.600730,191941.666667,936.589439)}
{pt3dadd(141070.875304,132570.870891,192233.333333,864.950339)}
{pt3dadd(140742.538104,133254.353092,192608.333333,831.825657)}
{pt3dadd(140423.122019,133684.206927,192891.666667,828.865820)}
{pt3dadd(140223.162371,133817.275405,193133.333333,792.506094)}
{pt3dadd(139960.900351,133555.584322,193400.000000,773.384947)}
{pt3dadd(139682.611142,133332.249194,193766.666667,722.085547)}
{pt3dadd(139373.196346,133376.689045,194183.333333,684.937658)}
{pt3dadd(138933.707200,133999.541328,194575.000000,651.370523)}
{pt3dadd(138828.988705,134433.428061,194883.333333,624.384461)}
{pt3dadd(138597.373249,134657.047585,195175.000000,620.542895)}
{pt3dadd(138386.494245,134302.211026,195450.000000,617.259160)}

{create adhoc5}
{access adhoc5}
{connect adhoc5(1), adhoc4(0)}
{nseg = 1}
{strdef color color = "White"}
{pt3dclear()}
{pt3dadd(138386.494245,134302.211026,195450.000000,617.259160)}
{pt3dadd(137718.080729,135108.898406,195666.666667,630.310351)}
{pt3dadd(137247.721674,136094.482970,195883.333333,654.437610)}
{pt3dadd(136881.791604,136740.761887,196241.666667,696.826221)}
{pt3dadd(136436.803903,137620.543302,196675.000000,712.919660)}
{pt3dadd(136024.776371,137809.338078,197058.333333,713.372196)}
{pt3dadd(135781.601121,137697.270906,197325.000000,722.384172)}
{pt3dadd(135596.604330,137427.204380,197550.000000,719.813140)}
{pt3dadd(135540.444622,137629.126251,197841.666667,722.657109)}
{pt3dadd(135398.059220,137561.270867,198116.666667,747.040193)}
{pt3dadd(135073.480870,137595.202132,198393.750000,771.423277)}

{create adhoc6}
{access adhoc6}
{connect adhoc6(1), adhoc5(0)}
{nseg = 1}
{strdef color color = "White"}
{pt3dclear()}
{pt3dadd(135073.480870,137595.202132,198393.750000,771.423277)}
{pt3dadd(135285.825182,137883.456124,198500.000000,746.793350)}
{pt3dadd(135171.930883,138082.753339,198633.333333,701.496751)}
{pt3dadd(135140.989506,138359.594440,198766.666667,633.430699)}
{pt3dadd(135100.125611,138445.499009,198837.500000,558.738784)}

{create adhoc7}
{access adhoc7}
{connect adhoc7(1), adhoc5(0)}
{nseg = 1}
{strdef color color = "White"}
{pt3dclear()}
{pt3dadd(135073.480870,137595.202132,198393.750000,771.423277)}
{pt3dadd(134155.880693,137200.499973,198583.333333,799.556131)}
{pt3dadd(133363.723207,137620.728887,198875.000000,799.556131)}
{pt3dadd(133086.874872,137798.396388,199175.000000,837.371594)}
{pt3dadd(132949.916477,138005.063953,199416.666667,853.206745)}
{pt3dadd(129154.327337,139340.164477,199541.666667,850.781120)}
{pt3dadd(125235.689036,141189.073805,199700.000000,840.073873)}
{pt3dadd(121579.460840,142992.262241,199933.333333,830.359454)}
{pt3dadd(121402.352257,142933.535910,200250.000000,807.895924)}
{pt3dadd(121037.142029,142742.363735,200558.333333,767.556615)}
{pt3dadd(120303.380503,142182.629304,200875.000000,702.011845)}
{pt3dadd(119425.977583,142065.250557,201166.666667,622.604419)}
{pt3dadd(118541.742813,141716.773290,201458.333333,553.212561)}
{pt3dadd(117918.924158,141291.313006,201725.000000,489.172368)}
{pt3dadd(117514.134978,140844.715108,201991.666667,441.805183)}
{pt3dadd(117157.980265,140555.024690,202266.666667,418.138883)}
{pt3dadd(116690.075543,140463.303549,202516.666667,426.323570)}
{pt3dadd(116331.966116,140339.313782,202750.000000,466.108408)}
{pt3dadd(115984.151886,140351.480439,202950.000000,513.640697)}
{pt3dadd(115635.078118,140123.701770,203191.666667,515.482013)}
{pt3dadd(115131.915478,140291.599224,203508.333333,491.283414)}
{pt3dadd(114603.224450,140664.391196,203866.666667,472.708362)}
{pt3dadd(114250.990830,141344.838573,204250.000000,481.871186)}
{pt3dadd(113970.454135,141804.983492,204625.000000,507.510283)}
{pt3dadd(113571.552913,141782.165105,205008.333333,531.336738)}
{pt3dadd(113273.808264,141799.910139,205275.000000,557.798283)}
{pt3dadd(113244.500785,141956.944622,205416.666667,582.178759)}
{pt3dadd(113376.808964,142198.416455,205437.500000,1000.000000)}

{create adhoc8}
{access adhoc8}
{connect adhoc8(1), adhoc4(0)}
{nseg = 1}
{strdef color color = "White"}
{pt3dclear()}
{pt3dadd(138386.494245,134302.211026,195450.000000,617.259160)}
{pt3dadd(138762.286858,133011.088315,195608.333333,577.932905)}
{pt3dadd(138969.663621,132739.948441,195783.333333,540.995938)}
{pt3dadd(139006.513588,132585.858465,195966.666667,501.202451)}
{pt3dadd(138964.324781,132590.791792,196133.333333,442.254081)}
{pt3dadd(138855.662426,132212.328778,196358.333333,395.702908)}
{pt3dadd(138377.029263,131296.905359,196512.500000,353.267017)}

{create adhoc9}
{access adhoc9}
{connect adhoc9(1), adhoc8(0)}
{nseg = 1}
{strdef color color = "White"}
{pt3dclear()}
{pt3dadd(138377.029263,131296.905359,196512.500000,353.267017)}
{pt3dadd(138394.864858,131654.138083,196866.666667,342.084352)}
{pt3dadd(138249.661934,131129.112313,197033.333333,340.706344)}
{pt3dadd(138598.679124,131497.400935,197116.666667,354.779003)}
{pt3dadd(138695.710622,131318.581302,197158.333333,362.346094)}
{pt3dadd(138966.501404,132125.620528,197175.000000,352.690802)}
{pt3dadd(138916.161827,132292.125366,197200.000000,319.520460)}

{create adhoc10}
{access adhoc10}
{connect adhoc10(1), adhoc8(0)}
{nseg = 1}
{strdef color color = "White"}
{pt3dclear()}
{pt3dadd(138377.029263,131296.905359,196512.500000,353.267017)}
{pt3dadd(137914.565460,131236.236772,196333.333333,351.567234)}
{pt3dadd(137654.719970,130822.242502,196075.000000,361.011244)}
{pt3dadd(137675.211382,130835.813192,195941.666667,368.165679)}
{pt3dadd(137857.635052,130484.616691,195850.000000,385.491366)}

{create adhoc11}
{access adhoc11}
{connect adhoc11(1), adhoc1(0)}
{nseg = 1}
{strdef color color = "White"}
{pt3dclear()}
{pt3dadd(145921.120569,127214.792481,192200.000000,960.867382)}
{pt3dadd(146639.269783,126536.200555,191941.666667,952.409082)}
{pt3dadd(149244.223955,126070.091795,191683.333333,902.937268)}
{pt3dadd(151648.729650,125354.809417,191441.666667,964.796612)}
{pt3dadd(153895.514231,124854.006429,191150.000000,958.545713)}
{pt3dadd(153742.403462,124333.103404,190841.666667,955.773042)}
{pt3dadd(153473.569189,123550.379746,190558.333333,942.268107)}
{pt3dadd(153657.589803,122547.093022,190283.333333,872.677690)}
{pt3dadd(154624.352921,121318.722395,189981.250000,881.213188)}

{create adhoc12}
{access adhoc12}
{connect adhoc12(1), adhoc11(0)}
{nseg = 1}
{strdef color color = "White"}
{pt3dclear()}
{pt3dadd(154624.352921,121318.722395,189981.250000,881.213188)}
{pt3dadd(155285.164884,120590.046973,190083.333333,937.944347)}
{pt3dadd(155894.403382,119704.214890,190325.000000,923.260906)}

{create adhoc13}
{access adhoc13}
{connect adhoc13(1), adhoc12(0)}
{nseg = 1}
{strdef color color = "White"}
{pt3dclear()}
{pt3dadd(155894.403382,119704.214890,190325.000000,923.260906)}
{pt3dadd(156474.910655,117344.680096,190425.000000,921.594404)}
{pt3dadd(157005.087940,115512.591256,190558.333333,928.703205)}
{pt3dadd(157722.654191,114399.589350,190775.000000,909.726852)}

{create adhoc14}
{access adhoc14}
{connect adhoc14(1), adhoc13(0)}
{nseg = 1}
{strdef color color = "White"}
{pt3dclear()}
{pt3dadd(157722.654191,114399.589350,190775.000000,909.726852)}
{pt3dadd(157385.957460,115566.094912,191100.000000,904.024023)}
{pt3dadd(157081.013219,116790.384192,191416.666667,911.512689)}
{pt3dadd(155060.510764,116895.207731,191625.000000,860.177386)}
{pt3dadd(153089.003634,117112.921700,191791.666667,835.107168)}
{pt3dadd(151136.929367,116990.550055,192033.333333,817.881080)}
{pt3dadd(151015.090349,117536.067654,192358.333333,711.542220)}
{pt3dadd(151153.149730,117677.198610,192633.333333,749.382724)}
{pt3dadd(151420.646897,117321.819804,192833.333333,824.159208)}
{pt3dadd(151417.889500,116832.791789,192941.666667,764.486327)}
{pt3dadd(151255.344320,116514.561463,192975.000000,687.764051)}

{create adhoc15}
{access adhoc15}
{connect adhoc15(1), adhoc13(0)}
{nseg = 1}
{strdef color color = "White"}
{pt3dclear()}
{pt3dadd(157722.654191,114399.589350,190775.000000,909.726852)}
{pt3dadd(158325.124623,112581.603965,190606.250000,895.736194)}

{create adhoc16}
{access adhoc16}
{connect adhoc16(1), adhoc15(0)}
{nseg = 1}
{strdef color color = "White"}
{pt3dclear()}
{pt3dadd(158325.124623,112581.603965,190606.250000,895.736194)}
{pt3dadd(159069.678817,112250.923306,191016.666667,874.161734)}
{pt3dadd(159251.821387,111927.814171,191291.666667,785.773134)}
{pt3dadd(157588.454891,112100.943693,191491.666667,761.493566)}
{pt3dadd(155754.844763,111936.210052,191666.666667,740.956525)}
{pt3dadd(153967.974416,112712.185878,191841.666667,714.399688)}
{pt3dadd(153942.315478,113230.151709,192016.666667,740.461776)}
{pt3dadd(153954.795633,113775.506806,192100.000000,695.967296)}

{create adhoc17}
{access adhoc17}
{connect adhoc17(1), adhoc15(0)}
{nseg = 1}
{strdef color color = "White"}
{pt3dclear()}
{pt3dadd(158325.124623,112581.603965,190606.250000,895.736194)}
{pt3dadd(158325.798049,112129.248921,190150.000000,927.441829)}
{pt3dadd(158041.704582,112087.840326,189808.333333,841.810013)}
{pt3dadd(158118.749947,111968.313883,189700.000000,829.176030)}

{create adhoc18}
{access adhoc18}
{connect adhoc18(1), adhoc12(0)}
{nseg = 1}
{strdef color color = "White"}
{pt3dclear()}
{pt3dadd(155894.403382,119704.214890,190325.000000,923.260906)}
{pt3dadd(155862.490700,120110.555148,190650.000000,932.704085)}
{pt3dadd(155931.153891,120620.161400,190900.000000,918.865176)}
{pt3dadd(156091.323603,120613.356801,190987.500000,953.940447)}

{create adhoc19}
{access adhoc19}
{connect adhoc19(1), adhoc11(0)}
{nseg = 1}
{strdef color color = "White"}
{pt3dclear()}
{pt3dadd(154624.352921,121318.722395,189981.250000,881.213188)}
{pt3dadd(155038.659337,120397.717266,189700.000000,961.153614)}
{pt3dadd(155604.496099,120160.580794,189441.666667,1018.741817)}
{pt3dadd(155983.259538,120047.524531,189258.333333,970.542910)}
{pt3dadd(156152.077569,120221.803916,189162.500000,918.058908)}
