# Supplementary material for: Full reconstruction of large lobula plate tangential cells in Drosophila from a 3D EM dataset
Source: PLoS One. 2018 Nov 28;13(11):e0207828. doi: 10.1371/journal.pone.0207828 (PMC6261601; doi:10.1371/journal.pone.0207828)
Supplement: S1 Dataset — (ZIP) [file pone.0207828.s001.zip › Diameter hoc/plotCompleteSkeletons/vs6_1_0001.hoc]

/* created with convertKnossosNmlToHoc.m */

{create adhoc1}
{access adhoc1}
{nseg = 1}
{strdef color color = "White"}
{pt3dclear()}
{pt3dadd(138678.254851,130045.644674,196875.000000,604.635483)}
{pt3dadd(138621.892077,129662.507957,196858.333333,650.138060)}
{pt3dadd(138608.239708,129272.991434,196766.666667,678.791077)}
{pt3dadd(138759.427717,128736.214757,196600.000000,764.333103)}
{pt3dadd(139047.410519,129183.950399,196333.333333,805.222525)}
{pt3dadd(139564.428762,129823.174673,196050.000000,814.885229)}

{create adhoc2}
{access adhoc2}
{connect adhoc2(1), adhoc1(0)}
{nseg = 1}
{strdef color color = "White"}
{pt3dclear()}
{pt3dadd(139564.428762,129823.174673,196050.000000,814.885229)}
{pt3dadd(140208.274440,131264.671718,196025.000000,842.007560)}
{pt3dadd(140731.284775,132157.050762,195975.000000,861.044072)}
{pt3dadd(140738.294709,132918.094300,195925.000000,857.104987)}

{create adhoc3}
{access adhoc3}
{connect adhoc3(1), adhoc2(0)}
{nseg = 1}
{strdef color color = "White"}
{pt3dclear()}
{pt3dadd(140738.294709,132918.094300,195925.000000,857.104987)}
{pt3dadd(140866.306719,133076.933194,195650.000000,876.928606)}
{pt3dadd(140835.817583,133610.474340,195341.666667,876.032571)}
{pt3dadd(140957.687278,133637.429019,194950.000000,865.727280)}
{pt3dadd(141164.359471,133461.582395,194566.666667,837.456321)}
{pt3dadd(141628.028724,133168.994589,194183.333333,825.430370)}
{pt3dadd(141926.067256,133195.358569,193833.333333,811.146179)}
{pt3dadd(142206.904080,133271.224530,193575.000000,821.197582)}
{pt3dadd(142321.618998,133117.497871,193275.000000,791.464148)}
{pt3dadd(142782.997857,133612.789908,192925.000000,744.096963)}
{pt3dadd(143262.239524,133696.987709,192541.666667,724.941598)}
{pt3dadd(143649.085848,134012.872441,192225.000000,707.350183)}
{pt3dadd(143594.702466,133324.837861,191958.333333,699.165496)}
{pt3dadd(146075.725127,133124.011900,191733.333333,699.165496)}
{pt3dadd(148483.119689,132800.822037,191550.000000,690.980808)}
{pt3dadd(151167.903215,133118.303719,191358.333333,699.165496)}
{pt3dadd(151264.448332,133461.687573,191066.666667,724.927392)}
{pt3dadd(151191.915867,133190.659731,190700.000000,744.082757)}
{pt3dadd(151018.810499,133102.290594,190291.666667,757.925153)}
{pt3dadd(150986.599935,132758.109807,189941.666667,775.924661)}
{pt3dadd(151288.509919,133019.686298,189608.333333,799.590962)}
{pt3dadd(151761.920632,133074.320279,189291.666667,810.169031)}
{pt3dadd(152248.604948,133380.877362,188975.000000,839.902466)}
{pt3dadd(152717.244101,133451.813694,188683.333333,859.057830)}
{pt3dadd(153172.355641,133379.343653,188383.333333,889.322911)}
{pt3dadd(153842.293085,132959.883192,188033.333333,903.574732)}
{pt3dadd(154393.666133,132875.495071,187675.000000,917.826552)}
{pt3dadd(154890.665977,133118.313666,187325.000000,932.078373)}
{pt3dadd(155231.844359,133742.351298,187008.333333,923.893686)}
{pt3dadd(155760.654750,133918.955078,186658.333333,903.035333)}
{pt3dadd(156346.832169,133836.520850,186350.000000,879.376785)}
{pt3dadd(156711.598886,133321.679831,186050.000000,874.941117)}
{pt3dadd(156892.252209,133443.941852,185783.333333,874.941117)}
{pt3dadd(156867.788647,133894.399861,185500.000000,865.606839)}
{pt3dadd(156747.602595,134434.076897,185150.000000,967.595311)}
{pt3dadd(156570.826876,134092.049606,184775.000000,1041.271490)}
{pt3dadd(156431.607889,133531.680662,184383.333333,1109.269995)}
{pt3dadd(156812.416571,132192.936249,183875.000000,1183.969865)}
{pt3dadd(157339.547734,131639.200179,183400.000000,1258.798352)}

{create adhoc4}
{access adhoc4}
{connect adhoc4(1), adhoc3(0)}
{nseg = 1}
{strdef color color = "White"}
{pt3dclear()}
{pt3dadd(157339.547734,131639.200179,183400.000000,1258.798352)}
{pt3dadd(158786.754219,131762.738322,182916.666667,1406.941578)}
{pt3dadd(159722.743861,132631.462252,182516.666667,1466.984043)}
{pt3dadd(160436.000000,133112.000000,181758.333333,1565.015398)}
{pt3dadd(160684.000000,133620.000000,180425.000000,1680.284399)}
{pt3dadd(160956.000000,133956.000000,178950.000000,1853.889746)}
{pt3dadd(161164.000000,133976.000000,177550.000000,2147.328665)}
{pt3dadd(161274.000000,133956.000000,176925.000000,2327.351975)}

{create adhoc5}
{access adhoc5}
{connect adhoc5(1), adhoc3(0)}
{nseg = 1}
{strdef color color = "White"}
{pt3dclear()}
{pt3dadd(157339.547734,131639.200179,183400.000000,1258.798352)}
{pt3dadd(156851.748180,130216.616679,183616.666667,1156.301004)}
{pt3dadd(156425.776785,129762.616839,184008.333333,1058.169327)}
{pt3dadd(156301.146298,129394.719140,184383.333333,971.413296)}
{pt3dadd(156466.105011,128937.683311,184733.333333,879.662506)}
{pt3dadd(156682.413032,128364.480532,185083.333333,780.159713)}
{pt3dadd(156836.821212,127409.225582,185391.666667,733.721817)}
{pt3dadd(156654.323583,127118.785162,185716.666667,710.055516)}
{pt3dadd(156355.386889,127181.947456,185991.666667,720.633585)}
{pt3dadd(156071.952106,127022.448255,186341.666667,727.240117)}
{pt3dadd(155978.573269,126614.306842,186700.000000,739.999480)}
{pt3dadd(155966.561414,125700.343109,187066.666667,760.857832)}
{pt3dadd(155994.492954,125651.377639,187358.333333,779.684329)}
{pt3dadd(155964.614248,125335.556119,187616.666667,805.446226)}
{pt3dadd(155866.372178,125640.649277,187891.666667,842.235342)}
{pt3dadd(155788.399742,125358.774610,188225.000000,852.007764)}
{pt3dadd(155613.680564,125309.638806,188583.333333,865.095995)}
{pt3dadd(155384.752952,125143.270028,188950.000000,875.674064)}
{pt3dadd(155056.701054,124946.433679,189316.666667,879.313598)}
{pt3dadd(154842.932051,124774.365690,189708.333333,928.628727)}
{pt3dadd(154870.089835,124298.473149,190100.000000,880.980763)}
{pt3dadd(155130.744681,123977.501980,190466.666667,917.974501)}
{pt3dadd(155431.004777,123459.957571,190841.666667,931.651218)}
{pt3dadd(155828.987113,122980.769972,191141.666667,932.063378)}
{pt3dadd(154843.894332,121683.213356,191393.750000,963.089619)}

{create adhoc6}
{access adhoc6}
{connect adhoc6(1), adhoc5(0)}
{nseg = 1}
{strdef color color = "White"}
{pt3dclear()}
{pt3dadd(154843.894332,121683.213356,191393.750000,963.089619)}
{pt3dadd(157266.587318,120596.924476,191275.000000,912.081732)}
{pt3dadd(157698.744219,119952.951126,191141.666667,830.851335)}
{pt3dadd(157839.651795,119620.137637,191000.000000,723.589602)}
{pt3dadd(157742.467308,119567.587849,190833.333333,618.551425)}
{pt3dadd(157801.412300,119157.967418,190762.500000,652.744298)}

{create adhoc7}
{access adhoc7}
{connect adhoc7(1), adhoc5(0)}
{nseg = 1}
{strdef color color = "White"}
{pt3dclear()}
{pt3dadd(154843.894332,121683.213356,191393.750000,963.089619)}
{pt3dadd(152279.770714,121670.832048,191683.333333,972.513636)}
{pt3dadd(150383.412748,121072.706430,191991.666667,1028.652067)}
{pt3dadd(150633.941515,121046.237590,192316.666667,1055.930997)}
{pt3dadd(150742.618656,121164.037323,192600.000000,1058.470814)}
{pt3dadd(150514.326668,121248.155169,192933.333333,1038.723140)}
{pt3dadd(150308.753624,121206.216255,193283.333333,1092.340583)}
{pt3dadd(150149.173333,120643.391611,193583.333333,1138.962128)}
{pt3dadd(149550.349844,120650.962664,193750.000000,1122.704115)}
{pt3dadd(148681.839955,120262.167641,193883.333333,1238.960753)}
{pt3dadd(147673.205996,120242.470189,194025.000000,1192.531413)}
{pt3dadd(147430.965848,119963.985983,194137.500000,1112.383545)}

{create adhoc8}
{access adhoc8}
{connect adhoc8(1), adhoc2(0)}
{nseg = 1}
{strdef color color = "White"}
{pt3dclear()}
{pt3dadd(140738.294709,132918.094300,195925.000000,857.104987)}
{pt3dadd(140304.389363,133785.090323,196141.666667,861.545510)}
{pt3dadd(139902.868858,134290.445409,196408.333333,832.425614)}
{pt3dadd(139713.680002,134301.658971,196750.000000,804.084674)}
{pt3dadd(139263.587315,134131.437694,197091.666667,784.120111)}
{pt3dadd(138679.804457,133954.140547,197416.666667,784.609626)}
{pt3dadd(138067.118559,134087.071134,197658.333333,823.666553)}
{pt3dadd(137745.759777,134492.002901,197841.666667,889.259393)}
{pt3dadd(137350.969950,134778.662889,198083.333333,870.057922)}
{pt3dadd(136481.068579,134970.283024,198350.000000,861.883671)}
{pt3dadd(135476.038360,135250.788805,198633.333333,854.613311)}
{pt3dadd(134600.797576,135586.877923,198866.666667,854.613311)}
{pt3dadd(134505.739376,135660.161750,199083.333333,868.830914)}
{pt3dadd(134508.201859,135499.751644,199291.666667,868.830914)}
{pt3dadd(130873.089031,137176.710116,199466.666667,831.324627)}
{pt3dadd(126911.876721,139203.790245,199650.000000,845.728588)}
{pt3dadd(122932.856986,140980.351534,199875.000000,875.734640)}
{pt3dadd(122676.947199,141074.501725,200116.666667,905.357746)}
{pt3dadd(122633.485940,140693.760408,200333.333333,919.201434)}
{pt3dadd(122530.394121,140640.065760,200483.333333,902.611221)}
{pt3dadd(122544.053093,140418.935784,200562.500000,1000.000000)}

{create adhoc9}
{access adhoc9}
{connect adhoc9(1), adhoc1(0)}
{nseg = 1}
{strdef color color = "White"}
{pt3dclear()}
{pt3dadd(139564.428762,129823.174673,196050.000000,814.885229)}
{pt3dadd(139350.649154,129170.844879,195775.000000,781.934733)}
{pt3dadd(139275.610844,128683.193806,195466.666667,743.223653)}
{pt3dadd(139282.309670,128638.264705,195125.000000,709.922546)}
{pt3dadd(139243.590856,128522.079107,194733.333333,759.094111)}
{pt3dadd(139194.059216,128340.562210,194466.666667,807.806918)}
{pt3dadd(139077.722936,128150.310420,194337.500000,875.249032)}
