# Supplementary material for: Full reconstruction of large lobula plate tangential cells in Drosophila from a 3D EM dataset
Source: PLoS One. 2018 Nov 28;13(11):e0207828. doi: 10.1371/journal.pone.0207828 (PMC6261601; doi:10.1371/journal.pone.0207828)
Supplement: S1 Dataset — (ZIP) [file pone.0207828.s001.zip › Diameter hoc/plotCompleteSkeletons/vsl1_1_0001.hoc]

/* created with convertKnossosNmlToHoc.m */

{create adhoc1}
{access adhoc1}
{nseg = 1}
{strdef color color = "White"}
{pt3dclear()}
{pt3dadd(150035.387430,123896.508216,184362.500000,1000.000000)}
{pt3dadd(150210.054166,123998.384696,184258.333333,439.583392)}
{pt3dadd(150414.029202,124278.569241,184091.666667,494.626339)}
{pt3dadd(150428.928440,124591.971829,183875.000000,533.927432)}
{pt3dadd(150769.074959,125156.942287,183583.333333,593.717305)}
{pt3dadd(151249.949461,125665.919555,183318.750000,646.473075)}

{create adhoc2}
{access adhoc2}
{connect adhoc2(1), adhoc1(0)}
{nseg = 1}
{strdef color color = "White"}
{pt3dclear()}
{pt3dadd(151249.949461,125665.919555,183318.750000,646.473075)}
{pt3dadd(151065.735471,125592.319275,182891.666667,593.717305)}
{pt3dadd(150808.689609,125439.954397,182750.000000,566.608365)}

{create adhoc3}
{access adhoc3}
{connect adhoc3(1), adhoc1(0)}
{nseg = 1}
{strdef color color = "White"}
{pt3dclear()}
{pt3dadd(151249.949461,125665.919555,183318.750000,646.473075)}
{pt3dadd(152185.342195,126205.743085,183275.000000,675.923494)}

{create adhoc4}
{access adhoc4}
{connect adhoc4(1), adhoc3(0)}
{nseg = 1}
{strdef color color = "White"}
{pt3dclear()}
{pt3dadd(152185.342195,126205.743085,183275.000000,675.923494)}
{pt3dadd(151905.446420,125946.434924,183683.333333,682.102994)}
{pt3dadd(151550.300759,125629.079936,183975.000000,667.620581)}
{pt3dadd(151331.265654,125470.017607,184137.500000,648.310697)}

{create adhoc5}
{access adhoc5}
{connect adhoc5(1), adhoc3(0)}
{nseg = 1}
{strdef color color = "White"}
{pt3dclear()}
{pt3dadd(152185.342195,126205.743085,183275.000000,675.923494)}
{pt3dadd(152760.290464,126444.410638,182975.000000,719.601351)}
{pt3dadd(153193.111629,126654.654312,182675.000000,757.076342)}
{pt3dadd(152603.900258,130470.171067,182641.666667,788.348469)}
{pt3dadd(151944.000000,134404.000000,182658.333333,845.813554)}
{pt3dadd(151004.000000,138216.000000,182483.333333,916.860184)}
{pt3dadd(150776.000000,138192.000000,182166.666667,1025.666955)}
{pt3dadd(150420.000000,137992.000000,181716.666667,1066.060755)}
{pt3dadd(150088.000000,137664.000000,181458.333333,1074.394522)}
{pt3dadd(149772.000000,137324.000000,181158.333333,1094.204120)}
{pt3dadd(149300.000000,136892.000000,180833.333333,1115.920474)}
{pt3dadd(148912.000000,135852.000000,180100.000000,1095.358464)}
{pt3dadd(148596.000000,134892.000000,179441.666667,1089.113799)}
{pt3dadd(148644.000000,134166.000000,178881.250000,1102.512270)}

{create adhoc6}
{access adhoc6}
{connect adhoc6(1), adhoc5(0)}
{nseg = 1}
{strdef color color = "White"}
{pt3dclear()}
{pt3dadd(148644.000000,134166.000000,178881.250000,1102.512270)}
{pt3dadd(148764.000000,134096.000000,178725.000000,1093.907710)}
{pt3dadd(148953.000000,134013.000000,178531.250000,1051.529829)}

{create adhoc7}
{access adhoc7}
{connect adhoc7(1), adhoc6(0)}
{nseg = 1}
{strdef color color = "White"}
{pt3dclear()}
{pt3dadd(148953.000000,134013.000000,178531.250000,1051.529829)}
{pt3dadd(149232.000000,133844.000000,178316.666667,1034.258728)}
{pt3dadd(149480.000000,133684.000000,178125.000000,1017.104792)}
{pt3dadd(149666.400000,133562.400000,177940.000000,1024.708028)}

{create adhoc8}
{access adhoc8}
{connect adhoc8(1), adhoc7(0)}
{nseg = 1}
{strdef color color = "White"}
{pt3dclear()}
{pt3dadd(149666.400000,133562.400000,177940.000000,1024.708028)}
{pt3dadd(149988.000000,133484.000000,177600.000000,1031.814634)}
{pt3dadd(150404.000000,133344.000000,177150.000000,1082.134563)}
{pt3dadd(150820.000000,133176.000000,176675.000000,1111.030505)}
{pt3dadd(151060.000000,133104.000000,176133.333333,1179.951767)}
{pt3dadd(151164.000000,133086.000000,175862.500000,1311.145525)}

{create adhoc9}
{access adhoc9}
{connect adhoc9(1), adhoc7(0)}
{nseg = 1}
{strdef color color = "White"}
{pt3dclear()}
{pt3dadd(149666.400000,133562.400000,177940.000000,1024.708028)}
{pt3dadd(150216.000000,132852.000000,178025.000000,1023.797739)}
{pt3dadd(151240.000000,132048.000000,177933.333333,1035.702992)}
{pt3dadd(152272.000000,130952.000000,178358.333333,970.733685)}
{pt3dadd(152692.000000,130284.000000,179000.000000,905.760334)}
{pt3dadd(152700.000000,129432.000000,179958.333333,829.917308)}
{pt3dadd(152700.000000,128712.000000,180383.333333,681.863218)}
{pt3dadd(152700.000000,128232.000000,180587.500000,619.305282)}

{create adhoc10}
{access adhoc10}
{connect adhoc10(1), adhoc9(0)}
{nseg = 1}
{strdef color color = "White"}
{pt3dclear()}
{pt3dadd(152700.000000,128232.000000,180587.500000,619.305282)}
{pt3dadd(152712.000000,128052.000000,180825.000000,611.828885)}
{pt3dadd(152956.000000,127936.000000,181275.000000,626.435822)}
{pt3dadd(153260.000000,127744.000000,181883.333333,635.350958)}
{pt3dadd(153608.000000,127528.000000,182300.000000,635.159214)}
{pt3dadd(153696.000000,127410.000000,182487.500000,619.030430)}

{create adhoc11}
{access adhoc11}
{connect adhoc11(1), adhoc9(0)}
{nseg = 1}
{strdef color color = "White"}
{pt3dclear()}
{pt3dadd(152700.000000,128232.000000,180587.500000,619.305282)}
{pt3dadd(153016.000000,128052.000000,180325.000000,572.691279)}
{pt3dadd(153416.000000,128004.000000,179900.000000,581.267413)}
{pt3dadd(153936.000000,127860.000000,179325.000000,566.939366)}
{pt3dadd(154212.000000,127740.000000,178916.666667,554.150192)}
{pt3dadd(154660.000000,127560.000000,178691.666667,529.896165)}
{pt3dadd(155208.000000,127192.000000,178616.666667,449.554709)}
{pt3dadd(155908.000000,126848.000000,178833.333333,407.495016)}
{pt3dadd(156460.000000,126544.000000,179075.000000,354.920400)}
{pt3dadd(156738.000000,126528.000000,179300.000000,346.196245)}

{create adhoc12}
{access adhoc12}
{connect adhoc12(1), adhoc7(0)}
{nseg = 1}
{strdef color color = "White"}
{pt3dclear()}
{pt3dadd(149666.400000,133562.400000,177940.000000,1024.708028)}
{pt3dadd(149016.000000,132984.000000,178041.666667,1031.814634)}
{pt3dadd(148488.000000,132196.000000,178125.000000,1035.004038)}
{pt3dadd(147976.000000,131160.000000,177858.333333,996.330181)}
{pt3dadd(148084.000000,130708.000000,177466.666667,954.717954)}
{pt3dadd(148116.000000,130464.000000,177062.500000,884.214114)}

{create adhoc13}
{access adhoc13}
{connect adhoc13(1), adhoc6(0)}
{nseg = 1}
{strdef color color = "White"}
{pt3dclear()}
{pt3dadd(148953.000000,134013.000000,178531.250000,1051.529829)}
{pt3dadd(148860.000000,134508.000000,177966.666667,1075.222257)}
{pt3dadd(148844.000000,134928.000000,177275.000000,1126.001800)}
{pt3dadd(148836.000000,135372.000000,176612.500000,1108.568662)}

{create adhoc14}
{access adhoc14}
{connect adhoc14(1), adhoc5(0)}
{nseg = 1}
{strdef color color = "White"}
{pt3dclear()}
{pt3dadd(148644.000000,134166.000000,178881.250000,1102.512270)}
{pt3dadd(148436.000000,134156.000000,179041.666667,1069.430550)}
{pt3dadd(148132.000000,134136.000000,179233.333333,1088.156911)}
{pt3dadd(147764.000000,134136.000000,179425.000000,1102.245325)}
{pt3dadd(147516.000000,134193.000000,179550.000000,1089.124769)}

{create adhoc15}
{access adhoc15}
{connect adhoc15(1), adhoc14(0)}
{nseg = 1}
{strdef color color = "White"}
{pt3dclear()}
{pt3dadd(147516.000000,134193.000000,179550.000000,1089.124769)}
{pt3dadd(147368.000000,134264.000000,179616.666667,1130.371774)}
{pt3dadd(147168.000000,134352.000000,179908.333333,1126.961867)}
{pt3dadd(146872.000000,134440.000000,180341.666667,1108.609783)}
{pt3dadd(146564.000000,134484.000000,180808.333333,1072.981903)}
{pt3dadd(146160.000000,134520.000000,181200.000000,1020.668694)}
{pt3dadd(145772.000000,134580.000000,181508.333333,877.014733)}
{pt3dadd(145408.000000,134664.000000,181750.000000,791.535050)}
{pt3dadd(145218.000000,134733.000000,181850.000000,716.448765)}

{create adhoc16}
{access adhoc16}
{connect adhoc16(1), adhoc15(0)}
{nseg = 1}
{strdef color color = "White"}
{pt3dclear()}
{pt3dadd(145218.000000,134733.000000,181850.000000,716.448765)}
{pt3dadd(144968.000000,134828.000000,181891.666667,657.801544)}
{pt3dadd(144356.000000,134872.000000,181916.666667,623.491679)}
{pt3dadd(143637.000000,134910.000000,181943.750000,588.803256)}

{create adhoc17}
{access adhoc17}
{connect adhoc17(1), adhoc16(0)}
{nseg = 1}
{strdef color color = "White"}
{pt3dclear()}
{pt3dadd(143637.000000,134910.000000,181943.750000,588.803256)}
{pt3dadd(142772.000000,135312.000000,182008.333333,585.452214)}
{pt3dadd(142064.000000,135812.000000,182058.333333,583.023362)}
{pt3dadd(141236.000000,136384.000000,182100.000000,600.551793)}
{pt3dadd(140796.000000,136532.000000,182033.333333,610.339780)}
{pt3dadd(140468.000000,136624.000000,181866.666667,630.453702)}
{pt3dadd(140208.000000,136728.000000,181633.333333,681.825455)}
{pt3dadd(140152.000000,136896.000000,181350.000000,740.511455)}
{pt3dadd(139864.000000,137316.000000,181066.666667,799.197454)}
{pt3dadd(139468.000000,137756.000000,180700.000000,883.903949)}
{pt3dadd(138940.000000,138160.000000,180250.000000,902.286371)}
{pt3dadd(138548.000000,138228.000000,179650.000000,875.012738)}
{pt3dadd(138256.000000,138244.000000,179075.000000,803.262750)}
{pt3dadd(138044.000000,138232.000000,178533.333333,776.090067)}
{pt3dadd(137979.000000,138279.000000,178212.500000,780.844432)}

{create adhoc18}
{access adhoc18}
{connect adhoc18(1), adhoc17(0)}
{nseg = 1}
{strdef color color = "White"}
{pt3dclear()}
{pt3dadd(137979.000000,138279.000000,178212.500000,780.844432)}
{pt3dadd(137892.000000,138092.000000,177916.666667,784.047640)}
{pt3dadd(137792.000000,137892.000000,177591.666667,785.699689)}
{pt3dadd(137688.000000,137688.000000,177231.250000,810.217550)}

{create adhoc19}
{access adhoc19}
{connect adhoc19(1), adhoc18(0)}
{nseg = 1}
{strdef color color = "White"}
{pt3dclear()}
{pt3dadd(137688.000000,137688.000000,177231.250000,810.217550)}
{pt3dadd(137488.000000,137504.000000,177058.333333,801.857824)}
{pt3dadd(137124.000000,137168.000000,176858.333333,751.003197)}
{pt3dadd(136516.000000,136720.000000,176500.000000,685.518572)}
{pt3dadd(136008.000000,136372.000000,176000.000000,645.760050)}
{pt3dadd(135700.000000,136040.000000,175533.333333,635.943833)}
{pt3dadd(135642.000000,135783.000000,175200.000000,622.162615)}

{create adhoc20}
{access adhoc20}
{connect adhoc20(1), adhoc19(0)}
{nseg = 1}
{strdef color color = "White"}
{pt3dclear()}
{pt3dadd(135642.000000,135783.000000,175200.000000,622.162615)}
{pt3dadd(135660.000000,135672.000000,175125.000000,645.070740)}

{create adhoc21}
{access adhoc21}
{connect adhoc21(1), adhoc19(0)}
{nseg = 1}
{strdef color color = "White"}
{pt3dclear()}
{pt3dadd(135642.000000,135783.000000,175200.000000,622.162615)}
{pt3dadd(135152.000000,135768.000000,175125.000000,645.070740)}
{pt3dadd(134898.000000,135816.000000,175125.000000,673.705897)}

{create adhoc22}
{access adhoc22}
{connect adhoc22(1), adhoc18(0)}
{nseg = 1}
{strdef color color = "White"}
{pt3dclear()}
{pt3dadd(137688.000000,137688.000000,177231.250000,810.217550)}
{pt3dadd(137732.000000,138044.000000,177108.333333,818.463425)}
{pt3dadd(137760.000000,138228.000000,177100.000000,803.596569)}

{create adhoc23}
{access adhoc23}
{connect adhoc23(1), adhoc17(0)}
{nseg = 1}
{strdef color color = "White"}
{pt3dclear()}
{pt3dadd(137979.000000,138279.000000,178212.500000,780.844432)}
{pt3dadd(138020.000000,139140.000000,178100.000000,785.293136)}
{pt3dadd(138088.000000,139976.000000,178050.000000,833.376685)}
{pt3dadd(138168.000000,140848.000000,177958.333333,906.608983)}
{pt3dadd(138198.000000,140838.000000,177887.500000,951.955500)}

{create adhoc24}
{access adhoc24}
{connect adhoc24(1), adhoc16(0)}
{nseg = 1}
{strdef color color = "White"}
{pt3dclear()}
{pt3dadd(143637.000000,134910.000000,181943.750000,588.803256)}
{pt3dadd(142808.000000,134604.000000,181991.666667,566.899419)}
{pt3dadd(142173.000000,134244.000000,182043.750000,544.251110)}

{create adhoc25}
{access adhoc25}
{connect adhoc25(1), adhoc24(0)}
{nseg = 1}
{strdef color color = "White"}
{pt3dclear()}
{pt3dadd(142173.000000,134244.000000,182043.750000,544.251110)}
{pt3dadd(141468.000000,133752.000000,181716.666667,511.065882)}
{pt3dadd(141140.000000,133480.000000,181275.000000,494.077820)}
{pt3dadd(140764.000000,133144.000000,180758.333333,473.181315)}
{pt3dadd(140736.000000,133116.000000,180637.500000,458.527744)}

{create adhoc26}
{access adhoc26}
{connect adhoc26(1), adhoc24(0)}
{nseg = 1}
{strdef color color = "White"}
{pt3dclear()}
{pt3dadd(142173.000000,134244.000000,182043.750000,544.251110)}
{pt3dadd(141852.000000,134200.000000,182216.666667,511.065882)}
{pt3dadd(141882.000000,134286.000000,182287.500000,494.077820)}

{create adhoc27}
{access adhoc27}
{connect adhoc27(1), adhoc15(0)}
{nseg = 1}
{strdef color color = "White"}
{pt3dclear()}
{pt3dadd(145218.000000,134733.000000,181850.000000,716.448765)}
{pt3dadd(145740.000000,134048.000000,181958.333333,684.077459)}
{pt3dadd(146276.000000,133172.000000,182141.666667,645.701312)}
{pt3dadd(146796.000000,132148.000000,182341.666667,613.583322)}
{pt3dadd(146764.000000,131736.000000,182416.666667,565.201153)}
{pt3dadd(146856.000000,131412.000000,182275.000000,494.776042)}
{pt3dadd(146952.000000,131136.000000,182100.000000,424.655416)}
{pt3dadd(146988.000000,130880.000000,181950.000000,384.934470)}
{pt3dadd(146952.000000,130628.000000,181875.000000,344.112530)}
{pt3dadd(146940.000000,130420.000000,181816.666667,333.582513)}
{pt3dadd(146955.000000,130278.000000,181775.000000,325.833689)}

{create adhoc28}
{access adhoc28}
{connect adhoc28(1), adhoc27(0)}
{nseg = 1}
{strdef color color = "White"}
{pt3dclear()}
{pt3dadd(146955.000000,130278.000000,181775.000000,325.833689)}
{pt3dadd(147108.000000,130216.000000,181733.333333,315.661759)}
{pt3dadd(147360.000000,130144.000000,181666.666667,305.996949)}
{pt3dadd(147656.000000,130012.000000,181575.000000,297.115871)}
{pt3dadd(147786.000000,129930.000000,181537.500000,287.229960)}

{create adhoc29}
{access adhoc29}
{connect adhoc29(1), adhoc27(0)}
{nseg = 1}
{strdef color color = "White"}
{pt3dclear()}
{pt3dadd(146955.000000,130278.000000,181775.000000,325.833689)}
{pt3dadd(146732.000000,130216.000000,181683.333333,326.895685)}
{pt3dadd(146412.000000,130128.000000,181600.000000,336.768503)}
{pt3dadd(146052.000000,129976.000000,181475.000000,370.411959)}
{pt3dadd(145860.000000,129788.000000,181400.000000,408.830868)}
{pt3dadd(145684.000000,129596.000000,181250.000000,455.460523)}
{pt3dadd(145508.000000,129396.000000,181083.333333,515.899323)}
{pt3dadd(145344.000000,129156.000000,180933.333333,560.031186)}
{pt3dadd(145148.000000,128900.000000,180758.333333,622.622531)}
{pt3dadd(145004.000000,128616.000000,180625.000000,674.008041)}
{pt3dadd(144896.000000,128328.000000,180450.000000,710.726038)}
{pt3dadd(144828.000000,128136.000000,180208.333333,735.364907)}
{pt3dadd(144792.000000,127984.000000,179841.666667,744.391307)}
{pt3dadd(144783.000000,127917.000000,179506.250000,719.870914)}

{create adhoc30}
{access adhoc30}
{connect adhoc30(1), adhoc29(0)}
{nseg = 1}
{strdef color color = "White"}
{pt3dclear()}
{pt3dadd(144783.000000,127917.000000,179506.250000,719.870914)}
{pt3dadd(144704.000000,127748.000000,179233.333333,716.669313)}
{pt3dadd(144376.000000,127576.000000,178900.000000,681.110439)}
{pt3dadd(144036.000000,127400.000000,178416.666667,652.654233)}
{pt3dadd(143944.000000,127380.000000,177983.333333,642.884719)}
{pt3dadd(144136.000000,127528.000000,177650.000000,624.162518)}
{pt3dadd(144357.000000,127710.000000,177450.000000,570.047041)}

{create adhoc31}
{access adhoc31}
{connect adhoc31(1), adhoc30(0)}
{nseg = 1}
{strdef color color = "White"}
{pt3dclear()}
{pt3dadd(144357.000000,127710.000000,177450.000000,570.047041)}
{pt3dadd(144476.000000,127912.000000,177291.666667,543.451700)}
{pt3dadd(144510.000000,127968.000000,177237.500000,511.537289)}

{create adhoc32}
{access adhoc32}
{connect adhoc32(1), adhoc30(0)}
{nseg = 1}
{strdef color color = "White"}
{pt3dclear()}
{pt3dadd(144357.000000,127710.000000,177450.000000,570.047041)}
{pt3dadd(144400.000000,127600.000000,177391.666667,543.451700)}
{pt3dadd(144424.000000,127340.000000,177350.000000,511.537289)}
{pt3dadd(144432.000000,127110.000000,177325.000000,453.361994)}

{create adhoc33}
{access adhoc33}
{connect adhoc33(1), adhoc29(0)}
{nseg = 1}
{strdef color color = "White"}
{pt3dclear()}
{pt3dadd(144783.000000,127917.000000,179506.250000,719.870914)}
{pt3dadd(144592.000000,127872.000000,179908.333333,699.151475)}
{pt3dadd(144356.000000,127736.000000,180558.333333,678.963551)}
{pt3dadd(144092.000000,127544.000000,181216.666667,667.202232)}
{pt3dadd(144000.000000,127360.000000,181500.000000,636.677038)}
{pt3dadd(143907.000000,127314.000000,181675.000000,582.014250)}

{create adhoc34}
{access adhoc34}
{connect adhoc34(1), adhoc33(0)}
{nseg = 1}
{strdef color color = "White"}
{pt3dclear()}
{pt3dadd(143907.000000,127314.000000,181675.000000,582.014250)}
{pt3dadd(144040.000000,127284.000000,181866.666667,515.315864)}
{pt3dadd(144126.000000,127266.000000,181912.500000,480.587870)}

{create adhoc35}
{access adhoc35}
{connect adhoc35(1), adhoc33(0)}
{nseg = 1}
{strdef color color = "White"}
{pt3dclear()}
{pt3dadd(143907.000000,127314.000000,181675.000000,582.014250)}
{pt3dadd(143768.000000,127364.000000,181841.666667,515.315864)}
{pt3dadd(143608.000000,127440.000000,181958.333333,480.587870)}
{pt3dadd(143478.000000,127500.000000,182050.000000,438.142544)}

{create adhoc36}
{access adhoc36}
{connect adhoc36(1), adhoc14(0)}
{nseg = 1}
{strdef color color = "White"}
{pt3dclear()}
{pt3dadd(147516.000000,134193.000000,179550.000000,1089.124769)}
{pt3dadd(147448.000000,133716.000000,179116.666667,1107.419665)}
{pt3dadd(147368.000000,133200.000000,178558.333333,1072.694843)}
{pt3dadd(147232.000000,132692.000000,177958.333333,1022.765783)}
{pt3dadd(147028.000000,132664.000000,177700.000000,920.834371)}
{pt3dadd(146812.000000,132600.000000,177416.666667,796.528472)}
{pt3dadd(146564.000000,132424.000000,177075.000000,665.447493)}
{pt3dadd(146352.000000,132244.000000,176766.666667,571.240459)}
{pt3dadd(146199.000000,132120.000000,176593.750000,520.166852)}

{create adhoc37}
{access adhoc37}
{connect adhoc37(1), adhoc36(0)}
{nseg = 1}
{strdef color color = "White"}
{pt3dclear()}
{pt3dadd(146199.000000,132120.000000,176593.750000,520.166852)}
{pt3dadd(146132.000000,132020.000000,176350.000000,526.294932)}
{pt3dadd(146097.000000,131910.000000,176100.000000,530.329094)}

{create adhoc38}
{access adhoc38}
{connect adhoc38(1), adhoc37(0)}
{nseg = 1}
{strdef color color = "White"}
{pt3dclear()}
{pt3dadd(146097.000000,131910.000000,176100.000000,530.329094)}
{pt3dadd(146056.000000,131928.000000,175775.000000,531.850555)}
{pt3dadd(146032.000000,132144.000000,175533.333333,558.255035)}
{pt3dadd(146010.000000,132294.000000,175325.000000,590.101249)}

{create adhoc39}
{access adhoc39}
{connect adhoc39(1), adhoc37(0)}
{nseg = 1}
{strdef color color = "White"}
{pt3dclear()}
{pt3dadd(146097.000000,131910.000000,176100.000000,530.329094)}
{pt3dadd(146172.000000,131464.000000,175916.666667,531.850555)}
{pt3dadd(146312.000000,130980.000000,175916.666667,558.255035)}
{pt3dadd(146430.000000,130548.000000,175900.000000,590.101249)}

{create adhoc40}
{access adhoc40}
{connect adhoc40(1), adhoc36(0)}
{nseg = 1}
{strdef color color = "White"}
{pt3dclear()}
{pt3dadd(146199.000000,132120.000000,176593.750000,520.166852)}
{pt3dadd(145892.000000,131912.000000,176533.333333,526.294932)}
{pt3dadd(145624.000000,131652.000000,176475.000000,579.941876)}
{pt3dadd(145356.000000,131424.000000,176437.500000,635.455081)}
