# Supplementary material for: Full reconstruction of large lobula plate tangential cells in Drosophila from a 3D EM dataset
Source: PLoS One. 2018 Nov 28;13(11):e0207828. doi: 10.1371/journal.pone.0207828 (PMC6261601; doi:10.1371/journal.pone.0207828)
Supplement: S1 Dataset — (ZIP) [file pone.0207828.s001.zip › Diameter hoc/plotCompleteSkeletons/vsl1_3_0001.hoc]

/* created with convertKnossosNmlToHoc.m */

{create adhoc1}
{access adhoc1}
{nseg = 1}
{strdef color color = "White"}
{pt3dclear()}
{pt3dadd(141736.880075,132989.634643,182575.000000,691.544497)}
{pt3dadd(141652.879436,132843.143428,182725.000000,709.649024)}
{pt3dadd(141579.676119,132512.593470,182966.666667,694.944685)}
{pt3dadd(141245.164563,132878.202424,183281.250000,668.918041)}

{create adhoc2}
{access adhoc2}
{connect adhoc2(1), adhoc1(0)}
{nseg = 1}
{strdef color color = "White"}
{pt3dclear()}
{pt3dadd(141245.164563,132878.202424,183281.250000,668.918041)}
{pt3dadd(141087.377970,133722.710006,183341.666667,694.944685)}
{pt3dadd(140769.310698,134451.960869,183458.333333,709.649024)}
{pt3dadd(140773.637648,134526.103015,183525.000000,691.544497)}

{create adhoc3}
{access adhoc3}
{connect adhoc3(1), adhoc1(0)}
{nseg = 1}
{strdef color color = "White"}
{pt3dclear()}
{pt3dadd(141245.164563,132878.202424,183281.250000,668.918041)}
{pt3dadd(141129.651117,132332.009041,183516.666667,628.608928)}
{pt3dadd(140864.424597,132319.883306,183766.666667,588.996382)}
{pt3dadd(140869.547298,132267.987458,183975.000000,601.986859)}

{create adhoc4}
{access adhoc4}
{connect adhoc4(1), adhoc3(0)}
{nseg = 1}
{strdef color color = "White"}
{pt3dclear()}
{pt3dadd(140869.547298,132267.987458,183975.000000,601.986859)}
{pt3dadd(141491.963907,132647.021259,183941.666667,629.954298)}
{pt3dadd(141959.217324,133158.069595,183933.333333,649.927211)}
{pt3dadd(142338.120018,133662.087365,183843.750000,653.850686)}

{create adhoc5}
{access adhoc5}
{connect adhoc5(1), adhoc4(0)}
{nseg = 1}
{strdef color color = "White"}
{pt3dclear()}
{pt3dadd(142338.120018,133662.087365,183843.750000,653.850686)}
{pt3dadd(142275.803348,133633.568007,183641.666667,657.361211)}
{pt3dadd(145250.979768,135173.195363,183266.666667,645.271981)}
{pt3dadd(148141.290485,136634.196808,182966.666667,609.711542)}
{pt3dadd(151004.000000,138216.000000,182483.333333,600.323964)}
{pt3dadd(150776.000000,138192.000000,182166.666667,696.922779)}
{pt3dadd(150420.000000,137992.000000,181716.666667,815.440005)}
{pt3dadd(150088.000000,137664.000000,181458.333333,920.368193)}
{pt3dadd(149772.000000,137324.000000,181158.333333,1017.670175)}
{pt3dadd(149300.000000,136892.000000,180833.333333,1115.920474)}
{pt3dadd(148912.000000,135852.000000,180100.000000,1095.358464)}
{pt3dadd(148596.000000,134892.000000,179441.666667,1089.113799)}
{pt3dadd(148644.000000,134166.000000,178881.250000,1102.512270)}

{create adhoc6}
{access adhoc6}
{connect adhoc6(1), adhoc5(0)}
{nseg = 1}
{strdef color color = "White"}
{pt3dclear()}
{pt3dadd(148644.000000,134166.000000,178881.250000,1102.512270)}
{pt3dadd(148764.000000,134096.000000,178725.000000,1093.907710)}
{pt3dadd(148953.000000,134013.000000,178531.250000,1051.529829)}

{create adhoc7}
{access adhoc7}
{connect adhoc7(1), adhoc6(0)}
{nseg = 1}
{strdef color color = "White"}
{pt3dclear()}
{pt3dadd(148953.000000,134013.000000,178531.250000,1051.529829)}
{pt3dadd(149232.000000,133844.000000,178316.666667,1034.258728)}
{pt3dadd(149480.000000,133684.000000,178125.000000,1017.104792)}
{pt3dadd(149666.400000,133562.400000,177940.000000,1024.708028)}

{create adhoc8}
{access adhoc8}
{connect adhoc8(1), adhoc7(0)}
{nseg = 1}
{strdef color color = "White"}
{pt3dclear()}
{pt3dadd(149666.400000,133562.400000,177940.000000,1024.708028)}
{pt3dadd(149988.000000,133484.000000,177600.000000,1031.814634)}
{pt3dadd(150404.000000,133344.000000,177150.000000,1082.134563)}
{pt3dadd(150820.000000,133176.000000,176675.000000,1111.030505)}
{pt3dadd(151060.000000,133104.000000,176133.333333,1179.951767)}
{pt3dadd(151164.000000,133086.000000,175862.500000,1311.145525)}

{create adhoc9}
{access adhoc9}
{connect adhoc9(1), adhoc7(0)}
{nseg = 1}
{strdef color color = "White"}
{pt3dclear()}
{pt3dadd(149666.400000,133562.400000,177940.000000,1024.708028)}
{pt3dadd(150216.000000,132852.000000,178025.000000,1023.797739)}
{pt3dadd(151240.000000,132048.000000,177933.333333,1035.702992)}
{pt3dadd(152272.000000,130952.000000,178358.333333,970.733685)}
{pt3dadd(152692.000000,130284.000000,179000.000000,905.760334)}
{pt3dadd(152700.000000,129432.000000,179958.333333,829.917308)}
{pt3dadd(152700.000000,128712.000000,180383.333333,681.863218)}
{pt3dadd(152700.000000,128232.000000,180587.500000,619.305282)}

{create adhoc10}
{access adhoc10}
{connect adhoc10(1), adhoc9(0)}
{nseg = 1}
{strdef color color = "White"}
{pt3dclear()}
{pt3dadd(152700.000000,128232.000000,180587.500000,619.305282)}
{pt3dadd(152712.000000,128052.000000,180825.000000,611.828885)}
{pt3dadd(152956.000000,127936.000000,181275.000000,626.435822)}
{pt3dadd(153260.000000,127744.000000,181883.333333,635.350958)}
{pt3dadd(153608.000000,127528.000000,182300.000000,635.159214)}
{pt3dadd(153696.000000,127410.000000,182487.500000,619.030430)}

{create adhoc11}
{access adhoc11}
{connect adhoc11(1), adhoc9(0)}
{nseg = 1}
{strdef color color = "White"}
{pt3dclear()}
{pt3dadd(152700.000000,128232.000000,180587.500000,619.305282)}
{pt3dadd(153016.000000,128052.000000,180325.000000,572.691279)}
{pt3dadd(153416.000000,128004.000000,179900.000000,581.267413)}
{pt3dadd(153936.000000,127860.000000,179325.000000,566.939366)}
{pt3dadd(154212.000000,127740.000000,178916.666667,554.150192)}
{pt3dadd(154660.000000,127560.000000,178691.666667,529.896165)}
{pt3dadd(155208.000000,127192.000000,178616.666667,449.554709)}
{pt3dadd(155908.000000,126848.000000,178833.333333,407.495016)}
{pt3dadd(156460.000000,126544.000000,179075.000000,354.920400)}
{pt3dadd(156738.000000,126528.000000,179300.000000,346.196245)}

{create adhoc12}
{access adhoc12}
{connect adhoc12(1), adhoc7(0)}
{nseg = 1}
{strdef color color = "White"}
{pt3dclear()}
{pt3dadd(149666.400000,133562.400000,177940.000000,1024.708028)}
{pt3dadd(149016.000000,132984.000000,178041.666667,1031.814634)}
{pt3dadd(148488.000000,132196.000000,178125.000000,1035.004038)}
{pt3dadd(147976.000000,131160.000000,177858.333333,996.330181)}
{pt3dadd(148084.000000,130708.000000,177466.666667,954.717954)}
{pt3dadd(148116.000000,130464.000000,177062.500000,884.214114)}

{create adhoc13}
{access adhoc13}
{connect adhoc13(1), adhoc6(0)}
{nseg = 1}
{strdef color color = "White"}
{pt3dclear()}
{pt3dadd(148953.000000,134013.000000,178531.250000,1051.529829)}
{pt3dadd(148860.000000,134508.000000,177966.666667,1075.222257)}
{pt3dadd(148844.000000,134928.000000,177275.000000,1126.001800)}
{pt3dadd(148836.000000,135372.000000,176612.500000,1108.568662)}

{create adhoc14}
{access adhoc14}
{connect adhoc14(1), adhoc5(0)}
{nseg = 1}
{strdef color color = "White"}
{pt3dclear()}
{pt3dadd(148644.000000,134166.000000,178881.250000,1102.512270)}
{pt3dadd(148436.000000,134156.000000,179041.666667,1069.430550)}
{pt3dadd(148132.000000,134136.000000,179233.333333,1088.156911)}
{pt3dadd(147764.000000,134136.000000,179425.000000,1102.245325)}
{pt3dadd(147516.000000,134193.000000,179550.000000,1089.124769)}

{create adhoc15}
{access adhoc15}
{connect adhoc15(1), adhoc14(0)}
{nseg = 1}
{strdef color color = "White"}
{pt3dclear()}
{pt3dadd(147516.000000,134193.000000,179550.000000,1089.124769)}
{pt3dadd(147368.000000,134264.000000,179616.666667,1130.371774)}
{pt3dadd(147168.000000,134352.000000,179908.333333,1126.961867)}
{pt3dadd(146872.000000,134440.000000,180341.666667,1108.609783)}
{pt3dadd(146564.000000,134484.000000,180808.333333,1072.981903)}
{pt3dadd(146160.000000,134520.000000,181200.000000,1020.668694)}
{pt3dadd(145772.000000,134580.000000,181508.333333,877.014733)}
{pt3dadd(145408.000000,134664.000000,181750.000000,791.535050)}
{pt3dadd(145218.000000,134733.000000,181850.000000,716.448765)}

{create adhoc16}
{access adhoc16}
{connect adhoc16(1), adhoc15(0)}
{nseg = 1}
{strdef color color = "White"}
{pt3dclear()}
{pt3dadd(145218.000000,134733.000000,181850.000000,716.448765)}
{pt3dadd(144968.000000,134828.000000,181891.666667,657.801544)}
{pt3dadd(144356.000000,134872.000000,181916.666667,623.491679)}
{pt3dadd(143637.000000,134910.000000,181943.750000,588.803256)}

{create adhoc17}
{access adhoc17}
{connect adhoc17(1), adhoc16(0)}
{nseg = 1}
{strdef color color = "White"}
{pt3dclear()}
{pt3dadd(143637.000000,134910.000000,181943.750000,588.803256)}
{pt3dadd(142772.000000,135312.000000,182008.333333,585.452214)}
{pt3dadd(142064.000000,135812.000000,182058.333333,583.023362)}
{pt3dadd(141236.000000,136384.000000,182100.000000,600.551793)}
{pt3dadd(140796.000000,136532.000000,182033.333333,610.339780)}
{pt3dadd(140468.000000,136624.000000,181866.666667,630.453702)}
{pt3dadd(140208.000000,136728.000000,181633.333333,681.825455)}
{pt3dadd(140152.000000,136896.000000,181350.000000,740.511455)}
{pt3dadd(139864.000000,137316.000000,181066.666667,799.197454)}
{pt3dadd(139468.000000,137756.000000,180700.000000,883.903949)}
{pt3dadd(138940.000000,138160.000000,180250.000000,902.286371)}
{pt3dadd(138548.000000,138228.000000,179650.000000,875.012738)}
{pt3dadd(138256.000000,138244.000000,179075.000000,803.262750)}
{pt3dadd(138044.000000,138232.000000,178533.333333,776.090067)}
{pt3dadd(137979.000000,138279.000000,178212.500000,780.844432)}

{create adhoc18}
{access adhoc18}
{connect adhoc18(1), adhoc17(0)}
{nseg = 1}
{strdef color color = "White"}
{pt3dclear()}
{pt3dadd(137979.000000,138279.000000,178212.500000,780.844432)}
{pt3dadd(137892.000000,138092.000000,177916.666667,784.047640)}
{pt3dadd(137792.000000,137892.000000,177591.666667,785.699689)}
{pt3dadd(137688.000000,137688.000000,177231.250000,810.217550)}

{create adhoc19}
{access adhoc19}
{connect adhoc19(1), adhoc18(0)}
{nseg = 1}
{strdef color color = "White"}
{pt3dclear()}
{pt3dadd(137688.000000,137688.000000,177231.250000,810.217550)}
{pt3dadd(137488.000000,137504.000000,177058.333333,801.857824)}
{pt3dadd(137124.000000,137168.000000,176858.333333,751.003197)}
{pt3dadd(136516.000000,136720.000000,176500.000000,685.518572)}
{pt3dadd(136008.000000,136372.000000,176000.000000,645.760050)}
{pt3dadd(135700.000000,136040.000000,175533.333333,635.943833)}
{pt3dadd(135642.000000,135783.000000,175200.000000,622.162615)}

{create adhoc20}
{access adhoc20}
{connect adhoc20(1), adhoc19(0)}
{nseg = 1}
{strdef color color = "White"}
{pt3dclear()}
{pt3dadd(135642.000000,135783.000000,175200.000000,622.162615)}
{pt3dadd(135660.000000,135672.000000,175125.000000,645.070740)}

{create adhoc21}
{access adhoc21}
{connect adhoc21(1), adhoc19(0)}
{nseg = 1}
{strdef color color = "White"}
{pt3dclear()}
{pt3dadd(135642.000000,135783.000000,175200.000000,622.162615)}
{pt3dadd(135152.000000,135768.000000,175125.000000,645.070740)}
{pt3dadd(134898.000000,135816.000000,175125.000000,673.705897)}

{create adhoc22}
{access adhoc22}
{connect adhoc22(1), adhoc18(0)}
{nseg = 1}
{strdef color color = "White"}
{pt3dclear()}
{pt3dadd(137688.000000,137688.000000,177231.250000,810.217550)}
{pt3dadd(137732.000000,138044.000000,177108.333333,818.463425)}
{pt3dadd(137760.000000,138228.000000,177100.000000,803.596569)}

{create adhoc23}
{access adhoc23}
{connect adhoc23(1), adhoc17(0)}
{nseg = 1}
{strdef color color = "White"}
{pt3dclear()}
{pt3dadd(137979.000000,138279.000000,178212.500000,780.844432)}
{pt3dadd(138020.000000,139140.000000,178100.000000,785.293136)}
{pt3dadd(138088.000000,139976.000000,178050.000000,833.376685)}
{pt3dadd(138168.000000,140848.000000,177958.333333,906.608983)}
{pt3dadd(138198.000000,140838.000000,177887.500000,951.955500)}

{create adhoc24}
{access adhoc24}
{connect adhoc24(1), adhoc16(0)}
{nseg = 1}
{strdef color color = "White"}
{pt3dclear()}
{pt3dadd(143637.000000,134910.000000,181943.750000,588.803256)}
{pt3dadd(142808.000000,134604.000000,181991.666667,566.899419)}
{pt3dadd(142173.000000,134244.000000,182043.750000,544.251110)}

{create adhoc25}
{access adhoc25}
{connect adhoc25(1), adhoc24(0)}
{nseg = 1}
{strdef color color = "White"}
{pt3dclear()}
{pt3dadd(142173.000000,134244.000000,182043.750000,544.251110)}
{pt3dadd(141468.000000,133752.000000,181716.666667,511.065882)}
{pt3dadd(141140.000000,133480.000000,181275.000000,494.077820)}
{pt3dadd(140764.000000,133144.000000,180758.333333,473.181315)}
{pt3dadd(140736.000000,133116.000000,180637.500000,458.527744)}

{create adhoc26}
{access adhoc26}
{connect adhoc26(1), adhoc24(0)}
{nseg = 1}
{strdef color color = "White"}
{pt3dclear()}
{pt3dadd(142173.000000,134244.000000,182043.750000,544.251110)}
{pt3dadd(141852.000000,134200.000000,182216.666667,511.065882)}
{pt3dadd(141882.000000,134286.000000,182287.500000,494.077820)}

{create adhoc27}
{access adhoc27}
{connect adhoc27(1), adhoc15(0)}
{nseg = 1}
{strdef color color = "White"}
{pt3dclear()}
{pt3dadd(145218.000000,134733.000000,181850.000000,716.448765)}
{pt3dadd(145740.000000,134048.000000,181958.333333,684.077459)}
{pt3dadd(146276.000000,133172.000000,182141.666667,645.701312)}
{pt3dadd(146796.000000,132148.000000,182341.666667,613.583322)}
{pt3dadd(146764.000000,131736.000000,182416.666667,565.201153)}
{pt3dadd(146856.000000,131412.000000,182275.000000,494.776042)}
{pt3dadd(146952.000000,131136.000000,182100.000000,424.655416)}
{pt3dadd(146988.000000,130880.000000,181950.000000,384.934470)}
{pt3dadd(146952.000000,130628.000000,181875.000000,344.112530)}
{pt3dadd(146940.000000,130420.000000,181816.666667,333.582513)}
{pt3dadd(146955.000000,130278.000000,181775.000000,325.833689)}

{create adhoc28}
{access adhoc28}
{connect adhoc28(1), adhoc27(0)}
{nseg = 1}
{strdef color color = "White"}
{pt3dclear()}
{pt3dadd(146955.000000,130278.000000,181775.000000,325.833689)}
{pt3dadd(147108.000000,130216.000000,181733.333333,315.661759)}
{pt3dadd(147360.000000,130144.000000,181666.666667,305.996949)}
{pt3dadd(147656.000000,130012.000000,181575.000000,297.115871)}
{pt3dadd(147786.000000,129930.000000,181537.500000,287.229960)}

{create adhoc29}
{access adhoc29}
{connect adhoc29(1), adhoc27(0)}
{nseg = 1}
{strdef color color = "White"}
{pt3dclear()}
{pt3dadd(146955.000000,130278.000000,181775.000000,325.833689)}
{pt3dadd(146732.000000,130216.000000,181683.333333,326.895685)}
{pt3dadd(146412.000000,130128.000000,181600.000000,336.768503)}
{pt3dadd(146052.000000,129976.000000,181475.000000,370.411959)}
{pt3dadd(145860.000000,129788.000000,181400.000000,408.830868)}
{pt3dadd(145684.000000,129596.000000,181250.000000,455.460523)}
{pt3dadd(145508.000000,129396.000000,181083.333333,515.899323)}
{pt3dadd(145344.000000,129156.000000,180933.333333,560.031186)}
{pt3dadd(145148.000000,128900.000000,180758.333333,622.622531)}
{pt3dadd(145004.000000,128616.000000,180625.000000,674.008041)}
{pt3dadd(144896.000000,128328.000000,180450.000000,710.726038)}
{pt3dadd(144828.000000,128136.000000,180208.333333,735.364907)}
{pt3dadd(144792.000000,127984.000000,179841.666667,744.391307)}
{pt3dadd(144783.000000,127917.000000,179506.250000,719.870914)}

{create adhoc30}
{access adhoc30}
{connect adhoc30(1), adhoc29(0)}
{nseg = 1}
{strdef color color = "White"}
{pt3dclear()}
{pt3dadd(144783.000000,127917.000000,179506.250000,719.870914)}
{pt3dadd(144704.000000,127748.000000,179233.333333,716.669313)}
{pt3dadd(144376.000000,127576.000000,178900.000000,681.110439)}
{pt3dadd(144036.000000,127400.000000,178416.666667,652.654233)}
{pt3dadd(143944.000000,127380.000000,177983.333333,642.884719)}
{pt3dadd(144136.000000,127528.000000,177650.000000,624.162518)}
{pt3dadd(144357.000000,127710.000000,177450.000000,570.047041)}

{create adhoc31}
{access adhoc31}
{connect adhoc31(1), adhoc30(0)}
{nseg = 1}
{strdef color color = "White"}
{pt3dclear()}
{pt3dadd(144357.000000,127710.000000,177450.000000,570.047041)}
{pt3dadd(144476.000000,127912.000000,177291.666667,543.451700)}
{pt3dadd(144510.000000,127968.000000,177237.500000,511.537289)}

{create adhoc32}
{access adhoc32}
{connect adhoc32(1), adhoc30(0)}
{nseg = 1}
{strdef color color = "White"}
{pt3dclear()}
{pt3dadd(144357.000000,127710.000000,177450.000000,570.047041)}
{pt3dadd(144400.000000,127600.000000,177391.666667,543.451700)}
{pt3dadd(144424.000000,127340.000000,177350.000000,511.537289)}
{pt3dadd(144432.000000,127110.000000,177325.000000,453.361994)}

{create adhoc33}
{access adhoc33}
{connect adhoc33(1), adhoc29(0)}
{nseg = 1}
{strdef color color = "White"}
{pt3dclear()}
{pt3dadd(144783.000000,127917.000000,179506.250000,719.870914)}
{pt3dadd(144592.000000,127872.000000,179908.333333,699.151475)}
{pt3dadd(144356.000000,127736.000000,180558.333333,678.963551)}
{pt3dadd(144092.000000,127544.000000,181216.666667,667.202232)}
{pt3dadd(144000.000000,127360.000000,181500.000000,636.677038)}
{pt3dadd(143907.000000,127314.000000,181675.000000,582.014250)}

{create adhoc34}
{access adhoc34}
{connect adhoc34(1), adhoc33(0)}
{nseg = 1}
{strdef color color = "White"}
{pt3dclear()}
{pt3dadd(143907.000000,127314.000000,181675.000000,582.014250)}
{pt3dadd(144040.000000,127284.000000,181866.666667,515.315864)}
{pt3dadd(144126.000000,127266.000000,181912.500000,480.587870)}

{create adhoc35}
{access adhoc35}
{connect adhoc35(1), adhoc33(0)}
{nseg = 1}
{strdef color color = "White"}
{pt3dclear()}
{pt3dadd(143907.000000,127314.000000,181675.000000,582.014250)}
{pt3dadd(143768.000000,127364.000000,181841.666667,515.315864)}
{pt3dadd(143608.000000,127440.000000,181958.333333,480.587870)}
{pt3dadd(143478.000000,127500.000000,182050.000000,438.142544)}

{create adhoc36}
{access adhoc36}
{connect adhoc36(1), adhoc14(0)}
{nseg = 1}
{strdef color color = "White"}
{pt3dclear()}
{pt3dadd(147516.000000,134193.000000,179550.000000,1089.124769)}
{pt3dadd(147448.000000,133716.000000,179116.666667,1107.419665)}
{pt3dadd(147368.000000,133200.000000,178558.333333,1072.694843)}
{pt3dadd(147232.000000,132692.000000,177958.333333,1022.765783)}
{pt3dadd(147028.000000,132664.000000,177700.000000,920.834371)}
{pt3dadd(146812.000000,132600.000000,177416.666667,796.528472)}
{pt3dadd(146564.000000,132424.000000,177075.000000,665.447493)}
{pt3dadd(146352.000000,132244.000000,176766.666667,571.240459)}
{pt3dadd(146199.000000,132120.000000,176593.750000,520.166852)}

{create adhoc37}
{access adhoc37}
{connect adhoc37(1), adhoc36(0)}
{nseg = 1}
{strdef color color = "White"}
{pt3dclear()}
{pt3dadd(146199.000000,132120.000000,176593.750000,520.166852)}
{pt3dadd(146132.000000,132020.000000,176350.000000,526.294932)}
{pt3dadd(146097.000000,131910.000000,176100.000000,530.329094)}

{create adhoc38}
{access adhoc38}
{connect adhoc38(1), adhoc37(0)}
{nseg = 1}
{strdef color color = "White"}
{pt3dclear()}
{pt3dadd(146097.000000,131910.000000,176100.000000,530.329094)}
{pt3dadd(146056.000000,131928.000000,175775.000000,531.850555)}
{pt3dadd(146032.000000,132144.000000,175533.333333,558.255035)}
{pt3dadd(146010.000000,132294.000000,175325.000000,590.101249)}

{create adhoc39}
{access adhoc39}
{connect adhoc39(1), adhoc37(0)}
{nseg = 1}
{strdef color color = "White"}
{pt3dclear()}
{pt3dadd(146097.000000,131910.000000,176100.000000,530.329094)}
{pt3dadd(146172.000000,131464.000000,175916.666667,531.850555)}
{pt3dadd(146312.000000,130980.000000,175916.666667,558.255035)}
{pt3dadd(146430.000000,130548.000000,175900.000000,590.101249)}

{create adhoc40}
{access adhoc40}
{connect adhoc40(1), adhoc36(0)}
{nseg = 1}
{strdef color color = "White"}
{pt3dclear()}
{pt3dadd(146199.000000,132120.000000,176593.750000,520.166852)}
{pt3dadd(145892.000000,131912.000000,176533.333333,526.294932)}
{pt3dadd(145624.000000,131652.000000,176475.000000,579.941876)}
{pt3dadd(145356.000000,131424.000000,176437.500000,635.455081)}

{create adhoc41}
{access adhoc41}
{connect adhoc41(1), adhoc4(0)}
{nseg = 1}
{strdef color color = "White"}
{pt3dclear()}
{pt3dadd(142338.120018,133662.087365,183843.750000,653.850686)}
{pt3dadd(142741.655064,133887.973997,183958.333333,612.063469)}
{pt3dadd(143140.468710,134052.254607,184066.666667,518.237960)}
{pt3dadd(143637.011669,134118.226062,184250.000000,361.401128)}
{pt3dadd(144215.181527,134100.202795,184475.000000,231.423537)}
{pt3dadd(144959.876986,134182.428311,184683.333333,217.327442)}
{pt3dadd(145698.250363,134308.033473,184858.333333,215.323231)}
{pt3dadd(146295.412589,134308.857985,185041.666667,217.043465)}
{pt3dadd(146727.941322,134327.640314,185200.000000,214.571079)}
{pt3dadd(146886.302108,134231.536578,185300.000000,227.034954)}

{create adhoc42}
{access adhoc42}
{connect adhoc42(1), adhoc3(0)}
{nseg = 1}
{strdef color color = "White"}
{pt3dclear()}
{pt3dadd(140869.547298,132267.987458,183975.000000,601.986859)}
{pt3dadd(140559.587306,132151.466327,184250.000000,557.838889)}
{pt3dadd(140649.865306,131881.145771,184568.750000,553.243978)}

{create adhoc43}
{access adhoc43}
{connect adhoc43(1), adhoc42(0)}
{nseg = 1}
{strdef color color = "White"}
{pt3dclear()}
{pt3dadd(140649.865306,131881.145771,184568.750000,553.243978)}
{pt3dadd(140970.841023,131035.211366,184683.333333,560.871195)}
{pt3dadd(141268.293136,130146.984241,184816.666667,541.490589)}
{pt3dadd(141472.303028,129898.549243,184950.000000,494.050398)}
{pt3dadd(141727.259035,129761.023544,185100.000000,446.851615)}

{create adhoc44}
{access adhoc44}
{connect adhoc44(1), adhoc43(0)}
{nseg = 1}
{strdef color color = "White"}
{pt3dclear()}
{pt3dadd(141727.259035,129761.023544,185100.000000,446.851615)}
{pt3dadd(141552.611471,130102.607889,185200.000000,385.665674)}
{pt3dadd(141446.493003,130417.456029,185350.000000,268.621155)}
{pt3dadd(141291.755461,130283.777536,185525.000000,186.700900)}
{pt3dadd(141171.059093,130201.086776,185675.000000,154.431247)}
{pt3dadd(141093.299446,129881.166821,185750.000000,126.416772)}

{create adhoc45}
{access adhoc45}
{connect adhoc45(1), adhoc43(0)}
{nseg = 1}
{strdef color color = "White"}
{pt3dclear()}
{pt3dadd(141727.259035,129761.023544,185100.000000,446.851615)}
{pt3dadd(142175.911045,129212.639956,185183.333333,374.679582)}
{pt3dadd(142733.986832,128559.686761,185308.333333,282.598471)}
{pt3dadd(143317.379759,127844.504397,185516.666667,235.210775)}
{pt3dadd(143678.348656,127339.296798,185758.333333,239.390338)}
{pt3dadd(143897.447244,126872.000418,185983.333333,234.560183)}
{pt3dadd(144069.230422,126598.630763,186208.333333,251.019674)}
{pt3dadd(144325.590068,126485.261655,186366.666667,259.156538)}
{pt3dadd(144644.238128,126115.672734,186516.666667,271.450495)}
{pt3dadd(144519.600016,126322.253013,186625.000000,279.407092)}
{pt3dadd(144529.843883,125954.160678,186741.666667,258.228561)}
{pt3dadd(144328.565279,126217.807629,186825.000000,228.209466)}

{create adhoc46}
{access adhoc46}
{connect adhoc46(1), adhoc42(0)}
{nseg = 1}
{strdef color color = "White"}
{pt3dclear()}
{pt3dadd(140649.865306,131881.145771,184568.750000,553.243978)}
{pt3dadd(140692.645108,132734.134981,184850.000000,610.117993)}
{pt3dadd(140820.787044,132896.376608,185208.333333,648.479339)}
{pt3dadd(140825.621335,133411.245303,185558.333333,659.540795)}
{pt3dadd(140830.987653,133506.339783,185868.750000,655.267065)}

{create adhoc47}
{access adhoc47}
{connect adhoc47(1), adhoc46(0)}
{nseg = 1}
{strdef color color = "White"}
{pt3dclear()}
{pt3dadd(140830.987653,133506.339783,185868.750000,655.267065)}
{pt3dadd(141429.519916,134215.572919,185966.666667,625.535329)}
{pt3dadd(141808.669369,133823.092149,186058.333333,608.865145)}
{pt3dadd(141916.339307,133698.652346,186183.333333,557.339550)}
{pt3dadd(141891.534767,133640.644879,186358.333333,476.692601)}
{pt3dadd(142027.115864,133951.124488,186600.000000,397.350843)}
{pt3dadd(142062.047716,134000.832068,186858.333333,278.338205)}
{pt3dadd(142252.509442,133852.750167,186975.000000,180.095345)}

{create adhoc48}
{access adhoc48}
{connect adhoc48(1), adhoc46(0)}
{nseg = 1}
{strdef color color = "White"}
{pt3dclear()}
{pt3dadd(140830.987653,133506.339783,185868.750000,655.267065)}
{pt3dadd(140174.285045,133264.055363,186000.000000,660.014905)}
{pt3dadd(139759.432133,132776.025280,186200.000000,679.468829)}
{pt3dadd(139497.313817,132975.262521,186425.000000,659.819183)}
{pt3dadd(139228.328913,133042.153062,186658.333333,597.202867)}
{pt3dadd(139078.474367,133201.345700,186908.333333,556.003802)}
{pt3dadd(139025.967010,132658.994099,187168.750000,515.374490)}

{create adhoc49}
{access adhoc49}
{connect adhoc49(1), adhoc48(0)}
{nseg = 1}
{strdef color color = "White"}
{pt3dclear()}
{pt3dadd(139025.967010,132658.994099,187168.750000,515.374490)}
{pt3dadd(139274.061396,131735.463596,187350.000000,477.819178)}
{pt3dadd(139329.248178,130856.461259,187518.750000,441.857159)}

{create adhoc50}
{access adhoc50}
{connect adhoc50(1), adhoc49(0)}
{nseg = 1}
{strdef color color = "White"}
{pt3dclear()}
{pt3dadd(139329.248178,130856.461259,187518.750000,441.857159)}
{pt3dadd(139257.773008,130243.384980,187375.000000,402.646372)}
{pt3dadd(139126.668065,130171.256341,187191.666667,354.722077)}
{pt3dadd(139083.591030,129803.946022,187000.000000,318.673898)}
{pt3dadd(139072.037222,129716.896526,186912.500000,275.686405)}

{create adhoc51}
{access adhoc51}
{connect adhoc51(1), adhoc49(0)}
{nseg = 1}
{strdef color color = "White"}
{pt3dclear()}
{pt3dadd(139329.248178,130856.461259,187518.750000,441.857159)}
{pt3dadd(139147.242140,130923.649340,187806.250000,402.646372)}

{create adhoc52}
{access adhoc52}
{connect adhoc52(1), adhoc51(0)}
{nseg = 1}
{strdef color color = "White"}
{pt3dclear()}
{pt3dadd(139147.242140,130923.649340,187806.250000,402.646372)}
{pt3dadd(139158.394389,131327.752460,188025.000000,354.722077)}
{pt3dadd(139109.592297,131381.172801,188250.000000,302.521929)}
{pt3dadd(139140.248311,131231.185740,188375.000000,257.161582)}

{create adhoc53}
{access adhoc53}
{connect adhoc53(1), adhoc51(0)}
{nseg = 1}
{strdef color color = "White"}
{pt3dclear()}
{pt3dadd(139147.242140,130923.649340,187806.250000,402.646372)}
{pt3dadd(138977.884483,130449.625791,187875.000000,354.722077)}
{pt3dadd(138708.566491,130126.635541,187966.666667,302.521929)}
{pt3dadd(138586.929824,130046.055814,188025.000000,257.161582)}

{create adhoc54}
{access adhoc54}
{connect adhoc54(1), adhoc48(0)}
{nseg = 1}
{strdef color color = "White"}
{pt3dclear()}
{pt3dadd(139025.967010,132658.994099,187168.750000,515.374490)}
{pt3dadd(138666.221936,133366.983001,187383.333333,571.164927)}
{pt3dadd(138266.210619,133659.895411,187633.333333,647.757273)}
{pt3dadd(137810.696363,134020.665826,187925.000000,732.805386)}
{pt3dadd(137285.341023,134219.805903,188258.333333,753.311406)}
{pt3dadd(136636.896778,134454.832085,188591.666667,734.922332)}
{pt3dadd(136070.103898,134474.218424,188966.666667,749.555195)}
{pt3dadd(135446.837462,134480.538086,189341.666667,726.756613)}
{pt3dadd(135027.636023,134616.470871,189733.333333,702.740004)}
{pt3dadd(134667.885458,134931.911498,190016.666667,660.323480)}
{pt3dadd(134545.704730,135320.656175,190293.750000,638.583454)}

{create adhoc55}
{access adhoc55}
{connect adhoc55(1), adhoc54(0)}
{nseg = 1}
{strdef color color = "White"}
{pt3dclear()}
{pt3dadd(134545.704730,135320.656175,190293.750000,638.583454)}
{pt3dadd(134793.486700,134703.768836,190450.000000,593.486858)}
{pt3dadd(134955.724496,134620.202053,190725.000000,550.284088)}
{pt3dadd(134730.670129,134644.969504,191016.666667,474.356137)}
{pt3dadd(134275.585833,134610.652053,191250.000000,395.641216)}
{pt3dadd(133594.581319,134278.589177,191416.666667,341.919712)}
{pt3dadd(131079.829945,134037.619117,191541.666667,324.190000)}
{pt3dadd(128704.012308,133852.278618,191675.000000,336.583547)}
{pt3dadd(126467.160847,133928.444549,191868.750000,329.789799)}

{create adhoc56}
{access adhoc56}
{connect adhoc56(1), adhoc55(0)}
{nseg = 1}
{strdef color color = "White"}
{pt3dclear()}
{pt3dadd(126467.160847,133928.444549,191868.750000,329.789799)}
{pt3dadd(126731.467733,134565.295017,192000.000000,299.312539)}
{pt3dadd(126850.632321,134668.970708,192175.000000,268.640934)}
{pt3dadd(127082.680027,134707.310722,192400.000000,241.302280)}
{pt3dadd(127054.553061,134595.077202,192616.666667,217.991273)}
{pt3dadd(127090.610893,134821.466359,192737.500000,210.673343)}

{create adhoc57}
{access adhoc57}
{connect adhoc57(1), adhoc55(0)}
{nseg = 1}
{strdef color color = "White"}
{pt3dclear()}
{pt3dadd(126467.160847,133928.444549,191868.750000,329.789799)}
{pt3dadd(126297.322010,133519.304004,192033.333333,343.061484)}
{pt3dadd(125966.723440,133318.654281,192250.000000,395.909257)}
{pt3dadd(125879.270677,133408.967289,192500.000000,468.050817)}
{pt3dadd(125693.818474,133453.956481,192725.000000,517.568013)}
{pt3dadd(125657.776874,133859.126737,192916.666667,534.988255)}
{pt3dadd(125584.958488,133906.135686,193056.250000,544.179847)}

{create adhoc58}
{access adhoc58}
{connect adhoc58(1), adhoc57(0)}
{nseg = 1}
{strdef color color = "White"}
{pt3dclear()}
{pt3dadd(125584.958488,133906.135686,193056.250000,544.179847)}
{pt3dadd(125993.112094,133207.828951,193083.333333,539.135714)}
{pt3dadd(126311.479819,132116.855946,193100.000000,549.199933)}
{pt3dadd(126591.358086,131197.359520,193137.500000,537.456785)}

{create adhoc59}
{access adhoc59}
{connect adhoc59(1), adhoc58(0)}
{nseg = 1}
{strdef color color = "White"}
{pt3dclear()}
{pt3dadd(126591.358086,131197.359520,193137.500000,537.456785)}
{pt3dadd(126402.710279,131095.480369,193391.666667,491.952469)}
{pt3dadd(126388.563610,131085.988437,193616.666667,413.744243)}
{pt3dadd(126420.071799,131149.374227,193816.666667,339.044044)}
{pt3dadd(126397.901844,131245.906181,193887.500000,308.647172)}

{create adhoc60}
{access adhoc60}
{connect adhoc60(1), adhoc58(0)}
{nseg = 1}
{strdef color color = "White"}
{pt3dclear()}
{pt3dadd(126591.358086,131197.359520,193137.500000,537.456785)}
{pt3dadd(127020.689104,131042.884529,192916.666667,514.831214)}
{pt3dadd(127432.126136,130493.012692,192666.666667,486.481283)}
{pt3dadd(127771.647199,130176.213866,192366.666667,478.243108)}
{pt3dadd(128258.966701,129533.898071,192041.666667,468.887731)}
{pt3dadd(130554.877089,129372.400833,191791.666667,459.698776)}
{pt3dadd(132661.415837,128863.412843,191525.000000,461.885277)}
{pt3dadd(134658.286692,128535.252596,191283.333333,462.889119)}
{pt3dadd(134659.794817,128106.056140,190925.000000,479.026068)}
{pt3dadd(134624.833213,127867.587099,190650.000000,509.089598)}
{pt3dadd(134476.517950,127793.966521,190418.750000,530.680275)}

{create adhoc61}
{access adhoc61}
{connect adhoc61(1), adhoc60(0)}
{nseg = 1}
{strdef color color = "White"}
{pt3dclear()}
{pt3dadd(134476.517950,127793.966521,190418.750000,530.680275)}
{pt3dadd(134209.309637,127883.300114,190400.000000,545.755319)}

{create adhoc62}
{access adhoc62}
{connect adhoc62(1), adhoc60(0)}
{nseg = 1}
{strdef color color = "White"}
{pt3dclear()}
{pt3dadd(134476.517950,127793.966521,190418.750000,530.680275)}
{pt3dadd(134757.457673,127439.238046,190316.666667,545.755319)}
{pt3dadd(134867.327608,127396.497221,190262.500000,531.665098)}

{create adhoc63}
{access adhoc63}
{connect adhoc63(1), adhoc57(0)}
{nseg = 1}
{strdef color color = "White"}
{pt3dclear()}
{pt3dadd(125584.958488,133906.135686,193056.250000,544.179847)}
{pt3dadd(124911.989116,134141.147643,193275.000000,570.258243)}
{pt3dadd(124527.566069,134096.516962,193533.333333,598.008585)}
{pt3dadd(124242.571860,134027.172512,193883.333333,645.700111)}
{pt3dadd(124114.472494,134204.727449,194241.666667,647.071591)}
{pt3dadd(123601.648048,134270.125987,194618.750000,639.106445)}

{create adhoc64}
{access adhoc64}
{connect adhoc64(1), adhoc63(0)}
{nseg = 1}
{strdef color color = "White"}
{pt3dclear()}
{pt3dadd(123601.648048,134270.125987,194618.750000,639.106445)}
{pt3dadd(122555.557665,134402.473086,194712.500000,657.572525)}

{create adhoc65}
{access adhoc65}
{connect adhoc65(1), adhoc64(0)}
{nseg = 1}
{strdef color color = "White"}
{pt3dclear()}
{pt3dadd(122555.557665,134402.473086,194712.500000,657.572525)}
{pt3dadd(121791.411430,134316.794544,194383.333333,657.515989)}
{pt3dadd(120879.551236,133991.339151,194291.666667,642.206022)}
{pt3dadd(120194.780357,133905.565686,194525.000000,635.533838)}
{pt3dadd(119773.565297,134063.280554,194908.333333,625.739811)}
{pt3dadd(119891.825497,134163.194690,195087.500000,623.996161)}

{create adhoc66}
{access adhoc66}
{connect adhoc66(1), adhoc64(0)}
{nseg = 1}
{strdef color color = "White"}
{pt3dclear()}
{pt3dadd(122555.557665,134402.473086,194712.500000,657.572525)}
{pt3dadd(122248.143320,134646.422565,195033.333333,657.515989)}
{pt3dadd(122235.902240,134549.724618,195137.500000,678.348097)}

{create adhoc67}
{access adhoc67}
{connect adhoc67(1), adhoc63(0)}
{nseg = 1}
{strdef color color = "White"}
{pt3dclear()}
{pt3dadd(123601.648048,134270.125987,194618.750000,639.106445)}
{pt3dadd(124227.385704,134147.583148,194783.333333,690.157247)}
{pt3dadd(124480.808410,134077.787366,194900.000000,715.806027)}
{pt3dadd(124640.061009,134147.958791,194962.500000,701.425033)}

{create adhoc68}
{access adhoc68}
{connect adhoc68(1), adhoc54(0)}
{nseg = 1}
{strdef color color = "White"}
{pt3dclear()}
{pt3dadd(134545.704730,135320.656175,190293.750000,638.583454)}
{pt3dadd(134155.571003,136187.296135,190425.000000,666.662484)}
{pt3dadd(133998.302098,137085.255267,190683.333333,678.553661)}
{pt3dadd(133800.635848,137430.653287,191025.000000,678.430392)}
{pt3dadd(133357.425851,137734.328117,191308.333333,646.882806)}
{pt3dadd(131230.562158,137637.889060,191533.333333,636.933814)}
{pt3dadd(127986.956015,138117.203020,191681.250000,608.642577)}

{create adhoc69}
{access adhoc69}
{connect adhoc69(1), adhoc68(0)}
{nseg = 1}
{strdef color color = "White"}
{pt3dclear()}
{pt3dadd(127986.956015,138117.203020,191681.250000,608.642577)}
{pt3dadd(125597.483502,138047.705229,191683.333333,602.650207)}
{pt3dadd(124434.693052,138464.335203,191750.000000,597.903893)}
{pt3dadd(125351.948908,138983.469603,191800.000000,585.392668)}

{create adhoc70}
{access adhoc70}
{connect adhoc70(1), adhoc69(0)}
{nseg = 1}
{strdef color color = "White"}
{pt3dclear()}
{pt3dadd(125351.948908,138983.469603,191800.000000,585.392668)}
{pt3dadd(123287.250807,139393.843208,191908.333333,572.212941)}
{pt3dadd(122591.876633,139437.672699,191850.000000,544.572645)}
{pt3dadd(121891.142015,139257.692274,191843.750000,537.819585)}

{create adhoc71}
{access adhoc71}
{connect adhoc71(1), adhoc70(0)}
{nseg = 1}
{strdef color color = "White"}
{pt3dclear()}
{pt3dadd(121891.142015,139257.692274,191843.750000,537.819585)}
{pt3dadd(121845.010171,139615.334974,192083.333333,533.577094)}
{pt3dadd(121980.323415,140070.030821,192375.000000,536.754182)}
{pt3dadd(122128.043496,140018.994413,192462.500000,538.470092)}

{create adhoc72}
{access adhoc72}
{connect adhoc72(1), adhoc70(0)}
{nseg = 1}
{strdef color color = "White"}
{pt3dclear()}
{pt3dadd(121891.142015,139257.692274,191843.750000,537.819585)}
{pt3dadd(121729.556932,138319.270592,191725.000000,533.577094)}
{pt3dadd(121444.105083,137648.459471,191950.000000,511.523524)}
{pt3dadd(121201.962687,137501.306422,192283.333333,482.152813)}
{pt3dadd(121205.718422,137390.306058,192600.000000,490.027431)}
{pt3dadd(121263.253431,137575.733260,192725.000000,532.250806)}

{create adhoc73}
{access adhoc73}
{connect adhoc73(1), adhoc69(0)}
{nseg = 1}
{strdef color color = "White"}
{pt3dclear()}
{pt3dadd(125351.948908,138983.469603,191800.000000,585.392668)}
{pt3dadd(127400.694812,138917.470125,191600.000000,614.726855)}
{pt3dadd(128441.986903,139231.747311,191433.333333,626.359140)}
{pt3dadd(127613.002749,139603.228103,191350.000000,638.592458)}
{pt3dadd(126777.029829,140203.762714,191391.666667,576.777243)}
{pt3dadd(126326.804582,140763.251295,191483.333333,486.124601)}
{pt3dadd(123536.233625,141370.222498,191600.000000,443.547389)}
{pt3dadd(121027.801945,141998.773130,191733.333333,396.535002)}
{pt3dadd(118525.944196,142418.540796,191916.666667,355.869238)}
{pt3dadd(118203.424065,142206.189228,192193.750000,339.819374)}

{create adhoc74}
{access adhoc74}
{connect adhoc74(1), adhoc73(0)}
{nseg = 1}
{strdef color color = "White"}
{pt3dclear()}
{pt3dadd(118203.424065,142206.189228,192193.750000,339.819374)}
{pt3dadd(118586.064736,142237.035718,192366.666667,347.134571)}
{pt3dadd(118803.431217,141932.680848,192600.000000,356.973864)}
{pt3dadd(118897.201455,141916.739844,192825.000000,372.780454)}
{pt3dadd(118780.278090,142079.956200,192991.666667,371.033689)}
{pt3dadd(118693.990533,142185.968183,193050.000000,347.826759)}

{create adhoc75}
{access adhoc75}
{connect adhoc75(1), adhoc73(0)}
{nseg = 1}
{strdef color color = "White"}
{pt3dclear()}
{pt3dadd(118203.424065,142206.189228,192193.750000,339.819374)}
{pt3dadd(117664.280251,142315.661890,192366.666667,330.768632)}
{pt3dadd(117094.330036,142245.651111,192533.333333,328.284783)}
{pt3dadd(116797.586604,142379.210773,192691.666667,323.734993)}
{pt3dadd(116159.565085,142168.503925,192908.333333,298.539251)}
{pt3dadd(115722.089188,141755.176161,193116.666667,258.455097)}
{pt3dadd(115389.261054,141487.259796,193308.333333,213.740783)}
{pt3dadd(115385.757268,141512.569760,193416.666667,197.262229)}
{pt3dadd(115443.837404,141638.908105,193525.000000,180.713005)}
{pt3dadd(115476.518506,141820.722068,193650.000000,170.876035)}
{pt3dadd(115520.614256,141725.942744,193783.333333,169.294918)}
{pt3dadd(115554.563468,141733.915993,193862.500000,170.406454)}

{create adhoc76}
{access adhoc76}
{connect adhoc76(1), adhoc68(0)}
{nseg = 1}
{strdef color color = "White"}
{pt3dclear()}
{pt3dadd(127986.956015,138117.203020,191681.250000,608.642577)}
{pt3dadd(127251.830739,138565.902855,191958.333333,595.680105)}
{pt3dadd(127175.529586,139159.640715,192283.333333,563.400839)}
{pt3dadd(127438.196762,139329.519260,192633.333333,545.152429)}
{pt3dadd(127416.662102,139662.406572,192941.666667,512.227118)}
{pt3dadd(127435.103871,139821.398055,193183.333333,469.140104)}
{pt3dadd(127208.794662,139964.143125,193375.000000,452.465919)}
{pt3dadd(127111.747978,139970.821015,193583.333333,452.465919)}
{pt3dadd(126803.470827,139960.547286,193816.666667,443.059191)}
{pt3dadd(126377.325534,139728.253947,194058.333333,442.021357)}
{pt3dadd(125988.316972,139647.399912,194225.000000,438.845533)}
{pt3dadd(125686.744891,139825.312922,194458.333333,466.579349)}
{pt3dadd(125620.806698,140199.086514,194775.000000,521.323970)}
{pt3dadd(125491.640382,140183.076838,195100.000000,559.343201)}
{pt3dadd(125485.903016,139931.103126,195400.000000,568.516994)}

{create adhoc77}
{access adhoc77}
{connect adhoc77(1), adhoc76(0)}
{nseg = 1}
{strdef color color = "White"}
{pt3dclear()}
{pt3dadd(125485.903016,139931.103126,195400.000000,568.516994)}
{pt3dadd(125953.021553,139147.926093,195408.333333,539.865777)}
{pt3dadd(126760.845236,138234.781670,195450.000000,502.871044)}
{pt3dadd(127540.831489,137335.290261,195431.250000,457.810841)}

{create adhoc78}
{access adhoc78}
{connect adhoc78(1), adhoc77(0)}
{nseg = 1}
{strdef color color = "White"}
{pt3dclear()}
{pt3dadd(127540.831489,137335.290261,195431.250000,457.810841)}
{pt3dadd(127794.925036,136877.418517,195616.666667,463.707318)}
{pt3dadd(127803.666952,136831.401524,195687.500000,455.826674)}

{create adhoc79}
{access adhoc79}
{connect adhoc79(1), adhoc77(0)}
{nseg = 1}
{strdef color color = "White"}
{pt3dclear()}
{pt3dadd(127540.831489,137335.290261,195431.250000,457.810841)}
{pt3dadd(127955.473552,136584.813920,195183.333333,427.898107)}
{pt3dadd(127776.468797,136184.696080,194906.250000,383.100806)}

{create adhoc80}
{access adhoc80}
{connect adhoc80(1), adhoc79(0)}
{nseg = 1}
{strdef color color = "White"}
{pt3dclear()}
{pt3dadd(127776.468797,136184.696080,194906.250000,383.100806)}
{pt3dadd(126994.420131,136115.033750,194891.666667,346.117280)}
{pt3dadd(126351.452639,136094.565219,194950.000000,336.132779)}
{pt3dadd(126102.224789,135816.597960,195050.000000,355.149019)}
{pt3dadd(126023.997916,135680.295929,195100.000000,377.492134)}

{create adhoc81}
{access adhoc81}
{connect adhoc81(1), adhoc79(0)}
{nseg = 1}
{strdef color color = "White"}
{pt3dclear()}
{pt3dadd(127776.468797,136184.696080,194906.250000,383.100806)}
{pt3dadd(128120.008927,135533.706061,194716.666667,333.004781)}
{pt3dadd(128283.408706,135095.169766,194516.666667,313.859351)}
{pt3dadd(128431.984727,134616.501596,194316.666667,344.665065)}
{pt3dadd(128579.593972,134058.586555,194133.333333,383.612709)}
{pt3dadd(128464.587261,133808.623619,194000.000000,409.835328)}
{pt3dadd(128358.992792,133620.363462,193950.000000,400.949949)}

{create adhoc82}
{access adhoc82}
{connect adhoc82(1), adhoc76(0)}
{nseg = 1}
{strdef color color = "White"}
{pt3dclear()}
{pt3dadd(125485.903016,139931.103126,195400.000000,568.516994)}
{pt3dadd(125027.762302,140569.723329,195616.666667,615.632741)}
{pt3dadd(124621.590073,140949.456632,195900.000000,667.356627)}
{pt3dadd(124248.639470,141022.577646,196225.000000,695.184232)}
{pt3dadd(123874.766328,140882.212481,196591.666667,659.552060)}
{pt3dadd(123768.432103,140904.930557,196991.666667,631.477401)}
{pt3dadd(123501.472076,141056.842711,197237.500000,601.615422)}

{create adhoc83}
{access adhoc83}
{connect adhoc83(1), adhoc82(0)}
{nseg = 1}
{strdef color color = "White"}
{pt3dclear()}
{pt3dadd(123501.472076,141056.842711,197237.500000,601.615422)}
{pt3dadd(124091.229392,140426.835223,197625.000000,646.497955)}
{pt3dadd(124238.280702,139993.727543,197841.666667,696.272242)}
{pt3dadd(124320.897224,139522.788766,198066.666667,767.814822)}
{pt3dadd(124377.295373,139409.601348,198175.000000,764.937103)}

{create adhoc84}
{access adhoc84}
{connect adhoc84(1), adhoc82(0)}
{nseg = 1}
{strdef color color = "White"}
{pt3dclear()}
{pt3dadd(123501.472076,141056.842711,197237.500000,601.615422)}
{pt3dadd(122659.735437,141353.485197,197066.666667,585.270997)}
{pt3dadd(121919.520072,141259.648414,196991.666667,552.222178)}
{pt3dadd(121580.376017,141053.131188,197225.000000,535.737314)}

{create adhoc85}
{access adhoc85}
{connect adhoc85(1), adhoc84(0)}
{nseg = 1}
{strdef color color = "White"}
{pt3dclear()}
{pt3dadd(121580.376017,141053.131188,197225.000000,535.737314)}
{pt3dadd(121433.838217,140184.099519,197291.666667,511.542289)}
{pt3dadd(121358.383460,139651.219987,197358.333333,488.120232)}
{pt3dadd(121611.783530,138585.671866,197383.333333,470.861343)}
{pt3dadd(121873.980838,137809.671900,197406.250000,460.483919)}

{create adhoc86}
{access adhoc86}
{connect adhoc86(1), adhoc85(0)}
{nseg = 1}
{strdef color color = "White"}
{pt3dclear()}
{pt3dadd(121873.980838,137809.671900,197406.250000,460.483919)}
{pt3dadd(121910.735135,137430.040376,197691.666667,442.695532)}
{pt3dadd(121805.867840,137560.643729,197837.500000,381.158790)}

{create adhoc87}
{access adhoc87}
{connect adhoc87(1), adhoc85(0)}
{nseg = 1}
{strdef color color = "White"}
{pt3dclear()}
{pt3dadd(121873.980838,137809.671900,197406.250000,460.483919)}
{pt3dadd(122177.062104,137334.157844,197158.333333,442.695532)}
{pt3dadd(122213.568401,137294.538691,196950.000000,381.158790)}
{pt3dadd(122191.029713,137014.879133,196850.000000,336.758150)}

{create adhoc88}
{access adhoc88}
{connect adhoc88(1), adhoc84(0)}
{nseg = 1}
{strdef color color = "White"}
{pt3dclear()}
{pt3dadd(121580.376017,141053.131188,197225.000000,535.737314)}
{pt3dadd(121484.488035,141536.072491,197508.333333,540.180925)}
{pt3dadd(121380.306756,142339.913759,197775.000000,508.404446)}
{pt3dadd(121332.613040,142662.521989,198041.666667,472.004803)}
{pt3dadd(121208.795459,142822.505288,198350.000000,467.571735)}
{pt3dadd(120949.983980,142814.794010,198733.333333,464.780274)}
{pt3dadd(120787.012334,142866.111263,199075.000000,426.795570)}
{pt3dadd(120759.201441,143004.234106,199358.333333,383.475824)}
{pt3dadd(117644.527813,144307.152642,199516.666667,369.661238)}
{pt3dadd(114483.851537,145664.745223,199716.666667,366.013402)}
{pt3dadd(111208.417067,146889.335869,199983.333333,366.013402)}
{pt3dadd(111200.417805,146841.855709,200333.333333,361.119237)}
{pt3dadd(111073.426357,146879.279508,200608.333333,362.960553)}
{pt3dadd(110950.356679,146937.294876,200825.000000,360.479753)}
{pt3dadd(110764.944352,146983.678099,201000.000000,367.461670)}
{pt3dadd(110542.836181,146700.109523,201191.666667,394.836320)}
{pt3dadd(110432.793521,146626.801243,201366.666667,404.243048)}
{pt3dadd(110367.147033,146608.677910,201600.000000,437.616016)}
{pt3dadd(110331.876663,146886.810123,201833.333333,468.264233)}
{pt3dadd(110260.101085,146958.123748,202091.666667,474.018162)}
{pt3dadd(110176.767014,146803.508331,202375.000000,466.478417)}
{pt3dadd(110243.044076,146409.125499,202733.333333,453.262448)}
{pt3dadd(110207.527232,146153.683271,203150.000000,448.985777)}
{pt3dadd(110092.353976,146072.075291,203558.333333,449.401536)}
{pt3dadd(109680.077655,145722.488620,203925.000000,453.923252)}

{create adhoc89}
{access adhoc89}
{connect adhoc89(1), adhoc88(0)}
{nseg = 1}
{strdef color color = "White"}
{pt3dclear()}
{pt3dadd(109680.077655,145722.488620,203925.000000,453.923252)}
{pt3dadd(109863.735369,145897.255918,204200.000000,478.739240)}
{pt3dadd(109936.968692,145676.930309,204391.666667,493.572038)}
{pt3dadd(109955.081208,145824.991591,204508.333333,499.780648)}
{pt3dadd(109841.385350,146198.394357,204608.333333,493.376340)}
{pt3dadd(109757.173378,146545.307882,204650.000000,496.184233)}

{create adhoc90}
{access adhoc90}
{connect adhoc90(1), adhoc88(0)}
{nseg = 1}
{strdef color color = "White"}
{pt3dclear()}
{pt3dadd(109680.077655,145722.488620,203925.000000,453.923252)}
{pt3dadd(109195.789918,145298.346387,203991.666667,444.585064)}
{pt3dadd(108608.954087,144753.834760,204041.666667,460.658184)}
{pt3dadd(108374.114210,144524.859322,204191.666667,467.411741)}
{pt3dadd(108232.598501,144082.655830,204441.666667,439.909973)}
{pt3dadd(108239.234386,143942.616869,204758.333333,410.315025)}
{pt3dadd(107976.367599,144096.536024,205025.000000,309.829366)}
{pt3dadd(107812.830895,144323.498615,205137.500000,1000.000000)}
