# Supplementary material for: Full reconstruction of large lobula plate tangential cells in Drosophila from a 3D EM dataset
Source: PLoS One. 2018 Nov 28;13(11):e0207828. doi: 10.1371/journal.pone.0207828 (PMC6261601; doi:10.1371/journal.pone.0207828)
Supplement: S1 Dataset — (ZIP) [file pone.0207828.s001.zip › Diameter hoc/plotCompleteSkeletons/vsl2_2_0001.hoc]

/* created with convertKnossosNmlToHoc.m */

{create adhoc1}
{access adhoc1}
{nseg = 1}
{strdef color color = "White"}
{pt3dclear()}
{pt3dadd(155793.783170,139028.636817,182637.500000,338.796261)}
{pt3dadd(155603.063022,138782.512808,182800.000000,313.787111)}
{pt3dadd(154876.875868,138528.945537,183037.500000,295.247220)}

{create adhoc2}
{access adhoc2}
{connect adhoc2(1), adhoc1(0)}
{nseg = 1}
{strdef color color = "White"}
{pt3dclear()}
{pt3dadd(154876.875868,138528.945537,183037.500000,295.247220)}
{pt3dadd(154410.769367,138673.904369,183391.666667,296.418827)}
{pt3dadd(154060.783775,138964.665927,183650.000000,306.689282)}
{pt3dadd(153987.659164,138857.472676,183908.333333,319.564300)}
{pt3dadd(153799.365723,138935.614844,184100.000000,325.945828)}
{pt3dadd(153451.473076,138906.387388,184250.000000,298.518845)}
{pt3dadd(153474.503524,139316.258552,184333.333333,260.057538)}
{pt3dadd(153420.009964,139505.572276,184387.500000,1000.000000)}

{create adhoc3}
{access adhoc3}
{connect adhoc3(1), adhoc1(0)}
{nseg = 1}
{strdef color color = "White"}
{pt3dclear()}
{pt3dadd(154876.875868,138528.945537,183037.500000,295.247220)}
{pt3dadd(155048.540908,138080.754930,182816.666667,294.963507)}
{pt3dadd(155324.000000,137936.000000,182533.333333,294.479946)}
{pt3dadd(155916.000000,137892.000000,182216.666667,307.705388)}
{pt3dadd(156452.000000,137924.000000,181883.333333,318.953821)}
{pt3dadd(156820.000000,137956.000000,181533.333333,338.025154)}
{pt3dadd(157132.000000,138032.000000,181225.000000,357.609886)}
{pt3dadd(157484.000000,138124.000000,180950.000000,371.545869)}
{pt3dadd(157960.000000,138552.000000,180725.000000,421.506563)}
{pt3dadd(158332.000000,138924.000000,180591.666667,439.521542)}
{pt3dadd(158664.000000,139392.000000,180412.500000,464.130614)}

{create adhoc4}
{access adhoc4}
{connect adhoc4(1), adhoc3(0)}
{nseg = 1}
{strdef color color = "White"}
{pt3dclear()}
{pt3dadd(158664.000000,139392.000000,180412.500000,464.130614)}
{pt3dadd(158888.000000,139800.000000,179950.000000,489.412216)}
{pt3dadd(159084.000000,140156.000000,179533.333333,513.708273)}
{pt3dadd(159204.000000,140349.000000,179212.500000,541.171794)}

{create adhoc5}
{access adhoc5}
{connect adhoc5(1), adhoc4(0)}
{nseg = 1}
{strdef color color = "White"}
{pt3dclear()}
{pt3dadd(159204.000000,140349.000000,179212.500000,541.171794)}
{pt3dadd(159312.000000,140636.000000,178933.333333,617.180365)}
{pt3dadd(159412.000000,140912.000000,178516.666667,673.378492)}
{pt3dadd(159552.000000,141168.000000,178050.000000,702.141893)}
{pt3dadd(159736.000000,141300.000000,177541.666667,719.090591)}
{pt3dadd(159916.000000,141428.000000,177200.000000,719.168623)}
{pt3dadd(160104.000000,141645.000000,176850.000000,668.149400)}

{create adhoc6}
{access adhoc6}
{connect adhoc6(1), adhoc5(0)}
{nseg = 1}
{strdef color color = "White"}
{pt3dclear()}
{pt3dadd(160104.000000,141645.000000,176850.000000,668.149400)}
{pt3dadd(160180.000000,142072.000000,176300.000000,686.070043)}
{pt3dadd(160266.000000,142350.000000,175937.500000,710.417489)}

{create adhoc7}
{access adhoc7}
{connect adhoc7(1), adhoc5(0)}
{nseg = 1}
{strdef color color = "White"}
{pt3dclear()}
{pt3dadd(160104.000000,141645.000000,176850.000000,668.149400)}
{pt3dadd(159164.000000,141048.000000,177008.333333,626.691990)}
{pt3dadd(157972.000000,140564.000000,176991.666667,585.234580)}
{pt3dadd(156632.000000,140120.000000,177025.000000,541.746809)}
{pt3dadd(155988.000000,140180.000000,177133.333333,496.228678)}
{pt3dadd(155628.000000,140256.000000,177225.000000,418.255018)}
{pt3dadd(155336.000000,140196.000000,177200.000000,334.387680)}
{pt3dadd(155040.000000,140036.000000,177100.000000,283.774499)}
{pt3dadd(154748.000000,139852.000000,177041.666667,232.235416)}
{pt3dadd(154420.000000,139704.000000,177058.333333,231.190777)}
{pt3dadd(154172.000000,139568.000000,177066.666667,233.185006)}
{pt3dadd(153912.000000,139432.000000,177008.333333,238.218101)}
{pt3dadd(153700.000000,139332.000000,176958.333333,246.290064)}
{pt3dadd(153448.000000,139260.000000,176941.666667,257.371266)}
{pt3dadd(153148.000000,139220.000000,176958.333333,271.385727)}
{pt3dadd(152748.000000,139216.000000,176966.666667,288.333447)}
{pt3dadd(152320.000000,139224.000000,177000.000000,308.214426)}
{pt3dadd(151832.000000,139236.000000,177066.666667,323.125160)}
{pt3dadd(151328.000000,139292.000000,177208.333333,333.991552)}
{pt3dadd(150768.000000,139324.000000,177316.666667,340.813602)}
{pt3dadd(150308.000000,139340.000000,177408.333333,343.591309)}
{pt3dadd(149936.000000,139236.000000,177400.000000,343.591309)}
{pt3dadd(149680.000000,139108.000000,177375.000000,338.673737)}
{pt3dadd(149372.000000,138960.000000,177258.333333,319.106389)}
{pt3dadd(149048.000000,138824.000000,177033.333333,303.518031)}
{pt3dadd(148736.000000,138720.000000,176775.000000,299.368650)}
{pt3dadd(148460.000000,138648.000000,176466.666667,287.974778)}
{pt3dadd(148196.000000,138656.000000,176241.666667,276.897423)}
{pt3dadd(147975.000000,138699.000000,176056.250000,264.620250)}

{create adhoc8}
{access adhoc8}
{connect adhoc8(1), adhoc7(0)}
{nseg = 1}
{strdef color color = "White"}
{pt3dclear()}
{pt3dadd(147975.000000,138699.000000,176056.250000,264.620250)}
{pt3dadd(148084.000000,138776.000000,176000.000000,247.865456)}
{pt3dadd(148336.000000,138832.000000,175925.000000,233.503245)}
{pt3dadd(148608.000000,138900.000000,175775.000000,222.131765)}
{pt3dadd(148636.000000,138908.000000,175550.000000,193.573918)}
{pt3dadd(148626.000000,138918.000000,175425.000000,177.209774)}

{create adhoc9}
{access adhoc9}
{connect adhoc9(1), adhoc7(0)}
{nseg = 1}
{strdef color color = "White"}
{pt3dclear()}
{pt3dadd(147975.000000,138699.000000,176056.250000,264.620250)}
{pt3dadd(147628.000000,138788.000000,175916.666667,247.865456)}
{pt3dadd(147168.000000,138856.000000,175675.000000,232.488103)}
{pt3dadd(146802.000000,138924.000000,175500.000000,221.740792)}

{create adhoc10}
{access adhoc10}
{connect adhoc10(1), adhoc4(0)}
{nseg = 1}
{strdef color color = "White"}
{pt3dclear()}
{pt3dadd(159204.000000,140349.000000,179212.500000,541.171794)}
{pt3dadd(159072.000000,139336.000000,179308.333333,542.054770)}
{pt3dadd(158972.000000,138260.000000,179308.333333,546.262301)}
{pt3dadd(158884.000000,137064.000000,179258.333333,515.462040)}
{pt3dadd(158916.000000,136708.000000,179158.333333,473.900584)}
{pt3dadd(158972.000000,136392.000000,178991.666667,422.817517)}
{pt3dadd(159076.000000,136132.000000,178833.333333,342.857829)}
{pt3dadd(159204.000000,135936.000000,178708.333333,290.884032)}
{pt3dadd(159384.000000,135688.000000,178650.000000,227.360502)}
{pt3dadd(159552.000000,135372.000000,178616.666667,225.688734)}
{pt3dadd(159648.000000,135186.000000,178600.000000,223.539318)}

{create adhoc11}
{access adhoc11}
{connect adhoc11(1), adhoc3(0)}
{nseg = 1}
{strdef color color = "White"}
{pt3dclear()}
{pt3dadd(158664.000000,139392.000000,180412.500000,464.130614)}
{pt3dadd(158592.000000,139268.000000,180683.333333,466.165384)}
{pt3dadd(158612.000000,139260.000000,180866.666667,472.758198)}
{pt3dadd(158656.000000,139264.000000,181150.000000,438.981921)}
{pt3dadd(158672.000000,139248.000000,181416.666667,425.323484)}
{pt3dadd(158656.000000,139284.000000,181841.666667,404.869829)}
{pt3dadd(158500.000000,139284.000000,182308.333333,364.234873)}
{pt3dadd(158418.000000,139284.000000,182587.500000,356.841357)}
