# Supplementary material for: Full reconstruction of large lobula plate tangential cells in Drosophila from a 3D EM dataset
Source: PLoS One. 2018 Nov 28;13(11):e0207828. doi: 10.1371/journal.pone.0207828 (PMC6261601; doi:10.1371/journal.pone.0207828)
Supplement: S1 Dataset — (ZIP) [file pone.0207828.s001.zip › Diameter hoc/plotCompleteSkeletons/vsl3_1_0001.hoc]

/* created with convertKnossosNmlToHoc.m */

{create adhoc1}
{access adhoc1}
{nseg = 1}
{strdef color color = "White"}
{pt3dclear()}
{pt3dadd(155399.992734,136689.637391,182800.000000,801.825372)}
{pt3dadd(155215.173991,136852.181253,182991.666667,843.793690)}
{pt3dadd(155424.585190,137115.706663,183181.250000,874.570457)}

{create adhoc2}
{access adhoc2}
{connect adhoc2(1), adhoc1(0)}
{nseg = 1}
{strdef color color = "White"}
{pt3dclear()}
{pt3dadd(155424.585190,137115.706663,183181.250000,874.570457)}
{pt3dadd(154247.007956,136850.680878,183725.000000,897.742481)}
{pt3dadd(153824.717997,136487.862057,184041.666667,920.914506)}
{pt3dadd(153663.475521,136422.672887,184341.666667,938.044827)}
{pt3dadd(153824.835379,136287.227349,184583.333333,955.175148)}
{pt3dadd(153982.642753,136834.935854,184875.000000,952.855034)}
{pt3dadd(153927.672476,136478.538291,185150.000000,928.118154)}
{pt3dadd(153668.755660,136180.500700,185425.000000,948.622229)}
{pt3dadd(153152.968131,135969.006612,185716.666667,970.949206)}
{pt3dadd(152480.921883,135971.376281,186066.666667,966.699468)}
{pt3dadd(151360.947072,135755.752228,186362.500000,928.630577)}

{create adhoc3}
{access adhoc3}
{connect adhoc3(1), adhoc2(0)}
{nseg = 1}
{strdef color color = "White"}
{pt3dclear()}
{pt3dadd(151360.947072,135755.752228,186362.500000,928.630577)}
{pt3dadd(150417.450139,135939.286247,186741.666667,871.825110)}
{pt3dadd(149391.099521,135803.799636,187008.333333,808.624177)}
{pt3dadd(148737.154280,135629.798512,187316.666667,746.888760)}
{pt3dadd(148249.441097,135300.070468,187600.000000,670.886887)}
{pt3dadd(147773.230394,135361.253419,187925.000000,659.308085)}
{pt3dadd(147373.796729,135636.352594,188216.666667,649.223491)}
{pt3dadd(146997.212723,135277.287276,188491.666667,601.564664)}
{pt3dadd(146755.001159,135185.832653,188708.333333,570.070027)}
{pt3dadd(146141.866770,135437.190254,188866.666667,519.487340)}
{pt3dadd(145343.241419,135874.708141,189016.666667,487.590848)}
{pt3dadd(144288.219305,136218.546985,189150.000000,444.180672)}

{create adhoc4}
{access adhoc4}
{connect adhoc4(1), adhoc3(0)}
{nseg = 1}
{strdef color color = "White"}
{pt3dclear()}
{pt3dadd(144288.219305,136218.546985,189150.000000,444.180672)}
{pt3dadd(143736.501779,135890.805523,188925.000000,421.444187)}
{pt3dadd(143490.828837,135689.279863,188800.000000,423.847762)}

{create adhoc5}
{access adhoc5}
{connect adhoc5(1), adhoc3(0)}
{nseg = 1}
{strdef color color = "White"}
{pt3dclear()}
{pt3dadd(144288.219305,136218.546985,189150.000000,444.180672)}
{pt3dadd(143729.118795,136323.498770,189500.000000,421.444187)}
{pt3dadd(143500.304024,136740.492854,189800.000000,423.847762)}
{pt3dadd(143309.072628,136789.054542,190066.666667,446.248426)}
{pt3dadd(143380.747656,136799.547365,190187.500000,1000.000000)}

{create adhoc6}
{access adhoc6}
{connect adhoc6(1), adhoc2(0)}
{nseg = 1}
{strdef color color = "White"}
{pt3dclear()}
{pt3dadd(151360.947072,135755.752228,186362.500000,928.630577)}
{pt3dadd(151007.207963,134719.721503,186175.000000,960.194666)}
{pt3dadd(150778.206985,134361.394018,186037.500000,960.930471)}

{create adhoc7}
{access adhoc7}
{connect adhoc7(1), adhoc1(0)}
{nseg = 1}
{strdef color color = "White"}
{pt3dclear()}
{pt3dadd(155424.585190,137115.706663,183181.250000,874.570457)}
{pt3dadd(156659.178835,137601.756326,182750.000000,858.739848)}
{pt3dadd(157544.000000,137960.000000,182241.666667,825.156575)}
{pt3dadd(157500.000000,138244.000000,181866.666667,809.825519)}
{pt3dadd(157368.000000,138536.000000,181541.666667,806.840070)}
{pt3dadd(157264.000000,138692.000000,181358.333333,818.747681)}
{pt3dadd(157161.000000,138822.000000,181206.250000,827.900015)}

{create adhoc8}
{access adhoc8}
{connect adhoc8(1), adhoc7(0)}
{nseg = 1}
{strdef color color = "White"}
{pt3dclear()}
{pt3dadd(157161.000000,138822.000000,181206.250000,827.900015)}
{pt3dadd(157176.000000,138940.000000,180916.666667,946.261184)}
{pt3dadd(157192.000000,139100.000000,180408.333333,1003.702178)}
{pt3dadd(157352.000000,139204.000000,179766.666667,1053.795048)}
{pt3dadd(157416.000000,139468.000000,179150.000000,1137.533625)}
{pt3dadd(157488.000000,139656.000000,178783.333333,1188.141154)}
{pt3dadd(157359.000000,139941.000000,178587.500000,1174.552710)}

{create adhoc9}
{access adhoc9}
{connect adhoc9(1), adhoc8(0)}
{nseg = 1}
{strdef color color = "White"}
{pt3dclear()}
{pt3dadd(157359.000000,139941.000000,178587.500000,1174.552710)}
{pt3dadd(157216.000000,140428.000000,178208.333333,1188.171353)}
{pt3dadd(157104.000000,140856.000000,177858.333333,1169.705535)}
{pt3dadd(157152.000000,141237.600000,177540.000000,1140.670892)}

{create adhoc10}
{access adhoc10}
{connect adhoc10(1), adhoc9(0)}
{nseg = 1}
{strdef color color = "White"}
{pt3dclear()}
{pt3dadd(157152.000000,141237.600000,177540.000000,1140.670892)}
{pt3dadd(157236.000000,141680.000000,177341.666667,1197.484054)}
{pt3dadd(157338.000000,142077.000000,177075.000000,1244.088856)}

{create adhoc11}
{access adhoc11}
{connect adhoc11(1), adhoc10(0)}
{nseg = 1}
{strdef color color = "White"}
{pt3dclear()}
{pt3dadd(157338.000000,142077.000000,177075.000000,1244.088856)}
{pt3dadd(157504.000000,142556.000000,176600.000000,1305.570422)}
{pt3dadd(157628.000000,143256.000000,176000.000000,1356.351931)}
{pt3dadd(157710.000000,143724.000000,175650.000000,1346.313133)}

{create adhoc12}
{access adhoc12}
{connect adhoc12(1), adhoc10(0)}
{nseg = 1}
{strdef color color = "White"}
{pt3dclear()}
{pt3dadd(157338.000000,142077.000000,177075.000000,1244.088856)}
{pt3dadd(156992.000000,141844.000000,177158.333333,1226.212797)}
{pt3dadd(156452.000000,141588.000000,177116.666667,1178.643484)}
{pt3dadd(155796.000000,141188.000000,176958.333333,1065.203036)}
{pt3dadd(155332.000000,140964.000000,176733.333333,900.826858)}
{pt3dadd(154992.000000,140812.000000,176483.333333,792.700279)}
{pt3dadd(154652.000000,140784.000000,176275.000000,685.208200)}
{pt3dadd(154304.000000,140656.000000,176183.333333,608.167474)}
{pt3dadd(153960.000000,140436.000000,176091.666667,534.497034)}
{pt3dadd(153636.000000,140112.000000,176075.000000,472.547117)}
{pt3dadd(153328.000000,139816.000000,176033.333333,427.237289)}
{pt3dadd(153032.000000,139596.000000,176000.000000,398.567551)}
{pt3dadd(152732.000000,139500.000000,175950.000000,386.537903)}
{pt3dadd(152424.000000,139432.000000,175958.333333,386.092473)}
{pt3dadd(152116.000000,139400.000000,175975.000000,386.408755)}
{pt3dadd(151776.000000,139328.000000,176025.000000,387.486750)}
{pt3dadd(151416.000000,139300.000000,176066.666667,389.326456)}
{pt3dadd(151032.000000,139308.000000,176116.666667,399.991670)}
{pt3dadd(150664.000000,139280.000000,176116.666667,411.894481)}
{pt3dadd(150312.000000,139188.000000,176000.000000,425.034890)}
{pt3dadd(149960.000000,138928.000000,175866.666667,429.439816)}
{pt3dadd(149616.000000,138592.000000,175750.000000,430.662573)}
{pt3dadd(149296.000000,138144.000000,175708.333333,430.049934)}
{pt3dadd(149012.000000,137680.000000,175583.333333,426.990101)}
{pt3dadd(148728.000000,137224.000000,175416.666667,420.565376)}
{pt3dadd(148590.000000,136992.000000,175287.500000,409.333662)}

{create adhoc13}
{access adhoc13}
{connect adhoc13(1), adhoc9(0)}
{nseg = 1}
{strdef color color = "White"}
{pt3dclear()}
{pt3dadd(157152.000000,141237.600000,177540.000000,1140.670892)}
{pt3dadd(157208.000000,140848.000000,177625.000000,1194.948921)}
{pt3dadd(157480.000000,140428.000000,177625.000000,1253.344776)}
{pt3dadd(157804.000000,140016.000000,177491.666667,1258.242829)}
{pt3dadd(158016.000000,139808.000000,177258.333333,1245.933850)}
{pt3dadd(158044.000000,139864.000000,176925.000000,1164.786403)}
{pt3dadd(158022.000000,139890.000000,176775.000000,996.752420)}

{create adhoc14}
{access adhoc14}
{connect adhoc14(1), adhoc9(0)}
{nseg = 1}
{strdef color color = "White"}
{pt3dclear()}
{pt3dadd(157152.000000,141237.600000,177540.000000,1140.670892)}
{pt3dadd(157164.000000,141044.000000,177458.333333,1185.570593)}
{pt3dadd(157300.000000,141040.000000,177150.000000,1236.179720)}
{pt3dadd(157568.000000,141036.000000,176691.666667,1219.879558)}
{pt3dadd(157884.000000,141036.000000,176233.333333,1210.532060)}
{pt3dadd(158232.000000,140924.000000,175883.333333,1135.266811)}
{pt3dadd(158476.000000,140712.000000,175650.000000,1008.787145)}
{pt3dadd(158632.000000,140432.000000,175525.000000,937.713946)}
{pt3dadd(158656.000000,140196.000000,175366.666667,848.872447)}
{pt3dadd(158658.000000,140094.000000,175275.000000,761.791425)}

{create adhoc15}
{access adhoc15}
{connect adhoc15(1), adhoc8(0)}
{nseg = 1}
{strdef color color = "White"}
{pt3dclear()}
{pt3dadd(157359.000000,139941.000000,178587.500000,1174.552710)}
{pt3dadd(157544.000000,139600.000000,178675.000000,1137.273342)}
{pt3dadd(157756.000000,139276.000000,178675.000000,1057.020592)}
{pt3dadd(158080.000000,138792.000000,178675.000000,916.072183)}
{pt3dadd(158440.000000,138312.000000,178675.000000,805.513333)}
{pt3dadd(158740.000000,137896.000000,178733.333333,669.467222)}
{pt3dadd(159000.000000,137556.000000,178816.666667,505.471158)}
{pt3dadd(159160.000000,137296.000000,178941.666667,424.731231)}
{pt3dadd(159312.000000,137060.000000,179025.000000,346.657904)}
{pt3dadd(159392.000000,136836.000000,179125.000000,338.924766)}
{pt3dadd(159460.000000,136620.000000,179191.666667,334.124888)}
{pt3dadd(159456.000000,136412.000000,179258.333333,332.258268)}
{pt3dadd(159508.000000,136176.000000,179266.666667,333.324907)}
{pt3dadd(159560.000000,135948.000000,179250.000000,338.658105)}
{pt3dadd(159640.000000,135716.000000,179191.666667,343.991303)}
{pt3dadd(159644.000000,135512.000000,179150.000000,349.324501)}
{pt3dadd(159656.000000,135312.000000,179125.000000,354.657698)}
{pt3dadd(159676.000000,135108.000000,179116.666667,363.940962)}
{pt3dadd(159712.000000,134892.000000,179116.666667,374.507692)}
{pt3dadd(159724.000000,134652.000000,179100.000000,386.357889)}
{pt3dadd(159700.000000,134396.000000,179083.333333,399.491551)}
{pt3dadd(159640.000000,134148.000000,179033.333333,415.266898)}
{pt3dadd(159548.000000,133904.000000,178975.000000,437.683827)}
{pt3dadd(159420.000000,133656.000000,178900.000000,466.742338)}
{pt3dadd(159284.000000,133412.000000,178925.000000,502.442432)}
{pt3dadd(159124.000000,133176.000000,179000.000000,542.129964)}
{pt3dadd(158988.000000,132940.000000,179108.333333,601.873088)}
{pt3dadd(158800.000000,132660.000000,179116.666667,644.986925)}
{pt3dadd(158592.000000,132404.000000,179075.000000,671.263988)}
{pt3dadd(158328.000000,132172.000000,179008.333333,693.615491)}
{pt3dadd(157936.000000,131892.000000,178941.666667,669.254582)}
{pt3dadd(157563.000000,131619.000000,178893.750000,644.136711)}

{create adhoc16}
{access adhoc16}
{connect adhoc16(1), adhoc15(0)}
{nseg = 1}
{strdef color color = "White"}
{pt3dclear()}
{pt3dadd(157563.000000,131619.000000,178893.750000,644.136711)}
{pt3dadd(157460.000000,131524.000000,178741.666667,624.186086)}
{pt3dadd(157580.000000,131652.000000,178575.000000,599.049243)}
{pt3dadd(157713.000000,131805.000000,178400.000000,562.822710)}

{create adhoc17}
{access adhoc17}
{connect adhoc17(1), adhoc16(0)}
{nseg = 1}
{strdef color color = "White"}
{pt3dclear()}
{pt3dadd(157713.000000,131805.000000,178400.000000,562.822710)}
{pt3dadd(157624.000000,131552.000000,178200.000000,548.795257)}
{pt3dadd(157436.000000,131140.000000,177916.666667,525.234754)}
{pt3dadd(157020.000000,130700.000000,177500.000000,489.920134)}
{pt3dadd(156540.000000,130428.000000,177166.666667,477.096511)}
{pt3dadd(156080.000000,130216.000000,176908.333333,470.506198)}
{pt3dadd(155656.000000,130008.000000,176691.666667,426.530204)}
{pt3dadd(155044.000000,129848.000000,176508.333333,417.455027)}
{pt3dadd(154392.000000,129728.000000,176333.333333,413.119928)}
{pt3dadd(153848.000000,129600.000000,176241.666667,427.803720)}
{pt3dadd(153596.000000,129620.000000,176191.666667,448.229337)}
{pt3dadd(153340.000000,129596.000000,176166.666667,489.802485)}
{pt3dadd(153088.000000,129516.000000,176225.000000,529.852619)}
{pt3dadd(152876.000000,129340.000000,176341.666667,557.921937)}
{pt3dadd(152656.000000,129132.000000,176483.333333,579.680199)}
{pt3dadd(152424.000000,128984.000000,176533.333333,595.127403)}
{pt3dadd(152217.000000,128889.000000,176537.500000,604.263550)}

{create adhoc18}
{access adhoc18}
{connect adhoc18(1), adhoc17(0)}
{nseg = 1}
{strdef color color = "White"}
{pt3dclear()}
{pt3dadd(152217.000000,128889.000000,176537.500000,604.263550)}
{pt3dadd(152052.000000,128864.000000,176516.666667,606.112392)}
{pt3dadd(151864.000000,128868.000000,176475.000000,600.155483)}
{pt3dadd(151572.000000,128948.000000,176350.000000,586.392822)}
{pt3dadd(151280.000000,129116.000000,176158.333333,565.594760)}
{pt3dadd(151008.000000,129304.000000,175900.000000,513.058271)}
{pt3dadd(150744.000000,129364.000000,175675.000000,455.720864)}
{pt3dadd(150484.000000,129356.000000,175500.000000,424.368473)}
{pt3dadd(150212.000000,129308.000000,175366.666667,405.389321)}
{pt3dadd(149980.000000,129264.000000,175258.333333,385.613613)}
{pt3dadd(149826.000000,129192.000000,175168.750000,365.943748)}

{create adhoc19}
{access adhoc19}
{connect adhoc19(1), adhoc18(0)}
{nseg = 1}
{strdef color color = "White"}
{pt3dclear()}
{pt3dadd(149826.000000,129192.000000,175168.750000,365.943748)}
{pt3dadd(149700.000000,129220.000000,175175.000000,346.408593)}
{pt3dadd(149508.000000,129336.000000,175183.333333,327.048561)}
{pt3dadd(149370.000000,129426.000000,175200.000000,307.922026)}

{create adhoc20}
{access adhoc20}
{connect adhoc20(1), adhoc18(0)}
{nseg = 1}
{strdef color color = "White"}
{pt3dclear()}
{pt3dadd(149826.000000,129192.000000,175168.750000,365.943748)}
{pt3dadd(149756.000000,129124.000000,175100.000000,346.408593)}
{pt3dadd(149742.000000,129108.000000,175075.000000,327.048561)}

{create adhoc21}
{access adhoc21}
{connect adhoc21(1), adhoc17(0)}
{nseg = 1}
{strdef color color = "White"}
{pt3dclear()}
{pt3dadd(152217.000000,128889.000000,176537.500000,604.263550)}
{pt3dadd(152124.000000,128908.000000,176691.666667,626.828953)}
{pt3dadd(152112.000000,128928.000000,176775.000000,648.286998)}

{create adhoc22}
{access adhoc22}
{connect adhoc22(1), adhoc16(0)}
{nseg = 1}
{strdef color color = "White"}
{pt3dclear()}
{pt3dadd(157713.000000,131805.000000,178400.000000,562.822710)}
{pt3dadd(157600.000000,132088.000000,178366.666667,568.324354)}
{pt3dadd(157492.000000,132424.000000,178291.666667,564.448728)}
{pt3dadd(157360.000000,132784.000000,178108.333333,537.737848)}
{pt3dadd(157348.000000,132964.000000,177825.000000,518.495695)}
{pt3dadd(157280.000000,133004.000000,177508.333333,482.407718)}
{pt3dadd(157242.000000,133026.000000,177350.000000,394.320549)}

{create adhoc23}
{access adhoc23}
{connect adhoc23(1), adhoc15(0)}
{nseg = 1}
{strdef color color = "White"}
{pt3dclear()}
{pt3dadd(157563.000000,131619.000000,178893.750000,644.136711)}
{pt3dadd(157560.000000,131624.000000,179025.000000,673.674064)}
{pt3dadd(157636.000000,131724.000000,179341.666667,699.421380)}
{pt3dadd(157476.000000,131796.000000,179750.000000,673.182252)}
{pt3dadd(157116.000000,131720.000000,180091.666667,632.693425)}
{pt3dadd(156836.000000,131700.000000,180100.000000,570.092148)}
{pt3dadd(156712.000000,131700.000000,179991.666667,491.334470)}
{pt3dadd(156488.000000,131736.000000,179741.666667,428.426313)}
{pt3dadd(156176.000000,131636.000000,179675.000000,392.245522)}
{pt3dadd(155868.000000,131456.000000,179725.000000,361.300322)}
{pt3dadd(155600.000000,131204.000000,179816.666667,328.105553)}
{pt3dadd(155344.000000,130964.000000,179883.333333,291.911359)}
{pt3dadd(155044.000000,130744.000000,179900.000000,251.592957)}
{pt3dadd(154896.000000,130614.000000,179912.500000,205.382829)}

{create adhoc24}
{access adhoc24}
{connect adhoc24(1), adhoc7(0)}
{nseg = 1}
{strdef color color = "White"}
{pt3dclear()}
{pt3dadd(157161.000000,138822.000000,181206.250000,827.900015)}
{pt3dadd(157024.000000,138764.000000,181300.000000,766.742141)}
{pt3dadd(156724.000000,138808.000000,181208.333333,687.521635)}
{pt3dadd(156216.000000,138832.000000,181116.666667,598.980726)}
{pt3dadd(155812.000000,138800.000000,181066.666667,541.813427)}
{pt3dadd(155472.000000,138784.000000,181150.000000,479.787842)}
{pt3dadd(155272.000000,138760.000000,181266.666667,394.089641)}
{pt3dadd(155056.000000,138764.000000,181325.000000,331.881613)}
{pt3dadd(154856.000000,138748.000000,181325.000000,254.121578)}
{pt3dadd(154752.000000,138762.000000,181300.000000,226.119568)}
