# Supplementary material for: Full reconstruction of large lobula plate tangential cells in Drosophila from a 3D EM dataset
Source: PLoS One. 2018 Nov 28;13(11):e0207828. doi: 10.1371/journal.pone.0207828 (PMC6261601; doi:10.1371/journal.pone.0207828)
Supplement: S1 Dataset — (ZIP) [file pone.0207828.s001.zip › Diameter hoc/plotCompleteSkeletons/vslbd_1_0001.hoc]

/* created with convertKnossosNmlToHoc.m */

{create adhoc1}
{access adhoc1}
{nseg = 1}
{strdef color color = "White"}
{pt3dclear()}
{pt3dadd(158203.279524,130370.216054,185425.000000,399.941363)}
{pt3dadd(157920.137651,131127.045354,185458.333333,482.404622)}
{pt3dadd(157671.131464,131360.166507,185558.333333,585.907439)}
{pt3dadd(157614.125276,131733.287660,185658.333333,651.520526)}
{pt3dadd(157990.260961,131727.579513,185725.000000,706.330381)}
{pt3dadd(158300.339343,132688.688242,185825.000000,749.338445)}

{create adhoc2}
{access adhoc2}
{connect adhoc2(1), adhoc1(0)}
{nseg = 1}
{strdef color color = "White"}
{pt3dclear()}
{pt3dadd(158300.339343,132688.688242,185825.000000,749.338445)}
{pt3dadd(157897.133416,133669.060219,185475.000000,784.228525)}
{pt3dadd(157002.399348,135095.499305,185212.500000,848.556091)}

{create adhoc3}
{access adhoc3}
{connect adhoc3(1), adhoc2(0)}
{nseg = 1}
{strdef color color = "White"}
{pt3dclear()}
{pt3dadd(157002.399348,135095.499305,185212.500000,848.556091)}
{pt3dadd(156703.914368,135483.032894,184791.666667,939.122127)}
{pt3dadd(156423.303051,135555.995501,184441.666667,1011.135064)}
{pt3dadd(156288.001904,135642.298882,184258.333333,1118.080616)}
{pt3dadd(156428.299336,135731.653026,183925.000000,1257.013670)}
{pt3dadd(156967.052913,135833.310869,183575.000000,1354.879205)}
{pt3dadd(157521.875371,135826.358372,183058.333333,1454.298648)}
{pt3dadd(158554.043207,136192.440188,182733.333333,1485.971437)}
{pt3dadd(159379.056044,136535.914924,182525.000000,1479.193495)}
{pt3dadd(160156.000000,137024.000000,182358.333333,1467.845891)}
{pt3dadd(160260.000000,137156.000000,182025.000000,1435.622475)}
{pt3dadd(160444.000000,137268.000000,181650.000000,1399.237234)}
{pt3dadd(160672.000000,137404.000000,181283.333333,1353.960654)}
{pt3dadd(160852.000000,137580.000000,180941.666667,1296.882143)}
{pt3dadd(160932.000000,137764.000000,180616.666667,1235.277354)}
{pt3dadd(160996.000000,137976.000000,180300.000000,1231.304500)}
{pt3dadd(161052.000000,138180.000000,179966.666667,1199.949724)}
{pt3dadd(161116.000000,138376.000000,179625.000000,1163.330057)}
{pt3dadd(161152.000000,138532.000000,179291.666667,1119.578650)}
{pt3dadd(161168.000000,138656.000000,178966.666667,1079.256056)}
{pt3dadd(161212.000000,138768.000000,178650.000000,1043.616701)}
{pt3dadd(161320.000000,138836.000000,178325.000000,1014.006908)}
{pt3dadd(161480.000000,138876.000000,178000.000000,993.090382)}
{pt3dadd(161620.000000,138936.000000,177666.666667,982.768523)}
{pt3dadd(161664.000000,139044.000000,177325.000000,979.502090)}
{pt3dadd(161620.000000,139248.000000,176966.666667,969.377819)}
{pt3dadd(161540.000000,139388.000000,176583.333333,962.968703)}
{pt3dadd(161464.000000,139564.000000,176216.666667,961.098263)}
{pt3dadd(161360.000000,139752.000000,175850.000000,962.514414)}
{pt3dadd(161220.000000,139984.000000,175500.000000,967.484440)}
{pt3dadd(161130.000000,140106.000000,175312.500000,976.505796)}

{create adhoc4}
{access adhoc4}
{connect adhoc4(1), adhoc2(0)}
{nseg = 1}
{strdef color color = "White"}
{pt3dclear()}
{pt3dadd(157002.399348,135095.499305,185212.500000,848.556091)}
{pt3dadd(156225.825199,135625.942920,185508.333333,824.577987)}
{pt3dadd(155828.140108,135452.226107,185816.666667,811.474393)}
{pt3dadd(155297.964468,135046.450679,186041.666667,799.834399)}
{pt3dadd(155102.656996,135105.330562,186191.666667,781.831520)}
{pt3dadd(154742.862055,135138.635389,186316.666667,728.087082)}
{pt3dadd(154851.089140,134878.706638,186408.333333,670.191299)}
{pt3dadd(154645.154571,135156.905783,186475.000000,654.351744)}
{pt3dadd(154583.952469,134785.784918,186525.000000,659.255288)}
{pt3dadd(154237.237400,135295.105578,186600.000000,674.736901)}
{pt3dadd(153881.320938,135317.871733,186691.666667,697.606242)}
{pt3dadd(153583.656614,135741.736667,186791.666667,715.197658)}
{pt3dadd(153369.036938,135341.356982,186941.666667,730.672415)}
{pt3dadd(153204.740735,134965.586281,187125.000000,767.012381)}
{pt3dadd(153041.684919,134628.496220,187383.333333,804.608104)}
{pt3dadd(152763.523713,134860.491525,187633.333333,834.873184)}
{pt3dadd(152325.487273,134716.653377,187900.000000,866.557260)}
{pt3dadd(151601.265955,134995.535009,188183.333333,910.337112)}
{pt3dadd(150860.078104,134962.374973,188500.000000,938.789119)}
{pt3dadd(150343.361697,134998.422949,188825.000000,957.944484)}
{pt3dadd(149936.014877,134846.049735,189141.666667,969.305699)}
{pt3dadd(149624.183471,134628.459897,189408.333333,972.615039)}
{pt3dadd(149053.256794,134595.953936,189650.000000,967.711495)}
{pt3dadd(148344.020694,134650.357895,189875.000000,953.475208)}
{pt3dadd(147842.014599,134301.910567,190150.000000,929.808907)}
{pt3dadd(147776.361274,134017.180693,190408.333333,905.811356)}
{pt3dadd(148072.455793,133865.988941,190658.333333,864.070792)}
{pt3dadd(148401.753037,134080.459243,190866.666667,822.835537)}
{pt3dadd(149094.184157,134551.352752,191066.666667,782.856038)}
{pt3dadd(149628.475111,134516.695739,191258.333333,739.710923)}
{pt3dadd(149951.816580,134827.818932,191433.333333,694.755772)}
{pt3dadd(147337.643298,134546.909034,191575.000000,675.628879)}
{pt3dadd(144518.546323,134889.164821,191666.666667,669.561746)}
{pt3dadd(142109.800395,135486.657600,191716.666667,680.646618)}
{pt3dadd(141668.051466,135990.706450,191775.000000,691.589098)}
{pt3dadd(141521.981407,136240.366510,191858.333333,715.619536)}
{pt3dadd(140868.855678,135811.792084,192000.000000,739.649974)}
{pt3dadd(140615.661501,135719.058676,192233.333333,769.383408)}
{pt3dadd(140274.861256,135567.068850,192475.000000,815.515739)}
{pt3dadd(140078.484418,135296.120038,192675.000000,859.981181)}
{pt3dadd(140086.238925,135695.208530,192825.000000,904.938214)}
{pt3dadd(139966.987846,135607.199895,192933.333333,938.311182)}
{pt3dadd(139959.457226,136044.978446,193025.000000,976.559222)}
{pt3dadd(139763.521983,135583.043772,193075.000000,1000.625863)}
{pt3dadd(139740.695417,135561.452343,193141.666667,1014.877684)}
{pt3dadd(139718.885320,135657.913334,193241.666667,1015.731915)}
{pt3dadd(139807.088763,135584.736830,193383.333333,1003.058250)}
{pt3dadd(139745.173444,135509.440590,193508.333333,996.991117)}
{pt3dadd(139622.053807,134897.391696,193625.000000,969.224701)}
{pt3dadd(139549.878904,135285.160718,193741.666667,930.976661)}
{pt3dadd(139523.592523,135631.601813,193900.000000,894.261310)}
{pt3dadd(139460.159082,135901.459819,194083.333333,835.095504)}
{pt3dadd(139274.715504,135934.084672,194291.666667,774.005986)}
{pt3dadd(139227.947134,135926.539003,194533.333333,710.663813)}
{pt3dadd(139131.235192,135765.334400,194766.666667,653.092246)}
{pt3dadd(139068.068285,135351.269962,194983.333333,588.023847)}
{pt3dadd(138815.645736,135214.951841,195200.000000,527.830520)}
{pt3dadd(138786.883600,135023.818566,195425.000000,468.892281)}
{pt3dadd(138616.910926,135225.220645,195650.000000,433.110763)}
{pt3dadd(138624.654461,135012.803085,195850.000000,391.833060)}
{pt3dadd(138503.211064,135307.951307,196016.666667,342.299816)}
{pt3dadd(138512.319471,135163.166999,196150.000000,306.060822)}
{pt3dadd(138406.610630,135390.164617,196266.666667,277.794719)}
{pt3dadd(138336.325359,135369.209547,196325.000000,1000.000000)}

{create adhoc5}
{access adhoc5}
{connect adhoc5(1), adhoc1(0)}
{nseg = 1}
{strdef color color = "White"}
{pt3dclear()}
{pt3dadd(158300.339343,132688.688242,185825.000000,749.338445)}
{pt3dadd(158470.240901,133274.331328,186091.666667,713.406554)}
{pt3dadd(158473.542618,133887.739654,186308.333333,704.588234)}
{pt3dadd(158601.497198,133573.996736,186358.333333,701.639440)}
{pt3dadd(158729.451779,133228.253818,186408.333333,691.037170)}
{pt3dadd(158607.183361,132914.534804,186458.333333,707.066425)}
{pt3dadd(158509.981260,132419.413939,186508.333333,731.355464)}
{pt3dadd(158320.791462,132149.187445,186608.333333,721.969407)}
{pt3dadd(158479.570238,131570.508501,186708.333333,708.912605)}
{pt3dadd(158486.389862,131938.758767,186841.666667,676.487761)}
{pt3dadd(158702.626574,131976.004232,187008.333333,641.208071)}
{pt3dadd(158769.519414,131669.854939,187225.000000,604.162297)}
{pt3dadd(158826.662257,131145.953624,187391.666667,574.488475)}
{pt3dadd(158889.593974,130870.239228,187508.333333,520.306153)}
{pt3dadd(159091.903314,130724.191711,187608.333333,485.893948)}
{pt3dadd(159406.212655,130702.144195,187708.333333,458.265306)}
{pt3dadd(159482.830044,130261.447333,187791.666667,437.635833)}
{pt3dadd(159326.450785,129634.608502,187841.666667,407.982682)}
{pt3dadd(159074.071525,128923.769672,187891.666667,378.453350)}
{pt3dadd(158924.165951,128517.503699,187925.000000,372.378465)}
{pt3dadd(158904.165951,128473.503699,187925.000000,359.321663)}
{pt3dadd(158855.566648,128341.792615,187991.666667,376.881649)}
{pt3dadd(158802.967345,128182.081532,188058.333333,418.713220)}
{pt3dadd(158534.368043,127742.370449,188125.000000,463.399639)}
{pt3dadd(158166.368043,127146.370449,188125.000000,497.832514)}
{pt3dadd(157746.368043,126118.370449,188125.000000,518.099608)}
{pt3dadd(157563.552462,125419.195068,188258.333333,556.800317)}
{pt3dadd(157268.209971,124676.550337,188475.000000,568.769662)}
{pt3dadd(157000.867480,124349.905606,188691.666667,581.803137)}
{pt3dadd(156572.336304,123843.831589,188875.000000,581.803137)}
{pt3dadd(156377.617340,123589.131491,189058.333333,585.943942)}
{pt3dadd(155989.226824,123551.492317,189308.333333,597.913288)}
{pt3dadd(155786.206092,123411.098956,189541.666667,583.721079)}
{pt3dadd(155288.971754,123156.823745,189775.000000,576.510787)}
{pt3dadd(155202.376862,123048.508703,189991.666667,621.474155)}
{pt3dadd(154935.607106,122762.447881,190166.666667,729.309799)}
{pt3dadd(155037.109969,122662.268082,190291.666667,804.686974)}
{pt3dadd(154956.436879,122218.245586,190400.000000,833.518086)}
{pt3dadd(154850.415455,121909.647456,190508.333333,893.012985)}
{pt3dadd(154293.049716,120913.145584,190583.333333,953.321484)}
{pt3dadd(153486.034259,120087.716853,190600.000000,1023.425035)}

{create adhoc6}
{access adhoc6}
{connect adhoc6(1), adhoc5(0)}
{nseg = 1}
{strdef color color = "White"}
{pt3dclear()}
{pt3dadd(153486.034259,120087.716853,190600.000000,1023.425035)}
{pt3dadd(153219.039791,119478.806424,190825.000000,1090.812899)}
{pt3dadd(153269.164666,119572.443780,191008.333333,1151.339122)}
{pt3dadd(153399.223764,119642.374196,191166.666667,1189.032109)}
{pt3dadd(153416.069679,119889.455966,191283.333333,1268.223787)}
{pt3dadd(153444.755698,119941.449181,191400.000000,1305.241150)}
{pt3dadd(153357.412964,120056.096466,191516.666667,1305.525680)}
{pt3dadd(151133.727671,119898.150929,191600.000000,1305.857631)}
{pt3dadd(148634.098563,119784.798215,191883.333333,1278.172373)}
{pt3dadd(146382.622417,119707.507977,192333.333333,1230.632961)}
{pt3dadd(146115.320752,120051.411232,192908.333333,1172.529236)}
{pt3dadd(146085.186154,120245.855434,193308.333333,1117.795956)}
{pt3dadd(145951.813217,120293.923941,193475.000000,1056.846868)}

{create adhoc7}
{access adhoc7}
{connect adhoc7(1), adhoc5(0)}
{nseg = 1}
{strdef color color = "White"}
{pt3dclear()}
{pt3dadd(153486.034259,120087.716853,190600.000000,1023.425035)}
{pt3dadd(153022.827093,119643.396781,190341.666667,1016.586816)}
{pt3dadd(152945.990041,120251.214702,190091.666667,1019.911710)}
{pt3dadd(152860.914268,120390.781680,189962.500000,1017.970971)}
