# Supplementary material for: Full reconstruction of large lobula plate tangential cells in Drosophila from a 3D EM dataset
Source: PLoS One. 2018 Nov 28;13(11):e0207828. doi: 10.1371/journal.pone.0207828 (PMC6261601; doi:10.1371/journal.pone.0207828)
Supplement: S1 Dataset — (ZIP) [file pone.0207828.s001.zip › Diameter hoc/VS_VSL_preliminary/Old Diameters Mar13_VS_VSL_HS/HSE/2_14_729_smaurer_001.007.hoc]

/* created with nml2hocm */

{create adhoc1}
{access adhoc1}
{nseg = 1}
{strdef color color = "White"}
{pt3dclear()}
{pt3dadd(182040.000000,148932.000000,80525.000000,167.176836)}
{pt3dadd(182256.000000,149148.000000,80500.000000,167.176836)}
{pt3dadd(182472.000000,149448.000000,80550.000000,167.176836)}
{pt3dadd(182712.000000,149736.000000,80700.000000,167.176836)}
{pt3dadd(182868.000000,151200.000000,80950.000000,167.176836)}
{pt3dadd(182724.000000,151404.000000,80900.000000,167.176836)}
{pt3dadd(182232.000000,152844.000000,80775.000000,167.176836)}
{pt3dadd(181152.000000,154464.000000,79850.000000,718.829820)}

{create adhoc2}
{access adhoc2}
{connect adhoc2(1), adhoc1(0)}
{nseg = 1}
{strdef color color = "White"}
{pt3dclear()}
{pt3dadd(181152.000000,154464.000000,79850.000000,718.829820)}
{pt3dadd(181284.000000,154632.000000,78800.000000,862.595802)}
{pt3dadd(181224.000000,154440.000000,78075.000000,771.743696)}
{pt3dadd(181512.000000,154020.000000,77200.000000,680.891589)}
{pt3dadd(181272.000000,152952.000000,76150.000000,590.039483)}
{pt3dadd(180984.000000,152316.000000,75450.000000,499.187376)}
{pt3dadd(180660.000000,152460.000000,74550.000000,718.829820)}
{pt3dadd(180240.000000,152304.000000,73625.000000,599.024880)}

{create adhoc3}
{access adhoc3}
{connect adhoc3(1), adhoc2(0)}
{nseg = 1}
{strdef color color = "White"}
{pt3dclear()}
{pt3dadd(180240.000000,152304.000000,73625.000000,599.024880)}
{pt3dadd(179988.000000,152772.000000,73100.000000,167.176836)}

{create adhoc4}
{access adhoc4}
{connect adhoc4(1), adhoc2(0)}
{nseg = 1}
{strdef color color = "White"}
{pt3dclear()}
{pt3dadd(180240.000000,152304.000000,73625.000000,599.024880)}
{pt3dadd(179880.000000,151200.000000,72625.000000,346.657896)}
{pt3dadd(179364.000000,150180.000000,71925.000000,320.177083)}
{pt3dadd(178896.000000,148848.000000,70950.000000,293.696271)}
{pt3dadd(178752.000000,148116.000000,69850.000000,267.215459)}
{pt3dadd(178476.000000,147228.000000,68875.000000,240.734646)}
{pt3dadd(177648.000000,146160.000000,68050.000000,240.734646)}
{pt3dadd(177144.000000,145008.000000,67375.000000,240.734646)}
{pt3dadd(177276.000000,143760.000000,66775.000000,415.989486)}

{create adhoc5}
{access adhoc5}
{connect adhoc5(1), adhoc4(0)}
{nseg = 1}
{strdef color color = "White"}
{pt3dclear()}
{pt3dadd(177276.000000,143760.000000,66775.000000,415.989486)}
{pt3dadd(177636.000000,143256.000000,67400.000000,200.612214)}
{pt3dadd(177780.000000,143208.000000,67775.000000,210.642822)}
{pt3dadd(177900.000000,142980.000000,68125.000000,220.673430)}
{pt3dadd(178152.000000,142620.000000,68600.000000,230.704038)}
{pt3dadd(178356.000000,142356.000000,69000.000000,240.734646)}
{pt3dadd(178704.000000,142200.000000,69425.000000,190.024344)}
{pt3dadd(179112.000000,141768.000000,69975.000000,139.314042)}
{pt3dadd(179304.000000,141696.000000,70050.000000,116.095032)}

{create adhoc6}
{access adhoc6}
{connect adhoc6(1), adhoc4(0)}
{nseg = 1}
{strdef color color = "White"}
{pt3dclear()}
{pt3dadd(177276.000000,143760.000000,66775.000000,415.989486)}
{pt3dadd(177000.000000,143352.000000,66375.000000,200.612214)}

{create adhoc7}
{access adhoc7}
{connect adhoc7(1), adhoc1(0)}
{nseg = 1}
{strdef color color = "White"}
{pt3dclear()}
{pt3dadd(181152.000000,154464.000000,79850.000000,718.829820)}
{pt3dadd(181608.000000,154512.000000,80650.000000,415.989486)}
{pt3dadd(181848.000000,155940.000000,81400.000000,455.758079)}
{pt3dadd(182052.000000,157164.000000,81800.000000,495.526671)}
{pt3dadd(182100.000000,157944.000000,82500.000000,535.295264)}
{pt3dadd(182508.000000,158808.000000,83500.000000,575.063856)}
{pt3dadd(182940.000000,159360.000000,84750.000000,556.094736)}
{pt3dadd(183132.000000,159564.000000,86000.000000,537.125616)}
{pt3dadd(183780.000000,159516.000000,87225.000000,518.156496)}
{pt3dadd(184416.000000,159936.000000,88125.000000,499.187376)}
{pt3dadd(185412.000000,160140.000000,89225.000000,499.187376)}
{pt3dadd(186468.000000,160260.000000,90450.000000,499.187376)}
{pt3dadd(187032.000000,160344.000000,91225.000000,499.187376)}
{pt3dadd(187488.000000,160632.000000,92250.000000,499.187376)}
{pt3dadd(187896.000000,160944.000000,93125.000000,554.097987)}
{pt3dadd(188412.000000,161532.000000,94475.000000,609.008598)}
{pt3dadd(188556.000000,162024.000000,95325.000000,663.919209)}
{pt3dadd(188940.000000,162300.000000,96475.000000,718.829820)}
{pt3dadd(189348.000000,162792.000000,97575.000000,711.641533)}
{pt3dadd(189396.000000,163440.000000,98350.000000,704.453247)}
{pt3dadd(189492.000000,164268.000000,99225.000000,697.264960)}
{pt3dadd(188964.000000,165696.000000,100175.000000,690.076674)}
{pt3dadd(188832.000000,170616.000000,100525.000000,2575.697112)}

{create adhoc8}
{access adhoc8}
{connect adhoc8(1), adhoc7(0)}
{nseg = 1}
{strdef color color = "White"}
{pt3dclear()}
{pt3dadd(188832.000000,170616.000000,100525.000000,2575.697112)}
{pt3dadd(188304.000000,171732.000000,99125.000000,2575.697112)}
{pt3dadd(187812.000000,172464.000000,97625.000000,2289.508551)}
{pt3dadd(187128.000000,173040.000000,96350.000000,2003.319990)}
{pt3dadd(186480.000000,173448.000000,95375.000000,1717.131429)}
{pt3dadd(184740.000000,173448.000000,92825.000000,1430.942868)}
{pt3dadd(184020.000000,174168.000000,91450.000000,1383.741621)}
{pt3dadd(182748.000000,175752.000000,89750.000000,1336.540374)}
{pt3dadd(181692.000000,178236.000000,88450.000000,1289.339127)}
{pt3dadd(181956.000000,179160.000000,89550.000000,1242.137880)}
{pt3dadd(181044.000000,180528.000000,88625.000000,1180.031000)}
{pt3dadd(180156.000000,181572.000000,88050.000000,1117.924119)}
{pt3dadd(178920.000000,183684.000000,87550.000000,1055.817239)}
{pt3dadd(177900.000000,184884.000000,86375.000000,993.710358)}
{pt3dadd(176796.000000,185736.000000,85225.000000,952.305755)}
{pt3dadd(175716.000000,187380.000000,84425.000000,910.901151)}
{pt3dadd(174480.000000,189204.000000,83425.000000,869.496547)}
{pt3dadd(173544.000000,190104.000000,82750.000000,828.091944)}
{pt3dadd(172632.000000,191760.000000,82325.000000,764.834922)}
{pt3dadd(171720.000000,192612.000000,81375.000000,701.577900)}
{pt3dadd(170796.000000,193260.000000,80675.000000,638.320878)}
{pt3dadd(169644.000000,193632.000000,79775.000000,575.063856)}
{pt3dadd(169584.000000,193776.000000,78900.000000,603.817061)}
{pt3dadd(168840.000000,194544.000000,77750.000000,632.570265)}
{pt3dadd(167940.000000,196020.000000,76625.000000,661.323469)}
{pt3dadd(166992.000000,197148.000000,76050.000000,690.076674)}
{pt3dadd(165504.000000,198108.000000,74650.000000,733.206456)}
{pt3dadd(164316.000000,198696.000000,73875.000000,776.336238)}
{pt3dadd(163164.000000,199968.000000,73125.000000,819.466020)}
{pt3dadd(162624.000000,200268.000000,72675.000000,862.595802)}
{pt3dadd(161892.000000,200280.000000,71550.000000,905.725589)}
{pt3dadd(161244.000000,200820.000000,70700.000000,948.855375)}
{pt3dadd(160752.000000,201216.000000,70000.000000,991.985162)}
{pt3dadd(160320.000000,201552.000000,68925.000000,1035.114948)}
{pt3dadd(159528.000000,202272.000000,68025.000000,1035.114948)}
{pt3dadd(159216.000000,202500.000000,66950.000000,1035.114948)}
{pt3dadd(158928.000000,202716.000000,65750.000000,1035.114948)}
{pt3dadd(157932.000000,203844.000000,65125.000000,862.595802)}

{create adhoc9}
{access adhoc9}
{connect adhoc9(1), adhoc8(0)}
{nseg = 1}
{strdef color color = "White"}
{pt3dclear()}
{pt3dadd(157932.000000,203844.000000,65125.000000,862.595802)}
{pt3dadd(157848.000000,202824.000000,63350.000000,690.076674)}
{pt3dadd(157620.000000,202548.000000,62725.000000,776.336242)}
{pt3dadd(157260.000000,202452.000000,61925.000000,862.595811)}
{pt3dadd(156888.000000,202368.000000,61125.000000,948.855380)}
{pt3dadd(156456.000000,202500.000000,60275.000000,1035.114948)}
{pt3dadd(156036.000000,202680.000000,59550.000000,1014.412617)}
{pt3dadd(156036.000000,202680.000000,58775.000000,993.710286)}
{pt3dadd(155472.000000,202644.000000,58050.000000,862.595802)}

{create adhoc10}
{access adhoc10}
{connect adhoc10(1), adhoc9(0)}
{nseg = 1}
{strdef color color = "White"}
{pt3dclear()}
{pt3dadd(155472.000000,202644.000000,58050.000000,862.595802)}
{pt3dadd(154920.000000,203484.000000,56875.000000,690.076674)}
{pt3dadd(154560.000000,203784.000000,56400.000000,690.076656)}
{pt3dadd(154860.000000,204084.000000,55800.000000,690.076638)}
{pt3dadd(155160.000000,204384.000000,55175.000000,690.076620)}
{pt3dadd(154896.000000,204696.000000,54450.000000,690.076602)}
{pt3dadd(154944.000000,205224.000000,53850.000000,690.076620)}
{pt3dadd(155400.000000,205320.000000,53125.000000,690.076638)}
{pt3dadd(155520.000000,205668.000000,52300.000000,690.076656)}
{pt3dadd(155568.000000,205968.000000,51575.000000,690.076674)}
{pt3dadd(155412.000000,206688.000000,50925.000000,575.063856)}

{create adhoc11}
{access adhoc11}
{connect adhoc11(1), adhoc10(0)}
{nseg = 1}
{strdef color color = "White"}
{pt3dclear()}
{pt3dadd(155412.000000,206688.000000,50925.000000,575.063856)}
{pt3dadd(155676.000000,206904.000000,50200.000000,499.187376)}
{pt3dadd(156084.000000,207168.000000,49525.000000,478.387903)}
{pt3dadd(156432.000000,207156.000000,48725.000000,457.588431)}
{pt3dadd(156756.000000,207096.000000,47950.000000,436.788958)}
{pt3dadd(157260.000000,206604.000000,47175.000000,415.989486)}
{pt3dadd(157584.000000,206412.000000,46525.000000,516.936264)}
{pt3dadd(157896.000000,206040.000000,45775.000000,617.883042)}
{pt3dadd(158436.000000,205524.000000,44925.000000,718.829820)}
{pt3dadd(158808.000000,205332.000000,44075.000000,690.076602)}

{create adhoc12}
{access adhoc12}
{connect adhoc12(1), adhoc11(0)}
{nseg = 1}
{strdef color color = "White"}
{pt3dclear()}
{pt3dadd(158808.000000,205332.000000,44075.000000,690.076602)}
{pt3dadd(159204.000000,205488.000000,43325.000000,346.657896)}
{pt3dadd(159840.000000,205536.000000,42775.000000,310.146476)}
{pt3dadd(160644.000000,205704.000000,42175.000000,273.635055)}
{pt3dadd(161220.000000,205500.000000,41575.000000,237.123635)}
{pt3dadd(161700.000000,205056.000000,40875.000000,200.612214)}
{pt3dadd(161976.000000,205092.000000,40025.000000,185.287671)}
{pt3dadd(162612.000000,204900.000000,39300.000000,169.963128)}
{pt3dadd(163116.000000,204672.000000,38600.000000,154.638585)}
{pt3dadd(163752.000000,204540.000000,37825.000000,139.314042)}
{pt3dadd(164928.000000,204624.000000,37300.000000,146.279741)}
{pt3dadd(165648.000000,204672.000000,36775.000000,153.245439)}
{pt3dadd(167088.000000,204072.000000,36050.000000,160.211138)}
{pt3dadd(168084.000000,203256.000000,35175.000000,167.176836)}
{pt3dadd(168612.000000,202812.000000,34725.000000,207.745086)}
{pt3dadd(169152.000000,202584.000000,34425.000000,248.313336)}
{pt3dadd(169908.000000,201888.000000,33725.000000,288.881586)}
{pt3dadd(169872.000000,201540.000000,33625.000000,167.176836)}

{create adhoc13}
{access adhoc13}
{connect adhoc13(1), adhoc11(0)}
{nseg = 1}
{strdef color color = "White"}
{pt3dclear()}
{pt3dadd(158808.000000,205332.000000,44075.000000,690.076602)}
{pt3dadd(159084.000000,204216.000000,43200.000000,200.612214)}
{pt3dadd(159456.000000,203424.000000,42825.000000,210.642822)}
{pt3dadd(160224.000000,202536.000000,42450.000000,220.673430)}
{pt3dadd(160440.000000,201924.000000,41925.000000,230.704038)}
{pt3dadd(160836.000000,200700.000000,40975.000000,240.734646)}
{pt3dadd(161184.000000,200364.000000,40825.000000,240.734646)}
{pt3dadd(161628.000000,199680.000000,40100.000000,240.734646)}
{pt3dadd(162264.000000,199104.000000,39850.000000,240.734646)}
{pt3dadd(162876.000000,198180.000000,39725.000000,240.734646)}
{pt3dadd(163728.000000,197592.000000,38975.000000,204.737450)}
{pt3dadd(164052.000000,197508.000000,38650.000000,168.740253)}
{pt3dadd(164448.000000,196500.000000,37600.000000,132.743057)}
{pt3dadd(164508.000000,196320.000000,37275.000000,96.745860)}
{pt3dadd(164976.000000,195828.000000,37175.000000,116.095032)}

{create adhoc14}
{access adhoc14}
{connect adhoc14(1), adhoc10(0)}
{nseg = 1}
{strdef color color = "White"}
{pt3dclear()}
{pt3dadd(155412.000000,206688.000000,50925.000000,575.063856)}
{pt3dadd(154932.000000,209052.000000,50675.000000,346.657896)}
{pt3dadd(154968.000000,209364.000000,50450.000000,231.105276)}
{pt3dadd(155364.000000,210228.000000,50075.000000,192.587724)}

{create adhoc15}
{access adhoc15}
{connect adhoc15(1), adhoc14(0)}
{nseg = 1}
{strdef color color = "White"}
{pt3dclear()}
{pt3dadd(155364.000000,210228.000000,50075.000000,192.587724)}
{pt3dadd(155724.000000,210420.000000,49550.000000,346.657896)}
{pt3dadd(156216.000000,210240.000000,49000.000000,320.177083)}
{pt3dadd(156492.000000,210540.000000,48375.000000,293.696271)}
{pt3dadd(156576.000000,210408.000000,47925.000000,267.215459)}
{pt3dadd(156756.000000,210276.000000,47525.000000,240.734646)}
{pt3dadd(157152.000000,210120.000000,47075.000000,200.612214)}
{pt3dadd(157500.000000,209844.000000,46550.000000,167.176836)}

{create adhoc16}
{access adhoc16}
{connect adhoc16(1), adhoc14(0)}
{nseg = 1}
{strdef color color = "White"}
{pt3dclear()}
{pt3dadd(155364.000000,210228.000000,50075.000000,192.587724)}
{pt3dadd(155172.000000,210780.000000,49850.000000,399.349944)}
{pt3dadd(155088.000000,211740.000000,49375.000000,359.696120)}
{pt3dadd(154980.000000,212304.000000,49300.000000,320.042295)}
{pt3dadd(154968.000000,212688.000000,49350.000000,280.388470)}
{pt3dadd(154632.000000,213300.000000,49950.000000,240.734646)}
{pt3dadd(153972.000000,213624.000000,50550.000000,277.326288)}

{create adhoc17}
{access adhoc17}
{connect adhoc17(1), adhoc9(0)}
{nseg = 1}
{strdef color color = "White"}
{pt3dclear()}
{pt3dadd(155472.000000,202644.000000,58050.000000,862.595802)}
{pt3dadd(155736.000000,201756.000000,56425.000000,415.989486)}
{pt3dadd(155580.000000,201468.000000,55250.000000,436.788958)}
{pt3dadd(155568.000000,200976.000000,54350.000000,457.588431)}
{pt3dadd(155532.000000,200832.000000,53475.000000,478.387903)}
{pt3dadd(155520.000000,201108.000000,52400.000000,499.187376)}
{pt3dadd(155436.000000,200472.000000,51350.000000,446.610929)}
{pt3dadd(155628.000000,200340.000000,50875.000000,394.034481)}
{pt3dadd(155748.000000,200064.000000,50225.000000,341.458034)}
{pt3dadd(155868.000000,199752.000000,49125.000000,288.881586)}
{pt3dadd(155952.000000,199668.000000,48650.000000,276.844851)}
{pt3dadd(155712.000000,198804.000000,47025.000000,264.808116)}
{pt3dadd(155796.000000,197988.000000,46600.000000,252.771381)}
{pt3dadd(156048.000000,197376.000000,46375.000000,240.734646)}
{pt3dadd(156036.000000,196188.000000,45875.000000,276.042396)}
{pt3dadd(156312.000000,195624.000000,45225.000000,311.350146)}
{pt3dadd(156948.000000,194352.000000,44475.000000,346.657896)}
{pt3dadd(157020.000000,194220.000000,44025.000000,240.734646)}

{create adhoc18}
{access adhoc18}
{connect adhoc18(1), adhoc8(0)}
{nseg = 1}
{strdef color color = "White"}
{pt3dclear()}
{pt3dadd(157932.000000,203844.000000,65125.000000,862.595802)}
{pt3dadd(155544.000000,206496.000000,63525.000000,479.219886)}

{create adhoc19}
{access adhoc19}
{connect adhoc19(1), adhoc18(0)}
{nseg = 1}
{strdef color color = "White"}
{pt3dclear()}
{pt3dadd(155544.000000,206496.000000,63525.000000,479.219886)}
{pt3dadd(155136.000000,207084.000000,63925.000000,399.349944)}
{pt3dadd(154476.000000,207900.000000,64300.000000,432.629088)}
{pt3dadd(154188.000000,208332.000000,64250.000000,465.908232)}
{pt3dadd(153288.000000,210600.000000,64100.000000,499.187376)}
{pt3dadd(153348.000000,211164.000000,63700.000000,599.024880)}

{create adhoc20}
{access adhoc20}
{connect adhoc20(1), adhoc19(0)}
{nseg = 1}
{strdef color color = "White"}
{pt3dclear()}
{pt3dadd(153348.000000,211164.000000,63700.000000,599.024880)}
{pt3dadd(153564.000000,212196.000000,63400.000000,332.791560)}
{pt3dadd(153456.000000,212580.000000,63300.000000,345.437649)}
{pt3dadd(153552.000000,213048.000000,63225.000000,358.083738)}
{pt3dadd(153540.000000,213696.000000,63075.000000,370.729827)}
{pt3dadd(153492.000000,214320.000000,63075.000000,383.375916)}
{pt3dadd(153720.000000,215124.000000,62875.000000,370.729836)}
{pt3dadd(153888.000000,215964.000000,62675.000000,358.083756)}
{pt3dadd(153972.000000,216600.000000,62650.000000,345.437676)}
{pt3dadd(153960.000000,217344.000000,62725.000000,332.791596)}
{pt3dadd(154104.000000,218004.000000,62850.000000,332.791596)}
{pt3dadd(154152.000000,218712.000000,62700.000000,332.791596)}
{pt3dadd(154236.000000,219432.000000,62650.000000,332.791596)}
{pt3dadd(154236.000000,220284.000000,61275.000000,332.791596)}
{pt3dadd(154032.000000,220932.000000,60825.000000,429.301152)}
{pt3dadd(153768.000000,221244.000000,60500.000000,525.810708)}
{pt3dadd(153540.000000,221784.000000,60250.000000,622.320264)}
{pt3dadd(153264.000000,222372.000000,59650.000000,718.829820)}
{pt3dadd(153192.000000,223176.000000,58525.000000,643.119736)}
{pt3dadd(152952.000000,223548.000000,57925.000000,567.409653)}
{pt3dadd(152772.000000,223812.000000,57700.000000,491.699570)}
{pt3dadd(152736.000000,224496.000000,57425.000000,415.989486)}
{pt3dadd(152844.000000,224892.000000,56900.000000,346.657896)}
{pt3dadd(152796.000000,225432.000000,56525.000000,288.881586)}

{create adhoc21}
{access adhoc21}
{connect adhoc21(1), adhoc19(0)}
{nseg = 1}
{strdef color color = "White"}
{pt3dclear()}
{pt3dadd(153348.000000,211164.000000,63700.000000,599.024880)}
{pt3dadd(152988.000000,211848.000000,64650.000000,200.612214)}
{pt3dadd(152472.000000,213240.000000,64925.000000,178.321968)}
{pt3dadd(152832.000000,215832.000000,65375.000000,156.031722)}
{pt3dadd(152796.000000,216768.000000,65625.000000,133.741476)}
{pt3dadd(152388.000000,217752.000000,65925.000000,167.176836)}

{create adhoc22}
{access adhoc22}
{connect adhoc22(1), adhoc18(0)}
{nseg = 1}
{strdef color color = "White"}
{pt3dclear()}
{pt3dadd(155544.000000,206496.000000,63525.000000,479.219886)}
{pt3dadd(155040.000000,206880.000000,62600.000000,240.734646)}
{pt3dadd(154644.000000,207588.000000,62100.000000,264.808116)}
{pt3dadd(154428.000000,208536.000000,61775.000000,288.881586)}
{pt3dadd(154248.000000,209328.000000,61550.000000,167.176836)}

{create adhoc23}
{access adhoc23}
{connect adhoc23(1), adhoc7(0)}
{nseg = 1}
{strdef color color = "White"}
{pt3dclear()}
{pt3dadd(188832.000000,170616.000000,100525.000000,2575.697112)}
{pt3dadd(189108.000000,169860.000000,102200.000000,2967.202872)}
{pt3dadd(189012.000000,170052.000000,103850.000000,3008.414058)}
{pt3dadd(188964.000000,169956.000000,105325.000000,3049.625244)}
{pt3dadd(189276.000000,169476.000000,106725.000000,3090.836430)}
{pt3dadd(189588.000000,169140.000000,108600.000000,2690.768673)}
{pt3dadd(188412.000000,169164.000000,110875.000000,2290.700916)}
{pt3dadd(187392.000000,168732.000000,112525.000000,1890.633159)}
{pt3dadd(186348.000000,168108.000000,114225.000000,1490.565402)}
{pt3dadd(185184.000000,167856.000000,115300.000000,1428.458522)}
{pt3dadd(184044.000000,167280.000000,116550.000000,1366.351641)}
{pt3dadd(183396.000000,166980.000000,117300.000000,1304.244761)}
{pt3dadd(182520.000000,166800.000000,118425.000000,1242.137880)}
{pt3dadd(181896.000000,166356.000000,118750.000000,1111.310865)}
{pt3dadd(179952.000000,165588.000000,119650.000000,980.483850)}
{pt3dadd(178032.000000,165336.000000,120925.000000,849.656835)}
{pt3dadd(176316.000000,164628.000000,121525.000000,718.829820)}
{pt3dadd(174540.000000,164064.000000,122200.000000,622.320264)}
{pt3dadd(172752.000000,163932.000000,122750.000000,525.810708)}
{pt3dadd(170832.000000,164208.000000,123150.000000,429.301152)}
{pt3dadd(168636.000000,164100.000000,123650.000000,332.791596)}
{pt3dadd(167148.000000,164064.000000,124375.000000,299.746750)}
{pt3dadd(165708.000000,164256.000000,125300.000000,266.701905)}
{pt3dadd(164268.000000,164004.000000,126350.000000,233.657060)}
{pt3dadd(163032.000000,163596.000000,127425.000000,200.612214)}
{pt3dadd(161412.000000,163236.000000,128575.000000,460.993630)}
{pt3dadd(159852.000000,162624.000000,129725.000000,721.375047)}
{pt3dadd(158064.000000,161244.000000,131075.000000,981.756464)}
{pt3dadd(157284.000000,160272.000000,132475.000000,1242.137880)}
{pt3dadd(155892.000000,159252.000000,133600.000000,1289.339127)}
{pt3dadd(155304.000000,157116.000000,135400.000000,1336.540374)}
{pt3dadd(154032.000000,154992.000000,136925.000000,1383.741621)}
{pt3dadd(154164.000000,152856.000000,138700.000000,1430.942868)}
{pt3dadd(152508.000000,149712.000000,139825.000000,1445.848502)}
{pt3dadd(150600.000000,148512.000000,141100.000000,1460.754135)}
{pt3dadd(150492.000000,145476.000000,142900.000000,1475.659769)}
{pt3dadd(149448.000000,144288.000000,144150.000000,1490.565402)}
{pt3dadd(149364.000000,143076.000000,145475.000000,1633.063469)}
{pt3dadd(150192.000000,140904.000000,146350.000000,1775.561535)}
{pt3dadd(150192.000000,139104.000000,148525.000000,1918.059601)}
{pt3dadd(150192.000000,136812.000000,151100.000000,2060.557668)}
{pt3dadd(150276.000000,135684.000000,151650.000000,1992.587863)}
{pt3dadd(150420.000000,134496.000000,152100.000000,1924.618059)}
{pt3dadd(150624.000000,133872.000000,152400.000000,1856.648255)}
{pt3dadd(150912.000000,132780.000000,152875.000000,1788.678450)}
{pt3dadd(150864.000000,131820.000000,153275.000000,1714.150188)}
{pt3dadd(151452.000000,130824.000000,153375.000000,1639.621926)}
{pt3dadd(151884.000000,129972.000000,153675.000000,1565.093664)}
{pt3dadd(152340.000000,128928.000000,153725.000000,1490.565402)}
{pt3dadd(152856.000000,127968.000000,153825.000000,1530.035537)}
{pt3dadd(153588.000000,127104.000000,153975.000000,1569.505671)}
{pt3dadd(153372.000000,126108.000000,153950.000000,1608.975806)}
{pt3dadd(153180.000000,125316.000000,154300.000000,1648.445940)}
{pt3dadd(153072.000000,124428.000000,154350.000000,1648.445976)}
{pt3dadd(152748.000000,123708.000000,154100.000000,1648.446012)}
{pt3dadd(152100.000000,122604.000000,154600.000000,1648.446048)}
{pt3dadd(152184.000000,121992.000000,154450.000000,1648.446084)}
{pt3dadd(152376.000000,121572.000000,154175.000000,1717.131222)}

{create adhoc24}
{access adhoc24}
{connect adhoc24(1), adhoc23(0)}
{nseg = 1}
{strdef color color = "White"}
{pt3dclear()}
{pt3dadd(152376.000000,121572.000000,154175.000000,1717.131222)}
{pt3dadd(152376.000000,120600.000000,154750.000000,1373.704920)}
{pt3dadd(152484.000000,119928.000000,155425.000000,1388.014407)}
{pt3dadd(152076.000000,119244.000000,156300.000000,1402.323894)}
{pt3dadd(151656.000000,118152.000000,156575.000000,1416.633381)}
{pt3dadd(151656.000000,117396.000000,156525.000000,1430.942868)}
{pt3dadd(151740.000000,116448.000000,156850.000000,1321.634740)}
{pt3dadd(151896.000000,115524.000000,157200.000000,1212.326613)}
{pt3dadd(151716.000000,114516.000000,157725.000000,1103.018486)}
{pt3dadd(151764.000000,113484.000000,157925.000000,993.710358)}
{pt3dadd(151692.000000,112524.000000,158450.000000,1004.061506)}
{pt3dadd(151332.000000,111348.000000,158775.000000,1014.412653)}
{pt3dadd(151188.000000,110556.000000,159175.000000,1024.763801)}
{pt3dadd(150648.000000,109536.000000,159425.000000,1035.114948)}
{pt3dadd(150732.000000,107808.000000,159550.000000,991.985162)}
{pt3dadd(151320.000000,107100.000000,159975.000000,948.855375)}
{pt3dadd(150612.000000,106560.000000,160275.000000,905.725589)}
{pt3dadd(150708.000000,104076.000000,161175.000000,862.595802)}
{pt3dadd(151236.000000,103116.000000,161525.000000,796.703072)}
{pt3dadd(151572.000000,102156.000000,161850.000000,730.810341)}
{pt3dadd(152136.000000,101580.000000,162025.000000,664.917611)}
{pt3dadd(152484.000000,101004.000000,162375.000000,599.024880)}
{pt3dadd(152964.000000,100476.000000,162725.000000,664.917611)}
{pt3dadd(153528.000000,100332.000000,162925.000000,730.810341)}
{pt3dadd(153984.000000,100152.000000,163025.000000,796.703072)}
{pt3dadd(154680.000000,99780.000000,163175.000000,862.595802)}
{pt3dadd(155364.000000,98964.000000,162975.000000,905.725589)}
{pt3dadd(155856.000000,98556.000000,162900.000000,948.855375)}
{pt3dadd(156144.000000,98112.000000,163300.000000,991.985162)}
{pt3dadd(156660.000000,97788.000000,163225.000000,1035.114948)}
{pt3dadd(156876.000000,97644.000000,163025.000000,18.000000)}
{pt3dadd(158100.000000,97104.000000,163400.000000,343.236762)}
{pt3dadd(158232.000000,96312.000000,163525.000000,668.473524)}
{pt3dadd(158580.000000,95568.000000,163625.000000,993.710286)}
{pt3dadd(158760.000000,94536.000000,164050.000000,952.305719)}
{pt3dadd(159072.000000,93720.000000,164450.000000,910.901151)}
{pt3dadd(159720.000000,92916.000000,164750.000000,869.496584)}
{pt3dadd(159912.000000,92244.000000,164900.000000,828.092016)}
{pt3dadd(160188.000000,91452.000000,165525.000000,740.873983)}
{pt3dadd(160272.000000,90936.000000,165525.000000,653.655951)}
{pt3dadd(160392.000000,90264.000000,165875.000000,566.437919)}
{pt3dadd(160800.000000,89592.000000,166000.000000,479.219886)}
{pt3dadd(160824.000000,88908.000000,165875.000000,599.024880)}

{create adhoc25}
{access adhoc25}
{connect adhoc25(1), adhoc24(0)}
{nseg = 1}
{strdef color color = "White"}
{pt3dclear()}
{pt3dadd(160824.000000,88908.000000,165875.000000,599.024880)}
{pt3dadd(158964.000000,88224.000000,165600.000000,200.612214)}
{pt3dadd(158736.000000,88032.000000,165325.000000,366.108111)}
{pt3dadd(158376.000000,87612.000000,164775.000000,531.604008)}
{pt3dadd(158496.000000,87048.000000,164325.000000,697.099905)}
{pt3dadd(158412.000000,86448.000000,163700.000000,862.595802)}
{pt3dadd(158508.000000,86340.000000,163000.000000,479.219886)}
{pt3dadd(158472.000000,86184.000000,162850.000000,399.349908)}

{create adhoc26}
{access adhoc26}
{connect adhoc26(1), adhoc24(0)}
{nseg = 1}
{strdef color color = "White"}
{pt3dclear()}
{pt3dadd(160824.000000,88908.000000,165875.000000,599.024880)}
{pt3dadd(161544.000000,87852.000000,166375.000000,346.657896)}
{pt3dadd(161628.000000,87384.000000,166325.000000,332.791560)}
{pt3dadd(161916.000000,86988.000000,166325.000000,200.612214)}

{create adhoc27}
{access adhoc27}
{connect adhoc27(1), adhoc23(0)}
{nseg = 1}
{strdef color color = "White"}
{pt3dclear()}
{pt3dadd(152376.000000,121572.000000,154175.000000,1717.131222)}
{pt3dadd(149340.000000,122196.000000,153650.000000,862.595802)}
{pt3dadd(146016.000000,122748.000000,154825.000000,989.109828)}
{pt3dadd(145560.000000,122544.000000,155900.000000,1115.623854)}
{pt3dadd(144696.000000,123048.000000,156575.000000,1242.137880)}
{pt3dadd(144816.000000,123660.000000,157500.000000,1035.114948)}

{create adhoc28}
{access adhoc28}
{connect adhoc28(1), adhoc27(0)}
{nseg = 1}
{strdef color color = "White"}
{pt3dclear()}
{pt3dadd(144816.000000,123660.000000,157500.000000,1035.114948)}
{pt3dadd(144324.000000,124188.000000,158275.000000,1035.114948)}
{pt3dadd(143124.000000,125424.000000,159150.000000,876.972384)}
{pt3dadd(142248.000000,126180.000000,159725.000000,718.829820)}
{pt3dadd(141324.000000,127332.000000,160700.000000,862.595802)}

{create adhoc29}
{access adhoc29}
{connect adhoc29(1), adhoc28(0)}
{nseg = 1}
{strdef color color = "White"}
{pt3dclear()}
{pt3dadd(141324.000000,127332.000000,160700.000000,862.595802)}
{pt3dadd(142104.000000,127956.000000,161600.000000,599.024880)}
{pt3dadd(141372.000000,128676.000000,162450.000000,599.024880)}
{pt3dadd(141648.000000,128700.000000,163550.000000,599.024880)}
{pt3dadd(141384.000000,128148.000000,164725.000000,599.024880)}
{pt3dadd(141384.000000,126768.000000,166575.000000,621.787810)}
{pt3dadd(141240.000000,126384.000000,167100.000000,644.550741)}
{pt3dadd(141912.000000,126420.000000,167725.000000,667.313671)}
{pt3dadd(142596.000000,124680.000000,168275.000000,690.076602)}
{pt3dadd(142992.000000,124176.000000,168975.000000,288.881586)}

{create adhoc30}
{access adhoc30}
{connect adhoc30(1), adhoc28(0)}
{nseg = 1}
{strdef color color = "White"}
{pt3dclear()}
{pt3dadd(141324.000000,127332.000000,160700.000000,862.595802)}
{pt3dadd(139896.000000,130128.000000,161875.000000,599.024880)}
{pt3dadd(140328.000000,131568.000000,162325.000000,628.976115)}
{pt3dadd(140916.000000,131952.000000,162400.000000,658.927350)}
{pt3dadd(140556.000000,132588.000000,162725.000000,688.878585)}
{pt3dadd(140520.000000,133068.000000,162875.000000,718.829820)}
{pt3dadd(140484.000000,133656.000000,163025.000000,658.927350)}
{pt3dadd(140388.000000,134220.000000,163000.000000,599.024880)}
{pt3dadd(140616.000000,134640.000000,163025.000000,346.657896)}

{create adhoc31}
{access adhoc31}
{connect adhoc31(1), adhoc27(0)}
{nseg = 1}
{strdef color color = "White"}
{pt3dclear()}
{pt3dadd(144816.000000,123660.000000,157500.000000,1035.114948)}
{pt3dadd(142260.000000,122532.000000,158475.000000,415.989486)}
{pt3dadd(140844.000000,122160.000000,159025.000000,477.610515)}
{pt3dadd(139548.000000,122316.000000,160200.000000,539.231544)}
{pt3dadd(138144.000000,121548.000000,160825.000000,600.852573)}
{pt3dadd(137268.000000,121272.000000,161400.000000,662.473602)}
{pt3dadd(135444.000000,121104.000000,162225.000000,557.038863)}
{pt3dadd(134148.000000,120972.000000,162950.000000,451.604124)}
{pt3dadd(133284.000000,120384.000000,163825.000000,346.169385)}
{pt3dadd(131856.000000,119736.000000,164425.000000,240.734646)}
{pt3dadd(130932.000000,119592.000000,164850.000000,293.606400)}
{pt3dadd(128544.000000,119556.000000,164150.000000,346.478154)}
{pt3dadd(128052.000000,119616.000000,164500.000000,399.349908)}
{pt3dadd(127704.000000,119352.000000,164675.000000,200.612214)}
