# Supplementary material for: Full reconstruction of large lobula plate tangential cells in Drosophila from a 3D EM dataset
Source: PLoS One. 2018 Nov 28;13(11):e0207828. doi: 10.1371/journal.pone.0207828 (PMC6261601; doi:10.1371/journal.pone.0207828)
Supplement: S1 Dataset — (ZIP) [file pone.0207828.s001.zip › Diameter hoc/VS_VSL_preliminary/Old Diameters Mar13_VS_VSL_HS/HSE/2_14_775_gmordhorst_002.018.hoc]

/* created with nml2hocm */

{create adhoc1}
{access adhoc1}
{nseg = 1}
{strdef color color = "White"}
{pt3dclear()}
{pt3dadd(168396.000000,188280.000000,70200.000000,139.314042)}
{pt3dadd(168396.000000,188100.000000,70175.000000,200.612214)}
{pt3dadd(168420.000000,187872.000000,70175.000000,192.253370)}
{pt3dadd(168216.000000,187296.000000,69750.000000,183.894525)}
{pt3dadd(168420.000000,186264.000000,69750.000000,175.535680)}
{pt3dadd(168768.000000,185352.000000,69325.000000,167.176836)}
{pt3dadd(169344.000000,184704.000000,69075.000000,167.176836)}
{pt3dadd(170268.000000,183228.000000,69225.000000,167.176836)}
{pt3dadd(170256.000000,182964.000000,69300.000000,167.176836)}
{pt3dadd(170280.000000,182700.000000,69200.000000,167.176836)}
{pt3dadd(170208.000000,182388.000000,69150.000000,157.889238)}
{pt3dadd(170040.000000,181116.000000,69150.000000,148.601640)}
{pt3dadd(169704.000000,180144.000000,69400.000000,139.314042)}
{pt3dadd(168876.000000,178860.000000,69425.000000,499.187376)}

{create adhoc2}
{access adhoc2}
{connect adhoc2(1), adhoc1(0)}
{nseg = 1}
{strdef color color = "White"}
{pt3dclear()}
{pt3dadd(168876.000000,178860.000000,69425.000000,499.187376)}
{pt3dadd(168672.000000,178752.000000,69125.000000,415.989486)}
{pt3dadd(168096.000000,179112.000000,68625.000000,411.829601)}
{pt3dadd(167388.000000,179508.000000,68025.000000,407.669715)}
{pt3dadd(166920.000000,180000.000000,67575.000000,403.509830)}
{pt3dadd(166680.000000,180300.000000,67225.000000,399.349944)}
{pt3dadd(166560.000000,180504.000000,66850.000000,386.176932)}
{pt3dadd(166524.000000,180708.000000,66375.000000,373.003920)}
{pt3dadd(165984.000000,181500.000000,65900.000000,359.830908)}
{pt3dadd(165804.000000,181896.000000,65450.000000,346.657896)}
{pt3dadd(165660.000000,182244.000000,64900.000000,384.790266)}
{pt3dadd(165348.000000,182484.000000,64375.000000,422.922636)}
{pt3dadd(165252.000000,182976.000000,63725.000000,461.055006)}
{pt3dadd(165240.000000,183624.000000,63000.000000,499.187376)}
{pt3dadd(164736.000000,184272.000000,62150.000000,478.387903)}
{pt3dadd(164052.000000,184464.000000,61525.000000,457.588431)}
{pt3dadd(163392.000000,185112.000000,60875.000000,436.788958)}
{pt3dadd(162660.000000,185988.000000,60200.000000,415.989486)}
{pt3dadd(162060.000000,186624.000000,59375.000000,436.788958)}
{pt3dadd(161772.000000,187236.000000,58500.000000,457.588431)}
{pt3dadd(161568.000000,187548.000000,57925.000000,478.387903)}
{pt3dadd(161112.000000,187980.000000,57300.000000,499.187376)}
{pt3dadd(160800.000000,188064.000000,56625.000000,461.055006)}
{pt3dadd(160548.000000,187932.000000,55975.000000,422.922636)}
{pt3dadd(160188.000000,187572.000000,55475.000000,384.790266)}
{pt3dadd(159864.000000,187224.000000,54850.000000,346.657896)}
{pt3dadd(159732.000000,186744.000000,54350.000000,359.830899)}
{pt3dadd(159300.000000,186504.000000,53900.000000,373.003902)}
{pt3dadd(159204.000000,186228.000000,53450.000000,386.176905)}
{pt3dadd(159252.000000,185904.000000,52925.000000,399.349908)}
{pt3dadd(159084.000000,185616.000000,52425.000000,399.349908)}
{pt3dadd(159252.000000,185400.000000,51900.000000,399.349908)}
{pt3dadd(159300.000000,185304.000000,51525.000000,399.349908)}
{pt3dadd(159420.000000,185196.000000,51025.000000,399.349908)}
{pt3dadd(159396.000000,185292.000000,50500.000000,386.176905)}
{pt3dadd(159216.000000,185556.000000,50000.000000,373.003902)}
{pt3dadd(159300.000000,185640.000000,49500.000000,359.830899)}
{pt3dadd(159012.000000,185688.000000,49025.000000,346.657896)}
{pt3dadd(158844.000000,185808.000000,48325.000000,332.213819)}
{pt3dadd(158736.000000,185784.000000,47875.000000,317.769741)}
{pt3dadd(158556.000000,185796.000000,47400.000000,303.325664)}
{pt3dadd(158532.000000,186036.000000,46375.000000,288.881586)}
{pt3dadd(158820.000000,186132.000000,44950.000000,276.844851)}
{pt3dadd(159168.000000,186192.000000,44400.000000,264.808116)}
{pt3dadd(159444.000000,186324.000000,43975.000000,252.771381)}
{pt3dadd(159576.000000,186336.000000,43425.000000,240.734646)}
{pt3dadd(159996.000000,186432.000000,42950.000000,252.771381)}
{pt3dadd(160524.000000,186492.000000,42475.000000,264.808116)}
{pt3dadd(161472.000000,186360.000000,42000.000000,276.844851)}
{pt3dadd(162144.000000,186564.000000,41525.000000,288.881586)}
{pt3dadd(162600.000000,186576.000000,41050.000000,266.814243)}
{pt3dadd(162960.000000,186996.000000,40600.000000,244.746900)}
{pt3dadd(163020.000000,187344.000000,40250.000000,222.679557)}
{pt3dadd(163080.000000,187692.000000,39850.000000,200.612214)}
{pt3dadd(163140.000000,187992.000000,39500.000000,200.612214)}
{pt3dadd(163296.000000,188112.000000,39150.000000,200.612214)}
{pt3dadd(163608.000000,188340.000000,38650.000000,200.612214)}
{pt3dadd(164040.000000,188748.000000,38150.000000,200.612214)}
{pt3dadd(164064.000000,188904.000000,37725.000000,200.612214)}
{pt3dadd(164424.000000,188904.000000,37000.000000,200.612214)}
{pt3dadd(164772.000000,188904.000000,36600.000000,200.612214)}
{pt3dadd(165192.000000,188928.000000,36150.000000,200.612214)}
{pt3dadd(165312.000000,188748.000000,35875.000000,167.176836)}

{create adhoc3}
{access adhoc3}
{connect adhoc3(1), adhoc1(0)}
{nseg = 1}
{strdef color color = "White"}
{pt3dclear()}
{pt3dadd(168876.000000,178860.000000,69425.000000,499.187376)}
{pt3dadd(168876.000000,178404.000000,69575.000000,499.187376)}
{pt3dadd(169116.000000,178068.000000,70075.000000,434.574193)}
{pt3dadd(169260.000000,177756.000000,70425.000000,369.961011)}
{pt3dadd(169800.000000,177228.000000,70775.000000,305.347828)}
{pt3dadd(170304.000000,177036.000000,71175.000000,240.734646)}
{pt3dadd(170604.000000,177072.000000,71525.000000,252.771381)}
{pt3dadd(170880.000000,176496.000000,72075.000000,264.808116)}
{pt3dadd(171192.000000,176100.000000,72475.000000,276.844851)}
{pt3dadd(171552.000000,175524.000000,72850.000000,288.881586)}
{pt3dadd(172368.000000,172992.000000,72950.000000,599.024880)}

{create adhoc4}
{access adhoc4}
{connect adhoc4(1), adhoc3(0)}
{nseg = 1}
{strdef color color = "White"}
{pt3dclear()}
{pt3dadd(172368.000000,172992.000000,72950.000000,599.024880)}
{pt3dadd(172332.000000,172632.000000,72550.000000,599.024880)}
{pt3dadd(172296.000000,172236.000000,72100.000000,599.024880)}
{pt3dadd(171888.000000,171840.000000,71625.000000,599.024880)}
{pt3dadd(171720.000000,171636.000000,71075.000000,599.024880)}
{pt3dadd(171768.000000,171348.000000,70625.000000,599.024880)}
{pt3dadd(171624.000000,171108.000000,70100.000000,569.073631)}
{pt3dadd(171480.000000,170796.000000,69575.000000,539.122383)}
{pt3dadd(171504.000000,170256.000000,68975.000000,509.171134)}
{pt3dadd(171144.000000,170148.000000,68400.000000,479.219886)}
{pt3dadd(170832.000000,169860.000000,67950.000000,489.203631)}
{pt3dadd(170724.000000,169764.000000,67425.000000,499.187376)}
{pt3dadd(170628.000000,169452.000000,66800.000000,479.219886)}

{create adhoc5}
{access adhoc5}
{connect adhoc5(1), adhoc4(0)}
{nseg = 1}
{strdef color color = "White"}
{pt3dclear()}
{pt3dadd(170628.000000,169452.000000,66800.000000,479.219886)}
{pt3dadd(168816.000000,169752.000000,66900.000000,346.657896)}
{pt3dadd(168468.000000,169464.000000,66450.000000,363.990794)}
{pt3dadd(168120.000000,169560.000000,65975.000000,381.323691)}
{pt3dadd(167976.000000,169524.000000,65525.000000,398.656589)}
{pt3dadd(167496.000000,169464.000000,65050.000000,415.989486)}
{pt3dadd(167136.000000,169260.000000,64475.000000,436.788958)}
{pt3dadd(166848.000000,169140.000000,63900.000000,457.588431)}
{pt3dadd(166368.000000,168900.000000,63225.000000,478.387903)}
{pt3dadd(166164.000000,168948.000000,62750.000000,499.187376)}
{pt3dadd(165888.000000,168996.000000,62150.000000,524.146752)}
{pt3dadd(165420.000000,169272.000000,61550.000000,549.106128)}
{pt3dadd(164172.000000,169404.000000,60400.000000,574.065504)}
{pt3dadd(163632.000000,169680.000000,60000.000000,599.024880)}
{pt3dadd(162936.000000,169740.000000,59475.000000,549.106137)}
{pt3dadd(162456.000000,169824.000000,58975.000000,499.187394)}
{pt3dadd(162252.000000,170016.000000,58475.000000,449.268651)}
{pt3dadd(162000.000000,170136.000000,57975.000000,399.349908)}
{pt3dadd(161568.000000,170436.000000,57450.000000,403.509803)}
{pt3dadd(161220.000000,170880.000000,56950.000000,407.669697)}
{pt3dadd(161016.000000,171192.000000,56525.000000,411.829591)}
{pt3dadd(160776.000000,171456.000000,56025.000000,415.989486)}
{pt3dadd(160536.000000,171660.000000,55575.000000,398.656589)}
{pt3dadd(160476.000000,172044.000000,55150.000000,381.323691)}
{pt3dadd(160308.000000,172284.000000,54625.000000,363.990794)}
{pt3dadd(160188.000000,172248.000000,54100.000000,346.657896)}
{pt3dadd(159972.000000,172476.000000,53550.000000,363.990794)}
{pt3dadd(159720.000000,172668.000000,53125.000000,381.323691)}
{pt3dadd(159180.000000,172788.000000,52625.000000,398.656589)}
{pt3dadd(158784.000000,173028.000000,52150.000000,415.989486)}
{pt3dadd(158472.000000,173304.000000,51725.000000,398.656589)}
{pt3dadd(158484.000000,173556.000000,51250.000000,381.323691)}
{pt3dadd(158376.000000,173820.000000,50775.000000,363.990794)}
{pt3dadd(158316.000000,173832.000000,50350.000000,346.657896)}
{pt3dadd(158364.000000,173964.000000,49950.000000,346.657896)}
{pt3dadd(158364.000000,174612.000000,49000.000000,346.657896)}
{pt3dadd(158364.000000,175044.000000,47650.000000,346.657896)}
{pt3dadd(158928.000000,175224.000000,47150.000000,346.657896)}
{pt3dadd(159192.000000,175260.000000,46775.000000,346.657896)}
{pt3dadd(159588.000000,175260.000000,46525.000000,346.657896)}
{pt3dadd(159900.000000,175392.000000,46025.000000,346.657896)}
{pt3dadd(160572.000000,175332.000000,45625.000000,346.657896)}
{pt3dadd(160320.000000,175728.000000,45250.000000,332.791596)}

{create adhoc6}
{access adhoc6}
{connect adhoc6(1), adhoc5(0)}
{nseg = 1}
{strdef color color = "White"}
{pt3dclear()}
{pt3dadd(160320.000000,175728.000000,45250.000000,332.791596)}
{pt3dadd(160476.000000,176592.000000,45275.000000,116.095032)}
{pt3dadd(160500.000000,177492.000000,44875.000000,106.420446)}
{pt3dadd(160512.000000,178140.000000,44450.000000,96.745860)}
{pt3dadd(160548.000000,178332.000000,44250.000000,98.604918)}

{create adhoc7}
{access adhoc7}
{connect adhoc7(1), adhoc5(0)}
{nseg = 1}
{strdef color color = "White"}
{pt3dclear()}
{pt3dadd(160320.000000,175728.000000,45250.000000,332.791596)}
{pt3dadd(160932.000000,175116.000000,44950.000000,346.657896)}
{pt3dadd(161268.000000,174864.000000,44500.000000,301.787631)}
{pt3dadd(161532.000000,175212.000000,44000.000000,256.917366)}
{pt3dadd(161748.000000,175368.000000,43500.000000,212.047101)}
{pt3dadd(162144.000000,175452.000000,43050.000000,167.176836)}
{pt3dadd(162300.000000,175584.000000,42600.000000,185.566288)}
{pt3dadd(162360.000000,175740.000000,42050.000000,203.955741)}
{pt3dadd(162624.000000,176244.000000,41725.000000,222.345193)}
{pt3dadd(162648.000000,176640.000000,41375.000000,240.734646)}
{pt3dadd(162612.000000,177024.000000,40825.000000,240.734646)}
{pt3dadd(162372.000000,177360.000000,40425.000000,240.734646)}
{pt3dadd(162384.000000,177552.000000,40075.000000,240.734646)}
{pt3dadd(162504.000000,177648.000000,39700.000000,240.734646)}
{pt3dadd(162804.000000,177888.000000,39325.000000,240.734646)}
{pt3dadd(163068.000000,177828.000000,39000.000000,240.734646)}
{pt3dadd(163596.000000,178020.000000,38675.000000,240.734646)}
{pt3dadd(163860.000000,178188.000000,38300.000000,240.734646)}
{pt3dadd(164088.000000,178188.000000,37850.000000,230.704038)}
{pt3dadd(164328.000000,178068.000000,37375.000000,220.673430)}
{pt3dadd(164352.000000,178056.000000,36950.000000,210.642822)}
{pt3dadd(164520.000000,178068.000000,36400.000000,200.612214)}
{pt3dadd(164784.000000,177924.000000,35950.000000,200.612214)}
{pt3dadd(164904.000000,177792.000000,35700.000000,200.612214)}

{create adhoc8}
{access adhoc8}
{connect adhoc8(1), adhoc4(0)}
{nseg = 1}
{strdef color color = "White"}
{pt3dclear()}
{pt3dadd(170628.000000,169452.000000,66800.000000,479.219886)}
{pt3dadd(171564.000000,168264.000000,66325.000000,599.024880)}
{pt3dadd(171348.000000,167904.000000,65750.000000,599.024880)}
{pt3dadd(171144.000000,167388.000000,65325.000000,599.024880)}
{pt3dadd(171144.000000,167076.000000,64875.000000,599.024880)}
{pt3dadd(170964.000000,166452.000000,64350.000000,599.024880)}
{pt3dadd(171060.000000,165972.000000,63725.000000,574.065504)}
{pt3dadd(171000.000000,165312.000000,63225.000000,549.106128)}
{pt3dadd(170784.000000,165276.000000,62750.000000,524.146752)}
{pt3dadd(171108.000000,164880.000000,62400.000000,499.187376)}
{pt3dadd(170928.000000,164076.000000,61750.000000,494.195504)}
{pt3dadd(170856.000000,163644.000000,61225.000000,489.203631)}
{pt3dadd(170940.000000,163164.000000,60750.000000,484.211758)}
{pt3dadd(170808.000000,162144.000000,59975.000000,479.219886)}
{pt3dadd(170436.000000,160992.000000,59350.000000,539.122383)}
{pt3dadd(170136.000000,160176.000000,58725.000000,599.024880)}
{pt3dadd(169596.000000,159636.000000,58200.000000,599.024880)}

{create adhoc9}
{access adhoc9}
{connect adhoc9(1), adhoc8(0)}
{nseg = 1}
{strdef color color = "White"}
{pt3dclear()}
{pt3dadd(169596.000000,159636.000000,58200.000000,599.024880)}
{pt3dadd(169908.000000,161508.000000,58000.000000,133.741476)}
{pt3dadd(169956.000000,161748.000000,57575.000000,129.329865)}
{pt3dadd(169884.000000,161832.000000,57225.000000,124.918254)}
{pt3dadd(169632.000000,162132.000000,56675.000000,120.506643)}
{pt3dadd(169428.000000,162180.000000,56500.000000,116.095032)}
{pt3dadd(168876.000000,162372.000000,56125.000000,137.224328)}
{pt3dadd(168288.000000,162636.000000,55750.000000,158.353623)}
{pt3dadd(167664.000000,163416.000000,55150.000000,179.482918)}
{pt3dadd(167268.000000,163476.000000,54750.000000,200.612214)}
{pt3dadd(166836.000000,163764.000000,54300.000000,140.616882)}
{pt3dadd(166188.000000,164436.000000,53875.000000,80.621550)}
{pt3dadd(165948.000000,164604.000000,53675.000000,67.184640)}

{create adhoc10}
{access adhoc10}
{connect adhoc10(1), adhoc8(0)}
{nseg = 1}
{strdef color color = "White"}
{pt3dclear()}
{pt3dadd(169596.000000,159636.000000,58200.000000,599.024880)}
{pt3dadd(169536.000000,158784.000000,57675.000000,599.024880)}
{pt3dadd(169572.000000,157704.000000,57050.000000,569.073631)}
{pt3dadd(169548.000000,156456.000000,56250.000000,539.122383)}
{pt3dadd(169548.000000,155640.000000,55750.000000,509.171134)}
{pt3dadd(169488.000000,155064.000000,55075.000000,479.219886)}
{pt3dadd(169200.000000,154368.000000,54450.000000,412.938891)}
{pt3dadd(168804.000000,153564.000000,53800.000000,346.657896)}
{pt3dadd(168732.000000,153564.000000,53625.000000,599.024880)}

{create adhoc11}
{access adhoc11}
{connect adhoc11(1), adhoc10(0)}
{nseg = 1}
{strdef color color = "White"}
{pt3dclear()}
{pt3dadd(168732.000000,153564.000000,53625.000000,599.024880)}
{pt3dadd(169368.000000,151440.000000,53550.000000,200.612214)}
{pt3dadd(169764.000000,150180.000000,53075.000000,200.612214)}
{pt3dadd(169332.000000,148524.000000,52725.000000,200.612214)}
{pt3dadd(169104.000000,147264.000000,52700.000000,200.612214)}
{pt3dadd(169308.000000,146052.000000,52700.000000,200.612214)}
{pt3dadd(169200.000000,145752.000000,52625.000000,192.253370)}
{pt3dadd(169248.000000,145536.000000,52625.000000,183.894525)}
{pt3dadd(169560.000000,145260.000000,52950.000000,175.535680)}
{pt3dadd(169788.000000,144540.000000,53350.000000,167.176836)}
{pt3dadd(169944.000000,144192.000000,53775.000000,148.601637)}
{pt3dadd(169956.000000,143904.000000,53825.000000,130.026438)}
{pt3dadd(169968.000000,143688.000000,53825.000000,111.451239)}
{pt3dadd(169728.000000,143448.000000,53650.000000,92.876040)}
{pt3dadd(169560.000000,142200.000000,54075.000000,117.642972)}
{pt3dadd(169872.000000,141348.000000,54075.000000,142.409904)}
{pt3dadd(170532.000000,141000.000000,54475.000000,167.176836)}
{pt3dadd(170844.000000,140244.000000,54700.000000,167.176836)}

{create adhoc12}
{access adhoc12}
{connect adhoc12(1), adhoc10(0)}
{nseg = 1}
{strdef color color = "White"}
{pt3dclear()}
{pt3dadd(168732.000000,153564.000000,53625.000000,599.024880)}
{pt3dadd(168480.000000,153684.000000,52950.000000,718.829820)}
{pt3dadd(168228.000000,153540.000000,52375.000000,718.829820)}
{pt3dadd(168192.000000,153588.000000,51700.000000,718.829820)}
{pt3dadd(168024.000000,153528.000000,50775.000000,718.829820)}
{pt3dadd(168000.000000,153924.000000,50200.000000,718.829820)}
{pt3dadd(167820.000000,153948.000000,49575.000000,688.878585)}
{pt3dadd(167748.000000,154008.000000,48975.000000,658.927350)}
{pt3dadd(167532.000000,153960.000000,48550.000000,628.976115)}
{pt3dadd(167256.000000,154164.000000,48025.000000,599.024880)}
{pt3dadd(167184.000000,154176.000000,47550.000000,658.927350)}
{pt3dadd(166896.000000,154152.000000,47000.000000,718.829820)}
{pt3dadd(166464.000000,154092.000000,46300.000000,599.024880)}

{create adhoc13}
{access adhoc13}
{connect adhoc13(1), adhoc12(0)}
{nseg = 1}
{strdef color color = "White"}
{pt3dclear()}
{pt3dadd(166464.000000,154092.000000,46300.000000,599.024880)}
{pt3dadd(165720.000000,155820.000000,46025.000000,200.612214)}
{pt3dadd(165552.000000,156684.000000,45600.000000,192.253370)}
{pt3dadd(165576.000000,157332.000000,45175.000000,183.894525)}
{pt3dadd(165468.000000,157872.000000,44675.000000,175.535680)}
{pt3dadd(165408.000000,158508.000000,44150.000000,167.176836)}
{pt3dadd(165552.000000,159564.000000,43525.000000,228.029211)}
{pt3dadd(165816.000000,159684.000000,43100.000000,288.881586)}
{pt3dadd(165864.000000,160116.000000,42575.000000,346.657896)}

{create adhoc14}
{access adhoc14}
{connect adhoc14(1), adhoc12(0)}
{nseg = 1}
{strdef color color = "White"}
{pt3dclear()}
{pt3dadd(166464.000000,154092.000000,46300.000000,599.024880)}
{pt3dadd(166560.000000,153780.000000,45600.000000,599.024880)}
{pt3dadd(166608.000000,153576.000000,45050.000000,628.976115)}
{pt3dadd(166356.000000,153288.000000,44050.000000,658.927350)}
{pt3dadd(166116.000000,152916.000000,43375.000000,688.878585)}
{pt3dadd(166152.000000,152928.000000,42650.000000,718.829820)}
{pt3dadd(166452.000000,152856.000000,41900.000000,658.927350)}
{pt3dadd(166944.000000,152472.000000,41250.000000,599.024880)}
{pt3dadd(166968.000000,152124.000000,40575.000000,346.657896)}

{create adhoc15}
{access adhoc15}
{connect adhoc15(1), adhoc14(0)}
{nseg = 1}
{strdef color color = "White"}
{pt3dclear()}
{pt3dadd(166968.000000,152124.000000,40575.000000,346.657896)}
{pt3dadd(168696.000000,150672.000000,40225.000000,288.881586)}
{pt3dadd(170244.000000,150240.000000,40450.000000,310.836591)}
{pt3dadd(170688.000000,149952.000000,40150.000000,332.791596)}
{pt3dadd(170772.000000,149532.000000,40275.000000,346.657896)}

{create adhoc16}
{access adhoc16}
{connect adhoc16(1), adhoc15(0)}
{nseg = 1}
{strdef color color = "White"}
{pt3dclear()}
{pt3dadd(170772.000000,149532.000000,40275.000000,346.657896)}
{pt3dadd(171336.000000,149844.000000,39875.000000,200.612214)}
{pt3dadd(171948.000000,149496.000000,39125.000000,219.790742)}
{pt3dadd(172476.000000,149220.000000,38725.000000,238.969269)}
{pt3dadd(172860.000000,148824.000000,38250.000000,258.147797)}
{pt3dadd(173064.000000,148644.000000,37700.000000,277.326324)}
{pt3dadd(173400.000000,148536.000000,37225.000000,258.147797)}
{pt3dadd(173640.000000,148212.000000,36775.000000,238.969269)}
{pt3dadd(174132.000000,147972.000000,36250.000000,219.790742)}
{pt3dadd(175116.000000,147504.000000,36100.000000,200.612214)}
{pt3dadd(175344.000000,147204.000000,35950.000000,200.612214)}
{pt3dadd(175596.000000,147024.000000,36100.000000,200.612214)}
{pt3dadd(175788.000000,146964.000000,36100.000000,200.612214)}
{pt3dadd(175548.000000,145068.000000,35475.000000,200.612214)}
{pt3dadd(175572.000000,144324.000000,35075.000000,200.612214)}
{pt3dadd(175656.000000,143844.000000,34675.000000,167.176836)}

{create adhoc17}
{access adhoc17}
{connect adhoc17(1), adhoc15(0)}
{nseg = 1}
{strdef color color = "White"}
{pt3dclear()}
{pt3dadd(170772.000000,149532.000000,40275.000000,346.657896)}
{pt3dadd(171132.000000,149172.000000,40400.000000,200.612214)}
{pt3dadd(171324.000000,148920.000000,40500.000000,192.253370)}
{pt3dadd(171552.000000,148584.000000,40550.000000,183.894525)}
{pt3dadd(171828.000000,148260.000000,40350.000000,175.535680)}
{pt3dadd(171948.000000,148032.000000,40100.000000,167.176836)}
{pt3dadd(172068.000000,147780.000000,40050.000000,167.176836)}
{pt3dadd(172200.000000,147516.000000,39925.000000,167.176836)}
{pt3dadd(172140.000000,147252.000000,39800.000000,167.176836)}
{pt3dadd(172080.000000,146976.000000,39775.000000,167.176836)}
{pt3dadd(172020.000000,146652.000000,39750.000000,175.535680)}
{pt3dadd(172020.000000,145308.000000,39225.000000,183.894525)}
{pt3dadd(172368.000000,145008.000000,39325.000000,192.253370)}
{pt3dadd(172452.000000,144768.000000,39325.000000,200.612214)}
{pt3dadd(172608.000000,143880.000000,39100.000000,210.642822)}
{pt3dadd(172992.000000,142692.000000,39050.000000,220.673430)}
{pt3dadd(173292.000000,142524.000000,39050.000000,230.704038)}
{pt3dadd(173268.000000,142248.000000,39000.000000,240.734646)}
{pt3dadd(173160.000000,142008.000000,38775.000000,240.734646)}
{pt3dadd(173292.000000,141780.000000,38800.000000,240.734646)}
{pt3dadd(173460.000000,141456.000000,38750.000000,240.734646)}
{pt3dadd(173460.000000,141144.000000,38900.000000,240.734646)}
{pt3dadd(173580.000000,140964.000000,38875.000000,222.345193)}
{pt3dadd(173556.000000,140724.000000,38875.000000,203.955741)}
{pt3dadd(173604.000000,140400.000000,39000.000000,185.566288)}
{pt3dadd(173652.000000,140208.000000,39125.000000,167.176836)}
{pt3dadd(173664.000000,139944.000000,39175.000000,175.535680)}
{pt3dadd(173640.000000,139680.000000,39175.000000,183.894525)}
{pt3dadd(173532.000000,139476.000000,39125.000000,192.253370)}
{pt3dadd(174168.000000,137952.000000,39275.000000,200.612214)}
{pt3dadd(174108.000000,137436.000000,38675.000000,183.894525)}
{pt3dadd(173868.000000,137004.000000,38275.000000,167.176836)}
{pt3dadd(173880.000000,136656.000000,37900.000000,139.314042)}

{create adhoc18}
{access adhoc18}
{connect adhoc18(1), adhoc14(0)}
{nseg = 1}
{strdef color color = "White"}
{pt3dclear()}
{pt3dadd(166968.000000,152124.000000,40575.000000,346.657896)}
{pt3dadd(166596.000000,152952.000000,40100.000000,383.375916)}
{pt3dadd(167340.000000,153384.000000,39650.000000,374.196411)}
{pt3dadd(168480.000000,153540.000000,39200.000000,365.016906)}
{pt3dadd(169308.000000,153396.000000,38375.000000,355.837401)}
{pt3dadd(169944.000000,153192.000000,37850.000000,346.657896)}
{pt3dadd(170484.000000,153024.000000,37400.000000,363.990794)}
{pt3dadd(171084.000000,152892.000000,36825.000000,381.323691)}
{pt3dadd(171612.000000,152520.000000,36325.000000,398.656589)}
{pt3dadd(172188.000000,152364.000000,35975.000000,415.989486)}
{pt3dadd(172536.000000,152136.000000,35500.000000,398.656589)}
{pt3dadd(172716.000000,152184.000000,35275.000000,381.323691)}
{pt3dadd(173124.000000,152148.000000,34975.000000,363.990794)}
{pt3dadd(173520.000000,151740.000000,34625.000000,346.657896)}
{pt3dadd(173832.000000,151428.000000,34400.000000,317.769741)}
{pt3dadd(174192.000000,151248.000000,34100.000000,288.881586)}
{pt3dadd(174516.000000,151104.000000,33700.000000,259.993431)}
{pt3dadd(174876.000000,151044.000000,33275.000000,231.105276)}
{pt3dadd(175320.000000,150756.000000,32900.000000,259.993431)}
{pt3dadd(175704.000000,150480.000000,32525.000000,288.881586)}
{pt3dadd(176040.000000,150336.000000,32525.000000,317.769741)}
{pt3dadd(176340.000000,150120.000000,32275.000000,346.657896)}
{pt3dadd(176712.000000,149868.000000,32000.000000,332.213819)}
{pt3dadd(177180.000000,149508.000000,31625.000000,317.769741)}
{pt3dadd(177948.000000,149160.000000,31150.000000,303.325664)}
{pt3dadd(178416.000000,148716.000000,30550.000000,288.881586)}
{pt3dadd(179016.000000,148404.000000,30250.000000,276.844851)}
{pt3dadd(179664.000000,148212.000000,29850.000000,264.808116)}
{pt3dadd(180672.000000,148056.000000,28975.000000,252.771381)}
{pt3dadd(181536.000000,147996.000000,28600.000000,240.734646)}
{pt3dadd(182184.000000,148308.000000,28175.000000,240.734646)}
{pt3dadd(182532.000000,148392.000000,27775.000000,240.734646)}
{pt3dadd(182964.000000,148500.000000,27375.000000,240.734646)}
{pt3dadd(183684.000000,148464.000000,26975.000000,240.734646)}
{pt3dadd(184224.000000,148428.000000,26975.000000,240.734646)}
{pt3dadd(184656.000000,149292.000000,26900.000000,240.734646)}
{pt3dadd(184812.000000,149796.000000,27025.000000,240.734646)}
{pt3dadd(184572.000000,151368.000000,27025.000000,240.734646)}
{pt3dadd(184224.000000,153420.000000,27375.000000,67.184640)}
{pt3dadd(184212.000000,153948.000000,27475.000000,67.184640)}

{create adhoc19}
{access adhoc19}
{connect adhoc19(1), adhoc3(0)}
{nseg = 1}
{strdef color color = "White"}
{pt3dclear()}
{pt3dadd(172368.000000,172992.000000,72950.000000,599.024880)}
{pt3dadd(172308.000000,173640.000000,73400.000000,599.024880)}
{pt3dadd(172908.000000,173700.000000,74000.000000,574.065504)}
{pt3dadd(173004.000000,174060.000000,74850.000000,549.106128)}
{pt3dadd(173592.000000,174096.000000,75725.000000,524.146752)}
{pt3dadd(173904.000000,174444.000000,76275.000000,499.187376)}
{pt3dadd(174336.000000,174768.000000,77100.000000,590.039483)}
{pt3dadd(174432.000000,175056.000000,77800.000000,680.891589)}
{pt3dadd(174876.000000,174900.000000,78375.000000,771.743696)}
{pt3dadd(175020.000000,175212.000000,79025.000000,862.595802)}
{pt3dadd(175296.000000,175464.000000,79675.000000,796.703072)}
{pt3dadd(175920.000000,175608.000000,80175.000000,730.810341)}
{pt3dadd(176388.000000,175716.000000,80825.000000,664.917611)}
{pt3dadd(176796.000000,175692.000000,81225.000000,599.024880)}
{pt3dadd(177264.000000,175668.000000,81725.000000,599.024880)}
{pt3dadd(177960.000000,175728.000000,82225.000000,599.024880)}
{pt3dadd(178068.000000,175800.000000,82650.000000,599.024880)}
{pt3dadd(178476.000000,175776.000000,83200.000000,599.024880)}
{pt3dadd(178692.000000,175716.000000,83225.000000,569.073631)}
{pt3dadd(178932.000000,175776.000000,83500.000000,539.122383)}
{pt3dadd(179196.000000,176088.000000,83950.000000,509.171134)}
{pt3dadd(179364.000000,176076.000000,84175.000000,479.219886)}
{pt3dadd(179700.000000,176244.000000,84675.000000,511.167876)}
{pt3dadd(179916.000000,176484.000000,85325.000000,543.115866)}
{pt3dadd(180180.000000,176700.000000,85975.000000,575.063856)}
{pt3dadd(180348.000000,177684.000000,88300.000000,288.881586)}

{create adhoc20}
{access adhoc20}
{connect adhoc20(1), adhoc19(0)}
{nseg = 1}
{strdef color color = "White"}
{pt3dclear()}
{pt3dadd(180348.000000,177684.000000,88300.000000,288.881586)}
{pt3dadd(180672.000000,177420.000000,88800.000000,240.734646)}
{pt3dadd(180912.000000,177876.000000,89000.000000,609.833790)}
{pt3dadd(181164.000000,177780.000000,89200.000000,978.932934)}
{pt3dadd(181440.000000,177852.000000,89350.000000,1348.032078)}
{pt3dadd(181764.000000,177696.000000,89425.000000,1717.131222)}
{pt3dadd(182052.000000,177252.000000,89725.000000,1824.451961)}
{pt3dadd(182328.000000,177216.000000,90175.000000,1931.772699)}
{pt3dadd(182580.000000,177348.000000,90475.000000,2039.093438)}
{pt3dadd(182880.000000,176844.000000,91000.000000,2146.414176)}
{pt3dadd(183048.000000,176724.000000,91150.000000,2146.414176)}
{pt3dadd(183252.000000,176448.000000,91550.000000,2146.414176)}
{pt3dadd(183552.000000,176148.000000,92000.000000,2146.414176)}
{pt3dadd(183768.000000,175500.000000,91925.000000,2146.414176)}
{pt3dadd(184116.000000,175668.000000,92550.000000,2146.414176)}
{pt3dadd(184464.000000,175368.000000,92850.000000,2146.414176)}
{pt3dadd(184908.000000,175032.000000,93350.000000,2146.414176)}
{pt3dadd(185340.000000,174744.000000,94000.000000,2146.414176)}
{pt3dadd(185676.000000,174612.000000,94725.000000,1082.207088)}
{pt3dadd(185964.000000,174348.000000,95425.000000,18.000000)}
{pt3dadd(186576.000000,173616.000000,96100.000000,605.226177)}
{pt3dadd(187248.000000,173100.000000,96700.000000,1192.452354)}
{pt3dadd(187488.000000,172680.000000,97275.000000,1266.980616)}
{pt3dadd(187536.000000,172476.000000,97825.000000,1341.508878)}
{pt3dadd(187728.000000,172260.000000,98225.000000,1416.037140)}
{pt3dadd(187956.000000,171900.000000,98675.000000,1490.565402)}
{pt3dadd(188280.000000,171384.000000,99450.000000,1490.565402)}
{pt3dadd(188640.000000,170280.000000,100075.000000,1490.565402)}

{create adhoc21}
{access adhoc21}
{connect adhoc21(1), adhoc20(0)}
{nseg = 1}
{strdef color color = "White"}
{pt3dclear()}
{pt3dadd(188640.000000,170280.000000,100075.000000,1490.565402)}
{pt3dadd(189108.000000,164676.000000,99475.000000,718.829820)}
{pt3dadd(189408.000000,163908.000000,98800.000000,663.919209)}
{pt3dadd(189348.000000,163392.000000,98175.000000,609.008598)}
{pt3dadd(189288.000000,162840.000000,97650.000000,554.097987)}
{pt3dadd(189192.000000,162492.000000,97150.000000,499.187376)}
{pt3dadd(188916.000000,162432.000000,96650.000000,478.387903)}
{pt3dadd(188664.000000,162300.000000,96075.000000,457.588431)}
{pt3dadd(188568.000000,162012.000000,95575.000000,436.788958)}
{pt3dadd(188532.000000,161880.000000,94925.000000,415.989486)}
{pt3dadd(188424.000000,161772.000000,94525.000000,415.989486)}
{pt3dadd(188484.000000,161376.000000,94075.000000,415.989486)}
{pt3dadd(188232.000000,161100.000000,93600.000000,415.989486)}
{pt3dadd(187848.000000,160992.000000,93075.000000,415.989486)}
{pt3dadd(187644.000000,160848.000000,92650.000000,384.212511)}
{pt3dadd(187440.000000,160716.000000,92200.000000,352.435536)}
{pt3dadd(187248.000000,160620.000000,91725.000000,320.658561)}
{pt3dadd(186972.000000,160296.000000,91250.000000,288.881586)}
{pt3dadd(186732.000000,160272.000000,90775.000000,303.325664)}
{pt3dadd(186552.000000,160440.000000,90350.000000,317.769741)}
{pt3dadd(186144.000000,160236.000000,89950.000000,332.213819)}
{pt3dadd(185712.000000,160092.000000,89575.000000,346.657896)}
{pt3dadd(185364.000000,160068.000000,89175.000000,346.657896)}
{pt3dadd(184992.000000,159864.000000,88700.000000,346.657896)}
{pt3dadd(184512.000000,159852.000000,88175.000000,346.657896)}
{pt3dadd(184164.000000,159684.000000,87675.000000,346.657896)}
{pt3dadd(183852.000000,159492.000000,87200.000000,363.990794)}
{pt3dadd(183528.000000,159468.000000,86825.000000,381.323691)}
{pt3dadd(183312.000000,159528.000000,86275.000000,398.656589)}
{pt3dadd(183240.000000,159456.000000,85775.000000,415.989486)}
{pt3dadd(183216.000000,159312.000000,85350.000000,398.656589)}
{pt3dadd(183072.000000,159288.000000,85000.000000,381.323691)}
{pt3dadd(182856.000000,159108.000000,84525.000000,363.990794)}
{pt3dadd(182676.000000,159120.000000,84125.000000,346.657896)}
{pt3dadd(182544.000000,158904.000000,83725.000000,363.990794)}
{pt3dadd(182520.000000,158652.000000,83350.000000,381.323691)}
{pt3dadd(182112.000000,158292.000000,82825.000000,398.656589)}
{pt3dadd(182052.000000,157788.000000,82325.000000,415.989486)}
{pt3dadd(182112.000000,157104.000000,81875.000000,469.014276)}
{pt3dadd(181836.000000,155928.000000,81450.000000,522.039066)}
{pt3dadd(181656.000000,155316.000000,81150.000000,575.063856)}
{pt3dadd(181596.000000,154620.000000,80675.000000,499.187376)}

{create adhoc22}
{access adhoc22}
{connect adhoc22(1), adhoc21(0)}
{nseg = 1}
{strdef color color = "White"}
{pt3dclear()}
{pt3dadd(181596.000000,154620.000000,80675.000000,499.187376)}
{pt3dadd(182292.000000,152556.000000,80725.000000,200.612214)}
{pt3dadd(182784.000000,150996.000000,80775.000000,148.679037)}
{pt3dadd(181608.000000,148656.000000,80425.000000,96.745860)}
{pt3dadd(181236.000000,147876.000000,79700.000000,90.874296)}

{create adhoc23}
{access adhoc23}
{connect adhoc23(1), adhoc21(0)}
{nseg = 1}
{strdef color color = "White"}
{pt3dclear()}
{pt3dadd(181596.000000,154620.000000,80675.000000,499.187376)}
{pt3dadd(181488.000000,154632.000000,80175.000000,415.989486)}
{pt3dadd(181392.000000,154632.000000,79775.000000,398.656589)}
{pt3dadd(181248.000000,154560.000000,79425.000000,381.323691)}
{pt3dadd(181368.000000,154620.000000,79025.000000,363.990794)}
{pt3dadd(181416.000000,154524.000000,78575.000000,346.657896)}
{pt3dadd(181464.000000,154452.000000,78125.000000,317.769741)}
{pt3dadd(181512.000000,154248.000000,77725.000000,288.881586)}
{pt3dadd(181440.000000,153924.000000,77275.000000,259.993431)}
{pt3dadd(181380.000000,153636.000000,76875.000000,231.105276)}
{pt3dadd(181392.000000,153156.000000,76450.000000,277.326328)}
{pt3dadd(181044.000000,152784.000000,76050.000000,323.547381)}
{pt3dadd(180900.000000,152412.000000,75700.000000,369.768433)}
{pt3dadd(180876.000000,152340.000000,75275.000000,415.989486)}
{pt3dadd(180852.000000,152436.000000,74900.000000,415.989486)}
{pt3dadd(180420.000000,152448.000000,74400.000000,415.989486)}
{pt3dadd(180348.000000,152340.000000,73975.000000,415.989486)}
{pt3dadd(180252.000000,152340.000000,73550.000000,415.989486)}
{pt3dadd(180192.000000,152064.000000,73125.000000,381.323696)}
{pt3dadd(179988.000000,151320.000000,72650.000000,346.657905)}
{pt3dadd(179868.000000,150804.000000,72350.000000,311.992115)}
{pt3dadd(179436.000000,150192.000000,71900.000000,277.326324)}
{pt3dadd(179112.000000,149496.000000,71475.000000,280.215140)}
{pt3dadd(178908.000000,148956.000000,71050.000000,283.103955)}
{pt3dadd(178884.000000,148596.000000,70625.000000,285.992771)}
{pt3dadd(178824.000000,148344.000000,70175.000000,288.881586)}
{pt3dadd(178800.000000,147840.000000,69625.000000,276.844851)}
{pt3dadd(178632.000000,147468.000000,69225.000000,264.808116)}
{pt3dadd(178164.000000,146988.000000,68700.000000,252.771381)}
{pt3dadd(177888.000000,146580.000000,68400.000000,240.734646)}
{pt3dadd(177492.000000,146064.000000,67925.000000,252.771381)}
{pt3dadd(177060.000000,145416.000000,67525.000000,264.808116)}
{pt3dadd(177144.000000,144012.000000,67100.000000,276.844851)}
{pt3dadd(177228.000000,143844.000000,66675.000000,288.881586)}
{pt3dadd(176940.000000,143448.000000,66275.000000,266.814243)}
{pt3dadd(176592.000000,143580.000000,65375.000000,244.746900)}
{pt3dadd(176232.000000,143292.000000,64825.000000,222.679557)}
{pt3dadd(176160.000000,143124.000000,64400.000000,200.612214)}
{pt3dadd(175788.000000,142716.000000,63900.000000,200.612214)}
{pt3dadd(175368.000000,142728.000000,63425.000000,200.612214)}
{pt3dadd(175272.000000,142632.000000,63075.000000,200.612214)}
{pt3dadd(174996.000000,142500.000000,62675.000000,200.612214)}
{pt3dadd(174744.000000,142056.000000,62300.000000,185.287671)}
{pt3dadd(174156.000000,141984.000000,61950.000000,169.963128)}
{pt3dadd(173868.000000,141924.000000,61600.000000,154.638585)}
{pt3dadd(173400.000000,141768.000000,61200.000000,139.314042)}
{pt3dadd(173052.000000,141396.000000,60675.000000,200.612214)}

{create adhoc24}
{access adhoc24}
{connect adhoc24(1), adhoc20(0)}
{nseg = 1}
{strdef color color = "White"}
{pt3dclear()}
{pt3dadd(188640.000000,170280.000000,100075.000000,1490.565402)}
{pt3dadd(188580.000000,169932.000000,100550.000000,1430.942742)}
{pt3dadd(188592.000000,170100.000000,101325.000000,1445.848407)}
{pt3dadd(188700.000000,170424.000000,101825.000000,1460.754072)}
{pt3dadd(188964.000000,170064.000000,102475.000000,1475.659737)}
{pt3dadd(189012.000000,169668.000000,102900.000000,1490.565402)}
{pt3dadd(189000.000000,169632.000000,103400.000000,1490.565402)}
{pt3dadd(189000.000000,169596.000000,104050.000000,1490.565402)}
{pt3dadd(189048.000000,169464.000000,104750.000000,1490.565402)}
{pt3dadd(188964.000000,169740.000000,105525.000000,1490.565402)}
{pt3dadd(189024.000000,169680.000000,106300.000000,1490.565402)}
{pt3dadd(189216.000000,169356.000000,107100.000000,1490.565402)}
{pt3dadd(189300.000000,169212.000000,107800.000000,1490.565402)}
{pt3dadd(189348.000000,169152.000000,108200.000000,1490.565402)}
{pt3dadd(189276.000000,169056.000000,108825.000000,1490.565402)}
{pt3dadd(189072.000000,168960.000000,109475.000000,1490.565402)}
{pt3dadd(188628.000000,168900.000000,110050.000000,1490.565402)}
{pt3dadd(188340.000000,169104.000000,110700.000000,1490.565402)}
{pt3dadd(188160.000000,169008.000000,111225.000000,1490.565402)}
{pt3dadd(187980.000000,168912.000000,112000.000000,1490.565402)}
{pt3dadd(187440.000000,168768.000000,112650.000000,1490.565402)}
{pt3dadd(186684.000000,168204.000000,113650.000000,1490.565402)}
{pt3dadd(186108.000000,167916.000000,114175.000000,1428.458522)}
{pt3dadd(185532.000000,167628.000000,114800.000000,1366.351641)}
{pt3dadd(185064.000000,167604.000000,115375.000000,1304.244761)}
{pt3dadd(184476.000000,167424.000000,116125.000000,1242.137880)}
{pt3dadd(183732.000000,167136.000000,116800.000000,1242.137880)}
{pt3dadd(182880.000000,166560.000000,117675.000000,1242.137880)}
{pt3dadd(182292.000000,166572.000000,118375.000000,1242.137880)}
{pt3dadd(181380.000000,166176.000000,119100.000000,1242.137880)}
{pt3dadd(180324.000000,165792.000000,119775.000000,1190.382147)}
{pt3dadd(179436.000000,165516.000000,120175.000000,1138.626414)}
{pt3dadd(178740.000000,165204.000000,120650.000000,1086.870681)}
{pt3dadd(178320.000000,164844.000000,120900.000000,1035.114948)}
{pt3dadd(177636.000000,164808.000000,121050.000000,991.985162)}
{pt3dadd(177216.000000,164772.000000,121125.000000,948.855375)}
{pt3dadd(176820.000000,164484.000000,121325.000000,905.725589)}
{pt3dadd(176472.000000,164340.000000,121450.000000,862.595802)}
{pt3dadd(176184.000000,164136.000000,121475.000000,862.595802)}
{pt3dadd(175860.000000,164184.000000,121575.000000,862.595802)}
{pt3dadd(175500.000000,164232.000000,121675.000000,862.595802)}
{pt3dadd(175164.000000,164028.000000,121775.000000,862.595802)}
{pt3dadd(174840.000000,163632.000000,122000.000000,826.654307)}
{pt3dadd(174456.000000,163716.000000,122125.000000,790.712811)}
{pt3dadd(173472.000000,163776.000000,122625.000000,754.771316)}
{pt3dadd(172704.000000,163500.000000,123025.000000,718.829820)}
{pt3dadd(172476.000000,163260.000000,123350.000000,663.919209)}
{pt3dadd(170724.000000,163536.000000,123650.000000,609.008598)}
{pt3dadd(167736.000000,163524.000000,124400.000000,554.097987)}
{pt3dadd(166704.000000,163656.000000,124775.000000,499.187376)}
{pt3dadd(165672.000000,163752.000000,125275.000000,524.146752)}
{pt3dadd(165084.000000,163932.000000,125675.000000,549.106128)}
{pt3dadd(164352.000000,163752.000000,126375.000000,574.065504)}
{pt3dadd(163872.000000,163980.000000,126875.000000,599.024880)}
{pt3dadd(163392.000000,163800.000000,127350.000000,599.024880)}
{pt3dadd(162888.000000,163152.000000,127750.000000,599.024880)}
{pt3dadd(161904.000000,163020.000000,128150.000000,599.024880)}
{pt3dadd(161196.000000,162864.000000,128600.000000,599.024880)}
{pt3dadd(160584.000000,162924.000000,128925.000000,664.917611)}
{pt3dadd(160212.000000,162828.000000,129300.000000,730.810341)}
{pt3dadd(159600.000000,162216.000000,129925.000000,796.703072)}
{pt3dadd(158796.000000,161628.000000,130425.000000,862.595802)}
{pt3dadd(158136.000000,161028.000000,131050.000000,905.725589)}
{pt3dadd(157896.000000,160968.000000,131625.000000,948.855375)}
{pt3dadd(157464.000000,160452.000000,132150.000000,991.985162)}
{pt3dadd(157044.000000,159936.000000,132600.000000,1035.114948)}
{pt3dadd(156768.000000,159528.000000,133150.000000,1035.114948)}
{pt3dadd(156264.000000,158832.000000,133700.000000,1035.114948)}
{pt3dadd(155796.000000,158628.000000,134350.000000,1035.114948)}
{pt3dadd(155808.000000,158268.000000,134850.000000,1035.114948)}
{pt3dadd(155484.000000,157560.000000,135275.000000,1148.977562)}
{pt3dadd(154956.000000,156768.000000,135875.000000,1262.840175)}
{pt3dadd(154404.000000,154476.000000,137025.000000,1376.702788)}
{pt3dadd(154056.000000,154572.000000,137375.000000,1490.565402)}
{pt3dadd(153324.000000,152952.000000,138000.000000,1565.093664)}
{pt3dadd(153228.000000,151284.000000,139450.000000,1639.621926)}
{pt3dadd(152796.000000,150936.000000,139950.000000,1714.150188)}
{pt3dadd(151812.000000,149364.000000,140475.000000,1788.678450)}
{pt3dadd(151020.000000,147420.000000,141525.000000,1770.791643)}
{pt3dadd(150504.000000,147252.000000,142175.000000,1752.904836)}
{pt3dadd(150300.000000,146724.000000,142825.000000,1735.018029)}
{pt3dadd(150120.000000,146148.000000,143375.000000,1717.131222)}
{pt3dadd(149940.000000,144012.000000,144125.000000,1645.584134)}
{pt3dadd(149772.000000,143640.000000,144600.000000,1574.037045)}
{pt3dadd(149568.000000,142452.000000,145250.000000,1502.489957)}
{pt3dadd(149628.000000,142200.000000,145625.000000,1430.942868)}
{pt3dadd(149904.000000,141456.000000,145875.000000,1445.848502)}
{pt3dadd(149604.000000,140892.000000,146375.000000,1460.754135)}
{pt3dadd(149760.000000,140424.000000,146850.000000,1475.659769)}
{pt3dadd(149184.000000,140064.000000,147450.000000,1490.565402)}
{pt3dadd(149316.000000,139512.000000,148050.000000,1475.659737)}
{pt3dadd(149484.000000,138852.000000,148675.000000,1460.754072)}
{pt3dadd(149640.000000,138192.000000,149275.000000,1445.848407)}
{pt3dadd(149760.000000,137304.000000,149850.000000,1430.942742)}
{pt3dadd(150096.000000,136440.000000,150400.000000,1520.376669)}
{pt3dadd(149964.000000,135324.000000,151150.000000,1609.810596)}
{pt3dadd(150072.000000,135468.000000,151550.000000,1699.244523)}
{pt3dadd(150612.000000,134904.000000,152100.000000,1788.678450)}
{pt3dadd(150540.000000,134520.000000,152025.000000,1699.244523)}
{pt3dadd(150468.000000,133896.000000,151950.000000,1609.810596)}
{pt3dadd(151068.000000,133488.000000,152575.000000,1520.376669)}
{pt3dadd(151296.000000,132936.000000,152775.000000,1430.942742)}
{pt3dadd(151320.000000,132540.000000,153050.000000,1430.942742)}
{pt3dadd(151512.000000,132108.000000,153250.000000,1430.942742)}
{pt3dadd(152112.000000,131592.000000,153425.000000,1430.942742)}
{pt3dadd(152112.000000,130908.000000,153475.000000,1430.942742)}
{pt3dadd(152196.000000,130332.000000,153675.000000,1430.942742)}
{pt3dadd(152364.000000,129804.000000,153700.000000,1430.942742)}
{pt3dadd(152520.000000,129312.000000,153725.000000,1430.942742)}
{pt3dadd(152676.000000,128904.000000,153750.000000,1430.942742)}
{pt3dadd(152916.000000,128520.000000,153800.000000,1383.741527)}
{pt3dadd(153108.000000,128172.000000,153850.000000,1336.540311)}
{pt3dadd(153228.000000,127716.000000,154050.000000,1289.339096)}
{pt3dadd(153432.000000,127308.000000,154075.000000,1242.137880)}
{pt3dadd(153600.000000,126840.000000,154100.000000,1289.339096)}
{pt3dadd(153432.000000,126396.000000,153950.000000,1336.540311)}
{pt3dadd(153396.000000,125892.000000,153975.000000,1383.741527)}
{pt3dadd(153264.000000,125448.000000,153900.000000,1430.942742)}
{pt3dadd(153204.000000,125064.000000,154000.000000,1520.376669)}
{pt3dadd(153144.000000,124560.000000,154100.000000,1609.810596)}
{pt3dadd(153000.000000,124284.000000,154150.000000,1699.244523)}
{pt3dadd(152832.000000,123912.000000,154100.000000,1788.678450)}
{pt3dadd(152580.000000,123528.000000,154075.000000,1788.678450)}
{pt3dadd(152328.000000,123120.000000,154050.000000,1788.678450)}
{pt3dadd(152292.000000,122820.000000,154050.000000,1717.131222)}

{create adhoc25}
{access adhoc25}
{connect adhoc25(1), adhoc24(0)}
{nseg = 1}
{strdef color color = "White"}
{pt3dclear()}
{pt3dadd(152292.000000,122820.000000,154050.000000,1717.131222)}
{pt3dadd(151416.000000,122856.000000,157500.000000,415.989486)}
{pt3dadd(151104.000000,123048.000000,157625.000000,360.139046)}
{pt3dadd(151032.000000,123324.000000,157875.000000,304.288605)}
{pt3dadd(150636.000000,123108.000000,158425.000000,248.438165)}
{pt3dadd(150048.000000,123120.000000,158775.000000,192.587724)}
{pt3dadd(149436.000000,123444.000000,159275.000000,269.237637)}
{pt3dadd(149112.000000,123828.000000,159850.000000,345.887550)}
{pt3dadd(148500.000000,123828.000000,160325.000000,422.537463)}
{pt3dadd(147324.000000,123216.000000,160900.000000,499.187376)}
{pt3dadd(146952.000000,122916.000000,161475.000000,499.187376)}
{pt3dadd(147120.000000,122820.000000,161775.000000,499.187376)}
{pt3dadd(146916.000000,122844.000000,162275.000000,499.187376)}
{pt3dadd(146568.000000,123144.000000,162675.000000,499.187376)}
{pt3dadd(146172.000000,123372.000000,163050.000000,590.039483)}
{pt3dadd(145476.000000,123564.000000,163750.000000,680.891589)}
{pt3dadd(144900.000000,124116.000000,164575.000000,771.743696)}
{pt3dadd(144996.000000,124056.000000,165025.000000,862.595802)}
{pt3dadd(144972.000000,124056.000000,165525.000000,499.187376)}
{pt3dadd(145392.000000,124080.000000,165950.000000,346.657896)}

{create adhoc26}
{access adhoc26}
{connect adhoc26(1), adhoc24(0)}
{nseg = 1}
{strdef color color = "White"}
{pt3dclear()}
{pt3dadd(152292.000000,122820.000000,154050.000000,1717.131222)}
{pt3dadd(152088.000000,122436.000000,154100.000000,1788.678450)}

{create adhoc27}
{access adhoc27}
{connect adhoc27(1), adhoc26(0)}
{nseg = 1}
{strdef color color = "White"}
{pt3dclear()}
{pt3dadd(152088.000000,122436.000000,154100.000000,1788.678450)}
{pt3dadd(148728.000000,121716.000000,154225.000000,862.595802)}
{pt3dadd(146508.000000,122148.000000,154225.000000,905.725589)}
{pt3dadd(146232.000000,122172.000000,154775.000000,948.855375)}
{pt3dadd(145932.000000,122376.000000,155125.000000,991.985162)}
{pt3dadd(145656.000000,122580.000000,155525.000000,1035.114948)}
{pt3dadd(145392.000000,122856.000000,156275.000000,1024.763782)}
{pt3dadd(145140.000000,123036.000000,156725.000000,1014.412617)}
{pt3dadd(144828.000000,123264.000000,157100.000000,1004.061452)}
{pt3dadd(144444.000000,123612.000000,157450.000000,993.710286)}
{pt3dadd(144144.000000,123912.000000,157700.000000,828.091908)}
{pt3dadd(143832.000000,124140.000000,158075.000000,662.473530)}
{pt3dadd(143592.000000,124368.000000,158425.000000,499.187376)}

{create adhoc28}
{access adhoc28}
{connect adhoc28(1), adhoc27(0)}
{nseg = 1}
{strdef color color = "White"}
{pt3dclear()}
{pt3dadd(143592.000000,124368.000000,158425.000000,499.187376)}
{pt3dadd(143364.000000,122844.000000,157500.000000,599.024880)}
{pt3dadd(143124.000000,122772.000000,157775.000000,549.106137)}
{pt3dadd(142824.000000,122604.000000,157925.000000,499.187394)}
{pt3dadd(142572.000000,122700.000000,158200.000000,449.268651)}
{pt3dadd(142332.000000,122484.000000,158400.000000,399.349908)}
{pt3dadd(141996.000000,122412.000000,158500.000000,424.309275)}
{pt3dadd(141660.000000,122280.000000,158675.000000,449.268642)}
{pt3dadd(141384.000000,122028.000000,158825.000000,474.228009)}
{pt3dadd(141084.000000,121968.000000,159225.000000,499.187376)}
{pt3dadd(140736.000000,121524.000000,159350.000000,524.146752)}
{pt3dadd(140316.000000,121992.000000,159600.000000,549.106128)}
{pt3dadd(139752.000000,122232.000000,160000.000000,574.065504)}
{pt3dadd(139248.000000,122496.000000,160450.000000,599.024880)}
{pt3dadd(138900.000000,122316.000000,160200.000000,574.065504)}
{pt3dadd(138564.000000,121968.000000,160500.000000,549.106128)}
{pt3dadd(138300.000000,121728.000000,160825.000000,524.146752)}
{pt3dadd(138012.000000,121368.000000,161025.000000,499.187376)}
{pt3dadd(137676.000000,121296.000000,161300.000000,499.187376)}
{pt3dadd(137328.000000,121260.000000,161350.000000,499.187376)}
{pt3dadd(137028.000000,121272.000000,161350.000000,499.187376)}
{pt3dadd(136680.000000,121272.000000,161475.000000,499.187376)}
{pt3dadd(136332.000000,121236.000000,161525.000000,446.610929)}
{pt3dadd(136020.000000,121212.000000,161875.000000,394.034481)}
{pt3dadd(135744.000000,121068.000000,162150.000000,341.458034)}
{pt3dadd(135420.000000,120972.000000,162225.000000,288.881586)}
{pt3dadd(135096.000000,120876.000000,162275.000000,341.458034)}
{pt3dadd(134652.000000,120888.000000,162225.000000,394.034481)}
{pt3dadd(134328.000000,120912.000000,162300.000000,446.610929)}
{pt3dadd(133920.000000,120888.000000,162775.000000,499.187376)}
{pt3dadd(133668.000000,120720.000000,163325.000000,424.543586)}
{pt3dadd(133368.000000,120480.000000,163725.000000,349.899795)}
{pt3dadd(133056.000000,120132.000000,163925.000000,275.256005)}
{pt3dadd(132840.000000,119880.000000,164075.000000,200.612214)}
{pt3dadd(132588.000000,119820.000000,164175.000000,237.123635)}
{pt3dadd(132288.000000,119784.000000,164225.000000,273.635055)}
{pt3dadd(131892.000000,119712.000000,164550.000000,310.146475)}
{pt3dadd(131520.000000,119496.000000,164700.000000,346.657896)}
{pt3dadd(131160.000000,119508.000000,164825.000000,346.657896)}
{pt3dadd(130788.000000,119520.000000,164825.000000,346.657896)}
{pt3dadd(130488.000000,119520.000000,164750.000000,346.657896)}
{pt3dadd(130080.000000,119568.000000,164875.000000,346.657896)}
{pt3dadd(129612.000000,119532.000000,164775.000000,363.990794)}
{pt3dadd(129144.000000,119544.000000,164625.000000,381.323691)}
{pt3dadd(128712.000000,119604.000000,164550.000000,398.656589)}
{pt3dadd(128244.000000,119604.000000,164475.000000,415.989486)}
{pt3dadd(127872.000000,119388.000000,164625.000000,346.657896)}
{pt3dadd(127464.000000,119352.000000,164675.000000,200.612214)}

{create adhoc29}
{access adhoc29}
{connect adhoc29(1), adhoc27(0)}
{nseg = 1}
{strdef color color = "White"}
{pt3dclear()}
{pt3dadd(143592.000000,124368.000000,158425.000000,499.187376)}
{pt3dadd(143424.000000,125088.000000,158800.000000,599.024880)}
{pt3dadd(143160.000000,125508.000000,159025.000000,599.024880)}
{pt3dadd(142812.000000,125772.000000,159450.000000,599.024880)}
{pt3dadd(142476.000000,126048.000000,159725.000000,599.024880)}
{pt3dadd(142236.000000,126348.000000,160000.000000,690.076674)}

{create adhoc30}
{access adhoc30}
{connect adhoc30(1), adhoc29(0)}
{nseg = 1}
{strdef color color = "White"}
{pt3dclear()}
{pt3dadd(142236.000000,126348.000000,160000.000000,690.076674)}
{pt3dadd(142524.000000,127740.000000,161175.000000,499.187376)}
{pt3dadd(142728.000000,127800.000000,161425.000000,429.085446)}
{pt3dadd(143004.000000,128004.000000,161500.000000,358.983516)}
{pt3dadd(143244.000000,128088.000000,161600.000000,288.881586)}
{pt3dadd(143424.000000,128064.000000,161750.000000,96.745860)}

{create adhoc31}
{access adhoc31}
{connect adhoc31(1), adhoc29(0)}
{nseg = 1}
{strdef color color = "White"}
{pt3dclear()}
{pt3dadd(142236.000000,126348.000000,160000.000000,690.076674)}
{pt3dadd(142044.000000,126852.000000,160100.000000,718.829820)}
{pt3dadd(141672.000000,127308.000000,160575.000000,790.712811)}
{pt3dadd(141360.000000,127764.000000,161050.000000,862.595802)}
{pt3dadd(141060.000000,128064.000000,161500.000000,415.989486)}

{create adhoc32}
{access adhoc32}
{connect adhoc32(1), adhoc31(0)}
{nseg = 1}
{strdef color color = "White"}
{pt3dclear()}
{pt3dadd(141060.000000,128064.000000,161500.000000,415.989486)}
{pt3dadd(141072.000000,128604.000000,163350.000000,346.657896)}
{pt3dadd(141408.000000,128040.000000,164800.000000,363.990794)}
{pt3dadd(141300.000000,127896.000000,165225.000000,381.323691)}
{pt3dadd(141660.000000,127620.000000,165975.000000,398.656589)}
{pt3dadd(141336.000000,126744.000000,166525.000000,415.989486)}
{pt3dadd(141432.000000,126576.000000,167200.000000,415.989486)}
{pt3dadd(142224.000000,125388.000000,167725.000000,415.989486)}
{pt3dadd(142680.000000,124620.000000,168100.000000,415.989486)}
{pt3dadd(142836.000000,124260.000000,168550.000000,415.989486)}
{pt3dadd(142860.000000,124260.000000,168950.000000,240.734646)}
{pt3dadd(143028.000000,124008.000000,169275.000000,55.987200)}

{create adhoc33}
{access adhoc33}
{connect adhoc33(1), adhoc31(0)}
{nseg = 1}
{strdef color color = "White"}
{pt3dclear()}
{pt3dadd(141060.000000,128064.000000,161500.000000,415.989486)}
{pt3dadd(140700.000000,128148.000000,160650.000000,599.024880)}
{pt3dadd(140364.000000,128580.000000,160550.000000,538.013082)}
{pt3dadd(140136.000000,129156.000000,160975.000000,477.001284)}
{pt3dadd(139980.000000,130104.000000,161650.000000,415.989486)}
{pt3dadd(139788.000000,129792.000000,161500.000000,599.024880)}

{create adhoc34}
{access adhoc34}
{connect adhoc34(1), adhoc33(0)}
{nseg = 1}
{strdef color color = "White"}
{pt3dclear()}
{pt3dadd(139788.000000,129792.000000,161500.000000,599.024880)}
{pt3dadd(139932.000000,132636.000000,162400.000000,499.187376)}
{pt3dadd(139932.000000,133548.000000,162675.000000,409.219042)}
{pt3dadd(140604.000000,132732.000000,162800.000000,319.250709)}
{pt3dadd(140964.000000,132732.000000,162750.000000,229.282376)}
{pt3dadd(141648.000000,131988.000000,162350.000000,139.314042)}
{pt3dadd(141804.000000,132012.000000,162350.000000,67.184640)}

{create adhoc35}
{access adhoc35}
{connect adhoc35(1), adhoc33(0)}
{nseg = 1}
{strdef color color = "White"}
{pt3dclear()}
{pt3dadd(139788.000000,129792.000000,161500.000000,599.024880)}
{pt3dadd(139548.000000,129696.000000,161550.000000,415.989486)}
{pt3dadd(139116.000000,129792.000000,161625.000000,96.745860)}

{create adhoc36}
{access adhoc36}
{connect adhoc36(1), adhoc26(0)}
{nseg = 1}
{strdef color color = "White"}
{pt3dclear()}
{pt3dadd(152088.000000,122436.000000,154100.000000,1788.678450)}
{pt3dadd(151764.000000,122052.000000,154275.000000,1788.678450)}
{pt3dadd(151872.000000,121716.000000,154050.000000,1684.935104)}
{pt3dadd(152148.000000,121332.000000,154050.000000,1581.191757)}
{pt3dadd(152556.000000,120804.000000,154500.000000,1477.448410)}
{pt3dadd(152532.000000,120336.000000,155225.000000,1373.705064)}
{pt3dadd(152304.000000,119868.000000,155550.000000,1388.014483)}
{pt3dadd(152064.000000,119340.000000,155975.000000,1402.323903)}
{pt3dadd(151716.000000,118896.000000,156200.000000,1416.633323)}
{pt3dadd(151356.000000,118524.000000,156550.000000,1430.942742)}
{pt3dadd(151476.000000,118140.000000,156575.000000,1460.754072)}
{pt3dadd(151188.000000,117864.000000,156625.000000,1490.565402)}
{pt3dadd(151428.000000,117432.000000,156475.000000,1192.452354)}

{create adhoc37}
{access adhoc37}
{connect adhoc37(1), adhoc36(0)}
{nseg = 1}
{strdef color color = "White"}
{pt3dclear()}
{pt3dadd(151428.000000,117432.000000,156475.000000,1192.452354)}
{pt3dadd(149604.000000,117468.000000,158450.000000,499.187376)}
{pt3dadd(148200.000000,117468.000000,159075.000000,461.055006)}
{pt3dadd(147972.000000,117696.000000,159150.000000,422.922636)}
{pt3dadd(147672.000000,117708.000000,159200.000000,384.790266)}
{pt3dadd(147420.000000,117708.000000,159400.000000,346.657896)}
{pt3dadd(147132.000000,117648.000000,159425.000000,363.990794)}
{pt3dadd(146700.000000,117696.000000,159575.000000,381.323691)}
{pt3dadd(146268.000000,117636.000000,159650.000000,398.656589)}
{pt3dadd(145980.000000,117540.000000,159575.000000,415.989486)}
{pt3dadd(145668.000000,117480.000000,159500.000000,415.989486)}
{pt3dadd(145428.000000,117492.000000,159425.000000,415.989486)}
{pt3dadd(145176.000000,117480.000000,159450.000000,415.989486)}
{pt3dadd(144948.000000,117456.000000,158850.000000,415.989486)}
{pt3dadd(145008.000000,117324.000000,158425.000000,407.836094)}
{pt3dadd(144360.000000,117084.000000,158025.000000,399.682701)}
{pt3dadd(143736.000000,117036.000000,157575.000000,391.529309)}
{pt3dadd(143364.000000,116712.000000,157250.000000,383.375916)}
{pt3dadd(142956.000000,116232.000000,156875.000000,359.752334)}
{pt3dadd(142584.000000,116016.000000,156550.000000,336.128751)}
{pt3dadd(142380.000000,115512.000000,156225.000000,312.505169)}
{pt3dadd(142404.000000,115116.000000,155950.000000,288.881586)}
{pt3dadd(143376.000000,114168.000000,155525.000000,288.881586)}
{pt3dadd(143352.000000,114588.000000,154975.000000,288.881586)}
{pt3dadd(142068.000000,114600.000000,154425.000000,288.881586)}
{pt3dadd(141636.000000,114372.000000,154050.000000,288.881586)}
{pt3dadd(141468.000000,114300.000000,153675.000000,276.844851)}
{pt3dadd(141372.000000,114228.000000,153300.000000,264.808116)}
{pt3dadd(141312.000000,114204.000000,152925.000000,252.771381)}
{pt3dadd(141312.000000,114108.000000,152425.000000,240.734646)}
{pt3dadd(141144.000000,114348.000000,151950.000000,240.734646)}

{create adhoc38}
{access adhoc38}
{connect adhoc38(1), adhoc36(0)}
{nseg = 1}
{strdef color color = "White"}
{pt3dclear()}
{pt3dadd(151428.000000,117432.000000,156475.000000,1192.452354)}
{pt3dadd(151620.000000,116988.000000,156475.000000,1242.137880)}
{pt3dadd(151716.000000,116556.000000,156825.000000,1229.716498)}
{pt3dadd(151812.000000,116064.000000,157075.000000,1217.295117)}
{pt3dadd(151776.000000,115680.000000,157125.000000,1204.873736)}
{pt3dadd(151740.000000,115380.000000,157150.000000,1192.452354)}
{pt3dadd(151704.000000,115128.000000,157175.000000,1101.362252)}
{pt3dadd(151644.000000,114852.000000,157275.000000,1010.272149)}
{pt3dadd(151776.000000,114564.000000,157525.000000,919.182046)}
{pt3dadd(151704.000000,114216.000000,157800.000000,828.091944)}
{pt3dadd(151680.000000,113892.000000,157850.000000,836.717909)}
{pt3dadd(151656.000000,113472.000000,157900.000000,845.343873)}
{pt3dadd(151656.000000,113124.000000,158025.000000,853.969838)}
{pt3dadd(151680.000000,112800.000000,158175.000000,862.595802)}
{pt3dadd(151704.000000,112428.000000,158325.000000,862.595802)}
{pt3dadd(151536.000000,112080.000000,158525.000000,862.595802)}
{pt3dadd(151356.000000,111636.000000,158650.000000,862.595802)}
{pt3dadd(151212.000000,111324.000000,158750.000000,862.595802)}
{pt3dadd(151104.000000,110904.000000,158875.000000,905.725589)}
{pt3dadd(150996.000000,110592.000000,159075.000000,948.855375)}
{pt3dadd(150960.000000,110256.000000,159125.000000,991.985162)}
{pt3dadd(150888.000000,109812.000000,159100.000000,1035.114948)}
{pt3dadd(150852.000000,109428.000000,159150.000000,1014.412617)}
{pt3dadd(150792.000000,108960.000000,159200.000000,993.710286)}
{pt3dadd(150732.000000,108564.000000,159250.000000,993.710286)}

{create adhoc39}
{access adhoc39}
{connect adhoc39(1), adhoc38(0)}
{nseg = 1}
{strdef color color = "White"}
{pt3dclear()}
{pt3dadd(150732.000000,108564.000000,159250.000000,993.710286)}
{pt3dadd(147564.000000,108012.000000,159250.000000,499.187376)}
{pt3dadd(147336.000000,107988.000000,158550.000000,633.169269)}
{pt3dadd(147084.000000,107856.000000,157900.000000,767.151162)}
{pt3dadd(146700.000000,107724.000000,157050.000000,901.133055)}
{pt3dadd(146280.000000,107508.000000,156475.000000,1035.114948)}
{pt3dadd(145980.000000,107424.000000,156300.000000,828.739794)}
{pt3dadd(145752.000000,107448.000000,156275.000000,622.364640)}
{pt3dadd(145548.000000,107532.000000,156150.000000,415.989486)}
{pt3dadd(145404.000000,107544.000000,156100.000000,346.657896)}

{create adhoc40}
{access adhoc40}
{connect adhoc40(1), adhoc38(0)}
{nseg = 1}
{strdef color color = "White"}
{pt3dclear()}
{pt3dadd(150732.000000,108564.000000,159250.000000,993.710286)}
{pt3dadd(150672.000000,108180.000000,159275.000000,1035.114948)}
{pt3dadd(150696.000000,107700.000000,159475.000000,1074.449300)}
{pt3dadd(150780.000000,107484.000000,159675.000000,1113.783651)}
{pt3dadd(151044.000000,107100.000000,159975.000000,1153.118003)}
{pt3dadd(151392.000000,106800.000000,160250.000000,1192.452354)}
{pt3dadd(151332.000000,106428.000000,160400.000000,1242.137880)}
{pt3dadd(151308.000000,106056.000000,160475.000000,1242.137880)}

{create adhoc41}
{access adhoc41}
{connect adhoc41(1), adhoc40(0)}
{nseg = 1}
{strdef color color = "White"}
{pt3dclear()}
{pt3dadd(151308.000000,106056.000000,160475.000000,1242.137880)}
{pt3dadd(151296.000000,106500.000000,163525.000000,718.829820)}
{pt3dadd(151020.000000,106236.000000,163900.000000,718.829820)}
{pt3dadd(150768.000000,106428.000000,164400.000000,718.829820)}
{pt3dadd(150492.000000,106668.000000,164825.000000,718.829820)}
{pt3dadd(150168.000000,106812.000000,165375.000000,718.829820)}
{pt3dadd(150108.000000,106680.000000,165975.000000,643.119736)}
{pt3dadd(149940.000000,107328.000000,166575.000000,567.409653)}
{pt3dadd(149856.000000,106044.000000,166800.000000,491.699570)}
{pt3dadd(150108.000000,106284.000000,167350.000000,415.989486)}
{pt3dadd(150036.000000,105840.000000,167850.000000,415.989486)}
{pt3dadd(150036.000000,105492.000000,168225.000000,415.989486)}
{pt3dadd(149640.000000,105384.000000,168625.000000,415.989486)}
{pt3dadd(149364.000000,105480.000000,169025.000000,415.989486)}
{pt3dadd(149232.000000,105420.000000,169500.000000,436.788958)}
{pt3dadd(149172.000000,105660.000000,170000.000000,457.588431)}
{pt3dadd(149220.000000,105828.000000,170350.000000,478.387903)}
{pt3dadd(149244.000000,105732.000000,170775.000000,499.187376)}
{pt3dadd(149184.000000,106128.000000,171275.000000,369.961011)}
{pt3dadd(149472.000000,106356.000000,171675.000000,240.734646)}
{pt3dadd(149556.000000,106176.000000,171925.000000,80.621550)}

{create adhoc42}
{access adhoc42}
{connect adhoc42(1), adhoc40(0)}
{nseg = 1}
{strdef color color = "White"}
{pt3dclear()}
{pt3dadd(151308.000000,106056.000000,160475.000000,1242.137880)}
{pt3dadd(151320.000000,105600.000000,160525.000000,1242.137880)}
{pt3dadd(151512.000000,105060.000000,160600.000000,1147.252361)}
{pt3dadd(151488.000000,104760.000000,160675.000000,1052.366841)}
{pt3dadd(151200.000000,104388.000000,160850.000000,957.481322)}
{pt3dadd(151140.000000,104172.000000,160825.000000,862.595802)}
{pt3dadd(150936.000000,103896.000000,160875.000000,826.654307)}
{pt3dadd(150876.000000,103488.000000,161225.000000,790.712811)}
{pt3dadd(150852.000000,103104.000000,161275.000000,754.771316)}
{pt3dadd(150864.000000,102720.000000,161475.000000,718.829820)}
{pt3dadd(150876.000000,102456.000000,161600.000000,688.878585)}
{pt3dadd(151044.000000,102168.000000,161725.000000,658.927350)}
{pt3dadd(151440.000000,101892.000000,161950.000000,628.976115)}
{pt3dadd(152124.000000,101544.000000,162075.000000,599.024880)}
{pt3dadd(152544.000000,101340.000000,162200.000000,664.917611)}
{pt3dadd(152820.000000,100716.000000,162725.000000,730.810341)}
{pt3dadd(153132.000000,100440.000000,162800.000000,796.703072)}
{pt3dadd(153432.000000,100164.000000,162900.000000,862.595802)}
{pt3dadd(153756.000000,100068.000000,162850.000000,905.725589)}
{pt3dadd(153960.000000,99972.000000,162800.000000,948.855375)}
{pt3dadd(154212.000000,99912.000000,162750.000000,991.985162)}
{pt3dadd(154584.000000,99696.000000,162725.000000,1035.114948)}
{pt3dadd(154968.000000,99528.000000,163000.000000,977.608566)}
{pt3dadd(155304.000000,99060.000000,163000.000000,920.102184)}
{pt3dadd(155604.000000,98592.000000,163025.000000,862.595802)}
{pt3dadd(156000.000000,98424.000000,162925.000000,862.595802)}

{create adhoc43}
{access adhoc43}
{connect adhoc43(1), adhoc42(0)}
{nseg = 1}
{strdef color color = "White"}
{pt3dclear()}
{pt3dadd(156000.000000,98424.000000,162925.000000,862.595802)}
{pt3dadd(156084.000000,100704.000000,163675.000000,415.989486)}
{pt3dadd(156360.000000,100836.000000,163850.000000,353.786324)}
{pt3dadd(156612.000000,101028.000000,163800.000000,291.583161)}
{pt3dadd(156888.000000,101328.000000,163850.000000,229.379999)}
{pt3dadd(157116.000000,101424.000000,163900.000000,167.176836)}
{pt3dadd(157344.000000,101472.000000,163950.000000,167.176836)}
{pt3dadd(157584.000000,101376.000000,163975.000000,231.105276)}

{create adhoc44}
{access adhoc44}
{connect adhoc44(1), adhoc42(0)}
{nseg = 1}
{strdef color color = "White"}
{pt3dclear()}
{pt3dadd(156000.000000,98424.000000,162925.000000,862.595802)}
{pt3dadd(156360.000000,97956.000000,163050.000000,862.595802)}
{pt3dadd(156708.000000,97584.000000,163250.000000,853.969838)}
{pt3dadd(157056.000000,97212.000000,163425.000000,845.343873)}
{pt3dadd(157380.000000,97176.000000,163425.000000,836.717909)}
{pt3dadd(157656.000000,96768.000000,163500.000000,828.091944)}
{pt3dadd(157908.000000,96252.000000,163775.000000,836.717909)}
{pt3dadd(158268.000000,95736.000000,163875.000000,845.343873)}
{pt3dadd(158520.000000,95412.000000,163650.000000,853.969838)}
{pt3dadd(158808.000000,95100.000000,163800.000000,862.595802)}
{pt3dadd(158748.000000,94500.000000,164100.000000,826.654307)}
{pt3dadd(158916.000000,94224.000000,164125.000000,790.712811)}
{pt3dadd(159072.000000,93900.000000,164250.000000,754.771316)}
{pt3dadd(159372.000000,93588.000000,164600.000000,718.829820)}
{pt3dadd(159528.000000,93324.000000,164600.000000,718.829820)}
{pt3dadd(159840.000000,92988.000000,164525.000000,718.829820)}
{pt3dadd(159864.000000,92700.000000,164650.000000,718.829820)}
{pt3dadd(159864.000000,92400.000000,164950.000000,718.829820)}
{pt3dadd(160032.000000,92040.000000,165175.000000,643.119736)}
{pt3dadd(159972.000000,91752.000000,165475.000000,567.409653)}
{pt3dadd(160236.000000,91464.000000,165475.000000,491.699570)}
{pt3dadd(160296.000000,91176.000000,165525.000000,415.989486)}
{pt3dadd(160272.000000,90948.000000,165575.000000,436.788958)}
{pt3dadd(160356.000000,90636.000000,165800.000000,457.588431)}
{pt3dadd(160380.000000,90348.000000,165925.000000,478.387903)}
{pt3dadd(160644.000000,89964.000000,166000.000000,499.187376)}
{pt3dadd(160668.000000,89556.000000,165925.000000,499.187376)}
{pt3dadd(160800.000000,89124.000000,165850.000000,499.187376)}
{pt3dadd(160704.000000,88800.000000,165925.000000,499.187376)}
{pt3dadd(160524.000000,88176.000000,165925.000000,415.989486)}

{create adhoc45}
{access adhoc45}
{connect adhoc45(1), adhoc44(0)}
{nseg = 1}
{strdef color color = "White"}
{pt3dclear()}
{pt3dadd(160524.000000,88176.000000,165925.000000,415.989486)}
{pt3dadd(158820.000000,88032.000000,165400.000000,240.734646)}
{pt3dadd(158472.000000,87996.000000,165100.000000,263.748884)}
{pt3dadd(158268.000000,87564.000000,164750.000000,286.763121)}
{pt3dadd(158340.000000,87132.000000,164375.000000,309.777359)}
{pt3dadd(158604.000000,86616.000000,164025.000000,332.791596)}
{pt3dadd(158496.000000,86448.000000,163725.000000,360.524226)}
{pt3dadd(158448.000000,86316.000000,163275.000000,388.256856)}
{pt3dadd(158376.000000,86328.000000,162800.000000,415.989486)}
{pt3dadd(158340.000000,86304.000000,162500.000000,139.314042)}

{create adhoc46}
{access adhoc46}
{connect adhoc46(1), adhoc44(0)}
{nseg = 1}
{strdef color color = "White"}
{pt3dclear()}
{pt3dadd(160524.000000,88176.000000,165925.000000,415.989486)}
{pt3dadd(160956.000000,87828.000000,166050.000000,346.657896)}
{pt3dadd(161340.000000,87504.000000,166175.000000,323.547372)}
{pt3dadd(161640.000000,87288.000000,166200.000000,300.436848)}
{pt3dadd(161760.000000,87000.000000,166325.000000,277.326324)}
{pt3dadd(161880.000000,86760.000000,166400.000000,200.612214)}

{create adhoc47}
{access adhoc47}
{connect adhoc47(1), adhoc19(0)}
{nseg = 1}
{strdef color color = "White"}
{pt3dclear()}
{pt3dadd(180348.000000,177684.000000,88300.000000,288.881586)}
{pt3dadd(180876.000000,179784.000000,88250.000000,1192.452354)}
{pt3dadd(179964.000000,182556.000000,88250.000000,1109.988216)}
{pt3dadd(179172.000000,182904.000000,87300.000000,1027.524078)}
{pt3dadd(178956.000000,183540.000000,87200.000000,945.059940)}
{pt3dadd(178512.000000,183984.000000,86900.000000,862.595802)}
{pt3dadd(178260.000000,184464.000000,86700.000000,819.466020)}
{pt3dadd(178080.000000,184944.000000,86375.000000,776.336238)}
{pt3dadd(177648.000000,185376.000000,85950.000000,733.206456)}
{pt3dadd(177060.000000,185724.000000,85225.000000,690.076674)}
{pt3dadd(176436.000000,186276.000000,84925.000000,667.313725)}
{pt3dadd(176076.000000,187032.000000,84825.000000,644.550777)}
{pt3dadd(175692.000000,187644.000000,84550.000000,621.787828)}
{pt3dadd(175188.000000,188040.000000,84175.000000,599.024880)}
{pt3dadd(174768.000000,188676.000000,83825.000000,628.976115)}
{pt3dadd(174372.000000,189168.000000,83625.000000,658.927350)}
{pt3dadd(173952.000000,189732.000000,83150.000000,688.878585)}
{pt3dadd(173472.000000,190080.000000,82875.000000,718.829820)}
{pt3dadd(173244.000000,190464.000000,82525.000000,688.878585)}
{pt3dadd(173268.000000,190992.000000,82800.000000,658.927350)}
{pt3dadd(173328.000000,191280.000000,82750.000000,628.976115)}
{pt3dadd(172752.000000,192516.000000,82750.000000,599.024880)}
{pt3dadd(172200.000000,192708.000000,82400.000000,514.902552)}
{pt3dadd(171624.000000,193116.000000,81650.000000,430.780224)}
{pt3dadd(170808.000000,193476.000000,81000.000000,346.657896)}
{pt3dadd(170340.000000,193908.000000,80950.000000,346.657896)}

{create adhoc48}
{access adhoc48}
{connect adhoc48(1), adhoc47(0)}
{nseg = 1}
{strdef color color = "White"}
{pt3dclear()}
{pt3dadd(170340.000000,193908.000000,80950.000000,346.657896)}
{pt3dadd(169008.000000,194148.000000,78725.000000,499.187376)}
{pt3dadd(168876.000000,194424.000000,78325.000000,524.146752)}
{pt3dadd(168636.000000,194820.000000,77650.000000,549.106128)}
{pt3dadd(168660.000000,195204.000000,77300.000000,574.065504)}
{pt3dadd(168408.000000,195492.000000,76325.000000,599.024880)}
{pt3dadd(167892.000000,195792.000000,76250.000000,569.073631)}
{pt3dadd(167580.000000,196104.000000,76075.000000,539.122383)}
{pt3dadd(167328.000000,196452.000000,75700.000000,509.171134)}
{pt3dadd(166968.000000,196656.000000,75400.000000,479.219886)}
{pt3dadd(166692.000000,197064.000000,75250.000000,539.122369)}
{pt3dadd(165984.000000,197484.000000,74775.000000,599.024853)}
{pt3dadd(165264.000000,197904.000000,74750.000000,658.927336)}
{pt3dadd(164760.000000,198240.000000,74450.000000,718.829820)}
{pt3dadd(164328.000000,198564.000000,73950.000000,718.829820)}
{pt3dadd(163824.000000,198972.000000,73525.000000,718.829820)}
{pt3dadd(163380.000000,199356.000000,73025.000000,599.024880)}

{create adhoc49}
{access adhoc49}
{connect adhoc49(1), adhoc48(0)}
{nseg = 1}
{strdef color color = "White"}
{pt3dclear()}
{pt3dadd(163380.000000,199356.000000,73025.000000,599.024880)}
{pt3dadd(162972.000000,199728.000000,72625.000000,599.024880)}
{pt3dadd(161556.000000,200532.000000,71425.000000,664.917611)}
{pt3dadd(161016.000000,200856.000000,70525.000000,730.810341)}
{pt3dadd(160620.000000,201288.000000,69800.000000,796.703072)}
{pt3dadd(160212.000000,201420.000000,69050.000000,862.595802)}
{pt3dadd(159816.000000,201816.000000,68325.000000,826.654307)}
{pt3dadd(159408.000000,202392.000000,67675.000000,790.712811)}
{pt3dadd(159240.000000,202404.000000,66875.000000,754.771316)}
{pt3dadd(158964.000000,202416.000000,66075.000000,718.829820)}
{pt3dadd(158256.000000,203136.000000,65450.000000,690.651675)}
{pt3dadd(157764.000000,203712.000000,64750.000000,662.473530)}
{pt3dadd(157896.000000,203196.000000,64125.000000,499.187376)}

{create adhoc50}
{access adhoc50}
{connect adhoc50(1), adhoc49(0)}
{nseg = 1}
{strdef color color = "White"}
{pt3dclear()}
{pt3dadd(157896.000000,203196.000000,64125.000000,499.187376)}
{pt3dadd(157824.000000,202908.000000,63500.000000,499.187376)}
{pt3dadd(157692.000000,202740.000000,62975.000000,518.156496)}
{pt3dadd(157380.000000,202560.000000,62150.000000,537.125616)}
{pt3dadd(157092.000000,202380.000000,61525.000000,556.094736)}
{pt3dadd(156816.000000,202344.000000,61075.000000,575.063856)}
{pt3dadd(156648.000000,202404.000000,60675.000000,581.054112)}
{pt3dadd(156552.000000,202608.000000,60125.000000,587.044368)}
{pt3dadd(156276.000000,202572.000000,59650.000000,593.034624)}
{pt3dadd(156024.000000,202440.000000,59200.000000,599.024880)}
{pt3dadd(155952.000000,202596.000000,58775.000000,549.106137)}
{pt3dadd(155676.000000,202608.000000,58250.000000,499.187394)}
{pt3dadd(155436.000000,202572.000000,57725.000000,449.268651)}
{pt3dadd(155268.000000,202656.000000,57300.000000,399.349908)}
{pt3dadd(155292.000000,202668.000000,57100.000000,415.989486)}

{create adhoc51}
{access adhoc51}
{connect adhoc51(1), adhoc50(0)}
{nseg = 1}
{strdef color color = "White"}
{pt3dclear()}
{pt3dadd(155292.000000,202668.000000,57100.000000,415.989486)}
{pt3dadd(154884.000000,203496.000000,56600.000000,399.349908)}
{pt3dadd(154812.000000,203832.000000,56150.000000,403.509803)}
{pt3dadd(154824.000000,204072.000000,55700.000000,407.669697)}
{pt3dadd(154980.000000,204312.000000,55300.000000,411.829591)}
{pt3dadd(155016.000000,204588.000000,54775.000000,415.989486)}
{pt3dadd(154980.000000,204816.000000,54250.000000,411.829591)}
{pt3dadd(154956.000000,205164.000000,53750.000000,407.669697)}
{pt3dadd(155232.000000,205212.000000,53225.000000,403.509803)}
{pt3dadd(155460.000000,205188.000000,52725.000000,399.349908)}
{pt3dadd(155664.000000,205572.000000,52050.000000,366.070752)}
{pt3dadd(155460.000000,206064.000000,51425.000000,332.791596)}
{pt3dadd(155292.000000,206748.000000,50800.000000,346.657896)}

{create adhoc52}
{access adhoc52}
{connect adhoc52(1), adhoc51(0)}
{nseg = 1}
{strdef color color = "White"}
{pt3dclear()}
{pt3dadd(155292.000000,206748.000000,50800.000000,346.657896)}
{pt3dadd(155568.000000,206760.000000,50425.000000,346.657896)}
{pt3dadd(155952.000000,207024.000000,49875.000000,363.990794)}
{pt3dadd(156228.000000,207048.000000,49375.000000,381.323691)}
{pt3dadd(156360.000000,207120.000000,48900.000000,398.656589)}
{pt3dadd(156636.000000,206892.000000,48475.000000,415.989486)}
{pt3dadd(156840.000000,206760.000000,47850.000000,398.656589)}
{pt3dadd(157104.000000,206652.000000,47300.000000,381.323691)}
{pt3dadd(157380.000000,206496.000000,46875.000000,363.990794)}
{pt3dadd(157740.000000,206136.000000,46325.000000,346.657896)}
{pt3dadd(157884.000000,206064.000000,45900.000000,346.657896)}
{pt3dadd(158316.000000,205716.000000,45300.000000,346.657896)}
{pt3dadd(158448.000000,205620.000000,44825.000000,346.657896)}
{pt3dadd(158640.000000,205332.000000,44300.000000,346.657896)}
{pt3dadd(158952.000000,205260.000000,43850.000000,415.989486)}
{pt3dadd(158808.000000,204852.000000,43525.000000,240.734646)}

{create adhoc53}
{access adhoc53}
{connect adhoc53(1), adhoc52(0)}
{nseg = 1}
{strdef color color = "White"}
{pt3dclear()}
{pt3dadd(158808.000000,204852.000000,43525.000000,240.734646)}
{pt3dadd(159348.000000,205488.000000,43100.000000,240.734646)}
{pt3dadd(159912.000000,205644.000000,42650.000000,230.704038)}
{pt3dadd(160404.000000,205572.000000,42275.000000,220.673430)}
{pt3dadd(160896.000000,205704.000000,41875.000000,210.642822)}
{pt3dadd(161232.000000,205428.000000,41500.000000,200.612214)}
{pt3dadd(161424.000000,205296.000000,41125.000000,210.642822)}
{pt3dadd(161760.000000,205008.000000,40725.000000,220.673430)}
{pt3dadd(161856.000000,205008.000000,40400.000000,230.704038)}
{pt3dadd(161904.000000,205104.000000,40000.000000,240.734646)}
{pt3dadd(162300.000000,204936.000000,39525.000000,240.734646)}
{pt3dadd(162660.000000,204840.000000,39125.000000,240.734646)}
{pt3dadd(162996.000000,204708.000000,38700.000000,240.734646)}
{pt3dadd(163152.000000,204576.000000,38400.000000,240.734646)}
{pt3dadd(163464.000000,204516.000000,38000.000000,252.771381)}
{pt3dadd(164136.000000,204564.000000,37575.000000,264.808116)}
{pt3dadd(164964.000000,204684.000000,37150.000000,276.844851)}
{pt3dadd(165420.000000,204792.000000,36850.000000,288.881586)}
{pt3dadd(165816.000000,204720.000000,36525.000000,266.814243)}
{pt3dadd(166800.000000,204312.000000,36075.000000,244.746900)}
{pt3dadd(167328.000000,204084.000000,35675.000000,222.679557)}
{pt3dadd(167976.000000,203472.000000,35175.000000,200.612214)}
{pt3dadd(168072.000000,203172.000000,34775.000000,167.176836)}
{pt3dadd(167976.000000,203064.000000,34575.000000,77.396688)}

{create adhoc54}
{access adhoc54}
{connect adhoc54(1), adhoc52(0)}
{nseg = 1}
{strdef color color = "White"}
{pt3dclear()}
{pt3dadd(158808.000000,204852.000000,43525.000000,240.734646)}
{pt3dadd(159012.000000,204168.000000,43250.000000,288.881586)}
{pt3dadd(159312.000000,203556.000000,42850.000000,264.808120)}
{pt3dadd(159468.000000,203400.000000,42725.000000,240.734655)}
{pt3dadd(159672.000000,203136.000000,42525.000000,216.661190)}
{pt3dadd(159912.000000,202908.000000,42425.000000,192.587724)}
{pt3dadd(160032.000000,202668.000000,42225.000000,216.661190)}
{pt3dadd(160152.000000,202380.000000,42150.000000,240.734655)}
{pt3dadd(160380.000000,202068.000000,42025.000000,264.808120)}
{pt3dadd(160536.000000,201804.000000,41775.000000,288.881586)}
{pt3dadd(160656.000000,201540.000000,41625.000000,266.814243)}
{pt3dadd(160788.000000,201264.000000,41450.000000,244.746900)}
{pt3dadd(160752.000000,200976.000000,41200.000000,222.679557)}
{pt3dadd(160908.000000,200712.000000,40900.000000,200.612214)}
{pt3dadd(161256.000000,200472.000000,40700.000000,198.606091)}
{pt3dadd(161280.000000,200280.000000,40525.000000,196.599969)}
{pt3dadd(161472.000000,200076.000000,40350.000000,194.593846)}
{pt3dadd(161676.000000,199752.000000,40050.000000,192.587724)}
{pt3dadd(161724.000000,199536.000000,40075.000000,243.944448)}
{pt3dadd(161772.000000,199212.000000,40025.000000,295.301172)}
{pt3dadd(161904.000000,198924.000000,39950.000000,346.657896)}
{pt3dadd(162024.000000,198696.000000,39950.000000,200.612214)}

{create adhoc55}
{access adhoc55}
{connect adhoc55(1), adhoc51(0)}
{nseg = 1}
{strdef color color = "White"}
{pt3dclear()}
{pt3dadd(155292.000000,206748.000000,50800.000000,346.657896)}
{pt3dadd(154824.000000,208776.000000,50825.000000,288.881586)}
{pt3dadd(154944.000000,209112.000000,50700.000000,288.881586)}
{pt3dadd(154968.000000,209316.000000,50600.000000,288.881586)}
{pt3dadd(154968.000000,209604.000000,50450.000000,288.881586)}
{pt3dadd(155064.000000,209772.000000,50350.000000,288.881586)}
{pt3dadd(155292.000000,210144.000000,50150.000000,283.219511)}
{pt3dadd(155556.000000,210468.000000,49675.000000,277.557435)}
{pt3dadd(155388.000000,210792.000000,49700.000000,271.895359)}
{pt3dadd(155412.000000,211020.000000,49675.000000,266.233284)}
{pt3dadd(155352.000000,211260.000000,49525.000000,259.858625)}
{pt3dadd(155196.000000,211536.000000,49400.000000,253.483965)}
{pt3dadd(155136.000000,211800.000000,49375.000000,247.109306)}
{pt3dadd(155100.000000,212088.000000,49300.000000,240.734646)}
{pt3dadd(155124.000000,212316.000000,49275.000000,252.771381)}
{pt3dadd(154992.000000,212484.000000,49275.000000,264.808116)}
{pt3dadd(154932.000000,212700.000000,49400.000000,276.844851)}
{pt3dadd(154980.000000,212892.000000,49500.000000,288.881586)}
{pt3dadd(154776.000000,213168.000000,49775.000000,231.105276)}
{pt3dadd(154776.000000,213276.000000,49800.000000,200.612214)}

{create adhoc56}
{access adhoc56}
{connect adhoc56(1), adhoc50(0)}
{nseg = 1}
{strdef color color = "White"}
{pt3dclear()}
{pt3dadd(155292.000000,202668.000000,57100.000000,415.989486)}
{pt3dadd(155496.000000,201972.000000,56900.000000,240.734646)}
{pt3dadd(155772.000000,201840.000000,56500.000000,240.734646)}
{pt3dadd(155604.000000,201780.000000,56200.000000,240.734646)}
{pt3dadd(155616.000000,201600.000000,55525.000000,240.734646)}
{pt3dadd(155664.000000,201204.000000,55000.000000,240.734646)}
{pt3dadd(155640.000000,201072.000000,54500.000000,240.734646)}
{pt3dadd(155568.000000,201036.000000,54075.000000,240.734646)}
{pt3dadd(155472.000000,200868.000000,53575.000000,240.734646)}
{pt3dadd(155520.000000,200964.000000,53050.000000,240.734646)}
{pt3dadd(155484.000000,200988.000000,52575.000000,222.345193)}
{pt3dadd(155412.000000,200772.000000,51925.000000,203.955741)}
{pt3dadd(155568.000000,200184.000000,50425.000000,185.566288)}
{pt3dadd(155832.000000,200184.000000,50125.000000,167.176836)}
{pt3dadd(155928.000000,199536.000000,48800.000000,160.211138)}
{pt3dadd(156012.000000,199500.000000,48525.000000,153.245439)}
{pt3dadd(155700.000000,199296.000000,48025.000000,146.279741)}
{pt3dadd(155712.000000,199320.000000,47650.000000,139.314042)}
{pt3dadd(155688.000000,199212.000000,47275.000000,164.669193)}
{pt3dadd(155652.000000,198744.000000,46950.000000,190.024344)}
{pt3dadd(155844.000000,197748.000000,46500.000000,215.379495)}
{pt3dadd(156000.000000,196452.000000,45900.000000,240.734646)}
{pt3dadd(156192.000000,195744.000000,45300.000000,222.345193)}
{pt3dadd(156540.000000,195300.000000,45025.000000,203.955741)}
{pt3dadd(156888.000000,194352.000000,44475.000000,185.566288)}
{pt3dadd(156816.000000,193692.000000,44050.000000,167.176836)}
{pt3dadd(157356.000000,192696.000000,43650.000000,231.105276)}
{pt3dadd(157488.000000,192408.000000,43300.000000,160.489764)}

{create adhoc57}
{access adhoc57}
{connect adhoc57(1), adhoc49(0)}
{nseg = 1}
{strdef color color = "White"}
{pt3dclear()}
{pt3dadd(157896.000000,203196.000000,64125.000000,499.187376)}
{pt3dadd(158088.000000,201984.000000,65175.000000,499.187376)}
{pt3dadd(157788.000000,201804.000000,65350.000000,422.922636)}
{pt3dadd(157512.000000,201864.000000,65425.000000,346.657896)}
{pt3dadd(157152.000000,201948.000000,65275.000000,346.657896)}

{create adhoc58}
{access adhoc58}
{connect adhoc58(1), adhoc57(0)}
{nseg = 1}
{strdef color color = "White"}
{pt3dclear()}
{pt3dadd(157152.000000,201948.000000,65275.000000,346.657896)}
{pt3dadd(156888.000000,201984.000000,65175.000000,346.657896)}
{pt3dadd(156516.000000,202104.000000,65175.000000,384.790266)}
{pt3dadd(156228.000000,202188.000000,65250.000000,422.922636)}
{pt3dadd(155580.000000,202164.000000,64975.000000,461.055006)}
{pt3dadd(155328.000000,202212.000000,65100.000000,499.187376)}
{pt3dadd(155184.000000,202080.000000,64950.000000,524.146752)}
{pt3dadd(154896.000000,201972.000000,64975.000000,549.106128)}
{pt3dadd(154656.000000,201912.000000,64875.000000,574.065504)}
{pt3dadd(154404.000000,201672.000000,64925.000000,599.024880)}
{pt3dadd(154020.000000,201636.000000,64900.000000,599.024880)}
{pt3dadd(153696.000000,201492.000000,64675.000000,599.024880)}
{pt3dadd(153300.000000,201552.000000,64650.000000,599.024880)}
{pt3dadd(152988.000000,201636.000000,64650.000000,599.024880)}
{pt3dadd(152604.000000,201492.000000,64350.000000,553.266031)}
{pt3dadd(152352.000000,201468.000000,63775.000000,507.507183)}
{pt3dadd(152100.000000,201336.000000,63425.000000,461.748335)}
{pt3dadd(151776.000000,201420.000000,62800.000000,415.989486)}
{pt3dadd(150228.000000,201420.000000,60550.000000,384.212511)}
{pt3dadd(148416.000000,201396.000000,58800.000000,352.435536)}
{pt3dadd(146568.000000,201396.000000,56925.000000,320.658561)}
{pt3dadd(144636.000000,201396.000000,56400.000000,288.881586)}
{pt3dadd(142704.000000,201396.000000,55625.000000,303.325664)}
{pt3dadd(142548.000000,201084.000000,55275.000000,317.769741)}
{pt3dadd(142188.000000,201108.000000,55050.000000,332.213819)}
{pt3dadd(141900.000000,201072.000000,54900.000000,346.657896)}
{pt3dadd(141648.000000,201192.000000,54650.000000,332.213819)}
{pt3dadd(140628.000000,201168.000000,53725.000000,317.769741)}
{pt3dadd(138072.000000,201168.000000,52375.000000,303.325664)}
{pt3dadd(136956.000000,201168.000000,51925.000000,288.881586)}
{pt3dadd(136740.000000,201024.000000,51875.000000,303.325664)}
{pt3dadd(136548.000000,200928.000000,51775.000000,317.769741)}
{pt3dadd(136308.000000,200820.000000,51700.000000,332.213819)}
{pt3dadd(135996.000000,200688.000000,51550.000000,346.657896)}
{pt3dadd(135660.000000,200508.000000,51375.000000,346.657896)}
{pt3dadd(135288.000000,200556.000000,51225.000000,346.657896)}
{pt3dadd(134988.000000,200184.000000,50925.000000,346.657896)}
{pt3dadd(134616.000000,200052.000000,50700.000000,346.657896)}
{pt3dadd(134340.000000,199848.000000,50550.000000,320.177083)}
{pt3dadd(133968.000000,199740.000000,50225.000000,293.696271)}
{pt3dadd(133668.000000,199452.000000,50000.000000,267.215459)}
{pt3dadd(133368.000000,199212.000000,49850.000000,240.734646)}
{pt3dadd(133056.000000,198900.000000,49750.000000,267.215459)}
{pt3dadd(132744.000000,198660.000000,49475.000000,293.696271)}
{pt3dadd(132480.000000,198348.000000,49325.000000,320.177083)}
{pt3dadd(132108.000000,198132.000000,49175.000000,346.657896)}
{pt3dadd(131844.000000,197820.000000,48925.000000,346.657896)}
{pt3dadd(131532.000000,197676.000000,48650.000000,346.657896)}
{pt3dadd(131244.000000,197208.000000,48350.000000,346.657896)}
{pt3dadd(130932.000000,196836.000000,47925.000000,346.657896)}
{pt3dadd(130836.000000,196620.000000,47625.000000,346.657896)}
{pt3dadd(130596.000000,196476.000000,47200.000000,346.657896)}
{pt3dadd(129852.000000,196200.000000,46625.000000,346.657896)}
{pt3dadd(129516.000000,196200.000000,46375.000000,346.657896)}
{pt3dadd(129288.000000,195768.000000,45600.000000,240.734646)}

{create adhoc59}
{access adhoc59}
{connect adhoc59(1), adhoc58(0)}
{nseg = 1}
{strdef color color = "White"}
{pt3dclear()}
{pt3dadd(129288.000000,195768.000000,45600.000000,240.734646)}
{pt3dadd(128964.000000,195888.000000,45475.000000,288.881586)}
{pt3dadd(128580.000000,195720.000000,45350.000000,80.621550)}

{create adhoc60}
{access adhoc60}
{connect adhoc60(1), adhoc58(0)}
{nseg = 1}
{strdef color color = "White"}
{pt3dclear()}
{pt3dadd(129288.000000,195768.000000,45600.000000,240.734646)}
{pt3dadd(129552.000000,194856.000000,45200.000000,415.989486)}
{pt3dadd(129936.000000,194760.000000,45550.000000,384.212511)}
{pt3dadd(129936.000000,194148.000000,46025.000000,352.435536)}
{pt3dadd(130224.000000,193680.000000,46150.000000,320.658561)}
{pt3dadd(130332.000000,192792.000000,46075.000000,288.881586)}
{pt3dadd(130680.000000,192468.000000,45800.000000,303.325664)}
{pt3dadd(130836.000000,192252.000000,45650.000000,317.769741)}
{pt3dadd(130812.000000,191916.000000,45675.000000,332.213819)}
{pt3dadd(130560.000000,191592.000000,45600.000000,346.657896)}
{pt3dadd(130416.000000,191268.000000,45375.000000,310.146476)}
{pt3dadd(130200.000000,191064.000000,45350.000000,273.635055)}
{pt3dadd(130020.000000,190764.000000,45350.000000,237.123635)}
{pt3dadd(129624.000000,190440.000000,45300.000000,200.612214)}
{pt3dadd(129228.000000,190224.000000,45300.000000,237.123635)}
{pt3dadd(129204.000000,189936.000000,45300.000000,273.635055)}
{pt3dadd(128988.000000,189612.000000,45450.000000,310.146475)}
{pt3dadd(128808.000000,189300.000000,45325.000000,346.657896)}
{pt3dadd(128736.000000,189024.000000,45300.000000,320.177083)}
{pt3dadd(128520.000000,188676.000000,45225.000000,293.696271)}
{pt3dadd(128568.000000,188448.000000,45150.000000,267.215459)}
{pt3dadd(128508.000000,188196.000000,45100.000000,240.734646)}
{pt3dadd(128292.000000,187464.000000,44875.000000,215.379495)}
{pt3dadd(128424.000000,186324.000000,44925.000000,190.024344)}
{pt3dadd(128748.000000,185640.000000,45100.000000,164.669193)}
{pt3dadd(128892.000000,185448.000000,45100.000000,139.314042)}
{pt3dadd(128976.000000,185076.000000,45100.000000,146.279741)}
{pt3dadd(128976.000000,184848.000000,45125.000000,153.245439)}
{pt3dadd(128940.000000,184560.000000,44975.000000,160.211138)}
{pt3dadd(129072.000000,184236.000000,44900.000000,167.176836)}
{pt3dadd(129312.000000,183864.000000,44725.000000,160.211138)}
{pt3dadd(129468.000000,183612.000000,44800.000000,153.245439)}
{pt3dadd(129528.000000,183360.000000,44700.000000,146.279741)}
{pt3dadd(129840.000000,183072.000000,44675.000000,139.314042)}
{pt3dadd(129972.000000,182808.000000,44650.000000,146.279741)}
{pt3dadd(130104.000000,182568.000000,44700.000000,153.245439)}
{pt3dadd(130152.000000,182304.000000,44700.000000,160.211138)}
{pt3dadd(130236.000000,182088.000000,44700.000000,167.176836)}
{pt3dadd(130320.000000,181272.000000,44475.000000,143.699844)}
{pt3dadd(130428.000000,180492.000000,44650.000000,120.222852)}
{pt3dadd(130404.000000,180120.000000,44875.000000,96.745860)}
{pt3dadd(130380.000000,179436.000000,44700.000000,116.095032)}

{create adhoc61}
{access adhoc61}
{connect adhoc61(1), adhoc57(0)}
{nseg = 1}
{strdef color color = "White"}
{pt3dclear()}
{pt3dadd(157152.000000,201948.000000,65275.000000,346.657896)}
{pt3dadd(159624.000000,201612.000000,64550.000000,277.326324)}
{pt3dadd(160644.000000,201588.000000,64125.000000,294.659217)}
{pt3dadd(162468.000000,201300.000000,64125.000000,311.992110)}
{pt3dadd(163680.000000,201324.000000,64125.000000,329.325003)}
{pt3dadd(164100.000000,201672.000000,64200.000000,346.657896)}
{pt3dadd(164700.000000,201504.000000,64300.000000,301.787631)}
{pt3dadd(166296.000000,201696.000000,64350.000000,256.917366)}
{pt3dadd(167652.000000,201048.000000,64525.000000,212.047101)}
{pt3dadd(168048.000000,200256.000000,64100.000000,167.176836)}
{pt3dadd(168468.000000,199308.000000,64125.000000,153.245439)}
{pt3dadd(168828.000000,198624.000000,63750.000000,139.314042)}
{pt3dadd(168804.000000,198528.000000,63500.000000,96.745860)}

{create adhoc62}
{access adhoc62}
{connect adhoc62(1), adhoc48(0)}
{nseg = 1}
{strdef color color = "White"}
{pt3dclear()}
{pt3dadd(163380.000000,199356.000000,73025.000000,599.024880)}
{pt3dadd(163248.000000,200856.000000,73350.000000,599.024880)}
{pt3dadd(162864.000000,203172.000000,73350.000000,535.933134)}
{pt3dadd(162888.000000,203508.000000,73500.000000,472.841388)}
{pt3dadd(162864.000000,203844.000000,73625.000000,409.749642)}
{pt3dadd(162684.000000,204060.000000,73625.000000,346.657896)}
{pt3dadd(162588.000000,204300.000000,73675.000000,320.177083)}
{pt3dadd(162408.000000,204660.000000,73675.000000,293.696271)}
{pt3dadd(162264.000000,204864.000000,73600.000000,267.215459)}
{pt3dadd(162228.000000,205116.000000,73675.000000,240.734646)}
{pt3dadd(162168.000000,205452.000000,73700.000000,228.697915)}
{pt3dadd(162060.000000,205740.000000,73825.000000,216.661185)}
{pt3dadd(161520.000000,206064.000000,73900.000000,204.624455)}
{pt3dadd(161724.000000,206304.000000,74100.000000,192.587724)}
{pt3dadd(161292.000000,207396.000000,74125.000000,244.278279)}
{pt3dadd(160512.000000,209616.000000,74125.000000,295.968834)}
{pt3dadd(160284.000000,209844.000000,73750.000000,347.659389)}
{pt3dadd(159996.000000,209856.000000,73500.000000,399.349944)}
{pt3dadd(159744.000000,210108.000000,73075.000000,333.104034)}
{pt3dadd(159180.000000,210780.000000,72525.000000,266.858124)}
{pt3dadd(158892.000000,211116.000000,72150.000000,200.612214)}
{pt3dadd(158376.000000,211356.000000,71575.000000,167.176836)}

{create adhoc63}
{access adhoc63}
{connect adhoc63(1), adhoc47(0)}
{nseg = 1}
{strdef color color = "White"}
{pt3dclear()}
{pt3dadd(170340.000000,193908.000000,80950.000000,346.657896)}
{pt3dadd(171396.000000,194472.000000,82350.000000,499.187376)}
{pt3dadd(171324.000000,194784.000000,82300.000000,499.187376)}
{pt3dadd(171408.000000,195096.000000,82250.000000,499.187376)}
{pt3dadd(171168.000000,195432.000000,82275.000000,499.187376)}
{pt3dadd(171264.000000,195696.000000,82400.000000,499.187376)}
{pt3dadd(171132.000000,196068.000000,82225.000000,499.187376)}
{pt3dadd(171096.000000,196368.000000,82300.000000,499.187376)}
{pt3dadd(171144.000000,196644.000000,82225.000000,499.187376)}
{pt3dadd(171120.000000,196992.000000,82150.000000,499.187376)}
{pt3dadd(171120.000000,197304.000000,82200.000000,499.187376)}
{pt3dadd(171120.000000,197604.000000,82250.000000,499.187376)}
{pt3dadd(171252.000000,197868.000000,82225.000000,499.187376)}
{pt3dadd(171072.000000,198120.000000,82225.000000,499.187376)}
{pt3dadd(171000.000000,198420.000000,82150.000000,416.184741)}
{pt3dadd(170976.000000,198636.000000,82375.000000,333.182106)}
{pt3dadd(170940.000000,199308.000000,82025.000000,250.179471)}
{pt3dadd(170400.000000,200580.000000,82300.000000,167.176836)}
{pt3dadd(168636.000000,203028.000000,82300.000000,275.138847)}
{pt3dadd(167940.000000,204576.000000,82250.000000,383.100858)}
{pt3dadd(167628.000000,205260.000000,82250.000000,491.062869)}
{pt3dadd(166992.000000,205692.000000,81600.000000,599.024880)}
{pt3dadd(166632.000000,206184.000000,81525.000000,593.034624)}
{pt3dadd(165516.000000,208140.000000,81500.000000,587.044368)}
{pt3dadd(164376.000000,209616.000000,81500.000000,581.054112)}
{pt3dadd(163272.000000,211356.000000,81500.000000,575.063856)}
{pt3dadd(162768.000000,212628.000000,81500.000000,581.054112)}
{pt3dadd(162192.000000,212808.000000,80625.000000,587.044368)}
{pt3dadd(161976.000000,213204.000000,80550.000000,593.034624)}
{pt3dadd(161760.000000,213456.000000,80475.000000,599.024880)}
{pt3dadd(161700.000000,213864.000000,80575.000000,599.024880)}
{pt3dadd(161628.000000,214332.000000,80550.000000,599.024880)}
{pt3dadd(161256.000000,215028.000000,80550.000000,599.024880)}
{pt3dadd(161352.000000,215832.000000,80550.000000,599.024880)}
{pt3dadd(161328.000000,216372.000000,80575.000000,644.550777)}
{pt3dadd(161160.000000,216864.000000,80500.000000,690.076674)}
{pt3dadd(161220.000000,217116.000000,80425.000000,599.024880)}

{create adhoc64}
{access adhoc64}
{connect adhoc64(1), adhoc63(0)}
{nseg = 1}
{strdef color color = "White"}
{pt3dclear()}
{pt3dadd(161220.000000,217116.000000,80425.000000,599.024880)}
{pt3dadd(161820.000000,217428.000000,81025.000000,288.881586)}
{pt3dadd(161880.000000,217884.000000,81350.000000,264.808116)}
{pt3dadd(161964.000000,218172.000000,81575.000000,240.734646)}
{pt3dadd(162276.000000,218376.000000,81975.000000,167.176836)}

{create adhoc65}
{access adhoc65}
{connect adhoc65(1), adhoc64(0)}
{nseg = 1}
{strdef color color = "White"}
{pt3dclear()}
{pt3dadd(162276.000000,218376.000000,81975.000000,167.176836)}
{pt3dadd(162636.000000,218544.000000,82525.000000,200.612214)}
{pt3dadd(162696.000000,218772.000000,82800.000000,217.017482)}
{pt3dadd(163200.000000,219108.000000,83350.000000,233.422749)}
{pt3dadd(163836.000000,219156.000000,83825.000000,249.828016)}
{pt3dadd(164100.000000,219360.000000,84225.000000,266.233284)}
{pt3dadd(164556.000000,219540.000000,84650.000000,271.895359)}
{pt3dadd(164892.000000,219852.000000,85300.000000,277.557435)}
{pt3dadd(164916.000000,220380.000000,85975.000000,283.219511)}
{pt3dadd(165084.000000,220848.000000,86575.000000,288.881586)}
{pt3dadd(165384.000000,221544.000000,87200.000000,303.325664)}
{pt3dadd(166104.000000,222276.000000,87700.000000,317.769741)}
{pt3dadd(166872.000000,222804.000000,88225.000000,332.213819)}
{pt3dadd(167256.000000,223416.000000,88800.000000,346.657896)}
{pt3dadd(167592.000000,223608.000000,89325.000000,310.146476)}
{pt3dadd(167760.000000,223668.000000,90025.000000,273.635055)}
{pt3dadd(168060.000000,223464.000000,90500.000000,237.123635)}
{pt3dadd(168408.000000,223404.000000,90875.000000,200.612214)}
{pt3dadd(168540.000000,223368.000000,91250.000000,237.123635)}
{pt3dadd(169008.000000,223308.000000,91700.000000,273.635055)}
{pt3dadd(169548.000000,223128.000000,92100.000000,310.146475)}
{pt3dadd(170076.000000,222360.000000,92650.000000,346.657896)}
{pt3dadd(170268.000000,222024.000000,92875.000000,301.787631)}
{pt3dadd(170532.000000,221640.000000,93050.000000,256.917366)}
{pt3dadd(170808.000000,221388.000000,93500.000000,212.047101)}
{pt3dadd(171120.000000,221376.000000,94450.000000,167.176836)}
{pt3dadd(171468.000000,221436.000000,94900.000000,240.734646)}
{pt3dadd(171636.000000,221412.000000,95125.000000,96.745860)}

{create adhoc66}
{access adhoc66}
{connect adhoc66(1), adhoc64(0)}
{nseg = 1}
{strdef color color = "White"}
{pt3dclear()}
{pt3dadd(162276.000000,218376.000000,81975.000000,167.176836)}
{pt3dadd(161904.000000,218532.000000,81100.000000,346.657896)}
{pt3dadd(161784.000000,218820.000000,81050.000000,346.657896)}
{pt3dadd(161724.000000,219168.000000,80950.000000,346.657896)}
{pt3dadd(161724.000000,219468.000000,80950.000000,346.657896)}
{pt3dadd(161736.000000,219696.000000,81000.000000,346.657896)}
{pt3dadd(161736.000000,220548.000000,81150.000000,346.657896)}
{pt3dadd(161736.000000,222276.000000,81525.000000,346.657896)}
{pt3dadd(161736.000000,223296.000000,81725.000000,346.657896)}
{pt3dadd(161628.000000,223524.000000,81700.000000,346.657896)}
{pt3dadd(161568.000000,223764.000000,81875.000000,332.213819)}
{pt3dadd(161472.000000,224004.000000,81725.000000,317.769741)}
{pt3dadd(161268.000000,224436.000000,81700.000000,303.325664)}
{pt3dadd(161172.000000,224724.000000,81950.000000,288.881586)}
{pt3dadd(161100.000000,225024.000000,82025.000000,288.881586)}
{pt3dadd(161064.000000,225312.000000,82200.000000,288.881586)}
{pt3dadd(161076.000000,225588.000000,82325.000000,288.881586)}
{pt3dadd(161052.000000,225972.000000,82600.000000,288.881586)}
{pt3dadd(160884.000000,226188.000000,82600.000000,288.881586)}
{pt3dadd(160884.000000,226512.000000,82700.000000,288.881586)}
{pt3dadd(160884.000000,226764.000000,82950.000000,288.881586)}
{pt3dadd(160908.000000,227124.000000,83000.000000,288.881586)}
{pt3dadd(160956.000000,227364.000000,83250.000000,288.881586)}

{create adhoc67}
{access adhoc67}
{connect adhoc67(1), adhoc66(0)}
{nseg = 1}
{strdef color color = "White"}
{pt3dclear()}
{pt3dadd(160956.000000,227364.000000,83250.000000,288.881586)}
{pt3dadd(160344.000000,227508.000000,82975.000000,240.734646)}
{pt3dadd(160200.000000,227748.000000,83075.000000,227.360502)}
{pt3dadd(160128.000000,228024.000000,83200.000000,213.986358)}
{pt3dadd(160128.000000,228240.000000,83175.000000,200.612214)}
{pt3dadd(160020.000000,228468.000000,83200.000000,240.734646)}

{create adhoc68}
{access adhoc68}
{connect adhoc68(1), adhoc66(0)}
{nseg = 1}
{strdef color color = "White"}
{pt3dclear()}
{pt3dadd(160956.000000,227364.000000,83250.000000,288.881586)}
{pt3dadd(161556.000000,227448.000000,83600.000000,167.176836)}
{pt3dadd(161868.000000,227652.000000,83750.000000,194.714208)}
{pt3dadd(162144.000000,227652.000000,83975.000000,222.251580)}
{pt3dadd(162204.000000,227976.000000,84675.000000,249.788952)}
{pt3dadd(162264.000000,228216.000000,84800.000000,277.326324)}
{pt3dadd(162060.000000,228540.000000,85025.000000,268.178405)}
{pt3dadd(162144.000000,228852.000000,85250.000000,259.030485)}
{pt3dadd(161928.000000,228876.000000,85475.000000,249.882566)}
{pt3dadd(162144.000000,229140.000000,85825.000000,240.734646)}
{pt3dadd(162324.000000,229344.000000,86150.000000,222.345193)}
{pt3dadd(162348.000000,229404.000000,86475.000000,203.955741)}
{pt3dadd(162288.000000,229944.000000,86800.000000,185.566288)}
{pt3dadd(162348.000000,230100.000000,87250.000000,167.176836)}
{pt3dadd(162360.000000,230220.000000,87575.000000,167.176836)}
{pt3dadd(162324.000000,230268.000000,87975.000000,167.176836)}
{pt3dadd(162336.000000,230268.000000,88175.000000,167.176836)}
{pt3dadd(162528.000000,230616.000000,88875.000000,200.612214)}

{create adhoc69}
{access adhoc69}
{connect adhoc69(1), adhoc63(0)}
{nseg = 1}
{strdef color color = "White"}
{pt3dclear()}
{pt3dadd(161220.000000,217116.000000,80425.000000,599.024880)}
{pt3dadd(160776.000000,217416.000000,79275.000000,415.989486)}
{pt3dadd(160500.000000,217800.000000,79050.000000,443.722116)}
{pt3dadd(160548.000000,217944.000000,78825.000000,471.454746)}
{pt3dadd(160032.000000,219588.000000,78825.000000,499.187376)}
{pt3dadd(159348.000000,221532.000000,78750.000000,415.989486)}

{create adhoc70}
{access adhoc70}
{connect adhoc70(1), adhoc69(0)}
{nseg = 1}
{strdef color color = "White"}
{pt3dclear()}
{pt3dadd(159348.000000,221532.000000,78750.000000,415.989486)}
{pt3dadd(159288.000000,221640.000000,78625.000000,332.791596)}
{pt3dadd(158520.000000,223488.000000,78825.000000,309.777359)}
{pt3dadd(158316.000000,224616.000000,79300.000000,286.763121)}
{pt3dadd(157884.000000,225180.000000,79500.000000,263.748884)}
{pt3dadd(157608.000000,226236.000000,79725.000000,240.734646)}
{pt3dadd(157476.000000,226536.000000,79750.000000,267.215459)}
{pt3dadd(156852.000000,227784.000000,80025.000000,293.696271)}
{pt3dadd(156228.000000,229716.000000,80025.000000,320.177083)}
{pt3dadd(156180.000000,230928.000000,79950.000000,346.657896)}
{pt3dadd(155988.000000,231180.000000,79825.000000,310.146476)}
{pt3dadd(155808.000000,231432.000000,79850.000000,273.635055)}
{pt3dadd(156312.000000,233724.000000,79750.000000,237.123635)}
{pt3dadd(156576.000000,234360.000000,80100.000000,200.612214)}
{pt3dadd(156672.000000,234612.000000,80200.000000,210.642822)}
{pt3dadd(156732.000000,234948.000000,80475.000000,220.673430)}
{pt3dadd(156864.000000,235284.000000,80575.000000,230.704038)}
{pt3dadd(156804.000000,235608.000000,80775.000000,240.734646)}
{pt3dadd(156228.000000,236700.000000,80400.000000,240.734646)}
{pt3dadd(155868.000000,236976.000000,79800.000000,240.734646)}
{pt3dadd(155724.000000,236928.000000,79475.000000,240.734646)}
{pt3dadd(155400.000000,236988.000000,79150.000000,240.734646)}
{pt3dadd(155088.000000,236988.000000,78550.000000,230.704038)}
{pt3dadd(154404.000000,236988.000000,77800.000000,220.673430)}
{pt3dadd(154332.000000,236832.000000,77425.000000,210.642822)}
{pt3dadd(154188.000000,236880.000000,77050.000000,200.612214)}
{pt3dadd(153948.000000,236856.000000,76650.000000,200.612214)}
{pt3dadd(153624.000000,237312.000000,76200.000000,200.612214)}
{pt3dadd(153348.000000,237444.000000,75900.000000,200.612214)}
{pt3dadd(153144.000000,237408.000000,75475.000000,200.612214)}
{pt3dadd(153048.000000,237372.000000,75175.000000,158.353623)}
{pt3dadd(152976.000000,237264.000000,74800.000000,116.095032)}
{pt3dadd(152976.000000,237240.000000,74500.000000,96.745860)}

{create adhoc71}
{access adhoc71}
{connect adhoc71(1), adhoc69(0)}
{nseg = 1}
{strdef color color = "White"}
{pt3dclear()}
{pt3dadd(159348.000000,221532.000000,78750.000000,415.989486)}
{pt3dadd(158544.000000,220560.000000,77025.000000,288.881586)}
{pt3dadd(158364.000000,220560.000000,76750.000000,276.844851)}
{pt3dadd(158232.000000,220788.000000,76425.000000,264.808116)}
{pt3dadd(157932.000000,221292.000000,76075.000000,252.771381)}
{pt3dadd(157692.000000,221640.000000,75700.000000,240.734646)}
{pt3dadd(157452.000000,221940.000000,75475.000000,240.734646)}
{pt3dadd(157212.000000,222036.000000,75400.000000,240.734646)}
{pt3dadd(156972.000000,222336.000000,75375.000000,240.734646)}
{pt3dadd(157032.000000,222624.000000,75275.000000,240.734646)}
{pt3dadd(156636.000000,223572.000000,75150.000000,238.327304)}
{pt3dadd(156024.000000,225024.000000,75150.000000,235.919961)}
{pt3dadd(155868.000000,226116.000000,74725.000000,233.512618)}
{pt3dadd(155064.000000,227688.000000,74500.000000,231.105276)}
{pt3dadd(154884.000000,227988.000000,74350.000000,223.482010)}
{pt3dadd(154740.000000,228240.000000,74275.000000,215.858745)}
{pt3dadd(154236.000000,228540.000000,73900.000000,208.235480)}
{pt3dadd(154020.000000,229512.000000,73475.000000,200.612214)}
{pt3dadd(154032.000000,229764.000000,73475.000000,200.612214)}
{pt3dadd(154092.000000,229920.000000,73475.000000,200.612214)}
{pt3dadd(153876.000000,230184.000000,73350.000000,200.612214)}
{pt3dadd(153576.000000,230472.000000,73500.000000,200.612214)}
{pt3dadd(153324.000000,230628.000000,73625.000000,116.095032)}
{pt3dadd(153096.000000,230496.000000,73450.000000,67.184640)}
