# Supplementary material for: Full reconstruction of large lobula plate tangential cells in Drosophila from a 3D EM dataset
Source: PLoS One. 2018 Nov 28;13(11):e0207828. doi: 10.1371/journal.pone.0207828 (PMC6261601; doi:10.1371/journal.pone.0207828)
Supplement: S1 Dataset — (ZIP) [file pone.0207828.s001.zip › Diameter hoc/VS_VSL_preliminary/Old Diameters Mar13_VS_VSL_HS/HSE/2_14_777_gmordhorst_001.008.hoc]

/* created with nml2hocm */

{create adhoc1}
{access adhoc1}
{nseg = 1}
{strdef color color = "White"}
{pt3dclear()}
{pt3dadd(144636.000000,125064.000000,165125.000000,231.105276)}
{pt3dadd(144852.000000,124680.000000,164950.000000,499.187376)}
{pt3dadd(143676.000000,124272.000000,164925.000000,518.156496)}
{pt3dadd(143964.000000,124092.000000,165075.000000,537.125616)}
{pt3dadd(144300.000000,124164.000000,165075.000000,556.094736)}
{pt3dadd(144540.000000,124032.000000,165025.000000,575.063856)}
{pt3dadd(145056.000000,124128.000000,165650.000000,603.817061)}
{pt3dadd(144852.000000,124092.000000,165150.000000,632.570265)}
{pt3dadd(144900.000000,123948.000000,164675.000000,661.323469)}
{pt3dadd(145248.000000,123768.000000,164150.000000,690.076674)}
{pt3dadd(145572.000000,123432.000000,163700.000000,697.264960)}
{pt3dadd(145944.000000,123396.000000,163250.000000,704.453247)}
{pt3dadd(146568.000000,123132.000000,162700.000000,711.641533)}
{pt3dadd(146940.000000,122748.000000,162250.000000,718.829820)}
{pt3dadd(147060.000000,122688.000000,161700.000000,625.786839)}
{pt3dadd(147084.000000,123012.000000,161225.000000,532.743858)}
{pt3dadd(147456.000000,123276.000000,160775.000000,439.700877)}
{pt3dadd(148308.000000,123612.000000,160350.000000,346.657896)}
{pt3dadd(148896.000000,123804.000000,160000.000000,310.146476)}
{pt3dadd(149148.000000,123552.000000,159650.000000,273.635055)}
{pt3dadd(149520.000000,123300.000000,159125.000000,237.123635)}
{pt3dadd(150324.000000,123240.000000,158625.000000,200.612214)}
{pt3dadd(150996.000000,123156.000000,158200.000000,266.701905)}
{pt3dadd(151092.000000,123000.000000,157625.000000,332.791596)}
{pt3dadd(152436.000000,123720.000000,154225.000000,1788.678450)}

{create adhoc2}
{access adhoc2}
{connect adhoc2(1), adhoc1(0)}
{nseg = 1}
{strdef color color = "White"}
{pt3dclear()}
{pt3dadd(152436.000000,123720.000000,154225.000000,1788.678450)}
{pt3dadd(152388.000000,123384.000000,154100.000000,1788.678450)}
{pt3dadd(152196.000000,123084.000000,154075.000000,1788.678450)}
{pt3dadd(152124.000000,122796.000000,154025.000000,1788.678450)}

{create adhoc3}
{access adhoc3}
{connect adhoc3(1), adhoc2(0)}
{nseg = 1}
{strdef color color = "White"}
{pt3dclear()}
{pt3dadd(152124.000000,122796.000000,154025.000000,1788.678450)}
{pt3dadd(152160.000000,122580.000000,154075.000000,1788.678450)}
{pt3dadd(152220.000000,122352.000000,154200.000000,1639.621926)}
{pt3dadd(151512.000000,122124.000000,153825.000000,1490.565402)}
{pt3dadd(151548.000000,121968.000000,153750.000000,1341.508878)}
{pt3dadd(151308.000000,121560.000000,153425.000000,1192.452354)}
{pt3dadd(151356.000000,121272.000000,153700.000000,1266.980616)}
{pt3dadd(152184.000000,121140.000000,153850.000000,1341.508878)}
{pt3dadd(152196.000000,120732.000000,154675.000000,1416.037140)}
{pt3dadd(152244.000000,120372.000000,155125.000000,1490.565402)}
{pt3dadd(152148.000000,120036.000000,155425.000000,1490.565402)}
{pt3dadd(152124.000000,119760.000000,155575.000000,1490.565402)}
{pt3dadd(152136.000000,119532.000000,155950.000000,1490.565402)}
{pt3dadd(151932.000000,119280.000000,156000.000000,1490.565402)}
{pt3dadd(151836.000000,119040.000000,156075.000000,1490.565402)}
{pt3dadd(151668.000000,118692.000000,156300.000000,1490.565402)}
{pt3dadd(151716.000000,118428.000000,156425.000000,1490.565402)}
{pt3dadd(151404.000000,118080.000000,156500.000000,1490.565402)}

{create adhoc4}
{access adhoc4}
{connect adhoc4(1), adhoc3(0)}
{nseg = 1}
{strdef color color = "White"}
{pt3dclear()}
{pt3dadd(151404.000000,118080.000000,156500.000000,1490.565402)}
{pt3dadd(152412.000000,122388.000000,156450.000000,415.989486)}
{pt3dadd(151404.000000,122448.000000,156875.000000,479.219886)}
{pt3dadd(151188.000000,123012.000000,157275.000000,415.989486)}

{create adhoc5}
{access adhoc5}
{connect adhoc5(1), adhoc3(0)}
{nseg = 1}
{strdef color color = "White"}
{pt3dclear()}
{pt3dadd(151404.000000,118080.000000,156500.000000,1490.565402)}
{pt3dadd(151836.000000,116712.000000,157000.000000,1242.137880)}
{pt3dadd(151728.000000,116052.000000,157375.000000,1242.137880)}
{pt3dadd(151644.000000,115632.000000,157150.000000,1242.137880)}
{pt3dadd(151728.000000,115296.000000,157200.000000,1242.137880)}
{pt3dadd(151704.000000,114900.000000,157325.000000,1242.137880)}
{pt3dadd(151680.000000,114600.000000,157450.000000,1147.252361)}
{pt3dadd(151620.000000,114264.000000,157600.000000,1052.366841)}
{pt3dadd(151716.000000,113868.000000,157875.000000,957.481322)}
{pt3dadd(151752.000000,113556.000000,157925.000000,862.595802)}
{pt3dadd(151728.000000,113232.000000,158050.000000,862.595802)}
{pt3dadd(151704.000000,112968.000000,158175.000000,862.595802)}
{pt3dadd(151644.000000,112692.000000,158225.000000,862.595802)}
{pt3dadd(151440.000000,112428.000000,158300.000000,862.595802)}
{pt3dadd(151524.000000,112080.000000,158600.000000,862.595802)}
{pt3dadd(151344.000000,111732.000000,158650.000000,862.595802)}
{pt3dadd(151236.000000,111732.000000,158675.000000,862.595802)}
{pt3dadd(151248.000000,111432.000000,158700.000000,862.595802)}
{pt3dadd(151188.000000,111192.000000,158750.000000,862.595802)}
{pt3dadd(151200.000000,110916.000000,159025.000000,862.595802)}
{pt3dadd(150960.000000,110544.000000,159150.000000,862.595802)}
{pt3dadd(150720.000000,110220.000000,159300.000000,862.595802)}
{pt3dadd(150624.000000,109860.000000,159200.000000,905.725589)}
{pt3dadd(150600.000000,109404.000000,159275.000000,948.855375)}
{pt3dadd(150504.000000,108984.000000,159475.000000,991.985162)}
{pt3dadd(150264.000000,108684.000000,159400.000000,1035.114948)}
{pt3dadd(150276.000000,108384.000000,159475.000000,1035.114948)}
{pt3dadd(149892.000000,108228.000000,159325.000000,993.710358)}

{create adhoc6}
{access adhoc6}
{connect adhoc6(1), adhoc5(0)}
{nseg = 1}
{strdef color color = "White"}
{pt3dclear()}
{pt3dadd(149892.000000,108228.000000,159325.000000,993.710358)}
{pt3dadd(150648.000000,107676.000000,160125.000000,1035.114948)}
{pt3dadd(150876.000000,106344.000000,160500.000000,991.985162)}
{pt3dadd(150960.000000,105180.000000,161025.000000,948.855375)}
{pt3dadd(151176.000000,104304.000000,161375.000000,905.725589)}
{pt3dadd(150852.000000,104040.000000,160925.000000,862.595802)}
{pt3dadd(150792.000000,103800.000000,160975.000000,826.654307)}
{pt3dadd(150876.000000,103608.000000,160975.000000,790.712811)}
{pt3dadd(150672.000000,103320.000000,161050.000000,754.771316)}
{pt3dadd(150648.000000,103020.000000,161175.000000,718.829820)}
{pt3dadd(150732.000000,102696.000000,161450.000000,663.919209)}
{pt3dadd(150984.000000,102360.000000,161500.000000,609.008598)}
{pt3dadd(151140.000000,102072.000000,161775.000000,554.097987)}
{pt3dadd(151896.000000,101748.000000,162050.000000,499.187376)}
{pt3dadd(152232.000000,101484.000000,162200.000000,554.097987)}
{pt3dadd(152880.000000,101232.000000,162475.000000,609.008598)}
{pt3dadd(153180.000000,100536.000000,162750.000000,663.919209)}
{pt3dadd(153468.000000,100224.000000,162900.000000,718.829820)}
{pt3dadd(153816.000000,100056.000000,162975.000000,754.771316)}
{pt3dadd(154188.000000,99780.000000,162900.000000,790.712811)}
{pt3dadd(154656.000000,99480.000000,162800.000000,826.654307)}
{pt3dadd(154968.000000,99312.000000,162875.000000,862.595802)}
{pt3dadd(155220.000000,99108.000000,162875.000000,819.466020)}
{pt3dadd(155436.000000,99084.000000,162950.000000,776.336238)}
{pt3dadd(155700.000000,98808.000000,162875.000000,733.206456)}
{pt3dadd(155892.000000,98532.000000,163100.000000,690.076674)}
{pt3dadd(156108.000000,97944.000000,163225.000000,862.595802)}

{create adhoc7}
{access adhoc7}
{connect adhoc7(1), adhoc6(0)}
{nseg = 1}
{strdef color color = "White"}
{pt3dclear()}
{pt3dadd(156108.000000,97944.000000,163225.000000,862.595802)}
{pt3dadd(156108.000000,100728.000000,163675.000000,332.791596)}
{pt3dadd(155352.000000,100524.000000,164050.000000,268.299078)}
{pt3dadd(155256.000000,100536.000000,164325.000000,203.806560)}
{pt3dadd(155016.000000,100620.000000,164550.000000,139.314042)}
{pt3dadd(154812.000000,100620.000000,164850.000000,77.396688)}

{create adhoc8}
{access adhoc8}
{connect adhoc8(1), adhoc6(0)}
{nseg = 1}
{strdef color color = "White"}
{pt3dclear()}
{pt3dadd(156108.000000,97944.000000,163225.000000,862.595802)}
{pt3dadd(156360.000000,97848.000000,163125.000000,862.595802)}
{pt3dadd(156540.000000,97824.000000,163175.000000,862.595802)}
{pt3dadd(156780.000000,97584.000000,163300.000000,862.595802)}
{pt3dadd(157056.000000,97416.000000,163350.000000,862.595802)}
{pt3dadd(157332.000000,97320.000000,163400.000000,862.595802)}
{pt3dadd(157644.000000,96876.000000,163475.000000,905.725589)}
{pt3dadd(158148.000000,96492.000000,163325.000000,948.855375)}
{pt3dadd(158412.000000,96048.000000,163450.000000,991.985162)}
{pt3dadd(158496.000000,95688.000000,163650.000000,1035.114948)}
{pt3dadd(158616.000000,95424.000000,163625.000000,991.985162)}
{pt3dadd(158808.000000,95160.000000,163700.000000,948.855375)}
{pt3dadd(158748.000000,94920.000000,163975.000000,905.725589)}
{pt3dadd(158652.000000,94584.000000,163975.000000,862.595802)}
{pt3dadd(158808.000000,94260.000000,164175.000000,826.654307)}
{pt3dadd(158928.000000,93936.000000,164250.000000,790.712811)}
{pt3dadd(159228.000000,93564.000000,164475.000000,754.771316)}
{pt3dadd(159492.000000,93276.000000,164525.000000,718.829820)}
{pt3dadd(159540.000000,92916.000000,164600.000000,688.878585)}
{pt3dadd(159696.000000,92592.000000,164750.000000,658.927350)}
{pt3dadd(159708.000000,92328.000000,164875.000000,628.976115)}
{pt3dadd(160044.000000,91980.000000,165300.000000,599.024880)}
{pt3dadd(160164.000000,91608.000000,165425.000000,499.187376)}

{create adhoc9}
{access adhoc9}
{connect adhoc9(1), adhoc8(0)}
{nseg = 1}
{strdef color color = "White"}
{pt3dclear()}
{pt3dadd(160164.000000,91608.000000,165425.000000,499.187376)}
{pt3dadd(160500.000000,88680.000000,165375.000000,240.734646)}
{pt3dadd(160188.000000,88440.000000,165150.000000,276.042396)}
{pt3dadd(160572.000000,88032.000000,165550.000000,311.350146)}
{pt3dadd(161220.000000,87684.000000,166100.000000,346.657896)}
{pt3dadd(161556.000000,87420.000000,166300.000000,288.881586)}

{create adhoc10}
{access adhoc10}
{connect adhoc10(1), adhoc8(0)}
{nseg = 1}
{strdef color color = "White"}
{pt3dclear()}
{pt3dadd(160164.000000,91608.000000,165425.000000,499.187376)}
{pt3dadd(160320.000000,91092.000000,165500.000000,415.989486)}
{pt3dadd(160260.000000,90768.000000,165775.000000,415.989486)}
{pt3dadd(160380.000000,90456.000000,165775.000000,415.989486)}
{pt3dadd(160536.000000,90132.000000,166000.000000,415.989486)}
{pt3dadd(160728.000000,89880.000000,165925.000000,415.989486)}
{pt3dadd(160740.000000,89652.000000,165900.000000,415.989486)}
{pt3dadd(160752.000000,89328.000000,165950.000000,415.989486)}
{pt3dadd(160764.000000,89124.000000,165875.000000,415.989486)}
{pt3dadd(161040.000000,88416.000000,165925.000000,415.989486)}
{pt3dadd(161352.000000,88284.000000,166200.000000,381.323691)}
{pt3dadd(161568.000000,87696.000000,166275.000000,346.657896)}
{pt3dadd(161868.000000,87456.000000,166375.000000,288.881586)}

{create adhoc11}
{access adhoc11}
{connect adhoc11(1), adhoc10(0)}
{nseg = 1}
{strdef color color = "White"}
{pt3dclear()}
{pt3dadd(161868.000000,87456.000000,166375.000000,288.881586)}
{pt3dadd(160884.000000,90204.000000,166475.000000,499.187376)}

{create adhoc12}
{access adhoc12}
{connect adhoc12(1), adhoc10(0)}
{nseg = 1}
{strdef color color = "White"}
{pt3dclear()}
{pt3dadd(161868.000000,87456.000000,166375.000000,288.881586)}
{pt3dadd(162060.000000,87180.000000,166375.000000,240.734646)}
{pt3dadd(162240.000000,87168.000000,166500.000000,192.587724)}
{pt3dadd(161892.000000,86904.000000,166350.000000,116.095032)}

{create adhoc13}
{access adhoc13}
{connect adhoc13(1), adhoc5(0)}
{nseg = 1}
{strdef color color = "White"}
{pt3dclear()}
{pt3dadd(149892.000000,108228.000000,159325.000000,993.710358)}
{pt3dadd(147432.000000,107940.000000,158800.000000,499.187376)}
{pt3dadd(147360.000000,107844.000000,158475.000000,518.156496)}
{pt3dadd(147168.000000,107952.000000,158125.000000,537.125616)}
{pt3dadd(146820.000000,107556.000000,157675.000000,556.094736)}
{pt3dadd(146580.000000,107508.000000,157125.000000,575.063856)}
{pt3dadd(146532.000000,107316.000000,156750.000000,690.076674)}
{pt3dadd(146484.000000,107520.000000,156300.000000,1035.114948)}

{create adhoc14}
{access adhoc14}
{connect adhoc14(1), adhoc13(0)}
{nseg = 1}
{strdef color color = "White"}
{pt3dclear()}
{pt3dadd(146484.000000,107520.000000,156300.000000,1035.114948)}
{pt3dadd(145656.000000,107388.000000,156250.000000,599.024880)}
{pt3dadd(145500.000000,107400.000000,156250.000000,599.024880)}
{pt3dadd(146532.000000,106800.000000,156075.000000,599.024880)}
{pt3dadd(146544.000000,106524.000000,156050.000000,599.024880)}
{pt3dadd(146472.000000,106308.000000,156025.000000,167.176836)}

{create adhoc15}
{access adhoc15}
{connect adhoc15(1), adhoc13(0)}
{nseg = 1}
{strdef color color = "White"}
{pt3dclear()}
{pt3dadd(146484.000000,107520.000000,156300.000000,1035.114948)}
{pt3dadd(146688.000000,107424.000000,155775.000000,862.595802)}
{pt3dadd(146568.000000,107556.000000,155275.000000,415.989486)}
{pt3dadd(146904.000000,107664.000000,154950.000000,200.612214)}

{create adhoc16}
{access adhoc16}
{connect adhoc16(1), adhoc2(0)}
{nseg = 1}
{strdef color color = "White"}
{pt3dclear()}
{pt3dadd(152124.000000,122796.000000,154025.000000,1788.678450)}
{pt3dadd(145992.000000,122808.000000,154700.000000,862.595802)}
{pt3dadd(145824.000000,122160.000000,155175.000000,905.725589)}
{pt3dadd(145416.000000,122364.000000,155700.000000,948.855375)}
{pt3dadd(144912.000000,122676.000000,156250.000000,991.985162)}
{pt3dadd(144744.000000,123084.000000,156825.000000,1035.114948)}
{pt3dadd(144696.000000,123324.000000,157275.000000,1035.114948)}
{pt3dadd(144444.000000,123636.000000,157800.000000,1035.114948)}
{pt3dadd(144564.000000,123840.000000,158025.000000,862.595802)}

{create adhoc17}
{access adhoc17}
{connect adhoc17(1), adhoc16(0)}
{nseg = 1}
{strdef color color = "White"}
{pt3dclear()}
{pt3dadd(144564.000000,123840.000000,158025.000000,862.595802)}
{pt3dadd(144264.000000,124404.000000,158450.000000,718.829820)}
{pt3dadd(143520.000000,124872.000000,158850.000000,754.771316)}
{pt3dadd(142896.000000,125364.000000,159225.000000,790.712811)}
{pt3dadd(142296.000000,126108.000000,159675.000000,826.654307)}
{pt3dadd(141720.000000,126948.000000,160050.000000,862.595802)}
{pt3dadd(141276.000000,127308.000000,160450.000000,790.712811)}
{pt3dadd(140796.000000,127908.000000,160875.000000,718.829820)}
{pt3dadd(141588.000000,127584.000000,161250.000000,862.595802)}

{create adhoc18}
{access adhoc18}
{connect adhoc18(1), adhoc17(0)}
{nseg = 1}
{strdef color color = "White"}
{pt3dclear()}
{pt3dadd(141588.000000,127584.000000,161250.000000,862.595802)}
{pt3dadd(141948.000000,127776.000000,161650.000000,499.187376)}
{pt3dadd(141600.000000,127584.000000,162050.000000,478.387903)}
{pt3dadd(141204.000000,128544.000000,162275.000000,457.588431)}
{pt3dadd(141528.000000,128580.000000,162775.000000,436.788958)}
{pt3dadd(141588.000000,128640.000000,163175.000000,415.989486)}
{pt3dadd(141648.000000,128544.000000,163675.000000,362.145168)}
{pt3dadd(141552.000000,128292.000000,164200.000000,308.300850)}
{pt3dadd(141228.000000,128040.000000,164625.000000,254.456532)}
{pt3dadd(141240.000000,127872.000000,165275.000000,200.612214)}
{pt3dadd(141396.000000,127704.000000,165650.000000,240.734646)}
{pt3dadd(141360.000000,126924.000000,166275.000000,288.881586)}

{create adhoc19}
{access adhoc19}
{connect adhoc19(1), adhoc18(0)}
{nseg = 1}
{strdef color color = "White"}
{pt3dclear()}
{pt3dadd(141360.000000,126924.000000,166275.000000,288.881586)}
{pt3dadd(141372.000000,126648.000000,166575.000000,499.187376)}
{pt3dadd(141168.000000,126396.000000,167025.000000,457.588431)}
{pt3dadd(141552.000000,126456.000000,167475.000000,415.989486)}
{pt3dadd(142800.000000,124740.000000,167775.000000,575.063856)}

{create adhoc20}
{access adhoc20}
{connect adhoc20(1), adhoc19(0)}
{nseg = 1}
{strdef color color = "White"}
{pt3dclear()}
{pt3dadd(142800.000000,124740.000000,167775.000000,575.063856)}
{pt3dadd(142704.000000,124488.000000,168150.000000,599.024880)}
{pt3dadd(142908.000000,124164.000000,168750.000000,535.933134)}
{pt3dadd(142872.000000,124044.000000,169100.000000,472.841388)}
{pt3dadd(143244.000000,124224.000000,168325.000000,409.749642)}
{pt3dadd(143532.000000,123972.000000,168350.000000,346.657896)}
{pt3dadd(143724.000000,123924.000000,168475.000000,240.734646)}
{pt3dadd(143304.000000,123456.000000,168500.000000,288.881586)}

{create adhoc21}
{access adhoc21}
{connect adhoc21(1), adhoc19(0)}
{nseg = 1}
{strdef color color = "White"}
{pt3dclear()}
{pt3dadd(142800.000000,124740.000000,167775.000000,575.063856)}
{pt3dadd(141696.000000,127008.000000,167775.000000,288.881586)}
{pt3dadd(141528.000000,127392.000000,167675.000000,240.734646)}

{create adhoc22}
{access adhoc22}
{connect adhoc22(1), adhoc18(0)}
{nseg = 1}
{strdef color color = "White"}
{pt3dclear()}
{pt3dadd(141360.000000,126924.000000,166275.000000,288.881586)}
{pt3dadd(141240.000000,126624.000000,166000.000000,231.105276)}

{create adhoc23}
{access adhoc23}
{connect adhoc23(1), adhoc17(0)}
{nseg = 1}
{strdef color color = "White"}
{pt3dclear()}
{pt3dadd(141588.000000,127584.000000,161250.000000,862.595802)}
{pt3dadd(140124.000000,129072.000000,161250.000000,575.063856)}
{pt3dadd(139848.000000,129708.000000,161725.000000,581.054112)}
{pt3dadd(139920.000000,130320.000000,162100.000000,587.044368)}
{pt3dadd(140508.000000,132252.000000,162350.000000,593.034624)}
{pt3dadd(140508.000000,132516.000000,162725.000000,599.024880)}
{pt3dadd(140568.000000,133260.000000,163225.000000,565.745712)}
{pt3dadd(140568.000000,133596.000000,163725.000000,532.466544)}
{pt3dadd(140976.000000,132840.000000,162925.000000,499.187376)}
{pt3dadd(141120.000000,132972.000000,162875.000000,415.989486)}

{create adhoc24}
{access adhoc24}
{connect adhoc24(1), adhoc23(0)}
{nseg = 1}
{strdef color color = "White"}
{pt3dclear()}
{pt3dadd(141120.000000,132972.000000,162875.000000,415.989486)}
{pt3dadd(141300.000000,133560.000000,163175.000000,332.791596)}
{pt3dadd(141468.000000,133668.000000,163150.000000,465.908238)}
{pt3dadd(140532.000000,134208.000000,162875.000000,599.024880)}
{pt3dadd(140616.000000,134580.000000,163000.000000,346.657896)}

{create adhoc25}
{access adhoc25}
{connect adhoc25(1), adhoc23(0)}
{nseg = 1}
{strdef color color = "White"}
{pt3dclear()}
{pt3dadd(141120.000000,132972.000000,162875.000000,415.989486)}
{pt3dadd(141120.000000,131844.000000,162550.000000,499.187376)}
{pt3dadd(141396.000000,131820.000000,162225.000000,288.881586)}
{pt3dadd(141576.000000,131880.000000,162325.000000,240.734646)}

{create adhoc26}
{access adhoc26}
{connect adhoc26(1), adhoc16(0)}
{nseg = 1}
{strdef color color = "White"}
{pt3dclear()}
{pt3dadd(144564.000000,123840.000000,158025.000000,862.595802)}
{pt3dadd(143052.000000,122676.000000,158025.000000,479.219886)}
{pt3dadd(142200.000000,122304.000000,158425.000000,539.122383)}
{pt3dadd(140892.000000,121956.000000,158900.000000,599.024880)}
{pt3dadd(140220.000000,121884.000000,159425.000000,499.187376)}

{create adhoc27}
{access adhoc27}
{connect adhoc27(1), adhoc26(0)}
{nseg = 1}
{strdef color color = "White"}
{pt3dclear()}
{pt3dadd(140220.000000,121884.000000,159425.000000,499.187376)}
{pt3dadd(139872.000000,122244.000000,159725.000000,718.829820)}
{pt3dadd(139260.000000,122280.000000,160250.000000,718.829820)}
{pt3dadd(138660.000000,122076.000000,160650.000000,718.829820)}
{pt3dadd(137652.000000,121212.000000,160925.000000,718.829820)}
{pt3dadd(137280.000000,121164.000000,161400.000000,718.829820)}
{pt3dadd(137028.000000,121212.000000,161800.000000,599.024880)}

{create adhoc28}
{access adhoc28}
{connect adhoc28(1), adhoc27(0)}
{nseg = 1}
{strdef color color = "White"}
{pt3dclear()}
{pt3dadd(137028.000000,121212.000000,161800.000000,599.024880)}
{pt3dadd(134928.000000,120936.000000,162250.000000,415.989486)}
{pt3dadd(134172.000000,120888.000000,162875.000000,415.989486)}
{pt3dadd(133848.000000,120792.000000,163275.000000,415.989486)}
{pt3dadd(133272.000000,120420.000000,163750.000000,415.989486)}
{pt3dadd(132192.000000,119700.000000,164300.000000,415.989486)}
{pt3dadd(130440.000000,119496.000000,164600.000000,346.657896)}

{create adhoc29}
{access adhoc29}
{connect adhoc29(1), adhoc28(0)}
{nseg = 1}
{strdef color color = "White"}
{pt3dclear()}
{pt3dadd(130440.000000,119496.000000,164600.000000,346.657896)}
{pt3dadd(129792.000000,119424.000000,165175.000000,288.881586)}
{pt3dadd(129264.000000,119508.000000,165450.000000,167.176836)}
{pt3dadd(128784.000000,119532.000000,165825.000000,139.314042)}

{create adhoc30}
{access adhoc30}
{connect adhoc30(1), adhoc28(0)}
{nseg = 1}
{strdef color color = "White"}
{pt3dclear()}
{pt3dadd(130440.000000,119496.000000,164600.000000,346.657896)}
{pt3dadd(129048.000000,119700.000000,164600.000000,599.024880)}
{pt3dadd(128952.000000,120132.000000,164450.000000,569.073631)}
{pt3dadd(128880.000000,120384.000000,164625.000000,539.122383)}
{pt3dadd(128916.000000,119520.000000,163925.000000,509.171134)}
{pt3dadd(128352.000000,119556.000000,164475.000000,479.219886)}
{pt3dadd(128052.000000,119340.000000,164525.000000,415.989486)}
{pt3dadd(127788.000000,119400.000000,164650.000000,288.881586)}

{create adhoc31}
{access adhoc31}
{connect adhoc31(1), adhoc27(0)}
{nseg = 1}
{strdef color color = "White"}
{pt3dclear()}
{pt3dadd(137028.000000,121212.000000,161800.000000,599.024880)}
{pt3dadd(134652.000000,120996.000000,161800.000000,346.657896)}
{pt3dadd(134664.000000,120852.000000,161575.000000,200.612214)}

{create adhoc32}
{access adhoc32}
{connect adhoc32(1), adhoc26(0)}
{nseg = 1}
{strdef color color = "White"}
{pt3dclear()}
{pt3dadd(140220.000000,121884.000000,159425.000000,499.187376)}
{pt3dadd(140916.000000,119988.000000,159225.000000,288.881586)}
{pt3dadd(141216.000000,120096.000000,159300.000000,264.808116)}
{pt3dadd(140628.000000,120228.000000,159875.000000,240.734646)}
{pt3dadd(140736.000000,120468.000000,159300.000000,231.105276)}

{create adhoc33}
{access adhoc33}
{connect adhoc33(1), adhoc1(0)}
{nseg = 1}
{strdef color color = "White"}
{pt3dclear()}
{pt3dadd(152436.000000,123720.000000,154225.000000,1788.678450)}
{pt3dadd(152688.000000,124020.000000,154250.000000,1788.678450)}
{pt3dadd(152964.000000,124296.000000,154275.000000,1770.791643)}
{pt3dadd(152988.000000,124572.000000,154125.000000,1752.904836)}
{pt3dadd(153060.000000,124812.000000,154100.000000,1735.018029)}
{pt3dadd(153132.000000,125052.000000,154125.000000,1717.131222)}
{pt3dadd(153120.000000,125328.000000,153950.000000,1660.489767)}
{pt3dadd(153144.000000,125652.000000,153925.000000,1603.848312)}
{pt3dadd(153192.000000,125952.000000,153925.000000,1547.206857)}
{pt3dadd(153180.000000,126288.000000,154000.000000,1490.565402)}
{pt3dadd(153252.000000,126552.000000,154000.000000,1475.659769)}
{pt3dadd(153216.000000,126840.000000,154025.000000,1460.754135)}
{pt3dadd(153084.000000,127176.000000,153875.000000,1445.848502)}
{pt3dadd(152952.000000,127524.000000,153850.000000,1430.942868)}
{pt3dadd(152868.000000,127896.000000,153800.000000,1445.848502)}
{pt3dadd(152892.000000,128208.000000,153700.000000,1460.754135)}
{pt3dadd(152688.000000,128508.000000,153825.000000,1475.659769)}
{pt3dadd(152604.000000,128796.000000,153725.000000,1490.565402)}
{pt3dadd(152400.000000,129108.000000,153600.000000,1475.659737)}
{pt3dadd(152340.000000,129420.000000,153575.000000,1460.754072)}
{pt3dadd(152160.000000,129732.000000,153575.000000,1445.848407)}
{pt3dadd(152004.000000,130068.000000,153575.000000,1430.942742)}
{pt3dadd(151944.000000,130452.000000,153475.000000,1445.848407)}
{pt3dadd(151992.000000,130764.000000,153375.000000,1460.754072)}
{pt3dadd(151812.000000,131064.000000,153350.000000,1475.659737)}
{pt3dadd(151908.000000,131352.000000,153525.000000,1490.565402)}
{pt3dadd(151572.000000,131628.000000,153400.000000,1490.565402)}
{pt3dadd(151392.000000,131904.000000,153300.000000,1490.565402)}
{pt3dadd(151332.000000,132168.000000,153250.000000,1490.565402)}
{pt3dadd(151272.000000,132396.000000,153200.000000,1490.565402)}
{pt3dadd(151008.000000,132624.000000,153150.000000,1565.093664)}
{pt3dadd(150852.000000,132876.000000,152900.000000,1639.621926)}
{pt3dadd(150840.000000,133140.000000,152550.000000,1714.150188)}
{pt3dadd(150552.000000,133380.000000,152400.000000,1788.678450)}
{pt3dadd(150624.000000,133644.000000,152200.000000,1788.678450)}
{pt3dadd(150468.000000,133932.000000,152125.000000,1788.678450)}
{pt3dadd(150432.000000,134160.000000,152050.000000,1788.678450)}
{pt3dadd(150420.000000,134520.000000,152075.000000,1788.678450)}
{pt3dadd(150264.000000,134820.000000,151900.000000,1770.791679)}
{pt3dadd(150204.000000,135120.000000,151825.000000,1752.904908)}
{pt3dadd(150192.000000,135504.000000,151650.000000,1735.018137)}
{pt3dadd(150180.000000,135828.000000,151500.000000,1717.131366)}
{pt3dadd(150072.000000,136104.000000,151350.000000,1735.018137)}
{pt3dadd(150120.000000,136380.000000,151275.000000,1752.904908)}
{pt3dadd(150084.000000,136620.000000,151300.000000,1770.791679)}
{pt3dadd(149976.000000,136932.000000,151000.000000,1788.678450)}
{pt3dadd(149868.000000,137268.000000,150425.000000,1788.678450)}
{pt3dadd(149676.000000,137544.000000,149675.000000,1788.678450)}
{pt3dadd(149484.000000,138144.000000,149225.000000,1788.678450)}
{pt3dadd(149472.000000,138540.000000,148825.000000,1788.678450)}
{pt3dadd(149544.000000,139476.000000,148375.000000,1714.150188)}
{pt3dadd(149484.000000,139776.000000,147875.000000,1639.621926)}
{pt3dadd(149448.000000,140016.000000,147600.000000,1565.093664)}
{pt3dadd(149472.000000,140280.000000,147200.000000,1490.565402)}
{pt3dadd(149496.000000,140460.000000,146925.000000,1490.565402)}
{pt3dadd(149544.000000,140712.000000,146675.000000,1490.565402)}
{pt3dadd(149592.000000,140964.000000,146425.000000,1490.565402)}
{pt3dadd(149640.000000,141276.000000,146175.000000,1490.565402)}
{pt3dadd(149688.000000,141552.000000,146000.000000,1490.565402)}
{pt3dadd(149676.000000,141864.000000,145850.000000,1490.565402)}
{pt3dadd(149700.000000,142164.000000,145500.000000,1490.565402)}
{pt3dadd(149796.000000,142428.000000,145150.000000,1490.565402)}
{pt3dadd(149820.000000,142704.000000,144850.000000,1490.565402)}
{pt3dadd(150036.000000,142932.000000,144525.000000,1490.565402)}
{pt3dadd(150180.000000,143196.000000,144325.000000,1490.565402)}
{pt3dadd(150324.000000,143496.000000,143925.000000,1490.565402)}
{pt3dadd(150348.000000,143748.000000,143600.000000,1565.093664)}
{pt3dadd(150336.000000,143952.000000,143425.000000,1639.621926)}
{pt3dadd(150324.000000,144216.000000,143250.000000,1714.150188)}
{pt3dadd(150312.000000,144480.000000,143125.000000,1788.678450)}
{pt3dadd(150300.000000,144696.000000,143000.000000,1788.678450)}
{pt3dadd(150288.000000,144900.000000,142875.000000,1788.678450)}
{pt3dadd(150276.000000,145128.000000,142825.000000,1788.678450)}
{pt3dadd(150300.000000,145404.000000,142650.000000,1788.678450)}
{pt3dadd(150324.000000,145692.000000,142575.000000,1714.150188)}
{pt3dadd(150312.000000,145956.000000,142500.000000,1639.621926)}
{pt3dadd(150252.000000,146196.000000,142400.000000,1565.093664)}
{pt3dadd(150240.000000,146376.000000,142400.000000,1490.565402)}
{pt3dadd(150264.000000,146640.000000,142225.000000,1530.035572)}
{pt3dadd(150360.000000,146880.000000,142175.000000,1569.505743)}
{pt3dadd(150432.000000,147096.000000,142225.000000,1608.975913)}
{pt3dadd(150708.000000,147360.000000,141950.000000,1648.446084)}
{pt3dadd(150828.000000,147612.000000,141575.000000,1608.975913)}
{pt3dadd(150888.000000,147912.000000,141425.000000,1569.505743)}
{pt3dadd(151200.000000,148116.000000,141225.000000,1530.035572)}
{pt3dadd(151224.000000,148368.000000,141100.000000,1490.565402)}
{pt3dadd(151284.000000,148644.000000,141025.000000,1490.565402)}
{pt3dadd(151308.000000,148872.000000,140950.000000,1490.565402)}
{pt3dadd(151404.000000,149160.000000,140875.000000,1490.565402)}
{pt3dadd(151536.000000,149508.000000,140900.000000,1490.565402)}
{pt3dadd(151596.000000,149736.000000,140675.000000,1565.093664)}
{pt3dadd(151584.000000,149964.000000,140550.000000,1639.621926)}
{pt3dadd(151716.000000,150192.000000,140425.000000,1714.150188)}
{pt3dadd(151740.000000,150396.000000,140125.000000,1788.678450)}
{pt3dadd(151800.000000,150660.000000,140300.000000,1788.678450)}
{pt3dadd(152040.000000,150900.000000,140100.000000,1788.678450)}
{pt3dadd(152088.000000,151188.000000,139950.000000,1788.678450)}
{pt3dadd(152112.000000,151464.000000,139875.000000,1788.678450)}
{pt3dadd(152364.000000,151740.000000,139925.000000,1788.678450)}
{pt3dadd(152460.000000,151968.000000,139775.000000,1788.678450)}
{pt3dadd(152808.000000,152256.000000,139300.000000,1788.678450)}
{pt3dadd(152724.000000,152544.000000,139325.000000,1788.678450)}
{pt3dadd(152892.000000,152844.000000,139075.000000,1714.150188)}
{pt3dadd(153084.000000,153120.000000,138975.000000,1639.621926)}
{pt3dadd(153360.000000,153336.000000,138875.000000,1565.093664)}
{pt3dadd(153864.000000,153540.000000,137950.000000,1490.565402)}
{pt3dadd(153804.000000,153828.000000,137925.000000,1428.458522)}
{pt3dadd(153852.000000,154164.000000,137850.000000,1366.351641)}
{pt3dadd(153876.000000,154476.000000,137775.000000,1304.244761)}
{pt3dadd(153864.000000,154776.000000,137700.000000,1242.137880)}
{pt3dadd(153804.000000,155016.000000,137700.000000,1242.137880)}
{pt3dadd(154248.000000,155316.000000,137525.000000,1242.137880)}
{pt3dadd(154212.000000,155676.000000,137325.000000,1242.137880)}
{pt3dadd(154428.000000,155988.000000,137275.000000,1242.137880)}
{pt3dadd(154572.000000,156276.000000,137200.000000,1190.382147)}
{pt3dadd(154644.000000,156588.000000,136775.000000,1138.626414)}
{pt3dadd(154788.000000,156948.000000,136250.000000,1086.870681)}
{pt3dadd(154608.000000,157272.000000,135875.000000,1035.114948)}
{pt3dadd(154752.000000,157584.000000,135725.000000,1024.763782)}
{pt3dadd(154968.000000,157872.000000,135300.000000,1014.412617)}
{pt3dadd(155568.000000,158376.000000,134900.000000,1004.061452)}
{pt3dadd(155640.000000,158724.000000,134350.000000,993.710286)}
{pt3dadd(156252.000000,158940.000000,133825.000000,1004.061452)}
{pt3dadd(156648.000000,159444.000000,133300.000000,1014.412617)}
{pt3dadd(156996.000000,159816.000000,132800.000000,1024.763782)}
{pt3dadd(157416.000000,160392.000000,132275.000000,1035.114948)}
{pt3dadd(157608.000000,160812.000000,131725.000000,991.985162)}
{pt3dadd(157956.000000,161160.000000,131200.000000,948.855375)}
{pt3dadd(158208.000000,161328.000000,130825.000000,905.725589)}
{pt3dadd(158736.000000,161868.000000,130300.000000,862.595802)}
{pt3dadd(159612.000000,162444.000000,129775.000000,771.743696)}
{pt3dadd(159912.000000,162708.000000,129250.000000,680.891589)}
{pt3dadd(160788.000000,162924.000000,128700.000000,590.039483)}
{pt3dadd(161772.000000,163032.000000,128150.000000,499.187376)}
{pt3dadd(162828.000000,163020.000000,127700.000000,499.187376)}
{pt3dadd(163248.000000,163776.000000,127325.000000,499.187376)}
{pt3dadd(163596.000000,164100.000000,126925.000000,499.187376)}
{pt3dadd(163992.000000,164064.000000,126550.000000,499.187376)}
{pt3dadd(164616.000000,163956.000000,126100.000000,478.387903)}
{pt3dadd(165096.000000,164112.000000,125675.000000,457.588431)}
{pt3dadd(165672.000000,163884.000000,125250.000000,436.788958)}
{pt3dadd(166344.000000,163788.000000,124825.000000,415.989486)}
{pt3dadd(167448.000000,163704.000000,124375.000000,436.788958)}
{pt3dadd(168480.000000,163500.000000,124100.000000,457.588431)}
{pt3dadd(170196.000000,163596.000000,123650.000000,478.387903)}
{pt3dadd(170424.000000,163488.000000,123625.000000,499.187376)}
{pt3dadd(170640.000000,163404.000000,123600.000000,524.146752)}
{pt3dadd(170856.000000,163596.000000,123500.000000,549.106128)}
{pt3dadd(171084.000000,163776.000000,123475.000000,574.065504)}
{pt3dadd(171912.000000,163764.000000,123175.000000,599.024880)}
{pt3dadd(173376.000000,163404.000000,122775.000000,628.976115)}
{pt3dadd(173640.000000,163620.000000,122525.000000,658.927350)}
{pt3dadd(173844.000000,163812.000000,122475.000000,688.878585)}
{pt3dadd(174048.000000,163680.000000,122325.000000,718.829820)}
{pt3dadd(174252.000000,164052.000000,122125.000000,718.829820)}
{pt3dadd(174516.000000,163992.000000,121925.000000,718.829820)}
{pt3dadd(174852.000000,163884.000000,121775.000000,718.829820)}
{pt3dadd(175104.000000,164160.000000,121700.000000,718.829820)}
{pt3dadd(175320.000000,164148.000000,121675.000000,718.829820)}
{pt3dadd(175572.000000,164400.000000,121550.000000,718.829820)}
{pt3dadd(175824.000000,164340.000000,121475.000000,718.829820)}
{pt3dadd(176076.000000,164436.000000,121400.000000,718.829820)}
{pt3dadd(176364.000000,164532.000000,121250.000000,754.771316)}
{pt3dadd(176616.000000,164400.000000,121350.000000,790.712811)}
{pt3dadd(176856.000000,164448.000000,121175.000000,826.654307)}
{pt3dadd(177096.000000,164472.000000,121075.000000,862.595802)}
{pt3dadd(177288.000000,164592.000000,121000.000000,905.725589)}
{pt3dadd(177624.000000,164832.000000,121200.000000,948.855375)}
{pt3dadd(178200.000000,164868.000000,120900.000000,991.985162)}
{pt3dadd(178704.000000,165156.000000,120450.000000,1035.114948)}
{pt3dadd(179352.000000,165444.000000,120150.000000,1035.114948)}
{pt3dadd(180084.000000,165612.000000,119850.000000,1035.114948)}
{pt3dadd(181044.000000,166176.000000,119425.000000,1035.114948)}
{pt3dadd(181692.000000,166572.000000,119000.000000,1035.114948)}
{pt3dadd(182136.000000,166656.000000,118450.000000,1035.114948)}
{pt3dadd(182844.000000,166884.000000,117925.000000,1035.114948)}
{pt3dadd(183396.000000,166812.000000,117400.000000,1035.114948)}
{pt3dadd(183744.000000,167064.000000,116975.000000,1035.114948)}
{pt3dadd(183996.000000,167088.000000,116525.000000,1086.870681)}
{pt3dadd(184272.000000,167436.000000,116100.000000,1138.626414)}
{pt3dadd(184692.000000,167700.000000,115725.000000,1190.382147)}
{pt3dadd(185172.000000,167772.000000,115300.000000,1242.137880)}
{pt3dadd(185220.000000,167796.000000,114850.000000,1304.244761)}
{pt3dadd(185724.000000,167976.000000,114475.000000,1366.351641)}
{pt3dadd(186000.000000,168132.000000,114150.000000,1428.458522)}
{pt3dadd(186276.000000,168252.000000,113750.000000,1490.565402)}
{pt3dadd(186696.000000,168468.000000,113325.000000,1565.093664)}
{pt3dadd(187020.000000,168660.000000,112925.000000,1639.621926)}
{pt3dadd(187092.000000,168720.000000,112650.000000,1714.150188)}
{pt3dadd(187368.000000,168708.000000,112250.000000,1788.678450)}
{pt3dadd(187584.000000,169284.000000,111800.000000,1788.678450)}
{pt3dadd(187752.000000,169224.000000,111400.000000,1788.678450)}
{pt3dadd(188100.000000,169068.000000,111075.000000,1788.678450)}
{pt3dadd(188352.000000,169164.000000,110575.000000,1788.678450)}
{pt3dadd(188604.000000,169080.000000,110150.000000,1714.150188)}
{pt3dadd(188856.000000,169104.000000,109650.000000,1639.621926)}
{pt3dadd(188916.000000,169272.000000,109275.000000,1565.093664)}
{pt3dadd(189192.000000,168984.000000,108925.000000,1490.565402)}
{pt3dadd(189216.000000,169056.000000,108525.000000,1461.350317)}
{pt3dadd(189360.000000,169080.000000,108150.000000,1432.135233)}
{pt3dadd(189408.000000,169428.000000,107700.000000,1402.920149)}
{pt3dadd(189228.000000,169596.000000,107325.000000,1373.705064)}
{pt3dadd(189252.000000,169680.000000,106925.000000,1328.391887)}
{pt3dadd(189120.000000,169572.000000,106500.000000,1283.078709)}
{pt3dadd(189072.000000,169560.000000,106200.000000,1237.765532)}
{pt3dadd(188916.000000,169692.000000,105750.000000,1192.452354)}
{pt3dadd(188868.000000,169716.000000,105325.000000,1192.452354)}
{pt3dadd(188892.000000,169596.000000,104925.000000,1192.452354)}
{pt3dadd(188880.000000,169728.000000,104500.000000,1192.452354)}
{pt3dadd(188904.000000,169464.000000,104050.000000,1192.452354)}
{pt3dadd(188976.000000,169452.000000,103650.000000,1266.980616)}
{pt3dadd(189000.000000,169620.000000,103275.000000,1341.508878)}
{pt3dadd(188988.000000,169716.000000,102825.000000,1416.037140)}
{pt3dadd(189132.000000,169920.000000,102525.000000,1490.565402)}
{pt3dadd(188904.000000,170400.000000,102100.000000,1475.659737)}
{pt3dadd(188820.000000,170568.000000,101775.000000,1460.754072)}
{pt3dadd(188880.000000,170628.000000,101450.000000,1445.848407)}
{pt3dadd(188772.000000,170760.000000,101075.000000,1430.942742)}
{pt3dadd(188628.000000,170628.000000,100575.000000,1445.848407)}
{pt3dadd(188472.000000,170820.000000,100275.000000,1460.754072)}
{pt3dadd(188316.000000,170868.000000,99775.000000,1475.659737)}
{pt3dadd(188280.000000,171372.000000,99350.000000,1490.565402)}
{pt3dadd(188100.000000,171456.000000,98925.000000,1490.565402)}
{pt3dadd(187584.000000,171900.000000,98400.000000,1490.565402)}
{pt3dadd(187404.000000,172176.000000,98200.000000,1490.565402)}
{pt3dadd(187296.000000,172452.000000,98000.000000,1490.565402)}
{pt3dadd(187152.000000,172608.000000,97975.000000,1490.565402)}
{pt3dadd(187020.000000,172680.000000,97525.000000,1490.565402)}
{pt3dadd(186912.000000,172896.000000,97250.000000,1490.565402)}
{pt3dadd(186792.000000,172992.000000,96850.000000,1490.565402)}
{pt3dadd(186612.000000,173268.000000,96425.000000,1490.565402)}
{pt3dadd(186480.000000,173820.000000,96100.000000,1490.565402)}
{pt3dadd(186324.000000,173760.000000,95850.000000,1490.565402)}
{pt3dadd(186168.000000,173952.000000,95600.000000,1490.565402)}
{pt3dadd(185964.000000,174348.000000,95425.000000,18.000000)}
{pt3dadd(185832.000000,174132.000000,95225.000000,608.226150)}
{pt3dadd(185640.000000,174444.000000,94800.000000,1198.452300)}
{pt3dadd(185376.000000,174732.000000,94300.000000,1788.678450)}
{pt3dadd(185148.000000,174972.000000,93775.000000,1699.244523)}
{pt3dadd(184812.000000,175176.000000,93375.000000,1609.810596)}
{pt3dadd(184548.000000,175152.000000,92975.000000,1520.376669)}
{pt3dadd(184272.000000,175620.000000,92650.000000,1430.942742)}
{pt3dadd(184056.000000,175752.000000,92350.000000,1520.376669)}
{pt3dadd(183792.000000,175884.000000,92150.000000,1609.810596)}
{pt3dadd(183588.000000,175992.000000,92200.000000,1699.244523)}
{pt3dadd(183336.000000,176124.000000,91675.000000,1788.678450)}
{pt3dadd(183084.000000,176328.000000,91275.000000,1714.150188)}
{pt3dadd(182832.000000,176712.000000,90850.000000,1639.621926)}
{pt3dadd(182640.000000,176748.000000,90850.000000,1565.093664)}
{pt3dadd(182448.000000,176832.000000,90475.000000,1490.565402)}
{pt3dadd(182184.000000,177168.000000,90075.000000,1490.565402)}
{pt3dadd(181908.000000,177432.000000,89775.000000,1490.565402)}
{pt3dadd(181668.000000,177444.000000,89625.000000,1490.565402)}
{pt3dadd(181464.000000,177636.000000,89400.000000,1490.565402)}
{pt3dadd(181200.000000,177504.000000,89175.000000,1428.458522)}
{pt3dadd(181008.000000,178008.000000,89175.000000,1366.351641)}
{pt3dadd(181512.000000,178380.000000,88875.000000,1304.244761)}
{pt3dadd(182124.000000,178620.000000,89925.000000,1242.137880)}
{pt3dadd(181740.000000,178932.000000,89475.000000,1242.137880)}
{pt3dadd(181800.000000,179184.000000,89475.000000,1242.137880)}
{pt3dadd(181704.000000,179472.000000,89275.000000,1242.137880)}
{pt3dadd(181404.000000,179712.000000,89075.000000,1242.137880)}
{pt3dadd(181356.000000,179976.000000,89100.000000,1190.382147)}
{pt3dadd(181308.000000,180252.000000,88950.000000,1138.626414)}
{pt3dadd(181056.000000,180516.000000,88725.000000,1086.870681)}
{pt3dadd(181008.000000,180780.000000,88825.000000,1035.114948)}
{pt3dadd(180888.000000,181056.000000,88725.000000,1035.114948)}
{pt3dadd(180540.000000,181272.000000,88375.000000,1035.114948)}
{pt3dadd(180168.000000,181500.000000,88050.000000,1035.114948)}
{pt3dadd(180144.000000,181740.000000,88175.000000,1035.114948)}
{pt3dadd(179844.000000,181980.000000,87825.000000,991.985162)}
{pt3dadd(179772.000000,182208.000000,87725.000000,948.855375)}
{pt3dadd(179556.000000,182460.000000,87425.000000,905.725589)}
{pt3dadd(179484.000000,182712.000000,87475.000000,862.595802)}
{pt3dadd(179388.000000,182952.000000,87450.000000,905.725589)}
{pt3dadd(179136.000000,183192.000000,87250.000000,948.855375)}
{pt3dadd(178992.000000,183432.000000,87050.000000,991.985162)}
{pt3dadd(178848.000000,183684.000000,86975.000000,1035.114948)}
{pt3dadd(178656.000000,183912.000000,86900.000000,1035.114948)}
{pt3dadd(178560.000000,184164.000000,86850.000000,1035.114948)}
{pt3dadd(178344.000000,184428.000000,86650.000000,1035.114948)}
{pt3dadd(178200.000000,184632.000000,86575.000000,1035.114948)}
{pt3dadd(178104.000000,184836.000000,86625.000000,1035.114948)}
{pt3dadd(177984.000000,185040.000000,86450.000000,1035.114948)}
{pt3dadd(177912.000000,185268.000000,86500.000000,1035.114948)}
{pt3dadd(177696.000000,185484.000000,86275.000000,1035.114948)}
{pt3dadd(177528.000000,185688.000000,86050.000000,991.985162)}
{pt3dadd(177312.000000,185892.000000,85900.000000,948.855375)}
{pt3dadd(176940.000000,186108.000000,85625.000000,905.725589)}
{pt3dadd(176952.000000,186372.000000,85575.000000,862.595802)}
{pt3dadd(176760.000000,186552.000000,85425.000000,862.595802)}
{pt3dadd(176388.000000,186732.000000,85050.000000,862.595802)}
{pt3dadd(176448.000000,186912.000000,85400.000000,862.595802)}
{pt3dadd(176184.000000,187068.000000,85075.000000,862.595802)}
{pt3dadd(176004.000000,187152.000000,84775.000000,826.654307)}
{pt3dadd(175824.000000,187608.000000,84675.000000,790.712811)}
{pt3dadd(175668.000000,187536.000000,84450.000000,754.771316)}
{pt3dadd(175488.000000,187872.000000,84475.000000,718.829820)}
{pt3dadd(175236.000000,188208.000000,84375.000000,754.771316)}
{pt3dadd(175008.000000,188364.000000,84075.000000,790.712811)}
{pt3dadd(174744.000000,188520.000000,83775.000000,826.654307)}
{pt3dadd(174540.000000,189012.000000,83725.000000,862.595802)}
{pt3dadd(174276.000000,189276.000000,83525.000000,819.466020)}
{pt3dadd(174036.000000,189636.000000,83250.000000,776.336238)}
{pt3dadd(173808.000000,190068.000000,83100.000000,733.206456)}
{pt3dadd(173544.000000,190200.000000,82925.000000,690.076674)}
{pt3dadd(173580.000000,190428.000000,82875.000000,697.264960)}
{pt3dadd(173460.000000,190632.000000,82725.000000,704.453247)}
{pt3dadd(173388.000000,190824.000000,82750.000000,711.641533)}
{pt3dadd(173292.000000,191064.000000,82675.000000,718.829820)}
{pt3dadd(173376.000000,191196.000000,82750.000000,718.829820)}
{pt3dadd(173028.000000,190716.000000,82300.000000,718.829820)}
{pt3dadd(172836.000000,191328.000000,82375.000000,718.829820)}
{pt3dadd(172668.000000,192024.000000,82300.000000,718.829820)}
{pt3dadd(172476.000000,192312.000000,82225.000000,688.878585)}
{pt3dadd(172236.000000,192624.000000,82200.000000,658.927350)}
{pt3dadd(171972.000000,192936.000000,82175.000000,628.976115)}
{pt3dadd(171804.000000,193656.000000,82300.000000,599.024880)}
{pt3dadd(171648.000000,193560.000000,82125.000000,599.024880)}
{pt3dadd(171528.000000,194988.000000,82375.000000,599.024880)}
{pt3dadd(171360.000000,195276.000000,82325.000000,599.024880)}
{pt3dadd(171372.000000,195528.000000,82325.000000,599.024880)}
{pt3dadd(171324.000000,195768.000000,82250.000000,574.065504)}
{pt3dadd(171204.000000,195984.000000,82250.000000,549.106128)}
{pt3dadd(171060.000000,196188.000000,82250.000000,524.146752)}
{pt3dadd(171036.000000,196440.000000,82250.000000,499.187376)}
{pt3dadd(171048.000000,196620.000000,82150.000000,499.187376)}
{pt3dadd(171024.000000,196824.000000,82175.000000,499.187376)}
{pt3dadd(171084.000000,196992.000000,82225.000000,499.187376)}
{pt3dadd(171120.000000,197124.000000,82175.000000,499.187376)}
{pt3dadd(171072.000000,197316.000000,82125.000000,478.387903)}
{pt3dadd(171228.000000,197544.000000,82225.000000,457.588431)}
{pt3dadd(171204.000000,197712.000000,82175.000000,436.788958)}
{pt3dadd(171060.000000,197880.000000,82300.000000,415.989486)}
{pt3dadd(171012.000000,198108.000000,82275.000000,398.656589)}
{pt3dadd(171072.000000,198372.000000,82325.000000,381.323691)}
{pt3dadd(171000.000000,198456.000000,82400.000000,363.990794)}
{pt3dadd(170604.000000,196236.000000,82175.000000,346.657896)}
{pt3dadd(170364.000000,195588.000000,82025.000000,409.749642)}
{pt3dadd(170040.000000,193992.000000,80975.000000,472.841388)}
{pt3dadd(169656.000000,193416.000000,79275.000000,535.933134)}
{pt3dadd(169356.000000,193656.000000,78975.000000,599.024880)}
{pt3dadd(169116.000000,194148.000000,78150.000000,599.024880)}
{pt3dadd(168900.000000,194484.000000,77975.000000,599.024880)}
{pt3dadd(168696.000000,194388.000000,77550.000000,599.024880)}
{pt3dadd(168528.000000,194904.000000,77125.000000,599.024880)}
{pt3dadd(168240.000000,196080.000000,76800.000000,599.024880)}
{pt3dadd(167952.000000,196236.000000,76625.000000,599.024880)}
{pt3dadd(167760.000000,196440.000000,76500.000000,599.024880)}
{pt3dadd(167508.000000,196704.000000,76150.000000,599.024880)}
{pt3dadd(166704.000000,196992.000000,75500.000000,628.976115)}
{pt3dadd(166428.000000,197244.000000,75300.000000,658.927350)}
{pt3dadd(166032.000000,197496.000000,75025.000000,688.878585)}
{pt3dadd(165660.000000,197784.000000,74875.000000,718.829820)}
{pt3dadd(165156.000000,198048.000000,74625.000000,754.771316)}
{pt3dadd(164784.000000,198348.000000,74300.000000,790.712811)}
{pt3dadd(164460.000000,198588.000000,74025.000000,826.654307)}
{pt3dadd(164064.000000,198852.000000,73850.000000,862.595802)}
{pt3dadd(163824.000000,199368.000000,73850.000000,862.595802)}
{pt3dadd(163560.000000,199680.000000,73550.000000,862.595802)}
{pt3dadd(163344.000000,200292.000000,73525.000000,862.595802)}
{pt3dadd(163104.000000,200448.000000,73625.000000,862.595802)}
{pt3dadd(162912.000000,200652.000000,73575.000000,862.595802)}

{create adhoc34}
{access adhoc34}
{connect adhoc34(1), adhoc33(0)}
{nseg = 1}
{strdef color color = "White"}
{pt3dclear()}
{pt3dadd(162912.000000,200652.000000,73575.000000,862.595802)}
{pt3dadd(162984.000000,202836.000000,73425.000000,346.657896)}
{pt3dadd(162816.000000,203604.000000,73475.000000,332.213819)}
{pt3dadd(162696.000000,203844.000000,73475.000000,317.769741)}
{pt3dadd(162492.000000,204588.000000,73600.000000,303.325664)}
{pt3dadd(162300.000000,205224.000000,73725.000000,288.881586)}
{pt3dadd(162108.000000,205656.000000,73825.000000,276.844851)}
{pt3dadd(161928.000000,206124.000000,74025.000000,264.808116)}
{pt3dadd(161724.000000,206664.000000,74175.000000,252.771381)}
{pt3dadd(161532.000000,207360.000000,74375.000000,240.734646)}
{pt3dadd(161412.000000,207420.000000,74350.000000,267.215459)}
{pt3dadd(161232.000000,207756.000000,74475.000000,293.696271)}
{pt3dadd(161112.000000,208272.000000,74575.000000,320.177083)}
{pt3dadd(160932.000000,209064.000000,74600.000000,346.657896)}
{pt3dadd(160776.000000,209376.000000,74750.000000,308.140349)}
{pt3dadd(160932.000000,210276.000000,75100.000000,269.622801)}
{pt3dadd(160560.000000,210744.000000,75200.000000,231.105254)}
{pt3dadd(160620.000000,210984.000000,75350.000000,192.587706)}
{pt3dadd(160548.000000,211200.000000,75325.000000,179.269290)}
{pt3dadd(160536.000000,211392.000000,75350.000000,165.950874)}
{pt3dadd(160488.000000,211572.000000,75325.000000,152.632458)}
{pt3dadd(160488.000000,211776.000000,75325.000000,139.314042)}
{pt3dadd(160476.000000,211956.000000,75300.000000,139.314042)}

{create adhoc35}
{access adhoc35}
{connect adhoc35(1), adhoc33(0)}
{nseg = 1}
{strdef color color = "White"}
{pt3dclear()}
{pt3dadd(162912.000000,200652.000000,73575.000000,862.595802)}
{pt3dadd(162756.000000,200028.000000,72750.000000,718.829820)}
{pt3dadd(162444.000000,200160.000000,72475.000000,718.829820)}
{pt3dadd(162204.000000,200400.000000,72200.000000,718.829820)}
{pt3dadd(161904.000000,200280.000000,71725.000000,718.829820)}
{pt3dadd(161640.000000,200412.000000,71450.000000,718.829820)}
{pt3dadd(161376.000000,200616.000000,71150.000000,718.829820)}
{pt3dadd(161088.000000,200748.000000,70725.000000,718.829820)}
{pt3dadd(160800.000000,201012.000000,70500.000000,718.829820)}
{pt3dadd(160548.000000,201324.000000,69950.000000,718.829820)}
{pt3dadd(160272.000000,201504.000000,69350.000000,718.829820)}
{pt3dadd(160032.000000,201660.000000,68950.000000,718.829820)}
{pt3dadd(159780.000000,201948.000000,68300.000000,718.829820)}
{pt3dadd(159504.000000,202308.000000,67725.000000,718.829820)}
{pt3dadd(159312.000000,202416.000000,67275.000000,688.878585)}
{pt3dadd(159144.000000,202596.000000,66775.000000,658.927350)}
{pt3dadd(158952.000000,202524.000000,66150.000000,628.976115)}
{pt3dadd(158556.000000,202992.000000,65650.000000,599.024880)}
{pt3dadd(158160.000000,203484.000000,65125.000000,599.024880)}
{pt3dadd(157956.000000,203136.000000,64325.000000,599.024880)}
{pt3dadd(157752.000000,202992.000000,63925.000000,599.024880)}
{pt3dadd(157560.000000,203004.000000,63575.000000,599.024880)}
{pt3dadd(157236.000000,203088.000000,63100.000000,499.187376)}
{pt3dadd(156960.000000,203160.000000,62650.000000,346.657896)}

{create adhoc36}
{access adhoc36}
{connect adhoc36(1), adhoc35(0)}
{nseg = 1}
{strdef color color = "White"}
{pt3dclear()}
{pt3dadd(156960.000000,203160.000000,62650.000000,346.657896)}
{pt3dadd(156960.000000,204768.000000,64575.000000,499.187376)}
{pt3dadd(156756.000000,204972.000000,64675.000000,461.055006)}
{pt3dadd(156504.000000,205488.000000,64525.000000,422.922636)}
{pt3dadd(156204.000000,205956.000000,64375.000000,384.790266)}
{pt3dadd(155928.000000,206220.000000,64325.000000,346.657896)}
{pt3dadd(155604.000000,206556.000000,64125.000000,381.323691)}
{pt3dadd(155268.000000,206940.000000,64050.000000,415.989486)}
{pt3dadd(155208.000000,207096.000000,64150.000000,332.791596)}

{create adhoc37}
{access adhoc37}
{connect adhoc37(1), adhoc36(0)}
{nseg = 1}
{strdef color color = "White"}
{pt3dclear()}
{pt3dadd(155208.000000,207096.000000,64150.000000,332.791596)}
{pt3dadd(155208.000000,206676.000000,63100.000000,200.612214)}
{pt3dadd(155064.000000,206832.000000,62650.000000,185.287671)}
{pt3dadd(154860.000000,207084.000000,62425.000000,169.963128)}
{pt3dadd(154644.000000,207444.000000,62200.000000,154.638585)}
{pt3dadd(154620.000000,207624.000000,62150.000000,139.314042)}
{pt3dadd(154428.000000,208356.000000,61850.000000,167.176836)}
{pt3dadd(154416.000000,208536.000000,61550.000000,133.741476)}

{create adhoc38}
{access adhoc38}
{connect adhoc38(1), adhoc36(0)}
{nseg = 1}
{strdef color color = "White"}
{pt3dclear()}
{pt3dadd(155208.000000,207096.000000,64150.000000,332.791596)}
{pt3dadd(154944.000000,207276.000000,64250.000000,346.657896)}
{pt3dadd(154764.000000,207660.000000,64375.000000,363.990794)}
{pt3dadd(154512.000000,208068.000000,64350.000000,381.323691)}
{pt3dadd(154272.000000,208152.000000,64200.000000,398.656589)}
{pt3dadd(154056.000000,208560.000000,64300.000000,415.989486)}
{pt3dadd(153828.000000,209052.000000,64275.000000,436.788958)}
{pt3dadd(153624.000000,209352.000000,64150.000000,457.588431)}
{pt3dadd(153528.000000,209616.000000,64125.000000,478.387903)}
{pt3dadd(153540.000000,209832.000000,64050.000000,499.187376)}
{pt3dadd(153444.000000,210012.000000,64050.000000,478.387903)}
{pt3dadd(153372.000000,210228.000000,64000.000000,457.588431)}
{pt3dadd(153408.000000,210408.000000,63925.000000,436.788958)}
{pt3dadd(153300.000000,210696.000000,64000.000000,415.989486)}
{pt3dadd(153300.000000,210900.000000,63950.000000,443.722116)}
{pt3dadd(153252.000000,211104.000000,63825.000000,471.454746)}
{pt3dadd(153204.000000,211308.000000,63675.000000,499.187376)}
{pt3dadd(153180.000000,211488.000000,63825.000000,599.024880)}

{create adhoc39}
{access adhoc39}
{connect adhoc39(1), adhoc38(0)}
{nseg = 1}
{strdef color color = "White"}
{pt3dclear()}
{pt3dadd(153180.000000,211488.000000,63825.000000,599.024880)}
{pt3dadd(153072.000000,211596.000000,64475.000000,231.105276)}
{pt3dadd(153000.000000,211812.000000,64575.000000,215.123166)}
{pt3dadd(152988.000000,212040.000000,64775.000000,199.141056)}
{pt3dadd(152856.000000,212244.000000,64925.000000,183.158946)}
{pt3dadd(152868.000000,212412.000000,64950.000000,167.176836)}
{pt3dadd(152724.000000,212640.000000,64925.000000,175.535680)}
{pt3dadd(152700.000000,212844.000000,64975.000000,183.894525)}
{pt3dadd(152628.000000,213132.000000,65075.000000,192.253370)}
{pt3dadd(152508.000000,213372.000000,65125.000000,200.612214)}
{pt3dadd(152496.000000,213612.000000,65175.000000,200.612214)}
{pt3dadd(152472.000000,213852.000000,65175.000000,200.612214)}
{pt3dadd(152388.000000,214056.000000,65125.000000,200.612214)}
{pt3dadd(152424.000000,214296.000000,65225.000000,200.612214)}
{pt3dadd(152820.000000,215220.000000,65350.000000,189.467088)}
{pt3dadd(152916.000000,216672.000000,65650.000000,178.321962)}
{pt3dadd(152508.000000,217668.000000,65950.000000,167.176836)}
{pt3dadd(152304.000000,217860.000000,66050.000000,139.314042)}

{create adhoc40}
{access adhoc40}
{connect adhoc40(1), adhoc38(0)}
{nseg = 1}
{strdef color color = "White"}
{pt3dclear()}
{pt3dadd(153180.000000,211488.000000,63825.000000,599.024880)}
{pt3dadd(153420.000000,211596.000000,63475.000000,399.349908)}
{pt3dadd(153420.000000,211812.000000,63400.000000,382.710330)}
{pt3dadd(153432.000000,212052.000000,63400.000000,366.070752)}
{pt3dadd(153420.000000,212244.000000,63400.000000,349.431174)}
{pt3dadd(153552.000000,212520.000000,63400.000000,332.791596)}
{pt3dadd(153552.000000,212748.000000,63325.000000,321.814093)}
{pt3dadd(153528.000000,212916.000000,63350.000000,310.836591)}
{pt3dadd(153468.000000,213120.000000,63300.000000,299.859089)}
{pt3dadd(153504.000000,213360.000000,63225.000000,288.881586)}
{pt3dadd(153492.000000,213612.000000,63100.000000,320.658561)}
{pt3dadd(153504.000000,213792.000000,63025.000000,352.435536)}
{pt3dadd(153444.000000,213984.000000,63025.000000,384.212511)}
{pt3dadd(153516.000000,214200.000000,63025.000000,415.989486)}
{pt3dadd(153468.000000,214392.000000,62975.000000,398.656589)}
{pt3dadd(153624.000000,214548.000000,62875.000000,381.323691)}
{pt3dadd(153732.000000,214740.000000,62875.000000,363.990794)}
{pt3dadd(153672.000000,214908.000000,62875.000000,346.657896)}
{pt3dadd(153768.000000,215076.000000,62875.000000,346.657896)}
{pt3dadd(153840.000000,215268.000000,62800.000000,346.657896)}
{pt3dadd(153816.000000,215448.000000,62675.000000,346.657896)}
{pt3dadd(153852.000000,215640.000000,62725.000000,346.657896)}
{pt3dadd(153912.000000,215808.000000,62775.000000,332.213819)}
{pt3dadd(153780.000000,215988.000000,62625.000000,317.769741)}
{pt3dadd(153828.000000,216180.000000,62625.000000,303.325664)}
{pt3dadd(153864.000000,216384.000000,62650.000000,288.881586)}
{pt3dadd(153900.000000,216588.000000,62675.000000,266.814243)}
{pt3dadd(153852.000000,216792.000000,62800.000000,244.746900)}
{pt3dadd(153780.000000,216984.000000,62850.000000,222.679557)}
{pt3dadd(153708.000000,217176.000000,62875.000000,200.612214)}
{pt3dadd(153864.000000,217356.000000,62875.000000,192.253370)}
{pt3dadd(154032.000000,217548.000000,62800.000000,183.894525)}
{pt3dadd(154104.000000,217716.000000,62750.000000,175.535680)}
{pt3dadd(154020.000000,217896.000000,62850.000000,167.176836)}
{pt3dadd(154032.000000,218052.000000,62800.000000,225.220104)}
{pt3dadd(154140.000000,218292.000000,62725.000000,283.263372)}
{pt3dadd(154116.000000,218448.000000,62775.000000,341.306640)}
{pt3dadd(154116.000000,218616.000000,62750.000000,399.349908)}
{pt3dadd(154152.000000,218796.000000,62725.000000,371.732827)}
{pt3dadd(154284.000000,219036.000000,62575.000000,344.115747)}
{pt3dadd(154260.000000,219240.000000,62525.000000,316.498667)}
{pt3dadd(154392.000000,219372.000000,62200.000000,288.881586)}
{pt3dadd(154368.000000,219348.000000,61900.000000,288.881586)}
{pt3dadd(154464.000000,219744.000000,61450.000000,288.881586)}
{pt3dadd(154212.000000,220164.000000,61050.000000,288.881586)}
{pt3dadd(153972.000000,220776.000000,60775.000000,288.881586)}
{pt3dadd(153660.000000,221532.000000,60475.000000,288.881586)}
{pt3dadd(153408.000000,221892.000000,60175.000000,288.881586)}
{pt3dadd(153408.000000,222240.000000,59775.000000,288.881586)}
{pt3dadd(153360.000000,222456.000000,59450.000000,288.881586)}
{pt3dadd(153396.000000,222624.000000,59000.000000,276.844851)}
{pt3dadd(153204.000000,222828.000000,58550.000000,264.808116)}
{pt3dadd(153180.000000,222924.000000,58150.000000,252.771381)}
{pt3dadd(152964.000000,223212.000000,57725.000000,240.734646)}
{pt3dadd(152724.000000,223620.000000,57825.000000,167.176836)}

{create adhoc41}
{access adhoc41}
{connect adhoc41(1), adhoc35(0)}
{nseg = 1}
{strdef color color = "White"}
{pt3dclear()}
{pt3dadd(156960.000000,203160.000000,62650.000000,346.657896)}
{pt3dadd(156780.000000,202488.000000,61175.000000,499.187376)}
{pt3dadd(156504.000000,202560.000000,60600.000000,494.195504)}
{pt3dadd(156228.000000,202608.000000,59650.000000,489.203631)}
{pt3dadd(156000.000000,202608.000000,59100.000000,484.211758)}
{pt3dadd(155760.000000,202536.000000,58575.000000,479.219886)}
{pt3dadd(155640.000000,202572.000000,57975.000000,479.219886)}
{pt3dadd(155316.000000,202776.000000,57425.000000,479.219886)}
{pt3dadd(155016.000000,203076.000000,57225.000000,499.187376)}

{create adhoc42}
{access adhoc42}
{connect adhoc42(1), adhoc41(0)}
{nseg = 1}
{strdef color color = "White"}
{pt3dclear()}
{pt3dadd(155016.000000,203076.000000,57225.000000,499.187376)}
{pt3dadd(155520.000000,201972.000000,57225.000000,415.989486)}
{pt3dadd(155676.000000,201756.000000,56950.000000,362.145168)}
{pt3dadd(155640.000000,201816.000000,56650.000000,308.300850)}
{pt3dadd(155700.000000,201804.000000,56225.000000,254.456532)}
{pt3dadd(155556.000000,201684.000000,55775.000000,200.612214)}
{pt3dadd(155604.000000,201384.000000,55325.000000,219.790746)}
{pt3dadd(155616.000000,201276.000000,55025.000000,238.969278)}
{pt3dadd(155652.000000,201024.000000,54725.000000,258.147810)}
{pt3dadd(155592.000000,200940.000000,54350.000000,277.326342)}
{pt3dadd(155544.000000,201000.000000,54000.000000,268.178418)}
{pt3dadd(155556.000000,200808.000000,53650.000000,259.030494)}
{pt3dadd(155508.000000,200820.000000,53250.000000,249.882570)}
{pt3dadd(155460.000000,200916.000000,52850.000000,240.734646)}
{pt3dadd(155448.000000,201072.000000,52425.000000,230.704038)}
{pt3dadd(155460.000000,200844.000000,52000.000000,220.673430)}
{pt3dadd(155484.000000,200652.000000,51550.000000,210.642822)}
{pt3dadd(155676.000000,200244.000000,50750.000000,200.612214)}
{pt3dadd(155688.000000,199968.000000,50400.000000,167.176836)}

{create adhoc43}
{access adhoc43}
{connect adhoc43(1), adhoc41(0)}
{nseg = 1}
{strdef color color = "White"}
{pt3dclear()}
{pt3dadd(155016.000000,203076.000000,57225.000000,499.187376)}
{pt3dadd(154704.000000,203412.000000,56725.000000,399.349944)}
{pt3dadd(154788.000000,203652.000000,56350.000000,403.509830)}
{pt3dadd(154728.000000,203856.000000,55900.000000,407.669715)}
{pt3dadd(154968.000000,204192.000000,55500.000000,411.829601)}
{pt3dadd(155052.000000,204372.000000,55050.000000,415.989486)}
{pt3dadd(154980.000000,204660.000000,54575.000000,415.989486)}
{pt3dadd(154992.000000,204972.000000,54075.000000,415.989486)}
{pt3dadd(155076.000000,205104.000000,53700.000000,415.989486)}
{pt3dadd(155268.000000,205284.000000,53125.000000,415.989486)}
{pt3dadd(155424.000000,205524.000000,52525.000000,415.989486)}
{pt3dadd(155568.000000,205704.000000,51975.000000,415.989486)}
{pt3dadd(155352.000000,206112.000000,51525.000000,415.989486)}
{pt3dadd(155184.000000,206724.000000,51025.000000,415.989486)}
{pt3dadd(155364.000000,206760.000000,50800.000000,399.349908)}

{create adhoc44}
{access adhoc44}
{connect adhoc44(1), adhoc43(0)}
{nseg = 1}
{strdef color color = "White"}
{pt3dclear()}
{pt3dadd(155364.000000,206760.000000,50800.000000,399.349908)}
{pt3dadd(154944.000000,208368.000000,50800.000000,499.187376)}
{pt3dadd(155028.000000,209184.000000,50550.000000,461.055006)}
{pt3dadd(155100.000000,210156.000000,50200.000000,422.922636)}
{pt3dadd(155112.000000,210240.000000,49900.000000,384.790266)}
{pt3dadd(155424.000000,210348.000000,49550.000000,346.657896)}
{pt3dadd(155712.000000,210228.000000,49225.000000,320.177083)}
{pt3dadd(155916.000000,210444.000000,48900.000000,293.696271)}
{pt3dadd(156180.000000,210504.000000,48675.000000,267.215459)}
{pt3dadd(156336.000000,210540.000000,48250.000000,240.734646)}
{pt3dadd(156612.000000,210456.000000,47875.000000,240.734646)}
{pt3dadd(156840.000000,210468.000000,47625.000000,240.734646)}
{pt3dadd(157080.000000,210432.000000,47275.000000,240.734646)}
{pt3dadd(157260.000000,210276.000000,47025.000000,240.734646)}
{pt3dadd(157488.000000,210300.000000,46800.000000,240.734646)}

{create adhoc45}
{access adhoc45}
{connect adhoc45(1), adhoc43(0)}
{nseg = 1}
{strdef color color = "White"}
{pt3dclear()}
{pt3dadd(155364.000000,206760.000000,50800.000000,399.349908)}
{pt3dadd(155568.000000,206796.000000,50275.000000,346.657896)}
{pt3dadd(155880.000000,207000.000000,49900.000000,346.657896)}
{pt3dadd(156168.000000,207096.000000,49425.000000,346.657896)}
{pt3dadd(156456.000000,207072.000000,48925.000000,346.657896)}
{pt3dadd(156588.000000,207036.000000,48450.000000,346.657896)}
{pt3dadd(156792.000000,206940.000000,48000.000000,346.657896)}
{pt3dadd(156996.000000,206688.000000,47525.000000,346.657896)}
{pt3dadd(157224.000000,206568.000000,47250.000000,346.657896)}
{pt3dadd(157392.000000,206472.000000,46875.000000,346.657896)}
{pt3dadd(157584.000000,206448.000000,46375.000000,332.213819)}
{pt3dadd(157764.000000,206256.000000,46050.000000,317.769741)}
{pt3dadd(157944.000000,205956.000000,45900.000000,303.325664)}
{pt3dadd(158184.000000,205476.000000,45325.000000,288.881586)}
{pt3dadd(158496.000000,205428.000000,45025.000000,303.325664)}
{pt3dadd(158688.000000,205560.000000,45075.000000,317.769741)}
{pt3dadd(158940.000000,205308.000000,44650.000000,332.213819)}
{pt3dadd(158964.000000,204972.000000,43750.000000,346.657896)}
{pt3dadd(158808.000000,204696.000000,43550.000000,310.146476)}
{pt3dadd(159012.000000,204384.000000,43450.000000,273.635055)}
{pt3dadd(159276.000000,203808.000000,43050.000000,237.123635)}
{pt3dadd(159804.000000,202956.000000,42625.000000,200.612214)}
{pt3dadd(160188.000000,202248.000000,42125.000000,208.235480)}
{pt3dadd(160464.000000,201732.000000,42125.000000,215.858745)}
{pt3dadd(160656.000000,201468.000000,41675.000000,223.482010)}
{pt3dadd(160920.000000,201048.000000,41225.000000,231.105276)}
{pt3dadd(161052.000000,200424.000000,40700.000000,215.123166)}
{pt3dadd(161364.000000,200172.000000,40425.000000,199.141056)}
{pt3dadd(161568.000000,200100.000000,40275.000000,183.158946)}
{pt3dadd(161832.000000,199848.000000,40150.000000,167.176836)}
{pt3dadd(161880.000000,199512.000000,40050.000000,228.029211)}
{pt3dadd(162012.000000,199140.000000,39900.000000,288.881586)}
{pt3dadd(162480.000000,198816.000000,39725.000000,240.734646)}
