# Supplementary material for: Full reconstruction of large lobula plate tangential cells in Drosophila from a 3D EM dataset
Source: PLoS One. 2018 Nov 28;13(11):e0207828. doi: 10.1371/journal.pone.0207828 (PMC6261601; doi:10.1371/journal.pone.0207828)
Supplement: S1 Dataset — (ZIP) [file pone.0207828.s001.zip › Diameter hoc/VS_VSL_preliminary/Old Diameters Mar13_VS_VSL_HS/HSE/2_14_778_gmordhorst_001.016.hoc]

/* created with nml2hocm */

{create adhoc1}
{access adhoc1}
{nseg = 1}
{strdef color color = "White"}
{pt3dclear()}
{pt3dadd(181404.000000,148188.000000,80225.000000,67.184640)}
{pt3dadd(181656.000000,148416.000000,80350.000000,96.745860)}
{pt3dadd(181848.000000,148884.000000,80500.000000,118.029951)}
{pt3dadd(182040.000000,149040.000000,80550.000000,139.314042)}
{pt3dadd(182604.000000,149616.000000,80700.000000,146.279741)}
{pt3dadd(182688.000000,149700.000000,80725.000000,153.245439)}
{pt3dadd(182772.000000,149808.000000,80775.000000,160.211138)}
{pt3dadd(182832.000000,150144.000000,80775.000000,167.176836)}
{pt3dadd(182868.000000,150756.000000,80775.000000,183.158946)}
{pt3dadd(182760.000000,151176.000000,80775.000000,199.141056)}
{pt3dadd(182400.000000,152340.000000,80700.000000,215.123166)}
{pt3dadd(182376.000000,152448.000000,80625.000000,231.105276)}
{pt3dadd(182244.000000,152580.000000,80575.000000,221.475888)}
{pt3dadd(182244.000000,152700.000000,80625.000000,211.846500)}
{pt3dadd(182160.000000,152844.000000,80550.000000,202.217112)}
{pt3dadd(182076.000000,153084.000000,80600.000000,192.587724)}
{pt3dadd(182040.000000,153276.000000,80625.000000,248.438165)}
{pt3dadd(181944.000000,153456.000000,80525.000000,304.288605)}
{pt3dadd(181980.000000,153696.000000,80725.000000,360.139046)}
{pt3dadd(181692.000000,153876.000000,80675.000000,415.989486)}
{pt3dadd(181512.000000,154980.000000,80675.000000,499.187376)}

{create adhoc2}
{access adhoc2}
{connect adhoc2(1), adhoc1(0)}
{nseg = 1}
{strdef color color = "White"}
{pt3dclear()}
{pt3dadd(181512.000000,154980.000000,80675.000000,499.187376)}
{pt3dadd(181404.000000,154932.000000,80325.000000,415.989486)}
{pt3dadd(181440.000000,154836.000000,80050.000000,415.989486)}
{pt3dadd(181212.000000,154704.000000,79750.000000,415.989486)}
{pt3dadd(181212.000000,154560.000000,79500.000000,415.989486)}
{pt3dadd(181332.000000,154596.000000,79250.000000,415.989486)}
{pt3dadd(181248.000000,154548.000000,79000.000000,415.989486)}
{pt3dadd(181368.000000,154596.000000,78675.000000,415.989486)}
{pt3dadd(181488.000000,154392.000000,78325.000000,415.989486)}
{pt3dadd(181392.000000,154344.000000,78050.000000,415.989486)}
{pt3dadd(181512.000000,154116.000000,77625.000000,398.656589)}
{pt3dadd(181500.000000,154116.000000,77425.000000,381.323691)}
{pt3dadd(181488.000000,153972.000000,77175.000000,363.990794)}
{pt3dadd(181356.000000,153576.000000,76850.000000,346.657896)}
{pt3dadd(181356.000000,153096.000000,76400.000000,346.657896)}
{pt3dadd(180912.000000,152952.000000,76350.000000,346.657896)}
{pt3dadd(181044.000000,152868.000000,76125.000000,346.657896)}
{pt3dadd(181116.000000,152628.000000,75850.000000,346.657896)}
{pt3dadd(180768.000000,152292.000000,75400.000000,363.990794)}
{pt3dadd(180408.000000,152328.000000,74175.000000,381.323691)}
{pt3dadd(180300.000000,152280.000000,73950.000000,398.656589)}
{pt3dadd(180204.000000,152316.000000,73575.000000,415.989486)}
{pt3dadd(180192.000000,152112.000000,73375.000000,398.656589)}
{pt3dadd(180132.000000,151872.000000,73100.000000,381.323691)}
{pt3dadd(180276.000000,151644.000000,72825.000000,363.990794)}
{pt3dadd(180372.000000,151632.000000,72650.000000,346.657896)}
{pt3dadd(180276.000000,151512.000000,72600.000000,288.881586)}
{pt3dadd(180000.000000,151368.000000,72675.000000,231.105276)}

{create adhoc3}
{access adhoc3}
{connect adhoc3(1), adhoc1(0)}
{nseg = 1}
{strdef color color = "White"}
{pt3dclear()}
{pt3dadd(181512.000000,154980.000000,80675.000000,499.187376)}
{pt3dadd(181488.000000,155124.000000,80875.000000,499.187376)}
{pt3dadd(181692.000000,155268.000000,81125.000000,599.024880)}
{pt3dadd(181740.000000,155616.000000,81000.000000,564.281428)}
{pt3dadd(181716.000000,155988.000000,81325.000000,529.537977)}
{pt3dadd(181812.000000,156408.000000,81525.000000,494.794525)}
{pt3dadd(181872.000000,156576.000000,81600.000000,460.051074)}
{pt3dadd(182052.000000,156972.000000,81800.000000,469.835150)}
{pt3dadd(182160.000000,157296.000000,81900.000000,479.619225)}
{pt3dadd(182196.000000,157548.000000,82175.000000,489.403301)}
{pt3dadd(182148.000000,157788.000000,82400.000000,499.187376)}
{pt3dadd(182100.000000,158208.000000,82575.000000,478.387903)}
{pt3dadd(182148.000000,158448.000000,82975.000000,457.588431)}
{pt3dadd(182280.000000,158664.000000,83475.000000,436.788958)}
{pt3dadd(182760.000000,159288.000000,84725.000000,415.989486)}
{pt3dadd(182772.000000,159324.000000,84925.000000,415.989486)}
{pt3dadd(182964.000000,159372.000000,85200.000000,415.989486)}
{pt3dadd(183072.000000,159456.000000,85525.000000,415.989486)}
{pt3dadd(182976.000000,159516.000000,85750.000000,415.989486)}
{pt3dadd(182988.000000,159528.000000,86125.000000,398.656589)}
{pt3dadd(183120.000000,159576.000000,86425.000000,381.323691)}
{pt3dadd(183420.000000,159552.000000,86675.000000,363.990794)}
{pt3dadd(183528.000000,159756.000000,87200.000000,346.657896)}
{pt3dadd(183612.000000,159864.000000,87525.000000,346.657896)}
{pt3dadd(184476.000000,159864.000000,87825.000000,346.657896)}
{pt3dadd(184620.000000,159912.000000,88050.000000,346.657896)}
{pt3dadd(184764.000000,159876.000000,88425.000000,346.657896)}
{pt3dadd(184956.000000,159876.000000,88700.000000,359.830899)}
{pt3dadd(185148.000000,159972.000000,88975.000000,373.003902)}
{pt3dadd(185496.000000,160104.000000,89225.000000,386.176905)}
{pt3dadd(185676.000000,160188.000000,89450.000000,399.349908)}
{pt3dadd(185976.000000,160248.000000,89800.000000,399.349908)}
{pt3dadd(186216.000000,160380.000000,90125.000000,399.349908)}
{pt3dadd(186444.000000,160332.000000,90375.000000,399.349908)}
{pt3dadd(186648.000000,160332.000000,90650.000000,399.349908)}
{pt3dadd(186888.000000,160284.000000,91050.000000,424.309275)}
{pt3dadd(187092.000000,160440.000000,91475.000000,449.268642)}
{pt3dadd(187368.000000,160644.000000,92075.000000,474.228009)}
{pt3dadd(187596.000000,160836.000000,92300.000000,499.187376)}
{pt3dadd(187596.000000,160908.000000,92575.000000,478.387903)}
{pt3dadd(187740.000000,160824.000000,92875.000000,457.588431)}
{pt3dadd(187848.000000,160740.000000,93175.000000,436.788958)}
{pt3dadd(188040.000000,160920.000000,93475.000000,415.989486)}
{pt3dadd(188220.000000,161100.000000,93725.000000,461.748335)}
{pt3dadd(188304.000000,161424.000000,94125.000000,507.507183)}
{pt3dadd(188424.000000,161604.000000,94425.000000,553.266031)}
{pt3dadd(188472.000000,161844.000000,94725.000000,599.024880)}
{pt3dadd(188388.000000,162084.000000,95350.000000,574.065504)}
{pt3dadd(188472.000000,162168.000000,95600.000000,549.106128)}
{pt3dadd(188556.000000,162144.000000,95825.000000,524.146752)}
{pt3dadd(188616.000000,162240.000000,96025.000000,499.187376)}
{pt3dadd(188700.000000,162240.000000,96275.000000,499.187376)}
{pt3dadd(188832.000000,162384.000000,96525.000000,499.187376)}
{pt3dadd(188964.000000,162492.000000,96725.000000,499.187376)}
{pt3dadd(189240.000000,162696.000000,96975.000000,499.187376)}
{pt3dadd(189120.000000,162660.000000,97250.000000,524.146752)}
{pt3dadd(189300.000000,162708.000000,97525.000000,549.106128)}
{pt3dadd(189204.000000,162900.000000,97425.000000,574.065504)}
{pt3dadd(189324.000000,163164.000000,97975.000000,599.024880)}
{pt3dadd(189360.000000,163524.000000,98525.000000,599.024880)}
{pt3dadd(189324.000000,163716.000000,98775.000000,599.024880)}
{pt3dadd(189360.000000,164052.000000,99100.000000,599.024880)}
{pt3dadd(189228.000000,164268.000000,99150.000000,599.024880)}
{pt3dadd(189192.000000,164472.000000,99400.000000,599.024880)}
{pt3dadd(189156.000000,164712.000000,99625.000000,599.024880)}
{pt3dadd(188964.000000,165156.000000,99825.000000,599.024880)}
{pt3dadd(188820.000000,165336.000000,99950.000000,599.024880)}
{pt3dadd(188724.000000,165564.000000,100150.000000,628.976115)}
{pt3dadd(188760.000000,165744.000000,100325.000000,658.927350)}
{pt3dadd(188772.000000,165948.000000,100500.000000,688.878585)}
{pt3dadd(188748.000000,166176.000000,100550.000000,718.829820)}
{pt3dadd(188724.000000,166452.000000,100550.000000,718.829820)}
{pt3dadd(188700.000000,166680.000000,100550.000000,718.829820)}
{pt3dadd(188664.000000,166884.000000,100675.000000,718.829820)}
{pt3dadd(188628.000000,167100.000000,100375.000000,718.829820)}
{pt3dadd(188628.000000,170064.000000,100450.000000,1242.137880)}

{create adhoc4}
{access adhoc4}
{connect adhoc4(1), adhoc3(0)}
{nseg = 1}
{strdef color color = "White"}
{pt3dclear()}
{pt3dadd(188628.000000,170064.000000,100450.000000,1242.137880)}
{pt3dadd(188712.000000,171204.000000,101400.000000,1242.137880)}
{pt3dadd(189000.000000,170628.000000,101875.000000,1304.244761)}
{pt3dadd(189000.000000,170184.000000,102375.000000,1366.351641)}
{pt3dadd(188988.000000,169812.000000,102875.000000,1428.458522)}
{pt3dadd(188952.000000,169488.000000,103325.000000,1490.565402)}
{pt3dadd(188892.000000,169440.000000,103950.000000,1490.565402)}
{pt3dadd(188892.000000,169524.000000,104500.000000,1490.565402)}
{pt3dadd(188928.000000,169740.000000,104950.000000,1490.565402)}
{pt3dadd(188976.000000,169824.000000,105500.000000,1490.565402)}
{pt3dadd(188844.000000,169968.000000,106050.000000,1428.458522)}
{pt3dadd(188928.000000,169908.000000,106350.000000,1366.351641)}
{pt3dadd(189144.000000,169668.000000,106875.000000,1304.244761)}
{pt3dadd(189276.000000,169488.000000,107400.000000,1242.137880)}
{pt3dadd(189240.000000,169332.000000,107925.000000,1304.244761)}
{pt3dadd(189156.000000,168900.000000,108500.000000,1366.351641)}
{pt3dadd(189120.000000,168924.000000,108975.000000,1428.458522)}
{pt3dadd(188916.000000,168972.000000,109425.000000,1490.565402)}
{pt3dadd(188688.000000,169008.000000,109925.000000,1490.565402)}
{pt3dadd(188436.000000,169020.000000,110600.000000,1490.565402)}
{pt3dadd(188064.000000,169164.000000,111275.000000,1490.565402)}
{pt3dadd(187584.000000,169248.000000,111800.000000,1490.565402)}
{pt3dadd(187140.000000,168972.000000,112425.000000,1490.565402)}
{pt3dadd(186852.000000,168696.000000,113150.000000,1490.565402)}
{pt3dadd(186516.000000,168456.000000,113625.000000,1490.565402)}
{pt3dadd(186216.000000,168312.000000,113975.000000,1490.565402)}
{pt3dadd(185748.000000,168084.000000,114375.000000,1490.565402)}
{pt3dadd(185316.000000,168024.000000,114750.000000,1490.565402)}
{pt3dadd(185112.000000,168012.000000,115125.000000,1490.565402)}
{pt3dadd(184920.000000,167856.000000,115500.000000,1490.565402)}
{pt3dadd(184488.000000,167676.000000,115925.000000,1428.458522)}
{pt3dadd(184104.000000,167484.000000,116300.000000,1366.351641)}
{pt3dadd(183432.000000,166944.000000,117200.000000,1304.244761)}
{pt3dadd(183228.000000,166812.000000,117425.000000,1242.137880)}
{pt3dadd(182928.000000,166728.000000,117875.000000,1229.716498)}
{pt3dadd(182016.000000,166668.000000,118575.000000,1217.295117)}
{pt3dadd(181440.000000,166560.000000,118975.000000,1204.873736)}
{pt3dadd(180840.000000,166248.000000,119425.000000,1192.452354)}
{pt3dadd(179916.000000,165852.000000,119875.000000,1204.873736)}
{pt3dadd(179400.000000,165660.000000,120075.000000,1217.295117)}
{pt3dadd(178776.000000,165384.000000,120475.000000,1229.716498)}
{pt3dadd(178116.000000,165312.000000,120900.000000,1242.137880)}
{pt3dadd(177756.000000,165204.000000,121250.000000,1147.252361)}
{pt3dadd(176880.000000,164928.000000,121550.000000,1052.366841)}
{pt3dadd(176616.000000,164544.000000,121250.000000,957.481322)}
{pt3dadd(176364.000000,164616.000000,121325.000000,862.595802)}
{pt3dadd(176040.000000,164604.000000,121350.000000,826.654307)}
{pt3dadd(175728.000000,164556.000000,121450.000000,790.712811)}
{pt3dadd(175476.000000,164580.000000,121400.000000,754.771316)}
{pt3dadd(175068.000000,164400.000000,121525.000000,718.829820)}
{pt3dadd(174780.000000,164148.000000,121800.000000,718.829820)}
{pt3dadd(174300.000000,164040.000000,122025.000000,718.829820)}
{pt3dadd(173844.000000,164352.000000,122175.000000,718.829820)}
{pt3dadd(172884.000000,163860.000000,122625.000000,718.829820)}
{pt3dadd(171936.000000,163764.000000,122975.000000,688.878585)}
{pt3dadd(170892.000000,163860.000000,123350.000000,658.927350)}
{pt3dadd(168468.000000,163932.000000,123650.000000,628.976115)}
{pt3dadd(166128.000000,163824.000000,124950.000000,599.024880)}
{pt3dadd(165360.000000,164052.000000,125375.000000,599.024880)}
{pt3dadd(164928.000000,164232.000000,125825.000000,599.024880)}
{pt3dadd(163980.000000,164028.000000,126550.000000,599.024880)}
{pt3dadd(163500.000000,164100.000000,127025.000000,599.024880)}
{pt3dadd(162840.000000,163692.000000,127550.000000,664.917611)}
{pt3dadd(161652.000000,162912.000000,128300.000000,730.810341)}
{pt3dadd(160632.000000,162612.000000,128775.000000,796.703072)}
{pt3dadd(159156.000000,162084.000000,130000.000000,862.595802)}
{pt3dadd(158208.000000,161472.000000,130675.000000,905.725589)}
{pt3dadd(158112.000000,161316.000000,131225.000000,948.855375)}
{pt3dadd(157668.000000,160872.000000,131675.000000,991.985162)}
{pt3dadd(157392.000000,160392.000000,132025.000000,1035.114948)}
{pt3dadd(157128.000000,159912.000000,132450.000000,1035.114948)}
{pt3dadd(156900.000000,159996.000000,132950.000000,1035.114948)}
{pt3dadd(156360.000000,159348.000000,133500.000000,1035.114948)}
{pt3dadd(156024.000000,158880.000000,133775.000000,1035.114948)}
{pt3dadd(155736.000000,158832.000000,134300.000000,1024.763782)}
{pt3dadd(155532.000000,158772.000000,134650.000000,1014.412617)}
{pt3dadd(154836.000000,158064.000000,135250.000000,1004.061452)}
{pt3dadd(154644.000000,157596.000000,135900.000000,993.710286)}
{pt3dadd(154680.000000,156384.000000,136500.000000,1117.924065)}
{pt3dadd(154440.000000,155268.000000,137075.000000,1242.137844)}
{pt3dadd(154104.000000,154620.000000,137850.000000,1366.351623)}
{pt3dadd(154056.000000,154128.000000,137925.000000,1490.565402)}
{pt3dadd(153300.000000,153204.000000,139125.000000,1565.093664)}
{pt3dadd(153024.000000,152784.000000,139100.000000,1639.621926)}
{pt3dadd(152832.000000,152496.000000,139400.000000,1714.150188)}
{pt3dadd(152316.000000,151980.000000,139775.000000,1788.678450)}
{pt3dadd(152184.000000,151740.000000,139875.000000,1788.678450)}
{pt3dadd(151632.000000,150288.000000,140475.000000,1788.678450)}
{pt3dadd(151476.000000,149040.000000,140800.000000,1788.678450)}
{pt3dadd(150876.000000,148140.000000,141725.000000,1788.678450)}
{pt3dadd(150768.000000,147492.000000,142075.000000,1788.678450)}
{pt3dadd(150480.000000,147096.000000,142200.000000,1788.678450)}
{pt3dadd(150324.000000,146628.000000,142350.000000,1788.678450)}
{pt3dadd(150312.000000,145992.000000,142600.000000,1788.678450)}
{pt3dadd(150300.000000,145548.000000,142850.000000,1714.150188)}
{pt3dadd(150288.000000,145092.000000,143100.000000,1639.621926)}
{pt3dadd(150276.000000,144240.000000,143350.000000,1565.093664)}
{pt3dadd(150264.000000,143844.000000,143600.000000,1490.565402)}
{pt3dadd(149988.000000,143268.000000,144425.000000,1490.565402)}
{pt3dadd(149844.000000,142956.000000,144875.000000,1490.565402)}
{pt3dadd(149712.000000,142656.000000,145050.000000,1490.565402)}
{pt3dadd(149568.000000,142260.000000,145400.000000,1490.565402)}
{pt3dadd(149760.000000,141720.000000,146075.000000,1428.458522)}
{pt3dadd(149664.000000,141132.000000,146150.000000,1366.351641)}
{pt3dadd(149808.000000,140784.000000,146700.000000,1304.244761)}
{pt3dadd(149376.000000,140184.000000,147475.000000,1242.137880)}
{pt3dadd(149592.000000,139848.000000,147700.000000,1378.773023)}
{pt3dadd(149556.000000,139668.000000,148075.000000,1515.408165)}
{pt3dadd(149220.000000,139044.000000,148600.000000,1652.043308)}
{pt3dadd(149688.000000,138408.000000,149175.000000,1788.678450)}
{pt3dadd(149724.000000,137604.000000,149650.000000,1788.678450)}
{pt3dadd(149988.000000,136668.000000,150275.000000,1788.678450)}
{pt3dadd(150132.000000,136200.000000,151425.000000,1788.678450)}
{pt3dadd(150324.000000,135756.000000,151450.000000,1788.678450)}
{pt3dadd(150192.000000,135288.000000,151725.000000,1770.791679)}
{pt3dadd(150744.000000,133716.000000,152550.000000,1752.904908)}
{pt3dadd(150828.000000,133224.000000,152575.000000,1735.018137)}
{pt3dadd(151092.000000,132840.000000,152875.000000,1717.131366)}
{pt3dadd(151512.000000,132312.000000,153250.000000,1645.584210)}
{pt3dadd(151884.000000,131784.000000,153700.000000,1574.037054)}
{pt3dadd(152112.000000,130872.000000,153725.000000,1502.489898)}
{pt3dadd(152340.000000,130404.000000,153775.000000,1430.942742)}
{pt3dadd(152568.000000,129252.000000,153825.000000,1371.320145)}
{pt3dadd(152796.000000,128640.000000,153875.000000,1311.697548)}
{pt3dadd(152916.000000,128004.000000,153900.000000,1252.074951)}
{pt3dadd(152952.000000,127620.000000,154000.000000,1192.452354)}
{pt3dadd(152988.000000,127152.000000,154100.000000,1323.622107)}
{pt3dadd(153360.000000,126828.000000,154200.000000,1454.791860)}
{pt3dadd(153216.000000,126480.000000,153975.000000,1585.961613)}
{pt3dadd(153072.000000,124596.000000,154175.000000,1717.131366)}
{pt3dadd(152736.000000,123828.000000,154100.000000,1752.904908)}
{pt3dadd(152484.000000,123264.000000,154075.000000,1788.678450)}
{pt3dadd(152160.000000,122856.000000,154100.000000,1788.678450)}

{create adhoc5}
{access adhoc5}
{connect adhoc5(1), adhoc4(0)}
{nseg = 1}
{strdef color color = "White"}
{pt3dclear()}
{pt3dadd(152160.000000,122856.000000,154100.000000,1788.678450)}
{pt3dadd(151248.000000,122856.000000,157050.000000,415.989486)}
{pt3dadd(151188.000000,122808.000000,157350.000000,398.656589)}
{pt3dadd(151152.000000,123024.000000,157625.000000,381.323691)}
{pt3dadd(151092.000000,123156.000000,157875.000000,363.990794)}
{pt3dadd(150900.000000,123192.000000,158150.000000,346.657896)}
{pt3dadd(150600.000000,123060.000000,158450.000000,332.213819)}
{pt3dadd(150108.000000,123204.000000,158700.000000,317.769741)}
{pt3dadd(149688.000000,123276.000000,158925.000000,303.325664)}
{pt3dadd(149484.000000,123348.000000,159125.000000,288.881586)}
{pt3dadd(149376.000000,123516.000000,159400.000000,299.859080)}
{pt3dadd(149184.000000,123600.000000,159625.000000,310.836573)}
{pt3dadd(148908.000000,123732.000000,159900.000000,321.814067)}
{pt3dadd(148560.000000,123828.000000,160150.000000,332.791560)}
{pt3dadd(148260.000000,123672.000000,160400.000000,399.349890)}
{pt3dadd(147552.000000,123456.000000,160675.000000,465.908220)}
{pt3dadd(147180.000000,123252.000000,160975.000000,532.466550)}
{pt3dadd(147048.000000,123168.000000,161200.000000,599.024880)}
{pt3dadd(146988.000000,122880.000000,161550.000000,553.266031)}
{pt3dadd(147036.000000,122724.000000,161825.000000,507.507183)}
{pt3dadd(147000.000000,122640.000000,162150.000000,461.748335)}
{pt3dadd(146748.000000,122976.000000,162425.000000,415.989486)}
{pt3dadd(146472.000000,123240.000000,162750.000000,436.788958)}
{pt3dadd(146100.000000,123420.000000,163000.000000,457.588431)}
{pt3dadd(145896.000000,123504.000000,163325.000000,478.387903)}
{pt3dadd(145560.000000,123468.000000,163575.000000,499.187376)}
{pt3dadd(145452.000000,123564.000000,163825.000000,554.097987)}
{pt3dadd(145272.000000,123840.000000,164175.000000,609.008598)}
{pt3dadd(144924.000000,124056.000000,164550.000000,663.919209)}
{pt3dadd(144864.000000,124116.000000,164875.000000,718.829820)}
{pt3dadd(144948.000000,124080.000000,165125.000000,567.409653)}
{pt3dadd(144816.000000,124068.000000,165450.000000,415.989486)}
{pt3dadd(145224.000000,124056.000000,165825.000000,288.881586)}

{create adhoc6}
{access adhoc6}
{connect adhoc6(1), adhoc4(0)}
{nseg = 1}
{strdef color color = "White"}
{pt3dclear()}
{pt3dadd(152160.000000,122856.000000,154100.000000,1788.678450)}
{pt3dadd(152136.000000,122412.000000,154175.000000,1788.678450)}

{create adhoc7}
{access adhoc7}
{connect adhoc7(1), adhoc6(0)}
{nseg = 1}
{strdef color color = "White"}
{pt3dclear()}
{pt3dadd(152136.000000,122412.000000,154175.000000,1788.678450)}
{pt3dadd(150048.000000,121920.000000,154175.000000,862.595802)}
{pt3dadd(149892.000000,122052.000000,153525.000000,862.595802)}
{pt3dadd(149712.000000,121968.000000,153600.000000,862.595802)}
{pt3dadd(149484.000000,121908.000000,153650.000000,862.595802)}
{pt3dadd(149352.000000,121872.000000,153650.000000,862.595802)}
{pt3dadd(149028.000000,121680.000000,153475.000000,826.654307)}
{pt3dadd(148716.000000,121704.000000,153575.000000,790.712811)}
{pt3dadd(148488.000000,121704.000000,153600.000000,754.771316)}
{pt3dadd(148296.000000,121752.000000,153675.000000,718.829820)}
{pt3dadd(148152.000000,121788.000000,153725.000000,718.829820)}
{pt3dadd(147876.000000,121740.000000,153800.000000,718.829820)}
{pt3dadd(147408.000000,121860.000000,153850.000000,718.829820)}
{pt3dadd(147108.000000,122124.000000,154150.000000,718.829820)}
{pt3dadd(146940.000000,122352.000000,154225.000000,746.145351)}
{pt3dadd(146652.000000,122472.000000,154425.000000,773.460882)}
{pt3dadd(146328.000000,122496.000000,154625.000000,800.776413)}
{pt3dadd(145908.000000,122664.000000,155150.000000,828.091944)}
{pt3dadd(145584.000000,123084.000000,156400.000000,879.847695)}
{pt3dadd(145104.000000,123120.000000,156575.000000,931.603446)}
{pt3dadd(144876.000000,123204.000000,156800.000000,983.359197)}
{pt3dadd(144600.000000,123480.000000,157325.000000,1035.114948)}
{pt3dadd(144372.000000,123756.000000,157450.000000,956.043666)}
{pt3dadd(144180.000000,123888.000000,157650.000000,876.972384)}
{pt3dadd(143904.000000,124128.000000,158000.000000,797.901102)}
{pt3dadd(143748.000000,124068.000000,158000.000000,718.829820)}
{pt3dadd(143652.000000,123936.000000,158000.000000,499.187376)}

{create adhoc8}
{access adhoc8}
{connect adhoc8(1), adhoc7(0)}
{nseg = 1}
{strdef color color = "White"}
{pt3dclear()}
{pt3dadd(143652.000000,123936.000000,158000.000000,499.187376)}
{pt3dadd(143088.000000,122940.000000,158000.000000,479.219886)}
{pt3dadd(142620.000000,122568.000000,158275.000000,509.171134)}
{pt3dadd(142056.000000,122328.000000,158550.000000,539.122383)}
{pt3dadd(141000.000000,122076.000000,158875.000000,569.073631)}
{pt3dadd(140232.000000,122076.000000,159175.000000,599.024880)}
{pt3dadd(140076.000000,122028.000000,159500.000000,574.065504)}
{pt3dadd(139704.000000,122292.000000,160025.000000,549.106128)}
{pt3dadd(139308.000000,122412.000000,160325.000000,524.146752)}
{pt3dadd(137868.000000,121452.000000,160800.000000,499.187376)}
{pt3dadd(137496.000000,121212.000000,161075.000000,446.610929)}
{pt3dadd(137148.000000,121212.000000,161350.000000,394.034481)}
{pt3dadd(137112.000000,121212.000000,161675.000000,341.458034)}
{pt3dadd(137016.000000,121236.000000,162000.000000,288.881586)}
{pt3dadd(134688.000000,120984.000000,162275.000000,276.844851)}
{pt3dadd(134544.000000,120912.000000,162700.000000,264.808116)}
{pt3dadd(133980.000000,120816.000000,163025.000000,252.771381)}
{pt3dadd(133656.000000,120672.000000,163475.000000,240.734646)}
{pt3dadd(133140.000000,120324.000000,163950.000000,238.327304)}
{pt3dadd(132516.000000,119904.000000,164150.000000,235.919961)}
{pt3dadd(132132.000000,119844.000000,164400.000000,233.512618)}
{pt3dadd(131568.000000,119664.000000,164575.000000,231.105276)}
{pt3dadd(131424.000000,119568.000000,164700.000000,242.660538)}
{pt3dadd(131316.000000,119568.000000,164800.000000,254.215800)}
{pt3dadd(131196.000000,119556.000000,164825.000000,265.771062)}
{pt3dadd(130992.000000,119556.000000,164775.000000,277.326324)}
{pt3dadd(130824.000000,119628.000000,164825.000000,294.659217)}
{pt3dadd(130632.000000,119544.000000,164850.000000,311.992110)}
{pt3dadd(130512.000000,119568.000000,164900.000000,329.325003)}
{pt3dadd(130356.000000,119664.000000,164850.000000,346.657896)}
{pt3dadd(130152.000000,119568.000000,164800.000000,409.749642)}
{pt3dadd(129912.000000,119520.000000,164825.000000,472.841388)}
{pt3dadd(129696.000000,119568.000000,164675.000000,535.933134)}
{pt3dadd(129480.000000,119592.000000,164700.000000,599.024880)}
{pt3dadd(129288.000000,119592.000000,164725.000000,599.024880)}
{pt3dadd(129012.000000,119532.000000,164725.000000,599.024880)}
{pt3dadd(128844.000000,119604.000000,164575.000000,599.024880)}
{pt3dadd(128676.000000,119568.000000,164525.000000,599.024880)}
{pt3dadd(128412.000000,119460.000000,164500.000000,521.489056)}
{pt3dadd(128208.000000,119508.000000,164475.000000,443.953233)}
{pt3dadd(128016.000000,119400.000000,164600.000000,366.417410)}
{pt3dadd(127788.000000,119340.000000,164675.000000,288.881586)}
{pt3dadd(127584.000000,119388.000000,164675.000000,116.095032)}

{create adhoc9}
{access adhoc9}
{connect adhoc9(1), adhoc7(0)}
{nseg = 1}
{strdef color color = "White"}
{pt3dclear()}
{pt3dadd(143652.000000,123936.000000,158000.000000,499.187376)}
{pt3dadd(143472.000000,125076.000000,158800.000000,599.024880)}
{pt3dadd(143136.000000,125460.000000,159125.000000,599.024880)}
{pt3dadd(142860.000000,125628.000000,159375.000000,599.024880)}
{pt3dadd(142644.000000,125820.000000,159350.000000,599.024880)}
{pt3dadd(142416.000000,126132.000000,159675.000000,599.024880)}
{pt3dadd(142140.000000,127032.000000,160150.000000,628.976115)}
{pt3dadd(141900.000000,127116.000000,160325.000000,658.927350)}
{pt3dadd(141696.000000,127344.000000,160525.000000,688.878585)}
{pt3dadd(140736.000000,128196.000000,160875.000000,718.829820)}
{pt3dadd(140736.000000,128112.000000,161300.000000,332.791596)}

{create adhoc10}
{access adhoc10}
{connect adhoc10(1), adhoc9(0)}
{nseg = 1}
{strdef color color = "White"}
{pt3dclear()}
{pt3dadd(140736.000000,128112.000000,161300.000000,332.791596)}
{pt3dadd(141936.000000,127860.000000,161500.000000,479.219886)}
{pt3dadd(141924.000000,127788.000000,161775.000000,446.079388)}
{pt3dadd(141828.000000,127692.000000,162050.000000,412.938891)}
{pt3dadd(141264.000000,128628.000000,162300.000000,379.798393)}
{pt3dadd(141456.000000,128772.000000,162650.000000,346.657896)}
{pt3dadd(141492.000000,128724.000000,162975.000000,332.213819)}
{pt3dadd(141660.000000,128712.000000,163300.000000,317.769741)}
{pt3dadd(141516.000000,128628.000000,163575.000000,303.325664)}
{pt3dadd(141504.000000,128484.000000,163950.000000,288.881586)}
{pt3dadd(141528.000000,128256.000000,164200.000000,276.844851)}
{pt3dadd(141288.000000,128172.000000,164500.000000,264.808116)}
{pt3dadd(141132.000000,127992.000000,164825.000000,252.771381)}
{pt3dadd(141168.000000,127932.000000,165100.000000,240.734646)}
{pt3dadd(141264.000000,127752.000000,165400.000000,240.734646)}
{pt3dadd(141396.000000,127740.000000,165675.000000,240.734646)}
{pt3dadd(141636.000000,127644.000000,165975.000000,240.734646)}
{pt3dadd(141432.000000,127176.000000,166250.000000,240.734646)}
{pt3dadd(141132.000000,126276.000000,166725.000000,330.307205)}
{pt3dadd(141156.000000,126372.000000,167050.000000,419.879763)}
{pt3dadd(141528.000000,126612.000000,167450.000000,509.452321)}
{pt3dadd(142860.000000,124644.000000,168025.000000,599.024880)}
{pt3dadd(142776.000000,124584.000000,168375.000000,553.266031)}
{pt3dadd(142908.000000,124152.000000,168850.000000,507.507183)}
{pt3dadd(142992.000000,124104.000000,169125.000000,461.748335)}
{pt3dadd(143520.000000,124128.000000,168250.000000,415.989486)}
{pt3dadd(143688.000000,123972.000000,168400.000000,415.989486)}

{create adhoc11}
{access adhoc11}
{connect adhoc11(1), adhoc9(0)}
{nseg = 1}
{strdef color color = "White"}
{pt3dclear()}
{pt3dadd(140736.000000,128112.000000,161300.000000,332.791596)}
{pt3dadd(139932.000000,129552.000000,161625.000000,599.024880)}
{pt3dadd(139968.000000,130152.000000,161825.000000,574.065504)}
{pt3dadd(139824.000000,130332.000000,161925.000000,549.106128)}
{pt3dadd(139908.000000,130560.000000,162050.000000,524.146752)}
{pt3dadd(140076.000000,130728.000000,162300.000000,499.187376)}
{pt3dadd(140256.000000,130968.000000,162425.000000,478.387903)}
{pt3dadd(140388.000000,131160.000000,162500.000000,457.588431)}
{pt3dadd(140532.000000,131448.000000,162450.000000,436.788958)}
{pt3dadd(140712.000000,131700.000000,162400.000000,415.989486)}
{pt3dadd(140736.000000,132036.000000,162525.000000,491.699570)}
{pt3dadd(140556.000000,132360.000000,162600.000000,567.409653)}
{pt3dadd(140484.000000,132612.000000,162825.000000,643.119737)}
{pt3dadd(140448.000000,132948.000000,162850.000000,718.829820)}
{pt3dadd(140448.000000,133260.000000,162925.000000,663.919209)}
{pt3dadd(140484.000000,133608.000000,163050.000000,609.008598)}
{pt3dadd(140436.000000,134016.000000,163000.000000,554.097987)}
{pt3dadd(140460.000000,134244.000000,163025.000000,499.187376)}
{pt3dadd(140676.000000,134484.000000,163125.000000,394.034481)}
{pt3dadd(140640.000000,134628.000000,163075.000000,288.881586)}
{pt3dadd(140736.000000,134760.000000,163125.000000,139.314042)}

{create adhoc12}
{access adhoc12}
{connect adhoc12(1), adhoc6(0)}
{nseg = 1}
{strdef color color = "White"}
{pt3dclear()}
{pt3dadd(152136.000000,122412.000000,154175.000000,1788.678450)}
{pt3dadd(151980.000000,121788.000000,153925.000000,1490.565402)}
{pt3dadd(152532.000000,121332.000000,154200.000000,1490.565402)}
{pt3dadd(152496.000000,120912.000000,154575.000000,1490.565402)}
{pt3dadd(152412.000000,120528.000000,154725.000000,1490.565402)}
{pt3dadd(152328.000000,120120.000000,155325.000000,1490.565402)}
{pt3dadd(152184.000000,119328.000000,155950.000000,1430.942742)}

{create adhoc13}
{access adhoc13}
{connect adhoc13(1), adhoc3(0)}
{nseg = 1}
{strdef color color = "White"}
{pt3dclear()}
{pt3dadd(188628.000000,170064.000000,100450.000000,1242.137880)}
{pt3dadd(188232.000000,170844.000000,99925.000000,1192.452354)}
{pt3dadd(188328.000000,171408.000000,99325.000000,1311.697548)}
{pt3dadd(188052.000000,172044.000000,98525.000000,1430.942742)}
{pt3dadd(187596.000000,172584.000000,97900.000000,1445.848407)}
{pt3dadd(187332.000000,173016.000000,97450.000000,1460.754072)}
{pt3dadd(186876.000000,173340.000000,96875.000000,1475.659737)}
{pt3dadd(186780.000000,173400.000000,96325.000000,1490.565402)}
{pt3dadd(186816.000000,173376.000000,95900.000000,754.282701)}
{pt3dadd(185964.000000,174348.000000,95425.000000,18.000000)}
{pt3dadd(185592.000000,174756.000000,94475.000000,754.282701)}
{pt3dadd(185472.000000,174780.000000,94375.000000,1490.565402)}
{pt3dadd(185340.000000,174864.000000,94225.000000,1490.565402)}
{pt3dadd(185196.000000,175008.000000,93925.000000,1490.565402)}
{pt3dadd(184872.000000,175008.000000,93625.000000,1490.565402)}
{pt3dadd(184716.000000,175188.000000,93275.000000,1490.565402)}
{pt3dadd(184584.000000,175368.000000,93025.000000,1490.565402)}
{pt3dadd(184380.000000,175560.000000,92900.000000,1490.565402)}
{pt3dadd(184092.000000,175608.000000,92550.000000,1490.565402)}
{pt3dadd(183816.000000,175884.000000,92175.000000,1490.565402)}
{pt3dadd(183588.000000,176196.000000,91850.000000,1565.093664)}
{pt3dadd(183372.000000,176508.000000,91600.000000,1639.621926)}
{pt3dadd(183408.000000,176448.000000,91350.000000,1714.150188)}
{pt3dadd(183132.000000,176640.000000,91050.000000,1788.678450)}
{pt3dadd(182928.000000,176832.000000,90800.000000,1699.244523)}
{pt3dadd(182688.000000,177252.000000,90525.000000,1609.810596)}
{pt3dadd(182556.000000,177492.000000,90300.000000,1520.376669)}
{pt3dadd(182412.000000,177240.000000,89900.000000,1430.942742)}
{pt3dadd(182220.000000,177456.000000,90000.000000,1490.565402)}

{create adhoc14}
{access adhoc14}
{connect adhoc14(1), adhoc13(0)}
{nseg = 1}
{strdef color color = "White"}
{pt3dclear()}
{pt3dadd(182220.000000,177456.000000,90000.000000,1490.565402)}
{pt3dadd(182112.000000,177252.000000,89400.000000,1242.137880)}
{pt3dadd(181572.000000,176952.000000,88325.000000,1147.252361)}
{pt3dadd(181524.000000,176268.000000,87625.000000,1052.366841)}
{pt3dadd(181260.000000,176112.000000,87025.000000,957.481322)}
{pt3dadd(181332.000000,176172.000000,86650.000000,862.595802)}
{pt3dadd(180948.000000,176172.000000,86275.000000,826.654307)}
{pt3dadd(180804.000000,176244.000000,85850.000000,790.712811)}
{pt3dadd(180660.000000,176316.000000,85525.000000,754.771316)}
{pt3dadd(180336.000000,176172.000000,85150.000000,718.829820)}
{pt3dadd(180012.000000,176136.000000,84650.000000,688.878585)}
{pt3dadd(179436.000000,176124.000000,84075.000000,658.927350)}
{pt3dadd(178920.000000,175992.000000,83650.000000,628.976115)}
{pt3dadd(178452.000000,176088.000000,83325.000000,599.024880)}
{pt3dadd(177984.000000,176184.000000,82850.000000,599.024880)}
{pt3dadd(177900.000000,175800.000000,82450.000000,599.024880)}
{pt3dadd(178020.000000,175512.000000,82150.000000,599.024880)}
{pt3dadd(177996.000000,175128.000000,81700.000000,599.024880)}
{pt3dadd(177036.000000,175536.000000,81150.000000,628.976115)}
{pt3dadd(176064.000000,175668.000000,80525.000000,658.927350)}
{pt3dadd(175020.000000,175776.000000,79875.000000,688.878585)}
{pt3dadd(174924.000000,175548.000000,79250.000000,718.829820)}
{pt3dadd(174840.000000,175404.000000,78850.000000,688.878585)}
{pt3dadd(174600.000000,175344.000000,78400.000000,658.927350)}
{pt3dadd(174312.000000,175236.000000,77950.000000,628.976115)}
{pt3dadd(174120.000000,175008.000000,77300.000000,599.024880)}
{pt3dadd(173940.000000,174708.000000,76625.000000,628.976115)}
{pt3dadd(173796.000000,174432.000000,76250.000000,658.927350)}
{pt3dadd(173532.000000,174060.000000,75450.000000,688.878585)}
{pt3dadd(173148.000000,174132.000000,74725.000000,718.829820)}
{pt3dadd(172968.000000,174084.000000,74075.000000,790.712811)}
{pt3dadd(172524.000000,173856.000000,73600.000000,862.595802)}
{pt3dadd(171900.000000,173496.000000,73100.000000,479.219886)}

{create adhoc15}
{access adhoc15}
{connect adhoc15(1), adhoc14(0)}
{nseg = 1}
{strdef color color = "White"}
{pt3dclear()}
{pt3dadd(171900.000000,173496.000000,73100.000000,479.219886)}
{pt3dadd(172404.000000,172644.000000,72675.000000,499.187376)}
{pt3dadd(172296.000000,172440.000000,72225.000000,499.187376)}
{pt3dadd(172068.000000,172104.000000,71850.000000,499.187376)}
{pt3dadd(171936.000000,171756.000000,71425.000000,499.187376)}
{pt3dadd(171540.000000,171696.000000,71025.000000,499.187376)}
{pt3dadd(171540.000000,171360.000000,70425.000000,494.195504)}
{pt3dadd(171432.000000,171168.000000,70000.000000,489.203631)}
{pt3dadd(171396.000000,170772.000000,69475.000000,484.211758)}
{pt3dadd(171312.000000,170484.000000,69075.000000,479.219886)}
{pt3dadd(170988.000000,170184.000000,68550.000000,484.211758)}
{pt3dadd(170832.000000,170004.000000,68325.000000,489.203631)}
{pt3dadd(170784.000000,169848.000000,68075.000000,494.195504)}
{pt3dadd(170880.000000,169752.000000,67750.000000,499.187376)}
{pt3dadd(170688.000000,169524.000000,67475.000000,499.187376)}
{pt3dadd(170436.000000,169596.000000,67225.000000,499.187376)}
{pt3dadd(170808.000000,169416.000000,67000.000000,499.187376)}

{create adhoc16}
{access adhoc16}
{connect adhoc16(1), adhoc15(0)}
{nseg = 1}
{strdef color color = "White"}
{pt3dclear()}
{pt3dadd(170808.000000,169416.000000,67000.000000,499.187376)}
{pt3dadd(171372.000000,169164.000000,66800.000000,499.187376)}
{pt3dadd(171408.000000,168732.000000,66500.000000,524.146752)}
{pt3dadd(171756.000000,168156.000000,66275.000000,549.106128)}
{pt3dadd(171288.000000,168048.000000,65950.000000,574.065504)}
{pt3dadd(171288.000000,167820.000000,65725.000000,599.024880)}
{pt3dadd(171108.000000,167520.000000,65350.000000,574.065504)}
{pt3dadd(171012.000000,167268.000000,65050.000000,549.106128)}
{pt3dadd(170928.000000,166920.000000,64825.000000,524.146752)}
{pt3dadd(170964.000000,166584.000000,64350.000000,499.187376)}
{pt3dadd(170880.000000,166332.000000,64125.000000,499.187376)}
{pt3dadd(170772.000000,165984.000000,63875.000000,499.187376)}
{pt3dadd(170808.000000,165756.000000,63600.000000,499.187376)}
{pt3dadd(170808.000000,165516.000000,63250.000000,499.187376)}

{create adhoc17}
{access adhoc17}
{connect adhoc17(1), adhoc16(0)}
{nseg = 1}
{strdef color color = "White"}
{pt3dclear()}
{pt3dadd(170808.000000,165516.000000,63250.000000,499.187376)}
{pt3dadd(170856.000000,165288.000000,62975.000000,499.187376)}
{pt3dadd(170604.000000,165180.000000,62675.000000,499.187376)}
{pt3dadd(170892.000000,164988.000000,62450.000000,499.187376)}
{pt3dadd(170832.000000,164568.000000,62200.000000,499.187376)}
{pt3dadd(170724.000000,164328.000000,61875.000000,499.187376)}
{pt3dadd(170952.000000,164148.000000,61650.000000,499.187376)}
{pt3dadd(170844.000000,163920.000000,61425.000000,499.187376)}
{pt3dadd(170796.000000,163596.000000,61250.000000,499.187376)}
{pt3dadd(170856.000000,163272.000000,61050.000000,499.187376)}
{pt3dadd(170892.000000,163020.000000,60800.000000,478.387903)}
{pt3dadd(170880.000000,162864.000000,60450.000000,457.588431)}
{pt3dadd(170868.000000,162540.000000,60200.000000,436.788958)}
{pt3dadd(170484.000000,161820.000000,59700.000000,415.989486)}
{pt3dadd(170424.000000,161388.000000,59475.000000,436.788958)}
{pt3dadd(170232.000000,160860.000000,59175.000000,457.588431)}
{pt3dadd(170028.000000,160620.000000,58950.000000,478.387903)}
{pt3dadd(170064.000000,160416.000000,58725.000000,499.187376)}
{pt3dadd(169836.000000,160032.000000,58400.000000,599.024880)}
{pt3dadd(169692.000000,159876.000000,58225.000000,575.063856)}

{create adhoc18}
{access adhoc18}
{connect adhoc18(1), adhoc17(0)}
{nseg = 1}
{strdef color color = "White"}
{pt3dclear()}
{pt3dadd(169692.000000,159876.000000,58225.000000,575.063856)}
{pt3dadd(169920.000000,161436.000000,58125.000000,167.176836)}
{pt3dadd(169908.000000,161532.000000,57975.000000,154.406385)}
{pt3dadd(170028.000000,161700.000000,57750.000000,141.635934)}
{pt3dadd(169944.000000,161820.000000,57450.000000,128.865483)}
{pt3dadd(169812.000000,161892.000000,57200.000000,116.095032)}
{pt3dadd(169704.000000,161940.000000,56925.000000,147.254936)}
{pt3dadd(169476.000000,162180.000000,56525.000000,178.414839)}
{pt3dadd(169200.000000,162264.000000,56325.000000,209.574742)}
{pt3dadd(168732.000000,162372.000000,56025.000000,240.734646)}
{pt3dadd(167856.000000,162852.000000,55525.000000,219.068528)}
{pt3dadd(167484.000000,163416.000000,55125.000000,197.402409)}
{pt3dadd(167292.000000,163500.000000,54875.000000,175.736291)}
{pt3dadd(167208.000000,163692.000000,54600.000000,154.070172)}
{pt3dadd(166836.000000,163812.000000,54300.000000,80.621550)}
{pt3dadd(166656.000000,164028.000000,54125.000000,139.314042)}

{create adhoc19}
{access adhoc19}
{connect adhoc19(1), adhoc17(0)}
{nseg = 1}
{strdef color color = "White"}
{pt3dclear()}
{pt3dadd(169692.000000,159876.000000,58225.000000,575.063856)}
{pt3dadd(169548.000000,159096.000000,57750.000000,599.024880)}
{pt3dadd(169512.000000,158364.000000,57450.000000,574.065504)}
{pt3dadd(169464.000000,157920.000000,57150.000000,549.106128)}
{pt3dadd(169464.000000,157500.000000,56950.000000,524.146752)}
{pt3dadd(169488.000000,156936.000000,56600.000000,499.187376)}
{pt3dadd(169440.000000,156468.000000,56225.000000,524.146752)}
{pt3dadd(169404.000000,156000.000000,56025.000000,549.106128)}
{pt3dadd(169500.000000,155676.000000,55775.000000,574.065504)}
{pt3dadd(169596.000000,155436.000000,55425.000000,599.024880)}
{pt3dadd(169320.000000,155136.000000,55125.000000,574.065504)}
{pt3dadd(169284.000000,154800.000000,54875.000000,549.106128)}
{pt3dadd(169248.000000,154464.000000,54625.000000,524.146752)}
{pt3dadd(168996.000000,154332.000000,54400.000000,499.187376)}
{pt3dadd(168888.000000,154140.000000,54175.000000,499.187376)}
{pt3dadd(168888.000000,153708.000000,53975.000000,499.187376)}
{pt3dadd(168660.000000,153504.000000,53700.000000,277.326324)}

{create adhoc20}
{access adhoc20}
{connect adhoc20(1), adhoc19(0)}
{nseg = 1}
{strdef color color = "White"}
{pt3dclear()}
{pt3dadd(168660.000000,153504.000000,53700.000000,277.326324)}
{pt3dadd(169320.000000,151356.000000,53375.000000,240.734646)}
{pt3dadd(169464.000000,151200.000000,53350.000000,252.771381)}
{pt3dadd(169512.000000,151020.000000,53350.000000,264.808116)}
{pt3dadd(169740.000000,150828.000000,53200.000000,276.844851)}
{pt3dadd(169644.000000,150660.000000,53175.000000,288.881586)}
{pt3dadd(169728.000000,150444.000000,53100.000000,285.992771)}
{pt3dadd(169692.000000,150288.000000,52975.000000,283.103955)}
{pt3dadd(169692.000000,150072.000000,53025.000000,280.215140)}
{pt3dadd(169692.000000,149844.000000,53075.000000,277.326324)}
{pt3dadd(169692.000000,149616.000000,52975.000000,258.147797)}
{pt3dadd(169644.000000,149448.000000,52975.000000,238.969269)}
{pt3dadd(169596.000000,149268.000000,52975.000000,219.790742)}
{pt3dadd(169452.000000,149040.000000,52825.000000,200.612214)}
{pt3dadd(169272.000000,148896.000000,52750.000000,200.612214)}
{pt3dadd(169092.000000,148560.000000,52675.000000,200.612214)}
{pt3dadd(169008.000000,148176.000000,52550.000000,200.612214)}
{pt3dadd(169008.000000,147804.000000,52525.000000,200.612214)}
{pt3dadd(168876.000000,147432.000000,52525.000000,200.612214)}
{pt3dadd(169020.000000,147252.000000,52550.000000,200.612214)}
{pt3dadd(168984.000000,147072.000000,52550.000000,200.612214)}
{pt3dadd(169080.000000,146928.000000,52550.000000,200.612214)}
{pt3dadd(169248.000000,146784.000000,52650.000000,185.287671)}
{pt3dadd(169068.000000,146652.000000,52600.000000,169.963128)}
{pt3dadd(169104.000000,146484.000000,52650.000000,154.638585)}
{pt3dadd(169140.000000,146352.000000,52700.000000,139.314042)}
{pt3dadd(169176.000000,146220.000000,52650.000000,139.314042)}
{pt3dadd(169260.000000,146016.000000,52725.000000,139.314042)}
{pt3dadd(169284.000000,145884.000000,52675.000000,139.314042)}
{pt3dadd(169224.000000,145704.000000,52675.000000,139.314042)}
{pt3dadd(169260.000000,145608.000000,52700.000000,200.612214)}
{pt3dadd(169308.000000,145440.000000,52725.000000,167.176836)}

{create adhoc21}
{access adhoc21}
{connect adhoc21(1), adhoc20(0)}
{nseg = 1}
{strdef color color = "White"}
{pt3dclear()}
{pt3dadd(169308.000000,145440.000000,52725.000000,167.176836)}
{pt3dadd(169056.000000,145344.000000,52425.000000,96.745860)}
{pt3dadd(169008.000000,145020.000000,52225.000000,92.714782)}
{pt3dadd(168960.000000,144864.000000,51975.000000,88.683705)}
{pt3dadd(168720.000000,144732.000000,51700.000000,84.652627)}
{pt3dadd(168468.000000,144588.000000,51425.000000,80.621550)}
{pt3dadd(168132.000000,144456.000000,51200.000000,160.489764)}

{create adhoc22}
{access adhoc22}
{connect adhoc22(1), adhoc20(0)}
{nseg = 1}
{strdef color color = "White"}
{pt3dclear()}
{pt3dadd(169308.000000,145440.000000,52725.000000,167.176836)}
{pt3dadd(169548.000000,145332.000000,52900.000000,240.734646)}
{pt3dadd(169716.000000,144876.000000,53100.000000,230.704038)}
{pt3dadd(169836.000000,144540.000000,53275.000000,220.673430)}
{pt3dadd(169728.000000,144300.000000,53600.000000,210.642822)}
{pt3dadd(169824.000000,144096.000000,53625.000000,200.612214)}
{pt3dadd(169968.000000,143784.000000,53725.000000,210.642822)}
{pt3dadd(169548.000000,143340.000000,53750.000000,220.673430)}
{pt3dadd(169320.000000,142752.000000,53750.000000,230.704038)}
{pt3dadd(169332.000000,142560.000000,53875.000000,240.734646)}
{pt3dadd(169332.000000,142236.000000,53825.000000,227.360502)}
{pt3dadd(169368.000000,142068.000000,53775.000000,213.986358)}
{pt3dadd(169464.000000,141888.000000,53850.000000,200.612214)}
{pt3dadd(169512.000000,141696.000000,53800.000000,240.734646)}

{create adhoc23}
{access adhoc23}
{connect adhoc23(1), adhoc19(0)}
{nseg = 1}
{strdef color color = "White"}
{pt3dclear()}
{pt3dadd(168660.000000,153504.000000,53700.000000,277.326324)}
{pt3dadd(168660.000000,153768.000000,52600.000000,575.063856)}
{pt3dadd(168216.000000,153528.000000,52300.000000,581.054112)}
{pt3dadd(168180.000000,153432.000000,51900.000000,587.044368)}
{pt3dadd(168144.000000,153324.000000,51625.000000,593.034624)}
{pt3dadd(168168.000000,153456.000000,51300.000000,599.024880)}
{pt3dadd(168156.000000,153552.000000,51100.000000,599.024880)}
{pt3dadd(168192.000000,153504.000000,50775.000000,599.024880)}
{pt3dadd(167952.000000,153720.000000,50275.000000,599.024880)}
{pt3dadd(167856.000000,153948.000000,49975.000000,599.024880)}
{pt3dadd(167892.000000,153984.000000,49700.000000,628.976115)}
{pt3dadd(167652.000000,153888.000000,49450.000000,658.927350)}
{pt3dadd(167796.000000,154008.000000,49100.000000,688.878585)}
{pt3dadd(167520.000000,153960.000000,48700.000000,718.829820)}
{pt3dadd(167424.000000,153972.000000,48250.000000,718.829820)}
{pt3dadd(167196.000000,154104.000000,47950.000000,718.829820)}
{pt3dadd(167004.000000,154140.000000,47450.000000,718.829820)}
{pt3dadd(166812.000000,154188.000000,46875.000000,718.829820)}
{pt3dadd(166440.000000,154308.000000,46600.000000,575.063856)}
{pt3dadd(166560.000000,154056.000000,46275.000000,499.187376)}

{create adhoc24}
{access adhoc24}
{connect adhoc24(1), adhoc23(0)}
{nseg = 1}
{strdef color color = "White"}
{pt3dclear()}
{pt3dadd(166560.000000,154056.000000,46275.000000,499.187376)}
{pt3dadd(165936.000000,155376.000000,46175.000000,231.105276)}
{pt3dadd(165696.000000,156168.000000,45975.000000,223.482010)}
{pt3dadd(165564.000000,156360.000000,45825.000000,215.858745)}
{pt3dadd(165480.000000,156552.000000,45775.000000,208.235480)}
{pt3dadd(165576.000000,156780.000000,45575.000000,200.612214)}
{pt3dadd(165612.000000,156984.000000,45525.000000,200.612214)}
{pt3dadd(165552.000000,157176.000000,45375.000000,200.612214)}
{pt3dadd(165600.000000,157368.000000,45275.000000,200.612214)}
{pt3dadd(165600.000000,157536.000000,45125.000000,200.612214)}
{pt3dadd(165324.000000,157800.000000,44750.000000,185.287671)}
{pt3dadd(165408.000000,157968.000000,44700.000000,169.963128)}
{pt3dadd(165300.000000,158220.000000,44325.000000,154.638585)}
{pt3dadd(165384.000000,158388.000000,44250.000000,139.314042)}
{pt3dadd(165456.000000,158628.000000,44025.000000,154.638585)}
{pt3dadd(165396.000000,158892.000000,43875.000000,169.963128)}
{pt3dadd(165444.000000,159108.000000,43625.000000,185.287671)}
{pt3dadd(165408.000000,159288.000000,43600.000000,200.612214)}
{pt3dadd(165540.000000,159552.000000,43375.000000,192.253370)}
{pt3dadd(165612.000000,159828.000000,43425.000000,183.894525)}
{pt3dadd(165744.000000,159996.000000,43300.000000,175.535680)}
{pt3dadd(165936.000000,159936.000000,42875.000000,167.176836)}
{pt3dadd(165924.000000,160020.000000,42700.000000,167.176836)}
{pt3dadd(165924.000000,160236.000000,42500.000000,80.621550)}

{create adhoc25}
{access adhoc25}
{connect adhoc25(1), adhoc23(0)}
{nseg = 1}
{strdef color color = "White"}
{pt3dclear()}
{pt3dadd(166560.000000,154056.000000,46275.000000,499.187376)}
{pt3dadd(166500.000000,153864.000000,45900.000000,599.024880)}
{pt3dadd(166500.000000,153780.000000,45475.000000,599.024880)}
{pt3dadd(166440.000000,153540.000000,45175.000000,599.024880)}
{pt3dadd(166332.000000,153504.000000,44725.000000,599.024880)}
{pt3dadd(166356.000000,153360.000000,44400.000000,599.024880)}
{pt3dadd(166344.000000,153360.000000,44150.000000,574.065504)}
{pt3dadd(166140.000000,153072.000000,43850.000000,549.106128)}
{pt3dadd(166092.000000,153096.000000,43575.000000,524.146752)}
{pt3dadd(165912.000000,152988.000000,43300.000000,499.187376)}
{pt3dadd(166032.000000,152940.000000,43025.000000,524.146752)}
{pt3dadd(165996.000000,152880.000000,42675.000000,549.106128)}
{pt3dadd(166032.000000,152880.000000,42250.000000,574.065504)}
{pt3dadd(166176.000000,152784.000000,41925.000000,599.024880)}
{pt3dadd(166464.000000,152772.000000,41650.000000,599.024880)}
{pt3dadd(166728.000000,152640.000000,41400.000000,599.024880)}
{pt3dadd(166812.000000,152412.000000,41025.000000,599.024880)}
{pt3dadd(166764.000000,152400.000000,40850.000000,499.187376)}

{create adhoc26}
{access adhoc26}
{connect adhoc26(1), adhoc25(0)}
{nseg = 1}
{strdef color color = "White"}
{pt3dclear()}
{pt3dadd(166764.000000,152400.000000,40850.000000,499.187376)}
{pt3dadd(166524.000000,152712.000000,40500.000000,415.989486)}
{pt3dadd(166464.000000,152904.000000,40125.000000,415.989486)}
{pt3dadd(166548.000000,153024.000000,39925.000000,415.989486)}
{pt3dadd(167580.000000,153456.000000,39625.000000,415.989486)}
{pt3dadd(168372.000000,153528.000000,39275.000000,415.989486)}
{pt3dadd(168804.000000,153480.000000,38825.000000,415.989486)}
{pt3dadd(169128.000000,153432.000000,38400.000000,415.989486)}
{pt3dadd(169560.000000,153396.000000,38125.000000,415.989486)}
{pt3dadd(169932.000000,153156.000000,37675.000000,415.989486)}
{pt3dadd(170676.000000,152880.000000,37225.000000,398.656589)}
{pt3dadd(171000.000000,152904.000000,37025.000000,381.323691)}
{pt3dadd(171204.000000,152796.000000,36825.000000,363.990794)}
{pt3dadd(171396.000000,152700.000000,36575.000000,346.657896)}
{pt3dadd(171552.000000,152604.000000,36325.000000,363.990794)}
{pt3dadd(171768.000000,152508.000000,36075.000000,381.323691)}
{pt3dadd(172068.000000,152412.000000,35825.000000,398.656589)}
{pt3dadd(172272.000000,152304.000000,35675.000000,415.989486)}
{pt3dadd(172740.000000,152124.000000,35300.000000,415.989486)}
{pt3dadd(173232.000000,152112.000000,34900.000000,415.989486)}
{pt3dadd(173664.000000,151584.000000,34375.000000,415.989486)}
{pt3dadd(174120.000000,151284.000000,33975.000000,415.989486)}
{pt3dadd(174576.000000,150996.000000,33475.000000,398.656589)}
{pt3dadd(174912.000000,150804.000000,33075.000000,381.323691)}
{pt3dadd(175248.000000,150600.000000,32650.000000,363.990794)}
{pt3dadd(176712.000000,149880.000000,32025.000000,346.657896)}
{pt3dadd(177048.000000,149832.000000,31925.000000,332.213819)}
{pt3dadd(177552.000000,149688.000000,31775.000000,317.769741)}
{pt3dadd(177624.000000,149412.000000,31325.000000,303.325664)}
{pt3dadd(177900.000000,149064.000000,30925.000000,288.881586)}
{pt3dadd(178752.000000,148500.000000,30275.000000,288.881586)}
{pt3dadd(178992.000000,148476.000000,30125.000000,288.881586)}
{pt3dadd(179208.000000,148320.000000,29925.000000,288.881586)}
{pt3dadd(179412.000000,148212.000000,29800.000000,288.881586)}
{pt3dadd(179820.000000,148152.000000,29600.000000,308.140356)}
{pt3dadd(180048.000000,147972.000000,29725.000000,327.399126)}
{pt3dadd(180252.000000,147792.000000,29700.000000,346.657896)}
{pt3dadd(180636.000000,147744.000000,29450.000000,240.734646)}

{create adhoc27}
{access adhoc27}
{connect adhoc27(1), adhoc26(0)}
{nseg = 1}
{strdef color color = "White"}
{pt3dclear()}
{pt3dadd(180636.000000,147744.000000,29450.000000,240.734646)}
{pt3dadd(181296.000000,147972.000000,28800.000000,240.734646)}
{pt3dadd(181620.000000,148044.000000,28525.000000,240.734646)}
{pt3dadd(182004.000000,148152.000000,28250.000000,240.734646)}
{pt3dadd(182388.000000,148608.000000,27950.000000,240.734646)}
{pt3dadd(182676.000000,148404.000000,27675.000000,240.734646)}
{pt3dadd(183240.000000,148488.000000,27200.000000,230.704038)}
{pt3dadd(183396.000000,148380.000000,27225.000000,220.673430)}
{pt3dadd(183528.000000,148428.000000,27175.000000,210.642822)}
{pt3dadd(183708.000000,148296.000000,27125.000000,200.612214)}
{pt3dadd(183924.000000,148320.000000,27150.000000,213.986358)}
{pt3dadd(184080.000000,148344.000000,27225.000000,227.360502)}
{pt3dadd(184272.000000,148332.000000,27050.000000,240.734646)}
{pt3dadd(184440.000000,148476.000000,26900.000000,240.734646)}

{create adhoc28}
{access adhoc28}
{connect adhoc28(1), adhoc26(0)}
{nseg = 1}
{strdef color color = "White"}
{pt3dclear()}
{pt3dadd(180636.000000,147744.000000,29450.000000,240.734646)}
{pt3dadd(181836.000000,146640.000000,29350.000000,167.176836)}
{pt3dadd(181968.000000,146412.000000,29400.000000,96.745860)}

{create adhoc29}
{access adhoc29}
{connect adhoc29(1), adhoc25(0)}
{nseg = 1}
{strdef color color = "White"}
{pt3dclear()}
{pt3dadd(166764.000000,152400.000000,40850.000000,499.187376)}
{pt3dadd(167280.000000,152076.000000,40850.000000,346.657896)}
{pt3dadd(168072.000000,151548.000000,40850.000000,346.657896)}
{pt3dadd(168288.000000,151068.000000,40450.000000,346.657896)}
{pt3dadd(168540.000000,151056.000000,40475.000000,346.657896)}
{pt3dadd(168780.000000,150924.000000,40525.000000,346.657896)}
{pt3dadd(169020.000000,150732.000000,40350.000000,329.325003)}
{pt3dadd(169212.000000,150648.000000,40325.000000,311.992110)}
{pt3dadd(169428.000000,150564.000000,40350.000000,294.659217)}
{pt3dadd(169608.000000,150528.000000,40375.000000,277.326324)}
{pt3dadd(169788.000000,150528.000000,40425.000000,294.659217)}
{pt3dadd(169944.000000,150252.000000,40300.000000,311.992110)}
{pt3dadd(170196.000000,149952.000000,40225.000000,329.325003)}
{pt3dadd(170580.000000,149868.000000,40250.000000,346.657896)}
{pt3dadd(171012.000000,149592.000000,40300.000000,293.696271)}
{pt3dadd(171144.000000,149460.000000,40475.000000,240.734646)}
{pt3dadd(171312.000000,148968.000000,40475.000000,240.734646)}

{create adhoc30}
{access adhoc30}
{connect adhoc30(1), adhoc29(0)}
{nseg = 1}
{strdef color color = "White"}
{pt3dclear()}
{pt3dadd(171312.000000,148968.000000,40475.000000,240.734646)}
{pt3dadd(171024.000000,150204.000000,40475.000000,200.612214)}
{pt3dadd(171240.000000,149916.000000,39925.000000,210.642822)}
{pt3dadd(171552.000000,149808.000000,39575.000000,220.673430)}
{pt3dadd(171720.000000,149652.000000,39250.000000,230.704038)}
{pt3dadd(172344.000000,149304.000000,38825.000000,240.734646)}
{pt3dadd(172872.000000,148824.000000,38350.000000,240.734646)}
{pt3dadd(172920.000000,148776.000000,38100.000000,240.734646)}
{pt3dadd(173052.000000,148632.000000,37750.000000,240.734646)}
{pt3dadd(173388.000000,148656.000000,37425.000000,240.734646)}
{pt3dadd(173616.000000,148524.000000,37175.000000,230.704038)}
{pt3dadd(173568.000000,148188.000000,36875.000000,220.673430)}
{pt3dadd(173892.000000,148056.000000,36500.000000,210.642822)}
{pt3dadd(174588.000000,148008.000000,36100.000000,200.612214)}
{pt3dadd(175020.000000,147660.000000,36100.000000,200.612214)}
{pt3dadd(175152.000000,147456.000000,36075.000000,200.612214)}
{pt3dadd(175380.000000,147264.000000,36000.000000,200.612214)}
{pt3dadd(175704.000000,147072.000000,36050.000000,200.612214)}

{create adhoc31}
{access adhoc31}
{connect adhoc31(1), adhoc29(0)}
{nseg = 1}
{strdef color color = "White"}
{pt3dclear()}
{pt3dadd(171312.000000,148968.000000,40475.000000,240.734646)}
{pt3dadd(171588.000000,148596.000000,40550.000000,200.612214)}
{pt3dadd(171864.000000,148224.000000,40300.000000,198.606091)}
{pt3dadd(171984.000000,147756.000000,39950.000000,196.599969)}
{pt3dadd(172032.000000,147024.000000,39750.000000,194.593846)}
{pt3dadd(171924.000000,146784.000000,39650.000000,192.587724)}
{pt3dadd(171732.000000,146568.000000,39550.000000,194.593846)}
{pt3dadd(171636.000000,146436.000000,39475.000000,196.599969)}
{pt3dadd(171828.000000,146244.000000,39425.000000,198.606091)}
{pt3dadd(171816.000000,145980.000000,39350.000000,200.612214)}
{pt3dadd(171780.000000,145872.000000,39375.000000,210.642822)}
{pt3dadd(171780.000000,145704.000000,39350.000000,220.673430)}
{pt3dadd(172008.000000,145584.000000,39300.000000,230.704038)}
{pt3dadd(172248.000000,145308.000000,39300.000000,240.734646)}
{pt3dadd(172236.000000,145032.000000,39275.000000,240.734646)}
{pt3dadd(172404.000000,144720.000000,39350.000000,240.734646)}
{pt3dadd(172572.000000,144552.000000,39425.000000,240.734646)}
{pt3dadd(172596.000000,144288.000000,39175.000000,240.734646)}
{pt3dadd(172776.000000,143940.000000,39125.000000,230.704038)}
{pt3dadd(172740.000000,143700.000000,39150.000000,220.673430)}
{pt3dadd(172824.000000,143460.000000,39100.000000,210.642822)}
{pt3dadd(172968.000000,143256.000000,39125.000000,200.612214)}
{pt3dadd(173004.000000,143040.000000,39025.000000,210.642822)}
{pt3dadd(173028.000000,142872.000000,39025.000000,220.673430)}
{pt3dadd(173100.000000,142692.000000,39050.000000,230.704038)}
{pt3dadd(173136.000000,142548.000000,39050.000000,240.734646)}
{pt3dadd(173172.000000,142296.000000,39050.000000,222.345193)}
{pt3dadd(173136.000000,141960.000000,38800.000000,203.955741)}
{pt3dadd(173184.000000,141636.000000,38750.000000,185.566288)}
{pt3dadd(173316.000000,141204.000000,38800.000000,167.176836)}
{pt3dadd(173448.000000,140856.000000,38850.000000,175.535680)}
{pt3dadd(173400.000000,140400.000000,39075.000000,183.894525)}
{pt3dadd(173532.000000,140256.000000,39200.000000,192.253370)}
{pt3dadd(173556.000000,140076.000000,39100.000000,200.612214)}
{pt3dadd(173556.000000,139872.000000,39100.000000,200.612214)}
{pt3dadd(173580.000000,139716.000000,39125.000000,200.612214)}
{pt3dadd(173616.000000,139548.000000,38950.000000,200.612214)}
{pt3dadd(173508.000000,139416.000000,39150.000000,200.612214)}
{pt3dadd(173556.000000,139296.000000,39175.000000,198.606087)}
{pt3dadd(173640.000000,139104.000000,39125.000000,196.599960)}
{pt3dadd(173832.000000,138948.000000,39225.000000,194.593833)}
{pt3dadd(173952.000000,138792.000000,39175.000000,192.587706)}
{pt3dadd(174132.000000,138576.000000,39150.000000,174.829818)}
{pt3dadd(174180.000000,138312.000000,39125.000000,157.071930)}
{pt3dadd(174096.000000,138108.000000,39150.000000,139.314042)}
{pt3dadd(174216.000000,137628.000000,39050.000000,288.881586)}

{create adhoc32}
{access adhoc32}
{connect adhoc32(1), adhoc31(0)}
{nseg = 1}
{strdef color color = "White"}
{pt3dclear()}
{pt3dadd(174216.000000,137628.000000,39050.000000,288.881586)}
{pt3dadd(174168.000000,137652.000000,39400.000000,133.741476)}
{pt3dadd(174120.000000,137424.000000,39675.000000,142.100316)}
{pt3dadd(174060.000000,137196.000000,39850.000000,150.459156)}
{pt3dadd(174060.000000,137064.000000,39800.000000,158.817996)}
{pt3dadd(174048.000000,136920.000000,39775.000000,167.176836)}
{pt3dadd(173952.000000,136764.000000,39825.000000,167.176836)}
{pt3dadd(173880.000000,136596.000000,39875.000000,167.176836)}
{pt3dadd(174000.000000,136428.000000,39875.000000,167.176836)}
{pt3dadd(174072.000000,136212.000000,39975.000000,167.176836)}
{pt3dadd(174036.000000,136056.000000,40000.000000,167.176836)}
{pt3dadd(174096.000000,135912.000000,40000.000000,167.176836)}
{pt3dadd(174108.000000,135708.000000,40100.000000,167.176836)}
{pt3dadd(174060.000000,135564.000000,40200.000000,167.176836)}
{pt3dadd(174000.000000,135408.000000,40225.000000,197.603024)}
{pt3dadd(174000.000000,134064.000000,40625.000000,228.029211)}
{pt3dadd(173856.000000,133572.000000,40625.000000,258.455399)}
{pt3dadd(173820.000000,133416.000000,40625.000000,288.881586)}
{pt3dadd(173736.000000,133248.000000,40625.000000,266.814243)}
{pt3dadd(173664.000000,133068.000000,40650.000000,244.746900)}
{pt3dadd(173592.000000,133020.000000,40900.000000,222.679557)}
{pt3dadd(173676.000000,132876.000000,41050.000000,200.612214)}
{pt3dadd(173832.000000,132564.000000,41450.000000,219.790746)}
{pt3dadd(173496.000000,132288.000000,41850.000000,238.969278)}
{pt3dadd(173412.000000,132060.000000,42100.000000,258.147810)}
{pt3dadd(173196.000000,131940.000000,42150.000000,277.326342)}
{pt3dadd(172920.000000,131652.000000,42400.000000,200.612214)}
{pt3dadd(172656.000000,131208.000000,42800.000000,240.734646)}

{create adhoc33}
{access adhoc33}
{connect adhoc33(1), adhoc31(0)}
{nseg = 1}
{strdef color color = "White"}
{pt3dclear()}
{pt3dadd(174216.000000,137628.000000,39050.000000,288.881586)}
{pt3dadd(174096.000000,137364.000000,38675.000000,200.612214)}
{pt3dadd(173916.000000,137196.000000,38475.000000,200.612214)}
{pt3dadd(173844.000000,137028.000000,38275.000000,200.612214)}
{pt3dadd(173712.000000,136668.000000,38000.000000,200.612214)}
{pt3dadd(173868.000000,136284.000000,37675.000000,200.612214)}
{pt3dadd(173976.000000,136104.000000,37650.000000,192.253370)}
{pt3dadd(174060.000000,135876.000000,37625.000000,183.894525)}
{pt3dadd(174216.000000,135708.000000,37575.000000,175.535680)}
{pt3dadd(174204.000000,135564.000000,37475.000000,167.176836)}
{pt3dadd(174252.000000,135432.000000,37425.000000,160.623504)}
{pt3dadd(174336.000000,135288.000000,37300.000000,154.070172)}
{pt3dadd(174708.000000,134880.000000,37075.000000,96.745860)}

{create adhoc34}
{access adhoc34}
{connect adhoc34(1), adhoc16(0)}
{nseg = 1}
{strdef color color = "White"}
{pt3dclear()}
{pt3dadd(170808.000000,165516.000000,63250.000000,499.187376)}
{pt3dadd(170568.000000,164352.000000,63250.000000,200.612214)}
{pt3dadd(170556.000000,164220.000000,63225.000000,200.612214)}
{pt3dadd(170532.000000,164088.000000,63150.000000,200.612214)}
{pt3dadd(170436.000000,163848.000000,63150.000000,200.612214)}
{pt3dadd(170376.000000,163512.000000,63100.000000,200.612214)}
{pt3dadd(170424.000000,163164.000000,63125.000000,200.612214)}
{pt3dadd(170472.000000,162984.000000,63150.000000,200.612214)}
{pt3dadd(170532.000000,162696.000000,63200.000000,200.612214)}
{pt3dadd(170580.000000,162528.000000,63200.000000,200.612214)}
{pt3dadd(170892.000000,162300.000000,63350.000000,200.612214)}
{pt3dadd(170928.000000,161952.000000,63300.000000,200.612214)}
{pt3dadd(171168.000000,161808.000000,63325.000000,200.612214)}
{pt3dadd(171300.000000,161592.000000,63275.000000,200.612214)}
{pt3dadd(171468.000000,161448.000000,63300.000000,198.606091)}
{pt3dadd(171852.000000,161244.000000,63350.000000,196.599969)}
{pt3dadd(171996.000000,161040.000000,63325.000000,194.593846)}
{pt3dadd(172068.000000,160848.000000,63325.000000,192.587724)}
{pt3dadd(172380.000000,160644.000000,63375.000000,194.593846)}
{pt3dadd(172524.000000,160332.000000,63400.000000,196.599969)}
{pt3dadd(172488.000000,160176.000000,63500.000000,198.606091)}
{pt3dadd(172500.000000,159936.000000,63475.000000,200.612214)}
{pt3dadd(172620.000000,159732.000000,63525.000000,210.642822)}
{pt3dadd(172680.000000,159540.000000,63550.000000,220.673430)}
{pt3dadd(172668.000000,159336.000000,63350.000000,230.704038)}
{pt3dadd(172728.000000,159120.000000,63325.000000,240.734646)}
{pt3dadd(172764.000000,158940.000000,63325.000000,238.327304)}
{pt3dadd(172896.000000,158784.000000,63375.000000,235.919961)}
{pt3dadd(172812.000000,158340.000000,63300.000000,233.512618)}
{pt3dadd(172836.000000,158136.000000,63275.000000,231.105276)}
{pt3dadd(172896.000000,157980.000000,63250.000000,233.512618)}
{pt3dadd(172800.000000,157776.000000,63150.000000,235.919961)}
{pt3dadd(172704.000000,157464.000000,63050.000000,238.327304)}
{pt3dadd(172608.000000,157056.000000,63250.000000,240.734646)}
{pt3dadd(172224.000000,156684.000000,63200.000000,240.734646)}
{pt3dadd(172296.000000,156540.000000,63200.000000,240.734646)}
{pt3dadd(172164.000000,156324.000000,63250.000000,240.734646)}
{pt3dadd(172188.000000,156108.000000,63225.000000,240.734646)}
{pt3dadd(172212.000000,155904.000000,63225.000000,252.771381)}
{pt3dadd(172332.000000,155760.000000,63200.000000,264.808116)}
{pt3dadd(172488.000000,155580.000000,63175.000000,276.844851)}
{pt3dadd(172656.000000,155388.000000,63125.000000,288.881586)}
{pt3dadd(172860.000000,155220.000000,63150.000000,288.881586)}
{pt3dadd(173220.000000,154980.000000,63125.000000,288.881586)}
{pt3dadd(173388.000000,154812.000000,62950.000000,288.881586)}
{pt3dadd(173496.000000,154656.000000,62925.000000,288.881586)}
{pt3dadd(173628.000000,154500.000000,62875.000000,285.992771)}
{pt3dadd(173808.000000,154344.000000,62825.000000,283.103955)}
{pt3dadd(173880.000000,154176.000000,62750.000000,280.215140)}
{pt3dadd(173928.000000,153828.000000,62700.000000,277.326324)}
{pt3dadd(173796.000000,153552.000000,62550.000000,258.147797)}
{pt3dadd(173580.000000,153312.000000,62450.000000,238.969269)}
{pt3dadd(173556.000000,153072.000000,62400.000000,219.790742)}
{pt3dadd(173532.000000,152880.000000,62350.000000,200.612214)}
{pt3dadd(173520.000000,152640.000000,62275.000000,200.612214)}
{pt3dadd(173460.000000,152364.000000,62200.000000,200.612214)}
{pt3dadd(173268.000000,152220.000000,62100.000000,200.612214)}
{pt3dadd(173256.000000,152028.000000,62025.000000,200.612214)}
{pt3dadd(172992.000000,151836.000000,62025.000000,200.612214)}
{pt3dadd(172764.000000,151608.000000,61950.000000,200.612214)}
{pt3dadd(172548.000000,151284.000000,61950.000000,200.612214)}
{pt3dadd(172560.000000,150960.000000,61775.000000,200.612214)}
{pt3dadd(172488.000000,150480.000000,61475.000000,192.253370)}
{pt3dadd(172476.000000,150276.000000,61200.000000,183.894525)}
{pt3dadd(172176.000000,149796.000000,60875.000000,175.535680)}
{pt3dadd(172176.000000,149472.000000,60550.000000,167.176836)}
{pt3dadd(171960.000000,149352.000000,60250.000000,200.612214)}

{create adhoc35}
{access adhoc35}
{connect adhoc35(1), adhoc15(0)}
{nseg = 1}
{strdef color color = "White"}
{pt3dclear()}
{pt3dadd(170808.000000,169416.000000,67000.000000,499.187376)}
{pt3dadd(168888.000000,169848.000000,67000.000000,332.791596)}
{pt3dadd(168492.000000,169644.000000,66650.000000,353.591069)}
{pt3dadd(168420.000000,169488.000000,66325.000000,374.390541)}
{pt3dadd(168084.000000,169596.000000,66050.000000,395.190014)}
{pt3dadd(167952.000000,169608.000000,65600.000000,415.989486)}
{pt3dadd(167592.000000,169404.000000,65125.000000,436.788958)}
{pt3dadd(167364.000000,169344.000000,64850.000000,457.588431)}
{pt3dadd(167292.000000,169188.000000,64650.000000,478.387903)}
{pt3dadd(167028.000000,169176.000000,64300.000000,499.187376)}
{pt3dadd(166824.000000,169164.000000,64075.000000,478.387903)}
{pt3dadd(166620.000000,169092.000000,63825.000000,457.588431)}
{pt3dadd(166416.000000,169020.000000,63525.000000,436.788958)}
{pt3dadd(166248.000000,168936.000000,63250.000000,415.989486)}
{pt3dadd(166080.000000,168852.000000,63000.000000,415.989486)}
{pt3dadd(166116.000000,169008.000000,62500.000000,415.989486)}
{pt3dadd(165852.000000,169056.000000,62175.000000,415.989486)}
{pt3dadd(165768.000000,169080.000000,61925.000000,415.989486)}
{pt3dadd(165588.000000,169140.000000,61675.000000,436.788958)}
{pt3dadd(165324.000000,169320.000000,61450.000000,457.588431)}
{pt3dadd(165072.000000,169356.000000,61175.000000,478.387903)}
{pt3dadd(164640.000000,169380.000000,60775.000000,499.187376)}
{pt3dadd(164196.000000,169440.000000,60550.000000,499.187376)}
{pt3dadd(163668.000000,169596.000000,60125.000000,499.187376)}
{pt3dadd(163212.000000,169764.000000,59750.000000,499.187376)}
{pt3dadd(162756.000000,169944.000000,59350.000000,499.187376)}
{pt3dadd(162480.000000,169932.000000,59000.000000,478.387903)}
{pt3dadd(162276.000000,169992.000000,58625.000000,457.588431)}
{pt3dadd(162072.000000,170040.000000,58325.000000,436.788958)}
{pt3dadd(161868.000000,170088.000000,57850.000000,415.989486)}
{pt3dadd(161652.000000,170460.000000,57525.000000,411.829591)}
{pt3dadd(161484.000000,170484.000000,57200.000000,407.669697)}
{pt3dadd(161352.000000,170628.000000,56975.000000,403.509803)}
{pt3dadd(161160.000000,170772.000000,56750.000000,399.349908)}
{pt3dadd(160896.000000,170976.000000,56550.000000,424.309275)}
{pt3dadd(160836.000000,171168.000000,56275.000000,449.268642)}
{pt3dadd(160740.000000,171528.000000,55975.000000,474.228009)}
{pt3dadd(160548.000000,171564.000000,55700.000000,499.187376)}
{pt3dadd(160536.000000,171960.000000,55400.000000,461.055006)}
{pt3dadd(160500.000000,172008.000000,55100.000000,422.922636)}
{pt3dadd(160320.000000,172068.000000,54800.000000,384.790266)}
{pt3dadd(160188.000000,172080.000000,54600.000000,346.657896)}
{pt3dadd(160188.000000,172140.000000,54250.000000,346.657896)}
{pt3dadd(159984.000000,171816.000000,54050.000000,346.657896)}
{pt3dadd(160044.000000,172440.000000,53650.000000,346.657896)}
{pt3dadd(159948.000000,172560.000000,53350.000000,346.657896)}
{pt3dadd(159624.000000,172596.000000,53125.000000,346.657896)}
{pt3dadd(159468.000000,172728.000000,52725.000000,346.657896)}
{pt3dadd(158880.000000,172944.000000,52475.000000,346.657896)}
{pt3dadd(158760.000000,173052.000000,52075.000000,346.657896)}
{pt3dadd(158640.000000,173148.000000,51825.000000,363.990794)}
{pt3dadd(158508.000000,173316.000000,51550.000000,381.323691)}
{pt3dadd(158364.000000,173424.000000,51300.000000,398.656589)}
{pt3dadd(158436.000000,173496.000000,51100.000000,415.989486)}
{pt3dadd(158352.000000,173676.000000,50875.000000,415.989486)}
{pt3dadd(158208.000000,173808.000000,50450.000000,415.989486)}
{pt3dadd(158112.000000,173844.000000,50225.000000,415.989486)}
{pt3dadd(158256.000000,173880.000000,49975.000000,415.989486)}
{pt3dadd(158280.000000,174300.000000,49600.000000,398.656589)}
{pt3dadd(158352.000000,174480.000000,49300.000000,381.323691)}
{pt3dadd(158304.000000,174660.000000,48900.000000,363.990794)}
{pt3dadd(158280.000000,174780.000000,48625.000000,346.657896)}
{pt3dadd(158268.000000,174924.000000,48225.000000,332.213819)}
{pt3dadd(158436.000000,174948.000000,47975.000000,317.769741)}
{pt3dadd(158388.000000,175020.000000,47775.000000,303.325664)}
{pt3dadd(158460.000000,175032.000000,47525.000000,288.881586)}
{pt3dadd(158616.000000,175224.000000,47150.000000,303.325664)}
{pt3dadd(159096.000000,175332.000000,46950.000000,317.769741)}
{pt3dadd(159096.000000,175260.000000,46725.000000,332.213819)}
{pt3dadd(159600.000000,175296.000000,46350.000000,346.657896)}
{pt3dadd(160032.000000,175308.000000,45925.000000,332.213819)}
{pt3dadd(160428.000000,175344.000000,45725.000000,317.769741)}
{pt3dadd(160560.000000,175380.000000,45300.000000,303.325664)}
{pt3dadd(160992.000000,175140.000000,45000.000000,288.881586)}
{pt3dadd(161184.000000,174972.000000,44750.000000,274.437509)}
{pt3dadd(161196.000000,174936.000000,44425.000000,259.993431)}
{pt3dadd(161364.000000,175080.000000,44150.000000,245.549354)}
{pt3dadd(161604.000000,175224.000000,43975.000000,231.105276)}
{pt3dadd(161748.000000,175308.000000,43700.000000,213.451398)}
{pt3dadd(161892.000000,175380.000000,43425.000000,195.797520)}
{pt3dadd(162012.000000,175380.000000,43075.000000,178.143642)}
{pt3dadd(162024.000000,175440.000000,42800.000000,160.489764)}
{pt3dadd(162264.000000,175572.000000,42475.000000,192.587720)}
{pt3dadd(162312.000000,175740.000000,42200.000000,224.685675)}
{pt3dadd(162552.000000,175932.000000,41975.000000,256.783631)}
{pt3dadd(162660.000000,176412.000000,41725.000000,288.881586)}
{pt3dadd(162720.000000,176556.000000,41500.000000,266.814243)}
{pt3dadd(162792.000000,176700.000000,41275.000000,244.746900)}
{pt3dadd(162468.000000,176916.000000,41050.000000,222.679557)}
{pt3dadd(162492.000000,176916.000000,40800.000000,200.612214)}
{pt3dadd(162468.000000,177144.000000,40575.000000,200.612214)}
{pt3dadd(162348.000000,177348.000000,40300.000000,200.612214)}
{pt3dadd(162324.000000,177468.000000,40050.000000,200.612214)}
{pt3dadd(162360.000000,177576.000000,39825.000000,200.612214)}
{pt3dadd(162396.000000,177684.000000,39550.000000,198.606091)}
{pt3dadd(162612.000000,177744.000000,39275.000000,196.599969)}
{pt3dadd(163068.000000,177828.000000,39025.000000,194.593846)}
{pt3dadd(163524.000000,177876.000000,38800.000000,192.587724)}
{pt3dadd(163596.000000,178056.000000,38375.000000,204.624455)}
{pt3dadd(163896.000000,178176.000000,38050.000000,216.661185)}
{pt3dadd(164112.000000,178128.000000,37725.000000,228.697915)}
{pt3dadd(164268.000000,178080.000000,37400.000000,240.734646)}
{pt3dadd(164256.000000,178044.000000,37150.000000,230.704038)}
{pt3dadd(164424.000000,177984.000000,36875.000000,220.673430)}
{pt3dadd(164388.000000,177972.000000,36600.000000,210.642822)}
{pt3dadd(164604.000000,177984.000000,36325.000000,200.612214)}
{pt3dadd(164664.000000,177900.000000,36050.000000,139.314042)}

{create adhoc36}
{access adhoc36}
{connect adhoc36(1), adhoc14(0)}
{nseg = 1}
{strdef color color = "White"}
{pt3dclear()}
{pt3dadd(171900.000000,173496.000000,73100.000000,479.219886)}
{pt3dadd(171900.000000,174792.000000,73300.000000,399.349908)}
{pt3dadd(171900.000000,175320.000000,73075.000000,424.309275)}
{pt3dadd(171372.000000,175548.000000,72700.000000,449.268642)}
{pt3dadd(171324.000000,175824.000000,72600.000000,474.228009)}
{pt3dadd(171096.000000,176436.000000,72250.000000,499.187376)}
{pt3dadd(170688.000000,176760.000000,71775.000000,499.187376)}
{pt3dadd(169944.000000,177060.000000,70875.000000,499.187376)}
{pt3dadd(169188.000000,177936.000000,70375.000000,499.187376)}
{pt3dadd(169140.000000,178140.000000,70025.000000,499.187376)}
{pt3dadd(168792.000000,178776.000000,69450.000000,499.187376)}

{create adhoc37}
{access adhoc37}
{connect adhoc37(1), adhoc36(0)}
{nseg = 1}
{strdef color color = "White"}
{pt3dclear()}
{pt3dadd(168792.000000,178776.000000,69450.000000,499.187376)}
{pt3dadd(169308.000000,179712.000000,69400.000000,200.612214)}
{pt3dadd(169488.000000,179892.000000,69400.000000,185.287671)}
{pt3dadd(169704.000000,180000.000000,69600.000000,169.963128)}
{pt3dadd(169944.000000,180828.000000,69375.000000,154.638585)}
{pt3dadd(170064.000000,180972.000000,69275.000000,139.314042)}
{pt3dadd(170100.000000,181116.000000,69225.000000,146.279741)}
{pt3dadd(170172.000000,181284.000000,69150.000000,153.245439)}
{pt3dadd(170208.000000,181452.000000,69200.000000,160.211138)}
{pt3dadd(170268.000000,181596.000000,69150.000000,167.176836)}
{pt3dadd(170304.000000,181740.000000,69175.000000,167.176836)}
{pt3dadd(170364.000000,181884.000000,69225.000000,167.176836)}
{pt3dadd(170184.000000,182220.000000,69250.000000,167.176836)}
{pt3dadd(170208.000000,182364.000000,69175.000000,167.176836)}
{pt3dadd(170184.000000,182568.000000,69200.000000,167.176836)}
{pt3dadd(170208.000000,182724.000000,69275.000000,167.176836)}
{pt3dadd(170316.000000,182904.000000,69150.000000,167.176836)}
{pt3dadd(170244.000000,183096.000000,69200.000000,167.176836)}
{pt3dadd(170256.000000,183252.000000,69225.000000,167.176836)}
{pt3dadd(169932.000000,183864.000000,69050.000000,167.176836)}
{pt3dadd(169608.000000,184380.000000,69050.000000,167.176836)}
{pt3dadd(169476.000000,184560.000000,69125.000000,167.176836)}
{pt3dadd(169224.000000,184788.000000,69250.000000,167.176836)}
{pt3dadd(168852.000000,185436.000000,69450.000000,167.176836)}
{pt3dadd(168624.000000,185604.000000,69600.000000,167.176836)}
{pt3dadd(168420.000000,185760.000000,69625.000000,167.176836)}
{pt3dadd(168384.000000,186276.000000,69775.000000,175.535680)}
{pt3dadd(168396.000000,186432.000000,69800.000000,183.894525)}
{pt3dadd(168216.000000,186972.000000,69800.000000,192.253370)}
{pt3dadd(168180.000000,187104.000000,69825.000000,200.612214)}
{pt3dadd(168252.000000,187296.000000,69875.000000,200.612214)}
{pt3dadd(168288.000000,187428.000000,69850.000000,200.612214)}
{pt3dadd(168300.000000,187560.000000,69875.000000,200.612214)}
{pt3dadd(168348.000000,187680.000000,69950.000000,200.612214)}
{pt3dadd(168396.000000,187836.000000,69975.000000,200.612214)}

{create adhoc38}
{access adhoc38}
{connect adhoc38(1), adhoc36(0)}
{nseg = 1}
{strdef color color = "White"}
{pt3dclear()}
{pt3dadd(168792.000000,178776.000000,69450.000000,499.187376)}
{pt3dadd(168564.000000,178812.000000,69025.000000,499.187376)}
{pt3dadd(168108.000000,179100.000000,68650.000000,499.187376)}
{pt3dadd(167844.000000,179268.000000,68375.000000,499.187376)}
{pt3dadd(167352.000000,179532.000000,68100.000000,499.187376)}
{pt3dadd(167124.000000,179784.000000,67850.000000,499.187376)}
{pt3dadd(166764.000000,180132.000000,67550.000000,461.055006)}
{pt3dadd(166404.000000,180468.000000,67025.000000,422.922636)}
{pt3dadd(165972.000000,180480.000000,66600.000000,384.790266)}
{pt3dadd(166080.000000,180804.000000,66375.000000,346.657896)}
{pt3dadd(166092.000000,180948.000000,66100.000000,363.990794)}
{pt3dadd(165744.000000,181464.000000,65850.000000,381.323691)}
{pt3dadd(165816.000000,181860.000000,65500.000000,398.656589)}
{pt3dadd(165552.000000,181992.000000,65200.000000,415.989486)}
{pt3dadd(165492.000000,182172.000000,64825.000000,461.748335)}
{pt3dadd(165408.000000,182280.000000,64475.000000,507.507183)}
{pt3dadd(165252.000000,182508.000000,64275.000000,553.266031)}
{pt3dadd(165240.000000,182940.000000,63975.000000,599.024880)}
{pt3dadd(165252.000000,183108.000000,63600.000000,553.266031)}
{pt3dadd(165216.000000,183336.000000,63250.000000,507.507183)}
{pt3dadd(165132.000000,183564.000000,62900.000000,461.748335)}
{pt3dadd(164976.000000,183948.000000,62625.000000,415.989486)}
{pt3dadd(164556.000000,184260.000000,62200.000000,461.748335)}
{pt3dadd(164232.000000,184440.000000,61875.000000,507.507183)}
{pt3dadd(164064.000000,184440.000000,61600.000000,553.266031)}
{pt3dadd(163860.000000,184632.000000,61325.000000,599.024880)}
{pt3dadd(163536.000000,184884.000000,61125.000000,574.065504)}
{pt3dadd(163296.000000,185136.000000,60850.000000,549.106128)}
{pt3dadd(163068.000000,185436.000000,60625.000000,524.146752)}
{pt3dadd(162864.000000,185652.000000,60325.000000,499.187376)}
{pt3dadd(162636.000000,185928.000000,60100.000000,478.387903)}
{pt3dadd(162456.000000,186180.000000,59775.000000,457.588431)}
{pt3dadd(162228.000000,186372.000000,59550.000000,436.788958)}
{pt3dadd(161940.000000,186612.000000,59300.000000,415.989486)}
{pt3dadd(161724.000000,186792.000000,59000.000000,436.788958)}
{pt3dadd(161700.000000,187056.000000,58825.000000,457.588431)}
{pt3dadd(161628.000000,187284.000000,58525.000000,478.387903)}
{pt3dadd(161592.000000,187488.000000,58300.000000,499.187376)}
{pt3dadd(161400.000000,187668.000000,58025.000000,478.387903)}
{pt3dadd(161268.000000,187824.000000,57750.000000,457.588431)}
{pt3dadd(161004.000000,187980.000000,57500.000000,436.788958)}
{pt3dadd(160908.000000,188088.000000,57225.000000,415.989486)}
{pt3dadd(160812.000000,188208.000000,56975.000000,457.588431)}
{pt3dadd(160764.000000,188112.000000,56700.000000,499.187376)}
{pt3dadd(160560.000000,188304.000000,56650.000000,346.657896)}

{create adhoc39}
{access adhoc39}
{connect adhoc39(1), adhoc38(0)}
{nseg = 1}
{strdef color color = "White"}
{pt3dclear()}
{pt3dadd(160560.000000,188304.000000,56650.000000,346.657896)}
{pt3dadd(160320.000000,189312.000000,56475.000000,139.314042)}
{pt3dadd(160236.000000,189456.000000,56500.000000,154.638585)}
{pt3dadd(160236.000000,189600.000000,56475.000000,169.963128)}
{pt3dadd(160032.000000,189828.000000,56475.000000,185.287671)}
{pt3dadd(160044.000000,189984.000000,56475.000000,200.612214)}
{pt3dadd(159888.000000,190128.000000,56525.000000,192.253370)}
{pt3dadd(159672.000000,190296.000000,56375.000000,183.894525)}
{pt3dadd(159456.000000,191232.000000,56400.000000,175.535680)}
{pt3dadd(159360.000000,191496.000000,56400.000000,167.176836)}
{pt3dadd(159168.000000,191652.000000,56400.000000,167.176836)}
{pt3dadd(159000.000000,191868.000000,56400.000000,167.176836)}
{pt3dadd(158868.000000,192096.000000,56575.000000,167.176836)}
{pt3dadd(158784.000000,192288.000000,56600.000000,167.176836)}
{pt3dadd(158856.000000,192516.000000,56675.000000,167.176836)}

{create adhoc40}
{access adhoc40}
{connect adhoc40(1), adhoc38(0)}
{nseg = 1}
{strdef color color = "White"}
{pt3dclear()}
{pt3dadd(160560.000000,188304.000000,56650.000000,346.657896)}
{pt3dadd(160500.000000,187968.000000,56300.000000,415.989486)}
{pt3dadd(160368.000000,187920.000000,56025.000000,384.212511)}
{pt3dadd(160272.000000,187836.000000,55775.000000,352.435536)}
{pt3dadd(160320.000000,187608.000000,55525.000000,320.658561)}
{pt3dadd(160236.000000,187620.000000,55250.000000,288.881586)}
{pt3dadd(160080.000000,187392.000000,55025.000000,299.859089)}
{pt3dadd(159816.000000,187224.000000,54825.000000,310.836591)}
{pt3dadd(159612.000000,186972.000000,54625.000000,321.814093)}
{pt3dadd(159576.000000,186852.000000,54425.000000,332.791596)}
{pt3dadd(159552.000000,186756.000000,54225.000000,360.524226)}
{pt3dadd(159384.000000,186540.000000,54025.000000,388.256856)}
{pt3dadd(159216.000000,186372.000000,53825.000000,415.989486)}
{pt3dadd(159060.000000,186096.000000,53750.000000,231.105276)}

{create adhoc41}
{access adhoc41}
{connect adhoc41(1), adhoc40(0)}
{nseg = 1}
{strdef color color = "White"}
{pt3dclear()}
{pt3dadd(159060.000000,186096.000000,53750.000000,231.105276)}
{pt3dadd(159288.000000,185556.000000,52350.000000,415.989486)}
{pt3dadd(159264.000000,185268.000000,51325.000000,415.989486)}
{pt3dadd(159372.000000,185016.000000,51150.000000,415.989486)}
{pt3dadd(159480.000000,184860.000000,51200.000000,415.989486)}
{pt3dadd(159096.000000,185268.000000,50575.000000,415.989486)}
{pt3dadd(158976.000000,185532.000000,50100.000000,395.190014)}
{pt3dadd(159060.000000,185652.000000,49725.000000,374.390541)}
{pt3dadd(159240.000000,185664.000000,49525.000000,353.591069)}
{pt3dadd(159360.000000,185712.000000,49225.000000,332.791596)}
{pt3dadd(159132.000000,185820.000000,48850.000000,309.777359)}
{pt3dadd(159252.000000,185748.000000,48500.000000,286.763121)}
{pt3dadd(158808.000000,185616.000000,48175.000000,263.748884)}
{pt3dadd(158616.000000,185736.000000,47900.000000,240.734646)}
{pt3dadd(158352.000000,185808.000000,47650.000000,252.771381)}
{pt3dadd(158508.000000,185892.000000,47325.000000,264.808116)}
{pt3dadd(158616.000000,186012.000000,46650.000000,276.844851)}
{pt3dadd(158664.000000,185940.000000,46150.000000,288.881586)}
{pt3dadd(158712.000000,186156.000000,45825.000000,288.881586)}
{pt3dadd(158904.000000,186144.000000,45175.000000,288.881586)}
{pt3dadd(158988.000000,186180.000000,44800.000000,288.881586)}
{pt3dadd(159072.000000,186216.000000,44375.000000,288.881586)}
{pt3dadd(159252.000000,186252.000000,44000.000000,283.219511)}
{pt3dadd(159456.000000,186372.000000,43625.000000,277.557435)}
{pt3dadd(159780.000000,186480.000000,43075.000000,271.895359)}
{pt3dadd(160152.000000,186528.000000,42525.000000,266.233284)}
{pt3dadd(160404.000000,186336.000000,42700.000000,259.858625)}
{pt3dadd(160704.000000,186288.000000,42525.000000,253.483965)}
{pt3dadd(160920.000000,186228.000000,42450.000000,247.109306)}
{pt3dadd(161124.000000,186372.000000,42275.000000,240.734646)}
{pt3dadd(161388.000000,186312.000000,42125.000000,240.734646)}
{pt3dadd(161616.000000,186348.000000,42025.000000,240.734646)}
{pt3dadd(161808.000000,186348.000000,41900.000000,240.734646)}
{pt3dadd(161964.000000,186420.000000,41675.000000,240.734646)}
{pt3dadd(162132.000000,186420.000000,41625.000000,238.327304)}
{pt3dadd(162276.000000,186396.000000,41550.000000,235.919961)}
{pt3dadd(162192.000000,186408.000000,41350.000000,233.512618)}
{pt3dadd(162528.000000,186528.000000,41150.000000,231.105276)}
{pt3dadd(162708.000000,186612.000000,40925.000000,215.123166)}
{pt3dadd(162792.000000,186828.000000,40775.000000,199.141056)}
{pt3dadd(162924.000000,187008.000000,40550.000000,183.158946)}
{pt3dadd(162996.000000,187212.000000,40350.000000,167.176836)}
{pt3dadd(163044.000000,187404.000000,40125.000000,185.566288)}
{pt3dadd(162996.000000,187596.000000,40000.000000,203.955741)}
{pt3dadd(163044.000000,187704.000000,39825.000000,222.345193)}
{pt3dadd(163128.000000,187968.000000,39575.000000,240.734646)}
{pt3dadd(163152.000000,188076.000000,39375.000000,220.673426)}
{pt3dadd(163080.000000,187980.000000,39175.000000,200.612205)}
{pt3dadd(163140.000000,188136.000000,38950.000000,180.550985)}
{pt3dadd(163440.000000,188292.000000,38750.000000,160.489764)}
{pt3dadd(163920.000000,188544.000000,38500.000000,180.550985)}
{pt3dadd(163992.000000,188628.000000,38300.000000,200.612205)}
{pt3dadd(164064.000000,188712.000000,38100.000000,220.673426)}
{pt3dadd(164100.000000,188856.000000,37800.000000,240.734646)}
{pt3dadd(164004.000000,188916.000000,37550.000000,215.379495)}
{pt3dadd(164088.000000,188856.000000,37325.000000,190.024344)}
{pt3dadd(164364.000000,188928.000000,37025.000000,164.669193)}
{pt3dadd(164688.000000,188904.000000,36775.000000,139.314042)}
{pt3dadd(164796.000000,188904.000000,36575.000000,146.279741)}
{pt3dadd(165000.000000,188772.000000,36375.000000,153.245439)}
{pt3dadd(165084.000000,188856.000000,36175.000000,160.211138)}
{pt3dadd(165336.000000,188760.000000,35925.000000,167.176836)}
{pt3dadd(165600.000000,188460.000000,35675.000000,139.314042)}
{pt3dadd(166104.000000,188220.000000,35300.000000,167.176836)}

{create adhoc42}
{access adhoc42}
{connect adhoc42(1), adhoc40(0)}
{nseg = 1}
{strdef color color = "White"}
{pt3dclear()}
{pt3dadd(159060.000000,186096.000000,53750.000000,231.105276)}
{pt3dadd(158964.000000,185100.000000,53750.000000,111.451230)}
{pt3dadd(158964.000000,184764.000000,53700.000000,101.174670)}
{pt3dadd(159324.000000,184284.000000,53875.000000,90.898110)}
{pt3dadd(159504.000000,184236.000000,53950.000000,80.621550)}
{pt3dadd(159684.000000,184080.000000,54000.000000,80.621550)}

{create adhoc43}
{access adhoc43}
{connect adhoc43(1), adhoc13(0)}
{nseg = 1}
{strdef color color = "White"}
{pt3dclear()}
{pt3dadd(182220.000000,177456.000000,90000.000000,1490.565402)}
{pt3dadd(182220.000000,179628.000000,89975.000000,993.710286)}
{pt3dadd(181164.000000,180036.000000,89100.000000,1035.114948)}
{pt3dadd(181200.000000,180288.000000,88900.000000,1035.114948)}
{pt3dadd(180996.000000,180552.000000,88775.000000,1035.114948)}
{pt3dadd(180792.000000,181260.000000,88750.000000,1035.114948)}
{pt3dadd(180456.000000,181404.000000,88550.000000,1035.114948)}
{pt3dadd(180168.000000,181584.000000,88100.000000,1035.114948)}
{pt3dadd(179784.000000,181788.000000,87800.000000,1035.114948)}
{pt3dadd(179688.000000,182016.000000,87850.000000,1035.114948)}
{pt3dadd(179604.000000,182172.000000,87675.000000,1035.114948)}
{pt3dadd(179544.000000,182364.000000,87625.000000,983.359197)}
{pt3dadd(179496.000000,182544.000000,87500.000000,931.603446)}
{pt3dadd(179448.000000,182904.000000,87375.000000,879.847695)}
{pt3dadd(179004.000000,183408.000000,87250.000000,828.091944)}
{pt3dadd(178860.000000,183900.000000,87050.000000,836.717909)}
{pt3dadd(178440.000000,184260.000000,86675.000000,845.343873)}
{pt3dadd(178164.000000,184608.000000,86425.000000,853.969838)}
{pt3dadd(178152.000000,184824.000000,86625.000000,862.595802)}
{pt3dadd(177756.000000,185412.000000,86275.000000,796.703072)}
{pt3dadd(177360.000000,185760.000000,85925.000000,730.810341)}
{pt3dadd(176964.000000,186024.000000,85575.000000,664.917611)}
{pt3dadd(176292.000000,186804.000000,85000.000000,599.024880)}
{pt3dadd(175656.000000,187164.000000,84350.000000,599.024880)}
{pt3dadd(175428.000000,187860.000000,84300.000000,599.024880)}
{pt3dadd(175200.000000,188244.000000,84325.000000,599.024880)}
{pt3dadd(174984.000000,188604.000000,84175.000000,599.024880)}
{pt3dadd(174672.000000,188988.000000,83825.000000,664.917611)}
{pt3dadd(174300.000000,189636.000000,83425.000000,730.810341)}
{pt3dadd(174072.000000,189864.000000,83275.000000,796.703072)}
{pt3dadd(173796.000000,190092.000000,83150.000000,862.595802)}
{pt3dadd(173652.000000,190464.000000,83000.000000,826.654307)}
{pt3dadd(173472.000000,190872.000000,82875.000000,790.712811)}
{pt3dadd(173256.000000,190992.000000,82725.000000,754.771316)}
{pt3dadd(173016.000000,191112.000000,82575.000000,718.829820)}
{pt3dadd(172800.000000,191592.000000,82475.000000,688.878585)}
{pt3dadd(172752.000000,191916.000000,82275.000000,658.927350)}
{pt3dadd(172704.000000,192072.000000,82075.000000,628.976115)}
{pt3dadd(172404.000000,192264.000000,81950.000000,599.024880)}
{pt3dadd(172272.000000,192516.000000,82000.000000,628.976115)}
{pt3dadd(172140.000000,192768.000000,82075.000000,658.927350)}
{pt3dadd(171960.000000,193056.000000,82275.000000,688.878585)}
{pt3dadd(171780.000000,193344.000000,82475.000000,718.829820)}
{pt3dadd(171060.000000,193560.000000,81325.000000,575.063856)}

{create adhoc44}
{access adhoc44}
{connect adhoc44(1), adhoc43(0)}
{nseg = 1}
{strdef color color = "White"}
{pt3dclear()}
{pt3dadd(171060.000000,193560.000000,81325.000000,575.063856)}
{pt3dadd(171336.000000,194892.000000,82325.000000,415.989486)}
{pt3dadd(171312.000000,195228.000000,82400.000000,436.788958)}
{pt3dadd(171300.000000,195492.000000,82450.000000,457.588431)}
{pt3dadd(171288.000000,195684.000000,82500.000000,478.387903)}
{pt3dadd(171180.000000,196020.000000,82375.000000,499.187376)}
{pt3dadd(170952.000000,196452.000000,82175.000000,499.187376)}
{pt3dadd(171000.000000,196776.000000,82200.000000,499.187376)}
{pt3dadd(171072.000000,197124.000000,82150.000000,499.187376)}
{pt3dadd(171060.000000,197388.000000,82200.000000,499.187376)}
{pt3dadd(171132.000000,197784.000000,82225.000000,461.055006)}
{pt3dadd(171204.000000,198132.000000,82250.000000,422.922636)}
{pt3dadd(171336.000000,198780.000000,82250.000000,384.790266)}
{pt3dadd(171324.000000,199152.000000,82250.000000,346.657896)}
{pt3dadd(170796.000000,199692.000000,82250.000000,284.179887)}
{pt3dadd(170508.000000,200448.000000,82225.000000,221.701878)}
{pt3dadd(170316.000000,200676.000000,82175.000000,159.223869)}
{pt3dadd(170184.000000,200928.000000,82200.000000,96.745860)}
{pt3dadd(169944.000000,201264.000000,82225.000000,159.223869)}
{pt3dadd(169992.000000,201492.000000,82225.000000,221.701878)}
{pt3dadd(169740.000000,201660.000000,82275.000000,284.179887)}
{pt3dadd(169296.000000,202020.000000,82425.000000,346.657896)}
{pt3dadd(168996.000000,202212.000000,82450.000000,409.749642)}
{pt3dadd(168648.000000,202392.000000,82275.000000,472.841388)}
{pt3dadd(168516.000000,202572.000000,82100.000000,535.933134)}
{pt3dadd(168504.000000,202740.000000,82000.000000,599.024880)}
{pt3dadd(168492.000000,202944.000000,81900.000000,599.024880)}
{pt3dadd(168360.000000,203124.000000,81750.000000,599.024880)}
{pt3dadd(167940.000000,203328.000000,81625.000000,599.024880)}
{pt3dadd(167940.000000,203556.000000,81850.000000,599.024880)}
{pt3dadd(167904.000000,203844.000000,81700.000000,628.976115)}
{pt3dadd(167868.000000,204108.000000,81750.000000,658.927350)}
{pt3dadd(167832.000000,204300.000000,81800.000000,688.878585)}
{pt3dadd(167724.000000,204444.000000,81975.000000,718.829820)}
{pt3dadd(167580.000000,204564.000000,81775.000000,718.829820)}
{pt3dadd(167484.000000,204696.000000,81700.000000,718.829820)}
{pt3dadd(167532.000000,204828.000000,81650.000000,718.829820)}
{pt3dadd(167436.000000,205044.000000,81675.000000,718.829820)}
{pt3dadd(167352.000000,205152.000000,81875.000000,688.878585)}
{pt3dadd(167112.000000,205272.000000,81725.000000,658.927350)}
{pt3dadd(167100.000000,205428.000000,81600.000000,628.976115)}
{pt3dadd(167052.000000,205572.000000,81600.000000,599.024880)}
{pt3dadd(166944.000000,205728.000000,81650.000000,574.065504)}
{pt3dadd(166752.000000,205944.000000,81700.000000,549.106128)}
{pt3dadd(166776.000000,206076.000000,81775.000000,524.146752)}
{pt3dadd(166800.000000,206220.000000,81850.000000,499.187376)}
{pt3dadd(166824.000000,206352.000000,81925.000000,499.187376)}
{pt3dadd(166644.000000,206484.000000,81625.000000,499.187376)}
{pt3dadd(166596.000000,206616.000000,81700.000000,499.187376)}
{pt3dadd(166296.000000,206820.000000,81475.000000,499.187376)}
{pt3dadd(166332.000000,207048.000000,81525.000000,499.187376)}
{pt3dadd(166056.000000,207240.000000,81500.000000,499.187376)}
{pt3dadd(165948.000000,207420.000000,81475.000000,499.187376)}
{pt3dadd(165792.000000,207624.000000,81450.000000,499.187376)}
{pt3dadd(165636.000000,207864.000000,81425.000000,478.387903)}
{pt3dadd(165480.000000,208032.000000,81400.000000,457.588431)}
{pt3dadd(165468.000000,208320.000000,81475.000000,436.788958)}
{pt3dadd(165180.000000,208632.000000,81325.000000,415.989486)}
{pt3dadd(164688.000000,209004.000000,81350.000000,461.748335)}
{pt3dadd(164532.000000,209232.000000,81475.000000,507.507183)}
{pt3dadd(164448.000000,209424.000000,81550.000000,553.266031)}
{pt3dadd(164268.000000,209580.000000,81575.000000,599.024880)}
{pt3dadd(164028.000000,209784.000000,81475.000000,628.976115)}
{pt3dadd(163980.000000,209940.000000,81525.000000,658.927350)}
{pt3dadd(163776.000000,210132.000000,81550.000000,688.878585)}
{pt3dadd(163572.000000,210348.000000,81575.000000,718.829820)}
{pt3dadd(163476.000000,210564.000000,81400.000000,711.641515)}
{pt3dadd(163440.000000,210804.000000,81425.000000,704.453211)}
{pt3dadd(163332.000000,211092.000000,81450.000000,697.264906)}
{pt3dadd(163008.000000,211620.000000,81300.000000,690.076602)}
{pt3dadd(162636.000000,212088.000000,80900.000000,667.313671)}
{pt3dadd(162552.000000,212376.000000,80825.000000,644.550741)}
{pt3dadd(162312.000000,212652.000000,80850.000000,621.787810)}
{pt3dadd(161976.000000,213180.000000,80825.000000,599.024880)}
{pt3dadd(161724.000000,213696.000000,80550.000000,599.024880)}
{pt3dadd(161796.000000,214020.000000,80675.000000,599.024880)}
{pt3dadd(161544.000000,214356.000000,80675.000000,599.024880)}
{pt3dadd(161412.000000,214764.000000,80525.000000,599.024880)}
{pt3dadd(161328.000000,215268.000000,80450.000000,628.976115)}
{pt3dadd(161364.000000,215640.000000,80500.000000,658.927350)}
{pt3dadd(161400.000000,216420.000000,80550.000000,688.878585)}
{pt3dadd(161208.000000,216756.000000,80425.000000,718.829820)}
{pt3dadd(161112.000000,217068.000000,80450.000000,718.829820)}
{pt3dadd(161016.000000,217308.000000,80475.000000,346.657896)}

{create adhoc45}
{access adhoc45}
{connect adhoc45(1), adhoc44(0)}
{nseg = 1}
{strdef color color = "White"}
{pt3dclear()}
{pt3dadd(161016.000000,217308.000000,80475.000000,346.657896)}
{pt3dadd(160716.000000,217452.000000,79300.000000,479.219886)}
{pt3dadd(160500.000000,217728.000000,78950.000000,509.171134)}
{pt3dadd(160356.000000,218136.000000,78925.000000,539.122383)}
{pt3dadd(160344.000000,218508.000000,79000.000000,569.073631)}
{pt3dadd(160248.000000,218736.000000,78900.000000,599.024880)}
{pt3dadd(159924.000000,219456.000000,78450.000000,553.266031)}
{pt3dadd(159672.000000,219852.000000,78075.000000,507.507183)}
{pt3dadd(159540.000000,220008.000000,77975.000000,461.748335)}
{pt3dadd(159288.000000,220284.000000,77775.000000,415.989486)}
{pt3dadd(159132.000000,220428.000000,77900.000000,139.314042)}
{pt3dadd(158988.000000,220536.000000,77800.000000,167.176836)}

{create adhoc46}
{access adhoc46}
{connect adhoc46(1), adhoc45(0)}
{nseg = 1}
{strdef color color = "White"}
{pt3dclear()}
{pt3dadd(158988.000000,220536.000000,77800.000000,167.176836)}
{pt3dadd(158556.000000,220644.000000,77000.000000,240.734646)}
{pt3dadd(158172.000000,221016.000000,76600.000000,230.704038)}
{pt3dadd(158076.000000,221244.000000,76200.000000,220.673430)}
{pt3dadd(157980.000000,221460.000000,76125.000000,210.642822)}
{pt3dadd(157836.000000,221664.000000,75975.000000,200.612214)}
{pt3dadd(157704.000000,221748.000000,75975.000000,210.642822)}
{pt3dadd(157620.000000,221976.000000,75725.000000,220.673430)}
{pt3dadd(157584.000000,222192.000000,75675.000000,230.704038)}
{pt3dadd(157428.000000,222420.000000,75725.000000,240.734646)}
{pt3dadd(156864.000000,222780.000000,75350.000000,240.734646)}
{pt3dadd(156528.000000,223728.000000,75125.000000,240.734646)}
{pt3dadd(156360.000000,223968.000000,75150.000000,240.734646)}
{pt3dadd(156228.000000,224352.000000,75125.000000,240.734646)}
{pt3dadd(156132.000000,224664.000000,74975.000000,240.734646)}
{pt3dadd(156096.000000,224880.000000,74900.000000,240.734646)}
{pt3dadd(155988.000000,225192.000000,74850.000000,240.734646)}
{pt3dadd(155940.000000,225444.000000,74750.000000,240.734646)}
{pt3dadd(155808.000000,225840.000000,74750.000000,252.771381)}
{pt3dadd(155808.000000,226176.000000,74725.000000,264.808116)}
{pt3dadd(155748.000000,226476.000000,74600.000000,276.844851)}
{pt3dadd(155640.000000,226668.000000,74475.000000,288.881586)}
{pt3dadd(155412.000000,227064.000000,74425.000000,288.881586)}
{pt3dadd(155256.000000,227388.000000,74500.000000,288.881586)}
{pt3dadd(155064.000000,227736.000000,74525.000000,288.881586)}
{pt3dadd(154860.000000,228012.000000,74475.000000,288.881586)}
{pt3dadd(154860.000000,228312.000000,74325.000000,276.844851)}
{pt3dadd(154272.000000,228648.000000,73925.000000,264.808116)}
{pt3dadd(153936.000000,229296.000000,73550.000000,252.771381)}
{pt3dadd(153888.000000,229236.000000,73125.000000,240.734646)}
{pt3dadd(153912.000000,229452.000000,73650.000000,200.612214)}
{pt3dadd(153780.000000,229680.000000,73600.000000,116.095032)}

{create adhoc47}
{access adhoc47}
{connect adhoc47(1), adhoc45(0)}
{nseg = 1}
{strdef color color = "White"}
{pt3dclear()}
{pt3dadd(158988.000000,220536.000000,77800.000000,167.176836)}
{pt3dadd(159540.000000,220752.000000,78500.000000,415.989486)}
{pt3dadd(159480.000000,221136.000000,78500.000000,398.656589)}
{pt3dadd(159420.000000,221328.000000,78525.000000,381.323691)}
{pt3dadd(159180.000000,221796.000000,78575.000000,363.990794)}
{pt3dadd(159072.000000,222084.000000,78650.000000,346.657896)}
{pt3dadd(159024.000000,222336.000000,78650.000000,329.325003)}
{pt3dadd(158964.000000,222612.000000,78725.000000,311.992110)}
{pt3dadd(158784.000000,222840.000000,78775.000000,294.659217)}
{pt3dadd(158772.000000,223080.000000,79050.000000,277.326324)}
{pt3dadd(158592.000000,223380.000000,79175.000000,294.659217)}
{pt3dadd(158460.000000,223920.000000,79075.000000,311.992110)}
{pt3dadd(158280.000000,224316.000000,79200.000000,329.325003)}
{pt3dadd(158244.000000,224616.000000,79350.000000,346.657896)}
{pt3dadd(158184.000000,224844.000000,79375.000000,332.213819)}
{pt3dadd(158088.000000,225084.000000,79375.000000,317.769741)}
{pt3dadd(157956.000000,225480.000000,79475.000000,303.325664)}
{pt3dadd(157536.000000,225888.000000,79550.000000,288.881586)}
{pt3dadd(157668.000000,226032.000000,79675.000000,288.881586)}
{pt3dadd(157584.000000,226188.000000,79750.000000,288.881586)}
{pt3dadd(157548.000000,226452.000000,79800.000000,288.881586)}
{pt3dadd(157440.000000,226608.000000,79850.000000,288.881586)}
{pt3dadd(157296.000000,226860.000000,79875.000000,303.325664)}
{pt3dadd(157200.000000,227040.000000,79975.000000,317.769741)}
{pt3dadd(157092.000000,227304.000000,80000.000000,332.213819)}
{pt3dadd(157056.000000,227460.000000,80075.000000,346.657896)}
{pt3dadd(156996.000000,227676.000000,80125.000000,332.213819)}
{pt3dadd(156972.000000,227820.000000,80150.000000,317.769741)}
{pt3dadd(156852.000000,228000.000000,80150.000000,303.325664)}
{pt3dadd(156804.000000,228192.000000,80225.000000,288.881586)}
{pt3dadd(156696.000000,228480.000000,80225.000000,303.325664)}
{pt3dadd(156600.000000,228660.000000,80350.000000,317.769741)}
{pt3dadd(156468.000000,228816.000000,80325.000000,332.213819)}
{pt3dadd(156360.000000,229008.000000,80225.000000,346.657896)}
{pt3dadd(156312.000000,229356.000000,80125.000000,320.177083)}
{pt3dadd(156288.000000,229824.000000,80025.000000,293.696271)}
{pt3dadd(156264.000000,230004.000000,80025.000000,267.215459)}
{pt3dadd(156240.000000,230244.000000,80025.000000,240.734646)}
{pt3dadd(156204.000000,230424.000000,80025.000000,263.748884)}
{pt3dadd(156180.000000,230580.000000,80100.000000,286.763121)}
{pt3dadd(156108.000000,231036.000000,80200.000000,309.777359)}
{pt3dadd(156060.000000,231228.000000,80225.000000,332.791596)}
{pt3dadd(156000.000000,231372.000000,80200.000000,299.746750)}
{pt3dadd(155940.000000,231540.000000,80175.000000,266.701905)}
{pt3dadd(155724.000000,231924.000000,80175.000000,233.657060)}
{pt3dadd(155652.000000,232128.000000,80125.000000,200.612214)}
{pt3dadd(155652.000000,232320.000000,79950.000000,192.253370)}
{pt3dadd(155832.000000,232620.000000,79650.000000,183.894525)}
{pt3dadd(155808.000000,232848.000000,79575.000000,175.535680)}
{pt3dadd(155640.000000,233076.000000,79550.000000,167.176836)}
{pt3dadd(155844.000000,233220.000000,79850.000000,175.535680)}
{pt3dadd(156336.000000,233796.000000,79825.000000,183.894525)}
{pt3dadd(156360.000000,233928.000000,79875.000000,192.253370)}
{pt3dadd(156456.000000,234144.000000,79825.000000,200.612214)}
{pt3dadd(156492.000000,234360.000000,79950.000000,210.642822)}
{pt3dadd(156492.000000,234492.000000,80025.000000,220.673430)}
{pt3dadd(156528.000000,234672.000000,80150.000000,230.704038)}
{pt3dadd(156588.000000,234888.000000,80375.000000,240.734646)}
{pt3dadd(156648.000000,235092.000000,80425.000000,240.734646)}
{pt3dadd(156528.000000,235356.000000,80500.000000,240.734646)}
{pt3dadd(156564.000000,235488.000000,80600.000000,240.734646)}
{pt3dadd(156480.000000,235692.000000,80650.000000,240.734646)}
{pt3dadd(156420.000000,235836.000000,80725.000000,230.704038)}
{pt3dadd(156492.000000,236028.000000,80800.000000,220.673430)}
{pt3dadd(156528.000000,236280.000000,80675.000000,210.642822)}
{pt3dadd(156336.000000,236424.000000,80475.000000,200.612214)}
{pt3dadd(156168.000000,236604.000000,80375.000000,210.642822)}
{pt3dadd(156048.000000,236748.000000,80225.000000,220.673430)}
{pt3dadd(155892.000000,237000.000000,80150.000000,230.704038)}
{pt3dadd(155808.000000,237168.000000,80075.000000,240.734646)}
{pt3dadd(155868.000000,237312.000000,80225.000000,228.697915)}
{pt3dadd(155736.000000,237456.000000,80300.000000,216.661185)}
{pt3dadd(155760.000000,237612.000000,80250.000000,204.624455)}
{pt3dadd(155760.000000,236892.000000,79675.000000,192.587724)}
{pt3dadd(155688.000000,236904.000000,79375.000000,194.593846)}
{pt3dadd(155472.000000,236952.000000,79125.000000,196.599969)}
{pt3dadd(155340.000000,236940.000000,78850.000000,198.606091)}
{pt3dadd(155268.000000,236868.000000,78725.000000,200.612214)}
{pt3dadd(155076.000000,236940.000000,78550.000000,200.612214)}
{pt3dadd(154836.000000,236700.000000,78225.000000,200.612214)}
{pt3dadd(154512.000000,236700.000000,77475.000000,200.612214)}
{pt3dadd(154344.000000,236784.000000,77250.000000,200.612214)}
{pt3dadd(154188.000000,236844.000000,76975.000000,198.606091)}
{pt3dadd(153972.000000,236928.000000,76700.000000,196.599969)}
{pt3dadd(153828.000000,237156.000000,76450.000000,194.593846)}
{pt3dadd(153696.000000,237384.000000,76175.000000,192.587724)}
{pt3dadd(153540.000000,237612.000000,75900.000000,184.563234)}
{pt3dadd(153204.000000,237372.000000,75725.000000,176.538744)}
{pt3dadd(153096.000000,237504.000000,75200.000000,168.514254)}
{pt3dadd(153012.000000,237456.000000,74875.000000,160.489764)}
{pt3dadd(152820.000000,236976.000000,73775.000000,96.745860)}

{create adhoc48}
{access adhoc48}
{connect adhoc48(1), adhoc44(0)}
{nseg = 1}
{strdef color color = "White"}
{pt3dclear()}
{pt3dadd(161016.000000,217308.000000,80475.000000,346.657896)}
{pt3dadd(161556.000000,217416.000000,81125.000000,415.989486)}
{pt3dadd(161724.000000,217656.000000,81200.000000,415.989486)}
{pt3dadd(161832.000000,217896.000000,81200.000000,415.989486)}
{pt3dadd(162156.000000,218148.000000,81475.000000,346.657896)}

{create adhoc49}
{access adhoc49}
{connect adhoc49(1), adhoc48(0)}
{nseg = 1}
{strdef color color = "White"}
{pt3dclear()}
{pt3dadd(162156.000000,218148.000000,81475.000000,346.657896)}
{pt3dadd(162336.000000,218112.000000,81875.000000,240.734646)}
{pt3dadd(162468.000000,218256.000000,82200.000000,230.704038)}
{pt3dadd(162708.000000,218508.000000,82600.000000,220.673430)}
{pt3dadd(162756.000000,218748.000000,82850.000000,210.642822)}
{pt3dadd(162936.000000,218904.000000,83075.000000,200.612214)}
{pt3dadd(163164.000000,219024.000000,83325.000000,208.235480)}
{pt3dadd(163488.000000,219168.000000,83625.000000,215.858745)}
{pt3dadd(163728.000000,219228.000000,83875.000000,223.482010)}
{pt3dadd(164016.000000,219288.000000,84200.000000,231.105276)}
{pt3dadd(164268.000000,219408.000000,84475.000000,233.512618)}
{pt3dadd(164508.000000,219492.000000,84675.000000,235.919961)}
{pt3dadd(164748.000000,219600.000000,84950.000000,238.327304)}
{pt3dadd(164832.000000,219816.000000,85325.000000,240.734646)}
{pt3dadd(164808.000000,220032.000000,85600.000000,252.771381)}
{pt3dadd(164928.000000,220200.000000,85900.000000,264.808116)}
{pt3dadd(164904.000000,220404.000000,86200.000000,276.844851)}
{pt3dadd(164892.000000,220716.000000,86550.000000,288.881586)}
{pt3dadd(165132.000000,221028.000000,86750.000000,266.814243)}
{pt3dadd(165276.000000,221448.000000,87050.000000,244.746900)}
{pt3dadd(165480.000000,221700.000000,87275.000000,222.679557)}
{pt3dadd(165804.000000,222048.000000,87550.000000,200.612214)}
{pt3dadd(166080.000000,222228.000000,87775.000000,222.679557)}
{pt3dadd(166656.000000,222420.000000,88025.000000,244.746900)}
{pt3dadd(166860.000000,222840.000000,88300.000000,266.814243)}
{pt3dadd(167016.000000,223116.000000,88550.000000,288.881586)}
{pt3dadd(167076.000000,223368.000000,88825.000000,285.992771)}
{pt3dadd(167220.000000,223584.000000,89100.000000,283.103955)}
{pt3dadd(167412.000000,223644.000000,89425.000000,280.215140)}
{pt3dadd(167604.000000,223704.000000,89700.000000,277.326324)}
{pt3dadd(167676.000000,223836.000000,89950.000000,280.215140)}
{pt3dadd(167868.000000,223572.000000,90300.000000,283.103955)}
{pt3dadd(168108.000000,223476.000000,90625.000000,285.992771)}
{pt3dadd(168300.000000,223356.000000,90950.000000,288.881586)}
{pt3dadd(168624.000000,223248.000000,91425.000000,276.844851)}
{pt3dadd(168996.000000,223344.000000,91750.000000,264.808116)}
{pt3dadd(169536.000000,223008.000000,92150.000000,252.771381)}
{pt3dadd(169932.000000,222708.000000,92375.000000,240.734646)}
{pt3dadd(170064.000000,222252.000000,92625.000000,240.734646)}
{pt3dadd(170196.000000,222096.000000,92725.000000,240.734646)}
{pt3dadd(170484.000000,221784.000000,93000.000000,240.734646)}
{pt3dadd(170544.000000,221592.000000,93125.000000,240.734646)}
{pt3dadd(170700.000000,221436.000000,93450.000000,222.345193)}
{pt3dadd(170748.000000,221496.000000,93700.000000,203.955741)}
{pt3dadd(170916.000000,221208.000000,94000.000000,185.566288)}
{pt3dadd(171108.000000,221280.000000,94400.000000,167.176836)}
{pt3dadd(171360.000000,221388.000000,94725.000000,288.881586)}
{pt3dadd(171456.000000,221208.000000,95050.000000,139.314042)}

{create adhoc50}
{access adhoc50}
{connect adhoc50(1), adhoc48(0)}
{nseg = 1}
{strdef color color = "White"}
{pt3dclear()}
{pt3dadd(162156.000000,218148.000000,81475.000000,346.657896)}
{pt3dadd(161868.000000,218532.000000,80900.000000,277.326342)}
{pt3dadd(161832.000000,218688.000000,80925.000000,268.178418)}
{pt3dadd(161760.000000,218844.000000,81000.000000,259.030494)}
{pt3dadd(161796.000000,219132.000000,81000.000000,249.882570)}
{pt3dadd(161724.000000,219360.000000,80925.000000,240.734646)}
{pt3dadd(161724.000000,219540.000000,80900.000000,230.704038)}
{pt3dadd(161688.000000,219816.000000,80950.000000,220.673430)}
{pt3dadd(161652.000000,219948.000000,81000.000000,210.642822)}
{pt3dadd(161712.000000,220116.000000,81050.000000,200.612214)}
{pt3dadd(161772.000000,220308.000000,81100.000000,190.581602)}
{pt3dadd(161760.000000,220464.000000,81100.000000,180.550989)}
{pt3dadd(161676.000000,220680.000000,81075.000000,170.520377)}
{pt3dadd(161640.000000,220812.000000,81100.000000,160.489764)}
{pt3dadd(161700.000000,220956.000000,81175.000000,178.143642)}
{pt3dadd(161736.000000,221196.000000,81300.000000,195.797520)}
{pt3dadd(161736.000000,221328.000000,81350.000000,213.451398)}
{pt3dadd(161760.000000,221532.000000,81400.000000,231.105276)}
{pt3dadd(161796.000000,221700.000000,81450.000000,242.660538)}
{pt3dadd(161820.000000,221880.000000,81525.000000,254.215800)}
{pt3dadd(161772.000000,222204.000000,81475.000000,265.771062)}
{pt3dadd(161688.000000,222552.000000,81475.000000,277.326324)}
{pt3dadd(161664.000000,222816.000000,81650.000000,280.215140)}
{pt3dadd(161712.000000,222960.000000,81725.000000,283.103955)}
{pt3dadd(161628.000000,223176.000000,81650.000000,285.992771)}
{pt3dadd(161544.000000,223476.000000,81625.000000,288.881586)}
{pt3dadd(161568.000000,223740.000000,81750.000000,288.881586)}
{pt3dadd(161556.000000,223944.000000,81725.000000,288.881586)}
{pt3dadd(161460.000000,224076.000000,81675.000000,288.881586)}
{pt3dadd(161412.000000,224208.000000,81725.000000,288.881586)}
{pt3dadd(161412.000000,224412.000000,81725.000000,288.881586)}
{pt3dadd(161304.000000,224532.000000,81800.000000,288.881586)}
{pt3dadd(161196.000000,224748.000000,81875.000000,288.881586)}
{pt3dadd(161088.000000,225012.000000,82000.000000,288.881586)}
{pt3dadd(161064.000000,225144.000000,82075.000000,276.844851)}
{pt3dadd(161088.000000,225288.000000,82150.000000,264.808116)}
{pt3dadd(161016.000000,225636.000000,82275.000000,252.771381)}
{pt3dadd(160944.000000,225852.000000,82400.000000,240.734646)}
{pt3dadd(160908.000000,226044.000000,82525.000000,240.734646)}
{pt3dadd(160872.000000,226212.000000,82525.000000,240.734646)}
{pt3dadd(160800.000000,226452.000000,82600.000000,240.734646)}
{pt3dadd(160848.000000,226644.000000,82775.000000,240.734646)}
{pt3dadd(160896.000000,226812.000000,82950.000000,240.734646)}
{pt3dadd(160812.000000,226956.000000,83000.000000,240.734646)}
{pt3dadd(160824.000000,227112.000000,83100.000000,240.734646)}
{pt3dadd(160752.000000,227244.000000,83075.000000,240.734646)}
{pt3dadd(160668.000000,227376.000000,83025.000000,240.734646)}
{pt3dadd(160404.000000,227496.000000,82975.000000,240.734646)}
{pt3dadd(160308.000000,227676.000000,82950.000000,240.734646)}
{pt3dadd(160248.000000,227844.000000,82975.000000,240.734646)}
{pt3dadd(160212.000000,227964.000000,83050.000000,240.734646)}
{pt3dadd(160176.000000,228120.000000,83125.000000,240.734646)}
{pt3dadd(160092.000000,228228.000000,83200.000000,240.734646)}
{pt3dadd(159972.000000,228384.000000,83200.000000,240.734646)}
{pt3dadd(159984.000000,228600.000000,83200.000000,240.734646)}
{pt3dadd(159816.000000,228720.000000,83225.000000,240.734646)}
{pt3dadd(159780.000000,228876.000000,83250.000000,240.734646)}
{pt3dadd(159756.000000,229020.000000,83275.000000,240.734646)}
{pt3dadd(159768.000000,229188.000000,83300.000000,230.704038)}
{pt3dadd(159708.000000,229440.000000,83350.000000,220.673430)}
{pt3dadd(159696.000000,229656.000000,83375.000000,210.642822)}
{pt3dadd(159636.000000,229872.000000,83300.000000,200.612214)}
{pt3dadd(159636.000000,230052.000000,83400.000000,200.612214)}
{pt3dadd(159576.000000,230280.000000,83575.000000,200.612214)}
{pt3dadd(159636.000000,230436.000000,83625.000000,200.612214)}
{pt3dadd(159540.000000,230592.000000,83625.000000,200.612214)}
{pt3dadd(159420.000000,230856.000000,83575.000000,210.642822)}
{pt3dadd(159492.000000,230988.000000,83775.000000,220.673430)}
{pt3dadd(159504.000000,231144.000000,83850.000000,230.704038)}
{pt3dadd(159444.000000,231336.000000,83825.000000,240.734646)}
{pt3dadd(159516.000000,231564.000000,83850.000000,240.734646)}
{pt3dadd(159468.000000,231792.000000,83850.000000,240.734646)}
{pt3dadd(159612.000000,231924.000000,83950.000000,240.734646)}
{pt3dadd(159708.000000,232116.000000,84050.000000,240.734646)}
{pt3dadd(159576.000000,232272.000000,84025.000000,222.345193)}
{pt3dadd(159576.000000,232440.000000,84025.000000,203.955741)}
{pt3dadd(159372.000000,232596.000000,83900.000000,185.566288)}
{pt3dadd(159336.000000,232824.000000,83900.000000,167.176836)}
{pt3dadd(159324.000000,232992.000000,83925.000000,167.176836)}
{pt3dadd(159348.000000,233172.000000,83950.000000,167.176836)}
{pt3dadd(159288.000000,233328.000000,83975.000000,167.176836)}
{pt3dadd(159276.000000,233460.000000,83975.000000,167.176836)}
{pt3dadd(159180.000000,233604.000000,84025.000000,175.535680)}
{pt3dadd(159084.000000,233748.000000,84125.000000,183.894525)}
{pt3dadd(158856.000000,234048.000000,84275.000000,192.253370)}
{pt3dadd(158784.000000,234228.000000,84425.000000,200.612214)}
{pt3dadd(158724.000000,234540.000000,84900.000000,180.179490)}
{pt3dadd(158748.000000,234672.000000,85200.000000,159.746766)}
{pt3dadd(158772.000000,234852.000000,85000.000000,139.314042)}
{pt3dadd(158400.000000,234996.000000,85025.000000,67.184640)}

{create adhoc51}
{access adhoc51}
{connect adhoc51(1), adhoc43(0)}
{nseg = 1}
{strdef color color = "White"}
{pt3dclear()}
{pt3dadd(171060.000000,193560.000000,81325.000000,575.063856)}
{pt3dadd(168876.000000,194436.000000,78675.000000,499.187376)}
{pt3dadd(169044.000000,194184.000000,78350.000000,448.344216)}
{pt3dadd(168684.000000,194664.000000,77525.000000,397.501056)}
{pt3dadd(168312.000000,195084.000000,77150.000000,346.657896)}
{pt3dadd(168084.000000,195540.000000,76700.000000,409.749642)}
{pt3dadd(167844.000000,195912.000000,76600.000000,472.841388)}
{pt3dadd(167592.000000,196104.000000,76225.000000,535.933134)}
{pt3dadd(167424.000000,196236.000000,76025.000000,599.024880)}
{pt3dadd(167256.000000,196380.000000,75875.000000,628.976115)}
{pt3dadd(166992.000000,196380.000000,75475.000000,658.927350)}
{pt3dadd(166824.000000,196884.000000,75375.000000,688.878585)}
{pt3dadd(166608.000000,197172.000000,75175.000000,718.829820)}
{pt3dadd(166272.000000,197496.000000,75175.000000,718.829820)}
{pt3dadd(165972.000000,197736.000000,75125.000000,718.829820)}
{pt3dadd(165780.000000,197976.000000,75075.000000,718.829820)}
{pt3dadd(165564.000000,197964.000000,75025.000000,718.829820)}
{pt3dadd(165288.000000,198048.000000,74925.000000,754.771316)}
{pt3dadd(165024.000000,198324.000000,74825.000000,790.712811)}
{pt3dadd(164820.000000,198444.000000,74650.000000,826.654307)}
{pt3dadd(164568.000000,198720.000000,74525.000000,862.595802)}
{pt3dadd(164256.000000,199092.000000,74400.000000,862.595802)}
{pt3dadd(163836.000000,199368.000000,74100.000000,862.595802)}
{pt3dadd(163512.000000,199896.000000,73675.000000,862.595802)}
{pt3dadd(163320.000000,200232.000000,73350.000000,862.595802)}
{pt3dadd(163008.000000,200472.000000,73400.000000,862.595802)}

{create adhoc52}
{access adhoc52}
{connect adhoc52(1), adhoc51(0)}
{nseg = 1}
{strdef color color = "White"}
{pt3dclear()}
{pt3dadd(163008.000000,200472.000000,73400.000000,862.595802)}
{pt3dadd(162804.000000,200076.000000,72850.000000,599.024880)}
{pt3dadd(162444.000000,200172.000000,72500.000000,593.034624)}
{pt3dadd(162132.000000,200448.000000,72150.000000,587.044368)}
{pt3dadd(161664.000000,200316.000000,71675.000000,581.054112)}
{pt3dadd(161376.000000,200580.000000,71200.000000,575.063856)}
{pt3dadd(161220.000000,200796.000000,70925.000000,581.054112)}
{pt3dadd(160992.000000,200964.000000,70575.000000,587.044368)}
{pt3dadd(160848.000000,201000.000000,70425.000000,593.034624)}
{pt3dadd(160680.000000,201168.000000,70225.000000,599.024880)}
{pt3dadd(160548.000000,201288.000000,69900.000000,599.024880)}
{pt3dadd(160380.000000,201324.000000,69650.000000,599.024880)}
{pt3dadd(160224.000000,201468.000000,69400.000000,599.024880)}
{pt3dadd(160032.000000,201696.000000,68900.000000,599.024880)}
{pt3dadd(159804.000000,201888.000000,68500.000000,599.024880)}
{pt3dadd(159576.000000,202056.000000,67900.000000,599.024880)}
{pt3dadd(159372.000000,202272.000000,67600.000000,599.024880)}
{pt3dadd(159084.000000,202560.000000,66875.000000,599.024880)}
{pt3dadd(159108.000000,202464.000000,66325.000000,599.024880)}
{pt3dadd(158856.000000,202692.000000,65875.000000,599.024880)}
{pt3dadd(158508.000000,203172.000000,65625.000000,599.024880)}
{pt3dadd(158184.000000,203412.000000,65325.000000,599.024880)}
{pt3dadd(157704.000000,203664.000000,65050.000000,574.065504)}
{pt3dadd(157752.000000,204156.000000,65150.000000,549.106128)}
{pt3dadd(157512.000000,204348.000000,65000.000000,524.146752)}
{pt3dadd(157260.000000,204600.000000,64850.000000,499.187376)}
{pt3dadd(157200.000000,204744.000000,64775.000000,474.228009)}
{pt3dadd(156960.000000,204888.000000,64600.000000,449.268642)}
{pt3dadd(156720.000000,205236.000000,64450.000000,424.309275)}
{pt3dadd(156480.000000,205428.000000,64300.000000,399.349908)}
{pt3dadd(156444.000000,205704.000000,64475.000000,386.176905)}
{pt3dadd(156312.000000,205860.000000,64500.000000,373.003902)}
{pt3dadd(156180.000000,206076.000000,64525.000000,359.830899)}
{pt3dadd(155808.000000,206412.000000,64325.000000,346.657896)}
{pt3dadd(155640.000000,206508.000000,64050.000000,363.990794)}
{pt3dadd(155268.000000,206784.000000,63975.000000,381.323691)}
{pt3dadd(155124.000000,207264.000000,64175.000000,398.656589)}
{pt3dadd(154776.000000,207504.000000,64225.000000,415.989486)}
{pt3dadd(154524.000000,207828.000000,64125.000000,436.788958)}
{pt3dadd(154164.000000,208308.000000,64250.000000,457.588431)}
{pt3dadd(154032.000000,208500.000000,64200.000000,478.387903)}
{pt3dadd(153828.000000,208812.000000,64275.000000,499.187376)}
{pt3dadd(153588.000000,209532.000000,64175.000000,478.387903)}
{pt3dadd(153528.000000,209772.000000,64075.000000,457.588431)}
{pt3dadd(153396.000000,210132.000000,64050.000000,436.788958)}
{pt3dadd(153360.000000,210384.000000,64075.000000,415.989486)}
{pt3dadd(153384.000000,210564.000000,64025.000000,415.989486)}
{pt3dadd(153288.000000,210756.000000,63975.000000,415.989486)}
{pt3dadd(153288.000000,211248.000000,63900.000000,415.989486)}
{pt3dadd(153276.000000,211452.000000,63600.000000,415.989486)}
{pt3dadd(153408.000000,211620.000000,63450.000000,398.656589)}
{pt3dadd(153528.000000,211776.000000,63325.000000,381.323691)}
{pt3dadd(153384.000000,212136.000000,63400.000000,363.990794)}
{pt3dadd(153384.000000,212352.000000,63300.000000,346.657896)}
{pt3dadd(153372.000000,212592.000000,63250.000000,346.657896)}
{pt3dadd(153312.000000,212880.000000,63300.000000,346.657896)}
{pt3dadd(153360.000000,213048.000000,63325.000000,346.657896)}
{pt3dadd(153396.000000,213252.000000,63175.000000,346.657896)}
{pt3dadd(153516.000000,213624.000000,63100.000000,363.990794)}
{pt3dadd(153456.000000,213840.000000,63050.000000,381.323691)}
{pt3dadd(153492.000000,214128.000000,63075.000000,398.656589)}
{pt3dadd(153444.000000,214320.000000,63125.000000,415.989486)}
{pt3dadd(153528.000000,214464.000000,63000.000000,398.656589)}
{pt3dadd(153672.000000,214644.000000,62900.000000,381.323691)}
{pt3dadd(153708.000000,214884.000000,62850.000000,363.990794)}
{pt3dadd(153828.000000,215232.000000,62750.000000,346.657896)}
{pt3dadd(153852.000000,215544.000000,62650.000000,320.177083)}
{pt3dadd(153924.000000,216144.000000,62525.000000,293.696271)}
{pt3dadd(153768.000000,216384.000000,62675.000000,267.215459)}
{pt3dadd(153948.000000,216852.000000,62750.000000,240.734646)}
{pt3dadd(154128.000000,217164.000000,62825.000000,267.215459)}
{pt3dadd(153948.000000,217692.000000,62825.000000,293.696271)}
{pt3dadd(154224.000000,218088.000000,62750.000000,320.177083)}
{pt3dadd(154188.000000,218424.000000,62600.000000,346.657896)}
{pt3dadd(154260.000000,218748.000000,62450.000000,346.657896)}
{pt3dadd(154332.000000,219216.000000,62300.000000,346.657896)}
{pt3dadd(154380.000000,219708.000000,61450.000000,346.657896)}
{pt3dadd(154296.000000,219876.000000,61150.000000,346.657896)}
{pt3dadd(154152.000000,220308.000000,61050.000000,332.213819)}
{pt3dadd(154116.000000,220524.000000,60900.000000,317.769741)}
{pt3dadd(153912.000000,220992.000000,60700.000000,303.325664)}
{pt3dadd(153804.000000,221184.000000,60550.000000,288.881586)}
{pt3dadd(153672.000000,221436.000000,60600.000000,303.325664)}
{pt3dadd(153492.000000,221808.000000,60450.000000,317.769741)}
{pt3dadd(153540.000000,222012.000000,60400.000000,332.213819)}
{pt3dadd(153408.000000,222180.000000,60000.000000,346.657896)}
{pt3dadd(153300.000000,222492.000000,59500.000000,332.213819)}
{pt3dadd(153336.000000,222624.000000,59175.000000,317.769741)}
{pt3dadd(153360.000000,222708.000000,58775.000000,303.325664)}
{pt3dadd(153216.000000,222804.000000,58550.000000,288.881586)}
{pt3dadd(152964.000000,222924.000000,58100.000000,266.814243)}
{pt3dadd(153000.000000,223452.000000,57625.000000,244.746900)}
{pt3dadd(152904.000000,223608.000000,57600.000000,222.679557)}
{pt3dadd(152808.000000,223896.000000,57725.000000,200.612214)}
{pt3dadd(152724.000000,224088.000000,57750.000000,192.253370)}
{pt3dadd(152640.000000,224616.000000,57550.000000,183.894525)}
{pt3dadd(152592.000000,224556.000000,57300.000000,175.535680)}
{pt3dadd(152616.000000,224796.000000,57000.000000,167.176836)}
{pt3dadd(152712.000000,225276.000000,56575.000000,240.734646)}
{pt3dadd(152796.000000,225348.000000,56375.000000,192.587706)}

{create adhoc53}
{access adhoc53}
{connect adhoc53(1), adhoc51(0)}
{nseg = 1}
{strdef color color = "White"}
{pt3dclear()}
{pt3dadd(163008.000000,200472.000000,73400.000000,862.595802)}
{pt3dadd(163176.000000,201792.000000,73375.000000,346.657896)}
{pt3dadd(163212.000000,202080.000000,73575.000000,293.696271)}
{pt3dadd(163212.000000,202404.000000,73650.000000,240.734646)}
{pt3dadd(163212.000000,202548.000000,73575.000000,267.215459)}
{pt3dadd(163152.000000,202716.000000,73550.000000,293.696271)}
{pt3dadd(163008.000000,202872.000000,73475.000000,320.177083)}
{pt3dadd(162960.000000,203052.000000,73475.000000,346.657896)}
{pt3dadd(162912.000000,203388.000000,73475.000000,332.213819)}
{pt3dadd(162816.000000,203808.000000,73500.000000,317.769741)}
{pt3dadd(162720.000000,204048.000000,73700.000000,303.325664)}
{pt3dadd(162624.000000,204216.000000,73700.000000,288.881586)}
{pt3dadd(162492.000000,204420.000000,73625.000000,274.437509)}
{pt3dadd(162444.000000,204624.000000,73575.000000,259.993431)}
{pt3dadd(162348.000000,204864.000000,73600.000000,245.549354)}
{pt3dadd(162252.000000,205116.000000,73625.000000,231.105276)}
{pt3dadd(162216.000000,205296.000000,73650.000000,223.482010)}
{pt3dadd(162132.000000,205560.000000,73675.000000,215.858745)}
{pt3dadd(162048.000000,205728.000000,73700.000000,208.235480)}
{pt3dadd(161844.000000,205944.000000,73875.000000,200.612214)}
{pt3dadd(161448.000000,206988.000000,74025.000000,210.642822)}
{pt3dadd(161328.000000,207156.000000,74225.000000,220.673430)}
{pt3dadd(161460.000000,207408.000000,74400.000000,230.704038)}
{pt3dadd(161232.000000,207684.000000,74450.000000,240.734646)}
{pt3dadd(161364.000000,207900.000000,74500.000000,230.704038)}
{pt3dadd(161064.000000,208200.000000,74575.000000,220.673430)}
{pt3dadd(160956.000000,208572.000000,74425.000000,210.642822)}
{pt3dadd(160752.000000,208860.000000,74475.000000,200.612214)}
{pt3dadd(160668.000000,209028.000000,74300.000000,210.642822)}
{pt3dadd(160692.000000,209268.000000,74375.000000,220.673430)}
{pt3dadd(160584.000000,209508.000000,74350.000000,230.704038)}
{pt3dadd(160284.000000,209700.000000,73850.000000,240.734646)}
{pt3dadd(159984.000000,209880.000000,73600.000000,222.345193)}
{pt3dadd(159564.000000,210384.000000,73175.000000,203.955741)}
{pt3dadd(159264.000000,210564.000000,73025.000000,185.566288)}
{pt3dadd(159348.000000,210528.000000,72700.000000,167.176836)}
{pt3dadd(159216.000000,210720.000000,72500.000000,160.211138)}
{pt3dadd(159060.000000,210924.000000,72450.000000,153.245439)}
{pt3dadd(158964.000000,211056.000000,72375.000000,146.279741)}
{pt3dadd(158736.000000,211236.000000,72000.000000,139.314042)}
{pt3dadd(158436.000000,211500.000000,71600.000000,146.279741)}
{pt3dadd(158328.000000,211740.000000,71375.000000,153.245439)}
{pt3dadd(158196.000000,211980.000000,71350.000000,160.211138)}
{pt3dadd(158112.000000,212148.000000,71325.000000,167.176836)}
{pt3dadd(158196.000000,212316.000000,71350.000000,165.505068)}
{pt3dadd(158184.000000,212472.000000,71350.000000,163.833300)}
{pt3dadd(158280.000000,212616.000000,71425.000000,162.161532)}
{pt3dadd(158268.000000,212760.000000,71350.000000,160.489764)}
{pt3dadd(158184.000000,212904.000000,71225.000000,155.195833)}
{pt3dadd(157692.000000,213552.000000,71350.000000,149.901903)}
{pt3dadd(157548.000000,213756.000000,71375.000000,144.607973)}
{pt3dadd(157632.000000,213912.000000,71450.000000,139.314042)}
{pt3dadd(157596.000000,214056.000000,71550.000000,160.489764)}
