# Supplementary material for: Full reconstruction of large lobula plate tangential cells in Drosophila from a 3D EM dataset
Source: PLoS One. 2018 Nov 28;13(11):e0207828. doi: 10.1371/journal.pone.0207828 (PMC6261601; doi:10.1371/journal.pone.0207828)
Supplement: S1 Dataset — (ZIP) [file pone.0207828.s001.zip › Diameter hoc/VS_VSL_preliminary/Old Diameters Mar13_VS_VSL_HS/HSN/2_14_738_smaurer_002.023.hoc]

/* created with nml2hocm */

{create adhoc1}
{access adhoc1}
{nseg = 1}
{strdef color color = "White"}
{pt3dclear()}
{pt3dadd(138696.000000,104172.000000,178200.000000,288.881586)}
{pt3dadd(138912.000000,104208.000000,178150.000000,499.187376)}
{pt3dadd(139104.000000,104256.000000,178175.000000,590.039483)}
{pt3dadd(139320.000000,104388.000000,177900.000000,680.891589)}
{pt3dadd(139536.000000,104460.000000,177825.000000,771.743696)}
{pt3dadd(139728.000000,104532.000000,177750.000000,862.595802)}
{pt3dadd(139968.000000,104496.000000,177725.000000,862.595802)}
{pt3dadd(140184.000000,104664.000000,177650.000000,862.595802)}
{pt3dadd(140484.000000,104628.000000,177550.000000,862.595802)}
{pt3dadd(140736.000000,104592.000000,177450.000000,862.595802)}
{pt3dadd(140976.000000,104556.000000,177300.000000,862.595802)}
{pt3dadd(141192.000000,104604.000000,177050.000000,862.595802)}
{pt3dadd(141396.000000,104676.000000,176800.000000,862.595802)}
{pt3dadd(141576.000000,104520.000000,176675.000000,862.595802)}
{pt3dadd(141768.000000,104592.000000,176625.000000,771.743696)}
{pt3dadd(142068.000000,104748.000000,176225.000000,680.891589)}
{pt3dadd(142176.000000,104988.000000,175875.000000,590.039483)}
{pt3dadd(142380.000000,105276.000000,175600.000000,499.187376)}
{pt3dadd(142416.000000,105660.000000,175350.000000,416.184741)}
{pt3dadd(142908.000000,106056.000000,175075.000000,333.182106)}
{pt3dadd(143400.000000,106452.000000,174850.000000,250.179471)}
{pt3dadd(145044.000000,107460.000000,174525.000000,167.176836)}
{pt3dadd(146688.000000,107580.000000,174150.000000,333.182106)}
{pt3dadd(147228.000000,107172.000000,173725.000000,499.187376)}
{pt3dadd(149040.000000,107568.000000,172125.000000,828.091944)}

{create adhoc2}
{access adhoc2}
{connect adhoc2(1), adhoc1(0)}
{nseg = 1}
{strdef color color = "White"}
{pt3dclear()}
{pt3dadd(149040.000000,107568.000000,172125.000000,828.091944)}
{pt3dadd(148572.000000,107868.000000,172550.000000,862.595802)}
{pt3dadd(149988.000000,108024.000000,171350.000000,1019.588202)}
{pt3dadd(150060.000000,108300.000000,171250.000000,1176.580602)}
{pt3dadd(150132.000000,108600.000000,171150.000000,1333.573002)}
{pt3dadd(149892.000000,108864.000000,171425.000000,1490.565402)}
{pt3dadd(149784.000000,109152.000000,171350.000000,1451.611956)}
{pt3dadd(149808.000000,109392.000000,171350.000000,1412.658510)}
{pt3dadd(149928.000000,109680.000000,171150.000000,1373.705064)}
{pt3dadd(150156.000000,110088.000000,170875.000000,1788.678450)}

{create adhoc3}
{access adhoc3}
{connect adhoc3(1), adhoc2(0)}
{nseg = 1}
{strdef color color = "White"}
{pt3dclear()}
{pt3dadd(150156.000000,110088.000000,170875.000000,1788.678450)}
{pt3dadd(150204.000000,110352.000000,170725.000000,1788.678450)}
{pt3dadd(150528.000000,110676.000000,171050.000000,1788.678450)}
{pt3dadd(150480.000000,110916.000000,170750.000000,1788.678450)}
{pt3dadd(150420.000000,111168.000000,170450.000000,1788.678450)}
{pt3dadd(150384.000000,111384.000000,170225.000000,1788.678450)}
{pt3dadd(150684.000000,111648.000000,170100.000000,1714.150188)}
{pt3dadd(150804.000000,111888.000000,169850.000000,1639.621926)}
{pt3dadd(150696.000000,112140.000000,169625.000000,1565.093664)}
{pt3dadd(150924.000000,112368.000000,169650.000000,1490.565402)}
{pt3dadd(151176.000000,112536.000000,169675.000000,1428.458522)}
{pt3dadd(151428.000000,112788.000000,169725.000000,1366.351641)}
{pt3dadd(151728.000000,113016.000000,169425.000000,1304.244761)}
{pt3dadd(151848.000000,113256.000000,169450.000000,1242.137880)}
{pt3dadd(152100.000000,113484.000000,169450.000000,1275.029712)}
{pt3dadd(152376.000000,113700.000000,169450.000000,1307.921544)}
{pt3dadd(152220.000000,113964.000000,169425.000000,1340.813376)}
{pt3dadd(152472.000000,114720.000000,169225.000000,1373.705208)}
{pt3dadd(152748.000000,114864.000000,169250.000000,1442.390562)}
{pt3dadd(153120.000000,115092.000000,169125.000000,1511.075916)}
{pt3dadd(153480.000000,115752.000000,168650.000000,1579.761270)}
{pt3dadd(153900.000000,116460.000000,167825.000000,1648.446624)}
{pt3dadd(154080.000000,116472.000000,168100.000000,1582.508340)}
{pt3dadd(154308.000000,116712.000000,168175.000000,1490.565402)}

{create adhoc4}
{access adhoc4}
{connect adhoc4(1), adhoc3(0)}
{nseg = 1}
{strdef color color = "White"}
{pt3dclear()}
{pt3dadd(154308.000000,116712.000000,168175.000000,1490.565402)}
{pt3dadd(154368.000000,116988.000000,168275.000000,1788.678450)}
{pt3dadd(154608.000000,117300.000000,168050.000000,1788.678450)}
{pt3dadd(154920.000000,117600.000000,167875.000000,1788.678450)}
{pt3dadd(155232.000000,117852.000000,167675.000000,1788.678450)}
{pt3dadd(155448.000000,118080.000000,167500.000000,1788.678450)}
{pt3dadd(155280.000000,118368.000000,167575.000000,1714.150188)}
{pt3dadd(155412.000000,118584.000000,167175.000000,1639.621926)}
{pt3dadd(155748.000000,118824.000000,167200.000000,1565.093664)}
{pt3dadd(155832.000000,119088.000000,166850.000000,1490.565402)}
{pt3dadd(156372.000000,119316.000000,166250.000000,1475.659737)}
{pt3dadd(156348.000000,119544.000000,166300.000000,1460.754072)}
{pt3dadd(156408.000000,119724.000000,166025.000000,1445.848407)}
{pt3dadd(156468.000000,119928.000000,165850.000000,1430.942742)}
{pt3dadd(156528.000000,120168.000000,165675.000000,1520.376669)}
{pt3dadd(156588.000000,120372.000000,165500.000000,1609.810596)}
{pt3dadd(156648.000000,120600.000000,165325.000000,1699.244523)}
{pt3dadd(156708.000000,120780.000000,165150.000000,1788.678450)}
{pt3dadd(156684.000000,121008.000000,164850.000000,1764.829422)}
{pt3dadd(156660.000000,121212.000000,164550.000000,1740.980394)}
{pt3dadd(156636.000000,121428.000000,164250.000000,1717.131366)}
{pt3dadd(156612.000000,121644.000000,163950.000000,1788.678450)}

{create adhoc5}
{access adhoc5}
{connect adhoc5(1), adhoc4(0)}
{nseg = 1}
{strdef color color = "White"}
{pt3dclear()}
{pt3dadd(156612.000000,121644.000000,163950.000000,1788.678450)}
{pt3dadd(156624.000000,121848.000000,163800.000000,2060.557668)}
{pt3dadd(151824.000000,121656.000000,163300.000000,1752.441237)}
{pt3dadd(151512.000000,122556.000000,162875.000000,1444.324806)}
{pt3dadd(151236.000000,122712.000000,162650.000000,1136.208375)}
{pt3dadd(150936.000000,122640.000000,162650.000000,828.091944)}
{pt3dadd(150648.000000,122520.000000,162650.000000,919.182046)}
{pt3dadd(150396.000000,122244.000000,162300.000000,1010.272149)}
{pt3dadd(150180.000000,122100.000000,161825.000000,1101.362252)}
{pt3dadd(149916.000000,122004.000000,161275.000000,1192.452354)}
{pt3dadd(149664.000000,121908.000000,160725.000000,1204.873736)}
{pt3dadd(149364.000000,121332.000000,160575.000000,1217.295117)}
{pt3dadd(149088.000000,121344.000000,160525.000000,1229.716498)}
{pt3dadd(148788.000000,121356.000000,160475.000000,1242.137880)}
{pt3dadd(148572.000000,121128.000000,160425.000000,1307.921472)}
{pt3dadd(148428.000000,121464.000000,159900.000000,1373.705064)}
{pt3dadd(148608.000000,122340.000000,159575.000000,1242.137880)}

{create adhoc6}
{access adhoc6}
{connect adhoc6(1), adhoc5(0)}
{nseg = 1}
{strdef color color = "White"}
{pt3dclear()}
{pt3dadd(148608.000000,122340.000000,159575.000000,1242.137880)}
{pt3dadd(148356.000000,120000.000000,159225.000000,828.091944)}
{pt3dadd(147336.000000,118032.000000,158850.000000,869.496529)}
{pt3dadd(147036.000000,117744.000000,157325.000000,910.901115)}
{pt3dadd(147192.000000,117432.000000,157075.000000,952.305701)}
{pt3dadd(146940.000000,117108.000000,156950.000000,993.710286)}
{pt3dadd(146616.000000,116796.000000,156825.000000,1004.061452)}
{pt3dadd(145116.000000,116556.000000,156750.000000,1014.412617)}
{pt3dadd(144432.000000,116148.000000,156200.000000,1024.763782)}
{pt3dadd(143976.000000,115776.000000,156025.000000,1035.114948)}
{pt3dadd(143496.000000,115560.000000,155775.000000,862.595802)}

{create adhoc7}
{access adhoc7}
{connect adhoc7(1), adhoc6(0)}
{nseg = 1}
{strdef color color = "White"}
{pt3dclear()}
{pt3dadd(143496.000000,115560.000000,155775.000000,862.595802)}
{pt3dadd(146640.000000,115260.000000,156825.000000,862.595802)}
{pt3dadd(146832.000000,114816.000000,156725.000000,862.595802)}
{pt3dadd(147048.000000,114492.000000,156975.000000,862.595802)}
{pt3dadd(146880.000000,114204.000000,156825.000000,862.595802)}
{pt3dadd(147096.000000,113856.000000,157175.000000,862.595802)}
{pt3dadd(147132.000000,113604.000000,157000.000000,905.725589)}
{pt3dadd(147264.000000,113304.000000,157425.000000,948.855375)}
{pt3dadd(147420.000000,112992.000000,157400.000000,991.985162)}
{pt3dadd(147660.000000,112692.000000,157425.000000,1035.114948)}
{pt3dadd(147672.000000,112440.000000,157400.000000,1024.763782)}
{pt3dadd(147576.000000,112212.000000,157425.000000,1014.412617)}
{pt3dadd(147684.000000,111972.000000,157300.000000,1004.061452)}
{pt3dadd(147768.000000,111744.000000,157525.000000,993.710286)}
{pt3dadd(147648.000000,111528.000000,157625.000000,1004.061452)}
{pt3dadd(147708.000000,111276.000000,157625.000000,1014.412617)}
{pt3dadd(147720.000000,111096.000000,157625.000000,1024.763782)}
{pt3dadd(147876.000000,110868.000000,157775.000000,1035.114948)}
{pt3dadd(148008.000000,110664.000000,157850.000000,956.043666)}
{pt3dadd(148248.000000,110460.000000,158050.000000,876.972384)}
{pt3dadd(148488.000000,110292.000000,158250.000000,797.901102)}
{pt3dadd(148548.000000,110088.000000,158150.000000,718.829820)}
{pt3dadd(148452.000000,109908.000000,157950.000000,746.145351)}
{pt3dadd(148560.000000,109728.000000,158050.000000,773.460882)}
{pt3dadd(148572.000000,109524.000000,157975.000000,800.776413)}
{pt3dadd(148656.000000,109260.000000,158325.000000,828.091944)}
{pt3dadd(148836.000000,108984.000000,158250.000000,725.066330)}
{pt3dadd(149484.000000,108684.000000,158250.000000,622.040715)}
{pt3dadd(149640.000000,108372.000000,158050.000000,519.015101)}
{pt3dadd(149904.000000,108096.000000,157800.000000,415.989486)}
{pt3dadd(150168.000000,107832.000000,157550.000000,527.641065)}
{pt3dadd(150252.000000,107580.000000,157900.000000,639.292644)}
{pt3dadd(150312.000000,107292.000000,157775.000000,750.944223)}
{pt3dadd(150552.000000,106992.000000,157800.000000,862.595802)}
{pt3dadd(150564.000000,106764.000000,157825.000000,845.688929)}
{pt3dadd(150576.000000,106524.000000,157850.000000,828.782055)}
{pt3dadd(150636.000000,106272.000000,157950.000000,811.875182)}
{pt3dadd(150744.000000,106020.000000,157925.000000,794.968308)}
{pt3dadd(150672.000000,105708.000000,157825.000000,768.745382)}
{pt3dadd(150732.000000,105408.000000,158050.000000,742.522455)}
{pt3dadd(150792.000000,105144.000000,158275.000000,716.299528)}
{pt3dadd(151008.000000,104880.000000,158275.000000,690.076602)}
{pt3dadd(150984.000000,104640.000000,158675.000000,697.264906)}
{pt3dadd(150732.000000,104376.000000,158775.000000,704.453211)}
{pt3dadd(150660.000000,104112.000000,158950.000000,711.641515)}
{pt3dadd(150720.000000,103896.000000,159050.000000,718.829820)}
{pt3dadd(150780.000000,103680.000000,159150.000000,718.829820)}
{pt3dadd(150684.000000,103464.000000,159125.000000,718.829820)}
{pt3dadd(150696.000000,103200.000000,159350.000000,718.829820)}
{pt3dadd(150648.000000,102972.000000,159400.000000,718.829820)}
{pt3dadd(150660.000000,102732.000000,159425.000000,746.145351)}
{pt3dadd(150672.000000,102516.000000,159450.000000,773.460882)}
{pt3dadd(150708.000000,102336.000000,159625.000000,800.776413)}
{pt3dadd(150744.000000,102144.000000,159800.000000,828.091944)}
{pt3dadd(150672.000000,101952.000000,159700.000000,836.717909)}
{pt3dadd(150684.000000,101772.000000,159875.000000,845.343873)}
{pt3dadd(150696.000000,101604.000000,160050.000000,853.969838)}
{pt3dadd(150780.000000,101388.000000,160250.000000,862.595802)}
{pt3dadd(150840.000000,101196.000000,160425.000000,819.466002)}
{pt3dadd(150900.000000,101052.000000,160725.000000,776.336202)}
{pt3dadd(151404.000000,100548.000000,160975.000000,733.206402)}
{pt3dadd(151488.000000,100236.000000,161325.000000,690.076602)}
{pt3dadd(151908.000000,99960.000000,161250.000000,621.554823)}
{pt3dadd(152196.000000,99696.000000,161250.000000,553.033044)}
{pt3dadd(152892.000000,99444.000000,161275.000000,484.511265)}
{pt3dadd(153228.000000,99168.000000,161150.000000,415.989486)}
{pt3dadd(153672.000000,98952.000000,161000.000000,461.748335)}
{pt3dadd(153960.000000,98712.000000,161050.000000,507.507183)}
{pt3dadd(154524.000000,98472.000000,161125.000000,553.266031)}
{pt3dadd(155088.000000,98280.000000,161175.000000,599.024880)}
{pt3dadd(154428.000000,98064.000000,160900.000000,697.696250)}
{pt3dadd(154668.000000,97860.000000,160875.000000,796.367619)}
{pt3dadd(154824.000000,97572.000000,160875.000000,895.038988)}
{pt3dadd(154980.000000,97320.000000,161025.000000,993.710358)}
{pt3dadd(155112.000000,96972.000000,160950.000000,889.048733)}
{pt3dadd(155148.000000,96720.000000,160875.000000,784.387107)}
{pt3dadd(155232.000000,96468.000000,161125.000000,679.725482)}
{pt3dadd(155376.000000,96252.000000,161250.000000,575.063856)}
{pt3dadd(155532.000000,96048.000000,161175.000000,346.657896)}

{create adhoc8}
{access adhoc8}
{connect adhoc8(1), adhoc7(0)}
{nseg = 1}
{strdef color color = "White"}
{pt3dclear()}
{pt3dadd(155532.000000,96048.000000,161175.000000,346.657896)}
{pt3dadd(156612.000000,95844.000000,161350.000000,479.219886)}
{pt3dadd(156720.000000,95580.000000,161500.000000,509.171134)}
{pt3dadd(156936.000000,95364.000000,161650.000000,539.122383)}
{pt3dadd(157200.000000,95148.000000,161825.000000,569.073631)}
{pt3dadd(157284.000000,94944.000000,161725.000000,599.024880)}
{pt3dadd(157344.000000,94692.000000,162050.000000,599.024880)}
{pt3dadd(157476.000000,94452.000000,162125.000000,599.024880)}
{pt3dadd(157608.000000,93948.000000,162500.000000,599.024880)}
{pt3dadd(157896.000000,93648.000000,162850.000000,599.024880)}
{pt3dadd(158484.000000,93096.000000,163175.000000,521.489056)}
{pt3dadd(158592.000000,92844.000000,163450.000000,443.953233)}
{pt3dadd(158904.000000,92568.000000,163725.000000,366.417410)}
{pt3dadd(159216.000000,91908.000000,164050.000000,288.881586)}
{pt3dadd(159060.000000,91860.000000,164350.000000,366.417410)}
{pt3dadd(159324.000000,91128.000000,164700.000000,443.953233)}
{pt3dadd(159444.000000,90396.000000,165025.000000,521.489056)}
{pt3dadd(159372.000000,90132.000000,164775.000000,599.024880)}
{pt3dadd(159384.000000,89772.000000,165125.000000,553.266031)}
{pt3dadd(159444.000000,89472.000000,165325.000000,507.507183)}
{pt3dadd(159504.000000,89196.000000,165250.000000,461.748335)}
{pt3dadd(159312.000000,88932.000000,165125.000000,415.989486)}
{pt3dadd(159348.000000,88668.000000,165175.000000,362.145168)}
{pt3dadd(159324.000000,88476.000000,164975.000000,308.300850)}
{pt3dadd(159276.000000,88164.000000,165375.000000,254.456532)}
{pt3dadd(159048.000000,87900.000000,165150.000000,200.612214)}
{pt3dadd(158964.000000,87600.000000,165200.000000,254.456532)}
{pt3dadd(159252.000000,87348.000000,165200.000000,308.300850)}
{pt3dadd(159132.000000,87156.000000,165050.000000,362.145168)}
{pt3dadd(159060.000000,86988.000000,164700.000000,415.989486)}
{pt3dadd(159156.000000,86796.000000,164550.000000,491.699570)}
{pt3dadd(159108.000000,86604.000000,164400.000000,567.409653)}
{pt3dadd(159060.000000,86388.000000,164475.000000,643.119737)}
{pt3dadd(159648.000000,86100.000000,164375.000000,718.829820)}
{pt3dadd(159780.000000,85872.000000,164275.000000,746.145351)}
{pt3dadd(159588.000000,85752.000000,163775.000000,773.460882)}
{pt3dadd(159720.000000,85404.000000,163400.000000,800.776413)}
{pt3dadd(159744.000000,85248.000000,163050.000000,828.091944)}
{pt3dadd(159552.000000,85344.000000,162700.000000,558.486765)}
{pt3dadd(159540.000000,85236.000000,162400.000000,288.881586)}
{pt3dadd(159396.000000,85272.000000,162275.000000,96.745860)}

{create adhoc9}
{access adhoc9}
{connect adhoc9(1), adhoc7(0)}
{nseg = 1}
{strdef color color = "White"}
{pt3dclear()}
{pt3dadd(155532.000000,96048.000000,161175.000000,346.657896)}
{pt3dadd(154488.000000,95844.000000,161125.000000,499.187376)}
{pt3dadd(154296.000000,95568.000000,160750.000000,524.146752)}
{pt3dadd(153912.000000,95436.000000,160750.000000,549.106128)}
{pt3dadd(153612.000000,95136.000000,160275.000000,574.065504)}
{pt3dadd(153156.000000,94608.000000,159975.000000,599.024880)}
{pt3dadd(153012.000000,94452.000000,159625.000000,574.065504)}
{pt3dadd(152940.000000,94476.000000,159375.000000,549.106128)}
{pt3dadd(153108.000000,94224.000000,159100.000000,524.146752)}
{pt3dadd(153444.000000,93852.000000,158775.000000,499.187376)}
{pt3dadd(154020.000000,93804.000000,158550.000000,167.176836)}

{create adhoc10}
{access adhoc10}
{connect adhoc10(1), adhoc6(0)}
{nseg = 1}
{strdef color color = "White"}
{pt3dclear()}
{pt3dadd(143496.000000,115560.000000,155775.000000,862.595802)}
{pt3dadd(141516.000000,115224.000000,157375.000000,599.024880)}
{pt3dadd(140556.000000,114876.000000,157875.000000,553.266031)}
{pt3dadd(140364.000000,114576.000000,157975.000000,507.507183)}
{pt3dadd(140292.000000,114204.000000,157950.000000,461.748335)}
{pt3dadd(140100.000000,113904.000000,158325.000000,415.989486)}
{pt3dadd(139728.000000,113628.000000,158175.000000,415.989486)}
{pt3dadd(139584.000000,113352.000000,158175.000000,288.881586)}

{create adhoc11}
{access adhoc11}
{connect adhoc11(1), adhoc6(0)}
{nseg = 1}
{strdef color color = "White"}
{pt3dclear()}
{pt3dadd(143496.000000,115560.000000,155775.000000,862.595802)}
{pt3dadd(141336.000000,115560.000000,153175.000000,690.076602)}
{pt3dadd(141144.000000,115920.000000,152725.000000,697.264906)}
{pt3dadd(140868.000000,115800.000000,152400.000000,704.453211)}
{pt3dadd(140592.000000,115692.000000,152075.000000,711.641515)}
{pt3dadd(140676.000000,115080.000000,151650.000000,718.829820)}
{pt3dadd(140604.000000,114756.000000,151225.000000,658.927336)}
{pt3dadd(140532.000000,114612.000000,150825.000000,599.024853)}
{pt3dadd(140364.000000,114156.000000,150425.000000,539.122369)}
{pt3dadd(140208.000000,113652.000000,150050.000000,479.219886)}
{pt3dadd(140016.000000,113580.000000,149675.000000,531.934083)}
{pt3dadd(139332.000000,113100.000000,149300.000000,584.648280)}
{pt3dadd(138828.000000,112848.000000,148875.000000,637.362477)}
{pt3dadd(138456.000000,112656.000000,148550.000000,690.076674)}
{pt3dadd(138468.000000,112440.000000,148275.000000,599.024880)}

{create adhoc12}
{access adhoc12}
{connect adhoc12(1), adhoc11(0)}
{nseg = 1}
{strdef color color = "White"}
{pt3dclear()}
{pt3dadd(138468.000000,112440.000000,148275.000000,599.024880)}
{pt3dadd(137988.000000,112860.000000,147975.000000,599.024880)}
{pt3dadd(137616.000000,113124.000000,147675.000000,507.507183)}
{pt3dadd(137220.000000,112800.000000,147300.000000,415.989486)}
{pt3dadd(137148.000000,112500.000000,147100.000000,288.881586)}

{create adhoc13}
{access adhoc13}
{connect adhoc13(1), adhoc11(0)}
{nseg = 1}
{strdef color color = "White"}
{pt3dclear()}
{pt3dadd(138468.000000,112440.000000,148275.000000,599.024880)}
{pt3dadd(139008.000000,108108.000000,147975.000000,718.829820)}
{pt3dadd(139116.000000,107880.000000,147825.000000,662.473602)}
{pt3dadd(139092.000000,107652.000000,147675.000000,690.076602)}

{create adhoc14}
{access adhoc14}
{connect adhoc14(1), adhoc5(0)}
{nseg = 1}
{strdef color color = "White"}
{pt3dclear()}
{pt3dadd(148608.000000,122340.000000,159575.000000,1242.137880)}
{pt3dadd(147252.000000,124344.000000,159250.000000,1035.114948)}
{pt3dadd(146964.000000,124560.000000,158875.000000,1035.114948)}
{pt3dadd(146772.000000,124860.000000,158625.000000,993.710286)}

{create adhoc15}
{access adhoc15}
{connect adhoc15(1), adhoc14(0)}
{nseg = 1}
{strdef color color = "White"}
{pt3dclear()}
{pt3dadd(146772.000000,124860.000000,158625.000000,993.710286)}
{pt3dadd(143652.000000,127200.000000,159100.000000,415.989486)}
{pt3dadd(142548.000000,128508.000000,159450.000000,415.989486)}
{pt3dadd(141936.000000,129264.000000,159875.000000,415.989486)}
{pt3dadd(141480.000000,129552.000000,160225.000000,415.989486)}
{pt3dadd(141192.000000,129840.000000,160450.000000,415.989486)}
{pt3dadd(140460.000000,131220.000000,160725.000000,436.788958)}
{pt3dadd(140388.000000,131448.000000,161100.000000,457.588431)}
{pt3dadd(140124.000000,131652.000000,161125.000000,478.387903)}
{pt3dadd(140160.000000,131868.000000,161175.000000,499.187376)}
{pt3dadd(140088.000000,132132.000000,161200.000000,446.610929)}
{pt3dadd(139356.000000,132348.000000,161500.000000,394.034481)}
{pt3dadd(138972.000000,132588.000000,161750.000000,341.458034)}
{pt3dadd(138780.000000,132792.000000,161825.000000,288.881586)}
{pt3dadd(138744.000000,133044.000000,161850.000000,320.658561)}
{pt3dadd(138804.000000,133308.000000,161975.000000,352.435536)}
{pt3dadd(138660.000000,133548.000000,162000.000000,384.212511)}
{pt3dadd(138552.000000,133788.000000,162000.000000,415.989486)}
{pt3dadd(138516.000000,133980.000000,161900.000000,415.989486)}
{pt3dadd(138588.000000,134232.000000,162075.000000,415.989486)}
{pt3dadd(138540.000000,134448.000000,162100.000000,415.989486)}
{pt3dadd(138468.000000,134712.000000,162050.000000,415.989486)}
{pt3dadd(138432.000000,134988.000000,162075.000000,384.212511)}
{pt3dadd(138672.000000,135252.000000,162125.000000,352.435536)}
{pt3dadd(138492.000000,135456.000000,162175.000000,320.658561)}
{pt3dadd(138444.000000,135660.000000,162175.000000,288.881586)}
{pt3dadd(138336.000000,135912.000000,162125.000000,167.176836)}
{pt3dadd(138324.000000,136044.000000,162075.000000,116.095032)}

{create adhoc16}
{access adhoc16}
{connect adhoc16(1), adhoc14(0)}
{nseg = 1}
{strdef color color = "White"}
{pt3dclear()}
{pt3dadd(146772.000000,124860.000000,158625.000000,993.710286)}
{pt3dadd(146328.000000,125328.000000,158350.000000,1035.114948)}
{pt3dadd(146616.000000,125208.000000,158000.000000,880.333582)}
{pt3dadd(146724.000000,125076.000000,157650.000000,725.552217)}
{pt3dadd(146748.000000,125100.000000,157300.000000,570.770851)}
{pt3dadd(146484.000000,125016.000000,156950.000000,415.989486)}
{pt3dadd(146004.000000,124908.000000,156650.000000,415.989486)}
{pt3dadd(145788.000000,125016.000000,156325.000000,415.989486)}
{pt3dadd(145704.000000,125124.000000,156100.000000,415.989486)}
{pt3dadd(145572.000000,125112.000000,155800.000000,415.989486)}
{pt3dadd(145608.000000,124944.000000,155575.000000,398.656589)}
{pt3dadd(145512.000000,124944.000000,155250.000000,381.323691)}
{pt3dadd(145344.000000,124644.000000,155000.000000,363.990794)}
{pt3dadd(144636.000000,123984.000000,154850.000000,346.657896)}
{pt3dadd(144264.000000,123648.000000,154600.000000,363.990794)}
{pt3dadd(144252.000000,123612.000000,154250.000000,381.323691)}
{pt3dadd(143916.000000,123576.000000,153900.000000,398.656589)}
{pt3dadd(143940.000000,123600.000000,153575.000000,415.989486)}
{pt3dadd(143724.000000,123408.000000,153400.000000,200.612214)}

{create adhoc17}
{access adhoc17}
{connect adhoc17(1), adhoc4(0)}
{nseg = 1}
{strdef color color = "White"}
{pt3dclear()}
{pt3dadd(156612.000000,121644.000000,163950.000000,1788.678450)}
{pt3dadd(156264.000000,122388.000000,163700.000000,2146.414176)}
{pt3dadd(156036.000000,123024.000000,163450.000000,2253.734910)}
{pt3dadd(156396.000000,123492.000000,163175.000000,2361.055644)}
{pt3dadd(157344.000000,124056.000000,163150.000000,2468.376378)}
{pt3dadd(157728.000000,124428.000000,162825.000000,2575.697112)}
{pt3dadd(157788.000000,124776.000000,162425.000000,2575.697112)}
{pt3dadd(158100.000000,125136.000000,162725.000000,2575.697112)}
{pt3dadd(158208.000000,125448.000000,162250.000000,2575.697112)}
{pt3dadd(158340.000000,125736.000000,162250.000000,2575.697112)}
{pt3dadd(158472.000000,126060.000000,162025.000000,2615.416398)}
{pt3dadd(158604.000000,126456.000000,161825.000000,2655.135684)}
{pt3dadd(158736.000000,126792.000000,161725.000000,2694.854970)}
{pt3dadd(158820.000000,127056.000000,161675.000000,2734.574256)}
{pt3dadd(158544.000000,127428.000000,160950.000000,2669.098005)}
{pt3dadd(158760.000000,127740.000000,161325.000000,2603.621754)}
{pt3dadd(158712.000000,128220.000000,161200.000000,2538.145503)}
{pt3dadd(158076.000000,128616.000000,160950.000000,2472.669252)}
{pt3dadd(157440.000000,129000.000000,160725.000000,2498.426217)}
{pt3dadd(157164.000000,129300.000000,160500.000000,2524.183182)}
{pt3dadd(157200.000000,129636.000000,160425.000000,2549.940147)}
{pt3dadd(157416.000000,129996.000000,160000.000000,2575.697112)}
{pt3dadd(156348.000000,130296.000000,160025.000000,2549.940147)}
{pt3dadd(156612.000000,130596.000000,159500.000000,2524.183182)}
{pt3dadd(156696.000000,130908.000000,159550.000000,2498.426217)}
{pt3dadd(156780.000000,131196.000000,159575.000000,2472.669252)}
{pt3dadd(156456.000000,131544.000000,159400.000000,2472.669252)}
{pt3dadd(156336.000000,131868.000000,158975.000000,2472.669252)}
{pt3dadd(156168.000000,132156.000000,159000.000000,2472.669252)}
{pt3dadd(156180.000000,132384.000000,159075.000000,2472.669252)}
{pt3dadd(156132.000000,132672.000000,158900.000000,2498.426217)}
{pt3dadd(155988.000000,132984.000000,158875.000000,2524.183182)}
{pt3dadd(155844.000000,133260.000000,158875.000000,2549.940147)}
{pt3dadd(155700.000000,133476.000000,158875.000000,2575.697112)}
{pt3dadd(155604.000000,133716.000000,158625.000000,2549.940147)}
{pt3dadd(155508.000000,134004.000000,158350.000000,2524.183182)}
{pt3dadd(155412.000000,134220.000000,158075.000000,2498.426217)}
{pt3dadd(155220.000000,134544.000000,158150.000000,2472.669252)}
{pt3dadd(155028.000000,134820.000000,158225.000000,2498.426217)}
{pt3dadd(154860.000000,135096.000000,157875.000000,2524.183182)}
{pt3dadd(154584.000000,135420.000000,157700.000000,2549.940147)}
{pt3dadd(154308.000000,135708.000000,157550.000000,2575.697112)}
{pt3dadd(154008.000000,135972.000000,157500.000000,2468.376378)}
{pt3dadd(154068.000000,136188.000000,157175.000000,2361.055644)}
{pt3dadd(153972.000000,136488.000000,157000.000000,2253.734910)}
{pt3dadd(153360.000000,136836.000000,156775.000000,2146.414176)}
{pt3dadd(153192.000000,137160.000000,156600.000000,2227.977945)}
{pt3dadd(152484.000000,137412.000000,155850.000000,2309.541714)}
{pt3dadd(152052.000000,137724.000000,155500.000000,2391.105483)}
{pt3dadd(151860.000000,138132.000000,155225.000000,2472.669252)}
{pt3dadd(151668.000000,138468.000000,154950.000000,2369.641356)}
{pt3dadd(151644.000000,138732.000000,154625.000000,2266.613460)}
{pt3dadd(151500.000000,139008.000000,154300.000000,2163.585564)}
{pt3dadd(151356.000000,139308.000000,153975.000000,2060.557668)}
{pt3dadd(151332.000000,139680.000000,154325.000000,2082.021795)}
{pt3dadd(151188.000000,139968.000000,154575.000000,2103.485922)}
{pt3dadd(151044.000000,140232.000000,154300.000000,2124.950049)}
{pt3dadd(150684.000000,140412.000000,153425.000000,2146.414176)}
{pt3dadd(150492.000000,140664.000000,153150.000000,2253.734910)}
{pt3dadd(150096.000000,140928.000000,152525.000000,2361.055644)}
{pt3dadd(149796.000000,141204.000000,152400.000000,2468.376378)}
{pt3dadd(149544.000000,141516.000000,152275.000000,2575.697112)}
{pt3dadd(149580.000000,141792.000000,151700.000000,2575.697112)}
{pt3dadd(149832.000000,142032.000000,151525.000000,2575.697112)}
{pt3dadd(149868.000000,142284.000000,151350.000000,2575.697112)}
{pt3dadd(149676.000000,142536.000000,151000.000000,2575.697112)}
{pt3dadd(149652.000000,142896.000000,150550.000000,2446.912251)}
{pt3dadd(149628.000000,143256.000000,150175.000000,2318.127390)}
{pt3dadd(149844.000000,143748.000000,149700.000000,2189.342529)}
{pt3dadd(150144.000000,145224.000000,149400.000000,2060.557668)}
{pt3dadd(150360.000000,146100.000000,149075.000000,1992.587863)}
{pt3dadd(149736.000000,146316.000000,148675.000000,1924.618059)}
{pt3dadd(149712.000000,147348.000000,148275.000000,1856.648255)}
{pt3dadd(149724.000000,147648.000000,147450.000000,1788.678450)}
{pt3dadd(149724.000000,147984.000000,147400.000000,1856.648286)}
{pt3dadd(149760.000000,148308.000000,147025.000000,1924.618122)}
{pt3dadd(149868.000000,148644.000000,146900.000000,1992.587958)}
{pt3dadd(150000.000000,148956.000000,146800.000000,2060.557794)}
{pt3dadd(150132.000000,149352.000000,146700.000000,2082.021889)}
{pt3dadd(150264.000000,149676.000000,146600.000000,2103.485985)}
{pt3dadd(150396.000000,150012.000000,146500.000000,2124.950081)}
{pt3dadd(150528.000000,150288.000000,146400.000000,2146.414176)}
{pt3dadd(150660.000000,150624.000000,146300.000000,2056.980245)}
{pt3dadd(150288.000000,150960.000000,146450.000000,1967.546313)}
{pt3dadd(150468.000000,151260.000000,145625.000000,1878.112382)}
{pt3dadd(150324.000000,151620.000000,145675.000000,1788.678450)}
{pt3dadd(150360.000000,151908.000000,146025.000000,1770.791679)}
{pt3dadd(150492.000000,152184.000000,145850.000000,1752.904908)}
{pt3dadd(150576.000000,152436.000000,145850.000000,1735.018137)}
{pt3dadd(150660.000000,152724.000000,145800.000000,1717.131366)}
{pt3dadd(150720.000000,152964.000000,145700.000000,1802.987942)}
{pt3dadd(150780.000000,153276.000000,145600.000000,1888.844517)}
{pt3dadd(150588.000000,153600.000000,145475.000000,1974.701093)}
{pt3dadd(150564.000000,153876.000000,145275.000000,2060.557668)}
{pt3dadd(150540.000000,154236.000000,145200.000000,1992.587863)}
{pt3dadd(150552.000000,154500.000000,145125.000000,1924.618059)}
{pt3dadd(150660.000000,154812.000000,144900.000000,1856.648255)}
{pt3dadd(150696.000000,155088.000000,144825.000000,1788.678450)}
{pt3dadd(150876.000000,155352.000000,144450.000000,1788.678450)}
{pt3dadd(151032.000000,155604.000000,144350.000000,1788.678450)}
{pt3dadd(151188.000000,155808.000000,144250.000000,1788.678450)}
{pt3dadd(151344.000000,156060.000000,144150.000000,1788.678450)}
{pt3dadd(151500.000000,156324.000000,144050.000000,1788.678450)}
{pt3dadd(151104.000000,156660.000000,143950.000000,1788.678450)}
{pt3dadd(150708.000000,156888.000000,143850.000000,1788.678450)}
{pt3dadd(150816.000000,157092.000000,143850.000000,1788.678450)}
{pt3dadd(150924.000000,157272.000000,143850.000000,1788.678450)}
{pt3dadd(151032.000000,157464.000000,143850.000000,1788.678450)}
{pt3dadd(151140.000000,157656.000000,143850.000000,1788.678450)}
{pt3dadd(150972.000000,157872.000000,143275.000000,1788.678450)}
{pt3dadd(151068.000000,158100.000000,143900.000000,1878.112382)}
{pt3dadd(150924.000000,158352.000000,143575.000000,1967.546313)}
{pt3dadd(151032.000000,158556.000000,143400.000000,2056.980245)}
{pt3dadd(151008.000000,158808.000000,143175.000000,2146.414176)}
{pt3dadd(151020.000000,159048.000000,143000.000000,2146.414176)}
{pt3dadd(151056.000000,159252.000000,143100.000000,2146.414176)}
{pt3dadd(151092.000000,159492.000000,143200.000000,2146.414176)}
{pt3dadd(151176.000000,159708.000000,143175.000000,2146.414176)}
{pt3dadd(151284.000000,159948.000000,143025.000000,2146.414176)}
{pt3dadd(151392.000000,160176.000000,142875.000000,2146.414176)}
{pt3dadd(151404.000000,160392.000000,142825.000000,2146.414176)}
{pt3dadd(151416.000000,160656.000000,142850.000000,2146.414176)}
{pt3dadd(151500.000000,160908.000000,142500.000000,2124.950049)}
{pt3dadd(151656.000000,161220.000000,142400.000000,2103.485922)}
{pt3dadd(151812.000000,161472.000000,142175.000000,2082.021795)}
{pt3dadd(151896.000000,161784.000000,142100.000000,2060.557668)}
{pt3dadd(151980.000000,162072.000000,142025.000000,1992.587863)}
{pt3dadd(152064.000000,162300.000000,141950.000000,1924.618059)}
{pt3dadd(152148.000000,162528.000000,141875.000000,1856.648255)}
{pt3dadd(152208.000000,162780.000000,141925.000000,1788.678450)}
{pt3dadd(152268.000000,163032.000000,141975.000000,1770.791643)}
{pt3dadd(152328.000000,163308.000000,142025.000000,1752.904836)}
{pt3dadd(152460.000000,163500.000000,141900.000000,1735.018029)}
{pt3dadd(152592.000000,163692.000000,141775.000000,1717.131222)}
{pt3dadd(152724.000000,163896.000000,141650.000000,1660.489767)}
{pt3dadd(152856.000000,164136.000000,141525.000000,1603.848312)}
{pt3dadd(152988.000000,164352.000000,141400.000000,1547.206857)}
{pt3dadd(153024.000000,164628.000000,141450.000000,1490.565402)}
{pt3dadd(153060.000000,164880.000000,141500.000000,1475.659769)}
{pt3dadd(153096.000000,165084.000000,141550.000000,1460.754135)}
{pt3dadd(153132.000000,165384.000000,141125.000000,1445.848502)}
{pt3dadd(153036.000000,165660.000000,141275.000000,1430.942868)}
{pt3dadd(152940.000000,165912.000000,141425.000000,1445.848502)}
{pt3dadd(153000.000000,166128.000000,141300.000000,1460.754135)}
{pt3dadd(153312.000000,166308.000000,141125.000000,1475.659769)}
{pt3dadd(153192.000000,166500.000000,141400.000000,1490.565402)}
{pt3dadd(153072.000000,166716.000000,141200.000000,1475.659737)}
{pt3dadd(153456.000000,166944.000000,141150.000000,1460.754072)}
{pt3dadd(153408.000000,167196.000000,140725.000000,1445.848407)}
{pt3dadd(153180.000000,167412.000000,140975.000000,1430.942742)}
{pt3dadd(153288.000000,167640.000000,140975.000000,1371.320145)}
{pt3dadd(153396.000000,167880.000000,140975.000000,1311.697548)}
{pt3dadd(153456.000000,168096.000000,140850.000000,1252.074951)}
{pt3dadd(153516.000000,168300.000000,140725.000000,1192.452354)}
{pt3dadd(153576.000000,168540.000000,140600.000000,1266.980616)}
{pt3dadd(153636.000000,168744.000000,140475.000000,1341.508878)}
{pt3dadd(153696.000000,168996.000000,140350.000000,1416.037140)}
{pt3dadd(153756.000000,169236.000000,140225.000000,1490.565402)}
{pt3dadd(153816.000000,169488.000000,140100.000000,1475.659737)}
{pt3dadd(153768.000000,169776.000000,140325.000000,1460.754072)}
{pt3dadd(153780.000000,170040.000000,140250.000000,1445.848407)}
{pt3dadd(153792.000000,170304.000000,140175.000000,1430.942742)}
{pt3dadd(153804.000000,170544.000000,140100.000000,1445.848407)}
{pt3dadd(153816.000000,170760.000000,140025.000000,1460.754072)}
{pt3dadd(153828.000000,170988.000000,139950.000000,1475.659737)}
{pt3dadd(153840.000000,171192.000000,139875.000000,1490.565402)}
{pt3dadd(153852.000000,171432.000000,139800.000000,1490.565402)}
{pt3dadd(153864.000000,171624.000000,139725.000000,1490.565402)}
{pt3dadd(153876.000000,171828.000000,139650.000000,1490.565402)}
{pt3dadd(153888.000000,172080.000000,139725.000000,1490.565402)}
{pt3dadd(153900.000000,172320.000000,139800.000000,1565.093664)}
{pt3dadd(153936.000000,172620.000000,139750.000000,1639.621926)}
{pt3dadd(153996.000000,172848.000000,139325.000000,1714.150188)}
{pt3dadd(154236.000000,173076.000000,139275.000000,1788.678450)}
{pt3dadd(154476.000000,173268.000000,139225.000000,1788.678450)}
{pt3dadd(154608.000000,173472.000000,139150.000000,1788.678450)}
{pt3dadd(154440.000000,173700.000000,138750.000000,1788.678450)}
{pt3dadd(154620.000000,173928.000000,138750.000000,1788.678450)}
{pt3dadd(154632.000000,174180.000000,138625.000000,1788.678450)}
{pt3dadd(154872.000000,174432.000000,138375.000000,1788.678450)}
{pt3dadd(155004.000000,174660.000000,138425.000000,1788.678450)}
{pt3dadd(155184.000000,174924.000000,138150.000000,1788.678450)}
{pt3dadd(155364.000000,175140.000000,137875.000000,1788.678450)}
{pt3dadd(155544.000000,175416.000000,137600.000000,1788.678450)}
{pt3dadd(155520.000000,175716.000000,137750.000000,1788.678450)}
{pt3dadd(155700.000000,175932.000000,137550.000000,1788.678450)}
{pt3dadd(156396.000000,176208.000000,137150.000000,1788.678450)}
{pt3dadd(156612.000000,176472.000000,137200.000000,1788.678450)}
{pt3dadd(156540.000000,176736.000000,137200.000000,1788.678450)}
{pt3dadd(156468.000000,176952.000000,137200.000000,1788.678450)}
{pt3dadd(156732.000000,177240.000000,137025.000000,1788.678450)}
{pt3dadd(156744.000000,177516.000000,137150.000000,1788.678450)}
{pt3dadd(157032.000000,177744.000000,137225.000000,1788.678450)}
{pt3dadd(157320.000000,177924.000000,137300.000000,1788.678450)}
{pt3dadd(157608.000000,178200.000000,137050.000000,1788.678450)}
{pt3dadd(157896.000000,178440.000000,136825.000000,1788.678450)}
{pt3dadd(158280.000000,178668.000000,136375.000000,1788.678450)}
{pt3dadd(158664.000000,178920.000000,135900.000000,1788.678450)}
{pt3dadd(158724.000000,179160.000000,135500.000000,1753.620359)}
{pt3dadd(158808.000000,178788.000000,135150.000000,1718.562267)}
{pt3dadd(158880.000000,178416.000000,134750.000000,1683.504176)}
{pt3dadd(159180.000000,178776.000000,134325.000000,1648.446084)}
{pt3dadd(159984.000000,179136.000000,133975.000000,1683.504176)}
{pt3dadd(160116.000000,179268.000000,133600.000000,1718.562267)}
{pt3dadd(160560.000000,180012.000000,133250.000000,1753.620359)}
{pt3dadd(160920.000000,180252.000000,132900.000000,1788.678450)}
{pt3dadd(161100.000000,180132.000000,132600.000000,1856.648255)}
{pt3dadd(161520.000000,180288.000000,132250.000000,1924.618059)}
{pt3dadd(161676.000000,180624.000000,131875.000000,1992.587863)}
{pt3dadd(161820.000000,180528.000000,131550.000000,2060.557668)}
{pt3dadd(161976.000000,180504.000000,131150.000000,1992.587863)}
{pt3dadd(162012.000000,180432.000000,130800.000000,1924.618059)}
{pt3dadd(161988.000000,180588.000000,130425.000000,1856.648255)}
{pt3dadd(162096.000000,180672.000000,130025.000000,1788.678450)}
{pt3dadd(162204.000000,180756.000000,129625.000000,1652.043308)}
{pt3dadd(162492.000000,180912.000000,129225.000000,1515.408165)}
{pt3dadd(162624.000000,181068.000000,128850.000000,1378.773023)}
{pt3dadd(163068.000000,181584.000000,128525.000000,1242.137880)}
{pt3dadd(163440.000000,181848.000000,128175.000000,1190.382147)}
{pt3dadd(163368.000000,182232.000000,127875.000000,1138.626414)}
{pt3dadd(163908.000000,182520.000000,127600.000000,1086.870681)}
{pt3dadd(164172.000000,183264.000000,127275.000000,1035.114948)}
{pt3dadd(164448.000000,183648.000000,126925.000000,1024.763801)}
{pt3dadd(164736.000000,184092.000000,126450.000000,1014.412653)}
{pt3dadd(165036.000000,184944.000000,126075.000000,1004.061506)}
{pt3dadd(165876.000000,186792.000000,125725.000000,993.710358)}
{pt3dadd(165708.000000,187092.000000,125775.000000,960.931719)}
{pt3dadd(165816.000000,187368.000000,125625.000000,928.153080)}
{pt3dadd(165900.000000,187632.000000,125450.000000,895.374441)}
{pt3dadd(166236.000000,187944.000000,125200.000000,862.595802)}
{pt3dadd(166524.000000,188172.000000,125125.000000,826.654307)}
{pt3dadd(166536.000000,188460.000000,125075.000000,790.712811)}
{pt3dadd(166800.000000,188676.000000,124900.000000,754.771316)}
{pt3dadd(167016.000000,188928.000000,124825.000000,718.829820)}
{pt3dadd(166944.000000,189168.000000,124850.000000,787.549937)}
{pt3dadd(166956.000000,189396.000000,124900.000000,856.270053)}
{pt3dadd(167400.000000,189672.000000,124975.000000,924.990169)}
{pt3dadd(167436.000000,189924.000000,125125.000000,993.710286)}
{pt3dadd(167496.000000,190152.000000,124975.000000,960.931665)}
{pt3dadd(167496.000000,190380.000000,125025.000000,928.153044)}
{pt3dadd(167508.000000,190668.000000,125075.000000,895.374423)}
{pt3dadd(167592.000000,190932.000000,124825.000000,862.595802)}
{pt3dadd(167724.000000,191136.000000,125050.000000,826.654307)}
{pt3dadd(168084.000000,191376.000000,125075.000000,790.712811)}
{pt3dadd(168300.000000,191568.000000,124825.000000,754.771316)}
{pt3dadd(168516.000000,191772.000000,124650.000000,718.829820)}
{pt3dadd(168240.000000,192000.000000,124950.000000,718.829820)}
{pt3dadd(168276.000000,192204.000000,124975.000000,718.829820)}
{pt3dadd(168312.000000,192396.000000,125025.000000,718.829820)}
{pt3dadd(168600.000000,192588.000000,124825.000000,718.829820)}
{pt3dadd(168840.000000,192768.000000,124825.000000,754.771316)}
{pt3dadd(169080.000000,192960.000000,124825.000000,790.712811)}
{pt3dadd(168960.000000,193200.000000,124750.000000,826.654307)}
{pt3dadd(169404.000000,193404.000000,124700.000000,862.595802)}
{pt3dadd(169440.000000,193632.000000,124750.000000,905.725589)}
{pt3dadd(169476.000000,193836.000000,124850.000000,948.855375)}
{pt3dadd(169512.000000,194052.000000,124950.000000,991.985162)}
{pt3dadd(169524.000000,194280.000000,124925.000000,1035.114948)}
{pt3dadd(169704.000000,194484.000000,124575.000000,991.985162)}
{pt3dadd(169920.000000,194688.000000,124500.000000,948.855375)}
{pt3dadd(170280.000000,194892.000000,124225.000000,905.725589)}
{pt3dadd(170340.000000,195084.000000,124200.000000,862.595802)}
{pt3dadd(170628.000000,195012.000000,124225.000000,862.595802)}
{pt3dadd(170880.000000,195192.000000,124000.000000,862.595802)}
{pt3dadd(171132.000000,195204.000000,123950.000000,862.595802)}
{pt3dadd(171396.000000,195444.000000,123900.000000,862.595802)}
{pt3dadd(171588.000000,196044.000000,123800.000000,826.654307)}
{pt3dadd(171876.000000,196200.000000,123500.000000,790.712811)}
{pt3dadd(172800.000000,196404.000000,122750.000000,754.771316)}
{pt3dadd(173244.000000,196680.000000,122350.000000,718.829820)}
{pt3dadd(173352.000000,197136.000000,122325.000000,718.829820)}
{pt3dadd(173592.000000,197508.000000,122425.000000,718.829820)}
{pt3dadd(173772.000000,197808.000000,122075.000000,718.829820)}
{pt3dadd(174216.000000,198456.000000,121850.000000,718.829820)}
{pt3dadd(174864.000000,198516.000000,121425.000000,787.549955)}
{pt3dadd(175488.000000,198516.000000,121100.000000,856.270089)}
{pt3dadd(176496.000000,199008.000000,120625.000000,924.990223)}
{pt3dadd(176148.000000,199320.000000,120075.000000,993.710358)}
{pt3dadd(177180.000000,200676.000000,119375.000000,1004.061506)}
{pt3dadd(177420.000000,200604.000000,118825.000000,1014.412653)}
{pt3dadd(178068.000000,200484.000000,118400.000000,1024.763801)}
{pt3dadd(178128.000000,200532.000000,117950.000000,1035.114948)}
{pt3dadd(178392.000000,200820.000000,117600.000000,1035.114948)}
{pt3dadd(178404.000000,200976.000000,117175.000000,1035.114948)}
{pt3dadd(178584.000000,200724.000000,116700.000000,1035.114948)}
{pt3dadd(178764.000000,201012.000000,116300.000000,1035.114948)}
{pt3dadd(179028.000000,201348.000000,115875.000000,991.985162)}
{pt3dadd(179280.000000,201684.000000,115475.000000,948.855375)}
{pt3dadd(179352.000000,201948.000000,115075.000000,905.725589)}
{pt3dadd(179424.000000,202212.000000,114675.000000,862.595802)}
{pt3dadd(179508.000000,202656.000000,114225.000000,826.654307)}
{pt3dadd(179592.000000,203100.000000,113825.000000,790.712811)}
{pt3dadd(179856.000000,203076.000000,113350.000000,754.771316)}
{pt3dadd(179916.000000,203592.000000,112875.000000,718.829820)}
{pt3dadd(179976.000000,204108.000000,112450.000000,797.901102)}
{pt3dadd(180240.000000,204348.000000,111975.000000,876.972384)}
{pt3dadd(180504.000000,204528.000000,111575.000000,956.043666)}
{pt3dadd(180888.000000,204912.000000,111150.000000,1035.114948)}
{pt3dadd(181104.000000,205044.000000,110750.000000,1086.870681)}
{pt3dadd(181188.000000,205344.000000,110350.000000,1138.626414)}
{pt3dadd(181272.000000,205680.000000,109950.000000,1190.382147)}
{pt3dadd(181428.000000,205944.000000,109550.000000,1242.137880)}
{pt3dadd(181572.000000,206232.000000,109125.000000,1468.206954)}
{pt3dadd(182016.000000,206520.000000,108625.000000,1694.276028)}
{pt3dadd(181968.000000,206412.000000,108175.000000,1920.345102)}
{pt3dadd(182004.000000,206496.000000,107775.000000,2146.414176)}
{pt3dadd(182040.000000,206424.000000,107375.000000,2253.734910)}
{pt3dadd(182052.000000,206076.000000,106975.000000,2361.055644)}
{pt3dadd(182112.000000,206028.000000,106575.000000,2468.376378)}
{pt3dadd(182172.000000,206004.000000,106225.000000,2575.697112)}
{pt3dadd(182232.000000,205980.000000,105800.000000,2361.055639)}
{pt3dadd(182292.000000,205956.000000,105450.000000,2146.414167)}
{pt3dadd(182352.000000,205932.000000,105075.000000,1931.772694)}
{pt3dadd(182412.000000,205908.000000,104650.000000,1717.131222)}
{pt3dadd(182316.000000,205992.000000,104275.000000,1645.584102)}
{pt3dadd(181944.000000,205800.000000,103925.000000,1574.036982)}
{pt3dadd(181572.000000,205896.000000,103575.000000,1502.489862)}
{pt3dadd(181548.000000,205860.000000,103200.000000,1430.942742)}
{pt3dadd(181020.000000,206040.000000,102850.000000,1371.320145)}
{pt3dadd(180516.000000,206448.000000,102550.000000,1311.697548)}
{pt3dadd(180420.000000,206484.000000,102075.000000,1252.074951)}
{pt3dadd(180192.000000,206520.000000,101525.000000,1192.452354)}
{pt3dadd(179256.000000,206820.000000,101025.000000,1237.765532)}
{pt3dadd(179412.000000,206448.000000,100525.000000,1283.078709)}
{pt3dadd(179376.000000,206196.000000,100000.000000,1328.391887)}
{pt3dadd(178668.000000,206460.000000,99550.000000,1373.705064)}
{pt3dadd(178116.000000,206460.000000,99075.000000,1373.705100)}
{pt3dadd(178176.000000,206280.000000,98625.000000,1373.705136)}
{pt3dadd(177744.000000,206112.000000,98175.000000,1373.705172)}
{pt3dadd(177240.000000,206760.000000,97825.000000,1373.705208)}
{pt3dadd(177168.000000,206736.000000,97425.000000,1340.813376)}
{pt3dadd(176664.000000,206640.000000,97050.000000,1307.921544)}
{pt3dadd(176160.000000,206904.000000,96700.000000,1275.029712)}
{pt3dadd(175656.000000,207168.000000,96425.000000,1242.137880)}
{pt3dadd(175536.000000,206712.000000,96050.000000,1304.244761)}
{pt3dadd(175236.000000,207132.000000,95675.000000,1366.351641)}
{pt3dadd(175008.000000,206940.000000,95275.000000,1428.458522)}
{pt3dadd(174780.000000,206820.000000,94825.000000,1490.565402)}
{pt3dadd(174588.000000,206904.000000,94475.000000,1490.565402)}
{pt3dadd(174264.000000,206988.000000,94050.000000,1490.565402)}
{pt3dadd(173916.000000,207456.000000,93625.000000,1717.131492)}

{create adhoc18}
{access adhoc18}
{connect adhoc18(1), adhoc17(0)}
{nseg = 1}
{strdef color color = "White"}
{pt3dclear()}
{pt3dadd(173916.000000,207456.000000,93625.000000,1717.131492)}
{pt3dadd(171984.000000,212064.000000,93075.000000,862.595802)}
{pt3dadd(171252.000000,212688.000000,92250.000000,905.725589)}
{pt3dadd(170964.000000,212640.000000,92200.000000,948.855375)}
{pt3dadd(170688.000000,212724.000000,91875.000000,991.985162)}
{pt3dadd(170412.000000,213108.000000,91525.000000,1035.114948)}
{pt3dadd(170088.000000,213372.000000,91250.000000,956.043666)}
{pt3dadd(169824.000000,213504.000000,90975.000000,876.972384)}
{pt3dadd(169596.000000,213660.000000,91000.000000,797.901102)}
{pt3dadd(169344.000000,213816.000000,91025.000000,718.829820)}
{pt3dadd(169116.000000,214236.000000,90575.000000,797.901102)}
{pt3dadd(168912.000000,215040.000000,90675.000000,876.972384)}
{pt3dadd(168708.000000,215460.000000,90450.000000,956.043666)}
{pt3dadd(168516.000000,215520.000000,90250.000000,1035.114948)}
{pt3dadd(168312.000000,216216.000000,90375.000000,1024.763801)}
{pt3dadd(168132.000000,216372.000000,90125.000000,1014.412653)}
{pt3dadd(167952.000000,216660.000000,89775.000000,1004.061506)}
{pt3dadd(167736.000000,216840.000000,89650.000000,993.710358)}
{pt3dadd(167556.000000,217020.000000,89500.000000,924.990223)}
{pt3dadd(167328.000000,217200.000000,89350.000000,856.270089)}
{pt3dadd(167100.000000,217848.000000,88850.000000,787.549955)}
{pt3dadd(166872.000000,218268.000000,88400.000000,718.829820)}
{pt3dadd(166656.000000,218556.000000,88025.000000,718.829820)}
{pt3dadd(166416.000000,218688.000000,88075.000000,718.829820)}
{pt3dadd(166152.000000,218952.000000,87775.000000,718.829820)}
{pt3dadd(165888.000000,219108.000000,87775.000000,718.829820)}
{pt3dadd(165588.000000,219192.000000,87700.000000,682.888329)}
{pt3dadd(165324.000000,219348.000000,87600.000000,646.946838)}
{pt3dadd(165072.000000,219504.000000,87500.000000,611.005347)}
{pt3dadd(164436.000000,219612.000000,87075.000000,575.063856)}
{pt3dadd(163704.000000,220380.000000,86775.000000,611.005347)}
{pt3dadd(162660.000000,220812.000000,86425.000000,646.946838)}
{pt3dadd(162180.000000,221520.000000,86075.000000,682.888329)}
{pt3dadd(161700.000000,222084.000000,85700.000000,718.829820)}
{pt3dadd(161736.000000,222036.000000,85325.000000,688.878585)}
{pt3dadd(161412.000000,222576.000000,84925.000000,658.927350)}
{pt3dadd(160884.000000,222960.000000,84550.000000,628.976115)}
{pt3dadd(160272.000000,222840.000000,84150.000000,599.024880)}
{pt3dadd(159996.000000,222996.000000,83875.000000,628.976115)}
{pt3dadd(159768.000000,223116.000000,83500.000000,658.927350)}
{pt3dadd(159516.000000,223224.000000,83200.000000,688.878585)}
{pt3dadd(159240.000000,223260.000000,82875.000000,718.829820)}
{pt3dadd(158760.000000,223116.000000,82500.000000,663.919209)}
{pt3dadd(158688.000000,223128.000000,82125.000000,609.008598)}
{pt3dadd(158184.000000,223188.000000,81750.000000,554.097987)}
{pt3dadd(157752.000000,223140.000000,81350.000000,499.187376)}
{pt3dadd(157476.000000,223176.000000,80975.000000,554.097987)}
{pt3dadd(157152.000000,223032.000000,80600.000000,609.008598)}
{pt3dadd(157080.000000,223116.000000,80150.000000,663.919209)}
{pt3dadd(156732.000000,223248.000000,79750.000000,718.829820)}
{pt3dadd(156384.000000,223464.000000,79350.000000,663.919209)}
{pt3dadd(156108.000000,223440.000000,79025.000000,609.008598)}
{pt3dadd(155964.000000,223548.000000,78650.000000,554.097987)}
{pt3dadd(155820.000000,223656.000000,78275.000000,499.187376)}
{pt3dadd(155640.000000,223464.000000,78375.000000,499.187376)}
{pt3dadd(155436.000000,223680.000000,78325.000000,499.187376)}
{pt3dadd(155268.000000,223788.000000,78225.000000,499.187376)}
{pt3dadd(155088.000000,223332.000000,77750.000000,499.187376)}
{pt3dadd(154932.000000,223164.000000,77200.000000,524.146752)}
{pt3dadd(154752.000000,223128.000000,77125.000000,549.106128)}
{pt3dadd(154560.000000,223284.000000,77000.000000,574.065504)}
{pt3dadd(154356.000000,223032.000000,76650.000000,599.024880)}
{pt3dadd(154164.000000,223248.000000,76475.000000,599.024880)}
{pt3dadd(153984.000000,223284.000000,76150.000000,599.024880)}
{pt3dadd(153792.000000,222936.000000,75825.000000,599.024880)}
{pt3dadd(153600.000000,223020.000000,75400.000000,599.024880)}
{pt3dadd(153396.000000,223032.000000,75100.000000,621.787828)}
{pt3dadd(153168.000000,222996.000000,74625.000000,644.550777)}
{pt3dadd(152904.000000,222696.000000,73875.000000,667.313725)}
{pt3dadd(152652.000000,223008.000000,73725.000000,690.076674)}
{pt3dadd(152484.000000,222912.000000,73350.000000,667.313725)}
{pt3dadd(152304.000000,223092.000000,72975.000000,644.550777)}
{pt3dadd(152136.000000,223104.000000,72550.000000,621.787828)}
{pt3dadd(151956.000000,223116.000000,72200.000000,599.024880)}
{pt3dadd(151740.000000,223092.000000,72050.000000,574.065504)}
{pt3dadd(151536.000000,223020.000000,71350.000000,549.106128)}
{pt3dadd(151308.000000,223176.000000,71200.000000,524.146752)}
{pt3dadd(151092.000000,223284.000000,70975.000000,499.187376)}
{pt3dadd(150852.000000,223368.000000,70675.000000,499.187376)}
{pt3dadd(150684.000000,223044.000000,70275.000000,499.187376)}
{pt3dadd(150504.000000,222876.000000,69875.000000,499.187376)}
{pt3dadd(150288.000000,222732.000000,69725.000000,499.187376)}
{pt3dadd(150120.000000,222504.000000,69400.000000,415.989486)}
{pt3dadd(149724.000000,222408.000000,69100.000000,499.187376)}

{create adhoc19}
{access adhoc19}
{connect adhoc19(1), adhoc17(0)}
{nseg = 1}
{strdef color color = "White"}
{pt3dclear()}
{pt3dadd(173916.000000,207456.000000,93625.000000,1717.131492)}
{pt3dadd(172548.000000,204756.000000,90100.000000,1192.452354)}
{pt3dadd(172212.000000,204144.000000,89300.000000,1204.873736)}
{pt3dadd(172092.000000,204252.000000,88775.000000,1217.295117)}
{pt3dadd(171516.000000,203844.000000,88250.000000,1229.716498)}
{pt3dadd(171288.000000,203544.000000,87675.000000,1242.137880)}
{pt3dadd(171036.000000,203316.000000,87100.000000,1190.382147)}
{pt3dadd(170736.000000,202812.000000,86400.000000,1138.626414)}
{pt3dadd(170472.000000,202620.000000,85800.000000,1086.870681)}
{pt3dadd(169920.000000,202224.000000,85125.000000,1035.114948)}
{pt3dadd(169956.000000,201768.000000,84625.000000,1035.114948)}
{pt3dadd(169056.000000,201468.000000,84000.000000,1035.114948)}
{pt3dadd(168480.000000,201348.000000,83400.000000,1035.114948)}
{pt3dadd(168288.000000,200796.000000,82750.000000,1035.114948)}
{pt3dadd(167784.000000,200928.000000,82125.000000,991.985162)}
{pt3dadd(167736.000000,200220.000000,81525.000000,948.855375)}
{pt3dadd(167160.000000,200124.000000,81175.000000,905.725589)}
{pt3dadd(167064.000000,199776.000000,80725.000000,862.595802)}
{pt3dadd(166980.000000,199200.000000,80200.000000,895.374441)}
{pt3dadd(166656.000000,198900.000000,79750.000000,928.153080)}
{pt3dadd(166260.000000,198984.000000,79350.000000,960.931719)}
{pt3dadd(166188.000000,198636.000000,78825.000000,993.710358)}
{pt3dadd(165756.000000,198384.000000,78300.000000,1004.061506)}
{pt3dadd(165360.000000,198108.000000,77800.000000,1014.412653)}
{pt3dadd(165192.000000,197832.000000,77325.000000,1024.763801)}
{pt3dadd(165132.000000,197664.000000,76925.000000,1035.114948)}
{pt3dadd(164856.000000,197292.000000,76525.000000,1074.449300)}
{pt3dadd(164580.000000,197016.000000,76150.000000,1113.783651)}
{pt3dadd(164304.000000,196740.000000,75750.000000,1153.118003)}
{pt3dadd(164340.000000,196368.000000,75300.000000,1192.452354)}
{pt3dadd(164376.000000,195996.000000,74825.000000,1204.873736)}
{pt3dadd(163560.000000,195744.000000,74450.000000,1217.295117)}
{pt3dadd(163596.000000,195864.000000,74050.000000,1229.716498)}
{pt3dadd(163404.000000,195564.000000,73700.000000,1242.137880)}
{pt3dadd(163284.000000,195264.000000,73225.000000,1217.295117)}
{pt3dadd(163212.000000,195096.000000,72825.000000,1192.452354)}
{pt3dadd(163140.000000,194928.000000,72450.000000,1192.452354)}

{create adhoc20}
{access adhoc20}
{connect adhoc20(1), adhoc19(0)}
{nseg = 1}
{strdef color color = "White"}
{pt3dclear()}
{pt3dadd(163140.000000,194928.000000,72450.000000,1192.452354)}
{pt3dadd(162708.000000,196620.000000,71950.000000,1035.114948)}
{pt3dadd(162360.000000,196632.000000,71550.000000,1035.114948)}
{pt3dadd(162036.000000,196644.000000,71150.000000,1035.114948)}
{pt3dadd(161784.000000,196692.000000,70725.000000,1035.114948)}
{pt3dadd(161508.000000,196872.000000,70300.000000,1035.114948)}
{pt3dadd(161184.000000,196848.000000,69925.000000,1035.114948)}
{pt3dadd(160908.000000,196824.000000,69475.000000,1035.114948)}
{pt3dadd(160632.000000,196812.000000,69075.000000,1035.114948)}
{pt3dadd(160716.000000,196632.000000,68725.000000,1035.114948)}
{pt3dadd(160284.000000,196692.000000,68325.000000,1035.114948)}
{pt3dadd(160056.000000,196752.000000,67950.000000,1035.114948)}
{pt3dadd(159708.000000,196788.000000,67575.000000,1035.114948)}
{pt3dadd(159384.000000,196920.000000,67125.000000,1035.114948)}
{pt3dadd(159060.000000,197040.000000,66725.000000,991.985162)}
{pt3dadd(158736.000000,197172.000000,66375.000000,948.855375)}
{pt3dadd(158412.000000,197292.000000,65975.000000,905.725589)}
{pt3dadd(158088.000000,197412.000000,65625.000000,862.595802)}
{pt3dadd(157968.000000,197700.000000,65175.000000,862.595802)}

{create adhoc21}
{access adhoc21}
{connect adhoc21(1), adhoc20(0)}
{nseg = 1}
{strdef color color = "White"}
{pt3dclear()}
{pt3dadd(157968.000000,197700.000000,65175.000000,862.595802)}
{pt3dadd(158028.000000,195972.000000,64500.000000,499.187376)}
{pt3dadd(157968.000000,195192.000000,64075.000000,524.146752)}
{pt3dadd(157776.000000,194712.000000,63600.000000,549.106128)}
{pt3dadd(157752.000000,194688.000000,63125.000000,574.065504)}
{pt3dadd(157704.000000,194340.000000,62550.000000,599.024880)}
{pt3dadd(157380.000000,193728.000000,62075.000000,628.976115)}
{pt3dadd(156600.000000,193452.000000,61450.000000,658.927350)}
{pt3dadd(156408.000000,192540.000000,60975.000000,688.878585)}
{pt3dadd(155856.000000,192108.000000,60425.000000,718.829820)}
{pt3dadd(155868.000000,191460.000000,59925.000000,787.549972)}
{pt3dadd(155940.000000,191292.000000,59500.000000,856.270125)}
{pt3dadd(155616.000000,190476.000000,59025.000000,924.990278)}
{pt3dadd(155664.000000,190296.000000,58500.000000,993.710430)}
{pt3dadd(155676.000000,189816.000000,57875.000000,1103.018539)}
{pt3dadd(155928.000000,189744.000000,57325.000000,1212.326649)}
{pt3dadd(155880.000000,189372.000000,56775.000000,1321.634759)}
{pt3dadd(155832.000000,189000.000000,56275.000000,1430.942868)}
{pt3dadd(155844.000000,189156.000000,55925.000000,1383.741621)}
{pt3dadd(155616.000000,189060.000000,55600.000000,1336.540374)}
{pt3dadd(155772.000000,188868.000000,55250.000000,1289.339127)}
{pt3dadd(155676.000000,189048.000000,54925.000000,1242.137880)}
{pt3dadd(155628.000000,188292.000000,54525.000000,1147.252361)}
{pt3dadd(155532.000000,188016.000000,54200.000000,1052.366841)}
{pt3dadd(155436.000000,188148.000000,54000.000000,957.481322)}
{pt3dadd(155568.000000,188124.000000,53800.000000,862.595802)}
{pt3dadd(155724.000000,187548.000000,53550.000000,718.829820)}
{pt3dadd(155808.000000,187176.000000,53200.000000,599.024880)}

{create adhoc22}
{access adhoc22}
{connect adhoc22(1), adhoc21(0)}
{nseg = 1}
{strdef color color = "White"}
{pt3dclear()}
{pt3dadd(155808.000000,187176.000000,53200.000000,599.024880)}
{pt3dadd(155136.000000,188736.000000,52725.000000,862.595802)}
{pt3dadd(155040.000000,188892.000000,52175.000000,826.654307)}
{pt3dadd(154872.000000,189108.000000,51600.000000,790.712811)}
{pt3dadd(154572.000000,189264.000000,51075.000000,754.771316)}
{pt3dadd(154236.000000,189252.000000,50700.000000,718.829820)}
{pt3dadd(154116.000000,189348.000000,50350.000000,797.901102)}
{pt3dadd(153996.000000,189720.000000,49975.000000,876.972384)}
{pt3dadd(153972.000000,189816.000000,49575.000000,956.043666)}
{pt3dadd(153936.000000,189912.000000,49200.000000,1035.114948)}
{pt3dadd(153900.000000,190008.000000,48750.000000,956.043666)}
{pt3dadd(154008.000000,189996.000000,48450.000000,876.972384)}
{pt3dadd(154212.000000,189852.000000,48050.000000,797.901102)}
{pt3dadd(154392.000000,189768.000000,47650.000000,718.829820)}
{pt3dadd(154572.000000,189684.000000,47225.000000,718.829820)}
{pt3dadd(154860.000000,189600.000000,46925.000000,718.829820)}
{pt3dadd(155196.000000,189492.000000,46350.000000,718.829820)}
{pt3dadd(155472.000000,189552.000000,45900.000000,718.829820)}
{pt3dadd(155616.000000,189648.000000,45475.000000,643.119736)}
{pt3dadd(155652.000000,189744.000000,45025.000000,567.409653)}
{pt3dadd(155856.000000,189624.000000,44600.000000,491.699570)}
{pt3dadd(156264.000000,190068.000000,44300.000000,415.989486)}
{pt3dadd(156432.000000,190380.000000,43850.000000,398.656589)}
{pt3dadd(156684.000000,190776.000000,43500.000000,381.323691)}
{pt3dadd(156924.000000,191172.000000,43075.000000,363.990794)}
{pt3dadd(157092.000000,191580.000000,42700.000000,346.657896)}
{pt3dadd(157296.000000,192048.000000,42425.000000,409.749642)}
{pt3dadd(157500.000000,192372.000000,42150.000000,472.841388)}
{pt3dadd(157476.000000,192660.000000,41850.000000,535.933134)}
{pt3dadd(157464.000000,192468.000000,41550.000000,599.024880)}
{pt3dadd(157524.000000,192432.000000,41250.000000,574.065504)}
{pt3dadd(157380.000000,192564.000000,40925.000000,549.106128)}
{pt3dadd(157452.000000,192552.000000,40575.000000,524.146752)}
{pt3dadd(157548.000000,192516.000000,40225.000000,499.187376)}
{pt3dadd(157752.000000,192372.000000,39775.000000,524.146752)}
{pt3dadd(157824.000000,192624.000000,39375.000000,549.106128)}
{pt3dadd(157968.000000,192324.000000,38950.000000,574.065504)}
{pt3dadd(158256.000000,192240.000000,38625.000000,599.024880)}
{pt3dadd(158544.000000,192168.000000,38175.000000,553.266031)}
{pt3dadd(158832.000000,191964.000000,37825.000000,507.507183)}
{pt3dadd(160368.000000,191784.000000,37650.000000,461.748335)}
{pt3dadd(160584.000000,191712.000000,37550.000000,415.989486)}
{pt3dadd(160884.000000,191604.000000,37500.000000,381.323696)}
{pt3dadd(161208.000000,191676.000000,37400.000000,346.657905)}
{pt3dadd(161448.000000,191628.000000,37350.000000,311.992115)}
{pt3dadd(161712.000000,191688.000000,37275.000000,277.326324)}
{pt3dadd(161964.000000,191748.000000,37050.000000,258.147797)}
{pt3dadd(162240.000000,191640.000000,36925.000000,238.969269)}
{pt3dadd(162504.000000,191316.000000,36675.000000,219.790742)}
{pt3dadd(162696.000000,191280.000000,36650.000000,200.612214)}
{pt3dadd(162924.000000,191220.000000,36625.000000,185.287671)}
{pt3dadd(163104.000000,191040.000000,36400.000000,169.963128)}
{pt3dadd(163272.000000,190944.000000,36100.000000,154.638585)}
{pt3dadd(163428.000000,190824.000000,36100.000000,139.314042)}
{pt3dadd(163572.000000,190764.000000,35925.000000,164.669193)}
{pt3dadd(163716.000000,190644.000000,35825.000000,190.024344)}
{pt3dadd(163872.000000,190500.000000,35600.000000,215.379495)}
{pt3dadd(164028.000000,190500.000000,35600.000000,240.734646)}
{pt3dadd(164196.000000,190404.000000,35500.000000,240.734646)}
{pt3dadd(164388.000000,190164.000000,35350.000000,240.734646)}
{pt3dadd(164592.000000,190104.000000,35325.000000,240.734646)}
{pt3dadd(164784.000000,189936.000000,35300.000000,240.734646)}
{pt3dadd(164940.000000,189756.000000,35325.000000,267.215459)}
{pt3dadd(165096.000000,189612.000000,35325.000000,293.696271)}
{pt3dadd(165288.000000,189384.000000,35225.000000,320.177083)}
{pt3dadd(165468.000000,189264.000000,35250.000000,346.657896)}
{pt3dadd(165636.000000,189096.000000,35125.000000,332.213819)}
{pt3dadd(165816.000000,189108.000000,35100.000000,317.769741)}
{pt3dadd(165996.000000,188988.000000,35050.000000,303.325664)}
{pt3dadd(166212.000000,188988.000000,34850.000000,288.881586)}
{pt3dadd(166368.000000,188880.000000,34725.000000,266.814243)}
{pt3dadd(166536.000000,188712.000000,34500.000000,244.746900)}
{pt3dadd(166704.000000,188604.000000,34400.000000,222.679557)}
{pt3dadd(166920.000000,188400.000000,34200.000000,200.612214)}
{pt3dadd(167100.000000,188112.000000,33900.000000,200.612214)}
{pt3dadd(167256.000000,187932.000000,33700.000000,200.612214)}
{pt3dadd(167448.000000,187896.000000,33600.000000,200.612214)}
{pt3dadd(167616.000000,187692.000000,33450.000000,200.612214)}
{pt3dadd(167796.000000,187488.000000,33300.000000,200.612214)}
{pt3dadd(167964.000000,187356.000000,33350.000000,200.612214)}
{pt3dadd(168156.000000,187176.000000,33125.000000,200.612214)}
{pt3dadd(168312.000000,187092.000000,33100.000000,200.612214)}
{pt3dadd(168468.000000,187032.000000,33125.000000,210.642822)}
{pt3dadd(168636.000000,186996.000000,33050.000000,220.673430)}
{pt3dadd(168852.000000,186456.000000,32900.000000,230.704038)}
{pt3dadd(169188.000000,186432.000000,32600.000000,240.734646)}
{pt3dadd(170016.000000,186228.000000,32300.000000,215.379495)}
{pt3dadd(170712.000000,186192.000000,32000.000000,190.024344)}
{pt3dadd(171276.000000,186012.000000,31675.000000,164.669193)}
{pt3dadd(171888.000000,185388.000000,31400.000000,139.314042)}
{pt3dadd(172392.000000,184656.000000,31150.000000,164.669193)}
{pt3dadd(172680.000000,184476.000000,31125.000000,190.024344)}
{pt3dadd(172872.000000,184236.000000,31075.000000,215.379495)}
{pt3dadd(173148.000000,184092.000000,31000.000000,240.734646)}
{pt3dadd(173424.000000,183888.000000,30900.000000,215.379495)}
{pt3dadd(173628.000000,183840.000000,30700.000000,190.024344)}
{pt3dadd(173868.000000,183948.000000,30400.000000,164.669193)}
{pt3dadd(174072.000000,183756.000000,30075.000000,139.314042)}
{pt3dadd(174468.000000,183492.000000,29825.000000,200.612214)}
{pt3dadd(174876.000000,183564.000000,29550.000000,139.314042)}

{create adhoc23}
{access adhoc23}
{connect adhoc23(1), adhoc21(0)}
{nseg = 1}
{strdef color color = "White"}
{pt3dclear()}
{pt3dadd(155808.000000,187176.000000,53200.000000,599.024880)}
{pt3dadd(156048.000000,186396.000000,52750.000000,499.187376)}
{pt3dadd(155976.000000,185484.000000,52200.000000,581.413518)}
{pt3dadd(155760.000000,185160.000000,51700.000000,663.639660)}
{pt3dadd(155880.000000,184860.000000,51225.000000,745.865802)}
{pt3dadd(155832.000000,184332.000000,50700.000000,828.091944)}
{pt3dadd(156048.000000,184260.000000,50200.000000,836.717909)}
{pt3dadd(156168.000000,183924.000000,49650.000000,845.343873)}
{pt3dadd(156372.000000,183540.000000,49200.000000,853.969838)}
{pt3dadd(156540.000000,183468.000000,48825.000000,862.595802)}
{pt3dadd(156744.000000,183408.000000,48450.000000,837.739220)}
{pt3dadd(156564.000000,183396.000000,48000.000000,812.882637)}
{pt3dadd(156612.000000,183300.000000,47650.000000,788.026055)}
{pt3dadd(156660.000000,183168.000000,47275.000000,763.169472)}
{pt3dadd(156708.000000,183036.000000,46925.000000,870.490193)}
{pt3dadd(156696.000000,182772.000000,46575.000000,977.810913)}
{pt3dadd(156696.000000,182700.000000,46100.000000,1085.131634)}
{pt3dadd(156780.000000,182700.000000,45725.000000,1192.452354)}
{pt3dadd(157008.000000,182568.000000,45300.000000,1266.980616)}
{pt3dadd(157116.000000,182472.000000,44900.000000,1341.508878)}
{pt3dadd(157284.000000,182628.000000,44500.000000,1416.037140)}
{pt3dadd(157368.000000,182724.000000,44125.000000,1490.565402)}
{pt3dadd(157416.000000,182772.000000,43775.000000,1490.565402)}
{pt3dadd(157356.000000,182592.000000,43425.000000,1490.565402)}
{pt3dadd(157476.000000,182496.000000,43125.000000,1490.565402)}
{pt3dadd(157476.000000,182472.000000,42775.000000,1490.565402)}
{pt3dadd(157476.000000,182256.000000,42375.000000,1416.037140)}
{pt3dadd(157848.000000,182088.000000,41975.000000,1341.508878)}
{pt3dadd(158064.000000,181944.000000,41525.000000,1266.980616)}
{pt3dadd(158412.000000,181656.000000,41150.000000,1192.452354)}
{pt3dadd(158700.000000,181308.000000,40800.000000,1109.988216)}
{pt3dadd(158712.000000,180960.000000,40450.000000,1027.524078)}
{pt3dadd(158772.000000,180564.000000,40075.000000,945.059940)}
{pt3dadd(159036.000000,180216.000000,39725.000000,862.595802)}
{pt3dadd(159372.000000,179808.000000,39350.000000,845.688911)}
{pt3dadd(159660.000000,179640.000000,38975.000000,828.782019)}
{pt3dadd(159816.000000,179364.000000,38800.000000,811.875127)}
{pt3dadd(159996.000000,179148.000000,38525.000000,794.968236)}
{pt3dadd(160200.000000,178920.000000,38325.000000,721.023021)}
{pt3dadd(160296.000000,178716.000000,37925.000000,647.077806)}
{pt3dadd(160572.000000,178536.000000,37625.000000,573.132591)}
{pt3dadd(160800.000000,178320.000000,37475.000000,499.187376)}
{pt3dadd(161040.000000,178296.000000,37450.000000,461.055006)}
{pt3dadd(161280.000000,178224.000000,37400.000000,422.922636)}
{pt3dadd(161088.000000,177960.000000,37350.000000,384.790266)}
{pt3dadd(161148.000000,177684.000000,37075.000000,346.657896)}
{pt3dadd(161484.000000,177384.000000,37000.000000,332.213819)}
{pt3dadd(161748.000000,177084.000000,36650.000000,317.769741)}
{pt3dadd(161928.000000,176820.000000,36425.000000,303.325664)}
{pt3dadd(162360.000000,176544.000000,36225.000000,288.881586)}
{pt3dadd(162444.000000,176328.000000,36100.000000,320.658561)}
{pt3dadd(162828.000000,176052.000000,35800.000000,352.435536)}
{pt3dadd(163224.000000,175800.000000,35575.000000,384.212511)}
{pt3dadd(163404.000000,175560.000000,35350.000000,415.989486)}
{pt3dadd(163572.000000,175320.000000,35150.000000,398.656589)}
{pt3dadd(163656.000000,175056.000000,34875.000000,381.323691)}
{pt3dadd(164040.000000,174816.000000,34750.000000,363.990794)}
{pt3dadd(164136.000000,174576.000000,34350.000000,346.657896)}
{pt3dadd(164220.000000,174348.000000,34175.000000,384.790266)}
{pt3dadd(164556.000000,174096.000000,34050.000000,422.922636)}
{pt3dadd(164844.000000,173832.000000,33800.000000,461.055006)}
{pt3dadd(164664.000000,173592.000000,33550.000000,499.187376)}
{pt3dadd(164952.000000,173340.000000,33175.000000,499.187376)}
{pt3dadd(165612.000000,173088.000000,32525.000000,499.187376)}
{pt3dadd(165780.000000,173028.000000,32100.000000,499.187376)}
{pt3dadd(166080.000000,172716.000000,31700.000000,499.187376)}
{pt3dadd(167364.000000,172560.000000,31250.000000,461.055006)}
{pt3dadd(168384.000000,172308.000000,30925.000000,422.922636)}
{pt3dadd(169032.000000,171720.000000,30475.000000,384.790266)}
{pt3dadd(169152.000000,171408.000000,30225.000000,346.657896)}
{pt3dadd(169272.000000,171144.000000,30150.000000,332.213819)}
{pt3dadd(169500.000000,170928.000000,29825.000000,317.769741)}
{pt3dadd(169704.000000,170736.000000,29800.000000,303.325664)}
{pt3dadd(169824.000000,170556.000000,29800.000000,288.881586)}
{pt3dadd(169944.000000,170364.000000,29800.000000,266.814243)}
{pt3dadd(170220.000000,170172.000000,29750.000000,244.746900)}
{pt3dadd(170340.000000,170028.000000,29775.000000,222.679557)}
{pt3dadd(170580.000000,169836.000000,29700.000000,200.612214)}
{pt3dadd(171216.000000,169704.000000,29575.000000,192.253370)}
{pt3dadd(171588.000000,169584.000000,29350.000000,183.894525)}
{pt3dadd(171828.000000,169656.000000,29100.000000,175.535680)}
{pt3dadd(172128.000000,169608.000000,29125.000000,167.176836)}
{pt3dadd(172344.000000,169620.000000,29125.000000,185.566288)}
{pt3dadd(172560.000000,169572.000000,29075.000000,203.955741)}
{pt3dadd(172764.000000,169524.000000,29000.000000,222.345193)}
{pt3dadd(172944.000000,169476.000000,28925.000000,240.734646)}
{pt3dadd(173160.000000,169428.000000,28850.000000,222.345193)}
{pt3dadd(173316.000000,169464.000000,28875.000000,203.955741)}
{pt3dadd(173496.000000,169500.000000,28900.000000,185.566288)}
{pt3dadd(173676.000000,169536.000000,28925.000000,167.176836)}
{pt3dadd(173868.000000,169572.000000,28950.000000,154.406385)}
{pt3dadd(174060.000000,169440.000000,29025.000000,141.635934)}
{pt3dadd(174264.000000,169416.000000,29050.000000,128.865483)}
{pt3dadd(174432.000000,169212.000000,29050.000000,116.095032)}
{pt3dadd(174612.000000,169080.000000,28950.000000,121.899785)}
{pt3dadd(174840.000000,169104.000000,29000.000000,127.704537)}
{pt3dadd(175056.000000,168948.000000,28975.000000,133.509289)}
{pt3dadd(175296.000000,168900.000000,28900.000000,139.314042)}
{pt3dadd(175476.000000,168768.000000,28775.000000,146.279741)}
{pt3dadd(175704.000000,168792.000000,28575.000000,153.245439)}
{pt3dadd(175920.000000,168768.000000,28525.000000,160.211138)}
{pt3dadd(176148.000000,168744.000000,28475.000000,167.176836)}
{pt3dadd(176376.000000,168720.000000,28425.000000,175.535680)}
{pt3dadd(176556.000000,168828.000000,28525.000000,183.894525)}
{pt3dadd(176772.000000,168828.000000,28600.000000,192.253370)}
{pt3dadd(177036.000000,168672.000000,28525.000000,200.612214)}
{pt3dadd(177276.000000,168516.000000,28450.000000,200.612214)}
{pt3dadd(177612.000000,168564.000000,28525.000000,200.612214)}
{pt3dadd(177804.000000,168576.000000,28425.000000,200.612214)}
{pt3dadd(178032.000000,168588.000000,28325.000000,200.612214)}
{pt3dadd(178236.000000,168624.000000,28300.000000,192.253370)}
{pt3dadd(178464.000000,168528.000000,28275.000000,183.894525)}
{pt3dadd(178668.000000,168648.000000,28300.000000,175.535680)}
{pt3dadd(178860.000000,168684.000000,28150.000000,167.176836)}
{pt3dadd(179160.000000,168804.000000,28025.000000,139.314042)}
{pt3dadd(179376.000000,168840.000000,28125.000000,139.314042)}

{create adhoc24}
{access adhoc24}
{connect adhoc24(1), adhoc20(0)}
{nseg = 1}
{strdef color color = "White"}
{pt3dclear()}
{pt3dadd(157968.000000,197700.000000,65175.000000,862.595802)}
{pt3dadd(157284.000000,198912.000000,64100.000000,993.710358)}
{pt3dadd(156840.000000,199284.000000,63575.000000,924.990223)}
{pt3dadd(156180.000000,199524.000000,63125.000000,856.270089)}
{pt3dadd(155904.000000,199512.000000,62500.000000,787.549955)}
{pt3dadd(155652.000000,199656.000000,62425.000000,718.829820)}
{pt3dadd(155352.000000,199740.000000,61975.000000,787.549955)}
{pt3dadd(155052.000000,199920.000000,61775.000000,856.270089)}
{pt3dadd(154740.000000,200100.000000,61575.000000,924.990223)}
{pt3dadd(154512.000000,200364.000000,61450.000000,993.710358)}
{pt3dadd(154284.000000,200484.000000,61425.000000,993.710358)}
{pt3dadd(154092.000000,200772.000000,60875.000000,993.710358)}
{pt3dadd(153828.000000,200952.000000,60875.000000,993.710358)}
{pt3dadd(153600.000000,201108.000000,60550.000000,993.710358)}
{pt3dadd(153348.000000,201312.000000,60225.000000,1043.395857)}
{pt3dadd(153096.000000,201516.000000,59900.000000,1093.081356)}
{pt3dadd(152856.000000,201564.000000,59650.000000,1142.766855)}
{pt3dadd(152628.000000,201684.000000,59350.000000,1192.452354)}
{pt3dadd(152412.000000,201948.000000,58900.000000,1153.118003)}
{pt3dadd(152196.000000,202008.000000,58750.000000,1113.783651)}
{pt3dadd(151812.000000,202272.000000,58275.000000,1074.449300)}
{pt3dadd(151128.000000,202356.000000,57675.000000,1035.114948)}
{pt3dadd(151068.000000,202488.000000,57275.000000,1106.025412)}
{pt3dadd(150948.000000,202716.000000,56925.000000,1176.935877)}
{pt3dadd(151092.000000,202848.000000,56575.000000,1247.846342)}
{pt3dadd(151236.000000,202980.000000,56175.000000,1318.756806)}
{pt3dadd(151056.000000,203064.000000,55850.000000,862.595802)}

{create adhoc25}
{access adhoc25}
{connect adhoc25(1), adhoc24(0)}
{nseg = 1}
{strdef color color = "White"}
{pt3dclear()}
{pt3dadd(151056.000000,203064.000000,55850.000000,862.595802)}
{pt3dadd(152004.000000,201192.000000,55850.000000,200.612214)}
{pt3dadd(152172.000000,200520.000000,55475.000000,200.612214)}
{pt3dadd(152244.000000,200340.000000,55150.000000,200.612214)}
{pt3dadd(152364.000000,199956.000000,54775.000000,200.612214)}
{pt3dadd(152712.000000,199620.000000,54450.000000,200.612214)}
{pt3dadd(153072.000000,199296.000000,54150.000000,192.253370)}
{pt3dadd(152964.000000,199164.000000,53875.000000,183.894525)}
{pt3dadd(153000.000000,198876.000000,53500.000000,175.535680)}
{pt3dadd(153168.000000,198648.000000,53200.000000,167.176836)}
{pt3dadd(153288.000000,198552.000000,52925.000000,175.535680)}
{pt3dadd(153312.000000,198468.000000,52775.000000,183.894525)}
{pt3dadd(153156.000000,198228.000000,52575.000000,192.253370)}
{pt3dadd(153084.000000,198096.000000,52300.000000,200.612214)}
{pt3dadd(153264.000000,197892.000000,52025.000000,200.612214)}
{pt3dadd(153444.000000,197796.000000,51750.000000,200.612214)}
{pt3dadd(154032.000000,197472.000000,51400.000000,200.612214)}
{pt3dadd(154272.000000,197448.000000,51175.000000,167.176836)}

{create adhoc26}
{access adhoc26}
{connect adhoc26(1), adhoc24(0)}
{nseg = 1}
{strdef color color = "White"}
{pt3dclear()}
{pt3dadd(151056.000000,203064.000000,55850.000000,862.595802)}
{pt3dadd(151044.000000,203484.000000,55450.000000,1035.114948)}
{pt3dadd(151284.000000,203976.000000,54975.000000,991.985162)}
{pt3dadd(151224.000000,204144.000000,54625.000000,948.855375)}
{pt3dadd(150948.000000,204516.000000,54275.000000,905.725589)}
{pt3dadd(150948.000000,204864.000000,53975.000000,862.595802)}
{pt3dadd(151140.000000,204732.000000,53625.000000,826.654307)}
{pt3dadd(151236.000000,204828.000000,53325.000000,790.712811)}
{pt3dadd(151476.000000,204744.000000,52875.000000,754.771316)}
{pt3dadd(151692.000000,204756.000000,52475.000000,718.829820)}
{pt3dadd(151716.000000,204948.000000,52100.000000,645.615672)}
{pt3dadd(151836.000000,204912.000000,51725.000000,572.401524)}
{pt3dadd(151944.000000,205164.000000,51350.000000,499.187376)}
{pt3dadd(152040.000000,205368.000000,51075.000000,690.076602)}

{create adhoc27}
{access adhoc27}
{connect adhoc27(1), adhoc26(0)}
{nseg = 1}
{strdef color color = "White"}
{pt3dclear()}
{pt3dadd(152040.000000,205368.000000,51075.000000,690.076602)}
{pt3dadd(152052.000000,204144.000000,50800.000000,240.734646)}
{pt3dadd(152196.000000,203904.000000,50500.000000,222.345193)}
{pt3dadd(152280.000000,203880.000000,50275.000000,203.955741)}
{pt3dadd(152412.000000,203784.000000,50150.000000,185.566288)}
{pt3dadd(152568.000000,203496.000000,49950.000000,167.176836)}
{pt3dadd(152700.000000,203376.000000,49700.000000,185.566288)}
{pt3dadd(152880.000000,203244.000000,49425.000000,203.955741)}
{pt3dadd(152856.000000,203148.000000,49175.000000,222.345193)}
{pt3dadd(152964.000000,203088.000000,48950.000000,240.734646)}
{pt3dadd(153012.000000,202944.000000,48675.000000,240.734646)}
{pt3dadd(153144.000000,202920.000000,48100.000000,240.734646)}
{pt3dadd(153300.000000,202908.000000,47875.000000,240.734646)}
{pt3dadd(153336.000000,202932.000000,47625.000000,240.734646)}
{pt3dadd(153288.000000,202980.000000,47350.000000,288.881586)}

{create adhoc28}
{access adhoc28}
{connect adhoc28(1), adhoc26(0)}
{nseg = 1}
{strdef color color = "White"}
{pt3dclear()}
{pt3dadd(152040.000000,205368.000000,51075.000000,690.076602)}
{pt3dadd(152496.000000,205656.000000,50700.000000,346.657896)}
{pt3dadd(152724.000000,206304.000000,50300.000000,409.749642)}
{pt3dadd(153264.000000,206688.000000,49900.000000,472.841388)}
{pt3dadd(153636.000000,206556.000000,49575.000000,535.933134)}
{pt3dadd(154140.000000,206652.000000,49150.000000,599.024880)}
{pt3dadd(154476.000000,206580.000000,48725.000000,708.047397)}
{pt3dadd(154656.000000,206580.000000,48350.000000,817.069914)}
{pt3dadd(154968.000000,206508.000000,47950.000000,926.092431)}
{pt3dadd(155148.000000,206520.000000,47575.000000,1035.114948)}
{pt3dadd(155328.000000,206664.000000,47250.000000,991.985162)}
{pt3dadd(155364.000000,206700.000000,46825.000000,948.855375)}
{pt3dadd(155652.000000,206760.000000,46475.000000,905.725589)}
{pt3dadd(155868.000000,206616.000000,45950.000000,862.595802)}
{pt3dadd(156084.000000,206496.000000,45600.000000,690.076674)}
{pt3dadd(156336.000000,206400.000000,45300.000000,599.024880)}

{create adhoc29}
{access adhoc29}
{connect adhoc29(1), adhoc28(0)}
{nseg = 1}
{strdef color color = "White"}
{pt3dclear()}
{pt3dadd(156336.000000,206400.000000,45300.000000,599.024880)}
{pt3dadd(156732.000000,207240.000000,44850.000000,346.657896)}
{pt3dadd(157296.000000,207744.000000,44525.000000,332.213819)}
{pt3dadd(157788.000000,208020.000000,44075.000000,317.769741)}
{pt3dadd(158208.000000,208200.000000,43775.000000,303.325664)}
{pt3dadd(158424.000000,208500.000000,43450.000000,288.881586)}
{pt3dadd(158628.000000,208368.000000,43175.000000,266.814243)}
{pt3dadd(158880.000000,208536.000000,42925.000000,244.746900)}
{pt3dadd(159144.000000,208668.000000,42725.000000,222.679557)}
{pt3dadd(159444.000000,208632.000000,42450.000000,200.612214)}
{pt3dadd(159528.000000,208620.000000,42200.000000,210.642822)}
{pt3dadd(159744.000000,208536.000000,42000.000000,220.673430)}
{pt3dadd(159972.000000,208548.000000,41675.000000,230.704038)}
{pt3dadd(160044.000000,208536.000000,41450.000000,240.734646)}
{pt3dadd(160224.000000,208356.000000,41200.000000,222.345193)}
{pt3dadd(160452.000000,208212.000000,41025.000000,203.955741)}
{pt3dadd(160680.000000,208068.000000,40850.000000,185.566288)}
{pt3dadd(160884.000000,208020.000000,40625.000000,167.176836)}
{pt3dadd(160968.000000,207912.000000,40425.000000,175.535680)}
{pt3dadd(161196.000000,207804.000000,40175.000000,183.894525)}
{pt3dadd(161364.000000,207792.000000,40100.000000,192.253370)}
{pt3dadd(161640.000000,207852.000000,39975.000000,200.612214)}
{pt3dadd(161892.000000,207840.000000,39725.000000,200.612214)}
{pt3dadd(162144.000000,207828.000000,39475.000000,167.176836)}

{create adhoc30}
{access adhoc30}
{connect adhoc30(1), adhoc28(0)}
{nseg = 1}
{strdef color color = "White"}
{pt3dclear()}
{pt3dadd(156336.000000,206400.000000,45300.000000,599.024880)}
{pt3dadd(156948.000000,205428.000000,44775.000000,499.187376)}
{pt3dadd(157164.000000,204924.000000,44425.000000,499.187376)}
{pt3dadd(157296.000000,204756.000000,44100.000000,499.187376)}
{pt3dadd(157596.000000,204624.000000,43800.000000,499.187376)}
{pt3dadd(157788.000000,204492.000000,43375.000000,499.187376)}
{pt3dadd(158016.000000,204252.000000,43075.000000,474.228018)}
{pt3dadd(158232.000000,204012.000000,42725.000000,449.268660)}
{pt3dadd(158568.000000,203700.000000,42375.000000,424.309302)}
{pt3dadd(158712.000000,203388.000000,42050.000000,399.349944)}
{pt3dadd(159012.000000,203136.000000,41825.000000,424.309302)}
{pt3dadd(159228.000000,202956.000000,41575.000000,449.268660)}
{pt3dadd(159252.000000,202836.000000,41325.000000,474.228018)}
{pt3dadd(159588.000000,202608.000000,41125.000000,499.187376)}
{pt3dadd(159828.000000,202476.000000,40925.000000,478.387903)}
{pt3dadd(159804.000000,202476.000000,40700.000000,457.588431)}
{pt3dadd(159900.000000,202272.000000,40400.000000,436.788958)}
{pt3dadd(160104.000000,202104.000000,40175.000000,415.989486)}
{pt3dadd(160308.000000,202080.000000,39925.000000,415.989486)}
{pt3dadd(160668.000000,201972.000000,39700.000000,415.989486)}
{pt3dadd(160980.000000,201696.000000,39500.000000,415.989486)}
{pt3dadd(161304.000000,201420.000000,39225.000000,415.989486)}
{pt3dadd(161472.000000,201000.000000,39300.000000,384.212511)}
{pt3dadd(161664.000000,200976.000000,39250.000000,352.435536)}
{pt3dadd(161856.000000,200784.000000,39100.000000,320.658561)}
{pt3dadd(162012.000000,200628.000000,38775.000000,288.881586)}
{pt3dadd(162192.000000,200556.000000,38725.000000,320.658561)}
{pt3dadd(162348.000000,200532.000000,38650.000000,352.435536)}
{pt3dadd(162480.000000,200448.000000,38600.000000,384.212511)}
{pt3dadd(162648.000000,200292.000000,38500.000000,415.989486)}
{pt3dadd(162816.000000,200112.000000,38300.000000,288.881586)}

{create adhoc31}
{access adhoc31}
{connect adhoc31(1), adhoc30(0)}
{nseg = 1}
{strdef color color = "White"}
{pt3dclear()}
{pt3dadd(162816.000000,200112.000000,38300.000000,288.881586)}
{pt3dadd(163044.000000,198804.000000,37650.000000,288.881586)}
{pt3dadd(163308.000000,198168.000000,37350.000000,258.455399)}
{pt3dadd(163548.000000,198060.000000,37100.000000,228.029211)}
{pt3dadd(163800.000000,197844.000000,36825.000000,197.603024)}
{pt3dadd(163992.000000,197676.000000,36550.000000,167.176836)}
{pt3dadd(164196.000000,197484.000000,36275.000000,197.603024)}
{pt3dadd(164400.000000,197340.000000,36025.000000,228.029211)}
{pt3dadd(164424.000000,197172.000000,35975.000000,258.455399)}
{pt3dadd(164652.000000,196944.000000,35825.000000,288.881586)}
{pt3dadd(164904.000000,196668.000000,35800.000000,266.814243)}
{pt3dadd(165132.000000,196428.000000,35525.000000,244.746900)}
{pt3dadd(165312.000000,196224.000000,35375.000000,222.679557)}
{pt3dadd(165420.000000,196020.000000,35425.000000,200.612214)}
{pt3dadd(165564.000000,195840.000000,35250.000000,210.642822)}
{pt3dadd(165744.000000,195636.000000,35300.000000,220.673430)}
{pt3dadd(165780.000000,195420.000000,35375.000000,230.704038)}
{pt3dadd(165888.000000,195216.000000,35325.000000,240.734646)}
{pt3dadd(165888.000000,195036.000000,35300.000000,284.548356)}
{pt3dadd(166164.000000,194868.000000,35100.000000,328.362066)}
{pt3dadd(166332.000000,194676.000000,34950.000000,372.175776)}
{pt3dadd(166368.000000,194472.000000,34750.000000,415.989486)}
{pt3dadd(166716.000000,194292.000000,34750.000000,362.145168)}
{pt3dadd(166872.000000,194076.000000,34675.000000,308.300850)}
{pt3dadd(166872.000000,193896.000000,34600.000000,254.456532)}
{pt3dadd(166800.000000,193680.000000,34625.000000,200.612214)}
{pt3dadd(166776.000000,193464.000000,34475.000000,200.612214)}
{pt3dadd(166836.000000,193248.000000,34500.000000,200.612214)}
{pt3dadd(166896.000000,193068.000000,34525.000000,200.612214)}
{pt3dadd(167148.000000,192900.000000,34675.000000,200.612214)}
{pt3dadd(167220.000000,192696.000000,34550.000000,192.253370)}
{pt3dadd(167328.000000,192504.000000,34525.000000,183.894525)}
{pt3dadd(167436.000000,192336.000000,34475.000000,175.535680)}
{pt3dadd(167400.000000,192156.000000,34325.000000,167.176836)}
{pt3dadd(167532.000000,192000.000000,34225.000000,160.211138)}
{pt3dadd(167640.000000,191808.000000,33925.000000,153.245439)}
{pt3dadd(167688.000000,191628.000000,33725.000000,146.279741)}
{pt3dadd(167868.000000,191424.000000,33550.000000,139.314042)}
{pt3dadd(167736.000000,191232.000000,33500.000000,146.279741)}
{pt3dadd(167748.000000,191040.000000,33400.000000,153.245439)}
{pt3dadd(167808.000000,190896.000000,33275.000000,160.211138)}
{pt3dadd(168024.000000,190620.000000,33100.000000,167.176836)}
{pt3dadd(168372.000000,190476.000000,32925.000000,156.196661)}
{pt3dadd(168684.000000,190308.000000,32775.000000,145.216485)}
{pt3dadd(169188.000000,190080.000000,32525.000000,134.236310)}
{pt3dadd(169524.000000,189900.000000,32325.000000,123.256134)}
{pt3dadd(169656.000000,189876.000000,32175.000000,116.628566)}
{pt3dadd(169788.000000,189852.000000,31975.000000,110.000997)}
{pt3dadd(169920.000000,189576.000000,31775.000000,103.373428)}
{pt3dadd(170196.000000,189432.000000,31575.000000,96.745860)}
{pt3dadd(170424.000000,189216.000000,31375.000000,96.745860)}
{pt3dadd(170652.000000,188964.000000,31200.000000,96.745860)}

{create adhoc32}
{access adhoc32}
{connect adhoc32(1), adhoc30(0)}
{nseg = 1}
{strdef color color = "White"}
{pt3dclear()}
{pt3dadd(162816.000000,200112.000000,38300.000000,288.881586)}
{pt3dadd(162828.000000,200220.000000,38075.000000,240.734646)}
{pt3dadd(162912.000000,200172.000000,37850.000000,139.314042)}
{pt3dadd(163068.000000,200280.000000,37600.000000,139.314042)}

{create adhoc33}
{access adhoc33}
{connect adhoc33(1), adhoc19(0)}
{nseg = 1}
{strdef color color = "White"}
{pt3dclear()}
{pt3dadd(163140.000000,194928.000000,72450.000000,1192.452354)}
{pt3dadd(163380.000000,193296.000000,71925.000000,499.187376)}
{pt3dadd(163872.000000,192408.000000,71550.000000,554.097987)}
{pt3dadd(163776.000000,191904.000000,71200.000000,609.008598)}
{pt3dadd(163476.000000,191424.000000,70775.000000,663.919209)}
{pt3dadd(163380.000000,191124.000000,70350.000000,718.829820)}
{pt3dadd(163044.000000,190644.000000,69950.000000,797.901102)}
{pt3dadd(163152.000000,190452.000000,69550.000000,876.972384)}
{pt3dadd(163104.000000,189948.000000,69025.000000,956.043666)}
{pt3dadd(163116.000000,189696.000000,68625.000000,1035.114948)}
{pt3dadd(163068.000000,189144.000000,68250.000000,1035.114948)}
{pt3dadd(163008.000000,189000.000000,67875.000000,1035.114948)}
{pt3dadd(162816.000000,188904.000000,67475.000000,1035.114948)}
{pt3dadd(162948.000000,188832.000000,67050.000000,1035.114948)}
{pt3dadd(162984.000000,188436.000000,66625.000000,1024.763801)}
{pt3dadd(163044.000000,187932.000000,66250.000000,1014.412653)}
{pt3dadd(162720.000000,188172.000000,65900.000000,1004.061506)}
{pt3dadd(162396.000000,187872.000000,65500.000000,993.710358)}
{pt3dadd(162504.000000,187728.000000,65175.000000,960.931719)}
{pt3dadd(162108.000000,187296.000000,64750.000000,928.153080)}
{pt3dadd(162216.000000,186924.000000,64300.000000,895.374441)}
{pt3dadd(162288.000000,186492.000000,63875.000000,862.595802)}
{pt3dadd(162360.000000,186060.000000,63525.000000,776.336238)}
{pt3dadd(162408.000000,185808.000000,63175.000000,690.076674)}
{pt3dadd(162384.000000,185508.000000,63025.000000,862.595802)}

{create adhoc34}
{access adhoc34}
{connect adhoc34(1), adhoc33(0)}
{nseg = 1}
{strdef color color = "White"}
{pt3dclear()}
{pt3dadd(162384.000000,185508.000000,63025.000000,862.595802)}
{pt3dadd(163140.000000,186768.000000,62850.000000,346.657896)}
{pt3dadd(163116.000000,187032.000000,62625.000000,332.213819)}
{pt3dadd(163044.000000,186828.000000,62275.000000,317.769741)}
{pt3dadd(163008.000000,186792.000000,61950.000000,303.325664)}
{pt3dadd(162972.000000,186756.000000,61675.000000,288.881586)}
{pt3dadd(162792.000000,186816.000000,61425.000000,266.814243)}
{pt3dadd(162396.000000,186636.000000,61175.000000,244.746900)}
{pt3dadd(162048.000000,186444.000000,60925.000000,222.679557)}
{pt3dadd(161892.000000,186144.000000,60750.000000,200.612214)}
{pt3dadd(161796.000000,186084.000000,60550.000000,167.176836)}

{create adhoc35}
{access adhoc35}
{connect adhoc35(1), adhoc33(0)}
{nseg = 1}
{strdef color color = "White"}
{pt3dclear()}
{pt3dadd(162384.000000,185508.000000,63025.000000,862.595802)}
{pt3dadd(162312.000000,184920.000000,62525.000000,718.829820)}
{pt3dadd(162348.000000,184572.000000,62200.000000,787.549937)}
{pt3dadd(162336.000000,184116.000000,61850.000000,856.270053)}
{pt3dadd(162504.000000,183732.000000,61475.000000,924.990169)}
{pt3dadd(162648.000000,183204.000000,61050.000000,993.710286)}
{pt3dadd(162792.000000,182676.000000,60625.000000,983.773188)}
{pt3dadd(162792.000000,182484.000000,60525.000000,973.836090)}
{pt3dadd(163164.000000,182292.000000,60425.000000,963.898992)}
{pt3dadd(163260.000000,182076.000000,60375.000000,953.961894)}
{pt3dadd(163356.000000,181836.000000,60300.000000,974.250158)}
{pt3dadd(163548.000000,181656.000000,59975.000000,994.538421)}
{pt3dadd(163620.000000,181452.000000,59900.000000,1014.826685)}
{pt3dadd(163692.000000,181248.000000,59825.000000,1035.114948)}
{pt3dadd(163764.000000,181056.000000,59750.000000,1005.287067)}
{pt3dadd(163512.000000,180876.000000,59475.000000,975.459186)}
{pt3dadd(163512.000000,180648.000000,59275.000000,945.631305)}
{pt3dadd(163512.000000,180432.000000,59075.000000,915.803424)}
{pt3dadd(163512.000000,180240.000000,58875.000000,893.875572)}
{pt3dadd(163512.000000,180012.000000,58675.000000,871.947720)}
{pt3dadd(163632.000000,179820.000000,58450.000000,850.019868)}
{pt3dadd(163596.000000,179592.000000,58675.000000,828.092016)}
{pt3dadd(163740.000000,179388.000000,58425.000000,836.717962)}
{pt3dadd(163680.000000,179220.000000,58425.000000,845.343909)}
{pt3dadd(163620.000000,179040.000000,58400.000000,853.969856)}
{pt3dadd(163560.000000,178848.000000,58375.000000,862.595802)}
{pt3dadd(163584.000000,178656.000000,58075.000000,862.595802)}
{pt3dadd(163608.000000,178476.000000,57775.000000,862.595802)}
{pt3dadd(163272.000000,178248.000000,57550.000000,862.595802)}
{pt3dadd(163464.000000,177996.000000,57650.000000,862.595802)}
{pt3dadd(163152.000000,177792.000000,57500.000000,905.725589)}
{pt3dadd(163044.000000,177408.000000,57150.000000,948.855375)}
{pt3dadd(162840.000000,177300.000000,56875.000000,991.985162)}
{pt3dadd(162504.000000,176820.000000,56575.000000,1035.114948)}
{pt3dadd(162396.000000,176508.000000,56100.000000,889.751592)}
{pt3dadd(162552.000000,175548.000000,55750.000000,744.388236)}
{pt3dadd(162660.000000,174612.000000,55400.000000,599.024880)}
{pt3dadd(162696.000000,173700.000000,55175.000000,415.989486)}

{create adhoc36}
{access adhoc36}
{connect adhoc36(1), adhoc35(0)}
{nseg = 1}
{strdef color color = "White"}
{pt3dclear()}
{pt3dadd(162696.000000,173700.000000,55175.000000,415.989486)}
{pt3dadd(162012.000000,170820.000000,54925.000000,415.989486)}
{pt3dadd(161772.000000,169572.000000,54625.000000,436.788958)}
{pt3dadd(161856.000000,169320.000000,54725.000000,457.588431)}
{pt3dadd(161844.000000,169116.000000,54725.000000,478.387903)}
{pt3dadd(161892.000000,168936.000000,54775.000000,499.187376)}
{pt3dadd(161964.000000,168732.000000,54725.000000,690.076602)}
{pt3dadd(162108.000000,168576.000000,54875.000000,718.829820)}

{create adhoc37}
{access adhoc37}
{connect adhoc37(1), adhoc36(0)}
{nseg = 1}
{strdef color color = "White"}
{pt3dclear()}
{pt3dadd(162108.000000,168576.000000,54875.000000,718.829820)}
{pt3dadd(161868.000000,168336.000000,54025.000000,599.024880)}
{pt3dadd(161916.000000,168144.000000,53850.000000,553.266031)}
{pt3dadd(161928.000000,167952.000000,53775.000000,507.507183)}
{pt3dadd(162036.000000,167748.000000,53675.000000,461.748335)}
{pt3dadd(161988.000000,167544.000000,53550.000000,415.989486)}
{pt3dadd(162012.000000,167328.000000,53525.000000,415.989486)}
{pt3dadd(162132.000000,167112.000000,53325.000000,415.989486)}
{pt3dadd(162108.000000,166908.000000,53175.000000,415.989486)}
{pt3dadd(162312.000000,166692.000000,53200.000000,415.989486)}
{pt3dadd(162396.000000,166476.000000,53150.000000,436.788958)}
{pt3dadd(162624.000000,166272.000000,53050.000000,457.588431)}
{pt3dadd(162852.000000,166068.000000,53125.000000,478.387903)}
{pt3dadd(163068.000000,165864.000000,53050.000000,499.187376)}
{pt3dadd(163224.000000,165672.000000,52925.000000,461.055006)}
{pt3dadd(163164.000000,165492.000000,52825.000000,422.922636)}
{pt3dadd(163152.000000,165336.000000,52900.000000,384.790266)}
{pt3dadd(163128.000000,165156.000000,52900.000000,346.657896)}
{pt3dadd(163164.000000,164988.000000,52750.000000,332.213819)}
{pt3dadd(163176.000000,164844.000000,52700.000000,317.769741)}
{pt3dadd(163308.000000,164664.000000,52750.000000,303.325664)}
{pt3dadd(163464.000000,164484.000000,52475.000000,288.881586)}
{pt3dadd(163668.000000,164280.000000,52450.000000,266.814243)}
{pt3dadd(163680.000000,164076.000000,52450.000000,244.746900)}
{pt3dadd(163932.000000,163848.000000,52375.000000,222.679557)}
{pt3dadd(164100.000000,163644.000000,52275.000000,200.612214)}
{pt3dadd(164376.000000,163452.000000,52200.000000,237.123635)}
{pt3dadd(164448.000000,163236.000000,52200.000000,273.635055)}
{pt3dadd(164520.000000,163008.000000,52175.000000,310.146475)}
{pt3dadd(164568.000000,162816.000000,52025.000000,346.657896)}
{pt3dadd(164604.000000,162624.000000,51975.000000,320.177083)}
{pt3dadd(164640.000000,162432.000000,51950.000000,293.696271)}
{pt3dadd(164880.000000,162252.000000,51900.000000,267.215459)}
{pt3dadd(164892.000000,162060.000000,51750.000000,240.734646)}
{pt3dadd(164904.000000,161880.000000,51600.000000,252.771381)}
{pt3dadd(164844.000000,161688.000000,51425.000000,264.808116)}
{pt3dadd(164928.000000,161472.000000,51325.000000,276.844851)}
{pt3dadd(164964.000000,161232.000000,51275.000000,288.881586)}
{pt3dadd(165000.000000,160992.000000,51225.000000,303.325664)}
{pt3dadd(165036.000000,160752.000000,51175.000000,317.769741)}
{pt3dadd(165072.000000,160548.000000,51125.000000,332.213819)}
{pt3dadd(165108.000000,160368.000000,51075.000000,346.657896)}
{pt3dadd(165144.000000,160188.000000,51025.000000,320.177083)}
{pt3dadd(165252.000000,160020.000000,50950.000000,293.696271)}
{pt3dadd(165360.000000,159852.000000,50875.000000,267.215459)}
{pt3dadd(165468.000000,159660.000000,50800.000000,240.734646)}
{pt3dadd(165576.000000,159468.000000,50725.000000,240.734646)}
{pt3dadd(165432.000000,159264.000000,50650.000000,240.734646)}
{pt3dadd(165480.000000,159120.000000,50750.000000,240.734646)}
{pt3dadd(165528.000000,158928.000000,50800.000000,240.734646)}
{pt3dadd(165600.000000,158748.000000,50725.000000,267.215459)}
{pt3dadd(165816.000000,158556.000000,50775.000000,293.696271)}
{pt3dadd(165972.000000,158352.000000,50925.000000,320.177083)}
{pt3dadd(165948.000000,158172.000000,51050.000000,346.657896)}
{pt3dadd(165936.000000,157980.000000,51225.000000,359.830908)}
{pt3dadd(165924.000000,157824.000000,51400.000000,373.003920)}
{pt3dadd(165840.000000,157656.000000,51475.000000,386.176932)}
{pt3dadd(165816.000000,157464.000000,51800.000000,399.349944)}
{pt3dadd(165828.000000,157320.000000,52050.000000,403.509830)}
{pt3dadd(165876.000000,157176.000000,52075.000000,407.669715)}
{pt3dadd(166032.000000,157020.000000,52375.000000,411.829601)}
{pt3dadd(166152.000000,157092.000000,52600.000000,415.989486)}
{pt3dadd(166344.000000,157128.000000,52900.000000,339.854927)}
{pt3dadd(166356.000000,157056.000000,53125.000000,263.720367)}
{pt3dadd(166488.000000,156948.000000,53350.000000,187.585807)}
{pt3dadd(166668.000000,156636.000000,53500.000000,111.451248)}
{pt3dadd(166800.000000,156384.000000,53675.000000,133.741490)}
{pt3dadd(166716.000000,156264.000000,53600.000000,156.031731)}
{pt3dadd(166716.000000,156132.000000,53625.000000,178.321973)}
{pt3dadd(166728.000000,156000.000000,53750.000000,200.612214)}
{pt3dadd(166656.000000,155880.000000,53850.000000,250.296637)}
{pt3dadd(166704.000000,155724.000000,53925.000000,299.981061)}
{pt3dadd(166512.000000,155604.000000,53875.000000,349.665484)}
{pt3dadd(166692.000000,155460.000000,53775.000000,399.349908)}
{pt3dadd(166668.000000,155316.000000,53750.000000,288.881586)}

{create adhoc38}
{access adhoc38}
{connect adhoc38(1), adhoc36(0)}
{nseg = 1}
{strdef color color = "White"}
{pt3dclear()}
{pt3dadd(162108.000000,168576.000000,54875.000000,718.829820)}
{pt3dadd(162492.000000,168324.000000,55525.000000,240.734646)}
{pt3dadd(162432.000000,168108.000000,55750.000000,252.771381)}
{pt3dadd(162348.000000,167916.000000,55800.000000,264.808116)}
{pt3dadd(162432.000000,167700.000000,55800.000000,276.844851)}
{pt3dadd(162588.000000,167508.000000,55950.000000,288.881586)}
{pt3dadd(162672.000000,167328.000000,55950.000000,276.844851)}
{pt3dadd(162744.000000,167148.000000,56050.000000,264.808116)}
{pt3dadd(162804.000000,166992.000000,56125.000000,252.771381)}
{pt3dadd(163068.000000,166764.000000,56150.000000,240.734646)}
{pt3dadd(163188.000000,166560.000000,56225.000000,284.548356)}
{pt3dadd(163164.000000,166320.000000,56050.000000,328.362066)}
{pt3dadd(163764.000000,166116.000000,55925.000000,372.175776)}
{pt3dadd(164040.000000,165888.000000,56075.000000,415.989486)}
{pt3dadd(164412.000000,165708.000000,56275.000000,398.656589)}
{pt3dadd(164364.000000,165744.000000,56625.000000,381.323691)}
{pt3dadd(164844.000000,165360.000000,56875.000000,363.990794)}
{pt3dadd(165264.000000,165000.000000,57175.000000,346.657896)}
{pt3dadd(165588.000000,164760.000000,57400.000000,346.657896)}
{pt3dadd(165816.000000,164460.000000,57675.000000,346.657896)}
{pt3dadd(165972.000000,164184.000000,57825.000000,346.657896)}
{pt3dadd(165972.000000,164052.000000,57975.000000,346.657896)}
{pt3dadd(166128.000000,164004.000000,58150.000000,277.326324)}
{pt3dadd(166212.000000,163944.000000,58400.000000,167.176836)}

{create adhoc39}
{access adhoc39}
{connect adhoc39(1), adhoc35(0)}
{nseg = 1}
{strdef color color = "White"}
{pt3dclear()}
{pt3dadd(162696.000000,173700.000000,55175.000000,415.989486)}
{pt3dadd(161820.000000,173484.000000,52975.000000,862.595802)}
{pt3dadd(161772.000000,173208.000000,52500.000000,862.595802)}
{pt3dadd(161712.000000,172956.000000,52025.000000,862.595802)}
{pt3dadd(161652.000000,172728.000000,51800.000000,862.595802)}
{pt3dadd(161640.000000,172500.000000,51775.000000,862.595802)}
{pt3dadd(161088.000000,172644.000000,51550.000000,862.595802)}

{create adhoc40}
{access adhoc40}
{connect adhoc40(1), adhoc39(0)}
{nseg = 1}
{strdef color color = "White"}
{pt3dclear()}
{pt3dadd(161088.000000,172644.000000,51550.000000,862.595802)}
{pt3dadd(159240.000000,172068.000000,51100.000000,167.176836)}
{pt3dadd(158964.000000,171816.000000,50825.000000,275.138847)}
{pt3dadd(158784.000000,171744.000000,50400.000000,383.100858)}
{pt3dadd(158772.000000,171600.000000,49975.000000,491.062869)}
{pt3dadd(158808.000000,171444.000000,49575.000000,599.024880)}
{pt3dadd(158856.000000,171372.000000,48975.000000,628.976115)}
{pt3dadd(158784.000000,171504.000000,48550.000000,658.927350)}
{pt3dadd(159336.000000,171468.000000,48125.000000,688.878585)}
{pt3dadd(159336.000000,171612.000000,47625.000000,718.829820)}
{pt3dadd(159528.000000,171456.000000,47225.000000,754.771316)}
{pt3dadd(159456.000000,171360.000000,46800.000000,790.712811)}
{pt3dadd(159300.000000,171300.000000,46250.000000,826.654307)}
{pt3dadd(159288.000000,171384.000000,45800.000000,862.595802)}
{pt3dadd(159480.000000,171492.000000,45275.000000,796.703072)}
{pt3dadd(159528.000000,171624.000000,44825.000000,730.810341)}
{pt3dadd(159984.000000,171624.000000,44450.000000,664.917611)}
{pt3dadd(160128.000000,171936.000000,44025.000000,599.024880)}
{pt3dadd(160272.000000,172128.000000,43650.000000,535.933134)}
{pt3dadd(160320.000000,172332.000000,43325.000000,472.841388)}
{pt3dadd(160368.000000,172536.000000,42925.000000,409.749642)}
{pt3dadd(160500.000000,172536.000000,42650.000000,346.657896)}
{pt3dadd(160632.000000,172848.000000,42150.000000,363.990794)}
{pt3dadd(160488.000000,172824.000000,41850.000000,381.323691)}
{pt3dadd(160536.000000,172812.000000,41550.000000,398.656589)}
{pt3dadd(160560.000000,172812.000000,41225.000000,415.989486)}
{pt3dadd(160524.000000,172824.000000,40900.000000,362.145168)}
{pt3dadd(160584.000000,172848.000000,40600.000000,308.300850)}
{pt3dadd(160752.000000,172956.000000,40300.000000,254.456532)}
{pt3dadd(160860.000000,172764.000000,40025.000000,200.612214)}
{pt3dadd(161112.000000,172620.000000,39850.000000,179.482918)}
{pt3dadd(162264.000000,172044.000000,39625.000000,158.353623)}
{pt3dadd(162336.000000,171840.000000,39525.000000,137.224328)}
{pt3dadd(162564.000000,171660.000000,39575.000000,116.095032)}
{pt3dadd(162888.000000,171480.000000,39475.000000,137.224328)}
{pt3dadd(163104.000000,171288.000000,39300.000000,158.353623)}
{pt3dadd(163356.000000,171060.000000,39200.000000,179.482918)}
{pt3dadd(163572.000000,170868.000000,39175.000000,200.612214)}
{pt3dadd(163704.000000,170652.000000,39150.000000,200.612214)}
{pt3dadd(163944.000000,170472.000000,39075.000000,200.612214)}
{pt3dadd(164244.000000,170280.000000,39000.000000,200.612214)}
{pt3dadd(164244.000000,170136.000000,39050.000000,200.612214)}
{pt3dadd(164484.000000,169956.000000,39100.000000,222.679557)}
{pt3dadd(164412.000000,169800.000000,39000.000000,244.746900)}
{pt3dadd(164520.000000,169668.000000,39575.000000,266.814243)}
{pt3dadd(164700.000000,169428.000000,39700.000000,288.881586)}
{pt3dadd(164748.000000,169200.000000,39625.000000,214.097814)}
{pt3dadd(164856.000000,169044.000000,39600.000000,139.314042)}
{pt3dadd(164940.000000,168876.000000,39525.000000,139.314042)}

{create adhoc41}
{access adhoc41}
{connect adhoc41(1), adhoc39(0)}
{nseg = 1}
{strdef color color = "White"}
{pt3dclear()}
{pt3dadd(161088.000000,172644.000000,51550.000000,862.595802)}
{pt3dadd(161448.000000,172452.000000,51175.000000,718.829820)}
{pt3dadd(161628.000000,171744.000000,50750.000000,718.829820)}
{pt3dadd(161460.000000,171312.000000,50350.000000,718.829820)}
{pt3dadd(161496.000000,170496.000000,50000.000000,718.829820)}
{pt3dadd(161616.000000,169812.000000,49625.000000,718.829820)}
{pt3dadd(161868.000000,169284.000000,49150.000000,790.712811)}
{pt3dadd(161724.000000,168984.000000,48825.000000,862.595802)}
{pt3dadd(162060.000000,168300.000000,48425.000000,1035.114948)}

{create adhoc42}
{access adhoc42}
{connect adhoc42(1), adhoc41(0)}
{nseg = 1}
{strdef color color = "White"}
{pt3dclear()}
{pt3dadd(162060.000000,168300.000000,48425.000000,1035.114948)}
{pt3dadd(163320.000000,165780.000000,48150.000000,288.881586)}
{pt3dadd(163656.000000,165168.000000,47825.000000,276.844851)}
{pt3dadd(163812.000000,164328.000000,47500.000000,264.808116)}
{pt3dadd(163824.000000,163956.000000,47175.000000,252.771381)}
{pt3dadd(163944.000000,163344.000000,46825.000000,240.734646)}
{pt3dadd(164280.000000,163068.000000,46550.000000,284.548356)}
{pt3dadd(164316.000000,162504.000000,46275.000000,328.362066)}
{pt3dadd(164436.000000,162012.000000,46100.000000,372.175776)}
{pt3dadd(165036.000000,161580.000000,45850.000000,415.989486)}
{pt3dadd(165324.000000,160740.000000,45550.000000,353.786324)}
{pt3dadd(165816.000000,159912.000000,45300.000000,291.583161)}
{pt3dadd(165996.000000,159168.000000,45125.000000,229.379999)}
{pt3dadd(166200.000000,158568.000000,45150.000000,167.176836)}
{pt3dadd(166440.000000,158208.000000,45125.000000,197.603024)}
{pt3dadd(166488.000000,157932.000000,45075.000000,228.029211)}
{pt3dadd(166488.000000,157692.000000,45025.000000,258.455399)}
{pt3dadd(166392.000000,157428.000000,44950.000000,288.881586)}
{pt3dadd(166320.000000,157236.000000,44650.000000,303.325664)}
{pt3dadd(166332.000000,157008.000000,44450.000000,317.769741)}
{pt3dadd(166344.000000,156780.000000,44375.000000,332.213819)}
{pt3dadd(166428.000000,156588.000000,44350.000000,346.657896)}
{pt3dadd(166536.000000,156384.000000,44000.000000,320.177083)}
{pt3dadd(166644.000000,156180.000000,43825.000000,293.696271)}
{pt3dadd(166716.000000,155964.000000,43875.000000,267.215459)}
{pt3dadd(166704.000000,155748.000000,43775.000000,240.734646)}
{pt3dadd(166668.000000,155556.000000,43750.000000,240.734646)}
{pt3dadd(166500.000000,155352.000000,43775.000000,240.734646)}
{pt3dadd(166464.000000,155136.000000,43625.000000,240.734646)}
{pt3dadd(166548.000000,154908.000000,43575.000000,240.734646)}
{pt3dadd(166800.000000,154716.000000,43550.000000,222.345193)}
{pt3dadd(166896.000000,154512.000000,43475.000000,203.955741)}
{pt3dadd(166908.000000,154332.000000,43400.000000,185.566288)}
{pt3dadd(167052.000000,154104.000000,43500.000000,167.176836)}
{pt3dadd(167388.000000,153900.000000,43600.000000,197.603024)}
{pt3dadd(167736.000000,153684.000000,43700.000000,228.029211)}
{pt3dadd(167784.000000,153444.000000,43825.000000,258.455399)}
{pt3dadd(167796.000000,153228.000000,43800.000000,288.881586)}
{pt3dadd(167880.000000,153036.000000,43900.000000,276.844851)}
{pt3dadd(167772.000000,152832.000000,43950.000000,264.808116)}
{pt3dadd(167652.000000,152664.000000,43950.000000,252.771381)}
{pt3dadd(167604.000000,152484.000000,44050.000000,240.734646)}
{pt3dadd(167556.000000,152292.000000,44150.000000,240.734646)}
{pt3dadd(167604.000000,152028.000000,43950.000000,240.734646)}
{pt3dadd(167556.000000,151884.000000,43900.000000,240.734646)}
{pt3dadd(167460.000000,151728.000000,43975.000000,240.734646)}
{pt3dadd(167388.000000,151560.000000,43900.000000,230.704038)}
{pt3dadd(167316.000000,151404.000000,43850.000000,220.673430)}
{pt3dadd(167268.000000,151272.000000,43700.000000,210.642822)}
{pt3dadd(167412.000000,151104.000000,43650.000000,200.612214)}
{pt3dadd(167448.000000,150972.000000,43600.000000,200.612214)}
{pt3dadd(167376.000000,150804.000000,43575.000000,200.612214)}
{pt3dadd(167328.000000,150660.000000,43400.000000,200.612214)}
{pt3dadd(167388.000000,150480.000000,43475.000000,200.612214)}
{pt3dadd(167568.000000,150276.000000,43300.000000,222.679557)}
{pt3dadd(167604.000000,150096.000000,43450.000000,244.746900)}
{pt3dadd(167652.000000,149964.000000,43600.000000,266.814243)}
{pt3dadd(167652.000000,149796.000000,43550.000000,288.881586)}
{pt3dadd(167652.000000,149652.000000,43500.000000,276.844851)}
{pt3dadd(167652.000000,149436.000000,43400.000000,264.808116)}
{pt3dadd(167556.000000,149232.000000,43500.000000,252.771381)}
{pt3dadd(167592.000000,149028.000000,43575.000000,240.734646)}
{pt3dadd(167460.000000,148812.000000,43425.000000,240.734646)}
{pt3dadd(167328.000000,148620.000000,43600.000000,240.734646)}
{pt3dadd(167316.000000,148428.000000,43650.000000,240.734646)}
{pt3dadd(167304.000000,148248.000000,43725.000000,240.734646)}
{pt3dadd(167232.000000,148056.000000,43650.000000,267.215459)}
{pt3dadd(167064.000000,147876.000000,43700.000000,293.696271)}
{pt3dadd(166896.000000,147708.000000,43850.000000,320.177083)}
{pt3dadd(166740.000000,147552.000000,44000.000000,346.657896)}
{pt3dadd(166680.000000,147372.000000,44025.000000,301.787631)}
{pt3dadd(166788.000000,147204.000000,44075.000000,256.917366)}
{pt3dadd(167016.000000,147048.000000,43900.000000,212.047101)}
{pt3dadd(167100.000000,146892.000000,44025.000000,167.176836)}
{pt3dadd(167040.000000,146760.000000,44000.000000,175.535680)}
{pt3dadd(167124.000000,146604.000000,44150.000000,183.894525)}
{pt3dadd(167184.000000,146436.000000,44275.000000,192.253370)}
{pt3dadd(167196.000000,146268.000000,44175.000000,200.612214)}
{pt3dadd(167076.000000,146088.000000,44050.000000,210.642822)}
{pt3dadd(167232.000000,145980.000000,44225.000000,220.673430)}
{pt3dadd(167136.000000,145764.000000,44300.000000,230.704038)}
{pt3dadd(167172.000000,145560.000000,44275.000000,240.734646)}
{pt3dadd(167184.000000,145320.000000,44500.000000,240.734646)}
{pt3dadd(167304.000000,145092.000000,44450.000000,240.734646)}
{pt3dadd(167316.000000,144888.000000,44500.000000,240.734646)}
{pt3dadd(167376.000000,144696.000000,44625.000000,240.734646)}
{pt3dadd(167436.000000,144492.000000,44750.000000,230.704038)}
{pt3dadd(167376.000000,144264.000000,44725.000000,220.673430)}
{pt3dadd(167364.000000,144096.000000,44750.000000,210.642822)}
{pt3dadd(167352.000000,143928.000000,44675.000000,200.612214)}
{pt3dadd(167340.000000,143760.000000,44600.000000,200.612214)}
{pt3dadd(167340.000000,143604.000000,44725.000000,200.612214)}
{pt3dadd(167280.000000,143448.000000,44700.000000,200.612214)}
{pt3dadd(167292.000000,143292.000000,44700.000000,200.612214)}
{pt3dadd(167244.000000,143124.000000,44700.000000,185.287671)}
{pt3dadd(167232.000000,142956.000000,44725.000000,169.963128)}
{pt3dadd(167220.000000,142776.000000,44850.000000,154.638585)}
{pt3dadd(167148.000000,142584.000000,44950.000000,139.314042)}
{pt3dadd(167160.000000,142368.000000,45225.000000,173.120910)}
{pt3dadd(167316.000000,141924.000000,45475.000000,206.927778)}
{pt3dadd(167412.000000,141636.000000,45725.000000,240.734646)}
{pt3dadd(167616.000000,142068.000000,46000.000000,346.657896)}

{create adhoc43}
{access adhoc43}
{connect adhoc43(1), adhoc41(0)}
{nseg = 1}
{strdef color color = "White"}
{pt3dclear()}
{pt3dadd(162060.000000,168300.000000,48425.000000,1035.114948)}
{pt3dadd(161556.000000,168696.000000,48050.000000,862.595802)}
{pt3dadd(161484.000000,168360.000000,47650.000000,895.374441)}
{pt3dadd(161544.000000,168252.000000,47300.000000,928.153080)}
{pt3dadd(161592.000000,168024.000000,46950.000000,960.931719)}
{pt3dadd(161652.000000,167736.000000,46575.000000,993.710358)}
{pt3dadd(161892.000000,167568.000000,46200.000000,1004.061506)}
{pt3dadd(161976.000000,167436.000000,45800.000000,1014.412653)}
{pt3dadd(162012.000000,167364.000000,45450.000000,1024.763801)}
{pt3dadd(162060.000000,167304.000000,45075.000000,1035.114948)}
{pt3dadd(162072.000000,167028.000000,44700.000000,991.985162)}
{pt3dadd(162240.000000,167004.000000,44400.000000,948.855375)}
{pt3dadd(162324.000000,166788.000000,44125.000000,905.725589)}
{pt3dadd(162336.000000,166788.000000,43825.000000,862.595802)}
{pt3dadd(162336.000000,166668.000000,43475.000000,862.595802)}
{pt3dadd(162336.000000,166548.000000,43125.000000,862.595802)}
{pt3dadd(162336.000000,166320.000000,42800.000000,862.595802)}
{pt3dadd(162540.000000,166152.000000,42475.000000,862.595802)}
{pt3dadd(162768.000000,165936.000000,42150.000000,826.654307)}
{pt3dadd(162864.000000,165636.000000,41800.000000,790.712811)}
{pt3dadd(163068.000000,165336.000000,41425.000000,754.771316)}
{pt3dadd(163236.000000,165120.000000,41125.000000,718.829820)}
{pt3dadd(163296.000000,165000.000000,40775.000000,718.829820)}
{pt3dadd(163104.000000,164040.000000,40450.000000,415.989486)}

{create adhoc44}
{access adhoc44}
{connect adhoc44(1), adhoc43(0)}
{nseg = 1}
{strdef color color = "White"}
{pt3dclear()}
{pt3dadd(163104.000000,164040.000000,40450.000000,415.989486)}
{pt3dadd(163056.000000,162876.000000,40025.000000,346.657896)}
{pt3dadd(163080.000000,162240.000000,39750.000000,363.990794)}
{pt3dadd(163224.000000,162072.000000,39475.000000,381.323691)}
{pt3dadd(163548.000000,161724.000000,39175.000000,398.656589)}
{pt3dadd(163764.000000,161484.000000,39000.000000,415.989486)}
{pt3dadd(164028.000000,161244.000000,38700.000000,415.989486)}
{pt3dadd(164472.000000,160980.000000,38625.000000,415.989486)}
{pt3dadd(165072.000000,160788.000000,38450.000000,415.989486)}
{pt3dadd(165492.000000,160536.000000,38325.000000,415.989486)}
{pt3dadd(165984.000000,160332.000000,38125.000000,398.656589)}
{pt3dadd(166068.000000,160104.000000,38150.000000,381.323691)}
{pt3dadd(166332.000000,159912.000000,37875.000000,363.990794)}
{pt3dadd(166644.000000,159684.000000,37725.000000,346.657896)}
{pt3dadd(166968.000000,159492.000000,37800.000000,379.798393)}
{pt3dadd(167016.000000,159288.000000,37650.000000,412.938891)}
{pt3dadd(167136.000000,159108.000000,37675.000000,446.079388)}
{pt3dadd(167292.000000,158916.000000,37725.000000,479.219886)}
{pt3dadd(167376.000000,158724.000000,37525.000000,446.079388)}
{pt3dadd(167436.000000,158556.000000,37275.000000,412.938891)}
{pt3dadd(167532.000000,158364.000000,37375.000000,379.798393)}
{pt3dadd(167856.000000,158160.000000,37175.000000,346.657896)}
{pt3dadd(168120.000000,157992.000000,37075.000000,422.922636)}
{pt3dadd(168540.000000,157812.000000,37000.000000,499.187376)}
{pt3dadd(168708.000000,157644.000000,36875.000000,415.989486)}

{create adhoc45}
{access adhoc45}
{connect adhoc45(1), adhoc44(0)}
{nseg = 1}
{strdef color color = "White"}
{pt3dclear()}
{pt3dadd(168708.000000,157644.000000,36875.000000,415.989486)}
{pt3dadd(168348.000000,157464.000000,37150.000000,346.657896)}
{pt3dadd(168300.000000,157332.000000,37200.000000,294.821933)}
{pt3dadd(168312.000000,157176.000000,37200.000000,242.985969)}
{pt3dadd(168204.000000,156948.000000,37200.000000,191.150005)}
{pt3dadd(168216.000000,156792.000000,37025.000000,139.314042)}
{pt3dadd(168024.000000,156636.000000,37025.000000,139.314042)}
{pt3dadd(168120.000000,156456.000000,37000.000000,139.314042)}
{pt3dadd(167988.000000,156240.000000,36900.000000,139.314042)}
{pt3dadd(168072.000000,155940.000000,36800.000000,139.314042)}
{pt3dadd(168048.000000,155772.000000,36900.000000,146.279741)}
{pt3dadd(168108.000000,155628.000000,36875.000000,153.245439)}
{pt3dadd(168144.000000,155496.000000,36775.000000,160.211138)}
{pt3dadd(168216.000000,155352.000000,36725.000000,167.176836)}
{pt3dadd(168312.000000,155220.000000,36725.000000,173.529553)}
{pt3dadd(168408.000000,155088.000000,36725.000000,179.882271)}
{pt3dadd(168504.000000,154920.000000,36725.000000,186.234989)}
{pt3dadd(168708.000000,154752.000000,36800.000000,192.587706)}
{pt3dadd(168900.000000,154572.000000,36650.000000,179.269290)}
{pt3dadd(168996.000000,154440.000000,36750.000000,165.950874)}
{pt3dadd(169068.000000,154308.000000,36900.000000,152.632458)}
{pt3dadd(168996.000000,154164.000000,36875.000000,139.314042)}
{pt3dadd(168948.000000,153996.000000,36900.000000,139.314042)}
{pt3dadd(168948.000000,153840.000000,36900.000000,139.314042)}
{pt3dadd(168912.000000,153648.000000,36875.000000,139.314042)}
{pt3dadd(168852.000000,153492.000000,36800.000000,139.314042)}
{pt3dadd(168768.000000,153300.000000,36875.000000,154.638585)}
{pt3dadd(168756.000000,153132.000000,36900.000000,169.963128)}
{pt3dadd(168768.000000,152940.000000,36875.000000,185.287671)}
{pt3dadd(168732.000000,152760.000000,37025.000000,200.612214)}
{pt3dadd(168648.000000,152568.000000,37125.000000,200.612214)}
{pt3dadd(168624.000000,152376.000000,37225.000000,200.612214)}
{pt3dadd(168684.000000,152220.000000,37250.000000,200.612214)}
{pt3dadd(168924.000000,152112.000000,37475.000000,200.612214)}
{pt3dadd(169368.000000,151584.000000,37675.000000,200.612214)}
{pt3dadd(169476.000000,151380.000000,37725.000000,200.612214)}
{pt3dadd(169596.000000,151284.000000,37750.000000,200.612214)}
{pt3dadd(169716.000000,151248.000000,37825.000000,200.612214)}
{pt3dadd(169848.000000,151080.000000,37800.000000,210.642822)}
{pt3dadd(169992.000000,150828.000000,37800.000000,220.673430)}
{pt3dadd(170124.000000,150396.000000,37800.000000,230.704038)}
{pt3dadd(170292.000000,150048.000000,37950.000000,240.734646)}
{pt3dadd(170400.000000,149580.000000,38200.000000,238.327304)}
{pt3dadd(170364.000000,149472.000000,38225.000000,235.919961)}
{pt3dadd(170460.000000,149328.000000,38250.000000,233.512618)}
{pt3dadd(170460.000000,149148.000000,38275.000000,231.105276)}
{pt3dadd(170448.000000,148992.000000,38425.000000,233.512618)}
{pt3dadd(170448.000000,148800.000000,38375.000000,235.919961)}
{pt3dadd(170448.000000,148656.000000,38325.000000,238.327304)}
{pt3dadd(170448.000000,148536.000000,38425.000000,240.734646)}
{pt3dadd(170376.000000,148308.000000,38475.000000,293.696271)}
{pt3dadd(170316.000000,148104.000000,38575.000000,346.657896)}
{pt3dadd(170208.000000,147960.000000,38600.000000,383.375880)}

{create adhoc46}
{access adhoc46}
{connect adhoc46(1), adhoc44(0)}
{nseg = 1}
{strdef color color = "White"}
{pt3dclear()}
{pt3dadd(168708.000000,157644.000000,36875.000000,415.989486)}
{pt3dadd(168804.000000,157848.000000,36525.000000,346.657896)}
{pt3dadd(169380.000000,157476.000000,36075.000000,332.213819)}
{pt3dadd(169992.000000,157344.000000,35725.000000,317.769741)}
{pt3dadd(170136.000000,157080.000000,35400.000000,303.325664)}
{pt3dadd(170688.000000,156936.000000,35100.000000,288.881586)}
{pt3dadd(171192.000000,156624.000000,34825.000000,285.992771)}
{pt3dadd(171672.000000,156192.000000,34525.000000,283.103955)}
{pt3dadd(172356.000000,155664.000000,34225.000000,280.215140)}
{pt3dadd(173388.000000,155040.000000,33925.000000,277.326324)}
{pt3dadd(173580.000000,154812.000000,34025.000000,280.215140)}
{pt3dadd(173844.000000,154728.000000,34025.000000,283.103955)}
{pt3dadd(174036.000000,154728.000000,33850.000000,285.992771)}
{pt3dadd(174240.000000,154296.000000,33825.000000,288.881586)}
{pt3dadd(174444.000000,154236.000000,33725.000000,288.881586)}
{pt3dadd(174624.000000,154176.000000,33625.000000,288.881586)}
{pt3dadd(174792.000000,153744.000000,33600.000000,288.881586)}
{pt3dadd(174996.000000,153312.000000,33575.000000,288.881586)}
{pt3dadd(175188.000000,153276.000000,33600.000000,276.844851)}
{pt3dadd(175344.000000,152856.000000,33600.000000,264.808116)}
{pt3dadd(175524.000000,152808.000000,33575.000000,252.771381)}
{pt3dadd(175704.000000,152724.000000,33625.000000,240.734646)}
{pt3dadd(175872.000000,152688.000000,33650.000000,215.379495)}
{pt3dadd(176028.000000,152508.000000,33475.000000,190.024344)}
{pt3dadd(176184.000000,152328.000000,33525.000000,164.669193)}
{pt3dadd(176316.000000,151752.000000,33475.000000,139.314042)}
{pt3dadd(176448.000000,151368.000000,33425.000000,152.632458)}
{pt3dadd(176592.000000,150852.000000,33400.000000,165.950874)}
{pt3dadd(176520.000000,150660.000000,33550.000000,179.269290)}
{pt3dadd(176532.000000,150516.000000,33650.000000,192.587706)}
{pt3dadd(176748.000000,150264.000000,33550.000000,186.234989)}
{pt3dadd(176904.000000,150144.000000,33400.000000,179.882271)}
{pt3dadd(177060.000000,149868.000000,33250.000000,173.529553)}
{pt3dadd(177192.000000,149736.000000,33075.000000,167.176836)}
{pt3dadd(177588.000000,149268.000000,32775.000000,154.406385)}
{pt3dadd(177888.000000,148872.000000,32575.000000,141.635934)}
{pt3dadd(178344.000000,148068.000000,32350.000000,128.865483)}
{pt3dadd(178392.000000,147960.000000,32300.000000,116.095032)}
{pt3dadd(178524.000000,147852.000000,32275.000000,96.745860)}
{pt3dadd(178488.000000,147708.000000,32250.000000,139.314042)}

{create adhoc47}
{access adhoc47}
{connect adhoc47(1), adhoc43(0)}
{nseg = 1}
{strdef color color = "White"}
{pt3dclear()}
{pt3dadd(163104.000000,164040.000000,40450.000000,415.989486)}
{pt3dadd(163680.000000,164952.000000,40250.000000,1035.114948)}
{pt3dadd(164028.000000,164988.000000,39925.000000,1024.763782)}
{pt3dadd(164448.000000,165072.000000,39600.000000,1014.412617)}
{pt3dadd(164928.000000,165084.000000,39300.000000,1004.061452)}
{pt3dadd(165024.000000,165012.000000,39025.000000,993.710286)}
{pt3dadd(165216.000000,165012.000000,38825.000000,960.931665)}
{pt3dadd(165372.000000,165108.000000,38700.000000,928.153044)}
{pt3dadd(165552.000000,165012.000000,38600.000000,895.374423)}
{pt3dadd(165756.000000,165048.000000,38450.000000,862.595802)}
{pt3dadd(165948.000000,164952.000000,38250.000000,862.595802)}
{pt3dadd(166128.000000,164904.000000,38225.000000,862.595802)}
{pt3dadd(166272.000000,164856.000000,38200.000000,862.595802)}
{pt3dadd(166464.000000,164832.000000,38075.000000,862.595802)}
{pt3dadd(166632.000000,164832.000000,37825.000000,826.654307)}
{pt3dadd(166812.000000,164760.000000,37575.000000,790.712811)}
{pt3dadd(167040.000000,164652.000000,37375.000000,754.771316)}
{pt3dadd(167244.000000,164640.000000,37325.000000,718.829820)}
{pt3dadd(167424.000000,164628.000000,37275.000000,688.878585)}
{pt3dadd(167604.000000,164616.000000,37225.000000,658.927350)}
{pt3dadd(167796.000000,164604.000000,37175.000000,628.976115)}
{pt3dadd(167964.000000,164592.000000,37125.000000,599.024880)}
{pt3dadd(168168.000000,164580.000000,37075.000000,628.976115)}
{pt3dadd(168348.000000,164388.000000,37025.000000,658.927350)}
{pt3dadd(168552.000000,164400.000000,36950.000000,688.878585)}
{pt3dadd(168732.000000,164160.000000,36750.000000,718.829820)}
{pt3dadd(168876.000000,164052.000000,36550.000000,797.901102)}
{pt3dadd(169032.000000,164004.000000,36300.000000,876.972384)}
{pt3dadd(169176.000000,163980.000000,36050.000000,956.043666)}
{pt3dadd(169344.000000,163932.000000,35950.000000,1035.114948)}
{pt3dadd(169536.000000,163716.000000,35900.000000,977.608566)}
{pt3dadd(169704.000000,163536.000000,35875.000000,920.102184)}
{pt3dadd(169860.000000,163632.000000,35750.000000,862.595802)}
{pt3dadd(169800.000000,163308.000000,35475.000000,599.024880)}

{create adhoc48}
{access adhoc48}
{connect adhoc48(1), adhoc47(0)}
{nseg = 1}
{strdef color color = "White"}
{pt3dclear()}
{pt3dadd(169800.000000,163308.000000,35475.000000,599.024880)}
{pt3dadd(170148.000000,162144.000000,35225.000000,415.989486)}
{pt3dadd(170328.000000,161952.000000,35100.000000,384.212511)}
{pt3dadd(170532.000000,161772.000000,34975.000000,352.435536)}
{pt3dadd(170760.000000,161556.000000,34825.000000,320.658561)}
{pt3dadd(171108.000000,161388.000000,34725.000000,288.881586)}
{pt3dadd(171288.000000,161208.000000,34625.000000,303.325664)}
{pt3dadd(171456.000000,161016.000000,34675.000000,317.769741)}
{pt3dadd(171624.000000,160848.000000,34350.000000,332.213819)}
{pt3dadd(171972.000000,160644.000000,34175.000000,346.657896)}
{pt3dadd(172176.000000,160440.000000,34150.000000,346.657896)}
{pt3dadd(172392.000000,160272.000000,33975.000000,346.657896)}
{pt3dadd(172608.000000,160152.000000,33775.000000,346.657896)}
{pt3dadd(172944.000000,159984.000000,33400.000000,346.657896)}
{pt3dadd(173340.000000,159936.000000,33025.000000,310.146476)}
{pt3dadd(173520.000000,159972.000000,32725.000000,273.635055)}
{pt3dadd(174372.000000,160152.000000,32425.000000,237.123635)}
{pt3dadd(175224.000000,160368.000000,32175.000000,200.612214)}
{pt3dadd(175728.000000,160176.000000,31925.000000,200.612214)}
{pt3dadd(175956.000000,160188.000000,31700.000000,200.612214)}
{pt3dadd(176772.000000,160344.000000,31500.000000,200.612214)}
{pt3dadd(177288.000000,160212.000000,31225.000000,200.612214)}
{pt3dadd(177612.000000,160092.000000,31025.000000,192.253370)}
{pt3dadd(177792.000000,159756.000000,30800.000000,183.894525)}
{pt3dadd(178056.000000,159624.000000,30625.000000,175.535680)}
{pt3dadd(178512.000000,159576.000000,30350.000000,167.176836)}
{pt3dadd(178860.000000,159552.000000,30075.000000,175.535680)}
{pt3dadd(178968.000000,159504.000000,29825.000000,183.894525)}
{pt3dadd(179184.000000,159396.000000,29575.000000,192.253370)}
{pt3dadd(179304.000000,159456.000000,29325.000000,200.612214)}
{pt3dadd(179412.000000,159612.000000,29100.000000,192.253370)}
{pt3dadd(179364.000000,159516.000000,28800.000000,183.894525)}
{pt3dadd(180096.000000,159888.000000,28450.000000,175.535680)}
{pt3dadd(180972.000000,159660.000000,28150.000000,167.176836)}
{pt3dadd(182628.000000,159396.000000,27925.000000,207.745086)}
{pt3dadd(183216.000000,159204.000000,27675.000000,248.313336)}
{pt3dadd(183612.000000,159024.000000,27400.000000,288.881586)}
{pt3dadd(183816.000000,158964.000000,27075.000000,346.657896)}

{create adhoc49}
{access adhoc49}
{connect adhoc49(1), adhoc47(0)}
{nseg = 1}
{strdef color color = "White"}
{pt3dclear()}
{pt3dadd(169800.000000,163308.000000,35475.000000,599.024880)}
{pt3dadd(169920.000000,163872.000000,35200.000000,862.595802)}
{pt3dadd(170028.000000,164088.000000,34925.000000,771.743696)}
{pt3dadd(170340.000000,164076.000000,34575.000000,680.891589)}
{pt3dadd(170724.000000,164028.000000,34275.000000,590.039483)}
{pt3dadd(171108.000000,163980.000000,33950.000000,499.187376)}
{pt3dadd(171564.000000,164016.000000,33700.000000,499.187376)}
{pt3dadd(171744.000000,164076.000000,33750.000000,499.187376)}
{pt3dadd(171924.000000,164016.000000,33650.000000,499.187376)}
{pt3dadd(172092.000000,163884.000000,33550.000000,499.187376)}
{pt3dadd(172296.000000,163992.000000,33550.000000,499.187376)}
{pt3dadd(172488.000000,164100.000000,33450.000000,499.187376)}
{pt3dadd(172692.000000,164052.000000,33350.000000,499.187376)}
{pt3dadd(172896.000000,163920.000000,33250.000000,499.187376)}
{pt3dadd(173064.000000,163800.000000,33250.000000,499.187376)}
{pt3dadd(173268.000000,163788.000000,33175.000000,499.187376)}
{pt3dadd(173460.000000,163620.000000,33150.000000,499.187376)}
{pt3dadd(173628.000000,163548.000000,33000.000000,499.187376)}
{pt3dadd(173796.000000,163476.000000,32850.000000,499.187376)}
{pt3dadd(173976.000000,163116.000000,32600.000000,499.187376)}
{pt3dadd(174180.000000,163092.000000,32475.000000,499.187376)}
{pt3dadd(174348.000000,162996.000000,32325.000000,499.187376)}
{pt3dadd(174540.000000,162900.000000,32175.000000,499.187376)}
{pt3dadd(174720.000000,162732.000000,31975.000000,499.187376)}
{pt3dadd(174924.000000,162828.000000,31950.000000,499.187376)}
{pt3dadd(175116.000000,162672.000000,32000.000000,499.187376)}
{pt3dadd(175308.000000,162156.000000,31475.000000,446.610929)}
{pt3dadd(175404.000000,161916.000000,31325.000000,394.034481)}
{pt3dadd(175380.000000,161700.000000,31325.000000,341.458034)}
{pt3dadd(175356.000000,161520.000000,31200.000000,288.881586)}
{pt3dadd(175392.000000,161328.000000,31125.000000,303.325664)}
{pt3dadd(175440.000000,161112.000000,31025.000000,317.769741)}
{pt3dadd(175536.000000,160908.000000,30900.000000,332.213819)}
{pt3dadd(175464.000000,160680.000000,30775.000000,346.657896)}
{pt3dadd(175572.000000,160464.000000,30675.000000,310.146476)}
{pt3dadd(175656.000000,160272.000000,30575.000000,273.635055)}
{pt3dadd(175776.000000,160092.000000,30550.000000,237.123635)}
{pt3dadd(175896.000000,159924.000000,30525.000000,200.612214)}
{pt3dadd(176016.000000,159756.000000,30500.000000,208.235480)}
{pt3dadd(176136.000000,159528.000000,30325.000000,215.858745)}
{pt3dadd(176256.000000,159348.000000,30175.000000,223.482010)}
{pt3dadd(176460.000000,159120.000000,30150.000000,231.105276)}
{pt3dadd(176472.000000,158916.000000,29875.000000,259.993431)}
{pt3dadd(176652.000000,158712.000000,30025.000000,288.881586)}
{pt3dadd(176808.000000,158532.000000,30025.000000,317.769741)}
{pt3dadd(176844.000000,158328.000000,29850.000000,346.657896)}
{pt3dadd(176928.000000,158112.000000,29850.000000,332.213819)}
{pt3dadd(177012.000000,157944.000000,29850.000000,317.769741)}
{pt3dadd(177000.000000,157752.000000,29850.000000,303.325664)}
{pt3dadd(177012.000000,157560.000000,29900.000000,288.881586)}
{pt3dadd(177120.000000,157368.000000,29925.000000,303.325664)}
{pt3dadd(177204.000000,157176.000000,29925.000000,317.769741)}
{pt3dadd(177372.000000,156972.000000,29925.000000,332.213819)}
{pt3dadd(177360.000000,156756.000000,29925.000000,346.657896)}
{pt3dadd(177396.000000,156552.000000,29850.000000,329.325003)}
{pt3dadd(177480.000000,156372.000000,29950.000000,311.992110)}
{pt3dadd(177588.000000,156192.000000,30050.000000,294.659217)}
{pt3dadd(177588.000000,156012.000000,30050.000000,277.326324)}
{pt3dadd(177600.000000,155820.000000,30025.000000,268.178405)}
{pt3dadd(177600.000000,155628.000000,29950.000000,259.030485)}
{pt3dadd(177768.000000,155424.000000,30050.000000,249.882566)}
{pt3dadd(177744.000000,155220.000000,30150.000000,240.734646)}
{pt3dadd(177756.000000,155004.000000,30075.000000,240.734646)}
{pt3dadd(177864.000000,154836.000000,30075.000000,240.734646)}
{pt3dadd(178020.000000,154608.000000,30075.000000,240.734646)}
{pt3dadd(178176.000000,154404.000000,29875.000000,240.734646)}
{pt3dadd(178392.000000,154188.000000,29750.000000,215.379495)}
{pt3dadd(178476.000000,153960.000000,29725.000000,190.024344)}
{pt3dadd(178536.000000,153768.000000,29775.000000,164.669193)}
{pt3dadd(178596.000000,153564.000000,29700.000000,139.314042)}
{pt3dadd(178692.000000,153324.000000,29850.000000,164.669193)}
{pt3dadd(179016.000000,153144.000000,29800.000000,190.024344)}
{pt3dadd(179268.000000,152964.000000,29675.000000,215.379495)}
{pt3dadd(179148.000000,152760.000000,29900.000000,240.734646)}
{pt3dadd(179088.000000,152556.000000,30000.000000,228.697915)}
{pt3dadd(179088.000000,152376.000000,30075.000000,216.661185)}
{pt3dadd(179040.000000,152184.000000,30150.000000,204.624455)}
{pt3dadd(179076.000000,151944.000000,30100.000000,192.587724)}
{pt3dadd(178968.000000,151716.000000,30075.000000,194.593846)}
{pt3dadd(178992.000000,151512.000000,30125.000000,196.599969)}
{pt3dadd(179184.000000,151332.000000,30000.000000,198.606091)}
{pt3dadd(179268.000000,151152.000000,29975.000000,200.612214)}
{pt3dadd(179352.000000,150972.000000,29950.000000,200.612214)}
{pt3dadd(179436.000000,150792.000000,29925.000000,200.612214)}
{pt3dadd(179520.000000,150600.000000,29900.000000,200.612214)}
{pt3dadd(179652.000000,150456.000000,29775.000000,200.612214)}
{pt3dadd(179808.000000,150288.000000,29725.000000,190.581602)}
{pt3dadd(179868.000000,150120.000000,29600.000000,180.550989)}
{pt3dadd(179952.000000,149952.000000,29575.000000,170.520377)}
{pt3dadd(180180.000000,149784.000000,29525.000000,160.489764)}
{pt3dadd(180492.000000,149640.000000,29425.000000,162.161532)}
{pt3dadd(180624.000000,149508.000000,29375.000000,163.833300)}
{pt3dadd(180684.000000,149328.000000,29350.000000,165.505068)}
{pt3dadd(180756.000000,149136.000000,29275.000000,167.176836)}
{pt3dadd(180780.000000,148968.000000,29100.000000,167.176836)}
{pt3dadd(180780.000000,148836.000000,28950.000000,167.176836)}
{pt3dadd(180816.000000,148692.000000,28825.000000,167.176836)}
{pt3dadd(180900.000000,148524.000000,28700.000000,167.176836)}
{pt3dadd(180864.000000,148344.000000,28575.000000,175.535680)}
{pt3dadd(180876.000000,148188.000000,28500.000000,183.894525)}
{pt3dadd(180828.000000,148044.000000,28550.000000,192.253370)}
{pt3dadd(180852.000000,147912.000000,28475.000000,200.612214)}
{pt3dadd(180912.000000,147768.000000,28450.000000,200.612214)}
{pt3dadd(180876.000000,147600.000000,28375.000000,200.612214)}
{pt3dadd(180900.000000,147480.000000,28375.000000,200.612214)}
{pt3dadd(181056.000000,147324.000000,28325.000000,200.612214)}
{pt3dadd(181224.000000,147204.000000,28300.000000,200.612214)}
{pt3dadd(181344.000000,147072.000000,28175.000000,200.612214)}
{pt3dadd(181392.000000,146952.000000,28175.000000,200.612214)}
{pt3dadd(181524.000000,146796.000000,28175.000000,200.612214)}
{pt3dadd(181476.000000,146640.000000,28250.000000,219.790746)}
{pt3dadd(181500.000000,146496.000000,28175.000000,238.969278)}
{pt3dadd(181476.000000,146292.000000,28225.000000,258.147810)}
{pt3dadd(181332.000000,146124.000000,28425.000000,277.326342)}
{pt3dadd(181224.000000,145992.000000,28450.000000,242.823267)}
{pt3dadd(181308.000000,145824.000000,28450.000000,208.320192)}
{pt3dadd(181284.000000,145704.000000,28525.000000,173.817117)}
{pt3dadd(181296.000000,145584.000000,28575.000000,139.314042)}
{pt3dadd(181368.000000,145416.000000,28725.000000,152.632463)}
{pt3dadd(181464.000000,145272.000000,28675.000000,165.950883)}
{pt3dadd(181500.000000,145152.000000,28775.000000,179.269304)}
{pt3dadd(181656.000000,144972.000000,28800.000000,192.587724)}
{pt3dadd(181632.000000,144792.000000,28925.000000,179.882280)}
{pt3dadd(181644.000000,144600.000000,28850.000000,167.176836)}
{pt3dadd(181608.000000,144408.000000,29050.000000,116.095032)}

{create adhoc50}
{access adhoc50}
{connect adhoc50(1), adhoc3(0)}
{nseg = 1}
{strdef color color = "White"}
{pt3dclear()}
{pt3dadd(154308.000000,116712.000000,168175.000000,1490.565402)}
{pt3dadd(150708.000000,117036.000000,171450.000000,346.657896)}
{pt3dadd(151152.000000,116640.000000,171900.000000,384.790266)}
{pt3dadd(151080.000000,116700.000000,172325.000000,422.922636)}
{pt3dadd(150828.000000,116616.000000,172800.000000,461.055006)}
{pt3dadd(150576.000000,116544.000000,173225.000000,499.187376)}
{pt3dadd(149940.000000,116580.000000,173625.000000,409.826676)}
{pt3dadd(149028.000000,116964.000000,174075.000000,320.465976)}
{pt3dadd(148188.000000,116508.000000,174450.000000,231.105276)}
{pt3dadd(147912.000000,116748.000000,174700.000000,167.176836)}

{create adhoc51}
{access adhoc51}
{connect adhoc51(1), adhoc2(0)}
{nseg = 1}
{strdef color color = "White"}
{pt3dclear()}
{pt3dadd(150156.000000,110088.000000,170875.000000,1788.678450)}
{pt3dadd(148548.000000,109824.000000,168250.000000,415.989486)}
{pt3dadd(148296.000000,109608.000000,168200.000000,415.989486)}
{pt3dadd(148404.000000,109356.000000,168250.000000,415.989486)}
{pt3dadd(148308.000000,109140.000000,168175.000000,240.734646)}

{create adhoc52}
{access adhoc52}
{connect adhoc52(1), adhoc1(0)}
{nseg = 1}
{strdef color color = "White"}
{pt3dclear()}
{pt3dadd(149040.000000,107568.000000,172125.000000,828.091944)}
{pt3dadd(150300.000000,107280.000000,170600.000000,1242.137880)}
{pt3dadd(150768.000000,106956.000000,170125.000000,1242.137880)}
{pt3dadd(150804.000000,106716.000000,169925.000000,1242.137880)}
{pt3dadd(151020.000000,106440.000000,169850.000000,1242.137880)}
{pt3dadd(151536.000000,106188.000000,169600.000000,1242.137880)}
{pt3dadd(151824.000000,105900.000000,169450.000000,1289.339127)}
{pt3dadd(151800.000000,105600.000000,169475.000000,1336.540374)}
{pt3dadd(151980.000000,105408.000000,169350.000000,1383.741621)}
{pt3dadd(152064.000000,105180.000000,168975.000000,1430.942868)}
{pt3dadd(152172.000000,104964.000000,168750.000000,1383.741621)}
{pt3dadd(152256.000000,104748.000000,168750.000000,1336.540374)}
{pt3dadd(152340.000000,104460.000000,168750.000000,1289.339127)}
{pt3dadd(152424.000000,104208.000000,168750.000000,1242.137880)}
{pt3dadd(152532.000000,103956.000000,168675.000000,1304.244761)}
{pt3dadd(152976.000000,103680.000000,168475.000000,1366.351641)}
{pt3dadd(153360.000000,103428.000000,168275.000000,1428.458522)}
{pt3dadd(153780.000000,103224.000000,168100.000000,1490.565402)}
{pt3dadd(154116.000000,102912.000000,167875.000000,1428.458522)}
{pt3dadd(154452.000000,102660.000000,167650.000000,1366.351641)}
{pt3dadd(154788.000000,102432.000000,167425.000000,1304.244761)}
{pt3dadd(154596.000000,102192.000000,167275.000000,1242.137880)}
{pt3dadd(154404.000000,102024.000000,167125.000000,1242.137880)}
{pt3dadd(154584.000000,101784.000000,167100.000000,1242.137880)}
{pt3dadd(154896.000000,101124.000000,166650.000000,1242.137880)}
{pt3dadd(155628.000000,101184.000000,166275.000000,1242.137880)}
{pt3dadd(155712.000000,100692.000000,165975.000000,1190.382147)}
{pt3dadd(156360.000000,100308.000000,165775.000000,1138.626414)}
{pt3dadd(156828.000000,99996.000000,165525.000000,1086.870681)}
{pt3dadd(157320.000000,99696.000000,165125.000000,1035.114948)}
{pt3dadd(157536.000000,99420.000000,165350.000000,983.359197)}
{pt3dadd(157440.000000,99156.000000,165300.000000,931.603446)}
{pt3dadd(157548.000000,98892.000000,165350.000000,879.847695)}
{pt3dadd(157656.000000,98616.000000,165400.000000,828.091944)}
{pt3dadd(157764.000000,98436.000000,165450.000000,770.825178)}
{pt3dadd(157872.000000,98124.000000,165500.000000,713.558412)}
{pt3dadd(157980.000000,97872.000000,165550.000000,656.291646)}
{pt3dadd(158088.000000,97620.000000,165600.000000,599.024880)}
{pt3dadd(158196.000000,97392.000000,165450.000000,628.976115)}
{pt3dadd(158484.000000,97140.000000,165375.000000,658.927350)}
{pt3dadd(158664.000000,96816.000000,165450.000000,688.878585)}
{pt3dadd(159432.000000,96552.000000,165625.000000,718.829820)}
{pt3dadd(159648.000000,96264.000000,165675.000000,754.771316)}
{pt3dadd(159708.000000,96024.000000,165700.000000,790.712811)}
{pt3dadd(159996.000000,95784.000000,165750.000000,826.654307)}
{pt3dadd(160416.000000,95496.000000,165800.000000,862.595802)}
{pt3dadd(160932.000000,95268.000000,165900.000000,862.595802)}
{pt3dadd(160836.000000,94992.000000,165850.000000,862.595802)}
{pt3dadd(160896.000000,94740.000000,165750.000000,862.595802)}
{pt3dadd(160824.000000,94452.000000,165800.000000,862.595802)}
{pt3dadd(160752.000000,94212.000000,165600.000000,819.466020)}
{pt3dadd(160884.000000,93936.000000,165675.000000,776.336238)}
{pt3dadd(161016.000000,93660.000000,165825.000000,733.206456)}
{pt3dadd(161148.000000,93372.000000,165900.000000,690.076674)}
{pt3dadd(161304.000000,93108.000000,165950.000000,609.567719)}
{pt3dadd(161436.000000,92868.000000,166225.000000,529.058763)}
{pt3dadd(161472.000000,92676.000000,166325.000000,448.549807)}
{pt3dadd(161760.000000,92448.000000,166350.000000,368.040852)}
{pt3dadd(161820.000000,92220.000000,166200.000000,352.705819)}
{pt3dadd(161820.000000,91956.000000,166275.000000,337.370787)}
{pt3dadd(161568.000000,91740.000000,166275.000000,322.035755)}
{pt3dadd(161520.000000,91512.000000,166150.000000,306.700722)}
{pt3dadd(161628.000000,91224.000000,166250.000000,236.938779)}
{pt3dadd(161688.000000,90972.000000,166375.000000,167.176836)}
{pt3dadd(161748.000000,90720.000000,166350.000000,55.987200)}
