# Supplementary material for: Full reconstruction of large lobula plate tangential cells in Drosophila from a 3D EM dataset
Source: PLoS One. 2018 Nov 28;13(11):e0207828. doi: 10.1371/journal.pone.0207828 (PMC6261601; doi:10.1371/journal.pone.0207828)
Supplement: S1 Dataset — (ZIP) [file pone.0207828.s001.zip › Diameter hoc/VS_VSL_preliminary/Old Diameters Mar13_VS_VSL_HS/HSN/2_14_739_smaurer_001.019.hoc]

/* created with nml2hocm */

{create adhoc1}
{access adhoc1}
{nseg = 1}
{strdef color color = "White"}
{pt3dclear()}
{pt3dadd(148200.000000,109200.000000,168225.000000,346.657896)}
{pt3dadd(148392.000000,109776.000000,168275.000000,319.479912)}
{pt3dadd(148440.000000,109992.000000,168300.000000,499.187376)}
{pt3dadd(150108.000000,109992.000000,170475.000000,1788.678450)}

{create adhoc2}
{access adhoc2}
{connect adhoc2(1), adhoc1(0)}
{nseg = 1}
{strdef color color = "White"}
{pt3dclear()}
{pt3dadd(150108.000000,109992.000000,170475.000000,1788.678450)}
{pt3dadd(150072.000000,109560.000000,170825.000000,1430.942868)}
{pt3dadd(149988.000000,108948.000000,170975.000000,1450.817046)}
{pt3dadd(149844.000000,108492.000000,171200.000000,1470.691224)}
{pt3dadd(149616.000000,108084.000000,171300.000000,1490.565402)}
{pt3dadd(149436.000000,107460.000000,171475.000000,1242.137880)}

{create adhoc3}
{access adhoc3}
{connect adhoc3(1), adhoc2(0)}
{nseg = 1}
{strdef color color = "White"}
{pt3dclear()}
{pt3dadd(149436.000000,107460.000000,171475.000000,1242.137880)}
{pt3dadd(150312.000000,107340.000000,170200.000000,1242.137880)}
{pt3dadd(150672.000000,107052.000000,169875.000000,1242.137880)}
{pt3dadd(150948.000000,106764.000000,169700.000000,1242.137880)}
{pt3dadd(151116.000000,106500.000000,169550.000000,1242.137880)}
{pt3dadd(151452.000000,106224.000000,169425.000000,1242.137880)}
{pt3dadd(151548.000000,105960.000000,169375.000000,1275.029712)}
{pt3dadd(151644.000000,105708.000000,169325.000000,1307.921544)}
{pt3dadd(151944.000000,105312.000000,169050.000000,1340.813376)}
{pt3dadd(151980.000000,105024.000000,169000.000000,1373.705208)}
{pt3dadd(152232.000000,104640.000000,168825.000000,1388.014623)}
{pt3dadd(152448.000000,104376.000000,168775.000000,1402.324038)}
{pt3dadd(152784.000000,104196.000000,168600.000000,1416.633453)}
{pt3dadd(152964.000000,104040.000000,168500.000000,1430.942868)}
{pt3dadd(153144.000000,103896.000000,168400.000000,1242.137880)}

{create adhoc4}
{access adhoc4}
{connect adhoc4(1), adhoc3(0)}
{nseg = 1}
{strdef color color = "White"}
{pt3dclear()}
{pt3dadd(153144.000000,103896.000000,168400.000000,1242.137880)}
{pt3dadd(153180.000000,103500.000000,168325.000000,1144.754316)}
{pt3dadd(153480.000000,103236.000000,168150.000000,1216.301454)}
{pt3dadd(153912.000000,102780.000000,167875.000000,1287.848592)}
{pt3dadd(154356.000000,102348.000000,167200.000000,1359.395730)}
{pt3dadd(154716.000000,101976.000000,166575.000000,1430.942868)}
{pt3dadd(155364.000000,101472.000000,166050.000000,1371.320240)}
{pt3dadd(155772.000000,101196.000000,165775.000000,1311.697611)}
{pt3dadd(156252.000000,100764.000000,165475.000000,1252.074982)}
{pt3dadd(156732.000000,100332.000000,165200.000000,1192.452354)}
{pt3dadd(156936.000000,100128.000000,165200.000000,1144.754316)}

{create adhoc5}
{access adhoc5}
{connect adhoc5(1), adhoc4(0)}
{nseg = 1}
{strdef color color = "White"}
{pt3dclear()}
{pt3dadd(156936.000000,100128.000000,165200.000000,1144.754316)}
{pt3dadd(157236.000000,99576.000000,165225.000000,862.595802)}
{pt3dadd(157560.000000,99048.000000,165400.000000,796.703072)}
{pt3dadd(157740.000000,98604.000000,165200.000000,730.810341)}
{pt3dadd(157992.000000,98196.000000,165300.000000,664.917611)}
{pt3dadd(158064.000000,97776.000000,165550.000000,599.024880)}
{pt3dadd(158352.000000,97344.000000,165425.000000,628.976115)}
{pt3dadd(158628.000000,96840.000000,165550.000000,658.927350)}
{pt3dadd(159312.000000,96456.000000,165675.000000,688.878585)}
{pt3dadd(159648.000000,96252.000000,165775.000000,718.829820)}
{pt3dadd(159792.000000,96060.000000,165675.000000,718.829820)}
{pt3dadd(160032.000000,95868.000000,165700.000000,718.829820)}
{pt3dadd(160656.000000,95448.000000,165850.000000,718.829820)}
{pt3dadd(160752.000000,94860.000000,165800.000000,718.829820)}
{pt3dadd(160716.000000,94212.000000,165750.000000,828.092016)}

{create adhoc6}
{access adhoc6}
{connect adhoc6(1), adhoc5(0)}
{nseg = 1}
{strdef color color = "White"}
{pt3dclear()}
{pt3dadd(160716.000000,94212.000000,165750.000000,828.092016)}
{pt3dadd(160956.000000,93708.000000,165650.000000,718.829820)}
{pt3dadd(161316.000000,93228.000000,165925.000000,625.786839)}
{pt3dadd(161280.000000,93024.000000,166025.000000,532.743858)}
{pt3dadd(161412.000000,92808.000000,166050.000000,439.700877)}
{pt3dadd(161508.000000,92340.000000,166225.000000,346.657896)}
{pt3dadd(161544.000000,91860.000000,166350.000000,311.350146)}
{pt3dadd(161508.000000,91296.000000,166300.000000,276.042396)}
{pt3dadd(161532.000000,91080.000000,166325.000000,240.734646)}
{pt3dadd(161568.000000,90828.000000,166350.000000,139.314042)}

{create adhoc7}
{access adhoc7}
{connect adhoc7(1), adhoc5(0)}
{nseg = 1}
{strdef color color = "White"}
{pt3dclear()}
{pt3dadd(160716.000000,94212.000000,165750.000000,828.092016)}
{pt3dadd(162096.000000,94980.000000,165850.000000,346.657896)}
{pt3dadd(162684.000000,95232.000000,166075.000000,240.734646)}
{pt3dadd(162948.000000,95532.000000,166075.000000,167.176836)}

{create adhoc8}
{access adhoc8}
{connect adhoc8(1), adhoc4(0)}
{nseg = 1}
{strdef color color = "White"}
{pt3dclear()}
{pt3dadd(156936.000000,100128.000000,165200.000000,1144.754316)}
{pt3dadd(156708.000000,100128.000000,162925.000000,599.024880)}
{pt3dadd(156372.000000,100296.000000,162425.000000,478.292418)}
{pt3dadd(156132.000000,100248.000000,162325.000000,357.559956)}
{pt3dadd(155832.000000,100272.000000,162200.000000,236.827494)}
{pt3dadd(155568.000000,100092.000000,162000.000000,116.095032)}
{pt3dadd(155340.000000,99912.000000,161875.000000,139.314042)}

{create adhoc9}
{access adhoc9}
{connect adhoc9(1), adhoc3(0)}
{nseg = 1}
{strdef color color = "White"}
{pt3dclear()}
{pt3dadd(153144.000000,103896.000000,168400.000000,1242.137880)}
{pt3dadd(150936.000000,103896.000000,170225.000000,346.657896)}
{pt3dadd(150744.000000,103668.000000,170100.000000,200.612214)}

{create adhoc10}
{access adhoc10}
{connect adhoc10(1), adhoc2(0)}
{nseg = 1}
{strdef color color = "White"}
{pt3dclear()}
{pt3dadd(149436.000000,107460.000000,171475.000000,1242.137880)}
{pt3dadd(147996.000000,107460.000000,173000.000000,828.092016)}
{pt3dadd(147624.000000,107676.000000,172950.000000,828.091944)}

{create adhoc11}
{access adhoc11}
{connect adhoc11(1), adhoc10(0)}
{nseg = 1}
{strdef color color = "White"}
{pt3dclear()}
{pt3dadd(147624.000000,107676.000000,172950.000000,828.091944)}
{pt3dadd(147324.000000,107604.000000,173075.000000,718.829820)}
{pt3dadd(146928.000000,107484.000000,173575.000000,599.306026)}
{pt3dadd(146388.000000,107544.000000,173875.000000,479.782233)}
{pt3dadd(145920.000000,107676.000000,174075.000000,360.258440)}
{pt3dadd(145572.000000,107520.000000,174300.000000,240.734646)}
{pt3dadd(145176.000000,107412.000000,174475.000000,215.379495)}
{pt3dadd(144768.000000,107148.000000,174575.000000,190.024344)}
{pt3dadd(144420.000000,107040.000000,174625.000000,164.669193)}
{pt3dadd(144048.000000,106884.000000,174625.000000,139.314042)}
{pt3dadd(143700.000000,106656.000000,174825.000000,254.241751)}
{pt3dadd(143352.000000,106404.000000,174900.000000,369.169461)}
{pt3dadd(143064.000000,106092.000000,175200.000000,484.097170)}
{pt3dadd(142356.000000,105384.000000,175525.000000,599.024880)}
{pt3dadd(142188.000000,104760.000000,176000.000000,664.917611)}
{pt3dadd(142008.000000,104508.000000,176425.000000,730.810341)}
{pt3dadd(141528.000000,104460.000000,176775.000000,796.703072)}
{pt3dadd(141024.000000,104592.000000,177350.000000,862.595802)}
{pt3dadd(140100.000000,104400.000000,178050.000000,718.829820)}
{pt3dadd(139812.000000,104364.000000,178650.000000,346.657896)}

{create adhoc12}
{access adhoc12}
{connect adhoc12(1), adhoc10(0)}
{nseg = 1}
{strdef color color = "White"}
{pt3dclear()}
{pt3dadd(147624.000000,107676.000000,172950.000000,828.091944)}
{pt3dadd(147600.000000,107268.000000,172075.000000,167.176836)}
{pt3dadd(147504.000000,107088.000000,172100.000000,96.745860)}

{create adhoc13}
{access adhoc13}
{connect adhoc13(1), adhoc1(0)}
{nseg = 1}
{strdef color color = "White"}
{pt3dclear()}
{pt3dadd(150108.000000,109992.000000,170475.000000,1788.678450)}
{pt3dadd(150156.000000,110220.000000,170450.000000,1582.508340)}
{pt3dadd(150204.000000,110556.000000,170425.000000,1616.164060)}
{pt3dadd(150240.000000,110868.000000,170375.000000,1649.819781)}
{pt3dadd(150240.000000,111204.000000,170275.000000,1683.475502)}
{pt3dadd(150504.000000,111708.000000,169900.000000,1717.131222)}
{pt3dadd(150912.000000,112104.000000,169725.000000,1598.382887)}
{pt3dadd(151260.000000,112656.000000,169600.000000,1479.634551)}
{pt3dadd(151668.000000,113112.000000,169450.000000,1360.886216)}
{pt3dadd(151836.000000,113304.000000,169425.000000,1242.137880)}
{pt3dadd(151980.000000,113544.000000,169400.000000,1289.339127)}
{pt3dadd(152328.000000,113784.000000,169275.000000,1336.540374)}
{pt3dadd(152568.000000,114048.000000,169275.000000,1383.741621)}
{pt3dadd(152988.000000,114552.000000,169075.000000,1430.942868)}
{pt3dadd(153288.000000,115140.000000,168575.000000,1430.942958)}
{pt3dadd(153612.000000,115620.000000,168000.000000,1430.943048)}
{pt3dadd(153900.000000,116460.000000,167825.000000,1430.943138)}
{pt3dadd(154176.000000,116856.000000,168350.000000,1717.131222)}

{create adhoc14}
{access adhoc14}
{connect adhoc14(1), adhoc13(0)}
{nseg = 1}
{strdef color color = "White"}
{pt3dclear()}
{pt3dadd(154176.000000,116856.000000,168350.000000,1717.131222)}
{pt3dadd(151812.000000,116940.000000,171400.000000,499.187376)}
{pt3dadd(151224.000000,116592.000000,171925.000000,828.092016)}
{pt3dadd(150840.000000,116544.000000,172175.000000,862.595802)}

{create adhoc15}
{access adhoc15}
{connect adhoc15(1), adhoc14(0)}
{nseg = 1}
{strdef color color = "White"}
{pt3dclear()}
{pt3dadd(150840.000000,116544.000000,172175.000000,862.595802)}
{pt3dadd(150636.000000,116484.000000,172700.000000,718.829820)}
{pt3dadd(150408.000000,116520.000000,172975.000000,643.119736)}
{pt3dadd(150168.000000,116508.000000,173200.000000,567.409653)}
{pt3dadd(149964.000000,116520.000000,173375.000000,491.699570)}
{pt3dadd(149748.000000,116544.000000,173650.000000,415.989486)}
{pt3dadd(149556.000000,116568.000000,173725.000000,381.323696)}
{pt3dadd(149400.000000,116604.000000,173800.000000,346.657905)}
{pt3dadd(149148.000000,116700.000000,173950.000000,311.992115)}
{pt3dadd(148752.000000,116796.000000,174100.000000,277.326324)}
{pt3dadd(148368.000000,116748.000000,174250.000000,288.881586)}
{pt3dadd(148044.000000,116700.000000,174625.000000,200.612214)}

{create adhoc16}
{access adhoc16}
{connect adhoc16(1), adhoc14(0)}
{nseg = 1}
{strdef color color = "White"}
{pt3dclear()}
{pt3dadd(150840.000000,116544.000000,172175.000000,862.595802)}
{pt3dadd(150840.000000,116844.000000,171200.000000,479.219886)}
{pt3dadd(150684.000000,117048.000000,170900.000000,484.211758)}
{pt3dadd(150528.000000,117108.000000,170750.000000,489.203631)}
{pt3dadd(150348.000000,117144.000000,170625.000000,494.195504)}
{pt3dadd(150180.000000,117192.000000,170550.000000,499.187376)}
{pt3dadd(150024.000000,117180.000000,170500.000000,416.184741)}
{pt3dadd(149724.000000,117216.000000,170575.000000,333.182106)}
{pt3dadd(149580.000000,117276.000000,170650.000000,250.179471)}
{pt3dadd(149448.000000,117276.000000,170700.000000,167.176836)}
{pt3dadd(149340.000000,117312.000000,170750.000000,139.314042)}
{pt3dadd(149220.000000,117336.000000,170775.000000,116.095032)}

{create adhoc17}
{access adhoc17}
{connect adhoc17(1), adhoc13(0)}
{nseg = 1}
{strdef color color = "White"}
{pt3dclear()}
{pt3dadd(154176.000000,116856.000000,168350.000000,1717.131222)}
{pt3dadd(154584.000000,117252.000000,167950.000000,1788.678450)}
{pt3dadd(154908.000000,117576.000000,167625.000000,1770.791643)}
{pt3dadd(155184.000000,117900.000000,167450.000000,1752.904836)}
{pt3dadd(155316.000000,118248.000000,167225.000000,1735.018029)}
{pt3dadd(155568.000000,118584.000000,166975.000000,1717.131222)}
{pt3dadd(155856.000000,118920.000000,166775.000000,1645.584102)}
{pt3dadd(155928.000000,119208.000000,166475.000000,1574.036982)}
{pt3dadd(156180.000000,119520.000000,166150.000000,1502.489862)}
{pt3dadd(156168.000000,119700.000000,166075.000000,1430.942742)}
{pt3dadd(156300.000000,120252.000000,165450.000000,1609.810601)}
{pt3dadd(156540.000000,120828.000000,164800.000000,1788.678459)}
{pt3dadd(156636.000000,121260.000000,164125.000000,1967.546318)}
{pt3dadd(156696.000000,121704.000000,163850.000000,2146.414176)}
{pt3dadd(156684.000000,121920.000000,163625.000000,2146.414176)}
{pt3dadd(156684.000000,122208.000000,163450.000000,2146.414176)}
{pt3dadd(156744.000000,122628.000000,163250.000000,2146.414176)}
{pt3dadd(156852.000000,123228.000000,162925.000000,2146.414176)}

{create adhoc18}
{access adhoc18}
{connect adhoc18(1), adhoc17(0)}
{nseg = 1}
{strdef color color = "White"}
{pt3dclear()}
{pt3dadd(156852.000000,123228.000000,162925.000000,2146.414176)}
{pt3dadd(153216.000000,123228.000000,163125.000000,1035.114948)}
{pt3dadd(152796.000000,122808.000000,163100.000000,1035.114948)}
{pt3dadd(152508.000000,122604.000000,163100.000000,1035.114948)}
{pt3dadd(152160.000000,122544.000000,163125.000000,1035.114948)}
{pt3dadd(151908.000000,122580.000000,163125.000000,1035.114948)}
{pt3dadd(151728.000000,122616.000000,163075.000000,1024.763801)}
{pt3dadd(151500.000000,122508.000000,162925.000000,1014.412653)}
{pt3dadd(151296.000000,122460.000000,162875.000000,1004.061506)}
{pt3dadd(151044.000000,122448.000000,162725.000000,993.710358)}
{pt3dadd(150720.000000,122400.000000,162550.000000,1055.817239)}
{pt3dadd(150492.000000,122364.000000,162275.000000,1117.924119)}
{pt3dadd(150264.000000,122256.000000,161975.000000,1180.031000)}
{pt3dadd(150096.000000,122112.000000,161525.000000,1242.137880)}
{pt3dadd(149916.000000,122016.000000,161250.000000,1242.137880)}
{pt3dadd(149712.000000,121800.000000,160975.000000,1242.137880)}
{pt3dadd(149292.000000,121428.000000,160700.000000,1242.137880)}
{pt3dadd(148764.000000,121308.000000,160550.000000,1242.137880)}
{pt3dadd(148500.000000,121272.000000,160125.000000,1242.137880)}
{pt3dadd(148464.000000,120720.000000,159600.000000,862.595802)}

{create adhoc19}
{access adhoc19}
{connect adhoc19(1), adhoc18(0)}
{nseg = 1}
{strdef color color = "White"}
{pt3dclear()}
{pt3dadd(148464.000000,120720.000000,159600.000000,862.595802)}
{pt3dadd(148248.000000,119784.000000,159175.000000,499.187376)}
{pt3dadd(148128.000000,119232.000000,159325.000000,457.588422)}
{pt3dadd(147756.000000,118944.000000,159250.000000,415.989468)}
{pt3dadd(147576.000000,118788.000000,159125.000000,374.390514)}
{pt3dadd(147120.000000,118392.000000,158850.000000,332.791560)}
{pt3dadd(146736.000000,117948.000000,158800.000000,309.777332)}
{pt3dadd(146472.000000,117516.000000,158725.000000,286.763103)}
{pt3dadd(146220.000000,117036.000000,158650.000000,263.748875)}
{pt3dadd(146004.000000,116760.000000,158675.000000,240.734646)}
{pt3dadd(145800.000000,116496.000000,158675.000000,360.258440)}
{pt3dadd(145752.000000,116232.000000,158600.000000,479.782233)}
{pt3dadd(145680.000000,115968.000000,158525.000000,599.306026)}
{pt3dadd(145572.000000,115596.000000,158325.000000,718.829820)}
{pt3dadd(145536.000000,115164.000000,158075.000000,663.919209)}
{pt3dadd(145512.000000,114852.000000,158050.000000,609.008598)}
{pt3dadd(145728.000000,114420.000000,158175.000000,554.097987)}
{pt3dadd(145812.000000,114144.000000,158250.000000,499.187376)}
{pt3dadd(146148.000000,113844.000000,158475.000000,446.610929)}
{pt3dadd(146136.000000,113316.000000,158550.000000,394.034481)}
{pt3dadd(146268.000000,112788.000000,158500.000000,341.458034)}
{pt3dadd(146412.000000,112248.000000,158525.000000,288.881586)}
{pt3dadd(146436.000000,111768.000000,158600.000000,288.881586)}
{pt3dadd(146376.000000,111180.000000,158600.000000,288.881586)}
{pt3dadd(146556.000000,110712.000000,158475.000000,288.881586)}
{pt3dadd(146760.000000,110196.000000,158400.000000,288.881586)}
{pt3dadd(147000.000000,109752.000000,158375.000000,320.658561)}
{pt3dadd(147192.000000,109488.000000,158250.000000,352.435536)}
{pt3dadd(147288.000000,109260.000000,158075.000000,384.212511)}
{pt3dadd(147588.000000,108960.000000,157900.000000,415.989486)}
{pt3dadd(147876.000000,108636.000000,157700.000000,461.748335)}
{pt3dadd(148176.000000,108324.000000,157475.000000,507.507183)}
{pt3dadd(148404.000000,107952.000000,157400.000000,553.266031)}
{pt3dadd(148392.000000,107676.000000,157350.000000,599.024880)}
{pt3dadd(148332.000000,107448.000000,157325.000000,599.024880)}
{pt3dadd(148344.000000,107196.000000,157250.000000,599.024880)}
{pt3dadd(148332.000000,106908.000000,157450.000000,599.024880)}
{pt3dadd(148632.000000,106608.000000,157800.000000,599.024880)}
{pt3dadd(148740.000000,106356.000000,158500.000000,565.745712)}
{pt3dadd(148596.000000,106020.000000,158975.000000,532.466544)}
{pt3dadd(148356.000000,105864.000000,159475.000000,499.187376)}
{pt3dadd(148428.000000,105828.000000,159825.000000,167.176836)}

{create adhoc20}
{access adhoc20}
{connect adhoc20(1), adhoc18(0)}
{nseg = 1}
{strdef color color = "White"}
{pt3dclear()}
{pt3dadd(148464.000000,120720.000000,159600.000000,862.595802)}
{pt3dadd(147948.000000,123096.000000,159600.000000,718.829820)}
{pt3dadd(147036.000000,124164.000000,159275.000000,876.972384)}
{pt3dadd(146808.000000,124716.000000,158525.000000,1035.114948)}
{pt3dadd(146772.000000,124956.000000,158375.000000,1035.114948)}

{create adhoc21}
{access adhoc21}
{connect adhoc21(1), adhoc20(0)}
{nseg = 1}
{strdef color color = "White"}
{pt3dclear()}
{pt3dadd(146772.000000,124956.000000,158375.000000,1035.114948)}
{pt3dadd(146628.000000,125604.000000,158300.000000,862.595802)}
{pt3dadd(146292.000000,125880.000000,158350.000000,750.944223)}
{pt3dadd(145608.000000,126216.000000,158600.000000,639.292644)}
{pt3dadd(145164.000000,126240.000000,158700.000000,527.641065)}
{pt3dadd(144924.000000,126432.000000,158750.000000,415.989486)}
{pt3dadd(144540.000000,126768.000000,158725.000000,415.989486)}
{pt3dadd(144120.000000,126972.000000,158800.000000,415.989486)}
{pt3dadd(143760.000000,127272.000000,158850.000000,415.989486)}
{pt3dadd(143496.000000,127416.000000,158925.000000,415.989486)}
{pt3dadd(143208.000000,127608.000000,158975.000000,415.989486)}
{pt3dadd(142896.000000,127812.000000,159125.000000,415.989486)}
{pt3dadd(142548.000000,128220.000000,159325.000000,415.989486)}
{pt3dadd(142296.000000,128364.000000,159400.000000,415.989486)}
{pt3dadd(142032.000000,128676.000000,159525.000000,346.657896)}
{pt3dadd(141864.000000,129000.000000,159700.000000,415.989486)}

{create adhoc22}
{access adhoc22}
{connect adhoc22(1), adhoc21(0)}
{nseg = 1}
{strdef color color = "White"}
{pt3dclear()}
{pt3dadd(141864.000000,129000.000000,159700.000000,415.989486)}
{pt3dadd(141516.000000,129408.000000,159975.000000,499.187376)}
{pt3dadd(141276.000000,129540.000000,160150.000000,499.187376)}
{pt3dadd(141012.000000,129852.000000,160400.000000,499.187376)}
{pt3dadd(140544.000000,130956.000000,160825.000000,499.187376)}
{pt3dadd(140196.000000,131520.000000,161125.000000,499.187376)}
{pt3dadd(139884.000000,131676.000000,161125.000000,434.574193)}
{pt3dadd(139524.000000,131916.000000,161325.000000,369.961011)}
{pt3dadd(139236.000000,132336.000000,161550.000000,305.347828)}
{pt3dadd(138924.000000,133140.000000,161900.000000,240.734646)}
{pt3dadd(138612.000000,133512.000000,161900.000000,284.548356)}
{pt3dadd(138564.000000,133920.000000,162000.000000,328.362066)}
{pt3dadd(138468.000000,134376.000000,162050.000000,372.175776)}
{pt3dadd(138480.000000,134844.000000,162125.000000,415.989486)}
{pt3dadd(138612.000000,135144.000000,162125.000000,372.175776)}
{pt3dadd(138612.000000,135396.000000,162150.000000,328.362066)}
{pt3dadd(138468.000000,135588.000000,162150.000000,284.548356)}
{pt3dadd(138372.000000,135828.000000,162100.000000,240.734646)}
{pt3dadd(138324.000000,136056.000000,162075.000000,167.176836)}

{create adhoc23}
{access adhoc23}
{connect adhoc23(1), adhoc21(0)}
{nseg = 1}
{strdef color color = "White"}
{pt3dclear()}
{pt3dadd(141864.000000,129000.000000,159700.000000,415.989486)}
{pt3dadd(141804.000000,128424.000000,159325.000000,240.734646)}
{pt3dadd(141816.000000,127620.000000,159175.000000,167.176836)}

{create adhoc24}
{access adhoc24}
{connect adhoc24(1), adhoc20(0)}
{nseg = 1}
{strdef color color = "White"}
{pt3dclear()}
{pt3dadd(146772.000000,124956.000000,158375.000000,1035.114948)}
{pt3dadd(146076.000000,124956.000000,156750.000000,288.881586)}
{pt3dadd(145824.000000,125004.000000,156500.000000,341.458034)}
{pt3dadd(145692.000000,125040.000000,156150.000000,394.034481)}
{pt3dadd(145656.000000,125100.000000,155850.000000,446.610929)}
{pt3dadd(145644.000000,124944.000000,155500.000000,499.187376)}
{pt3dadd(145488.000000,124848.000000,155150.000000,518.156496)}
{pt3dadd(145212.000000,124584.000000,154925.000000,537.125616)}
{pt3dadd(144552.000000,123900.000000,154600.000000,556.094736)}
{pt3dadd(144084.000000,123576.000000,154075.000000,575.063856)}
{pt3dadd(143808.000000,123504.000000,153500.000000,200.612214)}

{create adhoc25}
{access adhoc25}
{connect adhoc25(1), adhoc17(0)}
{nseg = 1}
{strdef color color = "White"}
{pt3dclear()}
{pt3dadd(156852.000000,123228.000000,162925.000000,2146.414176)}
{pt3dadd(157332.000000,123828.000000,162475.000000,2146.414176)}
{pt3dadd(157464.000000,124428.000000,162300.000000,2253.734910)}
{pt3dadd(157860.000000,125088.000000,162100.000000,2361.055644)}
{pt3dadd(158304.000000,125820.000000,161850.000000,2468.376378)}
{pt3dadd(158268.000000,126636.000000,161550.000000,2575.697112)}
{pt3dadd(158256.000000,127536.000000,161125.000000,2575.697112)}
{pt3dadd(157992.000000,128424.000000,160400.000000,2575.697112)}
{pt3dadd(157632.000000,129240.000000,159875.000000,2575.697112)}
{pt3dadd(157044.000000,130104.000000,159275.000000,2575.697112)}
{pt3dadd(156516.000000,131016.000000,159050.000000,2468.376378)}
{pt3dadd(156336.000000,131928.000000,159125.000000,2361.055644)}
{pt3dadd(156000.000000,132828.000000,158850.000000,2253.734910)}
{pt3dadd(155664.000000,133680.000000,158550.000000,2146.414176)}
{pt3dadd(155328.000000,134508.000000,158450.000000,2179.513679)}
{pt3dadd(154920.000000,135360.000000,158050.000000,2212.613181)}
{pt3dadd(154116.000000,136128.000000,157400.000000,2245.712684)}
{pt3dadd(153648.000000,136800.000000,156925.000000,2278.812186)}
{pt3dadd(152616.000000,137388.000000,156075.000000,2245.712684)}
{pt3dadd(152160.000000,138048.000000,155425.000000,2212.613181)}
{pt3dadd(151644.000000,138888.000000,154875.000000,2179.513679)}
{pt3dadd(151236.000000,139872.000000,154525.000000,2146.414176)}
{pt3dadd(151152.000000,140196.000000,154400.000000,2253.734910)}
{pt3dadd(150672.000000,140364.000000,153850.000000,2361.055644)}
{pt3dadd(150456.000000,140688.000000,153475.000000,2468.376378)}
{pt3dadd(150192.000000,140964.000000,152675.000000,2575.697112)}
{pt3dadd(149892.000000,141576.000000,152225.000000,2468.376378)}
{pt3dadd(149664.000000,142176.000000,151375.000000,2361.055644)}
{pt3dadd(149568.000000,142716.000000,150425.000000,2253.734910)}
{pt3dadd(149892.000000,143004.000000,149925.000000,2146.414176)}
{pt3dadd(150000.000000,143592.000000,149375.000000,2124.950049)}
{pt3dadd(149916.000000,144648.000000,148850.000000,2103.485922)}
{pt3dadd(150000.000000,145488.000000,147925.000000,2082.021795)}
{pt3dadd(149856.000000,146208.000000,147350.000000,2060.557668)}
{pt3dadd(149892.000000,146496.000000,147250.000000,2082.021795)}
{pt3dadd(149844.000000,146808.000000,147275.000000,2103.485922)}
{pt3dadd(149832.000000,147528.000000,147150.000000,2124.950049)}
{pt3dadd(149820.000000,147816.000000,147100.000000,2146.414176)}
{pt3dadd(149952.000000,148056.000000,147100.000000,2146.414176)}
{pt3dadd(149916.000000,148692.000000,146975.000000,2146.414176)}
{pt3dadd(150084.000000,149268.000000,146750.000000,2146.414176)}
{pt3dadd(150156.000000,149844.000000,146375.000000,2146.414176)}
{pt3dadd(150216.000000,150444.000000,146300.000000,2056.980245)}
{pt3dadd(150312.000000,150960.000000,146175.000000,1967.546313)}
{pt3dadd(150384.000000,151476.000000,145975.000000,1878.112382)}
{pt3dadd(150528.000000,152016.000000,145775.000000,1788.678450)}
{pt3dadd(150600.000000,152568.000000,145625.000000,1788.678450)}
{pt3dadd(150564.000000,153288.000000,145500.000000,1788.678450)}
{pt3dadd(150816.000000,153900.000000,145225.000000,1788.678450)}
{pt3dadd(150888.000000,154476.000000,144925.000000,1788.678450)}
{pt3dadd(150876.000000,155052.000000,144650.000000,1788.678450)}
{pt3dadd(150900.000000,155616.000000,144500.000000,1788.678450)}
{pt3dadd(150900.000000,156072.000000,144175.000000,1788.678450)}
{pt3dadd(150996.000000,156588.000000,143950.000000,1788.678450)}
{pt3dadd(151104.000000,157104.000000,143650.000000,1856.648255)}
{pt3dadd(151140.000000,157584.000000,143350.000000,1924.618059)}
{pt3dadd(151164.000000,158004.000000,143225.000000,1992.587863)}
{pt3dadd(151080.000000,158388.000000,143150.000000,2060.557668)}
{pt3dadd(150972.000000,158592.000000,142950.000000,2082.021795)}
{pt3dadd(151032.000000,158820.000000,142800.000000,2103.485922)}
{pt3dadd(151056.000000,159060.000000,142750.000000,2124.950049)}
{pt3dadd(151092.000000,159312.000000,142700.000000,2146.414176)}
{pt3dadd(151128.000000,159540.000000,142650.000000,2146.414176)}
{pt3dadd(151164.000000,159744.000000,142600.000000,2146.414176)}
{pt3dadd(151296.000000,159936.000000,142475.000000,2146.414176)}
{pt3dadd(151248.000000,160200.000000,142350.000000,2146.414176)}
{pt3dadd(151356.000000,160380.000000,142375.000000,2056.980245)}
{pt3dadd(151500.000000,160560.000000,142275.000000,1967.546313)}
{pt3dadd(151752.000000,161088.000000,141950.000000,1878.112382)}
{pt3dadd(151956.000000,161628.000000,141825.000000,1788.678450)}
{pt3dadd(152196.000000,162168.000000,141750.000000,1737.135887)}
{pt3dadd(152340.000000,162720.000000,141750.000000,1685.593323)}
{pt3dadd(152472.000000,163248.000000,141775.000000,1634.050759)}
{pt3dadd(152712.000000,163824.000000,141525.000000,1582.508196)}
{pt3dadd(152640.000000,164076.000000,141425.000000,1544.616900)}
{pt3dadd(152808.000000,164352.000000,141300.000000,1506.725604)}
{pt3dadd(152916.000000,164592.000000,141250.000000,1468.834308)}
{pt3dadd(153012.000000,164844.000000,141200.000000,1430.943012)}
{pt3dadd(153108.000000,165228.000000,141150.000000,1445.848610)}
{pt3dadd(153108.000000,165480.000000,141100.000000,1460.754207)}
{pt3dadd(153096.000000,165720.000000,141000.000000,1475.659805)}
{pt3dadd(153120.000000,165948.000000,140950.000000,1490.565402)}
{pt3dadd(153144.000000,166188.000000,140900.000000,1490.565402)}
{pt3dadd(153132.000000,166512.000000,140925.000000,1490.565402)}
{pt3dadd(153120.000000,166716.000000,140950.000000,1490.565402)}
{pt3dadd(153108.000000,166872.000000,140875.000000,1490.565402)}
{pt3dadd(153096.000000,167136.000000,140800.000000,1416.037140)}
{pt3dadd(153156.000000,167352.000000,140750.000000,1341.508878)}
{pt3dadd(153336.000000,167520.000000,140675.000000,1266.980616)}
{pt3dadd(153480.000000,167676.000000,140600.000000,1192.452354)}
{pt3dadd(153480.000000,167892.000000,140500.000000,1266.980616)}
{pt3dadd(153468.000000,168084.000000,140450.000000,1341.508878)}
{pt3dadd(153540.000000,168576.000000,140325.000000,1416.037140)}
{pt3dadd(153636.000000,169152.000000,140250.000000,1490.565402)}
{pt3dadd(153780.000000,169692.000000,140125.000000,1565.093664)}
{pt3dadd(153744.000000,170148.000000,139900.000000,1639.621926)}
{pt3dadd(153744.000000,170496.000000,139725.000000,1714.150188)}
{pt3dadd(153852.000000,170808.000000,139650.000000,1788.678450)}
{pt3dadd(153960.000000,171060.000000,139575.000000,1714.150188)}
{pt3dadd(154068.000000,171264.000000,139500.000000,1639.621926)}
{pt3dadd(154164.000000,171468.000000,139400.000000,1565.093664)}
{pt3dadd(154164.000000,171684.000000,139275.000000,1490.565402)}
{pt3dadd(154116.000000,172188.000000,139300.000000,1475.659737)}
{pt3dadd(154116.000000,172368.000000,139300.000000,1460.754072)}
{pt3dadd(154140.000000,172584.000000,139250.000000,1445.848407)}
{pt3dadd(154272.000000,172836.000000,139200.000000,1430.942742)}
{pt3dadd(154344.000000,173064.000000,139175.000000,1520.376669)}
{pt3dadd(154380.000000,173244.000000,139075.000000,1609.810596)}
{pt3dadd(154416.000000,173508.000000,138900.000000,1699.244523)}
{pt3dadd(154380.000000,173724.000000,138625.000000,1788.678450)}
{pt3dadd(154488.000000,173952.000000,138425.000000,1788.678450)}
{pt3dadd(154596.000000,174168.000000,138225.000000,1788.678450)}
{pt3dadd(154704.000000,174408.000000,138050.000000,1788.678450)}
{pt3dadd(154944.000000,174648.000000,137925.000000,1788.678450)}
{pt3dadd(155052.000000,174888.000000,137950.000000,1788.678450)}
{pt3dadd(155352.000000,175104.000000,137800.000000,1788.678450)}
{pt3dadd(155748.000000,175776.000000,137550.000000,1788.678450)}
{pt3dadd(156156.000000,176376.000000,136875.000000,1788.678450)}
{pt3dadd(156996.000000,176880.000000,136225.000000,1521.216293)}
{pt3dadd(157608.000000,177444.000000,135750.000000,1253.754135)}
{pt3dadd(158772.000000,177996.000000,134850.000000,986.291978)}
{pt3dadd(159240.000000,178452.000000,134375.000000,718.829820)}
{pt3dadd(159816.000000,178824.000000,133825.000000,986.291978)}
{pt3dadd(160464.000000,179496.000000,133075.000000,1253.754135)}
{pt3dadd(160788.000000,179784.000000,132500.000000,1521.216293)}
{pt3dadd(161328.000000,180060.000000,131925.000000,1788.678450)}
{pt3dadd(161580.000000,180240.000000,131150.000000,1788.678450)}
{pt3dadd(161916.000000,180348.000000,130450.000000,1788.678450)}
{pt3dadd(162204.000000,180528.000000,129775.000000,1788.678450)}
{pt3dadd(162492.000000,180636.000000,129225.000000,1788.678450)}
{pt3dadd(162696.000000,181044.000000,128775.000000,1589.936409)}
{pt3dadd(162876.000000,181296.000000,128450.000000,1391.194368)}
{pt3dadd(163152.000000,181704.000000,127925.000000,1192.452327)}
{pt3dadd(163860.000000,182628.000000,127325.000000,993.710286)}
{pt3dadd(164328.000000,183840.000000,126600.000000,1004.061452)}
{pt3dadd(164880.000000,185112.000000,126025.000000,1014.412617)}
{pt3dadd(165072.000000,185652.000000,125875.000000,1024.763782)}
{pt3dadd(165204.000000,186216.000000,125750.000000,1035.114948)}
{pt3dadd(165240.000000,186552.000000,125625.000000,991.985162)}
{pt3dadd(165312.000000,186780.000000,125700.000000,948.855375)}
{pt3dadd(165744.000000,187332.000000,125500.000000,905.725589)}
{pt3dadd(165888.000000,187944.000000,125225.000000,862.595802)}
{pt3dadd(166092.000000,188220.000000,125150.000000,862.595802)}
{pt3dadd(166296.000000,188760.000000,125075.000000,862.595802)}
{pt3dadd(166596.000000,189312.000000,124975.000000,862.595802)}
{pt3dadd(167040.000000,189888.000000,125025.000000,862.595802)}
{pt3dadd(167256.000000,190548.000000,124975.000000,826.654307)}
{pt3dadd(167532.000000,191136.000000,125075.000000,790.712811)}
{pt3dadd(168156.000000,191628.000000,124900.000000,754.771316)}
{pt3dadd(168408.000000,192264.000000,124925.000000,718.829820)}
{pt3dadd(168780.000000,192768.000000,124875.000000,797.901102)}
{pt3dadd(169284.000000,193260.000000,124850.000000,876.972384)}
{pt3dadd(169656.000000,193752.000000,124750.000000,956.043666)}
{pt3dadd(170064.000000,194184.000000,124500.000000,1035.114948)}
{pt3dadd(170580.000000,194520.000000,124375.000000,956.043666)}
{pt3dadd(171180.000000,195360.000000,123975.000000,876.972384)}
{pt3dadd(171792.000000,195648.000000,123575.000000,797.901102)}
{pt3dadd(172488.000000,196296.000000,123275.000000,718.829820)}
{pt3dadd(173040.000000,196464.000000,122675.000000,787.549955)}
{pt3dadd(173736.000000,196788.000000,122200.000000,856.270089)}
{pt3dadd(174276.000000,197472.000000,121575.000000,924.990223)}
{pt3dadd(175476.000000,198612.000000,120850.000000,993.710358)}
{pt3dadd(176028.000000,198960.000000,120300.000000,960.931719)}
{pt3dadd(176568.000000,199428.000000,119725.000000,928.153080)}
{pt3dadd(176772.000000,199860.000000,119175.000000,895.374441)}
{pt3dadd(177408.000000,200112.000000,118625.000000,862.595802)}
{pt3dadd(177984.000000,200484.000000,118125.000000,905.725589)}
{pt3dadd(178236.000000,200832.000000,117475.000000,948.855375)}
{pt3dadd(178440.000000,200976.000000,116675.000000,991.985162)}
{pt3dadd(178692.000000,201336.000000,115925.000000,1035.114948)}
{pt3dadd(178956.000000,201708.000000,115450.000000,1024.763801)}
{pt3dadd(179292.000000,202212.000000,114525.000000,1014.412653)}
{pt3dadd(179544.000000,202836.000000,113675.000000,1004.061506)}
{pt3dadd(179868.000000,203532.000000,112675.000000,993.710358)}
{pt3dadd(180396.000000,204300.000000,111725.000000,1117.924119)}
{pt3dadd(180684.000000,205140.000000,110875.000000,1242.137880)}
{pt3dadd(181008.000000,205944.000000,110000.000000,1366.351641)}
{pt3dadd(181464.000000,206340.000000,109350.000000,1490.565402)}
{pt3dadd(181860.000000,206484.000000,108575.000000,1761.848329)}
{pt3dadd(181812.000000,206064.000000,107675.000000,2033.131257)}
{pt3dadd(181944.000000,205644.000000,106825.000000,2304.414184)}
{pt3dadd(182052.000000,205740.000000,106275.000000,2575.697112)}
{pt3dadd(182040.000000,205764.000000,105775.000000,2361.055743)}
{pt3dadd(182148.000000,205572.000000,105250.000000,2146.414374)}
{pt3dadd(182292.000000,205500.000000,104775.000000,1931.773005)}
{pt3dadd(182100.000000,205680.000000,104400.000000,1717.131636)}
{pt3dadd(181752.000000,205932.000000,103625.000000,1598.383197)}
{pt3dadd(181128.000000,206136.000000,102975.000000,1479.634758)}
{pt3dadd(180780.000000,206340.000000,102325.000000,1360.886319)}
{pt3dadd(180156.000000,206292.000000,101725.000000,1242.137880)}
{pt3dadd(179628.000000,206256.000000,101225.000000,1242.137880)}
{pt3dadd(179340.000000,206256.000000,100575.000000,1242.137880)}
{pt3dadd(178896.000000,206292.000000,100025.000000,1242.137880)}
{pt3dadd(178344.000000,206256.000000,99375.000000,1242.137880)}
{pt3dadd(177972.000000,206292.000000,98800.000000,1304.244761)}
{pt3dadd(177924.000000,206280.000000,98175.000000,1366.351641)}
{pt3dadd(177516.000000,206208.000000,97600.000000,1428.458522)}
{pt3dadd(176736.000000,206568.000000,96975.000000,1490.565402)}
{pt3dadd(175932.000000,206736.000000,96250.000000,1490.565402)}
{pt3dadd(175296.000000,206652.000000,95500.000000,1490.565402)}
{pt3dadd(174924.000000,206580.000000,94675.000000,1490.565402)}
{pt3dadd(174480.000000,206688.000000,94275.000000,1717.131222)}

{create adhoc26}
{access adhoc26}
{connect adhoc26(1), adhoc25(0)}
{nseg = 1}
{strdef color color = "White"}
{pt3dclear()}
{pt3dadd(174480.000000,206688.000000,94275.000000,1717.131222)}
{pt3dadd(173472.000000,209724.000000,94275.000000,575.063856)}
{pt3dadd(173352.000000,210168.000000,93875.000000,611.005347)}
{pt3dadd(173172.000000,210612.000000,93700.000000,646.946838)}
{pt3dadd(172860.000000,211092.000000,93600.000000,682.888329)}
{pt3dadd(172380.000000,211560.000000,93200.000000,718.829820)}
{pt3dadd(171816.000000,212172.000000,92975.000000,754.771316)}
{pt3dadd(171444.000000,212304.000000,92625.000000,790.712811)}
{pt3dadd(171084.000000,212400.000000,92200.000000,826.654307)}
{pt3dadd(170712.000000,212676.000000,91800.000000,862.595802)}
{pt3dadd(170436.000000,212844.000000,91550.000000,862.595802)}
{pt3dadd(170148.000000,213048.000000,91250.000000,862.595802)}
{pt3dadd(169704.000000,213420.000000,90900.000000,862.595802)}
{pt3dadd(169284.000000,213900.000000,90650.000000,862.595802)}
{pt3dadd(169104.000000,214416.000000,90450.000000,862.595802)}
{pt3dadd(168672.000000,215184.000000,90225.000000,862.595802)}
{pt3dadd(168240.000000,215844.000000,89975.000000,862.595802)}
{pt3dadd(167832.000000,216432.000000,89625.000000,862.595802)}
{pt3dadd(167448.000000,216948.000000,89275.000000,826.654307)}
{pt3dadd(167196.000000,217632.000000,88750.000000,790.712811)}
{pt3dadd(166992.000000,217968.000000,88450.000000,754.771316)}
{pt3dadd(166788.000000,218328.000000,88325.000000,718.829820)}
{pt3dadd(166608.000000,218580.000000,88125.000000,754.771316)}
{pt3dadd(166440.000000,218688.000000,88025.000000,790.712811)}
{pt3dadd(166152.000000,218796.000000,87825.000000,826.654307)}
{pt3dadd(165780.000000,218928.000000,87550.000000,862.595802)}
{pt3dadd(165444.000000,219132.000000,87500.000000,862.595802)}
{pt3dadd(165024.000000,219384.000000,87225.000000,862.595802)}
{pt3dadd(164760.000000,219600.000000,87175.000000,862.595802)}
{pt3dadd(164592.000000,219744.000000,87200.000000,862.595802)}
{pt3dadd(164424.000000,219840.000000,87100.000000,826.654307)}
{pt3dadd(164064.000000,220044.000000,86975.000000,790.712811)}
{pt3dadd(163800.000000,220152.000000,86825.000000,754.771316)}
{pt3dadd(163560.000000,220320.000000,86625.000000,718.829820)}
{pt3dadd(163308.000000,220452.000000,86450.000000,754.771316)}
{pt3dadd(163140.000000,220404.000000,86475.000000,790.712811)}
{pt3dadd(162948.000000,220704.000000,86350.000000,826.654307)}
{pt3dadd(162588.000000,221064.000000,86075.000000,862.595802)}
{pt3dadd(162156.000000,221544.000000,85875.000000,895.374441)}
{pt3dadd(161820.000000,221844.000000,85575.000000,928.153080)}
{pt3dadd(161520.000000,222168.000000,85300.000000,960.931719)}
{pt3dadd(161184.000000,222540.000000,85250.000000,993.710358)}
{pt3dadd(160836.000000,222876.000000,84975.000000,924.990223)}
{pt3dadd(160464.000000,223092.000000,84525.000000,856.270089)}
{pt3dadd(160092.000000,223056.000000,83975.000000,787.549955)}
{pt3dadd(159864.000000,223128.000000,83650.000000,718.829820)}
{pt3dadd(159420.000000,222972.000000,83025.000000,688.878585)}
{pt3dadd(159072.000000,222900.000000,82525.000000,658.927350)}
{pt3dadd(158916.000000,222936.000000,82200.000000,628.976115)}
{pt3dadd(158280.000000,223008.000000,81725.000000,599.024880)}
{pt3dadd(157824.000000,223104.000000,81275.000000,599.024880)}
{pt3dadd(157524.000000,222912.000000,80775.000000,599.024880)}
{pt3dadd(157332.000000,222744.000000,80575.000000,599.024880)}
{pt3dadd(157044.000000,223032.000000,80150.000000,599.024880)}
{pt3dadd(156636.000000,223164.000000,79450.000000,628.976115)}
{pt3dadd(156348.000000,223152.000000,79125.000000,658.927350)}
{pt3dadd(155988.000000,223380.000000,78775.000000,688.878585)}
{pt3dadd(155760.000000,223476.000000,78550.000000,718.829820)}
{pt3dadd(155508.000000,223428.000000,78350.000000,575.063856)}

{create adhoc27}
{access adhoc27}
{connect adhoc27(1), adhoc26(0)}
{nseg = 1}
{strdef color color = "White"}
{pt3dclear()}
{pt3dadd(155508.000000,223428.000000,78350.000000,575.063856)}
{pt3dadd(155292.000000,223296.000000,78000.000000,575.063856)}
{pt3dadd(154956.000000,223344.000000,77650.000000,581.054112)}
{pt3dadd(154752.000000,223212.000000,77150.000000,587.044368)}
{pt3dadd(154476.000000,223164.000000,76800.000000,593.034624)}
{pt3dadd(154224.000000,223200.000000,76600.000000,599.024880)}
{pt3dadd(153924.000000,223236.000000,76250.000000,599.024880)}
{pt3dadd(153720.000000,223056.000000,75825.000000,599.024880)}
{pt3dadd(153468.000000,223020.000000,75275.000000,599.024880)}
{pt3dadd(153276.000000,222984.000000,74875.000000,599.024880)}
{pt3dadd(153048.000000,222984.000000,74525.000000,599.024880)}
{pt3dadd(152892.000000,222900.000000,74175.000000,599.024880)}
{pt3dadd(152760.000000,222816.000000,73700.000000,599.024880)}
{pt3dadd(152664.000000,222768.000000,73350.000000,599.024880)}
{pt3dadd(152292.000000,223008.000000,72975.000000,599.024880)}
{pt3dadd(152016.000000,223176.000000,72525.000000,599.024880)}
{pt3dadd(151824.000000,223056.000000,72075.000000,599.024880)}
{pt3dadd(151572.000000,223152.000000,71650.000000,599.024880)}
{pt3dadd(151488.000000,223104.000000,71275.000000,553.266031)}
{pt3dadd(151188.000000,223164.000000,71025.000000,507.507183)}
{pt3dadd(150924.000000,223044.000000,70725.000000,461.748335)}
{pt3dadd(150672.000000,222816.000000,70300.000000,415.989486)}
{pt3dadd(150276.000000,222672.000000,69750.000000,436.788958)}
{pt3dadd(149988.000000,222420.000000,69225.000000,457.588431)}
{pt3dadd(149688.000000,222348.000000,68900.000000,478.387903)}
{pt3dadd(149424.000000,222144.000000,68450.000000,499.187376)}
{pt3dadd(149280.000000,222012.000000,68075.000000,524.146752)}
{pt3dadd(149136.000000,221952.000000,67375.000000,549.106128)}
{pt3dadd(149112.000000,221856.000000,66850.000000,574.065504)}
{pt3dadd(149256.000000,221580.000000,66400.000000,599.024880)}
{pt3dadd(149004.000000,221772.000000,66000.000000,638.959860)}
{pt3dadd(149016.000000,221808.000000,65550.000000,678.894840)}
{pt3dadd(149160.000000,221688.000000,65075.000000,718.829820)}
{pt3dadd(149232.000000,221460.000000,64725.000000,599.024880)}

{create adhoc28}
{access adhoc28}
{connect adhoc28(1), adhoc27(0)}
{nseg = 1}
{strdef color color = "White"}
{pt3dclear()}
{pt3dadd(149232.000000,221460.000000,64725.000000,599.024880)}
{pt3dadd(149016.000000,221064.000000,64250.000000,599.024880)}
{pt3dadd(149124.000000,220848.000000,63825.000000,599.024880)}
{pt3dadd(149184.000000,220668.000000,63450.000000,599.024880)}
{pt3dadd(149232.000000,220572.000000,63050.000000,599.024880)}
{pt3dadd(149376.000000,220332.000000,62650.000000,599.024880)}
{pt3dadd(149508.000000,220140.000000,62225.000000,599.024880)}
{pt3dadd(149640.000000,219948.000000,61750.000000,599.024880)}
{pt3dadd(149844.000000,219804.000000,61550.000000,575.063856)}

{create adhoc29}
{access adhoc29}
{connect adhoc29(1), adhoc28(0)}
{nseg = 1}
{strdef color color = "White"}
{pt3dclear()}
{pt3dadd(149844.000000,219804.000000,61550.000000,575.063856)}
{pt3dadd(149796.000000,219936.000000,61125.000000,718.829820)}
{pt3dadd(149940.000000,219828.000000,60625.000000,688.878585)}
{pt3dadd(150000.000000,219708.000000,60225.000000,658.927350)}
{pt3dadd(149952.000000,219612.000000,59800.000000,628.976115)}
{pt3dadd(149988.000000,219468.000000,59425.000000,599.024880)}
{pt3dadd(150048.000000,219324.000000,59025.000000,628.976115)}
{pt3dadd(150108.000000,219156.000000,58550.000000,658.927350)}
{pt3dadd(150096.000000,219288.000000,58275.000000,688.878585)}
{pt3dadd(150048.000000,219372.000000,57900.000000,718.829820)}
{pt3dadd(150000.000000,219408.000000,57500.000000,718.829820)}
{pt3dadd(150192.000000,219384.000000,57025.000000,599.024880)}

{create adhoc30}
{access adhoc30}
{connect adhoc30(1), adhoc29(0)}
{nseg = 1}
{strdef color color = "White"}
{pt3dclear()}
{pt3dadd(150192.000000,219384.000000,57025.000000,599.024880)}
{pt3dadd(150240.000000,219132.000000,56600.000000,599.024880)}
{pt3dadd(150372.000000,218484.000000,56125.000000,346.657896)}

{create adhoc31}
{access adhoc31}
{connect adhoc31(1), adhoc29(0)}
{nseg = 1}
{strdef color color = "White"}
{pt3dclear()}
{pt3dadd(150192.000000,219384.000000,57025.000000,599.024880)}
{pt3dadd(150516.000000,220464.000000,56925.000000,200.612214)}
{pt3dadd(150648.000000,220860.000000,56825.000000,185.287671)}
{pt3dadd(150648.000000,221088.000000,56900.000000,169.963128)}
{pt3dadd(150672.000000,221280.000000,56900.000000,154.638585)}
{pt3dadd(150756.000000,221508.000000,56900.000000,139.314042)}
{pt3dadd(150768.000000,221724.000000,56850.000000,191.150005)}
{pt3dadd(150804.000000,221928.000000,56775.000000,242.985969)}
{pt3dadd(150804.000000,222120.000000,56750.000000,294.821933)}
{pt3dadd(150936.000000,222468.000000,56400.000000,346.657896)}
{pt3dadd(150960.000000,222756.000000,56150.000000,320.177083)}
{pt3dadd(150972.000000,222996.000000,55800.000000,293.696271)}
{pt3dadd(151056.000000,223272.000000,55425.000000,267.215459)}
{pt3dadd(151260.000000,223608.000000,55175.000000,240.734646)}
{pt3dadd(151380.000000,223896.000000,54850.000000,240.734646)}
{pt3dadd(151608.000000,224148.000000,54575.000000,240.734646)}
{pt3dadd(151704.000000,224328.000000,54300.000000,240.734646)}
{pt3dadd(151968.000000,225144.000000,54300.000000,240.734646)}
{pt3dadd(151932.000000,225384.000000,54325.000000,139.314042)}
{pt3dadd(152088.000000,225612.000000,54025.000000,96.745860)}

{create adhoc32}
{access adhoc32}
{connect adhoc32(1), adhoc28(0)}
{nseg = 1}
{strdef color color = "White"}
{pt3dclear()}
{pt3dadd(149844.000000,219804.000000,61550.000000,575.063856)}
{pt3dadd(150084.000000,218868.000000,61625.000000,167.176836)}
{pt3dadd(150408.000000,218220.000000,61650.000000,139.314042)}
{pt3dadd(150828.000000,217968.000000,61475.000000,80.621550)}

{create adhoc33}
{access adhoc33}
{connect adhoc33(1), adhoc27(0)}
{nseg = 1}
{strdef color color = "White"}
{pt3dclear()}
{pt3dadd(149232.000000,221460.000000,64725.000000,599.024880)}
{pt3dadd(149676.000000,222060.000000,64700.000000,200.612214)}
{pt3dadd(149856.000000,222420.000000,64700.000000,185.287671)}
{pt3dadd(149784.000000,222744.000000,64725.000000,169.963128)}
{pt3dadd(149904.000000,222924.000000,64675.000000,154.638585)}
{pt3dadd(150036.000000,223260.000000,64675.000000,139.314042)}
{pt3dadd(150108.000000,223488.000000,64650.000000,146.279741)}
{pt3dadd(150168.000000,223680.000000,64625.000000,153.245439)}
{pt3dadd(150192.000000,223860.000000,64550.000000,160.211138)}
{pt3dadd(150348.000000,224172.000000,64300.000000,167.176836)}
{pt3dadd(150384.000000,224484.000000,64150.000000,139.314042)}
{pt3dadd(150564.000000,224976.000000,64075.000000,139.314042)}

{create adhoc34}
{access adhoc34}
{connect adhoc34(1), adhoc26(0)}
{nseg = 1}
{strdef color color = "White"}
{pt3dclear()}
{pt3dadd(155508.000000,223428.000000,78350.000000,575.063856)}
{pt3dadd(155508.000000,224280.000000,78250.000000,167.176836)}
{pt3dadd(155616.000000,224664.000000,78300.000000,160.211138)}
{pt3dadd(155508.000000,224892.000000,78325.000000,153.245439)}
{pt3dadd(155400.000000,225060.000000,78200.000000,146.279741)}
{pt3dadd(155244.000000,225252.000000,78175.000000,139.314042)}
{pt3dadd(155100.000000,225468.000000,77900.000000,146.279741)}
{pt3dadd(154944.000000,225696.000000,77750.000000,153.245439)}
{pt3dadd(154872.000000,225912.000000,77425.000000,160.211138)}
{pt3dadd(154716.000000,226260.000000,77325.000000,167.176836)}
{pt3dadd(154560.000000,226596.000000,77325.000000,175.535680)}
{pt3dadd(154416.000000,226932.000000,77400.000000,183.894525)}
{pt3dadd(154320.000000,227208.000000,77550.000000,192.253370)}
{pt3dadd(154452.000000,227460.000000,77725.000000,200.612214)}
{pt3dadd(154476.000000,227724.000000,77925.000000,192.253370)}
{pt3dadd(154440.000000,227952.000000,78075.000000,183.894525)}
{pt3dadd(154380.000000,228132.000000,78050.000000,175.535680)}
{pt3dadd(154536.000000,228492.000000,78450.000000,167.176836)}
{pt3dadd(154644.000000,228696.000000,78475.000000,167.176836)}
{pt3dadd(154788.000000,229068.000000,78700.000000,116.095032)}

{create adhoc35}
{access adhoc35}
{connect adhoc35(1), adhoc25(0)}
{nseg = 1}
{strdef color color = "White"}
{pt3dclear()}
{pt3dadd(174480.000000,206688.000000,94275.000000,1717.131222)}
{pt3dadd(174684.000000,206124.000000,93900.000000,1717.131222)}
{pt3dadd(174048.000000,205932.000000,93025.000000,1645.584134)}
{pt3dadd(173856.000000,205740.000000,92525.000000,1574.037045)}
{pt3dadd(173520.000000,205452.000000,91750.000000,1502.489957)}
{pt3dadd(173364.000000,204972.000000,91275.000000,1430.942868)}
{pt3dadd(172992.000000,204684.000000,90725.000000,1383.741621)}
{pt3dadd(172776.000000,204564.000000,90250.000000,1336.540374)}
{pt3dadd(172620.000000,204372.000000,89825.000000,1289.339127)}
{pt3dadd(172248.000000,204336.000000,89425.000000,1242.137880)}
{pt3dadd(172056.000000,204180.000000,89000.000000,1242.137880)}
{pt3dadd(171948.000000,203952.000000,88575.000000,1242.137880)}
{pt3dadd(171600.000000,203616.000000,87950.000000,1242.137880)}
{pt3dadd(171228.000000,203316.000000,87350.000000,1242.137880)}
{pt3dadd(171108.000000,202944.000000,86875.000000,1180.030982)}
{pt3dadd(170664.000000,202716.000000,86400.000000,1117.924083)}
{pt3dadd(170508.000000,202392.000000,85650.000000,1055.817185)}
{pt3dadd(170148.000000,202044.000000,85125.000000,993.710286)}
{pt3dadd(169836.000000,201780.000000,84575.000000,1055.817185)}
{pt3dadd(169512.000000,201636.000000,84200.000000,1117.924083)}
{pt3dadd(168936.000000,201624.000000,83900.000000,1180.030982)}
{pt3dadd(168744.000000,201324.000000,83500.000000,1242.137880)}
{pt3dadd(168420.000000,201168.000000,83100.000000,1147.252361)}
{pt3dadd(168276.000000,201072.000000,82575.000000,1052.366841)}
{pt3dadd(168228.000000,200928.000000,82225.000000,957.481322)}
{pt3dadd(167880.000000,200748.000000,81800.000000,862.595802)}
{pt3dadd(167904.000000,200424.000000,81625.000000,718.829820)}

{create adhoc36}
{access adhoc36}
{connect adhoc36(1), adhoc35(0)}
{nseg = 1}
{strdef color color = "White"}
{pt3dclear()}
{pt3dadd(167904.000000,200424.000000,81625.000000,718.829820)}
{pt3dadd(167892.000000,201852.000000,81625.000000,415.989486)}

{create adhoc37}
{access adhoc37}
{connect adhoc37(1), adhoc35(0)}
{nseg = 1}
{strdef color color = "White"}
{pt3dclear()}
{pt3dadd(167904.000000,200424.000000,81625.000000,718.829820)}
{pt3dadd(167844.000000,200136.000000,81400.000000,718.829820)}
{pt3dadd(167460.000000,199620.000000,80950.000000,797.901102)}
{pt3dadd(167064.000000,199536.000000,80600.000000,876.972384)}
{pt3dadd(166908.000000,199392.000000,80150.000000,956.043666)}
{pt3dadd(166572.000000,199212.000000,79775.000000,1035.114948)}
{pt3dadd(166284.000000,198888.000000,79325.000000,1035.114948)}
{pt3dadd(166056.000000,198600.000000,78750.000000,1035.114948)}
{pt3dadd(165540.000000,198180.000000,78075.000000,1035.114948)}
{pt3dadd(165252.000000,197784.000000,77275.000000,1035.114948)}
{pt3dadd(164904.000000,197220.000000,76600.000000,1148.977562)}
{pt3dadd(164844.000000,196800.000000,76050.000000,1262.840175)}
{pt3dadd(164832.000000,196392.000000,75625.000000,1376.702788)}
{pt3dadd(164520.000000,196308.000000,75000.000000,1490.565402)}
{pt3dadd(164208.000000,196020.000000,74525.000000,1407.756228)}
{pt3dadd(164016.000000,195612.000000,73725.000000,1324.947054)}
{pt3dadd(163644.000000,195084.000000,73050.000000,1242.137880)}
{pt3dadd(163308.000000,195408.000000,72350.000000,1490.565402)}

{create adhoc38}
{access adhoc38}
{connect adhoc38(1), adhoc37(0)}
{nseg = 1}
{strdef color color = "White"}
{pt3dclear()}
{pt3dadd(163308.000000,195408.000000,72350.000000,1490.565402)}
{pt3dadd(163416.000000,193500.000000,72350.000000,415.989486)}
{pt3dadd(163728.000000,192120.000000,71300.000000,570.770852)}
{pt3dadd(163596.000000,191508.000000,70750.000000,725.552217)}
{pt3dadd(163356.000000,190944.000000,70125.000000,880.333582)}
{pt3dadd(163236.000000,190248.000000,69375.000000,1035.114948)}
{pt3dadd(163284.000000,189576.000000,68750.000000,1074.449300)}
{pt3dadd(163032.000000,189156.000000,68200.000000,1113.783651)}
{pt3dadd(162948.000000,188796.000000,67450.000000,1153.118003)}
{pt3dadd(162852.000000,188400.000000,66575.000000,1192.452354)}
{pt3dadd(162744.000000,187956.000000,65875.000000,1101.362234)}
{pt3dadd(162468.000000,187608.000000,65150.000000,1010.272113)}
{pt3dadd(162276.000000,186960.000000,64425.000000,919.181993)}
{pt3dadd(162240.000000,186324.000000,63800.000000,828.091872)}
{pt3dadd(162432.000000,185640.000000,63200.000000,800.776359)}
{pt3dadd(162384.000000,185208.000000,62850.000000,773.460846)}
{pt3dadd(162372.000000,184920.000000,62675.000000,746.145333)}
{pt3dadd(162360.000000,184608.000000,62450.000000,718.829820)}
{pt3dadd(162420.000000,184272.000000,62150.000000,797.901102)}
{pt3dadd(162612.000000,183840.000000,61675.000000,876.972384)}
{pt3dadd(162744.000000,183372.000000,61250.000000,956.043666)}
{pt3dadd(162708.000000,183120.000000,61075.000000,1035.114948)}
{pt3dadd(162792.000000,182880.000000,60850.000000,1035.114948)}
{pt3dadd(163152.000000,182568.000000,60600.000000,1035.114948)}
{pt3dadd(163308.000000,182244.000000,60450.000000,1035.114948)}
{pt3dadd(163452.000000,181944.000000,60225.000000,1035.114948)}
{pt3dadd(163608.000000,181704.000000,60075.000000,991.985162)}
{pt3dadd(163620.000000,181452.000000,59800.000000,948.855375)}
{pt3dadd(163680.000000,181152.000000,59550.000000,905.725589)}
{pt3dadd(163740.000000,180936.000000,59375.000000,862.595802)}
{pt3dadd(163680.000000,180636.000000,59100.000000,826.654307)}
{pt3dadd(163680.000000,180204.000000,58925.000000,790.712811)}
{pt3dadd(163740.000000,179940.000000,58725.000000,754.771316)}
{pt3dadd(163788.000000,179652.000000,58550.000000,718.829820)}
{pt3dadd(163776.000000,179292.000000,58325.000000,754.771316)}
{pt3dadd(163716.000000,178872.000000,57975.000000,790.712811)}
{pt3dadd(163680.000000,178536.000000,57800.000000,826.654307)}
{pt3dadd(163596.000000,178176.000000,57725.000000,862.595802)}
{pt3dadd(163464.000000,177780.000000,57475.000000,905.725589)}
{pt3dadd(162852.000000,177180.000000,56875.000000,948.855375)}
{pt3dadd(162588.000000,176700.000000,56325.000000,991.985162)}
{pt3dadd(162552.000000,176100.000000,55950.000000,1035.114948)}
{pt3dadd(162396.000000,175524.000000,55275.000000,1035.114948)}

{create adhoc39}
{access adhoc39}
{connect adhoc39(1), adhoc38(0)}
{nseg = 1}
{strdef color color = "White"}
{pt3dclear()}
{pt3dadd(162396.000000,175524.000000,55275.000000,1035.114948)}
{pt3dadd(162552.000000,173568.000000,55275.000000,288.881586)}
{pt3dadd(162660.000000,172620.000000,55325.000000,299.859089)}
{pt3dadd(162684.000000,172092.000000,55325.000000,310.836591)}
{pt3dadd(162684.000000,171720.000000,55400.000000,321.814093)}
{pt3dadd(162504.000000,171312.000000,55300.000000,332.791596)}
{pt3dadd(162276.000000,170892.000000,55175.000000,353.591069)}
{pt3dadd(162132.000000,170520.000000,55100.000000,374.390541)}
{pt3dadd(162096.000000,170220.000000,55075.000000,395.190014)}
{pt3dadd(162072.000000,169968.000000,54975.000000,415.989486)}
{pt3dadd(161928.000000,169632.000000,54925.000000,436.788958)}
{pt3dadd(161868.000000,169296.000000,54850.000000,457.588431)}
{pt3dadd(161904.000000,168960.000000,54750.000000,478.387903)}
{pt3dadd(161976.000000,168756.000000,54675.000000,499.187376)}
{pt3dadd(162036.000000,168528.000000,54650.000000,599.024880)}

{create adhoc40}
{access adhoc40}
{connect adhoc40(1), adhoc39(0)}
{nseg = 1}
{strdef color color = "White"}
{pt3dclear()}
{pt3dadd(162036.000000,168528.000000,54650.000000,599.024880)}
{pt3dadd(162408.000000,168288.000000,55500.000000,346.657896)}
{pt3dadd(162348.000000,168072.000000,55750.000000,310.146476)}
{pt3dadd(162444.000000,167700.000000,55800.000000,273.635055)}
{pt3dadd(162636.000000,167364.000000,55925.000000,237.123635)}
{pt3dadd(162780.000000,167124.000000,56150.000000,200.612214)}
{pt3dadd(163020.000000,166836.000000,56175.000000,254.456532)}
{pt3dadd(163296.000000,166512.000000,56300.000000,308.300850)}
{pt3dadd(163488.000000,166224.000000,56325.000000,362.145168)}
{pt3dadd(163896.000000,165984.000000,56325.000000,415.989486)}
{pt3dadd(164388.000000,165768.000000,56425.000000,365.238770)}
{pt3dadd(164700.000000,165540.000000,56600.000000,314.488053)}
{pt3dadd(164844.000000,165456.000000,57000.000000,263.737337)}
{pt3dadd(165456.000000,164820.000000,57350.000000,212.986620)}
{pt3dadd(165876.000000,164052.000000,57875.000000,231.960361)}
{pt3dadd(165876.000000,163620.000000,57750.000000,250.934103)}
{pt3dadd(166140.000000,163332.000000,58125.000000,269.907845)}
{pt3dadd(166272.000000,162948.000000,58075.000000,288.881586)}
{pt3dadd(166344.000000,162720.000000,58075.000000,276.844851)}
{pt3dadd(166572.000000,162456.000000,57875.000000,264.808116)}
{pt3dadd(166716.000000,162300.000000,57850.000000,252.771381)}
{pt3dadd(166668.000000,162036.000000,57850.000000,240.734646)}
{pt3dadd(166728.000000,161700.000000,57750.000000,240.734646)}
{pt3dadd(166992.000000,161364.000000,57850.000000,240.734646)}
{pt3dadd(167124.000000,160980.000000,57950.000000,240.734646)}
{pt3dadd(167352.000000,160692.000000,57850.000000,240.734646)}
{pt3dadd(167268.000000,160320.000000,57975.000000,230.704038)}
{pt3dadd(167256.000000,159936.000000,58025.000000,220.673430)}
{pt3dadd(167292.000000,159684.000000,58025.000000,210.642822)}
{pt3dadd(167376.000000,159456.000000,57925.000000,200.612214)}
{pt3dadd(167376.000000,159180.000000,57975.000000,200.612214)}
{pt3dadd(167412.000000,158868.000000,58050.000000,200.612214)}
{pt3dadd(167556.000000,158652.000000,57975.000000,200.612214)}
{pt3dadd(167652.000000,158436.000000,57950.000000,200.612214)}
{pt3dadd(168012.000000,157656.000000,58025.000000,210.642822)}
{pt3dadd(168132.000000,157272.000000,58000.000000,220.673430)}
{pt3dadd(168252.000000,157128.000000,58025.000000,230.704038)}
{pt3dadd(168192.000000,156876.000000,57975.000000,240.734646)}
{pt3dadd(168876.000000,156624.000000,58225.000000,288.881586)}
{pt3dadd(169176.000000,156312.000000,58550.000000,346.657896)}

{create adhoc41}
{access adhoc41}
{connect adhoc41(1), adhoc40(0)}
{nseg = 1}
{strdef color color = "White"}
{pt3dclear()}
{pt3dadd(169176.000000,156312.000000,58550.000000,346.657896)}
{pt3dadd(169368.000000,155676.000000,58650.000000,167.176836)}
{pt3dadd(169620.000000,155292.000000,58650.000000,160.211138)}
{pt3dadd(169692.000000,154860.000000,58650.000000,153.245439)}
{pt3dadd(169716.000000,154620.000000,58625.000000,146.279741)}
{pt3dadd(169764.000000,154428.000000,58350.000000,139.314042)}
{pt3dadd(169896.000000,154044.000000,58175.000000,146.279741)}
{pt3dadd(169920.000000,153756.000000,57950.000000,153.245439)}
{pt3dadd(170004.000000,153444.000000,57950.000000,160.211138)}
{pt3dadd(169992.000000,153216.000000,57875.000000,167.176836)}
{pt3dadd(169944.000000,153012.000000,57900.000000,185.566288)}
{pt3dadd(169932.000000,152844.000000,57900.000000,203.955741)}
{pt3dadd(170208.000000,152328.000000,58075.000000,222.345193)}
{pt3dadd(170604.000000,152040.000000,58075.000000,240.734646)}
{pt3dadd(170820.000000,151680.000000,58200.000000,240.734646)}
{pt3dadd(171000.000000,151392.000000,58425.000000,240.734646)}
{pt3dadd(170976.000000,151056.000000,58550.000000,240.734646)}
{pt3dadd(171012.000000,150864.000000,58625.000000,167.176836)}

{create adhoc42}
{access adhoc42}
{connect adhoc42(1), adhoc40(0)}
{nseg = 1}
{strdef color color = "White"}
{pt3dclear()}
{pt3dadd(169176.000000,156312.000000,58550.000000,346.657896)}
{pt3dadd(169572.000000,156216.000000,58900.000000,139.314042)}
{pt3dadd(170064.000000,156156.000000,59150.000000,164.669193)}
{pt3dadd(170496.000000,156072.000000,59475.000000,190.024344)}
{pt3dadd(170760.000000,156180.000000,59775.000000,215.379495)}
{pt3dadd(171120.000000,156288.000000,60050.000000,240.734646)}
{pt3dadd(171420.000000,156312.000000,60350.000000,222.345193)}
{pt3dadd(171624.000000,156300.000000,60450.000000,203.955741)}
{pt3dadd(171936.000000,156168.000000,60525.000000,185.566288)}
{pt3dadd(172116.000000,156060.000000,60850.000000,167.176836)}
{pt3dadd(172344.000000,156180.000000,61125.000000,150.149568)}
{pt3dadd(172644.000000,156240.000000,61425.000000,133.122300)}
{pt3dadd(172860.000000,156204.000000,61600.000000,116.095032)}
{pt3dadd(173040.000000,156156.000000,61925.000000,116.095032)}

{create adhoc43}
{access adhoc43}
{connect adhoc43(1), adhoc39(0)}
{nseg = 1}
{strdef color color = "White"}
{pt3dclear()}
{pt3dadd(162036.000000,168528.000000,54650.000000,599.024880)}
{pt3dadd(161904.000000,168288.000000,54025.000000,346.657896)}
{pt3dadd(161844.000000,168000.000000,53875.000000,346.657896)}
{pt3dadd(161940.000000,167688.000000,53675.000000,346.657896)}
{pt3dadd(162036.000000,167412.000000,53600.000000,346.657896)}
{pt3dadd(162060.000000,167112.000000,53350.000000,346.657896)}
{pt3dadd(162144.000000,166896.000000,53200.000000,384.790266)}
{pt3dadd(162396.000000,166572.000000,53125.000000,422.922636)}
{pt3dadd(162708.000000,166296.000000,53025.000000,461.055006)}
{pt3dadd(163020.000000,165972.000000,52975.000000,499.187376)}
{pt3dadd(163140.000000,165732.000000,52900.000000,434.574193)}
{pt3dadd(163140.000000,165420.000000,52900.000000,369.961011)}
{pt3dadd(163116.000000,165048.000000,52850.000000,305.347828)}
{pt3dadd(163212.000000,164736.000000,52725.000000,240.734646)}
{pt3dadd(163560.000000,164364.000000,52525.000000,267.215459)}
{pt3dadd(163668.000000,164112.000000,52500.000000,293.696271)}
{pt3dadd(163968.000000,163908.000000,52425.000000,320.177083)}
{pt3dadd(164256.000000,163524.000000,52300.000000,346.657896)}
{pt3dadd(164400.000000,162996.000000,52175.000000,320.177083)}
{pt3dadd(164640.000000,162552.000000,51975.000000,293.696271)}
{pt3dadd(164688.000000,162192.000000,51850.000000,267.215459)}
{pt3dadd(164820.000000,161820.000000,51550.000000,240.734646)}
{pt3dadd(165048.000000,160896.000000,51175.000000,252.771381)}
{pt3dadd(165108.000000,160464.000000,51050.000000,264.808116)}
{pt3dadd(165324.000000,160080.000000,50875.000000,276.844851)}
{pt3dadd(165516.000000,159684.000000,50775.000000,288.881586)}
{pt3dadd(165564.000000,159240.000000,50800.000000,303.325664)}
{pt3dadd(165648.000000,158844.000000,50725.000000,317.769741)}
{pt3dadd(165768.000000,158496.000000,50800.000000,332.213819)}
{pt3dadd(165888.000000,158208.000000,51075.000000,346.657896)}
{pt3dadd(165828.000000,157956.000000,51225.000000,384.790266)}
{pt3dadd(165876.000000,157728.000000,51375.000000,422.922636)}
{pt3dadd(165828.000000,157500.000000,51675.000000,461.055006)}
{pt3dadd(165924.000000,157236.000000,52075.000000,499.187376)}
{pt3dadd(165972.000000,156948.000000,52150.000000,499.187376)}

{create adhoc44}
{access adhoc44}
{connect adhoc44(1), adhoc43(0)}
{nseg = 1}
{strdef color color = "White"}
{pt3dclear()}
{pt3dadd(165972.000000,156948.000000,52150.000000,499.187376)}
{pt3dadd(166200.000000,156948.000000,52950.000000,240.734646)}
{pt3dadd(166488.000000,156996.000000,53350.000000,199.188108)}
{pt3dadd(166740.000000,156360.000000,53675.000000,157.641570)}
{pt3dadd(166728.000000,155976.000000,53850.000000,116.095032)}
{pt3dadd(166764.000000,155820.000000,53925.000000,67.184640)}

{create adhoc45}
{access adhoc45}
{connect adhoc45(1), adhoc43(0)}
{nseg = 1}
{strdef color color = "White"}
{pt3dclear()}
{pt3dadd(165972.000000,156948.000000,52150.000000,499.187376)}
{pt3dadd(165768.000000,156792.000000,52000.000000,288.881586)}
{pt3dadd(165744.000000,156540.000000,51750.000000,288.881586)}
{pt3dadd(165684.000000,156336.000000,51550.000000,288.881586)}
{pt3dadd(165744.000000,156072.000000,51475.000000,288.881586)}
{pt3dadd(165804.000000,155892.000000,51450.000000,288.881586)}
{pt3dadd(165876.000000,155700.000000,51475.000000,288.881586)}
{pt3dadd(165900.000000,155532.000000,51350.000000,288.881586)}
{pt3dadd(165948.000000,155316.000000,51350.000000,288.881586)}
{pt3dadd(166056.000000,155136.000000,51175.000000,288.881586)}
{pt3dadd(166188.000000,154848.000000,51000.000000,251.489700)}
{pt3dadd(166116.000000,154632.000000,50825.000000,214.097814)}
{pt3dadd(166032.000000,154392.000000,50600.000000,176.705928)}
{pt3dadd(165924.000000,154188.000000,50450.000000,139.314042)}
{pt3dadd(165756.000000,153888.000000,50350.000000,204.323009)}
{pt3dadd(165624.000000,153600.000000,50325.000000,269.331975)}
{pt3dadd(165660.000000,153288.000000,50325.000000,334.340941)}
{pt3dadd(165660.000000,152868.000000,50350.000000,399.349908)}
{pt3dadd(165660.000000,152484.000000,50450.000000,240.734646)}
{pt3dadd(165660.000000,152052.000000,50525.000000,240.734646)}

{create adhoc46}
{access adhoc46}
{connect adhoc46(1), adhoc38(0)}
{nseg = 1}
{strdef color color = "White"}
{pt3dclear()}
{pt3dadd(162396.000000,175524.000000,55275.000000,1035.114948)}
{pt3dadd(161952.000000,175344.000000,54725.000000,1035.114948)}
{pt3dadd(161724.000000,174864.000000,54125.000000,956.043666)}
{pt3dadd(161676.000000,174288.000000,53550.000000,876.972384)}
{pt3dadd(161568.000000,173748.000000,53050.000000,797.901102)}
{pt3dadd(161592.000000,173232.000000,52525.000000,718.829820)}
{pt3dadd(161580.000000,172656.000000,52050.000000,862.595802)}
{pt3dadd(161604.000000,172320.000000,51550.000000,862.595802)}

{create adhoc47}
{access adhoc47}
{connect adhoc47(1), adhoc46(0)}
{nseg = 1}
{strdef color color = "White"}
{pt3dclear()}
{pt3dadd(161604.000000,172320.000000,51550.000000,862.595802)}
{pt3dadd(159720.000000,172380.000000,51600.000000,479.219886)}
{pt3dadd(159468.000000,172056.000000,51075.000000,459.252401)}
{pt3dadd(159000.000000,171876.000000,50775.000000,439.284915)}
{pt3dadd(158868.000000,171696.000000,50175.000000,419.317430)}
{pt3dadd(158880.000000,171624.000000,49875.000000,399.349944)}
{pt3dadd(158772.000000,171456.000000,49500.000000,403.509830)}
{pt3dadd(158712.000000,171348.000000,49250.000000,407.669715)}
{pt3dadd(158808.000000,171336.000000,48850.000000,411.829601)}
{pt3dadd(159048.000000,171456.000000,48275.000000,415.989486)}
{pt3dadd(159324.000000,171636.000000,47750.000000,288.881586)}
{pt3dadd(159612.000000,171576.000000,47400.000000,599.024880)}

{create adhoc48}
{access adhoc48}
{connect adhoc48(1), adhoc47(0)}
{nseg = 1}
{strdef color color = "White"}
{pt3dclear()}
{pt3dadd(159612.000000,171576.000000,47400.000000,599.024880)}
{pt3dadd(160008.000000,172272.000000,47425.000000,96.745860)}
{pt3dadd(160020.000000,172500.000000,47425.000000,92.714782)}
{pt3dadd(160092.000000,172668.000000,47400.000000,88.683705)}
{pt3dadd(160176.000000,172824.000000,47400.000000,84.652627)}
{pt3dadd(160356.000000,172980.000000,47350.000000,80.621550)}
{pt3dadd(160380.000000,173112.000000,47325.000000,96.745860)}

{create adhoc49}
{access adhoc49}
{connect adhoc49(1), adhoc47(0)}
{nseg = 1}
{strdef color color = "White"}
{pt3dclear()}
{pt3dadd(159612.000000,171576.000000,47400.000000,599.024880)}
{pt3dadd(159528.000000,171504.000000,47075.000000,599.024880)}
{pt3dadd(159420.000000,171432.000000,46650.000000,574.065504)}
{pt3dadd(159348.000000,171372.000000,46175.000000,549.106128)}
{pt3dadd(159348.000000,171348.000000,45800.000000,524.146752)}
{pt3dadd(159408.000000,171408.000000,45450.000000,499.187376)}
{pt3dadd(159432.000000,171528.000000,45125.000000,479.219886)}
{pt3dadd(159552.000000,171672.000000,44850.000000,499.187376)}

{create adhoc50}
{access adhoc50}
{connect adhoc50(1), adhoc49(0)}
{nseg = 1}
{strdef color color = "White"}
{pt3dclear()}
{pt3dadd(159552.000000,171672.000000,44850.000000,499.187376)}
{pt3dadd(159216.000000,172284.000000,44825.000000,167.176836)}
{pt3dadd(159144.000000,172428.000000,44800.000000,167.176836)}

{create adhoc51}
{access adhoc51}
{connect adhoc51(1), adhoc49(0)}
{nseg = 1}
{strdef color color = "White"}
{pt3dclear()}
{pt3dadd(159552.000000,171672.000000,44850.000000,499.187376)}
{pt3dadd(159864.000000,171672.000000,44525.000000,346.657896)}
{pt3dadd(160020.000000,171816.000000,44175.000000,363.990794)}
{pt3dadd(160176.000000,171984.000000,43875.000000,381.323691)}
{pt3dadd(160368.000000,172200.000000,43525.000000,398.656589)}
{pt3dadd(160368.000000,172272.000000,43200.000000,415.989486)}
{pt3dadd(160500.000000,172500.000000,42925.000000,398.656589)}
{pt3dadd(160512.000000,172584.000000,42525.000000,381.323691)}
{pt3dadd(160536.000000,172752.000000,42175.000000,363.990794)}
{pt3dadd(160536.000000,172776.000000,41775.000000,346.657896)}
{pt3dadd(160380.000000,172800.000000,41350.000000,346.657896)}
{pt3dadd(160476.000000,172776.000000,41000.000000,346.657896)}
{pt3dadd(160572.000000,172848.000000,40625.000000,346.657896)}
{pt3dadd(160692.000000,172908.000000,40225.000000,346.657896)}
{pt3dadd(161136.000000,172644.000000,39900.000000,310.146476)}
{pt3dadd(161580.000000,172248.000000,39575.000000,273.635055)}
{pt3dadd(162348.000000,172056.000000,39450.000000,237.123635)}
{pt3dadd(162696.000000,171948.000000,39575.000000,200.612214)}
{pt3dadd(163032.000000,171384.000000,39475.000000,192.253370)}
{pt3dadd(163308.000000,170856.000000,39175.000000,183.894525)}
{pt3dadd(163620.000000,170748.000000,39125.000000,175.535680)}
{pt3dadd(164004.000000,170376.000000,39125.000000,167.176836)}
{pt3dadd(164244.000000,170100.000000,39000.000000,277.326324)}
{pt3dadd(164460.000000,169776.000000,39050.000000,288.881586)}

{create adhoc52}
{access adhoc52}
{connect adhoc52(1), adhoc51(0)}
{nseg = 1}
{strdef color color = "White"}
{pt3dclear()}
{pt3dadd(164460.000000,169776.000000,39050.000000,288.881586)}
{pt3dadd(164616.000000,169740.000000,39350.000000,346.657896)}
{pt3dadd(164676.000000,169584.000000,39575.000000,167.176836)}
{pt3dadd(164688.000000,169392.000000,39675.000000,167.176836)}

{create adhoc53}
{access adhoc53}
{connect adhoc53(1), adhoc51(0)}
{nseg = 1}
{strdef color color = "White"}
{pt3dclear()}
{pt3dadd(164460.000000,169776.000000,39050.000000,288.881586)}
{pt3dadd(164616.000000,169656.000000,38725.000000,139.314042)}

{create adhoc54}
{access adhoc54}
{connect adhoc54(1), adhoc46(0)}
{nseg = 1}
{strdef color color = "White"}
{pt3dclear()}
{pt3dadd(161604.000000,172320.000000,51550.000000,862.595802)}
{pt3dadd(161712.000000,172092.000000,51150.000000,862.595802)}
{pt3dadd(161604.000000,171624.000000,50750.000000,718.829820)}

{create adhoc55}
{access adhoc55}
{connect adhoc55(1), adhoc54(0)}
{nseg = 1}
{strdef color color = "White"}
{pt3dclear()}
{pt3dadd(161604.000000,171624.000000,50750.000000,718.829820)}
{pt3dadd(161568.000000,172836.000000,50600.000000,139.314042)}
{pt3dadd(161544.000000,173016.000000,50200.000000,167.176836)}

{create adhoc56}
{access adhoc56}
{connect adhoc56(1), adhoc54(0)}
{nseg = 1}
{strdef color color = "White"}
{pt3dclear()}
{pt3dadd(161604.000000,171624.000000,50750.000000,718.829820)}
{pt3dadd(161580.000000,170868.000000,50275.000000,599.024880)}
{pt3dadd(161628.000000,170412.000000,49975.000000,697.696250)}
{pt3dadd(161760.000000,169608.000000,49475.000000,796.367619)}
{pt3dadd(161820.000000,169044.000000,49100.000000,895.038988)}
{pt3dadd(161736.000000,168816.000000,48725.000000,993.710358)}
{pt3dadd(161808.000000,168792.000000,48475.000000,993.710358)}

{create adhoc57}
{access adhoc57}
{connect adhoc57(1), adhoc56(0)}
{nseg = 1}
{strdef color color = "White"}
{pt3dclear()}
{pt3dadd(161808.000000,168792.000000,48475.000000,993.710358)}
{pt3dadd(162336.000000,167244.000000,48475.000000,346.657896)}
{pt3dadd(163260.000000,166452.000000,48475.000000,346.657896)}
{pt3dadd(163440.000000,166068.000000,48400.000000,346.657896)}
{pt3dadd(163488.000000,165744.000000,48225.000000,346.657896)}
{pt3dadd(163572.000000,165516.000000,48125.000000,346.657896)}
{pt3dadd(163644.000000,165288.000000,48175.000000,384.790266)}
{pt3dadd(163632.000000,165084.000000,48025.000000,422.922636)}
{pt3dadd(163632.000000,164808.000000,47875.000000,461.055006)}
{pt3dadd(163716.000000,164496.000000,47675.000000,499.187376)}
{pt3dadd(163728.000000,164184.000000,47500.000000,461.055006)}
{pt3dadd(163848.000000,163836.000000,47300.000000,422.922636)}
{pt3dadd(163908.000000,163524.000000,47050.000000,384.790266)}
{pt3dadd(164148.000000,163248.000000,46850.000000,346.657896)}
{pt3dadd(164196.000000,162972.000000,46725.000000,346.657896)}
{pt3dadd(164172.000000,162684.000000,46625.000000,346.657896)}
{pt3dadd(164172.000000,162432.000000,46625.000000,200.612214)}

{create adhoc58}
{access adhoc58}
{connect adhoc58(1), adhoc56(0)}
{nseg = 1}
{strdef color color = "White"}
{pt3dclear()}
{pt3dadd(161808.000000,168792.000000,48475.000000,993.710358)}
{pt3dadd(161436.000000,168564.000000,47925.000000,993.710286)}
{pt3dadd(161520.000000,168240.000000,47450.000000,993.710304)}
{pt3dadd(161688.000000,167844.000000,46900.000000,993.710322)}
{pt3dadd(161916.000000,167580.000000,46475.000000,993.710340)}
{pt3dadd(162000.000000,167508.000000,45975.000000,993.710358)}
{pt3dadd(162024.000000,167256.000000,45425.000000,993.710358)}
{pt3dadd(162156.000000,167088.000000,44825.000000,993.710358)}
{pt3dadd(162252.000000,166992.000000,44375.000000,993.710358)}
{pt3dadd(162324.000000,166740.000000,43825.000000,993.710358)}
{pt3dadd(162420.000000,166440.000000,43375.000000,960.931719)}
{pt3dadd(162564.000000,166140.000000,42825.000000,928.153080)}
{pt3dadd(162720.000000,165840.000000,42425.000000,895.374441)}
{pt3dadd(162960.000000,165696.000000,41975.000000,862.595802)}
{pt3dadd(163212.000000,165408.000000,41575.000000,862.595802)}
{pt3dadd(163272.000000,165060.000000,41000.000000,862.595802)}
{pt3dadd(163200.000000,164664.000000,40625.000000,718.829820)}

{create adhoc59}
{access adhoc59}
{connect adhoc59(1), adhoc58(0)}
{nseg = 1}
{strdef color color = "White"}
{pt3dclear()}
{pt3dadd(163200.000000,164664.000000,40625.000000,718.829820)}
{pt3dadd(163092.000000,163272.000000,40350.000000,415.989486)}
{pt3dadd(163212.000000,162768.000000,40150.000000,469.014276)}
{pt3dadd(163260.000000,162396.000000,40050.000000,522.039066)}
{pt3dadd(163416.000000,162108.000000,39900.000000,575.063856)}
{pt3dadd(163560.000000,161736.000000,39575.000000,599.024880)}

{create adhoc60}
{access adhoc60}
{connect adhoc60(1), adhoc59(0)}
{nseg = 1}
{strdef color color = "White"}
{pt3dclear()}
{pt3dadd(163560.000000,161736.000000,39575.000000,599.024880)}
{pt3dadd(164064.000000,161712.000000,40850.000000,200.612214)}
{pt3dadd(164232.000000,161340.000000,40750.000000,183.894525)}
{pt3dadd(164448.000000,161004.000000,40725.000000,167.176836)}
{pt3dadd(164436.000000,160560.000000,40800.000000,167.176836)}

{create adhoc61}
{access adhoc61}
{connect adhoc61(1), adhoc59(0)}
{nseg = 1}
{strdef color color = "White"}
{pt3dclear()}
{pt3dadd(163560.000000,161736.000000,39575.000000,599.024880)}
{pt3dadd(163680.000000,161568.000000,39150.000000,346.657896)}
{pt3dadd(164136.000000,161268.000000,38725.000000,363.990794)}
{pt3dadd(164604.000000,161040.000000,38550.000000,381.323691)}
{pt3dadd(165288.000000,160692.000000,38425.000000,398.656589)}
{pt3dadd(165684.000000,160380.000000,38150.000000,415.989486)}
{pt3dadd(165984.000000,160128.000000,38050.000000,415.989486)}
{pt3dadd(166356.000000,159756.000000,37900.000000,415.989486)}
{pt3dadd(166860.000000,159384.000000,37800.000000,415.989486)}
{pt3dadd(167112.000000,159096.000000,37725.000000,415.989486)}
{pt3dadd(167184.000000,158880.000000,37525.000000,436.788958)}
{pt3dadd(167256.000000,158628.000000,37400.000000,457.588431)}
{pt3dadd(167460.000000,158436.000000,37350.000000,478.387903)}
{pt3dadd(167760.000000,158244.000000,37275.000000,499.187376)}
{pt3dadd(168072.000000,158064.000000,37100.000000,499.187376)}
{pt3dadd(168288.000000,157860.000000,37000.000000,599.024880)}

{create adhoc62}
{access adhoc62}
{connect adhoc62(1), adhoc61(0)}
{nseg = 1}
{strdef color color = "White"}
{pt3dclear()}
{pt3dadd(168288.000000,157860.000000,37000.000000,599.024880)}
{pt3dadd(168120.000000,157092.000000,37125.000000,96.745860)}
{pt3dadd(168264.000000,156756.000000,36900.000000,122.712448)}
{pt3dadd(168012.000000,156396.000000,36750.000000,148.679037)}
{pt3dadd(167988.000000,156036.000000,36750.000000,174.645625)}
{pt3dadd(168060.000000,155580.000000,36725.000000,200.612214)}
{pt3dadd(168264.000000,155244.000000,36750.000000,192.253370)}
{pt3dadd(168480.000000,154980.000000,36750.000000,183.894525)}
{pt3dadd(168648.000000,154716.000000,36800.000000,175.535680)}
{pt3dadd(168768.000000,154464.000000,36725.000000,167.176836)}
{pt3dadd(168888.000000,154152.000000,36875.000000,185.566288)}
{pt3dadd(168732.000000,153768.000000,36825.000000,203.955741)}
{pt3dadd(168708.000000,153432.000000,36825.000000,222.345193)}
{pt3dadd(168636.000000,153120.000000,36875.000000,240.734646)}
{pt3dadd(168624.000000,152412.000000,37200.000000,209.574742)}
{pt3dadd(168840.000000,152088.000000,37475.000000,178.414839)}
{pt3dadd(169020.000000,151836.000000,37475.000000,147.254936)}
{pt3dadd(169344.000000,151560.000000,37575.000000,116.095032)}
{pt3dadd(169512.000000,151152.000000,37675.000000,137.224328)}
{pt3dadd(169716.000000,150768.000000,37600.000000,158.353623)}
{pt3dadd(169896.000000,150444.000000,37600.000000,179.482918)}
{pt3dadd(170172.000000,150144.000000,37725.000000,200.612214)}
{pt3dadd(170304.000000,149736.000000,38000.000000,185.287671)}
{pt3dadd(170304.000000,149412.000000,38200.000000,169.963128)}
{pt3dadd(170400.000000,149088.000000,38350.000000,154.638585)}
{pt3dadd(170448.000000,148572.000000,38150.000000,139.314042)}
{pt3dadd(170568.000000,148116.000000,38075.000000,146.279741)}
{pt3dadd(170664.000000,147648.000000,38125.000000,153.245439)}
{pt3dadd(170676.000000,147516.000000,38125.000000,160.211138)}
{pt3dadd(170748.000000,147276.000000,38075.000000,167.176836)}
{pt3dadd(170892.000000,147060.000000,38125.000000,212.047101)}
{pt3dadd(171132.000000,146772.000000,38100.000000,256.917366)}
{pt3dadd(171372.000000,146424.000000,38000.000000,301.787631)}
{pt3dadd(171492.000000,146076.000000,38125.000000,346.657896)}
{pt3dadd(171480.000000,145692.000000,38025.000000,277.543278)}
{pt3dadd(171492.000000,145500.000000,37950.000000,208.428660)}
{pt3dadd(171396.000000,145032.000000,37875.000000,139.314042)}
{pt3dadd(171780.000000,144792.000000,37875.000000,139.314042)}

{create adhoc63}
{access adhoc63}
{connect adhoc63(1), adhoc61(0)}
{nseg = 1}
{strdef color color = "White"}
{pt3dclear()}
{pt3dadd(168288.000000,157860.000000,37000.000000,599.024880)}
{pt3dadd(168960.000000,157776.000000,36500.000000,346.657896)}
{pt3dadd(169464.000000,157428.000000,36125.000000,346.657896)}
{pt3dadd(169896.000000,157248.000000,35750.000000,346.657896)}
{pt3dadd(170376.000000,157008.000000,35300.000000,346.657896)}
{pt3dadd(170940.000000,156840.000000,35000.000000,346.657896)}
{pt3dadd(171132.000000,156576.000000,34775.000000,294.821933)}
{pt3dadd(171696.000000,156084.000000,34475.000000,242.985969)}
{pt3dadd(172200.000000,155760.000000,34225.000000,191.150005)}
{pt3dadd(172572.000000,155556.000000,34175.000000,139.314042)}
{pt3dadd(172824.000000,155400.000000,34225.000000,176.705928)}
{pt3dadd(173016.000000,155268.000000,34150.000000,214.097814)}
{pt3dadd(173280.000000,155124.000000,34075.000000,251.489700)}
{pt3dadd(173496.000000,154992.000000,33975.000000,288.881586)}
{pt3dadd(173760.000000,154776.000000,33850.000000,288.881586)}
{pt3dadd(174012.000000,154476.000000,33775.000000,288.881586)}
{pt3dadd(174336.000000,154236.000000,33650.000000,288.881586)}
{pt3dadd(174612.000000,153828.000000,33625.000000,288.881586)}
{pt3dadd(174924.000000,153456.000000,33675.000000,251.489700)}
{pt3dadd(175044.000000,153192.000000,33625.000000,214.097814)}
{pt3dadd(175368.000000,152892.000000,33625.000000,176.705928)}
{pt3dadd(175704.000000,152640.000000,33600.000000,139.314042)}
{pt3dadd(176076.000000,152340.000000,33500.000000,176.705928)}
{pt3dadd(176244.000000,151884.000000,33575.000000,214.097814)}
{pt3dadd(176304.000000,151236.000000,33725.000000,251.489700)}
{pt3dadd(176472.000000,150912.000000,33700.000000,288.881586)}
{pt3dadd(176568.000000,150432.000000,33650.000000,266.814243)}
{pt3dadd(176820.000000,150072.000000,33425.000000,244.746900)}
{pt3dadd(177096.000000,149832.000000,33175.000000,222.679557)}
{pt3dadd(177372.000000,149616.000000,32950.000000,200.612214)}
{pt3dadd(177624.000000,149340.000000,32775.000000,185.287671)}
{pt3dadd(177672.000000,149172.000000,32750.000000,169.963128)}
{pt3dadd(177804.000000,149112.000000,32575.000000,154.638585)}
{pt3dadd(178032.000000,148920.000000,32575.000000,139.314042)}
{pt3dadd(178284.000000,148500.000000,32650.000000,190.024344)}
{pt3dadd(178224.000000,148152.000000,32400.000000,240.734646)}
{pt3dadd(178548.000000,147816.000000,32375.000000,167.176836)}

{create adhoc64}
{access adhoc64}
{connect adhoc64(1), adhoc58(0)}
{nseg = 1}
{strdef color color = "White"}
{pt3dclear()}
{pt3dadd(163200.000000,164664.000000,40625.000000,718.829820)}
{pt3dadd(163632.000000,164964.000000,40175.000000,718.829820)}
{pt3dadd(164232.000000,165024.000000,39800.000000,787.549937)}
{pt3dadd(164616.000000,164988.000000,39375.000000,856.270053)}
{pt3dadd(165180.000000,164964.000000,38975.000000,924.990169)}
{pt3dadd(165576.000000,164988.000000,38525.000000,993.710286)}
{pt3dadd(166020.000000,164832.000000,38175.000000,910.901115)}
{pt3dadd(166488.000000,164820.000000,37800.000000,828.091944)}
{pt3dadd(166788.000000,164748.000000,37800.000000,745.282773)}
{pt3dadd(167208.000000,164676.000000,37375.000000,662.473602)}
{pt3dadd(167664.000000,164688.000000,37300.000000,575.063856)}
{pt3dadd(167940.000000,164664.000000,37225.000000,599.024880)}

{create adhoc65}
{access adhoc65}
{connect adhoc65(1), adhoc64(0)}
{nseg = 1}
{strdef color color = "White"}
{pt3dclear()}
{pt3dadd(167940.000000,164664.000000,37225.000000,599.024880)}
{pt3dadd(167940.000000,165384.000000,36925.000000,200.612214)}
{pt3dadd(168084.000000,165456.000000,36700.000000,167.176836)}
{pt3dadd(168204.000000,165588.000000,36525.000000,167.176836)}

{create adhoc66}
{access adhoc66}
{connect adhoc66(1), adhoc65(0)}
{nseg = 1}
{strdef color color = "White"}
{pt3dclear()}
{pt3dadd(168204.000000,165588.000000,36525.000000,167.176836)}
{pt3dadd(168432.000000,165360.000000,36500.000000,96.745860)}
{pt3dadd(168588.000000,165252.000000,36325.000000,67.184640)}

{create adhoc67}
{access adhoc67}
{connect adhoc67(1), adhoc65(0)}
{nseg = 1}
{strdef color color = "White"}
{pt3dclear()}
{pt3dadd(168204.000000,165588.000000,36525.000000,167.176836)}
{pt3dadd(168096.000000,165804.000000,36275.000000,200.612214)}
{pt3dadd(168180.000000,165960.000000,36025.000000,210.642822)}
{pt3dadd(168180.000000,166008.000000,35725.000000,220.673430)}
{pt3dadd(168156.000000,166056.000000,35450.000000,230.704038)}
{pt3dadd(168132.000000,166080.000000,35175.000000,240.734646)}
{pt3dadd(168120.000000,166140.000000,34800.000000,230.704038)}
{pt3dadd(168192.000000,166260.000000,34575.000000,220.673430)}
{pt3dadd(168348.000000,166428.000000,34200.000000,210.642822)}
{pt3dadd(168420.000000,166584.000000,33725.000000,200.612214)}
{pt3dadd(168420.000000,166728.000000,33525.000000,200.612214)}

{create adhoc68}
{access adhoc68}
{connect adhoc68(1), adhoc64(0)}
{nseg = 1}
{strdef color color = "White"}
{pt3dclear()}
{pt3dadd(167940.000000,164664.000000,37225.000000,599.024880)}
{pt3dadd(168240.000000,164508.000000,37225.000000,575.063856)}
{pt3dadd(168468.000000,164376.000000,37150.000000,611.005347)}
{pt3dadd(168648.000000,164280.000000,37000.000000,646.946838)}
{pt3dadd(168900.000000,164064.000000,36525.000000,682.888329)}
{pt3dadd(169188.000000,163932.000000,36250.000000,718.829820)}
{pt3dadd(169512.000000,163896.000000,35975.000000,790.712811)}
{pt3dadd(169884.000000,163836.000000,35850.000000,862.595802)}
{pt3dadd(170208.000000,163764.000000,35850.000000,862.595802)}

{create adhoc69}
{access adhoc69}
{connect adhoc69(1), adhoc68(0)}
{nseg = 1}
{strdef color color = "White"}
{pt3dclear()}
{pt3dadd(170208.000000,163764.000000,35850.000000,862.595802)}
{pt3dadd(170208.000000,162840.000000,35775.000000,332.791560)}
{pt3dadd(170220.000000,162228.000000,35300.000000,309.777332)}
{pt3dadd(170304.000000,161856.000000,35100.000000,286.763103)}
{pt3dadd(170928.000000,161508.000000,34775.000000,263.748875)}
{pt3dadd(171528.000000,160968.000000,34675.000000,240.734646)}
{pt3dadd(172080.000000,160656.000000,34400.000000,252.771381)}
{pt3dadd(172440.000000,160320.000000,33975.000000,264.808116)}
{pt3dadd(172740.000000,160116.000000,33350.000000,276.844851)}
{pt3dadd(173184.000000,160116.000000,32950.000000,288.881586)}
{pt3dadd(173724.000000,160092.000000,32575.000000,288.881586)}
{pt3dadd(174324.000000,160188.000000,32325.000000,288.881586)}
{pt3dadd(175176.000000,160248.000000,32125.000000,288.881586)}
{pt3dadd(175428.000000,160272.000000,32075.000000,288.881586)}
{pt3dadd(175656.000000,160260.000000,31900.000000,266.814243)}
{pt3dadd(175860.000000,160308.000000,31800.000000,244.746900)}
{pt3dadd(176052.000000,160296.000000,31800.000000,222.679557)}
{pt3dadd(176316.000000,160272.000000,31800.000000,200.612214)}
{pt3dadd(177012.000000,160392.000000,31375.000000,210.642822)}
{pt3dadd(177372.000000,160140.000000,31100.000000,220.673430)}
{pt3dadd(177648.000000,159804.000000,30775.000000,230.704038)}
{pt3dadd(177912.000000,159732.000000,30675.000000,240.734646)}
{pt3dadd(178308.000000,159576.000000,30450.000000,96.745860)}
{pt3dadd(178716.000000,159504.000000,30300.000000,139.314042)}

{create adhoc70}
{access adhoc70}
{connect adhoc70(1), adhoc68(0)}
{nseg = 1}
{strdef color color = "White"}
{pt3dclear()}
{pt3dadd(170208.000000,163764.000000,35850.000000,862.595802)}
{pt3dadd(170496.000000,164064.000000,34800.000000,862.595802)}
{pt3dadd(170820.000000,164016.000000,34400.000000,750.944223)}
{pt3dadd(171108.000000,164028.000000,33925.000000,639.292644)}
{pt3dadd(171516.000000,164016.000000,33750.000000,527.641065)}
{pt3dadd(171888.000000,164016.000000,33725.000000,415.989486)}
{pt3dadd(172140.000000,163980.000000,33600.000000,436.788958)}
{pt3dadd(172344.000000,163992.000000,33550.000000,457.588431)}
{pt3dadd(172608.000000,164052.000000,33400.000000,478.387903)}
{pt3dadd(172872.000000,163980.000000,33375.000000,499.187376)}
{pt3dadd(173148.000000,163896.000000,33225.000000,494.195504)}
{pt3dadd(173424.000000,163740.000000,33050.000000,489.203631)}
{pt3dadd(173688.000000,163440.000000,32775.000000,484.211758)}
{pt3dadd(173964.000000,163344.000000,32600.000000,479.219886)}
{pt3dadd(174312.000000,163056.000000,32300.000000,485.875716)}
{pt3dadd(174672.000000,162840.000000,32075.000000,492.531546)}
{pt3dadd(175080.000000,162360.000000,31625.000000,499.187376)}
{pt3dadd(175440.000000,161844.000000,31200.000000,277.326288)}

{create adhoc71}
{access adhoc71}
{connect adhoc71(1), adhoc70(0)}
{nseg = 1}
{strdef color color = "White"}
{pt3dclear()}
{pt3dadd(175440.000000,161844.000000,31200.000000,277.326288)}
{pt3dadd(175728.000000,162480.000000,31025.000000,200.612214)}
{pt3dadd(175728.000000,162936.000000,30875.000000,179.482918)}
{pt3dadd(175896.000000,163152.000000,30700.000000,158.353623)}
{pt3dadd(176376.000000,163596.000000,30475.000000,137.224328)}
{pt3dadd(176532.000000,163560.000000,30575.000000,116.095032)}
{pt3dadd(176676.000000,163620.000000,30550.000000,116.095032)}
{pt3dadd(176988.000000,163680.000000,30550.000000,116.095032)}
{pt3dadd(177288.000000,163752.000000,30550.000000,116.095032)}

{create adhoc72}
{access adhoc72}
{connect adhoc72(1), adhoc70(0)}
{nseg = 1}
{strdef color color = "White"}
{pt3dclear()}
{pt3dadd(175440.000000,161844.000000,31200.000000,277.326288)}
{pt3dadd(175476.000000,161220.000000,31025.000000,240.734646)}
{pt3dadd(175632.000000,160332.000000,30675.000000,267.215459)}
{pt3dadd(175956.000000,159816.000000,30350.000000,293.696271)}
{pt3dadd(176460.000000,159048.000000,30150.000000,320.177083)}
{pt3dadd(176508.000000,158628.000000,29900.000000,346.657896)}
{pt3dadd(176712.000000,158304.000000,29775.000000,332.213819)}
{pt3dadd(176784.000000,158016.000000,29825.000000,317.769741)}
{pt3dadd(176940.000000,157788.000000,29825.000000,303.325664)}
{pt3dadd(177084.000000,157572.000000,29875.000000,288.881586)}
{pt3dadd(177336.000000,157248.000000,30000.000000,276.844851)}
{pt3dadd(177252.000000,156972.000000,29925.000000,264.808116)}
{pt3dadd(177396.000000,156624.000000,30000.000000,252.771381)}
{pt3dadd(177540.000000,156300.000000,29975.000000,240.734646)}
{pt3dadd(177600.000000,156024.000000,30025.000000,252.771381)}
{pt3dadd(177660.000000,155712.000000,30075.000000,264.808116)}
{pt3dadd(177708.000000,155424.000000,30075.000000,276.844851)}
{pt3dadd(177792.000000,155160.000000,30075.000000,288.881586)}
{pt3dadd(177936.000000,154848.000000,30075.000000,276.844851)}
{pt3dadd(177984.000000,154608.000000,30050.000000,264.808116)}
{pt3dadd(178224.000000,154296.000000,29850.000000,252.771381)}
{pt3dadd(178368.000000,154080.000000,29775.000000,240.734646)}
{pt3dadd(178536.000000,153780.000000,29775.000000,240.734646)}
{pt3dadd(178536.000000,153540.000000,29750.000000,240.734646)}
{pt3dadd(178908.000000,153276.000000,29750.000000,240.734646)}
{pt3dadd(179184.000000,152820.000000,29925.000000,240.734646)}
{pt3dadd(179160.000000,152472.000000,30150.000000,252.771381)}
{pt3dadd(179136.000000,152112.000000,30200.000000,264.808116)}
{pt3dadd(178968.000000,151764.000000,30150.000000,276.844851)}
{pt3dadd(179016.000000,151392.000000,30125.000000,288.881586)}
{pt3dadd(179160.000000,151188.000000,30050.000000,266.814243)}
{pt3dadd(179280.000000,150960.000000,29925.000000,244.746900)}
{pt3dadd(179364.000000,150696.000000,29850.000000,222.679557)}
{pt3dadd(179760.000000,150516.000000,29750.000000,200.612214)}
{pt3dadd(180096.000000,150216.000000,29550.000000,210.642822)}
{pt3dadd(180228.000000,149904.000000,29525.000000,220.673430)}
{pt3dadd(180600.000000,149616.000000,29450.000000,230.704038)}
{pt3dadd(180732.000000,149232.000000,29375.000000,240.734646)}
{pt3dadd(180672.000000,149040.000000,29350.000000,240.734646)}
{pt3dadd(180732.000000,148800.000000,29025.000000,240.734646)}
{pt3dadd(180792.000000,148500.000000,28675.000000,240.734646)}
{pt3dadd(180792.000000,147888.000000,28475.000000,240.734646)}
{pt3dadd(181008.000000,147468.000000,28300.000000,240.734646)}
{pt3dadd(181440.000000,147132.000000,28300.000000,240.734646)}
{pt3dadd(181620.000000,146784.000000,28275.000000,240.734646)}
{pt3dadd(181596.000000,146388.000000,28275.000000,240.734646)}
{pt3dadd(181368.000000,146076.000000,28425.000000,220.673430)}
{pt3dadd(181596.000000,145704.000000,28775.000000,200.612214)}
{pt3dadd(181920.000000,145140.000000,29100.000000,139.314042)}

{create adhoc73}
{access adhoc73}
{connect adhoc73(1), adhoc37(0)}
{nseg = 1}
{strdef color color = "White"}
{pt3dclear()}
{pt3dadd(163308.000000,195408.000000,72350.000000,1490.565402)}
{pt3dadd(162852.000000,196164.000000,71775.000000,1192.452354)}
{pt3dadd(162324.000000,196380.000000,70975.000000,1153.118003)}
{pt3dadd(161700.000000,196536.000000,70325.000000,1113.783651)}
{pt3dadd(161412.000000,196524.000000,69725.000000,1074.449300)}
{pt3dadd(161100.000000,196296.000000,69025.000000,1035.114948)}
{pt3dadd(160572.000000,196368.000000,68375.000000,1035.114948)}
{pt3dadd(160200.000000,196440.000000,67850.000000,1035.114948)}
{pt3dadd(159648.000000,196524.000000,67150.000000,1035.114948)}
{pt3dadd(159360.000000,196548.000000,66425.000000,1035.114948)}
{pt3dadd(158700.000000,196836.000000,65775.000000,1014.412617)}
{pt3dadd(158364.000000,196860.000000,65225.000000,993.710286)}
{pt3dadd(158028.000000,196788.000000,64675.000000,1035.114948)}

{create adhoc74}
{access adhoc74}
{connect adhoc74(1), adhoc73(0)}
{nseg = 1}
{strdef color color = "White"}
{pt3dclear()}
{pt3dadd(158028.000000,196788.000000,64675.000000,1035.114948)}
{pt3dadd(157800.000000,198204.000000,64550.000000,1035.114948)}
{pt3dadd(156984.000000,198924.000000,63925.000000,991.985162)}
{pt3dadd(156636.000000,199188.000000,63600.000000,948.855375)}
{pt3dadd(156420.000000,199224.000000,63150.000000,905.725589)}
{pt3dadd(156204.000000,199332.000000,62875.000000,862.595802)}
{pt3dadd(156024.000000,199392.000000,62750.000000,826.654307)}
{pt3dadd(155772.000000,199488.000000,62550.000000,790.712811)}
{pt3dadd(155448.000000,199608.000000,62200.000000,754.771316)}
{pt3dadd(155292.000000,199656.000000,62075.000000,718.829820)}
{pt3dadd(155076.000000,199836.000000,61750.000000,797.901102)}
{pt3dadd(154860.000000,199944.000000,61650.000000,876.972384)}
{pt3dadd(154668.000000,200196.000000,61475.000000,956.043666)}
{pt3dadd(154344.000000,200376.000000,61275.000000,1035.114948)}
{pt3dadd(154056.000000,200628.000000,61025.000000,1035.114948)}
{pt3dadd(153768.000000,200856.000000,60650.000000,1035.114948)}
{pt3dadd(153456.000000,201120.000000,60325.000000,1035.114948)}
{pt3dadd(153120.000000,201348.000000,59975.000000,1035.114948)}
{pt3dadd(152772.000000,201624.000000,59425.000000,1242.137880)}
{pt3dadd(152556.000000,201708.000000,59150.000000,1242.137880)}

{create adhoc75}
{access adhoc75}
{connect adhoc75(1), adhoc74(0)}
{nseg = 1}
{strdef color color = "White"}
{pt3dclear()}
{pt3dadd(152556.000000,201708.000000,59150.000000,1242.137880)}
{pt3dadd(152220.000000,201852.000000,58725.000000,1242.137880)}
{pt3dadd(151968.000000,201840.000000,58400.000000,1242.137880)}

{create adhoc76}
{access adhoc76}
{connect adhoc76(1), adhoc75(0)}
{nseg = 1}
{strdef color color = "White"}
{pt3dclear()}
{pt3dadd(151968.000000,201840.000000,58400.000000,1242.137880)}
{pt3dadd(151800.000000,202128.000000,57925.000000,1490.565402)}
{pt3dadd(151428.000000,202296.000000,57450.000000,1416.037140)}
{pt3dadd(151140.000000,202608.000000,56825.000000,1341.508878)}
{pt3dadd(151272.000000,202848.000000,56275.000000,1266.980616)}
{pt3dadd(151296.000000,202980.000000,55900.000000,1192.452354)}
{pt3dadd(151068.000000,203388.000000,55475.000000,1082.500170)}
{pt3dadd(151032.000000,203676.000000,55150.000000,972.547986)}
{pt3dadd(151020.000000,204012.000000,54750.000000,862.595802)}
{pt3dadd(150996.000000,204096.000000,54600.000000,953.961966)}

{create adhoc77}
{access adhoc77}
{connect adhoc77(1), adhoc76(0)}
{nseg = 1}
{strdef color color = "White"}
{pt3dclear()}
{pt3dadd(150996.000000,204096.000000,54600.000000,953.961966)}
{pt3dadd(151056.000000,204480.000000,54150.000000,1035.114948)}
{pt3dadd(151068.000000,204648.000000,53800.000000,956.043666)}
{pt3dadd(151344.000000,204576.000000,53350.000000,876.972384)}
{pt3dadd(151440.000000,204648.000000,53025.000000,797.901102)}
{pt3dadd(151572.000000,204696.000000,52675.000000,718.829820)}
{pt3dadd(151620.000000,204744.000000,52425.000000,682.888329)}
{pt3dadd(151728.000000,204924.000000,51975.000000,646.946838)}
{pt3dadd(151920.000000,204984.000000,51500.000000,611.005347)}
{pt3dadd(152004.000000,205044.000000,51150.000000,575.063856)}
{pt3dadd(152112.000000,205224.000000,50950.000000,415.989486)}

{create adhoc78}
{access adhoc78}
{connect adhoc78(1), adhoc77(0)}
{nseg = 1}
{strdef color color = "White"}
{pt3dclear()}
{pt3dadd(152112.000000,205224.000000,50950.000000,415.989486)}
{pt3dadd(152352.000000,205764.000000,50575.000000,346.657896)}
{pt3dadd(152964.000000,206280.000000,50175.000000,439.700877)}
{pt3dadd(153348.000000,206556.000000,49775.000000,532.743858)}
{pt3dadd(153744.000000,206580.000000,49425.000000,625.786839)}
{pt3dadd(154212.000000,206568.000000,48925.000000,718.829820)}
{pt3dadd(154560.000000,206544.000000,48400.000000,862.595802)}

{create adhoc79}
{access adhoc79}
{connect adhoc79(1), adhoc78(0)}
{nseg = 1}
{strdef color color = "White"}
{pt3dclear()}
{pt3dadd(154560.000000,206544.000000,48400.000000,862.595802)}
{pt3dadd(154956.000000,206520.000000,48000.000000,1035.114948)}
{pt3dadd(155184.000000,206520.000000,47500.000000,1035.114948)}
{pt3dadd(155316.000000,206544.000000,46975.000000,1035.114948)}
{pt3dadd(155628.000000,206568.000000,46400.000000,1035.114948)}
{pt3dadd(155964.000000,206484.000000,45975.000000,1035.114948)}
{pt3dadd(156288.000000,206256.000000,45525.000000,718.829820)}
{pt3dadd(156624.000000,206244.000000,45100.000000,399.349872)}

{create adhoc80}
{access adhoc80}
{connect adhoc80(1), adhoc79(0)}
{nseg = 1}
{strdef color color = "White"}
{pt3dclear()}
{pt3dadd(156624.000000,206244.000000,45100.000000,399.349872)}
{pt3dadd(156924.000000,205536.000000,44775.000000,499.187376)}
{pt3dadd(157128.000000,204888.000000,44375.000000,494.195513)}
{pt3dadd(157440.000000,204576.000000,43975.000000,489.203649)}
{pt3dadd(157716.000000,204372.000000,43600.000000,484.211785)}
{pt3dadd(157980.000000,204324.000000,43375.000000,479.219922)}
{pt3dadd(158184.000000,204060.000000,43000.000000,431.635338)}
{pt3dadd(158388.000000,203772.000000,42625.000000,384.050754)}
{pt3dadd(158568.000000,203484.000000,42250.000000,336.466170)}
{pt3dadd(158916.000000,203064.000000,41900.000000,288.881586)}
{pt3dadd(159072.000000,202824.000000,41700.000000,320.658561)}
{pt3dadd(159720.000000,202524.000000,41075.000000,352.435536)}
{pt3dadd(160044.000000,202260.000000,40625.000000,384.212511)}
{pt3dadd(160248.000000,202104.000000,40150.000000,415.989486)}
{pt3dadd(160848.000000,201888.000000,39675.000000,415.989486)}
{pt3dadd(161172.000000,201612.000000,39375.000000,415.989486)}
{pt3dadd(161580.000000,200964.000000,39125.000000,415.989486)}
{pt3dadd(161808.000000,200820.000000,38925.000000,415.989486)}
{pt3dadd(162036.000000,200652.000000,38825.000000,398.656589)}
{pt3dadd(162276.000000,200352.000000,38525.000000,381.323691)}
{pt3dadd(162528.000000,200100.000000,38400.000000,363.990794)}
{pt3dadd(162720.000000,199680.000000,38050.000000,346.657896)}
{pt3dadd(162816.000000,199284.000000,37900.000000,346.657896)}

{create adhoc81}
{access adhoc81}
{connect adhoc81(1), adhoc80(0)}
{nseg = 1}
{strdef color color = "White"}
{pt3dclear()}
{pt3dadd(162816.000000,199284.000000,37900.000000,346.657896)}
{pt3dadd(163044.000000,198660.000000,37575.000000,240.734646)}
{pt3dadd(163344.000000,198156.000000,37250.000000,284.548356)}
{pt3dadd(163812.000000,197808.000000,36875.000000,328.362066)}
{pt3dadd(164076.000000,197664.000000,36550.000000,372.175776)}
{pt3dadd(164280.000000,197256.000000,36200.000000,415.989486)}
{pt3dadd(164616.000000,196968.000000,35875.000000,372.175776)}
{pt3dadd(165072.000000,196416.000000,35475.000000,328.362066)}
{pt3dadd(165384.000000,195984.000000,35450.000000,284.548356)}
{pt3dadd(165636.000000,195612.000000,35425.000000,240.734646)}
{pt3dadd(165876.000000,195216.000000,35300.000000,240.734646)}
{pt3dadd(166104.000000,194904.000000,35125.000000,240.734646)}
{pt3dadd(166308.000000,194484.000000,34850.000000,240.734646)}
{pt3dadd(166728.000000,194016.000000,34450.000000,240.734646)}
{pt3dadd(167004.000000,193704.000000,34525.000000,231.105276)}

{create adhoc82}
{access adhoc82}
{connect adhoc82(1), adhoc81(0)}
{nseg = 1}
{strdef color color = "White"}
{pt3dclear()}
{pt3dadd(167004.000000,193704.000000,34525.000000,231.105276)}
{pt3dadd(167124.000000,192720.000000,34550.000000,139.314042)}
{pt3dadd(167280.000000,192456.000000,34475.000000,154.638585)}
{pt3dadd(167424.000000,192360.000000,34475.000000,169.963128)}
{pt3dadd(167592.000000,192072.000000,34175.000000,185.287671)}
{pt3dadd(167604.000000,191748.000000,33875.000000,200.612214)}
{pt3dadd(167652.000000,191544.000000,33600.000000,179.482918)}
{pt3dadd(167868.000000,191136.000000,33325.000000,158.353623)}
{pt3dadd(168228.000000,190704.000000,33100.000000,137.224328)}
{pt3dadd(168564.000000,190500.000000,32800.000000,116.095032)}
{pt3dadd(169008.000000,190128.000000,32600.000000,116.095032)}
{pt3dadd(169632.000000,190020.000000,32425.000000,116.095032)}
{pt3dadd(169704.000000,189864.000000,32150.000000,116.095032)}
{pt3dadd(169836.000000,189732.000000,31850.000000,116.095032)}
{pt3dadd(170196.000000,189468.000000,31550.000000,99.791568)}
{pt3dadd(170460.000000,189192.000000,31375.000000,83.488104)}
{pt3dadd(170496.000000,188988.000000,31325.000000,67.184640)}
{pt3dadd(170592.000000,188712.000000,31300.000000,96.745860)}

{create adhoc83}
{access adhoc83}
{connect adhoc83(1), adhoc81(0)}
{nseg = 1}
{strdef color color = "White"}
{pt3dclear()}
{pt3dadd(167004.000000,193704.000000,34525.000000,231.105276)}
{pt3dadd(167040.000000,194364.000000,34475.000000,240.734646)}
{pt3dadd(167196.000000,194280.000000,34275.000000,230.704038)}
{pt3dadd(167352.000000,194256.000000,34200.000000,220.673430)}
{pt3dadd(167496.000000,194244.000000,34125.000000,210.642822)}
{pt3dadd(167652.000000,194244.000000,34050.000000,200.612214)}
{pt3dadd(167796.000000,194256.000000,33950.000000,192.253370)}
{pt3dadd(167940.000000,194232.000000,33925.000000,183.894525)}
{pt3dadd(168048.000000,194208.000000,33900.000000,175.535680)}
{pt3dadd(168480.000000,194148.000000,33725.000000,167.176836)}
{pt3dadd(168960.000000,194148.000000,33525.000000,185.566288)}
{pt3dadd(169644.000000,194424.000000,33325.000000,203.955741)}
{pt3dadd(169968.000000,194520.000000,33125.000000,222.345193)}
{pt3dadd(170232.000000,194496.000000,32925.000000,240.734646)}
{pt3dadd(170664.000000,194364.000000,32675.000000,216.215376)}
{pt3dadd(171096.000000,194136.000000,32400.000000,191.696106)}
{pt3dadd(171384.000000,193860.000000,32100.000000,167.176836)}
{pt3dadd(171432.000000,193656.000000,31825.000000,139.314042)}

{create adhoc84}
{access adhoc84}
{connect adhoc84(1), adhoc80(0)}
{nseg = 1}
{strdef color color = "White"}
{pt3dclear()}
{pt3dadd(162816.000000,199284.000000,37900.000000,346.657896)}
{pt3dadd(162828.000000,200232.000000,37800.000000,139.314042)}
{pt3dadd(162984.000000,200280.000000,37625.000000,139.314042)}
{pt3dadd(163380.000000,200292.000000,37450.000000,139.314042)}
{pt3dadd(163776.000000,200388.000000,37200.000000,139.314042)}
{pt3dadd(164136.000000,200436.000000,37000.000000,139.314042)}
{pt3dadd(164340.000000,200496.000000,36850.000000,146.279741)}
{pt3dadd(164736.000000,200556.000000,36625.000000,153.245439)}
{pt3dadd(165060.000000,200580.000000,36300.000000,160.211138)}
{pt3dadd(165300.000000,200424.000000,35950.000000,167.176836)}
{pt3dadd(165768.000000,200388.000000,35550.000000,167.176836)}
{pt3dadd(166092.000000,200352.000000,35225.000000,167.176836)}
{pt3dadd(166344.000000,200256.000000,34975.000000,139.314042)}

{create adhoc85}
{access adhoc85}
{connect adhoc85(1), adhoc79(0)}
{nseg = 1}
{strdef color color = "White"}
{pt3dclear()}
{pt3dadd(156624.000000,206244.000000,45100.000000,399.349872)}
{pt3dadd(156876.000000,207156.000000,44950.000000,346.657896)}
{pt3dadd(157092.000000,207264.000000,44775.000000,289.017180)}
{pt3dadd(157452.000000,207612.000000,44475.000000,231.376464)}
{pt3dadd(157776.000000,207888.000000,44275.000000,173.735748)}
{pt3dadd(157872.000000,208020.000000,43950.000000,116.095032)}
{pt3dadd(158136.000000,208200.000000,43975.000000,111.257739)}
{pt3dadd(158460.000000,208416.000000,43525.000000,106.420446)}
{pt3dadd(158748.000000,208452.000000,43075.000000,101.583153)}
{pt3dadd(159060.000000,208404.000000,42825.000000,96.745860)}
{pt3dadd(159348.000000,208548.000000,42575.000000,114.353604)}
{pt3dadd(159612.000000,208512.000000,42225.000000,131.961348)}
{pt3dadd(159828.000000,208608.000000,41925.000000,149.569092)}
{pt3dadd(160032.000000,208608.000000,41650.000000,167.176836)}
{pt3dadd(160224.000000,208392.000000,41250.000000,154.406385)}
{pt3dadd(160404.000000,208164.000000,40975.000000,141.635934)}
{pt3dadd(160776.000000,207996.000000,40650.000000,128.865483)}
{pt3dadd(161172.000000,207780.000000,40225.000000,116.095032)}
{pt3dadd(161724.000000,207528.000000,39775.000000,167.176836)}

{create adhoc86}
{access adhoc86}
{connect adhoc86(1), adhoc78(0)}
{nseg = 1}
{strdef color color = "White"}
{pt3dclear()}
{pt3dadd(154560.000000,206544.000000,48400.000000,862.595802)}
{pt3dadd(153936.000000,207672.000000,48550.000000,96.745860)}
{pt3dadd(153828.000000,208116.000000,48775.000000,96.745860)}
{pt3dadd(154044.000000,208332.000000,48900.000000,116.095032)}

{create adhoc87}
{access adhoc87}
{connect adhoc87(1), adhoc77(0)}
{nseg = 1}
{strdef color color = "White"}
{pt3dclear()}
{pt3dadd(152112.000000,205224.000000,50950.000000,415.989486)}
{pt3dadd(152124.000000,204312.000000,50925.000000,346.657896)}
{pt3dadd(152136.000000,204120.000000,50725.000000,332.213819)}
{pt3dadd(152208.000000,203928.000000,50425.000000,317.769741)}
{pt3dadd(152388.000000,203628.000000,50075.000000,303.325664)}
{pt3dadd(152580.000000,203376.000000,49750.000000,288.881586)}
{pt3dadd(152736.000000,203304.000000,49400.000000,288.881586)}
{pt3dadd(152916.000000,203184.000000,49025.000000,139.314042)}

{create adhoc88}
{access adhoc88}
{connect adhoc88(1), adhoc76(0)}
{nseg = 1}
{strdef color color = "White"}
{pt3dclear()}
{pt3dadd(150996.000000,204096.000000,54600.000000,953.961966)}
{pt3dadd(151044.000000,206412.000000,54600.000000,96.745860)}
{pt3dadd(151104.000000,207036.000000,54750.000000,107.387906)}
{pt3dadd(151224.000000,207816.000000,54950.000000,118.029951)}
{pt3dadd(151248.000000,208152.000000,54825.000000,128.671997)}
{pt3dadd(151308.000000,208500.000000,54875.000000,139.314042)}
{pt3dadd(151380.000000,209172.000000,55125.000000,139.314042)}
{pt3dadd(151944.000000,209556.000000,55525.000000,139.314042)}
{pt3dadd(152328.000000,209532.000000,55875.000000,139.314042)}
{pt3dadd(152712.000000,209796.000000,56225.000000,139.314042)}
{pt3dadd(152940.000000,210228.000000,56500.000000,133.741476)}

{create adhoc89}
{access adhoc89}
{connect adhoc89(1), adhoc75(0)}
{nseg = 1}
{strdef color color = "White"}
{pt3dclear()}
{pt3dadd(151968.000000,201840.000000,58400.000000,1242.137880)}
{pt3dadd(151968.000000,200916.000000,55625.000000,200.612214)}
{pt3dadd(152148.000000,200484.000000,55275.000000,210.642822)}
{pt3dadd(152220.000000,200220.000000,55000.000000,220.673430)}
{pt3dadd(152412.000000,199848.000000,54725.000000,230.704038)}
{pt3dadd(152616.000000,199704.000000,54475.000000,240.734646)}
{pt3dadd(152928.000000,199392.000000,54200.000000,222.345193)}
{pt3dadd(152988.000000,199188.000000,53850.000000,203.955741)}
{pt3dadd(153072.000000,198864.000000,53500.000000,185.566288)}
{pt3dadd(153132.000000,198720.000000,53150.000000,167.176836)}
{pt3dadd(153336.000000,198456.000000,52825.000000,175.535680)}
{pt3dadd(153036.000000,198204.000000,52500.000000,183.894525)}
{pt3dadd(153096.000000,198036.000000,52175.000000,192.253370)}
{pt3dadd(153312.000000,197868.000000,51850.000000,200.612214)}
{pt3dadd(153564.000000,197772.000000,51575.000000,200.612214)}
{pt3dadd(153900.000000,197520.000000,51050.000000,200.612214)}
{pt3dadd(154044.000000,197292.000000,50600.000000,200.612214)}
{pt3dadd(154272.000000,197280.000000,50325.000000,200.612214)}
{pt3dadd(154464.000000,197064.000000,50025.000000,200.612214)}

{create adhoc90}
{access adhoc90}
{connect adhoc90(1), adhoc74(0)}
{nseg = 1}
{strdef color color = "White"}
{pt3dclear()}
{pt3dadd(152556.000000,201708.000000,59150.000000,1242.137880)}
{pt3dadd(152556.000000,203160.000000,58525.000000,139.314042)}
{pt3dadd(152892.000000,203508.000000,58650.000000,167.176836)}
{pt3dadd(153024.000000,203724.000000,58700.000000,116.095032)}

{create adhoc91}
{access adhoc91}
{connect adhoc91(1), adhoc90(0)}
{nseg = 1}
{strdef color color = "White"}
{pt3dclear()}
{pt3dadd(153024.000000,203724.000000,58700.000000,116.095032)}
{pt3dadd(153336.000000,203820.000000,58975.000000,139.314042)}
{pt3dadd(153480.000000,203940.000000,59025.000000,154.638585)}
{pt3dadd(153684.000000,204168.000000,59250.000000,169.963128)}
{pt3dadd(153984.000000,204480.000000,59525.000000,185.287671)}
{pt3dadd(154404.000000,204936.000000,59775.000000,200.612214)}
{pt3dadd(154416.000000,205584.000000,60300.000000,139.314042)}
{pt3dadd(154296.000000,206136.000000,60850.000000,139.314042)}

{create adhoc92}
{access adhoc92}
{connect adhoc92(1), adhoc90(0)}
{nseg = 1}
{strdef color color = "White"}
{pt3dclear()}
{pt3dadd(153024.000000,203724.000000,58700.000000,116.095032)}
{pt3dadd(152880.000000,204024.000000,58725.000000,116.095032)}

{create adhoc93}
{access adhoc93}
{connect adhoc93(1), adhoc73(0)}
{nseg = 1}
{strdef color color = "White"}
{pt3dclear()}
{pt3dadd(158028.000000,196788.000000,64675.000000,1035.114948)}
{pt3dadd(158232.000000,195684.000000,64350.000000,599.024880)}
{pt3dadd(157920.000000,194988.000000,63675.000000,599.024880)}
{pt3dadd(157668.000000,194496.000000,63075.000000,599.024880)}
{pt3dadd(157380.000000,193896.000000,62475.000000,599.024880)}
{pt3dadd(156936.000000,193560.000000,61900.000000,599.024880)}
{pt3dadd(156588.000000,192900.000000,61275.000000,686.881854)}
{pt3dadd(156108.000000,192456.000000,60650.000000,774.738828)}
{pt3dadd(156036.000000,191796.000000,60050.000000,862.595802)}
{pt3dadd(155916.000000,191304.000000,59500.000000,879.171156)}

{create adhoc94}
{access adhoc94}
{connect adhoc94(1), adhoc93(0)}
{nseg = 1}
{strdef color color = "White"}
{pt3dclear()}
{pt3dadd(155916.000000,191304.000000,59500.000000,879.171156)}
{pt3dadd(157296.000000,191964.000000,59450.000000,116.095032)}
{pt3dadd(157620.000000,192108.000000,59225.000000,139.314042)}

{create adhoc95}
{access adhoc95}
{connect adhoc95(1), adhoc94(0)}
{nseg = 1}
{strdef color color = "White"}
{pt3dclear()}
{pt3dadd(157620.000000,192108.000000,59225.000000,139.314042)}
{pt3dadd(158052.000000,192096.000000,59025.000000,96.745860)}
{pt3dadd(158220.000000,192072.000000,59075.000000,92.714782)}
{pt3dadd(158436.000000,191952.000000,59075.000000,88.683705)}
{pt3dadd(158712.000000,191928.000000,59025.000000,84.652627)}
{pt3dadd(159108.000000,191928.000000,59025.000000,80.621550)}
{pt3dadd(159444.000000,192000.000000,59150.000000,73.903095)}
{pt3dadd(159888.000000,192096.000000,59150.000000,67.184640)}
{pt3dadd(160392.000000,192240.000000,59000.000000,80.621550)}

{create adhoc96}
{access adhoc96}
{connect adhoc96(1), adhoc94(0)}
{nseg = 1}
{strdef color color = "White"}
{pt3dclear()}
{pt3dadd(157620.000000,192108.000000,59225.000000,139.314042)}
{pt3dadd(157596.000000,192756.000000,59225.000000,139.314042)}
{pt3dadd(157740.000000,192864.000000,59250.000000,116.095032)}
{pt3dadd(157872.000000,192804.000000,59250.000000,96.745860)}

{create adhoc97}
{access adhoc97}
{connect adhoc97(1), adhoc93(0)}
{nseg = 1}
{strdef color color = "White"}
{pt3dclear()}
{pt3dadd(155916.000000,191304.000000,59500.000000,879.171156)}
{pt3dadd(155700.000000,190716.000000,59125.000000,1035.114948)}
{pt3dadd(155592.000000,190200.000000,58575.000000,1134.071928)}
{pt3dadd(155628.000000,189828.000000,58025.000000,1233.028908)}
{pt3dadd(155676.000000,189612.000000,57375.000000,1331.985888)}
{pt3dadd(155736.000000,189312.000000,56900.000000,1430.942868)}
{pt3dadd(155760.000000,189192.000000,56250.000000,1264.953456)}
{pt3dadd(155688.000000,189036.000000,55425.000000,1098.964044)}
{pt3dadd(155784.000000,188736.000000,54775.000000,1490.565402)}

{create adhoc98}
{access adhoc98}
{connect adhoc98(1), adhoc97(0)}
{nseg = 1}
{strdef color color = "White"}
{pt3dclear()}
{pt3dadd(155784.000000,188736.000000,54775.000000,1490.565402)}
{pt3dadd(156684.000000,189768.000000,54725.000000,96.745860)}

{create adhoc99}
{access adhoc99}
{connect adhoc99(1), adhoc98(0)}
{nseg = 1}
{strdef color color = "White"}
{pt3dclear()}
{pt3dadd(156684.000000,189768.000000,54725.000000,96.745860)}
{pt3dadd(156756.000000,190212.000000,54700.000000,80.621550)}
{pt3dadd(156768.000000,190332.000000,54700.000000,80.621550)}

{create adhoc100}
{access adhoc100}
{connect adhoc100(1), adhoc98(0)}
{nseg = 1}
{strdef color color = "White"}
{pt3dclear()}
{pt3dadd(156684.000000,189768.000000,54725.000000,96.745860)}
{pt3dadd(156960.000000,189648.000000,54850.000000,80.621550)}
{pt3dadd(157152.000000,189552.000000,54850.000000,139.314042)}

{create adhoc101}
{access adhoc101}
{connect adhoc101(1), adhoc97(0)}
{nseg = 1}
{strdef color color = "White"}
{pt3dclear()}
{pt3dadd(155784.000000,188736.000000,54775.000000,1490.565402)}
{pt3dadd(155736.000000,188436.000000,54175.000000,1242.137880)}
{pt3dadd(155844.000000,187872.000000,53775.000000,1035.114948)}

{create adhoc102}
{access adhoc102}
{connect adhoc102(1), adhoc101(0)}
{nseg = 1}
{strdef color color = "White"}
{pt3dclear()}
{pt3dadd(155844.000000,187872.000000,53775.000000,1035.114948)}
{pt3dadd(155616.000000,188532.000000,52575.000000,575.063856)}
{pt3dadd(155436.000000,188712.000000,52350.000000,728.414220)}
{pt3dadd(154908.000000,188964.000000,52025.000000,881.764584)}
{pt3dadd(154692.000000,189180.000000,51675.000000,1035.114948)}
{pt3dadd(154632.000000,189216.000000,51400.000000,1035.114948)}

{create adhoc103}
{access adhoc103}
{connect adhoc103(1), adhoc102(0)}
{nseg = 1}
{strdef color color = "White"}
{pt3dclear()}
{pt3dadd(154632.000000,189216.000000,51400.000000,1035.114948)}
{pt3dadd(154512.000000,189168.000000,51150.000000,1035.114948)}
{pt3dadd(154200.000000,189312.000000,50775.000000,991.985162)}
{pt3dadd(154080.000000,189396.000000,50500.000000,948.855375)}
{pt3dadd(153948.000000,189552.000000,50200.000000,905.725589)}
{pt3dadd(153888.000000,189756.000000,49950.000000,862.595802)}
{pt3dadd(153888.000000,189792.000000,49550.000000,895.374441)}
{pt3dadd(153864.000000,189840.000000,49075.000000,928.153080)}
{pt3dadd(153912.000000,189816.000000,48625.000000,960.931719)}
{pt3dadd(154152.000000,189720.000000,48300.000000,993.710358)}
{pt3dadd(154404.000000,189696.000000,48000.000000,960.931719)}
{pt3dadd(154644.000000,189684.000000,47475.000000,928.153080)}
{pt3dadd(154788.000000,189612.000000,47150.000000,895.374441)}
{pt3dadd(154944.000000,189600.000000,46700.000000,862.595802)}
{pt3dadd(155160.000000,189504.000000,46350.000000,862.595802)}
{pt3dadd(155292.000000,189480.000000,45950.000000,862.595802)}
{pt3dadd(155448.000000,189516.000000,45575.000000,862.595802)}
{pt3dadd(155604.000000,189624.000000,45175.000000,862.595802)}
{pt3dadd(155868.000000,189636.000000,44825.000000,862.595802)}
{pt3dadd(156096.000000,189696.000000,44475.000000,599.024880)}

{create adhoc104}
{access adhoc104}
{connect adhoc104(1), adhoc103(0)}
{nseg = 1}
{strdef color color = "White"}
{pt3dclear()}
{pt3dadd(156096.000000,189696.000000,44475.000000,599.024880)}
{pt3dadd(156360.000000,190092.000000,44200.000000,399.349944)}
{pt3dadd(156540.000000,190272.000000,43900.000000,346.657896)}
{pt3dadd(156624.000000,190548.000000,43675.000000,499.187376)}

{create adhoc105}
{access adhoc105}
{connect adhoc105(1), adhoc104(0)}
{nseg = 1}
{strdef color color = "White"}
{pt3dclear()}
{pt3dadd(156624.000000,190548.000000,43675.000000,499.187376)}
{pt3dadd(156744.000000,190764.000000,43325.000000,346.657896)}
{pt3dadd(157056.000000,191280.000000,43075.000000,363.990794)}
{pt3dadd(157068.000000,191496.000000,42800.000000,381.323691)}
{pt3dadd(157224.000000,191736.000000,42575.000000,398.656589)}
{pt3dadd(157356.000000,191988.000000,42325.000000,415.989486)}
{pt3dadd(157440.000000,192240.000000,42025.000000,491.699570)}
{pt3dadd(157452.000000,192372.000000,41650.000000,567.409653)}
{pt3dadd(157464.000000,192456.000000,41275.000000,643.119737)}
{pt3dadd(157476.000000,192576.000000,40950.000000,718.829820)}
{pt3dadd(157596.000000,192588.000000,40625.000000,643.119736)}
{pt3dadd(157644.000000,192528.000000,40250.000000,567.409653)}
{pt3dadd(157692.000000,192504.000000,39975.000000,491.699570)}
{pt3dadd(157656.000000,192492.000000,39675.000000,415.989486)}
{pt3dadd(157716.000000,192504.000000,39450.000000,461.748335)}
{pt3dadd(157896.000000,192324.000000,39000.000000,507.507183)}
{pt3dadd(158052.000000,192144.000000,38725.000000,553.266031)}
{pt3dadd(158340.000000,192048.000000,38425.000000,599.024880)}
{pt3dadd(158748.000000,191940.000000,38050.000000,521.489056)}
{pt3dadd(159000.000000,191880.000000,38125.000000,443.953233)}
{pt3dadd(159240.000000,191856.000000,38050.000000,366.417410)}
{pt3dadd(159468.000000,191772.000000,37950.000000,288.881586)}
{pt3dadd(159624.000000,191712.000000,37850.000000,320.658561)}
{pt3dadd(159840.000000,191724.000000,37775.000000,352.435536)}
{pt3dadd(160032.000000,191664.000000,37775.000000,384.212511)}
{pt3dadd(160716.000000,191664.000000,37700.000000,415.989486)}
{pt3dadd(160956.000000,191544.000000,37675.000000,362.145168)}
{pt3dadd(161172.000000,191568.000000,37575.000000,308.300850)}
{pt3dadd(161616.000000,191616.000000,37275.000000,254.456532)}
{pt3dadd(161964.000000,191544.000000,37000.000000,200.612214)}
{pt3dadd(162288.000000,191532.000000,36875.000000,174.645625)}
{pt3dadd(162576.000000,191352.000000,36750.000000,148.679037)}
{pt3dadd(162864.000000,191292.000000,36675.000000,122.712448)}
{pt3dadd(163200.000000,191112.000000,36575.000000,96.745860)}
{pt3dadd(163380.000000,191040.000000,36225.000000,133.741476)}

{create adhoc106}
{access adhoc106}
{connect adhoc106(1), adhoc104(0)}
{nseg = 1}
{strdef color color = "White"}
{pt3dclear()}
{pt3dadd(156624.000000,190548.000000,43675.000000,499.187376)}
{pt3dadd(156360.000000,191124.000000,43675.000000,200.612214)}
{pt3dadd(156204.000000,191412.000000,43650.000000,80.621550)}
{pt3dadd(156084.000000,191460.000000,43725.000000,116.095032)}

{create adhoc107}
{access adhoc107}
{connect adhoc107(1), adhoc103(0)}
{nseg = 1}
{strdef color color = "White"}
{pt3dclear()}
{pt3dadd(156096.000000,189696.000000,44475.000000,599.024880)}
{pt3dadd(156228.000000,188976.000000,44325.000000,240.734646)}
{pt3dadd(156252.000000,188796.000000,44150.000000,267.215459)}
{pt3dadd(156216.000000,188448.000000,43850.000000,293.696271)}
{pt3dadd(156288.000000,188232.000000,43575.000000,320.177083)}
{pt3dadd(156396.000000,188040.000000,43250.000000,346.657896)}
{pt3dadd(156492.000000,187872.000000,42950.000000,301.787631)}
{pt3dadd(156588.000000,187584.000000,42700.000000,256.917366)}
{pt3dadd(156816.000000,187464.000000,42375.000000,212.047101)}
{pt3dadd(157164.000000,187368.000000,42100.000000,167.176836)}
{pt3dadd(157380.000000,187284.000000,41825.000000,167.176836)}
{pt3dadd(157392.000000,187212.000000,41500.000000,167.176836)}
{pt3dadd(157500.000000,187224.000000,41175.000000,167.176836)}
{pt3dadd(157488.000000,187068.000000,40650.000000,167.176836)}
{pt3dadd(157488.000000,186984.000000,40375.000000,96.745860)}
{pt3dadd(157488.000000,186912.000000,40000.000000,116.095032)}

{create adhoc108}
{access adhoc108}
{connect adhoc108(1), adhoc102(0)}
{nseg = 1}
{strdef color color = "White"}
{pt3dclear()}
{pt3dadd(154632.000000,189216.000000,51400.000000,1035.114948)}
{pt3dadd(155040.000000,189936.000000,51400.000000,116.095032)}
{pt3dadd(155088.000000,190080.000000,51400.000000,111.257739)}
{pt3dadd(155136.000000,190212.000000,51425.000000,106.420446)}
{pt3dadd(155148.000000,190332.000000,51400.000000,101.583153)}
{pt3dadd(155160.000000,190464.000000,51400.000000,96.745860)}
{pt3dadd(155184.000000,190584.000000,51400.000000,96.745860)}
{pt3dadd(155244.000000,190704.000000,51450.000000,96.745860)}
{pt3dadd(155280.000000,190884.000000,51400.000000,96.745860)}
{pt3dadd(155556.000000,191076.000000,51500.000000,96.745860)}
{pt3dadd(155652.000000,191208.000000,51500.000000,200.612214)}
{pt3dadd(155664.000000,191316.000000,51500.000000,139.314042)}

{create adhoc109}
{access adhoc109}
{connect adhoc109(1), adhoc101(0)}
{nseg = 1}
{strdef color color = "White"}
{pt3dclear()}
{pt3dadd(155844.000000,187872.000000,53775.000000,1035.114948)}
{pt3dadd(155784.000000,187500.000000,53350.000000,718.829820)}
{pt3dadd(155904.000000,186600.000000,53025.000000,688.878585)}
{pt3dadd(155808.000000,186000.000000,52600.000000,658.927350)}
{pt3dadd(155676.000000,185616.000000,52175.000000,628.976115)}
{pt3dadd(155772.000000,185208.000000,51800.000000,599.024880)}
{pt3dadd(155808.000000,185088.000000,51500.000000,599.024880)}
{pt3dadd(155844.000000,184680.000000,50975.000000,599.024880)}
{pt3dadd(156120.000000,184236.000000,50350.000000,599.024880)}
{pt3dadd(156216.000000,183984.000000,49650.000000,599.024880)}
{pt3dadd(156396.000000,183540.000000,49050.000000,599.024880)}
{pt3dadd(156516.000000,183432.000000,48575.000000,599.024880)}
{pt3dadd(156540.000000,183396.000000,48125.000000,599.024880)}
{pt3dadd(156672.000000,183216.000000,47800.000000,599.024880)}
{pt3dadd(156636.000000,183024.000000,47275.000000,759.803130)}
{pt3dadd(156600.000000,182916.000000,46950.000000,920.581380)}
{pt3dadd(156564.000000,182808.000000,46675.000000,1081.359630)}
{pt3dadd(156768.000000,182700.000000,46350.000000,1242.137880)}
{pt3dadd(156972.000000,182616.000000,46025.000000,1242.137880)}
{pt3dadd(157140.000000,182544.000000,45700.000000,1242.137880)}
{pt3dadd(157248.000000,182472.000000,45375.000000,1242.137880)}
{pt3dadd(157236.000000,182460.000000,45025.000000,1242.137880)}
{pt3dadd(157224.000000,182556.000000,44725.000000,1190.382147)}
{pt3dadd(157224.000000,182652.000000,44375.000000,1138.626414)}
{pt3dadd(157224.000000,182748.000000,44050.000000,1086.870681)}
{pt3dadd(157356.000000,182676.000000,43725.000000,1035.114948)}
{pt3dadd(157428.000000,182604.000000,43300.000000,991.985162)}
{pt3dadd(157488.000000,182484.000000,42850.000000,948.855375)}
{pt3dadd(157524.000000,182268.000000,42425.000000,905.725589)}
{pt3dadd(157728.000000,182124.000000,42000.000000,862.595802)}
{pt3dadd(158052.000000,181908.000000,41575.000000,796.703072)}
{pt3dadd(158460.000000,181524.000000,41050.000000,730.810341)}
{pt3dadd(158628.000000,181224.000000,40650.000000,664.917611)}
{pt3dadd(158880.000000,180708.000000,40100.000000,599.024880)}
{pt3dadd(159276.000000,179964.000000,39600.000000,599.024880)}
{pt3dadd(159528.000000,179748.000000,39125.000000,599.024880)}
{pt3dadd(159888.000000,179256.000000,38625.000000,599.024880)}
{pt3dadd(160248.000000,178800.000000,38050.000000,599.024880)}
{pt3dadd(160500.000000,178500.000000,37650.000000,549.106128)}
{pt3dadd(160932.000000,178236.000000,37175.000000,499.187376)}
{pt3dadd(161448.000000,177864.000000,36750.000000,499.187376)}

{create adhoc110}
{access adhoc110}
{connect adhoc110(1), adhoc109(0)}
{nseg = 1}
{strdef color color = "White"}
{pt3dclear()}
{pt3dadd(161448.000000,177864.000000,36750.000000,499.187376)}
{pt3dadd(161724.000000,177144.000000,36575.000000,346.657896)}
{pt3dadd(161916.000000,176892.000000,36375.000000,332.213819)}
{pt3dadd(162156.000000,176784.000000,36250.000000,317.769741)}
{pt3dadd(162360.000000,176556.000000,36175.000000,303.325664)}
{pt3dadd(162480.000000,176340.000000,36025.000000,288.881586)}
{pt3dadd(162852.000000,176064.000000,35800.000000,303.325664)}
{pt3dadd(163188.000000,175728.000000,35500.000000,317.769741)}
{pt3dadd(163596.000000,175428.000000,35325.000000,332.213819)}
{pt3dadd(163764.000000,175164.000000,34850.000000,346.657896)}
{pt3dadd(163956.000000,174816.000000,34500.000000,392.488128)}
{pt3dadd(164400.000000,174216.000000,34125.000000,438.318360)}
{pt3dadd(164652.000000,173892.000000,33725.000000,484.148592)}
{pt3dadd(164928.000000,173496.000000,33200.000000,529.978824)}
{pt3dadd(165276.000000,173100.000000,32675.000000,497.321595)}
{pt3dadd(165588.000000,172956.000000,32200.000000,464.664366)}
{pt3dadd(165972.000000,172944.000000,31675.000000,432.007137)}
{pt3dadd(166956.000000,172800.000000,31200.000000,399.349908)}
{pt3dadd(167436.000000,172596.000000,31250.000000,386.176905)}
{pt3dadd(167856.000000,172464.000000,31075.000000,373.003902)}
{pt3dadd(168216.000000,172356.000000,30975.000000,359.830899)}
{pt3dadd(168540.000000,172140.000000,30750.000000,346.657896)}
{pt3dadd(168876.000000,172068.000000,30600.000000,288.881586)}

{create adhoc111}
{access adhoc111}
{connect adhoc111(1), adhoc110(0)}
{nseg = 1}
{strdef color color = "White"}
{pt3dclear()}
{pt3dadd(168876.000000,172068.000000,30600.000000,288.881586)}
{pt3dadd(169740.000000,172296.000000,30750.000000,200.612214)}
{pt3dadd(169920.000000,172320.000000,30750.000000,190.581602)}
{pt3dadd(170124.000000,172272.000000,30750.000000,180.550989)}
{pt3dadd(170316.000000,172224.000000,30725.000000,170.520377)}
{pt3dadd(170484.000000,172236.000000,30725.000000,160.489764)}
{pt3dadd(170664.000000,172296.000000,30700.000000,180.550985)}
{pt3dadd(170868.000000,172500.000000,30625.000000,200.612205)}
{pt3dadd(171156.000000,172608.000000,30625.000000,220.673426)}
{pt3dadd(171624.000000,172680.000000,30625.000000,240.734646)}
{pt3dadd(171780.000000,172692.000000,30525.000000,230.704038)}
{pt3dadd(171996.000000,172704.000000,30350.000000,220.673430)}
{pt3dadd(172560.000000,172860.000000,30350.000000,210.642822)}
{pt3dadd(172860.000000,172968.000000,30150.000000,200.612214)}
{pt3dadd(173172.000000,173004.000000,30075.000000,200.612214)}
{pt3dadd(173496.000000,172956.000000,29950.000000,200.612214)}
{pt3dadd(173904.000000,173004.000000,29650.000000,200.612214)}
{pt3dadd(174096.000000,173064.000000,29400.000000,200.612214)}
{pt3dadd(174336.000000,172812.000000,29075.000000,192.253370)}
{pt3dadd(174684.000000,172860.000000,28800.000000,183.894525)}
{pt3dadd(175080.000000,172836.000000,28625.000000,175.535680)}
{pt3dadd(175572.000000,172824.000000,28475.000000,167.176836)}
{pt3dadd(175992.000000,172908.000000,28225.000000,167.176836)}
{pt3dadd(176124.000000,172968.000000,28200.000000,167.176836)}
{pt3dadd(176328.000000,173196.000000,28200.000000,167.176836)}
{pt3dadd(176532.000000,173328.000000,28150.000000,167.176836)}
{pt3dadd(176664.000000,173460.000000,28125.000000,185.566288)}
{pt3dadd(176820.000000,173628.000000,28025.000000,203.955741)}
{pt3dadd(176952.000000,173880.000000,27875.000000,222.345193)}
{pt3dadd(177036.000000,173916.000000,27650.000000,240.734646)}
{pt3dadd(177336.000000,173952.000000,27450.000000,240.734646)}
{pt3dadd(177852.000000,173892.000000,27200.000000,240.734646)}
{pt3dadd(178152.000000,173892.000000,27200.000000,240.734646)}
{pt3dadd(178392.000000,173976.000000,27200.000000,240.734646)}
{pt3dadd(178596.000000,174132.000000,27125.000000,252.771381)}
{pt3dadd(178812.000000,174168.000000,27025.000000,264.808116)}
{pt3dadd(179112.000000,174108.000000,26925.000000,276.844851)}
{pt3dadd(179436.000000,174132.000000,26800.000000,288.881586)}
{pt3dadd(179724.000000,174012.000000,26525.000000,116.095032)}

{create adhoc112}
{access adhoc112}
{connect adhoc112(1), adhoc110(0)}
{nseg = 1}
{strdef color color = "White"}
{pt3dclear()}
{pt3dadd(168876.000000,172068.000000,30600.000000,288.881586)}
{pt3dadd(169116.000000,171444.000000,30275.000000,240.734646)}
{pt3dadd(169260.000000,171096.000000,30125.000000,215.379495)}
{pt3dadd(169884.000000,170496.000000,29750.000000,190.024344)}
{pt3dadd(170244.000000,170220.000000,29750.000000,164.669193)}
{pt3dadd(170724.000000,169956.000000,29625.000000,139.314042)}
{pt3dadd(171144.000000,169896.000000,29550.000000,154.638585)}
{pt3dadd(171516.000000,169788.000000,29350.000000,169.963128)}
{pt3dadd(171852.000000,169656.000000,29100.000000,185.287671)}
{pt3dadd(172476.000000,169584.000000,28950.000000,200.612214)}
{pt3dadd(172656.000000,169524.000000,28925.000000,210.642822)}
{pt3dadd(172908.000000,169452.000000,28850.000000,220.673430)}
{pt3dadd(173268.000000,169524.000000,28900.000000,230.704038)}
{pt3dadd(173616.000000,169440.000000,28925.000000,240.734646)}
{pt3dadd(174000.000000,169380.000000,28825.000000,240.734646)}
{pt3dadd(174324.000000,169224.000000,28700.000000,240.734646)}
{pt3dadd(174684.000000,169140.000000,28675.000000,240.734646)}
{pt3dadd(175272.000000,168876.000000,28675.000000,240.734646)}
{pt3dadd(175752.000000,168816.000000,28675.000000,230.704038)}
{pt3dadd(176172.000000,168804.000000,28650.000000,220.673430)}
{pt3dadd(176496.000000,168744.000000,28575.000000,210.642822)}
{pt3dadd(177324.000000,168828.000000,28225.000000,200.612214)}
{pt3dadd(177948.000000,168792.000000,27975.000000,200.612214)}
{pt3dadd(178416.000000,169020.000000,27675.000000,200.612214)}
{pt3dadd(178824.000000,169152.000000,27425.000000,200.612214)}
{pt3dadd(179232.000000,169140.000000,27200.000000,200.612214)}
{pt3dadd(180024.000000,169296.000000,26925.000000,172.439820)}
{pt3dadd(180324.000000,169356.000000,26650.000000,144.267426)}
{pt3dadd(180612.000000,169284.000000,26350.000000,116.095032)}
{pt3dadd(181068.000000,169116.000000,26050.000000,139.314042)}

{create adhoc113}
{access adhoc113}
{connect adhoc113(1), adhoc109(0)}
{nseg = 1}
{strdef color color = "White"}
{pt3dclear()}
{pt3dadd(161448.000000,177864.000000,36750.000000,499.187376)}
{pt3dadd(162012.000000,178236.000000,36575.000000,346.657896)}
{pt3dadd(162552.000000,178452.000000,36300.000000,320.177083)}
{pt3dadd(163212.000000,178620.000000,35850.000000,293.696271)}
{pt3dadd(163632.000000,178740.000000,35825.000000,267.215459)}
{pt3dadd(164292.000000,179076.000000,35725.000000,240.734646)}
{pt3dadd(164748.000000,179172.000000,35525.000000,267.215459)}
{pt3dadd(165312.000000,179352.000000,35250.000000,293.696271)}
{pt3dadd(165708.000000,179520.000000,35175.000000,320.177083)}
{pt3dadd(166176.000000,179580.000000,34625.000000,346.657896)}
{pt3dadd(166560.000000,179796.000000,34075.000000,381.323691)}
{pt3dadd(167016.000000,180072.000000,33675.000000,415.989486)}
{pt3dadd(167256.000000,180156.000000,33600.000000,346.657896)}

{create adhoc114}
{access adhoc114}
{connect adhoc114(1), adhoc113(0)}
{nseg = 1}
{strdef color color = "White"}
{pt3dclear()}
{pt3dadd(167256.000000,180156.000000,33600.000000,346.657896)}
{pt3dadd(167316.000000,180912.000000,33675.000000,288.881586)}
{pt3dadd(167292.000000,181176.000000,33700.000000,248.313336)}
{pt3dadd(167292.000000,181356.000000,33775.000000,207.745086)}
{pt3dadd(167280.000000,181524.000000,33900.000000,167.176836)}
{pt3dadd(167220.000000,181668.000000,34075.000000,167.176836)}

{create adhoc115}
{access adhoc115}
{connect adhoc115(1), adhoc113(0)}
{nseg = 1}
{strdef color color = "White"}
{pt3dclear()}
{pt3dadd(167256.000000,180156.000000,33600.000000,346.657896)}
{pt3dadd(167472.000000,180024.000000,33425.000000,277.326324)}
{pt3dadd(167844.000000,179808.000000,33250.000000,258.147797)}
{pt3dadd(168144.000000,179832.000000,33100.000000,238.969269)}
{pt3dadd(168768.000000,179700.000000,32650.000000,219.790742)}
{pt3dadd(169380.000000,179652.000000,32350.000000,200.612214)}
{pt3dadd(170124.000000,179244.000000,32000.000000,244.746900)}
{pt3dadd(170460.000000,178956.000000,31600.000000,288.881586)}
{pt3dadd(170844.000000,178632.000000,31200.000000,288.881586)}
