# Supplementary material for: Full reconstruction of large lobula plate tangential cells in Drosophila from a 3D EM dataset
Source: PLoS One. 2018 Nov 28;13(11):e0207828. doi: 10.1371/journal.pone.0207828 (PMC6261601; doi:10.1371/journal.pone.0207828)
Supplement: S1 Dataset — (ZIP) [file pone.0207828.s001.zip › Diameter hoc/VS_VSL_preliminary/Old Diameters Mar13_VS_VSL_HS/HSN/2_14_811_smaurer_001.015.hoc]

/* created with nml2hocm */

{create adhoc1}
{access adhoc1}
{nseg = 1}
{strdef color color = "White"}
{pt3dclear()}
{pt3dadd(153600.000000,218268.000000,71325.000000,240.734646)}
{pt3dadd(153396.000000,218292.000000,71375.000000,200.612214)}
{pt3dadd(153228.000000,219276.000000,71775.000000,222.679557)}
{pt3dadd(153264.000000,219396.000000,71775.000000,244.746900)}
{pt3dadd(153264.000000,219612.000000,71900.000000,266.814243)}
{pt3dadd(153240.000000,219888.000000,72100.000000,288.881586)}
{pt3dadd(153036.000000,220188.000000,72275.000000,276.844851)}
{pt3dadd(152952.000000,220440.000000,72400.000000,264.808116)}
{pt3dadd(152988.000000,220644.000000,72625.000000,252.771381)}
{pt3dadd(152772.000000,220872.000000,72800.000000,240.734646)}
{pt3dadd(152772.000000,222936.000000,73225.000000,599.024880)}

{create adhoc2}
{access adhoc2}
{connect adhoc2(1), adhoc1(0)}
{nseg = 1}
{strdef color color = "White"}
{pt3dclear()}
{pt3dadd(152772.000000,222936.000000,73225.000000,599.024880)}
{pt3dadd(152304.000000,223020.000000,72825.000000,415.989486)}
{pt3dadd(151908.000000,223188.000000,72425.000000,436.788958)}
{pt3dadd(151740.000000,223128.000000,71950.000000,457.588431)}
{pt3dadd(151524.000000,223188.000000,71475.000000,478.387903)}
{pt3dadd(151236.000000,223020.000000,70975.000000,499.187376)}
{pt3dadd(150924.000000,222936.000000,70475.000000,478.387903)}
{pt3dadd(150420.000000,222648.000000,70000.000000,457.588431)}
{pt3dadd(150132.000000,222588.000000,69550.000000,436.788958)}
{pt3dadd(149916.000000,222384.000000,69075.000000,415.989486)}
{pt3dadd(149544.000000,222240.000000,68625.000000,570.770852)}
{pt3dadd(149292.000000,222084.000000,68225.000000,725.552217)}
{pt3dadd(149160.000000,221916.000000,67700.000000,880.333582)}
{pt3dadd(149040.000000,221928.000000,67275.000000,1035.114948)}
{pt3dadd(149040.000000,221748.000000,66200.000000,991.985162)}
{pt3dadd(149028.000000,221112.000000,64150.000000,948.855375)}
{pt3dadd(149028.000000,220632.000000,63100.000000,905.725589)}
{pt3dadd(149340.000000,220356.000000,62600.000000,862.595802)}
{pt3dadd(149460.000000,220188.000000,62175.000000,826.654307)}
{pt3dadd(149700.000000,219972.000000,61675.000000,790.712811)}
{pt3dadd(149760.000000,219912.000000,61275.000000,754.771316)}
{pt3dadd(149868.000000,219780.000000,60900.000000,718.829820)}
{pt3dadd(149868.000000,219612.000000,59725.000000,625.786839)}
{pt3dadd(149940.000000,219396.000000,57675.000000,532.743858)}
{pt3dadd(150120.000000,219324.000000,57250.000000,439.700877)}
{pt3dadd(150360.000000,219072.000000,56575.000000,346.657896)}
{pt3dadd(150360.000000,218940.000000,56125.000000,332.213819)}
{pt3dadd(150300.000000,217524.000000,54750.000000,317.769741)}
{pt3dadd(150276.000000,217212.000000,54500.000000,303.325664)}
{pt3dadd(150444.000000,216996.000000,54150.000000,288.881586)}
{pt3dadd(150600.000000,216816.000000,53775.000000,259.458462)}
{pt3dadd(150756.000000,216780.000000,53400.000000,230.035338)}
{pt3dadd(150876.000000,217020.000000,53125.000000,200.612214)}
{pt3dadd(150924.000000,216996.000000,52800.000000,200.612214)}

{create adhoc3}
{access adhoc3}
{connect adhoc3(1), adhoc1(0)}
{nseg = 1}
{strdef color color = "White"}
{pt3dclear()}
{pt3dadd(152772.000000,222936.000000,73225.000000,599.024880)}
{pt3dadd(152940.000000,222744.000000,73700.000000,599.024880)}
{pt3dadd(152880.000000,222792.000000,74175.000000,593.034624)}
{pt3dadd(153228.000000,222876.000000,74675.000000,587.044368)}
{pt3dadd(153588.000000,223080.000000,75175.000000,581.054112)}
{pt3dadd(153768.000000,222972.000000,75800.000000,575.063856)}
{pt3dadd(154056.000000,223212.000000,76275.000000,581.054112)}
{pt3dadd(154296.000000,223284.000000,76675.000000,587.044368)}
{pt3dadd(154584.000000,223164.000000,76975.000000,593.034624)}
{pt3dadd(154872.000000,223308.000000,77375.000000,599.024880)}
{pt3dadd(155268.000000,223476.000000,78225.000000,664.917611)}
{pt3dadd(155520.000000,223500.000000,78625.000000,730.810341)}
{pt3dadd(155856.000000,223476.000000,78700.000000,796.703072)}
{pt3dadd(156144.000000,223452.000000,79025.000000,862.595802)}
{pt3dadd(156420.000000,223476.000000,79325.000000,771.743696)}
{pt3dadd(156732.000000,223128.000000,79850.000000,680.891589)}
{pt3dadd(157200.000000,222864.000000,80325.000000,590.039483)}
{pt3dadd(157812.000000,222792.000000,81025.000000,499.187376)}
{pt3dadd(158256.000000,222780.000000,81525.000000,524.146752)}
{pt3dadd(158496.000000,222888.000000,81900.000000,549.106128)}
{pt3dadd(158820.000000,223092.000000,82425.000000,574.065504)}
{pt3dadd(159072.000000,223032.000000,82650.000000,599.024880)}
{pt3dadd(159408.000000,222972.000000,83125.000000,628.976115)}
{pt3dadd(159672.000000,223068.000000,83550.000000,658.927350)}
{pt3dadd(160056.000000,223128.000000,83925.000000,688.878585)}
{pt3dadd(160392.000000,223068.000000,84275.000000,718.829820)}
{pt3dadd(160668.000000,223020.000000,84775.000000,754.771316)}
{pt3dadd(160968.000000,222852.000000,85075.000000,790.712811)}
{pt3dadd(161184.000000,222624.000000,85275.000000,826.654307)}
{pt3dadd(161544.000000,222204.000000,85650.000000,862.595802)}
{pt3dadd(161820.000000,221964.000000,85650.000000,796.703072)}
{pt3dadd(162156.000000,221652.000000,85975.000000,730.810341)}
{pt3dadd(162300.000000,221532.000000,86450.000000,664.917611)}
{pt3dadd(163284.000000,220284.000000,86450.000000,599.024880)}
{pt3dadd(163512.000000,220356.000000,86525.000000,628.976115)}
{pt3dadd(163824.000000,220296.000000,86750.000000,658.927350)}
{pt3dadd(164124.000000,220056.000000,86975.000000,688.878585)}
{pt3dadd(164616.000000,219816.000000,87225.000000,718.829820)}
{pt3dadd(165000.000000,219684.000000,87450.000000,737.864424)}
{pt3dadd(165300.000000,219348.000000,87575.000000,756.899028)}
{pt3dadd(165660.000000,219120.000000,87575.000000,775.933632)}
{pt3dadd(165984.000000,218964.000000,87700.000000,794.968236)}
{pt3dadd(166308.000000,218868.000000,87825.000000,775.933632)}
{pt3dadd(166692.000000,218484.000000,88175.000000,756.899028)}
{pt3dadd(166992.000000,218052.000000,88650.000000,737.864424)}
{pt3dadd(167304.000000,217488.000000,89225.000000,718.829820)}
{pt3dadd(167616.000000,216852.000000,89525.000000,797.901102)}
{pt3dadd(167904.000000,216432.000000,89700.000000,876.972384)}
{pt3dadd(168264.000000,215856.000000,89900.000000,956.043666)}
{pt3dadd(168564.000000,215364.000000,90200.000000,1035.114948)}
{pt3dadd(168828.000000,214908.000000,90400.000000,956.043666)}
{pt3dadd(169188.000000,214212.000000,90775.000000,876.972384)}
{pt3dadd(169524.000000,213864.000000,91075.000000,797.901102)}
{pt3dadd(169584.000000,213708.000000,91025.000000,718.829820)}
{pt3dadd(169920.000000,213480.000000,91000.000000,754.771316)}
{pt3dadd(170208.000000,213132.000000,91275.000000,790.712811)}
{pt3dadd(170472.000000,212964.000000,91700.000000,826.654307)}
{pt3dadd(170688.000000,212952.000000,91825.000000,862.595802)}
{pt3dadd(171036.000000,212688.000000,92225.000000,862.595802)}
{pt3dadd(171408.000000,212424.000000,92700.000000,862.595802)}
{pt3dadd(171720.000000,212148.000000,92825.000000,862.595802)}
{pt3dadd(171996.000000,212004.000000,92900.000000,862.595802)}
{pt3dadd(174852.000000,206376.000000,93975.000000,1490.565402)}

{create adhoc4}
{access adhoc4}
{connect adhoc4(1), adhoc3(0)}
{nseg = 1}
{strdef color color = "White"}
{pt3dclear()}
{pt3dadd(174852.000000,206376.000000,93975.000000,1490.565402)}
{pt3dadd(174300.000000,206124.000000,93250.000000,1490.565402)}
{pt3dadd(173868.000000,205800.000000,92475.000000,1490.565402)}
{pt3dadd(173916.000000,205212.000000,91925.000000,1490.565402)}
{pt3dadd(173340.000000,204936.000000,91125.000000,1490.565402)}
{pt3dadd(172824.000000,204576.000000,90250.000000,1428.458522)}
{pt3dadd(172392.000000,204228.000000,89425.000000,1366.351641)}
{pt3dadd(171924.000000,203916.000000,88650.000000,1304.244761)}
{pt3dadd(171576.000000,203676.000000,87975.000000,1242.137880)}
{pt3dadd(171444.000000,203064.000000,87250.000000,1190.382147)}
{pt3dadd(170820.000000,202704.000000,86325.000000,1138.626414)}
{pt3dadd(170472.000000,202272.000000,85625.000000,1086.870681)}
{pt3dadd(170064.000000,202020.000000,84975.000000,1035.114948)}
{pt3dadd(169740.000000,201708.000000,84500.000000,1035.114948)}
{pt3dadd(168972.000000,201528.000000,83825.000000,1035.114948)}
{pt3dadd(168276.000000,201168.000000,82925.000000,1035.114948)}
{pt3dadd(168180.000000,200856.000000,82175.000000,1035.114948)}
{pt3dadd(168012.000000,200604.000000,81675.000000,1035.114948)}
{pt3dadd(167196.000000,199944.000000,81175.000000,1035.114948)}
{pt3dadd(166908.000000,199716.000000,80550.000000,1035.114948)}
{pt3dadd(166620.000000,199152.000000,79875.000000,1035.114948)}
{pt3dadd(166140.000000,198720.000000,79025.000000,1035.114948)}
{pt3dadd(165396.000000,198564.000000,78525.000000,1035.114948)}
{pt3dadd(165264.000000,198360.000000,77825.000000,1035.114948)}
{pt3dadd(165096.000000,198000.000000,77250.000000,1035.114948)}
{pt3dadd(164928.000000,197292.000000,76700.000000,1086.870681)}
{pt3dadd(164952.000000,196632.000000,76100.000000,1138.626414)}
{pt3dadd(164688.000000,196308.000000,75350.000000,1190.382147)}
{pt3dadd(164472.000000,196104.000000,74750.000000,1242.137880)}
{pt3dadd(164232.000000,195456.000000,74175.000000,1229.716498)}
{pt3dadd(164244.000000,195024.000000,73775.000000,1217.295117)}
{pt3dadd(163296.000000,194856.000000,73175.000000,1204.873736)}
{pt3dadd(163308.000000,194820.000000,72550.000000,1192.452354)}
{pt3dadd(163068.000000,195312.000000,71950.000000,1458.439722)}

{create adhoc5}
{access adhoc5}
{connect adhoc5(1), adhoc4(0)}
{nseg = 1}
{strdef color color = "White"}
{pt3dclear()}
{pt3dadd(163068.000000,195312.000000,71950.000000,1458.439722)}
{pt3dadd(162708.000000,196104.000000,71400.000000,862.595802)}
{pt3dadd(162096.000000,196560.000000,70700.000000,920.102184)}
{pt3dadd(161724.000000,196620.000000,70175.000000,977.608566)}
{pt3dadd(161628.000000,195996.000000,69500.000000,1035.114948)}
{pt3dadd(160632.000000,196452.000000,68600.000000,1024.763819)}
{pt3dadd(160284.000000,196536.000000,68075.000000,1014.412689)}
{pt3dadd(159996.000000,196500.000000,67675.000000,1004.061560)}
{pt3dadd(159684.000000,196440.000000,67100.000000,993.710430)}
{pt3dadd(159372.000000,196572.000000,66525.000000,924.990278)}
{pt3dadd(158676.000000,197148.000000,65900.000000,856.270125)}
{pt3dadd(158316.000000,196932.000000,65325.000000,787.549972)}
{pt3dadd(157848.000000,196872.000000,64750.000000,718.829820)}
{pt3dadd(157824.000000,196920.000000,64425.000000,346.657896)}

{create adhoc6}
{access adhoc6}
{connect adhoc6(1), adhoc5(0)}
{nseg = 1}
{strdef color color = "White"}
{pt3dclear()}
{pt3dadd(157824.000000,196920.000000,64425.000000,346.657896)}
{pt3dadd(157320.000000,198768.000000,64125.000000,1035.114948)}
{pt3dadd(156516.000000,199164.000000,63475.000000,991.985162)}
{pt3dadd(156108.000000,199440.000000,62800.000000,948.855375)}
{pt3dadd(155460.000000,199584.000000,62225.000000,905.725589)}
{pt3dadd(154608.000000,200352.000000,61500.000000,862.595802)}
{pt3dadd(154320.000000,200544.000000,61300.000000,905.725589)}
{pt3dadd(154056.000000,200736.000000,61000.000000,948.855375)}
{pt3dadd(153744.000000,201000.000000,60625.000000,991.985162)}
{pt3dadd(153312.000000,201336.000000,60200.000000,1035.114948)}
{pt3dadd(152916.000000,201684.000000,59800.000000,1167.057588)}
{pt3dadd(152544.000000,201816.000000,59100.000000,1299.000228)}
{pt3dadd(152220.000000,202116.000000,58350.000000,1430.942868)}
{pt3dadd(152004.000000,202020.000000,57475.000000,1490.565402)}

{create adhoc7}
{access adhoc7}
{connect adhoc7(1), adhoc6(0)}
{nseg = 1}
{strdef color color = "White"}
{pt3dclear()}
{pt3dadd(152004.000000,202020.000000,57475.000000,1490.565402)}
{pt3dadd(151692.000000,202260.000000,57100.000000,1490.565402)}
{pt3dadd(151332.000000,202836.000000,56275.000000,1144.754316)}
{pt3dadd(151308.000000,202860.000000,55850.000000,953.961894)}

{create adhoc8}
{access adhoc8}
{connect adhoc8(1), adhoc7(0)}
{nseg = 1}
{strdef color color = "White"}
{pt3dclear()}
{pt3dadd(151308.000000,202860.000000,55850.000000,953.961894)}
{pt3dadd(152064.000000,200868.000000,55700.000000,167.176836)}
{pt3dadd(152184.000000,200472.000000,55300.000000,197.603024)}
{pt3dadd(152304.000000,200100.000000,54925.000000,228.029211)}
{pt3dadd(152568.000000,199656.000000,54525.000000,258.455399)}
{pt3dadd(152808.000000,199404.000000,54225.000000,288.881586)}
{pt3dadd(153000.000000,199080.000000,53825.000000,266.814243)}
{pt3dadd(153024.000000,198804.000000,53475.000000,244.746900)}
{pt3dadd(153096.000000,198696.000000,53225.000000,222.679557)}
{pt3dadd(153336.000000,198528.000000,52900.000000,200.612214)}
{pt3dadd(153192.000000,198264.000000,52550.000000,210.642822)}
{pt3dadd(153108.000000,198120.000000,52250.000000,220.673430)}
{pt3dadd(153312.000000,197796.000000,51850.000000,230.704038)}
{pt3dadd(153684.000000,197616.000000,51700.000000,240.734646)}
{pt3dadd(154080.000000,197508.000000,51375.000000,263.748875)}
{pt3dadd(154272.000000,197376.000000,51050.000000,286.763103)}
{pt3dadd(154320.000000,197244.000000,50800.000000,309.777332)}
{pt3dadd(154584.000000,197172.000000,50025.000000,332.791560)}
{pt3dadd(154740.000000,197076.000000,49800.000000,288.881586)}
{pt3dadd(154932.000000,196908.000000,50075.000000,139.314042)}

{create adhoc9}
{access adhoc9}
{connect adhoc9(1), adhoc7(0)}
{nseg = 1}
{strdef color color = "White"}
{pt3dclear()}
{pt3dadd(151308.000000,202860.000000,55850.000000,953.961894)}
{pt3dadd(151140.000000,203472.000000,55200.000000,1035.114948)}
{pt3dadd(151080.000000,204084.000000,54625.000000,1035.114948)}
{pt3dadd(151212.000000,204384.000000,54125.000000,1035.114948)}
{pt3dadd(151392.000000,204552.000000,53525.000000,1035.114948)}
{pt3dadd(151512.000000,204648.000000,53000.000000,1035.114948)}
{pt3dadd(151680.000000,204672.000000,52350.000000,889.751592)}
{pt3dadd(151884.000000,204792.000000,51900.000000,744.388236)}
{pt3dadd(151968.000000,205092.000000,51400.000000,599.024880)}
{pt3dadd(152088.000000,205404.000000,50950.000000,575.063964)}

{create adhoc10}
{access adhoc10}
{connect adhoc10(1), adhoc9(0)}
{nseg = 1}
{strdef color color = "White"}
{pt3dclear()}
{pt3dadd(152088.000000,205404.000000,50950.000000,575.063964)}
{pt3dadd(152052.000000,204252.000000,50950.000000,415.989486)}
{pt3dadd(152184.000000,204012.000000,50550.000000,384.212511)}
{pt3dadd(152280.000000,203844.000000,50175.000000,352.435536)}
{pt3dadd(152412.000000,203496.000000,49875.000000,320.658561)}
{pt3dadd(152700.000000,203316.000000,49525.000000,288.881586)}
{pt3dadd(152796.000000,203184.000000,49200.000000,264.808116)}
{pt3dadd(152796.000000,203052.000000,48875.000000,240.734646)}
{pt3dadd(152820.000000,203016.000000,48650.000000,200.612214)}

{create adhoc11}
{access adhoc11}
{connect adhoc11(1), adhoc9(0)}
{nseg = 1}
{strdef color color = "White"}
{pt3dclear()}
{pt3dadd(152088.000000,205404.000000,50950.000000,575.063964)}
{pt3dadd(152772.000000,206196.000000,50300.000000,346.657896)}
{pt3dadd(153468.000000,206664.000000,49800.000000,518.772159)}
{pt3dadd(154200.000000,206580.000000,49075.000000,690.886422)}
{pt3dadd(154896.000000,206520.000000,48300.000000,863.000685)}
{pt3dadd(155280.000000,206604.000000,47650.000000,1035.114948)}
{pt3dadd(155472.000000,206736.000000,46950.000000,956.043666)}
{pt3dadd(155772.000000,206700.000000,46300.000000,876.972384)}
{pt3dadd(156120.000000,206532.000000,45850.000000,797.901102)}
{pt3dadd(156456.000000,206340.000000,45200.000000,718.829820)}
{pt3dadd(156648.000000,206424.000000,44850.000000,599.024880)}

{create adhoc12}
{access adhoc12}
{connect adhoc12(1), adhoc11(0)}
{nseg = 1}
{strdef color color = "White"}
{pt3dclear()}
{pt3dadd(156648.000000,206424.000000,44850.000000,599.024880)}
{pt3dadd(156960.000000,205248.000000,44725.000000,346.657896)}
{pt3dadd(157452.000000,204672.000000,44075.000000,363.990794)}
{pt3dadd(157884.000000,204312.000000,43500.000000,381.323691)}
{pt3dadd(158232.000000,203964.000000,42950.000000,398.656589)}
{pt3dadd(158532.000000,203604.000000,42375.000000,415.989486)}
{pt3dadd(158952.000000,202992.000000,41875.000000,415.989486)}
{pt3dadd(159372.000000,202584.000000,41425.000000,415.989486)}
{pt3dadd(159756.000000,202488.000000,41050.000000,415.989486)}
{pt3dadd(160068.000000,202128.000000,40425.000000,415.989486)}
{pt3dadd(160752.000000,201948.000000,39800.000000,398.656589)}
{pt3dadd(161244.000000,201396.000000,39375.000000,381.323691)}
{pt3dadd(161772.000000,200820.000000,38950.000000,363.990794)}
{pt3dadd(162384.000000,200472.000000,38525.000000,346.657896)}
{pt3dadd(162684.000000,199896.000000,38125.000000,479.219922)}

{create adhoc13}
{access adhoc13}
{connect adhoc13(1), adhoc12(0)}
{nseg = 1}
{strdef color color = "White"}
{pt3dclear()}
{pt3dadd(162684.000000,199896.000000,38125.000000,479.219922)}
{pt3dadd(162816.000000,200232.000000,37850.000000,288.881586)}
{pt3dadd(163032.000000,200316.000000,37625.000000,251.489700)}
{pt3dadd(163452.000000,200304.000000,37425.000000,214.097814)}
{pt3dadd(163752.000000,200424.000000,37125.000000,176.705928)}
{pt3dadd(164424.000000,200664.000000,36775.000000,139.314042)}
{pt3dadd(164916.000000,200628.000000,36300.000000,139.314042)}
{pt3dadd(165012.000000,200652.000000,36150.000000,139.314042)}
{pt3dadd(165372.000000,200340.000000,35900.000000,139.314042)}
{pt3dadd(165420.000000,200316.000000,35725.000000,200.612214)}

{create adhoc14}
{access adhoc14}
{connect adhoc14(1), adhoc12(0)}
{nseg = 1}
{strdef color color = "White"}
{pt3dclear()}
{pt3dadd(162684.000000,199896.000000,38125.000000,479.219922)}
{pt3dadd(163104.000000,198576.000000,37625.000000,346.657896)}
{pt3dadd(163584.000000,197952.000000,37000.000000,363.990794)}
{pt3dadd(164232.000000,197580.000000,36550.000000,381.323691)}
{pt3dadd(164460.000000,197112.000000,36100.000000,398.656589)}
{pt3dadd(164664.000000,196860.000000,35775.000000,415.989486)}
{pt3dadd(165432.000000,195936.000000,35400.000000,362.145168)}
{pt3dadd(166404.000000,194340.000000,35000.000000,308.300850)}
{pt3dadd(166716.000000,194148.000000,34800.000000,254.456532)}
{pt3dadd(166800.000000,193872.000000,34650.000000,200.612214)}
{pt3dadd(166848.000000,193548.000000,34625.000000,185.287671)}
{pt3dadd(166896.000000,193272.000000,34600.000000,169.963128)}
{pt3dadd(166920.000000,193080.000000,34550.000000,154.638585)}
{pt3dadd(167088.000000,192936.000000,34600.000000,139.314042)}
{pt3dadd(167208.000000,192756.000000,34600.000000,176.705928)}
{pt3dadd(167340.000000,192540.000000,34575.000000,214.097814)}
{pt3dadd(167364.000000,192324.000000,34425.000000,251.489700)}
{pt3dadd(167640.000000,191856.000000,33975.000000,288.881586)}
{pt3dadd(167736.000000,191412.000000,33525.000000,266.814243)}
{pt3dadd(168000.000000,190716.000000,33150.000000,244.746900)}
{pt3dadd(168660.000000,190320.000000,32775.000000,222.679557)}
{pt3dadd(168960.000000,190176.000000,32600.000000,200.612214)}
{pt3dadd(169560.000000,189912.000000,32225.000000,169.963128)}
{pt3dadd(169728.000000,189804.000000,31850.000000,139.314042)}
{pt3dadd(170028.000000,189648.000000,31650.000000,167.176836)}

{create adhoc15}
{access adhoc15}
{connect adhoc15(1), adhoc11(0)}
{nseg = 1}
{strdef color color = "White"}
{pt3dclear()}
{pt3dadd(156648.000000,206424.000000,44850.000000,599.024880)}
{pt3dadd(157176.000000,207528.000000,44575.000000,240.734646)}
{pt3dadd(157860.000000,208104.000000,44050.000000,230.704038)}
{pt3dadd(158364.000000,208260.000000,43500.000000,220.673430)}
{pt3dadd(158664.000000,208500.000000,43025.000000,210.642822)}
{pt3dadd(159360.000000,208584.000000,42500.000000,200.612214)}
{pt3dadd(159792.000000,208692.000000,41900.000000,230.035338)}
{pt3dadd(160032.000000,208524.000000,41400.000000,259.458462)}
{pt3dadd(160392.000000,208212.000000,41025.000000,288.881586)}
{pt3dadd(160620.000000,208008.000000,40750.000000,200.612214)}

{create adhoc16}
{access adhoc16}
{connect adhoc16(1), adhoc6(0)}
{nseg = 1}
{strdef color color = "White"}
{pt3dclear()}
{pt3dadd(152004.000000,202020.000000,57475.000000,1490.565402)}
{pt3dadd(152688.000000,203340.000000,58600.000000,139.314042)}
{pt3dadd(152916.000000,203544.000000,58675.000000,146.279741)}
{pt3dadd(153216.000000,203820.000000,58775.000000,153.245439)}
{pt3dadd(153708.000000,204084.000000,59075.000000,160.211138)}
{pt3dadd(153876.000000,204312.000000,59250.000000,167.176836)}
{pt3dadd(154068.000000,204564.000000,59525.000000,167.176836)}
{pt3dadd(154308.000000,204816.000000,59700.000000,167.176836)}
{pt3dadd(154512.000000,205104.000000,60000.000000,167.176836)}
{pt3dadd(154740.000000,205380.000000,60225.000000,167.176836)}
{pt3dadd(154680.000000,205728.000000,60575.000000,170.614182)}
{pt3dadd(154704.000000,205896.000000,60550.000000,174.051528)}
{pt3dadd(154212.000000,206208.000000,60925.000000,177.488874)}
{pt3dadd(154332.000000,206544.000000,61275.000000,200.612214)}

{create adhoc17}
{access adhoc17}
{connect adhoc17(1), adhoc5(0)}
{nseg = 1}
{strdef color color = "White"}
{pt3dclear()}
{pt3dadd(157824.000000,196920.000000,64425.000000,346.657896)}
{pt3dadd(158136.000000,195528.000000,64175.000000,415.989486)}
{pt3dadd(158052.000000,194832.000000,63625.000000,516.936264)}
{pt3dadd(157548.000000,194436.000000,63050.000000,617.883042)}
{pt3dadd(157236.000000,193872.000000,62300.000000,718.829820)}
{pt3dadd(156996.000000,193320.000000,61700.000000,746.145369)}
{pt3dadd(156456.000000,192768.000000,61100.000000,773.460918)}
{pt3dadd(156252.000000,192156.000000,60425.000000,800.776467)}
{pt3dadd(156108.000000,191508.000000,59825.000000,828.092016)}
{pt3dadd(156048.000000,191328.000000,59475.000000,718.829820)}

{create adhoc18}
{access adhoc18}
{connect adhoc18(1), adhoc17(0)}
{nseg = 1}
{strdef color color = "White"}
{pt3dclear()}
{pt3dadd(156048.000000,191328.000000,59475.000000,718.829820)}
{pt3dadd(155772.000000,190752.000000,59000.000000,718.829820)}
{pt3dadd(155796.000000,190308.000000,58925.000000,862.595802)}

{create adhoc19}
{access adhoc19}
{connect adhoc19(1), adhoc18(0)}
{nseg = 1}
{strdef color color = "White"}
{pt3dclear()}
{pt3dadd(155796.000000,190308.000000,58925.000000,862.595802)}
{pt3dadd(155640.000000,190212.000000,58400.000000,1035.114948)}
{pt3dadd(155736.000000,189924.000000,57850.000000,1262.840175)}
{pt3dadd(155760.000000,189576.000000,57300.000000,1490.565402)}
{pt3dadd(155688.000000,189288.000000,56750.000000,1490.565402)}

{create adhoc20}
{access adhoc20}
{connect adhoc20(1), adhoc19(0)}
{nseg = 1}
{strdef color color = "White"}
{pt3dclear()}
{pt3dadd(155688.000000,189288.000000,56750.000000,1490.565402)}
{pt3dadd(155628.000000,189084.000000,56200.000000,1490.565402)}
{pt3dadd(155652.000000,189084.000000,55625.000000,1788.678450)}
{pt3dadd(155700.000000,188988.000000,54975.000000,1788.678450)}

{create adhoc21}
{access adhoc21}
{connect adhoc21(1), adhoc20(0)}
{nseg = 1}
{strdef color color = "White"}
{pt3dclear()}
{pt3dadd(155700.000000,188988.000000,54975.000000,1788.678450)}
{pt3dadd(155868.000000,188820.000000,54700.000000,1490.565402)}

{create adhoc22}
{access adhoc22}
{connect adhoc22(1), adhoc21(0)}
{nseg = 1}
{strdef color color = "White"}
{pt3dclear()}
{pt3dadd(155868.000000,188820.000000,54700.000000,1490.565402)}
{pt3dadd(155832.000000,188136.000000,54025.000000,862.595802)}
{pt3dadd(155844.000000,187620.000000,53300.000000,718.829820)}
{pt3dadd(155712.000000,187752.000000,53025.000000,718.829820)}

{create adhoc23}
{access adhoc23}
{connect adhoc23(1), adhoc22(0)}
{nseg = 1}
{strdef color color = "White"}
{pt3dclear()}
{pt3dadd(155712.000000,187752.000000,53025.000000,718.829820)}
{pt3dadd(155868.000000,186192.000000,52650.000000,499.187376)}
{pt3dadd(155832.000000,185352.000000,52125.000000,612.881037)}
{pt3dadd(155856.000000,185028.000000,51550.000000,726.574698)}
{pt3dadd(156024.000000,184524.000000,50875.000000,840.268359)}
{pt3dadd(156108.000000,184308.000000,50200.000000,953.962020)}
{pt3dadd(156312.000000,183876.000000,49525.000000,895.178970)}
{pt3dadd(156492.000000,183588.000000,48825.000000,836.395920)}
{pt3dadd(156552.000000,183384.000000,48250.000000,777.612870)}
{pt3dadd(156576.000000,183276.000000,47625.000000,718.829820)}
{pt3dadd(156660.000000,183000.000000,46950.000000,754.771316)}
{pt3dadd(156768.000000,182724.000000,46325.000000,790.712811)}
{pt3dadd(156852.000000,182580.000000,45700.000000,826.654307)}
{pt3dadd(157200.000000,182520.000000,45100.000000,862.595802)}
{pt3dadd(157296.000000,182604.000000,44525.000000,895.374423)}
{pt3dadd(157380.000000,182664.000000,43900.000000,928.153044)}
{pt3dadd(157464.000000,182628.000000,43250.000000,960.931665)}
{pt3dadd(157512.000000,182280.000000,42575.000000,993.710286)}
{pt3dadd(157908.000000,182040.000000,42000.000000,870.079558)}
{pt3dadd(158268.000000,181692.000000,41400.000000,746.448831)}
{pt3dadd(158604.000000,181260.000000,40925.000000,622.818104)}
{pt3dadd(158724.000000,180936.000000,40475.000000,499.187376)}
{pt3dadd(159144.000000,180240.000000,39850.000000,524.146752)}
{pt3dadd(159552.000000,179700.000000,39275.000000,549.106128)}
{pt3dadd(159888.000000,179340.000000,38675.000000,574.065504)}
{pt3dadd(159972.000000,178980.000000,38250.000000,599.024880)}
{pt3dadd(160644.000000,178500.000000,37650.000000,507.507183)}
{pt3dadd(161028.000000,177888.000000,37025.000000,415.989486)}
{pt3dadd(161724.000000,177756.000000,36550.000000,167.176836)}

{create adhoc24}
{access adhoc24}
{connect adhoc24(1), adhoc23(0)}
{nseg = 1}
{strdef color color = "White"}
{pt3dclear()}
{pt3dadd(161724.000000,177756.000000,36550.000000,167.176836)}
{pt3dadd(162060.000000,176772.000000,36325.000000,346.657896)}
{pt3dadd(162696.000000,176004.000000,35925.000000,363.990794)}
{pt3dadd(163308.000000,175716.000000,35550.000000,381.323691)}
{pt3dadd(163584.000000,175368.000000,35175.000000,398.656589)}
{pt3dadd(163824.000000,175188.000000,34825.000000,415.989486)}
{pt3dadd(164160.000000,174648.000000,34400.000000,436.788958)}
{pt3dadd(164592.000000,173904.000000,34000.000000,457.588431)}
{pt3dadd(164892.000000,173688.000000,33600.000000,478.387903)}
{pt3dadd(165168.000000,173472.000000,33175.000000,499.187376)}
{pt3dadd(165528.000000,173088.000000,32600.000000,478.387903)}
{pt3dadd(165768.000000,172848.000000,32025.000000,457.588431)}
{pt3dadd(166812.000000,172788.000000,31500.000000,436.788958)}
{pt3dadd(167076.000000,172644.000000,31625.000000,415.989486)}
{pt3dadd(167376.000000,172500.000000,31375.000000,392.878956)}
{pt3dadd(168696.000000,172248.000000,31075.000000,369.768426)}
{pt3dadd(169032.000000,172044.000000,30700.000000,346.657896)}
{pt3dadd(169368.000000,171768.000000,30550.000000,240.734646)}

{create adhoc25}
{access adhoc25}
{connect adhoc25(1), adhoc24(0)}
{nseg = 1}
{strdef color color = "White"}
{pt3dclear()}
{pt3dadd(169368.000000,171768.000000,30550.000000,240.734646)}
{pt3dadd(169560.000000,170784.000000,29900.000000,288.881586)}
{pt3dadd(169980.000000,170244.000000,29875.000000,251.489700)}
{pt3dadd(170232.000000,169920.000000,29875.000000,214.097814)}
{pt3dadd(170628.000000,169920.000000,29575.000000,176.705928)}
{pt3dadd(171360.000000,169848.000000,29250.000000,139.314042)}
{pt3dadd(173172.000000,169488.000000,29025.000000,146.279741)}
{pt3dadd(174960.000000,169092.000000,28950.000000,153.245439)}
{pt3dadd(175176.000000,169044.000000,28975.000000,160.211138)}
{pt3dadd(175380.000000,168876.000000,28775.000000,167.176836)}
{pt3dadd(176208.000000,168852.000000,28700.000000,175.535680)}
{pt3dadd(177108.000000,168696.000000,28525.000000,183.894525)}
{pt3dadd(177300.000000,168696.000000,28525.000000,192.253370)}
{pt3dadd(177468.000000,168672.000000,28475.000000,200.612214)}
{pt3dadd(177552.000000,168528.000000,28225.000000,139.314042)}

{create adhoc26}
{access adhoc26}
{connect adhoc26(1), adhoc24(0)}
{nseg = 1}
{strdef color color = "White"}
{pt3dclear()}
{pt3dadd(169368.000000,171768.000000,30550.000000,240.734646)}
{pt3dadd(169464.000000,172380.000000,30950.000000,167.176836)}
{pt3dadd(169716.000000,172344.000000,30925.000000,185.566288)}
{pt3dadd(170364.000000,172308.000000,30775.000000,203.955741)}
{pt3dadd(170928.000000,172512.000000,30775.000000,222.345193)}
{pt3dadd(171204.000000,172560.000000,30825.000000,240.734646)}
{pt3dadd(171360.000000,172584.000000,30675.000000,222.345193)}
{pt3dadd(171756.000000,172644.000000,30525.000000,203.955741)}
{pt3dadd(172248.000000,172896.000000,30350.000000,185.566288)}
{pt3dadd(173160.000000,172980.000000,30175.000000,167.176836)}
{pt3dadd(173388.000000,172980.000000,30025.000000,197.603024)}
{pt3dadd(173628.000000,173076.000000,30000.000000,228.029211)}
{pt3dadd(174084.000000,172968.000000,29550.000000,258.455399)}
{pt3dadd(174432.000000,172968.000000,29050.000000,288.881586)}
{pt3dadd(174648.000000,173052.000000,29075.000000,266.814243)}
{pt3dadd(174876.000000,173028.000000,29025.000000,244.746900)}
{pt3dadd(175308.000000,172812.000000,28600.000000,222.679557)}
{pt3dadd(176592.000000,173448.000000,28100.000000,200.612214)}
{pt3dadd(176940.000000,174012.000000,27725.000000,237.123635)}
{pt3dadd(177684.000000,173916.000000,27300.000000,273.635055)}
{pt3dadd(178584.000000,174108.000000,27150.000000,310.146475)}
{pt3dadd(179196.000000,174156.000000,26900.000000,346.657896)}
{pt3dadd(179496.000000,174120.000000,26550.000000,240.734646)}
{pt3dadd(179772.000000,173952.000000,26200.000000,288.881586)}

{create adhoc27}
{access adhoc27}
{connect adhoc27(1), adhoc23(0)}
{nseg = 1}
{strdef color color = "White"}
{pt3dclear()}
{pt3dadd(161724.000000,177756.000000,36550.000000,167.176836)}
{pt3dadd(162816.000000,178596.000000,36225.000000,288.881586)}
{pt3dadd(163392.000000,178692.000000,36150.000000,266.814243)}
{pt3dadd(163704.000000,178656.000000,36025.000000,244.746900)}
{pt3dadd(163908.000000,178632.000000,36075.000000,222.679557)}
{pt3dadd(164196.000000,178524.000000,36075.000000,200.612214)}
{pt3dadd(164052.000000,179136.000000,35875.000000,237.123635)}
{pt3dadd(164856.000000,179196.000000,35500.000000,273.635055)}
{pt3dadd(165384.000000,179424.000000,35100.000000,310.146475)}
{pt3dadd(165840.000000,179556.000000,34750.000000,346.657896)}
{pt3dadd(166236.000000,179652.000000,34375.000000,332.213819)}
{pt3dadd(166512.000000,179652.000000,34075.000000,317.769741)}
{pt3dadd(166836.000000,179844.000000,33850.000000,303.325664)}
{pt3dadd(167124.000000,180228.000000,33700.000000,288.881586)}
{pt3dadd(167340.000000,180240.000000,33500.000000,240.734646)}

{create adhoc28}
{access adhoc28}
{connect adhoc28(1), adhoc27(0)}
{nseg = 1}
{strdef color color = "White"}
{pt3dclear()}
{pt3dadd(167340.000000,180240.000000,33500.000000,240.734646)}
{pt3dadd(167736.000000,179880.000000,33225.000000,200.612214)}
{pt3dadd(168612.000000,179748.000000,32850.000000,237.123635)}
{pt3dadd(169212.000000,179580.000000,32475.000000,273.635055)}
{pt3dadd(169776.000000,179340.000000,32125.000000,310.146475)}
{pt3dadd(170508.000000,178908.000000,31775.000000,346.657896)}
{pt3dadd(170784.000000,178740.000000,31375.000000,294.821933)}
{pt3dadd(171012.000000,178656.000000,31000.000000,242.985969)}
{pt3dadd(171408.000000,178620.000000,30600.000000,191.150005)}
{pt3dadd(171564.000000,179016.000000,30400.000000,139.314042)}
{pt3dadd(172056.000000,179544.000000,30025.000000,167.176836)}

{create adhoc29}
{access adhoc29}
{connect adhoc29(1), adhoc27(0)}
{nseg = 1}
{strdef color color = "White"}
{pt3dclear()}
{pt3dadd(167340.000000,180240.000000,33500.000000,240.734646)}
{pt3dadd(167352.000000,181140.000000,33875.000000,139.314042)}
{pt3dadd(167532.000000,181332.000000,33900.000000,116.095032)}
{pt3dadd(168024.000000,181668.000000,33800.000000,116.095032)}

{create adhoc30}
{access adhoc30}
{connect adhoc30(1), adhoc22(0)}
{nseg = 1}
{strdef color color = "White"}
{pt3dclear()}
{pt3dadd(155712.000000,187752.000000,53025.000000,718.829820)}
{pt3dadd(155352.000000,188844.000000,52775.000000,718.829820)}
{pt3dadd(154980.000000,188976.000000,52250.000000,754.771316)}
{pt3dadd(154836.000000,189168.000000,51750.000000,790.712811)}
{pt3dadd(154656.000000,189216.000000,51325.000000,826.654307)}
{pt3dadd(154212.000000,189372.000000,50775.000000,862.595802)}
{pt3dadd(154104.000000,189528.000000,50325.000000,862.595802)}
{pt3dadd(154020.000000,189732.000000,49775.000000,862.595802)}
{pt3dadd(153984.000000,189864.000000,49075.000000,1035.114948)}

{create adhoc31}
{access adhoc31}
{connect adhoc31(1), adhoc30(0)}
{nseg = 1}
{strdef color color = "White"}
{pt3dclear()}
{pt3dadd(153984.000000,189864.000000,49075.000000,1035.114948)}
{pt3dadd(154368.000000,189720.000000,48400.000000,1035.114948)}
{pt3dadd(154452.000000,189624.000000,47875.000000,991.985162)}
{pt3dadd(154788.000000,189624.000000,47375.000000,948.855375)}
{pt3dadd(155064.000000,189480.000000,46900.000000,905.725589)}
{pt3dadd(155232.000000,189456.000000,46250.000000,862.595802)}
{pt3dadd(155544.000000,189384.000000,45650.000000,826.654307)}
{pt3dadd(155484.000000,189576.000000,45450.000000,790.712811)}
{pt3dadd(155640.000000,189672.000000,45050.000000,754.771316)}
{pt3dadd(155940.000000,189684.000000,44625.000000,718.829820)}
{pt3dadd(156144.000000,189576.000000,44450.000000,575.063856)}

{create adhoc32}
{access adhoc32}
{connect adhoc32(1), adhoc31(0)}
{nseg = 1}
{strdef color color = "White"}
{pt3dclear()}
{pt3dadd(156144.000000,189576.000000,44450.000000,575.063856)}
{pt3dadd(156576.000000,190272.000000,44025.000000,288.881586)}
{pt3dadd(156660.000000,190608.000000,43625.000000,320.658561)}
{pt3dadd(156744.000000,190884.000000,43200.000000,352.435536)}
{pt3dadd(157044.000000,191604.000000,42825.000000,384.212511)}
{pt3dadd(157356.000000,191916.000000,42400.000000,415.989486)}
{pt3dadd(157512.000000,192276.000000,41975.000000,455.758088)}
{pt3dadd(157524.000000,192336.000000,41600.000000,495.526689)}
{pt3dadd(157548.000000,192468.000000,41225.000000,535.295290)}
{pt3dadd(157560.000000,192588.000000,40850.000000,575.063892)}
{pt3dadd(157584.000000,192588.000000,40475.000000,611.005374)}
{pt3dadd(157644.000000,192456.000000,40075.000000,646.946856)}
{pt3dadd(157764.000000,192480.000000,39700.000000,682.888338)}
{pt3dadd(157824.000000,192348.000000,39300.000000,718.829820)}
{pt3dadd(157956.000000,192072.000000,38875.000000,718.829820)}
{pt3dadd(158376.000000,192168.000000,38450.000000,718.829820)}
{pt3dadd(158688.000000,192024.000000,38275.000000,718.829820)}

{create adhoc33}
{access adhoc33}
{connect adhoc33(1), adhoc32(0)}
{nseg = 1}
{strdef color color = "White"}
{pt3dclear()}
{pt3dadd(158688.000000,192024.000000,38275.000000,718.829820)}
{pt3dadd(158712.000000,191820.000000,38025.000000,718.829820)}
{pt3dadd(160476.000000,191640.000000,37900.000000,611.342762)}
{pt3dadd(160704.000000,191640.000000,37700.000000,503.855703)}
{pt3dadd(160944.000000,191532.000000,37700.000000,396.368644)}
{pt3dadd(161160.000000,191508.000000,37650.000000,288.881586)}
{pt3dadd(161412.000000,191592.000000,37400.000000,303.325664)}
{pt3dadd(161604.000000,191484.000000,37375.000000,317.769741)}
{pt3dadd(162180.000000,191508.000000,36850.000000,332.213819)}
{pt3dadd(163416.000000,191100.000000,36350.000000,346.657896)}
{pt3dadd(163380.000000,190908.000000,36025.000000,320.177083)}
{pt3dadd(163620.000000,190620.000000,35725.000000,293.696271)}
{pt3dadd(164892.000000,189588.000000,35450.000000,267.215459)}
{pt3dadd(165768.000000,188916.000000,35075.000000,240.734646)}
{pt3dadd(166236.000000,188820.000000,34675.000000,222.345193)}
{pt3dadd(166476.000000,188604.000000,34400.000000,203.955741)}
{pt3dadd(166728.000000,188496.000000,34325.000000,185.566288)}
{pt3dadd(167028.000000,188280.000000,34025.000000,167.176836)}
{pt3dadd(167532.000000,187668.000000,33550.000000,167.176836)}
{pt3dadd(167844.000000,187080.000000,33150.000000,167.176836)}
{pt3dadd(168084.000000,186984.000000,33075.000000,167.176836)}
{pt3dadd(168372.000000,186744.000000,33075.000000,167.176836)}
{pt3dadd(168624.000000,186672.000000,33025.000000,139.314042)}
{pt3dadd(168744.000000,186576.000000,32950.000000,167.176836)}

{create adhoc34}
{access adhoc34}
{connect adhoc34(1), adhoc32(0)}
{nseg = 1}
{strdef color color = "White"}
{pt3dclear()}
{pt3dadd(158688.000000,192024.000000,38275.000000,718.829820)}
{pt3dadd(159588.000000,190512.000000,38250.000000,139.314042)}
{pt3dadd(159708.000000,190452.000000,38250.000000,127.704537)}
{pt3dadd(159888.000000,190308.000000,38300.000000,116.095032)}
{pt3dadd(159984.000000,190272.000000,38300.000000,116.095032)}

{create adhoc35}
{access adhoc35}
{connect adhoc35(1), adhoc31(0)}
{nseg = 1}
{strdef color color = "White"}
{pt3dclear()}
{pt3dadd(156144.000000,189576.000000,44450.000000,575.063856)}
{pt3dadd(156156.000000,188880.000000,44375.000000,167.176836)}
{pt3dadd(156168.000000,188592.000000,44000.000000,180.847895)}
{pt3dadd(156216.000000,188196.000000,43575.000000,194.518953)}
{pt3dadd(156348.000000,187872.000000,43200.000000,208.190012)}
{pt3dadd(156468.000000,187692.000000,42825.000000,221.861070)}
{pt3dadd(156744.000000,187416.000000,42425.000000,226.579464)}
{pt3dadd(157212.000000,187344.000000,42000.000000,231.297858)}
{pt3dadd(157368.000000,187236.000000,41650.000000,236.016252)}
{pt3dadd(157308.000000,187248.000000,41250.000000,240.734646)}
{pt3dadd(157368.000000,187248.000000,40875.000000,215.379495)}
{pt3dadd(157464.000000,187212.000000,40550.000000,190.024344)}
{pt3dadd(157428.000000,187044.000000,40150.000000,164.669193)}
{pt3dadd(157476.000000,186972.000000,39775.000000,139.314042)}
{pt3dadd(157476.000000,186984.000000,39600.000000,167.176836)}

{create adhoc36}
{access adhoc36}
{connect adhoc36(1), adhoc30(0)}
{nseg = 1}
{strdef color color = "White"}
{pt3dclear()}
{pt3dadd(153984.000000,189864.000000,49075.000000,1035.114948)}
{pt3dadd(153888.000000,190668.000000,48950.000000,167.176836)}
{pt3dadd(153972.000000,191508.000000,48700.000000,157.889238)}
{pt3dadd(154032.000000,192384.000000,48450.000000,148.601640)}
{pt3dadd(154044.000000,192648.000000,48350.000000,139.314042)}
{pt3dadd(154248.000000,193008.000000,48150.000000,96.745860)}

{create adhoc37}
{access adhoc37}
{connect adhoc37(1), adhoc21(0)}
{nseg = 1}
{strdef color color = "White"}
{pt3dclear()}
{pt3dadd(155868.000000,188820.000000,54700.000000,1490.565402)}
{pt3dadd(156696.000000,189732.000000,54725.000000,116.095032)}
{pt3dadd(156912.000000,189744.000000,54625.000000,111.257739)}
{pt3dadd(157068.000000,189696.000000,54600.000000,106.420446)}
{pt3dadd(157128.000000,189708.000000,54600.000000,101.583153)}
{pt3dadd(157248.000000,189636.000000,54375.000000,96.745860)}
{pt3dadd(157380.000000,189612.000000,54275.000000,116.095032)}

{create adhoc38}
{access adhoc38}
{connect adhoc38(1), adhoc20(0)}
{nseg = 1}
{strdef color color = "White"}
{pt3dclear()}
{pt3dadd(155700.000000,188988.000000,54975.000000,1788.678450)}
{pt3dadd(157644.000000,188340.000000,55125.000000,96.745860)}
{pt3dadd(158100.000000,188208.000000,54925.000000,110.935254)}
{pt3dadd(158868.000000,188412.000000,54700.000000,125.124648)}
{pt3dadd(159072.000000,188412.000000,54700.000000,139.314042)}
{pt3dadd(159252.000000,188376.000000,54700.000000,111.451230)}

{create adhoc39}
{access adhoc39}
{connect adhoc39(1), adhoc19(0)}
{nseg = 1}
{strdef color color = "White"}
{pt3dclear()}
{pt3dadd(155688.000000,189288.000000,56750.000000,1490.565402)}
{pt3dadd(157236.000000,188148.000000,56625.000000,167.176836)}
{pt3dadd(157248.000000,188076.000000,56425.000000,149.569092)}
{pt3dadd(157572.000000,187776.000000,56400.000000,131.961348)}
{pt3dadd(157920.000000,187464.000000,56250.000000,114.353604)}
{pt3dadd(158724.000000,187224.000000,55975.000000,96.745860)}
{pt3dadd(158916.000000,187188.000000,55850.000000,139.314042)}
{pt3dadd(159312.000000,187488.000000,55525.000000,240.734646)}

{create adhoc40}
{access adhoc40}
{connect adhoc40(1), adhoc18(0)}
{nseg = 1}
{strdef color color = "White"}
{pt3dclear()}
{pt3dadd(155796.000000,190308.000000,58925.000000,862.595802)}
{pt3dadd(157752.000000,188820.000000,58875.000000,167.176836)}
{pt3dadd(157968.000000,188928.000000,58925.000000,167.176836)}
{pt3dadd(158184.000000,188928.000000,58850.000000,167.176836)}
{pt3dadd(158412.000000,188904.000000,58825.000000,167.176836)}
{pt3dadd(158640.000000,188760.000000,59100.000000,167.176836)}
{pt3dadd(159240.000000,188664.000000,59275.000000,167.176836)}
{pt3dadd(159480.000000,188832.000000,59625.000000,167.176836)}
{pt3dadd(159696.000000,188832.000000,59725.000000,167.176836)}
{pt3dadd(159912.000000,188772.000000,59800.000000,167.176836)}
{pt3dadd(160080.000000,188868.000000,59725.000000,153.245439)}
{pt3dadd(160224.000000,188868.000000,59825.000000,139.314042)}
{pt3dadd(160284.000000,188832.000000,59825.000000,200.612214)}

{create adhoc41}
{access adhoc41}
{connect adhoc41(1), adhoc17(0)}
{nseg = 1}
{strdef color color = "White"}
{pt3dclear()}
{pt3dadd(156048.000000,191328.000000,59475.000000,718.829820)}
{pt3dadd(157404.000000,191904.000000,59675.000000,288.881586)}
{pt3dadd(157572.000000,192012.000000,59350.000000,231.286068)}
{pt3dadd(158028.000000,192108.000000,59025.000000,173.690550)}
{pt3dadd(158232.000000,192072.000000,59000.000000,116.095032)}
{pt3dadd(158340.000000,192000.000000,59000.000000,80.621550)}

{create adhoc42}
{access adhoc42}
{connect adhoc42(1), adhoc4(0)}
{nseg = 1}
{strdef color color = "White"}
{pt3dclear()}
{pt3dadd(163068.000000,195312.000000,71950.000000,1458.439722)}
{pt3dadd(163044.000000,192396.000000,71325.000000,415.989486)}
{pt3dadd(163044.000000,190104.000000,69450.000000,622.526585)}
{pt3dadd(163200.000000,189684.000000,69050.000000,829.063683)}
{pt3dadd(163464.000000,189372.000000,68575.000000,1035.600782)}
{pt3dadd(163248.000000,189168.000000,68175.000000,1242.137880)}
{pt3dadd(163068.000000,188964.000000,67625.000000,1190.382147)}
{pt3dadd(163056.000000,188484.000000,67050.000000,1138.626414)}
{pt3dadd(162912.000000,188244.000000,66575.000000,1086.870681)}
{pt3dadd(162744.000000,188028.000000,65925.000000,1035.114948)}
{pt3dadd(162528.000000,187752.000000,65425.000000,956.043666)}
{pt3dadd(162408.000000,187236.000000,64850.000000,876.972384)}
{pt3dadd(162228.000000,186792.000000,64150.000000,797.901102)}
{pt3dadd(162252.000000,186180.000000,63675.000000,718.829820)}
{pt3dadd(162444.000000,185400.000000,62950.000000,718.829820)}

{create adhoc43}
{access adhoc43}
{connect adhoc43(1), adhoc42(0)}
{nseg = 1}
{strdef color color = "White"}
{pt3dclear()}
{pt3dadd(162444.000000,185400.000000,62950.000000,718.829820)}
{pt3dadd(163008.000000,186828.000000,62775.000000,415.989486)}
{pt3dadd(163092.000000,186876.000000,62425.000000,372.175776)}
{pt3dadd(162924.000000,186660.000000,62025.000000,328.362066)}
{pt3dadd(162924.000000,186792.000000,61675.000000,284.548356)}
{pt3dadd(162492.000000,186720.000000,61250.000000,240.734646)}
{pt3dadd(162048.000000,186444.000000,60900.000000,288.881586)}
{pt3dadd(161880.000000,186252.000000,60575.000000,288.881586)}

{create adhoc44}
{access adhoc44}
{connect adhoc44(1), adhoc42(0)}
{nseg = 1}
{strdef color color = "White"}
{pt3dclear()}
{pt3dadd(162444.000000,185400.000000,62950.000000,718.829820)}
{pt3dadd(162468.000000,184656.000000,62550.000000,794.968236)}
{pt3dadd(162588.000000,183780.000000,61975.000000,855.004914)}
{pt3dadd(162720.000000,183468.000000,61700.000000,915.041592)}
{pt3dadd(163356.000000,183288.000000,61175.000000,975.078270)}
{pt3dadd(163116.000000,182796.000000,60900.000000,1035.114948)}
{pt3dadd(163356.000000,182052.000000,60350.000000,1035.114948)}
{pt3dadd(163536.000000,181428.000000,59675.000000,1035.114948)}
{pt3dadd(163776.000000,180540.000000,59325.000000,1035.114948)}
{pt3dadd(163968.000000,180180.000000,59100.000000,993.710358)}

{create adhoc45}
{access adhoc45}
{connect adhoc45(1), adhoc44(0)}
{nseg = 1}
{strdef color color = "White"}
{pt3dclear()}
{pt3dadd(163968.000000,180180.000000,59100.000000,993.710358)}
{pt3dadd(164736.000000,176904.000000,59000.000000,288.881586)}
{pt3dadd(164976.000000,176556.000000,59350.000000,303.325664)}
{pt3dadd(165024.000000,176196.000000,59700.000000,317.769741)}
{pt3dadd(165072.000000,175836.000000,60100.000000,332.213819)}
{pt3dadd(165312.000000,175560.000000,60350.000000,346.657896)}
{pt3dadd(165576.000000,175332.000000,60400.000000,332.213819)}
{pt3dadd(165804.000000,175068.000000,60550.000000,317.769741)}
{pt3dadd(166332.000000,174828.000000,60900.000000,303.325664)}
{pt3dadd(166632.000000,174576.000000,61000.000000,288.881586)}
{pt3dadd(166752.000000,174420.000000,61075.000000,240.734646)}

{create adhoc46}
{access adhoc46}
{connect adhoc46(1), adhoc45(0)}
{nseg = 1}
{strdef color color = "White"}
{pt3dclear()}
{pt3dadd(166752.000000,174420.000000,61075.000000,240.734646)}
{pt3dadd(166908.000000,174408.000000,61475.000000,479.219958)}
{pt3dadd(167184.000000,174192.000000,61675.000000,419.598630)}
{pt3dadd(167448.000000,173952.000000,61775.000000,359.977302)}
{pt3dadd(167604.000000,173712.000000,61775.000000,300.355974)}
{pt3dadd(167628.000000,173472.000000,61825.000000,240.734646)}
{pt3dadd(167676.000000,173316.000000,61850.000000,230.704038)}
{pt3dadd(167832.000000,173040.000000,61900.000000,220.673430)}
{pt3dadd(168060.000000,172788.000000,62025.000000,210.642822)}
{pt3dadd(168072.000000,172572.000000,62100.000000,200.612214)}
{pt3dadd(168228.000000,172308.000000,62300.000000,200.612214)}
{pt3dadd(168564.000000,172032.000000,62450.000000,200.612214)}
{pt3dadd(168756.000000,171804.000000,62500.000000,200.612214)}
{pt3dadd(169140.000000,171276.000000,62900.000000,200.612214)}
{pt3dadd(169476.000000,169644.000000,63300.000000,192.253370)}
{pt3dadd(169716.000000,168864.000000,63275.000000,183.894525)}
{pt3dadd(169392.000000,168348.000000,63050.000000,175.535680)}
{pt3dadd(169332.000000,167988.000000,62850.000000,167.176836)}
{pt3dadd(169392.000000,167736.000000,62650.000000,240.734646)}
{pt3dadd(169416.000000,167520.000000,62550.000000,240.734646)}

{create adhoc47}
{access adhoc47}
{connect adhoc47(1), adhoc45(0)}
{nseg = 1}
{strdef color color = "White"}
{pt3dclear()}
{pt3dadd(166752.000000,174420.000000,61075.000000,240.734646)}
{pt3dadd(167112.000000,174276.000000,60925.000000,139.314042)}
{pt3dadd(167424.000000,174072.000000,60725.000000,139.314042)}
{pt3dadd(167556.000000,173832.000000,60650.000000,139.314042)}
{pt3dadd(167784.000000,173580.000000,60575.000000,139.314042)}
{pt3dadd(168048.000000,173352.000000,60600.000000,139.314042)}
{pt3dadd(168252.000000,173088.000000,60400.000000,164.669193)}
{pt3dadd(168336.000000,172848.000000,60375.000000,190.024344)}
{pt3dadd(168264.000000,172596.000000,60425.000000,215.379495)}
{pt3dadd(168696.000000,171876.000000,60225.000000,240.734646)}
{pt3dadd(168612.000000,171564.000000,59950.000000,240.734646)}
{pt3dadd(168636.000000,171540.000000,59800.000000,288.881586)}

{create adhoc48}
{access adhoc48}
{connect adhoc48(1), adhoc44(0)}
{nseg = 1}
{strdef color color = "White"}
{pt3dclear()}
{pt3dadd(163968.000000,180180.000000,59100.000000,993.710358)}
{pt3dadd(164160.000000,179436.000000,58575.000000,862.595802)}
{pt3dadd(163680.000000,178968.000000,58000.000000,905.725589)}
{pt3dadd(163308.000000,177972.000000,57525.000000,948.855375)}
{pt3dadd(162924.000000,177276.000000,57000.000000,991.985162)}
{pt3dadd(162588.000000,176700.000000,56450.000000,1035.114948)}
{pt3dadd(162480.000000,175812.000000,55900.000000,1035.114948)}

{create adhoc49}
{access adhoc49}
{connect adhoc49(1), adhoc48(0)}
{nseg = 1}
{strdef color color = "White"}
{pt3dclear()}
{pt3dadd(162480.000000,175812.000000,55900.000000,1035.114948)}
{pt3dadd(162480.000000,172548.000000,55200.000000,346.657896)}
{pt3dadd(162480.000000,171372.000000,55250.000000,293.696271)}
{pt3dadd(162456.000000,169656.000000,55350.000000,240.734646)}
{pt3dadd(162396.000000,167952.000000,55600.000000,277.326324)}

{create adhoc50}
{access adhoc50}
{connect adhoc50(1), adhoc49(0)}
{nseg = 1}
{strdef color color = "White"}
{pt3dclear()}
{pt3dadd(162396.000000,167952.000000,55600.000000,277.326324)}
{pt3dadd(162396.000000,166836.000000,53350.000000,415.989486)}
{pt3dadd(162336.000000,166620.000000,53175.000000,431.797086)}
{pt3dadd(162648.000000,166380.000000,53050.000000,447.604686)}
{pt3dadd(162816.000000,166164.000000,53100.000000,463.412286)}
{pt3dadd(163092.000000,165912.000000,53025.000000,479.219886)}
{pt3dadd(163260.000000,165588.000000,52900.000000,419.598576)}
{pt3dadd(163200.000000,165264.000000,52875.000000,359.977266)}
{pt3dadd(163224.000000,165012.000000,52725.000000,300.355956)}
{pt3dadd(163464.000000,164700.000000,52725.000000,240.734646)}
{pt3dadd(163584.000000,164436.000000,52525.000000,267.215459)}
{pt3dadd(163752.000000,164196.000000,52375.000000,293.696271)}
{pt3dadd(163956.000000,163992.000000,52475.000000,320.177083)}
{pt3dadd(164112.000000,163764.000000,52350.000000,346.657896)}
{pt3dadd(164280.000000,163524.000000,52275.000000,346.657896)}
{pt3dadd(164364.000000,163308.000000,52275.000000,346.657896)}
{pt3dadd(164748.000000,162756.000000,52275.000000,346.657896)}
{pt3dadd(164868.000000,162540.000000,52050.000000,346.657896)}
{pt3dadd(164928.000000,162300.000000,52000.000000,329.325003)}
{pt3dadd(164928.000000,162084.000000,51875.000000,311.992110)}
{pt3dadd(164892.000000,161868.000000,51600.000000,294.659217)}
{pt3dadd(164916.000000,161568.000000,51450.000000,277.326324)}
{pt3dadd(165000.000000,161352.000000,51375.000000,280.215140)}
{pt3dadd(165060.000000,161136.000000,51300.000000,283.103955)}
{pt3dadd(165036.000000,160908.000000,51200.000000,285.992771)}
{pt3dadd(165120.000000,160680.000000,51200.000000,288.881586)}
{pt3dadd(165168.000000,160392.000000,51075.000000,266.814243)}
{pt3dadd(165228.000000,160140.000000,51000.000000,244.746900)}
{pt3dadd(165252.000000,159912.000000,50875.000000,222.679557)}
{pt3dadd(165648.000000,158772.000000,50875.000000,200.612214)}
{pt3dadd(165684.000000,158544.000000,50800.000000,237.123635)}
{pt3dadd(165888.000000,158340.000000,50925.000000,273.635055)}
{pt3dadd(165972.000000,158124.000000,51050.000000,310.146475)}
{pt3dadd(165912.000000,157992.000000,51175.000000,346.657896)}
{pt3dadd(165936.000000,157764.000000,51450.000000,403.759386)}
{pt3dadd(165864.000000,157560.000000,51625.000000,460.860876)}
{pt3dadd(165960.000000,157368.000000,51950.000000,517.962366)}
{pt3dadd(166056.000000,157164.000000,52450.000000,575.063856)}
{pt3dadd(166332.000000,157176.000000,52900.000000,426.195099)}
{pt3dadd(166392.000000,157020.000000,53300.000000,277.326342)}
{pt3dadd(166716.000000,156516.000000,53575.000000,139.314042)}

{create adhoc51}
{access adhoc51}
{connect adhoc51(1), adhoc49(0)}
{nseg = 1}
{strdef color color = "White"}
{pt3dclear()}
{pt3dadd(162396.000000,167952.000000,55600.000000,277.326324)}
{pt3dadd(162576.000000,167520.000000,55975.000000,240.734646)}
{pt3dadd(162696.000000,167292.000000,55975.000000,252.771381)}
{pt3dadd(162828.000000,167028.000000,56125.000000,264.808116)}
{pt3dadd(163032.000000,166716.000000,56100.000000,276.844851)}
{pt3dadd(163116.000000,166428.000000,56100.000000,288.881586)}
{pt3dadd(163788.000000,166128.000000,56250.000000,266.814243)}
{pt3dadd(164040.000000,166068.000000,56375.000000,244.746900)}
{pt3dadd(164328.000000,165756.000000,56450.000000,222.679557)}
{pt3dadd(164796.000000,165252.000000,56975.000000,200.612214)}
{pt3dadd(165480.000000,164844.000000,57350.000000,237.123635)}
{pt3dadd(165648.000000,164556.000000,57550.000000,273.635055)}
{pt3dadd(165924.000000,164304.000000,57600.000000,310.146475)}
{pt3dadd(165948.000000,164112.000000,57850.000000,346.657896)}
{pt3dadd(166368.000000,162360.000000,57850.000000,332.213819)}
{pt3dadd(167076.000000,161124.000000,57850.000000,317.769741)}
{pt3dadd(167340.000000,160896.000000,58025.000000,303.325664)}
{pt3dadd(167316.000000,160728.000000,57950.000000,288.881586)}
{pt3dadd(167292.000000,160536.000000,58000.000000,258.455399)}
{pt3dadd(167256.000000,160236.000000,57950.000000,228.029211)}
{pt3dadd(167304.000000,159984.000000,58075.000000,197.603024)}
{pt3dadd(167652.000000,158616.000000,58075.000000,167.176836)}
{pt3dadd(167676.000000,158400.000000,58000.000000,212.047101)}
{pt3dadd(167772.000000,158196.000000,57950.000000,256.917366)}
{pt3dadd(168084.000000,157428.000000,57950.000000,301.787631)}
{pt3dadd(168288.000000,157260.000000,57900.000000,346.657896)}
{pt3dadd(168348.000000,157068.000000,57900.000000,332.213819)}
{pt3dadd(168216.000000,156888.000000,57900.000000,317.769741)}
{pt3dadd(168744.000000,156576.000000,58300.000000,303.325664)}
{pt3dadd(169212.000000,156216.000000,58675.000000,288.881586)}
{pt3dadd(169968.000000,156192.000000,59000.000000,288.881586)}
{pt3dadd(170496.000000,156096.000000,59325.000000,288.881586)}
{pt3dadd(170652.000000,156072.000000,59550.000000,288.881586)}
{pt3dadd(170844.000000,156156.000000,59750.000000,288.881586)}
{pt3dadd(171000.000000,156312.000000,59950.000000,288.881586)}
{pt3dadd(171216.000000,156336.000000,60075.000000,288.881586)}
{pt3dadd(171408.000000,156336.000000,60225.000000,288.881586)}
{pt3dadd(172200.000000,156312.000000,60550.000000,288.881586)}
{pt3dadd(172536.000000,156144.000000,60525.000000,264.808116)}
{pt3dadd(172224.000000,155940.000000,60625.000000,240.734646)}
{pt3dadd(172200.000000,155736.000000,60700.000000,200.612214)}

{create adhoc52}
{access adhoc52}
{connect adhoc52(1), adhoc48(0)}
{nseg = 1}
{strdef color color = "White"}
{pt3dclear()}
{pt3dadd(162480.000000,175812.000000,55900.000000,1035.114948)}
{pt3dadd(162252.000000,175272.000000,55100.000000,1035.114948)}
{pt3dadd(161904.000000,175056.000000,54525.000000,1035.114948)}
{pt3dadd(161844.000000,174600.000000,54025.000000,1035.114948)}
{pt3dadd(161844.000000,174060.000000,53425.000000,1035.114948)}
{pt3dadd(161808.000000,173376.000000,52725.000000,1035.114948)}
{pt3dadd(161784.000000,172932.000000,52300.000000,948.855375)}
{pt3dadd(161508.000000,172464.000000,51650.000000,862.595802)}
{pt3dadd(161772.000000,172176.000000,51275.000000,862.595802)}

{create adhoc53}
{access adhoc53}
{connect adhoc53(1), adhoc52(0)}
{nseg = 1}
{strdef color color = "White"}
{pt3dclear()}
{pt3dadd(161772.000000,172176.000000,51275.000000,862.595802)}
{pt3dadd(159780.000000,172260.000000,51575.000000,346.657896)}
{pt3dadd(158724.000000,172260.000000,51000.000000,363.990794)}
{pt3dadd(158952.000000,171900.000000,50725.000000,381.323691)}
{pt3dadd(158904.000000,171756.000000,50325.000000,398.656589)}
{pt3dadd(158736.000000,171612.000000,49825.000000,415.989486)}
{pt3dadd(158748.000000,171396.000000,49475.000000,491.699570)}
{pt3dadd(158748.000000,171336.000000,49075.000000,567.409653)}
{pt3dadd(158952.000000,171456.000000,48675.000000,643.119737)}
{pt3dadd(159144.000000,171516.000000,48300.000000,718.829820)}
{pt3dadd(159240.000000,171540.000000,47900.000000,718.829820)}
{pt3dadd(159480.000000,171660.000000,47550.000000,718.829820)}
{pt3dadd(159420.000000,171480.000000,47125.000000,718.829820)}
{pt3dadd(159444.000000,171420.000000,46750.000000,718.829820)}
{pt3dadd(159468.000000,171384.000000,46325.000000,663.919209)}
{pt3dadd(159372.000000,171324.000000,45975.000000,609.008598)}
{pt3dadd(159468.000000,171456.000000,45675.000000,554.097987)}
{pt3dadd(159528.000000,171504.000000,45225.000000,499.187376)}
{pt3dadd(159552.000000,171660.000000,44825.000000,499.187376)}
{pt3dadd(160008.000000,171672.000000,44475.000000,499.187376)}
{pt3dadd(160176.000000,171912.000000,44025.000000,499.187376)}
{pt3dadd(160224.000000,172140.000000,43600.000000,499.187376)}
{pt3dadd(160416.000000,172308.000000,43225.000000,524.146752)}
{pt3dadd(160476.000000,172500.000000,42975.000000,549.106128)}
{pt3dadd(160560.000000,172584.000000,42575.000000,574.065504)}
{pt3dadd(160416.000000,172752.000000,42175.000000,599.024880)}
{pt3dadd(160512.000000,172764.000000,41100.000000,495.643782)}
{pt3dadd(160656.000000,172776.000000,40550.000000,392.262684)}
{pt3dadd(160872.000000,172932.000000,40100.000000,288.881586)}
{pt3dadd(161148.000000,172452.000000,39825.000000,240.734646)}

{create adhoc54}
{access adhoc54}
{connect adhoc54(1), adhoc52(0)}
{nseg = 1}
{strdef color color = "White"}
{pt3dclear()}
{pt3dadd(161772.000000,172176.000000,51275.000000,862.595802)}
{pt3dadd(161856.000000,171708.000000,50850.000000,862.595802)}
{pt3dadd(161544.000000,170820.000000,50275.000000,895.374441)}
{pt3dadd(161748.000000,170208.000000,49825.000000,928.153080)}
{pt3dadd(161796.000000,169020.000000,49150.000000,960.931719)}
{pt3dadd(161832.000000,168744.000000,48525.000000,993.710358)}
{pt3dadd(161664.000000,168672.000000,48325.000000,1035.114948)}

{create adhoc55}
{access adhoc55}
{connect adhoc55(1), adhoc54(0)}
{nseg = 1}
{strdef color color = "White"}
{pt3dclear()}
{pt3dadd(161664.000000,168672.000000,48325.000000,1035.114948)}
{pt3dadd(162840.000000,166980.000000,48500.000000,346.657896)}
{pt3dadd(163788.000000,165624.000000,48500.000000,346.657896)}
{pt3dadd(163776.000000,165444.000000,48200.000000,346.657896)}
{pt3dadd(163824.000000,165252.000000,48100.000000,346.657896)}
{pt3dadd(163680.000000,164868.000000,47900.000000,346.657896)}
{pt3dadd(163728.000000,164580.000000,47800.000000,346.657896)}
{pt3dadd(163740.000000,164352.000000,47600.000000,346.657896)}
{pt3dadd(163824.000000,164064.000000,47450.000000,346.657896)}
{pt3dadd(163872.000000,163776.000000,47275.000000,346.657896)}
{pt3dadd(163992.000000,163524.000000,46975.000000,363.990794)}
{pt3dadd(164040.000000,163272.000000,46825.000000,381.323691)}
{pt3dadd(164052.000000,163020.000000,46600.000000,398.656589)}
{pt3dadd(164136.000000,162780.000000,46575.000000,415.989486)}
{pt3dadd(164220.000000,162564.000000,46575.000000,398.656589)}
{pt3dadd(164496.000000,162324.000000,46350.000000,381.323691)}
{pt3dadd(164592.000000,162180.000000,46325.000000,363.990794)}
{pt3dadd(164748.000000,162012.000000,46250.000000,346.657896)}
{pt3dadd(164688.000000,161868.000000,46125.000000,332.213819)}
{pt3dadd(164856.000000,161640.000000,46200.000000,317.769741)}
{pt3dadd(165360.000000,161436.000000,45925.000000,303.325664)}
{pt3dadd(165492.000000,161232.000000,45775.000000,288.881586)}
{pt3dadd(165720.000000,161016.000000,45675.000000,288.881586)}
{pt3dadd(165816.000000,159828.000000,45450.000000,288.881586)}
{pt3dadd(166212.000000,158544.000000,45175.000000,288.881586)}
{pt3dadd(166248.000000,158304.000000,45200.000000,288.881586)}
{pt3dadd(166380.000000,158100.000000,45125.000000,285.992771)}
{pt3dadd(166500.000000,157920.000000,45025.000000,283.103955)}
{pt3dadd(166332.000000,157692.000000,44950.000000,280.215140)}
{pt3dadd(166344.000000,157464.000000,44900.000000,277.326324)}
{pt3dadd(166356.000000,157284.000000,44750.000000,280.215140)}
{pt3dadd(166284.000000,157044.000000,44550.000000,283.103955)}
{pt3dadd(166344.000000,156852.000000,44425.000000,285.992771)}
{pt3dadd(166404.000000,156696.000000,44225.000000,288.881586)}
{pt3dadd(166500.000000,156420.000000,44000.000000,288.881586)}
{pt3dadd(166596.000000,156192.000000,43925.000000,288.881586)}
{pt3dadd(166536.000000,155916.000000,43700.000000,288.881586)}
{pt3dadd(166668.000000,155664.000000,43800.000000,288.881586)}
{pt3dadd(166644.000000,155400.000000,43750.000000,303.325664)}
{pt3dadd(166668.000000,155196.000000,43725.000000,317.769741)}
{pt3dadd(166728.000000,154968.000000,43575.000000,332.213819)}
{pt3dadd(166776.000000,154764.000000,43475.000000,346.657896)}
{pt3dadd(166872.000000,154524.000000,43450.000000,332.213819)}
{pt3dadd(166992.000000,154284.000000,43500.000000,317.769741)}
{pt3dadd(167160.000000,154032.000000,43575.000000,303.325664)}
{pt3dadd(167472.000000,153828.000000,43675.000000,288.881586)}
{pt3dadd(167736.000000,153576.000000,43750.000000,266.814243)}
{pt3dadd(167856.000000,153420.000000,43825.000000,244.746900)}
{pt3dadd(167940.000000,153228.000000,43850.000000,222.679557)}
{pt3dadd(167880.000000,153048.000000,43925.000000,200.612214)}
{pt3dadd(167856.000000,152808.000000,44000.000000,222.679557)}
{pt3dadd(167676.000000,152592.000000,44025.000000,244.746900)}
{pt3dadd(167640.000000,152412.000000,43975.000000,266.814243)}
{pt3dadd(167604.000000,152208.000000,44100.000000,288.881586)}
{pt3dadd(167532.000000,152004.000000,44025.000000,266.814243)}
{pt3dadd(167436.000000,151752.000000,43950.000000,244.746900)}
{pt3dadd(167376.000000,151572.000000,43875.000000,222.679557)}
{pt3dadd(167316.000000,151320.000000,43800.000000,200.612214)}
{pt3dadd(167484.000000,151104.000000,43725.000000,222.679557)}
{pt3dadd(167412.000000,150864.000000,43525.000000,244.746900)}
{pt3dadd(167760.000000,149976.000000,43550.000000,266.814243)}
{pt3dadd(167256.000000,148020.000000,43550.000000,288.881586)}
{pt3dadd(167124.000000,147516.000000,43850.000000,288.881586)}
{pt3dadd(167148.000000,147204.000000,44075.000000,288.881586)}
{pt3dadd(167268.000000,145956.000000,44275.000000,288.881586)}
{pt3dadd(167244.000000,145296.000000,44425.000000,288.881586)}
{pt3dadd(167364.000000,145140.000000,44625.000000,276.844851)}
{pt3dadd(167364.000000,144960.000000,44650.000000,264.808116)}
{pt3dadd(167364.000000,144768.000000,44700.000000,252.771381)}
{pt3dadd(167364.000000,144528.000000,44725.000000,240.734646)}
{pt3dadd(167532.000000,144372.000000,44825.000000,222.345193)}
{pt3dadd(167364.000000,142212.000000,45125.000000,203.955741)}
{pt3dadd(167448.000000,141732.000000,45450.000000,185.566288)}
{pt3dadd(167748.000000,141156.000000,45850.000000,167.176836)}
{pt3dadd(167736.000000,141060.000000,46075.000000,167.176836)}

{create adhoc56}
{access adhoc56}
{connect adhoc56(1), adhoc54(0)}
{nseg = 1}
{strdef color color = "White"}
{pt3dclear()}
{pt3dadd(161664.000000,168672.000000,48325.000000,1035.114948)}
{pt3dadd(161532.000000,168420.000000,47800.000000,1144.754388)}
{pt3dadd(161832.000000,167880.000000,47150.000000,1216.301508)}
{pt3dadd(161988.000000,167748.000000,46500.000000,1287.848628)}
{pt3dadd(161916.000000,167424.000000,46275.000000,1359.395748)}
{pt3dadd(161976.000000,167424.000000,45650.000000,1430.942868)}
{pt3dadd(162096.000000,167112.000000,45175.000000,1321.634740)}
{pt3dadd(162480.000000,166932.000000,44650.000000,1212.326613)}
{pt3dadd(162480.000000,166716.000000,44050.000000,1103.018486)}
{pt3dadd(162564.000000,166404.000000,43425.000000,993.710358)}
{pt3dadd(162684.000000,166056.000000,42750.000000,952.305772)}
{pt3dadd(162912.000000,165876.000000,42275.000000,910.901187)}
{pt3dadd(163272.000000,165468.000000,41625.000000,869.496602)}
{pt3dadd(163320.000000,164916.000000,40875.000000,828.092016)}
{pt3dadd(162948.000000,164484.000000,40275.000000,415.989486)}

{create adhoc57}
{access adhoc57}
{connect adhoc57(1), adhoc56(0)}
{nseg = 1}
{strdef color color = "White"}
{pt3dclear()}
{pt3dadd(162948.000000,164484.000000,40275.000000,415.989486)}
{pt3dadd(163116.000000,162924.000000,40250.000000,499.187376)}
{pt3dadd(163248.000000,162228.000000,39725.000000,499.187376)}
{pt3dadd(163440.000000,161784.000000,39250.000000,499.187376)}
{pt3dadd(164544.000000,161052.000000,38725.000000,499.187376)}
{pt3dadd(165192.000000,160728.000000,38325.000000,499.187376)}
{pt3dadd(165720.000000,160452.000000,38125.000000,499.187376)}
{pt3dadd(166104.000000,160176.000000,38000.000000,499.187376)}
{pt3dadd(166404.000000,159936.000000,37975.000000,499.187376)}
{pt3dadd(167100.000000,159096.000000,37975.000000,499.187376)}
{pt3dadd(167412.000000,158772.000000,37575.000000,518.156496)}
{pt3dadd(167916.000000,158232.000000,37275.000000,537.125616)}
{pt3dadd(168156.000000,158028.000000,37075.000000,556.094736)}
{pt3dadd(168432.000000,157776.000000,36850.000000,575.063856)}
{pt3dadd(168660.000000,157584.000000,36725.000000,491.481553)}
{pt3dadd(169392.000000,157476.000000,36175.000000,407.899251)}
{pt3dadd(169968.000000,157212.000000,35700.000000,324.316949)}
{pt3dadd(170532.000000,157008.000000,35175.000000,240.734646)}
{pt3dadd(171060.000000,156780.000000,34900.000000,240.734646)}
{pt3dadd(171120.000000,156564.000000,34700.000000,240.734646)}
{pt3dadd(171552.000000,156276.000000,34700.000000,240.734646)}
{pt3dadd(171756.000000,156072.000000,34600.000000,240.734646)}
{pt3dadd(172032.000000,155844.000000,34525.000000,252.771381)}
{pt3dadd(172236.000000,155616.000000,34175.000000,264.808116)}
{pt3dadd(172728.000000,155388.000000,34175.000000,276.844851)}
{pt3dadd(173124.000000,155148.000000,33975.000000,288.881586)}
{pt3dadd(173544.000000,154920.000000,33975.000000,276.844851)}
{pt3dadd(174012.000000,154728.000000,33950.000000,264.808116)}
{pt3dadd(174132.000000,154404.000000,33725.000000,252.771381)}
{pt3dadd(174360.000000,154128.000000,33525.000000,240.734646)}
{pt3dadd(174528.000000,153852.000000,33525.000000,252.771381)}
{pt3dadd(174804.000000,153636.000000,33625.000000,264.808116)}
{pt3dadd(175008.000000,153432.000000,33625.000000,276.844851)}
{pt3dadd(175032.000000,153276.000000,33625.000000,288.881586)}
{pt3dadd(175272.000000,153012.000000,33600.000000,266.814243)}
{pt3dadd(175584.000000,152748.000000,33600.000000,244.746900)}
{pt3dadd(176004.000000,152496.000000,33550.000000,222.679557)}
{pt3dadd(176160.000000,152220.000000,33625.000000,200.612214)}
{pt3dadd(176172.000000,151560.000000,33475.000000,200.612214)}
{pt3dadd(176076.000000,150528.000000,33450.000000,200.612214)}
{pt3dadd(176112.000000,150312.000000,33600.000000,200.612214)}
{pt3dadd(175836.000000,150132.000000,33550.000000,200.612214)}
{pt3dadd(175548.000000,149928.000000,33650.000000,220.673430)}
{pt3dadd(175332.000000,149700.000000,33725.000000,240.734646)}
{pt3dadd(174780.000000,148344.000000,34400.000000,200.612214)}

{create adhoc58}
{access adhoc58}
{connect adhoc58(1), adhoc56(0)}
{nseg = 1}
{strdef color color = "White"}
{pt3dclear()}
{pt3dadd(162948.000000,164484.000000,40275.000000,415.989486)}
{pt3dadd(164268.000000,164916.000000,39875.000000,1035.114948)}
{pt3dadd(164796.000000,165036.000000,39450.000000,956.043666)}
{pt3dadd(165396.000000,165120.000000,38900.000000,876.972384)}
{pt3dadd(165732.000000,164964.000000,38475.000000,797.901102)}
{pt3dadd(166596.000000,164676.000000,37875.000000,718.829820)}
{pt3dadd(166944.000000,164724.000000,37575.000000,718.829820)}
{pt3dadd(167256.000000,164736.000000,37325.000000,718.829820)}
{pt3dadd(167724.000000,164664.000000,37250.000000,718.829820)}
{pt3dadd(168024.000000,164556.000000,37125.000000,718.829820)}
{pt3dadd(168372.000000,164340.000000,37100.000000,754.771316)}
{pt3dadd(168744.000000,164232.000000,36800.000000,790.712811)}
{pt3dadd(169020.000000,164016.000000,36475.000000,826.654307)}
{pt3dadd(169296.000000,163956.000000,36175.000000,862.595802)}
{pt3dadd(169692.000000,163752.000000,35875.000000,862.595802)}
{pt3dadd(170040.000000,163716.000000,35975.000000,862.595802)}
{pt3dadd(170400.000000,163740.000000,35875.000000,599.024880)}

{create adhoc59}
{access adhoc59}
{connect adhoc59(1), adhoc58(0)}
{nseg = 1}
{strdef color color = "White"}
{pt3dclear()}
{pt3dadd(170400.000000,163740.000000,35875.000000,599.024880)}
{pt3dadd(170208.000000,162228.000000,35300.000000,288.881586)}
{pt3dadd(170700.000000,161724.000000,35000.000000,276.844851)}
{pt3dadd(171528.000000,160884.000000,34575.000000,264.808116)}
{pt3dadd(171792.000000,160848.000000,34600.000000,252.771381)}
{pt3dadd(172092.000000,160560.000000,34250.000000,240.734646)}
{pt3dadd(172320.000000,160524.000000,34250.000000,284.548356)}
{pt3dadd(172560.000000,160044.000000,33950.000000,328.362066)}
{pt3dadd(172776.000000,159972.000000,33800.000000,372.175776)}
{pt3dadd(173004.000000,159972.000000,33575.000000,415.989486)}
{pt3dadd(173208.000000,160104.000000,33350.000000,353.786324)}
{pt3dadd(173448.000000,159972.000000,32975.000000,291.583161)}
{pt3dadd(173880.000000,160164.000000,32575.000000,229.379999)}
{pt3dadd(174144.000000,160068.000000,32475.000000,167.176836)}
{pt3dadd(174336.000000,160236.000000,32400.000000,197.603024)}
{pt3dadd(174648.000000,160068.000000,32325.000000,228.029211)}
{pt3dadd(174960.000000,160092.000000,32350.000000,258.455399)}
{pt3dadd(175680.000000,160224.000000,32225.000000,288.881586)}
{pt3dadd(175860.000000,160200.000000,32225.000000,266.814243)}
{pt3dadd(176844.000000,160464.000000,31900.000000,244.746900)}
{pt3dadd(177228.000000,160452.000000,31475.000000,222.679557)}
{pt3dadd(177420.000000,160056.000000,31025.000000,200.612214)}
{pt3dadd(177840.000000,159768.000000,30625.000000,230.035338)}
{pt3dadd(178560.000000,159528.000000,30275.000000,259.458462)}
{pt3dadd(178956.000000,159504.000000,29675.000000,288.881586)}
{pt3dadd(179376.000000,159588.000000,29375.000000,346.657896)}

{create adhoc60}
{access adhoc60}
{connect adhoc60(1), adhoc58(0)}
{nseg = 1}
{strdef color color = "White"}
{pt3dclear()}
{pt3dadd(170400.000000,163740.000000,35875.000000,599.024880)}
{pt3dadd(170604.000000,163932.000000,34750.000000,718.829820)}
{pt3dadd(170928.000000,164088.000000,34175.000000,643.119736)}
{pt3dadd(171240.000000,164004.000000,33875.000000,567.409653)}
{pt3dadd(171612.000000,164016.000000,33875.000000,491.699570)}
{pt3dadd(171900.000000,163992.000000,33725.000000,415.989486)}
{pt3dadd(172224.000000,163992.000000,33575.000000,398.656589)}
{pt3dadd(172584.000000,163992.000000,33425.000000,381.323691)}
{pt3dadd(172896.000000,163992.000000,33425.000000,363.990794)}
{pt3dadd(173220.000000,163776.000000,33350.000000,346.657896)}
{pt3dadd(173508.000000,163416.000000,32950.000000,363.990794)}
{pt3dadd(173808.000000,163248.000000,32650.000000,381.323691)}
{pt3dadd(174084.000000,163080.000000,32375.000000,398.656589)}
{pt3dadd(174468.000000,162864.000000,32225.000000,415.989486)}
{pt3dadd(174660.000000,162756.000000,32050.000000,353.786324)}
{pt3dadd(175020.000000,162516.000000,31825.000000,291.583161)}
{pt3dadd(175260.000000,161904.000000,31400.000000,229.379999)}
{pt3dadd(175416.000000,161616.000000,31275.000000,167.176836)}
{pt3dadd(175416.000000,161388.000000,31125.000000,197.603024)}
{pt3dadd(175392.000000,161208.000000,31075.000000,228.029211)}
{pt3dadd(175392.000000,160980.000000,31000.000000,258.455399)}
{pt3dadd(175656.000000,160812.000000,30975.000000,288.881586)}
{pt3dadd(175668.000000,160560.000000,30800.000000,288.881586)}
{pt3dadd(175716.000000,160308.000000,30650.000000,288.881586)}
{pt3dadd(175812.000000,160044.000000,30575.000000,288.881586)}
{pt3dadd(176004.000000,159780.000000,30500.000000,288.881586)}
{pt3dadd(176232.000000,159564.000000,30350.000000,285.992775)}
{pt3dadd(176424.000000,159276.000000,30275.000000,283.103964)}
{pt3dadd(176508.000000,158988.000000,29975.000000,280.215153)}
{pt3dadd(176496.000000,158712.000000,29875.000000,277.326342)}
{pt3dadd(176724.000000,158460.000000,29800.000000,249.788966)}
{pt3dadd(176892.000000,158136.000000,29825.000000,222.251589)}
{pt3dadd(176868.000000,157872.000000,29850.000000,194.714212)}
{pt3dadd(177000.000000,157596.000000,29850.000000,167.176836)}
{pt3dadd(177276.000000,157404.000000,29925.000000,197.603024)}
{pt3dadd(177408.000000,157128.000000,30025.000000,228.029211)}
{pt3dadd(177504.000000,156852.000000,30025.000000,258.455399)}
{pt3dadd(177732.000000,156564.000000,30100.000000,288.881586)}
{pt3dadd(178188.000000,154944.000000,30175.000000,266.814243)}
{pt3dadd(178140.000000,154728.000000,30025.000000,244.746900)}
{pt3dadd(178296.000000,154440.000000,29950.000000,222.679557)}
{pt3dadd(178380.000000,154176.000000,29800.000000,200.612214)}
{pt3dadd(178464.000000,153852.000000,29850.000000,200.612214)}
{pt3dadd(178584.000000,153576.000000,29750.000000,200.612214)}
{pt3dadd(178932.000000,153420.000000,29750.000000,200.612214)}
{pt3dadd(179016.000000,153120.000000,29775.000000,200.612214)}
{pt3dadd(179136.000000,152868.000000,29825.000000,192.253370)}
{pt3dadd(179136.000000,152640.000000,29900.000000,183.894525)}
{pt3dadd(179028.000000,152412.000000,30150.000000,175.535680)}
{pt3dadd(179088.000000,152196.000000,30200.000000,167.176836)}
{pt3dadd(179016.000000,151908.000000,30150.000000,185.566288)}
{pt3dadd(178980.000000,151716.000000,30050.000000,203.955741)}
{pt3dadd(179340.000000,151116.000000,30000.000000,222.345193)}
{pt3dadd(179424.000000,150948.000000,29925.000000,240.734646)}
{pt3dadd(179700.000000,150708.000000,29825.000000,230.704038)}
{pt3dadd(179856.000000,150492.000000,29825.000000,220.673430)}
{pt3dadd(179916.000000,150324.000000,29625.000000,210.642822)}
{pt3dadd(180216.000000,150084.000000,29600.000000,200.612214)}
{pt3dadd(180600.000000,149904.000000,29525.000000,200.612214)}
{pt3dadd(180900.000000,149688.000000,29550.000000,200.612214)}
{pt3dadd(180900.000000,149436.000000,29525.000000,200.612214)}

{create adhoc61}
{access adhoc61}
{connect adhoc61(1), adhoc3(0)}
{nseg = 1}
{strdef color color = "White"}
{pt3dclear()}
{pt3dadd(174852.000000,206376.000000,93975.000000,1490.565402)}
{pt3dadd(175056.000000,206316.000000,94625.000000,1490.565402)}
{pt3dadd(175452.000000,206628.000000,95300.000000,1490.565402)}
{pt3dadd(175620.000000,206688.000000,96125.000000,1490.565402)}
{pt3dadd(176544.000000,206832.000000,96900.000000,1490.565402)}
{pt3dadd(177360.000000,206484.000000,97475.000000,1490.565402)}
{pt3dadd(177912.000000,206352.000000,98250.000000,1428.458522)}
{pt3dadd(178236.000000,206352.000000,99025.000000,1366.351641)}
{pt3dadd(178752.000000,206292.000000,99825.000000,1304.244761)}
{pt3dadd(179448.000000,206292.000000,100575.000000,1242.137880)}
{pt3dadd(179856.000000,206364.000000,101250.000000,1304.244761)}
{pt3dadd(180300.000000,206232.000000,101800.000000,1366.351641)}
{pt3dadd(181140.000000,206148.000000,102475.000000,1428.458522)}
{pt3dadd(181212.000000,206088.000000,102900.000000,1490.565402)}
{pt3dadd(181584.000000,206220.000000,103625.000000,1859.724842)}
{pt3dadd(182052.000000,205968.000000,104325.000000,2228.884281)}
{pt3dadd(182292.000000,205800.000000,104950.000000,2598.043720)}
{pt3dadd(182160.000000,205704.000000,105975.000000,2967.203160)}
{pt3dadd(182100.000000,205404.000000,106675.000000,2967.203088)}
{pt3dadd(182004.000000,205476.000000,107300.000000,2967.203016)}
{pt3dadd(181872.000000,205788.000000,107975.000000,2967.202944)}
{pt3dadd(181788.000000,205968.000000,108700.000000,2967.202872)}
{pt3dadd(181560.000000,205884.000000,109475.000000,2484.180891)}
{pt3dadd(181128.000000,205188.000000,110075.000000,2001.158910)}
{pt3dadd(180972.000000,205152.000000,110475.000000,1518.136929)}
{pt3dadd(180744.000000,205188.000000,110975.000000,1035.114948)}
{pt3dadd(180552.000000,204132.000000,111250.000000,991.985162)}
{pt3dadd(180468.000000,204012.000000,111725.000000,948.855375)}
{pt3dadd(180276.000000,203592.000000,112225.000000,905.725589)}
{pt3dadd(179964.000000,203280.000000,112700.000000,862.595802)}
{pt3dadd(179856.000000,202944.000000,113225.000000,581.063868)}
{pt3dadd(179724.000000,202584.000000,113700.000000,299.531934)}
{pt3dadd(179148.000000,202860.000000,114225.000000,18.000000)}
{pt3dadd(179232.000000,202152.000000,114725.000000,862.595802)}
{pt3dadd(179268.000000,201828.000000,115125.000000,957.481322)}
{pt3dadd(178944.000000,201660.000000,115550.000000,1052.366841)}
{pt3dadd(178668.000000,201228.000000,116100.000000,1147.252361)}
{pt3dadd(178692.000000,201120.000000,116750.000000,1242.137880)}
{pt3dadd(178596.000000,200676.000000,117275.000000,1190.382147)}
{pt3dadd(178428.000000,200400.000000,117850.000000,1138.626414)}
{pt3dadd(177828.000000,200076.000000,118425.000000,1086.870681)}
{pt3dadd(176868.000000,199464.000000,119100.000000,1035.114948)}
{pt3dadd(176388.000000,199452.000000,119875.000000,956.043666)}
{pt3dadd(176352.000000,198900.000000,120575.000000,876.972384)}
{pt3dadd(175308.000000,198192.000000,121175.000000,797.901102)}
{pt3dadd(174492.000000,198084.000000,121825.000000,718.829820)}
{pt3dadd(173904.000000,197604.000000,122400.000000,754.771316)}
{pt3dadd(172776.000000,197064.000000,123100.000000,790.712811)}
{pt3dadd(171492.000000,195600.000000,123625.000000,826.654307)}
{pt3dadd(171168.000000,194796.000000,123975.000000,862.595802)}
{pt3dadd(170064.000000,192564.000000,123975.000000,862.595802)}
{pt3dadd(168936.000000,190668.000000,123975.000000,862.595802)}
{pt3dadd(167772.000000,189732.000000,123975.000000,862.595802)}
{pt3dadd(167040.000000,189528.000000,124975.000000,862.595802)}
{pt3dadd(166728.000000,189156.000000,124900.000000,862.595802)}
{pt3dadd(166596.000000,188808.000000,125000.000000,862.595802)}
{pt3dadd(166200.000000,188484.000000,125050.000000,862.595802)}
{pt3dadd(166212.000000,188112.000000,124975.000000,862.595802)}
{pt3dadd(166068.000000,187776.000000,125300.000000,905.725589)}
{pt3dadd(165888.000000,187380.000000,125325.000000,948.855375)}
{pt3dadd(165648.000000,186996.000000,125425.000000,991.985162)}
{pt3dadd(165360.000000,186648.000000,125675.000000,1035.114948)}
{pt3dadd(165324.000000,186372.000000,125675.000000,1035.114948)}
{pt3dadd(165372.000000,185988.000000,125825.000000,1035.114948)}
{pt3dadd(165096.000000,185640.000000,126025.000000,1035.114948)}
{pt3dadd(165108.000000,185244.000000,126125.000000,1035.114948)}
{pt3dadd(164928.000000,184800.000000,126225.000000,1086.870681)}
{pt3dadd(164688.000000,184488.000000,126250.000000,1138.626414)}
{pt3dadd(164472.000000,184200.000000,126675.000000,1190.382147)}
{pt3dadd(164448.000000,183828.000000,126625.000000,1242.137880)}
{pt3dadd(164448.000000,183444.000000,126675.000000,1229.716498)}
{pt3dadd(164388.000000,183084.000000,126950.000000,1217.295117)}
{pt3dadd(164184.000000,182652.000000,127075.000000,1204.873736)}
{pt3dadd(163908.000000,182316.000000,127200.000000,1192.452354)}
{pt3dadd(163728.000000,181956.000000,127025.000000,1204.873736)}
{pt3dadd(163632.000000,181512.000000,127300.000000,1217.295117)}
{pt3dadd(163500.000000,181092.000000,127800.000000,1229.716498)}
{pt3dadd(164340.000000,180492.000000,127650.000000,1242.137880)}
{pt3dadd(164340.000000,180096.000000,127925.000000,1111.310865)}
{pt3dadd(164016.000000,179736.000000,128150.000000,980.483850)}
{pt3dadd(162948.000000,179268.000000,128700.000000,849.656835)}
{pt3dadd(162576.000000,178836.000000,129100.000000,718.829820)}
{pt3dadd(162000.000000,178236.000000,129875.000000,1075.725909)}
{pt3dadd(160560.000000,177996.000000,131550.000000,1432.621998)}
{pt3dadd(161364.000000,180108.000000,131975.000000,1789.518087)}
{pt3dadd(160956.000000,179412.000000,133100.000000,2146.414176)}
{pt3dadd(160176.000000,178872.000000,133650.000000,2056.980245)}
{pt3dadd(159552.000000,178584.000000,134225.000000,1967.546313)}
{pt3dadd(158844.000000,178188.000000,134975.000000,1878.112382)}
{pt3dadd(157992.000000,177840.000000,135550.000000,1788.678450)}
{pt3dadd(157140.000000,177504.000000,136225.000000,1788.678450)}
{pt3dadd(155880.000000,176664.000000,137100.000000,1788.678450)}
{pt3dadd(155184.000000,176112.000000,137625.000000,1788.678450)}
{pt3dadd(155112.000000,174180.000000,138275.000000,1788.678450)}
{pt3dadd(155016.000000,173424.000000,138950.000000,1788.678450)}
{pt3dadd(154044.000000,170760.000000,139675.000000,1788.678450)}
{pt3dadd(154068.000000,170244.000000,139950.000000,1788.678450)}
{pt3dadd(153888.000000,169740.000000,139950.000000,1788.678450)}
{pt3dadd(153792.000000,169272.000000,140075.000000,1652.043308)}
{pt3dadd(153792.000000,168900.000000,140100.000000,1515.408165)}
{pt3dadd(153756.000000,168456.000000,140275.000000,1378.773023)}
{pt3dadd(153588.000000,167820.000000,140400.000000,1242.137880)}
{pt3dadd(153492.000000,167436.000000,140450.000000,1304.244761)}
{pt3dadd(153432.000000,166992.000000,140650.000000,1366.351641)}
{pt3dadd(153372.000000,166488.000000,140725.000000,1428.458522)}
{pt3dadd(153540.000000,166080.000000,140850.000000,1490.565402)}
{pt3dadd(153396.000000,165636.000000,140900.000000,1416.037140)}
{pt3dadd(153228.000000,165084.000000,141000.000000,1341.508878)}
{pt3dadd(153060.000000,164640.000000,141125.000000,1266.980616)}
{pt3dadd(152988.000000,164244.000000,141125.000000,1192.452354)}
{pt3dadd(152916.000000,163728.000000,141425.000000,1341.508878)}
{pt3dadd(152700.000000,163176.000000,141425.000000,1490.565402)}
{pt3dadd(152496.000000,162660.000000,141500.000000,1639.621926)}
{pt3dadd(152256.000000,162288.000000,141725.000000,1788.678450)}
{pt3dadd(152184.000000,161784.000000,141750.000000,1856.648255)}
{pt3dadd(152052.000000,161160.000000,142050.000000,1924.618059)}
{pt3dadd(151800.000000,160548.000000,142275.000000,1992.587863)}
{pt3dadd(151596.000000,160080.000000,142375.000000,2060.557668)}
{pt3dadd(151380.000000,159468.000000,142775.000000,2082.021795)}
{pt3dadd(151104.000000,158856.000000,142975.000000,2103.485922)}
{pt3dadd(151188.000000,158304.000000,143250.000000,2124.950049)}
{pt3dadd(151224.000000,157896.000000,143400.000000,2146.414176)}
{pt3dadd(151044.000000,157344.000000,143650.000000,2056.980245)}
{pt3dadd(151068.000000,156828.000000,143800.000000,1967.546313)}
{pt3dadd(151044.000000,156120.000000,144150.000000,1878.112382)}
{pt3dadd(151104.000000,155676.000000,144400.000000,1788.678450)}
{pt3dadd(151188.000000,155196.000000,144875.000000,1816.261380)}
{pt3dadd(151104.000000,154536.000000,145000.000000,1843.844310)}
{pt3dadd(150972.000000,153804.000000,145175.000000,1871.427240)}
{pt3dadd(150840.000000,153288.000000,145375.000000,1899.010170)}
{pt3dadd(150744.000000,152760.000000,145600.000000,1871.427240)}
{pt3dadd(150708.000000,152064.000000,145800.000000,1843.844310)}
{pt3dadd(150684.000000,151488.000000,145975.000000,1816.261380)}
{pt3dadd(150660.000000,151068.000000,146150.000000,1788.678450)}
{pt3dadd(150528.000000,150564.000000,146300.000000,1878.112382)}
{pt3dadd(150384.000000,150096.000000,146450.000000,1967.546313)}
{pt3dadd(150240.000000,149712.000000,146600.000000,2056.980245)}
{pt3dadd(150096.000000,149304.000000,146750.000000,2146.414176)}
{pt3dadd(150000.000000,148812.000000,146800.000000,2104.344468)}
{pt3dadd(150024.000000,148248.000000,146850.000000,2062.274760)}
{pt3dadd(149844.000000,147648.000000,147025.000000,2020.205052)}
{pt3dadd(149808.000000,147192.000000,147075.000000,1978.135344)}
{pt3dadd(149736.000000,146760.000000,147400.000000,2020.205052)}
{pt3dadd(149640.000000,146340.000000,147525.000000,2062.274760)}
{pt3dadd(149688.000000,145848.000000,147800.000000,2104.344468)}
{pt3dadd(149712.000000,145344.000000,148050.000000,2146.414176)}
{pt3dadd(149712.000000,144816.000000,148200.000000,2146.414176)}
{pt3dadd(149616.000000,144456.000000,148525.000000,2146.414176)}
{pt3dadd(149580.000000,144132.000000,148775.000000,2146.414176)}
{pt3dadd(149580.000000,143820.000000,149075.000000,2146.414176)}
{pt3dadd(149532.000000,143436.000000,149825.000000,2253.734910)}
{pt3dadd(149664.000000,143124.000000,150125.000000,2361.055644)}
{pt3dadd(149724.000000,142668.000000,150475.000000,2468.376378)}
{pt3dadd(149724.000000,142332.000000,151025.000000,2575.697112)}
{pt3dadd(149880.000000,141156.000000,151925.000000,2549.940147)}
{pt3dadd(150480.000000,140496.000000,152775.000000,2524.183182)}
{pt3dadd(150840.000000,139872.000000,153725.000000,2498.426217)}
{pt3dadd(151392.000000,138804.000000,154475.000000,2472.669252)}
{pt3dadd(152028.000000,137964.000000,155150.000000,2369.641356)}
{pt3dadd(152892.000000,136752.000000,155625.000000,2266.613460)}
{pt3dadd(154140.000000,134916.000000,156375.000000,2163.585564)}
{pt3dadd(154812.000000,134412.000000,158300.000000,2060.557668)}
{pt3dadd(155340.000000,134076.000000,158375.000000,2189.342529)}
{pt3dadd(155904.000000,133512.000000,158675.000000,2318.127390)}
{pt3dadd(156180.000000,132828.000000,158800.000000,2446.912251)}
{pt3dadd(156336.000000,132408.000000,158850.000000,2575.697112)}
{pt3dadd(157008.000000,131964.000000,159250.000000,2575.697112)}
{pt3dadd(156804.000000,131532.000000,159225.000000,2575.697112)}
{pt3dadd(157080.000000,131208.000000,159500.000000,2575.697112)}
{pt3dadd(157368.000000,130776.000000,159325.000000,2575.697112)}
{pt3dadd(157272.000000,130044.000000,159650.000000,2575.697112)}
{pt3dadd(158112.000000,129408.000000,160050.000000,2575.697112)}
{pt3dadd(158220.000000,128832.000000,159900.000000,2575.697112)}
{pt3dadd(158436.000000,127992.000000,160475.000000,2575.697112)}
{pt3dadd(158412.000000,127284.000000,160950.000000,2575.697112)}
{pt3dadd(158772.000000,126444.000000,161650.000000,2575.697112)}
{pt3dadd(158352.000000,125688.000000,161800.000000,2575.697112)}
{pt3dadd(157680.000000,125088.000000,161925.000000,2575.697112)}
{pt3dadd(157776.000000,124488.000000,162275.000000,2432.602800)}
{pt3dadd(157404.000000,124116.000000,162650.000000,2289.508488)}
{pt3dadd(157332.000000,123708.000000,162575.000000,2146.414176)}
{pt3dadd(157032.000000,123084.000000,162775.000000,2146.414176)}

{create adhoc62}
{access adhoc62}
{connect adhoc62(1), adhoc61(0)}
{nseg = 1}
{strdef color color = "White"}
{pt3dclear()}
{pt3dadd(157032.000000,123084.000000,162775.000000,2146.414176)}
{pt3dadd(153060.000000,122712.000000,163600.000000,862.595802)}
{pt3dadd(152736.000000,122712.000000,163175.000000,862.595802)}
{pt3dadd(152208.000000,122568.000000,163175.000000,862.595802)}
{pt3dadd(151908.000000,122628.000000,163175.000000,862.595802)}
{pt3dadd(151632.000000,122568.000000,163025.000000,862.595802)}
{pt3dadd(151284.000000,122580.000000,162850.000000,990.373154)}
{pt3dadd(150924.000000,122484.000000,162725.000000,1118.150505)}
{pt3dadd(150624.000000,122412.000000,162475.000000,1245.927857)}
{pt3dadd(150228.000000,122172.000000,161750.000000,1373.705208)}
{pt3dadd(149928.000000,121920.000000,161100.000000,1340.813376)}
{pt3dadd(149616.000000,121680.000000,160625.000000,1307.921544)}
{pt3dadd(149196.000000,121476.000000,160600.000000,1275.029712)}
{pt3dadd(148836.000000,121068.000000,160575.000000,1242.137880)}
{pt3dadd(148572.000000,120744.000000,160350.000000,1035.114948)}
{pt3dadd(148200.000000,121320.000000,160350.000000,1035.114948)}

{create adhoc63}
{access adhoc63}
{connect adhoc63(1), adhoc62(0)}
{nseg = 1}
{strdef color color = "White"}
{pt3dclear()}
{pt3dadd(148200.000000,121320.000000,160350.000000,1035.114948)}
{pt3dadd(147396.000000,123960.000000,159475.000000,828.091944)}
{pt3dadd(146592.000000,124620.000000,158900.000000,745.865802)}
{pt3dadd(143076.000000,127584.000000,159150.000000,663.639660)}
{pt3dadd(142260.000000,128628.000000,159550.000000,581.413518)}
{pt3dadd(141960.000000,128952.000000,159825.000000,499.187376)}
{pt3dadd(141852.000000,129216.000000,159850.000000,461.055006)}
{pt3dadd(141312.000000,129552.000000,160000.000000,422.922636)}
{pt3dadd(141024.000000,130032.000000,160375.000000,384.790266)}
{pt3dadd(140712.000000,130368.000000,160625.000000,346.657896)}
{pt3dadd(140676.000000,130836.000000,160850.000000,397.501056)}
{pt3dadd(140400.000000,131244.000000,161000.000000,448.344216)}
{pt3dadd(140256.000000,131616.000000,161150.000000,499.187376)}
{pt3dadd(139824.000000,132228.000000,161200.000000,200.612214)}

{create adhoc64}
{access adhoc64}
{connect adhoc64(1), adhoc63(0)}
{nseg = 1}
{strdef color color = "White"}
{pt3dclear()}
{pt3dadd(139824.000000,132228.000000,161200.000000,200.612214)}
{pt3dadd(139416.000000,132348.000000,161475.000000,319.479948)}
{pt3dadd(138984.000000,132612.000000,161675.000000,343.607332)}
{pt3dadd(138876.000000,132888.000000,161750.000000,367.734717)}
{pt3dadd(138708.000000,133236.000000,161950.000000,391.862101)}
{pt3dadd(138576.000000,133644.000000,161900.000000,415.989486)}
{pt3dadd(138480.000000,134196.000000,162100.000000,384.212511)}
{pt3dadd(138540.000000,134748.000000,162150.000000,352.435536)}
{pt3dadd(138588.000000,135288.000000,162175.000000,320.658561)}
{pt3dadd(138516.000000,135612.000000,162100.000000,288.881586)}
{pt3dadd(138348.000000,136044.000000,162025.000000,167.176836)}
{pt3dadd(138276.000000,136260.000000,162100.000000,96.745860)}

{create adhoc65}
{access adhoc65}
{connect adhoc65(1), adhoc63(0)}
{nseg = 1}
{strdef color color = "White"}
{pt3dclear()}
{pt3dadd(139824.000000,132228.000000,161200.000000,200.612214)}
{pt3dadd(140520.000000,132528.000000,160700.000000,167.176836)}
{pt3dadd(140520.000000,132612.000000,160700.000000,200.612214)}

{create adhoc66}
{access adhoc66}
{connect adhoc66(1), adhoc62(0)}
{nseg = 1}
{strdef color color = "White"}
{pt3dclear()}
{pt3dadd(148200.000000,121320.000000,160350.000000,1035.114948)}
{pt3dadd(147804.000000,120696.000000,160450.000000,1035.114948)}
{pt3dadd(147360.000000,120048.000000,159750.000000,863.000685)}
{pt3dadd(147108.000000,119736.000000,159675.000000,690.886422)}
{pt3dadd(147876.000000,119604.000000,159150.000000,518.772159)}
{pt3dadd(147372.000000,118788.000000,158875.000000,346.657896)}
{pt3dadd(145668.000000,116460.000000,158875.000000,532.743858)}
{pt3dadd(145404.000000,115620.000000,158575.000000,718.829820)}
{pt3dadd(145716.000000,114996.000000,158050.000000,599.024880)}

{create adhoc67}
{access adhoc67}
{connect adhoc67(1), adhoc66(0)}
{nseg = 1}
{strdef color color = "White"}
{pt3dclear()}
{pt3dadd(145716.000000,114996.000000,158050.000000,599.024880)}
{pt3dadd(146436.000000,112656.000000,158300.000000,288.881586)}
{pt3dadd(146904.000000,109872.000000,158500.000000,303.325664)}
{pt3dadd(147156.000000,109644.000000,158225.000000,317.769741)}
{pt3dadd(147252.000000,109380.000000,157925.000000,332.213819)}
{pt3dadd(147372.000000,109080.000000,158050.000000,346.657896)}
{pt3dadd(147684.000000,108756.000000,157750.000000,363.990794)}
{pt3dadd(147948.000000,108504.000000,157675.000000,381.323691)}
{pt3dadd(148344.000000,108204.000000,157475.000000,398.656589)}
{pt3dadd(148440.000000,107868.000000,157350.000000,415.989486)}
{pt3dadd(148440.000000,107580.000000,157300.000000,491.699570)}
{pt3dadd(148296.000000,107196.000000,157375.000000,567.409653)}
{pt3dadd(148344.000000,106860.000000,157550.000000,643.119737)}
{pt3dadd(148656.000000,106536.000000,158000.000000,718.829820)}
{pt3dadd(148896.000000,106224.000000,158625.000000,645.615672)}
{pt3dadd(148728.000000,105996.000000,159025.000000,572.401524)}
{pt3dadd(148752.000000,105744.000000,159125.000000,499.187376)}
{pt3dadd(148656.000000,105444.000000,159175.000000,399.349908)}

{create adhoc68}
{access adhoc68}
{connect adhoc68(1), adhoc66(0)}
{nseg = 1}
{strdef color color = "White"}
{pt3dclear()}
{pt3dadd(145716.000000,114996.000000,158050.000000,599.024880)}
{pt3dadd(145056.000000,114996.000000,157425.000000,599.024880)}
{pt3dadd(145020.000000,114924.000000,156925.000000,96.745860)}

{create adhoc69}
{access adhoc69}
{connect adhoc69(1), adhoc61(0)}
{nseg = 1}
{strdef color color = "White"}
{pt3dclear()}
{pt3dadd(157032.000000,123084.000000,162775.000000,2146.414176)}
{pt3dadd(156228.000000,122580.000000,163275.000000,2146.414176)}
{pt3dadd(156384.000000,121860.000000,163775.000000,2056.980245)}
{pt3dadd(156516.000000,121284.000000,164175.000000,1967.546313)}
{pt3dadd(156648.000000,120924.000000,164575.000000,1878.112382)}
{pt3dadd(156576.000000,120480.000000,165200.000000,1788.678450)}
{pt3dadd(156516.000000,120036.000000,165750.000000,1770.791643)}
{pt3dadd(156276.000000,119580.000000,166100.000000,1752.904836)}
{pt3dadd(156024.000000,119124.000000,166675.000000,1735.018029)}
{pt3dadd(155820.000000,118728.000000,166925.000000,1717.131222)}
{pt3dadd(155424.000000,118248.000000,167325.000000,1645.584102)}
{pt3dadd(155064.000000,117804.000000,167825.000000,1574.036982)}
{pt3dadd(154692.000000,117300.000000,168025.000000,1502.489862)}
{pt3dadd(154224.000000,116784.000000,168550.000000,1430.942742)}
{pt3dadd(154116.000000,116580.000000,168600.000000,1490.565402)}

{create adhoc70}
{access adhoc70}
{connect adhoc70(1), adhoc69(0)}
{nseg = 1}
{strdef color color = "White"}
{pt3dclear()}
{pt3dadd(154116.000000,116580.000000,168600.000000,1490.565402)}
{pt3dadd(151632.000000,116832.000000,171425.000000,575.063856)}
{pt3dadd(151356.000000,117024.000000,171600.000000,718.829820)}

{create adhoc71}
{access adhoc71}
{connect adhoc71(1), adhoc70(0)}
{nseg = 1}
{strdef color color = "White"}
{pt3dclear()}
{pt3dadd(151356.000000,117024.000000,171600.000000,718.829820)}
{pt3dadd(150108.000000,117024.000000,170400.000000,415.989486)}
{pt3dadd(150012.000000,117144.000000,169975.000000,139.314042)}
{pt3dadd(149976.000000,117144.000000,169825.000000,67.184640)}

{create adhoc72}
{access adhoc72}
{connect adhoc72(1), adhoc70(0)}
{nseg = 1}
{strdef color color = "White"}
{pt3dclear()}
{pt3dadd(151356.000000,117024.000000,171600.000000,718.829820)}
{pt3dadd(150072.000000,117024.000000,173450.000000,332.791596)}
{pt3dadd(148896.000000,117036.000000,174100.000000,291.387906)}
{pt3dadd(148608.000000,116748.000000,174175.000000,249.984216)}
{pt3dadd(148248.000000,116616.000000,174425.000000,208.580526)}
{pt3dadd(147876.000000,116616.000000,174625.000000,167.176836)}
{pt3dadd(147648.000000,116640.000000,174600.000000,116.095032)}

{create adhoc73}
{access adhoc73}
{connect adhoc73(1), adhoc69(0)}
{nseg = 1}
{strdef color color = "White"}
{pt3dclear()}
{pt3dadd(154116.000000,116580.000000,168600.000000,1490.565402)}
{pt3dadd(153840.000000,115932.000000,168600.000000,1717.131222)}
{pt3dadd(153468.000000,115296.000000,168925.000000,1598.382887)}
{pt3dadd(153288.000000,115056.000000,169175.000000,1479.634551)}
{pt3dadd(153300.000000,114672.000000,169200.000000,1360.886216)}
{pt3dadd(152796.000000,114216.000000,169400.000000,1242.137880)}
{pt3dadd(152364.000000,113760.000000,169450.000000,1289.339127)}
{pt3dadd(151920.000000,113460.000000,169625.000000,1336.540374)}
{pt3dadd(151512.000000,113028.000000,169700.000000,1383.741621)}
{pt3dadd(151104.000000,112536.000000,169750.000000,1430.942868)}
{pt3dadd(150636.000000,112068.000000,169825.000000,1520.376763)}
{pt3dadd(150312.000000,111588.000000,170075.000000,1609.810659)}
{pt3dadd(150216.000000,111180.000000,170375.000000,1699.244555)}
{pt3dadd(150108.000000,110700.000000,170525.000000,1788.678450)}
{pt3dadd(149832.000000,110232.000000,170825.000000,1788.678450)}
{pt3dadd(149832.000000,109944.000000,170850.000000,1430.942868)}

{create adhoc74}
{access adhoc74}
{connect adhoc74(1), adhoc73(0)}
{nseg = 1}
{strdef color color = "White"}
{pt3dclear()}
{pt3dadd(149832.000000,109944.000000,170850.000000,1430.942868)}
{pt3dadd(148548.000000,109908.000000,168375.000000,415.989486)}
{pt3dadd(148272.000000,109620.000000,168225.000000,415.989486)}
{pt3dadd(148284.000000,109308.000000,168175.000000,415.989486)}
{pt3dadd(148296.000000,109164.000000,168125.000000,415.989486)}
{pt3dadd(148308.000000,108960.000000,167975.000000,240.734646)}

{create adhoc75}
{access adhoc75}
{connect adhoc75(1), adhoc73(0)}
{nseg = 1}
{strdef color color = "White"}
{pt3dclear()}
{pt3dadd(149832.000000,109944.000000,170850.000000,1430.942868)}
{pt3dadd(150168.000000,109488.000000,171200.000000,1430.942868)}
{pt3dadd(150096.000000,108900.000000,171375.000000,1430.942868)}
{pt3dadd(149808.000000,108384.000000,171425.000000,1430.942868)}
{pt3dadd(149640.000000,107988.000000,171600.000000,1430.942868)}

{create adhoc76}
{access adhoc76}
{connect adhoc76(1), adhoc75(0)}
{nseg = 1}
{strdef color color = "White"}
{pt3dclear()}
{pt3dadd(149640.000000,107988.000000,171600.000000,1430.942868)}
{pt3dadd(146604.000000,108024.000000,173850.000000,346.657896)}
{pt3dadd(146424.000000,107748.000000,173875.000000,320.177083)}
{pt3dadd(146148.000000,107616.000000,173975.000000,293.696271)}
{pt3dadd(145848.000000,107640.000000,174225.000000,267.215459)}
{pt3dadd(145608.000000,107472.000000,174300.000000,240.734646)}
{pt3dadd(145284.000000,107436.000000,174500.000000,230.704038)}
{pt3dadd(145044.000000,107412.000000,174475.000000,220.673430)}
{pt3dadd(144780.000000,107208.000000,174550.000000,210.642822)}
{pt3dadd(144552.000000,107100.000000,174550.000000,200.612214)}
{pt3dadd(144252.000000,107004.000000,174600.000000,210.642822)}
{pt3dadd(144036.000000,106872.000000,174650.000000,220.673430)}
{pt3dadd(143736.000000,106620.000000,174750.000000,230.704038)}
{pt3dadd(143484.000000,106452.000000,174925.000000,240.734646)}
{pt3dadd(143328.000000,106380.000000,174925.000000,396.199935)}
{pt3dadd(143040.000000,106008.000000,175175.000000,551.665224)}
{pt3dadd(142908.000000,105420.000000,175600.000000,707.130513)}
{pt3dadd(142236.000000,104808.000000,175925.000000,862.595802)}
{pt3dadd(142020.000000,104628.000000,176400.000000,853.969856)}
{pt3dadd(141720.000000,104676.000000,176675.000000,845.343909)}
{pt3dadd(141372.000000,104676.000000,177025.000000,836.717962)}
{pt3dadd(141024.000000,104568.000000,177425.000000,828.092016)}
{pt3dadd(140676.000000,104508.000000,177575.000000,836.717962)}
{pt3dadd(140328.000000,104544.000000,177800.000000,845.343909)}
{pt3dadd(139908.000000,104472.000000,177800.000000,853.969856)}
{pt3dadd(139512.000000,104340.000000,177875.000000,862.595802)}
{pt3dadd(139140.000000,104268.000000,178150.000000,713.727030)}
{pt3dadd(138888.000000,104208.000000,178250.000000,564.858258)}
{pt3dadd(138768.000000,104136.000000,178300.000000,415.989486)}
{pt3dadd(138744.000000,103968.000000,178775.000000,167.176836)}

{create adhoc77}
{access adhoc77}
{connect adhoc77(1), adhoc75(0)}
{nseg = 1}
{strdef color color = "White"}
{pt3dclear()}
{pt3dadd(149640.000000,107988.000000,171600.000000,1430.942868)}
{pt3dadd(150276.000000,107532.000000,170775.000000,1242.137880)}
{pt3dadd(150708.000000,107124.000000,170050.000000,1242.137880)}
{pt3dadd(151056.000000,106812.000000,169850.000000,1242.137880)}
{pt3dadd(151512.000000,106428.000000,169550.000000,1242.137880)}
{pt3dadd(151968.000000,105828.000000,169225.000000,1242.137880)}
{pt3dadd(152328.000000,105240.000000,168925.000000,1242.137880)}
{pt3dadd(152592.000000,104736.000000,168750.000000,1242.137880)}
{pt3dadd(152832.000000,104220.000000,168525.000000,1242.137880)}
{pt3dadd(153192.000000,103728.000000,168375.000000,1242.137880)}
{pt3dadd(153684.000000,103296.000000,168200.000000,1242.137880)}
{pt3dadd(153900.000000,102912.000000,167875.000000,1242.137880)}
{pt3dadd(154320.000000,102444.000000,167525.000000,1242.137880)}
{pt3dadd(154716.000000,101928.000000,167150.000000,1242.137880)}
{pt3dadd(155100.000000,101376.000000,166950.000000,1190.382147)}
{pt3dadd(155304.000000,100920.000000,166875.000000,1138.626414)}
{pt3dadd(155496.000000,100608.000000,166800.000000,1086.870681)}
{pt3dadd(155520.000000,100284.000000,166775.000000,1035.114948)}
{pt3dadd(155820.000000,99828.000000,166800.000000,1035.114948)}
{pt3dadd(156984.000000,99348.000000,166625.000000,1035.114948)}
{pt3dadd(157548.000000,99216.000000,166275.000000,1035.114948)}
{pt3dadd(157752.000000,99072.000000,165350.000000,1035.114948)}
{pt3dadd(157764.000000,98760.000000,165225.000000,926.092431)}
{pt3dadd(157992.000000,98340.000000,165275.000000,817.069914)}
{pt3dadd(158112.000000,97980.000000,165475.000000,708.047397)}
{pt3dadd(158340.000000,97560.000000,165475.000000,599.024880)}
{pt3dadd(158496.000000,97104.000000,165600.000000,628.976115)}
{pt3dadd(159192.000000,96612.000000,165650.000000,658.927350)}
{pt3dadd(159720.000000,96288.000000,165850.000000,688.878585)}
{pt3dadd(160056.000000,95952.000000,165900.000000,718.829820)}
{pt3dadd(160332.000000,95676.000000,165925.000000,754.771316)}
{pt3dadd(160836.000000,95196.000000,165900.000000,790.712811)}
{pt3dadd(160860.000000,94884.000000,165850.000000,826.654307)}
{pt3dadd(160716.000000,94488.000000,165875.000000,862.595802)}
{pt3dadd(160848.000000,94032.000000,165850.000000,826.654307)}
{pt3dadd(161004.000000,93576.000000,165600.000000,790.712811)}
{pt3dadd(161028.000000,93264.000000,166125.000000,754.771316)}
{pt3dadd(161424.000000,92976.000000,166150.000000,718.829820)}
{pt3dadd(161472.000000,92628.000000,166150.000000,611.342762)}
{pt3dadd(161712.000000,92364.000000,166200.000000,503.855703)}
{pt3dadd(161616.000000,91836.000000,166275.000000,396.368644)}
{pt3dadd(161664.000000,91524.000000,166250.000000,288.881586)}
{pt3dadd(161664.000000,91188.000000,166300.000000,240.734646)}
{pt3dadd(161712.000000,90672.000000,166350.000000,184.884210)}
