# Supplementary material for: Full reconstruction of large lobula plate tangential cells in Drosophila from a 3D EM dataset
Source: PLoS One. 2018 Nov 28;13(11):e0207828. doi: 10.1371/journal.pone.0207828 (PMC6261601; doi:10.1371/journal.pone.0207828)
Supplement: S1 Dataset — (ZIP) [file pone.0207828.s001.zip › Diameter hoc/VS_VSL_preliminary/Old Diameters Mar13_VS_VSL_HS/HSN/2_14_812_smaurer_002.014.hoc]

/* created with nml2hocm */

{create adhoc1}
{access adhoc1}
{nseg = 1}
{strdef color color = "White"}
{pt3dclear()}
{pt3dadd(138792.000000,134172.000000,162750.000000,240.734646)}
{pt3dadd(138636.000000,134736.000000,162525.000000,415.989486)}
{pt3dadd(138288.000000,136128.000000,162100.000000,384.212511)}
{pt3dadd(138336.000000,135972.000000,162050.000000,352.435536)}
{pt3dadd(138384.000000,135804.000000,162100.000000,320.658561)}
{pt3dadd(138528.000000,135540.000000,162100.000000,288.881586)}
{pt3dadd(138624.000000,135348.000000,162100.000000,320.658561)}
{pt3dadd(138648.000000,135120.000000,162125.000000,352.435536)}
{pt3dadd(138564.000000,134880.000000,162125.000000,384.212511)}
{pt3dadd(138588.000000,134628.000000,162100.000000,415.989486)}
{pt3dadd(138552.000000,134400.000000,162100.000000,415.989486)}
{pt3dadd(138540.000000,134208.000000,161975.000000,415.989486)}
{pt3dadd(138528.000000,134004.000000,162000.000000,415.989486)}
{pt3dadd(138576.000000,133800.000000,161900.000000,415.989486)}
{pt3dadd(138624.000000,133524.000000,161875.000000,384.212511)}
{pt3dadd(138744.000000,133320.000000,161850.000000,352.435536)}
{pt3dadd(138816.000000,133092.000000,161800.000000,320.658561)}
{pt3dadd(138840.000000,132948.000000,161775.000000,288.881586)}
{pt3dadd(138864.000000,132708.000000,161750.000000,308.140356)}
{pt3dadd(139140.000000,132468.000000,161600.000000,327.399126)}
{pt3dadd(139416.000000,132288.000000,161425.000000,346.657896)}
{pt3dadd(140220.000000,132300.000000,161125.000000,479.219922)}

{create adhoc2}
{access adhoc2}
{connect adhoc2(1), adhoc1(0)}
{nseg = 1}
{strdef color color = "White"}
{pt3dclear()}
{pt3dadd(140220.000000,132300.000000,161125.000000,479.219922)}
{pt3dadd(140484.000000,132444.000000,160875.000000,231.105276)}
{pt3dadd(141156.000000,131244.000000,161100.000000,240.734646)}
{pt3dadd(140436.000000,132036.000000,161700.000000,128.391822)}

{create adhoc3}
{access adhoc3}
{connect adhoc3(1), adhoc1(0)}
{nseg = 1}
{strdef color color = "White"}
{pt3dclear()}
{pt3dadd(140220.000000,132300.000000,161125.000000,479.219922)}
{pt3dadd(140088.000000,132060.000000,161050.000000,499.187376)}
{pt3dadd(140136.000000,131856.000000,161075.000000,499.187376)}
{pt3dadd(140340.000000,131580.000000,161025.000000,499.187376)}
{pt3dadd(140484.000000,131376.000000,161000.000000,499.187376)}
{pt3dadd(140532.000000,131160.000000,160925.000000,499.187376)}
{pt3dadd(140652.000000,130908.000000,160900.000000,461.055006)}
{pt3dadd(140616.000000,130656.000000,160800.000000,422.922636)}
{pt3dadd(140796.000000,130284.000000,160525.000000,384.790266)}
{pt3dadd(141072.000000,130008.000000,160350.000000,346.657896)}
{pt3dadd(141348.000000,129624.000000,160100.000000,346.657896)}
{pt3dadd(141600.000000,129396.000000,160000.000000,346.657896)}
{pt3dadd(141852.000000,129096.000000,159825.000000,346.657896)}
{pt3dadd(142152.000000,128820.000000,159625.000000,346.657896)}
{pt3dadd(142536.000000,128520.000000,159375.000000,379.798393)}
{pt3dadd(142764.000000,128244.000000,159250.000000,412.938891)}
{pt3dadd(143040.000000,127980.000000,159075.000000,446.079388)}
{pt3dadd(143316.000000,127740.000000,158925.000000,479.219886)}
{pt3dadd(143388.000000,127392.000000,158800.000000,463.412286)}
{pt3dadd(143772.000000,127104.000000,158725.000000,447.604686)}
{pt3dadd(144384.000000,126744.000000,158825.000000,431.797086)}
{pt3dadd(144684.000000,126444.000000,158775.000000,415.989486)}
{pt3dadd(145692.000000,126120.000000,158525.000000,570.770852)}
{pt3dadd(146436.000000,125796.000000,158300.000000,725.552217)}
{pt3dadd(146796.000000,125484.000000,158125.000000,880.333582)}
{pt3dadd(146940.000000,125172.000000,158175.000000,1035.114948)}
{pt3dadd(146856.000000,124896.000000,158275.000000,977.608566)}
{pt3dadd(146916.000000,124656.000000,158925.000000,920.102184)}
{pt3dadd(147216.000000,123924.000000,159400.000000,862.595802)}
{pt3dadd(148656.000000,121176.000000,159525.000000,1242.137880)}

{create adhoc4}
{access adhoc4}
{connect adhoc4(1), adhoc3(0)}
{nseg = 1}
{strdef color color = "White"}
{pt3dclear()}
{pt3dadd(148656.000000,121176.000000,159525.000000,1242.137880)}
{pt3dadd(148644.000000,121716.000000,159875.000000,1035.114948)}
{pt3dadd(147936.000000,121152.000000,160425.000000,1086.870681)}
{pt3dadd(148176.000000,121284.000000,160425.000000,1138.626414)}
{pt3dadd(148428.000000,121236.000000,160450.000000,1190.382147)}
{pt3dadd(148740.000000,121224.000000,160500.000000,1242.137880)}
{pt3dadd(149112.000000,121500.000000,160675.000000,1242.137880)}
{pt3dadd(149448.000000,121560.000000,160700.000000,1242.137880)}
{pt3dadd(149748.000000,121788.000000,161100.000000,1242.137880)}
{pt3dadd(150060.000000,121956.000000,161700.000000,1242.137880)}
{pt3dadd(150384.000000,122232.000000,162200.000000,1180.030982)}
{pt3dadd(150660.000000,122400.000000,162525.000000,1117.924083)}
{pt3dadd(151032.000000,122352.000000,162650.000000,1055.817185)}
{pt3dadd(151344.000000,122592.000000,162825.000000,993.710286)}
{pt3dadd(151644.000000,122652.000000,162975.000000,1004.061452)}
{pt3dadd(151932.000000,122532.000000,163150.000000,1014.412617)}
{pt3dadd(152184.000000,122664.000000,163150.000000,1024.763782)}
{pt3dadd(152556.000000,122760.000000,163075.000000,1035.114948)}
{pt3dadd(152808.000000,122748.000000,163100.000000,1035.114948)}
{pt3dadd(153060.000000,122844.000000,163125.000000,1035.114948)}
{pt3dadd(153396.000000,122868.000000,163200.000000,1035.114948)}
{pt3dadd(153660.000000,123000.000000,163050.000000,1035.114948)}
{pt3dadd(154032.000000,123204.000000,163200.000000,1148.977562)}
{pt3dadd(154356.000000,123264.000000,163175.000000,1262.840175)}
{pt3dadd(154620.000000,122124.000000,162900.000000,1376.702788)}
{pt3dadd(154680.000000,122472.000000,162900.000000,1490.565402)}
{pt3dadd(155064.000000,122736.000000,163150.000000,1654.527596)}
{pt3dadd(155376.000000,123024.000000,163175.000000,1818.489789)}
{pt3dadd(155760.000000,123252.000000,163050.000000,1982.451983)}
{pt3dadd(156336.000000,123444.000000,162825.000000,2146.414176)}
{pt3dadd(156912.000000,123660.000000,162625.000000,2253.734910)}
{pt3dadd(157260.000000,123960.000000,162425.000000,2361.055644)}
{pt3dadd(157680.000000,124296.000000,162300.000000,2468.376378)}
{pt3dadd(157776.000000,124692.000000,162175.000000,2575.697112)}
{pt3dadd(157872.000000,125052.000000,162050.000000,2575.697112)}
{pt3dadd(157968.000000,125484.000000,161925.000000,2575.697112)}
{pt3dadd(158208.000000,126012.000000,161650.000000,2575.697112)}
{pt3dadd(158268.000000,126300.000000,161575.000000,2575.697112)}
{pt3dadd(158184.000000,126636.000000,161450.000000,2575.697112)}
{pt3dadd(158100.000000,126948.000000,161325.000000,2575.697112)}
{pt3dadd(158016.000000,127344.000000,160900.000000,2575.697112)}
{pt3dadd(157932.000000,127656.000000,160675.000000,2575.697112)}
{pt3dadd(158028.000000,127920.000000,160475.000000,2575.697112)}
{pt3dadd(158124.000000,128184.000000,160275.000000,2575.697112)}
{pt3dadd(157788.000000,128400.000000,160500.000000,2575.697112)}
{pt3dadd(157740.000000,128676.000000,160225.000000,2575.697112)}
{pt3dadd(157800.000000,128952.000000,159950.000000,2575.697112)}
{pt3dadd(157572.000000,129252.000000,159825.000000,2575.697112)}
{pt3dadd(157344.000000,129552.000000,159700.000000,2575.697112)}
{pt3dadd(157116.000000,129828.000000,159575.000000,116.095032)}
{pt3dadd(157068.000000,129996.000000,159425.000000,730.995552)}
{pt3dadd(157056.000000,130308.000000,159300.000000,1345.896072)}
{pt3dadd(157080.000000,130608.000000,159225.000000,1960.796592)}
{pt3dadd(156888.000000,130872.000000,159150.000000,2575.697112)}
{pt3dadd(156696.000000,131136.000000,159075.000000,2575.697112)}
{pt3dadd(156504.000000,131496.000000,159000.000000,2575.697112)}
{pt3dadd(156384.000000,131808.000000,158875.000000,2575.697112)}
{pt3dadd(156264.000000,132156.000000,158750.000000,2575.697112)}
{pt3dadd(156144.000000,132480.000000,158625.000000,2549.940147)}
{pt3dadd(155880.000000,132792.000000,158650.000000,2524.183182)}
{pt3dadd(155760.000000,133116.000000,158575.000000,2498.426217)}
{pt3dadd(155640.000000,133476.000000,158525.000000,2472.669252)}
{pt3dadd(155412.000000,133800.000000,158475.000000,2369.641356)}
{pt3dadd(155148.000000,134040.000000,158175.000000,2266.613460)}
{pt3dadd(155172.000000,134316.000000,158250.000000,2163.585564)}
{pt3dadd(155052.000000,134544.000000,158025.000000,2060.557668)}
{pt3dadd(154824.000000,134868.000000,158075.000000,2060.557668)}
{pt3dadd(154596.000000,135144.000000,157650.000000,2060.557668)}
{pt3dadd(154260.000000,135336.000000,157525.000000,2060.557668)}
{pt3dadd(154140.000000,135720.000000,157300.000000,2060.557668)}
{pt3dadd(154056.000000,136032.000000,157100.000000,2082.021795)}
{pt3dadd(153828.000000,136296.000000,156900.000000,2103.485922)}
{pt3dadd(153612.000000,136536.000000,156875.000000,2124.950049)}
{pt3dadd(153480.000000,136776.000000,156600.000000,2146.414176)}
{pt3dadd(153288.000000,137052.000000,156375.000000,2227.977945)}
{pt3dadd(153024.000000,137292.000000,156100.000000,2309.541714)}
{pt3dadd(152628.000000,137580.000000,155900.000000,2391.105483)}
{pt3dadd(152412.000000,137856.000000,155850.000000,2472.669252)}
{pt3dadd(152328.000000,138156.000000,155500.000000,2391.105483)}
{pt3dadd(152040.000000,138468.000000,155125.000000,2309.541714)}
{pt3dadd(151488.000000,138792.000000,154775.000000,2227.977945)}
{pt3dadd(151224.000000,138936.000000,154375.000000,2146.414176)}
{pt3dadd(150900.000000,139704.000000,153900.000000,2253.734910)}
{pt3dadd(150696.000000,140244.000000,153400.000000,2361.055644)}
{pt3dadd(150492.000000,140580.000000,152875.000000,2468.376378)}
{pt3dadd(150360.000000,140880.000000,152475.000000,2575.697112)}
{pt3dadd(149676.000000,141624.000000,152075.000000,2575.697112)}
{pt3dadd(149640.000000,141924.000000,151875.000000,2575.697112)}
{pt3dadd(149604.000000,142224.000000,151500.000000,2575.697112)}
{pt3dadd(149592.000000,142488.000000,151300.000000,2575.697112)}
{pt3dadd(149580.000000,142788.000000,150575.000000,2468.376378)}
{pt3dadd(149604.000000,143112.000000,150250.000000,2361.055644)}
{pt3dadd(149676.000000,143268.000000,149375.000000,2253.734910)}
{pt3dadd(149592.000000,143520.000000,149500.000000,2146.414176)}
{pt3dadd(149592.000000,143832.000000,149075.000000,2146.414176)}
{pt3dadd(149484.000000,144036.000000,148725.000000,2146.414176)}
{pt3dadd(149664.000000,144264.000000,148400.000000,2146.414176)}
{pt3dadd(149844.000000,144564.000000,148075.000000,2146.414176)}
{pt3dadd(149868.000000,144888.000000,147950.000000,2146.414176)}
{pt3dadd(149760.000000,145140.000000,147825.000000,2146.414176)}
{pt3dadd(149676.000000,145392.000000,147950.000000,2146.414176)}
{pt3dadd(149664.000000,145584.000000,147725.000000,2146.414176)}
{pt3dadd(149652.000000,145860.000000,147550.000000,2056.980245)}
{pt3dadd(149772.000000,146148.000000,147375.000000,1967.546313)}
{pt3dadd(149868.000000,146472.000000,147325.000000,1878.112382)}
{pt3dadd(149964.000000,146676.000000,147300.000000,1788.678450)}
{pt3dadd(150012.000000,146988.000000,147125.000000,1878.112382)}
{pt3dadd(149952.000000,147276.000000,147000.000000,1967.546313)}
{pt3dadd(149892.000000,147588.000000,147050.000000,2056.980245)}
{pt3dadd(150096.000000,147948.000000,147075.000000,2146.414176)}
{pt3dadd(149988.000000,148356.000000,146750.000000,2146.414176)}
{pt3dadd(149904.000000,148668.000000,146725.000000,2146.414176)}
{pt3dadd(149868.000000,149016.000000,146675.000000,2146.414176)}
{pt3dadd(149940.000000,149280.000000,146575.000000,2146.414176)}
{pt3dadd(150012.000000,149688.000000,146475.000000,2056.980245)}
{pt3dadd(150108.000000,149928.000000,146475.000000,1967.546313)}
{pt3dadd(150336.000000,150192.000000,146450.000000,1878.112382)}
{pt3dadd(150384.000000,150612.000000,146175.000000,1788.678450)}
{pt3dadd(150480.000000,151032.000000,146050.000000,1788.678450)}
{pt3dadd(150216.000000,151332.000000,146075.000000,1788.678450)}
{pt3dadd(150312.000000,151728.000000,145875.000000,1788.678450)}
{pt3dadd(150456.000000,152124.000000,145775.000000,1788.678450)}
{pt3dadd(150504.000000,152472.000000,145750.000000,1788.678450)}
{pt3dadd(150528.000000,152820.000000,145575.000000,1788.678450)}
{pt3dadd(150552.000000,153084.000000,145400.000000,1788.678450)}
{pt3dadd(150732.000000,153372.000000,145175.000000,1788.678450)}
{pt3dadd(150804.000000,153660.000000,145050.000000,1788.678450)}
{pt3dadd(150792.000000,153984.000000,145050.000000,1788.678450)}
{pt3dadd(150756.000000,154380.000000,144850.000000,1788.678450)}
{pt3dadd(150828.000000,154644.000000,144800.000000,1788.678450)}
{pt3dadd(150792.000000,154932.000000,144600.000000,1788.678450)}
{pt3dadd(150840.000000,155244.000000,144650.000000,1788.678450)}
{pt3dadd(150888.000000,155448.000000,144525.000000,1788.678450)}
{pt3dadd(150936.000000,155712.000000,144350.000000,1788.678450)}
{pt3dadd(150828.000000,155988.000000,144275.000000,1770.791643)}
{pt3dadd(150900.000000,156288.000000,144050.000000,1752.904836)}
{pt3dadd(150924.000000,156588.000000,143850.000000,1735.018029)}
{pt3dadd(150912.000000,156888.000000,143725.000000,1717.131222)}
{pt3dadd(150900.000000,157212.000000,143625.000000,1735.018029)}
{pt3dadd(150948.000000,157440.000000,143600.000000,1752.904836)}
{pt3dadd(150996.000000,157608.000000,143525.000000,1770.791643)}
{pt3dadd(150984.000000,157884.000000,143300.000000,1788.678450)}
{pt3dadd(151032.000000,158184.000000,143100.000000,1856.648255)}
{pt3dadd(151104.000000,158544.000000,142900.000000,1924.618059)}
{pt3dadd(151152.000000,158820.000000,142875.000000,1992.587863)}
{pt3dadd(151092.000000,159192.000000,142775.000000,2060.557668)}
{pt3dadd(151080.000000,159516.000000,142600.000000,2082.021795)}
{pt3dadd(151200.000000,159768.000000,142475.000000,2103.485922)}
{pt3dadd(151296.000000,160056.000000,142400.000000,2124.950049)}
{pt3dadd(151392.000000,160248.000000,142325.000000,2146.414176)}
{pt3dadd(151488.000000,160440.000000,142250.000000,2124.950049)}
{pt3dadd(151584.000000,160692.000000,142075.000000,2103.485922)}
{pt3dadd(151656.000000,160908.000000,142025.000000,2082.021795)}
{pt3dadd(151620.000000,161148.000000,142100.000000,2060.557668)}
{pt3dadd(151920.000000,161364.000000,141925.000000,1992.587863)}
{pt3dadd(151860.000000,161688.000000,141900.000000,1924.618059)}
{pt3dadd(152136.000000,161952.000000,141875.000000,1856.648255)}
{pt3dadd(152232.000000,162264.000000,141850.000000,1788.678450)}
{pt3dadd(152460.000000,162540.000000,141775.000000,1714.150188)}
{pt3dadd(152532.000000,162828.000000,141575.000000,1639.621926)}
{pt3dadd(152472.000000,163164.000000,141475.000000,1565.093664)}
{pt3dadd(152520.000000,163416.000000,141475.000000,1490.565402)}
{pt3dadd(152616.000000,163704.000000,141425.000000,1490.565402)}
{pt3dadd(152688.000000,163968.000000,141475.000000,1490.565402)}
{pt3dadd(152712.000000,164136.000000,141275.000000,1490.565402)}
{pt3dadd(152736.000000,164400.000000,141375.000000,1490.565402)}
{pt3dadd(152832.000000,164664.000000,141375.000000,1475.659737)}
{pt3dadd(152880.000000,164928.000000,141425.000000,1460.754072)}
{pt3dadd(152976.000000,165216.000000,141100.000000,1445.848407)}
{pt3dadd(153000.000000,165516.000000,141150.000000,1430.942742)}
{pt3dadd(153072.000000,165792.000000,141175.000000,1445.848407)}
{pt3dadd(153096.000000,166068.000000,140950.000000,1460.754072)}
{pt3dadd(153120.000000,166344.000000,141025.000000,1475.659737)}
{pt3dadd(153204.000000,166620.000000,140800.000000,1490.565402)}
{pt3dadd(153096.000000,166932.000000,141050.000000,1490.565402)}
{pt3dadd(153168.000000,167220.000000,141075.000000,1490.565402)}
{pt3dadd(153264.000000,167544.000000,140750.000000,1490.565402)}
{pt3dadd(153360.000000,167820.000000,140700.000000,1490.565402)}
{pt3dadd(153432.000000,168132.000000,140625.000000,1565.093664)}
{pt3dadd(153504.000000,168528.000000,140525.000000,1639.621926)}
{pt3dadd(153684.000000,168948.000000,140300.000000,1714.150188)}
{pt3dadd(153708.000000,169524.000000,140125.000000,1788.678450)}
{pt3dadd(153756.000000,169908.000000,140000.000000,1714.150188)}
{pt3dadd(153828.000000,170256.000000,139925.000000,1639.621926)}
{pt3dadd(153948.000000,170652.000000,139900.000000,1565.093664)}
{pt3dadd(154020.000000,170928.000000,139575.000000,1490.565402)}
{pt3dadd(154068.000000,171240.000000,139550.000000,1490.565402)}
{pt3dadd(153960.000000,171612.000000,139525.000000,1490.565402)}
{pt3dadd(154140.000000,171912.000000,139575.000000,1490.565402)}
{pt3dadd(154260.000000,172176.000000,139400.000000,1490.565402)}
{pt3dadd(154284.000000,172524.000000,139275.000000,1565.093664)}
{pt3dadd(154404.000000,172824.000000,139200.000000,1639.621926)}
{pt3dadd(154452.000000,173160.000000,139150.000000,1714.150188)}
{pt3dadd(154392.000000,173472.000000,139125.000000,1788.678450)}
{pt3dadd(154488.000000,173796.000000,138725.000000,1788.678450)}
{pt3dadd(154608.000000,174156.000000,138525.000000,1788.678450)}
{pt3dadd(155100.000000,174468.000000,138300.000000,1788.678450)}
{pt3dadd(155412.000000,174900.000000,138300.000000,1788.678450)}
{pt3dadd(155628.000000,176424.000000,137325.000000,1788.678450)}
{pt3dadd(156144.000000,176700.000000,136925.000000,1788.678450)}
{pt3dadd(156912.000000,176796.000000,136500.000000,1788.678450)}
{pt3dadd(157368.000000,177528.000000,136075.000000,1788.678450)}
{pt3dadd(157776.000000,177780.000000,135625.000000,1788.678450)}
{pt3dadd(158580.000000,177864.000000,135175.000000,1788.678450)}
{pt3dadd(159036.000000,178068.000000,134825.000000,1788.678450)}
{pt3dadd(159312.000000,178344.000000,134400.000000,1788.678450)}
{pt3dadd(159756.000000,178620.000000,133850.000000,1856.648255)}
{pt3dadd(160236.000000,179136.000000,133425.000000,1924.618059)}
{pt3dadd(160668.000000,179616.000000,133050.000000,1992.587863)}
{pt3dadd(161028.000000,179880.000000,132475.000000,2060.557668)}
{pt3dadd(161544.000000,180180.000000,131875.000000,2082.021795)}
{pt3dadd(161376.000000,180012.000000,131425.000000,2103.485922)}
{pt3dadd(161712.000000,180156.000000,131000.000000,2124.950049)}
{pt3dadd(161940.000000,180180.000000,130550.000000,2146.414176)}
{pt3dadd(162144.000000,180564.000000,129975.000000,1982.451983)}
{pt3dadd(162528.000000,180900.000000,129450.000000,1818.489789)}
{pt3dadd(162780.000000,181044.000000,128850.000000,1654.527596)}
{pt3dadd(163164.000000,181188.000000,128325.000000,1490.565402)}
{pt3dadd(163620.000000,181932.000000,127875.000000,1366.351623)}
{pt3dadd(163692.000000,182208.000000,127725.000000,1242.137844)}
{pt3dadd(163920.000000,182424.000000,127400.000000,1117.924065)}
{pt3dadd(164148.000000,182688.000000,127075.000000,993.710286)}
{pt3dadd(163980.000000,182952.000000,127200.000000,1004.061452)}
{pt3dadd(164232.000000,183264.000000,126850.000000,1014.412617)}
{pt3dadd(164172.000000,183600.000000,126875.000000,1024.763782)}
{pt3dadd(164064.000000,183840.000000,126875.000000,1035.114948)}
{pt3dadd(164052.000000,184092.000000,126850.000000,991.985162)}
{pt3dadd(164352.000000,184368.000000,126650.000000,948.855375)}
{pt3dadd(164712.000000,184620.000000,126375.000000,905.725589)}
{pt3dadd(164736.000000,184836.000000,126275.000000,862.595802)}
{pt3dadd(164880.000000,185088.000000,126275.000000,905.725589)}
{pt3dadd(165156.000000,185376.000000,126100.000000,948.855375)}
{pt3dadd(165072.000000,185664.000000,126125.000000,991.985162)}
{pt3dadd(165168.000000,185928.000000,126050.000000,1035.114948)}
{pt3dadd(165288.000000,186192.000000,125975.000000,1024.763801)}
{pt3dadd(165360.000000,186480.000000,125750.000000,1014.412653)}
{pt3dadd(165432.000000,186732.000000,125900.000000,1004.061506)}
{pt3dadd(165528.000000,186936.000000,125650.000000,993.710358)}
{pt3dadd(165648.000000,187236.000000,125525.000000,952.305772)}
{pt3dadd(165696.000000,187512.000000,125425.000000,910.901187)}
{pt3dadd(165744.000000,187788.000000,125325.000000,869.496602)}
{pt3dadd(165924.000000,188016.000000,125250.000000,828.092016)}
{pt3dadd(166176.000000,188220.000000,125200.000000,800.776467)}
{pt3dadd(166296.000000,188436.000000,125075.000000,773.460918)}
{pt3dadd(166500.000000,188688.000000,125000.000000,746.145369)}
{pt3dadd(166464.000000,188964.000000,125100.000000,718.829820)}
{pt3dadd(166740.000000,189180.000000,125025.000000,754.771316)}
{pt3dadd(166884.000000,189396.000000,124925.000000,790.712811)}
{pt3dadd(167004.000000,189732.000000,125000.000000,826.654307)}
{pt3dadd(167184.000000,189972.000000,124925.000000,862.595802)}
{pt3dadd(167304.000000,190188.000000,124925.000000,862.595802)}
{pt3dadd(167448.000000,190440.000000,124850.000000,862.595802)}
{pt3dadd(167592.000000,190704.000000,124975.000000,862.595802)}
{pt3dadd(167688.000000,190980.000000,124975.000000,862.595802)}
{pt3dadd(167676.000000,191220.000000,125100.000000,862.595802)}
{pt3dadd(167928.000000,191484.000000,125050.000000,862.595802)}
{pt3dadd(168360.000000,191760.000000,124850.000000,862.595802)}
{pt3dadd(168384.000000,192012.000000,124950.000000,862.595802)}
{pt3dadd(168432.000000,192264.000000,124925.000000,826.654307)}
{pt3dadd(168612.000000,192468.000000,124825.000000,790.712811)}
{pt3dadd(168972.000000,192672.000000,124850.000000,754.771316)}
{pt3dadd(169092.000000,192936.000000,124825.000000,718.829820)}
{pt3dadd(169272.000000,193164.000000,124850.000000,787.549955)}
{pt3dadd(169488.000000,193392.000000,124850.000000,856.270089)}
{pt3dadd(169704.000000,193572.000000,124625.000000,924.990223)}
{pt3dadd(169836.000000,193848.000000,124575.000000,993.710358)}
{pt3dadd(170040.000000,194052.000000,124500.000000,960.931719)}
{pt3dadd(170280.000000,194256.000000,124425.000000,928.153080)}
{pt3dadd(170472.000000,194196.000000,124350.000000,895.374441)}
{pt3dadd(170712.000000,194580.000000,124250.000000,862.595802)}
{pt3dadd(170904.000000,194652.000000,124150.000000,796.703072)}
{pt3dadd(171132.000000,195228.000000,123875.000000,730.810341)}
{pt3dadd(171936.000000,195876.000000,123450.000000,664.917611)}
{pt3dadd(172476.000000,196728.000000,123075.000000,599.024880)}
{pt3dadd(173196.000000,197340.000000,122725.000000,664.917611)}
{pt3dadd(173712.000000,198108.000000,122350.000000,730.810341)}
{pt3dadd(174120.000000,198096.000000,121975.000000,796.703072)}
{pt3dadd(174708.000000,198528.000000,121700.000000,862.595802)}
{pt3dadd(175200.000000,198444.000000,121350.000000,905.725589)}
{pt3dadd(175452.000000,198468.000000,121000.000000,948.855375)}
{pt3dadd(175944.000000,198960.000000,120675.000000,991.985162)}
{pt3dadd(175860.000000,198852.000000,120350.000000,1035.114948)}
{pt3dadd(175956.000000,199032.000000,119950.000000,991.985162)}
{pt3dadd(177048.000000,199752.000000,119600.000000,948.855375)}
{pt3dadd(176700.000000,200016.000000,119200.000000,905.725589)}
{pt3dadd(177156.000000,200076.000000,118850.000000,862.595802)}
{pt3dadd(177720.000000,200148.000000,118575.000000,905.725589)}
{pt3dadd(178080.000000,200172.000000,118250.000000,948.855375)}
{pt3dadd(178200.000000,200424.000000,117875.000000,991.985162)}
{pt3dadd(178380.000000,200592.000000,117425.000000,1035.114948)}
{pt3dadd(178656.000000,200712.000000,117025.000000,1035.114948)}
{pt3dadd(178620.000000,200808.000000,116700.000000,1035.114948)}
{pt3dadd(178680.000000,201168.000000,116275.000000,1035.114948)}
{pt3dadd(178824.000000,201468.000000,115875.000000,1035.114948)}
{pt3dadd(179100.000000,201516.000000,115425.000000,1074.449367)}
{pt3dadd(179208.000000,201948.000000,115025.000000,1113.783786)}
{pt3dadd(179232.000000,202248.000000,114650.000000,1153.118205)}
{pt3dadd(179148.000000,202860.000000,114225.000000,1192.452624)}
{pt3dadd(179544.000000,202632.000000,113850.000000,1153.118205)}
{pt3dadd(179712.000000,203172.000000,113450.000000,1113.783786)}
{pt3dadd(179808.000000,203232.000000,113125.000000,1074.449367)}
{pt3dadd(180024.000000,203184.000000,112750.000000,1035.114948)}
{pt3dadd(180108.000000,203760.000000,112300.000000,1086.870681)}
{pt3dadd(180360.000000,204084.000000,111850.000000,1138.626414)}
{pt3dadd(180540.000000,204120.000000,111400.000000,1190.382147)}
{pt3dadd(180648.000000,204780.000000,111025.000000,1242.137880)}
{pt3dadd(180768.000000,205128.000000,110575.000000,1304.244761)}
{pt3dadd(181104.000000,205296.000000,110125.000000,1366.351641)}
{pt3dadd(181296.000000,205764.000000,109750.000000,1428.458522)}
{pt3dadd(181512.000000,206184.000000,109325.000000,1490.565402)}
{pt3dadd(181620.000000,206292.000000,109025.000000,1565.093664)}
{pt3dadd(181812.000000,206196.000000,108600.000000,1639.621926)}
{pt3dadd(181944.000000,206280.000000,108150.000000,1714.150188)}
{pt3dadd(181920.000000,205968.000000,107700.000000,1788.678450)}
{pt3dadd(181944.000000,205716.000000,107300.000000,1856.648255)}
{pt3dadd(181896.000000,205884.000000,106750.000000,1924.618059)}
{pt3dadd(182028.000000,205944.000000,106275.000000,1992.587863)}
{pt3dadd(182088.000000,205896.000000,105800.000000,2060.557668)}
{pt3dadd(182304.000000,205848.000000,105350.000000,1992.587863)}
{pt3dadd(182340.000000,205752.000000,104875.000000,1924.618059)}
{pt3dadd(182268.000000,205728.000000,104450.000000,1856.648255)}
{pt3dadd(182148.000000,205764.000000,103975.000000,1788.678450)}
{pt3dadd(181788.000000,205896.000000,103525.000000,1652.043308)}
{pt3dadd(181380.000000,205980.000000,103050.000000,1515.408165)}
{pt3dadd(181128.000000,206040.000000,102600.000000,1378.773023)}
{pt3dadd(180768.000000,206016.000000,102125.000000,1242.137880)}
{pt3dadd(180276.000000,206184.000000,101650.000000,1242.137880)}
{pt3dadd(179844.000000,206304.000000,101225.000000,1242.137880)}
{pt3dadd(179544.000000,206148.000000,100750.000000,1242.137880)}
{pt3dadd(179268.000000,206088.000000,100275.000000,1242.137880)}
{pt3dadd(178728.000000,206208.000000,99800.000000,1304.244761)}
{pt3dadd(178368.000000,206340.000000,99300.000000,1366.351641)}
{pt3dadd(178188.000000,206196.000000,98975.000000,1428.458522)}
{pt3dadd(177960.000000,206232.000000,98550.000000,1490.565402)}
{pt3dadd(177780.000000,206172.000000,98150.000000,1490.565402)}
{pt3dadd(177528.000000,206208.000000,97775.000000,1490.565402)}
{pt3dadd(177228.000000,206472.000000,97900.000000,1490.565402)}
{pt3dadd(177024.000000,206268.000000,97425.000000,1490.565402)}
{pt3dadd(176820.000000,206184.000000,97050.000000,1428.458522)}
{pt3dadd(175920.000000,206760.000000,96525.000000,1366.351641)}
{pt3dadd(175716.000000,206568.000000,96200.000000,1304.244761)}
{pt3dadd(175536.000000,206676.000000,95875.000000,1242.137880)}
{pt3dadd(175176.000000,206712.000000,95500.000000,1360.886216)}
{pt3dadd(175128.000000,206592.000000,95075.000000,1479.634551)}
{pt3dadd(174900.000000,206724.000000,94750.000000,1598.382887)}
{pt3dadd(174576.000000,206772.000000,94450.000000,1717.131222)}
{pt3dadd(174660.000000,206544.000000,94175.000000,1660.489767)}
{pt3dadd(174288.000000,206556.000000,93825.000000,1603.848312)}
{pt3dadd(174168.000000,206508.000000,93425.000000,1547.206857)}
{pt3dadd(174048.000000,206460.000000,93425.000000,1490.565402)}
{pt3dadd(174096.000000,206088.000000,92975.000000,1490.565402)}
{pt3dadd(174024.000000,205704.000000,92800.000000,1490.565402)}

{create adhoc5}
{access adhoc5}
{connect adhoc5(1), adhoc4(0)}
{nseg = 1}
{strdef color color = "White"}
{pt3dclear()}
{pt3dadd(174024.000000,205704.000000,92800.000000,1490.565402)}
{pt3dadd(172344.000000,211092.000000,92775.000000,499.187376)}
{pt3dadd(171540.000000,212220.000000,92475.000000,546.909682)}
{pt3dadd(170904.000000,212664.000000,92000.000000,594.631989)}
{pt3dadd(170340.000000,213060.000000,91675.000000,642.354295)}
{pt3dadd(170160.000000,213024.000000,91275.000000,690.076602)}
{pt3dadd(169956.000000,213132.000000,91175.000000,697.264906)}
{pt3dadd(169752.000000,213552.000000,90950.000000,704.453211)}
{pt3dadd(169536.000000,213924.000000,90725.000000,711.641515)}
{pt3dadd(169332.000000,214008.000000,90775.000000,718.829820)}
{pt3dadd(169116.000000,214356.000000,90425.000000,797.901102)}
{pt3dadd(168900.000000,214800.000000,90450.000000,876.972384)}
{pt3dadd(168708.000000,215148.000000,90225.000000,956.043666)}
{pt3dadd(168516.000000,215592.000000,90050.000000,1035.114948)}
{pt3dadd(168276.000000,215988.000000,90025.000000,983.359197)}
{pt3dadd(168048.000000,216252.000000,89900.000000,931.603446)}
{pt3dadd(167868.000000,216384.000000,89750.000000,879.847695)}
{pt3dadd(167640.000000,216864.000000,89500.000000,828.091944)}
{pt3dadd(167436.000000,217128.000000,89200.000000,800.776413)}
{pt3dadd(167304.000000,217500.000000,88850.000000,773.460882)}
{pt3dadd(167136.000000,217872.000000,88650.000000,746.145351)}
{pt3dadd(166932.000000,218112.000000,88475.000000,718.829820)}
{pt3dadd(166704.000000,218508.000000,88150.000000,718.829820)}
{pt3dadd(166488.000000,218640.000000,88050.000000,718.829820)}
{pt3dadd(166260.000000,218748.000000,87900.000000,718.829820)}
{pt3dadd(166044.000000,219012.000000,87875.000000,718.829820)}
{pt3dadd(165816.000000,219072.000000,87725.000000,718.829820)}
{pt3dadd(165612.000000,219168.000000,87725.000000,718.829820)}
{pt3dadd(165372.000000,219336.000000,87600.000000,718.829820)}
{pt3dadd(165168.000000,219288.000000,87250.000000,718.829820)}
{pt3dadd(164364.000000,219708.000000,86925.000000,688.878585)}
{pt3dadd(163752.000000,220224.000000,86625.000000,658.927350)}
{pt3dadd(163500.000000,220332.000000,86575.000000,628.976115)}
{pt3dadd(163272.000000,220392.000000,86525.000000,599.024880)}
{pt3dadd(163092.000000,220584.000000,86300.000000,664.917611)}
{pt3dadd(162924.000000,220824.000000,86275.000000,730.810341)}
{pt3dadd(162732.000000,220836.000000,86200.000000,796.703072)}
{pt3dadd(162576.000000,220968.000000,86150.000000,862.595802)}
{pt3dadd(162336.000000,221448.000000,86100.000000,826.654307)}
{pt3dadd(162108.000000,221616.000000,85775.000000,790.712811)}
{pt3dadd(161916.000000,221880.000000,85800.000000,754.771316)}
{pt3dadd(161688.000000,222096.000000,85600.000000,718.829820)}
{pt3dadd(161472.000000,222288.000000,85450.000000,754.771316)}
{pt3dadd(161268.000000,222504.000000,85400.000000,790.712811)}
{pt3dadd(161052.000000,222636.000000,85050.000000,826.654307)}
{pt3dadd(160872.000000,222948.000000,84975.000000,862.595802)}
{pt3dadd(160704.000000,222924.000000,84900.000000,826.654307)}
{pt3dadd(160500.000000,223032.000000,84600.000000,790.712811)}
{pt3dadd(160260.000000,223200.000000,84150.000000,754.771316)}
{pt3dadd(160044.000000,223080.000000,84050.000000,718.829820)}
{pt3dadd(159852.000000,223056.000000,83725.000000,688.878585)}
{pt3dadd(159660.000000,223032.000000,83375.000000,658.927350)}
{pt3dadd(159492.000000,222984.000000,83150.000000,628.976115)}
{pt3dadd(159312.000000,222936.000000,82875.000000,599.024880)}
{pt3dadd(159132.000000,222912.000000,82675.000000,574.065504)}
{pt3dadd(158916.000000,222996.000000,82450.000000,549.106128)}
{pt3dadd(158736.000000,223056.000000,82425.000000,524.146752)}
{pt3dadd(158544.000000,222960.000000,82100.000000,499.187376)}
{pt3dadd(158412.000000,222840.000000,81800.000000,499.187376)}
{pt3dadd(158196.000000,222732.000000,81475.000000,499.187376)}
{pt3dadd(157992.000000,222864.000000,81425.000000,499.187376)}
{pt3dadd(157788.000000,223080.000000,81225.000000,499.187376)}
{pt3dadd(157572.000000,223056.000000,81000.000000,554.097987)}
{pt3dadd(157356.000000,223068.000000,80625.000000,609.008598)}
{pt3dadd(157152.000000,223044.000000,80200.000000,663.919209)}
{pt3dadd(156948.000000,223056.000000,79900.000000,718.829820)}
{pt3dadd(156732.000000,223152.000000,79650.000000,746.145369)}
{pt3dadd(156576.000000,223152.000000,79450.000000,773.460918)}
{pt3dadd(156372.000000,223260.000000,79400.000000,800.776467)}
{pt3dadd(156192.000000,223392.000000,79025.000000,828.092016)}
{pt3dadd(156012.000000,223452.000000,78775.000000,770.825232)}
{pt3dadd(155844.000000,223560.000000,78725.000000,713.558448)}
{pt3dadd(155640.000000,223572.000000,78675.000000,656.291664)}
{pt3dadd(155424.000000,223584.000000,78550.000000,599.024880)}
{pt3dadd(155232.000000,223284.000000,77800.000000,599.024880)}
{pt3dadd(155064.000000,223200.000000,77550.000000,599.024880)}
{pt3dadd(154920.000000,223212.000000,77475.000000,599.024880)}
{pt3dadd(154740.000000,223164.000000,77200.000000,599.024880)}
{pt3dadd(154548.000000,223092.000000,76925.000000,599.024880)}
{pt3dadd(154356.000000,223176.000000,76650.000000,599.024880)}
{pt3dadd(154176.000000,223176.000000,76250.000000,599.024880)}
{pt3dadd(154032.000000,223056.000000,75875.000000,599.024880)}
{pt3dadd(153648.000000,223020.000000,75575.000000,599.024880)}
{pt3dadd(153444.000000,222996.000000,75150.000000,599.024880)}
{pt3dadd(153216.000000,222900.000000,74875.000000,599.024880)}
{pt3dadd(153096.000000,222852.000000,74525.000000,599.024880)}
{pt3dadd(152976.000000,222708.000000,74100.000000,553.266031)}
{pt3dadd(152940.000000,222720.000000,73825.000000,507.507183)}
{pt3dadd(152736.000000,222624.000000,73525.000000,461.748335)}
{pt3dadd(152532.000000,222912.000000,73175.000000,415.989486)}
{pt3dadd(152268.000000,223128.000000,72825.000000,461.748335)}
{pt3dadd(152040.000000,223152.000000,72450.000000,507.507183)}
{pt3dadd(151860.000000,223200.000000,72050.000000,553.266031)}
{pt3dadd(151632.000000,223260.000000,71700.000000,599.024880)}
{pt3dadd(151356.000000,223056.000000,71300.000000,535.933134)}
{pt3dadd(151236.000000,223092.000000,71000.000000,472.841388)}
{pt3dadd(150960.000000,222864.000000,70600.000000,409.749642)}
{pt3dadd(150576.000000,222648.000000,70200.000000,346.657896)}
{pt3dadd(150276.000000,222660.000000,69750.000000,384.790266)}
{pt3dadd(149892.000000,222456.000000,69375.000000,422.922636)}
{pt3dadd(149844.000000,222408.000000,69075.000000,461.055006)}
{pt3dadd(149508.000000,222228.000000,68650.000000,499.187376)}
{pt3dadd(149304.000000,221964.000000,68250.000000,684.925002)}
{pt3dadd(149256.000000,221820.000000,67800.000000,870.662628)}
{pt3dadd(149112.000000,221880.000000,67375.000000,1056.400254)}
{pt3dadd(149088.000000,221772.000000,66950.000000,1242.137880)}
{pt3dadd(149304.000000,221592.000000,66600.000000,1190.382147)}
{pt3dadd(149316.000000,221508.000000,66225.000000,1138.626414)}
{pt3dadd(148980.000000,221676.000000,65850.000000,1086.870681)}
{pt3dadd(149172.000000,221652.000000,65425.000000,1035.114948)}
{pt3dadd(149208.000000,221628.000000,65050.000000,901.133055)}
{pt3dadd(149112.000000,221112.000000,64625.000000,767.151162)}
{pt3dadd(149160.000000,220968.000000,64325.000000,633.169269)}
{pt3dadd(149040.000000,221004.000000,64050.000000,499.187376)}
{pt3dadd(149052.000000,220860.000000,63800.000000,554.097987)}
{pt3dadd(149148.000000,220764.000000,63450.000000,609.008598)}
{pt3dadd(149256.000000,220692.000000,63175.000000,663.919209)}
{pt3dadd(149340.000000,220440.000000,62850.000000,718.829820)}
{pt3dadd(149400.000000,220320.000000,62550.000000,718.829820)}
{pt3dadd(149568.000000,220068.000000,62275.000000,718.829820)}
{pt3dadd(149676.000000,220044.000000,62000.000000,718.829820)}
{pt3dadd(149712.000000,219744.000000,61700.000000,718.829820)}
{pt3dadd(149868.000000,219756.000000,61450.000000,718.829820)}
{pt3dadd(149796.000000,219864.000000,61175.000000,718.829820)}
{pt3dadd(149988.000000,219744.000000,60775.000000,718.829820)}
{pt3dadd(150120.000000,219696.000000,60375.000000,718.829820)}
{pt3dadd(149976.000000,219600.000000,60075.000000,787.549955)}
{pt3dadd(150108.000000,219372.000000,59675.000000,856.270089)}
{pt3dadd(150156.000000,219324.000000,59300.000000,924.990223)}
{pt3dadd(150084.000000,219300.000000,58925.000000,993.710358)}
{pt3dadd(150168.000000,219180.000000,58500.000000,889.048733)}
{pt3dadd(150240.000000,219312.000000,58075.000000,784.387107)}
{pt3dadd(150204.000000,219192.000000,57775.000000,679.725482)}
{pt3dadd(150240.000000,219228.000000,57375.000000,575.063856)}
{pt3dadd(150480.000000,219180.000000,57000.000000,718.829820)}
{pt3dadd(150456.000000,218952.000000,56525.000000,718.829820)}

{create adhoc6}
{access adhoc6}
{connect adhoc6(1), adhoc4(0)}
{nseg = 1}
{strdef color color = "White"}
{pt3dclear()}
{pt3dadd(174024.000000,205704.000000,92800.000000,1490.565402)}
{pt3dadd(174036.000000,205548.000000,92400.000000,1430.942868)}
{pt3dadd(173988.000000,205404.000000,92125.000000,1445.848502)}
{pt3dadd(173964.000000,205260.000000,91850.000000,1460.754135)}
{pt3dadd(173736.000000,204852.000000,91450.000000,1475.659769)}
{pt3dadd(173292.000000,204780.000000,91050.000000,1490.565402)}
{pt3dadd(173244.000000,204720.000000,90675.000000,1428.458522)}
{pt3dadd(172992.000000,204516.000000,90400.000000,1366.351641)}
{pt3dadd(172848.000000,204420.000000,90100.000000,1304.244761)}
{pt3dadd(172644.000000,204348.000000,89875.000000,1242.137880)}
{pt3dadd(172344.000000,204276.000000,89475.000000,1242.137880)}
{pt3dadd(172164.000000,204108.000000,89025.000000,1242.137880)}
{pt3dadd(171864.000000,204084.000000,88750.000000,1242.137880)}
{pt3dadd(171684.000000,203892.000000,88450.000000,1242.137880)}
{pt3dadd(171564.000000,203772.000000,88150.000000,1242.137880)}
{pt3dadd(171228.000000,203748.000000,87875.000000,1242.137880)}
{pt3dadd(171336.000000,203472.000000,87575.000000,1242.137880)}
{pt3dadd(170928.000000,203196.000000,87150.000000,1242.137880)}
{pt3dadd(170856.000000,203136.000000,86875.000000,1242.137880)}
{pt3dadd(170736.000000,202776.000000,86450.000000,1242.137880)}
{pt3dadd(170688.000000,202728.000000,86150.000000,1242.137880)}
{pt3dadd(170352.000000,202584.000000,85850.000000,1242.137880)}
{pt3dadd(170172.000000,202488.000000,85550.000000,1190.382147)}
{pt3dadd(169896.000000,202368.000000,85250.000000,1138.626414)}
{pt3dadd(169800.000000,202176.000000,84950.000000,1086.870681)}
{pt3dadd(169812.000000,201816.000000,84650.000000,1035.114948)}
{pt3dadd(169452.000000,201828.000000,84350.000000,1035.114948)}
{pt3dadd(169152.000000,201708.000000,84075.000000,1035.114948)}
{pt3dadd(169032.000000,201348.000000,83700.000000,1035.114948)}
{pt3dadd(168624.000000,201168.000000,83350.000000,1035.114948)}
{pt3dadd(168372.000000,201120.000000,83000.000000,991.985162)}
{pt3dadd(168192.000000,200940.000000,82650.000000,948.855375)}
{pt3dadd(168120.000000,200916.000000,82275.000000,905.725589)}
{pt3dadd(167712.000000,200772.000000,81975.000000,862.595802)}
{pt3dadd(167820.000000,200412.000000,81700.000000,862.595802)}
{pt3dadd(167520.000000,199872.000000,81150.000000,862.595802)}
{pt3dadd(167220.000000,199728.000000,80875.000000,862.595802)}
{pt3dadd(167100.000000,199512.000000,80600.000000,862.595802)}
{pt3dadd(166896.000000,199392.000000,80350.000000,895.374441)}
{pt3dadd(166560.000000,199320.000000,79975.000000,928.153080)}
{pt3dadd(166464.000000,199140.000000,79725.000000,960.931719)}
{pt3dadd(166128.000000,198996.000000,79375.000000,993.710358)}
{pt3dadd(165852.000000,198636.000000,79050.000000,1004.061506)}
{pt3dadd(165840.000000,198564.000000,78650.000000,1014.412653)}
{pt3dadd(165720.000000,198384.000000,78400.000000,1024.763801)}
{pt3dadd(165468.000000,198240.000000,78125.000000,1035.114948)}
{pt3dadd(165324.000000,198036.000000,77850.000000,1086.870681)}
{pt3dadd(165180.000000,197916.000000,77575.000000,1138.626414)}
{pt3dadd(165108.000000,197652.000000,77200.000000,1190.382147)}
{pt3dadd(164820.000000,197376.000000,76825.000000,1242.137880)}
{pt3dadd(164796.000000,196968.000000,76350.000000,1242.137880)}
{pt3dadd(164748.000000,196716.000000,75875.000000,1242.137880)}
{pt3dadd(164652.000000,196284.000000,75475.000000,1242.137880)}
{pt3dadd(164628.000000,196260.000000,75075.000000,1242.137880)}
{pt3dadd(164604.000000,195696.000000,74700.000000,1242.137880)}
{pt3dadd(164076.000000,195516.000000,74250.000000,1242.137880)}
{pt3dadd(164052.000000,195648.000000,73925.000000,1242.137880)}
{pt3dadd(163824.000000,195444.000000,73625.000000,1242.137880)}
{pt3dadd(163644.000000,195360.000000,73375.000000,1242.137880)}
{pt3dadd(163368.000000,195240.000000,73025.000000,1242.137880)}
{pt3dadd(163224.000000,195180.000000,72650.000000,1242.137880)}
{pt3dadd(162864.000000,195504.000000,72500.000000,1717.131222)}

{create adhoc7}
{access adhoc7}
{connect adhoc7(1), adhoc6(0)}
{nseg = 1}
{strdef color color = "White"}
{pt3dclear()}
{pt3dadd(162864.000000,195504.000000,72500.000000,1717.131222)}
{pt3dadd(163860.000000,192948.000000,72350.000000,415.989486)}
{pt3dadd(163968.000000,192612.000000,72000.000000,461.748335)}
{pt3dadd(163848.000000,192252.000000,71575.000000,507.507183)}
{pt3dadd(163776.000000,192024.000000,71275.000000,553.266031)}
{pt3dadd(163644.000000,191724.000000,70875.000000,599.024880)}
{pt3dadd(163512.000000,191520.000000,70625.000000,664.917611)}
{pt3dadd(163368.000000,191136.000000,70350.000000,730.810341)}
{pt3dadd(163224.000000,190752.000000,69950.000000,796.703072)}
{pt3dadd(163356.000000,190392.000000,69675.000000,862.595802)}
{pt3dadd(163152.000000,190164.000000,69300.000000,945.059940)}
{pt3dadd(163356.000000,189708.000000,68950.000000,1027.524078)}
{pt3dadd(163260.000000,189456.000000,68550.000000,1109.988216)}
{pt3dadd(163164.000000,189072.000000,68150.000000,1192.452354)}
{pt3dadd(162984.000000,189000.000000,67725.000000,1204.873736)}
{pt3dadd(162996.000000,188796.000000,67300.000000,1217.295117)}
{pt3dadd(162948.000000,188724.000000,67025.000000,1229.716498)}
{pt3dadd(162852.000000,188544.000000,66775.000000,1242.137880)}
{pt3dadd(162732.000000,188268.000000,66475.000000,1160.554266)}
{pt3dadd(162780.000000,187968.000000,66125.000000,1078.970652)}
{pt3dadd(162468.000000,188160.000000,65775.000000,997.387038)}
{pt3dadd(162396.000000,187872.000000,65475.000000,915.803424)}
{pt3dadd(162156.000000,187464.000000,65025.000000,866.560023)}
{pt3dadd(162204.000000,187164.000000,64625.000000,817.316622)}
{pt3dadd(162324.000000,186828.000000,64300.000000,768.073221)}
{pt3dadd(162348.000000,186528.000000,64000.000000,718.829820)}
{pt3dadd(162468.000000,186096.000000,63650.000000,718.829820)}
{pt3dadd(162384.000000,185712.000000,63225.000000,718.829820)}
{pt3dadd(162420.000000,185412.000000,63025.000000,1035.114948)}

{create adhoc8}
{access adhoc8}
{connect adhoc8(1), adhoc7(0)}
{nseg = 1}
{strdef color color = "White"}
{pt3dclear()}
{pt3dadd(162420.000000,185412.000000,63025.000000,1035.114948)}
{pt3dadd(162756.000000,186876.000000,63025.000000,346.657896)}
{pt3dadd(163044.000000,186804.000000,62850.000000,363.990794)}
{pt3dadd(163104.000000,186972.000000,62675.000000,381.323691)}
{pt3dadd(163164.000000,186744.000000,62450.000000,398.656589)}
{pt3dadd(163008.000000,186660.000000,62150.000000,415.989486)}
{pt3dadd(163008.000000,186732.000000,61875.000000,373.620186)}
{pt3dadd(162924.000000,186720.000000,61600.000000,331.250886)}
{pt3dadd(162768.000000,186684.000000,61350.000000,288.881586)}
{pt3dadd(162096.000000,186528.000000,60925.000000,288.881586)}

{create adhoc9}
{access adhoc9}
{connect adhoc9(1), adhoc7(0)}
{nseg = 1}
{strdef color color = "White"}
{pt3dclear()}
{pt3dadd(162420.000000,185412.000000,63025.000000,1035.114948)}
{pt3dadd(162516.000000,184824.000000,62725.000000,862.595802)}
{pt3dadd(162576.000000,184548.000000,62425.000000,905.725589)}
{pt3dadd(162600.000000,183804.000000,61975.000000,948.855375)}
{pt3dadd(162864.000000,183468.000000,61650.000000,991.985162)}
{pt3dadd(162984.000000,183060.000000,61225.000000,1035.114948)}
{pt3dadd(163068.000000,182784.000000,60850.000000,1035.114948)}
{pt3dadd(163224.000000,182292.000000,60425.000000,1035.114948)}
{pt3dadd(163536.000000,181836.000000,60125.000000,1035.114948)}
{pt3dadd(163476.000000,181476.000000,59625.000000,1035.114948)}
{pt3dadd(163608.000000,180864.000000,59300.000000,956.043666)}
{pt3dadd(163800.000000,179928.000000,58925.000000,876.972384)}
{pt3dadd(163860.000000,179592.000000,58650.000000,797.901102)}
{pt3dadd(163764.000000,179184.000000,58300.000000,718.829820)}
{pt3dadd(163464.000000,178728.000000,58000.000000,754.771316)}
{pt3dadd(163296.000000,178272.000000,57700.000000,790.712811)}
{pt3dadd(163224.000000,177780.000000,57400.000000,826.654307)}
{pt3dadd(163032.000000,177528.000000,57100.000000,862.595802)}
{pt3dadd(162804.000000,177252.000000,56800.000000,945.059940)}
{pt3dadd(162696.000000,176868.000000,56500.000000,1027.524078)}
{pt3dadd(162492.000000,176376.000000,56200.000000,1109.988216)}
{pt3dadd(162480.000000,175884.000000,55900.000000,1192.452354)}
{pt3dadd(162360.000000,175668.000000,55575.000000,1153.118003)}
{pt3dadd(162216.000000,175464.000000,55200.000000,1113.783651)}
{pt3dadd(162144.000000,175296.000000,54950.000000,1074.449300)}
{pt3dadd(162072.000000,175092.000000,54800.000000,1035.114948)}
{pt3dadd(162024.000000,174912.000000,54675.000000,1074.449300)}
{pt3dadd(161820.000000,174900.000000,54375.000000,1113.783651)}
{pt3dadd(161856.000000,174720.000000,54075.000000,1153.118003)}
{pt3dadd(161832.000000,174264.000000,53650.000000,1192.452354)}
{pt3dadd(161724.000000,173880.000000,53250.000000,1153.118003)}
{pt3dadd(161676.000000,173736.000000,52975.000000,1113.783651)}
{pt3dadd(161712.000000,173400.000000,52675.000000,1074.449300)}
{pt3dadd(161640.000000,173064.000000,52400.000000,1035.114948)}
{pt3dadd(161592.000000,172728.000000,52125.000000,983.359215)}
{pt3dadd(161628.000000,172524.000000,51725.000000,931.603482)}
{pt3dadd(161604.000000,172296.000000,51300.000000,879.847749)}
{pt3dadd(161712.000000,171624.000000,50850.000000,828.092016)}
{pt3dadd(161712.000000,171132.000000,50425.000000,836.717962)}
{pt3dadd(161676.000000,170304.000000,49950.000000,845.343909)}
{pt3dadd(161772.000000,169740.000000,49475.000000,853.969856)}
{pt3dadd(161664.000000,169152.000000,49000.000000,862.595802)}
{pt3dadd(161844.000000,168720.000000,48675.000000,1035.114948)}
{pt3dadd(161616.000000,168780.000000,48375.000000,1035.114948)}

{create adhoc10}
{access adhoc10}
{connect adhoc10(1), adhoc9(0)}
{nseg = 1}
{strdef color color = "White"}
{pt3dclear()}
{pt3dadd(161616.000000,168780.000000,48375.000000,1035.114948)}
{pt3dadd(163260.000000,166308.000000,48375.000000,288.881586)}
{pt3dadd(163452.000000,165564.000000,48025.000000,303.325664)}
{pt3dadd(163656.000000,164868.000000,47800.000000,317.769741)}
{pt3dadd(163728.000000,164196.000000,47450.000000,332.213819)}
{pt3dadd(163896.000000,163788.000000,47150.000000,346.657896)}
{pt3dadd(163956.000000,163200.000000,46825.000000,343.191321)}
{pt3dadd(164220.000000,162924.000000,46525.000000,339.724746)}
{pt3dadd(164448.000000,162468.000000,46400.000000,336.258171)}
{pt3dadd(164676.000000,161976.000000,46275.000000,332.791596)}
{pt3dadd(164880.000000,161904.000000,46175.000000,336.258171)}
{pt3dadd(165120.000000,161700.000000,46125.000000,339.724746)}
{pt3dadd(165336.000000,161184.000000,45800.000000,343.191321)}
{pt3dadd(165228.000000,160908.000000,45475.000000,346.657896)}
{pt3dadd(165084.000000,160728.000000,45275.000000,332.213819)}
{pt3dadd(165432.000000,160584.000000,45475.000000,317.769741)}
{pt3dadd(165540.000000,160392.000000,45350.000000,303.325664)}
{pt3dadd(165624.000000,160212.000000,45400.000000,288.881586)}
{pt3dadd(165636.000000,160056.000000,45375.000000,276.844851)}
{pt3dadd(165588.000000,159900.000000,45325.000000,264.808116)}
{pt3dadd(165756.000000,159720.000000,45175.000000,252.771381)}
{pt3dadd(165840.000000,159576.000000,45175.000000,240.734646)}
{pt3dadd(165876.000000,159420.000000,45150.000000,230.704038)}
{pt3dadd(165828.000000,159156.000000,45050.000000,220.673430)}
{pt3dadd(166020.000000,158892.000000,45125.000000,210.642822)}
{pt3dadd(166032.000000,158676.000000,45225.000000,200.612214)}
{pt3dadd(166224.000000,158460.000000,45175.000000,200.612214)}
{pt3dadd(166284.000000,158280.000000,45200.000000,200.612214)}
{pt3dadd(166368.000000,158148.000000,45150.000000,200.612214)}
{pt3dadd(166452.000000,157968.000000,45150.000000,200.612214)}
{pt3dadd(166464.000000,157788.000000,45050.000000,222.679557)}
{pt3dadd(166392.000000,157596.000000,44925.000000,244.746900)}
{pt3dadd(166296.000000,157428.000000,44675.000000,266.814243)}
{pt3dadd(166380.000000,157248.000000,44775.000000,288.881586)}
{pt3dadd(166332.000000,157056.000000,44500.000000,288.881586)}
{pt3dadd(166392.000000,156852.000000,44350.000000,288.881586)}
{pt3dadd(166440.000000,156672.000000,44125.000000,288.881586)}
{pt3dadd(166368.000000,156480.000000,44075.000000,288.881586)}
{pt3dadd(166476.000000,156264.000000,43875.000000,276.844851)}
{pt3dadd(166536.000000,156072.000000,43825.000000,264.808116)}
{pt3dadd(166836.000000,155352.000000,43750.000000,252.771381)}
{pt3dadd(167028.000000,155052.000000,43650.000000,240.734646)}
{pt3dadd(167184.000000,154248.000000,43425.000000,230.704038)}
{pt3dadd(167400.000000,154152.000000,43525.000000,220.673430)}
{pt3dadd(167676.000000,153768.000000,43700.000000,210.642822)}
{pt3dadd(167904.000000,153072.000000,43950.000000,200.612214)}
{pt3dadd(168048.000000,153204.000000,44025.000000,200.612214)}

{create adhoc11}
{access adhoc11}
{connect adhoc11(1), adhoc9(0)}
{nseg = 1}
{strdef color color = "White"}
{pt3dclear()}
{pt3dadd(161616.000000,168780.000000,48375.000000,1035.114948)}
{pt3dadd(161412.000000,168600.000000,48050.000000,993.710358)}
{pt3dadd(161604.000000,168324.000000,47625.000000,1103.018486)}
{pt3dadd(161772.000000,168024.000000,47300.000000,1212.326613)}
{pt3dadd(161724.000000,167748.000000,47000.000000,1321.634740)}
{pt3dadd(161892.000000,167628.000000,46600.000000,1430.942868)}
{pt3dadd(162024.000000,167556.000000,46275.000000,1430.942868)}
{pt3dadd(162084.000000,167376.000000,45850.000000,1430.942868)}
{pt3dadd(162096.000000,167232.000000,45425.000000,1430.942868)}
{pt3dadd(162096.000000,167184.000000,44975.000000,1430.942868)}
{pt3dadd(162204.000000,167088.000000,44675.000000,1383.741621)}
{pt3dadd(162336.000000,166944.000000,44375.000000,1336.540374)}
{pt3dadd(162420.000000,166716.000000,43950.000000,1289.339127)}
{pt3dadd(162336.000000,166692.000000,43675.000000,1242.137880)}
{pt3dadd(162504.000000,166416.000000,43375.000000,1190.382147)}
{pt3dadd(162600.000000,166296.000000,43075.000000,1138.626414)}
{pt3dadd(162648.000000,166092.000000,42700.000000,1086.870681)}
{pt3dadd(162840.000000,165888.000000,42300.000000,1035.114948)}
{pt3dadd(162924.000000,165708.000000,42025.000000,926.092431)}
{pt3dadd(163284.000000,165504.000000,41425.000000,817.069914)}
{pt3dadd(163392.000000,165288.000000,41075.000000,708.047397)}
{pt3dadd(163296.000000,164676.000000,40725.000000,599.024880)}
{pt3dadd(162996.000000,163980.000000,40400.000000,346.657896)}

{create adhoc12}
{access adhoc12}
{connect adhoc12(1), adhoc11(0)}
{nseg = 1}
{strdef color color = "White"}
{pt3dclear()}
{pt3dadd(162996.000000,163980.000000,40400.000000,346.657896)}
{pt3dadd(163608.000000,165000.000000,40300.000000,1035.114948)}
{pt3dadd(164028.000000,164928.000000,40700.000000,1086.870681)}
{pt3dadd(164220.000000,165012.000000,40625.000000,1138.626414)}
{pt3dadd(164388.000000,165072.000000,40300.000000,1190.382147)}
{pt3dadd(164568.000000,165000.000000,40025.000000,1242.137880)}
{pt3dadd(164760.000000,165012.000000,39325.000000,1190.382147)}
{pt3dadd(164940.000000,165012.000000,39175.000000,1138.626414)}
{pt3dadd(165096.000000,165024.000000,38950.000000,1086.870681)}
{pt3dadd(165300.000000,165000.000000,38725.000000,1035.114948)}
{pt3dadd(165516.000000,164976.000000,38525.000000,991.985162)}
{pt3dadd(165684.000000,164988.000000,38500.000000,948.855375)}
{pt3dadd(165864.000000,165000.000000,38300.000000,905.725589)}
{pt3dadd(166044.000000,164904.000000,38225.000000,862.595802)}
{pt3dadd(166236.000000,164832.000000,38000.000000,826.654307)}
{pt3dadd(166440.000000,164868.000000,37975.000000,790.712811)}
{pt3dadd(166572.000000,164688.000000,37775.000000,754.771316)}
{pt3dadd(166776.000000,164700.000000,37650.000000,718.829820)}
{pt3dadd(166956.000000,164652.000000,37400.000000,718.829820)}
{pt3dadd(167136.000000,164556.000000,37400.000000,718.829820)}
{pt3dadd(167316.000000,164592.000000,37400.000000,718.829820)}
{pt3dadd(167484.000000,164628.000000,37425.000000,718.829820)}
{pt3dadd(167604.000000,164604.000000,37375.000000,688.878585)}
{pt3dadd(167748.000000,164616.000000,37125.000000,658.927350)}
{pt3dadd(167928.000000,164628.000000,37225.000000,628.976115)}
{pt3dadd(168096.000000,164556.000000,37150.000000,599.024880)}
{pt3dadd(168336.000000,164280.000000,36875.000000,628.976115)}
{pt3dadd(169056.000000,163980.000000,36550.000000,658.927350)}
{pt3dadd(169560.000000,163788.000000,36275.000000,688.878585)}
{pt3dadd(169692.000000,163668.000000,36000.000000,718.829820)}
{pt3dadd(169824.000000,163644.000000,35575.000000,862.595802)}
{pt3dadd(169884.000000,164016.000000,35450.000000,862.595802)}

{create adhoc13}
{access adhoc13}
{connect adhoc13(1), adhoc12(0)}
{nseg = 1}
{strdef color color = "White"}
{pt3dclear()}
{pt3dadd(169884.000000,164016.000000,35450.000000,862.595802)}
{pt3dadd(170004.000000,162612.000000,35450.000000,231.105276)}
{pt3dadd(170352.000000,161892.000000,35175.000000,242.660538)}
{pt3dadd(170688.000000,161616.000000,34900.000000,254.215800)}
{pt3dadd(171348.000000,161160.000000,34675.000000,265.771062)}
{pt3dadd(172080.000000,160656.000000,34450.000000,277.326324)}
{pt3dadd(172272.000000,160416.000000,34025.000000,288.881586)}
{pt3dadd(172476.000000,160296.000000,33825.000000,240.734646)}

{create adhoc14}
{access adhoc14}
{connect adhoc14(1), adhoc12(0)}
{nseg = 1}
{strdef color color = "White"}
{pt3dclear()}
{pt3dadd(169884.000000,164016.000000,35450.000000,862.595802)}
{pt3dadd(170064.000000,163968.000000,35050.000000,862.595802)}
{pt3dadd(170304.000000,164076.000000,34700.000000,750.944223)}
{pt3dadd(170676.000000,164040.000000,34350.000000,639.292644)}
{pt3dadd(171180.000000,163980.000000,34000.000000,527.641065)}
{pt3dadd(172044.000000,163908.000000,33625.000000,415.989486)}
{pt3dadd(172932.000000,163980.000000,33250.000000,415.989486)}
{pt3dadd(173748.000000,163464.000000,32875.000000,415.989486)}
{pt3dadd(174384.000000,163164.000000,32475.000000,415.989486)}
{pt3dadd(174672.000000,162924.000000,32225.000000,415.989486)}
{pt3dadd(175020.000000,162588.000000,31825.000000,369.768434)}
{pt3dadd(175308.000000,162192.000000,31550.000000,323.547381)}
{pt3dadd(175368.000000,161856.000000,31200.000000,277.326328)}
{pt3dadd(175500.000000,160848.000000,30925.000000,231.105276)}
{pt3dadd(175704.000000,160152.000000,30550.000000,245.549354)}
{pt3dadd(176112.000000,159408.000000,30300.000000,259.993431)}
{pt3dadd(176280.000000,159072.000000,30175.000000,274.437509)}
{pt3dadd(176472.000000,158460.000000,29900.000000,288.881586)}
{pt3dadd(176700.000000,158280.000000,29925.000000,276.844851)}
{pt3dadd(176856.000000,158232.000000,29825.000000,264.808116)}
{pt3dadd(177012.000000,157848.000000,29825.000000,252.771381)}
{pt3dadd(177216.000000,156972.000000,29900.000000,240.734646)}
{pt3dadd(177372.000000,156564.000000,29925.000000,230.704038)}
{pt3dadd(177588.000000,156000.000000,30000.000000,220.673430)}
{pt3dadd(177792.000000,155460.000000,30050.000000,210.642822)}
{pt3dadd(177996.000000,155184.000000,30025.000000,200.612214)}
{pt3dadd(178152.000000,154728.000000,30050.000000,185.287671)}
{pt3dadd(178272.000000,154344.000000,29925.000000,169.963128)}
{pt3dadd(178440.000000,154092.000000,29850.000000,154.638585)}
{pt3dadd(178620.000000,153732.000000,29750.000000,139.314042)}
{pt3dadd(178800.000000,153612.000000,29775.000000,164.669193)}
{pt3dadd(178980.000000,153468.000000,29800.000000,190.024344)}
{pt3dadd(179124.000000,153108.000000,29825.000000,215.379495)}
{pt3dadd(179292.000000,153036.000000,29875.000000,240.734646)}
{pt3dadd(179472.000000,153204.000000,29750.000000,215.379495)}
{pt3dadd(179172.000000,152532.000000,30050.000000,190.024344)}
{pt3dadd(179076.000000,152244.000000,30150.000000,164.669193)}
{pt3dadd(179004.000000,151992.000000,30100.000000,139.314042)}
{pt3dadd(178884.000000,151764.000000,30050.000000,154.638585)}
{pt3dadd(178968.000000,151548.000000,30075.000000,169.963128)}
{pt3dadd(179136.000000,151308.000000,30000.000000,185.287671)}
{pt3dadd(179220.000000,151116.000000,29925.000000,200.612214)}
{pt3dadd(179280.000000,150912.000000,29950.000000,240.734646)}
{pt3dadd(179436.000000,150852.000000,29900.000000,240.734646)}

{create adhoc15}
{access adhoc15}
{connect adhoc15(1), adhoc11(0)}
{nseg = 1}
{strdef color color = "White"}
{pt3dclear()}
{pt3dadd(162996.000000,163980.000000,40400.000000,346.657896)}
{pt3dadd(163140.000000,162792.000000,40050.000000,415.989486)}
{pt3dadd(163272.000000,162252.000000,39750.000000,398.656589)}
{pt3dadd(163356.000000,161916.000000,39450.000000,381.323691)}
{pt3dadd(163548.000000,161688.000000,39150.000000,363.990794)}
{pt3dadd(164052.000000,161388.000000,38875.000000,346.657896)}
{pt3dadd(164784.000000,160944.000000,38575.000000,332.213819)}
{pt3dadd(165180.000000,160656.000000,38275.000000,317.769741)}
{pt3dadd(165996.000000,160152.000000,37975.000000,303.325664)}
{pt3dadd(166200.000000,159948.000000,37850.000000,288.881586)}
{pt3dadd(166380.000000,159720.000000,37800.000000,320.658561)}
{pt3dadd(166512.000000,159492.000000,37725.000000,352.435536)}
{pt3dadd(166668.000000,159420.000000,37750.000000,384.212511)}
{pt3dadd(167328.000000,158592.000000,37425.000000,415.989486)}
{pt3dadd(167760.000000,158292.000000,37125.000000,415.989486)}
{pt3dadd(168204.000000,157860.000000,36825.000000,415.989486)}
{pt3dadd(168840.000000,157836.000000,36550.000000,415.989486)}
{pt3dadd(169212.000000,157668.000000,36400.000000,415.989486)}
{pt3dadd(169560.000000,157380.000000,36125.000000,384.212511)}
{pt3dadd(169668.000000,157320.000000,35825.000000,352.435536)}
{pt3dadd(169992.000000,157176.000000,35575.000000,320.658561)}
{pt3dadd(170544.000000,156972.000000,35300.000000,288.881586)}
{pt3dadd(170964.000000,156768.000000,35025.000000,276.844851)}
{pt3dadd(171624.000000,156156.000000,34625.000000,264.808116)}
{pt3dadd(172224.000000,155796.000000,34350.000000,252.771381)}
{pt3dadd(172632.000000,155340.000000,34050.000000,240.734646)}
{pt3dadd(172836.000000,155268.000000,34150.000000,240.734646)}
{pt3dadd(173052.000000,155244.000000,34075.000000,240.734646)}
{pt3dadd(173220.000000,155124.000000,34025.000000,240.734646)}
{pt3dadd(173388.000000,154980.000000,34100.000000,240.734646)}
{pt3dadd(173580.000000,154884.000000,33975.000000,267.215459)}
{pt3dadd(173748.000000,154680.000000,33900.000000,293.696271)}
{pt3dadd(173964.000000,154500.000000,33700.000000,320.177083)}
{pt3dadd(174192.000000,154404.000000,33675.000000,346.657896)}
{pt3dadd(174468.000000,154128.000000,33575.000000,332.213819)}
{pt3dadd(174612.000000,153612.000000,33525.000000,317.769741)}
{pt3dadd(174864.000000,153336.000000,33600.000000,303.325664)}
{pt3dadd(175020.000000,153264.000000,33650.000000,288.881586)}
{pt3dadd(175260.000000,152928.000000,33675.000000,228.029211)}
{pt3dadd(175476.000000,152808.000000,33575.000000,167.176836)}
{pt3dadd(175656.000000,152628.000000,33475.000000,139.314042)}

{create adhoc16}
{access adhoc16}
{connect adhoc16(1), adhoc6(0)}
{nseg = 1}
{strdef color color = "White"}
{pt3dclear()}
{pt3dadd(162864.000000,195504.000000,72500.000000,1717.131222)}
{pt3dadd(162744.000000,196644.000000,72050.000000,1788.678450)}
{pt3dadd(162804.000000,196188.000000,71525.000000,1600.287575)}
{pt3dadd(162096.000000,196608.000000,71100.000000,1411.896699)}
{pt3dadd(161844.000000,196572.000000,70700.000000,1223.505823)}
{pt3dadd(161796.000000,196500.000000,70400.000000,1035.114948)}
{pt3dadd(161676.000000,196428.000000,70100.000000,1035.114948)}
{pt3dadd(161340.000000,196560.000000,69675.000000,1035.114948)}
{pt3dadd(161040.000000,196428.000000,69225.000000,1035.114948)}
{pt3dadd(160764.000000,196440.000000,68775.000000,1035.114948)}
{pt3dadd(160644.000000,196464.000000,68475.000000,1035.114948)}
{pt3dadd(160392.000000,196392.000000,68175.000000,1035.114948)}
{pt3dadd(160056.000000,196476.000000,67725.000000,1035.114948)}
{pt3dadd(159720.000000,196608.000000,67375.000000,1035.114948)}
{pt3dadd(159672.000000,196416.000000,66900.000000,1035.114948)}
{pt3dadd(159372.000000,196704.000000,66625.000000,1035.114948)}
{pt3dadd(159228.000000,196596.000000,66225.000000,1035.114948)}
{pt3dadd(158640.000000,197040.000000,65800.000000,1035.114948)}
{pt3dadd(158460.000000,197088.000000,65525.000000,929.686572)}
{pt3dadd(158232.000000,197064.000000,65125.000000,824.258196)}
{pt3dadd(158136.000000,196884.000000,64875.000000,718.829820)}
{pt3dadd(158064.000000,197280.000000,64700.000000,599.024880)}

{create adhoc17}
{access adhoc17}
{connect adhoc17(1), adhoc16(0)}
{nseg = 1}
{strdef color color = "White"}
{pt3dclear()}
{pt3dadd(158064.000000,197280.000000,64700.000000,599.024880)}
{pt3dadd(158304.000000,195876.000000,64700.000000,599.024880)}
{pt3dadd(158364.000000,195600.000000,64500.000000,599.024880)}
{pt3dadd(157944.000000,195324.000000,64050.000000,599.024880)}
{pt3dadd(158112.000000,194952.000000,63775.000000,599.024880)}
{pt3dadd(157836.000000,194700.000000,63350.000000,599.024880)}
{pt3dadd(157632.000000,194364.000000,62950.000000,599.024880)}
{pt3dadd(157560.000000,194112.000000,62675.000000,599.024880)}
{pt3dadd(157536.000000,193812.000000,62375.000000,599.024880)}
{pt3dadd(157164.000000,193560.000000,62075.000000,599.024880)}
{pt3dadd(156936.000000,193464.000000,61775.000000,628.976115)}
{pt3dadd(156756.000000,193164.000000,61475.000000,658.927350)}
{pt3dadd(156576.000000,192756.000000,61175.000000,688.878585)}
{pt3dadd(156216.000000,192684.000000,60925.000000,718.829820)}
{pt3dadd(156036.000000,192324.000000,60500.000000,718.829820)}
{pt3dadd(155916.000000,191868.000000,60100.000000,718.829820)}
{pt3dadd(155868.000000,191412.000000,59700.000000,718.829820)}
{pt3dadd(155748.000000,191160.000000,59400.000000,718.829820)}

{create adhoc18}
{access adhoc18}
{connect adhoc18(1), adhoc17(0)}
{nseg = 1}
{strdef color color = "White"}
{pt3dclear()}
{pt3dadd(155748.000000,191160.000000,59400.000000,718.829820)}
{pt3dadd(157368.000000,191952.000000,59425.000000,139.314042)}
{pt3dadd(157608.000000,192012.000000,59300.000000,139.314042)}
{pt3dadd(157740.000000,192336.000000,59100.000000,116.095032)}

{create adhoc19}
{access adhoc19}
{connect adhoc19(1), adhoc18(0)}
{nseg = 1}
{strdef color color = "White"}
{pt3dclear()}
{pt3dadd(157740.000000,192336.000000,59100.000000,116.095032)}
{pt3dadd(157572.000000,192804.000000,59100.000000,167.176836)}
{pt3dadd(157536.000000,192780.000000,58950.000000,200.612214)}
{pt3dadd(157632.000000,193020.000000,59100.000000,139.314042)}

{create adhoc20}
{access adhoc20}
{connect adhoc20(1), adhoc18(0)}
{nseg = 1}
{strdef color color = "White"}
{pt3dclear()}
{pt3dadd(157740.000000,192336.000000,59100.000000,116.095032)}
{pt3dadd(158172.000000,192048.000000,58950.000000,240.734646)}
{pt3dadd(158256.000000,192024.000000,58800.000000,240.734646)}

{create adhoc21}
{access adhoc21}
{connect adhoc21(1), adhoc17(0)}
{nseg = 1}
{strdef color color = "White"}
{pt3dclear()}
{pt3dadd(155748.000000,191160.000000,59400.000000,718.829820)}
{pt3dadd(155700.000000,190668.000000,59125.000000,862.595802)}
{pt3dadd(155676.000000,190392.000000,58825.000000,1019.588202)}
{pt3dadd(155592.000000,190164.000000,58450.000000,1176.580602)}
{pt3dadd(155604.000000,190020.000000,58000.000000,1333.573002)}
{pt3dadd(155628.000000,189900.000000,57675.000000,1490.565402)}
{pt3dadd(155712.000000,189672.000000,57425.000000,1565.093664)}
{pt3dadd(155760.000000,189288.000000,56975.000000,1639.621926)}
{pt3dadd(155712.000000,189264.000000,56525.000000,1714.150188)}
{pt3dadd(155688.000000,189192.000000,56075.000000,1788.678450)}
{pt3dadd(155796.000000,189072.000000,55750.000000,1689.307434)}
{pt3dadd(155736.000000,188976.000000,55300.000000,1589.936418)}
{pt3dadd(155820.000000,188772.000000,54850.000000,1490.565402)}
{pt3dadd(155772.000000,188724.000000,54725.000000,1717.131780)}

{create adhoc22}
{access adhoc22}
{connect adhoc22(1), adhoc21(0)}
{nseg = 1}
{strdef color color = "White"}
{pt3dclear()}
{pt3dadd(155772.000000,188724.000000,54725.000000,1717.131780)}
{pt3dadd(156696.000000,189804.000000,54725.000000,116.095032)}
{pt3dadd(156936.000000,189708.000000,54625.000000,133.122300)}
{pt3dadd(157104.000000,189720.000000,54500.000000,150.149568)}
{pt3dadd(157392.000000,189852.000000,54400.000000,167.176836)}
{pt3dadd(157584.000000,189840.000000,54425.000000,200.612214)}

{create adhoc23}
{access adhoc23}
{connect adhoc23(1), adhoc21(0)}
{nseg = 1}
{strdef color color = "White"}
{pt3dclear()}
{pt3dadd(155772.000000,188724.000000,54725.000000,1717.131780)}
{pt3dadd(155832.000000,188388.000000,54400.000000,1430.943012)}
{pt3dadd(155784.000000,188340.000000,54100.000000,1153.636968)}
{pt3dadd(155844.000000,187932.000000,53675.000000,876.330924)}
{pt3dadd(155772.000000,187416.000000,53300.000000,599.024880)}
{pt3dadd(155832.000000,186768.000000,53125.000000,499.187376)}

{create adhoc24}
{access adhoc24}
{connect adhoc24(1), adhoc23(0)}
{nseg = 1}
{strdef color color = "White"}
{pt3dclear()}
{pt3dadd(155832.000000,186768.000000,53125.000000,499.187376)}
{pt3dadd(155436.000000,188592.000000,53125.000000,862.595802)}
{pt3dadd(155232.000000,188880.000000,52925.000000,862.595802)}
{pt3dadd(154944.000000,188856.000000,52550.000000,862.595802)}
{pt3dadd(154872.000000,189060.000000,52175.000000,862.595802)}
{pt3dadd(154668.000000,189144.000000,51750.000000,862.595802)}
{pt3dadd(154644.000000,189204.000000,51450.000000,905.725589)}
{pt3dadd(154344.000000,189216.000000,51075.000000,948.855375)}
{pt3dadd(154116.000000,189432.000000,50625.000000,991.985162)}
{pt3dadd(154020.000000,189564.000000,50200.000000,1035.114948)}
{pt3dadd(153996.000000,189696.000000,49900.000000,1035.114948)}
{pt3dadd(153948.000000,189888.000000,49600.000000,1035.114948)}
{pt3dadd(154008.000000,189840.000000,49325.000000,1035.114948)}
{pt3dadd(153960.000000,189948.000000,49000.000000,1035.114948)}
{pt3dadd(153936.000000,189768.000000,48700.000000,956.043666)}
{pt3dadd(154332.000000,189696.000000,48275.000000,876.972384)}
{pt3dadd(154416.000000,189756.000000,47875.000000,797.901102)}
{pt3dadd(154656.000000,189660.000000,47450.000000,718.829820)}
{pt3dadd(154872.000000,189612.000000,47075.000000,797.901102)}
{pt3dadd(155112.000000,189516.000000,46775.000000,876.972384)}
{pt3dadd(155220.000000,189468.000000,46350.000000,956.043666)}
{pt3dadd(155388.000000,189528.000000,45975.000000,1035.114948)}
{pt3dadd(155364.000000,189456.000000,45750.000000,880.333582)}
{pt3dadd(155628.000000,189624.000000,45300.000000,725.552217)}
{pt3dadd(155916.000000,189648.000000,44875.000000,570.770851)}
{pt3dadd(156048.000000,189780.000000,44625.000000,415.989486)}
{pt3dadd(156240.000000,189948.000000,44350.000000,398.656589)}
{pt3dadd(156564.000000,190188.000000,44050.000000,381.323691)}
{pt3dadd(156756.000000,190524.000000,43750.000000,363.990794)}
{pt3dadd(156828.000000,190764.000000,43450.000000,346.657896)}
{pt3dadd(156924.000000,191004.000000,43200.000000,363.990794)}
{pt3dadd(156996.000000,191424.000000,42925.000000,381.323691)}
{pt3dadd(157188.000000,191748.000000,42650.000000,398.656589)}
{pt3dadd(157404.000000,191916.000000,42400.000000,415.989486)}
{pt3dadd(157488.000000,192312.000000,42125.000000,527.641065)}
{pt3dadd(157464.000000,192348.000000,41700.000000,639.292644)}
{pt3dadd(157440.000000,192456.000000,41400.000000,750.944223)}
{pt3dadd(157476.000000,192468.000000,41175.000000,862.595802)}
{pt3dadd(157512.000000,192528.000000,40850.000000,826.654307)}
{pt3dadd(157596.000000,192588.000000,40550.000000,790.712811)}
{pt3dadd(157632.000000,192516.000000,40125.000000,754.771316)}
{pt3dadd(157716.000000,192552.000000,39700.000000,718.829820)}
{pt3dadd(157752.000000,192252.000000,39300.000000,643.119736)}
{pt3dadd(157932.000000,192228.000000,39000.000000,567.409653)}
{pt3dadd(158352.000000,192048.000000,38575.000000,491.699570)}
{pt3dadd(158700.000000,191928.000000,38250.000000,415.989486)}
{pt3dadd(158988.000000,191700.000000,38025.000000,373.620186)}
{pt3dadd(159984.000000,191676.000000,37650.000000,331.250886)}
{pt3dadd(161472.000000,191664.000000,37250.000000,288.881586)}
{pt3dadd(162360.000000,191496.000000,36850.000000,240.734646)}

{create adhoc25}
{access adhoc25}
{connect adhoc25(1), adhoc23(0)}
{nseg = 1}
{strdef color color = "White"}
{pt3dclear()}
{pt3dadd(155832.000000,186768.000000,53125.000000,499.187376)}
{pt3dadd(155904.000000,186360.000000,52850.000000,499.187376)}
{pt3dadd(155856.000000,185928.000000,52550.000000,554.097987)}
{pt3dadd(155832.000000,185544.000000,52275.000000,609.008598)}
{pt3dadd(155784.000000,185340.000000,52025.000000,663.919209)}
{pt3dadd(155820.000000,185136.000000,51600.000000,718.829820)}
{pt3dadd(155880.000000,184836.000000,51175.000000,797.901102)}
{pt3dadd(156096.000000,184428.000000,50750.000000,876.972384)}
{pt3dadd(156024.000000,184284.000000,50300.000000,956.043666)}
{pt3dadd(156216.000000,184008.000000,49900.000000,1035.114948)}
{pt3dadd(156192.000000,183732.000000,49450.000000,1074.449300)}
{pt3dadd(156468.000000,183552.000000,49150.000000,1113.783651)}
{pt3dadd(156480.000000,183504.000000,48700.000000,1153.118003)}
{pt3dadd(156456.000000,183360.000000,48375.000000,1192.452354)}
{pt3dadd(156564.000000,183336.000000,48075.000000,1266.980616)}
{pt3dadd(156516.000000,183192.000000,47775.000000,1341.508878)}
{pt3dadd(156528.000000,183012.000000,47275.000000,1416.037140)}
{pt3dadd(156696.000000,182832.000000,46800.000000,1490.565402)}
{pt3dadd(156756.000000,182784.000000,46500.000000,1428.458522)}
{pt3dadd(156840.000000,182664.000000,46200.000000,1366.351641)}
{pt3dadd(157068.000000,182568.000000,45800.000000,1304.244761)}
{pt3dadd(157104.000000,182448.000000,45350.000000,1242.137880)}
{pt3dadd(157272.000000,182400.000000,44950.000000,1289.339096)}
{pt3dadd(157356.000000,182568.000000,44650.000000,1336.540311)}
{pt3dadd(157416.000000,182628.000000,44250.000000,1383.741527)}
{pt3dadd(157524.000000,182556.000000,43925.000000,1430.942742)}
{pt3dadd(157500.000000,182532.000000,43625.000000,1383.741527)}
{pt3dadd(157452.000000,182508.000000,43200.000000,1336.540311)}
{pt3dadd(157464.000000,182412.000000,42900.000000,1289.339096)}
{pt3dadd(157596.000000,182268.000000,42600.000000,1242.137880)}
{pt3dadd(157728.000000,182196.000000,42150.000000,1147.252361)}
{pt3dadd(157968.000000,181992.000000,41750.000000,1052.366841)}
{pt3dadd(158208.000000,181848.000000,41450.000000,957.481322)}
{pt3dadd(158448.000000,181548.000000,41150.000000,862.595802)}
{pt3dadd(158580.000000,181344.000000,40875.000000,826.654307)}
{pt3dadd(158748.000000,181044.000000,40575.000000,790.712811)}
{pt3dadd(158808.000000,180768.000000,40300.000000,754.771316)}
{pt3dadd(159060.000000,180408.000000,40025.000000,718.829820)}
{pt3dadd(159276.000000,180108.000000,39725.000000,718.829820)}
{pt3dadd(159312.000000,179964.000000,39475.000000,718.829820)}
{pt3dadd(159480.000000,179664.000000,39200.000000,718.829820)}
{pt3dadd(159768.000000,179388.000000,38925.000000,718.829820)}
{pt3dadd(159960.000000,179220.000000,38625.000000,718.829820)}
{pt3dadd(160020.000000,179076.000000,38350.000000,718.829820)}
{pt3dadd(160272.000000,178668.000000,38050.000000,718.829820)}
{pt3dadd(160440.000000,178524.000000,37750.000000,718.829820)}
{pt3dadd(160728.000000,178344.000000,37450.000000,609.008598)}
{pt3dadd(161016.000000,178224.000000,37150.000000,499.187376)}
{pt3dadd(161280.000000,177960.000000,36850.000000,332.791560)}

{create adhoc26}
{access adhoc26}
{connect adhoc26(1), adhoc25(0)}
{nseg = 1}
{strdef color color = "White"}
{pt3dclear()}
{pt3dadd(161280.000000,177960.000000,36850.000000,332.791560)}
{pt3dadd(161604.000000,177288.000000,36875.000000,288.881586)}
{pt3dadd(162000.000000,176832.000000,36475.000000,341.458034)}
{pt3dadd(162012.000000,176736.000000,36175.000000,394.034481)}
{pt3dadd(162780.000000,175968.000000,35850.000000,446.610929)}
{pt3dadd(163224.000000,175716.000000,35425.000000,499.187376)}
{pt3dadd(163752.000000,175152.000000,34975.000000,546.909682)}
{pt3dadd(164124.000000,174852.000000,34550.000000,594.631989)}
{pt3dadd(164448.000000,174204.000000,34125.000000,642.354295)}
{pt3dadd(164736.000000,173868.000000,33825.000000,690.076602)}
{pt3dadd(164904.000000,173640.000000,33550.000000,667.313671)}
{pt3dadd(164976.000000,173496.000000,33250.000000,644.550741)}
{pt3dadd(165312.000000,173160.000000,32800.000000,621.787810)}
{pt3dadd(165600.000000,172836.000000,32350.000000,599.024880)}
{pt3dadd(165660.000000,172848.000000,31925.000000,535.933134)}
{pt3dadd(166788.000000,172776.000000,31550.000000,472.841388)}
{pt3dadd(167652.000000,172404.000000,31250.000000,409.749642)}
{pt3dadd(168540.000000,172356.000000,30850.000000,346.657896)}
{pt3dadd(168960.000000,171972.000000,30550.000000,320.177083)}
{pt3dadd(169200.000000,171744.000000,30250.000000,293.696271)}
{pt3dadd(169488.000000,170928.000000,29850.000000,267.215459)}
{pt3dadd(169680.000000,170676.000000,29925.000000,240.734646)}
{pt3dadd(169872.000000,170556.000000,29850.000000,230.704038)}
{pt3dadd(170064.000000,170220.000000,29850.000000,220.673430)}
{pt3dadd(170220.000000,170280.000000,29625.000000,210.642822)}
{pt3dadd(170400.000000,170208.000000,29625.000000,200.612214)}
{pt3dadd(170664.000000,170064.000000,29575.000000,200.612214)}
{pt3dadd(170892.000000,169884.000000,29625.000000,200.612214)}
{pt3dadd(172320.000000,169404.000000,29100.000000,96.745860)}

{create adhoc27}
{access adhoc27}
{connect adhoc27(1), adhoc25(0)}
{nseg = 1}
{strdef color color = "White"}
{pt3dclear()}
{pt3dadd(161280.000000,177960.000000,36850.000000,332.791560)}
{pt3dadd(161568.000000,178332.000000,36725.000000,415.989486)}
{pt3dadd(162156.000000,178344.000000,36475.000000,362.145168)}
{pt3dadd(162840.000000,178524.000000,36225.000000,308.300850)}
{pt3dadd(163500.000000,178788.000000,35950.000000,254.456532)}
{pt3dadd(164436.000000,179016.000000,35500.000000,200.612214)}
{pt3dadd(164736.000000,179136.000000,35400.000000,237.123635)}
{pt3dadd(164700.000000,179304.000000,35350.000000,273.635055)}
{pt3dadd(165648.000000,179400.000000,34975.000000,310.146475)}
{pt3dadd(166284.000000,179580.000000,34500.000000,346.657896)}
{pt3dadd(166524.000000,179592.000000,34150.000000,369.768426)}
{pt3dadd(166776.000000,179676.000000,33775.000000,392.878956)}
{pt3dadd(166776.000000,179760.000000,33750.000000,415.989486)}
{pt3dadd(167052.000000,180108.000000,33550.000000,346.657896)}

{create adhoc28}
{access adhoc28}
{connect adhoc28(1), adhoc16(0)}
{nseg = 1}
{strdef color color = "White"}
{pt3dclear()}
{pt3dadd(158064.000000,197280.000000,64700.000000,599.024880)}
{pt3dadd(157632.000000,198360.000000,64700.000000,1035.114948)}
{pt3dadd(157404.000000,198600.000000,64250.000000,991.985162)}
{pt3dadd(156876.000000,199020.000000,63800.000000,948.855375)}
{pt3dadd(156516.000000,199236.000000,63375.000000,905.725589)}
{pt3dadd(156180.000000,199368.000000,62950.000000,862.595802)}
{pt3dadd(155820.000000,199572.000000,62650.000000,905.725589)}
{pt3dadd(155616.000000,199608.000000,62425.000000,948.855375)}
{pt3dadd(155400.000000,199716.000000,62075.000000,991.985162)}
{pt3dadd(155196.000000,199788.000000,62000.000000,1035.114948)}
{pt3dadd(154992.000000,199956.000000,61750.000000,991.985162)}
{pt3dadd(154800.000000,200148.000000,61675.000000,948.855375)}
{pt3dadd(154596.000000,200280.000000,61350.000000,905.725589)}
{pt3dadd(154356.000000,200448.000000,61325.000000,862.595802)}
{pt3dadd(154212.000000,200580.000000,61175.000000,862.595802)}
{pt3dadd(154020.000000,200772.000000,60950.000000,862.595802)}
{pt3dadd(153816.000000,200832.000000,60800.000000,862.595802)}
{pt3dadd(153624.000000,201012.000000,60650.000000,862.595802)}
{pt3dadd(153420.000000,201120.000000,60300.000000,957.481322)}
{pt3dadd(153204.000000,201348.000000,59950.000000,1052.366841)}
{pt3dadd(152940.000000,201432.000000,59675.000000,1147.252361)}
{pt3dadd(152700.000000,201684.000000,59425.000000,1242.137880)}
{pt3dadd(152484.000000,201924.000000,59300.000000,1304.244761)}
{pt3dadd(152268.000000,201900.000000,58775.000000,1366.351641)}
{pt3dadd(152040.000000,201936.000000,58325.000000,1428.458522)}
{pt3dadd(151548.000000,202260.000000,58000.000000,1490.565402)}
{pt3dadd(151248.000000,202500.000000,57475.000000,1407.756228)}
{pt3dadd(151200.000000,202632.000000,57000.000000,1324.947054)}
{pt3dadd(151236.000000,202848.000000,56500.000000,1242.137880)}
{pt3dadd(151320.000000,202980.000000,56050.000000,1035.114948)}

{create adhoc29}
{access adhoc29}
{connect adhoc29(1), adhoc28(0)}
{nseg = 1}
{strdef color color = "White"}
{pt3dclear()}
{pt3dadd(151320.000000,202980.000000,56050.000000,1035.114948)}
{pt3dadd(151968.000000,201324.000000,55950.000000,240.734646)}
{pt3dadd(152076.000000,200832.000000,55650.000000,230.704038)}
{pt3dadd(152208.000000,200448.000000,55350.000000,220.673430)}
{pt3dadd(152316.000000,200172.000000,55025.000000,210.642822)}
{pt3dadd(152376.000000,199800.000000,54725.000000,200.612214)}
{pt3dadd(152736.000000,199572.000000,54425.000000,210.642822)}
{pt3dadd(152928.000000,199272.000000,54150.000000,220.673430)}
{pt3dadd(153036.000000,199140.000000,53850.000000,230.704038)}
{pt3dadd(153012.000000,198900.000000,53550.000000,240.734646)}
{pt3dadd(153060.000000,198720.000000,53300.000000,240.734646)}
{pt3dadd(153336.000000,198576.000000,53000.000000,240.734646)}
{pt3dadd(153300.000000,198396.000000,52700.000000,240.734646)}
{pt3dadd(153024.000000,198132.000000,52400.000000,240.734646)}
{pt3dadd(153168.000000,197964.000000,52100.000000,220.673430)}
{pt3dadd(153420.000000,197784.000000,51800.000000,200.612214)}
{pt3dadd(153816.000000,197628.000000,51500.000000,167.176836)}

{create adhoc30}
{access adhoc30}
{connect adhoc30(1), adhoc28(0)}
{nseg = 1}
{strdef color color = "White"}
{pt3dclear()}
{pt3dadd(151320.000000,202980.000000,56050.000000,1035.114948)}
{pt3dadd(151128.000000,203352.000000,55625.000000,1035.114948)}
{pt3dadd(151116.000000,203748.000000,55200.000000,991.985162)}
{pt3dadd(151128.000000,203880.000000,54800.000000,948.855375)}
{pt3dadd(151164.000000,204204.000000,54525.000000,905.725589)}
{pt3dadd(151116.000000,204468.000000,54225.000000,862.595802)}
{pt3dadd(151200.000000,204324.000000,53925.000000,862.595802)}
{pt3dadd(151296.000000,204516.000000,53625.000000,862.595802)}
{pt3dadd(151464.000000,204552.000000,53325.000000,862.595802)}
{pt3dadd(151572.000000,204684.000000,53025.000000,862.595802)}
{pt3dadd(151692.000000,204720.000000,52525.000000,746.784329)}
{pt3dadd(151752.000000,204852.000000,52075.000000,630.972855)}
{pt3dadd(151884.000000,205140.000000,51450.000000,515.161381)}
{pt3dadd(152016.000000,205356.000000,50975.000000,399.349908)}
{pt3dadd(152604.000000,206064.000000,50500.000000,449.268651)}
{pt3dadd(153132.000000,206484.000000,50050.000000,499.187394)}
{pt3dadd(153576.000000,206652.000000,49600.000000,549.106137)}
{pt3dadd(154080.000000,206580.000000,49150.000000,599.024880)}
{pt3dadd(154476.000000,206532.000000,48700.000000,708.047397)}
{pt3dadd(154872.000000,206568.000000,48350.000000,817.069914)}
{pt3dadd(155160.000000,206580.000000,47900.000000,926.092431)}
{pt3dadd(155352.000000,206556.000000,47600.000000,1035.114948)}
{pt3dadd(155388.000000,206592.000000,47150.000000,991.985162)}
{pt3dadd(155556.000000,206520.000000,46725.000000,948.855375)}
{pt3dadd(155688.000000,206556.000000,46400.000000,905.725589)}
{pt3dadd(155904.000000,206436.000000,45925.000000,862.595802)}
{pt3dadd(156324.000000,206340.000000,45450.000000,690.076674)}
{pt3dadd(156564.000000,206448.000000,45000.000000,552.061278)}

{create adhoc31}
{access adhoc31}
{connect adhoc31(1), adhoc30(0)}
{nseg = 1}
{strdef color color = "White"}
{pt3dclear()}
{pt3dadd(156564.000000,206448.000000,45000.000000,552.061278)}
{pt3dadd(156852.000000,205320.000000,45000.000000,415.989486)}
{pt3dadd(156912.000000,205020.000000,44625.000000,431.797095)}
{pt3dadd(157260.000000,204684.000000,44300.000000,447.604704)}
{pt3dadd(157428.000000,204600.000000,44000.000000,463.412313)}
{pt3dadd(157800.000000,204372.000000,43550.000000,479.219922)}
{pt3dadd(158016.000000,204168.000000,43225.000000,463.412313)}
{pt3dadd(158232.000000,203928.000000,42925.000000,447.604704)}
{pt3dadd(158364.000000,203676.000000,42600.000000,431.797095)}
{pt3dadd(158688.000000,203424.000000,42300.000000,415.989486)}
{pt3dadd(158952.000000,202992.000000,41950.000000,461.748335)}
{pt3dadd(159204.000000,202740.000000,41625.000000,507.507183)}
{pt3dadd(159492.000000,202572.000000,41325.000000,553.266031)}
{pt3dadd(159864.000000,202320.000000,41025.000000,599.024880)}
{pt3dadd(159900.000000,202224.000000,40725.000000,509.452321)}
{pt3dadd(160092.000000,202080.000000,40425.000000,419.879763)}
{pt3dadd(160152.000000,202032.000000,40100.000000,330.307205)}
{pt3dadd(160944.000000,201600.000000,39650.000000,240.734646)}
{pt3dadd(161424.000000,201264.000000,39325.000000,252.771381)}
{pt3dadd(161712.000000,200892.000000,39000.000000,264.808116)}
{pt3dadd(162216.000000,200400.000000,38675.000000,276.844851)}
{pt3dadd(162612.000000,199896.000000,38350.000000,288.881586)}
{pt3dadd(162828.000000,199488.000000,38025.000000,346.657896)}

{create adhoc32}
{access adhoc32}
{connect adhoc32(1), adhoc31(0)}
{nseg = 1}
{strdef color color = "White"}
{pt3dclear()}
{pt3dadd(162828.000000,199488.000000,38025.000000,346.657896)}
{pt3dadd(162780.000000,200196.000000,37925.000000,240.734646)}
{pt3dadd(162888.000000,200292.000000,37750.000000,116.095032)}

{create adhoc33}
{access adhoc33}
{connect adhoc33(1), adhoc31(0)}
{nseg = 1}
{strdef color color = "White"}
{pt3dclear()}
{pt3dadd(162828.000000,199488.000000,38025.000000,346.657896)}
{pt3dadd(162960.000000,198768.000000,37800.000000,346.657896)}
{pt3dadd(163128.000000,198384.000000,37525.000000,310.146476)}
{pt3dadd(163320.000000,197976.000000,37275.000000,273.635055)}
{pt3dadd(163764.000000,197796.000000,36925.000000,237.123635)}
{pt3dadd(164052.000000,197580.000000,36600.000000,200.612214)}
{pt3dadd(164304.000000,197220.000000,36250.000000,200.612214)}
{pt3dadd(164748.000000,196764.000000,35800.000000,200.612214)}
{pt3dadd(164976.000000,196332.000000,35600.000000,200.612214)}
{pt3dadd(165168.000000,196104.000000,35600.000000,200.612214)}
{pt3dadd(165384.000000,195912.000000,35500.000000,208.235480)}
{pt3dadd(165600.000000,195540.000000,35475.000000,215.858745)}
{pt3dadd(165816.000000,195456.000000,35400.000000,223.482010)}
{pt3dadd(166008.000000,195156.000000,35200.000000,231.105276)}
{pt3dadd(166200.000000,194724.000000,35025.000000,223.482010)}
{pt3dadd(166380.000000,194304.000000,34900.000000,215.858745)}
{pt3dadd(166620.000000,193968.000000,34550.000000,208.235480)}
{pt3dadd(166824.000000,194004.000000,34350.000000,200.612214)}
{pt3dadd(166536.000000,193704.000000,34425.000000,240.734646)}

{create adhoc34}
{access adhoc34}
{connect adhoc34(1), adhoc30(0)}
{nseg = 1}
{strdef color color = "White"}
{pt3dclear()}
{pt3dadd(156564.000000,206448.000000,45000.000000,552.061278)}
{pt3dadd(156696.000000,206988.000000,45000.000000,346.657896)}
{pt3dadd(157116.000000,207336.000000,44725.000000,320.177083)}
{pt3dadd(157536.000000,207732.000000,44400.000000,293.696271)}
{pt3dadd(157908.000000,207936.000000,44100.000000,267.215459)}
{pt3dadd(158148.000000,208080.000000,43800.000000,240.734646)}
{pt3dadd(158400.000000,208380.000000,43500.000000,222.345193)}
{pt3dadd(158640.000000,208392.000000,43200.000000,203.955741)}
{pt3dadd(158892.000000,208476.000000,42900.000000,185.566288)}
{pt3dadd(159312.000000,208584.000000,42625.000000,167.176836)}
{pt3dadd(159504.000000,208560.000000,42325.000000,139.314042)}
{pt3dadd(159780.000000,208440.000000,42025.000000,139.314042)}

{create adhoc35}
{access adhoc35}
{connect adhoc35(1), adhoc3(0)}
{nseg = 1}
{strdef color color = "White"}
{pt3dclear()}
{pt3dadd(148656.000000,121176.000000,159525.000000,1242.137880)}
{pt3dadd(148308.000000,120060.000000,159275.000000,1035.114948)}
{pt3dadd(147048.000000,118104.000000,158800.000000,880.333582)}
{pt3dadd(146268.000000,117156.000000,158600.000000,725.552217)}
{pt3dadd(145848.000000,116724.000000,158525.000000,570.770851)}
{pt3dadd(145572.000000,116124.000000,158525.000000,415.989486)}
{pt3dadd(145620.000000,115764.000000,158300.000000,491.699570)}
{pt3dadd(145560.000000,115536.000000,158350.000000,567.409653)}
{pt3dadd(145464.000000,115248.000000,158125.000000,643.119737)}
{pt3dadd(145224.000000,115188.000000,158325.000000,718.829820)}
{pt3dadd(144960.000000,115200.000000,158250.000000,625.786839)}
{pt3dadd(145536.000000,114924.000000,157800.000000,532.743858)}
{pt3dadd(145152.000000,114972.000000,157350.000000,439.700877)}
{pt3dadd(145056.000000,114840.000000,157100.000000,346.657896)}
{pt3dadd(145800.000000,114552.000000,158025.000000,346.657896)}
{pt3dadd(145848.000000,114228.000000,158275.000000,346.657896)}
{pt3dadd(146184.000000,113952.000000,158475.000000,346.657896)}
{pt3dadd(146196.000000,113676.000000,158400.000000,346.657896)}
{pt3dadd(146244.000000,113424.000000,158475.000000,332.213819)}
{pt3dadd(146220.000000,113088.000000,158375.000000,317.769741)}
{pt3dadd(146340.000000,112812.000000,158525.000000,303.325664)}
{pt3dadd(146460.000000,112524.000000,158575.000000,288.881586)}
{pt3dadd(146436.000000,112248.000000,158575.000000,276.844851)}
{pt3dadd(146448.000000,111948.000000,158575.000000,264.808116)}
{pt3dadd(146532.000000,111612.000000,158500.000000,252.771381)}
{pt3dadd(146508.000000,111396.000000,158500.000000,240.734646)}
{pt3dadd(146448.000000,111168.000000,158475.000000,240.734646)}
{pt3dadd(146496.000000,110880.000000,158550.000000,240.734646)}
{pt3dadd(146652.000000,110592.000000,158400.000000,240.734646)}
{pt3dadd(146772.000000,110292.000000,158375.000000,240.734646)}
{pt3dadd(146928.000000,110052.000000,158350.000000,267.215459)}
{pt3dadd(147012.000000,109812.000000,158350.000000,293.696271)}
{pt3dadd(147168.000000,109584.000000,158350.000000,320.177083)}
{pt3dadd(147252.000000,109392.000000,158125.000000,346.657896)}
{pt3dadd(147300.000000,109188.000000,158050.000000,346.657896)}
{pt3dadd(147564.000000,108984.000000,157850.000000,346.657896)}
{pt3dadd(147804.000000,108744.000000,157725.000000,346.657896)}
{pt3dadd(148200.000000,108504.000000,157475.000000,346.657896)}
{pt3dadd(148284.000000,108276.000000,157425.000000,432.512573)}
{pt3dadd(148368.000000,108000.000000,157300.000000,518.367249)}
{pt3dadd(148428.000000,107712.000000,157200.000000,604.221926)}
{pt3dadd(148380.000000,107484.000000,157225.000000,690.076602)}
{pt3dadd(148356.000000,107232.000000,157350.000000,697.264906)}
{pt3dadd(148332.000000,106920.000000,157350.000000,704.453211)}
{pt3dadd(148464.000000,106752.000000,157425.000000,711.641515)}
{pt3dadd(148728.000000,106560.000000,157825.000000,718.829820)}
{pt3dadd(148896.000000,106344.000000,158100.000000,663.919209)}
{pt3dadd(148872.000000,106116.000000,158500.000000,609.008598)}
{pt3dadd(149088.000000,105912.000000,158525.000000,554.097987)}
{pt3dadd(148548.000000,105936.000000,159025.000000,499.187376)}
{pt3dadd(148428.000000,105816.000000,159550.000000,434.574193)}
{pt3dadd(148308.000000,105876.000000,159900.000000,369.961011)}
{pt3dadd(148032.000000,106092.000000,159150.000000,305.347828)}
{pt3dadd(147888.000000,105912.000000,159125.000000,240.734646)}
{pt3dadd(147684.000000,105840.000000,159250.000000,200.612214)}
