# Supplementary material for: Full reconstruction of large lobula plate tangential cells in Drosophila from a 3D EM dataset
Source: PLoS One. 2018 Nov 28;13(11):e0207828. doi: 10.1371/journal.pone.0207828 (PMC6261601; doi:10.1371/journal.pone.0207828)
Supplement: S1 Dataset — (ZIP) [file pone.0207828.s001.zip › Diameter hoc/VS_VSL_preliminary/Old Diameters Mar13_VS_VSL_HS/HSN/HSN_5skels_ck.001.hoc0007.hoc]

/* created with convertKnossosNmlToHoc.m */

{create adhoc1}
{access adhoc1}
{nseg = 1}
{strdef color color = "White"}
{pt3dclear()}
{pt3dadd(138696.000000,104172.000000,178200.000000,1000.000000)}
{pt3dadd(138912.000000,104208.000000,178150.000000,343.077544)}
{pt3dadd(139104.000000,104256.000000,178175.000000,206.446526)}
{pt3dadd(139320.000000,104388.000000,177900.000000,16.030924)}
{pt3dadd(139536.000000,104460.000000,177825.000000,10.784398)}
{pt3dadd(139728.000000,104532.000000,177750.000000,10.784398)}
{pt3dadd(139968.000000,104496.000000,177725.000000,10.784398)}
{pt3dadd(140184.000000,104664.000000,177650.000000,20.068796)}
{pt3dadd(140484.000000,104628.000000,177550.000000,10.784398)}
{pt3dadd(140736.000000,104592.000000,177450.000000,10.784398)}
{pt3dadd(140976.000000,104556.000000,177300.000000,10.784398)}
{pt3dadd(141192.000000,104604.000000,177050.000000,20.068796)}
{pt3dadd(141396.000000,104676.000000,176800.000000,10.784398)}
{pt3dadd(141576.000000,104520.000000,176675.000000,10.784398)}
{pt3dadd(141768.000000,104592.000000,176625.000000,10.784398)}
{pt3dadd(142068.000000,104748.000000,176225.000000,16.030924)}
{pt3dadd(142176.000000,104988.000000,175875.000000,6.746526)}
{pt3dadd(142380.000000,105276.000000,175600.000000,6.746526)}
{pt3dadd(142416.000000,105660.000000,175350.000000,6.746526)}
{pt3dadd(142908.000000,106056.000000,175075.000000,8.304047)}
{pt3dadd(143400.000000,106452.000000,174850.000000,3.057520)}
{pt3dadd(145044.000000,107460.000000,174525.000000,8.304047)}
{pt3dadd(146688.000000,107580.000000,174150.000000,17.205068)}
{pt3dadd(147228.000000,107172.000000,173725.000000,25.079247)}
{pt3dadd(149040.000000,107568.000000,172125.000000,46.005108)}

{create adhoc2}
{access adhoc2}
{connect adhoc2(1), adhoc1(0)}
{nseg = 1}
{strdef color color = "White"}
{pt3dclear()}
{pt3dadd(149040.000000,107568.000000,172125.000000,46.005108)}
{pt3dadd(148572.000000,107868.000000,172550.000000,31.809033)}
{pt3dadd(149988.000000,108024.000000,171350.000000,19.685420)}
{pt3dadd(150060.000000,108300.000000,171250.000000,27.046236)}
{pt3dadd(150132.000000,108600.000000,171150.000000,17.761838)}
{pt3dadd(149892.000000,108864.000000,171425.000000,17.761838)}
{pt3dadd(149784.000000,109152.000000,171350.000000,32.725228)}
{pt3dadd(149808.000000,109392.000000,171350.000000,52.299433)}
{pt3dadd(149928.000000,109680.000000,171150.000000,59.062658)}
{pt3dadd(150156.000000,110088.000000,170875.000000,99.371025)}

{create adhoc3}
{access adhoc3}
{connect adhoc3(1), adhoc2(0)}
{nseg = 1}
{strdef color color = "White"}
{pt3dclear()}
{pt3dadd(150156.000000,110088.000000,170875.000000,99.371025)}
{pt3dadd(150204.000000,110352.000000,170725.000000,66.747350)}
{pt3dadd(150528.000000,110676.000000,171050.000000,40.648410)}
{pt3dadd(150480.000000,110916.000000,170750.000000,40.648410)}
{pt3dadd(150420.000000,111168.000000,170450.000000,21.074205)}
{pt3dadd(150384.000000,111384.000000,170225.000000,21.074205)}
{pt3dadd(150684.000000,111648.000000,170100.000000,21.074205)}
{pt3dadd(150804.000000,111888.000000,169850.000000,37.336043)}
{pt3dadd(150696.000000,112140.000000,169625.000000,17.761838)}
{pt3dadd(150924.000000,112368.000000,169650.000000,17.761838)}
{pt3dadd(151176.000000,112536.000000,169675.000000,17.761838)}
{pt3dadd(151428.000000,112788.000000,169725.000000,31.263370)}
{pt3dadd(151728.000000,113016.000000,169425.000000,15.001532)}
{pt3dadd(151848.000000,113256.000000,169450.000000,15.001532)}
{pt3dadd(152100.000000,113484.000000,169450.000000,15.001532)}
{pt3dadd(152376.000000,113700.000000,169450.000000,29.964923)}
{pt3dadd(152220.000000,113964.000000,169425.000000,16.463391)}
{pt3dadd(152472.000000,114720.000000,169225.000000,16.463391)}
{pt3dadd(152748.000000,114864.000000,169250.000000,16.463391)}
{pt3dadd(153120.000000,115092.000000,169125.000000,34.479465)}
{pt3dadd(153480.000000,115752.000000,168650.000000,36.799500)}
{pt3dadd(153900.000000,116460.000000,167825.000000,53.061338)}
{pt3dadd(154080.000000,116472.000000,168100.000000,87.435563)}
{pt3dadd(154308.000000,116712.000000,168175.000000,82.809190)}

{create adhoc4}
{access adhoc4}
{connect adhoc4(1), adhoc3(0)}
{nseg = 1}
{strdef color color = "White"}
{pt3dclear()}
{pt3dadd(154308.000000,116712.000000,168175.000000,82.809190)}
{pt3dadd(154368.000000,116988.000000,168275.000000,61.226738)}
{pt3dadd(154608.000000,117300.000000,168050.000000,37.336043)}
{pt3dadd(154920.000000,117600.000000,167875.000000,40.648410)}
{pt3dadd(155232.000000,117852.000000,167675.000000,21.074205)}
{pt3dadd(155448.000000,118080.000000,167500.000000,21.074205)}
{pt3dadd(155280.000000,118368.000000,167575.000000,21.074205)}
{pt3dadd(155412.000000,118584.000000,167175.000000,37.336043)}
{pt3dadd(155748.000000,118824.000000,167200.000000,17.761838)}
{pt3dadd(155832.000000,119088.000000,166850.000000,17.761838)}
{pt3dadd(156372.000000,119316.000000,166250.000000,17.761838)}
{pt3dadd(156348.000000,119544.000000,166300.000000,33.361202)}
{pt3dadd(156408.000000,119724.000000,166025.000000,17.099364)}
{pt3dadd(156468.000000,119928.000000,165850.000000,17.099364)}
{pt3dadd(156528.000000,120168.000000,165675.000000,17.099364)}
{pt3dadd(156588.000000,120372.000000,165500.000000,36.673569)}
{pt3dadd(156648.000000,120600.000000,165325.000000,21.074205)}
{pt3dadd(156708.000000,120780.000000,165150.000000,21.074205)}
{pt3dadd(156684.000000,121008.000000,164850.000000,39.853443)}
{pt3dadd(156660.000000,121212.000000,164550.000000,59.427648)}
{pt3dadd(156636.000000,121428.000000,164250.000000,65.422405)}
{pt3dadd(156612.000000,121644.000000,163950.000000,99.371025)}

{create adhoc5}
{access adhoc5}
{connect adhoc5(1), adhoc4(0)}
{nseg = 1}
{strdef color color = "White"}
{pt3dclear()}
{pt3dadd(156612.000000,121644.000000,163950.000000,99.371025)}
{pt3dadd(156624.000000,121848.000000,163800.000000,71.782150)}
{pt3dadd(151824.000000,121656.000000,163300.000000,43.669290)}
{pt3dadd(151512.000000,122556.000000,162875.000000,32.996107)}
{pt3dadd(151236.000000,122712.000000,162650.000000,10.401022)}
{pt3dadd(150936.000000,122640.000000,162650.000000,10.401022)}
{pt3dadd(150648.000000,122520.000000,162650.000000,10.401022)}
{pt3dadd(150396.000000,122244.000000,162300.000000,23.350492)}
{pt3dadd(150180.000000,122100.000000,161825.000000,14.449470)}
{pt3dadd(149916.000000,122004.000000,161275.000000,14.449470)}
{pt3dadd(149664.000000,121908.000000,160725.000000,14.449470)}
{pt3dadd(149364.000000,121332.000000,160575.000000,27.951002)}
{pt3dadd(149088.000000,121344.000000,160525.000000,15.001532)}
{pt3dadd(148788.000000,121356.000000,160475.000000,29.964922)}
{pt3dadd(148572.000000,121128.000000,160425.000000,43.466454)}
{pt3dadd(148428.000000,121464.000000,159900.000000,48.941537)}
{pt3dadd(148608.000000,122340.000000,159575.000000,69.007660)}

{create adhoc6}
{access adhoc6}
{connect adhoc6(1), adhoc5(0)}
{nseg = 1}
{strdef color color = "White"}
{pt3dclear()}
{pt3dadd(148608.000000,122340.000000,159575.000000,69.007660)}
{pt3dadd(148356.000000,120000.000000,159225.000000,38.837589)}
{pt3dadd(147336.000000,118032.000000,158850.000000,23.902554)}
{pt3dadd(147036.000000,117744.000000,157325.000000,21.142247)}
{pt3dadd(147192.000000,117432.000000,157075.000000,12.241225)}
{pt3dadd(146940.000000,117108.000000,156950.000000,12.241225)}
{pt3dadd(146616.000000,116796.000000,156825.000000,12.241225)}
{pt3dadd(145116.000000,116556.000000,156750.000000,23.442503)}
{pt3dadd(144432.000000,116148.000000,156200.000000,21.985675)}
{pt3dadd(143976.000000,115776.000000,156025.000000,35.642792)}
{pt3dadd(143496.000000,115560.000000,155775.000000,47.921990)}

{create adhoc7}
{access adhoc7}
{connect adhoc7(1), adhoc6(0)}
{nseg = 1}
{strdef color color = "White"}
{pt3dclear()}
{pt3dadd(143496.000000,115560.000000,155775.000000,47.921990)}
{pt3dadd(146640.000000,115260.000000,156825.000000,32.447993)}
{pt3dadd(146832.000000,114816.000000,156725.000000,20.068796)}
{pt3dadd(147048.000000,114492.000000,156975.000000,20.068796)}
{pt3dadd(146880.000000,114204.000000,156825.000000,10.784398)}
{pt3dadd(147096.000000,113856.000000,157175.000000,10.784398)}
{pt3dadd(147132.000000,113604.000000,157000.000000,10.784398)}
{pt3dadd(147264.000000,113304.000000,157425.000000,21.985675)}
{pt3dadd(147420.000000,112992.000000,157400.000000,12.701277)}
{pt3dadd(147660.000000,112692.000000,157425.000000,12.701277)}
{pt3dadd(147672.000000,112440.000000,157400.000000,12.701277)}
{pt3dadd(147576.000000,112212.000000,157425.000000,23.442503)}
{pt3dadd(147684.000000,111972.000000,157300.000000,12.241225)}
{pt3dadd(147768.000000,111744.000000,157525.000000,12.241225)}
{pt3dadd(147648.000000,111528.000000,157625.000000,12.241225)}
{pt3dadd(147708.000000,111276.000000,157625.000000,23.442503)}
{pt3dadd(147720.000000,111096.000000,157625.000000,12.701277)}
{pt3dadd(147876.000000,110868.000000,157775.000000,12.701277)}
{pt3dadd(148008.000000,110664.000000,157850.000000,12.701277)}
{pt3dadd(148248.000000,110460.000000,158050.000000,20.388275)}
{pt3dadd(148488.000000,110292.000000,158250.000000,9.186998)}
{pt3dadd(148548.000000,110088.000000,158150.000000,9.186998)}
{pt3dadd(148452.000000,109908.000000,157950.000000,9.186998)}
{pt3dadd(148560.000000,109728.000000,158050.000000,18.088020)}
{pt3dadd(148572.000000,109524.000000,157975.000000,10.401022)}
{pt3dadd(148656.000000,109260.000000,158325.000000,10.401022)}
{pt3dadd(148836.000000,108984.000000,158250.000000,10.401022)}
{pt3dadd(149484.000000,108684.000000,158250.000000,14.723127)}
{pt3dadd(149640.000000,108372.000000,158050.000000,5.822105)}
{pt3dadd(149904.000000,108096.000000,157800.000000,5.822105)}
{pt3dadd(150168.000000,107832.000000,157550.000000,5.822105)}
{pt3dadd(150252.000000,107580.000000,157900.000000,15.106503)}
{pt3dadd(150312.000000,107292.000000,157775.000000,10.784398)}
{pt3dadd(150552.000000,106992.000000,157800.000000,10.784398)}
{pt3dadd(150564.000000,106764.000000,157825.000000,10.784398)}
{pt3dadd(150576.000000,106524.000000,157850.000000,19.317379)}
{pt3dadd(150636.000000,106272.000000,157950.000000,10.032981)}
{pt3dadd(150744.000000,106020.000000,157925.000000,10.032981)}
{pt3dadd(150672.000000,105708.000000,157825.000000,10.032981)}
{pt3dadd(150732.000000,105408.000000,158050.000000,17.400499)}
{pt3dadd(150792.000000,105144.000000,158275.000000,8.867518)}
{pt3dadd(151008.000000,104880.000000,158275.000000,8.867518)}
{pt3dadd(150984.000000,104640.000000,158675.000000,8.867518)}
{pt3dadd(150732.000000,104376.000000,158775.000000,16.554516)}
{pt3dadd(150660.000000,104112.000000,158950.000000,9.186998)}
{pt3dadd(150720.000000,103896.000000,159050.000000,9.186998)}
{pt3dadd(150780.000000,103680.000000,159150.000000,9.186998)}
{pt3dadd(150684.000000,103464.000000,159125.000000,16.873996)}
{pt3dadd(150696.000000,103200.000000,159350.000000,9.186998)}
{pt3dadd(150648.000000,102972.000000,159400.000000,9.186998)}
{pt3dadd(150660.000000,102732.000000,159425.000000,9.186998)}
{pt3dadd(150672.000000,102516.000000,159450.000000,18.088020)}
{pt3dadd(150708.000000,102336.000000,159625.000000,10.401022)}
{pt3dadd(150744.000000,102144.000000,159800.000000,10.401022)}
{pt3dadd(150672.000000,101952.000000,159700.000000,10.401022)}
{pt3dadd(150684.000000,101772.000000,159875.000000,19.685420)}
{pt3dadd(150696.000000,101604.000000,160050.000000,10.784398)}
{pt3dadd(150780.000000,101388.000000,160250.000000,10.784398)}
{pt3dadd(150840.000000,101196.000000,160425.000000,10.784398)}
{pt3dadd(150900.000000,101052.000000,160725.000000,18.151916)}
{pt3dadd(151404.000000,100548.000000,160975.000000,8.867518)}
{pt3dadd(151488.000000,100236.000000,161325.000000,8.867518)}
{pt3dadd(151908.000000,99960.000000,161250.000000,8.867518)}
{pt3dadd(152196.000000,99696.000000,161250.000000,13.189623)}
{pt3dadd(152892.000000,99444.000000,161275.000000,5.822105)}
{pt3dadd(153228.000000,99168.000000,161150.000000,5.822105)}
{pt3dadd(153672.000000,98952.000000,161000.000000,5.822105)}
{pt3dadd(153960.000000,98712.000000,161050.000000,12.177937)}
{pt3dadd(154524.000000,98472.000000,161125.000000,7.855832)}
{pt3dadd(155088.000000,98280.000000,161175.000000,7.855832)}
{pt3dadd(154428.000000,98064.000000,160900.000000,7.855832)}
{pt3dadd(154668.000000,97860.000000,160875.000000,18.597058)}
{pt3dadd(154824.000000,97572.000000,160875.000000,12.241226)}
{pt3dadd(154980.000000,97320.000000,161025.000000,12.241226)}
{pt3dadd(155112.000000,96972.000000,160950.000000,12.241226)}
{pt3dadd(155148.000000,96720.000000,160875.000000,18.330824)}
{pt3dadd(155232.000000,96468.000000,161125.000000,11.141353)}
{pt3dadd(155376.000000,96252.000000,161250.000000,17.568921)}
{pt3dadd(155532.000000,96048.000000,161175.000000,19.258772)}

{create adhoc8}
{access adhoc8}
{connect adhoc8(1), adhoc7(0)}
{nseg = 1}
{strdef color color = "White"}
{pt3dclear()}
{pt3dadd(155532.000000,96048.000000,161175.000000,19.258772)}
{pt3dadd(156612.000000,95844.000000,161350.000000,15.794033)}
{pt3dadd(156720.000000,95580.000000,161500.000000,10.076420)}
{pt3dadd(156936.000000,95364.000000,161650.000000,12.880497)}
{pt3dadd(157200.000000,95148.000000,161825.000000,7.855832)}
{pt3dadd(157284.000000,94944.000000,161725.000000,7.855832)}
{pt3dadd(157344.000000,94692.000000,162050.000000,7.855832)}
{pt3dadd(157476.000000,94452.000000,162125.000000,14.211664)}
{pt3dadd(157608.000000,93948.000000,162500.000000,7.855832)}
{pt3dadd(157896.000000,93648.000000,162850.000000,7.855832)}
{pt3dadd(158484.000000,93096.000000,163175.000000,7.855832)}
{pt3dadd(158592.000000,92844.000000,163450.000000,10.765627)}
{pt3dadd(158904.000000,92568.000000,163725.000000,4.409795)}
{pt3dadd(159216.000000,91908.000000,164050.000000,4.409795)}
{pt3dadd(159060.000000,91860.000000,164350.000000,4.409795)}
{pt3dadd(159324.000000,91128.000000,164700.000000,10.765627)}
{pt3dadd(159444.000000,90396.000000,165025.000000,7.855832)}
{pt3dadd(159372.000000,90132.000000,164775.000000,7.855832)}
{pt3dadd(159384.000000,89772.000000,165125.000000,7.855832)}
{pt3dadd(159444.000000,89472.000000,165325.000000,12.177937)}
{pt3dadd(159504.000000,89196.000000,165250.000000,5.822105)}
{pt3dadd(159312.000000,88932.000000,165125.000000,5.822105)}
{pt3dadd(159348.000000,88668.000000,165175.000000,5.822105)}
{pt3dadd(159324.000000,88476.000000,164975.000000,7.751130)}
{pt3dadd(159276.000000,88164.000000,165375.000000,3.429025)}
{pt3dadd(159048.000000,87900.000000,165150.000000,3.429025)}
{pt3dadd(158964.000000,87600.000000,165200.000000,3.429025)}
{pt3dadd(159252.000000,87348.000000,165200.000000,7.751130)}
{pt3dadd(159132.000000,87156.000000,165050.000000,5.822105)}
{pt3dadd(159060.000000,86988.000000,164700.000000,5.822105)}
{pt3dadd(159156.000000,86796.000000,164550.000000,5.822105)}
{pt3dadd(159108.000000,86604.000000,164400.000000,13.509103)}
{pt3dadd(159060.000000,86388.000000,164475.000000,9.186998)}
{pt3dadd(159648.000000,86100.000000,164375.000000,9.186998)}
{pt3dadd(159780.000000,85872.000000,164275.000000,9.186998)}
{pt3dadd(159588.000000,85752.000000,163775.000000,18.088020)}
{pt3dadd(159720.000000,85404.000000,163400.000000,10.401022)}
{pt3dadd(159744.000000,85248.000000,163050.000000,13.310817)}
{pt3dadd(159552.000000,85344.000000,162700.000000,14.085771)}
{pt3dadd(159540.000000,85236.000000,162400.000000,7.641249)}
{pt3dadd(159396.000000,85272.000000,162275.000000,5.374770)}

{create adhoc9}
{access adhoc9}
{connect adhoc9(1), adhoc7(0)}
{nseg = 1}
{strdef color color = "White"}
{pt3dclear()}
{pt3dadd(155532.000000,96048.000000,161175.000000,19.258772)}
{pt3dadd(154488.000000,95844.000000,161125.000000,16.163801)}
{pt3dadd(154296.000000,95568.000000,160750.000000,10.298281)}
{pt3dadd(153912.000000,95436.000000,160750.000000,13.102358)}
{pt3dadd(153612.000000,95136.000000,160275.000000,7.855832)}
{pt3dadd(153156.000000,94608.000000,159975.000000,7.855832)}
{pt3dadd(153012.000000,94452.000000,159625.000000,7.855832)}
{pt3dadd(152940.000000,94476.000000,159375.000000,13.102358)}
{pt3dadd(153108.000000,94224.000000,159100.000000,8.304047)}
{pt3dadd(153444.000000,93852.000000,158775.000000,12.840078)}
{pt3dadd(154020.000000,93804.000000,158550.000000,9.287602)}

{create adhoc10}
{access adhoc10}
{connect adhoc10(1), adhoc6(0)}
{nseg = 1}
{strdef color color = "White"}
{pt3dclear()}
{pt3dadd(143496.000000,115560.000000,155775.000000,47.921990)}
{pt3dadd(141516.000000,115224.000000,157375.000000,27.567050)}
{pt3dadd(140556.000000,114876.000000,157875.000000,17.140230)}
{pt3dadd(140364.000000,114576.000000,157975.000000,12.177937)}
{pt3dadd(140292.000000,114204.000000,157950.000000,10.144211)}
{pt3dadd(140100.000000,113904.000000,158325.000000,13.054006)}
{pt3dadd(139728.000000,113628.000000,158175.000000,20.756677)}
{pt3dadd(139584.000000,113352.000000,158175.000000,16.048977)}

{create adhoc11}
{access adhoc11}
{connect adhoc11(1), adhoc6(0)}
{nseg = 1}
{strdef color color = "White"}
{pt3dclear()}
{pt3dadd(143496.000000,115560.000000,155775.000000,47.921990)}
{pt3dadd(141336.000000,115560.000000,153175.000000,29.253193)}
{pt3dadd(141144.000000,115920.000000,152725.000000,18.151916)}
{pt3dadd(140868.000000,115800.000000,152400.000000,16.554516)}
{pt3dadd(140592.000000,115692.000000,152075.000000,9.186998)}
{pt3dadd(140676.000000,115080.000000,151650.000000,9.186998)}
{pt3dadd(140604.000000,114756.000000,151225.000000,9.186998)}
{pt3dadd(140532.000000,114612.000000,150825.000000,14.211663)}
{pt3dadd(140364.000000,114156.000000,150425.000000,6.524665)}
{pt3dadd(140208.000000,113652.000000,150050.000000,6.524665)}
{pt3dadd(140016.000000,113580.000000,149675.000000,6.524665)}
{pt3dadd(139332.000000,113100.000000,149300.000000,13.892184)}
{pt3dadd(138828.000000,112848.000000,148875.000000,15.223351)}
{pt3dadd(138456.000000,112656.000000,148550.000000,24.372251)}
{pt3dadd(138468.000000,112440.000000,148275.000000,33.279160)}

{create adhoc12}
{access adhoc12}
{connect adhoc12(1), adhoc11(0)}
{nseg = 1}
{strdef color color = "White"}
{pt3dclear()}
{pt3dadd(138468.000000,112440.000000,148275.000000,33.279160)}
{pt3dadd(137988.000000,112860.000000,147975.000000,22.686107)}
{pt3dadd(137616.000000,113124.000000,147675.000000,21.443565)}
{pt3dadd(137220.000000,112800.000000,147300.000000,13.553168)}
{pt3dadd(137148.000000,112500.000000,147100.000000,16.048977)}

{create adhoc13}
{access adhoc13}
{connect adhoc13(1), adhoc11(0)}
{nseg = 1}
{strdef color color = "White"}
{pt3dclear()}
{pt3dadd(138468.000000,112440.000000,148275.000000,33.279160)}
{pt3dadd(139008.000000,108108.000000,147975.000000,36.672747)}
{pt3dadd(139116.000000,107880.000000,147825.000000,38.358890)}
{pt3dadd(139092.000000,107652.000000,147675.000000,38.337590)}

{create adhoc14}
{access adhoc14}
{connect adhoc14(1), adhoc5(0)}
{nseg = 1}
{strdef color color = "White"}
{pt3dclear()}
{pt3dadd(148608.000000,122340.000000,159575.000000,69.007660)}
{pt3dadd(147252.000000,124344.000000,159250.000000,61.340144)}
{pt3dadd(146964.000000,124560.000000,158875.000000,56.739633)}
{pt3dadd(146772.000000,124860.000000,158625.000000,55.206127)}

{create adhoc15}
{access adhoc15}
{connect adhoc15(1), adhoc14(0)}
{nseg = 1}
{strdef color color = "White"}
{pt3dclear()}
{pt3dadd(146772.000000,124860.000000,158625.000000,55.206127)}
{pt3dadd(143652.000000,127200.000000,159100.000000,26.605551)}
{pt3dadd(142548.000000,128508.000000,159450.000000,16.563331)}
{pt3dadd(141936.000000,129264.000000,159875.000000,10.144211)}
{pt3dadd(141480.000000,129552.000000,160225.000000,5.822105)}
{pt3dadd(141192.000000,129840.000000,160450.000000,5.822105)}
{pt3dadd(140460.000000,131220.000000,160725.000000,5.822105)}
{pt3dadd(140388.000000,131448.000000,161100.000000,11.068632)}
{pt3dadd(140124.000000,131652.000000,161125.000000,6.746526)}
{pt3dadd(140160.000000,131868.000000,161175.000000,6.746526)}
{pt3dadd(140088.000000,132132.000000,161200.000000,6.746526)}
{pt3dadd(139356.000000,132348.000000,161500.000000,9.656322)}
{pt3dadd(138972.000000,132588.000000,161750.000000,4.409795)}
{pt3dadd(138780.000000,132792.000000,161825.000000,4.409795)}
{pt3dadd(138744.000000,133044.000000,161850.000000,4.409795)}
{pt3dadd(138804.000000,133308.000000,161975.000000,8.731901)}
{pt3dadd(138660.000000,133548.000000,162000.000000,5.822105)}
{pt3dadd(138552.000000,133788.000000,162000.000000,5.822105)}
{pt3dadd(138516.000000,133980.000000,161900.000000,5.822105)}
{pt3dadd(138588.000000,134232.000000,162075.000000,10.144211)}
{pt3dadd(138540.000000,134448.000000,162100.000000,5.822105)}
{pt3dadd(138468.000000,134712.000000,162050.000000,5.822105)}
{pt3dadd(138432.000000,134988.000000,162075.000000,5.822105)}
{pt3dadd(138672.000000,135252.000000,162125.000000,8.731901)}
{pt3dadd(138492.000000,135456.000000,162175.000000,5.967316)}
{pt3dadd(138444.000000,135660.000000,162175.000000,6.957261)}
{pt3dadd(138336.000000,135912.000000,162125.000000,10.595434)}
{pt3dadd(138324.000000,136044.000000,162075.000000,6.449724)}

{create adhoc16}
{access adhoc16}
{connect adhoc16(1), adhoc14(0)}
{nseg = 1}
{strdef color color = "White"}
{pt3dclear()}
{pt3dadd(146772.000000,124860.000000,158625.000000,55.206127)}
{pt3dadd(146328.000000,125328.000000,158350.000000,38.070838)}
{pt3dadd(146616.000000,125208.000000,158000.000000,23.442503)}
{pt3dadd(146724.000000,125076.000000,157650.000000,17.023383)}
{pt3dadd(146748.000000,125100.000000,157300.000000,5.822105)}
{pt3dadd(146484.000000,125016.000000,156950.000000,5.822105)}
{pt3dadd(146004.000000,124908.000000,156650.000000,5.822105)}
{pt3dadd(145788.000000,125016.000000,156325.000000,10.144211)}
{pt3dadd(145704.000000,125124.000000,156100.000000,5.822105)}
{pt3dadd(145572.000000,125112.000000,155800.000000,5.822105)}
{pt3dadd(145608.000000,124944.000000,155575.000000,5.822105)}
{pt3dadd(145512.000000,124944.000000,155250.000000,9.373860)}
{pt3dadd(145344.000000,124644.000000,155000.000000,5.051754)}
{pt3dadd(144636.000000,123984.000000,154850.000000,5.051754)}
{pt3dadd(144264.000000,123648.000000,154600.000000,5.051754)}
{pt3dadd(144252.000000,123612.000000,154250.000000,9.373860)}
{pt3dadd(143916.000000,123576.000000,153900.000000,7.751130)}
{pt3dadd(143940.000000,123600.000000,153575.000000,11.918550)}
{pt3dadd(143724.000000,123408.000000,153400.000000,11.145123)}

{create adhoc17}
{access adhoc17}
{connect adhoc17(1), adhoc4(0)}
{nseg = 1}
{strdef color color = "White"}
{pt3dclear()}
{pt3dadd(156612.000000,121644.000000,163950.000000,99.371025)}
{pt3dadd(156264.000000,122388.000000,163700.000000,73.372085)}
{pt3dadd(156036.000000,123024.000000,163450.000000,44.623251)}
{pt3dadd(156396.000000,123492.000000,163175.000000,53.367902)}
{pt3dadd(157344.000000,124056.000000,163150.000000,29.818856)}
{pt3dadd(157728.000000,124428.000000,162825.000000,29.818856)}
{pt3dadd(157788.000000,124776.000000,162425.000000,29.818856)}
{pt3dadd(158100.000000,125136.000000,162725.000000,58.137712)}
{pt3dadd(158208.000000,125448.000000,162250.000000,29.818856)}
{pt3dadd(158340.000000,125736.000000,162250.000000,29.818856)}
{pt3dadd(158472.000000,126060.000000,162025.000000,29.818856)}
{pt3dadd(158604.000000,126456.000000,161825.000000,59.903014)}
{pt3dadd(158736.000000,126792.000000,161725.000000,31.584158)}
{pt3dadd(158820.000000,127056.000000,161675.000000,31.584158)}
{pt3dadd(158544.000000,127428.000000,160950.000000,31.584158)}
{pt3dadd(158760.000000,127740.000000,161325.000000,58.758260)}
{pt3dadd(158712.000000,128220.000000,161200.000000,28.674102)}
{pt3dadd(158076.000000,128616.000000,160950.000000,28.674102)}
{pt3dadd(157440.000000,129000.000000,160725.000000,28.674102)}
{pt3dadd(157164.000000,129300.000000,160500.000000,56.992958)}
{pt3dadd(157200.000000,129636.000000,160425.000000,29.818856)}
{pt3dadd(157416.000000,129996.000000,160000.000000,29.818856)}
{pt3dadd(156348.000000,130296.000000,160025.000000,29.818856)}
{pt3dadd(156612.000000,130596.000000,159500.000000,56.992958)}
{pt3dadd(156696.000000,130908.000000,159550.000000,28.674102)}
{pt3dadd(156780.000000,131196.000000,159575.000000,28.674102)}
{pt3dadd(156456.000000,131544.000000,159400.000000,28.674102)}
{pt3dadd(156336.000000,131868.000000,158975.000000,55.848204)}
{pt3dadd(156168.000000,132156.000000,159000.000000,28.674102)}
{pt3dadd(156180.000000,132384.000000,159075.000000,28.674102)}
{pt3dadd(156132.000000,132672.000000,158900.000000,28.674102)}
{pt3dadd(155988.000000,132984.000000,158875.000000,56.992958)}
{pt3dadd(155844.000000,133260.000000,158875.000000,29.818856)}
{pt3dadd(155700.000000,133476.000000,158875.000000,29.818856)}
{pt3dadd(155604.000000,133716.000000,158625.000000,29.818856)}
{pt3dadd(155508.000000,134004.000000,158350.000000,56.992958)}
{pt3dadd(155412.000000,134220.000000,158075.000000,28.674102)}
{pt3dadd(155220.000000,134544.000000,158150.000000,28.674102)}
{pt3dadd(155028.000000,134820.000000,158225.000000,28.674102)}
{pt3dadd(154860.000000,135096.000000,157875.000000,56.992958)}
{pt3dadd(154584.000000,135420.000000,157700.000000,29.818856)}
{pt3dadd(154308.000000,135708.000000,157550.000000,29.818856)}
{pt3dadd(154008.000000,135972.000000,157500.000000,29.818856)}
{pt3dadd(154068.000000,136188.000000,157175.000000,53.367902)}
{pt3dadd(153972.000000,136488.000000,157000.000000,25.049046)}
{pt3dadd(153360.000000,136836.000000,156775.000000,25.049046)}
{pt3dadd(153192.000000,137160.000000,156600.000000,25.049046)}
{pt3dadd(152484.000000,137412.000000,155850.000000,52.223148)}
{pt3dadd(152052.000000,137724.000000,155500.000000,28.674102)}
{pt3dadd(151860.000000,138132.000000,155225.000000,28.674102)}
{pt3dadd(151668.000000,138468.000000,154950.000000,28.674102)}
{pt3dadd(151644.000000,138732.000000,154625.000000,51.269187)}
{pt3dadd(151500.000000,139008.000000,154300.000000,24.095085)}
{pt3dadd(151356.000000,139308.000000,153975.000000,24.095085)}
{pt3dadd(151332.000000,139680.000000,154325.000000,24.095085)}
{pt3dadd(151188.000000,139968.000000,154575.000000,47.644131)}
{pt3dadd(151044.000000,140232.000000,154300.000000,25.049046)}
{pt3dadd(150684.000000,140412.000000,153425.000000,25.049046)}
{pt3dadd(150492.000000,140664.000000,153150.000000,25.049046)}
{pt3dadd(150096.000000,140928.000000,152525.000000,53.367902)}
{pt3dadd(149796.000000,141204.000000,152400.000000,29.818856)}
{pt3dadd(149544.000000,141516.000000,152275.000000,29.818856)}
{pt3dadd(149580.000000,141792.000000,151700.000000,29.818856)}
{pt3dadd(149832.000000,142032.000000,151525.000000,58.137712)}
{pt3dadd(149868.000000,142284.000000,151350.000000,29.818856)}
{pt3dadd(149676.000000,142536.000000,151000.000000,29.818856)}
{pt3dadd(149652.000000,142896.000000,150550.000000,29.818856)}
{pt3dadd(149628.000000,143256.000000,150175.000000,52.413941)}
{pt3dadd(149844.000000,143748.000000,149700.000000,24.095085)}
{pt3dadd(150144.000000,145224.000000,149400.000000,24.095085)}
{pt3dadd(150360.000000,146100.000000,149075.000000,24.095085)}
{pt3dadd(149736.000000,146316.000000,148675.000000,43.669290)}
{pt3dadd(149712.000000,147348.000000,148275.000000,21.074205)}
{pt3dadd(149724.000000,147648.000000,147450.000000,21.074205)}
{pt3dadd(149724.000000,147984.000000,147400.000000,21.074205)}
{pt3dadd(149760.000000,148308.000000,147025.000000,43.669291)}
{pt3dadd(149868.000000,148644.000000,146900.000000,24.095086)}
{pt3dadd(150000.000000,148956.000000,146800.000000,24.095086)}
{pt3dadd(150132.000000,149352.000000,146700.000000,24.095086)}
{pt3dadd(150264.000000,149676.000000,146600.000000,47.644132)}
{pt3dadd(150396.000000,150012.000000,146500.000000,25.049046)}
{pt3dadd(150528.000000,150288.000000,146400.000000,25.049046)}
{pt3dadd(150660.000000,150624.000000,146300.000000,25.049046)}
{pt3dadd(150288.000000,150960.000000,146450.000000,44.623251)}
{pt3dadd(150468.000000,151260.000000,145625.000000,21.074205)}
{pt3dadd(150324.000000,151620.000000,145675.000000,21.074205)}
{pt3dadd(150360.000000,151908.000000,146025.000000,21.074205)}
{pt3dadd(150492.000000,152184.000000,145850.000000,39.853443)}
{pt3dadd(150576.000000,152436.000000,145850.000000,20.279238)}
{pt3dadd(150660.000000,152724.000000,145800.000000,20.279238)}
{pt3dadd(150720.000000,152964.000000,145700.000000,20.279238)}
{pt3dadd(150780.000000,153276.000000,145600.000000,42.874323)}
{pt3dadd(150588.000000,153600.000000,145475.000000,24.095085)}
{pt3dadd(150564.000000,153876.000000,145275.000000,24.095085)}
{pt3dadd(150540.000000,154236.000000,145200.000000,24.095085)}
{pt3dadd(150552.000000,154500.000000,145125.000000,43.669290)}
{pt3dadd(150660.000000,154812.000000,144900.000000,21.074205)}
{pt3dadd(150696.000000,155088.000000,144825.000000,21.074205)}
{pt3dadd(150876.000000,155352.000000,144450.000000,21.074205)}
{pt3dadd(151032.000000,155604.000000,144350.000000,40.648410)}
{pt3dadd(151188.000000,155808.000000,144250.000000,21.074205)}
{pt3dadd(151344.000000,156060.000000,144150.000000,21.074205)}
{pt3dadd(151500.000000,156324.000000,144050.000000,21.074205)}
{pt3dadd(151104.000000,156660.000000,143950.000000,40.648410)}
{pt3dadd(150708.000000,156888.000000,143850.000000,21.074205)}
{pt3dadd(150816.000000,157092.000000,143850.000000,21.074205)}
{pt3dadd(150924.000000,157272.000000,143850.000000,21.074205)}
{pt3dadd(151032.000000,157464.000000,143850.000000,40.648410)}
{pt3dadd(151140.000000,157656.000000,143850.000000,21.074205)}
{pt3dadd(150972.000000,157872.000000,143275.000000,21.074205)}
{pt3dadd(151068.000000,158100.000000,143900.000000,21.074205)}
{pt3dadd(150924.000000,158352.000000,143575.000000,44.623251)}
{pt3dadd(151032.000000,158556.000000,143400.000000,25.049046)}
{pt3dadd(151008.000000,158808.000000,143175.000000,25.049046)}
{pt3dadd(151020.000000,159048.000000,143000.000000,25.049046)}
{pt3dadd(151056.000000,159252.000000,143100.000000,48.598092)}
{pt3dadd(151092.000000,159492.000000,143200.000000,25.049046)}
{pt3dadd(151176.000000,159708.000000,143175.000000,25.049046)}
{pt3dadd(151284.000000,159948.000000,143025.000000,25.049046)}
{pt3dadd(151392.000000,160176.000000,142875.000000,48.598092)}
{pt3dadd(151404.000000,160392.000000,142825.000000,25.049046)}
{pt3dadd(151416.000000,160656.000000,142850.000000,25.049046)}
{pt3dadd(151500.000000,160908.000000,142500.000000,25.049046)}
{pt3dadd(151656.000000,161220.000000,142400.000000,47.644131)}
{pt3dadd(151812.000000,161472.000000,142175.000000,24.095085)}
{pt3dadd(151896.000000,161784.000000,142100.000000,24.095085)}
{pt3dadd(151980.000000,162072.000000,142025.000000,24.095085)}
{pt3dadd(152064.000000,162300.000000,141950.000000,43.669290)}
{pt3dadd(152148.000000,162528.000000,141875.000000,21.074205)}
{pt3dadd(152208.000000,162780.000000,141925.000000,21.074205)}
{pt3dadd(152268.000000,163032.000000,141975.000000,21.074205)}
{pt3dadd(152328.000000,163308.000000,142025.000000,39.853441)}
{pt3dadd(152460.000000,163500.000000,141900.000000,20.279236)}
{pt3dadd(152592.000000,163692.000000,141775.000000,20.279236)}
{pt3dadd(152724.000000,163896.000000,141650.000000,20.279236)}
{pt3dadd(152856.000000,164136.000000,141525.000000,36.541074)}
{pt3dadd(152988.000000,164352.000000,141400.000000,17.761838)}
{pt3dadd(153024.000000,164628.000000,141450.000000,17.761838)}
{pt3dadd(153060.000000,164880.000000,141500.000000,17.761838)}
{pt3dadd(153096.000000,165084.000000,141550.000000,33.361203)}
{pt3dadd(153132.000000,165384.000000,141125.000000,17.099365)}
{pt3dadd(153036.000000,165660.000000,141275.000000,17.099365)}
{pt3dadd(152940.000000,165912.000000,141425.000000,17.099365)}
{pt3dadd(153000.000000,166128.000000,141300.000000,33.361203)}
{pt3dadd(153312.000000,166308.000000,141125.000000,17.761838)}
{pt3dadd(153192.000000,166500.000000,141400.000000,17.761838)}
{pt3dadd(153072.000000,166716.000000,141200.000000,17.761838)}
{pt3dadd(153456.000000,166944.000000,141150.000000,33.361202)}
{pt3dadd(153408.000000,167196.000000,140725.000000,17.099364)}
{pt3dadd(153180.000000,167412.000000,140975.000000,17.099364)}
{pt3dadd(153288.000000,167640.000000,140975.000000,17.099364)}
{pt3dadd(153396.000000,167880.000000,140975.000000,30.048834)}
{pt3dadd(153456.000000,168096.000000,140850.000000,14.449470)}
{pt3dadd(153516.000000,168300.000000,140725.000000,14.449470)}
{pt3dadd(153576.000000,168540.000000,140600.000000,14.449470)}
{pt3dadd(153636.000000,168744.000000,140475.000000,30.711308)}
{pt3dadd(153696.000000,168996.000000,140350.000000,17.761838)}
{pt3dadd(153756.000000,169236.000000,140225.000000,17.761838)}
{pt3dadd(153816.000000,169488.000000,140100.000000,17.761838)}
{pt3dadd(153768.000000,169776.000000,140325.000000,33.361202)}
{pt3dadd(153780.000000,170040.000000,140250.000000,17.099364)}
{pt3dadd(153792.000000,170304.000000,140175.000000,17.099364)}
{pt3dadd(153804.000000,170544.000000,140100.000000,17.099364)}
{pt3dadd(153816.000000,170760.000000,140025.000000,33.361202)}
{pt3dadd(153828.000000,170988.000000,139950.000000,17.761838)}
{pt3dadd(153840.000000,171192.000000,139875.000000,17.761838)}
{pt3dadd(153852.000000,171432.000000,139800.000000,17.761838)}
{pt3dadd(153864.000000,171624.000000,139725.000000,34.023676)}
{pt3dadd(153876.000000,171828.000000,139650.000000,17.761838)}
{pt3dadd(153888.000000,172080.000000,139725.000000,17.761838)}
{pt3dadd(153900.000000,172320.000000,139800.000000,17.761838)}
{pt3dadd(153936.000000,172620.000000,139750.000000,37.336043)}
{pt3dadd(153996.000000,172848.000000,139325.000000,21.074205)}
{pt3dadd(154236.000000,173076.000000,139275.000000,21.074205)}
{pt3dadd(154476.000000,173268.000000,139225.000000,21.074205)}
{pt3dadd(154608.000000,173472.000000,139150.000000,40.648410)}
{pt3dadd(154440.000000,173700.000000,138750.000000,21.074205)}
{pt3dadd(154620.000000,173928.000000,138750.000000,21.074205)}
{pt3dadd(154632.000000,174180.000000,138625.000000,21.074205)}
{pt3dadd(154872.000000,174432.000000,138375.000000,40.648410)}
{pt3dadd(155004.000000,174660.000000,138425.000000,21.074205)}
{pt3dadd(155184.000000,174924.000000,138150.000000,21.074205)}
{pt3dadd(155364.000000,175140.000000,137875.000000,21.074205)}
{pt3dadd(155544.000000,175416.000000,137600.000000,40.648410)}
{pt3dadd(155520.000000,175716.000000,137750.000000,21.074205)}
{pt3dadd(155700.000000,175932.000000,137550.000000,21.074205)}
{pt3dadd(156396.000000,176208.000000,137150.000000,21.074205)}
{pt3dadd(156612.000000,176472.000000,137200.000000,40.648410)}
{pt3dadd(156540.000000,176736.000000,137200.000000,21.074205)}
{pt3dadd(156468.000000,176952.000000,137200.000000,21.074205)}
{pt3dadd(156732.000000,177240.000000,137025.000000,21.074205)}
{pt3dadd(156744.000000,177516.000000,137150.000000,40.648410)}
{pt3dadd(157032.000000,177744.000000,137225.000000,21.074205)}
{pt3dadd(157320.000000,177924.000000,137300.000000,21.074205)}
{pt3dadd(157608.000000,178200.000000,137050.000000,21.074205)}
{pt3dadd(157896.000000,178440.000000,136825.000000,40.648410)}
{pt3dadd(158280.000000,178668.000000,136375.000000,21.074205)}
{pt3dadd(158664.000000,178920.000000,135900.000000,21.074205)}
{pt3dadd(158724.000000,179160.000000,135500.000000,21.074205)}
{pt3dadd(158808.000000,178788.000000,135150.000000,39.090273)}
{pt3dadd(158880.000000,178416.000000,134750.000000,19.516068)}
{pt3dadd(159180.000000,178776.000000,134325.000000,19.516068)}
{pt3dadd(159984.000000,179136.000000,133975.000000,19.516068)}
{pt3dadd(160116.000000,179268.000000,133600.000000,39.090273)}
{pt3dadd(160560.000000,180012.000000,133250.000000,21.074205)}
{pt3dadd(160920.000000,180252.000000,132900.000000,21.074205)}
{pt3dadd(161100.000000,180132.000000,132600.000000,21.074205)}
{pt3dadd(161520.000000,180288.000000,132250.000000,43.669290)}
{pt3dadd(161676.000000,180624.000000,131875.000000,24.095085)}
{pt3dadd(161820.000000,180528.000000,131550.000000,24.095085)}
{pt3dadd(161976.000000,180504.000000,131150.000000,24.095085)}
{pt3dadd(162012.000000,180432.000000,130800.000000,43.669290)}
{pt3dadd(161988.000000,180588.000000,130425.000000,21.074205)}
{pt3dadd(162096.000000,180672.000000,130025.000000,21.074205)}
{pt3dadd(162204.000000,180756.000000,129625.000000,21.074205)}
{pt3dadd(162492.000000,180912.000000,129225.000000,34.575737)}
{pt3dadd(162624.000000,181068.000000,128850.000000,15.001532)}
{pt3dadd(163068.000000,181584.000000,128525.000000,15.001532)}
{pt3dadd(163440.000000,181848.000000,128175.000000,15.001532)}
{pt3dadd(163368.000000,182232.000000,127875.000000,26.202809)}
{pt3dadd(163908.000000,182520.000000,127600.000000,12.701277)}
{pt3dadd(164172.000000,183264.000000,127275.000000,12.701277)}
{pt3dadd(164448.000000,183648.000000,126925.000000,12.701277)}
{pt3dadd(164736.000000,184092.000000,126450.000000,23.442503)}
{pt3dadd(165036.000000,184944.000000,126075.000000,12.241226)}
{pt3dadd(165876.000000,186792.000000,125725.000000,12.241226)}
{pt3dadd(165708.000000,187092.000000,125775.000000,12.241226)}
{pt3dadd(165816.000000,187368.000000,125625.000000,21.525624)}
{pt3dadd(165900.000000,187632.000000,125450.000000,10.784398)}
{pt3dadd(166236.000000,187944.000000,125200.000000,10.784398)}
{pt3dadd(166524.000000,188172.000000,125125.000000,10.784398)}
{pt3dadd(166536.000000,188460.000000,125075.000000,18.471396)}
{pt3dadd(166800.000000,188676.000000,124900.000000,9.186998)}
{pt3dadd(167016.000000,188928.000000,124825.000000,9.186998)}
{pt3dadd(166944.000000,189168.000000,124850.000000,9.186998)}
{pt3dadd(166956.000000,189396.000000,124900.000000,19.928223)}
{pt3dadd(167400.000000,189672.000000,124975.000000,12.241225)}
{pt3dadd(167436.000000,189924.000000,125125.000000,12.241225)}
{pt3dadd(167496.000000,190152.000000,124975.000000,12.241225)}
{pt3dadd(167496.000000,190380.000000,125025.000000,21.525623)}
{pt3dadd(167508.000000,190668.000000,125075.000000,10.784398)}
{pt3dadd(167592.000000,190932.000000,124825.000000,10.784398)}
{pt3dadd(167724.000000,191136.000000,125050.000000,10.784398)}
{pt3dadd(168084.000000,191376.000000,125075.000000,18.471396)}
{pt3dadd(168300.000000,191568.000000,124825.000000,9.186998)}
{pt3dadd(168516.000000,191772.000000,124650.000000,9.186998)}
{pt3dadd(168240.000000,192000.000000,124950.000000,9.186998)}
{pt3dadd(168276.000000,192204.000000,124975.000000,16.873996)}
{pt3dadd(168312.000000,192396.000000,125025.000000,9.186998)}
{pt3dadd(168600.000000,192588.000000,124825.000000,9.186998)}
{pt3dadd(168840.000000,192768.000000,124825.000000,9.186998)}
{pt3dadd(169080.000000,192960.000000,124825.000000,18.471396)}
{pt3dadd(168960.000000,193200.000000,124750.000000,10.784398)}
{pt3dadd(169404.000000,193404.000000,124700.000000,10.784398)}
{pt3dadd(169440.000000,193632.000000,124750.000000,10.784398)}
{pt3dadd(169476.000000,193836.000000,124850.000000,21.985675)}
{pt3dadd(169512.000000,194052.000000,124950.000000,12.701277)}
{pt3dadd(169524.000000,194280.000000,124925.000000,12.701277)}
{pt3dadd(169704.000000,194484.000000,124575.000000,12.701277)}
{pt3dadd(169920.000000,194688.000000,124500.000000,21.985675)}
{pt3dadd(170280.000000,194892.000000,124225.000000,10.784398)}
{pt3dadd(170340.000000,195084.000000,124200.000000,10.784398)}
{pt3dadd(170628.000000,195012.000000,124225.000000,10.784398)}
{pt3dadd(170880.000000,195192.000000,124000.000000,20.068796)}
{pt3dadd(171132.000000,195204.000000,123950.000000,10.784398)}
{pt3dadd(171396.000000,195444.000000,123900.000000,10.784398)}
{pt3dadd(171588.000000,196044.000000,123800.000000,10.784398)}
{pt3dadd(171876.000000,196200.000000,123500.000000,18.471396)}
{pt3dadd(172800.000000,196404.000000,122750.000000,9.186998)}
{pt3dadd(173244.000000,196680.000000,122350.000000,9.186998)}
{pt3dadd(173352.000000,197136.000000,122325.000000,9.186998)}
{pt3dadd(173592.000000,197508.000000,122425.000000,16.873996)}
{pt3dadd(173772.000000,197808.000000,122075.000000,9.186998)}
{pt3dadd(174216.000000,198456.000000,121850.000000,9.186998)}
{pt3dadd(174864.000000,198516.000000,121425.000000,9.186998)}
{pt3dadd(175488.000000,198516.000000,121100.000000,19.928224)}
{pt3dadd(176496.000000,199008.000000,120625.000000,12.241226)}
{pt3dadd(176148.000000,199320.000000,120075.000000,12.241226)}
{pt3dadd(177180.000000,200676.000000,119375.000000,12.241226)}
{pt3dadd(177420.000000,200604.000000,118825.000000,23.442503)}
{pt3dadd(178068.000000,200484.000000,118400.000000,12.701277)}
{pt3dadd(178128.000000,200532.000000,117950.000000,12.701277)}
{pt3dadd(178392.000000,200820.000000,117600.000000,12.701277)}
{pt3dadd(178404.000000,200976.000000,117175.000000,23.902554)}
{pt3dadd(178584.000000,200724.000000,116700.000000,12.701277)}
{pt3dadd(178764.000000,201012.000000,116300.000000,12.701277)}
{pt3dadd(179028.000000,201348.000000,115875.000000,12.701277)}
{pt3dadd(179280.000000,201684.000000,115475.000000,21.985675)}
{pt3dadd(179352.000000,201948.000000,115075.000000,10.784398)}
{pt3dadd(179424.000000,202212.000000,114675.000000,10.784398)}
{pt3dadd(179508.000000,202656.000000,114225.000000,10.784398)}
{pt3dadd(179592.000000,203100.000000,113825.000000,18.471396)}
{pt3dadd(179856.000000,203076.000000,113350.000000,9.186998)}
{pt3dadd(179916.000000,203592.000000,112875.000000,9.186998)}
{pt3dadd(179976.000000,204108.000000,112450.000000,9.186998)}
{pt3dadd(180240.000000,204348.000000,111975.000000,20.388275)}
{pt3dadd(180504.000000,204528.000000,111575.000000,12.701277)}
{pt3dadd(180888.000000,204912.000000,111150.000000,12.701277)}
{pt3dadd(181104.000000,205044.000000,110750.000000,12.701277)}
{pt3dadd(181188.000000,205344.000000,110350.000000,26.202809)}
{pt3dadd(181272.000000,205680.000000,109950.000000,15.001532)}
{pt3dadd(181428.000000,205944.000000,109550.000000,15.001532)}
{pt3dadd(181572.000000,206232.000000,109125.000000,15.001532)}
{pt3dadd(182016.000000,206520.000000,108625.000000,38.550578)}
{pt3dadd(181968.000000,206412.000000,108175.000000,25.049046)}
{pt3dadd(182004.000000,206496.000000,107775.000000,25.049046)}
{pt3dadd(182040.000000,206424.000000,107375.000000,25.049046)}
{pt3dadd(182052.000000,206076.000000,106975.000000,53.367902)}
{pt3dadd(182112.000000,206028.000000,106575.000000,29.818856)}
{pt3dadd(182172.000000,206004.000000,106225.000000,29.818856)}
{pt3dadd(182232.000000,205980.000000,105800.000000,29.818856)}
{pt3dadd(182292.000000,205956.000000,105450.000000,48.598092)}
{pt3dadd(182352.000000,205932.000000,105075.000000,20.279236)}
{pt3dadd(182412.000000,205908.000000,104650.000000,20.279236)}
{pt3dadd(182316.000000,205992.000000,104275.000000,20.279236)}
{pt3dadd(181944.000000,205800.000000,103925.000000,35.878600)}
{pt3dadd(181572.000000,205896.000000,103575.000000,17.099364)}
{pt3dadd(181548.000000,205860.000000,103200.000000,17.099364)}
{pt3dadd(181020.000000,206040.000000,102850.000000,17.099364)}
{pt3dadd(180516.000000,206448.000000,102550.000000,30.048834)}
{pt3dadd(180420.000000,206484.000000,102075.000000,14.449470)}
{pt3dadd(180192.000000,206520.000000,101525.000000,14.449470)}
{pt3dadd(179256.000000,206820.000000,101025.000000,14.449470)}
{pt3dadd(179412.000000,206448.000000,100525.000000,197.932430)}
{pt3dadd(179376.000000,206196.000000,100000.000000,307.304933)}
{pt3dadd(178668.000000,206460.000000,99550.000000,918.914800)}

{create adhoc18}
{access adhoc18}
{connect adhoc18(1), adhoc17(0)}
{nseg = 1}
{strdef color color = "White"}
{pt3dclear()}
{pt3dadd(178668.000000,206460.000000,99550.000000,918.914800)}
{pt3dadd(178116.000000,206460.000000,99075.000000,307.304933)}
{pt3dadd(178176.000000,206280.000000,98625.000000,199.946351)}
{pt3dadd(177744.000000,206112.000000,98175.000000,16.463391)}
{pt3dadd(177240.000000,206760.000000,97825.000000,16.463391)}
{pt3dadd(177168.000000,206736.000000,97425.000000,16.463391)}
{pt3dadd(176664.000000,206640.000000,97050.000000,29.964923)}
{pt3dadd(176160.000000,206904.000000,96700.000000,15.001532)}
{pt3dadd(175656.000000,207168.000000,96425.000000,15.001532)}
{pt3dadd(175536.000000,206712.000000,96050.000000,15.001532)}
{pt3dadd(175236.000000,207132.000000,95675.000000,31.263370)}
{pt3dadd(175008.000000,206940.000000,95275.000000,17.761838)}
{pt3dadd(174780.000000,206820.000000,94825.000000,34.023676)}
{pt3dadd(174588.000000,206904.000000,94475.000000,52.802915)}
{pt3dadd(174264.000000,206988.000000,94050.000000,59.901795)}
{pt3dadd(173916.000000,207456.000000,93625.000000,95.396194)}

{create adhoc19}
{access adhoc19}
{connect adhoc19(1), adhoc18(0)}
{nseg = 1}
{strdef color color = "White"}
{pt3dclear()}
{pt3dadd(173916.000000,207456.000000,93625.000000,95.396194)}
{pt3dadd(171984.000000,212064.000000,93075.000000,48.272728)}
{pt3dadd(171252.000000,212688.000000,92250.000000,29.563637)}
{pt3dadd(170964.000000,212640.000000,92200.000000,21.985675)}
{pt3dadd(170688.000000,212724.000000,91875.000000,12.701277)}
{pt3dadd(170412.000000,213108.000000,91525.000000,12.701277)}
{pt3dadd(170088.000000,213372.000000,91250.000000,12.701277)}
{pt3dadd(169824.000000,213504.000000,90975.000000,20.388275)}
{pt3dadd(169596.000000,213660.000000,91000.000000,9.186998)}
{pt3dadd(169344.000000,213816.000000,91025.000000,9.186998)}
{pt3dadd(169116.000000,214236.000000,90575.000000,9.186998)}
{pt3dadd(168912.000000,215040.000000,90675.000000,20.388275)}
{pt3dadd(168708.000000,215460.000000,90450.000000,12.701277)}
{pt3dadd(168516.000000,215520.000000,90250.000000,12.701277)}
{pt3dadd(168312.000000,216216.000000,90375.000000,12.701277)}
{pt3dadd(168132.000000,216372.000000,90125.000000,23.442503)}
{pt3dadd(167952.000000,216660.000000,89775.000000,12.241226)}
{pt3dadd(167736.000000,216840.000000,89650.000000,12.241226)}
{pt3dadd(167556.000000,217020.000000,89500.000000,12.241226)}
{pt3dadd(167328.000000,217200.000000,89350.000000,19.928224)}
{pt3dadd(167100.000000,217848.000000,88850.000000,9.186998)}
{pt3dadd(166872.000000,218268.000000,88400.000000,9.186998)}
{pt3dadd(166656.000000,218556.000000,88025.000000,9.186998)}
{pt3dadd(166416.000000,218688.000000,88075.000000,16.873996)}
{pt3dadd(166152.000000,218952.000000,87775.000000,9.186998)}
{pt3dadd(165888.000000,219108.000000,87775.000000,9.186998)}
{pt3dadd(165588.000000,219192.000000,87700.000000,9.186998)}
{pt3dadd(165324.000000,219348.000000,87600.000000,15.276596)}
{pt3dadd(165072.000000,219504.000000,87500.000000,7.589598)}
{pt3dadd(164436.000000,219612.000000,87075.000000,7.589598)}
{pt3dadd(163704.000000,220380.000000,86775.000000,7.589598)}
{pt3dadd(162660.000000,220812.000000,86425.000000,15.276596)}
{pt3dadd(162180.000000,221520.000000,86075.000000,9.186998)}
{pt3dadd(161700.000000,222084.000000,85700.000000,9.186998)}
{pt3dadd(161736.000000,222036.000000,85325.000000,9.186998)}
{pt3dadd(161412.000000,222576.000000,84925.000000,15.542830)}
{pt3dadd(160884.000000,222960.000000,84550.000000,7.855832)}
{pt3dadd(160272.000000,222840.000000,84150.000000,7.855832)}
{pt3dadd(159996.000000,222996.000000,83875.000000,7.855832)}
{pt3dadd(159768.000000,223116.000000,83500.000000,15.542830)}
{pt3dadd(159516.000000,223224.000000,83200.000000,9.186998)}
{pt3dadd(159240.000000,223260.000000,82875.000000,9.186998)}
{pt3dadd(158760.000000,223116.000000,82500.000000,9.186998)}
{pt3dadd(158688.000000,223128.000000,82125.000000,14.433524)}
{pt3dadd(158184.000000,223188.000000,81750.000000,6.746526)}
{pt3dadd(157752.000000,223140.000000,81350.000000,6.746526)}
{pt3dadd(157476.000000,223176.000000,80975.000000,6.746526)}
{pt3dadd(157152.000000,223032.000000,80600.000000,14.433524)}
{pt3dadd(157080.000000,223116.000000,80150.000000,9.186998)}
{pt3dadd(156732.000000,223248.000000,79750.000000,9.186998)}
{pt3dadd(156384.000000,223464.000000,79350.000000,9.186998)}
{pt3dadd(156108.000000,223440.000000,79025.000000,14.433524)}
{pt3dadd(155964.000000,223548.000000,78650.000000,6.746526)}
{pt3dadd(155820.000000,223656.000000,78275.000000,6.746526)}
{pt3dadd(155640.000000,223464.000000,78375.000000,6.746526)}
{pt3dadd(155436.000000,223680.000000,78325.000000,11.993053)}
{pt3dadd(155268.000000,223788.000000,78225.000000,6.746526)}
{pt3dadd(155088.000000,223332.000000,77750.000000,6.746526)}
{pt3dadd(154932.000000,223164.000000,77200.000000,6.746526)}
{pt3dadd(154752.000000,223128.000000,77125.000000,13.102358)}
{pt3dadd(154560.000000,223284.000000,77000.000000,7.855832)}
{pt3dadd(154356.000000,223032.000000,76650.000000,7.855832)}
{pt3dadd(154164.000000,223248.000000,76475.000000,7.855832)}
{pt3dadd(153984.000000,223284.000000,76150.000000,14.211664)}
{pt3dadd(153792.000000,222936.000000,75825.000000,7.855832)}
{pt3dadd(153600.000000,223020.000000,75400.000000,7.855832)}
{pt3dadd(153396.000000,223032.000000,75100.000000,7.855832)}
{pt3dadd(153168.000000,222996.000000,74625.000000,15.223351)}
{pt3dadd(152904.000000,222696.000000,73875.000000,8.867519)}
{pt3dadd(152652.000000,223008.000000,73725.000000,8.867519)}
{pt3dadd(152484.000000,222912.000000,73350.000000,8.867519)}
{pt3dadd(152304.000000,223092.000000,72975.000000,15.223351)}
{pt3dadd(152136.000000,223104.000000,72550.000000,7.855832)}
{pt3dadd(151956.000000,223116.000000,72200.000000,7.855832)}
{pt3dadd(151740.000000,223092.000000,72050.000000,7.855832)}
{pt3dadd(151536.000000,223020.000000,71350.000000,13.102358)}
{pt3dadd(151308.000000,223176.000000,71200.000000,6.746526)}
{pt3dadd(151092.000000,223284.000000,70975.000000,6.746526)}
{pt3dadd(150852.000000,223368.000000,70675.000000,6.746526)}
{pt3dadd(150684.000000,223044.000000,70275.000000,11.993053)}
{pt3dadd(150504.000000,222876.000000,69875.000000,11.068632)}
{pt3dadd(150288.000000,222732.000000,69725.000000,16.315158)}
{pt3dadd(150120.000000,222504.000000,69400.000000,26.191930)}
{pt3dadd(149724.000000,222408.000000,69100.000000,27.732632)}

{create adhoc20}
{access adhoc20}
{connect adhoc20(1), adhoc18(0)}
{nseg = 1}
{strdef color color = "White"}
{pt3dclear()}
{pt3dadd(173916.000000,207456.000000,93625.000000,95.396194)}
{pt3dadd(172548.000000,204756.000000,90100.000000,54.381181)}
{pt3dadd(172212.000000,204144.000000,89300.000000,33.228709)}
{pt3dadd(172092.000000,204252.000000,88775.000000,27.951002)}
{pt3dadd(171516.000000,203844.000000,88250.000000,15.001532)}
{pt3dadd(171288.000000,203544.000000,87675.000000,15.001532)}
{pt3dadd(171036.000000,203316.000000,87100.000000,15.001532)}
{pt3dadd(170736.000000,202812.000000,86400.000000,26.202809)}
{pt3dadd(170472.000000,202620.000000,85800.000000,12.701277)}
{pt3dadd(169920.000000,202224.000000,85125.000000,12.701277)}
{pt3dadd(169956.000000,201768.000000,84625.000000,12.701277)}
{pt3dadd(169056.000000,201468.000000,84000.000000,23.902554)}
{pt3dadd(168480.000000,201348.000000,83400.000000,12.701277)}
{pt3dadd(168288.000000,200796.000000,82750.000000,12.701277)}
{pt3dadd(167784.000000,200928.000000,82125.000000,12.701277)}
{pt3dadd(167736.000000,200220.000000,81525.000000,21.985675)}
{pt3dadd(167160.000000,200124.000000,81175.000000,10.784398)}
{pt3dadd(167064.000000,199776.000000,80725.000000,10.784398)}
{pt3dadd(166980.000000,199200.000000,80200.000000,10.784398)}
{pt3dadd(166656.000000,198900.000000,79750.000000,21.525624)}
{pt3dadd(166260.000000,198984.000000,79350.000000,12.241226)}
{pt3dadd(166188.000000,198636.000000,78825.000000,12.241226)}
{pt3dadd(165756.000000,198384.000000,78300.000000,12.241226)}
{pt3dadd(165360.000000,198108.000000,77800.000000,23.442503)}
{pt3dadd(165192.000000,197832.000000,77325.000000,12.701277)}
{pt3dadd(165132.000000,197664.000000,76925.000000,12.701277)}
{pt3dadd(164856.000000,197292.000000,76525.000000,12.701277)}
{pt3dadd(164580.000000,197016.000000,76150.000000,25.650747)}
{pt3dadd(164304.000000,196740.000000,75750.000000,14.449470)}
{pt3dadd(164340.000000,196368.000000,75300.000000,14.449470)}
{pt3dadd(164376.000000,195996.000000,74825.000000,14.449470)}
{pt3dadd(163560.000000,195744.000000,74450.000000,27.951002)}
{pt3dadd(163596.000000,195864.000000,74050.000000,15.001532)}
{pt3dadd(163404.000000,195564.000000,73700.000000,27.951002)}
{pt3dadd(163284.000000,195264.000000,73225.000000,40.900472)}
{pt3dadd(163212.000000,195096.000000,72825.000000,44.664900)}
{pt3dadd(163140.000000,194928.000000,72450.000000,66.247350)}

{create adhoc21}
{access adhoc21}
{connect adhoc21(1), adhoc20(0)}
{nseg = 1}
{strdef color color = "White"}
{pt3dclear()}
{pt3dadd(163140.000000,194928.000000,72450.000000,66.247350)}
{pt3dadd(162708.000000,196620.000000,71950.000000,41.751245)}
{pt3dadd(162360.000000,196632.000000,71550.000000,25.650747)}
{pt3dadd(162036.000000,196644.000000,71150.000000,23.902554)}
{pt3dadd(161784.000000,196692.000000,70725.000000,12.701277)}
{pt3dadd(161508.000000,196872.000000,70300.000000,12.701277)}
{pt3dadd(161184.000000,196848.000000,69925.000000,12.701277)}
{pt3dadd(160908.000000,196824.000000,69475.000000,23.902554)}
{pt3dadd(160632.000000,196812.000000,69075.000000,12.701277)}
{pt3dadd(160716.000000,196632.000000,68725.000000,12.701277)}
{pt3dadd(160284.000000,196692.000000,68325.000000,12.701277)}
{pt3dadd(160056.000000,196752.000000,67950.000000,23.902554)}
{pt3dadd(159708.000000,196788.000000,67575.000000,12.701277)}
{pt3dadd(159384.000000,196920.000000,67125.000000,12.701277)}
{pt3dadd(159060.000000,197040.000000,66725.000000,12.701277)}
{pt3dadd(158736.000000,197172.000000,66375.000000,21.985675)}
{pt3dadd(158412.000000,197292.000000,65975.000000,20.068796)}
{pt3dadd(158088.000000,197412.000000,65625.000000,32.447993)}
{pt3dadd(157968.000000,197700.000000,65175.000000,47.921990)}

{create adhoc22}
{access adhoc22}
{connect adhoc22(1), adhoc21(0)}
{nseg = 1}
{strdef color color = "White"}
{pt3dclear()}
{pt3dadd(157968.000000,197700.000000,65175.000000,47.921990)}
{pt3dadd(158028.000000,195972.000000,64500.000000,25.718207)}
{pt3dadd(157968.000000,195192.000000,64075.000000,16.030924)}
{pt3dadd(157776.000000,194712.000000,63600.000000,13.102358)}
{pt3dadd(157752.000000,194688.000000,63125.000000,7.855832)}
{pt3dadd(157704.000000,194340.000000,62550.000000,7.855832)}
{pt3dadd(157380.000000,193728.000000,62075.000000,7.855832)}
{pt3dadd(156600.000000,193452.000000,61450.000000,15.542830)}
{pt3dadd(156408.000000,192540.000000,60975.000000,9.186998)}
{pt3dadd(155856.000000,192108.000000,60425.000000,9.186998)}
{pt3dadd(155868.000000,191460.000000,59925.000000,9.186998)}
{pt3dadd(155940.000000,191292.000000,59500.000000,19.928225)}
{pt3dadd(155616.000000,190476.000000,59025.000000,12.241227)}
{pt3dadd(155664.000000,190296.000000,58500.000000,12.241227)}
{pt3dadd(155676.000000,189816.000000,57875.000000,12.241227)}
{pt3dadd(155928.000000,189744.000000,57325.000000,27.840592)}
{pt3dadd(155880.000000,189372.000000,56775.000000,17.099365)}
{pt3dadd(155832.000000,189000.000000,56275.000000,17.099365)}
{pt3dadd(155844.000000,189156.000000,55925.000000,17.099365)}
{pt3dadd(155616.000000,189060.000000,55600.000000,30.600897)}
{pt3dadd(155772.000000,188868.000000,55250.000000,15.001532)}
{pt3dadd(155676.000000,189048.000000,54925.000000,15.001532)}
{pt3dadd(155628.000000,188292.000000,54525.000000,15.001532)}
{pt3dadd(155532.000000,188016.000000,54200.000000,24.285930)}
{pt3dadd(155436.000000,188148.000000,54000.000000,18.471396)}
{pt3dadd(155568.000000,188124.000000,53800.000000,24.827228)}
{pt3dadd(155724.000000,187548.000000,53550.000000,40.378713)}
{pt3dadd(155808.000000,187176.000000,53200.000000,33.279160)}

{create adhoc23}
{access adhoc23}
{connect adhoc23(1), adhoc22(0)}
{nseg = 1}
{strdef color color = "White"}
{pt3dclear()}
{pt3dadd(155808.000000,187176.000000,53200.000000,33.279160)}
{pt3dadd(155136.000000,188736.000000,52725.000000,27.567050)}
{pt3dadd(155040.000000,188892.000000,52175.000000,17.140230)}
{pt3dadd(154872.000000,189108.000000,51600.000000,18.471396)}
{pt3dadd(154572.000000,189264.000000,51075.000000,9.186998)}
{pt3dadd(154236.000000,189252.000000,50700.000000,9.186998)}
{pt3dadd(154116.000000,189348.000000,50350.000000,9.186998)}
{pt3dadd(153996.000000,189720.000000,49975.000000,20.388275)}
{pt3dadd(153972.000000,189816.000000,49575.000000,12.701277)}
{pt3dadd(153936.000000,189912.000000,49200.000000,12.701277)}
{pt3dadd(153900.000000,190008.000000,48750.000000,12.701277)}
{pt3dadd(154008.000000,189996.000000,48450.000000,20.388275)}
{pt3dadd(154212.000000,189852.000000,48050.000000,9.186998)}
{pt3dadd(154392.000000,189768.000000,47650.000000,9.186998)}
{pt3dadd(154572.000000,189684.000000,47225.000000,9.186998)}
{pt3dadd(154860.000000,189600.000000,46925.000000,16.873996)}
{pt3dadd(155196.000000,189492.000000,46350.000000,9.186998)}
{pt3dadd(155472.000000,189552.000000,45900.000000,9.186998)}
{pt3dadd(155616.000000,189648.000000,45475.000000,9.186998)}
{pt3dadd(155652.000000,189744.000000,45025.000000,13.509103)}
{pt3dadd(155856.000000,189624.000000,44600.000000,5.822105)}
{pt3dadd(156264.000000,190068.000000,44300.000000,5.822105)}
{pt3dadd(156432.000000,190380.000000,43850.000000,5.822105)}
{pt3dadd(156684.000000,190776.000000,43500.000000,9.373860)}
{pt3dadd(156924.000000,191172.000000,43075.000000,5.051754)}
{pt3dadd(157092.000000,191580.000000,42700.000000,5.051754)}
{pt3dadd(157296.000000,192048.000000,42425.000000,5.051754)}
{pt3dadd(157500.000000,192372.000000,42150.000000,11.407586)}
{pt3dadd(157476.000000,192660.000000,41850.000000,7.855832)}
{pt3dadd(157464.000000,192468.000000,41550.000000,7.855832)}
{pt3dadd(157524.000000,192432.000000,41250.000000,7.855832)}
{pt3dadd(157380.000000,192564.000000,40925.000000,13.102358)}
{pt3dadd(157452.000000,192552.000000,40575.000000,6.746526)}
{pt3dadd(157548.000000,192516.000000,40225.000000,6.746526)}
{pt3dadd(157752.000000,192372.000000,39775.000000,6.746526)}
{pt3dadd(157824.000000,192624.000000,39375.000000,13.102358)}
{pt3dadd(157968.000000,192324.000000,38950.000000,7.855832)}
{pt3dadd(158256.000000,192240.000000,38625.000000,7.855832)}
{pt3dadd(158544.000000,192168.000000,38175.000000,7.855832)}
{pt3dadd(158832.000000,191964.000000,37825.000000,12.177937)}
{pt3dadd(160368.000000,191784.000000,37650.000000,5.822105)}
{pt3dadd(160584.000000,191712.000000,37550.000000,5.822105)}
{pt3dadd(160884.000000,191604.000000,37500.000000,5.822105)}
{pt3dadd(161208.000000,191676.000000,37400.000000,8.603509)}
{pt3dadd(161448.000000,191628.000000,37350.000000,4.281404)}
{pt3dadd(161712.000000,191688.000000,37275.000000,4.281404)}
{pt3dadd(161964.000000,191748.000000,37050.000000,4.281404)}
{pt3dadd(162240.000000,191640.000000,36925.000000,6.210428)}
{pt3dadd(162504.000000,191316.000000,36675.000000,3.429025)}
{pt3dadd(162696.000000,191280.000000,36650.000000,3.429025)}
{pt3dadd(162924.000000,191220.000000,36625.000000,3.429025)}
{pt3dadd(163104.000000,191040.000000,36400.000000,4.676958)}
{pt3dadd(163272.000000,190944.000000,36100.000000,2.747934)}
{pt3dadd(163428.000000,190824.000000,36100.000000,2.747934)}
{pt3dadd(163572.000000,190764.000000,35925.000000,2.747934)}
{pt3dadd(163716.000000,190644.000000,35825.000000,5.122763)}
{pt3dadd(163872.000000,190500.000000,35600.000000,3.874829)}
{pt3dadd(164028.000000,190500.000000,35600.000000,3.874829)}
{pt3dadd(164196.000000,190404.000000,35500.000000,3.874829)}
{pt3dadd(164388.000000,190164.000000,35350.000000,6.249659)}
{pt3dadd(164592.000000,190104.000000,35325.000000,3.874829)}
{pt3dadd(164784.000000,189936.000000,35300.000000,3.874829)}
{pt3dadd(164940.000000,189756.000000,35325.000000,3.874829)}
{pt3dadd(165096.000000,189612.000000,35325.000000,7.426584)}
{pt3dadd(165288.000000,189384.000000,35225.000000,5.051754)}
{pt3dadd(165468.000000,189264.000000,35250.000000,5.051754)}
{pt3dadd(165636.000000,189096.000000,35125.000000,5.051754)}
{pt3dadd(165816.000000,189108.000000,35100.000000,7.961550)}
{pt3dadd(165996.000000,188988.000000,35050.000000,4.409795)}
{pt3dadd(166212.000000,188988.000000,34850.000000,4.409795)}
{pt3dadd(166368.000000,188880.000000,34725.000000,4.409795)}
{pt3dadd(166536.000000,188712.000000,34500.000000,6.338820)}
{pt3dadd(166704.000000,188604.000000,34400.000000,3.429025)}
{pt3dadd(166920.000000,188400.000000,34200.000000,3.429025)}
{pt3dadd(167100.000000,188112.000000,33900.000000,3.429025)}
{pt3dadd(167256.000000,187932.000000,33700.000000,5.358049)}
{pt3dadd(167448.000000,187896.000000,33600.000000,3.429025)}
{pt3dadd(167616.000000,187692.000000,33450.000000,3.429025)}
{pt3dadd(167796.000000,187488.000000,33300.000000,3.429025)}
{pt3dadd(167964.000000,187356.000000,33350.000000,5.358049)}
{pt3dadd(168156.000000,187176.000000,33125.000000,3.429025)}
{pt3dadd(168312.000000,187092.000000,33100.000000,3.429025)}
{pt3dadd(168468.000000,187032.000000,33125.000000,3.429025)}
{pt3dadd(168636.000000,186996.000000,33050.000000,5.803854)}
{pt3dadd(168852.000000,186456.000000,32900.000000,3.874829)}
{pt3dadd(169188.000000,186432.000000,32600.000000,3.874829)}
{pt3dadd(170016.000000,186228.000000,32300.000000,3.874829)}
{pt3dadd(170712.000000,186192.000000,32000.000000,5.122763)}
{pt3dadd(171276.000000,186012.000000,31675.000000,2.747934)}
{pt3dadd(171888.000000,185388.000000,31400.000000,2.747934)}
{pt3dadd(172392.000000,184656.000000,31150.000000,2.747934)}
{pt3dadd(172680.000000,184476.000000,31125.000000,5.122763)}
{pt3dadd(172872.000000,184236.000000,31075.000000,3.874829)}
{pt3dadd(173148.000000,184092.000000,31000.000000,3.874829)}
{pt3dadd(173424.000000,183888.000000,30900.000000,3.874829)}
{pt3dadd(173628.000000,183840.000000,30700.000000,5.122763)}
{pt3dadd(173868.000000,183948.000000,30400.000000,4.676958)}
{pt3dadd(174072.000000,183756.000000,30075.000000,5.924892)}
{pt3dadd(174468.000000,183492.000000,29825.000000,8.874820)}
{pt3dadd(174876.000000,183564.000000,29550.000000,7.739669)}

{create adhoc24}
{access adhoc24}
{connect adhoc24(1), adhoc22(0)}
{nseg = 1}
{strdef color color = "White"}
{pt3dclear()}
{pt3dadd(155808.000000,187176.000000,53200.000000,33.279160)}
{pt3dadd(156048.000000,186396.000000,52750.000000,20.837264)}
{pt3dadd(155976.000000,185484.000000,52200.000000,13.102358)}
{pt3dadd(155760.000000,185160.000000,51700.000000,15.647548)}
{pt3dadd(155880.000000,184860.000000,51225.000000,10.401022)}
{pt3dadd(155832.000000,184332.000000,50700.000000,10.401022)}
{pt3dadd(156048.000000,184260.000000,50200.000000,10.401022)}
{pt3dadd(156168.000000,183924.000000,49650.000000,19.685420)}
{pt3dadd(156372.000000,183540.000000,49200.000000,10.784398)}
{pt3dadd(156540.000000,183468.000000,48825.000000,10.784398)}
{pt3dadd(156744.000000,183408.000000,48450.000000,10.784398)}
{pt3dadd(156564.000000,183396.000000,48000.000000,18.964059)}
{pt3dadd(156612.000000,183300.000000,47650.000000,9.679661)}
{pt3dadd(156660.000000,183168.000000,47275.000000,9.679661)}
{pt3dadd(156708.000000,183036.000000,46925.000000,9.679661)}
{pt3dadd(156696.000000,182772.000000,46575.000000,22.629131)}
{pt3dadd(156696.000000,182700.000000,46100.000000,14.449470)}
{pt3dadd(156780.000000,182700.000000,45725.000000,14.449470)}
{pt3dadd(157008.000000,182568.000000,45300.000000,14.449470)}
{pt3dadd(157116.000000,182472.000000,44900.000000,30.711308)}
{pt3dadd(157284.000000,182628.000000,44500.000000,17.761838)}
{pt3dadd(157368.000000,182724.000000,44125.000000,17.761838)}
{pt3dadd(157416.000000,182772.000000,43775.000000,17.761838)}
{pt3dadd(157356.000000,182592.000000,43425.000000,34.023676)}
{pt3dadd(157476.000000,182496.000000,43125.000000,17.761838)}
{pt3dadd(157476.000000,182472.000000,42775.000000,17.761838)}
{pt3dadd(157476.000000,182256.000000,42375.000000,17.761838)}
{pt3dadd(157848.000000,182088.000000,41975.000000,30.711308)}
{pt3dadd(158064.000000,181944.000000,41525.000000,14.449470)}
{pt3dadd(158412.000000,181656.000000,41150.000000,14.449470)}
{pt3dadd(158700.000000,181308.000000,40800.000000,14.449470)}
{pt3dadd(158712.000000,180960.000000,40450.000000,23.733868)}
{pt3dadd(158772.000000,180564.000000,40075.000000,10.784398)}
{pt3dadd(159036.000000,180216.000000,39725.000000,10.784398)}
{pt3dadd(159372.000000,179808.000000,39350.000000,10.784398)}
{pt3dadd(159660.000000,179640.000000,38975.000000,19.317378)}
{pt3dadd(159816.000000,179364.000000,38800.000000,10.032980)}
{pt3dadd(159996.000000,179148.000000,38525.000000,10.032980)}
{pt3dadd(160200.000000,178920.000000,38325.000000,10.032980)}
{pt3dadd(160296.000000,178716.000000,37925.000000,15.279506)}
{pt3dadd(160572.000000,178536.000000,37625.000000,6.746526)}
{pt3dadd(160800.000000,178320.000000,37475.000000,6.746526)}
{pt3dadd(161040.000000,178296.000000,37450.000000,6.746526)}
{pt3dadd(161280.000000,178224.000000,37400.000000,10.298281)}
{pt3dadd(161088.000000,177960.000000,37350.000000,5.051754)}
{pt3dadd(161148.000000,177684.000000,37075.000000,5.051754)}
{pt3dadd(161484.000000,177384.000000,37000.000000,5.051754)}
{pt3dadd(161748.000000,177084.000000,36650.000000,7.961550)}
{pt3dadd(161928.000000,176820.000000,36425.000000,4.409795)}
{pt3dadd(162360.000000,176544.000000,36225.000000,4.409795)}
{pt3dadd(162444.000000,176328.000000,36100.000000,4.409795)}
{pt3dadd(162828.000000,176052.000000,35800.000000,8.731901)}
{pt3dadd(163224.000000,175800.000000,35575.000000,5.822105)}
{pt3dadd(163404.000000,175560.000000,35350.000000,5.822105)}
{pt3dadd(163572.000000,175320.000000,35150.000000,5.822105)}
{pt3dadd(163656.000000,175056.000000,34875.000000,9.373860)}
{pt3dadd(164040.000000,174816.000000,34750.000000,5.051754)}
{pt3dadd(164136.000000,174576.000000,34350.000000,5.051754)}
{pt3dadd(164220.000000,174348.000000,34175.000000,5.051754)}
{pt3dadd(164556.000000,174096.000000,34050.000000,10.298281)}
{pt3dadd(164844.000000,173832.000000,33800.000000,6.746526)}
{pt3dadd(164664.000000,173592.000000,33550.000000,6.746526)}
{pt3dadd(164952.000000,173340.000000,33175.000000,6.746526)}
{pt3dadd(165612.000000,173088.000000,32525.000000,11.993053)}
{pt3dadd(165780.000000,173028.000000,32100.000000,6.746526)}
{pt3dadd(166080.000000,172716.000000,31700.000000,6.746526)}
{pt3dadd(167364.000000,172560.000000,31250.000000,6.746526)}
{pt3dadd(168384.000000,172308.000000,30925.000000,10.298281)}
{pt3dadd(169032.000000,171720.000000,30475.000000,5.051754)}
{pt3dadd(169152.000000,171408.000000,30225.000000,5.051754)}
{pt3dadd(169272.000000,171144.000000,30150.000000,5.051754)}
{pt3dadd(169500.000000,170928.000000,29825.000000,7.961550)}
{pt3dadd(169704.000000,170736.000000,29800.000000,4.409795)}
{pt3dadd(169824.000000,170556.000000,29800.000000,4.409795)}
{pt3dadd(169944.000000,170364.000000,29800.000000,4.409795)}
{pt3dadd(170220.000000,170172.000000,29750.000000,6.338820)}
{pt3dadd(170340.000000,170028.000000,29775.000000,3.429025)}
{pt3dadd(170580.000000,169836.000000,29700.000000,3.429025)}
{pt3dadd(171216.000000,169704.000000,29575.000000,3.429025)}
{pt3dadd(171588.000000,169584.000000,29350.000000,4.986545)}
{pt3dadd(171828.000000,169656.000000,29100.000000,3.057520)}
{pt3dadd(172128.000000,169608.000000,29125.000000,3.057520)}
{pt3dadd(172344.000000,169620.000000,29125.000000,3.057520)}
{pt3dadd(172560.000000,169572.000000,29075.000000,5.432350)}
{pt3dadd(172764.000000,169524.000000,29000.000000,3.874829)}
{pt3dadd(172944.000000,169476.000000,28925.000000,3.874829)}
{pt3dadd(173160.000000,169428.000000,28850.000000,3.874829)}
{pt3dadd(173316.000000,169464.000000,28875.000000,5.432350)}
{pt3dadd(173496.000000,169500.000000,28900.000000,3.057520)}
{pt3dadd(173676.000000,169536.000000,28925.000000,3.057520)}
{pt3dadd(173868.000000,169572.000000,28950.000000,3.057520)}
{pt3dadd(174060.000000,169440.000000,29025.000000,4.047465)}
{pt3dadd(174264.000000,169416.000000,29050.000000,2.489945)}
{pt3dadd(174432.000000,169212.000000,29050.000000,2.489945)}
{pt3dadd(174612.000000,169080.000000,28950.000000,2.489945)}
{pt3dadd(174840.000000,169104.000000,29000.000000,3.737879)}
{pt3dadd(175056.000000,168948.000000,28975.000000,2.747934)}
{pt3dadd(175296.000000,168900.000000,28900.000000,2.747934)}
{pt3dadd(175476.000000,168768.000000,28775.000000,2.747934)}
{pt3dadd(175704.000000,168792.000000,28575.000000,4.305454)}
{pt3dadd(175920.000000,168768.000000,28525.000000,3.057520)}
{pt3dadd(176148.000000,168744.000000,28475.000000,3.057520)}
{pt3dadd(176376.000000,168720.000000,28425.000000,3.057520)}
{pt3dadd(176556.000000,168828.000000,28525.000000,4.986545)}
{pt3dadd(176772.000000,168828.000000,28600.000000,3.429025)}
{pt3dadd(177036.000000,168672.000000,28525.000000,3.429025)}
{pt3dadd(177276.000000,168516.000000,28450.000000,3.429025)}
{pt3dadd(177612.000000,168564.000000,28525.000000,5.358049)}
{pt3dadd(177804.000000,168576.000000,28425.000000,3.429025)}
{pt3dadd(178032.000000,168588.000000,28325.000000,3.429025)}
{pt3dadd(178236.000000,168624.000000,28300.000000,3.429025)}
{pt3dadd(178464.000000,168528.000000,28275.000000,4.986545)}
{pt3dadd(178668.000000,168648.000000,28300.000000,4.305454)}
{pt3dadd(178860.000000,168684.000000,28150.000000,5.553388)}
{pt3dadd(179160.000000,168804.000000,28025.000000,8.255647)}
{pt3dadd(179376.000000,168840.000000,28125.000000,7.739669)}

{create adhoc25}
{access adhoc25}
{connect adhoc25(1), adhoc21(0)}
{nseg = 1}
{strdef color color = "White"}
{pt3dclear()}
{pt3dadd(157968.000000,197700.000000,65175.000000,47.921990)}
{pt3dadd(157284.000000,198912.000000,64100.000000,34.876040)}
{pt3dadd(156840.000000,199284.000000,63575.000000,21.525624)}
{pt3dadd(156180.000000,199524.000000,63125.000000,19.928224)}
{pt3dadd(155904.000000,199512.000000,62500.000000,9.186998)}
{pt3dadd(155652.000000,199656.000000,62425.000000,9.186998)}
{pt3dadd(155352.000000,199740.000000,61975.000000,9.186998)}
{pt3dadd(155052.000000,199920.000000,61775.000000,19.928224)}
{pt3dadd(154740.000000,200100.000000,61575.000000,12.241226)}
{pt3dadd(154512.000000,200364.000000,61450.000000,12.241226)}
{pt3dadd(154284.000000,200484.000000,61425.000000,12.241226)}
{pt3dadd(154092.000000,200772.000000,60875.000000,22.982452)}
{pt3dadd(153828.000000,200952.000000,60875.000000,12.241226)}
{pt3dadd(153600.000000,201108.000000,60550.000000,12.241226)}
{pt3dadd(153348.000000,201312.000000,60225.000000,12.241226)}
{pt3dadd(153096.000000,201516.000000,59900.000000,25.190696)}
{pt3dadd(152856.000000,201564.000000,59650.000000,14.449470)}
{pt3dadd(152628.000000,201684.000000,59350.000000,14.449470)}
{pt3dadd(152412.000000,201948.000000,58900.000000,14.449470)}
{pt3dadd(152196.000000,202008.000000,58750.000000,25.650747)}
{pt3dadd(151812.000000,202272.000000,58275.000000,12.701277)}
{pt3dadd(151128.000000,202356.000000,57675.000000,12.701277)}
{pt3dadd(151068.000000,202488.000000,57275.000000,12.701277)}
{pt3dadd(150948.000000,202716.000000,56925.000000,27.054131)}
{pt3dadd(151092.000000,202848.000000,56575.000000,25.137252)}
{pt3dadd(151236.000000,202980.000000,56175.000000,40.895420)}
{pt3dadd(151056.000000,203064.000000,55850.000000,47.921990)}

{create adhoc26}
{access adhoc26}
{connect adhoc26(1), adhoc25(0)}
{nseg = 1}
{strdef color color = "White"}
{pt3dclear()}
{pt3dadd(151056.000000,203064.000000,55850.000000,47.921990)}
{pt3dadd(152004.000000,201192.000000,55850.000000,20.189038)}
{pt3dadd(152172.000000,200520.000000,55475.000000,12.713423)}
{pt3dadd(152244.000000,200340.000000,55150.000000,5.358049)}
{pt3dadd(152364.000000,199956.000000,54775.000000,3.429025)}
{pt3dadd(152712.000000,199620.000000,54450.000000,3.429025)}
{pt3dadd(153072.000000,199296.000000,54150.000000,3.429025)}
{pt3dadd(152964.000000,199164.000000,53875.000000,4.986545)}
{pt3dadd(153000.000000,198876.000000,53500.000000,3.057520)}
{pt3dadd(153168.000000,198648.000000,53200.000000,3.057520)}
{pt3dadd(153288.000000,198552.000000,52925.000000,3.057520)}
{pt3dadd(153312.000000,198468.000000,52775.000000,4.986545)}
{pt3dadd(153156.000000,198228.000000,52575.000000,3.429025)}
{pt3dadd(153084.000000,198096.000000,52300.000000,3.429025)}
{pt3dadd(153264.000000,197892.000000,52025.000000,5.358049)}
{pt3dadd(153444.000000,197796.000000,51750.000000,6.915570)}
{pt3dadd(154032.000000,197472.000000,51400.000000,7.310908)}
{pt3dadd(154272.000000,197448.000000,51175.000000,9.287602)}

{create adhoc27}
{access adhoc27}
{connect adhoc27(1), adhoc25(0)}
{nseg = 1}
{strdef color color = "White"}
{pt3dclear()}
{pt3dadd(151056.000000,203064.000000,55850.000000,47.921990)}
{pt3dadd(151044.000000,203484.000000,55450.000000,35.642792)}
{pt3dadd(151284.000000,203976.000000,54975.000000,21.985675)}
{pt3dadd(151224.000000,204144.000000,54625.000000,21.985675)}
{pt3dadd(150948.000000,204516.000000,54275.000000,10.784398)}
{pt3dadd(150948.000000,204864.000000,53975.000000,10.784398)}
{pt3dadd(151140.000000,204732.000000,53625.000000,10.784398)}
{pt3dadd(151236.000000,204828.000000,53325.000000,18.471396)}
{pt3dadd(151476.000000,204744.000000,52875.000000,9.186998)}
{pt3dadd(151692.000000,204756.000000,52475.000000,9.186998)}
{pt3dadd(151716.000000,204948.000000,52100.000000,14.433524)}
{pt3dadd(151836.000000,204912.000000,51725.000000,21.801042)}
{pt3dadd(151944.000000,205164.000000,51350.000000,22.523407)}
{pt3dadd(152040.000000,205368.000000,51075.000000,38.337590)}

{create adhoc28}
{access adhoc28}
{connect adhoc28(1), adhoc27(0)}
{nseg = 1}
{strdef color color = "White"}
{pt3dclear()}
{pt3dadd(152040.000000,205368.000000,51075.000000,38.337590)}
{pt3dadd(152052.000000,204144.000000,50800.000000,17.737246)}
{pt3dadd(152196.000000,203904.000000,50500.000000,11.242347)}
{pt3dadd(152280.000000,203880.000000,50275.000000,5.432350)}
{pt3dadd(152412.000000,203784.000000,50150.000000,3.057520)}
{pt3dadd(152568.000000,203496.000000,49950.000000,3.057520)}
{pt3dadd(152700.000000,203376.000000,49700.000000,3.057520)}
{pt3dadd(152880.000000,203244.000000,49425.000000,5.432350)}
{pt3dadd(152856.000000,203148.000000,49175.000000,3.874829)}
{pt3dadd(152964.000000,203088.000000,48950.000000,3.874829)}
{pt3dadd(153012.000000,202944.000000,48675.000000,3.874829)}
{pt3dadd(153144.000000,202920.000000,48100.000000,6.249659)}
{pt3dadd(153300.000000,202908.000000,47875.000000,6.784625)}
{pt3dadd(153336.000000,202932.000000,47625.000000,10.307708)}
{pt3dadd(153288.000000,202980.000000,47350.000000,16.048977)}

{create adhoc29}
{access adhoc29}
{connect adhoc29(1), adhoc27(0)}
{nseg = 1}
{strdef color color = "White"}
{pt3dclear()}
{pt3dadd(152040.000000,205368.000000,51075.000000,38.337590)}
{pt3dadd(152496.000000,205656.000000,50700.000000,19.698787)}
{pt3dadd(152724.000000,206304.000000,50300.000000,12.419272)}
{pt3dadd(153264.000000,206688.000000,49900.000000,11.407586)}
{pt3dadd(153636.000000,206556.000000,49575.000000,7.855832)}
{pt3dadd(154140.000000,206652.000000,49150.000000,7.855832)}
{pt3dadd(154476.000000,206580.000000,48725.000000,7.855832)}
{pt3dadd(154656.000000,206580.000000,48350.000000,19.057109)}
{pt3dadd(154968.000000,206508.000000,47950.000000,12.701277)}
{pt3dadd(155148.000000,206520.000000,47575.000000,12.701277)}
{pt3dadd(155328.000000,206664.000000,47250.000000,12.701277)}
{pt3dadd(155364.000000,206700.000000,46825.000000,21.985675)}
{pt3dadd(155652.000000,206760.000000,46475.000000,18.151917)}
{pt3dadd(155868.000000,206616.000000,45950.000000,24.507749)}
{pt3dadd(156084.000000,206496.000000,45600.000000,39.846248)}
{pt3dadd(156336.000000,206400.000000,45300.000000,33.279160)}

{create adhoc30}
{access adhoc30}
{connect adhoc30(1), adhoc29(0)}
{nseg = 1}
{strdef color color = "White"}
{pt3dclear()}
{pt3dadd(156336.000000,206400.000000,45300.000000,33.279160)}
{pt3dadd(156732.000000,207240.000000,44850.000000,18.012644)}
{pt3dadd(157296.000000,207744.000000,44525.000000,11.407586)}
{pt3dadd(157788.000000,208020.000000,44075.000000,7.961550)}
{pt3dadd(158208.000000,208200.000000,43775.000000,4.409795)}
{pt3dadd(158424.000000,208500.000000,43450.000000,4.409795)}
{pt3dadd(158628.000000,208368.000000,43175.000000,4.409795)}
{pt3dadd(158880.000000,208536.000000,42925.000000,6.338820)}
{pt3dadd(159144.000000,208668.000000,42725.000000,3.429025)}
{pt3dadd(159444.000000,208632.000000,42450.000000,3.429025)}
{pt3dadd(159528.000000,208620.000000,42200.000000,3.429025)}
{pt3dadd(159744.000000,208536.000000,42000.000000,5.803854)}
{pt3dadd(159972.000000,208548.000000,41675.000000,3.874829)}
{pt3dadd(160044.000000,208536.000000,41450.000000,3.874829)}
{pt3dadd(160224.000000,208356.000000,41200.000000,3.874829)}
{pt3dadd(160452.000000,208212.000000,41025.000000,5.432350)}
{pt3dadd(160680.000000,208068.000000,40850.000000,3.057520)}
{pt3dadd(160884.000000,208020.000000,40625.000000,3.057520)}
{pt3dadd(160968.000000,207912.000000,40425.000000,3.057520)}
{pt3dadd(161196.000000,207804.000000,40175.000000,4.986545)}
{pt3dadd(161364.000000,207792.000000,40100.000000,5.358049)}
{pt3dadd(161640.000000,207852.000000,39975.000000,6.915570)}
{pt3dadd(161892.000000,207840.000000,39725.000000,10.525949)}
{pt3dadd(162144.000000,207828.000000,39475.000000,9.287602)}

{create adhoc31}
{access adhoc31}
{connect adhoc31(1), adhoc29(0)}
{nseg = 1}
{strdef color color = "White"}
{pt3dclear()}
{pt3dadd(156336.000000,206400.000000,45300.000000,33.279160)}
{pt3dadd(156948.000000,205428.000000,44775.000000,20.837264)}
{pt3dadd(157164.000000,204924.000000,44425.000000,13.102358)}
{pt3dadd(157296.000000,204756.000000,44100.000000,11.993053)}
{pt3dadd(157596.000000,204624.000000,43800.000000,6.746526)}
{pt3dadd(157788.000000,204492.000000,43375.000000,6.746526)}
{pt3dadd(158016.000000,204252.000000,43075.000000,6.746526)}
{pt3dadd(158232.000000,204012.000000,42725.000000,10.883748)}
{pt3dadd(158568.000000,203700.000000,42375.000000,5.637222)}
{pt3dadd(158712.000000,203388.000000,42050.000000,5.637222)}
{pt3dadd(159012.000000,203136.000000,41825.000000,5.637222)}
{pt3dadd(159228.000000,202956.000000,41575.000000,10.883748)}
{pt3dadd(159252.000000,202836.000000,41325.000000,6.746526)}
{pt3dadd(159588.000000,202608.000000,41125.000000,6.746526)}
{pt3dadd(159828.000000,202476.000000,40925.000000,6.746526)}
{pt3dadd(159804.000000,202476.000000,40700.000000,11.068632)}
{pt3dadd(159900.000000,202272.000000,40400.000000,5.822105)}
{pt3dadd(160104.000000,202104.000000,40175.000000,5.822105)}
{pt3dadd(160308.000000,202080.000000,39925.000000,5.822105)}
{pt3dadd(160668.000000,201972.000000,39700.000000,10.144211)}
{pt3dadd(160980.000000,201696.000000,39500.000000,5.822105)}
{pt3dadd(161304.000000,201420.000000,39225.000000,5.822105)}
{pt3dadd(161472.000000,201000.000000,39300.000000,5.822105)}
{pt3dadd(161664.000000,200976.000000,39250.000000,8.731901)}
{pt3dadd(161856.000000,200784.000000,39100.000000,4.409795)}
{pt3dadd(162012.000000,200628.000000,38775.000000,4.409795)}
{pt3dadd(162192.000000,200556.000000,38725.000000,4.409795)}
{pt3dadd(162348.000000,200532.000000,38650.000000,8.731901)}
{pt3dadd(162480.000000,200448.000000,38600.000000,8.731901)}
{pt3dadd(162648.000000,200292.000000,38500.000000,13.553168)}
{pt3dadd(162816.000000,200112.000000,38300.000000,16.048977)}

{create adhoc32}
{access adhoc32}
{connect adhoc32(1), adhoc31(0)}
{nseg = 1}
{strdef color color = "White"}
{pt3dclear()}
{pt3dadd(162816.000000,200112.000000,38300.000000,16.048977)}
{pt3dadd(163044.000000,198804.000000,37650.000000,11.199318)}
{pt3dadd(163308.000000,198168.000000,37350.000000,7.319591)}
{pt3dadd(163548.000000,198060.000000,37100.000000,5.967316)}
{pt3dadd(163800.000000,197844.000000,36825.000000,3.057520)}
{pt3dadd(163992.000000,197676.000000,36550.000000,3.057520)}
{pt3dadd(164196.000000,197484.000000,36275.000000,3.057520)}
{pt3dadd(164400.000000,197340.000000,36025.000000,5.967316)}
{pt3dadd(164424.000000,197172.000000,35975.000000,4.409795)}
{pt3dadd(164652.000000,196944.000000,35825.000000,4.409795)}
{pt3dadd(164904.000000,196668.000000,35800.000000,4.409795)}
{pt3dadd(165132.000000,196428.000000,35525.000000,6.338820)}
{pt3dadd(165312.000000,196224.000000,35375.000000,3.429025)}
{pt3dadd(165420.000000,196020.000000,35425.000000,3.429025)}
{pt3dadd(165564.000000,195840.000000,35250.000000,3.429025)}
{pt3dadd(165744.000000,195636.000000,35300.000000,5.803854)}
{pt3dadd(165780.000000,195420.000000,35375.000000,3.874829)}
{pt3dadd(165888.000000,195216.000000,35325.000000,3.874829)}
{pt3dadd(165888.000000,195036.000000,35300.000000,3.874829)}
{pt3dadd(166164.000000,194868.000000,35100.000000,8.196935)}
{pt3dadd(166332.000000,194676.000000,34950.000000,5.822105)}
{pt3dadd(166368.000000,194472.000000,34750.000000,5.822105)}
{pt3dadd(166716.000000,194292.000000,34750.000000,5.822105)}
{pt3dadd(166872.000000,194076.000000,34675.000000,7.751130)}
{pt3dadd(166872.000000,193896.000000,34600.000000,3.429025)}
{pt3dadd(166800.000000,193680.000000,34625.000000,3.429025)}
{pt3dadd(166776.000000,193464.000000,34475.000000,3.429025)}
{pt3dadd(166836.000000,193248.000000,34500.000000,5.358049)}
{pt3dadd(166896.000000,193068.000000,34525.000000,3.429025)}
{pt3dadd(167148.000000,192900.000000,34675.000000,3.429025)}
{pt3dadd(167220.000000,192696.000000,34550.000000,3.429025)}
{pt3dadd(167328.000000,192504.000000,34525.000000,4.986545)}
{pt3dadd(167436.000000,192336.000000,34475.000000,3.057520)}
{pt3dadd(167400.000000,192156.000000,34325.000000,3.057520)}
{pt3dadd(167532.000000,192000.000000,34225.000000,3.057520)}
{pt3dadd(167640.000000,191808.000000,33925.000000,4.305454)}
{pt3dadd(167688.000000,191628.000000,33725.000000,2.747934)}
{pt3dadd(167868.000000,191424.000000,33550.000000,2.747934)}
{pt3dadd(167736.000000,191232.000000,33500.000000,2.747934)}
{pt3dadd(167748.000000,191040.000000,33400.000000,4.305454)}
{pt3dadd(167808.000000,190896.000000,33275.000000,3.057520)}
{pt3dadd(168024.000000,190620.000000,33100.000000,3.057520)}
{pt3dadd(168372.000000,190476.000000,32925.000000,3.057520)}
{pt3dadd(168684.000000,190308.000000,32775.000000,4.127033)}
{pt3dadd(169188.000000,190080.000000,32525.000000,2.569513)}
{pt3dadd(169524.000000,189900.000000,32325.000000,2.569513)}
{pt3dadd(169656.000000,189876.000000,32175.000000,2.569513)}
{pt3dadd(169788.000000,189852.000000,31975.000000,3.344467)}
{pt3dadd(169920.000000,189576.000000,31775.000000,3.049908)}
{pt3dadd(170196.000000,189432.000000,31575.000000,3.824862)}
{pt3dadd(170424.000000,189216.000000,31375.000000,5.374770)}
{pt3dadd(170652.000000,188964.000000,31200.000000,5.374770)}

{create adhoc33}
{access adhoc33}
{connect adhoc33(1), adhoc31(0)}
{nseg = 1}
{strdef color color = "White"}
{pt3dclear()}
{pt3dadd(162816.000000,200112.000000,38300.000000,16.048977)}
{pt3dadd(162828.000000,200220.000000,38075.000000,12.387598)}
{pt3dadd(162912.000000,200172.000000,37850.000000,9.617828)}
{pt3dadd(163068.000000,200280.000000,37600.000000,7.739669)}

{create adhoc34}
{access adhoc34}
{connect adhoc34(1), adhoc20(0)}
{nseg = 1}
{strdef color color = "White"}
{pt3dclear()}
{pt3dadd(163140.000000,194928.000000,72450.000000,66.247350)}
{pt3dadd(163380.000000,193296.000000,71925.000000,31.826661)}
{pt3dadd(163872.000000,192408.000000,71550.000000,19.695996)}
{pt3dadd(163776.000000,191904.000000,71200.000000,14.433524)}
{pt3dadd(163476.000000,191424.000000,70775.000000,9.186998)}
{pt3dadd(163380.000000,191124.000000,70350.000000,9.186998)}
{pt3dadd(163044.000000,190644.000000,69950.000000,9.186998)}
{pt3dadd(163152.000000,190452.000000,69550.000000,20.388275)}
{pt3dadd(163104.000000,189948.000000,69025.000000,12.701277)}
{pt3dadd(163116.000000,189696.000000,68625.000000,12.701277)}
{pt3dadd(163068.000000,189144.000000,68250.000000,12.701277)}
{pt3dadd(163008.000000,189000.000000,67875.000000,23.902554)}
{pt3dadd(162816.000000,188904.000000,67475.000000,12.701277)}
{pt3dadd(162948.000000,188832.000000,67050.000000,12.701277)}
{pt3dadd(162984.000000,188436.000000,66625.000000,12.701277)}
{pt3dadd(163044.000000,187932.000000,66250.000000,23.442503)}
{pt3dadd(162720.000000,188172.000000,65900.000000,12.241226)}
{pt3dadd(162396.000000,187872.000000,65500.000000,12.241226)}
{pt3dadd(162504.000000,187728.000000,65175.000000,12.241226)}
{pt3dadd(162108.000000,187296.000000,64750.000000,21.525624)}
{pt3dadd(162216.000000,186924.000000,64300.000000,10.784398)}
{pt3dadd(162288.000000,186492.000000,63875.000000,18.151917)}
{pt3dadd(162360.000000,186060.000000,63525.000000,27.436315)}
{pt3dadd(162408.000000,185808.000000,63175.000000,29.253194)}
{pt3dadd(162384.000000,185508.000000,63025.000000,47.921990)}

{create adhoc35}
{access adhoc35}
{connect adhoc35(1), adhoc34(0)}
{nseg = 1}
{strdef color color = "White"}
{pt3dclear()}
{pt3dadd(162384.000000,185508.000000,63025.000000,47.921990)}
{pt3dadd(163140.000000,186768.000000,62850.000000,22.893587)}
{pt3dadd(163116.000000,187032.000000,62625.000000,14.336152)}
{pt3dadd(163044.000000,186828.000000,62275.000000,7.961550)}
{pt3dadd(163008.000000,186792.000000,61950.000000,4.409795)}
{pt3dadd(162972.000000,186756.000000,61675.000000,4.409795)}
{pt3dadd(162792.000000,186816.000000,61425.000000,4.409795)}
{pt3dadd(162396.000000,186636.000000,61175.000000,6.338820)}
{pt3dadd(162048.000000,186444.000000,60925.000000,4.986545)}
{pt3dadd(161892.000000,186144.000000,60750.000000,7.310908)}
{pt3dadd(161796.000000,186084.000000,60550.000000,9.287602)}

{create adhoc36}
{access adhoc36}
{connect adhoc36(1), adhoc34(0)}
{nseg = 1}
{strdef color color = "White"}
{pt3dclear()}
{pt3dadd(162384.000000,185508.000000,63025.000000,47.921990)}
{pt3dadd(162312.000000,184920.000000,62525.000000,29.785660)}
{pt3dadd(162348.000000,184572.000000,62200.000000,18.471396)}
{pt3dadd(162336.000000,184116.000000,61850.000000,19.928223)}
{pt3dadd(162504.000000,183732.000000,61475.000000,12.241225)}
{pt3dadd(162648.000000,183204.000000,61050.000000,12.241225)}
{pt3dadd(162792.000000,182676.000000,60625.000000,12.241225)}
{pt3dadd(162792.000000,182484.000000,60525.000000,22.540802)}
{pt3dadd(163164.000000,182292.000000,60425.000000,11.799577)}
{pt3dadd(163260.000000,182076.000000,60375.000000,11.799577)}
{pt3dadd(163356.000000,181836.000000,60300.000000,11.799577)}
{pt3dadd(163548.000000,181656.000000,59975.000000,23.000854)}
{pt3dadd(163620.000000,181452.000000,59900.000000,12.701277)}
{pt3dadd(163692.000000,181248.000000,59825.000000,12.701277)}
{pt3dadd(163764.000000,181056.000000,59750.000000,12.701277)}
{pt3dadd(163512.000000,180876.000000,59475.000000,22.576871)}
{pt3dadd(163512.000000,180648.000000,59275.000000,11.375594)}
{pt3dadd(163512.000000,180432.000000,59075.000000,11.375594)}
{pt3dadd(163512.000000,180240.000000,58875.000000,11.375594)}
{pt3dadd(163512.000000,180012.000000,58675.000000,20.276616)}
{pt3dadd(163632.000000,179820.000000,58450.000000,10.401022)}
{pt3dadd(163596.000000,179592.000000,58675.000000,10.401022)}
{pt3dadd(163740.000000,179388.000000,58425.000000,10.401022)}
{pt3dadd(163680.000000,179220.000000,58425.000000,19.685420)}
{pt3dadd(163620.000000,179040.000000,58400.000000,10.784398)}
{pt3dadd(163560.000000,178848.000000,58375.000000,10.784398)}
{pt3dadd(163584.000000,178656.000000,58075.000000,10.784398)}
{pt3dadd(163608.000000,178476.000000,57775.000000,20.068796)}
{pt3dadd(163272.000000,178248.000000,57550.000000,10.784398)}
{pt3dadd(163464.000000,177996.000000,57650.000000,10.784398)}
{pt3dadd(163152.000000,177792.000000,57500.000000,10.784398)}
{pt3dadd(163044.000000,177408.000000,57150.000000,21.985675)}
{pt3dadd(162840.000000,177300.000000,56875.000000,12.701277)}
{pt3dadd(162504.000000,176820.000000,56575.000000,12.701277)}
{pt3dadd(162396.000000,176508.000000,56100.000000,19.057109)}
{pt3dadd(162552.000000,175548.000000,55750.000000,23.379215)}
{pt3dadd(162660.000000,174612.000000,55400.000000,19.296562)}
{pt3dadd(162696.000000,173700.000000,55175.000000,23.110527)}

{create adhoc37}
{access adhoc37}
{connect adhoc37(1), adhoc36(0)}
{nseg = 1}
{strdef color color = "White"}
{pt3dclear()}
{pt3dadd(162696.000000,173700.000000,55175.000000,23.110527)}
{pt3dadd(162012.000000,170820.000000,54925.000000,15.907018)}
{pt3dadd(161772.000000,169572.000000,54625.000000,10.144211)}
{pt3dadd(161856.000000,169320.000000,54725.000000,11.068632)}
{pt3dadd(161844.000000,169116.000000,54725.000000,14.114044)}
{pt3dadd(161892.000000,168936.000000,54775.000000,21.801042)}
{pt3dadd(161964.000000,168732.000000,54725.000000,35.335071)}
{pt3dadd(162108.000000,168576.000000,54875.000000,39.934990)}

{create adhoc38}
{access adhoc38}
{connect adhoc38(1), adhoc37(0)}
{nseg = 1}
{strdef color color = "White"}
{pt3dclear()}
{pt3dadd(162108.000000,168576.000000,54875.000000,39.934990)}
{pt3dadd(161868.000000,168336.000000,54025.000000,24.904717)}
{pt3dadd(161916.000000,168144.000000,53850.000000,15.542830)}
{pt3dadd(161928.000000,167952.000000,53775.000000,12.177937)}
{pt3dadd(162036.000000,167748.000000,53675.000000,5.822105)}
{pt3dadd(161988.000000,167544.000000,53550.000000,5.822105)}
{pt3dadd(162012.000000,167328.000000,53525.000000,5.822105)}
{pt3dadd(162132.000000,167112.000000,53325.000000,10.144211)}
{pt3dadd(162108.000000,166908.000000,53175.000000,5.822105)}
{pt3dadd(162312.000000,166692.000000,53200.000000,5.822105)}
{pt3dadd(162396.000000,166476.000000,53150.000000,5.822105)}
{pt3dadd(162624.000000,166272.000000,53050.000000,11.068632)}
{pt3dadd(162852.000000,166068.000000,53125.000000,6.746526)}
{pt3dadd(163068.000000,165864.000000,53050.000000,6.746526)}
{pt3dadd(163224.000000,165672.000000,52925.000000,6.746526)}
{pt3dadd(163164.000000,165492.000000,52825.000000,10.298281)}
{pt3dadd(163152.000000,165336.000000,52900.000000,5.051754)}
{pt3dadd(163128.000000,165156.000000,52900.000000,5.051754)}
{pt3dadd(163164.000000,164988.000000,52750.000000,5.051754)}
{pt3dadd(163176.000000,164844.000000,52700.000000,7.961550)}
{pt3dadd(163308.000000,164664.000000,52750.000000,4.409795)}
{pt3dadd(163464.000000,164484.000000,52475.000000,4.409795)}
{pt3dadd(163668.000000,164280.000000,52450.000000,4.409795)}
{pt3dadd(163680.000000,164076.000000,52450.000000,6.338820)}
{pt3dadd(163932.000000,163848.000000,52375.000000,3.429025)}
{pt3dadd(164100.000000,163644.000000,52275.000000,3.429025)}
{pt3dadd(164376.000000,163452.000000,52200.000000,3.429025)}
{pt3dadd(164448.000000,163236.000000,52200.000000,6.980779)}
{pt3dadd(164520.000000,163008.000000,52175.000000,5.051754)}
{pt3dadd(164568.000000,162816.000000,52025.000000,5.051754)}
{pt3dadd(164604.000000,162624.000000,51975.000000,5.051754)}
{pt3dadd(164640.000000,162432.000000,51950.000000,7.426584)}
{pt3dadd(164880.000000,162252.000000,51900.000000,3.874829)}
{pt3dadd(164892.000000,162060.000000,51750.000000,3.874829)}
{pt3dadd(164904.000000,161880.000000,51600.000000,3.874829)}
{pt3dadd(164844.000000,161688.000000,51425.000000,6.784625)}
{pt3dadd(164928.000000,161472.000000,51325.000000,4.409795)}
{pt3dadd(164964.000000,161232.000000,51275.000000,4.409795)}
{pt3dadd(165000.000000,160992.000000,51225.000000,4.409795)}
{pt3dadd(165036.000000,160752.000000,51175.000000,7.961550)}
{pt3dadd(165072.000000,160548.000000,51125.000000,5.051754)}
{pt3dadd(165108.000000,160368.000000,51075.000000,5.051754)}
{pt3dadd(165144.000000,160188.000000,51025.000000,5.051754)}
{pt3dadd(165252.000000,160020.000000,50950.000000,7.426584)}
{pt3dadd(165360.000000,159852.000000,50875.000000,3.874829)}
{pt3dadd(165468.000000,159660.000000,50800.000000,3.874829)}
{pt3dadd(165576.000000,159468.000000,50725.000000,3.874829)}
{pt3dadd(165432.000000,159264.000000,50650.000000,6.249659)}
{pt3dadd(165480.000000,159120.000000,50750.000000,3.874829)}
{pt3dadd(165528.000000,158928.000000,50800.000000,3.874829)}
{pt3dadd(165600.000000,158748.000000,50725.000000,3.874829)}
{pt3dadd(165816.000000,158556.000000,50775.000000,7.426584)}
{pt3dadd(165972.000000,158352.000000,50925.000000,5.051754)}
{pt3dadd(165948.000000,158172.000000,51050.000000,5.051754)}
{pt3dadd(165936.000000,157980.000000,51225.000000,5.051754)}
{pt3dadd(165924.000000,157824.000000,51400.000000,9.188976)}
{pt3dadd(165840.000000,157656.000000,51475.000000,5.637222)}
{pt3dadd(165816.000000,157464.000000,51800.000000,5.637222)}
{pt3dadd(165828.000000,157320.000000,52050.000000,5.637222)}
{pt3dadd(165876.000000,157176.000000,52075.000000,9.959327)}
{pt3dadd(166032.000000,157020.000000,52375.000000,5.822105)}
{pt3dadd(166152.000000,157092.000000,52600.000000,5.822105)}
{pt3dadd(166344.000000,157128.000000,52900.000000,5.822105)}
{pt3dadd(166356.000000,157056.000000,53125.000000,6.760453)}
{pt3dadd(166488.000000,156948.000000,53350.000000,2.438347)}
{pt3dadd(166668.000000,156636.000000,53500.000000,2.438347)}
{pt3dadd(166800.000000,156384.000000,53675.000000,2.438347)}
{pt3dadd(166716.000000,156264.000000,53600.000000,4.367372)}
{pt3dadd(166716.000000,156132.000000,53625.000000,3.429025)}
{pt3dadd(166728.000000,156000.000000,53750.000000,3.429025)}
{pt3dadd(166656.000000,155880.000000,53850.000000,3.429025)}
{pt3dadd(166704.000000,155724.000000,53925.000000,7.566246)}
{pt3dadd(166512.000000,155604.000000,53875.000000,8.547017)}
{pt3dadd(166692.000000,155460.000000,53775.000000,13.245028)}
{pt3dadd(166668.000000,155316.000000,53750.000000,16.048977)}

{create adhoc39}
{access adhoc39}
{connect adhoc39(1), adhoc37(0)}
{nseg = 1}
{strdef color color = "White"}
{pt3dclear()}
{pt3dadd(162108.000000,168576.000000,54875.000000,39.934990)}
{pt3dadd(162492.000000,168324.000000,55525.000000,18.269712)}
{pt3dadd(162432.000000,168108.000000,55750.000000,11.561827)}
{pt3dadd(162348.000000,167916.000000,55800.000000,6.784625)}
{pt3dadd(162432.000000,167700.000000,55800.000000,4.409795)}
{pt3dadd(162588.000000,167508.000000,55950.000000,4.409795)}
{pt3dadd(162672.000000,167328.000000,55950.000000,4.409795)}
{pt3dadd(162744.000000,167148.000000,56050.000000,6.784625)}
{pt3dadd(162804.000000,166992.000000,56125.000000,3.874829)}
{pt3dadd(163068.000000,166764.000000,56150.000000,3.874829)}
{pt3dadd(163188.000000,166560.000000,56225.000000,3.874829)}
{pt3dadd(163164.000000,166320.000000,56050.000000,8.196935)}
{pt3dadd(163764.000000,166116.000000,55925.000000,5.822105)}
{pt3dadd(164040.000000,165888.000000,56075.000000,5.822105)}
{pt3dadd(164412.000000,165708.000000,56275.000000,5.822105)}
{pt3dadd(164364.000000,165744.000000,56625.000000,9.373860)}
{pt3dadd(164844.000000,165360.000000,56875.000000,5.051754)}
{pt3dadd(165264.000000,165000.000000,57175.000000,5.051754)}
{pt3dadd(165588.000000,164760.000000,57400.000000,5.051754)}
{pt3dadd(165816.000000,164460.000000,57675.000000,8.603509)}
{pt3dadd(165972.000000,164184.000000,57825.000000,7.833158)}
{pt3dadd(165972.000000,164052.000000,57975.000000,9.390678)}
{pt3dadd(166128.000000,164004.000000,58150.000000,14.651131)}
{pt3dadd(166212.000000,163944.000000,58400.000000,9.287602)}

{create adhoc40}
{access adhoc40}
{connect adhoc40(1), adhoc36(0)}
{nseg = 1}
{strdef color color = "White"}
{pt3dclear()}
{pt3dadd(162696.000000,173700.000000,55175.000000,23.110527)}
{pt3dadd(161820.000000,173484.000000,52975.000000,24.177506)}
{pt3dadd(161772.000000,173208.000000,52500.000000,15.106503)}
{pt3dadd(161712.000000,172956.000000,52025.000000,20.068796)}
{pt3dadd(161652.000000,172728.000000,51800.000000,20.068796)}
{pt3dadd(161640.000000,172500.000000,51775.000000,32.447993)}
{pt3dadd(161088.000000,172644.000000,51550.000000,47.921990)}

{create adhoc41}
{access adhoc41}
{connect adhoc41(1), adhoc40(0)}
{nseg = 1}
{strdef color color = "White"}
{pt3dclear()}
{pt3dadd(161088.000000,172644.000000,51550.000000,47.921990)}
{pt3dadd(159240.000000,172068.000000,51100.000000,19.569864)}
{pt3dadd(158964.000000,171816.000000,50825.000000,12.341918)}
{pt3dadd(158784.000000,171744.000000,50400.000000,9.413352)}
{pt3dadd(158772.000000,171600.000000,49975.000000,7.855832)}
{pt3dadd(158808.000000,171444.000000,49575.000000,7.855832)}
{pt3dadd(158856.000000,171372.000000,48975.000000,7.855832)}
{pt3dadd(158784.000000,171504.000000,48550.000000,15.542830)}
{pt3dadd(159336.000000,171468.000000,48125.000000,9.186998)}
{pt3dadd(159336.000000,171612.000000,47625.000000,9.186998)}
{pt3dadd(159528.000000,171456.000000,47225.000000,9.186998)}
{pt3dadd(159456.000000,171360.000000,46800.000000,18.471396)}
{pt3dadd(159300.000000,171300.000000,46250.000000,10.784398)}
{pt3dadd(159288.000000,171384.000000,45800.000000,10.784398)}
{pt3dadd(159480.000000,171492.000000,45275.000000,10.784398)}
{pt3dadd(159528.000000,171624.000000,44825.000000,17.140230)}
{pt3dadd(159984.000000,171624.000000,44450.000000,7.855832)}
{pt3dadd(160128.000000,171936.000000,44025.000000,7.855832)}
{pt3dadd(160272.000000,172128.000000,43650.000000,7.855832)}
{pt3dadd(160320.000000,172332.000000,43325.000000,11.407586)}
{pt3dadd(160368.000000,172536.000000,42925.000000,5.051754)}
{pt3dadd(160500.000000,172536.000000,42650.000000,5.051754)}
{pt3dadd(160632.000000,172848.000000,42150.000000,5.051754)}
{pt3dadd(160488.000000,172824.000000,41850.000000,9.373860)}
{pt3dadd(160536.000000,172812.000000,41550.000000,5.822105)}
{pt3dadd(160560.000000,172812.000000,41225.000000,5.822105)}
{pt3dadd(160524.000000,172824.000000,40900.000000,5.822105)}
{pt3dadd(160584.000000,172848.000000,40600.000000,7.751130)}
{pt3dadd(160752.000000,172956.000000,40300.000000,3.429025)}
{pt3dadd(160860.000000,172764.000000,40025.000000,3.429025)}
{pt3dadd(161112.000000,172620.000000,39850.000000,3.429025)}
{pt3dadd(162264.000000,172044.000000,39625.000000,4.418969)}
{pt3dadd(162336.000000,171840.000000,39525.000000,2.489945)}
{pt3dadd(162564.000000,171660.000000,39575.000000,2.489945)}
{pt3dadd(162888.000000,171480.000000,39475.000000,2.489945)}
{pt3dadd(163104.000000,171288.000000,39300.000000,4.418969)}
{pt3dadd(163356.000000,171060.000000,39200.000000,3.429025)}
{pt3dadd(163572.000000,170868.000000,39175.000000,3.429025)}
{pt3dadd(163704.000000,170652.000000,39150.000000,3.429025)}
{pt3dadd(163944.000000,170472.000000,39075.000000,5.358049)}
{pt3dadd(164244.000000,170280.000000,39000.000000,3.429025)}
{pt3dadd(164244.000000,170136.000000,39050.000000,3.429025)}
{pt3dadd(164484.000000,169956.000000,39100.000000,3.429025)}
{pt3dadd(164412.000000,169800.000000,39000.000000,6.338820)}
{pt3dadd(164520.000000,169668.000000,39575.000000,4.409795)}
{pt3dadd(164700.000000,169428.000000,39700.000000,5.657729)}
{pt3dadd(164748.000000,169200.000000,39625.000000,6.905663)}
{pt3dadd(164856.000000,169044.000000,39600.000000,5.659779)}
{pt3dadd(164940.000000,168876.000000,39525.000000,7.739669)}

{create adhoc42}
{access adhoc42}
{connect adhoc42(1), adhoc40(0)}
{nseg = 1}
{strdef color color = "White"}
{pt3dclear()}
{pt3dadd(161088.000000,172644.000000,51550.000000,47.921990)}
{pt3dadd(161448.000000,172452.000000,51175.000000,29.785660)}
{pt3dadd(161628.000000,171744.000000,50750.000000,18.471396)}
{pt3dadd(161460.000000,171312.000000,50350.000000,16.873996)}
{pt3dadd(161496.000000,170496.000000,50000.000000,9.186998)}
{pt3dadd(161616.000000,169812.000000,49625.000000,18.471396)}
{pt3dadd(161868.000000,169284.000000,49150.000000,29.672673)}
{pt3dadd(161724.000000,168984.000000,48825.000000,35.642792)}
{pt3dadd(162060.000000,168300.000000,48425.000000,57.506386)}

{create adhoc43}
{access adhoc43}
{connect adhoc43(1), adhoc42(0)}
{nseg = 1}
{strdef color color = "White"}
{pt3dclear()}
{pt3dadd(162060.000000,168300.000000,48425.000000,57.506386)}
{pt3dadd(163320.000000,165780.000000,48150.000000,25.018454)}
{pt3dadd(163656.000000,165168.000000,47825.000000,15.611073)}
{pt3dadd(163812.000000,164328.000000,47500.000000,6.784625)}
{pt3dadd(163824.000000,163956.000000,47175.000000,3.874829)}
{pt3dadd(163944.000000,163344.000000,46825.000000,3.874829)}
{pt3dadd(164280.000000,163068.000000,46550.000000,3.874829)}
{pt3dadd(164316.000000,162504.000000,46275.000000,8.196935)}
{pt3dadd(164436.000000,162012.000000,46100.000000,5.822105)}
{pt3dadd(165036.000000,161580.000000,45850.000000,5.822105)}
{pt3dadd(165324.000000,160740.000000,45550.000000,5.822105)}
{pt3dadd(165816.000000,159912.000000,45300.000000,7.379626)}
{pt3dadd(165996.000000,159168.000000,45125.000000,3.057520)}
{pt3dadd(166200.000000,158568.000000,45150.000000,3.057520)}
{pt3dadd(166440.000000,158208.000000,45125.000000,3.057520)}
{pt3dadd(166488.000000,157932.000000,45075.000000,5.967316)}
{pt3dadd(166488.000000,157692.000000,45025.000000,4.409795)}
{pt3dadd(166392.000000,157428.000000,44950.000000,4.409795)}
{pt3dadd(166320.000000,157236.000000,44650.000000,4.409795)}
{pt3dadd(166332.000000,157008.000000,44450.000000,7.961550)}
{pt3dadd(166344.000000,156780.000000,44375.000000,5.051754)}
{pt3dadd(166428.000000,156588.000000,44350.000000,5.051754)}
{pt3dadd(166536.000000,156384.000000,44000.000000,5.051754)}
{pt3dadd(166644.000000,156180.000000,43825.000000,7.426584)}
{pt3dadd(166716.000000,155964.000000,43875.000000,3.874829)}
{pt3dadd(166704.000000,155748.000000,43775.000000,3.874829)}
{pt3dadd(166668.000000,155556.000000,43750.000000,3.874829)}
{pt3dadd(166500.000000,155352.000000,43775.000000,6.249659)}
{pt3dadd(166464.000000,155136.000000,43625.000000,3.874829)}
{pt3dadd(166548.000000,154908.000000,43575.000000,3.874829)}
{pt3dadd(166800.000000,154716.000000,43550.000000,3.874829)}
{pt3dadd(166896.000000,154512.000000,43475.000000,5.432350)}
{pt3dadd(166908.000000,154332.000000,43400.000000,3.057520)}
{pt3dadd(167052.000000,154104.000000,43500.000000,3.057520)}
{pt3dadd(167388.000000,153900.000000,43600.000000,3.057520)}
{pt3dadd(167736.000000,153684.000000,43700.000000,5.967316)}
{pt3dadd(167784.000000,153444.000000,43825.000000,4.409795)}
{pt3dadd(167796.000000,153228.000000,43800.000000,4.409795)}
{pt3dadd(167880.000000,153036.000000,43900.000000,4.409795)}
{pt3dadd(167772.000000,152832.000000,43950.000000,6.784625)}
{pt3dadd(167652.000000,152664.000000,43950.000000,3.874829)}
{pt3dadd(167604.000000,152484.000000,44050.000000,3.874829)}
{pt3dadd(167556.000000,152292.000000,44150.000000,3.874829)}
{pt3dadd(167604.000000,152028.000000,43950.000000,6.249659)}
{pt3dadd(167556.000000,151884.000000,43900.000000,3.874829)}
{pt3dadd(167460.000000,151728.000000,43975.000000,3.874829)}
{pt3dadd(167388.000000,151560.000000,43900.000000,3.874829)}
{pt3dadd(167316.000000,151404.000000,43850.000000,5.803854)}
{pt3dadd(167268.000000,151272.000000,43700.000000,3.429025)}
{pt3dadd(167412.000000,151104.000000,43650.000000,3.429025)}
{pt3dadd(167448.000000,150972.000000,43600.000000,3.429025)}
{pt3dadd(167376.000000,150804.000000,43575.000000,5.358049)}
{pt3dadd(167328.000000,150660.000000,43400.000000,3.429025)}
{pt3dadd(167388.000000,150480.000000,43475.000000,3.429025)}
{pt3dadd(167568.000000,150276.000000,43300.000000,3.429025)}
{pt3dadd(167604.000000,150096.000000,43450.000000,6.338820)}
{pt3dadd(167652.000000,149964.000000,43600.000000,4.409795)}
{pt3dadd(167652.000000,149796.000000,43550.000000,4.409795)}
{pt3dadd(167652.000000,149652.000000,43500.000000,4.409795)}
{pt3dadd(167652.000000,149436.000000,43400.000000,6.784625)}
{pt3dadd(167556.000000,149232.000000,43500.000000,3.874829)}
{pt3dadd(167592.000000,149028.000000,43575.000000,3.874829)}
{pt3dadd(167460.000000,148812.000000,43425.000000,3.874829)}
{pt3dadd(167328.000000,148620.000000,43600.000000,6.249659)}
{pt3dadd(167316.000000,148428.000000,43650.000000,3.874829)}
{pt3dadd(167304.000000,148248.000000,43725.000000,3.874829)}
{pt3dadd(167232.000000,148056.000000,43650.000000,3.874829)}
{pt3dadd(167064.000000,147876.000000,43700.000000,7.426584)}
{pt3dadd(166896.000000,147708.000000,43850.000000,5.051754)}
{pt3dadd(166740.000000,147552.000000,44000.000000,5.051754)}
{pt3dadd(166680.000000,147372.000000,44025.000000,5.051754)}
{pt3dadd(166788.000000,147204.000000,44075.000000,6.609275)}
{pt3dadd(167016.000000,147048.000000,43900.000000,3.057520)}
{pt3dadd(167100.000000,146892.000000,44025.000000,3.057520)}
{pt3dadd(167040.000000,146760.000000,44000.000000,3.057520)}
{pt3dadd(167124.000000,146604.000000,44150.000000,4.986545)}
{pt3dadd(167184.000000,146436.000000,44275.000000,3.429025)}
{pt3dadd(167196.000000,146268.000000,44175.000000,3.429025)}
{pt3dadd(167076.000000,146088.000000,44050.000000,3.429025)}
{pt3dadd(167232.000000,145980.000000,44225.000000,5.803854)}
{pt3dadd(167136.000000,145764.000000,44300.000000,3.874829)}
{pt3dadd(167172.000000,145560.000000,44275.000000,3.874829)}
{pt3dadd(167184.000000,145320.000000,44500.000000,3.874829)}
{pt3dadd(167304.000000,145092.000000,44450.000000,6.249659)}
{pt3dadd(167316.000000,144888.000000,44500.000000,3.874829)}
{pt3dadd(167376.000000,144696.000000,44625.000000,3.874829)}
{pt3dadd(167436.000000,144492.000000,44750.000000,3.874829)}
{pt3dadd(167376.000000,144264.000000,44725.000000,5.803854)}
{pt3dadd(167364.000000,144096.000000,44750.000000,3.429025)}
{pt3dadd(167352.000000,143928.000000,44675.000000,3.429025)}
{pt3dadd(167340.000000,143760.000000,44600.000000,3.429025)}
{pt3dadd(167340.000000,143604.000000,44725.000000,5.358049)}
{pt3dadd(167280.000000,143448.000000,44700.000000,3.429025)}
{pt3dadd(167292.000000,143292.000000,44700.000000,3.429025)}
{pt3dadd(167244.000000,143124.000000,44700.000000,3.429025)}
{pt3dadd(167232.000000,142956.000000,44725.000000,4.676958)}
{pt3dadd(167220.000000,142776.000000,44850.000000,2.747934)}
{pt3dadd(167148.000000,142584.000000,44950.000000,2.747934)}
{pt3dadd(167160.000000,142368.000000,45225.000000,5.122763)}
{pt3dadd(167316.000000,141924.000000,45475.000000,8.674518)}
{pt3dadd(167412.000000,141636.000000,45725.000000,11.377640)}
{pt3dadd(167616.000000,142068.000000,46000.000000,19.258772)}

{create adhoc44}
{access adhoc44}
{connect adhoc44(1), adhoc42(0)}
{nseg = 1}
{strdef color color = "White"}
{pt3dclear()}
{pt3dadd(162060.000000,168300.000000,48425.000000,57.506386)}
{pt3dadd(161556.000000,168696.000000,48050.000000,35.642792)}
{pt3dadd(161484.000000,168360.000000,47650.000000,21.985675)}
{pt3dadd(161544.000000,168252.000000,47300.000000,21.525624)}
{pt3dadd(161592.000000,168024.000000,46950.000000,12.241226)}
{pt3dadd(161652.000000,167736.000000,46575.000000,12.241226)}
{pt3dadd(161892.000000,167568.000000,46200.000000,12.241226)}
{pt3dadd(161976.000000,167436.000000,45800.000000,23.442503)}
{pt3dadd(162012.000000,167364.000000,45450.000000,12.701277)}
{pt3dadd(162060.000000,167304.000000,45075.000000,12.701277)}
{pt3dadd(162072.000000,167028.000000,44700.000000,12.701277)}
{pt3dadd(162240.000000,167004.000000,44400.000000,21.985675)}
{pt3dadd(162324.000000,166788.000000,44125.000000,10.784398)}
{pt3dadd(162336.000000,166788.000000,43825.000000,10.784398)}
{pt3dadd(162336.000000,166668.000000,43475.000000,10.784398)}
{pt3dadd(162336.000000,166548.000000,43125.000000,20.068796)}
{pt3dadd(162336.000000,166320.000000,42800.000000,10.784398)}
{pt3dadd(162540.000000,166152.000000,42475.000000,10.784398)}
{pt3dadd(162768.000000,165936.000000,42150.000000,10.784398)}
{pt3dadd(162864.000000,165636.000000,41800.000000,18.471396)}
{pt3dadd(163068.000000,165336.000000,41425.000000,16.873996)}
{pt3dadd(163236.000000,165120.000000,41125.000000,21.196101)}
{pt3dadd(163296.000000,165000.000000,40775.000000,34.326836)}
{pt3dadd(163104.000000,164040.000000,40450.000000,23.110527)}

{create adhoc45}
{access adhoc45}
{connect adhoc45(1), adhoc44(0)}
{nseg = 1}
{strdef color color = "White"}
{pt3dclear()}
{pt3dadd(163104.000000,164040.000000,40450.000000,23.110527)}
{pt3dadd(163056.000000,162876.000000,40025.000000,14.623100)}
{pt3dadd(163080.000000,162240.000000,39750.000000,9.373860)}
{pt3dadd(163224.000000,162072.000000,39475.000000,9.373860)}
{pt3dadd(163548.000000,161724.000000,39175.000000,5.822105)}
{pt3dadd(163764.000000,161484.000000,39000.000000,5.822105)}
{pt3dadd(164028.000000,161244.000000,38700.000000,5.822105)}
{pt3dadd(164472.000000,160980.000000,38625.000000,10.144211)}
{pt3dadd(165072.000000,160788.000000,38450.000000,5.822105)}
{pt3dadd(165492.000000,160536.000000,38325.000000,5.822105)}
{pt3dadd(165984.000000,160332.000000,38125.000000,5.822105)}
{pt3dadd(166068.000000,160104.000000,38150.000000,9.373860)}
{pt3dadd(166332.000000,159912.000000,37875.000000,5.051754)}
{pt3dadd(166644.000000,159684.000000,37725.000000,5.051754)}
{pt3dadd(166968.000000,159492.000000,37800.000000,5.051754)}
{pt3dadd(167016.000000,159288.000000,37650.000000,10.076420)}
{pt3dadd(167136.000000,159108.000000,37675.000000,6.524665)}
{pt3dadd(167292.000000,158916.000000,37725.000000,6.524665)}
{pt3dadd(167376.000000,158724.000000,37525.000000,6.524665)}
{pt3dadd(167436.000000,158556.000000,37275.000000,10.076420)}
{pt3dadd(167532.000000,158364.000000,37375.000000,5.051754)}
{pt3dadd(167856.000000,158160.000000,37175.000000,10.298281)}
{pt3dadd(168120.000000,157992.000000,37075.000000,14.620386)}
{pt3dadd(168540.000000,157812.000000,37000.000000,17.447720)}
{pt3dadd(168708.000000,157644.000000,36875.000000,23.110527)}

{create adhoc46}
{access adhoc46}
{connect adhoc46(1), adhoc45(0)}
{nseg = 1}
{strdef color color = "White"}
{pt3dclear()}
{pt3dadd(168708.000000,157644.000000,36875.000000,23.110527)}
{pt3dadd(168348.000000,157464.000000,37150.000000,14.623100)}
{pt3dadd(168300.000000,157332.000000,37200.000000,9.373860)}
{pt3dadd(168312.000000,157176.000000,37200.000000,6.299688)}
{pt3dadd(168204.000000,156948.000000,37200.000000,2.747934)}
{pt3dadd(168216.000000,156792.000000,37025.000000,2.747934)}
{pt3dadd(168024.000000,156636.000000,37025.000000,2.747934)}
{pt3dadd(168120.000000,156456.000000,37000.000000,3.995868)}
{pt3dadd(167988.000000,156240.000000,36900.000000,2.747934)}
{pt3dadd(168072.000000,155940.000000,36800.000000,2.747934)}
{pt3dadd(168048.000000,155772.000000,36900.000000,2.747934)}
{pt3dadd(168108.000000,155628.000000,36875.000000,4.305454)}
{pt3dadd(168144.000000,155496.000000,36775.000000,3.057520)}
{pt3dadd(168216.000000,155352.000000,36725.000000,3.057520)}
{pt3dadd(168312.000000,155220.000000,36725.000000,3.057520)}
{pt3dadd(168408.000000,155088.000000,36725.000000,4.897384)}
{pt3dadd(168504.000000,154920.000000,36725.000000,3.339863)}
{pt3dadd(168708.000000,154752.000000,36800.000000,3.339863)}
{pt3dadd(168900.000000,154572.000000,36650.000000,3.339863)}
{pt3dadd(168996.000000,154440.000000,36750.000000,4.587797)}
{pt3dadd(169068.000000,154308.000000,36900.000000,2.747934)}
{pt3dadd(168996.000000,154164.000000,36875.000000,2.747934)}
{pt3dadd(168948.000000,153996.000000,36900.000000,2.747934)}
{pt3dadd(168948.000000,153840.000000,36900.000000,3.995868)}
{pt3dadd(168912.000000,153648.000000,36875.000000,2.747934)}
{pt3dadd(168852.000000,153492.000000,36800.000000,2.747934)}
{pt3dadd(168768.000000,153300.000000,36875.000000,2.747934)}
{pt3dadd(168756.000000,153132.000000,36900.000000,4.676958)}
{pt3dadd(168768.000000,152940.000000,36875.000000,3.429025)}
{pt3dadd(168732.000000,152760.000000,37025.000000,3.429025)}
{pt3dadd(168648.000000,152568.000000,37125.000000,3.429025)}
{pt3dadd(168624.000000,152376.000000,37225.000000,5.358049)}
{pt3dadd(168684.000000,152220.000000,37250.000000,3.429025)}
{pt3dadd(168924.000000,152112.000000,37475.000000,3.429025)}
{pt3dadd(169368.000000,151584.000000,37675.000000,3.429025)}
{pt3dadd(169476.000000,151380.000000,37725.000000,5.358049)}
{pt3dadd(169596.000000,151284.000000,37750.000000,3.429025)}
{pt3dadd(169716.000000,151248.000000,37825.000000,3.429025)}
{pt3dadd(169848.000000,151080.000000,37800.000000,3.429025)}
{pt3dadd(169992.000000,150828.000000,37800.000000,5.803854)}
{pt3dadd(170124.000000,150396.000000,37800.000000,3.874829)}
{pt3dadd(170292.000000,150048.000000,37950.000000,3.874829)}
{pt3dadd(170400.000000,149580.000000,38200.000000,3.874829)}
{pt3dadd(170364.000000,149472.000000,38225.000000,6.142666)}
{pt3dadd(170460.000000,149328.000000,38250.000000,3.767836)}
{pt3dadd(170460.000000,149148.000000,38275.000000,3.767836)}
{pt3dadd(170448.000000,148992.000000,38425.000000,3.767836)}
{pt3dadd(170448.000000,148800.000000,38375.000000,6.142666)}
{pt3dadd(170448.000000,148656.000000,38325.000000,3.874829)}
{pt3dadd(170448.000000,148536.000000,38425.000000,7.426584)}
{pt3dadd(170376.000000,148308.000000,38475.000000,11.386316)}
{pt3dadd(170316.000000,148104.000000,38575.000000,14.019144)}
{pt3dadd(170208.000000,147960.000000,38600.000000,21.298660)}

{create adhoc47}
{access adhoc47}
{connect adhoc47(1), adhoc45(0)}
{nseg = 1}
{strdef color color = "White"}
{pt3dclear()}
{pt3dadd(168708.000000,157644.000000,36875.000000,23.110527)}
{pt3dadd(168804.000000,157848.000000,36525.000000,14.623100)}
{pt3dadd(169380.000000,157476.000000,36075.000000,9.373860)}
{pt3dadd(169992.000000,157344.000000,35725.000000,7.961550)}
{pt3dadd(170136.000000,157080.000000,35400.000000,4.409795)}
{pt3dadd(170688.000000,156936.000000,35100.000000,4.409795)}
{pt3dadd(171192.000000,156624.000000,34825.000000,4.409795)}
{pt3dadd(171672.000000,156192.000000,34525.000000,7.191199)}
{pt3dadd(172356.000000,155664.000000,34225.000000,4.281404)}
{pt3dadd(173388.000000,155040.000000,33925.000000,4.281404)}
{pt3dadd(173580.000000,154812.000000,34025.000000,4.281404)}
{pt3dadd(173844.000000,154728.000000,34025.000000,7.191199)}
{pt3dadd(174036.000000,154728.000000,33850.000000,4.409795)}
{pt3dadd(174240.000000,154296.000000,33825.000000,4.409795)}
{pt3dadd(174444.000000,154236.000000,33725.000000,4.409795)}
{pt3dadd(174624.000000,154176.000000,33625.000000,7.319591)}
{pt3dadd(174792.000000,153744.000000,33600.000000,4.409795)}
{pt3dadd(174996.000000,153312.000000,33575.000000,4.409795)}
{pt3dadd(175188.000000,153276.000000,33600.000000,4.409795)}
{pt3dadd(175344.000000,152856.000000,33600.000000,6.784625)}
{pt3dadd(175524.000000,152808.000000,33575.000000,3.874829)}
{pt3dadd(175704.000000,152724.000000,33625.000000,3.874829)}
{pt3dadd(175872.000000,152688.000000,33650.000000,3.874829)}
{pt3dadd(176028.000000,152508.000000,33475.000000,5.122763)}
{pt3dadd(176184.000000,152328.000000,33525.000000,2.747934)}
{pt3dadd(176316.000000,151752.000000,33475.000000,2.747934)}
{pt3dadd(176448.000000,151368.000000,33425.000000,2.747934)}
{pt3dadd(176592.000000,150852.000000,33400.000000,4.587797)}
{pt3dadd(176520.000000,150660.000000,33550.000000,3.339863)}
{pt3dadd(176532.000000,150516.000000,33650.000000,3.339863)}
{pt3dadd(176748.000000,150264.000000,33550.000000,3.339863)}
{pt3dadd(176904.000000,150144.000000,33400.000000,4.897384)}
{pt3dadd(177060.000000,149868.000000,33250.000000,3.057520)}
{pt3dadd(177192.000000,149736.000000,33075.000000,3.057520)}
{pt3dadd(177588.000000,149268.000000,32775.000000,3.057520)}
{pt3dadd(177888.000000,148872.000000,32575.000000,4.047465)}
{pt3dadd(178344.000000,148068.000000,32350.000000,3.264899)}
{pt3dadd(178392.000000,147960.000000,32300.000000,4.512833)}
{pt3dadd(178524.000000,147852.000000,32275.000000,6.521388)}
{pt3dadd(178488.000000,147708.000000,32250.000000,7.739669)}

{create adhoc48}
{access adhoc48}
{connect adhoc48(1), adhoc44(0)}
{nseg = 1}
{strdef color color = "White"}
{pt3dclear()}
{pt3dadd(163104.000000,164040.000000,40450.000000,23.110527)}
{pt3dadd(163680.000000,164952.000000,40250.000000,27.372304)}
{pt3dadd(164028.000000,164988.000000,39925.000000,17.023383)}
{pt3dadd(164448.000000,165072.000000,39600.000000,23.442503)}
{pt3dadd(164928.000000,165084.000000,39300.000000,12.241225)}
{pt3dadd(165024.000000,165012.000000,39025.000000,12.241225)}
{pt3dadd(165216.000000,165012.000000,38825.000000,12.241225)}
{pt3dadd(165372.000000,165108.000000,38700.000000,21.525623)}
{pt3dadd(165552.000000,165012.000000,38600.000000,10.784398)}
{pt3dadd(165756.000000,165048.000000,38450.000000,10.784398)}
{pt3dadd(165948.000000,164952.000000,38250.000000,10.784398)}
{pt3dadd(166128.000000,164904.000000,38225.000000,20.068796)}
{pt3dadd(166272.000000,164856.000000,38200.000000,10.784398)}
{pt3dadd(166464.000000,164832.000000,38075.000000,10.784398)}
{pt3dadd(166632.000000,164832.000000,37825.000000,10.784398)}
{pt3dadd(166812.000000,164760.000000,37575.000000,18.471396)}
{pt3dadd(167040.000000,164652.000000,37375.000000,9.186998)}
{pt3dadd(167244.000000,164640.000000,37325.000000,9.186998)}
{pt3dadd(167424.000000,164628.000000,37275.000000,9.186998)}
{pt3dadd(167604.000000,164616.000000,37225.000000,15.542830)}
{pt3dadd(167796.000000,164604.000000,37175.000000,7.855832)}
{pt3dadd(167964.000000,164592.000000,37125.000000,7.855832)}
{pt3dadd(168168.000000,164580.000000,37075.000000,7.855832)}
{pt3dadd(168348.000000,164388.000000,37025.000000,15.542830)}
{pt3dadd(168552.000000,164400.000000,36950.000000,9.186998)}
{pt3dadd(168732.000000,164160.000000,36750.000000,9.186998)}
{pt3dadd(168876.000000,164052.000000,36550.000000,9.186998)}
{pt3dadd(169032.000000,164004.000000,36300.000000,20.388275)}
{pt3dadd(169176.000000,163980.000000,36050.000000,12.701277)}
{pt3dadd(169344.000000,163932.000000,35950.000000,12.701277)}
{pt3dadd(169536.000000,163716.000000,35900.000000,21.985675)}
{pt3dadd(169704.000000,163536.000000,35875.000000,28.341507)}
{pt3dadd(169860.000000,163632.000000,35750.000000,27.567050)}
{pt3dadd(169800.000000,163308.000000,35475.000000,33.279160)}

{create adhoc49}
{access adhoc49}
{connect adhoc49(1), adhoc48(0)}
{nseg = 1}
{strdef color color = "White"}
{pt3dclear()}
{pt3dadd(169800.000000,163308.000000,35475.000000,33.279160)}
{pt3dadd(170148.000000,162144.000000,35225.000000,19.296562)}
{pt3dadd(170328.000000,161952.000000,35100.000000,12.177937)}
{pt3dadd(170532.000000,161772.000000,34975.000000,8.731901)}
{pt3dadd(170760.000000,161556.000000,34825.000000,4.409795)}
{pt3dadd(171108.000000,161388.000000,34725.000000,4.409795)}
{pt3dadd(171288.000000,161208.000000,34625.000000,4.409795)}
{pt3dadd(171456.000000,161016.000000,34675.000000,7.961550)}
{pt3dadd(171624.000000,160848.000000,34350.000000,5.051754)}
{pt3dadd(171972.000000,160644.000000,34175.000000,5.051754)}
{pt3dadd(172176.000000,160440.000000,34150.000000,5.051754)}
{pt3dadd(172392.000000,160272.000000,33975.000000,8.603509)}
{pt3dadd(172608.000000,160152.000000,33775.000000,5.051754)}
{pt3dadd(172944.000000,159984.000000,33400.000000,5.051754)}
{pt3dadd(173340.000000,159936.000000,33025.000000,5.051754)}
{pt3dadd(173520.000000,159972.000000,32725.000000,6.980779)}
{pt3dadd(174372.000000,160152.000000,32425.000000,3.429025)}
{pt3dadd(175224.000000,160368.000000,32175.000000,3.429025)}
{pt3dadd(175728.000000,160176.000000,31925.000000,3.429025)}
{pt3dadd(175956.000000,160188.000000,31700.000000,5.358049)}
{pt3dadd(176772.000000,160344.000000,31500.000000,3.429025)}
{pt3dadd(177288.000000,160212.000000,31225.000000,3.429025)}
{pt3dadd(177612.000000,160092.000000,31025.000000,3.429025)}
{pt3dadd(177792.000000,159756.000000,30800.000000,4.986545)}
{pt3dadd(178056.000000,159624.000000,30625.000000,3.057520)}
{pt3dadd(178512.000000,159576.000000,30350.000000,3.057520)}
{pt3dadd(178860.000000,159552.000000,30075.000000,3.057520)}
{pt3dadd(178968.000000,159504.000000,29825.000000,4.986545)}
{pt3dadd(179184.000000,159396.000000,29575.000000,3.429025)}
{pt3dadd(179304.000000,159456.000000,29325.000000,3.429025)}
{pt3dadd(179412.000000,159612.000000,29100.000000,3.429025)}
{pt3dadd(179364.000000,159516.000000,28800.000000,4.986545)}
{pt3dadd(180096.000000,159888.000000,28450.000000,3.057520)}
{pt3dadd(180972.000000,159660.000000,28150.000000,3.057520)}
{pt3dadd(182628.000000,159396.000000,27925.000000,5.967316)}
{pt3dadd(183216.000000,159204.000000,27675.000000,9.519070)}
{pt3dadd(183612.000000,159024.000000,27400.000000,12.269250)}
{pt3dadd(183816.000000,158964.000000,27075.000000,19.258772)}

{create adhoc50}
{access adhoc50}
{connect adhoc50(1), adhoc48(0)}
{nseg = 1}
{strdef color color = "White"}
{pt3dclear()}
{pt3dadd(169800.000000,163308.000000,35475.000000,33.279160)}
{pt3dadd(169920.000000,163872.000000,35200.000000,27.567050)}
{pt3dadd(170028.000000,164088.000000,34925.000000,17.140230)}
{pt3dadd(170340.000000,164076.000000,34575.000000,16.030924)}
{pt3dadd(170724.000000,164028.000000,34275.000000,6.746526)}
{pt3dadd(171108.000000,163980.000000,33950.000000,6.746526)}
{pt3dadd(171564.000000,164016.000000,33700.000000,6.746526)}
{pt3dadd(171744.000000,164076.000000,33750.000000,11.993053)}
{pt3dadd(171924.000000,164016.000000,33650.000000,6.746526)}
{pt3dadd(172092.000000,163884.000000,33550.000000,6.746526)}
{pt3dadd(172296.000000,163992.000000,33550.000000,6.746526)}
{pt3dadd(172488.000000,164100.000000,33450.000000,11.993053)}
{pt3dadd(172692.000000,164052.000000,33350.000000,6.746526)}
{pt3dadd(172896.000000,163920.000000,33250.000000,6.746526)}
{pt3dadd(173064.000000,163800.000000,33250.000000,6.746526)}
{pt3dadd(173268.000000,163788.000000,33175.000000,11.993053)}
{pt3dadd(173460.000000,163620.000000,33150.000000,6.746526)}
{pt3dadd(173628.000000,163548.000000,33000.000000,6.746526)}
{pt3dadd(173796.000000,163476.000000,32850.000000,6.746526)}
{pt3dadd(173976.000000,163116.000000,32600.000000,11.993053)}
{pt3dadd(174180.000000,163092.000000,32475.000000,6.746526)}
{pt3dadd(174348.000000,162996.000000,32325.000000,6.746526)}
{pt3dadd(174540.000000,162900.000000,32175.000000,6.746526)}
{pt3dadd(174720.000000,162732.000000,31975.000000,11.993053)}
{pt3dadd(174924.000000,162828.000000,31950.000000,6.746526)}
{pt3dadd(175116.000000,162672.000000,32000.000000,6.746526)}
{pt3dadd(175308.000000,162156.000000,31475.000000,6.746526)}
{pt3dadd(175404.000000,161916.000000,31325.000000,9.656322)}
{pt3dadd(175380.000000,161700.000000,31325.000000,4.409795)}
{pt3dadd(175356.000000,161520.000000,31200.000000,4.409795)}
{pt3dadd(175392.000000,161328.000000,31125.000000,4.409795)}
{pt3dadd(175440.000000,161112.000000,31025.000000,7.961550)}
{pt3dadd(175536.000000,160908.000000,30900.000000,5.051754)}
{pt3dadd(175464.000000,160680.000000,30775.000000,5.051754)}
{pt3dadd(175572.000000,160464.000000,30675.000000,5.051754)}
{pt3dadd(175656.000000,160272.000000,30575.000000,6.980779)}
{pt3dadd(175776.000000,160092.000000,30550.000000,3.429025)}
{pt3dadd(175896.000000,159924.000000,30525.000000,3.429025)}
{pt3dadd(176016.000000,159756.000000,30500.000000,3.429025)}
{pt3dadd(176136.000000,159528.000000,30325.000000,5.696861)}
{pt3dadd(176256.000000,159348.000000,30175.000000,3.767836)}
{pt3dadd(176460.000000,159120.000000,30150.000000,3.767836)}
{pt3dadd(176472.000000,158916.000000,29875.000000,3.767836)}
{pt3dadd(176652.000000,158712.000000,30025.000000,7.319591)}
{pt3dadd(176808.000000,158532.000000,30025.000000,5.051754)}
{pt3dadd(176844.000000,158328.000000,29850.000000,5.051754)}
{pt3dadd(176928.000000,158112.000000,29850.000000,5.051754)}
{pt3dadd(177012.000000,157944.000000,29850.000000,7.961550)}
{pt3dadd(177000.000000,157752.000000,29850.000000,4.409795)}
{pt3dadd(177012.000000,157560.000000,29900.000000,4.409795)}
{pt3dadd(177120.000000,157368.000000,29925.000000,4.409795)}
{pt3dadd(177204.000000,157176.000000,29925.000000,7.961550)}
{pt3dadd(177372.000000,156972.000000,29925.000000,5.051754)}
{pt3dadd(177360.000000,156756.000000,29925.000000,5.051754)}
{pt3dadd(177396.000000,156552.000000,29850.000000,5.051754)}
{pt3dadd(177480.000000,156372.000000,29950.000000,7.833158)}
{pt3dadd(177588.000000,156192.000000,30050.000000,4.281404)}
{pt3dadd(177588.000000,156012.000000,30050.000000,4.281404)}
{pt3dadd(177600.000000,155820.000000,30025.000000,4.281404)}
{pt3dadd(177600.000000,155628.000000,29950.000000,6.656233)}
{pt3dadd(177768.000000,155424.000000,30050.000000,3.874829)}
{pt3dadd(177744.000000,155220.000000,30150.000000,3.874829)}
{pt3dadd(177756.000000,155004.000000,30075.000000,3.874829)}
{pt3dadd(177864.000000,154836.000000,30075.000000,6.249659)}
{pt3dadd(178020.000000,154608.000000,30075.000000,3.874829)}
{pt3dadd(178176.000000,154404.000000,29875.000000,3.874829)}
{pt3dadd(178392.000000,154188.000000,29750.000000,3.874829)}
{pt3dadd(178476.000000,153960.000000,29725.000000,5.122763)}
{pt3dadd(178536.000000,153768.000000,29775.000000,2.747934)}
{pt3dadd(178596.000000,153564.000000,29700.000000,2.747934)}
{pt3dadd(178692.000000,153324.000000,29850.000000,2.747934)}
{pt3dadd(179016.000000,153144.000000,29800.000000,5.122763)}
{pt3dadd(179268.000000,152964.000000,29675.000000,3.874829)}
{pt3dadd(179148.000000,152760.000000,29900.000000,3.874829)}
{pt3dadd(179088.000000,152556.000000,30000.000000,3.874829)}
{pt3dadd(179088.000000,152376.000000,30075.000000,5.714693)}
{pt3dadd(179040.000000,152184.000000,30150.000000,3.339864)}
{pt3dadd(179076.000000,151944.000000,30100.000000,3.339864)}
{pt3dadd(178968.000000,151716.000000,30075.000000,3.339864)}
{pt3dadd(178992.000000,151512.000000,30125.000000,5.268888)}
{pt3dadd(179184.000000,151332.000000,30000.000000,3.429025)}
{pt3dadd(179268.000000,151152.000000,29975.000000,3.429025)}
{pt3dadd(179352.000000,150972.000000,29950.000000,3.429025)}
{pt3dadd(179436.000000,150792.000000,29925.000000,5.358049)}
{pt3dadd(179520.000000,150600.000000,29900.000000,3.429025)}
{pt3dadd(179652.000000,150456.000000,29775.000000,3.429025)}
{pt3dadd(179808.000000,150288.000000,29725.000000,3.429025)}
{pt3dadd(179868.000000,150120.000000,29600.000000,4.912244)}
{pt3dadd(179952.000000,149952.000000,29575.000000,2.983220)}
{pt3dadd(180180.000000,149784.000000,29525.000000,2.983220)}
{pt3dadd(180492.000000,149640.000000,29425.000000,2.983220)}
{pt3dadd(180624.000000,149508.000000,29375.000000,4.540740)}
{pt3dadd(180684.000000,149328.000000,29350.000000,3.057520)}
{pt3dadd(180756.000000,149136.000000,29275.000000,3.057520)}
{pt3dadd(180780.000000,148968.000000,29100.000000,3.057520)}
{pt3dadd(180780.000000,148836.000000,28950.000000,4.615041)}
{pt3dadd(180816.000000,148692.000000,28825.000000,3.057520)}
{pt3dadd(180900.000000,148524.000000,28700.000000,3.057520)}
{pt3dadd(180864.000000,148344.000000,28575.000000,3.057520)}
{pt3dadd(180876.000000,148188.000000,28500.000000,4.986545)}
{pt3dadd(180828.000000,148044.000000,28550.000000,3.429025)}
{pt3dadd(180852.000000,147912.000000,28475.000000,3.429025)}
{pt3dadd(180912.000000,147768.000000,28450.000000,3.429025)}
{pt3dadd(180876.000000,147600.000000,28375.000000,5.358049)}
{pt3dadd(180900.000000,147480.000000,28375.000000,3.429025)}
{pt3dadd(181056.000000,147324.000000,28325.000000,3.429025)}
{pt3dadd(181224.000000,147204.000000,28300.000000,3.429025)}
{pt3dadd(181344.000000,147072.000000,28175.000000,5.358049)}
{pt3dadd(181392.000000,146952.000000,28175.000000,3.429025)}
{pt3dadd(181524.000000,146796.000000,28175.000000,3.429025)}
{pt3dadd(181476.000000,146640.000000,28250.000000,3.429025)}
{pt3dadd(181500.000000,146496.000000,28175.000000,6.210428)}
{pt3dadd(181476.000000,146292.000000,28225.000000,4.281404)}
{pt3dadd(181332.000000,146124.000000,28425.000000,4.281404)}
{pt3dadd(181224.000000,145992.000000,28450.000000,4.281404)}
{pt3dadd(181308.000000,145824.000000,28450.000000,5.529338)}
{pt3dadd(181284.000000,145704.000000,28525.000000,2.747934)}
{pt3dadd(181296.000000,145584.000000,28575.000000,2.747934)}
{pt3dadd(181368.000000,145416.000000,28725.000000,2.747934)}
{pt3dadd(181464.000000,145272.000000,28675.000000,4.587797)}
{pt3dadd(181500.000000,145152.000000,28775.000000,3.339864)}
{pt3dadd(181656.000000,144972.000000,28800.000000,4.897384)}
{pt3dadd(181632.000000,144792.000000,28925.000000,5.887329)}
{pt3dadd(181644.000000,144600.000000,28850.000000,5.745775)}
{pt3dadd(181608.000000,144408.000000,29050.000000,6.449724)}

{create adhoc51}
{access adhoc51}
{connect adhoc51(1), adhoc17(0)}
{nseg = 1}
{strdef color color = "White"}
{pt3dclear()}
{pt3dadd(178668.000000,206460.000000,99550.000000,918.914800)}
{pt3dadd(180348.000000,203808.000000,99675.000000,454.965900)}
{pt3dadd(180492.000000,203580.000000,99800.000000,305.764434)}
{pt3dadd(180540.000000,203604.000000,99950.000000,135.467580)}
{pt3dadd(180624.000000,203532.000000,100075.000000,93.573851)}
{pt3dadd(180720.000000,203640.000000,100125.000000,76.149554)}
{pt3dadd(180792.000000,203736.000000,100300.000000,73.917518)}
{pt3dadd(180936.000000,203700.000000,100450.000000,72.393503)}
{pt3dadd(180984.000000,203640.000000,100625.000000,75.299843)}
{pt3dadd(181128.000000,203628.000000,100775.000000,76.980070)}
{pt3dadd(181260.000000,203640.000000,100925.000000,82.470269)}
{pt3dadd(181476.000000,203688.000000,101150.000000,87.286164)}
{pt3dadd(181620.000000,203688.000000,101425.000000,87.286164)}
{pt3dadd(181716.000000,203640.000000,101725.000000,90.818839)}
{pt3dadd(181776.000000,203556.000000,101800.000000,91.722472)}
{pt3dadd(181884.000000,203556.000000,101900.000000,88.358020)}
{pt3dadd(181956.000000,203532.000000,102000.000000,88.358020)}
{pt3dadd(182028.000000,203508.000000,102100.000000,92.465894)}
{pt3dadd(182064.000000,203472.000000,102200.000000,91.517078)}
{pt3dadd(182196.000000,203496.000000,102325.000000,89.752842)}
{pt3dadd(182304.000000,203268.000000,102600.000000,95.062366)}
{pt3dadd(182436.000000,203064.000000,102600.000000,94.158733)}
{pt3dadd(182532.000000,203088.000000,102850.000000,92.394497)}
{pt3dadd(182700.000000,203004.000000,102975.000000,91.490864)}
{pt3dadd(182724.000000,202884.000000,103100.000000,106.734718)}
{pt3dadd(182832.000000,202848.000000,103175.000000,121.595994)}
{pt3dadd(182964.000000,202740.000000,103300.000000,147.017361)}
{pt3dadd(183120.000000,202596.000000,103425.000000,180.155081)}
{pt3dadd(183204.000000,202452.000000,103725.000000,212.432198)}
{pt3dadd(183240.000000,202476.000000,103950.000000,223.470314)}
{pt3dadd(183252.000000,202464.000000,104175.000000,238.037450)}
{pt3dadd(183324.000000,202452.000000,104325.000000,240.212154)}
{pt3dadd(183372.000000,202392.000000,104450.000000,227.434150)}
{pt3dadd(183504.000000,202308.000000,104600.000000,218.507258)}
{pt3dadd(183732.000000,202236.000000,104975.000000,220.681962)}
{pt3dadd(183912.000000,202140.000000,105375.000000,220.681962)}
{pt3dadd(184044.000000,202416.000000,105625.000000,210.795872)}
{pt3dadd(184080.000000,202452.000000,105900.000000,216.718126)}
{pt3dadd(184128.000000,202428.000000,106375.000000,209.373948)}
{pt3dadd(184140.000000,202476.000000,106625.000000,199.487858)}
{pt3dadd(184212.000000,202560.000000,106925.000000,172.203887)}
{pt3dadd(184080.000000,202356.000000,107175.000000,167.331637)}
{pt3dadd(184104.000000,202500.000000,107450.000000,151.874243)}
{pt3dadd(183888.000000,202320.000000,107850.000000,145.832169)}
{pt3dadd(183912.000000,202548.000000,107750.000000,134.268625)}
{pt3dadd(183744.000000,202452.000000,108125.000000,132.124184)}
{pt3dadd(183648.000000,202596.000000,108425.000000,119.286453)}
{pt3dadd(183492.000000,202632.000000,108700.000000,106.118239)}
{pt3dadd(183324.000000,202608.000000,109000.000000,113.864247)}
{pt3dadd(183180.000000,202536.000000,109250.000000,135.313881)}
{pt3dadd(183492.000000,202272.000000,109275.000000,157.886543)}
{pt3dadd(183552.000000,201972.000000,109625.000000,170.724274)}
{pt3dadd(183564.000000,201780.000000,109900.000000,182.557410)}
{pt3dadd(183576.000000,201588.000000,109900.000000,169.840575)}
{pt3dadd(183552.000000,201444.000000,110025.000000,158.250551)}
{pt3dadd(183408.000000,201216.000000,110025.000000,148.835231)}
{pt3dadd(183348.000000,201216.000000,110600.000000,155.496613)}
{pt3dadd(183312.000000,201120.000000,110825.000000,159.705449)}
{pt3dadd(183348.000000,201012.000000,111025.000000,166.078110)}
{pt3dadd(183240.000000,200796.000000,111025.000000,166.078110)}
{pt3dadd(183096.000000,200652.000000,111250.000000,173.422288)}
{pt3dadd(182760.000000,200292.000000,111750.000000,173.422288)}
{pt3dadd(182352.000000,200028.000000,112150.000000,190.464064)}
{pt3dadd(181596.000000,199968.000000,112850.000000,202.448482)}
{pt3dadd(181344.000000,199560.000000,113525.000000,192.588872)}
{pt3dadd(180864.000000,199188.000000,114350.000000,177.867542)}
{pt3dadd(181068.000000,198972.000000,114650.000000,165.725820)}
{pt3dadd(180828.000000,198840.000000,114925.000000,138.695018)}
{pt3dadd(180696.000000,198732.000000,115275.000000,116.248426)}
{pt3dadd(180516.000000,198588.000000,115500.000000,111.954438)}
{pt3dadd(180612.000000,198504.000000,115700.000000,122.824656)}
{pt3dadd(180516.000000,198456.000000,115950.000000,155.680768)}
{pt3dadd(180708.000000,198300.000000,116150.000000,193.045566)}
{pt3dadd(180348.000000,198108.000000,116625.000000,244.916470)}
{pt3dadd(180192.000000,197892.000000,117075.000000,280.501992)}
{pt3dadd(179964.000000,197748.000000,117475.000000,301.216382)}
{pt3dadd(179712.000000,197700.000000,117750.000000,293.279996)}
{pt3dadd(179448.000000,197472.000000,118050.000000,282.946000)}
{pt3dadd(179196.000000,197268.000000,118350.000000,253.521688)}
{pt3dadd(178596.000000,196956.000000,118575.000000,226.047690)}
{pt3dadd(178356.000000,196740.000000,118725.000000,203.544168)}
{pt3dadd(177648.000000,196380.000000,119350.000000,188.977032)}
{pt3dadd(177324.000000,196044.000000,119600.000000,170.463332)}
{pt3dadd(176916.000000,195780.000000,119800.000000,164.823088)}
{pt3dadd(176580.000000,195720.000000,119950.000000,170.865162)}
{pt3dadd(176364.000000,195552.000000,120100.000000,178.576548)}
{pt3dadd(176184.000000,195360.000000,120350.000000,170.830540)}
{pt3dadd(175896.000000,195120.000000,120650.000000,172.302464)}
{pt3dadd(175584.000000,195036.000000,120900.000000,168.975734)}
{pt3dadd(175344.000000,194700.000000,121125.000000,174.347392)}
{pt3dadd(174852.000000,194484.000000,121425.000000,176.522096)}
{pt3dadd(174228.000000,193884.000000,121750.000000,186.057236)}
{pt3dadd(173952.000000,193692.000000,122000.000000,198.640872)}
{pt3dadd(173532.000000,193404.000000,122250.000000,209.678988)}
{pt3dadd(173256.000000,193164.000000,122550.000000,213.722650)}
{pt3dadd(172884.000000,192876.000000,122825.000000,200.509830)}
{pt3dadd(172428.000000,192564.000000,123100.000000,210.890224)}
{pt3dadd(172236.000000,192564.000000,123275.000000,220.263464)}
{pt3dadd(172092.000000,192384.000000,123275.000000,229.636704)}
{pt3dadd(171984.000000,192180.000000,123275.000000,239.009944)}
{pt3dadd(171876.000000,191940.000000,123275.000000,274.027556)}
{pt3dadd(171780.000000,191700.000000,123275.000000,290.335886)}
{pt3dadd(171540.000000,191412.000000,123350.000000,292.979250)}
{pt3dadd(171288.000000,191124.000000,123350.000000,292.979250)}
{pt3dadd(171036.000000,190836.000000,123350.000000,283.606010)}
{pt3dadd(170784.000000,190548.000000,123350.000000,264.084654)}
{pt3dadd(170712.000000,190272.000000,123450.000000,245.492888)}
{pt3dadd(170556.000000,190092.000000,123525.000000,237.934424)}
{pt3dadd(170400.000000,189972.000000,123525.000000,230.735888)}
{pt3dadd(170052.000000,189960.000000,123825.000000,219.697772)}
{pt3dadd(169788.000000,189864.000000,123825.000000,193.713039)}
{pt3dadd(169608.000000,189768.000000,124050.000000,164.436742)}
{pt3dadd(169272.000000,189552.000000,124050.000000,138.452008)}
{pt3dadd(169164.000000,189300.000000,124150.000000,113.704642)}
{pt3dadd(169008.000000,189072.000000,124275.000000,100.225024)}
{pt3dadd(168960.000000,188568.000000,124325.000000,103.687642)}
{pt3dadd(168840.000000,187896.000000,124325.000000,111.514305)}
{pt3dadd(168720.000000,187224.000000,124325.000000,110.468236)}
{pt3dadd(168648.000000,187020.000000,124400.000000,108.523164)}
{pt3dadd(168744.000000,186648.000000,124400.000000,116.248426)}
{pt3dadd(168636.000000,186264.000000,124400.000000,123.274286)}
{pt3dadd(168648.000000,185772.000000,124500.000000,144.723920)}
{pt3dadd(168672.000000,185472.000000,124475.000000,169.471286)}
{pt3dadd(168924.000000,184908.000000,124475.000000,214.755490)}
{pt3dadd(169428.000000,184248.000000,124475.000000,255.527458)}
{pt3dadd(169956.000000,183672.000000,124475.000000,281.357710)}
{pt3dadd(170748.000000,183132.000000,124350.000000,313.798018)}
{pt3dadd(171480.000000,182976.000000,124350.000000,346.238326)}
{pt3dadd(172452.000000,183060.000000,124350.000000,368.093044)}
{pt3dadd(173148.000000,183192.000000,124350.000000,386.734736)}
{pt3dadd(173328.000000,183456.000000,124250.000000,399.295770)}
{pt3dadd(173808.000000,183684.000000,124150.000000,399.295770)}
{pt3dadd(174096.000000,183840.000000,124000.000000,395.576288)}
{pt3dadd(174360.000000,183816.000000,123750.000000,380.308270)}
{pt3dadd(174912.000000,184236.000000,123575.000000,355.393522)}
{pt3dadd(175368.000000,184356.000000,123350.000000,334.896102)}
{pt3dadd(175692.000000,184740.000000,123150.000000,304.739230)}
{pt3dadd(175872.000000,185124.000000,122925.000000,288.635836)}
{pt3dadd(175800.000000,185508.000000,122925.000000,276.074802)}
{pt3dadd(176028.000000,185928.000000,122925.000000,279.134832)}
{pt3dadd(176244.000000,186132.000000,122825.000000,303.174612)}
{pt3dadd(176760.000000,186180.000000,122575.000000,333.331484)}
{pt3dadd(177228.000000,186384.000000,122400.000000,342.518844)}
{pt3dadd(177756.000000,186612.000000,122400.000000,345.433148)}
{pt3dadd(178200.000000,186876.000000,122400.000000,320.623016)}
{pt3dadd(178332.000000,187176.000000,122375.000000,275.671926)}
{pt3dadd(178548.000000,187740.000000,122375.000000,222.992938)}
{pt3dadd(178884.000000,187836.000000,122125.000000,196.942300)}
{pt3dadd(179088.000000,188124.000000,122000.000000,175.192198)}
{pt3dadd(178992.000000,188412.000000,121925.000000,177.164718)}
{pt3dadd(179136.000000,188772.000000,121925.000000,198.076028)}
{pt3dadd(179484.000000,189180.000000,121925.000000,216.140004)}
{pt3dadd(179844.000000,189432.000000,121850.000000,242.190642)}
{pt3dadd(180036.000000,189576.000000,121725.000000,273.587474)}
{pt3dadd(180300.000000,189780.000000,121600.000000,296.425086)}
{pt3dadd(180408.000000,189924.000000,121450.000000,246.375296)}
{pt3dadd(180588.000000,190044.000000,121350.000000,264.081736)}
{pt3dadd(180804.000000,190224.000000,121225.000000,270.997770)}
{pt3dadd(181008.000000,190344.000000,121100.000000,267.624096)}
{pt3dadd(181212.000000,190476.000000,120975.000000,267.624096)}
{pt3dadd(181344.000000,190512.000000,120850.000000,325.610272)}
{pt3dadd(181476.000000,190644.000000,120725.000000,317.277072)}
{pt3dadd(181848.000000,190680.000000,120625.000000,295.754782)}
{pt3dadd(181980.000000,190824.000000,120475.000000,281.148526)}
{pt3dadd(182184.000000,191040.000000,120200.000000,272.398660)}
{pt3dadd(182340.000000,191328.000000,120000.000000,266.979764)}
{pt3dadd(182736.000000,191604.000000,119775.000000,262.064664)}
{pt3dadd(183060.000000,192072.000000,119525.000000,254.866128)}
{pt3dadd(183348.000000,192288.000000,119350.000000,247.667592)}
{pt3dadd(183540.000000,192384.000000,119125.000000,242.506738)}
{pt3dadd(183672.000000,192696.000000,118925.000000,242.506738)}
{pt3dadd(183708.000000,192792.000000,118725.000000,240.223302)}
{pt3dadd(183840.000000,193044.000000,118550.000000,240.223302)}
{pt3dadd(184176.000000,193224.000000,118350.000000,238.048598)}
{pt3dadd(184248.000000,193416.000000,118175.000000,238.048598)}
{pt3dadd(184476.000000,193500.000000,118000.000000,228.675358)}
{pt3dadd(184704.000000,193608.000000,117850.000000,228.675358)}
{pt3dadd(184728.000000,193824.000000,117675.000000,233.356404)}
{pt3dadd(184812.000000,193824.000000,117425.000000,235.531108)}
{pt3dadd(184848.000000,194004.000000,117225.000000,240.691962)}
{pt3dadd(185052.000000,194136.000000,117000.000000,250.065202)}
{pt3dadd(185004.000000,194316.000000,116775.000000,254.746248)}
{pt3dadd(184992.000000,194496.000000,116600.000000,254.746248)}
{pt3dadd(185028.000000,194880.000000,116425.000000,276.551040)}
{pt3dadd(185124.000000,195216.000000,116250.000000,276.551040)}
{pt3dadd(185292.000000,195540.000000,116075.000000,287.944270)}
{pt3dadd(185544.000000,195804.000000,115875.000000,295.880656)}
{pt3dadd(186024.000000,196008.000000,115600.000000,313.004402)}
{pt3dadd(186312.000000,196056.000000,115500.000000,303.817042)}
{pt3dadd(186756.000000,196164.000000,115275.000000,296.258578)}
{pt3dadd(187164.000000,196236.000000,115075.000000,284.865348)}
{pt3dadd(187512.000000,196380.000000,114875.000000,284.865348)}
{pt3dadd(187608.000000,196524.000000,114575.000000,272.902456)}
{pt3dadd(187740.000000,196656.000000,114350.000000,267.483560)}
{pt3dadd(187992.000000,196788.000000,114125.000000,272.398660)}
{pt3dadd(188268.000000,196776.000000,113925.000000,277.817556)}
{pt3dadd(188532.000000,196848.000000,113675.000000,263.025420)}
{pt3dadd(188724.000000,196908.000000,113425.000000,255.466956)}
{pt3dadd(188892.000000,196932.000000,113225.000000,252.949466)}
{pt3dadd(189036.000000,196956.000000,113025.000000,248.034366)}
{pt3dadd(189180.000000,197052.000000,112825.000000,245.258834)}
{pt3dadd(189312.000000,196968.000000,112650.000000,257.275438)}
{pt3dadd(189396.000000,196992.000000,112425.000000,267.609434)}
{pt3dadd(189576.000000,197028.000000,112250.000000,272.770288)}
{pt3dadd(190284.000000,196992.000000,111950.000000,277.685388)}
{pt3dadd(190404.000000,196800.000000,111700.000000,280.460920)}
{pt3dadd(190788.000000,196788.000000,111700.000000,275.300066)}
{pt3dadd(191340.000000,196704.000000,111575.000000,269.881170)}
{pt3dadd(192060.000000,196632.000000,111575.000000,250.153180)}
{pt3dadd(192156.000000,196464.000000,111225.000000,252.796544)}
{pt3dadd(192444.000000,196320.000000,111225.000000,247.377648)}
{pt3dadd(192888.000000,196176.000000,111225.000000,267.875068)}
{pt3dadd(193416.000000,196368.000000,111225.000000,285.854998)}
{pt3dadd(193956.000000,196740.000000,111225.000000,332.086844)}
{pt3dadd(194052.000000,196860.000000,111075.000000,381.249800)}
{pt3dadd(194184.000000,197064.000000,111075.000000,449.555286)}
{pt3dadd(194448.000000,197208.000000,110950.000000,505.939484)}
{pt3dadd(194844.000000,197388.000000,110950.000000,582.378534)}
{pt3dadd(194628.000000,197484.000000,110825.000000,662.747134)}
{pt3dadd(194544.000000,197568.000000,110650.000000,746.052274)}
{pt3dadd(194436.000000,197700.000000,110525.000000,815.234308)}
{pt3dadd(194448.000000,197832.000000,110425.000000,885.380574)}
{pt3dadd(194460.000000,198036.000000,110425.000000,945.340874)}
{pt3dadd(194472.000000,198240.000000,110425.000000,990.204334)}
{pt3dadd(194484.000000,198444.000000,110425.000000,1212.559634)}
{pt3dadd(194496.000000,198648.000000,110425.000000,1453.055574)}
{pt3dadd(195936.000000,202572.000000,110425.000000,1547.294620)}
{pt3dadd(195660.000000,204492.000000,111175.000000,1650.115980)}
{pt3dadd(194760.000000,202380.000000,111175.000000,1734.486140)}
{pt3dadd(195768.000000,202980.000000,111175.000000,1564.065900)}
{pt3dadd(195912.000000,203124.000000,111175.000000,1373.128960)}
{pt3dadd(196692.000000,203904.000000,111175.000000,1269.490980)}
{pt3dadd(197220.000000,204420.000000,111175.000000,1166.669620)}
{pt3dadd(197820.000000,204792.000000,111175.000000,1114.966700)}
{pt3dadd(196800.000000,205092.000000,111175.000000,1054.080268)}
{pt3dadd(195744.000000,205776.000000,111175.000000,956.212148)}
{pt3dadd(195096.000000,206388.000000,111175.000000,985.842288)}
{pt3dadd(194100.000000,205980.000000,111175.000000,1116.178548)}
{pt3dadd(193140.000000,204780.000000,111175.000000,1197.772188)}
{pt3dadd(194124.000000,204360.000000,111175.000000,1471.138080)}
{pt3dadd(194664.000000,202860.000000,111175.000000,1444.495040)}
{pt3dadd(195624.000000,203976.000000,110775.000000,1360.479140)}
{pt3dadd(195276.000000,201072.000000,110775.000000,1170.182580)}
{pt3dadd(195996.000000,201636.000000,110775.000000,969.847906)}
{pt3dadd(197040.000000,202332.000000,110775.000000,584.928182)}
{pt3dadd(198204.000000,203124.000000,110775.000000,603.118522)}
{pt3dadd(199416.000000,204156.000000,110775.000000,596.756950)}
{pt3dadd(198636.000000,204624.000000,110775.000000,589.743322)}
{pt3dadd(197880.000000,205188.000000,110775.000000,615.856816)}
{pt3dadd(197052.000000,205740.000000,110775.000000,658.290560)}
{pt3dadd(196200.000000,206340.000000,110775.000000,595.544790)}
{pt3dadd(195516.000000,207372.000000,110775.000000,578.220662)}
{pt3dadd(194580.000000,207300.000000,110775.000000,532.890064)}
{pt3dadd(193884.000000,206664.000000,110775.000000,471.719032)}
{pt3dadd(192852.000000,205848.000000,110775.000000,489.043160)}
{pt3dadd(192048.000000,204984.000000,110775.000000,588.698210)}
{pt3dadd(192648.000000,203868.000000,110775.000000,743.295890)}
{pt3dadd(193380.000000,202896.000000,110775.000000,775.585264)}
{pt3dadd(194220.000000,201744.000000,110775.000000,1061.655076)}
{pt3dadd(195144.000000,201084.000000,110775.000000,1081.709928)}
{pt3dadd(195744.000000,203256.000000,110500.000000,1118.454228)}
{pt3dadd(193788.000000,200280.000000,110500.000000,975.122034)}
{pt3dadd(194544.000000,200064.000000,110500.000000,1010.273726)}
{pt3dadd(195480.000000,199800.000000,110500.000000,835.466360)}
{pt3dadd(196116.000000,201096.000000,110500.000000,783.122134)}
{pt3dadd(197052.000000,202104.000000,110500.000000,691.278214)}
{pt3dadd(198276.000000,202596.000000,110500.000000,717.391708)}
{pt3dadd(199128.000000,203484.000000,110500.000000,717.391708)}
{pt3dadd(198984.000000,204552.000000,110500.000000,653.607014)}
{pt3dadd(198108.000000,204960.000000,110500.000000,721.048080)}
{pt3dadd(196884.000000,205788.000000,110500.000000,726.818206)}
{pt3dadd(196164.000000,206556.000000,110500.000000,684.205546)}
{pt3dadd(195108.000000,207768.000000,110500.000000,603.836946)}
{pt3dadd(193980.000000,207252.000000,110500.000000,560.664956)}
{pt3dadd(192888.000000,206508.000000,110500.000000,829.132596)}
{pt3dadd(191796.000000,205272.000000,110500.000000,829.132596)}
{pt3dadd(195456.000000,204288.000000,110500.000000,858.051976)}
{pt3dadd(191652.000000,204444.000000,110500.000000,1004.526816)}
{pt3dadd(191808.000000,203856.000000,110500.000000,1068.756400)}
{pt3dadd(192624.000000,203220.000000,110500.000000,753.308300)}
{pt3dadd(192624.000000,202272.000000,110500.000000,802.637794)}
{pt3dadd(193020.000000,201516.000000,110500.000000,1099.895554)}
{pt3dadd(193716.000000,200604.000000,110500.000000,1099.895554)}
{pt3dadd(197052.000000,203688.000000,110250.000000,1142.622654)}
{pt3dadd(196548.000000,201192.000000,110250.000000,1189.603114)}
{pt3dadd(195096.000000,199956.000000,110250.000000,1134.503494)}
{pt3dadd(194364.000000,198852.000000,110250.000000,778.042324)}
{pt3dadd(193992.000000,197232.000000,110250.000000,627.662036)}
{pt3dadd(193428.000000,196536.000000,110250.000000,504.673932)}
{pt3dadd(192876.000000,196272.000000,110250.000000,406.551342)}
{pt3dadd(192060.000000,196524.000000,110250.000000,401.055982)}
{pt3dadd(193872.000000,196728.000000,110250.000000,460.259392)}
{pt3dadd(195012.000000,197364.000000,110250.000000,468.265568)}
{pt3dadd(195060.000000,197952.000000,110250.000000,515.048764)}
{pt3dadd(195312.000000,198720.000000,110250.000000,629.815622)}
{pt3dadd(195660.000000,199656.000000,110250.000000,682.291442)}
{pt3dadd(196404.000000,200568.000000,110250.000000,695.984722)}
{pt3dadd(197304.000000,201204.000000,110250.000000,731.042260)}
{pt3dadd(198240.000000,201624.000000,110250.000000,807.247168)}
{pt3dadd(199332.000000,202236.000000,110250.000000,798.722060)}
{pt3dadd(199224.000000,202896.000000,110250.000000,806.841220)}
{pt3dadd(199716.000000,203556.000000,110250.000000,780.727726)}
{pt3dadd(199296.000000,204444.000000,110250.000000,745.670188)}
{pt3dadd(199056.000000,205140.000000,110250.000000,658.199794)}
{pt3dadd(198180.000000,205620.000000,110250.000000,608.870300)}
{pt3dadd(197124.000000,206184.000000,110250.000000,533.310074)}
{pt3dadd(196452.000000,207060.000000,110250.000000,527.539948)}
{pt3dadd(195444.000000,207804.000000,110250.000000,596.075294)}
{pt3dadd(194580.000000,207708.000000,110250.000000,648.551114)}
{pt3dadd(194040.000000,207132.000000,110250.000000,697.880608)}
{pt3dadd(193224.000000,206388.000000,110250.000000,724.111340)}
{pt3dadd(192264.000000,205512.000000,110250.000000,826.317580)}
{pt3dadd(191964.000000,204732.000000,110250.000000,889.275886)}
{pt3dadd(192012.000000,203916.000000,110250.000000,958.270226)}
{pt3dadd(192216.000000,203220.000000,110250.000000,1159.953006)}
{pt3dadd(196704.000000,205500.000000,110250.000000,1588.667040)}
{pt3dadd(196512.000000,204348.000000,110250.000000,1823.451420)}
{pt3dadd(195516.000000,203688.000000,110250.000000,1776.344800)}
{pt3dadd(194088.000000,203148.000000,110250.000000,1773.456700)}
{pt3dadd(192468.000000,202116.000000,110250.000000,1563.654760)}
{pt3dadd(193368.000000,201348.000000,110250.000000,1221.014520)}
{pt3dadd(193488.000000,200616.000000,110250.000000,1199.472000)}
{pt3dadd(194400.000000,200004.000000,110250.000000,1481.363000)}
{pt3dadd(195396.000000,202116.000000,110250.000000,1544.490380)}
{pt3dadd(196728.000000,203784.000000,110025.000000,1622.021080)}
{pt3dadd(195636.000000,201192.000000,110025.000000,1593.801888)}
{pt3dadd(195528.000000,200100.000000,110025.000000,1303.223780)}
{pt3dadd(195264.000000,198996.000000,110025.000000,966.233160)}
{pt3dadd(194712.000000,197508.000000,110025.000000,790.019080)}
{pt3dadd(195348.000000,197820.000000,110025.000000,677.336688)}
{pt3dadd(195672.000000,198528.000000,110025.000000,638.581952)}
{pt3dadd(195984.000000,199320.000000,110025.000000,695.686994)}
{pt3dadd(196380.000000,200160.000000,110025.000000,768.263094)}
{pt3dadd(196968.000000,200952.000000,110025.000000,850.238128)}
{pt3dadd(197844.000000,201468.000000,110025.000000,850.238128)}
{pt3dadd(198780.000000,201936.000000,110025.000000,843.558476)}
{pt3dadd(199944.000000,202656.000000,110025.000000,800.831376)}
{pt3dadd(200268.000000,203484.000000,110025.000000,740.084044)}
{pt3dadd(199980.000000,204024.000000,110025.000000,652.613650)}
{pt3dadd(199440.000000,204720.000000,110025.000000,635.289522)}
{pt3dadd(198708.000000,205392.000000,110025.000000,664.079642)}
{pt3dadd(197748.000000,205824.000000,110025.000000,671.812168)}
{pt3dadd(196752.000000,206124.000000,110025.000000,684.853392)}
{pt3dadd(196320.000000,206736.000000,110025.000000,696.118878)}
{pt3dadd(195036.000000,207588.000000,110025.000000,977.005878)}
{pt3dadd(193512.000000,207204.000000,110025.000000,954.895410)}
{pt3dadd(196596.000000,204312.000000,110025.000000,947.162884)}
{pt3dadd(192984.000000,206676.000000,110025.000000,1004.267926)}
{pt3dadd(192528.000000,206292.000000,110025.000000,1090.341720)}
{pt3dadd(192480.000000,205632.000000,110025.000000,917.156320)}
{pt3dadd(192024.000000,205032.000000,110025.000000,994.492568)}
{pt3dadd(191976.000000,204384.000000,110025.000000,1037.219668)}
{pt3dadd(192120.000000,203724.000000,110025.000000,1037.219668)}
{pt3dadd(192216.000000,203040.000000,110025.000000,1000.475368)}
{pt3dadd(192420.000000,202368.000000,110025.000000,923.139120)}
{pt3dadd(192672.000000,201696.000000,110025.000000,884.557608)}
{pt3dadd(192924.000000,201048.000000,110025.000000,884.557608)}
{pt3dadd(193356.000000,200448.000000,110025.000000,951.684894)}
{pt3dadd(194088.000000,199872.000000,110025.000000,1358.563794)}
{pt3dadd(194748.000000,199092.000000,110025.000000,1717.054742)}
{pt3dadd(195060.000000,203232.000000,110025.000000,1933.761334)}
{pt3dadd(195756.000000,204252.000000,109775.000000,2090.845600)}
{pt3dadd(195840.000000,201096.000000,109775.000000,2163.923460)}
{pt3dadd(195660.000000,200364.000000,109775.000000,1804.151180)}
{pt3dadd(195180.000000,199440.000000,109775.000000,1432.619008)}
{pt3dadd(194772.000000,198336.000000,109775.000000,1191.535622)}
{pt3dadd(194328.000000,197184.000000,109775.000000,1007.575942)}
{pt3dadd(195312.000000,197892.000000,109775.000000,857.971862)}
{pt3dadd(196092.000000,198732.000000,109775.000000,847.609542)}
{pt3dadd(196788.000000,199656.000000,109775.000000,984.883094)}
{pt3dadd(197376.000000,200760.000000,109775.000000,1070.146320)}
{pt3dadd(198144.000000,201636.000000,109775.000000,1062.027160)}
{pt3dadd(198984.000000,202152.000000,109775.000000,1091.657300)}
{pt3dadd(200292.000000,203052.000000,109775.000000,1031.697000)}
{pt3dadd(199860.000000,203808.000000,109775.000000,894.423448)}
{pt3dadd(199164.000000,204576.000000,109775.000000,801.795908)}
{pt3dadd(198108.000000,205476.000000,109775.000000,773.005788)}
{pt3dadd(196824.000000,206352.000000,109775.000000,710.047482)}
{pt3dadd(195588.000000,207216.000000,109775.000000,710.047482)}
{pt3dadd(194400.000000,207612.000000,109775.000000,716.409054)}
{pt3dadd(193656.000000,207264.000000,109775.000000,673.796394)}
{pt3dadd(192588.000000,206856.000000,109775.000000,971.054154)}
{pt3dadd(191724.000000,206484.000000,109775.000000,986.905840)}
{pt3dadd(195648.000000,204864.000000,109775.000000,1002.002680)}
{pt3dadd(191724.000000,205548.000000,109775.000000,1086.018580)}
{pt3dadd(191496.000000,204744.000000,109775.000000,1151.847240)}
{pt3dadd(191736.000000,204288.000000,109775.000000,891.498760)}
{pt3dadd(191688.000000,203400.000000,109775.000000,883.379600)}
{pt3dadd(192060.000000,202836.000000,109775.000000,1179.108020)}
{pt3dadd(192408.000000,202032.000000,109775.000000,1392.349880)}
{pt3dadd(193656.000000,203856.000000,109775.000000,1559.430440)}
{pt3dadd(193992.000000,202884.000000,109775.000000,1543.578754)}
{pt3dadd(193692.000000,201912.000000,109775.000000,1514.788634)}
{pt3dadd(192924.000000,200964.000000,109775.000000,1235.704482)}
{pt3dadd(193500.000000,199764.000000,109775.000000,1235.704482)}
{pt3dadd(194340.000000,198720.000000,109775.000000,1421.823422)}
{pt3dadd(195900.000000,204396.000000,109475.000000,1677.506888)}
{pt3dadd(195840.000000,201432.000000,109475.000000,1881.496728)}
{pt3dadd(195756.000000,200628.000000,109475.000000,1980.199560)}
{pt3dadd(195624.000000,199812.000000,109475.000000,1777.838160)}
{pt3dadd(195384.000000,199020.000000,109475.000000,1442.115140)}
{pt3dadd(195144.000000,198240.000000,109475.000000,1179.067360)}
{pt3dadd(194532.000000,197400.000000,109475.000000,975.077520)}
{pt3dadd(195780.000000,198216.000000,109475.000000,867.849580)}
{pt3dadd(196728.000000,198900.000000,109475.000000,809.862500)}
{pt3dadd(197388.000000,199512.000000,109475.000000,819.261434)}
{pt3dadd(197928.000000,200112.000000,109475.000000,879.221734)}
{pt3dadd(198516.000000,200976.000000,109475.000000,974.118094)}
{pt3dadd(199188.000000,201768.000000,109475.000000,1010.862394)}
{pt3dadd(200016.000000,202800.000000,109475.000000,980.632766)}
{pt3dadd(200124.000000,203796.000000,109475.000000,937.905666)}
{pt3dadd(199476.000000,204516.000000,109475.000000,870.931738)}
{pt3dadd(198840.000000,204600.000000,109475.000000,782.715030)}
{pt3dadd(197952.000000,205164.000000,109475.000000,665.889460)}
{pt3dadd(197328.000000,206004.000000,109475.000000,680.267402)}
{pt3dadd(196296.000000,206988.000000,109475.000000,704.644196)}
{pt3dadd(195180.000000,207312.000000,109475.000000,704.644196)}
{pt3dadd(194148.000000,207360.000000,109475.000000,679.774204)}
{pt3dadd(193188.000000,207288.000000,109475.000000,716.584622)}
{pt3dadd(192720.000000,207024.000000,109475.000000,732.436308)}
{pt3dadd(192072.000000,206460.000000,109475.000000,760.655500)}
{pt3dadd(191652.000000,205728.000000,109475.000000,872.292368)}
{pt3dadd(191688.000000,204960.000000,109475.000000,996.803528)}
{pt3dadd(191904.000000,204228.000000,109475.000000,1109.485920)}
{pt3dadd(192240.000000,203376.000000,109475.000000,1167.473000)}
{pt3dadd(192612.000000,202596.000000,109475.000000,1188.715780)}
{pt3dadd(193020.000000,201744.000000,109475.000000,1332.540240)}
{pt3dadd(193380.000000,200952.000000,109475.000000,1567.639340)}
{pt3dadd(193524.000000,205380.000000,109475.000000,1905.106700)}
{pt3dadd(194748.000000,204864.000000,109475.000000,2151.630260)}
{pt3dadd(194880.000000,204156.000000,109475.000000,2244.648360)}
{pt3dadd(194136.000000,203136.000000,109475.000000,1982.507380)}
{pt3dadd(193788.000000,201540.000000,109475.000000,1647.767112)}
{pt3dadd(193452.000000,199932.000000,109475.000000,1267.763626)}
{pt3dadd(194136.000000,199032.000000,109475.000000,1223.601466)}
{pt3dadd(194472.000000,198144.000000,109475.000000,1090.072766)}
{pt3dadd(195828.000000,204096.000000,109225.000000,1144.458526)}
{pt3dadd(196236.000000,198948.000000,109225.000000,1183.213262)}
{pt3dadd(196920.000000,199476.000000,109225.000000,1173.814328)}
{pt3dadd(197652.000000,200004.000000,109225.000000,921.990956)}
{pt3dadd(198384.000000,200544.000000,109225.000000,921.990956)}
{pt3dadd(199116.000000,201084.000000,109225.000000,951.621096)}
{pt3dadd(199788.000000,201708.000000,109225.000000,1012.507528)}
{pt3dadd(200280.000000,202584.000000,109225.000000,1031.775348)}
{pt3dadd(200328.000000,203292.000000,109225.000000,1050.125654)}
{pt3dadd(199944.000000,203928.000000,109225.000000,1041.174282)}
{pt3dadd(198888.000000,204132.000000,109225.000000,978.215976)}
{pt3dadd(197880.000000,204672.000000,109225.000000,926.280916)}
{pt3dadd(197136.000000,205368.000000,109225.000000,881.417456)}
{pt3dadd(196008.000000,206268.000000,109225.000000,863.067150)}
{pt3dadd(194988.000000,207000.000000,109225.000000,805.212548)}
{pt3dadd(193812.000000,207360.000000,109225.000000,724.951544)}
{pt3dadd(192756.000000,207384.000000,109225.000000,947.306844)}
{pt3dadd(192108.000000,207132.000000,109225.000000,1002.532624)}
{pt3dadd(195660.000000,204540.000000,109225.000000,1020.882930)}
{pt3dadd(192072.000000,205860.000000,109225.000000,1164.215124)}
{pt3dadd(191580.000000,205068.000000,109225.000000,1341.735054)}
{pt3dadd(191940.000000,204228.000000,109225.000000,1149.009894)}
{pt3dadd(192192.000000,203304.000000,109225.000000,1110.428382)}
{pt3dadd(192432.000000,202392.000000,109225.000000,1120.297268)}
{pt3dadd(192816.000000,201480.000000,109225.000000,1053.169982)}
{pt3dadd(193260.000000,200832.000000,109225.000000,998.638156)}
{pt3dadd(193824.000000,200076.000000,109225.000000,951.531536)}
{pt3dadd(194412.000000,199284.000000,109225.000000,882.411448)}
{pt3dadd(194328.000000,198096.000000,109225.000000,882.411448)}
{pt3dadd(194412.000000,197076.000000,109225.000000,832.320034)}
{pt3dadd(195168.000000,197400.000000,109225.000000,775.214992)}
{pt3dadd(195564.000000,197652.000000,109225.000000,822.321612)}
{pt3dadd(196032.000000,198324.000000,109225.000000,1143.265072)}
{pt3dadd(196152.000000,199176.000000,109225.000000,1242.216072)}
{pt3dadd(195996.000000,203544.000000,108800.000000,1315.289292)}
{pt3dadd(195684.000000,197688.000000,108800.000000,1290.419300)}
{pt3dadd(196416.000000,198192.000000,108800.000000,1200.041828)}
{pt3dadd(197400.000000,198756.000000,108800.000000,909.463720)}
{pt3dadd(198420.000000,199608.000000,108800.000000,765.649260)}
{pt3dadd(198960.000000,200376.000000,108800.000000,715.792040)}
{pt3dadd(199416.000000,201096.000000,108800.000000,797.767074)}
{pt3dadd(199908.000000,201828.000000,108800.000000,867.913340)}
{pt3dadd(200292.000000,202440.000000,108800.000000,915.619448)}
{pt3dadd(200772.000000,203148.000000,108800.000000,970.845228)}
{pt3dadd(200244.000000,203700.000000,108800.000000,947.629228)}
{pt3dadd(199116.000000,203928.000000,108800.000000,883.844534)}
{pt3dadd(198372.000000,204408.000000,108800.000000,841.117434)}
{pt3dadd(197592.000000,204936.000000,108800.000000,850.516368)}
{pt3dadd(196464.000000,205440.000000,108800.000000,795.290588)}
{pt3dadd(195624.000000,205920.000000,108800.000000,788.276960)}
{pt3dadd(194904.000000,206448.000000,108800.000000,732.793032)}
{pt3dadd(193428.000000,207396.000000,108800.000000,988.476498)}
{pt3dadd(191976.000000,207180.000000,108800.000000,961.601084)}
{pt3dadd(195960.000000,203844.000000,108800.000000,961.601084)}
{pt3dadd(191700.000000,206088.000000,108800.000000,1018.706126)}
{pt3dadd(191364.000000,205632.000000,108800.000000,1158.205954)}
{pt3dadd(191568.000000,204996.000000,108800.000000,945.249588)}
{pt3dadd(191700.000000,204324.000000,108800.000000,992.356208)}
{pt3dadd(191628.000000,203628.000000,108800.000000,1009.000476)}
{pt3dadd(191892.000000,202956.000000,108800.000000,1009.000476)}
{pt3dadd(192324.000000,202248.000000,108800.000000,998.638156)}
{pt3dadd(192840.000000,201552.000000,108800.000000,980.287850)}
{pt3dadd(193416.000000,200844.000000,108800.000000,950.657710)}
{pt3dadd(193872.000000,199896.000000,108800.000000,1036.135302)}
{pt3dadd(194328.000000,198900.000000,108800.000000,1249.091668)}
{pt3dadd(195312.000000,197976.000000,108800.000000,1379.427928)}
{pt3dadd(195996.000000,203292.000000,108400.000000,1407.647120)}
{pt3dadd(196092.000000,197544.000000,108400.000000,1407.647120)}
{pt3dadd(196752.000000,197844.000000,108400.000000,1383.055960)}
{pt3dadd(197436.000000,198840.000000,108400.000000,1190.330800)}
{pt3dadd(198024.000000,199884.000000,108400.000000,1040.726720)}
{pt3dadd(198516.000000,200712.000000,108400.000000,1021.458900)}
{pt3dadd(199212.000000,201420.000000,108400.000000,1030.857834)}
{pt3dadd(199920.000000,202032.000000,108400.000000,1008.552914)}
{pt3dadd(200604.000000,202800.000000,108400.000000,998.190594)}
{pt3dadd(200328.000000,203556.000000,108400.000000,998.190594)}
{pt3dadd(199428.000000,203940.000000,108400.000000,957.498114)}
{pt3dadd(198408.000000,204096.000000,108400.000000,930.622700)}
{pt3dadd(197688.000000,204504.000000,108400.000000,910.391494)}
{pt3dadd(196848.000000,204924.000000,108400.000000,900.522608)}
{pt3dadd(195840.000000,205416.000000,108400.000000,891.571236)}
{pt3dadd(194952.000000,206160.000000,108400.000000,877.877956)}
{pt3dadd(193860.000000,207132.000000,108400.000000,886.403064)}
{pt3dadd(192732.000000,207300.000000,108400.000000,804.428030)}
{pt3dadd(191952.000000,206700.000000,108400.000000,979.235396)}
{pt3dadd(191148.000000,206172.000000,108400.000000,910.115308)}
{pt3dadd(195912.000000,203712.000000,108400.000000,903.753736)}
{pt3dadd(191040.000000,205524.000000,108400.000000,912.705108)}
{pt3dadd(191076.000000,204780.000000,108400.000000,994.680142)}
{pt3dadd(191520.000000,204600.000000,108400.000000,829.741662)}
{pt3dadd(191796.000000,203724.000000,108400.000000,890.336642)}
{pt3dadd(192144.000000,202752.000000,108400.000000,917.755808)}
{pt3dadd(192444.000000,202020.000000,108400.000000,870.049700)}
{pt3dadd(192732.000000,201300.000000,108400.000000,843.174286)}
{pt3dadd(193188.000000,200712.000000,108400.000000,783.213986)}
{pt3dadd(193800.000000,200016.000000,108400.000000,800.690466)}
{pt3dadd(194100.000000,198924.000000,108400.000000,853.286452)}
{pt3dadd(194820.000000,197880.000000,108400.000000,1143.864560)}
{pt3dadd(195468.000000,197544.000000,108400.000000,1298.933620)}
{pt3dadd(195816.000000,203220.000000,108075.000000,1582.498100)}
{pt3dadd(195912.000000,197916.000000,108075.000000,1612.128240)}
{pt3dadd(196932.000000,198312.000000,108075.000000,1602.259354)}
{pt3dadd(197628.000000,198864.000000,108075.000000,1318.694874)}
{pt3dadd(198132.000000,199512.000000,108075.000000,1181.102294)}
{pt3dadd(198852.000000,200316.000000,108075.000000,883.844534)}
{pt3dadd(199584.000000,201180.000000,108075.000000,813.521914)}
{pt3dadd(200532.000000,201960.000000,108075.000000,756.416872)}
{pt3dadd(201300.000000,202620.000000,108075.000000,749.403244)}
{pt3dadd(201528.000000,203532.000000,108075.000000,731.926764)}
{pt3dadd(200700.000000,203880.000000,108075.000000,738.606416)}
{pt3dadd(199992.000000,203652.000000,108075.000000,724.913136)}
{pt3dadd(199080.000000,203964.000000,108075.000000,739.291078)}
{pt3dadd(198096.000000,204264.000000,108075.000000,746.304706)}
{pt3dadd(197352.000000,204588.000000,108075.000000,685.709726)}
{pt3dadd(196716.000000,205032.000000,108075.000000,666.609860)}
{pt3dadd(196176.000000,205668.000000,108075.000000,680.303140)}
{pt3dadd(195324.000000,206352.000000,108075.000000,680.303140)}
{pt3dadd(193968.000000,207216.000000,108075.000000,703.519140)}
{pt3dadd(193008.000000,207108.000000,108075.000000,748.262434)}
{pt3dadd(192408.000000,206772.000000,108075.000000,834.336228)}
{pt3dadd(191412.000000,206232.000000,108075.000000,1097.384008)}
{pt3dadd(191532.000000,205860.000000,108075.000000,1090.019694)}
{pt3dadd(195600.000000,203628.000000,108075.000000,1074.168008)}
{pt3dadd(191220.000000,205500.000000,108075.000000,1081.900534)}
{pt3dadd(191472.000000,204624.000000,108075.000000,1029.304548)}
{pt3dadd(191772.000000,203700.000000,108075.000000,740.143274)}
{pt3dadd(191940.000000,202896.000000,108075.000000,720.088422)}
{pt3dadd(192120.000000,202128.000000,108075.000000,720.088422)}
{pt3dadd(192480.000000,201588.000000,108075.000000,712.355896)}
{pt3dadd(192972.000000,200988.000000,108075.000000,728.207582)}
{pt3dadd(193524.000000,200364.000000,108075.000000,786.062184)}
{pt3dadd(194184.000000,199572.000000,108075.000000,856.208450)}
{pt3dadd(194532.000000,198360.000000,108075.000000,1132.408616)}
{pt3dadd(195156.000000,197784.000000,108075.000000,1229.667542)}
{pt3dadd(195720.000000,203052.000000,107775.000000,1336.895482)}
{pt3dadd(195984.000000,197892.000000,107775.000000,1375.476994)}
{pt3dadd(196632.000000,199092.000000,107775.000000,1318.371952)}
{pt3dadd(197496.000000,199092.000000,107775.000000,1049.904312)}
{pt3dadd(198108.000000,199224.000000,107775.000000,945.281072)}
{pt3dadd(198660.000000,200064.000000,107775.000000,788.723638)}
{pt3dadd(199428.000000,200904.000000,107775.000000,725.765332)}
{pt3dadd(200412.000000,201672.000000,107775.000000,725.765332)}
{pt3dadd(200844.000000,202284.000000,107775.000000,733.884492)}
{pt3dadd(201240.000000,203100.000000,107775.000000,681.540266)}
{pt3dadd(200484.000000,203760.000000,107775.000000,655.309534)}
{pt3dadd(199032.000000,204228.000000,107775.000000,627.890368)}
{pt3dadd(197892.000000,204588.000000,107775.000000,634.903996)}
{pt3dadd(197064.000000,204852.000000,107775.000000,597.994716)}
{pt3dadd(196200.000000,205308.000000,107775.000000,643.325314)}
{pt3dadd(195576.000000,205740.000000,107775.000000,695.669540)}
{pt3dadd(194496.000000,206712.000000,107775.000000,689.610898)}
{pt3dadd(193548.000000,207120.000000,107775.000000,712.826898)}
{pt3dadd(192660.000000,207180.000000,107775.000000,749.736178)}
{pt3dadd(192156.000000,206568.000000,107775.000000,1024.984206)}
{pt3dadd(191640.000000,206376.000000,107775.000000,1048.200206)}
{pt3dadd(195540.000000,203364.000000,107775.000000,1067.300072)}
{pt3dadd(191544.000000,205476.000000,107775.000000,1044.084072)}
{pt3dadd(191568.000000,204672.000000,107775.000000,1061.560552)}
{pt3dadd(191760.000000,203928.000000,107775.000000,800.690466)}
{pt3dadd(192096.000000,203292.000000,107775.000000,777.474466)}
{pt3dadd(192480.000000,202440.000000,107775.000000,747.109114)}
{pt3dadd(192876.000000,201600.000000,107775.000000,747.109114)}
{pt3dadd(193176.000000,200952.000000,107775.000000,658.819510)}
{pt3dadd(193572.000000,200244.000000,107775.000000,651.455196)}
{pt3dadd(193980.000000,199500.000000,107775.000000,674.671196)}
{pt3dadd(194436.000000,198780.000000,107775.000000,1017.157176)}
{pt3dadd(195000.000000,197904.000000,107775.000000,1032.254016)}
{pt3dadd(195720.000000,202944.000000,107400.000000,1087.215454)}
{pt3dadd(196332.000000,198516.000000,107400.000000,1118.956562)}
{pt3dadd(197280.000000,199212.000000,107400.000000,1082.047282)}
{pt3dadd(198096.000000,199920.000000,107400.000000,720.075012)}
{pt3dadd(199224.000000,200592.000000,107400.000000,691.284892)}
{pt3dadd(200136.000000,201192.000000,107400.000000,691.284892)}
{pt3dadd(200580.000000,201924.000000,107400.000000,659.543784)}
{pt3dadd(200964.000000,202800.000000,107400.000000,653.182212)}
{pt3dadd(201204.000000,203628.000000,107400.000000,678.163862)}
{pt3dadd(199872.000000,204144.000000,107400.000000,639.512916)}
{pt3dadd(198756.000000,204372.000000,107400.000000,625.134974)}
{pt3dadd(197748.000000,204708.000000,107400.000000,632.499288)}
{pt3dadd(196752.000000,205056.000000,107400.000000,702.645554)}
{pt3dadd(195876.000000,205428.000000,107400.000000,766.270282)}
{pt3dadd(195096.000000,205836.000000,107400.000000,850.355616)}
{pt3dadd(194436.000000,206304.000000,107400.000000,889.110352)}
{pt3dadd(193344.000000,206976.000000,107400.000000,849.862418)}
{pt3dadd(192456.000000,206664.000000,107400.000000,1088.781424)}
{pt3dadd(191232.000000,206148.000000,107400.000000,1050.026688)}
{pt3dadd(195600.000000,203364.000000,107400.000000,1078.245880)}
{pt3dadd(191448.000000,205356.000000,107400.000000,1163.723472)}
{pt3dadd(192312.000000,204144.000000,107400.000000,1245.698506)}
{pt3dadd(192600.000000,203352.000000,107400.000000,964.052400)}
{pt3dadd(192852.000000,202620.000000,107400.000000,1002.807136)}
{pt3dadd(193500.000000,201468.000000,107400.000000,950.211150)}
{pt3dadd(194088.000000,200184.000000,107400.000000,883.083864)}
{pt3dadd(194484.000000,199296.000000,107400.000000,1138.099450)}
{pt3dadd(194964.000000,198252.000000,107400.000000,1138.099450)}
{pt3dadd(195900.000000,202908.000000,107050.000000,1129.574342)}
{pt3dadd(196872.000000,198876.000000,107050.000000,1182.170328)}
{pt3dadd(197604.000000,199440.000000,107050.000000,1125.065286)}
{pt3dadd(198624.000000,200196.000000,107050.000000,812.944658)}
{pt3dadd(199404.000000,201084.000000,107050.000000,886.783424)}
{pt3dadd(200292.000000,202068.000000,107050.000000,820.954764)}
{pt3dadd(200976.000000,203220.000000,107050.000000,740.939612)}
{pt3dadd(200364.000000,204156.000000,107050.000000,734.259960)}
{pt3dadd(199320.000000,204288.000000,107050.000000,764.489588)}
{pt3dadd(198396.000000,204456.000000,107050.000000,715.027616)}
{pt3dadd(197052.000000,204768.000000,107050.000000,789.381384)}
{pt3dadd(195984.000000,205428.000000,107050.000000,879.758856)}
{pt3dadd(194412.000000,206172.000000,107050.000000,1161.686536)}
{pt3dadd(193224.000000,206616.000000,107050.000000,1198.430836)}
{pt3dadd(195780.000000,203436.000000,107050.000000,1198.430836)}
{pt3dadd(192156.000000,206328.000000,107050.000000,1166.689728)}
{pt3dadd(191628.000000,206172.000000,107050.000000,1089.353480)}
{pt3dadd(191760.000000,205632.000000,107050.000000,783.740100)}
{pt3dadd(192000.000000,204852.000000,107050.000000,710.086520)}
{pt3dadd(192480.000000,204228.000000,107050.000000,719.037892)}
{pt3dadd(193368.000000,203580.000000,107050.000000,726.402206)}
{pt3dadd(193992.000000,202788.000000,107050.000000,733.415834)}
{pt3dadd(193824.000000,201780.000000,107050.000000,718.450588)}
{pt3dadd(193716.000000,200676.000000,107050.000000,718.450588)}
{pt3dadd(193848.000000,199884.000000,107050.000000,737.718408)}
{pt3dadd(194364.000000,199284.000000,107050.000000,692.975114)}
{pt3dadd(195120.000000,198432.000000,107050.000000,1069.390614)}
{pt3dadd(195912.000000,197868.000000,107050.000000,1108.041560)}
{pt3dadd(196092.000000,202848.000000,106775.000000,1064.869570)}
{pt3dadd(196296.000000,198492.000000,106775.000000,978.795776)}
{pt3dadd(197160.000000,198612.000000,106775.000000,1039.390756)}
{pt3dadd(198000.000000,199320.000000,106775.000000,670.339570)}
{pt3dadd(198468.000000,200100.000000,106775.000000,636.435726)}
{pt3dadd(199176.000000,200616.000000,106775.000000,700.665310)}
{pt3dadd(200124.000000,201564.000000,106775.000000,719.765176)}
{pt3dadd(200760.000000,202272.000000,106775.000000,696.549176)}
{pt3dadd(201252.000000,203556.000000,106775.000000,689.184862)}
{pt3dadd(200328.000000,203928.000000,106775.000000,768.523094)}
{pt3dadd(199008.000000,204300.000000,106775.000000,768.523094)}
{pt3dadd(197604.000000,204648.000000,106775.000000,782.901036)}
{pt3dadd(196800.000000,205176.000000,106775.000000,797.997876)}
{pt3dadd(195900.000000,205608.000000,106775.000000,829.738984)}
{pt3dadd(194832.000000,206064.000000,106775.000000,745.653650)}
{pt3dadd(194040.000000,206664.000000,106775.000000,1066.015976)}
{pt3dadd(192384.000000,207120.000000,106775.000000,1058.651662)}
{pt3dadd(195996.000000,203340.000000,106775.000000,1029.861542)}
{pt3dadd(191580.000000,206304.000000,106775.000000,950.523310)}
{pt3dadd(191664.000000,205632.000000,106775.000000,960.254876)}
{pt3dadd(192552.000000,204456.000000,106775.000000,612.473384)}
{pt3dadd(193248.000000,203628.000000,106775.000000,693.676464)}
{pt3dadd(193920.000000,202656.000000,106775.000000,700.356116)}
{pt3dadd(194184.000000,201720.000000,106775.000000,678.776032)}
{pt3dadd(193764.000000,201108.000000,106775.000000,728.753006)}
{pt3dadd(193548.000000,199944.000000,106775.000000,741.794230)}
{pt3dadd(194244.000000,199284.000000,106775.000000,1012.068470)}
{pt3dadd(195336.000000,198060.000000,106775.000000,1005.388818)}
{pt3dadd(196224.000000,202872.000000,106425.000000,1081.930340)}
{pt3dadd(196404.000000,198576.000000,106425.000000,1067.552398)}
{pt3dadd(197364.000000,199152.000000,106425.000000,1074.566026)}
{pt3dadd(198252.000000,200040.000000,106425.000000,716.075078)}
{pt3dadd(199020.000000,200616.000000,106425.000000,703.654864)}
{pt3dadd(199752.000000,201264.000000,106425.000000,703.654864)}
{pt3dadd(200352.000000,201888.000000,106425.000000,742.409600)}
{pt3dadd(200844.000000,202656.000000,106425.000000,735.395972)}
{pt3dadd(200844.000000,203340.000000,106425.000000,710.525980)}
{pt3dadd(200448.000000,204096.000000,106425.000000,704.755854)}
{pt3dadd(200040.000000,204216.000000,106425.000000,665.507920)}
{pt3dadd(198996.000000,204564.000000,106425.000000,601.883192)}
{pt3dadd(198396.000000,204828.000000,106425.000000,582.783326)}
{pt3dadd(197580.000000,205128.000000,106425.000000,614.666946)}
{pt3dadd(197016.000000,205548.000000,106425.000000,653.914880)}
{pt3dadd(196200.000000,205944.000000,106425.000000,735.889914)}
{pt3dadd(195420.000000,206376.000000,106425.000000,767.773534)}
{pt3dadd(194736.000000,206724.000000,106425.000000,741.542802)}
{pt3dadd(193668.000000,207072.000000,106425.000000,1046.649802)}
{pt3dadd(192492.000000,207120.000000,106425.000000,1054.382328)}
{pt3dadd(196164.000000,203316.000000,106425.000000,1027.506914)}
{pt3dadd(191676.000000,206376.000000,106425.000000,1020.493286)}
{pt3dadd(191460.000000,205860.000000,106425.000000,1059.144232)}
{pt3dadd(191652.000000,205368.000000,106425.000000,711.424572)}
{pt3dadd(192192.000000,204876.000000,106425.000000,653.715072)}
{pt3dadd(192744.000000,204300.000000,106425.000000,630.499072)}
{pt3dadd(193284.000000,203724.000000,106425.000000,644.877014)}
{pt3dadd(193824.000000,203148.000000,106425.000000,638.515442)}
{pt3dadd(194172.000000,202476.000000,106425.000000,667.434822)}
{pt3dadd(194280.000000,201660.000000,106425.000000,696.354202)}
{pt3dadd(194244.000000,200760.000000,106425.000000,719.570202)}
{pt3dadd(194184.000000,199944.000000,106425.000000,727.302728)}
{pt3dadd(194616.000000,199320.000000,106425.000000,1105.139280)}
{pt3dadd(195276.000000,198336.000000,106425.000000,1142.048560)}
{pt3dadd(196464.000000,202848.000000,106100.000000,1155.741840)}
{pt3dadd(197040.000000,199248.000000,106100.000000,1112.470988)}
{pt3dadd(197976.000000,199572.000000,106100.000000,1090.360520)}
{pt3dadd(198612.000000,200028.000000,106100.000000,732.578820)}
{pt3dadd(199176.000000,200472.000000,106100.000000,724.459660)}
{pt3dadd(199404.000000,201012.000000,106100.000000,765.152140)}
{pt3dadd(200028.000000,201876.000000,106100.000000,778.193364)}
{pt3dadd(201036.000000,203040.000000,106100.000000,792.571306)}
{pt3dadd(200544.000000,203748.000000,106100.000000,799.935620)}
{pt3dadd(199620.000000,204120.000000,106100.000000,792.203094)}
{pt3dadd(198576.000000,204540.000000,106100.000000,719.626994)}
{pt3dadd(198084.000000,204972.000000,106100.000000,726.640622)}
{pt3dadd(197388.000000,205404.000000,106100.000000,734.373148)}
{pt3dadd(196356.000000,206124.000000,106100.000000,758.749942)}
{pt3dadd(195432.000000,206544.000000,106100.000000,801.477042)}
{pt3dadd(194724.000000,206736.000000,106100.000000,819.667382)}
{pt3dadd(193932.000000,206808.000000,106100.000000,1124.774382)}
{pt3dadd(192588.000000,206904.000000,106100.000000,1095.984262)}
{pt3dadd(196332.000000,203484.000000,106100.000000,1087.459154)}
{pt3dadd(191532.000000,206004.000000,106100.000000,1005.484120)}
{pt3dadd(192408.000000,205188.000000,106100.000000,1012.163772)}
{pt3dadd(193248.000000,204372.000000,106100.000000,693.363492)}
{pt3dadd(193728.000000,203628.000000,106100.000000,738.797880)}
{pt3dadd(194340.000000,202740.000000,106100.000000,730.678720)}
{pt3dadd(194688.000000,201924.000000,106100.000000,742.507488)}
{pt3dadd(194616.000000,200964.000000,106100.000000,742.507488)}
{pt3dadd(194724.000000,200112.000000,106100.000000,742.507488)}
{pt3dadd(195156.000000,199464.000000,106100.000000,1038.493020)}
{pt3dadd(195744.000000,198300.000000,106100.000000,1023.396180)}
{pt3dadd(196476.000000,202692.000000,105725.000000,1036.437404)}
{pt3dadd(197496.000000,199416.000000,105725.000000,1050.815346)}
{pt3dadd(198180.000000,199812.000000,105725.000000,1096.249734)}
{pt3dadd(198900.000000,200700.000000,105725.000000,818.614508)}
{pt3dadd(199752.000000,201756.000000,105725.000000,825.978822)}
{pt3dadd(200772.000000,202692.000000,105725.000000,848.089290)}
{pt3dadd(200388.000000,203532.000000,105725.000000,863.940976)}
{pt3dadd(199620.000000,203988.000000,105725.000000,855.415868)}
{pt3dadd(198948.000000,204504.000000,105725.000000,865.284754)}
{pt3dadd(197952.000000,205056.000000,105725.000000,881.136440)}
{pt3dadd(196560.000000,206124.000000,105725.000000,881.136440)}
{pt3dadd(195396.000000,206832.000000,105725.000000,850.906812)}
{pt3dadd(194388.000000,206928.000000,105725.000000,827.690812)}
{pt3dadd(193104.000000,206820.000000,105725.000000,1119.207832)}
{pt3dadd(192384.000000,206676.000000,105725.000000,1103.356146)}
{pt3dadd(196368.000000,203256.000000,105725.000000,1088.259306)}
{pt3dadd(191412.000000,205740.000000,105725.000000,1063.389314)}
{pt3dadd(191652.000000,205308.000000,105725.000000,1063.389314)}
{pt3dadd(192048.000000,204912.000000,105725.000000,704.898366)}
{pt3dadd(192816.000000,204564.000000,105725.000000,704.898366)}
{pt3dadd(193752.000000,204096.000000,105725.000000,684.843514)}
{pt3dadd(194292.000000,203484.000000,105725.000000,731.823974)}
{pt3dadd(194412.000000,202644.000000,105725.000000,724.810346)}
{pt3dadd(194724.000000,201648.000000,105725.000000,684.226850)}
{pt3dadd(194724.000000,200508.000000,105725.000000,669.848908)}
{pt3dadd(195024.000000,199512.000000,105725.000000,713.119760)}
{pt3dadd(195504.000000,198684.000000,105725.000000,1003.129920)}
{pt3dadd(196068.000000,198612.000000,105725.000000,1017.507862)}
{pt3dadd(196440.000000,202620.000000,105400.000000,1058.091358)}
{pt3dadd(197064.000000,199140.000000,105400.000000,1065.104986)}
{pt3dadd(197988.000000,199536.000000,105400.000000,1082.581466)}
{pt3dadd(198636.000000,200652.000000,105400.000000,792.571306)}
{pt3dadd(199812.000000,201576.000000,105400.000000,808.422992)}
{pt3dadd(200772.000000,202236.000000,105400.000000,763.092394)}
{pt3dadd(200616.000000,203256.000000,105400.000000,770.456708)}
{pt3dadd(200040.000000,204048.000000,105400.000000,737.128542)}
{pt3dadd(199104.000000,204348.000000,105400.000000,772.123116)}
{pt3dadd(198528.000000,204840.000000,105400.000000,780.648224)}
{pt3dadd(197760.000000,205284.000000,105400.000000,864.733558)}
{pt3dadd(197172.000000,205848.000000,105400.000000,872.466084)}
{pt3dadd(196536.000000,206256.000000,105400.000000,896.842878)}
{pt3dadd(195744.000000,206916.000000,105400.000000,861.848304)}
{pt3dadd(194952.000000,206796.000000,105400.000000,861.848304)}
{pt3dadd(193872.000000,206808.000000,105400.000000,1113.671676)}
{pt3dadd(192792.000000,206748.000000,105400.000000,1130.315944)}
{pt3dadd(196320.000000,203040.000000,105400.000000,1098.574836)}
{pt3dadd(191508.000000,205740.000000,105400.000000,1007.038946)}
{pt3dadd(192252.000000,204888.000000,105400.000000,975.297838)}
{pt3dadd(193332.000000,204276.000000,105400.000000,723.474466)}
{pt3dadd(194628.000000,203664.000000,105400.000000,751.693658)}
{pt3dadd(194940.000000,203004.000000,105400.000000,744.680030)}
{pt3dadd(195228.000000,202416.000000,105400.000000,783.740100)}
{pt3dadd(194988.000000,201600.000000,105400.000000,776.726472)}
{pt3dadd(195060.000000,200160.000000,105400.000000,724.930512)}
{pt3dadd(195372.000000,199536.000000,105400.000000,735.292832)}
{pt3dadd(195660.000000,198756.000000,105400.000000,1025.870940)}
{pt3dadd(196260.000000,199068.000000,105400.000000,1063.249920)}
{pt3dadd(196200.000000,202788.000000,105075.000000,1056.570268)}
{pt3dadd(196212.000000,198756.000000,105075.000000,1146.947740)}
{pt3dadd(196920.000000,199200.000000,105075.000000,1083.989434)}
{pt3dadd(197628.000000,200112.000000,105075.000000,800.424954)}
{pt3dadd(198780.000000,200472.000000,105075.000000,807.789268)}
{pt3dadd(199740.000000,201240.000000,105075.000000,748.585858)}
{pt3dadd(200880.000000,202056.000000,105075.000000,601.824188)}
{pt3dadd(201300.000000,202788.000000,105075.000000,587.446246)}
{pt3dadd(201048.000000,203352.000000,105075.000000,594.810560)}
{pt3dadd(199992.000000,203808.000000,105075.000000,561.332752)}
{pt3dadd(198864.000000,204408.000000,105075.000000,704.552062)}
{pt3dadd(198228.000000,205212.000000,105075.000000,831.082526)}
{pt3dadd(197448.000000,205656.000000,105075.000000,878.788634)}
{pt3dadd(196416.000000,206484.000000,105075.000000,886.521160)}
{pt3dadd(195600.000000,206820.000000,105075.000000,919.998968)}
{pt3dadd(194724.000000,206832.000000,105075.000000,842.662720)}
{pt3dadd(193860.000000,206688.000000,105075.000000,807.668146)}
{pt3dadd(192708.000000,206880.000000,105075.000000,724.363006)}
{pt3dadd(192432.000000,206604.000000,105075.000000,702.252538)}
{pt3dadd(191844.000000,206124.000000,105075.000000,600.469244)}
{pt3dadd(191604.000000,205476.000000,105075.000000,570.103892)}
{pt3dadd(191664.000000,204780.000000,105075.000000,578.223052)}
{pt3dadd(192216.000000,204504.000000,105075.000000,845.734492)}
{pt3dadd(192876.000000,204912.000000,105075.000000,783.570912)}
{pt3dadd(195960.000000,203184.000000,105075.000000,734.315863)}
{pt3dadd(193692.000000,204036.000000,105075.000000,751.639991)}
{pt3dadd(193932.000000,203412.000000,105075.000000,714.730711)}
{pt3dadd(194496.000000,202896.000000,105075.000000,497.196245)}
{pt3dadd(194628.000000,202056.000000,105075.000000,581.470293)}
{pt3dadd(194964.000000,201216.000000,105075.000000,732.508636)}
{pt3dadd(195300.000000,200508.000000,105075.000000,752.563488)}
{pt3dadd(195384.000000,199860.000000,105075.000000,1009.764788)}
{pt3dadd(195696.000000,198864.000000,105075.000000,1002.400474)}
{pt3dadd(196068.000000,202932.000000,104750.000000,980.290006)}
{pt3dadd(196824.000000,199164.000000,104750.000000,996.141692)}
{pt3dadd(197748.000000,199560.000000,104750.000000,1003.506006)}
{pt3dadd(198444.000000,200364.000000,104750.000000,722.619006)}
{pt3dadd(199260.000000,200808.000000,104750.000000,729.983320)}
{pt3dadd(200628.000000,201588.000000,104750.000000,716.942096)}
{pt3dadd(200760.000000,202308.000000,104750.000000,680.032816)}
{pt3dadd(200652.000000,202800.000000,104750.000000,665.654874)}
{pt3dadd(200292.000000,203568.000000,104750.000000,689.340574)}
{pt3dadd(199608.000000,204120.000000,104750.000000,661.921408)}
{pt3dadd(198888.000000,204744.000000,104750.000000,722.668740)}
{pt3dadd(198180.000000,205308.000000,104750.000000,743.726334)}
{pt3dadd(197316.000000,206196.000000,104750.000000,718.856342)}
{pt3dadd(196332.000000,206928.000000,104750.000000,725.535994)}
{pt3dadd(195408.000000,207204.000000,104750.000000,760.687686)}
{pt3dadd(194664.000000,206928.000000,104750.000000,727.359520)}
{pt3dadd(193824.000000,206616.000000,104750.000000,688.111586)}
{pt3dadd(192588.000000,206388.000000,104750.000000,682.616226)}
{pt3dadd(192096.000000,205728.000000,104750.000000,704.726694)}
{pt3dadd(192192.000000,204816.000000,104750.000000,721.370962)}
{pt3dadd(193128.000000,205032.000000,104750.000000,682.123028)}
{pt3dadd(194040.000000,204720.000000,104750.000000,904.303208)}
{pt3dadd(194436.000000,203892.000000,104750.000000,1022.885268)}
{pt3dadd(195624.000000,203172.000000,104750.000000,1007.788428)}
{pt3dadd(195024.000000,202884.000000,104750.000000,1057.250400)}
{pt3dadd(194652.000000,202440.000000,104750.000000,1082.120392)}
{pt3dadd(194976.000000,201648.000000,104750.000000,899.188146)}
{pt3dadd(195168.000000,200772.000000,104750.000000,825.349380)}
{pt3dadd(195396.000000,199932.000000,104750.000000,955.793320)}
{pt3dadd(195744.000000,198996.000000,104750.000000,1158.154720)}
{pt3dadd(196236.000000,199812.000000,104750.000000,1180.265188)}
{pt3dadd(196716.000000,202860.000000,104475.000000,1146.787380)}
{pt3dadd(197184.000000,199404.000000,104475.000000,1154.519906)}
{pt3dadd(198336.000000,199836.000000,104475.000000,1074.167380)}
{pt3dadd(199140.000000,200904.000000,104475.000000,822.344008)}
{pt3dadd(200388.000000,202104.000000,104475.000000,814.611482)}
{pt3dadd(200892.000000,202356.000000,104475.000000,872.466084)}
{pt3dadd(200328.000000,202944.000000,104475.000000,837.314392)}
{pt3dadd(199848.000000,203724.000000,104475.000000,780.209350)}
{pt3dadd(199164.000000,204504.000000,104475.000000,808.428542)}
{pt3dadd(198144.000000,205296.000000,104475.000000,841.756708)}
{pt3dadd(197352.000000,206196.000000,104475.000000,663.029340)}
{pt3dadd(196680.000000,206808.000000,104475.000000,536.097932)}
{pt3dadd(195648.000000,206940.000000,104475.000000,396.125300)}
{pt3dadd(194760.000000,206892.000000,104475.000000,189.178740)}
{pt3dadd(193224.000000,206700.000000,104475.000000,1.500000)}
{pt3dadd(192648.000000,206268.000000,104475.000000,1.500000)}
{pt3dadd(192540.000000,205524.000000,104475.000000,1.500000)}
{pt3dadd(192984.000000,204828.000000,104475.000000,1.500000)}
{pt3dadd(193908.000000,204216.000000,104475.000000,1.500000)}
{pt3dadd(196428.000000,204384.000000,104475.000000,1.500000)}
{pt3dadd(194400.000000,203880.000000,104475.000000,1.500000)}
{pt3dadd(195048.000000,203184.000000,104475.000000,1.500000)}
{pt3dadd(194868.000000,202476.000000,104475.000000,1.500000)}
{pt3dadd(195396.000000,201864.000000,104475.000000,1.500000)}
{pt3dadd(195744.000000,200904.000000,104475.000000,1.500000)}
{pt3dadd(195852.000000,199068.000000,104475.000000,1.500000)}
{pt3dadd(196308.000000,200004.000000,104475.000000,1.500000)}
{pt3dadd(197292.000000,203172.000000,104125.000000,1.500000)}
{pt3dadd(197640.000000,199824.000000,104125.000000,1.500000)}
{pt3dadd(198528.000000,200424.000000,104125.000000,1.500000)}
{pt3dadd(199740.000000,201444.000000,104125.000000,1.500000)}
{pt3dadd(200724.000000,202104.000000,104125.000000,1.500000)}
{pt3dadd(200676.000000,203052.000000,104125.000000,1.500000)}
{pt3dadd(200328.000000,203484.000000,104125.000000,1.500000)}
{pt3dadd(199704.000000,204168.000000,104125.000000,1.500000)}
{pt3dadd(198852.000000,204756.000000,104125.000000,1.500000)}
{pt3dadd(197976.000000,205668.000000,104125.000000,1.500000)}
{pt3dadd(197304.000000,206556.000000,104125.000000,1.500000)}
{pt3dadd(196284.000000,206712.000000,104125.000000,1.500000)}
{pt3dadd(195204.000000,206556.000000,104125.000000,1.500000)}
{pt3dadd(193656.000000,206508.000000,104125.000000,1.500000)}
{pt3dadd(192972.000000,206052.000000,104125.000000,1.500000)}
{pt3dadd(193200.000000,205428.000000,104125.000000,1.500000)}
{pt3dadd(193680.000000,204876.000000,104125.000000,1.500000)}
{pt3dadd(194496.000000,204252.000000,104125.000000,1.500000)}
{pt3dadd(197208.000000,203820.000000,104125.000000,1.500000)}
{pt3dadd(194592.000000,203772.000000,104125.000000,1.500000)}
{pt3dadd(194640.000000,203232.000000,104125.000000,1.500000)}
{pt3dadd(194976.000000,202620.000000,104125.000000,1.500000)}
{pt3dadd(195228.000000,202020.000000,104125.000000,1.500000)}
{pt3dadd(195408.000000,201372.000000,104125.000000,1.500000)}
{pt3dadd(195600.000000,200724.000000,104125.000000,1.500000)}
{pt3dadd(195792.000000,200076.000000,104125.000000,1.500000)}
{pt3dadd(195852.000000,199428.000000,104125.000000,1.500000)}
{pt3dadd(196008.000000,198816.000000,104125.000000,1.500000)}
{pt3dadd(196404.000000,199668.000000,104125.000000,1.500000)}
{pt3dadd(196896.000000,201024.000000,104125.000000,1.500000)}
{pt3dadd(197544.000000,202860.000000,103700.000000,1.500000)}
{pt3dadd(198264.000000,200340.000000,103700.000000,1.500000)}
{pt3dadd(199308.000000,201048.000000,103700.000000,1.500000)}
{pt3dadd(200208.000000,201684.000000,103700.000000,1.500000)}
{pt3dadd(200940.000000,202272.000000,103700.000000,1.500000)}
{pt3dadd(200748.000000,203064.000000,103700.000000,1.500000)}
{pt3dadd(200184.000000,203724.000000,103700.000000,1.500000)}
{pt3dadd(199248.000000,204216.000000,103700.000000,1.500000)}
{pt3dadd(198552.000000,204876.000000,103700.000000,1.500000)}
{pt3dadd(198072.000000,205392.000000,103700.000000,1.500000)}
{pt3dadd(197460.000000,206340.000000,103700.000000,1.500000)}
{pt3dadd(196680.000000,207240.000000,103700.000000,1.500000)}
{pt3dadd(196200.000000,206664.000000,103700.000000,1.500000)}
{pt3dadd(195528.000000,206460.000000,103700.000000,1.500000)}
{pt3dadd(194472.000000,206388.000000,103700.000000,1.500000)}
{pt3dadd(193416.000000,206316.000000,103700.000000,1.500000)}
{pt3dadd(193164.000000,205836.000000,103700.000000,1.500000)}
{pt3dadd(193476.000000,205344.000000,103700.000000,1.500000)}
{pt3dadd(193884.000000,204828.000000,103700.000000,1.500000)}
{pt3dadd(194292.000000,204324.000000,103700.000000,1.500000)}
{pt3dadd(197100.000000,204072.000000,103700.000000,1.500000)}
{pt3dadd(195000.000000,203400.000000,103700.000000,1.500000)}
{pt3dadd(195120.000000,202512.000000,103700.000000,1.500000)}
{pt3dadd(195504.000000,202092.000000,103700.000000,1.500000)}
{pt3dadd(195948.000000,201204.000000,103700.000000,1.500000)}
{pt3dadd(195936.000000,200412.000000,103700.000000,1.500000)}
{pt3dadd(195684.000000,199272.000000,103700.000000,1.500000)}
{pt3dadd(197136.000000,200268.000000,103700.000000,1.500000)}
{pt3dadd(197736.000000,202944.000000,103325.000000,1.500000)}
{pt3dadd(198288.000000,200412.000000,103325.000000,1.500000)}
{pt3dadd(198984.000000,201012.000000,103325.000000,1.500000)}
{pt3dadd(199848.000000,201396.000000,103325.000000,1.500000)}
{pt3dadd(200736.000000,202068.000000,103325.000000,1.500000)}
{pt3dadd(200256.000000,202872.000000,103325.000000,1.500000)}
{pt3dadd(199632.000000,203844.000000,103325.000000,1.500000)}
{pt3dadd(198984.000000,204720.000000,103325.000000,1.500000)}
{pt3dadd(198204.000000,205380.000000,103325.000000,1.500000)}
{pt3dadd(197724.000000,205932.000000,103325.000000,1.500000)}
{pt3dadd(197292.000000,206688.000000,103325.000000,1.500000)}
{pt3dadd(196824.000000,206940.000000,103325.000000,1.500000)}
{pt3dadd(196260.000000,206712.000000,103325.000000,1.500000)}
{pt3dadd(195336.000000,206304.000000,103325.000000,1.500000)}
{pt3dadd(194136.000000,206076.000000,103325.000000,1.500000)}
{pt3dadd(193032.000000,205872.000000,103325.000000,1.500000)}
{pt3dadd(193644.000000,205416.000000,103325.000000,1.500000)}
{pt3dadd(194556.000000,205008.000000,103325.000000,1.500000)}
{pt3dadd(197376.000000,204168.000000,103325.000000,1.500000)}
{pt3dadd(194904.000000,204276.000000,103325.000000,1.500000)}
{pt3dadd(194820.000000,203784.000000,103325.000000,1.500000)}
{pt3dadd(195108.000000,203220.000000,103325.000000,1.500000)}
{pt3dadd(195552.000000,202524.000000,103325.000000,1.500000)}
{pt3dadd(195948.000000,201636.000000,103325.000000,1.500000)}
{pt3dadd(196044.000000,200904.000000,103325.000000,1.500000)}
{pt3dadd(196056.000000,200136.000000,103325.000000,278.930200)}
{pt3dadd(196320.000000,199512.000000,103325.000000,802.331960)}
{pt3dadd(197028.000000,200604.000000,103325.000000,1192.826240)}
{pt3dadd(197436.000000,202524.000000,103325.000000,1339.812500)}
{pt3dadd(197820.000000,203100.000000,103000.000000,1466.743908)}
{pt3dadd(198360.000000,200328.000000,103000.000000,1322.606688)}
{pt3dadd(199044.000000,200568.000000,103000.000000,969.407188)}
{pt3dadd(199584.000000,201216.000000,103000.000000,688.520188)}
{pt3dadd(200424.000000,202092.000000,103000.000000,608.707464)}
{pt3dadd(200328.000000,202968.000000,103000.000000,581.165192)}
{pt3dadd(200208.000000,203652.000000,103000.000000,552.245812)}
{pt3dadd(199728.000000,204180.000000,103000.000000,560.770920)}
{pt3dadd(199116.000000,204936.000000,103000.000000,578.095048)}
{pt3dadd(198372.000000,204960.000000,103000.000000,665.272086)}
{pt3dadd(197460.000000,206016.000000,103000.000000,686.755716)}
{pt3dadd(196788.000000,206820.000000,103000.000000,681.771252)}
{pt3dadd(196056.000000,206604.000000,103000.000000,636.336864)}
{pt3dadd(195468.000000,206424.000000,103000.000000,642.698436)}
{pt3dadd(194580.000000,205944.000000,103000.000000,727.961662)}
{pt3dadd(194304.000000,205284.000000,103000.000000,961.250836)}
{pt3dadd(195312.000000,204852.000000,103000.000000,1049.540440)}
{pt3dadd(197556.000000,203820.000000,103000.000000,1086.449720)}
{pt3dadd(195084.000000,204228.000000,103000.000000,1093.129372)}
{pt3dadd(195456.000000,203460.000000,103000.000000,1117.720532)}
{pt3dadd(195552.000000,203064.000000,103000.000000,970.505152)}
{pt3dadd(196056.000000,202440.000000,103000.000000,1011.015752)}
{pt3dadd(196188.000000,201336.000000,103000.000000,1231.307772)}
{pt3dadd(196476.000000,200280.000000,103000.000000,1412.542580)}
{pt3dadd(197136.000000,201480.000000,103000.000000,1318.539880)}
{pt3dadd(198084.000000,203268.000000,102775.000000,1238.524728)}
{pt3dadd(198444.000000,200784.000000,102775.000000,1180.537648)}
{pt3dadd(199488.000000,201168.000000,102775.000000,937.029628)}
{pt3dadd(199932.000000,201744.000000,102775.000000,777.905288)}
{pt3dadd(200076.000000,202644.000000,102775.000000,734.634436)}
{pt3dadd(199764.000000,203220.000000,102775.000000,762.053602)}
{pt3dadd(199380.000000,204012.000000,102775.000000,738.837602)}
{pt3dadd(198588.000000,204720.000000,102775.000000,746.201916)}
{pt3dadd(197808.000000,205344.000000,102775.000000,688.492416)}
{pt3dadd(197028.000000,206208.000000,102775.000000,635.650578)}
{pt3dadd(196944.000000,207024.000000,102775.000000,575.942038)}
{pt3dadd(196260.000000,206868.000000,102775.000000,575.942038)}
{pt3dadd(195528.000000,206364.000000,102775.000000,516.233498)}
{pt3dadd(194784.000000,205872.000000,102775.000000,551.832530)}
{pt3dadd(193584.000000,205716.000000,102775.000000,717.356760)}
{pt3dadd(194736.000000,205236.000000,102775.000000,914.031446)}
{pt3dadd(195384.000000,204660.000000,102775.000000,937.247446)}
{pt3dadd(197832.000000,204048.000000,102775.000000,1021.332780)}
{pt3dadd(195288.000000,204084.000000,102775.000000,1021.332780)}
{pt3dadd(195432.000000,203616.000000,102775.000000,988.665540)}
{pt3dadd(195168.000000,203304.000000,102775.000000,904.295380)}
{pt3dadd(195732.000000,202800.000000,102775.000000,921.771860)}
{pt3dadd(195852.000000,201912.000000,102775.000000,949.991052)}
{pt3dadd(196080.000000,201048.000000,102775.000000,949.991052)}
{pt3dadd(196668.000000,200412.000000,102775.000000,1080.327312)}
{pt3dadd(197508.000000,200160.000000,102775.000000,1210.663572)}
{pt3dadd(197652.000000,201804.000000,102775.000000,1156.277812)}
{pt3dadd(198372.000000,203292.000000,102475.000000,1103.681826)}
{pt3dadd(198996.000000,201168.000000,102475.000000,1144.699474)}
{pt3dadd(199620.000000,201864.000000,102475.000000,940.709634)}
{pt3dadd(199968.000000,202656.000000,102475.000000,773.629074)}
{pt3dadd(199872.000000,203508.000000,102475.000000,802.419194)}
{pt3dadd(199236.000000,204264.000000,102475.000000,795.054880)}
{pt3dadd(198504.000000,204852.000000,102475.000000,768.415174)}
{pt3dadd(197796.000000,205536.000000,102475.000000,716.836694)}
{pt3dadd(196896.000000,206592.000000,102475.000000,628.348934)}
{pt3dadd(195588.000000,206352.000000,102475.000000,606.238466)}
{pt3dadd(194580.000000,205860.000000,102475.000000,580.124972)}
{pt3dadd(195216.000000,205344.000000,102475.000000,559.067378)}
{pt3dadd(196128.000000,204684.000000,102475.000000,586.960158)}
{pt3dadd(195984.000000,204048.000000,102475.000000,620.348298)}
{pt3dadd(196488.000000,203532.000000,102475.000000,677.453340)}
{pt3dadd(197040.000000,202932.000000,102475.000000,671.683214)}
{pt3dadd(197628.000000,202032.000000,102475.000000,624.205462)}
{pt3dadd(197640.000000,200724.000000,102475.000000,792.028382)}
{pt3dadd(197892.000000,200340.000000,102475.000000,982.823302)}
{pt3dadd(198000.000000,202188.000000,102475.000000,919.038608)}
{pt3dadd(198468.000000,203460.000000,102175.000000,943.908600)}
{pt3dadd(198972.000000,201492.000000,102175.000000,985.024780)}
{pt3dadd(199704.000000,201888.000000,102175.000000,806.983716)}
{pt3dadd(199944.000000,202152.000000,102175.000000,591.207146)}
{pt3dadd(200196.000000,202992.000000,102175.000000,584.845574)}
{pt3dadd(199968.000000,203832.000000,102175.000000,584.845574)}
{pt3dadd(199188.000000,204420.000000,102175.000000,597.886798)}
{pt3dadd(198120.000000,205296.000000,102175.000000,608.104942)}
{pt3dadd(197160.000000,206424.000000,102175.000000,588.531162)}
{pt3dadd(196092.000000,206376.000000,102175.000000,565.973354)}
{pt3dadd(195444.000000,206436.000000,102175.000000,580.351296)}
{pt3dadd(196464.000000,205944.000000,102175.000000,573.671644)}
{pt3dadd(196800.000000,205140.000000,102175.000000,573.671644)}
{pt3dadd(196788.000000,204324.000000,102175.000000,636.417414)}
{pt3dadd(197112.000000,203340.000000,102175.000000,679.030074)}
{pt3dadd(197544.000000,202584.000000,102175.000000,830.577060)}
{pt3dadd(197928.000000,201096.000000,102175.000000,936.897880)}
{pt3dadd(198468.000000,203196.000000,102175.000000,960.583580)}
{pt3dadd(198588.000000,203904.000000,101825.000000,917.411590)}
{pt3dadd(198840.000000,202308.000000,101825.000000,924.775904)}
{pt3dadd(199476.000000,202236.000000,101825.000000,758.850976)}
{pt3dadd(199608.000000,203028.000000,101825.000000,640.109942)}
{pt3dadd(199416.000000,203904.000000,101825.000000,592.632190)}
{pt3dadd(198972.000000,204756.000000,101825.000000,592.632190)}
{pt3dadd(198288.000000,205596.000000,101825.000000,578.254248)}
{pt3dadd(197340.000000,206328.000000,101825.000000,559.154382)}
{pt3dadd(197088.000000,205944.000000,101825.000000,645.228176)}
{pt3dadd(197088.000000,205476.000000,101825.000000,641.127448)}
{pt3dadd(198300.000000,204336.000000,101825.000000,650.395594)}
{pt3dadd(197052.000000,204948.000000,101825.000000,605.064996)}
{pt3dadd(197160.000000,204240.000000,101825.000000,574.313220)}
{pt3dadd(197760.000000,203172.000000,101825.000000,564.444334)}
{pt3dadd(198228.000000,201900.000000,101825.000000,629.716094)}
{pt3dadd(198624.000000,203784.000000,101575.000000,588.313134)}
{pt3dadd(198696.000000,202392.000000,101575.000000,551.657276)}
{pt3dadd(199128.000000,202596.000000,101575.000000,461.536286)}
{pt3dadd(199164.000000,203064.000000,101575.000000,264.458612)}
{pt3dadd(199308.000000,204204.000000,101575.000000,117.472352)}
{pt3dadd(199068.000000,204864.000000,101575.000000,126.659712)}
{pt3dadd(198636.000000,205008.000000,101575.000000,150.388036)}
{pt3dadd(198612.000000,204552.000000,101575.000000,283.681016)}
{pt3dadd(198384.000000,204144.000000,101575.000000,354.228226)}
{pt3dadd(197796.000000,203892.000000,101575.000000,421.401762)}
{pt3dadd(197652.000000,203448.000000,101575.000000,453.189543)}
{pt3dadd(198168.000000,202836.000000,101575.000000,337.367680)}

{create adhoc52}
{access adhoc52}
{connect adhoc52(1), adhoc3(0)}
{nseg = 1}
{strdef color color = "White"}
{pt3dclear()}
{pt3dadd(154308.000000,116712.000000,168175.000000,82.809190)}
{pt3dadd(150708.000000,117036.000000,171450.000000,34.522654)}
{pt3dadd(151152.000000,116640.000000,171900.000000,21.313592)}
{pt3dadd(151080.000000,116700.000000,172325.000000,10.298281)}
{pt3dadd(150828.000000,116616.000000,172800.000000,6.746526)}
{pt3dadd(150576.000000,116544.000000,173225.000000,6.746526)}
{pt3dadd(149940.000000,116580.000000,173625.000000,9.014363)}
{pt3dadd(149028.000000,116964.000000,174075.000000,10.571883)}
{pt3dadd(148188.000000,116508.000000,174450.000000,7.875595)}
{pt3dadd(147912.000000,116748.000000,174700.000000,9.287602)}

{create adhoc53}
{access adhoc53}
{connect adhoc53(1), adhoc2(0)}
{nseg = 1}
{strdef color color = "White"}
{pt3dclear()}
{pt3dadd(150156.000000,110088.000000,170875.000000,99.371025)}
{pt3dadd(148548.000000,109824.000000,168250.000000,41.327184)}
{pt3dadd(148296.000000,109608.000000,168200.000000,32.093245)}
{pt3dadd(148404.000000,109356.000000,168250.000000,12.661558)}
{pt3dadd(148308.000000,109140.000000,168175.000000,13.374147)}

{create adhoc54}
{access adhoc54}
{connect adhoc54(1), adhoc1(0)}
{nseg = 1}
{strdef color color = "White"}
{pt3dclear()}
{pt3dadd(149040.000000,107568.000000,172125.000000,46.005108)}
{pt3dadd(150300.000000,107280.000000,170600.000000,38.837589)}
{pt3dadd(150768.000000,106956.000000,170125.000000,23.902554)}
{pt3dadd(150804.000000,106716.000000,169925.000000,28.503064)}
{pt3dadd(151020.000000,106440.000000,169850.000000,15.001532)}
{pt3dadd(151536.000000,106188.000000,169600.000000,15.001532)}
{pt3dadd(151824.000000,105900.000000,169450.000000,15.001532)}
{pt3dadd(151800.000000,105600.000000,169475.000000,30.600897)}
{pt3dadd(151980.000000,105408.000000,169350.000000,17.099365)}
{pt3dadd(152064.000000,105180.000000,168975.000000,17.099365)}
{pt3dadd(152172.000000,104964.000000,168750.000000,17.099365)}
{pt3dadd(152256.000000,104748.000000,168750.000000,30.600897)}
{pt3dadd(152340.000000,104460.000000,168750.000000,15.001532)}
{pt3dadd(152424.000000,104208.000000,168750.000000,15.001532)}
{pt3dadd(152532.000000,103956.000000,168675.000000,15.001532)}
{pt3dadd(152976.000000,103680.000000,168475.000000,31.263370)}
{pt3dadd(153360.000000,103428.000000,168275.000000,17.761838)}
{pt3dadd(153780.000000,103224.000000,168100.000000,17.761838)}
{pt3dadd(154116.000000,102912.000000,167875.000000,17.761838)}
{pt3dadd(154452.000000,102660.000000,167650.000000,31.263370)}
{pt3dadd(154788.000000,102432.000000,167425.000000,15.001532)}
{pt3dadd(154596.000000,102192.000000,167275.000000,15.001532)}
{pt3dadd(154404.000000,102024.000000,167125.000000,15.001532)}
{pt3dadd(154584.000000,101784.000000,167100.000000,28.503064)}
{pt3dadd(154896.000000,101124.000000,166650.000000,15.001532)}
{pt3dadd(155628.000000,101184.000000,166275.000000,15.001532)}
{pt3dadd(155712.000000,100692.000000,165975.000000,15.001532)}
{pt3dadd(156360.000000,100308.000000,165775.000000,26.202809)}
{pt3dadd(156828.000000,99996.000000,165525.000000,12.701277)}
{pt3dadd(157320.000000,99696.000000,165125.000000,12.701277)}
{pt3dadd(157536.000000,99420.000000,165350.000000,12.701277)}
{pt3dadd(157440.000000,99156.000000,165300.000000,21.602299)}
{pt3dadd(157548.000000,98892.000000,165350.000000,10.401022)}
{pt3dadd(157656.000000,98616.000000,165400.000000,10.401022)}
{pt3dadd(157764.000000,98436.000000,165450.000000,10.401022)}
{pt3dadd(157872.000000,98124.000000,165500.000000,16.756854)}
{pt3dadd(157980.000000,97872.000000,165550.000000,7.855832)}
{pt3dadd(158088.000000,97620.000000,165600.000000,7.855832)}
{pt3dadd(158196.000000,97392.000000,165450.000000,7.855832)}
{pt3dadd(158484.000000,97140.000000,165375.000000,15.542830)}
{pt3dadd(158664.000000,96816.000000,165450.000000,9.186998)}
{pt3dadd(159432.000000,96552.000000,165625.000000,9.186998)}
{pt3dadd(159648.000000,96264.000000,165675.000000,9.186998)}
{pt3dadd(159708.000000,96024.000000,165700.000000,18.471396)}
{pt3dadd(159996.000000,95784.000000,165750.000000,10.784398)}
{pt3dadd(160416.000000,95496.000000,165800.000000,10.784398)}
{pt3dadd(160932.000000,95268.000000,165900.000000,10.784398)}
{pt3dadd(160836.000000,94992.000000,165850.000000,20.068796)}
{pt3dadd(160896.000000,94740.000000,165750.000000,10.784398)}
{pt3dadd(160824.000000,94452.000000,165800.000000,10.784398)}
{pt3dadd(160752.000000,94212.000000,165600.000000,10.784398)}
{pt3dadd(160884.000000,93936.000000,165675.000000,18.151917)}
{pt3dadd(161016.000000,93660.000000,165825.000000,8.867519)}
{pt3dadd(161148.000000,93372.000000,165900.000000,8.867519)}
{pt3dadd(161304.000000,93108.000000,165950.000000,8.867519)}
{pt3dadd(161436.000000,92868.000000,166225.000000,12.656861)}
{pt3dadd(161472.000000,92676.000000,166325.000000,5.289343)}
{pt3dadd(161760.000000,92448.000000,166350.000000,5.289343)}
{pt3dadd(161820.000000,92220.000000,166200.000000,5.289343)}
{pt3dadd(161820.000000,91956.000000,166275.000000,8.397129)}
{pt3dadd(161568.000000,91740.000000,166275.000000,4.607786)}
{pt3dadd(161520.000000,91512.000000,166150.000000,6.165306)}
{pt3dadd(161628.000000,91224.000000,166250.000000,6.487386)}
{pt3dadd(161688.000000,90972.000000,166375.000000,4.632667)}
{pt3dadd(161748.000000,90720.000000,166350.000000,3.110400)}
