# Supplementary material for: Full reconstruction of large lobula plate tangential cells in Drosophila from a 3D EM dataset
Source: PLoS One. 2018 Nov 28;13(11):e0207828. doi: 10.1371/journal.pone.0207828 (PMC6261601; doi:10.1371/journal.pone.0207828)
Supplement: S1 Dataset — (ZIP) [file pone.0207828.s001.zip › Diameter hoc/VS_VSL_preliminary/Old Diameters Mar13_VS_VSL_HS/HSS/2_14_723_sbeyer_003.126.hoc]

/* created with nml2hocm */

{create adhoc1}
{access adhoc1}
{nseg = 1}
{strdef color color = "White"}
{pt3dclear()}
{pt3dadd(147288.000000,107100.000000,170075.000000,1055.005830)}
{pt3dadd(147336.000000,107076.000000,169800.000000,1055.005614)}
{pt3dadd(147516.000000,107184.000000,169425.000000,1089.367299)}
{pt3dadd(147612.000000,107280.000000,169075.000000,1123.728984)}
{pt3dadd(147780.000000,107280.000000,168675.000000,1158.090669)}
{pt3dadd(147912.000000,107292.000000,168325.000000,1192.452354)}
{pt3dadd(148044.000000,107340.000000,168000.000000,1142.766837)}
{pt3dadd(147984.000000,107376.000000,167675.000000,1093.081320)}
{pt3dadd(147780.000000,107208.000000,167375.000000,1043.395803)}
{pt3dadd(147912.000000,106980.000000,167025.000000,993.710286)}
{pt3dadd(147876.000000,106944.000000,166725.000000,804.169246)}
{pt3dadd(148056.000000,107976.000000,166450.000000,614.628207)}
{pt3dadd(148020.000000,108012.000000,166275.000000,425.087167)}
{pt3dadd(148188.000000,108048.000000,166000.000000,235.546128)}
{pt3dadd(147936.000000,108060.000000,165700.000000,263.324070)}
{pt3dadd(148032.000000,108108.000000,165400.000000,291.102012)}
{pt3dadd(148140.000000,108288.000000,165150.000000,318.879954)}
{pt3dadd(148236.000000,108432.000000,164900.000000,346.657896)}
{pt3dadd(148200.000000,108528.000000,164600.000000,363.990794)}
{pt3dadd(148248.000000,108672.000000,164300.000000,381.323691)}
{pt3dadd(148128.000000,108804.000000,164050.000000,398.656589)}
{pt3dadd(148092.000000,108936.000000,163750.000000,415.989486)}
{pt3dadd(148056.000000,109116.000000,163450.000000,384.212511)}
{pt3dadd(147936.000000,109320.000000,163150.000000,352.435536)}
{pt3dadd(147804.000000,109452.000000,162850.000000,320.658561)}
{pt3dadd(147540.000000,109632.000000,162525.000000,288.881586)}
{pt3dadd(147612.000000,109596.000000,162225.000000,327.073460)}
{pt3dadd(147660.000000,109512.000000,161925.000000,365.265333)}
{pt3dadd(147660.000000,109356.000000,161550.000000,403.457206)}
{pt3dadd(147576.000000,109356.000000,160800.000000,441.649080)}
{pt3dadd(147516.000000,109356.000000,160125.000000,522.029178)}
{pt3dadd(147648.000000,109356.000000,159500.000000,602.409276)}
{pt3dadd(148020.000000,109356.000000,158975.000000,682.789374)}
{pt3dadd(148368.000000,109356.000000,158550.000000,763.169472)}
{pt3dadd(148644.000000,109356.000000,158200.000000,794.968308)}

{create adhoc2}
{access adhoc2}
{connect adhoc2(1), adhoc1(0)}
{nseg = 1}
{strdef color color = "White"}
{pt3dclear()}
{pt3dadd(148644.000000,109356.000000,158200.000000,794.968308)}
{pt3dadd(148680.000000,109620.000000,158050.000000,828.092016)}
{pt3dadd(148680.000000,109860.000000,158100.000000,793.588180)}
{pt3dadd(148692.000000,110052.000000,158000.000000,759.084345)}
{pt3dadd(148632.000000,110268.000000,158125.000000,724.580509)}
{pt3dadd(148464.000000,110424.000000,158225.000000,690.076674)}
{pt3dadd(148272.000000,110592.000000,158100.000000,756.047979)}
{pt3dadd(148176.000000,110760.000000,157975.000000,822.019284)}
{pt3dadd(148056.000000,110940.000000,157800.000000,887.990589)}
{pt3dadd(147960.000000,111120.000000,157675.000000,953.961894)}
{pt3dadd(147924.000000,111336.000000,157600.000000,963.898992)}
{pt3dadd(147864.000000,111516.000000,157550.000000,973.836090)}
{pt3dadd(147804.000000,111708.000000,157500.000000,983.773188)}
{pt3dadd(147708.000000,111888.000000,157450.000000,993.710286)}
{pt3dadd(147672.000000,112080.000000,157425.000000,1004.061452)}
{pt3dadd(147684.000000,112284.000000,157400.000000,1014.412617)}
{pt3dadd(147552.000000,112500.000000,157350.000000,1024.763782)}
{pt3dadd(147468.000000,112716.000000,157375.000000,1035.114948)}
{pt3dadd(147432.000000,112896.000000,157350.000000,1024.763782)}
{pt3dadd(147444.000000,113100.000000,157325.000000,1014.412617)}
{pt3dadd(147480.000000,113292.000000,157300.000000,1004.061452)}
{pt3dadd(147516.000000,113508.000000,157325.000000,993.710286)}
{pt3dadd(147324.000000,113760.000000,157175.000000,1004.061452)}
{pt3dadd(147240.000000,114000.000000,157150.000000,1014.412617)}
{pt3dadd(147180.000000,114252.000000,157025.000000,1024.763782)}
{pt3dadd(147096.000000,114492.000000,156900.000000,1035.114948)}
{pt3dadd(147000.000000,114744.000000,156900.000000,1008.063930)}
{pt3dadd(146712.000000,115020.000000,157000.000000,981.012912)}
{pt3dadd(146448.000000,115752.000000,157000.000000,953.961894)}
{pt3dadd(146220.000000,116736.000000,157000.000000,993.710286)}

{create adhoc3}
{access adhoc3}
{connect adhoc3(1), adhoc2(0)}
{nseg = 1}
{strdef color color = "White"}
{pt3dclear()}
{pt3dadd(146220.000000,116736.000000,157000.000000,993.710286)}
{pt3dadd(146832.000000,116988.000000,157100.000000,1192.452354)}
{pt3dadd(147168.000000,117276.000000,157275.000000,1192.452354)}
{pt3dadd(147108.000000,117504.000000,157225.000000,1192.452354)}
{pt3dadd(147084.000000,117828.000000,157225.000000,1192.452354)}
{pt3dadd(147300.000000,118116.000000,157275.000000,1192.452354)}
{pt3dadd(147348.000000,118428.000000,157375.000000,1153.118003)}
{pt3dadd(147420.000000,118740.000000,157475.000000,1113.783651)}
{pt3dadd(147456.000000,119052.000000,157575.000000,1074.449300)}
{pt3dadd(147540.000000,119304.000000,157575.000000,1035.114948)}
{pt3dadd(147684.000000,119772.000000,157375.000000,1134.071928)}
{pt3dadd(147660.000000,120096.000000,157550.000000,1233.028908)}
{pt3dadd(147804.000000,120396.000000,157275.000000,1331.985888)}
{pt3dadd(147684.000000,120876.000000,157225.000000,1430.942868)}
{pt3dadd(147804.000000,121392.000000,157200.000000,1468.834200)}
{pt3dadd(147816.000000,121728.000000,157100.000000,1506.725532)}
{pt3dadd(147984.000000,122004.000000,157050.000000,1544.616864)}
{pt3dadd(148224.000000,122268.000000,156975.000000,1582.508196)}
{pt3dadd(148344.000000,122532.000000,156850.000000,1744.305462)}
{pt3dadd(148476.000000,122820.000000,156700.000000,1906.102728)}
{pt3dadd(148596.000000,123168.000000,156700.000000,2067.899994)}
{pt3dadd(148812.000000,123540.000000,156350.000000,2229.697260)}
{pt3dadd(148608.000000,123852.000000,155925.000000,2277.718962)}
{pt3dadd(148644.000000,124248.000000,155675.000000,2325.740664)}
{pt3dadd(148584.000000,124620.000000,155450.000000,2373.762366)}
{pt3dadd(148584.000000,124800.000000,155125.000000,1972.693404)}

{create adhoc4}
{access adhoc4}
{connect adhoc4(1), adhoc3(0)}
{nseg = 1}
{strdef color color = "White"}
{pt3dclear()}
{pt3dadd(148584.000000,124800.000000,155125.000000,1972.693404)}
{pt3dadd(148896.000000,125328.000000,154150.000000,2140.509564)}
{pt3dadd(148872.000000,125028.000000,153700.000000,2052.551785)}
{pt3dadd(148824.000000,125172.000000,153250.000000,1964.594007)}
{pt3dadd(148992.000000,125916.000000,152425.000000,1876.636229)}
{pt3dadd(148764.000000,126408.000000,152000.000000,1788.678450)}
{pt3dadd(148788.000000,127176.000000,151600.000000,1737.135887)}
{pt3dadd(148908.000000,127680.000000,151225.000000,1685.593323)}
{pt3dadd(148980.000000,127992.000000,150900.000000,1634.050759)}
{pt3dadd(148824.000000,128352.000000,150675.000000,1582.508196)}
{pt3dadd(148752.000000,128664.000000,150650.000000,1634.050759)}
{pt3dadd(148632.000000,128976.000000,150550.000000,1685.593323)}
{pt3dadd(148500.000000,129276.000000,150450.000000,1737.135887)}
{pt3dadd(148524.000000,129624.000000,150350.000000,1788.678450)}
{pt3dadd(148488.000000,129960.000000,150250.000000,1816.261344)}
{pt3dadd(148476.000000,130296.000000,150150.000000,1843.844238)}
{pt3dadd(148488.000000,130572.000000,150050.000000,1871.427132)}
{pt3dadd(148416.000000,130884.000000,149850.000000,1899.010026)}
{pt3dadd(148404.000000,131172.000000,149500.000000,1853.540325)}
{pt3dadd(148344.000000,131508.000000,149550.000000,1808.070624)}
{pt3dadd(148200.000000,131832.000000,149525.000000,1762.600923)}
{pt3dadd(148416.000000,132096.000000,149200.000000,1717.131222)}
{pt3dadd(148320.000000,132324.000000,148950.000000,1631.274683)}
{pt3dadd(148548.000000,132576.000000,148775.000000,1545.418143)}
{pt3dadd(148980.000000,132912.000000,148525.000000,1459.561603)}
{pt3dadd(149052.000000,133164.000000,148350.000000,1373.705064)}
{pt3dadd(149016.000000,133428.000000,148225.000000,1373.705064)}
{pt3dadd(149196.000000,133728.000000,148075.000000,1373.705064)}
{pt3dadd(149400.000000,133992.000000,148200.000000,1373.705064)}
{pt3dadd(149820.000000,134292.000000,147925.000000,1373.705064)}
{pt3dadd(150168.000000,134568.000000,147825.000000,1388.014515)}
{pt3dadd(150528.000000,134844.000000,147550.000000,1402.323966)}
{pt3dadd(150840.000000,135204.000000,147400.000000,1416.633417)}
{pt3dadd(151008.000000,135552.000000,147375.000000,1430.942868)}
{pt3dadd(151056.000000,135924.000000,147200.000000,1430.942868)}
{pt3dadd(151200.000000,136320.000000,147025.000000,1430.942868)}
{pt3dadd(151788.000000,136620.000000,146900.000000,1430.942868)}
{pt3dadd(151932.000000,136968.000000,146825.000000,1430.942868)}
{pt3dadd(152160.000000,137376.000000,146750.000000,1520.376763)}
{pt3dadd(152640.000000,137748.000000,146550.000000,1609.810659)}
{pt3dadd(152892.000000,138072.000000,146475.000000,1699.244555)}
{pt3dadd(152964.000000,138372.000000,146475.000000,1788.678450)}
{pt3dadd(152892.000000,138768.000000,146375.000000,1699.244555)}
{pt3dadd(153480.000000,139224.000000,146300.000000,1609.810659)}
{pt3dadd(153648.000000,139596.000000,146200.000000,1520.376763)}
{pt3dadd(153708.000000,139848.000000,146225.000000,1430.942868)}
{pt3dadd(153708.000000,140208.000000,146250.000000,1445.848502)}
{pt3dadd(153696.000000,140604.000000,146125.000000,1460.754135)}
{pt3dadd(153852.000000,141024.000000,145775.000000,1475.659769)}
{pt3dadd(153996.000000,141396.000000,145850.000000,1490.565402)}
{pt3dadd(153960.000000,141720.000000,145750.000000,1490.565402)}
{pt3dadd(153900.000000,142092.000000,145675.000000,1490.565402)}
{pt3dadd(153900.000000,142464.000000,145500.000000,1490.565402)}
{pt3dadd(153900.000000,142836.000000,145425.000000,1490.565402)}
{pt3dadd(153912.000000,143220.000000,145375.000000,1475.659737)}
{pt3dadd(153972.000000,143568.000000,145175.000000,1460.754072)}
{pt3dadd(153900.000000,143784.000000,145200.000000,1445.848407)}
{pt3dadd(153912.000000,144072.000000,144925.000000,1430.942742)}
{pt3dadd(153852.000000,144372.000000,145000.000000,1445.848407)}
{pt3dadd(153996.000000,144720.000000,144950.000000,1460.754072)}
{pt3dadd(153936.000000,145068.000000,144800.000000,1475.659737)}
{pt3dadd(153876.000000,145440.000000,144650.000000,1490.565402)}
{pt3dadd(153936.000000,145800.000000,144500.000000,1475.659769)}
{pt3dadd(153960.000000,146160.000000,144300.000000,1460.754135)}
{pt3dadd(154008.000000,146508.000000,144150.000000,1445.848502)}
{pt3dadd(154140.000000,146868.000000,143950.000000,1430.942868)}
{pt3dadd(154104.000000,147204.000000,143800.000000,1430.942868)}
{pt3dadd(154116.000000,147576.000000,143725.000000,1430.942868)}
{pt3dadd(154128.000000,147864.000000,143650.000000,1430.942868)}
{pt3dadd(154116.000000,148212.000000,143475.000000,1430.942868)}
{pt3dadd(154164.000000,148548.000000,143450.000000,1416.633417)}
{pt3dadd(154212.000000,148920.000000,143300.000000,1402.323966)}
{pt3dadd(154272.000000,149364.000000,143100.000000,1388.014515)}
{pt3dadd(154356.000000,149688.000000,142875.000000,1373.705064)}
{pt3dadd(154368.000000,149964.000000,142725.000000,1402.920149)}
{pt3dadd(154308.000000,150204.000000,142750.000000,1432.135233)}
{pt3dadd(154296.000000,150504.000000,142700.000000,1461.350317)}
{pt3dadd(154176.000000,150780.000000,142700.000000,1490.565402)}
{pt3dadd(154140.000000,151044.000000,142650.000000,1490.565402)}
{pt3dadd(154224.000000,151272.000000,142550.000000,1490.565402)}
{pt3dadd(154224.000000,151476.000000,142400.000000,1490.565402)}
{pt3dadd(154200.000000,151716.000000,142275.000000,1490.565402)}
{pt3dadd(154236.000000,151968.000000,142175.000000,1461.350354)}
{pt3dadd(154260.000000,152304.000000,142075.000000,1432.135305)}
{pt3dadd(154464.000000,152580.000000,141975.000000,1402.920257)}
{pt3dadd(154404.000000,152820.000000,141800.000000,1373.705208)}
{pt3dadd(154332.000000,153084.000000,141800.000000,1402.920257)}
{pt3dadd(154284.000000,153360.000000,141800.000000,1432.135305)}
{pt3dadd(154368.000000,153672.000000,141650.000000,1461.350354)}
{pt3dadd(154356.000000,154032.000000,141550.000000,1490.565402)}
{pt3dadd(154344.000000,154428.000000,141500.000000,1428.458522)}
{pt3dadd(154332.000000,154704.000000,141450.000000,1366.351641)}
{pt3dadd(154344.000000,155100.000000,141425.000000,1304.244761)}
{pt3dadd(154464.000000,155424.000000,141275.000000,1242.137880)}
{pt3dadd(154404.000000,155688.000000,141125.000000,1304.244761)}
{pt3dadd(154392.000000,155916.000000,141025.000000,1366.351641)}
{pt3dadd(154308.000000,156204.000000,140750.000000,1428.458522)}
{pt3dadd(154260.000000,156540.000000,140525.000000,1490.565402)}
{pt3dadd(154176.000000,156864.000000,140350.000000,1475.659769)}
{pt3dadd(154212.000000,157248.000000,140200.000000,1460.754135)}
{pt3dadd(154224.000000,157548.000000,140100.000000,1445.848502)}
{pt3dadd(154332.000000,157956.000000,139975.000000,1430.942868)}
{pt3dadd(154332.000000,158328.000000,139900.000000,1383.741621)}
{pt3dadd(154608.000000,158712.000000,139800.000000,1336.540374)}
{pt3dadd(154812.000000,159048.000000,139675.000000,1289.339127)}
{pt3dadd(154944.000000,159372.000000,139575.000000,1242.137880)}
{pt3dadd(155472.000000,159636.000000,138850.000000,1217.792021)}
{pt3dadd(155616.000000,159864.000000,138675.000000,1193.446161)}
{pt3dadd(155772.000000,160080.000000,138725.000000,1169.100302)}
{pt3dadd(155964.000000,160368.000000,138550.000000,1144.754442)}
{pt3dadd(156012.000000,160224.000000,138150.000000,1031.085000)}
{pt3dadd(156600.000000,160896.000000,137600.000000,917.415558)}
{pt3dadd(157308.000000,161004.000000,137150.000000,803.746116)}
{pt3dadd(158064.000000,161196.000000,136700.000000,690.076674)}
{pt3dadd(159072.000000,160968.000000,136275.000000,765.985095)}
{pt3dadd(159528.000000,160752.000000,135850.000000,841.893516)}
{pt3dadd(159804.000000,160524.000000,135725.000000,917.801937)}
{pt3dadd(159888.000000,160476.000000,135375.000000,993.710358)}
{pt3dadd(160440.000000,160308.000000,135000.000000,1318.756950)}

{create adhoc5}
{access adhoc5}
{connect adhoc5(1), adhoc4(0)}
{nseg = 1}
{strdef color color = "White"}
{pt3dclear()}
{pt3dadd(160440.000000,160308.000000,135000.000000,1318.756950)}
{pt3dadd(160392.000000,161160.000000,135100.000000,1120.081770)}
{pt3dadd(160380.000000,161412.000000,135100.000000,889.133450)}
{pt3dadd(160344.000000,161976.000000,135100.000000,658.185129)}
{pt3dadd(160356.000000,162684.000000,135100.000000,427.236808)}
{pt3dadd(160740.000000,163380.000000,134925.000000,196.288488)}
{pt3dadd(160728.000000,164028.000000,134925.000000,232.931133)}
{pt3dadd(160500.000000,164448.000000,134925.000000,269.573778)}
{pt3dadd(159840.000000,164928.000000,134925.000000,306.216423)}
{pt3dadd(159924.000000,165180.000000,134525.000000,342.859068)}
{pt3dadd(160092.000000,165372.000000,134075.000000,352.724616)}
{pt3dadd(159996.000000,165528.000000,133650.000000,362.590164)}
{pt3dadd(160224.000000,165180.000000,133325.000000,372.455712)}
{pt3dadd(160344.000000,165120.000000,132875.000000,382.321260)}
{pt3dadd(160680.000000,164856.000000,132450.000000,357.404800)}
{pt3dadd(160896.000000,164328.000000,132100.000000,332.488341)}
{pt3dadd(161112.000000,163848.000000,131725.000000,307.571882)}
{pt3dadd(161292.000000,163560.000000,131375.000000,282.655422)}
{pt3dadd(161628.000000,163152.000000,131000.000000,345.920904)}
{pt3dadd(162012.000000,162636.000000,130625.000000,409.186386)}
{pt3dadd(162312.000000,162468.000000,130200.000000,472.451868)}
{pt3dadd(162696.000000,162180.000000,129850.000000,535.717350)}
{pt3dadd(162852.000000,162228.000000,129275.000000,489.874855)}
{pt3dadd(163080.000000,162276.000000,128900.000000,444.032361)}
{pt3dadd(163956.000000,161880.000000,128575.000000,398.189866)}
{pt3dadd(164256.000000,161556.000000,128375.000000,352.347372)}
{pt3dadd(164376.000000,161256.000000,128425.000000,631.288950)}
{pt3dadd(164592.000000,160932.000000,128450.000000,910.230528)}
{pt3dadd(164832.000000,160536.000000,128400.000000,1189.172106)}
{pt3dadd(165060.000000,160356.000000,128300.000000,1098.964386)}

{create adhoc6}
{access adhoc6}
{connect adhoc6(1), adhoc4(0)}
{nseg = 1}
{strdef color color = "White"}
{pt3dclear()}
{pt3dadd(160440.000000,160308.000000,135000.000000,1318.756950)}
{pt3dadd(160620.000000,160116.000000,134625.000000,1519.207848)}
{pt3dadd(160944.000000,159840.000000,134100.000000,1676.009430)}
{pt3dadd(161064.000000,159600.000000,133600.000000,1832.811012)}
{pt3dadd(161352.000000,159564.000000,133075.000000,1989.612594)}
{pt3dadd(161436.000000,159816.000000,132375.000000,2146.414176)}
{pt3dadd(161232.000000,159876.000000,131825.000000,2021.922153)}
{pt3dadd(161256.000000,160068.000000,131425.000000,1897.430130)}
{pt3dadd(161460.000000,159936.000000,130850.000000,1772.938107)}
{pt3dadd(161736.000000,159828.000000,130600.000000,1648.446084)}
{pt3dadd(161868.000000,159624.000000,130100.000000,1495.113300)}
{pt3dadd(161940.000000,159204.000000,129625.000000,1341.780516)}
{pt3dadd(161988.000000,158808.000000,129050.000000,1188.447732)}
{pt3dadd(162420.000000,158496.000000,128625.000000,1035.114948)}
{pt3dadd(162804.000000,157680.000000,128150.000000,956.043666)}
{pt3dadd(163764.000000,157032.000000,127750.000000,876.972384)}
{pt3dadd(164628.000000,156468.000000,127475.000000,797.901102)}
{pt3dadd(165468.000000,156144.000000,127125.000000,718.829820)}
{pt3dadd(166704.000000,155904.000000,126375.000000,718.829820)}
{pt3dadd(168732.000000,155568.000000,125950.000000,718.829820)}
{pt3dadd(169152.000000,155724.000000,125600.000000,718.829820)}
{pt3dadd(169560.000000,155592.000000,125650.000000,718.829820)}
{pt3dadd(169956.000000,155640.000000,125550.000000,682.888329)}
{pt3dadd(170268.000000,155520.000000,125425.000000,646.946838)}
{pt3dadd(170628.000000,155484.000000,125500.000000,611.005347)}
{pt3dadd(171024.000000,155196.000000,125350.000000,575.063856)}
{pt3dadd(171420.000000,154692.000000,125275.000000,556.094736)}
{pt3dadd(171780.000000,154464.000000,125250.000000,537.125616)}
{pt3dadd(172140.000000,154272.000000,125300.000000,518.156496)}
{pt3dadd(172488.000000,154152.000000,125275.000000,499.187376)}
{pt3dadd(172812.000000,154032.000000,125300.000000,512.405860)}
{pt3dadd(173184.000000,154056.000000,125125.000000,525.624345)}
{pt3dadd(173508.000000,154056.000000,125075.000000,538.842829)}
{pt3dadd(173868.000000,154104.000000,124525.000000,552.061314)}
{pt3dadd(174204.000000,153744.000000,124600.000000,593.753441)}
{pt3dadd(174552.000000,153816.000000,124500.000000,635.445567)}
{pt3dadd(174924.000000,153540.000000,124425.000000,677.137693)}
{pt3dadd(175284.000000,153120.000000,124425.000000,718.829820)}
{pt3dadd(175656.000000,152892.000000,124625.000000,754.771316)}
{pt3dadd(175956.000000,152808.000000,124550.000000,790.712811)}
{pt3dadd(176256.000000,152772.000000,124500.000000,826.654307)}
{pt3dadd(176556.000000,152688.000000,124500.000000,862.595802)}
{pt3dadd(176892.000000,152688.000000,124025.000000,819.466020)}
{pt3dadd(177228.000000,152628.000000,124050.000000,776.336238)}
{pt3dadd(177528.000000,152628.000000,124100.000000,733.206456)}
{pt3dadd(177888.000000,152544.000000,123675.000000,690.076674)}
{pt3dadd(178260.000000,152292.000000,123425.000000,776.336242)}
{pt3dadd(178608.000000,152172.000000,123400.000000,862.595811)}
{pt3dadd(179028.000000,151980.000000,123325.000000,948.855380)}
{pt3dadd(180036.000000,151680.000000,122875.000000,1035.114948)}
{pt3dadd(180336.000000,151476.000000,122800.000000,1024.763782)}
{pt3dadd(180672.000000,151308.000000,122700.000000,1014.412617)}
{pt3dadd(180996.000000,151164.000000,122625.000000,1004.061452)}
{pt3dadd(181356.000000,151080.000000,122375.000000,993.710286)}
{pt3dadd(181668.000000,150864.000000,122100.000000,1004.061452)}
{pt3dadd(182040.000000,150696.000000,121825.000000,1014.412617)}
{pt3dadd(182388.000000,150768.000000,121450.000000,1024.763782)}
{pt3dadd(182712.000000,150708.000000,121700.000000,1035.114948)}
{pt3dadd(183036.000000,150648.000000,120900.000000,1051.077222)}
{pt3dadd(183264.000000,150840.000000,120725.000000,1067.039496)}
{pt3dadd(183528.000000,150948.000000,120325.000000,1083.001770)}
{pt3dadd(183768.000000,150948.000000,120225.000000,1098.964044)}
{pt3dadd(184260.000000,150852.000000,119925.000000,1083.001770)}
{pt3dadd(184488.000000,150732.000000,119850.000000,1067.039496)}
{pt3dadd(184776.000000,150804.000000,119375.000000,1051.077222)}
{pt3dadd(185088.000000,150432.000000,119125.000000,1035.114948)}
{pt3dadd(185412.000000,149736.000000,118850.000000,1074.449300)}
{pt3dadd(185724.000000,149844.000000,118675.000000,1113.783651)}
{pt3dadd(186048.000000,149892.000000,118300.000000,1153.118003)}
{pt3dadd(186384.000000,150216.000000,117850.000000,1192.452354)}
{pt3dadd(186648.000000,150132.000000,117575.000000,1132.829757)}
{pt3dadd(186912.000000,150144.000000,117500.000000,1073.207160)}
{pt3dadd(187200.000000,150024.000000,117350.000000,1013.584563)}
{pt3dadd(187524.000000,149556.000000,117275.000000,953.961966)}
{pt3dadd(187800.000000,149544.000000,117025.000000,922.494460)}
{pt3dadd(188112.000000,149592.000000,116350.000000,891.026955)}
{pt3dadd(188424.000000,149496.000000,116175.000000,859.559450)}
{pt3dadd(188748.000000,149304.000000,115450.000000,828.091944)}
{pt3dadd(189036.000000,149256.000000,114925.000000,836.717909)}
{pt3dadd(189336.000000,149364.000000,114425.000000,845.343873)}
{pt3dadd(189672.000000,149292.000000,113800.000000,853.969838)}
{pt3dadd(189972.000000,149100.000000,113375.000000,862.595802)}
{pt3dadd(190548.000000,149160.000000,112775.000000,933.135430)}
{pt3dadd(190788.000000,149364.000000,112150.000000,1003.675059)}
{pt3dadd(191136.000000,149628.000000,111600.000000,1074.214688)}
{pt3dadd(191292.000000,149592.000000,111100.000000,1144.754316)}
{pt3dadd(191472.000000,149580.000000,110550.000000,1428.268716)}
{pt3dadd(191328.000000,149112.000000,110075.000000,1711.783116)}
{pt3dadd(191520.000000,148728.000000,109700.000000,1995.297516)}
{pt3dadd(191544.000000,148416.000000,109275.000000,2278.811916)}
{pt3dadd(191256.000000,148056.000000,108925.000000,2421.237645)}
{pt3dadd(191172.000000,147780.000000,108550.000000,2563.663374)}
{pt3dadd(191064.000000,147888.000000,108175.000000,2706.089103)}
{pt3dadd(190980.000000,148032.000000,107800.000000,2848.514832)}
{pt3dadd(191088.000000,148080.000000,107350.000000,2754.553437)}
{pt3dadd(191220.000000,147960.000000,106900.000000,2660.592042)}
{pt3dadd(191076.000000,147984.000000,106450.000000,2566.630647)}
{pt3dadd(190800.000000,147948.000000,106075.000000,2472.669252)}
{pt3dadd(190488.000000,147756.000000,105725.000000,2610.557077)}
{pt3dadd(190200.000000,147624.000000,105300.000000,2748.444903)}
{pt3dadd(189924.000000,147480.000000,104800.000000,2886.332728)}
{pt3dadd(189732.000000,147396.000000,104400.000000,3024.220554)}
{pt3dadd(189588.000000,147312.000000,104075.000000,3009.966134)}
{pt3dadd(189504.000000,147264.000000,103675.000000,2995.711713)}
{pt3dadd(189420.000000,147204.000000,103250.000000,2981.457293)}
{pt3dadd(189336.000000,147144.000000,102875.000000,2967.202872)}
{pt3dadd(189252.000000,147084.000000,102450.000000,3079.956591)}
{pt3dadd(189168.000000,147024.000000,102000.000000,3192.710310)}
{pt3dadd(189084.000000,146964.000000,101650.000000,3305.464029)}
{pt3dadd(189000.000000,146904.000000,101275.000000,3418.217748)}
{pt3dadd(188916.000000,146844.000000,100900.000000,3336.372418)}
{pt3dadd(188832.000000,146784.000000,100550.000000,3254.527089)}
{pt3dadd(189096.000000,146508.000000,100200.000000,3172.681760)}
{pt3dadd(189036.000000,146220.000000,99825.000000,3090.836430)}
{pt3dadd(189012.000000,145884.000000,99475.000000,3030.256030)}
{pt3dadd(189036.000000,145884.000000,99150.000000,2969.675631)}
{pt3dadd(188784.000000,145764.000000,98850.000000,2909.095232)}
{pt3dadd(188556.000000,145680.000000,98450.000000,2848.514832)}
{pt3dadd(188580.000000,145656.000000,98050.000000,2888.077608)}
{pt3dadd(188712.000000,145512.000000,97600.000000,2927.640384)}
{pt3dadd(188676.000000,145176.000000,97150.000000,2967.203160)}
{pt3dadd(188856.000000,144840.000000,96775.000000,2967.203160)}

{create adhoc7}
{access adhoc7}
{connect adhoc7(1), adhoc6(0)}
{nseg = 1}
{strdef color color = "White"}
{pt3dclear()}
{pt3dadd(188856.000000,144840.000000,96775.000000,2967.203160)}
{pt3dadd(189000.000000,144588.000000,96400.000000,2848.514832)}
{pt3dadd(188904.000000,144492.000000,96000.000000,2754.553437)}
{pt3dadd(189012.000000,144540.000000,95625.000000,2660.592042)}
{pt3dadd(188916.000000,144420.000000,95275.000000,2566.630647)}
{pt3dadd(188904.000000,144168.000000,94900.000000,2472.669252)}
{pt3dadd(188868.000000,143616.000000,94575.000000,2447.942531)}
{pt3dadd(188592.000000,143256.000000,94275.000000,2423.215809)}
{pt3dadd(188592.000000,142968.000000,93950.000000,2398.489088)}
{pt3dadd(188448.000000,142680.000000,93650.000000,2373.762366)}
{pt3dadd(188388.000000,142404.000000,93325.000000,2350.024753)}
{pt3dadd(188232.000000,142128.000000,92950.000000,2326.287141)}
{pt3dadd(187932.000000,141792.000000,92550.000000,2302.549529)}
{pt3dadd(187800.000000,141504.000000,92150.000000,2278.811916)}
{pt3dadd(187188.000000,141228.000000,91650.000000,2373.762366)}
{pt3dadd(186912.000000,141120.000000,91100.000000,2472.669252)}

{create adhoc8}
{access adhoc8}
{connect adhoc8(1), adhoc7(0)}
{nseg = 1}
{strdef color color = "White"}
{pt3dclear()}
{pt3dadd(186912.000000,141120.000000,91100.000000,2472.669252)}
{pt3dadd(186216.000000,140388.000000,90600.000000,2146.414176)}
{pt3dadd(186024.000000,140136.000000,90325.000000,2021.922153)}
{pt3dadd(185940.000000,139824.000000,90200.000000,1897.430130)}
{pt3dadd(185664.000000,139584.000000,90300.000000,1772.938107)}
{pt3dadd(185472.000000,139332.000000,89900.000000,1648.446084)}
{pt3dadd(185448.000000,139068.000000,89600.000000,1490.565402)}
{pt3dadd(185448.000000,138804.000000,89400.000000,1430.942742)}

{create adhoc9}
{access adhoc9}
{connect adhoc9(1), adhoc8(0)}
{nseg = 1}
{strdef color color = "White"}
{pt3dclear()}
{pt3dadd(185448.000000,138804.000000,89400.000000,1430.942742)}
{pt3dadd(185316.000000,138576.000000,89250.000000,1430.942742)}

{create adhoc10}
{access adhoc10}
{connect adhoc10(1), adhoc9(0)}
{nseg = 1}
{strdef color color = "White"}
{pt3dclear()}
{pt3dadd(185316.000000,138576.000000,89250.000000,1430.942742)}
{pt3dadd(185244.000000,138300.000000,89025.000000,1242.137880)}
{pt3dadd(185172.000000,137928.000000,88625.000000,1229.716498)}
{pt3dadd(185076.000000,137616.000000,88475.000000,1217.295117)}
{pt3dadd(184992.000000,137280.000000,88250.000000,1204.873736)}
{pt3dadd(184956.000000,136956.000000,87900.000000,1192.452354)}
{pt3dadd(184788.000000,136644.000000,87575.000000,1153.118003)}
{pt3dadd(184752.000000,136320.000000,87475.000000,1113.783651)}
{pt3dadd(184692.000000,136092.000000,87500.000000,1074.449300)}
{pt3dadd(184596.000000,135816.000000,87500.000000,1035.114948)}
{pt3dadd(184512.000000,135504.000000,87525.000000,1035.114948)}
{pt3dadd(184392.000000,135192.000000,87425.000000,1035.114948)}
{pt3dadd(184200.000000,134940.000000,87300.000000,1035.114948)}
{pt3dadd(184116.000000,134712.000000,87225.000000,1035.114948)}
{pt3dadd(184032.000000,134448.000000,87150.000000,1035.114948)}
{pt3dadd(183948.000000,134232.000000,87075.000000,1035.114948)}
{pt3dadd(183864.000000,133980.000000,87000.000000,1035.114948)}
{pt3dadd(183528.000000,133776.000000,86925.000000,1035.114948)}
{pt3dadd(183300.000000,133560.000000,86875.000000,1035.114948)}
{pt3dadd(183204.000000,133332.000000,86775.000000,1035.114948)}
{pt3dadd(183108.000000,133116.000000,86675.000000,1035.114948)}
{pt3dadd(182904.000000,132888.000000,86550.000000,1035.114948)}
{pt3dadd(182844.000000,132672.000000,86500.000000,1035.114948)}
{pt3dadd(182808.000000,132480.000000,86325.000000,1035.114948)}
{pt3dadd(182808.000000,132252.000000,86200.000000,1035.114948)}
{pt3dadd(182664.000000,132024.000000,86200.000000,1035.114948)}
{pt3dadd(182604.000000,131856.000000,86075.000000,1014.826685)}
{pt3dadd(182592.000000,131652.000000,85975.000000,994.538421)}
{pt3dadd(182556.000000,131436.000000,85950.000000,974.250158)}
{pt3dadd(182520.000000,131220.000000,85925.000000,953.961894)}
{pt3dadd(182424.000000,130992.000000,85900.000000,963.899010)}
{pt3dadd(182280.000000,130788.000000,85725.000000,973.836126)}
{pt3dadd(182220.000000,130620.000000,85600.000000,983.773242)}
{pt3dadd(182196.000000,130392.000000,85675.000000,993.710358)}
{pt3dadd(182160.000000,130176.000000,85650.000000,952.305755)}
{pt3dadd(182076.000000,129960.000000,85650.000000,910.901151)}
{pt3dadd(181884.000000,129792.000000,85500.000000,869.496547)}
{pt3dadd(181788.000000,129600.000000,85350.000000,828.091944)}
{pt3dadd(181752.000000,129396.000000,85275.000000,869.496547)}
{pt3dadd(181632.000000,129204.000000,85225.000000,910.901151)}
{pt3dadd(181548.000000,128988.000000,85125.000000,952.305755)}
{pt3dadd(181572.000000,128736.000000,85050.000000,993.710358)}
{pt3dadd(181536.000000,128472.000000,85000.000000,993.710340)}
{pt3dadd(181500.000000,128220.000000,84950.000000,993.710322)}
{pt3dadd(181440.000000,127920.000000,84900.000000,993.710304)}
{pt3dadd(181380.000000,127644.000000,84875.000000,993.710286)}
{pt3dadd(181320.000000,127404.000000,84875.000000,993.710286)}
{pt3dadd(181260.000000,127140.000000,84875.000000,993.710286)}
{pt3dadd(181200.000000,126876.000000,84875.000000,993.710286)}
{pt3dadd(181248.000000,126636.000000,84825.000000,993.710286)}
{pt3dadd(181296.000000,126420.000000,84775.000000,983.773206)}
{pt3dadd(181344.000000,126192.000000,84725.000000,973.836126)}
{pt3dadd(181224.000000,125964.000000,84650.000000,963.899046)}
{pt3dadd(181224.000000,125700.000000,84500.000000,953.961966)}
{pt3dadd(181188.000000,125508.000000,84275.000000,993.710358)}

{create adhoc11}
{access adhoc11}
{connect adhoc11(1), adhoc10(0)}
{nseg = 1}
{strdef color color = "White"}
{pt3dclear()}
{pt3dadd(181188.000000,125508.000000,84275.000000,993.710358)}
{pt3dadd(181092.000000,125304.000000,84350.000000,953.961966)}
{pt3dadd(181032.000000,125052.000000,84375.000000,931.120425)}
{pt3dadd(180792.000000,124524.000000,84350.000000,908.278884)}
{pt3dadd(180732.000000,124272.000000,84275.000000,885.437343)}
{pt3dadd(180648.000000,124032.000000,84200.000000,862.595802)}
{pt3dadd(180504.000000,123732.000000,84125.000000,1004.682569)}
{pt3dadd(180216.000000,123480.000000,84025.000000,1146.769335)}
{pt3dadd(179856.000000,123240.000000,83875.000000,1288.856102)}
{pt3dadd(179772.000000,122988.000000,83725.000000,1430.942868)}
{pt3dadd(179772.000000,122784.000000,83525.000000,1445.848502)}
{pt3dadd(179520.000000,122628.000000,83300.000000,1460.754135)}
{pt3dadd(179460.000000,122472.000000,82825.000000,1475.659769)}
{pt3dadd(179268.000000,122244.000000,82450.000000,1490.565402)}
{pt3dadd(178992.000000,122160.000000,82100.000000,1376.702789)}
{pt3dadd(178824.000000,122136.000000,81725.000000,1262.840175)}
{pt3dadd(178632.000000,121992.000000,81400.000000,1148.977562)}
{pt3dadd(178440.000000,121932.000000,81050.000000,1035.114948)}
{pt3dadd(178188.000000,121896.000000,80725.000000,1035.114948)}
{pt3dadd(177900.000000,121860.000000,80400.000000,1035.114948)}
{pt3dadd(177648.000000,121848.000000,80025.000000,1035.114948)}
{pt3dadd(177396.000000,121836.000000,79750.000000,1035.114948)}
{pt3dadd(177084.000000,121884.000000,79475.000000,1021.313418)}
{pt3dadd(176748.000000,121884.000000,79150.000000,1007.511888)}
{pt3dadd(176472.000000,121848.000000,78800.000000,993.710358)}
{pt3dadd(176328.000000,121824.000000,78450.000000,993.710358)}

{create adhoc12}
{access adhoc12}
{connect adhoc12(1), adhoc11(0)}
{nseg = 1}
{strdef color color = "White"}
{pt3dclear()}
{pt3dadd(176328.000000,121824.000000,78450.000000,993.710358)}
{pt3dadd(176160.000000,121848.000000,78150.000000,993.710358)}

{create adhoc13}
{access adhoc13}
{connect adhoc13(1), adhoc12(0)}
{nseg = 1}
{strdef color color = "White"}
{pt3dclear()}
{pt3dadd(176160.000000,121848.000000,78150.000000,993.710358)}
{pt3dadd(175764.000000,121812.000000,77925.000000,993.710358)}
{pt3dadd(175368.000000,121800.000000,77625.000000,1020.023798)}
{pt3dadd(174984.000000,121752.000000,77325.000000,1046.337237)}
{pt3dadd(174672.000000,121776.000000,77000.000000,1072.650676)}
{pt3dadd(174420.000000,121932.000000,76775.000000,1098.964116)}
{pt3dadd(174360.000000,121836.000000,76500.000000,1144.754244)}

{create adhoc14}
{access adhoc14}
{connect adhoc14(1), adhoc13(0)}
{nseg = 1}
{strdef color color = "White"}
{pt3dclear()}
{pt3dadd(174360.000000,121836.000000,76500.000000,1144.754244)}
{pt3dadd(174132.000000,121776.000000,76225.000000,1430.942868)}
{pt3dadd(173796.000000,121608.000000,75875.000000,1351.446030)}
{pt3dadd(173328.000000,121464.000000,75575.000000,1271.949192)}
{pt3dadd(173316.000000,121512.000000,75225.000000,1192.452354)}
{pt3dadd(173172.000000,121512.000000,74925.000000,1318.757076)}

{create adhoc15}
{access adhoc15}
{connect adhoc15(1), adhoc14(0)}
{nseg = 1}
{strdef color color = "White"}
{pt3dclear()}
{pt3dadd(173172.000000,121512.000000,74925.000000,1318.757076)}
{pt3dadd(173136.000000,121452.000000,74750.000000,1430.942868)}
{pt3dadd(173040.000000,121416.000000,74350.000000,1430.942868)}
{pt3dadd(172812.000000,121320.000000,74000.000000,1242.137880)}

{create adhoc16}
{access adhoc16}
{connect adhoc16(1), adhoc15(0)}
{nseg = 1}
{strdef color color = "White"}
{pt3dclear()}
{pt3dadd(172812.000000,121320.000000,74000.000000,1242.137880)}
{pt3dadd(172752.000000,121308.000000,73875.000000,1242.137880)}
{pt3dadd(172656.000000,121116.000000,73600.000000,1190.382147)}
{pt3dadd(172512.000000,121032.000000,73325.000000,1138.626414)}
{pt3dadd(172236.000000,120948.000000,73100.000000,1086.870681)}
{pt3dadd(171960.000000,120756.000000,72800.000000,1035.114948)}
{pt3dadd(171648.000000,120780.000000,72500.000000,1147.952466)}
{pt3dadd(171420.000000,120696.000000,72175.000000,1260.789984)}
{pt3dadd(171144.000000,120612.000000,71925.000000,1373.627502)}
{pt3dadd(170976.000000,120636.000000,71600.000000,1486.465020)}
{pt3dadd(170892.000000,120708.000000,71275.000000,1430.942868)}

{create adhoc17}
{access adhoc17}
{connect adhoc17(1), adhoc16(0)}
{nseg = 1}
{strdef color color = "White"}
{pt3dclear()}
{pt3dadd(170892.000000,120708.000000,71275.000000,1430.942868)}
{pt3dadd(170940.000000,120792.000000,71025.000000,1717.131222)}
{pt3dadd(170796.000000,120648.000000,70825.000000,1579.536356)}
{pt3dadd(170712.000000,120456.000000,70550.000000,1441.941489)}
{pt3dadd(170712.000000,120420.000000,70225.000000,1304.346623)}
{pt3dadd(170904.000000,120384.000000,69875.000000,1166.751756)}
{pt3dadd(171096.000000,120324.000000,69525.000000,1055.005686)}

{create adhoc18}
{access adhoc18}
{connect adhoc18(1), adhoc17(0)}
{nseg = 1}
{strdef color color = "White"}
{pt3dclear()}
{pt3dadd(171096.000000,120324.000000,69525.000000,1055.005686)}
{pt3dadd(171000.000000,120132.000000,69325.000000,1144.754388)}
{pt3dadd(171072.000000,119856.000000,69050.000000,1156.678880)}
{pt3dadd(170976.000000,119652.000000,68800.000000,1168.603371)}
{pt3dadd(171108.000000,119448.000000,68525.000000,1180.527862)}
{pt3dadd(171096.000000,119364.000000,68250.000000,1192.452354)}
{pt3dadd(171060.000000,119244.000000,68000.000000,1176.553032)}
{pt3dadd(170964.000000,119124.000000,67775.000000,1160.653710)}
{pt3dadd(170964.000000,119040.000000,67550.000000,1144.754388)}
{pt3dadd(170904.000000,118956.000000,67275.000000,1144.754388)}

{create adhoc19}
{access adhoc19}
{connect adhoc19(1), adhoc18(0)}
{nseg = 1}
{strdef color color = "White"}
{pt3dclear()}
{pt3dadd(170904.000000,118956.000000,67275.000000,1144.754388)}
{pt3dadd(170976.000000,118836.000000,67075.000000,1242.137880)}
{pt3dadd(170916.000000,118752.000000,66850.000000,1242.137880)}
{pt3dadd(170772.000000,118656.000000,66575.000000,1242.137880)}
{pt3dadd(170676.000000,118512.000000,66325.000000,1242.137880)}
{pt3dadd(170580.000000,118368.000000,66100.000000,1242.137880)}
{pt3dadd(170460.000000,118392.000000,65850.000000,1190.382147)}
{pt3dadd(170340.000000,118464.000000,65625.000000,1138.626414)}
{pt3dadd(170256.000000,118296.000000,65425.000000,1086.870681)}
{pt3dadd(170172.000000,118128.000000,65200.000000,1035.114948)}
{pt3dadd(170172.000000,117816.000000,64725.000000,931.603482)}
{pt3dadd(170076.000000,117648.000000,64525.000000,828.092016)}
{pt3dadd(169956.000000,117552.000000,64375.000000,828.091944)}

{create adhoc20}
{access adhoc20}
{connect adhoc20(1), adhoc19(0)}
{nseg = 1}
{strdef color color = "White"}
{pt3dclear()}
{pt3dadd(169956.000000,117552.000000,64375.000000,828.091944)}
{pt3dadd(169896.000000,117408.000000,64175.000000,993.710358)}
{pt3dadd(169848.000000,117264.000000,63925.000000,952.305772)}
{pt3dadd(169800.000000,117120.000000,63725.000000,910.901187)}
{pt3dadd(169884.000000,116808.000000,63400.000000,869.496602)}
{pt3dadd(169884.000000,116424.000000,63250.000000,828.092016)}
{pt3dadd(169824.000000,116328.000000,63100.000000,819.168129)}
{pt3dadd(169824.000000,116232.000000,62850.000000,810.244242)}
{pt3dadd(169704.000000,115752.000000,62725.000000,331.876134)}

{create adhoc21}
{access adhoc21}
{connect adhoc21(1), adhoc20(0)}
{nseg = 1}
{strdef color color = "White"}
{pt3dclear()}
{pt3dadd(169704.000000,115752.000000,62725.000000,331.876134)}
{pt3dadd(169836.000000,114888.000000,62550.000000,399.349944)}
{pt3dadd(169908.000000,114468.000000,62375.000000,419.317430)}
{pt3dadd(169824.000000,114180.000000,62150.000000,439.284915)}
{pt3dadd(169860.000000,113928.000000,61975.000000,459.252401)}
{pt3dadd(169776.000000,113832.000000,61825.000000,479.219886)}
{pt3dadd(169716.000000,113628.000000,61600.000000,459.252401)}
{pt3dadd(169740.000000,113424.000000,61425.000000,439.284915)}
{pt3dadd(169848.000000,113172.000000,61225.000000,419.317430)}
{pt3dadd(169812.000000,112884.000000,61050.000000,399.349944)}
{pt3dadd(169752.000000,112632.000000,60925.000000,399.349932)}
{pt3dadd(169824.000000,112512.000000,60775.000000,399.349920)}
{pt3dadd(169884.000000,112176.000000,60575.000000,399.349908)}
{pt3dadd(169956.000000,112116.000000,60550.000000,415.989486)}

{create adhoc22}
{access adhoc22}
{connect adhoc22(1), adhoc21(0)}
{nseg = 1}
{strdef color color = "White"}
{pt3dclear()}
{pt3dadd(169956.000000,112116.000000,60550.000000,415.989486)}
{pt3dadd(170028.000000,111960.000000,60300.000000,499.187376)}
{pt3dadd(170160.000000,111840.000000,60050.000000,518.156496)}
{pt3dadd(170184.000000,111744.000000,59825.000000,537.125616)}
{pt3dadd(170184.000000,111492.000000,59550.000000,556.094736)}
{pt3dadd(170424.000000,111300.000000,59325.000000,575.063856)}
{pt3dadd(170580.000000,111216.000000,59100.000000,583.931790)}
{pt3dadd(170652.000000,111096.000000,58900.000000,592.799724)}
{pt3dadd(170700.000000,110952.000000,58675.000000,601.667658)}
{pt3dadd(170808.000000,110868.000000,58400.000000,610.535592)}
{pt3dadd(170724.000000,110856.000000,58200.000000,664.924680)}
{pt3dadd(170724.000000,110760.000000,57975.000000,719.313768)}
{pt3dadd(170832.000000,110616.000000,57750.000000,773.702856)}
{pt3dadd(170964.000000,110664.000000,57600.000000,828.091944)}
{pt3dadd(170964.000000,110520.000000,57475.000000,800.776413)}
{pt3dadd(170952.000000,110520.000000,57250.000000,773.460882)}
{pt3dadd(171000.000000,110460.000000,57000.000000,746.145351)}
{pt3dadd(171000.000000,110400.000000,56725.000000,718.829820)}
{pt3dadd(171156.000000,110304.000000,56475.000000,688.878585)}
{pt3dadd(171372.000000,110160.000000,56200.000000,658.927350)}
{pt3dadd(171456.000000,110100.000000,55950.000000,628.976115)}
{pt3dadd(171648.000000,110004.000000,55725.000000,599.024880)}
{pt3dadd(171804.000000,109944.000000,55450.000000,574.065504)}
{pt3dadd(171888.000000,109848.000000,55175.000000,549.106128)}
{pt3dadd(171936.000000,109728.000000,55025.000000,524.146752)}
{pt3dadd(171960.000000,109668.000000,54875.000000,499.187376)}
{pt3dadd(172332.000000,109380.000000,54600.000000,518.156496)}
{pt3dadd(172572.000000,109272.000000,54450.000000,537.125616)}
{pt3dadd(172644.000000,109128.000000,54300.000000,556.094736)}
{pt3dadd(172728.000000,109044.000000,54150.000000,575.063856)}
{pt3dadd(172800.000000,108924.000000,53925.000000,581.054112)}
{pt3dadd(172932.000000,108804.000000,53750.000000,587.044368)}
{pt3dadd(173064.000000,108576.000000,53525.000000,593.034624)}
{pt3dadd(173184.000000,108516.000000,53375.000000,599.024880)}
{pt3dadd(173316.000000,108480.000000,53200.000000,559.089882)}
{pt3dadd(173448.000000,108276.000000,52950.000000,519.154884)}
{pt3dadd(173328.000000,107964.000000,52675.000000,479.219886)}
{pt3dadd(173328.000000,107868.000000,52425.000000,529.978860)}

{create adhoc23}
{access adhoc23}
{connect adhoc23(1), adhoc22(0)}
{nseg = 1}
{strdef color color = "White"}
{pt3dclear()}
{pt3dadd(173328.000000,107868.000000,52425.000000,529.978860)}
{pt3dadd(173400.000000,107784.000000,52250.000000,552.061314)}
{pt3dadd(173592.000000,107724.000000,52050.000000,563.802206)}
{pt3dadd(173772.000000,107748.000000,51875.000000,575.543097)}
{pt3dadd(173736.000000,107652.000000,51675.000000,587.283988)}
{pt3dadd(173784.000000,107640.000000,51525.000000,599.024880)}
{pt3dadd(173832.000000,107640.000000,51300.000000,574.065504)}
{pt3dadd(173832.000000,107556.000000,51075.000000,549.106128)}
{pt3dadd(173916.000000,107496.000000,50925.000000,524.146752)}
{pt3dadd(173856.000000,107412.000000,50725.000000,499.187376)}
{pt3dadd(173928.000000,107328.000000,50575.000000,524.146752)}
{pt3dadd(174108.000000,107316.000000,50325.000000,549.106128)}
{pt3dadd(174216.000000,107196.000000,50100.000000,574.065504)}
{pt3dadd(174192.000000,107220.000000,49875.000000,599.024880)}
{pt3dadd(174384.000000,107220.000000,49700.000000,552.979917)}
{pt3dadd(174576.000000,107052.000000,49450.000000,506.934954)}
{pt3dadd(174708.000000,107100.000000,49175.000000,460.889991)}
{pt3dadd(174984.000000,107184.000000,48925.000000,414.845028)}
{pt3dadd(175008.000000,107304.000000,48750.000000,479.219886)}

{create adhoc24}
{access adhoc24}
{connect adhoc24(1), adhoc23(0)}
{nseg = 1}
{strdef color color = "White"}
{pt3dclear()}
{pt3dadd(175008.000000,107304.000000,48750.000000,479.219886)}
{pt3dadd(174996.000000,107136.000000,48725.000000,460.051110)}

{create adhoc25}
{access adhoc25}
{connect adhoc25(1), adhoc24(0)}
{nseg = 1}
{strdef color color = "White"}
{pt3dclear()}
{pt3dadd(174996.000000,107136.000000,48725.000000,460.051110)}
{pt3dadd(175452.000000,107460.000000,48450.000000,499.187376)}
{pt3dadd(175560.000000,107604.000000,48175.000000,478.387903)}
{pt3dadd(175824.000000,107568.000000,47950.000000,457.588431)}
{pt3dadd(176364.000000,107688.000000,47725.000000,436.788958)}
{pt3dadd(176628.000000,107796.000000,47525.000000,415.989486)}
{pt3dadd(176760.000000,107832.000000,47275.000000,415.989486)}
{pt3dadd(177000.000000,107856.000000,47000.000000,415.989486)}
{pt3dadd(177276.000000,107820.000000,46750.000000,415.989486)}
{pt3dadd(177492.000000,107856.000000,46475.000000,415.989486)}
{pt3dadd(177648.000000,107844.000000,46225.000000,398.656589)}
{pt3dadd(177756.000000,108000.000000,45925.000000,381.323691)}
{pt3dadd(177972.000000,107988.000000,45675.000000,363.990794)}
{pt3dadd(178248.000000,108120.000000,45400.000000,346.657896)}
{pt3dadd(178440.000000,108204.000000,45150.000000,182.884095)}
{pt3dadd(178572.000000,108276.000000,44925.000000,19.110294)}
{pt3dadd(178620.000000,108432.000000,44675.000000,182.884095)}
{pt3dadd(178560.000000,108612.000000,44525.000000,346.657896)}
{pt3dadd(178632.000000,108684.000000,44325.000000,361.469412)}
{pt3dadd(178596.000000,108840.000000,44100.000000,376.280928)}
{pt3dadd(178776.000000,109224.000000,43825.000000,391.092444)}
{pt3dadd(178608.000000,109464.000000,43650.000000,405.903960)}
{pt3dadd(178500.000000,109572.000000,43450.000000,441.902745)}
{pt3dadd(178632.000000,109548.000000,43275.000000,477.901530)}
{pt3dadd(178572.000000,109596.000000,43000.000000,440.433990)}

{create adhoc26}
{access adhoc26}
{connect adhoc26(1), adhoc25(0)}
{nseg = 1}
{strdef color color = "White"}
{pt3dclear()}
{pt3dadd(178572.000000,109596.000000,43000.000000,440.433990)}
{pt3dadd(178788.000000,109680.000000,42650.000000,240.072390)}
{pt3dadd(178896.000000,110004.000000,42425.000000,249.385878)}
{pt3dadd(178992.000000,110208.000000,42250.000000,258.699366)}
{pt3dadd(179172.000000,110388.000000,42125.000000,268.012854)}
{pt3dadd(179316.000000,110436.000000,42000.000000,277.326342)}
{pt3dadd(179424.000000,110580.000000,41700.000000,255.103992)}
{pt3dadd(179664.000000,110736.000000,41675.000000,232.881642)}
{pt3dadd(179820.000000,110928.000000,41525.000000,210.659292)}
{pt3dadd(179964.000000,111036.000000,41350.000000,188.436942)}
{pt3dadd(180108.000000,111264.000000,40975.000000,174.463353)}
{pt3dadd(180216.000000,111396.000000,40925.000000,160.489764)}
{pt3dadd(180336.000000,111408.000000,40950.000000,133.741476)}

{create adhoc27}
{access adhoc27}
{connect adhoc27(1), adhoc25(0)}
{nseg = 1}
{strdef color color = "White"}
{pt3dclear()}
{pt3dadd(178572.000000,109596.000000,43000.000000,440.433990)}
{pt3dadd(178572.000000,109404.000000,42775.000000,325.619010)}
{pt3dadd(178716.000000,109236.000000,42600.000000,286.008467)}
{pt3dadd(178884.000000,109176.000000,42550.000000,246.397923)}
{pt3dadd(179100.000000,109164.000000,42550.000000,206.787379)}
{pt3dadd(179268.000000,108972.000000,42500.000000,167.176836)}
{pt3dadd(179412.000000,108852.000000,42375.000000,142.178787)}
{pt3dadd(179616.000000,108648.000000,42375.000000,117.180738)}
{pt3dadd(179736.000000,108444.000000,42450.000000,92.182689)}
{pt3dadd(179820.000000,108324.000000,42425.000000,67.184640)}
{pt3dadd(180060.000000,108144.000000,42425.000000,72.678726)}
{pt3dadd(180492.000000,108000.000000,42400.000000,78.172812)}
{pt3dadd(180756.000000,107868.000000,42425.000000,83.666898)}
{pt3dadd(180768.000000,107688.000000,42500.000000,89.160984)}
{pt3dadd(180828.000000,107376.000000,42525.000000,71.454348)}
{pt3dadd(180864.000000,107208.000000,42600.000000,53.747712)}
{pt3dadd(180948.000000,107028.000000,42650.000000,25.920000)}

{create adhoc28}
{access adhoc28}
{connect adhoc28(1), adhoc24(0)}
{nseg = 1}
{strdef color color = "White"}
{pt3dclear()}
{pt3dadd(174996.000000,107136.000000,48725.000000,460.051110)}
{pt3dadd(174900.000000,106740.000000,48725.000000,346.657896)}
{pt3dadd(174984.000000,106524.000000,48800.000000,276.789582)}
{pt3dadd(174960.000000,106224.000000,48800.000000,206.921268)}
{pt3dadd(174948.000000,106068.000000,48875.000000,137.052954)}
{pt3dadd(174636.000000,105936.000000,48975.000000,67.184640)}
{pt3dadd(174480.000000,105864.000000,49100.000000,60.108480)}
{pt3dadd(174336.000000,105840.000000,49125.000000,53.032320)}
{pt3dadd(174132.000000,105720.000000,49075.000000,45.956160)}
{pt3dadd(173808.000000,105636.000000,48925.000000,38.880000)}
{pt3dadd(173604.000000,105588.000000,48925.000000,55.987200)}
{pt3dadd(173316.000000,105528.000000,48925.000000,67.184640)}

{create adhoc29}
{access adhoc29}
{connect adhoc29(1), adhoc23(0)}
{nseg = 1}
{strdef color color = "White"}
{pt3dclear()}
{pt3dadd(175008.000000,107304.000000,48750.000000,479.219886)}
{pt3dadd(175140.000000,107676.000000,48750.000000,415.989486)}
{pt3dadd(175224.000000,107976.000000,48750.000000,362.145168)}
{pt3dadd(175164.000000,108360.000000,48750.000000,308.300850)}
{pt3dadd(174960.000000,108636.000000,48750.000000,254.456532)}
{pt3dadd(174900.000000,108864.000000,48750.000000,200.612214)}
{pt3dadd(174864.000000,109092.000000,48750.000000,240.734646)}

{create adhoc30}
{access adhoc30}
{connect adhoc30(1), adhoc29(0)}
{nseg = 1}
{strdef color color = "White"}
{pt3dclear()}
{pt3dadd(174864.000000,109092.000000,48750.000000,240.734646)}
{pt3dadd(174984.000000,109368.000000,48750.000000,150.749532)}
{pt3dadd(175056.000000,109560.000000,48875.000000,116.095032)}
{pt3dadd(175080.000000,109764.000000,48725.000000,46.656000)}

{create adhoc31}
{access adhoc31}
{connect adhoc31(1), adhoc29(0)}
{nseg = 1}
{strdef color color = "White"}
{pt3dclear()}
{pt3dadd(174864.000000,109092.000000,48750.000000,240.734646)}
{pt3dadd(174720.000000,109104.000000,48925.000000,160.489764)}
{pt3dadd(174492.000000,109104.000000,49050.000000,168.514254)}
{pt3dadd(174516.000000,109284.000000,49125.000000,176.538744)}
{pt3dadd(174432.000000,109368.000000,49150.000000,184.563234)}
{pt3dadd(174312.000000,109560.000000,49225.000000,192.587724)}
{pt3dadd(174168.000000,109692.000000,49275.000000,194.593846)}
{pt3dadd(173940.000000,109680.000000,49225.000000,196.599969)}
{pt3dadd(173700.000000,109764.000000,48975.000000,198.606091)}
{pt3dadd(173532.000000,109740.000000,48975.000000,200.612214)}
{pt3dadd(173328.000000,109740.000000,48825.000000,139.314042)}
{pt3dadd(173136.000000,109788.000000,48875.000000,55.987200)}

{create adhoc32}
{access adhoc32}
{connect adhoc32(1), adhoc22(0)}
{nseg = 1}
{strdef color color = "White"}
{pt3dclear()}
{pt3dadd(173328.000000,107868.000000,52425.000000,529.978860)}
{pt3dadd(173088.000000,107652.000000,52425.000000,332.791596)}
{pt3dadd(172800.000000,107364.000000,52425.000000,139.314042)}

{create adhoc33}
{access adhoc33}
{connect adhoc33(1), adhoc32(0)}
{nseg = 1}
{strdef color color = "White"}
{pt3dclear()}
{pt3dadd(172800.000000,107364.000000,52425.000000,139.314042)}
{pt3dadd(172644.000000,107316.000000,52375.000000,167.176836)}
{pt3dadd(172392.000000,107280.000000,52375.000000,167.176836)}
{pt3dadd(172236.000000,107268.000000,52200.000000,167.176836)}
{pt3dadd(171996.000000,107256.000000,52150.000000,167.176836)}
{pt3dadd(171732.000000,107244.000000,52175.000000,167.176836)}
{pt3dadd(171444.000000,107340.000000,52200.000000,154.406385)}
{pt3dadd(171180.000000,107304.000000,52125.000000,141.635934)}
{pt3dadd(170952.000000,107124.000000,52200.000000,128.865483)}
{pt3dadd(170748.000000,106956.000000,52200.000000,116.095032)}
{pt3dadd(170532.000000,106752.000000,52200.000000,61.917354)}

{create adhoc34}
{access adhoc34}
{connect adhoc34(1), adhoc32(0)}
{nseg = 1}
{strdef color color = "White"}
{pt3dclear()}
{pt3dadd(172800.000000,107364.000000,52425.000000,139.314042)}
{pt3dadd(172512.000000,107136.000000,52225.000000,160.489764)}
{pt3dadd(172512.000000,106764.000000,51950.000000,133.741476)}
{pt3dadd(172344.000000,106416.000000,51675.000000,67.184640)}

{create adhoc35}
{access adhoc35}
{connect adhoc35(1), adhoc34(0)}
{nseg = 1}
{strdef color color = "White"}
{pt3dclear()}
{pt3dadd(172344.000000,106416.000000,51675.000000,67.184640)}
{pt3dadd(172332.000000,106284.000000,51425.000000,96.745860)}
{pt3dadd(172236.000000,106008.000000,51400.000000,55.987200)}

{create adhoc36}
{access adhoc36}
{connect adhoc36(1), adhoc34(0)}
{nseg = 1}
{strdef color color = "White"}
{pt3dclear()}
{pt3dadd(172344.000000,106416.000000,51675.000000,67.184640)}
{pt3dadd(172404.000000,106272.000000,51825.000000,92.876040)}
{pt3dadd(172392.000000,105996.000000,51825.000000,67.184640)}

{create adhoc37}
{access adhoc37}
{connect adhoc37(1), adhoc21(0)}
{nseg = 1}
{strdef color color = "White"}
{pt3dclear()}
{pt3dadd(169956.000000,112116.000000,60550.000000,415.989486)}
{pt3dadd(170076.000000,111768.000000,60550.000000,331.876026)}
{pt3dadd(170340.000000,111420.000000,60550.000000,167.176836)}

{create adhoc38}
{access adhoc38}
{connect adhoc38(1), adhoc37(0)}
{nseg = 1}
{strdef color color = "White"}
{pt3dclear()}
{pt3dadd(170340.000000,111420.000000,60550.000000,167.176836)}
{pt3dadd(170628.000000,111480.000000,60875.000000,139.314042)}
{pt3dadd(170688.000000,111564.000000,61250.000000,152.632458)}
{pt3dadd(170676.000000,111660.000000,61500.000000,165.950874)}
{pt3dadd(170664.000000,111804.000000,61825.000000,179.269290)}
{pt3dadd(170664.000000,111900.000000,62025.000000,192.587706)}
{pt3dadd(170856.000000,111960.000000,62125.000000,163.015987)}
{pt3dadd(170712.000000,112080.000000,62350.000000,133.444269)}
{pt3dadd(170604.000000,112248.000000,62550.000000,103.872551)}
{pt3dadd(170772.000000,112392.000000,62575.000000,74.300832)}
{pt3dadd(170964.000000,112596.000000,62700.000000,65.144016)}
{pt3dadd(171060.000000,112896.000000,62725.000000,55.987200)}
{pt3dadd(171216.000000,113328.000000,62825.000000,38.880000)}

{create adhoc39}
{access adhoc39}
{connect adhoc39(1), adhoc37(0)}
{nseg = 1}
{strdef color color = "White"}
{pt3dclear()}
{pt3dadd(170340.000000,111420.000000,60550.000000,167.176836)}
{pt3dadd(170208.000000,111156.000000,60550.000000,67.184640)}

{create adhoc40}
{access adhoc40}
{connect adhoc40(1), adhoc20(0)}
{nseg = 1}
{strdef color color = "White"}
{pt3dclear()}
{pt3dadd(169704.000000,115752.000000,62725.000000,331.876134)}
{pt3dadd(169500.000000,116256.000000,62725.000000,993.710358)}
{pt3dadd(169488.000000,116676.000000,62725.000000,928.443451)}
{pt3dadd(169392.000000,116508.000000,62375.000000,863.176545)}
{pt3dadd(169188.000000,116244.000000,62000.000000,797.909639)}
{pt3dadd(169020.000000,116100.000000,61600.000000,732.642732)}
{pt3dadd(168888.000000,115932.000000,61300.000000,662.473530)}
{pt3dadd(168756.000000,115800.000000,61075.000000,690.076602)}

{create adhoc41}
{access adhoc41}
{connect adhoc41(1), adhoc40(0)}
{nseg = 1}
{strdef color color = "White"}
{pt3dclear()}
{pt3dadd(168756.000000,115800.000000,61075.000000,690.076602)}
{pt3dadd(168708.000000,115584.000000,60875.000000,690.076602)}
{pt3dadd(168804.000000,115320.000000,60650.000000,667.313671)}
{pt3dadd(168696.000000,115020.000000,60325.000000,644.550741)}
{pt3dadd(168660.000000,114852.000000,60125.000000,621.787810)}
{pt3dadd(168612.000000,114708.000000,59850.000000,599.024880)}
{pt3dadd(168636.000000,114564.000000,59650.000000,599.024880)}
{pt3dadd(168588.000000,114324.000000,59400.000000,599.024880)}
{pt3dadd(168456.000000,114024.000000,59200.000000,599.024880)}
{pt3dadd(168492.000000,113820.000000,58975.000000,599.024880)}
{pt3dadd(168456.000000,113652.000000,58650.000000,664.917611)}
{pt3dadd(168408.000000,113556.000000,58450.000000,730.810341)}
{pt3dadd(168312.000000,113484.000000,58225.000000,796.703072)}
{pt3dadd(168168.000000,113280.000000,57900.000000,862.595802)}
{pt3dadd(168168.000000,113172.000000,57600.000000,895.374423)}
{pt3dadd(168108.000000,113076.000000,57400.000000,928.153044)}
{pt3dadd(168012.000000,113004.000000,57125.000000,960.931665)}
{pt3dadd(167832.000000,113040.000000,56850.000000,993.710286)}
{pt3dadd(167796.000000,112932.000000,56625.000000,1055.817185)}
{pt3dadd(167700.000000,112956.000000,56350.000000,1117.924083)}
{pt3dadd(167592.000000,112956.000000,56075.000000,1180.030982)}
{pt3dadd(167484.000000,112884.000000,55825.000000,1242.137880)}
{pt3dadd(167436.000000,112812.000000,55550.000000,1170.550962)}
{pt3dadd(167424.000000,112908.000000,55250.000000,1098.964044)}
{pt3dadd(167448.000000,112896.000000,54975.000000,1098.964260)}

{create adhoc42}
{access adhoc42}
{connect adhoc42(1), adhoc41(0)}
{nseg = 1}
{strdef color color = "White"}
{pt3dclear()}
{pt3dadd(167448.000000,112896.000000,54975.000000,1098.964260)}
{pt3dadd(167508.000000,112752.000000,54750.000000,953.962020)}
{pt3dadd(167688.000000,112584.000000,54550.000000,887.990665)}
{pt3dadd(167808.000000,112572.000000,54300.000000,822.019311)}
{pt3dadd(168036.000000,112632.000000,54025.000000,756.047957)}
{pt3dadd(168228.000000,112584.000000,53825.000000,690.076602)}
{pt3dadd(168564.000000,112644.000000,53550.000000,662.473530)}
{pt3dadd(168852.000000,112572.000000,53450.000000,599.024880)}

{create adhoc43}
{access adhoc43}
{connect adhoc43(1), adhoc42(0)}
{nseg = 1}
{strdef color color = "White"}
{pt3dclear()}
{pt3dadd(168852.000000,112572.000000,53450.000000,599.024880)}
{pt3dadd(169116.000000,112596.000000,53275.000000,599.024880)}
{pt3dadd(169344.000000,112656.000000,53075.000000,621.787810)}
{pt3dadd(169596.000000,112692.000000,52875.000000,644.550741)}
{pt3dadd(169860.000000,112776.000000,52700.000000,667.313671)}
{pt3dadd(169956.000000,112848.000000,52525.000000,690.076602)}
{pt3dadd(170148.000000,112872.000000,52275.000000,690.076602)}
{pt3dadd(170640.000000,113088.000000,51875.000000,718.829820)}

{create adhoc44}
{access adhoc44}
{connect adhoc44(1), adhoc43(0)}
{nseg = 1}
{strdef color color = "White"}
{pt3dclear()}
{pt3dadd(170640.000000,113088.000000,51875.000000,718.829820)}
{pt3dadd(170796.000000,113124.000000,51650.000000,828.092016)}
{pt3dadd(171264.000000,113484.000000,50725.000000,773.460918)}
{pt3dadd(171432.000000,113484.000000,50500.000000,718.829820)}
{pt3dadd(171552.000000,113568.000000,50250.000000,794.968236)}

{create adhoc45}
{access adhoc45}
{connect adhoc45(1), adhoc44(0)}
{nseg = 1}
{strdef color color = "White"}
{pt3dclear()}
{pt3dadd(171552.000000,113568.000000,50250.000000,794.968236)}
{pt3dadd(171816.000000,113676.000000,49975.000000,718.829820)}
{pt3dadd(171936.000000,113748.000000,49775.000000,682.888329)}
{pt3dadd(172092.000000,113808.000000,49525.000000,646.946838)}
{pt3dadd(172356.000000,114012.000000,49300.000000,611.005347)}
{pt3dadd(172680.000000,114264.000000,49075.000000,575.063856)}
{pt3dadd(172884.000000,114456.000000,48875.000000,581.054112)}
{pt3dadd(173112.000000,114540.000000,48675.000000,587.044368)}
{pt3dadd(173544.000000,114624.000000,48475.000000,593.034624)}
{pt3dadd(173796.000000,114660.000000,48250.000000,599.024880)}
{pt3dadd(174084.000000,114660.000000,48025.000000,593.034624)}
{pt3dadd(174276.000000,114744.000000,47775.000000,587.044368)}
{pt3dadd(174432.000000,114768.000000,47575.000000,581.054112)}
{pt3dadd(174564.000000,114828.000000,47350.000000,575.063856)}
{pt3dadd(174816.000000,114948.000000,47125.000000,556.094736)}
{pt3dadd(175104.000000,115032.000000,46900.000000,537.125616)}
{pt3dadd(175296.000000,115152.000000,46725.000000,518.156496)}
{pt3dadd(175548.000000,115320.000000,46525.000000,499.187376)}
{pt3dadd(175752.000000,115416.000000,46325.000000,499.187376)}
{pt3dadd(176136.000000,115620.000000,45950.000000,499.187376)}
{pt3dadd(176424.000000,115920.000000,45625.000000,499.187376)}
{pt3dadd(177384.000000,117180.000000,43625.000000,499.187376)}
{pt3dadd(177612.000000,117444.000000,43200.000000,346.657896)}
{pt3dadd(177912.000000,117600.000000,42850.000000,415.989486)}

{create adhoc46}
{access adhoc46}
{connect adhoc46(1), adhoc45(0)}
{nseg = 1}
{strdef color color = "White"}
{pt3dclear()}
{pt3dadd(177912.000000,117600.000000,42850.000000,415.989486)}
{pt3dadd(178332.000000,117828.000000,42500.000000,499.187376)}
{pt3dadd(178560.000000,117864.000000,42175.000000,474.228009)}
{pt3dadd(178896.000000,117972.000000,41750.000000,449.268642)}
{pt3dadd(179196.000000,118008.000000,41400.000000,424.309275)}
{pt3dadd(179460.000000,118248.000000,41050.000000,399.349908)}
{pt3dadd(179796.000000,118332.000000,40700.000000,383.375916)}
{pt3dadd(179964.000000,118356.000000,40375.000000,319.479948)}

{create adhoc47}
{access adhoc47}
{connect adhoc47(1), adhoc46(0)}
{nseg = 1}
{strdef color color = "White"}
{pt3dclear()}
{pt3dadd(179964.000000,118356.000000,40375.000000,319.479948)}
{pt3dadd(179964.000000,118740.000000,40275.000000,288.881586)}
{pt3dadd(180000.000000,118908.000000,40000.000000,290.269354)}
{pt3dadd(180324.000000,119304.000000,39650.000000,291.657123)}
{pt3dadd(180516.000000,119508.000000,39350.000000,293.044892)}
{pt3dadd(180708.000000,119604.000000,39125.000000,294.432660)}
{pt3dadd(181008.000000,119772.000000,38825.000000,293.044892)}
{pt3dadd(181260.000000,120036.000000,38600.000000,291.657123)}
{pt3dadd(181452.000000,120360.000000,38450.000000,290.269354)}
{pt3dadd(181656.000000,120852.000000,38150.000000,288.881586)}
{pt3dadd(181740.000000,121008.000000,37925.000000,274.437509)}
{pt3dadd(181956.000000,121236.000000,37600.000000,259.993431)}
{pt3dadd(182184.000000,121440.000000,37250.000000,245.549354)}
{pt3dadd(182412.000000,121644.000000,37050.000000,231.105276)}
{pt3dadd(182688.000000,121764.000000,36825.000000,231.105267)}
{pt3dadd(182916.000000,121716.000000,36675.000000,231.105258)}
{pt3dadd(183144.000000,121668.000000,36350.000000,231.105249)}
{pt3dadd(183348.000000,121692.000000,36050.000000,231.105240)}
{pt3dadd(183588.000000,121728.000000,35675.000000,215.123139)}
{pt3dadd(183792.000000,121716.000000,35600.000000,199.141038)}
{pt3dadd(184212.000000,121884.000000,35375.000000,183.158937)}
{pt3dadd(184572.000000,121908.000000,35100.000000,167.176836)}
{pt3dadd(185268.000000,121500.000000,34900.000000,167.176836)}
{pt3dadd(185520.000000,121428.000000,34625.000000,167.176836)}
{pt3dadd(185784.000000,121584.000000,34200.000000,167.176836)}
{pt3dadd(186276.000000,121860.000000,33850.000000,167.176836)}
{pt3dadd(186864.000000,122148.000000,33675.000000,175.647132)}
{pt3dadd(187488.000000,122304.000000,33500.000000,184.117428)}
{pt3dadd(187596.000000,122256.000000,33275.000000,192.587724)}
{pt3dadd(187992.000000,122064.000000,33450.000000,55.987200)}

{create adhoc48}
{access adhoc48}
{connect adhoc48(1), adhoc46(0)}
{nseg = 1}
{strdef color color = "White"}
{pt3dclear()}
{pt3dadd(179964.000000,118356.000000,40375.000000,319.479948)}
{pt3dadd(180432.000000,118140.000000,40325.000000,200.612214)}
{pt3dadd(180588.000000,117888.000000,40150.000000,185.287671)}
{pt3dadd(181008.000000,117276.000000,39850.000000,169.963128)}
{pt3dadd(181140.000000,116868.000000,39725.000000,154.638585)}
{pt3dadd(181272.000000,116532.000000,39550.000000,139.314042)}
{pt3dadd(181548.000000,115728.000000,39325.000000,137.920900)}
{pt3dadd(181956.000000,115416.000000,39200.000000,136.527759)}
{pt3dadd(182076.000000,115068.000000,39075.000000,135.134617)}
{pt3dadd(182268.000000,115032.000000,38850.000000,133.741476)}
{pt3dadd(182616.000000,114912.000000,39025.000000,92.876040)}
{pt3dadd(182712.000000,114540.000000,39050.000000,64.497240)}

{create adhoc49}
{access adhoc49}
{connect adhoc49(1), adhoc45(0)}
{nseg = 1}
{strdef color color = "White"}
{pt3dclear()}
{pt3dadd(177912.000000,117600.000000,42850.000000,415.989486)}
{pt3dadd(177252.000000,117168.000000,42975.000000,552.061332)}
{pt3dadd(176796.000000,116724.000000,42975.000000,452.563542)}
{pt3dadd(176784.000000,116640.000000,42775.000000,353.065752)}
{pt3dadd(176640.000000,116748.000000,42650.000000,253.567962)}
{pt3dadd(176532.000000,116820.000000,42450.000000,154.070172)}
{pt3dadd(176388.000000,116952.000000,42425.000000,175.736291)}
{pt3dadd(176496.000000,117312.000000,42200.000000,197.402409)}
{pt3dadd(176460.000000,117444.000000,42050.000000,219.068528)}
{pt3dadd(176532.000000,117468.000000,41875.000000,240.734646)}
{pt3dadd(176352.000000,117588.000000,41675.000000,227.360502)}
{pt3dadd(176124.000000,117828.000000,41575.000000,213.986358)}
{pt3dadd(176040.000000,118020.000000,41450.000000,200.612214)}
{pt3dadd(176028.000000,118284.000000,41325.000000,46.656000)}

{create adhoc50}
{access adhoc50}
{connect adhoc50(1), adhoc44(0)}
{nseg = 1}
{strdef color color = "White"}
{pt3dclear()}
{pt3dadd(171552.000000,113568.000000,50250.000000,794.968236)}
{pt3dadd(171264.000000,113256.000000,50250.000000,716.852142)}
{pt3dadd(171348.000000,112944.000000,50150.000000,549.303107)}
{pt3dadd(171600.000000,112488.000000,50050.000000,381.754071)}
{pt3dadd(171492.000000,112260.000000,49925.000000,214.205035)}
{pt3dadd(171336.000000,112056.000000,49900.000000,46.656000)}
{pt3dadd(171228.000000,111936.000000,49775.000000,32.400000)}
{pt3dadd(171072.000000,112044.000000,49975.000000,37.324800)}

{create adhoc51}
{access adhoc51}
{connect adhoc51(1), adhoc43(0)}
{nseg = 1}
{strdef color color = "White"}
{pt3dclear()}
{pt3dadd(170640.000000,113088.000000,51875.000000,718.829820)}
{pt3dadd(170868.000000,113808.000000,50950.000000,346.657896)}
{pt3dadd(170556.000000,114312.000000,50950.000000,301.787631)}
{pt3dadd(170208.000000,114696.000000,50950.000000,256.917366)}
{pt3dadd(170040.000000,114852.000000,50800.000000,212.047101)}
{pt3dadd(169836.000000,115248.000000,50875.000000,167.176836)}
{pt3dadd(169704.000000,115464.000000,50950.000000,158.817996)}
{pt3dadd(169548.000000,115740.000000,51150.000000,150.459156)}
{pt3dadd(169380.000000,115956.000000,51375.000000,142.100316)}
{pt3dadd(169548.000000,116316.000000,51600.000000,133.741476)}
{pt3dadd(169428.000000,116616.000000,51800.000000,135.134617)}
{pt3dadd(169260.000000,116748.000000,51925.000000,136.527759)}
{pt3dadd(169116.000000,116856.000000,52100.000000,137.920900)}
{pt3dadd(168876.000000,116904.000000,52175.000000,139.314042)}
{pt3dadd(168684.000000,117000.000000,52225.000000,118.029951)}
{pt3dadd(168504.000000,117084.000000,52175.000000,96.745860)}
{pt3dadd(168360.000000,117336.000000,52100.000000,167.176836)}

{create adhoc52}
{access adhoc52}
{connect adhoc52(1), adhoc51(0)}
{nseg = 1}
{strdef color color = "White"}
{pt3dclear()}
{pt3dadd(168360.000000,117336.000000,52100.000000,167.176836)}
{pt3dadd(168228.000000,117024.000000,52175.000000,116.095032)}
{pt3dadd(168000.000000,116808.000000,52100.000000,127.704537)}
{pt3dadd(167784.000000,116796.000000,52200.000000,139.314042)}
{pt3dadd(167664.000000,116880.000000,52350.000000,200.612214)}

{create adhoc53}
{access adhoc53}
{connect adhoc53(1), adhoc52(0)}
{nseg = 1}
{strdef color color = "White"}
{pt3dclear()}
{pt3dadd(167664.000000,116880.000000,52350.000000,200.612214)}
{pt3dadd(167580.000000,116820.000000,52700.000000,96.745860)}
{pt3dadd(167436.000000,116712.000000,52950.000000,76.366530)}
{pt3dadd(167340.000000,116748.000000,53225.000000,55.987200)}
{pt3dadd(167208.000000,116700.000000,53375.000000,77.396688)}

{create adhoc54}
{access adhoc54}
{connect adhoc54(1), adhoc52(0)}
{nseg = 1}
{strdef color color = "White"}
{pt3dclear()}
{pt3dadd(167664.000000,116880.000000,52350.000000,200.612214)}
{pt3dadd(167688.000000,117000.000000,52325.000000,133.741476)}
{pt3dadd(167520.000000,117024.000000,52275.000000,119.655279)}
{pt3dadd(167304.000000,117072.000000,52250.000000,105.569082)}
{pt3dadd(167160.000000,117276.000000,52175.000000,91.482885)}
{pt3dadd(167148.000000,117420.000000,52075.000000,77.396688)}
{pt3dadd(166980.000000,117264.000000,52100.000000,70.946964)}
{pt3dadd(166860.000000,117180.000000,52100.000000,64.497240)}
{pt3dadd(166668.000000,117096.000000,52100.000000,32.400000)}

{create adhoc55}
{access adhoc55}
{connect adhoc55(1), adhoc51(0)}
{nseg = 1}
{strdef color color = "White"}
{pt3dclear()}
{pt3dadd(168360.000000,117336.000000,52100.000000,167.176836)}
{pt3dadd(168336.000000,117600.000000,52100.000000,38.880000)}

{create adhoc56}
{access adhoc56}
{connect adhoc56(1), adhoc42(0)}
{nseg = 1}
{strdef color color = "White"}
{pt3dclear()}
{pt3dadd(168852.000000,112572.000000,53450.000000,599.024880)}
{pt3dadd(168864.000000,112260.000000,53475.000000,240.734646)}
{pt3dadd(168972.000000,111888.000000,53475.000000,44.789760)}
{pt3dadd(169104.000000,111780.000000,53525.000000,38.880000)}

{create adhoc57}
{access adhoc57}
{connect adhoc57(1), adhoc41(0)}
{nseg = 1}
{strdef color color = "White"}
{pt3dclear()}
{pt3dadd(167448.000000,112896.000000,54975.000000,1098.964260)}
{pt3dadd(167832.000000,113028.000000,54975.000000,993.710286)}
{pt3dadd(168012.000000,113268.000000,54975.000000,790.903040)}
{pt3dadd(168168.000000,113652.000000,54975.000000,514.966766)}
{pt3dadd(168408.000000,113868.000000,55000.000000,271.768890)}
{pt3dadd(168708.000000,114060.000000,55000.000000,167.176836)}
{pt3dadd(168888.000000,114120.000000,54875.000000,167.176836)}
{pt3dadd(168996.000000,114120.000000,54900.000000,167.176836)}
{pt3dadd(169104.000000,114444.000000,54750.000000,167.176836)}
{pt3dadd(169332.000000,114468.000000,54550.000000,167.176836)}
{pt3dadd(169584.000000,114468.000000,54325.000000,36.520344)}
{pt3dadd(169884.000000,114468.000000,54175.000000,62.651642)}

{create adhoc58}
{access adhoc58}
{connect adhoc58(1), adhoc40(0)}
{nseg = 1}
{strdef color color = "White"}
{pt3dclear()}
{pt3dadd(168756.000000,115800.000000,61075.000000,690.076602)}
{pt3dadd(168648.000000,116028.000000,61075.000000,777.834432)}
{pt3dadd(168660.000000,116352.000000,61075.000000,631.522755)}
{pt3dadd(168636.000000,116604.000000,61050.000000,485.211078)}
{pt3dadd(168552.000000,116688.000000,60825.000000,338.899401)}
{pt3dadd(168516.000000,116892.000000,60625.000000,192.587724)}
{pt3dadd(168504.000000,116892.000000,60425.000000,231.105267)}
{pt3dadd(168504.000000,116952.000000,60175.000000,269.622810)}
{pt3dadd(168492.000000,117108.000000,59875.000000,308.140353)}
{pt3dadd(168492.000000,117192.000000,59575.000000,346.657896)}
{pt3dadd(168540.000000,117156.000000,59375.000000,298.510974)}
{pt3dadd(168768.000000,117120.000000,59200.000000,250.364052)}
{pt3dadd(169140.000000,117072.000000,59000.000000,202.217130)}
{pt3dadd(169236.000000,117228.000000,59100.000000,154.070208)}
{pt3dadd(169416.000000,117252.000000,58950.000000,135.708044)}
{pt3dadd(169584.000000,117312.000000,58875.000000,117.345879)}
{pt3dadd(169956.000000,117348.000000,58725.000000,98.983714)}
{pt3dadd(170172.000000,117444.000000,58650.000000,80.621550)}
{pt3dadd(170256.000000,117636.000000,58500.000000,76.590473)}
{pt3dadd(170340.000000,117768.000000,58375.000000,72.559395)}
{pt3dadd(170520.000000,117864.000000,58075.000000,68.528318)}
{pt3dadd(170712.000000,117972.000000,57925.000000,64.497240)}
{pt3dadd(170928.000000,118128.000000,57750.000000,83.201441)}
{pt3dadd(171048.000000,118296.000000,57625.000000,101.905641)}
{pt3dadd(171132.000000,118440.000000,57550.000000,120.609842)}
{pt3dadd(171180.000000,118668.000000,57750.000000,139.314042)}
{pt3dadd(171228.000000,118764.000000,58000.000000,80.621550)}

{create adhoc59}
{access adhoc59}
{connect adhoc59(1), adhoc19(0)}
{nseg = 1}
{strdef color color = "White"}
{pt3dclear()}
{pt3dadd(169956.000000,117552.000000,64375.000000,828.091944)}
{pt3dadd(170004.000000,117912.000000,64375.000000,828.092016)}
{pt3dadd(170184.000000,118332.000000,63850.000000,655.897522)}
{pt3dadd(170376.000000,118524.000000,63675.000000,483.703029)}
{pt3dadd(170532.000000,118644.000000,63425.000000,311.508535)}
{pt3dadd(170616.000000,118980.000000,63175.000000,139.314042)}
{pt3dadd(170556.000000,119340.000000,63075.000000,200.612214)}
{pt3dadd(170604.000000,119616.000000,62775.000000,192.587724)}

{create adhoc60}
{access adhoc60}
{connect adhoc60(1), adhoc59(0)}
{nseg = 1}
{strdef color color = "White"}
{pt3dclear()}
{pt3dadd(170604.000000,119616.000000,62775.000000,192.587724)}
{pt3dadd(170844.000000,119652.000000,62625.000000,139.314042)}
{pt3dadd(170976.000000,119532.000000,62425.000000,38.880000)}

{create adhoc61}
{access adhoc61}
{connect adhoc61(1), adhoc59(0)}
{nseg = 1}
{strdef color color = "White"}
{pt3dclear()}
{pt3dadd(170604.000000,119616.000000,62775.000000,192.587724)}
{pt3dadd(170592.000000,119820.000000,62825.000000,160.489764)}
{pt3dadd(170580.000000,120096.000000,62825.000000,245.360574)}
{pt3dadd(170628.000000,120312.000000,62475.000000,240.734646)}

{create adhoc62}
{access adhoc62}
{connect adhoc62(1), adhoc61(0)}
{nseg = 1}
{strdef color color = "White"}
{pt3dclear()}
{pt3dadd(170628.000000,120312.000000,62475.000000,240.734646)}
{pt3dadd(170544.000000,120336.000000,62275.000000,231.105276)}
{pt3dadd(170412.000000,120336.000000,62125.000000,197.515422)}
{pt3dadd(170028.000000,120348.000000,62025.000000,163.925568)}
{pt3dadd(170016.000000,120396.000000,61825.000000,130.335714)}
{pt3dadd(169992.000000,120384.000000,61675.000000,96.745860)}
{pt3dadd(170040.000000,120408.000000,61425.000000,92.714782)}
{pt3dadd(169968.000000,120456.000000,61200.000000,88.683705)}
{pt3dadd(169944.000000,120456.000000,60925.000000,84.652627)}
{pt3dadd(169920.000000,120528.000000,60650.000000,80.621550)}
{pt3dadd(169932.000000,120636.000000,60475.000000,85.996320)}
{pt3dadd(169944.000000,121044.000000,60350.000000,91.371090)}
{pt3dadd(169908.000000,121140.000000,60150.000000,96.745860)}
{pt3dadd(169908.000000,121356.000000,60075.000000,133.741476)}

{create adhoc63}
{access adhoc63}
{connect adhoc63(1), adhoc61(0)}
{nseg = 1}
{strdef color color = "White"}
{pt3dclear()}
{pt3dadd(170628.000000,120312.000000,62475.000000,240.734646)}
{pt3dadd(170976.000000,120540.000000,62600.000000,133.741476)}
{pt3dadd(171060.000000,120720.000000,62975.000000,46.656000)}

{create adhoc64}
{access adhoc64}
{connect adhoc64(1), adhoc18(0)}
{nseg = 1}
{strdef color color = "White"}
{pt3dclear()}
{pt3dadd(170904.000000,118956.000000,67275.000000,1144.754388)}
{pt3dadd(171588.000000,118848.000000,67275.000000,675.203598)}
{pt3dadd(172020.000000,118632.000000,67275.000000,548.196907)}
{pt3dadd(172236.000000,118248.000000,67275.000000,421.190217)}
{pt3dadd(172416.000000,118032.000000,67325.000000,294.183526)}
{pt3dadd(172524.000000,117564.000000,67525.000000,167.176836)}
{pt3dadd(172500.000000,117240.000000,67675.000000,175.535680)}
{pt3dadd(172488.000000,116892.000000,67925.000000,183.894525)}
{pt3dadd(172524.000000,116592.000000,68125.000000,192.253370)}
{pt3dadd(172620.000000,116388.000000,68325.000000,200.612214)}
{pt3dadd(172752.000000,116220.000000,68600.000000,139.314042)}

{create adhoc65}
{access adhoc65}
{connect adhoc65(1), adhoc64(0)}
{nseg = 1}
{strdef color color = "White"}
{pt3dclear()}
{pt3dadd(172752.000000,116220.000000,68600.000000,139.314042)}
{pt3dadd(173148.000000,116328.000000,68800.000000,80.621550)}
{pt3dadd(173328.000000,116484.000000,68775.000000,38.880000)}

{create adhoc66}
{access adhoc66}
{connect adhoc66(1), adhoc64(0)}
{nseg = 1}
{strdef color color = "White"}
{pt3dclear()}
{pt3dadd(172752.000000,116220.000000,68600.000000,139.314042)}
{pt3dadd(172584.000000,116136.000000,68600.000000,133.741476)}
{pt3dadd(172524.000000,116064.000000,68775.000000,94.864338)}
{pt3dadd(172500.000000,115908.000000,68775.000000,55.987200)}
{pt3dadd(172380.000000,115872.000000,68875.000000,55.987200)}

{create adhoc67}
{access adhoc67}
{connect adhoc67(1), adhoc17(0)}
{nseg = 1}
{strdef color color = "White"}
{pt3dclear()}
{pt3dadd(171096.000000,120324.000000,69525.000000,1055.005686)}
{pt3dadd(171072.000000,120600.000000,69525.000000,990.976608)}
{pt3dadd(171024.000000,120924.000000,69525.000000,785.026665)}
{pt3dadd(171024.000000,121296.000000,69650.000000,579.076722)}
{pt3dadd(171108.000000,121596.000000,69475.000000,373.126779)}
{pt3dadd(171168.000000,121716.000000,69275.000000,167.176836)}
{pt3dadd(171240.000000,122076.000000,69100.000000,190.506429)}
{pt3dadd(171420.000000,122292.000000,68850.000000,213.836022)}
{pt3dadd(171564.000000,122364.000000,68600.000000,237.165615)}
{pt3dadd(171792.000000,122460.000000,68400.000000,260.495208)}
{pt3dadd(171792.000000,122532.000000,68175.000000,267.591803)}
{pt3dadd(171732.000000,122652.000000,68000.000000,274.688397)}
{pt3dadd(171744.000000,122760.000000,67825.000000,281.784991)}
{pt3dadd(171732.000000,122880.000000,67625.000000,288.881586)}
{pt3dadd(171720.000000,122988.000000,67475.000000,308.671412)}
{pt3dadd(171756.000000,123084.000000,67325.000000,328.461237)}
{pt3dadd(171696.000000,123216.000000,67125.000000,348.251062)}
{pt3dadd(171672.000000,123372.000000,66875.000000,368.040888)}
{pt3dadd(171612.000000,123408.000000,66600.000000,543.435354)}
{pt3dadd(171624.000000,123144.000000,66400.000000,718.829820)}
{pt3dadd(171648.000000,122928.000000,66225.000000,383.375916)}

{create adhoc68}
{access adhoc68}
{connect adhoc68(1), adhoc16(0)}
{nseg = 1}
{strdef color color = "White"}
{pt3dclear()}
{pt3dadd(170892.000000,120708.000000,71275.000000,1430.942868)}
{pt3dadd(171288.000000,120984.000000,71275.000000,1373.705208)}
{pt3dadd(171804.000000,121272.000000,71275.000000,1058.141714)}
{pt3dadd(172008.000000,121668.000000,71175.000000,742.578219)}
{pt3dadd(172212.000000,121944.000000,71175.000000,427.014724)}
{pt3dadd(172368.000000,122040.000000,70900.000000,111.451230)}
{pt3dadd(172548.000000,122196.000000,70900.000000,111.451230)}
{pt3dadd(172704.000000,122376.000000,70850.000000,111.451230)}
{pt3dadd(172872.000000,122508.000000,70775.000000,111.451230)}
{pt3dadd(172992.000000,122580.000000,70625.000000,111.451230)}
{pt3dadd(173172.000000,122664.000000,70650.000000,111.451230)}
{pt3dadd(173364.000000,122928.000000,70800.000000,111.451230)}
{pt3dadd(173556.000000,122976.000000,70750.000000,111.451230)}
{pt3dadd(173964.000000,122988.000000,70650.000000,111.451230)}
{pt3dadd(174324.000000,122952.000000,70650.000000,99.712733)}
{pt3dadd(174708.000000,122880.000000,70650.000000,87.974235)}
{pt3dadd(174900.000000,122964.000000,70650.000000,76.235737)}
{pt3dadd(174924.000000,123144.000000,70675.000000,64.497240)}
{pt3dadd(174864.000000,123372.000000,70550.000000,64.497240)}
{pt3dadd(174792.000000,123516.000000,70575.000000,64.497240)}
{pt3dadd(174684.000000,123660.000000,70450.000000,55.987200)}

{create adhoc69}
{access adhoc69}
{connect adhoc69(1), adhoc15(0)}
{nseg = 1}
{strdef color color = "White"}
{pt3dclear()}
{pt3dadd(172812.000000,121320.000000,74000.000000,1242.137880)}
{pt3dadd(173412.000000,121752.000000,74000.000000,1144.754316)}
{pt3dadd(173904.000000,122208.000000,74000.000000,908.718791)}
{pt3dadd(174528.000000,122352.000000,74000.000000,672.683265)}
{pt3dadd(174888.000000,122400.000000,73850.000000,436.647739)}
{pt3dadd(175296.000000,122544.000000,73650.000000,200.612214)}
{pt3dadd(175692.000000,122976.000000,73475.000000,174.645625)}
{pt3dadd(175872.000000,123276.000000,73300.000000,148.679037)}
{pt3dadd(176100.000000,123468.000000,73150.000000,122.712448)}
{pt3dadd(176532.000000,123552.000000,73025.000000,96.745860)}
{pt3dadd(176736.000000,123696.000000,73000.000000,46.656000)}
{pt3dadd(176928.000000,123924.000000,72975.000000,46.656000)}

{create adhoc70}
{access adhoc70}
{connect adhoc70(1), adhoc14(0)}
{nseg = 1}
{strdef color color = "White"}
{pt3dclear()}
{pt3dadd(173172.000000,121512.000000,74925.000000,1318.757076)}
{pt3dadd(173520.000000,121224.000000,74925.000000,1192.452480)}
{pt3dadd(173880.000000,120720.000000,74925.000000,923.363118)}
{pt3dadd(173976.000000,120408.000000,74825.000000,654.273756)}
{pt3dadd(174072.000000,120108.000000,74725.000000,385.184394)}
{pt3dadd(174180.000000,119964.000000,74750.000000,116.095032)}
{pt3dadd(174300.000000,119748.000000,74725.000000,136.143396)}
{pt3dadd(174432.000000,119304.000000,74475.000000,156.191760)}
{pt3dadd(174384.000000,119148.000000,74325.000000,176.240124)}
{pt3dadd(174528.000000,118800.000000,74200.000000,196.288488)}
{pt3dadd(174684.000000,118692.000000,73925.000000,180.651735)}
{pt3dadd(174660.000000,118524.000000,73900.000000,165.014982)}
{pt3dadd(174792.000000,118368.000000,74050.000000,149.378229)}
{pt3dadd(174840.000000,118176.000000,73875.000000,133.741476)}
{pt3dadd(174996.000000,117840.000000,73825.000000,77.396688)}
{pt3dadd(175092.000000,117540.000000,73825.000000,38.880000)}

{create adhoc71}
{access adhoc71}
{connect adhoc71(1), adhoc13(0)}
{nseg = 1}
{strdef color color = "White"}
{pt3dclear()}
{pt3dadd(174360.000000,121836.000000,76500.000000,1144.754244)}
{pt3dadd(174780.000000,122292.000000,76425.000000,828.091944)}
{pt3dadd(175056.000000,122652.000000,76425.000000,641.224346)}
{pt3dadd(175152.000000,122976.000000,76200.000000,454.356747)}
{pt3dadd(175260.000000,123252.000000,76050.000000,267.489149)}
{pt3dadd(175536.000000,123540.000000,75925.000000,80.621550)}
{pt3dadd(175980.000000,123948.000000,75925.000000,77.396688)}
{pt3dadd(176268.000000,124164.000000,75975.000000,46.656000)}

{create adhoc72}
{access adhoc72}
{connect adhoc72(1), adhoc12(0)}
{nseg = 1}
{strdef color color = "White"}
{pt3dclear()}
{pt3dadd(176160.000000,121848.000000,78150.000000,993.710358)}
{pt3dadd(176136.000000,121692.000000,77575.000000,896.065380)}
{pt3dadd(176136.000000,121500.000000,77150.000000,471.360690)}
{pt3dadd(176280.000000,121356.000000,76925.000000,46.656000)}
{pt3dadd(176388.000000,121224.000000,76875.000000,38.880000)}

{create adhoc73}
{access adhoc73}
{connect adhoc73(1), adhoc11(0)}
{nseg = 1}
{strdef color color = "White"}
{pt3dclear()}
{pt3dadd(176328.000000,121824.000000,78450.000000,993.710358)}
{pt3dadd(176652.000000,121320.000000,78425.000000,415.989486)}
{pt3dadd(176772.000000,120924.000000,78200.000000,335.211125)}
{pt3dadd(176904.000000,120384.000000,78000.000000,254.432763)}
{pt3dadd(177024.000000,120156.000000,77950.000000,173.654402)}
{pt3dadd(177120.000000,119676.000000,77950.000000,92.876040)}
{pt3dadd(177120.000000,119208.000000,78075.000000,138.988615)}
{pt3dadd(177216.000000,118860.000000,78175.000000,185.101191)}
{pt3dadd(177348.000000,118548.000000,78375.000000,231.213766)}
{pt3dadd(177468.000000,118272.000000,78600.000000,277.326342)}
{pt3dadd(177636.000000,118056.000000,78725.000000,221.991557)}
{pt3dadd(177828.000000,117828.000000,78750.000000,166.656771)}
{pt3dadd(178056.000000,117300.000000,78750.000000,111.321986)}
{pt3dadd(178020.000000,116976.000000,78850.000000,55.987200)}
{pt3dadd(177996.000000,116640.000000,78875.000000,38.880000)}

{create adhoc74}
{access adhoc74}
{connect adhoc74(1), adhoc10(0)}
{nseg = 1}
{strdef color color = "White"}
{pt3dclear()}
{pt3dadd(181188.000000,125508.000000,84275.000000,993.710358)}
{pt3dadd(181308.000000,125508.000000,83650.000000,915.803352)}
{pt3dadd(181560.000000,125508.000000,83200.000000,745.739050)}
{pt3dadd(181752.000000,125580.000000,82975.000000,575.674749)}
{pt3dadd(181824.000000,125628.000000,82775.000000,405.610447)}
{pt3dadd(181980.000000,125664.000000,82600.000000,235.546146)}
{pt3dadd(182112.000000,125712.000000,82400.000000,276.497077)}
{pt3dadd(182160.000000,125772.000000,82225.000000,317.448009)}
{pt3dadd(182064.000000,125784.000000,82000.000000,358.398941)}
{pt3dadd(182172.000000,125916.000000,81725.000000,399.349872)}
{pt3dadd(182220.000000,126144.000000,81475.000000,358.675356)}
{pt3dadd(182196.000000,126396.000000,81250.000000,318.000840)}
{pt3dadd(182040.000000,126684.000000,81100.000000,277.326324)}
{pt3dadd(181872.000000,126876.000000,80850.000000,80.621550)}

{create adhoc75}
{access adhoc75}
{connect adhoc75(1), adhoc7(0)}
{nseg = 1}
{strdef color color = "White"}
{pt3dclear()}
{pt3dadd(186912.000000,141120.000000,91100.000000,2472.669252)}
{pt3dadd(186708.000000,141096.000000,90350.000000,2967.203160)}
{pt3dadd(186348.000000,140964.000000,89850.000000,2762.005914)}
{pt3dadd(186324.000000,141132.000000,89325.000000,2556.808668)}
{pt3dadd(186192.000000,141132.000000,88825.000000,2351.611422)}
{pt3dadd(185796.000000,141264.000000,88300.000000,2146.414176)}
{pt3dadd(185832.000000,141660.000000,87825.000000,1907.923740)}
{pt3dadd(185676.000000,141804.000000,87375.000000,1669.433304)}
{pt3dadd(185604.000000,141936.000000,86875.000000,1430.942868)}
{pt3dadd(185328.000000,142056.000000,86375.000000,893.600460)}

{create adhoc76}
{access adhoc76}
{connect adhoc76(1), adhoc75(0)}
{nseg = 1}
{strdef color color = "White"}
{pt3dclear()}
{pt3dadd(185328.000000,142056.000000,86375.000000,893.600460)}
{pt3dadd(185256.000000,141732.000000,86250.000000,1215.366264)}
{pt3dadd(184728.000000,140892.000000,85750.000000,1340.807503)}
{pt3dadd(184368.000000,140664.000000,85150.000000,1466.248743)}
{pt3dadd(183924.000000,140496.000000,84525.000000,1591.689983)}
{pt3dadd(183732.000000,140244.000000,83900.000000,1717.131222)}
{pt3dadd(183756.000000,140424.000000,83550.000000,1717.131258)}
{pt3dadd(183612.000000,140280.000000,83150.000000,1717.131294)}
{pt3dadd(183444.000000,139968.000000,82825.000000,1717.131330)}
{pt3dadd(183252.000000,139956.000000,82500.000000,1717.131366)}
{pt3dadd(183156.000000,140004.000000,82150.000000,1536.276096)}
{pt3dadd(183036.000000,140196.000000,81775.000000,1355.420826)}
{pt3dadd(182640.000000,140028.000000,81425.000000,1174.565556)}
{pt3dadd(182364.000000,140100.000000,81150.000000,993.710286)}
{pt3dadd(182172.000000,140028.000000,80850.000000,993.710286)}
{pt3dadd(181980.000000,139968.000000,80550.000000,993.710286)}
{pt3dadd(181812.000000,140052.000000,80250.000000,993.710286)}
{pt3dadd(181620.000000,140100.000000,79925.000000,993.710286)}
{pt3dadd(181524.000000,139956.000000,79650.000000,993.710286)}
{pt3dadd(181332.000000,139788.000000,79375.000000,993.710286)}
{pt3dadd(181140.000000,139620.000000,79025.000000,993.710286)}
{pt3dadd(180972.000000,139536.000000,78725.000000,993.710286)}
{pt3dadd(180744.000000,139416.000000,78425.000000,993.710286)}
{pt3dadd(180384.000000,139248.000000,78150.000000,993.710286)}
{pt3dadd(180072.000000,139056.000000,77825.000000,993.710286)}
{pt3dadd(179760.000000,138864.000000,77450.000000,993.710286)}
{pt3dadd(179448.000000,138672.000000,77125.000000,1055.817185)}
{pt3dadd(179280.000000,138504.000000,76850.000000,1117.924083)}
{pt3dadd(179112.000000,138336.000000,76575.000000,1180.030982)}
{pt3dadd(178860.000000,138060.000000,76375.000000,1242.137880)}
{pt3dadd(178716.000000,138168.000000,76075.000000,1242.137880)}
{pt3dadd(178632.000000,138156.000000,75750.000000,1242.137880)}
{pt3dadd(178356.000000,137904.000000,75275.000000,1242.137880)}
{pt3dadd(178164.000000,137868.000000,74850.000000,1242.137880)}
{pt3dadd(177876.000000,137724.000000,74525.000000,1229.716498)}
{pt3dadd(177600.000000,137580.000000,74150.000000,1217.295117)}
{pt3dadd(177396.000000,137448.000000,73825.000000,1204.873736)}
{pt3dadd(177312.000000,137448.000000,73475.000000,1192.452354)}
{pt3dadd(177120.000000,137244.000000,73100.000000,1101.362252)}
{pt3dadd(176616.000000,136908.000000,72775.000000,1010.272149)}
{pt3dadd(176172.000000,136812.000000,72450.000000,919.182046)}
{pt3dadd(175968.000000,136968.000000,72050.000000,828.091944)}
{pt3dadd(175680.000000,136908.000000,71650.000000,919.182046)}
{pt3dadd(175296.000000,136920.000000,71225.000000,1010.272149)}
{pt3dadd(174984.000000,137004.000000,70850.000000,1101.362252)}
{pt3dadd(174816.000000,137076.000000,70500.000000,1192.452354)}
{pt3dadd(174840.000000,137160.000000,70125.000000,1318.757076)}
{pt3dadd(174588.000000,136908.000000,69825.000000,1430.942742)}

{create adhoc77}
{access adhoc77}
{connect adhoc77(1), adhoc76(0)}
{nseg = 1}
{strdef color color = "White"}
{pt3dclear()}
{pt3dadd(174588.000000,136908.000000,69825.000000,1430.942742)}
{pt3dadd(174852.000000,137448.000000,69825.000000,1192.452354)}
{pt3dadd(175152.000000,138072.000000,69825.000000,926.437221)}
{pt3dadd(175392.000000,138612.000000,69825.000000,660.422088)}
{pt3dadd(175752.000000,139008.000000,69825.000000,394.406955)}
{pt3dadd(176076.000000,139296.000000,69875.000000,128.391822)}
{pt3dadd(176424.000000,139680.000000,69875.000000,124.156674)}
{pt3dadd(176712.000000,140172.000000,69875.000000,119.921526)}
{pt3dadd(177000.000000,140724.000000,69875.000000,115.686378)}
{pt3dadd(177408.000000,141252.000000,69875.000000,111.451230)}
{pt3dadd(177924.000000,141768.000000,69800.000000,125.382632)}
{pt3dadd(178248.000000,142152.000000,69650.000000,139.314033)}
{pt3dadd(178752.000000,142692.000000,69650.000000,153.245434)}
{pt3dadd(179328.000000,143292.000000,69650.000000,167.176836)}
{pt3dadd(179472.000000,143592.000000,69650.000000,167.979960)}
{pt3dadd(179640.000000,143640.000000,69850.000000,168.783084)}
{pt3dadd(179868.000000,144060.000000,69850.000000,169.586208)}
{pt3dadd(179964.000000,144480.000000,69850.000000,170.389332)}
{pt3dadd(180108.000000,144912.000000,69975.000000,204.467166)}
{pt3dadd(180276.000000,144912.000000,70025.000000,221.861052)}

{create adhoc78}
{access adhoc78}
{connect adhoc78(1), adhoc77(0)}
{nseg = 1}
{strdef color color = "White"}
{pt3dclear()}
{pt3dadd(180276.000000,144912.000000,70025.000000,221.861052)}
{pt3dadd(180276.000000,144720.000000,70325.000000,254.179602)}
{pt3dadd(180276.000000,144504.000000,70650.000000,249.359238)}
{pt3dadd(180360.000000,144432.000000,70825.000000,244.538874)}
{pt3dadd(180396.000000,144312.000000,71175.000000,239.718510)}
{pt3dadd(180336.000000,144252.000000,71525.000000,234.898146)}
{pt3dadd(180552.000000,144480.000000,71850.000000,193.245426)}
{pt3dadd(180564.000000,144552.000000,72125.000000,151.592706)}
{pt3dadd(180672.000000,144708.000000,72425.000000,109.939986)}
{pt3dadd(180864.000000,145044.000000,72725.000000,68.287266)}
{pt3dadd(181092.000000,145104.000000,72950.000000,65.736630)}

{create adhoc79}
{access adhoc79}
{connect adhoc79(1), adhoc77(0)}
{nseg = 1}
{strdef color color = "White"}
{pt3dclear()}
{pt3dadd(180276.000000,144912.000000,70025.000000,221.861052)}
{pt3dadd(180456.000000,145032.000000,70050.000000,204.467166)}
{pt3dadd(180696.000000,145092.000000,69950.000000,133.741476)}

{create adhoc80}
{access adhoc80}
{connect adhoc80(1), adhoc76(0)}
{nseg = 1}
{strdef color color = "White"}
{pt3dclear()}
{pt3dadd(174588.000000,136908.000000,69825.000000,1430.942742)}
{pt3dadd(174420.000000,136512.000000,69525.000000,1373.705208)}

{create adhoc81}
{access adhoc81}
{connect adhoc81(1), adhoc80(0)}
{nseg = 1}
{strdef color color = "White"}
{pt3dclear()}
{pt3dadd(174420.000000,136512.000000,69525.000000,1373.705208)}
{pt3dadd(174804.000000,136224.000000,69525.000000,1490.565402)}
{pt3dadd(175236.000000,135876.000000,69525.000000,1142.110517)}
{pt3dadd(175512.000000,135432.000000,69525.000000,793.655631)}
{pt3dadd(175836.000000,135264.000000,69375.000000,445.200745)}
{pt3dadd(176112.000000,134952.000000,69375.000000,96.745860)}
{pt3dadd(176316.000000,134784.000000,69675.000000,132.743057)}
{pt3dadd(176568.000000,134640.000000,69900.000000,168.740253)}
{pt3dadd(176700.000000,134424.000000,70125.000000,204.737450)}
{pt3dadd(176796.000000,134184.000000,70475.000000,240.734646)}
{pt3dadd(176892.000000,133812.000000,70750.000000,213.986354)}
{pt3dadd(176916.000000,133500.000000,70950.000000,187.238061)}
{pt3dadd(177060.000000,133140.000000,71050.000000,160.489769)}
{pt3dadd(177204.000000,132696.000000,71050.000000,133.741476)}
{pt3dadd(177528.000000,132024.000000,71300.000000,148.453038)}
{pt3dadd(177768.000000,131280.000000,71300.000000,163.164600)}
{pt3dadd(177828.000000,130980.000000,71075.000000,177.876162)}
{pt3dadd(177828.000000,130752.000000,70900.000000,192.587724)}
{pt3dadd(178008.000000,130632.000000,70725.000000,204.458891)}
{pt3dadd(178584.000000,130224.000000,70900.000000,216.330057)}
{pt3dadd(178788.000000,129900.000000,71050.000000,228.201224)}
{pt3dadd(178908.000000,129948.000000,71350.000000,240.072390)}
{pt3dadd(178956.000000,129720.000000,71625.000000,173.663478)}
{pt3dadd(178932.000000,129300.000000,71750.000000,77.396688)}

{create adhoc82}
{access adhoc82}
{connect adhoc82(1), adhoc81(0)}
{nseg = 1}
{strdef color color = "White"}
{pt3dclear()}
{pt3dadd(178932.000000,129300.000000,71750.000000,77.396688)}
{pt3dadd(178968.000000,129600.000000,71975.000000,96.745860)}
{pt3dadd(179160.000000,129600.000000,72350.000000,89.264184)}
{pt3dadd(178968.000000,129828.000000,72625.000000,81.782508)}
{pt3dadd(178824.000000,129972.000000,72850.000000,74.300832)}
{pt3dadd(178500.000000,129768.000000,73550.000000,61.917354)}

{create adhoc83}
{access adhoc83}
{connect adhoc83(1), adhoc81(0)}
{nseg = 1}
{strdef color color = "White"}
{pt3dclear()}
{pt3dadd(178932.000000,129300.000000,71750.000000,77.396688)}
{pt3dadd(178884.000000,128880.000000,71850.000000,116.095032)}
{pt3dadd(178836.000000,128724.000000,71475.000000,71.328816)}
{pt3dadd(178872.000000,128448.000000,71325.000000,33.022584)}

{create adhoc84}
{access adhoc84}
{connect adhoc84(1), adhoc80(0)}
{nseg = 1}
{strdef color color = "White"}
{pt3dclear()}
{pt3dadd(174420.000000,136512.000000,69525.000000,1373.705208)}
{pt3dadd(174408.000000,136644.000000,69150.000000,1369.925622)}
{pt3dadd(174204.000000,136284.000000,68825.000000,1044.377721)}
{pt3dadd(174096.000000,136092.000000,68500.000000,718.829820)}
{pt3dadd(173868.000000,136080.000000,68200.000000,763.169544)}

{create adhoc85}
{access adhoc85}
{connect adhoc85(1), adhoc84(0)}
{nseg = 1}
{strdef color color = "White"}
{pt3dclear()}
{pt3dadd(173868.000000,136080.000000,68200.000000,763.169544)}
{pt3dadd(173784.000000,136776.000000,68200.000000,1035.114948)}
{pt3dadd(173760.000000,137448.000000,68200.000000,975.078288)}
{pt3dadd(173460.000000,137664.000000,67875.000000,915.041628)}
{pt3dadd(173316.000000,137736.000000,67550.000000,855.004968)}
{pt3dadd(173136.000000,138180.000000,67150.000000,794.968308)}
{pt3dadd(173028.000000,138624.000000,66800.000000,550.834497)}
{pt3dadd(173040.000000,139356.000000,66550.000000,306.700686)}
{pt3dadd(172848.000000,139836.000000,66250.000000,415.989486)}

{create adhoc86}
{access adhoc86}
{connect adhoc86(1), adhoc85(0)}
{nseg = 1}
{strdef color color = "White"}
{pt3dclear()}
{pt3dadd(172848.000000,139836.000000,66250.000000,415.989486)}
{pt3dadd(173004.000000,139176.000000,66250.000000,332.791596)}
{pt3dadd(173124.000000,138492.000000,66250.000000,376.788640)}
{pt3dadd(173364.000000,138144.000000,66250.000000,420.785685)}
{pt3dadd(173112.000000,138312.000000,65875.000000,464.782730)}
{pt3dadd(173364.000000,138324.000000,65450.000000,508.779774)}
{pt3dadd(173640.000000,138240.000000,65050.000000,479.219922)}
{pt3dadd(173712.000000,138276.000000,64575.000000,552.061278)}

{create adhoc87}
{access adhoc87}
{connect adhoc87(1), adhoc86(0)}
{nseg = 1}
{strdef color color = "White"}
{pt3dclear()}
{pt3dadd(173712.000000,138276.000000,64575.000000,552.061278)}
{pt3dadd(173904.000000,138504.000000,64400.000000,196.288452)}
{pt3dadd(174240.000000,138804.000000,64400.000000,170.435349)}
{pt3dadd(174468.000000,139104.000000,64225.000000,144.582246)}
{pt3dadd(174612.000000,139272.000000,64100.000000,118.729143)}
{pt3dadd(174732.000000,139404.000000,63950.000000,92.876040)}
{pt3dadd(175032.000000,139572.000000,63675.000000,98.680788)}
{pt3dadd(175308.000000,139668.000000,63475.000000,104.485536)}
{pt3dadd(175632.000000,139740.000000,63325.000000,110.290284)}
{pt3dadd(175896.000000,139728.000000,63275.000000,116.095032)}
{pt3dadd(176196.000000,139728.000000,63075.000000,98.358291)}
{pt3dadd(176388.000000,139644.000000,63075.000000,80.621550)}
{pt3dadd(176532.000000,139500.000000,63025.000000,67.184640)}

{create adhoc88}
{access adhoc88}
{connect adhoc88(1), adhoc86(0)}
{nseg = 1}
{strdef color color = "White"}
{pt3dclear()}
{pt3dadd(173712.000000,138276.000000,64575.000000,552.061278)}
{pt3dadd(173760.000000,138300.000000,64200.000000,499.187376)}
{pt3dadd(173808.000000,138012.000000,63975.000000,474.228000)}
{pt3dadd(173712.000000,137976.000000,63600.000000,449.268624)}
{pt3dadd(173712.000000,137964.000000,63250.000000,424.309248)}
{pt3dadd(173628.000000,137820.000000,62825.000000,399.349872)}
{pt3dadd(173580.000000,137736.000000,62425.000000,386.176878)}
{pt3dadd(173460.000000,137676.000000,61975.000000,373.003884)}
{pt3dadd(173364.000000,137700.000000,61475.000000,359.830890)}
{pt3dadd(173388.000000,137688.000000,61050.000000,346.657896)}
{pt3dadd(173100.000000,137712.000000,60625.000000,330.657264)}
{pt3dadd(172836.000000,137748.000000,60175.000000,314.656632)}
{pt3dadd(172488.000000,137748.000000,59850.000000,298.656000)}
{pt3dadd(172164.000000,137628.000000,59450.000000,282.655368)}
{pt3dadd(171768.000000,137376.000000,59075.000000,285.768477)}
{pt3dadd(171672.000000,137448.000000,58800.000000,288.881586)}
{pt3dadd(171660.000000,137496.000000,58500.000000,240.734646)}

{create adhoc89}
{access adhoc89}
{connect adhoc89(1), adhoc88(0)}
{nseg = 1}
{strdef color color = "White"}
{pt3dclear()}
{pt3dadd(171660.000000,137496.000000,58500.000000,240.734646)}
{pt3dadd(171744.000000,136944.000000,58500.000000,240.734646)}
{pt3dadd(171840.000000,136548.000000,58400.000000,190.024344)}
{pt3dadd(171912.000000,136200.000000,58150.000000,139.314042)}
{pt3dadd(171900.000000,135576.000000,58050.000000,277.326342)}

{create adhoc90}
{access adhoc90}
{connect adhoc90(1), adhoc89(0)}
{nseg = 1}
{strdef color color = "White"}
{pt3dclear()}
{pt3dadd(171900.000000,135576.000000,58050.000000,277.326342)}
{pt3dadd(171900.000000,135408.000000,58275.000000,288.086868)}
{pt3dadd(171732.000000,135120.000000,58450.000000,266.218205)}
{pt3dadd(171480.000000,135084.000000,58625.000000,244.349541)}
{pt3dadd(171252.000000,134880.000000,58850.000000,222.480878)}
{pt3dadd(170976.000000,134676.000000,58850.000000,200.612214)}
{pt3dadd(170760.000000,134472.000000,58925.000000,219.600018)}
{pt3dadd(170496.000000,134496.000000,59125.000000,238.587822)}
{pt3dadd(170304.000000,134316.000000,59250.000000,257.575626)}
{pt3dadd(170112.000000,134364.000000,59600.000000,276.563430)}
{pt3dadd(169872.000000,134364.000000,59625.000000,249.216782)}
{pt3dadd(169656.000000,134268.000000,59550.000000,221.870133)}
{pt3dadd(169428.000000,134232.000000,59575.000000,194.523485)}
{pt3dadd(169200.000000,134172.000000,59600.000000,167.176836)}
{pt3dadd(168996.000000,134112.000000,59750.000000,160.211138)}
{pt3dadd(169152.000000,134064.000000,60075.000000,153.245439)}
{pt3dadd(169152.000000,134052.000000,60550.000000,146.279741)}
{pt3dadd(169116.000000,133992.000000,60300.000000,139.314042)}
{pt3dadd(169728.000000,134292.000000,60700.000000,67.184640)}
{pt3dadd(169956.000000,134400.000000,60850.000000,55.987200)}

{create adhoc91}
{access adhoc91}
{connect adhoc91(1), adhoc89(0)}
{nseg = 1}
{strdef color color = "White"}
{pt3dclear()}
{pt3dadd(171900.000000,135576.000000,58050.000000,277.326342)}
{pt3dadd(171780.000000,135456.000000,57800.000000,277.326324)}
{pt3dadd(171720.000000,135708.000000,57700.000000,240.734646)}
{pt3dadd(171792.000000,135648.000000,57525.000000,288.881586)}

{create adhoc92}
{access adhoc92}
{connect adhoc92(1), adhoc88(0)}
{nseg = 1}
{strdef color color = "White"}
{pt3dclear()}
{pt3dadd(171660.000000,137496.000000,58500.000000,240.734646)}
{pt3dadd(171348.000000,137652.000000,58275.000000,240.734646)}
{pt3dadd(171168.000000,137784.000000,57875.000000,234.443442)}
{pt3dadd(171132.000000,137832.000000,57500.000000,228.152238)}
{pt3dadd(171300.000000,137832.000000,57025.000000,221.861034)}
{pt3dadd(171240.000000,137880.000000,56800.000000,204.467130)}

{create adhoc93}
{access adhoc93}
{connect adhoc93(1), adhoc92(0)}
{nseg = 1}
{strdef color color = "White"}
{pt3dclear()}
{pt3dadd(171240.000000,137880.000000,56800.000000,204.467130)}
{pt3dadd(170748.000000,137712.000000,56800.000000,67.184640)}
{pt3dadd(170508.000000,137436.000000,56675.000000,46.656000)}

{create adhoc94}
{access adhoc94}
{connect adhoc94(1), adhoc92(0)}
{nseg = 1}
{strdef color color = "White"}
{pt3dclear()}
{pt3dadd(171240.000000,137880.000000,56800.000000,204.467130)}
{pt3dadd(171540.000000,138180.000000,56575.000000,200.612214)}
{pt3dadd(171312.000000,138492.000000,56175.000000,196.680213)}
{pt3dadd(171036.000000,138972.000000,55950.000000,192.748212)}
{pt3dadd(170688.000000,139512.000000,55650.000000,188.816211)}
{pt3dadd(170340.000000,140040.000000,55600.000000,184.884210)}
{pt3dadd(169716.000000,140772.000000,55375.000000,161.954484)}
{pt3dadd(169008.000000,141336.000000,55325.000000,139.024758)}
{pt3dadd(168264.000000,141636.000000,55125.000000,116.095032)}
{pt3dadd(167640.000000,141540.000000,54925.000000,44.789760)}

{create adhoc95}
{access adhoc95}
{connect adhoc95(1), adhoc85(0)}
{nseg = 1}
{strdef color color = "White"}
{pt3dclear()}
{pt3dadd(172848.000000,139836.000000,66250.000000,415.989486)}
{pt3dadd(172524.000000,140736.000000,66000.000000,415.989486)}
{pt3dadd(172320.000000,141432.000000,65725.000000,455.758079)}
{pt3dadd(172452.000000,142104.000000,65500.000000,495.526671)}
{pt3dadd(172320.000000,142320.000000,65150.000000,535.295264)}
{pt3dadd(172236.000000,142716.000000,64925.000000,575.063856)}
{pt3dadd(172344.000000,143052.000000,64625.000000,611.005347)}
{pt3dadd(172116.000000,143412.000000,64275.000000,646.946838)}
{pt3dadd(171924.000000,143772.000000,63925.000000,682.888329)}
{pt3dadd(171672.000000,143952.000000,63625.000000,718.829820)}
{pt3dadd(171552.000000,143916.000000,63325.000000,754.771316)}
{pt3dadd(171348.000000,144048.000000,63000.000000,790.712811)}
{pt3dadd(171036.000000,144180.000000,62600.000000,826.654307)}
{pt3dadd(170856.000000,144312.000000,62175.000000,862.595802)}
{pt3dadd(170688.000000,144468.000000,61825.000000,862.595802)}
{pt3dadd(170508.000000,144396.000000,61475.000000,862.595802)}
{pt3dadd(170340.000000,144504.000000,61050.000000,862.595802)}
{pt3dadd(170112.000000,144540.000000,60700.000000,993.710286)}

{create adhoc96}
{access adhoc96}
{connect adhoc96(1), adhoc95(0)}
{nseg = 1}
{strdef color color = "White"}
{pt3dclear()}
{pt3dadd(170112.000000,144540.000000,60700.000000,993.710286)}
{pt3dadd(170112.000000,144900.000000,60700.000000,828.091944)}
{pt3dadd(170220.000000,145176.000000,60900.000000,629.168958)}
{pt3dadd(170124.000000,145392.000000,60900.000000,430.245972)}
{pt3dadd(169944.000000,145668.000000,60900.000000,231.322986)}
{pt3dadd(169740.000000,145836.000000,60900.000000,32.400000)}
{pt3dadd(169728.000000,146052.000000,60925.000000,44.789760)}

{create adhoc97}
{access adhoc97}
{connect adhoc97(1), adhoc95(0)}
{nseg = 1}
{strdef color color = "White"}
{pt3dclear()}
{pt3dadd(170112.000000,144540.000000,60700.000000,993.710286)}
{pt3dadd(170028.000000,144528.000000,60250.000000,953.961966)}
{pt3dadd(170028.000000,144552.000000,59850.000000,995.491930)}
{pt3dadd(170136.000000,144600.000000,59375.000000,1037.021895)}
{pt3dadd(170076.000000,144684.000000,58975.000000,1078.551860)}
{pt3dadd(169872.000000,144756.000000,58575.000000,1120.081824)}
{pt3dadd(169608.000000,144840.000000,58225.000000,1098.840105)}
{pt3dadd(169548.000000,144792.000000,57825.000000,1077.598386)}
{pt3dadd(169488.000000,144864.000000,57550.000000,1056.356667)}
{pt3dadd(169320.000000,144828.000000,57175.000000,1035.114948)}
{pt3dadd(169308.000000,144984.000000,56825.000000,982.789677)}
{pt3dadd(168984.000000,144924.000000,56450.000000,930.464406)}
{pt3dadd(168804.000000,145044.000000,56125.000000,878.139135)}
{pt3dadd(168720.000000,145104.000000,55850.000000,825.813864)}
{pt3dadd(168672.000000,145092.000000,55550.000000,688.178232)}
{pt3dadd(168660.000000,145368.000000,55350.000000,673.346070)}

{create adhoc98}
{access adhoc98}
{connect adhoc98(1), adhoc97(0)}
{nseg = 1}
{strdef color color = "White"}
{pt3dclear()}
{pt3dadd(168660.000000,145368.000000,55350.000000,673.346070)}
{pt3dadd(168792.000000,144936.000000,55350.000000,1035.114948)}
{pt3dadd(168828.000000,144444.000000,55350.000000,956.043666)}
{pt3dadd(168912.000000,144300.000000,55000.000000,876.972384)}
{pt3dadd(168948.000000,144096.000000,54575.000000,797.901102)}
{pt3dadd(169116.000000,144000.000000,54150.000000,718.829820)}
{pt3dadd(169056.000000,143904.000000,53800.000000,711.641533)}
{pt3dadd(169056.000000,143760.000000,53400.000000,704.453247)}
{pt3dadd(169044.000000,143556.000000,53050.000000,697.264960)}
{pt3dadd(169176.000000,143412.000000,52700.000000,690.076674)}
{pt3dadd(169116.000000,143316.000000,52250.000000,690.076602)}

{create adhoc99}
{access adhoc99}
{connect adhoc99(1), adhoc98(0)}
{nseg = 1}
{strdef color color = "White"}
{pt3dclear()}
{pt3dadd(169116.000000,143316.000000,52250.000000,690.076602)}
{pt3dadd(169380.000000,142920.000000,52250.000000,200.612214)}
{pt3dadd(169272.000000,142620.000000,52250.000000,174.645625)}
{pt3dadd(169164.000000,142260.000000,52250.000000,148.679037)}
{pt3dadd(168984.000000,141792.000000,52250.000000,122.712448)}
{pt3dadd(168828.000000,141516.000000,52125.000000,96.745860)}
{pt3dadd(168636.000000,141240.000000,52075.000000,95.778405)}
{pt3dadd(168420.000000,141144.000000,52000.000000,94.810950)}
{pt3dadd(168156.000000,141144.000000,51750.000000,93.843495)}
{pt3dadd(167940.000000,141000.000000,51650.000000,92.876040)}
{pt3dadd(167724.000000,140784.000000,51575.000000,92.876040)}
{pt3dadd(167460.000000,140616.000000,51400.000000,92.876040)}
{pt3dadd(167304.000000,140424.000000,51375.000000,92.876040)}
{pt3dadd(167076.000000,140076.000000,51325.000000,92.876040)}
{pt3dadd(166992.000000,139752.000000,51325.000000,55.987200)}

{create adhoc100}
{access adhoc100}
{connect adhoc100(1), adhoc98(0)}
{nseg = 1}
{strdef color color = "White"}
{pt3dclear()}
{pt3dadd(169116.000000,143316.000000,52250.000000,690.076602)}
{pt3dadd(169332.000000,143508.000000,51750.000000,608.855994)}
{pt3dadd(169380.000000,143496.000000,51425.000000,606.398215)}
{pt3dadd(169380.000000,143412.000000,51125.000000,603.940437)}
{pt3dadd(169368.000000,143328.000000,50750.000000,601.482658)}
{pt3dadd(169332.000000,143208.000000,50300.000000,599.024880)}
{pt3dadd(169356.000000,142860.000000,49950.000000,593.034624)}
{pt3dadd(169452.000000,142848.000000,49575.000000,587.044368)}
{pt3dadd(169476.000000,142476.000000,49275.000000,581.054112)}
{pt3dadd(169512.000000,142272.000000,48900.000000,575.063856)}
{pt3dadd(169536.000000,142104.000000,48550.000000,618.768693)}
{pt3dadd(169560.000000,141936.000000,48225.000000,662.473530)}
{pt3dadd(169548.000000,141936.000000,47900.000000,716.852286)}

{create adhoc101}
{access adhoc101}
{connect adhoc101(1), adhoc100(0)}
{nseg = 1}
{strdef color color = "White"}
{pt3dclear()}
{pt3dadd(169548.000000,141936.000000,47900.000000,716.852286)}
{pt3dadd(169500.000000,141684.000000,47925.000000,383.375916)}
{pt3dadd(169296.000000,141348.000000,47925.000000,359.752334)}
{pt3dadd(169164.000000,141036.000000,47925.000000,336.128751)}
{pt3dadd(168984.000000,140688.000000,47925.000000,312.505169)}
{pt3dadd(168888.000000,140316.000000,47925.000000,288.881586)}
{pt3dadd(168852.000000,139908.000000,47925.000000,251.489700)}
{pt3dadd(169068.000000,139608.000000,48175.000000,214.097814)}
{pt3dadd(169380.000000,139248.000000,48300.000000,176.705928)}
{pt3dadd(169764.000000,138684.000000,48400.000000,139.314042)}
{pt3dadd(169932.000000,138120.000000,48450.000000,154.638585)}
{pt3dadd(170112.000000,137724.000000,48625.000000,169.963128)}
{pt3dadd(170304.000000,137508.000000,48850.000000,185.287671)}
{pt3dadd(170472.000000,137196.000000,48900.000000,200.612214)}
{pt3dadd(170688.000000,136800.000000,49175.000000,167.176836)}

{create adhoc102}
{access adhoc102}
{connect adhoc102(1), adhoc100(0)}
{nseg = 1}
{strdef color color = "White"}
{pt3dclear()}
{pt3dadd(169548.000000,141936.000000,47900.000000,716.852286)}
{pt3dadd(169740.000000,141924.000000,47575.000000,690.076602)}
{pt3dadd(169872.000000,142092.000000,47225.000000,642.354295)}
{pt3dadd(169944.000000,142260.000000,46850.000000,594.631989)}
{pt3dadd(169992.000000,142416.000000,46475.000000,546.909682)}
{pt3dadd(170016.000000,142692.000000,46050.000000,499.187376)}
{pt3dadd(170004.000000,142968.000000,45575.000000,461.055006)}
{pt3dadd(169884.000000,143160.000000,45200.000000,422.922636)}
{pt3dadd(169932.000000,143472.000000,44850.000000,384.790266)}
{pt3dadd(169836.000000,143748.000000,44475.000000,346.657896)}
{pt3dadd(169608.000000,143856.000000,44075.000000,403.354521)}
{pt3dadd(169572.000000,143964.000000,43675.000000,460.051146)}
{pt3dadd(169284.000000,144072.000000,43325.000000,599.024880)}

{create adhoc103}
{access adhoc103}
{connect adhoc103(1), adhoc102(0)}
{nseg = 1}
{strdef color color = "White"}
{pt3dclear()}
{pt3dadd(169284.000000,144072.000000,43325.000000,599.024880)}
{pt3dadd(169728.000000,143808.000000,43325.000000,116.095032)}
{pt3dadd(169584.000000,143328.000000,43325.000000,135.569972)}
{pt3dadd(169524.000000,143160.000000,43225.000000,178.414839)}
{pt3dadd(169320.000000,142908.000000,43100.000000,221.259706)}
{pt3dadd(169092.000000,142728.000000,43125.000000,240.734646)}
{pt3dadd(168960.000000,142644.000000,43075.000000,240.734646)}
{pt3dadd(168720.000000,142524.000000,43050.000000,240.734646)}
{pt3dadd(168516.000000,142212.000000,43275.000000,240.734646)}
{pt3dadd(168312.000000,142092.000000,43325.000000,240.734646)}
{pt3dadd(168084.000000,141948.000000,43500.000000,229.241238)}
{pt3dadd(167880.000000,141720.000000,43700.000000,203.955741)}
{pt3dadd(167652.000000,141348.000000,43925.000000,178.670244)}
{pt3dadd(167424.000000,141060.000000,44100.000000,167.176836)}
{pt3dadd(167196.000000,140880.000000,44200.000000,168.788089)}
{pt3dadd(166992.000000,140676.000000,44200.000000,172.332846)}
{pt3dadd(166752.000000,140388.000000,44350.000000,175.877603)}
{pt3dadd(166356.000000,140220.000000,44425.000000,177.488856)}
{pt3dadd(166032.000000,140040.000000,44425.000000,173.829687)}
{pt3dadd(166164.000000,139800.000000,44625.000000,165.779514)}
{pt3dadd(166104.000000,139560.000000,44775.000000,157.729341)}
{pt3dadd(165792.000000,139284.000000,44975.000000,154.070172)}
{pt3dadd(165780.000000,139056.000000,45075.000000,154.241088)}
{pt3dadd(165780.000000,138804.000000,45175.000000,154.736662)}
{pt3dadd(165744.000000,138540.000000,45300.000000,155.531139)}
{pt3dadd(165708.000000,138288.000000,45450.000000,156.598758)}
{pt3dadd(165528.000000,138036.000000,45675.000000,161.112956)}
{pt3dadd(165444.000000,137808.000000,45925.000000,171.108802)}
{pt3dadd(165456.000000,137520.000000,46050.000000,184.852990)}
{pt3dadd(165336.000000,137304.000000,46375.000000,200.612214)}
{pt3dadd(165156.000000,137040.000000,46300.000000,216.653167)}

{create adhoc104}
{access adhoc104}
{connect adhoc104(1), adhoc102(0)}
{nseg = 1}
{strdef color color = "White"}
{pt3dclear()}
{pt3dadd(169284.000000,144072.000000,43325.000000,599.024880)}
{pt3dadd(169200.000000,144120.000000,43050.000000,540.162972)}
{pt3dadd(169356.000000,144228.000000,42675.000000,554.878449)}
{pt3dadd(169524.000000,144276.000000,42400.000000,569.593926)}
{pt3dadd(169752.000000,144360.000000,42150.000000,584.309403)}
{pt3dadd(169908.000000,144420.000000,41775.000000,599.024880)}
{pt3dadd(170160.000000,144552.000000,41475.000000,532.466556)}
{pt3dadd(170268.000000,144516.000000,41150.000000,465.908232)}
{pt3dadd(170496.000000,144672.000000,40825.000000,399.349908)}
{pt3dadd(170976.000000,145320.000000,40550.000000,319.479948)}

{create adhoc105}
{access adhoc105}
{connect adhoc105(1), adhoc104(0)}
{nseg = 1}
{strdef color color = "White"}
{pt3dclear()}
{pt3dadd(170976.000000,145320.000000,40550.000000,319.479948)}
{pt3dadd(171504.000000,145308.000000,40550.000000,288.881586)}
{pt3dadd(171672.000000,145236.000000,40300.000000,276.844851)}
{pt3dadd(172200.000000,145224.000000,39950.000000,264.808116)}
{pt3dadd(172848.000000,145260.000000,39675.000000,252.771381)}
{pt3dadd(173268.000000,145332.000000,39425.000000,240.734646)}
{pt3dadd(173544.000000,145272.000000,39200.000000,212.648935)}
{pt3dadd(173568.000000,145200.000000,38950.000000,184.563225)}
{pt3dadd(173784.000000,145272.000000,38650.000000,156.477515)}
{pt3dadd(174060.000000,145776.000000,38325.000000,128.391804)}
{pt3dadd(174216.000000,146028.000000,37975.000000,156.477515)}
{pt3dadd(174468.000000,146388.000000,37600.000000,184.563225)}
{pt3dadd(174672.000000,146700.000000,37325.000000,212.648935)}
{pt3dadd(174948.000000,147096.000000,37075.000000,240.734646)}
{pt3dadd(175116.000000,147288.000000,36700.000000,226.772037)}
{pt3dadd(175452.000000,147480.000000,36525.000000,212.809428)}
{pt3dadd(175740.000000,147636.000000,36200.000000,198.846819)}
{pt3dadd(175860.000000,147540.000000,35875.000000,184.884210)}
{pt3dadd(176064.000000,147528.000000,35525.000000,173.491668)}
{pt3dadd(176292.000000,147444.000000,35025.000000,162.099126)}
{pt3dadd(176520.000000,147444.000000,34700.000000,150.706584)}
{pt3dadd(176724.000000,147432.000000,34500.000000,139.314042)}
{pt3dadd(176892.000000,147504.000000,34300.000000,138.563393)}
{pt3dadd(177108.000000,147696.000000,34050.000000,137.812743)}
{pt3dadd(177360.000000,147636.000000,33850.000000,137.062094)}
{pt3dadd(177552.000000,147492.000000,33700.000000,136.311444)}
{pt3dadd(177780.000000,147312.000000,33725.000000,144.027792)}
{pt3dadd(178056.000000,147300.000000,33750.000000,151.744140)}
{pt3dadd(178380.000000,147300.000000,33625.000000,159.460488)}
{pt3dadd(178620.000000,147516.000000,33475.000000,167.176836)}
{pt3dadd(178848.000000,147624.000000,33225.000000,172.491853)}
{pt3dadd(178920.000000,147828.000000,33050.000000,177.806871)}
{pt3dadd(178812.000000,148188.000000,32875.000000,183.121889)}
{pt3dadd(178920.000000,148296.000000,32575.000000,188.436906)}
{pt3dadd(178920.000000,148488.000000,32750.000000,160.489782)}
{pt3dadd(178992.000000,148740.000000,32700.000000,31.104000)}

{create adhoc106}
{access adhoc106}
{connect adhoc106(1), adhoc104(0)}
{nseg = 1}
{strdef color color = "White"}
{pt3dclear()}
{pt3dadd(170976.000000,145320.000000,40550.000000,319.479948)}
{pt3dadd(170676.000000,145908.000000,40325.000000,167.176836)}
{pt3dadd(170304.000000,146352.000000,39975.000000,175.535680)}
{pt3dadd(170076.000000,146856.000000,39750.000000,183.894525)}
{pt3dadd(170064.000000,147300.000000,39525.000000,192.253370)}
{pt3dadd(170016.000000,147384.000000,39200.000000,200.612214)}
{pt3dadd(170004.000000,147696.000000,38750.000000,192.253370)}
{pt3dadd(170004.000000,147780.000000,38300.000000,183.894525)}
{pt3dadd(170004.000000,147996.000000,37925.000000,175.535680)}
{pt3dadd(170004.000000,148296.000000,37475.000000,167.176836)}
{pt3dadd(170004.000000,148656.000000,37025.000000,144.731799)}
{pt3dadd(170004.000000,148908.000000,36600.000000,122.286762)}
{pt3dadd(170652.000000,149100.000000,36450.000000,99.841725)}
{pt3dadd(171120.000000,149256.000000,36125.000000,77.396688)}
{pt3dadd(171624.000000,149484.000000,36125.000000,106.194443)}
{pt3dadd(172020.000000,150132.000000,36000.000000,134.992197)}
{pt3dadd(172116.000000,150576.000000,36000.000000,163.789952)}
{pt3dadd(172356.000000,150888.000000,35975.000000,192.587706)}
{pt3dadd(172620.000000,150960.000000,36025.000000,46.656000)}

{create adhoc107}
{access adhoc107}
{connect adhoc107(1), adhoc97(0)}
{nseg = 1}
{strdef color color = "White"}
{pt3dclear()}
{pt3dadd(168660.000000,145368.000000,55350.000000,673.346070)}
{pt3dadd(168384.000000,145908.000000,55075.000000,552.061278)}
{pt3dadd(168180.000000,146208.000000,54725.000000,552.061278)}
{pt3dadd(168120.000000,146340.000000,54425.000000,552.061278)}
{pt3dadd(168060.000000,146676.000000,54150.000000,325.618974)}

{create adhoc108}
{access adhoc108}
{connect adhoc108(1), adhoc107(0)}
{nseg = 1}
{strdef color color = "White"}
{pt3dclear()}
{pt3dadd(168060.000000,146676.000000,54150.000000,325.618974)}
{pt3dadd(167976.000000,146388.000000,54150.000000,499.187376)}
{pt3dadd(168012.000000,145992.000000,54150.000000,470.234511)}
{pt3dadd(168084.000000,145896.000000,53825.000000,441.281646)}
{pt3dadd(167964.000000,145944.000000,53425.000000,412.328781)}
{pt3dadd(167952.000000,145908.000000,53000.000000,383.375916)}
{pt3dadd(167856.000000,145872.000000,52600.000000,374.196411)}
{pt3dadd(167760.000000,145944.000000,52400.000000,365.016906)}
{pt3dadd(167616.000000,145968.000000,52075.000000,355.837401)}
{pt3dadd(167376.000000,145956.000000,51675.000000,346.657896)}
{pt3dadd(167256.000000,145944.000000,51375.000000,363.990794)}
{pt3dadd(167160.000000,145968.000000,51000.000000,381.323691)}
{pt3dadd(167100.000000,146100.000000,50700.000000,398.656589)}
{pt3dadd(166932.000000,146088.000000,50400.000000,415.989486)}
{pt3dadd(166812.000000,146112.000000,50075.000000,415.989486)}
{pt3dadd(166668.000000,146328.000000,49700.000000,415.989486)}
{pt3dadd(166776.000000,146316.000000,49250.000000,415.989486)}
{pt3dadd(166692.000000,146448.000000,48850.000000,415.989486)}
{pt3dadd(166812.000000,146580.000000,48450.000000,362.145168)}
{pt3dadd(167136.000000,146712.000000,48100.000000,308.300850)}
{pt3dadd(167436.000000,146856.000000,47700.000000,254.456532)}
{pt3dadd(167340.000000,146952.000000,47325.000000,200.612214)}
{pt3dadd(167328.000000,147204.000000,47025.000000,167.176836)}
{pt3dadd(167376.000000,147408.000000,46925.000000,167.176836)}

{create adhoc109}
{access adhoc109}
{connect adhoc109(1), adhoc107(0)}
{nseg = 1}
{strdef color color = "White"}
{pt3dclear()}
{pt3dadd(168060.000000,146676.000000,54150.000000,325.618974)}
{pt3dadd(167964.000000,147288.000000,53950.000000,240.734646)}
{pt3dadd(167976.000000,147612.000000,53675.000000,240.734646)}
{pt3dadd(167772.000000,147972.000000,53375.000000,240.734646)}
{pt3dadd(167580.000000,148272.000000,53125.000000,240.734646)}
{pt3dadd(167520.000000,148428.000000,52925.000000,240.734646)}
{pt3dadd(167460.000000,148788.000000,52625.000000,305.347828)}
{pt3dadd(167448.000000,148980.000000,52325.000000,369.961011)}
{pt3dadd(167412.000000,149148.000000,52050.000000,434.574193)}
{pt3dadd(167484.000000,149172.000000,51725.000000,499.187376)}
{pt3dadd(167484.000000,149220.000000,51425.000000,422.537463)}
{pt3dadd(167364.000000,149352.000000,51100.000000,345.887550)}
{pt3dadd(167196.000000,149520.000000,50775.000000,269.237637)}
{pt3dadd(166908.000000,149688.000000,50450.000000,192.587724)}
{pt3dadd(166500.000000,149868.000000,50125.000000,231.105267)}
{pt3dadd(166044.000000,150084.000000,49900.000000,269.622810)}
{pt3dadd(165852.000000,150288.000000,49625.000000,308.140353)}
{pt3dadd(165804.000000,150516.000000,49350.000000,346.657896)}
{pt3dadd(165780.000000,150684.000000,49075.000000,363.990794)}
{pt3dadd(165720.000000,150936.000000,48700.000000,381.323691)}
{pt3dadd(165684.000000,151212.000000,48375.000000,398.656589)}
{pt3dadd(165720.000000,151380.000000,48075.000000,415.989486)}
{pt3dadd(165852.000000,151548.000000,47750.000000,384.212511)}
{pt3dadd(165660.000000,151716.000000,47450.000000,352.435536)}
{pt3dadd(165480.000000,151968.000000,47150.000000,320.658561)}
{pt3dadd(165300.000000,152196.000000,46875.000000,288.881586)}
{pt3dadd(164988.000000,152508.000000,46600.000000,276.844851)}
{pt3dadd(164856.000000,152904.000000,46375.000000,264.808116)}
{pt3dadd(164784.000000,153216.000000,46150.000000,252.771381)}
{pt3dadd(164616.000000,153552.000000,45950.000000,240.734646)}
{pt3dadd(164616.000000,153864.000000,45650.000000,252.771381)}
{pt3dadd(164388.000000,154260.000000,45325.000000,264.808116)}
{pt3dadd(164220.000000,154392.000000,44975.000000,276.844851)}
{pt3dadd(164100.000000,154620.000000,44625.000000,288.881586)}
{pt3dadd(164100.000000,154848.000000,44250.000000,276.844851)}
{pt3dadd(164148.000000,155436.000000,43900.000000,264.808116)}
{pt3dadd(164196.000000,155508.000000,43575.000000,252.771381)}
{pt3dadd(164496.000000,155664.000000,43225.000000,240.734646)}
{pt3dadd(164796.000000,155556.000000,42900.000000,230.704038)}
{pt3dadd(165444.000000,155592.000000,42625.000000,220.673430)}
{pt3dadd(165696.000000,155628.000000,42350.000000,210.642822)}
{pt3dadd(166200.000000,155904.000000,42075.000000,200.612214)}
{pt3dadd(166668.000000,156048.000000,41825.000000,210.642822)}
{pt3dadd(166980.000000,156348.000000,41600.000000,220.673430)}
{pt3dadd(167292.000000,156552.000000,41325.000000,230.704038)}
{pt3dadd(167520.000000,156804.000000,41025.000000,240.734646)}
{pt3dadd(167736.000000,156960.000000,40725.000000,240.734646)}
{pt3dadd(167844.000000,157104.000000,40325.000000,240.734646)}
{pt3dadd(168000.000000,157152.000000,40025.000000,288.881586)}

{create adhoc110}
{access adhoc110}
{connect adhoc110(1), adhoc109(0)}
{nseg = 1}
{strdef color color = "White"}
{pt3dclear()}
{pt3dadd(168000.000000,157152.000000,40025.000000,288.881586)}
{pt3dadd(168468.000000,157380.000000,40075.000000,192.587724)}
{pt3dadd(168624.000000,157548.000000,39775.000000,202.217112)}
{pt3dadd(168600.000000,157704.000000,39575.000000,211.846500)}
{pt3dadd(168900.000000,158100.000000,39425.000000,221.475888)}
{pt3dadd(169068.000000,158436.000000,39275.000000,231.105276)}
{pt3dadd(169320.000000,158628.000000,39000.000000,185.209659)}
{pt3dadd(169512.000000,158700.000000,38725.000000,139.314042)}
{pt3dadd(169560.000000,158880.000000,38200.000000,55.987200)}

{create adhoc111}
{access adhoc111}
{connect adhoc111(1), adhoc109(0)}
{nseg = 1}
{strdef color color = "White"}
{pt3dclear()}
{pt3dadd(168000.000000,157152.000000,40025.000000,288.881586)}
{pt3dadd(167628.000000,156804.000000,39775.000000,139.314042)}
{pt3dadd(167652.000000,156684.000000,39475.000000,146.279741)}
{pt3dadd(167568.000000,156444.000000,39200.000000,153.245439)}
{pt3dadd(167628.000000,156528.000000,38850.000000,160.211138)}
{pt3dadd(167796.000000,156468.000000,38525.000000,167.176836)}
{pt3dadd(168264.000000,156456.000000,38375.000000,165.505073)}
{pt3dadd(168888.000000,156456.000000,38275.000000,163.833309)}
{pt3dadd(169596.000000,156444.000000,38125.000000,162.161545)}
{pt3dadd(169848.000000,156192.000000,38000.000000,160.489782)}
{pt3dadd(170064.000000,155976.000000,37800.000000,155.195847)}
{pt3dadd(170196.000000,155796.000000,37600.000000,149.901912)}
{pt3dadd(170376.000000,155484.000000,37075.000000,144.607977)}
{pt3dadd(170544.000000,155388.000000,36600.000000,139.314042)}
{pt3dadd(170784.000000,155580.000000,36350.000000,167.176836)}
{pt3dadd(171024.000000,155436.000000,36100.000000,55.987200)}

{create adhoc112}
{access adhoc112}
{connect adhoc112(1), adhoc84(0)}
{nseg = 1}
{strdef color color = "White"}
{pt3dclear()}
{pt3dadd(173868.000000,136080.000000,68200.000000,763.169544)}
{pt3dadd(173640.000000,134604.000000,68000.000000,575.063856)}
{pt3dadd(173424.000000,133944.000000,67700.000000,613.401462)}
{pt3dadd(173316.000000,133752.000000,67425.000000,651.739068)}
{pt3dadd(173196.000000,133392.000000,67150.000000,690.076674)}
{pt3dadd(173292.000000,133140.000000,67000.000000,690.076674)}

{create adhoc113}
{access adhoc113}
{connect adhoc113(1), adhoc112(0)}
{nseg = 1}
{strdef color color = "White"}
{pt3dclear()}
{pt3dadd(173292.000000,133140.000000,67000.000000,690.076674)}
{pt3dadd(173448.000000,132600.000000,67100.000000,718.829820)}
{pt3dadd(173640.000000,132024.000000,67100.000000,568.146123)}
{pt3dadd(174108.000000,131712.000000,67100.000000,417.462426)}
{pt3dadd(174612.000000,131616.000000,67375.000000,266.778729)}
{pt3dadd(174948.000000,131472.000000,67775.000000,116.095032)}
{pt3dadd(175308.000000,131412.000000,68100.000000,99.791568)}
{pt3dadd(175704.000000,131484.000000,68300.000000,83.488104)}
{pt3dadd(175956.000000,131364.000000,68475.000000,67.184640)}
{pt3dadd(176124.000000,131040.000000,68375.000000,38.880000)}

{create adhoc114}
{access adhoc114}
{connect adhoc114(1), adhoc112(0)}
{nseg = 1}
{strdef color color = "White"}
{pt3dclear()}
{pt3dadd(173292.000000,133140.000000,67000.000000,690.076674)}
{pt3dadd(173136.000000,132756.000000,66750.000000,690.076674)}
{pt3dadd(173052.000000,132396.000000,66425.000000,828.092016)}

{create adhoc115}
{access adhoc115}
{connect adhoc115(1), adhoc114(0)}
{nseg = 1}
{strdef color color = "White"}
{pt3dclear()}
{pt3dadd(173052.000000,132396.000000,66425.000000,828.092016)}
{pt3dadd(173052.000000,131964.000000,66425.000000,862.595802)}
{pt3dadd(172992.000000,131424.000000,66425.000000,681.775362)}
{pt3dadd(172932.000000,130788.000000,66425.000000,500.954922)}
{pt3dadd(173040.000000,130476.000000,66350.000000,320.134482)}
{pt3dadd(173232.000000,130044.000000,66425.000000,139.314042)}
{pt3dadd(173292.000000,129420.000000,66500.000000,125.124648)}
{pt3dadd(173472.000000,128964.000000,66500.000000,110.935254)}
{pt3dadd(173508.000000,128496.000000,66250.000000,96.745860)}
{pt3dadd(173496.000000,128352.000000,66075.000000,92.876040)}

{create adhoc116}
{access adhoc116}
{connect adhoc116(1), adhoc114(0)}
{nseg = 1}
{strdef color color = "White"}
{pt3dclear()}
{pt3dadd(173052.000000,132396.000000,66425.000000,828.092016)}
{pt3dadd(172584.000000,132084.000000,66000.000000,862.595802)}
{pt3dadd(172380.000000,131916.000000,65650.000000,905.725589)}
{pt3dadd(172368.000000,131640.000000,65350.000000,948.855375)}
{pt3dadd(172284.000000,131412.000000,65025.000000,991.985162)}
{pt3dadd(172248.000000,131316.000000,64625.000000,1035.114948)}
{pt3dadd(172056.000000,131196.000000,64275.000000,1035.114948)}
{pt3dadd(172104.000000,130908.000000,63950.000000,1035.114948)}
{pt3dadd(171936.000000,130632.000000,63650.000000,1035.114948)}
{pt3dadd(171972.000000,130380.000000,63350.000000,1035.114948)}
{pt3dadd(171936.000000,130176.000000,63050.000000,1024.763819)}
{pt3dadd(171768.000000,129924.000000,62675.000000,1014.412689)}
{pt3dadd(171648.000000,129612.000000,62425.000000,1004.061560)}
{pt3dadd(171588.000000,129492.000000,62125.000000,993.710430)}
{pt3dadd(171504.000000,129096.000000,61750.000000,1055.005416)}
{pt3dadd(171468.000000,128904.000000,61425.000000,1192.452354)}

{create adhoc117}
{access adhoc117}
{connect adhoc117(1), adhoc116(0)}
{nseg = 1}
{strdef color color = "White"}
{pt3dclear()}
{pt3dadd(171468.000000,128904.000000,61425.000000,1192.452354)}
{pt3dadd(171240.000000,128532.000000,61425.000000,1242.137880)}
{pt3dadd(170976.000000,128136.000000,61425.000000,966.431921)}
{pt3dadd(171048.000000,127980.000000,61675.000000,690.725961)}
{pt3dadd(170868.000000,127656.000000,61675.000000,415.020001)}
{pt3dadd(170640.000000,127416.000000,61675.000000,139.314042)}
{pt3dadd(170328.000000,127152.000000,61825.000000,146.372616)}
{pt3dadd(170100.000000,126756.000000,62250.000000,153.431190)}
{pt3dadd(170112.000000,126408.000000,62475.000000,160.489764)}
{pt3dadd(170076.000000,126168.000000,62725.000000,80.621550)}

{create adhoc118}
{access adhoc118}
{connect adhoc118(1), adhoc117(0)}
{nseg = 1}
{strdef color color = "White"}
{pt3dclear()}
{pt3dadd(170076.000000,126168.000000,62725.000000,80.621550)}
{pt3dadd(170364.000000,125976.000000,62625.000000,96.745860)}
{pt3dadd(170724.000000,125976.000000,62250.000000,88.683705)}
{pt3dadd(171084.000000,126072.000000,62000.000000,80.621550)}
{pt3dadd(171288.000000,126036.000000,61700.000000,55.987200)}

{create adhoc119}
{access adhoc119}
{connect adhoc119(1), adhoc117(0)}
{nseg = 1}
{strdef color color = "White"}
{pt3dclear()}
{pt3dadd(170076.000000,126168.000000,62725.000000,80.621550)}
{pt3dadd(170016.000000,125820.000000,63350.000000,80.621550)}
{pt3dadd(169788.000000,125676.000000,63625.000000,46.656000)}

{create adhoc120}
{access adhoc120}
{connect adhoc120(1), adhoc116(0)}
{nseg = 1}
{strdef color color = "White"}
{pt3dclear()}
{pt3dadd(171468.000000,128904.000000,61425.000000,1192.452354)}
{pt3dadd(171264.000000,128760.000000,61100.000000,1144.754388)}
{pt3dadd(171060.000000,128700.000000,60775.000000,1106.993399)}
{pt3dadd(171024.000000,128448.000000,60500.000000,1069.232409)}
{pt3dadd(170964.000000,128196.000000,60275.000000,1031.471419)}
{pt3dadd(170964.000000,128184.000000,60100.000000,993.710430)}
{pt3dadd(170868.000000,128040.000000,59850.000000,889.048787)}
{pt3dadd(170808.000000,127944.000000,59550.000000,784.387143)}
{pt3dadd(170856.000000,127524.000000,59175.000000,679.725500)}
{pt3dadd(170964.000000,126996.000000,58975.000000,575.063856)}
{pt3dadd(170916.000000,126936.000000,58700.000000,562.669596)}
{pt3dadd(171000.000000,126792.000000,58500.000000,599.024880)}

{create adhoc121}
{access adhoc121}
{connect adhoc121(1), adhoc120(0)}
{nseg = 1}
{strdef color color = "White"}
{pt3dclear()}
{pt3dadd(171000.000000,126792.000000,58500.000000,599.024880)}
{pt3dadd(170820.000000,127248.000000,58500.000000,701.402076)}
{pt3dadd(170496.000000,127728.000000,58500.000000,691.669958)}
{pt3dadd(170004.000000,128280.000000,58500.000000,681.937839)}
{pt3dadd(169488.000000,128676.000000,58500.000000,672.205721)}
{pt3dadd(169524.000000,128544.000000,58250.000000,662.473602)}
{pt3dadd(169428.000000,128664.000000,57825.000000,646.611421)}
{pt3dadd(169128.000000,128880.000000,57625.000000,630.749241)}
{pt3dadd(168852.000000,129156.000000,57400.000000,614.887060)}
{pt3dadd(168768.000000,129288.000000,57075.000000,599.024880)}
{pt3dadd(168636.000000,129456.000000,56875.000000,628.976115)}
{pt3dadd(168576.000000,129696.000000,56550.000000,658.927350)}
{pt3dadd(168540.000000,129864.000000,56225.000000,688.878585)}
{pt3dadd(168576.000000,130068.000000,55875.000000,718.829820)}
{pt3dadd(168528.000000,130152.000000,55600.000000,652.472019)}
{pt3dadd(168444.000000,130332.000000,55300.000000,586.114218)}
{pt3dadd(168336.000000,130548.000000,55025.000000,479.219886)}

{create adhoc122}
{access adhoc122}
{connect adhoc122(1), adhoc121(0)}
{nseg = 1}
{strdef color color = "White"}
{pt3dclear()}
{pt3dadd(168336.000000,130548.000000,55025.000000,479.219886)}
{pt3dadd(168240.000000,131016.000000,54600.000000,499.187376)}
{pt3dadd(168288.000000,131376.000000,54250.000000,499.187376)}
{pt3dadd(168336.000000,131676.000000,53825.000000,499.187376)}
{pt3dadd(168540.000000,131976.000000,53375.000000,499.187376)}
{pt3dadd(168756.000000,132228.000000,52975.000000,499.187376)}
{pt3dadd(169140.000000,132624.000000,52425.000000,573.132609)}
{pt3dadd(169224.000000,132756.000000,51925.000000,647.077842)}
{pt3dadd(169404.000000,132804.000000,51300.000000,721.023075)}
{pt3dadd(169440.000000,132744.000000,51125.000000,794.968308)}
{pt3dadd(169488.000000,132828.000000,50775.000000,803.249217)}
{pt3dadd(169452.000000,132900.000000,50450.000000,811.530126)}
{pt3dadd(169536.000000,133104.000000,50150.000000,819.811035)}
{pt3dadd(169392.000000,133176.000000,49800.000000,828.091944)}
{pt3dadd(169416.000000,133248.000000,49450.000000,828.092016)}

{create adhoc123}
{access adhoc123}
{connect adhoc123(1), adhoc122(0)}
{nseg = 1}
{strdef color color = "White"}
{pt3dclear()}
{pt3dadd(169416.000000,133248.000000,49450.000000,828.092016)}
{pt3dadd(169584.000000,132780.000000,49450.000000,240.734646)}
{pt3dadd(169644.000000,132576.000000,49225.000000,196.675295)}
{pt3dadd(169728.000000,132276.000000,49050.000000,152.615943)}
{pt3dadd(169848.000000,132072.000000,48825.000000,108.556592)}
{pt3dadd(169980.000000,131796.000000,48600.000000,64.497240)}
{pt3dadd(170148.000000,131412.000000,48400.000000,83.201441)}
{pt3dadd(170484.000000,131112.000000,48225.000000,101.905641)}
{pt3dadd(170616.000000,130824.000000,48025.000000,120.609842)}
{pt3dadd(170664.000000,130140.000000,47800.000000,139.314042)}
{pt3dadd(170520.000000,129732.000000,47650.000000,67.184640)}
{pt3dadd(170388.000000,129348.000000,47650.000000,55.987200)}

{create adhoc124}
{access adhoc124}
{connect adhoc124(1), adhoc122(0)}
{nseg = 1}
{strdef color color = "White"}
{pt3dclear()}
{pt3dadd(169416.000000,133248.000000,49450.000000,828.092016)}
{pt3dadd(169704.000000,133500.000000,49150.000000,828.092016)}
{pt3dadd(169740.000000,133656.000000,48850.000000,793.588162)}
{pt3dadd(169752.000000,133632.000000,48525.000000,759.084309)}
{pt3dadd(169716.000000,133680.000000,48200.000000,724.580455)}
{pt3dadd(169584.000000,133752.000000,47900.000000,690.076602)}
{pt3dadd(169488.000000,133848.000000,47725.000000,288.881586)}

{create adhoc125}
{access adhoc125}
{connect adhoc125(1), adhoc124(0)}
{nseg = 1}
{strdef color color = "White"}
{pt3dclear()}
{pt3dadd(169488.000000,133848.000000,47725.000000,288.881586)}
{pt3dadd(169320.000000,134124.000000,47725.000000,167.176836)}
{pt3dadd(169068.000000,134460.000000,47725.000000,154.406385)}
{pt3dadd(168768.000000,134964.000000,47725.000000,141.635934)}
{pt3dadd(168732.000000,135192.000000,47975.000000,128.865483)}
{pt3dadd(168900.000000,135780.000000,48000.000000,116.095032)}
{pt3dadd(169080.000000,136164.000000,48325.000000,46.656000)}

{create adhoc126}
{access adhoc126}
{connect adhoc126(1), adhoc124(0)}
{nseg = 1}
{strdef color color = "White"}
{pt3dclear()}
{pt3dadd(169488.000000,133848.000000,47725.000000,288.881586)}
{pt3dadd(169836.000000,133716.000000,47425.000000,383.375916)}
{pt3dadd(170016.000000,133464.000000,47225.000000,374.196411)}
{pt3dadd(170220.000000,133272.000000,46875.000000,365.016906)}
{pt3dadd(170316.000000,133020.000000,46600.000000,355.837401)}
{pt3dadd(170340.000000,132924.000000,46325.000000,346.657896)}
{pt3dadd(170292.000000,132648.000000,46050.000000,379.798393)}
{pt3dadd(170364.000000,132456.000000,45725.000000,412.938891)}
{pt3dadd(170304.000000,132156.000000,45375.000000,446.079388)}
{pt3dadd(170256.000000,131988.000000,45000.000000,479.219886)}
{pt3dadd(170220.000000,131712.000000,44750.000000,637.467264)}
{pt3dadd(170184.000000,131400.000000,44350.000000,795.714642)}
{pt3dadd(170076.000000,131292.000000,44050.000000,953.962020)}
{pt3dadd(170016.000000,131100.000000,43700.000000,993.710358)}

{create adhoc127}
{access adhoc127}
{connect adhoc127(1), adhoc126(0)}
{nseg = 1}
{strdef color color = "White"}
{pt3dclear()}
{pt3dadd(170016.000000,131100.000000,43700.000000,993.710358)}
{pt3dadd(170316.000000,130776.000000,43700.000000,96.745860)}
{pt3dadd(170520.000000,130380.000000,43700.000000,107.387906)}
{pt3dadd(170700.000000,130116.000000,43825.000000,118.029951)}
{pt3dadd(170916.000000,129684.000000,43950.000000,128.671997)}
{pt3dadd(171216.000000,129480.000000,43975.000000,139.314042)}
{pt3dadd(171540.000000,129360.000000,44000.000000,96.745860)}
{pt3dadd(171720.000000,129156.000000,43800.000000,67.184640)}

{create adhoc128}
{access adhoc128}
{connect adhoc128(1), adhoc126(0)}
{nseg = 1}
{strdef color color = "White"}
{pt3dclear()}
{pt3dadd(170016.000000,131100.000000,43700.000000,993.710358)}
{pt3dadd(169968.000000,131040.000000,43525.000000,862.595802)}
{pt3dadd(170064.000000,131112.000000,43200.000000,796.703072)}
{pt3dadd(170112.000000,131100.000000,42825.000000,730.810341)}
{pt3dadd(170460.000000,131040.000000,42525.000000,664.917611)}
{pt3dadd(170724.000000,131076.000000,42275.000000,599.024880)}
{pt3dadd(170904.000000,131064.000000,41950.000000,664.917611)}
{pt3dadd(171000.000000,131016.000000,41650.000000,730.810341)}
{pt3dadd(171300.000000,130932.000000,41300.000000,796.703072)}
{pt3dadd(171432.000000,130848.000000,40975.000000,862.595802)}
{pt3dadd(171516.000000,131064.000000,40675.000000,707.328567)}
{pt3dadd(171672.000000,131196.000000,40375.000000,552.061332)}
{pt3dadd(171936.000000,131544.000000,40050.000000,288.881586)}

{create adhoc129}
{access adhoc129}
{connect adhoc129(1), adhoc128(0)}
{nseg = 1}
{strdef color color = "White"}
{pt3dclear()}
{pt3dadd(171936.000000,131544.000000,40050.000000,288.881586)}
{pt3dadd(171900.000000,131064.000000,40050.000000,69.791454)}
{pt3dadd(171996.000000,130716.000000,40050.000000,76.530055)}
{pt3dadd(172344.000000,130656.000000,39925.000000,83.268657)}
{pt3dadd(172824.000000,130488.000000,39825.000000,90.007258)}
{pt3dadd(173112.000000,130080.000000,39700.000000,96.745860)}
{pt3dadd(173412.000000,129804.000000,39575.000000,96.745860)}
{pt3dadd(173940.000000,129588.000000,39450.000000,80.621550)}

{create adhoc130}
{access adhoc130}
{connect adhoc130(1), adhoc128(0)}
{nseg = 1}
{strdef color color = "White"}
{pt3dclear()}
{pt3dadd(171936.000000,131544.000000,40050.000000,288.881586)}
{pt3dadd(172308.000000,131880.000000,39950.000000,255.583944)}
{pt3dadd(172488.000000,132396.000000,39725.000000,288.881586)}

{create adhoc131}
{access adhoc131}
{connect adhoc131(1), adhoc130(0)}
{nseg = 1}
{strdef color color = "White"}
{pt3dclear()}
{pt3dadd(172488.000000,132396.000000,39725.000000,288.881586)}
{pt3dadd(172512.000000,132684.000000,39775.000000,288.881586)}
{pt3dadd(172452.000000,133020.000000,39775.000000,251.489700)}
{pt3dadd(172284.000000,133440.000000,39775.000000,214.097814)}
{pt3dadd(172104.000000,133920.000000,39775.000000,176.705928)}
{pt3dadd(172104.000000,134520.000000,40050.000000,139.314042)}
{pt3dadd(172284.000000,134772.000000,39875.000000,121.281691)}
{pt3dadd(172272.000000,135120.000000,39725.000000,103.249341)}
{pt3dadd(172044.000000,135540.000000,39625.000000,85.216990)}
{pt3dadd(171948.000000,135996.000000,39475.000000,67.184640)}
{pt3dadd(171996.000000,136332.000000,39675.000000,92.182689)}
{pt3dadd(171948.000000,136788.000000,39675.000000,117.180738)}
{pt3dadd(171756.000000,137256.000000,39675.000000,142.178787)}
{pt3dadd(171864.000000,137592.000000,39600.000000,167.176836)}
{pt3dadd(171936.000000,138024.000000,39325.000000,157.889238)}
{pt3dadd(171840.000000,138324.000000,39125.000000,148.601640)}
{pt3dadd(172092.000000,138420.000000,38700.000000,139.314042)}
{pt3dadd(172272.000000,138684.000000,38600.000000,77.396688)}

{create adhoc132}
{access adhoc132}
{connect adhoc132(1), adhoc130(0)}
{nseg = 1}
{strdef color color = "White"}
{pt3dclear()}
{pt3dadd(172488.000000,132396.000000,39725.000000,288.881586)}
{pt3dadd(172764.000000,132636.000000,39575.000000,415.989486)}
{pt3dadd(172920.000000,132744.000000,39350.000000,372.175776)}
{pt3dadd(173052.000000,132912.000000,39025.000000,328.362066)}
{pt3dadd(173328.000000,133044.000000,38700.000000,284.548356)}
{pt3dadd(173700.000000,133176.000000,38400.000000,240.734646)}
{pt3dadd(174168.000000,133380.000000,38175.000000,238.327304)}
{pt3dadd(174432.000000,133584.000000,37975.000000,235.919961)}
{pt3dadd(174864.000000,133992.000000,37700.000000,233.512618)}
{pt3dadd(175524.000000,134532.000000,37550.000000,231.105276)}
{pt3dadd(175920.000000,134856.000000,37550.000000,245.549354)}
{pt3dadd(175992.000000,134952.000000,37375.000000,259.993431)}
{pt3dadd(176124.000000,135120.000000,37225.000000,274.437509)}
{pt3dadd(176184.000000,135648.000000,37000.000000,288.881586)}
{pt3dadd(176340.000000,135996.000000,36775.000000,285.992784)}
{pt3dadd(176292.000000,136380.000000,36525.000000,283.103982)}
{pt3dadd(176448.000000,136596.000000,36250.000000,280.215180)}
{pt3dadd(176568.000000,136848.000000,35975.000000,277.326378)}
{pt3dadd(176568.000000,137184.000000,35675.000000,277.326369)}
{pt3dadd(176568.000000,137472.000000,35400.000000,277.326360)}
{pt3dadd(177156.000000,137772.000000,35025.000000,277.326351)}
{pt3dadd(177972.000000,138216.000000,34850.000000,277.326342)}
{pt3dadd(178092.000000,138444.000000,34625.000000,268.178418)}
{pt3dadd(178332.000000,138648.000000,34325.000000,259.030494)}
{pt3dadd(178584.000000,138612.000000,33975.000000,249.882570)}
{pt3dadd(178824.000000,138696.000000,33700.000000,240.734646)}
{pt3dadd(179244.000000,138708.000000,33350.000000,230.704038)}
{pt3dadd(179460.000000,138732.000000,33100.000000,220.673430)}
{pt3dadd(179616.000000,138804.000000,32750.000000,210.642822)}
{pt3dadd(179784.000000,138900.000000,32475.000000,200.612214)}
{pt3dadd(180000.000000,139068.000000,32150.000000,185.287671)}
{pt3dadd(180180.000000,139116.000000,31875.000000,169.963128)}
{pt3dadd(180216.000000,139248.000000,31525.000000,154.638585)}
{pt3dadd(180552.000000,139572.000000,31350.000000,139.314042)}
{pt3dadd(180972.000000,139860.000000,31150.000000,154.638585)}
{pt3dadd(181212.000000,139980.000000,30975.000000,169.963128)}
{pt3dadd(181164.000000,139968.000000,30725.000000,185.287671)}
{pt3dadd(181440.000000,140100.000000,30475.000000,200.612214)}
{pt3dadd(181596.000000,140472.000000,30325.000000,192.253370)}
{pt3dadd(181692.000000,140688.000000,30200.000000,183.894525)}
{pt3dadd(181764.000000,140892.000000,30150.000000,175.535680)}
{pt3dadd(181896.000000,141120.000000,30000.000000,167.176836)}
{pt3dadd(182052.000000,141336.000000,29725.000000,116.095032)}
{pt3dadd(182496.000000,141864.000000,29425.000000,80.621550)}

{create adhoc133}
{access adhoc133}
{connect adhoc133(1), adhoc121(0)}
{nseg = 1}
{strdef color color = "White"}
{pt3dclear()}
{pt3dadd(168336.000000,130548.000000,55025.000000,479.219886)}
{pt3dadd(168504.000000,129996.000000,55075.000000,635.974632)}
{pt3dadd(168588.000000,129600.000000,55075.000000,501.167439)}
{pt3dadd(168876.000000,129492.000000,54875.000000,366.360246)}
{pt3dadd(168900.000000,129264.000000,54750.000000,231.553053)}
{pt3dadd(169056.000000,129036.000000,54600.000000,96.745860)}
{pt3dadd(169272.000000,128808.000000,54450.000000,122.712448)}
{pt3dadd(169476.000000,128544.000000,54250.000000,148.679037)}
{pt3dadd(169632.000000,128196.000000,54125.000000,174.645625)}
{pt3dadd(169836.000000,127464.000000,53975.000000,200.612214)}
{pt3dadd(169872.000000,126948.000000,53975.000000,139.314042)}
{pt3dadd(169872.000000,126720.000000,54200.000000,116.095032)}

{create adhoc134}
{access adhoc134}
{connect adhoc134(1), adhoc120(0)}
{nseg = 1}
{strdef color color = "White"}
{pt3dclear()}
{pt3dadd(171000.000000,126792.000000,58500.000000,599.024880)}
{pt3dadd(170844.000000,126288.000000,58275.000000,599.024880)}
{pt3dadd(170652.000000,125184.000000,58175.000000,629.375454)}
{pt3dadd(170532.000000,124656.000000,57875.000000,659.726028)}
{pt3dadd(170604.000000,124380.000000,57625.000000,690.076602)}
{pt3dadd(170400.000000,124176.000000,57400.000000,794.968308)}

{create adhoc135}
{access adhoc135}
{connect adhoc135(1), adhoc134(0)}
{nseg = 1}
{strdef color color = "White"}
{pt3dclear()}
{pt3dadd(170400.000000,124176.000000,57400.000000,794.968308)}
{pt3dadd(170148.000000,124212.000000,57400.000000,662.473602)}
{pt3dadd(169716.000000,124332.000000,57400.000000,531.683712)}
{pt3dadd(169248.000000,124416.000000,57400.000000,400.893822)}
{pt3dadd(168864.000000,124404.000000,57400.000000,270.103932)}
{pt3dadd(168432.000000,124392.000000,57400.000000,139.314042)}
{pt3dadd(167952.000000,124380.000000,57400.000000,154.638585)}
{pt3dadd(167772.000000,124344.000000,57275.000000,169.963128)}
{pt3dadd(167508.000000,124284.000000,57275.000000,185.287671)}
{pt3dadd(167196.000000,124152.000000,57275.000000,200.612214)}
{pt3dadd(166884.000000,123852.000000,57275.000000,140.616882)}
{pt3dadd(166788.000000,123648.000000,57150.000000,80.621550)}
{pt3dadd(166596.000000,123396.000000,57100.000000,55.987200)}

{create adhoc136}
{access adhoc136}
{connect adhoc136(1), adhoc134(0)}
{nseg = 1}
{strdef color color = "White"}
{pt3dclear()}
{pt3dadd(170400.000000,124176.000000,57400.000000,794.968308)}
{pt3dadd(170340.000000,123948.000000,57125.000000,763.169544)}
{pt3dadd(170280.000000,123672.000000,56900.000000,794.968236)}
{pt3dadd(170232.000000,123588.000000,56675.000000,828.092016)}

{create adhoc137}
{access adhoc137}
{connect adhoc137(1), adhoc136(0)}
{nseg = 1}
{strdef color color = "White"}
{pt3dclear()}
{pt3dadd(170232.000000,123588.000000,56675.000000,828.092016)}
{pt3dadd(169956.000000,123192.000000,56675.000000,828.092016)}
{pt3dadd(169668.000000,122964.000000,56675.000000,634.505940)}
{pt3dadd(169584.000000,122700.000000,56650.000000,440.919864)}
{pt3dadd(169416.000000,122436.000000,56650.000000,247.333788)}
{pt3dadd(169188.000000,122172.000000,56650.000000,53.747712)}
{pt3dadd(168936.000000,121848.000000,56650.000000,116.076690)}
{pt3dadd(168852.000000,121452.000000,56650.000000,178.405668)}
{pt3dadd(168744.000000,121008.000000,56650.000000,240.734646)}
{pt3dadd(168444.000000,120864.000000,56800.000000,96.745860)}

{create adhoc138}
{access adhoc138}
{connect adhoc138(1), adhoc137(0)}
{nseg = 1}
{strdef color color = "White"}
{pt3dclear()}
{pt3dadd(168444.000000,120864.000000,56800.000000,96.745860)}
{pt3dadd(168480.000000,120612.000000,56925.000000,64.497240)}
{pt3dadd(168612.000000,120228.000000,56925.000000,68.528318)}
{pt3dadd(168648.000000,119964.000000,56925.000000,72.559395)}
{pt3dadd(168864.000000,119736.000000,56925.000000,76.590473)}
{pt3dadd(169116.000000,119472.000000,56925.000000,80.621550)}
{pt3dadd(169260.000000,119208.000000,56950.000000,93.807369)}
{pt3dadd(169308.000000,118860.000000,56950.000000,106.993188)}
{pt3dadd(169380.000000,118476.000000,56950.000000,55.987200)}

{create adhoc139}
{access adhoc139}
{connect adhoc139(1), adhoc137(0)}
{nseg = 1}
{strdef color color = "White"}
{pt3dclear()}
{pt3dadd(168444.000000,120864.000000,56800.000000,96.745860)}
{pt3dadd(168144.000000,120708.000000,56800.000000,80.621550)}
{pt3dadd(167736.000000,120648.000000,56800.000000,76.590473)}
{pt3dadd(167268.000000,120696.000000,56800.000000,72.559395)}
{pt3dadd(167004.000000,120996.000000,56800.000000,68.528318)}
{pt3dadd(166752.000000,121104.000000,56825.000000,64.497240)}
{pt3dadd(166560.000000,121284.000000,57000.000000,55.987200)}

{create adhoc140}
{access adhoc140}
{connect adhoc140(1), adhoc136(0)}
{nseg = 1}
{strdef color color = "White"}
{pt3dclear()}
{pt3dadd(170232.000000,123588.000000,56675.000000,828.092016)}
{pt3dadd(170172.000000,123468.000000,56500.000000,828.092016)}
{pt3dadd(170052.000000,123384.000000,56225.000000,879.847749)}
{pt3dadd(169908.000000,123120.000000,55950.000000,931.603482)}
{pt3dadd(169860.000000,123084.000000,55700.000000,983.359215)}
{pt3dadd(169764.000000,123048.000000,55475.000000,1035.114948)}
{pt3dadd(169704.000000,123012.000000,55200.000000,1119.762513)}
{pt3dadd(169644.000000,122952.000000,54925.000000,1204.410078)}
{pt3dadd(169632.000000,122868.000000,54625.000000,1289.057643)}
{pt3dadd(169536.000000,122724.000000,54375.000000,1373.705208)}
{pt3dadd(169524.000000,122748.000000,54125.000000,1388.014623)}
{pt3dadd(169548.000000,122820.000000,53850.000000,1402.324038)}
{pt3dadd(169620.000000,122928.000000,53600.000000,1416.633453)}
{pt3dadd(169692.000000,123036.000000,53375.000000,1430.942868)}
{pt3dadd(169692.000000,123108.000000,53100.000000,1430.942868)}
{pt3dadd(169692.000000,123156.000000,52800.000000,1717.131492)}

{create adhoc141}
{access adhoc141}
{connect adhoc141(1), adhoc140(0)}
{nseg = 1}
{strdef color color = "White"}
{pt3dclear()}
{pt3dadd(169692.000000,123156.000000,52800.000000,1717.131492)}
{pt3dadd(169464.000000,123360.000000,52800.000000,1035.114948)}
{pt3dadd(169140.000000,123612.000000,52800.000000,811.164722)}
{pt3dadd(168792.000000,123936.000000,52800.000000,587.214495)}
{pt3dadd(168384.000000,124212.000000,52950.000000,363.264268)}
{pt3dadd(168276.000000,124428.000000,53100.000000,139.314042)}
{pt3dadd(167868.000000,124608.000000,53150.000000,133.509289)}
{pt3dadd(167388.000000,124800.000000,53250.000000,127.704537)}
{pt3dadd(166992.000000,124968.000000,53650.000000,121.899785)}
{pt3dadd(166884.000000,125208.000000,53625.000000,116.095032)}
{pt3dadd(166584.000000,125424.000000,53400.000000,92.326608)}
{pt3dadd(166548.000000,125700.000000,53375.000000,68.558184)}
{pt3dadd(166428.000000,126168.000000,53200.000000,44.789760)}
{pt3dadd(166428.000000,126756.000000,53000.000000,46.656000)}

{create adhoc142}
{access adhoc142}
{connect adhoc142(1), adhoc140(0)}
{nseg = 1}
{strdef color color = "White"}
{pt3dclear()}
{pt3dadd(169692.000000,123156.000000,52800.000000,1717.131492)}
{pt3dadd(169608.000000,123036.000000,52600.000000,1648.446084)}
{pt3dadd(169668.000000,123084.000000,52250.000000,1490.565402)}
{pt3dadd(169692.000000,123108.000000,51975.000000,1373.705208)}

{create adhoc143}
{access adhoc143}
{connect adhoc143(1), adhoc142(0)}
{nseg = 1}
{strdef color color = "White"}
{pt3dclear()}
{pt3dadd(169692.000000,123108.000000,51975.000000,1373.705208)}
{pt3dadd(169488.000000,123444.000000,51950.000000,1242.137880)}
{pt3dadd(169320.000000,123792.000000,51950.000000,908.336802)}
{pt3dadd(169116.000000,124104.000000,51950.000000,574.535724)}
{pt3dadd(169008.000000,124440.000000,51550.000000,240.734646)}
{pt3dadd(168804.000000,124596.000000,51175.000000,240.734646)}

{create adhoc144}
{access adhoc144}
{connect adhoc144(1), adhoc143(0)}
{nseg = 1}
{strdef color color = "White"}
{pt3dclear()}
{pt3dadd(168804.000000,124596.000000,51175.000000,240.734646)}
{pt3dadd(168288.000000,124464.000000,51175.000000,240.734646)}
{pt3dadd(167880.000000,124212.000000,51275.000000,197.347145)}
{pt3dadd(167748.000000,124176.000000,51275.000000,153.959643)}
{pt3dadd(167460.000000,124032.000000,51325.000000,110.572141)}
{pt3dadd(167184.000000,123984.000000,51350.000000,67.184640)}
{pt3dadd(166884.000000,123900.000000,51400.000000,80.621550)}
{pt3dadd(166560.000000,123756.000000,51350.000000,55.987200)}

{create adhoc145}
{access adhoc145}
{connect adhoc145(1), adhoc143(0)}
{nseg = 1}
{strdef color color = "White"}
{pt3dclear()}
{pt3dadd(168804.000000,124596.000000,51175.000000,240.734646)}
{pt3dadd(168612.000000,124620.000000,50925.000000,240.734646)}
{pt3dadd(168528.000000,124824.000000,50675.000000,230.704038)}
{pt3dadd(168396.000000,125220.000000,50350.000000,220.673430)}
{pt3dadd(168336.000000,125256.000000,50075.000000,210.642822)}
{pt3dadd(168648.000000,125604.000000,49725.000000,200.612214)}
{pt3dadd(169080.000000,126072.000000,49450.000000,189.467088)}
{pt3dadd(169380.000000,126444.000000,49200.000000,178.321962)}
{pt3dadd(169464.000000,126660.000000,48875.000000,167.176836)}
{pt3dadd(169800.000000,126816.000000,48500.000000,116.095032)}

{create adhoc146}
{access adhoc146}
{connect adhoc146(1), adhoc142(0)}
{nseg = 1}
{strdef color color = "White"}
{pt3dclear()}
{pt3dadd(169692.000000,123108.000000,51975.000000,1373.705208)}
{pt3dadd(169656.000000,123180.000000,51675.000000,1318.756806)}
{pt3dadd(169704.000000,123228.000000,51425.000000,1299.602075)}
{pt3dadd(169752.000000,123228.000000,51150.000000,1280.447343)}
{pt3dadd(169884.000000,123312.000000,50950.000000,1261.292612)}
{pt3dadd(170064.000000,123348.000000,50675.000000,1242.137880)}
{pt3dadd(170040.000000,123324.000000,50425.000000,1318.757076)}
{pt3dadd(170112.000000,123264.000000,50125.000000,1144.754244)}

{create adhoc147}
{access adhoc147}
{connect adhoc147(1), adhoc146(0)}
{nseg = 1}
{strdef color color = "White"}
{pt3dclear()}
{pt3dadd(170112.000000,123264.000000,50125.000000,1144.754244)}
{pt3dadd(170112.000000,122856.000000,50125.000000,288.881586)}
{pt3dadd(170052.000000,122400.000000,50125.000000,184.751568)}
{pt3dadd(170052.000000,122160.000000,49925.000000,80.621550)}
{pt3dadd(170040.000000,121980.000000,49850.000000,67.184640)}

{create adhoc148}
{access adhoc148}
{connect adhoc148(1), adhoc147(0)}
{nseg = 1}
{strdef color color = "White"}
{pt3dclear()}
{pt3dadd(170040.000000,121980.000000,49850.000000,67.184640)}
{pt3dadd(170328.000000,121884.000000,49850.000000,80.621550)}
{pt3dadd(170508.000000,121692.000000,49725.000000,85.996320)}
{pt3dadd(170664.000000,121512.000000,49600.000000,91.371090)}
{pt3dadd(170796.000000,121392.000000,49350.000000,96.745860)}
{pt3dadd(170880.000000,121356.000000,49100.000000,55.987200)}

{create adhoc149}
{access adhoc149}
{connect adhoc149(1), adhoc147(0)}
{nseg = 1}
{strdef color color = "White"}
{pt3dclear()}
{pt3dadd(170040.000000,121980.000000,49850.000000,67.184640)}
{pt3dadd(169668.000000,121740.000000,49700.000000,74.300814)}
{pt3dadd(169236.000000,121464.000000,49700.000000,81.782496)}
{pt3dadd(169080.000000,121344.000000,49700.000000,89.264178)}
{pt3dadd(168900.000000,121116.000000,50075.000000,96.745860)}
{pt3dadd(168720.000000,120852.000000,50550.000000,96.745860)}

{create adhoc150}
{access adhoc150}
{connect adhoc150(1), adhoc146(0)}
{nseg = 1}
{strdef color color = "White"}
{pt3dclear()}
{pt3dadd(170112.000000,123264.000000,50125.000000,1144.754244)}
{pt3dadd(170172.000000,123456.000000,49750.000000,1098.964116)}
{pt3dadd(170316.000000,123504.000000,49300.000000,828.091944)}
{pt3dadd(170460.000000,123552.000000,48900.000000,794.968308)}

{create adhoc151}
{access adhoc151}
{connect adhoc151(1), adhoc150(0)}
{nseg = 1}
{strdef color color = "White"}
{pt3dclear()}
{pt3dadd(170460.000000,123552.000000,48900.000000,794.968308)}
{pt3dadd(170316.000000,123036.000000,48900.000000,346.657896)}
{pt3dadd(170388.000000,122724.000000,48675.000000,317.769741)}
{pt3dadd(170472.000000,122412.000000,48275.000000,288.881586)}
{pt3dadd(170580.000000,122292.000000,48000.000000,259.993431)}
{pt3dadd(170640.000000,121812.000000,47675.000000,231.105276)}
{pt3dadd(170988.000000,121404.000000,47375.000000,223.482010)}
{pt3dadd(171492.000000,121176.000000,47100.000000,215.858745)}
{pt3dadd(171972.000000,120972.000000,46725.000000,208.235480)}
{pt3dadd(172368.000000,120792.000000,46400.000000,200.612214)}
{pt3dadd(172680.000000,120312.000000,46125.000000,139.314042)}
{pt3dadd(172872.000000,120096.000000,45725.000000,116.095032)}

{create adhoc152}
{access adhoc152}
{connect adhoc152(1), adhoc150(0)}
{nseg = 1}
{strdef color color = "White"}
{pt3dclear()}
{pt3dadd(170460.000000,123552.000000,48900.000000,794.968308)}
{pt3dadd(170748.000000,123732.000000,48700.000000,718.829820)}
{pt3dadd(170976.000000,123888.000000,48450.000000,754.771316)}
{pt3dadd(171192.000000,123972.000000,48150.000000,790.712811)}
{pt3dadd(171432.000000,123984.000000,47850.000000,826.654307)}
{pt3dadd(171708.000000,124020.000000,47500.000000,862.595802)}
{pt3dadd(171888.000000,124104.000000,47200.000000,826.654307)}
{pt3dadd(172080.000000,124260.000000,46900.000000,790.712811)}
{pt3dadd(172440.000000,124356.000000,46575.000000,754.771316)}
{pt3dadd(172644.000000,124452.000000,46275.000000,718.829820)}
{pt3dadd(173004.000000,124872.000000,45175.000000,797.901102)}
{pt3dadd(173340.000000,125400.000000,44225.000000,876.972384)}
{pt3dadd(173568.000000,125664.000000,43675.000000,956.043666)}
{pt3dadd(173652.000000,125832.000000,43100.000000,1035.114948)}
{pt3dadd(173664.000000,125832.000000,42800.000000,1056.398004)}
{pt3dadd(173748.000000,125880.000000,42475.000000,1077.681060)}
{pt3dadd(173712.000000,125856.000000,42125.000000,1098.964116)}
{pt3dadd(173820.000000,125808.000000,41800.000000,953.961894)}

{create adhoc153}
{access adhoc153}
{connect adhoc153(1), adhoc152(0)}
{nseg = 1}
{strdef color color = "White"}
{pt3dclear()}
{pt3dadd(173820.000000,125808.000000,41800.000000,953.961894)}
{pt3dadd(173952.000000,126000.000000,41150.000000,862.595802)}
{pt3dadd(174180.000000,126324.000000,40625.000000,771.743696)}
{pt3dadd(174420.000000,126612.000000,40000.000000,680.891589)}
{pt3dadd(174648.000000,126924.000000,39450.000000,590.039483)}
{pt3dadd(174960.000000,127416.000000,38850.000000,499.187376)}
{pt3dadd(175308.000000,127644.000000,38525.000000,478.387903)}
{pt3dadd(175512.000000,127836.000000,38250.000000,457.588431)}
{pt3dadd(175728.000000,128040.000000,38000.000000,436.788958)}
{pt3dadd(175836.000000,128208.000000,37750.000000,415.989486)}
{pt3dadd(176256.000000,128568.000000,37425.000000,415.989486)}
{pt3dadd(176604.000000,128892.000000,37200.000000,415.989486)}
{pt3dadd(176988.000000,129036.000000,36950.000000,415.989486)}
{pt3dadd(177144.000000,129168.000000,36650.000000,415.989486)}
{pt3dadd(177156.000000,129192.000000,36375.000000,346.657896)}

{create adhoc154}
{access adhoc154}
{connect adhoc154(1), adhoc153(0)}
{nseg = 1}
{strdef color color = "White"}
{pt3dclear()}
{pt3dadd(177156.000000,129192.000000,36375.000000,346.657896)}
{pt3dadd(177336.000000,129516.000000,36200.000000,288.881586)}
{pt3dadd(177576.000000,129888.000000,35925.000000,266.814243)}
{pt3dadd(177732.000000,130056.000000,35950.000000,244.746900)}
{pt3dadd(177900.000000,130272.000000,35925.000000,222.679557)}
{pt3dadd(178020.000000,130572.000000,35700.000000,200.612214)}
{pt3dadd(178080.000000,130824.000000,35525.000000,222.679557)}
{pt3dadd(178260.000000,131232.000000,35375.000000,244.746900)}
{pt3dadd(178680.000000,131592.000000,35225.000000,266.814243)}
{pt3dadd(178740.000000,131796.000000,35025.000000,288.881586)}
{pt3dadd(178812.000000,131988.000000,34825.000000,266.814243)}
{pt3dadd(179052.000000,132096.000000,34625.000000,244.746900)}
{pt3dadd(179352.000000,132096.000000,34425.000000,222.679557)}
{pt3dadd(179736.000000,132168.000000,34125.000000,200.612214)}
{pt3dadd(180192.000000,132396.000000,33925.000000,210.642822)}
{pt3dadd(180648.000000,132660.000000,33775.000000,220.673430)}
{pt3dadd(180912.000000,132744.000000,33475.000000,230.704038)}
{pt3dadd(180996.000000,132876.000000,33350.000000,240.734646)}
{pt3dadd(181104.000000,133020.000000,33100.000000,208.413792)}
{pt3dadd(181488.000000,133224.000000,32825.000000,176.092938)}
{pt3dadd(181704.000000,133344.000000,32575.000000,143.772084)}
{pt3dadd(181908.000000,133512.000000,32400.000000,111.451230)}
{pt3dadd(182196.000000,133824.000000,32175.000000,112.612180)}
{pt3dadd(182448.000000,134100.000000,32100.000000,113.773131)}
{pt3dadd(182460.000000,134172.000000,31875.000000,114.934082)}
{pt3dadd(182544.000000,134244.000000,31625.000000,116.095032)}
{pt3dadd(182796.000000,134400.000000,31400.000000,98.735274)}
{pt3dadd(183180.000000,134544.000000,31200.000000,81.375516)}
{pt3dadd(183300.000000,134616.000000,30775.000000,64.015758)}
{pt3dadd(183540.000000,134736.000000,30475.000000,46.656000)}
{pt3dadd(183708.000000,135156.000000,30275.000000,85.145054)}
{pt3dadd(183852.000000,135216.000000,30075.000000,123.634107)}
{pt3dadd(184140.000000,135456.000000,29625.000000,162.123161)}
{pt3dadd(184272.000000,135624.000000,29575.000000,200.612214)}
{pt3dadd(184536.000000,135864.000000,29225.000000,139.314042)}
{pt3dadd(185028.000000,136944.000000,28900.000000,71.328780)}

{create adhoc155}
{access adhoc155}
{connect adhoc155(1), adhoc153(0)}
{nseg = 1}
{strdef color color = "White"}
{pt3dclear()}
{pt3dadd(177156.000000,129192.000000,36375.000000,346.657896)}
{pt3dadd(177336.000000,129060.000000,36300.000000,231.105276)}
{pt3dadd(177684.000000,128904.000000,36300.000000,233.512618)}
{pt3dadd(178152.000000,128772.000000,35850.000000,235.919961)}
{pt3dadd(178380.000000,128712.000000,35450.000000,238.327304)}
{pt3dadd(178716.000000,128616.000000,35125.000000,240.734646)}
{pt3dadd(178944.000000,128448.000000,34925.000000,228.697915)}
{pt3dadd(179220.000000,128280.000000,34900.000000,216.661185)}
{pt3dadd(179496.000000,128172.000000,34925.000000,204.624455)}
{pt3dadd(180000.000000,128148.000000,34950.000000,192.587724)}
{pt3dadd(180420.000000,127884.000000,34750.000000,168.627258)}
{pt3dadd(180684.000000,127548.000000,34750.000000,144.666792)}
{pt3dadd(180876.000000,127080.000000,34675.000000,120.706326)}
{pt3dadd(180876.000000,126792.000000,34675.000000,96.745860)}
{pt3dadd(180948.000000,126396.000000,34500.000000,86.892120)}
{pt3dadd(181104.000000,126132.000000,34375.000000,77.038380)}
{pt3dadd(181296.000000,125880.000000,34125.000000,67.184640)}
{pt3dadd(181524.000000,125760.000000,34200.000000,80.621550)}

{create adhoc156}
{access adhoc156}
{connect adhoc156(1), adhoc152(0)}
{nseg = 1}
{strdef color color = "White"}
{pt3dclear()}
{pt3dadd(173820.000000,125808.000000,41800.000000,953.961894)}
{pt3dadd(174072.000000,125484.000000,41500.000000,288.881586)}
{pt3dadd(174348.000000,125148.000000,41500.000000,266.814243)}
{pt3dadd(174648.000000,124752.000000,41500.000000,244.746900)}
{pt3dadd(174744.000000,124572.000000,41450.000000,222.679557)}
{pt3dadd(174816.000000,124356.000000,41475.000000,200.612214)}
{pt3dadd(175104.000000,124140.000000,41475.000000,192.253370)}
{pt3dadd(175452.000000,123924.000000,41425.000000,183.894525)}
{pt3dadd(175668.000000,123708.000000,41450.000000,175.535680)}
{pt3dadd(175812.000000,123492.000000,41325.000000,167.176836)}
{pt3dadd(176004.000000,123240.000000,41225.000000,160.211138)}
{pt3dadd(176196.000000,123024.000000,41225.000000,153.245439)}
{pt3dadd(176388.000000,122820.000000,41500.000000,146.279741)}
{pt3dadd(176544.000000,122604.000000,41575.000000,139.314042)}
{pt3dadd(176604.000000,122232.000000,41775.000000,240.734646)}

{create adhoc157}
{access adhoc157}
{connect adhoc157(1), adhoc156(0)}
{nseg = 1}
{strdef color color = "White"}
{pt3dclear()}
{pt3dadd(176604.000000,122232.000000,41775.000000,240.734646)}
{pt3dadd(176604.000000,121860.000000,41725.000000,240.734646)}
{pt3dadd(176544.000000,121512.000000,41725.000000,203.769995)}
{pt3dadd(176232.000000,121116.000000,41725.000000,166.805343)}
{pt3dadd(176064.000000,121104.000000,41675.000000,129.840691)}
{pt3dadd(175812.000000,120840.000000,41625.000000,92.876040)}
{pt3dadd(175776.000000,120528.000000,41450.000000,46.656000)}

{create adhoc158}
{access adhoc158}
{connect adhoc158(1), adhoc156(0)}
{nseg = 1}
{strdef color color = "White"}
{pt3dclear()}
{pt3dadd(176604.000000,122232.000000,41775.000000,240.734646)}
{pt3dadd(176880.000000,122148.000000,41950.000000,288.881586)}
{pt3dadd(176976.000000,122676.000000,42075.000000,277.326342)}
{pt3dadd(177204.000000,122700.000000,42100.000000,116.095032)}

{create adhoc159}
{access adhoc159}
{connect adhoc159(1), adhoc156(0)}
{nseg = 1}
{strdef color color = "White"}
{pt3dclear()}
{pt3dadd(176604.000000,122232.000000,41775.000000,240.734646)}
{pt3dadd(176592.000000,122040.000000,42025.000000,288.881586)}

{create adhoc160}
{access adhoc160}
{connect adhoc160(1), adhoc75(0)}
{nseg = 1}
{strdef color color = "White"}
{pt3dclear()}
{pt3dadd(185328.000000,142056.000000,86375.000000,893.600460)}
{pt3dadd(185604.000000,143040.000000,86375.000000,622.267956)}
{pt3dadd(185520.000000,143520.000000,86050.000000,616.457187)}
{pt3dadd(185160.000000,144024.000000,85525.000000,610.646418)}
{pt3dadd(185088.000000,144516.000000,85125.000000,604.835649)}
{pt3dadd(185100.000000,144828.000000,84950.000000,599.024880)}
{pt3dadd(185088.000000,145152.000000,84650.000000,628.976115)}
{pt3dadd(185196.000000,145404.000000,84400.000000,658.927350)}
{pt3dadd(185028.000000,146028.000000,84075.000000,688.878585)}
{pt3dadd(185088.000000,146196.000000,83800.000000,718.829820)}
{pt3dadd(184872.000000,146424.000000,83500.000000,711.641497)}
{pt3dadd(184596.000000,146652.000000,83250.000000,704.453175)}
{pt3dadd(184500.000000,147204.000000,82975.000000,697.264852)}
{pt3dadd(184224.000000,147288.000000,82775.000000,690.076530)}
{pt3dadd(184140.000000,147624.000000,82500.000000,667.313617)}
{pt3dadd(183960.000000,147912.000000,82250.000000,644.550705)}
{pt3dadd(183780.000000,147912.000000,81900.000000,621.787792)}
{pt3dadd(183516.000000,148236.000000,81525.000000,599.024880)}
{pt3dadd(183432.000000,148500.000000,81250.000000,599.024880)}
{pt3dadd(183192.000000,148788.000000,80900.000000,599.024880)}
{pt3dadd(182988.000000,148956.000000,80550.000000,599.024880)}
{pt3dadd(182892.000000,149124.000000,80175.000000,599.024880)}
{pt3dadd(182484.000000,149160.000000,79850.000000,599.024880)}
{pt3dadd(182208.000000,149256.000000,79550.000000,599.024880)}
{pt3dadd(181932.000000,149388.000000,79150.000000,599.024880)}
{pt3dadd(181668.000000,149556.000000,78775.000000,599.024880)}
{pt3dadd(181392.000000,149796.000000,78400.000000,564.281437)}
{pt3dadd(181008.000000,150048.000000,78050.000000,529.537995)}
{pt3dadd(180876.000000,150168.000000,77700.000000,494.794553)}
{pt3dadd(180468.000000,150360.000000,77325.000000,460.051110)}
{pt3dadd(179952.000000,150648.000000,76925.000000,449.035704)}
{pt3dadd(179604.000000,150576.000000,76800.000000,438.020298)}
{pt3dadd(179364.000000,150840.000000,76450.000000,427.004892)}
{pt3dadd(178800.000000,151236.000000,76000.000000,415.989486)}
{pt3dadd(178428.000000,151284.000000,75725.000000,436.788958)}
{pt3dadd(178080.000000,151272.000000,75350.000000,457.588431)}
{pt3dadd(177900.000000,151824.000000,74975.000000,478.387903)}
{pt3dadd(177768.000000,152352.000000,74650.000000,499.187376)}
{pt3dadd(177516.000000,152376.000000,74550.000000,581.413536)}
{pt3dadd(177240.000000,152880.000000,74175.000000,663.639696)}
{pt3dadd(176940.000000,153216.000000,73800.000000,745.865856)}
{pt3dadd(176448.000000,153372.000000,73350.000000,828.092016)}
{pt3dadd(176136.000000,153576.000000,73050.000000,690.076674)}

{create adhoc161}
{access adhoc161}
{connect adhoc161(1), adhoc160(0)}
{nseg = 1}
{strdef color color = "White"}
{pt3dclear()}
{pt3dadd(176136.000000,153576.000000,73050.000000,690.076674)}
{pt3dadd(175788.000000,154068.000000,72625.000000,718.829820)}
{pt3dadd(175524.000000,154188.000000,72275.000000,777.612856)}
{pt3dadd(175308.000000,154572.000000,71625.000000,836.395893)}
{pt3dadd(175044.000000,154884.000000,71200.000000,895.178929)}
{pt3dadd(174948.000000,155220.000000,70925.000000,953.961966)}
{pt3dadd(174636.000000,155616.000000,70525.000000,843.302349)}
{pt3dadd(174336.000000,155880.000000,70200.000000,732.642732)}
{pt3dadd(174336.000000,156192.000000,69875.000000,690.076602)}

{create adhoc162}
{access adhoc162}
{connect adhoc162(1), adhoc161(0)}
{nseg = 1}
{strdef color color = "White"}
{pt3dclear()}
{pt3dadd(174336.000000,156192.000000,69875.000000,690.076602)}
{pt3dadd(174120.000000,156156.000000,69575.000000,552.061278)}
{pt3dadd(174216.000000,155772.000000,69300.000000,657.119205)}
{pt3dadd(174372.000000,155472.000000,69000.000000,762.177132)}
{pt3dadd(174288.000000,155376.000000,68650.000000,867.235059)}
{pt3dadd(174156.000000,155340.000000,68275.000000,972.292986)}
{pt3dadd(174084.000000,155424.000000,67950.000000,1035.114948)}
{pt3dadd(174108.000000,155412.000000,67625.000000,993.710286)}

{create adhoc163}
{access adhoc163}
{connect adhoc163(1), adhoc162(0)}
{nseg = 1}
{strdef color color = "White"}
{pt3dclear()}
{pt3dadd(174108.000000,155412.000000,67625.000000,993.710286)}
{pt3dadd(173964.000000,155340.000000,67325.000000,1035.114948)}
{pt3dadd(173892.000000,155532.000000,67075.000000,880.333582)}
{pt3dadd(173928.000000,155652.000000,66825.000000,725.552217)}
{pt3dadd(173964.000000,155772.000000,66400.000000,570.770851)}
{pt3dadd(173364.000000,156216.000000,66025.000000,415.989486)}
{pt3dadd(173088.000000,156240.000000,65750.000000,455.758088)}
{pt3dadd(172752.000000,156360.000000,65425.000000,495.526689)}
{pt3dadd(172452.000000,156444.000000,65100.000000,535.295290)}
{pt3dadd(172164.000000,156684.000000,64700.000000,575.063892)}
{pt3dadd(171984.000000,156912.000000,64375.000000,583.050888)}
{pt3dadd(171816.000000,156972.000000,64025.000000,591.037884)}
{pt3dadd(171552.000000,157164.000000,63650.000000,599.024880)}
{pt3dadd(171312.000000,157320.000000,63275.000000,468.891360)}

{create adhoc164}
{access adhoc164}
{connect adhoc164(1), adhoc163(0)}
{nseg = 1}
{strdef color color = "White"}
{pt3dclear()}
{pt3dadd(171312.000000,157320.000000,63275.000000,468.891360)}
{pt3dadd(171132.000000,157632.000000,62975.000000,599.024880)}
{pt3dadd(171060.000000,157800.000000,62725.000000,553.266031)}
{pt3dadd(171024.000000,157992.000000,62425.000000,507.507183)}
{pt3dadd(170988.000000,158196.000000,62050.000000,461.748335)}
{pt3dadd(170940.000000,158460.000000,61725.000000,415.989486)}
{pt3dadd(170796.000000,158748.000000,61475.000000,553.033080)}
{pt3dadd(170628.000000,159012.000000,61250.000000,690.076674)}
{pt3dadd(170364.000000,159240.000000,60950.000000,346.657896)}

{create adhoc165}
{access adhoc165}
{connect adhoc165(1), adhoc164(0)}
{nseg = 1}
{strdef color color = "White"}
{pt3dclear()}
{pt3dadd(170364.000000,159240.000000,60950.000000,346.657896)}
{pt3dadd(170700.000000,159012.000000,60750.000000,1144.754244)}
{pt3dadd(170796.000000,159072.000000,60550.000000,1117.344420)}
{pt3dadd(170928.000000,159096.000000,60250.000000,1089.934596)}
{pt3dadd(170988.000000,159132.000000,59875.000000,1062.524772)}
{pt3dadd(171024.000000,159192.000000,59600.000000,1035.114948)}
{pt3dadd(171060.000000,159156.000000,59350.000000,991.985162)}
{pt3dadd(171120.000000,159144.000000,59075.000000,948.855375)}
{pt3dadd(171048.000000,159036.000000,58825.000000,905.725589)}
{pt3dadd(171144.000000,159132.000000,58500.000000,862.595802)}
{pt3dadd(171204.000000,159096.000000,58175.000000,750.944223)}
{pt3dadd(171240.000000,159024.000000,57875.000000,639.292644)}
{pt3dadd(171192.000000,159060.000000,57625.000000,527.641065)}
{pt3dadd(170880.000000,158952.000000,57400.000000,415.989486)}
{pt3dadd(170544.000000,158748.000000,57100.000000,436.788958)}
{pt3dadd(170376.000000,158832.000000,56875.000000,457.588431)}
{pt3dadd(170160.000000,158832.000000,56600.000000,478.387903)}
{pt3dadd(169920.000000,158724.000000,56250.000000,499.187376)}
{pt3dadd(169620.000000,158724.000000,55975.000000,499.187376)}
{pt3dadd(169404.000000,158712.000000,55725.000000,499.187376)}
{pt3dadd(169104.000000,158772.000000,55475.000000,499.187376)}
{pt3dadd(168840.000000,158808.000000,55225.000000,499.187376)}
{pt3dadd(168672.000000,158892.000000,55000.000000,524.146752)}
{pt3dadd(168396.000000,159012.000000,54725.000000,549.106128)}
{pt3dadd(168048.000000,159036.000000,54475.000000,574.065504)}
{pt3dadd(167940.000000,159072.000000,54275.000000,599.024880)}
{pt3dadd(167844.000000,159072.000000,54050.000000,628.976115)}
{pt3dadd(167700.000000,159168.000000,53800.000000,658.927350)}
{pt3dadd(167604.000000,159096.000000,53525.000000,688.878585)}
{pt3dadd(167508.000000,159288.000000,53225.000000,718.829820)}
{pt3dadd(167436.000000,159372.000000,52925.000000,638.959842)}
{pt3dadd(167400.000000,159432.000000,52625.000000,559.089864)}
{pt3dadd(167388.000000,159684.000000,52200.000000,479.219886)}
{pt3dadd(167352.000000,159720.000000,51950.000000,508.779630)}

{create adhoc166}
{access adhoc166}
{connect adhoc166(1), adhoc165(0)}
{nseg = 1}
{strdef color color = "White"}
{pt3dclear()}
{pt3dadd(167352.000000,159720.000000,51950.000000,508.779630)}
{pt3dadd(167376.000000,160176.000000,51825.000000,346.657896)}
{pt3dadd(167448.000000,160536.000000,51625.000000,329.325007)}
{pt3dadd(167508.000000,161124.000000,51500.000000,311.992119)}
{pt3dadd(167364.000000,161292.000000,51450.000000,294.659230)}
{pt3dadd(167184.000000,161748.000000,51325.000000,277.326342)}
{pt3dadd(167148.000000,162036.000000,51225.000000,311.992119)}
{pt3dadd(167112.000000,162276.000000,51175.000000,346.657896)}
{pt3dadd(167040.000000,162552.000000,51125.000000,346.657896)}

{create adhoc167}
{access adhoc167}
{connect adhoc167(1), adhoc166(0)}
{nseg = 1}
{strdef color color = "White"}
{pt3dclear()}
{pt3dadd(167040.000000,162552.000000,51125.000000,346.657896)}
{pt3dadd(167040.000000,162804.000000,51150.000000,260.495172)}
{pt3dadd(167124.000000,162996.000000,51175.000000,237.165588)}
{pt3dadd(167352.000000,163200.000000,51400.000000,213.836004)}
{pt3dadd(167412.000000,163392.000000,51525.000000,190.506420)}
{pt3dadd(167472.000000,163572.000000,51500.000000,167.176836)}
{pt3dadd(167436.000000,163764.000000,51600.000000,173.529553)}
{pt3dadd(167424.000000,163944.000000,51500.000000,179.882271)}
{pt3dadd(167376.000000,164124.000000,51525.000000,186.234989)}
{pt3dadd(167328.000000,164292.000000,51425.000000,192.587706)}
{pt3dadd(167256.000000,164472.000000,51300.000000,189.411347)}
{pt3dadd(167184.000000,164652.000000,51225.000000,186.234989)}
{pt3dadd(166968.000000,164832.000000,51125.000000,183.058630)}
{pt3dadd(166896.000000,165012.000000,51025.000000,179.882271)}
{pt3dadd(166788.000000,165204.000000,50950.000000,176.705912)}
{pt3dadd(166608.000000,165444.000000,50850.000000,173.529553)}
{pt3dadd(166332.000000,165660.000000,50700.000000,170.353195)}
{pt3dadd(166284.000000,165864.000000,50675.000000,167.176836)}
{pt3dadd(166176.000000,166044.000000,50500.000000,197.603024)}
{pt3dadd(165996.000000,166248.000000,50450.000000,228.029211)}
{pt3dadd(165864.000000,166440.000000,50275.000000,258.455399)}
{pt3dadd(165684.000000,166584.000000,50075.000000,288.881586)}
{pt3dadd(165504.000000,166728.000000,49925.000000,288.881586)}
{pt3dadd(165456.000000,166884.000000,49550.000000,288.881586)}
{pt3dadd(165420.000000,167052.000000,49350.000000,288.881586)}
{pt3dadd(165312.000000,167256.000000,49150.000000,288.881586)}
{pt3dadd(165252.000000,167616.000000,48775.000000,266.814243)}
{pt3dadd(165144.000000,167844.000000,48725.000000,244.746900)}
{pt3dadd(164928.000000,168060.000000,48550.000000,222.679557)}
{pt3dadd(164652.000000,168264.000000,48450.000000,200.612214)}
{pt3dadd(164544.000000,168504.000000,48225.000000,200.612214)}
{pt3dadd(164376.000000,168744.000000,48200.000000,200.612214)}
{pt3dadd(164196.000000,168972.000000,48225.000000,200.612214)}
{pt3dadd(164016.000000,169152.000000,48175.000000,200.612214)}
{pt3dadd(163980.000000,169356.000000,48050.000000,174.645625)}
{pt3dadd(163872.000000,169560.000000,47875.000000,148.679037)}
{pt3dadd(163824.000000,169776.000000,47825.000000,122.712448)}
{pt3dadd(163608.000000,169980.000000,47750.000000,96.745860)}
{pt3dadd(163428.000000,170184.000000,47650.000000,132.743057)}
{pt3dadd(163260.000000,170484.000000,47500.000000,168.740253)}
{pt3dadd(163188.000000,170748.000000,47300.000000,204.737450)}
{pt3dadd(163092.000000,170952.000000,47100.000000,240.734646)}
{pt3dadd(163212.000000,171336.000000,46875.000000,209.574742)}
{pt3dadd(163068.000000,171504.000000,46675.000000,178.414839)}
{pt3dadd(163068.000000,171696.000000,46500.000000,147.254936)}
{pt3dadd(163032.000000,171792.000000,46325.000000,116.095032)}
{pt3dadd(163032.000000,172152.000000,46175.000000,144.847593)}
{pt3dadd(163020.000000,172440.000000,45950.000000,173.600154)}
{pt3dadd(163056.000000,172536.000000,45725.000000,202.352715)}
{pt3dadd(162948.000000,173064.000000,45500.000000,231.105276)}
{pt3dadd(162924.000000,173496.000000,45275.000000,277.326328)}
{pt3dadd(162804.000000,173892.000000,45050.000000,323.547381)}
{pt3dadd(162804.000000,174060.000000,44750.000000,369.768433)}
{pt3dadd(162696.000000,174276.000000,44600.000000,415.989486)}
{pt3dadd(162648.000000,174456.000000,44350.000000,384.212511)}
{pt3dadd(162516.000000,174636.000000,44150.000000,352.435536)}
{pt3dadd(162516.000000,174852.000000,44225.000000,320.658561)}
{pt3dadd(162468.000000,175068.000000,44400.000000,288.881586)}
{pt3dadd(162264.000000,175308.000000,44475.000000,258.455399)}
{pt3dadd(161952.000000,175512.000000,44425.000000,228.029211)}
{pt3dadd(161676.000000,175668.000000,44200.000000,197.603024)}
{pt3dadd(161400.000000,176040.000000,44025.000000,167.176836)}
{pt3dadd(161268.000000,176136.000000,43850.000000,185.566288)}
{pt3dadd(161052.000000,176364.000000,43825.000000,203.955741)}
{pt3dadd(160752.000000,176544.000000,43800.000000,222.345193)}
{pt3dadd(160548.000000,176724.000000,43700.000000,240.734646)}
{pt3dadd(160404.000000,176904.000000,43625.000000,238.327304)}
{pt3dadd(160128.000000,177084.000000,43600.000000,235.919961)}
{pt3dadd(159864.000000,177288.000000,43450.000000,233.512618)}
{pt3dadd(159768.000000,177480.000000,43500.000000,231.105276)}
{pt3dadd(159624.000000,177672.000000,43525.000000,256.526847)}
{pt3dadd(159528.000000,177864.000000,43600.000000,281.948418)}
{pt3dadd(159360.000000,178032.000000,43800.000000,307.369989)}
{pt3dadd(159180.000000,178188.000000,44075.000000,332.791560)}
{pt3dadd(159000.000000,178368.000000,44275.000000,299.746723)}
{pt3dadd(158700.000000,178548.000000,44375.000000,266.701887)}
{pt3dadd(158532.000000,178716.000000,44675.000000,233.657051)}
{pt3dadd(158484.000000,178932.000000,44950.000000,200.612214)}
{pt3dadd(158376.000000,179112.000000,45225.000000,183.894530)}
{pt3dadd(158040.000000,179256.000000,45575.000000,167.176845)}
{pt3dadd(158028.000000,179544.000000,45625.000000,150.459160)}
{pt3dadd(157848.000000,179784.000000,45775.000000,133.741476)}
{pt3dadd(157668.000000,180240.000000,46000.000000,80.621550)}

{create adhoc168}
{access adhoc168}
{connect adhoc168(1), adhoc166(0)}
{nseg = 1}
{strdef color color = "White"}
{pt3dclear()}
{pt3dadd(167040.000000,162552.000000,51125.000000,346.657896)}
{pt3dadd(166716.000000,162456.000000,51050.000000,288.881586)}
{pt3dadd(166476.000000,162504.000000,50775.000000,183.139137)}
{pt3dadd(166284.000000,162672.000000,50650.000000,77.396688)}
{pt3dadd(166152.000000,162792.000000,50475.000000,38.880000)}

{create adhoc169}
{access adhoc169}
{connect adhoc169(1), adhoc165(0)}
{nseg = 1}
{strdef color color = "White"}
{pt3dclear()}
{pt3dadd(167352.000000,159720.000000,51950.000000,508.779630)}
{pt3dadd(167304.000000,159360.000000,51950.000000,441.649080)}
{pt3dadd(167472.000000,159012.000000,51950.000000,373.031019)}
{pt3dadd(167580.000000,158760.000000,51775.000000,304.412958)}
{pt3dadd(167700.000000,158580.000000,51500.000000,235.794897)}
{pt3dadd(167700.000000,158352.000000,51275.000000,167.176836)}
{pt3dadd(167784.000000,158124.000000,51075.000000,197.603024)}
{pt3dadd(167772.000000,157824.000000,50950.000000,228.029211)}
{pt3dadd(167928.000000,157476.000000,50850.000000,258.455399)}
{pt3dadd(167916.000000,157188.000000,50975.000000,288.881586)}
{pt3dadd(167868.000000,156828.000000,51325.000000,247.475228)}
{pt3dadd(167796.000000,156312.000000,51500.000000,206.068869)}
{pt3dadd(167868.000000,155916.000000,51625.000000,164.662511)}
{pt3dadd(168252.000000,155712.000000,51775.000000,123.256152)}
{pt3dadd(168636.000000,155256.000000,51775.000000,96.745860)}
{pt3dadd(168912.000000,155016.000000,51850.000000,55.987200)}

{create adhoc170}
{access adhoc170}
{connect adhoc170(1), adhoc164(0)}
{nseg = 1}
{strdef color color = "White"}
{pt3dclear()}
{pt3dadd(170364.000000,159240.000000,60950.000000,346.657896)}
{pt3dadd(170268.000000,159552.000000,60800.000000,240.734646)}
{pt3dadd(170064.000000,159912.000000,60800.000000,252.771381)}
{pt3dadd(169824.000000,160440.000000,60750.000000,264.808116)}
{pt3dadd(169632.000000,160644.000000,60700.000000,276.844851)}
{pt3dadd(169344.000000,161268.000000,60700.000000,288.881586)}
{pt3dadd(169128.000000,161784.000000,60525.000000,258.455399)}
{pt3dadd(169044.000000,162024.000000,60475.000000,228.029211)}
{pt3dadd(169044.000000,162240.000000,60375.000000,197.603024)}
{pt3dadd(168864.000000,162444.000000,60450.000000,167.176836)}
{pt3dadd(168852.000000,162648.000000,60400.000000,175.535680)}
{pt3dadd(168816.000000,162864.000000,60425.000000,183.894525)}
{pt3dadd(168696.000000,163068.000000,60300.000000,192.253370)}
{pt3dadd(168696.000000,163284.000000,60400.000000,200.612214)}
{pt3dadd(168660.000000,163500.000000,60325.000000,219.790746)}
{pt3dadd(168576.000000,163716.000000,60325.000000,238.969278)}
{pt3dadd(168480.000000,163920.000000,60175.000000,258.147810)}
{pt3dadd(168528.000000,164136.000000,60200.000000,277.326342)}
{pt3dadd(168516.000000,164352.000000,60150.000000,258.147810)}
{pt3dadd(168516.000000,164544.000000,60000.000000,238.969278)}
{pt3dadd(168372.000000,164772.000000,59850.000000,219.790746)}
{pt3dadd(168456.000000,164964.000000,59850.000000,200.612214)}
{pt3dadd(168456.000000,165168.000000,59800.000000,197.937384)}
{pt3dadd(168288.000000,165384.000000,59700.000000,195.262554)}
{pt3dadd(168372.000000,165780.000000,59675.000000,192.587724)}
{pt3dadd(168444.000000,165996.000000,59650.000000,116.095032)}

{create adhoc171}
{access adhoc171}
{connect adhoc171(1), adhoc170(0)}
{nseg = 1}
{strdef color color = "White"}
{pt3dclear()}
{pt3dadd(168444.000000,165996.000000,59650.000000,116.095032)}
{pt3dadd(169140.000000,166164.000000,59750.000000,139.314042)}
{pt3dadd(169416.000000,166368.000000,59800.000000,139.314042)}
{pt3dadd(169608.000000,166596.000000,59775.000000,139.314042)}
{pt3dadd(169776.000000,166824.000000,59825.000000,139.314042)}
{pt3dadd(170004.000000,167004.000000,59900.000000,139.314042)}
{pt3dadd(170064.000000,167196.000000,60075.000000,67.184640)}

{create adhoc172}
{access adhoc172}
{connect adhoc172(1), adhoc170(0)}
{nseg = 1}
{strdef color color = "White"}
{pt3dclear()}
{pt3dadd(168444.000000,165996.000000,59650.000000,116.095032)}
{pt3dadd(168072.000000,165960.000000,59650.000000,167.176836)}
{pt3dadd(167844.000000,166044.000000,59525.000000,167.176836)}
{pt3dadd(167532.000000,166332.000000,59325.000000,167.176836)}
{pt3dadd(167136.000000,166536.000000,59250.000000,167.176836)}
{pt3dadd(167076.000000,166752.000000,59150.000000,167.176836)}
{pt3dadd(166836.000000,166956.000000,58775.000000,185.566288)}
{pt3dadd(166404.000000,167148.000000,58675.000000,203.955741)}
{pt3dadd(166344.000000,167328.000000,58625.000000,222.345193)}
{pt3dadd(166452.000000,167520.000000,58475.000000,240.734646)}
{pt3dadd(166500.000000,167724.000000,58400.000000,247.109306)}
{pt3dadd(166440.000000,167940.000000,58275.000000,253.483965)}
{pt3dadd(166488.000000,168120.000000,58250.000000,259.858625)}
{pt3dadd(166452.000000,168312.000000,58150.000000,266.233284)}
{pt3dadd(166416.000000,168492.000000,58200.000000,241.469172)}
{pt3dadd(166356.000000,168660.000000,58175.000000,216.705060)}
{pt3dadd(166236.000000,168840.000000,58200.000000,191.940948)}
{pt3dadd(166176.000000,169032.000000,58075.000000,167.176836)}
{pt3dadd(166176.000000,169224.000000,57900.000000,173.529553)}
{pt3dadd(166284.000000,169440.000000,57750.000000,179.882271)}
{pt3dadd(166284.000000,169704.000000,57600.000000,186.234989)}
{pt3dadd(166248.000000,169956.000000,57550.000000,192.587706)}
{pt3dadd(166212.000000,170220.000000,57500.000000,204.624441)}
{pt3dadd(166152.000000,170472.000000,57425.000000,216.661176)}
{pt3dadd(166224.000000,170724.000000,57350.000000,228.697911)}
{pt3dadd(166164.000000,170976.000000,57225.000000,240.734646)}
{pt3dadd(166188.000000,171216.000000,57175.000000,252.771381)}
{pt3dadd(166176.000000,171480.000000,57050.000000,264.808116)}
{pt3dadd(166332.000000,171756.000000,56900.000000,276.844851)}
{pt3dadd(166308.000000,172032.000000,56775.000000,288.881586)}
{pt3dadd(166272.000000,172236.000000,56725.000000,288.881586)}
{pt3dadd(166356.000000,172488.000000,56600.000000,277.326342)}

{create adhoc173}
{access adhoc173}
{connect adhoc173(1), adhoc172(0)}
{nseg = 1}
{strdef color color = "White"}
{pt3dclear()}
{pt3dadd(166356.000000,172488.000000,56600.000000,277.326342)}
{pt3dadd(166344.000000,172680.000000,56675.000000,167.176836)}
{pt3dadd(166452.000000,172920.000000,56775.000000,148.601637)}
{pt3dadd(166476.000000,173160.000000,56775.000000,130.026438)}
{pt3dadd(166632.000000,173484.000000,56900.000000,111.451239)}
{pt3dadd(166788.000000,173724.000000,57025.000000,92.876040)}
{pt3dadd(166860.000000,173988.000000,56975.000000,80.030340)}
{pt3dadd(166860.000000,174204.000000,56850.000000,67.184640)}
{pt3dadd(166740.000000,174288.000000,56775.000000,46.656000)}

{create adhoc174}
{access adhoc174}
{connect adhoc174(1), adhoc172(0)}
{nseg = 1}
{strdef color color = "White"}
{pt3dclear()}
{pt3dadd(166356.000000,172488.000000,56600.000000,277.326342)}
{pt3dadd(166188.000000,172488.000000,56300.000000,116.095032)}
{pt3dadd(165864.000000,172488.000000,55950.000000,67.184640)}
{pt3dadd(165636.000000,172488.000000,55625.000000,38.880000)}

{create adhoc175}
{access adhoc175}
{connect adhoc175(1), adhoc163(0)}
{nseg = 1}
{strdef color color = "White"}
{pt3dclear()}
{pt3dadd(171312.000000,157320.000000,63275.000000,468.891360)}
{pt3dadd(171444.000000,156924.000000,63275.000000,460.051020)}
{pt3dadd(171720.000000,156636.000000,63150.000000,369.224730)}
{pt3dadd(171924.000000,156396.000000,62900.000000,278.398440)}
{pt3dadd(172128.000000,156228.000000,62600.000000,187.572150)}
{pt3dadd(172188.000000,156060.000000,62400.000000,96.745860)}
{pt3dadd(172164.000000,155940.000000,62325.000000,114.353604)}
{pt3dadd(172104.000000,155772.000000,62200.000000,131.961348)}
{pt3dadd(172116.000000,155568.000000,62050.000000,149.569092)}
{pt3dadd(172068.000000,155412.000000,61925.000000,167.176836)}
{pt3dadd(172032.000000,155220.000000,61775.000000,167.176836)}
{pt3dadd(171972.000000,155016.000000,61700.000000,167.176836)}
{pt3dadd(171888.000000,154812.000000,61450.000000,167.176836)}
{pt3dadd(171864.000000,154632.000000,61250.000000,167.176836)}
{pt3dadd(171744.000000,154452.000000,61000.000000,167.176836)}
{pt3dadd(171684.000000,154284.000000,60675.000000,167.176836)}
{pt3dadd(171732.000000,154116.000000,60550.000000,167.176836)}
{pt3dadd(171648.000000,153924.000000,60250.000000,167.176836)}
{pt3dadd(171576.000000,153756.000000,60125.000000,185.566288)}
{pt3dadd(171516.000000,153576.000000,59875.000000,203.955741)}
{pt3dadd(171516.000000,153408.000000,59650.000000,222.345193)}
{pt3dadd(171480.000000,153216.000000,59400.000000,240.734646)}
{pt3dadd(171276.000000,153096.000000,59100.000000,200.612214)}

{create adhoc176}
{access adhoc176}
{connect adhoc176(1), adhoc175(0)}
{nseg = 1}
{strdef color color = "White"}
{pt3dclear()}
{pt3dadd(171276.000000,153096.000000,59100.000000,200.612214)}
{pt3dadd(171156.000000,152952.000000,59075.000000,196.288506)}
{pt3dadd(171156.000000,152712.000000,58900.000000,126.137853)}
{pt3dadd(171036.000000,152412.000000,58925.000000,55.987200)}
{pt3dadd(170796.000000,152196.000000,58900.000000,46.656000)}

{create adhoc177}
{access adhoc177}
{connect adhoc177(1), adhoc175(0)}
{nseg = 1}
{strdef color color = "White"}
{pt3dclear()}
{pt3dadd(171276.000000,153096.000000,59100.000000,200.612214)}
{pt3dadd(171132.000000,153132.000000,58925.000000,240.734646)}
{pt3dadd(171036.000000,153132.000000,58500.000000,252.771381)}
{pt3dadd(170916.000000,153132.000000,58050.000000,264.808116)}
{pt3dadd(170856.000000,153132.000000,57575.000000,276.844851)}
{pt3dadd(170796.000000,153132.000000,57050.000000,288.881586)}
{pt3dadd(170760.000000,153120.000000,56725.000000,251.489700)}
{pt3dadd(170892.000000,153108.000000,56550.000000,214.097814)}
{pt3dadd(171048.000000,152940.000000,56300.000000,176.705928)}
{pt3dadd(171216.000000,152760.000000,56175.000000,139.314042)}
{pt3dadd(171264.000000,152544.000000,56150.000000,133.509289)}
{pt3dadd(171144.000000,152376.000000,56175.000000,127.704537)}
{pt3dadd(171024.000000,152196.000000,56200.000000,121.899785)}
{pt3dadd(171012.000000,152016.000000,56225.000000,116.095032)}
{pt3dadd(170892.000000,151848.000000,56175.000000,116.095032)}
{pt3dadd(170724.000000,151656.000000,56125.000000,116.095032)}
{pt3dadd(170604.000000,151476.000000,56150.000000,116.095032)}
{pt3dadd(170400.000000,151284.000000,56175.000000,116.095032)}
{pt3dadd(170256.000000,151080.000000,56150.000000,96.745860)}
{pt3dadd(170112.000000,150888.000000,56150.000000,55.987200)}

{create adhoc178}
{access adhoc178}
{connect adhoc178(1), adhoc162(0)}
{nseg = 1}
{strdef color color = "White"}
{pt3dclear()}
{pt3dadd(174108.000000,155412.000000,67625.000000,993.710286)}
{pt3dadd(174072.000000,154932.000000,67625.000000,415.989486)}
{pt3dadd(174180.000000,154584.000000,67625.000000,345.427483)}
{pt3dadd(174168.000000,154164.000000,67450.000000,274.865481)}
{pt3dadd(174300.000000,153900.000000,67450.000000,204.303479)}
{pt3dadd(174300.000000,153624.000000,67250.000000,133.741476)}
{pt3dadd(174288.000000,153324.000000,67075.000000,160.489769)}
{pt3dadd(174252.000000,152928.000000,66825.000000,187.238061)}
{pt3dadd(174192.000000,152628.000000,66575.000000,213.986354)}
{pt3dadd(174156.000000,152400.000000,66325.000000,240.734646)}
{pt3dadd(174120.000000,152364.000000,66175.000000,231.105276)}
{pt3dadd(174024.000000,152328.000000,66150.000000,167.176836)}

{create adhoc179}
{access adhoc179}
{connect adhoc179(1), adhoc161(0)}
{nseg = 1}
{strdef color color = "White"}
{pt3dclear()}
{pt3dadd(174336.000000,156192.000000,69875.000000,690.076602)}
{pt3dadd(174360.000000,156708.000000,69850.000000,399.349908)}
{pt3dadd(174360.000000,157176.000000,69800.000000,443.278395)}
{pt3dadd(174360.000000,157776.000000,69625.000000,487.206882)}
{pt3dadd(174432.000000,157956.000000,69750.000000,531.135369)}
{pt3dadd(174456.000000,158148.000000,69750.000000,575.063856)}
{pt3dadd(174444.000000,158304.000000,69750.000000,535.295264)}
{pt3dadd(174480.000000,158436.000000,69750.000000,495.526671)}
{pt3dadd(174672.000000,158568.000000,69825.000000,455.758079)}
{pt3dadd(174708.000000,158724.000000,69775.000000,415.989486)}
{pt3dadd(174732.000000,158880.000000,69775.000000,319.479948)}

{create adhoc180}
{access adhoc180}
{connect adhoc180(1), adhoc179(0)}
{nseg = 1}
{strdef color color = "White"}
{pt3dclear()}
{pt3dadd(174732.000000,158880.000000,69775.000000,319.479948)}
{pt3dadd(175428.000000,158928.000000,70300.000000,277.326342)}
{pt3dadd(175380.000000,159084.000000,70275.000000,268.178418)}
{pt3dadd(175548.000000,159276.000000,70300.000000,259.030494)}
{pt3dadd(175512.000000,159480.000000,70325.000000,249.882570)}
{pt3dadd(175728.000000,159660.000000,70375.000000,240.734646)}
{pt3dadd(175932.000000,159864.000000,70500.000000,238.327304)}
{pt3dadd(175956.000000,160032.000000,70575.000000,235.919961)}
{pt3dadd(176076.000000,160224.000000,70600.000000,233.512618)}
{pt3dadd(176196.000000,160380.000000,70675.000000,231.105276)}
{pt3dadd(176460.000000,160536.000000,70800.000000,281.948418)}
{pt3dadd(176532.000000,160668.000000,70825.000000,332.791560)}
{pt3dadd(176664.000000,160860.000000,70825.000000,288.881586)}

{create adhoc181}
{access adhoc181}
{connect adhoc181(1), adhoc180(0)}
{nseg = 1}
{strdef color color = "White"}
{pt3dclear()}
{pt3dadd(176664.000000,160860.000000,70825.000000,288.881586)}
{pt3dadd(176652.000000,161052.000000,70750.000000,319.479912)}
{pt3dadd(176652.000000,161232.000000,70700.000000,326.274408)}
{pt3dadd(176616.000000,161412.000000,70575.000000,333.068904)}
{pt3dadd(176604.000000,161568.000000,70675.000000,339.863400)}
{pt3dadd(176760.000000,161760.000000,70775.000000,346.657896)}
{pt3dadd(176880.000000,161940.000000,70875.000000,343.191312)}
{pt3dadd(176952.000000,162156.000000,70925.000000,339.724728)}
{pt3dadd(177072.000000,162372.000000,70975.000000,336.258144)}
{pt3dadd(177252.000000,162564.000000,71100.000000,332.791560)}
{pt3dadd(177384.000000,162756.000000,71250.000000,321.814067)}
{pt3dadd(177336.000000,162960.000000,71400.000000,310.836573)}
{pt3dadd(177324.000000,163128.000000,71500.000000,299.859080)}
{pt3dadd(177348.000000,163344.000000,71650.000000,288.881586)}
{pt3dadd(177336.000000,163548.000000,71800.000000,303.325664)}
{pt3dadd(177336.000000,163740.000000,71900.000000,317.769741)}
{pt3dadd(177492.000000,163896.000000,72075.000000,332.213819)}
{pt3dadd(177516.000000,164064.000000,72175.000000,346.657896)}
{pt3dadd(177504.000000,164220.000000,72250.000000,320.177083)}
{pt3dadd(177540.000000,164424.000000,72250.000000,293.696271)}
{pt3dadd(177576.000000,164628.000000,72250.000000,267.215459)}
{pt3dadd(177732.000000,164832.000000,72325.000000,240.734646)}
{pt3dadd(177756.000000,164988.000000,72350.000000,222.345193)}
{pt3dadd(177960.000000,165168.000000,72425.000000,203.955741)}
{pt3dadd(178080.000000,165336.000000,72375.000000,185.566288)}
{pt3dadd(178176.000000,165504.000000,72425.000000,167.176836)}
{pt3dadd(178176.000000,165684.000000,72500.000000,225.220104)}
{pt3dadd(178260.000000,165852.000000,72500.000000,283.263372)}
{pt3dadd(178464.000000,166044.000000,72550.000000,341.306640)}
{pt3dadd(178428.000000,166224.000000,72625.000000,399.349908)}
{pt3dadd(178524.000000,166440.000000,72700.000000,415.989486)}

{create adhoc182}
{access adhoc182}
{connect adhoc182(1), adhoc181(0)}
{nseg = 1}
{strdef color color = "White"}
{pt3dclear()}
{pt3dadd(178524.000000,166440.000000,72700.000000,415.989486)}
{pt3dadd(178752.000000,166524.000000,72975.000000,415.989486)}
{pt3dadd(179220.000000,166680.000000,73200.000000,346.657896)}
{pt3dadd(179472.000000,166764.000000,73475.000000,240.734646)}

{create adhoc183}
{access adhoc183}
{connect adhoc183(1), adhoc182(0)}
{nseg = 1}
{strdef color color = "White"}
{pt3dclear()}
{pt3dadd(179472.000000,166764.000000,73475.000000,240.734646)}
{pt3dadd(179712.000000,166452.000000,73575.000000,240.734646)}
{pt3dadd(179868.000000,166260.000000,73850.000000,230.704038)}
{pt3dadd(180000.000000,166176.000000,74075.000000,220.673430)}
{pt3dadd(180132.000000,166260.000000,74300.000000,210.642822)}
{pt3dadd(180312.000000,166284.000000,74600.000000,200.612214)}
{pt3dadd(180552.000000,166368.000000,74850.000000,192.253370)}
{pt3dadd(180648.000000,166512.000000,75100.000000,183.894525)}
{pt3dadd(180744.000000,166476.000000,75400.000000,175.535680)}
{pt3dadd(180876.000000,166548.000000,75625.000000,167.176836)}
{pt3dadd(181008.000000,166644.000000,75800.000000,175.535680)}
{pt3dadd(181248.000000,166740.000000,75900.000000,183.894525)}
{pt3dadd(181548.000000,166896.000000,76075.000000,192.253370)}
{pt3dadd(181668.000000,166920.000000,76225.000000,200.612214)}
{pt3dadd(181884.000000,166968.000000,76450.000000,210.642822)}
{pt3dadd(181956.000000,166956.000000,76725.000000,220.673430)}
{pt3dadd(182136.000000,167028.000000,77025.000000,230.704038)}
{pt3dadd(182220.000000,167016.000000,77300.000000,240.734646)}
{pt3dadd(182316.000000,167052.000000,77600.000000,240.734646)}
{pt3dadd(182472.000000,167052.000000,77875.000000,240.734646)}
{pt3dadd(182568.000000,167052.000000,78150.000000,240.734646)}
{pt3dadd(182916.000000,167076.000000,78425.000000,240.734646)}
{pt3dadd(183156.000000,167064.000000,78700.000000,252.771381)}
{pt3dadd(183276.000000,167148.000000,79000.000000,264.808116)}
{pt3dadd(183480.000000,167136.000000,79250.000000,276.844851)}
{pt3dadd(183612.000000,167208.000000,79500.000000,288.881586)}
{pt3dadd(183708.000000,167232.000000,79775.000000,320.658561)}
{pt3dadd(183828.000000,167364.000000,80025.000000,352.435536)}
{pt3dadd(183792.000000,167484.000000,80300.000000,384.212511)}
{pt3dadd(183828.000000,167532.000000,80550.000000,415.989486)}
{pt3dadd(183744.000000,167520.000000,80800.000000,420.024713)}
{pt3dadd(183648.000000,167676.000000,81000.000000,424.059939)}
{pt3dadd(183636.000000,167772.000000,81225.000000,428.095166)}
{pt3dadd(183660.000000,167844.000000,81475.000000,432.130392)}
{pt3dadd(183744.000000,167916.000000,81750.000000,374.250847)}
{pt3dadd(183900.000000,167856.000000,81950.000000,316.371303)}
{pt3dadd(183888.000000,167772.000000,82150.000000,258.491759)}
{pt3dadd(184068.000000,167760.000000,82375.000000,200.612214)}
{pt3dadd(184284.000000,167712.000000,82425.000000,167.255320)}
{pt3dadd(184464.000000,167616.000000,82475.000000,133.898427)}
{pt3dadd(184656.000000,167652.000000,82600.000000,100.541533)}
{pt3dadd(184824.000000,167520.000000,82550.000000,67.184640)}
{pt3dadd(185004.000000,167484.000000,82550.000000,62.052480)}
{pt3dadd(185172.000000,167508.000000,82550.000000,56.920320)}
{pt3dadd(185328.000000,167544.000000,82750.000000,51.788160)}
{pt3dadd(185484.000000,167448.000000,82750.000000,46.656000)}
{pt3dadd(185604.000000,167256.000000,82775.000000,56.920320)}
{pt3dadd(185856.000000,167088.000000,82900.000000,67.184640)}
{pt3dadd(186024.000000,166896.000000,83025.000000,38.880000)}

{create adhoc184}
{access adhoc184}
{connect adhoc184(1), adhoc182(0)}
{nseg = 1}
{strdef color color = "White"}
{pt3dclear()}
{pt3dadd(179472.000000,166764.000000,73475.000000,240.734646)}
{pt3dadd(179340.000000,167136.000000,73375.000000,116.095032)}
{pt3dadd(179208.000000,167352.000000,73550.000000,55.987200)}

{create adhoc185}
{access adhoc185}
{connect adhoc185(1), adhoc181(0)}
{nseg = 1}
{strdef color color = "White"}
{pt3dclear()}
{pt3dadd(178524.000000,166440.000000,72700.000000,415.989486)}
{pt3dadd(178416.000000,166740.000000,72500.000000,288.881586)}
{pt3dadd(178332.000000,167052.000000,72350.000000,276.844851)}
{pt3dadd(178368.000000,167580.000000,72350.000000,264.808116)}
{pt3dadd(178248.000000,167808.000000,72275.000000,252.771381)}
{pt3dadd(178200.000000,168036.000000,72300.000000,240.734646)}
{pt3dadd(178188.000000,168240.000000,72300.000000,222.345193)}
{pt3dadd(178224.000000,168444.000000,72300.000000,203.955741)}
{pt3dadd(178140.000000,168648.000000,72275.000000,185.566288)}
{pt3dadd(178176.000000,168804.000000,72275.000000,167.176836)}
{pt3dadd(178128.000000,169020.000000,72250.000000,180.847890)}
{pt3dadd(178068.000000,169188.000000,72225.000000,194.518944)}
{pt3dadd(178056.000000,169368.000000,72175.000000,208.189998)}
{pt3dadd(178140.000000,169524.000000,72050.000000,221.861052)}
{pt3dadd(178236.000000,169692.000000,72025.000000,216.548843)}
{pt3dadd(178308.000000,169872.000000,72000.000000,211.236633)}
{pt3dadd(178272.000000,170064.000000,72025.000000,205.924423)}
{pt3dadd(178308.000000,170256.000000,72000.000000,200.612214)}
{pt3dadd(178296.000000,170436.000000,72100.000000,208.235480)}
{pt3dadd(178296.000000,170592.000000,72100.000000,215.858745)}
{pt3dadd(178320.000000,170748.000000,72150.000000,223.482010)}
{pt3dadd(178272.000000,170916.000000,72150.000000,231.105276)}
{pt3dadd(178320.000000,171096.000000,72250.000000,213.451398)}
{pt3dadd(178356.000000,171276.000000,72325.000000,195.797520)}
{pt3dadd(178440.000000,171444.000000,72425.000000,178.143642)}
{pt3dadd(178488.000000,171612.000000,72575.000000,160.489764)}
{pt3dadd(178524.000000,171780.000000,72725.000000,178.143642)}
{pt3dadd(178560.000000,171948.000000,72825.000000,195.797520)}
{pt3dadd(178584.000000,172152.000000,72975.000000,213.451398)}
{pt3dadd(178524.000000,172368.000000,73200.000000,231.105276)}
{pt3dadd(178380.000000,172764.000000,73375.000000,283.741213)}
{pt3dadd(178500.000000,172956.000000,73575.000000,336.377151)}
{pt3dadd(178740.000000,173136.000000,73925.000000,389.013088)}
{pt3dadd(178764.000000,173328.000000,74100.000000,441.649026)}
{pt3dadd(178728.000000,173496.000000,74325.000000,391.420431)}
{pt3dadd(178776.000000,173688.000000,74750.000000,341.191836)}
{pt3dadd(178716.000000,173832.000000,75025.000000,290.963241)}
{pt3dadd(178920.000000,173772.000000,75025.000000,240.734646)}
{pt3dadd(179064.000000,173688.000000,74950.000000,240.734646)}
{pt3dadd(179088.000000,173304.000000,75450.000000,240.734646)}
{pt3dadd(179028.000000,173028.000000,75625.000000,240.734646)}
{pt3dadd(179004.000000,172320.000000,75925.000000,240.734646)}
{pt3dadd(178944.000000,171852.000000,76125.000000,222.345193)}
{pt3dadd(178920.000000,171648.000000,76200.000000,203.955741)}
{pt3dadd(178884.000000,171396.000000,76125.000000,185.566288)}
{pt3dadd(178824.000000,171156.000000,76200.000000,167.176836)}
{pt3dadd(178680.000000,170916.000000,76200.000000,185.566288)}
{pt3dadd(178512.000000,170676.000000,76200.000000,203.955741)}
{pt3dadd(178380.000000,170448.000000,76200.000000,222.345193)}
{pt3dadd(178464.000000,170220.000000,76200.000000,240.734646)}
{pt3dadd(178428.000000,169992.000000,76200.000000,222.345193)}
{pt3dadd(178524.000000,169776.000000,76375.000000,203.955741)}
{pt3dadd(178656.000000,169596.000000,76650.000000,185.566288)}
{pt3dadd(178812.000000,169620.000000,76850.000000,167.176836)}
{pt3dadd(179016.000000,169692.000000,77075.000000,167.176836)}
{pt3dadd(179196.000000,169788.000000,77225.000000,167.176836)}
{pt3dadd(179448.000000,169776.000000,77325.000000,167.176836)}
{pt3dadd(179880.000000,169848.000000,77525.000000,167.176836)}
{pt3dadd(180132.000000,169896.000000,77700.000000,157.889238)}
{pt3dadd(180432.000000,170064.000000,77850.000000,148.601640)}
{pt3dadd(180732.000000,170004.000000,78025.000000,139.314042)}
{pt3dadd(181164.000000,170424.000000,78225.000000,139.314042)}

{create adhoc186}
{access adhoc186}
{connect adhoc186(1), adhoc180(0)}
{nseg = 1}
{strdef color color = "White"}
{pt3dclear()}
{pt3dadd(176664.000000,160860.000000,70825.000000,288.881586)}
{pt3dadd(176916.000000,160836.000000,71050.000000,231.105276)}
{pt3dadd(177492.000000,160992.000000,71275.000000,182.423376)}
{pt3dadd(177828.000000,160884.000000,71400.000000,133.741476)}
{pt3dadd(178212.000000,160836.000000,71625.000000,111.451230)}

{create adhoc187}
{access adhoc187}
{connect adhoc187(1), adhoc186(0)}
{nseg = 1}
{strdef color color = "White"}
{pt3dclear()}
{pt3dadd(178212.000000,160836.000000,71625.000000,111.451230)}
{pt3dadd(178584.000000,160788.000000,71775.000000,67.184640)}
{pt3dadd(178884.000000,160656.000000,71925.000000,55.987200)}
{pt3dadd(179232.000000,160620.000000,72025.000000,38.880000)}

{create adhoc188}
{access adhoc188}
{connect adhoc188(1), adhoc186(0)}
{nseg = 1}
{strdef color color = "White"}
{pt3dclear()}
{pt3dadd(178212.000000,160836.000000,71625.000000,111.451230)}
{pt3dadd(178092.000000,160632.000000,71650.000000,38.880000)}
{pt3dadd(178116.000000,160380.000000,71650.000000,55.104390)}
{pt3dadd(178128.000000,160200.000000,71575.000000,71.328780)}
{pt3dadd(178080.000000,160080.000000,71450.000000,38.880000)}

{create adhoc189}
{access adhoc189}
{connect adhoc189(1), adhoc179(0)}
{nseg = 1}
{strdef color color = "White"}
{pt3dclear()}
{pt3dadd(174732.000000,158880.000000,69775.000000,319.479948)}
{pt3dadd(174504.000000,158880.000000,69525.000000,288.881586)}
{pt3dadd(174252.000000,158880.000000,69225.000000,276.844851)}
{pt3dadd(173952.000000,158880.000000,68925.000000,264.808116)}
{pt3dadd(173856.000000,159084.000000,68975.000000,252.771381)}
{pt3dadd(173844.000000,159288.000000,68975.000000,240.734646)}
{pt3dadd(173676.000000,159480.000000,68975.000000,240.734646)}
{pt3dadd(173532.000000,159636.000000,68975.000000,240.734646)}
{pt3dadd(173436.000000,159780.000000,68950.000000,240.734646)}
{pt3dadd(173400.000000,159924.000000,68875.000000,240.734646)}
{pt3dadd(173184.000000,160080.000000,68800.000000,263.748875)}
{pt3dadd(173016.000000,160236.000000,68725.000000,286.763103)}
{pt3dadd(172824.000000,160404.000000,68700.000000,309.777332)}
{pt3dadd(172716.000000,160548.000000,68700.000000,332.791560)}
{pt3dadd(172548.000000,160692.000000,68675.000000,353.591042)}
{pt3dadd(172512.000000,160872.000000,68625.000000,374.390523)}
{pt3dadd(172476.000000,161028.000000,68575.000000,395.190005)}
{pt3dadd(172464.000000,161184.000000,68550.000000,415.989486)}
{pt3dadd(172428.000000,161352.000000,68425.000000,479.219886)}

{create adhoc190}
{access adhoc190}
{connect adhoc190(1), adhoc189(0)}
{nseg = 1}
{strdef color color = "White"}
{pt3dclear()}
{pt3dadd(172428.000000,161352.000000,68425.000000,479.219886)}
{pt3dadd(172416.000000,161532.000000,68425.000000,499.187376)}
{pt3dadd(172476.000000,161688.000000,68425.000000,461.055006)}
{pt3dadd(172536.000000,161820.000000,68400.000000,422.922636)}
{pt3dadd(172512.000000,162012.000000,68450.000000,384.790266)}
{pt3dadd(172512.000000,162192.000000,68500.000000,346.657896)}
{pt3dadd(172584.000000,162360.000000,68575.000000,320.177083)}
{pt3dadd(172620.000000,162528.000000,68525.000000,293.696271)}
{pt3dadd(172812.000000,162720.000000,68450.000000,267.215459)}
{pt3dadd(172896.000000,162876.000000,68425.000000,240.734646)}
{pt3dadd(172848.000000,163032.000000,68400.000000,230.704038)}
{pt3dadd(172788.000000,163188.000000,68350.000000,220.673430)}
{pt3dadd(172656.000000,163356.000000,68275.000000,210.642822)}
{pt3dadd(172680.000000,163488.000000,68350.000000,200.612214)}
{pt3dadd(172644.000000,163620.000000,68375.000000,208.235480)}
{pt3dadd(172620.000000,163764.000000,68400.000000,215.858745)}
{pt3dadd(172608.000000,163908.000000,68375.000000,223.482010)}
{pt3dadd(172536.000000,164064.000000,68425.000000,231.105276)}
{pt3dadd(172488.000000,164244.000000,68400.000000,259.993431)}
{pt3dadd(172368.000000,164436.000000,68450.000000,288.881586)}
{pt3dadd(172296.000000,164628.000000,68475.000000,317.769741)}
{pt3dadd(172380.000000,164820.000000,68500.000000,346.657896)}
{pt3dadd(172464.000000,164964.000000,68425.000000,346.657896)}
{pt3dadd(172560.000000,165144.000000,68425.000000,346.657896)}
{pt3dadd(172608.000000,165312.000000,68400.000000,346.657896)}
{pt3dadd(172692.000000,165480.000000,68425.000000,346.657896)}
{pt3dadd(172764.000000,165636.000000,68500.000000,346.657896)}
{pt3dadd(172848.000000,165792.000000,68350.000000,346.657896)}
{pt3dadd(172932.000000,165936.000000,68325.000000,346.657896)}
{pt3dadd(172956.000000,166092.000000,68175.000000,346.657896)}
{pt3dadd(173076.000000,166260.000000,68100.000000,332.213819)}
{pt3dadd(173112.000000,166416.000000,68100.000000,317.769741)}
{pt3dadd(173328.000000,166560.000000,68150.000000,303.325664)}
{pt3dadd(173352.000000,166728.000000,68150.000000,288.881586)}
{pt3dadd(173448.000000,166872.000000,68200.000000,266.814243)}
{pt3dadd(173496.000000,167016.000000,68200.000000,244.746900)}
{pt3dadd(173676.000000,167184.000000,68200.000000,222.679557)}
{pt3dadd(173760.000000,167352.000000,68100.000000,200.612214)}
{pt3dadd(173856.000000,167544.000000,68100.000000,222.679557)}
{pt3dadd(174060.000000,167724.000000,68100.000000,244.746900)}
{pt3dadd(174228.000000,167904.000000,68150.000000,266.814243)}
{pt3dadd(174312.000000,168084.000000,68150.000000,288.881586)}
{pt3dadd(174408.000000,168264.000000,68075.000000,276.844851)}
{pt3dadd(174564.000000,168456.000000,68075.000000,264.808116)}
{pt3dadd(174720.000000,168612.000000,68150.000000,252.771381)}
{pt3dadd(174756.000000,168780.000000,68175.000000,240.734646)}
{pt3dadd(174828.000000,168960.000000,68275.000000,230.704038)}
{pt3dadd(174780.000000,169140.000000,68300.000000,220.673430)}
{pt3dadd(174732.000000,169332.000000,68300.000000,210.642822)}
{pt3dadd(174732.000000,169488.000000,68300.000000,200.612214)}
{pt3dadd(174684.000000,169644.000000,68300.000000,210.642822)}
{pt3dadd(174672.000000,169800.000000,68425.000000,220.673430)}
{pt3dadd(174612.000000,169968.000000,68400.000000,230.704038)}
{pt3dadd(174648.000000,170124.000000,68375.000000,240.734646)}
{pt3dadd(174564.000000,170280.000000,68425.000000,252.771381)}
{pt3dadd(174504.000000,170448.000000,68425.000000,264.808116)}
{pt3dadd(174468.000000,170604.000000,68425.000000,276.844851)}
{pt3dadd(174468.000000,170760.000000,68450.000000,288.881586)}
{pt3dadd(174420.000000,170904.000000,68475.000000,303.325664)}
{pt3dadd(174456.000000,171072.000000,68550.000000,317.769741)}
{pt3dadd(174576.000000,171192.000000,68525.000000,332.213819)}
{pt3dadd(174480.000000,171360.000000,68550.000000,346.657896)}
{pt3dadd(174432.000000,171540.000000,68600.000000,332.213819)}
{pt3dadd(174432.000000,171720.000000,68625.000000,317.769741)}
{pt3dadd(174348.000000,171888.000000,68625.000000,303.325664)}
{pt3dadd(174432.000000,172068.000000,68625.000000,288.881586)}
{pt3dadd(174372.000000,172236.000000,68675.000000,303.325664)}
{pt3dadd(174372.000000,172416.000000,68600.000000,317.769741)}
{pt3dadd(174372.000000,172584.000000,68575.000000,332.213819)}
{pt3dadd(174420.000000,172728.000000,68475.000000,346.657896)}
{pt3dadd(174456.000000,172884.000000,68425.000000,308.140353)}
{pt3dadd(174456.000000,173064.000000,68325.000000,269.622810)}
{pt3dadd(174408.000000,173232.000000,68325.000000,231.105267)}
{pt3dadd(174348.000000,173424.000000,68325.000000,192.587724)}
{pt3dadd(174252.000000,173580.000000,68325.000000,204.624455)}
{pt3dadd(174192.000000,173760.000000,68375.000000,216.661185)}
{pt3dadd(174096.000000,173940.000000,68425.000000,228.697915)}
{pt3dadd(173916.000000,174132.000000,68400.000000,240.734646)}
{pt3dadd(173904.000000,174312.000000,68450.000000,267.215459)}
{pt3dadd(173844.000000,174516.000000,68400.000000,293.696271)}
{pt3dadd(173796.000000,174720.000000,68325.000000,320.177083)}
{pt3dadd(173748.000000,174888.000000,68300.000000,346.657896)}
{pt3dadd(173784.000000,175080.000000,68275.000000,430.780224)}
{pt3dadd(173736.000000,175260.000000,68200.000000,514.902552)}
{pt3dadd(173736.000000,175464.000000,68175.000000,599.024880)}
{pt3dadd(173628.000000,175608.000000,68175.000000,499.187376)}

{create adhoc191}
{access adhoc191}
{connect adhoc191(1), adhoc190(0)}
{nseg = 1}
{strdef color color = "White"}
{pt3dclear()}
{pt3dadd(173628.000000,175608.000000,68175.000000,499.187376)}
{pt3dadd(173592.000000,175752.000000,68500.000000,346.657896)}
{pt3dadd(173460.000000,175944.000000,68675.000000,346.657896)}
{pt3dadd(173448.000000,176112.000000,68800.000000,346.657896)}
{pt3dadd(173448.000000,176292.000000,68950.000000,346.657896)}
{pt3dadd(173448.000000,176472.000000,68975.000000,346.657896)}
{pt3dadd(173436.000000,176664.000000,69025.000000,363.990794)}
{pt3dadd(173484.000000,176880.000000,69200.000000,381.323691)}
{pt3dadd(173604.000000,177036.000000,69325.000000,398.656589)}
{pt3dadd(173628.000000,177216.000000,69575.000000,415.989486)}
{pt3dadd(173712.000000,177348.000000,69800.000000,368.040852)}

{create adhoc192}
{access adhoc192}
{connect adhoc192(1), adhoc191(0)}
{nseg = 1}
{strdef color color = "White"}
{pt3dclear()}
{pt3dadd(173712.000000,177348.000000,69800.000000,368.040852)}
{pt3dadd(173892.000000,177468.000000,70050.000000,288.881586)}
{pt3dadd(173976.000000,177636.000000,70125.000000,288.881586)}
{pt3dadd(174264.000000,177792.000000,70400.000000,288.881586)}
{pt3dadd(174396.000000,177984.000000,70525.000000,288.881586)}
{pt3dadd(174468.000000,178164.000000,70750.000000,288.881586)}
{pt3dadd(174492.000000,178356.000000,70900.000000,276.844851)}
{pt3dadd(174528.000000,178524.000000,71050.000000,264.808116)}
{pt3dadd(174624.000000,178728.000000,71150.000000,252.771381)}
{pt3dadd(174648.000000,178920.000000,71225.000000,240.734646)}
{pt3dadd(174672.000000,179052.000000,71325.000000,267.215459)}
{pt3dadd(174636.000000,179184.000000,71450.000000,293.696271)}
{pt3dadd(174588.000000,179304.000000,71625.000000,320.177083)}
{pt3dadd(174492.000000,179424.000000,71800.000000,346.657896)}
{pt3dadd(174588.000000,179556.000000,72025.000000,346.657896)}
{pt3dadd(174744.000000,179676.000000,72250.000000,346.657896)}
{pt3dadd(174828.000000,179796.000000,72450.000000,346.657896)}
{pt3dadd(174864.000000,179928.000000,72675.000000,346.657896)}
{pt3dadd(174948.000000,180084.000000,72825.000000,329.325003)}
{pt3dadd(174996.000000,180228.000000,73000.000000,311.992110)}
{pt3dadd(175116.000000,180384.000000,73225.000000,294.659217)}
{pt3dadd(175164.000000,180504.000000,73375.000000,277.326324)}
{pt3dadd(175188.000000,180660.000000,73625.000000,265.771062)}
{pt3dadd(175212.000000,180804.000000,73875.000000,254.215800)}
{pt3dadd(175200.000000,180972.000000,74050.000000,242.660538)}
{pt3dadd(175188.000000,181152.000000,74125.000000,231.105276)}
{pt3dadd(175140.000000,181320.000000,74175.000000,223.482010)}
{pt3dadd(175140.000000,181524.000000,74300.000000,215.858745)}
{pt3dadd(175212.000000,181704.000000,74375.000000,208.235480)}
{pt3dadd(175332.000000,181884.000000,74525.000000,200.612214)}
{pt3dadd(175332.000000,182052.000000,74725.000000,210.642822)}
{pt3dadd(175416.000000,182232.000000,74800.000000,220.673430)}
{pt3dadd(175380.000000,182412.000000,74850.000000,230.704038)}
{pt3dadd(175320.000000,182604.000000,74900.000000,240.734646)}
{pt3dadd(175236.000000,182796.000000,74950.000000,215.379495)}
{pt3dadd(175200.000000,183000.000000,75000.000000,190.024344)}
{pt3dadd(175200.000000,183192.000000,75025.000000,164.669193)}
{pt3dadd(175188.000000,183384.000000,75000.000000,139.314042)}
{pt3dadd(175176.000000,183552.000000,75100.000000,164.669193)}
{pt3dadd(175140.000000,183732.000000,75200.000000,190.024344)}
{pt3dadd(175128.000000,183912.000000,75400.000000,215.379495)}
{pt3dadd(175116.000000,184092.000000,75675.000000,240.734646)}
{pt3dadd(175212.000000,184476.000000,75825.000000,220.673430)}
{pt3dadd(175164.000000,185196.000000,76025.000000,200.612214)}
{pt3dadd(174972.000000,185508.000000,76075.000000,288.881586)}

{create adhoc193}
{access adhoc193}
{connect adhoc193(1), adhoc192(0)}
{nseg = 1}
{strdef color color = "White"}
{pt3dclear()}
{pt3dadd(174972.000000,185508.000000,76075.000000,288.881586)}
{pt3dadd(174924.000000,185592.000000,76325.000000,346.657896)}
{pt3dadd(174948.000000,185688.000000,76550.000000,320.177083)}
{pt3dadd(175128.000000,185928.000000,76800.000000,293.696271)}
{pt3dadd(175284.000000,186108.000000,77100.000000,267.215459)}
{pt3dadd(175404.000000,186348.000000,77375.000000,240.734646)}
{pt3dadd(175488.000000,186552.000000,77650.000000,230.704038)}
{pt3dadd(175608.000000,186708.000000,77950.000000,220.673430)}
{pt3dadd(175644.000000,186732.000000,78250.000000,210.642822)}
{pt3dadd(175692.000000,186684.000000,78450.000000,200.612214)}
{pt3dadd(175896.000000,186720.000000,78625.000000,178.321968)}
{pt3dadd(176160.000000,186924.000000,78900.000000,156.031722)}
{pt3dadd(176328.000000,187068.000000,79000.000000,133.741476)}
{pt3dadd(176592.000000,187260.000000,79175.000000,111.451230)}
{pt3dadd(176856.000000,187476.000000,79350.000000,67.184640)}

{create adhoc194}
{access adhoc194}
{connect adhoc194(1), adhoc192(0)}
{nseg = 1}
{strdef color color = "White"}
{pt3dclear()}
{pt3dadd(174972.000000,185508.000000,76075.000000,288.881586)}
{pt3dadd(174708.000000,185796.000000,76150.000000,240.734646)}
{pt3dadd(174564.000000,186024.000000,75950.000000,178.414839)}
{pt3dadd(174420.000000,186156.000000,75900.000000,116.095032)}
{pt3dadd(174240.000000,186264.000000,75725.000000,67.184640)}

{create adhoc195}
{access adhoc195}
{connect adhoc195(1), adhoc191(0)}
{nseg = 1}
{strdef color color = "White"}
{pt3dclear()}
{pt3dadd(173712.000000,177348.000000,69800.000000,368.040852)}
{pt3dadd(173520.000000,177528.000000,69800.000000,288.881586)}
{pt3dadd(173232.000000,177672.000000,69800.000000,245.684947)}
{pt3dadd(173052.000000,178008.000000,69625.000000,202.488309)}
{pt3dadd(172812.000000,178188.000000,69600.000000,159.291671)}
{pt3dadd(172620.000000,178380.000000,69550.000000,116.095032)}
{pt3dadd(172404.000000,178536.000000,69375.000000,98.735274)}
{pt3dadd(172248.000000,178740.000000,69325.000000,81.375516)}
{pt3dadd(171972.000000,178944.000000,69200.000000,64.015758)}
{pt3dadd(171600.000000,179100.000000,69075.000000,46.656000)}
{pt3dadd(171264.000000,179268.000000,69075.000000,44.789760)}
{pt3dadd(171000.000000,179436.000000,68900.000000,38.880000)}

{create adhoc196}
{access adhoc196}
{connect adhoc196(1), adhoc190(0)}
{nseg = 1}
{strdef color color = "White"}
{pt3dclear()}
{pt3dadd(173628.000000,175608.000000,68175.000000,499.187376)}
{pt3dadd(173628.000000,175548.000000,67750.000000,662.473530)}
{pt3dadd(173628.000000,175620.000000,67325.000000,557.038809)}
{pt3dadd(173628.000000,175776.000000,66775.000000,451.604088)}
{pt3dadd(173616.000000,175848.000000,66550.000000,346.169367)}
{pt3dadd(172656.000000,175980.000000,66350.000000,240.734646)}
{pt3dadd(172428.000000,176064.000000,66225.000000,139.314042)}
{pt3dadd(172260.000000,176004.000000,66125.000000,96.745860)}

{create adhoc197}
{access adhoc197}
{connect adhoc197(1), adhoc189(0)}
{nseg = 1}
{strdef color color = "White"}
{pt3dclear()}
{pt3dadd(172428.000000,161352.000000,68425.000000,479.219886)}
{pt3dadd(172368.000000,161412.000000,68150.000000,479.219886)}
{pt3dadd(172404.000000,161604.000000,67625.000000,419.598576)}
{pt3dadd(172392.000000,161772.000000,67300.000000,359.977266)}
{pt3dadd(172344.000000,161916.000000,67000.000000,300.355956)}
{pt3dadd(172380.000000,162048.000000,66675.000000,240.734646)}
{pt3dadd(172584.000000,162060.000000,66300.000000,200.612214)}

{create adhoc198}
{access adhoc198}
{connect adhoc198(1), adhoc160(0)}
{nseg = 1}
{strdef color color = "White"}
{pt3dclear()}
{pt3dadd(176136.000000,153576.000000,73050.000000,690.076674)}
{pt3dadd(176256.000000,153180.000000,73050.000000,794.968236)}
{pt3dadd(176424.000000,152688.000000,73050.000000,646.379230)}
{pt3dadd(176580.000000,152328.000000,73050.000000,497.790225)}
{pt3dadd(176628.000000,152376.000000,72775.000000,349.201219)}
{pt3dadd(176808.000000,152424.000000,72425.000000,200.612214)}
{pt3dadd(176880.000000,152460.000000,72125.000000,185.287671)}
{pt3dadd(176904.000000,152400.000000,71925.000000,169.963128)}
{pt3dadd(177024.000000,152388.000000,71725.000000,154.638585)}
{pt3dadd(177180.000000,152352.000000,71500.000000,139.314042)}
{pt3dadd(177552.000000,152292.000000,71250.000000,127.704541)}
{pt3dadd(177972.000000,152088.000000,71250.000000,116.095041)}
{pt3dadd(178188.000000,152112.000000,71075.000000,104.485541)}
{pt3dadd(178380.000000,151800.000000,71025.000000,92.876040)}
{pt3dadd(178272.000000,151404.000000,71025.000000,119.810083)}
{pt3dadd(178164.000000,151224.000000,71075.000000,146.744127)}
{pt3dadd(177948.000000,150912.000000,70950.000000,173.678170)}
{pt3dadd(177804.000000,150648.000000,70575.000000,200.612214)}
{pt3dadd(177648.000000,150480.000000,70350.000000,165.990096)}
{pt3dadd(177492.000000,150444.000000,70275.000000,131.367978)}
{pt3dadd(177324.000000,150480.000000,70225.000000,96.745860)}
{pt3dadd(177156.000000,150504.000000,70200.000000,67.184640)}

{create adhoc199}
{access adhoc199}
{connect adhoc199(1), adhoc6(0)}
{nseg = 1}
{strdef color color = "White"}
{pt3dclear()}
{pt3dadd(188856.000000,144840.000000,96775.000000,2967.203160)}
{pt3dadd(188928.000000,144180.000000,96775.000000,3560.643684)}
{pt3dadd(188952.000000,143292.000000,96775.000000,2757.147237)}
{pt3dadd(188880.000000,142320.000000,96775.000000,1953.650790)}
{pt3dadd(188748.000000,141192.000000,96775.000000,1150.154343)}
{pt3dadd(188520.000000,140244.000000,96775.000000,346.657896)}
{pt3dadd(188172.000000,139512.000000,97050.000000,343.191321)}
{pt3dadd(188040.000000,139140.000000,97300.000000,339.724746)}
{pt3dadd(187956.000000,138288.000000,97575.000000,336.258171)}
{pt3dadd(187908.000000,137148.000000,97625.000000,332.791596)}
{pt3dadd(187824.000000,136176.000000,97475.000000,353.591069)}
{pt3dadd(187656.000000,135768.000000,97650.000000,374.390541)}
{pt3dadd(187476.000000,135552.000000,97625.000000,395.190014)}
{pt3dadd(187548.000000,135360.000000,97675.000000,415.989486)}
{pt3dadd(187488.000000,135156.000000,97625.000000,415.989486)}
{pt3dadd(187476.000000,134916.000000,97575.000000,415.989486)}
{pt3dadd(187464.000000,134748.000000,97550.000000,415.989486)}
{pt3dadd(187356.000000,134076.000000,97200.000000,415.989486)}
{pt3dadd(187356.000000,132972.000000,96700.000000,384.212511)}
{pt3dadd(187356.000000,131952.000000,96525.000000,352.435536)}
{pt3dadd(187356.000000,130788.000000,96575.000000,320.658561)}
{pt3dadd(187188.000000,130488.000000,96475.000000,288.881586)}
{pt3dadd(186984.000000,130176.000000,96400.000000,303.325664)}
{pt3dadd(186804.000000,129828.000000,96375.000000,317.769741)}
{pt3dadd(186648.000000,128916.000000,96175.000000,332.213819)}
{pt3dadd(186336.000000,128376.000000,95925.000000,346.657896)}
{pt3dadd(185736.000000,127296.000000,95725.000000,343.191312)}
{pt3dadd(185496.000000,126468.000000,95525.000000,339.724728)}
{pt3dadd(185388.000000,125976.000000,95275.000000,336.258144)}
{pt3dadd(185352.000000,125028.000000,95000.000000,332.791560)}
{pt3dadd(185304.000000,124176.000000,94775.000000,332.791560)}
{pt3dadd(185232.000000,123984.000000,94775.000000,332.791560)}
{pt3dadd(185280.000000,123756.000000,94875.000000,332.791560)}
{pt3dadd(185280.000000,123576.000000,94825.000000,332.791560)}
{pt3dadd(185280.000000,123420.000000,94825.000000,321.814067)}
{pt3dadd(185352.000000,123240.000000,94900.000000,310.836573)}
{pt3dadd(185352.000000,123072.000000,95000.000000,299.859080)}
{pt3dadd(185340.000000,122904.000000,95225.000000,288.881586)}
{pt3dadd(185364.000000,122724.000000,95300.000000,303.325664)}
{pt3dadd(185328.000000,122532.000000,95450.000000,317.769741)}
{pt3dadd(185184.000000,122364.000000,95625.000000,332.213819)}
{pt3dadd(185088.000000,122184.000000,95725.000000,346.657896)}
{pt3dadd(185004.000000,122004.000000,95750.000000,332.213819)}
{pt3dadd(184944.000000,121836.000000,95775.000000,317.769741)}
{pt3dadd(184992.000000,121668.000000,95800.000000,303.325664)}
{pt3dadd(184932.000000,121488.000000,95800.000000,288.881586)}
{pt3dadd(184932.000000,121296.000000,95700.000000,303.325664)}
{pt3dadd(184956.000000,121116.000000,95725.000000,317.769741)}
{pt3dadd(184872.000000,120972.000000,95675.000000,332.213819)}
{pt3dadd(184788.000000,120828.000000,95700.000000,346.657896)}
{pt3dadd(184860.000000,120696.000000,95550.000000,320.177083)}
{pt3dadd(184716.000000,120564.000000,95450.000000,293.696271)}
{pt3dadd(184632.000000,120396.000000,95475.000000,267.215459)}
{pt3dadd(184548.000000,120216.000000,95425.000000,240.734646)}
{pt3dadd(184572.000000,120060.000000,95375.000000,240.734646)}
{pt3dadd(184488.000000,119916.000000,95300.000000,240.734646)}
{pt3dadd(184428.000000,119772.000000,95250.000000,240.734646)}
{pt3dadd(184416.000000,119616.000000,95200.000000,240.734646)}
{pt3dadd(184320.000000,119472.000000,95150.000000,267.215459)}
{pt3dadd(184236.000000,119352.000000,94950.000000,293.696271)}
{pt3dadd(184224.000000,119208.000000,94900.000000,320.177083)}
{pt3dadd(184188.000000,119052.000000,94900.000000,346.657896)}
{pt3dadd(184008.000000,118896.000000,94825.000000,332.213819)}
{pt3dadd(184056.000000,118728.000000,94750.000000,317.769741)}
{pt3dadd(184020.000000,118560.000000,94625.000000,303.325664)}
{pt3dadd(183900.000000,118404.000000,94575.000000,288.881586)}
{pt3dadd(183840.000000,118248.000000,94625.000000,276.844851)}
{pt3dadd(183720.000000,118104.000000,94725.000000,264.808116)}
{pt3dadd(183660.000000,117936.000000,94750.000000,252.771381)}
{pt3dadd(183576.000000,117780.000000,94700.000000,240.734646)}
{pt3dadd(183564.000000,117612.000000,94725.000000,267.215459)}
{pt3dadd(183396.000000,117432.000000,94750.000000,293.696271)}
{pt3dadd(183396.000000,117252.000000,94750.000000,320.177083)}
{pt3dadd(183384.000000,117060.000000,94675.000000,346.657896)}
{pt3dadd(183324.000000,116892.000000,94625.000000,346.657896)}
{pt3dadd(183264.000000,116736.000000,94525.000000,346.657896)}
{pt3dadd(183180.000000,116604.000000,94425.000000,346.657896)}
{pt3dadd(183120.000000,116436.000000,94375.000000,346.657896)}
{pt3dadd(183084.000000,116280.000000,94350.000000,346.657896)}
{pt3dadd(183072.000000,116124.000000,94325.000000,346.657896)}
{pt3dadd(183096.000000,115968.000000,94300.000000,346.657896)}
{pt3dadd(183012.000000,115812.000000,94225.000000,346.657896)}
{pt3dadd(182952.000000,115656.000000,94250.000000,310.146476)}
{pt3dadd(182868.000000,115488.000000,94125.000000,273.635055)}
{pt3dadd(182892.000000,115320.000000,94150.000000,237.123635)}
{pt3dadd(182880.000000,115152.000000,94200.000000,200.612214)}
{pt3dadd(183012.000000,114984.000000,94200.000000,210.642822)}
{pt3dadd(183168.000000,114840.000000,94200.000000,220.673430)}
{pt3dadd(183192.000000,114672.000000,94150.000000,230.704038)}
{pt3dadd(183240.000000,114504.000000,94200.000000,240.734646)}
{pt3dadd(183180.000000,114336.000000,94225.000000,230.704038)}
{pt3dadd(183084.000000,114180.000000,94075.000000,220.673430)}
{pt3dadd(183108.000000,114012.000000,94075.000000,210.642822)}
{pt3dadd(183180.000000,113844.000000,94025.000000,200.612214)}
{pt3dadd(182976.000000,113784.000000,93850.000000,215.858745)}
{pt3dadd(182808.000000,113580.000000,93650.000000,231.105276)}
{pt3dadd(182412.000000,113256.000000,93450.000000,167.176836)}

{create adhoc200}
{access adhoc200}
{connect adhoc200(1), adhoc199(0)}
{nseg = 1}
{strdef color color = "White"}
{pt3dclear()}
{pt3dadd(182412.000000,113256.000000,93450.000000,167.176836)}
{pt3dadd(182244.000000,113232.000000,93275.000000,288.881586)}
{pt3dadd(182064.000000,113148.000000,93100.000000,274.437500)}
{pt3dadd(181968.000000,113304.000000,92950.000000,259.993413)}
{pt3dadd(181884.000000,113436.000000,92775.000000,245.549327)}
{pt3dadd(181800.000000,113508.000000,92625.000000,231.105240)}
{pt3dadd(181680.000000,113532.000000,92425.000000,223.481984)}
{pt3dadd(181356.000000,113832.000000,92250.000000,215.858727)}
{pt3dadd(181044.000000,114096.000000,92075.000000,208.235470)}
{pt3dadd(180924.000000,114336.000000,91875.000000,200.612214)}
{pt3dadd(180744.000000,114552.000000,91625.000000,167.176836)}
{pt3dadd(180756.000000,114636.000000,91400.000000,80.621550)}

{create adhoc201}
{access adhoc201}
{connect adhoc201(1), adhoc199(0)}
{nseg = 1}
{strdef color color = "White"}
{pt3dclear()}
{pt3dadd(182412.000000,113256.000000,93450.000000,167.176836)}
{pt3dadd(182268.000000,112968.000000,93500.000000,167.176836)}
{pt3dadd(182220.000000,112800.000000,93650.000000,96.745860)}
{pt3dadd(182172.000000,112440.000000,93800.000000,80.621550)}

{create adhoc202}
{access adhoc202}
{connect adhoc202(1), adhoc3(0)}
{nseg = 1}
{strdef color color = "White"}
{pt3dclear()}
{pt3dadd(148584.000000,124800.000000,155125.000000,1972.693404)}
{pt3dadd(148008.000000,124788.000000,155125.000000,1978.135344)}
{pt3dadd(147624.000000,124728.000000,155125.000000,1587.598880)}
{pt3dadd(147120.000000,124560.000000,155125.000000,1197.062415)}
{pt3dadd(146508.000000,124488.000000,155125.000000,806.525951)}
{pt3dadd(145632.000000,124248.000000,155350.000000,415.989486)}
{pt3dadd(144900.000000,124044.000000,155350.000000,461.748335)}
{pt3dadd(144252.000000,123972.000000,155350.000000,507.507183)}
{pt3dadd(143652.000000,123768.000000,155500.000000,553.266031)}
{pt3dadd(143028.000000,123744.000000,155750.000000,599.024880)}
{pt3dadd(142536.000000,123744.000000,156025.000000,628.976115)}
{pt3dadd(141972.000000,123744.000000,156225.000000,658.927350)}
{pt3dadd(141672.000000,123996.000000,156300.000000,688.878585)}
{pt3dadd(141408.000000,124188.000000,156325.000000,718.829820)}
{pt3dadd(141180.000000,124308.000000,156525.000000,594.772512)}
{pt3dadd(140964.000000,124896.000000,156925.000000,470.715204)}
{pt3dadd(140760.000000,125532.000000,157250.000000,346.657896)}
{pt3dadd(140556.000000,126000.000000,157500.000000,499.187376)}

{create adhoc203}
{access adhoc203}
{connect adhoc203(1), adhoc202(0)}
{nseg = 1}
{strdef color color = "White"}
{pt3dclear()}
{pt3dadd(140556.000000,126000.000000,157500.000000,499.187376)}
{pt3dadd(140376.000000,126588.000000,157775.000000,599.024880)}
{pt3dadd(140208.000000,127140.000000,157950.000000,574.065504)}
{pt3dadd(140016.000000,127260.000000,158125.000000,549.106128)}
{pt3dadd(139836.000000,127356.000000,158425.000000,524.146752)}
{pt3dadd(139668.000000,127740.000000,158775.000000,499.187376)}
{pt3dadd(139284.000000,128340.000000,159075.000000,499.187376)}
{pt3dadd(139296.000000,129192.000000,159425.000000,499.187376)}
{pt3dadd(139224.000000,129780.000000,159650.000000,499.187376)}
{pt3dadd(139008.000000,130080.000000,159950.000000,499.187376)}
{pt3dadd(138840.000000,130080.000000,160225.000000,478.387903)}
{pt3dadd(138732.000000,130236.000000,160525.000000,457.588431)}
{pt3dadd(138696.000000,130404.000000,160875.000000,436.788958)}
{pt3dadd(138732.000000,130536.000000,161200.000000,415.989486)}
{pt3dadd(138564.000000,130740.000000,161500.000000,491.699570)}
{pt3dadd(138600.000000,131196.000000,161825.000000,567.409653)}
{pt3dadd(138648.000000,131460.000000,162125.000000,643.119737)}
{pt3dadd(138552.000000,131796.000000,162400.000000,718.829820)}
{pt3dadd(138636.000000,132120.000000,162725.000000,609.008598)}
{pt3dadd(138624.000000,132372.000000,163125.000000,499.187376)}
{pt3dadd(138828.000000,132504.000000,163475.000000,499.187376)}

{create adhoc204}
{access adhoc204}
{connect adhoc204(1), adhoc202(0)}
{nseg = 1}
{strdef color color = "White"}
{pt3dclear()}
{pt3dadd(140556.000000,126000.000000,157500.000000,499.187376)}
{pt3dadd(140016.000000,126156.000000,157500.000000,690.076674)}
{pt3dadd(139416.000000,126456.000000,157500.000000,621.554877)}
{pt3dadd(138636.000000,126492.000000,157225.000000,553.033080)}
{pt3dadd(137832.000000,126048.000000,156875.000000,484.511283)}
{pt3dadd(137448.000000,125844.000000,156525.000000,415.989486)}
{pt3dadd(137112.000000,125400.000000,156175.000000,346.657905)}
{pt3dadd(137040.000000,125100.000000,156125.000000,277.326324)}
{pt3dadd(137040.000000,124668.000000,156075.000000,139.314042)}

{create adhoc205}
{access adhoc205}
{connect adhoc205(1), adhoc2(0)}
{nseg = 1}
{strdef color color = "White"}
{pt3dclear()}
{pt3dadd(146220.000000,116736.000000,157000.000000,993.710286)}
{pt3dadd(145920.000000,116772.000000,156950.000000,953.961894)}
{pt3dadd(145632.000000,116736.000000,156875.000000,931.120371)}
{pt3dadd(145332.000000,116700.000000,156600.000000,908.278848)}
{pt3dadd(145044.000000,116592.000000,156575.000000,885.437325)}
{pt3dadd(144768.000000,116352.000000,156400.000000,862.595802)}
{pt3dadd(144480.000000,116244.000000,156325.000000,905.725589)}
{pt3dadd(144156.000000,116172.000000,156100.000000,948.855375)}
{pt3dadd(143916.000000,116196.000000,156075.000000,991.985162)}
{pt3dadd(143724.000000,116100.000000,156100.000000,1035.114948)}
{pt3dadd(143544.000000,116064.000000,155925.000000,1024.763782)}
{pt3dadd(143328.000000,115992.000000,155750.000000,1014.412617)}
{pt3dadd(143100.000000,116088.000000,155575.000000,1004.061452)}
{pt3dadd(142824.000000,116148.000000,155400.000000,993.710286)}
{pt3dadd(142860.000000,116184.000000,155050.000000,1004.061452)}
{pt3dadd(142596.000000,116184.000000,154550.000000,1014.412617)}
{pt3dadd(142392.000000,116184.000000,154200.000000,1024.763782)}
{pt3dadd(142008.000000,116112.000000,153875.000000,1035.114948)}
{pt3dadd(141696.000000,115968.000000,153425.000000,956.043666)}
{pt3dadd(141588.000000,115920.000000,153000.000000,876.972384)}
{pt3dadd(141144.000000,115812.000000,152700.000000,797.901102)}
{pt3dadd(140844.000000,115668.000000,152325.000000,718.829820)}
{pt3dadd(140748.000000,115512.000000,151975.000000,718.829820)}
{pt3dadd(140652.000000,115080.000000,151700.000000,718.829820)}
{pt3dadd(140688.000000,114768.000000,151350.000000,718.829820)}
{pt3dadd(140676.000000,114600.000000,150975.000000,718.829820)}
{pt3dadd(140496.000000,114288.000000,150575.000000,688.878585)}
{pt3dadd(140340.000000,113988.000000,150250.000000,658.927350)}
{pt3dadd(140028.000000,113712.000000,149900.000000,628.976115)}
{pt3dadd(139584.000000,113460.000000,149525.000000,599.024880)}
{pt3dadd(139284.000000,113160.000000,149250.000000,599.024880)}
{pt3dadd(138840.000000,112896.000000,148875.000000,599.024880)}
{pt3dadd(138504.000000,112620.000000,148500.000000,599.024880)}
{pt3dadd(138372.000000,112488.000000,148175.000000,575.063856)}

{create adhoc206}
{access adhoc206}
{connect adhoc206(1), adhoc205(0)}
{nseg = 1}
{strdef color color = "White"}
{pt3dclear()}
{pt3dadd(138372.000000,112488.000000,148175.000000,575.063856)}
{pt3dadd(137904.000000,112908.000000,147875.000000,575.063856)}
{pt3dadd(137460.000000,113004.000000,147575.000000,495.526671)}
{pt3dadd(137028.000000,112692.000000,147200.000000,415.989486)}
{pt3dadd(136920.000000,112368.000000,146975.000000,240.734646)}

{create adhoc207}
{access adhoc207}
{connect adhoc207(1), adhoc205(0)}
{nseg = 1}
{strdef color color = "White"}
{pt3dclear()}
{pt3dadd(138372.000000,112488.000000,148175.000000,575.063856)}
{pt3dadd(138540.000000,111912.000000,148175.000000,288.881586)}
{pt3dadd(138696.000000,111336.000000,148175.000000,258.455399)}
{pt3dadd(138672.000000,110976.000000,148275.000000,228.029211)}
{pt3dadd(138660.000000,110796.000000,148225.000000,197.603024)}
{pt3dadd(138660.000000,110628.000000,148250.000000,167.176836)}
{pt3dadd(138648.000000,110448.000000,148275.000000,167.176836)}
{pt3dadd(138672.000000,110244.000000,148300.000000,167.176836)}
{pt3dadd(138732.000000,110076.000000,148250.000000,167.176836)}
{pt3dadd(138768.000000,109860.000000,148275.000000,167.176836)}
{pt3dadd(138804.000000,109668.000000,148275.000000,212.047101)}
{pt3dadd(138864.000000,109440.000000,148275.000000,256.917366)}
{pt3dadd(138948.000000,109212.000000,148300.000000,301.787631)}
{pt3dadd(139068.000000,108996.000000,148250.000000,346.657896)}
{pt3dadd(139056.000000,108780.000000,148200.000000,384.790266)}
{pt3dadd(139140.000000,108516.000000,148275.000000,422.922636)}
{pt3dadd(139104.000000,108240.000000,148300.000000,461.055006)}
{pt3dadd(139128.000000,108012.000000,148425.000000,499.187376)}
{pt3dadd(138996.000000,107784.000000,148375.000000,524.146752)}
{pt3dadd(138984.000000,107568.000000,148275.000000,549.106128)}
{pt3dadd(138840.000000,107328.000000,148225.000000,574.065504)}
{pt3dadd(138804.000000,107112.000000,148250.000000,599.024880)}
{pt3dadd(138804.000000,106908.000000,148300.000000,443.555874)}
{pt3dadd(138756.000000,106668.000000,148375.000000,288.086868)}
{pt3dadd(138720.000000,106572.000000,148350.000000,111.451230)}

{create adhoc208}
{access adhoc208}
{connect adhoc208(1), adhoc1(0)}
{nseg = 1}
{strdef color color = "White"}
{pt3dclear()}
{pt3dadd(148644.000000,109356.000000,158200.000000,794.968308)}
{pt3dadd(148980.000000,109152.000000,158100.000000,690.076602)}
{pt3dadd(149136.000000,108960.000000,158250.000000,642.354295)}
{pt3dadd(149292.000000,108780.000000,158300.000000,594.631989)}
{pt3dadd(149580.000000,108576.000000,158025.000000,546.909682)}
{pt3dadd(149736.000000,108408.000000,157875.000000,499.187376)}
{pt3dadd(149868.000000,108216.000000,157750.000000,494.195504)}
{pt3dadd(149988.000000,108036.000000,157725.000000,489.203631)}
{pt3dadd(150024.000000,107880.000000,157800.000000,484.211758)}
{pt3dadd(150144.000000,107736.000000,157750.000000,479.219886)}
{pt3dadd(150276.000000,107568.000000,157700.000000,531.934065)}
{pt3dadd(150432.000000,107412.000000,157725.000000,584.648244)}
{pt3dadd(150528.000000,107256.000000,157775.000000,637.362423)}
{pt3dadd(150612.000000,107100.000000,157825.000000,690.076602)}
{pt3dadd(150696.000000,106908.000000,157750.000000,724.580455)}
{pt3dadd(150648.000000,106716.000000,157725.000000,759.084309)}
{pt3dadd(150684.000000,106524.000000,157700.000000,793.588162)}
{pt3dadd(150720.000000,106308.000000,157750.000000,828.092016)}
{pt3dadd(150804.000000,106116.000000,157775.000000,786.687394)}
{pt3dadd(150864.000000,105924.000000,157750.000000,745.282773)}
{pt3dadd(151032.000000,105696.000000,157825.000000,703.878152)}
{pt3dadd(151032.000000,105516.000000,157925.000000,662.473530)}
{pt3dadd(150996.000000,105312.000000,158100.000000,646.611368)}
{pt3dadd(151020.000000,105132.000000,158150.000000,630.749205)}
{pt3dadd(151080.000000,104940.000000,158200.000000,614.887042)}
{pt3dadd(151248.000000,104772.000000,158300.000000,599.024880)}
{pt3dadd(151308.000000,104604.000000,158300.000000,608.262305)}
{pt3dadd(151164.000000,104208.000000,158600.000000,617.499729)}
{pt3dadd(151092.000000,104016.000000,158675.000000,626.737153)}
{pt3dadd(151056.000000,103668.000000,158825.000000,635.974578)}
{pt3dadd(150900.000000,103296.000000,159175.000000,649.500102)}
{pt3dadd(150804.000000,103092.000000,159325.000000,663.025626)}
{pt3dadd(150756.000000,102900.000000,159400.000000,676.551150)}
{pt3dadd(150708.000000,102684.000000,159450.000000,690.076674)}
{pt3dadd(150660.000000,102492.000000,159500.000000,697.264960)}
{pt3dadd(150648.000000,102288.000000,159650.000000,704.453247)}
{pt3dadd(150648.000000,102084.000000,159850.000000,711.641533)}
{pt3dadd(150600.000000,101832.000000,160000.000000,718.829820)}
{pt3dadd(150756.000000,101652.000000,160325.000000,711.641533)}
{pt3dadd(150684.000000,101256.000000,160600.000000,704.453247)}
{pt3dadd(150744.000000,101052.000000,160750.000000,697.264960)}
{pt3dadd(150936.000000,100896.000000,160925.000000,690.076674)}
{pt3dadd(151140.000000,100656.000000,161025.000000,667.313725)}
{pt3dadd(151392.000000,100452.000000,161125.000000,644.550777)}
{pt3dadd(151596.000000,100236.000000,161275.000000,621.787828)}
{pt3dadd(151752.000000,100044.000000,161275.000000,599.024880)}
{pt3dadd(152244.000000,99852.000000,161300.000000,553.266031)}
{pt3dadd(152640.000000,99636.000000,161325.000000,507.507183)}
{pt3dadd(152868.000000,99444.000000,161275.000000,461.748335)}
{pt3dadd(153096.000000,99204.000000,161225.000000,415.989486)}
{pt3dadd(153480.000000,99036.000000,161175.000000,455.758079)}
{pt3dadd(153780.000000,98844.000000,161125.000000,495.526671)}
{pt3dadd(154236.000000,98664.000000,160975.000000,535.295264)}
{pt3dadd(154596.000000,98484.000000,161000.000000,575.063856)}
{pt3dadd(154680.000000,98256.000000,161025.000000,651.090717)}
{pt3dadd(154764.000000,98016.000000,161075.000000,727.117578)}
{pt3dadd(154920.000000,97800.000000,160900.000000,803.144439)}
{pt3dadd(154980.000000,97608.000000,160875.000000,879.171300)}
{pt3dadd(155076.000000,97428.000000,160875.000000,875.027425)}
{pt3dadd(155112.000000,97260.000000,160900.000000,870.883551)}
{pt3dadd(155208.000000,97080.000000,160875.000000,866.739677)}
{pt3dadd(155268.000000,96900.000000,160900.000000,862.595802)}
{pt3dadd(155268.000000,96684.000000,160950.000000,741.459660)}
{pt3dadd(155292.000000,96468.000000,161100.000000,620.323518)}
{pt3dadd(155376.000000,96240.000000,161175.000000,499.187376)}
{pt3dadd(155412.000000,96036.000000,161275.000000,319.479912)}

{create adhoc209}
{access adhoc209}
{connect adhoc209(1), adhoc208(0)}
{nseg = 1}
{strdef color color = "White"}
{pt3dclear()}
{pt3dadd(155412.000000,96036.000000,161275.000000,319.479912)}
{pt3dadd(156480.000000,95928.000000,161400.000000,460.051110)}
{pt3dadd(156732.000000,95724.000000,161450.000000,449.035704)}
{pt3dadd(156732.000000,95544.000000,161525.000000,438.020298)}
{pt3dadd(156888.000000,95364.000000,161600.000000,427.004892)}
{pt3dadd(157044.000000,95172.000000,161750.000000,415.989486)}
{pt3dadd(157212.000000,94956.000000,161875.000000,484.511265)}
{pt3dadd(157332.000000,94284.000000,162000.000000,553.033044)}
{pt3dadd(157452.000000,94008.000000,162250.000000,621.554823)}
{pt3dadd(157596.000000,93876.000000,162550.000000,690.076602)}
{pt3dadd(157980.000000,93564.000000,162850.000000,667.313671)}
{pt3dadd(158340.000000,93192.000000,163075.000000,644.550741)}
{pt3dadd(158532.000000,92880.000000,163350.000000,621.787810)}
{pt3dadd(158676.000000,92640.000000,163600.000000,599.024880)}
{pt3dadd(158868.000000,92304.000000,163875.000000,507.507183)}
{pt3dadd(159360.000000,91572.000000,164100.000000,415.989486)}
{pt3dadd(159252.000000,91440.000000,164325.000000,575.063856)}

{create adhoc210}
{access adhoc210}
{connect adhoc210(1), adhoc209(0)}
{nseg = 1}
{strdef color color = "White"}
{pt3dclear()}
{pt3dadd(159252.000000,91440.000000,164325.000000,575.063856)}
{pt3dadd(159312.000000,90900.000000,164575.000000,718.829820)}
{pt3dadd(159348.000000,90384.000000,164850.000000,658.927336)}
{pt3dadd(159348.000000,90012.000000,165075.000000,599.024853)}
{pt3dadd(159408.000000,89808.000000,165100.000000,539.122369)}
{pt3dadd(159504.000000,89628.000000,165175.000000,479.219886)}
{pt3dadd(159588.000000,89436.000000,165250.000000,459.252391)}
{pt3dadd(159552.000000,89268.000000,165250.000000,439.284897)}
{pt3dadd(159384.000000,89112.000000,165200.000000,419.317403)}
{pt3dadd(159336.000000,88932.000000,165175.000000,399.349908)}
{pt3dadd(159336.000000,88776.000000,165250.000000,368.844016)}
{pt3dadd(159336.000000,88584.000000,165325.000000,338.338125)}
{pt3dadd(159288.000000,88404.000000,165300.000000,307.832233)}
{pt3dadd(159324.000000,88236.000000,165325.000000,277.326342)}
{pt3dadd(159288.000000,88080.000000,165325.000000,268.178418)}
{pt3dadd(159252.000000,87912.000000,165275.000000,259.030494)}
{pt3dadd(159252.000000,87732.000000,165300.000000,249.882570)}
{pt3dadd(159276.000000,87552.000000,165250.000000,240.734646)}
{pt3dadd(159264.000000,87396.000000,165275.000000,238.327304)}
{pt3dadd(159228.000000,87204.000000,165125.000000,235.919961)}
{pt3dadd(158952.000000,87012.000000,164825.000000,233.512618)}
{pt3dadd(159204.000000,86880.000000,164475.000000,231.105276)}
{pt3dadd(159324.000000,86688.000000,164350.000000,421.756528)}
{pt3dadd(159624.000000,86484.000000,164475.000000,612.407781)}
{pt3dadd(159792.000000,86280.000000,164375.000000,803.059033)}
{pt3dadd(159960.000000,86088.000000,164075.000000,993.710286)}
{pt3dadd(159984.000000,85908.000000,163900.000000,1074.971952)}
{pt3dadd(160008.000000,85740.000000,163875.000000,1156.233618)}
{pt3dadd(159828.000000,85524.000000,163825.000000,1237.495284)}
{pt3dadd(159780.000000,85320.000000,163750.000000,1318.756950)}
{pt3dadd(159708.000000,85104.000000,163575.000000,1247.846450)}
{pt3dadd(159732.000000,85008.000000,163200.000000,1176.935949)}
{pt3dadd(159720.000000,84996.000000,162975.000000,1106.025449)}
{pt3dadd(159624.000000,85080.000000,162650.000000,1035.114948)}
{pt3dadd(159444.000000,85236.000000,162300.000000,915.803424)}

{create adhoc211}
{access adhoc211}
{connect adhoc211(1), adhoc209(0)}
{nseg = 1}
{strdef color color = "White"}
{pt3dclear()}
{pt3dadd(159252.000000,91440.000000,164325.000000,575.063856)}
{pt3dadd(158880.000000,91872.000000,164325.000000,479.219922)}
{pt3dadd(158448.000000,92364.000000,164325.000000,412.938909)}
{pt3dadd(157824.000000,92892.000000,164325.000000,346.657896)}
{pt3dadd(157476.000000,92916.000000,164625.000000,82.170756)}

{create adhoc212}
{access adhoc212}
{connect adhoc212(1), adhoc208(0)}
{nseg = 1}
{strdef color color = "White"}
{pt3dclear()}
{pt3dadd(155412.000000,96036.000000,161275.000000,319.479912)}
{pt3dadd(154644.000000,96036.000000,161050.000000,575.063856)}
{pt3dadd(154608.000000,95820.000000,161050.000000,473.092101)}
{pt3dadd(154368.000000,95604.000000,160875.000000,371.120346)}
{pt3dadd(153888.000000,95412.000000,160675.000000,269.148591)}
{pt3dadd(153780.000000,95196.000000,160525.000000,167.176836)}
{pt3dadd(153564.000000,94968.000000,160525.000000,297.901777)}
{pt3dadd(153252.000000,94740.000000,160350.000000,428.626719)}
{pt3dadd(153120.000000,94428.000000,160100.000000,559.351660)}
{pt3dadd(153108.000000,94320.000000,159725.000000,690.076602)}
{pt3dadd(153060.000000,94224.000000,159400.000000,690.076602)}
{pt3dadd(153120.000000,94188.000000,159125.000000,690.076602)}
{pt3dadd(153180.000000,94116.000000,158900.000000,690.076602)}
{pt3dadd(153924.000000,93876.000000,158625.000000,111.451230)}
