# Supplementary material for: Full reconstruction of large lobula plate tangential cells in Drosophila from a 3D EM dataset
Source: PLoS One. 2018 Nov 28;13(11):e0207828. doi: 10.1371/journal.pone.0207828 (PMC6261601; doi:10.1371/journal.pone.0207828)
Supplement: S1 Dataset — (ZIP) [file pone.0207828.s001.zip › Diameter hoc/VS_VSL_preliminary/Old Diameters Mar13_VS_VSL_HS/HSS/2_14_724_gmordhorst_001.055.hoc]

/* created with nml2hocm */

{create adhoc1}
{access adhoc1}
{nseg = 1}
{strdef color color = "White"}
{pt3dclear()}
{pt3dadd(153276.000000,93516.000000,158900.000000,277.326324)}
{pt3dadd(153060.000000,93780.000000,159100.000000,415.989486)}
{pt3dadd(153024.000000,94260.000000,159425.000000,438.020298)}
{pt3dadd(153348.000000,94608.000000,159825.000000,460.051110)}
{pt3dadd(153636.000000,94944.000000,160475.000000,488.804296)}
{pt3dadd(153876.000000,95352.000000,160575.000000,517.557483)}
{pt3dadd(154512.000000,95712.000000,160925.000000,546.310670)}
{pt3dadd(154812.000000,96144.000000,161100.000000,575.063856)}
{pt3dadd(155640.000000,96384.000000,161100.000000,552.061332)}

{create adhoc2}
{access adhoc2}
{connect adhoc2(1), adhoc1(0)}
{nseg = 1}
{strdef color color = "White"}
{pt3dclear()}
{pt3dadd(155640.000000,96384.000000,161100.000000,552.061332)}
{pt3dadd(156624.000000,96024.000000,161275.000000,415.989486)}
{pt3dadd(156696.000000,95640.000000,161300.000000,461.748335)}
{pt3dadd(156972.000000,95316.000000,161575.000000,507.507183)}
{pt3dadd(157248.000000,94944.000000,161900.000000,553.266031)}
{pt3dadd(157476.000000,94572.000000,162050.000000,599.024880)}
{pt3dadd(157464.000000,94236.000000,162150.000000,628.976115)}
{pt3dadd(157740.000000,93864.000000,162375.000000,658.927350)}
{pt3dadd(158016.000000,93468.000000,162675.000000,688.878585)}
{pt3dadd(158184.000000,93000.000000,163150.000000,718.829820)}
{pt3dadd(158460.000000,92508.000000,163450.000000,718.829820)}
{pt3dadd(159204.000000,91944.000000,164025.000000,718.829820)}
{pt3dadd(159324.000000,91488.000000,164450.000000,718.829820)}
{pt3dadd(159396.000000,91080.000000,164525.000000,718.829820)}
{pt3dadd(159468.000000,90576.000000,164600.000000,643.119736)}
{pt3dadd(159372.000000,90168.000000,164750.000000,567.409653)}
{pt3dadd(159516.000000,89760.000000,165075.000000,491.699570)}
{pt3dadd(159468.000000,89352.000000,165100.000000,415.989486)}
{pt3dadd(159336.000000,89100.000000,165125.000000,395.190014)}
{pt3dadd(159288.000000,88752.000000,165250.000000,374.390541)}
{pt3dadd(159288.000000,88452.000000,165275.000000,353.591069)}
{pt3dadd(159252.000000,88032.000000,165225.000000,332.791596)}
{pt3dadd(159204.000000,87732.000000,165250.000000,432.754380)}
{pt3dadd(159240.000000,87288.000000,165125.000000,532.717164)}
{pt3dadd(158916.000000,86940.000000,164900.000000,632.679948)}
{pt3dadd(159588.000000,86400.000000,164275.000000,732.642732)}
{pt3dadd(160020.000000,86076.000000,164400.000000,699.238269)}
{pt3dadd(159816.000000,85620.000000,163850.000000,665.833806)}
{pt3dadd(159672.000000,85080.000000,163450.000000,632.429343)}
{pt3dadd(159708.000000,84684.000000,163300.000000,599.024880)}
{pt3dadd(159780.000000,84240.000000,163200.000000,346.657896)}
{pt3dadd(159720.000000,84012.000000,163200.000000,55.987200)}

{create adhoc3}
{access adhoc3}
{connect adhoc3(1), adhoc1(0)}
{nseg = 1}
{strdef color color = "White"}
{pt3dclear()}
{pt3dadd(155640.000000,96384.000000,161100.000000,552.061332)}
{pt3dadd(155316.000000,96732.000000,160975.000000,862.595802)}
{pt3dadd(155268.000000,97128.000000,160850.000000,771.743696)}
{pt3dadd(155076.000000,97512.000000,160875.000000,680.891589)}
{pt3dadd(154896.000000,97908.000000,160975.000000,590.039483)}
{pt3dadd(154704.000000,98388.000000,160950.000000,499.187376)}
{pt3dadd(153708.000000,98928.000000,161050.000000,512.405865)}
{pt3dadd(153036.000000,99348.000000,161175.000000,525.624354)}
{pt3dadd(152388.000000,99732.000000,161200.000000,538.842843)}
{pt3dadd(151764.000000,100116.000000,161150.000000,552.061332)}
{pt3dadd(151500.000000,100476.000000,161175.000000,629.694950)}
{pt3dadd(151164.000000,100872.000000,160950.000000,707.328567)}
{pt3dadd(150696.000000,101328.000000,160425.000000,784.962185)}
{pt3dadd(150576.000000,101784.000000,160025.000000,862.595802)}
{pt3dadd(150576.000000,102120.000000,159675.000000,790.712816)}
{pt3dadd(150684.000000,102516.000000,159550.000000,718.829829)}
{pt3dadd(150600.000000,102888.000000,159275.000000,646.946843)}
{pt3dadd(150696.000000,103296.000000,159100.000000,575.063856)}
{pt3dadd(150828.000000,103644.000000,158950.000000,581.054112)}
{pt3dadd(150828.000000,104040.000000,158725.000000,587.044368)}
{pt3dadd(151128.000000,104376.000000,158450.000000,593.034624)}
{pt3dadd(151128.000000,104748.000000,158250.000000,599.024880)}
{pt3dadd(151008.000000,105096.000000,158050.000000,621.787828)}
{pt3dadd(150912.000000,105504.000000,157900.000000,644.550777)}
{pt3dadd(150840.000000,105900.000000,157750.000000,667.313725)}
{pt3dadd(150792.000000,106296.000000,157775.000000,690.076674)}
{pt3dadd(150528.000000,106668.000000,157750.000000,667.313725)}
{pt3dadd(150576.000000,106932.000000,157750.000000,644.550777)}
{pt3dadd(150540.000000,107184.000000,157775.000000,621.787828)}
{pt3dadd(150312.000000,107424.000000,157775.000000,599.024880)}
{pt3dadd(150024.000000,107808.000000,157725.000000,564.281428)}
{pt3dadd(149796.000000,108204.000000,157800.000000,529.537977)}
{pt3dadd(149616.000000,108456.000000,157900.000000,494.794525)}
{pt3dadd(149004.000000,108900.000000,158225.000000,460.051074)}
{pt3dadd(148788.000000,109284.000000,158100.000000,586.114362)}

{create adhoc4}
{access adhoc4}
{connect adhoc4(1), adhoc3(0)}
{nseg = 1}
{strdef color color = "White"}
{pt3dclear()}
{pt3dadd(148788.000000,109284.000000,158100.000000,586.114362)}
{pt3dadd(148644.000000,109644.000000,158025.000000,599.024880)}
{pt3dadd(148548.000000,110112.000000,158075.000000,610.535664)}
{pt3dadd(148116.000000,110604.000000,158025.000000,686.852604)}
{pt3dadd(147972.000000,111036.000000,157750.000000,763.169544)}
{pt3dadd(147732.000000,111516.000000,157575.000000,839.486484)}
{pt3dadd(147636.000000,111972.000000,157375.000000,915.803424)}
{pt3dadd(147552.000000,112356.000000,157350.000000,984.965657)}
{pt3dadd(147504.000000,112704.000000,157325.000000,1054.127889)}
{pt3dadd(147408.000000,113088.000000,157250.000000,1123.290122)}
{pt3dadd(147276.000000,113460.000000,157275.000000,1192.452354)}
{pt3dadd(147276.000000,113964.000000,157025.000000,1123.290122)}
{pt3dadd(147144.000000,114192.000000,156950.000000,1054.127889)}
{pt3dadd(147144.000000,114600.000000,156875.000000,984.965657)}
{pt3dadd(147024.000000,115032.000000,156850.000000,915.803424)}
{pt3dadd(146952.000000,115560.000000,156825.000000,1059.493919)}
{pt3dadd(147048.000000,115992.000000,156875.000000,1203.184413)}
{pt3dadd(147096.000000,116268.000000,156925.000000,1346.874908)}
{pt3dadd(147108.000000,116760.000000,156975.000000,1490.565402)}
{pt3dadd(147144.000000,117180.000000,157125.000000,1055.005560)}

{create adhoc5}
{access adhoc5}
{connect adhoc5(1), adhoc4(0)}
{nseg = 1}
{strdef color color = "White"}
{pt3dclear()}
{pt3dadd(147144.000000,117180.000000,157125.000000,1055.005560)}
{pt3dadd(147180.000000,117612.000000,157175.000000,1192.452354)}
{pt3dadd(147264.000000,118008.000000,157200.000000,1093.081325)}
{pt3dadd(147408.000000,118512.000000,157325.000000,993.710295)}
{pt3dadd(147360.000000,118932.000000,157525.000000,894.339265)}
{pt3dadd(147372.000000,119304.000000,157700.000000,794.968236)}
{pt3dadd(147372.000000,119628.000000,157425.000000,18.000000)}
{pt3dadd(147444.000000,119760.000000,157750.000000,426.045960)}
{pt3dadd(147432.000000,119964.000000,157750.000000,834.091920)}
{pt3dadd(147432.000000,120180.000000,157650.000000,1242.137880)}
{pt3dadd(147528.000000,120384.000000,157400.000000,1209.676716)}
{pt3dadd(147708.000000,120660.000000,157325.000000,1177.215552)}
{pt3dadd(147648.000000,120840.000000,157250.000000,1144.754388)}
{pt3dadd(147828.000000,120984.000000,157150.000000,1242.137880)}

{create adhoc6}
{access adhoc6}
{connect adhoc6(1), adhoc5(0)}
{nseg = 1}
{strdef color color = "White"}
{pt3dclear()}
{pt3dadd(147828.000000,120984.000000,157150.000000,1242.137880)}
{pt3dadd(147924.000000,121104.000000,157975.000000,1242.137880)}
{pt3dadd(146808.000000,121044.000000,158700.000000,1035.114948)}
{pt3dadd(145524.000000,121740.000000,159300.000000,862.595802)}

{create adhoc7}
{access adhoc7}
{connect adhoc7(1), adhoc6(0)}
{nseg = 1}
{strdef color color = "White"}
{pt3dclear()}
{pt3dadd(145524.000000,121740.000000,159300.000000,862.595802)}
{pt3dadd(145272.000000,122352.000000,160150.000000,953.961894)}
{pt3dadd(145140.000000,123048.000000,160925.000000,887.990589)}
{pt3dadd(144792.000000,124056.000000,161475.000000,822.019284)}
{pt3dadd(144516.000000,124368.000000,162100.000000,756.047979)}
{pt3dadd(144096.000000,124284.000000,162775.000000,690.076674)}
{pt3dadd(143316.000000,124428.000000,163550.000000,559.351714)}
{pt3dadd(142500.000000,124932.000000,164350.000000,428.626755)}
{pt3dadd(142200.000000,125112.000000,165250.000000,297.901796)}
{pt3dadd(141852.000000,124968.000000,165750.000000,167.176836)}
{pt3dadd(141216.000000,125100.000000,166500.000000,275.138847)}
{pt3dadd(141012.000000,125352.000000,167450.000000,383.100858)}
{pt3dadd(141408.000000,125832.000000,168000.000000,491.062869)}
{pt3dadd(142464.000000,126348.000000,169125.000000,599.024880)}
{pt3dadd(142800.000000,126396.000000,169625.000000,80.621550)}

{create adhoc8}
{access adhoc8}
{connect adhoc8(1), adhoc6(0)}
{nseg = 1}
{strdef color color = "White"}
{pt3dclear()}
{pt3dadd(145524.000000,121740.000000,159300.000000,862.595802)}
{pt3dadd(145140.000000,121824.000000,159675.000000,828.091944)}
{pt3dadd(144804.000000,121956.000000,159700.000000,800.776413)}
{pt3dadd(144348.000000,121920.000000,159925.000000,773.460882)}
{pt3dadd(143916.000000,121872.000000,160150.000000,746.145351)}
{pt3dadd(143568.000000,121632.000000,160225.000000,718.829820)}
{pt3dadd(143100.000000,121524.000000,160425.000000,711.641533)}
{pt3dadd(142752.000000,121332.000000,160550.000000,704.453247)}
{pt3dadd(142392.000000,121248.000000,160850.000000,697.264960)}
{pt3dadd(141996.000000,121116.000000,160750.000000,690.076674)}
{pt3dadd(141576.000000,121032.000000,160925.000000,683.175888)}
{pt3dadd(141132.000000,121020.000000,161075.000000,676.275102)}
{pt3dadd(140724.000000,121008.000000,161225.000000,669.374316)}
{pt3dadd(140304.000000,121008.000000,161275.000000,662.473530)}
{pt3dadd(139848.000000,120816.000000,161200.000000,676.562602)}
{pt3dadd(139392.000000,120612.000000,161250.000000,690.651675)}
{pt3dadd(138972.000000,120480.000000,161425.000000,704.740748)}
{pt3dadd(138432.000000,120300.000000,161350.000000,718.829820)}
{pt3dadd(137940.000000,120012.000000,161375.000000,737.864424)}
{pt3dadd(137340.000000,119784.000000,161400.000000,756.899028)}
{pt3dadd(136968.000000,119628.000000,161450.000000,775.933632)}
{pt3dadd(136536.000000,119580.000000,161575.000000,794.968236)}
{pt3dadd(136152.000000,119616.000000,161650.000000,811.875127)}
{pt3dadd(135648.000000,119652.000000,161550.000000,828.782019)}
{pt3dadd(135168.000000,119544.000000,161675.000000,845.688911)}
{pt3dadd(134640.000000,119568.000000,162175.000000,862.595802)}
{pt3dadd(134328.000000,119604.000000,162125.000000,634.224996)}

{create adhoc9}
{access adhoc9}
{connect adhoc9(1), adhoc8(0)}
{nseg = 1}
{strdef color color = "White"}
{pt3dclear()}
{pt3dadd(134328.000000,119604.000000,162125.000000,634.224996)}
{pt3dadd(134196.000000,120012.000000,160800.000000,415.989486)}
{pt3dadd(133800.000000,120084.000000,160400.000000,323.547381)}
{pt3dadd(133896.000000,120156.000000,160000.000000,231.105276)}
{pt3dadd(134064.000000,120192.000000,159800.000000,116.095032)}

{create adhoc10}
{access adhoc10}
{connect adhoc10(1), adhoc8(0)}
{nseg = 1}
{strdef color color = "White"}
{pt3dclear()}
{pt3dadd(134328.000000,119604.000000,162125.000000,634.224996)}
{pt3dadd(133980.000000,119544.000000,162775.000000,718.829820)}
{pt3dadd(133524.000000,119196.000000,163075.000000,704.740748)}
{pt3dadd(133092.000000,118956.000000,163300.000000,690.651675)}
{pt3dadd(132648.000000,118896.000000,163450.000000,676.562602)}
{pt3dadd(132072.000000,118764.000000,163600.000000,662.473530)}
{pt3dadd(131544.000000,118560.000000,163650.000000,683.535420)}
{pt3dadd(131148.000000,118512.000000,163775.000000,704.597310)}
{pt3dadd(130608.000000,118416.000000,163775.000000,725.659200)}
{pt3dadd(130248.000000,118596.000000,163875.000000,746.721090)}
{pt3dadd(129768.000000,118392.000000,164275.000000,709.797037)}
{pt3dadd(129432.000000,118260.000000,164450.000000,672.872985)}
{pt3dadd(129036.000000,118224.000000,165000.000000,635.948932)}
{pt3dadd(128580.000000,118308.000000,165450.000000,599.024880)}
{pt3dadd(128292.000000,118476.000000,165975.000000,507.044979)}
{pt3dadd(127992.000000,118428.000000,166325.000000,415.065078)}
{pt3dadd(127644.000000,119016.000000,166575.000000,323.085177)}
{pt3dadd(126984.000000,117564.000000,166775.000000,231.105276)}
{pt3dadd(126168.000000,117972.000000,167325.000000,298.125801)}
{pt3dadd(125652.000000,118092.000000,167800.000000,365.146326)}
{pt3dadd(125160.000000,118596.000000,168525.000000,432.166851)}
{pt3dadd(124212.000000,118884.000000,169400.000000,499.187376)}
{pt3dadd(123012.000000,118656.000000,170100.000000,552.061314)}
{pt3dadd(122088.000000,118716.000000,171175.000000,552.061332)}

{create adhoc11}
{access adhoc11}
{connect adhoc11(1), adhoc5(0)}
{nseg = 1}
{strdef color color = "White"}
{pt3dclear()}
{pt3dadd(147828.000000,120984.000000,157150.000000,1242.137880)}
{pt3dadd(147852.000000,121212.000000,157000.000000,1490.565402)}
{pt3dadd(147984.000000,121440.000000,156875.000000,1490.565402)}
{pt3dadd(148080.000000,121680.000000,156825.000000,1490.565402)}
{pt3dadd(148104.000000,121860.000000,156825.000000,1490.565402)}
{pt3dadd(148128.000000,122064.000000,156825.000000,1490.565402)}
{pt3dadd(148296.000000,122328.000000,156725.000000,1698.574428)}
{pt3dadd(148428.000000,122616.000000,156625.000000,1906.583454)}
{pt3dadd(148560.000000,122928.000000,156525.000000,2114.592480)}
{pt3dadd(148608.000000,123348.000000,156400.000000,2322.601506)}
{pt3dadd(148752.000000,123660.000000,156175.000000,2146.414176)}

{create adhoc12}
{access adhoc12}
{connect adhoc12(1), adhoc11(0)}
{nseg = 1}
{strdef color color = "White"}
{pt3dclear()}
{pt3dadd(148752.000000,123660.000000,156175.000000,2146.414176)}
{pt3dadd(148596.000000,123072.000000,155600.000000,1717.131366)}
{pt3dadd(148464.000000,123924.000000,155000.000000,1660.489875)}
{pt3dadd(148656.000000,124536.000000,154425.000000,1603.848384)}
{pt3dadd(148692.000000,124764.000000,153775.000000,1547.206893)}
{pt3dadd(148896.000000,125172.000000,153075.000000,1490.565402)}
{pt3dadd(148920.000000,125652.000000,152500.000000,1547.206961)}
{pt3dadd(148968.000000,125904.000000,151975.000000,1603.848519)}
{pt3dadd(148932.000000,126192.000000,151875.000000,1660.490078)}
{pt3dadd(148980.000000,126456.000000,151700.000000,1717.131636)}
{pt3dadd(149064.000000,126744.000000,151450.000000,1645.584413)}
{pt3dadd(149136.000000,127128.000000,151275.000000,1574.037189)}
{pt3dadd(149088.000000,127380.000000,151150.000000,1502.489965)}
{pt3dadd(149052.000000,127668.000000,150925.000000,1430.942742)}
{pt3dadd(148956.000000,127944.000000,150750.000000,1445.848407)}
{pt3dadd(148944.000000,128292.000000,150625.000000,1460.754072)}
{pt3dadd(148992.000000,128628.000000,150475.000000,1475.659737)}
{pt3dadd(148860.000000,128976.000000,150350.000000,1490.565402)}
{pt3dadd(148728.000000,129324.000000,150150.000000,1530.035572)}
{pt3dadd(148668.000000,129660.000000,150050.000000,1569.505743)}
{pt3dadd(148608.000000,129972.000000,149875.000000,1608.975913)}
{pt3dadd(148464.000000,130248.000000,149675.000000,1648.446084)}
{pt3dadd(148416.000000,130608.000000,149600.000000,1683.504176)}
{pt3dadd(148368.000000,130800.000000,149625.000000,1718.562267)}
{pt3dadd(148488.000000,131052.000000,149450.000000,1753.620359)}
{pt3dadd(148440.000000,131388.000000,149225.000000,1788.678450)}
{pt3dadd(148356.000000,131712.000000,149125.000000,1652.043308)}
{pt3dadd(148320.000000,132120.000000,149000.000000,1515.408165)}
{pt3dadd(148536.000000,132456.000000,148800.000000,1378.773023)}
{pt3dadd(148908.000000,132876.000000,148450.000000,1242.137880)}
{pt3dadd(149040.000000,133212.000000,148325.000000,1311.405408)}
{pt3dadd(149124.000000,133476.000000,148075.000000,1380.672936)}
{pt3dadd(149532.000000,133800.000000,147825.000000,1449.940464)}
{pt3dadd(149760.000000,134148.000000,147775.000000,1519.207992)}
{pt3dadd(149928.000000,134412.000000,147725.000000,1449.940464)}
{pt3dadd(150024.000000,134640.000000,147775.000000,1380.672936)}
{pt3dadd(150144.000000,134928.000000,147575.000000,1311.405408)}
{pt3dadd(150516.000000,135264.000000,147500.000000,1242.137880)}
{pt3dadd(150420.000000,135588.000000,147375.000000,1190.382147)}
{pt3dadd(151164.000000,135852.000000,147275.000000,1138.626414)}
{pt3dadd(151260.000000,136200.000000,147025.000000,1086.870681)}
{pt3dadd(151524.000000,136620.000000,146900.000000,1035.114948)}
{pt3dadd(151800.000000,136980.000000,146825.000000,1119.762477)}
{pt3dadd(152076.000000,137340.000000,146725.000000,1204.410006)}
{pt3dadd(152244.000000,137628.000000,146575.000000,1289.057535)}
{pt3dadd(152628.000000,137964.000000,146500.000000,1373.705064)}
{pt3dadd(152760.000000,138372.000000,146400.000000,1373.705064)}
{pt3dadd(153084.000000,138756.000000,146425.000000,1373.705064)}
{pt3dadd(153360.000000,139128.000000,146300.000000,1373.705064)}
{pt3dadd(153816.000000,139632.000000,146325.000000,1373.705064)}
{pt3dadd(153768.000000,139872.000000,146125.000000,1402.920149)}
{pt3dadd(153708.000000,140220.000000,146150.000000,1432.135233)}
{pt3dadd(153756.000000,140520.000000,146000.000000,1461.350317)}
{pt3dadd(153744.000000,140712.000000,146000.000000,1490.565402)}
{pt3dadd(153840.000000,140976.000000,146000.000000,1461.350317)}
{pt3dadd(153828.000000,141240.000000,145900.000000,1432.135233)}
{pt3dadd(153744.000000,141492.000000,145750.000000,1402.920149)}
{pt3dadd(153768.000000,141840.000000,145750.000000,1373.705064)}
{pt3dadd(153768.000000,142188.000000,145575.000000,1402.920149)}
{pt3dadd(153768.000000,142560.000000,145550.000000,1432.135233)}
{pt3dadd(153768.000000,142872.000000,145525.000000,1461.350317)}
{pt3dadd(153768.000000,143124.000000,145500.000000,1490.565402)}
{pt3dadd(153840.000000,143424.000000,145400.000000,1447.613253)}
{pt3dadd(153792.000000,143808.000000,145200.000000,1404.661104)}
{pt3dadd(153744.000000,144240.000000,145000.000000,1361.708955)}
{pt3dadd(153780.000000,144648.000000,144950.000000,1318.756806)}
{pt3dadd(153684.000000,145128.000000,144900.000000,1299.602075)}
{pt3dadd(153672.000000,145620.000000,144675.000000,1280.447343)}
{pt3dadd(153720.000000,146040.000000,144500.000000,1261.292612)}
{pt3dadd(153768.000000,146424.000000,144325.000000,1242.137880)}
{pt3dadd(153792.000000,146808.000000,144150.000000,1242.137880)}
{pt3dadd(153972.000000,147264.000000,143900.000000,1242.137880)}
{pt3dadd(154020.000000,147588.000000,143850.000000,1242.137880)}
{pt3dadd(154056.000000,148056.000000,143650.000000,1242.137880)}
{pt3dadd(154020.000000,148344.000000,143525.000000,1289.339096)}
{pt3dadd(154068.000000,148668.000000,143375.000000,1336.540311)}
{pt3dadd(154140.000000,148956.000000,143175.000000,1383.741527)}
{pt3dadd(154128.000000,149364.000000,143025.000000,1430.942742)}
{pt3dadd(154296.000000,149676.000000,142975.000000,1445.848407)}
{pt3dadd(154284.000000,150072.000000,142825.000000,1460.754072)}
{pt3dadd(154200.000000,150528.000000,142725.000000,1475.659737)}
{pt3dadd(154152.000000,150948.000000,142575.000000,1490.565402)}
{pt3dadd(154236.000000,151356.000000,142375.000000,1447.613253)}
{pt3dadd(154224.000000,151644.000000,142350.000000,1404.661104)}
{pt3dadd(154320.000000,151872.000000,142200.000000,1361.708955)}
{pt3dadd(154368.000000,152136.000000,142075.000000,1318.756806)}
{pt3dadd(154356.000000,152328.000000,141975.000000,1247.846342)}
{pt3dadd(154356.000000,152640.000000,141875.000000,1176.935877)}
{pt3dadd(154380.000000,152940.000000,141775.000000,1106.025412)}
{pt3dadd(154344.000000,153276.000000,141725.000000,1035.114948)}
{pt3dadd(154368.000000,153768.000000,141625.000000,1035.114948)}
{pt3dadd(154368.000000,154308.000000,141475.000000,1035.114948)}
{pt3dadd(154368.000000,154716.000000,141425.000000,1035.114948)}
{pt3dadd(154500.000000,155184.000000,141225.000000,1035.114948)}
{pt3dadd(154224.000000,155616.000000,141075.000000,1019.409476)}
{pt3dadd(154248.000000,156036.000000,140850.000000,1003.704003)}
{pt3dadd(154068.000000,156480.000000,140700.000000,987.998531)}
{pt3dadd(154236.000000,156936.000000,140325.000000,972.293058)}
{pt3dadd(154404.000000,157296.000000,139975.000000,1027.332882)}
{pt3dadd(154344.000000,157716.000000,139900.000000,1082.372706)}
{pt3dadd(154308.000000,157932.000000,139850.000000,1137.412530)}
{pt3dadd(154776.000000,158448.000000,139725.000000,1192.452354)}
{pt3dadd(154908.000000,158892.000000,139575.000000,1142.766837)}
{pt3dadd(155028.000000,159324.000000,139175.000000,1093.081320)}
{pt3dadd(156132.000000,159828.000000,138450.000000,1043.395803)}
{pt3dadd(156216.000000,160620.000000,137750.000000,993.710286)}
{pt3dadd(157488.000000,160908.000000,137050.000000,924.990169)}
{pt3dadd(158880.000000,160908.000000,136375.000000,856.270053)}
{pt3dadd(159720.000000,160488.000000,135675.000000,787.549937)}
{pt3dadd(159888.000000,160296.000000,135275.000000,718.829820)}
{pt3dadd(160776.000000,160284.000000,134675.000000,1242.137880)}

{create adhoc13}
{access adhoc13}
{connect adhoc13(1), adhoc12(0)}
{nseg = 1}
{strdef color color = "White"}
{pt3dclear()}
{pt3dadd(160776.000000,160284.000000,134675.000000,1242.137880)}
{pt3dadd(161064.000000,160200.000000,134000.000000,1373.705064)}
{pt3dadd(161388.000000,159888.000000,133325.000000,1477.448410)}
{pt3dadd(161412.000000,159984.000000,132500.000000,1581.191757)}
{pt3dadd(161208.000000,159984.000000,131725.000000,1684.935104)}
{pt3dadd(161304.000000,159888.000000,131075.000000,1788.678450)}
{pt3dadd(161592.000000,159564.000000,130200.000000,1521.216293)}
{pt3dadd(161916.000000,158928.000000,129250.000000,1253.754135)}
{pt3dadd(162336.000000,158400.000000,128425.000000,986.291978)}
{pt3dadd(162864.000000,157740.000000,127825.000000,718.829820)}
{pt3dadd(163212.000000,157704.000000,127725.000000,682.888356)}
{pt3dadd(163596.000000,157332.000000,127500.000000,646.946892)}
{pt3dadd(163980.000000,157140.000000,127325.000000,611.005428)}
{pt3dadd(164400.000000,156672.000000,127350.000000,575.063964)}
{pt3dadd(164808.000000,156468.000000,127200.000000,596.916356)}
{pt3dadd(165168.000000,156312.000000,127075.000000,618.768747)}
{pt3dadd(165612.000000,156036.000000,126800.000000,640.621139)}
{pt3dadd(165936.000000,156000.000000,126500.000000,662.473530)}
{pt3dadd(166404.000000,156120.000000,126425.000000,640.621112)}
{pt3dadd(166836.000000,155352.000000,126450.000000,618.768693)}
{pt3dadd(167184.000000,155076.000000,126300.000000,596.916274)}
{pt3dadd(167472.000000,155208.000000,126175.000000,575.063856)}
{pt3dadd(167868.000000,155052.000000,126075.000000,596.916293)}
{pt3dadd(168276.000000,155760.000000,125700.000000,618.768729)}
{pt3dadd(168840.000000,155760.000000,125525.000000,640.621165)}
{pt3dadd(169332.000000,155664.000000,125550.000000,662.473602)}
{pt3dadd(169704.000000,155460.000000,125675.000000,621.652045)}
{pt3dadd(170028.000000,155232.000000,125525.000000,580.830489)}
{pt3dadd(170448.000000,154860.000000,125400.000000,540.008932)}
{pt3dadd(170832.000000,154944.000000,125275.000000,499.187376)}
{pt3dadd(171276.000000,154608.000000,125175.000000,499.187376)}
{pt3dadd(171732.000000,154512.000000,125150.000000,499.187376)}
{pt3dadd(172212.000000,154224.000000,125150.000000,499.187376)}
{pt3dadd(172752.000000,154092.000000,125050.000000,499.187376)}
{pt3dadd(173244.000000,154272.000000,124725.000000,461.055006)}
{pt3dadd(173784.000000,153780.000000,124650.000000,422.922636)}
{pt3dadd(174192.000000,153828.000000,124550.000000,384.790266)}
{pt3dadd(174504.000000,153624.000000,124525.000000,346.657896)}
{pt3dadd(174936.000000,153324.000000,124500.000000,439.700877)}
{pt3dadd(175428.000000,153072.000000,124600.000000,532.743858)}
{pt3dadd(175848.000000,153060.000000,124450.000000,625.786839)}
{pt3dadd(176280.000000,153060.000000,124350.000000,718.829820)}
{pt3dadd(176760.000000,152568.000000,124225.000000,688.878585)}
{pt3dadd(177264.000000,152640.000000,123950.000000,658.927350)}
{pt3dadd(177648.000000,152496.000000,123900.000000,628.976115)}
{pt3dadd(178104.000000,152316.000000,123625.000000,599.024880)}
{pt3dadd(178632.000000,151968.000000,123525.000000,708.047397)}
{pt3dadd(179172.000000,151644.000000,123700.000000,817.069914)}
{pt3dadd(179628.000000,151632.000000,123400.000000,926.092431)}
{pt3dadd(180000.000000,151524.000000,123250.000000,1035.114948)}
{pt3dadd(180492.000000,151344.000000,122875.000000,1062.524754)}
{pt3dadd(180912.000000,151284.000000,122675.000000,1089.934560)}
{pt3dadd(181236.000000,150864.000000,122525.000000,1117.344366)}
{pt3dadd(181680.000000,150564.000000,122100.000000,1144.754172)}
{pt3dadd(182124.000000,150828.000000,121600.000000,1117.344366)}
{pt3dadd(182592.000000,151068.000000,121200.000000,1089.934560)}
{pt3dadd(183036.000000,150960.000000,120975.000000,1062.524754)}
{pt3dadd(183588.000000,151044.000000,120450.000000,1035.114948)}
{pt3dadd(183984.000000,151092.000000,120050.000000,1086.870681)}
{pt3dadd(184308.000000,151008.000000,119725.000000,1138.626414)}
{pt3dadd(185208.000000,150396.000000,119075.000000,1190.382147)}
{pt3dadd(185760.000000,150120.000000,118400.000000,1242.137880)}
{pt3dadd(186288.000000,150396.000000,117750.000000,1190.382147)}
{pt3dadd(187332.000000,150228.000000,117025.000000,1138.626414)}
{pt3dadd(188052.000000,150276.000000,116075.000000,1086.870681)}
{pt3dadd(188700.000000,150264.000000,115275.000000,1035.114948)}
{pt3dadd(188976.000000,150024.000000,114800.000000,1035.114948)}
{pt3dadd(189636.000000,149652.000000,114075.000000,1035.114948)}
{pt3dadd(190236.000000,149568.000000,113125.000000,1035.114948)}
{pt3dadd(190932.000000,149904.000000,112025.000000,1035.114948)}
{pt3dadd(191112.000000,149844.000000,111175.000000,1035.114948)}
{pt3dadd(191160.000000,149160.000000,110275.000000,1035.114948)}
{pt3dadd(191448.000000,148596.000000,109400.000000,1035.114948)}
{pt3dadd(191280.000000,148248.000000,108425.000000,1035.114948)}
{pt3dadd(191424.000000,148320.000000,107525.000000,1068.024114)}
{pt3dadd(191292.000000,148032.000000,106450.000000,1100.933280)}
{pt3dadd(190584.000000,147936.000000,105725.000000,1133.842446)}
{pt3dadd(190056.000000,147420.000000,104875.000000,1166.751612)}
{pt3dadd(189804.000000,147228.000000,104175.000000,1247.705060)}
{pt3dadd(189432.000000,146988.000000,103325.000000,1328.658507)}
{pt3dadd(189252.000000,146892.000000,102525.000000,1409.611955)}
{pt3dadd(189120.000000,146748.000000,101450.000000,1490.565402)}
{pt3dadd(189036.000000,146328.000000,100425.000000,1428.458522)}
{pt3dadd(189024.000000,146196.000000,99600.000000,1366.351641)}
{pt3dadd(188916.000000,145968.000000,99075.000000,1304.244761)}
{pt3dadd(188736.000000,145680.000000,98175.000000,1242.137880)}
{pt3dadd(188760.000000,145164.000000,97550.000000,1373.705064)}
{pt3dadd(188880.000000,144828.000000,96775.000000,1098.964044)}

{create adhoc14}
{access adhoc14}
{connect adhoc14(1), adhoc13(0)}
{nseg = 1}
{strdef color color = "White"}
{pt3dclear()}
{pt3dadd(188880.000000,144828.000000,96775.000000,1098.964044)}
{pt3dadd(188904.000000,144504.000000,95950.000000,1144.754388)}
{pt3dadd(188856.000000,144252.000000,95400.000000,1133.306770)}
{pt3dadd(188652.000000,143568.000000,94675.000000,1121.859153)}
{pt3dadd(188532.000000,143124.000000,94075.000000,1110.411535)}
{pt3dadd(187956.000000,142176.000000,93075.000000,1098.963918)}
{pt3dadd(187680.000000,141636.000000,92250.000000,1134.757409)}
{pt3dadd(187092.000000,141264.000000,91475.000000,1170.550899)}
{pt3dadd(186840.000000,140892.000000,90700.000000,1206.344390)}
{pt3dadd(186216.000000,140460.000000,89950.000000,1242.137880)}
{pt3dadd(185976.000000,140364.000000,89475.000000,1490.565402)}

{create adhoc15}
{access adhoc15}
{connect adhoc15(1), adhoc14(0)}
{nseg = 1}
{strdef color color = "White"}
{pt3dclear()}
{pt3dadd(185976.000000,140364.000000,89475.000000,1490.565402)}
{pt3dadd(185532.000000,140136.000000,89500.000000,1788.678450)}
{pt3dadd(185712.000000,139704.000000,89575.000000,1627.697399)}
{pt3dadd(185604.000000,139308.000000,89675.000000,1466.716347)}
{pt3dadd(185556.000000,138936.000000,89500.000000,1305.735296)}
{pt3dadd(185448.000000,138576.000000,89250.000000,1144.754244)}
{pt3dadd(185316.000000,138204.000000,88750.000000,1156.678772)}
{pt3dadd(185208.000000,137916.000000,88500.000000,1168.603299)}
{pt3dadd(185124.000000,137640.000000,88525.000000,1180.527826)}
{pt3dadd(185064.000000,137304.000000,88275.000000,1192.452354)}
{pt3dadd(184956.000000,136932.000000,88125.000000,1153.118003)}
{pt3dadd(184824.000000,136632.000000,87825.000000,1113.783651)}
{pt3dadd(184728.000000,136356.000000,87775.000000,1074.449300)}
{pt3dadd(184536.000000,136104.000000,87625.000000,1035.114948)}
{pt3dadd(184452.000000,135840.000000,87600.000000,975.078270)}
{pt3dadd(184368.000000,135600.000000,87525.000000,915.041592)}
{pt3dadd(184260.000000,135324.000000,87450.000000,855.004914)}
{pt3dadd(184056.000000,134988.000000,87350.000000,794.968236)}
{pt3dadd(184008.000000,134628.000000,87150.000000,844.653748)}
{pt3dadd(183912.000000,134304.000000,87175.000000,894.339261)}
{pt3dadd(183672.000000,133992.000000,87125.000000,944.024774)}
{pt3dadd(183384.000000,133644.000000,86925.000000,993.710286)}
{pt3dadd(183276.000000,133260.000000,86775.000000,1004.061452)}
{pt3dadd(182952.000000,132864.000000,86575.000000,1014.412617)}
{pt3dadd(182844.000000,132516.000000,86425.000000,1024.763782)}
{pt3dadd(182760.000000,132132.000000,86225.000000,1035.114948)}
{pt3dadd(182616.000000,131736.000000,86075.000000,1035.114948)}
{pt3dadd(182508.000000,131412.000000,85900.000000,1035.114948)}
{pt3dadd(182364.000000,131076.000000,85875.000000,1035.114948)}
{pt3dadd(182280.000000,130692.000000,85750.000000,1035.114948)}
{pt3dadd(182196.000000,130356.000000,85700.000000,1035.114948)}
{pt3dadd(181944.000000,129948.000000,85600.000000,1035.114948)}
{pt3dadd(181860.000000,129540.000000,85300.000000,1035.114948)}
{pt3dadd(181764.000000,129108.000000,85250.000000,1035.114948)}
{pt3dadd(181704.000000,128820.000000,85150.000000,1035.114948)}
{pt3dadd(181608.000000,128472.000000,85050.000000,1035.114948)}
{pt3dadd(181452.000000,128148.000000,84900.000000,1035.114948)}
{pt3dadd(181452.000000,127752.000000,84925.000000,1035.114948)}
{pt3dadd(181356.000000,127332.000000,84950.000000,1035.114948)}
{pt3dadd(181308.000000,126960.000000,84900.000000,1035.114948)}
{pt3dadd(181260.000000,126672.000000,84800.000000,1035.114948)}

{create adhoc16}
{access adhoc16}
{connect adhoc16(1), adhoc15(0)}
{nseg = 1}
{strdef color color = "White"}
{pt3dclear()}
{pt3dadd(181260.000000,126672.000000,84800.000000,1035.114948)}
{pt3dadd(181176.000000,126252.000000,84650.000000,828.091944)}
{pt3dadd(181068.000000,125880.000000,84575.000000,862.595802)}
{pt3dadd(181020.000000,125580.000000,84475.000000,993.710286)}

{create adhoc17}
{access adhoc17}
{connect adhoc17(1), adhoc16(0)}
{nseg = 1}
{strdef color color = "White"}
{pt3dclear()}
{pt3dadd(181020.000000,125580.000000,84475.000000,993.710286)}
{pt3dadd(180912.000000,125244.000000,84375.000000,862.595802)}
{pt3dadd(180732.000000,124824.000000,84225.000000,945.059940)}
{pt3dadd(180432.000000,124368.000000,84175.000000,1027.524078)}
{pt3dadd(180228.000000,123936.000000,84125.000000,1109.988216)}
{pt3dadd(180072.000000,123612.000000,83925.000000,1192.452354)}
{pt3dadd(179796.000000,123000.000000,83600.000000,1192.452354)}
{pt3dadd(179688.000000,122616.000000,83725.000000,1192.452354)}
{pt3dadd(179496.000000,122148.000000,83725.000000,1373.705064)}

{create adhoc18}
{access adhoc18}
{connect adhoc18(1), adhoc17(0)}
{nseg = 1}
{strdef color color = "White"}
{pt3dclear()}
{pt3dadd(179496.000000,122148.000000,83725.000000,1373.705064)}
{pt3dadd(179628.000000,122616.000000,83075.000000,1192.452354)}
{pt3dadd(179280.000000,122436.000000,82450.000000,1109.988216)}
{pt3dadd(178896.000000,122124.000000,81850.000000,1027.524078)}
{pt3dadd(178404.000000,121968.000000,81125.000000,945.059940)}
{pt3dadd(177840.000000,121896.000000,80450.000000,862.595802)}
{pt3dadd(177468.000000,121848.000000,79925.000000,829.453716)}
{pt3dadd(177216.000000,121824.000000,79525.000000,796.311630)}
{pt3dadd(176484.000000,121872.000000,78750.000000,763.169544)}
{pt3dadd(176064.000000,121836.000000,78250.000000,1035.114948)}

{create adhoc19}
{access adhoc19}
{connect adhoc19(1), adhoc18(0)}
{nseg = 1}
{strdef color color = "White"}
{pt3dclear()}
{pt3dadd(176064.000000,121836.000000,78250.000000,1035.114948)}
{pt3dadd(175248.000000,121836.000000,77600.000000,862.595802)}
{pt3dadd(174612.000000,121836.000000,76875.000000,805.940527)}
{pt3dadd(173976.000000,121740.000000,76225.000000,749.285253)}
{pt3dadd(173496.000000,121560.000000,75675.000000,692.629979)}
{pt3dadd(173412.000000,121584.000000,75050.000000,635.974704)}
{pt3dadd(173268.000000,121488.000000,74875.000000,552.061332)}

{create adhoc20}
{access adhoc20}
{connect adhoc20(1), adhoc19(0)}
{nseg = 1}
{strdef color color = "White"}
{pt3dclear()}
{pt3dadd(173268.000000,121488.000000,74875.000000,552.061332)}
{pt3dadd(172920.000000,121476.000000,74175.000000,635.974578)}
{pt3dadd(172920.000000,121464.000000,74000.000000,599.024880)}

{create adhoc21}
{access adhoc21}
{connect adhoc21(1), adhoc20(0)}
{nseg = 1}
{strdef color color = "White"}
{pt3dclear()}
{pt3dadd(172920.000000,121464.000000,74000.000000,599.024880)}
{pt3dadd(172356.000000,121128.000000,73350.000000,690.076674)}
{pt3dadd(171792.000000,120864.000000,72725.000000,659.726076)}
{pt3dadd(171168.000000,120732.000000,72100.000000,629.375478)}
{pt3dadd(170832.000000,120792.000000,71375.000000,599.024880)}
{pt3dadd(170820.000000,120708.000000,71075.000000,718.829820)}

{create adhoc22}
{access adhoc22}
{connect adhoc22(1), adhoc21(0)}
{nseg = 1}
{strdef color color = "White"}
{pt3dclear()}
{pt3dadd(170820.000000,120708.000000,71075.000000,718.829820)}
{pt3dadd(172128.000000,121848.000000,71075.000000,106.993188)}
{pt3dadd(172728.000000,122388.000000,70775.000000,104.431356)}
{pt3dadd(173088.000000,122628.000000,70650.000000,101.869524)}
{pt3dadd(173412.000000,122940.000000,70700.000000,99.307692)}
{pt3dadd(173676.000000,123012.000000,70675.000000,96.745860)}
{pt3dadd(173988.000000,123012.000000,70625.000000,76.366530)}
{pt3dadd(174384.000000,122940.000000,70650.000000,55.987200)}
{pt3dadd(174696.000000,122880.000000,70650.000000,61.917354)}

{create adhoc23}
{access adhoc23}
{connect adhoc23(1), adhoc21(0)}
{nseg = 1}
{strdef color color = "White"}
{pt3dclear()}
{pt3dadd(170820.000000,120708.000000,71075.000000,718.829820)}
{pt3dadd(170784.000000,120552.000000,70350.000000,529.978896)}
{pt3dadd(170880.000000,120468.000000,69675.000000,339.186510)}
{pt3dadd(170880.000000,120324.000000,69525.000000,599.024880)}

{create adhoc24}
{access adhoc24}
{connect adhoc24(1), adhoc23(0)}
{nseg = 1}
{strdef color color = "White"}
{pt3dclear()}
{pt3dadd(170880.000000,120324.000000,69525.000000,599.024880)}
{pt3dadd(171120.000000,121308.000000,69725.000000,240.734646)}
{pt3dadd(171108.000000,121572.000000,69375.000000,222.345193)}
{pt3dadd(171348.000000,122160.000000,68925.000000,203.955741)}
{pt3dadd(171780.000000,122460.000000,68300.000000,185.566288)}
{pt3dadd(171756.000000,122904.000000,67600.000000,167.176836)}
{pt3dadd(171648.000000,123252.000000,66900.000000,332.791596)}
{pt3dadd(171636.000000,123000.000000,66275.000000,154.070172)}

{create adhoc25}
{access adhoc25}
{connect adhoc25(1), adhoc23(0)}
{nseg = 1}
{strdef color color = "White"}
{pt3dclear()}
{pt3dadd(170880.000000,120324.000000,69525.000000,599.024880)}
{pt3dadd(171012.000000,119760.000000,68950.000000,662.473530)}
{pt3dadd(170928.000000,119340.000000,68250.000000,676.562602)}
{pt3dadd(170880.000000,119064.000000,67775.000000,690.651675)}
{pt3dadd(170796.000000,118788.000000,66975.000000,704.740748)}
{pt3dadd(170772.000000,118392.000000,66325.000000,718.829820)}
{pt3dadd(170352.000000,118416.000000,65675.000000,711.641533)}
{pt3dadd(170256.000000,118140.000000,65175.000000,704.453247)}
{pt3dadd(170028.000000,117672.000000,64500.000000,697.264960)}
{pt3dadd(169920.000000,117204.000000,63800.000000,690.076674)}
{pt3dadd(169872.000000,116616.000000,63225.000000,552.061332)}

{create adhoc26}
{access adhoc26}
{connect adhoc26(1), adhoc25(0)}
{nseg = 1}
{strdef color color = "White"}
{pt3dclear()}
{pt3dadd(169872.000000,116616.000000,63225.000000,552.061332)}
{pt3dadd(169884.000000,114912.000000,62725.000000,415.989486)}
{pt3dadd(169836.000000,114228.000000,62200.000000,436.788958)}
{pt3dadd(169764.000000,113628.000000,61600.000000,457.588431)}
{pt3dadd(169776.000000,112800.000000,60975.000000,478.387903)}
{pt3dadd(170004.000000,111948.000000,60300.000000,499.187376)}
{pt3dadd(170268.000000,111432.000000,59525.000000,478.387903)}
{pt3dadd(170640.000000,110988.000000,58550.000000,457.588431)}
{pt3dadd(170748.000000,110736.000000,57875.000000,436.788958)}
{pt3dadd(171048.000000,110472.000000,57325.000000,415.989486)}
{pt3dadd(171156.000000,110280.000000,56575.000000,407.836094)}
{pt3dadd(171504.000000,110076.000000,55775.000000,399.682701)}
{pt3dadd(171900.000000,109716.000000,55000.000000,391.529309)}
{pt3dadd(172644.000000,109080.000000,54175.000000,383.375916)}
{pt3dadd(173160.000000,108516.000000,53325.000000,365.016906)}
{pt3dadd(173364.000000,107952.000000,52725.000000,346.657896)}
{pt3dadd(173328.000000,107808.000000,52400.000000,288.881586)}

{create adhoc27}
{access adhoc27}
{connect adhoc27(1), adhoc26(0)}
{nseg = 1}
{strdef color color = "White"}
{pt3dclear()}
{pt3dadd(173328.000000,107808.000000,52400.000000,288.881586)}
{pt3dadd(172968.000000,107844.000000,52675.000000,346.657896)}
{pt3dadd(172740.000000,107388.000000,52400.000000,308.140353)}
{pt3dadd(172368.000000,107268.000000,52300.000000,269.622810)}
{pt3dadd(171996.000000,107304.000000,52200.000000,231.105267)}
{pt3dadd(171660.000000,107268.000000,52150.000000,192.587724)}
{pt3dadd(171228.000000,107304.000000,52200.000000,154.341378)}
{pt3dadd(170856.000000,106956.000000,52175.000000,116.095032)}
{pt3dadd(170508.000000,106824.000000,52200.000000,67.184640)}

{create adhoc28}
{access adhoc28}
{connect adhoc28(1), adhoc26(0)}
{nseg = 1}
{strdef color color = "White"}
{pt3dclear()}
{pt3dadd(173328.000000,107808.000000,52400.000000,288.881586)}
{pt3dadd(173736.000000,107640.000000,51625.000000,266.233266)}
{pt3dadd(173880.000000,107460.000000,50850.000000,303.672321)}
{pt3dadd(174192.000000,107220.000000,50000.000000,341.111376)}
{pt3dadd(174852.000000,107148.000000,49100.000000,378.550431)}
{pt3dadd(175260.000000,107424.000000,48450.000000,415.989486)}
{pt3dadd(176028.000000,107640.000000,47975.000000,411.829591)}
{pt3dadd(176580.000000,107724.000000,47475.000000,407.669697)}
{pt3dadd(177276.000000,107772.000000,46775.000000,403.509803)}
{pt3dadd(177612.000000,107832.000000,46225.000000,399.349908)}
{pt3dadd(177876.000000,108024.000000,45625.000000,359.696092)}
{pt3dadd(178512.000000,108408.000000,44800.000000,320.042277)}
{pt3dadd(178620.000000,108684.000000,44300.000000,280.388462)}
{pt3dadd(178656.000000,109260.000000,43775.000000,240.734646)}
{pt3dadd(178524.000000,109380.000000,43475.000000,200.612214)}

{create adhoc29}
{access adhoc29}
{connect adhoc29(1), adhoc25(0)}
{nseg = 1}
{strdef color color = "White"}
{pt3dclear()}
{pt3dadd(169872.000000,116616.000000,63225.000000,552.061332)}
{pt3dadd(169572.000000,116532.000000,62725.000000,635.974578)}
{pt3dadd(169188.000000,116256.000000,62100.000000,605.519217)}
{pt3dadd(168960.000000,116028.000000,61550.000000,575.063856)}
{pt3dadd(168804.000000,115704.000000,61050.000000,599.024880)}

{create adhoc30}
{access adhoc30}
{connect adhoc30(1), adhoc29(0)}
{nseg = 1}
{strdef color color = "White"}
{pt3dclear()}
{pt3dadd(168804.000000,115704.000000,61050.000000,599.024880)}
{pt3dadd(168780.000000,116508.000000,61050.000000,170.389278)}
{pt3dadd(168516.000000,116712.000000,60750.000000,159.148323)}
{pt3dadd(168504.000000,116856.000000,60250.000000,147.907368)}
{pt3dadd(168588.000000,117168.000000,59525.000000,167.176836)}

{create adhoc31}
{access adhoc31}
{connect adhoc31(1), adhoc29(0)}
{nseg = 1}
{strdef color color = "White"}
{pt3dclear()}
{pt3dadd(168804.000000,115704.000000,61050.000000,599.024880)}
{pt3dadd(168672.000000,115128.000000,60400.000000,575.063856)}
{pt3dadd(168588.000000,114804.000000,60025.000000,581.054112)}
{pt3dadd(168624.000000,114432.000000,59575.000000,587.044368)}
{pt3dadd(168564.000000,113952.000000,59150.000000,593.034624)}
{pt3dadd(168432.000000,113724.000000,58775.000000,599.024880)}
{pt3dadd(168264.000000,113448.000000,58200.000000,576.463576)}
{pt3dadd(168072.000000,113148.000000,57600.000000,553.902273)}
{pt3dadd(168012.000000,113004.000000,57175.000000,531.340969)}
{pt3dadd(167784.000000,112944.000000,56750.000000,508.779666)}
{pt3dadd(167556.000000,112944.000000,56175.000000,485.582121)}
{pt3dadd(167352.000000,112848.000000,55500.000000,462.384576)}
{pt3dadd(167532.000000,112704.000000,54850.000000,439.187031)}
{pt3dadd(167868.000000,112596.000000,54200.000000,415.989486)}
{pt3dadd(168444.000000,112584.000000,53700.000000,398.418174)}
{pt3dadd(169200.000000,112620.000000,53200.000000,380.846862)}
{pt3dadd(169992.000000,112848.000000,52375.000000,363.275550)}
{pt3dadd(170700.000000,113124.000000,51700.000000,345.704238)}
{pt3dadd(171060.000000,113388.000000,51000.000000,415.989486)}

{create adhoc32}
{access adhoc32}
{connect adhoc32(1), adhoc31(0)}
{nseg = 1}
{strdef color color = "White"}
{pt3dclear()}
{pt3dadd(171060.000000,113388.000000,51000.000000,415.989486)}
{pt3dadd(171084.000000,113880.000000,50825.000000,415.989486)}
{pt3dadd(170604.000000,114300.000000,50950.000000,372.175776)}
{pt3dadd(170112.000000,114708.000000,50850.000000,328.362066)}
{pt3dadd(169908.000000,115020.000000,50750.000000,284.548356)}
{pt3dadd(169776.000000,115368.000000,50900.000000,240.734646)}
{pt3dadd(169632.000000,115668.000000,51125.000000,220.673426)}
{pt3dadd(169452.000000,115908.000000,51425.000000,200.612205)}
{pt3dadd(169368.000000,116532.000000,51775.000000,180.550985)}
{pt3dadd(169320.000000,116736.000000,51975.000000,160.489764)}
{pt3dadd(169092.000000,117096.000000,52200.000000,55.987200)}

{create adhoc33}
{access adhoc33}
{connect adhoc33(1), adhoc31(0)}
{nseg = 1}
{strdef color color = "White"}
{pt3dclear()}
{pt3dadd(171060.000000,113388.000000,51000.000000,415.989486)}
{pt3dadd(171528.000000,113520.000000,50300.000000,415.989486)}
{pt3dadd(171936.000000,113748.000000,49700.000000,398.656589)}
{pt3dadd(172800.000000,114396.000000,48925.000000,381.323691)}
{pt3dadd(173832.000000,114624.000000,48200.000000,363.990794)}
{pt3dadd(174576.000000,114804.000000,47400.000000,346.657896)}
{pt3dadd(175428.000000,115176.000000,46650.000000,315.458685)}
{pt3dadd(176052.000000,115680.000000,45850.000000,284.259474)}
{pt3dadd(176520.000000,116076.000000,45200.000000,253.060263)}
{pt3dadd(176952.000000,116244.000000,44725.000000,221.861052)}
{pt3dadd(177408.000000,116508.000000,44125.000000,200.612214)}

{create adhoc34}
{access adhoc34}
{connect adhoc34(1), adhoc20(0)}
{nseg = 1}
{strdef color color = "White"}
{pt3dclear()}
{pt3dadd(172920.000000,121464.000000,74000.000000,599.024880)}
{pt3dadd(173880.000000,122208.000000,74000.000000,288.881586)}
{pt3dadd(174108.000000,122136.000000,74100.000000,258.455399)}
{pt3dadd(174312.000000,122268.000000,74200.000000,228.029211)}
{pt3dadd(174528.000000,122340.000000,74150.000000,197.603024)}
{pt3dadd(174756.000000,122388.000000,73850.000000,167.176836)}
{pt3dadd(174936.000000,122448.000000,73800.000000,167.176836)}
{pt3dadd(175092.000000,122436.000000,73700.000000,167.176836)}
{pt3dadd(175284.000000,122544.000000,73650.000000,167.176836)}
{pt3dadd(175440.000000,122676.000000,73650.000000,167.176836)}
{pt3dadd(175596.000000,122748.000000,73700.000000,203.893332)}
{pt3dadd(175824.000000,123084.000000,73450.000000,240.609828)}
{pt3dadd(175980.000000,123372.000000,73075.000000,277.326324)}
{pt3dadd(176184.000000,123576.000000,72975.000000,116.095032)}

{create adhoc35}
{access adhoc35}
{connect adhoc35(1), adhoc19(0)}
{nseg = 1}
{strdef color color = "White"}
{pt3dclear()}
{pt3dadd(173268.000000,121488.000000,74875.000000,552.061332)}
{pt3dadd(173808.000000,120936.000000,74875.000000,200.612214)}
{pt3dadd(173892.000000,120684.000000,74900.000000,208.235480)}
{pt3dadd(174000.000000,120492.000000,74825.000000,215.858745)}
{pt3dadd(174120.000000,120228.000000,74800.000000,223.482010)}
{pt3dadd(174192.000000,119952.000000,74750.000000,231.105276)}
{pt3dadd(174252.000000,119712.000000,74700.000000,213.451398)}
{pt3dadd(174372.000000,119448.000000,74575.000000,195.797520)}
{pt3dadd(174252.000000,119208.000000,74500.000000,178.143642)}
{pt3dadd(174384.000000,119148.000000,74275.000000,160.489764)}
{pt3dadd(174636.000000,118668.000000,74125.000000,131.779931)}
{pt3dadd(174696.000000,118488.000000,74050.000000,103.070097)}
{pt3dadd(174708.000000,118284.000000,74025.000000,74.360264)}
{pt3dadd(174972.000000,117828.000000,73850.000000,45.650430)}
{pt3dadd(175164.000000,117852.000000,73650.000000,67.184640)}

{create adhoc36}
{access adhoc36}
{connect adhoc36(1), adhoc18(0)}
{nseg = 1}
{strdef color color = "White"}
{pt3dclear()}
{pt3dadd(176064.000000,121836.000000,78250.000000,1035.114948)}
{pt3dadd(176796.000000,120924.000000,78250.000000,139.314042)}
{pt3dadd(176796.000000,120732.000000,78125.000000,119.749878)}
{pt3dadd(176868.000000,120480.000000,77900.000000,100.185714)}
{pt3dadd(177036.000000,120228.000000,77925.000000,80.621550)}
{pt3dadd(177132.000000,119976.000000,77975.000000,116.095032)}

{create adhoc37}
{access adhoc37}
{connect adhoc37(1), adhoc17(0)}
{nseg = 1}
{strdef color color = "White"}
{pt3dclear()}
{pt3dadd(179496.000000,122148.000000,83725.000000,1373.705064)}
{pt3dadd(179364.000000,121668.000000,83750.000000,662.473530)}
{pt3dadd(179316.000000,121236.000000,83875.000000,662.473548)}
{pt3dadd(179268.000000,120756.000000,83950.000000,662.473566)}
{pt3dadd(179172.000000,120408.000000,83950.000000,662.473584)}
{pt3dadd(179088.000000,120048.000000,83925.000000,662.473602)}
{pt3dadd(178980.000000,119628.000000,83875.000000,669.374370)}
{pt3dadd(178884.000000,119220.000000,83750.000000,676.275138)}
{pt3dadd(178788.000000,118788.000000,83700.000000,683.175906)}
{pt3dadd(178656.000000,118356.000000,83550.000000,690.076674)}
{pt3dadd(178464.000000,117936.000000,83400.000000,697.264960)}
{pt3dadd(178260.000000,117600.000000,83350.000000,704.453247)}
{pt3dadd(178020.000000,117252.000000,83300.000000,711.641533)}
{pt3dadd(177912.000000,116952.000000,83150.000000,718.829820)}
{pt3dadd(177816.000000,116724.000000,83025.000000,658.927350)}
{pt3dadd(177636.000000,116496.000000,82925.000000,599.024880)}
{pt3dadd(177552.000000,116208.000000,82825.000000,690.076674)}

{create adhoc38}
{access adhoc38}
{connect adhoc38(1), adhoc37(0)}
{nseg = 1}
{strdef color color = "White"}
{pt3dclear()}
{pt3dadd(177552.000000,116208.000000,82825.000000,690.076674)}
{pt3dadd(178548.000000,116208.000000,83750.000000,240.734646)}
{pt3dadd(178776.000000,115920.000000,84050.000000,252.771381)}
{pt3dadd(179100.000000,115572.000000,84425.000000,264.808116)}
{pt3dadd(179352.000000,115272.000000,84900.000000,276.844851)}
{pt3dadd(179556.000000,114696.000000,85400.000000,288.881586)}
{pt3dadd(179496.000000,114396.000000,85750.000000,266.814243)}
{pt3dadd(179580.000000,113760.000000,86300.000000,244.746900)}
{pt3dadd(179544.000000,112932.000000,86525.000000,222.679557)}
{pt3dadd(179544.000000,112188.000000,86800.000000,200.612214)}
{pt3dadd(179712.000000,111408.000000,87250.000000,198.606091)}
{pt3dadd(180216.000000,110580.000000,87700.000000,196.599969)}
{pt3dadd(180228.000000,110316.000000,87775.000000,194.593846)}
{pt3dadd(180288.000000,109968.000000,87900.000000,192.587724)}
{pt3dadd(180240.000000,109704.000000,87975.000000,190.661846)}
{pt3dadd(180072.000000,109368.000000,88025.000000,188.735967)}
{pt3dadd(179856.000000,109068.000000,88150.000000,186.810089)}
{pt3dadd(179688.000000,108708.000000,88125.000000,184.884210)}
{pt3dadd(179424.000000,108372.000000,88225.000000,188.816211)}
{pt3dadd(179352.000000,108072.000000,88275.000000,192.748212)}
{pt3dadd(179136.000000,107580.000000,88425.000000,196.680213)}
{pt3dadd(178872.000000,107220.000000,88900.000000,200.612214)}
{pt3dadd(178632.000000,106908.000000,89350.000000,200.612214)}
{pt3dadd(178260.000000,106284.000000,90025.000000,200.612214)}
{pt3dadd(178092.000000,105876.000000,90650.000000,200.612214)}
{pt3dadd(178152.000000,105636.000000,91150.000000,200.612214)}
{pt3dadd(178200.000000,105564.000000,91725.000000,160.489764)}
{pt3dadd(178332.000000,105444.000000,92400.000000,139.314042)}

{create adhoc39}
{access adhoc39}
{connect adhoc39(1), adhoc37(0)}
{nseg = 1}
{strdef color color = "White"}
{pt3dclear()}
{pt3dadd(177552.000000,116208.000000,82825.000000,690.076674)}
{pt3dadd(177360.000000,115884.000000,82575.000000,718.829820)}
{pt3dadd(177120.000000,115596.000000,82475.000000,718.829820)}
{pt3dadd(177060.000000,115284.000000,82225.000000,718.829820)}
{pt3dadd(176784.000000,114996.000000,82100.000000,718.829820)}
{pt3dadd(176676.000000,114600.000000,81850.000000,718.829820)}
{pt3dadd(176484.000000,114216.000000,81650.000000,599.024880)}
{pt3dadd(176280.000000,113808.000000,81400.000000,635.974578)}

{create adhoc40}
{access adhoc40}
{connect adhoc40(1), adhoc39(0)}
{nseg = 1}
{strdef color color = "White"}
{pt3dclear()}
{pt3dadd(176280.000000,113808.000000,81400.000000,635.974578)}
{pt3dadd(177180.000000,113520.000000,81700.000000,167.176836)}
{pt3dadd(177228.000000,113280.000000,81625.000000,167.176836)}
{pt3dadd(177144.000000,113052.000000,81600.000000,167.176836)}
{pt3dadd(177096.000000,112776.000000,81650.000000,167.176836)}
{pt3dadd(176952.000000,112524.000000,81750.000000,167.176836)}
{pt3dadd(176700.000000,112248.000000,81725.000000,196.046473)}
{pt3dadd(176364.000000,111972.000000,81875.000000,224.916111)}
{pt3dadd(176316.000000,111672.000000,81825.000000,253.785749)}
{pt3dadd(176148.000000,111372.000000,81825.000000,282.655386)}
{pt3dadd(175956.000000,111072.000000,81825.000000,288.666729)}
{pt3dadd(175872.000000,110820.000000,81875.000000,294.678072)}
{pt3dadd(175800.000000,110544.000000,81875.000000,300.689415)}
{pt3dadd(175716.000000,110244.000000,81850.000000,306.700758)}
{pt3dadd(175596.000000,109956.000000,81825.000000,302.245965)}
{pt3dadd(175548.000000,109692.000000,81800.000000,297.791172)}
{pt3dadd(175428.000000,109428.000000,81750.000000,293.336379)}
{pt3dadd(175392.000000,109116.000000,81725.000000,288.881586)}
{pt3dadd(175248.000000,108780.000000,81575.000000,276.844851)}
{pt3dadd(175092.000000,108432.000000,81400.000000,264.808116)}
{pt3dadd(175020.000000,108036.000000,81225.000000,252.771381)}
{pt3dadd(174828.000000,107664.000000,81025.000000,240.734646)}
{pt3dadd(174636.000000,107316.000000,80850.000000,230.704038)}
{pt3dadd(174444.000000,106944.000000,80800.000000,220.673430)}
{pt3dadd(174420.000000,106632.000000,80775.000000,210.642822)}
{pt3dadd(174288.000000,106416.000000,80625.000000,200.612214)}
{pt3dadd(174132.000000,106104.000000,80575.000000,210.642822)}
{pt3dadd(174048.000000,105780.000000,80475.000000,220.673430)}
{pt3dadd(173916.000000,105384.000000,80400.000000,230.704038)}
{pt3dadd(173868.000000,105084.000000,80400.000000,240.734646)}
{pt3dadd(173856.000000,104700.000000,80375.000000,252.771381)}
{pt3dadd(173916.000000,104460.000000,80350.000000,264.808116)}
{pt3dadd(174024.000000,104172.000000,80375.000000,276.844851)}
{pt3dadd(174096.000000,103788.000000,80400.000000,288.881586)}
{pt3dadd(174312.000000,103572.000000,80625.000000,399.349908)}

{create adhoc41}
{access adhoc41}
{connect adhoc41(1), adhoc40(0)}
{nseg = 1}
{strdef color color = "White"}
{pt3dclear()}
{pt3dadd(174312.000000,103572.000000,80625.000000,399.349908)}
{pt3dadd(174576.000000,103440.000000,81050.000000,240.734646)}
{pt3dadd(174948.000000,103524.000000,81375.000000,222.345193)}
{pt3dadd(175056.000000,103716.000000,81800.000000,203.955741)}
{pt3dadd(175428.000000,104088.000000,82525.000000,185.566288)}
{pt3dadd(175608.000000,104304.000000,82775.000000,167.176836)}
{pt3dadd(175764.000000,104556.000000,82975.000000,149.569092)}
{pt3dadd(176016.000000,104844.000000,83100.000000,131.961348)}
{pt3dadd(176316.000000,105132.000000,83150.000000,114.353604)}
{pt3dadd(176580.000000,105372.000000,83125.000000,96.745860)}
{pt3dadd(176952.000000,105648.000000,83100.000000,130.335714)}
{pt3dadd(177108.000000,105960.000000,83025.000000,163.925568)}
{pt3dadd(177660.000000,106188.000000,82875.000000,197.515422)}
{pt3dadd(178008.000000,106440.000000,82825.000000,231.105276)}
{pt3dadd(178404.000000,106764.000000,82950.000000,80.621550)}
{pt3dadd(178740.000000,106920.000000,82800.000000,80.621550)}

{create adhoc42}
{access adhoc42}
{connect adhoc42(1), adhoc40(0)}
{nseg = 1}
{strdef color color = "White"}
{pt3dclear()}
{pt3dadd(174312.000000,103572.000000,80625.000000,399.349908)}
{pt3dadd(174264.000000,103332.000000,80600.000000,415.989486)}
{pt3dadd(174216.000000,103164.000000,80575.000000,372.175776)}
{pt3dadd(174192.000000,103020.000000,80600.000000,328.362066)}
{pt3dadd(174168.000000,102876.000000,80625.000000,284.548356)}
{pt3dadd(174072.000000,102732.000000,80700.000000,240.734646)}
{pt3dadd(173976.000000,102600.000000,80700.000000,240.734646)}
{pt3dadd(173916.000000,102360.000000,80750.000000,288.881586)}

{create adhoc43}
{access adhoc43}
{connect adhoc43(1), adhoc42(0)}
{nseg = 1}
{strdef color color = "White"}
{pt3dclear()}
{pt3dadd(173916.000000,102360.000000,80750.000000,288.881586)}
{pt3dadd(173892.000000,102120.000000,81250.000000,116.095032)}
{pt3dadd(173316.000000,101832.000000,81700.000000,136.559634)}
{pt3dadd(172860.000000,101604.000000,82025.000000,157.024236)}
{pt3dadd(172824.000000,101244.000000,82375.000000,177.488838)}
{pt3dadd(173112.000000,101280.000000,82775.000000,90.874278)}

{create adhoc44}
{access adhoc44}
{connect adhoc44(1), adhoc42(0)}
{nseg = 1}
{strdef color color = "White"}
{pt3dclear()}
{pt3dadd(173916.000000,102360.000000,80750.000000,288.881586)}
{pt3dadd(173796.000000,102024.000000,80475.000000,240.734646)}
{pt3dadd(173760.000000,101784.000000,80450.000000,215.379495)}
{pt3dadd(173712.000000,101436.000000,80425.000000,190.024344)}
{pt3dadd(173784.000000,101064.000000,80400.000000,164.669193)}
{pt3dadd(173712.000000,100704.000000,80475.000000,139.314042)}
{pt3dadd(173580.000000,100404.000000,80525.000000,146.279741)}
{pt3dadd(173436.000000,100092.000000,80425.000000,153.245439)}
{pt3dadd(173328.000000,99792.000000,80475.000000,160.211138)}
{pt3dadd(173028.000000,99468.000000,80550.000000,167.176836)}
{pt3dadd(172836.000000,99132.000000,80575.000000,180.847890)}
{pt3dadd(172668.000000,98784.000000,80675.000000,194.518944)}
{pt3dadd(172572.000000,98400.000000,80875.000000,208.189998)}
{pt3dadd(172704.000000,97992.000000,81450.000000,221.861052)}
{pt3dadd(173004.000000,97632.000000,81775.000000,214.778106)}
{pt3dadd(172920.000000,96984.000000,82050.000000,207.695160)}
{pt3dadd(172800.000000,96768.000000,82400.000000,200.612214)}
{pt3dadd(172896.000000,96576.000000,83000.000000,96.745860)}

{create adhoc45}
{access adhoc45}
{connect adhoc45(1), adhoc39(0)}
{nseg = 1}
{strdef color color = "White"}
{pt3dclear()}
{pt3dadd(176280.000000,113808.000000,81400.000000,635.974578)}
{pt3dadd(175788.000000,113508.000000,80975.000000,718.829820)}
{pt3dadd(175368.000000,113124.000000,80550.000000,713.665626)}
{pt3dadd(174936.000000,112740.000000,80125.000000,708.501432)}
{pt3dadd(174564.000000,112296.000000,79650.000000,703.337238)}
{pt3dadd(174408.000000,111924.000000,79600.000000,690.076674)}

{create adhoc46}
{access adhoc46}
{connect adhoc46(1), adhoc45(0)}
{nseg = 1}
{strdef color color = "White"}
{pt3dclear()}
{pt3dadd(174408.000000,111924.000000,79600.000000,690.076674)}
{pt3dadd(173736.000000,111816.000000,79100.000000,718.829820)}
{pt3dadd(173364.000000,111876.000000,78850.000000,643.119736)}
{pt3dadd(172788.000000,111768.000000,78525.000000,567.409653)}
{pt3dadd(172488.000000,111732.000000,78175.000000,491.699570)}
{pt3dadd(172140.000000,111684.000000,77850.000000,415.989486)}
{pt3dadd(171912.000000,111552.000000,77500.000000,434.099237)}
{pt3dadd(171708.000000,111468.000000,77025.000000,452.208987)}
{pt3dadd(171660.000000,111312.000000,76525.000000,470.318738)}
{pt3dadd(171660.000000,111120.000000,76100.000000,488.428488)}
{pt3dadd(171408.000000,110832.000000,75650.000000,491.118210)}
{pt3dadd(171504.000000,110904.000000,75100.000000,493.807932)}
{pt3dadd(171444.000000,110868.000000,74600.000000,496.497654)}
{pt3dadd(171204.000000,110724.000000,73975.000000,499.187376)}
{pt3dadd(171012.000000,110712.000000,73325.000000,471.454746)}
{pt3dadd(170916.000000,110460.000000,72775.000000,443.722116)}
{pt3dadd(170868.000000,110172.000000,72175.000000,415.989486)}
{pt3dadd(170832.000000,110124.000000,71850.000000,441.649080)}

{create adhoc47}
{access adhoc47}
{connect adhoc47(1), adhoc46(0)}
{nseg = 1}
{strdef color color = "White"}
{pt3dclear()}
{pt3dadd(170832.000000,110124.000000,71850.000000,441.649080)}
{pt3dadd(170820.000000,109680.000000,71850.000000,353.319282)}
{pt3dadd(170916.000000,109404.000000,71925.000000,299.817972)}
{pt3dadd(170988.000000,109176.000000,71875.000000,246.316662)}
{pt3dadd(171264.000000,108924.000000,71800.000000,192.815352)}
{pt3dadd(171636.000000,108504.000000,71650.000000,139.314042)}
{pt3dadd(171984.000000,108276.000000,71650.000000,185.209659)}
{pt3dadd(172236.000000,107964.000000,71700.000000,231.105276)}
{pt3dadd(172152.000000,107712.000000,71800.000000,184.884210)}

{create adhoc48}
{access adhoc48}
{connect adhoc48(1), adhoc46(0)}
{nseg = 1}
{strdef color color = "White"}
{pt3dclear()}
{pt3dadd(170832.000000,110124.000000,71850.000000,441.649080)}
{pt3dadd(170784.000000,110064.000000,71350.000000,415.989486)}
{pt3dadd(170688.000000,109920.000000,70825.000000,424.542666)}
{pt3dadd(170592.000000,109776.000000,70200.000000,433.095846)}
{pt3dadd(170484.000000,109716.000000,69700.000000,441.649026)}
{pt3dadd(170388.000000,109716.000000,69325.000000,499.187376)}

{create adhoc49}
{access adhoc49}
{connect adhoc49(1), adhoc48(0)}
{nseg = 1}
{strdef color color = "White"}
{pt3dclear()}
{pt3dadd(170388.000000,109716.000000,69325.000000,499.187376)}
{pt3dadd(170388.000000,110124.000000,69250.000000,415.989486)}
{pt3dadd(170460.000000,110448.000000,69325.000000,266.042259)}
{pt3dadd(170436.000000,110724.000000,69075.000000,116.095032)}
{pt3dadd(170400.000000,110940.000000,69025.000000,116.095032)}

{create adhoc50}
{access adhoc50}
{connect adhoc50(1), adhoc48(0)}
{nseg = 1}
{strdef color color = "White"}
{pt3dclear()}
{pt3dadd(170388.000000,109716.000000,69325.000000,499.187376)}
{pt3dadd(170160.000000,109296.000000,68600.000000,346.657896)}
{pt3dadd(170016.000000,109056.000000,67975.000000,479.219886)}
{pt3dadd(169908.000000,108684.000000,67275.000000,415.989486)}

{create adhoc51}
{access adhoc51}
{connect adhoc51(1), adhoc50(0)}
{nseg = 1}
{strdef color color = "White"}
{pt3dclear()}
{pt3dadd(169908.000000,108684.000000,67275.000000,415.989486)}
{pt3dadd(169836.000000,108312.000000,67225.000000,415.989486)}
{pt3dadd(169680.000000,108036.000000,67225.000000,373.332258)}
{pt3dadd(169524.000000,107688.000000,67100.000000,330.675030)}
{pt3dadd(169224.000000,107328.000000,66925.000000,288.017802)}
{pt3dadd(169152.000000,106968.000000,66775.000000,245.360574)}
{pt3dadd(169236.000000,106608.000000,66600.000000,270.684905)}
{pt3dadd(169416.000000,106200.000000,66300.000000,296.009235)}
{pt3dadd(169416.000000,105876.000000,66125.000000,321.333566)}
{pt3dadd(169332.000000,105504.000000,65925.000000,346.657896)}
{pt3dadd(169356.000000,104568.000000,65350.000000,329.325003)}
{pt3dadd(169368.000000,103272.000000,64800.000000,311.992110)}
{pt3dadd(169356.000000,102936.000000,64550.000000,294.659217)}
{pt3dadd(169212.000000,102588.000000,64125.000000,277.326324)}
{pt3dadd(169020.000000,101724.000000,63525.000000,252.366953)}
{pt3dadd(169020.000000,101460.000000,63350.000000,227.407581)}
{pt3dadd(169128.000000,101280.000000,63175.000000,202.448209)}
{pt3dadd(169320.000000,100980.000000,63100.000000,177.488838)}
{pt3dadd(169260.000000,100644.000000,63075.000000,219.781102)}
{pt3dadd(169176.000000,100344.000000,63050.000000,262.073367)}
{pt3dadd(169212.000000,99936.000000,63100.000000,304.365632)}
{pt3dadd(168852.000000,99660.000000,63325.000000,346.657896)}
{pt3dadd(168660.000000,99264.000000,63550.000000,286.830876)}
{pt3dadd(169020.000000,99048.000000,63825.000000,227.003856)}
{pt3dadd(169248.000000,98760.000000,63950.000000,167.176836)}
{pt3dadd(169308.000000,98532.000000,64150.000000,55.987200)}

{create adhoc52}
{access adhoc52}
{connect adhoc52(1), adhoc50(0)}
{nseg = 1}
{strdef color color = "White"}
{pt3dclear()}
{pt3dadd(169908.000000,108684.000000,67275.000000,415.989486)}
{pt3dadd(170100.000000,108828.000000,66575.000000,399.349908)}
{pt3dadd(169248.000000,108792.000000,65975.000000,386.176905)}
{pt3dadd(169044.000000,108564.000000,65300.000000,373.003902)}
{pt3dadd(168900.000000,108516.000000,64825.000000,359.830899)}
{pt3dadd(168720.000000,108084.000000,64200.000000,346.657896)}
{pt3dadd(168624.000000,107688.000000,63775.000000,368.040852)}

{create adhoc53}
{access adhoc53}
{connect adhoc53(1), adhoc52(0)}
{nseg = 1}
{strdef color color = "White"}
{pt3dclear()}
{pt3dadd(168624.000000,107688.000000,63775.000000,368.040852)}
{pt3dadd(169068.000000,108564.000000,63775.000000,200.612214)}
{pt3dadd(169260.000000,108684.000000,63575.000000,198.606091)}
{pt3dadd(169476.000000,108840.000000,63325.000000,196.599969)}
{pt3dadd(169728.000000,109068.000000,62950.000000,194.593846)}
{pt3dadd(168852.000000,109296.000000,62475.000000,192.587724)}
{pt3dadd(168288.000000,109404.000000,62150.000000,46.656000)}

{create adhoc54}
{access adhoc54}
{connect adhoc54(1), adhoc52(0)}
{nseg = 1}
{strdef color color = "White"}
{pt3dclear()}
{pt3dadd(168624.000000,107688.000000,63775.000000,368.040852)}
{pt3dadd(168576.000000,107028.000000,63200.000000,346.657896)}
{pt3dadd(168612.000000,106452.000000,62550.000000,332.213819)}
{pt3dadd(168756.000000,105972.000000,62000.000000,317.769741)}
{pt3dadd(169092.000000,105120.000000,61200.000000,303.325664)}
{pt3dadd(169740.000000,104256.000000,60500.000000,288.881586)}
{pt3dadd(170028.000000,103908.000000,60000.000000,308.140356)}
{pt3dadd(170208.000000,103608.000000,59500.000000,327.399126)}
{pt3dadd(170484.000000,103044.000000,59025.000000,346.657896)}
{pt3dadd(170724.000000,102744.000000,58500.000000,432.130320)}

{create adhoc55}
{access adhoc55}
{connect adhoc55(1), adhoc54(0)}
{nseg = 1}
{strdef color color = "White"}
{pt3dclear()}
{pt3dadd(170724.000000,102744.000000,58500.000000,432.130320)}
{pt3dadd(169848.000000,102168.000000,58275.000000,184.884210)}
{pt3dadd(169644.000000,101904.000000,58225.000000,180.457366)}
{pt3dadd(169500.000000,101616.000000,58125.000000,176.030523)}
{pt3dadd(169296.000000,101388.000000,57975.000000,171.603680)}
{pt3dadd(169260.000000,101064.000000,57875.000000,167.176836)}
{pt3dadd(169128.000000,100764.000000,57900.000000,173.529558)}
{pt3dadd(168972.000000,100464.000000,57800.000000,179.882280)}
{pt3dadd(168912.000000,100128.000000,57875.000000,186.235002)}
{pt3dadd(169008.000000,99852.000000,57900.000000,192.587724)}
{pt3dadd(169236.000000,99456.000000,57800.000000,176.538744)}
{pt3dadd(169608.000000,99048.000000,57850.000000,160.489764)}
{pt3dadd(170460.000000,98808.000000,57825.000000,116.095032)}

{create adhoc56}
{access adhoc56}
{connect adhoc56(1), adhoc54(0)}
{nseg = 1}
{strdef color color = "White"}
{pt3dclear()}
{pt3dadd(170724.000000,102744.000000,58500.000000,432.130320)}
{pt3dadd(170892.000000,102552.000000,57900.000000,346.657896)}

{create adhoc57}
{access adhoc57}
{connect adhoc57(1), adhoc56(0)}
{nseg = 1}
{strdef color color = "White"}
{pt3dclear()}
{pt3dadd(170892.000000,102552.000000,57900.000000,346.657896)}
{pt3dadd(170328.000000,103608.000000,57850.000000,192.587724)}
{pt3dadd(170136.000000,103788.000000,57550.000000,200.612214)}

{create adhoc58}
{access adhoc58}
{connect adhoc58(1), adhoc56(0)}
{nseg = 1}
{strdef color color = "White"}
{pt3dclear()}
{pt3dadd(170892.000000,102552.000000,57900.000000,346.657896)}
{pt3dadd(171300.000000,101880.000000,57425.000000,245.360574)}
{pt3dadd(171264.000000,101592.000000,56800.000000,267.218329)}
{pt3dadd(171348.000000,101496.000000,56350.000000,289.076085)}
{pt3dadd(171612.000000,101532.000000,55825.000000,310.933840)}
{pt3dadd(171828.000000,101736.000000,55325.000000,332.791596)}
{pt3dadd(172284.000000,102120.000000,54750.000000,277.586676)}
{pt3dadd(173124.000000,102144.000000,54100.000000,222.381756)}
{pt3dadd(173724.000000,101532.000000,53400.000000,167.176836)}
{pt3dadd(173820.000000,101040.000000,53050.000000,111.451230)}

{create adhoc59}
{access adhoc59}
{connect adhoc59(1), adhoc45(0)}
{nseg = 1}
{strdef color color = "White"}
{pt3dclear()}
{pt3dadd(174408.000000,111924.000000,79600.000000,690.076674)}
{pt3dadd(174348.000000,111468.000000,79350.000000,460.051074)}
{pt3dadd(174312.000000,111024.000000,79150.000000,431.702779)}
{pt3dadd(174312.000000,110688.000000,79050.000000,403.354485)}
{pt3dadd(174312.000000,110352.000000,78700.000000,375.006191)}
{pt3dadd(174252.000000,109932.000000,78600.000000,346.657896)}
{pt3dadd(174216.000000,109500.000000,78400.000000,346.657896)}
{pt3dadd(174024.000000,109080.000000,78175.000000,346.657896)}
{pt3dadd(173916.000000,108636.000000,77750.000000,346.657896)}
{pt3dadd(173784.000000,108216.000000,77400.000000,346.657896)}
{pt3dadd(173820.000000,107892.000000,77125.000000,336.668603)}
{pt3dadd(173784.000000,107556.000000,76850.000000,326.679309)}
{pt3dadd(173748.000000,107244.000000,76600.000000,316.690015)}
{pt3dadd(173844.000000,106524.000000,76050.000000,306.700722)}
{pt3dadd(173784.000000,106332.000000,76000.000000,334.022913)}
{pt3dadd(173688.000000,106068.000000,75825.000000,361.345104)}
{pt3dadd(173628.000000,105792.000000,75475.000000,388.667295)}
{pt3dadd(173484.000000,105564.000000,75350.000000,415.989486)}
{pt3dadd(173256.000000,105180.000000,75175.000000,415.989486)}
{pt3dadd(172980.000000,104784.000000,75075.000000,415.989486)}
{pt3dadd(172548.000000,104376.000000,74950.000000,415.989486)}
{pt3dadd(172296.000000,103992.000000,74925.000000,415.989486)}
{pt3dadd(171960.000000,103548.000000,74775.000000,319.479912)}
{pt3dadd(171684.000000,103044.000000,74550.000000,383.375916)}

{create adhoc60}
{access adhoc60}
{connect adhoc60(1), adhoc59(0)}
{nseg = 1}
{strdef color color = "White"}
{pt3dclear()}
{pt3dadd(171684.000000,103044.000000,74550.000000,383.375916)}
{pt3dadd(171324.000000,103200.000000,74175.000000,288.881586)}
{pt3dadd(170832.000000,102912.000000,73650.000000,285.029832)}
{pt3dadd(170700.000000,102948.000000,73350.000000,281.178078)}
{pt3dadd(170772.000000,103044.000000,73075.000000,277.326324)}
{pt3dadd(170772.000000,103044.000000,72950.000000,96.745860)}

{create adhoc61}
{access adhoc61}
{connect adhoc61(1), adhoc59(0)}
{nseg = 1}
{strdef color color = "White"}
{pt3dclear()}
{pt3dadd(171684.000000,103044.000000,74550.000000,383.375916)}
{pt3dadd(171576.000000,101712.000000,74100.000000,399.349908)}
{pt3dadd(171228.000000,100236.000000,73625.000000,399.349908)}
{pt3dadd(171180.000000,99840.000000,73250.000000,399.349908)}
{pt3dadd(170964.000000,99564.000000,72925.000000,399.349908)}
{pt3dadd(170532.000000,99216.000000,72525.000000,319.479912)}

{create adhoc62}
{access adhoc62}
{connect adhoc62(1), adhoc61(0)}
{nseg = 1}
{strdef color color = "White"}
{pt3dclear()}
{pt3dadd(170532.000000,99216.000000,72525.000000,319.479912)}
{pt3dadd(170208.000000,98736.000000,72200.000000,415.989486)}
{pt3dadd(170244.000000,98244.000000,72225.000000,372.175776)}
{pt3dadd(170220.000000,97884.000000,72250.000000,328.362066)}
{pt3dadd(170040.000000,97488.000000,72175.000000,284.548356)}
{pt3dadd(170004.000000,97176.000000,72450.000000,240.734646)}
{pt3dadd(169896.000000,96828.000000,72500.000000,220.673430)}
{pt3dadd(169788.000000,96396.000000,72725.000000,200.612214)}
{pt3dadd(169680.000000,96120.000000,72950.000000,200.612214)}

{create adhoc63}
{access adhoc63}
{connect adhoc63(1), adhoc62(0)}
{nseg = 1}
{strdef color color = "White"}
{pt3dclear()}
{pt3dadd(169680.000000,96120.000000,72950.000000,200.612214)}
{pt3dadd(169524.000000,95928.000000,72600.000000,92.876058)}
{pt3dadd(169272.000000,95736.000000,72400.000000,116.095032)}

{create adhoc64}
{access adhoc64}
{connect adhoc64(1), adhoc62(0)}
{nseg = 1}
{strdef color color = "White"}
{pt3dclear()}
{pt3dadd(169680.000000,96120.000000,72950.000000,200.612214)}
{pt3dadd(169656.000000,95964.000000,73250.000000,288.881586)}
{pt3dadd(170088.000000,95904.000000,73650.000000,228.029211)}
{pt3dadd(171024.000000,95844.000000,74100.000000,167.176836)}
{pt3dadd(171348.000000,95916.000000,74475.000000,116.095032)}

{create adhoc65}
{access adhoc65}
{connect adhoc65(1), adhoc64(0)}
{nseg = 1}
{strdef color color = "White"}
{pt3dclear()}
{pt3dadd(171348.000000,95916.000000,74475.000000,116.095032)}
{pt3dadd(171048.000000,95964.000000,74900.000000,80.621550)}

{create adhoc66}
{access adhoc66}
{connect adhoc66(1), adhoc64(0)}
{nseg = 1}
{strdef color color = "White"}
{pt3dclear()}
{pt3dadd(171348.000000,95916.000000,74475.000000,116.095032)}
{pt3dadd(171516.000000,95772.000000,74850.000000,96.745860)}

{create adhoc67}
{access adhoc67}
{connect adhoc67(1), adhoc61(0)}
{nseg = 1}
{strdef color color = "White"}
{pt3dclear()}
{pt3dadd(170532.000000,99216.000000,72525.000000,319.479912)}
{pt3dadd(170256.000000,98976.000000,72200.000000,479.219994)}
{pt3dadd(169956.000000,98880.000000,71775.000000,412.938945)}
{pt3dadd(169680.000000,98844.000000,71350.000000,346.657896)}
{pt3dadd(169164.000000,98724.000000,70925.000000,288.881586)}

{create adhoc68}
{access adhoc68}
{connect adhoc68(1), adhoc67(0)}
{nseg = 1}
{strdef color color = "White"}
{pt3dclear()}
{pt3dadd(169164.000000,98724.000000,70925.000000,288.881586)}
{pt3dadd(168720.000000,98808.000000,70950.000000,200.612214)}
{pt3dadd(168408.000000,98904.000000,71050.000000,139.314042)}
{pt3dadd(168048.000000,98892.000000,71075.000000,139.314042)}

{create adhoc69}
{access adhoc69}
{connect adhoc69(1), adhoc67(0)}
{nseg = 1}
{strdef color color = "White"}
{pt3dclear()}
{pt3dadd(169164.000000,98724.000000,70925.000000,288.881586)}
{pt3dadd(169056.000000,98544.000000,70550.000000,332.791596)}
{pt3dadd(168960.000000,98364.000000,70100.000000,240.734646)}
{pt3dadd(169008.000000,98388.000000,69900.000000,221.861052)}

{create adhoc70}
{access adhoc70}
{connect adhoc70(1), adhoc69(0)}
{nseg = 1}
{strdef color color = "White"}
{pt3dclear()}
{pt3dadd(169008.000000,98388.000000,69900.000000,221.861052)}
{pt3dadd(168720.000000,97992.000000,69900.000000,200.612214)}
{pt3dadd(168636.000000,97740.000000,69725.000000,198.606091)}
{pt3dadd(168660.000000,97416.000000,69625.000000,196.599969)}
{pt3dadd(168612.000000,97056.000000,69475.000000,194.593846)}
{pt3dadd(168492.000000,96708.000000,69550.000000,192.587724)}
{pt3dadd(168384.000000,96432.000000,69525.000000,194.593846)}
{pt3dadd(168456.000000,96156.000000,69475.000000,196.599969)}
{pt3dadd(168288.000000,95916.000000,69600.000000,198.606091)}
{pt3dadd(168252.000000,95604.000000,69550.000000,200.612214)}
{pt3dadd(168216.000000,95292.000000,69575.000000,200.612214)}
{pt3dadd(168156.000000,94944.000000,69475.000000,200.612214)}
{pt3dadd(168180.000000,94680.000000,69600.000000,200.612214)}
{pt3dadd(168480.000000,94356.000000,69575.000000,116.095032)}

{create adhoc71}
{access adhoc71}
{connect adhoc71(1), adhoc69(0)}
{nseg = 1}
{strdef color color = "White"}
{pt3dclear()}
{pt3dadd(169008.000000,98388.000000,69900.000000,221.861052)}
{pt3dadd(169152.000000,98616.000000,69475.000000,240.734646)}
{pt3dadd(169260.000000,98808.000000,69075.000000,276.394964)}
{pt3dadd(169344.000000,98844.000000,68775.000000,312.055281)}
{pt3dadd(169284.000000,98460.000000,68375.000000,347.715599)}
{pt3dadd(169248.000000,98376.000000,68050.000000,383.375916)}
{pt3dadd(169092.000000,97608.000000,67475.000000,67.184640)}

{create adhoc72}
{access adhoc72}
{connect adhoc72(1), adhoc16(0)}
{nseg = 1}
{strdef color color = "White"}
{pt3dclear()}
{pt3dadd(181020.000000,125580.000000,84475.000000,993.710286)}
{pt3dadd(181440.000000,125580.000000,83300.000000,160.489764)}
{pt3dadd(181716.000000,125652.000000,82975.000000,158.884871)}
{pt3dadd(181920.000000,125616.000000,82650.000000,157.279977)}
{pt3dadd(182136.000000,125700.000000,82325.000000,155.675084)}
{pt3dadd(182124.000000,125724.000000,81950.000000,154.070190)}
{pt3dadd(182280.000000,125964.000000,81550.000000,177.488856)}

{create adhoc73}
{access adhoc73}
{connect adhoc73(1), adhoc15(0)}
{nseg = 1}
{strdef color color = "White"}
{pt3dclear()}
{pt3dadd(181260.000000,126672.000000,84800.000000,1035.114948)}
{pt3dadd(182436.000000,126672.000000,85150.000000,139.314042)}
{pt3dadd(182988.000000,126324.000000,85300.000000,162.261850)}
{pt3dadd(183276.000000,126024.000000,85550.000000,185.209659)}
{pt3dadd(183888.000000,125664.000000,85850.000000,208.157468)}
{pt3dadd(184152.000000,125100.000000,86400.000000,231.105276)}
{pt3dadd(184080.000000,124308.000000,86875.000000,192.678134)}
{pt3dadd(184380.000000,123900.000000,87325.000000,154.250991)}
{pt3dadd(184704.000000,123900.000000,87575.000000,115.823848)}
{pt3dadd(185220.000000,124248.000000,87825.000000,77.396706)}
{pt3dadd(185460.000000,124488.000000,87975.000000,80.621550)}
{pt3dadd(185736.000000,125136.000000,88325.000000,133.741476)}

{create adhoc74}
{access adhoc74}
{connect adhoc74(1), adhoc14(0)}
{nseg = 1}
{strdef color color = "White"}
{pt3dclear()}
{pt3dadd(185976.000000,140364.000000,89475.000000,1490.565402)}
{pt3dadd(185736.000000,140448.000000,88775.000000,1035.114948)}
{pt3dadd(185700.000000,141084.000000,88125.000000,991.985162)}
{pt3dadd(185784.000000,141600.000000,87600.000000,948.855375)}
{pt3dadd(185604.000000,141888.000000,86950.000000,905.725589)}
{pt3dadd(185448.000000,141960.000000,86325.000000,862.595802)}
{pt3dadd(185208.000000,141828.000000,85925.000000,718.829820)}

{create adhoc75}
{access adhoc75}
{connect adhoc75(1), adhoc74(0)}
{nseg = 1}
{strdef color color = "White"}
{pt3dclear()}
{pt3dadd(185208.000000,141828.000000,85925.000000,718.829820)}
{pt3dadd(184644.000000,140772.000000,85350.000000,718.829820)}
{pt3dadd(184212.000000,140568.000000,84925.000000,711.641533)}
{pt3dadd(183876.000000,140448.000000,84250.000000,704.453247)}
{pt3dadd(183696.000000,140448.000000,83350.000000,697.264960)}
{pt3dadd(183492.000000,140100.000000,82800.000000,690.076674)}
{pt3dadd(183048.000000,140088.000000,82075.000000,776.336242)}
{pt3dadd(182472.000000,140184.000000,81225.000000,862.595811)}
{pt3dadd(182004.000000,140256.000000,80550.000000,948.855380)}
{pt3dadd(181488.000000,139956.000000,79650.000000,1035.114948)}
{pt3dadd(180864.000000,139524.000000,78775.000000,977.608566)}
{pt3dadd(180228.000000,139044.000000,77925.000000,920.102184)}
{pt3dadd(179508.000000,138612.000000,77075.000000,862.595802)}
{pt3dadd(179268.000000,138264.000000,76700.000000,1192.452354)}

{create adhoc76}
{access adhoc76}
{connect adhoc76(1), adhoc75(0)}
{nseg = 1}
{strdef color color = "White"}
{pt3dclear()}
{pt3dadd(179268.000000,138264.000000,76700.000000,1192.452354)}
{pt3dadd(178788.000000,138060.000000,76075.000000,1192.452354)}
{pt3dadd(178404.000000,137856.000000,75375.000000,1101.362252)}
{pt3dadd(177828.000000,137664.000000,74550.000000,1010.272149)}
{pt3dadd(177348.000000,137364.000000,73725.000000,919.182046)}
{pt3dadd(176592.000000,137220.000000,72675.000000,828.091944)}
{pt3dadd(175632.000000,137076.000000,71650.000000,897.099612)}
{pt3dadd(175188.000000,137028.000000,70850.000000,966.107280)}
{pt3dadd(174756.000000,136992.000000,69925.000000,1035.114948)}
{pt3dadd(174432.000000,136404.000000,69050.000000,1035.114948)}

{create adhoc77}
{access adhoc77}
{connect adhoc77(1), adhoc76(0)}
{nseg = 1}
{strdef color color = "White"}
{pt3dclear()}
{pt3dadd(174432.000000,136404.000000,69050.000000,1035.114948)}
{pt3dadd(174072.000000,137256.000000,68525.000000,718.829820)}
{pt3dadd(173508.000000,137844.000000,67650.000000,551.102850)}
{pt3dadd(173376.000000,138324.000000,67025.000000,383.375880)}
{pt3dadd(172812.000000,138540.000000,66450.000000,346.657896)}

{create adhoc78}
{access adhoc78}
{connect adhoc78(1), adhoc77(0)}
{nseg = 1}
{strdef color color = "White"}
{pt3dclear()}
{pt3dadd(172812.000000,138540.000000,66450.000000,346.657896)}
{pt3dadd(172944.000000,138864.000000,66450.000000,346.657896)}
{pt3dadd(172920.000000,139188.000000,66500.000000,384.790266)}
{pt3dadd(173028.000000,139512.000000,66475.000000,422.922636)}
{pt3dadd(172788.000000,139740.000000,66325.000000,461.055006)}
{pt3dadd(172608.000000,139956.000000,66275.000000,499.187376)}
{pt3dadd(172608.000000,140232.000000,66250.000000,461.055006)}
{pt3dadd(172452.000000,140472.000000,66100.000000,422.922636)}
{pt3dadd(172344.000000,140700.000000,66000.000000,384.790266)}
{pt3dadd(172236.000000,140880.000000,65900.000000,346.657896)}
{pt3dadd(172320.000000,141192.000000,65800.000000,370.405692)}
{pt3dadd(172284.000000,141360.000000,65675.000000,394.153488)}
{pt3dadd(172140.000000,141624.000000,65550.000000,417.901284)}
{pt3dadd(172224.000000,141912.000000,65425.000000,441.649080)}
{pt3dadd(172176.000000,142188.000000,65275.000000,475.002774)}
{pt3dadd(172260.000000,142428.000000,65175.000000,508.356468)}
{pt3dadd(172212.000000,142668.000000,65075.000000,541.710162)}
{pt3dadd(172176.000000,142956.000000,64750.000000,575.063856)}
{pt3dadd(171984.000000,143256.000000,64275.000000,581.054112)}
{pt3dadd(171900.000000,143808.000000,63825.000000,587.044368)}
{pt3dadd(171564.000000,143952.000000,63325.000000,593.034624)}
{pt3dadd(171324.000000,144096.000000,62975.000000,599.024880)}
{pt3dadd(171000.000000,144048.000000,62525.000000,581.763366)}
{pt3dadd(170724.000000,144312.000000,62175.000000,564.501852)}
{pt3dadd(170628.000000,144444.000000,61725.000000,547.240338)}
{pt3dadd(170388.000000,144468.000000,61475.000000,529.978824)}
{pt3dadd(170340.000000,144648.000000,60925.000000,570.003286)}
{pt3dadd(170280.000000,144612.000000,60375.000000,610.027749)}
{pt3dadd(170124.000000,144600.000000,59750.000000,650.052211)}
{pt3dadd(170064.000000,144648.000000,59150.000000,690.076674)}
{pt3dadd(169776.000000,144780.000000,58500.000000,642.354349)}
{pt3dadd(169632.000000,144780.000000,57975.000000,594.632025)}
{pt3dadd(169236.000000,144816.000000,57300.000000,546.909700)}
{pt3dadd(169152.000000,144960.000000,56750.000000,499.187376)}
{pt3dadd(168732.000000,145056.000000,56025.000000,599.024880)}

{create adhoc79}
{access adhoc79}
{connect adhoc79(1), adhoc78(0)}
{nseg = 1}
{strdef color color = "White"}
{pt3dclear()}
{pt3dadd(168732.000000,145056.000000,56025.000000,599.024880)}
{pt3dadd(168852.000000,144576.000000,55450.000000,288.881586)}
{pt3dadd(169044.000000,144180.000000,54675.000000,288.881586)}
{pt3dadd(169092.000000,143940.000000,54075.000000,288.881586)}
{pt3dadd(169188.000000,143796.000000,53550.000000,288.881586)}
{pt3dadd(169152.000000,143544.000000,52925.000000,288.881586)}
{pt3dadd(169116.000000,143460.000000,52450.000000,320.658561)}
{pt3dadd(169236.000000,143544.000000,52075.000000,352.435536)}
{pt3dadd(169332.000000,143520.000000,51425.000000,384.212511)}
{pt3dadd(169452.000000,143328.000000,50700.000000,415.989486)}
{pt3dadd(169416.000000,142932.000000,49950.000000,400.321926)}
{pt3dadd(169416.000000,142608.000000,49425.000000,384.654366)}
{pt3dadd(169548.000000,142188.000000,48700.000000,368.986806)}
{pt3dadd(169572.000000,142032.000000,47975.000000,353.319246)}
{pt3dadd(169848.000000,142224.000000,47250.000000,344.859412)}
{pt3dadd(170016.000000,142284.000000,46800.000000,336.399579)}
{pt3dadd(169932.000000,142596.000000,46300.000000,327.939746)}
{pt3dadd(169944.000000,142956.000000,45700.000000,319.479912)}
{pt3dadd(170016.000000,143496.000000,44950.000000,311.830331)}
{pt3dadd(169692.000000,143856.000000,44200.000000,304.180749)}
{pt3dadd(169260.000000,144072.000000,43400.000000,296.531167)}
{pt3dadd(169248.000000,144216.000000,42700.000000,288.881586)}
{pt3dadd(169740.000000,144408.000000,41950.000000,352.435536)}
{pt3dadd(170292.000000,144564.000000,41200.000000,415.989486)}
{pt3dadd(170904.000000,145224.000000,40575.000000,415.989486)}

{create adhoc80}
{access adhoc80}
{connect adhoc80(1), adhoc79(0)}
{nseg = 1}
{strdef color color = "White"}
{pt3dclear()}
{pt3dadd(170904.000000,145224.000000,40575.000000,415.989486)}
{pt3dadd(171624.000000,145176.000000,40250.000000,266.233284)}
{pt3dadd(172680.000000,145260.000000,39700.000000,253.483965)}
{pt3dadd(173148.000000,145248.000000,39325.000000,240.734646)}
{pt3dadd(173736.000000,145368.000000,38725.000000,266.233284)}

{create adhoc81}
{access adhoc81}
{connect adhoc81(1), adhoc79(0)}
{nseg = 1}
{strdef color color = "White"}
{pt3dclear()}
{pt3dadd(170904.000000,145224.000000,40575.000000,415.989486)}
{pt3dadd(170664.000000,145752.000000,40325.000000,231.105276)}
{pt3dadd(170244.000000,146568.000000,39950.000000,200.612214)}

{create adhoc82}
{access adhoc82}
{connect adhoc82(1), adhoc78(0)}
{nseg = 1}
{strdef color color = "White"}
{pt3dclear()}
{pt3dadd(168732.000000,145056.000000,56025.000000,599.024880)}
{pt3dadd(168576.000000,145584.000000,55350.000000,415.989486)}
{pt3dadd(168228.000000,146184.000000,54700.000000,346.657896)}

{create adhoc83}
{access adhoc83}
{connect adhoc83(1), adhoc82(0)}
{nseg = 1}
{strdef color color = "White"}
{pt3dclear()}
{pt3dadd(168228.000000,146184.000000,54700.000000,346.657896)}
{pt3dadd(168084.000000,147012.000000,54100.000000,288.881586)}
{pt3dadd(167628.000000,147888.000000,53425.000000,276.844851)}
{pt3dadd(167544.000000,148644.000000,52750.000000,264.808116)}
{pt3dadd(167388.000000,149064.000000,52025.000000,252.771381)}
{pt3dadd(167400.000000,149400.000000,51200.000000,240.734646)}
{pt3dadd(166908.000000,149712.000000,50450.000000,260.420972)}
{pt3dadd(166140.000000,150120.000000,49900.000000,280.107297)}
{pt3dadd(165708.000000,150528.000000,49300.000000,299.793622)}
{pt3dadd(165660.000000,151080.000000,48575.000000,319.479948)}
{pt3dadd(165840.000000,151524.000000,47950.000000,311.830357)}
{pt3dadd(165432.000000,151932.000000,47150.000000,304.180767)}
{pt3dadd(164952.000000,152748.000000,46450.000000,296.531176)}
{pt3dadd(164628.000000,153228.000000,46125.000000,288.881586)}
{pt3dadd(164508.000000,153948.000000,45525.000000,276.844851)}
{pt3dadd(164256.000000,154176.000000,45125.000000,264.808116)}
{pt3dadd(164124.000000,154560.000000,44800.000000,252.771381)}
{pt3dadd(164100.000000,154824.000000,44525.000000,240.734646)}
{pt3dadd(164232.000000,155460.000000,43800.000000,222.345193)}
{pt3dadd(164448.000000,155520.000000,43200.000000,203.955741)}
{pt3dadd(165588.000000,155652.000000,42550.000000,185.566288)}
{pt3dadd(166620.000000,156060.000000,41825.000000,167.176836)}
{pt3dadd(167484.000000,156660.000000,41175.000000,200.612214)}
{pt3dadd(167640.000000,157032.000000,40625.000000,204.467166)}

{create adhoc84}
{access adhoc84}
{connect adhoc84(1), adhoc82(0)}
{nseg = 1}
{strdef color color = "White"}
{pt3dclear()}
{pt3dadd(168228.000000,146184.000000,54700.000000,346.657896)}
{pt3dadd(168036.000000,145932.000000,54075.000000,240.734646)}
{pt3dadd(167976.000000,145956.000000,53425.000000,238.327304)}
{pt3dadd(167724.000000,145896.000000,52525.000000,235.919961)}
{pt3dadd(167460.000000,145980.000000,51800.000000,233.512618)}
{pt3dadd(167112.000000,145968.000000,50925.000000,231.105276)}
{pt3dadd(166872.000000,146148.000000,50375.000000,233.512618)}
{pt3dadd(166728.000000,146256.000000,49675.000000,235.919961)}
{pt3dadd(166764.000000,146400.000000,48950.000000,238.327304)}
{pt3dadd(166944.000000,146628.000000,48300.000000,240.734646)}
{pt3dadd(167268.000000,146832.000000,47600.000000,167.176836)}
{pt3dadd(167196.000000,147372.000000,46900.000000,96.745860)}

{create adhoc85}
{access adhoc85}
{connect adhoc85(1), adhoc77(0)}
{nseg = 1}
{strdef color color = "White"}
{pt3dclear()}
{pt3dadd(172812.000000,138540.000000,66450.000000,346.657896)}
{pt3dadd(173220.000000,138252.000000,66175.000000,479.219796)}
{pt3dadd(173196.000000,138312.000000,65850.000000,436.090028)}
{pt3dadd(173388.000000,138252.000000,65350.000000,392.960259)}
{pt3dadd(173604.000000,138192.000000,64775.000000,349.830491)}
{pt3dadd(173664.000000,138252.000000,64625.000000,306.700722)}
{pt3dadd(173748.000000,138348.000000,64375.000000,255.583926)}

{create adhoc86}
{access adhoc86}
{connect adhoc86(1), adhoc85(0)}
{nseg = 1}
{strdef color color = "White"}
{pt3dclear()}
{pt3dadd(173748.000000,138348.000000,64375.000000,255.583926)}
{pt3dadd(174024.000000,138420.000000,64350.000000,160.489764)}
{pt3dadd(174288.000000,138888.000000,64300.000000,137.163483)}
{pt3dadd(174624.000000,139260.000000,64175.000000,113.837202)}
{pt3dadd(174804.000000,139428.000000,63825.000000,90.510921)}
{pt3dadd(175284.000000,139620.000000,63425.000000,67.184640)}
{pt3dadd(175920.000000,139692.000000,63125.000000,116.095032)}

{create adhoc87}
{access adhoc87}
{connect adhoc87(1), adhoc85(0)}
{nseg = 1}
{strdef color color = "White"}
{pt3dclear()}
{pt3dadd(173748.000000,138348.000000,64375.000000,255.583926)}
{pt3dadd(173820.000000,137976.000000,63900.000000,277.326324)}
{pt3dadd(173700.000000,137928.000000,63425.000000,274.553064)}
{pt3dadd(173688.000000,137844.000000,62975.000000,271.779804)}
{pt3dadd(173568.000000,137616.000000,62300.000000,269.006544)}
{pt3dadd(173448.000000,137748.000000,61925.000000,266.233284)}
{pt3dadd(173376.000000,137676.000000,61500.000000,252.921618)}
{pt3dadd(173184.000000,137652.000000,61000.000000,239.609952)}
{pt3dadd(173064.000000,137724.000000,60625.000000,226.298286)}
{pt3dadd(172824.000000,137724.000000,60300.000000,212.986620)}
{pt3dadd(172644.000000,137796.000000,60075.000000,209.893019)}
{pt3dadd(172404.000000,137712.000000,59800.000000,206.799417)}
{pt3dadd(172164.000000,137640.000000,59500.000000,203.705816)}
{pt3dadd(171816.000000,137484.000000,58975.000000,200.612214)}
{pt3dadd(171600.000000,137244.000000,58525.000000,277.326378)}

{create adhoc88}
{access adhoc88}
{connect adhoc88(1), adhoc87(0)}
{nseg = 1}
{strdef color color = "White"}
{pt3dclear()}
{pt3dadd(171600.000000,137244.000000,58525.000000,277.326378)}
{pt3dadd(171312.000000,137580.000000,58200.000000,167.176836)}
{pt3dadd(171180.000000,137736.000000,57675.000000,160.211138)}
{pt3dadd(171336.000000,137832.000000,57225.000000,153.245439)}
{pt3dadd(171300.000000,137916.000000,56650.000000,146.279741)}
{pt3dadd(171288.000000,138396.000000,56200.000000,139.314042)}
{pt3dadd(171132.000000,138756.000000,56000.000000,157.732182)}
{pt3dadd(170808.000000,139140.000000,55775.000000,176.150322)}
{pt3dadd(170676.000000,139476.000000,55725.000000,194.568462)}
{pt3dadd(170460.000000,139836.000000,55650.000000,212.986602)}
{pt3dadd(170424.000000,140124.000000,55750.000000,209.893005)}
{pt3dadd(170172.000000,140484.000000,55625.000000,206.799408)}
{pt3dadd(170088.000000,140796.000000,55575.000000,203.705811)}
{pt3dadd(169404.000000,141012.000000,55525.000000,200.612214)}
{pt3dadd(169296.000000,141300.000000,55525.000000,96.745860)}

{create adhoc89}
{access adhoc89}
{connect adhoc89(1), adhoc87(0)}
{nseg = 1}
{strdef color color = "White"}
{pt3dclear()}
{pt3dadd(171600.000000,137244.000000,58525.000000,277.326378)}
{pt3dadd(171768.000000,136416.000000,58250.000000,154.070172)}
{pt3dadd(171804.000000,136140.000000,58000.000000,165.705683)}
{pt3dadd(171852.000000,135804.000000,57900.000000,177.341193)}
{pt3dadd(171696.000000,135372.000000,58200.000000,188.976703)}
{pt3dadd(171624.000000,135108.000000,58500.000000,200.612214)}
{pt3dadd(171060.000000,134724.000000,58825.000000,192.253370)}
{pt3dadd(170280.000000,134352.000000,59250.000000,183.894525)}
{pt3dadd(169692.000000,134268.000000,59650.000000,175.535680)}
{pt3dadd(169116.000000,134076.000000,60000.000000,167.176836)}
{pt3dadd(169200.000000,134076.000000,60525.000000,139.314042)}
{pt3dadd(169752.000000,134472.000000,60950.000000,80.621550)}

{create adhoc90}
{access adhoc90}
{connect adhoc90(1), adhoc76(0)}
{nseg = 1}
{strdef color color = "White"}
{pt3dclear()}
{pt3dadd(174432.000000,136404.000000,69050.000000,1035.114948)}
{pt3dadd(175512.000000,135672.000000,69375.000000,346.657896)}
{pt3dadd(175596.000000,135468.000000,69200.000000,301.787631)}
{pt3dadd(175716.000000,135252.000000,69300.000000,256.917366)}
{pt3dadd(176100.000000,135036.000000,69450.000000,212.047101)}
{pt3dadd(176292.000000,134760.000000,69750.000000,167.176836)}
{pt3dadd(176580.000000,134436.000000,70075.000000,175.535680)}
{pt3dadd(176748.000000,134184.000000,70425.000000,183.894525)}
{pt3dadd(176892.000000,133632.000000,70775.000000,192.253370)}
{pt3dadd(176928.000000,133524.000000,70950.000000,200.612214)}
{pt3dadd(177144.000000,132828.000000,71125.000000,210.642822)}
{pt3dadd(177204.000000,132480.000000,71150.000000,220.673430)}
{pt3dadd(177444.000000,132144.000000,71225.000000,230.704038)}
{pt3dadd(177516.000000,131892.000000,71250.000000,240.734646)}
{pt3dadd(177672.000000,131580.000000,71250.000000,230.704038)}
{pt3dadd(177648.000000,131304.000000,71125.000000,220.673430)}
{pt3dadd(177660.000000,131064.000000,71025.000000,210.642822)}
{pt3dadd(177780.000000,130776.000000,70975.000000,200.612214)}
{pt3dadd(178140.000000,130476.000000,70875.000000,185.287671)}
{pt3dadd(178404.000000,130152.000000,70975.000000,169.963128)}
{pt3dadd(178752.000000,129936.000000,71125.000000,154.638585)}
{pt3dadd(178932.000000,129876.000000,71375.000000,139.314042)}
{pt3dadd(178956.000000,129708.000000,71625.000000,133.509289)}
{pt3dadd(178908.000000,129468.000000,71575.000000,127.704537)}
{pt3dadd(178980.000000,129288.000000,71750.000000,121.899785)}
{pt3dadd(178956.000000,128988.000000,71750.000000,116.095032)}
{pt3dadd(178776.000000,128724.000000,71700.000000,67.184640)}

{create adhoc91}
{access adhoc91}
{connect adhoc91(1), adhoc76(0)}
{nseg = 1}
{strdef color color = "White"}
{pt3dclear()}
{pt3dadd(174432.000000,136404.000000,69050.000000,1035.114948)}
{pt3dadd(174000.000000,135024.000000,68550.000000,552.061332)}
{pt3dadd(173484.000000,134148.000000,67825.000000,563.802219)}
{pt3dadd(173136.000000,133224.000000,67150.000000,575.543106)}
{pt3dadd(173004.000000,132204.000000,66400.000000,587.283993)}
{pt3dadd(172416.000000,132024.000000,65825.000000,599.024880)}
{pt3dadd(172416.000000,131592.000000,65350.000000,664.917611)}
{pt3dadd(172188.000000,131028.000000,64425.000000,730.810341)}
{pt3dadd(172008.000000,130608.000000,63675.000000,796.703072)}
{pt3dadd(171804.000000,129852.000000,62775.000000,862.595802)}
{pt3dadd(171564.000000,129288.000000,62000.000000,895.374423)}
{pt3dadd(171276.000000,128844.000000,61100.000000,928.153044)}
{pt3dadd(171000.000000,128328.000000,60275.000000,960.931665)}
{pt3dadd(170796.000000,127944.000000,59775.000000,993.710286)}
{pt3dadd(171012.000000,127464.000000,59350.000000,718.829820)}

{create adhoc92}
{access adhoc92}
{connect adhoc92(1), adhoc91(0)}
{nseg = 1}
{strdef color color = "White"}
{pt3dclear()}
{pt3dadd(171012.000000,127464.000000,59350.000000,718.829820)}
{pt3dadd(170976.000000,126036.000000,58750.000000,599.024880)}
{pt3dadd(170880.000000,125832.000000,58450.000000,621.787828)}
{pt3dadd(170784.000000,125616.000000,58400.000000,644.550777)}
{pt3dadd(170808.000000,125364.000000,58250.000000,667.313725)}
{pt3dadd(170748.000000,125088.000000,58250.000000,690.076674)}
{pt3dadd(170616.000000,124764.000000,58000.000000,667.313725)}
{pt3dadd(170460.000000,124416.000000,57700.000000,644.550777)}
{pt3dadd(170280.000000,123900.000000,57125.000000,621.787828)}
{pt3dadd(170136.000000,123564.000000,56775.000000,599.024880)}
{pt3dadd(169956.000000,123336.000000,56300.000000,574.065504)}
{pt3dadd(169776.000000,123096.000000,55650.000000,549.106128)}
{pt3dadd(169680.000000,122940.000000,54950.000000,524.146752)}
{pt3dadd(169524.000000,122784.000000,54225.000000,499.187376)}
{pt3dadd(169476.000000,122952.000000,53475.000000,518.156496)}
{pt3dadd(169596.000000,123000.000000,52725.000000,537.125616)}
{pt3dadd(169680.000000,123096.000000,52200.000000,556.094736)}
{pt3dadd(169752.000000,123168.000000,51450.000000,575.063856)}
{pt3dadd(169980.000000,123288.000000,50725.000000,522.039066)}
{pt3dadd(170196.000000,123420.000000,49900.000000,469.014276)}
{pt3dadd(170412.000000,123552.000000,49225.000000,415.989486)}
{pt3dadd(170676.000000,123624.000000,48825.000000,499.187376)}

{create adhoc93}
{access adhoc93}
{connect adhoc93(1), adhoc92(0)}
{nseg = 1}
{strdef color color = "White"}
{pt3dclear()}
{pt3dadd(170676.000000,123624.000000,48825.000000,499.187376)}
{pt3dadd(171252.000000,123984.000000,48175.000000,346.657896)}
{pt3dadd(171732.000000,124056.000000,47475.000000,384.790266)}
{pt3dadd(172152.000000,124296.000000,46900.000000,422.922636)}
{pt3dadd(172716.000000,124428.000000,46150.000000,461.055006)}
{pt3dadd(172944.000000,124692.000000,45500.000000,499.187376)}
{pt3dadd(173184.000000,125076.000000,44750.000000,461.055006)}
{pt3dadd(173400.000000,125436.000000,44125.000000,422.922636)}
{pt3dadd(173580.000000,125616.000000,43750.000000,384.790266)}
{pt3dadd(173676.000000,125748.000000,43425.000000,346.657896)}
{pt3dadd(173676.000000,125796.000000,43150.000000,346.657896)}
{pt3dadd(173808.000000,125796.000000,42825.000000,346.657896)}
{pt3dadd(173748.000000,125880.000000,42425.000000,346.657896)}
{pt3dadd(173832.000000,125784.000000,41900.000000,346.657896)}
{pt3dadd(173952.000000,125736.000000,41425.000000,346.657896)}

{create adhoc94}
{access adhoc94}
{connect adhoc94(1), adhoc93(0)}
{nseg = 1}
{strdef color color = "White"}
{pt3dclear()}
{pt3dadd(173952.000000,125736.000000,41425.000000,346.657896)}
{pt3dadd(174120.000000,126144.000000,40900.000000,346.657896)}
{pt3dadd(174396.000000,126648.000000,40225.000000,359.830899)}
{pt3dadd(174720.000000,127056.000000,39450.000000,373.003902)}
{pt3dadd(174948.000000,127416.000000,38775.000000,386.176905)}
{pt3dadd(175536.000000,127884.000000,38075.000000,399.349908)}
{pt3dadd(176352.000000,128676.000000,37450.000000,344.115747)}
{pt3dadd(177204.000000,129144.000000,36675.000000,288.881586)}
{pt3dadd(177396.000000,129324.000000,36325.000000,240.734646)}

{create adhoc95}
{access adhoc95}
{connect adhoc95(1), adhoc93(0)}
{nseg = 1}
{strdef color color = "White"}
{pt3dclear()}
{pt3dadd(173952.000000,125736.000000,41425.000000,346.657896)}
{pt3dadd(174192.000000,125328.000000,41400.000000,240.734646)}
{pt3dadd(174612.000000,124848.000000,41350.000000,238.327304)}
{pt3dadd(174696.000000,124500.000000,41475.000000,235.919961)}
{pt3dadd(175224.000000,123972.000000,41425.000000,233.512618)}
{pt3dadd(175464.000000,123708.000000,41350.000000,231.105276)}
{pt3dadd(175752.000000,123372.000000,41275.000000,221.861052)}
{pt3dadd(176016.000000,123120.000000,41175.000000,116.095032)}

{create adhoc96}
{access adhoc96}
{connect adhoc96(1), adhoc92(0)}
{nseg = 1}
{strdef color color = "White"}
{pt3dclear()}
{pt3dadd(170676.000000,123624.000000,48825.000000,499.187376)}
{pt3dadd(170244.000000,123180.000000,49000.000000,288.881586)}
{pt3dadd(170364.000000,122796.000000,48675.000000,264.808120)}
{pt3dadd(170556.000000,122352.000000,48200.000000,240.734655)}
{pt3dadd(170736.000000,121932.000000,47650.000000,216.661190)}
{pt3dadd(171360.000000,121236.000000,47100.000000,192.587724)}
{pt3dadd(172392.000000,120792.000000,46500.000000,96.745860)}

{create adhoc97}
{access adhoc97}
{connect adhoc97(1), adhoc91(0)}
{nseg = 1}
{strdef color color = "White"}
{pt3dclear()}
{pt3dadd(171012.000000,127464.000000,59350.000000,718.829820)}
{pt3dadd(170220.000000,128112.000000,59050.000000,499.187376)}
{pt3dadd(169932.000000,128388.000000,58600.000000,478.387903)}
{pt3dadd(169716.000000,128460.000000,58225.000000,457.588431)}
{pt3dadd(169308.000000,128784.000000,57700.000000,436.788958)}
{pt3dadd(168732.000000,129276.000000,57050.000000,415.989486)}
{pt3dadd(168516.000000,129708.000000,56400.000000,415.989486)}
{pt3dadd(168564.000000,130164.000000,55800.000000,415.989486)}
{pt3dadd(168348.000000,130584.000000,55075.000000,415.989486)}
{pt3dadd(168312.000000,131196.000000,54450.000000,415.989486)}
{pt3dadd(168420.000000,131784.000000,53775.000000,436.788958)}
{pt3dadd(168708.000000,132180.000000,53050.000000,457.588431)}
{pt3dadd(169008.000000,132552.000000,52450.000000,478.387903)}
{pt3dadd(169260.000000,132672.000000,51725.000000,499.187376)}
{pt3dadd(169356.000000,132840.000000,50925.000000,478.387903)}
{pt3dadd(169440.000000,133092.000000,50175.000000,457.588431)}
{pt3dadd(169572.000000,133344.000000,49450.000000,436.788958)}
{pt3dadd(169656.000000,133584.000000,48625.000000,415.989486)}
{pt3dadd(169656.000000,133716.000000,47875.000000,415.989486)}
{pt3dadd(170088.000000,133620.000000,47300.000000,415.989486)}
{pt3dadd(170220.000000,133176.000000,46725.000000,415.989486)}
{pt3dadd(170328.000000,132600.000000,46025.000000,415.989486)}
{pt3dadd(170304.000000,132204.000000,45400.000000,398.656589)}
{pt3dadd(170196.000000,131652.000000,44750.000000,381.323691)}
{pt3dadd(170028.000000,131328.000000,44025.000000,363.990794)}
{pt3dadd(170016.000000,131052.000000,43325.000000,346.657896)}
{pt3dadd(170424.000000,131100.000000,42625.000000,346.657896)}
{pt3dadd(170988.000000,130980.000000,41800.000000,346.657896)}
{pt3dadd(171276.000000,130920.000000,41175.000000,346.657896)}
{pt3dadd(171672.000000,131172.000000,40500.000000,346.657896)}
{pt3dadd(172344.000000,132144.000000,39900.000000,288.881586)}

{create adhoc98}
{access adhoc98}
{connect adhoc98(1), adhoc97(0)}
{nseg = 1}
{strdef color color = "White"}
{pt3dclear()}
{pt3dadd(172344.000000,132144.000000,39900.000000,288.881586)}
{pt3dadd(172476.000000,132372.000000,39925.000000,319.479912)}
{pt3dadd(172452.000000,132600.000000,39875.000000,263.796399)}
{pt3dadd(172464.000000,132840.000000,39850.000000,208.112886)}
{pt3dadd(172404.000000,133092.000000,39800.000000,152.429373)}
{pt3dadd(172380.000000,133392.000000,39775.000000,96.745860)}
{pt3dadd(172296.000000,133668.000000,39800.000000,101.583153)}
{pt3dadd(172224.000000,133920.000000,39800.000000,106.420446)}
{pt3dadd(172224.000000,134196.000000,39850.000000,111.257739)}
{pt3dadd(172236.000000,134472.000000,39950.000000,116.095032)}
{pt3dadd(172104.000000,134700.000000,39950.000000,116.095032)}

{create adhoc99}
{access adhoc99}
{connect adhoc99(1), adhoc97(0)}
{nseg = 1}
{strdef color color = "White"}
{pt3dclear()}
{pt3dadd(172344.000000,132144.000000,39900.000000,288.881586)}
{pt3dadd(172920.000000,132804.000000,39150.000000,499.187376)}
{pt3dadd(173712.000000,133104.000000,38450.000000,446.610929)}
{pt3dadd(174324.000000,133464.000000,37950.000000,394.034481)}
{pt3dadd(174660.000000,133944.000000,37700.000000,341.458034)}
{pt3dadd(175056.000000,134280.000000,37550.000000,288.881586)}
{pt3dadd(175488.000000,134628.000000,37450.000000,303.325664)}
{pt3dadd(175836.000000,134892.000000,37325.000000,317.769741)}
{pt3dadd(176232.000000,135720.000000,36850.000000,332.213819)}
{pt3dadd(176484.000000,136584.000000,36175.000000,346.657896)}
{pt3dadd(176832.000000,137436.000000,35525.000000,301.787631)}
{pt3dadd(177792.000000,138204.000000,34800.000000,256.917366)}
{pt3dadd(178392.000000,138492.000000,34100.000000,212.047101)}
{pt3dadd(178920.000000,138696.000000,33400.000000,167.176836)}
{pt3dadd(179448.000000,138828.000000,32675.000000,167.176836)}
{pt3dadd(179880.000000,139068.000000,32075.000000,167.176836)}
{pt3dadd(180432.000000,139476.000000,31275.000000,167.176836)}
{pt3dadd(181200.000000,139992.000000,30725.000000,77.396688)}

{create adhoc100}
{access adhoc100}
{connect adhoc100(1), adhoc75(0)}
{nseg = 1}
{strdef color color = "White"}
{pt3dclear()}
{pt3dadd(179268.000000,138264.000000,76700.000000,1192.452354)}
{pt3dadd(179652.000000,138012.000000,76525.000000,828.091944)}
{pt3dadd(179880.000000,137712.000000,76875.000000,658.756345)}
{pt3dadd(179952.000000,137340.000000,76700.000000,489.420747)}
{pt3dadd(180132.000000,136980.000000,76475.000000,320.085149)}
{pt3dadd(180372.000000,136752.000000,76550.000000,150.749550)}
{pt3dadd(180324.000000,136380.000000,76350.000000,145.080204)}
{pt3dadd(180264.000000,136080.000000,76325.000000,139.410858)}
{pt3dadd(180240.000000,135732.000000,76275.000000,133.741512)}
{pt3dadd(180144.000000,135108.000000,75950.000000,116.095032)}

{create adhoc101}
{access adhoc101}
{connect adhoc101(1), adhoc74(0)}
{nseg = 1}
{strdef color color = "White"}
{pt3dclear()}
{pt3dadd(185208.000000,141828.000000,85925.000000,718.829820)}
{pt3dadd(185232.000000,142188.000000,86275.000000,862.595802)}
{pt3dadd(185496.000000,142608.000000,86400.000000,766.751823)}
{pt3dadd(185412.000000,143040.000000,86300.000000,670.907844)}
{pt3dadd(185376.000000,143520.000000,85900.000000,575.063865)}
{pt3dadd(185124.000000,143928.000000,85625.000000,479.219886)}
{pt3dadd(184896.000000,144396.000000,85200.000000,497.430243)}
{pt3dadd(184944.000000,144864.000000,84925.000000,515.640600)}
{pt3dadd(185136.000000,145248.000000,84575.000000,533.850957)}
{pt3dadd(184992.000000,145740.000000,84050.000000,552.061314)}
{pt3dadd(184764.000000,146100.000000,83950.000000,563.802206)}
{pt3dadd(184704.000000,146460.000000,83550.000000,575.543097)}
{pt3dadd(184788.000000,146832.000000,83300.000000,587.283988)}
{pt3dadd(184176.000000,147384.000000,82700.000000,599.024880)}
{pt3dadd(183804.000000,147984.000000,81975.000000,553.266031)}
{pt3dadd(183420.000000,148560.000000,81200.000000,507.507183)}
{pt3dadd(183036.000000,149028.000000,80500.000000,461.748335)}
{pt3dadd(182604.000000,149460.000000,79675.000000,415.989486)}
{pt3dadd(181656.000000,149688.000000,78775.000000,427.004883)}
{pt3dadd(181212.000000,150060.000000,78175.000000,438.020280)}
{pt3dadd(180540.000000,150420.000000,77475.000000,449.035677)}
{pt3dadd(179724.000000,150576.000000,76875.000000,460.051074)}
{pt3dadd(179160.000000,151248.000000,76150.000000,524.745760)}
{pt3dadd(178404.000000,151476.000000,75650.000000,589.440447)}
{pt3dadd(178068.000000,152280.000000,75150.000000,654.135133)}
{pt3dadd(177600.000000,152832.000000,74600.000000,718.829820)}
{pt3dadd(176928.000000,153192.000000,73950.000000,663.919209)}
{pt3dadd(176352.000000,153708.000000,73200.000000,609.008598)}
{pt3dadd(175620.000000,154008.000000,72475.000000,554.097987)}
{pt3dadd(175344.000000,154380.000000,71825.000000,499.187376)}
{pt3dadd(175056.000000,154980.000000,71150.000000,514.583100)}
{pt3dadd(174852.000000,155124.000000,70800.000000,529.978824)}
{pt3dadd(174420.000000,155304.000000,70350.000000,575.063856)}

{create adhoc102}
{access adhoc102}
{connect adhoc102(1), adhoc101(0)}
{nseg = 1}
{strdef color color = "White"}
{pt3dclear()}
{pt3dadd(174420.000000,155304.000000,70350.000000,575.063856)}
{pt3dadd(174276.000000,155532.000000,69650.000000,599.024880)}
{pt3dadd(174300.000000,155328.000000,69025.000000,546.566262)}
{pt3dadd(174096.000000,155292.000000,68350.000000,494.107644)}
{pt3dadd(174060.000000,155364.000000,67775.000000,441.649026)}
{pt3dadd(173880.000000,155388.000000,67550.000000,415.989486)}

{create adhoc103}
{access adhoc103}
{connect adhoc103(1), adhoc102(0)}
{nseg = 1}
{strdef color color = "White"}
{pt3dclear()}
{pt3dadd(173880.000000,155388.000000,67550.000000,415.989486)}
{pt3dadd(173832.000000,155616.000000,66825.000000,288.881586)}
{pt3dadd(173400.000000,156180.000000,66075.000000,341.458034)}
{pt3dadd(172596.000000,156396.000000,65275.000000,394.034481)}
{pt3dadd(172416.000000,156480.000000,64850.000000,446.610929)}
{pt3dadd(171888.000000,156900.000000,64200.000000,499.187376)}
{pt3dadd(171372.000000,157284.000000,63450.000000,479.219886)}
{pt3dadd(171276.000000,157452.000000,63175.000000,415.989486)}

{create adhoc104}
{access adhoc104}
{connect adhoc104(1), adhoc103(0)}
{nseg = 1}
{strdef color color = "White"}
{pt3dclear()}
{pt3dadd(171276.000000,157452.000000,63175.000000,415.989486)}
{pt3dadd(170940.000000,157884.000000,62450.000000,368.040852)}
{pt3dadd(170940.000000,158448.000000,61800.000000,332.791596)}
{pt3dadd(170520.000000,159060.000000,60950.000000,383.375916)}

{create adhoc105}
{access adhoc105}
{connect adhoc105(1), adhoc104(0)}
{nseg = 1}
{strdef color color = "White"}
{pt3dclear()}
{pt3dadd(170520.000000,159060.000000,60950.000000,383.375916)}
{pt3dadd(170952.000000,159024.000000,60200.000000,399.349908)}
{pt3dadd(171048.000000,159120.000000,59375.000000,419.317403)}
{pt3dadd(171072.000000,159072.000000,58650.000000,439.284897)}
{pt3dadd(171300.000000,159060.000000,57925.000000,459.252391)}
{pt3dadd(170808.000000,158916.000000,57350.000000,479.219886)}
{pt3dadd(170280.000000,158844.000000,56850.000000,446.079388)}
{pt3dadd(170088.000000,158760.000000,56375.000000,412.938891)}
{pt3dadd(169356.000000,158616.000000,55675.000000,379.798393)}
{pt3dadd(168636.000000,158832.000000,55050.000000,346.657896)}
{pt3dadd(168060.000000,158976.000000,54500.000000,342.035796)}
{pt3dadd(167616.000000,159108.000000,53700.000000,337.413696)}
{pt3dadd(167376.000000,159348.000000,53075.000000,332.791596)}
{pt3dadd(167412.000000,159516.000000,52350.000000,288.881586)}

{create adhoc106}
{access adhoc106}
{connect adhoc106(1), adhoc105(0)}
{nseg = 1}
{strdef color color = "White"}
{pt3dclear()}
{pt3dadd(167412.000000,159516.000000,52350.000000,288.881586)}
{pt3dadd(167304.000000,160092.000000,51900.000000,319.479912)}
{pt3dadd(167436.000000,160380.000000,51700.000000,297.386253)}
{pt3dadd(167400.000000,160836.000000,51575.000000,275.292594)}
{pt3dadd(167316.000000,161124.000000,51450.000000,253.198935)}
{pt3dadd(167268.000000,161508.000000,51325.000000,231.105276)}
{pt3dadd(167220.000000,161760.000000,51225.000000,233.512618)}
{pt3dadd(167208.000000,162000.000000,51225.000000,235.919961)}
{pt3dadd(167208.000000,162252.000000,51250.000000,238.327304)}
{pt3dadd(167172.000000,162528.000000,51275.000000,240.734646)}
{pt3dadd(167172.000000,162840.000000,51325.000000,238.327304)}
{pt3dadd(167304.000000,163212.000000,51450.000000,235.919961)}
{pt3dadd(167448.000000,163524.000000,51575.000000,233.512618)}
{pt3dadd(167340.000000,163836.000000,51575.000000,231.105276)}
{pt3dadd(167244.000000,164208.000000,51500.000000,233.512618)}
{pt3dadd(167184.000000,164496.000000,51375.000000,235.919961)}
{pt3dadd(166848.000000,164904.000000,51075.000000,238.327304)}
{pt3dadd(166332.000000,165576.000000,50750.000000,240.734646)}
{pt3dadd(165924.000000,166224.000000,50400.000000,252.771381)}
{pt3dadd(165564.000000,166632.000000,50050.000000,264.808116)}
{pt3dadd(165252.000000,167052.000000,49475.000000,276.844851)}
{pt3dadd(164976.000000,167676.000000,48775.000000,288.881586)}
{pt3dadd(164160.000000,169068.000000,48125.000000,240.734655)}
{pt3dadd(163824.000000,169620.000000,47875.000000,192.587724)}
{pt3dadd(163392.000000,169956.000000,47575.000000,240.734646)}

{create adhoc107}
{access adhoc107}
{connect adhoc107(1), adhoc105(0)}
{nseg = 1}
{strdef color color = "White"}
{pt3dclear()}
{pt3dadd(167412.000000,159516.000000,52350.000000,288.881586)}
{pt3dadd(167736.000000,158928.000000,52125.000000,167.176836)}
{pt3dadd(167700.000000,158688.000000,51675.000000,147.907368)}
{pt3dadd(167748.000000,158268.000000,51250.000000,141.991074)}

{create adhoc108}
{access adhoc108}
{connect adhoc108(1), adhoc104(0)}
{nseg = 1}
{strdef color color = "White"}
{pt3dclear()}
{pt3dadd(170520.000000,159060.000000,60950.000000,383.375916)}
{pt3dadd(170280.000000,159336.000000,61000.000000,288.881586)}
{pt3dadd(170184.000000,159612.000000,60950.000000,274.437509)}
{pt3dadd(170148.000000,159828.000000,60900.000000,259.993431)}
{pt3dadd(170148.000000,160068.000000,60950.000000,245.549354)}
{pt3dadd(169776.000000,160440.000000,60850.000000,231.105276)}
{pt3dadd(169620.000000,160764.000000,60825.000000,221.475888)}
{pt3dadd(169536.000000,161124.000000,60850.000000,211.846500)}
{pt3dadd(169296.000000,161520.000000,60650.000000,202.217112)}
{pt3dadd(169008.000000,162012.000000,60450.000000,192.587724)}
{pt3dadd(168912.000000,162432.000000,60450.000000,202.217112)}
{pt3dadd(168780.000000,162792.000000,60375.000000,211.846500)}
{pt3dadd(168648.000000,163236.000000,60350.000000,221.475888)}
{pt3dadd(168564.000000,163584.000000,60225.000000,231.105276)}
{pt3dadd(168552.000000,163992.000000,60150.000000,233.512618)}
{pt3dadd(168540.000000,164388.000000,60075.000000,235.919961)}
{pt3dadd(168528.000000,164664.000000,60000.000000,238.327304)}
{pt3dadd(168180.000000,165000.000000,59800.000000,240.734646)}
{pt3dadd(168084.000000,165288.000000,59700.000000,222.345193)}
{pt3dadd(168312.000000,165660.000000,59650.000000,203.955741)}
{pt3dadd(167412.000000,166416.000000,59275.000000,185.566288)}
{pt3dadd(166836.000000,166968.000000,58875.000000,167.176836)}
{pt3dadd(166488.000000,167736.000000,58475.000000,197.603024)}
{pt3dadd(166152.000000,168924.000000,58025.000000,228.029211)}
{pt3dadd(166152.000000,170556.000000,57500.000000,258.455399)}
{pt3dadd(166332.000000,171936.000000,57000.000000,288.881586)}
{pt3dadd(166320.000000,172320.000000,56625.000000,255.583926)}

{create adhoc109}
{access adhoc109}
{connect adhoc109(1), adhoc103(0)}
{nseg = 1}
{strdef color color = "White"}
{pt3dclear()}
{pt3dadd(171276.000000,157452.000000,63175.000000,415.989486)}
{pt3dadd(171660.000000,156624.000000,63175.000000,167.176836)}
{pt3dadd(171828.000000,156444.000000,62850.000000,167.176836)}
{pt3dadd(172020.000000,156168.000000,62475.000000,167.176836)}
{pt3dadd(172212.000000,155376.000000,61975.000000,167.176836)}
{pt3dadd(171852.000000,154836.000000,61500.000000,167.176836)}
{pt3dadd(171852.000000,154380.000000,60950.000000,171.603680)}
{pt3dadd(171672.000000,154212.000000,60650.000000,176.030523)}
{pt3dadd(171636.000000,154044.000000,60375.000000,180.457366)}
{pt3dadd(171564.000000,153540.000000,59850.000000,184.884210)}
{pt3dadd(171288.000000,153228.000000,59250.000000,221.861052)}

{create adhoc110}
{access adhoc110}
{connect adhoc110(1), adhoc102(0)}
{nseg = 1}
{strdef color color = "White"}
{pt3dclear()}
{pt3dadd(173880.000000,155388.000000,67550.000000,415.989486)}
{pt3dadd(173964.000000,154908.000000,67850.000000,415.989486)}
{pt3dadd(174072.000000,154668.000000,67525.000000,395.190014)}
{pt3dadd(174084.000000,154308.000000,67400.000000,374.390541)}
{pt3dadd(174240.000000,153468.000000,67050.000000,353.591069)}
{pt3dadd(174156.000000,152760.000000,66625.000000,332.791596)}
{pt3dadd(174120.000000,152376.000000,66175.000000,288.881586)}

{create adhoc111}
{access adhoc111}
{connect adhoc111(1), adhoc101(0)}
{nseg = 1}
{strdef color color = "White"}
{pt3dclear()}
{pt3dadd(174420.000000,155304.000000,70350.000000,575.063856)}
{pt3dadd(174468.000000,155964.000000,70050.000000,635.974578)}
{pt3dadd(174528.000000,156288.000000,70225.000000,601.777778)}
{pt3dadd(174432.000000,156804.000000,70050.000000,567.580977)}
{pt3dadd(174396.000000,157116.000000,70000.000000,533.384176)}
{pt3dadd(174324.000000,157488.000000,69775.000000,499.187376)}
{pt3dadd(174492.000000,157980.000000,69750.000000,499.187376)}
{pt3dadd(174600.000000,158364.000000,69750.000000,479.219886)}

{create adhoc112}
{access adhoc112}
{connect adhoc112(1), adhoc111(0)}
{nseg = 1}
{strdef color color = "White"}
{pt3dclear()}
{pt3dadd(174600.000000,158364.000000,69750.000000,479.219886)}
{pt3dadd(174828.000000,158724.000000,69850.000000,346.657896)}
{pt3dadd(175284.000000,159120.000000,70150.000000,301.787631)}
{pt3dadd(175548.000000,159396.000000,70250.000000,256.917366)}
{pt3dadd(175740.000000,159720.000000,70400.000000,212.047101)}
{pt3dadd(175824.000000,159948.000000,70500.000000,167.176836)}
{pt3dadd(176136.000000,160260.000000,70525.000000,202.057808)}
{pt3dadd(176388.000000,160596.000000,70575.000000,236.938779)}
{pt3dadd(176616.000000,161004.000000,70700.000000,271.819751)}
{pt3dadd(176652.000000,161328.000000,70675.000000,306.700722)}
{pt3dadd(176712.000000,161640.000000,70750.000000,302.245938)}
{pt3dadd(176952.000000,162012.000000,70875.000000,297.791154)}
{pt3dadd(177096.000000,162408.000000,71025.000000,293.336370)}
{pt3dadd(177300.000000,162828.000000,71225.000000,288.881586)}
{pt3dadd(177336.000000,163164.000000,71475.000000,288.881586)}
{pt3dadd(177276.000000,163572.000000,71825.000000,288.881586)}
{pt3dadd(177444.000000,163992.000000,72000.000000,288.881586)}
{pt3dadd(177468.000000,164184.000000,72150.000000,288.881586)}
{pt3dadd(177600.000000,164556.000000,72225.000000,250.096559)}
{pt3dadd(177720.000000,164952.000000,72350.000000,211.311531)}
{pt3dadd(178080.000000,165348.000000,72275.000000,172.526503)}
{pt3dadd(178236.000000,165684.000000,72475.000000,133.741476)}
{pt3dadd(178284.000000,165924.000000,72475.000000,233.266536)}
{pt3dadd(178404.000000,166260.000000,72425.000000,332.791596)}
{pt3dadd(178272.000000,166488.000000,72375.000000,346.657896)}

{create adhoc113}
{access adhoc113}
{connect adhoc113(1), adhoc112(0)}
{nseg = 1}
{strdef color color = "White"}
{pt3dclear()}
{pt3dadd(178272.000000,166488.000000,72375.000000,346.657896)}
{pt3dadd(178704.000000,166548.000000,72950.000000,200.612214)}
{pt3dadd(179448.000000,166536.000000,73550.000000,192.253370)}
{pt3dadd(179952.000000,166224.000000,74000.000000,183.894525)}
{pt3dadd(180180.000000,166260.000000,74375.000000,175.535680)}
{pt3dadd(180480.000000,166272.000000,74750.000000,167.176836)}
{pt3dadd(180744.000000,166476.000000,75400.000000,200.612214)}
{pt3dadd(181008.000000,166632.000000,75825.000000,160.489764)}

{create adhoc114}
{access adhoc114}
{connect adhoc114(1), adhoc112(0)}
{nseg = 1}
{strdef color color = "White"}
{pt3dclear()}
{pt3dadd(178272.000000,166488.000000,72375.000000,346.657896)}
{pt3dadd(178260.000000,166872.000000,72350.000000,212.986620)}
{pt3dadd(178212.000000,167196.000000,72300.000000,201.534174)}
{pt3dadd(178260.000000,167640.000000,72250.000000,190.081728)}
{pt3dadd(178320.000000,168084.000000,72250.000000,178.629282)}
{pt3dadd(178344.000000,168516.000000,72300.000000,167.176836)}
{pt3dadd(178224.000000,168900.000000,72275.000000,180.847890)}
{pt3dadd(178272.000000,169284.000000,72100.000000,194.518944)}
{pt3dadd(178200.000000,169548.000000,72000.000000,208.189998)}
{pt3dadd(178308.000000,169788.000000,71950.000000,221.861052)}
{pt3dadd(178308.000000,170196.000000,71950.000000,226.579451)}
{pt3dadd(178284.000000,170496.000000,72025.000000,231.297849)}
{pt3dadd(178296.000000,170676.000000,72100.000000,236.016248)}
{pt3dadd(178428.000000,170964.000000,72300.000000,240.734646)}
{pt3dadd(178416.000000,171336.000000,72350.000000,228.697915)}
{pt3dadd(178500.000000,171636.000000,72500.000000,216.661185)}
{pt3dadd(178524.000000,171852.000000,72725.000000,204.624455)}
{pt3dadd(178572.000000,172200.000000,72975.000000,192.587724)}
{pt3dadd(178644.000000,172500.000000,73175.000000,186.235002)}
{pt3dadd(178644.000000,172872.000000,73600.000000,179.882280)}
{pt3dadd(178764.000000,173208.000000,73700.000000,173.529558)}
{pt3dadd(178776.000000,173496.000000,74325.000000,167.176836)}
{pt3dadd(178824.000000,173736.000000,74925.000000,133.741476)}
{pt3dadd(178908.000000,173640.000000,75225.000000,147.907368)}

{create adhoc115}
{access adhoc115}
{connect adhoc115(1), adhoc111(0)}
{nseg = 1}
{strdef color color = "White"}
{pt3dclear()}
{pt3dadd(174600.000000,158364.000000,69750.000000,479.219886)}
{pt3dadd(174144.000000,158616.000000,69175.000000,240.734646)}
{pt3dadd(174036.000000,158856.000000,69000.000000,240.734646)}
{pt3dadd(173796.000000,159120.000000,68900.000000,240.734646)}
{pt3dadd(173664.000000,159468.000000,68950.000000,240.734646)}
{pt3dadd(173532.000000,159744.000000,68975.000000,240.734646)}
{pt3dadd(173160.000000,159996.000000,68925.000000,265.347603)}
{pt3dadd(172968.000000,160272.000000,68800.000000,289.960560)}
{pt3dadd(172764.000000,160452.000000,68775.000000,314.573517)}
{pt3dadd(172560.000000,160680.000000,68750.000000,339.186474)}
{pt3dadd(172500.000000,161040.000000,68650.000000,354.227332)}
{pt3dadd(172464.000000,161352.000000,68475.000000,369.268191)}
{pt3dadd(172488.000000,161544.000000,68450.000000,384.309049)}
{pt3dadd(172536.000000,161832.000000,68500.000000,399.349908)}
{pt3dadd(172500.000000,162168.000000,68450.000000,368.844012)}
{pt3dadd(172572.000000,162504.000000,68425.000000,338.338116)}
{pt3dadd(172716.000000,162840.000000,68325.000000,307.832220)}
{pt3dadd(172704.000000,163248.000000,68325.000000,277.326324)}
{pt3dadd(172644.000000,163440.000000,68350.000000,265.771062)}
{pt3dadd(172512.000000,163740.000000,68275.000000,254.215800)}
{pt3dadd(172452.000000,164028.000000,68350.000000,242.660538)}
{pt3dadd(172416.000000,164244.000000,68325.000000,231.105276)}
{pt3dadd(172416.000000,164496.000000,68350.000000,245.549354)}
{pt3dadd(172440.000000,164892.000000,68375.000000,259.993431)}
{pt3dadd(172608.000000,165252.000000,68375.000000,274.437509)}
{pt3dadd(172800.000000,165588.000000,68300.000000,288.881586)}
{pt3dadd(172968.000000,166020.000000,68150.000000,285.992775)}
{pt3dadd(173148.000000,166344.000000,68150.000000,283.103964)}
{pt3dadd(173328.000000,166704.000000,68050.000000,280.215153)}
{pt3dadd(173508.000000,167004.000000,68100.000000,277.326342)}
{pt3dadd(173748.000000,167328.000000,68100.000000,268.178418)}
{pt3dadd(173928.000000,167652.000000,68175.000000,259.030494)}
{pt3dadd(174156.000000,167832.000000,68125.000000,249.882570)}
{pt3dadd(174240.000000,168060.000000,68025.000000,240.734646)}
{pt3dadd(174468.000000,168348.000000,68075.000000,222.345193)}
{pt3dadd(174636.000000,168600.000000,68125.000000,203.955741)}
{pt3dadd(174756.000000,168936.000000,68200.000000,185.566288)}
{pt3dadd(174648.000000,169104.000000,68225.000000,167.176836)}
{pt3dadd(174696.000000,169296.000000,68250.000000,169.754837)}
{pt3dadd(174648.000000,169584.000000,68300.000000,172.332837)}
{pt3dadd(174600.000000,169836.000000,68275.000000,174.910837)}
{pt3dadd(174540.000000,170064.000000,68325.000000,177.488838)}
{pt3dadd(174456.000000,170244.000000,68375.000000,219.781102)}
{pt3dadd(174492.000000,170532.000000,68400.000000,262.073367)}
{pt3dadd(174444.000000,170820.000000,68475.000000,304.365632)}
{pt3dadd(174540.000000,171132.000000,68600.000000,346.657896)}
{pt3dadd(174444.000000,171444.000000,68575.000000,310.146476)}
{pt3dadd(174408.000000,171768.000000,68650.000000,273.635055)}
{pt3dadd(174372.000000,172128.000000,68600.000000,237.123635)}
{pt3dadd(174324.000000,172488.000000,68500.000000,200.612214)}
{pt3dadd(174372.000000,172800.000000,68275.000000,210.642822)}
{pt3dadd(174324.000000,173076.000000,68300.000000,220.673430)}
{pt3dadd(174264.000000,173388.000000,68300.000000,230.704038)}
{pt3dadd(174180.000000,173712.000000,68325.000000,240.734646)}
{pt3dadd(174000.000000,174108.000000,68450.000000,237.524856)}
{pt3dadd(173892.000000,174408.000000,68350.000000,234.315066)}
{pt3dadd(173736.000000,174864.000000,68225.000000,231.105276)}
{pt3dadd(173640.000000,175152.000000,68250.000000,240.734646)}

{create adhoc116}
{access adhoc116}
{connect adhoc116(1), adhoc115(0)}
{nseg = 1}
{strdef color color = "White"}
{pt3dclear()}
{pt3dadd(173640.000000,175152.000000,68250.000000,240.734646)}
{pt3dadd(173736.000000,175476.000000,67700.000000,200.612214)}
{pt3dadd(173760.000000,175656.000000,67250.000000,170.891886)}
{pt3dadd(173760.000000,175872.000000,66800.000000,141.171558)}
{pt3dadd(173316.000000,175836.000000,66450.000000,111.451230)}
{pt3dadd(172500.000000,176016.000000,66150.000000,67.184640)}

{create adhoc117}
{access adhoc117}
{connect adhoc117(1), adhoc115(0)}
{nseg = 1}
{strdef color color = "White"}
{pt3dclear()}
{pt3dadd(173640.000000,175152.000000,68250.000000,240.734646)}
{pt3dadd(173544.000000,175488.000000,68300.000000,346.657896)}
{pt3dadd(173640.000000,175836.000000,68625.000000,308.140353)}
{pt3dadd(173628.000000,176160.000000,68775.000000,269.622810)}
{pt3dadd(173592.000000,176412.000000,68875.000000,231.105267)}
{pt3dadd(173580.000000,176736.000000,69075.000000,192.587724)}
{pt3dadd(173760.000000,177072.000000,69350.000000,184.884210)}

{create adhoc118}
{access adhoc118}
{connect adhoc118(1), adhoc117(0)}
{nseg = 1}
{strdef color color = "White"}
{pt3dclear()}
{pt3dadd(173760.000000,177072.000000,69350.000000,184.884210)}
{pt3dadd(173520.000000,177468.000000,69775.000000,200.612214)}
{pt3dadd(173196.000000,177720.000000,69625.000000,200.612214)}
{pt3dadd(172860.000000,177996.000000,69625.000000,200.612214)}
{pt3dadd(172536.000000,178164.000000,69475.000000,192.587724)}

{create adhoc119}
{access adhoc119}
{connect adhoc119(1), adhoc117(0)}
{nseg = 1}
{strdef color color = "White"}
{pt3dclear()}
{pt3dadd(173760.000000,177072.000000,69350.000000,184.884210)}
{pt3dadd(173856.000000,177480.000000,69975.000000,200.612214)}
{pt3dadd(174324.000000,177888.000000,70550.000000,222.679557)}
{pt3dadd(174516.000000,178272.000000,70800.000000,244.746900)}
{pt3dadd(174600.000000,178968.000000,71275.000000,266.814243)}
{pt3dadd(174636.000000,179388.000000,71750.000000,288.881586)}
{pt3dadd(174816.000000,179820.000000,72525.000000,256.783631)}
{pt3dadd(175128.000000,180324.000000,73250.000000,224.685675)}
{pt3dadd(175200.000000,180984.000000,73950.000000,192.587720)}
{pt3dadd(175320.000000,181920.000000,74450.000000,160.489764)}
{pt3dadd(175368.000000,183576.000000,75175.000000,139.314042)}

{create adhoc120}
{access adhoc120}
{connect adhoc120(1), adhoc13(0)}
{nseg = 1}
{strdef color color = "White"}
{pt3dclear()}
{pt3dadd(188880.000000,144828.000000,96775.000000,1098.964044)}
{pt3dadd(188844.000000,144648.000000,96750.000000,1242.137880)}
{pt3dadd(188808.000000,144324.000000,96725.000000,1327.230495)}
{pt3dadd(188760.000000,144048.000000,96725.000000,1412.323110)}
{pt3dadd(188784.000000,143748.000000,96750.000000,1497.415725)}
{pt3dadd(188772.000000,143340.000000,96775.000000,1582.508340)}
{pt3dadd(188760.000000,142956.000000,96800.000000,1237.034309)}
{pt3dadd(188808.000000,142560.000000,96925.000000,891.560277)}
{pt3dadd(188880.000000,142308.000000,96875.000000,546.086246)}
{pt3dadd(188880.000000,142044.000000,96900.000000,200.612214)}
{pt3dadd(188796.000000,141576.000000,96800.000000,219.790742)}
{pt3dadd(188844.000000,141216.000000,96875.000000,238.969269)}
{pt3dadd(188760.000000,140940.000000,96950.000000,258.147797)}
{pt3dadd(188664.000000,140604.000000,97000.000000,277.326324)}
{pt3dadd(188472.000000,140196.000000,97100.000000,294.659217)}
{pt3dadd(188352.000000,139824.000000,97250.000000,311.992110)}
{pt3dadd(188196.000000,139500.000000,97275.000000,329.325003)}
{pt3dadd(187872.000000,139056.000000,97375.000000,346.657896)}
{pt3dadd(187836.000000,138696.000000,97450.000000,339.863400)}
{pt3dadd(187764.000000,138312.000000,97475.000000,333.068904)}
{pt3dadd(187776.000000,138024.000000,97550.000000,326.274408)}
{pt3dadd(187764.000000,137688.000000,97625.000000,319.479912)}
{pt3dadd(187704.000000,137376.000000,97625.000000,335.453913)}
{pt3dadd(187752.000000,137052.000000,97550.000000,351.427914)}
{pt3dadd(187680.000000,136644.000000,97600.000000,367.401915)}
{pt3dadd(187632.000000,136212.000000,97600.000000,383.375916)}
{pt3dadd(187620.000000,135960.000000,97550.000000,374.196411)}
{pt3dadd(187476.000000,135588.000000,97525.000000,365.016906)}
{pt3dadd(187356.000000,135144.000000,97375.000000,355.837401)}
{pt3dadd(187284.000000,134784.000000,97300.000000,346.657896)}
{pt3dadd(187332.000000,134400.000000,97200.000000,352.003635)}
{pt3dadd(187428.000000,134028.000000,97100.000000,357.349374)}
{pt3dadd(187332.000000,133668.000000,97075.000000,362.695113)}
{pt3dadd(187212.000000,133296.000000,97000.000000,368.040852)}
{pt3dadd(187164.000000,132840.000000,96825.000000,362.695113)}
{pt3dadd(187152.000000,132384.000000,96700.000000,357.349374)}
{pt3dadd(187092.000000,131976.000000,96675.000000,352.003635)}
{pt3dadd(187116.000000,131652.000000,96625.000000,346.657896)}
{pt3dadd(187092.000000,131352.000000,96600.000000,320.177083)}
{pt3dadd(187020.000000,131052.000000,96500.000000,293.696271)}
{pt3dadd(187008.000000,130776.000000,96475.000000,267.215459)}
{pt3dadd(186924.000000,130440.000000,96375.000000,240.734646)}
{pt3dadd(186756.000000,130056.000000,96200.000000,252.771381)}
{pt3dadd(186708.000000,129852.000000,96125.000000,264.808116)}
{pt3dadd(186624.000000,129600.000000,95950.000000,276.844851)}
{pt3dadd(186600.000000,129276.000000,95925.000000,288.881586)}
{pt3dadd(186504.000000,128880.000000,95825.000000,303.325664)}
{pt3dadd(186312.000000,128460.000000,95750.000000,317.769741)}
{pt3dadd(186120.000000,128148.000000,95725.000000,332.213819)}
{pt3dadd(186048.000000,127776.000000,95775.000000,346.657896)}
{pt3dadd(185976.000000,127392.000000,95900.000000,320.177083)}
{pt3dadd(185556.000000,126972.000000,95750.000000,293.696271)}
{pt3dadd(185496.000000,126552.000000,95550.000000,267.215459)}
{pt3dadd(185376.000000,126156.000000,95400.000000,240.734646)}
{pt3dadd(185352.000000,125628.000000,95200.000000,252.771381)}
{pt3dadd(185352.000000,125160.000000,94875.000000,264.808116)}
{pt3dadd(185388.000000,124740.000000,94800.000000,276.844851)}
{pt3dadd(185328.000000,124320.000000,94775.000000,288.881586)}
{pt3dadd(185328.000000,123924.000000,94775.000000,285.992771)}
{pt3dadd(185244.000000,123528.000000,94850.000000,283.103955)}
{pt3dadd(185268.000000,123192.000000,94950.000000,280.215140)}
{pt3dadd(185352.000000,122820.000000,95200.000000,277.326324)}
{pt3dadd(185316.000000,122328.000000,95350.000000,268.178405)}
{pt3dadd(185016.000000,121920.000000,95525.000000,259.030485)}
{pt3dadd(184968.000000,121380.000000,95725.000000,249.882566)}
{pt3dadd(184788.000000,120912.000000,95600.000000,240.734646)}
{pt3dadd(184620.000000,120444.000000,95375.000000,252.771381)}
{pt3dadd(184524.000000,119964.000000,95225.000000,264.808116)}
{pt3dadd(184380.000000,119532.000000,95100.000000,276.844851)}
{pt3dadd(184188.000000,119100.000000,94925.000000,288.881586)}
{pt3dadd(183924.000000,118488.000000,94525.000000,276.844851)}
{pt3dadd(183708.000000,117972.000000,94650.000000,264.808116)}
{pt3dadd(183492.000000,117456.000000,94675.000000,252.771381)}
{pt3dadd(183360.000000,117012.000000,94575.000000,240.734646)}
{pt3dadd(183264.000000,116544.000000,94375.000000,230.704038)}
{pt3dadd(183084.000000,116076.000000,94250.000000,220.673430)}
{pt3dadd(183024.000000,115524.000000,94075.000000,210.642822)}
{pt3dadd(183108.000000,114972.000000,94150.000000,200.612214)}
{pt3dadd(183156.000000,114576.000000,94150.000000,200.612214)}
{pt3dadd(183084.000000,114072.000000,93975.000000,200.612214)}
{pt3dadd(182784.000000,113544.000000,93650.000000,200.612214)}
{pt3dadd(182172.000000,113208.000000,93175.000000,200.612214)}
{pt3dadd(181884.000000,113340.000000,92800.000000,200.612214)}
{pt3dadd(181776.000000,113496.000000,92425.000000,200.612214)}
{pt3dadd(181044.000000,114072.000000,92050.000000,200.612214)}
{pt3dadd(180780.000000,114492.000000,91650.000000,200.612214)}
{pt3dadd(180696.000000,114804.000000,91150.000000,80.621550)}

{create adhoc121}
{access adhoc121}
{connect adhoc121(1), adhoc12(0)}
{nseg = 1}
{strdef color color = "White"}
{pt3dclear()}
{pt3dadd(160776.000000,160284.000000,134675.000000,1242.137880)}
{pt3dadd(160584.000000,160740.000000,134575.000000,1242.137880)}
{pt3dadd(160524.000000,161340.000000,134525.000000,1003.823807)}
{pt3dadd(160620.000000,161760.000000,134550.000000,765.509733)}
{pt3dadd(160692.000000,162252.000000,134525.000000,527.195660)}
{pt3dadd(160836.000000,162744.000000,134775.000000,288.881586)}
{pt3dadd(161124.000000,163128.000000,134625.000000,274.437509)}
{pt3dadd(161160.000000,163560.000000,134600.000000,259.993431)}
{pt3dadd(161112.000000,163932.000000,134650.000000,245.549354)}
{pt3dadd(160620.000000,164364.000000,134675.000000,231.105276)}
{pt3dadd(160236.000000,164808.000000,134475.000000,242.660538)}
{pt3dadd(160140.000000,165300.000000,133775.000000,254.215800)}
{pt3dadd(160176.000000,165108.000000,133250.000000,265.771062)}
{pt3dadd(160464.000000,164952.000000,132625.000000,277.326324)}
{pt3dadd(160920.000000,164328.000000,132050.000000,318.407000)}
{pt3dadd(161376.000000,163512.000000,131425.000000,359.487675)}
{pt3dadd(162144.000000,162744.000000,130525.000000,400.568350)}
{pt3dadd(162792.000000,162264.000000,129625.000000,441.649026)}
{pt3dadd(162924.000000,162312.000000,129200.000000,290.481534)}
{pt3dadd(163824.000000,162036.000000,128475.000000,139.314042)}
{pt3dadd(164340.000000,161808.000000,128150.000000,116.095032)}

{create adhoc122}
{access adhoc122}
{connect adhoc122(1), adhoc11(0)}
{nseg = 1}
{strdef color color = "White"}
{pt3dclear()}
{pt3dadd(148752.000000,123660.000000,156175.000000,2146.414176)}
{pt3dadd(148152.000000,123684.000000,156200.000000,1717.131222)}
{pt3dadd(147756.000000,123756.000000,156225.000000,1471.009100)}
{pt3dadd(147396.000000,123840.000000,156200.000000,1224.886977)}
{pt3dadd(147012.000000,123924.000000,156050.000000,978.764854)}
{pt3dadd(146640.000000,124188.000000,155800.000000,732.642732)}
{pt3dadd(146316.000000,124188.000000,155800.000000,630.886793)}
{pt3dadd(145860.000000,124284.000000,155775.000000,529.130853)}
{pt3dadd(145476.000000,124140.000000,155700.000000,427.374914)}
{pt3dadd(145092.000000,124092.000000,155600.000000,325.618974)}
{pt3dadd(144672.000000,124032.000000,155575.000000,348.211602)}
{pt3dadd(144264.000000,123792.000000,155625.000000,370.804230)}
{pt3dadd(143904.000000,123780.000000,155725.000000,393.396858)}
{pt3dadd(143484.000000,123900.000000,155950.000000,415.989486)}
{pt3dadd(143184.000000,123888.000000,156075.000000,495.152811)}
{pt3dadd(142788.000000,123924.000000,156075.000000,574.316136)}
{pt3dadd(142380.000000,123996.000000,156100.000000,653.479461)}
{pt3dadd(142020.000000,123960.000000,156150.000000,732.642786)}
{pt3dadd(141648.000000,124152.000000,156300.000000,653.479461)}
{pt3dadd(141276.000000,124416.000000,156500.000000,574.316136)}
{pt3dadd(140808.000000,125544.000000,157250.000000,495.152811)}
{pt3dadd(140100.000000,125916.000000,157625.000000,415.989486)}
{pt3dadd(139956.000000,126264.000000,157600.000000,635.974578)}

{create adhoc123}
{access adhoc123}
{connect adhoc123(1), adhoc122(0)}
{nseg = 1}
{strdef color color = "White"}
{pt3dclear()}
{pt3dadd(139956.000000,126264.000000,157600.000000,635.974578)}
{pt3dadd(138984.000000,126552.000000,157325.000000,599.024880)}
{pt3dadd(138372.000000,126180.000000,156925.000000,565.745712)}
{pt3dadd(137364.000000,125808.000000,156550.000000,532.466544)}
{pt3dadd(137112.000000,125400.000000,156200.000000,499.187376)}
{pt3dadd(136980.000000,125400.000000,155825.000000,415.989486)}

{create adhoc124}
{access adhoc124}
{connect adhoc124(1), adhoc122(0)}
{nseg = 1}
{strdef color color = "White"}
{pt3dclear()}
{pt3dadd(139956.000000,126264.000000,157600.000000,635.974578)}
{pt3dadd(139596.000000,127356.000000,158150.000000,718.829820)}
{pt3dadd(139884.000000,127788.000000,158600.000000,611.342762)}
{pt3dadd(139344.000000,128844.000000,159300.000000,503.855703)}
{pt3dadd(138984.000000,130020.000000,159975.000000,396.368644)}
{pt3dadd(138648.000000,130380.000000,160875.000000,288.881586)}
{pt3dadd(138684.000000,131040.000000,161700.000000,443.953233)}
{pt3dadd(138636.000000,131856.000000,162575.000000,599.024880)}
{pt3dadd(138804.000000,132384.000000,163425.000000,177.000552)}

{create adhoc125}
{access adhoc125}
{connect adhoc125(1), adhoc4(0)}
{nseg = 1}
{strdef color color = "White"}
{pt3dclear()}
{pt3dadd(147144.000000,117180.000000,157125.000000,1055.005560)}
{pt3dadd(146988.000000,117180.000000,157100.000000,1098.964044)}
{pt3dadd(146784.000000,116952.000000,157100.000000,1192.452354)}
{pt3dadd(146616.000000,116772.000000,157050.000000,1101.362252)}
{pt3dadd(146388.000000,116724.000000,157025.000000,1010.272149)}
{pt3dadd(146100.000000,116628.000000,157050.000000,919.182046)}
{pt3dadd(145812.000000,116580.000000,156850.000000,828.091944)}
{pt3dadd(145512.000000,116532.000000,156750.000000,800.776413)}
{pt3dadd(145164.000000,116484.000000,156600.000000,773.460882)}
{pt3dadd(144840.000000,116376.000000,156450.000000,746.145351)}
{pt3dadd(144564.000000,116232.000000,156250.000000,718.829820)}
{pt3dadd(144252.000000,116148.000000,156150.000000,729.914733)}
{pt3dadd(144048.000000,116112.000000,156000.000000,740.999646)}
{pt3dadd(143748.000000,116052.000000,155900.000000,752.084559)}
{pt3dadd(143436.000000,115992.000000,155800.000000,763.169472)}
{pt3dadd(143172.000000,116088.000000,155250.000000,710.392437)}
{pt3dadd(142836.000000,116088.000000,155225.000000,657.615402)}
{pt3dadd(142488.000000,116160.000000,154725.000000,604.838367)}
{pt3dadd(142104.000000,116052.000000,154100.000000,552.061332)}
{pt3dadd(141780.000000,115956.000000,153800.000000,513.883476)}
{pt3dadd(141540.000000,115860.000000,153575.000000,475.705620)}
{pt3dadd(141324.000000,115824.000000,153425.000000,437.527764)}
{pt3dadd(141312.000000,115860.000000,152925.000000,399.349908)}
{pt3dadd(140724.000000,115716.000000,152450.000000,479.219886)}
{pt3dadd(140676.000000,115536.000000,151975.000000,559.089864)}
{pt3dadd(140748.000000,114828.000000,151425.000000,638.959842)}
{pt3dadd(140640.000000,114540.000000,151000.000000,718.829820)}
{pt3dadd(140412.000000,114192.000000,150575.000000,682.888329)}
{pt3dadd(140004.000000,113724.000000,149925.000000,646.946838)}
{pt3dadd(138960.000000,112860.000000,149150.000000,611.005347)}
{pt3dadd(138384.000000,112572.000000,148550.000000,575.063856)}
{pt3dadd(138384.000000,112596.000000,148400.000000,662.473602)}

{create adhoc126}
{access adhoc126}
{connect adhoc126(1), adhoc125(0)}
{nseg = 1}
{strdef color color = "White"}
{pt3dclear()}
{pt3dadd(138384.000000,112596.000000,148400.000000,662.473602)}
{pt3dadd(137796.000000,112860.000000,147900.000000,575.063856)}
{pt3dadd(137028.000000,112548.000000,147200.000000,277.326324)}

{create adhoc127}
{access adhoc127}
{connect adhoc127(1), adhoc125(0)}
{nseg = 1}
{strdef color color = "White"}
{pt3dclear()}
{pt3dadd(138384.000000,112596.000000,148400.000000,662.473602)}
{pt3dadd(138420.000000,112356.000000,148350.000000,575.063856)}
{pt3dadd(138468.000000,112056.000000,148300.000000,471.420333)}
{pt3dadd(138600.000000,111828.000000,148250.000000,367.776810)}
{pt3dadd(138672.000000,111516.000000,148275.000000,264.133287)}
{pt3dadd(138660.000000,111264.000000,148225.000000,160.489764)}
{pt3dadd(138636.000000,111084.000000,148275.000000,155.195833)}
{pt3dadd(138624.000000,110856.000000,148250.000000,149.901903)}
{pt3dadd(138636.000000,110712.000000,148225.000000,144.607973)}
{pt3dadd(138648.000000,110568.000000,148250.000000,139.314042)}
{pt3dadd(138660.000000,110280.000000,148275.000000,164.669193)}
{pt3dadd(138696.000000,110016.000000,148250.000000,190.024344)}
{pt3dadd(138792.000000,109716.000000,148225.000000,215.379495)}
{pt3dadd(138912.000000,109356.000000,148250.000000,240.734646)}
{pt3dadd(139008.000000,109068.000000,148250.000000,252.771381)}
{pt3dadd(139032.000000,108792.000000,148250.000000,264.808116)}
{pt3dadd(139080.000000,108444.000000,148200.000000,276.844851)}
{pt3dadd(139068.000000,108072.000000,148325.000000,288.881586)}
{pt3dadd(138852.000000,107640.000000,148075.000000,312.505169)}
{pt3dadd(138792.000000,107328.000000,148250.000000,336.128751)}
{pt3dadd(138744.000000,107088.000000,148275.000000,359.752334)}
{pt3dadd(138732.000000,106872.000000,148275.000000,383.375916)}
{pt3dadd(138720.000000,106644.000000,148375.000000,160.489764)}

{create adhoc128}
{access adhoc128}
{connect adhoc128(1), adhoc3(0)}
{nseg = 1}
{strdef color color = "White"}
{pt3dclear()}
{pt3dadd(148788.000000,109284.000000,158100.000000,586.114362)}
{pt3dadd(148704.000000,109320.000000,158475.000000,703.337040)}
{pt3dadd(147888.000000,109680.000000,158950.000000,569.296989)}
{pt3dadd(147912.000000,109476.000000,159275.000000,435.256938)}
{pt3dadd(147708.000000,109272.000000,159650.000000,301.216887)}
{pt3dadd(147528.000000,109224.000000,160125.000000,167.176836)}
{pt3dadd(147516.000000,109272.000000,160650.000000,165.505068)}
{pt3dadd(147660.000000,109224.000000,160925.000000,163.833300)}
{pt3dadd(147660.000000,109320.000000,161200.000000,162.161532)}
{pt3dadd(147732.000000,109356.000000,161600.000000,160.489764)}
{pt3dadd(147576.000000,109548.000000,161950.000000,180.550985)}
{pt3dadd(147480.000000,109572.000000,162275.000000,200.612205)}
{pt3dadd(147612.000000,109572.000000,162600.000000,220.673426)}
{pt3dadd(148020.000000,109188.000000,163075.000000,240.734646)}
{pt3dadd(148008.000000,109044.000000,163525.000000,236.016248)}
{pt3dadd(148140.000000,108912.000000,163825.000000,231.297849)}
{pt3dadd(148260.000000,108720.000000,164200.000000,226.579451)}
{pt3dadd(148128.000000,108480.000000,164625.000000,221.861052)}
{pt3dadd(148092.000000,108348.000000,165050.000000,226.579451)}
{pt3dadd(147936.000000,108072.000000,165500.000000,231.297849)}
{pt3dadd(148212.000000,108012.000000,166000.000000,236.016248)}
{pt3dadd(148020.000000,107928.000000,166350.000000,240.734646)}
{pt3dadd(147912.000000,106824.000000,166675.000000,439.329722)}
{pt3dadd(147912.000000,107136.000000,167025.000000,637.924797)}
{pt3dadd(147936.000000,107376.000000,167475.000000,836.519873)}
{pt3dadd(148152.000000,107472.000000,167875.000000,1035.114948)}
{pt3dadd(147804.000000,107316.000000,168300.000000,805.629264)}
{pt3dadd(147648.000000,107400.000000,168875.000000,576.143580)}
{pt3dadd(147540.000000,107196.000000,169400.000000,346.657896)}
{pt3dadd(147336.000000,107136.000000,170025.000000,116.095032)}
