# Supplementary material for: Full reconstruction of large lobula plate tangential cells in Drosophila from a 3D EM dataset
Source: PLoS One. 2018 Nov 28;13(11):e0207828. doi: 10.1371/journal.pone.0207828 (PMC6261601; doi:10.1371/journal.pone.0207828)
Supplement: S1 Dataset — (ZIP) [file pone.0207828.s001.zip › Diameter hoc/VS_VSL_preliminary/Old Diameters Mar13_VS_VSL_HS/HSS/2_14_725_smaurer_001.008.hoc]

/* created with nml2hocm */

{create adhoc1}
{access adhoc1}
{nseg = 1}
{strdef color color = "White"}
{pt3dclear()}
{pt3dadd(121296.000000,118680.000000,170975.000000,346.657896)}
{pt3dadd(121596.000000,118656.000000,170825.000000,479.219886)}
{pt3dadd(122052.000000,118872.000000,171375.000000,511.167876)}
{pt3dadd(122064.000000,118776.000000,171200.000000,543.115866)}
{pt3dadd(122076.000000,118656.000000,170850.000000,575.063856)}
{pt3dadd(122652.000000,118656.000000,170425.000000,556.094736)}
{pt3dadd(123072.000000,118656.000000,170025.000000,537.125616)}
{pt3dadd(123564.000000,118788.000000,169650.000000,518.156496)}
{pt3dadd(124344.000000,118968.000000,169325.000000,499.187376)}
{pt3dadd(124836.000000,118860.000000,168950.000000,524.146752)}
{pt3dadd(125148.000000,118632.000000,168550.000000,549.106128)}
{pt3dadd(125052.000000,118632.000000,168325.000000,574.065504)}
{pt3dadd(125256.000000,118428.000000,168175.000000,599.024880)}
{pt3dadd(125472.000000,118284.000000,168050.000000,553.266031)}
{pt3dadd(125664.000000,118164.000000,167725.000000,507.507183)}
{pt3dadd(125880.000000,118092.000000,167500.000000,461.748335)}
{pt3dadd(126576.000000,117816.000000,167175.000000,415.989486)}
{pt3dadd(126984.000000,117636.000000,166800.000000,455.758079)}
{pt3dadd(127428.000000,118488.000000,166425.000000,495.526671)}
{pt3dadd(127296.000000,118308.000000,166100.000000,535.295264)}
{pt3dadd(127572.000000,118416.000000,166000.000000,575.063856)}
{pt3dadd(127812.000000,118632.000000,165850.000000,646.946843)}
{pt3dadd(127980.000000,118512.000000,165700.000000,718.829829)}
{pt3dadd(128184.000000,118440.000000,165600.000000,790.712816)}
{pt3dadd(128400.000000,118344.000000,165550.000000,862.595802)}
{pt3dadd(128580.000000,118296.000000,165425.000000,853.969838)}
{pt3dadd(128820.000000,118248.000000,165300.000000,845.343873)}
{pt3dadd(129096.000000,118248.000000,164775.000000,836.717909)}
{pt3dadd(129360.000000,118284.000000,164500.000000,828.091944)}
{pt3dadd(129588.000000,118416.000000,164375.000000,800.776413)}
{pt3dadd(129840.000000,118608.000000,164075.000000,773.460882)}
{pt3dadd(130032.000000,118644.000000,163925.000000,746.145351)}
{pt3dadd(130236.000000,118644.000000,163800.000000,718.829820)}
{pt3dadd(130416.000000,118632.000000,163800.000000,754.771316)}
{pt3dadd(130620.000000,118404.000000,163825.000000,790.712811)}
{pt3dadd(130800.000000,118428.000000,163750.000000,826.654307)}
{pt3dadd(130992.000000,118476.000000,163875.000000,862.595802)}
{pt3dadd(131232.000000,118572.000000,163675.000000,853.969856)}
{pt3dadd(131424.000000,118512.000000,163675.000000,845.343909)}
{pt3dadd(131640.000000,118536.000000,163650.000000,836.717962)}
{pt3dadd(131844.000000,118524.000000,163675.000000,828.092016)}
{pt3dadd(132084.000000,118740.000000,163750.000000,793.588162)}
{pt3dadd(132240.000000,118728.000000,163675.000000,759.084309)}
{pt3dadd(132372.000000,118692.000000,163600.000000,724.580455)}
{pt3dadd(132576.000000,118812.000000,163525.000000,690.076602)}
{pt3dadd(132756.000000,118884.000000,163450.000000,642.354295)}
{pt3dadd(132936.000000,118956.000000,163375.000000,594.631989)}
{pt3dadd(133140.000000,119028.000000,163300.000000,546.909682)}
{pt3dadd(133320.000000,118896.000000,163250.000000,499.187376)}
{pt3dadd(133452.000000,119040.000000,163200.000000,554.097987)}
{pt3dadd(133644.000000,119304.000000,163075.000000,609.008598)}
{pt3dadd(133884.000000,119472.000000,162900.000000,663.919209)}
{pt3dadd(134124.000000,119664.000000,162675.000000,718.829820)}
{pt3dadd(134220.000000,119688.000000,162100.000000,993.710286)}

{create adhoc2}
{access adhoc2}
{connect adhoc2(1), adhoc1(0)}
{nseg = 1}
{strdef color color = "White"}
{pt3dclear()}
{pt3dadd(134220.000000,119688.000000,162100.000000,993.710286)}
{pt3dadd(134472.000000,119628.000000,162075.000000,993.710286)}
{pt3dadd(134700.000000,119592.000000,162025.000000,952.305719)}
{pt3dadd(134928.000000,119616.000000,161750.000000,910.901151)}
{pt3dadd(135156.000000,119604.000000,161650.000000,869.496584)}
{pt3dadd(135384.000000,119592.000000,161575.000000,828.092016)}
{pt3dadd(135588.000000,119616.000000,161675.000000,859.559503)}
{pt3dadd(135792.000000,119580.000000,161700.000000,891.026991)}
{pt3dadd(136008.000000,119544.000000,161650.000000,922.494479)}
{pt3dadd(136260.000000,119532.000000,161600.000000,953.961966)}
{pt3dadd(136500.000000,119520.000000,161550.000000,922.494479)}
{pt3dadd(136728.000000,119592.000000,161450.000000,891.026991)}
{pt3dadd(136992.000000,119664.000000,161400.000000,859.559503)}
{pt3dadd(137184.000000,119880.000000,161375.000000,828.092016)}
{pt3dadd(137364.000000,119868.000000,161350.000000,800.776467)}
{pt3dadd(137544.000000,119856.000000,161325.000000,773.460918)}
{pt3dadd(137724.000000,119880.000000,161450.000000,746.145369)}
{pt3dadd(137904.000000,120072.000000,161425.000000,718.829820)}
{pt3dadd(138084.000000,120144.000000,161375.000000,746.145369)}
{pt3dadd(138288.000000,120132.000000,161325.000000,773.460918)}
{pt3dadd(138480.000000,120324.000000,161375.000000,800.776467)}
{pt3dadd(138696.000000,120444.000000,161425.000000,828.092016)}
{pt3dadd(138912.000000,120492.000000,161375.000000,800.776467)}
{pt3dadd(139128.000000,120588.000000,161275.000000,773.460918)}
{pt3dadd(139380.000000,120612.000000,161250.000000,746.145369)}
{pt3dadd(139680.000000,120780.000000,161250.000000,718.829820)}
{pt3dadd(139908.000000,120948.000000,161250.000000,688.878585)}
{pt3dadd(140112.000000,120996.000000,161275.000000,658.927350)}
{pt3dadd(140328.000000,120936.000000,161300.000000,628.976115)}
{pt3dadd(140556.000000,120984.000000,161250.000000,599.024880)}
{pt3dadd(140832.000000,121032.000000,161275.000000,628.976115)}
{pt3dadd(141024.000000,121080.000000,161075.000000,658.927350)}
{pt3dadd(141216.000000,121068.000000,161025.000000,688.878585)}
{pt3dadd(141408.000000,121032.000000,160900.000000,718.829820)}
{pt3dadd(141624.000000,121056.000000,160825.000000,688.878585)}
{pt3dadd(141840.000000,121104.000000,160725.000000,658.927350)}
{pt3dadd(142068.000000,121152.000000,160675.000000,628.976115)}
{pt3dadd(142296.000000,121200.000000,160625.000000,599.024880)}
{pt3dadd(142500.000000,121272.000000,160700.000000,628.976115)}
{pt3dadd(142764.000000,121416.000000,160525.000000,658.927350)}
{pt3dadd(143040.000000,121512.000000,160450.000000,688.878585)}
{pt3dadd(143316.000000,121560.000000,160275.000000,718.829820)}
{pt3dadd(143532.000000,121656.000000,160350.000000,754.771316)}
{pt3dadd(143736.000000,121704.000000,160475.000000,790.712811)}
{pt3dadd(144180.000000,121920.000000,160000.000000,826.654307)}
{pt3dadd(145092.000000,121764.000000,159550.000000,862.595802)}
{pt3dadd(145584.000000,121632.000000,159125.000000,1004.682537)}
{pt3dadd(146592.000000,121332.000000,158775.000000,1146.769272)}
{pt3dadd(147300.000000,120600.000000,158425.000000,1288.856007)}
{pt3dadd(146844.000000,121248.000000,158000.000000,1430.942742)}
{pt3dadd(146940.000000,121032.000000,157875.000000,1383.741527)}
{pt3dadd(147132.000000,120864.000000,157625.000000,1336.540311)}
{pt3dadd(147444.000000,120708.000000,157400.000000,1289.339096)}
{pt3dadd(147744.000000,120504.000000,157200.000000,1242.137880)}
{pt3dadd(147672.000000,120300.000000,157350.000000,1170.093969)}
{pt3dadd(147528.000000,120072.000000,157650.000000,1098.050058)}
{pt3dadd(147468.000000,119856.000000,157575.000000,1026.006147)}
{pt3dadd(147372.000000,119628.000000,157425.000000,953.962236)}
{pt3dadd(147336.000000,119424.000000,157725.000000,1026.006147)}
{pt3dadd(147264.000000,119076.000000,157550.000000,1098.050058)}
{pt3dadd(147384.000000,118392.000000,157375.000000,1170.093969)}
{pt3dadd(147156.000000,117612.000000,157150.000000,1242.137880)}
{pt3dadd(146952.000000,117312.000000,157125.000000,1190.382147)}
{pt3dadd(146760.000000,117060.000000,156950.000000,1138.626414)}
{pt3dadd(146724.000000,116796.000000,156900.000000,1086.870681)}
{pt3dadd(146676.000000,116592.000000,156850.000000,1035.114948)}
{pt3dadd(146592.000000,116028.000000,156800.000000,993.710430)}

{create adhoc3}
{access adhoc3}
{connect adhoc3(1), adhoc2(0)}
{nseg = 1}
{strdef color color = "White"}
{pt3dclear()}
{pt3dadd(146592.000000,116028.000000,156800.000000,993.710430)}
{pt3dadd(143700.000000,115932.000000,156800.000000,862.595802)}
{pt3dadd(143508.000000,116052.000000,155925.000000,948.855375)}
{pt3dadd(143100.000000,116040.000000,155575.000000,1035.114948)}
{pt3dadd(142920.000000,116220.000000,154875.000000,926.092431)}
{pt3dadd(142344.000000,116220.000000,154225.000000,817.069914)}
{pt3dadd(141828.000000,116028.000000,153775.000000,708.047397)}
{pt3dadd(141648.000000,115908.000000,153200.000000,599.024880)}
{pt3dadd(141228.000000,115932.000000,152850.000000,599.024880)}
{pt3dadd(140916.000000,115800.000000,152575.000000,599.024880)}
{pt3dadd(140700.000000,115620.000000,152225.000000,599.024880)}
{pt3dadd(140664.000000,115176.000000,151775.000000,599.024880)}
{pt3dadd(140724.000000,114696.000000,151325.000000,628.976115)}
{pt3dadd(140592.000000,114516.000000,150875.000000,658.927350)}
{pt3dadd(140436.000000,114240.000000,150475.000000,688.878585)}
{pt3dadd(140148.000000,113904.000000,150050.000000,718.829820)}
{pt3dadd(139800.000000,113568.000000,149675.000000,711.641515)}
{pt3dadd(139320.000000,113268.000000,149325.000000,704.453211)}
{pt3dadd(138960.000000,112872.000000,148950.000000,697.264906)}
{pt3dadd(138540.000000,112632.000000,148525.000000,690.076602)}
{pt3dadd(138300.000000,112620.000000,148250.000000,599.024880)}

{create adhoc4}
{access adhoc4}
{connect adhoc4(1), adhoc3(0)}
{nseg = 1}
{strdef color color = "White"}
{pt3dclear()}
{pt3dadd(138300.000000,112620.000000,148250.000000,599.024880)}
{pt3dadd(138660.000000,111252.000000,148250.000000,167.176836)}
{pt3dadd(138600.000000,110616.000000,148250.000000,167.176836)}
{pt3dadd(138780.000000,110004.000000,148225.000000,167.176836)}
{pt3dadd(138888.000000,109464.000000,148350.000000,250.179471)}
{pt3dadd(138996.000000,108804.000000,148275.000000,333.182106)}
{pt3dadd(139044.000000,108576.000000,148225.000000,416.184741)}
{pt3dadd(139068.000000,108252.000000,148350.000000,499.187376)}
{pt3dadd(139008.000000,108000.000000,148400.000000,499.187376)}
{pt3dadd(138996.000000,107748.000000,148100.000000,499.187376)}
{pt3dadd(138876.000000,107484.000000,148100.000000,499.187376)}
{pt3dadd(138696.000000,106932.000000,148250.000000,499.187376)}
{pt3dadd(138756.000000,106620.000000,148450.000000,200.612214)}

{create adhoc5}
{access adhoc5}
{connect adhoc5(1), adhoc3(0)}
{nseg = 1}
{strdef color color = "White"}
{pt3dclear()}
{pt3dadd(138300.000000,112620.000000,148250.000000,599.024880)}
{pt3dadd(137928.000000,112884.000000,147900.000000,599.024880)}
{pt3dadd(137712.000000,112860.000000,147875.000000,553.266031)}
{pt3dadd(137472.000000,112968.000000,147775.000000,507.507183)}
{pt3dadd(137256.000000,112932.000000,147675.000000,461.748335)}
{pt3dadd(137016.000000,112920.000000,147600.000000,415.989486)}
{pt3dadd(136752.000000,112908.000000,147650.000000,352.435536)}
{pt3dadd(136524.000000,112956.000000,147600.000000,288.881586)}
{pt3dadd(137088.000000,112680.000000,147200.000000,346.657896)}

{create adhoc6}
{access adhoc6}
{connect adhoc6(1), adhoc2(0)}
{nseg = 1}
{strdef color color = "White"}
{pt3dclear()}
{pt3dadd(146592.000000,116028.000000,156800.000000,993.710430)}
{pt3dadd(146892.000000,115140.000000,156750.000000,828.091944)}
{pt3dadd(147108.000000,114852.000000,156825.000000,869.496547)}
{pt3dadd(147144.000000,114576.000000,156875.000000,910.901151)}
{pt3dadd(147204.000000,114288.000000,157025.000000,952.305755)}
{pt3dadd(147228.000000,114072.000000,157025.000000,993.710358)}
{pt3dadd(147300.000000,113868.000000,157100.000000,1031.471329)}
{pt3dadd(147336.000000,113628.000000,157175.000000,1069.232301)}
{pt3dadd(147372.000000,113388.000000,157250.000000,1106.993273)}
{pt3dadd(147396.000000,113136.000000,157275.000000,1144.754244)}
{pt3dadd(147396.000000,112908.000000,157350.000000,1117.344420)}
{pt3dadd(147504.000000,112644.000000,157425.000000,1089.934596)}
{pt3dadd(147612.000000,112392.000000,157425.000000,1062.524772)}
{pt3dadd(147612.000000,112140.000000,157425.000000,1035.114948)}
{pt3dadd(147672.000000,111852.000000,157425.000000,1024.763801)}
{pt3dadd(147672.000000,111612.000000,157550.000000,1014.412653)}
{pt3dadd(147708.000000,111384.000000,157550.000000,1004.061506)}
{pt3dadd(147792.000000,111156.000000,157625.000000,993.710358)}
{pt3dadd(148056.000000,110892.000000,157725.000000,924.990223)}
{pt3dadd(148092.000000,110628.000000,157850.000000,856.270089)}
{pt3dadd(148308.000000,110412.000000,158025.000000,787.549955)}
{pt3dadd(148416.000000,110208.000000,158100.000000,718.829820)}
{pt3dadd(148452.000000,109992.000000,158075.000000,744.209292)}
{pt3dadd(148572.000000,109668.000000,158100.000000,769.588764)}
{pt3dadd(148560.000000,109428.000000,158125.000000,794.968236)}
{pt3dadd(148620.000000,109212.000000,158275.000000,862.595802)}

{create adhoc7}
{access adhoc7}
{connect adhoc7(1), adhoc6(0)}
{nseg = 1}
{strdef color color = "White"}
{pt3dclear()}
{pt3dadd(148620.000000,109212.000000,158275.000000,862.595802)}
{pt3dadd(147564.000000,109212.000000,159950.000000,415.989486)}
{pt3dadd(147468.000000,109200.000000,160375.000000,395.190005)}
{pt3dadd(147552.000000,109248.000000,160675.000000,374.390523)}
{pt3dadd(147720.000000,109296.000000,160950.000000,353.591042)}
{pt3dadd(147648.000000,109356.000000,161250.000000,332.791560)}
{pt3dadd(147708.000000,109368.000000,161650.000000,299.746723)}
{pt3dadd(147588.000000,109512.000000,161975.000000,266.701887)}
{pt3dadd(147564.000000,109500.000000,162275.000000,233.657051)}
{pt3dadd(147684.000000,109548.000000,162750.000000,200.612214)}
{pt3dadd(147984.000000,109272.000000,163150.000000,254.456532)}
{pt3dadd(148092.000000,109020.000000,163500.000000,308.300850)}
{pt3dadd(148092.000000,108888.000000,163875.000000,362.145168)}
{pt3dadd(148236.000000,108612.000000,164400.000000,415.989486)}
{pt3dadd(148212.000000,108396.000000,164900.000000,369.768434)}
{pt3dadd(148032.000000,108144.000000,165350.000000,323.547381)}
{pt3dadd(148008.000000,108036.000000,165825.000000,277.326328)}
{pt3dadd(148044.000000,107976.000000,166350.000000,231.105276)}
{pt3dadd(148056.000000,107904.000000,166450.000000,200.612214)}
{pt3dadd(148128.000000,108528.000000,166575.000000,111.451230)}

{create adhoc8}
{access adhoc8}
{connect adhoc8(1), adhoc6(0)}
{nseg = 1}
{strdef color color = "White"}
{pt3dclear()}
{pt3dadd(148620.000000,109212.000000,158275.000000,862.595802)}
{pt3dadd(148968.000000,109020.000000,158225.000000,599.024880)}
{pt3dadd(149040.000000,108780.000000,158250.000000,553.266031)}
{pt3dadd(149448.000000,108564.000000,158075.000000,507.507183)}
{pt3dadd(149628.000000,108372.000000,157925.000000,461.748335)}
{pt3dadd(149772.000000,108144.000000,157825.000000,415.989486)}
{pt3dadd(149892.000000,107928.000000,157825.000000,461.748335)}
{pt3dadd(149964.000000,107736.000000,157850.000000,507.507183)}
{pt3dadd(150072.000000,107544.000000,157775.000000,553.266031)}
{pt3dadd(150324.000000,107304.000000,157775.000000,599.024880)}
{pt3dadd(150516.000000,107112.000000,157775.000000,664.917611)}
{pt3dadd(150516.000000,106824.000000,157800.000000,730.810341)}
{pt3dadd(150636.000000,106548.000000,157825.000000,796.703072)}
{pt3dadd(150660.000000,106308.000000,157775.000000,862.595802)}
{pt3dadd(150840.000000,106116.000000,157725.000000,853.969856)}
{pt3dadd(150804.000000,105888.000000,157825.000000,845.343909)}
{pt3dadd(150912.000000,105648.000000,157900.000000,836.717962)}
{pt3dadd(150840.000000,105360.000000,157975.000000,828.092016)}
{pt3dadd(150876.000000,105132.000000,158100.000000,800.776467)}
{pt3dadd(150996.000000,104928.000000,158125.000000,773.460918)}
{pt3dadd(151068.000000,104736.000000,158275.000000,746.145369)}
{pt3dadd(150984.000000,104532.000000,158550.000000,718.829820)}
{pt3dadd(150912.000000,104340.000000,158775.000000,718.829820)}
{pt3dadd(150792.000000,104172.000000,158900.000000,718.829820)}
{pt3dadd(150744.000000,103956.000000,158925.000000,718.829820)}
{pt3dadd(150768.000000,103716.000000,159075.000000,718.829820)}
{pt3dadd(150612.000000,103512.000000,159150.000000,688.878585)}
{pt3dadd(150612.000000,103344.000000,159200.000000,658.927350)}
{pt3dadd(150600.000000,103116.000000,159325.000000,628.976115)}
{pt3dadd(150636.000000,102912.000000,159425.000000,599.024880)}
{pt3dadd(150660.000000,102696.000000,159400.000000,621.787828)}
{pt3dadd(150720.000000,102492.000000,159425.000000,644.550777)}
{pt3dadd(150684.000000,102288.000000,159500.000000,667.313725)}
{pt3dadd(150528.000000,102072.000000,159600.000000,690.076674)}
{pt3dadd(150528.000000,101868.000000,159900.000000,759.084345)}
{pt3dadd(150516.000000,101688.000000,160175.000000,828.092016)}
{pt3dadd(150540.000000,101568.000000,160325.000000,862.595802)}

{create adhoc9}
{access adhoc9}
{connect adhoc9(1), adhoc8(0)}
{nseg = 1}
{strdef color color = "White"}
{pt3dclear()}
{pt3dadd(150540.000000,101568.000000,160325.000000,862.595802)}
{pt3dadd(149544.000000,103380.000000,160325.000000,450.135648)}

{create adhoc10}
{access adhoc10}
{connect adhoc10(1), adhoc8(0)}
{nseg = 1}
{strdef color color = "White"}
{pt3dclear()}
{pt3dadd(150540.000000,101568.000000,160325.000000,862.595802)}
{pt3dadd(150624.000000,101268.000000,160500.000000,828.091944)}
{pt3dadd(150696.000000,101076.000000,160700.000000,745.865802)}
{pt3dadd(151476.000000,100368.000000,161225.000000,663.639660)}
{pt3dadd(151680.000000,100104.000000,161200.000000,581.413518)}
{pt3dadd(152088.000000,99852.000000,161250.000000,499.187376)}
{pt3dadd(152628.000000,99660.000000,161275.000000,478.387903)}
{pt3dadd(152832.000000,99732.000000,161275.000000,457.588431)}
{pt3dadd(153072.000000,99636.000000,161350.000000,436.788958)}
{pt3dadd(153312.000000,99276.000000,161175.000000,415.989486)}
{pt3dadd(153480.000000,98892.000000,161075.000000,461.748335)}
{pt3dadd(153924.000000,98700.000000,161000.000000,507.507183)}
{pt3dadd(154524.000000,98484.000000,161000.000000,553.266031)}
{pt3dadd(154836.000000,98256.000000,160925.000000,599.024880)}
{pt3dadd(154860.000000,98016.000000,160875.000000,664.917611)}
{pt3dadd(154884.000000,97764.000000,160850.000000,730.810341)}
{pt3dadd(154920.000000,97548.000000,160850.000000,796.703072)}
{pt3dadd(155076.000000,97392.000000,160850.000000,862.595802)}
{pt3dadd(155148.000000,97176.000000,160875.000000,862.595802)}
{pt3dadd(155208.000000,96984.000000,160925.000000,862.595802)}
{pt3dadd(155172.000000,96816.000000,161025.000000,862.595802)}
{pt3dadd(155196.000000,96684.000000,161100.000000,862.595802)}
{pt3dadd(155448.000000,96444.000000,161175.000000,690.076602)}
{pt3dadd(155520.000000,96240.000000,161150.000000,599.024880)}

{create adhoc11}
{access adhoc11}
{connect adhoc11(1), adhoc10(0)}
{nseg = 1}
{strdef color color = "White"}
{pt3dclear()}
{pt3dadd(155520.000000,96240.000000,161150.000000,599.024880)}
{pt3dadd(154560.000000,95964.000000,161050.000000,499.187376)}
{pt3dadd(154524.000000,95736.000000,160975.000000,478.387903)}
{pt3dadd(154224.000000,95544.000000,160850.000000,457.588431)}
{pt3dadd(153684.000000,95076.000000,160475.000000,436.788958)}
{pt3dadd(153204.000000,94656.000000,160250.000000,415.989486)}
{pt3dadd(153168.000000,94476.000000,159825.000000,477.001284)}
{pt3dadd(153012.000000,94356.000000,159375.000000,538.013082)}
{pt3dadd(153276.000000,94164.000000,158925.000000,599.024880)}
{pt3dadd(153636.000000,93888.000000,158700.000000,200.612214)}

{create adhoc12}
{access adhoc12}
{connect adhoc12(1), adhoc10(0)}
{nseg = 1}
{strdef color color = "White"}
{pt3dclear()}
{pt3dadd(155520.000000,96240.000000,161150.000000,599.024880)}
{pt3dadd(156372.000000,95964.000000,161275.000000,415.989486)}
{pt3dadd(156828.000000,95532.000000,161475.000000,461.748335)}
{pt3dadd(156972.000000,95280.000000,161650.000000,507.507183)}
{pt3dadd(157080.000000,95076.000000,161700.000000,553.266031)}
{pt3dadd(157332.000000,94872.000000,161850.000000,599.024880)}
{pt3dadd(157392.000000,94620.000000,162000.000000,621.787828)}
{pt3dadd(157404.000000,94380.000000,162075.000000,644.550777)}
{pt3dadd(157488.000000,94164.000000,162225.000000,667.313725)}
{pt3dadd(157608.000000,93972.000000,162250.000000,690.076674)}
{pt3dadd(157716.000000,93792.000000,162350.000000,676.551150)}
{pt3dadd(157860.000000,93588.000000,162525.000000,663.025626)}
{pt3dadd(157944.000000,93384.000000,162725.000000,649.500102)}
{pt3dadd(158364.000000,93036.000000,163075.000000,635.974578)}
{pt3dadd(158556.000000,92724.000000,163475.000000,590.378844)}
{pt3dadd(159096.000000,91860.000000,163925.000000,544.783110)}
{pt3dadd(159132.000000,91668.000000,164275.000000,499.187376)}
{pt3dadd(159396.000000,91248.000000,164525.000000,599.024880)}

{create adhoc13}
{access adhoc13}
{connect adhoc13(1), adhoc12(0)}
{nseg = 1}
{strdef color color = "White"}
{pt3dclear()}
{pt3dadd(159396.000000,91248.000000,164525.000000,599.024880)}
{pt3dadd(157956.000000,92676.000000,164350.000000,862.595802)}
{pt3dadd(157692.000000,92676.000000,164500.000000,288.881586)}
{pt3dadd(157656.000000,92772.000000,164650.000000,288.881586)}

{create adhoc14}
{access adhoc14}
{connect adhoc14(1), adhoc12(0)}
{nseg = 1}
{strdef color color = "White"}
{pt3dclear()}
{pt3dadd(159396.000000,91248.000000,164525.000000,599.024880)}
{pt3dadd(159516.000000,90768.000000,164575.000000,718.829820)}
{pt3dadd(159516.000000,90504.000000,164600.000000,682.888329)}
{pt3dadd(159444.000000,90288.000000,164750.000000,646.946838)}
{pt3dadd(159432.000000,90072.000000,164850.000000,611.005347)}
{pt3dadd(159432.000000,89832.000000,165025.000000,575.063856)}
{pt3dadd(159468.000000,89616.000000,165150.000000,517.962366)}
{pt3dadd(159528.000000,89412.000000,165125.000000,460.860876)}
{pt3dadd(159444.000000,89184.000000,165150.000000,403.759386)}
{pt3dadd(159348.000000,88968.000000,165150.000000,346.657896)}
{pt3dadd(159264.000000,88728.000000,165225.000000,294.821933)}
{pt3dadd(159300.000000,88512.000000,165275.000000,242.985969)}
{pt3dadd(159288.000000,88320.000000,165250.000000,191.150005)}
{pt3dadd(159252.000000,88104.000000,165225.000000,139.314042)}
{pt3dadd(159132.000000,87864.000000,165250.000000,164.669193)}
{pt3dadd(159120.000000,87624.000000,165150.000000,190.024344)}
{pt3dadd(159180.000000,87432.000000,165125.000000,215.379495)}
{pt3dadd(159108.000000,87240.000000,164950.000000,240.734646)}
{pt3dadd(159024.000000,87060.000000,164625.000000,305.347828)}
{pt3dadd(159108.000000,86868.000000,164475.000000,369.961011)}
{pt3dadd(159144.000000,86664.000000,164425.000000,434.574193)}
{pt3dadd(159156.000000,86460.000000,164425.000000,499.187376)}
{pt3dadd(159744.000000,86268.000000,164175.000000,633.169269)}
{pt3dadd(159852.000000,86076.000000,164125.000000,767.151162)}
{pt3dadd(159720.000000,85632.000000,163825.000000,901.133055)}
{pt3dadd(159708.000000,85212.000000,163250.000000,1035.114948)}
{pt3dadd(159576.000000,85152.000000,162775.000000,828.091944)}
{pt3dadd(159444.000000,85176.000000,162375.000000,862.595802)}

{create adhoc15}
{access adhoc15}
{connect adhoc15(1), adhoc1(0)}
{nseg = 1}
{strdef color color = "White"}
{pt3dclear()}
{pt3dadd(134220.000000,119688.000000,162100.000000,993.710286)}
{pt3dadd(134124.000000,120096.000000,160675.000000,479.219886)}
{pt3dadd(133932.000000,120060.000000,160450.000000,396.515016)}
{pt3dadd(133728.000000,120108.000000,160400.000000,313.810146)}
{pt3dadd(133512.000000,120180.000000,160300.000000,231.105276)}
{pt3dadd(133944.000000,120228.000000,159925.000000,415.989486)}
