# Supplementary material for: Full reconstruction of large lobula plate tangential cells in Drosophila from a 3D EM dataset
Source: PLoS One. 2018 Nov 28;13(11):e0207828. doi: 10.1371/journal.pone.0207828 (PMC6261601; doi:10.1371/journal.pone.0207828)
Supplement: S1 Dataset — (ZIP) [file pone.0207828.s001.zip › Diameter hoc/VS_VSL_preliminary/Old Diameters Mar13_VS_VSL_HS/HSS/2_14_726_smaurer_002.053.hoc]

/* created with nml2hocm */

{create adhoc1}
{access adhoc1}
{nseg = 1}
{strdef color color = "White"}
{pt3dclear()}
{pt3dadd(184512.000000,161280.000000,118925.000000,167.176836)}
{pt3dadd(184272.000000,161304.000000,118925.000000,240.734646)}
{pt3dadd(184068.000000,161472.000000,119125.000000,215.379495)}
{pt3dadd(183876.000000,161436.000000,119000.000000,190.024344)}
{pt3dadd(183624.000000,161400.000000,119300.000000,164.669193)}
{pt3dadd(183396.000000,161448.000000,119175.000000,139.314042)}
{pt3dadd(183228.000000,161364.000000,119400.000000,176.705928)}
{pt3dadd(183036.000000,161304.000000,119350.000000,214.097814)}
{pt3dadd(182748.000000,161268.000000,119275.000000,251.489700)}
{pt3dadd(182592.000000,161292.000000,119400.000000,288.881586)}
{pt3dadd(182448.000000,161316.000000,119525.000000,303.325664)}
{pt3dadd(182304.000000,161340.000000,119675.000000,317.769741)}
{pt3dadd(182172.000000,161412.000000,119550.000000,332.213819)}
{pt3dadd(182004.000000,161328.000000,119750.000000,346.657896)}
{pt3dadd(181836.000000,161220.000000,119950.000000,320.177083)}
{pt3dadd(181656.000000,161364.000000,120100.000000,293.696271)}
{pt3dadd(181176.000000,161556.000000,120350.000000,267.215459)}
{pt3dadd(180732.000000,161700.000000,121025.000000,240.734646)}
{pt3dadd(180528.000000,161364.000000,120975.000000,263.748875)}
{pt3dadd(180372.000000,161412.000000,121025.000000,286.763103)}
{pt3dadd(180216.000000,161280.000000,121125.000000,309.777332)}
{pt3dadd(180036.000000,161148.000000,121200.000000,332.791560)}
{pt3dadd(179796.000000,161424.000000,121425.000000,353.591042)}
{pt3dadd(179592.000000,161700.000000,121725.000000,374.390523)}
{pt3dadd(179232.000000,161712.000000,121975.000000,395.190005)}
{pt3dadd(178632.000000,161856.000000,122575.000000,415.989486)}
{pt3dadd(178092.000000,161904.000000,122950.000000,372.175776)}
{pt3dadd(177444.000000,162060.000000,123250.000000,328.362066)}
{pt3dadd(176748.000000,161700.000000,123700.000000,284.548356)}
{pt3dadd(176280.000000,161400.000000,124000.000000,240.734646)}
{pt3dadd(175308.000000,160956.000000,124275.000000,240.734646)}
{pt3dadd(174228.000000,160872.000000,124650.000000,240.734646)}
{pt3dadd(174000.000000,160692.000000,124600.000000,240.734646)}
{pt3dadd(173808.000000,160608.000000,124500.000000,240.734646)}
{pt3dadd(173580.000000,160776.000000,124450.000000,240.734646)}
{pt3dadd(172608.000000,160692.000000,124750.000000,240.734646)}
{pt3dadd(171888.000000,160632.000000,124950.000000,240.734646)}
{pt3dadd(171204.000000,160584.000000,125225.000000,240.734646)}
{pt3dadd(170484.000000,160788.000000,125475.000000,220.673430)}
{pt3dadd(169500.000000,160440.000000,125775.000000,200.612214)}
{pt3dadd(169032.000000,160344.000000,126025.000000,180.550998)}
{pt3dadd(168084.000000,160032.000000,126250.000000,160.489782)}
{pt3dadd(166956.000000,160140.000000,126575.000000,245.164181)}
{pt3dadd(166212.000000,160512.000000,126900.000000,329.838579)}
{pt3dadd(165672.000000,160740.000000,127200.000000,414.512978)}
{pt3dadd(165180.000000,160956.000000,127475.000000,499.187376)}
{pt3dadd(164784.000000,161388.000000,127725.000000,424.543586)}
{pt3dadd(164484.000000,161736.000000,127975.000000,349.899795)}
{pt3dadd(164280.000000,161772.000000,128250.000000,275.256005)}
{pt3dadd(163884.000000,161904.000000,128525.000000,200.612214)}
{pt3dadd(163536.000000,162012.000000,128700.000000,275.256004)}
{pt3dadd(163116.000000,162264.000000,128850.000000,349.899795)}
{pt3dadd(162864.000000,162324.000000,129125.000000,424.543586)}
{pt3dadd(162840.000000,162324.000000,129400.000000,499.187376)}
{pt3dadd(162876.000000,162360.000000,129625.000000,478.387903)}
{pt3dadd(162648.000000,162480.000000,129875.000000,457.588431)}
{pt3dadd(162396.000000,162600.000000,130150.000000,436.788958)}
{pt3dadd(162264.000000,162744.000000,130325.000000,415.989486)}
{pt3dadd(162096.000000,162816.000000,130550.000000,384.212511)}
{pt3dadd(161928.000000,163008.000000,130775.000000,352.435536)}
{pt3dadd(161616.000000,163188.000000,130975.000000,320.658561)}
{pt3dadd(161508.000000,163452.000000,131175.000000,288.881586)}
{pt3dadd(161520.000000,163632.000000,131350.000000,276.844851)}
{pt3dadd(161172.000000,163872.000000,131575.000000,264.808116)}
{pt3dadd(161124.000000,164112.000000,131800.000000,252.771381)}
{pt3dadd(160836.000000,164316.000000,132000.000000,240.734646)}
{pt3dadd(160848.000000,164508.000000,132200.000000,267.215459)}
{pt3dadd(160668.000000,164892.000000,132500.000000,293.696271)}
{pt3dadd(160464.000000,165288.000000,132800.000000,320.177083)}
{pt3dadd(160272.000000,165216.000000,133025.000000,346.657896)}
{pt3dadd(160152.000000,165396.000000,133325.000000,430.780224)}
{pt3dadd(160080.000000,165360.000000,133650.000000,514.902552)}
{pt3dadd(159996.000000,165480.000000,134175.000000,599.024880)}
{pt3dadd(160500.000000,160380.000000,134925.000000,1430.942742)}

{create adhoc2}
{access adhoc2}
{connect adhoc2(1), adhoc1(0)}
{nseg = 1}
{strdef color color = "White"}
{pt3dclear()}
{pt3dadd(160500.000000,160380.000000,134925.000000,1430.942742)}
{pt3dadd(160212.000000,160320.000000,135375.000000,1098.964116)}
{pt3dadd(159984.000000,160644.000000,135450.000000,1031.246091)}
{pt3dadd(159744.000000,160692.000000,135950.000000,963.528066)}
{pt3dadd(159504.000000,161064.000000,136125.000000,895.810041)}
{pt3dadd(159216.000000,161004.000000,136225.000000,828.092016)}
{pt3dadd(159012.000000,161460.000000,136475.000000,800.776467)}
{pt3dadd(158760.000000,161040.000000,136350.000000,773.460918)}
{pt3dadd(158640.000000,160980.000000,136625.000000,746.145369)}
{pt3dadd(158364.000000,161352.000000,136925.000000,718.829820)}
{pt3dadd(158040.000000,163668.000000,137025.000000,643.119736)}
{pt3dadd(158028.000000,163476.000000,137100.000000,567.409653)}
{pt3dadd(157920.000000,163284.000000,137000.000000,491.699570)}
{pt3dadd(157992.000000,163104.000000,137025.000000,415.989486)}
{pt3dadd(157704.000000,162888.000000,137325.000000,527.641065)}
{pt3dadd(157392.000000,162648.000000,137525.000000,639.292644)}
{pt3dadd(156900.000000,162396.000000,137975.000000,750.944223)}
{pt3dadd(156612.000000,162120.000000,138425.000000,862.595802)}
{pt3dadd(156096.000000,161856.000000,138925.000000,796.703072)}
{pt3dadd(155856.000000,161616.000000,139425.000000,730.810341)}
{pt3dadd(155544.000000,161424.000000,139250.000000,664.917611)}
{pt3dadd(155280.000000,161268.000000,139525.000000,599.024880)}
{pt3dadd(155472.000000,161076.000000,139250.000000,664.917611)}
{pt3dadd(155460.000000,160896.000000,139450.000000,730.810341)}
{pt3dadd(155448.000000,160716.000000,139425.000000,796.703072)}
{pt3dadd(155208.000000,160536.000000,139500.000000,862.595802)}
{pt3dadd(154944.000000,160356.000000,139625.000000,895.374441)}
{pt3dadd(155040.000000,160164.000000,139500.000000,928.153080)}
{pt3dadd(155064.000000,159960.000000,139575.000000,960.931719)}
{pt3dadd(154776.000000,159780.000000,139775.000000,993.710358)}
{pt3dadd(154824.000000,159588.000000,139700.000000,1055.817239)}
{pt3dadd(154812.000000,159312.000000,139625.000000,1117.924119)}
{pt3dadd(154752.000000,159120.000000,139650.000000,1180.031000)}
{pt3dadd(154692.000000,158892.000000,139675.000000,1242.137880)}
{pt3dadd(154716.000000,158712.000000,139850.000000,1242.137880)}
{pt3dadd(154740.000000,158556.000000,140025.000000,1242.137880)}
{pt3dadd(154608.000000,158388.000000,140025.000000,1242.137880)}
{pt3dadd(154548.000000,158196.000000,140025.000000,1242.137880)}
{pt3dadd(154488.000000,158040.000000,140025.000000,1242.137880)}
{pt3dadd(154428.000000,157860.000000,140025.000000,1242.137880)}
{pt3dadd(154596.000000,157692.000000,139950.000000,1242.137880)}
{pt3dadd(154536.000000,157500.000000,140225.000000,1242.137880)}
{pt3dadd(154476.000000,157320.000000,140225.000000,1242.137880)}
{pt3dadd(154416.000000,157152.000000,140225.000000,1242.137880)}
{pt3dadd(154536.000000,156972.000000,140375.000000,1242.137880)}
{pt3dadd(154560.000000,156780.000000,140625.000000,1242.137880)}
{pt3dadd(154452.000000,156612.000000,140750.000000,1242.137880)}
{pt3dadd(154344.000000,156444.000000,140750.000000,1242.137880)}
{pt3dadd(154368.000000,156264.000000,140550.000000,1242.137880)}
{pt3dadd(154512.000000,156096.000000,140700.000000,1242.137880)}
{pt3dadd(154668.000000,155916.000000,140850.000000,1242.137880)}
{pt3dadd(154560.000000,155748.000000,141125.000000,1242.137880)}
{pt3dadd(154500.000000,155580.000000,141300.000000,1242.137880)}
{pt3dadd(154440.000000,155424.000000,141500.000000,1242.137880)}
{pt3dadd(154584.000000,155256.000000,141375.000000,1180.030982)}
{pt3dadd(154656.000000,155100.000000,141650.000000,1117.924083)}
{pt3dadd(154620.000000,154944.000000,141650.000000,1055.817185)}
{pt3dadd(154584.000000,154764.000000,141650.000000,993.710286)}
{pt3dadd(154548.000000,154608.000000,141650.000000,1055.817185)}
{pt3dadd(154512.000000,154440.000000,141650.000000,1117.924083)}
{pt3dadd(154476.000000,154296.000000,141650.000000,1180.030982)}
{pt3dadd(154440.000000,154140.000000,141650.000000,1242.137880)}
{pt3dadd(154404.000000,153996.000000,141650.000000,1242.137880)}
{pt3dadd(154368.000000,153840.000000,141650.000000,1242.137880)}
{pt3dadd(154332.000000,153696.000000,141650.000000,1242.137880)}
{pt3dadd(154296.000000,153528.000000,141650.000000,1242.137880)}
{pt3dadd(154284.000000,153372.000000,141775.000000,1242.137880)}
{pt3dadd(154272.000000,153216.000000,141900.000000,1242.137880)}
{pt3dadd(154260.000000,153036.000000,142025.000000,1242.137880)}
{pt3dadd(154248.000000,152844.000000,142150.000000,1242.137880)}
{pt3dadd(154236.000000,152676.000000,141875.000000,1304.244761)}
{pt3dadd(154152.000000,152532.000000,141925.000000,1366.351641)}
{pt3dadd(154140.000000,152340.000000,141875.000000,1428.458522)}
{pt3dadd(154104.000000,152160.000000,141975.000000,1490.565402)}
{pt3dadd(154248.000000,151980.000000,142300.000000,1490.565402)}
{pt3dadd(154212.000000,151812.000000,142350.000000,1490.565402)}
{pt3dadd(154176.000000,151656.000000,142400.000000,1490.565402)}
{pt3dadd(154140.000000,151488.000000,142450.000000,1490.565402)}
{pt3dadd(154260.000000,151344.000000,142325.000000,1475.659737)}
{pt3dadd(154128.000000,151176.000000,142550.000000,1460.754072)}
{pt3dadd(154176.000000,151008.000000,142750.000000,1445.848407)}
{pt3dadd(154320.000000,150828.000000,142800.000000,1430.942742)}
{pt3dadd(154080.000000,150612.000000,142850.000000,1416.633287)}
{pt3dadd(154128.000000,150444.000000,142825.000000,1402.323831)}
{pt3dadd(154176.000000,150252.000000,143125.000000,1388.014375)}
{pt3dadd(154200.000000,150084.000000,142850.000000,1373.704920)}
{pt3dadd(154092.000000,149916.000000,142975.000000,1402.920041)}
{pt3dadd(154260.000000,149736.000000,143150.000000,1432.135161)}
{pt3dadd(154152.000000,149580.000000,143125.000000,1461.350281)}
{pt3dadd(154116.000000,149436.000000,143075.000000,1490.565402)}
{pt3dadd(154080.000000,149292.000000,143225.000000,1475.659769)}
{pt3dadd(154044.000000,149160.000000,143375.000000,1460.754135)}
{pt3dadd(154008.000000,149016.000000,143525.000000,1445.848502)}
{pt3dadd(154128.000000,148860.000000,143625.000000,1430.942868)}
{pt3dadd(153972.000000,148716.000000,143725.000000,1445.848502)}
{pt3dadd(154068.000000,148560.000000,143900.000000,1460.754135)}
{pt3dadd(153960.000000,148404.000000,143875.000000,1475.659769)}
{pt3dadd(154056.000000,148272.000000,143800.000000,1490.565402)}
{pt3dadd(153792.000000,148092.000000,143825.000000,1490.565402)}
{pt3dadd(153840.000000,147924.000000,143850.000000,1490.565402)}
{pt3dadd(153888.000000,147768.000000,143875.000000,1490.565402)}
{pt3dadd(153936.000000,147600.000000,143900.000000,1490.565402)}
{pt3dadd(153924.000000,147444.000000,143900.000000,1490.565402)}
{pt3dadd(153684.000000,147264.000000,144250.000000,1490.565402)}
{pt3dadd(153756.000000,147072.000000,144250.000000,1490.565402)}
{pt3dadd(153876.000000,146892.000000,144225.000000,1490.565402)}
{pt3dadd(153720.000000,146748.000000,144375.000000,1490.565402)}
{pt3dadd(153564.000000,146604.000000,144525.000000,1490.565402)}
{pt3dadd(153612.000000,146460.000000,144600.000000,1490.565402)}
{pt3dadd(153396.000000,146304.000000,144750.000000,1490.565402)}
{pt3dadd(153312.000000,146148.000000,144675.000000,1490.565402)}
{pt3dadd(153228.000000,145980.000000,144600.000000,1490.565402)}
{pt3dadd(153300.000000,145836.000000,144675.000000,1490.565402)}
{pt3dadd(153372.000000,145692.000000,144750.000000,1490.565402)}
{pt3dadd(153444.000000,145548.000000,144825.000000,1490.565402)}
{pt3dadd(153516.000000,145404.000000,144900.000000,1490.565402)}
{pt3dadd(153588.000000,145260.000000,144975.000000,1490.565402)}
{pt3dadd(153660.000000,145128.000000,145050.000000,1490.565402)}
{pt3dadd(153732.000000,144984.000000,145125.000000,1490.565402)}
{pt3dadd(153804.000000,144840.000000,145200.000000,1490.565402)}
{pt3dadd(153768.000000,144684.000000,145300.000000,1490.565402)}
{pt3dadd(153684.000000,144528.000000,145350.000000,1490.565402)}
{pt3dadd(153624.000000,144384.000000,145325.000000,1490.565402)}
{pt3dadd(153768.000000,144252.000000,145200.000000,1490.565402)}
{pt3dadd(153792.000000,144096.000000,145300.000000,1490.565402)}
{pt3dadd(153816.000000,143940.000000,145400.000000,1490.565402)}
{pt3dadd(153840.000000,143784.000000,145500.000000,1490.565402)}
{pt3dadd(153828.000000,143628.000000,145575.000000,1490.565402)}
{pt3dadd(153816.000000,143448.000000,145650.000000,1490.565402)}
{pt3dadd(153804.000000,143232.000000,145725.000000,1490.565402)}
{pt3dadd(153792.000000,143040.000000,145800.000000,1490.565402)}
{pt3dadd(153780.000000,142848.000000,145875.000000,1490.565402)}
{pt3dadd(153768.000000,142632.000000,145950.000000,1490.565402)}
{pt3dadd(153792.000000,142476.000000,145800.000000,1490.565402)}
{pt3dadd(153816.000000,142308.000000,145800.000000,1490.565402)}
{pt3dadd(153840.000000,142152.000000,145800.000000,1490.565402)}
{pt3dadd(153864.000000,141996.000000,145800.000000,1490.565402)}
{pt3dadd(154032.000000,141828.000000,145825.000000,1490.565402)}
{pt3dadd(153924.000000,141648.000000,145800.000000,1475.659737)}
{pt3dadd(153816.000000,141468.000000,145800.000000,1460.754072)}
{pt3dadd(154092.000000,141324.000000,145725.000000,1445.848407)}
{pt3dadd(154008.000000,141324.000000,145800.000000,1430.942742)}
{pt3dadd(153924.000000,141204.000000,145875.000000,1502.489862)}
{pt3dadd(153840.000000,141072.000000,145950.000000,1574.036982)}
{pt3dadd(153756.000000,140928.000000,146025.000000,1645.584102)}
{pt3dadd(153672.000000,140808.000000,146100.000000,1717.131222)}
{pt3dadd(153588.000000,140676.000000,146250.000000,1660.489767)}
{pt3dadd(153504.000000,140544.000000,146150.000000,1603.848312)}
{pt3dadd(153756.000000,140400.000000,146250.000000,1547.206857)}
{pt3dadd(153672.000000,140256.000000,146350.000000,1490.565402)}
{pt3dadd(153588.000000,140124.000000,146450.000000,1475.659769)}
{pt3dadd(153612.000000,139980.000000,146450.000000,1460.754135)}
{pt3dadd(153456.000000,139812.000000,146500.000000,1445.848502)}
{pt3dadd(153396.000000,139680.000000,146475.000000,1430.942868)}
{pt3dadd(153312.000000,139536.000000,146400.000000,1430.942837)}
{pt3dadd(153228.000000,139368.000000,146325.000000,1430.942805)}
{pt3dadd(153168.000000,139224.000000,146275.000000,1430.942773)}
{pt3dadd(153084.000000,139068.000000,146425.000000,1430.942742)}
{pt3dadd(153000.000000,138888.000000,146575.000000,1485.318542)}
{pt3dadd(152964.000000,138684.000000,146475.000000,1539.694341)}
{pt3dadd(152928.000000,138528.000000,146375.000000,1594.070141)}
{pt3dadd(152640.000000,138372.000000,146500.000000,1648.445940)}
{pt3dadd(152424.000000,138180.000000,146450.000000,1522.523016)}
{pt3dadd(152364.000000,138012.000000,146225.000000,1396.600092)}
{pt3dadd(152100.000000,137892.000000,146375.000000,1270.677168)}
{pt3dadd(151836.000000,137760.000000,146525.000000,1144.754244)}
{pt3dadd(151572.000000,137616.000000,146675.000000,1106.993254)}
{pt3dadd(151404.000000,137472.000000,146800.000000,1069.232265)}
{pt3dadd(151248.000000,137376.000000,147150.000000,1031.471276)}
{pt3dadd(151440.000000,137364.000000,146875.000000,993.710286)}
{pt3dadd(151464.000000,137220.000000,146925.000000,1055.817185)}
{pt3dadd(151488.000000,137088.000000,146975.000000,1117.924083)}
{pt3dadd(151512.000000,136956.000000,147025.000000,1180.030982)}
{pt3dadd(151452.000000,136800.000000,146900.000000,1242.137880)}
{pt3dadd(151140.000000,136644.000000,147050.000000,1242.137880)}
{pt3dadd(151236.000000,136500.000000,146975.000000,1242.137880)}
{pt3dadd(151152.000000,136344.000000,147100.000000,1242.137880)}
{pt3dadd(151020.000000,136164.000000,147275.000000,1242.137880)}
{pt3dadd(150780.000000,135984.000000,147500.000000,1289.339127)}
{pt3dadd(150624.000000,135816.000000,147550.000000,1336.540374)}
{pt3dadd(150468.000000,135648.000000,147600.000000,1383.741621)}
{pt3dadd(150408.000000,135444.000000,147625.000000,1430.942868)}
{pt3dadd(150348.000000,135288.000000,147650.000000,1445.848502)}
{pt3dadd(150288.000000,135108.000000,147675.000000,1460.754135)}
{pt3dadd(150228.000000,134952.000000,147700.000000,1475.659769)}
{pt3dadd(150168.000000,134784.000000,147725.000000,1490.565402)}
{pt3dadd(150108.000000,134616.000000,147750.000000,1428.458522)}
{pt3dadd(149976.000000,134460.000000,147875.000000,1366.351641)}
{pt3dadd(149844.000000,134280.000000,148000.000000,1304.244761)}
{pt3dadd(149784.000000,134112.000000,147875.000000,1242.137880)}
{pt3dadd(149724.000000,133944.000000,147750.000000,1289.339127)}
{pt3dadd(149340.000000,133812.000000,148100.000000,1336.540374)}
{pt3dadd(149076.000000,133632.000000,148475.000000,1383.741621)}
{pt3dadd(148896.000000,133428.000000,148500.000000,1430.942868)}
{pt3dadd(148944.000000,133224.000000,148325.000000,1445.848502)}
{pt3dadd(148932.000000,133056.000000,148475.000000,1460.754135)}
{pt3dadd(148716.000000,132876.000000,148650.000000,1475.659769)}
{pt3dadd(148500.000000,132708.000000,148825.000000,1490.565402)}
{pt3dadd(148464.000000,132552.000000,149075.000000,1547.206893)}
{pt3dadd(148416.000000,132396.000000,149025.000000,1603.848384)}
{pt3dadd(148308.000000,132228.000000,149300.000000,1660.489875)}
{pt3dadd(148296.000000,132036.000000,149375.000000,1717.131366)}
{pt3dadd(148368.000000,131856.000000,149325.000000,1735.018137)}
{pt3dadd(148464.000000,131700.000000,149250.000000,1752.904908)}
{pt3dadd(148428.000000,131520.000000,149475.000000,1770.791679)}
{pt3dadd(148392.000000,131364.000000,149400.000000,1788.678450)}
{pt3dadd(148308.000000,131196.000000,149725.000000,1770.791679)}
{pt3dadd(148176.000000,131040.000000,149650.000000,1752.904908)}
{pt3dadd(148272.000000,130872.000000,149750.000000,1735.018137)}
{pt3dadd(148368.000000,130680.000000,149850.000000,1717.131366)}
{pt3dadd(148332.000000,130500.000000,149875.000000,1735.018137)}
{pt3dadd(148296.000000,130344.000000,149900.000000,1752.904908)}
{pt3dadd(148668.000000,130164.000000,149925.000000,1770.791679)}
{pt3dadd(148608.000000,129996.000000,150350.000000,1788.678450)}
{pt3dadd(148908.000000,129864.000000,150475.000000,1714.150188)}
{pt3dadd(148980.000000,129120.000000,150725.000000,1639.621926)}
{pt3dadd(148824.000000,128700.000000,151025.000000,1565.093664)}
{pt3dadd(148668.000000,128280.000000,151275.000000,1490.565402)}
{pt3dadd(148584.000000,128244.000000,151525.000000,1565.093664)}
{pt3dadd(148632.000000,127932.000000,151775.000000,1639.621926)}
{pt3dadd(148776.000000,127392.000000,151950.000000,1714.150188)}
{pt3dadd(148824.000000,126924.000000,152150.000000,1788.678450)}
{pt3dadd(149016.000000,126384.000000,152350.000000,1788.678450)}
{pt3dadd(148956.000000,125916.000000,152575.000000,1788.678450)}
{pt3dadd(148848.000000,125652.000000,152825.000000,1788.678450)}
{pt3dadd(148740.000000,125268.000000,153075.000000,1788.678450)}
{pt3dadd(148836.000000,125052.000000,153350.000000,1985.433116)}
{pt3dadd(148752.000000,124944.000000,153625.000000,2182.187781)}
{pt3dadd(148668.000000,124836.000000,153900.000000,2378.942446)}
{pt3dadd(148656.000000,124728.000000,154225.000000,2575.697112)}
{pt3dadd(148644.000000,124368.000000,154550.000000,2474.729739)}
{pt3dadd(148488.000000,124248.000000,154925.000000,2373.762366)}
{pt3dadd(147480.000000,124476.000000,155325.000000,1242.137880)}

{create adhoc3}
{access adhoc3}
{connect adhoc3(1), adhoc2(0)}
{nseg = 1}
{strdef color color = "White"}
{pt3dclear()}
{pt3dadd(147480.000000,124476.000000,155325.000000,1242.137880)}
{pt3dadd(147420.000000,124212.000000,155400.000000,1490.565402)}
{pt3dadd(148560.000000,124020.000000,155275.000000,1490.565402)}
{pt3dadd(148524.000000,123720.000000,155350.000000,1490.565402)}
{pt3dadd(147828.000000,123480.000000,156725.000000,1490.565402)}
{pt3dadd(143712.000000,121860.000000,160500.000000,828.092016)}

{create adhoc4}
{access adhoc4}
{connect adhoc4(1), adhoc3(0)}
{nseg = 1}
{strdef color color = "White"}
{pt3dclear()}
{pt3dadd(143712.000000,121860.000000,160500.000000,828.092016)}
{pt3dadd(144264.000000,121932.000000,160175.000000,862.595802)}

{create adhoc5}
{access adhoc5}
{connect adhoc5(1), adhoc4(0)}
{nseg = 1}
{strdef color color = "White"}
{pt3dclear()}
{pt3dadd(144264.000000,121932.000000,160175.000000,862.595802)}
{pt3dadd(145224.000000,123480.000000,161075.000000,718.829820)}
{pt3dadd(145032.000000,124032.000000,161300.000000,754.771316)}
{pt3dadd(144972.000000,124092.000000,161575.000000,790.712811)}
{pt3dadd(144792.000000,124200.000000,161875.000000,826.654307)}
{pt3dadd(144720.000000,124224.000000,162075.000000,862.595802)}
{pt3dadd(144312.000000,124308.000000,162275.000000,819.466020)}
{pt3dadd(144180.000000,124404.000000,162475.000000,776.336238)}
{pt3dadd(144108.000000,124416.000000,162675.000000,733.206456)}
{pt3dadd(144036.000000,124296.000000,162900.000000,690.076674)}
{pt3dadd(143940.000000,124284.000000,163100.000000,600.755404)}
{pt3dadd(143832.000000,124320.000000,163300.000000,511.434135)}
{pt3dadd(143484.000000,124428.000000,163500.000000,422.112866)}
{pt3dadd(143136.000000,124536.000000,163700.000000,332.791596)}
{pt3dadd(142968.000000,124764.000000,163875.000000,429.301152)}
{pt3dadd(142824.000000,124848.000000,164050.000000,525.810708)}
{pt3dadd(142704.000000,124944.000000,164250.000000,622.320264)}
{pt3dadd(142464.000000,125100.000000,164475.000000,718.829820)}
{pt3dadd(142296.000000,125196.000000,164700.000000,688.878585)}
{pt3dadd(142188.000000,125232.000000,164925.000000,658.927350)}
{pt3dadd(142128.000000,125232.000000,165100.000000,628.976115)}
{pt3dadd(142116.000000,125220.000000,165325.000000,599.024880)}
{pt3dadd(142068.000000,125088.000000,165525.000000,553.266031)}
{pt3dadd(141876.000000,125088.000000,165700.000000,507.507183)}
{pt3dadd(141888.000000,125028.000000,165925.000000,461.748335)}
{pt3dadd(141732.000000,125028.000000,166125.000000,415.989486)}
{pt3dadd(141420.000000,125160.000000,166325.000000,398.656589)}
{pt3dadd(141216.000000,125124.000000,166550.000000,381.323691)}
{pt3dadd(140988.000000,124716.000000,166725.000000,363.990794)}
{pt3dadd(140940.000000,124788.000000,166950.000000,346.657896)}
{pt3dadd(140964.000000,124944.000000,167150.000000,403.759386)}
{pt3dadd(140976.000000,125220.000000,167375.000000,460.860876)}
{pt3dadd(141108.000000,125448.000000,167550.000000,517.962366)}
{pt3dadd(141216.000000,125676.000000,167725.000000,575.063856)}
{pt3dadd(141396.000000,125820.000000,167925.000000,611.005347)}
{pt3dadd(141492.000000,125964.000000,168300.000000,646.946838)}
{pt3dadd(141492.000000,126084.000000,168625.000000,682.888329)}
{pt3dadd(141636.000000,126000.000000,168475.000000,718.829820)}
{pt3dadd(141768.000000,126012.000000,168575.000000,718.829820)}
{pt3dadd(141912.000000,126024.000000,168675.000000,718.829820)}
{pt3dadd(142056.000000,126036.000000,168775.000000,718.829820)}
{pt3dadd(142200.000000,126108.000000,168750.000000,718.829820)}
{pt3dadd(142344.000000,126180.000000,168725.000000,718.829820)}
{pt3dadd(142500.000000,126300.000000,168750.000000,718.829820)}
{pt3dadd(142656.000000,126420.000000,168775.000000,718.829820)}
{pt3dadd(142800.000000,126540.000000,168800.000000,718.829820)}
{pt3dadd(142944.000000,126660.000000,168825.000000,663.919209)}
{pt3dadd(143088.000000,126660.000000,168825.000000,609.008598)}
{pt3dadd(143196.000000,126684.000000,168800.000000,554.097987)}
{pt3dadd(143340.000000,126708.000000,168775.000000,499.187376)}
{pt3dadd(143460.000000,126732.000000,168775.000000,416.184741)}
{pt3dadd(143460.000000,126756.000000,168775.000000,333.182106)}
{pt3dadd(143556.000000,126804.000000,168825.000000,250.179471)}
{pt3dadd(143652.000000,126804.000000,168800.000000,167.176836)}
{pt3dadd(143736.000000,126828.000000,168775.000000,116.095032)}

{create adhoc6}
{access adhoc6}
{connect adhoc6(1), adhoc4(0)}
{nseg = 1}
{strdef color color = "White"}
{pt3dclear()}
{pt3dadd(144264.000000,121932.000000,160175.000000,862.595802)}
{pt3dadd(144540.000000,121752.000000,159825.000000,862.595802)}
{pt3dadd(145044.000000,121464.000000,159450.000000,1004.682537)}
{pt3dadd(145116.000000,121296.000000,159500.000000,1146.769272)}
{pt3dadd(146076.000000,121164.000000,158925.000000,1288.856007)}
{pt3dadd(147372.000000,120960.000000,157450.000000,1430.942742)}
{pt3dadd(147336.000000,120768.000000,157450.000000,1321.634628)}
{pt3dadd(147408.000000,120612.000000,157350.000000,1212.326514)}
{pt3dadd(147300.000000,120468.000000,157375.000000,1103.018400)}
{pt3dadd(147264.000000,120324.000000,157400.000000,993.710286)}
{pt3dadd(147336.000000,120156.000000,157450.000000,952.305719)}
{pt3dadd(147528.000000,120036.000000,157750.000000,910.901151)}
{pt3dadd(147504.000000,119892.000000,157625.000000,869.496584)}
{pt3dadd(147456.000000,119760.000000,157600.000000,828.092016)}
{pt3dadd(147372.000000,119628.000000,157425.000000,18.000000)}
{pt3dadd(147300.000000,119388.000000,157800.000000,288.030648)}
{pt3dadd(147132.000000,119148.000000,157650.000000,558.061296)}
{pt3dadd(147348.000000,118920.000000,157575.000000,828.091944)}
{pt3dadd(147324.000000,118740.000000,157425.000000,859.559431)}
{pt3dadd(147228.000000,118572.000000,157375.000000,891.026919)}
{pt3dadd(147132.000000,118404.000000,157325.000000,922.494407)}
{pt3dadd(147216.000000,118260.000000,157250.000000,953.961894)}
{pt3dadd(147144.000000,118080.000000,157250.000000,974.250158)}
{pt3dadd(147072.000000,117900.000000,157275.000000,994.538421)}
{pt3dadd(147000.000000,117708.000000,157300.000000,1014.826685)}
{pt3dadd(147264.000000,117516.000000,157125.000000,1035.114948)}
{pt3dadd(146892.000000,117336.000000,157250.000000,1035.114948)}
{pt3dadd(146928.000000,117168.000000,157050.000000,1035.114948)}

{create adhoc7}
{access adhoc7}
{connect adhoc7(1), adhoc6(0)}
{nseg = 1}
{strdef color color = "White"}
{pt3dclear()}
{pt3dadd(146928.000000,117168.000000,157050.000000,1035.114948)}
{pt3dadd(146808.000000,117000.000000,156925.000000,1144.754172)}
{pt3dadd(145152.000000,116784.000000,156425.000000,1117.344366)}
{pt3dadd(144516.000000,116436.000000,156150.000000,1089.934560)}
{pt3dadd(143856.000000,116160.000000,156050.000000,1062.524754)}
{pt3dadd(144120.000000,115872.000000,156100.000000,1035.114948)}
{pt3dadd(143580.000000,116028.000000,155950.000000,991.985162)}
{pt3dadd(143304.000000,116040.000000,155800.000000,948.855375)}
{pt3dadd(143052.000000,116124.000000,155650.000000,905.725589)}
{pt3dadd(142836.000000,116256.000000,155200.000000,862.595802)}
{pt3dadd(143016.000000,116316.000000,154875.000000,895.374441)}
{pt3dadd(142440.000000,116400.000000,154525.000000,928.153080)}
{pt3dadd(142452.000000,116244.000000,154225.000000,960.931719)}
{pt3dadd(141960.000000,116100.000000,153900.000000,993.710358)}
{pt3dadd(141684.000000,116028.000000,153600.000000,895.038988)}
{pt3dadd(141456.000000,115968.000000,153300.000000,796.367619)}
{pt3dadd(141492.000000,115836.000000,153000.000000,697.696250)}
{pt3dadd(141120.000000,115812.000000,152700.000000,599.024880)}
{pt3dadd(140724.000000,115752.000000,152425.000000,628.976115)}
{pt3dadd(140556.000000,115632.000000,152175.000000,658.927350)}
{pt3dadd(140460.000000,115356.000000,151900.000000,688.878585)}
{pt3dadd(140592.000000,115056.000000,151550.000000,718.829820)}
{pt3dadd(140544.000000,114660.000000,151225.000000,718.829820)}
{pt3dadd(140580.000000,114612.000000,150925.000000,718.829820)}
{pt3dadd(140508.000000,114264.000000,150525.000000,718.829820)}
{pt3dadd(140388.000000,113940.000000,150175.000000,718.829820)}
{pt3dadd(139776.000000,113868.000000,149875.000000,688.878585)}
{pt3dadd(139704.000000,113520.000000,149600.000000,658.927350)}
{pt3dadd(139428.000000,113472.000000,149325.000000,628.976115)}
{pt3dadd(138996.000000,112968.000000,149075.000000,599.024880)}
{pt3dadd(138828.000000,112872.000000,148825.000000,718.829820)}

{create adhoc8}
{access adhoc8}
{connect adhoc8(1), adhoc7(0)}
{nseg = 1}
{strdef color color = "White"}
{pt3dclear()}
{pt3dadd(138828.000000,112872.000000,148825.000000,718.829820)}
{pt3dadd(138552.000000,112440.000000,148550.000000,599.024880)}
{pt3dadd(138276.000000,112524.000000,148275.000000,599.024880)}
{pt3dadd(137976.000000,112824.000000,147975.000000,599.024880)}
{pt3dadd(137664.000000,112908.000000,147700.000000,599.024880)}
{pt3dadd(137364.000000,112824.000000,147425.000000,599.024880)}
{pt3dadd(137064.000000,112560.000000,147125.000000,415.989486)}

{create adhoc9}
{access adhoc9}
{connect adhoc9(1), adhoc7(0)}
{nseg = 1}
{strdef color color = "White"}
{pt3dclear()}
{pt3dadd(138828.000000,112872.000000,148825.000000,718.829820)}
{pt3dadd(138672.000000,108156.000000,148350.000000,346.657896)}
{pt3dadd(138432.000000,107220.000000,148375.000000,499.187376)}
{pt3dadd(138216.000000,107280.000000,148275.000000,415.989486)}

{create adhoc10}
{access adhoc10}
{connect adhoc10(1), adhoc6(0)}
{nseg = 1}
{strdef color color = "White"}
{pt3dclear()}
{pt3dadd(146928.000000,117168.000000,157050.000000,1035.114948)}
{pt3dadd(147708.000000,113100.000000,158275.000000,993.710358)}
{pt3dadd(147708.000000,111624.000000,158575.000000,895.038988)}
{pt3dadd(147660.000000,110400.000000,158825.000000,796.367619)}
{pt3dadd(147912.000000,109548.000000,159050.000000,697.696250)}
{pt3dadd(147996.000000,109524.000000,159350.000000,599.024880)}
{pt3dadd(147696.000000,109404.000000,159575.000000,532.466550)}
{pt3dadd(147576.000000,109104.000000,159800.000000,465.908220)}
{pt3dadd(147588.000000,109320.000000,160050.000000,399.349890)}
{pt3dadd(147624.000000,109152.000000,160300.000000,332.791560)}
{pt3dadd(147492.000000,109284.000000,160550.000000,336.258144)}
{pt3dadd(147576.000000,109272.000000,160825.000000,339.724728)}
{pt3dadd(147648.000000,109308.000000,161050.000000,343.191312)}
{pt3dadd(147684.000000,109212.000000,161250.000000,346.657896)}
{pt3dadd(147660.000000,109392.000000,161525.000000,320.177083)}
{pt3dadd(147696.000000,109404.000000,161775.000000,293.696271)}
{pt3dadd(147648.000000,109536.000000,161950.000000,267.215459)}
{pt3dadd(147564.000000,109608.000000,162125.000000,240.734646)}
{pt3dadd(147588.000000,109548.000000,162350.000000,240.734646)}
{pt3dadd(147492.000000,109608.000000,162550.000000,240.734646)}
{pt3dadd(147612.000000,109476.000000,162750.000000,240.734646)}
{pt3dadd(147852.000000,109296.000000,162975.000000,240.734646)}
{pt3dadd(148068.000000,109212.000000,163175.000000,263.748884)}
{pt3dadd(147996.000000,109176.000000,163375.000000,286.763121)}
{pt3dadd(147948.000000,109092.000000,163575.000000,309.777359)}
{pt3dadd(148092.000000,108960.000000,163775.000000,332.791596)}
{pt3dadd(148116.000000,108876.000000,163975.000000,321.814093)}
{pt3dadd(148236.000000,108780.000000,164150.000000,310.836591)}
{pt3dadd(148200.000000,108768.000000,164325.000000,299.859089)}
{pt3dadd(148272.000000,108540.000000,164575.000000,288.881586)}
{pt3dadd(148248.000000,108480.000000,164800.000000,276.844851)}
{pt3dadd(148176.000000,108456.000000,165000.000000,264.808116)}
{pt3dadd(148140.000000,108264.000000,165200.000000,252.771381)}
{pt3dadd(147972.000000,108192.000000,165425.000000,240.734646)}
{pt3dadd(147924.000000,108072.000000,165600.000000,240.734646)}
{pt3dadd(148044.000000,108012.000000,165850.000000,240.734646)}
{pt3dadd(148140.000000,108060.000000,166100.000000,240.734646)}
{pt3dadd(148332.000000,108048.000000,166350.000000,240.734646)}
{pt3dadd(148536.000000,108036.000000,166375.000000,330.307205)}
{pt3dadd(148236.000000,108276.000000,166550.000000,419.879763)}
{pt3dadd(148008.000000,107148.000000,166775.000000,509.452321)}
{pt3dadd(147948.000000,107268.000000,167025.000000,599.024880)}
{pt3dadd(147888.000000,107388.000000,167275.000000,735.457221)}
{pt3dadd(147828.000000,107508.000000,167525.000000,871.889562)}
{pt3dadd(147960.000000,107556.000000,167775.000000,1008.321903)}
{pt3dadd(148176.000000,107544.000000,168025.000000,1144.754244)}
{pt3dadd(148032.000000,107532.000000,168300.000000,1008.321903)}
{pt3dadd(147888.000000,107496.000000,168550.000000,871.889562)}
{pt3dadd(147852.000000,107400.000000,168800.000000,735.457221)}
{pt3dadd(147564.000000,107316.000000,169100.000000,599.024880)}
{pt3dadd(147516.000000,107244.000000,169350.000000,553.266031)}
{pt3dadd(147360.000000,107064.000000,169575.000000,507.507183)}
{pt3dadd(147252.000000,107196.000000,169800.000000,461.748335)}
{pt3dadd(147240.000000,107160.000000,169950.000000,415.989486)}
{pt3dadd(147276.000000,107160.000000,170100.000000,288.881586)}

{create adhoc11}
{access adhoc11}
{connect adhoc11(1), adhoc3(0)}
{nseg = 1}
{strdef color color = "White"}
{pt3dclear()}
{pt3dadd(143712.000000,121860.000000,160500.000000,828.092016)}
{pt3dadd(143520.000000,121716.000000,160225.000000,828.092016)}
{pt3dadd(143304.000000,121464.000000,160300.000000,800.776467)}
{pt3dadd(143088.000000,121524.000000,160475.000000,773.460918)}
{pt3dadd(142896.000000,121536.000000,160550.000000,746.145369)}
{pt3dadd(142692.000000,121368.000000,160625.000000,718.829820)}
{pt3dadd(142476.000000,121200.000000,160625.000000,704.740765)}
{pt3dadd(142260.000000,121212.000000,160725.000000,690.651711)}
{pt3dadd(142080.000000,121224.000000,160825.000000,676.562656)}
{pt3dadd(141924.000000,121236.000000,160925.000000,662.473602)}
{pt3dadd(141804.000000,121140.000000,160850.000000,676.562656)}
{pt3dadd(141612.000000,121152.000000,160900.000000,690.651711)}
{pt3dadd(141432.000000,121104.000000,160825.000000,704.740765)}
{pt3dadd(141264.000000,120984.000000,160950.000000,718.829820)}
{pt3dadd(141072.000000,121224.000000,161225.000000,677.137684)}
{pt3dadd(140880.000000,121080.000000,161225.000000,635.445549)}
{pt3dadd(140700.000000,120984.000000,161100.000000,593.753413)}
{pt3dadd(140544.000000,121068.000000,161250.000000,552.061278)}
{pt3dadd(140376.000000,121152.000000,161400.000000,586.565109)}
{pt3dadd(140220.000000,121128.000000,161400.000000,621.068940)}
{pt3dadd(140064.000000,121080.000000,161400.000000,655.572771)}
{pt3dadd(139920.000000,120936.000000,161325.000000,690.076602)}
{pt3dadd(139788.000000,120792.000000,161250.000000,724.580455)}
{pt3dadd(139644.000000,120768.000000,161250.000000,759.084309)}
{pt3dadd(139476.000000,120744.000000,161250.000000,793.588162)}
{pt3dadd(139296.000000,120576.000000,161300.000000,828.092016)}
{pt3dadd(139116.000000,120528.000000,161350.000000,836.717962)}
{pt3dadd(138888.000000,120504.000000,161325.000000,845.343909)}
{pt3dadd(138732.000000,120456.000000,161400.000000,853.969856)}
{pt3dadd(138528.000000,120384.000000,161375.000000,862.595802)}
{pt3dadd(138348.000000,120216.000000,161450.000000,819.466020)}
{pt3dadd(138204.000000,120228.000000,161450.000000,776.336238)}
{pt3dadd(138036.000000,120036.000000,161325.000000,733.206456)}
{pt3dadd(137892.000000,119844.000000,161400.000000,690.076674)}
{pt3dadd(137724.000000,119952.000000,161450.000000,724.580509)}
{pt3dadd(137556.000000,119784.000000,161350.000000,759.084345)}
{pt3dadd(137400.000000,119640.000000,161275.000000,793.588180)}
{pt3dadd(137268.000000,119700.000000,161375.000000,828.092016)}
{pt3dadd(137088.000000,119712.000000,161325.000000,869.496602)}
{pt3dadd(136920.000000,119640.000000,161450.000000,910.901187)}
{pt3dadd(136764.000000,119616.000000,161425.000000,952.305772)}
{pt3dadd(136620.000000,119592.000000,161475.000000,993.710358)}
{pt3dadd(136488.000000,119568.000000,161525.000000,983.773242)}
{pt3dadd(136380.000000,119544.000000,161575.000000,973.836126)}
{pt3dadd(136272.000000,119520.000000,161625.000000,963.899010)}
{pt3dadd(136164.000000,119496.000000,161675.000000,953.961894)}
{pt3dadd(136032.000000,119472.000000,161725.000000,931.120371)}
{pt3dadd(135912.000000,119448.000000,161775.000000,908.278848)}
{pt3dadd(135768.000000,119628.000000,161725.000000,885.437325)}
{pt3dadd(135624.000000,119808.000000,161675.000000,862.595802)}
{pt3dadd(135468.000000,119784.000000,161525.000000,862.595802)}
{pt3dadd(135336.000000,119664.000000,161600.000000,862.595802)}
{pt3dadd(135204.000000,119544.000000,161675.000000,862.595802)}
{pt3dadd(135060.000000,119424.000000,161750.000000,862.595802)}
{pt3dadd(134904.000000,119532.000000,161875.000000,945.059972)}
{pt3dadd(134760.000000,119640.000000,162000.000000,1027.524141)}
{pt3dadd(134604.000000,119592.000000,162050.000000,1109.988311)}
{pt3dadd(134448.000000,119544.000000,162100.000000,1192.452480)}
{pt3dadd(134328.000000,119652.000000,162225.000000,993.710358)}
{pt3dadd(134184.000000,119508.000000,162300.000000,862.595802)}

{create adhoc12}
{access adhoc12}
{connect adhoc12(1), adhoc11(0)}
{nseg = 1}
{strdef color color = "White"}
{pt3dclear()}
{pt3dadd(134184.000000,119508.000000,162300.000000,862.595802)}
{pt3dadd(134184.000000,120000.000000,160925.000000,575.063856)}
{pt3dadd(134040.000000,119952.000000,160800.000000,517.962366)}
{pt3dadd(133908.000000,120084.000000,160500.000000,460.860876)}
{pt3dadd(133752.000000,119964.000000,160350.000000,403.759386)}
{pt3dadd(133608.000000,120120.000000,160150.000000,346.657896)}
{pt3dadd(133992.000000,120204.000000,159875.000000,399.349908)}

{create adhoc13}
{access adhoc13}
{connect adhoc13(1), adhoc11(0)}
{nseg = 1}
{strdef color color = "White"}
{pt3dclear()}
{pt3dadd(134184.000000,119508.000000,162300.000000,862.595802)}
{pt3dadd(133980.000000,119688.000000,162625.000000,862.595802)}
{pt3dadd(133812.000000,119664.000000,162875.000000,796.703072)}
{pt3dadd(133644.000000,119472.000000,163000.000000,730.810341)}
{pt3dadd(133488.000000,119280.000000,163125.000000,664.917611)}
{pt3dadd(133332.000000,119088.000000,163250.000000,599.024880)}
{pt3dadd(133188.000000,118896.000000,163375.000000,599.024880)}
{pt3dadd(133044.000000,118704.000000,163500.000000,599.024880)}
{pt3dadd(132876.000000,118716.000000,163525.000000,599.024880)}
{pt3dadd(132720.000000,118728.000000,163550.000000,599.024880)}
{pt3dadd(132564.000000,118740.000000,163575.000000,628.976115)}
{pt3dadd(132432.000000,118752.000000,163600.000000,658.927350)}
{pt3dadd(132288.000000,118764.000000,163625.000000,688.878585)}
{pt3dadd(132144.000000,118776.000000,163650.000000,718.829820)}
{pt3dadd(132012.000000,118752.000000,163825.000000,711.641515)}
{pt3dadd(131856.000000,118704.000000,163625.000000,704.453211)}
{pt3dadd(131712.000000,118788.000000,163650.000000,697.264906)}
{pt3dadd(131556.000000,118716.000000,163700.000000,690.076602)}
{pt3dadd(131424.000000,118644.000000,163750.000000,733.206402)}
{pt3dadd(131280.000000,118572.000000,163800.000000,776.336202)}
{pt3dadd(131112.000000,118632.000000,163850.000000,819.466002)}
{pt3dadd(130956.000000,118512.000000,163775.000000,862.595802)}
{pt3dadd(130812.000000,118572.000000,163725.000000,853.969856)}
{pt3dadd(130668.000000,118584.000000,163700.000000,845.343909)}
{pt3dadd(130548.000000,118596.000000,163825.000000,836.717962)}
{pt3dadd(130416.000000,118608.000000,163950.000000,828.092016)}
{pt3dadd(130296.000000,118644.000000,163550.000000,770.825232)}
{pt3dadd(130176.000000,118596.000000,163725.000000,713.558448)}
{pt3dadd(130068.000000,118632.000000,163800.000000,656.291664)}
{pt3dadd(129948.000000,118692.000000,163900.000000,599.024880)}
{pt3dadd(129804.000000,118620.000000,164100.000000,628.976115)}
{pt3dadd(129684.000000,118476.000000,164300.000000,658.927350)}
{pt3dadd(129564.000000,118332.000000,164500.000000,688.878585)}
{pt3dadd(129420.000000,118236.000000,164425.000000,718.829820)}
{pt3dadd(129264.000000,118164.000000,164700.000000,746.145351)}
{pt3dadd(129108.000000,118068.000000,164900.000000,773.460882)}
{pt3dadd(128940.000000,118284.000000,165100.000000,800.776413)}
{pt3dadd(128808.000000,118236.000000,165300.000000,828.091944)}
{pt3dadd(128664.000000,118344.000000,165375.000000,800.776413)}
{pt3dadd(128532.000000,118320.000000,165475.000000,773.460882)}
{pt3dadd(128412.000000,118296.000000,165575.000000,746.145351)}
{pt3dadd(128280.000000,118272.000000,165675.000000,718.829820)}
{pt3dadd(128124.000000,118404.000000,165650.000000,663.919209)}
{pt3dadd(127956.000000,118488.000000,165725.000000,609.008598)}
{pt3dadd(128208.000000,118488.000000,166025.000000,554.097987)}
{pt3dadd(127884.000000,118488.000000,166375.000000,499.187376)}
{pt3dadd(127224.000000,117684.000000,166625.000000,478.387903)}
{pt3dadd(126744.000000,117816.000000,166850.000000,457.588431)}
{pt3dadd(126528.000000,117696.000000,167100.000000,436.788958)}
{pt3dadd(126204.000000,117936.000000,167400.000000,415.989486)}
{pt3dadd(125916.000000,118128.000000,167600.000000,455.758079)}
{pt3dadd(125700.000000,118248.000000,167875.000000,495.526671)}
{pt3dadd(125580.000000,118416.000000,168150.000000,535.295264)}
{pt3dadd(125196.000000,118632.000000,168425.000000,575.063856)}
{pt3dadd(125184.000000,118800.000000,168675.000000,569.313220)}
{pt3dadd(124920.000000,118824.000000,168925.000000,563.562585)}
{pt3dadd(124584.000000,118812.000000,169175.000000,557.811949)}
{pt3dadd(124164.000000,118848.000000,169450.000000,552.061314)}
{pt3dadd(123636.000000,118872.000000,169725.000000,563.802206)}
{pt3dadd(123516.000000,118872.000000,170125.000000,575.543097)}
{pt3dadd(123312.000000,118836.000000,170200.000000,587.283988)}
{pt3dadd(123132.000000,118872.000000,170250.000000,599.024880)}
{pt3dadd(122952.000000,118788.000000,170200.000000,599.024880)}
{pt3dadd(122712.000000,118824.000000,170475.000000,599.024880)}
{pt3dadd(122508.000000,118788.000000,170575.000000,599.024880)}
{pt3dadd(122328.000000,118752.000000,170675.000000,599.024880)}
{pt3dadd(122172.000000,118716.000000,170750.000000,569.073640)}
{pt3dadd(121992.000000,118680.000000,170825.000000,539.122401)}
{pt3dadd(121824.000000,118560.000000,170925.000000,509.171161)}
{pt3dadd(121644.000000,118584.000000,170850.000000,479.219922)}
{pt3dadd(121488.000000,118692.000000,170750.000000,435.032580)}
{pt3dadd(121308.000000,118764.000000,170975.000000,390.845238)}
{pt3dadd(121152.000000,118656.000000,171075.000000,346.657896)}
{pt3dadd(121056.000000,118764.000000,171025.000000,240.734646)}

{create adhoc14}
{access adhoc14}
{connect adhoc14(1), adhoc2(0)}
{nseg = 1}
{strdef color color = "White"}
{pt3dclear()}
{pt3dadd(147480.000000,124476.000000,155325.000000,1242.137880)}
{pt3dadd(141612.000000,124740.000000,155925.000000,718.829820)}
{pt3dadd(141552.000000,124908.000000,156250.000000,682.888329)}
{pt3dadd(141300.000000,125112.000000,156350.000000,646.946838)}
{pt3dadd(140928.000000,125304.000000,156425.000000,611.005347)}
{pt3dadd(140604.000000,125484.000000,157125.000000,575.063856)}
{pt3dadd(140280.000000,125688.000000,157375.000000,527.141871)}
{pt3dadd(140172.000000,125892.000000,157625.000000,479.219886)}
{pt3dadd(139104.000000,126096.000000,157525.000000,575.063856)}

{create adhoc15}
{access adhoc15}
{connect adhoc15(1), adhoc14(0)}
{nseg = 1}
{strdef color color = "White"}
{pt3dclear()}
{pt3dadd(139104.000000,126096.000000,157525.000000,575.063856)}
{pt3dadd(137520.000000,125772.000000,156925.000000,415.989486)}
{pt3dadd(137352.000000,125616.000000,156550.000000,398.656589)}
{pt3dadd(137172.000000,125580.000000,156350.000000,381.323691)}
{pt3dadd(137004.000000,125436.000000,156300.000000,363.990794)}
{pt3dadd(137064.000000,125352.000000,156025.000000,346.657896)}
{pt3dadd(136956.000000,125352.000000,155850.000000,288.881586)}

{create adhoc16}
{access adhoc16}
{connect adhoc16(1), adhoc14(0)}
{nseg = 1}
{strdef color color = "White"}
{pt3dclear()}
{pt3dadd(139104.000000,126096.000000,157525.000000,575.063856)}
{pt3dadd(138924.000000,126300.000000,157525.000000,499.187376)}
{pt3dadd(138744.000000,126300.000000,157525.000000,581.413536)}
{pt3dadd(139080.000000,126516.000000,157700.000000,663.639696)}
{pt3dadd(139248.000000,126732.000000,157675.000000,745.865856)}
{pt3dadd(139392.000000,126912.000000,157750.000000,828.092016)}
{pt3dadd(139500.000000,127104.000000,157825.000000,745.865856)}
{pt3dadd(139980.000000,127212.000000,158075.000000,663.639696)}
{pt3dadd(139944.000000,127416.000000,158400.000000,581.413536)}
{pt3dadd(139752.000000,127728.000000,158700.000000,499.187376)}
{pt3dadd(139368.000000,128088.000000,158925.000000,461.055006)}
{pt3dadd(139332.000000,128448.000000,159150.000000,422.922636)}
{pt3dadd(139212.000000,129132.000000,159425.000000,384.790266)}
{pt3dadd(139104.000000,129780.000000,159575.000000,346.657896)}
{pt3dadd(139080.000000,129804.000000,159775.000000,379.798393)}
{pt3dadd(139104.000000,130080.000000,159950.000000,412.938891)}
{pt3dadd(138816.000000,130104.000000,160150.000000,446.079388)}
{pt3dadd(138840.000000,130308.000000,160375.000000,479.219886)}
{pt3dadd(138732.000000,130368.000000,160575.000000,484.211758)}
{pt3dadd(138624.000000,130368.000000,160750.000000,489.203631)}
{pt3dadd(138684.000000,130260.000000,160975.000000,494.195504)}
{pt3dadd(138612.000000,130572.000000,161150.000000,499.187376)}
{pt3dadd(138636.000000,130752.000000,161350.000000,573.132609)}
{pt3dadd(138624.000000,130932.000000,161575.000000,647.077842)}
{pt3dadd(138840.000000,131244.000000,161850.000000,721.023075)}
{pt3dadd(138864.000000,131496.000000,162100.000000,794.968308)}
{pt3dadd(138816.000000,131688.000000,162525.000000,734.241551)}
{pt3dadd(138780.000000,131856.000000,162600.000000,673.514793)}
{pt3dadd(138696.000000,132000.000000,162575.000000,612.788035)}
{pt3dadd(138624.000000,132144.000000,162650.000000,552.061278)}
{pt3dadd(138552.000000,132288.000000,162725.000000,518.043330)}
{pt3dadd(138480.000000,132408.000000,162800.000000,484.025382)}
{pt3dadd(138408.000000,132552.000000,162875.000000,450.007434)}
{pt3dadd(138504.000000,132468.000000,163075.000000,415.989486)}
{pt3dadd(138576.000000,132492.000000,163325.000000,398.656589)}
{pt3dadd(138360.000000,132888.000000,162825.000000,381.323691)}
{pt3dadd(138168.000000,133116.000000,162725.000000,363.990794)}
{pt3dadd(138336.000000,133308.000000,162700.000000,346.657896)}
{pt3dadd(138372.000000,133512.000000,162825.000000,288.881586)}
{pt3dadd(138216.000000,133704.000000,162725.000000,240.734646)}

{create adhoc17}
{access adhoc17}
{connect adhoc17(1), adhoc1(0)}
{nseg = 1}
{strdef color color = "White"}
{pt3dclear()}
{pt3dadd(160500.000000,160380.000000,134925.000000,1430.942742)}
{pt3dadd(160812.000000,160152.000000,134175.000000,1788.678450)}
{pt3dadd(161052.000000,160296.000000,134600.000000,1856.648255)}
{pt3dadd(161256.000000,160356.000000,134250.000000,1924.618059)}
{pt3dadd(161496.000000,160080.000000,133775.000000,1992.587863)}
{pt3dadd(161724.000000,159984.000000,133300.000000,2060.557668)}
{pt3dadd(161940.000000,159912.000000,133025.000000,1918.059601)}
{pt3dadd(161592.000000,160152.000000,132575.000000,1775.561535)}
{pt3dadd(161340.000000,160080.000000,132200.000000,1633.063469)}
{pt3dadd(161196.000000,160008.000000,131900.000000,1490.565402)}
{pt3dadd(161328.000000,160092.000000,131600.000000,1547.206857)}
{pt3dadd(161364.000000,159948.000000,131325.000000,1603.848312)}
{pt3dadd(161376.000000,159876.000000,131025.000000,1660.489767)}
{pt3dadd(161436.000000,159804.000000,130675.000000,1717.131222)}
{pt3dadd(161652.000000,159912.000000,130375.000000,1660.489767)}
{pt3dadd(161808.000000,160068.000000,130100.000000,1603.848312)}
{pt3dadd(161820.000000,159744.000000,129800.000000,1547.206857)}
{pt3dadd(162024.000000,159468.000000,129500.000000,1490.565402)}
{pt3dadd(161940.000000,159276.000000,129200.000000,1297.631507)}
{pt3dadd(162024.000000,159180.000000,128875.000000,1104.697611)}
{pt3dadd(162408.000000,159012.000000,128550.000000,911.763715)}
{pt3dadd(162744.000000,158640.000000,128225.000000,718.829820)}
{pt3dadd(163056.000000,157752.000000,127950.000000,688.878585)}
{pt3dadd(163536.000000,157704.000000,127650.000000,658.927350)}
{pt3dadd(163716.000000,157404.000000,127425.000000,628.976115)}
{pt3dadd(163908.000000,157440.000000,127275.000000,599.024880)}
{pt3dadd(164196.000000,156960.000000,127250.000000,628.976115)}
{pt3dadd(164460.000000,156480.000000,127325.000000,658.927350)}
{pt3dadd(164796.000000,156564.000000,127300.000000,688.878585)}
{pt3dadd(165048.000000,156264.000000,127175.000000,718.829820)}
{pt3dadd(165312.000000,156192.000000,127100.000000,663.919209)}
{pt3dadd(165588.000000,155616.000000,126775.000000,609.008598)}
{pt3dadd(167232.000000,155388.000000,126225.000000,554.097987)}
{pt3dadd(169308.000000,155040.000000,125875.000000,499.187376)}
{pt3dadd(169668.000000,155436.000000,125500.000000,524.146752)}
{pt3dadd(169872.000000,155412.000000,125525.000000,549.106128)}
{pt3dadd(170136.000000,155316.000000,125600.000000,574.065504)}
{pt3dadd(170448.000000,155220.000000,125675.000000,599.024880)}
{pt3dadd(170712.000000,155256.000000,125500.000000,569.073631)}
{pt3dadd(170964.000000,154956.000000,125500.000000,539.122383)}
{pt3dadd(171168.000000,154632.000000,125500.000000,509.171134)}
{pt3dadd(171360.000000,154716.000000,125375.000000,479.219886)}
{pt3dadd(171540.000000,154416.000000,125325.000000,484.211758)}
{pt3dadd(171768.000000,154272.000000,125675.000000,489.203631)}
{pt3dadd(171960.000000,154152.000000,125450.000000,494.195504)}
{pt3dadd(172176.000000,153828.000000,125475.000000,499.187376)}
{pt3dadd(172344.000000,154296.000000,125350.000000,499.187376)}
{pt3dadd(172536.000000,154152.000000,125150.000000,499.187376)}
{pt3dadd(172752.000000,154164.000000,125250.000000,499.187376)}
{pt3dadd(172944.000000,154140.000000,125150.000000,499.187376)}
{pt3dadd(173124.000000,154176.000000,124925.000000,478.387903)}
{pt3dadd(173328.000000,154236.000000,124700.000000,457.588431)}
{pt3dadd(173604.000000,154248.000000,124700.000000,436.788958)}
{pt3dadd(173808.000000,154260.000000,124650.000000,415.989486)}
{pt3dadd(174012.000000,154212.000000,124575.000000,395.190014)}
{pt3dadd(174252.000000,154248.000000,124500.000000,374.390541)}
{pt3dadd(174432.000000,154104.000000,124600.000000,353.591069)}
{pt3dadd(174672.000000,153960.000000,124375.000000,332.791596)}
{pt3dadd(174852.000000,153996.000000,124225.000000,399.349917)}
{pt3dadd(175080.000000,153672.000000,124200.000000,465.908238)}
{pt3dadd(175260.000000,153348.000000,124200.000000,532.466559)}
{pt3dadd(175464.000000,153324.000000,124125.000000,599.024880)}
{pt3dadd(175680.000000,153384.000000,124250.000000,628.976115)}
{pt3dadd(175920.000000,153468.000000,123900.000000,658.927350)}
{pt3dadd(176112.000000,153240.000000,124275.000000,688.878585)}
{pt3dadd(176268.000000,153072.000000,124300.000000,718.829820)}
{pt3dadd(176472.000000,153288.000000,123975.000000,754.771316)}
{pt3dadd(176640.000000,153144.000000,123825.000000,790.712811)}
{pt3dadd(176856.000000,153384.000000,123600.000000,826.654307)}
{pt3dadd(177036.000000,153648.000000,123800.000000,862.595802)}
{pt3dadd(177228.000000,153120.000000,123800.000000,826.654307)}
{pt3dadd(177420.000000,153096.000000,123850.000000,790.712811)}
{pt3dadd(177672.000000,153180.000000,124025.000000,754.771316)}
{pt3dadd(177888.000000,152628.000000,123925.000000,718.829820)}
{pt3dadd(178080.000000,152640.000000,123700.000000,688.878585)}
{pt3dadd(178284.000000,152652.000000,123475.000000,658.927350)}
{pt3dadd(178512.000000,152784.000000,123175.000000,628.976115)}
{pt3dadd(178728.000000,152916.000000,122875.000000,599.024880)}
{pt3dadd(178920.000000,153048.000000,122575.000000,553.266031)}
{pt3dadd(179112.000000,153180.000000,122275.000000,507.507183)}
{pt3dadd(179328.000000,153132.000000,122225.000000,461.748335)}
{pt3dadd(179568.000000,153084.000000,122175.000000,415.989486)}
{pt3dadd(179796.000000,152940.000000,122225.000000,570.770852)}
{pt3dadd(180000.000000,152796.000000,122275.000000,725.552217)}
{pt3dadd(180240.000000,152040.000000,122625.000000,880.333582)}
{pt3dadd(180504.000000,151812.000000,122775.000000,1035.114948)}
{pt3dadd(180756.000000,151896.000000,122300.000000,983.359197)}
{pt3dadd(180960.000000,151644.000000,122200.000000,931.603446)}
{pt3dadd(181164.000000,151824.000000,122325.000000,879.847695)}
{pt3dadd(181344.000000,151572.000000,122025.000000,828.091944)}
{pt3dadd(181560.000000,151452.000000,121750.000000,836.717909)}
{pt3dadd(181764.000000,151176.000000,121750.000000,845.343873)}
{pt3dadd(181968.000000,151032.000000,121975.000000,853.969838)}
{pt3dadd(182172.000000,151296.000000,121775.000000,862.595802)}
{pt3dadd(182352.000000,151560.000000,121575.000000,845.688929)}
{pt3dadd(182544.000000,151512.000000,121525.000000,828.782055)}
{pt3dadd(182748.000000,151464.000000,121475.000000,811.875182)}
{pt3dadd(182952.000000,151416.000000,121425.000000,794.968308)}
{pt3dadd(183168.000000,151044.000000,120925.000000,811.875182)}
{pt3dadd(183348.000000,151104.000000,120700.000000,828.782055)}
{pt3dadd(183540.000000,151236.000000,120550.000000,845.688929)}
{pt3dadd(183672.000000,151368.000000,120400.000000,862.595802)}
{pt3dadd(184032.000000,150888.000000,120025.000000,862.595802)}
{pt3dadd(184500.000000,150864.000000,119700.000000,862.595802)}
{pt3dadd(185016.000000,151044.000000,119225.000000,862.595802)}
{pt3dadd(185556.000000,150576.000000,118800.000000,862.595802)}
{pt3dadd(185736.000000,150612.000000,118475.000000,796.703072)}
{pt3dadd(185892.000000,150492.000000,118100.000000,730.810341)}
{pt3dadd(186312.000000,150300.000000,117825.000000,664.917611)}
{pt3dadd(186732.000000,150156.000000,117475.000000,599.024880)}
{pt3dadd(187152.000000,150012.000000,117125.000000,553.266031)}
{pt3dadd(187596.000000,150048.000000,116825.000000,507.507183)}
{pt3dadd(187860.000000,150204.000000,116500.000000,461.748335)}
{pt3dadd(188124.000000,150348.000000,116200.000000,415.989486)}
{pt3dadd(188340.000000,150036.000000,115875.000000,461.748335)}
{pt3dadd(188808.000000,150072.000000,115550.000000,507.507183)}
{pt3dadd(189060.000000,149772.000000,115400.000000,553.266031)}
{pt3dadd(189264.000000,149676.000000,114850.000000,599.024880)}
{pt3dadd(189456.000000,149628.000000,114400.000000,656.291646)}
{pt3dadd(189636.000000,149604.000000,114100.000000,713.558412)}
{pt3dadd(189828.000000,149460.000000,114000.000000,770.825178)}
{pt3dadd(190116.000000,149544.000000,113675.000000,828.091944)}
{pt3dadd(190176.000000,149568.000000,113325.000000,869.496529)}
{pt3dadd(190236.000000,149604.000000,113025.000000,910.901115)}
{pt3dadd(190524.000000,149820.000000,112675.000000,952.305701)}
{pt3dadd(190656.000000,149904.000000,112325.000000,993.710286)}
{pt3dadd(191040.000000,149904.000000,112000.000000,1004.061452)}
{pt3dadd(191400.000000,149760.000000,111675.000000,1014.412617)}
{pt3dadd(191208.000000,149664.000000,111425.000000,1024.763782)}
{pt3dadd(191244.000000,149544.000000,111150.000000,1035.114948)}
{pt3dadd(191280.000000,149424.000000,110850.000000,1086.870681)}
{pt3dadd(191316.000000,149304.000000,110575.000000,1138.626414)}
{pt3dadd(191352.000000,149184.000000,110300.000000,1190.382147)}
{pt3dadd(191388.000000,149064.000000,110050.000000,1242.137880)}
{pt3dadd(191424.000000,148944.000000,109800.000000,1360.886252)}
{pt3dadd(191640.000000,148896.000000,109500.000000,1479.634623)}
{pt3dadd(191520.000000,148704.000000,109225.000000,1598.382995)}
{pt3dadd(191376.000000,148560.000000,108900.000000,1717.131366)}
{pt3dadd(191352.000000,148416.000000,108600.000000,1906.015838)}
{pt3dadd(191280.000000,148224.000000,108275.000000,2094.900309)}
{pt3dadd(190956.000000,148176.000000,107975.000000,2283.784780)}
{pt3dadd(191196.000000,148236.000000,107700.000000,2472.669252)}
{pt3dadd(191280.000000,148320.000000,107425.000000,2301.671551)}
{pt3dadd(191364.000000,148404.000000,107125.000000,2130.673851)}
{pt3dadd(191448.000000,148260.000000,106825.000000,1959.676150)}
{pt3dadd(191532.000000,148116.000000,106525.000000,1788.678450)}
{pt3dadd(191196.000000,148092.000000,106200.000000,1985.433116)}
{pt3dadd(190872.000000,148068.000000,105925.000000,2182.187781)}
{pt3dadd(190548.000000,148044.000000,105675.000000,2378.942446)}
{pt3dadd(190476.000000,147852.000000,105425.000000,2575.697112)}
{pt3dadd(190404.000000,147660.000000,105150.000000,2468.376378)}
{pt3dadd(190260.000000,147696.000000,104800.000000,2361.055644)}
{pt3dadd(190116.000000,147732.000000,104475.000000,2253.734910)}
{pt3dadd(189540.000000,147300.000000,104150.000000,2146.414176)}
{pt3dadd(189624.000000,147048.000000,103825.000000,2227.977945)}
{pt3dadd(189432.000000,147156.000000,103450.000000,2309.541714)}
{pt3dadd(189156.000000,147012.000000,103125.000000,2391.105483)}
{pt3dadd(189312.000000,146868.000000,102775.000000,2472.669252)}
{pt3dadd(189120.000000,147048.000000,102425.000000,2627.211046)}
{pt3dadd(189096.000000,146904.000000,102125.000000,2781.752841)}
{pt3dadd(189228.000000,146760.000000,101875.000000,2936.294635)}
{pt3dadd(189132.000000,146820.000000,101600.000000,3090.836430)}
{pt3dadd(189036.000000,146748.000000,101325.000000,3090.836430)}
{pt3dadd(189120.000000,146760.000000,101000.000000,3090.836430)}
{pt3dadd(189156.000000,146688.000000,100700.000000,3090.836430)}
{pt3dadd(189132.000000,146664.000000,100425.000000,3090.836430)}
{pt3dadd(189108.000000,146640.000000,100125.000000,3090.836430)}
{pt3dadd(189084.000000,146616.000000,99875.000000,3090.836430)}
{pt3dadd(188988.000000,146496.000000,99625.000000,3090.836430)}
{pt3dadd(189036.000000,145944.000000,99375.000000,3090.836430)}
{pt3dadd(188880.000000,146028.000000,99150.000000,2936.294635)}
{pt3dadd(188988.000000,145764.000000,98825.000000,2781.752841)}
{pt3dadd(188916.000000,145692.000000,98525.000000,2627.211046)}
{pt3dadd(188844.000000,145620.000000,98250.000000,2472.669252)}
{pt3dadd(188772.000000,145548.000000,97975.000000,2627.211046)}
{pt3dadd(188700.000000,145476.000000,97700.000000,2781.752841)}
{pt3dadd(188628.000000,145404.000000,97450.000000,2936.294635)}
{pt3dadd(188808.000000,145152.000000,97200.000000,3090.836430)}
{pt3dadd(188784.000000,145056.000000,96950.000000,2967.203160)}

{create adhoc18}
{access adhoc18}
{connect adhoc18(1), adhoc17(0)}
{nseg = 1}
{strdef color color = "White"}
{pt3dclear()}
{pt3dadd(188784.000000,145056.000000,96950.000000,2967.203160)}
{pt3dadd(188760.000000,140844.000000,97050.000000,288.881586)}
{pt3dadd(188124.000000,139728.000000,97275.000000,303.325664)}
{pt3dadd(187980.000000,138948.000000,97450.000000,317.769741)}
{pt3dadd(187836.000000,138168.000000,97550.000000,332.213819)}
{pt3dadd(187680.000000,137460.000000,97525.000000,346.657896)}
{pt3dadd(187512.000000,136524.000000,97625.000000,332.213819)}
{pt3dadd(187368.000000,135156.000000,97425.000000,317.769741)}
{pt3dadd(187212.000000,133680.000000,97000.000000,303.325664)}
{pt3dadd(187116.000000,133152.000000,96925.000000,288.881586)}
{pt3dadd(186972.000000,132540.000000,96900.000000,276.844851)}
{pt3dadd(186852.000000,132336.000000,96850.000000,264.808116)}
{pt3dadd(186912.000000,132132.000000,96850.000000,252.771381)}
{pt3dadd(186588.000000,131904.000000,96800.000000,240.734646)}
{pt3dadd(187068.000000,131700.000000,96700.000000,252.771381)}
{pt3dadd(187068.000000,131496.000000,96625.000000,264.808116)}
{pt3dadd(186924.000000,131292.000000,96625.000000,276.844851)}
{pt3dadd(186912.000000,131136.000000,96600.000000,288.881586)}
{pt3dadd(186888.000000,130956.000000,96550.000000,276.844851)}
{pt3dadd(186900.000000,130788.000000,96525.000000,264.808116)}
{pt3dadd(186900.000000,130620.000000,96475.000000,252.771381)}
{pt3dadd(186876.000000,130464.000000,96325.000000,240.734646)}
{pt3dadd(186792.000000,130284.000000,96250.000000,267.215459)}
{pt3dadd(186744.000000,130116.000000,96250.000000,293.696271)}
{pt3dadd(186708.000000,129960.000000,96200.000000,320.177083)}
{pt3dadd(186696.000000,129792.000000,96175.000000,346.657896)}
{pt3dadd(186660.000000,129648.000000,96050.000000,346.657896)}
{pt3dadd(186624.000000,129480.000000,95925.000000,346.657896)}
{pt3dadd(186636.000000,129312.000000,95975.000000,346.657896)}
{pt3dadd(186552.000000,129156.000000,95900.000000,346.657896)}
{pt3dadd(186480.000000,128976.000000,95875.000000,332.213819)}
{pt3dadd(186420.000000,128820.000000,95800.000000,317.769741)}
{pt3dadd(186384.000000,128652.000000,95725.000000,303.325664)}
{pt3dadd(186264.000000,128484.000000,95750.000000,288.881586)}
{pt3dadd(186204.000000,128304.000000,95725.000000,303.325664)}
{pt3dadd(186132.000000,128148.000000,95775.000000,317.769741)}
{pt3dadd(186012.000000,127956.000000,95825.000000,332.213819)}
{pt3dadd(186036.000000,127776.000000,95750.000000,346.657896)}
{pt3dadd(185868.000000,127608.000000,95775.000000,332.213819)}
{pt3dadd(185880.000000,127464.000000,95850.000000,317.769741)}
{pt3dadd(185868.000000,127308.000000,95750.000000,303.325664)}
{pt3dadd(185832.000000,127164.000000,95750.000000,288.881586)}
{pt3dadd(185700.000000,127020.000000,95650.000000,303.325664)}
{pt3dadd(185616.000000,126912.000000,95650.000000,317.769741)}
{pt3dadd(185580.000000,126792.000000,95625.000000,332.213819)}
{pt3dadd(185532.000000,126684.000000,95550.000000,346.657896)}
{pt3dadd(185484.000000,126564.000000,95475.000000,320.177083)}
{pt3dadd(185436.000000,126420.000000,95525.000000,293.696271)}
{pt3dadd(185424.000000,126240.000000,95475.000000,267.215459)}
{pt3dadd(185376.000000,126072.000000,95375.000000,240.734646)}
{pt3dadd(185304.000000,125928.000000,95300.000000,230.704038)}
{pt3dadd(185340.000000,125772.000000,95250.000000,220.673430)}
{pt3dadd(185364.000000,125616.000000,95175.000000,210.642822)}
{pt3dadd(185388.000000,125472.000000,95100.000000,200.612214)}
{pt3dadd(185376.000000,125292.000000,94975.000000,237.123635)}
{pt3dadd(185364.000000,125136.000000,94850.000000,273.635055)}
{pt3dadd(185436.000000,124992.000000,94850.000000,310.146475)}
{pt3dadd(185388.000000,124836.000000,94825.000000,346.657896)}
{pt3dadd(185340.000000,124668.000000,94775.000000,346.657896)}
{pt3dadd(185304.000000,124524.000000,94775.000000,346.657896)}
{pt3dadd(185280.000000,124392.000000,94750.000000,346.657896)}
{pt3dadd(185292.000000,124272.000000,94725.000000,346.657896)}
{pt3dadd(185304.000000,124164.000000,94700.000000,343.191312)}
{pt3dadd(185316.000000,124056.000000,94700.000000,339.724728)}
{pt3dadd(185280.000000,123948.000000,94800.000000,336.258144)}
{pt3dadd(185352.000000,123768.000000,94800.000000,332.791560)}
{pt3dadd(185352.000000,123624.000000,94800.000000,332.791569)}
{pt3dadd(185268.000000,123468.000000,94700.000000,332.791578)}
{pt3dadd(185292.000000,123300.000000,94975.000000,332.791587)}
{pt3dadd(185400.000000,123180.000000,95000.000000,332.791596)}
{pt3dadd(185412.000000,123036.000000,95100.000000,336.258171)}
{pt3dadd(185388.000000,122892.000000,95100.000000,339.724746)}
{pt3dadd(185364.000000,122736.000000,95200.000000,343.191321)}
{pt3dadd(185340.000000,122604.000000,95300.000000,346.657896)}
{pt3dadd(185316.000000,122460.000000,95300.000000,332.213819)}
{pt3dadd(185208.000000,122316.000000,95300.000000,317.769741)}
{pt3dadd(185148.000000,122184.000000,95225.000000,303.325664)}
{pt3dadd(185076.000000,122052.000000,95325.000000,288.881586)}
{pt3dadd(185040.000000,121920.000000,95425.000000,285.992771)}
{pt3dadd(185004.000000,121800.000000,95500.000000,283.103955)}
{pt3dadd(184992.000000,121644.000000,95600.000000,280.215140)}
{pt3dadd(185004.000000,121488.000000,95600.000000,277.326324)}
{pt3dadd(185016.000000,121344.000000,95600.000000,280.215140)}
{pt3dadd(185004.000000,121188.000000,95600.000000,283.103955)}
{pt3dadd(184968.000000,121056.000000,95525.000000,285.992771)}
{pt3dadd(184932.000000,120948.000000,95450.000000,288.881586)}
{pt3dadd(184956.000000,120804.000000,95275.000000,288.881586)}
{pt3dadd(184884.000000,120648.000000,95250.000000,288.881586)}
{pt3dadd(184812.000000,120492.000000,95225.000000,288.881586)}
{pt3dadd(184740.000000,120348.000000,95200.000000,288.881586)}
{pt3dadd(184752.000000,120228.000000,95100.000000,276.844851)}
{pt3dadd(184392.000000,119460.000000,95100.000000,264.808116)}
{pt3dadd(184248.000000,119316.000000,94875.000000,252.771381)}
{pt3dadd(184260.000000,119208.000000,94875.000000,240.734646)}
{pt3dadd(184212.000000,119076.000000,94750.000000,252.771381)}
{pt3dadd(184176.000000,118932.000000,94725.000000,264.808116)}
{pt3dadd(184104.000000,118788.000000,94800.000000,276.844851)}
{pt3dadd(184044.000000,118644.000000,94675.000000,288.881586)}
{pt3dadd(183996.000000,118500.000000,94600.000000,266.814243)}
{pt3dadd(183948.000000,118368.000000,94550.000000,244.746900)}
{pt3dadd(183900.000000,118236.000000,94650.000000,222.679557)}
{pt3dadd(183828.000000,118104.000000,94675.000000,200.612214)}
{pt3dadd(183696.000000,117972.000000,94725.000000,200.612214)}
{pt3dadd(183660.000000,117852.000000,94700.000000,200.612214)}
{pt3dadd(183624.000000,117732.000000,94675.000000,200.612214)}
{pt3dadd(183588.000000,117600.000000,94650.000000,200.612214)}
{pt3dadd(183564.000000,117456.000000,94650.000000,222.679557)}
{pt3dadd(183456.000000,117324.000000,94750.000000,244.746900)}
{pt3dadd(183468.000000,117204.000000,94650.000000,266.814243)}
{pt3dadd(183432.000000,117072.000000,94575.000000,288.881586)}
{pt3dadd(183408.000000,116952.000000,94475.000000,316.498675)}
{pt3dadd(183324.000000,116820.000000,94525.000000,344.115765)}
{pt3dadd(183300.000000,116712.000000,94450.000000,371.732855)}
{pt3dadd(183276.000000,116604.000000,94425.000000,399.349944)}
{pt3dadd(183264.000000,116472.000000,94350.000000,399.349944)}
{pt3dadd(183192.000000,116364.000000,94350.000000,399.349944)}
{pt3dadd(183132.000000,116232.000000,94275.000000,399.349944)}
{pt3dadd(183120.000000,116112.000000,94275.000000,399.349944)}
{pt3dadd(183132.000000,115992.000000,94250.000000,359.696120)}
{pt3dadd(183144.000000,115860.000000,94175.000000,320.042295)}
{pt3dadd(183060.000000,115740.000000,94075.000000,280.388470)}
{pt3dadd(182928.000000,115620.000000,94075.000000,240.734646)}
{pt3dadd(182784.000000,115512.000000,94000.000000,230.704038)}
{pt3dadd(182856.000000,115392.000000,94075.000000,220.673430)}
{pt3dadd(182844.000000,115272.000000,94100.000000,210.642822)}
{pt3dadd(182832.000000,115176.000000,94125.000000,200.612214)}
{pt3dadd(183048.000000,115068.000000,94125.000000,210.642822)}
{pt3dadd(183156.000000,114960.000000,94175.000000,220.673430)}
{pt3dadd(183156.000000,114864.000000,94125.000000,230.704038)}
{pt3dadd(183168.000000,114708.000000,94175.000000,240.734646)}
{pt3dadd(183216.000000,114552.000000,94150.000000,230.704038)}
{pt3dadd(183216.000000,114396.000000,94100.000000,220.673430)}
{pt3dadd(183180.000000,114264.000000,94100.000000,210.642822)}
{pt3dadd(183132.000000,114132.000000,94050.000000,200.612214)}
{pt3dadd(183048.000000,114024.000000,93900.000000,210.642822)}
{pt3dadd(183012.000000,113904.000000,93875.000000,220.673430)}
{pt3dadd(182976.000000,113760.000000,93800.000000,230.704038)}
{pt3dadd(182940.000000,113652.000000,93725.000000,240.734646)}
{pt3dadd(182904.000000,113532.000000,93650.000000,222.345193)}
{pt3dadd(182760.000000,113568.000000,93625.000000,203.955741)}
{pt3dadd(182616.000000,113388.000000,93625.000000,185.566288)}
{pt3dadd(182472.000000,113256.000000,93550.000000,167.176836)}
{pt3dadd(182256.000000,113124.000000,93250.000000,175.535680)}
{pt3dadd(182208.000000,112980.000000,93175.000000,183.894525)}
{pt3dadd(182076.000000,113208.000000,92950.000000,192.253370)}
{pt3dadd(181872.000000,113436.000000,92700.000000,200.612214)}
{pt3dadd(181836.000000,113400.000000,92450.000000,210.642822)}
{pt3dadd(181584.000000,113736.000000,92250.000000,220.673430)}
{pt3dadd(181104.000000,114108.000000,92025.000000,230.704038)}
{pt3dadd(180924.000000,114396.000000,91775.000000,240.734646)}
{pt3dadd(180792.000000,114540.000000,91550.000000,220.673430)}
{pt3dadd(180756.000000,114696.000000,91550.000000,200.612214)}
{pt3dadd(180732.000000,114708.000000,91350.000000,200.612214)}

{create adhoc19}
{access adhoc19}
{connect adhoc19(1), adhoc17(0)}
{nseg = 1}
{strdef color color = "White"}
{pt3dclear()}
{pt3dadd(188784.000000,145056.000000,96950.000000,2967.203160)}
{pt3dadd(188760.000000,145068.000000,96600.000000,2575.697112)}
{pt3dadd(188868.000000,144636.000000,96275.000000,2549.940147)}
{pt3dadd(188952.000000,144924.000000,96025.000000,2524.183182)}
{pt3dadd(188796.000000,144672.000000,95675.000000,2498.426217)}
{pt3dadd(188700.000000,144348.000000,95400.000000,2472.669252)}
{pt3dadd(188856.000000,143892.000000,95100.000000,2498.426217)}
{pt3dadd(188784.000000,143796.000000,94800.000000,2524.183182)}
{pt3dadd(188760.000000,143448.000000,94550.000000,2549.940147)}
{pt3dadd(188676.000000,143328.000000,94275.000000,2575.697112)}
{pt3dadd(188652.000000,143076.000000,94000.000000,2468.376378)}
{pt3dadd(188424.000000,142932.000000,93800.000000,2361.055644)}
{pt3dadd(188328.000000,142572.000000,93575.000000,2253.734910)}
{pt3dadd(188292.000000,142404.000000,93300.000000,2146.414176)}
{pt3dadd(188148.000000,142236.000000,93050.000000,2146.414176)}
{pt3dadd(187800.000000,142164.000000,92750.000000,2146.414176)}
{pt3dadd(187752.000000,141912.000000,92450.000000,2146.414176)}
{pt3dadd(187500.000000,141816.000000,92175.000000,2146.414176)}
{pt3dadd(187356.000000,141696.000000,91900.000000,2056.980245)}
{pt3dadd(187284.000000,141480.000000,91700.000000,1967.546313)}
{pt3dadd(187548.000000,141252.000000,91425.000000,1878.112382)}
{pt3dadd(187380.000000,141180.000000,91125.000000,1788.678450)}
{pt3dadd(187212.000000,141108.000000,90850.000000,1878.112382)}
{pt3dadd(186960.000000,141012.000000,90625.000000,1967.546313)}
{pt3dadd(186708.000000,140964.000000,90375.000000,2056.980245)}
{pt3dadd(186456.000000,140796.000000,90100.000000,2146.414176)}
{pt3dadd(186132.000000,140544.000000,89875.000000,1920.345102)}
{pt3dadd(185964.000000,140316.000000,89625.000000,1694.276028)}
{pt3dadd(186024.000000,140148.000000,89350.000000,1468.206954)}
{pt3dadd(185928.000000,140004.000000,89100.000000,1242.137880)}
{pt3dadd(185760.000000,139500.000000,88800.000000,1067.701860)}
{pt3dadd(185460.000000,139512.000000,88450.000000,893.265840)}
{pt3dadd(185160.000000,139344.000000,88175.000000,718.829820)}
{pt3dadd(184968.000000,138948.000000,87875.000000,346.657896)}

{create adhoc20}
{access adhoc20}
{connect adhoc20(1), adhoc19(0)}
{nseg = 1}
{strdef color color = "White"}
{pt3dclear()}
{pt3dadd(184968.000000,138948.000000,87875.000000,346.657896)}
{pt3dadd(185280.000000,140748.000000,87450.000000,1717.131222)}
{pt3dadd(185580.000000,141540.000000,87125.000000,1437.604637)}
{pt3dadd(185532.000000,141924.000000,86725.000000,1158.078051)}
{pt3dadd(185508.000000,142056.000000,86275.000000,878.551465)}
{pt3dadd(185484.000000,142500.000000,85925.000000,599.024880)}
{pt3dadd(184872.000000,142560.000000,85550.000000,599.024880)}

{create adhoc21}
{access adhoc21}
{connect adhoc21(1), adhoc20(0)}
{nseg = 1}
{strdef color color = "White"}
{pt3dclear()}
{pt3dadd(184872.000000,142560.000000,85550.000000,599.024880)}
{pt3dadd(184956.000000,144168.000000,85300.000000,599.024880)}
{pt3dadd(185100.000000,144780.000000,85025.000000,593.034624)}
{pt3dadd(185052.000000,145128.000000,84700.000000,587.044368)}
{pt3dadd(184980.000000,145344.000000,84425.000000,581.054112)}
{pt3dadd(185028.000000,145776.000000,84200.000000,575.063856)}
{pt3dadd(185112.000000,146064.000000,83950.000000,581.054112)}
{pt3dadd(185016.000000,146436.000000,83725.000000,587.044368)}
{pt3dadd(184920.000000,146736.000000,83500.000000,593.034624)}
{pt3dadd(184752.000000,146856.000000,83300.000000,599.024880)}
{pt3dadd(184536.000000,147120.000000,83050.000000,621.787828)}
{pt3dadd(184368.000000,147420.000000,82850.000000,644.550777)}
{pt3dadd(184200.000000,147684.000000,82625.000000,667.313725)}
{pt3dadd(184104.000000,147816.000000,82350.000000,690.076674)}
{pt3dadd(184092.000000,147888.000000,82100.000000,667.313725)}
{pt3dadd(183828.000000,148104.000000,81900.000000,644.550777)}
{pt3dadd(183696.000000,148212.000000,81675.000000,621.787828)}
{pt3dadd(183564.000000,148308.000000,81450.000000,599.024880)}
{pt3dadd(183492.000000,148548.000000,81225.000000,574.065504)}
{pt3dadd(183192.000000,148788.000000,80850.000000,549.106128)}
{pt3dadd(183036.000000,148860.000000,80575.000000,524.146752)}
{pt3dadd(182916.000000,148944.000000,80375.000000,499.187376)}
{pt3dadd(182796.000000,149076.000000,80150.000000,524.146752)}
{pt3dadd(182448.000000,149184.000000,79900.000000,549.106128)}
{pt3dadd(182316.000000,149304.000000,79675.000000,574.065504)}
{pt3dadd(182184.000000,149436.000000,79475.000000,599.024880)}
{pt3dadd(182052.000000,149568.000000,79275.000000,569.073631)}
{pt3dadd(181872.000000,149760.000000,79075.000000,539.122383)}
{pt3dadd(181716.000000,149748.000000,78875.000000,509.171134)}
{pt3dadd(181644.000000,149880.000000,78650.000000,479.219886)}
{pt3dadd(181596.000000,150048.000000,78475.000000,484.211758)}
{pt3dadd(181560.000000,150192.000000,78450.000000,489.203631)}
{pt3dadd(181392.000000,150156.000000,78275.000000,494.195504)}
{pt3dadd(181332.000000,150192.000000,78100.000000,499.187376)}
{pt3dadd(181104.000000,150336.000000,77900.000000,499.187376)}
{pt3dadd(180768.000000,150372.000000,77725.000000,499.187376)}
{pt3dadd(180648.000000,150432.000000,77550.000000,499.187376)}
{pt3dadd(180420.000000,150648.000000,77325.000000,499.187376)}
{pt3dadd(180084.000000,150648.000000,77125.000000,478.387903)}
{pt3dadd(179940.000000,150828.000000,76950.000000,457.588431)}
{pt3dadd(179832.000000,150828.000000,76875.000000,436.788958)}
{pt3dadd(179664.000000,151320.000000,76650.000000,415.989486)}
{pt3dadd(179436.000000,151260.000000,76450.000000,455.758079)}
{pt3dadd(179100.000000,151512.000000,76300.000000,495.526671)}
{pt3dadd(178932.000000,151644.000000,76075.000000,535.295264)}
{pt3dadd(178764.000000,151764.000000,75900.000000,575.063856)}
{pt3dadd(178500.000000,151788.000000,75700.000000,603.817043)}
{pt3dadd(178248.000000,151836.000000,75500.000000,632.570229)}
{pt3dadd(178356.000000,151908.000000,75275.000000,661.323416)}
{pt3dadd(178188.000000,152352.000000,75100.000000,690.076602)}
{pt3dadd(178020.000000,152604.000000,74900.000000,661.323416)}
{pt3dadd(177852.000000,152856.000000,74700.000000,632.570229)}
{pt3dadd(177672.000000,152988.000000,74500.000000,603.817043)}
{pt3dadd(177432.000000,153216.000000,74225.000000,575.063856)}
{pt3dadd(177120.000000,153408.000000,73975.000000,611.005347)}
{pt3dadd(176880.000000,153612.000000,73750.000000,646.946838)}
{pt3dadd(176832.000000,153816.000000,73550.000000,682.888329)}
{pt3dadd(176664.000000,153852.000000,73300.000000,718.829820)}
{pt3dadd(176484.000000,153888.000000,73075.000000,746.145351)}
{pt3dadd(176172.000000,153948.000000,72875.000000,773.460882)}
{pt3dadd(175884.000000,154140.000000,72600.000000,800.776413)}
{pt3dadd(175788.000000,154284.000000,72375.000000,828.091944)}
{pt3dadd(175644.000000,154284.000000,72150.000000,836.717909)}
{pt3dadd(175548.000000,154308.000000,71925.000000,845.343873)}
{pt3dadd(175284.000000,154392.000000,71700.000000,853.969838)}
{pt3dadd(175140.000000,154584.000000,71475.000000,862.595802)}
{pt3dadd(174996.000000,154776.000000,71250.000000,826.654307)}
{pt3dadd(174900.000000,155004.000000,71050.000000,790.712811)}
{pt3dadd(174768.000000,155088.000000,70850.000000,754.771316)}
{pt3dadd(174684.000000,155376.000000,70650.000000,718.829820)}
{pt3dadd(174840.000000,157632.000000,70450.000000,479.219886)}

{create adhoc22}
{access adhoc22}
{connect adhoc22(1), adhoc21(0)}
{nseg = 1}
{strdef color color = "White"}
{pt3dclear()}
{pt3dadd(174840.000000,157632.000000,70450.000000,479.219886)}
{pt3dadd(174576.000000,157272.000000,70025.000000,479.219886)}
{pt3dadd(174336.000000,157068.000000,69675.000000,499.187376)}
{pt3dadd(173988.000000,156516.000000,69375.000000,479.219886)}

{create adhoc23}
{access adhoc23}
{connect adhoc23(1), adhoc22(0)}
{nseg = 1}
{strdef color color = "White"}
{pt3dclear()}
{pt3dadd(173988.000000,156516.000000,69375.000000,479.219886)}
{pt3dadd(174108.000000,158088.000000,69200.000000,332.791560)}
{pt3dadd(173580.000000,159552.000000,68950.000000,309.777332)}
{pt3dadd(173376.000000,159840.000000,69000.000000,286.763103)}
{pt3dadd(173184.000000,160248.000000,68850.000000,263.748875)}
{pt3dadd(173016.000000,160392.000000,68850.000000,240.734646)}
{pt3dadd(172884.000000,161268.000000,68875.000000,267.215459)}
{pt3dadd(172704.000000,161832.000000,68650.000000,293.696271)}
{pt3dadd(172668.000000,162000.000000,68525.000000,320.177083)}
{pt3dadd(172476.000000,162252.000000,68475.000000,346.657896)}
{pt3dadd(172548.000000,162456.000000,68500.000000,310.146476)}
{pt3dadd(172728.000000,162636.000000,68500.000000,273.635055)}
{pt3dadd(172824.000000,162816.000000,68375.000000,237.123635)}
{pt3dadd(172920.000000,163008.000000,68375.000000,200.612214)}
{pt3dadd(173016.000000,163008.000000,68375.000000,200.612214)}

{create adhoc24}
{access adhoc24}
{connect adhoc24(1), adhoc23(0)}
{nseg = 1}
{strdef color color = "White"}
{pt3dclear()}
{pt3dadd(173016.000000,163008.000000,68375.000000,200.612214)}
{pt3dadd(172704.000000,163176.000000,68425.000000,200.612214)}
{pt3dadd(172548.000000,163176.000000,68450.000000,210.642822)}
{pt3dadd(172692.000000,163452.000000,68350.000000,220.673430)}
{pt3dadd(172692.000000,163692.000000,68425.000000,230.704038)}
{pt3dadd(172632.000000,163872.000000,68375.000000,240.734646)}
{pt3dadd(172572.000000,164052.000000,68425.000000,249.882566)}
{pt3dadd(172500.000000,164244.000000,68425.000000,259.030485)}
{pt3dadd(172428.000000,164244.000000,68425.000000,268.178405)}
{pt3dadd(172248.000000,164400.000000,68500.000000,277.326324)}
{pt3dadd(172368.000000,164616.000000,68550.000000,294.659217)}
{pt3dadd(172452.000000,164796.000000,68550.000000,311.992110)}
{pt3dadd(172416.000000,164928.000000,68475.000000,329.325003)}
{pt3dadd(172440.000000,165072.000000,68500.000000,346.657896)}
{pt3dadd(172500.000000,165204.000000,68475.000000,343.191321)}
{pt3dadd(172560.000000,165324.000000,68450.000000,339.724746)}
{pt3dadd(172620.000000,165468.000000,68425.000000,336.258171)}
{pt3dadd(172680.000000,165600.000000,68400.000000,332.791596)}
{pt3dadd(172740.000000,165720.000000,68375.000000,336.258171)}
{pt3dadd(172800.000000,165840.000000,68275.000000,339.724746)}
{pt3dadd(172848.000000,165960.000000,68175.000000,343.191321)}
{pt3dadd(172932.000000,166092.000000,68175.000000,346.657896)}
{pt3dadd(172992.000000,166260.000000,68225.000000,310.146476)}
{pt3dadd(173052.000000,166392.000000,68250.000000,273.635055)}
{pt3dadd(173064.000000,166512.000000,68225.000000,237.123635)}
{pt3dadd(173076.000000,166512.000000,68200.000000,200.612214)}
{pt3dadd(173124.000000,166632.000000,68175.000000,222.679557)}
{pt3dadd(173304.000000,166788.000000,68100.000000,244.746900)}
{pt3dadd(173592.000000,166932.000000,68075.000000,266.814243)}
{pt3dadd(173748.000000,167112.000000,68150.000000,288.881586)}
{pt3dadd(173940.000000,167208.000000,68100.000000,276.844851)}
{pt3dadd(173820.000000,167328.000000,68125.000000,264.808116)}
{pt3dadd(173940.000000,167460.000000,68075.000000,252.771381)}
{pt3dadd(174060.000000,167592.000000,68025.000000,240.734646)}
{pt3dadd(174156.000000,167724.000000,68100.000000,230.704038)}
{pt3dadd(174240.000000,167844.000000,68175.000000,220.673430)}
{pt3dadd(174288.000000,167976.000000,68175.000000,210.642822)}
{pt3dadd(174300.000000,168132.000000,68175.000000,200.612214)}
{pt3dadd(174504.000000,168264.000000,68075.000000,200.612214)}
{pt3dadd(174624.000000,168396.000000,68050.000000,200.612214)}
{pt3dadd(174708.000000,168528.000000,68200.000000,200.612214)}
{pt3dadd(174780.000000,168672.000000,68150.000000,200.612214)}
{pt3dadd(174792.000000,168792.000000,68125.000000,192.253370)}
{pt3dadd(174792.000000,168924.000000,68175.000000,183.894525)}
{pt3dadd(174792.000000,169044.000000,68225.000000,175.535680)}
{pt3dadd(174792.000000,169176.000000,68275.000000,167.176836)}
{pt3dadd(174792.000000,169272.000000,68325.000000,167.176836)}
{pt3dadd(174780.000000,169440.000000,68250.000000,167.176836)}
{pt3dadd(174648.000000,169596.000000,68350.000000,167.176836)}
{pt3dadd(174564.000000,169704.000000,68325.000000,167.176836)}
{pt3dadd(174600.000000,169836.000000,68400.000000,185.566288)}
{pt3dadd(174624.000000,169968.000000,68400.000000,203.955741)}
{pt3dadd(174576.000000,170100.000000,68400.000000,222.345193)}
{pt3dadd(174528.000000,170208.000000,68400.000000,240.734646)}
{pt3dadd(174480.000000,170328.000000,68400.000000,252.771381)}
{pt3dadd(174480.000000,170472.000000,68450.000000,264.808116)}
{pt3dadd(174432.000000,170652.000000,68475.000000,276.844851)}
{pt3dadd(174480.000000,170784.000000,68500.000000,288.881586)}
{pt3dadd(174528.000000,170928.000000,68525.000000,288.881586)}
{pt3dadd(174564.000000,171060.000000,68575.000000,288.881586)}
{pt3dadd(174576.000000,171180.000000,68600.000000,288.881586)}
{pt3dadd(174516.000000,171312.000000,68600.000000,288.881586)}
{pt3dadd(174360.000000,171432.000000,68550.000000,288.881586)}
{pt3dadd(174252.000000,171552.000000,68625.000000,288.881586)}
{pt3dadd(174228.000000,171696.000000,68650.000000,288.881586)}
{pt3dadd(174228.000000,171852.000000,68675.000000,288.881586)}
{pt3dadd(174288.000000,171972.000000,68675.000000,288.881586)}
{pt3dadd(174336.000000,172116.000000,68675.000000,288.881586)}
{pt3dadd(174384.000000,172248.000000,68675.000000,288.881586)}
{pt3dadd(174324.000000,172392.000000,68625.000000,288.881586)}
{pt3dadd(174348.000000,172524.000000,68550.000000,266.814243)}
{pt3dadd(174372.000000,172644.000000,68525.000000,244.746900)}
{pt3dadd(174360.000000,172764.000000,68450.000000,222.679557)}
{pt3dadd(174348.000000,172872.000000,68425.000000,200.612214)}
{pt3dadd(174336.000000,172944.000000,68400.000000,200.612214)}
{pt3dadd(174324.000000,173052.000000,68375.000000,200.612214)}
{pt3dadd(174312.000000,173172.000000,68350.000000,200.612214)}
{pt3dadd(174300.000000,173268.000000,68325.000000,200.612214)}
{pt3dadd(174288.000000,173376.000000,68300.000000,200.612214)}
{pt3dadd(174252.000000,173484.000000,68300.000000,200.612214)}
{pt3dadd(174324.000000,173664.000000,68375.000000,200.612214)}
{pt3dadd(174324.000000,173820.000000,68375.000000,200.612214)}
{pt3dadd(174180.000000,173916.000000,68400.000000,210.642822)}
{pt3dadd(174036.000000,174012.000000,68400.000000,220.673430)}
{pt3dadd(173892.000000,174132.000000,68475.000000,230.704038)}
{pt3dadd(173880.000000,174252.000000,68525.000000,240.734646)}
{pt3dadd(173868.000000,174384.000000,68475.000000,267.215459)}
{pt3dadd(173796.000000,174576.000000,68450.000000,293.696271)}
{pt3dadd(173844.000000,174696.000000,68300.000000,320.177083)}
{pt3dadd(173748.000000,174840.000000,68250.000000,346.657896)}
{pt3dadd(173760.000000,174972.000000,68225.000000,363.990794)}
{pt3dadd(173772.000000,175104.000000,68200.000000,381.323691)}
{pt3dadd(173784.000000,175248.000000,68175.000000,398.656589)}
{pt3dadd(173796.000000,175392.000000,68200.000000,415.989486)}
{pt3dadd(173700.000000,175524.000000,68050.000000,460.051110)}
{pt3dadd(173652.000000,175644.000000,67925.000000,599.024880)}

{create adhoc25}
{access adhoc25}
{connect adhoc25(1), adhoc24(0)}
{nseg = 1}
{strdef color color = "White"}
{pt3dclear()}
{pt3dadd(173652.000000,175644.000000,67925.000000,599.024880)}
{pt3dadd(173700.000000,175728.000000,67300.000000,288.881586)}
{pt3dadd(173652.000000,175848.000000,66825.000000,266.814243)}
{pt3dadd(173616.000000,175896.000000,66675.000000,244.746900)}
{pt3dadd(173124.000000,175944.000000,66475.000000,222.679557)}
{pt3dadd(172668.000000,176052.000000,66275.000000,200.612214)}
{pt3dadd(172368.000000,176052.000000,66075.000000,222.679557)}
{pt3dadd(172236.000000,175980.000000,66050.000000,244.746900)}
{pt3dadd(172152.000000,176088.000000,65825.000000,266.814243)}
{pt3dadd(172116.000000,176172.000000,65600.000000,288.881586)}
{pt3dadd(171756.000000,176328.000000,65350.000000,139.314042)}
{pt3dadd(171756.000000,176544.000000,65375.000000,96.745860)}

{create adhoc26}
{access adhoc26}
{connect adhoc26(1), adhoc24(0)}
{nseg = 1}
{strdef color color = "White"}
{pt3dclear()}
{pt3dadd(173652.000000,175644.000000,67925.000000,599.024880)}
{pt3dadd(173532.000000,175764.000000,68400.000000,200.612214)}
{pt3dadd(173520.000000,175908.000000,68775.000000,192.253370)}
{pt3dadd(173580.000000,176064.000000,68725.000000,183.894525)}
{pt3dadd(173616.000000,176208.000000,68750.000000,175.535680)}
{pt3dadd(173448.000000,176352.000000,68900.000000,167.176836)}
{pt3dadd(173436.000000,176484.000000,68925.000000,171.603680)}
{pt3dadd(173424.000000,176592.000000,68975.000000,176.030523)}
{pt3dadd(173484.000000,176736.000000,69025.000000,180.457366)}
{pt3dadd(173544.000000,176856.000000,69075.000000,184.884210)}
{pt3dadd(173604.000000,176964.000000,69125.000000,198.846819)}
{pt3dadd(173664.000000,177096.000000,69175.000000,212.809428)}
{pt3dadd(173616.000000,177216.000000,69450.000000,226.772037)}
{pt3dadd(173628.000000,177336.000000,69725.000000,240.734646)}
{pt3dadd(173736.000000,177432.000000,69975.000000,215.379495)}
{pt3dadd(173760.000000,177552.000000,70025.000000,190.024344)}
{pt3dadd(173844.000000,177684.000000,70075.000000,164.669193)}
{pt3dadd(173988.000000,177612.000000,70125.000000,139.314042)}
{pt3dadd(174120.000000,177708.000000,70225.000000,173.817113)}
{pt3dadd(174252.000000,177744.000000,70300.000000,208.320183)}
{pt3dadd(174432.000000,177756.000000,70400.000000,242.823254)}
{pt3dadd(174468.000000,178032.000000,70600.000000,277.326324)}
{pt3dadd(174492.000000,178224.000000,70775.000000,265.771062)}
{pt3dadd(174540.000000,178284.000000,70950.000000,254.215800)}
{pt3dadd(174552.000000,178584.000000,71150.000000,242.660538)}
{pt3dadd(174600.000000,178896.000000,71275.000000,231.105276)}
{pt3dadd(174600.000000,179196.000000,71425.000000,233.512618)}
{pt3dadd(174612.000000,179352.000000,71650.000000,235.919961)}
{pt3dadd(174660.000000,179484.000000,71825.000000,238.327304)}
{pt3dadd(174708.000000,179616.000000,71975.000000,240.734646)}
{pt3dadd(174756.000000,179748.000000,72175.000000,240.734646)}
{pt3dadd(174720.000000,179832.000000,72425.000000,240.734646)}
{pt3dadd(174888.000000,179868.000000,72750.000000,240.734646)}
{pt3dadd(174936.000000,180012.000000,72800.000000,240.734646)}
{pt3dadd(174996.000000,180132.000000,72850.000000,240.734646)}
{pt3dadd(175068.000000,180288.000000,73000.000000,240.734646)}
{pt3dadd(175164.000000,180408.000000,73175.000000,240.734646)}
{pt3dadd(175260.000000,180540.000000,73375.000000,240.734646)}
{pt3dadd(175200.000000,180672.000000,73550.000000,222.345193)}
{pt3dadd(175176.000000,180756.000000,73800.000000,203.955741)}
{pt3dadd(175224.000000,180852.000000,73950.000000,185.566288)}
{pt3dadd(175224.000000,180972.000000,74025.000000,167.176836)}
{pt3dadd(175224.000000,181080.000000,74100.000000,160.211138)}
{pt3dadd(175200.000000,181224.000000,74150.000000,153.245439)}
{pt3dadd(175176.000000,181344.000000,74150.000000,146.279741)}
{pt3dadd(175140.000000,181488.000000,74200.000000,139.314042)}
{pt3dadd(175152.000000,181632.000000,74300.000000,133.509289)}
{pt3dadd(175164.000000,181776.000000,74300.000000,127.704537)}
{pt3dadd(175236.000000,182016.000000,74500.000000,121.899785)}
{pt3dadd(175512.000000,182340.000000,74675.000000,116.095032)}
{pt3dadd(175656.000000,182544.000000,74750.000000,116.095032)}
{pt3dadd(175764.000000,182664.000000,74775.000000,116.095032)}
{pt3dadd(175908.000000,182676.000000,74825.000000,116.095032)}
{pt3dadd(176040.000000,182820.000000,74825.000000,116.095032)}

{create adhoc27}
{access adhoc27}
{connect adhoc27(1), adhoc23(0)}
{nseg = 1}
{strdef color color = "White"}
{pt3dclear()}
{pt3dadd(173016.000000,163008.000000,68375.000000,200.612214)}
{pt3dadd(173952.000000,163020.000000,68275.000000,96.745860)}
{pt3dadd(174060.000000,163212.000000,68300.000000,92.714782)}
{pt3dadd(174144.000000,163356.000000,68275.000000,88.683705)}
{pt3dadd(174204.000000,163524.000000,68275.000000,84.652627)}
{pt3dadd(174276.000000,163692.000000,68225.000000,80.621550)}
{pt3dadd(174360.000000,163824.000000,68250.000000,100.185714)}
{pt3dadd(174468.000000,163980.000000,68300.000000,119.749878)}
{pt3dadd(174528.000000,164112.000000,68350.000000,139.314042)}
{pt3dadd(174588.000000,164112.000000,68400.000000,80.621550)}

{create adhoc28}
{access adhoc28}
{connect adhoc28(1), adhoc22(0)}
{nseg = 1}
{strdef color color = "White"}
{pt3dclear()}
{pt3dadd(173988.000000,156516.000000,69375.000000,479.219886)}
{pt3dadd(174336.000000,155412.000000,69150.000000,828.091944)}
{pt3dadd(174264.000000,155364.000000,68750.000000,836.717909)}
{pt3dadd(174192.000000,155256.000000,68475.000000,845.343873)}
{pt3dadd(174192.000000,155340.000000,68275.000000,853.969838)}
{pt3dadd(174156.000000,155376.000000,68050.000000,862.595802)}
{pt3dadd(174144.000000,155316.000000,67800.000000,928.153080)}
{pt3dadd(174072.000000,155400.000000,67550.000000,993.710358)}
{pt3dadd(173904.000000,155016.000000,67375.000000,599.024880)}

{create adhoc29}
{access adhoc29}
{connect adhoc29(1), adhoc28(0)}
{nseg = 1}
{strdef color color = "White"}
{pt3dclear()}
{pt3dadd(173904.000000,155016.000000,67375.000000,599.024880)}
{pt3dadd(173916.000000,155556.000000,67100.000000,794.968236)}
{pt3dadd(173892.000000,155616.000000,66825.000000,682.890651)}
{pt3dadd(173868.000000,155688.000000,66550.000000,570.813066)}
{pt3dadd(173772.000000,155688.000000,66325.000000,458.735481)}
{pt3dadd(173472.000000,156204.000000,66050.000000,346.657896)}
{pt3dadd(173244.000000,156288.000000,65800.000000,409.749642)}
{pt3dadd(172980.000000,156132.000000,65625.000000,472.841388)}
{pt3dadd(172932.000000,156228.000000,65375.000000,535.933134)}
{pt3dadd(172716.000000,156360.000000,65150.000000,599.024880)}
{pt3dadd(172500.000000,156480.000000,64950.000000,599.024880)}
{pt3dadd(172428.000000,156600.000000,64700.000000,599.024880)}
{pt3dadd(172092.000000,156804.000000,64475.000000,599.024880)}
{pt3dadd(171888.000000,156936.000000,64275.000000,599.024880)}
{pt3dadd(171816.000000,157056.000000,64025.000000,569.073631)}
{pt3dadd(171816.000000,157140.000000,63850.000000,539.122383)}
{pt3dadd(171660.000000,157248.000000,63675.000000,509.171134)}
{pt3dadd(171540.000000,157176.000000,63475.000000,479.219886)}
{pt3dadd(171420.000000,157236.000000,63300.000000,415.989486)}

{create adhoc30}
{access adhoc30}
{connect adhoc30(1), adhoc29(0)}
{nseg = 1}
{strdef color color = "White"}
{pt3dclear()}
{pt3dadd(171420.000000,157236.000000,63300.000000,415.989486)}
{pt3dadd(171252.000000,157656.000000,63100.000000,499.187376)}
{pt3dadd(171120.000000,157788.000000,62825.000000,499.187376)}
{pt3dadd(171060.000000,157908.000000,62625.000000,499.187376)}
{pt3dadd(171048.000000,157968.000000,62400.000000,499.187376)}
{pt3dadd(171012.000000,158004.000000,62175.000000,499.187376)}
{pt3dadd(171060.000000,158352.000000,61975.000000,499.187376)}
{pt3dadd(171048.000000,158508.000000,61725.000000,499.187376)}
{pt3dadd(170904.000000,158700.000000,61525.000000,499.187376)}
{pt3dadd(170664.000000,158964.000000,61350.000000,499.187376)}
{pt3dadd(170472.000000,159264.000000,61175.000000,415.989486)}
{pt3dadd(170028.000000,160020.000000,60950.000000,167.176836)}

{create adhoc31}
{access adhoc31}
{connect adhoc31(1), adhoc30(0)}
{nseg = 1}
{strdef color color = "White"}
{pt3dclear()}
{pt3dadd(170028.000000,160020.000000,60950.000000,167.176836)}
{pt3dadd(170808.000000,159228.000000,60700.000000,690.076674)}
{pt3dadd(171036.000000,159012.000000,60400.000000,677.795153)}
{pt3dadd(171012.000000,159024.000000,60100.000000,647.741550)}
{pt3dadd(171012.000000,159036.000000,59800.000000,610.102305)}
{pt3dadd(171072.000000,159060.000000,59525.000000,575.063856)}
{pt3dadd(171108.000000,159084.000000,59275.000000,544.133651)}
{pt3dadd(171168.000000,159132.000000,59025.000000,512.133166)}
{pt3dadd(171192.000000,159156.000000,58825.000000,479.219886)}
{pt3dadd(171180.000000,159120.000000,58625.000000,445.551293)}

{create adhoc32}
{access adhoc32}
{connect adhoc32(1), adhoc30(0)}
{nseg = 1}
{strdef color color = "White"}
{pt3dclear()}
{pt3dadd(170028.000000,160020.000000,60950.000000,167.176836)}
{pt3dadd(169332.000000,161304.000000,60750.000000,240.734646)}
{pt3dadd(169116.000000,162000.000000,60550.000000,230.704038)}
{pt3dadd(169080.000000,162132.000000,60525.000000,220.673430)}
{pt3dadd(169008.000000,162252.000000,60500.000000,210.642822)}
{pt3dadd(168936.000000,162384.000000,60525.000000,200.612214)}
{pt3dadd(168864.000000,162528.000000,60550.000000,210.642822)}
{pt3dadd(168804.000000,162660.000000,60425.000000,220.673430)}
{pt3dadd(168684.000000,162768.000000,60400.000000,230.704038)}
{pt3dadd(168696.000000,162888.000000,60350.000000,240.734646)}
{pt3dadd(168708.000000,163020.000000,60325.000000,230.704038)}
{pt3dadd(168660.000000,163128.000000,60425.000000,220.673430)}
{pt3dadd(168612.000000,163236.000000,60475.000000,210.642822)}
{pt3dadd(168624.000000,163356.000000,60400.000000,200.612214)}
{pt3dadd(168636.000000,163476.000000,60325.000000,200.612214)}
{pt3dadd(168648.000000,163608.000000,60250.000000,200.612214)}
{pt3dadd(168696.000000,163728.000000,60300.000000,200.612214)}
{pt3dadd(168624.000000,163848.000000,60275.000000,200.612214)}
{pt3dadd(168540.000000,163980.000000,60200.000000,210.642822)}
{pt3dadd(168540.000000,164100.000000,60075.000000,220.673430)}
{pt3dadd(168624.000000,164208.000000,60125.000000,230.704038)}
{pt3dadd(168636.000000,164316.000000,59950.000000,240.734646)}
{pt3dadd(168612.000000,164460.000000,60000.000000,238.327304)}
{pt3dadd(168708.000000,164580.000000,60000.000000,235.919961)}
{pt3dadd(168756.000000,164700.000000,60000.000000,233.512618)}
{pt3dadd(168684.000000,164820.000000,59925.000000,231.105276)}
{pt3dadd(168612.000000,164952.000000,59850.000000,233.512618)}
{pt3dadd(168588.000000,165048.000000,59875.000000,235.919961)}
{pt3dadd(168516.000000,165168.000000,59825.000000,238.327304)}
{pt3dadd(168408.000000,165288.000000,59750.000000,240.734646)}
{pt3dadd(168336.000000,165396.000000,59700.000000,222.345193)}
{pt3dadd(168264.000000,165528.000000,59650.000000,203.955741)}
{pt3dadd(168192.000000,165612.000000,59600.000000,185.566288)}
{pt3dadd(168168.000000,165744.000000,59575.000000,167.176836)}
{pt3dadd(168144.000000,165828.000000,59600.000000,154.406385)}
{pt3dadd(168096.000000,165924.000000,59525.000000,141.635934)}
{pt3dadd(167964.000000,166080.000000,59475.000000,128.865483)}
{pt3dadd(167880.000000,166188.000000,59450.000000,116.095032)}
{pt3dadd(167712.000000,166320.000000,59350.000000,121.899785)}
{pt3dadd(167520.000000,166452.000000,59275.000000,127.704537)}
{pt3dadd(167448.000000,166548.000000,59100.000000,133.509289)}
{pt3dadd(167292.000000,166668.000000,59225.000000,139.314042)}
{pt3dadd(167028.000000,166812.000000,58800.000000,164.669193)}
{pt3dadd(166872.000000,166932.000000,58575.000000,190.024344)}
{pt3dadd(166728.000000,167040.000000,58725.000000,215.379495)}
{pt3dadd(166572.000000,167172.000000,58800.000000,240.734646)}
{pt3dadd(166476.000000,167316.000000,58625.000000,238.327304)}
{pt3dadd(166380.000000,167424.000000,58450.000000,235.919961)}
{pt3dadd(166320.000000,167532.000000,58400.000000,233.512618)}
{pt3dadd(166368.000000,167664.000000,58275.000000,231.105276)}
{pt3dadd(166416.000000,167772.000000,58150.000000,233.512618)}
{pt3dadd(166500.000000,167880.000000,58050.000000,235.919961)}
{pt3dadd(166452.000000,168012.000000,58200.000000,238.327304)}
{pt3dadd(166404.000000,168096.000000,58350.000000,240.734646)}
{pt3dadd(166404.000000,168240.000000,58325.000000,230.704038)}
{pt3dadd(166416.000000,168360.000000,58275.000000,220.673430)}
{pt3dadd(166428.000000,168480.000000,58225.000000,210.642822)}
{pt3dadd(166440.000000,168600.000000,58175.000000,200.612214)}
{pt3dadd(166452.000000,168696.000000,58125.000000,192.253370)}
{pt3dadd(166368.000000,168816.000000,58150.000000,183.894525)}
{pt3dadd(166284.000000,168924.000000,58175.000000,175.535680)}
{pt3dadd(166176.000000,169044.000000,58100.000000,167.176836)}
{pt3dadd(166092.000000,169176.000000,58050.000000,175.535680)}
{pt3dadd(166092.000000,169320.000000,57950.000000,183.894525)}
{pt3dadd(166260.000000,169512.000000,57525.000000,192.253370)}
{pt3dadd(166332.000000,169644.000000,57525.000000,200.612214)}
{pt3dadd(166344.000000,169788.000000,57425.000000,192.253370)}
{pt3dadd(166284.000000,169932.000000,57625.000000,183.894525)}
{pt3dadd(166200.000000,170100.000000,57550.000000,175.535680)}
{pt3dadd(166260.000000,170256.000000,57525.000000,167.176836)}
{pt3dadd(166104.000000,170352.000000,57350.000000,167.176836)}
{pt3dadd(166164.000000,170508.000000,57375.000000,167.176836)}
{pt3dadd(166176.000000,170652.000000,57350.000000,167.176836)}
{pt3dadd(166188.000000,170808.000000,57300.000000,167.176836)}
{pt3dadd(166200.000000,170916.000000,57250.000000,175.535680)}
{pt3dadd(166380.000000,171348.000000,57125.000000,183.894525)}
{pt3dadd(166488.000000,171660.000000,56900.000000,192.253370)}
{pt3dadd(166536.000000,171792.000000,56950.000000,200.612214)}
{pt3dadd(166344.000000,171936.000000,56850.000000,222.679557)}
{pt3dadd(166320.000000,172080.000000,56800.000000,244.746900)}
{pt3dadd(166392.000000,172260.000000,56750.000000,266.814243)}
{pt3dadd(166344.000000,172404.000000,56775.000000,288.881586)}
{pt3dadd(166404.000000,172572.000000,56675.000000,251.489700)}
{pt3dadd(166380.000000,172704.000000,56825.000000,214.097814)}
{pt3dadd(166464.000000,172860.000000,56825.000000,176.705928)}
{pt3dadd(166548.000000,173016.000000,56850.000000,139.314042)}
{pt3dadd(166632.000000,173112.000000,56875.000000,139.314042)}
{pt3dadd(166716.000000,173196.000000,56900.000000,139.314042)}
{pt3dadd(166608.000000,173352.000000,56900.000000,139.314042)}
{pt3dadd(166608.000000,173484.000000,56850.000000,139.314042)}
{pt3dadd(166608.000000,173484.000000,56800.000000,139.314042)}
{pt3dadd(166620.000000,173592.000000,56850.000000,139.314042)}
{pt3dadd(166752.000000,173760.000000,56950.000000,96.745860)}

{create adhoc33}
{access adhoc33}
{connect adhoc33(1), adhoc29(0)}
{nseg = 1}
{strdef color color = "White"}
{pt3dclear()}
{pt3dadd(171420.000000,157236.000000,63300.000000,415.989486)}
{pt3dadd(171792.000000,156660.000000,63150.000000,192.587724)}
{pt3dadd(171936.000000,156444.000000,62975.000000,179.269304)}
{pt3dadd(171972.000000,156504.000000,62800.000000,165.950883)}
{pt3dadd(172020.000000,156312.000000,62650.000000,152.632462)}
{pt3dadd(171972.000000,156180.000000,62475.000000,139.314042)}
{pt3dadd(172080.000000,156060.000000,62350.000000,139.314042)}
{pt3dadd(172140.000000,155724.000000,62200.000000,139.314042)}
{pt3dadd(172140.000000,155484.000000,62025.000000,139.314042)}
{pt3dadd(172068.000000,155304.000000,61850.000000,139.314042)}
{pt3dadd(172056.000000,155172.000000,61700.000000,139.314042)}
{pt3dadd(171936.000000,155028.000000,61550.000000,139.314042)}
{pt3dadd(171924.000000,154800.000000,61325.000000,139.314042)}
{pt3dadd(171852.000000,154572.000000,61150.000000,139.314042)}
{pt3dadd(171912.000000,154392.000000,60950.000000,164.669193)}
{pt3dadd(171804.000000,154320.000000,60775.000000,190.024344)}
{pt3dadd(171756.000000,154164.000000,60600.000000,215.379495)}
{pt3dadd(171660.000000,154116.000000,60450.000000,240.734646)}
{pt3dadd(171696.000000,154032.000000,60275.000000,209.574742)}
{pt3dadd(171756.000000,153888.000000,60200.000000,178.414839)}
{pt3dadd(171648.000000,153744.000000,60125.000000,147.254936)}
{pt3dadd(171588.000000,153612.000000,59975.000000,116.095032)}
{pt3dadd(171624.000000,153456.000000,59800.000000,159.291671)}
{pt3dadd(171564.000000,153360.000000,59650.000000,202.488309)}
{pt3dadd(171480.000000,153288.000000,59525.000000,245.684947)}
{pt3dadd(171384.000000,153180.000000,59300.000000,288.881586)}
{pt3dadd(171240.000000,153084.000000,59150.000000,258.455399)}
{pt3dadd(171132.000000,152880.000000,58925.000000,228.029211)}
{pt3dadd(171000.000000,153060.000000,58775.000000,197.603024)}
{pt3dadd(170952.000000,153288.000000,58550.000000,167.176836)}
{pt3dadd(170964.000000,153204.000000,58375.000000,185.566288)}
{pt3dadd(170988.000000,153180.000000,58150.000000,203.955741)}
{pt3dadd(171012.000000,153156.000000,57925.000000,222.345193)}
{pt3dadd(171036.000000,153132.000000,57700.000000,240.734646)}
{pt3dadd(170952.000000,153276.000000,57500.000000,215.379495)}
{pt3dadd(170820.000000,153300.000000,57325.000000,190.024344)}
{pt3dadd(170784.000000,153228.000000,57150.000000,164.669193)}
{pt3dadd(170748.000000,153180.000000,56950.000000,139.314042)}
{pt3dadd(170712.000000,153132.000000,56725.000000,139.314042)}
{pt3dadd(170856.000000,152988.000000,56525.000000,139.314042)}
{pt3dadd(171036.000000,152916.000000,56350.000000,139.314042)}
{pt3dadd(171132.000000,152724.000000,56200.000000,139.314042)}
{pt3dadd(171048.000000,152424.000000,56200.000000,139.314042)}
{pt3dadd(170928.000000,152148.000000,56200.000000,139.314042)}
{pt3dadd(170688.000000,151800.000000,56200.000000,139.314042)}
{pt3dadd(170400.000000,151548.000000,56200.000000,139.314042)}
{pt3dadd(170208.000000,151224.000000,56200.000000,96.745860)}
{pt3dadd(170076.000000,151080.000000,56175.000000,116.095032)}

{create adhoc34}
{access adhoc34}
{connect adhoc34(1), adhoc28(0)}
{nseg = 1}
{strdef color color = "White"}
{pt3dclear()}
{pt3dadd(173904.000000,155016.000000,67375.000000,599.024880)}
{pt3dadd(174240.000000,153948.000000,67375.000000,139.314042)}
{pt3dadd(174300.000000,153444.000000,67175.000000,146.279741)}
{pt3dadd(174336.000000,153060.000000,66875.000000,153.245439)}
{pt3dadd(174228.000000,152868.000000,66700.000000,160.211138)}
{pt3dadd(174240.000000,152628.000000,66525.000000,167.176836)}
{pt3dadd(174108.000000,152412.000000,66350.000000,183.894525)}
{pt3dadd(174132.000000,152340.000000,66175.000000,200.612214)}
{pt3dadd(174180.000000,152220.000000,66200.000000,200.612214)}

{create adhoc35}
{access adhoc35}
{connect adhoc35(1), adhoc21(0)}
{nseg = 1}
{strdef color color = "White"}
{pt3dclear()}
{pt3dadd(174840.000000,157632.000000,70450.000000,479.219886)}
{pt3dadd(176484.000000,160860.000000,70675.000000,288.881586)}
{pt3dadd(176940.000000,162012.000000,70950.000000,299.859089)}
{pt3dadd(176976.000000,162216.000000,70900.000000,310.836591)}
{pt3dadd(176964.000000,162372.000000,71075.000000,321.814093)}
{pt3dadd(177096.000000,162492.000000,71100.000000,332.791596)}
{pt3dadd(177252.000000,162636.000000,71125.000000,321.814093)}
{pt3dadd(177276.000000,162756.000000,71225.000000,310.836591)}
{pt3dadd(177264.000000,162888.000000,71350.000000,299.859089)}
{pt3dadd(177288.000000,163032.000000,71400.000000,288.881586)}
{pt3dadd(177276.000000,163152.000000,71450.000000,276.844851)}
{pt3dadd(177312.000000,163296.000000,71625.000000,264.808116)}
{pt3dadd(177288.000000,163416.000000,71675.000000,252.771381)}
{pt3dadd(177252.000000,163548.000000,71750.000000,240.734646)}
{pt3dadd(177300.000000,163680.000000,71875.000000,252.771381)}
{pt3dadd(177276.000000,163812.000000,71975.000000,264.808116)}
{pt3dadd(177444.000000,163944.000000,72050.000000,276.844851)}
{pt3dadd(177444.000000,164088.000000,72100.000000,288.881586)}
{pt3dadd(177552.000000,164220.000000,72175.000000,288.881586)}
{pt3dadd(177588.000000,164352.000000,72225.000000,288.881586)}
{pt3dadd(177600.000000,164472.000000,72300.000000,288.881586)}
{pt3dadd(177564.000000,164616.000000,72250.000000,288.881586)}
{pt3dadd(177648.000000,164760.000000,72275.000000,258.455399)}
{pt3dadd(177672.000000,164880.000000,72275.000000,228.029211)}
{pt3dadd(177744.000000,165000.000000,72250.000000,197.603024)}
{pt3dadd(177864.000000,165144.000000,72300.000000,167.176836)}
{pt3dadd(177984.000000,165144.000000,72350.000000,167.176836)}
{pt3dadd(177996.000000,165276.000000,72350.000000,167.176836)}
{pt3dadd(178236.000000,165420.000000,72350.000000,167.176836)}
{pt3dadd(178272.000000,165564.000000,72475.000000,167.176836)}
{pt3dadd(178332.000000,165696.000000,72525.000000,208.580517)}
{pt3dadd(178332.000000,165804.000000,72525.000000,249.984198)}
{pt3dadd(178272.000000,165924.000000,72575.000000,291.387879)}
{pt3dadd(178212.000000,166044.000000,72625.000000,332.791560)}
{pt3dadd(178320.000000,166212.000000,72675.000000,336.258144)}
{pt3dadd(178428.000000,166332.000000,72725.000000,339.724728)}
{pt3dadd(178620.000000,166452.000000,72725.000000,343.191312)}
{pt3dadd(178620.000000,166608.000000,72800.000000,346.657896)}
{pt3dadd(178608.000000,166752.000000,72850.000000,310.146476)}
{pt3dadd(178692.000000,166896.000000,72875.000000,273.635055)}
{pt3dadd(178992.000000,166680.000000,73175.000000,237.123635)}
{pt3dadd(179340.000000,166704.000000,73400.000000,200.612214)}
{pt3dadd(179580.000000,166476.000000,73625.000000,200.612214)}
{pt3dadd(179808.000000,166344.000000,73825.000000,200.612214)}
{pt3dadd(180012.000000,166236.000000,74000.000000,200.612214)}
{pt3dadd(180180.000000,166224.000000,74225.000000,200.612214)}
{pt3dadd(180240.000000,166332.000000,74450.000000,200.612214)}
{pt3dadd(180444.000000,166320.000000,74675.000000,200.612214)}
{pt3dadd(180552.000000,166380.000000,74875.000000,200.612214)}
{pt3dadd(180624.000000,166500.000000,75075.000000,200.612214)}
{pt3dadd(180696.000000,166488.000000,75300.000000,185.287671)}
{pt3dadd(180864.000000,166512.000000,75525.000000,169.963128)}
{pt3dadd(181032.000000,166584.000000,75700.000000,154.638585)}
{pt3dadd(181248.000000,166668.000000,75900.000000,139.314042)}
{pt3dadd(181500.000000,166884.000000,76075.000000,224.290503)}
{pt3dadd(181668.000000,166932.000000,76250.000000,309.266964)}
{pt3dadd(181800.000000,166992.000000,76400.000000,394.243425)}
{pt3dadd(181956.000000,167004.000000,76575.000000,479.219886)}
{pt3dadd(182088.000000,166944.000000,76925.000000,431.635311)}
{pt3dadd(182232.000000,166968.000000,77200.000000,384.050736)}
{pt3dadd(182388.000000,167040.000000,77425.000000,336.466161)}
{pt3dadd(182544.000000,166980.000000,77750.000000,288.881586)}
{pt3dadd(182640.000000,166932.000000,77900.000000,299.859080)}
{pt3dadd(182700.000000,166968.000000,78100.000000,310.836573)}
{pt3dadd(182820.000000,167016.000000,78300.000000,321.814067)}
{pt3dadd(183072.000000,167016.000000,78550.000000,332.791560)}
{pt3dadd(183156.000000,167052.000000,78775.000000,284.422181)}
{pt3dadd(183300.000000,167124.000000,78950.000000,236.052801)}
{pt3dadd(183444.000000,167112.000000,79150.000000,187.683421)}
{pt3dadd(183576.000000,167136.000000,79325.000000,139.314042)}
{pt3dadd(183708.000000,167148.000000,79500.000000,164.669193)}
{pt3dadd(183684.000000,167232.000000,79675.000000,190.024344)}
{pt3dadd(183744.000000,167268.000000,79875.000000,215.379495)}
{pt3dadd(183804.000000,167328.000000,80100.000000,240.734646)}
{pt3dadd(183792.000000,167508.000000,80300.000000,238.327304)}
{pt3dadd(183816.000000,167568.000000,80500.000000,235.919961)}
{pt3dadd(183840.000000,167628.000000,80675.000000,233.512618)}
{pt3dadd(183864.000000,167604.000000,80850.000000,231.105276)}
{pt3dadd(183696.000000,167736.000000,81050.000000,245.549354)}
{pt3dadd(183732.000000,167772.000000,81250.000000,259.993431)}
{pt3dadd(183768.000000,167820.000000,81500.000000,274.437509)}
{pt3dadd(183780.000000,167832.000000,81700.000000,288.881586)}
{pt3dadd(183792.000000,167844.000000,81925.000000,245.684947)}
{pt3dadd(183876.000000,167772.000000,82150.000000,202.488309)}
{pt3dadd(183960.000000,167700.000000,82325.000000,159.291671)}
{pt3dadd(184344.000000,167652.000000,82500.000000,116.095032)}
{pt3dadd(184620.000000,167640.000000,82700.000000,116.095032)}
{pt3dadd(185304.000000,167592.000000,82700.000000,116.095032)}
{pt3dadd(185532.000000,167472.000000,82725.000000,116.095032)}
{pt3dadd(185808.000000,167112.000000,82875.000000,116.095032)}

{create adhoc36}
{access adhoc36}
{connect adhoc36(1), adhoc20(0)}
{nseg = 1}
{strdef color color = "White"}
{pt3dclear()}
{pt3dadd(184872.000000,142560.000000,85550.000000,599.024880)}
{pt3dadd(184476.000000,140928.000000,85275.000000,1242.137880)}
{pt3dadd(184044.000000,140016.000000,84900.000000,1289.339127)}
{pt3dadd(183948.000000,140256.000000,84475.000000,1336.540374)}
{pt3dadd(183804.000000,140208.000000,84100.000000,1383.741621)}
{pt3dadd(183552.000000,139956.000000,83750.000000,1430.942868)}
{pt3dadd(183372.000000,140496.000000,83150.000000,1331.985888)}
{pt3dadd(183180.000000,140508.000000,82675.000000,1233.028908)}
{pt3dadd(183024.000000,140268.000000,82300.000000,1134.071928)}
{pt3dadd(182868.000000,140196.000000,81925.000000,1035.114948)}
{pt3dadd(182688.000000,140076.000000,81750.000000,991.985162)}
{pt3dadd(182520.000000,139884.000000,81600.000000,948.855375)}
{pt3dadd(182388.000000,139692.000000,81425.000000,905.725589)}
{pt3dadd(182220.000000,139800.000000,80950.000000,862.595802)}
{pt3dadd(182076.000000,140016.000000,80675.000000,853.969856)}
{pt3dadd(181896.000000,139848.000000,80600.000000,845.343909)}
{pt3dadd(181764.000000,139908.000000,80450.000000,836.717962)}
{pt3dadd(181608.000000,140112.000000,80200.000000,828.092016)}
{pt3dadd(181464.000000,139860.000000,79750.000000,869.496602)}
{pt3dadd(181320.000000,140148.000000,79650.000000,910.901187)}
{pt3dadd(181140.000000,140028.000000,79275.000000,952.305772)}
{pt3dadd(180984.000000,139836.000000,79150.000000,993.710358)}
{pt3dadd(180840.000000,139692.000000,78675.000000,960.931719)}
{pt3dadd(180696.000000,139704.000000,78625.000000,928.153080)}
{pt3dadd(180504.000000,139608.000000,78600.000000,895.374441)}
{pt3dadd(180312.000000,139464.000000,78125.000000,862.595802)}
{pt3dadd(180132.000000,139356.000000,77850.000000,862.595802)}
{pt3dadd(179964.000000,139080.000000,77650.000000,862.595802)}
{pt3dadd(179784.000000,138912.000000,77500.000000,862.595802)}
{pt3dadd(179592.000000,138744.000000,77175.000000,862.595802)}
{pt3dadd(179400.000000,138672.000000,76875.000000,957.481322)}
{pt3dadd(179208.000000,138888.000000,76925.000000,1052.366841)}
{pt3dadd(179040.000000,138516.000000,76400.000000,1147.252361)}
{pt3dadd(178860.000000,138324.000000,76075.000000,1242.137880)}
{pt3dadd(178680.000000,138540.000000,76000.000000,1190.382147)}
{pt3dadd(178512.000000,138240.000000,75700.000000,1138.626414)}
{pt3dadd(178344.000000,137868.000000,75350.000000,1086.870681)}
{pt3dadd(178164.000000,138048.000000,75325.000000,1035.114948)}
{pt3dadd(177960.000000,138000.000000,75075.000000,1086.870681)}
{pt3dadd(177780.000000,137904.000000,74800.000000,1138.626414)}
{pt3dadd(177624.000000,137808.000000,74425.000000,1190.382147)}
{pt3dadd(177468.000000,137328.000000,74000.000000,1242.137880)}
{pt3dadd(177324.000000,137484.000000,73925.000000,1111.310865)}
{pt3dadd(177204.000000,137664.000000,73700.000000,980.483850)}
{pt3dadd(177024.000000,137520.000000,73725.000000,849.656835)}
{pt3dadd(176844.000000,137448.000000,73225.000000,718.829820)}
{pt3dadd(176676.000000,137388.000000,72750.000000,797.901102)}
{pt3dadd(176508.000000,137376.000000,72425.000000,876.972384)}
{pt3dadd(176364.000000,137028.000000,72250.000000,956.043666)}
{pt3dadd(176196.000000,137004.000000,72125.000000,1035.114948)}
{pt3dadd(176004.000000,136932.000000,71950.000000,1074.449300)}
{pt3dadd(175848.000000,136944.000000,71425.000000,1113.783651)}
{pt3dadd(175716.000000,136848.000000,71125.000000,1153.118003)}
{pt3dadd(175572.000000,137112.000000,70950.000000,1192.452354)}
{pt3dadd(175392.000000,136920.000000,70625.000000,1252.074951)}
{pt3dadd(175236.000000,136728.000000,70275.000000,1311.697548)}
{pt3dadd(175056.000000,136560.000000,70000.000000,1371.320145)}
{pt3dadd(174852.000000,136536.000000,69925.000000,1430.942742)}
{pt3dadd(174672.000000,136512.000000,69825.000000,1445.848407)}
{pt3dadd(174528.000000,136596.000000,69550.000000,1460.754072)}
{pt3dadd(174336.000000,136620.000000,69375.000000,1475.659737)}
{pt3dadd(174132.000000,136524.000000,69300.000000,1490.565402)}
{pt3dadd(173976.000000,136224.000000,69300.000000,1376.702789)}
{pt3dadd(173772.000000,136536.000000,68800.000000,1262.840175)}
{pt3dadd(173616.000000,136464.000000,68825.000000,1148.977562)}
{pt3dadd(173424.000000,136392.000000,68825.000000,1035.114948)}
{pt3dadd(173256.000000,136476.000000,68675.000000,828.091944)}
{pt3dadd(173076.000000,136536.000000,68800.000000,499.187376)}

{create adhoc37}
{access adhoc37}
{connect adhoc37(1), adhoc36(0)}
{nseg = 1}
{strdef color color = "White"}
{pt3dclear()}
{pt3dadd(173076.000000,136536.000000,68800.000000,499.187376)}
{pt3dadd(173544.000000,137592.000000,68250.000000,862.595802)}
{pt3dadd(173256.000000,137796.000000,67850.000000,750.944223)}
{pt3dadd(173040.000000,137892.000000,67450.000000,639.292644)}
{pt3dadd(173364.000000,138144.000000,67250.000000,527.641065)}
{pt3dadd(173208.000000,138492.000000,67000.000000,415.989486)}
{pt3dadd(173028.000000,138852.000000,66725.000000,398.656589)}
{pt3dadd(173064.000000,138960.000000,66625.000000,381.323691)}
{pt3dadd(172968.000000,139092.000000,66525.000000,363.990794)}
{pt3dadd(173112.000000,139236.000000,66475.000000,346.657896)}
{pt3dadd(173112.000000,139356.000000,66475.000000,346.657896)}
{pt3dadd(172980.000000,139500.000000,66500.000000,346.657896)}
{pt3dadd(172764.000000,139656.000000,66400.000000,346.657896)}
{pt3dadd(172560.000000,139776.000000,66250.000000,415.989486)}

{create adhoc38}
{access adhoc38}
{connect adhoc38(1), adhoc37(0)}
{nseg = 1}
{strdef color color = "White"}
{pt3dclear()}
{pt3dadd(172560.000000,139776.000000,66250.000000,415.989486)}
{pt3dadd(173100.000000,138492.000000,66025.000000,415.989486)}
{pt3dadd(173184.000000,138288.000000,65775.000000,415.989486)}
{pt3dadd(173280.000000,138264.000000,65500.000000,415.989486)}
{pt3dadd(173424.000000,138264.000000,65300.000000,415.989486)}
{pt3dadd(173508.000000,138132.000000,65075.000000,415.989486)}
{pt3dadd(173472.000000,138228.000000,64825.000000,457.588431)}
{pt3dadd(173592.000000,138252.000000,64575.000000,499.187376)}
{pt3dadd(173712.000000,138276.000000,64350.000000,575.063856)}

{create adhoc39}
{access adhoc39}
{connect adhoc39(1), adhoc38(0)}
{nseg = 1}
{strdef color color = "White"}
{pt3dclear()}
{pt3dadd(173712.000000,138276.000000,64350.000000,575.063856)}
{pt3dadd(173832.000000,138204.000000,64125.000000,288.881586)}
{pt3dadd(173892.000000,137928.000000,63875.000000,316.498675)}
{pt3dadd(173736.000000,137988.000000,63700.000000,344.115765)}
{pt3dadd(173700.000000,137916.000000,63500.000000,371.732855)}
{pt3dadd(173688.000000,137928.000000,63275.000000,399.349944)}
{pt3dadd(173676.000000,137832.000000,63100.000000,443.278422)}
{pt3dadd(173700.000000,137856.000000,62900.000000,487.206900)}
{pt3dadd(173664.000000,137844.000000,62700.000000,531.135378)}
{pt3dadd(173604.000000,137712.000000,62500.000000,575.063856)}
{pt3dadd(173484.000000,137652.000000,62300.000000,531.135378)}
{pt3dadd(173424.000000,137616.000000,62150.000000,487.206900)}
{pt3dadd(173316.000000,137676.000000,61950.000000,443.278422)}
{pt3dadd(173244.000000,137712.000000,61725.000000,399.349944)}
{pt3dadd(173256.000000,137700.000000,61525.000000,386.176932)}
{pt3dadd(173316.000000,137640.000000,61325.000000,373.003920)}
{pt3dadd(173316.000000,137700.000000,61150.000000,359.830908)}
{pt3dadd(173232.000000,137712.000000,60975.000000,346.657896)}
{pt3dadd(173160.000000,137808.000000,60750.000000,320.177083)}
{pt3dadd(172992.000000,137760.000000,60550.000000,293.696271)}
{pt3dadd(172932.000000,137724.000000,60375.000000,267.215459)}
{pt3dadd(172776.000000,137832.000000,60175.000000,240.734646)}
{pt3dadd(172584.000000,137784.000000,59950.000000,252.771381)}
{pt3dadd(172464.000000,137784.000000,59800.000000,264.808116)}
{pt3dadd(172272.000000,137676.000000,59625.000000,276.844851)}
{pt3dadd(172128.000000,137628.000000,59400.000000,288.881586)}
{pt3dadd(172008.000000,137532.000000,59250.000000,303.325664)}
{pt3dadd(171960.000000,137472.000000,59075.000000,317.769741)}
{pt3dadd(171864.000000,137508.000000,58900.000000,332.213819)}
{pt3dadd(171672.000000,137436.000000,58750.000000,346.657896)}
{pt3dadd(171600.000000,137316.000000,58600.000000,311.992110)}
{pt3dadd(171624.000000,137172.000000,58425.000000,277.326324)}
{pt3dadd(171624.000000,137160.000000,58300.000000,240.734646)}

{create adhoc40}
{access adhoc40}
{connect adhoc40(1), adhoc39(0)}
{nseg = 1}
{strdef color color = "White"}
{pt3dclear()}
{pt3dadd(171624.000000,137160.000000,58300.000000,240.734646)}
{pt3dadd(171372.000000,137568.000000,58150.000000,288.881586)}
{pt3dadd(171180.000000,137664.000000,57875.000000,274.437509)}
{pt3dadd(171168.000000,137796.000000,57650.000000,259.993431)}
{pt3dadd(171168.000000,137916.000000,57650.000000,245.549354)}
{pt3dadd(171144.000000,137784.000000,57350.000000,231.105276)}
{pt3dadd(171204.000000,137844.000000,56975.000000,223.482010)}
{pt3dadd(171144.000000,137856.000000,56800.000000,215.858745)}
{pt3dadd(171168.000000,137820.000000,56650.000000,208.235480)}
{pt3dadd(171408.000000,138156.000000,56525.000000,200.612214)}
{pt3dadd(171240.000000,138192.000000,56325.000000,185.287671)}
{pt3dadd(171204.000000,138540.000000,56125.000000,169.963128)}
{pt3dadd(171132.000000,138648.000000,56000.000000,154.638585)}
{pt3dadd(170940.000000,138960.000000,55800.000000,139.314042)}
{pt3dadd(170784.000000,139416.000000,55750.000000,139.314042)}
{pt3dadd(170652.000000,139620.000000,55750.000000,139.314042)}
{pt3dadd(170508.000000,139764.000000,55775.000000,139.314042)}
{pt3dadd(170352.000000,139920.000000,55775.000000,139.314042)}
{pt3dadd(170220.000000,139980.000000,55725.000000,146.279741)}
{pt3dadd(170100.000000,140088.000000,55650.000000,153.245439)}
{pt3dadd(169944.000000,140580.000000,55575.000000,160.211138)}
{pt3dadd(169836.000000,140844.000000,55700.000000,167.176836)}
{pt3dadd(169704.000000,141024.000000,55700.000000,160.211138)}
{pt3dadd(169572.000000,141072.000000,55725.000000,153.245439)}
{pt3dadd(169440.000000,141120.000000,55750.000000,146.279741)}
{pt3dadd(169272.000000,141096.000000,55625.000000,139.314042)}
{pt3dadd(169128.000000,141108.000000,55625.000000,139.314042)}
{pt3dadd(168936.000000,141336.000000,55250.000000,139.314042)}
{pt3dadd(168744.000000,141516.000000,55225.000000,139.314042)}
{pt3dadd(168612.000000,141636.000000,55175.000000,139.314042)}
{pt3dadd(168444.000000,141684.000000,55125.000000,133.509289)}
{pt3dadd(168264.000000,141696.000000,55100.000000,127.704537)}
{pt3dadd(168120.000000,141684.000000,55150.000000,121.899785)}
{pt3dadd(167940.000000,141744.000000,55125.000000,116.095032)}
{pt3dadd(167736.000000,141672.000000,55200.000000,121.899785)}
{pt3dadd(167568.000000,141612.000000,55150.000000,127.704537)}
{pt3dadd(167436.000000,141528.000000,55150.000000,133.509289)}
{pt3dadd(167256.000000,141384.000000,54975.000000,139.314042)}
{pt3dadd(167052.000000,141264.000000,54925.000000,139.314042)}
{pt3dadd(166872.000000,141228.000000,54700.000000,116.095032)}

{create adhoc41}
{access adhoc41}
{connect adhoc41(1), adhoc39(0)}
{nseg = 1}
{strdef color color = "White"}
{pt3dclear()}
{pt3dadd(171624.000000,137160.000000,58300.000000,240.734646)}
{pt3dadd(171876.000000,136428.000000,58300.000000,200.612214)}
{pt3dadd(172080.000000,135960.000000,58125.000000,222.679557)}
{pt3dadd(171780.000000,135672.000000,57875.000000,244.746900)}
{pt3dadd(171684.000000,135480.000000,57750.000000,266.814243)}
{pt3dadd(171648.000000,135240.000000,58100.000000,288.881586)}
{pt3dadd(171576.000000,135072.000000,58275.000000,276.844851)}
{pt3dadd(171288.000000,134904.000000,58525.000000,264.808116)}
{pt3dadd(171072.000000,134760.000000,58850.000000,252.771381)}
{pt3dadd(170784.000000,134616.000000,59000.000000,240.734646)}
{pt3dadd(170568.000000,134472.000000,59025.000000,230.704038)}
{pt3dadd(170268.000000,134292.000000,59225.000000,220.673430)}
{pt3dadd(169716.000000,134316.000000,59450.000000,210.642822)}
{pt3dadd(169620.000000,134232.000000,59675.000000,200.612214)}
{pt3dadd(169152.000000,134184.000000,59875.000000,230.035338)}
{pt3dadd(169104.000000,134004.000000,60075.000000,259.458462)}
{pt3dadd(169140.000000,134028.000000,60275.000000,288.881586)}
{pt3dadd(169116.000000,133992.000000,60500.000000,200.612214)}

{create adhoc42}
{access adhoc42}
{connect adhoc42(1), adhoc38(0)}
{nseg = 1}
{strdef color color = "White"}
{pt3dclear()}
{pt3dadd(173712.000000,138276.000000,64350.000000,575.063856)}
{pt3dadd(174360.000000,139068.000000,64250.000000,96.745860)}
{pt3dadd(174492.000000,139212.000000,64075.000000,114.353604)}
{pt3dadd(174720.000000,139440.000000,63925.000000,131.961348)}
{pt3dadd(174840.000000,139416.000000,63775.000000,149.569092)}
{pt3dadd(174948.000000,139512.000000,63675.000000,167.176836)}
{pt3dadd(175092.000000,139476.000000,63475.000000,150.459156)}
{pt3dadd(175236.000000,139560.000000,63450.000000,133.741476)}
{pt3dadd(175344.000000,139680.000000,63375.000000,116.095032)}

{create adhoc43}
{access adhoc43}
{connect adhoc43(1), adhoc37(0)}
{nseg = 1}
{strdef color color = "White"}
{pt3dclear()}
{pt3dadd(172560.000000,139776.000000,66250.000000,415.989486)}
{pt3dadd(172680.000000,139944.000000,66275.000000,415.989486)}
{pt3dadd(172800.000000,140088.000000,66300.000000,415.989486)}
{pt3dadd(172728.000000,140232.000000,66275.000000,415.989486)}
{pt3dadd(172656.000000,140388.000000,66250.000000,415.989486)}
{pt3dadd(172548.000000,140532.000000,66150.000000,415.989486)}
{pt3dadd(172644.000000,140676.000000,66175.000000,436.788958)}
{pt3dadd(172452.000000,140796.000000,66000.000000,457.588431)}
{pt3dadd(172464.000000,140916.000000,65950.000000,478.387903)}
{pt3dadd(172464.000000,141060.000000,65900.000000,499.187376)}
{pt3dadd(172464.000000,141240.000000,65850.000000,499.187376)}
{pt3dadd(172464.000000,141396.000000,65750.000000,499.187376)}
{pt3dadd(172464.000000,141540.000000,65650.000000,499.187376)}
{pt3dadd(172476.000000,141672.000000,65625.000000,499.187376)}
{pt3dadd(172476.000000,141816.000000,65450.000000,518.156496)}
{pt3dadd(172476.000000,141948.000000,65350.000000,537.125616)}
{pt3dadd(172452.000000,142092.000000,65400.000000,556.094736)}
{pt3dadd(172380.000000,142248.000000,65325.000000,575.063856)}
{pt3dadd(172320.000000,142416.000000,65275.000000,581.054112)}
{pt3dadd(172500.000000,142584.000000,65300.000000,587.044368)}
{pt3dadd(172428.000000,142776.000000,65075.000000,593.034624)}
{pt3dadd(172356.000000,142932.000000,64850.000000,599.024880)}
{pt3dadd(172284.000000,143064.000000,64625.000000,621.787828)}
{pt3dadd(172236.000000,143184.000000,64400.000000,644.550777)}
{pt3dadd(172188.000000,143304.000000,64200.000000,667.313725)}
{pt3dadd(172092.000000,143784.000000,63925.000000,690.076674)}
{pt3dadd(171720.000000,143940.000000,63725.000000,733.206456)}
{pt3dadd(171660.000000,143904.000000,63500.000000,776.336238)}
{pt3dadd(171552.000000,143976.000000,63250.000000,819.466020)}
{pt3dadd(171444.000000,144048.000000,62950.000000,862.595802)}
{pt3dadd(171252.000000,144060.000000,62750.000000,819.466020)}
{pt3dadd(171204.000000,144156.000000,62550.000000,776.336238)}
{pt3dadd(170916.000000,144204.000000,62350.000000,733.206456)}
{pt3dadd(170856.000000,144276.000000,62150.000000,690.076674)}
{pt3dadd(170712.000000,144300.000000,61850.000000,697.264960)}
{pt3dadd(170520.000000,144456.000000,61575.000000,704.453247)}
{pt3dadd(170328.000000,144516.000000,61300.000000,711.641533)}
{pt3dadd(170136.000000,144576.000000,61025.000000,718.829820)}
{pt3dadd(170172.000000,144516.000000,60775.000000,797.901102)}
{pt3dadd(170124.000000,144552.000000,60475.000000,876.972384)}
{pt3dadd(170076.000000,144588.000000,60225.000000,956.043666)}
{pt3dadd(170028.000000,144624.000000,60000.000000,1035.114948)}
{pt3dadd(170064.000000,144636.000000,59750.000000,1134.071928)}
{pt3dadd(170076.000000,144648.000000,59550.000000,1233.028908)}
{pt3dadd(170088.000000,144660.000000,59325.000000,1331.985888)}
{pt3dadd(170100.000000,144672.000000,59125.000000,1430.942868)}
{pt3dadd(170112.000000,144684.000000,58900.000000,1383.741621)}
{pt3dadd(170040.000000,144684.000000,58700.000000,1336.540374)}
{pt3dadd(169968.000000,144684.000000,58500.000000,1289.339127)}
{pt3dadd(169776.000000,144768.000000,58275.000000,1242.137880)}
{pt3dadd(169584.000000,144852.000000,58075.000000,1190.382147)}
{pt3dadd(169512.000000,144732.000000,57850.000000,1138.626414)}
{pt3dadd(169512.000000,144804.000000,57600.000000,1086.870681)}
{pt3dadd(169512.000000,144876.000000,57575.000000,1035.114948)}
{pt3dadd(169512.000000,144948.000000,57350.000000,983.359215)}
{pt3dadd(169296.000000,144864.000000,57150.000000,931.603482)}
{pt3dadd(169188.000000,144864.000000,56975.000000,879.847749)}
{pt3dadd(169128.000000,144924.000000,56775.000000,828.092016)}
{pt3dadd(169068.000000,144972.000000,56575.000000,800.776467)}
{pt3dadd(169008.000000,145020.000000,56400.000000,773.460918)}
{pt3dadd(168948.000000,145068.000000,56200.000000,746.145369)}
{pt3dadd(168888.000000,145116.000000,55975.000000,718.829820)}
{pt3dadd(168828.000000,145164.000000,55750.000000,658.927350)}
{pt3dadd(168768.000000,145056.000000,55525.000000,599.024880)}
{pt3dadd(168708.000000,145092.000000,55350.000000,255.583926)}

{create adhoc44}
{access adhoc44}
{connect adhoc44(1), adhoc43(0)}
{nseg = 1}
{strdef color color = "White"}
{pt3dclear()}
{pt3dadd(168708.000000,145092.000000,55350.000000,255.583926)}
{pt3dadd(168540.000000,145740.000000,55200.000000,479.219886)}
{pt3dadd(168384.000000,145956.000000,54950.000000,485.875716)}
{pt3dadd(168216.000000,146172.000000,54700.000000,492.531546)}
{pt3dadd(168168.000000,146292.000000,54450.000000,499.187376)}
{pt3dadd(168132.000000,146412.000000,54225.000000,599.024880)}

{create adhoc45}
{access adhoc45}
{connect adhoc45(1), adhoc44(0)}
{nseg = 1}
{strdef color color = "White"}
{pt3dclear()}
{pt3dadd(168132.000000,146412.000000,54225.000000,599.024880)}
{pt3dadd(168084.000000,147048.000000,54000.000000,288.881586)}
{pt3dadd(168012.000000,147552.000000,53800.000000,276.844851)}
{pt3dadd(167820.000000,147660.000000,53600.000000,264.808116)}
{pt3dadd(167844.000000,147888.000000,53400.000000,252.771381)}
{pt3dadd(167676.000000,148056.000000,53250.000000,240.734646)}
{pt3dadd(167604.000000,148416.000000,53050.000000,267.215459)}
{pt3dadd(167532.000000,148536.000000,52950.000000,293.696271)}
{pt3dadd(167484.000000,148644.000000,52800.000000,320.177083)}
{pt3dadd(167520.000000,148824.000000,52575.000000,346.657896)}
{pt3dadd(167496.000000,148968.000000,52375.000000,332.213819)}
{pt3dadd(167472.000000,149100.000000,52200.000000,317.769741)}
{pt3dadd(167328.000000,149076.000000,51950.000000,303.325664)}
{pt3dadd(167376.000000,149076.000000,51775.000000,288.881586)}
{pt3dadd(167496.000000,149232.000000,51550.000000,285.992771)}
{pt3dadd(167388.000000,149304.000000,51350.000000,283.103955)}
{pt3dadd(167388.000000,149364.000000,51175.000000,280.215140)}
{pt3dadd(167340.000000,149400.000000,50975.000000,277.326324)}
{pt3dadd(167268.000000,149496.000000,50800.000000,256.141674)}
{pt3dadd(167076.000000,149652.000000,50625.000000,234.957024)}
{pt3dadd(166932.000000,149724.000000,50475.000000,213.772374)}
{pt3dadd(166848.000000,149748.000000,50300.000000,192.587724)}
{pt3dadd(166596.000000,149928.000000,50100.000000,204.624455)}
{pt3dadd(166332.000000,150060.000000,49950.000000,216.661185)}
{pt3dadd(166044.000000,150216.000000,49800.000000,228.697915)}
{pt3dadd(165936.000000,150312.000000,49575.000000,240.734646)}
{pt3dadd(165924.000000,150396.000000,49375.000000,249.882566)}
{pt3dadd(165744.000000,150648.000000,49175.000000,259.030485)}
{pt3dadd(165660.000000,150756.000000,48950.000000,268.178405)}
{pt3dadd(165672.000000,150852.000000,48750.000000,277.326324)}
{pt3dadd(165672.000000,151116.000000,48550.000000,294.659217)}
{pt3dadd(165636.000000,151260.000000,48300.000000,311.992110)}
{pt3dadd(165672.000000,151392.000000,48100.000000,329.325003)}
{pt3dadd(165804.000000,151428.000000,47950.000000,346.657896)}
{pt3dadd(165828.000000,151560.000000,47750.000000,332.213819)}
{pt3dadd(165660.000000,151764.000000,47500.000000,317.769741)}
{pt3dadd(165540.000000,151932.000000,47300.000000,303.325664)}
{pt3dadd(165396.000000,151932.000000,47125.000000,288.881586)}
{pt3dadd(165276.000000,152148.000000,46925.000000,266.814243)}
{pt3dadd(165180.000000,152340.000000,46700.000000,244.746900)}
{pt3dadd(165000.000000,152520.000000,46525.000000,222.679557)}
{pt3dadd(164928.000000,152796.000000,46350.000000,200.612214)}
{pt3dadd(164868.000000,153168.000000,46150.000000,233.657060)}
{pt3dadd(164748.000000,153468.000000,45925.000000,266.701905)}
{pt3dadd(164640.000000,153720.000000,45750.000000,299.746750)}
{pt3dadd(164520.000000,154008.000000,45575.000000,332.791596)}
{pt3dadd(164484.000000,154176.000000,45400.000000,336.258171)}
{pt3dadd(164436.000000,154296.000000,45225.000000,339.724746)}
{pt3dadd(164232.000000,154284.000000,45000.000000,343.191321)}
{pt3dadd(164052.000000,154476.000000,44775.000000,346.657896)}
{pt3dadd(164028.000000,154656.000000,44600.000000,310.146476)}
{pt3dadd(164112.000000,154932.000000,44375.000000,273.635055)}
{pt3dadd(164208.000000,155136.000000,44175.000000,237.123635)}
{pt3dadd(164184.000000,155352.000000,44000.000000,200.612214)}
{pt3dadd(164160.000000,155532.000000,43825.000000,200.612214)}
{pt3dadd(164220.000000,155448.000000,43625.000000,200.612214)}
{pt3dadd(164184.000000,155544.000000,43450.000000,200.612214)}
{pt3dadd(164412.000000,155556.000000,43225.000000,200.612214)}
{pt3dadd(164640.000000,155556.000000,43025.000000,185.287671)}
{pt3dadd(164868.000000,155544.000000,42875.000000,169.963128)}
{pt3dadd(165096.000000,155544.000000,42725.000000,154.638585)}
{pt3dadd(165312.000000,155592.000000,42575.000000,139.314042)}
{pt3dadd(165456.000000,155676.000000,42375.000000,139.314042)}
{pt3dadd(165792.000000,155760.000000,42150.000000,139.314042)}
{pt3dadd(166224.000000,155820.000000,41975.000000,139.314042)}
{pt3dadd(166572.000000,156096.000000,41775.000000,139.314042)}
{pt3dadd(166992.000000,156300.000000,41550.000000,176.705928)}
{pt3dadd(167232.000000,156444.000000,41400.000000,214.097814)}
{pt3dadd(167436.000000,156636.000000,41225.000000,251.489700)}
{pt3dadd(167676.000000,156780.000000,41050.000000,288.881586)}
{pt3dadd(167676.000000,156912.000000,40825.000000,272.832606)}
{pt3dadd(167628.000000,157020.000000,40600.000000,256.783626)}
{pt3dadd(167676.000000,156984.000000,40375.000000,240.734646)}
{pt3dadd(167868.000000,157116.000000,40150.000000,231.105276)}

{create adhoc46}
{access adhoc46}
{connect adhoc46(1), adhoc45(0)}
{nseg = 1}
{strdef color color = "White"}
{pt3dclear()}
{pt3dadd(167868.000000,157116.000000,40150.000000,231.105276)}
{pt3dadd(167724.000000,156912.000000,39975.000000,240.734646)}
{pt3dadd(167604.000000,156756.000000,39750.000000,240.734646)}
{pt3dadd(167448.000000,156600.000000,39525.000000,240.734646)}
{pt3dadd(167520.000000,156528.000000,39300.000000,240.734646)}
{pt3dadd(167580.000000,156516.000000,39100.000000,240.734646)}
{pt3dadd(167808.000000,156432.000000,38925.000000,215.379495)}
{pt3dadd(167688.000000,156504.000000,38700.000000,190.024344)}
{pt3dadd(167952.000000,156432.000000,38475.000000,164.669193)}
{pt3dadd(168120.000000,156516.000000,38425.000000,139.314042)}
{pt3dadd(168324.000000,156456.000000,38425.000000,133.509289)}
{pt3dadd(168480.000000,156408.000000,38350.000000,127.704537)}
{pt3dadd(168648.000000,156336.000000,38325.000000,121.899785)}
{pt3dadd(168840.000000,156504.000000,38275.000000,116.095032)}
{pt3dadd(169020.000000,156420.000000,38275.000000,121.899785)}
{pt3dadd(169164.000000,156444.000000,38300.000000,127.704537)}
{pt3dadd(169332.000000,156396.000000,38250.000000,133.509289)}
{pt3dadd(169500.000000,156396.000000,38225.000000,139.314042)}
{pt3dadd(169680.000000,156444.000000,38250.000000,133.509289)}
{pt3dadd(169848.000000,156180.000000,37925.000000,127.704537)}
{pt3dadd(170016.000000,156144.000000,37675.000000,121.899785)}
{pt3dadd(170172.000000,155976.000000,37500.000000,116.095032)}
{pt3dadd(170316.000000,155880.000000,37500.000000,167.176836)}
{pt3dadd(170460.000000,155940.000000,37550.000000,139.314042)}

{create adhoc47}
{access adhoc47}
{connect adhoc47(1), adhoc45(0)}
{nseg = 1}
{strdef color color = "White"}
{pt3dclear()}
{pt3dadd(167868.000000,157116.000000,40150.000000,231.105276)}
{pt3dadd(168492.000000,157200.000000,39975.000000,231.105276)}
{pt3dadd(168540.000000,157464.000000,39750.000000,167.176836)}
{pt3dadd(168516.000000,157632.000000,39600.000000,139.314042)}

{create adhoc48}
{access adhoc48}
{connect adhoc48(1), adhoc44(0)}
{nseg = 1}
{strdef color color = "White"}
{pt3dclear()}
{pt3dadd(168132.000000,146412.000000,54225.000000,599.024880)}
{pt3dadd(167916.000000,146052.000000,54050.000000,346.657896)}
{pt3dadd(168000.000000,145956.000000,53825.000000,332.213819)}
{pt3dadd(168060.000000,145920.000000,53675.000000,317.769741)}
{pt3dadd(168024.000000,145968.000000,53475.000000,303.325664)}
{pt3dadd(167952.000000,145980.000000,53275.000000,288.881586)}
{pt3dadd(167928.000000,145848.000000,53125.000000,258.455399)}
{pt3dadd(167844.000000,145800.000000,52900.000000,228.029211)}
{pt3dadd(167748.000000,145860.000000,52675.000000,197.603024)}
{pt3dadd(167652.000000,145860.000000,52475.000000,167.176836)}
{pt3dadd(167508.000000,145908.000000,52325.000000,175.535680)}
{pt3dadd(167592.000000,145992.000000,52125.000000,183.894525)}
{pt3dadd(167520.000000,145992.000000,51925.000000,192.253370)}
{pt3dadd(167508.000000,145932.000000,51750.000000,200.612214)}
{pt3dadd(167424.000000,145992.000000,51550.000000,237.123635)}
{pt3dadd(167316.000000,145992.000000,51325.000000,273.635055)}
{pt3dadd(167196.000000,145968.000000,51150.000000,310.146475)}
{pt3dadd(167220.000000,145980.000000,50950.000000,346.657896)}
{pt3dadd(167076.000000,146016.000000,50775.000000,332.213819)}
{pt3dadd(166932.000000,146112.000000,50575.000000,317.769741)}
{pt3dadd(166884.000000,146052.000000,50375.000000,303.325664)}
{pt3dadd(166836.000000,145992.000000,50175.000000,288.881586)}
{pt3dadd(166800.000000,146148.000000,50000.000000,320.658561)}
{pt3dadd(166776.000000,146280.000000,50000.000000,352.435536)}
{pt3dadd(166776.000000,146292.000000,49650.000000,384.212511)}
{pt3dadd(166776.000000,146304.000000,49400.000000,415.989486)}
{pt3dadd(166728.000000,146304.000000,49175.000000,398.656589)}
{pt3dadd(166656.000000,146400.000000,49000.000000,381.323691)}
{pt3dadd(166680.000000,146496.000000,48775.000000,363.990794)}
{pt3dadd(166740.000000,146544.000000,48575.000000,346.657896)}
{pt3dadd(166800.000000,146592.000000,48325.000000,310.146476)}
{pt3dadd(166980.000000,146616.000000,48175.000000,273.635055)}
{pt3dadd(166968.000000,146664.000000,47975.000000,237.123635)}
{pt3dadd(167148.000000,146772.000000,47800.000000,200.612214)}
{pt3dadd(167268.000000,146844.000000,47800.000000,192.253370)}
{pt3dadd(167412.000000,146832.000000,47600.000000,183.894525)}
{pt3dadd(167388.000000,146892.000000,47350.000000,175.535680)}
{pt3dadd(167280.000000,147108.000000,47150.000000,167.176836)}
{pt3dadd(167244.000000,147264.000000,46950.000000,153.245439)}
{pt3dadd(167136.000000,147444.000000,47000.000000,139.314042)}
{pt3dadd(167232.000000,147648.000000,46825.000000,116.095032)}

{create adhoc49}
{access adhoc49}
{connect adhoc49(1), adhoc43(0)}
{nseg = 1}
{strdef color color = "White"}
{pt3dclear()}
{pt3dadd(168708.000000,145092.000000,55350.000000,255.583926)}
{pt3dadd(168852.000000,144420.000000,55150.000000,415.989486)}
{pt3dadd(169056.000000,144240.000000,54900.000000,411.829601)}
{pt3dadd(169032.000000,144096.000000,54650.000000,407.669715)}
{pt3dadd(169068.000000,143880.000000,54450.000000,403.509830)}
{pt3dadd(169068.000000,143988.000000,54200.000000,399.349944)}
{pt3dadd(169176.000000,143928.000000,53975.000000,399.349935)}
{pt3dadd(169176.000000,143880.000000,53750.000000,399.349926)}
{pt3dadd(169092.000000,143724.000000,53550.000000,399.349917)}
{pt3dadd(169032.000000,143616.000000,53350.000000,399.349908)}
{pt3dadd(169104.000000,143544.000000,53150.000000,449.268651)}
{pt3dadd(169176.000000,143472.000000,52975.000000,499.187394)}
{pt3dadd(169248.000000,143400.000000,52775.000000,549.106137)}
{pt3dadd(169320.000000,143328.000000,52575.000000,599.024880)}
{pt3dadd(169212.000000,143184.000000,52325.000000,529.978824)}
{pt3dadd(169224.000000,143244.000000,52100.000000,415.989486)}

{create adhoc50}
{access adhoc50}
{connect adhoc50(1), adhoc49(0)}
{nseg = 1}
{strdef color color = "White"}
{pt3dclear()}
{pt3dadd(169224.000000,143244.000000,52100.000000,415.989486)}
{pt3dadd(169308.000000,143544.000000,51875.000000,499.187376)}
{pt3dadd(169332.000000,143520.000000,51650.000000,499.187376)}
{pt3dadd(169356.000000,143496.000000,51400.000000,499.187376)}
{pt3dadd(169380.000000,143472.000000,51200.000000,499.187376)}
{pt3dadd(169404.000000,143448.000000,51000.000000,499.187376)}
{pt3dadd(169500.000000,143352.000000,50800.000000,499.187376)}
{pt3dadd(169524.000000,143280.000000,50550.000000,499.187376)}
{pt3dadd(169524.000000,143268.000000,50350.000000,499.187376)}
{pt3dadd(169500.000000,143124.000000,50150.000000,499.187376)}
{pt3dadd(169416.000000,142896.000000,49975.000000,524.146752)}
{pt3dadd(169500.000000,142788.000000,49775.000000,549.106128)}
{pt3dadd(169428.000000,142632.000000,49550.000000,574.065504)}
{pt3dadd(169464.000000,142548.000000,49350.000000,599.024880)}
{pt3dadd(169452.000000,142416.000000,49050.000000,574.065504)}
{pt3dadd(169452.000000,142296.000000,48825.000000,549.106128)}
{pt3dadd(169428.000000,142224.000000,48600.000000,524.146752)}
{pt3dadd(169416.000000,142140.000000,48375.000000,499.187376)}
{pt3dadd(169428.000000,142104.000000,48100.000000,422.922636)}
{pt3dadd(169428.000000,141840.000000,47800.000000,346.657896)}
{pt3dadd(169296.000000,141672.000000,47600.000000,240.734646)}

{create adhoc51}
{access adhoc51}
{connect adhoc51(1), adhoc50(0)}
{nseg = 1}
{strdef color color = "White"}
{pt3dclear()}
{pt3dadd(169296.000000,141672.000000,47600.000000,240.734646)}
{pt3dadd(169752.000000,142032.000000,47425.000000,346.657896)}
{pt3dadd(169848.000000,141984.000000,47175.000000,320.177083)}
{pt3dadd(169956.000000,142224.000000,46900.000000,293.696271)}
{pt3dadd(169824.000000,142380.000000,46675.000000,267.215459)}
{pt3dadd(169944.000000,142404.000000,46400.000000,240.734646)}
{pt3dadd(170016.000000,142584.000000,46150.000000,267.215459)}
{pt3dadd(169944.000000,142740.000000,45950.000000,293.696271)}
{pt3dadd(170016.000000,142824.000000,45775.000000,320.177083)}
{pt3dadd(170088.000000,142908.000000,45550.000000,346.657896)}
{pt3dadd(169980.000000,143136.000000,45350.000000,310.146476)}
{pt3dadd(169956.000000,143232.000000,45150.000000,273.635055)}
{pt3dadd(170004.000000,143364.000000,44925.000000,237.123635)}
{pt3dadd(169920.000000,143532.000000,44675.000000,200.612214)}
{pt3dadd(169728.000000,143712.000000,44500.000000,250.296637)}
{pt3dadd(169656.000000,143772.000000,44300.000000,299.981061)}
{pt3dadd(169692.000000,143808.000000,44075.000000,349.665484)}
{pt3dadd(169620.000000,143904.000000,43825.000000,399.349908)}
{pt3dadd(169416.000000,143952.000000,43550.000000,437.527750)}
{pt3dadd(169260.000000,144180.000000,43175.000000,475.705593)}
{pt3dadd(169236.000000,144216.000000,42975.000000,513.883436)}
{pt3dadd(169320.000000,144216.000000,42725.000000,552.061278)}
{pt3dadd(169356.000000,144240.000000,42500.000000,500.710433)}
{pt3dadd(169512.000000,144276.000000,42250.000000,449.359587)}
{pt3dadd(169680.000000,144348.000000,42050.000000,398.008741)}
{pt3dadd(169908.000000,144432.000000,41800.000000,346.657896)}
{pt3dadd(170136.000000,144480.000000,41575.000000,332.213819)}
{pt3dadd(170364.000000,144504.000000,41350.000000,317.769741)}
{pt3dadd(170472.000000,144456.000000,41175.000000,303.325664)}
{pt3dadd(170748.000000,144720.000000,40975.000000,288.881586)}
{pt3dadd(170856.000000,144936.000000,40775.000000,200.612214)}
{pt3dadd(170892.000000,145248.000000,40500.000000,288.881586)}

{create adhoc52}
{access adhoc52}
{connect adhoc52(1), adhoc51(0)}
{nseg = 1}
{strdef color color = "White"}
{pt3dclear()}
{pt3dadd(170892.000000,145248.000000,40500.000000,288.881586)}
{pt3dadd(170628.000000,145752.000000,40300.000000,200.612214)}
{pt3dadd(170484.000000,146268.000000,40025.000000,192.253370)}
{pt3dadd(170256.000000,146628.000000,39850.000000,183.894525)}
{pt3dadd(170112.000000,146832.000000,39700.000000,175.535680)}
{pt3dadd(170040.000000,146964.000000,39525.000000,167.176836)}
{pt3dadd(170076.000000,147144.000000,39350.000000,160.211138)}
{pt3dadd(170124.000000,147228.000000,39150.000000,153.245439)}
{pt3dadd(170076.000000,147360.000000,38975.000000,146.279741)}
{pt3dadd(169932.000000,147564.000000,38825.000000,139.314042)}
{pt3dadd(170076.000000,147684.000000,38675.000000,164.669193)}
{pt3dadd(170148.000000,147852.000000,38425.000000,190.024344)}
{pt3dadd(169896.000000,147912.000000,38200.000000,215.379495)}
{pt3dadd(169908.000000,148092.000000,38000.000000,240.734646)}
{pt3dadd(169992.000000,148128.000000,37825.000000,249.882570)}
{pt3dadd(170016.000000,148332.000000,37625.000000,259.030494)}
{pt3dadd(170040.000000,148332.000000,37400.000000,268.178418)}
{pt3dadd(169920.000000,148512.000000,37200.000000,277.326342)}
{pt3dadd(169812.000000,148596.000000,37000.000000,258.147810)}
{pt3dadd(169824.000000,148656.000000,36750.000000,238.969278)}
{pt3dadd(169992.000000,148824.000000,36550.000000,219.790746)}
{pt3dadd(170376.000000,149004.000000,36425.000000,200.612214)}
{pt3dadd(170532.000000,149124.000000,36450.000000,208.235480)}
{pt3dadd(170676.000000,149232.000000,36450.000000,215.858745)}
{pt3dadd(170700.000000,149148.000000,36200.000000,223.482010)}
{pt3dadd(170928.000000,149436.000000,35900.000000,231.105276)}
{pt3dadd(171204.000000,149628.000000,35650.000000,208.157467)}
{pt3dadd(171504.000000,149808.000000,35450.000000,185.209659)}
{pt3dadd(171816.000000,149988.000000,35225.000000,162.261850)}
{pt3dadd(172008.000000,150204.000000,35050.000000,139.314042)}
{pt3dadd(172260.000000,150456.000000,34875.000000,118.029951)}
{pt3dadd(172452.000000,150384.000000,34725.000000,96.745860)}
{pt3dadd(172716.000000,150312.000000,34650.000000,116.095032)}

{create adhoc53}
{access adhoc53}
{connect adhoc53(1), adhoc51(0)}
{nseg = 1}
{strdef color color = "White"}
{pt3dclear()}
{pt3dadd(170892.000000,145248.000000,40500.000000,288.881586)}
{pt3dadd(171672.000000,145248.000000,40250.000000,288.881586)}
{pt3dadd(172032.000000,145248.000000,39950.000000,266.814243)}
{pt3dadd(172716.000000,145272.000000,39700.000000,244.746900)}
{pt3dadd(173232.000000,145260.000000,39475.000000,222.679557)}
{pt3dadd(173256.000000,145260.000000,39200.000000,200.612214)}
{pt3dadd(173436.000000,145260.000000,38975.000000,200.612214)}
{pt3dadd(173616.000000,145260.000000,38725.000000,200.612214)}
{pt3dadd(173784.000000,145392.000000,38475.000000,200.612214)}
{pt3dadd(173880.000000,145476.000000,38250.000000,200.612214)}
{pt3dadd(174060.000000,145896.000000,38150.000000,200.612214)}
{pt3dadd(174300.000000,146100.000000,37925.000000,200.612214)}
{pt3dadd(174444.000000,146208.000000,37700.000000,200.612214)}
{pt3dadd(174504.000000,146544.000000,37500.000000,200.612214)}
{pt3dadd(174564.000000,146736.000000,37225.000000,183.894530)}
{pt3dadd(174672.000000,146964.000000,37000.000000,167.176845)}
{pt3dadd(174948.000000,147144.000000,36775.000000,150.459160)}
{pt3dadd(175404.000000,147420.000000,36500.000000,133.741476)}
{pt3dadd(175716.000000,147552.000000,36300.000000,142.100316)}
{pt3dadd(176016.000000,147624.000000,36100.000000,150.459156)}
{pt3dadd(175968.000000,147564.000000,35900.000000,158.817996)}
{pt3dadd(176016.000000,147492.000000,35600.000000,167.176836)}
{pt3dadd(176064.000000,147420.000000,35400.000000,175.535680)}
{pt3dadd(176184.000000,147420.000000,35200.000000,183.894525)}
{pt3dadd(176292.000000,147336.000000,35000.000000,192.253370)}
{pt3dadd(176448.000000,147456.000000,34750.000000,200.612214)}
{pt3dadd(176688.000000,147348.000000,34575.000000,185.287671)}
{pt3dadd(176844.000000,147360.000000,34375.000000,169.963128)}
{pt3dadd(176880.000000,147420.000000,34150.000000,154.638585)}
{pt3dadd(177096.000000,147516.000000,33925.000000,139.314042)}
{pt3dadd(178044.000000,147276.000000,33675.000000,164.669193)}
{pt3dadd(178320.000000,147276.000000,33550.000000,190.024344)}
{pt3dadd(178620.000000,147408.000000,33275.000000,215.379495)}
{pt3dadd(178920.000000,147432.000000,33125.000000,240.734646)}
{pt3dadd(179196.000000,147348.000000,32925.000000,252.771381)}
{pt3dadd(179412.000000,147300.000000,32700.000000,264.808116)}
{pt3dadd(179592.000000,147456.000000,32475.000000,276.844851)}
{pt3dadd(179688.000000,147480.000000,32275.000000,288.881586)}
{pt3dadd(179820.000000,147432.000000,32075.000000,258.455399)}
{pt3dadd(179868.000000,147276.000000,31850.000000,228.029211)}
{pt3dadd(179892.000000,147228.000000,31550.000000,197.603024)}
{pt3dadd(179964.000000,147204.000000,31275.000000,167.176836)}
{pt3dadd(180036.000000,147180.000000,31025.000000,157.889238)}
{pt3dadd(180048.000000,147132.000000,30850.000000,148.601640)}
{pt3dadd(179976.000000,146988.000000,30650.000000,139.314042)}
{pt3dadd(179952.000000,146988.000000,30450.000000,167.176836)}

{create adhoc54}
{access adhoc54}
{connect adhoc54(1), adhoc50(0)}
{nseg = 1}
{strdef color color = "White"}
{pt3dclear()}
{pt3dadd(169296.000000,141672.000000,47600.000000,240.734646)}
{pt3dadd(168576.000000,140496.000000,47450.000000,200.612214)}
{pt3dadd(168240.000000,140328.000000,47225.000000,200.612214)}
{pt3dadd(168084.000000,140256.000000,47000.000000,200.612214)}
{pt3dadd(167892.000000,140088.000000,46750.000000,200.612214)}
{pt3dadd(167928.000000,139896.000000,46525.000000,200.612214)}
{pt3dadd(167976.000000,139584.000000,46300.000000,200.612214)}
{pt3dadd(168036.000000,139356.000000,46025.000000,200.612214)}
{pt3dadd(168048.000000,139152.000000,45825.000000,200.612214)}
{pt3dadd(168180.000000,139224.000000,45600.000000,200.612214)}
{pt3dadd(168360.000000,138792.000000,45375.000000,200.612214)}
{pt3dadd(168720.000000,138600.000000,45125.000000,200.612214)}
{pt3dadd(169008.000000,138468.000000,44900.000000,200.612214)}
{pt3dadd(169500.000000,138432.000000,44725.000000,200.612214)}
{pt3dadd(169704.000000,138204.000000,44550.000000,210.642822)}
{pt3dadd(170220.000000,137868.000000,44375.000000,220.673430)}
{pt3dadd(170436.000000,137508.000000,44175.000000,230.704038)}
{pt3dadd(170460.000000,137112.000000,44000.000000,240.734646)}
{pt3dadd(170340.000000,136260.000000,43800.000000,228.697915)}
{pt3dadd(170220.000000,135912.000000,43600.000000,216.661185)}
{pt3dadd(170280.000000,135828.000000,43400.000000,204.624455)}
{pt3dadd(170340.000000,135924.000000,43200.000000,192.587724)}
{pt3dadd(170352.000000,135936.000000,42950.000000,240.734646)}
{pt3dadd(170436.000000,135888.000000,42700.000000,200.612214)}

{create adhoc55}
{access adhoc55}
{connect adhoc55(1), adhoc49(0)}
{nseg = 1}
{strdef color color = "White"}
{pt3dclear()}
{pt3dadd(169224.000000,143244.000000,52100.000000,415.989486)}
{pt3dadd(168984.000000,141876.000000,52175.000000,240.734646)}
{pt3dadd(168360.000000,141240.000000,51900.000000,200.706372)}
{pt3dadd(168180.000000,141132.000000,51750.000000,160.678098)}
{pt3dadd(167904.000000,140928.000000,51625.000000,120.649824)}
{pt3dadd(167520.000000,140520.000000,51475.000000,80.621550)}
{pt3dadd(167136.000000,140064.000000,51225.000000,139.314042)}

{create adhoc56}
{access adhoc56}
{connect adhoc56(1), adhoc36(0)}
{nseg = 1}
{strdef color color = "White"}
{pt3dclear()}
{pt3dadd(173076.000000,136536.000000,68800.000000,499.187376)}
{pt3dadd(173076.000000,133044.000000,66825.000000,690.076674)}
{pt3dadd(172884.000000,132432.000000,66475.000000,697.264960)}
{pt3dadd(172992.000000,132132.000000,66200.000000,704.453247)}
{pt3dadd(172896.000000,132264.000000,65900.000000,711.641533)}
{pt3dadd(172320.000000,131784.000000,65675.000000,718.829820)}
{pt3dadd(172200.000000,131472.000000,65425.000000,837.235453)}
{pt3dadd(172368.000000,131508.000000,65150.000000,955.641087)}
{pt3dadd(172248.000000,131412.000000,64900.000000,1074.046721)}
{pt3dadd(172308.000000,130956.000000,64700.000000,1192.452354)}
{pt3dadd(172356.000000,131112.000000,64450.000000,1153.118003)}
{pt3dadd(172284.000000,130968.000000,64225.000000,1113.783651)}
{pt3dadd(172296.000000,130872.000000,63975.000000,1074.449300)}
{pt3dadd(172176.000000,130704.000000,63700.000000,1035.114948)}
{pt3dadd(172032.000000,130512.000000,63450.000000,1024.763782)}
{pt3dadd(171960.000000,130320.000000,63150.000000,1014.412617)}
{pt3dadd(171912.000000,130128.000000,62875.000000,1004.061452)}
{pt3dadd(171864.000000,129936.000000,62650.000000,993.710286)}
{pt3dadd(171816.000000,129744.000000,62400.000000,1043.395803)}
{pt3dadd(171468.000000,129900.000000,62150.000000,1093.081320)}
{pt3dadd(171600.000000,129576.000000,61925.000000,1142.766837)}
{pt3dadd(171552.000000,129276.000000,61625.000000,1192.452354)}
{pt3dadd(171516.000000,128976.000000,61300.000000,1153.118003)}
{pt3dadd(171204.000000,128856.000000,60975.000000,1113.783651)}
{pt3dadd(171132.000000,128556.000000,60650.000000,1074.449300)}
{pt3dadd(171060.000000,128208.000000,60325.000000,1035.114948)}
{pt3dadd(171120.000000,128220.000000,60025.000000,991.985162)}
{pt3dadd(170772.000000,127944.000000,59725.000000,948.855375)}
{pt3dadd(170832.000000,127668.000000,59450.000000,905.725589)}
{pt3dadd(170904.000000,127548.000000,59150.000000,862.595802)}
{pt3dadd(171024.000000,127320.000000,58750.000000,718.829820)}

{create adhoc57}
{access adhoc57}
{connect adhoc57(1), adhoc56(0)}
{nseg = 1}
{strdef color color = "White"}
{pt3dclear()}
{pt3dadd(171024.000000,127320.000000,58750.000000,718.829820)}
{pt3dadd(170928.000000,125664.000000,58425.000000,599.024880)}
{pt3dadd(170784.000000,125208.000000,58175.000000,628.976115)}
{pt3dadd(170712.000000,124980.000000,57850.000000,658.927350)}
{pt3dadd(170652.000000,124524.000000,57500.000000,688.878585)}
{pt3dadd(170436.000000,123996.000000,57175.000000,718.829820)}
{pt3dadd(170160.000000,123492.000000,56825.000000,797.901102)}
{pt3dadd(170052.000000,123396.000000,56450.000000,876.972384)}
{pt3dadd(169956.000000,123300.000000,56150.000000,956.043666)}
{pt3dadd(169764.000000,123204.000000,55925.000000,1035.114948)}
{pt3dadd(169716.000000,123216.000000,55700.000000,1035.114948)}
{pt3dadd(169824.000000,123108.000000,55450.000000,1035.114948)}
{pt3dadd(169848.000000,123096.000000,55250.000000,1035.114948)}
{pt3dadd(169788.000000,122988.000000,55025.000000,1035.114948)}
{pt3dadd(169608.000000,122940.000000,54800.000000,1035.114948)}
{pt3dadd(169548.000000,122940.000000,54600.000000,1035.114948)}
{pt3dadd(169488.000000,122892.000000,54350.000000,1035.114948)}
{pt3dadd(169512.000000,122772.000000,54100.000000,1035.114948)}
{pt3dadd(169608.000000,122880.000000,53875.000000,1074.449300)}
{pt3dadd(169548.000000,122892.000000,53650.000000,1113.783651)}
{pt3dadd(169596.000000,123000.000000,53450.000000,1153.118003)}
{pt3dadd(169488.000000,122892.000000,53225.000000,1192.452354)}
{pt3dadd(169536.000000,123060.000000,53025.000000,1192.452354)}
{pt3dadd(169572.000000,123156.000000,52800.000000,1192.452354)}
{pt3dadd(169620.000000,123252.000000,52575.000000,1192.452354)}
{pt3dadd(169680.000000,123204.000000,52325.000000,1192.452354)}
{pt3dadd(169740.000000,123156.000000,52125.000000,1204.873736)}
{pt3dadd(169800.000000,123276.000000,51900.000000,1217.295117)}
{pt3dadd(169776.000000,123264.000000,51650.000000,1229.716498)}
{pt3dadd(169752.000000,123252.000000,51475.000000,1242.137880)}
{pt3dadd(169728.000000,123240.000000,51250.000000,1190.382147)}
{pt3dadd(169824.000000,123228.000000,51050.000000,1138.626414)}
{pt3dadd(169944.000000,123228.000000,50850.000000,1086.870681)}
{pt3dadd(170052.000000,123552.000000,50600.000000,1035.114948)}
{pt3dadd(170064.000000,123540.000000,50350.000000,991.985162)}
{pt3dadd(170040.000000,123408.000000,50100.000000,948.855375)}
{pt3dadd(170220.000000,123444.000000,49850.000000,905.725589)}
{pt3dadd(170376.000000,123528.000000,49550.000000,862.595802)}
{pt3dadd(170424.000000,123576.000000,49300.000000,774.738828)}
{pt3dadd(170472.000000,123624.000000,49075.000000,686.881854)}
{pt3dadd(170520.000000,123672.000000,48850.000000,599.024880)}
{pt3dadd(170448.000000,123432.000000,48700.000000,240.734646)}

{create adhoc58}
{access adhoc58}
{connect adhoc58(1), adhoc57(0)}
{nseg = 1}
{strdef color color = "White"}
{pt3dclear()}
{pt3dadd(170448.000000,123432.000000,48700.000000,240.734646)}
{pt3dadd(170496.000000,122796.000000,48550.000000,139.314042)}
{pt3dadd(170508.000000,122520.000000,48325.000000,176.705928)}
{pt3dadd(170484.000000,122340.000000,48150.000000,214.097814)}
{pt3dadd(170580.000000,122088.000000,47950.000000,251.489700)}
{pt3dadd(170760.000000,121980.000000,47725.000000,288.881586)}
{pt3dadd(170808.000000,121644.000000,47525.000000,251.489700)}
{pt3dadd(170952.000000,121464.000000,47325.000000,214.097814)}
{pt3dadd(171372.000000,121284.000000,47100.000000,176.705928)}
{pt3dadd(171468.000000,121248.000000,46975.000000,139.314042)}
{pt3dadd(171564.000000,121032.000000,46850.000000,154.638585)}
{pt3dadd(171696.000000,121080.000000,46875.000000,169.963128)}
{pt3dadd(171816.000000,121116.000000,46850.000000,185.287671)}
{pt3dadd(171936.000000,121044.000000,46825.000000,200.612214)}
{pt3dadd(172080.000000,121008.000000,46800.000000,192.253370)}
{pt3dadd(172224.000000,120936.000000,46700.000000,183.894525)}
{pt3dadd(172368.000000,120768.000000,46575.000000,175.535680)}
{pt3dadd(172524.000000,120828.000000,46500.000000,167.176836)}
{pt3dadd(172680.000000,120720.000000,46375.000000,167.176836)}
{pt3dadd(172812.000000,120768.000000,46300.000000,167.176836)}
{pt3dadd(172968.000000,120792.000000,46350.000000,139.314042)}

{create adhoc59}
{access adhoc59}
{connect adhoc59(1), adhoc57(0)}
{nseg = 1}
{strdef color color = "White"}
{pt3dclear()}
{pt3dadd(170448.000000,123432.000000,48700.000000,240.734646)}
{pt3dadd(170976.000000,123816.000000,48425.000000,575.063856)}
{pt3dadd(171144.000000,123888.000000,48150.000000,575.063856)}
{pt3dadd(171288.000000,123984.000000,47925.000000,575.063856)}
{pt3dadd(171516.000000,124056.000000,47625.000000,575.063856)}
{pt3dadd(171708.000000,124020.000000,47400.000000,575.063856)}
{pt3dadd(171804.000000,124128.000000,47225.000000,646.946843)}
{pt3dadd(172056.000000,124248.000000,46975.000000,718.829829)}
{pt3dadd(172224.000000,124416.000000,46700.000000,790.712816)}
{pt3dadd(172536.000000,124368.000000,46450.000000,862.595802)}
{pt3dadd(172632.000000,124392.000000,46200.000000,795.888402)}
{pt3dadd(172740.000000,124488.000000,45925.000000,729.181002)}
{pt3dadd(172848.000000,124584.000000,45675.000000,662.473602)}
{pt3dadd(172932.000000,124644.000000,45425.000000,599.024880)}

{create adhoc60}
{access adhoc60}
{connect adhoc60(1), adhoc59(0)}
{nseg = 1}
{strdef color color = "White"}
{pt3dclear()}
{pt3dadd(172932.000000,124644.000000,45425.000000,599.024880)}
{pt3dadd(172692.000000,123720.000000,45300.000000,139.314042)}
{pt3dadd(172656.000000,123660.000000,45125.000000,116.095032)}

{create adhoc61}
{access adhoc61}
{connect adhoc61(1), adhoc59(0)}
{nseg = 1}
{strdef color color = "White"}
{pt3dclear()}
{pt3dadd(172932.000000,124644.000000,45425.000000,599.024880)}
{pt3dadd(173016.000000,124908.000000,45175.000000,599.024880)}
{pt3dadd(173100.000000,125040.000000,44925.000000,593.034624)}
{pt3dadd(173304.000000,125124.000000,44675.000000,587.044368)}
{pt3dadd(173280.000000,125220.000000,44425.000000,581.054112)}
{pt3dadd(173328.000000,125352.000000,44200.000000,575.063856)}
{pt3dadd(173436.000000,125508.000000,44000.000000,611.005347)}
{pt3dadd(173496.000000,125676.000000,43800.000000,646.946838)}
{pt3dadd(173568.000000,125736.000000,43600.000000,682.888329)}
{pt3dadd(173592.000000,125760.000000,43350.000000,718.829820)}
{pt3dadd(173616.000000,125760.000000,43100.000000,663.919209)}
{pt3dadd(173712.000000,125856.000000,42900.000000,609.008598)}
{pt3dadd(173808.000000,125952.000000,42650.000000,554.097987)}
{pt3dadd(173772.000000,125844.000000,42450.000000,499.187376)}
{pt3dadd(173736.000000,125892.000000,42275.000000,524.146752)}
{pt3dadd(173772.000000,125796.000000,42050.000000,549.106128)}
{pt3dadd(173868.000000,125832.000000,41825.000000,574.065504)}
{pt3dadd(174036.000000,125760.000000,41625.000000,599.024880)}
{pt3dadd(174240.000000,125616.000000,41400.000000,346.657896)}
{pt3dadd(174540.000000,125028.000000,41275.000000,116.095032)}

{create adhoc62}
{access adhoc62}
{connect adhoc62(1), adhoc61(0)}
{nseg = 1}
{strdef color color = "White"}
{pt3dclear()}
{pt3dadd(174540.000000,125028.000000,41275.000000,116.095032)}
{pt3dadd(175524.000000,123660.000000,41200.000000,167.176836)}
{pt3dadd(176136.000000,123156.000000,41025.000000,160.211138)}
{pt3dadd(176172.000000,123156.000000,40900.000000,153.245439)}
{pt3dadd(176232.000000,122940.000000,41225.000000,146.279741)}
{pt3dadd(176280.000000,122808.000000,41425.000000,139.314042)}
{pt3dadd(176304.000000,122676.000000,41525.000000,133.509289)}
{pt3dadd(176352.000000,122556.000000,41650.000000,127.704537)}
{pt3dadd(176304.000000,122424.000000,41800.000000,121.899785)}
{pt3dadd(176208.000000,122232.000000,41850.000000,116.095032)}
{pt3dadd(176172.000000,122088.000000,41850.000000,96.745860)}

{create adhoc63}
{access adhoc63}
{connect adhoc63(1), adhoc61(0)}
{nseg = 1}
{strdef color color = "White"}
{pt3dclear()}
{pt3dadd(174540.000000,125028.000000,41275.000000,116.095032)}
{pt3dadd(174168.000000,126120.000000,41050.000000,479.219886)}
{pt3dadd(174228.000000,126276.000000,40850.000000,509.171134)}
{pt3dadd(174264.000000,126288.000000,40625.000000,539.122383)}
{pt3dadd(174312.000000,126444.000000,40425.000000,569.073631)}
{pt3dadd(174468.000000,126672.000000,40150.000000,599.024880)}
{pt3dadd(174564.000000,126684.000000,39925.000000,553.266031)}
{pt3dadd(174672.000000,126924.000000,39675.000000,507.507183)}
{pt3dadd(174756.000000,126984.000000,39450.000000,461.748335)}
{pt3dadd(174828.000000,127128.000000,39250.000000,415.989486)}
{pt3dadd(174864.000000,127188.000000,39075.000000,398.656589)}
{pt3dadd(175044.000000,127368.000000,38850.000000,381.323691)}
{pt3dadd(175176.000000,127488.000000,38625.000000,363.990794)}
{pt3dadd(175200.000000,127752.000000,38425.000000,346.657896)}
{pt3dadd(175368.000000,127812.000000,38225.000000,310.146476)}
{pt3dadd(175656.000000,127992.000000,38025.000000,273.635055)}
{pt3dadd(175908.000000,128208.000000,37825.000000,237.123635)}
{pt3dadd(175956.000000,128376.000000,37625.000000,200.612214)}
{pt3dadd(176160.000000,128628.000000,37425.000000,237.123635)}
{pt3dadd(176496.000000,128856.000000,37250.000000,273.635055)}
{pt3dadd(176784.000000,128952.000000,37050.000000,310.146475)}
{pt3dadd(177024.000000,129060.000000,36850.000000,346.657896)}
{pt3dadd(177168.000000,129096.000000,36675.000000,317.769741)}
{pt3dadd(177240.000000,129204.000000,36475.000000,288.881586)}
{pt3dadd(177276.000000,129336.000000,36325.000000,288.881586)}

{create adhoc64}
{access adhoc64}
{connect adhoc64(1), adhoc63(0)}
{nseg = 1}
{strdef color color = "White"}
{pt3dclear()}
{pt3dadd(177276.000000,129336.000000,36325.000000,288.881586)}
{pt3dadd(177852.000000,129024.000000,36050.000000,139.314042)}
{pt3dadd(178008.000000,128952.000000,35850.000000,176.705928)}
{pt3dadd(178308.000000,128880.000000,35600.000000,214.097814)}
{pt3dadd(178584.000000,128700.000000,35325.000000,251.489700)}
{pt3dadd(178896.000000,128496.000000,35125.000000,288.881586)}
{pt3dadd(179208.000000,128316.000000,34925.000000,258.455399)}
{pt3dadd(179520.000000,128136.000000,34725.000000,228.029211)}
{pt3dadd(180144.000000,128028.000000,34625.000000,197.603024)}
{pt3dadd(180624.000000,127956.000000,34400.000000,167.176836)}
{pt3dadd(180768.000000,127896.000000,34325.000000,160.211138)}
{pt3dadd(180948.000000,127860.000000,34350.000000,153.245439)}
{pt3dadd(181212.000000,127956.000000,34275.000000,146.279741)}
{pt3dadd(181392.000000,128088.000000,34225.000000,139.314042)}
{pt3dadd(181584.000000,128088.000000,34175.000000,154.638585)}
{pt3dadd(181704.000000,128088.000000,34125.000000,169.963128)}
{pt3dadd(181824.000000,128100.000000,34075.000000,185.287671)}
{pt3dadd(181932.000000,128172.000000,34025.000000,200.612214)}
{pt3dadd(182076.000000,128196.000000,33975.000000,190.581602)}
{pt3dadd(182472.000000,128088.000000,33700.000000,180.550989)}
{pt3dadd(182928.000000,128052.000000,33475.000000,170.520377)}
{pt3dadd(183408.000000,128064.000000,33300.000000,160.489764)}
{pt3dadd(183540.000000,128112.000000,33350.000000,162.161532)}
{pt3dadd(183708.000000,128136.000000,33200.000000,163.833300)}
{pt3dadd(183852.000000,128124.000000,33375.000000,165.505068)}
{pt3dadd(184056.000000,128148.000000,33300.000000,167.176836)}
{pt3dadd(184080.000000,128316.000000,33075.000000,179.882271)}
{pt3dadd(184584.000000,128352.000000,32850.000000,192.587706)}
{pt3dadd(184920.000000,128532.000000,32675.000000,160.489764)}

{create adhoc65}
{access adhoc65}
{connect adhoc65(1), adhoc63(0)}
{nseg = 1}
{strdef color color = "White"}
{pt3dclear()}
{pt3dadd(177276.000000,129336.000000,36325.000000,288.881586)}
{pt3dadd(177576.000000,129840.000000,36050.000000,240.734646)}
{pt3dadd(177768.000000,130020.000000,35775.000000,263.748875)}
{pt3dadd(177996.000000,130416.000000,35600.000000,286.763103)}
{pt3dadd(178248.000000,131196.000000,35350.000000,309.777332)}
{pt3dadd(178728.000000,131652.000000,35175.000000,332.791560)}
{pt3dadd(178752.000000,132036.000000,34950.000000,291.387879)}
{pt3dadd(178872.000000,132084.000000,34750.000000,249.984198)}
{pt3dadd(178992.000000,132132.000000,34475.000000,208.580517)}
{pt3dadd(179316.000000,132060.000000,34275.000000,167.176836)}
{pt3dadd(179628.000000,132060.000000,34050.000000,167.176836)}
{pt3dadd(180204.000000,132252.000000,33825.000000,167.176836)}
{pt3dadd(180720.000000,132636.000000,33625.000000,167.176836)}
{pt3dadd(180900.000000,132696.000000,33475.000000,167.176836)}
{pt3dadd(180888.000000,132780.000000,33275.000000,171.603680)}
{pt3dadd(181056.000000,132876.000000,33125.000000,176.030523)}
{pt3dadd(181152.000000,132984.000000,33000.000000,180.457366)}
{pt3dadd(181308.000000,133008.000000,32825.000000,184.884210)}
{pt3dadd(181392.000000,133116.000000,32625.000000,188.816211)}
{pt3dadd(181716.000000,133524.000000,32450.000000,192.748212)}
{pt3dadd(181920.000000,133656.000000,32250.000000,196.680213)}
{pt3dadd(182136.000000,133908.000000,32050.000000,200.612214)}
{pt3dadd(182304.000000,134052.000000,31875.000000,185.287671)}
{pt3dadd(182496.000000,134220.000000,31675.000000,169.963128)}
{pt3dadd(182652.000000,134376.000000,31475.000000,154.638585)}
{pt3dadd(182808.000000,134544.000000,31300.000000,139.314042)}
{pt3dadd(183120.000000,134640.000000,31075.000000,139.314042)}
{pt3dadd(183264.000000,134688.000000,30850.000000,139.314042)}
{pt3dadd(183348.000000,134784.000000,30600.000000,139.314042)}
{pt3dadd(183432.000000,135012.000000,30350.000000,139.314042)}
{pt3dadd(183552.000000,135180.000000,30100.000000,176.705928)}
{pt3dadd(183744.000000,135228.000000,29875.000000,214.097814)}
{pt3dadd(183996.000000,135348.000000,29675.000000,251.489700)}
{pt3dadd(184116.000000,135480.000000,29450.000000,288.881586)}
{pt3dadd(184176.000000,135612.000000,29275.000000,266.814243)}
{pt3dadd(184284.000000,135744.000000,29275.000000,244.746900)}
{pt3dadd(184416.000000,135888.000000,29175.000000,222.679557)}
{pt3dadd(184548.000000,136092.000000,29200.000000,200.612214)}
{pt3dadd(184632.000000,136260.000000,29275.000000,170.614548)}
{pt3dadd(184692.000000,136464.000000,29200.000000,140.616882)}
{pt3dadd(184812.000000,136728.000000,29025.000000,110.619216)}
{pt3dadd(185040.000000,136920.000000,28750.000000,80.621550)}
{pt3dadd(185184.000000,136968.000000,28925.000000,139.314042)}
{pt3dadd(185316.000000,136944.000000,28900.000000,167.176836)}

{create adhoc66}
{access adhoc66}
{connect adhoc66(1), adhoc56(0)}
{nseg = 1}
{strdef color color = "White"}
{pt3dclear()}
{pt3dadd(171024.000000,127320.000000,58750.000000,718.829820)}
{pt3dadd(170004.000000,128148.000000,58450.000000,718.829820)}
{pt3dadd(169392.000000,128460.000000,58000.000000,688.878585)}
{pt3dadd(169116.000000,128844.000000,57600.000000,658.927350)}
{pt3dadd(168996.000000,129048.000000,57425.000000,628.976115)}
{pt3dadd(168852.000000,129276.000000,57175.000000,599.024880)}
{pt3dadd(168768.000000,129288.000000,56950.000000,656.291646)}
{pt3dadd(168660.000000,129480.000000,56650.000000,713.558412)}
{pt3dadd(168576.000000,129696.000000,56400.000000,770.825178)}
{pt3dadd(168492.000000,129924.000000,56150.000000,828.091944)}
{pt3dadd(168528.000000,130056.000000,55925.000000,800.776413)}
{pt3dadd(168552.000000,130188.000000,55750.000000,773.460882)}
{pt3dadd(168588.000000,130248.000000,55575.000000,746.145351)}
{pt3dadd(168528.000000,130320.000000,55400.000000,718.829820)}
{pt3dadd(168480.000000,130392.000000,55250.000000,682.888329)}
{pt3dadd(168372.000000,130548.000000,54975.000000,646.946838)}
{pt3dadd(168312.000000,130752.000000,54775.000000,611.005347)}
{pt3dadd(168276.000000,131040.000000,54550.000000,575.063856)}
{pt3dadd(168288.000000,131268.000000,54350.000000,575.063856)}
{pt3dadd(168336.000000,131424.000000,54125.000000,575.063856)}
{pt3dadd(168336.000000,131568.000000,53925.000000,575.063856)}
{pt3dadd(168348.000000,131712.000000,53725.000000,575.063856)}
{pt3dadd(168432.000000,131880.000000,53525.000000,581.054112)}
{pt3dadd(168612.000000,131988.000000,53350.000000,587.044368)}
{pt3dadd(168660.000000,132144.000000,53150.000000,593.034624)}
{pt3dadd(168696.000000,132240.000000,52925.000000,599.024880)}
{pt3dadd(168792.000000,132372.000000,52700.000000,656.291646)}
{pt3dadd(168888.000000,132456.000000,52525.000000,713.558412)}
{pt3dadd(169128.000000,132684.000000,52300.000000,770.825178)}
{pt3dadd(169236.000000,132708.000000,52000.000000,828.091944)}
{pt3dadd(169188.000000,132780.000000,51775.000000,836.717909)}
{pt3dadd(169380.000000,132612.000000,51575.000000,845.343873)}
{pt3dadd(169488.000000,132708.000000,51300.000000,853.969838)}
{pt3dadd(169452.000000,132804.000000,51050.000000,862.595802)}
{pt3dadd(169416.000000,132900.000000,50825.000000,862.595802)}
{pt3dadd(169404.000000,132852.000000,50625.000000,862.595802)}
{pt3dadd(169416.000000,132924.000000,50350.000000,862.595802)}
{pt3dadd(169464.000000,133092.000000,50100.000000,862.595802)}
{pt3dadd(169608.000000,133152.000000,49875.000000,851.094540)}
{pt3dadd(169608.000000,133248.000000,49675.000000,839.593278)}
{pt3dadd(169608.000000,133356.000000,49475.000000,828.092016)}
{pt3dadd(169560.000000,133404.000000,49275.000000,828.091944)}

{create adhoc67}
{access adhoc67}
{connect adhoc67(1), adhoc66(0)}
{nseg = 1}
{strdef color color = "White"}
{pt3dclear()}
{pt3dadd(169560.000000,133404.000000,49275.000000,828.091944)}
{pt3dadd(169692.000000,132432.000000,49150.000000,139.314042)}
{pt3dadd(169728.000000,132216.000000,48950.000000,133.509289)}
{pt3dadd(169860.000000,132036.000000,48725.000000,127.704537)}
{pt3dadd(169968.000000,131688.000000,48525.000000,121.899785)}
{pt3dadd(170088.000000,131568.000000,48375.000000,116.095032)}
{pt3dadd(170412.000000,131256.000000,48225.000000,116.095032)}
{pt3dadd(170520.000000,131064.000000,48075.000000,116.095032)}
{pt3dadd(170604.000000,130980.000000,47900.000000,133.741476)}

{create adhoc68}
{access adhoc68}
{connect adhoc68(1), adhoc66(0)}
{nseg = 1}
{strdef color color = "White"}
{pt3dclear()}
{pt3dadd(169560.000000,133404.000000,49275.000000,828.091944)}
{pt3dadd(169656.000000,133548.000000,49050.000000,1035.114948)}
{pt3dadd(169632.000000,133596.000000,48800.000000,1014.826716)}
{pt3dadd(169644.000000,133608.000000,48575.000000,994.538484)}
{pt3dadd(169668.000000,133632.000000,48350.000000,974.250252)}
{pt3dadd(169692.000000,133656.000000,48150.000000,953.962020)}
{pt3dadd(169692.000000,133692.000000,47950.000000,787.691911)}
{pt3dadd(169680.000000,133788.000000,47800.000000,621.421803)}
{pt3dadd(169440.000000,133992.000000,47625.000000,455.151695)}
{pt3dadd(169836.000000,133752.000000,47400.000000,288.881586)}
{pt3dadd(169848.000000,133572.000000,47225.000000,288.881586)}
{pt3dadd(170292.000000,133344.000000,46950.000000,288.881586)}
{pt3dadd(170196.000000,133188.000000,46750.000000,288.881586)}
{pt3dadd(170136.000000,133020.000000,46575.000000,288.881586)}
{pt3dadd(170184.000000,132900.000000,46350.000000,303.325664)}
{pt3dadd(170328.000000,132828.000000,46100.000000,317.769741)}
{pt3dadd(170268.000000,132636.000000,45850.000000,332.213819)}
{pt3dadd(170376.000000,132480.000000,45675.000000,346.657896)}
{pt3dadd(170316.000000,132336.000000,45450.000000,346.657896)}
{pt3dadd(170232.000000,132228.000000,45250.000000,346.657896)}
{pt3dadd(170136.000000,132120.000000,45050.000000,346.657896)}
{pt3dadd(170028.000000,131772.000000,44850.000000,346.657896)}
{pt3dadd(170124.000000,131640.000000,44625.000000,363.990794)}
{pt3dadd(170184.000000,131532.000000,44425.000000,381.323691)}
{pt3dadd(170112.000000,131424.000000,44200.000000,398.656589)}
{pt3dadd(170004.000000,131244.000000,44000.000000,415.989486)}
{pt3dadd(169788.000000,131148.000000,43800.000000,461.748335)}
{pt3dadd(169944.000000,131100.000000,43575.000000,507.507183)}
{pt3dadd(169932.000000,131004.000000,43350.000000,553.266031)}
{pt3dadd(170028.000000,131064.000000,43075.000000,599.024880)}
{pt3dadd(170196.000000,131028.000000,42825.000000,599.024880)}
{pt3dadd(170316.000000,131052.000000,42600.000000,599.024880)}
{pt3dadd(170580.000000,131076.000000,42375.000000,599.024880)}
{pt3dadd(170700.000000,131040.000000,42125.000000,599.024880)}
{pt3dadd(170892.000000,131028.000000,41925.000000,574.065504)}
{pt3dadd(170892.000000,130980.000000,41700.000000,549.106128)}
{pt3dadd(171048.000000,130896.000000,41450.000000,524.146752)}
{pt3dadd(171168.000000,130872.000000,41250.000000,499.187376)}
{pt3dadd(171384.000000,130812.000000,41000.000000,494.195504)}
{pt3dadd(171396.000000,130884.000000,40750.000000,489.203631)}
{pt3dadd(171480.000000,131112.000000,40525.000000,484.211758)}
{pt3dadd(171636.000000,131232.000000,40325.000000,479.219886)}
{pt3dadd(171816.000000,131364.000000,40100.000000,446.079388)}
{pt3dadd(172044.000000,131592.000000,39900.000000,412.938891)}
{pt3dadd(172092.000000,131748.000000,40000.000000,379.798393)}
{pt3dadd(172068.000000,131904.000000,39875.000000,346.657896)}
{pt3dadd(172140.000000,132048.000000,39850.000000,329.325003)}
{pt3dadd(172236.000000,132204.000000,39800.000000,311.992110)}
{pt3dadd(172356.000000,132324.000000,39625.000000,294.659217)}
{pt3dadd(172572.000000,132444.000000,39475.000000,277.326324)}
{pt3dadd(172752.000000,132576.000000,39475.000000,327.799714)}
{pt3dadd(172848.000000,132696.000000,39400.000000,378.273105)}
{pt3dadd(172860.000000,132816.000000,39275.000000,428.746496)}
{pt3dadd(173016.000000,132876.000000,39000.000000,479.219886)}
{pt3dadd(173064.000000,132912.000000,38775.000000,458.977716)}
{pt3dadd(173484.000000,132972.000000,38550.000000,438.735546)}
{pt3dadd(173736.000000,133212.000000,38375.000000,418.493376)}
{pt3dadd(173844.000000,133272.000000,38225.000000,398.251206)}
{pt3dadd(174144.000000,133440.000000,38050.000000,358.872066)}
{pt3dadd(174444.000000,133524.000000,37900.000000,319.492926)}
{pt3dadd(174576.000000,133812.000000,37725.000000,280.113786)}
{pt3dadd(174828.000000,134184.000000,37525.000000,240.734646)}
{pt3dadd(175140.000000,134304.000000,37575.000000,222.345193)}
{pt3dadd(175344.000000,134436.000000,37525.000000,203.955741)}
{pt3dadd(175464.000000,134556.000000,37475.000000,185.566288)}
{pt3dadd(175440.000000,134688.000000,37400.000000,167.176836)}
{pt3dadd(175680.000000,134820.000000,37375.000000,185.566288)}
{pt3dadd(175908.000000,134964.000000,37325.000000,203.955741)}
{pt3dadd(176004.000000,135084.000000,37275.000000,222.345193)}
{pt3dadd(176136.000000,135228.000000,37150.000000,240.734646)}
{pt3dadd(176232.000000,135360.000000,37050.000000,263.748884)}
{pt3dadd(176196.000000,135480.000000,36925.000000,286.763121)}
{pt3dadd(176172.000000,135624.000000,36875.000000,309.777359)}
{pt3dadd(176232.000000,135768.000000,36850.000000,332.791596)}
{pt3dadd(176316.000000,135900.000000,36750.000000,336.258171)}
{pt3dadd(176340.000000,136032.000000,36700.000000,339.724746)}
{pt3dadd(176364.000000,136188.000000,36625.000000,343.191321)}
{pt3dadd(176340.000000,136320.000000,36525.000000,346.657896)}
{pt3dadd(176472.000000,136452.000000,36375.000000,320.177083)}
{pt3dadd(176484.000000,136596.000000,36300.000000,293.696271)}
{pt3dadd(176628.000000,136776.000000,36150.000000,267.215459)}
{pt3dadd(176520.000000,136920.000000,35925.000000,240.734646)}
{pt3dadd(176532.000000,137076.000000,36000.000000,204.737450)}
{pt3dadd(176592.000000,137220.000000,35850.000000,168.740253)}
{pt3dadd(176784.000000,137376.000000,35675.000000,132.743057)}
{pt3dadd(176928.000000,137568.000000,35500.000000,96.745860)}
{pt3dadd(177192.000000,137688.000000,35350.000000,149.234575)}
{pt3dadd(177360.000000,137820.000000,35150.000000,201.723291)}
{pt3dadd(177552.000000,137940.000000,35025.000000,254.212007)}
{pt3dadd(177744.000000,138084.000000,34850.000000,306.700722)}
{pt3dadd(178008.000000,138216.000000,34600.000000,271.819751)}
{pt3dadd(178176.000000,138360.000000,34525.000000,236.938779)}
{pt3dadd(178272.000000,138444.000000,34375.000000,202.057808)}
{pt3dadd(178188.000000,138552.000000,34325.000000,167.176836)}
{pt3dadd(178584.000000,138504.000000,34025.000000,175.535680)}
{pt3dadd(178572.000000,138588.000000,33800.000000,183.894525)}
{pt3dadd(178800.000000,138672.000000,33575.000000,192.253370)}
{pt3dadd(179040.000000,138708.000000,33375.000000,200.612214)}
{pt3dadd(179292.000000,138708.000000,33225.000000,192.253370)}
{pt3dadd(179424.000000,138744.000000,33000.000000,183.894525)}
{pt3dadd(179520.000000,138756.000000,32825.000000,175.535680)}
{pt3dadd(179580.000000,138876.000000,32650.000000,167.176836)}
{pt3dadd(179820.000000,139020.000000,32450.000000,194.714208)}
{pt3dadd(179916.000000,139128.000000,32225.000000,222.251580)}
{pt3dadd(180012.000000,139080.000000,32000.000000,249.788952)}
{pt3dadd(180096.000000,139104.000000,31825.000000,277.326324)}
{pt3dadd(180192.000000,139176.000000,31650.000000,242.823254)}
{pt3dadd(180288.000000,139356.000000,31450.000000,208.320183)}
{pt3dadd(180528.000000,139632.000000,31275.000000,173.817113)}
{pt3dadd(180816.000000,139788.000000,31100.000000,139.314042)}
{pt3dadd(181140.000000,139920.000000,30950.000000,139.314042)}
{pt3dadd(181284.000000,139920.000000,30750.000000,139.314042)}
{pt3dadd(181428.000000,139896.000000,30675.000000,139.314042)}
{pt3dadd(181584.000000,139980.000000,30600.000000,139.314042)}
{pt3dadd(181752.000000,139908.000000,30600.000000,98.636028)}
{pt3dadd(181932.000000,140040.000000,30600.000000,57.958014)}
{pt3dadd(182064.000000,140196.000000,30600.000000,17.280000)}
{pt3dadd(182208.000000,140136.000000,30600.000000,277.326342)}
{pt3dadd(182340.000000,140076.000000,30525.000000,258.147810)}
{pt3dadd(182448.000000,140136.000000,30500.000000,238.969278)}
{pt3dadd(182700.000000,140160.000000,30550.000000,219.790746)}
{pt3dadd(182964.000000,140172.000000,30575.000000,200.612214)}
{pt3dadd(183144.000000,140148.000000,30650.000000,185.287671)}
{pt3dadd(183324.000000,140256.000000,30725.000000,169.963128)}
{pt3dadd(183444.000000,140352.000000,30775.000000,154.638585)}
{pt3dadd(183564.000000,140412.000000,30825.000000,139.314042)}
{pt3dadd(183720.000000,140388.000000,30850.000000,139.314042)}
{pt3dadd(183972.000000,140556.000000,30825.000000,139.314042)}
{pt3dadd(184284.000000,140652.000000,30900.000000,139.314042)}
{pt3dadd(184428.000000,140664.000000,30950.000000,139.314042)}
{pt3dadd(184608.000000,140736.000000,31000.000000,155.602319)}
{pt3dadd(184980.000000,140928.000000,31000.000000,171.890595)}
{pt3dadd(185532.000000,141108.000000,31000.000000,188.178871)}
{pt3dadd(186132.000000,141240.000000,31000.000000,204.467148)}
{pt3dadd(186300.000000,141216.000000,31200.000000,201.497288)}
{pt3dadd(186468.000000,141180.000000,31150.000000,198.527427)}
{pt3dadd(186684.000000,141276.000000,31200.000000,195.557567)}
{pt3dadd(186840.000000,141216.000000,31200.000000,192.587706)}
{pt3dadd(187020.000000,141144.000000,31200.000000,179.269290)}
{pt3dadd(187248.000000,141156.000000,31075.000000,165.950874)}
{pt3dadd(187452.000000,141072.000000,31175.000000,152.632458)}
{pt3dadd(187632.000000,140976.000000,31275.000000,139.314042)}
{pt3dadd(187824.000000,140988.000000,31200.000000,146.279741)}
{pt3dadd(188004.000000,140988.000000,31250.000000,153.245439)}
{pt3dadd(188160.000000,140892.000000,31350.000000,160.211138)}
{pt3dadd(188268.000000,140496.000000,31525.000000,167.176836)}
{pt3dadd(188388.000000,140220.000000,31575.000000,173.529553)}
{pt3dadd(188520.000000,140124.000000,31550.000000,179.882271)}
{pt3dadd(188652.000000,139740.000000,31525.000000,186.234989)}
{pt3dadd(188784.000000,139548.000000,31375.000000,192.587706)}
{pt3dadd(188700.000000,139356.000000,31500.000000,186.234989)}
{pt3dadd(188640.000000,139200.000000,31400.000000,179.882271)}
{pt3dadd(188736.000000,139020.000000,31400.000000,173.529553)}
{pt3dadd(188772.000000,138852.000000,31325.000000,167.176836)}
{pt3dadd(188808.000000,138684.000000,31250.000000,167.176836)}
{pt3dadd(188904.000000,138504.000000,31325.000000,167.176836)}
{pt3dadd(189000.000000,138324.000000,31325.000000,167.176836)}
{pt3dadd(188964.000000,138144.000000,31375.000000,167.176836)}
{pt3dadd(188964.000000,137964.000000,31500.000000,185.566288)}
{pt3dadd(188832.000000,137820.000000,31550.000000,203.955741)}
{pt3dadd(188748.000000,137676.000000,31625.000000,222.345193)}
{pt3dadd(188676.000000,137544.000000,31700.000000,240.734646)}
{pt3dadd(188616.000000,137424.000000,31650.000000,238.327304)}
{pt3dadd(188520.000000,137304.000000,31625.000000,235.919961)}
{pt3dadd(188388.000000,137100.000000,31700.000000,233.512618)}
{pt3dadd(188268.000000,137100.000000,31600.000000,231.105276)}
{pt3dadd(188148.000000,137064.000000,31625.000000,208.157467)}
{pt3dadd(188004.000000,136968.000000,31600.000000,185.209659)}
{pt3dadd(187884.000000,136872.000000,31500.000000,162.261850)}
{pt3dadd(187764.000000,136716.000000,31425.000000,139.314042)}
{pt3dadd(187644.000000,136524.000000,31300.000000,164.669193)}
{pt3dadd(187500.000000,136356.000000,31300.000000,190.024344)}
{pt3dadd(187392.000000,136188.000000,31300.000000,215.379495)}
{pt3dadd(187296.000000,136068.000000,31250.000000,240.734646)}
{pt3dadd(187200.000000,135936.000000,31150.000000,249.882566)}
{pt3dadd(187212.000000,135792.000000,31200.000000,259.030485)}
{pt3dadd(187200.000000,135648.000000,31125.000000,268.178405)}
{pt3dadd(187176.000000,135504.000000,30900.000000,277.326324)}
{pt3dadd(187212.000000,135360.000000,30800.000000,268.178405)}
{pt3dadd(187200.000000,135240.000000,30725.000000,259.030485)}
{pt3dadd(187200.000000,135096.000000,30550.000000,249.882566)}
{pt3dadd(187200.000000,134772.000000,30375.000000,240.734646)}
{pt3dadd(187200.000000,134508.000000,30225.000000,240.734646)}
{pt3dadd(187200.000000,134148.000000,30075.000000,240.734646)}
{pt3dadd(187200.000000,133872.000000,29875.000000,240.734646)}
{pt3dadd(187728.000000,133272.000000,29700.000000,240.734646)}
{pt3dadd(187872.000000,133176.000000,29700.000000,284.548356)}
{pt3dadd(188040.000000,133080.000000,29625.000000,328.362066)}
{pt3dadd(188172.000000,132948.000000,29500.000000,372.175776)}
{pt3dadd(188328.000000,132900.000000,29550.000000,415.989486)}
{pt3dadd(188424.000000,132900.000000,29475.000000,415.989486)}
{pt3dadd(188532.000000,132804.000000,29375.000000,415.989486)}
{pt3dadd(188628.000000,132768.000000,29325.000000,415.989486)}
{pt3dadd(188736.000000,132732.000000,29275.000000,415.989486)}
{pt3dadd(188832.000000,132732.000000,29250.000000,415.989486)}
{pt3dadd(188928.000000,132696.000000,29225.000000,415.989486)}
{pt3dadd(189036.000000,132660.000000,29200.000000,415.989486)}
{pt3dadd(189168.000000,132588.000000,29025.000000,415.989486)}
{pt3dadd(189324.000000,132648.000000,28975.000000,384.212511)}
{pt3dadd(189492.000000,132576.000000,28875.000000,352.435536)}
{pt3dadd(189612.000000,132504.000000,28775.000000,320.658561)}
{pt3dadd(189756.000000,132432.000000,28675.000000,288.881586)}
{pt3dadd(189876.000000,132336.000000,28525.000000,336.466161)}
{pt3dadd(190092.000000,132276.000000,28325.000000,384.050736)}
{pt3dadd(190332.000000,132228.000000,28075.000000,431.635311)}
{pt3dadd(190632.000000,132096.000000,27850.000000,479.219886)}
{pt3dadd(190884.000000,131916.000000,27575.000000,463.412286)}
{pt3dadd(191016.000000,131880.000000,27350.000000,447.604686)}
{pt3dadd(191136.000000,131844.000000,27125.000000,431.797086)}
{pt3dadd(191280.000000,131700.000000,26875.000000,415.989486)}
{pt3dadd(191544.000000,131724.000000,26650.000000,411.829591)}
{pt3dadd(191760.000000,131724.000000,26450.000000,407.669697)}
{pt3dadd(191976.000000,131640.000000,26250.000000,403.509803)}
{pt3dadd(192192.000000,131580.000000,26075.000000,399.349908)}
{pt3dadd(192432.000000,131604.000000,25850.000000,403.509803)}
{pt3dadd(192672.000000,131628.000000,25625.000000,407.669697)}
{pt3dadd(192912.000000,131652.000000,25400.000000,411.829591)}
{pt3dadd(193056.000000,131676.000000,25200.000000,415.989486)}
{pt3dadd(193368.000000,131640.000000,24950.000000,395.190005)}
{pt3dadd(193512.000000,131664.000000,24750.000000,374.390523)}
{pt3dadd(193632.000000,131676.000000,24575.000000,353.591042)}
{pt3dadd(193752.000000,131688.000000,24350.000000,332.791560)}
{pt3dadd(193872.000000,131700.000000,24175.000000,332.791560)}
{pt3dadd(194196.000000,131664.000000,23975.000000,332.791560)}
{pt3dadd(194508.000000,131652.000000,23800.000000,332.791560)}
{pt3dadd(194676.000000,131592.000000,23650.000000,332.791560)}
{pt3dadd(194856.000000,131676.000000,23475.000000,336.258144)}
{pt3dadd(195048.000000,131652.000000,23300.000000,339.724728)}
{pt3dadd(195240.000000,131628.000000,23100.000000,343.191312)}
{pt3dadd(195432.000000,131604.000000,22900.000000,346.657896)}
{pt3dadd(195744.000000,131580.000000,22700.000000,363.990794)}
{pt3dadd(196044.000000,131652.000000,22500.000000,381.323691)}
{pt3dadd(196332.000000,131724.000000,22325.000000,398.656589)}
{pt3dadd(196584.000000,131748.000000,22150.000000,415.989486)}
{pt3dadd(196764.000000,131724.000000,21950.000000,436.788958)}
{pt3dadd(196932.000000,131664.000000,21775.000000,457.588431)}
{pt3dadd(197100.000000,131544.000000,21600.000000,478.387903)}
{pt3dadd(197172.000000,131508.000000,21425.000000,499.187376)}
{pt3dadd(197352.000000,131448.000000,21225.000000,394.034481)}
{pt3dadd(197532.000000,131400.000000,21000.000000,288.881586)}
{pt3dadd(197664.000000,131328.000000,20850.000000,240.734646)}

{create adhoc69}
{access adhoc69}
{connect adhoc69(1), adhoc68(0)}
{nseg = 1}
{strdef color color = "White"}
{pt3dclear()}
{pt3dadd(197664.000000,131328.000000,20850.000000,240.734646)}
{pt3dadd(198180.000000,131268.000000,20550.000000,167.176836)}
{pt3dadd(198432.000000,131208.000000,20350.000000,197.603024)}
{pt3dadd(198624.000000,131268.000000,20150.000000,228.029211)}
{pt3dadd(198780.000000,131388.000000,20100.000000,258.455399)}
{pt3dadd(198900.000000,131496.000000,20125.000000,288.881586)}
{pt3dadd(199032.000000,131508.000000,20075.000000,276.844851)}
{pt3dadd(199176.000000,131568.000000,20025.000000,264.808116)}
{pt3dadd(199344.000000,131748.000000,19975.000000,252.771381)}
{pt3dadd(199488.000000,131928.000000,19925.000000,240.734646)}
{pt3dadd(199608.000000,132096.000000,19750.000000,249.882570)}
{pt3dadd(199740.000000,132144.000000,19650.000000,259.030494)}
{pt3dadd(199776.000000,132216.000000,19425.000000,268.178418)}
{pt3dadd(200064.000000,132336.000000,19175.000000,277.326342)}
{pt3dadd(200148.000000,132444.000000,18900.000000,280.215153)}
{pt3dadd(200208.000000,132648.000000,18650.000000,283.103964)}
{pt3dadd(200304.000000,132708.000000,18400.000000,285.992775)}
{pt3dadd(200496.000000,132792.000000,18150.000000,288.881586)}
{pt3dadd(200592.000000,132912.000000,17900.000000,288.881586)}
{pt3dadd(200532.000000,133008.000000,17675.000000,288.881586)}
{pt3dadd(200520.000000,132936.000000,17400.000000,288.881586)}
{pt3dadd(200508.000000,132864.000000,17200.000000,288.881586)}
{pt3dadd(200424.000000,132768.000000,17000.000000,288.881586)}
{pt3dadd(200460.000000,132696.000000,16750.000000,288.881586)}
{pt3dadd(200496.000000,132624.000000,16500.000000,288.881586)}
{pt3dadd(200496.000000,132756.000000,16325.000000,288.881586)}
{pt3dadd(200568.000000,132672.000000,16100.000000,248.313336)}
{pt3dadd(200616.000000,132732.000000,15875.000000,207.745086)}
{pt3dadd(200676.000000,132720.000000,15675.000000,167.176836)}
{pt3dadd(200724.000000,132756.000000,15425.000000,200.612214)}

{create adhoc70}
{access adhoc70}
{connect adhoc70(1), adhoc69(0)}
{nseg = 1}
{strdef color color = "White"}
{pt3dclear()}
{pt3dadd(200724.000000,132756.000000,15425.000000,200.612214)}
{pt3dadd(201012.000000,132792.000000,15250.000000,133.741476)}
{pt3dadd(201252.000000,132732.000000,15025.000000,124.492572)}
{pt3dadd(201300.000000,132552.000000,14825.000000,115.243668)}
{pt3dadd(201432.000000,132588.000000,14600.000000,105.994764)}
{pt3dadd(201492.000000,132360.000000,14400.000000,96.745860)}
{pt3dadd(201576.000000,132336.000000,14200.000000,122.712448)}
{pt3dadd(201744.000000,132156.000000,14025.000000,148.679037)}
{pt3dadd(201900.000000,132000.000000,13825.000000,174.645625)}
{pt3dadd(201780.000000,131976.000000,13625.000000,200.612214)}
{pt3dadd(201840.000000,131964.000000,13450.000000,192.253370)}
{pt3dadd(201888.000000,131748.000000,13250.000000,183.894525)}
{pt3dadd(201960.000000,131664.000000,13100.000000,175.535680)}
{pt3dadd(202128.000000,131424.000000,12900.000000,167.176836)}
{pt3dadd(202332.000000,131136.000000,12700.000000,167.176836)}
{pt3dadd(202392.000000,131040.000000,12550.000000,167.176836)}
{pt3dadd(202500.000000,130920.000000,12450.000000,167.176836)}
{pt3dadd(202392.000000,130812.000000,12275.000000,167.176836)}
{pt3dadd(202596.000000,130584.000000,12075.000000,167.176836)}
{pt3dadd(202788.000000,130356.000000,11900.000000,167.176836)}
{pt3dadd(202968.000000,130044.000000,11725.000000,167.176836)}
{pt3dadd(203016.000000,129696.000000,11575.000000,167.176836)}
{pt3dadd(202896.000000,129564.000000,11400.000000,175.535680)}
{pt3dadd(202920.000000,129420.000000,11475.000000,183.894525)}
{pt3dadd(202836.000000,129252.000000,11350.000000,192.253370)}
{pt3dadd(202728.000000,129108.000000,11200.000000,200.612214)}
{pt3dadd(202644.000000,128952.000000,11175.000000,200.612214)}
{pt3dadd(202620.000000,128844.000000,11000.000000,200.612214)}
{pt3dadd(202584.000000,128700.000000,10700.000000,200.612214)}
{pt3dadd(202440.000000,128580.000000,10450.000000,200.612214)}
{pt3dadd(202488.000000,128424.000000,10250.000000,179.482918)}
{pt3dadd(202476.000000,128280.000000,9900.000000,158.353623)}
{pt3dadd(202524.000000,128208.000000,9675.000000,137.224328)}
{pt3dadd(202308.000000,128196.000000,9500.000000,116.095032)}
{pt3dadd(202188.000000,128088.000000,9250.000000,121.899785)}
{pt3dadd(202068.000000,127992.000000,9050.000000,127.704537)}
{pt3dadd(201876.000000,128064.000000,9050.000000,133.509289)}
{pt3dadd(201756.000000,127968.000000,8975.000000,139.314042)}
{pt3dadd(201648.000000,127956.000000,8900.000000,154.638585)}
{pt3dadd(201504.000000,127848.000000,8725.000000,169.963128)}
{pt3dadd(201372.000000,127656.000000,8550.000000,185.287671)}
{pt3dadd(201228.000000,127632.000000,8575.000000,200.612214)}
{pt3dadd(201276.000000,127632.000000,8300.000000,179.482918)}
{pt3dadd(201000.000000,127680.000000,7975.000000,158.353623)}
{pt3dadd(200616.000000,127560.000000,7750.000000,137.224328)}
{pt3dadd(200496.000000,127572.000000,7700.000000,116.095032)}
{pt3dadd(199992.000000,127632.000000,7550.000000,156.402855)}
{pt3dadd(199524.000000,127572.000000,7350.000000,196.710678)}
{pt3dadd(199272.000000,127596.000000,7100.000000,237.018501)}
{pt3dadd(199068.000000,127452.000000,6850.000000,277.326324)}
{pt3dadd(199044.000000,127272.000000,6900.000000,240.734646)}
{pt3dadd(199272.000000,127044.000000,7000.000000,288.881586)}

{create adhoc71}
{access adhoc71}
{connect adhoc71(1), adhoc69(0)}
{nseg = 1}
{strdef color color = "White"}
{pt3dclear()}
{pt3dadd(200724.000000,132756.000000,15425.000000,200.612214)}
{pt3dadd(200448.000000,133260.000000,15250.000000,139.314042)}
{pt3dadd(200364.000000,133428.000000,15025.000000,153.245439)}
{pt3dadd(200136.000000,133536.000000,14850.000000,167.176836)}
{pt3dadd(199944.000000,133776.000000,14600.000000,116.095032)}

{create adhoc72}
{access adhoc72}
{connect adhoc72(1), adhoc68(0)}
{nseg = 1}
{strdef color color = "White"}
{pt3dclear()}
{pt3dadd(197664.000000,131328.000000,20850.000000,240.734646)}
{pt3dadd(197376.000000,131052.000000,20600.000000,240.734646)}
{pt3dadd(197124.000000,130884.000000,20375.000000,222.345193)}
{pt3dadd(197088.000000,130692.000000,20150.000000,203.955741)}
{pt3dadd(197064.000000,130524.000000,19950.000000,185.566288)}
{pt3dadd(196920.000000,130284.000000,19775.000000,167.176836)}
{pt3dadd(196812.000000,130200.000000,19600.000000,175.535680)}
{pt3dadd(196740.000000,130092.000000,19400.000000,183.894525)}
{pt3dadd(196596.000000,130044.000000,19175.000000,192.253370)}
{pt3dadd(196620.000000,129972.000000,18975.000000,200.612214)}
{pt3dadd(196632.000000,129924.000000,18775.000000,192.253370)}
{pt3dadd(196656.000000,129948.000000,18575.000000,183.894525)}
{pt3dadd(196668.000000,129936.000000,18425.000000,175.535680)}
{pt3dadd(196680.000000,129900.000000,18275.000000,167.176836)}
{pt3dadd(196692.000000,129864.000000,18150.000000,175.535680)}
{pt3dadd(196680.000000,129792.000000,17975.000000,183.894525)}
{pt3dadd(196680.000000,129780.000000,17800.000000,192.253370)}
{pt3dadd(196704.000000,129660.000000,17650.000000,200.612214)}
{pt3dadd(196740.000000,129432.000000,17500.000000,219.790742)}
{pt3dadd(196812.000000,129360.000000,17300.000000,238.969269)}
{pt3dadd(196728.000000,129360.000000,17050.000000,258.147797)}
{pt3dadd(196836.000000,129240.000000,16850.000000,277.326324)}
{pt3dadd(196872.000000,129192.000000,16650.000000,242.823254)}
{pt3dadd(196920.000000,129144.000000,16475.000000,208.320183)}
{pt3dadd(196704.000000,128988.000000,16300.000000,173.817113)}
{pt3dadd(196572.000000,128964.000000,16200.000000,139.314042)}
{pt3dadd(196488.000000,128832.000000,16075.000000,128.671997)}
{pt3dadd(196296.000000,128700.000000,16075.000000,118.029951)}
{pt3dadd(196164.000000,128580.000000,15925.000000,107.387906)}
{pt3dadd(196056.000000,128436.000000,15850.000000,96.745860)}
{pt3dadd(195936.000000,128304.000000,15675.000000,101.583153)}
{pt3dadd(195696.000000,128100.000000,15400.000000,106.420446)}
{pt3dadd(195624.000000,128112.000000,15225.000000,111.257739)}
{pt3dadd(195540.000000,128040.000000,15050.000000,116.095032)}
{pt3dadd(195528.000000,128016.000000,14850.000000,116.095032)}
{pt3dadd(195456.000000,127920.000000,14650.000000,116.095032)}
{pt3dadd(195372.000000,127956.000000,14525.000000,116.095032)}
{pt3dadd(195276.000000,128004.000000,14375.000000,116.095032)}
{pt3dadd(195216.000000,127920.000000,14225.000000,121.899785)}
{pt3dadd(195084.000000,127860.000000,14025.000000,127.704537)}
{pt3dadd(194988.000000,127824.000000,13825.000000,133.509289)}
{pt3dadd(195012.000000,127872.000000,13650.000000,139.314042)}
{pt3dadd(194820.000000,127776.000000,13675.000000,127.704537)}
{pt3dadd(194808.000000,127500.000000,13525.000000,116.095032)}
{pt3dadd(194736.000000,127380.000000,13550.000000,96.745860)}

{create adhoc73}
{access adhoc73}
{connect adhoc73(1), adhoc19(0)}
{nseg = 1}
{strdef color color = "White"}
{pt3dclear()}
{pt3dadd(184968.000000,138948.000000,87875.000000,346.657896)}
{pt3dadd(184356.000000,135528.000000,87675.000000,1035.114948)}
{pt3dadd(183996.000000,134496.000000,87300.000000,1035.114948)}
{pt3dadd(183876.000000,134364.000000,87275.000000,1035.114948)}
{pt3dadd(183756.000000,134244.000000,87175.000000,1035.114948)}
{pt3dadd(183636.000000,134124.000000,87075.000000,1035.114948)}
{pt3dadd(183540.000000,134004.000000,86975.000000,1024.763782)}
{pt3dadd(183444.000000,133872.000000,86875.000000,1014.412617)}
{pt3dadd(183372.000000,133740.000000,86800.000000,1004.061452)}
{pt3dadd(183300.000000,133620.000000,86725.000000,993.710286)}
{pt3dadd(183204.000000,133476.000000,86750.000000,1004.061452)}
{pt3dadd(183108.000000,133344.000000,86775.000000,1014.412617)}
{pt3dadd(183012.000000,133212.000000,86800.000000,1024.763782)}
{pt3dadd(182916.000000,133092.000000,86825.000000,1035.114948)}
{pt3dadd(182796.000000,132984.000000,86600.000000,1035.114948)}
{pt3dadd(182808.000000,132828.000000,86525.000000,1035.114948)}
{pt3dadd(182868.000000,132672.000000,86450.000000,1035.114948)}
{pt3dadd(182928.000000,132528.000000,86375.000000,1035.114948)}
{pt3dadd(182856.000000,132372.000000,86325.000000,1086.870681)}
{pt3dadd(182784.000000,132252.000000,86275.000000,1138.626414)}
{pt3dadd(182712.000000,132096.000000,86225.000000,1190.382147)}
{pt3dadd(182640.000000,131952.000000,86175.000000,1242.137880)}
{pt3dadd(182568.000000,131820.000000,86125.000000,1190.382147)}
{pt3dadd(182496.000000,131688.000000,86075.000000,1138.626414)}
{pt3dadd(182424.000000,131556.000000,86025.000000,1086.870681)}
{pt3dadd(182436.000000,131412.000000,85950.000000,1035.114948)}
{pt3dadd(182448.000000,131292.000000,85875.000000,983.359197)}
{pt3dadd(182460.000000,131160.000000,85800.000000,931.603446)}
{pt3dadd(182472.000000,131040.000000,85725.000000,879.847695)}
{pt3dadd(182484.000000,130908.000000,85650.000000,828.091944)}
{pt3dadd(182496.000000,130776.000000,85575.000000,859.559431)}
{pt3dadd(182304.000000,130608.000000,85725.000000,891.026919)}
{pt3dadd(182112.000000,130404.000000,85800.000000,922.494407)}
{pt3dadd(181992.000000,130248.000000,85700.000000,953.961894)}
{pt3dadd(181920.000000,130116.000000,85600.000000,931.120371)}
{pt3dadd(182004.000000,129996.000000,85575.000000,908.278848)}
{pt3dadd(182064.000000,129900.000000,85550.000000,885.437325)}
{pt3dadd(181920.000000,129744.000000,85550.000000,862.595802)}
{pt3dadd(181776.000000,129624.000000,85550.000000,895.374441)}
{pt3dadd(181992.000000,129468.000000,85325.000000,928.153080)}
{pt3dadd(181896.000000,129312.000000,85275.000000,960.931719)}
{pt3dadd(181800.000000,129180.000000,85225.000000,993.710358)}
{pt3dadd(181704.000000,129024.000000,85175.000000,960.931719)}
{pt3dadd(181608.000000,128892.000000,85125.000000,928.153080)}
{pt3dadd(181512.000000,128748.000000,85075.000000,895.374441)}
{pt3dadd(181416.000000,128640.000000,85025.000000,862.595802)}
{pt3dadd(181320.000000,128496.000000,84975.000000,905.725589)}
{pt3dadd(181380.000000,128328.000000,85150.000000,948.855375)}
{pt3dadd(181356.000000,128160.000000,84925.000000,991.985162)}
{pt3dadd(181488.000000,127992.000000,84925.000000,1035.114948)}
{pt3dadd(181416.000000,127848.000000,85000.000000,1035.114948)}
{pt3dadd(181272.000000,127680.000000,84975.000000,1035.114948)}
{pt3dadd(181452.000000,127524.000000,85100.000000,1035.114948)}
{pt3dadd(181404.000000,127356.000000,85000.000000,1035.114948)}
{pt3dadd(181488.000000,127212.000000,84750.000000,991.985162)}
{pt3dadd(181512.000000,127044.000000,84775.000000,948.855375)}
{pt3dadd(181548.000000,126888.000000,84800.000000,905.725589)}
{pt3dadd(181584.000000,126744.000000,84825.000000,862.595802)}
{pt3dadd(181512.000000,126600.000000,84750.000000,862.595802)}
{pt3dadd(181440.000000,126456.000000,84675.000000,862.595802)}
{pt3dadd(181368.000000,126300.000000,84600.000000,862.595802)}
{pt3dadd(181296.000000,126144.000000,84525.000000,862.595802)}
{pt3dadd(181224.000000,126000.000000,84450.000000,895.374441)}
{pt3dadd(181152.000000,125844.000000,84375.000000,928.153080)}
{pt3dadd(181104.000000,125712.000000,84425.000000,960.931719)}
{pt3dadd(181116.000000,125592.000000,84400.000000,993.710358)}
{pt3dadd(181092.000000,125448.000000,84375.000000,993.710340)}
{pt3dadd(181068.000000,125328.000000,84350.000000,993.710322)}
{pt3dadd(181044.000000,125196.000000,84325.000000,993.710304)}
{pt3dadd(180876.000000,125064.000000,84250.000000,993.710286)}
{pt3dadd(180708.000000,124932.000000,84100.000000,1004.061452)}
{pt3dadd(180612.000000,124764.000000,84100.000000,1014.412617)}
{pt3dadd(180516.000000,124632.000000,84100.000000,1024.763782)}
{pt3dadd(180420.000000,124476.000000,84100.000000,1035.114948)}
{pt3dadd(180324.000000,124320.000000,84100.000000,1035.114948)}
{pt3dadd(180228.000000,124176.000000,84100.000000,1035.114948)}
{pt3dadd(180132.000000,124020.000000,84100.000000,1035.114948)}
{pt3dadd(180036.000000,123852.000000,84100.000000,1035.114948)}
{pt3dadd(179940.000000,123708.000000,84100.000000,1062.524772)}
{pt3dadd(179844.000000,123552.000000,83975.000000,1089.934596)}
{pt3dadd(179820.000000,123396.000000,83950.000000,1117.344420)}
{pt3dadd(179796.000000,123228.000000,83925.000000,1144.754244)}
{pt3dadd(179772.000000,123060.000000,83900.000000,1169.100153)}
{pt3dadd(179748.000000,122904.000000,83875.000000,1193.446062)}
{pt3dadd(179760.000000,122760.000000,83675.000000,1217.791971)}
{pt3dadd(179520.000000,122148.000000,83975.000000,1242.137880)}
{pt3dadd(179340.000000,121464.000000,83775.000000,1081.359630)}
{pt3dadd(179160.000000,121140.000000,83625.000000,920.581380)}
{pt3dadd(178980.000000,121152.000000,83725.000000,759.803130)}
{pt3dadd(178776.000000,121212.000000,83725.000000,599.024880)}
{pt3dadd(178584.000000,120636.000000,83600.000000,599.024880)}

{create adhoc74}
{access adhoc74}
{connect adhoc74(1), adhoc73(0)}
{nseg = 1}
{strdef color color = "White"}
{pt3dclear()}
{pt3dadd(178584.000000,120636.000000,83600.000000,599.024880)}
{pt3dadd(178416.000000,119196.000000,83900.000000,599.024880)}
{pt3dadd(178296.000000,118320.000000,83675.000000,621.787828)}
{pt3dadd(178128.000000,117804.000000,83575.000000,644.550777)}
{pt3dadd(177984.000000,117204.000000,83325.000000,667.313725)}
{pt3dadd(177876.000000,116760.000000,83175.000000,690.076674)}
{pt3dadd(177756.000000,116544.000000,83075.000000,699.661056)}
{pt3dadd(177612.000000,116424.000000,82900.000000,709.245438)}
{pt3dadd(177504.000000,116208.000000,82875.000000,718.829820)}
{pt3dadd(177552.000000,116040.000000,82825.000000,718.829820)}

{create adhoc75}
{access adhoc75}
{connect adhoc75(1), adhoc74(0)}
{nseg = 1}
{strdef color color = "White"}
{pt3dclear()}
{pt3dadd(177552.000000,116040.000000,82825.000000,718.829820)}
{pt3dadd(177444.000000,115872.000000,82700.000000,718.829820)}
{pt3dadd(177360.000000,115728.000000,82650.000000,711.641515)}
{pt3dadd(177276.000000,115584.000000,82600.000000,704.453211)}
{pt3dadd(177168.000000,115452.000000,82475.000000,697.264906)}
{pt3dadd(177000.000000,115332.000000,82300.000000,690.076602)}
{pt3dadd(177012.000000,115200.000000,82200.000000,690.076602)}
{pt3dadd(176820.000000,115080.000000,82175.000000,690.076602)}
{pt3dadd(176700.000000,114948.000000,82025.000000,690.076602)}
{pt3dadd(176700.000000,114816.000000,81975.000000,690.076602)}
{pt3dadd(176700.000000,114708.000000,81925.000000,697.264906)}
{pt3dadd(176700.000000,114588.000000,81875.000000,704.453211)}
{pt3dadd(176532.000000,114420.000000,81850.000000,711.641515)}
{pt3dadd(176364.000000,114300.000000,81825.000000,718.829820)}
{pt3dadd(176184.000000,114192.000000,81725.000000,711.641533)}
{pt3dadd(176268.000000,114072.000000,81625.000000,704.453247)}
{pt3dadd(176268.000000,113916.000000,81525.000000,697.264960)}
{pt3dadd(176232.000000,113784.000000,81350.000000,690.076674)}
{pt3dadd(176136.000000,113640.000000,81200.000000,690.076674)}
{pt3dadd(175944.000000,113508.000000,81100.000000,690.076674)}
{pt3dadd(175800.000000,113376.000000,81025.000000,718.829820)}

{create adhoc76}
{access adhoc76}
{connect adhoc76(1), adhoc75(0)}
{nseg = 1}
{strdef color color = "White"}
{pt3dclear()}
{pt3dadd(175800.000000,113376.000000,81025.000000,718.829820)}
{pt3dadd(175512.000000,113232.000000,80775.000000,718.829820)}
{pt3dadd(175440.000000,113052.000000,80550.000000,718.829820)}
{pt3dadd(175284.000000,112872.000000,80350.000000,718.829820)}
{pt3dadd(175044.000000,112704.000000,80250.000000,718.829820)}
{pt3dadd(174792.000000,112584.000000,80100.000000,718.829820)}
{pt3dadd(174576.000000,112392.000000,79875.000000,718.829820)}
{pt3dadd(174504.000000,112212.000000,79675.000000,718.829820)}
{pt3dadd(174192.000000,111816.000000,79450.000000,718.829820)}
{pt3dadd(174084.000000,111780.000000,79250.000000,718.829820)}
{pt3dadd(173976.000000,111588.000000,79075.000000,828.092088)}
{pt3dadd(173748.000000,111504.000000,78850.000000,862.595802)}

{create adhoc77}
{access adhoc77}
{connect adhoc77(1), adhoc76(0)}
{nseg = 1}
{strdef color color = "White"}
{pt3dclear()}
{pt3dadd(173748.000000,111504.000000,78850.000000,862.595802)}
{pt3dadd(173436.000000,111720.000000,78650.000000,862.595802)}
{pt3dadd(172764.000000,111720.000000,78400.000000,862.595802)}
{pt3dadd(172452.000000,111696.000000,78150.000000,862.595802)}
{pt3dadd(172236.000000,111612.000000,77875.000000,862.595802)}
{pt3dadd(172044.000000,111480.000000,77650.000000,862.595802)}
{pt3dadd(171924.000000,111612.000000,77425.000000,905.725589)}
{pt3dadd(171840.000000,111588.000000,77175.000000,948.855375)}
{pt3dadd(171708.000000,111480.000000,76975.000000,991.985162)}
{pt3dadd(171636.000000,111372.000000,76725.000000,1035.114948)}
{pt3dadd(171672.000000,111312.000000,76475.000000,1035.114948)}
{pt3dadd(171732.000000,111300.000000,76250.000000,1035.114948)}
{pt3dadd(171780.000000,111156.000000,76050.000000,1035.114948)}
{pt3dadd(171612.000000,111084.000000,75800.000000,1035.114948)}
{pt3dadd(171432.000000,110892.000000,75600.000000,1035.114948)}
{pt3dadd(171480.000000,110760.000000,75375.000000,1035.114948)}
{pt3dadd(171540.000000,111060.000000,75125.000000,1035.114948)}
{pt3dadd(171504.000000,110928.000000,74925.000000,1035.114948)}
{pt3dadd(171432.000000,110880.000000,74650.000000,1024.763782)}
{pt3dadd(171420.000000,110892.000000,74425.000000,1014.412617)}
{pt3dadd(171396.000000,110844.000000,74250.000000,1004.061452)}
{pt3dadd(171372.000000,110796.000000,74075.000000,993.710286)}
{pt3dadd(171180.000000,110736.000000,73850.000000,1043.395767)}
{pt3dadd(171144.000000,110772.000000,73725.000000,1093.081248)}
{pt3dadd(171144.000000,110700.000000,73550.000000,1142.766729)}
{pt3dadd(171048.000000,110748.000000,73375.000000,1192.452210)}
{pt3dadd(170976.000000,110592.000000,73150.000000,1093.081234)}
{pt3dadd(170976.000000,110520.000000,72975.000000,993.710259)}
{pt3dadd(170940.000000,110484.000000,72750.000000,894.339283)}
{pt3dadd(170916.000000,110412.000000,72500.000000,794.968308)}
{pt3dadd(170892.000000,110340.000000,72250.000000,844.653821)}
{pt3dadd(170868.000000,110268.000000,72000.000000,894.339333)}
{pt3dadd(170844.000000,110196.000000,71750.000000,944.024845)}
{pt3dadd(170796.000000,110052.000000,71450.000000,993.710358)}
{pt3dadd(170748.000000,109968.000000,71200.000000,993.710358)}
{pt3dadd(170616.000000,109896.000000,70950.000000,993.710358)}
{pt3dadd(170784.000000,109836.000000,70700.000000,993.710358)}
{pt3dadd(170712.000000,109884.000000,70500.000000,993.710358)}
{pt3dadd(170640.000000,109788.000000,70250.000000,1004.061506)}
{pt3dadd(170568.000000,109692.000000,70025.000000,1014.412653)}
{pt3dadd(170496.000000,109680.000000,69825.000000,1024.763801)}
{pt3dadd(170424.000000,109764.000000,69625.000000,1035.114948)}
{pt3dadd(170352.000000,109716.000000,69425.000000,862.595802)}
{pt3dadd(170352.000000,109716.000000,69200.000000,1035.114948)}

{create adhoc78}
{access adhoc78}
{connect adhoc78(1), adhoc77(0)}
{nseg = 1}
{strdef color color = "White"}
{pt3dclear()}
{pt3dadd(170352.000000,109716.000000,69200.000000,1035.114948)}
{pt3dadd(170244.000000,109680.000000,68950.000000,828.092016)}
{pt3dadd(170280.000000,109416.000000,68675.000000,800.776467)}
{pt3dadd(170076.000000,109188.000000,68425.000000,773.460918)}
{pt3dadd(170088.000000,109056.000000,68175.000000,746.145369)}
{pt3dadd(170100.000000,109068.000000,67925.000000,718.829820)}
{pt3dadd(169992.000000,108900.000000,67725.000000,670.907832)}
{pt3dadd(169920.000000,108840.000000,67500.000000,622.985844)}
{pt3dadd(169800.000000,108588.000000,67325.000000,575.063856)}
{pt3dadd(169872.000000,108492.000000,67100.000000,690.076674)}

{create adhoc79}
{access adhoc79}
{connect adhoc79(1), adhoc78(0)}
{nseg = 1}
{strdef color color = "White"}
{pt3dclear()}
{pt3dadd(169872.000000,108492.000000,67100.000000,690.076674)}
{pt3dadd(169812.000000,108360.000000,66100.000000,415.989486)}
{pt3dadd(169752.000000,108096.000000,65875.000000,346.820625)}
{pt3dadd(169680.000000,107928.000000,65950.000000,277.651764)}
{pt3dadd(169620.000000,107832.000000,65775.000000,208.482903)}
{pt3dadd(169524.000000,107676.000000,65725.000000,139.314042)}
{pt3dadd(169428.000000,107556.000000,65750.000000,139.314042)}
{pt3dadd(169344.000000,107388.000000,65900.000000,139.314042)}
{pt3dadd(169152.000000,107256.000000,65925.000000,139.314042)}
{pt3dadd(169104.000000,107112.000000,65900.000000,139.314042)}
{pt3dadd(169008.000000,106980.000000,65800.000000,176.705928)}
{pt3dadd(168948.000000,106860.000000,65875.000000,214.097814)}
{pt3dadd(168936.000000,106740.000000,65825.000000,251.489700)}
{pt3dadd(168828.000000,106584.000000,65900.000000,288.881586)}
{pt3dadd(168780.000000,106440.000000,65900.000000,266.814243)}
{pt3dadd(168780.000000,106308.000000,65875.000000,244.746900)}
{pt3dadd(168720.000000,106176.000000,65825.000000,222.679557)}
{pt3dadd(168864.000000,106032.000000,65650.000000,200.612214)}
{pt3dadd(168912.000000,105888.000000,65675.000000,200.612214)}
{pt3dadd(168840.000000,105732.000000,65800.000000,200.612214)}
{pt3dadd(168720.000000,105288.000000,66150.000000,200.612214)}
{pt3dadd(168552.000000,105108.000000,66275.000000,200.612214)}
{pt3dadd(168372.000000,104676.000000,66550.000000,200.612214)}
{pt3dadd(168252.000000,104544.000000,66475.000000,200.612214)}
{pt3dadd(168108.000000,104604.000000,66450.000000,200.612214)}
{pt3dadd(168156.000000,104628.000000,66750.000000,200.612214)}
{pt3dadd(168132.000000,104748.000000,66950.000000,210.642822)}
{pt3dadd(168060.000000,104748.000000,67225.000000,220.673430)}
{pt3dadd(167940.000000,104772.000000,67475.000000,230.704038)}
{pt3dadd(167952.000000,104832.000000,67675.000000,240.734646)}
{pt3dadd(167844.000000,104724.000000,67900.000000,222.345193)}
{pt3dadd(167760.000000,104760.000000,68150.000000,203.955741)}
{pt3dadd(167724.000000,104628.000000,68350.000000,185.566288)}
{pt3dadd(167652.000000,104520.000000,68525.000000,167.176836)}
{pt3dadd(167580.000000,104436.000000,68725.000000,160.211138)}
{pt3dadd(167172.000000,104292.000000,68950.000000,153.245439)}
{pt3dadd(167100.000000,104148.000000,69075.000000,146.279741)}
{pt3dadd(167004.000000,104040.000000,69250.000000,139.314042)}
{pt3dadd(166896.000000,103908.000000,69425.000000,164.669193)}
{pt3dadd(166884.000000,103776.000000,69500.000000,190.024344)}
{pt3dadd(166884.000000,103620.000000,69525.000000,215.379495)}
{pt3dadd(166788.000000,103476.000000,69475.000000,240.734646)}
{pt3dadd(166788.000000,103308.000000,69725.000000,240.734646)}
{pt3dadd(166824.000000,103140.000000,69750.000000,240.734646)}
{pt3dadd(166776.000000,102876.000000,69650.000000,240.734646)}
{pt3dadd(166800.000000,102732.000000,69475.000000,240.734646)}
{pt3dadd(166776.000000,102516.000000,69600.000000,209.574742)}
{pt3dadd(166740.000000,102372.000000,69725.000000,178.414839)}
{pt3dadd(166752.000000,102228.000000,69700.000000,147.254936)}
{pt3dadd(166836.000000,102072.000000,69750.000000,116.095032)}
{pt3dadd(166896.000000,101928.000000,69875.000000,121.899785)}
{pt3dadd(166956.000000,101820.000000,70075.000000,127.704537)}
{pt3dadd(166956.000000,101712.000000,70300.000000,133.509289)}
{pt3dadd(166956.000000,101604.000000,70525.000000,139.314042)}
{pt3dadd(166956.000000,101388.000000,70700.000000,164.669193)}
{pt3dadd(167100.000000,101064.000000,70925.000000,190.024344)}
{pt3dadd(167316.000000,100632.000000,71050.000000,215.379495)}
{pt3dadd(167436.000000,100272.000000,71250.000000,240.734646)}
{pt3dadd(167352.000000,99576.000000,71450.000000,209.574742)}
{pt3dadd(167340.000000,99432.000000,71675.000000,178.414839)}
{pt3dadd(167184.000000,99336.000000,71575.000000,147.254936)}
{pt3dadd(167064.000000,99096.000000,71700.000000,116.095032)}
{pt3dadd(166860.000000,98592.000000,71775.000000,128.865483)}
{pt3dadd(166656.000000,98436.000000,71875.000000,141.635934)}
{pt3dadd(166476.000000,98040.000000,71900.000000,154.406385)}
{pt3dadd(166308.000000,97932.000000,72025.000000,167.176836)}
{pt3dadd(166176.000000,97728.000000,72075.000000,197.603024)}
{pt3dadd(166044.000000,97656.000000,72100.000000,228.029211)}
{pt3dadd(166200.000000,97836.000000,72375.000000,258.455399)}
{pt3dadd(166236.000000,97788.000000,72600.000000,288.881586)}
{pt3dadd(166236.000000,97872.000000,72875.000000,251.489700)}
{pt3dadd(166332.000000,97872.000000,73125.000000,214.097814)}
{pt3dadd(166392.000000,97968.000000,73425.000000,176.705928)}
{pt3dadd(166416.000000,97956.000000,73625.000000,139.314042)}
{pt3dadd(166464.000000,97932.000000,73800.000000,146.279741)}
{pt3dadd(166488.000000,97908.000000,74000.000000,153.245439)}
{pt3dadd(166428.000000,97812.000000,74200.000000,160.211138)}
{pt3dadd(166572.000000,97956.000000,74400.000000,167.176836)}
{pt3dadd(166728.000000,98016.000000,74575.000000,167.176836)}
{pt3dadd(166788.000000,98016.000000,74825.000000,167.176836)}
{pt3dadd(166944.000000,98040.000000,75000.000000,167.176836)}
{pt3dadd(167076.000000,98004.000000,75200.000000,167.176836)}
{pt3dadd(167184.000000,98004.000000,75400.000000,175.535680)}
{pt3dadd(167316.000000,98472.000000,75525.000000,183.894525)}
{pt3dadd(167520.000000,98532.000000,75650.000000,192.253370)}
{pt3dadd(167676.000000,98640.000000,75600.000000,200.612214)}
{pt3dadd(167820.000000,98724.000000,75575.000000,210.642822)}
{pt3dadd(167940.000000,98724.000000,75575.000000,220.673430)}
{pt3dadd(168084.000000,98772.000000,75600.000000,230.704038)}
{pt3dadd(168264.000000,98808.000000,75575.000000,240.734646)}
{pt3dadd(168420.000000,98964.000000,75425.000000,216.215376)}
{pt3dadd(168564.000000,98892.000000,75350.000000,191.696106)}
{pt3dadd(168684.000000,98964.000000,75275.000000,167.176836)}
{pt3dadd(168816.000000,99024.000000,75350.000000,167.176836)}

{create adhoc80}
{access adhoc80}
{connect adhoc80(1), adhoc78(0)}
{nseg = 1}
{strdef color color = "White"}
{pt3dclear()}
{pt3dadd(169872.000000,108492.000000,67100.000000,690.076674)}
{pt3dadd(169368.000000,107352.000000,66900.000000,346.657896)}
{pt3dadd(169140.000000,106668.000000,66700.000000,332.213819)}
{pt3dadd(169344.000000,106428.000000,66450.000000,317.769741)}
{pt3dadd(169392.000000,106020.000000,66200.000000,303.325664)}
{pt3dadd(169404.000000,105840.000000,66100.000000,288.881586)}
{pt3dadd(169440.000000,105672.000000,66000.000000,303.325664)}
{pt3dadd(169356.000000,105468.000000,65900.000000,317.769741)}
{pt3dadd(169380.000000,105300.000000,65725.000000,332.213819)}
{pt3dadd(169440.000000,105144.000000,65675.000000,346.657896)}
{pt3dadd(169488.000000,105012.000000,65600.000000,332.213819)}
{pt3dadd(169512.000000,104880.000000,65525.000000,317.769741)}
{pt3dadd(169428.000000,104724.000000,65325.000000,303.325664)}
{pt3dadd(169416.000000,104568.000000,65300.000000,288.881586)}
{pt3dadd(169404.000000,104436.000000,65175.000000,276.844851)}
{pt3dadd(169236.000000,104268.000000,65175.000000,264.808116)}
{pt3dadd(169248.000000,104100.000000,65075.000000,252.771381)}
{pt3dadd(169236.000000,103932.000000,65025.000000,240.734646)}
{pt3dadd(169164.000000,103728.000000,65050.000000,252.771381)}
{pt3dadd(169284.000000,103548.000000,64825.000000,264.808116)}
{pt3dadd(169212.000000,103392.000000,64550.000000,276.844851)}
{pt3dadd(169332.000000,103212.000000,64500.000000,288.881586)}
{pt3dadd(169332.000000,103080.000000,64400.000000,303.325664)}
{pt3dadd(169344.000000,102912.000000,64400.000000,317.769741)}
{pt3dadd(169344.000000,102744.000000,64400.000000,332.213819)}
{pt3dadd(169320.000000,102576.000000,64275.000000,346.657896)}
{pt3dadd(169248.000000,102444.000000,64100.000000,320.177083)}
{pt3dadd(169164.000000,102336.000000,64000.000000,293.696271)}
{pt3dadd(169140.000000,102180.000000,63775.000000,267.215459)}
{pt3dadd(169056.000000,102036.000000,63750.000000,240.734646)}
{pt3dadd(168984.000000,101892.000000,63725.000000,230.704038)}
{pt3dadd(169020.000000,101736.000000,63625.000000,220.673430)}
{pt3dadd(169056.000000,101604.000000,63450.000000,210.642822)}
{pt3dadd(169092.000000,101472.000000,63275.000000,200.612214)}
{pt3dadd(169188.000000,101316.000000,63225.000000,222.679557)}
{pt3dadd(169284.000000,101172.000000,63175.000000,244.746900)}
{pt3dadd(169440.000000,101016.000000,63250.000000,266.814243)}
{pt3dadd(169488.000000,100860.000000,63250.000000,288.881586)}
{pt3dadd(169416.000000,100704.000000,63200.000000,276.844851)}
{pt3dadd(169344.000000,100548.000000,63100.000000,264.808116)}
{pt3dadd(169272.000000,100416.000000,63050.000000,252.771381)}
{pt3dadd(169236.000000,100272.000000,63075.000000,240.734646)}
{pt3dadd(169188.000000,100116.000000,63100.000000,252.771381)}
{pt3dadd(169164.000000,99960.000000,63175.000000,264.808116)}
{pt3dadd(169140.000000,99828.000000,63250.000000,276.844851)}
{pt3dadd(168828.000000,99696.000000,63275.000000,288.881586)}
{pt3dadd(168756.000000,99528.000000,63375.000000,237.168216)}
{pt3dadd(168696.000000,99372.000000,63500.000000,185.454846)}
{pt3dadd(168780.000000,99264.000000,63600.000000,133.741476)}
{pt3dadd(168600.000000,99144.000000,63650.000000,116.095032)}

{create adhoc81}
{access adhoc81}
{connect adhoc81(1), adhoc77(0)}
{nseg = 1}
{strdef color color = "White"}
{pt3dclear()}
{pt3dadd(170352.000000,109716.000000,69200.000000,1035.114948)}
{pt3dadd(170424.000000,110988.000000,69000.000000,139.314042)}
{pt3dadd(170136.000000,111156.000000,68875.000000,167.176836)}
{pt3dadd(170004.000000,111348.000000,68775.000000,116.095032)}

{create adhoc82}
{access adhoc82}
{connect adhoc82(1), adhoc76(0)}
{nseg = 1}
{strdef color color = "White"}
{pt3dclear()}
{pt3dadd(173748.000000,111504.000000,78850.000000,862.595802)}
{pt3dadd(174132.000000,110292.000000,78675.000000,368.040852)}
{pt3dadd(174396.000000,109308.000000,78425.000000,380.028011)}
{pt3dadd(174144.000000,109296.000000,78200.000000,392.015169)}
{pt3dadd(173964.000000,108960.000000,77975.000000,404.002327)}
{pt3dadd(173904.000000,108624.000000,77775.000000,415.989486)}
{pt3dadd(173832.000000,108288.000000,77575.000000,415.989486)}
{pt3dadd(173724.000000,107988.000000,77350.000000,415.989486)}
{pt3dadd(173760.000000,107940.000000,77150.000000,415.989486)}
{pt3dadd(173820.000000,107736.000000,76950.000000,415.989486)}
{pt3dadd(173664.000000,107280.000000,76725.000000,346.657896)}
{pt3dadd(173736.000000,107052.000000,76500.000000,415.989486)}

{create adhoc83}
{access adhoc83}
{connect adhoc83(1), adhoc82(0)}
{nseg = 1}
{strdef color color = "White"}
{pt3dclear()}
{pt3dadd(173736.000000,107052.000000,76500.000000,415.989486)}
{pt3dadd(173832.000000,106884.000000,76275.000000,499.187376)}
{pt3dadd(173904.000000,106668.000000,76050.000000,499.187376)}
{pt3dadd(173748.000000,106260.000000,75850.000000,499.187376)}
{pt3dadd(173376.000000,105588.000000,75550.000000,499.187376)}
{pt3dadd(173364.000000,105312.000000,75350.000000,499.187376)}
{pt3dadd(173364.000000,105156.000000,75250.000000,499.187376)}
{pt3dadd(173256.000000,104940.000000,75100.000000,499.187376)}
{pt3dadd(172944.000000,104688.000000,75050.000000,499.187376)}
{pt3dadd(172572.000000,104520.000000,75150.000000,499.187376)}
{pt3dadd(172392.000000,104328.000000,75200.000000,499.187376)}
{pt3dadd(172320.000000,104136.000000,75025.000000,499.187376)}
{pt3dadd(172356.000000,103968.000000,74975.000000,499.187376)}
{pt3dadd(172212.000000,103800.000000,74975.000000,499.187376)}
{pt3dadd(172068.000000,103608.000000,74975.000000,474.228009)}
{pt3dadd(171876.000000,103428.000000,74850.000000,449.268642)}
{pt3dadd(171696.000000,103272.000000,74675.000000,424.309275)}
{pt3dadd(171624.000000,103092.000000,74425.000000,399.349908)}
{pt3dadd(171576.000000,102924.000000,74350.000000,386.176905)}
{pt3dadd(171600.000000,102732.000000,74500.000000,373.003902)}
{pt3dadd(171660.000000,102528.000000,74400.000000,359.830899)}
{pt3dadd(171600.000000,102396.000000,74400.000000,346.657896)}
{pt3dadd(171588.000000,102264.000000,74475.000000,343.191321)}
{pt3dadd(171564.000000,102120.000000,74350.000000,339.724746)}
{pt3dadd(171624.000000,101952.000000,74375.000000,336.258171)}
{pt3dadd(171600.000000,101808.000000,74375.000000,332.791596)}
{pt3dadd(171576.000000,101700.000000,74375.000000,336.258171)}
{pt3dadd(171552.000000,101520.000000,74300.000000,339.724746)}
{pt3dadd(171528.000000,101352.000000,74225.000000,343.191321)}
{pt3dadd(171384.000000,101208.000000,74075.000000,346.657896)}
{pt3dadd(171348.000000,101064.000000,74050.000000,343.191312)}
{pt3dadd(171312.000000,100932.000000,74025.000000,339.724728)}
{pt3dadd(171276.000000,100800.000000,74000.000000,336.258144)}
{pt3dadd(171324.000000,100644.000000,73900.000000,332.791560)}
{pt3dadd(171360.000000,100512.000000,73775.000000,374.390514)}
{pt3dadd(171324.000000,100392.000000,73625.000000,415.989468)}
{pt3dadd(171288.000000,100284.000000,73475.000000,457.588422)}
{pt3dadd(171120.000000,100164.000000,73375.000000,499.187376)}
{pt3dadd(171108.000000,100056.000000,73375.000000,478.387903)}
{pt3dadd(171096.000000,99936.000000,73300.000000,457.588431)}
{pt3dadd(171084.000000,99768.000000,73225.000000,436.788958)}
{pt3dadd(170916.000000,99636.000000,72975.000000,415.989486)}
{pt3dadd(170760.000000,99516.000000,72800.000000,374.390541)}
{pt3dadd(170748.000000,99396.000000,72650.000000,332.791596)}
{pt3dadd(170496.000000,99288.000000,72450.000000,441.649044)}

{create adhoc84}
{access adhoc84}
{connect adhoc84(1), adhoc83(0)}
{nseg = 1}
{strdef color color = "White"}
{pt3dclear()}
{pt3dadd(170496.000000,99288.000000,72450.000000,441.649044)}
{pt3dadd(170340.000000,98868.000000,72150.000000,479.219886)}
{pt3dadd(170172.000000,98616.000000,72125.000000,527.141871)}
{pt3dadd(170028.000000,98748.000000,72050.000000,575.063856)}
{pt3dadd(169872.000000,98820.000000,71950.000000,599.024880)}

{create adhoc85}
{access adhoc85}
{connect adhoc85(1), adhoc84(0)}
{nseg = 1}
{strdef color color = "White"}
{pt3dclear()}
{pt3dadd(169872.000000,98820.000000,71950.000000,599.024880)}
{pt3dadd(169716.000000,98880.000000,71600.000000,499.187376)}
{pt3dadd(169548.000000,98868.000000,71375.000000,478.387903)}
{pt3dadd(169416.000000,98796.000000,71225.000000,457.588431)}
{pt3dadd(169416.000000,98760.000000,71025.000000,436.788958)}
{pt3dadd(169152.000000,98736.000000,70775.000000,415.989486)}
{pt3dadd(169092.000000,98664.000000,70600.000000,398.656589)}
{pt3dadd(169020.000000,98544.000000,70400.000000,381.323691)}
{pt3dadd(168972.000000,98460.000000,70225.000000,363.990794)}
{pt3dadd(168960.000000,98388.000000,69975.000000,346.657896)}
{pt3dadd(168828.000000,98328.000000,69800.000000,240.734646)}

{create adhoc86}
{access adhoc86}
{connect adhoc86(1), adhoc85(0)}
{nseg = 1}
{strdef color color = "White"}
{pt3dclear()}
{pt3dadd(168828.000000,98328.000000,69800.000000,240.734646)}
{pt3dadd(169104.000000,98688.000000,69550.000000,288.881586)}
{pt3dadd(169152.000000,98772.000000,69325.000000,258.455399)}
{pt3dadd(169284.000000,98844.000000,69075.000000,228.029211)}
{pt3dadd(169272.000000,98772.000000,68850.000000,197.603024)}
{pt3dadd(169344.000000,98664.000000,68600.000000,167.176836)}
{pt3dadd(169320.000000,98460.000000,68375.000000,185.566288)}
{pt3dadd(169404.000000,98400.000000,68150.000000,203.955741)}
{pt3dadd(169284.000000,98268.000000,67975.000000,222.345193)}
{pt3dadd(169212.000000,98148.000000,67750.000000,240.734646)}
{pt3dadd(169068.000000,97704.000000,67525.000000,139.314042)}
{pt3dadd(169104.000000,97716.000000,67375.000000,167.176836)}

{create adhoc87}
{access adhoc87}
{connect adhoc87(1), adhoc85(0)}
{nseg = 1}
{strdef color color = "White"}
{pt3dclear()}
{pt3dadd(168828.000000,98328.000000,69800.000000,240.734646)}
{pt3dadd(168696.000000,97644.000000,69675.000000,139.314042)}
{pt3dadd(168708.000000,97500.000000,69650.000000,146.279741)}
{pt3dadd(168660.000000,97356.000000,69575.000000,153.245439)}
{pt3dadd(168600.000000,97260.000000,69500.000000,160.211138)}
{pt3dadd(168648.000000,97152.000000,69450.000000,167.176836)}
{pt3dadd(168576.000000,97044.000000,69475.000000,154.406385)}
{pt3dadd(168564.000000,96924.000000,69525.000000,141.635934)}
{pt3dadd(168576.000000,96780.000000,69600.000000,128.865483)}
{pt3dadd(168540.000000,96660.000000,69450.000000,116.095032)}
{pt3dadd(168468.000000,96516.000000,69525.000000,128.865483)}
{pt3dadd(168396.000000,96384.000000,69475.000000,141.635934)}
{pt3dadd(168480.000000,96252.000000,69425.000000,154.406385)}
{pt3dadd(168408.000000,96108.000000,69575.000000,167.176836)}
{pt3dadd(168276.000000,95976.000000,69500.000000,197.603024)}
{pt3dadd(168132.000000,95868.000000,69500.000000,228.029211)}
{pt3dadd(168132.000000,95556.000000,69500.000000,258.455399)}
{pt3dadd(168132.000000,95208.000000,69500.000000,288.881586)}
{pt3dadd(168132.000000,94860.000000,69500.000000,258.455399)}
{pt3dadd(168180.000000,94716.000000,69500.000000,228.029211)}
{pt3dadd(168324.000000,94560.000000,69450.000000,197.603024)}
{pt3dadd(168516.000000,94428.000000,69475.000000,167.176836)}
{pt3dadd(168624.000000,94056.000000,69625.000000,141.635934)}
{pt3dadd(168732.000000,93972.000000,69725.000000,116.095032)}
{pt3dadd(168852.000000,93876.000000,69825.000000,133.741476)}

{create adhoc88}
{access adhoc88}
{connect adhoc88(1), adhoc84(0)}
{nseg = 1}
{strdef color color = "White"}
{pt3dclear()}
{pt3dadd(169872.000000,98820.000000,71950.000000,599.024880)}
{pt3dadd(169776.000000,97200.000000,72500.000000,240.734646)}
{pt3dadd(169644.000000,96516.000000,72675.000000,267.215459)}
{pt3dadd(169476.000000,96108.000000,73000.000000,293.696271)}
{pt3dadd(169680.000000,95928.000000,73300.000000,320.177083)}
{pt3dadd(169980.000000,95976.000000,73550.000000,346.657896)}
{pt3dadd(170448.000000,95892.000000,73825.000000,294.821933)}
{pt3dadd(171024.000000,95820.000000,74075.000000,242.985969)}
{pt3dadd(171324.000000,95916.000000,74300.000000,191.150005)}
{pt3dadd(171408.000000,95964.000000,74500.000000,139.314042)}
{pt3dadd(171264.000000,95940.000000,74775.000000,139.314042)}
{pt3dadd(171588.000000,95760.000000,74975.000000,139.314042)}
{pt3dadd(171720.000000,95688.000000,75175.000000,116.095032)}

{create adhoc89}
{access adhoc89}
{connect adhoc89(1), adhoc83(0)}
{nseg = 1}
{strdef color color = "White"}
{pt3dclear()}
{pt3dadd(170496.000000,99288.000000,72450.000000,441.649044)}
{pt3dadd(171084.000000,99216.000000,73300.000000,139.314042)}
{pt3dadd(171060.000000,99108.000000,73300.000000,127.704537)}
{pt3dadd(170988.000000,98988.000000,73400.000000,116.095032)}
{pt3dadd(171012.000000,98868.000000,73325.000000,116.095032)}

{create adhoc90}
{access adhoc90}
{connect adhoc90(1), adhoc82(0)}
{nseg = 1}
{strdef color color = "White"}
{pt3dclear()}
{pt3dadd(173736.000000,107052.000000,76500.000000,415.989486)}
{pt3dadd(173472.000000,106248.000000,76675.000000,139.314042)}
{pt3dadd(173292.000000,105972.000000,76875.000000,139.314042)}
{pt3dadd(173268.000000,105912.000000,77025.000000,139.314042)}
{pt3dadd(173052.000000,105672.000000,77175.000000,139.314042)}
{pt3dadd(172932.000000,105504.000000,77125.000000,240.734646)}

{create adhoc91}
{access adhoc91}
{connect adhoc91(1), adhoc75(0)}
{nseg = 1}
{strdef color color = "White"}
{pt3dclear()}
{pt3dadd(175800.000000,113376.000000,81025.000000,718.829820)}
{pt3dadd(177132.000000,113256.000000,81650.000000,200.612214)}
{pt3dadd(177204.000000,113088.000000,81650.000000,200.612214)}
{pt3dadd(177012.000000,112944.000000,81625.000000,200.612214)}
{pt3dadd(176856.000000,112404.000000,81750.000000,200.612214)}
{pt3dadd(176712.000000,112020.000000,81825.000000,200.612214)}
{pt3dadd(176568.000000,111888.000000,81900.000000,222.679557)}
{pt3dadd(176436.000000,111828.000000,81850.000000,244.746900)}
{pt3dadd(176304.000000,111516.000000,81925.000000,266.814243)}
{pt3dadd(176196.000000,111264.000000,81900.000000,288.881586)}
{pt3dadd(176064.000000,111012.000000,81875.000000,288.881586)}
{pt3dadd(175920.000000,110700.000000,81900.000000,288.881586)}
{pt3dadd(175860.000000,110556.000000,81850.000000,288.881586)}
{pt3dadd(175788.000000,110424.000000,81825.000000,288.881586)}
{pt3dadd(175644.000000,110304.000000,81825.000000,303.325664)}
{pt3dadd(175740.000000,110184.000000,81900.000000,317.769741)}
{pt3dadd(175704.000000,110040.000000,81825.000000,332.213819)}
{pt3dadd(175668.000000,109896.000000,81775.000000,346.657896)}
{pt3dadd(175596.000000,109764.000000,81800.000000,332.213819)}
{pt3dadd(175524.000000,109644.000000,81825.000000,317.769741)}
{pt3dadd(175452.000000,109512.000000,81850.000000,303.325664)}
{pt3dadd(175404.000000,109380.000000,81800.000000,288.881586)}
{pt3dadd(175512.000000,109260.000000,81750.000000,303.325664)}
{pt3dadd(175440.000000,109152.000000,81700.000000,317.769741)}
{pt3dadd(175332.000000,109032.000000,81750.000000,332.213819)}
{pt3dadd(175296.000000,108924.000000,81675.000000,346.657896)}
{pt3dadd(175260.000000,108792.000000,81575.000000,332.213819)}
{pt3dadd(175212.000000,108684.000000,81475.000000,317.769741)}
{pt3dadd(175152.000000,108552.000000,81500.000000,303.325664)}
{pt3dadd(175128.000000,108432.000000,81425.000000,288.881586)}
{pt3dadd(175104.000000,108324.000000,81350.000000,285.992775)}
{pt3dadd(175056.000000,108192.000000,81275.000000,283.103964)}
{pt3dadd(174984.000000,108072.000000,81250.000000,280.215153)}
{pt3dadd(174972.000000,107940.000000,81125.000000,277.326342)}
{pt3dadd(174912.000000,107784.000000,81150.000000,265.771075)}
{pt3dadd(174852.000000,107652.000000,81050.000000,254.215809)}
{pt3dadd(174648.000000,107508.000000,80950.000000,242.660543)}
{pt3dadd(174528.000000,107388.000000,80925.000000,231.105276)}
{pt3dadd(174456.000000,107280.000000,80875.000000,223.482010)}
{pt3dadd(174504.000000,107160.000000,80900.000000,215.858745)}
{pt3dadd(174432.000000,107028.000000,80800.000000,208.235480)}
{pt3dadd(174504.000000,106908.000000,80800.000000,200.612214)}
{pt3dadd(174384.000000,106788.000000,80825.000000,200.612214)}
{pt3dadd(174372.000000,106680.000000,80750.000000,200.612214)}
{pt3dadd(174396.000000,106560.000000,80825.000000,288.881586)}

{create adhoc92}
{access adhoc92}
{connect adhoc92(1), adhoc91(0)}
{nseg = 1}
{strdef color color = "White"}
{pt3dclear()}
{pt3dadd(174396.000000,106560.000000,80825.000000,288.881586)}
{pt3dadd(174396.000000,106404.000000,80725.000000,200.612214)}
{pt3dadd(174324.000000,106272.000000,80625.000000,210.642822)}
{pt3dadd(174252.000000,106176.000000,80650.000000,220.673430)}
{pt3dadd(174120.000000,106056.000000,80625.000000,230.704038)}
{pt3dadd(174120.000000,105924.000000,80550.000000,240.734646)}
{pt3dadd(174048.000000,105768.000000,80525.000000,252.771381)}
{pt3dadd(174012.000000,105636.000000,80475.000000,264.808116)}
{pt3dadd(174000.000000,105516.000000,80500.000000,276.844851)}
{pt3dadd(173952.000000,105396.000000,80475.000000,288.881586)}
{pt3dadd(173904.000000,105264.000000,80425.000000,288.881586)}
{pt3dadd(173856.000000,105132.000000,80375.000000,288.881586)}
{pt3dadd(173772.000000,105000.000000,80425.000000,288.881586)}
{pt3dadd(173796.000000,104880.000000,80400.000000,288.881586)}
{pt3dadd(173820.000000,104772.000000,80375.000000,288.881586)}
{pt3dadd(173880.000000,104652.000000,80400.000000,288.881586)}
{pt3dadd(173940.000000,104532.000000,80400.000000,288.881586)}
{pt3dadd(174000.000000,104412.000000,80375.000000,288.881586)}
{pt3dadd(173988.000000,104292.000000,80250.000000,303.325664)}
{pt3dadd(173976.000000,104172.000000,80375.000000,317.769741)}
{pt3dadd(173988.000000,104076.000000,80400.000000,332.213819)}
{pt3dadd(174036.000000,103980.000000,80400.000000,346.657896)}
{pt3dadd(174216.000000,103848.000000,80425.000000,363.990794)}
{pt3dadd(174252.000000,103728.000000,80500.000000,381.323691)}
{pt3dadd(174372.000000,103596.000000,80550.000000,398.656589)}
{pt3dadd(174432.000000,103452.000000,80700.000000,415.989486)}
{pt3dadd(174336.000000,103332.000000,80700.000000,398.656589)}
{pt3dadd(174252.000000,103188.000000,80650.000000,381.323691)}
{pt3dadd(174180.000000,103056.000000,80650.000000,363.990794)}
{pt3dadd(174132.000000,102924.000000,80725.000000,346.657896)}
{pt3dadd(174084.000000,102792.000000,80800.000000,332.213819)}
{pt3dadd(174144.000000,102660.000000,80750.000000,317.769741)}
{pt3dadd(174024.000000,102516.000000,80725.000000,303.325664)}
{pt3dadd(173904.000000,102384.000000,80700.000000,288.881586)}
{pt3dadd(173856.000000,102288.000000,80700.000000,332.791596)}
{pt3dadd(173808.000000,102288.000000,80700.000000,346.657896)}

{create adhoc93}
{access adhoc93}
{connect adhoc93(1), adhoc92(0)}
{nseg = 1}
{strdef color color = "White"}
{pt3dclear()}
{pt3dadd(173808.000000,102288.000000,80700.000000,346.657896)}
{pt3dadd(173808.000000,102156.000000,81300.000000,160.489764)}
{pt3dadd(173832.000000,101988.000000,81500.000000,170.520377)}
{pt3dadd(173436.000000,101904.000000,81675.000000,180.550989)}
{pt3dadd(173292.000000,101808.000000,81825.000000,190.581602)}
{pt3dadd(173100.000000,101736.000000,81875.000000,200.612214)}
{pt3dadd(172944.000000,101328.000000,82400.000000,174.645625)}
{pt3dadd(172776.000000,101172.000000,82550.000000,148.679037)}
{pt3dadd(172956.000000,101244.000000,82775.000000,122.712448)}
{pt3dadd(172764.000000,101016.000000,82975.000000,96.745860)}
{pt3dadd(172824.000000,100860.000000,82875.000000,139.314042)}

{create adhoc94}
{access adhoc94}
{connect adhoc94(1), adhoc92(0)}
{nseg = 1}
{strdef color color = "White"}
{pt3dclear()}
{pt3dadd(173808.000000,102288.000000,80700.000000,346.657896)}
{pt3dadd(173700.000000,102120.000000,80600.000000,240.734646)}
{pt3dadd(173712.000000,101976.000000,80550.000000,222.345193)}
{pt3dadd(173712.000000,101796.000000,80500.000000,203.955741)}
{pt3dadd(173712.000000,101664.000000,80450.000000,185.566288)}
{pt3dadd(173712.000000,101520.000000,80500.000000,167.176836)}
{pt3dadd(173712.000000,101376.000000,80450.000000,160.211138)}
{pt3dadd(173700.000000,101232.000000,80500.000000,153.245439)}
{pt3dadd(173748.000000,101100.000000,80425.000000,146.279741)}
{pt3dadd(173808.000000,100956.000000,80425.000000,139.314042)}
{pt3dadd(173712.000000,100812.000000,80425.000000,139.314042)}
{pt3dadd(173736.000000,100668.000000,80525.000000,139.314042)}
{pt3dadd(173688.000000,100572.000000,80650.000000,139.314042)}
{pt3dadd(173568.000000,100464.000000,80525.000000,139.314042)}
{pt3dadd(173616.000000,100356.000000,80475.000000,139.314042)}
{pt3dadd(173568.000000,100236.000000,80450.000000,139.314042)}
{pt3dadd(173472.000000,100092.000000,80400.000000,139.314042)}
{pt3dadd(173460.000000,99972.000000,80450.000000,139.314042)}
{pt3dadd(173388.000000,99816.000000,80475.000000,154.638585)}
{pt3dadd(173328.000000,99684.000000,80475.000000,169.963128)}
{pt3dadd(173208.000000,99552.000000,80525.000000,185.287671)}
{pt3dadd(173052.000000,99432.000000,80500.000000,200.612214)}
{pt3dadd(172896.000000,99312.000000,80500.000000,222.679557)}
{pt3dadd(172884.000000,99192.000000,80500.000000,244.746900)}
{pt3dadd(172872.000000,99084.000000,80575.000000,266.814243)}
{pt3dadd(172752.000000,98988.000000,80525.000000,288.881586)}
{pt3dadd(172668.000000,98880.000000,80550.000000,285.992771)}
{pt3dadd(172644.000000,98784.000000,80625.000000,283.103955)}
{pt3dadd(172632.000000,98664.000000,80700.000000,280.215140)}
{pt3dadd(172620.000000,98556.000000,80775.000000,277.326324)}
{pt3dadd(172620.000000,98448.000000,80900.000000,268.178405)}
{pt3dadd(172620.000000,98340.000000,81025.000000,259.030485)}
{pt3dadd(172728.000000,98076.000000,81300.000000,249.882566)}
{pt3dadd(172752.000000,97968.000000,81475.000000,240.734646)}
{pt3dadd(172944.000000,97800.000000,81675.000000,222.345193)}
{pt3dadd(172956.000000,97392.000000,81875.000000,203.955741)}
{pt3dadd(172944.000000,97056.000000,82050.000000,185.566288)}
{pt3dadd(172848.000000,96864.000000,82250.000000,167.176836)}
{pt3dadd(172752.000000,96744.000000,82400.000000,167.176836)}
{pt3dadd(172848.000000,96540.000000,82650.000000,167.176836)}
{pt3dadd(172896.000000,96480.000000,82875.000000,167.176836)}
{pt3dadd(172872.000000,96396.000000,83050.000000,167.176836)}
{pt3dadd(172908.000000,96336.000000,83225.000000,167.176836)}
{pt3dadd(172812.000000,96336.000000,83400.000000,167.176836)}
{pt3dadd(172740.000000,96300.000000,83575.000000,167.176836)}
{pt3dadd(172668.000000,96264.000000,83750.000000,167.176836)}
{pt3dadd(172596.000000,96228.000000,83900.000000,167.176836)}
{pt3dadd(172524.000000,96192.000000,84050.000000,167.176836)}

{create adhoc95}
{access adhoc95}
{connect adhoc95(1), adhoc91(0)}
{nseg = 1}
{strdef color color = "White"}
{pt3dclear()}
{pt3dadd(174396.000000,106560.000000,80825.000000,288.881586)}
{pt3dadd(174276.000000,106464.000000,81450.000000,96.745860)}
{pt3dadd(174228.000000,106356.000000,81650.000000,96.745860)}
{pt3dadd(174240.000000,106260.000000,81650.000000,96.745860)}

{create adhoc96}
{access adhoc96}
{connect adhoc96(1), adhoc74(0)}
{nseg = 1}
{strdef color color = "White"}
{pt3dclear()}
{pt3dadd(177552.000000,116040.000000,82825.000000,718.829820)}
{pt3dadd(178668.000000,115896.000000,84000.000000,192.587760)}
{pt3dadd(179052.000000,115776.000000,84300.000000,231.105294)}
{pt3dadd(179124.000000,115656.000000,84500.000000,269.622828)}
{pt3dadd(179148.000000,115548.000000,84475.000000,308.140362)}
{pt3dadd(179184.000000,115428.000000,84600.000000,346.657896)}
{pt3dadd(179328.000000,115344.000000,84725.000000,343.191321)}
{pt3dadd(179364.000000,115200.000000,84950.000000,339.724746)}
{pt3dadd(179448.000000,115020.000000,85175.000000,336.258171)}
{pt3dadd(179472.000000,114876.000000,85375.000000,332.791596)}
{pt3dadd(179520.000000,114564.000000,85550.000000,321.814093)}
{pt3dadd(179460.000000,114480.000000,85725.000000,310.836591)}
{pt3dadd(179580.000000,114348.000000,85950.000000,299.859089)}
{pt3dadd(179628.000000,114024.000000,86150.000000,288.881586)}
{pt3dadd(179676.000000,113820.000000,86300.000000,310.836591)}
{pt3dadd(179640.000000,113412.000000,86550.000000,332.791596)}
{pt3dadd(179736.000000,113124.000000,86750.000000,346.657896)}

{create adhoc97}
{access adhoc97}
{connect adhoc97(1), adhoc96(0)}
{nseg = 1}
{strdef color color = "White"}
{pt3dclear()}
{pt3dadd(179736.000000,113124.000000,86750.000000,346.657896)}
{pt3dadd(179676.000000,113604.000000,86800.000000,240.734646)}
{pt3dadd(179676.000000,113628.000000,87000.000000,240.734646)}

{create adhoc98}
{access adhoc98}
{connect adhoc98(1), adhoc96(0)}
{nseg = 1}
{strdef color color = "White"}
{pt3dclear()}
{pt3dadd(179736.000000,113124.000000,86750.000000,346.657896)}
{pt3dadd(179652.000000,112164.000000,86950.000000,240.734646)}
{pt3dadd(179892.000000,111720.000000,87175.000000,240.734646)}
{pt3dadd(179892.000000,111252.000000,87350.000000,240.734646)}
{pt3dadd(180024.000000,110988.000000,87550.000000,240.734646)}
{pt3dadd(180132.000000,110628.000000,87725.000000,240.734646)}
{pt3dadd(180168.000000,110508.000000,87750.000000,240.734646)}
{pt3dadd(180264.000000,110412.000000,87700.000000,240.734646)}
{pt3dadd(180240.000000,110292.000000,87850.000000,240.734646)}
{pt3dadd(180216.000000,110160.000000,87975.000000,240.734646)}
{pt3dadd(180240.000000,110028.000000,88000.000000,222.345193)}
{pt3dadd(180300.000000,109908.000000,87950.000000,203.955741)}
{pt3dadd(180228.000000,109788.000000,87975.000000,185.566288)}
{pt3dadd(180156.000000,109632.000000,88125.000000,167.176836)}
{pt3dadd(180180.000000,109512.000000,88075.000000,167.176836)}
{pt3dadd(180144.000000,109392.000000,88100.000000,167.176836)}
{pt3dadd(180120.000000,109236.000000,88125.000000,167.176836)}
{pt3dadd(179928.000000,109104.000000,88075.000000,167.176836)}
{pt3dadd(179808.000000,108960.000000,88125.000000,185.566288)}
{pt3dadd(179688.000000,108828.000000,88150.000000,203.955741)}
{pt3dadd(179592.000000,108684.000000,88150.000000,222.345193)}
{pt3dadd(179544.000000,108552.000000,88200.000000,240.734646)}
{pt3dadd(179496.000000,108444.000000,88250.000000,249.882566)}
{pt3dadd(179424.000000,108312.000000,88300.000000,259.030485)}
{pt3dadd(179280.000000,108180.000000,88350.000000,268.178405)}
{pt3dadd(179160.000000,108084.000000,88450.000000,277.326324)}
{pt3dadd(179076.000000,107940.000000,88375.000000,280.215140)}
{pt3dadd(179052.000000,107772.000000,88575.000000,283.103955)}
{pt3dadd(179088.000000,107652.000000,88600.000000,285.992771)}
{pt3dadd(179088.000000,107544.000000,88725.000000,288.881586)}
{pt3dadd(179076.000000,107424.000000,88825.000000,303.325664)}
{pt3dadd(179004.000000,107316.000000,88975.000000,317.769741)}
{pt3dadd(178872.000000,107208.000000,89075.000000,332.213819)}
{pt3dadd(178764.000000,107112.000000,89225.000000,346.657896)}
{pt3dadd(178764.000000,107040.000000,89300.000000,332.213819)}
{pt3dadd(178692.000000,106920.000000,89350.000000,317.769741)}
{pt3dadd(178608.000000,106800.000000,89550.000000,303.325664)}
{pt3dadd(178560.000000,106692.000000,89700.000000,288.881586)}
{pt3dadd(178500.000000,106560.000000,89750.000000,288.881586)}
{pt3dadd(178440.000000,106452.000000,89800.000000,288.881586)}
{pt3dadd(178452.000000,106356.000000,89925.000000,288.881586)}
{pt3dadd(178320.000000,106224.000000,90025.000000,288.881586)}
{pt3dadd(178224.000000,106116.000000,90150.000000,299.859089)}
{pt3dadd(178152.000000,106008.000000,90225.000000,310.836591)}
{pt3dadd(178080.000000,105888.000000,90300.000000,321.814093)}
{pt3dadd(178092.000000,105768.000000,90500.000000,332.791596)}
{pt3dadd(178200.000000,105852.000000,90675.000000,353.591069)}
{pt3dadd(178104.000000,105672.000000,90850.000000,374.390541)}
{pt3dadd(178116.000000,105600.000000,91050.000000,395.190014)}
{pt3dadd(178128.000000,105696.000000,91225.000000,415.989486)}
{pt3dadd(178080.000000,105744.000000,91450.000000,372.175776)}
{pt3dadd(178260.000000,105696.000000,91625.000000,328.362066)}
{pt3dadd(178308.000000,105672.000000,91850.000000,284.548356)}
{pt3dadd(178296.000000,105528.000000,92075.000000,240.734646)}
{pt3dadd(178332.000000,105420.000000,92400.000000,204.737450)}
{pt3dadd(178692.000000,105336.000000,92625.000000,168.740253)}
{pt3dadd(178800.000000,105396.000000,92850.000000,132.743057)}
{pt3dadd(179040.000000,105444.000000,93025.000000,96.745860)}
{pt3dadd(179364.000000,105408.000000,93250.000000,101.583153)}
{pt3dadd(179592.000000,105300.000000,93450.000000,106.420446)}
{pt3dadd(179724.000000,105384.000000,93475.000000,111.257739)}
{pt3dadd(179904.000000,105504.000000,93625.000000,116.095032)}
{pt3dadd(180036.000000,105612.000000,93750.000000,96.745860)}
{pt3dadd(180000.000000,105660.000000,93925.000000,92.876040)}

{create adhoc99}
{access adhoc99}
{connect adhoc99(1), adhoc73(0)}
{nseg = 1}
{strdef color color = "White"}
{pt3dclear()}
{pt3dadd(178584.000000,120636.000000,83600.000000,599.024880)}
{pt3dadd(178344.000000,122352.000000,81400.000000,862.595802)}
{pt3dadd(178152.000000,122592.000000,80300.000000,862.595802)}
{pt3dadd(177960.000000,122244.000000,80525.000000,862.595802)}
{pt3dadd(177792.000000,122016.000000,80175.000000,862.595802)}
{pt3dadd(177564.000000,122172.000000,79825.000000,862.595802)}
{pt3dadd(177132.000000,121980.000000,79575.000000,905.725589)}
{pt3dadd(177060.000000,121908.000000,79350.000000,948.855375)}
{pt3dadd(176664.000000,121920.000000,79075.000000,991.985162)}
{pt3dadd(176472.000000,121944.000000,78825.000000,1035.114948)}
{pt3dadd(176448.000000,121920.000000,78550.000000,991.985162)}
{pt3dadd(176124.000000,121872.000000,78300.000000,948.855375)}
{pt3dadd(175896.000000,121908.000000,78050.000000,905.725589)}
{pt3dadd(175596.000000,121836.000000,77800.000000,862.595802)}
{pt3dadd(175296.000000,121872.000000,77550.000000,905.725589)}
{pt3dadd(174948.000000,121788.000000,77300.000000,948.855375)}
{pt3dadd(174648.000000,121872.000000,77075.000000,991.985162)}
{pt3dadd(174552.000000,121848.000000,76875.000000,1035.114948)}
{pt3dadd(174384.000000,121908.000000,76625.000000,1035.114948)}
{pt3dadd(173988.000000,121764.000000,76400.000000,1035.114948)}
{pt3dadd(173892.000000,121692.000000,76200.000000,1035.114948)}
{pt3dadd(173820.000000,121776.000000,76025.000000,1035.114948)}
{pt3dadd(173496.000000,121704.000000,75825.000000,1074.449300)}
{pt3dadd(173376.000000,121356.000000,75500.000000,1113.783651)}
{pt3dadd(173328.000000,121464.000000,75225.000000,1153.118003)}
{pt3dadd(173436.000000,121572.000000,74975.000000,1192.452354)}
{pt3dadd(173160.000000,121548.000000,74725.000000,1153.118003)}
{pt3dadd(173268.000000,121476.000000,74500.000000,1113.783651)}
{pt3dadd(173076.000000,121404.000000,74250.000000,1074.449300)}
{pt3dadd(172728.000000,121380.000000,73975.000000,1035.114948)}
{pt3dadd(172764.000000,121320.000000,73775.000000,1074.449300)}
{pt3dadd(172644.000000,121176.000000,73575.000000,1113.783651)}
{pt3dadd(172536.000000,121128.000000,73375.000000,1153.118003)}
{pt3dadd(172416.000000,121080.000000,73200.000000,1192.452354)}
{pt3dadd(172188.000000,120888.000000,73025.000000,1153.118003)}
{pt3dadd(172020.000000,120864.000000,72825.000000,1113.783651)}
{pt3dadd(171624.000000,120924.000000,72575.000000,1074.449300)}
{pt3dadd(171276.000000,120864.000000,72350.000000,1035.114948)}
{pt3dadd(171180.000000,120720.000000,72150.000000,1134.071896)}
{pt3dadd(170952.000000,120600.000000,71925.000000,1233.028845)}
{pt3dadd(170964.000000,120708.000000,71650.000000,1331.985794)}
{pt3dadd(170916.000000,120840.000000,71375.000000,1430.942742)}
{pt3dadd(170892.000000,120792.000000,71125.000000,1371.320145)}
{pt3dadd(170700.000000,120672.000000,70875.000000,1311.697548)}
{pt3dadd(170628.000000,120444.000000,70650.000000,1252.074951)}
{pt3dadd(170724.000000,120456.000000,70375.000000,1192.452354)}
{pt3dadd(170832.000000,120492.000000,70125.000000,1153.118003)}
{pt3dadd(170808.000000,120468.000000,69900.000000,1113.783651)}
{pt3dadd(170820.000000,120444.000000,69650.000000,1074.449300)}
{pt3dadd(171036.000000,120192.000000,69350.000000,1035.114948)}
{pt3dadd(171120.000000,120048.000000,69050.000000,1074.449300)}
{pt3dadd(171180.000000,119616.000000,68800.000000,1113.783651)}
{pt3dadd(171132.000000,119388.000000,68475.000000,1153.118003)}
{pt3dadd(171144.000000,119364.000000,68200.000000,1192.452354)}
{pt3dadd(171024.000000,119316.000000,67975.000000,1192.452354)}
{pt3dadd(170904.000000,119268.000000,67700.000000,1192.452354)}
{pt3dadd(170916.000000,119040.000000,67425.000000,1192.452354)}
{pt3dadd(170916.000000,118812.000000,67150.000000,1192.452354)}
{pt3dadd(170988.000000,118644.000000,66875.000000,1153.118003)}
{pt3dadd(170916.000000,118548.000000,66600.000000,1113.783651)}
{pt3dadd(170796.000000,118404.000000,66325.000000,1074.449300)}
{pt3dadd(170772.000000,118260.000000,66075.000000,1035.114948)}
{pt3dadd(170316.000000,118368.000000,65750.000000,1074.449300)}
{pt3dadd(170352.000000,118320.000000,65525.000000,1113.783651)}
{pt3dadd(170364.000000,118224.000000,65300.000000,1153.118003)}
{pt3dadd(170376.000000,118128.000000,65025.000000,1192.452354)}
{pt3dadd(170256.000000,117984.000000,64775.000000,1153.118003)}
{pt3dadd(170148.000000,117684.000000,64525.000000,1113.783651)}
{pt3dadd(170028.000000,117516.000000,64325.000000,1074.449300)}
{pt3dadd(170004.000000,117444.000000,64075.000000,1035.114948)}
{pt3dadd(169932.000000,117216.000000,63800.000000,926.092431)}
{pt3dadd(169872.000000,116988.000000,63525.000000,817.069914)}
{pt3dadd(169812.000000,116760.000000,63250.000000,708.047397)}
{pt3dadd(169908.000000,116328.000000,63000.000000,599.024880)}
{pt3dadd(169608.000000,115752.000000,62725.000000,346.657896)}

{create adhoc100}
{access adhoc100}
{connect adhoc100(1), adhoc99(0)}
{nseg = 1}
{strdef color color = "White"}
{pt3dclear()}
{pt3dadd(169608.000000,115752.000000,62725.000000,346.657896)}
{pt3dadd(169080.000000,115752.000000,61425.000000,690.076674)}
{pt3dadd(168828.000000,115632.000000,61050.000000,667.313725)}
{pt3dadd(168804.000000,115452.000000,60700.000000,644.550777)}
{pt3dadd(168744.000000,115284.000000,60425.000000,621.787828)}
{pt3dadd(168744.000000,115152.000000,60300.000000,599.024880)}
{pt3dadd(168648.000000,114996.000000,60200.000000,599.024880)}
{pt3dadd(168708.000000,114828.000000,60050.000000,599.024880)}
{pt3dadd(168696.000000,114672.000000,59800.000000,599.024880)}
{pt3dadd(168636.000000,114516.000000,59625.000000,599.024880)}
{pt3dadd(168624.000000,114372.000000,59550.000000,574.065504)}
{pt3dadd(168684.000000,114132.000000,59250.000000,549.106128)}
{pt3dadd(168612.000000,113952.000000,59050.000000,524.146752)}
{pt3dadd(168540.000000,113928.000000,58875.000000,499.187376)}
{pt3dadd(168348.000000,113832.000000,58650.000000,499.187376)}
{pt3dadd(168312.000000,113736.000000,58425.000000,499.187376)}
{pt3dadd(168288.000000,113544.000000,58200.000000,499.187376)}
{pt3dadd(168216.000000,113412.000000,58025.000000,499.187376)}
{pt3dadd(168144.000000,113280.000000,57825.000000,546.909700)}
{pt3dadd(168072.000000,113148.000000,57625.000000,594.632025)}
{pt3dadd(168108.000000,113136.000000,57425.000000,642.354349)}
{pt3dadd(168072.000000,113016.000000,57200.000000,690.076674)}
{pt3dadd(167940.000000,112980.000000,56975.000000,697.264960)}
{pt3dadd(167808.000000,112944.000000,56775.000000,704.453247)}
{pt3dadd(167736.000000,112872.000000,56500.000000,711.641533)}
{pt3dadd(167580.000000,112956.000000,56275.000000,718.829820)}
{pt3dadd(167568.000000,112896.000000,56000.000000,787.549937)}
{pt3dadd(167532.000000,112896.000000,55775.000000,856.270053)}
{pt3dadd(167424.000000,112728.000000,55500.000000,924.990169)}
{pt3dadd(167424.000000,112728.000000,55300.000000,993.710286)}
{pt3dadd(167412.000000,112740.000000,55100.000000,917.801883)}
{pt3dadd(167436.000000,112680.000000,54875.000000,841.893480)}
{pt3dadd(167472.000000,112620.000000,54625.000000,765.985077)}
{pt3dadd(167592.000000,112428.000000,54400.000000,690.076674)}
{pt3dadd(167964.000000,112488.000000,54175.000000,667.313725)}
{pt3dadd(168144.000000,112452.000000,53950.000000,644.550777)}
{pt3dadd(168420.000000,112476.000000,53700.000000,621.787828)}
{pt3dadd(168636.000000,112476.000000,53475.000000,599.024880)}
{pt3dadd(168756.000000,112536.000000,53450.000000,628.976115)}
{pt3dadd(168900.000000,112596.000000,53350.000000,658.927350)}
{pt3dadd(169032.000000,112536.000000,53175.000000,688.878585)}
{pt3dadd(169152.000000,112560.000000,53175.000000,718.829820)}
{pt3dadd(169284.000000,112572.000000,53025.000000,688.878585)}
{pt3dadd(169416.000000,112632.000000,53050.000000,658.927350)}
{pt3dadd(169572.000000,112644.000000,53000.000000,628.976115)}
{pt3dadd(169716.000000,112776.000000,52875.000000,599.024880)}
{pt3dadd(169860.000000,112824.000000,52675.000000,593.034624)}
{pt3dadd(170016.000000,112824.000000,52575.000000,587.044368)}
{pt3dadd(170148.000000,112956.000000,52425.000000,581.054112)}
{pt3dadd(170256.000000,112992.000000,52275.000000,575.063856)}
{pt3dadd(170616.000000,113064.000000,52050.000000,611.005347)}
{pt3dadd(170652.000000,113040.000000,51800.000000,646.946838)}
{pt3dadd(170880.000000,113172.000000,51550.000000,682.888329)}
{pt3dadd(170916.000000,113256.000000,51350.000000,718.829820)}
{pt3dadd(170964.000000,113328.000000,51175.000000,704.453211)}
{pt3dadd(171048.000000,113424.000000,50950.000000,690.076602)}
{pt3dadd(171108.000000,113484.000000,50750.000000,718.829820)}

{create adhoc101}
{access adhoc101}
{connect adhoc101(1), adhoc100(0)}
{nseg = 1}
{strdef color color = "White"}
{pt3dclear()}
{pt3dadd(171108.000000,113484.000000,50750.000000,718.829820)}
{pt3dadd(171288.000000,113472.000000,50400.000000,718.829820)}
{pt3dadd(171708.000000,113604.000000,50050.000000,688.878585)}
{pt3dadd(171924.000000,113784.000000,49750.000000,658.927350)}
{pt3dadd(172140.000000,113952.000000,49450.000000,628.976115)}
{pt3dadd(172260.000000,114000.000000,49375.000000,599.024880)}
{pt3dadd(172380.000000,114048.000000,49300.000000,574.065504)}
{pt3dadd(172500.000000,114096.000000,49225.000000,549.106128)}
{pt3dadd(172620.000000,114228.000000,49100.000000,524.146752)}
{pt3dadd(172728.000000,114312.000000,48950.000000,499.187376)}
{pt3dadd(172836.000000,114396.000000,48800.000000,499.187376)}
{pt3dadd(172968.000000,114480.000000,48650.000000,499.187376)}
{pt3dadd(173088.000000,114516.000000,48675.000000,499.187376)}
{pt3dadd(173184.000000,114540.000000,48700.000000,499.187376)}
{pt3dadd(173292.000000,114504.000000,48700.000000,518.156496)}
{pt3dadd(173412.000000,114492.000000,48625.000000,537.125616)}
{pt3dadd(173640.000000,114576.000000,48375.000000,556.094736)}
{pt3dadd(173868.000000,114648.000000,48150.000000,575.063856)}
{pt3dadd(174048.000000,114696.000000,47975.000000,581.054112)}
{pt3dadd(174228.000000,114756.000000,47750.000000,587.044368)}
{pt3dadd(174408.000000,114816.000000,47525.000000,593.034624)}
{pt3dadd(174576.000000,114756.000000,47325.000000,599.024880)}
{pt3dadd(174924.000000,114936.000000,47100.000000,574.065504)}
{pt3dadd(175068.000000,114972.000000,46925.000000,549.106128)}
{pt3dadd(175212.000000,115032.000000,46725.000000,524.146752)}
{pt3dadd(175428.000000,115164.000000,46500.000000,499.187376)}
{pt3dadd(175680.000000,115488.000000,46275.000000,554.097987)}
{pt3dadd(175980.000000,115620.000000,46050.000000,609.008598)}
{pt3dadd(176208.000000,115668.000000,45875.000000,663.919209)}
{pt3dadd(176364.000000,115764.000000,45700.000000,718.829820)}
{pt3dadd(176424.000000,115800.000000,45500.000000,718.829820)}
{pt3dadd(176532.000000,115884.000000,45325.000000,718.829820)}
{pt3dadd(176496.000000,116040.000000,45125.000000,718.829820)}
{pt3dadd(176676.000000,116268.000000,44900.000000,718.829820)}
{pt3dadd(176772.000000,116232.000000,44675.000000,599.306026)}
{pt3dadd(176928.000000,116352.000000,44575.000000,479.782233)}
{pt3dadd(177096.000000,116532.000000,43825.000000,360.258440)}
{pt3dadd(177264.000000,116772.000000,43700.000000,240.734646)}
{pt3dadd(177408.000000,116772.000000,43825.000000,280.388470)}
{pt3dadd(177552.000000,116892.000000,43700.000000,320.042295)}
{pt3dadd(177708.000000,117264.000000,43600.000000,359.696120)}
{pt3dadd(177852.000000,117600.000000,43100.000000,399.349944)}
{pt3dadd(177984.000000,117648.000000,43050.000000,403.509830)}
{pt3dadd(178140.000000,117852.000000,42875.000000,407.669715)}
{pt3dadd(178284.000000,117792.000000,42625.000000,411.829601)}
{pt3dadd(178404.000000,117816.000000,42525.000000,415.989486)}
{pt3dadd(178536.000000,117840.000000,42425.000000,415.989486)}
{pt3dadd(178656.000000,117924.000000,42200.000000,415.989486)}
{pt3dadd(178752.000000,117948.000000,42075.000000,415.989486)}
{pt3dadd(178860.000000,118044.000000,41900.000000,415.989486)}
{pt3dadd(179052.000000,117972.000000,41625.000000,353.786324)}
{pt3dadd(179232.000000,118020.000000,41425.000000,291.583161)}
{pt3dadd(179412.000000,118068.000000,41225.000000,229.379999)}
{pt3dadd(179544.000000,118296.000000,41025.000000,167.176836)}
{pt3dadd(179772.000000,118380.000000,40775.000000,222.251589)}
{pt3dadd(180060.000000,118404.000000,40550.000000,277.326342)}
{pt3dadd(180192.000000,118368.000000,40350.000000,240.734646)}

{create adhoc102}
{access adhoc102}
{connect adhoc102(1), adhoc101(0)}
{nseg = 1}
{strdef color color = "White"}
{pt3dclear()}
{pt3dadd(180192.000000,118368.000000,40350.000000,240.734646)}
{pt3dadd(179976.000000,118752.000000,40225.000000,288.881586)}
{pt3dadd(180156.000000,118956.000000,40025.000000,303.325664)}
{pt3dadd(180216.000000,119172.000000,39875.000000,317.769741)}
{pt3dadd(180336.000000,119208.000000,39650.000000,332.213819)}
{pt3dadd(180264.000000,119196.000000,39400.000000,346.657896)}
{pt3dadd(180420.000000,119304.000000,39175.000000,310.146476)}
{pt3dadd(180636.000000,119484.000000,38950.000000,273.635055)}
{pt3dadd(180996.000000,119712.000000,38775.000000,237.123635)}
{pt3dadd(181308.000000,120036.000000,38525.000000,200.612214)}
{pt3dadd(181368.000000,120192.000000,38350.000000,200.612214)}
{pt3dadd(181596.000000,120624.000000,38225.000000,200.612214)}
{pt3dadd(181716.000000,120936.000000,38000.000000,200.612214)}
{pt3dadd(181872.000000,121272.000000,37800.000000,200.612214)}
{pt3dadd(182028.000000,121416.000000,37600.000000,192.253370)}
{pt3dadd(182196.000000,121560.000000,37400.000000,183.894525)}
{pt3dadd(182364.000000,121572.000000,37250.000000,175.535680)}
{pt3dadd(182532.000000,121656.000000,37050.000000,167.176836)}
{pt3dadd(182700.000000,121740.000000,36825.000000,185.566288)}
{pt3dadd(182856.000000,121716.000000,36675.000000,203.955741)}
{pt3dadd(183036.000000,121620.000000,36500.000000,222.345193)}
{pt3dadd(183240.000000,121524.000000,36325.000000,240.734646)}
{pt3dadd(183324.000000,121584.000000,36125.000000,222.345193)}
{pt3dadd(183504.000000,121572.000000,35950.000000,203.955741)}
{pt3dadd(183720.000000,121668.000000,35725.000000,185.566288)}
{pt3dadd(183828.000000,121752.000000,35500.000000,167.176836)}
{pt3dadd(183948.000000,121812.000000,35475.000000,197.603024)}
{pt3dadd(184068.000000,121812.000000,35375.000000,228.029211)}
{pt3dadd(184212.000000,122004.000000,35425.000000,258.455399)}
{pt3dadd(184356.000000,122004.000000,35375.000000,288.881586)}
{pt3dadd(184512.000000,122124.000000,35325.000000,251.489700)}
{pt3dadd(184668.000000,122172.000000,35225.000000,214.097814)}
{pt3dadd(184788.000000,122196.000000,35200.000000,176.705928)}
{pt3dadd(184884.000000,122292.000000,35150.000000,139.314042)}
{pt3dadd(184992.000000,122352.000000,35100.000000,146.279741)}
{pt3dadd(185100.000000,122412.000000,35050.000000,153.245439)}
{pt3dadd(185244.000000,122520.000000,34975.000000,160.211138)}
{pt3dadd(185532.000000,122688.000000,34900.000000,167.176836)}
{pt3dadd(185664.000000,122856.000000,34850.000000,154.406385)}
{pt3dadd(185736.000000,122988.000000,34875.000000,141.635934)}
{pt3dadd(185748.000000,123144.000000,34875.000000,128.865483)}
{pt3dadd(185652.000000,123288.000000,34925.000000,116.095032)}
{pt3dadd(185628.000000,123408.000000,34825.000000,116.095032)}
{pt3dadd(185484.000000,123552.000000,34850.000000,116.095032)}
{pt3dadd(185472.000000,123720.000000,34900.000000,116.095032)}
{pt3dadd(185520.000000,123852.000000,34875.000000,116.095032)}
{pt3dadd(185628.000000,123984.000000,34675.000000,121.899785)}
{pt3dadd(185736.000000,124128.000000,34625.000000,127.704537)}
{pt3dadd(185904.000000,124260.000000,34650.000000,133.509289)}
{pt3dadd(186024.000000,124380.000000,34700.000000,139.314042)}
{pt3dadd(186108.000000,124488.000000,34950.000000,167.176836)}

{create adhoc103}
{access adhoc103}
{connect adhoc103(1), adhoc101(0)}
{nseg = 1}
{strdef color color = "White"}
{pt3dclear()}
{pt3dadd(180192.000000,118368.000000,40350.000000,240.734646)}
{pt3dadd(180600.000000,117864.000000,40175.000000,167.176836)}
{pt3dadd(180756.000000,117588.000000,39975.000000,173.529558)}
{pt3dadd(180924.000000,117144.000000,39825.000000,179.882280)}
{pt3dadd(181164.000000,116844.000000,39700.000000,186.235002)}
{pt3dadd(181260.000000,116544.000000,39525.000000,192.587724)}
{pt3dadd(181380.000000,116352.000000,39525.000000,186.235002)}
{pt3dadd(181500.000000,116400.000000,39500.000000,179.882280)}
{pt3dadd(181308.000000,116244.000000,39375.000000,173.529558)}
{pt3dadd(181368.000000,116076.000000,39375.000000,167.176836)}
{pt3dadd(181428.000000,115908.000000,39200.000000,154.406385)}
{pt3dadd(181560.000000,115752.000000,39325.000000,141.635934)}
{pt3dadd(181716.000000,115608.000000,39250.000000,128.865483)}
{pt3dadd(181896.000000,115440.000000,39250.000000,116.095032)}
{pt3dadd(182208.000000,115284.000000,39100.000000,116.095032)}
{pt3dadd(182316.000000,115104.000000,39000.000000,116.095032)}
{pt3dadd(182484.000000,114948.000000,39000.000000,116.095032)}
{pt3dadd(182676.000000,114648.000000,38975.000000,116.095032)}
{pt3dadd(182736.000000,114540.000000,38925.000000,121.899785)}
{pt3dadd(182664.000000,114384.000000,38775.000000,127.704537)}
{pt3dadd(182688.000000,114240.000000,38825.000000,133.509289)}
{pt3dadd(182952.000000,114048.000000,38725.000000,139.314042)}
{pt3dadd(183228.000000,113892.000000,38750.000000,154.638585)}
{pt3dadd(183360.000000,113940.000000,38700.000000,169.963128)}
{pt3dadd(183480.000000,113916.000000,38650.000000,185.287671)}
{pt3dadd(183624.000000,113844.000000,38525.000000,200.612214)}
{pt3dadd(183756.000000,113736.000000,38450.000000,200.612214)}
{pt3dadd(183900.000000,113688.000000,38425.000000,200.612214)}
{pt3dadd(184044.000000,113640.000000,38400.000000,200.612214)}
{pt3dadd(184248.000000,113604.000000,38375.000000,200.612214)}
{pt3dadd(184440.000000,113592.000000,38350.000000,219.790746)}
{pt3dadd(184560.000000,113532.000000,38375.000000,238.969278)}
{pt3dadd(184668.000000,113448.000000,38375.000000,258.147810)}
{pt3dadd(184764.000000,113412.000000,38250.000000,277.326342)}
{pt3dadd(184896.000000,113292.000000,38100.000000,241.430126)}
{pt3dadd(185040.000000,113484.000000,37875.000000,205.533909)}
{pt3dadd(185148.000000,113664.000000,37725.000000,169.637693)}
{pt3dadd(185256.000000,113784.000000,37700.000000,133.741476)}
{pt3dadd(185364.000000,113868.000000,37725.000000,124.918254)}
{pt3dadd(185484.000000,113952.000000,37525.000000,116.095032)}
{pt3dadd(185616.000000,113964.000000,37550.000000,116.095032)}

{create adhoc104}
{access adhoc104}
{connect adhoc104(1), adhoc100(0)}
{nseg = 1}
{strdef color color = "White"}
{pt3dclear()}
{pt3dadd(171108.000000,113484.000000,50750.000000,718.829820)}
{pt3dadd(169932.000000,114900.000000,50750.000000,200.612214)}
{pt3dadd(169992.000000,115068.000000,50700.000000,210.642822)}
{pt3dadd(169788.000000,115212.000000,50725.000000,220.673430)}
{pt3dadd(169644.000000,115404.000000,50800.000000,230.704038)}
{pt3dadd(169620.000000,115572.000000,51050.000000,240.734646)}
{pt3dadd(169596.000000,115740.000000,51250.000000,215.379495)}
{pt3dadd(169476.000000,115884.000000,51300.000000,190.024344)}
{pt3dadd(169440.000000,116304.000000,51550.000000,164.669193)}
{pt3dadd(169464.000000,116520.000000,51775.000000,139.314042)}
{pt3dadd(169404.000000,116748.000000,51950.000000,146.279741)}
{pt3dadd(169176.000000,116856.000000,52175.000000,153.245439)}
{pt3dadd(169056.000000,116880.000000,52200.000000,160.211138)}
{pt3dadd(168948.000000,116856.000000,52225.000000,167.176836)}
{pt3dadd(168840.000000,116952.000000,52275.000000,160.211138)}
{pt3dadd(168708.000000,116892.000000,52300.000000,153.245439)}
{pt3dadd(168588.000000,117000.000000,52325.000000,146.279741)}
{pt3dadd(168504.000000,117072.000000,52175.000000,139.314042)}
{pt3dadd(168408.000000,117120.000000,52150.000000,146.279741)}
{pt3dadd(168372.000000,117252.000000,52150.000000,153.245439)}
{pt3dadd(168360.000000,117420.000000,52100.000000,160.211138)}
{pt3dadd(168324.000000,117564.000000,52000.000000,167.176836)}
{pt3dadd(168252.000000,117720.000000,51975.000000,167.176836)}
{pt3dadd(168120.000000,116964.000000,52250.000000,167.176836)}
{pt3dadd(167928.000000,116844.000000,52200.000000,167.176836)}
{pt3dadd(167772.000000,116868.000000,52225.000000,167.176836)}
{pt3dadd(167628.000000,116844.000000,52325.000000,154.406385)}
{pt3dadd(167652.000000,116760.000000,52500.000000,141.635934)}
{pt3dadd(167568.000000,116772.000000,52725.000000,128.865483)}
{pt3dadd(167508.000000,116772.000000,52925.000000,116.095032)}
{pt3dadd(167460.000000,116640.000000,53100.000000,106.420446)}
{pt3dadd(167340.000000,116700.000000,53150.000000,96.745860)}
{pt3dadd(167232.000000,116736.000000,53325.000000,96.745860)}

{create adhoc105}
{access adhoc105}
{connect adhoc105(1), adhoc99(0)}
{nseg = 1}
{strdef color color = "White"}
{pt3dclear()}
{pt3dadd(169608.000000,115752.000000,62725.000000,346.657896)}
{pt3dadd(169860.000000,114792.000000,62475.000000,399.349908)}
{pt3dadd(169920.000000,114156.000000,62175.000000,386.176905)}
{pt3dadd(169836.000000,113928.000000,61875.000000,373.003902)}
{pt3dadd(169860.000000,113652.000000,61550.000000,359.830899)}
{pt3dadd(169860.000000,113376.000000,61275.000000,346.657896)}
{pt3dadd(169932.000000,112896.000000,61050.000000,363.990794)}
{pt3dadd(169836.000000,112572.000000,60825.000000,381.323691)}
{pt3dadd(169848.000000,112428.000000,60600.000000,398.656589)}
{pt3dadd(169992.000000,112260.000000,60400.000000,415.989486)}
{pt3dadd(170136.000000,111888.000000,60200.000000,436.788958)}
{pt3dadd(169980.000000,111720.000000,59975.000000,457.588431)}
{pt3dadd(170016.000000,111684.000000,59750.000000,478.387903)}
{pt3dadd(170196.000000,111420.000000,59475.000000,499.187376)}
{pt3dadd(170340.000000,111372.000000,59300.000000,518.156496)}
{pt3dadd(170484.000000,111180.000000,59050.000000,537.125616)}
{pt3dadd(170580.000000,111096.000000,58850.000000,556.094736)}
{pt3dadd(170676.000000,111012.000000,58600.000000,575.063856)}
{pt3dadd(170736.000000,110904.000000,58375.000000,630.039951)}
{pt3dadd(170688.000000,110832.000000,58150.000000,685.016046)}
{pt3dadd(170784.000000,110796.000000,57875.000000,739.992141)}
{pt3dadd(170856.000000,110712.000000,57625.000000,794.968236)}
{pt3dadd(171060.000000,110520.000000,57375.000000,775.933632)}
{pt3dadd(170988.000000,110544.000000,57150.000000,756.899028)}
{pt3dadd(170976.000000,110460.000000,57000.000000,737.864424)}
{pt3dadd(171012.000000,110496.000000,56775.000000,718.829820)}
{pt3dadd(171120.000000,110352.000000,56550.000000,688.878585)}
{pt3dadd(171180.000000,110208.000000,56325.000000,658.927350)}
{pt3dadd(171288.000000,110136.000000,56125.000000,628.976115)}
{pt3dadd(171504.000000,110016.000000,55900.000000,599.024880)}
{pt3dadd(171636.000000,109980.000000,55600.000000,593.034624)}
{pt3dadd(171768.000000,109896.000000,55375.000000,587.044368)}
{pt3dadd(171804.000000,109788.000000,55175.000000,581.054112)}
{pt3dadd(171876.000000,109788.000000,55000.000000,575.063856)}
{pt3dadd(172056.000000,109668.000000,54750.000000,556.094736)}
{pt3dadd(172428.000000,109296.000000,54475.000000,537.125616)}
{pt3dadd(172704.000000,109116.000000,54250.000000,518.156496)}
{pt3dadd(172776.000000,108972.000000,54025.000000,499.187376)}
{pt3dadd(172956.000000,108852.000000,53800.000000,461.055006)}
{pt3dadd(173028.000000,108708.000000,53575.000000,422.922636)}
{pt3dadd(173172.000000,108624.000000,53325.000000,384.790266)}
{pt3dadd(173268.000000,108336.000000,53100.000000,346.657896)}
{pt3dadd(173280.000000,108300.000000,52900.000000,363.990794)}
{pt3dadd(173376.000000,107976.000000,52675.000000,381.323691)}
{pt3dadd(173268.000000,107868.000000,52450.000000,398.656589)}
{pt3dadd(173472.000000,107712.000000,52225.000000,415.989486)}
{pt3dadd(173532.000000,107712.000000,52000.000000,415.989486)}
{pt3dadd(173700.000000,107628.000000,51775.000000,415.989486)}
{pt3dadd(173796.000000,107592.000000,51525.000000,415.989486)}
{pt3dadd(173820.000000,107652.000000,51250.000000,415.989486)}
{pt3dadd(173880.000000,107460.000000,51025.000000,461.748335)}
{pt3dadd(173988.000000,107460.000000,50775.000000,507.507183)}
{pt3dadd(173976.000000,107280.000000,50600.000000,553.266031)}
{pt3dadd(173952.000000,107304.000000,50375.000000,599.024880)}
{pt3dadd(174096.000000,107304.000000,50200.000000,599.024880)}
{pt3dadd(174144.000000,107244.000000,50025.000000,599.024880)}
{pt3dadd(174192.000000,107172.000000,49850.000000,599.024880)}
{pt3dadd(174252.000000,107208.000000,49650.000000,599.024880)}
{pt3dadd(174396.000000,107160.000000,49475.000000,574.065504)}
{pt3dadd(174540.000000,107088.000000,49275.000000,549.106128)}
{pt3dadd(174744.000000,107160.000000,49075.000000,524.146752)}
{pt3dadd(174852.000000,107088.000000,49025.000000,499.187376)}
{pt3dadd(174984.000000,107160.000000,48850.000000,478.387903)}
{pt3dadd(175092.000000,107244.000000,48750.000000,457.588431)}
{pt3dadd(175236.000000,107364.000000,48750.000000,436.788958)}
{pt3dadd(175368.000000,107484.000000,48750.000000,415.989486)}
{pt3dadd(175476.000000,107532.000000,48550.000000,415.989486)}
{pt3dadd(175560.000000,107520.000000,48350.000000,415.989486)}
{pt3dadd(175668.000000,107484.000000,48350.000000,415.989486)}
{pt3dadd(175788.000000,107544.000000,48300.000000,415.989486)}
{pt3dadd(175896.000000,107592.000000,48125.000000,415.989486)}
{pt3dadd(176004.000000,107604.000000,48000.000000,415.989486)}
{pt3dadd(176100.000000,107664.000000,47850.000000,415.989486)}
{pt3dadd(176196.000000,107712.000000,47750.000000,415.989486)}
{pt3dadd(176316.000000,107712.000000,47650.000000,431.797086)}
{pt3dadd(176424.000000,107712.000000,47550.000000,447.604686)}
{pt3dadd(176532.000000,107712.000000,47450.000000,463.412286)}
{pt3dadd(176640.000000,107712.000000,47350.000000,479.219886)}
{pt3dadd(176748.000000,107760.000000,47225.000000,484.211758)}
{pt3dadd(176856.000000,107808.000000,47100.000000,489.203631)}
{pt3dadd(176952.000000,107760.000000,47050.000000,494.195504)}
{pt3dadd(177048.000000,107712.000000,47000.000000,499.187376)}
{pt3dadd(177156.000000,107664.000000,46950.000000,524.146752)}
{pt3dadd(177252.000000,107700.000000,46900.000000,549.106128)}
{pt3dadd(177348.000000,107736.000000,46800.000000,574.065504)}
{pt3dadd(177444.000000,107772.000000,46700.000000,599.024880)}
{pt3dadd(177540.000000,107844.000000,46600.000000,553.266031)}
{pt3dadd(177648.000000,107856.000000,46400.000000,507.507183)}
{pt3dadd(177756.000000,107868.000000,46200.000000,461.748335)}
{pt3dadd(177840.000000,107880.000000,46000.000000,415.989486)}
{pt3dadd(177948.000000,107892.000000,45800.000000,398.656589)}
{pt3dadd(178068.000000,107976.000000,45600.000000,381.323691)}
{pt3dadd(178212.000000,108012.000000,45500.000000,363.990794)}
{pt3dadd(178356.000000,108216.000000,45150.000000,346.657896)}
{pt3dadd(178548.000000,108276.000000,44875.000000,332.213819)}
{pt3dadd(178632.000000,108396.000000,44650.000000,317.769741)}
{pt3dadd(178656.000000,108660.000000,44450.000000,303.325664)}
{pt3dadd(178584.000000,108720.000000,44300.000000,288.881586)}
{pt3dadd(178644.000000,108948.000000,44025.000000,341.458034)}
{pt3dadd(178788.000000,109236.000000,43875.000000,394.034481)}
{pt3dadd(178716.000000,109272.000000,43650.000000,446.610929)}
{pt3dadd(178596.000000,109452.000000,43375.000000,499.187376)}
{pt3dadd(178512.000000,109512.000000,43125.000000,416.184741)}
{pt3dadd(178644.000000,109560.000000,42875.000000,333.182106)}
{pt3dadd(178728.000000,109500.000000,42625.000000,250.179471)}
{pt3dadd(178884.000000,109884.000000,42400.000000,167.176836)}
{pt3dadd(179088.000000,110280.000000,42250.000000,197.603024)}
{pt3dadd(179352.000000,110460.000000,42050.000000,228.029211)}
{pt3dadd(179448.000000,110580.000000,41875.000000,258.455399)}
{pt3dadd(179580.000000,110832.000000,41675.000000,288.881586)}
{pt3dadd(179700.000000,110772.000000,41475.000000,266.814243)}
{pt3dadd(179796.000000,110964.000000,41250.000000,244.746900)}
{pt3dadd(179976.000000,111144.000000,41125.000000,222.679557)}
{pt3dadd(180132.000000,111420.000000,40975.000000,200.612214)}
{pt3dadd(180036.000000,111588.000000,40875.000000,185.287671)}
{pt3dadd(179988.000000,111744.000000,40825.000000,169.963128)}
{pt3dadd(179964.000000,111876.000000,40900.000000,154.638585)}
{pt3dadd(179808.000000,112020.000000,40850.000000,139.314042)}
{pt3dadd(179652.000000,112152.000000,40825.000000,146.279741)}
{pt3dadd(179496.000000,112296.000000,40750.000000,153.245439)}
{pt3dadd(179424.000000,112440.000000,40525.000000,160.211138)}
{pt3dadd(179328.000000,112608.000000,40525.000000,167.176836)}
{pt3dadd(179208.000000,112776.000000,40450.000000,149.569092)}
{pt3dadd(179076.000000,112944.000000,40600.000000,131.961348)}
{pt3dadd(178968.000000,113076.000000,40700.000000,114.353604)}
{pt3dadd(178932.000000,113184.000000,40525.000000,96.745860)}
{pt3dadd(178716.000000,113196.000000,40700.000000,96.745860)}
{pt3dadd(178536.000000,113196.000000,40725.000000,139.314042)}
