# Supplementary material for: Full reconstruction of large lobula plate tangential cells in Drosophila from a 3D EM dataset
Source: PLoS One. 2018 Nov 28;13(11):e0207828. doi: 10.1371/journal.pone.0207828 (PMC6261601; doi:10.1371/journal.pone.0207828)
Supplement: S1 Dataset — (ZIP) [file pone.0207828.s001.zip › Diameter hoc/VS_VSL_preliminary/Old Diameters Mar13_VS_VSL_HS/HSS/2_14_727_gmordhorst_001.021.hoc]

/* created with nml2hocm */

{create adhoc1}
{access adhoc1}
{nseg = 1}
{strdef color color = "White"}
{pt3dclear()}
{pt3dadd(147372.000000,119628.000000,157425.000000,1612.917396)}
{pt3dadd(147780.000000,119988.000000,157725.000000,828.091944)}
{pt3dadd(147996.000000,120300.000000,157475.000000,931.603428)}
{pt3dadd(148116.000000,120600.000000,156900.000000,1035.114912)}
{pt3dadd(147960.000000,121032.000000,157075.000000,1138.626396)}
{pt3dadd(147804.000000,121188.000000,157125.000000,1242.137880)}
{pt3dadd(148164.000000,121512.000000,157000.000000,1304.244761)}
{pt3dadd(148524.000000,122112.000000,156875.000000,1366.351641)}
{pt3dadd(148548.000000,122436.000000,156425.000000,1428.458522)}
{pt3dadd(148548.000000,122820.000000,155975.000000,1490.565402)}
{pt3dadd(148536.000000,123228.000000,155675.000000,1497.726050)}
{pt3dadd(148536.000000,123708.000000,155425.000000,1504.886697)}
{pt3dadd(148728.000000,124200.000000,155500.000000,1512.047345)}
{pt3dadd(148992.000000,124704.000000,155200.000000,1519.207992)}
{pt3dadd(149028.000000,125160.000000,154475.000000,1568.688835)}
{pt3dadd(149148.000000,125460.000000,153000.000000,1618.169679)}
{pt3dadd(149184.000000,125856.000000,152700.000000,1667.650522)}
{pt3dadd(149220.000000,126132.000000,151700.000000,1717.131366)}
{pt3dadd(149268.000000,126516.000000,151625.000000,1660.489875)}
{pt3dadd(149304.000000,126792.000000,151475.000000,1603.848384)}
{pt3dadd(149232.000000,127332.000000,151300.000000,1547.206893)}
{pt3dadd(149076.000000,127692.000000,151025.000000,1490.565402)}
{pt3dadd(148920.000000,128016.000000,150725.000000,1475.659737)}
{pt3dadd(148596.000000,128376.000000,150350.000000,1460.754072)}
{pt3dadd(148272.000000,128676.000000,149975.000000,1445.848407)}
{pt3dadd(149172.000000,129012.000000,150350.000000,1430.942742)}
{pt3dadd(148692.000000,129492.000000,149900.000000,1520.376669)}
{pt3dadd(148776.000000,129912.000000,150175.000000,1609.810596)}
{pt3dadd(148608.000000,130296.000000,149675.000000,1699.244523)}
{pt3dadd(148440.000000,130716.000000,149700.000000,1788.678450)}
{pt3dadd(148236.000000,131112.000000,149250.000000,1714.150188)}
{pt3dadd(149184.000000,131472.000000,149475.000000,1639.621926)}
{pt3dadd(148356.000000,131856.000000,148675.000000,1565.093664)}
{pt3dadd(148740.000000,132192.000000,149050.000000,1490.565402)}
{pt3dadd(148668.000000,132504.000000,148825.000000,1416.037140)}
{pt3dadd(149088.000000,132924.000000,148600.000000,1341.508878)}
{pt3dadd(149316.000000,133296.000000,148250.000000,1266.980616)}
{pt3dadd(149376.000000,133716.000000,148100.000000,1192.452354)}
{pt3dadd(149904.000000,134196.000000,147825.000000,1204.873736)}
{pt3dadd(150432.000000,134604.000000,147675.000000,1217.295117)}
{pt3dadd(150336.000000,134868.000000,147850.000000,1229.716498)}
{pt3dadd(150204.000000,135708.000000,147575.000000,1242.137880)}
{pt3dadd(150648.000000,136236.000000,147025.000000,1304.244761)}
{pt3dadd(151524.000000,136764.000000,146950.000000,1366.351641)}
{pt3dadd(152124.000000,137328.000000,146650.000000,1428.458522)}
{pt3dadd(152436.000000,137748.000000,146700.000000,1490.565402)}
{pt3dadd(152748.000000,138144.000000,146450.000000,1461.350317)}
{pt3dadd(152916.000000,138528.000000,146275.000000,1432.135233)}
{pt3dadd(153000.000000,138876.000000,146325.000000,1402.920149)}
{pt3dadd(153144.000000,139308.000000,146300.000000,1373.705064)}
{pt3dadd(153456.000000,139656.000000,146300.000000,1402.920149)}
{pt3dadd(153768.000000,140016.000000,146275.000000,1432.135233)}
{pt3dadd(153936.000000,140580.000000,145850.000000,1461.350317)}
{pt3dadd(153996.000000,141024.000000,146000.000000,1490.565402)}
{pt3dadd(154044.000000,141444.000000,145825.000000,1513.551101)}
{pt3dadd(154104.000000,141936.000000,145600.000000,1536.536799)}
{pt3dadd(154032.000000,142380.000000,145425.000000,1559.522498)}
{pt3dadd(153708.000000,142788.000000,145325.000000,1582.508196)}
{pt3dadd(154128.000000,143388.000000,145175.000000,1559.522498)}
{pt3dadd(154164.000000,143724.000000,145300.000000,1536.536799)}
{pt3dadd(153792.000000,144048.000000,144950.000000,1513.551101)}
{pt3dadd(153744.000000,144480.000000,145025.000000,1490.565402)}
{pt3dadd(154020.000000,144936.000000,144775.000000,1428.458522)}
{pt3dadd(153696.000000,145392.000000,144750.000000,1366.351641)}
{pt3dadd(153780.000000,146136.000000,144400.000000,1304.244761)}
{pt3dadd(153864.000000,146628.000000,144350.000000,1242.137880)}
{pt3dadd(153948.000000,147132.000000,144050.000000,1229.716498)}
{pt3dadd(154020.000000,147756.000000,143750.000000,1217.295117)}
{pt3dadd(154092.000000,148284.000000,143450.000000,1204.873736)}
{pt3dadd(153948.000000,148764.000000,143275.000000,1192.452354)}
{pt3dadd(153852.000000,149352.000000,143125.000000,1204.873736)}
{pt3dadd(154320.000000,149700.000000,143050.000000,1217.295117)}
{pt3dadd(154440.000000,150144.000000,142825.000000,1229.716498)}
{pt3dadd(153876.000000,150708.000000,142750.000000,1242.137880)}
{pt3dadd(153996.000000,151152.000000,142625.000000,1242.137880)}
{pt3dadd(154248.000000,151536.000000,142400.000000,1242.137880)}
{pt3dadd(154500.000000,152016.000000,142175.000000,1242.137880)}
{pt3dadd(154776.000000,152472.000000,142250.000000,1242.137880)}
{pt3dadd(154428.000000,152712.000000,141850.000000,1190.382147)}
{pt3dadd(154332.000000,153228.000000,141875.000000,1138.626414)}
{pt3dadd(154344.000000,153624.000000,141625.000000,1086.870681)}
{pt3dadd(154488.000000,154152.000000,141525.000000,1035.114948)}
{pt3dadd(154416.000000,154596.000000,141375.000000,926.092431)}
{pt3dadd(154608.000000,155004.000000,141275.000000,817.069914)}
{pt3dadd(154860.000000,155532.000000,141000.000000,708.047397)}
{pt3dadd(154836.000000,155916.000000,140600.000000,599.024880)}
{pt3dadd(154848.000000,156432.000000,140450.000000,747.381748)}
{pt3dadd(154824.000000,156924.000000,140175.000000,895.738617)}
{pt3dadd(154800.000000,157368.000000,139875.000000,1044.095486)}
{pt3dadd(154620.000000,157800.000000,140100.000000,1192.452354)}
{pt3dadd(154956.000000,158220.000000,139750.000000,1153.118003)}
{pt3dadd(155292.000000,158832.000000,139400.000000,1113.783651)}
{pt3dadd(155376.000000,159372.000000,139150.000000,1074.449300)}
{pt3dadd(156048.000000,159564.000000,138625.000000,1035.114948)}
{pt3dadd(156840.000000,161064.000000,137450.000000,1086.870681)}
{pt3dadd(158244.000000,161424.000000,136550.000000,1138.626414)}
{pt3dadd(160020.000000,160812.000000,135825.000000,1190.382147)}
{pt3dadd(160632.000000,160080.000000,135225.000000,1242.137880)}
{pt3dadd(160812.000000,160092.000000,134800.000000,1242.137880)}
{pt3dadd(161268.000000,160332.000000,133950.000000,1242.137880)}
{pt3dadd(161436.000000,160128.000000,133250.000000,1242.137880)}
{pt3dadd(161472.000000,160164.000000,132375.000000,1242.137880)}
{pt3dadd(161016.000000,160032.000000,131725.000000,1104.122578)}
{pt3dadd(161184.000000,159876.000000,130975.000000,966.107277)}
{pt3dadd(161892.000000,159732.000000,130150.000000,828.091975)}
{pt3dadd(162084.000000,158628.000000,129500.000000,690.076674)}
{pt3dadd(162204.000000,158040.000000,128650.000000,667.313725)}
{pt3dadd(163188.000000,157584.000000,127950.000000,644.550777)}
{pt3dadd(164232.000000,156912.000000,127425.000000,621.787828)}
{pt3dadd(165240.000000,156324.000000,126925.000000,599.024880)}
{pt3dadd(165552.000000,156012.000000,126950.000000,599.024880)}
{pt3dadd(166176.000000,155916.000000,126825.000000,599.024880)}
{pt3dadd(166668.000000,155520.000000,126475.000000,599.024880)}
{pt3dadd(167112.000000,155388.000000,126475.000000,599.024880)}
{pt3dadd(167616.000000,155256.000000,126475.000000,599.024880)}
{pt3dadd(168084.000000,154860.000000,126300.000000,599.024880)}
{pt3dadd(168576.000000,154980.000000,126100.000000,599.024880)}
{pt3dadd(169116.000000,155040.000000,125950.000000,599.024880)}
{pt3dadd(169668.000000,155088.000000,125800.000000,569.073631)}
{pt3dadd(170256.000000,155196.000000,125650.000000,539.122383)}
{pt3dadd(170724.000000,155232.000000,125500.000000,509.171134)}
{pt3dadd(171228.000000,154836.000000,125200.000000,479.219886)}
{pt3dadd(171612.000000,154548.000000,125275.000000,463.412286)}
{pt3dadd(172032.000000,153936.000000,125600.000000,447.604686)}
{pt3dadd(172548.000000,153648.000000,125575.000000,431.797086)}
{pt3dadd(172944.000000,153624.000000,125300.000000,415.989486)}
{pt3dadd(173388.000000,153984.000000,125000.000000,461.748335)}
{pt3dadd(173796.000000,153780.000000,124950.000000,507.507183)}
{pt3dadd(174252.000000,153732.000000,124675.000000,553.266031)}
{pt3dadd(174660.000000,153336.000000,124675.000000,599.024880)}
{pt3dadd(175356.000000,152940.000000,124700.000000,708.047397)}
{pt3dadd(177912.000000,152460.000000,123725.000000,817.069914)}
{pt3dadd(178404.000000,152412.000000,123725.000000,926.092431)}
{pt3dadd(180120.000000,151716.000000,123100.000000,1035.114948)}
{pt3dadd(180612.000000,151452.000000,122950.000000,991.985162)}
{pt3dadd(181032.000000,151080.000000,122850.000000,948.855375)}
{pt3dadd(181488.000000,150600.000000,122375.000000,905.725589)}
{pt3dadd(181908.000000,150660.000000,122075.000000,862.595802)}
{pt3dadd(182352.000000,150708.000000,121775.000000,826.654307)}
{pt3dadd(182712.000000,151224.000000,121550.000000,790.712811)}
{pt3dadd(183132.000000,151068.000000,121075.000000,754.771316)}
{pt3dadd(183588.000000,151092.000000,120575.000000,718.829820)}
{pt3dadd(183984.000000,151512.000000,120650.000000,754.771316)}
{pt3dadd(184464.000000,150840.000000,119900.000000,790.712811)}
{pt3dadd(184992.000000,150636.000000,119225.000000,826.654307)}
{pt3dadd(185844.000000,150348.000000,118675.000000,862.595802)}
{pt3dadd(186480.000000,149868.000000,118050.000000,862.595802)}
{pt3dadd(187116.000000,150468.000000,117475.000000,862.595802)}
{pt3dadd(187476.000000,150252.000000,116825.000000,862.595802)}
{pt3dadd(187836.000000,150000.000000,116025.000000,862.595802)}
{pt3dadd(188520.000000,150252.000000,115625.000000,862.595802)}
{pt3dadd(188748.000000,150468.000000,115125.000000,862.595802)}
{pt3dadd(189036.000000,150444.000000,114900.000000,862.595802)}
{pt3dadd(189324.000000,150156.000000,114425.000000,862.595802)}
{pt3dadd(189672.000000,149832.000000,113950.000000,826.654307)}
{pt3dadd(190008.000000,149508.000000,113575.000000,790.712811)}
{pt3dadd(190632.000000,149700.000000,112500.000000,754.771316)}
{pt3dadd(191136.000000,149964.000000,111750.000000,718.829820)}
{pt3dadd(191304.000000,149748.000000,110950.000000,787.549937)}
{pt3dadd(191064.000000,148992.000000,110125.000000,856.270053)}
{pt3dadd(191748.000000,148380.000000,109400.000000,924.990169)}
{pt3dadd(191208.000000,148104.000000,108700.000000,993.710286)}
{pt3dadd(191244.000000,147840.000000,107900.000000,1103.018400)}
{pt3dadd(191568.000000,148440.000000,107325.000000,1212.326514)}
{pt3dadd(191196.000000,147744.000000,106575.000000,1321.634628)}
{pt3dadd(191100.000000,148128.000000,106075.000000,1430.942742)}
{pt3dadd(190536.000000,147648.000000,105575.000000,1430.942742)}
{pt3dadd(189996.000000,147168.000000,104625.000000,1430.942742)}
{pt3dadd(189516.000000,146928.000000,103725.000000,1430.942742)}
{pt3dadd(189276.000000,146988.000000,102725.000000,1430.942742)}
{pt3dadd(189096.000000,146784.000000,101700.000000,1416.633323)}
{pt3dadd(189288.000000,146736.000000,101225.000000,1402.323903)}
{pt3dadd(189300.000000,146556.000000,100725.000000,1388.014483)}
{pt3dadd(189144.000000,146316.000000,100225.000000,1373.705064)}
{pt3dadd(189060.000000,146076.000000,99575.000000,1402.920149)}
{pt3dadd(189072.000000,145944.000000,98900.000000,1432.135233)}
{pt3dadd(188808.000000,145740.000000,98250.000000,1461.350317)}
{pt3dadd(188544.000000,145512.000000,97650.000000,1490.565402)}
{pt3dadd(188820.000000,144924.000000,97000.000000,1192.452354)}

{create adhoc2}
{access adhoc2}
{connect adhoc2(1), adhoc1(0)}
{nseg = 1}
{strdef color color = "White"}
{pt3dclear()}
{pt3dadd(188820.000000,144924.000000,97000.000000,1192.452354)}
{pt3dadd(188124.000000,139740.000000,97475.000000,346.657896)}
{pt3dadd(187788.000000,137652.000000,97650.000000,332.213819)}
{pt3dadd(187476.000000,134892.000000,97450.000000,317.769741)}
{pt3dadd(187332.000000,133488.000000,97000.000000,303.325664)}
{pt3dadd(186984.000000,131868.000000,96600.000000,288.881586)}
{pt3dadd(186648.000000,129348.000000,96125.000000,288.881586)}
{pt3dadd(186060.000000,127632.000000,95725.000000,288.881586)}
{pt3dadd(185760.000000,127860.000000,95725.000000,288.881586)}
{pt3dadd(185364.000000,125340.000000,95150.000000,288.881586)}
{pt3dadd(185004.000000,121668.000000,95525.000000,276.844851)}
{pt3dadd(184128.000000,118908.000000,94925.000000,264.808116)}
{pt3dadd(183132.000000,116448.000000,94450.000000,252.771381)}
{pt3dadd(182988.000000,115752.000000,94100.000000,240.734646)}
{pt3dadd(182880.000000,113652.000000,93700.000000,240.734646)}
{pt3dadd(182196.000000,113112.000000,93200.000000,240.734646)}
{pt3dadd(181824.000000,113424.000000,92575.000000,240.734646)}
{pt3dadd(180996.000000,114204.000000,92000.000000,240.734646)}
{pt3dadd(180672.000000,114624.000000,91500.000000,96.745860)}

{create adhoc3}
{access adhoc3}
{connect adhoc3(1), adhoc1(0)}
{nseg = 1}
{strdef color color = "White"}
{pt3dclear()}
{pt3dadd(188820.000000,144924.000000,97000.000000,1192.452354)}
{pt3dadd(189000.000000,144756.000000,96250.000000,1490.565402)}
{pt3dadd(188808.000000,144468.000000,95600.000000,1428.458522)}
{pt3dadd(188844.000000,143712.000000,94800.000000,1366.351641)}
{pt3dadd(188256.000000,143100.000000,94175.000000,1304.244761)}
{pt3dadd(188160.000000,142560.000000,93575.000000,1242.137880)}
{pt3dadd(188112.000000,142056.000000,93025.000000,1281.628890)}
{pt3dadd(187224.000000,141492.000000,92450.000000,1321.119900)}
{pt3dadd(186936.000000,141132.000000,91700.000000,1360.610910)}
{pt3dadd(186684.000000,140784.000000,91000.000000,1400.101920)}
{pt3dadd(186540.000000,140436.000000,90300.000000,1278.439596)}
{pt3dadd(185676.000000,139980.000000,89825.000000,1156.777272)}
{pt3dadd(185388.000000,139908.000000,89200.000000,1035.114948)}
{pt3dadd(185616.000000,139404.000000,88625.000000,828.091944)}

{create adhoc4}
{access adhoc4}
{connect adhoc4(1), adhoc3(0)}
{nseg = 1}
{strdef color color = "White"}
{pt3dclear()}
{pt3dadd(185616.000000,139404.000000,88625.000000,828.091944)}
{pt3dadd(184632.000000,135636.000000,87650.000000,844.004466)}
{pt3dadd(183564.000000,133476.000000,87150.000000,881.430921)}
{pt3dadd(183036.000000,132468.000000,86650.000000,918.857376)}
{pt3dadd(182892.000000,132204.000000,86300.000000,956.283831)}
{pt3dadd(182664.000000,131964.000000,86250.000000,993.710286)}
{pt3dadd(182676.000000,131604.000000,86025.000000,1004.061452)}
{pt3dadd(182520.000000,131340.000000,85875.000000,1014.412617)}
{pt3dadd(182424.000000,131040.000000,85900.000000,1024.763782)}
{pt3dadd(182352.000000,130776.000000,85875.000000,1035.114948)}
{pt3dadd(182280.000000,130464.000000,85650.000000,983.359197)}
{pt3dadd(182184.000000,130140.000000,85450.000000,931.603446)}
{pt3dadd(181836.000000,129840.000000,85450.000000,879.847695)}
{pt3dadd(181488.000000,129420.000000,85425.000000,828.091944)}
{pt3dadd(181308.000000,129084.000000,85125.000000,836.717909)}
{pt3dadd(181728.000000,128748.000000,85075.000000,845.343873)}
{pt3dadd(181404.000000,128436.000000,84850.000000,853.969838)}
{pt3dadd(181596.000000,128100.000000,84800.000000,862.595802)}
{pt3dadd(181548.000000,127728.000000,84950.000000,862.595802)}
{pt3dadd(181260.000000,127368.000000,84950.000000,862.595802)}
{pt3dadd(181164.000000,127032.000000,84900.000000,862.595802)}
{pt3dadd(181284.000000,126684.000000,84750.000000,862.595802)}
{pt3dadd(181428.000000,126324.000000,84600.000000,905.725589)}
{pt3dadd(180864.000000,126036.000000,84675.000000,948.855375)}
{pt3dadd(180876.000000,125604.000000,84550.000000,991.985162)}
{pt3dadd(180996.000000,125148.000000,84400.000000,1035.114948)}
{pt3dadd(181008.000000,124764.000000,84250.000000,1014.826649)}
{pt3dadd(180504.000000,124416.000000,83850.000000,994.538349)}
{pt3dadd(180516.000000,124092.000000,84200.000000,974.250050)}
{pt3dadd(180252.000000,123804.000000,83975.000000,953.961750)}
{pt3dadd(179988.000000,123516.000000,83775.000000,922.494299)}
{pt3dadd(179916.000000,123204.000000,83550.000000,891.026847)}
{pt3dadd(179736.000000,122820.000000,83150.000000,859.559395)}
{pt3dadd(179496.000000,122448.000000,83000.000000,828.091944)}
{pt3dadd(179256.000000,122016.000000,82850.000000,662.473530)}

{create adhoc5}
{access adhoc5}
{connect adhoc5(1), adhoc4(0)}
{nseg = 1}
{strdef color color = "White"}
{pt3dclear()}
{pt3dadd(179256.000000,122016.000000,82850.000000,662.473530)}
{pt3dadd(178896.000000,122100.000000,81975.000000,575.063766)}
{pt3dadd(178872.000000,121968.000000,81500.000000,611.005280)}
{pt3dadd(178416.000000,122160.000000,81000.000000,646.946793)}
{pt3dadd(177828.000000,121836.000000,80500.000000,682.888307)}
{pt3dadd(177456.000000,121644.000000,79975.000000,718.829820)}
{pt3dadd(177276.000000,121872.000000,79475.000000,682.888329)}
{pt3dadd(177096.000000,121932.000000,79050.000000,646.946838)}
{pt3dadd(176592.000000,121776.000000,78650.000000,611.005347)}
{pt3dadd(175920.000000,121572.000000,78250.000000,575.063856)}
{pt3dadd(175524.000000,121944.000000,77800.000000,546.310660)}
{pt3dadd(175128.000000,122064.000000,77375.000000,517.557465)}
{pt3dadd(174564.000000,121632.000000,76975.000000,488.804269)}
{pt3dadd(174108.000000,121716.000000,76475.000000,460.051074)}
{pt3dadd(173820.000000,121800.000000,75800.000000,469.835150)}
{pt3dadd(173460.000000,121368.000000,75150.000000,479.619225)}
{pt3dadd(173388.000000,121596.000000,74525.000000,489.403301)}
{pt3dadd(172860.000000,121356.000000,73900.000000,499.187376)}
{pt3dadd(172296.000000,121092.000000,73375.000000,499.187376)}
{pt3dadd(171732.000000,120768.000000,72725.000000,499.187376)}
{pt3dadd(171252.000000,120708.000000,72075.000000,499.187376)}
{pt3dadd(170772.000000,120648.000000,71600.000000,499.187376)}
{pt3dadd(170592.000000,120744.000000,70975.000000,518.156496)}
{pt3dadd(170820.000000,120480.000000,70425.000000,537.125616)}
{pt3dadd(170880.000000,120348.000000,69875.000000,556.094736)}
{pt3dadd(170940.000000,120324.000000,69475.000000,575.063856)}
{pt3dadd(171192.000000,119760.000000,68975.000000,581.054112)}
{pt3dadd(170988.000000,119328.000000,68375.000000,587.044368)}
{pt3dadd(171012.000000,119304.000000,67750.000000,593.034624)}
{pt3dadd(170940.000000,118872.000000,67125.000000,599.024880)}
{pt3dadd(170916.000000,118776.000000,66725.000000,569.073631)}
{pt3dadd(170820.000000,118404.000000,66275.000000,539.122383)}
{pt3dadd(170160.000000,118332.000000,65575.000000,509.171134)}
{pt3dadd(169980.000000,118092.000000,64925.000000,479.219886)}
{pt3dadd(169956.000000,117504.000000,64350.000000,539.122383)}
{pt3dadd(169896.000000,117300.000000,63700.000000,599.024880)}
{pt3dadd(169872.000000,116352.000000,63025.000000,415.989486)}

{create adhoc6}
{access adhoc6}
{connect adhoc6(1), adhoc5(0)}
{nseg = 1}
{strdef color color = "White"}
{pt3dclear()}
{pt3dadd(169872.000000,116352.000000,63025.000000,415.989486)}
{pt3dadd(169932.000000,114432.000000,62200.000000,346.657896)}
{pt3dadd(169860.000000,113844.000000,61775.000000,346.657896)}
{pt3dadd(169788.000000,113256.000000,61350.000000,346.657896)}
{pt3dadd(169764.000000,112824.000000,60875.000000,346.657896)}
{pt3dadd(169848.000000,112344.000000,60500.000000,346.657896)}
{pt3dadd(170040.000000,111804.000000,60175.000000,363.990794)}
{pt3dadd(170160.000000,111672.000000,59675.000000,381.323691)}
{pt3dadd(170304.000000,111240.000000,59225.000000,398.656589)}
{pt3dadd(170724.000000,111108.000000,58700.000000,415.989486)}
{pt3dadd(170892.000000,110844.000000,58150.000000,398.656589)}
{pt3dadd(170700.000000,110604.000000,57625.000000,381.323691)}
{pt3dadd(171120.000000,110556.000000,57150.000000,363.990794)}
{pt3dadd(171180.000000,110400.000000,56625.000000,346.657896)}
{pt3dadd(171240.000000,110268.000000,56200.000000,332.213819)}
{pt3dadd(171576.000000,109980.000000,55750.000000,317.769741)}
{pt3dadd(171912.000000,109908.000000,55325.000000,303.325664)}
{pt3dadd(172188.000000,109728.000000,54875.000000,288.881586)}
{pt3dadd(172416.000000,109332.000000,54525.000000,320.658561)}
{pt3dadd(172740.000000,109008.000000,54000.000000,352.435536)}
{pt3dadd(173160.000000,108744.000000,53625.000000,384.212511)}
{pt3dadd(173304.000000,108348.000000,53100.000000,415.989486)}
{pt3dadd(173388.000000,107892.000000,52550.000000,411.829601)}
{pt3dadd(173556.000000,107652.000000,52100.000000,407.669715)}
{pt3dadd(173736.000000,107628.000000,51625.000000,403.509830)}
{pt3dadd(173964.000000,107604.000000,51175.000000,399.349944)}
{pt3dadd(174000.000000,107400.000000,50750.000000,403.509830)}
{pt3dadd(174084.000000,107160.000000,50125.000000,407.669715)}
{pt3dadd(174240.000000,107220.000000,49575.000000,411.829601)}
{pt3dadd(174684.000000,107040.000000,49025.000000,415.989486)}
{pt3dadd(175236.000000,107580.000000,48350.000000,431.797086)}
{pt3dadd(175872.000000,107664.000000,47800.000000,447.604686)}
{pt3dadd(176772.000000,107832.000000,47250.000000,463.412286)}
{pt3dadd(177564.000000,107868.000000,46450.000000,479.219886)}
{pt3dadd(177756.000000,107988.000000,45850.000000,417.191234)}
{pt3dadd(178116.000000,108048.000000,45225.000000,355.162581)}
{pt3dadd(178692.000000,108408.000000,44725.000000,293.133929)}
{pt3dadd(178596.000000,108636.000000,44375.000000,231.105276)}
{pt3dadd(178656.000000,108972.000000,43925.000000,233.512618)}
{pt3dadd(178692.000000,109416.000000,43525.000000,235.919961)}
{pt3dadd(178596.000000,109428.000000,42925.000000,238.327304)}
{pt3dadd(178548.000000,109728.000000,43050.000000,240.734646)}
{pt3dadd(178800.000000,110088.000000,42375.000000,240.734646)}
{pt3dadd(179232.000000,110472.000000,42100.000000,240.734646)}
{pt3dadd(179484.000000,110640.000000,41675.000000,240.734646)}
{pt3dadd(179688.000000,110832.000000,41750.000000,240.734646)}
{pt3dadd(179940.000000,111108.000000,41400.000000,222.345193)}
{pt3dadd(180192.000000,111360.000000,41050.000000,203.955741)}
{pt3dadd(180048.000000,111624.000000,40875.000000,185.566288)}
{pt3dadd(179844.000000,111912.000000,40825.000000,167.176836)}
{pt3dadd(179232.000000,112572.000000,40575.000000,183.894525)}
{pt3dadd(178968.000000,112788.000000,40475.000000,200.612214)}
{pt3dadd(179208.000000,112716.000000,40300.000000,221.861052)}

{create adhoc7}
{access adhoc7}
{connect adhoc7(1), adhoc5(0)}
{nseg = 1}
{strdef color color = "White"}
{pt3dclear()}
{pt3dadd(169872.000000,116352.000000,63025.000000,415.989486)}
{pt3dadd(169500.000000,116196.000000,61950.000000,332.791596)}
{pt3dadd(169116.000000,116124.000000,61425.000000,529.978824)}

{create adhoc8}
{access adhoc8}
{connect adhoc8(1), adhoc7(0)}
{nseg = 1}
{strdef color color = "White"}
{pt3dclear()}
{pt3dadd(169116.000000,116124.000000,61425.000000,529.978824)}
{pt3dadd(168480.000000,116808.000000,60525.000000,177.488856)}
{pt3dadd(168576.000000,117156.000000,59950.000000,156.335652)}
{pt3dadd(168564.000000,117180.000000,59250.000000,135.182448)}
{pt3dadd(169764.000000,117300.000000,58700.000000,114.029244)}
{pt3dadd(170100.000000,117360.000000,58550.000000,92.876040)}
{pt3dadd(170616.000000,117924.000000,57975.000000,80.579760)}
{pt3dadd(170892.000000,118164.000000,57675.000000,68.283480)}
{pt3dadd(171120.000000,118560.000000,57600.000000,55.987200)}
{pt3dadd(171156.000000,118680.000000,57825.000000,38.880000)}

{create adhoc9}
{access adhoc9}
{connect adhoc9(1), adhoc7(0)}
{nseg = 1}
{strdef color color = "White"}
{pt3dclear()}
{pt3dadd(169116.000000,116124.000000,61425.000000,529.978824)}
{pt3dadd(168660.000000,115824.000000,60925.000000,575.063856)}
{pt3dadd(168792.000000,115032.000000,60200.000000,535.295264)}
{pt3dadd(168504.000000,114528.000000,59775.000000,495.526671)}
{pt3dadd(168624.000000,114288.000000,59425.000000,455.758079)}
{pt3dadd(168684.000000,113892.000000,58950.000000,415.989486)}
{pt3dadd(168492.000000,113616.000000,58550.000000,411.829601)}
{pt3dadd(168312.000000,113340.000000,58050.000000,407.669715)}
{pt3dadd(167880.000000,113064.000000,57500.000000,403.509830)}
{pt3dadd(168048.000000,113028.000000,57000.000000,399.349944)}
{pt3dadd(167676.000000,112896.000000,56375.000000,399.349935)}
{pt3dadd(167472.000000,112872.000000,55775.000000,399.349926)}
{pt3dadd(167268.000000,112836.000000,55275.000000,399.349917)}
{pt3dadd(167616.000000,112764.000000,54625.000000,399.349908)}
{pt3dadd(168012.000000,112464.000000,54000.000000,419.317403)}
{pt3dadd(168864.000000,112644.000000,53450.000000,439.284897)}
{pt3dadd(169776.000000,112764.000000,53000.000000,459.252391)}
{pt3dadd(170100.000000,112812.000000,52350.000000,479.219886)}
{pt3dadd(170784.000000,113016.000000,51750.000000,415.989486)}
{pt3dadd(171228.000000,113388.000000,51125.000000,415.989486)}

{create adhoc10}
{access adhoc10}
{connect adhoc10(1), adhoc9(0)}
{nseg = 1}
{strdef color color = "White"}
{pt3dclear()}
{pt3dadd(171228.000000,113388.000000,51125.000000,415.989486)}
{pt3dadd(171444.000000,113484.000000,50600.000000,441.649080)}
{pt3dadd(171924.000000,113748.000000,50050.000000,451.041790)}
{pt3dadd(172284.000000,113964.000000,49525.000000,460.434501)}
{pt3dadd(172668.000000,114348.000000,49025.000000,469.827211)}
{pt3dadd(173352.000000,114660.000000,48500.000000,479.219922)}
{pt3dadd(174144.000000,114684.000000,47925.000000,419.598603)}
{pt3dadd(174540.000000,114804.000000,47300.000000,359.977284)}
{pt3dadd(175020.000000,114972.000000,46675.000000,300.355965)}
{pt3dadd(176256.000000,115740.000000,45700.000000,240.734646)}
{pt3dadd(176580.000000,116052.000000,45250.000000,259.030485)}
{pt3dadd(176700.000000,116244.000000,44825.000000,277.326324)}
{pt3dadd(177156.000000,116496.000000,44275.000000,192.587724)}

{create adhoc11}
{access adhoc11}
{connect adhoc11(1), adhoc10(0)}
{nseg = 1}
{strdef color color = "White"}
{pt3dclear()}
{pt3dadd(177156.000000,116496.000000,44275.000000,192.587724)}
{pt3dadd(176796.000000,116712.000000,43675.000000,192.587724)}
{pt3dadd(176736.000000,116700.000000,42775.000000,194.593846)}
{pt3dadd(176424.000000,117084.000000,42275.000000,196.599969)}
{pt3dadd(176412.000000,117408.000000,41875.000000,198.606091)}
{pt3dadd(176124.000000,117936.000000,41425.000000,200.612214)}
{pt3dadd(175872.000000,118152.000000,41575.000000,116.095032)}

{create adhoc12}
{access adhoc12}
{connect adhoc12(1), adhoc10(0)}
{nseg = 1}
{strdef color color = "White"}
{pt3dclear()}
{pt3dadd(177156.000000,116496.000000,44275.000000,192.587724)}
{pt3dadd(177408.000000,116976.000000,43775.000000,212.986638)}
{pt3dadd(177564.000000,117372.000000,42975.000000,231.960375)}
{pt3dadd(178668.000000,117960.000000,42025.000000,250.934112)}
{pt3dadd(179280.000000,118044.000000,41300.000000,269.907849)}
{pt3dadd(179544.000000,118296.000000,40900.000000,288.881586)}
{pt3dadd(179856.000000,118308.000000,40525.000000,277.326342)}

{create adhoc13}
{access adhoc13}
{connect adhoc13(1), adhoc12(0)}
{nseg = 1}
{strdef color color = "White"}
{pt3dclear()}
{pt3dadd(179856.000000,118308.000000,40525.000000,277.326342)}
{pt3dadd(179988.000000,118932.000000,40000.000000,231.105276)}
{pt3dadd(180264.000000,119064.000000,39750.000000,221.475906)}
{pt3dadd(180336.000000,119256.000000,39500.000000,211.846536)}
{pt3dadd(180720.000000,119568.000000,39025.000000,202.217166)}
{pt3dadd(181428.000000,120252.000000,38625.000000,192.587796)}
{pt3dadd(181776.000000,120768.000000,38125.000000,192.587778)}
{pt3dadd(181812.000000,120984.000000,37975.000000,192.587760)}
{pt3dadd(182064.000000,121236.000000,37575.000000,192.587742)}
{pt3dadd(182676.000000,121620.000000,37150.000000,192.587724)}
{pt3dadd(182928.000000,121644.000000,36625.000000,179.269304)}
{pt3dadd(183324.000000,121680.000000,36125.000000,165.950883)}
{pt3dadd(183708.000000,121776.000000,35600.000000,152.632462)}
{pt3dadd(183936.000000,121824.000000,35450.000000,139.314042)}
{pt3dadd(184296.000000,121752.000000,35325.000000,118.482332)}
{pt3dadd(185280.000000,121572.000000,34750.000000,97.650621)}
{pt3dadd(185856.000000,121560.000000,34425.000000,76.818910)}
{pt3dadd(186588.000000,121860.000000,33550.000000,55.987200)}
{pt3dadd(187200.000000,122196.000000,33350.000000,74.300832)}

{create adhoc14}
{access adhoc14}
{connect adhoc14(1), adhoc12(0)}
{nseg = 1}
{strdef color color = "White"}
{pt3dclear()}
{pt3dadd(179856.000000,118308.000000,40525.000000,277.326342)}
{pt3dadd(180696.000000,117816.000000,40075.000000,160.489764)}

{create adhoc15}
{access adhoc15}
{connect adhoc15(1), adhoc9(0)}
{nseg = 1}
{strdef color color = "White"}
{pt3dclear()}
{pt3dadd(171228.000000,113388.000000,51125.000000,415.989486)}
{pt3dadd(169980.000000,114888.000000,50725.000000,139.314042)}
{pt3dadd(169476.000000,115728.000000,51250.000000,124.640919)}
{pt3dadd(169476.000000,116316.000000,51625.000000,109.967796)}
{pt3dadd(169200.000000,116760.000000,51900.000000,95.294673)}
{pt3dadd(168564.000000,117120.000000,52150.000000,80.621550)}
{pt3dadd(168252.000000,117444.000000,51975.000000,133.741476)}

{create adhoc16}
{access adhoc16}
{connect adhoc16(1), adhoc4(0)}
{nseg = 1}
{strdef color color = "White"}
{pt3dclear()}
{pt3dadd(179256.000000,122016.000000,82850.000000,662.473530)}
{pt3dadd(179016.000000,121680.000000,82650.000000,599.024880)}
{pt3dadd(179328.000000,121260.000000,83800.000000,640.061028)}
{pt3dadd(179292.000000,120852.000000,83950.000000,681.097176)}
{pt3dadd(179268.000000,120564.000000,84100.000000,722.133324)}
{pt3dadd(179220.000000,120168.000000,84025.000000,763.169472)}
{pt3dadd(178740.000000,119196.000000,84075.000000,726.623073)}
{pt3dadd(178248.000000,118236.000000,83900.000000,690.076674)}
{pt3dadd(177900.000000,117072.000000,83175.000000,718.829820)}

{create adhoc17}
{access adhoc17}
{connect adhoc17(1), adhoc16(0)}
{nseg = 1}
{strdef color color = "White"}
{pt3dclear()}
{pt3dadd(177900.000000,117072.000000,83175.000000,718.829820)}
{pt3dadd(178836.000000,115848.000000,84025.000000,192.587724)}
{pt3dadd(179184.000000,115452.000000,84525.000000,194.593846)}
{pt3dadd(179592.000000,114492.000000,85650.000000,196.599969)}
{pt3dadd(179604.000000,113460.000000,86475.000000,198.606091)}
{pt3dadd(179916.000000,111444.000000,87350.000000,200.612214)}
{pt3dadd(180300.000000,110328.000000,87850.000000,199.531278)}
{pt3dadd(179388.000000,108132.000000,88350.000000,198.450342)}
{pt3dadd(178860.000000,107412.000000,88950.000000,197.369406)}
{pt3dadd(178752.000000,106740.000000,89475.000000,196.288470)}
{pt3dadd(178272.000000,106368.000000,89825.000000,219.436749)}
{pt3dadd(178260.000000,106272.000000,90175.000000,242.585028)}
{pt3dadd(178080.000000,105804.000000,90775.000000,265.733307)}
{pt3dadd(178104.000000,105660.000000,91500.000000,288.881586)}
{pt3dadd(178416.000000,105420.000000,92275.000000,246.084312)}
{pt3dadd(178908.000000,105324.000000,92900.000000,203.287038)}
{pt3dadd(179616.000000,105336.000000,93425.000000,160.489764)}
{pt3dadd(179820.000000,105564.000000,93600.000000,96.745860)}

{create adhoc18}
{access adhoc18}
{connect adhoc18(1), adhoc16(0)}
{nseg = 1}
{strdef color color = "White"}
{pt3dclear()}
{pt3dadd(177900.000000,117072.000000,83175.000000,718.829820)}
{pt3dadd(177660.000000,116148.000000,82875.000000,718.829820)}
{pt3dadd(177252.000000,115476.000000,82625.000000,763.169472)}
{pt3dadd(176940.000000,114708.000000,82050.000000,718.829820)}

{create adhoc19}
{access adhoc19}
{connect adhoc19(1), adhoc18(0)}
{nseg = 1}
{strdef color color = "White"}
{pt3dclear()}
{pt3dadd(176940.000000,114708.000000,82050.000000,718.829820)}
{pt3dadd(177636.000000,113388.000000,81700.000000,92.876040)}
{pt3dadd(177936.000000,113388.000000,81375.000000,118.325898)}
{pt3dadd(178248.000000,113388.000000,81425.000000,96.745860)}

{create adhoc20}
{access adhoc20}
{connect adhoc20(1), adhoc18(0)}
{nseg = 1}
{strdef color color = "White"}
{pt3dclear()}
{pt3dadd(176940.000000,114708.000000,82050.000000,718.829820)}
{pt3dadd(176652.000000,114336.000000,81800.000000,690.076674)}
{pt3dadd(176412.000000,114492.000000,82025.000000,690.076674)}
{pt3dadd(176112.000000,114120.000000,81925.000000,690.076674)}
{pt3dadd(175896.000000,113712.000000,81350.000000,690.076674)}
{pt3dadd(175716.000000,113412.000000,80750.000000,690.076674)}
{pt3dadd(175416.000000,113184.000000,80550.000000,690.076656)}
{pt3dadd(175164.000000,112860.000000,80375.000000,690.076638)}
{pt3dadd(174972.000000,112584.000000,80375.000000,690.076620)}
{pt3dadd(174804.000000,112380.000000,80075.000000,690.076602)}
{pt3dadd(174672.000000,112176.000000,79650.000000,575.063856)}
{pt3dadd(174420.000000,111552.000000,79200.000000,479.219886)}

{create adhoc21}
{access adhoc21}
{connect adhoc21(1), adhoc20(0)}
{nseg = 1}
{strdef color color = "White"}
{pt3dclear()}
{pt3dadd(174420.000000,111552.000000,79200.000000,479.219886)}
{pt3dadd(173040.000000,111900.000000,78750.000000,599.024880)}
{pt3dadd(172908.000000,111852.000000,78200.000000,587.283993)}
{pt3dadd(172236.000000,111636.000000,77625.000000,575.543106)}
{pt3dadd(171552.000000,111456.000000,77225.000000,563.802219)}
{pt3dadd(171648.000000,111456.000000,76625.000000,552.061332)}
{pt3dadd(171612.000000,111048.000000,76075.000000,538.842843)}
{pt3dadd(171192.000000,110640.000000,75325.000000,525.624354)}
{pt3dadd(171516.000000,110844.000000,74675.000000,512.405865)}
{pt3dadd(171228.000000,110652.000000,73850.000000,499.187376)}
{pt3dadd(171000.000000,110676.000000,73350.000000,457.588431)}
{pt3dadd(170976.000000,110460.000000,72700.000000,415.989486)}
{pt3dadd(170940.000000,110232.000000,72175.000000,441.649026)}

{create adhoc22}
{access adhoc22}
{connect adhoc22(1), adhoc21(0)}
{nseg = 1}
{strdef color color = "White"}
{pt3dclear()}
{pt3dadd(170940.000000,110232.000000,72175.000000,441.649026)}
{pt3dadd(171684.000000,108312.000000,71625.000000,160.489764)}
{pt3dadd(173232.000000,107988.000000,71800.000000,149.391081)}
{pt3dadd(173424.000000,107964.000000,71750.000000,138.292398)}
{pt3dadd(173940.000000,108156.000000,71900.000000,127.193715)}
{pt3dadd(174120.000000,108468.000000,72175.000000,116.095032)}
{pt3dadd(174192.000000,108588.000000,72450.000000,109.645308)}
{pt3dadd(174312.000000,108864.000000,72625.000000,103.195584)}
{pt3dadd(174516.000000,109092.000000,72900.000000,96.745860)}
{pt3dadd(174684.000000,109428.000000,73250.000000,67.184640)}

{create adhoc23}
{access adhoc23}
{connect adhoc23(1), adhoc21(0)}
{nseg = 1}
{strdef color color = "White"}
{pt3dclear()}
{pt3dadd(170940.000000,110232.000000,72175.000000,441.649026)}
{pt3dadd(170868.000000,109920.000000,71625.000000,499.187376)}
{pt3dadd(170748.000000,109848.000000,70950.000000,509.451192)}
{pt3dadd(170640.000000,109728.000000,70350.000000,519.715008)}
{pt3dadd(170628.000000,109740.000000,69850.000000,529.978824)}
{pt3dadd(170412.000000,109668.000000,69450.000000,622.267686)}

{create adhoc24}
{access adhoc24}
{connect adhoc24(1), adhoc23(0)}
{nseg = 1}
{strdef color color = "White"}
{pt3dclear()}
{pt3dadd(170412.000000,109668.000000,69450.000000,622.267686)}
{pt3dadd(170424.000000,111048.000000,68950.000000,139.314042)}

{create adhoc25}
{access adhoc25}
{connect adhoc25(1), adhoc24(0)}
{nseg = 1}
{strdef color color = "White"}
{pt3dclear()}
{pt3dadd(170424.000000,111048.000000,68950.000000,139.314042)}
{pt3dadd(170688.000000,111072.000000,69000.000000,96.745860)}
{pt3dadd(170940.000000,111276.000000,68900.000000,109.077732)}
{pt3dadd(172152.000000,111408.000000,68950.000000,121.409604)}
{pt3dadd(172692.000000,111264.000000,68850.000000,133.741476)}
{pt3dadd(172680.000000,111276.000000,68675.000000,133.741476)}

{create adhoc26}
{access adhoc26}
{connect adhoc26(1), adhoc24(0)}
{nseg = 1}
{strdef color color = "White"}
{pt3dclear()}
{pt3dadd(170424.000000,111048.000000,68950.000000,139.314042)}
{pt3dadd(170124.000000,111360.000000,68850.000000,133.741476)}

{create adhoc27}
{access adhoc27}
{connect adhoc27(1), adhoc23(0)}
{nseg = 1}
{strdef color color = "White"}
{pt3dclear()}
{pt3dadd(170412.000000,109668.000000,69450.000000,622.267686)}
{pt3dadd(170256.000000,109644.000000,69000.000000,499.187376)}
{pt3dadd(170172.000000,109308.000000,68450.000000,457.588431)}
{pt3dadd(170208.000000,109176.000000,67925.000000,415.989486)}
{pt3dadd(170100.000000,108924.000000,67550.000000,415.989486)}

{create adhoc28}
{access adhoc28}
{connect adhoc28(1), adhoc27(0)}
{nseg = 1}
{strdef color color = "White"}
{pt3dclear()}
{pt3dadd(170100.000000,108924.000000,67550.000000,415.989486)}
{pt3dadd(169824.000000,108468.000000,67100.000000,479.219886)}
{pt3dadd(169992.000000,108924.000000,66600.000000,446.079388)}
{pt3dadd(169824.000000,108744.000000,66225.000000,412.938891)}
{pt3dadd(169284.000000,108732.000000,65750.000000,379.798393)}
{pt3dadd(168996.000000,108624.000000,65250.000000,346.657896)}
{pt3dadd(168912.000000,108504.000000,64800.000000,399.349908)}
{pt3dadd(168840.000000,108372.000000,64325.000000,399.349944)}

{create adhoc29}
{access adhoc29}
{connect adhoc29(1), adhoc28(0)}
{nseg = 1}
{strdef color color = "White"}
{pt3dclear()}
{pt3dadd(168840.000000,108372.000000,64325.000000,399.349944)}
{pt3dadd(168768.000000,107916.000000,63700.000000,346.657896)}
{pt3dadd(168672.000000,106980.000000,62875.000000,332.791596)}

{create adhoc30}
{access adhoc30}
{connect adhoc30(1), adhoc28(0)}
{nseg = 1}
{strdef color color = "White"}
{pt3dclear()}
{pt3dadd(168840.000000,108372.000000,64325.000000,399.349944)}
{pt3dadd(169260.000000,108732.000000,63550.000000,167.176836)}
{pt3dadd(169476.000000,108804.000000,63350.000000,167.176836)}
{pt3dadd(169788.000000,109152.000000,62875.000000,167.176836)}
{pt3dadd(169260.000000,109248.000000,62575.000000,167.176836)}
{pt3dadd(168636.000000,109296.000000,62350.000000,167.176836)}
{pt3dadd(168360.000000,109368.000000,62325.000000,153.245439)}
{pt3dadd(168312.000000,109440.000000,62150.000000,139.314042)}
{pt3dadd(168264.000000,109704.000000,61425.000000,77.396688)}

{create adhoc31}
{access adhoc31}
{connect adhoc31(1), adhoc27(0)}
{nseg = 1}
{strdef color color = "White"}
{pt3dclear()}
{pt3dadd(170100.000000,108924.000000,67550.000000,415.989486)}
{pt3dadd(169152.000000,106896.000000,66700.000000,346.657896)}
{pt3dadd(169572.000000,105888.000000,66200.000000,332.213819)}
{pt3dadd(169380.000000,104784.000000,65550.000000,317.769741)}
{pt3dadd(169320.000000,103932.000000,65075.000000,303.325664)}
{pt3dadd(169248.000000,103416.000000,64850.000000,288.881586)}
{pt3dadd(169296.000000,102912.000000,64475.000000,276.844851)}
{pt3dadd(169200.000000,102408.000000,63975.000000,264.808116)}
{pt3dadd(169116.000000,101556.000000,63425.000000,252.771381)}
{pt3dadd(169332.000000,100380.000000,63050.000000,240.734646)}
{pt3dadd(169620.000000,100008.000000,62750.000000,220.673426)}
{pt3dadd(168780.000000,99588.000000,63375.000000,200.612205)}
{pt3dadd(168732.000000,99144.000000,63600.000000,180.550985)}
{pt3dadd(169248.000000,98664.000000,64150.000000,160.489764)}
{pt3dadd(169536.000000,98568.000000,64175.000000,116.095032)}
{pt3dadd(169836.000000,98412.000000,64150.000000,80.621550)}

{create adhoc32}
{access adhoc32}
{connect adhoc32(1), adhoc20(0)}
{nseg = 1}
{strdef color color = "White"}
{pt3dclear()}
{pt3dadd(174420.000000,111552.000000,79200.000000,479.219886)}
{pt3dadd(174480.000000,110436.000000,78875.000000,415.989486)}
{pt3dadd(174228.000000,109584.000000,78500.000000,398.656589)}
{pt3dadd(173892.000000,108684.000000,77925.000000,381.323691)}
{pt3dadd(173952.000000,108216.000000,77525.000000,363.990794)}
{pt3dadd(173964.000000,107556.000000,76975.000000,346.657896)}
{pt3dadd(173868.000000,107076.000000,76525.000000,363.990794)}
{pt3dadd(173784.000000,106596.000000,76125.000000,381.323691)}
{pt3dadd(173748.000000,106056.000000,75675.000000,398.656589)}
{pt3dadd(173400.000000,105420.000000,75350.000000,415.989486)}
{pt3dadd(172896.000000,104772.000000,74900.000000,415.989486)}
{pt3dadd(172236.000000,103608.000000,74675.000000,415.989486)}
{pt3dadd(171936.000000,103032.000000,74675.000000,415.989486)}
{pt3dadd(171624.000000,102276.000000,74575.000000,415.989486)}
{pt3dadd(171372.000000,101412.000000,74250.000000,383.819628)}
{pt3dadd(171048.000000,100200.000000,73525.000000,351.649770)}
{pt3dadd(171048.000000,99636.000000,72900.000000,319.479912)}
{pt3dadd(170340.000000,98736.000000,72350.000000,415.989486)}

{create adhoc33}
{access adhoc33}
{connect adhoc33(1), adhoc32(0)}
{nseg = 1}
{strdef color color = "White"}
{pt3dclear()}
{pt3dadd(170340.000000,98736.000000,72350.000000,415.989486)}
{pt3dadd(170052.000000,98844.000000,71625.000000,346.657896)}
{pt3dadd(169392.000000,98796.000000,70950.000000,415.989486)}

{create adhoc34}
{access adhoc34}
{connect adhoc34(1), adhoc33(0)}
{nseg = 1}
{strdef color color = "White"}
{pt3dclear()}
{pt3dadd(169392.000000,98796.000000,70950.000000,415.989486)}
{pt3dadd(169020.000000,98400.000000,70275.000000,288.881586)}

{create adhoc35}
{access adhoc35}
{connect adhoc35(1), adhoc34(0)}
{nseg = 1}
{strdef color color = "White"}
{pt3dclear()}
{pt3dadd(169020.000000,98400.000000,70275.000000,288.881586)}
{pt3dadd(168996.000000,98544.000000,69775.000000,200.612214)}
{pt3dadd(169116.000000,98868.000000,69350.000000,185.287671)}
{pt3dadd(169284.000000,98808.000000,68925.000000,169.963128)}
{pt3dadd(169332.000000,98316.000000,68075.000000,154.638585)}
{pt3dadd(169140.000000,97800.000000,67525.000000,139.314042)}
{pt3dadd(168900.000000,97440.000000,67500.000000,55.987200)}

{create adhoc36}
{access adhoc36}
{connect adhoc36(1), adhoc34(0)}
{nseg = 1}
{strdef color color = "White"}
{pt3dclear()}
{pt3dadd(169020.000000,98400.000000,70275.000000,288.881586)}
{pt3dadd(168480.000000,96876.000000,69525.000000,200.612214)}
{pt3dadd(168240.000000,95520.000000,69550.000000,197.937384)}
{pt3dadd(168060.000000,95376.000000,69500.000000,195.262554)}
{pt3dadd(167748.000000,95700.000000,69550.000000,192.587724)}
{pt3dadd(167280.000000,95736.000000,69550.000000,61.917354)}

{create adhoc37}
{access adhoc37}
{connect adhoc37(1), adhoc33(0)}
{nseg = 1}
{strdef color color = "White"}
{pt3dclear()}
{pt3dadd(169392.000000,98796.000000,70950.000000,415.989486)}
{pt3dadd(168324.000000,98820.000000,71025.000000,192.587724)}
{pt3dadd(167988.000000,99096.000000,70925.000000,139.314042)}

{create adhoc38}
{access adhoc38}
{connect adhoc38(1), adhoc37(0)}
{nseg = 1}
{strdef color color = "White"}
{pt3dclear()}
{pt3dadd(167988.000000,99096.000000,70925.000000,139.314042)}
{pt3dadd(167688.000000,99108.000000,70900.000000,67.184640)}

{create adhoc39}
{access adhoc39}
{connect adhoc39(1), adhoc37(0)}
{nseg = 1}
{strdef color color = "White"}
{pt3dclear()}
{pt3dadd(167988.000000,99096.000000,70925.000000,139.314042)}
{pt3dadd(167928.000000,98628.000000,71250.000000,55.987200)}
{pt3dadd(167760.000000,98100.000000,71325.000000,55.987200)}

{create adhoc40}
{access adhoc40}
{connect adhoc40(1), adhoc32(0)}
{nseg = 1}
{strdef color color = "White"}
{pt3dclear()}
{pt3dadd(170340.000000,98736.000000,72350.000000,415.989486)}
{pt3dadd(169956.000000,96888.000000,72500.000000,231.105276)}
{pt3dadd(169836.000000,96504.000000,72775.000000,288.881586)}
{pt3dadd(169752.000000,96060.000000,73100.000000,212.986602)}

{create adhoc41}
{access adhoc41}
{connect adhoc41(1), adhoc40(0)}
{nseg = 1}
{strdef color color = "White"}
{pt3dclear()}
{pt3dadd(169752.000000,96060.000000,73100.000000,212.986602)}
{pt3dadd(170076.000000,95892.000000,73650.000000,200.612214)}
{pt3dadd(170808.000000,95844.000000,74025.000000,170.614548)}
{pt3dadd(171192.000000,95916.000000,74200.000000,140.616882)}
{pt3dadd(171384.000000,95940.000000,74525.000000,110.619216)}
{pt3dadd(171552.000000,95772.000000,74975.000000,80.621550)}
{pt3dadd(171756.000000,95712.000000,75375.000000,55.987200)}
{pt3dadd(171912.000000,95556.000000,75400.000000,67.184640)}

{create adhoc42}
{access adhoc42}
{connect adhoc42(1), adhoc40(0)}
{nseg = 1}
{strdef color color = "White"}
{pt3dclear()}
{pt3dadd(169752.000000,96060.000000,73100.000000,212.986602)}
{pt3dadd(169008.000000,95952.000000,73400.000000,167.176836)}
{pt3dadd(168768.000000,95832.000000,73675.000000,96.745860)}
{pt3dadd(168576.000000,95832.000000,73700.000000,46.656000)}

{create adhoc43}
{access adhoc43}
{connect adhoc43(1), adhoc40(0)}
{nseg = 1}
{strdef color color = "White"}
{pt3dclear()}
{pt3dadd(169752.000000,96060.000000,73100.000000,212.986602)}
{pt3dadd(169200.000000,95760.000000,72400.000000,167.176836)}
{pt3dadd(168960.000000,95892.000000,71700.000000,67.184640)}
{pt3dadd(168660.000000,95724.000000,71550.000000,67.184640)}

{create adhoc44}
{access adhoc44}
{connect adhoc44(1), adhoc3(0)}
{nseg = 1}
{strdef color color = "White"}
{pt3dclear()}
{pt3dadd(185616.000000,139404.000000,88625.000000,828.091944)}
{pt3dadd(185784.000000,141312.000000,87575.000000,862.595802)}
{pt3dadd(185832.000000,141912.000000,86800.000000,915.803424)}
{pt3dadd(185436.000000,142404.000000,86150.000000,1192.452480)}

{create adhoc45}
{access adhoc45}
{connect adhoc45(1), adhoc44(0)}
{nseg = 1}
{strdef color color = "White"}
{pt3dclear()}
{pt3dadd(185436.000000,142404.000000,86150.000000,1192.452480)}
{pt3dadd(184764.000000,140700.000000,85150.000000,828.091944)}
{pt3dadd(183756.000000,139740.000000,84450.000000,828.091962)}
{pt3dadd(183300.000000,139776.000000,83775.000000,828.091980)}
{pt3dadd(183372.000000,140328.000000,83125.000000,828.091998)}
{pt3dadd(183432.000000,140196.000000,82550.000000,828.092016)}
{pt3dadd(183156.000000,140160.000000,81875.000000,828.091998)}
{pt3dadd(182472.000000,139968.000000,81225.000000,828.091980)}
{pt3dadd(181908.000000,140436.000000,80525.000000,828.091962)}
{pt3dadd(181524.000000,140436.000000,79800.000000,828.091944)}
{pt3dadd(181092.000000,139848.000000,79175.000000,879.847695)}
{pt3dadd(180912.000000,139848.000000,78725.000000,931.603446)}
{pt3dadd(180444.000000,139380.000000,78150.000000,983.359197)}
{pt3dadd(180012.000000,139224.000000,77925.000000,1035.114948)}
{pt3dadd(179628.000000,138840.000000,77250.000000,1035.114948)}
{pt3dadd(179244.000000,138516.000000,76625.000000,1035.114948)}
{pt3dadd(178968.000000,138228.000000,76025.000000,1035.114948)}
{pt3dadd(178692.000000,137976.000000,75450.000000,1035.114948)}
{pt3dadd(178332.000000,137784.000000,75100.000000,1035.114948)}
{pt3dadd(178056.000000,137856.000000,74500.000000,1035.114948)}
{pt3dadd(177492.000000,137388.000000,73900.000000,1035.114948)}
{pt3dadd(176952.000000,136896.000000,73350.000000,1035.114948)}
{pt3dadd(176976.000000,137076.000000,72725.000000,1035.114948)}
{pt3dadd(176388.000000,137220.000000,72100.000000,1035.114948)}
{pt3dadd(175788.000000,137172.000000,71400.000000,1035.114948)}
{pt3dadd(175008.000000,137004.000000,71000.000000,1035.114948)}
{pt3dadd(174456.000000,136896.000000,69975.000000,993.710286)}
{pt3dadd(174528.000000,136932.000000,69325.000000,828.091944)}

{create adhoc46}
{access adhoc46}
{connect adhoc46(1), adhoc45(0)}
{nseg = 1}
{strdef color color = "White"}
{pt3dclear()}
{pt3dadd(174528.000000,136932.000000,69325.000000,828.091944)}
{pt3dadd(174624.000000,136392.000000,68625.000000,599.024880)}
{pt3dadd(173808.000000,134532.000000,67900.000000,479.219886)}

{create adhoc47}
{access adhoc47}
{connect adhoc47(1), adhoc45(0)}
{nseg = 1}
{strdef color color = "White"}
{pt3dclear()}
{pt3dadd(174528.000000,136932.000000,69325.000000,828.091944)}
{pt3dadd(173376.000000,137844.000000,67700.000000,599.024880)}
{pt3dadd(173268.000000,138492.000000,66900.000000,479.219886)}
{pt3dadd(173064.000000,139368.000000,66425.000000,346.657896)}

{create adhoc48}
{access adhoc48}
{connect adhoc48(1), adhoc47(0)}
{nseg = 1}
{strdef color color = "White"}
{pt3dclear()}
{pt3dadd(173064.000000,139368.000000,66425.000000,346.657896)}
{pt3dadd(172596.000000,139740.000000,66225.000000,415.989486)}
{pt3dadd(172632.000000,140316.000000,66250.000000,431.797086)}
{pt3dadd(172344.000000,140688.000000,65900.000000,447.604686)}
{pt3dadd(172236.000000,141300.000000,65825.000000,463.412286)}
{pt3dadd(172272.000000,141924.000000,65425.000000,479.219886)}
{pt3dadd(172488.000000,142464.000000,65325.000000,509.171134)}
{pt3dadd(172164.000000,143136.000000,64375.000000,539.122383)}
{pt3dadd(171948.000000,143676.000000,63700.000000,569.073631)}
{pt3dadd(171636.000000,144072.000000,63300.000000,599.024880)}
{pt3dadd(171036.000000,144264.000000,62500.000000,574.065504)}
{pt3dadd(170316.000000,144300.000000,61525.000000,549.106128)}
{pt3dadd(169860.000000,144492.000000,60100.000000,524.146752)}
{pt3dadd(169716.000000,144792.000000,58400.000000,499.187376)}
{pt3dadd(169320.000000,144972.000000,57100.000000,499.187376)}
{pt3dadd(168756.000000,145092.000000,55825.000000,575.063856)}

{create adhoc49}
{access adhoc49}
{connect adhoc49(1), adhoc48(0)}
{nseg = 1}
{strdef color color = "White"}
{pt3dclear()}
{pt3dadd(168756.000000,145092.000000,55825.000000,575.063856)}
{pt3dadd(168648.000000,145920.000000,55000.000000,415.989486)}
{pt3dadd(168276.000000,146688.000000,54400.000000,288.881586)}

{create adhoc50}
{access adhoc50}
{connect adhoc50(1), adhoc49(0)}
{nseg = 1}
{strdef color color = "White"}
{pt3dclear()}
{pt3dadd(168276.000000,146688.000000,54400.000000,288.881586)}
{pt3dadd(168144.000000,147468.000000,53900.000000,277.326342)}
{pt3dadd(167640.000000,148200.000000,53200.000000,268.178418)}
{pt3dadd(167604.000000,148512.000000,52925.000000,259.030494)}
{pt3dadd(167496.000000,148908.000000,52475.000000,249.882570)}
{pt3dadd(167340.000000,149076.000000,52000.000000,240.734646)}
{pt3dadd(167520.000000,149304.000000,51325.000000,252.771381)}
{pt3dadd(167244.000000,149556.000000,50750.000000,264.808116)}
{pt3dadd(166596.000000,149760.000000,50250.000000,276.844851)}
{pt3dadd(166080.000000,150168.000000,49800.000000,288.881586)}
{pt3dadd(165840.000000,150612.000000,49300.000000,288.881586)}
{pt3dadd(165576.000000,150972.000000,48575.000000,288.881586)}
{pt3dadd(165780.000000,151476.000000,48025.000000,288.881586)}
{pt3dadd(165396.000000,151620.000000,47325.000000,288.881586)}
{pt3dadd(165300.000000,152424.000000,46675.000000,276.844851)}
{pt3dadd(164808.000000,153300.000000,46075.000000,264.808116)}
{pt3dadd(164544.000000,153876.000000,45650.000000,252.771381)}
{pt3dadd(164388.000000,154092.000000,45175.000000,240.734646)}
{pt3dadd(164136.000000,154584.000000,44675.000000,222.345193)}
{pt3dadd(164136.000000,154848.000000,44125.000000,203.955741)}
{pt3dadd(164088.000000,155352.000000,43750.000000,185.566288)}
{pt3dadd(164592.000000,155520.000000,43000.000000,167.176836)}
{pt3dadd(165396.000000,155580.000000,42825.000000,167.176836)}
{pt3dadd(165492.000000,155640.000000,42550.000000,167.176836)}
{pt3dadd(166200.000000,155724.000000,42100.000000,167.176836)}
{pt3dadd(167028.000000,156204.000000,41475.000000,167.176836)}
{pt3dadd(167172.000000,156492.000000,41400.000000,167.176836)}
{pt3dadd(167688.000000,156900.000000,40975.000000,167.176836)}
{pt3dadd(167736.000000,156948.000000,40575.000000,167.176836)}
{pt3dadd(167868.000000,157080.000000,40050.000000,167.176836)}

{create adhoc51}
{access adhoc51}
{connect adhoc51(1), adhoc50(0)}
{nseg = 1}
{strdef color color = "White"}
{pt3dclear()}
{pt3dadd(167868.000000,157080.000000,40050.000000,167.176836)}
{pt3dadd(167520.000000,156660.000000,39625.000000,167.176836)}

{create adhoc52}
{access adhoc52}
{connect adhoc52(1), adhoc50(0)}
{nseg = 1}
{strdef color color = "White"}
{pt3dclear()}
{pt3dadd(167868.000000,157080.000000,40050.000000,167.176836)}
{pt3dadd(168468.000000,157416.000000,39800.000000,167.176836)}
{pt3dadd(168696.000000,157536.000000,39800.000000,153.245439)}
{pt3dadd(168552.000000,157692.000000,39625.000000,139.314042)}
{pt3dadd(168528.000000,157752.000000,39475.000000,113.592870)}

{create adhoc53}
{access adhoc53}
{connect adhoc53(1), adhoc49(0)}
{nseg = 1}
{strdef color color = "White"}
{pt3dclear()}
{pt3dadd(168276.000000,146688.000000,54400.000000,288.881586)}
{pt3dadd(168096.000000,145968.000000,53875.000000,240.734646)}
{pt3dadd(167952.000000,145956.000000,53300.000000,238.327304)}
{pt3dadd(167772.000000,145992.000000,52500.000000,235.919961)}
{pt3dadd(167388.000000,145980.000000,51850.000000,233.512618)}
{pt3dadd(167100.000000,145932.000000,51125.000000,231.105276)}
{pt3dadd(166992.000000,146100.000000,50500.000000,233.512618)}
{pt3dadd(166728.000000,146148.000000,49700.000000,235.919961)}
{pt3dadd(166632.000000,146460.000000,48825.000000,238.327304)}
{pt3dadd(167052.000000,146688.000000,48075.000000,240.734646)}
{pt3dadd(167220.000000,146868.000000,47375.000000,203.955741)}
{pt3dadd(167268.000000,147240.000000,47050.000000,167.176836)}
{pt3dadd(167280.000000,147324.000000,47125.000000,111.451230)}

{create adhoc54}
{access adhoc54}
{connect adhoc54(1), adhoc48(0)}
{nseg = 1}
{strdef color color = "White"}
{pt3dclear()}
{pt3dadd(168756.000000,145092.000000,55825.000000,575.063856)}
{pt3dadd(169056.000000,144048.000000,54275.000000,415.989486)}
{pt3dadd(169044.000000,143856.000000,53475.000000,288.881586)}
{pt3dadd(169068.000000,143448.000000,52875.000000,399.349872)}

{create adhoc55}
{access adhoc55}
{connect adhoc55(1), adhoc54(0)}
{nseg = 1}
{strdef color color = "White"}
{pt3dclear()}
{pt3dadd(169068.000000,143448.000000,52875.000000,399.349872)}
{pt3dadd(169164.000000,143244.000000,51950.000000,499.187376)}
{pt3dadd(169308.000000,143472.000000,51575.000000,415.989486)}

{create adhoc56}
{access adhoc56}
{connect adhoc56(1), adhoc54(0)}
{nseg = 1}
{strdef color color = "White"}
{pt3dclear()}
{pt3dadd(169068.000000,143448.000000,52875.000000,399.349872)}
{pt3dadd(168708.000000,141432.000000,52100.000000,167.176836)}
{pt3dadd(168168.000000,141012.000000,51750.000000,157.889238)}
{pt3dadd(167808.000000,140916.000000,51600.000000,148.601640)}
{pt3dadd(167136.000000,140016.000000,51400.000000,139.314042)}
{pt3dadd(166956.000000,139740.000000,51250.000000,46.656000)}

{create adhoc57}
{access adhoc57}
{connect adhoc57(1), adhoc47(0)}
{nseg = 1}
{strdef color color = "White"}
{pt3dclear()}
{pt3dadd(173064.000000,139368.000000,66425.000000,346.657896)}
{pt3dadd(173280.000000,138264.000000,65825.000000,200.612214)}
{pt3dadd(173496.000000,138156.000000,64975.000000,182.557111)}
{pt3dadd(173676.000000,138288.000000,64350.000000,164.502009)}
{pt3dadd(174420.000000,139080.000000,64250.000000,146.446907)}
{pt3dadd(174528.000000,139176.000000,64250.000000,128.391804)}
{pt3dadd(174516.000000,139356.000000,64150.000000,112.568832)}
{pt3dadd(174768.000000,139392.000000,63900.000000,96.745860)}
{pt3dadd(174960.000000,139488.000000,63625.000000,85.594554)}

{create adhoc58}
{access adhoc58}
{connect adhoc58(1), adhoc44(0)}
{nseg = 1}
{strdef color color = "White"}
{pt3dclear()}
{pt3dadd(185436.000000,142404.000000,86150.000000,1192.452480)}
{pt3dadd(184956.000000,144288.000000,85100.000000,599.024880)}
{pt3dadd(184932.000000,145140.000000,84625.000000,574.065504)}
{pt3dadd(184884.000000,145932.000000,84175.000000,549.106128)}
{pt3dadd(184836.000000,146640.000000,83650.000000,524.146752)}
{pt3dadd(184800.000000,147348.000000,83200.000000,499.187376)}
{pt3dadd(184572.000000,147732.000000,82675.000000,499.187376)}
{pt3dadd(183708.000000,147636.000000,82250.000000,499.187376)}
{pt3dadd(183660.000000,148296.000000,81625.000000,499.187376)}
{pt3dadd(183648.000000,148716.000000,81200.000000,499.187376)}
{pt3dadd(183324.000000,148968.000000,80725.000000,499.187376)}
{pt3dadd(182844.000000,149088.000000,80175.000000,499.187376)}
{pt3dadd(182280.000000,149232.000000,79600.000000,499.187376)}
{pt3dadd(181992.000000,149484.000000,79150.000000,499.187376)}
{pt3dadd(181704.000000,149736.000000,78675.000000,474.228009)}
{pt3dadd(181440.000000,149988.000000,78225.000000,449.268642)}
{pt3dadd(180936.000000,150144.000000,77675.000000,424.309275)}
{pt3dadd(180216.000000,150504.000000,77150.000000,399.349908)}
{pt3dadd(179436.000000,150672.000000,76700.000000,443.278395)}
{pt3dadd(179196.000000,151008.000000,76125.000000,487.206882)}
{pt3dadd(178476.000000,151752.000000,75600.000000,531.135369)}
{pt3dadd(178248.000000,152628.000000,74750.000000,575.063856)}
{pt3dadd(177564.000000,152496.000000,74200.000000,569.313225)}
{pt3dadd(176892.000000,153696.000000,73625.000000,563.562594)}
{pt3dadd(176364.000000,154656.000000,73125.000000,557.811963)}
{pt3dadd(175776.000000,154524.000000,72075.000000,552.061332)}
{pt3dadd(175236.000000,154788.000000,71200.000000,599.024880)}

{create adhoc59}
{access adhoc59}
{connect adhoc59(1), adhoc58(0)}
{nseg = 1}
{strdef color color = "White"}
{pt3dclear()}
{pt3dadd(175236.000000,154788.000000,71200.000000,599.024880)}
{pt3dadd(173664.000000,155340.000000,67350.000000,399.349908)}
{pt3dadd(173364.000000,155460.000000,66600.000000,403.223710)}
{pt3dadd(173508.000000,156120.000000,66000.000000,407.097513)}
{pt3dadd(172824.000000,156312.000000,65500.000000,410.971316)}
{pt3dadd(172500.000000,156540.000000,64900.000000,414.845118)}
{pt3dadd(171996.000000,156864.000000,64250.000000,406.977826)}
{pt3dadd(171624.000000,157308.000000,63725.000000,399.110535)}
{pt3dadd(171288.000000,157320.000000,63175.000000,391.243244)}
{pt3dadd(171024.000000,157764.000000,62575.000000,383.375952)}
{pt3dadd(170928.000000,158148.000000,62175.000000,399.682719)}
{pt3dadd(170940.000000,158568.000000,61675.000000,415.989486)}
{pt3dadd(170952.000000,158796.000000,61150.000000,399.349908)}

{create adhoc60}
{access adhoc60}
{connect adhoc60(1), adhoc59(0)}
{nseg = 1}
{strdef color color = "White"}
{pt3dclear()}
{pt3dadd(170952.000000,158796.000000,61150.000000,399.349908)}
{pt3dadd(168984.000000,162036.000000,60575.000000,200.612214)}
{pt3dadd(168600.000000,164244.000000,60125.000000,200.612214)}
{pt3dadd(168288.000000,165468.000000,59750.000000,288.881586)}

{create adhoc61}
{access adhoc61}
{connect adhoc61(1), adhoc60(0)}
{nseg = 1}
{strdef color color = "White"}
{pt3dclear()}
{pt3dadd(168288.000000,165468.000000,59750.000000,288.881586)}
{pt3dadd(169416.000000,166320.000000,59800.000000,167.176836)}
{pt3dadd(169728.000000,166536.000000,59800.000000,160.489764)}
{pt3dadd(170004.000000,167052.000000,59925.000000,139.314042)}

{create adhoc62}
{access adhoc62}
{connect adhoc62(1), adhoc60(0)}
{nseg = 1}
{strdef color color = "White"}
{pt3dclear()}
{pt3dadd(168288.000000,165468.000000,59750.000000,288.881586)}
{pt3dadd(167400.000000,166452.000000,59300.000000,167.176836)}
{pt3dadd(167148.000000,166704.000000,59150.000000,175.535680)}
{pt3dadd(166800.000000,167088.000000,58675.000000,183.894525)}
{pt3dadd(166560.000000,168204.000000,58250.000000,192.253370)}
{pt3dadd(166320.000000,169680.000000,57675.000000,200.612214)}
{pt3dadd(166260.000000,170880.000000,57300.000000,200.612214)}
{pt3dadd(166440.000000,171816.000000,56975.000000,200.612214)}
{pt3dadd(166284.000000,172368.000000,56500.000000,200.612214)}
{pt3dadd(166224.000000,172716.000000,56625.000000,200.612214)}
{pt3dadd(166428.000000,173172.000000,56725.000000,158.353623)}
{pt3dadd(166560.000000,173724.000000,56950.000000,116.095032)}
{pt3dadd(166848.000000,173772.000000,56950.000000,92.876040)}

{create adhoc63}
{access adhoc63}
{connect adhoc63(1), adhoc59(0)}
{nseg = 1}
{strdef color color = "White"}
{pt3dclear()}
{pt3dadd(170952.000000,158796.000000,61150.000000,399.349908)}
{pt3dadd(170916.000000,159024.000000,60350.000000,346.657896)}
{pt3dadd(171132.000000,159060.000000,58750.000000,363.990794)}
{pt3dadd(171276.000000,159084.000000,58225.000000,381.323691)}
{pt3dadd(171240.000000,159048.000000,57650.000000,398.656589)}
{pt3dadd(170724.000000,158808.000000,57000.000000,415.989486)}
{pt3dadd(170160.000000,158952.000000,56575.000000,398.656589)}
{pt3dadd(169956.000000,158700.000000,56225.000000,381.323691)}
{pt3dadd(169524.000000,158664.000000,55700.000000,363.990794)}
{pt3dadd(168948.000000,158712.000000,55275.000000,346.657896)}
{pt3dadd(168372.000000,158844.000000,54925.000000,315.458699)}
{pt3dadd(168216.000000,159012.000000,54400.000000,284.259501)}
{pt3dadd(167568.000000,159240.000000,53925.000000,253.060303)}
{pt3dadd(167520.000000,159132.000000,53275.000000,221.861106)}
{pt3dadd(167424.000000,159408.000000,52825.000000,240.734646)}
{pt3dadd(167412.000000,159528.000000,52350.000000,240.734646)}

{create adhoc64}
{access adhoc64}
{connect adhoc64(1), adhoc63(0)}
{nseg = 1}
{strdef color color = "White"}
{pt3dclear()}
{pt3dadd(167412.000000,159528.000000,52350.000000,240.734646)}
{pt3dadd(167688.000000,158652.000000,51725.000000,200.612214)}
{pt3dadd(167664.000000,158136.000000,51150.000000,185.287671)}
{pt3dadd(167832.000000,157560.000000,50875.000000,169.963128)}
{pt3dadd(168012.000000,157440.000000,50750.000000,154.638585)}
{pt3dadd(167832.000000,156780.000000,51375.000000,139.314042)}
{pt3dadd(167796.000000,156012.000000,51750.000000,131.574372)}
{pt3dadd(167976.000000,155748.000000,51925.000000,123.834702)}
{pt3dadd(168324.000000,155748.000000,51750.000000,116.095032)}
{pt3dadd(168732.000000,155220.000000,51900.000000,184.884210)}

{create adhoc65}
{access adhoc65}
{connect adhoc65(1), adhoc63(0)}
{nseg = 1}
{strdef color color = "White"}
{pt3dclear()}
{pt3dadd(167412.000000,159528.000000,52350.000000,240.734646)}
{pt3dadd(167448.000000,159768.000000,51750.000000,266.233374)}
{pt3dadd(167244.000000,161112.000000,51275.000000,252.921690)}
{pt3dadd(167196.000000,162372.000000,51425.000000,239.610006)}
{pt3dadd(167112.000000,162744.000000,51225.000000,226.298322)}
{pt3dadd(167232.000000,163080.000000,51275.000000,212.986638)}
{pt3dadd(167436.000000,163368.000000,51475.000000,217.516298)}
{pt3dadd(167364.000000,163644.000000,51500.000000,222.045957)}
{pt3dadd(167352.000000,163920.000000,51500.000000,226.575617)}
{pt3dadd(167280.000000,164196.000000,51450.000000,231.105276)}
{pt3dadd(167124.000000,164460.000000,51225.000000,223.482010)}
{pt3dadd(167160.000000,164724.000000,51100.000000,215.858745)}
{pt3dadd(166872.000000,165000.000000,51050.000000,208.235480)}
{pt3dadd(166740.000000,165228.000000,50900.000000,200.612214)}
{pt3dadd(166584.000000,165456.000000,50950.000000,200.612214)}
{pt3dadd(166428.000000,165660.000000,50700.000000,200.612214)}
{pt3dadd(165888.000000,166380.000000,50275.000000,200.612214)}
{pt3dadd(165444.000000,166836.000000,49925.000000,200.612214)}
{pt3dadd(165408.000000,167016.000000,49475.000000,200.612214)}
{pt3dadd(165192.000000,167448.000000,49000.000000,200.612214)}
{pt3dadd(164976.000000,167892.000000,48600.000000,200.612214)}
{pt3dadd(164412.000000,168792.000000,48200.000000,200.612214)}
{pt3dadd(163764.000000,169812.000000,47700.000000,200.612214)}
{pt3dadd(163176.000000,170592.000000,47350.000000,200.612214)}
{pt3dadd(163164.000000,171132.000000,46975.000000,200.612214)}
{pt3dadd(163152.000000,171600.000000,46575.000000,200.612214)}
{pt3dadd(163116.000000,172284.000000,46075.000000,222.679557)}
{pt3dadd(163092.000000,172836.000000,45600.000000,244.746900)}
{pt3dadd(162840.000000,173748.000000,45100.000000,266.814243)}
{pt3dadd(162804.000000,174480.000000,44700.000000,288.881586)}
{pt3dadd(162432.000000,174756.000000,44500.000000,274.437509)}
{pt3dadd(161760.000000,175596.000000,44225.000000,259.993431)}
{pt3dadd(161472.000000,176064.000000,43925.000000,245.549354)}
{pt3dadd(161148.000000,176232.000000,43975.000000,231.105276)}
{pt3dadd(160032.000000,177252.000000,43800.000000,231.105276)}
{pt3dadd(159624.000000,177876.000000,43800.000000,231.105276)}
{pt3dadd(159324.000000,177984.000000,43650.000000,231.105276)}
{pt3dadd(158964.000000,178236.000000,43975.000000,231.105276)}
{pt3dadd(158652.000000,178464.000000,44675.000000,218.266086)}
{pt3dadd(158280.000000,179100.000000,45025.000000,205.426896)}
{pt3dadd(158244.000000,179424.000000,45450.000000,192.587706)}
{pt3dadd(158172.000000,179772.000000,45800.000000,231.105240)}

{create adhoc66}
{access adhoc66}
{connect adhoc66(1), adhoc58(0)}
{nseg = 1}
{strdef color color = "White"}
{pt3dclear()}
{pt3dadd(175236.000000,154788.000000,71200.000000,599.024880)}
{pt3dadd(174864.000000,155664.000000,70450.000000,718.829820)}
{pt3dadd(174312.000000,156240.000000,69625.000000,580.916574)}
{pt3dadd(173712.000000,159456.000000,68975.000000,443.003328)}
{pt3dadd(172548.000000,161688.000000,68575.000000,305.090082)}
{pt3dadd(172812.000000,163728.000000,68475.000000,167.176836)}
{pt3dadd(172764.000000,165048.000000,68525.000000,208.580526)}
{pt3dadd(172620.000000,165420.000000,68475.000000,249.984216)}
{pt3dadd(172704.000000,165792.000000,68300.000000,291.387906)}
{pt3dadd(172884.000000,166104.000000,68125.000000,332.791596)}
{pt3dadd(173100.000000,166428.000000,68000.000000,309.777359)}
{pt3dadd(173388.000000,166680.000000,68200.000000,286.763121)}
{pt3dadd(173688.000000,166956.000000,68150.000000,263.748884)}
{pt3dadd(173976.000000,167304.000000,68125.000000,240.734646)}
{pt3dadd(174048.000000,167448.000000,68175.000000,240.734646)}
{pt3dadd(174120.000000,167772.000000,68075.000000,240.734646)}
{pt3dadd(174264.000000,168072.000000,68100.000000,240.734646)}
{pt3dadd(174540.000000,168324.000000,68100.000000,240.734646)}
{pt3dadd(174672.000000,168600.000000,68200.000000,254.159149)}
{pt3dadd(174768.000000,168864.000000,68150.000000,267.583653)}
{pt3dadd(174732.000000,169200.000000,68225.000000,281.008157)}
{pt3dadd(174540.000000,170916.000000,68425.000000,294.432660)}
{pt3dadd(174684.000000,171204.000000,68675.000000,293.044892)}
{pt3dadd(174432.000000,171528.000000,68625.000000,291.657123)}
{pt3dadd(174348.000000,171792.000000,68625.000000,290.269354)}
{pt3dadd(174372.000000,172092.000000,68650.000000,288.881586)}
{pt3dadd(174444.000000,172524.000000,68550.000000,276.844851)}
{pt3dadd(174516.000000,172752.000000,68450.000000,264.808116)}
{pt3dadd(174588.000000,173124.000000,68350.000000,252.771381)}
{pt3dadd(174288.000000,173412.000000,68350.000000,240.734646)}
{pt3dadd(174192.000000,173664.000000,68400.000000,247.109301)}
{pt3dadd(174180.000000,173940.000000,68400.000000,253.483956)}
{pt3dadd(173940.000000,174216.000000,68400.000000,259.858611)}
{pt3dadd(173748.000000,174576.000000,68275.000000,266.233266)}
{pt3dadd(173748.000000,174900.000000,68250.000000,277.557426)}
{pt3dadd(173664.000000,175248.000000,68250.000000,288.881586)}
{pt3dadd(173580.000000,175560.000000,68125.000000,399.349908)}

{create adhoc67}
{access adhoc67}
{connect adhoc67(1), adhoc66(0)}
{nseg = 1}
{strdef color color = "White"}
{pt3dclear()}
{pt3dadd(173580.000000,175560.000000,68125.000000,399.349908)}
{pt3dadd(173436.000000,175932.000000,68725.000000,200.612214)}
{pt3dadd(173532.000000,176880.000000,69125.000000,288.881586)}
{pt3dadd(173496.000000,177444.000000,69625.000000,167.176836)}

{create adhoc68}
{access adhoc68}
{connect adhoc68(1), adhoc67(0)}
{nseg = 1}
{strdef color color = "White"}
{pt3dclear()}
{pt3dadd(173496.000000,177444.000000,69625.000000,167.176836)}
{pt3dadd(172968.000000,177984.000000,69650.000000,160.489764)}
{pt3dadd(172704.000000,178164.000000,69575.000000,143.586333)}
{pt3dadd(172392.000000,178308.000000,69450.000000,126.682902)}
{pt3dadd(172368.000000,178344.000000,69275.000000,109.779471)}
{pt3dadd(172176.000000,178584.000000,69100.000000,92.876040)}
{pt3dadd(171768.000000,178932.000000,69075.000000,88.791210)}
{pt3dadd(171288.000000,179208.000000,69025.000000,84.706380)}
{pt3dadd(171024.000000,179256.000000,69000.000000,80.621550)}
{pt3dadd(170820.000000,179412.000000,68775.000000,55.987200)}

{create adhoc69}
{access adhoc69}
{connect adhoc69(1), adhoc67(0)}
{nseg = 1}
{strdef color color = "White"}
{pt3dclear()}
{pt3dadd(173496.000000,177444.000000,69625.000000,167.176836)}
{pt3dadd(174060.000000,177528.000000,70100.000000,160.489764)}
{pt3dadd(174384.000000,177816.000000,70475.000000,162.161532)}
{pt3dadd(174516.000000,178380.000000,70850.000000,163.833300)}
{pt3dadd(174564.000000,178848.000000,71200.000000,165.505068)}
{pt3dadd(174648.000000,179436.000000,71675.000000,167.176836)}
{pt3dadd(174756.000000,179640.000000,72175.000000,171.603688)}
{pt3dadd(174936.000000,179916.000000,72700.000000,176.030541)}
{pt3dadd(175128.000000,180228.000000,73100.000000,180.457394)}
{pt3dadd(175320.000000,180540.000000,73500.000000,184.884246)}
{pt3dadd(175188.000000,180924.000000,73950.000000,172.098554)}
{pt3dadd(175224.000000,181428.000000,74300.000000,159.312861)}
{pt3dadd(175368.000000,182052.000000,74625.000000,146.527169)}
{pt3dadd(175476.000000,182880.000000,75000.000000,133.741476)}
{pt3dadd(175284.000000,183576.000000,75125.000000,142.100316)}
{pt3dadd(175236.000000,184248.000000,75650.000000,150.459156)}
{pt3dadd(175188.000000,184920.000000,75850.000000,158.817996)}
{pt3dadd(175056.000000,185364.000000,76100.000000,167.176836)}
{pt3dadd(174732.000000,185976.000000,76000.000000,116.095032)}
{pt3dadd(174408.000000,186156.000000,75850.000000,55.987200)}

{create adhoc70}
{access adhoc70}
{connect adhoc70(1), adhoc66(0)}
{nseg = 1}
{strdef color color = "White"}
{pt3dclear()}
{pt3dadd(173580.000000,175560.000000,68125.000000,399.349908)}
{pt3dadd(173508.000000,175896.000000,66875.000000,346.657896)}
{pt3dadd(173724.000000,175812.000000,66475.000000,320.177083)}
{pt3dadd(172800.000000,175932.000000,66425.000000,293.696271)}
{pt3dadd(172428.000000,176100.000000,66175.000000,267.215459)}
{pt3dadd(172044.000000,176112.000000,65925.000000,240.734646)}
{pt3dadd(171852.000000,176292.000000,65550.000000,236.016248)}
{pt3dadd(171168.000000,176724.000000,65250.000000,231.297849)}
{pt3dadd(170976.000000,176940.000000,65025.000000,226.579451)}
{pt3dadd(170568.000000,176880.000000,64775.000000,221.861052)}
{pt3dadd(170148.000000,176928.000000,64675.000000,195.419547)}
{pt3dadd(169680.000000,177096.000000,64375.000000,168.978042)}
{pt3dadd(169188.000000,177312.000000,64200.000000,142.536537)}
{pt3dadd(168576.000000,177768.000000,63975.000000,116.095032)}
{pt3dadd(168252.000000,178128.000000,63725.000000,80.621550)}
