# Supplementary material for: Full reconstruction of large lobula plate tangential cells in Drosophila from a 3D EM dataset
Source: PLoS One. 2018 Nov 28;13(11):e0207828. doi: 10.1371/journal.pone.0207828 (PMC6261601; doi:10.1371/journal.pone.0207828)
Supplement: S1 Dataset — (ZIP) [file pone.0207828.s001.zip › Diameter hoc/VS_VSL_preliminary/Old Diameters Mar13_VS_VSL_HS/VS1/2_14_733_smaurer_002.022.hoc]

/* created with nml2hocm */

{create adhoc1}
{access adhoc1}
{nseg = 1}
{strdef color color = "White"}
{pt3dclear()}
{pt3dadd(180444.000000,206292.000000,73200.000000,1582.508196)}
{pt3dadd(181668.000000,205032.000000,73200.000000,718.829820)}
{pt3dadd(183480.000000,203184.000000,73200.000000,773.460918)}
{pt3dadd(184476.000000,202008.000000,72500.000000,828.092016)}
{pt3dadd(187656.000000,199716.000000,70125.000000,2060.557668)}

{create adhoc2}
{access adhoc2}
{connect adhoc2(1), adhoc1(0)}
{nseg = 1}
{strdef color color = "White"}
{pt3dclear()}
{pt3dadd(187656.000000,199716.000000,70125.000000,2060.557668)}
{pt3dadd(187584.000000,199176.000000,69350.000000,2146.414176)}
{pt3dadd(186672.000000,198516.000000,68850.000000,2472.669252)}

{create adhoc3}
{access adhoc3}
{connect adhoc3(1), adhoc2(0)}
{nseg = 1}
{strdef color color = "White"}
{pt3dclear()}
{pt3dadd(186672.000000,198516.000000,68850.000000,2472.669252)}
{pt3dadd(182748.000000,197532.000000,68850.000000,953.961966)}
{pt3dadd(181644.000000,197100.000000,69525.000000,887.990643)}
{pt3dadd(180816.000000,196452.000000,70250.000000,822.019320)}
{pt3dadd(180480.000000,196332.000000,70175.000000,756.047997)}
{pt3dadd(180060.000000,196308.000000,70375.000000,690.076674)}
{pt3dadd(179604.000000,195744.000000,70450.000000,765.985095)}
{pt3dadd(179268.000000,195564.000000,70450.000000,841.893516)}
{pt3dadd(178692.000000,195408.000000,70775.000000,917.801937)}
{pt3dadd(178128.000000,195036.000000,71125.000000,993.710358)}
{pt3dadd(177600.000000,194640.000000,71450.000000,889.048733)}
{pt3dadd(177132.000000,194352.000000,71775.000000,784.387107)}
{pt3dadd(176568.000000,194364.000000,72100.000000,679.725482)}
{pt3dadd(176064.000000,193308.000000,71875.000000,575.063856)}
{pt3dadd(175716.000000,192204.000000,71650.000000,599.024880)}

{create adhoc4}
{access adhoc4}
{connect adhoc4(1), adhoc3(0)}
{nseg = 1}
{strdef color color = "White"}
{pt3dclear()}
{pt3dadd(175716.000000,192204.000000,71650.000000,599.024880)}
{pt3dadd(176448.000000,188196.000000,72750.000000,575.063856)}

{create adhoc5}
{access adhoc5}
{connect adhoc5(1), adhoc4(0)}
{nseg = 1}
{strdef color color = "White"}
{pt3dclear()}
{pt3dadd(176448.000000,188196.000000,72750.000000,575.063856)}
{pt3dadd(176292.000000,187440.000000,72025.000000,96.745860)}
{pt3dadd(175596.000000,186732.000000,71850.000000,107.387906)}
{pt3dadd(175140.000000,186576.000000,71600.000000,118.029951)}
{pt3dadd(175128.000000,186324.000000,70950.000000,128.671997)}
{pt3dadd(175032.000000,186216.000000,70825.000000,139.314042)}
{pt3dadd(175092.000000,186168.000000,70625.000000,131.574372)}
{pt3dadd(174900.000000,186300.000000,70625.000000,123.834702)}
{pt3dadd(174780.000000,186552.000000,70500.000000,116.095032)}
{pt3dadd(174672.000000,186588.000000,70400.000000,96.745860)}

{create adhoc6}
{access adhoc6}
{connect adhoc6(1), adhoc4(0)}
{nseg = 1}
{strdef color color = "White"}
{pt3dclear()}
{pt3dadd(176448.000000,188196.000000,72750.000000,575.063856)}
{pt3dadd(176676.000000,187248.000000,73400.000000,718.829820)}

{create adhoc7}
{access adhoc7}
{connect adhoc7(1), adhoc6(0)}
{nseg = 1}
{strdef color color = "White"}
{pt3dclear()}
{pt3dadd(176676.000000,187248.000000,73400.000000,718.829820)}
{pt3dadd(176604.000000,185208.000000,74050.000000,288.881586)}

{create adhoc8}
{access adhoc8}
{connect adhoc8(1), adhoc7(0)}
{nseg = 1}
{strdef color color = "White"}
{pt3dclear()}
{pt3dadd(176604.000000,185208.000000,74050.000000,288.881586)}
{pt3dadd(176328.000000,184584.000000,73350.000000,200.612214)}
{pt3dadd(176112.000000,184260.000000,72825.000000,200.612214)}
{pt3dadd(176328.000000,184020.000000,72475.000000,200.612214)}
{pt3dadd(176304.000000,183876.000000,72250.000000,200.612214)}
{pt3dadd(176328.000000,183480.000000,71950.000000,200.612214)}
{pt3dadd(176364.000000,182712.000000,71575.000000,140.616882)}
{pt3dadd(176520.000000,182304.000000,71325.000000,80.621550)}
{pt3dadd(176832.000000,181872.000000,71175.000000,67.184640)}

{create adhoc9}
{access adhoc9}
{connect adhoc9(1), adhoc7(0)}
{nseg = 1}
{strdef color color = "White"}
{pt3dclear()}
{pt3dadd(176604.000000,185208.000000,74050.000000,288.881586)}
{pt3dadd(177504.000000,184188.000000,74100.000000,180.899478)}
{pt3dadd(177756.000000,183924.000000,74550.000000,80.621550)}

{create adhoc10}
{access adhoc10}
{connect adhoc10(1), adhoc6(0)}
{nseg = 1}
{strdef color color = "White"}
{pt3dclear()}
{pt3dadd(176676.000000,187248.000000,73400.000000,718.829820)}
{pt3dadd(177048.000000,187416.000000,74025.000000,599.024880)}
{pt3dadd(177372.000000,187560.000000,74375.000000,574.065504)}
{pt3dadd(177540.000000,187644.000000,74925.000000,549.106128)}
{pt3dadd(177708.000000,187572.000000,75475.000000,524.146752)}
{pt3dadd(177876.000000,188040.000000,76125.000000,499.187376)}
{pt3dadd(177804.000000,188328.000000,76625.000000,346.657896)}

{create adhoc11}
{access adhoc11}
{connect adhoc11(1), adhoc10(0)}
{nseg = 1}
{strdef color color = "White"}
{pt3dclear()}
{pt3dadd(177804.000000,188328.000000,76625.000000,346.657896)}
{pt3dadd(177180.000000,188820.000000,76850.000000,139.314042)}
{pt3dadd(176940.000000,189084.000000,76925.000000,116.095041)}
{pt3dadd(176700.000000,189468.000000,76925.000000,92.876040)}
{pt3dadd(176484.000000,189828.000000,76950.000000,200.612214)}

{create adhoc12}
{access adhoc12}
{connect adhoc12(1), adhoc11(0)}
{nseg = 1}
{strdef color color = "White"}
{pt3dclear()}
{pt3dadd(176484.000000,189828.000000,76950.000000,200.612214)}
{pt3dadd(176316.000000,190104.000000,77275.000000,96.745860)}
{pt3dadd(176328.000000,190344.000000,77425.000000,92.876040)}
{pt3dadd(176496.000000,190464.000000,77525.000000,116.095032)}

{create adhoc13}
{access adhoc13}
{connect adhoc13(1), adhoc11(0)}
{nseg = 1}
{strdef color color = "White"}
{pt3dclear()}
{pt3dadd(176484.000000,189828.000000,76950.000000,200.612214)}
{pt3dadd(175956.000000,189996.000000,76675.000000,139.314042)}
{pt3dadd(175848.000000,190056.000000,76525.000000,133.741476)}

{create adhoc14}
{access adhoc14}
{connect adhoc14(1), adhoc10(0)}
{nseg = 1}
{strdef color color = "White"}
{pt3dclear()}
{pt3dadd(177804.000000,188328.000000,76625.000000,346.657896)}
{pt3dadd(178164.000000,188556.000000,77100.000000,415.989486)}

{create adhoc15}
{access adhoc15}
{connect adhoc15(1), adhoc14(0)}
{nseg = 1}
{strdef color color = "White"}
{pt3dclear()}
{pt3dadd(178164.000000,188556.000000,77100.000000,415.989486)}
{pt3dadd(178392.000000,187668.000000,77300.000000,96.745860)}
{pt3dadd(178608.000000,186936.000000,77125.000000,91.371090)}
{pt3dadd(178812.000000,186936.000000,77300.000000,85.996320)}
{pt3dadd(179040.000000,186768.000000,77375.000000,80.621550)}
{pt3dadd(179364.000000,186756.000000,77300.000000,67.184640)}

{create adhoc16}
{access adhoc16}
{connect adhoc16(1), adhoc14(0)}
{nseg = 1}
{strdef color color = "White"}
{pt3dclear()}
{pt3dadd(178164.000000,188556.000000,77100.000000,415.989486)}
{pt3dadd(178332.000000,188712.000000,77650.000000,415.989486)}
{pt3dadd(178692.000000,188928.000000,78150.000000,384.212511)}
{pt3dadd(178452.000000,189444.000000,78575.000000,352.435536)}
{pt3dadd(178536.000000,189924.000000,78975.000000,320.658561)}
{pt3dadd(178668.000000,190284.000000,79375.000000,288.881586)}
{pt3dadd(178500.000000,190572.000000,79950.000000,288.881586)}

{create adhoc17}
{access adhoc17}
{connect adhoc17(1), adhoc16(0)}
{nseg = 1}
{strdef color color = "White"}
{pt3dclear()}
{pt3dadd(178500.000000,190572.000000,79950.000000,288.881586)}
{pt3dadd(178224.000000,190212.000000,80200.000000,116.095032)}
{pt3dadd(178284.000000,189840.000000,80325.000000,109.645308)}
{pt3dadd(178404.000000,189804.000000,80400.000000,103.195584)}
{pt3dadd(178884.000000,189408.000000,80525.000000,96.745860)}
{pt3dadd(179040.000000,189252.000000,80500.000000,80.621550)}

{create adhoc18}
{access adhoc18}
{connect adhoc18(1), adhoc16(0)}
{nseg = 1}
{strdef color color = "White"}
{pt3dclear()}
{pt3dadd(178500.000000,190572.000000,79950.000000,288.881586)}
{pt3dadd(178536.000000,191184.000000,80450.000000,288.881586)}
{pt3dadd(178656.000000,191496.000000,80925.000000,346.657896)}

{create adhoc19}
{access adhoc19}
{connect adhoc19(1), adhoc18(0)}
{nseg = 1}
{strdef color color = "White"}
{pt3dclear()}
{pt3dadd(178656.000000,191496.000000,80925.000000,346.657896)}
{pt3dadd(178560.000000,191772.000000,80850.000000,116.095032)}
{pt3dadd(177888.000000,192168.000000,80800.000000,80.621550)}
{pt3dadd(177480.000000,192492.000000,80500.000000,116.095032)}

{create adhoc20}
{access adhoc20}
{connect adhoc20(1), adhoc18(0)}
{nseg = 1}
{strdef color color = "White"}
{pt3dclear()}
{pt3dadd(178656.000000,191496.000000,80925.000000,346.657896)}
{pt3dadd(178944.000000,191136.000000,81300.000000,415.989486)}
{pt3dadd(179208.000000,191088.000000,81675.000000,336.178580)}
{pt3dadd(179436.000000,190776.000000,81850.000000,256.367673)}
{pt3dadd(179844.000000,190620.000000,82050.000000,176.556767)}
{pt3dadd(180396.000000,190380.000000,82200.000000,96.745860)}
{pt3dadd(180564.000000,190092.000000,82175.000000,86.892120)}
{pt3dadd(181272.000000,189804.000000,81975.000000,77.038380)}
{pt3dadd(181536.000000,189612.000000,81925.000000,67.184640)}
{pt3dadd(181596.000000,189252.000000,81850.000000,80.621550)}

{create adhoc21}
{access adhoc21}
{connect adhoc21(1), adhoc3(0)}
{nseg = 1}
{strdef color color = "White"}
{pt3dclear()}
{pt3dadd(175716.000000,192204.000000,71650.000000,599.024880)}
{pt3dadd(175068.000000,192000.000000,71650.000000,599.024880)}
{pt3dadd(174408.000000,190380.000000,70350.000000,574.065504)}
{pt3dadd(174024.000000,189408.000000,69400.000000,549.106128)}
{pt3dadd(173580.000000,189084.000000,68950.000000,524.146752)}
{pt3dadd(173172.000000,188304.000000,68000.000000,499.187376)}
{pt3dadd(172884.000000,187524.000000,66925.000000,443.722117)}
{pt3dadd(172584.000000,186744.000000,65850.000000,388.256859)}
{pt3dadd(172236.000000,185916.000000,65750.000000,332.791600)}
{pt3dadd(172080.000000,185484.000000,65400.000000,277.326342)}
{pt3dadd(172200.000000,184428.000000,65050.000000,311.992128)}
{pt3dadd(172512.000000,183192.000000,64600.000000,346.657914)}
{pt3dadd(172248.000000,183012.000000,64325.000000,381.323700)}
{pt3dadd(172560.000000,182664.000000,63800.000000,415.989486)}
{pt3dadd(172464.000000,182400.000000,63300.000000,388.256838)}
{pt3dadd(172176.000000,182352.000000,62700.000000,360.524190)}
{pt3dadd(171852.000000,182304.000000,62300.000000,332.791542)}
{pt3dadd(171588.000000,182172.000000,61800.000000,346.657896)}

{create adhoc22}
{access adhoc22}
{connect adhoc22(1), adhoc21(0)}
{nseg = 1}
{strdef color color = "White"}
{pt3dclear()}
{pt3dadd(171588.000000,182172.000000,61800.000000,346.657896)}
{pt3dadd(171408.000000,181692.000000,61275.000000,415.989486)}
{pt3dadd(171120.000000,181488.000000,60750.000000,372.175776)}
{pt3dadd(171048.000000,181176.000000,60325.000000,328.362066)}
{pt3dadd(170844.000000,180888.000000,59825.000000,284.548356)}
{pt3dadd(170460.000000,180600.000000,59200.000000,240.734646)}
{pt3dadd(169740.000000,180060.000000,58600.000000,200.612214)}
{pt3dadd(169632.000000,179820.000000,58175.000000,288.881586)}

{create adhoc23}
{access adhoc23}
{connect adhoc23(1), adhoc22(0)}
{nseg = 1}
{strdef color color = "White"}
{pt3dclear()}
{pt3dadd(169632.000000,179820.000000,58175.000000,288.881586)}
{pt3dadd(169272.000000,179760.000000,57850.000000,240.734646)}
{pt3dadd(168492.000000,179916.000000,57650.000000,215.379495)}
{pt3dadd(168072.000000,179988.000000,57600.000000,190.024344)}
{pt3dadd(167952.000000,179964.000000,57475.000000,164.669193)}
{pt3dadd(167892.000000,179892.000000,57175.000000,139.314042)}
{pt3dadd(167796.000000,179892.000000,57150.000000,116.095032)}

{create adhoc24}
{access adhoc24}
{connect adhoc24(1), adhoc22(0)}
{nseg = 1}
{strdef color color = "White"}
{pt3dclear()}
{pt3dadd(169632.000000,179820.000000,58175.000000,288.881586)}
{pt3dadd(169296.000000,178872.000000,57750.000000,200.612214)}
{pt3dadd(169080.000000,178476.000000,57625.000000,192.253370)}
{pt3dadd(168996.000000,178104.000000,57500.000000,183.894525)}
{pt3dadd(169008.000000,177816.000000,57225.000000,175.535680)}
{pt3dadd(169080.000000,177504.000000,57100.000000,167.176836)}
{pt3dadd(169140.000000,177168.000000,56900.000000,173.529553)}
{pt3dadd(168876.000000,176988.000000,56675.000000,179.882271)}
{pt3dadd(168732.000000,176784.000000,56425.000000,186.234989)}
{pt3dadd(168792.000000,176100.000000,56400.000000,192.587706)}
{pt3dadd(168792.000000,175608.000000,56325.000000,139.314042)}
{pt3dadd(168828.000000,175212.000000,56200.000000,139.314042)}

{create adhoc25}
{access adhoc25}
{connect adhoc25(1), adhoc21(0)}
{nseg = 1}
{strdef color color = "White"}
{pt3dclear()}
{pt3dadd(171588.000000,182172.000000,61800.000000,346.657896)}
{pt3dadd(170376.000000,182832.000000,61200.000000,167.176836)}
{pt3dadd(170172.000000,183060.000000,61150.000000,139.314042)}

{create adhoc26}
{access adhoc26}
{connect adhoc26(1), adhoc25(0)}
{nseg = 1}
{strdef color color = "White"}
{pt3dclear()}
{pt3dadd(170172.000000,183060.000000,61150.000000,139.314042)}
{pt3dadd(170112.000000,183624.000000,61325.000000,96.745860)}
{pt3dadd(170136.000000,183816.000000,61275.000000,80.621550)}

{create adhoc27}
{access adhoc27}
{connect adhoc27(1), adhoc25(0)}
{nseg = 1}
{strdef color color = "White"}
{pt3dclear()}
{pt3dadd(170172.000000,183060.000000,61150.000000,139.314042)}
{pt3dadd(169932.000000,182676.000000,60825.000000,167.176836)}
{pt3dadd(169908.000000,182688.000000,60575.000000,143.699844)}
{pt3dadd(169800.000000,182628.000000,60775.000000,120.222852)}
{pt3dadd(169620.000000,182532.000000,60925.000000,96.745860)}
{pt3dadd(169524.000000,182556.000000,61275.000000,80.621550)}

{create adhoc28}
{access adhoc28}
{connect adhoc28(1), adhoc3(0)}
{nseg = 1}
{strdef color color = "White"}
{pt3dclear()}
{pt3dadd(175716.000000,192204.000000,71650.000000,599.024880)}
{pt3dadd(174084.000000,191472.000000,71850.000000,96.745860)}
{pt3dadd(173904.000000,191496.000000,71850.000000,89.355555)}
{pt3dadd(173712.000000,191580.000000,71700.000000,81.965250)}
{pt3dadd(173484.000000,191544.000000,71450.000000,74.574945)}
{pt3dadd(173328.000000,191532.000000,71375.000000,67.184640)}
{pt3dadd(173196.000000,191580.000000,71300.000000,96.745860)}
{pt3dadd(173004.000000,191748.000000,71300.000000,55.987200)}

{create adhoc29}
{access adhoc29}
{connect adhoc29(1), adhoc2(0)}
{nseg = 1}
{strdef color color = "White"}
{pt3dclear()}
{pt3dadd(186672.000000,198516.000000,68850.000000,2472.669252)}
{pt3dadd(186516.000000,198156.000000,68050.000000,2146.414176)}
{pt3dadd(186420.000000,197868.000000,67425.000000,2382.519740)}
{pt3dadd(186348.000000,197580.000000,66575.000000,2618.625303)}
{pt3dadd(186708.000000,197100.000000,65825.000000,2854.730867)}
{pt3dadd(186636.000000,196860.000000,64925.000000,3090.836430)}
{pt3dadd(186588.000000,196296.000000,64225.000000,2936.294635)}
{pt3dadd(186576.000000,195648.000000,63550.000000,2781.752841)}
{pt3dadd(186816.000000,195468.000000,62925.000000,2627.211046)}
{pt3dadd(186876.000000,194976.000000,61750.000000,2472.669252)}
{pt3dadd(186480.000000,194844.000000,60800.000000,2301.671551)}
{pt3dadd(186456.000000,194772.000000,60075.000000,2130.673851)}
{pt3dadd(186732.000000,194484.000000,59325.000000,1959.676150)}
{pt3dadd(186216.000000,194904.000000,58850.000000,1788.678450)}
{pt3dadd(185928.000000,194712.000000,58300.000000,1606.498260)}
{pt3dadd(185580.000000,194664.000000,57650.000000,1424.318070)}
{pt3dadd(185016.000000,194376.000000,56850.000000,1242.137880)}
{pt3dadd(184188.000000,194556.000000,55600.000000,2373.762366)}

{create adhoc30}
{access adhoc30}
{connect adhoc30(1), adhoc29(0)}
{nseg = 1}
{strdef color color = "White"}
{pt3dclear()}
{pt3dadd(184188.000000,194556.000000,55600.000000,2373.762366)}
{pt3dadd(184848.000000,192576.000000,54425.000000,2060.557668)}
{pt3dadd(184992.000000,191568.000000,53850.000000,1903.153936)}
{pt3dadd(184428.000000,191028.000000,53325.000000,1745.750205)}
{pt3dadd(184404.000000,190356.000000,52800.000000,1588.346474)}
{pt3dadd(184584.000000,189876.000000,52175.000000,1430.942742)}
{pt3dadd(184692.000000,189156.000000,51625.000000,1574.036982)}
{pt3dadd(184956.000000,188208.000000,51150.000000,1717.131222)}
{pt3dadd(183336.000000,188304.000000,48375.000000,499.187376)}

{create adhoc31}
{access adhoc31}
{connect adhoc31(1), adhoc30(0)}
{nseg = 1}
{strdef color color = "White"}
{pt3dclear()}
{pt3dadd(183336.000000,188304.000000,48375.000000,499.187376)}
{pt3dadd(182544.000000,188496.000000,47700.000000,499.187376)}
{pt3dadd(181872.000000,188244.000000,47050.000000,478.387903)}
{pt3dadd(181284.000000,188256.000000,46650.000000,457.588431)}
{pt3dadd(180672.000000,188412.000000,46200.000000,436.788958)}
{pt3dadd(180240.000000,188256.000000,45900.000000,415.989486)}
{pt3dadd(179052.000000,188280.000000,45325.000000,384.212511)}
{pt3dadd(177240.000000,187608.000000,44875.000000,352.435536)}
{pt3dadd(176028.000000,187620.000000,44525.000000,320.658561)}
{pt3dadd(174432.000000,187284.000000,44150.000000,288.881586)}
{pt3dadd(172836.000000,187212.000000,43875.000000,285.992771)}
{pt3dadd(171384.000000,187140.000000,43750.000000,283.103955)}
{pt3dadd(171192.000000,187140.000000,43975.000000,280.215140)}
{pt3dadd(170868.000000,187092.000000,43925.000000,277.326324)}
{pt3dadd(170592.000000,187080.000000,43875.000000,303.838731)}
{pt3dadd(170256.000000,187104.000000,43875.000000,330.351138)}
{pt3dadd(169980.000000,187032.000000,43825.000000,356.863545)}
{pt3dadd(169620.000000,187032.000000,43825.000000,383.375952)}
{pt3dadd(169272.000000,187056.000000,43750.000000,407.336935)}
{pt3dadd(168900.000000,186948.000000,43575.000000,431.297919)}
{pt3dadd(168588.000000,186876.000000,43475.000000,455.258902)}
{pt3dadd(168276.000000,186768.000000,43400.000000,479.219886)}
{pt3dadd(167988.000000,186768.000000,43350.000000,460.051110)}
{pt3dadd(167808.000000,186768.000000,43300.000000,277.326324)}

{create adhoc32}
{access adhoc32}
{connect adhoc32(1), adhoc31(0)}
{nseg = 1}
{strdef color color = "White"}
{pt3dclear()}
{pt3dadd(167808.000000,186768.000000,43300.000000,277.326324)}
{pt3dadd(167652.000000,186768.000000,43250.000000,346.657896)}
{pt3dadd(167436.000000,186996.000000,43375.000000,301.787631)}
{pt3dadd(167184.000000,186948.000000,43475.000000,256.917366)}
{pt3dadd(166596.000000,187224.000000,43750.000000,212.047101)}
{pt3dadd(166032.000000,187536.000000,43750.000000,167.176836)}
{pt3dadd(165552.000000,187968.000000,43825.000000,160.211138)}
{pt3dadd(165252.000000,188364.000000,44025.000000,153.245439)}
{pt3dadd(164820.000000,188904.000000,44200.000000,146.279741)}
{pt3dadd(164532.000000,189432.000000,44550.000000,139.314042)}
{pt3dadd(164340.000000,189936.000000,44600.000000,139.314042)}
{pt3dadd(164328.000000,190644.000000,44775.000000,139.314042)}
{pt3dadd(164112.000000,191268.000000,44775.000000,139.314042)}
{pt3dadd(163932.000000,191736.000000,44775.000000,139.314042)}
{pt3dadd(163500.000000,192000.000000,45025.000000,111.451230)}

{create adhoc33}
{access adhoc33}
{connect adhoc33(1), adhoc32(0)}
{nseg = 1}
{strdef color color = "White"}
{pt3dclear()}
{pt3dadd(163500.000000,192000.000000,45025.000000,111.451230)}
{pt3dadd(163332.000000,192396.000000,44875.000000,96.745860)}
{pt3dadd(162936.000000,192480.000000,45000.000000,92.714782)}
{pt3dadd(162600.000000,192756.000000,45075.000000,88.683705)}
{pt3dadd(162288.000000,192900.000000,45075.000000,84.652627)}
{pt3dadd(162120.000000,192852.000000,45100.000000,80.621550)}
{pt3dadd(161964.000000,192828.000000,45050.000000,109.967796)}
{pt3dadd(161784.000000,192648.000000,44675.000000,139.314042)}
{pt3dadd(161592.000000,192480.000000,44425.000000,80.621550)}

{create adhoc34}
{access adhoc34}
{connect adhoc34(1), adhoc32(0)}
{nseg = 1}
{strdef color color = "White"}
{pt3dclear()}
{pt3dadd(163500.000000,192000.000000,45025.000000,111.451230)}
{pt3dadd(163692.000000,192060.000000,44550.000000,240.734646)}
{pt3dadd(163800.000000,192096.000000,44350.000000,209.574742)}
{pt3dadd(163956.000000,192192.000000,44225.000000,178.414839)}
{pt3dadd(164004.000000,192216.000000,44050.000000,147.254936)}
{pt3dadd(164064.000000,192372.000000,43800.000000,116.095032)}
{pt3dadd(164256.000000,192564.000000,43475.000000,139.314042)}
{pt3dadd(164376.000000,192780.000000,43675.000000,116.095032)}

{create adhoc35}
{access adhoc35}
{connect adhoc35(1), adhoc31(0)}
{nseg = 1}
{strdef color color = "White"}
{pt3dclear()}
{pt3dadd(167808.000000,186768.000000,43300.000000,277.326324)}
{pt3dadd(167460.000000,186144.000000,42775.000000,240.734646)}
{pt3dadd(167232.000000,185904.000000,42500.000000,222.345193)}
{pt3dadd(167100.000000,185508.000000,42025.000000,203.955741)}
{pt3dadd(166896.000000,184524.000000,41650.000000,185.566288)}
{pt3dadd(166836.000000,184188.000000,41275.000000,167.176836)}
{pt3dadd(166656.000000,183696.000000,41050.000000,149.569092)}
{pt3dadd(166680.000000,183456.000000,40625.000000,131.961348)}
{pt3dadd(166356.000000,183156.000000,41225.000000,114.353604)}
{pt3dadd(166008.000000,182808.000000,41225.000000,96.745860)}
{pt3dadd(165780.000000,182400.000000,41250.000000,101.583153)}
{pt3dadd(165864.000000,182016.000000,41275.000000,106.420446)}
{pt3dadd(165900.000000,181548.000000,41075.000000,111.257739)}
{pt3dadd(165888.000000,181104.000000,41000.000000,116.095032)}
{pt3dadd(165864.000000,180852.000000,40975.000000,104.485536)}
{pt3dadd(165816.000000,180300.000000,40975.000000,92.876040)}
{pt3dadd(165672.000000,180048.000000,41100.000000,80.621550)}

{create adhoc36}
{access adhoc36}
{connect adhoc36(1), adhoc30(0)}
{nseg = 1}
{strdef color color = "White"}
{pt3dclear()}
{pt3dadd(183336.000000,188304.000000,48375.000000,499.187376)}
{pt3dadd(184896.000000,186792.000000,48725.000000,1490.565402)}
{pt3dadd(185496.000000,184308.000000,48725.000000,1490.565402)}
{pt3dadd(185400.000000,184068.000000,48850.000000,1490.565402)}
{pt3dadd(185640.000000,183744.000000,48825.000000,1490.565402)}
{pt3dadd(185412.000000,183552.000000,49150.000000,1490.565402)}
{pt3dadd(185196.000000,183324.000000,49025.000000,1519.207848)}
{pt3dadd(185400.000000,183120.000000,48975.000000,1490.565402)}

{create adhoc37}
{access adhoc37}
{connect adhoc37(1), adhoc36(0)}
{nseg = 1}
{strdef color color = "White"}
{pt3dclear()}
{pt3dadd(185400.000000,183120.000000,48975.000000,1490.565402)}
{pt3dadd(186576.000000,179532.000000,49725.000000,399.349944)}
{pt3dadd(187572.000000,178452.000000,49725.000000,386.176932)}
{pt3dadd(187656.000000,178164.000000,49975.000000,373.003920)}
{pt3dadd(187764.000000,177900.000000,49925.000000,359.830908)}
{pt3dadd(187884.000000,177636.000000,50050.000000,346.657896)}
{pt3dadd(188064.000000,177432.000000,50225.000000,346.657896)}
{pt3dadd(188280.000000,177156.000000,50175.000000,346.657896)}
{pt3dadd(188508.000000,176136.000000,50375.000000,346.657896)}
{pt3dadd(188712.000000,175704.000000,50450.000000,346.657896)}
{pt3dadd(189528.000000,173676.000000,50425.000000,363.990794)}
{pt3dadd(190116.000000,171636.000000,50425.000000,381.323691)}
{pt3dadd(190164.000000,171396.000000,50625.000000,398.656589)}
{pt3dadd(190200.000000,171072.000000,50575.000000,415.989486)}
{pt3dadd(190272.000000,170760.000000,50650.000000,407.836103)}
{pt3dadd(190272.000000,170472.000000,50675.000000,399.682719)}
{pt3dadd(190320.000000,170220.000000,50625.000000,391.529336)}
{pt3dadd(190344.000000,170016.000000,50650.000000,383.375952)}
{pt3dadd(190332.000000,169824.000000,50650.000000,412.328808)}
{pt3dadd(190356.000000,169596.000000,50725.000000,441.281664)}
{pt3dadd(190320.000000,169392.000000,50825.000000,470.234520)}
{pt3dadd(190272.000000,169176.000000,50900.000000,499.187376)}
{pt3dadd(190224.000000,168960.000000,50925.000000,499.187376)}
{pt3dadd(190068.000000,168744.000000,50725.000000,499.187376)}
{pt3dadd(189816.000000,168576.000000,50900.000000,499.187376)}
{pt3dadd(189672.000000,168384.000000,50875.000000,499.187376)}
{pt3dadd(189432.000000,168192.000000,50975.000000,478.387903)}
{pt3dadd(189012.000000,167964.000000,51125.000000,457.588431)}
{pt3dadd(188760.000000,167724.000000,51025.000000,436.788958)}
{pt3dadd(188436.000000,167484.000000,51050.000000,415.989486)}
{pt3dadd(187836.000000,167316.000000,50925.000000,398.656589)}
{pt3dadd(187140.000000,167208.000000,50975.000000,381.323691)}
{pt3dadd(186960.000000,167004.000000,51025.000000,363.990794)}
{pt3dadd(186456.000000,166800.000000,51025.000000,346.657896)}
{pt3dadd(186288.000000,166800.000000,50975.000000,332.213819)}
{pt3dadd(186072.000000,166668.000000,50950.000000,317.769741)}
{pt3dadd(185880.000000,166632.000000,50975.000000,303.325664)}
{pt3dadd(185676.000000,166668.000000,50825.000000,288.881586)}
{pt3dadd(185472.000000,166620.000000,50750.000000,303.325664)}
{pt3dadd(185292.000000,166512.000000,50600.000000,317.769741)}
{pt3dadd(185052.000000,166464.000000,50675.000000,332.213819)}
{pt3dadd(184788.000000,166332.000000,50650.000000,346.657896)}
{pt3dadd(184560.000000,166272.000000,50600.000000,310.146476)}
{pt3dadd(183696.000000,166188.000000,50400.000000,273.635055)}
{pt3dadd(182268.000000,165828.000000,50400.000000,237.123635)}
{pt3dadd(181260.000000,165456.000000,50400.000000,200.612214)}
{pt3dadd(180660.000000,165228.000000,50575.000000,185.287671)}
{pt3dadd(178992.000000,164676.000000,50575.000000,169.963128)}
{pt3dadd(178008.000000,164652.000000,50575.000000,154.638585)}
{pt3dadd(177756.000000,164460.000000,50500.000000,139.314042)}
{pt3dadd(177480.000000,164424.000000,50450.000000,176.705928)}
{pt3dadd(177240.000000,164448.000000,50450.000000,214.097814)}
{pt3dadd(177024.000000,164352.000000,50525.000000,251.489700)}
{pt3dadd(176496.000000,164220.000000,50525.000000,288.881586)}
{pt3dadd(175716.000000,163968.000000,50275.000000,288.881586)}
{pt3dadd(175512.000000,163956.000000,50275.000000,288.881586)}
{pt3dadd(175248.000000,163776.000000,50125.000000,288.881586)}
{pt3dadd(174984.000000,163632.000000,50100.000000,288.881586)}
{pt3dadd(174732.000000,163668.000000,50050.000000,276.844851)}
{pt3dadd(174576.000000,163704.000000,49950.000000,264.808116)}
{pt3dadd(174420.000000,163608.000000,49850.000000,252.771381)}
{pt3dadd(174240.000000,163548.000000,49975.000000,240.734646)}
{pt3dadd(174048.000000,163596.000000,49950.000000,240.734646)}
{pt3dadd(173808.000000,163404.000000,50000.000000,240.734646)}
{pt3dadd(173532.000000,163212.000000,49975.000000,240.734646)}
{pt3dadd(173340.000000,163236.000000,50050.000000,240.734646)}
{pt3dadd(173148.000000,163152.000000,49975.000000,267.215459)}
{pt3dadd(172920.000000,163236.000000,50050.000000,293.696271)}
{pt3dadd(172644.000000,163176.000000,49975.000000,320.177083)}
{pt3dadd(172380.000000,163140.000000,50100.000000,346.657896)}
{pt3dadd(172104.000000,163308.000000,50200.000000,320.177083)}
{pt3dadd(171888.000000,163296.000000,50100.000000,293.696271)}
{pt3dadd(171624.000000,163284.000000,50100.000000,267.215459)}
{pt3dadd(171408.000000,163176.000000,49600.000000,240.734646)}
{pt3dadd(171108.000000,163356.000000,49275.000000,228.697915)}
{pt3dadd(170628.000000,162732.000000,48950.000000,216.661185)}
{pt3dadd(170244.000000,162312.000000,48725.000000,204.624455)}
{pt3dadd(170064.000000,162324.000000,48725.000000,192.587724)}
{pt3dadd(169944.000000,162144.000000,48575.000000,167.176836)}

{create adhoc38}
{access adhoc38}
{connect adhoc38(1), adhoc36(0)}
{nseg = 1}
{strdef color color = "White"}
{pt3dclear()}
{pt3dadd(185400.000000,183120.000000,48975.000000,1490.565402)}
{pt3dadd(184008.000000,183372.000000,51050.000000,718.829820)}
{pt3dadd(183732.000000,183228.000000,51475.000000,625.786839)}
{pt3dadd(183456.000000,183420.000000,51975.000000,532.743858)}
{pt3dadd(183180.000000,183564.000000,52475.000000,439.700877)}
{pt3dadd(182664.000000,183468.000000,52850.000000,346.657896)}
{pt3dadd(181608.000000,183972.000000,53100.000000,415.989486)}
{pt3dadd(180900.000000,184332.000000,53525.000000,415.989486)}

{create adhoc39}
{access adhoc39}
{connect adhoc39(1), adhoc38(0)}
{nseg = 1}
{strdef color color = "White"}
{pt3dclear()}
{pt3dadd(180900.000000,184332.000000,53525.000000,415.989486)}
{pt3dadd(179736.000000,184884.000000,53750.000000,346.657896)}
{pt3dadd(179088.000000,184872.000000,53750.000000,332.213819)}
{pt3dadd(178872.000000,185088.000000,54000.000000,317.769741)}
{pt3dadd(178632.000000,185076.000000,53950.000000,303.325664)}
{pt3dadd(178476.000000,185148.000000,54050.000000,288.881586)}
{pt3dadd(178260.000000,185124.000000,54225.000000,303.325664)}
{pt3dadd(177840.000000,185088.000000,54275.000000,317.769741)}
{pt3dadd(177060.000000,185112.000000,54350.000000,332.213819)}
{pt3dadd(176268.000000,185136.000000,54350.000000,346.657896)}
{pt3dadd(175404.000000,185196.000000,54600.000000,375.006168)}
{pt3dadd(175152.000000,185244.000000,54825.000000,403.354440)}
{pt3dadd(174876.000000,185268.000000,54950.000000,431.702712)}
{pt3dadd(174648.000000,185208.000000,54875.000000,460.050984)}
{pt3dadd(174456.000000,185220.000000,55000.000000,449.035610)}
{pt3dadd(174276.000000,185304.000000,54875.000000,438.020235)}
{pt3dadd(174108.000000,185352.000000,54975.000000,427.004861)}
{pt3dadd(173940.000000,185268.000000,54950.000000,415.989486)}
{pt3dadd(173724.000000,185304.000000,54925.000000,398.656589)}
{pt3dadd(173448.000000,185280.000000,54975.000000,381.323691)}
{pt3dadd(173136.000000,185304.000000,54950.000000,363.990794)}
{pt3dadd(172872.000000,185352.000000,54950.000000,346.657896)}
{pt3dadd(172572.000000,185400.000000,55000.000000,363.990794)}
{pt3dadd(171876.000000,185424.000000,55000.000000,381.323691)}
{pt3dadd(171180.000000,185460.000000,55000.000000,398.656589)}
{pt3dadd(170544.000000,185496.000000,55000.000000,415.989486)}
{pt3dadd(170124.000000,185520.000000,55000.000000,395.190014)}
{pt3dadd(169896.000000,185580.000000,55400.000000,374.390541)}
{pt3dadd(169584.000000,185640.000000,55600.000000,353.591069)}
{pt3dadd(169308.000000,185712.000000,55625.000000,332.791596)}
{pt3dadd(169044.000000,185688.000000,55700.000000,353.591069)}
{pt3dadd(168792.000000,185736.000000,55800.000000,374.390541)}
{pt3dadd(168588.000000,185676.000000,55850.000000,395.190014)}
{pt3dadd(168396.000000,185808.000000,55875.000000,415.989486)}
{pt3dadd(168168.000000,185844.000000,55925.000000,398.656589)}
{pt3dadd(167928.000000,185916.000000,55950.000000,381.323691)}
{pt3dadd(167724.000000,186096.000000,55950.000000,363.990794)}
{pt3dadd(167352.000000,186444.000000,56275.000000,346.657896)}
{pt3dadd(167100.000000,186696.000000,56550.000000,346.657896)}
{pt3dadd(166596.000000,187092.000000,56775.000000,346.657896)}
{pt3dadd(166116.000000,187392.000000,56925.000000,346.657896)}
{pt3dadd(165924.000000,187680.000000,57200.000000,346.657896)}
{pt3dadd(165732.000000,187968.000000,57525.000000,301.787631)}
{pt3dadd(165516.000000,188376.000000,57875.000000,256.917366)}
{pt3dadd(165432.000000,188724.000000,58250.000000,212.047101)}
{pt3dadd(165780.000000,189024.000000,58700.000000,167.176836)}
{pt3dadd(166044.000000,189408.000000,59025.000000,167.176836)}
{pt3dadd(166224.000000,189624.000000,59175.000000,167.176836)}
{pt3dadd(166428.000000,190200.000000,59625.000000,167.176836)}
{pt3dadd(166620.000000,190308.000000,59900.000000,167.176836)}
{pt3dadd(166836.000000,190476.000000,60225.000000,240.734646)}
{pt3dadd(167016.000000,190704.000000,60625.000000,139.314042)}

{create adhoc40}
{access adhoc40}
{connect adhoc40(1), adhoc39(0)}
{nseg = 1}
{strdef color color = "White"}
{pt3dclear()}
{pt3dadd(167016.000000,190704.000000,60625.000000,139.314042)}
{pt3dadd(167280.000000,190716.000000,60750.000000,288.881586)}
{pt3dadd(167352.000000,190812.000000,61100.000000,245.684947)}
{pt3dadd(167340.000000,190800.000000,61475.000000,202.488309)}
{pt3dadd(167328.000000,190848.000000,61825.000000,159.291671)}
{pt3dadd(166980.000000,191028.000000,61950.000000,116.095032)}
{pt3dadd(166728.000000,191220.000000,62050.000000,139.314042)}

{create adhoc41}
{access adhoc41}
{connect adhoc41(1), adhoc39(0)}
{nseg = 1}
{strdef color color = "White"}
{pt3dclear()}
{pt3dadd(167016.000000,190704.000000,60625.000000,139.314042)}
{pt3dadd(166596.000000,190968.000000,60750.000000,139.314042)}
{pt3dadd(166464.000000,191100.000000,60700.000000,109.967796)}
{pt3dadd(166260.000000,191256.000000,60825.000000,80.621550)}
{pt3dadd(166188.000000,191400.000000,60900.000000,80.621550)}

{create adhoc42}
{access adhoc42}
{connect adhoc42(1), adhoc38(0)}
{nseg = 1}
{strdef color color = "White"}
{pt3dclear()}
{pt3dadd(180900.000000,184332.000000,53525.000000,415.989486)}
{pt3dadd(180156.000000,183876.000000,52725.000000,415.989486)}
{pt3dadd(179784.000000,183768.000000,52425.000000,395.190005)}
{pt3dadd(179520.000000,183864.000000,52325.000000,374.390523)}
{pt3dadd(179280.000000,183864.000000,52350.000000,353.591042)}
{pt3dadd(179052.000000,183864.000000,52200.000000,332.791560)}
{pt3dadd(178836.000000,183756.000000,52100.000000,321.814067)}
{pt3dadd(178092.000000,183900.000000,51925.000000,310.836573)}
{pt3dadd(177300.000000,183924.000000,51850.000000,299.859080)}
{pt3dadd(176268.000000,183684.000000,51775.000000,288.881586)}
{pt3dadd(174888.000000,183372.000000,51775.000000,276.844851)}
{pt3dadd(173316.000000,183204.000000,51775.000000,264.808116)}
{pt3dadd(171696.000000,182976.000000,51775.000000,252.771381)}
{pt3dadd(170640.000000,182700.000000,51775.000000,240.734646)}
{pt3dadd(169620.000000,182580.000000,51775.000000,300.355956)}
{pt3dadd(169356.000000,182544.000000,51425.000000,359.977266)}
{pt3dadd(169008.000000,182412.000000,51200.000000,419.598576)}
{pt3dadd(168684.000000,182376.000000,51175.000000,479.219886)}
{pt3dadd(168372.000000,182340.000000,51050.000000,446.079388)}
{pt3dadd(168024.000000,182220.000000,50925.000000,412.938891)}
{pt3dadd(167664.000000,182148.000000,50825.000000,379.798393)}
{pt3dadd(167352.000000,182232.000000,50725.000000,346.657896)}
{pt3dadd(167088.000000,182100.000000,50800.000000,192.587706)}

{create adhoc43}
{access adhoc43}
{connect adhoc43(1), adhoc42(0)}
{nseg = 1}
{strdef color color = "White"}
{pt3dclear()}
{pt3dadd(167088.000000,182100.000000,50800.000000,192.587706)}
{pt3dadd(166824.000000,182076.000000,50625.000000,192.587724)}
{pt3dadd(166596.000000,182304.000000,50450.000000,194.593846)}
{pt3dadd(166092.000000,182616.000000,50100.000000,196.599969)}
{pt3dadd(165984.000000,182616.000000,49775.000000,198.606091)}
{pt3dadd(165804.000000,182856.000000,49875.000000,200.612214)}
{pt3dadd(165576.000000,183048.000000,49875.000000,200.612214)}
{pt3dadd(165372.000000,183108.000000,49500.000000,200.612214)}
{pt3dadd(164520.000000,183672.000000,49650.000000,200.612214)}
{pt3dadd(164340.000000,183756.000000,49575.000000,200.612214)}
{pt3dadd(164520.000000,183924.000000,49725.000000,210.642822)}
{pt3dadd(164424.000000,184152.000000,49950.000000,220.673430)}
{pt3dadd(164052.000000,184416.000000,49950.000000,230.704038)}
{pt3dadd(164208.000000,184452.000000,50375.000000,240.734646)}
{pt3dadd(163812.000000,184716.000000,50700.000000,240.734646)}
{pt3dadd(163800.000000,185148.000000,51175.000000,240.734646)}

{create adhoc44}
{access adhoc44}
{connect adhoc44(1), adhoc42(0)}
{nseg = 1}
{strdef color color = "White"}
{pt3dclear()}
{pt3dadd(167088.000000,182100.000000,50800.000000,192.587706)}
{pt3dadd(166716.000000,181620.000000,50725.000000,167.176836)}
{pt3dadd(166632.000000,180672.000000,50900.000000,183.158946)}
{pt3dadd(166524.000000,180480.000000,50975.000000,199.141056)}
{pt3dadd(166560.000000,180276.000000,51075.000000,215.123166)}
{pt3dadd(166500.000000,180036.000000,50900.000000,231.105276)}
{pt3dadd(166464.000000,179808.000000,50925.000000,233.512618)}
{pt3dadd(166536.000000,179592.000000,50875.000000,235.919961)}
{pt3dadd(166548.000000,179304.000000,51100.000000,238.327304)}
{pt3dadd(166608.000000,179088.000000,51250.000000,240.734646)}
{pt3dadd(166416.000000,178884.000000,51300.000000,222.345193)}
{pt3dadd(166188.000000,178692.000000,51525.000000,203.955741)}
{pt3dadd(166296.000000,178440.000000,51800.000000,185.566288)}
{pt3dadd(165840.000000,178128.000000,51350.000000,167.176836)}
{pt3dadd(165660.000000,177984.000000,51225.000000,175.647132)}
{pt3dadd(165528.000000,177660.000000,51025.000000,184.117428)}
{pt3dadd(165492.000000,177516.000000,50850.000000,192.587724)}
{pt3dadd(165372.000000,177324.000000,50850.000000,200.612214)}

{create adhoc45}
{access adhoc45}
{connect adhoc45(1), adhoc29(0)}
{nseg = 1}
{strdef color color = "White"}
{pt3dclear()}
{pt3dadd(184188.000000,194556.000000,55600.000000,2373.762366)}
{pt3dadd(181212.000000,196404.000000,55450.000000,1035.114948)}
{pt3dadd(180264.000000,196656.000000,54700.000000,1138.626414)}
{pt3dadd(179568.000000,197016.000000,54250.000000,1242.137880)}
{pt3dadd(178740.000000,197388.000000,53725.000000,1035.114948)}

{create adhoc46}
{access adhoc46}
{connect adhoc46(1), adhoc45(0)}
{nseg = 1}
{strdef color color = "White"}
{pt3dclear()}
{pt3dadd(178740.000000,197388.000000,53725.000000,1035.114948)}
{pt3dadd(177900.000000,197904.000000,53300.000000,690.076674)}

{create adhoc47}
{access adhoc47}
{connect adhoc47(1), adhoc46(0)}
{nseg = 1}
{strdef color color = "White"}
{pt3dclear()}
{pt3dadd(177900.000000,197904.000000,53300.000000,690.076674)}
{pt3dadd(177000.000000,197616.000000,53425.000000,240.734646)}
{pt3dadd(176784.000000,197640.000000,53400.000000,230.704038)}
{pt3dadd(176412.000000,197640.000000,53300.000000,220.673430)}
{pt3dadd(176124.000000,197712.000000,53250.000000,210.642822)}
{pt3dadd(175848.000000,197784.000000,53325.000000,200.612214)}
{pt3dadd(175536.000000,197688.000000,53250.000000,210.642822)}
{pt3dadd(175272.000000,197640.000000,53275.000000,220.673430)}
{pt3dadd(174984.000000,197604.000000,53300.000000,230.704038)}
{pt3dadd(174744.000000,197652.000000,53250.000000,240.734646)}
{pt3dadd(174480.000000,197652.000000,53300.000000,252.771381)}
{pt3dadd(174204.000000,197640.000000,53200.000000,264.808116)}
{pt3dadd(173928.000000,197604.000000,53150.000000,276.844851)}
{pt3dadd(173688.000000,197568.000000,53150.000000,288.881586)}
{pt3dadd(173436.000000,197532.000000,53225.000000,303.325664)}
{pt3dadd(173232.000000,197580.000000,53325.000000,317.769741)}
{pt3dadd(173040.000000,197580.000000,53425.000000,332.213819)}
{pt3dadd(172668.000000,197400.000000,53425.000000,346.657896)}
{pt3dadd(172356.000000,197472.000000,53450.000000,320.177083)}
{pt3dadd(172044.000000,197472.000000,53625.000000,293.696271)}
{pt3dadd(171672.000000,197412.000000,53425.000000,267.215459)}
{pt3dadd(171360.000000,197352.000000,53175.000000,240.734646)}
{pt3dadd(171108.000000,197424.000000,53075.000000,240.734646)}
{pt3dadd(170856.000000,197412.000000,53025.000000,240.734646)}
{pt3dadd(170520.000000,197400.000000,52975.000000,240.734646)}
{pt3dadd(170232.000000,197472.000000,53050.000000,240.734646)}
{pt3dadd(169848.000000,197496.000000,53025.000000,230.704038)}
{pt3dadd(169488.000000,197520.000000,53000.000000,220.673430)}
{pt3dadd(169116.000000,197424.000000,53025.000000,210.642822)}
{pt3dadd(168696.000000,197472.000000,52950.000000,200.612214)}
{pt3dadd(168396.000000,197556.000000,52975.000000,210.642822)}
{pt3dadd(168048.000000,197556.000000,53000.000000,220.673430)}
{pt3dadd(167676.000000,197556.000000,53025.000000,230.704038)}
{pt3dadd(167292.000000,197412.000000,53050.000000,240.734646)}
{pt3dadd(166992.000000,197268.000000,53050.000000,267.215459)}
{pt3dadd(166680.000000,197304.000000,53025.000000,293.696271)}
{pt3dadd(166368.000000,197256.000000,53100.000000,320.177083)}
{pt3dadd(166044.000000,197208.000000,53200.000000,346.657896)}
{pt3dadd(165720.000000,197172.000000,53325.000000,332.213819)}
{pt3dadd(165288.000000,197208.000000,53400.000000,317.769741)}
{pt3dadd(164952.000000,197244.000000,53475.000000,303.325664)}
{pt3dadd(164616.000000,197244.000000,53600.000000,288.881586)}
{pt3dadd(164196.000000,197136.000000,53725.000000,288.881586)}
{pt3dadd(163920.000000,197004.000000,53725.000000,288.881586)}
{pt3dadd(163692.000000,196764.000000,53750.000000,288.881586)}
{pt3dadd(163380.000000,196620.000000,53775.000000,288.881586)}
{pt3dadd(163032.000000,196572.000000,53825.000000,259.458462)}
{pt3dadd(162660.000000,196332.000000,53925.000000,230.035338)}
{pt3dadd(162372.000000,195744.000000,53950.000000,200.612214)}
{pt3dadd(162012.000000,195516.000000,53900.000000,200.612214)}

{create adhoc48}
{access adhoc48}
{connect adhoc48(1), adhoc47(0)}
{nseg = 1}
{strdef color color = "White"}
{pt3dclear()}
{pt3dadd(162012.000000,195516.000000,53900.000000,200.612214)}
{pt3dadd(161652.000000,194100.000000,54425.000000,240.734646)}
{pt3dadd(162156.000000,193260.000000,54600.000000,168.740253)}
{pt3dadd(162204.000000,192900.000000,54775.000000,96.745860)}
{pt3dadd(162564.000000,192612.000000,54925.000000,167.176836)}

{create adhoc49}
{access adhoc49}
{connect adhoc49(1), adhoc48(0)}
{nseg = 1}
{strdef color color = "White"}
{pt3dclear()}
{pt3dadd(162564.000000,192612.000000,54925.000000,167.176836)}
{pt3dadd(162468.000000,192120.000000,54675.000000,139.314042)}
{pt3dadd(162588.000000,192108.000000,54525.000000,130.026438)}
{pt3dadd(162432.000000,191904.000000,54575.000000,120.738834)}
{pt3dadd(162348.000000,191616.000000,54425.000000,111.451230)}
{pt3dadd(162144.000000,191316.000000,54300.000000,96.745860)}

{create adhoc50}
{access adhoc50}
{connect adhoc50(1), adhoc49(0)}
{nseg = 1}
{strdef color color = "White"}
{pt3dclear()}
{pt3dadd(162144.000000,191316.000000,54300.000000,96.745860)}
{pt3dadd(161892.000000,191244.000000,54050.000000,116.095032)}
{pt3dadd(161916.000000,191076.000000,54075.000000,116.095032)}

{create adhoc51}
{access adhoc51}
{connect adhoc51(1), adhoc49(0)}
{nseg = 1}
{strdef color color = "White"}
{pt3dclear()}
{pt3dadd(162144.000000,191316.000000,54300.000000,96.745860)}
{pt3dadd(162288.000000,191232.000000,54175.000000,139.314042)}
{pt3dadd(162432.000000,191196.000000,53925.000000,96.745860)}
{pt3dadd(162444.000000,191124.000000,53725.000000,96.745860)}

{create adhoc52}
{access adhoc52}
{connect adhoc52(1), adhoc48(0)}
{nseg = 1}
{strdef color color = "White"}
{pt3dclear()}
{pt3dadd(162564.000000,192612.000000,54925.000000,167.176836)}
{pt3dadd(162468.000000,193092.000000,55375.000000,67.184640)}
{pt3dadd(162552.000000,193308.000000,55525.000000,67.184640)}
{pt3dadd(162780.000000,193344.000000,55575.000000,67.184640)}
{pt3dadd(162996.000000,193308.000000,55325.000000,96.745860)}

{create adhoc53}
{access adhoc53}
{connect adhoc53(1), adhoc47(0)}
{nseg = 1}
{strdef color color = "White"}
{pt3dclear()}
{pt3dadd(162012.000000,195516.000000,53900.000000,200.612214)}
{pt3dadd(161712.000000,195456.000000,54000.000000,192.587706)}
{pt3dadd(161412.000000,195456.000000,54075.000000,179.269290)}
{pt3dadd(161004.000000,195936.000000,54000.000000,165.950874)}
{pt3dadd(160728.000000,196188.000000,54000.000000,152.632458)}
{pt3dadd(160488.000000,196440.000000,53425.000000,139.314042)}
{pt3dadd(160404.000000,196536.000000,53025.000000,167.176836)}
{pt3dadd(160368.000000,196692.000000,53225.000000,139.314042)}

{create adhoc54}
{access adhoc54}
{connect adhoc54(1), adhoc46(0)}
{nseg = 1}
{strdef color color = "White"}
{pt3dclear()}
{pt3dadd(177900.000000,197904.000000,53300.000000,690.076674)}
{pt3dadd(177564.000000,198708.000000,53075.000000,499.187376)}
{pt3dadd(177240.000000,199500.000000,52575.000000,581.413536)}
{pt3dadd(176880.000000,199860.000000,52575.000000,663.639696)}
{pt3dadd(176604.000000,200112.000000,52475.000000,745.865856)}
{pt3dadd(176268.000000,200364.000000,52375.000000,828.092016)}
{pt3dadd(175980.000000,200832.000000,52325.000000,791.671284)}
{pt3dadd(175668.000000,200976.000000,51975.000000,755.250552)}
{pt3dadd(175380.000000,201384.000000,51950.000000,718.829820)}
{pt3dadd(175116.000000,201792.000000,51925.000000,599.024880)}

{create adhoc55}
{access adhoc55}
{connect adhoc55(1), adhoc54(0)}
{nseg = 1}
{strdef color color = "White"}
{pt3dclear()}
{pt3dadd(175116.000000,201792.000000,51925.000000,599.024880)}
{pt3dadd(174168.000000,201240.000000,51775.000000,288.881586)}
{pt3dadd(173832.000000,201156.000000,51650.000000,303.325664)}
{pt3dadd(173424.000000,201108.000000,51500.000000,317.769741)}
{pt3dadd(173052.000000,201192.000000,51525.000000,332.213819)}
{pt3dadd(172680.000000,201144.000000,51525.000000,346.657896)}
{pt3dadd(172368.000000,201132.000000,51475.000000,346.657896)}
{pt3dadd(172092.000000,201120.000000,51425.000000,346.657896)}
{pt3dadd(171816.000000,201216.000000,51450.000000,346.657896)}
{pt3dadd(171552.000000,201240.000000,51525.000000,346.657896)}
{pt3dadd(171264.000000,201228.000000,51500.000000,332.213819)}
{pt3dadd(171024.000000,201216.000000,51475.000000,317.769741)}
{pt3dadd(170796.000000,201252.000000,51450.000000,303.325664)}
{pt3dadd(170604.000000,201420.000000,51425.000000,288.881586)}
{pt3dadd(170388.000000,201516.000000,51400.000000,288.881586)}
{pt3dadd(170208.000000,201564.000000,51375.000000,288.881586)}
{pt3dadd(170052.000000,201468.000000,51425.000000,288.881586)}
{pt3dadd(169728.000000,201468.000000,51250.000000,288.881586)}
{pt3dadd(169488.000000,201504.000000,51325.000000,320.658561)}
{pt3dadd(169236.000000,201540.000000,51400.000000,352.435536)}
{pt3dadd(168924.000000,201540.000000,51200.000000,384.212511)}
{pt3dadd(168600.000000,201444.000000,51250.000000,415.989486)}
{pt3dadd(168216.000000,201516.000000,51125.000000,398.656589)}
{pt3dadd(167844.000000,201612.000000,51050.000000,381.323691)}
{pt3dadd(167508.000000,201708.000000,50950.000000,363.990794)}
{pt3dadd(167148.000000,201576.000000,50800.000000,346.657896)}
{pt3dadd(166884.000000,201600.000000,50600.000000,346.657896)}
{pt3dadd(166512.000000,201624.000000,50400.000000,346.657896)}
{pt3dadd(166248.000000,201672.000000,50325.000000,346.657896)}
{pt3dadd(165468.000000,201492.000000,50325.000000,346.657896)}

{create adhoc56}
{access adhoc56}
{connect adhoc56(1), adhoc55(0)}
{nseg = 1}
{strdef color color = "White"}
{pt3dclear()}
{pt3dadd(165468.000000,201492.000000,50325.000000,346.657896)}
{pt3dadd(164652.000000,200952.000000,50175.000000,192.587706)}
{pt3dadd(164016.000000,200544.000000,50125.000000,196.599960)}
{pt3dadd(162864.000000,200388.000000,50025.000000,200.612214)}
{pt3dadd(162132.000000,200064.000000,49875.000000,200.612214)}

{create adhoc57}
{access adhoc57}
{connect adhoc57(1), adhoc56(0)}
{nseg = 1}
{strdef color color = "White"}
{pt3dclear()}
{pt3dadd(162132.000000,200064.000000,49875.000000,200.612214)}
{pt3dadd(162576.000000,200064.000000,49400.000000,96.745860)}
{pt3dadd(162564.000000,200172.000000,49275.000000,116.095032)}

{create adhoc58}
{access adhoc58}
{connect adhoc58(1), adhoc56(0)}
{nseg = 1}
{strdef color color = "White"}
{pt3dclear()}
{pt3dadd(162132.000000,200064.000000,49875.000000,200.612214)}
{pt3dadd(161628.000000,199656.000000,50125.000000,96.745860)}
{pt3dadd(161316.000000,199140.000000,50400.000000,106.420446)}
{pt3dadd(161088.000000,199008.000000,50550.000000,116.095032)}
{pt3dadd(160944.000000,199008.000000,50600.000000,80.621550)}

{create adhoc59}
{access adhoc59}
{connect adhoc59(1), adhoc56(0)}
{nseg = 1}
{strdef color color = "White"}
{pt3dclear()}
{pt3dadd(162132.000000,200064.000000,49875.000000,200.612214)}
{pt3dadd(161772.000000,199788.000000,49525.000000,111.451230)}
{pt3dadd(161688.000000,199428.000000,49325.000000,112.612180)}
{pt3dadd(161496.000000,198984.000000,49100.000000,113.773131)}
{pt3dadd(161244.000000,198516.000000,48925.000000,114.934082)}
{pt3dadd(161016.000000,198192.000000,48775.000000,116.095032)}
{pt3dadd(160956.000000,197484.000000,48450.000000,128.865483)}
{pt3dadd(160848.000000,196992.000000,48350.000000,141.635934)}
{pt3dadd(161124.000000,196512.000000,48175.000000,154.406385)}
{pt3dadd(161280.000000,196332.000000,47975.000000,167.176836)}
{pt3dadd(161148.000000,195612.000000,48400.000000,111.451230)}

{create adhoc60}
{access adhoc60}
{connect adhoc60(1), adhoc55(0)}
{nseg = 1}
{strdef color color = "White"}
{pt3dclear()}
{pt3dadd(165468.000000,201492.000000,50325.000000,346.657896)}
{pt3dadd(164772.000000,201792.000000,49700.000000,288.881586)}
{pt3dadd(164076.000000,202044.000000,49325.000000,288.881586)}
{pt3dadd(163260.000000,202284.000000,48900.000000,288.881586)}
{pt3dadd(162252.000000,202296.000000,48375.000000,288.881586)}
{pt3dadd(162024.000000,202104.000000,48075.000000,306.700722)}

{create adhoc61}
{access adhoc61}
{connect adhoc61(1), adhoc60(0)}
{nseg = 1}
{strdef color color = "White"}
{pt3dclear()}
{pt3dadd(162024.000000,202104.000000,48075.000000,306.700722)}
{pt3dadd(161088.000000,202740.000000,48150.000000,111.451230)}
{pt3dadd(160644.000000,203256.000000,48075.000000,112.612180)}
{pt3dadd(160488.000000,203580.000000,48075.000000,113.773131)}
{pt3dadd(160224.000000,204348.000000,47800.000000,114.934082)}
{pt3dadd(160140.000000,204600.000000,47975.000000,116.095032)}
{pt3dadd(160116.000000,204900.000000,48000.000000,158.353623)}
{pt3dadd(160092.000000,205104.000000,48150.000000,200.612214)}
{pt3dadd(160236.000000,205680.000000,48300.000000,116.095032)}

{create adhoc62}
{access adhoc62}
{connect adhoc62(1), adhoc60(0)}
{nseg = 1}
{strdef color color = "White"}
{pt3dclear()}
{pt3dadd(162024.000000,202104.000000,48075.000000,306.700722)}
{pt3dadd(161760.000000,201564.000000,47625.000000,353.319246)}
{pt3dadd(161652.000000,201204.000000,47100.000000,294.013193)}
{pt3dadd(161676.000000,200940.000000,46575.000000,234.707139)}
{pt3dadd(161676.000000,200676.000000,46050.000000,175.401086)}
{pt3dadd(161940.000000,200388.000000,45600.000000,116.095032)}
{pt3dadd(161964.000000,200328.000000,45325.000000,111.257739)}
{pt3dadd(162252.000000,200232.000000,45150.000000,106.420446)}
{pt3dadd(162564.000000,199956.000000,44725.000000,101.583153)}
{pt3dadd(162720.000000,199824.000000,44625.000000,96.745860)}
{pt3dadd(162756.000000,199896.000000,44375.000000,96.745860)}
{pt3dadd(162828.000000,199980.000000,44125.000000,96.745860)}
{pt3dadd(162924.000000,200184.000000,43700.000000,96.745860)}
{pt3dadd(162936.000000,200412.000000,43375.000000,96.745860)}
{pt3dadd(162684.000000,200736.000000,43550.000000,96.745860)}
{pt3dadd(162012.000000,201576.000000,43925.000000,96.745860)}
{pt3dadd(161856.000000,202188.000000,43850.000000,139.314042)}

{create adhoc63}
{access adhoc63}
{connect adhoc63(1), adhoc54(0)}
{nseg = 1}
{strdef color color = "White"}
{pt3dclear()}
{pt3dadd(175116.000000,201792.000000,51925.000000,599.024880)}
{pt3dadd(174744.000000,202008.000000,52000.000000,575.063856)}
{pt3dadd(174444.000000,202716.000000,52175.000000,581.054112)}
{pt3dadd(174084.000000,203172.000000,52225.000000,587.044368)}
{pt3dadd(173904.000000,203460.000000,52225.000000,593.034624)}
{pt3dadd(173436.000000,203772.000000,52150.000000,599.024880)}
{pt3dadd(173124.000000,204084.000000,52400.000000,599.024880)}
{pt3dadd(172920.000000,204372.000000,52350.000000,599.024880)}
{pt3dadd(172668.000000,204372.000000,52425.000000,599.024880)}
{pt3dadd(172320.000000,204600.000000,52475.000000,599.024880)}
{pt3dadd(172044.000000,204684.000000,52425.000000,574.065504)}
{pt3dadd(171768.000000,204828.000000,52500.000000,549.106128)}
{pt3dadd(171540.000000,205020.000000,52575.000000,524.146752)}
{pt3dadd(171324.000000,205248.000000,52475.000000,499.187376)}
{pt3dadd(171096.000000,205212.000000,52675.000000,499.187376)}
{pt3dadd(170868.000000,205476.000000,52575.000000,499.187376)}
{pt3dadd(170616.000000,205740.000000,52475.000000,499.187376)}
{pt3dadd(170304.000000,205956.000000,52500.000000,499.187376)}
{pt3dadd(169956.000000,206184.000000,52475.000000,524.146752)}
{pt3dadd(169704.000000,206412.000000,52450.000000,549.106128)}
{pt3dadd(169440.000000,206760.000000,52275.000000,574.065504)}
{pt3dadd(169224.000000,207168.000000,52100.000000,599.024880)}
{pt3dadd(168912.000000,207300.000000,52225.000000,628.976115)}
{pt3dadd(168516.000000,207564.000000,52100.000000,658.927350)}
{pt3dadd(168120.000000,207828.000000,52050.000000,688.878585)}
{pt3dadd(167772.000000,207972.000000,52075.000000,718.829820)}
{pt3dadd(167472.000000,208104.000000,52075.000000,658.927336)}
{pt3dadd(167160.000000,208272.000000,52100.000000,599.024853)}
{pt3dadd(166908.000000,208440.000000,52175.000000,539.122369)}
{pt3dadd(166692.000000,208608.000000,52250.000000,479.219886)}
{pt3dadd(166476.000000,208776.000000,52325.000000,484.211758)}
{pt3dadd(166260.000000,208860.000000,52300.000000,489.203631)}
{pt3dadd(166092.000000,208944.000000,52275.000000,494.195504)}
{pt3dadd(165744.000000,209112.000000,52250.000000,499.187376)}
{pt3dadd(165456.000000,209364.000000,52225.000000,499.187376)}
{pt3dadd(165156.000000,209448.000000,52175.000000,499.187376)}
{pt3dadd(164736.000000,209544.000000,52125.000000,499.187376)}
{pt3dadd(164424.000000,209820.000000,52075.000000,499.187376)}
{pt3dadd(164148.000000,209952.000000,52100.000000,524.146752)}
{pt3dadd(163812.000000,210072.000000,52100.000000,549.106128)}
{pt3dadd(163560.000000,210120.000000,52125.000000,574.065504)}
{pt3dadd(163164.000000,210300.000000,52125.000000,599.024880)}
{pt3dadd(162864.000000,210600.000000,52075.000000,599.024880)}
{pt3dadd(162492.000000,210900.000000,52050.000000,599.024880)}
{pt3dadd(162216.000000,211200.000000,52050.000000,599.024880)}
{pt3dadd(161952.000000,211500.000000,52050.000000,499.187376)}

{create adhoc64}
{access adhoc64}
{connect adhoc64(1), adhoc63(0)}
{nseg = 1}
{strdef color color = "White"}
{pt3dclear()}
{pt3dadd(161952.000000,211500.000000,52050.000000,499.187376)}
{pt3dadd(161664.000000,211584.000000,52175.000000,499.187376)}
{pt3dadd(161376.000000,211068.000000,52500.000000,446.610929)}
{pt3dadd(161016.000000,210708.000000,52600.000000,394.034481)}
{pt3dadd(160668.000000,210672.000000,52850.000000,341.458034)}
{pt3dadd(160116.000000,210696.000000,52975.000000,288.881586)}
{pt3dadd(159696.000000,210756.000000,53175.000000,288.881586)}

{create adhoc65}
{access adhoc65}
{connect adhoc65(1), adhoc64(0)}
{nseg = 1}
{strdef color color = "White"}
{pt3dclear()}
{pt3dadd(159696.000000,210756.000000,53175.000000,288.881586)}
{pt3dadd(159540.000000,211404.000000,53975.000000,415.989486)}
{pt3dadd(159228.000000,211512.000000,54075.000000,373.620186)}
{pt3dadd(158916.000000,211836.000000,54600.000000,331.250886)}
{pt3dadd(158712.000000,212400.000000,54900.000000,288.881586)}
{pt3dadd(158436.000000,212976.000000,55250.000000,139.314042)}

{create adhoc66}
{access adhoc66}
{connect adhoc66(1), adhoc65(0)}
{nseg = 1}
{strdef color color = "White"}
{pt3dclear()}
{pt3dadd(158436.000000,212976.000000,55250.000000,139.314042)}
{pt3dadd(158256.000000,212544.000000,55475.000000,200.612214)}
{pt3dadd(158028.000000,212424.000000,55700.000000,192.253370)}
{pt3dadd(157836.000000,212376.000000,55925.000000,183.894525)}
{pt3dadd(157896.000000,212328.000000,56350.000000,175.535680)}
{pt3dadd(157908.000000,212220.000000,56525.000000,167.176836)}
{pt3dadd(157752.000000,212052.000000,56850.000000,240.734646)}

{create adhoc67}
{access adhoc67}
{connect adhoc67(1), adhoc66(0)}
{nseg = 1}
{strdef color color = "White"}
{pt3dclear()}
{pt3dadd(157752.000000,212052.000000,56850.000000,240.734646)}
{pt3dadd(158136.000000,212052.000000,56675.000000,116.095032)}
{pt3dadd(158412.000000,212052.000000,56725.000000,92.876040)}
{pt3dadd(158712.000000,212088.000000,56750.000000,167.176836)}

{create adhoc68}
{access adhoc68}
{connect adhoc68(1), adhoc66(0)}
{nseg = 1}
{strdef color color = "White"}
{pt3dclear()}
{pt3dadd(157752.000000,212052.000000,56850.000000,240.734646)}
{pt3dadd(157644.000000,211908.000000,57375.000000,277.326342)}

{create adhoc69}
{access adhoc69}
{connect adhoc69(1), adhoc68(0)}
{nseg = 1}
{strdef color color = "White"}
{pt3dclear()}
{pt3dadd(157644.000000,211908.000000,57375.000000,277.326342)}
{pt3dadd(157488.000000,211440.000000,57850.000000,200.612214)}

{create adhoc70}
{access adhoc70}
{connect adhoc70(1), adhoc69(0)}
{nseg = 1}
{strdef color color = "White"}
{pt3dclear()}
{pt3dadd(157488.000000,211440.000000,57850.000000,200.612214)}
{pt3dadd(157416.000000,211080.000000,57675.000000,116.095032)}
{pt3dadd(157332.000000,210660.000000,57650.000000,111.451230)}

{create adhoc71}
{access adhoc71}
{connect adhoc71(1), adhoc69(0)}
{nseg = 1}
{strdef color color = "White"}
{pt3dclear()}
{pt3dadd(157488.000000,211440.000000,57850.000000,200.612214)}
{pt3dadd(157536.000000,211536.000000,58050.000000,102.713454)}
{pt3dadd(157752.000000,211512.000000,58175.000000,116.095032)}

{create adhoc72}
{access adhoc72}
{connect adhoc72(1), adhoc68(0)}
{nseg = 1}
{strdef color color = "White"}
{pt3dclear()}
{pt3dadd(157644.000000,211908.000000,57375.000000,277.326342)}
{pt3dadd(157740.000000,212448.000000,57800.000000,133.741476)}
{pt3dadd(157632.000000,212628.000000,58100.000000,139.314042)}

{create adhoc73}
{access adhoc73}
{connect adhoc73(1), adhoc65(0)}
{nseg = 1}
{strdef color color = "White"}
{pt3dclear()}
{pt3dadd(158436.000000,212976.000000,55250.000000,139.314042)}
{pt3dadd(158136.000000,213864.000000,55350.000000,240.734646)}
{pt3dadd(157992.000000,214116.000000,55450.000000,240.734646)}
{pt3dadd(157740.000000,214296.000000,55775.000000,240.734646)}
{pt3dadd(157608.000000,214764.000000,56175.000000,240.734646)}
{pt3dadd(157596.000000,215004.000000,56250.000000,240.734646)}
{pt3dadd(157644.000000,215532.000000,56375.000000,240.734646)}
{pt3dadd(157620.000000,215652.000000,56375.000000,240.734646)}
{pt3dadd(157572.000000,215868.000000,56475.000000,240.734646)}
{pt3dadd(157452.000000,215988.000000,56650.000000,240.734646)}
{pt3dadd(157392.000000,216576.000000,56900.000000,220.673430)}
{pt3dadd(157212.000000,216888.000000,56975.000000,200.612214)}
{pt3dadd(157248.000000,217224.000000,57225.000000,277.326342)}

{create adhoc74}
{access adhoc74}
{connect adhoc74(1), adhoc73(0)}
{nseg = 1}
{strdef color color = "White"}
{pt3dclear()}
{pt3dadd(157248.000000,217224.000000,57225.000000,277.326342)}
{pt3dadd(157128.000000,217500.000000,57625.000000,96.745860)}
{pt3dadd(156984.000000,217848.000000,57850.000000,96.745860)}

{create adhoc75}
{access adhoc75}
{connect adhoc75(1), adhoc73(0)}
{nseg = 1}
{strdef color color = "White"}
{pt3dclear()}
{pt3dadd(157248.000000,217224.000000,57225.000000,277.326342)}
{pt3dadd(157524.000000,217740.000000,57350.000000,139.314042)}
{pt3dadd(157716.000000,217584.000000,56950.000000,127.704537)}
{pt3dadd(157752.000000,217584.000000,56750.000000,116.095032)}
{pt3dadd(157716.000000,217584.000000,56475.000000,116.095032)}

{create adhoc76}
{access adhoc76}
{connect adhoc76(1), adhoc64(0)}
{nseg = 1}
{strdef color color = "White"}
{pt3dclear()}
{pt3dadd(159696.000000,210756.000000,53175.000000,288.881586)}
{pt3dadd(159120.000000,210120.000000,52950.000000,139.314042)}
{pt3dadd(158844.000000,209940.000000,52950.000000,96.745860)}

{create adhoc77}
{access adhoc77}
{connect adhoc77(1), adhoc63(0)}
{nseg = 1}
{strdef color color = "White"}
{pt3dclear()}
{pt3dadd(161952.000000,211500.000000,52050.000000,499.187376)}
{pt3dadd(161256.000000,212532.000000,51775.000000,346.657896)}
{pt3dadd(161016.000000,213288.000000,51875.000000,472.841388)}
{pt3dadd(160716.000000,213684.000000,51425.000000,599.024880)}
{pt3dadd(160356.000000,213984.000000,51400.000000,718.829820)}

{create adhoc78}
{access adhoc78}
{connect adhoc78(1), adhoc77(0)}
{nseg = 1}
{strdef color color = "White"}
{pt3dclear()}
{pt3dadd(160356.000000,213984.000000,51400.000000,718.829820)}
{pt3dadd(160128.000000,214716.000000,51775.000000,415.989486)}
{pt3dadd(159732.000000,215268.000000,51825.000000,436.788958)}
{pt3dadd(159444.000000,215604.000000,51950.000000,457.588431)}
{pt3dadd(159216.000000,215868.000000,52125.000000,478.387903)}
{pt3dadd(159024.000000,216192.000000,52075.000000,499.187376)}
{pt3dadd(158916.000000,216444.000000,52300.000000,434.574193)}
{pt3dadd(158688.000000,217380.000000,52400.000000,369.961011)}
{pt3dadd(158388.000000,217968.000000,52600.000000,305.347828)}
{pt3dadd(158376.000000,218784.000000,52825.000000,240.734646)}
{pt3dadd(158184.000000,219768.000000,53175.000000,230.704038)}
{pt3dadd(157740.000000,220488.000000,53450.000000,220.673430)}
{pt3dadd(157284.000000,221400.000000,53825.000000,210.642822)}
{pt3dadd(157188.000000,222624.000000,54275.000000,200.612214)}
{pt3dadd(157164.000000,223920.000000,54475.000000,200.612214)}
{pt3dadd(156876.000000,225072.000000,54700.000000,200.612214)}
{pt3dadd(156828.000000,225780.000000,54725.000000,200.612214)}
{pt3dadd(156828.000000,226284.000000,54700.000000,200.612214)}
{pt3dadd(156696.000000,226740.000000,54775.000000,200.612214)}
{pt3dadd(156732.000000,227076.000000,54750.000000,200.612214)}

{create adhoc79}
{access adhoc79}
{connect adhoc79(1), adhoc77(0)}
{nseg = 1}
{strdef color color = "White"}
{pt3dclear()}
{pt3dadd(160356.000000,213984.000000,51400.000000,718.829820)}
{pt3dadd(159948.000000,213768.000000,50150.000000,288.881586)}
{pt3dadd(160032.000000,213252.000000,49675.000000,272.832606)}
{pt3dadd(160128.000000,212892.000000,49300.000000,256.783626)}
{pt3dadd(160212.000000,212628.000000,49000.000000,240.734646)}
{pt3dadd(160236.000000,212316.000000,48525.000000,346.657896)}

{create adhoc80}
{access adhoc80}
{connect adhoc80(1), adhoc79(0)}
{nseg = 1}
{strdef color color = "White"}
{pt3dclear()}
{pt3dadd(160236.000000,212316.000000,48525.000000,346.657896)}
{pt3dadd(160428.000000,212232.000000,47975.000000,415.989486)}
{pt3dadd(160608.000000,212424.000000,47525.000000,384.212511)}
{pt3dadd(160464.000000,212556.000000,47025.000000,352.435536)}
{pt3dadd(160464.000000,212580.000000,46575.000000,320.658561)}
{pt3dadd(160608.000000,212484.000000,46025.000000,288.881586)}
{pt3dadd(160884.000000,212748.000000,45450.000000,266.814243)}
{pt3dadd(161016.000000,212928.000000,44925.000000,244.746900)}
{pt3dadd(161460.000000,212796.000000,44550.000000,222.679557)}
{pt3dadd(161736.000000,212748.000000,44150.000000,200.612214)}
{pt3dadd(161904.000000,213024.000000,43775.000000,200.612214)}
{pt3dadd(162060.000000,213192.000000,43400.000000,200.612214)}
{pt3dadd(162408.000000,212976.000000,42975.000000,200.612214)}
{pt3dadd(162792.000000,212556.000000,42550.000000,200.612214)}
{pt3dadd(162924.000000,212400.000000,42400.000000,180.550998)}
{pt3dadd(163200.000000,212052.000000,42125.000000,160.489782)}
{pt3dadd(163440.000000,211824.000000,41875.000000,200.612214)}

{create adhoc81}
{access adhoc81}
{connect adhoc81(1), adhoc79(0)}
{nseg = 1}
{strdef color color = "White"}
{pt3dclear()}
{pt3dadd(160236.000000,212316.000000,48525.000000,346.657896)}
{pt3dadd(159780.000000,211896.000000,48400.000000,200.612214)}
{pt3dadd(159600.000000,211836.000000,48525.000000,165.990096)}
{pt3dadd(159408.000000,211596.000000,48475.000000,131.367978)}
{pt3dadd(159252.000000,211140.000000,48425.000000,96.745860)}
{pt3dadd(159072.000000,210624.000000,48175.000000,116.095032)}

{create adhoc82}
{access adhoc82}
{connect adhoc82(1), adhoc81(0)}
{nseg = 1}
{strdef color color = "White"}
{pt3dclear()}
{pt3dadd(159072.000000,210624.000000,48175.000000,116.095032)}
{pt3dadd(158820.000000,210612.000000,48225.000000,80.621550)}

{create adhoc83}
{access adhoc83}
{connect adhoc83(1), adhoc81(0)}
{nseg = 1}
{strdef color color = "White"}
{pt3dclear()}
{pt3dadd(159072.000000,210624.000000,48175.000000,116.095032)}
{pt3dadd(158988.000000,210204.000000,47900.000000,80.621550)}
{pt3dadd(158988.000000,210000.000000,47750.000000,110.619216)}
{pt3dadd(159036.000000,209640.000000,47525.000000,140.616882)}
{pt3dadd(159120.000000,209460.000000,47275.000000,170.614548)}
{pt3dadd(159372.000000,209268.000000,47125.000000,200.612214)}
{pt3dadd(159492.000000,209052.000000,46875.000000,116.095032)}

{create adhoc84}
{access adhoc84}
{connect adhoc84(1), adhoc45(0)}
{nseg = 1}
{strdef color color = "White"}
{pt3dclear()}
{pt3dadd(178740.000000,197388.000000,53725.000000,1035.114948)}
{pt3dadd(178740.000000,197616.000000,56675.000000,718.829820)}
{pt3dadd(178416.000000,197808.000000,57025.000000,682.888329)}
{pt3dadd(178020.000000,197976.000000,56925.000000,646.946838)}
{pt3dadd(177708.000000,198228.000000,56950.000000,611.005347)}
{pt3dadd(177360.000000,198312.000000,57125.000000,575.063856)}
{pt3dadd(177084.000000,198264.000000,57050.000000,581.054112)}
{pt3dadd(176832.000000,198216.000000,56975.000000,587.044368)}
{pt3dadd(176556.000000,198168.000000,57050.000000,593.034624)}
{pt3dadd(176292.000000,198252.000000,56975.000000,599.024880)}
{pt3dadd(175812.000000,198420.000000,57125.000000,564.281428)}
{pt3dadd(175464.000000,198588.000000,57275.000000,529.537977)}
{pt3dadd(175092.000000,198756.000000,57425.000000,494.794525)}
{pt3dadd(174684.000000,198684.000000,57175.000000,460.051074)}
{pt3dadd(174276.000000,198804.000000,57425.000000,524.745760)}
{pt3dadd(174000.000000,198888.000000,57500.000000,589.440447)}
{pt3dadd(173640.000000,198972.000000,57575.000000,654.135133)}
{pt3dadd(173376.000000,199140.000000,57425.000000,718.829820)}
{pt3dadd(173076.000000,199308.000000,57700.000000,718.829820)}
{pt3dadd(172824.000000,199392.000000,57500.000000,718.829820)}
{pt3dadd(172512.000000,199452.000000,57625.000000,718.829820)}
{pt3dadd(172212.000000,199572.000000,57750.000000,718.829820)}
{pt3dadd(171972.000000,199608.000000,57950.000000,718.829820)}
{pt3dadd(171624.000000,199728.000000,57875.000000,718.829820)}
{pt3dadd(171300.000000,199704.000000,57875.000000,718.829820)}
{pt3dadd(171000.000000,199764.000000,58100.000000,718.829820)}
{pt3dadd(170688.000000,200016.000000,58075.000000,718.829820)}
{pt3dadd(170364.000000,199944.000000,57875.000000,718.829820)}
{pt3dadd(170040.000000,200088.000000,58125.000000,718.829820)}
{pt3dadd(169716.000000,200148.000000,58100.000000,718.829820)}
{pt3dadd(169332.000000,200208.000000,58100.000000,718.829820)}
{pt3dadd(168948.000000,200268.000000,58100.000000,718.829820)}
{pt3dadd(168540.000000,200496.000000,58175.000000,718.829820)}
{pt3dadd(168204.000000,200616.000000,58350.000000,718.829820)}
{pt3dadd(167832.000000,200700.000000,58575.000000,754.771316)}
{pt3dadd(167532.000000,200820.000000,58650.000000,790.712811)}
{pt3dadd(167196.000000,200748.000000,58700.000000,826.654307)}
{pt3dadd(166860.000000,200892.000000,58750.000000,862.595802)}
{pt3dadd(166476.000000,201084.000000,58875.000000,826.654307)}
{pt3dadd(166092.000000,201120.000000,58700.000000,790.712811)}
{pt3dadd(165732.000000,201048.000000,58850.000000,754.771316)}
{pt3dadd(165432.000000,200976.000000,59000.000000,718.829820)}
{pt3dadd(165072.000000,200904.000000,59150.000000,828.091944)}
{pt3dadd(164688.000000,200988.000000,59275.000000,862.595802)}

{create adhoc85}
{access adhoc85}
{connect adhoc85(1), adhoc84(0)}
{nseg = 1}
{strdef color color = "White"}
{pt3dclear()}
{pt3dadd(164688.000000,200988.000000,59275.000000,862.595802)}
{pt3dadd(164256.000000,201072.000000,59400.000000,1035.114948)}
{pt3dadd(163800.000000,201156.000000,60050.000000,599.024880)}

{create adhoc86}
{access adhoc86}
{connect adhoc86(1), adhoc85(0)}
{nseg = 1}
{strdef color color = "White"}
{pt3dclear()}
{pt3dadd(163800.000000,201156.000000,60050.000000,599.024880)}
{pt3dadd(163008.000000,200136.000000,61200.000000,415.989486)}

{create adhoc87}
{access adhoc87}
{connect adhoc87(1), adhoc86(0)}
{nseg = 1}
{strdef color color = "White"}
{pt3dclear()}
{pt3dadd(163008.000000,200136.000000,61200.000000,415.989486)}
{pt3dadd(162408.000000,200628.000000,61025.000000,167.176836)}
{pt3dadd(162288.000000,200556.000000,61025.000000,131.961348)}
{pt3dadd(162108.000000,200688.000000,61000.000000,96.745860)}
{pt3dadd(161748.000000,200856.000000,60925.000000,96.745860)}

{create adhoc88}
{access adhoc88}
{connect adhoc88(1), adhoc86(0)}
{nseg = 1}
{strdef color color = "White"}
{pt3dclear()}
{pt3dadd(163008.000000,200136.000000,61200.000000,415.989486)}
{pt3dadd(162624.000000,199044.000000,61425.000000,346.657896)}

{create adhoc89}
{access adhoc89}
{connect adhoc89(1), adhoc88(0)}
{nseg = 1}
{strdef color color = "White"}
{pt3dclear()}
{pt3dadd(162624.000000,199044.000000,61425.000000,346.657896)}
{pt3dadd(162432.000000,199092.000000,61550.000000,116.095032)}
{pt3dadd(162144.000000,199092.000000,61650.000000,98.358291)}
{pt3dadd(162000.000000,199140.000000,61675.000000,80.621550)}
{pt3dadd(161892.000000,199152.000000,61700.000000,96.745860)}

{create adhoc90}
{access adhoc90}
{connect adhoc90(1), adhoc88(0)}
{nseg = 1}
{strdef color color = "White"}
{pt3dclear()}
{pt3dadd(162624.000000,199044.000000,61425.000000,346.657896)}
{pt3dadd(162384.000000,198528.000000,60900.000000,200.612214)}
{pt3dadd(162336.000000,198240.000000,60650.000000,231.105276)}
{pt3dadd(162156.000000,198084.000000,60500.000000,240.734646)}

{create adhoc91}
{access adhoc91}
{connect adhoc91(1), adhoc90(0)}
{nseg = 1}
{strdef color color = "White"}
{pt3dclear()}
{pt3dadd(162156.000000,198084.000000,60500.000000,240.734646)}
{pt3dadd(162468.000000,198084.000000,60075.000000,116.095032)}
{pt3dadd(162708.000000,198168.000000,59975.000000,96.745860)}

{create adhoc92}
{access adhoc92}
{connect adhoc92(1), adhoc90(0)}
{nseg = 1}
{strdef color color = "White"}
{pt3dclear()}
{pt3dadd(162156.000000,198084.000000,60500.000000,240.734646)}
{pt3dadd(162000.000000,197520.000000,60250.000000,139.314042)}
{pt3dadd(161532.000000,196572.000000,59975.000000,133.509289)}
{pt3dadd(161484.000000,196260.000000,59800.000000,127.704537)}
{pt3dadd(161796.000000,195516.000000,59800.000000,121.899785)}
{pt3dadd(161880.000000,195372.000000,59800.000000,116.095032)}
{pt3dadd(162036.000000,195204.000000,59725.000000,110.290284)}
{pt3dadd(162168.000000,195060.000000,59675.000000,104.485536)}
{pt3dadd(162216.000000,194856.000000,59575.000000,98.680788)}
{pt3dadd(162396.000000,194712.000000,59575.000000,92.876040)}
{pt3dadd(162492.000000,194448.000000,59550.000000,116.095032)}

{create adhoc93}
{access adhoc93}
{connect adhoc93(1), adhoc88(0)}
{nseg = 1}
{strdef color color = "White"}
{pt3dclear()}
{pt3dadd(162624.000000,199044.000000,61425.000000,346.657896)}
{pt3dadd(163068.000000,197868.000000,61725.000000,240.734646)}
{pt3dadd(163236.000000,197004.000000,62225.000000,346.657896)}

{create adhoc94}
{access adhoc94}
{connect adhoc94(1), adhoc93(0)}
{nseg = 1}
{strdef color color = "White"}
{pt3dclear()}
{pt3dadd(163236.000000,197004.000000,62225.000000,346.657896)}
{pt3dadd(163764.000000,195624.000000,61975.000000,167.176836)}

{create adhoc95}
{access adhoc95}
{connect adhoc95(1), adhoc94(0)}
{nseg = 1}
{strdef color color = "White"}
{pt3dclear()}
{pt3dadd(163764.000000,195624.000000,61975.000000,167.176836)}
{pt3dadd(163476.000000,195336.000000,61675.000000,96.745860)}
{pt3dadd(163392.000000,195336.000000,61625.000000,67.184640)}
{pt3dadd(163428.000000,195048.000000,61350.000000,96.745860)}

{create adhoc96}
{access adhoc96}
{connect adhoc96(1), adhoc94(0)}
{nseg = 1}
{strdef color color = "White"}
{pt3dclear()}
{pt3dadd(163764.000000,195624.000000,61975.000000,167.176836)}
{pt3dadd(164244.000000,194736.000000,61575.000000,200.612214)}

{create adhoc97}
{access adhoc97}
{connect adhoc97(1), adhoc96(0)}
{nseg = 1}
{strdef color color = "White"}
{pt3dclear()}
{pt3dadd(164244.000000,194736.000000,61575.000000,200.612214)}
{pt3dadd(164280.000000,194580.000000,62000.000000,139.314042)}
{pt3dadd(164832.000000,194268.000000,62100.000000,139.314042)}
{pt3dadd(165408.000000,193908.000000,61975.000000,139.314042)}
{pt3dadd(165264.000000,193836.000000,61675.000000,139.314042)}
{pt3dadd(165180.000000,193608.000000,61325.000000,139.314042)}

{create adhoc98}
{access adhoc98}
{connect adhoc98(1), adhoc96(0)}
{nseg = 1}
{strdef color color = "White"}
{pt3dclear()}
{pt3dadd(164244.000000,194736.000000,61575.000000,200.612214)}
{pt3dadd(164436.000000,194592.000000,61350.000000,116.095032)}
{pt3dadd(164928.000000,194544.000000,60900.000000,116.095032)}

{create adhoc99}
{access adhoc99}
{connect adhoc99(1), adhoc93(0)}
{nseg = 1}
{strdef color color = "White"}
{pt3dclear()}
{pt3dadd(163236.000000,197004.000000,62225.000000,346.657896)}
{pt3dadd(163392.000000,197040.000000,62600.000000,499.187376)}
{pt3dadd(163428.000000,197184.000000,63050.000000,422.922636)}
{pt3dadd(163740.000000,197232.000000,63425.000000,346.657896)}
{pt3dadd(164064.000000,197160.000000,63750.000000,288.881586)}

{create adhoc100}
{access adhoc100}
{connect adhoc100(1), adhoc99(0)}
{nseg = 1}
{strdef color color = "White"}
{pt3dclear()}
{pt3dadd(164064.000000,197160.000000,63750.000000,288.881586)}
{pt3dadd(164688.000000,196608.000000,64150.000000,288.881586)}
{pt3dadd(164796.000000,196620.000000,64500.000000,248.313336)}
{pt3dadd(165096.000000,196488.000000,64875.000000,207.745086)}
{pt3dadd(165564.000000,195900.000000,64875.000000,167.176836)}
{pt3dadd(165768.000000,195876.000000,64950.000000,200.612214)}

{create adhoc101}
{access adhoc101}
{connect adhoc101(1), adhoc100(0)}
{nseg = 1}
{strdef color color = "White"}
{pt3dclear()}
{pt3dadd(165768.000000,195876.000000,64950.000000,200.612214)}
{pt3dadd(166032.000000,195396.000000,64925.000000,167.176836)}
{pt3dadd(166284.000000,195060.000000,65025.000000,167.176836)}
{pt3dadd(166560.000000,194820.000000,65100.000000,167.176836)}
{pt3dadd(166428.000000,194316.000000,64825.000000,167.176836)}
{pt3dadd(166500.000000,194208.000000,64625.000000,200.612214)}

{create adhoc102}
{access adhoc102}
{connect adhoc102(1), adhoc100(0)}
{nseg = 1}
{strdef color color = "White"}
{pt3dclear()}
{pt3dadd(165768.000000,195876.000000,64950.000000,200.612214)}
{pt3dadd(166080.000000,196164.000000,65125.000000,139.314042)}
{pt3dadd(166344.000000,196248.000000,65275.000000,109.967796)}
{pt3dadd(166440.000000,196380.000000,65325.000000,80.621550)}
{pt3dadd(166608.000000,196320.000000,65475.000000,167.176836)}

{create adhoc103}
{access adhoc103}
{connect adhoc103(1), adhoc99(0)}
{nseg = 1}
{strdef color color = "White"}
{pt3dclear()}
{pt3dadd(164064.000000,197160.000000,63750.000000,288.881586)}
{pt3dadd(164328.000000,197244.000000,64050.000000,288.881586)}
{pt3dadd(164244.000000,197688.000000,64350.000000,352.435536)}
{pt3dadd(164472.000000,197988.000000,64600.000000,415.989486)}
{pt3dadd(164640.000000,197940.000000,65050.000000,167.176836)}

{create adhoc104}
{access adhoc104}
{connect adhoc104(1), adhoc85(0)}
{nseg = 1}
{strdef color color = "White"}
{pt3dclear()}
{pt3dadd(163800.000000,201156.000000,60050.000000,599.024880)}
{pt3dadd(163056.000000,201996.000000,60325.000000,415.989486)}
{pt3dadd(162840.000000,202584.000000,60275.000000,411.829601)}
{pt3dadd(162480.000000,203160.000000,60475.000000,407.669715)}
{pt3dadd(162120.000000,203712.000000,60575.000000,403.509830)}
{pt3dadd(161820.000000,204336.000000,60950.000000,399.349944)}
{pt3dadd(161724.000000,204612.000000,61250.000000,334.340969)}
{pt3dadd(161676.000000,204696.000000,61525.000000,269.331993)}
{pt3dadd(161160.000000,205344.000000,61725.000000,204.323017)}
{pt3dadd(160944.000000,205752.000000,62000.000000,139.314042)}
{pt3dadd(160788.000000,205896.000000,62250.000000,133.509289)}
{pt3dadd(160692.000000,206112.000000,62625.000000,127.704537)}
{pt3dadd(160608.000000,206136.000000,63075.000000,121.899785)}
{pt3dadd(160920.000000,206052.000000,63450.000000,116.095032)}
{pt3dadd(161220.000000,205896.000000,63875.000000,111.257739)}
{pt3dadd(161544.000000,205644.000000,64225.000000,106.420446)}
{pt3dadd(161988.000000,205560.000000,63900.000000,101.583153)}
{pt3dadd(162180.000000,205644.000000,63975.000000,96.745860)}
{pt3dadd(162192.000000,205908.000000,64275.000000,106.420446)}
{pt3dadd(162408.000000,205968.000000,64475.000000,116.095032)}
{pt3dadd(162612.000000,205932.000000,64575.000000,80.621550)}

{create adhoc105}
{access adhoc105}
{connect adhoc105(1), adhoc84(0)}
{nseg = 1}
{strdef color color = "White"}
{pt3dclear()}
{pt3dadd(164688.000000,200988.000000,59275.000000,862.595802)}
{pt3dadd(163704.000000,201048.000000,58400.000000,599.024880)}
{pt3dadd(163356.000000,200808.000000,58375.000000,599.024880)}
{pt3dadd(162996.000000,201036.000000,58175.000000,599.024880)}
{pt3dadd(162612.000000,201096.000000,58200.000000,599.024880)}
{pt3dadd(162336.000000,201432.000000,58175.000000,599.024880)}
{pt3dadd(162060.000000,201660.000000,58175.000000,574.065504)}
{pt3dadd(161784.000000,201696.000000,58100.000000,549.106128)}
{pt3dadd(161580.000000,201948.000000,57850.000000,524.146752)}
{pt3dadd(161220.000000,202224.000000,57675.000000,499.187376)}
{pt3dadd(160992.000000,202308.000000,57525.000000,474.228009)}
{pt3dadd(160560.000000,202620.000000,57375.000000,449.268642)}
{pt3dadd(160260.000000,202848.000000,57350.000000,424.309275)}
{pt3dadd(159912.000000,203208.000000,57175.000000,399.349908)}
{pt3dadd(159528.000000,203352.000000,56100.000000,449.268651)}
{pt3dadd(159288.000000,203412.000000,54700.000000,499.187394)}
{pt3dadd(159300.000000,203580.000000,54300.000000,549.106137)}
{pt3dadd(159096.000000,203316.000000,53700.000000,599.024880)}
{pt3dadd(159036.000000,203376.000000,53000.000000,463.545840)}
{pt3dadd(158448.000000,203508.000000,52575.000000,328.066800)}
{pt3dadd(158568.000000,203112.000000,52025.000000,192.587760)}
{pt3dadd(158664.000000,203076.000000,51850.000000,167.176836)}

{create adhoc106}
{access adhoc106}
{connect adhoc106(1), adhoc1(0)}
{nseg = 1}
{strdef color color = "White"}
{pt3dclear()}
{pt3dadd(187656.000000,199716.000000,70125.000000,2060.557668)}
{pt3dadd(187548.000000,199848.000000,70400.000000,2146.414176)}
{pt3dadd(187404.000000,200388.000000,71000.000000,2146.414176)}
{pt3dadd(187284.000000,200820.000000,71750.000000,2146.414176)}
{pt3dadd(187488.000000,201168.000000,72375.000000,2146.414176)}
{pt3dadd(187692.000000,201384.000000,72875.000000,2146.414176)}
{pt3dadd(187956.000000,201216.000000,73750.000000,2575.697112)}

{create adhoc107}
{access adhoc107}
{connect adhoc107(1), adhoc106(0)}
{nseg = 1}
{strdef color color = "White"}
{pt3dclear()}
{pt3dadd(187956.000000,201216.000000,73750.000000,2575.697112)}
{pt3dadd(188304.000000,201276.000000,74250.000000,2575.697112)}
{pt3dadd(188628.000000,201192.000000,75175.000000,2468.376378)}
{pt3dadd(188832.000000,201276.000000,75950.000000,2361.055644)}
{pt3dadd(189468.000000,201108.000000,76550.000000,2253.734910)}
{pt3dadd(189648.000000,201456.000000,77275.000000,2146.414176)}
{pt3dadd(189828.000000,201612.000000,78150.000000,2253.734910)}
{pt3dadd(189816.000000,201552.000000,78750.000000,2361.055644)}
{pt3dadd(189912.000000,201732.000000,79375.000000,2468.376378)}
{pt3dadd(190200.000000,201504.000000,79900.000000,2575.697112)}
{pt3dadd(190296.000000,201684.000000,80525.000000,2575.697112)}
{pt3dadd(190560.000000,201948.000000,81050.000000,2575.697112)}
{pt3dadd(190800.000000,201588.000000,81525.000000,2575.697112)}
{pt3dadd(190980.000000,201444.000000,82025.000000,2575.697112)}
{pt3dadd(191376.000000,201300.000000,82625.000000,2575.697112)}
{pt3dadd(191724.000000,201240.000000,83350.000000,2575.697112)}
{pt3dadd(191856.000000,201528.000000,84025.000000,2575.697112)}
{pt3dadd(191952.000000,201552.000000,84675.000000,2575.697112)}
{pt3dadd(192048.000000,201588.000000,85350.000000,2704.481942)}
{pt3dadd(192180.000000,201516.000000,86125.000000,2833.266771)}
{pt3dadd(192504.000000,201288.000000,86850.000000,2962.051600)}
{pt3dadd(192684.000000,201036.000000,87675.000000,3090.836430)}
{pt3dadd(192816.000000,200976.000000,88475.000000,3090.836430)}
{pt3dadd(192864.000000,201216.000000,88975.000000,3090.836430)}
{pt3dadd(192960.000000,201024.000000,89625.000000,3090.836430)}
{pt3dadd(192984.000000,201012.000000,90150.000000,3090.836430)}
{pt3dadd(193008.000000,201084.000000,90925.000000,3090.836430)}
{pt3dadd(193056.000000,201156.000000,91575.000000,3090.836430)}
{pt3dadd(193128.000000,200976.000000,91725.000000,3090.836430)}
{pt3dadd(193416.000000,200856.000000,92475.000000,3090.836430)}
{pt3dadd(193596.000000,200820.000000,93275.000000,2962.051600)}
{pt3dadd(193752.000000,200808.000000,94225.000000,2833.266771)}
{pt3dadd(193452.000000,200688.000000,95125.000000,2704.481942)}
{pt3dadd(193368.000000,200820.000000,95925.000000,2575.697112)}
{pt3dadd(192900.000000,201000.000000,96650.000000,2575.697112)}
{pt3dadd(192192.000000,201132.000000,97425.000000,2575.697112)}
{pt3dadd(191856.000000,201072.000000,98000.000000,2575.697112)}
{pt3dadd(191664.000000,201012.000000,98650.000000,2575.697112)}
{pt3dadd(191628.000000,201192.000000,99375.000000,2575.697112)}
{pt3dadd(191400.000000,201132.000000,99950.000000,2575.697112)}
{pt3dadd(191040.000000,201228.000000,100725.000000,2575.697112)}
{pt3dadd(191064.000000,200760.000000,101450.000000,2575.697112)}
{pt3dadd(190704.000000,200424.000000,102200.000000,2378.942446)}
{pt3dadd(190692.000000,200256.000000,102925.000000,2182.187781)}
{pt3dadd(190548.000000,199920.000000,103425.000000,1985.433116)}
{pt3dadd(190356.000000,199488.000000,103900.000000,1788.678450)}
{pt3dadd(189864.000000,199044.000000,104550.000000,1878.112382)}
{pt3dadd(189720.000000,198900.000000,105425.000000,1967.546313)}
{pt3dadd(189720.000000,198732.000000,106150.000000,2056.980245)}
{pt3dadd(189720.000000,198204.000000,106850.000000,2146.414176)}
{pt3dadd(189444.000000,197892.000000,107650.000000,2146.414176)}
{pt3dadd(189492.000000,197700.000000,108375.000000,2146.414176)}
{pt3dadd(189024.000000,197016.000000,108900.000000,2146.414176)}
{pt3dadd(188880.000000,197040.000000,109575.000000,2146.414176)}
{pt3dadd(188712.000000,196248.000000,110225.000000,1920.345102)}
{pt3dadd(188484.000000,195996.000000,111050.000000,1694.276028)}
{pt3dadd(188400.000000,195828.000000,111700.000000,1468.206954)}
{pt3dadd(188124.000000,195228.000000,111925.000000,1242.137880)}
{pt3dadd(187656.000000,194544.000000,112600.000000,1304.244761)}
{pt3dadd(187404.000000,193968.000000,113325.000000,1366.351641)}
{pt3dadd(186912.000000,193224.000000,113975.000000,1428.458522)}
{pt3dadd(186936.000000,193164.000000,114725.000000,1490.565402)}
{pt3dadd(186624.000000,192396.000000,115350.000000,1324.947038)}
{pt3dadd(186132.000000,191916.000000,116025.000000,1159.328673)}
{pt3dadd(185640.000000,191448.000000,116700.000000,993.710309)}
{pt3dadd(185040.000000,190788.000000,117325.000000,828.091944)}
{pt3dadd(184368.000000,189936.000000,117825.000000,836.717909)}
{pt3dadd(183804.000000,189336.000000,118375.000000,845.343873)}
{pt3dadd(183372.000000,188700.000000,118975.000000,853.969838)}
{pt3dadd(183216.000000,188124.000000,119600.000000,862.595802)}
{pt3dadd(182376.000000,186972.000000,120000.000000,862.595802)}
{pt3dadd(181992.000000,186120.000000,120675.000000,862.595802)}
{pt3dadd(181200.000000,185676.000000,121200.000000,862.595802)}
{pt3dadd(180960.000000,185184.000000,121400.000000,862.595802)}
{pt3dadd(180528.000000,184800.000000,121750.000000,862.595802)}
{pt3dadd(180120.000000,184464.000000,122025.000000,862.595802)}
{pt3dadd(179712.000000,184020.000000,122250.000000,862.595802)}
{pt3dadd(179316.000000,183744.000000,122450.000000,862.595802)}
{pt3dadd(178992.000000,183216.000000,122600.000000,862.595802)}
{pt3dadd(178608.000000,183132.000000,122950.000000,862.595802)}
{pt3dadd(178236.000000,182712.000000,122825.000000,862.595802)}
{pt3dadd(177864.000000,182244.000000,122850.000000,862.595802)}
{pt3dadd(177420.000000,182268.000000,123250.000000,853.969820)}
{pt3dadd(177144.000000,182016.000000,123300.000000,845.343837)}
{pt3dadd(176820.000000,181440.000000,123375.000000,836.717855)}
{pt3dadd(176292.000000,181188.000000,123625.000000,828.091872)}
{pt3dadd(175908.000000,180828.000000,123650.000000,836.717855)}
{pt3dadd(175380.000000,180516.000000,123700.000000,845.343837)}
{pt3dadd(175260.000000,180120.000000,123900.000000,853.969820)}
{pt3dadd(174516.000000,179676.000000,124200.000000,862.595802)}
{pt3dadd(174348.000000,179196.000000,124250.000000,862.595802)}
{pt3dadd(173688.000000,178956.000000,124925.000000,862.595802)}
{pt3dadd(173172.000000,178080.000000,125375.000000,862.595802)}
{pt3dadd(172548.000000,176688.000000,125800.000000,862.595802)}
{pt3dadd(171588.000000,175644.000000,126575.000000,796.703072)}
{pt3dadd(170844.000000,174792.000000,127250.000000,730.810341)}
{pt3dadd(169656.000000,173616.000000,127850.000000,664.917611)}
{pt3dadd(169164.000000,172680.000000,128350.000000,599.024880)}
{pt3dadd(168636.000000,172356.000000,128550.000000,628.976115)}
{pt3dadd(168216.000000,172020.000000,128925.000000,658.927350)}
{pt3dadd(167796.000000,171660.000000,129300.000000,688.878585)}
{pt3dadd(167460.000000,171168.000000,129525.000000,718.829820)}
{pt3dadd(167124.000000,170736.000000,129750.000000,718.829820)}
{pt3dadd(166788.000000,170388.000000,129950.000000,718.829820)}
{pt3dadd(166452.000000,170004.000000,130150.000000,718.829820)}
{pt3dadd(166608.000000,169680.000000,130075.000000,718.829820)}
{pt3dadd(166164.000000,169176.000000,130575.000000,746.145369)}
{pt3dadd(165672.000000,168612.000000,130850.000000,773.460918)}
{pt3dadd(165360.000000,168096.000000,130950.000000,800.776467)}
{pt3dadd(165000.000000,167796.000000,131300.000000,828.092016)}
{pt3dadd(164916.000000,167436.000000,131400.000000,836.717962)}
{pt3dadd(164388.000000,167028.000000,131900.000000,845.343909)}
{pt3dadd(164244.000000,166536.000000,131900.000000,853.969856)}
{pt3dadd(164100.000000,166200.000000,131900.000000,862.595802)}
{pt3dadd(163716.000000,166056.000000,132425.000000,895.374441)}
{pt3dadd(163356.000000,165492.000000,132375.000000,928.153080)}
{pt3dadd(163128.000000,164952.000000,132625.000000,960.931719)}
{pt3dadd(162276.000000,164640.000000,132825.000000,993.710358)}
{pt3dadd(161424.000000,164136.000000,133375.000000,1004.061506)}
{pt3dadd(160716.000000,163764.000000,133425.000000,1014.412653)}
{pt3dadd(160848.000000,163392.000000,133225.000000,1024.763801)}
{pt3dadd(160296.000000,163152.000000,133450.000000,1035.114948)}
{pt3dadd(159876.000000,162708.000000,133375.000000,983.359197)}
{pt3dadd(159384.000000,162396.000000,133775.000000,931.603446)}
{pt3dadd(158508.000000,161196.000000,134500.000000,879.847695)}
{pt3dadd(157716.000000,159288.000000,135275.000000,828.091944)}
{pt3dadd(157392.000000,158280.000000,135825.000000,828.091962)}
{pt3dadd(157392.000000,157680.000000,136525.000000,828.091980)}
{pt3dadd(157356.000000,156996.000000,137250.000000,828.091998)}
{pt3dadd(157296.000000,157020.000000,137750.000000,828.092016)}
{pt3dadd(158352.000000,156900.000000,137975.000000,770.825232)}
{pt3dadd(158904.000000,156456.000000,138600.000000,713.558448)}
{pt3dadd(158304.000000,157104.000000,139200.000000,656.291664)}
{pt3dadd(157152.000000,157428.000000,139750.000000,599.024880)}
{pt3dadd(156576.000000,156852.000000,140500.000000,896.438273)}
{pt3dadd(156300.000000,157224.000000,141150.000000,1193.851665)}
{pt3dadd(155988.000000,157080.000000,141625.000000,1491.265058)}
{pt3dadd(156036.000000,156888.000000,142250.000000,1788.678450)}
{pt3dadd(156192.000000,157020.000000,142900.000000,1788.678450)}
{pt3dadd(156120.000000,156552.000000,143475.000000,1788.678450)}
{pt3dadd(156072.000000,156276.000000,143950.000000,1788.678450)}
{pt3dadd(156036.000000,156000.000000,144600.000000,1788.678450)}
{pt3dadd(156168.000000,155364.000000,145275.000000,1714.150188)}
{pt3dadd(155988.000000,155004.000000,145800.000000,1639.621926)}
{pt3dadd(156060.000000,154644.000000,146275.000000,1565.093664)}
{pt3dadd(156024.000000,154356.000000,146700.000000,1490.565402)}
{pt3dadd(155976.000000,153768.000000,147075.000000,1490.565402)}
{pt3dadd(155856.000000,153252.000000,147375.000000,1490.565402)}
{pt3dadd(155772.000000,152676.000000,147725.000000,1490.565402)}
{pt3dadd(155712.000000,152208.000000,148000.000000,1490.565402)}
{pt3dadd(155640.000000,151644.000000,148750.000000,1565.093664)}
{pt3dadd(155556.000000,151248.000000,149000.000000,1639.621926)}
{pt3dadd(155580.000000,150732.000000,149525.000000,1714.150188)}
{pt3dadd(155220.000000,150324.000000,149475.000000,1788.678450)}
{pt3dadd(154992.000000,150096.000000,150075.000000,1878.112382)}
{pt3dadd(154656.000000,149460.000000,150650.000000,1967.546313)}
{pt3dadd(154536.000000,148500.000000,151175.000000,2056.980245)}
{pt3dadd(154356.000000,147924.000000,152025.000000,2146.414176)}
{pt3dadd(154104.000000,147564.000000,152350.000000,2351.611422)}
{pt3dadd(154200.000000,147060.000000,153400.000000,2556.808668)}
{pt3dadd(153516.000000,146652.000000,155250.000000,2762.005914)}
{pt3dadd(153384.000000,146760.000000,156975.000000,2967.203160)}
{pt3dadd(152772.000000,146748.000000,158100.000000,2869.326648)}
{pt3dadd(151644.000000,146028.000000,159600.000000,2771.450136)}
{pt3dadd(151476.000000,144756.000000,161075.000000,2673.573624)}
{pt3dadd(151692.000000,144216.000000,162450.000000,2575.697112)}
{pt3dadd(152340.000000,143640.000000,163625.000000,2575.697112)}
{pt3dadd(152700.000000,143736.000000,164150.000000,2575.697112)}
{pt3dadd(153372.000000,143088.000000,165375.000000,2575.697112)}
{pt3dadd(153792.000000,141624.000000,166400.000000,2575.697112)}
{pt3dadd(153984.000000,141240.000000,166775.000000,1296.848556)}
{pt3dadd(153708.000000,141324.000000,167025.000000,18.000000)}
{pt3dadd(154056.000000,140736.000000,167700.000000,1296.848556)}
{pt3dadd(154020.000000,140700.000000,168325.000000,2575.697112)}
{pt3dadd(154008.000000,140424.000000,169000.000000,2615.416398)}
{pt3dadd(153804.000000,140016.000000,169500.000000,2655.135684)}
{pt3dadd(153888.000000,139380.000000,170850.000000,2694.854970)}
{pt3dadd(153612.000000,138876.000000,172275.000000,2734.574256)}
{pt3dadd(153552.000000,138372.000000,173675.000000,2693.083356)}
{pt3dadd(152016.000000,137892.000000,174925.000000,2651.592456)}
{pt3dadd(152172.000000,137112.000000,176175.000000,2610.101556)}
{pt3dadd(152016.000000,136812.000000,177350.000000,2568.610656)}
{pt3dadd(151572.000000,136536.000000,178475.000000,2544.625305)}
{pt3dadd(151320.000000,136008.000000,179525.000000,2520.639954)}
{pt3dadd(150936.000000,135348.000000,180625.000000,2496.654603)}
{pt3dadd(150804.000000,135204.000000,181525.000000,2472.669252)}
{pt3dadd(150348.000000,134712.000000,182725.000000,2575.697112)}

{create adhoc108}
{access adhoc108}
{connect adhoc108(1), adhoc106(0)}
{nseg = 1}
{strdef color color = "White"}
{pt3dclear()}
{pt3dadd(187956.000000,201216.000000,73750.000000,2575.697112)}
{pt3dadd(183120.000000,204180.000000,73750.000000,499.187376)}
{pt3dadd(181740.000000,205596.000000,73925.000000,633.169269)}
{pt3dadd(180912.000000,206040.000000,73925.000000,767.151162)}
{pt3dadd(180432.000000,206556.000000,74550.000000,901.133055)}
{pt3dadd(179376.000000,207300.000000,75225.000000,1035.114948)}
{pt3dadd(178380.000000,207996.000000,75525.000000,956.043666)}
{pt3dadd(178044.000000,208440.000000,76225.000000,876.972384)}
{pt3dadd(177780.000000,208608.000000,76525.000000,797.901102)}
{pt3dadd(177504.000000,208608.000000,76600.000000,718.829820)}
{pt3dadd(177180.000000,209004.000000,76800.000000,677.137684)}
{pt3dadd(176832.000000,209184.000000,77025.000000,635.445549)}
{pt3dadd(176568.000000,209352.000000,77275.000000,593.753413)}
{pt3dadd(176268.000000,209628.000000,77475.000000,552.061278)}
{pt3dadd(175980.000000,209724.000000,77550.000000,563.802178)}
{pt3dadd(175728.000000,209820.000000,77675.000000,575.543079)}
{pt3dadd(175476.000000,209964.000000,77925.000000,587.283979)}
{pt3dadd(175212.000000,210132.000000,78125.000000,599.024880)}
{pt3dadd(174912.000000,210264.000000,78125.000000,621.787828)}
{pt3dadd(174588.000000,210504.000000,78250.000000,644.550777)}
{pt3dadd(174360.000000,210408.000000,78425.000000,667.313725)}
{pt3dadd(174096.000000,210588.000000,78625.000000,690.076674)}
{pt3dadd(173844.000000,210624.000000,78750.000000,661.323469)}
{pt3dadd(173556.000000,210792.000000,78975.000000,632.570265)}
{pt3dadd(173316.000000,210792.000000,79025.000000,603.817061)}
{pt3dadd(173088.000000,210792.000000,79100.000000,575.063856)}
{pt3dadd(172836.000000,210960.000000,79125.000000,613.401462)}
{pt3dadd(172560.000000,211032.000000,79200.000000,651.739068)}
{pt3dadd(172332.000000,210996.000000,79325.000000,690.076674)}
{pt3dadd(172128.000000,211176.000000,79425.000000,575.063856)}

{create adhoc109}
{access adhoc109}
{connect adhoc109(1), adhoc108(0)}
{nseg = 1}
{strdef color color = "White"}
{pt3dclear()}
{pt3dadd(172128.000000,211176.000000,79425.000000,575.063856)}
{pt3dadd(171888.000000,211224.000000,79500.000000,499.187376)}
{pt3dadd(171480.000000,211968.000000,79825.000000,524.146752)}
{pt3dadd(171144.000000,212316.000000,80000.000000,549.106128)}
{pt3dadd(171012.000000,212580.000000,79850.000000,574.065504)}
{pt3dadd(170880.000000,212796.000000,80050.000000,599.024880)}
{pt3dadd(170856.000000,213048.000000,80325.000000,574.065504)}
{pt3dadd(170724.000000,213300.000000,80400.000000,549.106128)}
{pt3dadd(170592.000000,213564.000000,80475.000000,524.146752)}
{pt3dadd(170520.000000,213804.000000,80650.000000,499.187376)}
{pt3dadd(170448.000000,214128.000000,80825.000000,549.106128)}
{pt3dadd(170124.000000,214404.000000,80875.000000,599.024880)}
{pt3dadd(170100.000000,214680.000000,81075.000000,552.061314)}

{create adhoc110}
{access adhoc110}
{connect adhoc110(1), adhoc109(0)}
{nseg = 1}
{strdef color color = "White"}
{pt3dclear()}
{pt3dadd(170100.000000,214680.000000,81075.000000,552.061314)}
{pt3dadd(170076.000000,214956.000000,81250.000000,575.063856)}
{pt3dadd(170004.000000,215208.000000,81250.000000,556.094736)}
{pt3dadd(169932.000000,215424.000000,81250.000000,537.125616)}
{pt3dadd(169860.000000,215736.000000,81250.000000,518.156496)}
{pt3dadd(169812.000000,216012.000000,81375.000000,499.187376)}
{pt3dadd(169788.000000,216264.000000,81500.000000,499.187376)}
{pt3dadd(169716.000000,216552.000000,81675.000000,499.187376)}
{pt3dadd(169476.000000,216804.000000,81750.000000,499.187376)}
{pt3dadd(169452.000000,217656.000000,82200.000000,499.187376)}
{pt3dadd(169080.000000,218808.000000,82600.000000,499.187376)}
{pt3dadd(168696.000000,219816.000000,83100.000000,399.349908)}

{create adhoc111}
{access adhoc111}
{connect adhoc111(1), adhoc110(0)}
{nseg = 1}
{strdef color color = "White"}
{pt3dclear()}
{pt3dadd(168696.000000,219816.000000,83100.000000,399.349908)}
{pt3dadd(169284.000000,219204.000000,83825.000000,718.829820)}
{pt3dadd(169512.000000,219348.000000,84350.000000,704.453247)}
{pt3dadd(169380.000000,219288.000000,84800.000000,690.076674)}
{pt3dadd(169524.000000,219264.000000,85225.000000,599.024880)}

{create adhoc112}
{access adhoc112}
{connect adhoc112(1), adhoc111(0)}
{nseg = 1}
{strdef color color = "White"}
{pt3dclear()}
{pt3dadd(169524.000000,219264.000000,85225.000000,599.024880)}
{pt3dadd(169824.000000,218676.000000,85700.000000,167.176836)}
{pt3dadd(169992.000000,218268.000000,85925.000000,142.178787)}
{pt3dadd(170112.000000,218016.000000,86125.000000,117.180738)}
{pt3dadd(170280.000000,217860.000000,86325.000000,92.182689)}
{pt3dadd(170484.000000,217716.000000,86275.000000,67.184640)}
{pt3dadd(170712.000000,217704.000000,86550.000000,110.572142)}
{pt3dadd(171192.000000,217452.000000,86675.000000,153.959643)}
{pt3dadd(171552.000000,217272.000000,86875.000000,197.347145)}
{pt3dadd(171720.000000,217344.000000,87100.000000,240.734646)}
{pt3dadd(171948.000000,217332.000000,87400.000000,139.314042)}
{pt3dadd(172212.000000,216780.000000,87550.000000,96.745860)}

{create adhoc113}
{access adhoc113}
{connect adhoc113(1), adhoc111(0)}
{nseg = 1}
{strdef color color = "White"}
{pt3dclear()}
{pt3dadd(169524.000000,219264.000000,85225.000000,599.024880)}
{pt3dadd(169728.000000,219780.000000,85725.000000,415.989486)}
{pt3dadd(169860.000000,219924.000000,86250.000000,431.797086)}
{pt3dadd(170256.000000,220344.000000,86750.000000,447.604686)}
{pt3dadd(170328.000000,220332.000000,86950.000000,463.412286)}
{pt3dadd(170688.000000,220644.000000,87400.000000,479.219886)}
{pt3dadd(171048.000000,220812.000000,87850.000000,485.875716)}
{pt3dadd(171228.000000,220944.000000,88325.000000,492.531546)}
{pt3dadd(171408.000000,221076.000000,88700.000000,499.187376)}
{pt3dadd(171588.000000,221208.000000,89175.000000,499.187376)}

{create adhoc114}
{access adhoc114}
{connect adhoc114(1), adhoc113(0)}
{nseg = 1}
{strdef color color = "White"}
{pt3dclear()}
{pt3dadd(171588.000000,221208.000000,89175.000000,499.187376)}
{pt3dadd(171900.000000,221256.000000,89600.000000,499.187376)}
{pt3dadd(172164.000000,221280.000000,90075.000000,499.187376)}
{pt3dadd(172260.000000,221196.000000,90600.000000,499.187376)}
{pt3dadd(172464.000000,221172.000000,91125.000000,499.187376)}

{create adhoc115}
{access adhoc115}
{connect adhoc115(1), adhoc114(0)}
{nseg = 1}
{strdef color color = "White"}
{pt3dclear()}
{pt3dadd(172464.000000,221172.000000,91125.000000,499.187376)}
{pt3dadd(173028.000000,221292.000000,91625.000000,610.535664)}
{pt3dadd(173124.000000,221556.000000,92200.000000,530.122144)}
{pt3dadd(174264.000000,220896.000000,93000.000000,449.708625)}
{pt3dadd(174432.000000,220524.000000,93075.000000,369.295105)}
{pt3dadd(174552.000000,220248.000000,93025.000000,288.881586)}
{pt3dadd(174672.000000,219984.000000,92975.000000,288.881586)}
{pt3dadd(174744.000000,219672.000000,93050.000000,288.881586)}
{pt3dadd(174708.000000,219324.000000,93125.000000,288.881586)}
{pt3dadd(174696.000000,219144.000000,93025.000000,288.881586)}
{pt3dadd(174816.000000,218808.000000,92900.000000,266.814243)}
{pt3dadd(174684.000000,218424.000000,92825.000000,244.746900)}
{pt3dadd(174624.000000,217380.000000,92775.000000,222.679557)}
{pt3dadd(174708.000000,216780.000000,92800.000000,200.612214)}
{pt3dadd(175116.000000,215532.000000,92425.000000,208.235480)}
{pt3dadd(175536.000000,214620.000000,92600.000000,215.858745)}
{pt3dadd(175668.000000,214476.000000,92800.000000,223.482010)}
{pt3dadd(175992.000000,214320.000000,92925.000000,231.105276)}
{pt3dadd(176316.000000,214092.000000,92925.000000,202.352715)}
{pt3dadd(176628.000000,213768.000000,93200.000000,173.600154)}
{pt3dadd(176916.000000,213588.000000,93550.000000,144.847593)}
{pt3dadd(177180.000000,213408.000000,93775.000000,116.095032)}
{pt3dadd(177324.000000,213132.000000,93750.000000,128.865483)}
{pt3dadd(177552.000000,213036.000000,94025.000000,141.635934)}
{pt3dadd(177324.000000,213036.000000,94500.000000,154.406385)}
{pt3dadd(177456.000000,213072.000000,94825.000000,167.176836)}
{pt3dadd(177504.000000,213324.000000,95075.000000,116.095032)}

{create adhoc116}
{access adhoc116}
{connect adhoc116(1), adhoc114(0)}
{nseg = 1}
{strdef color color = "White"}
{pt3dclear()}
{pt3dadd(172464.000000,221172.000000,91125.000000,499.187376)}
{pt3dadd(172164.000000,219444.000000,90675.000000,139.314042)}
{pt3dadd(172248.000000,218988.000000,90425.000000,139.314042)}
{pt3dadd(172248.000000,218544.000000,90375.000000,139.314042)}
{pt3dadd(171948.000000,218424.000000,90350.000000,240.734646)}

{create adhoc117}
{access adhoc117}
{connect adhoc117(1), adhoc113(0)}
{nseg = 1}
{strdef color color = "White"}
{pt3dclear()}
{pt3dadd(171588.000000,221208.000000,89175.000000,499.187376)}
{pt3dadd(171168.000000,222600.000000,89675.000000,139.314042)}
{pt3dadd(170664.000000,223608.000000,89450.000000,128.671997)}
{pt3dadd(170484.000000,223572.000000,89225.000000,118.029951)}
{pt3dadd(170604.000000,223836.000000,89350.000000,107.387906)}
{pt3dadd(170616.000000,224016.000000,89325.000000,96.745860)}
{pt3dadd(170580.000000,224484.000000,89375.000000,92.714782)}
{pt3dadd(170496.000000,225012.000000,89450.000000,88.683705)}
{pt3dadd(170364.000000,225444.000000,89550.000000,84.652627)}
{pt3dadd(170172.000000,225780.000000,89550.000000,80.621550)}
{pt3dadd(170016.000000,225924.000000,89550.000000,95.294673)}
{pt3dadd(169932.000000,226164.000000,89750.000000,109.967796)}
{pt3dadd(169764.000000,226344.000000,89750.000000,124.640919)}
{pt3dadd(169668.000000,227028.000000,90050.000000,139.314042)}
{pt3dadd(169620.000000,227256.000000,90300.000000,159.746766)}
{pt3dadd(169476.000000,227436.000000,90575.000000,180.179490)}
{pt3dadd(169404.000000,227364.000000,90775.000000,200.612214)}
{pt3dadd(169332.000000,227220.000000,90975.000000,96.745860)}

{create adhoc118}
{access adhoc118}
{connect adhoc118(1), adhoc110(0)}
{nseg = 1}
{strdef color color = "White"}
{pt3dclear()}
{pt3dadd(168696.000000,219816.000000,83100.000000,399.349908)}
{pt3dadd(166548.000000,223704.000000,83375.000000,415.989486)}
{pt3dadd(165984.000000,224280.000000,83375.000000,411.829601)}
{pt3dadd(165012.000000,226404.000000,83750.000000,407.669715)}
{pt3dadd(164244.000000,227988.000000,83350.000000,403.509830)}
{pt3dadd(163920.000000,228456.000000,83125.000000,399.349944)}
{pt3dadd(163968.000000,228744.000000,83250.000000,386.176932)}
{pt3dadd(163872.000000,228924.000000,83275.000000,373.003920)}
{pt3dadd(163764.000000,229140.000000,83225.000000,359.830908)}
{pt3dadd(163572.000000,229560.000000,82975.000000,346.657896)}
{pt3dadd(163524.000000,229308.000000,82700.000000,200.612214)}

{create adhoc119}
{access adhoc119}
{connect adhoc119(1), adhoc118(0)}
{nseg = 1}
{strdef color color = "White"}
{pt3dclear()}
{pt3dadd(163524.000000,229308.000000,82700.000000,200.612214)}
{pt3dadd(163272.000000,229404.000000,82425.000000,77.396688)}
{pt3dadd(163272.000000,229356.000000,82250.000000,74.843676)}
{pt3dadd(163176.000000,229368.000000,82150.000000,72.290664)}
{pt3dadd(163056.000000,229356.000000,82000.000000,69.737652)}
{pt3dadd(162768.000000,229188.000000,81700.000000,67.184640)}
{pt3dadd(162528.000000,229188.000000,81375.000000,67.184640)}
{pt3dadd(162420.000000,229092.000000,81225.000000,67.184640)}
{pt3dadd(162276.000000,229284.000000,81025.000000,67.184640)}
{pt3dadd(162084.000000,229512.000000,80825.000000,96.745860)}

{create adhoc120}
{access adhoc120}
{connect adhoc120(1), adhoc118(0)}
{nseg = 1}
{strdef color color = "White"}
{pt3dclear()}
{pt3dadd(163524.000000,229308.000000,82700.000000,200.612214)}
{pt3dadd(163668.000000,229872.000000,83025.000000,288.881586)}
{pt3dadd(163692.000000,230148.000000,83100.000000,266.814243)}
{pt3dadd(163740.000000,230400.000000,83150.000000,244.746900)}
{pt3dadd(163608.000000,230628.000000,83275.000000,222.679557)}
{pt3dadd(163572.000000,230844.000000,83300.000000,200.612214)}
{pt3dadd(163596.000000,231096.000000,83250.000000,192.253370)}
{pt3dadd(163404.000000,231348.000000,83300.000000,183.894525)}
{pt3dadd(163308.000000,231552.000000,83325.000000,175.535680)}
{pt3dadd(163068.000000,231828.000000,83375.000000,167.176836)}
{pt3dadd(162960.000000,232104.000000,83350.000000,167.176836)}
{pt3dadd(162720.000000,232476.000000,83300.000000,167.176836)}
{pt3dadd(161832.000000,233028.000000,83025.000000,167.176836)}
{pt3dadd(161640.000000,233280.000000,82925.000000,167.176836)}
{pt3dadd(161172.000000,233676.000000,82725.000000,160.211138)}
{pt3dadd(160644.000000,234876.000000,82450.000000,153.245439)}
{pt3dadd(160452.000000,235296.000000,82450.000000,146.279741)}
{pt3dadd(160152.000000,235740.000000,82200.000000,139.314042)}
{pt3dadd(160068.000000,236184.000000,81900.000000,164.669193)}
{pt3dadd(159960.000000,236604.000000,81575.000000,190.024344)}
{pt3dadd(159876.000000,236736.000000,81200.000000,215.379495)}
{pt3dadd(159804.000000,236604.000000,80850.000000,240.734646)}
{pt3dadd(159900.000000,236400.000000,80500.000000,200.612214)}
{pt3dadd(159672.000000,236520.000000,80175.000000,167.176836)}

{create adhoc121}
{access adhoc121}
{connect adhoc121(1), adhoc120(0)}
{nseg = 1}
{strdef color color = "White"}
{pt3dclear()}
{pt3dadd(159672.000000,236520.000000,80175.000000,167.176836)}
{pt3dadd(159396.000000,236604.000000,79975.000000,200.612214)}
{pt3dadd(159252.000000,236448.000000,79700.000000,116.095032)}
{pt3dadd(159132.000000,236436.000000,79725.000000,96.745860)}

{create adhoc122}
{access adhoc122}
{connect adhoc122(1), adhoc120(0)}
{nseg = 1}
{strdef color color = "White"}
{pt3dclear()}
{pt3dadd(159672.000000,236520.000000,80175.000000,167.176836)}
{pt3dadd(159888.000000,236328.000000,79975.000000,167.176836)}

{create adhoc123}
{access adhoc123}
{connect adhoc123(1), adhoc109(0)}
{nseg = 1}
{strdef color color = "White"}
{pt3dclear()}
{pt3dadd(170100.000000,214680.000000,81075.000000,552.061314)}
{pt3dadd(169560.000000,214452.000000,82575.000000,346.657896)}
{pt3dadd(169572.000000,214380.000000,82775.000000,346.657896)}
{pt3dadd(169428.000000,214440.000000,82950.000000,346.657896)}
{pt3dadd(169356.000000,214392.000000,83175.000000,346.657896)}
{pt3dadd(169224.000000,214164.000000,83625.000000,346.657896)}
{pt3dadd(169320.000000,213888.000000,83750.000000,231.105276)}
{pt3dadd(169572.000000,213612.000000,83800.000000,167.176836)}

{create adhoc124}
{access adhoc124}
{connect adhoc124(1), adhoc123(0)}
{nseg = 1}
{strdef color color = "White"}
{pt3dclear()}
{pt3dadd(169572.000000,213612.000000,83800.000000,167.176836)}
{pt3dadd(169788.000000,213384.000000,84100.000000,167.176836)}
{pt3dadd(169908.000000,213156.000000,84150.000000,154.406385)}
{pt3dadd(170232.000000,212880.000000,84350.000000,141.635934)}
{pt3dadd(170400.000000,212640.000000,84425.000000,128.865483)}
{pt3dadd(170460.000000,212448.000000,84325.000000,116.095032)}
{pt3dadd(170556.000000,212244.000000,84325.000000,167.176836)}

{create adhoc125}
{access adhoc125}
{connect adhoc125(1), adhoc124(0)}
{nseg = 1}
{strdef color color = "White"}
{pt3dclear()}
{pt3dadd(170556.000000,212244.000000,84325.000000,167.176836)}
{pt3dadd(170652.000000,212004.000000,84275.000000,116.095032)}
{pt3dadd(170868.000000,211764.000000,84400.000000,137.224328)}
{pt3dadd(170964.000000,211608.000000,84375.000000,158.353623)}
{pt3dadd(171204.000000,211428.000000,84575.000000,179.482918)}
{pt3dadd(171444.000000,211308.000000,84675.000000,200.612214)}
{pt3dadd(171636.000000,211176.000000,84675.000000,96.745860)}

{create adhoc126}
{access adhoc126}
{connect adhoc126(1), adhoc124(0)}
{nseg = 1}
{strdef color color = "White"}
{pt3dclear()}
{pt3dadd(170556.000000,212244.000000,84325.000000,167.176836)}
{pt3dadd(170508.000000,211776.000000,83625.000000,200.612214)}
{pt3dadd(170892.000000,211188.000000,82900.000000,92.876040)}

{create adhoc127}
{access adhoc127}
{connect adhoc127(1), adhoc123(0)}
{nseg = 1}
{strdef color color = "White"}
{pt3dclear()}
{pt3dadd(169572.000000,213612.000000,83800.000000,167.176836)}
{pt3dadd(169536.000000,212976.000000,83550.000000,80.621550)}

{create adhoc128}
{access adhoc128}
{connect adhoc128(1), adhoc108(0)}
{nseg = 1}
{strdef color color = "White"}
{pt3dclear()}
{pt3dadd(172128.000000,211176.000000,79425.000000,575.063856)}
{pt3dadd(171768.000000,209304.000000,79375.000000,167.176836)}
{pt3dadd(171600.000000,208416.000000,79600.000000,185.566288)}
{pt3dadd(171360.000000,207948.000000,79600.000000,203.955741)}
{pt3dadd(171408.000000,206952.000000,79150.000000,222.345193)}
{pt3dadd(171528.000000,206436.000000,78925.000000,240.734646)}
{pt3dadd(171648.000000,205884.000000,78600.000000,215.379495)}
{pt3dadd(171828.000000,205104.000000,78175.000000,190.024344)}
{pt3dadd(171312.000000,205104.000000,77825.000000,164.669193)}
{pt3dadd(171012.000000,204744.000000,77475.000000,139.314042)}
{pt3dadd(170652.000000,204660.000000,77200.000000,146.279741)}
{pt3dadd(170244.000000,204708.000000,76900.000000,153.245439)}
{pt3dadd(169788.000000,204852.000000,76625.000000,160.211138)}
{pt3dadd(169644.000000,204924.000000,76375.000000,167.176836)}
{pt3dadd(169260.000000,204876.000000,76050.000000,116.095032)}
{pt3dadd(168696.000000,204828.000000,75775.000000,116.095032)}
