# Supplementary material for: Full reconstruction of large lobula plate tangential cells in Drosophila from a 3D EM dataset
Source: PLoS One. 2018 Nov 28;13(11):e0207828. doi: 10.1371/journal.pone.0207828 (PMC6261601; doi:10.1371/journal.pone.0207828)
Supplement: S1 Dataset — (ZIP) [file pone.0207828.s001.zip › Diameter hoc/VS_VSL_preliminary/Old Diameters Mar13_VS_VSL_HS/VS1/2_14_789_smaurer_001.020.hoc]

/* created with nml2hocm */

{create adhoc1}
{access adhoc1}
{nseg = 1}
{strdef color color = "White"}
{pt3dclear()}
{pt3dadd(189132.000000,197484.000000,107825.000000,2472.669792)}
{pt3dadd(189492.000000,197916.000000,107200.000000,2146.414176)}
{pt3dadd(189564.000000,198000.000000,106675.000000,2056.980245)}
{pt3dadd(189720.000000,198360.000000,106050.000000,1967.546313)}
{pt3dadd(189816.000000,198624.000000,105300.000000,1878.112382)}
{pt3dadd(189840.000000,198456.000000,104600.000000,1788.678450)}
{pt3dadd(189900.000000,198816.000000,103950.000000,1985.433116)}
{pt3dadd(190572.000000,199800.000000,103325.000000,2182.187781)}
{pt3dadd(190776.000000,200040.000000,102825.000000,2378.942446)}
{pt3dadd(190860.000000,200160.000000,102250.000000,2575.697112)}
{pt3dadd(190920.000000,200964.000000,101650.000000,2575.697112)}
{pt3dadd(191040.000000,200820.000000,100975.000000,2575.697112)}
{pt3dadd(191388.000000,201180.000000,100225.000000,2575.697112)}
{pt3dadd(191472.000000,200940.000000,99550.000000,2575.697112)}
{pt3dadd(191676.000000,201036.000000,98875.000000,2575.697112)}
{pt3dadd(191916.000000,201048.000000,98225.000000,2575.697112)}
{pt3dadd(192456.000000,201072.000000,97525.000000,2575.697112)}
{pt3dadd(192660.000000,200904.000000,96825.000000,2575.697112)}
{pt3dadd(193044.000000,200772.000000,96175.000000,2704.481942)}
{pt3dadd(193044.000000,200628.000000,95625.000000,2833.266771)}
{pt3dadd(193236.000000,200712.000000,95150.000000,2962.051600)}
{pt3dadd(193512.000000,200712.000000,94575.000000,3090.836430)}
{pt3dadd(193572.000000,200688.000000,93875.000000,3245.378224)}
{pt3dadd(193284.000000,200772.000000,93325.000000,3399.920019)}
{pt3dadd(193140.000000,200820.000000,92625.000000,3554.461814)}
{pt3dadd(193200.000000,201012.000000,92000.000000,3709.003608)}
{pt3dadd(193140.000000,201036.000000,91550.000000,3554.461814)}
{pt3dadd(192996.000000,201084.000000,90925.000000,3399.920019)}
{pt3dadd(192972.000000,200904.000000,90300.000000,3245.378224)}
{pt3dadd(192936.000000,200772.000000,89575.000000,3090.836430)}
{pt3dadd(192756.000000,200736.000000,88725.000000,2962.051600)}
{pt3dadd(192684.000000,200832.000000,88175.000000,2833.266771)}
{pt3dadd(192648.000000,201000.000000,87550.000000,2704.481942)}
{pt3dadd(192612.000000,201168.000000,86925.000000,2575.697112)}
{pt3dadd(192444.000000,201336.000000,86100.000000,2468.376378)}
{pt3dadd(192504.000000,201120.000000,85325.000000,2361.055644)}
{pt3dadd(192228.000000,201324.000000,84650.000000,2253.734910)}
{pt3dadd(192048.000000,201192.000000,84125.000000,2146.414176)}
{pt3dadd(191688.000000,201096.000000,83325.000000,2253.734910)}
{pt3dadd(191376.000000,201192.000000,82725.000000,2361.055644)}
{pt3dadd(191208.000000,201276.000000,82000.000000,2468.376378)}
{pt3dadd(190812.000000,201336.000000,81400.000000,2575.697112)}
{pt3dadd(190668.000000,201444.000000,80825.000000,2575.697112)}
{pt3dadd(190416.000000,201444.000000,80150.000000,2575.697112)}
{pt3dadd(189984.000000,201444.000000,79500.000000,2575.697112)}
{pt3dadd(189708.000000,201504.000000,78900.000000,2575.697112)}
{pt3dadd(189636.000000,201384.000000,78275.000000,2643.901609)}
{pt3dadd(189684.000000,201108.000000,77850.000000,2712.106107)}
{pt3dadd(189480.000000,201000.000000,77200.000000,2780.310605)}
{pt3dadd(189264.000000,200928.000000,76350.000000,2848.515102)}
{pt3dadd(188868.000000,200940.000000,75600.000000,2967.203160)}
{pt3dadd(188760.000000,201084.000000,74900.000000,2472.669252)}

{create adhoc2}
{access adhoc2}
{connect adhoc2(1), adhoc1(0)}
{nseg = 1}
{strdef color color = "White"}
{pt3dclear()}
{pt3dadd(188760.000000,201084.000000,74900.000000,2472.669252)}
{pt3dadd(188568.000000,201144.000000,74425.000000,2575.697112)}
{pt3dadd(188064.000000,201048.000000,73775.000000,2549.940147)}
{pt3dadd(187452.000000,201096.000000,73150.000000,2524.183182)}
{pt3dadd(187056.000000,200892.000000,72375.000000,2498.426217)}
{pt3dadd(187560.000000,200424.000000,71575.000000,2472.669252)}
{pt3dadd(187464.000000,199728.000000,70900.000000,2266.613460)}
{pt3dadd(187152.000000,199368.000000,69950.000000,2060.557668)}
{pt3dadd(187092.000000,198708.000000,69175.000000,2146.414176)}

{create adhoc3}
{access adhoc3}
{connect adhoc3(1), adhoc2(0)}
{nseg = 1}
{strdef color color = "White"}
{pt3dclear()}
{pt3dadd(187092.000000,198708.000000,69175.000000,2146.414176)}
{pt3dadd(186780.000000,198360.000000,68550.000000,2146.414176)}
{pt3dadd(186396.000000,197916.000000,67650.000000,2253.734910)}
{pt3dadd(186480.000000,197328.000000,66850.000000,2361.055644)}
{pt3dadd(186600.000000,197460.000000,66200.000000,2468.376378)}
{pt3dadd(186228.000000,197832.000000,65400.000000,2575.697112)}
{pt3dadd(186228.000000,196800.000000,64500.000000,2575.697112)}
{pt3dadd(186468.000000,195948.000000,63450.000000,2575.697112)}
{pt3dadd(186600.000000,195480.000000,62950.000000,2575.697112)}
{pt3dadd(186600.000000,195240.000000,62375.000000,2575.697112)}
{pt3dadd(186456.000000,195000.000000,61725.000000,2549.940147)}
{pt3dadd(186396.000000,194712.000000,60825.000000,2524.183182)}
{pt3dadd(186432.000000,194244.000000,59950.000000,2498.426217)}
{pt3dadd(186528.000000,194292.000000,59225.000000,2472.669252)}
{pt3dadd(186048.000000,194388.000000,58425.000000,2165.036409)}
{pt3dadd(185496.000000,194136.000000,57525.000000,1857.403566)}
{pt3dadd(184872.000000,194268.000000,56750.000000,1549.770723)}
{pt3dadd(184728.000000,194076.000000,56475.000000,1242.137880)}
{pt3dadd(184704.000000,194100.000000,55900.000000,1304.244761)}
{pt3dadd(184560.000000,193248.000000,55200.000000,1366.351641)}
{pt3dadd(184536.000000,192372.000000,54275.000000,1428.458522)}
{pt3dadd(184596.000000,191868.000000,53925.000000,1490.565402)}
{pt3dadd(184572.000000,190944.000000,53250.000000,1547.206857)}
{pt3dadd(184656.000000,189864.000000,52325.000000,1603.848312)}
{pt3dadd(184704.000000,189060.000000,51775.000000,1660.489767)}
{pt3dadd(184728.000000,188628.000000,51150.000000,1717.131222)}
{pt3dadd(184884.000000,187704.000000,50600.000000,1660.489767)}
{pt3dadd(184908.000000,187200.000000,49825.000000,1603.848312)}
{pt3dadd(185136.000000,186708.000000,49625.000000,1547.206857)}
{pt3dadd(185328.000000,186252.000000,49475.000000,1490.565402)}
{pt3dadd(185460.000000,185868.000000,49250.000000,1428.458522)}
{pt3dadd(185520.000000,185604.000000,49225.000000,1366.351641)}
{pt3dadd(185568.000000,185256.000000,49150.000000,1304.244761)}
{pt3dadd(185460.000000,184728.000000,49000.000000,1242.137880)}
{pt3dadd(185352.000000,184380.000000,48875.000000,1242.137880)}
{pt3dadd(185364.000000,184020.000000,48750.000000,1242.137880)}
{pt3dadd(185376.000000,183624.000000,48825.000000,1490.565402)}

{create adhoc4}
{access adhoc4}
{connect adhoc4(1), adhoc3(0)}
{nseg = 1}
{strdef color color = "White"}
{pt3dclear()}
{pt3dadd(185376.000000,183624.000000,48825.000000,1490.565402)}
{pt3dadd(183084.000000,183600.000000,52075.000000,718.829820)}
{pt3dadd(183012.000000,183432.000000,52525.000000,625.786839)}
{pt3dadd(181692.000000,183828.000000,53150.000000,532.743858)}
{pt3dadd(180540.000000,184548.000000,53625.000000,439.700877)}
{pt3dadd(179508.000000,184884.000000,53625.000000,346.657896)}
{pt3dadd(179208.000000,185004.000000,53925.000000,332.213819)}
{pt3dadd(178968.000000,185052.000000,53950.000000,317.769741)}
{pt3dadd(178728.000000,185100.000000,53950.000000,303.325664)}
{pt3dadd(178476.000000,185124.000000,54050.000000,288.881586)}
{pt3dadd(178224.000000,185124.000000,54125.000000,288.881586)}
{pt3dadd(177972.000000,185052.000000,54250.000000,288.881586)}
{pt3dadd(177156.000000,185100.000000,54225.000000,288.881586)}
{pt3dadd(175788.000000,185100.000000,54675.000000,288.881586)}
{pt3dadd(174012.000000,185100.000000,54900.000000,303.325664)}
{pt3dadd(171528.000000,185244.000000,54900.000000,317.769741)}
{pt3dadd(170376.000000,185448.000000,55300.000000,332.213819)}
{pt3dadd(168672.000000,185688.000000,55500.000000,346.657896)}
{pt3dadd(167400.000000,185232.000000,55425.000000,200.612214)}
{pt3dadd(166500.000000,184884.000000,55175.000000,139.314042)}

{create adhoc5}
{access adhoc5}
{connect adhoc5(1), adhoc3(0)}
{nseg = 1}
{strdef color color = "White"}
{pt3dclear()}
{pt3dadd(185376.000000,183624.000000,48825.000000,1490.565402)}
{pt3dadd(185316.000000,183264.000000,48800.000000,1490.565402)}
{pt3dadd(185364.000000,182880.000000,48600.000000,1565.093664)}
{pt3dadd(185412.000000,182520.000000,48375.000000,1639.621926)}
{pt3dadd(185580.000000,182208.000000,48250.000000,1714.150188)}
{pt3dadd(185700.000000,181896.000000,47900.000000,1788.678450)}
{pt3dadd(185748.000000,181488.000000,47625.000000,1788.678450)}
{pt3dadd(185988.000000,181116.000000,47125.000000,1788.678450)}
{pt3dadd(186108.000000,180708.000000,46300.000000,1788.678450)}
{pt3dadd(186420.000000,180312.000000,45875.000000,1788.678450)}
{pt3dadd(186612.000000,179796.000000,45175.000000,1788.678450)}
{pt3dadd(186864.000000,179424.000000,44925.000000,1788.678450)}
{pt3dadd(186876.000000,179268.000000,44975.000000,1490.565402)}

{create adhoc6}
{access adhoc6}
{connect adhoc6(1), adhoc5(0)}
{nseg = 1}
{strdef color color = "White"}
{pt3dclear()}
{pt3dadd(186876.000000,179268.000000,44975.000000,1490.565402)}
{pt3dadd(186360.000000,179244.000000,41700.000000,575.063892)}
{pt3dadd(186348.000000,179028.000000,41350.000000,415.989486)}

{create adhoc7}
{access adhoc7}
{connect adhoc7(1), adhoc6(0)}
{nseg = 1}
{strdef color color = "White"}
{pt3dclear()}
{pt3dadd(186348.000000,179028.000000,41350.000000,415.989486)}
{pt3dadd(186348.000000,180240.000000,41825.000000,690.076674)}
{pt3dadd(186348.000000,181476.000000,40750.000000,642.354349)}
{pt3dadd(186072.000000,181776.000000,40625.000000,594.632025)}
{pt3dadd(185832.000000,182004.000000,40125.000000,546.909700)}
{pt3dadd(185652.000000,182376.000000,39775.000000,499.187376)}
{pt3dadd(185436.000000,182736.000000,39450.000000,549.106128)}
{pt3dadd(185196.000000,183084.000000,39125.000000,599.024880)}
{pt3dadd(184836.000000,183432.000000,38800.000000,599.024880)}

{create adhoc8}
{access adhoc8}
{connect adhoc8(1), adhoc7(0)}
{nseg = 1}
{strdef color color = "White"}
{pt3dclear()}
{pt3dadd(184836.000000,183432.000000,38800.000000,599.024880)}
{pt3dadd(182124.000000,185448.000000,38900.000000,116.095032)}
{pt3dadd(181872.000000,185676.000000,38850.000000,147.254936)}
{pt3dadd(181596.000000,185940.000000,38925.000000,178.414839)}
{pt3dadd(181368.000000,186240.000000,38900.000000,209.574742)}
{pt3dadd(180468.000000,186552.000000,38675.000000,240.734646)}
{pt3dadd(179952.000000,186864.000000,38950.000000,176.092938)}
{pt3dadd(179556.000000,187428.000000,39350.000000,111.451230)}
{pt3dadd(179532.000000,187440.000000,39475.000000,96.745860)}

{create adhoc9}
{access adhoc9}
{connect adhoc9(1), adhoc7(0)}
{nseg = 1}
{strdef color color = "White"}
{pt3dclear()}
{pt3dadd(184836.000000,183432.000000,38800.000000,599.024880)}
{pt3dadd(184932.000000,183624.000000,38300.000000,499.187376)}
{pt3dadd(184896.000000,183828.000000,37875.000000,499.187376)}

{create adhoc10}
{access adhoc10}
{connect adhoc10(1), adhoc9(0)}
{nseg = 1}
{strdef color color = "White"}
{pt3dclear()}
{pt3dadd(184896.000000,183828.000000,37875.000000,499.187376)}
{pt3dadd(185652.000000,183612.000000,37650.000000,690.076602)}
{pt3dadd(185784.000000,183768.000000,37150.000000,667.313671)}
{pt3dadd(185760.000000,183900.000000,36750.000000,644.550741)}
{pt3dadd(185664.000000,183876.000000,36325.000000,621.787810)}
{pt3dadd(185592.000000,183888.000000,35900.000000,599.024880)}
{pt3dadd(185352.000000,183828.000000,35425.000000,535.933134)}
{pt3dadd(185448.000000,183840.000000,35000.000000,472.841388)}
{pt3dadd(185412.000000,183852.000000,34675.000000,409.749642)}
{pt3dadd(185376.000000,183864.000000,34225.000000,346.657896)}
{pt3dadd(185172.000000,184020.000000,33825.000000,301.787631)}
{pt3dadd(185436.000000,183516.000000,33375.000000,256.917366)}
{pt3dadd(186204.000000,182904.000000,32775.000000,212.047101)}
{pt3dadd(186288.000000,182400.000000,32300.000000,167.176836)}
{pt3dadd(186780.000000,181884.000000,31875.000000,178.321962)}
{pt3dadd(187536.000000,181116.000000,31375.000000,189.467088)}
{pt3dadd(187920.000000,181080.000000,31025.000000,200.612214)}
{pt3dadd(188304.000000,181044.000000,30825.000000,288.881586)}

{create adhoc11}
{access adhoc11}
{connect adhoc11(1), adhoc9(0)}
{nseg = 1}
{strdef color color = "White"}
{pt3dclear()}
{pt3dadd(184896.000000,183828.000000,37875.000000,499.187376)}
{pt3dadd(184380.000000,184212.000000,37650.000000,288.881586)}
{pt3dadd(183900.000000,184548.000000,37325.000000,276.844851)}
{pt3dadd(183840.000000,184944.000000,36975.000000,264.808116)}
{pt3dadd(183744.000000,185244.000000,36600.000000,252.771381)}
{pt3dadd(183864.000000,185712.000000,36275.000000,240.734646)}
{pt3dadd(183912.000000,186312.000000,35900.000000,240.734646)}
{pt3dadd(184140.000000,186960.000000,35525.000000,240.734646)}
{pt3dadd(184056.000000,187572.000000,35100.000000,240.734646)}
{pt3dadd(183912.000000,189000.000000,34450.000000,240.734646)}
{pt3dadd(183552.000000,189912.000000,34125.000000,238.327304)}
{pt3dadd(182736.000000,191688.000000,34175.000000,235.919961)}
{pt3dadd(182208.000000,192480.000000,34175.000000,233.512618)}
{pt3dadd(182280.000000,192780.000000,34050.000000,231.105276)}
{pt3dadd(181908.000000,192996.000000,34250.000000,215.123166)}
{pt3dadd(181692.000000,193224.000000,34225.000000,199.141056)}
{pt3dadd(181704.000000,193404.000000,34275.000000,183.158946)}
{pt3dadd(181236.000000,194628.000000,34025.000000,167.176836)}
{pt3dadd(180600.000000,195492.000000,34400.000000,167.176836)}
{pt3dadd(180060.000000,196188.000000,34825.000000,167.176836)}
{pt3dadd(178920.000000,197616.000000,35350.000000,167.176836)}
{pt3dadd(178476.000000,198228.000000,35800.000000,167.176836)}
{pt3dadd(178500.000000,198228.000000,36025.000000,240.734646)}
{pt3dadd(178500.000000,198240.000000,36200.000000,240.734646)}

{create adhoc12}
{access adhoc12}
{connect adhoc12(1), adhoc6(0)}
{nseg = 1}
{strdef color color = "White"}
{pt3dclear()}
{pt3dadd(186348.000000,179028.000000,41350.000000,415.989486)}
{pt3dadd(186312.000000,178704.000000,41000.000000,499.187376)}
{pt3dadd(186276.000000,178416.000000,40600.000000,499.187376)}
{pt3dadd(186252.000000,178320.000000,40275.000000,499.187376)}
{pt3dadd(186348.000000,177972.000000,39750.000000,499.187376)}
{pt3dadd(186168.000000,177792.000000,39300.000000,499.187376)}
{pt3dadd(185988.000000,177792.000000,38950.000000,394.545920)}
{pt3dadd(185844.000000,177552.000000,38600.000000,289.904463)}
{pt3dadd(184920.000000,177192.000000,38000.000000,185.263007)}
{pt3dadd(184488.000000,176832.000000,37500.000000,80.621550)}
{pt3dadd(184248.000000,175860.000000,37200.000000,110.619216)}
{pt3dadd(184224.000000,175428.000000,36975.000000,140.616882)}
{pt3dadd(184728.000000,175512.000000,36575.000000,170.614548)}
{pt3dadd(184740.000000,175596.000000,36200.000000,200.612214)}
{pt3dadd(184752.000000,175656.000000,35800.000000,200.612214)}

{create adhoc13}
{access adhoc13}
{connect adhoc13(1), adhoc5(0)}
{nseg = 1}
{strdef color color = "White"}
{pt3dclear()}
{pt3dadd(186876.000000,179268.000000,44975.000000,1490.565402)}
{pt3dadd(187308.000000,178788.000000,45500.000000,1490.565402)}
{pt3dadd(187500.000000,178392.000000,45400.000000,1428.458522)}
{pt3dadd(187812.000000,178020.000000,45250.000000,1366.351641)}
{pt3dadd(187944.000000,177660.000000,45075.000000,1304.244761)}
{pt3dadd(188040.000000,177360.000000,44875.000000,1242.137880)}
{pt3dadd(188136.000000,177084.000000,44650.000000,1289.339127)}
{pt3dadd(188340.000000,176760.000000,44625.000000,1336.540374)}
{pt3dadd(188532.000000,176400.000000,44600.000000,1383.741621)}
{pt3dadd(188724.000000,175992.000000,44600.000000,1430.942868)}
{pt3dadd(188736.000000,175500.000000,44525.000000,1383.741621)}
{pt3dadd(188736.000000,175008.000000,44300.000000,1336.540374)}
{pt3dadd(188736.000000,174648.000000,44125.000000,1289.339127)}
{pt3dadd(188592.000000,174156.000000,43975.000000,1242.137880)}
{pt3dadd(188448.000000,173652.000000,43825.000000,1192.452354)}
{pt3dadd(188580.000000,173400.000000,43925.000000,1242.137880)}

{create adhoc14}
{access adhoc14}
{connect adhoc14(1), adhoc13(0)}
{nseg = 1}
{strdef color color = "White"}
{pt3dclear()}
{pt3dadd(188580.000000,173400.000000,43925.000000,1242.137880)}
{pt3dadd(185160.000000,173436.000000,43675.000000,240.734646)}
{pt3dadd(184992.000000,173220.000000,43725.000000,267.215459)}
{pt3dadd(183432.000000,173220.000000,43300.000000,293.696271)}
{pt3dadd(183240.000000,172896.000000,43450.000000,320.177083)}
{pt3dadd(183084.000000,172824.000000,43575.000000,346.657896)}
{pt3dadd(182844.000000,172848.000000,43500.000000,329.325007)}
{pt3dadd(182556.000000,172824.000000,43525.000000,311.992119)}
{pt3dadd(182400.000000,172800.000000,43575.000000,294.659230)}
{pt3dadd(182148.000000,172728.000000,43600.000000,277.326342)}
{pt3dadd(180780.000000,172476.000000,43600.000000,277.326338)}
{pt3dadd(178368.000000,171492.000000,43625.000000,277.326333)}
{pt3dadd(176592.000000,171168.000000,43625.000000,277.326328)}
{pt3dadd(174480.000000,170736.000000,43525.000000,277.326324)}
{pt3dadd(172044.000000,170352.000000,43525.000000,280.215140)}
{pt3dadd(171084.000000,169992.000000,43575.000000,283.103955)}
{pt3dadd(169488.000000,170088.000000,43925.000000,285.992771)}
{pt3dadd(168468.000000,170400.000000,44350.000000,288.881586)}
{pt3dadd(168192.000000,170604.000000,44775.000000,320.658561)}
{pt3dadd(168156.000000,170952.000000,45200.000000,352.435536)}
{pt3dadd(167952.000000,171228.000000,45625.000000,384.212511)}
{pt3dadd(167748.000000,171504.000000,46075.000000,415.989486)}
{pt3dadd(167616.000000,171852.000000,46500.000000,415.989486)}
{pt3dadd(167304.000000,171948.000000,46875.000000,415.989486)}
{pt3dadd(167052.000000,171924.000000,47350.000000,415.989486)}
{pt3dadd(167244.000000,171828.000000,47825.000000,415.989486)}
{pt3dadd(167628.000000,171828.000000,48250.000000,277.326324)}
{pt3dadd(167988.000000,171876.000000,48550.000000,167.176836)}

{create adhoc15}
{access adhoc15}
{connect adhoc15(1), adhoc14(0)}
{nseg = 1}
{strdef color color = "White"}
{pt3dclear()}
{pt3dadd(167988.000000,171876.000000,48550.000000,167.176836)}
{pt3dadd(167148.000000,171732.000000,48850.000000,200.612214)}
{pt3dadd(167112.000000,171744.000000,49225.000000,116.095032)}
{pt3dadd(167088.000000,171708.000000,49400.000000,96.745860)}

{create adhoc16}
{access adhoc16}
{connect adhoc16(1), adhoc14(0)}
{nseg = 1}
{strdef color color = "White"}
{pt3dclear()}
{pt3dadd(167988.000000,171876.000000,48550.000000,167.176836)}
{pt3dadd(168828.000000,171624.000000,48900.000000,240.734646)}
{pt3dadd(169068.000000,171384.000000,49275.000000,267.215459)}
{pt3dadd(169416.000000,171252.000000,49700.000000,293.696271)}
{pt3dadd(169392.000000,170940.000000,50125.000000,320.177083)}
{pt3dadd(169368.000000,170628.000000,50575.000000,346.657896)}
{pt3dadd(169116.000000,170352.000000,51000.000000,288.881586)}
{pt3dadd(168720.000000,169776.000000,51525.000000,167.176836)}

{create adhoc17}
{access adhoc17}
{connect adhoc17(1), adhoc16(0)}
{nseg = 1}
{strdef color color = "White"}
{pt3dclear()}
{pt3dadd(168720.000000,169776.000000,51525.000000,167.176836)}
{pt3dadd(168852.000000,169188.000000,51625.000000,96.745860)}
{pt3dadd(168936.000000,168792.000000,51825.000000,96.745860)}
{pt3dadd(169068.000000,168468.000000,52225.000000,96.745860)}
{pt3dadd(169188.000000,168432.000000,52450.000000,200.612214)}

{create adhoc18}
{access adhoc18}
{connect adhoc18(1), adhoc16(0)}
{nseg = 1}
{strdef color color = "White"}
{pt3dclear()}
{pt3dadd(168720.000000,169776.000000,51525.000000,167.176836)}
{pt3dadd(168468.000000,169872.000000,51875.000000,200.612214)}
{pt3dadd(168432.000000,169728.000000,52200.000000,96.745860)}

{create adhoc19}
{access adhoc19}
{connect adhoc19(1), adhoc13(0)}
{nseg = 1}
{strdef color color = "White"}
{pt3dclear()}
{pt3dadd(188580.000000,173400.000000,43925.000000,1242.137880)}
{pt3dadd(189192.000000,173016.000000,43875.000000,1242.137880)}
{pt3dadd(189348.000000,172596.000000,43725.000000,1190.382147)}
{pt3dadd(189432.000000,172104.000000,43725.000000,1138.626414)}
{pt3dadd(189624.000000,171672.000000,43725.000000,1086.870681)}
{pt3dadd(189708.000000,171252.000000,43700.000000,1035.114948)}
{pt3dadd(189900.000000,170736.000000,43750.000000,1035.114948)}
{pt3dadd(190032.000000,170316.000000,43575.000000,1035.114948)}
{pt3dadd(190260.000000,169872.000000,43450.000000,1035.114948)}
{pt3dadd(190416.000000,169428.000000,43375.000000,1035.114948)}
{pt3dadd(190320.000000,168960.000000,43150.000000,1035.114948)}
{pt3dadd(190260.000000,168612.000000,43225.000000,1035.114948)}
{pt3dadd(190092.000000,168240.000000,43300.000000,1035.114948)}
{pt3dadd(190176.000000,167736.000000,43150.000000,1035.114948)}
{pt3dadd(190224.000000,167328.000000,42975.000000,991.985162)}
{pt3dadd(190224.000000,166860.000000,42750.000000,948.855375)}
{pt3dadd(190092.000000,166404.000000,42600.000000,905.725589)}
{pt3dadd(189960.000000,166128.000000,42550.000000,862.595802)}
{pt3dadd(190080.000000,165780.000000,42700.000000,862.595802)}
{pt3dadd(189972.000000,165516.000000,42725.000000,862.595802)}

{create adhoc20}
{access adhoc20}
{connect adhoc20(1), adhoc19(0)}
{nseg = 1}
{strdef color color = "White"}
{pt3dclear()}
{pt3dadd(189972.000000,165516.000000,42725.000000,862.595802)}
{pt3dadd(188892.000000,165504.000000,39975.000000,1035.114948)}
{pt3dadd(188688.000000,165396.000000,39600.000000,1104.122592)}
{pt3dadd(188700.000000,165156.000000,39250.000000,1173.130236)}
{pt3dadd(188592.000000,164976.000000,38750.000000,1242.137880)}
{pt3dadd(188448.000000,164760.000000,38225.000000,1035.114948)}

{create adhoc21}
{access adhoc21}
{connect adhoc21(1), adhoc20(0)}
{nseg = 1}
{strdef color color = "White"}
{pt3dclear()}
{pt3dadd(188448.000000,164760.000000,38225.000000,1035.114948)}
{pt3dadd(187272.000000,164028.000000,38300.000000,288.881586)}
{pt3dadd(187104.000000,163872.000000,38150.000000,276.844851)}
{pt3dadd(186924.000000,163584.000000,38125.000000,264.808116)}
{pt3dadd(186672.000000,163644.000000,38050.000000,252.771381)}
{pt3dadd(185760.000000,162504.000000,37950.000000,240.734646)}
{pt3dadd(185028.000000,161664.000000,37950.000000,267.215459)}
{pt3dadd(184428.000000,160980.000000,37950.000000,293.696271)}
{pt3dadd(184272.000000,160896.000000,37925.000000,320.177083)}
{pt3dadd(183504.000000,160308.000000,38200.000000,346.657896)}
{pt3dadd(183504.000000,159984.000000,38650.000000,273.635055)}
{pt3dadd(183744.000000,159696.000000,39100.000000,200.612214)}
{pt3dadd(183972.000000,159564.000000,39525.000000,240.734646)}

{create adhoc22}
{access adhoc22}
{connect adhoc22(1), adhoc20(0)}
{nseg = 1}
{strdef color color = "White"}
{pt3dclear()}
{pt3dadd(188448.000000,164760.000000,38225.000000,1035.114948)}
{pt3dadd(188712.000000,164784.000000,37775.000000,718.829820)}
{pt3dadd(188580.000000,164508.000000,37275.000000,415.989486)}

{create adhoc23}
{access adhoc23}
{connect adhoc23(1), adhoc22(0)}
{nseg = 1}
{strdef color color = "White"}
{pt3dclear()}
{pt3dadd(188580.000000,164508.000000,37275.000000,415.989486)}
{pt3dadd(188076.000000,165444.000000,37025.000000,167.176836)}
{pt3dadd(187800.000000,165948.000000,36600.000000,203.955741)}
{pt3dadd(187632.000000,166212.000000,36175.000000,240.734646)}
{pt3dadd(187500.000000,166608.000000,35775.000000,139.314042)}

{create adhoc24}
{access adhoc24}
{connect adhoc24(1), adhoc22(0)}
{nseg = 1}
{strdef color color = "White"}
{pt3dclear()}
{pt3dadd(188580.000000,164508.000000,37275.000000,415.989486)}
{pt3dadd(189012.000000,164136.000000,36800.000000,499.187376)}
{pt3dadd(189168.000000,163968.000000,36300.000000,471.454746)}
{pt3dadd(189360.000000,163692.000000,35875.000000,443.722116)}
{pt3dadd(189720.000000,163596.000000,35450.000000,415.989486)}
{pt3dadd(189816.000000,163572.000000,35175.000000,575.063856)}

{create adhoc25}
{access adhoc25}
{connect adhoc25(1), adhoc24(0)}
{nseg = 1}
{strdef color color = "White"}
{pt3dclear()}
{pt3dadd(189816.000000,163572.000000,35175.000000,575.063856)}
{pt3dadd(190548.000000,163200.000000,35050.000000,499.187376)}
{pt3dadd(190680.000000,163032.000000,34650.000000,478.387903)}
{pt3dadd(191016.000000,162816.000000,34250.000000,457.588431)}
{pt3dadd(191580.000000,162576.000000,33850.000000,436.788958)}
{pt3dadd(191844.000000,162096.000000,33400.000000,415.989486)}
{pt3dadd(192312.000000,161580.000000,32950.000000,362.145168)}
{pt3dadd(192840.000000,160464.000000,32850.000000,308.300850)}
{pt3dadd(192816.000000,158712.000000,32850.000000,254.456532)}
{pt3dadd(192684.000000,158592.000000,33075.000000,200.612214)}
{pt3dadd(192768.000000,158100.000000,33475.000000,213.986358)}
{pt3dadd(193068.000000,157824.000000,33550.000000,227.360502)}
{pt3dadd(193344.000000,157272.000000,33325.000000,240.734646)}
{pt3dadd(193308.000000,157056.000000,33300.000000,240.734646)}

{create adhoc26}
{access adhoc26}
{connect adhoc26(1), adhoc24(0)}
{nseg = 1}
{strdef color color = "White"}
{pt3dclear()}
{pt3dadd(189816.000000,163572.000000,35175.000000,575.063856)}
{pt3dadd(189816.000000,164340.000000,34925.000000,415.989486)}
{pt3dadd(189948.000000,164496.000000,34450.000000,431.797086)}
{pt3dadd(190032.000000,164652.000000,33975.000000,447.604686)}
{pt3dadd(190680.000000,165456.000000,33475.000000,463.412286)}
{pt3dadd(190728.000000,165672.000000,33325.000000,479.219886)}
{pt3dadd(190884.000000,165900.000000,33025.000000,463.412286)}
{pt3dadd(190896.000000,166116.000000,32850.000000,447.604686)}
{pt3dadd(190896.000000,166212.000000,32675.000000,431.797086)}
{pt3dadd(191052.000000,166380.000000,33000.000000,415.989486)}
{pt3dadd(191100.000000,166536.000000,32750.000000,384.212511)}
{pt3dadd(191100.000000,166728.000000,32675.000000,352.435536)}
{pt3dadd(191112.000000,166860.000000,32600.000000,320.658561)}
{pt3dadd(191160.000000,167016.000000,32525.000000,288.881586)}
{pt3dadd(191172.000000,167208.000000,32375.000000,288.881586)}
{pt3dadd(191220.000000,167460.000000,32275.000000,288.881586)}
{pt3dadd(191232.000000,167676.000000,32200.000000,288.881586)}
{pt3dadd(191088.000000,167928.000000,32100.000000,288.881586)}
{pt3dadd(191052.000000,168120.000000,32125.000000,288.881586)}
{pt3dadd(191016.000000,168324.000000,32225.000000,288.881586)}
{pt3dadd(191016.000000,168516.000000,32125.000000,288.881586)}
{pt3dadd(191172.000000,168708.000000,32100.000000,288.881586)}
{pt3dadd(191136.000000,168900.000000,32100.000000,266.814243)}
{pt3dadd(190404.000000,169776.000000,32175.000000,244.746900)}
{pt3dadd(190320.000000,169932.000000,32100.000000,222.679557)}
{pt3dadd(189888.000000,170196.000000,32075.000000,200.612214)}
{pt3dadd(189852.000000,170364.000000,32075.000000,200.612214)}
{pt3dadd(189828.000000,170592.000000,32075.000000,200.612214)}
{pt3dadd(189732.000000,170832.000000,32200.000000,200.612214)}
{pt3dadd(189792.000000,171048.000000,32325.000000,200.612214)}
{pt3dadd(189516.000000,171228.000000,32375.000000,222.679557)}
{pt3dadd(189516.000000,171468.000000,32475.000000,244.746900)}
{pt3dadd(189204.000000,171648.000000,32450.000000,266.814243)}
{pt3dadd(189216.000000,171852.000000,32450.000000,288.881586)}
{pt3dadd(189216.000000,172044.000000,32625.000000,320.658561)}
{pt3dadd(189036.000000,173580.000000,32500.000000,352.435536)}
{pt3dadd(188868.000000,174180.000000,32225.000000,384.212511)}
{pt3dadd(188760.000000,174504.000000,31575.000000,415.989486)}
{pt3dadd(188784.000000,174732.000000,31900.000000,341.015873)}
{pt3dadd(188724.000000,174948.000000,31900.000000,266.042259)}
{pt3dadd(188652.000000,175224.000000,31825.000000,191.068646)}
{pt3dadd(188280.000000,175464.000000,31750.000000,116.095032)}
{pt3dadd(188436.000000,175656.000000,31750.000000,127.704537)}
{pt3dadd(188796.000000,175860.000000,31775.000000,139.314042)}
{pt3dadd(188964.000000,175932.000000,31825.000000,80.621550)}

{create adhoc27}
{access adhoc27}
{connect adhoc27(1), adhoc19(0)}
{nseg = 1}
{strdef color color = "White"}
{pt3dclear()}
{pt3dadd(189972.000000,165516.000000,42725.000000,862.595802)}
{pt3dadd(190656.000000,165096.000000,42925.000000,690.076674)}
{pt3dadd(190716.000000,164688.000000,42925.000000,667.313725)}
{pt3dadd(190884.000000,164316.000000,42925.000000,644.550777)}
{pt3dadd(191004.000000,163932.000000,43050.000000,621.787828)}
{pt3dadd(191268.000000,163548.000000,43175.000000,599.024880)}
{pt3dadd(191208.000000,163188.000000,43100.000000,599.024880)}
{pt3dadd(191268.000000,162792.000000,43025.000000,599.024880)}
{pt3dadd(191400.000000,162420.000000,43150.000000,599.024880)}
{pt3dadd(191628.000000,162000.000000,43200.000000,599.024880)}
{pt3dadd(191820.000000,161676.000000,43250.000000,599.024880)}
{pt3dadd(191904.000000,161232.000000,43350.000000,599.024880)}
{pt3dadd(191736.000000,160872.000000,43275.000000,599.024880)}
{pt3dadd(191748.000000,160488.000000,43325.000000,599.024880)}
{pt3dadd(191904.000000,160140.000000,43425.000000,628.976115)}
{pt3dadd(191964.000000,159828.000000,43375.000000,658.927350)}
{pt3dadd(191904.000000,159408.000000,43400.000000,688.878585)}
{pt3dadd(191988.000000,159108.000000,43375.000000,718.829820)}
{pt3dadd(191964.000000,158748.000000,43525.000000,754.771316)}
{pt3dadd(191940.000000,158436.000000,43575.000000,790.712811)}
{pt3dadd(192000.000000,158004.000000,43625.000000,826.654307)}
{pt3dadd(192012.000000,157524.000000,43650.000000,862.595802)}
{pt3dadd(192096.000000,157104.000000,43875.000000,905.725589)}
{pt3dadd(192060.000000,156756.000000,43900.000000,948.855375)}
{pt3dadd(192144.000000,156444.000000,43850.000000,991.985162)}
{pt3dadd(192072.000000,156096.000000,43775.000000,1035.114948)}
{pt3dadd(192000.000000,155688.000000,43725.000000,1035.114948)}

{create adhoc28}
{access adhoc28}
{connect adhoc28(1), adhoc27(0)}
{nseg = 1}
{strdef color color = "White"}
{pt3dclear()}
{pt3dadd(192000.000000,155688.000000,43725.000000,1035.114948)}
{pt3dadd(190740.000000,155604.000000,42025.000000,399.349944)}
{pt3dadd(190572.000000,155364.000000,41675.000000,415.989486)}

{create adhoc29}
{access adhoc29}
{connect adhoc29(1), adhoc28(0)}
{nseg = 1}
{strdef color color = "White"}
{pt3dclear()}
{pt3dadd(190572.000000,155364.000000,41675.000000,415.989486)}
{pt3dadd(189312.000000,155520.000000,41575.000000,139.314042)}

{create adhoc30}
{access adhoc30}
{connect adhoc30(1), adhoc29(0)}
{nseg = 1}
{strdef color color = "White"}
{pt3dclear()}
{pt3dadd(189312.000000,155520.000000,41575.000000,139.314042)}
{pt3dadd(188436.000000,155544.000000,41000.000000,96.745860)}
{pt3dadd(187932.000000,155832.000000,40875.000000,91.371090)}
{pt3dadd(187728.000000,155952.000000,41000.000000,85.996320)}
{pt3dadd(187476.000000,155892.000000,41075.000000,80.621550)}
{pt3dadd(187380.000000,155904.000000,41125.000000,67.184640)}

{create adhoc31}
{access adhoc31}
{connect adhoc31(1), adhoc29(0)}
{nseg = 1}
{strdef color color = "White"}
{pt3dclear()}
{pt3dadd(189312.000000,155520.000000,41575.000000,139.314042)}
{pt3dadd(188496.000000,155520.000000,41925.000000,96.745860)}
{pt3dadd(187008.000000,155544.000000,42675.000000,116.095032)}
{pt3dadd(186840.000000,155604.000000,42850.000000,116.095032)}

{create adhoc32}
{access adhoc32}
{connect adhoc32(1), adhoc28(0)}
{nseg = 1}
{strdef color color = "White"}
{pt3dclear()}
{pt3dadd(190572.000000,155364.000000,41675.000000,415.989486)}
{pt3dadd(190692.000000,155160.000000,41525.000000,415.989486)}
{pt3dadd(190848.000000,154908.000000,41275.000000,395.190005)}
{pt3dadd(190872.000000,154620.000000,41050.000000,374.390523)}
{pt3dadd(190764.000000,154440.000000,40875.000000,353.591042)}
{pt3dadd(190788.000000,154200.000000,40650.000000,332.791560)}
{pt3dadd(190656.000000,153984.000000,40325.000000,337.413672)}
{pt3dadd(190668.000000,153780.000000,40250.000000,342.035784)}
{pt3dadd(190716.000000,153600.000000,40075.000000,346.657896)}
{pt3dadd(190956.000000,153372.000000,39725.000000,346.657896)}

{create adhoc33}
{access adhoc33}
{connect adhoc33(1), adhoc32(0)}
{nseg = 1}
{strdef color color = "White"}
{pt3dclear()}
{pt3dadd(190956.000000,153372.000000,39725.000000,346.657896)}
{pt3dadd(191376.000000,153660.000000,38850.000000,240.734646)}
{pt3dadd(191400.000000,154020.000000,38550.000000,230.704038)}
{pt3dadd(191340.000000,154272.000000,38425.000000,220.673430)}
{pt3dadd(191160.000000,154524.000000,38325.000000,210.642822)}
{pt3dadd(191100.000000,154764.000000,38225.000000,200.612214)}
{pt3dadd(191112.000000,154932.000000,38150.000000,200.612214)}
{pt3dadd(190896.000000,155220.000000,38175.000000,200.612214)}
{pt3dadd(190716.000000,155460.000000,38150.000000,200.612214)}
{pt3dadd(190572.000000,155616.000000,38275.000000,200.612214)}
{pt3dadd(190140.000000,155832.000000,38325.000000,170.614548)}
{pt3dadd(189744.000000,156012.000000,38350.000000,140.616882)}
{pt3dadd(189348.000000,156204.000000,38325.000000,110.619216)}
{pt3dadd(188544.000000,156360.000000,38425.000000,80.621550)}
{pt3dadd(188472.000000,156564.000000,38475.000000,96.745860)}

{create adhoc34}
{access adhoc34}
{connect adhoc34(1), adhoc32(0)}
{nseg = 1}
{strdef color color = "White"}
{pt3dclear()}
{pt3dadd(190956.000000,153372.000000,39725.000000,346.657896)}
{pt3dadd(191220.000000,153096.000000,39525.000000,332.791596)}
{pt3dadd(191280.000000,152868.000000,39250.000000,309.777359)}
{pt3dadd(191316.000000,152652.000000,39025.000000,286.763121)}
{pt3dadd(191556.000000,152340.000000,38800.000000,263.748884)}
{pt3dadd(191760.000000,152004.000000,38275.000000,240.734646)}
{pt3dadd(192060.000000,151776.000000,37875.000000,284.548356)}
{pt3dadd(192288.000000,151560.000000,37600.000000,328.362066)}
{pt3dadd(192444.000000,151332.000000,36875.000000,372.175776)}
{pt3dadd(192504.000000,151332.000000,36550.000000,415.989486)}
{pt3dadd(192672.000000,151272.000000,36175.000000,362.145168)}
{pt3dadd(192636.000000,151176.000000,35825.000000,308.300850)}
{pt3dadd(192696.000000,151104.000000,35500.000000,254.456532)}
{pt3dadd(192816.000000,151104.000000,35225.000000,200.612214)}
{pt3dadd(192708.000000,150972.000000,34925.000000,174.645625)}
{pt3dadd(192648.000000,150864.000000,34575.000000,148.679037)}
{pt3dadd(192660.000000,150732.000000,34175.000000,122.712448)}
{pt3dadd(192588.000000,150564.000000,33925.000000,96.745860)}
{pt3dadd(193464.000000,149784.000000,33525.000000,96.745860)}
{pt3dadd(194028.000000,149208.000000,33300.000000,116.095032)}

{create adhoc35}
{access adhoc35}
{connect adhoc35(1), adhoc27(0)}
{nseg = 1}
{strdef color color = "White"}
{pt3dclear()}
{pt3dadd(192000.000000,155688.000000,43725.000000,1035.114948)}
{pt3dadd(192228.000000,155292.000000,44150.000000,862.595802)}
{pt3dadd(192384.000000,154908.000000,44375.000000,905.725589)}
{pt3dadd(192324.000000,154452.000000,44425.000000,948.855375)}
{pt3dadd(192324.000000,154116.000000,44500.000000,991.985162)}
{pt3dadd(192384.000000,153684.000000,44600.000000,1035.114948)}
{pt3dadd(192432.000000,153252.000000,44800.000000,1035.114948)}
{pt3dadd(192444.000000,152880.000000,44900.000000,1035.114948)}
{pt3dadd(192456.000000,152616.000000,45000.000000,993.710286)}

{create adhoc36}
{access adhoc36}
{connect adhoc36(1), adhoc35(0)}
{nseg = 1}
{strdef color color = "White"}
{pt3dclear()}
{pt3dadd(192456.000000,152616.000000,45000.000000,993.710286)}
{pt3dadd(190800.000000,152592.000000,43525.000000,240.734646)}
{pt3dadd(190512.000000,152352.000000,43475.000000,230.704038)}
{pt3dadd(190068.000000,152100.000000,43475.000000,220.673430)}
{pt3dadd(189456.000000,151860.000000,43250.000000,210.642822)}
{pt3dadd(189216.000000,151704.000000,43075.000000,200.612214)}
{pt3dadd(188820.000000,151752.000000,42775.000000,210.642822)}
{pt3dadd(188460.000000,151620.000000,42425.000000,220.673430)}
{pt3dadd(188220.000000,151440.000000,42250.000000,230.704038)}
{pt3dadd(187860.000000,151308.000000,41950.000000,240.734646)}
{pt3dadd(187872.000000,150996.000000,41650.000000,230.704038)}
{pt3dadd(187884.000000,150864.000000,41275.000000,220.673430)}
{pt3dadd(187848.000000,150504.000000,40900.000000,210.642822)}
{pt3dadd(187788.000000,150192.000000,40550.000000,200.612214)}
{pt3dadd(187536.000000,149904.000000,40200.000000,200.612214)}
{pt3dadd(187560.000000,149592.000000,39950.000000,200.612214)}
{pt3dadd(187320.000000,148908.000000,39800.000000,200.612214)}
{pt3dadd(187344.000000,148560.000000,39450.000000,200.612214)}
{pt3dadd(187344.000000,148200.000000,39050.000000,200.612214)}
{pt3dadd(187344.000000,147948.000000,38725.000000,200.612214)}
{pt3dadd(187212.000000,147804.000000,38275.000000,200.612214)}
{pt3dadd(187176.000000,147768.000000,37875.000000,116.095032)}

{create adhoc37}
{access adhoc37}
{connect adhoc37(1), adhoc35(0)}
{nseg = 1}
{strdef color color = "White"}
{pt3dclear()}
{pt3dadd(192456.000000,152616.000000,45000.000000,993.710286)}
{pt3dadd(192696.000000,152136.000000,45050.000000,1035.114948)}
{pt3dadd(192924.000000,151812.000000,45075.000000,1035.114948)}
{pt3dadd(193020.000000,151464.000000,45075.000000,1035.114948)}
{pt3dadd(193032.000000,151056.000000,45150.000000,1035.114948)}
{pt3dadd(193092.000000,150684.000000,45350.000000,1035.114948)}
{pt3dadd(193152.000000,150348.000000,45550.000000,1035.114948)}
{pt3dadd(193272.000000,150024.000000,45825.000000,1035.114948)}
{pt3dadd(193332.000000,149592.000000,46000.000000,1035.114948)}
{pt3dadd(193332.000000,149172.000000,46050.000000,1035.114948)}
{pt3dadd(193344.000000,148812.000000,46100.000000,983.359197)}
{pt3dadd(193356.000000,148488.000000,46150.000000,931.603446)}
{pt3dadd(193320.000000,148224.000000,46200.000000,879.847695)}
{pt3dadd(193260.000000,147816.000000,46250.000000,828.091944)}
{pt3dadd(193308.000000,147492.000000,46300.000000,836.717909)}
{pt3dadd(193440.000000,147096.000000,46300.000000,845.343873)}
{pt3dadd(193572.000000,146724.000000,46375.000000,853.969838)}
{pt3dadd(193692.000000,146268.000000,46375.000000,862.595802)}
{pt3dadd(193788.000000,145680.000000,46375.000000,862.595802)}
{pt3dadd(193848.000000,145284.000000,46300.000000,862.595802)}
{pt3dadd(193908.000000,144936.000000,46225.000000,862.595802)}
{pt3dadd(193800.000000,144420.000000,46125.000000,862.595802)}
{pt3dadd(193740.000000,143952.000000,46100.000000,862.595802)}
{pt3dadd(193596.000000,143532.000000,45950.000000,993.710358)}

{create adhoc38}
{access adhoc38}
{connect adhoc38(1), adhoc37(0)}
{nseg = 1}
{strdef color color = "White"}
{pt3dclear()}
{pt3dadd(193596.000000,143532.000000,45950.000000,993.710358)}
{pt3dadd(193596.000000,143292.000000,46050.000000,1035.114948)}
{pt3dadd(193692.000000,142920.000000,46025.000000,1104.122592)}
{pt3dadd(193740.000000,142608.000000,45900.000000,1173.130236)}
{pt3dadd(193740.000000,142200.000000,45825.000000,1242.137880)}
{pt3dadd(193272.000000,141816.000000,46150.000000,1035.114948)}

{create adhoc39}
{access adhoc39}
{connect adhoc39(1), adhoc38(0)}
{nseg = 1}
{strdef color color = "White"}
{pt3dclear()}
{pt3dadd(193272.000000,141816.000000,46150.000000,1035.114948)}
{pt3dadd(193632.000000,141552.000000,46925.000000,718.829820)}
{pt3dadd(193680.000000,141264.000000,47050.000000,718.829820)}
{pt3dadd(193644.000000,141012.000000,47200.000000,718.829820)}
{pt3dadd(193608.000000,140736.000000,47350.000000,718.829820)}
{pt3dadd(193656.000000,140460.000000,47650.000000,718.829820)}
{pt3dadd(193632.000000,140088.000000,47650.000000,718.829820)}
{pt3dadd(193608.000000,139668.000000,47825.000000,718.829820)}
{pt3dadd(193584.000000,139284.000000,48000.000000,718.829820)}
{pt3dadd(193644.000000,138888.000000,48125.000000,718.829820)}
{pt3dadd(193668.000000,138516.000000,48200.000000,711.641533)}
{pt3dadd(193668.000000,138276.000000,48125.000000,704.453247)}
{pt3dadd(193608.000000,137904.000000,48075.000000,697.264960)}
{pt3dadd(193620.000000,137544.000000,48350.000000,690.076674)}
{pt3dadd(193668.000000,137220.000000,48475.000000,776.336242)}
{pt3dadd(193668.000000,136932.000000,48550.000000,862.595811)}
{pt3dadd(193596.000000,136584.000000,48475.000000,948.855380)}
{pt3dadd(193500.000000,136380.000000,48350.000000,1035.114948)}
{pt3dadd(193320.000000,136116.000000,48325.000000,862.595802)}
{pt3dadd(193260.000000,135864.000000,48250.000000,862.595802)}

{create adhoc40}
{access adhoc40}
{connect adhoc40(1), adhoc39(0)}
{nseg = 1}
{strdef color color = "White"}
{pt3dclear()}
{pt3dadd(193260.000000,135864.000000,48250.000000,862.595802)}
{pt3dadd(193500.000000,135624.000000,48925.000000,862.595802)}
{pt3dadd(193512.000000,135312.000000,49125.000000,862.595802)}
{pt3dadd(193416.000000,135000.000000,49175.000000,862.595802)}
{pt3dadd(193320.000000,134700.000000,49300.000000,862.595802)}
{pt3dadd(193260.000000,134388.000000,49350.000000,862.595802)}
{pt3dadd(193188.000000,134076.000000,49400.000000,862.595802)}
{pt3dadd(193080.000000,133764.000000,49550.000000,862.595802)}
{pt3dadd(192972.000000,133476.000000,49600.000000,862.595802)}
{pt3dadd(192900.000000,133476.000000,49625.000000,862.595802)}
{pt3dadd(192768.000000,133164.000000,49700.000000,828.092016)}
{pt3dadd(192660.000000,132888.000000,49750.000000,718.829820)}

{create adhoc41}
{access adhoc41}
{connect adhoc41(1), adhoc40(0)}
{nseg = 1}
{strdef color color = "White"}
{pt3dclear()}
{pt3dadd(192660.000000,132888.000000,49750.000000,718.829820)}
{pt3dadd(193020.000000,132600.000000,50400.000000,599.024880)}
{pt3dadd(193140.000000,132360.000000,50325.000000,708.047397)}
{pt3dadd(193272.000000,132036.000000,50525.000000,817.069914)}
{pt3dadd(193368.000000,131604.000000,50800.000000,926.092431)}
{pt3dadd(193428.000000,131208.000000,50975.000000,1035.114948)}
{pt3dadd(193356.000000,130788.000000,51150.000000,1204.410078)}
{pt3dadd(193284.000000,130368.000000,51300.000000,1373.705208)}
{pt3dadd(193188.000000,129984.000000,51525.000000,1490.565402)}

{create adhoc42}
{access adhoc42}
{connect adhoc42(1), adhoc41(0)}
{nseg = 1}
{strdef color color = "White"}
{pt3dclear()}
{pt3dadd(193188.000000,129984.000000,51525.000000,1490.565402)}
{pt3dadd(193020.000000,129876.000000,50425.000000,479.219886)}
{pt3dadd(192900.000000,129672.000000,49950.000000,431.635311)}
{pt3dadd(192696.000000,129456.000000,49875.000000,384.050736)}
{pt3dadd(192480.000000,129300.000000,49800.000000,336.466161)}
{pt3dadd(192420.000000,129120.000000,49800.000000,288.881586)}
{pt3dadd(192252.000000,128868.000000,49625.000000,288.881586)}
{pt3dadd(192144.000000,128640.000000,49575.000000,288.881586)}
{pt3dadd(192012.000000,128400.000000,49350.000000,288.881586)}
{pt3dadd(191844.000000,128196.000000,49375.000000,288.881586)}
{pt3dadd(191664.000000,127968.000000,49250.000000,288.881586)}
{pt3dadd(191460.000000,127716.000000,49150.000000,288.881586)}
{pt3dadd(191256.000000,127500.000000,48925.000000,288.881586)}
{pt3dadd(191040.000000,127248.000000,48700.000000,288.881586)}
{pt3dadd(190944.000000,127044.000000,48625.000000,288.881586)}
{pt3dadd(190704.000000,126840.000000,48600.000000,288.881586)}
{pt3dadd(190644.000000,126732.000000,48575.000000,288.881586)}
{pt3dadd(190584.000000,126516.000000,48425.000000,288.881586)}
{pt3dadd(190344.000000,126300.000000,48325.000000,303.325664)}
{pt3dadd(190140.000000,126120.000000,48250.000000,317.769741)}
{pt3dadd(189924.000000,125928.000000,48300.000000,332.213819)}
{pt3dadd(189672.000000,125724.000000,48150.000000,346.657896)}
{pt3dadd(189420.000000,125532.000000,48100.000000,320.177083)}
{pt3dadd(189276.000000,125364.000000,47950.000000,293.696271)}
{pt3dadd(189108.000000,125148.000000,47800.000000,267.215459)}
{pt3dadd(188856.000000,124932.000000,47925.000000,240.734646)}
{pt3dadd(188640.000000,124716.000000,47875.000000,252.771381)}
{pt3dadd(188400.000000,124524.000000,47900.000000,264.808116)}
{pt3dadd(188148.000000,124344.000000,47825.000000,276.844851)}
{pt3dadd(187896.000000,124116.000000,47700.000000,288.881586)}
{pt3dadd(187608.000000,123924.000000,47700.000000,341.458034)}
{pt3dadd(187320.000000,123756.000000,47700.000000,394.034481)}
{pt3dadd(187140.000000,123588.000000,47625.000000,446.610929)}
{pt3dadd(187044.000000,123408.000000,47475.000000,499.187376)}
{pt3dadd(186936.000000,123252.000000,47350.000000,457.588431)}
{pt3dadd(186900.000000,123036.000000,47500.000000,415.989486)}
{pt3dadd(186828.000000,122892.000000,47575.000000,277.326324)}

{create adhoc43}
{access adhoc43}
{connect adhoc43(1), adhoc42(0)}
{nseg = 1}
{strdef color color = "White"}
{pt3dclear()}
{pt3dadd(186828.000000,122892.000000,47575.000000,277.326324)}
{pt3dadd(185544.000000,122880.000000,47100.000000,167.176836)}
{pt3dadd(185184.000000,122700.000000,47100.000000,167.176836)}
{pt3dadd(184380.000000,122460.000000,46900.000000,167.176836)}
{pt3dadd(183684.000000,122244.000000,46725.000000,167.176836)}
{pt3dadd(183276.000000,122040.000000,46675.000000,167.176836)}
{pt3dadd(182052.000000,121500.000000,46675.000000,173.529553)}
{pt3dadd(181836.000000,121524.000000,46800.000000,179.882271)}
{pt3dadd(181656.000000,121524.000000,46775.000000,186.234989)}
{pt3dadd(181476.000000,121488.000000,46750.000000,192.587706)}
{pt3dadd(181356.000000,121344.000000,46750.000000,194.593833)}
{pt3dadd(181116.000000,121392.000000,46750.000000,196.599960)}
{pt3dadd(180936.000000,121332.000000,46675.000000,198.606087)}
{pt3dadd(180744.000000,121308.000000,46725.000000,200.612214)}
{pt3dadd(180540.000000,121272.000000,46725.000000,210.642822)}
{pt3dadd(180324.000000,121164.000000,46775.000000,220.673430)}
{pt3dadd(179580.000000,121176.000000,46775.000000,230.704038)}
{pt3dadd(179472.000000,121224.000000,46925.000000,240.734646)}
{pt3dadd(179328.000000,121236.000000,47000.000000,252.771381)}
{pt3dadd(179184.000000,121236.000000,47050.000000,264.808116)}
{pt3dadd(179028.000000,121200.000000,47100.000000,276.844851)}
{pt3dadd(178860.000000,121176.000000,47225.000000,288.881586)}
{pt3dadd(178704.000000,121236.000000,47325.000000,288.881586)}
{pt3dadd(178524.000000,121200.000000,47375.000000,288.881586)}
{pt3dadd(178044.000000,121164.000000,47450.000000,288.881586)}
{pt3dadd(177768.000000,120408.000000,47925.000000,288.881586)}
{pt3dadd(177504.000000,119892.000000,48125.000000,200.612214)}
{pt3dadd(177120.000000,119208.000000,48100.000000,116.095032)}

{create adhoc44}
{access adhoc44}
{connect adhoc44(1), adhoc42(0)}
{nseg = 1}
{strdef color color = "White"}
{pt3dclear()}
{pt3dadd(186828.000000,122892.000000,47575.000000,277.326324)}
{pt3dadd(187368.000000,122676.000000,47725.000000,346.657896)}
{pt3dadd(187380.000000,122448.000000,47800.000000,317.769741)}
{pt3dadd(187392.000000,122268.000000,47900.000000,288.881586)}
{pt3dadd(187332.000000,122112.000000,47900.000000,259.993431)}
{pt3dadd(188148.000000,120780.000000,47900.000000,231.105276)}
{pt3dadd(188484.000000,120600.000000,47750.000000,215.123166)}
{pt3dadd(188820.000000,120360.000000,47625.000000,199.141056)}
{pt3dadd(189204.000000,120144.000000,47425.000000,183.158946)}
{pt3dadd(189360.000000,119916.000000,47425.000000,167.176836)}
{pt3dadd(189516.000000,119676.000000,47300.000000,205.252614)}
{pt3dadd(189600.000000,119508.000000,47175.000000,243.328392)}
{pt3dadd(189732.000000,119268.000000,47200.000000,281.404170)}
{pt3dadd(189852.000000,119052.000000,47075.000000,319.479948)}
{pt3dadd(189936.000000,118788.000000,46975.000000,299.793622)}
{pt3dadd(190056.000000,118584.000000,46775.000000,280.107297)}
{pt3dadd(190176.000000,118356.000000,46700.000000,260.420972)}
{pt3dadd(190260.000000,118152.000000,46625.000000,240.734646)}
{pt3dadd(190224.000000,117996.000000,46475.000000,230.704038)}
{pt3dadd(190188.000000,117588.000000,46050.000000,220.673430)}
{pt3dadd(190188.000000,116676.000000,45650.000000,210.642822)}
{pt3dadd(190152.000000,116136.000000,45275.000000,200.612214)}
{pt3dadd(190212.000000,115932.000000,45075.000000,210.642822)}
{pt3dadd(190308.000000,115776.000000,44950.000000,220.673430)}
{pt3dadd(190476.000000,115536.000000,45150.000000,230.704038)}
{pt3dadd(190500.000000,115332.000000,45200.000000,240.734646)}
{pt3dadd(190524.000000,115128.000000,45175.000000,240.734646)}
{pt3dadd(190548.000000,114924.000000,45200.000000,240.734646)}
{pt3dadd(190524.000000,114732.000000,45300.000000,240.734646)}
{pt3dadd(190548.000000,114528.000000,45500.000000,240.734646)}
{pt3dadd(190608.000000,114288.000000,45775.000000,240.734646)}
{pt3dadd(190440.000000,114060.000000,45925.000000,240.734646)}
{pt3dadd(190440.000000,113904.000000,46200.000000,240.734646)}
{pt3dadd(190236.000000,113616.000000,46450.000000,240.734646)}
{pt3dadd(189996.000000,113400.000000,46575.000000,222.345193)}
{pt3dadd(189720.000000,113136.000000,46575.000000,203.955741)}
{pt3dadd(189852.000000,112956.000000,46700.000000,185.566288)}
{pt3dadd(189720.000000,112776.000000,46600.000000,167.176836)}
{pt3dadd(189588.000000,112596.000000,46600.000000,149.569092)}
{pt3dadd(189528.000000,112536.000000,46525.000000,131.961348)}
{pt3dadd(189468.000000,112344.000000,46575.000000,114.353604)}
{pt3dadd(189480.000000,112188.000000,46775.000000,96.745860)}
{pt3dadd(189408.000000,112056.000000,46775.000000,101.583153)}
{pt3dadd(189348.000000,111924.000000,46850.000000,106.420446)}
{pt3dadd(189204.000000,111744.000000,46850.000000,111.257739)}
{pt3dadd(189096.000000,111552.000000,46800.000000,116.095032)}
{pt3dadd(189180.000000,111288.000000,46800.000000,139.314042)}
{pt3dadd(189156.000000,111192.000000,46775.000000,96.745860)}

{create adhoc45}
{access adhoc45}
{connect adhoc45(1), adhoc41(0)}
{nseg = 1}
{strdef color color = "White"}
{pt3dclear()}
{pt3dadd(193188.000000,129984.000000,51525.000000,1490.565402)}
{pt3dadd(193128.000000,129804.000000,53100.000000,862.595802)}
{pt3dadd(192960.000000,129552.000000,53650.000000,862.595802)}
{pt3dadd(192864.000000,129300.000000,53775.000000,862.595802)}
{pt3dadd(192756.000000,129048.000000,53925.000000,862.595802)}
{pt3dadd(192648.000000,128820.000000,54125.000000,862.595802)}
{pt3dadd(192576.000000,128532.000000,54425.000000,862.595802)}
{pt3dadd(192504.000000,128292.000000,54800.000000,862.595802)}
{pt3dadd(192432.000000,128112.000000,55175.000000,862.595802)}
{pt3dadd(192192.000000,127884.000000,55375.000000,862.595802)}
{pt3dadd(191952.000000,127644.000000,55675.000000,796.703072)}
{pt3dadd(191784.000000,127404.000000,55925.000000,730.810341)}
{pt3dadd(191724.000000,127128.000000,56050.000000,664.917611)}
{pt3dadd(191664.000000,126912.000000,56175.000000,599.024880)}
{pt3dadd(191592.000000,126696.000000,56300.000000,574.065504)}
{pt3dadd(191604.000000,126432.000000,56450.000000,549.106128)}
{pt3dadd(191616.000000,126228.000000,56725.000000,524.146752)}
{pt3dadd(191580.000000,125928.000000,56950.000000,499.187376)}
{pt3dadd(191472.000000,125604.000000,57025.000000,524.146752)}
{pt3dadd(191412.000000,125316.000000,57200.000000,549.106128)}
{pt3dadd(191340.000000,125040.000000,57325.000000,574.065504)}
{pt3dadd(191364.000000,124716.000000,57650.000000,599.024880)}
{pt3dadd(191196.000000,124368.000000,57800.000000,628.976115)}
{pt3dadd(191424.000000,124080.000000,58150.000000,658.927350)}
{pt3dadd(191436.000000,123756.000000,58500.000000,688.878585)}
{pt3dadd(191496.000000,123396.000000,58725.000000,718.829820)}
{pt3dadd(191556.000000,123120.000000,58950.000000,754.771316)}
{pt3dadd(191604.000000,122844.000000,59200.000000,790.712811)}
{pt3dadd(191652.000000,122640.000000,59450.000000,826.654307)}
{pt3dadd(191700.000000,122436.000000,59700.000000,862.595802)}
{pt3dadd(191712.000000,122148.000000,59900.000000,826.654307)}
{pt3dadd(191676.000000,121896.000000,60075.000000,790.712811)}
{pt3dadd(191616.000000,121680.000000,60325.000000,754.771316)}
{pt3dadd(191664.000000,121428.000000,60525.000000,718.829820)}
{pt3dadd(191676.000000,121224.000000,60650.000000,754.771316)}
{pt3dadd(191688.000000,120984.000000,60775.000000,790.712811)}
{pt3dadd(191616.000000,120636.000000,60975.000000,826.654307)}
{pt3dadd(191364.000000,120252.000000,61475.000000,862.595802)}
{pt3dadd(191124.000000,120000.000000,61600.000000,862.595802)}
{pt3dadd(191016.000000,119652.000000,61650.000000,862.595802)}
{pt3dadd(190908.000000,119376.000000,61700.000000,862.595802)}
{pt3dadd(190764.000000,119040.000000,61750.000000,862.595802)}
{pt3dadd(190764.000000,118824.000000,61875.000000,828.091944)}

{create adhoc46}
{access adhoc46}
{connect adhoc46(1), adhoc45(0)}
{nseg = 1}
{strdef color color = "White"}
{pt3dclear()}
{pt3dadd(190764.000000,118824.000000,61875.000000,828.091944)}
{pt3dadd(190728.000000,118272.000000,63400.000000,399.349944)}
{pt3dadd(190488.000000,117732.000000,63650.000000,403.509830)}
{pt3dadd(190140.000000,116520.000000,64100.000000,407.669715)}
{pt3dadd(190140.000000,116340.000000,64300.000000,411.829601)}
{pt3dadd(190080.000000,116160.000000,64350.000000,415.989486)}
{pt3dadd(189912.000000,115944.000000,64650.000000,415.989486)}
{pt3dadd(189708.000000,115716.000000,65000.000000,415.989486)}
{pt3dadd(189504.000000,115500.000000,65350.000000,415.989486)}
{pt3dadd(189300.000000,115284.000000,65425.000000,415.989486)}
{pt3dadd(189276.000000,115056.000000,65400.000000,411.829601)}
{pt3dadd(189096.000000,114828.000000,65500.000000,407.669715)}
{pt3dadd(188916.000000,114624.000000,65600.000000,403.509830)}
{pt3dadd(188772.000000,114432.000000,65650.000000,399.349944)}
{pt3dadd(188748.000000,114228.000000,65650.000000,371.732855)}
{pt3dadd(188472.000000,114012.000000,65700.000000,344.115765)}
{pt3dadd(188328.000000,113808.000000,65750.000000,316.498675)}
{pt3dadd(188196.000000,113628.000000,65825.000000,288.881586)}
{pt3dadd(188028.000000,113424.000000,65950.000000,303.325664)}
{pt3dadd(187932.000000,113220.000000,66025.000000,317.769741)}
{pt3dadd(187608.000000,113208.000000,66025.000000,332.213819)}
{pt3dadd(187356.000000,113148.000000,66200.000000,346.657896)}
{pt3dadd(187152.000000,113112.000000,66350.000000,284.179887)}
{pt3dadd(186948.000000,113016.000000,66550.000000,221.701878)}
{pt3dadd(186648.000000,113016.000000,66775.000000,159.223869)}
{pt3dadd(186384.000000,112980.000000,66950.000000,96.745860)}
{pt3dadd(186036.000000,112872.000000,67050.000000,95.778405)}
{pt3dadd(185772.000000,112656.000000,67050.000000,94.810950)}
{pt3dadd(185508.000000,112632.000000,67050.000000,93.843495)}
{pt3dadd(185268.000000,112524.000000,67150.000000,92.876040)}
{pt3dadd(184980.000000,112356.000000,67175.000000,116.095032)}
{pt3dadd(184764.000000,112284.000000,67175.000000,139.314042)}

{create adhoc47}
{access adhoc47}
{connect adhoc47(1), adhoc45(0)}
{nseg = 1}
{strdef color color = "White"}
{pt3dclear()}
{pt3dadd(190764.000000,118824.000000,61875.000000,828.091944)}
{pt3dadd(189996.000000,118608.000000,61300.000000,499.187376)}
{pt3dadd(189792.000000,118368.000000,61475.000000,518.156496)}
{pt3dadd(189624.000000,118128.000000,61325.000000,537.125616)}
{pt3dadd(189516.000000,117828.000000,61325.000000,556.094736)}
{pt3dadd(189204.000000,117600.000000,61325.000000,575.063856)}
{pt3dadd(188964.000000,117264.000000,61225.000000,556.094736)}
{pt3dadd(188652.000000,116952.000000,61150.000000,537.125616)}
{pt3dadd(188280.000000,116652.000000,61100.000000,518.156496)}
{pt3dadd(188244.000000,116376.000000,61125.000000,499.187376)}
{pt3dadd(187896.000000,116052.000000,61025.000000,240.734646)}

{create adhoc48}
{access adhoc48}
{connect adhoc48(1), adhoc47(0)}
{nseg = 1}
{strdef color color = "White"}
{pt3dclear()}
{pt3dadd(187896.000000,116052.000000,61025.000000,240.734646)}
{pt3dadd(187932.000000,116304.000000,61650.000000,288.881586)}
{pt3dadd(187668.000000,115980.000000,61625.000000,320.658561)}
{pt3dadd(187404.000000,115620.000000,61775.000000,352.435536)}
{pt3dadd(187212.000000,115452.000000,61800.000000,384.212511)}
{pt3dadd(186984.000000,115164.000000,61800.000000,415.989486)}
{pt3dadd(186756.000000,114876.000000,61825.000000,398.656589)}
{pt3dadd(186384.000000,114648.000000,61950.000000,381.323691)}
{pt3dadd(186192.000000,114516.000000,62025.000000,363.990794)}
{pt3dadd(185964.000000,114492.000000,62125.000000,346.657896)}
{pt3dadd(185772.000000,114420.000000,62175.000000,346.657896)}
{pt3dadd(185556.000000,114240.000000,62275.000000,346.657896)}
{pt3dadd(185328.000000,114240.000000,62550.000000,346.657896)}
{pt3dadd(185064.000000,114108.000000,62550.000000,346.657896)}
{pt3dadd(184824.000000,113940.000000,62600.000000,320.177083)}
{pt3dadd(184560.000000,113592.000000,62700.000000,293.696271)}
{pt3dadd(184332.000000,113652.000000,62650.000000,267.215459)}
{pt3dadd(184092.000000,113472.000000,62675.000000,240.734646)}
{pt3dadd(183864.000000,113220.000000,62750.000000,252.771381)}
{pt3dadd(183672.000000,113016.000000,62800.000000,264.808116)}
{pt3dadd(183504.000000,112764.000000,62850.000000,276.844851)}
{pt3dadd(183336.000000,112560.000000,62825.000000,288.881586)}
{pt3dadd(181632.000000,110808.000000,62825.000000,303.325664)}
{pt3dadd(181380.000000,110496.000000,62900.000000,317.769741)}
{pt3dadd(180648.000000,109884.000000,62900.000000,332.213819)}
{pt3dadd(180420.000000,109848.000000,62950.000000,346.657896)}
{pt3dadd(180288.000000,109716.000000,62900.000000,332.213819)}
{pt3dadd(180084.000000,109500.000000,62950.000000,317.769741)}
{pt3dadd(179856.000000,109404.000000,63025.000000,303.325664)}
{pt3dadd(177300.000000,106812.000000,63025.000000,288.881586)}
{pt3dadd(177096.000000,106776.000000,63025.000000,288.881586)}
{pt3dadd(176904.000000,106632.000000,62925.000000,288.881586)}
{pt3dadd(176736.000000,106344.000000,62950.000000,288.881586)}
{pt3dadd(176532.000000,106164.000000,62800.000000,288.881586)}
{pt3dadd(176316.000000,106188.000000,62725.000000,288.881586)}
{pt3dadd(176196.000000,106116.000000,62650.000000,288.881586)}
{pt3dadd(175968.000000,106020.000000,62500.000000,288.881586)}
{pt3dadd(175788.000000,105780.000000,62350.000000,288.881586)}
{pt3dadd(175548.000000,105432.000000,62000.000000,415.989486)}

{create adhoc49}
{access adhoc49}
{connect adhoc49(1), adhoc48(0)}
{nseg = 1}
{strdef color color = "White"}
{pt3dclear()}
{pt3dadd(175548.000000,105432.000000,62000.000000,415.989486)}
{pt3dadd(175512.000000,106140.000000,62900.000000,200.612214)}
{pt3dadd(175332.000000,106008.000000,63300.000000,200.612214)}
{pt3dadd(175152.000000,105984.000000,63400.000000,200.612214)}
{pt3dadd(174948.000000,105912.000000,63525.000000,200.612214)}
{pt3dadd(174756.000000,105744.000000,63675.000000,96.745860)}

{create adhoc50}
{access adhoc50}
{connect adhoc50(1), adhoc48(0)}
{nseg = 1}
{strdef color color = "White"}
{pt3dclear()}
{pt3dadd(175548.000000,105432.000000,62000.000000,415.989486)}
{pt3dadd(175332.000000,105192.000000,61400.000000,346.657896)}
{pt3dadd(175332.000000,104844.000000,60825.000000,363.990794)}
{pt3dadd(175200.000000,104664.000000,60500.000000,381.323691)}
{pt3dadd(174924.000000,104628.000000,59925.000000,398.656589)}
{pt3dadd(174828.000000,104532.000000,59550.000000,415.989486)}
{pt3dadd(174756.000000,104508.000000,59075.000000,346.657896)}
{pt3dadd(174768.000000,103920.000000,58675.000000,240.734646)}

{create adhoc51}
{access adhoc51}
{connect adhoc51(1), adhoc50(0)}
{nseg = 1}
{strdef color color = "White"}
{pt3dclear()}
{pt3dadd(174768.000000,103920.000000,58675.000000,240.734646)}
{pt3dadd(174924.000000,104856.000000,58650.000000,346.657896)}
{pt3dadd(174888.000000,105156.000000,58200.000000,310.146476)}
{pt3dadd(175056.000000,105348.000000,57800.000000,273.635055)}
{pt3dadd(174912.000000,105624.000000,57400.000000,237.123635)}
{pt3dadd(174780.000000,106260.000000,56825.000000,200.612214)}
{pt3dadd(175020.000000,106788.000000,56575.000000,240.734646)}
{pt3dadd(175320.000000,106608.000000,56200.000000,200.612214)}

{create adhoc52}
{access adhoc52}
{connect adhoc52(1), adhoc50(0)}
{nseg = 1}
{strdef color color = "White"}
{pt3dclear()}
{pt3dadd(174768.000000,103920.000000,58675.000000,240.734646)}
{pt3dadd(174648.000000,103440.000000,58225.000000,200.612214)}
{pt3dadd(174564.000000,102816.000000,57825.000000,200.612214)}
{pt3dadd(174492.000000,102264.000000,57400.000000,200.612214)}
{pt3dadd(174744.000000,101976.000000,57025.000000,200.612214)}
{pt3dadd(174780.000000,101988.000000,56925.000000,133.741476)}

{create adhoc53}
{access adhoc53}
{connect adhoc53(1), adhoc47(0)}
{nseg = 1}
{strdef color color = "White"}
{pt3dclear()}
{pt3dadd(187896.000000,116052.000000,61025.000000,240.734646)}
{pt3dadd(187692.000000,115836.000000,60575.000000,399.349944)}
{pt3dadd(187056.000000,115608.000000,60275.000000,386.176932)}
{pt3dadd(186840.000000,115212.000000,60350.000000,373.003920)}
{pt3dadd(185652.000000,115008.000000,60075.000000,359.830908)}
{pt3dadd(185472.000000,114984.000000,60050.000000,346.657896)}
{pt3dadd(185256.000000,114888.000000,59900.000000,346.657896)}
{pt3dadd(185040.000000,114888.000000,59925.000000,346.657896)}
{pt3dadd(184824.000000,114780.000000,59750.000000,346.657896)}
{pt3dadd(184584.000000,114720.000000,59725.000000,346.657896)}
{pt3dadd(184404.000000,114660.000000,59650.000000,346.657896)}
{pt3dadd(184104.000000,114492.000000,59575.000000,346.657896)}
{pt3dadd(183780.000000,114468.000000,59500.000000,346.657896)}
{pt3dadd(183504.000000,114468.000000,59425.000000,346.657896)}
{pt3dadd(183288.000000,114480.000000,59475.000000,346.657896)}
{pt3dadd(183048.000000,114528.000000,59525.000000,346.657896)}
{pt3dadd(182784.000000,114468.000000,59500.000000,346.657896)}
{pt3dadd(182568.000000,114480.000000,59475.000000,346.657896)}
{pt3dadd(182340.000000,114492.000000,59450.000000,346.657896)}
{pt3dadd(182100.000000,114504.000000,59425.000000,346.657896)}
{pt3dadd(181824.000000,114516.000000,59400.000000,346.657896)}
{pt3dadd(181620.000000,114540.000000,59350.000000,346.657896)}
{pt3dadd(181380.000000,114540.000000,59275.000000,346.657896)}
{pt3dadd(181128.000000,114504.000000,59250.000000,346.657896)}
{pt3dadd(180924.000000,114588.000000,59275.000000,346.657896)}
{pt3dadd(180744.000000,114456.000000,59200.000000,346.657896)}
{pt3dadd(180480.000000,114468.000000,59125.000000,343.191321)}
{pt3dadd(180240.000000,114444.000000,59050.000000,339.724746)}
{pt3dadd(179976.000000,114444.000000,59000.000000,336.258171)}
{pt3dadd(179784.000000,114420.000000,58950.000000,332.791596)}
{pt3dadd(179556.000000,114324.000000,58950.000000,321.814093)}
{pt3dadd(179364.000000,114216.000000,58900.000000,310.836591)}
{pt3dadd(179196.000000,114228.000000,58850.000000,299.859089)}
{pt3dadd(178944.000000,114156.000000,58800.000000,288.881586)}
{pt3dadd(178788.000000,114120.000000,58750.000000,303.325664)}
{pt3dadd(178608.000000,114120.000000,58675.000000,317.769741)}
{pt3dadd(178404.000000,114120.000000,58575.000000,332.213819)}
{pt3dadd(178212.000000,114120.000000,58475.000000,346.657896)}
{pt3dadd(178032.000000,114120.000000,58350.000000,363.990794)}
{pt3dadd(177852.000000,114096.000000,58350.000000,381.323691)}
{pt3dadd(177648.000000,114108.000000,58350.000000,398.656589)}
{pt3dadd(177468.000000,114264.000000,58350.000000,415.989486)}
{pt3dadd(177264.000000,114288.000000,58300.000000,415.989486)}
{pt3dadd(177060.000000,114312.000000,58250.000000,415.989486)}
{pt3dadd(176844.000000,114360.000000,58200.000000,415.989486)}
{pt3dadd(176640.000000,114408.000000,58150.000000,415.989486)}
{pt3dadd(176328.000000,114456.000000,58100.000000,398.656589)}
{pt3dadd(176124.000000,114876.000000,58300.000000,381.323691)}
{pt3dadd(175968.000000,115308.000000,58350.000000,363.990794)}
{pt3dadd(175836.000000,115512.000000,58425.000000,346.657896)}
{pt3dadd(175680.000000,115596.000000,58400.000000,346.657896)}
{pt3dadd(175608.000000,115836.000000,58600.000000,346.657896)}
{pt3dadd(175320.000000,116124.000000,58725.000000,346.657896)}
{pt3dadd(175080.000000,116352.000000,58900.000000,346.657896)}
{pt3dadd(175080.000000,116652.000000,59100.000000,332.791560)}

{create adhoc54}
{access adhoc54}
{connect adhoc54(1), adhoc53(0)}
{nseg = 1}
{strdef color color = "White"}
{pt3dclear()}
{pt3dadd(175080.000000,116652.000000,59100.000000,332.791560)}
{pt3dadd(174564.000000,116748.000000,58550.000000,167.176836)}
{pt3dadd(174384.000000,116964.000000,58475.000000,185.566288)}
{pt3dadd(174252.000000,117156.000000,58475.000000,203.955741)}
{pt3dadd(173748.000000,117516.000000,58125.000000,222.345193)}
{pt3dadd(173544.000000,117816.000000,57700.000000,240.734646)}
{pt3dadd(173664.000000,118236.000000,57400.000000,215.379495)}
{pt3dadd(173616.000000,118128.000000,57275.000000,190.024344)}
{pt3dadd(173340.000000,118992.000000,57275.000000,164.669193)}
{pt3dadd(173400.000000,119388.000000,57600.000000,139.314042)}
{pt3dadd(173328.000000,119580.000000,57825.000000,200.612214)}
{pt3dadd(173304.000000,119700.000000,58000.000000,116.095032)}

{create adhoc55}
{access adhoc55}
{connect adhoc55(1), adhoc53(0)}
{nseg = 1}
{strdef color color = "White"}
{pt3dclear()}
{pt3dadd(175080.000000,116652.000000,59100.000000,332.791560)}
{pt3dadd(175440.000000,116784.000000,59425.000000,346.657896)}
{pt3dadd(175464.000000,117000.000000,59625.000000,332.213819)}
{pt3dadd(175524.000000,117168.000000,59900.000000,317.769741)}
{pt3dadd(175488.000000,117324.000000,59900.000000,303.325664)}
{pt3dadd(175392.000000,117552.000000,60175.000000,288.881586)}
{pt3dadd(175212.000000,117744.000000,60525.000000,276.844851)}
{pt3dadd(175188.000000,117960.000000,60700.000000,264.808116)}
{pt3dadd(175248.000000,118200.000000,60875.000000,252.771381)}
{pt3dadd(175248.000000,118464.000000,61075.000000,240.734646)}
{pt3dadd(175308.000000,118728.000000,61200.000000,263.748884)}
{pt3dadd(175272.000000,118896.000000,61350.000000,286.763121)}
{pt3dadd(175248.000000,119052.000000,61550.000000,309.777359)}
{pt3dadd(175212.000000,119196.000000,62025.000000,332.791596)}
{pt3dadd(175188.000000,119196.000000,62950.000000,399.349917)}
{pt3dadd(175212.000000,119400.000000,63250.000000,465.908238)}
{pt3dadd(175224.000000,119628.000000,63750.000000,532.466559)}
{pt3dadd(175344.000000,119724.000000,64150.000000,599.024880)}
{pt3dadd(175248.000000,119928.000000,64550.000000,535.933134)}
{pt3dadd(175104.000000,119868.000000,64900.000000,472.841388)}
{pt3dadd(175068.000000,119904.000000,65250.000000,409.749642)}
{pt3dadd(174924.000000,119928.000000,65575.000000,346.657896)}
{pt3dadd(174984.000000,120120.000000,65950.000000,317.769741)}
{pt3dadd(175248.000000,119940.000000,66250.000000,288.881586)}
{pt3dadd(174972.000000,119760.000000,66600.000000,96.745860)}

{create adhoc56}
{access adhoc56}
{connect adhoc56(1), adhoc55(0)}
{nseg = 1}
{strdef color color = "White"}
{pt3dclear()}
{pt3dadd(174972.000000,119760.000000,66600.000000,96.745860)}
{pt3dadd(175572.000000,120216.000000,66625.000000,67.184640)}
{pt3dadd(176076.000000,120336.000000,66725.000000,153.959643)}
{pt3dadd(176100.000000,120504.000000,66925.000000,240.734646)}
{pt3dadd(176232.000000,120672.000000,66775.000000,96.745860)}

{create adhoc57}
{access adhoc57}
{connect adhoc57(1), adhoc55(0)}
{nseg = 1}
{strdef color color = "White"}
{pt3dclear()}
{pt3dadd(174972.000000,119760.000000,66600.000000,96.745860)}
{pt3dadd(174192.000000,119388.000000,66750.000000,96.745860)}
{pt3dadd(173844.000000,118884.000000,66875.000000,107.387906)}
{pt3dadd(173724.000000,118608.000000,66900.000000,118.029951)}
{pt3dadd(173652.000000,118356.000000,66825.000000,128.671997)}
{pt3dadd(173484.000000,118164.000000,66850.000000,139.314042)}
{pt3dadd(173352.000000,117960.000000,66850.000000,125.124648)}
{pt3dadd(173100.000000,117696.000000,66875.000000,110.935254)}
{pt3dadd(173028.000000,117432.000000,66875.000000,96.745860)}
{pt3dadd(173028.000000,117228.000000,66650.000000,139.314042)}

{create adhoc58}
{access adhoc58}
{connect adhoc58(1), adhoc40(0)}
{nseg = 1}
{strdef color color = "White"}
{pt3dclear()}
{pt3dadd(192660.000000,132888.000000,49750.000000,718.829820)}
{pt3dadd(191472.000000,132912.000000,48825.000000,240.734646)}
{pt3dadd(191004.000000,132732.000000,48775.000000,252.771381)}
{pt3dadd(190776.000000,132624.000000,48775.000000,264.808116)}
{pt3dadd(190428.000000,132600.000000,48825.000000,276.844851)}
{pt3dadd(190164.000000,132468.000000,48725.000000,288.881586)}
{pt3dadd(189876.000000,132516.000000,48725.000000,341.458034)}
{pt3dadd(189600.000000,132456.000000,48775.000000,394.034481)}
{pt3dadd(189324.000000,132324.000000,48825.000000,446.610929)}
{pt3dadd(189096.000000,132180.000000,48850.000000,499.187376)}
{pt3dadd(188844.000000,131964.000000,48950.000000,499.187376)}
{pt3dadd(188652.000000,131928.000000,48950.000000,399.349908)}

{create adhoc59}
{access adhoc59}
{connect adhoc59(1), adhoc58(0)}
{nseg = 1}
{strdef color color = "White"}
{pt3dclear()}
{pt3dadd(188652.000000,131928.000000,48950.000000,399.349908)}
{pt3dadd(188436.000000,131712.000000,48875.000000,415.989486)}
{pt3dadd(188184.000000,131568.000000,49000.000000,384.212511)}
{pt3dadd(187908.000000,131316.000000,49025.000000,352.435536)}
{pt3dadd(187692.000000,131172.000000,49025.000000,320.658561)}
{pt3dadd(187428.000000,130968.000000,49025.000000,288.881586)}
{pt3dadd(187152.000000,130800.000000,49150.000000,285.992771)}
{pt3dadd(186828.000000,130584.000000,49100.000000,283.103955)}
{pt3dadd(186516.000000,130440.000000,49150.000000,280.215140)}
{pt3dadd(186216.000000,130224.000000,49200.000000,277.326324)}
{pt3dadd(185892.000000,130044.000000,49325.000000,280.215140)}
{pt3dadd(185628.000000,130128.000000,49425.000000,283.103955)}
{pt3dadd(185364.000000,130056.000000,49525.000000,285.992771)}
{pt3dadd(185148.000000,130032.000000,49625.000000,288.881586)}
{pt3dadd(184944.000000,129996.000000,49675.000000,288.881586)}
{pt3dadd(184668.000000,130008.000000,49775.000000,288.881586)}
{pt3dadd(184404.000000,130032.000000,49825.000000,288.881586)}
{pt3dadd(184236.000000,130032.000000,49775.000000,288.881586)}
{pt3dadd(184020.000000,129972.000000,49775.000000,288.881586)}
{pt3dadd(183708.000000,129996.000000,49825.000000,288.881586)}
{pt3dadd(183504.000000,129936.000000,49875.000000,288.881586)}
{pt3dadd(183228.000000,129900.000000,49850.000000,288.881586)}
{pt3dadd(182940.000000,129912.000000,49850.000000,288.881586)}
{pt3dadd(182700.000000,129852.000000,49825.000000,288.881586)}
{pt3dadd(182508.000000,129816.000000,49900.000000,288.881586)}
{pt3dadd(182220.000000,129744.000000,49975.000000,288.881586)}
{pt3dadd(181944.000000,129528.000000,49900.000000,288.881586)}
{pt3dadd(181764.000000,129552.000000,49925.000000,288.881586)}
{pt3dadd(181620.000000,129456.000000,49925.000000,288.881586)}
{pt3dadd(181380.000000,129456.000000,49875.000000,288.881586)}
{pt3dadd(181128.000000,129348.000000,49850.000000,276.844851)}
{pt3dadd(180924.000000,129324.000000,49875.000000,264.808116)}
{pt3dadd(180624.000000,129300.000000,49825.000000,252.771381)}
{pt3dadd(180348.000000,129204.000000,49825.000000,240.734646)}
{pt3dadd(180108.000000,129096.000000,49750.000000,240.734646)}
{pt3dadd(179832.000000,129036.000000,49650.000000,240.734646)}
{pt3dadd(179520.000000,128976.000000,49675.000000,240.734646)}
{pt3dadd(179244.000000,128832.000000,49600.000000,240.734646)}
{pt3dadd(178932.000000,128772.000000,49625.000000,252.771381)}
{pt3dadd(178668.000000,128628.000000,49625.000000,264.808116)}
{pt3dadd(178428.000000,128532.000000,49600.000000,276.844851)}
{pt3dadd(178164.000000,128436.000000,49675.000000,288.881586)}
{pt3dadd(177900.000000,128232.000000,49650.000000,316.498685)}
{pt3dadd(177612.000000,128124.000000,49650.000000,344.115783)}
{pt3dadd(177336.000000,127992.000000,49650.000000,371.732881)}
{pt3dadd(177036.000000,127920.000000,49700.000000,399.349980)}
{pt3dadd(176784.000000,127944.000000,49725.000000,403.509857)}
{pt3dadd(176532.000000,127872.000000,49675.000000,407.669733)}
{pt3dadd(176280.000000,127692.000000,49675.000000,411.829610)}
{pt3dadd(175968.000000,127524.000000,49725.000000,415.989486)}
{pt3dadd(175704.000000,127452.000000,49725.000000,362.145168)}
{pt3dadd(175668.000000,127140.000000,49975.000000,308.300850)}
{pt3dadd(175488.000000,126768.000000,50225.000000,254.456532)}
{pt3dadd(175440.000000,126372.000000,50450.000000,200.612214)}
{pt3dadd(175320.000000,125832.000000,50675.000000,250.296637)}
{pt3dadd(175320.000000,125676.000000,50775.000000,299.981061)}
{pt3dadd(175248.000000,125412.000000,51050.000000,349.665484)}
{pt3dadd(175032.000000,125112.000000,51450.000000,399.349908)}
{pt3dadd(174828.000000,124848.000000,51700.000000,328.536189)}
{pt3dadd(174804.000000,124560.000000,51700.000000,257.722470)}
{pt3dadd(174816.000000,124356.000000,51475.000000,186.908751)}
{pt3dadd(174900.000000,124164.000000,51450.000000,116.095032)}
{pt3dadd(174864.000000,123840.000000,51375.000000,137.224328)}
{pt3dadd(174732.000000,123528.000000,51300.000000,158.353623)}
{pt3dadd(174600.000000,123264.000000,51325.000000,179.482918)}
{pt3dadd(174204.000000,123096.000000,51375.000000,200.612214)}
{pt3dadd(174360.000000,122892.000000,51525.000000,96.745860)}

{create adhoc60}
{access adhoc60}
{connect adhoc60(1), adhoc58(0)}
{nseg = 1}
{strdef color color = "White"}
{pt3dclear()}
{pt3dadd(188652.000000,131928.000000,48950.000000,399.349908)}
{pt3dadd(188184.000000,132912.000000,48850.000000,288.881586)}
{pt3dadd(188016.000000,133056.000000,49025.000000,245.684947)}
{pt3dadd(187956.000000,132996.000000,49300.000000,202.488309)}
{pt3dadd(187080.000000,133416.000000,49300.000000,159.291671)}
{pt3dadd(186912.000000,133476.000000,49275.000000,116.095032)}
{pt3dadd(186876.000000,133488.000000,49525.000000,116.095032)}

{create adhoc61}
{access adhoc61}
{connect adhoc61(1), adhoc40(0)}
{nseg = 1}
{strdef color color = "White"}
{pt3dclear()}
{pt3dadd(192660.000000,132888.000000,49750.000000,718.829820)}
{pt3dadd(191592.000000,132780.000000,50600.000000,200.612214)}
{pt3dadd(191004.000000,132936.000000,50950.000000,192.253370)}
{pt3dadd(190896.000000,133068.000000,50950.000000,183.894525)}
{pt3dadd(190764.000000,133248.000000,51075.000000,175.535680)}
{pt3dadd(190692.000000,133452.000000,51100.000000,167.176836)}
{pt3dadd(190476.000000,133596.000000,51300.000000,167.176836)}
{pt3dadd(190344.000000,133848.000000,51375.000000,167.176836)}
{pt3dadd(190068.000000,134136.000000,51425.000000,167.176836)}
{pt3dadd(189888.000000,134400.000000,51550.000000,167.176836)}
{pt3dadd(189828.000000,134580.000000,51900.000000,175.535680)}
{pt3dadd(189660.000000,134736.000000,52150.000000,183.894525)}
{pt3dadd(189528.000000,134952.000000,52425.000000,192.253370)}
{pt3dadd(189420.000000,135204.000000,52575.000000,200.612214)}
{pt3dadd(189276.000000,135480.000000,52700.000000,185.287671)}
{pt3dadd(189204.000000,135684.000000,52675.000000,169.963128)}
{pt3dadd(189132.000000,135912.000000,52675.000000,154.638585)}
{pt3dadd(188892.000000,136152.000000,52525.000000,139.314042)}
{pt3dadd(188820.000000,136404.000000,52525.000000,96.745860)}

{create adhoc62}
{access adhoc62}
{connect adhoc62(1), adhoc39(0)}
{nseg = 1}
{strdef color color = "White"}
{pt3dclear()}
{pt3dadd(193260.000000,135864.000000,48250.000000,862.595802)}
{pt3dadd(191136.000000,135780.000000,47175.000000,332.791596)}
{pt3dadd(190248.000000,135576.000000,47025.000000,321.814093)}
{pt3dadd(190044.000000,135360.000000,46925.000000,310.836591)}
{pt3dadd(189804.000000,135336.000000,46850.000000,299.859089)}
{pt3dadd(189528.000000,135228.000000,46800.000000,288.881586)}
{pt3dadd(189240.000000,135120.000000,46725.000000,276.844851)}
{pt3dadd(189048.000000,135024.000000,46750.000000,264.808116)}
{pt3dadd(188700.000000,134892.000000,46475.000000,252.771381)}
{pt3dadd(188040.000000,134748.000000,46200.000000,240.734646)}
{pt3dadd(187464.000000,134352.000000,46200.000000,252.771381)}
{pt3dadd(186696.000000,134280.000000,45900.000000,264.808116)}
{pt3dadd(185376.000000,134220.000000,45500.000000,276.844851)}
{pt3dadd(183972.000000,134160.000000,45100.000000,288.881586)}
{pt3dadd(182244.000000,134160.000000,44600.000000,303.325664)}
{pt3dadd(182028.000000,134016.000000,44650.000000,317.769741)}
{pt3dadd(181740.000000,133980.000000,44500.000000,332.213819)}
{pt3dadd(181488.000000,133776.000000,44475.000000,346.657896)}
{pt3dadd(181368.000000,133632.000000,44500.000000,332.213819)}
{pt3dadd(180960.000000,133500.000000,44275.000000,317.769741)}
{pt3dadd(180684.000000,133560.000000,44300.000000,303.325664)}
{pt3dadd(180408.000000,133344.000000,44175.000000,288.881586)}
{pt3dadd(180180.000000,133320.000000,44150.000000,288.881586)}
{pt3dadd(179964.000000,133176.000000,44050.000000,288.881586)}
{pt3dadd(179688.000000,133188.000000,43950.000000,288.881586)}
{pt3dadd(179412.000000,133116.000000,43875.000000,288.881586)}
{pt3dadd(179136.000000,133248.000000,43800.000000,288.881586)}
{pt3dadd(178860.000000,133260.000000,43675.000000,288.881586)}
{pt3dadd(178608.000000,133200.000000,43425.000000,288.881586)}
{pt3dadd(177900.000000,133392.000000,43750.000000,288.881586)}
{pt3dadd(177696.000000,133452.000000,43750.000000,266.814243)}
{pt3dadd(177456.000000,133548.000000,43725.000000,244.746900)}
{pt3dadd(177132.000000,133980.000000,43825.000000,222.679557)}
{pt3dadd(176880.000000,134508.000000,43825.000000,200.612214)}
{pt3dadd(176664.000000,134856.000000,43800.000000,185.287671)}
{pt3dadd(176412.000000,135012.000000,43800.000000,169.963128)}
{pt3dadd(175872.000000,135432.000000,43925.000000,154.638585)}
{pt3dadd(175128.000000,135672.000000,43925.000000,139.314042)}
{pt3dadd(175128.000000,136032.000000,43750.000000,167.176836)}

{create adhoc63}
{access adhoc63}
{connect adhoc63(1), adhoc38(0)}
{nseg = 1}
{strdef color color = "White"}
{pt3dclear()}
{pt3dadd(193272.000000,141816.000000,46150.000000,1035.114948)}
{pt3dadd(192996.000000,141684.000000,44650.000000,690.076602)}
{pt3dadd(192696.000000,141684.000000,42725.000000,828.092016)}

{create adhoc64}
{access adhoc64}
{connect adhoc64(1), adhoc63(0)}
{nseg = 1}
{strdef color color = "White"}
{pt3dclear()}
{pt3dadd(192696.000000,141684.000000,42725.000000,828.092016)}
{pt3dadd(192144.000000,141240.000000,42400.000000,415.989486)}
{pt3dadd(191904.000000,141192.000000,42200.000000,111.451230)}

{create adhoc65}
{access adhoc65}
{connect adhoc65(1), adhoc64(0)}
{nseg = 1}
{strdef color color = "White"}
{pt3dclear()}
{pt3dadd(191904.000000,141192.000000,42200.000000,111.451230)}
{pt3dadd(190488.000000,141084.000000,42050.000000,240.734646)}
{pt3dadd(189780.000000,141180.000000,41650.000000,267.215459)}
{pt3dadd(189528.000000,141504.000000,41275.000000,293.696271)}
{pt3dadd(189492.000000,141924.000000,40950.000000,320.177083)}
{pt3dadd(189468.000000,142272.000000,40650.000000,346.657896)}
{pt3dadd(189492.000000,142548.000000,40250.000000,317.769741)}
{pt3dadd(189540.000000,143232.000000,39925.000000,288.881586)}
{pt3dadd(189552.000000,143724.000000,39450.000000,167.176836)}

{create adhoc66}
{access adhoc66}
{connect adhoc66(1), adhoc64(0)}
{nseg = 1}
{strdef color color = "White"}
{pt3dclear()}
{pt3dadd(191904.000000,141192.000000,42200.000000,111.451230)}
{pt3dadd(192516.000000,141468.000000,42000.000000,599.024880)}
{pt3dadd(192636.000000,141552.000000,41775.000000,574.065504)}
{pt3dadd(192660.000000,141552.000000,41400.000000,549.106128)}
{pt3dadd(192780.000000,141492.000000,41075.000000,524.146752)}
{pt3dadd(192840.000000,141384.000000,40650.000000,499.187376)}
{pt3dadd(192840.000000,141252.000000,40250.000000,554.097987)}
{pt3dadd(192816.000000,141108.000000,39750.000000,609.008598)}
{pt3dadd(193008.000000,140748.000000,39175.000000,663.919209)}
{pt3dadd(193020.000000,140652.000000,38650.000000,718.829820)}
{pt3dadd(193284.000000,140700.000000,38150.000000,663.919209)}
{pt3dadd(193380.000000,140640.000000,37750.000000,609.008598)}
{pt3dadd(193356.000000,140652.000000,37250.000000,554.097987)}
{pt3dadd(193368.000000,140700.000000,36850.000000,499.187376)}
{pt3dadd(193452.000000,141204.000000,36625.000000,461.055006)}
{pt3dadd(193428.000000,141960.000000,36275.000000,422.922636)}
{pt3dadd(193392.000000,142596.000000,35925.000000,384.790266)}
{pt3dadd(193368.000000,143736.000000,35525.000000,346.657896)}
{pt3dadd(193464.000000,144120.000000,35225.000000,343.191312)}
{pt3dadd(193392.000000,144312.000000,34800.000000,339.724728)}
{pt3dadd(193488.000000,144588.000000,34325.000000,336.258144)}
{pt3dadd(193800.000000,144708.000000,33975.000000,332.791560)}
{pt3dadd(193896.000000,145056.000000,33625.000000,299.746723)}
{pt3dadd(194124.000000,145488.000000,33275.000000,266.701887)}
{pt3dadd(194580.000000,145680.000000,32975.000000,233.657051)}
{pt3dadd(194700.000000,145680.000000,32575.000000,200.612214)}
{pt3dadd(194868.000000,145620.000000,32200.000000,80.621550)}

{create adhoc67}
{access adhoc67}
{connect adhoc67(1), adhoc63(0)}
{nseg = 1}
{strdef color color = "White"}
{pt3dclear()}
{pt3dadd(192696.000000,141684.000000,42725.000000,828.092016)}
{pt3dadd(192192.000000,139008.000000,43375.000000,415.989486)}
{pt3dadd(191952.000000,138264.000000,43025.000000,398.656589)}
{pt3dadd(192024.000000,138012.000000,43025.000000,381.323691)}
{pt3dadd(192180.000000,137772.000000,43025.000000,363.990794)}
{pt3dadd(192156.000000,137568.000000,42975.000000,346.657896)}
{pt3dadd(192168.000000,137364.000000,42900.000000,346.657896)}
{pt3dadd(192216.000000,137160.000000,42750.000000,346.657896)}
{pt3dadd(192156.000000,136920.000000,42625.000000,346.657896)}
{pt3dadd(192204.000000,136704.000000,42500.000000,346.657896)}
{pt3dadd(192228.000000,136428.000000,42350.000000,363.990794)}
{pt3dadd(192348.000000,136176.000000,42100.000000,381.323691)}
{pt3dadd(192312.000000,135924.000000,41850.000000,398.656589)}
{pt3dadd(192360.000000,135696.000000,41625.000000,415.989486)}
{pt3dadd(192420.000000,135420.000000,41625.000000,381.323696)}
{pt3dadd(192396.000000,135264.000000,41250.000000,346.657905)}
{pt3dadd(192420.000000,134964.000000,40975.000000,311.992115)}
{pt3dadd(192552.000000,134700.000000,40725.000000,277.326324)}
{pt3dadd(192576.000000,134484.000000,40525.000000,268.178405)}
{pt3dadd(192708.000000,134280.000000,40400.000000,259.030485)}
{pt3dadd(192900.000000,134052.000000,40300.000000,249.882566)}
{pt3dadd(193056.000000,133848.000000,40225.000000,240.734646)}
{pt3dadd(193140.000000,133596.000000,40100.000000,252.771381)}
{pt3dadd(193296.000000,133368.000000,39925.000000,264.808116)}
{pt3dadd(193272.000000,133188.000000,39700.000000,276.844851)}
{pt3dadd(193296.000000,132996.000000,39575.000000,288.881586)}
{pt3dadd(193536.000000,132768.000000,39525.000000,288.881586)}
{pt3dadd(193596.000000,132636.000000,39425.000000,288.881586)}
{pt3dadd(193356.000000,132264.000000,39650.000000,288.881586)}
{pt3dadd(193224.000000,132060.000000,39650.000000,288.881586)}
{pt3dadd(193200.000000,131904.000000,39575.000000,308.140356)}
{pt3dadd(193200.000000,129636.000000,40075.000000,327.399126)}
{pt3dadd(193056.000000,129396.000000,40275.000000,346.657896)}
{pt3dadd(193056.000000,129168.000000,40125.000000,200.612214)}

{create adhoc68}
{access adhoc68}
{connect adhoc68(1), adhoc67(0)}
{nseg = 1}
{strdef color color = "White"}
{pt3dclear()}
{pt3dadd(193056.000000,129168.000000,40125.000000,200.612214)}
{pt3dadd(193356.000000,128976.000000,40050.000000,167.176836)}
{pt3dadd(193476.000000,128712.000000,40050.000000,167.176836)}
{pt3dadd(193524.000000,128508.000000,40075.000000,167.176836)}
{pt3dadd(193548.000000,128328.000000,40100.000000,167.176836)}
{pt3dadd(193632.000000,128160.000000,40025.000000,167.176836)}
{pt3dadd(193488.000000,127980.000000,40100.000000,212.047101)}
{pt3dadd(193416.000000,127788.000000,40275.000000,256.917366)}
{pt3dadd(193356.000000,127596.000000,40325.000000,301.787631)}
{pt3dadd(193332.000000,127380.000000,40325.000000,346.657896)}
{pt3dadd(193344.000000,127152.000000,40250.000000,339.863409)}
{pt3dadd(193212.000000,126960.000000,40450.000000,333.068922)}
{pt3dadd(193104.000000,126840.000000,40650.000000,326.274435)}
{pt3dadd(193068.000000,126624.000000,40600.000000,319.479948)}
{pt3dadd(192936.000000,126408.000000,40600.000000,343.607332)}
{pt3dadd(192804.000000,126204.000000,40600.000000,367.734717)}
{pt3dadd(192780.000000,126048.000000,40650.000000,391.862101)}
{pt3dadd(192636.000000,125808.000000,40775.000000,415.989486)}
{pt3dadd(192456.000000,125280.000000,40800.000000,240.734646)}
{pt3dadd(192132.000000,125436.000000,41000.000000,240.734646)}

{create adhoc69}
{access adhoc69}
{connect adhoc69(1), adhoc68(0)}
{nseg = 1}
{strdef color color = "White"}
{pt3dclear()}
{pt3dadd(192132.000000,125436.000000,41000.000000,240.734646)}
{pt3dadd(191892.000000,125448.000000,41075.000000,80.621550)}

{create adhoc70}
{access adhoc70}
{connect adhoc70(1), adhoc68(0)}
{nseg = 1}
{strdef color color = "White"}
{pt3dclear()}
{pt3dadd(192132.000000,125436.000000,41000.000000,240.734646)}
{pt3dadd(192060.000000,125340.000000,42250.000000,167.176836)}
{pt3dadd(191856.000000,125256.000000,42625.000000,141.635934)}
{pt3dadd(191700.000000,124932.000000,42850.000000,116.095032)}
{pt3dadd(191496.000000,124764.000000,42900.000000,96.745860)}

{create adhoc71}
{access adhoc71}
{connect adhoc71(1), adhoc67(0)}
{nseg = 1}
{strdef color color = "White"}
{pt3dclear()}
{pt3dadd(193056.000000,129168.000000,40125.000000,200.612214)}
{pt3dadd(192444.000000,129120.000000,41100.000000,415.989486)}
{pt3dadd(192168.000000,128892.000000,41450.000000,372.175776)}
{pt3dadd(191556.000000,128724.000000,41775.000000,328.362066)}
{pt3dadd(191376.000000,128652.000000,41850.000000,284.548356)}
{pt3dadd(191220.000000,128652.000000,41975.000000,240.734646)}
{pt3dadd(190992.000000,128748.000000,42025.000000,200.612214)}
{pt3dadd(190860.000000,128976.000000,42200.000000,96.745860)}

{create adhoc72}
{access adhoc72}
{connect adhoc72(1), adhoc37(0)}
{nseg = 1}
{strdef color color = "White"}
{pt3dclear()}
{pt3dadd(193596.000000,143532.000000,45950.000000,993.710358)}
{pt3dadd(190704.000000,143460.000000,46025.000000,240.734646)}
{pt3dadd(190080.000000,143112.000000,46025.000000,230.704038)}
{pt3dadd(190020.000000,143064.000000,45700.000000,220.673430)}
{pt3dadd(189804.000000,142956.000000,45800.000000,210.642822)}
{pt3dadd(189540.000000,142788.000000,45775.000000,200.612214)}
{pt3dadd(189360.000000,142536.000000,45675.000000,174.645625)}
{pt3dadd(189084.000000,142836.000000,45500.000000,148.679037)}
{pt3dadd(188868.000000,142920.000000,45525.000000,122.712448)}
{pt3dadd(188628.000000,142668.000000,45475.000000,96.745860)}
{pt3dadd(188412.000000,142608.000000,45400.000000,107.387906)}
{pt3dadd(188196.000000,142668.000000,45425.000000,118.029951)}
{pt3dadd(187956.000000,142632.000000,45350.000000,128.671997)}
{pt3dadd(187716.000000,142560.000000,45300.000000,139.314042)}
{pt3dadd(187512.000000,142392.000000,45375.000000,133.509289)}
{pt3dadd(187344.000000,142368.000000,45350.000000,127.704537)}
{pt3dadd(187668.000000,142848.000000,44825.000000,121.899785)}
{pt3dadd(186720.000000,143088.000000,44625.000000,116.095032)}
{pt3dadd(186276.000000,143136.000000,44400.000000,111.257739)}
{pt3dadd(185388.000000,143400.000000,44500.000000,106.420446)}
{pt3dadd(184512.000000,143556.000000,44500.000000,101.583153)}
{pt3dadd(184296.000000,143376.000000,44350.000000,96.745860)}
{pt3dadd(184092.000000,143160.000000,43850.000000,96.745860)}
{pt3dadd(183588.000000,142908.000000,43500.000000,96.745860)}
{pt3dadd(183216.000000,142704.000000,43100.000000,96.745860)}
{pt3dadd(183084.000000,142548.000000,42975.000000,116.095032)}

{create adhoc73}
{access adhoc73}
{connect adhoc73(1), adhoc2(0)}
{nseg = 1}
{strdef color color = "White"}
{pt3dclear()}
{pt3dadd(187092.000000,198708.000000,69175.000000,2146.414176)}
{pt3dadd(182220.000000,197124.000000,69225.000000,862.595802)}
{pt3dadd(181596.000000,196776.000000,69650.000000,853.969856)}
{pt3dadd(181344.000000,196716.000000,69650.000000,845.343909)}
{pt3dadd(181044.000000,196440.000000,69850.000000,836.717962)}
{pt3dadd(180792.000000,196344.000000,69975.000000,828.092016)}
{pt3dadd(180492.000000,196248.000000,70100.000000,800.776467)}
{pt3dadd(180192.000000,196176.000000,70225.000000,773.460918)}
{pt3dadd(179928.000000,196116.000000,70325.000000,746.145369)}
{pt3dadd(179640.000000,195864.000000,70425.000000,718.829820)}
{pt3dadd(179304.000000,195588.000000,70550.000000,754.771316)}
{pt3dadd(179028.000000,195312.000000,70750.000000,790.712811)}
{pt3dadd(178836.000000,195312.000000,70800.000000,826.654307)}
{pt3dadd(178596.000000,195168.000000,70900.000000,862.595802)}
{pt3dadd(178416.000000,194988.000000,71025.000000,905.725589)}
{pt3dadd(178188.000000,194808.000000,71150.000000,948.855375)}
{pt3dadd(177876.000000,194748.000000,71275.000000,991.985162)}
{pt3dadd(177504.000000,194616.000000,71500.000000,1035.114948)}
{pt3dadd(177228.000000,194508.000000,71675.000000,1035.114948)}
{pt3dadd(176964.000000,194472.000000,71775.000000,862.595802)}

{create adhoc74}
{access adhoc74}
{connect adhoc74(1), adhoc73(0)}
{nseg = 1}
{strdef color color = "White"}
{pt3dclear()}
{pt3dadd(176964.000000,194472.000000,71775.000000,862.595802)}
{pt3dadd(176628.000000,194256.000000,72000.000000,862.595802)}
{pt3dadd(176316.000000,194076.000000,71950.000000,766.751823)}
{pt3dadd(176544.000000,193788.000000,71825.000000,670.907844)}
{pt3dadd(176328.000000,193512.000000,71850.000000,575.063865)}
{pt3dadd(176016.000000,193260.000000,71850.000000,479.219886)}
{pt3dadd(175692.000000,192852.000000,71775.000000,509.171134)}
{pt3dadd(175524.000000,192516.000000,71675.000000,539.122383)}
{pt3dadd(175692.000000,192144.000000,71550.000000,569.073631)}
{pt3dadd(175584.000000,191844.000000,71575.000000,599.024880)}
{pt3dadd(175488.000000,191496.000000,71500.000000,718.829820)}
{pt3dadd(175500.000000,191136.000000,71275.000000,828.091944)}

{create adhoc75}
{access adhoc75}
{connect adhoc75(1), adhoc74(0)}
{nseg = 1}
{strdef color color = "White"}
{pt3dclear()}
{pt3dadd(175500.000000,191136.000000,71275.000000,828.091944)}
{pt3dadd(174948.000000,191064.000000,70750.000000,346.657896)}
{pt3dadd(174816.000000,190848.000000,70475.000000,363.990794)}
{pt3dadd(174780.000000,190608.000000,70300.000000,381.323691)}
{pt3dadd(174528.000000,190368.000000,70050.000000,398.656589)}
{pt3dadd(174276.000000,190152.000000,69900.000000,415.989486)}
{pt3dadd(174144.000000,189912.000000,69725.000000,415.989486)}
{pt3dadd(174048.000000,189732.000000,69650.000000,415.989486)}
{pt3dadd(173868.000000,189540.000000,69425.000000,415.989486)}
{pt3dadd(173544.000000,189312.000000,69325.000000,415.989486)}
{pt3dadd(173472.000000,189012.000000,69100.000000,436.788958)}
{pt3dadd(173304.000000,188772.000000,68725.000000,457.588431)}
{pt3dadd(173316.000000,188568.000000,68400.000000,478.387903)}
{pt3dadd(173136.000000,188268.000000,68000.000000,499.187376)}
{pt3dadd(173220.000000,188052.000000,67725.000000,499.187376)}
{pt3dadd(173004.000000,187836.000000,67500.000000,499.187376)}
{pt3dadd(172896.000000,187572.000000,66950.000000,499.187376)}
{pt3dadd(172908.000000,187332.000000,66625.000000,499.187376)}
{pt3dadd(172812.000000,187116.000000,66300.000000,461.055006)}
{pt3dadd(172860.000000,186888.000000,66200.000000,422.922636)}
{pt3dadd(172416.000000,187008.000000,66025.000000,384.790266)}
{pt3dadd(172080.000000,186276.000000,65575.000000,346.657896)}
{pt3dadd(172080.000000,186060.000000,65650.000000,332.213819)}
{pt3dadd(172056.000000,185856.000000,65500.000000,317.769741)}
{pt3dadd(171960.000000,185604.000000,65400.000000,303.325664)}
{pt3dadd(171924.000000,185352.000000,65300.000000,288.881586)}
{pt3dadd(171888.000000,185112.000000,65200.000000,299.859089)}
{pt3dadd(171912.000000,184908.000000,65200.000000,310.836591)}
{pt3dadd(171936.000000,184728.000000,65200.000000,321.814093)}
{pt3dadd(171960.000000,184476.000000,65025.000000,332.791596)}
{pt3dadd(171972.000000,184248.000000,64875.000000,332.791596)}
{pt3dadd(171972.000000,184056.000000,64850.000000,332.791596)}
{pt3dadd(172032.000000,183708.000000,64625.000000,332.791596)}
{pt3dadd(172092.000000,183420.000000,64500.000000,332.791596)}
{pt3dadd(172404.000000,183180.000000,64425.000000,415.989486)}
{pt3dadd(172536.000000,182964.000000,64450.000000,499.187376)}
{pt3dadd(172548.000000,182628.000000,63850.000000,479.219886)}

{create adhoc76}
{access adhoc76}
{connect adhoc76(1), adhoc75(0)}
{nseg = 1}
{strdef color color = "White"}
{pt3dclear()}
{pt3dadd(172548.000000,182628.000000,63850.000000,479.219886)}
{pt3dadd(172296.000000,182388.000000,63275.000000,415.989486)}
{pt3dadd(172044.000000,182412.000000,63100.000000,167.176836)}

{create adhoc77}
{access adhoc77}
{connect adhoc77(1), adhoc75(0)}
{nseg = 1}
{strdef color color = "White"}
{pt3dclear()}
{pt3dadd(172548.000000,182628.000000,63850.000000,479.219886)}
{pt3dadd(172560.000000,182508.000000,64575.000000,288.881586)}
{pt3dadd(172680.000000,182376.000000,64750.000000,299.859089)}
{pt3dadd(172848.000000,182160.000000,64875.000000,310.836591)}
{pt3dadd(172776.000000,181980.000000,65000.000000,321.814093)}
{pt3dadd(172980.000000,181764.000000,65150.000000,332.791596)}
{pt3dadd(173208.000000,181524.000000,65325.000000,321.814093)}
{pt3dadd(173364.000000,181272.000000,65450.000000,310.836591)}
{pt3dadd(173604.000000,181044.000000,65500.000000,299.859089)}
{pt3dadd(173628.000000,180840.000000,65600.000000,288.881586)}
{pt3dadd(173760.000000,180612.000000,65700.000000,288.881586)}
{pt3dadd(173928.000000,180408.000000,65825.000000,288.881586)}
{pt3dadd(174024.000000,180180.000000,65950.000000,288.881586)}
{pt3dadd(174072.000000,179892.000000,65950.000000,288.881586)}
{pt3dadd(173676.000000,179028.000000,65875.000000,264.808116)}
{pt3dadd(173472.000000,178872.000000,65550.000000,240.734646)}
{pt3dadd(173076.000000,178776.000000,65375.000000,216.661176)}
{pt3dadd(172776.000000,178680.000000,65375.000000,192.587706)}
{pt3dadd(172380.000000,178656.000000,65000.000000,240.734646)}
{pt3dadd(172380.000000,178104.000000,64225.000000,332.791596)}

{create adhoc78}
{access adhoc78}
{connect adhoc78(1), adhoc74(0)}
{nseg = 1}
{strdef color color = "White"}
{pt3dclear()}
{pt3dadd(175500.000000,191136.000000,71275.000000,828.091944)}
{pt3dadd(175836.000000,191004.000000,72100.000000,599.024880)}
{pt3dadd(175932.000000,190692.000000,72000.000000,574.065504)}
{pt3dadd(175980.000000,190368.000000,71875.000000,549.106128)}
{pt3dadd(176004.000000,190080.000000,71900.000000,524.146752)}
{pt3dadd(175824.000000,189804.000000,72000.000000,499.187376)}
{pt3dadd(175884.000000,189456.000000,72050.000000,524.146752)}
{pt3dadd(175932.000000,189060.000000,72175.000000,549.106128)}
{pt3dadd(175896.000000,188712.000000,72300.000000,574.065504)}
{pt3dadd(175980.000000,188448.000000,72375.000000,599.024880)}
{pt3dadd(176064.000000,188124.000000,72575.000000,599.024880)}
{pt3dadd(176304.000000,187848.000000,72775.000000,599.024880)}
{pt3dadd(176424.000000,187572.000000,73075.000000,662.473530)}

{create adhoc79}
{access adhoc79}
{connect adhoc79(1), adhoc78(0)}
{nseg = 1}
{strdef color color = "White"}
{pt3dclear()}
{pt3dadd(176424.000000,187572.000000,73075.000000,662.473530)}
{pt3dadd(176532.000000,186984.000000,73425.000000,499.187376)}
{pt3dadd(176472.000000,186720.000000,73600.000000,446.610929)}
{pt3dadd(176556.000000,186444.000000,73875.000000,394.034481)}
{pt3dadd(176640.000000,186108.000000,74000.000000,341.458034)}
{pt3dadd(176604.000000,185796.000000,74000.000000,288.881586)}
{pt3dadd(176460.000000,185496.000000,74000.000000,288.881586)}
{pt3dadd(176424.000000,185184.000000,73925.000000,288.881586)}
{pt3dadd(176448.000000,184968.000000,73725.000000,288.881586)}
{pt3dadd(176124.000000,184692.000000,73375.000000,288.881586)}
{pt3dadd(176124.000000,184428.000000,73125.000000,276.844851)}
{pt3dadd(176280.000000,184152.000000,72650.000000,264.808116)}
{pt3dadd(176364.000000,183960.000000,72425.000000,252.771381)}
{pt3dadd(176364.000000,183708.000000,72100.000000,240.734646)}
{pt3dadd(176292.000000,183456.000000,71950.000000,238.327304)}
{pt3dadd(176160.000000,183192.000000,71775.000000,235.919961)}
{pt3dadd(176328.000000,182964.000000,71600.000000,233.512618)}
{pt3dadd(176352.000000,182796.000000,71600.000000,231.105276)}
{pt3dadd(176364.000000,182544.000000,71625.000000,192.768528)}
{pt3dadd(176520.000000,182268.000000,71475.000000,154.431780)}
{pt3dadd(176568.000000,182028.000000,71400.000000,116.095032)}
{pt3dadd(176544.000000,181908.000000,71375.000000,116.095032)}

{create adhoc80}
{access adhoc80}
{connect adhoc80(1), adhoc78(0)}
{nseg = 1}
{strdef color color = "White"}
{pt3dclear()}
{pt3dadd(176424.000000,187572.000000,73075.000000,662.473530)}
{pt3dadd(177444.000000,187572.000000,74800.000000,862.595802)}
{pt3dadd(177528.000000,187692.000000,75375.000000,819.466002)}
{pt3dadd(177576.000000,187752.000000,75725.000000,776.336202)}
{pt3dadd(177804.000000,188016.000000,76025.000000,733.206402)}
{pt3dadd(177804.000000,188100.000000,76375.000000,690.076602)}
{pt3dadd(177852.000000,188364.000000,76775.000000,659.726028)}
{pt3dadd(178380.000000,188448.000000,77275.000000,629.375454)}
{pt3dadd(178440.000000,188820.000000,77700.000000,599.024880)}
{pt3dadd(178704.000000,188904.000000,78175.000000,346.657896)}

{create adhoc81}
{access adhoc81}
{connect adhoc81(1), adhoc80(0)}
{nseg = 1}
{strdef color color = "White"}
{pt3dclear()}
{pt3dadd(178704.000000,188904.000000,78175.000000,346.657896)}
{pt3dadd(178380.000000,189360.000000,78375.000000,415.989486)}
{pt3dadd(178476.000000,189672.000000,78750.000000,395.190005)}
{pt3dadd(178740.000000,190104.000000,79125.000000,374.390523)}
{pt3dadd(178668.000000,190380.000000,79550.000000,353.591042)}
{pt3dadd(178476.000000,190680.000000,79925.000000,332.791560)}
{pt3dadd(178560.000000,191016.000000,80400.000000,336.258144)}
{pt3dadd(178728.000000,191364.000000,80800.000000,339.724728)}
{pt3dadd(179052.000000,191256.000000,81275.000000,343.191312)}
{pt3dadd(179136.000000,191088.000000,81600.000000,346.657896)}
{pt3dadd(179676.000000,190776.000000,81975.000000,277.326342)}

{create adhoc82}
{access adhoc82}
{connect adhoc82(1), adhoc81(0)}
{nseg = 1}
{strdef color color = "White"}
{pt3dclear()}
{pt3dadd(179676.000000,190776.000000,81975.000000,277.326342)}
{pt3dadd(180072.000000,190644.000000,82300.000000,332.791560)}
{pt3dadd(179928.000000,190776.000000,82625.000000,277.586652)}
{pt3dadd(179976.000000,191088.000000,82925.000000,222.381744)}
{pt3dadd(180240.000000,191064.000000,83400.000000,167.176836)}
{pt3dadd(180432.000000,191088.000000,83675.000000,139.314042)}

{create adhoc83}
{access adhoc83}
{connect adhoc83(1), adhoc81(0)}
{nseg = 1}
{strdef color color = "White"}
{pt3dclear()}
{pt3dadd(179676.000000,190776.000000,81975.000000,277.326342)}
{pt3dadd(178980.000000,191652.000000,82050.000000,167.176836)}
{pt3dadd(178848.000000,191928.000000,82300.000000,156.031716)}
{pt3dadd(178704.000000,192264.000000,82525.000000,144.886596)}
{pt3dadd(178704.000000,192936.000000,82775.000000,133.741476)}
{pt3dadd(178764.000000,193164.000000,83000.000000,96.745860)}

{create adhoc84}
{access adhoc84}
{connect adhoc84(1), adhoc80(0)}
{nseg = 1}
{strdef color color = "White"}
{pt3dclear()}
{pt3dadd(178704.000000,188904.000000,78175.000000,346.657896)}
{pt3dadd(179244.000000,188124.000000,78400.000000,200.612214)}
{pt3dadd(179268.000000,188184.000000,78600.000000,192.253370)}
{pt3dadd(180024.000000,187872.000000,78825.000000,183.894525)}
{pt3dadd(180456.000000,187812.000000,79050.000000,175.535680)}
{pt3dadd(180624.000000,187776.000000,79300.000000,167.176836)}
{pt3dadd(180720.000000,187668.000000,79525.000000,167.176836)}

{create adhoc85}
{access adhoc85}
{connect adhoc85(1), adhoc73(0)}
{nseg = 1}
{strdef color color = "White"}
{pt3dclear()}
{pt3dadd(176964.000000,194472.000000,71775.000000,862.595802)}
{pt3dadd(176892.000000,195612.000000,74800.000000,662.473530)}
{pt3dadd(176892.000000,196500.000000,76575.000000,755.633885)}
{pt3dadd(176892.000000,197400.000000,78325.000000,848.794239)}
{pt3dadd(176892.000000,198300.000000,80075.000000,941.954593)}
{pt3dadd(176916.000000,198276.000000,80600.000000,1035.114948)}
{pt3dadd(177036.000000,198324.000000,81100.000000,575.063856)}
{pt3dadd(177132.000000,198384.000000,81300.000000,139.314042)}

{create adhoc86}
{access adhoc86}
{connect adhoc86(1), adhoc85(0)}
{nseg = 1}
{strdef color color = "White"}
{pt3dclear()}
{pt3dadd(177132.000000,198384.000000,81300.000000,139.314042)}
{pt3dadd(176508.000000,199260.000000,81475.000000,346.657896)}
{pt3dadd(176220.000000,199788.000000,81850.000000,409.749642)}
{pt3dadd(176052.000000,200556.000000,82300.000000,472.841388)}
{pt3dadd(175836.000000,200916.000000,82650.000000,535.933134)}
{pt3dadd(175800.000000,201264.000000,83050.000000,599.024880)}
{pt3dadd(175896.000000,201696.000000,83425.000000,575.063856)}

{create adhoc87}
{access adhoc87}
{connect adhoc87(1), adhoc86(0)}
{nseg = 1}
{strdef color color = "White"}
{pt3dclear()}
{pt3dadd(175896.000000,201696.000000,83425.000000,575.063856)}
{pt3dadd(175944.000000,201792.000000,83875.000000,499.187376)}
{pt3dadd(176136.000000,201960.000000,84275.000000,478.387903)}
{pt3dadd(176196.000000,202128.000000,84600.000000,457.588431)}
{pt3dadd(176352.000000,202332.000000,84900.000000,436.788958)}
{pt3dadd(176484.000000,202392.000000,85225.000000,415.989486)}
{pt3dadd(176748.000000,202440.000000,85550.000000,427.004879)}
{pt3dadd(176988.000000,202752.000000,85950.000000,438.020271)}
{pt3dadd(177084.000000,202884.000000,86350.000000,449.035664)}
{pt3dadd(177252.000000,203220.000000,86800.000000,460.051056)}
{pt3dadd(177312.000000,203448.000000,87175.000000,479.619216)}
{pt3dadd(177396.000000,203688.000000,87575.000000,499.187376)}
{pt3dadd(177312.000000,204252.000000,87925.000000,288.881586)}

{create adhoc88}
{access adhoc88}
{connect adhoc88(1), adhoc87(0)}
{nseg = 1}
{strdef color color = "White"}
{pt3dclear()}
{pt3dadd(177312.000000,204252.000000,87925.000000,288.881586)}
{pt3dadd(176676.000000,205944.000000,88150.000000,288.881586)}
{pt3dadd(176436.000000,206772.000000,88550.000000,285.992775)}
{pt3dadd(176508.000000,206964.000000,88575.000000,283.103964)}
{pt3dadd(176532.000000,207108.000000,88625.000000,280.215153)}
{pt3dadd(176436.000000,207300.000000,88725.000000,277.326342)}
{pt3dadd(176376.000000,207504.000000,88800.000000,294.659230)}
{pt3dadd(176544.000000,207660.000000,88675.000000,311.992119)}
{pt3dadd(176508.000000,207780.000000,88675.000000,329.325007)}
{pt3dadd(176520.000000,207936.000000,88700.000000,346.657896)}
{pt3dadd(176520.000000,208116.000000,88600.000000,332.213819)}
{pt3dadd(176340.000000,208308.000000,88225.000000,317.769741)}
{pt3dadd(176316.000000,208548.000000,88150.000000,303.325664)}
{pt3dadd(176184.000000,208788.000000,88000.000000,288.881586)}
{pt3dadd(176076.000000,209040.000000,87950.000000,276.844851)}
{pt3dadd(175800.000000,209172.000000,87800.000000,264.808116)}
{pt3dadd(175596.000000,209436.000000,87775.000000,252.771381)}
{pt3dadd(175236.000000,209652.000000,87775.000000,240.734646)}
{pt3dadd(174996.000000,209868.000000,87950.000000,252.771381)}
{pt3dadd(174528.000000,210876.000000,88025.000000,264.808116)}
{pt3dadd(174552.000000,211428.000000,88250.000000,276.844851)}
{pt3dadd(174444.000000,212220.000000,88425.000000,288.881586)}
{pt3dadd(174396.000000,212424.000000,88450.000000,288.881586)}

{create adhoc89}
{access adhoc89}
{connect adhoc89(1), adhoc87(0)}
{nseg = 1}
{strdef color color = "White"}
{pt3dclear()}
{pt3dadd(177312.000000,204252.000000,87925.000000,288.881586)}
{pt3dadd(177396.000000,203340.000000,88475.000000,599.024880)}
{pt3dadd(177708.000000,203160.000000,88925.000000,553.266031)}
{pt3dadd(178068.000000,203028.000000,89325.000000,507.507183)}
{pt3dadd(178416.000000,203160.000000,89750.000000,461.748335)}
{pt3dadd(178572.000000,202932.000000,90050.000000,415.989486)}
{pt3dadd(179208.000000,202788.000000,90475.000000,398.656589)}
{pt3dadd(179472.000000,202800.000000,90850.000000,381.323691)}
{pt3dadd(179892.000000,202668.000000,91225.000000,363.990794)}
{pt3dadd(180120.000000,202644.000000,91400.000000,346.657896)}
{pt3dadd(180624.000000,201132.000000,91450.000000,320.177083)}
{pt3dadd(180876.000000,200244.000000,91125.000000,293.696271)}
{pt3dadd(181068.000000,199968.000000,90700.000000,267.215459)}
{pt3dadd(181044.000000,199644.000000,90325.000000,240.734646)}
{pt3dadd(180804.000000,199572.000000,89925.000000,160.678098)}
{pt3dadd(180696.000000,199104.000000,89525.000000,80.621550)}
{pt3dadd(180660.000000,198960.000000,89150.000000,116.095032)}

{create adhoc90}
{access adhoc90}
{connect adhoc90(1), adhoc86(0)}
{nseg = 1}
{strdef color color = "White"}
{pt3dclear()}
{pt3dadd(175896.000000,201696.000000,83425.000000,575.063856)}
{pt3dadd(175548.000000,203544.000000,83475.000000,116.095032)}
{pt3dadd(175536.000000,203700.000000,83625.000000,116.095032)}
{pt3dadd(175392.000000,203868.000000,83675.000000,116.095032)}
{pt3dadd(175356.000000,204072.000000,83850.000000,116.095032)}
{pt3dadd(175356.000000,204300.000000,83925.000000,116.095032)}
{pt3dadd(175224.000000,204480.000000,83925.000000,144.267426)}
{pt3dadd(175164.000000,204576.000000,84000.000000,172.439820)}
{pt3dadd(175128.000000,204756.000000,84050.000000,200.612214)}
{pt3dadd(175356.000000,204960.000000,84500.000000,96.745860)}

{create adhoc91}
{access adhoc91}
{connect adhoc91(1), adhoc85(0)}
{nseg = 1}
{strdef color color = "White"}
{pt3dclear()}
{pt3dadd(177132.000000,198384.000000,81300.000000,139.314042)}
{pt3dadd(177492.000000,197460.000000,81500.000000,862.595802)}
{pt3dadd(177684.000000,197460.000000,82000.000000,905.725589)}
{pt3dadd(177660.000000,197388.000000,82325.000000,948.855375)}
{pt3dadd(177588.000000,197484.000000,82675.000000,991.985162)}
{pt3dadd(177684.000000,197508.000000,83025.000000,1035.114948)}
{pt3dadd(177768.000000,197628.000000,83450.000000,977.608566)}
{pt3dadd(177780.000000,197724.000000,83825.000000,920.102184)}
{pt3dadd(177936.000000,197724.000000,84225.000000,862.595802)}
{pt3dadd(178104.000000,197688.000000,84775.000000,718.829820)}

{create adhoc92}
{access adhoc92}
{connect adhoc92(1), adhoc91(0)}
{nseg = 1}
{strdef color color = "White"}
{pt3dclear()}
{pt3dadd(178104.000000,197688.000000,84775.000000,718.829820)}
{pt3dadd(178272.000000,197652.000000,85100.000000,828.092016)}
{pt3dadd(178272.000000,197556.000000,85600.000000,725.066383)}
{pt3dadd(178512.000000,197532.000000,86000.000000,622.040751)}
{pt3dadd(178704.000000,197064.000000,86400.000000,519.015118)}
{pt3dadd(178932.000000,196212.000000,86850.000000,415.989486)}
{pt3dadd(179460.000000,195804.000000,87275.000000,436.788958)}
{pt3dadd(179856.000000,195480.000000,87400.000000,457.588431)}
{pt3dadd(180192.000000,195300.000000,87550.000000,478.387903)}
{pt3dadd(180456.000000,195072.000000,87650.000000,499.187376)}
{pt3dadd(180552.000000,194856.000000,87475.000000,446.610929)}
{pt3dadd(180672.000000,194628.000000,87600.000000,394.034481)}
{pt3dadd(180972.000000,194424.000000,87650.000000,341.458034)}
{pt3dadd(181164.000000,194256.000000,87675.000000,288.881586)}
{pt3dadd(181176.000000,193944.000000,87675.000000,288.881586)}
{pt3dadd(181380.000000,193728.000000,87600.000000,288.881586)}
{pt3dadd(181536.000000,193464.000000,87575.000000,288.881586)}
{pt3dadd(181740.000000,193212.000000,87550.000000,288.881586)}
{pt3dadd(181668.000000,192924.000000,87425.000000,320.658561)}
{pt3dadd(181824.000000,192720.000000,87375.000000,352.435536)}
{pt3dadd(182544.000000,191508.000000,87375.000000,384.212511)}
{pt3dadd(182544.000000,191304.000000,86775.000000,415.989486)}
{pt3dadd(182508.000000,191160.000000,86350.000000,372.175776)}
{pt3dadd(182400.000000,190464.000000,86050.000000,328.362066)}
{pt3dadd(182280.000000,189816.000000,85625.000000,284.548356)}
{pt3dadd(182304.000000,189276.000000,85425.000000,240.734646)}
{pt3dadd(182388.000000,189024.000000,85175.000000,230.704038)}
{pt3dadd(181704.000000,188736.000000,84725.000000,220.673430)}
{pt3dadd(181668.000000,188712.000000,84350.000000,210.642822)}
{pt3dadd(181092.000000,188472.000000,83825.000000,200.612214)}
{pt3dadd(180996.000000,188352.000000,83425.000000,139.314042)}

{create adhoc93}
{access adhoc93}
{connect adhoc93(1), adhoc91(0)}
{nseg = 1}
{strdef color color = "White"}
{pt3dclear()}
{pt3dadd(178104.000000,197688.000000,84775.000000,718.829820)}
{pt3dadd(178596.000000,196980.000000,84800.000000,200.612214)}
{pt3dadd(179160.000000,196776.000000,85000.000000,200.612214)}
{pt3dadd(179616.000000,196308.000000,85300.000000,200.612214)}
{pt3dadd(179916.000000,196056.000000,85500.000000,139.314042)}

{create adhoc94}
{access adhoc94}
{connect adhoc94(1), adhoc1(0)}
{nseg = 1}
{strdef color color = "White"}
{pt3dclear()}
{pt3dadd(188760.000000,201084.000000,74900.000000,2472.669252)}
{pt3dadd(183984.000000,204156.000000,74350.000000,346.657896)}
{pt3dadd(181884.000000,205224.000000,74350.000000,508.421012)}
{pt3dadd(179940.000000,207024.000000,74875.000000,670.184127)}
{pt3dadd(179688.000000,207024.000000,75175.000000,831.947242)}
{pt3dadd(179436.000000,207144.000000,75450.000000,993.710358)}
{pt3dadd(179172.000000,207408.000000,75725.000000,960.931719)}
{pt3dadd(178884.000000,207576.000000,75900.000000,928.153080)}
{pt3dadd(178644.000000,207852.000000,76050.000000,895.374441)}
{pt3dadd(178428.000000,208128.000000,76175.000000,862.595802)}
{pt3dadd(178224.000000,208224.000000,76150.000000,826.654307)}
{pt3dadd(177996.000000,208380.000000,76250.000000,790.712811)}
{pt3dadd(177732.000000,208584.000000,76650.000000,754.771316)}
{pt3dadd(177540.000000,208740.000000,76825.000000,718.829820)}
{pt3dadd(177312.000000,208872.000000,76875.000000,688.878585)}
{pt3dadd(177120.000000,208836.000000,76850.000000,658.927350)}
{pt3dadd(176880.000000,209112.000000,77100.000000,628.976115)}
{pt3dadd(176592.000000,209388.000000,77300.000000,599.024880)}
{pt3dadd(176364.000000,209520.000000,77375.000000,599.024880)}
{pt3dadd(176184.000000,209544.000000,77475.000000,599.024880)}
{pt3dadd(175992.000000,209664.000000,77600.000000,599.024880)}
{pt3dadd(175752.000000,209904.000000,77825.000000,599.024880)}
{pt3dadd(175512.000000,210024.000000,78000.000000,628.976115)}
{pt3dadd(175284.000000,210084.000000,78050.000000,658.927350)}
{pt3dadd(175092.000000,210180.000000,78175.000000,688.878585)}
{pt3dadd(174888.000000,210264.000000,78300.000000,718.829820)}
{pt3dadd(174696.000000,210276.000000,78300.000000,711.641515)}
{pt3dadd(174492.000000,210396.000000,78300.000000,704.453211)}
{pt3dadd(174156.000000,210564.000000,78550.000000,697.264906)}
{pt3dadd(173916.000000,210660.000000,78750.000000,690.076602)}
{pt3dadd(173688.000000,210660.000000,78875.000000,697.264906)}
{pt3dadd(173400.000000,210636.000000,78950.000000,704.453211)}
{pt3dadd(173196.000000,210732.000000,79075.000000,711.641515)}
{pt3dadd(172980.000000,210828.000000,79150.000000,718.829820)}
{pt3dadd(172788.000000,210912.000000,79150.000000,711.641515)}
{pt3dadd(172584.000000,210876.000000,79275.000000,704.453211)}
{pt3dadd(172416.000000,210924.000000,79375.000000,697.264906)}
{pt3dadd(172212.000000,211008.000000,79400.000000,690.076602)}
{pt3dadd(171972.000000,211056.000000,79425.000000,599.024880)}
{pt3dadd(171708.000000,211116.000000,79450.000000,599.024880)}

{create adhoc95}
{access adhoc95}
{connect adhoc95(1), adhoc94(0)}
{nseg = 1}
{strdef color color = "White"}
{pt3dclear()}
{pt3dadd(171708.000000,211116.000000,79450.000000,599.024880)}
{pt3dadd(171384.000000,211752.000000,79800.000000,690.076602)}
{pt3dadd(171240.000000,212364.000000,79800.000000,637.362423)}
{pt3dadd(170952.000000,212748.000000,79925.000000,584.648244)}
{pt3dadd(170772.000000,213000.000000,80100.000000,531.934065)}
{pt3dadd(170592.000000,213312.000000,80275.000000,479.219886)}
{pt3dadd(170412.000000,213480.000000,80450.000000,531.934083)}
{pt3dadd(170232.000000,213864.000000,80625.000000,584.648280)}
{pt3dadd(170052.000000,214248.000000,80800.000000,637.362477)}
{pt3dadd(169992.000000,214524.000000,81150.000000,690.076674)}
{pt3dadd(169992.000000,214812.000000,81150.000000,642.354349)}
{pt3dadd(169956.000000,215028.000000,81150.000000,594.632025)}
{pt3dadd(169980.000000,215232.000000,81150.000000,546.909700)}
{pt3dadd(170028.000000,215508.000000,81150.000000,499.187376)}
{pt3dadd(169860.000000,215760.000000,81325.000000,499.187376)}
{pt3dadd(169692.000000,215988.000000,81500.000000,499.187376)}
{pt3dadd(169560.000000,216228.000000,81400.000000,499.187376)}
{pt3dadd(169500.000000,216456.000000,81450.000000,499.187376)}
{pt3dadd(169548.000000,216816.000000,81725.000000,499.187376)}
{pt3dadd(169596.000000,217056.000000,82000.000000,499.187376)}
{pt3dadd(169536.000000,217320.000000,82050.000000,499.187376)}
{pt3dadd(169476.000000,217464.000000,82100.000000,499.187376)}
{pt3dadd(169416.000000,217620.000000,82150.000000,494.195504)}
{pt3dadd(169308.000000,217836.000000,82250.000000,489.203631)}
{pt3dadd(169356.000000,218040.000000,82325.000000,484.211758)}
{pt3dadd(169356.000000,218232.000000,82375.000000,479.219886)}
{pt3dadd(169212.000000,218412.000000,82650.000000,575.063865)}
{pt3dadd(169152.000000,218592.000000,82675.000000,670.907844)}
{pt3dadd(169248.000000,218796.000000,82900.000000,766.751823)}
{pt3dadd(169212.000000,218976.000000,83450.000000,862.595802)}
{pt3dadd(169188.000000,219252.000000,84000.000000,718.829820)}
{pt3dadd(169164.000000,219504.000000,84550.000000,718.829820)}

{create adhoc96}
{access adhoc96}
{connect adhoc96(1), adhoc95(0)}
{nseg = 1}
{strdef color color = "White"}
{pt3dclear()}
{pt3dadd(169164.000000,219504.000000,84550.000000,718.829820)}
{pt3dadd(169680.000000,219852.000000,86025.000000,575.063892)}
{pt3dadd(169956.000000,220128.000000,86375.000000,556.094763)}
{pt3dadd(170220.000000,220404.000000,86725.000000,537.125634)}
{pt3dadd(170604.000000,220584.000000,87400.000000,518.156505)}
{pt3dadd(170916.000000,220728.000000,87725.000000,499.187376)}
{pt3dadd(171228.000000,220860.000000,88075.000000,494.195504)}
{pt3dadd(171324.000000,220956.000000,88425.000000,489.203631)}
{pt3dadd(171456.000000,221232.000000,88775.000000,484.211758)}
{pt3dadd(171612.000000,221424.000000,89250.000000,479.219886)}
{pt3dadd(171540.000000,221652.000000,89575.000000,463.412286)}
{pt3dadd(171948.000000,221364.000000,90025.000000,447.604686)}
{pt3dadd(172188.000000,221148.000000,90450.000000,431.797086)}
{pt3dadd(172428.000000,221124.000000,90875.000000,415.989486)}
{pt3dadd(172764.000000,221220.000000,91225.000000,398.656589)}
{pt3dadd(173064.000000,221232.000000,91575.000000,381.323691)}
{pt3dadd(173196.000000,221316.000000,91925.000000,363.990794)}
{pt3dadd(173280.000000,221268.000000,92300.000000,346.657896)}
{pt3dadd(173964.000000,220788.000000,92650.000000,346.657896)}
{pt3dadd(174432.000000,220440.000000,93025.000000,346.657896)}
{pt3dadd(174672.000000,219336.000000,92925.000000,346.657896)}
{pt3dadd(174816.000000,217416.000000,92925.000000,346.657896)}
{pt3dadd(174792.000000,217188.000000,92800.000000,346.657896)}
{pt3dadd(174960.000000,217020.000000,92500.000000,346.657896)}
{pt3dadd(174936.000000,216720.000000,92700.000000,346.657896)}
{pt3dadd(174984.000000,216468.000000,92700.000000,346.657896)}
{pt3dadd(174996.000000,216336.000000,92625.000000,320.177083)}
{pt3dadd(174888.000000,216168.000000,92550.000000,293.696271)}
{pt3dadd(174828.000000,216012.000000,92525.000000,267.215459)}
{pt3dadd(174840.000000,215844.000000,92525.000000,240.734646)}
{pt3dadd(174888.000000,215676.000000,92375.000000,252.771381)}
{pt3dadd(175056.000000,215388.000000,92350.000000,264.808116)}
{pt3dadd(175260.000000,215232.000000,92625.000000,276.844851)}
{pt3dadd(175416.000000,215064.000000,92575.000000,288.881586)}
{pt3dadd(175356.000000,214944.000000,92700.000000,276.844851)}
{pt3dadd(175416.000000,214740.000000,92850.000000,264.808116)}
{pt3dadd(175740.000000,214536.000000,92925.000000,252.771381)}
{pt3dadd(175764.000000,214368.000000,92925.000000,240.734646)}
{pt3dadd(176028.000000,214152.000000,92975.000000,230.704038)}
{pt3dadd(176376.000000,213912.000000,93075.000000,220.673430)}
{pt3dadd(176724.000000,213696.000000,93325.000000,210.642822)}
{pt3dadd(177072.000000,213516.000000,93750.000000,200.612214)}
{pt3dadd(177420.000000,213060.000000,94225.000000,415.989486)}
{pt3dadd(177636.000000,213000.000000,94275.000000,98.604918)}

{create adhoc97}
{access adhoc97}
{connect adhoc97(1), adhoc95(0)}
{nseg = 1}
{strdef color color = "White"}
{pt3dclear()}
{pt3dadd(169164.000000,219504.000000,84550.000000,718.829820)}
{pt3dadd(168624.000000,219492.000000,82875.000000,479.219886)}
{pt3dadd(168204.000000,219804.000000,83000.000000,446.079388)}
{pt3dadd(168432.000000,219996.000000,82825.000000,412.938891)}
{pt3dadd(168372.000000,220284.000000,82900.000000,379.798393)}
{pt3dadd(168312.000000,220512.000000,82950.000000,346.657896)}
{pt3dadd(168180.000000,220680.000000,82950.000000,363.990794)}
{pt3dadd(168048.000000,220932.000000,83150.000000,381.323691)}
{pt3dadd(168060.000000,221112.000000,83175.000000,398.656589)}
{pt3dadd(168000.000000,221316.000000,83250.000000,415.989486)}
{pt3dadd(167856.000000,221532.000000,83325.000000,398.656589)}
{pt3dadd(167712.000000,221688.000000,83425.000000,381.323691)}
{pt3dadd(167676.000000,221832.000000,83475.000000,363.990794)}
{pt3dadd(167580.000000,222036.000000,83475.000000,346.657896)}
{pt3dadd(167484.000000,222192.000000,83450.000000,379.798393)}
{pt3dadd(167412.000000,222456.000000,83450.000000,412.938891)}
{pt3dadd(167304.000000,222648.000000,83450.000000,446.079388)}
{pt3dadd(167196.000000,222828.000000,83450.000000,479.219886)}
{pt3dadd(167052.000000,223056.000000,83375.000000,463.412286)}
{pt3dadd(166992.000000,223200.000000,83375.000000,447.604686)}
{pt3dadd(166884.000000,223392.000000,83425.000000,431.797086)}
{pt3dadd(166740.000000,223584.000000,83550.000000,415.989486)}
{pt3dadd(166560.000000,223752.000000,83500.000000,395.190005)}
{pt3dadd(166380.000000,223908.000000,83475.000000,374.390523)}
{pt3dadd(166200.000000,224088.000000,83450.000000,353.591042)}
{pt3dadd(166020.000000,224256.000000,83425.000000,332.791560)}
{pt3dadd(165840.000000,224472.000000,83400.000000,321.814067)}
{pt3dadd(165804.000000,224736.000000,83500.000000,310.836573)}
{pt3dadd(165744.000000,224904.000000,83575.000000,299.859080)}
{pt3dadd(165744.000000,225048.000000,83650.000000,288.881586)}
{pt3dadd(165720.000000,225180.000000,83725.000000,303.325664)}
{pt3dadd(165648.000000,225336.000000,83750.000000,317.769741)}
{pt3dadd(165540.000000,225468.000000,83675.000000,332.213819)}
{pt3dadd(165336.000000,225624.000000,83700.000000,346.657896)}
{pt3dadd(165312.000000,225768.000000,83675.000000,359.830899)}
{pt3dadd(164832.000000,227052.000000,83675.000000,373.003902)}
{pt3dadd(164988.000000,227256.000000,83775.000000,386.176905)}
{pt3dadd(164952.000000,227460.000000,83750.000000,399.349908)}
{pt3dadd(164952.000000,227640.000000,83675.000000,371.732827)}
{pt3dadd(164220.000000,228132.000000,83400.000000,344.115747)}
{pt3dadd(164112.000000,228420.000000,83200.000000,316.498667)}
{pt3dadd(163944.000000,228756.000000,83175.000000,288.881586)}
{pt3dadd(163776.000000,228900.000000,83150.000000,266.814243)}
{pt3dadd(163716.000000,229224.000000,83025.000000,244.746900)}
{pt3dadd(163740.000000,229428.000000,82975.000000,222.679557)}
{pt3dadd(163668.000000,229608.000000,83050.000000,200.612214)}
{pt3dadd(163596.000000,229752.000000,83075.000000,192.253370)}
{pt3dadd(163752.000000,229908.000000,83200.000000,183.894525)}
{pt3dadd(163752.000000,230100.000000,83175.000000,175.535680)}
{pt3dadd(163752.000000,230256.000000,83150.000000,167.176836)}
{pt3dadd(163752.000000,230388.000000,83125.000000,153.245439)}
{pt3dadd(163752.000000,230580.000000,83100.000000,139.314042)}
{pt3dadd(163764.000000,230760.000000,83150.000000,139.314042)}

{create adhoc98}
{access adhoc98}
{connect adhoc98(1), adhoc94(0)}
{nseg = 1}
{strdef color color = "White"}
{pt3dclear()}
{pt3dadd(171708.000000,211116.000000,79450.000000,599.024880)}
{pt3dadd(171600.000000,208212.000000,79425.000000,346.657896)}
{pt3dadd(171396.000000,208020.000000,79350.000000,317.769741)}
{pt3dadd(171324.000000,207840.000000,79375.000000,288.881586)}
{pt3dadd(171348.000000,207708.000000,79300.000000,259.993431)}
{pt3dadd(171372.000000,207588.000000,79225.000000,231.105276)}
{pt3dadd(171396.000000,207456.000000,79150.000000,233.512618)}
{pt3dadd(171336.000000,207288.000000,79150.000000,235.919961)}
{pt3dadd(171420.000000,207120.000000,79175.000000,238.327304)}
{pt3dadd(171504.000000,206964.000000,79100.000000,240.734646)}
{pt3dadd(171468.000000,206832.000000,79050.000000,267.215459)}
{pt3dadd(171432.000000,206652.000000,78900.000000,293.696271)}
{pt3dadd(171492.000000,206484.000000,78700.000000,320.177083)}
{pt3dadd(171576.000000,206328.000000,78750.000000,346.657896)}
{pt3dadd(171624.000000,206100.000000,78575.000000,294.821933)}
{pt3dadd(171672.000000,205872.000000,78550.000000,242.985969)}
{pt3dadd(171672.000000,205644.000000,78375.000000,191.150005)}
{pt3dadd(171900.000000,205476.000000,78275.000000,139.314042)}
{pt3dadd(171768.000000,205248.000000,78200.000000,139.314042)}
{pt3dadd(171696.000000,205056.000000,77950.000000,139.314042)}
{pt3dadd(171576.000000,204492.000000,77725.000000,139.314042)}
{pt3dadd(171348.000000,203076.000000,78900.000000,139.314042)}
{pt3dadd(171612.000000,203016.000000,79650.000000,80.621550)}
