# Supplementary material for: Full reconstruction of large lobula plate tangential cells in Drosophila from a 3D EM dataset
Source: PLoS One. 2018 Nov 28;13(11):e0207828. doi: 10.1371/journal.pone.0207828 (PMC6261601; doi:10.1371/journal.pone.0207828)
Supplement: S1 Dataset — (ZIP) [file pone.0207828.s001.zip › Diameter hoc/VS_VSL_preliminary/Old Diameters Mar13_VS_VSL_HS/VS1/2_14_790_smaurer_002.043.hoc]

/* created with nml2hocm */

{create adhoc1}
{access adhoc1}
{nseg = 1}
{strdef color color = "White"}
{pt3dclear()}
{pt3dadd(168900.000000,204900.000000,75400.000000,77.396688)}
{pt3dadd(168900.000000,204900.000000,75825.000000,116.095032)}
{pt3dadd(168984.000000,204828.000000,75925.000000,145.957806)}
{pt3dadd(169092.000000,204780.000000,76000.000000,175.820580)}
{pt3dadd(169332.000000,204876.000000,76050.000000,205.683354)}
{pt3dadd(169416.000000,204936.000000,76250.000000,235.546128)}
{pt3dadd(169764.000000,204936.000000,76575.000000,226.812649)}
{pt3dadd(169932.000000,204936.000000,76775.000000,218.079171)}
{pt3dadd(170292.000000,204720.000000,76950.000000,209.345692)}
{pt3dadd(170604.000000,204672.000000,77100.000000,200.612214)}
{pt3dadd(170760.000000,204732.000000,77250.000000,217.017473)}
{pt3dadd(170976.000000,204756.000000,77425.000000,233.422731)}
{pt3dadd(171168.000000,204948.000000,77650.000000,249.827990)}
{pt3dadd(171420.000000,204864.000000,77900.000000,266.233248)}
{pt3dadd(171576.000000,205068.000000,77975.000000,269.006522)}
{pt3dadd(171612.000000,205272.000000,78125.000000,271.779795)}
{pt3dadd(171744.000000,205428.000000,78275.000000,274.553068)}
{pt3dadd(171684.000000,205620.000000,78400.000000,277.326342)}
{pt3dadd(171660.000000,205788.000000,78500.000000,307.832233)}
{pt3dadd(171636.000000,205992.000000,78600.000000,338.338125)}
{pt3dadd(171612.000000,206112.000000,78650.000000,368.844017)}
{pt3dadd(171588.000000,206280.000000,78625.000000,399.349908)}
{pt3dadd(171408.000000,206448.000000,78900.000000,359.696092)}
{pt3dadd(171312.000000,206772.000000,79050.000000,320.042277)}
{pt3dadd(171348.000000,206940.000000,79100.000000,280.388462)}
{pt3dadd(171396.000000,207084.000000,79150.000000,240.734646)}
{pt3dadd(171372.000000,207240.000000,79200.000000,240.734646)}
{pt3dadd(171348.000000,207372.000000,79250.000000,240.734646)}
{pt3dadd(171300.000000,207504.000000,79250.000000,240.734646)}
{pt3dadd(171300.000000,207636.000000,79225.000000,240.734646)}
{pt3dadd(171336.000000,207816.000000,79550.000000,267.215459)}
{pt3dadd(171252.000000,208008.000000,79650.000000,293.696271)}
{pt3dadd(171348.000000,208260.000000,79700.000000,320.177083)}
{pt3dadd(171348.000000,208440.000000,79600.000000,346.657896)}
{pt3dadd(171588.000000,208620.000000,79450.000000,310.146476)}
{pt3dadd(171588.000000,208860.000000,79375.000000,273.635055)}
{pt3dadd(171732.000000,209172.000000,79375.000000,237.123635)}
{pt3dadd(171744.000000,209388.000000,79400.000000,200.612214)}
{pt3dadd(171828.000000,209592.000000,79425.000000,237.123635)}
{pt3dadd(171840.000000,209760.000000,79350.000000,273.635055)}
{pt3dadd(172020.000000,209892.000000,79350.000000,310.146475)}
{pt3dadd(172404.000000,210096.000000,79200.000000,346.657896)}
{pt3dadd(171744.000000,210324.000000,79325.000000,288.881586)}
{pt3dadd(171744.000000,211368.000000,79500.000000,718.829820)}

{create adhoc2}
{access adhoc2}
{connect adhoc2(1), adhoc1(0)}
{nseg = 1}
{strdef color color = "White"}
{pt3dclear()}
{pt3dadd(171744.000000,211368.000000,79500.000000,718.829820)}
{pt3dadd(171372.000000,211968.000000,79775.000000,718.829820)}
{pt3dadd(171444.000000,212136.000000,79825.000000,688.878585)}
{pt3dadd(171036.000000,212532.000000,79975.000000,658.927350)}
{pt3dadd(170796.000000,212880.000000,80150.000000,628.976115)}
{pt3dadd(170880.000000,213048.000000,80225.000000,599.024880)}
{pt3dadd(170700.000000,213300.000000,80375.000000,574.065504)}
{pt3dadd(170640.000000,213516.000000,80500.000000,549.106128)}
{pt3dadd(170400.000000,213888.000000,80625.000000,524.146752)}
{pt3dadd(170424.000000,214080.000000,80800.000000,499.187376)}
{pt3dadd(170196.000000,214308.000000,80850.000000,524.146752)}
{pt3dadd(170160.000000,214764.000000,81075.000000,549.106128)}
{pt3dadd(170004.000000,215052.000000,81100.000000,574.065504)}
{pt3dadd(169944.000000,215544.000000,81225.000000,599.024880)}
{pt3dadd(169884.000000,215856.000000,81350.000000,553.266031)}
{pt3dadd(169848.000000,216096.000000,81500.000000,507.507183)}
{pt3dadd(169896.000000,216348.000000,81525.000000,461.748335)}
{pt3dadd(169632.000000,216624.000000,81650.000000,415.989486)}
{pt3dadd(169572.000000,216780.000000,81675.000000,415.989486)}
{pt3dadd(169572.000000,216936.000000,81775.000000,415.989486)}
{pt3dadd(169536.000000,217116.000000,81925.000000,415.989486)}
{pt3dadd(169500.000000,217284.000000,81950.000000,415.989486)}
{pt3dadd(169464.000000,217464.000000,82125.000000,436.788958)}
{pt3dadd(169320.000000,217752.000000,82300.000000,457.588431)}
{pt3dadd(169428.000000,217980.000000,82325.000000,478.387903)}
{pt3dadd(169272.000000,218220.000000,82450.000000,499.187376)}
{pt3dadd(169236.000000,218448.000000,82650.000000,590.039483)}
{pt3dadd(169320.000000,218628.000000,82750.000000,680.891589)}
{pt3dadd(169176.000000,218868.000000,83050.000000,771.743696)}
{pt3dadd(169224.000000,219156.000000,83450.000000,862.595802)}
{pt3dadd(169128.000000,219444.000000,83675.000000,862.595802)}

{create adhoc3}
{access adhoc3}
{connect adhoc3(1), adhoc2(0)}
{nseg = 1}
{strdef color color = "White"}
{pt3dclear()}
{pt3dadd(169128.000000,219444.000000,83675.000000,862.595802)}
{pt3dadd(169440.000000,219672.000000,85250.000000,718.829820)}
{pt3dadd(169668.000000,219492.000000,85675.000000,663.919209)}
{pt3dadd(169632.000000,219852.000000,85950.000000,609.008598)}
{pt3dadd(169740.000000,219924.000000,86225.000000,554.097987)}
{pt3dadd(169932.000000,220068.000000,86550.000000,499.187376)}
{pt3dadd(170148.000000,220404.000000,86825.000000,499.187376)}
{pt3dadd(170352.000000,220428.000000,87075.000000,499.187376)}
{pt3dadd(170568.000000,220452.000000,87350.000000,499.187376)}
{pt3dadd(170796.000000,220620.000000,87600.000000,499.187376)}
{pt3dadd(171084.000000,220824.000000,87950.000000,499.187376)}
{pt3dadd(171156.000000,220908.000000,88325.000000,499.187376)}
{pt3dadd(171444.000000,221016.000000,88600.000000,499.187376)}
{pt3dadd(171468.000000,221148.000000,88925.000000,499.187376)}
{pt3dadd(171516.000000,221364.000000,89225.000000,554.097987)}
{pt3dadd(171624.000000,221580.000000,89550.000000,609.008598)}
{pt3dadd(171876.000000,221232.000000,89875.000000,663.919209)}
{pt3dadd(172176.000000,221148.000000,90150.000000,718.829820)}
{pt3dadd(172164.000000,221196.000000,90375.000000,625.786839)}
{pt3dadd(172248.000000,221100.000000,90625.000000,532.743858)}
{pt3dadd(172464.000000,221088.000000,90900.000000,439.700877)}
{pt3dadd(172548.000000,221136.000000,91175.000000,346.657896)}
{pt3dadd(172968.000000,221184.000000,91525.000000,346.657896)}
{pt3dadd(173256.000000,221232.000000,91850.000000,346.657896)}
{pt3dadd(173328.000000,221376.000000,92100.000000,346.657896)}
{pt3dadd(173328.000000,221220.000000,92400.000000,346.657896)}
{pt3dadd(173988.000000,220776.000000,92650.000000,332.213819)}
{pt3dadd(174360.000000,220308.000000,92775.000000,317.769741)}
{pt3dadd(174492.000000,220164.000000,92925.000000,303.325664)}
{pt3dadd(174624.000000,219984.000000,92975.000000,288.881586)}
{pt3dadd(174612.000000,219732.000000,92925.000000,276.844851)}
{pt3dadd(174612.000000,219600.000000,93025.000000,264.808116)}
{pt3dadd(174660.000000,219480.000000,93050.000000,252.771381)}
{pt3dadd(174708.000000,219312.000000,93075.000000,240.734646)}
{pt3dadd(174708.000000,219144.000000,93000.000000,228.697915)}
{pt3dadd(174792.000000,219024.000000,92975.000000,216.661185)}
{pt3dadd(174780.000000,218832.000000,92925.000000,204.624455)}
{pt3dadd(174804.000000,218532.000000,92925.000000,192.587724)}
{pt3dadd(174744.000000,218340.000000,92825.000000,216.661190)}
{pt3dadd(174708.000000,218112.000000,92925.000000,240.734655)}
{pt3dadd(174420.000000,217920.000000,92625.000000,264.808120)}
{pt3dadd(174468.000000,217752.000000,92625.000000,288.881586)}
{pt3dadd(174636.000000,217548.000000,92800.000000,303.325664)}
{pt3dadd(174768.000000,217272.000000,92700.000000,317.769741)}
{pt3dadd(174768.000000,217128.000000,92625.000000,332.213819)}
{pt3dadd(174876.000000,216840.000000,92650.000000,346.657896)}
{pt3dadd(174876.000000,216672.000000,92725.000000,329.325007)}
{pt3dadd(174960.000000,216516.000000,92650.000000,311.992119)}
{pt3dadd(174924.000000,216372.000000,92575.000000,294.659230)}
{pt3dadd(174888.000000,216240.000000,92600.000000,277.326342)}
{pt3dadd(174828.000000,216096.000000,92500.000000,280.215153)}
{pt3dadd(174876.000000,215772.000000,92475.000000,283.103964)}
{pt3dadd(175020.000000,215568.000000,92525.000000,285.992775)}
{pt3dadd(175092.000000,215412.000000,92475.000000,288.881586)}
{pt3dadd(175176.000000,215208.000000,92575.000000,276.844851)}
{pt3dadd(175344.000000,214896.000000,92675.000000,264.808116)}
{pt3dadd(175488.000000,214716.000000,92750.000000,252.771381)}
{pt3dadd(175620.000000,214500.000000,92775.000000,240.734646)}
{pt3dadd(175644.000000,214368.000000,92950.000000,267.215459)}
{pt3dadd(176004.000000,214224.000000,92950.000000,293.696271)}
{pt3dadd(176340.000000,214008.000000,92950.000000,320.177083)}
{pt3dadd(176424.000000,213876.000000,93025.000000,346.657896)}
{pt3dadd(176448.000000,213756.000000,93125.000000,297.976002)}
{pt3dadd(176700.000000,213588.000000,93250.000000,249.294108)}
{pt3dadd(176868.000000,213444.000000,93325.000000,200.612214)}
{pt3dadd(176976.000000,213708.000000,93675.000000,240.734646)}

{create adhoc4}
{access adhoc4}
{connect adhoc4(1), adhoc2(0)}
{nseg = 1}
{strdef color color = "White"}
{pt3dclear()}
{pt3dadd(169128.000000,219444.000000,83675.000000,862.595802)}
{pt3dadd(168756.000000,219696.000000,82825.000000,288.881586)}
{pt3dadd(168504.000000,219888.000000,82750.000000,303.325664)}
{pt3dadd(168348.000000,220260.000000,83000.000000,317.769741)}
{pt3dadd(168372.000000,220476.000000,82925.000000,332.213819)}
{pt3dadd(168168.000000,220704.000000,83050.000000,346.657896)}
{pt3dadd(168072.000000,221148.000000,83200.000000,363.990794)}
{pt3dadd(167928.000000,221460.000000,83275.000000,381.323691)}
{pt3dadd(167784.000000,221676.000000,83350.000000,398.656589)}
{pt3dadd(167724.000000,221868.000000,83400.000000,415.989486)}
{pt3dadd(167484.000000,222144.000000,83425.000000,415.989486)}
{pt3dadd(167556.000000,222468.000000,83450.000000,415.989486)}
{pt3dadd(167328.000000,222684.000000,83425.000000,415.989486)}
{pt3dadd(167088.000000,223008.000000,83425.000000,415.989486)}
{pt3dadd(166992.000000,223248.000000,83450.000000,415.989486)}
{pt3dadd(166764.000000,223560.000000,83350.000000,415.989486)}
{pt3dadd(166476.000000,223788.000000,83325.000000,415.989486)}
{pt3dadd(166380.000000,223992.000000,83350.000000,415.989486)}
{pt3dadd(166176.000000,224244.000000,83325.000000,381.323700)}
{pt3dadd(165948.000000,224412.000000,83250.000000,346.657914)}
{pt3dadd(165888.000000,224592.000000,83500.000000,311.992128)}
{pt3dadd(165744.000000,224892.000000,83575.000000,277.326342)}
{pt3dadd(165444.000000,225384.000000,83650.000000,311.992128)}
{pt3dadd(165288.000000,225720.000000,83875.000000,346.657914)}
{pt3dadd(165084.000000,225996.000000,83825.000000,381.323700)}
{pt3dadd(165024.000000,226368.000000,83850.000000,415.989486)}
{pt3dadd(165132.000000,226620.000000,83775.000000,436.788958)}
{pt3dadd(164988.000000,227244.000000,83800.000000,457.588431)}
{pt3dadd(164832.000000,227484.000000,83850.000000,478.387903)}
{pt3dadd(164712.000000,227748.000000,83825.000000,499.187376)}
{pt3dadd(164736.000000,227940.000000,83900.000000,434.574193)}
{pt3dadd(164676.000000,228228.000000,84550.000000,369.961011)}
{pt3dadd(164676.000000,228480.000000,84525.000000,305.347828)}
{pt3dadd(164676.000000,228660.000000,84700.000000,240.734646)}
{pt3dadd(164760.000000,228828.000000,84675.000000,222.345193)}
{pt3dadd(164832.000000,228960.000000,84625.000000,203.955741)}
{pt3dadd(164832.000000,229104.000000,84575.000000,185.566288)}
{pt3dadd(164628.000000,229284.000000,84525.000000,167.176836)}
{pt3dadd(164844.000000,229416.000000,84600.000000,139.314042)}
{pt3dadd(164928.000000,229632.000000,84625.000000,200.612214)}

{create adhoc5}
{access adhoc5}
{connect adhoc5(1), adhoc1(0)}
{nseg = 1}
{strdef color color = "White"}
{pt3dclear()}
{pt3dadd(171744.000000,211368.000000,79500.000000,718.829820)}
{pt3dadd(172008.000000,211152.000000,79350.000000,718.829820)}
{pt3dadd(172572.000000,211008.000000,79125.000000,718.829820)}
{pt3dadd(172764.000000,210900.000000,79025.000000,718.829820)}
{pt3dadd(173256.000000,210732.000000,78850.000000,718.829820)}
{pt3dadd(173700.000000,210660.000000,78725.000000,718.829820)}
{pt3dadd(174108.000000,210516.000000,78500.000000,718.829820)}
{pt3dadd(174552.000000,210408.000000,78300.000000,718.829820)}
{pt3dadd(174816.000000,210300.000000,78200.000000,718.829820)}
{pt3dadd(175152.000000,210192.000000,78100.000000,718.829820)}
{pt3dadd(175488.000000,209976.000000,77975.000000,688.878585)}
{pt3dadd(175704.000000,209808.000000,77725.000000,658.927350)}
{pt3dadd(176040.000000,209700.000000,77625.000000,628.976115)}
{pt3dadd(176232.000000,209652.000000,77475.000000,599.024880)}
{pt3dadd(176520.000000,209316.000000,77125.000000,628.976115)}
{pt3dadd(176832.000000,209184.000000,76925.000000,658.927350)}
{pt3dadd(177336.000000,208896.000000,76700.000000,688.878585)}
{pt3dadd(177744.000000,208680.000000,76550.000000,718.829820)}
{pt3dadd(178128.000000,208284.000000,76025.000000,787.549955)}
{pt3dadd(178608.000000,207888.000000,75925.000000,856.270089)}
{pt3dadd(178920.000000,207672.000000,75850.000000,924.990223)}
{pt3dadd(179304.000000,207312.000000,75425.000000,993.710358)}
{pt3dadd(179604.000000,207180.000000,75250.000000,928.153080)}
{pt3dadd(179832.000000,207036.000000,74925.000000,862.595802)}
{pt3dadd(179988.000000,206316.000000,73175.000000,1490.565402)}

{create adhoc6}
{access adhoc6}
{connect adhoc6(1), adhoc5(0)}
{nseg = 1}
{strdef color color = "White"}
{pt3dclear()}
{pt3dadd(179988.000000,206316.000000,73175.000000,1490.565402)}
{pt3dadd(180312.000000,206316.000000,73125.000000,1717.131222)}
{pt3dadd(180564.000000,206232.000000,73150.000000,1546.627154)}
{pt3dadd(180984.000000,205980.000000,73000.000000,1376.123085)}
{pt3dadd(181332.000000,205704.000000,73125.000000,1205.619017)}
{pt3dadd(181668.000000,205512.000000,73325.000000,1035.114948)}
{pt3dadd(182076.000000,205140.000000,73600.000000,863.000685)}
{pt3dadd(182484.000000,204540.000000,73600.000000,690.886422)}
{pt3dadd(183036.000000,203964.000000,73525.000000,518.772159)}
{pt3dadd(183480.000000,204696.000000,74575.000000,346.657896)}
{pt3dadd(185544.000000,202908.000000,75150.000000,381.323691)}
{pt3dadd(186264.000000,202248.000000,75150.000000,415.989486)}
{pt3dadd(188736.000000,201096.000000,75150.000000,2472.669252)}

{create adhoc7}
{access adhoc7}
{connect adhoc7(1), adhoc6(0)}
{nseg = 1}
{strdef color color = "White"}
{pt3dclear()}
{pt3dadd(188736.000000,201096.000000,75150.000000,2472.669252)}
{pt3dadd(188796.000000,201096.000000,75525.000000,2575.697112)}
{pt3dadd(189228.000000,201048.000000,75900.000000,2446.912251)}
{pt3dadd(189516.000000,200964.000000,76600.000000,2318.127390)}
{pt3dadd(189708.000000,201300.000000,77625.000000,2189.342529)}
{pt3dadd(189756.000000,201456.000000,78475.000000,2060.557668)}
{pt3dadd(190092.000000,201504.000000,79675.000000,2189.342529)}
{pt3dadd(190632.000000,201600.000000,80975.000000,2318.127390)}
{pt3dadd(191340.000000,201372.000000,82600.000000,2446.912251)}
{pt3dadd(191808.000000,200952.000000,83300.000000,2575.697112)}
{pt3dadd(191988.000000,201288.000000,84325.000000,2575.697112)}
{pt3dadd(192420.000000,201324.000000,85000.000000,2575.697112)}
{pt3dadd(192480.000000,201132.000000,85550.000000,2575.697112)}
{pt3dadd(192528.000000,201084.000000,86300.000000,2575.697112)}
{pt3dadd(192852.000000,200520.000000,87225.000000,2673.573624)}
{pt3dadd(192864.000000,200532.000000,87950.000000,2771.450136)}
{pt3dadd(192900.000000,200664.000000,88775.000000,2869.326648)}
{pt3dadd(192924.000000,200892.000000,89650.000000,2967.203160)}
{pt3dadd(192696.000000,201216.000000,90550.000000,2998.111477)}
{pt3dadd(192828.000000,200988.000000,91350.000000,3029.019795)}
{pt3dadd(193260.000000,200856.000000,92250.000000,3059.928112)}
{pt3dadd(193608.000000,200712.000000,93100.000000,3090.836430)}
{pt3dadd(193608.000000,200628.000000,93950.000000,2962.051600)}
{pt3dadd(193524.000000,200688.000000,94800.000000,2833.266771)}
{pt3dadd(193092.000000,200592.000000,95525.000000,2704.481942)}
{pt3dadd(193128.000000,200772.000000,96425.000000,2575.697112)}
{pt3dadd(192468.000000,201168.000000,97225.000000,2575.697112)}
{pt3dadd(191964.000000,200880.000000,97900.000000,2575.697112)}
{pt3dadd(191820.000000,201012.000000,98675.000000,2575.697112)}
{pt3dadd(191676.000000,201156.000000,99325.000000,2575.697112)}
{pt3dadd(191304.000000,200940.000000,99950.000000,2549.940147)}
{pt3dadd(191136.000000,201120.000000,100750.000000,2524.183182)}
{pt3dadd(190872.000000,200940.000000,101500.000000,2498.426217)}
{pt3dadd(190728.000000,200628.000000,101900.000000,2472.669252)}
{pt3dadd(190656.000000,200208.000000,102600.000000,2369.641356)}
{pt3dadd(190344.000000,199740.000000,103300.000000,2266.613460)}
{pt3dadd(190020.000000,199272.000000,104050.000000,2163.585564)}
{pt3dadd(189756.000000,198888.000000,104600.000000,2060.557668)}
{pt3dadd(189708.000000,198480.000000,105100.000000,2189.342529)}
{pt3dadd(189708.000000,198672.000000,105525.000000,2318.127390)}
{pt3dadd(189492.000000,198216.000000,106325.000000,2446.912251)}
{pt3dadd(189444.000000,198120.000000,106900.000000,2575.697112)}
{pt3dadd(189372.000000,198156.000000,107325.000000,1296.848556)}
{pt3dadd(189132.000000,197484.000000,107825.000000,18.000000)}
{pt3dadd(189156.000000,197376.000000,108225.000000,1082.207088)}
{pt3dadd(189120.000000,196956.000000,108700.000000,2146.414176)}
{pt3dadd(189036.000000,196704.000000,109200.000000,2056.980245)}
{pt3dadd(188940.000000,196644.000000,109750.000000,1967.546313)}
{pt3dadd(188688.000000,196308.000000,110175.000000,1878.112382)}
{pt3dadd(188496.000000,195864.000000,110725.000000,1788.678450)}
{pt3dadd(188388.000000,195192.000000,111350.000000,1714.150188)}
{pt3dadd(188052.000000,195264.000000,111900.000000,1639.621926)}
{pt3dadd(187968.000000,194436.000000,112250.000000,1565.093664)}
{pt3dadd(187536.000000,194244.000000,112625.000000,1490.565402)}
{pt3dadd(187476.000000,193992.000000,112925.000000,1490.565402)}
{pt3dadd(187392.000000,193656.000000,113300.000000,1490.565402)}
{pt3dadd(187188.000000,193176.000000,113850.000000,1490.565402)}
{pt3dadd(186720.000000,192612.000000,114375.000000,1490.565402)}
{pt3dadd(186564.000000,192696.000000,114900.000000,1366.351623)}
{pt3dadd(186288.000000,192456.000000,115425.000000,1242.137844)}
{pt3dadd(186240.000000,192084.000000,115725.000000,1117.924065)}
{pt3dadd(186192.000000,191700.000000,116300.000000,993.710286)}
{pt3dadd(185724.000000,191112.000000,116625.000000,960.931665)}
{pt3dadd(185112.000000,190572.000000,117050.000000,928.153044)}
{pt3dadd(184812.000000,190236.000000,117500.000000,895.374423)}
{pt3dadd(184284.000000,189228.000000,118025.000000,862.595802)}
{pt3dadd(183732.000000,188736.000000,118500.000000,853.969856)}
{pt3dadd(183444.000000,188256.000000,118875.000000,845.343909)}
{pt3dadd(183336.000000,188028.000000,119250.000000,836.717962)}
{pt3dadd(182760.000000,187608.000000,119725.000000,828.092016)}
{pt3dadd(182280.000000,186756.000000,120250.000000,800.776467)}
{pt3dadd(181644.000000,185400.000000,120800.000000,773.460918)}
{pt3dadd(181092.000000,184980.000000,121250.000000,746.145369)}
{pt3dadd(180252.000000,183792.000000,121775.000000,718.829820)}
{pt3dadd(179712.000000,183816.000000,122000.000000,754.771316)}
{pt3dadd(178968.000000,182568.000000,122350.000000,790.712811)}
{pt3dadd(178656.000000,182988.000000,122475.000000,826.654307)}
{pt3dadd(178308.000000,182652.000000,122550.000000,862.595802)}
{pt3dadd(177972.000000,182352.000000,122675.000000,862.595802)}
{pt3dadd(177636.000000,182196.000000,122900.000000,862.595802)}
{pt3dadd(177252.000000,181992.000000,122900.000000,862.595802)}
{pt3dadd(176880.000000,181620.000000,123075.000000,862.595802)}
{pt3dadd(176544.000000,181392.000000,123350.000000,766.751823)}
{pt3dadd(176112.000000,180972.000000,123525.000000,670.907844)}
{pt3dadd(175752.000000,180768.000000,123575.000000,575.063865)}
{pt3dadd(175476.000000,180396.000000,123700.000000,479.219886)}
{pt3dadd(175188.000000,180108.000000,123825.000000,575.063865)}
{pt3dadd(174816.000000,179820.000000,123975.000000,670.907844)}
{pt3dadd(174492.000000,179400.000000,124200.000000,766.751823)}
{pt3dadd(174096.000000,179064.000000,124325.000000,862.595802)}
{pt3dadd(173832.000000,178872.000000,124475.000000,862.595802)}
{pt3dadd(173568.000000,178680.000000,124625.000000,862.595802)}
{pt3dadd(173424.000000,177912.000000,124975.000000,862.595802)}
{pt3dadd(173124.000000,177336.000000,125100.000000,862.595802)}
{pt3dadd(172872.000000,176940.000000,125200.000000,862.595802)}
{pt3dadd(172668.000000,176556.000000,125625.000000,862.595802)}
{pt3dadd(172332.000000,176544.000000,125800.000000,862.595802)}
{pt3dadd(172092.000000,176172.000000,125900.000000,862.595802)}
{pt3dadd(171804.000000,175884.000000,126100.000000,796.703072)}
{pt3dadd(171480.000000,175512.000000,126475.000000,730.810341)}
{pt3dadd(171120.000000,174996.000000,126775.000000,664.917611)}
{pt3dadd(170604.000000,174468.000000,127075.000000,599.024880)}
{pt3dadd(170196.000000,173892.000000,127550.000000,656.291664)}
{pt3dadd(169236.000000,172944.000000,127900.000000,713.558448)}
{pt3dadd(168708.000000,172356.000000,128425.000000,770.825232)}
{pt3dadd(168192.000000,171528.000000,128775.000000,828.092016)}
{pt3dadd(167760.000000,171144.000000,129100.000000,800.776467)}
{pt3dadd(167436.000000,170616.000000,129475.000000,773.460918)}
{pt3dadd(167148.000000,170376.000000,129800.000000,746.145369)}
{pt3dadd(166764.000000,169752.000000,130150.000000,718.829820)}
{pt3dadd(166536.000000,169524.000000,130425.000000,711.641533)}
{pt3dadd(166104.000000,169536.000000,130250.000000,704.453247)}
{pt3dadd(165804.000000,168768.000000,130775.000000,697.264960)}
{pt3dadd(165372.000000,168384.000000,130900.000000,690.076674)}
{pt3dadd(165012.000000,168000.000000,131175.000000,690.076674)}
{pt3dadd(164316.000000,167580.000000,131450.000000,690.076674)}
{pt3dadd(164124.000000,167088.000000,131775.000000,690.076674)}
{pt3dadd(163692.000000,166476.000000,132025.000000,690.076674)}
{pt3dadd(163476.000000,166344.000000,132150.000000,724.580491)}
{pt3dadd(163140.000000,165960.000000,132325.000000,759.084309)}
{pt3dadd(162804.000000,165444.000000,132350.000000,793.588126)}
{pt3dadd(162372.000000,164832.000000,132575.000000,828.091944)}
{pt3dadd(162168.000000,164676.000000,132700.000000,836.717909)}
{pt3dadd(161832.000000,164388.000000,132900.000000,845.343873)}
{pt3dadd(161388.000000,163956.000000,132875.000000,853.969838)}
{pt3dadd(160932.000000,163764.000000,133175.000000,862.595802)}
{pt3dadd(160560.000000,163572.000000,133225.000000,895.374423)}
{pt3dadd(160284.000000,163044.000000,133200.000000,928.153044)}
{pt3dadd(159936.000000,162864.000000,133450.000000,960.931665)}
{pt3dadd(159648.000000,162480.000000,133625.000000,993.710286)}
{pt3dadd(159300.000000,161640.000000,133725.000000,1004.061452)}
{pt3dadd(158832.000000,161724.000000,134075.000000,1014.412617)}
{pt3dadd(158472.000000,161196.000000,134100.000000,1024.763782)}
{pt3dadd(158064.000000,161460.000000,134550.000000,1035.114948)}
{pt3dadd(157776.000000,160896.000000,134775.000000,956.043666)}
{pt3dadd(157380.000000,161076.000000,134900.000000,876.972384)}
{pt3dadd(157164.000000,160704.000000,135225.000000,797.901102)}
{pt3dadd(156972.000000,160404.000000,135275.000000,718.829820)}
{pt3dadd(156768.000000,160008.000000,135475.000000,849.656835)}
{pt3dadd(156504.000000,160056.000000,135675.000000,980.483850)}
{pt3dadd(156132.000000,158904.000000,135975.000000,1111.310865)}
{pt3dadd(157560.000000,157356.000000,136675.000000,1242.137880)}
{pt3dadd(157212.000000,157200.000000,137200.000000,1304.244761)}
{pt3dadd(157284.000000,156924.000000,137900.000000,1366.351641)}
{pt3dadd(158508.000000,156732.000000,138575.000000,1428.458522)}
{pt3dadd(158316.000000,156540.000000,139175.000000,1490.565402)}
{pt3dadd(157920.000000,156564.000000,139775.000000,1376.702789)}
{pt3dadd(157536.000000,156696.000000,140100.000000,1262.840175)}
{pt3dadd(156828.000000,156876.000000,140450.000000,1148.977562)}
{pt3dadd(156144.000000,156876.000000,141075.000000,1035.114948)}
{pt3dadd(155988.000000,157296.000000,141875.000000,1223.505823)}
{pt3dadd(155808.000000,157236.000000,142600.000000,1411.896699)}
{pt3dadd(155892.000000,157188.000000,143300.000000,1600.287575)}
{pt3dadd(156060.000000,156696.000000,144000.000000,1788.678450)}
{pt3dadd(155988.000000,156036.000000,144600.000000,1770.791643)}
{pt3dadd(156012.000000,155544.000000,145325.000000,1752.904836)}
{pt3dadd(156060.000000,154920.000000,145925.000000,1735.018029)}
{pt3dadd(156132.000000,154440.000000,146425.000000,1717.131222)}
{pt3dadd(155700.000000,153588.000000,146900.000000,1717.131222)}
{pt3dadd(156096.000000,152856.000000,147275.000000,1717.131222)}
{pt3dadd(155952.000000,152796.000000,147775.000000,1717.131222)}
{pt3dadd(155676.000000,151872.000000,148375.000000,1717.131222)}
{pt3dadd(155340.000000,150852.000000,148725.000000,1824.451961)}
{pt3dadd(155160.000000,149616.000000,149125.000000,1931.772699)}
{pt3dadd(155124.000000,148932.000000,149750.000000,2039.093438)}
{pt3dadd(154560.000000,148488.000000,150900.000000,2146.414176)}
{pt3dadd(154140.000000,148212.000000,151600.000000,2253.734910)}
{pt3dadd(153840.000000,147540.000000,152050.000000,2361.055644)}
{pt3dadd(153552.000000,146868.000000,152950.000000,2468.376378)}
{pt3dadd(153468.000000,146388.000000,154175.000000,2575.697112)}
{pt3dadd(153552.000000,146436.000000,154875.000000,2704.481942)}
{pt3dadd(153504.000000,146304.000000,155675.000000,2833.266771)}
{pt3dadd(153180.000000,146484.000000,156225.000000,2962.051600)}
{pt3dadd(152928.000000,146616.000000,157275.000000,3090.836430)}
{pt3dadd(152688.000000,146520.000000,157900.000000,3090.836430)}
{pt3dadd(152556.000000,146388.000000,158675.000000,3090.836430)}
{pt3dadd(151728.000000,146100.000000,159075.000000,3090.836430)}
{pt3dadd(151404.000000,145824.000000,159775.000000,3090.836430)}
{pt3dadd(151296.000000,145296.000000,160500.000000,3059.928180)}
{pt3dadd(151248.000000,144852.000000,161050.000000,3029.019930)}
{pt3dadd(151440.000000,144468.000000,161950.000000,2998.111680)}
{pt3dadd(151776.000000,144000.000000,162725.000000,2967.203430)}
{pt3dadd(152064.000000,143556.000000,163425.000000,2869.326851)}
{pt3dadd(152472.000000,143076.000000,164175.000000,2771.450271)}
{pt3dadd(152712.000000,142836.000000,164950.000000,2673.573691)}
{pt3dadd(152892.000000,142440.000000,165600.000000,2575.697112)}
{pt3dadd(153036.000000,141804.000000,166075.000000,2549.940147)}
{pt3dadd(153612.000000,140472.000000,166950.000000,2524.183182)}
{pt3dadd(154080.000000,140652.000000,167625.000000,2498.426217)}
{pt3dadd(154272.000000,140472.000000,168125.000000,2472.669252)}
{pt3dadd(154140.000000,140328.000000,168900.000000,2627.211046)}
{pt3dadd(153996.000000,140184.000000,169525.000000,2781.752841)}
{pt3dadd(153948.000000,139740.000000,170275.000000,2936.294635)}
{pt3dadd(153972.000000,139404.000000,170975.000000,3090.836430)}
{pt3dadd(153840.000000,139248.000000,171900.000000,2962.051600)}
{pt3dadd(153612.000000,138924.000000,172325.000000,2833.266771)}
{pt3dadd(153564.000000,138480.000000,173000.000000,2704.481942)}
{pt3dadd(153492.000000,138300.000000,173675.000000,2575.697112)}
{pt3dadd(153216.000000,138000.000000,174325.000000,2704.481942)}
{pt3dadd(152172.000000,137844.000000,174650.000000,2833.266771)}
{pt3dadd(151752.000000,137748.000000,175275.000000,2962.051600)}
{pt3dadd(152028.000000,137400.000000,175725.000000,3090.836430)}
{pt3dadd(152076.000000,136956.000000,176500.000000,3090.836430)}
{pt3dadd(151968.000000,136656.000000,177200.000000,3090.836430)}
{pt3dadd(151692.000000,136560.000000,178125.000000,3090.836430)}
{pt3dadd(151320.000000,136692.000000,178825.000000,3090.836430)}
{pt3dadd(151320.000000,136344.000000,179650.000000,2962.051600)}
{pt3dadd(151140.000000,135804.000000,180400.000000,2833.266771)}
{pt3dadd(150756.000000,135096.000000,181200.000000,2704.481942)}
{pt3dadd(150564.000000,135012.000000,182275.000000,2575.697112)}
{pt3dadd(150456.000000,134808.000000,182425.000000,2575.697112)}
{pt3dadd(150444.000000,134652.000000,182800.000000,2575.697112)}

{create adhoc8}
{access adhoc8}
{connect adhoc8(1), adhoc6(0)}
{nseg = 1}
{strdef color color = "White"}
{pt3dclear()}
{pt3dadd(188736.000000,201096.000000,75150.000000,2472.669252)}
{pt3dadd(188628.000000,201048.000000,74525.000000,2472.669252)}
{pt3dadd(187728.000000,201216.000000,73850.000000,2421.691896)}
{pt3dadd(187248.000000,201312.000000,73150.000000,2309.541714)}
{pt3dadd(187320.000000,201060.000000,72675.000000,2197.391532)}
{pt3dadd(187464.000000,201024.000000,72150.000000,2146.414176)}
{pt3dadd(187488.000000,200592.000000,71675.000000,2146.414176)}
{pt3dadd(187512.000000,200160.000000,71100.000000,2146.414176)}
{pt3dadd(187872.000000,199536.000000,70200.000000,2146.414176)}
{pt3dadd(187332.000000,198948.000000,69650.000000,2146.414176)}
{pt3dadd(187056.000000,198648.000000,69175.000000,2146.414176)}

{create adhoc9}
{access adhoc9}
{connect adhoc9(1), adhoc8(0)}
{nseg = 1}
{strdef color color = "White"}
{pt3dclear()}
{pt3dadd(187056.000000,198648.000000,69175.000000,78.220897)}
{pt3dadd(184572.000000,197904.000000,69175.000000,288.881586)}
{pt3dadd(184416.000000,197616.000000,67975.000000,499.542275)}
{pt3dadd(183924.000000,197688.000000,67750.000000,683.310110)}
{pt3dadd(183492.000000,197736.000000,67800.000000,813.292237)}
{pt3dadd(183084.000000,197484.000000,68725.000000,862.595802)}
{pt3dadd(182748.000000,197328.000000,68950.000000,862.595802)}
{pt3dadd(182448.000000,197328.000000,69075.000000,862.595802)}
{pt3dadd(182112.000000,197172.000000,69425.000000,862.595802)}
{pt3dadd(181740.000000,196956.000000,69650.000000,862.595802)}
{pt3dadd(181572.000000,196776.000000,69825.000000,840.132367)}
{pt3dadd(181068.000000,196500.000000,69950.000000,790.712811)}
{pt3dadd(180732.000000,196368.000000,70075.000000,741.293255)}
{pt3dadd(179916.000000,195996.000000,70400.000000,718.829820)}
{pt3dadd(179508.000000,195672.000000,70575.000000,768.249371)}
{pt3dadd(179064.000000,195492.000000,70725.000000,876.972384)}
{pt3dadd(178260.000000,195072.000000,71075.000000,985.695397)}
{pt3dadd(177516.000000,194640.000000,71450.000000,1035.114948)}
{pt3dadd(177072.000000,194508.000000,71850.000000,1035.114948)}
{pt3dadd(176952.000000,194496.000000,71975.000000,1035.114948)}

{create adhoc10}
{access adhoc10}
{connect adhoc10(1), adhoc9(0)}
{nseg = 1}
{strdef color color = "White"}
{pt3dclear()}
{pt3dadd(176952.000000,194496.000000,71975.000000,1035.114948)}
{pt3dadd(176316.000000,194124.000000,71925.000000,718.829820)}
{pt3dadd(175308.000000,193800.000000,71925.000000,415.989486)}

{create adhoc11}
{access adhoc11}
{connect adhoc11(1), adhoc10(0)}
{nseg = 1}
{strdef color color = "White"}
{pt3dclear()}
{pt3dadd(175308.000000,193800.000000,71925.000000,415.989486)}
{pt3dadd(175632.000000,191124.000000,71925.000000,499.187376)}
{pt3dadd(175776.000000,190956.000000,71975.000000,494.195504)}
{pt3dadd(175872.000000,190764.000000,72025.000000,489.203631)}
{pt3dadd(175956.000000,190236.000000,71875.000000,484.211758)}
{pt3dadd(175896.000000,189864.000000,71975.000000,479.219886)}
{pt3dadd(175860.000000,189480.000000,72000.000000,497.430243)}
{pt3dadd(175944.000000,189156.000000,72250.000000,515.640600)}
{pt3dadd(175968.000000,188784.000000,72300.000000,533.850957)}
{pt3dadd(175860.000000,188592.000000,72300.000000,552.061314)}
{pt3dadd(176052.000000,188400.000000,72325.000000,599.024880)}
{pt3dadd(176088.000000,188028.000000,72550.000000,599.024880)}

{create adhoc12}
{access adhoc12}
{connect adhoc12(1), adhoc11(0)}
{nseg = 1}
{strdef color color = "White"}
{pt3dclear()}
{pt3dadd(176088.000000,188028.000000,72550.000000,599.024880)}
{pt3dadd(176316.000000,187824.000000,72875.000000,599.024880)}
{pt3dadd(176484.000000,187464.000000,73150.000000,549.106137)}
{pt3dadd(176616.000000,187284.000000,73425.000000,499.187394)}
{pt3dadd(176712.000000,187128.000000,73625.000000,449.268651)}
{pt3dadd(176472.000000,186888.000000,73975.000000,399.349908)}
{pt3dadd(177420.000000,187548.000000,74475.000000,506.535435)}
{pt3dadd(177360.000000,187548.000000,74750.000000,613.720962)}
{pt3dadd(177552.000000,187476.000000,74925.000000,720.906489)}
{pt3dadd(177612.000000,187644.000000,75375.000000,828.092016)}
{pt3dadd(177588.000000,187644.000000,75625.000000,740.873983)}
{pt3dadd(177624.000000,187740.000000,75850.000000,653.655951)}
{pt3dadd(177708.000000,187884.000000,76050.000000,566.437919)}
{pt3dadd(177732.000000,188160.000000,76250.000000,479.219886)}
{pt3dadd(177756.000000,188136.000000,76450.000000,509.171134)}
{pt3dadd(177876.000000,188328.000000,76775.000000,539.122383)}
{pt3dadd(177888.000000,188328.000000,76975.000000,569.073631)}
{pt3dadd(178200.000000,188472.000000,77175.000000,599.024880)}
{pt3dadd(178212.000000,188568.000000,77450.000000,574.065504)}
{pt3dadd(178380.000000,188580.000000,77650.000000,549.106128)}
{pt3dadd(178332.000000,188808.000000,77850.000000,524.146752)}
{pt3dadd(178452.000000,188892.000000,78075.000000,499.187376)}
{pt3dadd(178620.000000,189048.000000,78325.000000,457.588422)}
{pt3dadd(178380.000000,189360.000000,78425.000000,415.989468)}
{pt3dadd(178392.000000,189504.000000,78625.000000,374.390514)}
{pt3dadd(178476.000000,189672.000000,78775.000000,332.791560)}
{pt3dadd(178488.000000,190008.000000,78950.000000,353.591042)}
{pt3dadd(178644.000000,190152.000000,79175.000000,374.390523)}
{pt3dadd(178656.000000,190344.000000,79525.000000,395.190005)}
{pt3dadd(178500.000000,190572.000000,79825.000000,415.989486)}
{pt3dadd(178500.000000,190824.000000,80225.000000,436.788958)}
{pt3dadd(178500.000000,191208.000000,80550.000000,457.588431)}
{pt3dadd(178584.000000,191328.000000,80800.000000,478.387903)}
{pt3dadd(178656.000000,191340.000000,81125.000000,499.187376)}
{pt3dadd(179016.000000,191160.000000,81350.000000,461.055006)}
{pt3dadd(179136.000000,191028.000000,81575.000000,422.922636)}
{pt3dadd(179040.000000,191112.000000,81800.000000,384.790266)}
{pt3dadd(179340.000000,190932.000000,81975.000000,346.657896)}
{pt3dadd(179448.000000,190992.000000,81600.000000,301.787631)}
{pt3dadd(179580.000000,191052.000000,81775.000000,256.917366)}
{pt3dadd(179760.000000,190872.000000,81800.000000,212.047101)}
{pt3dadd(180024.000000,190440.000000,81800.000000,167.176836)}
{pt3dadd(180156.000000,190560.000000,82250.000000,197.603024)}
{pt3dadd(180132.000000,190656.000000,82550.000000,228.029211)}
{pt3dadd(179760.000000,190824.000000,82700.000000,258.455399)}
{pt3dadd(179412.000000,191484.000000,82950.000000,288.881586)}
{pt3dadd(179400.000000,191388.000000,83150.000000,245.684947)}
{pt3dadd(179652.000000,191256.000000,83400.000000,202.488309)}
{pt3dadd(179688.000000,191232.000000,83600.000000,159.291671)}
{pt3dadd(179832.000000,191436.000000,83775.000000,116.095032)}
{pt3dadd(179892.000000,191544.000000,83725.000000,158.353623)}
{pt3dadd(179976.000000,191700.000000,83500.000000,200.612214)}
{pt3dadd(180096.000000,191820.000000,83475.000000,346.657896)}

{create adhoc13}
{access adhoc13}
{connect adhoc13(1), adhoc11(0)}
{nseg = 1}
{strdef color color = "White"}
{pt3dclear()}
{pt3dadd(176088.000000,188028.000000,72550.000000,599.024880)}
{pt3dadd(176508.000000,185376.000000,73825.000000,277.326342)}
{pt3dadd(176376.000000,185244.000000,73900.000000,280.215153)}
{pt3dadd(176580.000000,184872.000000,73750.000000,283.103964)}
{pt3dadd(176340.000000,184320.000000,73100.000000,285.992775)}
{pt3dadd(176340.000000,184068.000000,72450.000000,288.881586)}
{pt3dadd(176268.000000,183732.000000,72075.000000,266.814243)}
{pt3dadd(176304.000000,183432.000000,72025.000000,244.746900)}
{pt3dadd(176232.000000,183168.000000,71775.000000,222.679557)}
{pt3dadd(176316.000000,182988.000000,71700.000000,200.612214)}
{pt3dadd(176376.000000,182712.000000,71600.000000,178.321968)}
{pt3dadd(176436.000000,182532.000000,71575.000000,156.031722)}
{pt3dadd(176532.000000,182388.000000,71550.000000,133.741476)}
{pt3dadd(176616.000000,182244.000000,71400.000000,111.451230)}
{pt3dadd(176736.000000,182148.000000,71250.000000,116.095032)}

{create adhoc14}
{access adhoc14}
{connect adhoc14(1), adhoc10(0)}
{nseg = 1}
{strdef color color = "White"}
{pt3dclear()}
{pt3dadd(175308.000000,193800.000000,71925.000000,415.989486)}
{pt3dadd(174036.000000,194604.000000,72500.000000,288.881586)}
{pt3dadd(173916.000000,194688.000000,72650.000000,303.325664)}
{pt3dadd(173808.000000,194784.000000,72650.000000,317.769741)}
{pt3dadd(173652.000000,195012.000000,72675.000000,332.213819)}
{pt3dadd(173532.000000,194988.000000,72700.000000,346.657896)}
{pt3dadd(173424.000000,195048.000000,72700.000000,310.146476)}
{pt3dadd(173256.000000,195144.000000,72900.000000,273.635055)}
{pt3dadd(173172.000000,195300.000000,72900.000000,237.123635)}
{pt3dadd(173028.000000,195516.000000,72950.000000,200.612214)}
{pt3dadd(172860.000000,195648.000000,72950.000000,222.679557)}
{pt3dadd(172716.000000,195804.000000,73075.000000,244.746900)}
{pt3dadd(172512.000000,196020.000000,72850.000000,266.814243)}
{pt3dadd(172380.000000,196032.000000,72900.000000,288.881586)}
{pt3dadd(172092.000000,196128.000000,72850.000000,266.814243)}
{pt3dadd(171900.000000,196200.000000,72850.000000,244.746900)}
{pt3dadd(171720.000000,196152.000000,72750.000000,222.679557)}
{pt3dadd(171516.000000,196188.000000,72725.000000,200.612214)}
{pt3dadd(171420.000000,196248.000000,72700.000000,200.612214)}
{pt3dadd(171276.000000,196284.000000,72625.000000,200.612214)}
{pt3dadd(171108.000000,196356.000000,72475.000000,200.612214)}
{pt3dadd(170988.000000,196452.000000,72600.000000,200.612214)}
{pt3dadd(170844.000000,196488.000000,72450.000000,200.612214)}
{pt3dadd(170736.000000,196548.000000,72500.000000,200.612214)}
{pt3dadd(170640.000000,196644.000000,72475.000000,200.612214)}
{pt3dadd(170532.000000,196704.000000,72400.000000,200.612214)}
{pt3dadd(170424.000000,196764.000000,72300.000000,222.679557)}
{pt3dadd(170316.000000,196740.000000,72000.000000,244.746900)}
{pt3dadd(170220.000000,196860.000000,72000.000000,266.814243)}
{pt3dadd(170100.000000,196836.000000,71750.000000,288.881586)}
{pt3dadd(169968.000000,196956.000000,71725.000000,266.814243)}
{pt3dadd(169800.000000,197016.000000,71825.000000,244.746900)}
{pt3dadd(169800.000000,197496.000000,71500.000000,222.679557)}
{pt3dadd(169800.000000,198024.000000,71475.000000,200.612214)}
{pt3dadd(169584.000000,198240.000000,71450.000000,192.253370)}
{pt3dadd(169584.000000,198384.000000,71525.000000,183.894525)}
{pt3dadd(169584.000000,198576.000000,71425.000000,175.535680)}
{pt3dadd(169476.000000,198756.000000,71425.000000,167.176836)}
{pt3dadd(169608.000000,198912.000000,71450.000000,197.603024)}
{pt3dadd(169668.000000,199080.000000,71375.000000,228.029211)}
{pt3dadd(169584.000000,199992.000000,71300.000000,258.455399)}
{pt3dadd(169368.000000,199968.000000,71225.000000,288.881586)}
{pt3dadd(169164.000000,200088.000000,71150.000000,139.314042)}

{create adhoc15}
{access adhoc15}
{connect adhoc15(1), adhoc9(0)}
{nseg = 1}
{strdef color color = "White"}
{pt3dclear()}
{pt3dadd(176952.000000,194496.000000,71975.000000,1035.114948)}
{pt3dadd(176952.000000,194856.000000,73075.000000,599.024880)}
{pt3dadd(176268.000000,194988.000000,73350.000000,621.787810)}
{pt3dadd(176268.000000,195540.000000,74250.000000,644.550741)}
{pt3dadd(176268.000000,195900.000000,75350.000000,667.313671)}
{pt3dadd(176352.000000,195900.000000,75625.000000,690.076602)}
{pt3dadd(176496.000000,196320.000000,76100.000000,690.076620)}
{pt3dadd(176376.000000,196308.000000,76350.000000,690.076638)}
{pt3dadd(176424.000000,196440.000000,76700.000000,690.076656)}
{pt3dadd(176424.000000,196584.000000,76950.000000,690.076674)}
{pt3dadd(176196.000000,196656.000000,77300.000000,733.206456)}
{pt3dadd(176484.000000,196836.000000,77550.000000,776.336238)}
{pt3dadd(176676.000000,197148.000000,77950.000000,819.466020)}
{pt3dadd(176868.000000,197544.000000,78575.000000,862.595802)}
{pt3dadd(176952.000000,197628.000000,78825.000000,957.481322)}
{pt3dadd(177036.000000,197712.000000,79200.000000,1052.366841)}
{pt3dadd(177120.000000,197796.000000,79600.000000,1147.252361)}
{pt3dadd(177084.000000,197868.000000,80100.000000,1242.137880)}
{pt3dadd(177132.000000,198060.000000,80300.000000,1159.328706)}
{pt3dadd(177120.000000,198204.000000,80625.000000,1076.519532)}
{pt3dadd(177096.000000,198228.000000,80900.000000,993.710358)}
{pt3dadd(177096.000000,198420.000000,81250.000000,599.024880)}

{create adhoc16}
{access adhoc16}
{connect adhoc16(1), adhoc15(0)}
{nseg = 1}
{strdef color color = "White"}
{pt3dclear()}
{pt3dadd(177096.000000,198420.000000,81250.000000,599.024880)}
{pt3dadd(177432.000000,197556.000000,81325.000000,1035.114948)}
{pt3dadd(177540.000000,197400.000000,81650.000000,1035.114948)}
{pt3dadd(177624.000000,197424.000000,81975.000000,1035.114948)}
{pt3dadd(177672.000000,197436.000000,82175.000000,1035.114948)}
{pt3dadd(177672.000000,197400.000000,82375.000000,1035.114948)}
{pt3dadd(177636.000000,197364.000000,82600.000000,926.092431)}
{pt3dadd(177624.000000,197448.000000,82825.000000,817.069914)}
{pt3dadd(177696.000000,197556.000000,83075.000000,708.047397)}
{pt3dadd(177684.000000,197628.000000,83400.000000,599.024880)}
{pt3dadd(177732.000000,197700.000000,83750.000000,621.787810)}
{pt3dadd(177732.000000,197748.000000,84000.000000,644.550741)}
{pt3dadd(177900.000000,197772.000000,84325.000000,667.313671)}
{pt3dadd(178008.000000,197760.000000,84625.000000,690.076602)}
{pt3dadd(178224.000000,197700.000000,85050.000000,637.362423)}
{pt3dadd(178248.000000,197640.000000,85525.000000,584.648244)}
{pt3dadd(178560.000000,197460.000000,86125.000000,531.934065)}
{pt3dadd(178632.000000,197088.000000,86475.000000,479.219886)}
{pt3dadd(179112.000000,196224.000000,86900.000000,446.079388)}
{pt3dadd(179424.000000,195888.000000,87225.000000,412.938891)}
{pt3dadd(179580.000000,195888.000000,87225.000000,379.798393)}
{pt3dadd(179808.000000,195552.000000,87350.000000,346.657896)}
{pt3dadd(180060.000000,195552.000000,87475.000000,384.790266)}
{pt3dadd(180216.000000,195264.000000,87400.000000,422.922636)}
{pt3dadd(180420.000000,195084.000000,87550.000000,461.055006)}
{pt3dadd(180612.000000,195000.000000,87625.000000,499.187376)}
{pt3dadd(180780.000000,194820.000000,87625.000000,446.610929)}
{pt3dadd(181008.000000,194532.000000,87825.000000,394.034481)}
{pt3dadd(181392.000000,193668.000000,87575.000000,341.458034)}
{pt3dadd(181788.000000,192888.000000,87175.000000,288.881586)}
{pt3dadd(181980.000000,192372.000000,87150.000000,320.658561)}
{pt3dadd(182160.000000,192132.000000,87100.000000,352.435536)}
{pt3dadd(182268.000000,191832.000000,87050.000000,384.212511)}
{pt3dadd(182412.000000,191544.000000,86950.000000,415.989486)}
{pt3dadd(182484.000000,191316.000000,86775.000000,360.139046)}
{pt3dadd(182484.000000,191136.000000,86575.000000,304.288605)}
{pt3dadd(182472.000000,191028.000000,86475.000000,248.438165)}
{pt3dadd(182520.000000,190836.000000,86225.000000,192.587724)}
{pt3dadd(182436.000000,190728.000000,86150.000000,204.624455)}
{pt3dadd(182400.000000,190620.000000,86125.000000,216.661185)}
{pt3dadd(182400.000000,190512.000000,86050.000000,228.697915)}
{pt3dadd(182340.000000,190368.000000,86025.000000,240.734646)}
{pt3dadd(182448.000000,190224.000000,85925.000000,238.327304)}
{pt3dadd(182352.000000,190008.000000,85775.000000,235.919961)}
{pt3dadd(182352.000000,189768.000000,85525.000000,233.512618)}
{pt3dadd(182208.000000,189252.000000,85425.000000,231.105276)}
{pt3dadd(182352.000000,188988.000000,85225.000000,277.326328)}
{pt3dadd(181800.000000,188724.000000,84675.000000,323.547381)}
{pt3dadd(181680.000000,188796.000000,84475.000000,369.768433)}
{pt3dadd(181584.000000,188712.000000,84300.000000,415.989486)}
{pt3dadd(181524.000000,188652.000000,84100.000000,344.197062)}
{pt3dadd(181116.000000,188568.000000,83925.000000,272.404638)}
{pt3dadd(181080.000000,188472.000000,83775.000000,200.612214)}
{pt3dadd(181068.000000,188388.000000,83575.000000,167.176836)}

{create adhoc17}
{access adhoc17}
{connect adhoc17(1), adhoc15(0)}
{nseg = 1}
{strdef color color = "White"}
{pt3dclear()}
{pt3dadd(177096.000000,198420.000000,81250.000000,599.024880)}
{pt3dadd(176508.000000,199248.000000,81475.000000,288.881586)}
{pt3dadd(176268.000000,199788.000000,81825.000000,320.658561)}
{pt3dadd(175896.000000,200388.000000,82100.000000,352.435536)}
{pt3dadd(176028.000000,200844.000000,82525.000000,384.212511)}
{pt3dadd(175824.000000,201204.000000,83025.000000,415.989486)}
{pt3dadd(175824.000000,201516.000000,83450.000000,499.187376)}

{create adhoc18}
{access adhoc18}
{connect adhoc18(1), adhoc17(0)}
{nseg = 1}
{strdef color color = "White"}
{pt3dclear()}
{pt3dadd(175824.000000,201516.000000,83450.000000,499.187376)}
{pt3dadd(175872.000000,202512.000000,83450.000000,116.095032)}
{pt3dadd(175824.000000,202704.000000,83450.000000,127.193715)}
{pt3dadd(175824.000000,202824.000000,83425.000000,138.292398)}
{pt3dadd(175644.000000,203232.000000,83425.000000,149.391081)}
{pt3dadd(175548.000000,203448.000000,83625.000000,160.489764)}
{pt3dadd(175368.000000,204060.000000,83825.000000,167.176836)}
{pt3dadd(175284.000000,204492.000000,84025.000000,116.095032)}

{create adhoc19}
{access adhoc19}
{connect adhoc19(1), adhoc17(0)}
{nseg = 1}
{strdef color color = "White"}
{pt3dclear()}
{pt3dadd(175824.000000,201516.000000,83450.000000,499.187376)}
{pt3dadd(175968.000000,201792.000000,84050.000000,499.187376)}
{pt3dadd(176148.000000,202020.000000,84375.000000,461.055006)}
{pt3dadd(176292.000000,202212.000000,84650.000000,422.922636)}
{pt3dadd(176484.000000,202404.000000,85025.000000,384.790266)}
{pt3dadd(176568.000000,202428.000000,85550.000000,346.657896)}
{pt3dadd(176784.000000,202572.000000,85700.000000,384.790266)}
{pt3dadd(176928.000000,202716.000000,85900.000000,422.922636)}
{pt3dadd(177000.000000,202884.000000,86100.000000,461.055006)}
{pt3dadd(177168.000000,202992.000000,86325.000000,499.187376)}
{pt3dadd(177084.000000,203064.000000,86550.000000,499.187376)}
{pt3dadd(177084.000000,203196.000000,86775.000000,499.187376)}
{pt3dadd(177156.000000,203388.000000,87050.000000,499.187376)}
{pt3dadd(177348.000000,203532.000000,87325.000000,499.187376)}
{pt3dadd(177264.000000,203700.000000,87550.000000,422.922636)}
{pt3dadd(177252.000000,203916.000000,87750.000000,346.657896)}
{pt3dadd(177300.000000,204072.000000,87850.000000,415.989486)}

{create adhoc20}
{access adhoc20}
{connect adhoc20(1), adhoc19(0)}
{nseg = 1}
{strdef color color = "White"}
{pt3dclear()}
{pt3dadd(177300.000000,204072.000000,87850.000000,415.989486)}
{pt3dadd(177516.000000,203316.000000,88175.000000,718.829820)}
{pt3dadd(177564.000000,203220.000000,88675.000000,643.119736)}
{pt3dadd(177792.000000,203136.000000,89050.000000,567.409653)}
{pt3dadd(178008.000000,203088.000000,89275.000000,491.699570)}
{pt3dadd(178092.000000,203196.000000,89525.000000,415.989486)}
{pt3dadd(178224.000000,203196.000000,89700.000000,415.989486)}
{pt3dadd(178560.000000,202908.000000,89950.000000,415.989486)}
{pt3dadd(178728.000000,202848.000000,90225.000000,415.989486)}
{pt3dadd(179148.000000,202848.000000,90450.000000,415.989486)}
{pt3dadd(179256.000000,202812.000000,90650.000000,368.523189)}
{pt3dadd(179448.000000,202776.000000,90925.000000,321.056892)}
{pt3dadd(179988.000000,202620.000000,91225.000000,273.590595)}
{pt3dadd(180180.000000,203268.000000,91850.000000,226.124298)}
{pt3dadd(180348.000000,203376.000000,92050.000000,256.257698)}
{pt3dadd(180204.000000,203820.000000,92550.000000,286.391097)}
{pt3dadd(180144.000000,204360.000000,92850.000000,316.524496)}
{pt3dadd(180276.000000,204492.000000,93150.000000,346.657896)}
{pt3dadd(180348.000000,204576.000000,93450.000000,320.177083)}
{pt3dadd(180540.000000,204684.000000,93700.000000,293.696271)}
{pt3dadd(180504.000000,204852.000000,93925.000000,267.215459)}
{pt3dadd(180588.000000,204960.000000,94200.000000,240.734646)}
{pt3dadd(180576.000000,205176.000000,94425.000000,222.345193)}
{pt3dadd(180684.000000,205548.000000,94700.000000,203.955741)}
{pt3dadd(180636.000000,206112.000000,95275.000000,185.566288)}
{pt3dadd(180480.000000,206304.000000,95575.000000,167.176836)}
{pt3dadd(180528.000000,206556.000000,95825.000000,228.029211)}
{pt3dadd(180600.000000,206544.000000,96125.000000,288.881586)}
{pt3dadd(180744.000000,206568.000000,96425.000000,288.881586)}

{create adhoc21}
{access adhoc21}
{connect adhoc21(1), adhoc19(0)}
{nseg = 1}
{strdef color color = "White"}
{pt3dclear()}
{pt3dadd(177300.000000,204072.000000,87850.000000,415.989486)}
{pt3dadd(177072.000000,205392.000000,88050.000000,133.741476)}
{pt3dadd(176520.000000,205956.000000,88300.000000,186.970581)}
{pt3dadd(176688.000000,206172.000000,88100.000000,240.199686)}
{pt3dadd(176460.000000,206376.000000,88575.000000,293.428791)}
{pt3dadd(176376.000000,206508.000000,88650.000000,346.657896)}
{pt3dadd(176376.000000,206676.000000,88600.000000,320.177083)}
{pt3dadd(176484.000000,206796.000000,88675.000000,293.696271)}
{pt3dadd(176448.000000,207036.000000,88700.000000,267.215459)}
{pt3dadd(176520.000000,207336.000000,88725.000000,240.734646)}
{pt3dadd(176568.000000,207480.000000,88800.000000,267.215459)}
{pt3dadd(176448.000000,207672.000000,88750.000000,293.696271)}
{pt3dadd(176496.000000,208068.000000,88675.000000,320.177083)}
{pt3dadd(176460.000000,208296.000000,88350.000000,346.657896)}
{pt3dadd(176400.000000,208404.000000,88250.000000,320.177083)}
{pt3dadd(176304.000000,208620.000000,88175.000000,293.696271)}
{pt3dadd(176268.000000,208776.000000,88025.000000,267.215459)}
{pt3dadd(176148.000000,208920.000000,87975.000000,240.734646)}
{pt3dadd(176028.000000,209052.000000,87900.000000,240.734646)}
{pt3dadd(175620.000000,209124.000000,88025.000000,240.734646)}
{pt3dadd(175536.000000,209400.000000,87950.000000,240.734646)}
{pt3dadd(175524.000000,209544.000000,88025.000000,240.734646)}
{pt3dadd(175260.000000,209676.000000,87875.000000,240.734646)}
{pt3dadd(175104.000000,209856.000000,87850.000000,240.734646)}
{pt3dadd(174984.000000,209964.000000,87750.000000,240.734646)}
{pt3dadd(174900.000000,210084.000000,87775.000000,240.734646)}
{pt3dadd(174744.000000,210192.000000,87800.000000,230.704038)}
{pt3dadd(174708.000000,210444.000000,87900.000000,220.673430)}
{pt3dadd(174672.000000,210540.000000,87900.000000,210.642822)}
{pt3dadd(174672.000000,210660.000000,87950.000000,200.612214)}
{pt3dadd(174612.000000,210780.000000,88025.000000,192.253370)}
{pt3dadd(174636.000000,210936.000000,88100.000000,183.894525)}
{pt3dadd(174624.000000,211164.000000,88050.000000,175.535680)}
{pt3dadd(174564.000000,211272.000000,88125.000000,167.176836)}
{pt3dadd(174504.000000,211404.000000,88250.000000,256.917366)}
{pt3dadd(174384.000000,212040.000000,88350.000000,346.657896)}
{pt3dadd(174492.000000,212292.000000,88700.000000,332.791542)}

{create adhoc22}
{access adhoc22}
{connect adhoc22(1), adhoc8(0)}
{nseg = 1}
{strdef color color = "White"}
{pt3dclear()}
{pt3dadd(187056.000000,198648.000000,69175.000000,1988.786848)}
{pt3dadd(186432.000000,198180.000000,68525.000000,2146.414176)}
{pt3dadd(186168.000000,197976.000000,67875.000000,2304.041504)}
{pt3dadd(186384.000000,197544.000000,66850.000000,2441.546194)}
{pt3dadd(186600.000000,196932.000000,66225.000000,2538.805610)}
{pt3dadd(186396.000000,197124.000000,65650.000000,2575.697112)}
{pt3dadd(186660.000000,196656.000000,65100.000000,2575.697112)}
{pt3dadd(186624.000000,196020.000000,64125.000000,2575.697112)}
{pt3dadd(186612.000000,195720.000000,63450.000000,2575.697112)}
{pt3dadd(186828.000000,195324.000000,62825.000000,2575.697112)}
{pt3dadd(186600.000000,195144.000000,62075.000000,2575.697112)}
{pt3dadd(186204.000000,195180.000000,61425.000000,2575.697112)}
{pt3dadd(186336.000000,194832.000000,60650.000000,2575.697112)}
{pt3dadd(186528.000000,194364.000000,59875.000000,2575.697112)}
{pt3dadd(186384.000000,194232.000000,59125.000000,2378.066811)}
{pt3dadd(186192.000000,194232.000000,58600.000000,1935.322072)}
{pt3dadd(185856.000000,194448.000000,58175.000000,1472.682141)}
{pt3dadd(185460.000000,194544.000000,57575.000000,1215.366264)}
{pt3dadd(185268.000000,194172.000000,57075.000000,1161.481845)}
{pt3dadd(184836.000000,194604.000000,56550.000000,1136.234305)}
{pt3dadd(184440.000000,194388.000000,55925.000000,1105.489916)}
{pt3dadd(184164.000000,193392.000000,54925.000000,1035.114948)}
{pt3dadd(182148.000000,195420.000000,54925.000000,415.989486)}

{create adhoc23}
{access adhoc23}
{connect adhoc23(1), adhoc22(0)}
{nseg = 1}
{strdef color color = "White"}
{pt3dclear()}
{pt3dadd(182148.000000,195420.000000,54925.000000,415.989486)}
{pt3dadd(180384.000000,196308.000000,54925.000000,1192.452354)}
{pt3dadd(180168.000000,196536.000000,55300.000000,1341.508878)}
{pt3dadd(179976.000000,196668.000000,55325.000000,1490.565402)}
{pt3dadd(179736.000000,196752.000000,55275.000000,1639.621926)}
{pt3dadd(179520.000000,196836.000000,55075.000000,1788.678450)}
{pt3dadd(179136.000000,196884.000000,54925.000000,1639.621926)}
{pt3dadd(179004.000000,197208.000000,54900.000000,1490.565402)}
{pt3dadd(178908.000000,197196.000000,55125.000000,1490.565402)}

{create adhoc24}
{access adhoc24}
{connect adhoc24(1), adhoc23(0)}
{nseg = 1}
{strdef color color = "White"}
{pt3dclear()}
{pt3dadd(178908.000000,197196.000000,55125.000000,1490.565402)}
{pt3dadd(178716.000000,197568.000000,53350.000000,828.091944)}
{pt3dadd(178548.000000,197388.000000,53600.000000,800.776413)}
{pt3dadd(178368.000000,197616.000000,53375.000000,773.460882)}
{pt3dadd(178164.000000,197784.000000,53275.000000,746.145351)}
{pt3dadd(178032.000000,198240.000000,53150.000000,718.829820)}
{pt3dadd(177852.000000,198276.000000,53050.000000,688.878585)}
{pt3dadd(177684.000000,198588.000000,52950.000000,658.927350)}
{pt3dadd(177456.000000,198948.000000,52825.000000,628.976115)}
{pt3dadd(177288.000000,199032.000000,52900.000000,599.024880)}
{pt3dadd(177168.000000,199392.000000,52875.000000,718.829820)}

{create adhoc25}
{access adhoc25}
{connect adhoc25(1), adhoc24(0)}
{nseg = 1}
{strdef color color = "White"}
{pt3dclear()}
{pt3dadd(177168.000000,199392.000000,52875.000000,718.829820)}
{pt3dadd(177000.000000,199920.000000,52300.000000,862.595802)}
{pt3dadd(176808.000000,200016.000000,52550.000000,862.595802)}
{pt3dadd(176544.000000,200160.000000,52300.000000,862.595802)}
{pt3dadd(176376.000000,200304.000000,52075.000000,862.595802)}
{pt3dadd(176208.000000,200424.000000,52125.000000,862.595802)}
{pt3dadd(176028.000000,200640.000000,52200.000000,826.654307)}
{pt3dadd(175884.000000,200904.000000,52075.000000,790.712811)}
{pt3dadd(175692.000000,201072.000000,51925.000000,754.771316)}
{pt3dadd(175548.000000,201240.000000,51775.000000,718.829820)}
{pt3dadd(175344.000000,201420.000000,52000.000000,643.119736)}
{pt3dadd(175152.000000,201600.000000,51900.000000,567.409653)}
{pt3dadd(174972.000000,201924.000000,51975.000000,491.699570)}
{pt3dadd(174732.000000,201996.000000,52050.000000,415.989486)}
{pt3dadd(174540.000000,202044.000000,51900.000000,200.612214)}

{create adhoc26}
{access adhoc26}
{connect adhoc26(1), adhoc25(0)}
{nseg = 1}
{strdef color color = "White"}
{pt3dclear()}
{pt3dadd(174540.000000,202044.000000,51900.000000,200.612214)}
{pt3dadd(174492.000000,202704.000000,52025.000000,599.024880)}
{pt3dadd(174204.000000,203124.000000,52075.000000,599.024880)}
{pt3dadd(174072.000000,203172.000000,52100.000000,599.024880)}
{pt3dadd(173820.000000,203388.000000,52100.000000,599.024880)}
{pt3dadd(173604.000000,203568.000000,52200.000000,599.024880)}
{pt3dadd(173424.000000,203712.000000,52175.000000,593.034624)}
{pt3dadd(173196.000000,203952.000000,52225.000000,587.044368)}
{pt3dadd(172848.000000,204192.000000,52250.000000,581.054112)}
{pt3dadd(172668.000000,204432.000000,52275.000000,575.063856)}
{pt3dadd(172440.000000,204480.000000,52325.000000,556.094736)}
{pt3dadd(172104.000000,204708.000000,52350.000000,537.125616)}
{pt3dadd(171840.000000,204924.000000,52375.000000,518.156496)}
{pt3dadd(171540.000000,205116.000000,52375.000000,499.187376)}
{pt3dadd(171228.000000,205284.000000,52425.000000,499.187376)}
{pt3dadd(171012.000000,205404.000000,52500.000000,499.187376)}
{pt3dadd(170652.000000,205644.000000,52575.000000,499.187376)}
{pt3dadd(170352.000000,205908.000000,52450.000000,499.187376)}
{pt3dadd(170148.000000,206088.000000,52400.000000,524.146752)}
{pt3dadd(170004.000000,206160.000000,52400.000000,549.106128)}
{pt3dadd(169692.000000,206448.000000,52350.000000,574.065504)}
{pt3dadd(169512.000000,206724.000000,52250.000000,599.024880)}
{pt3dadd(169296.000000,206940.000000,52175.000000,599.024880)}
{pt3dadd(169056.000000,207168.000000,52075.000000,599.024880)}
{pt3dadd(168828.000000,207336.000000,52275.000000,599.024880)}
{pt3dadd(168528.000000,207480.000000,52200.000000,599.024880)}
{pt3dadd(168348.000000,207672.000000,52075.000000,628.976115)}
{pt3dadd(168096.000000,207864.000000,52100.000000,658.927350)}
{pt3dadd(167688.000000,207996.000000,52050.000000,688.878585)}
{pt3dadd(167388.000000,208044.000000,52100.000000,718.829820)}
{pt3dadd(167160.000000,208140.000000,52175.000000,663.919209)}
{pt3dadd(166920.000000,208416.000000,52200.000000,609.008598)}
{pt3dadd(166728.000000,208488.000000,52125.000000,554.097987)}
{pt3dadd(166500.000000,208668.000000,52250.000000,499.187376)}
{pt3dadd(166272.000000,208800.000000,52250.000000,499.187376)}
{pt3dadd(166140.000000,208932.000000,52250.000000,499.187376)}
{pt3dadd(165960.000000,209064.000000,52175.000000,499.187376)}
{pt3dadd(165528.000000,209208.000000,52225.000000,499.187376)}
{pt3dadd(165276.000000,209352.000000,52275.000000,524.146752)}
{pt3dadd(165000.000000,209496.000000,52250.000000,549.106128)}
{pt3dadd(164748.000000,209616.000000,52125.000000,574.065504)}
{pt3dadd(164304.000000,209832.000000,52150.000000,599.024880)}
{pt3dadd(163680.000000,210048.000000,52125.000000,599.024880)}
{pt3dadd(163212.000000,210276.000000,52125.000000,599.024880)}
{pt3dadd(163032.000000,210504.000000,52125.000000,599.024880)}
{pt3dadd(162876.000000,210636.000000,52025.000000,599.024880)}
{pt3dadd(162720.000000,210804.000000,52100.000000,574.065504)}
{pt3dadd(162588.000000,210828.000000,52100.000000,549.106128)}
{pt3dadd(162432.000000,211008.000000,52200.000000,524.146752)}
{pt3dadd(162240.000000,211056.000000,52225.000000,499.187376)}
{pt3dadd(162072.000000,211200.000000,52075.000000,499.187376)}
{pt3dadd(161760.000000,211656.000000,52200.000000,499.187376)}
{pt3dadd(161604.000000,211728.000000,52125.000000,499.187376)}

{create adhoc27}
{access adhoc27}
{connect adhoc27(1), adhoc26(0)}
{nseg = 1}
{strdef color color = "White"}
{pt3dclear()}
{pt3dadd(161604.000000,211728.000000,52125.000000,499.187376)}
{pt3dadd(161316.000000,212628.000000,51800.000000,479.219886)}
{pt3dadd(161172.000000,213000.000000,51600.000000,509.171134)}
{pt3dadd(160884.000000,213156.000000,51750.000000,539.122383)}
{pt3dadd(160740.000000,213420.000000,51400.000000,569.073631)}
{pt3dadd(160596.000000,213600.000000,51475.000000,599.024880)}
{pt3dadd(160560.000000,213816.000000,51450.000000,535.933134)}
{pt3dadd(160428.000000,214284.000000,51425.000000,472.841388)}
{pt3dadd(160296.000000,214620.000000,51600.000000,409.749642)}
{pt3dadd(159876.000000,214872.000000,51925.000000,346.657896)}
{pt3dadd(159864.000000,215052.000000,51825.000000,332.213819)}
{pt3dadd(159660.000000,215232.000000,51850.000000,317.769741)}
{pt3dadd(159456.000000,215472.000000,52050.000000,303.325664)}
{pt3dadd(159108.000000,215832.000000,52075.000000,288.881586)}
{pt3dadd(158976.000000,216132.000000,52150.000000,320.658561)}
{pt3dadd(158916.000000,216300.000000,52175.000000,352.435536)}
{pt3dadd(158952.000000,216540.000000,52250.000000,384.212511)}
{pt3dadd(158772.000000,216768.000000,52200.000000,415.989486)}
{pt3dadd(158760.000000,217044.000000,52250.000000,398.656589)}
{pt3dadd(158748.000000,217224.000000,52300.000000,381.323691)}
{pt3dadd(158736.000000,217620.000000,52350.000000,363.990794)}
{pt3dadd(158580.000000,217872.000000,52400.000000,346.657896)}
{pt3dadd(158520.000000,218148.000000,52475.000000,320.177083)}
{pt3dadd(158544.000000,218484.000000,52500.000000,293.696271)}
{pt3dadd(158460.000000,218808.000000,52500.000000,267.215459)}
{pt3dadd(158196.000000,219576.000000,53025.000000,240.734646)}
{pt3dadd(157920.000000,220008.000000,53300.000000,240.734646)}
{pt3dadd(157620.000000,220668.000000,53500.000000,240.734646)}
{pt3dadd(157488.000000,221292.000000,53775.000000,240.734646)}
{pt3dadd(157416.000000,221616.000000,53975.000000,240.734646)}
{pt3dadd(157200.000000,222504.000000,54225.000000,240.734646)}
{pt3dadd(157284.000000,222792.000000,54300.000000,240.734646)}
{pt3dadd(157152.000000,223044.000000,54375.000000,240.734646)}
{pt3dadd(157320.000000,223308.000000,54300.000000,240.734646)}
{pt3dadd(157284.000000,223488.000000,54350.000000,230.704038)}
{pt3dadd(157200.000000,223620.000000,54350.000000,220.673430)}
{pt3dadd(157164.000000,223860.000000,54350.000000,210.642822)}
{pt3dadd(157152.000000,224052.000000,54400.000000,200.612214)}
{pt3dadd(157104.000000,224244.000000,54325.000000,192.253370)}
{pt3dadd(156972.000000,224400.000000,54400.000000,183.894525)}
{pt3dadd(156924.000000,224616.000000,54550.000000,175.535680)}
{pt3dadd(157008.000000,224952.000000,54400.000000,167.176836)}
{pt3dadd(156972.000000,225156.000000,54475.000000,185.566288)}
{pt3dadd(156828.000000,225432.000000,54425.000000,203.955741)}
{pt3dadd(156720.000000,225588.000000,54425.000000,222.345193)}
{pt3dadd(156744.000000,225732.000000,54375.000000,240.734646)}
{pt3dadd(156780.000000,225864.000000,54475.000000,240.734646)}
{pt3dadd(156816.000000,226044.000000,54525.000000,240.734646)}
{pt3dadd(156888.000000,226296.000000,54550.000000,240.734646)}
{pt3dadd(156840.000000,226440.000000,54600.000000,240.734646)}
{pt3dadd(156876.000000,226560.000000,54625.000000,231.105276)}

{create adhoc28}
{access adhoc28}
{connect adhoc28(1), adhoc26(0)}
{nseg = 1}
{strdef color color = "White"}
{pt3dclear()}
{pt3dadd(161604.000000,211728.000000,52125.000000,499.187376)}
{pt3dadd(160800.000000,210804.000000,52575.000000,346.657896)}
{pt3dadd(160320.000000,210660.000000,52925.000000,384.790266)}
{pt3dadd(160068.000000,210876.000000,52925.000000,422.922636)}
{pt3dadd(159864.000000,211056.000000,53075.000000,461.055006)}
{pt3dadd(159432.000000,211272.000000,53750.000000,499.187376)}
{pt3dadd(159276.000000,211440.000000,54250.000000,434.574193)}
{pt3dadd(158940.000000,211920.000000,54650.000000,369.961011)}
{pt3dadd(158832.000000,212040.000000,54500.000000,305.347828)}
{pt3dadd(158724.000000,212220.000000,54725.000000,240.734646)}
{pt3dadd(158592.000000,212388.000000,54850.000000,230.704038)}
{pt3dadd(158436.000000,212568.000000,55050.000000,220.673430)}
{pt3dadd(158388.000000,212868.000000,55100.000000,210.642822)}
{pt3dadd(158412.000000,213060.000000,55050.000000,200.612214)}
{pt3dadd(158352.000000,213228.000000,55025.000000,198.606091)}
{pt3dadd(158244.000000,213408.000000,55050.000000,196.599969)}
{pt3dadd(158088.000000,213576.000000,55225.000000,194.593846)}
{pt3dadd(158208.000000,213780.000000,55175.000000,192.587724)}
{pt3dadd(158232.000000,213948.000000,55200.000000,186.235002)}
{pt3dadd(158124.000000,214092.000000,55300.000000,179.882280)}
{pt3dadd(157968.000000,214212.000000,55525.000000,173.529558)}
{pt3dadd(157824.000000,214296.000000,55675.000000,167.176836)}
{pt3dadd(157704.000000,214536.000000,55900.000000,160.211138)}
{pt3dadd(157668.000000,215040.000000,56300.000000,153.245439)}
{pt3dadd(157440.000000,215796.000000,56400.000000,146.279741)}
{pt3dadd(157260.000000,215976.000000,56650.000000,139.314042)}
{pt3dadd(157296.000000,216504.000000,56750.000000,176.705928)}
{pt3dadd(157188.000000,216864.000000,56925.000000,214.097814)}
{pt3dadd(157128.000000,217224.000000,57125.000000,251.489700)}
{pt3dadd(157248.000000,217416.000000,57350.000000,288.881586)}
{pt3dadd(157152.000000,217488.000000,57600.000000,167.176836)}
{pt3dadd(156972.000000,217776.000000,57775.000000,96.745860)}

{create adhoc29}
{access adhoc29}
{connect adhoc29(1), adhoc25(0)}
{nseg = 1}
{strdef color color = "White"}
{pt3dclear()}
{pt3dadd(174540.000000,202044.000000,51900.000000,200.612214)}
{pt3dadd(174396.000000,201276.000000,51725.000000,346.657896)}
{pt3dadd(174216.000000,201084.000000,51575.000000,332.213819)}
{pt3dadd(174072.000000,201120.000000,51525.000000,317.769741)}
{pt3dadd(173808.000000,201120.000000,51525.000000,303.325664)}
{pt3dadd(173604.000000,201120.000000,51525.000000,288.881586)}
{pt3dadd(173412.000000,201120.000000,51525.000000,303.325664)}
{pt3dadd(172872.000000,201120.000000,51525.000000,317.769741)}
{pt3dadd(172428.000000,201192.000000,51375.000000,332.213819)}
{pt3dadd(171912.000000,201264.000000,51400.000000,346.657896)}
{pt3dadd(171444.000000,201204.000000,51475.000000,332.213819)}
{pt3dadd(171144.000000,201324.000000,51500.000000,317.769741)}
{pt3dadd(170880.000000,201372.000000,51350.000000,303.325664)}
{pt3dadd(170592.000000,201420.000000,51325.000000,288.881586)}
{pt3dadd(170340.000000,201468.000000,51300.000000,299.859089)}
{pt3dadd(169920.000000,201516.000000,51275.000000,310.836591)}
{pt3dadd(169656.000000,201564.000000,51250.000000,321.814093)}
{pt3dadd(169428.000000,201612.000000,51225.000000,332.791596)}
{pt3dadd(169128.000000,201552.000000,51250.000000,349.431174)}
{pt3dadd(168840.000000,201588.000000,51325.000000,366.070752)}
{pt3dadd(168648.000000,201576.000000,51275.000000,382.710330)}
{pt3dadd(168372.000000,201540.000000,51175.000000,399.349908)}
{pt3dadd(168228.000000,201540.000000,51125.000000,403.509803)}
{pt3dadd(167700.000000,201540.000000,51075.000000,407.669697)}
{pt3dadd(167400.000000,201576.000000,50850.000000,411.829591)}
{pt3dadd(167184.000000,201612.000000,50625.000000,415.989486)}
{pt3dadd(167028.000000,201660.000000,50750.000000,398.656589)}
{pt3dadd(166872.000000,201612.000000,50700.000000,381.323691)}
{pt3dadd(166452.000000,201648.000000,50500.000000,363.990794)}
{pt3dadd(166188.000000,201612.000000,50275.000000,346.657896)}
{pt3dadd(166044.000000,201660.000000,50300.000000,343.191321)}
{pt3dadd(165864.000000,201612.000000,50200.000000,339.724746)}
{pt3dadd(165600.000000,201516.000000,50275.000000,336.258171)}
{pt3dadd(165360.000000,201588.000000,50025.000000,332.791596)}
{pt3dadd(165096.000000,201636.000000,49875.000000,288.881586)}
{pt3dadd(164880.000000,201672.000000,50000.000000,288.881586)}

{create adhoc30}
{access adhoc30}
{connect adhoc30(1), adhoc29(0)}
{nseg = 1}
{strdef color color = "White"}
{pt3dclear()}
{pt3dadd(164880.000000,201672.000000,50000.000000,288.881586)}
{pt3dadd(164628.000000,201060.000000,50200.000000,116.095032)}
{pt3dadd(164424.000000,200772.000000,50125.000000,137.224328)}
{pt3dadd(164232.000000,200628.000000,50075.000000,158.353623)}
{pt3dadd(163848.000000,200400.000000,49975.000000,179.482918)}
{pt3dadd(163680.000000,200424.000000,49950.000000,200.612214)}
{pt3dadd(163524.000000,200340.000000,50000.000000,200.612214)}
{pt3dadd(163356.000000,200364.000000,50025.000000,200.612214)}
{pt3dadd(163128.000000,200268.000000,49975.000000,200.612214)}
{pt3dadd(162948.000000,200232.000000,49875.000000,200.612214)}
{pt3dadd(162768.000000,200220.000000,49900.000000,210.642822)}
{pt3dadd(162636.000000,200112.000000,49700.000000,220.673430)}
{pt3dadd(162492.000000,200112.000000,49650.000000,230.704038)}
{pt3dadd(162336.000000,200184.000000,49775.000000,240.734646)}
{pt3dadd(162144.000000,200136.000000,49825.000000,238.327304)}
{pt3dadd(161976.000000,199944.000000,49725.000000,235.919961)}
{pt3dadd(161784.000000,199836.000000,49700.000000,233.512618)}
{pt3dadd(161544.000000,199692.000000,49600.000000,231.105276)}
{pt3dadd(161568.000000,199656.000000,49450.000000,240.734646)}

{create adhoc31}
{access adhoc31}
{connect adhoc31(1), adhoc29(0)}
{nseg = 1}
{strdef color color = "White"}
{pt3dclear()}
{pt3dadd(164880.000000,201672.000000,50000.000000,288.881586)}
{pt3dadd(164304.000000,201936.000000,49600.000000,346.657896)}
{pt3dadd(163536.000000,202176.000000,49175.000000,363.990794)}
{pt3dadd(162756.000000,202272.000000,48725.000000,381.323691)}
{pt3dadd(161496.000000,201492.000000,47475.000000,398.656589)}
{pt3dadd(161448.000000,201216.000000,47250.000000,415.989486)}
{pt3dadd(161640.000000,201168.000000,46950.000000,398.656589)}
{pt3dadd(161664.000000,201108.000000,46725.000000,381.323691)}
{pt3dadd(161700.000000,200964.000000,46450.000000,363.990794)}
{pt3dadd(161700.000000,200736.000000,46175.000000,346.657896)}
{pt3dadd(161736.000000,200580.000000,45925.000000,332.213819)}
{pt3dadd(162000.000000,200472.000000,45650.000000,317.769741)}
{pt3dadd(162048.000000,200328.000000,45325.000000,303.325664)}
{pt3dadd(162264.000000,200244.000000,45050.000000,288.881586)}
{pt3dadd(162432.000000,200184.000000,44775.000000,288.881586)}
{pt3dadd(162660.000000,199944.000000,44475.000000,288.881586)}
{pt3dadd(162768.000000,200016.000000,44150.000000,288.881586)}
{pt3dadd(162792.000000,200016.000000,43950.000000,240.734646)}

{create adhoc32}
{access adhoc32}
{connect adhoc32(1), adhoc24(0)}
{nseg = 1}
{strdef color color = "White"}
{pt3dclear()}
{pt3dadd(177168.000000,199392.000000,52875.000000,718.829820)}
{pt3dadd(177168.000000,197820.000000,53450.000000,288.881586)}
{pt3dadd(177072.000000,197664.000000,53475.000000,274.437509)}
{pt3dadd(176952.000000,197652.000000,53425.000000,259.993431)}
{pt3dadd(176724.000000,197616.000000,53375.000000,245.549354)}
{pt3dadd(176628.000000,197664.000000,53300.000000,231.105276)}
{pt3dadd(176448.000000,197736.000000,53275.000000,231.105276)}
{pt3dadd(176292.000000,197724.000000,53275.000000,231.105276)}
{pt3dadd(176088.000000,197712.000000,53275.000000,231.105276)}
{pt3dadd(175812.000000,197784.000000,53275.000000,231.105276)}
{pt3dadd(175416.000000,197748.000000,53250.000000,245.549354)}
{pt3dadd(175080.000000,197712.000000,53225.000000,259.993431)}
{pt3dadd(174816.000000,197700.000000,53250.000000,274.437509)}
{pt3dadd(174564.000000,197688.000000,53275.000000,288.881586)}
{pt3dadd(174264.000000,197628.000000,53175.000000,285.992771)}
{pt3dadd(173988.000000,197616.000000,53125.000000,283.103955)}
{pt3dadd(173784.000000,197604.000000,53175.000000,280.215140)}
{pt3dadd(173568.000000,197592.000000,53225.000000,277.326324)}
{pt3dadd(173448.000000,197592.000000,53200.000000,291.192642)}
{pt3dadd(173304.000000,197592.000000,53175.000000,305.058960)}
{pt3dadd(173052.000000,197556.000000,53350.000000,318.925278)}
{pt3dadd(172800.000000,197544.000000,53525.000000,332.791596)}
{pt3dadd(172632.000000,197496.000000,53575.000000,353.591069)}
{pt3dadd(172236.000000,197448.000000,53625.000000,374.390541)}
{pt3dadd(172116.000000,197496.000000,53575.000000,395.190014)}
{pt3dadd(171996.000000,197496.000000,53325.000000,415.989486)}
{pt3dadd(171876.000000,197496.000000,53375.000000,398.656589)}
{pt3dadd(171684.000000,197436.000000,53225.000000,381.323691)}
{pt3dadd(171432.000000,197400.000000,53175.000000,363.990794)}
{pt3dadd(171216.000000,197388.000000,53125.000000,346.657896)}
{pt3dadd(171060.000000,197388.000000,53150.000000,332.213819)}
{pt3dadd(170916.000000,197388.000000,53100.000000,317.769741)}
{pt3dadd(170760.000000,197412.000000,53050.000000,303.325664)}
{pt3dadd(170580.000000,197400.000000,53125.000000,288.881586)}
{pt3dadd(170256.000000,197532.000000,53075.000000,285.992771)}
{pt3dadd(169980.000000,197520.000000,53000.000000,283.103955)}
{pt3dadd(169776.000000,197508.000000,53075.000000,280.215140)}
{pt3dadd(169500.000000,197496.000000,53025.000000,277.326324)}
{pt3dadd(168912.000000,197484.000000,52975.000000,258.147797)}
{pt3dadd(168588.000000,197532.000000,52975.000000,238.969269)}
{pt3dadd(168312.000000,197580.000000,52975.000000,219.790742)}
{pt3dadd(167988.000000,197544.000000,52975.000000,200.612214)}
{pt3dadd(167712.000000,197508.000000,52975.000000,222.679557)}
{pt3dadd(167472.000000,197472.000000,52975.000000,244.746900)}
{pt3dadd(167232.000000,197412.000000,53000.000000,266.814243)}
{pt3dadd(167016.000000,197352.000000,53025.000000,288.881586)}
{pt3dadd(166572.000000,197316.000000,53100.000000,303.325664)}
{pt3dadd(166248.000000,197112.000000,53275.000000,317.769741)}
{pt3dadd(166020.000000,197184.000000,53250.000000,332.213819)}
{pt3dadd(165684.000000,197232.000000,53350.000000,346.657896)}
{pt3dadd(165372.000000,197196.000000,53450.000000,332.213819)}
{pt3dadd(165060.000000,197196.000000,53600.000000,317.769741)}
{pt3dadd(164832.000000,197220.000000,53550.000000,303.325664)}
{pt3dadd(164544.000000,197220.000000,53550.000000,288.881586)}
{pt3dadd(164316.000000,197112.000000,53575.000000,288.881586)}
{pt3dadd(163968.000000,197052.000000,53600.000000,288.881586)}
{pt3dadd(163692.000000,196908.000000,53750.000000,288.881586)}
{pt3dadd(163344.000000,196716.000000,53775.000000,288.881586)}
{pt3dadd(163068.000000,196560.000000,53875.000000,303.325664)}
{pt3dadd(162900.000000,196584.000000,53850.000000,317.769741)}
{pt3dadd(162720.000000,196332.000000,53975.000000,332.213819)}
{pt3dadd(162552.000000,195960.000000,53925.000000,346.657896)}
{pt3dadd(162348.000000,195768.000000,53900.000000,294.821933)}
{pt3dadd(162156.000000,195660.000000,53850.000000,242.985969)}
{pt3dadd(162012.000000,195564.000000,53975.000000,191.150005)}
{pt3dadd(161784.000000,195612.000000,54050.000000,139.314042)}
{pt3dadd(161508.000000,195384.000000,54025.000000,200.612214)}

{create adhoc33}
{access adhoc33}
{connect adhoc33(1), adhoc32(0)}
{nseg = 1}
{strdef color color = "White"}
{pt3dclear()}
{pt3dadd(161508.000000,195384.000000,54025.000000,200.612214)}
{pt3dadd(161016.000000,195864.000000,53850.000000,96.745860)}
{pt3dadd(160764.000000,196128.000000,53925.000000,114.353604)}
{pt3dadd(160632.000000,196116.000000,54075.000000,131.961348)}
{pt3dadd(160548.000000,196308.000000,53550.000000,149.569092)}
{pt3dadd(160416.000000,196536.000000,53300.000000,167.176836)}
{pt3dadd(160452.000000,196500.000000,53100.000000,116.095032)}
{pt3dadd(160296.000000,196644.000000,52950.000000,96.745860)}

{create adhoc34}
{access adhoc34}
{connect adhoc34(1), adhoc32(0)}
{nseg = 1}
{strdef color color = "White"}
{pt3dclear()}
{pt3dadd(161508.000000,195384.000000,54025.000000,200.612214)}
{pt3dadd(161604.000000,194520.000000,54275.000000,167.176836)}
{pt3dadd(161568.000000,194388.000000,54375.000000,167.176836)}
{pt3dadd(161568.000000,194256.000000,54375.000000,167.176836)}
{pt3dadd(161664.000000,193920.000000,54350.000000,167.176836)}
{pt3dadd(161700.000000,193728.000000,54375.000000,167.176836)}
{pt3dadd(161832.000000,193608.000000,54475.000000,154.406385)}
{pt3dadd(162072.000000,193488.000000,54550.000000,141.635934)}
{pt3dadd(162120.000000,193368.000000,54575.000000,128.865483)}
{pt3dadd(162168.000000,193212.000000,54650.000000,116.095032)}
{pt3dadd(162120.000000,193080.000000,54600.000000,139.314042)}
{pt3dadd(162240.000000,192744.000000,55125.000000,111.451230)}

{create adhoc35}
{access adhoc35}
{connect adhoc35(1), adhoc32(0)}
{nseg = 1}
{strdef color color = "White"}
{pt3dclear()}
{pt3dadd(161508.000000,195384.000000,54025.000000,200.612214)}
{pt3dadd(162012.000000,195660.000000,53500.000000,116.095032)}
{pt3dadd(161916.000000,195336.000000,53275.000000,121.899785)}
{pt3dadd(161868.000000,195060.000000,53125.000000,127.704537)}
{pt3dadd(161940.000000,194808.000000,52875.000000,133.509289)}
{pt3dadd(161964.000000,194628.000000,52700.000000,139.314042)}
{pt3dadd(161772.000000,194304.000000,52475.000000,139.314042)}
{pt3dadd(161688.000000,194208.000000,52250.000000,139.314042)}
{pt3dadd(161676.000000,194100.000000,52000.000000,139.314042)}
{pt3dadd(161448.000000,193776.000000,51650.000000,240.734646)}

{create adhoc36}
{access adhoc36}
{connect adhoc36(1), adhoc23(0)}
{nseg = 1}
{strdef color color = "White"}
{pt3dclear()}
{pt3dadd(178908.000000,197196.000000,55125.000000,1490.565402)}
{pt3dadd(178716.000000,197424.000000,56625.000000,718.829820)}
{pt3dadd(178608.000000,197604.000000,56725.000000,688.878585)}
{pt3dadd(178464.000000,197604.000000,56775.000000,658.927350)}
{pt3dadd(178356.000000,197688.000000,56750.000000,628.976115)}
{pt3dadd(178248.000000,197772.000000,56775.000000,599.024880)}
{pt3dadd(178140.000000,197856.000000,56900.000000,574.065504)}
{pt3dadd(178008.000000,197928.000000,56900.000000,549.106128)}
{pt3dadd(177924.000000,198060.000000,56775.000000,524.146752)}
{pt3dadd(177804.000000,198048.000000,56750.000000,499.187376)}
{pt3dadd(177636.000000,198084.000000,56900.000000,499.187376)}
{pt3dadd(177468.000000,198120.000000,57050.000000,499.187376)}
{pt3dadd(177252.000000,198240.000000,56925.000000,499.187376)}
{pt3dadd(177108.000000,198276.000000,56950.000000,499.187376)}
{pt3dadd(176928.000000,198168.000000,57025.000000,524.146752)}
{pt3dadd(176712.000000,198348.000000,56950.000000,549.106128)}
{pt3dadd(176496.000000,198372.000000,57100.000000,574.065504)}
{pt3dadd(176364.000000,198276.000000,57075.000000,599.024880)}
{pt3dadd(176184.000000,198276.000000,57025.000000,574.065504)}
{pt3dadd(175944.000000,198468.000000,57275.000000,549.106128)}
{pt3dadd(175692.000000,198660.000000,57200.000000,524.146752)}
{pt3dadd(175524.000000,198600.000000,57175.000000,499.187376)}
{pt3dadd(175392.000000,198696.000000,57250.000000,499.187376)}
{pt3dadd(175224.000000,198732.000000,57200.000000,499.187376)}
{pt3dadd(174984.000000,198768.000000,57150.000000,499.187376)}
{pt3dadd(174828.000000,198720.000000,57175.000000,499.187376)}
{pt3dadd(174600.000000,198672.000000,57200.000000,524.146752)}
{pt3dadd(174372.000000,198792.000000,57375.000000,549.106128)}
{pt3dadd(174156.000000,198936.000000,57525.000000,574.065504)}
{pt3dadd(173952.000000,198984.000000,57450.000000,599.024880)}
{pt3dadd(173688.000000,199032.000000,57400.000000,628.976115)}
{pt3dadd(173388.000000,199128.000000,57400.000000,658.927350)}
{pt3dadd(173100.000000,199248.000000,57600.000000,688.878585)}
{pt3dadd(172944.000000,199332.000000,57600.000000,718.829820)}
{pt3dadd(172800.000000,199416.000000,57600.000000,718.829820)}
{pt3dadd(172344.000000,199488.000000,57725.000000,718.829820)}
{pt3dadd(172104.000000,199560.000000,57825.000000,718.829820)}
{pt3dadd(171900.000000,199632.000000,57925.000000,718.829820)}
{pt3dadd(171768.000000,199704.000000,58025.000000,718.829820)}
{pt3dadd(171540.000000,199740.000000,57925.000000,718.829820)}
{pt3dadd(171228.000000,199764.000000,57925.000000,718.829820)}
{pt3dadd(170976.000000,199848.000000,58150.000000,718.829820)}
{pt3dadd(170748.000000,199932.000000,58100.000000,718.829820)}
{pt3dadd(170508.000000,200016.000000,58050.000000,718.829820)}
{pt3dadd(170184.000000,200040.000000,58125.000000,718.829820)}
{pt3dadd(169752.000000,200064.000000,58200.000000,718.829820)}
{pt3dadd(169572.000000,200088.000000,58275.000000,688.878585)}
{pt3dadd(169164.000000,200172.000000,58275.000000,658.927350)}
{pt3dadd(168924.000000,200256.000000,58275.000000,628.976115)}
{pt3dadd(168756.000000,200340.000000,58225.000000,599.024880)}
{pt3dadd(168588.000000,200460.000000,58350.000000,628.976115)}
{pt3dadd(168288.000000,200580.000000,58400.000000,658.927350)}
{pt3dadd(168156.000000,200604.000000,58375.000000,688.878585)}
{pt3dadd(167808.000000,200568.000000,58600.000000,718.829820)}
{pt3dadd(167652.000000,200688.000000,58525.000000,718.829820)}
{pt3dadd(167508.000000,200592.000000,58600.000000,718.829820)}
{pt3dadd(167364.000000,200712.000000,58500.000000,718.829820)}
{pt3dadd(167148.000000,200760.000000,58675.000000,718.829820)}
{pt3dadd(166920.000000,200760.000000,58750.000000,688.878585)}
{pt3dadd(166536.000000,200760.000000,58825.000000,658.927350)}
{pt3dadd(166164.000000,200928.000000,58775.000000,628.976115)}
{pt3dadd(165912.000000,200928.000000,58900.000000,599.024880)}
{pt3dadd(165720.000000,200976.000000,58975.000000,664.917611)}
{pt3dadd(165492.000000,200964.000000,58925.000000,730.810341)}
{pt3dadd(165204.000000,201000.000000,59050.000000,796.703072)}
{pt3dadd(164904.000000,201000.000000,59150.000000,862.595802)}
{pt3dadd(164688.000000,200964.000000,59350.000000,895.374441)}
{pt3dadd(164532.000000,200952.000000,59175.000000,928.153080)}
{pt3dadd(164412.000000,200940.000000,59050.000000,960.931719)}
{pt3dadd(164292.000000,201012.000000,59050.000000,993.710358)}
{pt3dadd(164124.000000,200976.000000,59250.000000,1035.114948)}
{pt3dadd(164040.000000,201096.000000,59250.000000,1035.114948)}

{create adhoc37}
{access adhoc37}
{connect adhoc37(1), adhoc36(0)}
{nseg = 1}
{strdef color color = "White"}
{pt3dclear()}
{pt3dadd(164040.000000,201096.000000,59250.000000,1035.114948)}
{pt3dadd(163920.000000,200892.000000,60075.000000,499.187376)}
{pt3dadd(163716.000000,201264.000000,60325.000000,499.187376)}
{pt3dadd(163500.000000,201264.000000,60175.000000,499.187376)}
{pt3dadd(163320.000000,201252.000000,60225.000000,499.187376)}
{pt3dadd(163176.000000,201756.000000,60225.000000,415.989486)}

{create adhoc38}
{access adhoc38}
{connect adhoc38(1), adhoc37(0)}
{nseg = 1}
{strdef color color = "White"}
{pt3dclear()}
{pt3dadd(163176.000000,201756.000000,60225.000000,415.989486)}
{pt3dadd(163008.000000,202236.000000,60250.000000,415.989486)}
{pt3dadd(162852.000000,202512.000000,60275.000000,398.656589)}
{pt3dadd(162708.000000,202740.000000,60350.000000,381.323691)}
{pt3dadd(162600.000000,203064.000000,60375.000000,363.990794)}
{pt3dadd(162456.000000,203184.000000,60300.000000,346.657896)}
{pt3dadd(162324.000000,203448.000000,60300.000000,346.657896)}
{pt3dadd(162180.000000,203712.000000,60375.000000,346.657896)}
{pt3dadd(162060.000000,203892.000000,60475.000000,346.657896)}
{pt3dadd(161964.000000,204216.000000,60725.000000,346.657896)}
{pt3dadd(161808.000000,204384.000000,60925.000000,310.146476)}
{pt3dadd(161664.000000,204672.000000,61150.000000,273.635055)}
{pt3dadd(161532.000000,204768.000000,61325.000000,237.123635)}
{pt3dadd(161376.000000,204948.000000,61525.000000,200.612214)}
{pt3dadd(161244.000000,205236.000000,61525.000000,210.642822)}
{pt3dadd(161112.000000,205428.000000,61700.000000,220.673430)}
{pt3dadd(160992.000000,205464.000000,61750.000000,230.704038)}
{pt3dadd(160860.000000,205644.000000,61850.000000,240.734646)}
{pt3dadd(160752.000000,206052.000000,62400.000000,230.704038)}
{pt3dadd(160608.000000,206100.000000,62700.000000,220.673430)}
{pt3dadd(160596.000000,206184.000000,63000.000000,210.642822)}
{pt3dadd(160740.000000,206052.000000,63250.000000,200.612214)}
{pt3dadd(160836.000000,206124.000000,63450.000000,237.123635)}
{pt3dadd(161112.000000,205968.000000,63900.000000,273.635055)}
{pt3dadd(161400.000000,205704.000000,64075.000000,310.146475)}
{pt3dadd(161616.000000,205728.000000,63900.000000,346.657896)}
{pt3dadd(161832.000000,205632.000000,63850.000000,346.657896)}
{pt3dadd(162096.000000,205668.000000,63950.000000,160.489764)}

{create adhoc39}
{access adhoc39}
{connect adhoc39(1), adhoc37(0)}
{nseg = 1}
{strdef color color = "White"}
{pt3dclear()}
{pt3dadd(163176.000000,201756.000000,60225.000000,415.989486)}
{pt3dadd(163392.000000,200616.000000,60825.000000,288.881586)}
{pt3dadd(162804.000000,200088.000000,61100.000000,288.881586)}
{pt3dadd(162708.000000,199392.000000,61375.000000,288.881586)}
{pt3dadd(162792.000000,198288.000000,61650.000000,288.881586)}
{pt3dadd(163020.000000,198132.000000,61650.000000,288.881586)}
{pt3dadd(163044.000000,197964.000000,61700.000000,366.417410)}
{pt3dadd(162840.000000,197844.000000,61850.000000,443.953233)}
{pt3dadd(162912.000000,197580.000000,61900.000000,521.489056)}
{pt3dadd(163128.000000,197256.000000,62325.000000,599.024880)}
{pt3dadd(163356.000000,197064.000000,62725.000000,532.466559)}
{pt3dadd(163488.000000,197184.000000,63200.000000,465.908238)}
{pt3dadd(163896.000000,197220.000000,63500.000000,399.349917)}
{pt3dadd(164088.000000,197136.000000,63800.000000,332.791596)}
{pt3dadd(164376.000000,197028.000000,64100.000000,415.989486)}

{create adhoc40}
{access adhoc40}
{connect adhoc40(1), adhoc39(0)}
{nseg = 1}
{strdef color color = "White"}
{pt3dclear()}
{pt3dadd(164376.000000,197028.000000,64100.000000,415.989486)}
{pt3dadd(164376.000000,197736.000000,64325.000000,200.612214)}
{pt3dadd(164520.000000,197964.000000,64575.000000,172.439820)}
{pt3dadd(164532.000000,198012.000000,64875.000000,144.267426)}
{pt3dadd(164652.000000,197964.000000,65125.000000,116.095032)}
{pt3dadd(164928.000000,197916.000000,64850.000000,116.095032)}

{create adhoc41}
{access adhoc41}
{connect adhoc41(1), adhoc39(0)}
{nseg = 1}
{strdef color color = "White"}
{pt3dclear()}
{pt3dadd(164376.000000,197028.000000,64100.000000,415.989486)}
{pt3dadd(164604.000000,196728.000000,64350.000000,200.612214)}
{pt3dadd(164868.000000,196536.000000,64675.000000,185.287671)}
{pt3dadd(165612.000000,195924.000000,64875.000000,169.963128)}
{pt3dadd(165984.000000,195360.000000,64875.000000,154.638585)}
{pt3dadd(166332.000000,194700.000000,64875.000000,139.314042)}
{pt3dadd(166332.000000,194592.000000,64850.000000,128.671997)}
{pt3dadd(166404.000000,194472.000000,64800.000000,118.029951)}
{pt3dadd(166500.000000,194340.000000,64650.000000,107.387906)}
{pt3dadd(166536.000000,194208.000000,64700.000000,96.745860)}
{pt3dadd(166452.000000,194064.000000,64750.000000,101.583153)}
{pt3dadd(166440.000000,193932.000000,64725.000000,106.420446)}
{pt3dadd(166464.000000,193824.000000,64650.000000,111.257739)}
{pt3dadd(166584.000000,193632.000000,64625.000000,116.095032)}
{pt3dadd(166608.000000,193524.000000,64650.000000,116.095032)}
{pt3dadd(166680.000000,193344.000000,64775.000000,96.745860)}

{create adhoc42}
{access adhoc42}
{connect adhoc42(1), adhoc36(0)}
{nseg = 1}
{strdef color color = "White"}
{pt3dclear()}
{pt3dadd(164040.000000,201096.000000,59250.000000,1035.114948)}
{pt3dadd(163920.000000,201012.000000,58500.000000,499.187376)}
{pt3dadd(163704.000000,200928.000000,58225.000000,499.187376)}
{pt3dadd(163500.000000,200940.000000,58350.000000,499.187376)}
{pt3dadd(163284.000000,200940.000000,58475.000000,499.187376)}
{pt3dadd(163128.000000,201024.000000,58375.000000,499.187376)}
{pt3dadd(162840.000000,201264.000000,58175.000000,524.146752)}
{pt3dadd(162696.000000,201312.000000,58125.000000,549.106128)}
{pt3dadd(162540.000000,201348.000000,58200.000000,574.065504)}
{pt3dadd(162396.000000,201564.000000,58150.000000,599.024880)}
{pt3dadd(162228.000000,201780.000000,57925.000000,574.065504)}
{pt3dadd(162036.000000,201996.000000,57925.000000,549.106128)}
{pt3dadd(161844.000000,202080.000000,57825.000000,524.146752)}
{pt3dadd(161652.000000,202152.000000,57625.000000,499.187376)}
{pt3dadd(161520.000000,202248.000000,57550.000000,478.387903)}
{pt3dadd(161340.000000,202344.000000,57450.000000,457.588431)}
{pt3dadd(161184.000000,202416.000000,57525.000000,436.788958)}
{pt3dadd(160548.000000,202728.000000,57525.000000,415.989486)}
{pt3dadd(159984.000000,203292.000000,57525.000000,369.768434)}
{pt3dadd(159396.000000,204204.000000,57525.000000,323.547381)}
{pt3dadd(159408.000000,204384.000000,57475.000000,277.326328)}
{pt3dadd(159312.000000,204480.000000,57525.000000,231.105276)}
{pt3dadd(159180.000000,204660.000000,57600.000000,215.123166)}
{pt3dadd(159096.000000,204804.000000,57675.000000,199.141056)}
{pt3dadd(158916.000000,204924.000000,57650.000000,183.158946)}
{pt3dadd(158952.000000,205128.000000,57700.000000,167.176836)}
{pt3dadd(158844.000000,205284.000000,57700.000000,180.847904)}
{pt3dadd(158748.000000,205500.000000,57650.000000,194.518971)}
{pt3dadd(158928.000000,205644.000000,57725.000000,208.190038)}
{pt3dadd(158604.000000,206400.000000,57800.000000,221.861106)}
{pt3dadd(158316.000000,206904.000000,57800.000000,240.734646)}
{pt3dadd(158304.000000,207048.000000,57950.000000,288.881586)}

{create adhoc43}
{access adhoc43}
{connect adhoc43(1), adhoc22(0)}
{nseg = 1}
{strdef color color = "White"}
{pt3dclear()}
{pt3dadd(182148.000000,195420.000000,54925.000000,415.989486)}
{pt3dadd(184668.000000,192456.000000,54450.000000,1035.114948)}
{pt3dadd(184788.000000,192060.000000,54100.000000,1148.977562)}
{pt3dadd(184452.000000,191436.000000,53450.000000,1262.840175)}
{pt3dadd(184212.000000,190752.000000,52825.000000,1376.702788)}
{pt3dadd(184680.000000,189936.000000,52300.000000,1490.565402)}
{pt3dadd(184776.000000,189360.000000,51800.000000,1490.565402)}
{pt3dadd(184740.000000,188484.000000,51350.000000,1490.565402)}
{pt3dadd(184764.000000,187860.000000,50925.000000,1490.565402)}
{pt3dadd(185124.000000,187584.000000,50625.000000,1490.565402)}
{pt3dadd(185196.000000,186612.000000,50475.000000,1490.565402)}

{create adhoc44}
{access adhoc44}
{connect adhoc44(1), adhoc43(0)}
{nseg = 1}
{strdef color color = "White"}
{pt3dclear()}
{pt3dadd(185196.000000,186612.000000,50475.000000,1490.565402)}
{pt3dadd(182820.000000,188268.000000,48275.000000,288.881586)}
{pt3dadd(182712.000000,188256.000000,47825.000000,285.992771)}
{pt3dadd(182484.000000,188352.000000,47575.000000,283.103955)}
{pt3dadd(182268.000000,188340.000000,47375.000000,280.215140)}
{pt3dadd(182136.000000,188328.000000,47175.000000,277.326324)}
{pt3dadd(182016.000000,188316.000000,47100.000000,307.832229)}
{pt3dadd(181788.000000,188304.000000,47025.000000,338.338134)}
{pt3dadd(181596.000000,188292.000000,46950.000000,368.844039)}
{pt3dadd(181428.000000,188292.000000,46850.000000,399.349944)}
{pt3dadd(181272.000000,188292.000000,46750.000000,371.732855)}
{pt3dadd(181140.000000,188292.000000,46650.000000,344.115765)}
{pt3dadd(180972.000000,188292.000000,46550.000000,316.498675)}
{pt3dadd(180828.000000,188292.000000,46450.000000,288.881586)}
{pt3dadd(180696.000000,188388.000000,46275.000000,320.658561)}
{pt3dadd(180552.000000,188424.000000,46175.000000,352.435536)}
{pt3dadd(180384.000000,188472.000000,46025.000000,384.212511)}
{pt3dadd(180192.000000,188520.000000,45875.000000,415.989486)}
{pt3dadd(180048.000000,188436.000000,45775.000000,398.656589)}
{pt3dadd(179880.000000,188352.000000,45675.000000,381.323691)}
{pt3dadd(179748.000000,188448.000000,45700.000000,363.990794)}
{pt3dadd(179592.000000,188292.000000,45500.000000,346.657896)}
{pt3dadd(179448.000000,188328.000000,45575.000000,346.657896)}
{pt3dadd(179268.000000,188244.000000,45375.000000,346.657896)}
{pt3dadd(179088.000000,188328.000000,45275.000000,346.657896)}
{pt3dadd(178836.000000,188220.000000,45250.000000,346.657896)}
{pt3dadd(178680.000000,188088.000000,45325.000000,346.657896)}
{pt3dadd(178524.000000,188076.000000,45275.000000,346.657896)}
{pt3dadd(178368.000000,188016.000000,45125.000000,346.657896)}
{pt3dadd(178212.000000,187920.000000,45150.000000,346.657896)}
{pt3dadd(178056.000000,187884.000000,45000.000000,346.657896)}
{pt3dadd(177900.000000,187920.000000,45075.000000,346.657896)}
{pt3dadd(177684.000000,187824.000000,44875.000000,346.657896)}
{pt3dadd(177504.000000,187860.000000,44775.000000,346.657896)}
{pt3dadd(177288.000000,187776.000000,44800.000000,346.657896)}
{pt3dadd(177108.000000,187716.000000,44800.000000,346.657896)}
{pt3dadd(176856.000000,187740.000000,44550.000000,346.657896)}
{pt3dadd(176652.000000,187764.000000,44500.000000,346.657896)}
{pt3dadd(176520.000000,187656.000000,44625.000000,339.863400)}
{pt3dadd(176364.000000,187560.000000,44675.000000,333.068904)}
{pt3dadd(176184.000000,187560.000000,44575.000000,326.274408)}
{pt3dadd(176004.000000,187584.000000,44525.000000,319.479912)}
{pt3dadd(175692.000000,187500.000000,44575.000000,322.807824)}
{pt3dadd(175452.000000,187356.000000,44550.000000,326.135736)}
{pt3dadd(175284.000000,187296.000000,44425.000000,329.463648)}
{pt3dadd(175092.000000,187260.000000,44400.000000,332.791560)}
{pt3dadd(174912.000000,187212.000000,44300.000000,321.814067)}
{pt3dadd(174576.000000,187200.000000,44325.000000,310.836573)}
{pt3dadd(174324.000000,187284.000000,44300.000000,299.859080)}
{pt3dadd(174108.000000,187284.000000,44225.000000,288.881586)}
{pt3dadd(173988.000000,187248.000000,44250.000000,276.844851)}
{pt3dadd(173748.000000,187248.000000,44175.000000,264.808116)}
{pt3dadd(173556.000000,187296.000000,44150.000000,252.771381)}
{pt3dadd(173436.000000,187248.000000,44050.000000,240.734646)}
{pt3dadd(173316.000000,187248.000000,44000.000000,252.771381)}
{pt3dadd(173028.000000,187236.000000,44075.000000,264.808116)}
{pt3dadd(172848.000000,187236.000000,44075.000000,276.844851)}
{pt3dadd(172692.000000,187200.000000,44025.000000,288.881586)}
{pt3dadd(172560.000000,187188.000000,43975.000000,276.844851)}
{pt3dadd(172416.000000,187128.000000,44000.000000,264.808116)}
{pt3dadd(172296.000000,187272.000000,43850.000000,252.771381)}
{pt3dadd(172152.000000,187224.000000,43800.000000,240.734646)}
{pt3dadd(171972.000000,187248.000000,43875.000000,252.771381)}
{pt3dadd(171660.000000,187188.000000,43825.000000,264.808116)}
{pt3dadd(171324.000000,187188.000000,43900.000000,276.844851)}
{pt3dadd(171096.000000,187176.000000,43925.000000,288.881586)}
{pt3dadd(170868.000000,187200.000000,43950.000000,303.325664)}
{pt3dadd(170724.000000,187164.000000,43900.000000,317.769741)}
{pt3dadd(170220.000000,187116.000000,43775.000000,332.213819)}
{pt3dadd(169884.000000,187140.000000,43775.000000,346.657896)}
{pt3dadd(169620.000000,187092.000000,43800.000000,346.657896)}
{pt3dadd(169428.000000,187032.000000,43825.000000,346.657896)}
{pt3dadd(169200.000000,186984.000000,43775.000000,346.657896)}
{pt3dadd(168984.000000,186972.000000,43675.000000,346.657896)}
{pt3dadd(168792.000000,186936.000000,43575.000000,346.657896)}
{pt3dadd(168624.000000,186924.000000,43525.000000,346.657896)}
{pt3dadd(168420.000000,187008.000000,43350.000000,346.657896)}
{pt3dadd(168240.000000,186924.000000,43200.000000,346.657896)}
{pt3dadd(168024.000000,186828.000000,43375.000000,317.769741)}
{pt3dadd(167856.000000,186828.000000,43325.000000,288.881586)}
{pt3dadd(167640.000000,186852.000000,43350.000000,259.993431)}
{pt3dadd(167424.000000,187032.000000,43450.000000,231.105276)}
{pt3dadd(167292.000000,186900.000000,43475.000000,259.993431)}
{pt3dadd(167172.000000,187020.000000,43500.000000,288.881586)}
{pt3dadd(167028.000000,187044.000000,43525.000000,317.769741)}
{pt3dadd(166740.000000,187176.000000,43625.000000,346.657896)}
{pt3dadd(166500.000000,187140.000000,43650.000000,310.146476)}
{pt3dadd(166320.000000,187224.000000,43725.000000,273.635055)}
{pt3dadd(166152.000000,187356.000000,43675.000000,237.123635)}
{pt3dadd(166008.000000,187500.000000,43725.000000,200.612214)}
{pt3dadd(165876.000000,187596.000000,43750.000000,200.612214)}
{pt3dadd(165684.000000,187764.000000,43700.000000,200.612214)}
{pt3dadd(165516.000000,187860.000000,43725.000000,200.612214)}
{pt3dadd(165300.000000,188184.000000,43750.000000,200.612214)}
{pt3dadd(165144.000000,188328.000000,43800.000000,185.287671)}
{pt3dadd(164808.000000,188784.000000,44150.000000,169.963128)}
{pt3dadd(164532.000000,189504.000000,44500.000000,154.638585)}
{pt3dadd(164352.000000,189828.000000,44625.000000,139.314042)}
{pt3dadd(164220.000000,190200.000000,44725.000000,146.279741)}
{pt3dadd(164172.000000,190428.000000,44675.000000,153.245439)}
{pt3dadd(164136.000000,191280.000000,44800.000000,160.211138)}
{pt3dadd(163884.000000,191388.000000,45000.000000,167.176836)}
{pt3dadd(163656.000000,191652.000000,45025.000000,167.176836)}
{pt3dadd(163536.000000,191700.000000,44975.000000,167.176836)}
{pt3dadd(163452.000000,191820.000000,45000.000000,167.176836)}
{pt3dadd(163332.000000,192000.000000,44950.000000,167.176836)}
{pt3dadd(163188.000000,192192.000000,44900.000000,149.569092)}
{pt3dadd(162696.000000,192672.000000,45075.000000,131.961348)}
{pt3dadd(162312.000000,192852.000000,45075.000000,114.353604)}
{pt3dadd(162168.000000,192840.000000,45150.000000,96.745860)}
{pt3dadd(161952.000000,192828.000000,45000.000000,167.176836)}
{pt3dadd(161796.000000,192840.000000,44900.000000,167.176836)}

{create adhoc45}
{access adhoc45}
{connect adhoc45(1), adhoc43(0)}
{nseg = 1}
{strdef color color = "White"}
{pt3dclear()}
{pt3dadd(185196.000000,186612.000000,50475.000000,1490.565402)}
{pt3dadd(185448.000000,186228.000000,49800.000000,1490.565402)}
{pt3dadd(185544.000000,185724.000000,49300.000000,1461.350354)}
{pt3dadd(185460.000000,185196.000000,49150.000000,1432.135305)}
{pt3dadd(185424.000000,184680.000000,49075.000000,1402.920257)}
{pt3dadd(185388.000000,184080.000000,49000.000000,1373.705208)}
{pt3dadd(185472.000000,183684.000000,48925.000000,1242.137880)}
{pt3dadd(185388.000000,183444.000000,48825.000000,1490.565402)}

{create adhoc46}
{access adhoc46}
{connect adhoc46(1), adhoc45(0)}
{nseg = 1}
{strdef color color = "White"}
{pt3dclear()}
{pt3dadd(185388.000000,183444.000000,48825.000000,1490.565402)}
{pt3dadd(185328.000000,183036.000000,48800.000000,1490.565402)}
{pt3dadd(185508.000000,182544.000000,48450.000000,1565.093664)}
{pt3dadd(185736.000000,182076.000000,48025.000000,1639.621926)}
{pt3dadd(185736.000000,181644.000000,47875.000000,1714.150188)}
{pt3dadd(185964.000000,181356.000000,47575.000000,1788.678450)}
{pt3dadd(186156.000000,181056.000000,47050.000000,1788.678450)}
{pt3dadd(186048.000000,180972.000000,47000.000000,1717.131222)}

{create adhoc47}
{access adhoc47}
{connect adhoc47(1), adhoc46(0)}
{nseg = 1}
{strdef color color = "White"}
{pt3dclear()}
{pt3dadd(186048.000000,180972.000000,47000.000000,1717.131222)}
{pt3dadd(186456.000000,180516.000000,46350.000000,1717.131222)}
{pt3dadd(186540.000000,180288.000000,45925.000000,1831.606704)}
{pt3dadd(186540.000000,180168.000000,45625.000000,1946.082186)}
{pt3dadd(186804.000000,179568.000000,45225.000000,2060.557668)}
{pt3dadd(186948.000000,179208.000000,45450.000000,1717.131222)}

{create adhoc48}
{access adhoc48}
{connect adhoc48(1), adhoc47(0)}
{nseg = 1}
{strdef color color = "White"}
{pt3dclear()}
{pt3dadd(186948.000000,179208.000000,45450.000000,1717.131222)}
{pt3dadd(187716.000000,178848.000000,45800.000000,1490.565402)}
{pt3dadd(187632.000000,178584.000000,45700.000000,1428.458522)}
{pt3dadd(187968.000000,178320.000000,45550.000000,1366.351641)}
{pt3dadd(188064.000000,178080.000000,45450.000000,1304.244761)}
{pt3dadd(188052.000000,177924.000000,45350.000000,1242.137880)}
{pt3dadd(187956.000000,177768.000000,45250.000000,1242.137880)}
{pt3dadd(187920.000000,177600.000000,45325.000000,1242.137880)}
{pt3dadd(188112.000000,177480.000000,45150.000000,1242.137880)}
{pt3dadd(188160.000000,177276.000000,44825.000000,1242.137880)}
{pt3dadd(188112.000000,177072.000000,44675.000000,1289.339127)}
{pt3dadd(188064.000000,176916.000000,45025.000000,1336.540374)}
{pt3dadd(188244.000000,176736.000000,44775.000000,1383.741621)}
{pt3dadd(188292.000000,176592.000000,44775.000000,1430.942868)}
{pt3dadd(188376.000000,176436.000000,44775.000000,1445.848502)}
{pt3dadd(188316.000000,176244.000000,44775.000000,1460.754135)}
{pt3dadd(188652.000000,176112.000000,44675.000000,1475.659769)}
{pt3dadd(188700.000000,175908.000000,44800.000000,1490.565402)}
{pt3dadd(188604.000000,175668.000000,44750.000000,1475.659769)}
{pt3dadd(188568.000000,175476.000000,44550.000000,1460.754135)}
{pt3dadd(188460.000000,175308.000000,44450.000000,1445.848502)}
{pt3dadd(188328.000000,175140.000000,44375.000000,1430.942868)}
{pt3dadd(188472.000000,174984.000000,44300.000000,1416.633453)}
{pt3dadd(188568.000000,174840.000000,44100.000000,1402.324038)}
{pt3dadd(188556.000000,174708.000000,44250.000000,1388.014623)}
{pt3dadd(188736.000000,174576.000000,44100.000000,1373.705208)}
{pt3dadd(188676.000000,174420.000000,44050.000000,1340.813376)}
{pt3dadd(188592.000000,174252.000000,43950.000000,1307.921544)}
{pt3dadd(188580.000000,174048.000000,43900.000000,1275.029712)}
{pt3dadd(188760.000000,173892.000000,44025.000000,1242.137880)}
{pt3dadd(188556.000000,173664.000000,43875.000000,1242.137880)}
{pt3dadd(188844.000000,173568.000000,43950.000000,1242.137880)}

{create adhoc49}
{access adhoc49}
{connect adhoc49(1), adhoc48(0)}
{nseg = 1}
{strdef color color = "White"}
{pt3dclear()}
{pt3dadd(188844.000000,173568.000000,43950.000000,1242.137880)}
{pt3dadd(185976.000000,173508.000000,43950.000000,277.326342)}
{pt3dadd(185868.000000,173448.000000,43700.000000,280.215153)}
{pt3dadd(185724.000000,173340.000000,43725.000000,283.103964)}
{pt3dadd(185568.000000,173208.000000,43750.000000,285.992775)}
{pt3dadd(185472.000000,173388.000000,43825.000000,288.881586)}
{pt3dadd(185376.000000,173304.000000,43775.000000,303.325664)}
{pt3dadd(185088.000000,173292.000000,43725.000000,317.769741)}
{pt3dadd(184932.000000,173232.000000,43725.000000,332.213819)}
{pt3dadd(184776.000000,173172.000000,43625.000000,346.657896)}
{pt3dadd(184560.000000,173196.000000,43575.000000,363.990794)}
{pt3dadd(184296.000000,173088.000000,43525.000000,381.323691)}
{pt3dadd(184032.000000,173028.000000,43550.000000,398.656589)}
{pt3dadd(183756.000000,172872.000000,43450.000000,415.989486)}
{pt3dadd(183636.000000,172908.000000,43350.000000,384.212511)}
{pt3dadd(183432.000000,172944.000000,43425.000000,352.435536)}
{pt3dadd(183156.000000,172932.000000,43500.000000,320.658561)}
{pt3dadd(182952.000000,172968.000000,43425.000000,288.881586)}
{pt3dadd(182760.000000,172932.000000,43475.000000,288.881586)}
{pt3dadd(182592.000000,172836.000000,43500.000000,288.881586)}
{pt3dadd(182424.000000,172824.000000,43525.000000,288.881586)}
{pt3dadd(182232.000000,172764.000000,43575.000000,288.881586)}
{pt3dadd(182100.000000,172764.000000,43625.000000,303.325664)}
{pt3dadd(181788.000000,172752.000000,43600.000000,317.769741)}
{pt3dadd(181644.000000,172644.000000,43600.000000,332.213819)}
{pt3dadd(181524.000000,172632.000000,43575.000000,346.657896)}
{pt3dadd(181416.000000,172536.000000,43700.000000,346.657896)}
{pt3dadd(181308.000000,172524.000000,43750.000000,346.657896)}
{pt3dadd(181056.000000,172344.000000,43975.000000,346.657896)}
{pt3dadd(180864.000000,172332.000000,43975.000000,346.657896)}
{pt3dadd(180660.000000,172380.000000,43725.000000,320.177083)}
{pt3dadd(180432.000000,172272.000000,43825.000000,293.696271)}
{pt3dadd(180204.000000,172188.000000,44050.000000,267.215459)}
{pt3dadd(180012.000000,172080.000000,43950.000000,240.734646)}
{pt3dadd(179832.000000,172068.000000,44025.000000,252.771381)}
{pt3dadd(179616.000000,171984.000000,43950.000000,264.808116)}
{pt3dadd(179400.000000,171936.000000,43775.000000,276.844851)}
{pt3dadd(179112.000000,171840.000000,43725.000000,288.881586)}
{pt3dadd(178944.000000,171732.000000,43750.000000,288.881586)}
{pt3dadd(178584.000000,171636.000000,43775.000000,288.881586)}
{pt3dadd(178164.000000,171576.000000,43725.000000,288.881586)}
{pt3dadd(177792.000000,171348.000000,43675.000000,288.881586)}
{pt3dadd(177480.000000,171312.000000,43675.000000,288.881586)}
{pt3dadd(177228.000000,171276.000000,43675.000000,288.881586)}
{pt3dadd(176976.000000,171240.000000,43675.000000,288.881586)}
{pt3dadd(176760.000000,171228.000000,43600.000000,288.881586)}
{pt3dadd(176628.000000,171216.000000,43550.000000,288.881586)}
{pt3dadd(176472.000000,171132.000000,43525.000000,288.881586)}
{pt3dadd(176304.000000,171156.000000,43475.000000,288.881586)}
{pt3dadd(176196.000000,171180.000000,43425.000000,288.881586)}
{pt3dadd(175992.000000,171204.000000,43375.000000,288.881586)}
{pt3dadd(175752.000000,171024.000000,43550.000000,288.881586)}
{pt3dadd(175548.000000,170988.000000,43500.000000,288.881586)}
{pt3dadd(175320.000000,170952.000000,43450.000000,288.881586)}
{pt3dadd(175128.000000,170916.000000,43400.000000,288.881586)}
{pt3dadd(174972.000000,170904.000000,43425.000000,288.881586)}
{pt3dadd(174840.000000,170856.000000,43375.000000,288.881586)}
{pt3dadd(174564.000000,170880.000000,43425.000000,288.881586)}
{pt3dadd(174228.000000,170832.000000,43400.000000,303.325664)}
{pt3dadd(173976.000000,170772.000000,43450.000000,317.769741)}
{pt3dadd(173724.000000,170712.000000,43450.000000,332.213819)}
{pt3dadd(173472.000000,170664.000000,43425.000000,346.657896)}
{pt3dadd(173208.000000,170652.000000,43350.000000,346.657896)}
{pt3dadd(172932.000000,170604.000000,43425.000000,346.657896)}
{pt3dadd(172596.000000,170472.000000,43350.000000,346.657896)}
{pt3dadd(172464.000000,170472.000000,43275.000000,346.657896)}
{pt3dadd(172248.000000,170388.000000,43350.000000,332.213819)}
{pt3dadd(171948.000000,170244.000000,43425.000000,317.769741)}
{pt3dadd(171624.000000,170136.000000,43450.000000,303.325664)}
{pt3dadd(171432.000000,170028.000000,43500.000000,288.881586)}
{pt3dadd(171228.000000,170064.000000,43575.000000,316.498685)}
{pt3dadd(171084.000000,169956.000000,43625.000000,344.115783)}
{pt3dadd(170796.000000,169956.000000,43700.000000,371.732881)}
{pt3dadd(170556.000000,170028.000000,43675.000000,399.349980)}
{pt3dadd(170364.000000,169944.000000,43850.000000,386.176959)}
{pt3dadd(170124.000000,169968.000000,43825.000000,373.003938)}
{pt3dadd(169980.000000,170004.000000,43850.000000,359.830917)}
{pt3dadd(169872.000000,170052.000000,43825.000000,346.657896)}
{pt3dadd(169764.000000,170076.000000,43900.000000,332.213819)}
{pt3dadd(169560.000000,170076.000000,43925.000000,317.769741)}
{pt3dadd(169392.000000,170076.000000,44000.000000,303.325664)}
{pt3dadd(169116.000000,170124.000000,44025.000000,288.881586)}
{pt3dadd(168948.000000,170148.000000,44000.000000,303.325664)}
{pt3dadd(168804.000000,170184.000000,44100.000000,317.769741)}
{pt3dadd(168612.000000,170328.000000,44300.000000,332.213819)}
{pt3dadd(168468.000000,170412.000000,44425.000000,346.657896)}
{pt3dadd(168360.000000,170580.000000,44675.000000,363.990794)}
{pt3dadd(168240.000000,170700.000000,44925.000000,381.323691)}
{pt3dadd(168264.000000,170844.000000,44975.000000,398.656589)}
{pt3dadd(168084.000000,171048.000000,45300.000000,415.989486)}
{pt3dadd(167808.000000,171168.000000,45550.000000,436.788958)}
{pt3dadd(167748.000000,171336.000000,45800.000000,457.588431)}
{pt3dadd(167616.000000,171564.000000,46000.000000,478.387903)}
{pt3dadd(167628.000000,171684.000000,46250.000000,499.187376)}
{pt3dadd(167424.000000,171828.000000,46600.000000,532.466544)}
{pt3dadd(167232.000000,171960.000000,46800.000000,565.745712)}
{pt3dadd(167220.000000,172032.000000,47050.000000,599.024880)}
{pt3dadd(167172.000000,172020.000000,47250.000000,415.989486)}

{create adhoc50}
{access adhoc50}
{connect adhoc50(1), adhoc48(0)}
{nseg = 1}
{strdef color color = "White"}
{pt3dclear()}
{pt3dadd(188844.000000,173568.000000,43950.000000,1242.137880)}
{pt3dadd(189036.000000,173388.000000,44000.000000,1242.137880)}
{pt3dadd(189108.000000,173232.000000,43950.000000,1229.716498)}
{pt3dadd(189300.000000,173100.000000,43975.000000,1217.295117)}
{pt3dadd(189252.000000,172956.000000,43925.000000,1204.873736)}
{pt3dadd(189252.000000,172764.000000,44000.000000,1192.452354)}
{pt3dadd(189420.000000,172536.000000,43950.000000,1153.118003)}
{pt3dadd(189264.000000,172212.000000,43925.000000,1113.783651)}
{pt3dadd(189540.000000,171924.000000,44000.000000,1074.449300)}
{pt3dadd(189528.000000,171624.000000,43775.000000,1035.114948)}
{pt3dadd(189564.000000,171288.000000,44050.000000,1035.114948)}
{pt3dadd(189744.000000,170976.000000,43950.000000,1035.114948)}
{pt3dadd(189984.000000,170796.000000,43850.000000,1035.114948)}
{pt3dadd(190296.000000,170568.000000,43875.000000,1035.114948)}
{pt3dadd(190284.000000,170268.000000,43825.000000,1035.114948)}
{pt3dadd(190320.000000,170052.000000,43625.000000,1035.114948)}
{pt3dadd(190236.000000,169824.000000,43400.000000,1035.114948)}
{pt3dadd(190512.000000,169560.000000,43525.000000,1035.114948)}
{pt3dadd(190368.000000,169356.000000,43350.000000,1035.114948)}
{pt3dadd(190224.000000,169212.000000,43575.000000,1035.114948)}
{pt3dadd(190176.000000,168876.000000,43300.000000,1035.114948)}
{pt3dadd(190164.000000,168552.000000,43350.000000,1035.114948)}
{pt3dadd(190008.000000,168228.000000,43375.000000,1024.763801)}
{pt3dadd(190128.000000,167940.000000,43450.000000,1014.412653)}
{pt3dadd(190032.000000,167592.000000,43050.000000,1004.061506)}
{pt3dadd(190200.000000,167304.000000,43025.000000,993.710358)}
{pt3dadd(190272.000000,167004.000000,42825.000000,993.710358)}
{pt3dadd(190080.000000,166656.000000,42700.000000,993.710358)}
{pt3dadd(190068.000000,166440.000000,42675.000000,993.710358)}
{pt3dadd(189936.000000,166224.000000,42675.000000,993.710358)}
{pt3dadd(189804.000000,165948.000000,42675.000000,894.339297)}
{pt3dadd(189948.000000,165732.000000,42850.000000,794.968236)}
{pt3dadd(190092.000000,165600.000000,43000.000000,718.829820)}

{create adhoc51}
{access adhoc51}
{connect adhoc51(1), adhoc50(0)}
{nseg = 1}
{strdef color color = "White"}
{pt3dclear()}
{pt3dadd(190092.000000,165600.000000,43000.000000,718.829820)}
{pt3dadd(188832.000000,165600.000000,40550.000000,1035.114948)}
{pt3dadd(188796.000000,165516.000000,40300.000000,1024.763801)}
{pt3dadd(188844.000000,165552.000000,40100.000000,1014.412653)}
{pt3dadd(188688.000000,165396.000000,39900.000000,1004.061506)}
{pt3dadd(188652.000000,165348.000000,39675.000000,993.710358)}
{pt3dadd(188676.000000,165192.000000,39450.000000,1055.817239)}
{pt3dadd(188664.000000,165144.000000,39200.000000,1117.924119)}
{pt3dadd(188568.000000,165036.000000,38950.000000,1180.031000)}
{pt3dadd(188652.000000,164976.000000,38725.000000,1242.137880)}
{pt3dadd(188544.000000,164892.000000,38425.000000,1192.452354)}
{pt3dadd(188244.000000,164604.000000,38225.000000,828.092016)}

{create adhoc52}
{access adhoc52}
{connect adhoc52(1), adhoc51(0)}
{nseg = 1}
{strdef color color = "White"}
{pt3dclear()}
{pt3dadd(188244.000000,164604.000000,38225.000000,828.092016)}
{pt3dadd(187992.000000,164376.000000,38225.000000,116.095032)}
{pt3dadd(187704.000000,164328.000000,38450.000000,144.847593)}
{pt3dadd(187392.000000,164148.000000,38350.000000,173.600154)}
{pt3dadd(187188.000000,163812.000000,38150.000000,202.352715)}
{pt3dadd(187068.000000,163656.000000,38100.000000,231.105276)}
{pt3dadd(186936.000000,163416.000000,38100.000000,215.123166)}
{pt3dadd(186936.000000,162636.000000,37875.000000,199.141056)}
{pt3dadd(186936.000000,162168.000000,37625.000000,183.158946)}
{pt3dadd(187020.000000,162000.000000,37400.000000,167.176836)}
{pt3dadd(187392.000000,161244.000000,37250.000000,139.314042)}

{create adhoc53}
{access adhoc53}
{connect adhoc53(1), adhoc51(0)}
{nseg = 1}
{strdef color color = "White"}
{pt3dclear()}
{pt3dadd(188244.000000,164604.000000,38225.000000,828.092016)}
{pt3dadd(188712.000000,164832.000000,38000.000000,690.076674)}
{pt3dadd(188664.000000,164772.000000,37750.000000,661.323469)}
{pt3dadd(188532.000000,164532.000000,37375.000000,632.570265)}
{pt3dadd(188712.000000,164340.000000,37150.000000,603.817061)}
{pt3dadd(188856.000000,164184.000000,37025.000000,575.063856)}
{pt3dadd(189036.000000,164136.000000,36775.000000,581.054112)}
{pt3dadd(189072.000000,164004.000000,36500.000000,587.044368)}
{pt3dadd(189144.000000,163812.000000,36225.000000,593.034624)}
{pt3dadd(189336.000000,163812.000000,36025.000000,599.024880)}
{pt3dadd(189384.000000,163632.000000,35800.000000,532.466550)}
{pt3dadd(189672.000000,163620.000000,35375.000000,465.908220)}
{pt3dadd(189744.000000,163620.000000,35225.000000,399.349890)}
{pt3dadd(190464.000000,163140.000000,35050.000000,332.791560)}
{pt3dadd(190752.000000,163080.000000,34850.000000,336.258144)}
{pt3dadd(190776.000000,163008.000000,34575.000000,339.724728)}
{pt3dadd(190896.000000,162900.000000,34275.000000,343.191312)}
{pt3dadd(191340.000000,162612.000000,34050.000000,346.657896)}
{pt3dadd(191568.000000,162564.000000,33875.000000,327.399126)}
{pt3dadd(192048.000000,162024.000000,33300.000000,308.140356)}
{pt3dadd(192684.000000,161364.000000,32850.000000,288.881586)}
{pt3dadd(192888.000000,161040.000000,32625.000000,346.657896)}

{create adhoc54}
{access adhoc54}
{connect adhoc54(1), adhoc50(0)}
{nseg = 1}
{strdef color color = "White"}
{pt3dclear()}
{pt3dadd(190092.000000,165600.000000,43000.000000,718.829820)}
{pt3dadd(190404.000000,165312.000000,43025.000000,718.829820)}
{pt3dadd(190680.000000,165132.000000,42975.000000,688.878585)}
{pt3dadd(190752.000000,164928.000000,42950.000000,658.927350)}
{pt3dadd(190668.000000,164688.000000,42975.000000,628.976115)}
{pt3dadd(190812.000000,164424.000000,42950.000000,599.024880)}
{pt3dadd(190764.000000,164196.000000,43000.000000,599.024880)}
{pt3dadd(190992.000000,163920.000000,43025.000000,599.024880)}
{pt3dadd(191028.000000,163704.000000,43050.000000,599.024880)}
{pt3dadd(190992.000000,163464.000000,42950.000000,599.024880)}
{pt3dadd(191076.000000,163308.000000,43125.000000,593.034624)}
{pt3dadd(191244.000000,163044.000000,43075.000000,587.044368)}
{pt3dadd(191196.000000,162864.000000,43150.000000,581.054112)}
{pt3dadd(191436.000000,162684.000000,43175.000000,575.063856)}
{pt3dadd(191388.000000,162456.000000,43225.000000,581.054112)}
{pt3dadd(191556.000000,162192.000000,43150.000000,587.044368)}
{pt3dadd(191832.000000,161928.000000,43475.000000,593.034624)}
{pt3dadd(192012.000000,161736.000000,43350.000000,599.024880)}
{pt3dadd(191736.000000,161496.000000,43300.000000,628.976115)}
{pt3dadd(191772.000000,161304.000000,43400.000000,658.927350)}
{pt3dadd(191760.000000,161076.000000,43325.000000,688.878585)}
{pt3dadd(191724.000000,160860.000000,43300.000000,718.829820)}
{pt3dadd(191772.000000,160632.000000,43450.000000,718.829820)}
{pt3dadd(191820.000000,160380.000000,43475.000000,718.829820)}
{pt3dadd(191904.000000,160056.000000,43400.000000,718.829820)}
{pt3dadd(191952.000000,159744.000000,43425.000000,718.829820)}
{pt3dadd(191868.000000,159408.000000,43450.000000,718.829820)}
{pt3dadd(191940.000000,159132.000000,43475.000000,718.829820)}
{pt3dadd(192084.000000,158880.000000,43500.000000,718.829820)}
{pt3dadd(191940.000000,158664.000000,43600.000000,718.829820)}
{pt3dadd(191976.000000,158328.000000,43650.000000,754.771316)}
{pt3dadd(192024.000000,158076.000000,43725.000000,790.712811)}
{pt3dadd(192060.000000,157860.000000,43750.000000,826.654307)}
{pt3dadd(192192.000000,157692.000000,43850.000000,862.595802)}
{pt3dadd(192036.000000,157440.000000,43750.000000,862.595802)}
{pt3dadd(192000.000000,157164.000000,43825.000000,862.595802)}
{pt3dadd(192216.000000,156936.000000,43900.000000,862.595802)}
{pt3dadd(192348.000000,156444.000000,43925.000000,862.595802)}
{pt3dadd(192432.000000,156228.000000,44150.000000,948.855375)}
{pt3dadd(192324.000000,155976.000000,44325.000000,1035.114948)}
{pt3dadd(192264.000000,155700.000000,43875.000000,953.961894)}

{create adhoc55}
{access adhoc55}
{connect adhoc55(1), adhoc54(0)}
{nseg = 1}
{strdef color color = "White"}
{pt3dclear()}
{pt3dadd(192264.000000,155700.000000,43875.000000,953.961894)}
{pt3dadd(191112.000000,155736.000000,42825.000000,1035.114948)}
{pt3dadd(190932.000000,155736.000000,42125.000000,880.333582)}
{pt3dadd(190740.000000,155592.000000,41850.000000,725.552217)}
{pt3dadd(190656.000000,155388.000000,41650.000000,570.770851)}
{pt3dadd(190788.000000,155196.000000,41375.000000,415.989486)}
{pt3dadd(190812.000000,154716.000000,41125.000000,411.829591)}
{pt3dadd(190800.000000,154272.000000,40800.000000,407.669697)}
{pt3dadd(190752.000000,153852.000000,40500.000000,403.509803)}
{pt3dadd(190476.000000,153672.000000,40200.000000,399.349908)}
{pt3dadd(190812.000000,153588.000000,39850.000000,381.785904)}
{pt3dadd(191184.000000,153216.000000,39600.000000,364.221900)}
{pt3dadd(191268.000000,153060.000000,39225.000000,346.657896)}
{pt3dadd(191208.000000,153024.000000,38925.000000,499.187376)}

{create adhoc56}
{access adhoc56}
{connect adhoc56(1), adhoc55(0)}
{nseg = 1}
{strdef color color = "White"}
{pt3dclear()}
{pt3dadd(191208.000000,153024.000000,38925.000000,499.187376)}
{pt3dadd(191352.000000,153588.000000,38700.000000,415.989486)}
{pt3dadd(191676.000000,153996.000000,38550.000000,346.820625)}
{pt3dadd(191148.000000,154668.000000,38250.000000,277.651764)}
{pt3dadd(190968.000000,155172.000000,38250.000000,208.482903)}
{pt3dadd(190332.000000,155532.000000,38250.000000,139.314042)}
{pt3dadd(190200.000000,155748.000000,38275.000000,146.279741)}
{pt3dadd(190080.000000,155784.000000,38375.000000,153.245439)}
{pt3dadd(189984.000000,155868.000000,38325.000000,160.211138)}
{pt3dadd(189864.000000,155892.000000,38350.000000,167.176836)}
{pt3dadd(189720.000000,155988.000000,38425.000000,175.535680)}
{pt3dadd(189588.000000,156084.000000,38300.000000,183.894525)}
{pt3dadd(189480.000000,156108.000000,38350.000000,192.253370)}
{pt3dadd(189372.000000,156108.000000,38300.000000,200.612214)}
{pt3dadd(189264.000000,156192.000000,38250.000000,180.179490)}
{pt3dadd(189084.000000,156144.000000,38225.000000,159.746766)}
{pt3dadd(188664.000000,156288.000000,38425.000000,139.314042)}
{pt3dadd(188400.000000,156408.000000,38450.000000,96.745860)}

{create adhoc57}
{access adhoc57}
{connect adhoc57(1), adhoc55(0)}
{nseg = 1}
{strdef color color = "White"}
{pt3dclear()}
{pt3dadd(191208.000000,153024.000000,38925.000000,499.187376)}
{pt3dadd(191448.000000,152448.000000,38825.000000,240.734646)}
{pt3dadd(191688.000000,152124.000000,38450.000000,267.215459)}
{pt3dadd(191940.000000,151932.000000,38075.000000,293.696271)}
{pt3dadd(192144.000000,151728.000000,37875.000000,320.177083)}
{pt3dadd(192096.000000,151488.000000,37600.000000,346.657896)}
{pt3dadd(192168.000000,151380.000000,37425.000000,384.790266)}
{pt3dadd(192348.000000,151332.000000,37225.000000,422.922636)}
{pt3dadd(192468.000000,151380.000000,36975.000000,461.055006)}
{pt3dadd(192468.000000,151416.000000,36700.000000,499.187376)}
{pt3dadd(192564.000000,151380.000000,36500.000000,434.574193)}
{pt3dadd(192588.000000,151404.000000,36325.000000,369.961011)}
{pt3dadd(192816.000000,151344.000000,36050.000000,305.347828)}
{pt3dadd(192768.000000,151308.000000,35850.000000,240.734646)}
{pt3dadd(192804.000000,151224.000000,35650.000000,284.548356)}
{pt3dadd(192744.000000,151080.000000,35400.000000,328.362066)}
{pt3dadd(192804.000000,151080.000000,35225.000000,372.175776)}
{pt3dadd(192708.000000,151020.000000,35050.000000,415.989486)}
{pt3dadd(192708.000000,150972.000000,34800.000000,499.187376)}
{pt3dadd(192756.000000,150720.000000,34300.000000,288.881586)}

{create adhoc58}
{access adhoc58}
{connect adhoc58(1), adhoc54(0)}
{nseg = 1}
{strdef color color = "White"}
{pt3dclear()}
{pt3dadd(192264.000000,155700.000000,43875.000000,953.961894)}
{pt3dadd(192348.000000,155412.000000,44100.000000,1035.114948)}
{pt3dadd(192252.000000,155112.000000,44325.000000,991.985162)}
{pt3dadd(192444.000000,154932.000000,44375.000000,948.855375)}
{pt3dadd(192408.000000,154776.000000,44425.000000,905.725589)}
{pt3dadd(192348.000000,154320.000000,44550.000000,862.595802)}
{pt3dadd(192444.000000,153732.000000,44775.000000,905.725589)}
{pt3dadd(192336.000000,153348.000000,44825.000000,948.855375)}
{pt3dadd(192420.000000,153108.000000,44825.000000,991.985162)}
{pt3dadd(192612.000000,152928.000000,45000.000000,1035.114948)}
{pt3dadd(192636.000000,152700.000000,44925.000000,1035.114948)}
{pt3dadd(192660.000000,152568.000000,44850.000000,862.595802)}

{create adhoc59}
{access adhoc59}
{connect adhoc59(1), adhoc58(0)}
{nseg = 1}
{strdef color color = "White"}
{pt3dclear()}
{pt3dadd(192660.000000,152568.000000,44850.000000,862.595802)}
{pt3dadd(191316.000000,152712.000000,43850.000000,599.024880)}
{pt3dadd(190872.000000,152736.000000,43650.000000,535.933134)}
{pt3dadd(190752.000000,152544.000000,43550.000000,472.841388)}
{pt3dadd(190584.000000,152484.000000,43575.000000,409.749642)}
{pt3dadd(190416.000000,152352.000000,43525.000000,346.657896)}
{pt3dadd(190224.000000,152244.000000,43475.000000,346.657896)}
{pt3dadd(190080.000000,152112.000000,43425.000000,346.657896)}
{pt3dadd(189876.000000,151956.000000,43400.000000,346.657896)}
{pt3dadd(189684.000000,151860.000000,43325.000000,346.657896)}
{pt3dadd(189528.000000,151824.000000,43300.000000,310.146476)}
{pt3dadd(189312.000000,151692.000000,43125.000000,273.635055)}
{pt3dadd(189144.000000,151692.000000,42950.000000,237.123635)}
{pt3dadd(188964.000000,151656.000000,42950.000000,200.612214)}
{pt3dadd(188748.000000,151656.000000,42675.000000,237.123635)}
{pt3dadd(188640.000000,151524.000000,42650.000000,273.635055)}
{pt3dadd(188448.000000,151548.000000,42525.000000,310.146475)}
{pt3dadd(188292.000000,151368.000000,42400.000000,346.657896)}
{pt3dadd(188316.000000,151320.000000,42225.000000,310.146476)}
{pt3dadd(188064.000000,151140.000000,41950.000000,273.635055)}
{pt3dadd(187956.000000,151044.000000,41675.000000,237.123635)}
{pt3dadd(187896.000000,150852.000000,41375.000000,200.612214)}
{pt3dadd(187932.000000,150756.000000,41175.000000,222.679557)}
{pt3dadd(187884.000000,150552.000000,40975.000000,244.746900)}
{pt3dadd(187884.000000,150264.000000,40750.000000,266.814243)}
{pt3dadd(187788.000000,150084.000000,40550.000000,288.881586)}
{pt3dadd(187644.000000,150024.000000,40400.000000,258.455399)}
{pt3dadd(187680.000000,149832.000000,40225.000000,228.029211)}
{pt3dadd(187572.000000,149112.000000,39825.000000,197.603024)}
{pt3dadd(187476.000000,148932.000000,39725.000000,167.176836)}
{pt3dadd(187428.000000,148788.000000,39575.000000,175.535680)}
{pt3dadd(187332.000000,148656.000000,39475.000000,183.894525)}
{pt3dadd(187428.000000,148536.000000,39500.000000,192.253370)}
{pt3dadd(187320.000000,148404.000000,39475.000000,200.612214)}
{pt3dadd(187344.000000,148188.000000,39375.000000,198.606091)}
{pt3dadd(187476.000000,148032.000000,39225.000000,196.599969)}
{pt3dadd(187464.000000,147984.000000,39075.000000,194.593846)}
{pt3dadd(187464.000000,147648.000000,39075.000000,192.587724)}
{pt3dadd(187428.000000,147372.000000,38975.000000,167.176836)}

{create adhoc60}
{access adhoc60}
{connect adhoc60(1), adhoc58(0)}
{nseg = 1}
{strdef color color = "White"}
{pt3dclear()}
{pt3dadd(192660.000000,152568.000000,44850.000000,862.595802)}
{pt3dadd(192696.000000,152376.000000,45125.000000,1035.114948)}
{pt3dadd(192660.000000,152100.000000,44975.000000,1035.114948)}
{pt3dadd(192792.000000,151848.000000,45150.000000,1035.114948)}
{pt3dadd(192792.000000,151536.000000,45175.000000,1035.114948)}
{pt3dadd(192984.000000,151212.000000,45300.000000,1035.114948)}
{pt3dadd(193116.000000,150864.000000,45425.000000,1035.114948)}
{pt3dadd(193140.000000,150672.000000,45500.000000,1035.114948)}
{pt3dadd(193332.000000,150324.000000,45700.000000,1035.114948)}
{pt3dadd(193284.000000,149796.000000,45875.000000,1035.114948)}
{pt3dadd(193416.000000,149244.000000,46225.000000,991.985162)}
{pt3dadd(193296.000000,148836.000000,46125.000000,948.855375)}
{pt3dadd(193368.000000,148608.000000,46200.000000,905.725589)}
{pt3dadd(193260.000000,147960.000000,46175.000000,862.595802)}
{pt3dadd(193332.000000,147660.000000,46300.000000,853.969838)}
{pt3dadd(193476.000000,147360.000000,46400.000000,845.343873)}
{pt3dadd(193548.000000,147084.000000,46450.000000,836.717909)}
{pt3dadd(193572.000000,146760.000000,46400.000000,828.091944)}
{pt3dadd(193596.000000,146484.000000,46375.000000,836.717909)}
{pt3dadd(193632.000000,146280.000000,46475.000000,845.343873)}
{pt3dadd(193620.000000,146088.000000,46325.000000,853.969838)}
{pt3dadd(193608.000000,145764.000000,46350.000000,862.595802)}
{pt3dadd(193788.000000,145356.000000,46325.000000,862.595802)}
{pt3dadd(193728.000000,144852.000000,46225.000000,862.595802)}
{pt3dadd(193716.000000,144432.000000,46275.000000,862.595802)}
{pt3dadd(193632.000000,143940.000000,46175.000000,862.595802)}
{pt3dadd(193584.000000,143412.000000,46125.000000,993.710358)}

{create adhoc61}
{access adhoc61}
{connect adhoc61(1), adhoc60(0)}
{nseg = 1}
{strdef color color = "White"}
{pt3dclear()}
{pt3dadd(193584.000000,143412.000000,46125.000000,993.710358)}
{pt3dadd(193608.000000,142860.000000,46050.000000,1035.114948)}
{pt3dadd(193500.000000,142488.000000,46000.000000,1104.122592)}
{pt3dadd(193500.000000,142236.000000,46025.000000,1173.130236)}
{pt3dadd(193488.000000,142008.000000,46200.000000,1242.137880)}
{pt3dadd(193296.000000,141888.000000,46325.000000,1035.114948)}

{create adhoc62}
{access adhoc62}
{connect adhoc62(1), adhoc61(0)}
{nseg = 1}
{strdef color color = "White"}
{pt3dclear()}
{pt3dadd(193296.000000,141888.000000,46325.000000,1035.114948)}
{pt3dadd(193668.000000,141696.000000,46875.000000,862.595802)}
{pt3dadd(193692.000000,141384.000000,47125.000000,826.654307)}
{pt3dadd(193608.000000,141048.000000,47225.000000,790.712811)}
{pt3dadd(193524.000000,140688.000000,47325.000000,754.771316)}
{pt3dadd(193656.000000,140460.000000,47475.000000,718.829820)}
{pt3dadd(193608.000000,140220.000000,47550.000000,718.829820)}
{pt3dadd(193560.000000,139812.000000,47625.000000,718.829820)}
{pt3dadd(193680.000000,139584.000000,47800.000000,718.829820)}
{pt3dadd(193548.000000,139356.000000,47850.000000,718.829820)}
{pt3dadd(193596.000000,139224.000000,47925.000000,718.829820)}
{pt3dadd(193680.000000,139008.000000,48025.000000,718.829820)}
{pt3dadd(193728.000000,138684.000000,48100.000000,718.829820)}
{pt3dadd(193716.000000,138420.000000,48175.000000,718.829820)}
{pt3dadd(193620.000000,138000.000000,48100.000000,754.771316)}
{pt3dadd(193644.000000,137820.000000,48125.000000,790.712811)}
{pt3dadd(193728.000000,137568.000000,48300.000000,826.654307)}
{pt3dadd(193692.000000,137208.000000,48425.000000,862.595802)}
{pt3dadd(193656.000000,136692.000000,48550.000000,862.595802)}
{pt3dadd(193572.000000,136368.000000,48450.000000,862.595802)}
{pt3dadd(193524.000000,136044.000000,48400.000000,862.595802)}
{pt3dadd(193476.000000,135888.000000,48350.000000,828.091944)}

{create adhoc63}
{access adhoc63}
{connect adhoc63(1), adhoc62(0)}
{nseg = 1}
{strdef color color = "White"}
{pt3dclear()}
{pt3dadd(193476.000000,135888.000000,48350.000000,828.091944)}
{pt3dadd(193524.000000,135768.000000,48775.000000,828.091944)}
{pt3dadd(193596.000000,135600.000000,48950.000000,800.776413)}
{pt3dadd(193512.000000,135096.000000,49175.000000,773.460882)}
{pt3dadd(193464.000000,134880.000000,49250.000000,746.145351)}
{pt3dadd(193380.000000,134676.000000,49325.000000,718.829820)}
{pt3dadd(193296.000000,134376.000000,49400.000000,754.771316)}
{pt3dadd(193056.000000,134112.000000,49400.000000,790.712811)}
{pt3dadd(193128.000000,133812.000000,49525.000000,826.654307)}
{pt3dadd(192996.000000,133572.000000,49625.000000,862.595802)}
{pt3dadd(193092.000000,133320.000000,49850.000000,790.712811)}
{pt3dadd(193044.000000,133092.000000,49900.000000,718.829820)}
{pt3dadd(192996.000000,132972.000000,49950.000000,718.829820)}

{create adhoc64}
{access adhoc64}
{connect adhoc64(1), adhoc63(0)}
{nseg = 1}
{strdef color color = "White"}
{pt3dclear()}
{pt3dadd(192996.000000,132972.000000,49950.000000,718.829820)}
{pt3dadd(193116.000000,132684.000000,50300.000000,718.829820)}
{pt3dadd(193164.000000,132408.000000,50350.000000,754.771316)}
{pt3dadd(193260.000000,132120.000000,50575.000000,790.712811)}
{pt3dadd(193296.000000,131904.000000,50650.000000,826.654307)}
{pt3dadd(193344.000000,131664.000000,50825.000000,862.595802)}
{pt3dadd(193392.000000,131484.000000,50775.000000,957.481322)}
{pt3dadd(193476.000000,131184.000000,50925.000000,1052.366841)}
{pt3dadd(193380.000000,131028.000000,51100.000000,1147.252361)}
{pt3dadd(193452.000000,130572.000000,51125.000000,1242.137880)}
{pt3dadd(193452.000000,130392.000000,51300.000000,1305.072834)}
{pt3dadd(193344.000000,130236.000000,51475.000000,1368.007788)}
{pt3dadd(193368.000000,130152.000000,51775.000000,1430.942742)}
{pt3dadd(193224.000000,130032.000000,51800.000000,1490.565402)}

{create adhoc65}
{access adhoc65}
{connect adhoc65(1), adhoc64(0)}
{nseg = 1}
{strdef color color = "White"}
{pt3dclear()}
{pt3dadd(193224.000000,130032.000000,51800.000000,1490.565402)}
{pt3dadd(193296.000000,129816.000000,53250.000000,828.091944)}
{pt3dadd(193104.000000,129612.000000,53475.000000,828.091944)}
{pt3dadd(192900.000000,129360.000000,53725.000000,828.091944)}
{pt3dadd(192804.000000,129120.000000,53900.000000,828.091944)}
{pt3dadd(192600.000000,128880.000000,54200.000000,828.091944)}
{pt3dadd(192552.000000,128460.000000,54650.000000,836.717909)}
{pt3dadd(192456.000000,128328.000000,55000.000000,845.343873)}
{pt3dadd(192132.000000,127992.000000,55375.000000,853.969838)}
{pt3dadd(191976.000000,127524.000000,55650.000000,862.595802)}
{pt3dadd(191880.000000,127140.000000,56025.000000,796.703072)}
{pt3dadd(191724.000000,126768.000000,56325.000000,730.810341)}
{pt3dadd(191580.000000,126492.000000,56675.000000,664.917611)}
{pt3dadd(191592.000000,126240.000000,56625.000000,599.024880)}
{pt3dadd(191556.000000,125988.000000,56800.000000,574.065504)}
{pt3dadd(191520.000000,125784.000000,56925.000000,549.106128)}
{pt3dadd(191436.000000,125592.000000,57025.000000,524.146752)}
{pt3dadd(191508.000000,125364.000000,57125.000000,499.187376)}
{pt3dadd(191400.000000,125208.000000,57275.000000,554.097987)}
{pt3dadd(191388.000000,124956.000000,57375.000000,609.008598)}
{pt3dadd(191376.000000,124836.000000,57475.000000,663.919209)}
{pt3dadd(191376.000000,124716.000000,57700.000000,718.829820)}
{pt3dadd(191280.000000,124404.000000,57875.000000,718.829820)}
{pt3dadd(191304.000000,124224.000000,58050.000000,718.829820)}
{pt3dadd(191400.000000,124020.000000,58375.000000,718.829820)}
{pt3dadd(191496.000000,123744.000000,58675.000000,718.829820)}
{pt3dadd(191532.000000,123312.000000,58925.000000,754.771316)}
{pt3dadd(191568.000000,122820.000000,59300.000000,790.712811)}
{pt3dadd(191652.000000,122376.000000,59700.000000,826.654307)}
{pt3dadd(191676.000000,121908.000000,60000.000000,862.595802)}
{pt3dadd(191664.000000,121464.000000,60300.000000,862.595802)}
{pt3dadd(191712.000000,121260.000000,60625.000000,862.595802)}
{pt3dadd(191568.000000,121068.000000,60850.000000,862.595802)}
{pt3dadd(191556.000000,120672.000000,61300.000000,862.595802)}
{pt3dadd(191352.000000,120108.000000,61575.000000,862.595802)}
{pt3dadd(191016.000000,119712.000000,62050.000000,862.595802)}
{pt3dadd(191100.000000,119556.000000,62275.000000,862.595802)}
{pt3dadd(191100.000000,119424.000000,62575.000000,862.595802)}
{pt3dadd(191040.000000,119124.000000,62850.000000,733.611326)}
{pt3dadd(190896.000000,118752.000000,63150.000000,604.626849)}
{pt3dadd(190728.000000,118236.000000,63400.000000,475.642373)}
{pt3dadd(190452.000000,117624.000000,63650.000000,346.657896)}
{pt3dadd(190272.000000,116904.000000,63925.000000,384.790266)}
{pt3dadd(190044.000000,116196.000000,64475.000000,422.922636)}
{pt3dadd(189864.000000,115872.000000,64775.000000,461.055006)}
{pt3dadd(189528.000000,115548.000000,65150.000000,499.187376)}
{pt3dadd(189324.000000,115020.000000,65475.000000,461.055006)}
{pt3dadd(189180.000000,114828.000000,65425.000000,422.922636)}
{pt3dadd(188988.000000,114600.000000,65550.000000,384.790266)}
{pt3dadd(188796.000000,114348.000000,65675.000000,346.657896)}
{pt3dadd(188652.000000,114060.000000,65700.000000,332.213819)}
{pt3dadd(188376.000000,113916.000000,65725.000000,317.769741)}
{pt3dadd(188376.000000,113748.000000,65700.000000,303.325664)}
{pt3dadd(188280.000000,113616.000000,65825.000000,288.881586)}
{pt3dadd(188148.000000,113448.000000,65850.000000,251.489700)}
{pt3dadd(187956.000000,113472.000000,65875.000000,214.097814)}
{pt3dadd(187584.000000,113244.000000,66025.000000,176.705928)}
{pt3dadd(187872.000000,112848.000000,66075.000000,139.314042)}
{pt3dadd(187716.000000,112668.000000,66425.000000,208.482903)}
{pt3dadd(187248.000000,112440.000000,66675.000000,277.651764)}
{pt3dadd(186828.000000,112248.000000,66875.000000,346.820625)}
{pt3dadd(186576.000000,112296.000000,67200.000000,415.989486)}
{pt3dadd(186180.000000,111900.000000,67400.000000,384.212511)}
{pt3dadd(185184.000000,111516.000000,67625.000000,352.435536)}
{pt3dadd(185040.000000,111444.000000,67775.000000,320.658561)}
{pt3dadd(184860.000000,111480.000000,67750.000000,288.881586)}
{pt3dadd(184608.000000,111396.000000,67825.000000,288.881586)}
{pt3dadd(184296.000000,111264.000000,67875.000000,288.881586)}
{pt3dadd(184080.000000,111180.000000,67925.000000,288.881586)}
{pt3dadd(183744.000000,111024.000000,67975.000000,288.881586)}
{pt3dadd(183468.000000,110964.000000,68050.000000,303.325664)}
{pt3dadd(183108.000000,110832.000000,68025.000000,317.769741)}
{pt3dadd(182784.000000,110724.000000,68075.000000,332.213819)}
{pt3dadd(182520.000000,110676.000000,68250.000000,346.657896)}
{pt3dadd(182340.000000,110568.000000,68325.000000,346.657896)}
{pt3dadd(182148.000000,110460.000000,68400.000000,346.657896)}
{pt3dadd(181872.000000,110508.000000,68450.000000,346.657896)}
{pt3dadd(181644.000000,110472.000000,68525.000000,346.657896)}
{pt3dadd(181296.000000,110436.000000,68600.000000,343.191321)}
{pt3dadd(180972.000000,110472.000000,68650.000000,339.724746)}
{pt3dadd(180804.000000,110388.000000,68725.000000,336.258171)}
{pt3dadd(180576.000000,110388.000000,68800.000000,332.791596)}
{pt3dadd(180360.000000,110388.000000,68875.000000,349.431174)}
{pt3dadd(180156.000000,110388.000000,68950.000000,366.070752)}
{pt3dadd(179904.000000,110424.000000,69175.000000,382.710330)}
{pt3dadd(179712.000000,110460.000000,69200.000000,399.349908)}
{pt3dadd(179436.000000,110352.000000,69400.000000,449.268651)}
{pt3dadd(179220.000000,110400.000000,69475.000000,499.187394)}
{pt3dadd(178992.000000,110172.000000,69900.000000,549.106137)}
{pt3dadd(178788.000000,110016.000000,70325.000000,599.024880)}
{pt3dadd(178680.000000,109920.000000,70625.000000,599.024880)}
{pt3dadd(178152.000000,109788.000000,71000.000000,599.024880)}
{pt3dadd(178272.000000,109968.000000,71425.000000,599.024880)}
{pt3dadd(178164.000000,110052.000000,71750.000000,599.024880)}
{pt3dadd(178080.000000,110172.000000,71975.000000,553.266031)}
{pt3dadd(178284.000000,110580.000000,72500.000000,507.507183)}
{pt3dadd(178548.000000,110916.000000,73025.000000,461.748335)}
{pt3dadd(178656.000000,110820.000000,73475.000000,415.989486)}
{pt3dadd(178800.000000,110916.000000,73775.000000,398.656589)}
{pt3dadd(178800.000000,111012.000000,74000.000000,381.323691)}
{pt3dadd(178896.000000,111108.000000,74350.000000,363.990794)}
{pt3dadd(178884.000000,111492.000000,74700.000000,346.657896)}
{pt3dadd(178932.000000,111756.000000,74900.000000,359.830908)}
{pt3dadd(179160.000000,111528.000000,75300.000000,373.003920)}
{pt3dadd(179112.000000,111660.000000,75625.000000,386.176932)}
{pt3dadd(179304.000000,111708.000000,75850.000000,399.349944)}
{pt3dadd(179436.000000,111828.000000,76125.000000,386.176932)}
{pt3dadd(179664.000000,112020.000000,76475.000000,373.003920)}
{pt3dadd(179712.000000,111972.000000,76775.000000,359.830908)}
{pt3dadd(179928.000000,112044.000000,77025.000000,346.657896)}
{pt3dadd(179964.000000,112068.000000,77300.000000,301.787631)}
{pt3dadd(180048.000000,112344.000000,77625.000000,256.917366)}
{pt3dadd(180072.000000,112560.000000,77875.000000,212.047101)}
{pt3dadd(180168.000000,112656.000000,78100.000000,167.176836)}
{pt3dadd(180300.000000,112824.000000,78275.000000,167.176836)}
{pt3dadd(180216.000000,113112.000000,78425.000000,167.176836)}
{pt3dadd(180360.000000,113304.000000,78675.000000,139.314042)}

{create adhoc66}
{access adhoc66}
{connect adhoc66(1), adhoc64(0)}
{nseg = 1}
{strdef color color = "White"}
{pt3dclear()}
{pt3dadd(193224.000000,130032.000000,51800.000000,1490.565402)}
{pt3dadd(193260.000000,130032.000000,50375.000000,575.063856)}
{pt3dadd(193056.000000,129864.000000,50200.000000,514.495791)}
{pt3dadd(192864.000000,129684.000000,50000.000000,453.927726)}
{pt3dadd(192780.000000,129516.000000,49925.000000,393.359661)}
{pt3dadd(192720.000000,129372.000000,49925.000000,332.791596)}
{pt3dadd(192624.000000,129204.000000,49850.000000,336.258171)}
{pt3dadd(192444.000000,129048.000000,49800.000000,339.724746)}
{pt3dadd(192312.000000,128856.000000,49675.000000,343.191321)}
{pt3dadd(192276.000000,128700.000000,49575.000000,346.657896)}
{pt3dadd(192216.000000,128532.000000,49500.000000,343.191321)}
{pt3dadd(191976.000000,128316.000000,49450.000000,339.724746)}
{pt3dadd(191820.000000,128112.000000,49400.000000,336.258171)}
{pt3dadd(191580.000000,127884.000000,49250.000000,332.791596)}
{pt3dadd(191448.000000,127716.000000,49150.000000,309.777359)}
{pt3dadd(191208.000000,127320.000000,48800.000000,286.763121)}
{pt3dadd(191064.000000,127080.000000,48675.000000,263.748884)}
{pt3dadd(190764.000000,126792.000000,48625.000000,240.734646)}
{pt3dadd(190572.000000,126588.000000,48600.000000,267.215459)}
{pt3dadd(190344.000000,126276.000000,48275.000000,293.696271)}
{pt3dadd(189960.000000,125988.000000,48175.000000,320.177083)}
{pt3dadd(189540.000000,125592.000000,48100.000000,346.657896)}
{pt3dadd(189336.000000,125352.000000,48000.000000,332.213819)}
{pt3dadd(188856.000000,124980.000000,47900.000000,317.769741)}
{pt3dadd(188772.000000,124812.000000,47850.000000,303.325664)}
{pt3dadd(188580.000000,124632.000000,47800.000000,288.881586)}
{pt3dadd(188256.000000,124392.000000,47825.000000,366.417410)}
{pt3dadd(187824.000000,124140.000000,47825.000000,443.953233)}
{pt3dadd(187392.000000,123804.000000,47775.000000,521.489056)}
{pt3dadd(187188.000000,123624.000000,47650.000000,599.024880)}
{pt3dadd(187140.000000,123360.000000,47650.000000,535.933134)}
{pt3dadd(187056.000000,122844.000000,47575.000000,472.841388)}
{pt3dadd(187272.000000,122628.000000,47725.000000,409.749642)}
{pt3dadd(187452.000000,122352.000000,47800.000000,346.657896)}
{pt3dadd(187500.000000,122040.000000,48125.000000,320.177083)}
{pt3dadd(187728.000000,121740.000000,48075.000000,293.696271)}
{pt3dadd(187728.000000,121476.000000,48100.000000,267.215459)}
{pt3dadd(187872.000000,121272.000000,48075.000000,240.734646)}
{pt3dadd(187824.000000,121092.000000,48050.000000,252.771381)}
{pt3dadd(187968.000000,120900.000000,48050.000000,264.808116)}
{pt3dadd(188292.000000,120696.000000,47950.000000,276.844851)}
{pt3dadd(188664.000000,120420.000000,47650.000000,288.881586)}
{pt3dadd(189084.000000,120192.000000,47450.000000,288.881586)}
{pt3dadd(189348.000000,119928.000000,47400.000000,288.881586)}
{pt3dadd(189576.000000,119640.000000,47350.000000,288.881586)}
{pt3dadd(189696.000000,119424.000000,47200.000000,288.881586)}
{pt3dadd(189816.000000,119232.000000,47125.000000,285.992771)}
{pt3dadd(189852.000000,119004.000000,47025.000000,283.103955)}
{pt3dadd(189888.000000,118836.000000,47000.000000,280.215140)}
{pt3dadd(190056.000000,118572.000000,46850.000000,277.326324)}
{pt3dadd(190200.000000,118332.000000,46700.000000,268.178405)}
{pt3dadd(190284.000000,118008.000000,46225.000000,259.030485)}
{pt3dadd(190356.000000,117768.000000,46175.000000,249.882566)}
{pt3dadd(190212.000000,117540.000000,46175.000000,240.734646)}
{pt3dadd(190212.000000,117348.000000,46175.000000,252.771381)}
{pt3dadd(190176.000000,117144.000000,45875.000000,264.808116)}
{pt3dadd(190140.000000,116904.000000,45800.000000,276.844851)}
{pt3dadd(190128.000000,116676.000000,45600.000000,288.881586)}
{pt3dadd(190200.000000,116508.000000,45550.000000,276.844851)}
{pt3dadd(190248.000000,116316.000000,45325.000000,264.808116)}
{pt3dadd(190296.000000,116064.000000,45225.000000,252.771381)}
{pt3dadd(190416.000000,115848.000000,45075.000000,240.734646)}
{pt3dadd(190416.000000,115620.000000,44950.000000,230.704038)}
{pt3dadd(190488.000000,115368.000000,45150.000000,220.673430)}
{pt3dadd(190620.000000,115128.000000,45075.000000,210.642822)}
{pt3dadd(190524.000000,114708.000000,45375.000000,200.612214)}
{pt3dadd(190548.000000,114264.000000,45600.000000,222.679557)}
{pt3dadd(190548.000000,114156.000000,45875.000000,244.746900)}
{pt3dadd(190464.000000,113952.000000,46200.000000,266.814243)}
{pt3dadd(190236.000000,113628.000000,46375.000000,288.881586)}
{pt3dadd(189996.000000,113532.000000,46425.000000,276.844851)}
{pt3dadd(189660.000000,113232.000000,46550.000000,264.808116)}
{pt3dadd(189744.000000,113172.000000,46750.000000,252.771381)}
{pt3dadd(189684.000000,113388.000000,46900.000000,240.734646)}
{pt3dadd(189264.000000,113304.000000,47075.000000,252.771381)}
{pt3dadd(189072.000000,113328.000000,47325.000000,264.808116)}
{pt3dadd(188964.000000,113196.000000,47600.000000,276.844851)}
{pt3dadd(188784.000000,113160.000000,47850.000000,288.881586)}
{pt3dadd(188688.000000,113256.000000,48075.000000,200.612214)}
{pt3dadd(188784.000000,113172.000000,48250.000000,212.986620)}

{create adhoc67}
{access adhoc67}
{connect adhoc67(1), adhoc63(0)}
{nseg = 1}
{strdef color color = "White"}
{pt3dclear()}
{pt3dadd(192996.000000,132972.000000,49950.000000,718.829820)}
{pt3dadd(191412.000000,132888.000000,48900.000000,288.881586)}
{pt3dadd(190968.000000,132756.000000,48800.000000,288.881586)}
{pt3dadd(190020.000000,132504.000000,48750.000000,288.881586)}
{pt3dadd(189888.000000,132504.000000,48750.000000,288.881586)}
{pt3dadd(189708.000000,132408.000000,48700.000000,288.881586)}
{pt3dadd(189576.000000,132396.000000,48750.000000,320.658561)}
{pt3dadd(189348.000000,132336.000000,48775.000000,352.435536)}
{pt3dadd(189072.000000,132252.000000,48800.000000,384.212511)}
{pt3dadd(188892.000000,132012.000000,48850.000000,415.989486)}
{pt3dadd(188676.000000,132012.000000,48975.000000,415.989486)}

{create adhoc68}
{access adhoc68}
{connect adhoc68(1), adhoc67(0)}
{nseg = 1}
{strdef color color = "White"}
{pt3dclear()}
{pt3dadd(188676.000000,132012.000000,48975.000000,415.989486)}
{pt3dadd(188184.000000,132924.000000,48975.000000,240.734646)}
{pt3dadd(187956.000000,133116.000000,49225.000000,222.345193)}
{pt3dadd(187800.000000,133200.000000,49200.000000,203.955741)}
{pt3dadd(187668.000000,133248.000000,49275.000000,185.566288)}
{pt3dadd(187440.000000,133296.000000,49275.000000,167.176836)}
{pt3dadd(187236.000000,133380.000000,49350.000000,149.569092)}
{pt3dadd(187092.000000,133476.000000,49325.000000,131.961348)}
{pt3dadd(186912.000000,133500.000000,49350.000000,114.353604)}
{pt3dadd(186684.000000,133500.000000,49350.000000,96.745860)}
{pt3dadd(186492.000000,133620.000000,49300.000000,139.314042)}

{create adhoc69}
{access adhoc69}
{connect adhoc69(1), adhoc67(0)}
{nseg = 1}
{strdef color color = "White"}
{pt3dclear()}
{pt3dadd(188676.000000,132012.000000,48975.000000,415.989486)}
{pt3dadd(188436.000000,131772.000000,49000.000000,415.989486)}
{pt3dadd(188196.000000,131592.000000,48875.000000,415.989486)}
{pt3dadd(188100.000000,131460.000000,48925.000000,415.989486)}
{pt3dadd(187884.000000,131280.000000,49000.000000,415.989486)}
{pt3dadd(187656.000000,131088.000000,49075.000000,415.989486)}
{pt3dadd(187476.000000,131028.000000,49100.000000,398.656589)}
{pt3dadd(187332.000000,130944.000000,49200.000000,381.323691)}
{pt3dadd(187152.000000,130848.000000,49150.000000,363.990794)}
{pt3dadd(186972.000000,130692.000000,49100.000000,346.657896)}
{pt3dadd(186744.000000,130608.000000,49175.000000,332.213819)}
{pt3dadd(186552.000000,130464.000000,49200.000000,317.769741)}
{pt3dadd(186384.000000,130368.000000,49200.000000,303.325664)}
{pt3dadd(186132.000000,130224.000000,49175.000000,288.881586)}
{pt3dadd(186000.000000,130224.000000,49300.000000,280.557180)}
{pt3dadd(185868.000000,130176.000000,49275.000000,272.232774)}
{pt3dadd(185676.000000,130128.000000,49450.000000,263.908368)}
{pt3dadd(185472.000000,130152.000000,49475.000000,255.583962)}
{pt3dadd(185280.000000,130056.000000,49550.000000,239.834912)}
{pt3dadd(185028.000000,129996.000000,49625.000000,224.085861)}
{pt3dadd(184788.000000,129984.000000,49750.000000,208.336811)}
{pt3dadd(184656.000000,129984.000000,49825.000000,192.587760)}
{pt3dadd(184392.000000,129984.000000,49775.000000,204.624482)}
{pt3dadd(184296.000000,129984.000000,49725.000000,216.661203)}
{pt3dadd(184152.000000,130032.000000,49775.000000,228.697925)}
{pt3dadd(183960.000000,130020.000000,49825.000000,240.734646)}
{pt3dadd(183756.000000,130008.000000,49750.000000,240.734646)}
{pt3dadd(183600.000000,130008.000000,49825.000000,240.734646)}
{pt3dadd(183396.000000,129948.000000,49800.000000,240.734646)}
{pt3dadd(183216.000000,129888.000000,49775.000000,240.734646)}
{pt3dadd(182868.000000,129804.000000,49800.000000,240.734646)}
{pt3dadd(182760.000000,129852.000000,49875.000000,240.734646)}
{pt3dadd(182568.000000,129816.000000,49925.000000,240.734646)}
{pt3dadd(182184.000000,129768.000000,49925.000000,240.734646)}
{pt3dadd(182064.000000,129684.000000,50000.000000,252.771381)}
{pt3dadd(181848.000000,129648.000000,49900.000000,264.808116)}
{pt3dadd(181608.000000,129468.000000,49850.000000,276.844851)}
{pt3dadd(181428.000000,129468.000000,49875.000000,288.881586)}
{pt3dadd(181272.000000,129468.000000,49900.000000,288.881586)}
{pt3dadd(181056.000000,129372.000000,49850.000000,288.881586)}
{pt3dadd(180852.000000,129336.000000,49800.000000,288.881586)}
{pt3dadd(180756.000000,129300.000000,49750.000000,288.881586)}
{pt3dadd(180540.000000,129264.000000,49825.000000,274.437509)}
{pt3dadd(180084.000000,129084.000000,49700.000000,259.993431)}
{pt3dadd(179880.000000,129000.000000,49675.000000,245.549354)}
{pt3dadd(179712.000000,129000.000000,49750.000000,231.105276)}
{pt3dadd(179508.000000,129036.000000,49650.000000,233.512618)}
{pt3dadd(179304.000000,128892.000000,49575.000000,235.919961)}
{pt3dadd(179172.000000,128856.000000,49625.000000,238.327304)}
{pt3dadd(179016.000000,128808.000000,49600.000000,240.734646)}
{pt3dadd(178860.000000,128772.000000,49575.000000,240.734646)}
{pt3dadd(178692.000000,128736.000000,49550.000000,240.734646)}
{pt3dadd(178488.000000,128532.000000,49625.000000,240.734646)}
{pt3dadd(178320.000000,128424.000000,49625.000000,240.734646)}
{pt3dadd(178176.000000,128424.000000,49650.000000,252.771381)}
{pt3dadd(178020.000000,128316.000000,49675.000000,264.808116)}
{pt3dadd(177900.000000,128256.000000,49550.000000,276.844851)}
{pt3dadd(177720.000000,128280.000000,49625.000000,288.881586)}
{pt3dadd(177528.000000,128100.000000,49700.000000,320.658561)}
{pt3dadd(177348.000000,128016.000000,49700.000000,352.435536)}
{pt3dadd(177156.000000,127980.000000,49650.000000,384.212511)}
{pt3dadd(176904.000000,127872.000000,49675.000000,415.989486)}
{pt3dadd(176712.000000,127896.000000,49650.000000,415.989486)}
{pt3dadd(176496.000000,127812.000000,49725.000000,415.989486)}
{pt3dadd(176340.000000,127728.000000,49725.000000,415.989486)}
{pt3dadd(176172.000000,127548.000000,49775.000000,415.989486)}
{pt3dadd(175884.000000,127464.000000,49825.000000,384.212511)}
{pt3dadd(175716.000000,127428.000000,49725.000000,352.435536)}
{pt3dadd(175596.000000,127056.000000,49950.000000,320.658561)}
{pt3dadd(175416.000000,126900.000000,50100.000000,288.881586)}
{pt3dadd(175380.000000,126660.000000,50125.000000,266.814243)}
{pt3dadd(175464.000000,126504.000000,50325.000000,244.746900)}
{pt3dadd(175428.000000,126336.000000,50400.000000,222.679557)}
{pt3dadd(175500.000000,126132.000000,50575.000000,200.612214)}
{pt3dadd(175500.000000,125976.000000,50650.000000,254.456532)}
{pt3dadd(175272.000000,125856.000000,50825.000000,308.300850)}
{pt3dadd(175356.000000,125592.000000,50750.000000,362.145168)}
{pt3dadd(175248.000000,125436.000000,50900.000000,415.989486)}
{pt3dadd(175092.000000,125220.000000,51275.000000,384.212511)}
{pt3dadd(174792.000000,124596.000000,51450.000000,352.435536)}
{pt3dadd(174888.000000,124872.000000,51750.000000,320.658561)}
{pt3dadd(174828.000000,125064.000000,52075.000000,288.881586)}
{pt3dadd(175008.000000,124956.000000,52275.000000,231.286068)}
{pt3dadd(175200.000000,124812.000000,52475.000000,173.690550)}
{pt3dadd(175200.000000,124632.000000,52700.000000,116.095032)}
{pt3dadd(175116.000000,124332.000000,52875.000000,167.176836)}

{create adhoc70}
{access adhoc70}
{connect adhoc70(1), adhoc62(0)}
{nseg = 1}
{strdef color color = "White"}
{pt3dclear()}
{pt3dadd(193476.000000,135888.000000,48350.000000,828.091944)}
{pt3dadd(191076.000000,135792.000000,47400.000000,346.657896)}
{pt3dadd(190908.000000,135660.000000,47225.000000,332.213819)}
{pt3dadd(190752.000000,135600.000000,47050.000000,317.769741)}
{pt3dadd(190572.000000,135516.000000,47125.000000,303.325664)}
{pt3dadd(190428.000000,135432.000000,47025.000000,288.881586)}
{pt3dadd(190296.000000,135420.000000,46975.000000,288.881586)}
{pt3dadd(190176.000000,135408.000000,46925.000000,288.881586)}
{pt3dadd(190080.000000,135396.000000,46875.000000,288.881586)}
{pt3dadd(189924.000000,135288.000000,46900.000000,288.881586)}
{pt3dadd(189720.000000,135252.000000,46800.000000,303.325664)}
{pt3dadd(189528.000000,135240.000000,46825.000000,317.769741)}
{pt3dadd(189372.000000,135192.000000,46850.000000,332.213819)}
{pt3dadd(189180.000000,135108.000000,46750.000000,346.657896)}
{pt3dadd(188952.000000,135072.000000,46725.000000,332.213819)}
{pt3dadd(188748.000000,134928.000000,46700.000000,317.769741)}
{pt3dadd(188088.000000,134628.000000,46200.000000,303.325664)}
{pt3dadd(187908.000000,134628.000000,46150.000000,288.881586)}
{pt3dadd(187716.000000,134532.000000,46050.000000,303.325664)}
{pt3dadd(187536.000000,134472.000000,46000.000000,317.769741)}
{pt3dadd(187380.000000,134412.000000,46025.000000,332.213819)}
{pt3dadd(187200.000000,134412.000000,46000.000000,346.657896)}
{pt3dadd(187056.000000,134316.000000,45900.000000,332.213819)}
{pt3dadd(186756.000000,134364.000000,45875.000000,317.769741)}
{pt3dadd(186468.000000,134388.000000,45825.000000,303.325664)}
{pt3dadd(186192.000000,134340.000000,45675.000000,288.881586)}
{pt3dadd(185988.000000,134328.000000,45575.000000,288.881586)}
{pt3dadd(185856.000000,134244.000000,45600.000000,288.881586)}
{pt3dadd(185640.000000,134292.000000,45450.000000,288.881586)}
{pt3dadd(185436.000000,134316.000000,45475.000000,288.881586)}
{pt3dadd(185220.000000,134268.000000,45425.000000,274.437509)}
{pt3dadd(185040.000000,134268.000000,45375.000000,259.993431)}
{pt3dadd(184872.000000,134184.000000,45400.000000,245.549354)}
{pt3dadd(184500.000000,134268.000000,45200.000000,231.105276)}
{pt3dadd(184260.000000,134208.000000,45000.000000,233.512618)}
{pt3dadd(184056.000000,134232.000000,45025.000000,235.919961)}
{pt3dadd(183792.000000,134136.000000,44950.000000,238.327304)}
{pt3dadd(183504.000000,134208.000000,44900.000000,240.734646)}
{pt3dadd(183216.000000,134112.000000,44875.000000,252.771381)}
{pt3dadd(183060.000000,134112.000000,44900.000000,264.808116)}
{pt3dadd(182844.000000,134064.000000,44900.000000,276.844851)}
{pt3dadd(182532.000000,134016.000000,44775.000000,288.881586)}
{pt3dadd(182232.000000,134088.000000,44625.000000,303.325664)}
{pt3dadd(181980.000000,133944.000000,44525.000000,317.769741)}
{pt3dadd(181680.000000,133932.000000,44450.000000,332.213819)}
{pt3dadd(181356.000000,133788.000000,44400.000000,346.657896)}
{pt3dadd(181092.000000,133776.000000,44300.000000,320.177083)}
{pt3dadd(180804.000000,133680.000000,44300.000000,293.696271)}
{pt3dadd(180552.000000,133680.000000,44175.000000,267.215459)}
{pt3dadd(180276.000000,133620.000000,44125.000000,240.734646)}
{pt3dadd(180048.000000,133536.000000,44075.000000,252.771381)}
{pt3dadd(179844.000000,133476.000000,44025.000000,264.808116)}
{pt3dadd(179556.000000,133380.000000,43975.000000,276.844851)}
{pt3dadd(179364.000000,133428.000000,43875.000000,288.881586)}
{pt3dadd(179100.000000,133392.000000,43775.000000,285.992771)}
{pt3dadd(178860.000000,133296.000000,43675.000000,283.103955)}
{pt3dadd(178464.000000,133236.000000,43600.000000,280.215140)}
{pt3dadd(178200.000000,133380.000000,43675.000000,277.326324)}
{pt3dadd(178044.000000,133452.000000,43700.000000,268.178405)}
{pt3dadd(177888.000000,133488.000000,43675.000000,259.030485)}
{pt3dadd(177624.000000,133440.000000,43750.000000,249.882566)}
{pt3dadd(177348.000000,133608.000000,43775.000000,240.734646)}
{pt3dadd(177036.000000,134316.000000,43850.000000,209.574742)}
{pt3dadd(176796.000000,134544.000000,43825.000000,178.414839)}
{pt3dadd(176544.000000,134880.000000,43800.000000,147.254936)}
{pt3dadd(176304.000000,135156.000000,43875.000000,116.095032)}
{pt3dadd(176028.000000,135348.000000,43975.000000,128.865483)}
{pt3dadd(175800.000000,135528.000000,44000.000000,141.635934)}
{pt3dadd(175584.000000,135648.000000,43925.000000,154.406385)}
{pt3dadd(175392.000000,135684.000000,43850.000000,167.176836)}
{pt3dadd(175140.000000,135756.000000,43750.000000,167.176836)}
{pt3dadd(174888.000000,135720.000000,43750.000000,167.176836)}
{pt3dadd(175272.000000,135816.000000,43475.000000,167.176836)}
{pt3dadd(175020.000000,135960.000000,43300.000000,167.176836)}
{pt3dadd(174768.000000,135900.000000,43075.000000,167.176836)}
{pt3dadd(174636.000000,135708.000000,42850.000000,139.314042)}

{create adhoc71}
{access adhoc71}
{connect adhoc71(1), adhoc61(0)}
{nseg = 1}
{strdef color color = "White"}
{pt3dclear()}
{pt3dadd(193296.000000,141888.000000,46325.000000,1035.114948)}
{pt3dadd(193296.000000,141972.000000,44625.000000,718.829820)}
{pt3dadd(192996.000000,141540.000000,44325.000000,643.119736)}
{pt3dadd(192768.000000,141000.000000,44150.000000,567.409653)}
{pt3dadd(192612.000000,140844.000000,43850.000000,491.699570)}
{pt3dadd(192648.000000,140568.000000,43725.000000,415.989486)}
{pt3dadd(192660.000000,140388.000000,43600.000000,332.791596)}

{create adhoc72}
{access adhoc72}
{connect adhoc72(1), adhoc71(0)}
{nseg = 1}
{strdef color color = "White"}
{pt3dclear()}
{pt3dadd(192660.000000,140388.000000,43600.000000,332.791596)}
{pt3dadd(192744.000000,141444.000000,43400.000000,862.595802)}
{pt3dadd(192588.000000,141492.000000,43050.000000,814.673808)}
{pt3dadd(192312.000000,141444.000000,42775.000000,766.751814)}
{pt3dadd(192480.000000,141396.000000,42325.000000,718.829820)}
{pt3dadd(192012.000000,141252.000000,42325.000000,499.187376)}

{create adhoc73}
{access adhoc73}
{connect adhoc73(1), adhoc72(0)}
{nseg = 1}
{strdef color color = "White"}
{pt3dclear()}
{pt3dadd(192012.000000,141252.000000,42325.000000,499.187376)}
{pt3dadd(192612.000000,141528.000000,42075.000000,575.063856)}
{pt3dadd(192468.000000,141576.000000,41700.000000,603.817043)}
{pt3dadd(192660.000000,141516.000000,41400.000000,632.570229)}
{pt3dadd(192660.000000,141480.000000,41150.000000,661.323416)}
{pt3dadd(192792.000000,141432.000000,40850.000000,690.076602)}
{pt3dadd(192792.000000,141324.000000,40550.000000,642.354295)}
{pt3dadd(192888.000000,141312.000000,40225.000000,594.631989)}
{pt3dadd(192936.000000,141276.000000,39900.000000,546.909682)}
{pt3dadd(192960.000000,141000.000000,39675.000000,499.187376)}
{pt3dadd(192984.000000,140664.000000,39325.000000,518.156496)}
{pt3dadd(192876.000000,140700.000000,39075.000000,537.125616)}
{pt3dadd(192948.000000,140652.000000,38875.000000,556.094736)}
{pt3dadd(192972.000000,140556.000000,38625.000000,575.063856)}
{pt3dadd(193212.000000,140748.000000,38375.000000,603.817043)}
{pt3dadd(193284.000000,140664.000000,38150.000000,632.570229)}
{pt3dadd(193332.000000,140604.000000,37900.000000,661.323416)}
{pt3dadd(193320.000000,140604.000000,37650.000000,690.076602)}
{pt3dadd(193308.000000,140628.000000,37325.000000,586.889032)}
{pt3dadd(193296.000000,140652.000000,37100.000000,483.701463)}
{pt3dadd(193380.000000,141132.000000,36875.000000,380.513893)}
{pt3dadd(193272.000000,141540.000000,36650.000000,277.326324)}
{pt3dadd(193344.000000,141720.000000,36575.000000,294.659217)}
{pt3dadd(193212.000000,141948.000000,36450.000000,311.992110)}
{pt3dadd(193344.000000,142128.000000,36300.000000,329.325003)}
{pt3dadd(193428.000000,142368.000000,36150.000000,346.657896)}
{pt3dadd(193452.000000,142572.000000,36050.000000,332.213819)}
{pt3dadd(193488.000000,142824.000000,35975.000000,317.769741)}
{pt3dadd(193440.000000,143076.000000,35800.000000,303.325664)}
{pt3dadd(193488.000000,143256.000000,35700.000000,288.881586)}
{pt3dadd(193428.000000,143496.000000,35650.000000,316.498667)}
{pt3dadd(193452.000000,143712.000000,35575.000000,344.115747)}
{pt3dadd(193404.000000,143904.000000,35425.000000,371.732827)}
{pt3dadd(193356.000000,144156.000000,35350.000000,399.349908)}
{pt3dadd(193476.000000,144360.000000,34900.000000,371.732827)}
{pt3dadd(193464.000000,144564.000000,34525.000000,344.115747)}
{pt3dadd(193692.000000,144768.000000,34175.000000,316.498667)}
{pt3dadd(193860.000000,145020.000000,33875.000000,288.881586)}
{pt3dadd(194088.000000,145212.000000,33550.000000,299.859089)}
{pt3dadd(194136.000000,145524.000000,33350.000000,310.836591)}
{pt3dadd(194520.000000,145608.000000,33025.000000,321.814093)}
{pt3dadd(194664.000000,145608.000000,32700.000000,332.791596)}
{pt3dadd(194832.000000,145788.000000,32450.000000,214.768728)}
{pt3dadd(194592.000000,146208.000000,32350.000000,96.745860)}
{pt3dadd(194316.000000,146664.000000,32150.000000,80.621550)}

{create adhoc74}
{access adhoc74}
{connect adhoc74(1), adhoc72(0)}
{nseg = 1}
{strdef color color = "White"}
{pt3dclear()}
{pt3dadd(192012.000000,141252.000000,42325.000000,499.187376)}
{pt3dadd(191904.000000,141216.000000,42650.000000,346.657896)}
{pt3dadd(191796.000000,141168.000000,42600.000000,332.213819)}
{pt3dadd(191652.000000,141072.000000,42500.000000,317.769741)}
{pt3dadd(191532.000000,141096.000000,42450.000000,303.325664)}
{pt3dadd(191352.000000,140988.000000,42475.000000,288.881586)}
{pt3dadd(191196.000000,141024.000000,42275.000000,266.814243)}
{pt3dadd(191076.000000,141072.000000,42350.000000,244.746900)}
{pt3dadd(190956.000000,141036.000000,42350.000000,222.679557)}
{pt3dadd(190812.000000,141072.000000,42175.000000,200.612214)}
{pt3dadd(190656.000000,141120.000000,42075.000000,210.642822)}
{pt3dadd(190488.000000,141240.000000,42000.000000,220.673430)}
{pt3dadd(190320.000000,141132.000000,42025.000000,230.704038)}
{pt3dadd(190128.000000,141132.000000,41975.000000,240.734646)}
{pt3dadd(189912.000000,141324.000000,41600.000000,230.704038)}
{pt3dadd(189684.000000,141564.000000,41300.000000,220.673430)}
{pt3dadd(189432.000000,141528.000000,41275.000000,210.642822)}
{pt3dadd(189516.000000,141804.000000,41075.000000,200.612214)}
{pt3dadd(189540.000000,142116.000000,40875.000000,200.612214)}
{pt3dadd(189456.000000,142200.000000,40600.000000,200.612214)}
{pt3dadd(189552.000000,142272.000000,40350.000000,200.612214)}
{pt3dadd(189552.000000,142752.000000,40075.000000,200.612214)}
{pt3dadd(189624.000000,143592.000000,39850.000000,240.734646)}
{pt3dadd(189564.000000,143676.000000,39700.000000,200.612214)}

{create adhoc75}
{access adhoc75}
{connect adhoc75(1), adhoc71(0)}
{nseg = 1}
{strdef color color = "White"}
{pt3dclear()}
{pt3dadd(192660.000000,140388.000000,43600.000000,332.791596)}
{pt3dadd(192408.000000,139248.000000,43550.000000,346.657896)}
{pt3dadd(192324.000000,138924.000000,43400.000000,346.657896)}
{pt3dadd(192180.000000,138768.000000,43325.000000,346.657896)}
{pt3dadd(192180.000000,138624.000000,43350.000000,346.657896)}
{pt3dadd(192168.000000,138480.000000,43300.000000,346.657896)}
{pt3dadd(191940.000000,138348.000000,43125.000000,346.657896)}
{pt3dadd(192036.000000,138204.000000,43050.000000,346.657896)}
{pt3dadd(192024.000000,138048.000000,42925.000000,346.657896)}
{pt3dadd(192120.000000,137820.000000,43025.000000,346.657896)}
{pt3dadd(192120.000000,137652.000000,42975.000000,346.657896)}
{pt3dadd(192288.000000,137484.000000,43000.000000,346.657896)}
{pt3dadd(192204.000000,137280.000000,42800.000000,346.657896)}
{pt3dadd(192120.000000,137040.000000,42650.000000,346.657896)}
{pt3dadd(192144.000000,136836.000000,42575.000000,346.657896)}
{pt3dadd(192144.000000,136656.000000,42475.000000,346.657896)}
{pt3dadd(192240.000000,136440.000000,42275.000000,346.657896)}
{pt3dadd(192312.000000,136284.000000,42150.000000,346.657896)}
{pt3dadd(192348.000000,136116.000000,42025.000000,363.990794)}
{pt3dadd(192288.000000,135948.000000,41750.000000,381.323691)}
{pt3dadd(192372.000000,135528.000000,41725.000000,398.656589)}
{pt3dadd(192408.000000,135144.000000,41175.000000,415.989486)}
{pt3dadd(192444.000000,134808.000000,40825.000000,398.656589)}
{pt3dadd(192564.000000,134616.000000,40675.000000,381.323691)}
{pt3dadd(192600.000000,134448.000000,40525.000000,363.990794)}
{pt3dadd(192684.000000,134256.000000,40450.000000,346.657896)}
{pt3dadd(192924.000000,134004.000000,40325.000000,320.177083)}
{pt3dadd(193020.000000,133584.000000,40100.000000,293.696271)}
{pt3dadd(193212.000000,133224.000000,39700.000000,267.215459)}
{pt3dadd(193332.000000,132996.000000,39650.000000,240.734646)}
{pt3dadd(193692.000000,132636.000000,39500.000000,267.215459)}
{pt3dadd(193416.000000,132444.000000,39625.000000,293.696271)}
{pt3dadd(193176.000000,132276.000000,39625.000000,320.177083)}
{pt3dadd(193212.000000,132096.000000,39625.000000,346.657896)}
{pt3dadd(193260.000000,131904.000000,39575.000000,346.657896)}
{pt3dadd(193068.000000,131736.000000,39600.000000,346.657896)}
{pt3dadd(192864.000000,131496.000000,39650.000000,346.657896)}
{pt3dadd(192804.000000,131268.000000,39725.000000,346.657896)}
{pt3dadd(192756.000000,131028.000000,39825.000000,326.551739)}
{pt3dadd(192720.000000,130608.000000,39900.000000,306.445581)}
{pt3dadd(192852.000000,130440.000000,40025.000000,286.339424)}
{pt3dadd(192948.000000,130272.000000,40075.000000,266.233266)}
{pt3dadd(192936.000000,130056.000000,40025.000000,310.605492)}
{pt3dadd(193032.000000,129744.000000,40150.000000,354.977718)}
{pt3dadd(192996.000000,129600.000000,40175.000000,399.349944)}
{pt3dadd(192936.000000,129264.000000,40300.000000,415.989486)}

{create adhoc76}
{access adhoc76}
{connect adhoc76(1), adhoc75(0)}
{nseg = 1}
{strdef color color = "White"}
{pt3dclear()}
{pt3dadd(192936.000000,129264.000000,40300.000000,415.989486)}
{pt3dadd(193200.000000,129108.000000,40075.000000,200.612214)}
{pt3dadd(193368.000000,128928.000000,40025.000000,222.679557)}
{pt3dadd(193308.000000,128772.000000,40075.000000,244.746900)}
{pt3dadd(193428.000000,128520.000000,40050.000000,266.814243)}
{pt3dadd(193452.000000,128316.000000,40025.000000,288.881586)}
{pt3dadd(193476.000000,128124.000000,40000.000000,288.881586)}
{pt3dadd(193512.000000,127944.000000,40125.000000,288.881586)}
{pt3dadd(193416.000000,127716.000000,40300.000000,288.881586)}
{pt3dadd(193452.000000,127524.000000,40325.000000,288.881586)}
{pt3dadd(193368.000000,127368.000000,40325.000000,288.881586)}
{pt3dadd(193212.000000,127200.000000,40375.000000,288.881586)}
{pt3dadd(193032.000000,126864.000000,40450.000000,288.881586)}
{pt3dadd(193068.000000,126564.000000,40525.000000,288.881586)}
{pt3dadd(192924.000000,126408.000000,40550.000000,303.325664)}
{pt3dadd(192792.000000,126240.000000,40550.000000,317.769741)}
{pt3dadd(192792.000000,126096.000000,40625.000000,332.213819)}
{pt3dadd(192744.000000,125940.000000,40700.000000,346.657896)}
{pt3dadd(192564.000000,125772.000000,40850.000000,326.551739)}
{pt3dadd(192432.000000,125616.000000,40875.000000,306.445581)}
{pt3dadd(192432.000000,125448.000000,40900.000000,286.339424)}
{pt3dadd(192372.000000,125268.000000,40975.000000,266.233266)}
{pt3dadd(192312.000000,125100.000000,41050.000000,241.469158)}
{pt3dadd(192432.000000,124992.000000,40900.000000,216.705051)}
{pt3dadd(192324.000000,124860.000000,40900.000000,191.940944)}
{pt3dadd(192168.000000,124752.000000,40925.000000,167.176836)}
{pt3dadd(192312.000000,124380.000000,40925.000000,167.176836)}
{pt3dadd(192336.000000,124272.000000,40850.000000,167.176836)}
{pt3dadd(192336.000000,123960.000000,40800.000000,167.176836)}
{pt3dadd(192336.000000,123816.000000,40625.000000,167.176836)}
{pt3dadd(192300.000000,123672.000000,40550.000000,175.535680)}
{pt3dadd(192252.000000,123540.000000,40500.000000,183.894525)}
{pt3dadd(192204.000000,123360.000000,40400.000000,192.253370)}
{pt3dadd(192060.000000,123204.000000,40250.000000,200.612214)}
{pt3dadd(191916.000000,122988.000000,40250.000000,200.612214)}
{pt3dadd(191880.000000,122832.000000,40050.000000,200.612214)}
{pt3dadd(191880.000000,122700.000000,40075.000000,200.612214)}
{pt3dadd(191904.000000,122568.000000,40100.000000,200.612214)}
{pt3dadd(191820.000000,122412.000000,40125.000000,192.253370)}
{pt3dadd(191736.000000,122280.000000,40025.000000,183.894525)}
{pt3dadd(191580.000000,122052.000000,39950.000000,175.535680)}
{pt3dadd(191532.000000,121872.000000,39950.000000,167.176836)}
{pt3dadd(191616.000000,121428.000000,39575.000000,197.603024)}
{pt3dadd(191604.000000,121104.000000,39300.000000,228.029211)}
{pt3dadd(191232.000000,120912.000000,39025.000000,258.455399)}
{pt3dadd(191124.000000,120804.000000,38775.000000,288.881586)}
{pt3dadd(191124.000000,120756.000000,38500.000000,288.881586)}
{pt3dadd(191064.000000,120660.000000,38275.000000,288.881586)}
{pt3dadd(191136.000000,120564.000000,38075.000000,288.881586)}
{pt3dadd(191100.000000,120600.000000,37825.000000,288.881586)}
{pt3dadd(191148.000000,120420.000000,38000.000000,200.612214)}

{create adhoc77}
{access adhoc77}
{connect adhoc77(1), adhoc75(0)}
{nseg = 1}
{strdef color color = "White"}
{pt3dclear()}
{pt3dadd(192936.000000,129264.000000,40300.000000,415.989486)}
{pt3dadd(192696.000000,129156.000000,41125.000000,346.657896)}
{pt3dadd(192180.000000,128976.000000,41575.000000,310.146476)}
{pt3dadd(191712.000000,128784.000000,41825.000000,273.635055)}
{pt3dadd(191196.000000,128688.000000,42050.000000,237.123635)}
{pt3dadd(191100.000000,128772.000000,42250.000000,200.612214)}
{pt3dadd(190584.000000,128640.000000,42625.000000,198.606091)}
{pt3dadd(190236.000000,128640.000000,42975.000000,196.599969)}
{pt3dadd(189948.000000,128640.000000,43350.000000,194.593846)}
{pt3dadd(189792.000000,128592.000000,43575.000000,192.587724)}
{pt3dadd(189708.000000,128448.000000,43725.000000,195.262554)}
{pt3dadd(189528.000000,128148.000000,43950.000000,197.937384)}
{pt3dadd(189252.000000,128064.000000,44200.000000,200.612214)}
{pt3dadd(188928.000000,127980.000000,44450.000000,200.612214)}

{create adhoc78}
{access adhoc78}
{connect adhoc78(1), adhoc60(0)}
{nseg = 1}
{strdef color color = "White"}
{pt3dclear()}
{pt3dadd(193584.000000,143412.000000,46125.000000,993.710358)}
{pt3dadd(190908.000000,143448.000000,45975.000000,200.612214)}
{pt3dadd(190764.000000,143436.000000,46050.000000,208.235480)}
{pt3dadd(190644.000000,143400.000000,45950.000000,215.858745)}
{pt3dadd(190536.000000,143352.000000,45950.000000,223.482010)}
{pt3dadd(190344.000000,143268.000000,45875.000000,231.105276)}
{pt3dadd(190176.000000,143184.000000,45775.000000,215.123166)}
{pt3dadd(189936.000000,143136.000000,45700.000000,199.141056)}
{pt3dadd(189768.000000,143124.000000,45825.000000,183.158946)}
{pt3dadd(189576.000000,142872.000000,45875.000000,167.176836)}
{pt3dadd(189444.000000,142860.000000,45875.000000,149.569092)}
{pt3dadd(189312.000000,142668.000000,45900.000000,131.961348)}
{pt3dadd(189180.000000,142572.000000,45800.000000,114.353604)}
{pt3dadd(189024.000000,142488.000000,45825.000000,96.745860)}
{pt3dadd(188892.000000,142260.000000,45800.000000,107.387906)}
{pt3dadd(188796.000000,142080.000000,45875.000000,118.029951)}
{pt3dadd(188688.000000,141948.000000,45975.000000,128.671997)}
{pt3dadd(188568.000000,141624.000000,45925.000000,139.314042)}
{pt3dadd(188532.000000,140940.000000,45850.000000,169.963128)}
{pt3dadd(188568.000000,140772.000000,45875.000000,200.612214)}
{pt3dadd(188508.000000,140628.000000,46100.000000,167.176836)}

{create adhoc79}
{access adhoc79}
{connect adhoc79(1), adhoc47(0)}
{nseg = 1}
{strdef color color = "White"}
{pt3dclear()}
{pt3dadd(186948.000000,179208.000000,45450.000000,1717.131222)}
{pt3dadd(186948.000000,179868.000000,43125.000000,718.829820)}
{pt3dadd(186276.000000,179892.000000,42925.000000,746.145369)}
{pt3dadd(185988.000000,179796.000000,42625.000000,773.460918)}
{pt3dadd(186036.000000,179928.000000,42400.000000,800.776467)}
{pt3dadd(186084.000000,180048.000000,42150.000000,828.092016)}
{pt3dadd(186120.000000,180144.000000,41925.000000,663.639696)}
{pt3dadd(186204.000000,180312.000000,41750.000000,499.187376)}
{pt3dadd(186192.000000,180456.000000,41575.000000,415.989486)}

{create adhoc80}
{access adhoc80}
{connect adhoc80(1), adhoc79(0)}
{nseg = 1}
{strdef color color = "White"}
{pt3dclear()}
{pt3dadd(186192.000000,180456.000000,41575.000000,415.989486)}
{pt3dadd(186336.000000,179196.000000,41450.000000,499.187376)}
{pt3dadd(186252.000000,178992.000000,41225.000000,474.228018)}
{pt3dadd(186372.000000,178692.000000,40900.000000,449.268660)}
{pt3dadd(186360.000000,178404.000000,40600.000000,424.309302)}
{pt3dadd(186276.000000,178320.000000,40350.000000,399.349944)}
{pt3dadd(186276.000000,178308.000000,40150.000000,424.309302)}
{pt3dadd(186276.000000,178248.000000,39950.000000,449.268660)}
{pt3dadd(186372.000000,177912.000000,39750.000000,474.228018)}
{pt3dadd(186324.000000,177948.000000,39450.000000,499.187376)}
{pt3dadd(186216.000000,177900.000000,39225.000000,499.187376)}
{pt3dadd(186108.000000,177768.000000,38950.000000,499.187376)}
{pt3dadd(185868.000000,177576.000000,38675.000000,499.187376)}
{pt3dadd(185664.000000,177444.000000,38500.000000,499.187376)}
{pt3dadd(185508.000000,177492.000000,38225.000000,409.219042)}
{pt3dadd(184752.000000,177120.000000,37850.000000,319.250709)}
{pt3dadd(184632.000000,176892.000000,37850.000000,229.282376)}
{pt3dadd(184404.000000,176172.000000,37450.000000,139.314042)}
{pt3dadd(184404.000000,175500.000000,37275.000000,176.705928)}
{pt3dadd(184320.000000,175356.000000,37050.000000,214.097814)}
{pt3dadd(184440.000000,175248.000000,37125.000000,251.489700)}
{pt3dadd(184560.000000,175512.000000,36875.000000,288.881586)}
{pt3dadd(184728.000000,175512.000000,36700.000000,288.881586)}
{pt3dadd(184752.000000,175548.000000,36425.000000,288.881586)}
{pt3dadd(184704.000000,175584.000000,36225.000000,288.881586)}
{pt3dadd(184656.000000,175632.000000,36025.000000,288.881586)}
{pt3dadd(184728.000000,175776.000000,35425.000000,224.836344)}
{pt3dadd(184632.000000,175380.000000,34950.000000,160.791102)}
{pt3dadd(184536.000000,175452.000000,34725.000000,96.745860)}
{pt3dadd(184392.000000,175404.000000,34825.000000,139.314042)}

{create adhoc81}
{access adhoc81}
{connect adhoc81(1), adhoc79(0)}
{nseg = 1}
{strdef color color = "White"}
{pt3dclear()}
{pt3dadd(186192.000000,180456.000000,41575.000000,415.989486)}
{pt3dadd(186084.000000,181080.000000,41375.000000,415.989486)}
{pt3dadd(186024.000000,181320.000000,41075.000000,436.788958)}
{pt3dadd(186096.000000,181548.000000,40825.000000,457.588431)}
{pt3dadd(185988.000000,181716.000000,40550.000000,478.387903)}
{pt3dadd(185904.000000,181848.000000,40325.000000,499.187376)}
{pt3dadd(185784.000000,181992.000000,40100.000000,499.187376)}
{pt3dadd(185724.000000,182184.000000,39900.000000,499.187376)}
{pt3dadd(185472.000000,182400.000000,39650.000000,499.187376)}
{pt3dadd(185376.000000,182712.000000,39400.000000,499.187376)}
{pt3dadd(185220.000000,182952.000000,39075.000000,499.187376)}

{create adhoc82}
{access adhoc82}
{connect adhoc82(1), adhoc81(0)}
{nseg = 1}
{strdef color color = "White"}
{pt3dclear()}
{pt3dadd(185220.000000,182952.000000,39075.000000,499.187376)}
{pt3dadd(183816.000000,183888.000000,39075.000000,240.734646)}
{pt3dadd(183672.000000,184008.000000,38950.000000,222.345193)}
{pt3dadd(183540.000000,184056.000000,38950.000000,203.955741)}
{pt3dadd(183396.000000,184248.000000,38925.000000,185.566288)}
{pt3dadd(183252.000000,184332.000000,38950.000000,167.176836)}
{pt3dadd(183156.000000,184608.000000,39000.000000,158.818001)}
{pt3dadd(183024.000000,184728.000000,39000.000000,150.459165)}
{pt3dadd(182892.000000,184860.000000,38950.000000,142.100329)}
{pt3dadd(182760.000000,184944.000000,38975.000000,133.741494)}
{pt3dadd(182664.000000,185016.000000,38900.000000,140.428562)}
{pt3dadd(182568.000000,185052.000000,38975.000000,147.115629)}
{pt3dadd(182448.000000,185136.000000,38875.000000,153.802697)}
{pt3dadd(182328.000000,185232.000000,38950.000000,160.489764)}
{pt3dadd(182184.000000,185376.000000,38850.000000,155.195833)}
{pt3dadd(182076.000000,185520.000000,38875.000000,149.901903)}
{pt3dadd(181884.000000,185700.000000,38775.000000,144.607973)}
{pt3dadd(181740.000000,185688.000000,38850.000000,139.314042)}
{pt3dadd(181212.000000,186252.000000,38725.000000,148.601640)}
{pt3dadd(180684.000000,186576.000000,38725.000000,157.889238)}
{pt3dadd(180564.000000,186528.000000,38600.000000,167.176836)}
{pt3dadd(180372.000000,186648.000000,38550.000000,116.095032)}

{create adhoc83}
{access adhoc83}
{connect adhoc83(1), adhoc81(0)}
{nseg = 1}
{strdef color color = "White"}
{pt3dclear()}
{pt3dadd(185220.000000,182952.000000,39075.000000,499.187376)}
{pt3dadd(185076.000000,183648.000000,38325.000000,718.829820)}
{pt3dadd(184872.000000,183864.000000,38000.000000,499.187376)}
{pt3dadd(185052.000000,183828.000000,37850.000000,346.657896)}

{create adhoc84}
{access adhoc84}
{connect adhoc84(1), adhoc83(0)}
{nseg = 1}
{strdef color color = "White"}
{pt3dclear()}
{pt3dadd(185052.000000,183828.000000,37850.000000,346.657896)}
{pt3dadd(185712.000000,183636.000000,37675.000000,718.829820)}
{pt3dadd(185796.000000,183744.000000,37400.000000,718.829820)}
{pt3dadd(185784.000000,183840.000000,37200.000000,718.829820)}
{pt3dadd(185748.000000,183828.000000,37000.000000,718.829820)}
{pt3dadd(185796.000000,183876.000000,36700.000000,718.829820)}
{pt3dadd(185748.000000,183912.000000,36475.000000,663.919209)}
{pt3dadd(185700.000000,183876.000000,36175.000000,609.008598)}
{pt3dadd(185568.000000,183924.000000,35950.000000,554.097987)}
{pt3dadd(185532.000000,183948.000000,35700.000000,499.187376)}
{pt3dadd(185400.000000,183816.000000,35475.000000,546.909682)}
{pt3dadd(185520.000000,183852.000000,35200.000000,594.631989)}
{pt3dadd(185520.000000,183816.000000,34975.000000,642.354295)}
{pt3dadd(185508.000000,183864.000000,34650.000000,690.076602)}
{pt3dadd(185460.000000,183888.000000,34400.000000,577.741113)}
{pt3dadd(185328.000000,184008.000000,34225.000000,465.405624)}
{pt3dadd(185196.000000,183996.000000,33975.000000,353.070135)}
{pt3dadd(184704.000000,184020.000000,33675.000000,240.734646)}
{pt3dadd(184584.000000,184020.000000,33575.000000,277.326342)}

{create adhoc85}
{access adhoc85}
{connect adhoc85(1), adhoc83(0)}
{nseg = 1}
{strdef color color = "White"}
{pt3dclear()}
{pt3dadd(185052.000000,183828.000000,37850.000000,346.657896)}
{pt3dadd(184200.000000,184308.000000,37725.000000,288.881586)}
{pt3dadd(184092.000000,184440.000000,37475.000000,288.881586)}
{pt3dadd(183960.000000,184680.000000,37275.000000,288.881586)}
{pt3dadd(183948.000000,184872.000000,37050.000000,288.881586)}
{pt3dadd(183672.000000,185064.000000,36825.000000,288.881586)}
{pt3dadd(183612.000000,185280.000000,36575.000000,303.325664)}
{pt3dadd(183888.000000,185520.000000,36325.000000,317.769741)}
{pt3dadd(183840.000000,186012.000000,36175.000000,332.213819)}
{pt3dadd(183912.000000,186240.000000,36025.000000,346.657896)}
{pt3dadd(183900.000000,186288.000000,35825.000000,359.830908)}
{pt3dadd(184092.000000,186768.000000,35600.000000,373.003920)}
{pt3dadd(184164.000000,187128.000000,35350.000000,386.176932)}
{pt3dadd(184152.000000,187644.000000,35025.000000,399.349944)}
{pt3dadd(184176.000000,187860.000000,34725.000000,371.732855)}
{pt3dadd(183804.000000,188316.000000,34500.000000,344.115765)}
{pt3dadd(184008.000000,188496.000000,34625.000000,316.498675)}
{pt3dadd(184104.000000,188652.000000,34525.000000,288.881586)}
{pt3dadd(184200.000000,188808.000000,34425.000000,299.859080)}
{pt3dadd(184068.000000,188976.000000,34500.000000,310.836573)}
{pt3dadd(183912.000000,189180.000000,34400.000000,321.814067)}
{pt3dadd(183864.000000,189396.000000,34325.000000,332.791560)}
{pt3dadd(183720.000000,189600.000000,34325.000000,309.777332)}
{pt3dadd(183672.000000,189792.000000,34275.000000,286.763103)}
{pt3dadd(183624.000000,189996.000000,34225.000000,263.748875)}
{pt3dadd(183540.000000,190200.000000,34225.000000,240.734646)}
{pt3dadd(183504.000000,190464.000000,34275.000000,267.215459)}
{pt3dadd(183600.000000,190632.000000,34000.000000,293.696271)}
{pt3dadd(183492.000000,190776.000000,34075.000000,320.177083)}
{pt3dadd(183444.000000,190932.000000,34100.000000,346.657896)}
{pt3dadd(183288.000000,191112.000000,34150.000000,346.657896)}
{pt3dadd(183180.000000,191292.000000,34175.000000,346.657896)}
{pt3dadd(183072.000000,191496.000000,34200.000000,346.657896)}
{pt3dadd(182916.000000,191628.000000,34225.000000,346.657896)}
{pt3dadd(182880.000000,191808.000000,34175.000000,329.325003)}
{pt3dadd(182832.000000,191964.000000,34125.000000,311.992110)}
{pt3dadd(182676.000000,192132.000000,34200.000000,294.659217)}
{pt3dadd(182436.000000,192372.000000,34150.000000,277.326324)}
{pt3dadd(182460.000000,192540.000000,34100.000000,268.178405)}
{pt3dadd(182424.000000,192720.000000,34050.000000,259.030485)}
{pt3dadd(182076.000000,192936.000000,34125.000000,249.882566)}
{pt3dadd(181740.000000,193128.000000,34300.000000,240.734646)}
{pt3dadd(181644.000000,193272.000000,34300.000000,230.704038)}
{pt3dadd(181668.000000,193500.000000,34350.000000,220.673430)}
{pt3dadd(181428.000000,193344.000000,34625.000000,210.642822)}
{pt3dadd(180996.000000,193644.000000,34850.000000,200.612214)}
{pt3dadd(180720.000000,193776.000000,35175.000000,210.642822)}
{pt3dadd(180672.000000,193908.000000,35525.000000,220.673430)}
{pt3dadd(180588.000000,194088.000000,35875.000000,230.704038)}
{pt3dadd(180456.000000,194256.000000,35875.000000,240.734646)}
{pt3dadd(180456.000000,194388.000000,35975.000000,222.345193)}
{pt3dadd(179844.000000,194472.000000,35975.000000,203.955741)}
{pt3dadd(179844.000000,194580.000000,35950.000000,185.566288)}
{pt3dadd(179712.000000,194796.000000,36300.000000,167.176836)}
{pt3dadd(179748.000000,194916.000000,36525.000000,207.745086)}
{pt3dadd(179700.000000,194964.000000,36800.000000,248.313336)}
{pt3dadd(179724.000000,194784.000000,37000.000000,288.881586)}
{pt3dadd(179664.000000,194820.000000,37200.000000,240.734646)}

{create adhoc86}
{access adhoc86}
{connect adhoc86(1), adhoc46(0)}
{nseg = 1}
{strdef color color = "White"}
{pt3dclear()}
{pt3dadd(186048.000000,180972.000000,47000.000000,1717.131222)}
{pt3dadd(186132.000000,180852.000000,49375.000000,277.326324)}
{pt3dadd(186312.000000,180756.000000,49325.000000,280.215140)}
{pt3dadd(186348.000000,180564.000000,49400.000000,283.103955)}
{pt3dadd(186432.000000,180336.000000,49350.000000,285.992771)}
{pt3dadd(186516.000000,180156.000000,49375.000000,288.881586)}
{pt3dadd(186600.000000,179892.000000,49575.000000,288.881586)}
{pt3dadd(186636.000000,179700.000000,49600.000000,288.881586)}
{pt3dadd(186720.000000,179520.000000,49700.000000,288.881586)}
{pt3dadd(186840.000000,179328.000000,49750.000000,288.881586)}
{pt3dadd(187020.000000,179100.000000,49775.000000,288.881586)}
{pt3dadd(187140.000000,178896.000000,49850.000000,288.881586)}
{pt3dadd(187104.000000,178740.000000,49875.000000,288.881586)}
{pt3dadd(187176.000000,178524.000000,49925.000000,288.881586)}
{pt3dadd(187416.000000,178380.000000,49950.000000,288.881586)}
{pt3dadd(187512.000000,178224.000000,50025.000000,288.881586)}
{pt3dadd(187680.000000,178080.000000,50025.000000,288.881586)}
{pt3dadd(187800.000000,177732.000000,50100.000000,288.881586)}
{pt3dadd(188160.000000,177420.000000,50125.000000,320.658561)}
{pt3dadd(188328.000000,176976.000000,50225.000000,352.435536)}
{pt3dadd(188424.000000,176544.000000,50375.000000,384.212511)}
{pt3dadd(188556.000000,176256.000000,50350.000000,415.989486)}
{pt3dadd(188688.000000,175932.000000,50325.000000,398.656589)}
{pt3dadd(188724.000000,175668.000000,50350.000000,381.323691)}
{pt3dadd(188760.000000,175452.000000,50375.000000,363.990794)}
{pt3dadd(188796.000000,175176.000000,50400.000000,346.657896)}
{pt3dadd(188832.000000,174924.000000,50350.000000,332.213819)}
{pt3dadd(188868.000000,174624.000000,50350.000000,317.769741)}
{pt3dadd(188952.000000,174276.000000,50450.000000,303.325664)}
{pt3dadd(189132.000000,174036.000000,50475.000000,288.881586)}
{pt3dadd(189312.000000,173760.000000,50550.000000,303.325664)}
{pt3dadd(189480.000000,173448.000000,50500.000000,317.769741)}
{pt3dadd(189648.000000,173244.000000,50450.000000,332.213819)}
{pt3dadd(189864.000000,172848.000000,50575.000000,346.657896)}
{pt3dadd(189888.000000,172584.000000,50475.000000,363.990794)}
{pt3dadd(190032.000000,172344.000000,50650.000000,381.323691)}
{pt3dadd(190068.000000,171828.000000,50650.000000,398.656589)}
{pt3dadd(190104.000000,171444.000000,50675.000000,415.989486)}
{pt3dadd(190140.000000,171060.000000,50700.000000,398.656589)}
{pt3dadd(190236.000000,170676.000000,50725.000000,381.323691)}
{pt3dadd(190308.000000,170400.000000,50750.000000,363.990794)}
{pt3dadd(190296.000000,170052.000000,50600.000000,346.657896)}
{pt3dadd(190320.000000,169776.000000,50625.000000,379.798393)}
{pt3dadd(190344.000000,169512.000000,50700.000000,412.938891)}
{pt3dadd(190284.000000,169128.000000,50975.000000,446.079388)}
{pt3dadd(190176.000000,168900.000000,50950.000000,479.219886)}
{pt3dadd(189876.000000,168660.000000,50950.000000,479.219886)}
{pt3dadd(189672.000000,168420.000000,51100.000000,479.219886)}
{pt3dadd(189516.000000,168216.000000,51000.000000,479.219886)}
{pt3dadd(189144.000000,168048.000000,51125.000000,479.219886)}
{pt3dadd(188844.000000,167772.000000,51050.000000,484.211758)}
{pt3dadd(188112.000000,167424.000000,51100.000000,489.203631)}
{pt3dadd(187908.000000,167448.000000,50975.000000,494.195504)}
{pt3dadd(187584.000000,167364.000000,50975.000000,499.187376)}
{pt3dadd(187128.000000,167208.000000,50975.000000,446.610929)}
{pt3dadd(186768.000000,167052.000000,51050.000000,394.034481)}
{pt3dadd(186420.000000,166944.000000,51000.000000,341.458034)}
{pt3dadd(186012.000000,166692.000000,50950.000000,288.881586)}
{pt3dadd(185700.000000,166632.000000,50825.000000,303.325664)}
{pt3dadd(185400.000000,166632.000000,50700.000000,317.769741)}
{pt3dadd(185172.000000,166488.000000,50725.000000,332.213819)}
{pt3dadd(184848.000000,166404.000000,50650.000000,346.657896)}
{pt3dadd(184452.000000,166404.000000,50675.000000,346.657896)}
{pt3dadd(184272.000000,166368.000000,50600.000000,346.657896)}
{pt3dadd(184020.000000,166284.000000,50625.000000,346.657896)}
{pt3dadd(183840.000000,166272.000000,50650.000000,346.657896)}
{pt3dadd(183336.000000,166212.000000,50575.000000,346.657896)}
{pt3dadd(183072.000000,166128.000000,50650.000000,346.657896)}
{pt3dadd(182784.000000,166044.000000,50725.000000,346.657896)}
{pt3dadd(182664.000000,166080.000000,50625.000000,346.657896)}
{pt3dadd(182436.000000,165936.000000,50575.000000,332.213819)}
{pt3dadd(182196.000000,165780.000000,50650.000000,317.769741)}
{pt3dadd(182016.000000,165624.000000,50550.000000,303.325664)}
{pt3dadd(181800.000000,165540.000000,50575.000000,288.881586)}
{pt3dadd(181596.000000,165384.000000,50525.000000,276.844851)}
{pt3dadd(181416.000000,165420.000000,50550.000000,264.808116)}
{pt3dadd(181224.000000,165324.000000,50575.000000,252.771381)}
{pt3dadd(180900.000000,165312.000000,50625.000000,240.734646)}
{pt3dadd(180624.000000,165300.000000,50675.000000,252.771381)}
{pt3dadd(180396.000000,165216.000000,50625.000000,264.808116)}
{pt3dadd(180036.000000,165180.000000,50625.000000,276.844851)}
{pt3dadd(179808.000000,165048.000000,50650.000000,288.881586)}
{pt3dadd(179532.000000,164988.000000,50675.000000,266.814243)}
{pt3dadd(179304.000000,164832.000000,50675.000000,244.746900)}
{pt3dadd(178932.000000,164688.000000,50675.000000,222.679557)}
{pt3dadd(178584.000000,164628.000000,50675.000000,200.612214)}
{pt3dadd(178344.000000,164664.000000,50600.000000,198.606087)}
{pt3dadd(178188.000000,164580.000000,50600.000000,196.599960)}
{pt3dadd(177960.000000,164652.000000,50600.000000,194.593833)}
{pt3dadd(177732.000000,164568.000000,50575.000000,192.587706)}
{pt3dadd(177528.000000,164568.000000,50550.000000,231.105254)}
{pt3dadd(177396.000000,164472.000000,50600.000000,269.622801)}
{pt3dadd(177000.000000,164328.000000,50525.000000,308.140349)}
{pt3dadd(176712.000000,164280.000000,50375.000000,346.657896)}
{pt3dadd(176556.000000,164232.000000,50400.000000,320.177083)}
{pt3dadd(176160.000000,164100.000000,50375.000000,293.696271)}
{pt3dadd(175908.000000,163956.000000,50400.000000,267.215459)}
{pt3dadd(175560.000000,163872.000000,50225.000000,240.734646)}
{pt3dadd(175380.000000,163896.000000,50200.000000,252.771381)}
{pt3dadd(175188.000000,163764.000000,50175.000000,264.808116)}
{pt3dadd(175020.000000,163704.000000,50125.000000,276.844851)}
{pt3dadd(174900.000000,163644.000000,50150.000000,288.881586)}
{pt3dadd(174708.000000,163692.000000,50025.000000,264.808120)}
{pt3dadd(174432.000000,163680.000000,49900.000000,240.734655)}
{pt3dadd(174156.000000,163680.000000,49900.000000,216.661190)}
{pt3dadd(174012.000000,163548.000000,49950.000000,192.587724)}
{pt3dadd(173844.000000,163416.000000,50000.000000,216.661190)}
{pt3dadd(173652.000000,163332.000000,50075.000000,240.734655)}
{pt3dadd(173460.000000,163356.000000,49975.000000,264.808120)}
{pt3dadd(173220.000000,163152.000000,50000.000000,288.881586)}
{pt3dadd(173052.000000,163116.000000,50100.000000,288.881586)}
{pt3dadd(172812.000000,163200.000000,50000.000000,288.881586)}
{pt3dadd(172656.000000,163272.000000,50050.000000,288.881586)}
{pt3dadd(172476.000000,163176.000000,50125.000000,288.881586)}
{pt3dadd(172272.000000,163224.000000,50175.000000,358.983516)}
{pt3dadd(172068.000000,163356.000000,50100.000000,429.085446)}
{pt3dadd(171816.000000,163260.000000,50150.000000,499.187376)}
{pt3dadd(171420.000000,163212.000000,50100.000000,288.881586)}

{create adhoc87}
{access adhoc87}
{connect adhoc87(1), adhoc86(0)}
{nseg = 1}
{strdef color color = "White"}
{pt3dclear()}
{pt3dadd(171420.000000,163212.000000,50100.000000,288.881586)}
{pt3dadd(171552.000000,163284.000000,49725.000000,240.734646)}
{pt3dadd(171360.000000,163356.000000,49575.000000,252.771381)}
{pt3dadd(171228.000000,163296.000000,49400.000000,264.808116)}
{pt3dadd(171096.000000,163284.000000,49300.000000,276.844851)}
{pt3dadd(170940.000000,163224.000000,49200.000000,288.881586)}
{pt3dadd(170856.000000,163020.000000,49000.000000,259.458462)}
{pt3dadd(170388.000000,162576.000000,48875.000000,230.035338)}
{pt3dadd(170196.000000,162192.000000,48625.000000,200.612214)}
{pt3dadd(170004.000000,162108.000000,48525.000000,139.314042)}

{create adhoc88}
{access adhoc88}
{connect adhoc88(1), adhoc86(0)}
{nseg = 1}
{strdef color color = "White"}
{pt3dclear()}
{pt3dadd(171420.000000,163212.000000,50100.000000,288.881586)}
{pt3dadd(171696.000000,163212.000000,50750.000000,167.176836)}
{pt3dadd(171348.000000,163452.000000,51075.000000,229.379999)}
{pt3dadd(171060.000000,163668.000000,51325.000000,291.583161)}
{pt3dadd(171000.000000,163740.000000,51625.000000,353.786324)}
{pt3dadd(170904.000000,163932.000000,52100.000000,415.989486)}
{pt3dadd(170796.000000,164100.000000,52400.000000,415.989486)}
{pt3dadd(170880.000000,164292.000000,52625.000000,415.989486)}
{pt3dadd(171216.000000,164700.000000,53550.000000,415.989486)}
{pt3dadd(171480.000000,164652.000000,53925.000000,415.989486)}
{pt3dadd(171516.000000,164772.000000,54225.000000,353.786324)}
{pt3dadd(171540.000000,164868.000000,54650.000000,291.583161)}
{pt3dadd(171480.000000,164940.000000,54900.000000,229.379999)}
{pt3dadd(171348.000000,165948.000000,55400.000000,167.176836)}
{pt3dadd(170976.000000,166140.000000,55525.000000,153.245434)}
{pt3dadd(170916.000000,166272.000000,55675.000000,139.314033)}
{pt3dadd(171060.000000,166440.000000,55750.000000,125.382632)}
{pt3dadd(171096.000000,166620.000000,55925.000000,111.451230)}
{pt3dadd(171276.000000,166704.000000,56050.000000,184.884228)}
{pt3dadd(171552.000000,167016.000000,56225.000000,139.314042)}

{create adhoc89}
{access adhoc89}
{connect adhoc89(1), adhoc45(0)}
{nseg = 1}
{strdef color color = "White"}
{pt3dclear()}
{pt3dadd(185388.000000,183444.000000,48825.000000,1490.565402)}
{pt3dadd(183576.000000,183108.000000,52150.000000,575.063856)}
{pt3dadd(183120.000000,183528.000000,52500.000000,535.295264)}
{pt3dadd(182880.000000,183576.000000,52600.000000,495.526671)}
{pt3dadd(182760.000000,183648.000000,52750.000000,455.758079)}
{pt3dadd(182460.000000,183636.000000,52850.000000,415.989486)}
{pt3dadd(182160.000000,183636.000000,52975.000000,431.797064)}
{pt3dadd(181896.000000,183876.000000,52975.000000,447.604641)}
{pt3dadd(181584.000000,184008.000000,53050.000000,463.412219)}
{pt3dadd(181344.000000,184092.000000,53000.000000,479.219796)}
{pt3dadd(181200.000000,184176.000000,52950.000000,463.412219)}
{pt3dadd(180996.000000,184128.000000,52975.000000,447.604641)}
{pt3dadd(180732.000000,184176.000000,53100.000000,431.797064)}
{pt3dadd(180552.000000,184116.000000,52900.000000,415.989486)}
{pt3dadd(180492.000000,184236.000000,53075.000000,346.657896)}

{create adhoc90}
{access adhoc90}
{connect adhoc90(1), adhoc89(0)}
{nseg = 1}
{strdef color color = "White"}
{pt3dclear()}
{pt3dadd(180492.000000,184236.000000,53075.000000,346.657896)}
{pt3dadd(180348.000000,184608.000000,53500.000000,346.657896)}
{pt3dadd(180204.000000,184752.000000,53600.000000,346.657896)}
{pt3dadd(180072.000000,184752.000000,53650.000000,346.657896)}
{pt3dadd(179904.000000,184848.000000,53725.000000,346.657896)}
{pt3dadd(179628.000000,184920.000000,53775.000000,346.657896)}
{pt3dadd(179460.000000,184992.000000,53825.000000,346.657896)}
{pt3dadd(179280.000000,184980.000000,53850.000000,346.657896)}
{pt3dadd(179088.000000,184968.000000,53875.000000,346.657896)}
{pt3dadd(178800.000000,185088.000000,53950.000000,346.657896)}
{pt3dadd(178596.000000,185208.000000,54025.000000,346.657896)}
{pt3dadd(178404.000000,185100.000000,54050.000000,346.657896)}
{pt3dadd(178212.000000,185100.000000,54100.000000,346.657896)}
{pt3dadd(178068.000000,185100.000000,54150.000000,346.657896)}
{pt3dadd(177912.000000,185100.000000,54200.000000,332.213819)}
{pt3dadd(177768.000000,185136.000000,54150.000000,317.769741)}
{pt3dadd(177624.000000,185100.000000,54100.000000,303.325664)}
{pt3dadd(177432.000000,185088.000000,54300.000000,288.881586)}
{pt3dadd(177288.000000,185028.000000,54325.000000,288.881586)}
{pt3dadd(177108.000000,185064.000000,54325.000000,288.881586)}
{pt3dadd(176844.000000,185100.000000,54400.000000,288.881586)}
{pt3dadd(176604.000000,185088.000000,54500.000000,288.881586)}
{pt3dadd(176400.000000,185040.000000,54500.000000,276.844851)}
{pt3dadd(176220.000000,185076.000000,54525.000000,264.808116)}
{pt3dadd(175968.000000,185112.000000,54550.000000,252.771381)}
{pt3dadd(175848.000000,185100.000000,54625.000000,240.734646)}
{pt3dadd(175680.000000,185088.000000,54700.000000,284.548356)}
{pt3dadd(175416.000000,185112.000000,54775.000000,328.362066)}
{pt3dadd(175104.000000,185136.000000,54750.000000,372.175776)}
{pt3dadd(174672.000000,185172.000000,54825.000000,415.989486)}
{pt3dadd(174348.000000,185244.000000,54950.000000,411.829591)}
{pt3dadd(174072.000000,185316.000000,55025.000000,407.669697)}
{pt3dadd(173844.000000,185304.000000,55050.000000,403.509803)}
{pt3dadd(173652.000000,185292.000000,55000.000000,399.349908)}
{pt3dadd(173472.000000,185280.000000,54950.000000,371.732827)}
{pt3dadd(173208.000000,185268.000000,54900.000000,344.115747)}
{pt3dadd(172836.000000,185304.000000,55000.000000,316.498667)}
{pt3dadd(172452.000000,185340.000000,55100.000000,288.881586)}
{pt3dadd(172248.000000,185376.000000,55000.000000,303.325664)}
{pt3dadd(172020.000000,185412.000000,54975.000000,317.769741)}
{pt3dadd(171804.000000,185448.000000,54950.000000,332.213819)}
{pt3dadd(171624.000000,185388.000000,55050.000000,346.657896)}
{pt3dadd(171252.000000,185388.000000,55225.000000,332.213819)}
{pt3dadd(170964.000000,185460.000000,55300.000000,317.769741)}
{pt3dadd(170652.000000,185484.000000,55325.000000,303.325664)}
{pt3dadd(170472.000000,185508.000000,55350.000000,288.881586)}
{pt3dadd(170148.000000,185544.000000,55250.000000,303.325664)}
{pt3dadd(169932.000000,185544.000000,55375.000000,317.769741)}
{pt3dadd(169716.000000,185592.000000,55450.000000,332.213819)}
{pt3dadd(169512.000000,185664.000000,55525.000000,346.657896)}
{pt3dadd(169200.000000,185688.000000,55700.000000,363.990794)}
{pt3dadd(168948.000000,185736.000000,55700.000000,381.323691)}
{pt3dadd(168780.000000,185772.000000,55775.000000,398.656589)}
{pt3dadd(168480.000000,185760.000000,55900.000000,415.989486)}
{pt3dadd(168216.000000,185808.000000,55975.000000,373.620186)}
{pt3dadd(167964.000000,185904.000000,56000.000000,331.250886)}
{pt3dadd(167784.000000,186000.000000,56025.000000,288.881586)}
{pt3dadd(167616.000000,186144.000000,55975.000000,167.176836)}

{create adhoc91}
{access adhoc91}
{connect adhoc91(1), adhoc90(0)}
{nseg = 1}
{strdef color color = "White"}
{pt3dclear()}
{pt3dadd(167616.000000,186144.000000,55975.000000,167.176836)}
{pt3dadd(167520.000000,185436.000000,55525.000000,240.734646)}
{pt3dadd(167364.000000,185388.000000,55525.000000,222.345193)}
{pt3dadd(167196.000000,185352.000000,55500.000000,203.955741)}
{pt3dadd(167028.000000,185244.000000,55400.000000,185.566288)}
{pt3dadd(166464.000000,184860.000000,55275.000000,167.176836)}
{pt3dadd(166224.000000,184860.000000,55300.000000,167.176836)}
{pt3dadd(165744.000000,184344.000000,55075.000000,167.176836)}
{pt3dadd(165696.000000,184212.000000,55075.000000,167.176836)}
{pt3dadd(165600.000000,184044.000000,55025.000000,167.176836)}
{pt3dadd(165624.000000,183912.000000,55050.000000,175.535680)}
{pt3dadd(165336.000000,183708.000000,55000.000000,183.894525)}
{pt3dadd(165360.000000,183528.000000,55000.000000,192.253370)}
{pt3dadd(165348.000000,183396.000000,54975.000000,200.612214)}
{pt3dadd(165384.000000,183264.000000,55000.000000,200.612214)}
{pt3dadd(165384.000000,183096.000000,55050.000000,200.612214)}
{pt3dadd(165372.000000,182940.000000,55075.000000,200.612214)}
{pt3dadd(165180.000000,182772.000000,55100.000000,200.612214)}
{pt3dadd(165180.000000,182568.000000,55050.000000,200.612214)}
{pt3dadd(165084.000000,182436.000000,55050.000000,200.612214)}
{pt3dadd(165072.000000,182280.000000,55075.000000,200.612214)}
{pt3dadd(165012.000000,182136.000000,55050.000000,200.612214)}

{create adhoc92}
{access adhoc92}
{connect adhoc92(1), adhoc90(0)}
{nseg = 1}
{strdef color color = "White"}
{pt3dclear()}
{pt3dadd(167616.000000,186144.000000,55975.000000,167.176836)}
{pt3dadd(167412.000000,186504.000000,56300.000000,399.349944)}
{pt3dadd(166896.000000,186924.000000,56750.000000,403.509830)}
{pt3dadd(165876.000000,187680.000000,57275.000000,407.669715)}
{pt3dadd(165720.000000,187956.000000,57575.000000,411.829601)}
{pt3dadd(165624.000000,188184.000000,57775.000000,415.989486)}
{pt3dadd(165468.000000,188472.000000,58125.000000,362.145168)}
{pt3dadd(165684.000000,188940.000000,58500.000000,308.300850)}
{pt3dadd(166104.000000,189312.000000,58975.000000,254.456532)}
{pt3dadd(166332.000000,189648.000000,59250.000000,200.612214)}
{pt3dadd(166344.000000,189804.000000,59300.000000,222.679557)}
{pt3dadd(166344.000000,189936.000000,59350.000000,244.746900)}
{pt3dadd(166524.000000,190128.000000,59475.000000,266.814243)}
{pt3dadd(166572.000000,190284.000000,59700.000000,288.881586)}
{pt3dadd(166884.000000,190404.000000,60250.000000,303.325664)}
{pt3dadd(167076.000000,190632.000000,60425.000000,317.769741)}
{pt3dadd(167268.000000,190812.000000,60825.000000,332.213819)}
{pt3dadd(167340.000000,190884.000000,61100.000000,346.657896)}
{pt3dadd(167376.000000,190752.000000,61400.000000,297.976002)}
{pt3dadd(167340.000000,190788.000000,61700.000000,249.294108)}
{pt3dadd(167052.000000,190956.000000,62075.000000,200.612214)}
{pt3dadd(166872.000000,191052.000000,61950.000000,200.612214)}

{create adhoc93}
{access adhoc93}
{connect adhoc93(1), adhoc89(0)}
{nseg = 1}
{strdef color color = "White"}
{pt3dclear()}
{pt3dadd(180492.000000,184236.000000,53075.000000,346.657896)}
{pt3dadd(180360.000000,184008.000000,52500.000000,383.375952)}
{pt3dadd(178632.000000,183720.000000,52225.000000,359.752361)}
{pt3dadd(178404.000000,183900.000000,51875.000000,336.128769)}
{pt3dadd(178188.000000,183900.000000,51850.000000,312.505178)}
{pt3dadd(177900.000000,183840.000000,51875.000000,288.881586)}
{pt3dadd(177756.000000,183984.000000,51775.000000,285.992771)}
{pt3dadd(177588.000000,183936.000000,51750.000000,283.103955)}
{pt3dadd(177408.000000,183804.000000,51775.000000,280.215140)}
{pt3dadd(177036.000000,183792.000000,51800.000000,277.326324)}
{pt3dadd(176868.000000,183792.000000,51825.000000,307.832220)}
{pt3dadd(176580.000000,183708.000000,51725.000000,338.338116)}
{pt3dadd(176328.000000,183708.000000,51750.000000,368.844012)}
{pt3dadd(176028.000000,183600.000000,51650.000000,399.349908)}
{pt3dadd(175776.000000,183564.000000,51725.000000,359.696092)}
{pt3dadd(175524.000000,183564.000000,51625.000000,320.042277)}
{pt3dadd(175260.000000,183480.000000,51575.000000,280.388462)}
{pt3dadd(175020.000000,183468.000000,51550.000000,240.734646)}
{pt3dadd(174804.000000,183468.000000,51500.000000,252.771381)}
{pt3dadd(174528.000000,183420.000000,51575.000000,264.808116)}
{pt3dadd(174300.000000,183420.000000,51600.000000,276.844851)}
{pt3dadd(174000.000000,183324.000000,51600.000000,288.881586)}
{pt3dadd(173592.000000,183240.000000,51625.000000,285.992771)}
{pt3dadd(173364.000000,183228.000000,51550.000000,283.103955)}
{pt3dadd(172992.000000,183216.000000,51675.000000,280.215140)}
{pt3dadd(172656.000000,183204.000000,51800.000000,277.326324)}
{pt3dadd(172332.000000,183108.000000,51750.000000,268.178405)}
{pt3dadd(172008.000000,183060.000000,51775.000000,259.030485)}
{pt3dadd(171660.000000,183012.000000,51800.000000,249.882566)}
{pt3dadd(171408.000000,182976.000000,51775.000000,240.734646)}
{pt3dadd(171024.000000,182832.000000,51675.000000,252.771381)}
{pt3dadd(170760.000000,182928.000000,51575.000000,264.808116)}
{pt3dadd(170616.000000,182736.000000,51700.000000,276.844851)}
{pt3dadd(170436.000000,182700.000000,51625.000000,288.881586)}
{pt3dadd(170256.000000,182736.000000,51475.000000,303.325664)}
{pt3dadd(170076.000000,182700.000000,51325.000000,317.769741)}
{pt3dadd(169884.000000,182592.000000,51325.000000,332.213819)}
{pt3dadd(169608.000000,182496.000000,51300.000000,346.657896)}
{pt3dadd(169380.000000,182460.000000,51325.000000,363.990794)}
{pt3dadd(168864.000000,182424.000000,51400.000000,381.323691)}
{pt3dadd(168252.000000,182316.000000,51400.000000,398.656589)}
{pt3dadd(168084.000000,182208.000000,51075.000000,415.989486)}
{pt3dadd(167940.000000,182256.000000,50850.000000,384.212511)}
{pt3dadd(167700.000000,182256.000000,50775.000000,352.435536)}
{pt3dadd(167448.000000,182280.000000,50775.000000,320.658561)}
{pt3dadd(167064.000000,182232.000000,50625.000000,288.881586)}
{pt3dadd(166728.000000,182220.000000,50450.000000,277.326342)}

{create adhoc94}
{access adhoc94}
{connect adhoc94(1), adhoc93(0)}
{nseg = 1}
{strdef color color = "White"}
{pt3dclear()}
{pt3dadd(166728.000000,182220.000000,50450.000000,277.326342)}
{pt3dadd(166620.000000,181008.000000,50850.000000,200.612214)}
{pt3dadd(166644.000000,180864.000000,50900.000000,192.253370)}
{pt3dadd(166584.000000,180696.000000,50975.000000,183.894525)}
{pt3dadd(166620.000000,180576.000000,50925.000000,175.535680)}
{pt3dadd(166608.000000,180456.000000,51000.000000,167.176836)}
{pt3dadd(166464.000000,179964.000000,51000.000000,185.566288)}
{pt3dadd(166428.000000,179820.000000,51025.000000,203.955741)}
{pt3dadd(166548.000000,179676.000000,50975.000000,222.345193)}
{pt3dadd(166548.000000,179532.000000,51025.000000,240.734646)}
{pt3dadd(166572.000000,179376.000000,51125.000000,230.704038)}
{pt3dadd(166536.000000,179232.000000,51175.000000,220.673430)}
{pt3dadd(166500.000000,179088.000000,51225.000000,210.642822)}
{pt3dadd(166500.000000,178944.000000,51300.000000,200.612214)}
{pt3dadd(166536.000000,178788.000000,51250.000000,210.642822)}
{pt3dadd(166452.000000,178620.000000,51200.000000,220.673430)}
{pt3dadd(166488.000000,178488.000000,51325.000000,230.704038)}
{pt3dadd(166428.000000,178332.000000,51400.000000,240.734646)}
{pt3dadd(166344.000000,178164.000000,51425.000000,227.360502)}
{pt3dadd(166428.000000,178068.000000,51875.000000,213.986358)}
{pt3dadd(166860.000000,177768.000000,52025.000000,200.612214)}
{pt3dadd(166848.000000,177684.000000,52225.000000,116.095032)}

{create adhoc95}
{access adhoc95}
{connect adhoc95(1), adhoc93(0)}
{nseg = 1}
{strdef color color = "White"}
{pt3dclear()}
{pt3dadd(166728.000000,182220.000000,50450.000000,277.326342)}
{pt3dadd(166512.000000,182136.000000,50350.000000,116.095032)}
{pt3dadd(166344.000000,182448.000000,50325.000000,121.899785)}
{pt3dadd(166176.000000,182436.000000,50275.000000,127.704537)}
{pt3dadd(165912.000000,182736.000000,50200.000000,133.509289)}
{pt3dadd(165744.000000,182556.000000,50075.000000,139.314042)}
{pt3dadd(165300.000000,182964.000000,49850.000000,154.638585)}
{pt3dadd(165108.000000,182856.000000,49875.000000,169.963128)}
{pt3dadd(164988.000000,183072.000000,49750.000000,185.287671)}
{pt3dadd(164808.000000,183072.000000,49600.000000,200.612214)}
{pt3dadd(164676.000000,183348.000000,49350.000000,415.989486)}
{pt3dadd(164484.000000,183348.000000,49325.000000,288.881586)}

{create adhoc96}
{access adhoc96}
{connect adhoc96(1), adhoc5(0)}
{nseg = 1}
{strdef color color = "White"}
{pt3dclear()}
{pt3dadd(179988.000000,206316.000000,73175.000000,1490.565402)}
{pt3dadd(179796.000000,206604.000000,71750.000000,1035.114948)}
{pt3dadd(179616.000000,206832.000000,71800.000000,956.043666)}
{pt3dadd(179256.000000,207000.000000,71700.000000,876.972384)}
{pt3dadd(178740.000000,207192.000000,71500.000000,797.901102)}
{pt3dadd(178212.000000,207336.000000,71450.000000,718.829820)}
{pt3dadd(177924.000000,207504.000000,71500.000000,663.919209)}
{pt3dadd(177288.000000,207648.000000,71475.000000,609.008598)}
{pt3dadd(176592.000000,207924.000000,71450.000000,554.097987)}
{pt3dadd(175920.000000,208380.000000,71600.000000,499.187376)}
{pt3dadd(175164.000000,208572.000000,71800.000000,581.413536)}
{pt3dadd(174480.000000,208740.000000,71725.000000,663.639696)}
{pt3dadd(174084.000000,208788.000000,71875.000000,745.865856)}
{pt3dadd(173352.000000,209088.000000,71850.000000,828.092016)}
{pt3dadd(172356.000000,209520.000000,72250.000000,811.861398)}
{pt3dadd(171768.000000,209772.000000,72325.000000,795.630780)}
{pt3dadd(170448.000000,210468.000000,72575.000000,779.400162)}
{pt3dadd(169584.000000,210924.000000,72975.000000,763.169544)}
{pt3dadd(168888.000000,211344.000000,73125.000000,752.084613)}
{pt3dadd(168108.000000,211968.000000,73350.000000,740.999682)}
{pt3dadd(167232.000000,212820.000000,73775.000000,729.914751)}
{pt3dadd(166584.000000,213396.000000,74175.000000,718.829820)}
{pt3dadd(166356.000000,213168.000000,73900.000000,828.092016)}

{create adhoc97}
{access adhoc97}
{connect adhoc97(1), adhoc96(0)}
{nseg = 1}
{strdef color color = "White"}
{pt3dclear()}
{pt3dadd(166356.000000,213168.000000,73900.000000,828.092016)}
{pt3dadd(166200.000000,212388.000000,72600.000000,862.595802)}
{pt3dadd(165972.000000,212460.000000,72500.000000,796.703072)}
{pt3dadd(165708.000000,212508.000000,72325.000000,730.810341)}
{pt3dadd(165456.000000,212532.000000,72250.000000,664.917611)}
{pt3dadd(165144.000000,212556.000000,72175.000000,599.024880)}
{pt3dadd(164880.000000,212556.000000,72025.000000,599.024880)}
{pt3dadd(164544.000000,212688.000000,71925.000000,599.024880)}
{pt3dadd(164436.000000,212628.000000,72125.000000,240.734646)}

{create adhoc98}
{access adhoc98}
{connect adhoc98(1), adhoc97(0)}
{nseg = 1}
{strdef color color = "White"}
{pt3dclear()}
{pt3dadd(164436.000000,212628.000000,72125.000000,240.734646)}
{pt3dadd(164340.000000,211908.000000,72500.000000,346.657896)}
{pt3dadd(164124.000000,211620.000000,72550.000000,320.177083)}
{pt3dadd(163944.000000,211440.000000,72525.000000,293.696271)}
{pt3dadd(163932.000000,211284.000000,72500.000000,267.215459)}
{pt3dadd(163704.000000,210936.000000,72400.000000,240.734646)}
{pt3dadd(163728.000000,210720.000000,72300.000000,240.734646)}
{pt3dadd(163632.000000,210384.000000,72150.000000,240.734646)}
{pt3dadd(163476.000000,210000.000000,72125.000000,240.734646)}
{pt3dadd(163836.000000,209664.000000,72100.000000,240.734646)}
{pt3dadd(163908.000000,209412.000000,72075.000000,252.771381)}
{pt3dadd(163992.000000,209172.000000,72000.000000,264.808116)}
{pt3dadd(164136.000000,208872.000000,71950.000000,276.844851)}
{pt3dadd(164244.000000,208680.000000,71950.000000,288.881586)}
{pt3dadd(164232.000000,208524.000000,71975.000000,276.844851)}
{pt3dadd(164256.000000,208308.000000,71825.000000,264.808116)}
{pt3dadd(164388.000000,207972.000000,71575.000000,252.771381)}
{pt3dadd(164496.000000,207804.000000,71450.000000,240.734646)}
{pt3dadd(164580.000000,207396.000000,71225.000000,263.748884)}
{pt3dadd(164724.000000,207144.000000,71150.000000,286.763121)}
{pt3dadd(164772.000000,206928.000000,71100.000000,309.777359)}
{pt3dadd(164856.000000,206688.000000,71000.000000,332.791596)}
{pt3dadd(164940.000000,206376.000000,70750.000000,321.814093)}
{pt3dadd(165096.000000,206172.000000,70550.000000,310.836591)}
{pt3dadd(165228.000000,205920.000000,70450.000000,299.859089)}
{pt3dadd(165396.000000,205716.000000,70200.000000,288.881586)}
{pt3dadd(165504.000000,205536.000000,70100.000000,276.844851)}
{pt3dadd(165588.000000,205344.000000,70000.000000,264.808116)}
{pt3dadd(165672.000000,205152.000000,69800.000000,252.771381)}
{pt3dadd(165756.000000,204996.000000,69775.000000,240.734646)}
{pt3dadd(165756.000000,204804.000000,69625.000000,200.612214)}
{pt3dadd(165492.000000,204480.000000,69375.000000,200.612214)}

{create adhoc99}
{access adhoc99}
{connect adhoc99(1), adhoc97(0)}
{nseg = 1}
{strdef color color = "White"}
{pt3dclear()}
{pt3dadd(164436.000000,212628.000000,72125.000000,240.734646)}
{pt3dadd(164244.000000,212880.000000,71425.000000,499.187376)}
{pt3dadd(164004.000000,212868.000000,71425.000000,590.039483)}
{pt3dadd(163248.000000,213192.000000,70750.000000,680.891589)}
{pt3dadd(162888.000000,213540.000000,70250.000000,771.743696)}
{pt3dadd(162396.000000,214044.000000,69600.000000,862.595802)}
{pt3dadd(161916.000000,214092.000000,69600.000000,790.712811)}
{pt3dadd(161328.000000,214512.000000,68800.000000,718.829820)}
{pt3dadd(161256.000000,214512.000000,68725.000000,718.829820)}

{create adhoc100}
{access adhoc100}
{connect adhoc100(1), adhoc99(0)}
{nseg = 1}
{strdef color color = "White"}
{pt3dclear()}
{pt3dadd(161256.000000,214512.000000,68725.000000,718.829820)}
{pt3dadd(161256.000000,213180.000000,68325.000000,139.314042)}
{pt3dadd(161112.000000,212916.000000,68200.000000,164.669193)}
{pt3dadd(161052.000000,212604.000000,68125.000000,190.024344)}
{pt3dadd(161124.000000,212220.000000,68050.000000,215.379495)}
{pt3dadd(161088.000000,212040.000000,68100.000000,240.734646)}
{pt3dadd(161136.000000,211788.000000,68075.000000,256.783626)}
{pt3dadd(161136.000000,211524.000000,68075.000000,272.832606)}
{pt3dadd(161100.000000,211260.000000,68100.000000,288.881586)}
{pt3dadd(161148.000000,211056.000000,68100.000000,288.881586)}

{create adhoc101}
{access adhoc101}
{connect adhoc101(1), adhoc99(0)}
{nseg = 1}
{strdef color color = "White"}
{pt3dclear()}
{pt3dadd(161256.000000,214512.000000,68725.000000,718.829820)}
{pt3dadd(160860.000000,215220.000000,68300.000000,862.595802)}
{pt3dadd(160524.000000,215508.000000,67975.000000,790.712811)}
{pt3dadd(160200.000000,216072.000000,67750.000000,718.829820)}
{pt3dadd(160116.000000,214884.000000,67700.000000,499.187376)}

{create adhoc102}
{access adhoc102}
{connect adhoc102(1), adhoc101(0)}
{nseg = 1}
{strdef color color = "White"}
{pt3dclear()}
{pt3dadd(160116.000000,214884.000000,67700.000000,499.187376)}
{pt3dadd(159960.000000,214332.000000,66450.000000,479.219958)}
{pt3dadd(159768.000000,214248.000000,65875.000000,435.032604)}
{pt3dadd(159780.000000,214476.000000,65650.000000,390.845250)}
{pt3dadd(159744.000000,214440.000000,65400.000000,346.657896)}
{pt3dadd(159708.000000,214356.000000,65275.000000,346.657896)}

{create adhoc103}
{access adhoc103}
{connect adhoc103(1), adhoc102(0)}
{nseg = 1}
{strdef color color = "White"}
{pt3dclear()}
{pt3dadd(159708.000000,214356.000000,65275.000000,346.657896)}
{pt3dadd(159360.000000,215040.000000,65025.000000,415.989486)}
{pt3dadd(159036.000000,215316.000000,64700.000000,461.748335)}
{pt3dadd(159264.000000,215568.000000,64425.000000,507.507183)}
{pt3dadd(159264.000000,215508.000000,64150.000000,553.266031)}
{pt3dadd(159180.000000,215580.000000,63850.000000,599.024880)}
{pt3dadd(159000.000000,215724.000000,63350.000000,509.452321)}
{pt3dadd(158844.000000,215520.000000,62775.000000,419.879763)}
{pt3dadd(158112.000000,216168.000000,62425.000000,330.307205)}
{pt3dadd(157440.000000,216732.000000,61725.000000,240.734646)}
{pt3dadd(157032.000000,216900.000000,61375.000000,222.345193)}
{pt3dadd(156852.000000,216816.000000,61025.000000,203.955741)}
{pt3dadd(156876.000000,216756.000000,60875.000000,185.566288)}
{pt3dadd(157020.000000,216888.000000,60700.000000,167.176836)}
{pt3dadd(157392.000000,216972.000000,60425.000000,200.612214)}

{create adhoc104}
{access adhoc104}
{connect adhoc104(1), adhoc102(0)}
{nseg = 1}
{strdef color color = "White"}
{pt3dclear()}
{pt3dadd(159708.000000,214356.000000,65275.000000,346.657896)}
{pt3dadd(159612.000000,213696.000000,65150.000000,277.326324)}
{pt3dadd(159396.000000,213372.000000,64900.000000,268.178405)}
{pt3dadd(159120.000000,212700.000000,64750.000000,259.030485)}
{pt3dadd(159084.000000,212292.000000,64525.000000,249.882566)}
{pt3dadd(159048.000000,211860.000000,64175.000000,240.734646)}
{pt3dadd(159084.000000,211572.000000,63850.000000,267.215459)}
{pt3dadd(159180.000000,211164.000000,63500.000000,293.696271)}
{pt3dadd(159372.000000,210900.000000,63250.000000,320.177083)}
{pt3dadd(159420.000000,210924.000000,62900.000000,346.657896)}
{pt3dadd(159792.000000,211152.000000,62475.000000,273.635055)}
{pt3dadd(159816.000000,210888.000000,62075.000000,200.612214)}
{pt3dadd(159984.000000,210084.000000,61150.000000,346.657896)}

{create adhoc105}
{access adhoc105}
{connect adhoc105(1), adhoc101(0)}
{nseg = 1}
{strdef color color = "White"}
{pt3dclear()}
{pt3dadd(160116.000000,214884.000000,67700.000000,499.187376)}
{pt3dadd(159888.000000,217176.000000,67350.000000,718.829820)}
{pt3dadd(159888.000000,217632.000000,67150.000000,688.878585)}
{pt3dadd(159540.000000,218196.000000,67050.000000,658.927350)}
{pt3dadd(159372.000000,218592.000000,66950.000000,628.976115)}
{pt3dadd(158820.000000,219180.000000,66775.000000,599.024880)}
{pt3dadd(158208.000000,220380.000000,66775.000000,553.266031)}
{pt3dadd(157968.000000,220716.000000,66775.000000,507.507183)}
{pt3dadd(157764.000000,221388.000000,66325.000000,461.748335)}
{pt3dadd(157212.000000,222384.000000,66275.000000,415.989486)}
{pt3dadd(157236.000000,222672.000000,66150.000000,436.788958)}
{pt3dadd(156948.000000,223152.000000,66175.000000,457.588431)}
{pt3dadd(156492.000000,223764.000000,65875.000000,478.387903)}
{pt3dadd(156096.000000,224484.000000,65650.000000,499.187376)}
{pt3dadd(155736.000000,225456.000000,65025.000000,499.187376)}
{pt3dadd(155616.000000,225960.000000,64900.000000,499.187376)}
{pt3dadd(155280.000000,227244.000000,64500.000000,499.187376)}
{pt3dadd(155268.000000,228420.000000,63225.000000,499.187376)}
{pt3dadd(154872.000000,229476.000000,62800.000000,432.166851)}
{pt3dadd(154848.000000,230784.000000,61275.000000,365.146326)}
{pt3dadd(154812.000000,230928.000000,61350.000000,298.125801)}
{pt3dadd(154836.000000,231084.000000,61425.000000,231.105276)}
{pt3dadd(154824.000000,231252.000000,61475.000000,200.612214)}

{create adhoc106}
{access adhoc106}
{connect adhoc106(1), adhoc96(0)}
{nseg = 1}
{strdef color color = "White"}
{pt3dclear()}
{pt3dadd(166356.000000,213168.000000,73900.000000,828.092016)}
{pt3dadd(166164.000000,215112.000000,75350.000000,415.989486)}
{pt3dadd(165852.000000,215652.000000,75475.000000,455.758079)}
{pt3dadd(165408.000000,216552.000000,75700.000000,495.526671)}
{pt3dadd(165168.000000,217236.000000,75700.000000,535.295264)}
{pt3dadd(164856.000000,217176.000000,75800.000000,575.063856)}
{pt3dadd(164652.000000,217608.000000,75950.000000,581.054112)}
{pt3dadd(164412.000000,218352.000000,75775.000000,587.044368)}
{pt3dadd(164016.000000,218940.000000,75875.000000,593.034624)}
{pt3dadd(163752.000000,219636.000000,75525.000000,599.024880)}
{pt3dadd(163464.000000,220152.000000,75450.000000,621.787810)}
{pt3dadd(162828.000000,220932.000000,75375.000000,644.550741)}
{pt3dadd(162456.000000,221508.000000,75425.000000,667.313671)}
{pt3dadd(162000.000000,222468.000000,75375.000000,690.076602)}
{pt3dadd(161628.000000,223068.000000,75150.000000,697.264906)}
{pt3dadd(161400.000000,223836.000000,74800.000000,704.453211)}
{pt3dadd(161076.000000,224424.000000,74700.000000,711.641515)}
{pt3dadd(160920.000000,224916.000000,74600.000000,718.829820)}
{pt3dadd(160476.000000,225672.000000,74300.000000,688.878585)}
{pt3dadd(159888.000000,226056.000000,73750.000000,658.927350)}
{pt3dadd(159648.000000,226440.000000,73700.000000,628.976115)}
{pt3dadd(159264.000000,226908.000000,73675.000000,599.024880)}
{pt3dadd(158820.000000,227748.000000,73525.000000,509.452321)}
{pt3dadd(158688.000000,228348.000000,73450.000000,419.879763)}
{pt3dadd(158820.000000,229632.000000,73950.000000,330.307205)}
{pt3dadd(159084.000000,229872.000000,74275.000000,240.734646)}
{pt3dadd(158952.000000,230292.000000,74475.000000,222.345193)}
{pt3dadd(158940.000000,230520.000000,74675.000000,203.955741)}
{pt3dadd(158796.000000,230100.000000,74225.000000,185.566288)}
{pt3dadd(158796.000000,230592.000000,74250.000000,167.176836)}
{pt3dadd(158796.000000,231096.000000,74300.000000,175.535680)}
{pt3dadd(158784.000000,231276.000000,74325.000000,183.894525)}
{pt3dadd(158724.000000,231468.000000,74400.000000,192.253370)}
{pt3dadd(158520.000000,231744.000000,74500.000000,200.612214)}
{pt3dadd(158484.000000,232020.000000,74600.000000,200.612214)}
{pt3dadd(158400.000000,232224.000000,74675.000000,200.612214)}
{pt3dadd(158256.000000,232452.000000,74750.000000,200.612214)}
{pt3dadd(158256.000000,232716.000000,74800.000000,200.612214)}
{pt3dadd(158280.000000,232956.000000,75000.000000,244.746900)}
{pt3dadd(158388.000000,233064.000000,75350.000000,288.881586)}
{pt3dadd(158436.000000,233148.000000,75525.000000,116.095032)}
