# Supplementary material for: Full reconstruction of large lobula plate tangential cells in Drosophila from a 3D EM dataset
Source: PLoS One. 2018 Nov 28;13(11):e0207828. doi: 10.1371/journal.pone.0207828 (PMC6261601; doi:10.1371/journal.pone.0207828)
Supplement: S1 Dataset — (ZIP) [file pone.0207828.s001.zip › Diameter hoc/VS_VSL_preliminary/Old Diameters Mar13_VS_VSL_HS/VS1/2_14_791_sbeyer_002.059.hoc]

/* created with nml2hocm */

{create adhoc1}
{access adhoc1}
{nseg = 1}
{strdef color color = "White"}
{pt3dclear()}
{pt3dadd(150036.000000,134712.000000,182800.000000,2575.697112)}
{pt3dadd(150168.000000,134952.000000,182475.000000,2734.574256)}
{pt3dadd(150420.000000,135012.000000,181975.000000,2941.091541)}
{pt3dadd(150588.000000,135036.000000,181425.000000,3147.608826)}
{pt3dadd(150792.000000,135516.000000,180900.000000,3354.126111)}
{pt3dadd(151068.000000,135864.000000,180175.000000,3560.643396)}
{pt3dadd(151236.000000,136284.000000,179450.000000,3560.643396)}
{pt3dadd(151368.000000,136548.000000,178850.000000,3560.643396)}
{pt3dadd(151536.000000,136680.000000,178200.000000,3560.643396)}
{pt3dadd(151956.000000,136740.000000,177500.000000,3560.643396)}
{pt3dadd(151980.000000,136800.000000,176800.000000,3443.191654)}
{pt3dadd(152076.000000,137040.000000,176175.000000,3325.739913)}
{pt3dadd(151992.000000,137628.000000,175300.000000,3208.288172)}
{pt3dadd(152124.000000,138120.000000,174525.000000,3090.836430)}
{pt3dadd(153288.000000,138072.000000,173875.000000,3059.928041)}
{pt3dadd(153456.000000,138456.000000,173525.000000,3029.019651)}
{pt3dadd(153648.000000,138660.000000,172800.000000,2998.111261)}
{pt3dadd(153672.000000,139008.000000,172175.000000,2967.202872)}
{pt3dadd(153660.000000,139140.000000,171550.000000,2998.111261)}
{pt3dadd(153648.000000,139524.000000,170900.000000,3029.019651)}
{pt3dadd(153960.000000,139764.000000,170350.000000,3059.928041)}
{pt3dadd(153840.000000,140004.000000,169900.000000,3090.836430)}
{pt3dadd(153828.000000,140208.000000,169350.000000,3059.928112)}
{pt3dadd(153744.000000,140304.000000,168950.000000,3029.019795)}
{pt3dadd(154164.000000,140580.000000,168550.000000,2998.111477)}
{pt3dadd(154080.000000,140748.000000,168100.000000,2967.203160)}
{pt3dadd(153960.000000,140736.000000,167525.000000,2967.203160)}
{pt3dadd(153804.000000,140796.000000,166975.000000,2967.203160)}
{pt3dadd(153504.000000,141852.000000,166350.000000,2967.203160)}
{pt3dadd(153108.000000,142056.000000,165750.000000,2967.203160)}
{pt3dadd(152892.000000,142536.000000,165250.000000,2937.531146)}
{pt3dadd(152592.000000,142848.000000,164875.000000,2907.859131)}
{pt3dadd(152556.000000,143124.000000,164375.000000,2878.187116)}
{pt3dadd(152400.000000,143352.000000,163875.000000,2848.515102)}
{pt3dadd(151908.000000,143700.000000,162950.000000,2878.187116)}
{pt3dadd(151572.000000,144360.000000,162000.000000,2907.859131)}
{pt3dadd(151416.000000,144456.000000,161500.000000,2937.531146)}
{pt3dadd(151344.000000,144972.000000,161100.000000,2967.203160)}
{pt3dadd(151116.000000,145320.000000,160425.000000,3152.653272)}
{pt3dadd(151500.000000,145704.000000,159725.000000,3338.103384)}
{pt3dadd(151848.000000,146136.000000,159100.000000,3523.553496)}
{pt3dadd(152436.000000,146508.000000,158525.000000,3709.003608)}
{pt3dadd(152880.000000,146712.000000,157675.000000,3671.913555)}
{pt3dadd(152868.000000,146760.000000,156825.000000,3634.823502)}
{pt3dadd(153456.000000,146892.000000,155900.000000,3597.733449)}
{pt3dadd(153552.000000,146700.000000,155325.000000,3560.643396)}
{pt3dadd(153648.000000,146832.000000,154800.000000,3443.191654)}
{pt3dadd(153708.000000,146604.000000,154200.000000,3325.739913)}
{pt3dadd(153696.000000,146808.000000,153650.000000,3208.288172)}
{pt3dadd(153792.000000,146820.000000,153000.000000,3090.836430)}
{pt3dadd(154104.000000,147096.000000,152525.000000,2833.266739)}
{pt3dadd(153912.000000,147516.000000,152125.000000,2575.697049)}
{pt3dadd(154296.000000,147960.000000,151675.000000,2318.127358)}
{pt3dadd(154212.000000,148584.000000,151225.000000,2060.557668)}
{pt3dadd(154632.000000,148896.000000,150550.000000,1992.587863)}
{pt3dadd(155352.000000,149628.000000,149925.000000,1924.618059)}
{pt3dadd(155376.000000,150180.000000,149500.000000,1856.648255)}
{pt3dadd(155568.000000,151200.000000,148950.000000,1788.678450)}
{pt3dadd(155700.000000,151836.000000,148325.000000,1753.620322)}
{pt3dadd(155724.000000,152160.000000,148050.000000,1718.562195)}
{pt3dadd(155784.000000,152508.000000,148000.000000,1683.504068)}
{pt3dadd(155844.000000,153084.000000,147450.000000,1648.445940)}
{pt3dadd(156228.000000,153444.000000,146775.000000,1751.473872)}
{pt3dadd(156252.000000,154140.000000,146350.000000,1854.501804)}
{pt3dadd(156096.000000,154908.000000,145775.000000,1957.529736)}
{pt3dadd(156060.000000,155532.000000,144975.000000,2060.557668)}
{pt3dadd(156000.000000,156264.000000,144250.000000,1992.587863)}
{pt3dadd(156096.000000,156612.000000,143725.000000,1924.618059)}
{pt3dadd(156156.000000,156960.000000,143250.000000,1856.648255)}
{pt3dadd(155856.000000,157224.000000,142700.000000,1788.678450)}
{pt3dadd(156132.000000,157284.000000,142250.000000,1770.791643)}
{pt3dadd(155964.000000,157632.000000,141800.000000,1752.904836)}
{pt3dadd(156204.000000,157056.000000,141350.000000,1735.018029)}
{pt3dadd(156336.000000,157092.000000,141050.000000,1717.131222)}
{pt3dadd(157032.000000,156600.000000,140325.000000,1494.871420)}
{pt3dadd(157728.000000,156552.000000,139800.000000,1272.611619)}
{pt3dadd(158424.000000,156612.000000,139200.000000,1050.351817)}
{pt3dadd(158412.000000,156744.000000,138725.000000,828.092016)}
{pt3dadd(158400.000000,156612.000000,138300.000000,931.603482)}
{pt3dadd(157500.000000,156960.000000,137775.000000,1035.114948)}
{pt3dadd(157344.000000,157164.000000,137425.000000,1138.626414)}
{pt3dadd(157524.000000,157260.000000,136850.000000,1242.137880)}
{pt3dadd(157092.000000,157956.000000,136500.000000,1104.122561)}
{pt3dadd(157380.000000,158340.000000,136075.000000,966.107241)}
{pt3dadd(157896.000000,159432.000000,135400.000000,828.091922)}
{pt3dadd(157740.000000,159696.000000,135375.000000,690.076602)}
{pt3dadd(157704.000000,160032.000000,135225.000000,733.206402)}
{pt3dadd(157692.000000,160284.000000,135025.000000,776.336202)}
{pt3dadd(157788.000000,160476.000000,134775.000000,819.466002)}
{pt3dadd(157956.000000,160788.000000,134525.000000,862.595802)}
{pt3dadd(158100.000000,160956.000000,134500.000000,957.481322)}
{pt3dadd(158088.000000,161124.000000,134250.000000,1052.366841)}
{pt3dadd(158340.000000,161460.000000,134075.000000,1147.252361)}
{pt3dadd(158592.000000,161724.000000,133950.000000,1242.137880)}
{pt3dadd(158760.000000,161952.000000,133825.000000,1190.382147)}
{pt3dadd(158928.000000,162168.000000,133625.000000,1138.626414)}
{pt3dadd(159672.000000,162396.000000,133575.000000,1086.870681)}
{pt3dadd(159924.000000,162648.000000,133425.000000,1035.114948)}
{pt3dadd(160104.000000,162864.000000,133275.000000,1024.763801)}
{pt3dadd(160284.000000,163008.000000,133225.000000,1014.412653)}
{pt3dadd(160488.000000,163128.000000,133200.000000,1004.061506)}
{pt3dadd(160752.000000,163608.000000,133300.000000,993.710358)}
{pt3dadd(160980.000000,163680.000000,133250.000000,960.931719)}
{pt3dadd(161172.000000,163644.000000,133225.000000,928.153080)}
{pt3dadd(161448.000000,163992.000000,133225.000000,895.374441)}
{pt3dadd(161844.000000,164148.000000,133100.000000,862.595802)}
{pt3dadd(162144.000000,164364.000000,132800.000000,885.437325)}
{pt3dadd(162468.000000,164532.000000,132800.000000,908.278848)}
{pt3dadd(162816.000000,164796.000000,132525.000000,931.120371)}
{pt3dadd(163068.000000,165108.000000,132350.000000,953.961894)}
{pt3dadd(163392.000000,165444.000000,132225.000000,922.494425)}
{pt3dadd(163584.000000,165756.000000,132175.000000,891.026955)}
{pt3dadd(163800.000000,166104.000000,132100.000000,859.559485)}
{pt3dadd(163992.000000,166380.000000,131975.000000,828.092016)}
{pt3dadd(164184.000000,166680.000000,131825.000000,828.092016)}
{pt3dadd(164328.000000,166956.000000,131725.000000,828.092016)}
{pt3dadd(164448.000000,167208.000000,131650.000000,828.092016)}
{pt3dadd(164724.000000,167628.000000,131400.000000,828.092016)}
{pt3dadd(165024.000000,167916.000000,131175.000000,770.825232)}
{pt3dadd(165312.000000,168468.000000,131000.000000,713.558448)}
{pt3dadd(165468.000000,168660.000000,130750.000000,656.291664)}
{pt3dadd(166752.000000,169788.000000,130225.000000,599.024880)}
{pt3dadd(167328.000000,170520.000000,129750.000000,587.283979)}
{pt3dadd(167424.000000,171132.000000,129175.000000,575.543079)}
{pt3dadd(168636.000000,172116.000000,128575.000000,563.802178)}
{pt3dadd(169032.000000,172776.000000,128125.000000,552.061278)}
{pt3dadd(169920.000000,173532.000000,127650.000000,563.802178)}
{pt3dadd(170172.000000,174060.000000,127200.000000,575.543079)}
{pt3dadd(170316.000000,174252.000000,127175.000000,587.283979)}
{pt3dadd(170712.000000,174516.000000,126900.000000,599.024880)}
{pt3dadd(171132.000000,174864.000000,126725.000000,628.976115)}
{pt3dadd(171300.000000,175080.000000,126625.000000,658.927350)}
{pt3dadd(171396.000000,175332.000000,126575.000000,688.878585)}
{pt3dadd(171588.000000,175572.000000,126450.000000,718.829820)}
{pt3dadd(171780.000000,175836.000000,126375.000000,754.771316)}
{pt3dadd(172056.000000,176052.000000,126200.000000,790.712811)}
{pt3dadd(172044.000000,176256.000000,126075.000000,826.654307)}
{pt3dadd(172116.000000,176496.000000,125975.000000,862.595802)}
{pt3dadd(172464.000000,176796.000000,125775.000000,826.654307)}
{pt3dadd(172716.000000,177048.000000,125625.000000,790.712811)}
{pt3dadd(172812.000000,177348.000000,125325.000000,754.771316)}
{pt3dadd(172836.000000,177612.000000,125050.000000,718.829820)}
{pt3dadd(173112.000000,177900.000000,124800.000000,754.771316)}
{pt3dadd(173328.000000,178176.000000,124675.000000,790.712811)}
{pt3dadd(173520.000000,178464.000000,124575.000000,826.654307)}
{pt3dadd(173688.000000,178704.000000,124450.000000,862.595802)}
{pt3dadd(173904.000000,178980.000000,124250.000000,819.466020)}
{pt3dadd(174324.000000,179244.000000,124200.000000,776.336238)}
{pt3dadd(174516.000000,179316.000000,124200.000000,733.206456)}
{pt3dadd(174852.000000,179688.000000,124125.000000,690.076674)}
{pt3dadd(175056.000000,179880.000000,124000.000000,667.313725)}
{pt3dadd(175296.000000,180252.000000,123850.000000,644.550777)}
{pt3dadd(175488.000000,180444.000000,123725.000000,621.787828)}
{pt3dadd(175728.000000,180612.000000,123625.000000,599.024880)}
{pt3dadd(175896.000000,180756.000000,123625.000000,664.917611)}
{pt3dadd(176100.000000,181008.000000,123450.000000,730.810341)}
{pt3dadd(176292.000000,181260.000000,123375.000000,796.703072)}
{pt3dadd(176532.000000,181452.000000,123400.000000,862.595802)}
{pt3dadd(176772.000000,181548.000000,123225.000000,853.969838)}
{pt3dadd(177036.000000,181824.000000,123075.000000,845.343873)}
{pt3dadd(177312.000000,182016.000000,123000.000000,836.717909)}
{pt3dadd(177516.000000,182136.000000,122925.000000,828.091944)}
{pt3dadd(177768.000000,182328.000000,122900.000000,836.717909)}
{pt3dadd(177996.000000,182544.000000,122875.000000,845.343873)}
{pt3dadd(178272.000000,182616.000000,122725.000000,853.969838)}
{pt3dadd(178524.000000,182808.000000,122575.000000,862.595802)}
{pt3dadd(178812.000000,183108.000000,122500.000000,853.969856)}
{pt3dadd(179052.000000,183324.000000,122400.000000,845.343909)}
{pt3dadd(179244.000000,183540.000000,122350.000000,836.717962)}
{pt3dadd(179460.000000,183636.000000,122225.000000,828.092016)}
{pt3dadd(179688.000000,183756.000000,122150.000000,800.776467)}
{pt3dadd(179904.000000,183900.000000,122100.000000,773.460918)}
{pt3dadd(180108.000000,183540.000000,121900.000000,746.145369)}
{pt3dadd(180576.000000,184392.000000,121575.000000,718.829820)}
{pt3dadd(181236.000000,185268.000000,121100.000000,754.771316)}
{pt3dadd(181608.000000,185772.000000,120725.000000,790.712811)}
{pt3dadd(182004.000000,186588.000000,120250.000000,826.654307)}
{pt3dadd(182856.000000,187236.000000,119750.000000,862.595802)}
{pt3dadd(183108.000000,187992.000000,119300.000000,853.969838)}
{pt3dadd(183360.000000,188412.000000,118950.000000,845.343873)}
{pt3dadd(183684.000000,188940.000000,118525.000000,836.717909)}
{pt3dadd(184092.000000,189516.000000,118050.000000,828.091944)}
{pt3dadd(184512.000000,190020.000000,117750.000000,879.847695)}
{pt3dadd(184812.000000,190284.000000,117350.000000,931.603446)}
{pt3dadd(185112.000000,190476.000000,117050.000000,983.359197)}
{pt3dadd(185424.000000,191148.000000,116700.000000,1035.114948)}
{pt3dadd(185748.000000,191544.000000,116400.000000,1134.071928)}
{pt3dadd(186060.000000,191736.000000,116025.000000,1233.028908)}
{pt3dadd(186276.000000,192108.000000,115675.000000,1331.985888)}
{pt3dadd(186408.000000,192300.000000,115375.000000,1430.942868)}
{pt3dadd(186504.000000,192600.000000,114975.000000,1445.848502)}
{pt3dadd(186552.000000,192672.000000,114600.000000,1460.754135)}
{pt3dadd(186732.000000,192792.000000,114275.000000,1475.659769)}
{pt3dadd(186924.000000,193164.000000,113875.000000,1490.565402)}
{pt3dadd(187296.000000,193584.000000,113450.000000,1490.565402)}
{pt3dadd(187476.000000,193980.000000,113050.000000,1490.565402)}
{pt3dadd(187548.000000,194280.000000,112600.000000,1490.565402)}
{pt3dadd(187908.000000,194532.000000,112300.000000,1490.565402)}
{pt3dadd(188004.000000,194880.000000,111950.000000,1547.206857)}
{pt3dadd(188280.000000,195072.000000,111550.000000,1603.848312)}
{pt3dadd(188352.000000,195396.000000,111200.000000,1660.489767)}
{pt3dadd(188496.000000,195564.000000,110875.000000,1717.131222)}
{pt3dadd(188544.000000,195708.000000,110575.000000,1802.987834)}
{pt3dadd(188664.000000,196128.000000,110225.000000,1888.844445)}
{pt3dadd(188808.000000,196452.000000,109850.000000,1974.701057)}
{pt3dadd(188952.000000,196668.000000,109575.000000,2060.557668)}
{pt3dadd(188976.000000,196872.000000,109150.000000,2163.585564)}
{pt3dadd(189120.000000,196992.000000,108775.000000,2266.613460)}
{pt3dadd(189192.000000,197160.000000,108450.000000,2369.641356)}
{pt3dadd(189168.000000,197208.000000,108125.000000,2472.669252)}
{pt3dadd(189132.000000,197484.000000,107825.000000,18.000000)}
{pt3dadd(189348.000000,197748.000000,107400.000000,870.565704)}
{pt3dadd(189504.000000,197940.000000,106900.000000,1723.131408)}
{pt3dadd(189588.000000,198048.000000,106550.000000,2575.697112)}
{pt3dadd(189516.000000,198288.000000,106125.000000,2575.697112)}
{pt3dadd(189684.000000,198456.000000,105500.000000,2575.697112)}
{pt3dadd(189744.000000,198648.000000,105000.000000,2575.697112)}
{pt3dadd(189852.000000,199152.000000,104475.000000,2575.697112)}
{pt3dadd(189960.000000,199320.000000,104025.000000,2575.697112)}
{pt3dadd(190272.000000,199740.000000,103450.000000,2575.697112)}
{pt3dadd(190380.000000,200244.000000,102750.000000,2575.697112)}
{pt3dadd(190620.000000,200568.000000,102250.000000,2575.697112)}
{pt3dadd(190740.000000,200916.000000,101700.000000,2575.697112)}
{pt3dadd(190836.000000,200976.000000,101225.000000,2575.697112)}
{pt3dadd(191316.000000,201168.000000,100700.000000,2575.697112)}
{pt3dadd(191376.000000,200964.000000,100075.000000,2575.697112)}
{pt3dadd(191616.000000,200976.000000,99600.000000,2704.481942)}
{pt3dadd(191652.000000,201036.000000,99050.000000,2833.266771)}
{pt3dadd(191760.000000,201072.000000,98475.000000,2962.051600)}
{pt3dadd(192000.000000,201000.000000,98000.000000,3090.836430)}
{pt3dadd(192504.000000,201060.000000,97475.000000,3090.836430)}
{pt3dadd(192564.000000,200988.000000,97050.000000,3090.836430)}
{pt3dadd(192816.000000,200808.000000,96475.000000,3090.836430)}
{pt3dadd(192900.000000,200688.000000,95900.000000,3090.836430)}
{pt3dadd(193236.000000,200700.000000,95350.000000,3245.378224)}
{pt3dadd(193584.000000,200712.000000,94750.000000,3399.920019)}
{pt3dadd(193440.000000,200724.000000,94175.000000,3554.461814)}
{pt3dadd(193416.000000,200904.000000,93675.000000,3709.003608)}
{pt3dadd(193368.000000,200940.000000,93025.000000,3709.003608)}
{pt3dadd(193248.000000,200916.000000,92550.000000,3709.003608)}
{pt3dadd(193044.000000,200952.000000,92000.000000,3709.003608)}
{pt3dadd(192948.000000,201012.000000,91350.000000,3709.003608)}
{pt3dadd(192924.000000,201024.000000,90800.000000,3554.461814)}
{pt3dadd(192780.000000,201000.000000,90100.000000,3399.920019)}
{pt3dadd(192708.000000,201084.000000,89400.000000,3245.378224)}
{pt3dadd(192684.000000,200784.000000,88700.000000,3090.836430)}
{pt3dadd(192756.000000,201000.000000,88200.000000,3059.928041)}
{pt3dadd(192768.000000,200928.000000,87650.000000,3029.019651)}
{pt3dadd(192432.000000,201192.000000,87150.000000,2998.111261)}
{pt3dadd(192516.000000,201288.000000,86600.000000,2967.202872)}
{pt3dadd(192312.000000,201396.000000,86100.000000,2869.326432)}
{pt3dadd(192288.000000,201192.000000,85550.000000,2771.449992)}
{pt3dadd(192168.000000,201228.000000,85000.000000,2673.573552)}
{pt3dadd(192048.000000,201240.000000,84475.000000,2575.697112)}
{pt3dadd(191928.000000,201096.000000,83975.000000,2575.697112)}
{pt3dadd(191580.000000,201132.000000,83300.000000,2575.697112)}
{pt3dadd(191376.000000,200928.000000,82875.000000,2575.697112)}
{pt3dadd(191196.000000,201216.000000,82300.000000,2575.697112)}
{pt3dadd(191016.000000,201504.000000,81925.000000,2704.481942)}
{pt3dadd(190788.000000,201480.000000,81425.000000,2833.266771)}
{pt3dadd(190716.000000,201492.000000,80925.000000,2962.051600)}
{pt3dadd(190440.000000,201504.000000,80425.000000,3090.836430)}
{pt3dadd(190188.000000,201420.000000,79875.000000,3090.836430)}
{pt3dadd(189984.000000,201456.000000,79250.000000,3090.836430)}
{pt3dadd(189912.000000,201312.000000,78625.000000,3090.836430)}
{pt3dadd(189732.000000,201132.000000,78100.000000,3090.836430)}
{pt3dadd(189744.000000,200988.000000,77475.000000,3090.836430)}
{pt3dadd(189528.000000,201048.000000,76925.000000,3090.836430)}
{pt3dadd(189192.000000,200928.000000,76300.000000,3090.836430)}
{pt3dadd(188736.000000,200880.000000,75650.000000,3090.836430)}
{pt3dadd(188688.000000,201096.000000,75125.000000,3030.256098)}
{pt3dadd(188664.000000,200820.000000,74875.000000,2969.675766)}
{pt3dadd(188052.000000,201036.000000,74500.000000,2909.095434)}
{pt3dadd(187752.000000,201180.000000,73875.000000,2848.515102)}
{pt3dadd(187296.000000,201300.000000,73475.000000,2712.106107)}
{pt3dadd(187572.000000,200952.000000,72925.000000,2575.697112)}
{pt3dadd(187260.000000,200856.000000,72475.000000,2575.697112)}

{create adhoc2}
{access adhoc2}
{connect adhoc2(1), adhoc1(0)}
{nseg = 1}
{strdef color color = "White"}
{pt3dclear()}
{pt3dadd(187260.000000,200856.000000,72475.000000,2575.697112)}
{pt3dadd(180348.000000,206460.000000,72275.000000,1788.678450)}
{pt3dadd(180120.000000,206484.000000,72325.000000,1717.131222)}

{create adhoc3}
{access adhoc3}
{connect adhoc3(1), adhoc2(0)}
{nseg = 1}
{strdef color color = "White"}
{pt3dclear()}
{pt3dadd(180120.000000,206484.000000,72325.000000,1717.131222)}
{pt3dadd(180180.000000,206496.000000,74200.000000,1242.137880)}
{pt3dadd(180132.000000,206724.000000,74650.000000,1190.382147)}
{pt3dadd(179868.000000,206904.000000,74900.000000,1138.626414)}
{pt3dadd(179700.000000,207036.000000,75050.000000,1086.870681)}
{pt3dadd(179388.000000,207252.000000,75250.000000,1035.114948)}
{pt3dadd(179124.000000,207432.000000,75450.000000,991.985162)}
{pt3dadd(179076.000000,207552.000000,75500.000000,948.855375)}
{pt3dadd(178920.000000,207696.000000,75675.000000,905.725589)}
{pt3dadd(178608.000000,207936.000000,75850.000000,862.595802)}
{pt3dadd(178488.000000,208080.000000,76025.000000,812.565252)}
{pt3dadd(178176.000000,208224.000000,76175.000000,762.534702)}
{pt3dadd(177984.000000,208392.000000,76350.000000,712.504152)}
{pt3dadd(177828.000000,208548.000000,76500.000000,662.473602)}
{pt3dadd(177588.000000,208692.000000,76625.000000,640.621165)}
{pt3dadd(177324.000000,208836.000000,76775.000000,618.768729)}
{pt3dadd(177168.000000,208968.000000,76925.000000,596.916293)}
{pt3dadd(176880.000000,209100.000000,77075.000000,575.063856)}
{pt3dadd(176724.000000,209232.000000,77175.000000,581.054112)}
{pt3dadd(176508.000000,209364.000000,77375.000000,587.044368)}
{pt3dadd(176304.000000,209580.000000,77475.000000,593.034624)}
{pt3dadd(176136.000000,209604.000000,77575.000000,599.024880)}
{pt3dadd(175944.000000,209820.000000,77725.000000,628.976115)}
{pt3dadd(175728.000000,209880.000000,77825.000000,658.927350)}
{pt3dadd(175488.000000,210036.000000,77975.000000,688.878585)}
{pt3dadd(175284.000000,210096.000000,78125.000000,718.829820)}
{pt3dadd(175104.000000,210156.000000,78175.000000,718.829820)}
{pt3dadd(174864.000000,210312.000000,78225.000000,718.829820)}
{pt3dadd(174660.000000,210384.000000,78325.000000,718.829820)}
{pt3dadd(174480.000000,210492.000000,78475.000000,718.829820)}
{pt3dadd(174276.000000,210528.000000,78500.000000,718.829820)}
{pt3dadd(174096.000000,210528.000000,78600.000000,718.829820)}
{pt3dadd(173964.000000,210600.000000,78675.000000,718.829820)}
{pt3dadd(173832.000000,210636.000000,78750.000000,718.829820)}
{pt3dadd(173664.000000,210696.000000,78850.000000,718.829820)}
{pt3dadd(173460.000000,210756.000000,78950.000000,718.829820)}
{pt3dadd(173292.000000,210828.000000,78975.000000,718.829820)}
{pt3dadd(173160.000000,210816.000000,79000.000000,718.829820)}
{pt3dadd(172980.000000,210876.000000,78975.000000,718.829820)}
{pt3dadd(172824.000000,210936.000000,79050.000000,718.829820)}
{pt3dadd(172644.000000,210900.000000,79100.000000,718.829820)}
{pt3dadd(172476.000000,210972.000000,79175.000000,718.829820)}
{pt3dadd(172260.000000,211104.000000,79275.000000,718.829820)}
{pt3dadd(172104.000000,211104.000000,79350.000000,718.829820)}
{pt3dadd(172260.000000,211332.000000,79325.000000,718.829820)}
{pt3dadd(172260.000000,211512.000000,79375.000000,718.829820)}
{pt3dadd(171816.000000,211656.000000,79550.000000,718.829820)}
{pt3dadd(171708.000000,211788.000000,79575.000000,718.829820)}
{pt3dadd(171540.000000,211968.000000,79700.000000,718.829820)}
{pt3dadd(171372.000000,212028.000000,79825.000000,718.829820)}
{pt3dadd(171372.000000,212208.000000,79850.000000,688.878585)}
{pt3dadd(171228.000000,212352.000000,79950.000000,658.927350)}
{pt3dadd(171120.000000,212568.000000,79975.000000,628.976115)}
{pt3dadd(170928.000000,212772.000000,80050.000000,599.024880)}
{pt3dadd(170880.000000,212952.000000,80200.000000,599.024880)}
{pt3dadd(170760.000000,213144.000000,80300.000000,599.024880)}
{pt3dadd(170760.000000,213312.000000,80425.000000,599.024880)}
{pt3dadd(170616.000000,213564.000000,80575.000000,599.024880)}
{pt3dadd(170472.000000,213744.000000,80575.000000,593.034624)}
{pt3dadd(170400.000000,213960.000000,80700.000000,587.044368)}
{pt3dadd(170328.000000,214140.000000,80775.000000,581.054112)}
{pt3dadd(170292.000000,214332.000000,80950.000000,575.063856)}
{pt3dadd(170136.000000,214512.000000,81050.000000,581.054112)}
{pt3dadd(170052.000000,214680.000000,81125.000000,587.044368)}
{pt3dadd(170016.000000,214836.000000,81125.000000,593.034624)}
{pt3dadd(170004.000000,215028.000000,81200.000000,599.024880)}
{pt3dadd(170040.000000,215268.000000,81300.000000,574.065504)}
{pt3dadd(170004.000000,215460.000000,81325.000000,549.106128)}
{pt3dadd(169992.000000,215640.000000,81350.000000,524.146752)}
{pt3dadd(169956.000000,215808.000000,81350.000000,499.187376)}
{pt3dadd(169872.000000,216000.000000,81425.000000,499.187376)}
{pt3dadd(169860.000000,216228.000000,81475.000000,499.187376)}
{pt3dadd(169452.000000,216420.000000,81625.000000,499.187376)}
{pt3dadd(169260.000000,216588.000000,81625.000000,499.187376)}
{pt3dadd(169416.000000,216804.000000,81775.000000,478.387903)}
{pt3dadd(169452.000000,217044.000000,81925.000000,457.588431)}
{pt3dadd(169524.000000,217308.000000,82100.000000,436.788958)}
{pt3dadd(169356.000000,217524.000000,82100.000000,415.989486)}
{pt3dadd(169428.000000,217752.000000,82275.000000,415.989486)}
{pt3dadd(169224.000000,218352.000000,82475.000000,415.989486)}
{pt3dadd(169164.000000,218688.000000,82650.000000,415.989486)}
{pt3dadd(168780.000000,219432.000000,82850.000000,415.989486)}
{pt3dadd(168720.000000,219840.000000,83050.000000,398.656589)}
{pt3dadd(168492.000000,220020.000000,82875.000000,381.323691)}
{pt3dadd(168384.000000,220200.000000,82925.000000,363.990794)}
{pt3dadd(168276.000000,220416.000000,82950.000000,346.657896)}
{pt3dadd(168132.000000,220572.000000,83050.000000,346.657896)}
{pt3dadd(168156.000000,220728.000000,83050.000000,346.657896)}
{pt3dadd(168084.000000,220956.000000,83250.000000,346.657896)}
{pt3dadd(167964.000000,221172.000000,83175.000000,346.657896)}
{pt3dadd(167856.000000,221388.000000,83300.000000,346.657896)}
{pt3dadd(167784.000000,221544.000000,83400.000000,346.657896)}
{pt3dadd(167748.000000,221772.000000,83375.000000,346.657896)}
{pt3dadd(167628.000000,221976.000000,83450.000000,346.657896)}
{pt3dadd(167556.000000,222180.000000,83450.000000,346.657896)}

{create adhoc4}
{access adhoc4}
{connect adhoc4(1), adhoc3(0)}
{nseg = 1}
{strdef color color = "White"}
{pt3dclear()}
{pt3dadd(167556.000000,222180.000000,83450.000000,346.657896)}
{pt3dadd(168600.000000,222192.000000,84225.000000,67.184640)}
{pt3dadd(168744.000000,222264.000000,84450.000000,74.574945)}
{pt3dadd(168624.000000,222408.000000,84375.000000,81.965250)}
{pt3dadd(168648.000000,222516.000000,84450.000000,89.355555)}
{pt3dadd(168852.000000,222216.000000,84600.000000,96.745860)}
{pt3dadd(168972.000000,222240.000000,84725.000000,55.987200)}

{create adhoc5}
{access adhoc5}
{connect adhoc5(1), adhoc3(0)}
{nseg = 1}
{strdef color color = "White"}
{pt3dclear()}
{pt3dadd(167556.000000,222180.000000,83450.000000,346.657896)}
{pt3dadd(167448.000000,222312.000000,83400.000000,346.657896)}
{pt3dadd(167412.000000,222516.000000,83425.000000,379.798393)}
{pt3dadd(167292.000000,222684.000000,83425.000000,412.938891)}
{pt3dadd(167136.000000,222912.000000,83400.000000,446.079388)}
{pt3dadd(167100.000000,223056.000000,83475.000000,479.219886)}
{pt3dadd(166980.000000,223224.000000,83375.000000,463.412286)}
{pt3dadd(166836.000000,223404.000000,83325.000000,447.604686)}
{pt3dadd(166728.000000,223596.000000,83350.000000,431.797086)}
{pt3dadd(166488.000000,223764.000000,83400.000000,415.989486)}
{pt3dadd(166368.000000,223908.000000,83425.000000,398.656589)}
{pt3dadd(166320.000000,224064.000000,83350.000000,381.323691)}
{pt3dadd(166152.000000,224220.000000,83325.000000,363.990794)}
{pt3dadd(165984.000000,224472.000000,83575.000000,346.657896)}
{pt3dadd(165756.000000,224652.000000,83575.000000,332.213819)}
{pt3dadd(165852.000000,224832.000000,83600.000000,317.769741)}
{pt3dadd(165732.000000,224988.000000,83625.000000,303.325664)}
{pt3dadd(165660.000000,225132.000000,83700.000000,288.881586)}
{pt3dadd(165648.000000,225300.000000,83775.000000,303.325664)}
{pt3dadd(165420.000000,225480.000000,83900.000000,317.769741)}
{pt3dadd(165384.000000,225612.000000,83975.000000,332.213819)}
{pt3dadd(165264.000000,225744.000000,83875.000000,346.657896)}
{pt3dadd(165156.000000,225912.000000,83900.000000,346.657896)}
{pt3dadd(165036.000000,226080.000000,83875.000000,346.657896)}
{pt3dadd(165000.000000,226260.000000,83900.000000,346.657896)}
{pt3dadd(165060.000000,226392.000000,83875.000000,346.657896)}
{pt3dadd(164976.000000,226524.000000,84000.000000,363.990794)}
{pt3dadd(165012.000000,226692.000000,83975.000000,381.323691)}
{pt3dadd(165072.000000,226848.000000,83950.000000,398.656589)}
{pt3dadd(165024.000000,227028.000000,83800.000000,415.989486)}
{pt3dadd(164940.000000,227268.000000,83825.000000,436.788958)}
{pt3dadd(164856.000000,227484.000000,83850.000000,457.588431)}
{pt3dadd(164784.000000,227640.000000,83775.000000,478.387903)}
{pt3dadd(164616.000000,227820.000000,83750.000000,499.187376)}
{pt3dadd(164688.000000,228012.000000,84025.000000,409.219042)}
{pt3dadd(164472.000000,227724.000000,83625.000000,319.250709)}
{pt3dadd(164340.000000,227820.000000,83550.000000,229.282376)}
{pt3dadd(164244.000000,227844.000000,83500.000000,139.314042)}
{pt3dadd(164112.000000,227868.000000,83450.000000,208.482903)}
{pt3dadd(164148.000000,228228.000000,83225.000000,277.651764)}
{pt3dadd(164004.000000,228384.000000,83100.000000,346.820625)}
{pt3dadd(163968.000000,228504.000000,83150.000000,415.989486)}
{pt3dadd(163932.000000,228648.000000,83125.000000,398.656589)}
{pt3dadd(163932.000000,228792.000000,83175.000000,381.323691)}
{pt3dadd(163824.000000,228924.000000,83200.000000,363.990794)}
{pt3dadd(163788.000000,229092.000000,83100.000000,346.657896)}
{pt3dadd(163776.000000,229248.000000,82950.000000,319.479912)}
{pt3dadd(163692.000000,229368.000000,82975.000000,266.233248)}

{create adhoc6}
{access adhoc6}
{connect adhoc6(1), adhoc2(0)}
{nseg = 1}
{strdef color color = "White"}
{pt3dclear()}
{pt3dadd(180120.000000,206484.000000,72325.000000,1717.131222)}
{pt3dadd(179892.000000,206460.000000,72000.000000,993.710358)}
{pt3dadd(179628.000000,206748.000000,71875.000000,960.931719)}
{pt3dadd(179412.000000,206904.000000,71750.000000,928.153080)}
{pt3dadd(179208.000000,206940.000000,71850.000000,895.374441)}
{pt3dadd(179028.000000,207024.000000,71750.000000,862.595802)}
{pt3dadd(178860.000000,207132.000000,71625.000000,862.595802)}
{pt3dadd(178680.000000,207216.000000,71500.000000,862.595802)}
{pt3dadd(178440.000000,207228.000000,71500.000000,862.595802)}
{pt3dadd(178284.000000,207336.000000,71525.000000,862.595802)}
{pt3dadd(178032.000000,207444.000000,71425.000000,862.595802)}
{pt3dadd(177780.000000,207504.000000,71250.000000,862.595802)}
{pt3dadd(177564.000000,207708.000000,71300.000000,862.595802)}
{pt3dadd(177420.000000,207720.000000,71375.000000,862.595802)}
{pt3dadd(177228.000000,207756.000000,71375.000000,826.654307)}
{pt3dadd(177024.000000,207816.000000,71400.000000,790.712811)}
{pt3dadd(176832.000000,207900.000000,71425.000000,754.771316)}
{pt3dadd(176580.000000,208164.000000,71450.000000,718.829820)}
{pt3dadd(176412.000000,208044.000000,71450.000000,671.617089)}
{pt3dadd(176136.000000,208224.000000,71450.000000,624.404358)}
{pt3dadd(175980.000000,208464.000000,71600.000000,577.191627)}
{pt3dadd(175704.000000,208440.000000,71575.000000,529.978896)}
{pt3dadd(175584.000000,208416.000000,71625.000000,501.481543)}
{pt3dadd(175416.000000,208320.000000,71650.000000,472.984191)}
{pt3dadd(175248.000000,208380.000000,71600.000000,444.486839)}
{pt3dadd(175044.000000,208416.000000,71675.000000,415.989486)}
{pt3dadd(174840.000000,208500.000000,71700.000000,436.788958)}
{pt3dadd(174636.000000,208560.000000,71700.000000,457.588431)}
{pt3dadd(174420.000000,208572.000000,71725.000000,478.387903)}
{pt3dadd(174252.000000,208704.000000,71750.000000,499.187376)}
{pt3dadd(173964.000000,208860.000000,71925.000000,590.039483)}
{pt3dadd(173760.000000,208944.000000,72000.000000,680.891589)}
{pt3dadd(173496.000000,209028.000000,72025.000000,771.743696)}
{pt3dadd(173280.000000,209088.000000,72200.000000,862.595802)}
{pt3dadd(173028.000000,209196.000000,72300.000000,862.595802)}
{pt3dadd(172752.000000,209304.000000,72125.000000,862.595802)}
{pt3dadd(172248.000000,209496.000000,72150.000000,862.595802)}
{pt3dadd(171720.000000,209664.000000,72125.000000,862.595802)}
{pt3dadd(171096.000000,209916.000000,72275.000000,862.595802)}
{pt3dadd(170796.000000,210120.000000,72350.000000,862.595802)}
{pt3dadd(170652.000000,210336.000000,72450.000000,862.595802)}
{pt3dadd(170256.000000,210624.000000,72775.000000,862.595802)}
{pt3dadd(169500.000000,210852.000000,72825.000000,885.437343)}
{pt3dadd(169200.000000,211092.000000,72775.000000,908.278884)}
{pt3dadd(168804.000000,211296.000000,72950.000000,931.120425)}
{pt3dadd(168300.000000,211584.000000,72925.000000,953.961966)}
{pt3dadd(168132.000000,211740.000000,73000.000000,974.250211)}
{pt3dadd(167760.000000,211908.000000,72950.000000,994.538457)}
{pt3dadd(167388.000000,212100.000000,72925.000000,1014.826703)}
{pt3dadd(167208.000000,212616.000000,73675.000000,1035.114948)}
{pt3dadd(166956.000000,212904.000000,73775.000000,977.608566)}
{pt3dadd(166728.000000,213144.000000,73975.000000,920.102184)}
{pt3dadd(166560.000000,213252.000000,74025.000000,862.595802)}
{pt3dadd(166356.000000,212544.000000,73000.000000,862.595802)}

{create adhoc7}
{access adhoc7}
{connect adhoc7(1), adhoc6(0)}
{nseg = 1}
{strdef color color = "White"}
{pt3dclear()}
{pt3dadd(166356.000000,212544.000000,73000.000000,862.595802)}
{pt3dadd(166356.000000,214728.000000,75175.000000,415.989486)}
{pt3dadd(166116.000000,215136.000000,75475.000000,484.511265)}
{pt3dadd(165864.000000,215544.000000,75625.000000,553.033044)}
{pt3dadd(165624.000000,216216.000000,75725.000000,621.554823)}
{pt3dadd(165576.000000,216408.000000,75600.000000,690.076602)}
{pt3dadd(165420.000000,216564.000000,75550.000000,697.264906)}
{pt3dadd(165216.000000,216780.000000,75550.000000,704.453211)}
{pt3dadd(165024.000000,216936.000000,75650.000000,711.641515)}
{pt3dadd(165024.000000,217116.000000,75700.000000,718.829820)}
{pt3dadd(164952.000000,217308.000000,75800.000000,688.878585)}
{pt3dadd(164784.000000,217536.000000,75750.000000,658.927350)}
{pt3dadd(164640.000000,217704.000000,75850.000000,628.976115)}
{pt3dadd(164712.000000,217908.000000,75800.000000,599.024880)}
{pt3dadd(164544.000000,218088.000000,75775.000000,599.024880)}
{pt3dadd(164424.000000,218280.000000,75825.000000,599.024880)}
{pt3dadd(164172.000000,218868.000000,75775.000000,599.024880)}
{pt3dadd(163956.000000,219396.000000,75675.000000,599.024880)}
{pt3dadd(163692.000000,219864.000000,75575.000000,621.787810)}
{pt3dadd(163548.000000,220056.000000,75600.000000,644.550741)}
{pt3dadd(163272.000000,220416.000000,75475.000000,667.313671)}
{pt3dadd(163068.000000,220752.000000,75475.000000,690.076602)}
{pt3dadd(162900.000000,220932.000000,75450.000000,642.354295)}
{pt3dadd(162612.000000,221448.000000,75475.000000,594.631989)}
{pt3dadd(162420.000000,221628.000000,75425.000000,546.909682)}
{pt3dadd(162252.000000,221832.000000,75375.000000,499.187376)}
{pt3dadd(162204.000000,222012.000000,75250.000000,524.146752)}
{pt3dadd(162192.000000,222168.000000,75250.000000,549.106128)}
{pt3dadd(162156.000000,222312.000000,75325.000000,574.065504)}
{pt3dadd(162108.000000,222480.000000,75250.000000,599.024880)}
{pt3dadd(161940.000000,222672.000000,75025.000000,628.976115)}
{pt3dadd(161808.000000,222960.000000,74975.000000,658.927350)}
{pt3dadd(161628.000000,223476.000000,75075.000000,688.878585)}
{pt3dadd(161472.000000,223728.000000,74900.000000,718.829820)}
{pt3dadd(161304.000000,224100.000000,74725.000000,754.771316)}
{pt3dadd(161076.000000,224316.000000,74675.000000,790.712811)}
{pt3dadd(160896.000000,224868.000000,74650.000000,826.654307)}
{pt3dadd(160776.000000,225192.000000,74500.000000,862.595802)}
{pt3dadd(160596.000000,225300.000000,74425.000000,771.743696)}
{pt3dadd(160440.000000,225564.000000,74350.000000,680.891589)}
{pt3dadd(160320.000000,225672.000000,74250.000000,590.039483)}
{pt3dadd(160164.000000,226032.000000,74125.000000,499.187376)}
{pt3dadd(159972.000000,226176.000000,74075.000000,554.097987)}
{pt3dadd(159792.000000,226320.000000,74025.000000,609.008598)}
{pt3dadd(159612.000000,226512.000000,73950.000000,663.919209)}
{pt3dadd(159468.000000,226584.000000,73600.000000,718.829820)}
{pt3dadd(159312.000000,226812.000000,73575.000000,754.771316)}
{pt3dadd(159168.000000,227040.000000,73575.000000,790.712811)}
{pt3dadd(159036.000000,227364.000000,73425.000000,826.654307)}
{pt3dadd(158844.000000,227592.000000,73350.000000,862.595802)}
{pt3dadd(158832.000000,227784.000000,73450.000000,819.466002)}
{pt3dadd(158784.000000,227952.000000,73550.000000,776.336202)}
{pt3dadd(158844.000000,228132.000000,73500.000000,733.206402)}
{pt3dadd(158688.000000,228276.000000,73325.000000,690.076602)}
{pt3dadd(158760.000000,227496.000000,72975.000000,667.313671)}
{pt3dadd(158988.000000,227184.000000,72750.000000,644.550741)}
{pt3dadd(158604.000000,227736.000000,72375.000000,621.787810)}
{pt3dadd(158340.000000,228204.000000,72050.000000,599.024880)}
{pt3dadd(158220.000000,228528.000000,71750.000000,553.266031)}
{pt3dadd(157896.000000,229200.000000,71450.000000,507.507183)}
{pt3dadd(157704.000000,229524.000000,71125.000000,461.748335)}
{pt3dadd(157524.000000,229668.000000,71050.000000,415.989486)}
{pt3dadd(157440.000000,230004.000000,70800.000000,372.175776)}
{pt3dadd(157272.000000,230160.000000,70850.000000,328.362066)}
{pt3dadd(157128.000000,230088.000000,70850.000000,284.548356)}
{pt3dadd(157020.000000,230412.000000,71350.000000,240.734646)}
{pt3dadd(156840.000000,230856.000000,71425.000000,222.345193)}
{pt3dadd(156624.000000,231384.000000,71650.000000,203.955741)}
{pt3dadd(156648.000000,231540.000000,71675.000000,185.566288)}
{pt3dadd(156636.000000,231720.000000,71625.000000,167.176836)}
{pt3dadd(156600.000000,231960.000000,71725.000000,167.176836)}

{create adhoc8}
{access adhoc8}
{connect adhoc8(1), adhoc6(0)}
{nseg = 1}
{strdef color color = "White"}
{pt3dclear()}
{pt3dadd(166356.000000,212544.000000,73000.000000,862.595802)}
{pt3dadd(166212.000000,212400.000000,72600.000000,862.595802)}
{pt3dadd(166008.000000,212376.000000,72525.000000,796.703072)}
{pt3dadd(165828.000000,212460.000000,72350.000000,730.810341)}
{pt3dadd(165660.000000,212544.000000,72275.000000,664.917611)}
{pt3dadd(165456.000000,212556.000000,72150.000000,599.024880)}
{pt3dadd(165264.000000,212568.000000,72150.000000,629.375454)}
{pt3dadd(165048.000000,212652.000000,72100.000000,659.726028)}
{pt3dadd(164856.000000,212628.000000,72000.000000,690.076602)}
{pt3dadd(164628.000000,212640.000000,72000.000000,690.076602)}

{create adhoc9}
{access adhoc9}
{connect adhoc9(1), adhoc8(0)}
{nseg = 1}
{strdef color color = "White"}
{pt3dclear()}
{pt3dadd(164628.000000,212640.000000,72000.000000,690.076602)}
{pt3dadd(164460.000000,211968.000000,72500.000000,288.881586)}
{pt3dadd(164256.000000,211812.000000,72525.000000,288.881586)}
{pt3dadd(164100.000000,211644.000000,72475.000000,288.881586)}
{pt3dadd(163956.000000,211308.000000,72500.000000,288.881586)}
{pt3dadd(163680.000000,210264.000000,72250.000000,288.881586)}
{pt3dadd(163692.000000,209808.000000,72050.000000,303.325664)}
{pt3dadd(164160.000000,208536.000000,71825.000000,317.769741)}
{pt3dadd(164448.000000,207936.000000,71575.000000,332.213819)}
{pt3dadd(164760.000000,207144.000000,71275.000000,346.657896)}
{pt3dadd(164784.000000,206988.000000,71100.000000,332.213819)}
{pt3dadd(164880.000000,206532.000000,70825.000000,317.769741)}
{pt3dadd(165024.000000,206532.000000,70800.000000,303.325664)}
{pt3dadd(165168.000000,206268.000000,70625.000000,288.881586)}
{pt3dadd(165276.000000,205896.000000,70400.000000,266.814243)}
{pt3dadd(165468.000000,205668.000000,70175.000000,244.746900)}
{pt3dadd(165732.000000,205332.000000,69975.000000,222.679557)}
{pt3dadd(165804.000000,204960.000000,69650.000000,200.612214)}
{pt3dadd(166020.000000,204840.000000,69675.000000,167.176836)}

{create adhoc10}
{access adhoc10}
{connect adhoc10(1), adhoc8(0)}
{nseg = 1}
{strdef color color = "White"}
{pt3dclear()}
{pt3dadd(164628.000000,212640.000000,72000.000000,690.076602)}
{pt3dadd(164436.000000,212844.000000,71700.000000,499.187376)}
{pt3dadd(164196.000000,212772.000000,71550.000000,581.413518)}
{pt3dadd(163992.000000,212856.000000,71375.000000,663.639660)}
{pt3dadd(163752.000000,213012.000000,71175.000000,745.865802)}
{pt3dadd(163500.000000,213048.000000,71075.000000,828.091944)}
{pt3dadd(163020.000000,213360.000000,70625.000000,836.717909)}
{pt3dadd(162492.000000,213756.000000,70075.000000,845.343873)}
{pt3dadd(162228.000000,214212.000000,69525.000000,853.969838)}
{pt3dadd(162060.000000,214368.000000,69500.000000,862.595802)}
{pt3dadd(161844.000000,214428.000000,69200.000000,862.595802)}
{pt3dadd(161268.000000,214968.000000,68900.000000,862.595802)}
{pt3dadd(160668.000000,215352.000000,68425.000000,862.595802)}
{pt3dadd(160476.000000,215772.000000,68100.000000,862.595802)}
{pt3dadd(160284.000000,215928.000000,67700.000000,862.595802)}
{pt3dadd(160092.000000,216588.000000,67650.000000,828.092016)}

{create adhoc11}
{access adhoc11}
{connect adhoc11(1), adhoc10(0)}
{nseg = 1}
{strdef color color = "White"}
{pt3dclear()}
{pt3dadd(160092.000000,216588.000000,67650.000000,828.092016)}
{pt3dadd(160092.000000,214536.000000,67050.000000,415.989486)}
{pt3dadd(159924.000000,214344.000000,66575.000000,415.989486)}
{pt3dadd(160140.000000,214236.000000,66250.000000,415.989486)}
{pt3dadd(159972.000000,214488.000000,65925.000000,415.989486)}
{pt3dadd(159816.000000,214344.000000,65650.000000,415.989486)}
{pt3dadd(159804.000000,214008.000000,65350.000000,346.657896)}

{create adhoc12}
{access adhoc12}
{connect adhoc12(1), adhoc11(0)}
{nseg = 1}
{strdef color color = "White"}
{pt3dclear()}
{pt3dadd(159804.000000,214008.000000,65350.000000,346.657896)}
{pt3dadd(159504.000000,214716.000000,65325.000000,499.187376)}
{pt3dadd(159420.000000,214968.000000,65150.000000,461.055006)}
{pt3dadd(159216.000000,215076.000000,64850.000000,422.922636)}
{pt3dadd(159108.000000,215304.000000,64550.000000,384.790266)}
{pt3dadd(159300.000000,215496.000000,64325.000000,346.657896)}
{pt3dadd(159252.000000,215628.000000,64000.000000,369.768426)}
{pt3dadd(159108.000000,215772.000000,63600.000000,392.878956)}
{pt3dadd(159024.000000,215688.000000,63325.000000,415.989486)}
{pt3dadd(158940.000000,215952.000000,63300.000000,288.881586)}

{create adhoc13}
{access adhoc13}
{connect adhoc13(1), adhoc11(0)}
{nseg = 1}
{strdef color color = "White"}
{pt3dclear()}
{pt3dadd(159804.000000,214008.000000,65350.000000,346.657896)}
{pt3dadd(159624.000000,213888.000000,65275.000000,288.881586)}
{pt3dadd(159576.000000,213552.000000,65050.000000,240.734646)}

{create adhoc14}
{access adhoc14}
{connect adhoc14(1), adhoc10(0)}
{nseg = 1}
{strdef color color = "White"}
{pt3dclear()}
{pt3dadd(160092.000000,216588.000000,67650.000000,828.092016)}
{pt3dadd(159924.000000,216852.000000,67425.000000,690.076602)}
{pt3dadd(159744.000000,217344.000000,67125.000000,667.313671)}
{pt3dadd(159552.000000,217980.000000,67125.000000,644.550741)}
{pt3dadd(159408.000000,218448.000000,67100.000000,621.787810)}
{pt3dadd(159168.000000,218832.000000,66925.000000,599.024880)}
{pt3dadd(158976.000000,219192.000000,66900.000000,574.065504)}
{pt3dadd(158832.000000,219300.000000,66850.000000,549.106128)}
{pt3dadd(158616.000000,219456.000000,66950.000000,524.146752)}
{pt3dadd(158772.000000,219684.000000,66900.000000,499.187376)}
{pt3dadd(158580.000000,219852.000000,66925.000000,524.146752)}
{pt3dadd(158388.000000,220368.000000,66825.000000,549.106128)}
{pt3dadd(158208.000000,220428.000000,66700.000000,574.065504)}
{pt3dadd(158016.000000,220728.000000,66700.000000,599.024880)}
{pt3dadd(157824.000000,221040.000000,66525.000000,574.065504)}
{pt3dadd(157704.000000,221448.000000,66500.000000,549.106128)}
{pt3dadd(157536.000000,221940.000000,66400.000000,524.146752)}
{pt3dadd(157344.000000,222120.000000,66400.000000,499.187376)}
{pt3dadd(157320.000000,222276.000000,66175.000000,474.228009)}
{pt3dadd(157272.000000,222444.000000,66000.000000,449.268642)}
{pt3dadd(157308.000000,222624.000000,66000.000000,424.309275)}
{pt3dadd(157008.000000,222876.000000,65900.000000,399.349908)}
{pt3dadd(156852.000000,223092.000000,65925.000000,424.309275)}
{pt3dadd(156708.000000,223296.000000,65950.000000,449.268642)}
{pt3dadd(156636.000000,223476.000000,65925.000000,474.228009)}
{pt3dadd(156564.000000,223656.000000,65950.000000,499.187376)}
{pt3dadd(156444.000000,223848.000000,65875.000000,489.403301)}
{pt3dadd(156408.000000,223992.000000,65700.000000,479.619225)}
{pt3dadd(156324.000000,224208.000000,65650.000000,469.835150)}
{pt3dadd(156216.000000,224448.000000,65675.000000,460.051074)}
{pt3dadd(156168.000000,224604.000000,65600.000000,524.745760)}
{pt3dadd(156060.000000,224748.000000,65425.000000,589.440447)}
{pt3dadd(155988.000000,224904.000000,65400.000000,654.135133)}
{pt3dadd(155880.000000,225108.000000,65350.000000,718.829820)}
{pt3dadd(155724.000000,225144.000000,65425.000000,718.829820)}
{pt3dadd(155544.000000,225276.000000,65400.000000,718.829820)}
{pt3dadd(155844.000000,225264.000000,65050.000000,718.829820)}
{pt3dadd(155724.000000,225492.000000,64975.000000,718.829820)}
{pt3dadd(155712.000000,225708.000000,65175.000000,599.024880)}
{pt3dadd(155604.000000,225900.000000,65300.000000,499.187376)}

{create adhoc15}
{access adhoc15}
{connect adhoc15(1), adhoc1(0)}
{nseg = 1}
{strdef color color = "White"}
{pt3dclear()}
{pt3dadd(187260.000000,200856.000000,72475.000000,2575.697112)}
{pt3dadd(187488.000000,200664.000000,72175.000000,2734.574256)}
{pt3dadd(187644.000000,200604.000000,71775.000000,2587.534236)}
{pt3dadd(187584.000000,200148.000000,71250.000000,2440.494216)}
{pt3dadd(187572.000000,199944.000000,70775.000000,2293.454196)}
{pt3dadd(187728.000000,199596.000000,70375.000000,2146.414176)}
{pt3dadd(187380.000000,199392.000000,69925.000000,2103.485922)}
{pt3dadd(187320.000000,199080.000000,69450.000000,2060.557668)}
{pt3dadd(187080.000000,198732.000000,69150.000000,2060.557668)}

{create adhoc16}
{access adhoc16}
{connect adhoc16(1), adhoc15(0)}
{nseg = 1}
{strdef color color = "White"}
{pt3dclear()}
{pt3dadd(187080.000000,198732.000000,69150.000000,2060.557668)}
{pt3dadd(182340.000000,197328.000000,69150.000000,828.091944)}
{pt3dadd(182124.000000,197160.000000,69275.000000,836.717909)}
{pt3dadd(181824.000000,197040.000000,69400.000000,845.343873)}
{pt3dadd(181596.000000,196920.000000,69550.000000,853.969838)}
{pt3dadd(181368.000000,196776.000000,69650.000000,862.595802)}
{pt3dadd(181140.000000,196476.000000,69775.000000,853.969856)}
{pt3dadd(180816.000000,196452.000000,69975.000000,845.343909)}
{pt3dadd(180504.000000,196332.000000,70025.000000,836.717962)}
{pt3dadd(180324.000000,196284.000000,70200.000000,828.092016)}
{pt3dadd(180120.000000,196188.000000,70225.000000,828.092016)}
{pt3dadd(179832.000000,195936.000000,70325.000000,828.092016)}
{pt3dadd(179508.000000,195660.000000,70525.000000,828.092016)}
{pt3dadd(179220.000000,195540.000000,70600.000000,828.092016)}
{pt3dadd(178980.000000,195396.000000,70750.000000,879.847749)}
{pt3dadd(178752.000000,195228.000000,70850.000000,931.603482)}
{pt3dadd(178512.000000,195108.000000,70925.000000,983.359215)}
{pt3dadd(178260.000000,194988.000000,71200.000000,1035.114948)}
{pt3dadd(177936.000000,194892.000000,71325.000000,1035.114948)}
{pt3dadd(177636.000000,194796.000000,71475.000000,1035.114948)}
{pt3dadd(177420.000000,194628.000000,71625.000000,1035.114948)}
{pt3dadd(177252.000000,194508.000000,71625.000000,1035.114948)}
{pt3dadd(177048.000000,194460.000000,71875.000000,956.043666)}
{pt3dadd(176832.000000,194436.000000,71975.000000,876.972384)}
{pt3dadd(176580.000000,194268.000000,72075.000000,797.901102)}
{pt3dadd(176892.000000,194040.000000,71775.000000,718.829820)}
{pt3dadd(176592.000000,193860.000000,71850.000000,663.919209)}
{pt3dadd(176172.000000,193608.000000,71775.000000,609.008598)}
{pt3dadd(176028.000000,193308.000000,71775.000000,554.097987)}
{pt3dadd(175836.000000,192996.000000,71725.000000,499.187376)}
{pt3dadd(175584.000000,192744.000000,71825.000000,524.146752)}
{pt3dadd(175512.000000,192480.000000,71775.000000,549.106128)}
{pt3dadd(175668.000000,192240.000000,71625.000000,574.065504)}
{pt3dadd(175572.000000,192060.000000,71625.000000,599.024880)}
{pt3dadd(175524.000000,191856.000000,71525.000000,628.976115)}
{pt3dadd(175452.000000,191700.000000,71500.000000,658.927350)}
{pt3dadd(175512.000000,191544.000000,71525.000000,688.878585)}
{pt3dadd(175488.000000,191352.000000,71550.000000,718.829820)}
{pt3dadd(175824.000000,191100.000000,71675.000000,552.061314)}

{create adhoc17}
{access adhoc17}
{connect adhoc17(1), adhoc16(0)}
{nseg = 1}
{strdef color color = "White"}
{pt3dclear()}
{pt3dadd(175824.000000,191100.000000,71675.000000,552.061314)}
{pt3dadd(175932.000000,190908.000000,71950.000000,499.187376)}
{pt3dadd(175980.000000,190692.000000,71950.000000,494.195504)}
{pt3dadd(175956.000000,190404.000000,71925.000000,489.203631)}
{pt3dadd(175932.000000,190188.000000,71950.000000,484.211758)}
{pt3dadd(175908.000000,190032.000000,71900.000000,479.219886)}
{pt3dadd(175860.000000,189756.000000,71925.000000,474.427683)}
{pt3dadd(175872.000000,189540.000000,72025.000000,469.635480)}
{pt3dadd(175884.000000,189360.000000,72175.000000,464.843277)}
{pt3dadd(175896.000000,189168.000000,72250.000000,460.051074)}
{pt3dadd(175932.000000,188952.000000,72325.000000,488.804269)}
{pt3dadd(175992.000000,188688.000000,72250.000000,517.557465)}
{pt3dadd(176004.000000,188448.000000,72375.000000,546.310660)}
{pt3dadd(176064.000000,188196.000000,72575.000000,575.063856)}
{pt3dadd(176148.000000,188016.000000,72700.000000,596.916306)}
{pt3dadd(176352.000000,187860.000000,72850.000000,618.768756)}
{pt3dadd(176484.000000,187692.000000,72950.000000,640.621206)}
{pt3dadd(176616.000000,187488.000000,73100.000000,662.473656)}
{pt3dadd(176820.000000,187248.000000,73475.000000,600.852613)}
{pt3dadd(176724.000000,187032.000000,73525.000000,539.231571)}
{pt3dadd(176532.000000,186792.000000,73525.000000,477.610528)}
{pt3dadd(176508.000000,186576.000000,73800.000000,415.989486)}
{pt3dadd(176568.000000,186384.000000,73850.000000,372.175776)}
{pt3dadd(176628.000000,186156.000000,73925.000000,328.362066)}
{pt3dadd(176664.000000,185964.000000,73975.000000,284.548356)}
{pt3dadd(176616.000000,185760.000000,74050.000000,240.734646)}
{pt3dadd(176448.000000,185508.000000,74025.000000,238.327304)}
{pt3dadd(176460.000000,185268.000000,73975.000000,235.919961)}
{pt3dadd(176520.000000,185064.000000,73900.000000,233.512618)}
{pt3dadd(176580.000000,184848.000000,73800.000000,231.105276)}
{pt3dadd(176232.000000,184644.000000,73300.000000,200.508198)}
{pt3dadd(176184.000000,184416.000000,73150.000000,169.911120)}
{pt3dadd(176112.000000,184212.000000,72875.000000,139.314042)}
{pt3dadd(176088.000000,183984.000000,72500.000000,167.176836)}

{create adhoc18}
{access adhoc18}
{connect adhoc18(1), adhoc16(0)}
{nseg = 1}
{strdef color color = "White"}
{pt3dclear()}
{pt3dadd(175824.000000,191100.000000,71675.000000,552.061314)}
{pt3dadd(174924.000000,191100.000000,70775.000000,266.233248)}
{pt3dadd(174804.000000,190620.000000,70500.000000,303.672308)}
{pt3dadd(174324.000000,190320.000000,70075.000000,341.111367)}
{pt3dadd(174180.000000,189900.000000,69675.000000,378.550427)}
{pt3dadd(173964.000000,189528.000000,69425.000000,415.989486)}
{pt3dadd(173676.000000,189084.000000,69200.000000,436.788958)}
{pt3dadd(173352.000000,188784.000000,68825.000000,457.588431)}
{pt3dadd(173364.000000,188496.000000,68575.000000,478.387903)}
{pt3dadd(173268.000000,188328.000000,68200.000000,499.187376)}
{pt3dadd(173100.000000,188112.000000,67775.000000,499.187376)}
{pt3dadd(172956.000000,187944.000000,67350.000000,499.187376)}
{pt3dadd(172992.000000,187500.000000,66925.000000,499.187376)}
{pt3dadd(172944.000000,187200.000000,66500.000000,499.187376)}
{pt3dadd(172740.000000,186948.000000,66200.000000,461.055006)}
{pt3dadd(172296.000000,186624.000000,65750.000000,422.922636)}
{pt3dadd(171996.000000,185628.000000,65400.000000,384.790266)}
{pt3dadd(171984.000000,184596.000000,65100.000000,346.657896)}
{pt3dadd(172140.000000,183516.000000,64800.000000,383.375952)}

{create adhoc19}
{access adhoc19}
{connect adhoc19(1), adhoc18(0)}
{nseg = 1}
{strdef color color = "White"}
{pt3dclear()}
{pt3dadd(172140.000000,183516.000000,64800.000000,383.375952)}
{pt3dadd(172272.000000,183264.000000,64450.000000,346.657896)}
{pt3dadd(172248.000000,183048.000000,64100.000000,363.990794)}
{pt3dadd(172584.000000,182748.000000,63825.000000,381.323691)}
{pt3dadd(172416.000000,182460.000000,63600.000000,398.656589)}
{pt3dadd(172428.000000,182268.000000,63150.000000,415.989486)}
{pt3dadd(172260.000000,182220.000000,62850.000000,395.190014)}
{pt3dadd(172044.000000,182172.000000,62550.000000,374.390541)}
{pt3dadd(171828.000000,182232.000000,62250.000000,353.591069)}
{pt3dadd(171504.000000,182112.000000,61825.000000,332.791596)}
{pt3dadd(171408.000000,181908.000000,61500.000000,309.777359)}
{pt3dadd(171360.000000,181812.000000,61250.000000,286.763121)}
{pt3dadd(171264.000000,181560.000000,60900.000000,263.748884)}
{pt3dadd(171192.000000,181368.000000,60525.000000,240.734646)}
{pt3dadd(171000.000000,181068.000000,60125.000000,230.704038)}
{pt3dadd(170820.000000,180948.000000,59825.000000,220.673430)}
{pt3dadd(170628.000000,180696.000000,59425.000000,210.642822)}
{pt3dadd(170256.000000,180600.000000,59100.000000,200.612214)}
{pt3dadd(170004.000000,180312.000000,58750.000000,222.679557)}
{pt3dadd(169716.000000,179940.000000,58375.000000,244.746900)}
{pt3dadd(169500.000000,179544.000000,58025.000000,266.814243)}
{pt3dadd(169224.000000,179724.000000,57925.000000,288.881586)}
{pt3dadd(169032.000000,179604.000000,57825.000000,250.096559)}
{pt3dadd(169428.000000,179328.000000,57975.000000,211.311531)}
{pt3dadd(169440.000000,179136.000000,57925.000000,172.526503)}
{pt3dadd(169416.000000,178980.000000,57875.000000,133.741476)}
{pt3dadd(169296.000000,178824.000000,57775.000000,135.134617)}
{pt3dadd(169104.000000,178596.000000,57700.000000,136.527759)}
{pt3dadd(169032.000000,178416.000000,57550.000000,137.920900)}
{pt3dadd(169056.000000,178260.000000,57500.000000,139.314042)}
{pt3dadd(169044.000000,178116.000000,57350.000000,137.920900)}
{pt3dadd(168960.000000,177996.000000,57225.000000,136.527759)}
{pt3dadd(168876.000000,177912.000000,57150.000000,135.134617)}
{pt3dadd(168948.000000,177768.000000,57150.000000,133.741476)}
{pt3dadd(168912.000000,177684.000000,57100.000000,142.100316)}
{pt3dadd(168924.000000,177492.000000,57050.000000,150.459156)}
{pt3dadd(168936.000000,177372.000000,56850.000000,158.817996)}
{pt3dadd(168960.000000,177192.000000,56800.000000,167.176836)}
{pt3dadd(168720.000000,176928.000000,56700.000000,164.640312)}
{pt3dadd(168708.000000,176736.000000,56550.000000,162.103788)}
{pt3dadd(168552.000000,176520.000000,56400.000000,159.567264)}
{pt3dadd(168552.000000,176280.000000,56400.000000,157.030740)}
{pt3dadd(168384.000000,175920.000000,56050.000000,106.993206)}

{create adhoc20}
{access adhoc20}
{connect adhoc20(1), adhoc18(0)}
{nseg = 1}
{strdef color color = "White"}
{pt3dclear()}
{pt3dadd(172140.000000,183516.000000,64800.000000,383.375952)}
{pt3dadd(172836.000000,182004.000000,64950.000000,231.105276)}
{pt3dadd(173136.000000,181608.000000,65200.000000,245.549354)}
{pt3dadd(173268.000000,181380.000000,65425.000000,259.993431)}
{pt3dadd(173412.000000,181128.000000,65450.000000,274.437509)}
{pt3dadd(173568.000000,180924.000000,65550.000000,288.881586)}
{pt3dadd(173736.000000,180516.000000,65700.000000,240.734646)}
{pt3dadd(173892.000000,180108.000000,65800.000000,200.612214)}

{create adhoc21}
{access adhoc21}
{connect adhoc21(1), adhoc20(0)}
{nseg = 1}
{strdef color color = "White"}
{pt3dclear()}
{pt3dadd(173892.000000,180108.000000,65800.000000,200.612214)}
{pt3dadd(173592.000000,179316.000000,65800.000000,200.612214)}
{pt3dadd(173376.000000,178908.000000,65550.000000,254.456532)}
{pt3dadd(172980.000000,178788.000000,65400.000000,308.300850)}
{pt3dadd(172704.000000,178716.000000,65175.000000,362.145168)}
{pt3dadd(172452.000000,178620.000000,64950.000000,415.989486)}
{pt3dadd(172284.000000,178356.000000,64725.000000,415.989486)}
{pt3dadd(172248.000000,178320.000000,64425.000000,415.989486)}
{pt3dadd(171996.000000,178056.000000,63925.000000,415.989486)}
{pt3dadd(172032.000000,177876.000000,63550.000000,415.989486)}
{pt3dadd(171864.000000,177672.000000,63425.000000,372.175776)}
{pt3dadd(171816.000000,177504.000000,63125.000000,328.362066)}
{pt3dadd(171636.000000,177348.000000,62775.000000,284.548356)}
{pt3dadd(171528.000000,177168.000000,62575.000000,240.734646)}
{pt3dadd(171384.000000,176820.000000,62325.000000,240.734646)}
{pt3dadd(171408.000000,176376.000000,62075.000000,240.734646)}
{pt3dadd(171372.000000,176304.000000,61875.000000,240.734646)}
{pt3dadd(171576.000000,176316.000000,61500.000000,240.734646)}
{pt3dadd(171360.000000,175896.000000,61250.000000,240.734646)}
{pt3dadd(171336.000000,175188.000000,60975.000000,240.734646)}
{pt3dadd(171372.000000,174576.000000,60700.000000,240.734646)}
{pt3dadd(171084.000000,175152.000000,60900.000000,167.176836)}

{create adhoc22}
{access adhoc22}
{connect adhoc22(1), adhoc20(0)}
{nseg = 1}
{strdef color color = "White"}
{pt3dclear()}
{pt3dadd(173892.000000,180108.000000,65800.000000,200.612214)}
{pt3dadd(173904.000000,179784.000000,66025.000000,231.105276)}
{pt3dadd(174156.000000,179232.000000,66075.000000,167.176836)}

{create adhoc23}
{access adhoc23}
{connect adhoc23(1), adhoc22(0)}
{nseg = 1}
{strdef color color = "White"}
{pt3dclear()}
{pt3dadd(174156.000000,179232.000000,66075.000000,167.176836)}
{pt3dadd(173820.000000,178932.000000,66225.000000,167.176836)}
{pt3dadd(173736.000000,178656.000000,66350.000000,55.987200)}

{create adhoc24}
{access adhoc24}
{connect adhoc24(1), adhoc22(0)}
{nseg = 1}
{strdef color color = "White"}
{pt3dclear()}
{pt3dadd(174156.000000,179232.000000,66075.000000,167.176836)}
{pt3dadd(174588.000000,179592.000000,66275.000000,167.176836)}
{pt3dadd(174804.000000,179520.000000,66375.000000,175.535680)}
{pt3dadd(174984.000000,179364.000000,66500.000000,183.894525)}
{pt3dadd(175140.000000,179292.000000,66775.000000,192.253370)}
{pt3dadd(175284.000000,179352.000000,66975.000000,200.612214)}
{pt3dadd(175452.000000,179352.000000,67225.000000,183.894530)}
{pt3dadd(175740.000000,179148.000000,67500.000000,167.176845)}
{pt3dadd(175572.000000,178896.000000,67675.000000,150.459160)}
{pt3dadd(175488.000000,178728.000000,67950.000000,133.741476)}
{pt3dadd(175236.000000,178632.000000,68200.000000,96.745860)}
{pt3dadd(175260.000000,178428.000000,68325.000000,80.621550)}

{create adhoc25}
{access adhoc25}
{connect adhoc25(1), adhoc15(0)}
{nseg = 1}
{strdef color color = "White"}
{pt3dclear()}
{pt3dadd(187080.000000,198732.000000,69150.000000,2060.557668)}
{pt3dadd(185988.000000,197988.000000,68625.000000,1717.131222)}
{pt3dadd(186036.000000,197916.000000,67950.000000,2060.557524)}
{pt3dadd(186372.000000,197376.000000,67375.000000,2403.983826)}
{pt3dadd(186492.000000,197244.000000,66825.000000,2747.410128)}
{pt3dadd(186684.000000,196788.000000,66325.000000,3090.836430)}
{pt3dadd(186516.000000,196944.000000,65825.000000,2962.051600)}
{pt3dadd(186672.000000,196656.000000,65300.000000,2833.266771)}
{pt3dadd(186564.000000,196524.000000,64800.000000,2704.481942)}
{pt3dadd(186648.000000,195984.000000,64300.000000,2575.697112)}
{pt3dadd(186732.000000,195636.000000,63850.000000,2643.901542)}
{pt3dadd(186804.000000,195648.000000,63350.000000,2712.105972)}
{pt3dadd(186780.000000,195192.000000,62775.000000,2780.310402)}
{pt3dadd(186840.000000,194952.000000,62300.000000,2848.514832)}
{pt3dadd(186960.000000,195036.000000,61975.000000,2878.186914)}
{pt3dadd(186720.000000,194676.000000,61375.000000,2907.858996)}
{pt3dadd(186588.000000,194616.000000,60825.000000,2937.531078)}
{pt3dadd(186600.000000,194268.000000,60350.000000,2967.203160)}
{pt3dadd(186720.000000,194244.000000,59825.000000,2535.936840)}
{pt3dadd(186624.000000,194400.000000,59350.000000,2104.670520)}
{pt3dadd(186312.000000,194592.000000,58825.000000,1673.404200)}
{pt3dadd(186036.000000,194424.000000,58200.000000,1242.137880)}
{pt3dadd(185940.000000,194232.000000,57775.000000,1242.137880)}
{pt3dadd(185436.000000,194172.000000,57225.000000,1242.137880)}
{pt3dadd(184644.000000,194436.000000,56750.000000,1242.137880)}
{pt3dadd(184404.000000,194808.000000,56425.000000,1242.137880)}
{pt3dadd(183612.000000,195060.000000,55950.000000,1052.366841)}
{pt3dadd(183732.000000,194784.000000,55425.000000,862.595802)}
{pt3dadd(183216.000000,194436.000000,54925.000000,599.024880)}

{create adhoc26}
{access adhoc26}
{connect adhoc26(1), adhoc25(0)}
{nseg = 1}
{strdef color color = "White"}
{pt3dclear()}
{pt3dadd(183216.000000,194436.000000,54925.000000,599.024880)}
{pt3dadd(180204.000000,196356.000000,54650.000000,1192.452354)}
{pt3dadd(180000.000000,196644.000000,55225.000000,1306.450787)}
{pt3dadd(179724.000000,196776.000000,55300.000000,1420.449219)}
{pt3dadd(179472.000000,196788.000000,55025.000000,1534.447651)}
{pt3dadd(179292.000000,196848.000000,55125.000000,1648.446084)}
{pt3dadd(179040.000000,197052.000000,54975.000000,1788.678450)}
{pt3dadd(178800.000000,197292.000000,54050.000000,1035.114948)}

{create adhoc27}
{access adhoc27}
{connect adhoc27(1), adhoc26(0)}
{nseg = 1}
{strdef color color = "White"}
{pt3dclear()}
{pt3dadd(178800.000000,197292.000000,54050.000000,1035.114948)}
{pt3dadd(178572.000000,197484.000000,53500.000000,862.595802)}
{pt3dadd(178308.000000,197736.000000,53400.000000,796.703072)}
{pt3dadd(178116.000000,198000.000000,53250.000000,730.810341)}
{pt3dadd(177888.000000,198180.000000,53150.000000,664.917611)}
{pt3dadd(177648.000000,198672.000000,53000.000000,599.024880)}
{pt3dadd(177468.000000,198876.000000,52975.000000,656.291664)}
{pt3dadd(177504.000000,199056.000000,52800.000000,713.558448)}
{pt3dadd(177360.000000,199224.000000,52675.000000,770.825232)}
{pt3dadd(177216.000000,199392.000000,52625.000000,828.092016)}
{pt3dadd(177072.000000,199608.000000,52450.000000,828.092016)}
{pt3dadd(176904.000000,199884.000000,52350.000000,828.092016)}
{pt3dadd(176688.000000,200064.000000,52375.000000,828.092016)}
{pt3dadd(176520.000000,200280.000000,52250.000000,828.092016)}
{pt3dadd(176352.000000,200496.000000,52125.000000,840.861837)}
{pt3dadd(176076.000000,200616.000000,52100.000000,853.631658)}
{pt3dadd(175956.000000,200784.000000,52000.000000,866.401479)}
{pt3dadd(175752.000000,201012.000000,51950.000000,879.171300)}
{pt3dadd(175572.000000,201192.000000,51975.000000,803.144439)}
{pt3dadd(175356.000000,201432.000000,51925.000000,727.117578)}
{pt3dadd(175080.000000,201816.000000,51975.000000,651.090717)}
{pt3dadd(174852.000000,201996.000000,52025.000000,575.063856)}
{pt3dadd(174588.000000,202308.000000,52100.000000,499.187376)}

{create adhoc28}
{access adhoc28}
{connect adhoc28(1), adhoc27(0)}
{nseg = 1}
{strdef color color = "White"}
{pt3dclear()}
{pt3dadd(174588.000000,202308.000000,52100.000000,499.187376)}
{pt3dadd(174396.000000,202824.000000,52050.000000,575.063856)}
{pt3dadd(174156.000000,203064.000000,52050.000000,603.817043)}
{pt3dadd(173916.000000,203220.000000,52125.000000,632.570229)}
{pt3dadd(173700.000000,203484.000000,52175.000000,661.323416)}
{pt3dadd(173472.000000,203688.000000,52175.000000,690.076602)}
{pt3dadd(173232.000000,203868.000000,52175.000000,667.313671)}
{pt3dadd(173040.000000,204000.000000,52225.000000,644.550741)}
{pt3dadd(172788.000000,204204.000000,52250.000000,621.787810)}
{pt3dadd(172572.000000,204384.000000,52275.000000,599.024880)}
{pt3dadd(172344.000000,204516.000000,52400.000000,574.065504)}
{pt3dadd(172176.000000,204672.000000,52375.000000,549.106128)}
{pt3dadd(171936.000000,204756.000000,52400.000000,524.146752)}
{pt3dadd(171744.000000,204912.000000,52425.000000,499.187376)}
{pt3dadd(171600.000000,204948.000000,52475.000000,499.187376)}
{pt3dadd(171408.000000,205080.000000,52450.000000,499.187376)}
{pt3dadd(171216.000000,205236.000000,52500.000000,499.187376)}
{pt3dadd(171036.000000,205368.000000,52525.000000,499.187376)}
{pt3dadd(170832.000000,205608.000000,52600.000000,499.187376)}
{pt3dadd(170652.000000,205668.000000,52550.000000,499.187376)}
{pt3dadd(170424.000000,205872.000000,52475.000000,499.187376)}
{pt3dadd(170148.000000,206052.000000,52475.000000,499.187376)}
{pt3dadd(169956.000000,206256.000000,52450.000000,524.146752)}
{pt3dadd(169752.000000,206388.000000,52450.000000,549.106128)}
{pt3dadd(169608.000000,206544.000000,52300.000000,574.065504)}
{pt3dadd(169416.000000,206856.000000,52300.000000,599.024880)}
{pt3dadd(169200.000000,207120.000000,52200.000000,599.024880)}
{pt3dadd(169044.000000,207180.000000,52150.000000,599.024880)}
{pt3dadd(168852.000000,207360.000000,52100.000000,599.024880)}
{pt3dadd(168684.000000,207468.000000,52175.000000,599.024880)}
{pt3dadd(168480.000000,207624.000000,52100.000000,628.976115)}
{pt3dadd(168264.000000,207732.000000,52100.000000,658.927350)}
{pt3dadd(168048.000000,207816.000000,52100.000000,688.878585)}
{pt3dadd(167880.000000,207852.000000,52225.000000,718.829820)}
{pt3dadd(167664.000000,208008.000000,52125.000000,688.878585)}
{pt3dadd(167400.000000,208116.000000,52100.000000,658.927350)}
{pt3dadd(167232.000000,208200.000000,52175.000000,628.976115)}
{pt3dadd(167040.000000,208284.000000,52150.000000,599.024880)}
{pt3dadd(166788.000000,208440.000000,52125.000000,581.763384)}
{pt3dadd(166536.000000,208644.000000,52275.000000,564.501888)}
{pt3dadd(166368.000000,208752.000000,52300.000000,547.240392)}
{pt3dadd(166236.000000,208908.000000,52325.000000,529.978896)}
{pt3dadd(166056.000000,208968.000000,52125.000000,547.240392)}
{pt3dadd(165864.000000,209052.000000,52150.000000,564.501888)}
{pt3dadd(165684.000000,209184.000000,52150.000000,581.763384)}
{pt3dadd(165504.000000,209220.000000,52175.000000,599.024880)}
{pt3dadd(165348.000000,209400.000000,52175.000000,593.034624)}
{pt3dadd(165144.000000,209436.000000,52150.000000,587.044368)}
{pt3dadd(164952.000000,209496.000000,52125.000000,581.054112)}
{pt3dadd(164820.000000,209532.000000,52225.000000,575.063856)}
{pt3dadd(164640.000000,209664.000000,52125.000000,575.063856)}
{pt3dadd(164460.000000,209844.000000,52150.000000,575.063856)}
{pt3dadd(164196.000000,209880.000000,52125.000000,575.063856)}
{pt3dadd(164004.000000,209916.000000,52100.000000,575.063856)}
{pt3dadd(163752.000000,210048.000000,52175.000000,581.054112)}
{pt3dadd(163524.000000,210132.000000,52225.000000,587.044368)}
{pt3dadd(163296.000000,210312.000000,52125.000000,593.034624)}
{pt3dadd(163068.000000,210444.000000,52050.000000,599.024880)}
{pt3dadd(162756.000000,210732.000000,52100.000000,574.065504)}
{pt3dadd(162492.000000,210912.000000,52150.000000,549.106128)}
{pt3dadd(162240.000000,211176.000000,52175.000000,524.146752)}
{pt3dadd(161940.000000,211488.000000,52025.000000,499.187376)}
{pt3dadd(161748.000000,211692.000000,52075.000000,499.187376)}
{pt3dadd(161544.000000,211800.000000,52050.000000,415.989486)}

{create adhoc29}
{access adhoc29}
{connect adhoc29(1), adhoc28(0)}
{nseg = 1}
{strdef color color = "White"}
{pt3dclear()}
{pt3dadd(161544.000000,211800.000000,52050.000000,415.989486)}
{pt3dadd(161328.000000,212436.000000,51775.000000,415.989486)}
{pt3dadd(161208.000000,212844.000000,51725.000000,491.699570)}
{pt3dadd(160968.000000,213252.000000,51625.000000,567.409653)}
{pt3dadd(160728.000000,213588.000000,51500.000000,643.119737)}
{pt3dadd(160512.000000,213948.000000,51425.000000,718.829820)}
{pt3dadd(160332.000000,213960.000000,51325.000000,794.968308)}
{pt3dadd(160092.000000,214320.000000,51725.000000,399.349944)}

{create adhoc30}
{access adhoc30}
{connect adhoc30(1), adhoc29(0)}
{nseg = 1}
{strdef color color = "White"}
{pt3dclear()}
{pt3dadd(160092.000000,214320.000000,51725.000000,399.349944)}
{pt3dadd(159864.000000,214956.000000,51825.000000,346.657896)}
{pt3dadd(159516.000000,215448.000000,51925.000000,363.990794)}
{pt3dadd(159264.000000,215760.000000,52050.000000,381.323691)}
{pt3dadd(159060.000000,216324.000000,52125.000000,398.656589)}
{pt3dadd(158868.000000,216888.000000,52350.000000,415.989486)}
{pt3dadd(158616.000000,217320.000000,52425.000000,362.145168)}
{pt3dadd(158364.000000,218208.000000,52725.000000,308.300850)}
{pt3dadd(158316.000000,219252.000000,53025.000000,254.456532)}
{pt3dadd(157980.000000,220116.000000,53300.000000,200.612214)}
{pt3dadd(157560.000000,221136.000000,53700.000000,187.238070)}
{pt3dadd(157368.000000,221952.000000,54025.000000,173.863926)}
{pt3dadd(157224.000000,222588.000000,54300.000000,160.489782)}
{pt3dadd(156996.000000,222576.000000,54275.000000,139.314042)}

{create adhoc31}
{access adhoc31}
{connect adhoc31(1), adhoc29(0)}
{nseg = 1}
{strdef color color = "White"}
{pt3dclear()}
{pt3dadd(160092.000000,214320.000000,51725.000000,399.349944)}
{pt3dadd(159936.000000,213816.000000,50350.000000,332.791560)}
{pt3dadd(160020.000000,213672.000000,50100.000000,353.591042)}
{pt3dadd(160116.000000,213252.000000,49750.000000,374.390523)}
{pt3dadd(160152.000000,213108.000000,49475.000000,395.190005)}
{pt3dadd(160128.000000,212760.000000,49250.000000,415.989486)}
{pt3dadd(160200.000000,212640.000000,48950.000000,395.190005)}
{pt3dadd(160260.000000,212244.000000,48500.000000,374.390523)}
{pt3dadd(160440.000000,212256.000000,48400.000000,353.591042)}
{pt3dadd(160644.000000,212208.000000,47925.000000,332.791560)}
{pt3dadd(160464.000000,211956.000000,48000.000000,200.612214)}

{create adhoc32}
{access adhoc32}
{connect adhoc32(1), adhoc28(0)}
{nseg = 1}
{strdef color color = "White"}
{pt3dclear()}
{pt3dadd(161544.000000,211800.000000,52050.000000,415.989486)}
{pt3dadd(161460.000000,211092.000000,52425.000000,288.881586)}
{pt3dadd(161280.000000,210792.000000,52525.000000,303.325664)}
{pt3dadd(161112.000000,210648.000000,52575.000000,317.769741)}
{pt3dadd(160920.000000,210576.000000,52675.000000,332.213819)}
{pt3dadd(160740.000000,210732.000000,52625.000000,346.657896)}
{pt3dadd(160560.000000,210564.000000,52650.000000,359.830899)}
{pt3dadd(160356.000000,210696.000000,52775.000000,373.003902)}
{pt3dadd(160188.000000,210648.000000,52925.000000,386.176905)}
{pt3dadd(159984.000000,210780.000000,53175.000000,399.349908)}
{pt3dadd(159804.000000,210960.000000,53375.000000,409.924688)}
{pt3dadd(159528.000000,211200.000000,53725.000000,420.499467)}
{pt3dadd(159348.000000,211176.000000,54000.000000,431.074246)}
{pt3dadd(159156.000000,211440.000000,54325.000000,441.649026)}
{pt3dadd(158952.000000,211800.000000,54600.000000,405.363204)}
{pt3dadd(158736.000000,212364.000000,54925.000000,369.077382)}
{pt3dadd(158508.000000,212496.000000,55000.000000,332.791560)}
{pt3dadd(158340.000000,212808.000000,55100.000000,277.326342)}

{create adhoc33}
{access adhoc33}
{connect adhoc33(1), adhoc27(0)}
{nseg = 1}
{strdef color color = "White"}
{pt3dclear()}
{pt3dadd(174588.000000,202308.000000,52100.000000,499.187376)}
{pt3dadd(174588.000000,201276.000000,51825.000000,479.219886)}
{pt3dadd(174336.000000,201180.000000,51600.000000,428.746496)}
{pt3dadd(174084.000000,201108.000000,51500.000000,378.273105)}
{pt3dadd(173844.000000,201084.000000,51525.000000,327.799714)}
{pt3dadd(173640.000000,201096.000000,51500.000000,277.326324)}
{pt3dadd(173400.000000,201108.000000,51500.000000,294.659217)}
{pt3dadd(173184.000000,201144.000000,51425.000000,311.992110)}
{pt3dadd(172776.000000,201180.000000,51475.000000,329.325003)}
{pt3dadd(172572.000000,201240.000000,51350.000000,346.657896)}
{pt3dadd(172368.000000,201144.000000,51400.000000,346.657896)}
{pt3dadd(172188.000000,201324.000000,51475.000000,346.657896)}
{pt3dadd(172008.000000,201300.000000,51475.000000,346.657896)}
{pt3dadd(171744.000000,201336.000000,51550.000000,346.657896)}
{pt3dadd(171432.000000,201144.000000,51475.000000,346.657896)}
{pt3dadd(171228.000000,201276.000000,51450.000000,346.657896)}
{pt3dadd(171000.000000,201180.000000,51500.000000,346.657896)}
{pt3dadd(170784.000000,201312.000000,51500.000000,346.657896)}
{pt3dadd(170592.000000,201324.000000,51425.000000,332.213819)}
{pt3dadd(170364.000000,201528.000000,51375.000000,317.769741)}
{pt3dadd(170184.000000,201456.000000,51400.000000,303.325664)}
{pt3dadd(170016.000000,201540.000000,51425.000000,288.881586)}
{pt3dadd(169812.000000,201552.000000,51275.000000,299.859089)}
{pt3dadd(169620.000000,201564.000000,51325.000000,310.836591)}
{pt3dadd(169392.000000,201672.000000,51325.000000,321.814093)}
{pt3dadd(169140.000000,201648.000000,51450.000000,332.791596)}
{pt3dadd(168924.000000,201624.000000,51400.000000,349.431174)}
{pt3dadd(168672.000000,201528.000000,51350.000000,366.070752)}
{pt3dadd(168432.000000,201504.000000,51075.000000,382.710330)}
{pt3dadd(168168.000000,201516.000000,51050.000000,399.349908)}
{pt3dadd(168024.000000,201576.000000,51050.000000,403.509803)}
{pt3dadd(167808.000000,201552.000000,50950.000000,407.669697)}
{pt3dadd(167568.000000,201588.000000,51000.000000,411.829591)}
{pt3dadd(167388.000000,201600.000000,50925.000000,415.989486)}
{pt3dadd(167184.000000,201660.000000,50650.000000,411.829601)}
{pt3dadd(166956.000000,201540.000000,50750.000000,407.669715)}
{pt3dadd(166728.000000,201624.000000,50475.000000,403.509830)}
{pt3dadd(166560.000000,201540.000000,50550.000000,399.349944)}
{pt3dadd(166344.000000,201672.000000,50500.000000,399.349944)}
{pt3dadd(166164.000000,201624.000000,50425.000000,399.349944)}
{pt3dadd(165960.000000,201660.000000,50375.000000,399.349944)}
{pt3dadd(165732.000000,201588.000000,50300.000000,399.349944)}
{pt3dadd(165516.000000,201444.000000,50175.000000,386.176932)}
{pt3dadd(165324.000000,201480.000000,50150.000000,373.003920)}
{pt3dadd(165108.000000,201492.000000,50200.000000,359.830908)}
{pt3dadd(164916.000000,201732.000000,50000.000000,346.657896)}
{pt3dadd(164712.000000,201744.000000,49825.000000,346.657896)}
{pt3dadd(164580.000000,201924.000000,49725.000000,346.657896)}
{pt3dadd(164376.000000,201960.000000,49575.000000,346.657896)}
{pt3dadd(164112.000000,202164.000000,49475.000000,346.657896)}
{pt3dadd(163944.000000,202044.000000,49450.000000,346.657896)}
{pt3dadd(163788.000000,202200.000000,49400.000000,346.657896)}
{pt3dadd(163584.000000,202176.000000,49275.000000,346.657896)}
{pt3dadd(163428.000000,202236.000000,49150.000000,346.657896)}
{pt3dadd(163272.000000,202248.000000,49025.000000,359.830908)}
{pt3dadd(163068.000000,202308.000000,48925.000000,373.003920)}
{pt3dadd(162876.000000,202368.000000,48950.000000,386.176932)}
{pt3dadd(162708.000000,202296.000000,48775.000000,399.349944)}
{pt3dadd(162492.000000,202200.000000,48625.000000,386.176932)}
{pt3dadd(162312.000000,202152.000000,48425.000000,373.003920)}
{pt3dadd(162108.000000,202128.000000,48275.000000,359.830908)}
{pt3dadd(161916.000000,202056.000000,47975.000000,346.657896)}
{pt3dadd(161664.000000,201780.000000,47825.000000,346.657896)}
{pt3dadd(161412.000000,201180.000000,47325.000000,415.989486)}

{create adhoc34}
{access adhoc34}
{connect adhoc34(1), adhoc26(0)}
{nseg = 1}
{strdef color color = "White"}
{pt3dclear()}
{pt3dadd(178800.000000,197292.000000,54050.000000,1035.114948)}
{pt3dadd(178800.000000,197364.000000,56675.000000,718.829820)}
{pt3dadd(178596.000000,197544.000000,56800.000000,688.878585)}
{pt3dadd(178320.000000,197724.000000,56850.000000,658.927350)}
{pt3dadd(178068.000000,197988.000000,56825.000000,628.976115)}
{pt3dadd(177912.000000,198072.000000,56825.000000,599.024880)}
{pt3dadd(177732.000000,198204.000000,56975.000000,574.065504)}
{pt3dadd(177492.000000,198264.000000,56975.000000,549.106128)}
{pt3dadd(177228.000000,198276.000000,56975.000000,524.146752)}
{pt3dadd(176952.000000,198252.000000,57000.000000,499.187376)}
{pt3dadd(176676.000000,198336.000000,57025.000000,524.146752)}
{pt3dadd(176304.000000,198288.000000,57075.000000,549.106128)}
{pt3dadd(176064.000000,198444.000000,57125.000000,574.065504)}
{pt3dadd(175812.000000,198420.000000,57150.000000,599.024880)}
{pt3dadd(175524.000000,198552.000000,57150.000000,599.024880)}
{pt3dadd(175332.000000,198612.000000,57275.000000,599.024880)}
{pt3dadd(175104.000000,198672.000000,57400.000000,599.024880)}
{pt3dadd(174876.000000,198684.000000,57375.000000,599.024880)}
{pt3dadd(174660.000000,198660.000000,57375.000000,599.024880)}
{pt3dadd(174408.000000,198792.000000,57375.000000,599.024880)}
{pt3dadd(174192.000000,198924.000000,57425.000000,599.024880)}
{pt3dadd(173976.000000,198960.000000,57400.000000,599.024880)}
{pt3dadd(173724.000000,198972.000000,57475.000000,628.976115)}
{pt3dadd(173544.000000,199080.000000,57625.000000,658.927350)}
{pt3dadd(173292.000000,199164.000000,57750.000000,688.878585)}
{pt3dadd(173088.000000,199320.000000,57675.000000,718.829820)}
{pt3dadd(172884.000000,199380.000000,57600.000000,704.740748)}
{pt3dadd(172680.000000,199416.000000,57700.000000,690.651675)}
{pt3dadd(172416.000000,199500.000000,57725.000000,676.562602)}
{pt3dadd(172176.000000,199608.000000,57875.000000,662.473530)}
{pt3dadd(171876.000000,199644.000000,57875.000000,676.562602)}
{pt3dadd(171660.000000,199680.000000,58025.000000,690.651675)}
{pt3dadd(171432.000000,199740.000000,58075.000000,704.740748)}
{pt3dadd(171156.000000,199824.000000,58200.000000,718.829820)}
{pt3dadd(170940.000000,199932.000000,58200.000000,718.829820)}
{pt3dadd(170736.000000,199968.000000,58125.000000,718.829820)}
{pt3dadd(170544.000000,199944.000000,58225.000000,718.829820)}
{pt3dadd(170280.000000,200076.000000,58125.000000,718.829820)}
{pt3dadd(170100.000000,200160.000000,58150.000000,718.829820)}
{pt3dadd(169920.000000,200064.000000,58225.000000,718.829820)}
{pt3dadd(169728.000000,200124.000000,58250.000000,718.829820)}
{pt3dadd(169524.000000,200160.000000,58225.000000,718.829820)}
{pt3dadd(169332.000000,200220.000000,58225.000000,718.829820)}
{pt3dadd(169116.000000,200148.000000,58325.000000,718.829820)}
{pt3dadd(168924.000000,200304.000000,58225.000000,718.829820)}
{pt3dadd(168756.000000,200412.000000,58200.000000,718.829820)}
{pt3dadd(168552.000000,200424.000000,58325.000000,718.829820)}
{pt3dadd(168264.000000,200532.000000,58375.000000,718.829820)}
{pt3dadd(168108.000000,200568.000000,58500.000000,718.829820)}
{pt3dadd(167904.000000,200700.000000,58500.000000,718.829820)}
{pt3dadd(167676.000000,200784.000000,58575.000000,718.829820)}
{pt3dadd(167508.000000,200820.000000,58600.000000,718.829820)}
{pt3dadd(167268.000000,200832.000000,58625.000000,718.829820)}
{pt3dadd(167112.000000,200784.000000,58700.000000,718.829820)}
{pt3dadd(166836.000000,200964.000000,58725.000000,682.888329)}
{pt3dadd(166584.000000,201024.000000,58750.000000,646.946838)}
{pt3dadd(166356.000000,201036.000000,58800.000000,611.005347)}
{pt3dadd(166128.000000,201120.000000,58750.000000,575.063856)}
{pt3dadd(165924.000000,201000.000000,58925.000000,611.005347)}
{pt3dadd(165708.000000,200928.000000,58975.000000,646.946838)}
{pt3dadd(165456.000000,200940.000000,59075.000000,682.888329)}
{pt3dadd(165264.000000,200952.000000,59125.000000,718.829820)}
{pt3dadd(165036.000000,201036.000000,59275.000000,777.612856)}
{pt3dadd(164844.000000,201072.000000,59300.000000,836.395893)}
{pt3dadd(164604.000000,201048.000000,59025.000000,895.178929)}
{pt3dadd(164412.000000,201024.000000,58875.000000,953.961966)}
{pt3dadd(164220.000000,200952.000000,59075.000000,993.710358)}

{create adhoc35}
{access adhoc35}
{connect adhoc35(1), adhoc34(0)}
{nseg = 1}
{strdef color color = "White"}
{pt3dclear()}
{pt3dadd(164220.000000,200952.000000,59075.000000,993.710358)}
{pt3dadd(163992.000000,201060.000000,58400.000000,499.187376)}
{pt3dadd(163740.000000,200940.000000,58500.000000,518.156496)}
{pt3dadd(163524.000000,200892.000000,58500.000000,537.125616)}
{pt3dadd(163260.000000,200952.000000,58400.000000,556.094736)}
{pt3dadd(163080.000000,201084.000000,58350.000000,575.063856)}
{pt3dadd(162300.000000,201492.000000,57925.000000,556.094736)}
{pt3dadd(162024.000000,201660.000000,57850.000000,537.125616)}
{pt3dadd(161772.000000,201828.000000,57775.000000,518.156496)}
{pt3dadd(161652.000000,201996.000000,57800.000000,499.187376)}
{pt3dadd(161352.000000,202164.000000,57675.000000,499.187376)}
{pt3dadd(161100.000000,202356.000000,57575.000000,499.187376)}
{pt3dadd(160932.000000,202548.000000,57425.000000,499.187376)}
{pt3dadd(160536.000000,202680.000000,57250.000000,499.187376)}
{pt3dadd(160392.000000,202848.000000,57250.000000,499.187376)}
{pt3dadd(160068.000000,202980.000000,57150.000000,499.187376)}
{pt3dadd(159816.000000,203136.000000,56675.000000,499.187376)}
{pt3dadd(159648.000000,203148.000000,56300.000000,499.187376)}
{pt3dadd(159444.000000,203388.000000,54900.000000,499.187376)}
{pt3dadd(159252.000000,203364.000000,54375.000000,499.187376)}
{pt3dadd(159084.000000,203400.000000,54100.000000,499.187376)}
{pt3dadd(158904.000000,203460.000000,53925.000000,499.187376)}
{pt3dadd(159048.000000,203292.000000,53625.000000,429.085446)}
{pt3dadd(159024.000000,203304.000000,53225.000000,358.983516)}
{pt3dadd(158904.000000,203256.000000,52900.000000,288.881586)}
{pt3dadd(158628.000000,203412.000000,52650.000000,139.314042)}

{create adhoc36}
{access adhoc36}
{connect adhoc36(1), adhoc34(0)}
{nseg = 1}
{strdef color color = "White"}
{pt3dclear()}
{pt3dadd(164220.000000,200952.000000,59075.000000,993.710358)}
{pt3dadd(163992.000000,201012.000000,59925.000000,599.024880)}
{pt3dadd(163716.000000,201024.000000,60225.000000,538.013082)}
{pt3dadd(163548.000000,201072.000000,60375.000000,477.001284)}
{pt3dadd(163404.000000,201012.000000,60525.000000,415.989486)}
{pt3dadd(163188.000000,201708.000000,60225.000000,346.657896)}

{create adhoc37}
{access adhoc37}
{connect adhoc37(1), adhoc36(0)}
{nseg = 1}
{strdef color color = "White"}
{pt3dclear()}
{pt3dadd(163188.000000,201708.000000,60225.000000,346.657896)}
{pt3dadd(162996.000000,202200.000000,60350.000000,288.881586)}
{pt3dadd(162840.000000,202536.000000,60350.000000,303.325664)}
{pt3dadd(162708.000000,202776.000000,60425.000000,317.769741)}
{pt3dadd(162576.000000,203040.000000,60375.000000,332.213819)}
{pt3dadd(162396.000000,203352.000000,60350.000000,346.657896)}
{pt3dadd(162252.000000,203616.000000,60425.000000,320.177083)}
{pt3dadd(162060.000000,203880.000000,60450.000000,293.696271)}
{pt3dadd(161928.000000,204012.000000,60650.000000,267.215459)}
{pt3dadd(161760.000000,204480.000000,61125.000000,240.734646)}
{pt3dadd(161580.000000,204744.000000,61425.000000,220.673426)}
{pt3dadd(161400.000000,205008.000000,61575.000000,200.612205)}
{pt3dadd(161256.000000,205248.000000,61550.000000,180.550985)}
{pt3dadd(161112.000000,205452.000000,61700.000000,160.489764)}
{pt3dadd(160956.000000,205584.000000,61950.000000,167.176836)}

{create adhoc38}
{access adhoc38}
{connect adhoc38(1), adhoc36(0)}
{nseg = 1}
{strdef color color = "White"}
{pt3dclear()}
{pt3dadd(163188.000000,201708.000000,60225.000000,346.657896)}
{pt3dadd(163152.000000,200400.000000,60950.000000,288.881586)}
{pt3dadd(163020.000000,199776.000000,61050.000000,274.437509)}
{pt3dadd(162792.000000,199296.000000,61200.000000,259.993431)}
{pt3dadd(162636.000000,199356.000000,61275.000000,245.549354)}
{pt3dadd(162444.000000,199212.000000,61300.000000,231.105276)}
{pt3dadd(162276.000000,199020.000000,61225.000000,208.157467)}
{pt3dadd(162120.000000,198312.000000,60750.000000,185.209659)}
{pt3dadd(161904.000000,197688.000000,60350.000000,162.261850)}
{pt3dadd(161724.000000,197316.000000,60200.000000,139.314042)}
{pt3dadd(161532.000000,196872.000000,60050.000000,139.314042)}
{pt3dadd(161328.000000,196548.000000,59925.000000,167.176836)}

{create adhoc39}
{access adhoc39}
{connect adhoc39(1), adhoc25(0)}
{nseg = 1}
{strdef color color = "White"}
{pt3dclear()}
{pt3dadd(183216.000000,194436.000000,54925.000000,599.024880)}
{pt3dadd(184500.000000,192456.000000,54550.000000,1035.114948)}
{pt3dadd(184512.000000,192000.000000,54050.000000,1134.071996)}
{pt3dadd(184560.000000,191388.000000,53700.000000,1233.029043)}
{pt3dadd(184380.000000,191136.000000,53150.000000,1331.986091)}
{pt3dadd(184392.000000,190332.000000,52700.000000,1430.943138)}
{pt3dadd(184464.000000,189684.000000,52175.000000,1445.848704)}
{pt3dadd(184584.000000,189192.000000,51700.000000,1460.754270)}
{pt3dadd(184692.000000,188544.000000,51300.000000,1475.659836)}
{pt3dadd(184752.000000,188052.000000,50925.000000,1490.565402)}
{pt3dadd(184944.000000,187764.000000,50250.000000,1490.565402)}
{pt3dadd(185076.000000,187392.000000,49975.000000,1490.565402)}
{pt3dadd(185052.000000,187008.000000,49825.000000,1490.565402)}
{pt3dadd(185112.000000,186648.000000,49700.000000,1490.565402)}
{pt3dadd(185280.000000,186324.000000,49500.000000,1475.659769)}
{pt3dadd(185388.000000,185964.000000,49350.000000,1460.754135)}
{pt3dadd(185400.000000,185712.000000,49350.000000,1445.848502)}
{pt3dadd(185484.000000,185412.000000,49150.000000,1430.942868)}
{pt3dadd(185652.000000,185124.000000,49050.000000,1430.942868)}
{pt3dadd(185532.000000,184848.000000,49050.000000,1430.942868)}
{pt3dadd(185460.000000,184572.000000,48750.000000,1430.942868)}
{pt3dadd(185316.000000,184284.000000,48800.000000,1430.942868)}
{pt3dadd(185400.000000,183996.000000,48800.000000,1485.318672)}
{pt3dadd(185460.000000,183672.000000,48700.000000,1539.694476)}
{pt3dadd(185436.000000,183384.000000,48775.000000,1594.070280)}
{pt3dadd(185412.000000,183144.000000,48525.000000,1648.446084)}
{pt3dadd(185472.000000,182928.000000,48700.000000,1665.617472)}
{pt3dadd(185568.000000,182688.000000,48425.000000,1682.788860)}
{pt3dadd(185700.000000,182292.000000,48200.000000,1699.960248)}
{pt3dadd(185580.000000,181920.000000,47900.000000,1717.131636)}
{pt3dadd(185772.000000,181608.000000,47625.000000,1645.584413)}
{pt3dadd(185880.000000,181344.000000,47350.000000,1574.037189)}
{pt3dadd(185952.000000,181092.000000,46950.000000,1502.489965)}
{pt3dadd(186216.000000,180828.000000,46625.000000,1430.942742)}
{pt3dadd(186540.000000,180540.000000,46050.000000,1704.539043)}
{pt3dadd(186516.000000,180240.000000,45750.000000,1978.135344)}
{pt3dadd(186552.000000,180120.000000,45525.000000,2187.659448)}

{create adhoc40}
{access adhoc40}
{connect adhoc40(1), adhoc39(0)}
{nseg = 1}
{strdef color color = "White"}
{pt3dclear()}
{pt3dadd(186552.000000,180120.000000,45525.000000,2187.659448)}
{pt3dadd(186636.000000,179916.000000,45200.000000,2373.762366)}
{pt3dadd(186804.000000,179640.000000,44925.000000,2060.557668)}
{pt3dadd(186840.000000,179364.000000,45150.000000,1717.131222)}

{create adhoc41}
{access adhoc41}
{connect adhoc41(1), adhoc40(0)}
{nseg = 1}
{strdef color color = "White"}
{pt3dclear()}
{pt3dadd(186840.000000,179364.000000,45150.000000,1717.131222)}
{pt3dadd(186948.000000,179196.000000,45325.000000,1582.508340)}

{create adhoc42}
{access adhoc42}
{connect adhoc42(1), adhoc41(0)}
{nseg = 1}
{strdef color color = "White"}
{pt3dclear()}
{pt3dadd(186948.000000,179196.000000,45325.000000,1582.508340)}
{pt3dadd(187212.000000,178932.000000,45500.000000,1490.565402)}
{pt3dadd(187692.000000,178620.000000,45400.000000,1373.705208)}

{create adhoc43}
{access adhoc43}
{connect adhoc43(1), adhoc42(0)}
{nseg = 1}
{strdef color color = "White"}
{pt3dclear()}
{pt3dadd(187692.000000,178620.000000,45400.000000,1373.705208)}
{pt3dadd(187776.000000,178332.000000,45325.000000,1373.705064)}
{pt3dadd(187836.000000,178068.000000,45225.000000,1340.813268)}
{pt3dadd(187920.000000,177720.000000,45075.000000,1307.921472)}
{pt3dadd(188052.000000,177420.000000,45025.000000,1275.029676)}
{pt3dadd(188064.000000,177048.000000,44775.000000,1242.137880)}
{pt3dadd(188076.000000,176700.000000,44700.000000,1304.244761)}
{pt3dadd(188244.000000,176508.000000,44500.000000,1366.351641)}
{pt3dadd(188460.000000,176292.000000,44625.000000,1428.458522)}
{pt3dadd(188472.000000,175956.000000,44475.000000,1490.565402)}
{pt3dadd(188448.000000,175644.000000,44500.000000,1461.350354)}
{pt3dadd(188400.000000,175344.000000,44450.000000,1432.135305)}
{pt3dadd(188568.000000,174948.000000,44200.000000,1402.920257)}
{pt3dadd(188628.000000,174636.000000,44125.000000,1373.705208)}
{pt3dadd(188556.000000,174324.000000,44025.000000,1328.391995)}
{pt3dadd(188748.000000,174000.000000,43950.000000,1283.078781)}
{pt3dadd(188676.000000,173700.000000,43925.000000,1237.765568)}
{pt3dadd(188808.000000,173460.000000,43975.000000,1192.452354)}
{pt3dadd(188892.000000,173220.000000,44025.000000,1192.452480)}

{create adhoc44}
{access adhoc44}
{connect adhoc44(1), adhoc43(0)}
{nseg = 1}
{strdef color color = "White"}
{pt3dclear()}
{pt3dadd(188892.000000,173220.000000,44025.000000,1192.452480)}
{pt3dadd(189060.000000,173004.000000,43775.000000,1242.137880)}
{pt3dadd(189252.000000,172704.000000,43800.000000,1229.716498)}
{pt3dadd(189444.000000,172392.000000,43775.000000,1217.295117)}
{pt3dadd(189504.000000,172092.000000,43800.000000,1204.873736)}
{pt3dadd(189516.000000,171804.000000,43825.000000,1192.452354)}
{pt3dadd(189624.000000,171360.000000,43850.000000,1153.118003)}
{pt3dadd(189756.000000,170952.000000,43775.000000,1113.783651)}
{pt3dadd(189972.000000,170652.000000,43725.000000,1074.449300)}
{pt3dadd(190212.000000,170292.000000,43625.000000,1035.114948)}
{pt3dadd(190224.000000,169968.000000,43500.000000,1035.114948)}
{pt3dadd(190284.000000,169716.000000,43375.000000,1035.114948)}
{pt3dadd(190140.000000,169404.000000,43350.000000,1035.114948)}
{pt3dadd(190176.000000,169092.000000,43375.000000,1035.114948)}
{pt3dadd(190104.000000,168804.000000,43275.000000,1035.114948)}
{pt3dadd(190116.000000,168528.000000,43225.000000,1035.114948)}
{pt3dadd(189864.000000,168264.000000,43175.000000,1035.114948)}
{pt3dadd(189900.000000,167892.000000,43150.000000,1035.114948)}
{pt3dadd(190092.000000,167616.000000,43075.000000,1074.449367)}
{pt3dadd(190224.000000,167304.000000,42950.000000,1113.783786)}
{pt3dadd(190176.000000,166956.000000,42725.000000,1153.118205)}
{pt3dadd(190236.000000,166596.000000,42425.000000,1192.452624)}
{pt3dadd(189972.000000,166248.000000,42550.000000,1073.207322)}
{pt3dadd(189792.000000,165948.000000,42600.000000,953.962020)}
{pt3dadd(189696.000000,165636.000000,42600.000000,1035.114948)}

{create adhoc45}
{access adhoc45}
{connect adhoc45(1), adhoc44(0)}
{nseg = 1}
{strdef color color = "White"}
{pt3dclear()}
{pt3dadd(189696.000000,165636.000000,42600.000000,1035.114948)}
{pt3dadd(190332.000000,165372.000000,42875.000000,718.829820)}
{pt3dadd(190596.000000,165060.000000,43000.000000,688.878585)}
{pt3dadd(190452.000000,164772.000000,42925.000000,658.927350)}
{pt3dadd(190620.000000,164424.000000,42975.000000,628.976115)}
{pt3dadd(190728.000000,164184.000000,43025.000000,599.024880)}
{pt3dadd(190812.000000,163836.000000,43000.000000,587.283988)}
{pt3dadd(190944.000000,163488.000000,43075.000000,575.543097)}
{pt3dadd(191052.000000,163116.000000,43100.000000,563.802206)}
{pt3dadd(191112.000000,162780.000000,43125.000000,552.061314)}
{pt3dadd(191280.000000,162444.000000,43175.000000,563.802206)}
{pt3dadd(191472.000000,162144.000000,43225.000000,575.543097)}
{pt3dadd(191580.000000,161856.000000,43300.000000,587.283988)}
{pt3dadd(191688.000000,161616.000000,43225.000000,599.024880)}
{pt3dadd(191664.000000,161400.000000,43425.000000,628.976115)}
{pt3dadd(191796.000000,161172.000000,43350.000000,658.927350)}
{pt3dadd(191808.000000,160920.000000,43325.000000,688.878585)}
{pt3dadd(191784.000000,160620.000000,43425.000000,718.829820)}
{pt3dadd(191892.000000,160344.000000,43450.000000,711.641515)}
{pt3dadd(191868.000000,160128.000000,43500.000000,704.453211)}
{pt3dadd(191820.000000,159852.000000,43425.000000,697.264906)}
{pt3dadd(191880.000000,159576.000000,43450.000000,690.076602)}
{pt3dadd(191964.000000,159264.000000,43475.000000,697.264906)}
{pt3dadd(192000.000000,158928.000000,43450.000000,704.453211)}
{pt3dadd(191952.000000,158592.000000,43675.000000,711.641515)}
{pt3dadd(192060.000000,158316.000000,43650.000000,718.829820)}
{pt3dadd(192096.000000,157992.000000,43700.000000,754.771316)}
{pt3dadd(192072.000000,157716.000000,43775.000000,790.712811)}
{pt3dadd(192108.000000,157332.000000,43850.000000,826.654307)}
{pt3dadd(192240.000000,156960.000000,43900.000000,862.595802)}
{pt3dadd(192216.000000,156552.000000,43850.000000,880.331676)}
{pt3dadd(192144.000000,156192.000000,43825.000000,898.067550)}
{pt3dadd(192096.000000,155868.000000,43900.000000,915.803424)}
{pt3dadd(192132.000000,155688.000000,43950.000000,993.710358)}

{create adhoc46}
{access adhoc46}
{connect adhoc46(1), adhoc45(0)}
{nseg = 1}
{strdef color color = "White"}
{pt3dclear()}
{pt3dadd(192132.000000,155688.000000,43950.000000,993.710358)}
{pt3dadd(192168.000000,155376.000000,44050.000000,993.710358)}
{pt3dadd(192336.000000,155052.000000,44250.000000,960.931719)}
{pt3dadd(192240.000000,154824.000000,44325.000000,928.153080)}
{pt3dadd(192372.000000,154584.000000,44400.000000,895.374441)}
{pt3dadd(192300.000000,154344.000000,44475.000000,862.595802)}
{pt3dadd(192276.000000,154032.000000,44650.000000,895.374423)}
{pt3dadd(192360.000000,153804.000000,44725.000000,928.153044)}
{pt3dadd(192288.000000,153564.000000,44725.000000,960.931665)}
{pt3dadd(192456.000000,153300.000000,44825.000000,993.710286)}
{pt3dadd(192432.000000,152976.000000,44875.000000,953.961966)}
{pt3dadd(192408.000000,152688.000000,44875.000000,953.961894)}

{create adhoc47}
{access adhoc47}
{connect adhoc47(1), adhoc46(0)}
{nseg = 1}
{strdef color color = "White"}
{pt3dclear()}
{pt3dadd(192408.000000,152688.000000,44875.000000,953.961894)}
{pt3dadd(192576.000000,152520.000000,45000.000000,993.710358)}
{pt3dadd(192636.000000,152244.000000,45000.000000,993.710340)}
{pt3dadd(192744.000000,151956.000000,45125.000000,993.710322)}
{pt3dadd(192876.000000,151608.000000,45150.000000,993.710304)}
{pt3dadd(192984.000000,151320.000000,45175.000000,993.710286)}
{pt3dadd(193044.000000,151092.000000,45375.000000,993.710304)}
{pt3dadd(193080.000000,150804.000000,45425.000000,993.710322)}
{pt3dadd(193248.000000,150492.000000,45600.000000,993.710340)}
{pt3dadd(193224.000000,150108.000000,45850.000000,993.710358)}
{pt3dadd(193260.000000,149820.000000,45950.000000,993.710358)}
{pt3dadd(193428.000000,149508.000000,45975.000000,993.710358)}
{pt3dadd(193356.000000,149256.000000,46100.000000,993.710358)}
{pt3dadd(193332.000000,148956.000000,46175.000000,993.710358)}
{pt3dadd(193284.000000,148584.000000,46100.000000,960.931719)}
{pt3dadd(193260.000000,148308.000000,46175.000000,928.153080)}
{pt3dadd(193344.000000,148020.000000,46200.000000,895.374441)}
{pt3dadd(193380.000000,147624.000000,46400.000000,862.595802)}
{pt3dadd(193464.000000,147360.000000,46350.000000,837.739220)}
{pt3dadd(193548.000000,147072.000000,46375.000000,812.882637)}
{pt3dadd(193524.000000,146688.000000,46175.000000,788.026055)}
{pt3dadd(193536.000000,146352.000000,46400.000000,763.169472)}
{pt3dadd(193620.000000,146052.000000,46350.000000,779.400108)}
{pt3dadd(193704.000000,145788.000000,46350.000000,795.630744)}
{pt3dadd(193872.000000,145416.000000,46275.000000,811.861380)}
{pt3dadd(193692.000000,145104.000000,46175.000000,828.092016)}
{pt3dadd(193776.000000,144840.000000,46125.000000,828.091998)}
{pt3dadd(193632.000000,144588.000000,46000.000000,828.091980)}
{pt3dadd(193668.000000,144288.000000,46025.000000,828.091962)}
{pt3dadd(193596.000000,144036.000000,46050.000000,828.091944)}
{pt3dadd(193392.000000,143688.000000,46025.000000,953.961966)}
{pt3dadd(193452.000000,143532.000000,45950.000000,953.961966)}

{create adhoc48}
{access adhoc48}
{connect adhoc48(1), adhoc47(0)}
{nseg = 1}
{strdef color color = "White"}
{pt3dclear()}
{pt3dadd(193452.000000,143532.000000,45950.000000,953.961966)}
{pt3dadd(193488.000000,143232.000000,45925.000000,993.710358)}
{pt3dadd(193524.000000,143232.000000,45900.000000,1055.817239)}
{pt3dadd(193584.000000,142944.000000,45950.000000,1117.924119)}
{pt3dadd(193512.000000,142632.000000,45825.000000,1180.031000)}
{pt3dadd(193548.000000,142368.000000,45825.000000,1242.137880)}
{pt3dadd(193500.000000,142104.000000,46050.000000,1192.452354)}
{pt3dadd(193692.000000,141876.000000,46575.000000,828.092016)}

{create adhoc49}
{access adhoc49}
{connect adhoc49(1), adhoc48(0)}
{nseg = 1}
{strdef color color = "White"}
{pt3dclear()}
{pt3dadd(193692.000000,141876.000000,46575.000000,828.092016)}
{pt3dadd(193668.000000,141588.000000,46900.000000,718.829820)}
{pt3dadd(193620.000000,141312.000000,47075.000000,718.829820)}
{pt3dadd(193548.000000,141024.000000,47200.000000,718.829820)}
{pt3dadd(193476.000000,140748.000000,47300.000000,718.829820)}
{pt3dadd(193560.000000,140436.000000,47500.000000,718.829820)}
{pt3dadd(193512.000000,140160.000000,47550.000000,718.829820)}
{pt3dadd(193524.000000,139860.000000,47675.000000,718.829820)}
{pt3dadd(193500.000000,139584.000000,47725.000000,718.829820)}
{pt3dadd(193536.000000,139332.000000,47925.000000,718.829820)}
{pt3dadd(193596.000000,139032.000000,48100.000000,746.145369)}
{pt3dadd(193608.000000,138756.000000,48050.000000,773.460918)}
{pt3dadd(193644.000000,138456.000000,48075.000000,800.776467)}
{pt3dadd(193620.000000,138180.000000,48100.000000,828.092016)}
{pt3dadd(193596.000000,138180.000000,48125.000000,819.811071)}
{pt3dadd(193632.000000,137940.000000,48100.000000,811.530126)}
{pt3dadd(193644.000000,137712.000000,48175.000000,803.249181)}
{pt3dadd(193620.000000,137460.000000,48300.000000,794.968236)}
{pt3dadd(193680.000000,137220.000000,48375.000000,834.716651)}
{pt3dadd(193500.000000,136884.000000,48450.000000,874.465065)}
{pt3dadd(193536.000000,136632.000000,48450.000000,914.213479)}
{pt3dadd(193512.000000,136344.000000,48450.000000,953.961894)}
{pt3dadd(193464.000000,136080.000000,48425.000000,993.710358)}
{pt3dadd(193392.000000,135924.000000,48475.000000,993.710358)}

{create adhoc50}
{access adhoc50}
{connect adhoc50(1), adhoc49(0)}
{nseg = 1}
{strdef color color = "White"}
{pt3dclear()}
{pt3dadd(193392.000000,135924.000000,48475.000000,993.710358)}
{pt3dadd(193404.000000,135636.000000,48825.000000,828.092016)}
{pt3dadd(193464.000000,135324.000000,49025.000000,800.776467)}
{pt3dadd(193416.000000,135108.000000,49150.000000,773.460918)}
{pt3dadd(193392.000000,134904.000000,49325.000000,746.145369)}
{pt3dadd(193272.000000,134592.000000,49350.000000,718.829820)}
{pt3dadd(193224.000000,134292.000000,49425.000000,768.073221)}
{pt3dadd(193128.000000,134052.000000,49475.000000,817.316622)}
{pt3dadd(193032.000000,133788.000000,49475.000000,866.560023)}
{pt3dadd(193008.000000,133560.000000,49550.000000,915.803424)}
{pt3dadd(192912.000000,133320.000000,49650.000000,862.595802)}
{pt3dadd(192888.000000,133008.000000,49700.000000,718.829820)}

{create adhoc51}
{access adhoc51}
{connect adhoc51(1), adhoc50(0)}
{nseg = 1}
{strdef color color = "White"}
{pt3dclear()}
{pt3dadd(192888.000000,133008.000000,49700.000000,718.829820)}
{pt3dadd(193176.000000,132792.000000,50125.000000,599.024880)}
{pt3dadd(193104.000000,132456.000000,50350.000000,656.291664)}
{pt3dadd(193212.000000,132156.000000,50525.000000,713.558448)}
{pt3dadd(193296.000000,131964.000000,50625.000000,770.825232)}
{pt3dadd(193332.000000,131700.000000,50800.000000,828.092016)}
{pt3dadd(193392.000000,131436.000000,50875.000000,964.495314)}
{pt3dadd(193428.000000,131100.000000,50975.000000,1100.898612)}
{pt3dadd(193356.000000,130752.000000,50975.000000,1237.301910)}
{pt3dadd(193368.000000,130464.000000,51300.000000,1373.705208)}
{pt3dadd(193320.000000,130248.000000,51575.000000,1430.942868)}
{pt3dadd(193296.000000,130068.000000,51925.000000,1430.942742)}

{create adhoc52}
{access adhoc52}
{connect adhoc52(1), adhoc51(0)}
{nseg = 1}
{strdef color color = "White"}
{pt3dclear()}
{pt3dadd(193296.000000,130068.000000,51925.000000,1430.942742)}
{pt3dadd(193308.000000,129924.000000,52775.000000,953.961894)}
{pt3dadd(193164.000000,129720.000000,53400.000000,931.120371)}
{pt3dadd(192972.000000,129468.000000,53625.000000,908.278848)}
{pt3dadd(192792.000000,129228.000000,53800.000000,885.437325)}
{pt3dadd(192672.000000,128892.000000,54075.000000,862.595802)}
{pt3dadd(192600.000000,128580.000000,54500.000000,853.969856)}
{pt3dadd(192348.000000,128220.000000,54825.000000,845.343909)}
{pt3dadd(192228.000000,127968.000000,55075.000000,836.717962)}
{pt3dadd(192084.000000,127728.000000,55625.000000,828.092016)}
{pt3dadd(191988.000000,127536.000000,55800.000000,770.825232)}
{pt3dadd(191844.000000,127272.000000,55900.000000,713.558448)}
{pt3dadd(191772.000000,127032.000000,56075.000000,656.291664)}
{pt3dadd(191628.000000,126780.000000,56350.000000,599.024880)}
{pt3dadd(191580.000000,126528.000000,56525.000000,574.065504)}
{pt3dadd(191592.000000,126264.000000,56625.000000,549.106128)}
{pt3dadd(191544.000000,126036.000000,56850.000000,524.146752)}
{pt3dadd(191448.000000,125856.000000,56900.000000,499.187376)}
{pt3dadd(191460.000000,125664.000000,56900.000000,524.146752)}
{pt3dadd(191364.000000,125448.000000,57150.000000,549.106128)}
{pt3dadd(191340.000000,125196.000000,57175.000000,574.065504)}
{pt3dadd(191316.000000,124980.000000,57400.000000,599.024880)}
{pt3dadd(191352.000000,124788.000000,57675.000000,621.787810)}
{pt3dadd(191388.000000,124512.000000,57900.000000,644.550741)}
{pt3dadd(191448.000000,124236.000000,58250.000000,667.313671)}
{pt3dadd(191376.000000,123996.000000,58450.000000,690.076602)}
{pt3dadd(191484.000000,123756.000000,58575.000000,697.264906)}
{pt3dadd(191460.000000,123540.000000,58625.000000,704.453211)}
{pt3dadd(191544.000000,123360.000000,58800.000000,711.641515)}
{pt3dadd(191520.000000,123156.000000,59025.000000,718.829820)}
{pt3dadd(191628.000000,122928.000000,59150.000000,754.771316)}
{pt3dadd(191664.000000,122700.000000,59375.000000,790.712811)}
{pt3dadd(191592.000000,122496.000000,59600.000000,826.654307)}
{pt3dadd(191628.000000,122328.000000,59600.000000,862.595802)}
{pt3dadd(191736.000000,121920.000000,60075.000000,826.654307)}
{pt3dadd(191640.000000,121332.000000,60500.000000,790.712811)}
{pt3dadd(191532.000000,120816.000000,60800.000000,754.771316)}
{pt3dadd(191484.000000,120600.000000,61125.000000,718.829820)}
{pt3dadd(191340.000000,120288.000000,61400.000000,746.145369)}
{pt3dadd(191220.000000,120060.000000,61525.000000,773.460918)}
{pt3dadd(191016.000000,119808.000000,61600.000000,800.776467)}
{pt3dadd(190968.000000,119544.000000,61675.000000,828.092016)}
{pt3dadd(190896.000000,119328.000000,61775.000000,811.530162)}
{pt3dadd(190776.000000,119112.000000,61825.000000,794.968308)}
{pt3dadd(190752.000000,118908.000000,61700.000000,794.968308)}

{create adhoc53}
{access adhoc53}
{connect adhoc53(1), adhoc52(0)}
{nseg = 1}
{strdef color color = "White"}
{pt3dclear()}
{pt3dadd(190752.000000,118908.000000,61700.000000,794.968308)}
{pt3dadd(190296.000000,118764.000000,61275.000000,479.219886)}
{pt3dadd(189936.000000,118560.000000,61375.000000,484.211758)}
{pt3dadd(189840.000000,118356.000000,61300.000000,489.203631)}
{pt3dadd(189612.000000,118092.000000,61475.000000,494.195504)}
{pt3dadd(189468.000000,117876.000000,61375.000000,499.187376)}
{pt3dadd(189288.000000,117624.000000,61350.000000,499.187376)}
{pt3dadd(189144.000000,117408.000000,61275.000000,499.187376)}
{pt3dadd(188868.000000,117156.000000,61300.000000,499.187376)}
{pt3dadd(188664.000000,116964.000000,61225.000000,499.187376)}
{pt3dadd(188484.000000,116688.000000,61225.000000,599.024880)}
{pt3dadd(188340.000000,116448.000000,61000.000000,499.187376)}

{create adhoc54}
{access adhoc54}
{connect adhoc54(1), adhoc53(0)}
{nseg = 1}
{strdef color color = "White"}
{pt3dclear()}
{pt3dadd(188340.000000,116448.000000,61000.000000,499.187376)}
{pt3dadd(188160.000000,116184.000000,60600.000000,346.657896)}
{pt3dadd(187800.000000,115944.000000,60475.000000,346.657896)}
{pt3dadd(187416.000000,115740.000000,60350.000000,346.657896)}
{pt3dadd(187140.000000,115536.000000,60150.000000,346.657896)}
{pt3dadd(186840.000000,115284.000000,60225.000000,346.657896)}
{pt3dadd(185784.000000,115056.000000,60225.000000,339.863418)}
{pt3dadd(184980.000000,114804.000000,59950.000000,333.068940)}
{pt3dadd(184776.000000,114528.000000,59375.000000,326.274462)}
{pt3dadd(184500.000000,114624.000000,59725.000000,319.479984)}
{pt3dadd(184188.000000,114576.000000,59575.000000,343.607360)}
{pt3dadd(183948.000000,114552.000000,59575.000000,367.734735)}
{pt3dadd(183744.000000,114504.000000,59550.000000,391.862111)}
{pt3dadd(183456.000000,114516.000000,59425.000000,415.989486)}
{pt3dadd(183192.000000,114552.000000,59425.000000,398.656589)}
{pt3dadd(182892.000000,114408.000000,59425.000000,381.323691)}
{pt3dadd(182700.000000,114468.000000,59375.000000,363.990794)}
{pt3dadd(182460.000000,114420.000000,59350.000000,346.657896)}
{pt3dadd(182196.000000,114432.000000,59350.000000,339.863400)}
{pt3dadd(181980.000000,114492.000000,59350.000000,333.068904)}
{pt3dadd(181692.000000,114468.000000,59200.000000,326.274408)}
{pt3dadd(181488.000000,114552.000000,59300.000000,319.479912)}
{pt3dadd(181284.000000,114564.000000,59275.000000,326.274408)}
{pt3dadd(181020.000000,114540.000000,59250.000000,333.068904)}
{pt3dadd(180828.000000,114444.000000,59150.000000,339.863400)}
{pt3dadd(180564.000000,114420.000000,59100.000000,346.657896)}
{pt3dadd(180276.000000,114456.000000,59075.000000,346.657896)}
{pt3dadd(179988.000000,114408.000000,59050.000000,346.657896)}
{pt3dadd(179676.000000,114384.000000,58950.000000,346.657896)}
{pt3dadd(179448.000000,114264.000000,58900.000000,346.657896)}
{pt3dadd(179208.000000,114276.000000,58800.000000,363.990794)}
{pt3dadd(178932.000000,114180.000000,58725.000000,381.323691)}
{pt3dadd(178716.000000,114192.000000,58650.000000,398.656589)}
{pt3dadd(178476.000000,114144.000000,58625.000000,415.989486)}
{pt3dadd(178284.000000,114156.000000,58525.000000,415.989486)}
{pt3dadd(178080.000000,114192.000000,58525.000000,415.989486)}
{pt3dadd(177876.000000,114144.000000,58425.000000,415.989486)}
{pt3dadd(177660.000000,114228.000000,58325.000000,415.989486)}
{pt3dadd(177444.000000,114264.000000,58300.000000,431.797086)}
{pt3dadd(177192.000000,114372.000000,58275.000000,447.604686)}
{pt3dadd(176976.000000,114432.000000,58300.000000,463.412286)}
{pt3dadd(176736.000000,114468.000000,58300.000000,479.219886)}
{pt3dadd(176568.000000,114528.000000,58225.000000,463.412286)}
{pt3dadd(176388.000000,114696.000000,58250.000000,447.604686)}
{pt3dadd(176172.000000,114960.000000,58300.000000,431.797086)}
{pt3dadd(175944.000000,115356.000000,58400.000000,415.989486)}
{pt3dadd(175740.000000,115524.000000,58450.000000,415.989486)}
{pt3dadd(175464.000000,116676.000000,59325.000000,415.989486)}
{pt3dadd(175416.000000,116820.000000,59350.000000,415.989486)}
{pt3dadd(175452.000000,117072.000000,59850.000000,415.989486)}
{pt3dadd(175524.000000,117264.000000,59925.000000,372.175776)}
{pt3dadd(175428.000000,117432.000000,60175.000000,328.362066)}
{pt3dadd(175464.000000,117624.000000,60400.000000,284.548356)}
{pt3dadd(175236.000000,117828.000000,60575.000000,240.734646)}
{pt3dadd(175248.000000,117972.000000,60675.000000,238.327304)}
{pt3dadd(175248.000000,118152.000000,60775.000000,235.919961)}
{pt3dadd(175260.000000,118308.000000,60900.000000,233.512618)}
{pt3dadd(175296.000000,118464.000000,61050.000000,231.105276)}
{pt3dadd(175308.000000,118716.000000,61250.000000,323.085177)}
{pt3dadd(175200.000000,118944.000000,61450.000000,415.065078)}
{pt3dadd(175176.000000,119100.000000,61825.000000,507.044979)}
{pt3dadd(175152.000000,119232.000000,62625.000000,599.024880)}
{pt3dadd(175164.000000,119424.000000,63200.000000,599.024880)}
{pt3dadd(175200.000000,119556.000000,63750.000000,599.024880)}
{pt3dadd(175248.000000,119736.000000,64350.000000,599.024880)}
{pt3dadd(175188.000000,119904.000000,64825.000000,599.024880)}
{pt3dadd(175272.000000,120048.000000,64925.000000,430.308600)}
{pt3dadd(175416.000000,120204.000000,64500.000000,261.592320)}
{pt3dadd(175452.000000,120348.000000,64425.000000,92.876040)}
{pt3dadd(175428.000000,120468.000000,64400.000000,46.656000)}

{create adhoc55}
{access adhoc55}
{connect adhoc55(1), adhoc53(0)}
{nseg = 1}
{strdef color color = "White"}
{pt3dclear()}
{pt3dadd(188340.000000,116448.000000,61000.000000,499.187376)}
{pt3dadd(187932.000000,116340.000000,61550.000000,231.105276)}
{pt3dadd(187824.000000,116208.000000,61625.000000,245.549354)}
{pt3dadd(187668.000000,116040.000000,61550.000000,259.993431)}
{pt3dadd(187584.000000,115860.000000,61525.000000,274.437509)}
{pt3dadd(187308.000000,115644.000000,61700.000000,288.881586)}
{pt3dadd(187152.000000,115440.000000,61700.000000,316.498675)}
{pt3dadd(186984.000000,115224.000000,61825.000000,344.115765)}
{pt3dadd(186720.000000,115044.000000,61825.000000,371.732855)}
{pt3dadd(186564.000000,114852.000000,61925.000000,399.349944)}
{pt3dadd(186300.000000,114624.000000,61925.000000,379.382445)}
{pt3dadd(185964.000000,114396.000000,62175.000000,359.414946)}
{pt3dadd(185484.000000,114156.000000,62275.000000,339.447447)}
{pt3dadd(184956.000000,113928.000000,62575.000000,319.479948)}
{pt3dadd(184692.000000,113772.000000,62650.000000,326.274435)}
{pt3dadd(184260.000000,113544.000000,62600.000000,333.068922)}
{pt3dadd(184008.000000,113328.000000,62750.000000,339.863409)}
{pt3dadd(183912.000000,113136.000000,62775.000000,346.657896)}
{pt3dadd(183576.000000,112848.000000,62775.000000,320.177083)}
{pt3dadd(183360.000000,112680.000000,62825.000000,293.696271)}
{pt3dadd(183240.000000,112452.000000,62850.000000,267.215459)}
{pt3dadd(183084.000000,112260.000000,62825.000000,240.734646)}
{pt3dadd(182904.000000,112056.000000,62825.000000,240.734646)}
{pt3dadd(182748.000000,111840.000000,62825.000000,240.734646)}
{pt3dadd(182544.000000,111612.000000,62825.000000,240.734646)}
{pt3dadd(182268.000000,111384.000000,62875.000000,240.734646)}
{pt3dadd(182100.000000,111192.000000,62875.000000,252.771381)}
{pt3dadd(181848.000000,111036.000000,62850.000000,264.808116)}
{pt3dadd(181740.000000,110844.000000,62875.000000,276.844851)}
{pt3dadd(181476.000000,110664.000000,62900.000000,288.881586)}
{pt3dadd(181200.000000,110448.000000,62900.000000,299.859080)}
{pt3dadd(181020.000000,110256.000000,62950.000000,310.836573)}
{pt3dadd(180636.000000,110028.000000,62925.000000,321.814067)}
{pt3dadd(180408.000000,109812.000000,62975.000000,332.791560)}
{pt3dadd(180156.000000,109596.000000,62975.000000,305.058933)}
{pt3dadd(179904.000000,109404.000000,63025.000000,277.326306)}
{pt3dadd(179640.000000,109176.000000,63175.000000,249.593679)}
{pt3dadd(179304.000000,108984.000000,63275.000000,221.861052)}
{pt3dadd(179052.000000,108852.000000,63325.000000,249.593688)}
{pt3dadd(178860.000000,108564.000000,63375.000000,277.326324)}
{pt3dadd(178656.000000,108456.000000,63325.000000,305.058960)}
{pt3dadd(178440.000000,108312.000000,63300.000000,332.791596)}
{pt3dadd(178236.000000,107988.000000,63300.000000,336.258171)}
{pt3dadd(178080.000000,107772.000000,63325.000000,339.724746)}
{pt3dadd(177864.000000,107496.000000,63200.000000,343.191321)}
{pt3dadd(177672.000000,107220.000000,63100.000000,346.657896)}
{pt3dadd(177456.000000,107016.000000,63125.000000,332.213819)}
{pt3dadd(177240.000000,106908.000000,63150.000000,317.769741)}
{pt3dadd(177096.000000,106740.000000,63125.000000,303.325664)}
{pt3dadd(176856.000000,106644.000000,63000.000000,288.881586)}
{pt3dadd(176688.000000,106380.000000,62875.000000,303.325664)}
{pt3dadd(176460.000000,106272.000000,62850.000000,317.769741)}
{pt3dadd(176244.000000,106200.000000,62725.000000,332.213819)}
{pt3dadd(176100.000000,106104.000000,62675.000000,346.657896)}
{pt3dadd(175896.000000,105948.000000,62475.000000,346.657896)}
{pt3dadd(175668.000000,105732.000000,62250.000000,346.657896)}
{pt3dadd(175512.000000,105564.000000,61925.000000,346.657896)}
{pt3dadd(175296.000000,104976.000000,61025.000000,346.657896)}
{pt3dadd(175128.000000,104820.000000,60725.000000,425.611804)}
{pt3dadd(175128.000000,104676.000000,60425.000000,504.565713)}
{pt3dadd(174984.000000,104616.000000,60150.000000,583.519622)}
{pt3dadd(175032.000000,104532.000000,59850.000000,662.473530)}
{pt3dadd(174864.000000,104508.000000,59400.000000,676.275138)}
{pt3dadd(174864.000000,104448.000000,59025.000000,690.076746)}
{pt3dadd(174816.000000,104460.000000,58800.000000,718.829820)}

{create adhoc56}
{access adhoc56}
{connect adhoc56(1), adhoc55(0)}
{nseg = 1}
{strdef color color = "White"}
{pt3dclear()}
{pt3dadd(174816.000000,104460.000000,58800.000000,718.829820)}
{pt3dadd(174900.000000,104856.000000,58650.000000,415.989486)}
{pt3dadd(174912.000000,105072.000000,58325.000000,360.139046)}
{pt3dadd(174960.000000,105180.000000,58150.000000,304.288605)}
{pt3dadd(174996.000000,105264.000000,57850.000000,248.438165)}
{pt3dadd(174936.000000,105660.000000,57600.000000,192.587724)}
{pt3dadd(174936.000000,105744.000000,57450.000000,194.593846)}
{pt3dadd(174816.000000,105828.000000,57125.000000,196.599969)}
{pt3dadd(174792.000000,106224.000000,56975.000000,198.606091)}
{pt3dadd(174984.000000,106620.000000,56650.000000,200.612214)}
{pt3dadd(175116.000000,106812.000000,56475.000000,189.467088)}
{pt3dadd(175308.000000,106656.000000,56300.000000,178.321962)}
{pt3dadd(175104.000000,107136.000000,56575.000000,167.176836)}
{pt3dadd(175032.000000,107304.000000,56600.000000,139.314042)}

{create adhoc57}
{access adhoc57}
{connect adhoc57(1), adhoc55(0)}
{nseg = 1}
{strdef color color = "White"}
{pt3dclear()}
{pt3dadd(174816.000000,104460.000000,58800.000000,718.829820)}
{pt3dadd(174864.000000,104124.000000,58800.000000,221.861052)}
{pt3dadd(174840.000000,103836.000000,58625.000000,208.189998)}
{pt3dadd(174648.000000,103524.000000,58450.000000,194.518944)}
{pt3dadd(174612.000000,103320.000000,58125.000000,180.847890)}
{pt3dadd(174504.000000,102984.000000,57950.000000,167.176836)}
{pt3dadd(174552.000000,102432.000000,57600.000000,179.882271)}
{pt3dadd(174576.000000,102276.000000,57425.000000,192.587706)}
{pt3dadd(174732.000000,101952.000000,57125.000000,80.621550)}

{create adhoc58}
{access adhoc58}
{connect adhoc58(1), adhoc52(0)}
{nseg = 1}
{strdef color color = "White"}
{pt3dclear()}
{pt3dadd(190752.000000,118908.000000,61700.000000,794.968308)}
{pt3dadd(190920.000000,118764.000000,62775.000000,479.219886)}
{pt3dadd(190728.000000,118308.000000,63350.000000,463.412286)}
{pt3dadd(190560.000000,117720.000000,63575.000000,447.604686)}
{pt3dadd(190380.000000,117000.000000,64000.000000,431.797086)}
{pt3dadd(190200.000000,116508.000000,64300.000000,415.989486)}
{pt3dadd(189960.000000,116076.000000,64450.000000,415.989486)}
{pt3dadd(189780.000000,115740.000000,64800.000000,415.989486)}
{pt3dadd(189648.000000,115536.000000,65050.000000,415.989486)}
{pt3dadd(189444.000000,115488.000000,65350.000000,415.989486)}
{pt3dadd(189276.000000,115260.000000,65575.000000,415.989486)}
{pt3dadd(189084.000000,114960.000000,65550.000000,415.989486)}
{pt3dadd(188940.000000,114600.000000,65675.000000,415.989486)}
{pt3dadd(188772.000000,114528.000000,65750.000000,415.989486)}
{pt3dadd(188544.000000,114072.000000,65725.000000,353.786324)}
{pt3dadd(188340.000000,113844.000000,65725.000000,291.583161)}
{pt3dadd(188100.000000,113592.000000,65775.000000,229.379999)}
{pt3dadd(187932.000000,113496.000000,65800.000000,167.176836)}
{pt3dadd(187704.000000,113316.000000,65975.000000,212.047101)}
{pt3dadd(187752.000000,112776.000000,66300.000000,256.917366)}
{pt3dadd(187296.000000,112572.000000,66650.000000,301.787631)}
{pt3dadd(186756.000000,112152.000000,67050.000000,346.657896)}
{pt3dadd(185952.000000,111696.000000,67500.000000,332.213819)}
{pt3dadd(184944.000000,111420.000000,67775.000000,317.769741)}
{pt3dadd(184248.000000,111168.000000,67800.000000,303.325664)}
{pt3dadd(183444.000000,110952.000000,68075.000000,288.881586)}
{pt3dadd(182388.000000,110724.000000,68325.000000,299.859089)}
{pt3dadd(180984.000000,110484.000000,68700.000000,310.836591)}
{pt3dadd(180312.000000,110304.000000,69000.000000,321.814093)}
{pt3dadd(179616.000000,110484.000000,69400.000000,332.791596)}
{pt3dadd(179100.000000,110268.000000,69800.000000,461.471004)}
{pt3dadd(178872.000000,110040.000000,70125.000000,590.150412)}
{pt3dadd(178644.000000,109920.000000,70550.000000,718.829820)}
{pt3dadd(178056.000000,109776.000000,70900.000000,319.479948)}

{create adhoc59}
{access adhoc59}
{connect adhoc59(1), adhoc58(0)}
{nseg = 1}
{strdef color color = "White"}
{pt3dclear()}
{pt3dadd(178056.000000,109776.000000,70900.000000,319.479948)}
{pt3dadd(178248.000000,109908.000000,71275.000000,499.187376)}
{pt3dadd(178200.000000,109992.000000,71500.000000,457.588431)}
{pt3dadd(178104.000000,110160.000000,71775.000000,415.989486)}
{pt3dadd(178296.000000,110400.000000,72250.000000,374.390541)}
{pt3dadd(178356.000000,110724.000000,72525.000000,332.791596)}
{pt3dadd(178512.000000,110916.000000,72775.000000,499.187376)}

{create adhoc60}
{access adhoc60}
{connect adhoc60(1), adhoc59(0)}
{nseg = 1}
{strdef color color = "White"}
{pt3dclear()}
{pt3dadd(178512.000000,110916.000000,72775.000000,499.187376)}
{pt3dadd(178572.000000,110868.000000,73075.000000,479.219886)}
{pt3dadd(178632.000000,110844.000000,73400.000000,419.598576)}
{pt3dadd(178752.000000,110868.000000,73750.000000,359.977266)}
{pt3dadd(178872.000000,111036.000000,74175.000000,300.355956)}
{pt3dadd(178884.000000,111432.000000,74625.000000,240.734646)}
{pt3dadd(178980.000000,111744.000000,75025.000000,346.657896)}
{pt3dadd(178980.000000,111780.000000,75200.000000,288.881586)}

{create adhoc61}
{access adhoc61}
{connect adhoc61(1), adhoc59(0)}
{nseg = 1}
{strdef color color = "White"}
{pt3dclear()}
{pt3dadd(178512.000000,110916.000000,72775.000000,499.187376)}
{pt3dadd(178752.000000,111624.000000,72900.000000,167.176836)}
{pt3dadd(178776.000000,111792.000000,73050.000000,160.211138)}
{pt3dadd(179076.000000,112128.000000,73350.000000,153.245439)}
{pt3dadd(179424.000000,112932.000000,73675.000000,146.279741)}
{pt3dadd(179580.000000,113556.000000,73875.000000,139.314042)}
{pt3dadd(179736.000000,113844.000000,74025.000000,146.279741)}
{pt3dadd(179700.000000,114060.000000,74200.000000,153.245439)}
{pt3dadd(179796.000000,114228.000000,74500.000000,160.211138)}
{pt3dadd(179904.000000,114552.000000,74650.000000,167.176836)}
{pt3dadd(180012.000000,114720.000000,74800.000000,160.211138)}
{pt3dadd(180108.000000,114972.000000,74950.000000,153.245439)}
{pt3dadd(180312.000000,115320.000000,75125.000000,146.279741)}
{pt3dadd(180456.000000,115872.000000,75350.000000,139.314042)}
{pt3dadd(180576.000000,116508.000000,75525.000000,146.279741)}
{pt3dadd(180612.000000,116760.000000,75825.000000,153.245439)}
{pt3dadd(180816.000000,117096.000000,75700.000000,160.211138)}
{pt3dadd(180960.000000,117444.000000,76025.000000,167.176836)}
{pt3dadd(181176.000000,117600.000000,76200.000000,131.961348)}
{pt3dadd(181332.000000,117984.000000,76600.000000,96.745860)}
{pt3dadd(181440.000000,118140.000000,76700.000000,80.621550)}

{create adhoc62}
{access adhoc62}
{connect adhoc62(1), adhoc58(0)}
{nseg = 1}
{strdef color color = "White"}
{pt3dclear()}
{pt3dadd(178056.000000,109776.000000,70900.000000,319.479948)}
{pt3dadd(177252.000000,109812.000000,70900.000000,133.741476)}
{pt3dadd(176820.000000,109824.000000,70650.000000,120.461494)}
{pt3dadd(176520.000000,109680.000000,70500.000000,107.181513)}
{pt3dadd(176376.000000,109704.000000,70500.000000,93.901532)}
{pt3dadd(176292.000000,109668.000000,70500.000000,80.621550)}
{pt3dadd(176208.000000,109632.000000,70500.000000,90.898110)}
{pt3dadd(176052.000000,109680.000000,70450.000000,101.174670)}
{pt3dadd(175452.000000,109320.000000,70000.000000,111.451230)}
{pt3dadd(175476.000000,109068.000000,69650.000000,46.656000)}

{create adhoc63}
{access adhoc63}
{connect adhoc63(1), adhoc51(0)}
{nseg = 1}
{strdef color color = "White"}
{pt3dclear()}
{pt3dadd(193296.000000,130068.000000,51925.000000,1430.942742)}
{pt3dadd(193308.000000,129924.000000,50350.000000,499.187376)}
{pt3dadd(192996.000000,129780.000000,50025.000000,446.610929)}
{pt3dadd(192888.000000,129588.000000,49950.000000,394.034481)}
{pt3dadd(192636.000000,129324.000000,49900.000000,341.458034)}
{pt3dadd(192516.000000,129120.000000,49750.000000,288.881586)}
{pt3dadd(192288.000000,128880.000000,49700.000000,288.881586)}
{pt3dadd(192192.000000,128616.000000,49500.000000,288.881586)}
{pt3dadd(192096.000000,128616.000000,49275.000000,288.881586)}
{pt3dadd(191976.000000,128364.000000,49400.000000,288.881586)}
{pt3dadd(191772.000000,128124.000000,49450.000000,303.325664)}
{pt3dadd(191652.000000,127968.000000,49325.000000,317.769741)}
{pt3dadd(191448.000000,127776.000000,49125.000000,332.213819)}
{pt3dadd(191304.000000,127572.000000,48875.000000,346.657896)}
{pt3dadd(191184.000000,127368.000000,48825.000000,317.769741)}
{pt3dadd(191064.000000,127164.000000,48700.000000,288.881586)}
{pt3dadd(190944.000000,126972.000000,48650.000000,259.993431)}
{pt3dadd(190692.000000,126732.000000,48575.000000,231.105276)}
{pt3dadd(190548.000000,126480.000000,48350.000000,259.993431)}
{pt3dadd(190452.000000,126276.000000,48325.000000,288.881586)}
{pt3dadd(190092.000000,126084.000000,48225.000000,317.769741)}
{pt3dadd(189816.000000,125856.000000,48125.000000,346.657896)}
{pt3dadd(189564.000000,125628.000000,48075.000000,320.177083)}
{pt3dadd(189336.000000,125400.000000,47975.000000,293.696271)}
{pt3dadd(189108.000000,125112.000000,47950.000000,267.215459)}
{pt3dadd(188724.000000,124920.000000,47950.000000,240.734646)}
{pt3dadd(188496.000000,124680.000000,47825.000000,249.882570)}
{pt3dadd(188316.000000,124476.000000,47775.000000,259.030494)}
{pt3dadd(187980.000000,124308.000000,47800.000000,268.178418)}
{pt3dadd(187728.000000,124128.000000,47675.000000,277.326342)}
{pt3dadd(187500.000000,123912.000000,47700.000000,332.791600)}
{pt3dadd(187296.000000,123732.000000,47650.000000,388.256859)}
{pt3dadd(187152.000000,123528.000000,47600.000000,443.722118)}
{pt3dadd(187032.000000,123336.000000,47375.000000,499.187376)}
{pt3dadd(186984.000000,123120.000000,47500.000000,415.989486)}
{pt3dadd(187068.000000,122976.000000,47550.000000,415.989486)}

{create adhoc64}
{access adhoc64}
{connect adhoc64(1), adhoc63(0)}
{nseg = 1}
{strdef color color = "White"}
{pt3dclear()}
{pt3dadd(187068.000000,122976.000000,47550.000000,415.989486)}
{pt3dadd(187284.000000,122772.000000,47750.000000,346.657896)}
{pt3dadd(187416.000000,122568.000000,47750.000000,301.787631)}
{pt3dadd(187500.000000,122388.000000,47875.000000,256.917366)}
{pt3dadd(187560.000000,122256.000000,47975.000000,212.047101)}
{pt3dadd(187596.000000,122040.000000,48075.000000,167.176836)}
{pt3dadd(187680.000000,121860.000000,48125.000000,175.535680)}
{pt3dadd(187788.000000,121680.000000,48000.000000,183.894525)}
{pt3dadd(187872.000000,121548.000000,48100.000000,192.253370)}
{pt3dadd(187848.000000,121356.000000,48075.000000,200.612214)}
{pt3dadd(188040.000000,121188.000000,48050.000000,210.642822)}
{pt3dadd(187992.000000,121020.000000,48050.000000,220.673430)}
{pt3dadd(188268.000000,120792.000000,47950.000000,230.704038)}
{pt3dadd(188424.000000,120648.000000,47925.000000,240.734646)}
{pt3dadd(189084.000000,120084.000000,47525.000000,252.771381)}
{pt3dadd(189648.000000,119448.000000,47225.000000,264.808116)}
{pt3dadd(189960.000000,118944.000000,46900.000000,276.844851)}
{pt3dadd(190248.000000,118416.000000,46575.000000,288.881586)}
{pt3dadd(190272.000000,117744.000000,46250.000000,276.844851)}
{pt3dadd(190260.000000,117324.000000,45975.000000,264.808116)}
{pt3dadd(190176.000000,116904.000000,45675.000000,252.771381)}
{pt3dadd(190164.000000,116436.000000,45400.000000,240.734646)}
{pt3dadd(190404.000000,116040.000000,45100.000000,194.547785)}
{pt3dadd(190524.000000,115644.000000,44925.000000,148.360923)}
{pt3dadd(190524.000000,115716.000000,44750.000000,102.174062)}
{pt3dadd(190548.000000,115716.000000,44375.000000,55.987200)}
{pt3dadd(190884.000000,115608.000000,44200.000000,55.987200)}

{create adhoc65}
{access adhoc65}
{connect adhoc65(1), adhoc63(0)}
{nseg = 1}
{strdef color color = "White"}
{pt3dclear()}
{pt3dadd(187068.000000,122976.000000,47550.000000,415.989486)}
{pt3dadd(185880.000000,122976.000000,47225.000000,167.176836)}
{pt3dadd(185292.000000,122796.000000,46975.000000,165.505073)}
{pt3dadd(184956.000000,122628.000000,47000.000000,163.833309)}
{pt3dadd(184416.000000,122508.000000,46800.000000,162.161545)}
{pt3dadd(183816.000000,122268.000000,46675.000000,160.489782)}
{pt3dadd(183276.000000,122028.000000,46500.000000,155.195847)}
{pt3dadd(182724.000000,121752.000000,46550.000000,149.901912)}
{pt3dadd(181824.000000,121500.000000,46725.000000,144.607977)}
{pt3dadd(181248.000000,121344.000000,46775.000000,139.314042)}
{pt3dadd(181092.000000,121260.000000,46775.000000,144.607973)}
{pt3dadd(180912.000000,121308.000000,46825.000000,149.901903)}
{pt3dadd(180720.000000,121260.000000,46750.000000,155.195833)}
{pt3dadd(180516.000000,121200.000000,46800.000000,160.489764)}
{pt3dadd(180312.000000,121188.000000,46875.000000,180.550985)}
{pt3dadd(180168.000000,121200.000000,46825.000000,200.612205)}
{pt3dadd(180012.000000,121188.000000,46875.000000,220.673426)}
{pt3dadd(179820.000000,121164.000000,46900.000000,240.734646)}
{pt3dadd(179028.000000,121152.000000,47200.000000,252.771381)}
{pt3dadd(178536.000000,121248.000000,47450.000000,264.808116)}
{pt3dadd(178068.000000,120852.000000,47925.000000,276.844851)}
{pt3dadd(177972.000000,120636.000000,47975.000000,288.881586)}
{pt3dadd(177852.000000,120468.000000,48025.000000,266.814243)}
{pt3dadd(177576.000000,120216.000000,48175.000000,244.746900)}
{pt3dadd(177672.000000,119976.000000,48175.000000,222.679557)}
{pt3dadd(177684.000000,119760.000000,48100.000000,200.612214)}
{pt3dadd(177624.000000,119532.000000,48075.000000,200.612214)}
{pt3dadd(177564.000000,119340.000000,48125.000000,200.612214)}
{pt3dadd(177552.000000,119148.000000,48075.000000,200.612214)}
{pt3dadd(177588.000000,118896.000000,48100.000000,200.612214)}
{pt3dadd(177804.000000,118656.000000,48100.000000,178.321968)}
{pt3dadd(178008.000000,118476.000000,48100.000000,156.031722)}
{pt3dadd(178056.000000,118308.000000,48050.000000,133.741476)}
{pt3dadd(178272.000000,118128.000000,48175.000000,111.451230)}
{pt3dadd(178308.000000,117996.000000,48100.000000,277.326342)}
{pt3dadd(178308.000000,117804.000000,48250.000000,80.621550)}

{create adhoc66}
{access adhoc66}
{connect adhoc66(1), adhoc50(0)}
{nseg = 1}
{strdef color color = "White"}
{pt3dclear()}
{pt3dadd(192888.000000,133008.000000,49700.000000,718.829820)}
{pt3dadd(191700.000000,132948.000000,48800.000000,200.612214)}
{pt3dadd(191028.000000,132780.000000,48775.000000,246.303148)}
{pt3dadd(190200.000000,132564.000000,48675.000000,291.994083)}
{pt3dadd(189636.000000,132372.000000,48725.000000,337.685017)}
{pt3dadd(189336.000000,132228.000000,48750.000000,383.375952)}
{pt3dadd(188844.000000,132072.000000,48975.000000,359.752361)}
{pt3dadd(188664.000000,131916.000000,49000.000000,336.128769)}
{pt3dadd(188412.000000,131760.000000,49025.000000,312.505178)}
{pt3dadd(188184.000000,131580.000000,49000.000000,288.881586)}
{pt3dadd(187956.000000,131400.000000,49050.000000,288.881586)}
{pt3dadd(187776.000000,131208.000000,49150.000000,288.881586)}
{pt3dadd(187656.000000,131004.000000,49125.000000,288.881586)}
{pt3dadd(186960.000000,130716.000000,49050.000000,288.881586)}
{pt3dadd(186684.000000,130500.000000,49125.000000,274.437509)}
{pt3dadd(186228.000000,130344.000000,49325.000000,259.993431)}
{pt3dadd(185460.000000,130176.000000,49425.000000,245.549354)}
{pt3dadd(185220.000000,130104.000000,49550.000000,231.105276)}
{pt3dadd(185052.000000,129984.000000,49650.000000,231.105276)}
{pt3dadd(184824.000000,129936.000000,49775.000000,231.105276)}
{pt3dadd(184620.000000,129972.000000,49750.000000,231.105276)}
{pt3dadd(184428.000000,129984.000000,49825.000000,231.105276)}
{pt3dadd(184140.000000,130068.000000,49850.000000,233.512618)}
{pt3dadd(183888.000000,130044.000000,49775.000000,235.919961)}
{pt3dadd(183684.000000,129984.000000,49825.000000,238.327304)}
{pt3dadd(183420.000000,129912.000000,49825.000000,240.734646)}
{pt3dadd(183228.000000,129924.000000,49750.000000,240.734646)}
{pt3dadd(183012.000000,129924.000000,49675.000000,240.734646)}
{pt3dadd(182832.000000,129828.000000,49850.000000,240.734646)}
{pt3dadd(182688.000000,129876.000000,49850.000000,240.734646)}
{pt3dadd(182568.000000,129756.000000,49950.000000,238.327304)}
{pt3dadd(182388.000000,129804.000000,49925.000000,235.919961)}
{pt3dadd(182268.000000,129732.000000,49925.000000,233.512618)}
{pt3dadd(182076.000000,129684.000000,49900.000000,231.105276)}
{pt3dadd(181896.000000,129612.000000,49925.000000,245.549354)}
{pt3dadd(181704.000000,129540.000000,49925.000000,259.993431)}
{pt3dadd(181500.000000,129540.000000,49925.000000,274.437509)}
{pt3dadd(181344.000000,129444.000000,49900.000000,288.881586)}
{pt3dadd(181200.000000,129384.000000,49925.000000,288.881586)}
{pt3dadd(181008.000000,129360.000000,49850.000000,288.881586)}
{pt3dadd(180804.000000,129348.000000,49825.000000,288.881586)}
{pt3dadd(180612.000000,129300.000000,49825.000000,288.881586)}
{pt3dadd(180348.000000,129240.000000,49800.000000,266.814243)}
{pt3dadd(180144.000000,129120.000000,49750.000000,244.746900)}
{pt3dadd(179952.000000,129108.000000,49725.000000,222.679557)}
{pt3dadd(179736.000000,129036.000000,49700.000000,200.612214)}
{pt3dadd(179532.000000,128988.000000,49650.000000,200.612214)}
{pt3dadd(179340.000000,128928.000000,49600.000000,200.612214)}
{pt3dadd(179124.000000,128856.000000,49625.000000,200.612214)}
{pt3dadd(178944.000000,128808.000000,49600.000000,200.612214)}
{pt3dadd(178764.000000,128736.000000,49625.000000,210.642822)}
{pt3dadd(178608.000000,128664.000000,49600.000000,220.673430)}
{pt3dadd(178428.000000,128448.000000,49600.000000,230.704038)}
{pt3dadd(178164.000000,128388.000000,49625.000000,240.734646)}
{pt3dadd(177960.000000,128292.000000,49550.000000,267.215459)}
{pt3dadd(177780.000000,128244.000000,49675.000000,293.696271)}
{pt3dadd(177564.000000,128076.000000,49675.000000,320.177083)}
{pt3dadd(177312.000000,128016.000000,49675.000000,346.657896)}
{pt3dadd(177144.000000,128004.000000,49775.000000,346.657896)}
{pt3dadd(176940.000000,127896.000000,49750.000000,346.657896)}
{pt3dadd(176700.000000,127872.000000,49700.000000,346.657896)}
{pt3dadd(176508.000000,127824.000000,49750.000000,346.657896)}
{pt3dadd(176244.000000,127644.000000,49750.000000,320.177083)}
{pt3dadd(176016.000000,127524.000000,49775.000000,293.696271)}
{pt3dadd(175764.000000,127344.000000,49825.000000,267.215459)}
{pt3dadd(175608.000000,126744.000000,50150.000000,240.734646)}
{pt3dadd(175428.000000,126276.000000,50225.000000,160.489764)}
{pt3dadd(175284.000000,126096.000000,50450.000000,111.451230)}

{create adhoc67}
{access adhoc67}
{connect adhoc67(1), adhoc66(0)}
{nseg = 1}
{strdef color color = "White"}
{pt3dclear()}
{pt3dadd(175284.000000,126096.000000,50450.000000,111.451230)}
{pt3dadd(175284.000000,125544.000000,50875.000000,346.657896)}
{pt3dadd(175140.000000,125220.000000,51175.000000,346.657896)}
{pt3dadd(174924.000000,124956.000000,51475.000000,479.219886)}

{create adhoc68}
{access adhoc68}
{connect adhoc68(1), adhoc67(0)}
{nseg = 1}
{strdef color color = "White"}
{pt3dclear()}
{pt3dadd(174924.000000,124956.000000,51475.000000,479.219886)}
{pt3dadd(174780.000000,124932.000000,51800.000000,383.375916)}
{pt3dadd(174876.000000,125040.000000,52125.000000,287.832564)}
{pt3dadd(175140.000000,124824.000000,52425.000000,192.289212)}
{pt3dadd(175200.000000,124584.000000,52725.000000,96.745860)}
{pt3dadd(175116.000000,124368.000000,52875.000000,111.451230)}

{create adhoc69}
{access adhoc69}
{connect adhoc69(1), adhoc67(0)}
{nseg = 1}
{strdef color color = "White"}
{pt3dclear()}
{pt3dadd(174924.000000,124956.000000,51475.000000,479.219886)}
{pt3dadd(174780.000000,123624.000000,51325.000000,116.095032)}
{pt3dadd(174636.000000,123480.000000,51200.000000,116.095032)}
{pt3dadd(174636.000000,123420.000000,51075.000000,116.095032)}
{pt3dadd(174444.000000,123324.000000,51300.000000,116.095032)}
{pt3dadd(174324.000000,123204.000000,51325.000000,116.095032)}
{pt3dadd(174156.000000,123048.000000,51450.000000,167.176836)}
{pt3dadd(174360.000000,122892.000000,51500.000000,67.184640)}

{create adhoc70}
{access adhoc70}
{connect adhoc70(1), adhoc66(0)}
{nseg = 1}
{strdef color color = "White"}
{pt3dclear()}
{pt3dadd(175284.000000,126096.000000,50450.000000,111.451230)}
{pt3dadd(175284.000000,126780.000000,50250.000000,240.734646)}
{pt3dadd(175152.000000,126684.000000,50250.000000,116.095032)}
{pt3dadd(174984.000000,126612.000000,50225.000000,55.987200)}

{create adhoc71}
{access adhoc71}
{connect adhoc71(1), adhoc49(0)}
{nseg = 1}
{strdef color color = "White"}
{pt3dclear()}
{pt3dadd(193392.000000,135924.000000,48475.000000,993.710358)}
{pt3dadd(191604.000000,135924.000000,47400.000000,288.881586)}
{pt3dadd(191424.000000,135852.000000,47350.000000,288.881586)}
{pt3dadd(191220.000000,135744.000000,47325.000000,288.881586)}
{pt3dadd(191028.000000,135708.000000,47200.000000,288.881586)}
{pt3dadd(190848.000000,135612.000000,47175.000000,288.881586)}
{pt3dadd(190632.000000,135552.000000,47050.000000,288.881586)}
{pt3dadd(190440.000000,135456.000000,47025.000000,288.881586)}
{pt3dadd(190224.000000,135420.000000,47025.000000,288.881586)}
{pt3dadd(189960.000000,135312.000000,46850.000000,288.881586)}
{pt3dadd(189696.000000,135192.000000,46850.000000,276.844851)}
{pt3dadd(189444.000000,135156.000000,46800.000000,264.808116)}
{pt3dadd(189264.000000,135120.000000,46750.000000,252.771381)}
{pt3dadd(189012.000000,134988.000000,46650.000000,240.734646)}
{pt3dadd(188856.000000,135012.000000,46675.000000,252.771381)}
{pt3dadd(188688.000000,134952.000000,46650.000000,264.808116)}
{pt3dadd(188484.000000,134760.000000,46375.000000,276.844851)}
{pt3dadd(187812.000000,134604.000000,46200.000000,288.881586)}
{pt3dadd(187164.000000,134424.000000,46025.000000,276.844851)}
{pt3dadd(186696.000000,134364.000000,45850.000000,264.808116)}
{pt3dadd(186012.000000,134292.000000,45525.000000,252.771381)}
{pt3dadd(185304.000000,134292.000000,45350.000000,240.734646)}
{pt3dadd(184788.000000,134232.000000,45200.000000,252.771381)}
{pt3dadd(183840.000000,134160.000000,45075.000000,264.808116)}
{pt3dadd(182748.000000,134028.000000,44950.000000,276.844851)}
{pt3dadd(181908.000000,133788.000000,44775.000000,288.881586)}
{pt3dadd(181692.000000,133776.000000,44600.000000,288.881586)}
{pt3dadd(181500.000000,133632.000000,44525.000000,288.881586)}
{pt3dadd(181284.000000,133512.000000,44475.000000,288.881586)}
{pt3dadd(181104.000000,133548.000000,44450.000000,288.881586)}
{pt3dadd(180924.000000,133560.000000,44325.000000,274.437509)}
{pt3dadd(180768.000000,133584.000000,44250.000000,259.993431)}
{pt3dadd(180564.000000,133416.000000,44200.000000,245.549354)}
{pt3dadd(180384.000000,133308.000000,44175.000000,231.105276)}
{pt3dadd(180192.000000,133260.000000,44200.000000,231.105276)}
{pt3dadd(180000.000000,133380.000000,44000.000000,231.105276)}
{pt3dadd(179784.000000,133428.000000,44025.000000,231.105276)}
{pt3dadd(179628.000000,133404.000000,43975.000000,231.105276)}
{pt3dadd(179472.000000,133500.000000,43875.000000,259.993431)}
{pt3dadd(179352.000000,133464.000000,43775.000000,288.881586)}
{pt3dadd(179160.000000,133428.000000,43725.000000,317.769741)}
{pt3dadd(178956.000000,133368.000000,43725.000000,346.657896)}
{pt3dadd(178740.000000,133248.000000,43625.000000,320.177083)}
{pt3dadd(178584.000000,133224.000000,43625.000000,293.696271)}
{pt3dadd(178380.000000,133224.000000,43625.000000,267.215459)}
{pt3dadd(178188.000000,133404.000000,43700.000000,240.734646)}
{pt3dadd(178008.000000,133464.000000,43700.000000,240.734646)}
{pt3dadd(177804.000000,133464.000000,43725.000000,240.734646)}
{pt3dadd(177612.000000,133512.000000,43775.000000,240.734646)}
{pt3dadd(177468.000000,133572.000000,43775.000000,240.734646)}
{pt3dadd(177324.000000,133620.000000,43800.000000,209.574742)}
{pt3dadd(177144.000000,134004.000000,43750.000000,178.414839)}
{pt3dadd(176952.000000,134388.000000,43850.000000,147.254936)}
{pt3dadd(176736.000000,134664.000000,43825.000000,116.095032)}
{pt3dadd(176592.000000,135000.000000,43800.000000,111.257739)}
{pt3dadd(176388.000000,135084.000000,43875.000000,106.420446)}
{pt3dadd(176172.000000,135288.000000,43950.000000,101.583153)}
{pt3dadd(175944.000000,135540.000000,43975.000000,96.745860)}
{pt3dadd(175800.000000,135516.000000,43925.000000,122.712448)}
{pt3dadd(175620.000000,135636.000000,43875.000000,148.679037)}
{pt3dadd(175416.000000,135660.000000,43875.000000,174.645625)}
{pt3dadd(175212.000000,135792.000000,43700.000000,200.612214)}
{pt3dadd(175020.000000,135696.000000,43650.000000,185.287671)}
{pt3dadd(174864.000000,135672.000000,43800.000000,169.963128)}
{pt3dadd(175176.000000,135972.000000,43425.000000,154.638585)}
{pt3dadd(174936.000000,135864.000000,43075.000000,139.314042)}
{pt3dadd(174624.000000,135600.000000,42925.000000,80.621550)}

{create adhoc72}
{access adhoc72}
{connect adhoc72(1), adhoc48(0)}
{nseg = 1}
{strdef color color = "White"}
{pt3dclear()}
{pt3dadd(193692.000000,141876.000000,46575.000000,828.092016)}
{pt3dadd(193176.000000,141876.000000,44575.000000,718.829820)}
{pt3dadd(193056.000000,141672.000000,43825.000000,862.595802)}
{pt3dadd(192720.000000,141420.000000,43600.000000,828.092016)}

{create adhoc73}
{access adhoc73}
{connect adhoc73(1), adhoc72(0)}
{nseg = 1}
{strdef color color = "White"}
{pt3dclear()}
{pt3dadd(192720.000000,141420.000000,43600.000000,828.092016)}
{pt3dadd(192732.000000,141480.000000,43325.000000,828.091944)}
{pt3dadd(192372.000000,141408.000000,42800.000000,953.961894)}
{pt3dadd(192168.000000,141228.000000,42500.000000,499.187376)}

{create adhoc74}
{access adhoc74}
{connect adhoc74(1), adhoc73(0)}
{nseg = 1}
{strdef color color = "White"}
{pt3dclear()}
{pt3dadd(192168.000000,141228.000000,42500.000000,499.187376)}
{pt3dadd(192516.000000,141444.000000,42125.000000,828.092016)}
{pt3dadd(192552.000000,141492.000000,41750.000000,828.092016)}
{pt3dadd(192684.000000,141468.000000,41400.000000,828.092016)}
{pt3dadd(192720.000000,141444.000000,40950.000000,828.092016)}
{pt3dadd(192672.000000,141348.000000,40650.000000,828.092016)}
{pt3dadd(192936.000000,141276.000000,40250.000000,811.530162)}
{pt3dadd(192948.000000,141180.000000,39850.000000,794.968308)}
{pt3dadd(193140.000000,140976.000000,39600.000000,499.187376)}

{create adhoc75}
{access adhoc75}
{connect adhoc75(1), adhoc73(0)}
{nseg = 1}
{strdef color color = "White"}
{pt3dclear()}
{pt3dadd(192168.000000,141228.000000,42500.000000,499.187376)}
{pt3dadd(191424.000000,141084.000000,42300.000000,200.612214)}
{pt3dadd(190656.000000,141012.000000,42125.000000,222.679557)}
{pt3dadd(190200.000000,141096.000000,41975.000000,244.746900)}
{pt3dadd(189504.000000,141384.000000,41650.000000,266.814243)}
{pt3dadd(189564.000000,142116.000000,40925.000000,288.881586)}
{pt3dadd(189492.000000,142284.000000,40450.000000,264.808116)}
{pt3dadd(189600.000000,143124.000000,39950.000000,240.734646)}
{pt3dadd(189504.000000,143700.000000,39650.000000,167.176836)}

{create adhoc76}
{access adhoc76}
{connect adhoc76(1), adhoc72(0)}
{nseg = 1}
{strdef color color = "White"}
{pt3dclear()}
{pt3dadd(192720.000000,141420.000000,43600.000000,828.092016)}
{pt3dadd(192444.000000,139392.000000,43600.000000,383.375952)}
{pt3dadd(192192.000000,138780.000000,43350.000000,374.196438)}
{pt3dadd(192072.000000,138084.000000,43075.000000,365.016924)}
{pt3dadd(192108.000000,137364.000000,42775.000000,355.837410)}
{pt3dadd(192216.000000,136848.000000,42500.000000,346.657896)}
{pt3dadd(192240.000000,136548.000000,42225.000000,346.657896)}
{pt3dadd(192312.000000,136416.000000,42250.000000,346.657896)}
{pt3dadd(192324.000000,135816.000000,41925.000000,346.657896)}
{pt3dadd(192372.000000,135600.000000,41700.000000,346.657896)}
{pt3dadd(192348.000000,135348.000000,41450.000000,346.657896)}
{pt3dadd(192384.000000,135204.000000,41300.000000,399.349944)}

{create adhoc77}
{access adhoc77}
{connect adhoc77(1), adhoc76(0)}
{nseg = 1}
{strdef color color = "White"}
{pt3dclear()}
{pt3dadd(192384.000000,135204.000000,41300.000000,399.349944)}
{pt3dadd(192168.000000,135864.000000,41300.000000,200.612214)}
{pt3dadd(192048.000000,136044.000000,41075.000000,158.353623)}
{pt3dadd(191832.000000,136044.000000,40825.000000,116.095032)}
{pt3dadd(191688.000000,135984.000000,40575.000000,139.314042)}

{create adhoc78}
{access adhoc78}
{connect adhoc78(1), adhoc76(0)}
{nseg = 1}
{strdef color color = "White"}
{pt3dclear()}
{pt3dadd(192384.000000,135204.000000,41300.000000,399.349944)}
{pt3dadd(192672.000000,134904.000000,40950.000000,288.881586)}
{pt3dadd(192588.000000,134532.000000,40575.000000,308.140356)}
{pt3dadd(192756.000000,134052.000000,40250.000000,327.399126)}
{pt3dadd(192948.000000,133548.000000,40025.000000,346.657896)}
{pt3dadd(193212.000000,132924.000000,39825.000000,288.881586)}

{create adhoc79}
{access adhoc79}
{connect adhoc79(1), adhoc78(0)}
{nseg = 1}
{strdef color color = "White"}
{pt3dclear()}
{pt3dadd(193212.000000,132924.000000,39825.000000,288.881586)}
{pt3dadd(192936.000000,130824.000000,39825.000000,200.612214)}
{pt3dadd(193116.000000,129432.000000,40075.000000,288.881586)}
{pt3dadd(193320.000000,128580.000000,40200.000000,200.612214)}

{create adhoc80}
{access adhoc80}
{connect adhoc80(1), adhoc79(0)}
{nseg = 1}
{strdef color color = "White"}
{pt3dclear()}
{pt3dadd(193320.000000,128580.000000,40200.000000,200.612214)}
{pt3dadd(193404.000000,127572.000000,40200.000000,200.612214)}
{pt3dadd(193104.000000,126948.000000,40425.000000,275.256004)}
{pt3dadd(192924.000000,126276.000000,40725.000000,349.899795)}
{pt3dadd(192528.000000,125544.000000,40925.000000,424.543586)}
{pt3dadd(192336.000000,125520.000000,41125.000000,499.187376)}
{pt3dadd(192372.000000,125604.000000,41350.000000,434.574193)}
{pt3dadd(192384.000000,125508.000000,41600.000000,369.961011)}
{pt3dadd(192336.000000,125640.000000,41825.000000,305.347828)}
{pt3dadd(192228.000000,125424.000000,42100.000000,240.734646)}
{pt3dadd(192024.000000,125364.000000,42375.000000,192.738384)}
{pt3dadd(191892.000000,125232.000000,42600.000000,144.742122)}
{pt3dadd(191712.000000,124956.000000,42775.000000,96.745860)}
{pt3dadd(191628.000000,124800.000000,42875.000000,67.184640)}

{create adhoc81}
{access adhoc81}
{connect adhoc81(1), adhoc79(0)}
{nseg = 1}
{strdef color color = "White"}
{pt3dclear()}
{pt3dadd(193320.000000,128580.000000,40200.000000,200.612214)}
{pt3dadd(192996.000000,129624.000000,40325.000000,346.657896)}
{pt3dadd(192816.000000,129432.000000,40550.000000,346.657896)}
{pt3dadd(192648.000000,129156.000000,40900.000000,346.657896)}
{pt3dadd(192516.000000,128988.000000,41125.000000,346.657896)}
{pt3dadd(192192.000000,129000.000000,41450.000000,346.657896)}
{pt3dadd(191940.000000,128892.000000,41650.000000,286.830876)}
{pt3dadd(191496.000000,128748.000000,41950.000000,227.003856)}
{pt3dadd(191100.000000,128820.000000,42225.000000,167.176836)}
{pt3dadd(190944.000000,128904.000000,42175.000000,55.987200)}

{create adhoc82}
{access adhoc82}
{connect adhoc82(1), adhoc78(0)}
{nseg = 1}
{strdef color color = "White"}
{pt3dclear()}
{pt3dadd(193212.000000,132924.000000,39825.000000,288.881586)}
{pt3dadd(193272.000000,132276.000000,39475.000000,288.881586)}
{pt3dadd(193572.000000,132540.000000,39250.000000,303.325664)}
{pt3dadd(194316.000000,132744.000000,39050.000000,317.769741)}
{pt3dadd(194556.000000,132672.000000,38850.000000,332.213819)}
{pt3dadd(194664.000000,132780.000000,38600.000000,346.657896)}
{pt3dadd(194676.000000,132660.000000,38350.000000,332.213819)}
{pt3dadd(194712.000000,132588.000000,38100.000000,317.769741)}
{pt3dadd(194916.000000,132504.000000,37800.000000,303.325664)}
{pt3dadd(194856.000000,132444.000000,37575.000000,288.881586)}
{pt3dadd(194676.000000,132480.000000,37275.000000,240.847655)}
{pt3dadd(194568.000000,132780.000000,36725.000000,192.813723)}
{pt3dadd(194376.000000,133068.000000,36450.000000,144.779792)}
{pt3dadd(194292.000000,133248.000000,36400.000000,96.745860)}
{pt3dadd(194160.000000,133440.000000,36200.000000,107.387906)}
{pt3dadd(194160.000000,133596.000000,36200.000000,118.029951)}
{pt3dadd(194148.000000,133728.000000,36075.000000,128.671997)}
{pt3dadd(194220.000000,133896.000000,36075.000000,139.314042)}
{pt3dadd(194280.000000,134088.000000,36175.000000,116.095032)}

{create adhoc83}
{access adhoc83}
{connect adhoc83(1), adhoc47(0)}
{nseg = 1}
{strdef color color = "White"}
{pt3dclear()}
{pt3dadd(193452.000000,143532.000000,45950.000000,953.961966)}
{pt3dadd(190980.000000,143532.000000,46000.000000,167.176836)}
{pt3dadd(189876.000000,143028.000000,45775.000000,203.955741)}
{pt3dadd(189708.000000,142956.000000,45700.000000,240.734646)}
{pt3dadd(189516.000000,142896.000000,45625.000000,139.314042)}

{create adhoc84}
{access adhoc84}
{connect adhoc84(1), adhoc46(0)}
{nseg = 1}
{strdef color color = "White"}
{pt3dclear()}
{pt3dadd(192408.000000,152688.000000,44875.000000,953.961894)}
{pt3dadd(190956.000000,152748.000000,43725.000000,240.734646)}
{pt3dadd(190704.000000,152532.000000,43450.000000,267.215459)}
{pt3dadd(190428.000000,152340.000000,43450.000000,293.696271)}
{pt3dadd(190008.000000,152100.000000,43375.000000,320.177083)}
{pt3dadd(189552.000000,151884.000000,43225.000000,346.657896)}
{pt3dadd(189300.000000,151728.000000,43075.000000,320.177083)}
{pt3dadd(189156.000000,151704.000000,43050.000000,293.696271)}
{pt3dadd(188940.000000,151620.000000,42825.000000,267.215459)}
{pt3dadd(188712.000000,151584.000000,42725.000000,240.734646)}
{pt3dadd(188532.000000,151572.000000,42550.000000,240.734646)}
{pt3dadd(188340.000000,151404.000000,42350.000000,240.734646)}
{pt3dadd(188184.000000,151236.000000,42075.000000,240.734646)}
{pt3dadd(187920.000000,151044.000000,41750.000000,240.734646)}
{pt3dadd(187956.000000,151032.000000,41525.000000,230.704038)}
{pt3dadd(187944.000000,150756.000000,41200.000000,220.673430)}
{pt3dadd(187980.000000,150492.000000,40975.000000,210.642822)}
{pt3dadd(187776.000000,150144.000000,40675.000000,200.612214)}
{pt3dadd(187608.000000,149940.000000,40325.000000,179.482918)}
{pt3dadd(187464.000000,149808.000000,40200.000000,158.353623)}
{pt3dadd(187488.000000,149664.000000,40175.000000,137.224328)}
{pt3dadd(187548.000000,149472.000000,40050.000000,116.095032)}
{pt3dadd(187404.000000,149328.000000,39950.000000,137.224328)}
{pt3dadd(187404.000000,149196.000000,39825.000000,158.353623)}
{pt3dadd(187368.000000,149064.000000,39900.000000,179.482918)}
{pt3dadd(187392.000000,148920.000000,39925.000000,200.612214)}
{pt3dadd(187320.000000,148800.000000,39700.000000,208.235480)}
{pt3dadd(187356.000000,148632.000000,39450.000000,215.858745)}
{pt3dadd(187452.000000,148284.000000,39250.000000,223.482010)}
{pt3dadd(187332.000000,148116.000000,39050.000000,231.105276)}
{pt3dadd(187260.000000,147888.000000,38825.000000,240.734646)}
{pt3dadd(187368.000000,147660.000000,38575.000000,167.176836)}

{create adhoc85}
{access adhoc85}
{connect adhoc85(1), adhoc45(0)}
{nseg = 1}
{strdef color color = "White"}
{pt3dclear()}
{pt3dadd(192132.000000,155688.000000,43950.000000,993.710358)}
{pt3dadd(190968.000000,155688.000000,42050.000000,460.051182)}
{pt3dadd(190764.000000,155568.000000,41750.000000,395.191440)}
{pt3dadd(190692.000000,155412.000000,41550.000000,330.331698)}
{pt3dadd(190788.000000,155244.000000,41325.000000,265.471956)}
{pt3dadd(190920.000000,154596.000000,41025.000000,200.612214)}
{pt3dadd(190824.000000,154116.000000,40650.000000,222.679557)}
{pt3dadd(190656.000000,153840.000000,40325.000000,244.746900)}
{pt3dadd(190524.000000,153540.000000,39975.000000,266.814243)}
{pt3dadd(190968.000000,153336.000000,39725.000000,288.881586)}
{pt3dadd(191196.000000,153156.000000,39525.000000,394.034481)}
{pt3dadd(191232.000000,153048.000000,39200.000000,499.187376)}
{pt3dadd(191304.000000,153000.000000,38900.000000,499.187376)}

{create adhoc86}
{access adhoc86}
{connect adhoc86(1), adhoc85(0)}
{nseg = 1}
{strdef color color = "White"}
{pt3dclear()}
{pt3dadd(191304.000000,153000.000000,38900.000000,499.187376)}
{pt3dadd(191520.000000,152388.000000,38875.000000,240.734646)}
{pt3dadd(191484.000000,152232.000000,38675.000000,252.771381)}
{pt3dadd(191748.000000,152220.000000,38400.000000,264.808116)}
{pt3dadd(192000.000000,152136.000000,38200.000000,276.844851)}
{pt3dadd(191952.000000,151824.000000,37900.000000,288.881586)}
{pt3dadd(192204.000000,151596.000000,37575.000000,341.458034)}
{pt3dadd(192348.000000,151428.000000,37300.000000,394.034481)}
{pt3dadd(192420.000000,151344.000000,37000.000000,446.610929)}
{pt3dadd(192480.000000,151368.000000,36700.000000,499.187376)}
{pt3dadd(192516.000000,151440.000000,36500.000000,446.610929)}
{pt3dadd(192672.000000,151284.000000,36225.000000,394.034481)}
{pt3dadd(192636.000000,151164.000000,35950.000000,341.458034)}
{pt3dadd(192768.000000,151188.000000,35650.000000,288.881586)}
{pt3dadd(192732.000000,150996.000000,35375.000000,288.881586)}
{pt3dadd(192684.000000,150948.000000,35075.000000,288.881586)}
{pt3dadd(192612.000000,150948.000000,34800.000000,288.881586)}
{pt3dadd(192708.000000,150900.000000,34525.000000,255.583926)}

{create adhoc87}
{access adhoc87}
{connect adhoc87(1), adhoc85(0)}
{nseg = 1}
{strdef color color = "White"}
{pt3dclear()}
{pt3dadd(191304.000000,153000.000000,38900.000000,499.187376)}
{pt3dadd(191412.000000,153468.000000,38875.000000,415.989486)}
{pt3dadd(191628.000000,153792.000000,38675.000000,291.583161)}
{pt3dadd(191436.000000,154500.000000,38375.000000,167.176836)}
{pt3dadd(191040.000000,154992.000000,38050.000000,116.095032)}

{create adhoc88}
{access adhoc88}
{connect adhoc88(1), adhoc44(0)}
{nseg = 1}
{strdef color color = "White"}
{pt3dclear()}
{pt3dadd(189696.000000,165636.000000,42600.000000,1035.114948)}
{pt3dadd(188928.000000,165624.000000,40350.000000,1035.114948)}
{pt3dadd(188856.000000,165444.000000,39825.000000,1074.449300)}
{pt3dadd(188736.000000,165216.000000,39300.000000,1113.783651)}
{pt3dadd(188772.000000,165048.000000,38975.000000,1153.118003)}
{pt3dadd(188664.000000,164868.000000,38625.000000,1192.452354)}
{pt3dadd(188568.000000,164676.000000,38250.000000,1082.500170)}
{pt3dadd(188676.000000,164496.000000,37900.000000,972.547986)}
{pt3dadd(188736.000000,164688.000000,37650.000000,862.595802)}
{pt3dadd(188652.000000,164412.000000,37300.000000,862.595802)}

{create adhoc89}
{access adhoc89}
{connect adhoc89(1), adhoc88(0)}
{nseg = 1}
{strdef color color = "White"}
{pt3dclear()}
{pt3dadd(188652.000000,164412.000000,37300.000000,862.595802)}
{pt3dadd(188220.000000,165192.000000,37225.000000,368.040852)}
{pt3dadd(188016.000000,165492.000000,37000.000000,326.183693)}
{pt3dadd(187896.000000,165708.000000,36775.000000,284.326533)}
{pt3dadd(187644.000000,165780.000000,36550.000000,242.469374)}
{pt3dadd(187668.000000,166032.000000,36325.000000,200.612214)}
{pt3dadd(187776.000000,166176.000000,36125.000000,174.259800)}
{pt3dadd(187692.000000,166296.000000,35925.000000,147.907386)}
{pt3dadd(187656.000000,166404.000000,36025.000000,55.987200)}

{create adhoc90}
{access adhoc90}
{connect adhoc90(1), adhoc88(0)}
{nseg = 1}
{strdef color color = "White"}
{pt3dclear()}
{pt3dadd(188652.000000,164412.000000,37300.000000,862.595802)}
{pt3dadd(188880.000000,164148.000000,36950.000000,635.974704)}
{pt3dadd(189060.000000,164100.000000,36700.000000,533.879138)}
{pt3dadd(189156.000000,163980.000000,36400.000000,454.006874)}
{pt3dadd(189444.000000,163764.000000,35850.000000,401.968837)}
{pt3dadd(189444.000000,163608.000000,35700.000000,383.375952)}
{pt3dadd(189744.000000,163404.000000,35525.000000,388.471817)}
{pt3dadd(190224.000000,163248.000000,35200.000000,399.682719)}
{pt3dadd(190512.000000,163104.000000,34800.000000,410.893621)}
{pt3dadd(190644.000000,162972.000000,34700.000000,415.989486)}
{pt3dadd(190980.000000,162852.000000,34250.000000,415.989486)}
{pt3dadd(191112.000000,162804.000000,34225.000000,415.989486)}
{pt3dadd(191484.000000,162564.000000,34025.000000,415.989486)}
{pt3dadd(191628.000000,162420.000000,33800.000000,415.989486)}
{pt3dadd(191760.000000,162408.000000,33525.000000,396.391237)}
{pt3dadd(191988.000000,162060.000000,33325.000000,349.122918)}
{pt3dadd(192240.000000,161820.000000,33075.000000,291.474173)}
{pt3dadd(192648.000000,161136.000000,32725.000000,240.734646)}
{pt3dadd(192780.000000,160944.000000,32550.000000,200.612214)}
{pt3dadd(192804.000000,160944.000000,32375.000000,160.644262)}

{create adhoc91}
{access adhoc91}
{connect adhoc91(1), adhoc43(0)}
{nseg = 1}
{strdef color color = "White"}
{pt3dclear()}
{pt3dadd(188892.000000,173220.000000,44025.000000,1192.452480)}
{pt3dadd(185592.000000,173220.000000,43950.000000,200.612214)}
{pt3dadd(184116.000000,173112.000000,43525.000000,273.635055)}
{pt3dadd(183612.000000,172908.000000,43450.000000,346.657896)}
{pt3dadd(183108.000000,172764.000000,43600.000000,346.657896)}

{create adhoc92}
{access adhoc92}
{connect adhoc92(1), adhoc91(0)}
{nseg = 1}
{strdef color color = "White"}
{pt3dclear()}
{pt3dadd(183108.000000,172764.000000,43600.000000,346.657896)}
{pt3dadd(183936.000000,172716.000000,43350.000000,399.349944)}
{pt3dadd(183768.000000,172572.000000,43150.000000,116.095032)}

{create adhoc93}
{access adhoc93}
{connect adhoc93(1), adhoc91(0)}
{nseg = 1}
{strdef color color = "White"}
{pt3dclear()}
{pt3dadd(183108.000000,172764.000000,43600.000000,346.657896)}
{pt3dadd(181560.000000,172620.000000,43725.000000,346.657896)}
{pt3dadd(181056.000000,172452.000000,43825.000000,332.213819)}
{pt3dadd(180564.000000,172272.000000,43850.000000,317.769741)}
{pt3dadd(179952.000000,172116.000000,43750.000000,303.325664)}
{pt3dadd(179172.000000,171948.000000,43825.000000,288.881586)}
{pt3dadd(178992.000000,171840.000000,43650.000000,303.325664)}
{pt3dadd(178824.000000,171732.000000,43675.000000,317.769741)}
{pt3dadd(178656.000000,171624.000000,43700.000000,332.213819)}
{pt3dadd(178524.000000,171576.000000,43725.000000,346.657896)}
{pt3dadd(178320.000000,171576.000000,43700.000000,346.657896)}
{pt3dadd(178164.000000,171492.000000,43725.000000,346.657896)}
{pt3dadd(177996.000000,171444.000000,43675.000000,346.657896)}
{pt3dadd(177852.000000,171396.000000,43650.000000,346.657896)}
{pt3dadd(177732.000000,171324.000000,43625.000000,346.657896)}
{pt3dadd(177552.000000,171348.000000,43650.000000,346.657896)}
{pt3dadd(177408.000000,171348.000000,43625.000000,346.657896)}
{pt3dadd(177264.000000,171228.000000,43625.000000,346.657896)}
{pt3dadd(177120.000000,171228.000000,43600.000000,332.213819)}
{pt3dadd(176964.000000,171252.000000,43600.000000,317.769741)}
{pt3dadd(176820.000000,171216.000000,43575.000000,303.325664)}
{pt3dadd(176676.000000,171240.000000,43525.000000,288.881586)}
{pt3dadd(176520.000000,171168.000000,43525.000000,288.881586)}
{pt3dadd(176364.000000,171096.000000,43450.000000,288.881586)}
{pt3dadd(176184.000000,171096.000000,43475.000000,288.881586)}
{pt3dadd(175968.000000,171048.000000,43475.000000,288.881586)}
{pt3dadd(175824.000000,171036.000000,43450.000000,285.992771)}
{pt3dadd(175668.000000,171024.000000,43475.000000,283.103955)}
{pt3dadd(175488.000000,170952.000000,43450.000000,280.215140)}
{pt3dadd(175308.000000,170976.000000,43425.000000,277.326324)}
{pt3dadd(175176.000000,170904.000000,43375.000000,280.215140)}
{pt3dadd(174984.000000,170868.000000,43425.000000,283.103955)}
{pt3dadd(174816.000000,170868.000000,43450.000000,285.992771)}
{pt3dadd(174612.000000,170784.000000,43400.000000,288.881586)}
{pt3dadd(174408.000000,170784.000000,43425.000000,299.859080)}
{pt3dadd(174252.000000,170772.000000,43375.000000,310.836573)}
{pt3dadd(174108.000000,170760.000000,43350.000000,321.814067)}
{pt3dadd(173916.000000,170724.000000,43375.000000,332.791560)}
{pt3dadd(173712.000000,170676.000000,43325.000000,349.431156)}
{pt3dadd(173496.000000,170736.000000,43325.000000,366.070752)}
{pt3dadd(173352.000000,170664.000000,43300.000000,382.710348)}
{pt3dadd(173220.000000,170688.000000,43325.000000,399.349944)}
{pt3dadd(173016.000000,170580.000000,43350.000000,399.349944)}
{pt3dadd(172836.000000,170496.000000,43400.000000,399.349944)}
{pt3dadd(172668.000000,170520.000000,43325.000000,399.349944)}
{pt3dadd(172524.000000,170412.000000,43375.000000,399.349944)}
{pt3dadd(172344.000000,170340.000000,43450.000000,386.176932)}
{pt3dadd(172176.000000,170232.000000,43350.000000,373.003920)}
{pt3dadd(171972.000000,170184.000000,43375.000000,359.830908)}
{pt3dadd(171768.000000,170148.000000,43475.000000,346.657896)}
{pt3dadd(171612.000000,170100.000000,43500.000000,363.990794)}
{pt3dadd(171408.000000,170016.000000,43500.000000,381.323691)}
{pt3dadd(171168.000000,169908.000000,43600.000000,398.656589)}
{pt3dadd(171024.000000,169908.000000,43625.000000,415.989486)}
{pt3dadd(170808.000000,170004.000000,43700.000000,415.989486)}
{pt3dadd(170664.000000,170004.000000,43725.000000,415.989486)}
{pt3dadd(170520.000000,169992.000000,43775.000000,415.989486)}
{pt3dadd(170364.000000,169944.000000,43800.000000,415.989486)}
{pt3dadd(170208.000000,169968.000000,43775.000000,384.212511)}
{pt3dadd(170028.000000,170040.000000,43800.000000,352.435536)}
{pt3dadd(169836.000000,170100.000000,43925.000000,320.658561)}
{pt3dadd(169656.000000,170064.000000,43950.000000,288.881586)}
{pt3dadd(169464.000000,170052.000000,43900.000000,285.992775)}
{pt3dadd(169344.000000,170112.000000,43925.000000,283.103964)}
{pt3dadd(169212.000000,170040.000000,44000.000000,280.215153)}
{pt3dadd(169092.000000,170136.000000,44075.000000,277.326342)}
{pt3dadd(168960.000000,170124.000000,44025.000000,307.832243)}
{pt3dadd(168780.000000,170220.000000,44075.000000,338.338143)}
{pt3dadd(168636.000000,170364.000000,44400.000000,368.844044)}
{pt3dadd(168456.000000,170580.000000,44650.000000,399.349944)}
{pt3dadd(168324.000000,170676.000000,44750.000000,403.509830)}
{pt3dadd(168192.000000,170748.000000,44850.000000,407.669715)}
{pt3dadd(168036.000000,170820.000000,45075.000000,411.829601)}
{pt3dadd(168036.000000,171048.000000,45300.000000,415.989486)}
{pt3dadd(167964.000000,171180.000000,45550.000000,431.797086)}
{pt3dadd(167820.000000,171408.000000,45925.000000,447.604686)}
{pt3dadd(167592.000000,171660.000000,46275.000000,463.412286)}
{pt3dadd(167472.000000,171852.000000,46650.000000,479.219886)}
{pt3dadd(167244.000000,171888.000000,46950.000000,519.154884)}
{pt3dadd(167052.000000,171828.000000,47325.000000,559.089882)}
{pt3dadd(167148.000000,171864.000000,47600.000000,599.024880)}
{pt3dadd(167208.000000,171756.000000,47950.000000,499.187376)}

{create adhoc94}
{access adhoc94}
{connect adhoc94(1), adhoc93(0)}
{nseg = 1}
{strdef color color = "White"}
{pt3dclear()}
{pt3dadd(167208.000000,171756.000000,47950.000000,499.187376)}
{pt3dadd(166500.000000,171564.000000,48025.000000,139.314042)}
{pt3dadd(166116.000000,171528.000000,48275.000000,116.095032)}
{pt3dadd(165744.000000,171384.000000,48325.000000,96.745860)}

{create adhoc95}
{access adhoc95}
{connect adhoc95(1), adhoc93(0)}
{nseg = 1}
{strdef color color = "White"}
{pt3dclear()}
{pt3dadd(167208.000000,171756.000000,47950.000000,499.187376)}
{pt3dadd(167580.000000,171756.000000,48225.000000,240.734646)}
{pt3dadd(168180.000000,171792.000000,48500.000000,230.704038)}
{pt3dadd(168672.000000,171768.000000,48750.000000,220.673430)}
{pt3dadd(168972.000000,171540.000000,48975.000000,210.642822)}
{pt3dadd(169080.000000,171372.000000,49175.000000,200.612214)}
{pt3dadd(169296.000000,171300.000000,49525.000000,210.642822)}
{pt3dadd(169452.000000,171192.000000,49750.000000,220.673430)}
{pt3dadd(169488.000000,171084.000000,50050.000000,230.704038)}
{pt3dadd(169476.000000,170676.000000,50400.000000,240.734646)}
{pt3dadd(169356.000000,170592.000000,50650.000000,223.148309)}
{pt3dadd(169188.000000,170448.000000,50950.000000,205.561971)}
{pt3dadd(168912.000000,170076.000000,51325.000000,187.975633)}
{pt3dadd(168636.000000,169656.000000,51600.000000,170.389296)}
{pt3dadd(168516.000000,169800.000000,51875.000000,192.587706)}
{pt3dadd(168300.000000,169788.000000,51625.000000,67.184640)}

{create adhoc96}
{access adhoc96}
{connect adhoc96(1), adhoc42(0)}
{nseg = 1}
{strdef color color = "White"}
{pt3dclear()}
{pt3dadd(187692.000000,178620.000000,45400.000000,1373.705208)}
{pt3dadd(184728.000000,178560.000000,44975.000000,139.314042)}
{pt3dadd(184788.000000,178428.000000,45200.000000,116.095032)}

{create adhoc97}
{access adhoc97}
{connect adhoc97(1), adhoc41(0)}
{nseg = 1}
{strdef color color = "White"}
{pt3dclear()}
{pt3dadd(186948.000000,179196.000000,45325.000000,1582.508340)}
{pt3dadd(185424.000000,179196.000000,42725.000000,200.612214)}

{create adhoc98}
{access adhoc98}
{connect adhoc98(1), adhoc40(0)}
{nseg = 1}
{strdef color color = "White"}
{pt3dclear()}
{pt3dadd(186840.000000,179364.000000,45150.000000,1717.131222)}
{pt3dadd(186276.000000,179352.000000,42050.000000,718.829820)}
{pt3dadd(186360.000000,179196.000000,41600.000000,643.119736)}
{pt3dadd(186372.000000,179028.000000,41425.000000,567.409653)}
{pt3dadd(186300.000000,178824.000000,41050.000000,491.699570)}
{pt3dadd(186228.000000,178620.000000,40750.000000,415.989486)}
{pt3dadd(186312.000000,178440.000000,40475.000000,415.989486)}
{pt3dadd(186312.000000,178260.000000,40300.000000,415.989486)}
{pt3dadd(186372.000000,178080.000000,39925.000000,415.989486)}
{pt3dadd(186276.000000,177936.000000,39450.000000,415.989486)}
{pt3dadd(186084.000000,177732.000000,39050.000000,415.989486)}
{pt3dadd(185784.000000,177564.000000,38475.000000,415.989486)}
{pt3dadd(185484.000000,177372.000000,38375.000000,415.989486)}
{pt3dadd(185340.000000,177348.000000,38250.000000,415.989486)}
{pt3dadd(185184.000000,177204.000000,38200.000000,415.989486)}
{pt3dadd(185028.000000,177132.000000,38100.000000,415.989486)}
{pt3dadd(184836.000000,177192.000000,37825.000000,415.989486)}
{pt3dadd(184812.000000,176952.000000,37775.000000,415.989486)}
{pt3dadd(184716.000000,176844.000000,37825.000000,240.734646)}
{pt3dadd(184392.000000,176664.000000,37450.000000,226.124298)}

{create adhoc99}
{access adhoc99}
{connect adhoc99(1), adhoc39(0)}
{nseg = 1}
{strdef color color = "White"}
{pt3dclear()}
{pt3dadd(186552.000000,180120.000000,45525.000000,2187.659448)}
{pt3dadd(186528.000000,180228.000000,42300.000000,599.024880)}
{pt3dadd(186252.000000,180204.000000,41925.000000,569.073631)}
{pt3dadd(186108.000000,180876.000000,41500.000000,539.122383)}
{pt3dadd(186060.000000,181188.000000,41200.000000,509.171134)}
{pt3dadd(186072.000000,181572.000000,40850.000000,479.219886)}
{pt3dadd(185904.000000,181860.000000,40300.000000,484.211758)}
{pt3dadd(185796.000000,182100.000000,39950.000000,489.203631)}
{pt3dadd(185472.000000,182508.000000,39625.000000,494.195504)}
{pt3dadd(185184.000000,182976.000000,39225.000000,499.187376)}
{pt3dadd(185016.000000,183264.000000,38900.000000,599.024880)}

{create adhoc100}
{access adhoc100}
{connect adhoc100(1), adhoc99(0)}
{nseg = 1}
{strdef color color = "White"}
{pt3dclear()}
{pt3dadd(185016.000000,183264.000000,38900.000000,599.024880)}
{pt3dadd(184812.000000,183672.000000,38600.000000,662.473602)}
{pt3dadd(185052.000000,183648.000000,38225.000000,690.076602)}
{pt3dadd(184776.000000,183912.000000,37925.000000,599.024880)}

{create adhoc101}
{access adhoc101}
{connect adhoc101(1), adhoc100(0)}
{nseg = 1}
{strdef color color = "White"}
{pt3dclear()}
{pt3dadd(184776.000000,183912.000000,37925.000000,599.024880)}
{pt3dadd(184104.000000,184296.000000,37600.000000,240.734646)}
{pt3dadd(183888.000000,184656.000000,37350.000000,252.771381)}
{pt3dadd(183768.000000,184944.000000,36950.000000,264.808116)}
{pt3dadd(183660.000000,185232.000000,36650.000000,276.844851)}
{pt3dadd(183780.000000,185664.000000,36350.000000,288.881586)}
{pt3dadd(184020.000000,186096.000000,36025.000000,320.658561)}
{pt3dadd(184080.000000,186660.000000,35700.000000,352.435536)}
{pt3dadd(184224.000000,187020.000000,35425.000000,384.212511)}
{pt3dadd(184260.000000,187512.000000,35200.000000,415.989486)}
{pt3dadd(184128.000000,187872.000000,34925.000000,384.212511)}
{pt3dadd(184140.000000,188508.000000,34600.000000,352.435536)}
{pt3dadd(183600.000000,189576.000000,34300.000000,320.658561)}
{pt3dadd(183504.000000,189756.000000,34325.000000,288.881586)}
{pt3dadd(183636.000000,189912.000000,34200.000000,276.844851)}
{pt3dadd(183564.000000,190080.000000,34225.000000,264.808116)}
{pt3dadd(183540.000000,190236.000000,34175.000000,252.771381)}
{pt3dadd(183492.000000,190416.000000,34150.000000,240.734646)}
{pt3dadd(183552.000000,190584.000000,34025.000000,249.882570)}
{pt3dadd(183564.000000,190764.000000,34050.000000,259.030494)}
{pt3dadd(183312.000000,190944.000000,34175.000000,268.178418)}
{pt3dadd(183372.000000,191112.000000,34250.000000,277.326342)}
{pt3dadd(183180.000000,191280.000000,34175.000000,280.215153)}
{pt3dadd(183060.000000,191436.000000,34175.000000,283.103964)}
{pt3dadd(182892.000000,191604.000000,34175.000000,285.992775)}
{pt3dadd(182844.000000,191796.000000,34100.000000,288.881586)}
{pt3dadd(182856.000000,191976.000000,34125.000000,276.844851)}
{pt3dadd(182664.000000,192240.000000,34150.000000,264.808116)}
{pt3dadd(182592.000000,192504.000000,34025.000000,252.771381)}
{pt3dadd(182520.000000,192720.000000,34075.000000,240.734646)}
{pt3dadd(182448.000000,192876.000000,34000.000000,192.587706)}

{create adhoc102}
{access adhoc102}
{connect adhoc102(1), adhoc100(0)}
{nseg = 1}
{strdef color color = "White"}
{pt3dclear()}
{pt3dadd(184776.000000,183912.000000,37925.000000,599.024880)}
{pt3dadd(185544.000000,183660.000000,37800.000000,862.595802)}
{pt3dadd(185724.000000,183612.000000,37575.000000,826.654307)}
{pt3dadd(185736.000000,183648.000000,37325.000000,790.712811)}
{pt3dadd(185688.000000,183804.000000,37050.000000,754.771316)}
{pt3dadd(185796.000000,183840.000000,36775.000000,718.829820)}
{pt3dadd(185724.000000,183852.000000,36500.000000,711.641515)}
{pt3dadd(185700.000000,183912.000000,36225.000000,704.453211)}
{pt3dadd(185628.000000,183864.000000,36025.000000,697.264906)}
{pt3dadd(185556.000000,183900.000000,35775.000000,690.076602)}
{pt3dadd(185412.000000,183876.000000,35500.000000,690.076602)}
{pt3dadd(185448.000000,183804.000000,35175.000000,690.076602)}
{pt3dadd(185556.000000,183816.000000,34875.000000,690.076602)}

{create adhoc103}
{access adhoc103}
{connect adhoc103(1), adhoc99(0)}
{nseg = 1}
{strdef color color = "White"}
{pt3dclear()}
{pt3dadd(185016.000000,183264.000000,38900.000000,599.024880)}
{pt3dadd(182676.000000,184992.000000,39000.000000,67.184640)}
{pt3dadd(181896.000000,185760.000000,38700.000000,167.176890)}
