# Supplementary material for: Full reconstruction of large lobula plate tangential cells in Drosophila from a 3D EM dataset
Source: PLoS One. 2018 Nov 28;13(11):e0207828. doi: 10.1371/journal.pone.0207828 (PMC6261601; doi:10.1371/journal.pone.0207828)
Supplement: S1 Dataset — (ZIP) [file pone.0207828.s001.zip › Diameter hoc/VS_VSL_preliminary/Old Diameters Mar13_VS_VSL_HS/VS2/2_14_744_gmordhorst_001.027.hoc]

/* created with nml2hocm */

{create adhoc1}
{access adhoc1}
{nseg = 1}
{strdef color color = "White"}
{pt3dclear()}
{pt3dadd(174312.000000,193884.000000,47375.000000,64.497240)}
{pt3dadd(174552.000000,194064.000000,47325.000000,61.917354)}
{pt3dadd(174660.000000,194472.000000,47475.000000,88.232224)}
{pt3dadd(174768.000000,194592.000000,47550.000000,114.547095)}
{pt3dadd(174780.000000,194916.000000,47725.000000,140.861966)}
{pt3dadd(174720.000000,195228.000000,47850.000000,167.176836)}
{pt3dadd(174900.000000,195504.000000,47950.000000,150.149568)}
{pt3dadd(174648.000000,195744.000000,48100.000000,133.122300)}
{pt3dadd(174636.000000,196008.000000,48225.000000,116.095032)}
{pt3dadd(175008.000000,196236.000000,48225.000000,116.095032)}

{create adhoc2}
{access adhoc2}
{connect adhoc2(1), adhoc1(0)}
{nseg = 1}
{strdef color color = "White"}
{pt3dclear()}
{pt3dadd(175008.000000,196236.000000,48225.000000,116.095032)}
{pt3dadd(175920.000000,195972.000000,48300.000000,55.987200)}

{create adhoc3}
{access adhoc3}
{connect adhoc3(1), adhoc1(0)}
{nseg = 1}
{strdef color color = "White"}
{pt3dclear()}
{pt3dadd(175008.000000,196236.000000,48225.000000,116.095032)}
{pt3dadd(174744.000000,196560.000000,48350.000000,133.741476)}
{pt3dadd(174396.000000,197052.000000,48550.000000,150.459161)}
{pt3dadd(174096.000000,197412.000000,48875.000000,167.176845)}
{pt3dadd(173832.000000,197748.000000,49125.000000,183.894530)}
{pt3dadd(173544.000000,198084.000000,49275.000000,200.612214)}
{pt3dadd(173448.000000,199008.000000,49250.000000,167.176836)}
{pt3dadd(173064.000000,200052.000000,49200.000000,346.657896)}

{create adhoc4}
{access adhoc4}
{connect adhoc4(1), adhoc3(0)}
{nseg = 1}
{strdef color color = "White"}
{pt3dclear()}
{pt3dadd(173064.000000,200052.000000,49200.000000,346.657896)}
{pt3dadd(173040.000000,199824.000000,48675.000000,383.375916)}
{pt3dadd(172860.000000,199572.000000,48175.000000,311.718402)}
{pt3dadd(172572.000000,199032.000000,47850.000000,240.060888)}
{pt3dadd(172764.000000,198744.000000,47375.000000,168.403374)}
{pt3dadd(173340.000000,198456.000000,47275.000000,96.745860)}
{pt3dadd(173496.000000,198300.000000,47225.000000,80.621550)}

{create adhoc5}
{access adhoc5}
{connect adhoc5(1), adhoc3(0)}
{nseg = 1}
{strdef color color = "White"}
{pt3dclear()}
{pt3dadd(173064.000000,200052.000000,49200.000000,346.657896)}
{pt3dadd(172800.000000,201240.000000,49650.000000,332.791596)}
{pt3dadd(172836.000000,201744.000000,50525.000000,415.989486)}

{create adhoc6}
{access adhoc6}
{connect adhoc6(1), adhoc5(0)}
{nseg = 1}
{strdef color color = "White"}
{pt3dclear()}
{pt3dadd(172836.000000,201744.000000,50525.000000,415.989486)}
{pt3dadd(172560.000000,202512.000000,49125.000000,346.657896)}

{create adhoc7}
{access adhoc7}
{connect adhoc7(1), adhoc6(0)}
{nseg = 1}
{strdef color color = "White"}
{pt3dclear()}
{pt3dadd(172560.000000,202512.000000,49125.000000,346.657896)}
{pt3dadd(172824.000000,201948.000000,48325.000000,116.095032)}
{pt3dadd(172860.000000,201684.000000,48050.000000,80.621550)}
{pt3dadd(173064.000000,201636.000000,48000.000000,80.621550)}

{create adhoc8}
{access adhoc8}
{connect adhoc8(1), adhoc6(0)}
{nseg = 1}
{strdef color color = "White"}
{pt3dclear()}
{pt3dadd(172560.000000,202512.000000,49125.000000,346.657896)}
{pt3dadd(172404.000000,203832.000000,48250.000000,288.881586)}

{create adhoc9}
{access adhoc9}
{connect adhoc9(1), adhoc8(0)}
{nseg = 1}
{strdef color color = "White"}
{pt3dclear()}
{pt3dadd(172404.000000,203832.000000,48250.000000,288.881586)}
{pt3dadd(172164.000000,204624.000000,48250.000000,96.745860)}
{pt3dadd(171684.000000,204924.000000,48300.000000,46.656000)}

{create adhoc10}
{access adhoc10}
{connect adhoc10(1), adhoc8(0)}
{nseg = 1}
{strdef color color = "White"}
{pt3dclear()}
{pt3dadd(172404.000000,203832.000000,48250.000000,288.881586)}
{pt3dadd(171972.000000,204192.000000,48175.000000,240.734646)}
{pt3dadd(172392.000000,204372.000000,47000.000000,240.734646)}
{pt3dadd(172488.000000,204168.000000,46425.000000,240.734646)}
{pt3dadd(171900.000000,203748.000000,45700.000000,167.176836)}

{create adhoc11}
{access adhoc11}
{connect adhoc11(1), adhoc10(0)}
{nseg = 1}
{strdef color color = "White"}
{pt3dclear()}
{pt3dadd(171900.000000,203748.000000,45700.000000,167.176836)}
{pt3dadd(172524.000000,202368.000000,45550.000000,46.656000)}

{create adhoc12}
{access adhoc12}
{connect adhoc12(1), adhoc10(0)}
{nseg = 1}
{strdef color color = "White"}
{pt3dclear()}
{pt3dadd(171900.000000,203748.000000,45700.000000,167.176836)}
{pt3dadd(172164.000000,203484.000000,45075.000000,96.745860)}

{create adhoc13}
{access adhoc13}
{connect adhoc13(1), adhoc5(0)}
{nseg = 1}
{strdef color color = "White"}
{pt3dclear()}
{pt3dadd(172836.000000,201744.000000,50525.000000,415.989486)}
{pt3dadd(172944.000000,202344.000000,51325.000000,332.791596)}
{pt3dadd(173268.000000,202404.000000,51925.000000,321.814093)}
{pt3dadd(173424.000000,202368.000000,52450.000000,310.836591)}
{pt3dadd(173784.000000,202464.000000,52900.000000,299.859089)}
{pt3dadd(173940.000000,202776.000000,53400.000000,288.881586)}
{pt3dadd(174528.000000,202920.000000,53675.000000,432.310140)}
{pt3dadd(174828.000000,203016.000000,54075.000000,575.738694)}
{pt3dadd(175188.000000,203112.000000,54475.000000,719.167248)}
{pt3dadd(175968.000000,204204.000000,55175.000000,862.595802)}
{pt3dadd(176532.000000,203292.000000,55475.000000,819.466020)}
{pt3dadd(176952.000000,203076.000000,55650.000000,776.336238)}
{pt3dadd(177516.000000,202404.000000,55425.000000,733.206456)}
{pt3dadd(177996.000000,201396.000000,55925.000000,690.076674)}
{pt3dadd(178788.000000,200136.000000,56850.000000,747.583050)}
{pt3dadd(179424.000000,199800.000000,57625.000000,805.089426)}
{pt3dadd(180060.000000,199308.000000,58350.000000,862.595802)}
{pt3dadd(182328.000000,195960.000000,59600.000000,1788.678450)}

{create adhoc14}
{access adhoc14}
{connect adhoc14(1), adhoc13(0)}
{nseg = 1}
{strdef color color = "White"}
{pt3dclear()}
{pt3dadd(182328.000000,195960.000000,59600.000000,1788.678450)}
{pt3dadd(182136.000000,197640.000000,61550.000000,1242.137880)}
{pt3dadd(182616.000000,198828.000000,62800.000000,1242.137880)}
{pt3dadd(182352.000000,199632.000000,64400.000000,1430.942868)}

{create adhoc15}
{access adhoc15}
{connect adhoc15(1), adhoc14(0)}
{nseg = 1}
{strdef color color = "White"}
{pt3dclear()}
{pt3dadd(182352.000000,199632.000000,64400.000000,1430.942868)}
{pt3dadd(182484.000000,200580.000000,65850.000000,1242.137880)}
{pt3dadd(183372.000000,201360.000000,67275.000000,1173.130236)}
{pt3dadd(183528.000000,202452.000000,68825.000000,1104.122592)}
{pt3dadd(183732.000000,204876.000000,72000.000000,1035.114948)}
{pt3dadd(184824.000000,205248.000000,72650.000000,1242.137880)}

{create adhoc16}
{access adhoc16}
{connect adhoc16(1), adhoc15(0)}
{nseg = 1}
{strdef color color = "White"}
{pt3dclear()}
{pt3dadd(184824.000000,205248.000000,72650.000000,1242.137880)}
{pt3dadd(181176.000000,205140.000000,71100.000000,1242.137880)}
{pt3dadd(179856.000000,205332.000000,71975.000000,1111.310865)}
{pt3dadd(179496.000000,205464.000000,71675.000000,980.483850)}
{pt3dadd(179160.000000,205512.000000,71675.000000,849.656835)}
{pt3dadd(178812.000000,205596.000000,71975.000000,718.829820)}
{pt3dadd(178308.000000,205716.000000,72575.000000,790.712811)}
{pt3dadd(177876.000000,206088.000000,72775.000000,862.595802)}
{pt3dadd(177552.000000,206460.000000,72875.000000,718.829820)}

{create adhoc17}
{access adhoc17}
{connect adhoc17(1), adhoc16(0)}
{nseg = 1}
{strdef color color = "White"}
{pt3dclear()}
{pt3dadd(177552.000000,206460.000000,72875.000000,718.829820)}
{pt3dadd(177708.000000,205092.000000,73350.000000,167.176836)}
{pt3dadd(177576.000000,204216.000000,72750.000000,67.184640)}

{create adhoc18}
{access adhoc18}
{connect adhoc18(1), adhoc16(0)}
{nseg = 1}
{strdef color color = "White"}
{pt3dclear()}
{pt3dadd(177552.000000,206460.000000,72875.000000,718.829820)}
{pt3dadd(177192.000000,206868.000000,72850.000000,718.829820)}
{pt3dadd(176748.000000,207276.000000,72950.000000,797.901102)}
{pt3dadd(176184.000000,207456.000000,73150.000000,876.972384)}
{pt3dadd(175776.000000,207852.000000,73325.000000,956.043666)}
{pt3dadd(175368.000000,208260.000000,73500.000000,1035.114948)}
{pt3dadd(174948.000000,208656.000000,73675.000000,977.608566)}
{pt3dadd(174528.000000,208920.000000,73775.000000,920.102184)}
{pt3dadd(174132.000000,209148.000000,73750.000000,862.595802)}
{pt3dadd(173688.000000,209376.000000,73750.000000,718.829820)}

{create adhoc19}
{access adhoc19}
{connect adhoc19(1), adhoc18(0)}
{nseg = 1}
{strdef color color = "White"}
{pt3dclear()}
{pt3dadd(173688.000000,209376.000000,73750.000000,718.829820)}
{pt3dadd(173148.000000,209004.000000,74275.000000,499.187376)}
{pt3dadd(172884.000000,208908.000000,74375.000000,546.909682)}
{pt3dadd(172584.000000,208944.000000,74350.000000,594.631989)}
{pt3dadd(172236.000000,209316.000000,74525.000000,642.354295)}
{pt3dadd(171432.000000,209400.000000,74675.000000,690.076602)}
{pt3dadd(170952.000000,209544.000000,75275.000000,697.264906)}
{pt3dadd(170496.000000,209856.000000,75475.000000,704.453211)}
{pt3dadd(169968.000000,210204.000000,75750.000000,711.641515)}
{pt3dadd(169332.000000,210732.000000,76050.000000,718.829820)}
{pt3dadd(168768.000000,211764.000000,76500.000000,663.919209)}
{pt3dadd(168168.000000,212220.000000,76825.000000,609.008598)}
{pt3dadd(168216.000000,212664.000000,77000.000000,554.097987)}
{pt3dadd(168072.000000,213072.000000,77125.000000,499.187376)}
{pt3dadd(167928.000000,213384.000000,77225.000000,494.195504)}
{pt3dadd(167784.000000,213732.000000,77325.000000,489.203631)}
{pt3dadd(167628.000000,214008.000000,77425.000000,484.211758)}
{pt3dadd(167436.000000,214392.000000,77525.000000,479.219886)}
{pt3dadd(167172.000000,214836.000000,77875.000000,599.024880)}
{pt3dadd(167124.000000,215340.000000,78300.000000,599.024880)}

{create adhoc20}
{access adhoc20}
{connect adhoc20(1), adhoc19(0)}
{nseg = 1}
{strdef color color = "White"}
{pt3dclear()}
{pt3dadd(167124.000000,215340.000000,78300.000000,599.024880)}
{pt3dadd(166944.000000,215904.000000,78100.000000,599.024880)}
{pt3dadd(166620.000000,216372.000000,78225.000000,574.065504)}
{pt3dadd(166524.000000,216720.000000,78175.000000,549.106128)}
{pt3dadd(166296.000000,217092.000000,78200.000000,524.146752)}
{pt3dadd(166092.000000,217464.000000,78175.000000,499.187376)}
{pt3dadd(165888.000000,217740.000000,78175.000000,518.156496)}
{pt3dadd(165732.000000,218040.000000,78175.000000,537.125616)}
{pt3dadd(165636.000000,218352.000000,78475.000000,556.094736)}
{pt3dadd(165696.000000,218640.000000,78500.000000,575.063856)}
{pt3dadd(165588.000000,219108.000000,78525.000000,549.771696)}
{pt3dadd(165432.000000,219504.000000,78600.000000,524.479536)}
{pt3dadd(165276.000000,219984.000000,78725.000000,499.187376)}
{pt3dadd(165264.000000,220404.000000,78925.000000,479.219886)}

{create adhoc21}
{access adhoc21}
{connect adhoc21(1), adhoc20(0)}
{nseg = 1}
{strdef color color = "White"}
{pt3dclear()}
{pt3dadd(165264.000000,220404.000000,78925.000000,479.219886)}
{pt3dadd(165288.000000,220920.000000,79275.000000,399.349908)}
{pt3dadd(165300.000000,221364.000000,79650.000000,414.525209)}
{pt3dadd(165252.000000,221784.000000,79950.000000,429.700509)}
{pt3dadd(165396.000000,222384.000000,80250.000000,444.875809)}
{pt3dadd(165444.000000,223068.000000,80550.000000,460.051110)}
{pt3dadd(165468.000000,223464.000000,80850.000000,499.187376)}
{pt3dadd(165480.000000,223848.000000,81200.000000,415.989486)}

{create adhoc22}
{access adhoc22}
{connect adhoc22(1), adhoc21(0)}
{nseg = 1}
{strdef color color = "White"}
{pt3dclear()}
{pt3dadd(165480.000000,223848.000000,81200.000000,415.989486)}
{pt3dadd(165492.000000,224196.000000,81550.000000,499.187376)}
{pt3dadd(165372.000000,224640.000000,81800.000000,499.187376)}
{pt3dadd(165312.000000,224856.000000,82025.000000,499.187376)}
{pt3dadd(165264.000000,225312.000000,82225.000000,499.187376)}

{create adhoc23}
{access adhoc23}
{connect adhoc23(1), adhoc22(0)}
{nseg = 1}
{strdef color color = "White"}
{pt3dclear()}
{pt3dadd(165264.000000,225312.000000,82225.000000,499.187376)}
{pt3dadd(165792.000000,225876.000000,82700.000000,415.989486)}

{create adhoc24}
{access adhoc24}
{connect adhoc24(1), adhoc23(0)}
{nseg = 1}
{strdef color color = "White"}
{pt3dclear()}
{pt3dadd(165792.000000,225876.000000,82700.000000,415.989486)}
{pt3dadd(165960.000000,226116.000000,83400.000000,415.989486)}
{pt3dadd(166248.000000,226584.000000,84300.000000,353.786324)}
{pt3dadd(166176.000000,226848.000000,84225.000000,291.583161)}
{pt3dadd(166296.000000,227148.000000,84650.000000,229.379999)}
{pt3dadd(166260.000000,227436.000000,84775.000000,167.176836)}
{pt3dadd(166188.000000,227748.000000,85050.000000,240.734646)}
{pt3dadd(166488.000000,228084.000000,85475.000000,200.612214)}

{create adhoc25}
{access adhoc25}
{connect adhoc25(1), adhoc23(0)}
{nseg = 1}
{strdef color color = "White"}
{pt3dclear()}
{pt3dadd(165792.000000,225876.000000,82700.000000,415.989486)}
{pt3dadd(167040.000000,225276.000000,86000.000000,346.657896)}
{pt3dadd(167652.000000,224580.000000,85750.000000,284.179887)}
{pt3dadd(167820.000000,224184.000000,85575.000000,221.701878)}
{pt3dadd(167748.000000,223728.000000,85350.000000,159.223869)}
{pt3dadd(168036.000000,223344.000000,85175.000000,96.745860)}
{pt3dadd(167964.000000,222996.000000,85300.000000,139.314042)}
{pt3dadd(167868.000000,222588.000000,85225.000000,200.612214)}

{create adhoc26}
{access adhoc26}
{connect adhoc26(1), adhoc25(0)}
{nseg = 1}
{strdef color color = "White"}
{pt3dclear()}
{pt3dadd(167868.000000,222588.000000,85225.000000,200.612214)}
{pt3dadd(168216.000000,222240.000000,85225.000000,133.741476)}
{pt3dadd(168360.000000,221940.000000,85250.000000,129.329865)}
{pt3dadd(168540.000000,221256.000000,84875.000000,124.918254)}
{pt3dadd(168144.000000,220500.000000,84550.000000,120.506643)}
{pt3dadd(167988.000000,220224.000000,84350.000000,116.095032)}
{pt3dadd(167712.000000,220248.000000,84350.000000,80.621550)}

{create adhoc27}
{access adhoc27}
{connect adhoc27(1), adhoc25(0)}
{nseg = 1}
{strdef color color = "White"}
{pt3dclear()}
{pt3dadd(167868.000000,222588.000000,85225.000000,200.612214)}
{pt3dadd(167244.000000,222288.000000,85125.000000,139.314042)}
{pt3dadd(166944.000000,221928.000000,84725.000000,169.963128)}
{pt3dadd(166800.000000,221568.000000,84425.000000,200.612214)}
{pt3dadd(166812.000000,221220.000000,84025.000000,116.095032)}

{create adhoc28}
{access adhoc28}
{connect adhoc28(1), adhoc22(0)}
{nseg = 1}
{strdef color color = "White"}
{pt3dclear()}
{pt3dadd(165264.000000,225312.000000,82225.000000,499.187376)}
{pt3dadd(164460.000000,226644.000000,82475.000000,167.176836)}
{pt3dadd(163728.000000,227820.000000,82600.000000,175.535680)}
{pt3dadd(163452.000000,228612.000000,82925.000000,183.894525)}
{pt3dadd(163152.000000,228960.000000,83000.000000,192.253370)}
{pt3dadd(163128.000000,229404.000000,83225.000000,200.612214)}
{pt3dadd(163284.000000,229956.000000,83350.000000,215.582972)}
{pt3dadd(163692.000000,230388.000000,83650.000000,230.553729)}
{pt3dadd(164220.000000,230796.000000,84175.000000,245.524486)}
{pt3dadd(164340.000000,231144.000000,84275.000000,260.495244)}
{pt3dadd(164496.000000,231432.000000,84625.000000,269.957358)}
{pt3dadd(164352.000000,231780.000000,85125.000000,279.419472)}
{pt3dadd(164412.000000,232092.000000,85650.000000,288.881586)}
{pt3dadd(164568.000000,231900.000000,86300.000000,346.657896)}

{create adhoc29}
{access adhoc29}
{connect adhoc29(1), adhoc28(0)}
{nseg = 1}
{strdef color color = "White"}
{pt3dclear()}
{pt3dadd(164568.000000,231900.000000,86300.000000,346.657896)}
{pt3dadd(164472.000000,232344.000000,86725.000000,200.612214)}
{pt3dadd(164412.000000,233136.000000,87100.000000,116.095032)}

{create adhoc30}
{access adhoc30}
{connect adhoc30(1), adhoc28(0)}
{nseg = 1}
{strdef color color = "White"}
{pt3dclear()}
{pt3dadd(164568.000000,231900.000000,86300.000000,346.657896)}
{pt3dadd(165000.000000,231444.000000,86650.000000,240.734646)}
{pt3dadd(165204.000000,231324.000000,87150.000000,224.923199)}
{pt3dadd(165528.000000,231432.000000,87525.000000,209.111751)}
{pt3dadd(165660.000000,231732.000000,87925.000000,193.300304)}
{pt3dadd(165660.000000,231996.000000,88325.000000,177.488856)}
{pt3dadd(165984.000000,232044.000000,88500.000000,80.621550)}
{pt3dadd(166236.000000,232320.000000,88450.000000,80.621550)}

{create adhoc31}
{access adhoc31}
{connect adhoc31(1), adhoc21(0)}
{nseg = 1}
{strdef color color = "White"}
{pt3dclear()}
{pt3dadd(165480.000000,223848.000000,81200.000000,415.989486)}
{pt3dadd(164376.000000,224460.000000,82050.000000,80.621550)}
{pt3dadd(163716.000000,224712.000000,82125.000000,73.903095)}
{pt3dadd(163464.000000,224568.000000,82075.000000,67.184640)}
{pt3dadd(163152.000000,224664.000000,82200.000000,55.987200)}

{create adhoc32}
{access adhoc32}
{connect adhoc32(1), adhoc20(0)}
{nseg = 1}
{strdef color color = "White"}
{pt3dclear()}
{pt3dadd(165264.000000,220404.000000,78925.000000,479.219886)}
{pt3dadd(163920.000000,220908.000000,79650.000000,96.745860)}
{pt3dadd(163740.000000,221100.000000,79550.000000,87.071274)}
{pt3dadd(163224.000000,221148.000000,79700.000000,77.396688)}
{pt3dadd(163188.000000,221568.000000,79775.000000,67.184640)}

{create adhoc33}
{access adhoc33}
{connect adhoc33(1), adhoc19(0)}
{nseg = 1}
{strdef color color = "White"}
{pt3dclear()}
{pt3dadd(167124.000000,215340.000000,78300.000000,599.024880)}
{pt3dadd(167664.000000,214836.000000,80525.000000,499.187376)}
{pt3dadd(168024.000000,214512.000000,80600.000000,422.537463)}
{pt3dadd(168096.000000,214092.000000,80700.000000,345.887550)}
{pt3dadd(168324.000000,213612.000000,80825.000000,269.237637)}
{pt3dadd(168636.000000,213096.000000,80725.000000,192.587724)}
{pt3dadd(168684.000000,212736.000000,80825.000000,192.587724)}
{pt3dadd(168672.000000,212412.000000,80625.000000,192.587724)}
{pt3dadd(168888.000000,212004.000000,80700.000000,192.587724)}
{pt3dadd(169200.000000,211500.000000,80425.000000,192.587724)}
{pt3dadd(169248.000000,211104.000000,80450.000000,204.624455)}
{pt3dadd(169392.000000,210624.000000,80525.000000,216.661185)}
{pt3dadd(169608.000000,210264.000000,80525.000000,228.697915)}
{pt3dadd(170064.000000,209904.000000,80350.000000,240.734646)}
{pt3dadd(170340.000000,209532.000000,80600.000000,208.413792)}
{pt3dadd(170820.000000,209232.000000,80700.000000,176.092938)}
{pt3dadd(171036.000000,208884.000000,80800.000000,143.772084)}
{pt3dadd(171180.000000,208656.000000,80775.000000,111.451230)}
{pt3dadd(171276.000000,208260.000000,80950.000000,200.612214)}
{pt3dadd(171348.000000,206916.000000,81175.000000,346.657896)}

{create adhoc34}
{access adhoc34}
{connect adhoc34(1), adhoc33(0)}
{nseg = 1}
{strdef color color = "White"}
{pt3dclear()}
{pt3dadd(171348.000000,206916.000000,81175.000000,346.657896)}
{pt3dadd(171252.000000,207240.000000,81600.000000,346.657896)}
{pt3dadd(171108.000000,207648.000000,81800.000000,96.745860)}

{create adhoc35}
{access adhoc35}
{connect adhoc35(1), adhoc33(0)}
{nseg = 1}
{strdef color color = "White"}
{pt3dclear()}
{pt3dadd(171348.000000,206916.000000,81175.000000,346.657896)}
{pt3dadd(171240.000000,205764.000000,80900.000000,167.176836)}
{pt3dadd(171516.000000,204792.000000,80800.000000,145.538014)}
{pt3dadd(171864.000000,204600.000000,80775.000000,123.899193)}
{pt3dadd(172080.000000,204300.000000,80775.000000,102.260372)}
{pt3dadd(172224.000000,204012.000000,80825.000000,80.621550)}
{pt3dadd(172404.000000,203808.000000,80875.000000,116.095032)}
{pt3dadd(172560.000000,203736.000000,80975.000000,80.621550)}

{create adhoc36}
{access adhoc36}
{connect adhoc36(1), adhoc18(0)}
{nseg = 1}
{strdef color color = "White"}
{pt3dclear()}
{pt3dadd(173688.000000,209376.000000,73750.000000,718.829820)}
{pt3dadd(173244.000000,210492.000000,73475.000000,499.187376)}
{pt3dadd(172572.000000,210888.000000,73225.000000,499.187376)}
{pt3dadd(172164.000000,210984.000000,73125.000000,499.187376)}
{pt3dadd(171768.000000,211080.000000,73025.000000,499.187376)}
{pt3dadd(171372.000000,211404.000000,73050.000000,499.187376)}
{pt3dadd(170964.000000,211812.000000,73125.000000,478.387903)}
{pt3dadd(170508.000000,212208.000000,73275.000000,457.588431)}
{pt3dadd(170112.000000,212244.000000,73200.000000,436.788958)}
{pt3dadd(169704.000000,212388.000000,73100.000000,415.989486)}
{pt3dadd(169380.000000,212568.000000,73050.000000,415.989486)}
{pt3dadd(169032.000000,212760.000000,73075.000000,415.989486)}
{pt3dadd(168672.000000,213012.000000,73150.000000,415.989486)}
{pt3dadd(168264.000000,213264.000000,73225.000000,415.989486)}
{pt3dadd(167844.000000,213516.000000,73300.000000,415.989486)}
{pt3dadd(167508.000000,213768.000000,73375.000000,415.989486)}
{pt3dadd(167088.000000,214020.000000,73450.000000,415.989486)}
{pt3dadd(166776.000000,214296.000000,73550.000000,415.989486)}
{pt3dadd(166368.000000,214656.000000,73700.000000,415.989486)}
{pt3dadd(165972.000000,214884.000000,74025.000000,319.479948)}

{create adhoc37}
{access adhoc37}
{connect adhoc37(1), adhoc36(0)}
{nseg = 1}
{strdef color color = "White"}
{pt3dclear()}
{pt3dadd(165972.000000,214884.000000,74025.000000,319.479948)}
{pt3dadd(165648.000000,215196.000000,74175.000000,415.989486)}
{pt3dadd(165216.000000,215532.000000,74125.000000,436.788958)}
{pt3dadd(164916.000000,215556.000000,74100.000000,457.588431)}
{pt3dadd(164592.000000,216540.000000,74350.000000,478.387903)}
{pt3dadd(164172.000000,217008.000000,74650.000000,499.187376)}
{pt3dadd(163680.000000,217512.000000,74525.000000,499.187376)}
{pt3dadd(163560.000000,217908.000000,74650.000000,599.024880)}

{create adhoc38}
{access adhoc38}
{connect adhoc38(1), adhoc37(0)}
{nseg = 1}
{strdef color color = "White"}
{pt3dclear()}
{pt3dadd(163560.000000,217908.000000,74650.000000,599.024880)}
{pt3dadd(163488.000000,218256.000000,74750.000000,319.479912)}
{pt3dadd(163056.000000,218568.000000,73625.000000,346.657896)}

{create adhoc39}
{access adhoc39}
{connect adhoc39(1), adhoc37(0)}
{nseg = 1}
{strdef color color = "White"}
{pt3dclear()}
{pt3dadd(163560.000000,217908.000000,74650.000000,599.024880)}
{pt3dadd(163296.000000,218568.000000,75625.000000,415.989486)}
{pt3dadd(163164.000000,219024.000000,75975.000000,398.656589)}
{pt3dadd(163044.000000,219420.000000,76325.000000,381.323691)}
{pt3dadd(162864.000000,219852.000000,76375.000000,363.990794)}
{pt3dadd(162672.000000,220224.000000,76425.000000,346.657896)}
{pt3dadd(162576.000000,220596.000000,76650.000000,332.213819)}
{pt3dadd(162612.000000,221016.000000,76725.000000,317.769741)}
{pt3dadd(162648.000000,221388.000000,76925.000000,303.325664)}
{pt3dadd(162576.000000,221628.000000,76975.000000,288.881586)}
{pt3dadd(162672.000000,221988.000000,77050.000000,320.658561)}
{pt3dadd(162780.000000,222408.000000,77175.000000,352.435536)}
{pt3dadd(162828.000000,222804.000000,77275.000000,384.212511)}
{pt3dadd(162624.000000,223284.000000,77275.000000,415.989486)}
{pt3dadd(162432.000000,223608.000000,77300.000000,395.190005)}
{pt3dadd(162336.000000,224112.000000,77475.000000,374.390523)}
{pt3dadd(162264.000000,224556.000000,77350.000000,353.591042)}
{pt3dadd(162204.000000,224964.000000,77325.000000,332.791560)}
{pt3dadd(162192.000000,225336.000000,77300.000000,277.326324)}

{create adhoc40}
{access adhoc40}
{connect adhoc40(1), adhoc39(0)}
{nseg = 1}
{strdef color color = "White"}
{pt3dclear()}
{pt3dadd(162192.000000,225336.000000,77300.000000,277.326324)}
{pt3dadd(162192.000000,225804.000000,77300.000000,332.791596)}
{pt3dadd(162192.000000,226152.000000,77275.000000,299.746750)}
{pt3dadd(162156.000000,226536.000000,77075.000000,266.701905)}
{pt3dadd(161964.000000,227160.000000,76625.000000,233.657060)}
{pt3dadd(161808.000000,227544.000000,76425.000000,200.612214)}
{pt3dadd(161628.000000,227868.000000,76400.000000,208.235480)}
{pt3dadd(161448.000000,228192.000000,76375.000000,215.858745)}
{pt3dadd(161244.000000,228816.000000,76500.000000,223.482010)}
{pt3dadd(161088.000000,229416.000000,76725.000000,231.105276)}
{pt3dadd(160968.000000,229920.000000,76950.000000,219.550009)}
{pt3dadd(160752.000000,230328.000000,77225.000000,207.994743)}
{pt3dadd(160644.000000,230616.000000,77275.000000,196.439476)}
{pt3dadd(160212.000000,231444.000000,77475.000000,184.884210)}
{pt3dadd(160188.000000,232116.000000,77750.000000,190.126878)}
{pt3dadd(160104.000000,232776.000000,77975.000000,195.369546)}
{pt3dadd(160032.000000,233316.000000,78300.000000,200.612214)}
{pt3dadd(159780.000000,233916.000000,78700.000000,200.612214)}

{create adhoc41}
{access adhoc41}
{connect adhoc41(1), adhoc40(0)}
{nseg = 1}
{strdef color color = "White"}
{pt3dclear()}
{pt3dadd(159780.000000,233916.000000,78700.000000,200.612214)}
{pt3dadd(159636.000000,235152.000000,78900.000000,167.176836)}
{pt3dadd(159516.000000,235440.000000,79125.000000,167.176836)}
{pt3dadd(159552.000000,235896.000000,79450.000000,167.176836)}
{pt3dadd(159096.000000,236256.000000,79800.000000,167.176836)}
{pt3dadd(159132.000000,236544.000000,80125.000000,167.176836)}
{pt3dadd(158820.000000,236808.000000,80375.000000,183.894525)}
{pt3dadd(158328.000000,237012.000000,80650.000000,200.612214)}
{pt3dadd(157896.000000,237156.000000,80900.000000,80.621550)}

{create adhoc42}
{access adhoc42}
{connect adhoc42(1), adhoc40(0)}
{nseg = 1}
{strdef color color = "White"}
{pt3dclear()}
{pt3dadd(159780.000000,233916.000000,78700.000000,200.612214)}
{pt3dadd(159840.000000,234156.000000,79200.000000,200.612214)}
{pt3dadd(159948.000000,234024.000000,79500.000000,200.612214)}
{pt3dadd(160296.000000,234084.000000,79975.000000,200.612214)}
{pt3dadd(160680.000000,234252.000000,80325.000000,200.612214)}
{pt3dadd(161076.000000,234456.000000,80675.000000,200.612214)}
{pt3dadd(161568.000000,234396.000000,81200.000000,200.612214)}
{pt3dadd(162060.000000,234372.000000,81850.000000,200.612214)}
{pt3dadd(162444.000000,234096.000000,82200.000000,200.612214)}
{pt3dadd(162636.000000,234120.000000,82575.000000,200.612214)}
{pt3dadd(162720.000000,234324.000000,83100.000000,196.680213)}
{pt3dadd(162336.000000,234492.000000,83725.000000,192.748212)}
{pt3dadd(161592.000000,234804.000000,84100.000000,188.816211)}
{pt3dadd(160932.000000,235284.000000,84275.000000,184.884210)}
{pt3dadd(160596.000000,235464.000000,84100.000000,80.399754)}

{create adhoc43}
{access adhoc43}
{connect adhoc43(1), adhoc39(0)}
{nseg = 1}
{strdef color color = "White"}
{pt3dclear()}
{pt3dadd(162192.000000,225336.000000,77300.000000,277.326324)}
{pt3dadd(161004.000000,225504.000000,77475.000000,116.095032)}

{create adhoc44}
{access adhoc44}
{connect adhoc44(1), adhoc43(0)}
{nseg = 1}
{strdef color color = "White"}
{pt3dclear()}
{pt3dadd(161004.000000,225504.000000,77475.000000,116.095032)}
{pt3dadd(161328.000000,225696.000000,77100.000000,80.621550)}
{pt3dadd(161136.000000,226104.000000,76925.000000,80.621550)}

{create adhoc45}
{access adhoc45}
{connect adhoc45(1), adhoc43(0)}
{nseg = 1}
{strdef color color = "White"}
{pt3dclear()}
{pt3dadd(161004.000000,225504.000000,77475.000000,116.095032)}
{pt3dadd(160632.000000,225504.000000,77725.000000,92.876040)}
{pt3dadd(160680.000000,225504.000000,78100.000000,67.184640)}

{create adhoc46}
{access adhoc46}
{connect adhoc46(1), adhoc36(0)}
{nseg = 1}
{strdef color color = "White"}
{pt3dclear()}
{pt3dadd(165972.000000,214884.000000,74025.000000,319.479948)}
{pt3dadd(165648.000000,213072.000000,73475.000000,167.176836)}
{pt3dadd(165288.000000,212808.000000,73350.000000,175.535680)}
{pt3dadd(165084.000000,211296.000000,72950.000000,183.894525)}
{pt3dadd(164952.000000,210516.000000,73050.000000,192.253370)}
{pt3dadd(164892.000000,210276.000000,73125.000000,200.612214)}
{pt3dadd(165216.000000,209940.000000,73075.000000,174.645625)}
{pt3dadd(165480.000000,209472.000000,73100.000000,148.679037)}
{pt3dadd(165552.000000,209280.000000,72850.000000,122.712448)}
{pt3dadd(165480.000000,208752.000000,72450.000000,96.745860)}
{pt3dadd(165828.000000,208404.000000,72375.000000,131.367978)}
{pt3dadd(165900.000000,207528.000000,71925.000000,165.990096)}
{pt3dadd(165840.000000,206988.000000,71700.000000,200.612214)}
{pt3dadd(165696.000000,206604.000000,71475.000000,67.184640)}

{create adhoc47}
{access adhoc47}
{connect adhoc47(1), adhoc15(0)}
{nseg = 1}
{strdef color color = "White"}
{pt3dclear()}
{pt3dadd(184824.000000,205248.000000,72650.000000,1242.137880)}
{pt3dadd(186180.000000,206040.000000,76425.000000,1242.137880)}
{pt3dadd(187080.000000,205956.000000,78125.000000,1242.137880)}
{pt3dadd(189888.000000,205596.000000,82550.000000,1242.137880)}
{pt3dadd(192084.000000,205356.000000,87200.000000,1242.137880)}
{pt3dadd(191592.000000,205260.000000,90325.000000,1242.137880)}
{pt3dadd(190500.000000,206328.000000,95600.000000,1229.716498)}
{pt3dadd(187920.000000,205812.000000,100250.000000,1217.295117)}
{pt3dadd(187416.000000,206640.000000,102550.000000,1204.873736)}
{pt3dadd(185592.000000,204552.000000,107575.000000,1192.452354)}
{pt3dadd(185712.000000,202476.000000,110025.000000,1044.095486)}
{pt3dadd(184512.000000,200556.000000,112700.000000,895.738617)}
{pt3dadd(183276.000000,196968.000000,116700.000000,747.381748)}
{pt3dadd(179400.000000,192036.000000,121225.000000,599.024880)}
{pt3dadd(177564.000000,190356.000000,122900.000000,599.024880)}
{pt3dadd(175956.000000,188544.000000,124175.000000,599.024880)}
{pt3dadd(174912.000000,186876.000000,125075.000000,599.024880)}
{pt3dadd(173616.000000,185292.000000,126000.000000,599.024880)}
{pt3dadd(172272.000000,184152.000000,126775.000000,664.917611)}
{pt3dadd(171180.000000,182688.000000,126950.000000,730.810341)}
{pt3dadd(170232.000000,182832.000000,127700.000000,796.703072)}
{pt3dadd(167376.000000,180324.000000,129575.000000,862.595802)}
{pt3dadd(166344.000000,179016.000000,130775.000000,905.725589)}
{pt3dadd(164148.000000,176256.000000,133025.000000,948.855375)}
{pt3dadd(161640.000000,173544.000000,135425.000000,991.985162)}
{pt3dadd(160572.000000,171912.000000,137200.000000,1035.114948)}
{pt3dadd(161004.000000,170532.000000,138000.000000,1074.449300)}
{pt3dadd(160524.000000,167400.000000,139875.000000,1113.783651)}
{pt3dadd(158208.000000,164028.000000,142600.000000,1153.118003)}
{pt3dadd(156672.000000,161088.000000,144850.000000,1192.452354)}
{pt3dadd(156660.000000,159876.000000,145975.000000,1266.980616)}
{pt3dadd(156624.000000,159048.000000,146875.000000,1341.508878)}
{pt3dadd(156576.000000,157464.000000,148325.000000,1416.037140)}
{pt3dadd(156708.000000,155988.000000,149450.000000,1490.565402)}
{pt3dadd(155592.000000,154416.000000,151325.000000,1490.565402)}
{pt3dadd(155520.000000,152064.000000,153425.000000,1490.565402)}
{pt3dadd(155892.000000,150804.000000,155075.000000,1490.565402)}
{pt3dadd(156708.000000,149652.000000,157025.000000,1490.565402)}
{pt3dadd(156684.000000,146976.000000,159300.000000,1475.659737)}
{pt3dadd(156264.000000,145800.000000,160350.000000,1460.754072)}
{pt3dadd(156180.000000,144324.000000,161075.000000,1445.848407)}
{pt3dadd(156072.000000,142080.000000,162425.000000,1430.942742)}
{pt3dadd(156564.000000,140484.000000,163775.000000,1445.848407)}
{pt3dadd(156504.000000,139056.000000,165050.000000,1460.754072)}
{pt3dadd(157368.000000,138456.000000,166125.000000,1475.659737)}
{pt3dadd(157692.000000,137784.000000,167025.000000,1490.565402)}
{pt3dadd(157164.000000,137964.000000,168025.000000,18.000000)}
{pt3dadd(157668.000000,137952.000000,168475.000000,508.855134)}
{pt3dadd(157140.000000,137784.000000,169125.000000,999.710268)}
{pt3dadd(157176.000000,137472.000000,169700.000000,1490.565402)}
{pt3dadd(157440.000000,137112.000000,170475.000000,1490.565402)}
{pt3dadd(156840.000000,136572.000000,171775.000000,1490.565402)}
{pt3dadd(156660.000000,136296.000000,172775.000000,1490.565402)}
{pt3dadd(156612.000000,136176.000000,173200.000000,1490.565402)}
{pt3dadd(155760.000000,135588.000000,174225.000000,1490.565402)}
{pt3dadd(154812.000000,135300.000000,174900.000000,1490.565402)}
{pt3dadd(154788.000000,134700.000000,176200.000000,1490.565402)}
{pt3dadd(154380.000000,134088.000000,177225.000000,1490.565402)}
{pt3dadd(153948.000000,133704.000000,178300.000000,1490.565402)}
{pt3dadd(154032.000000,133548.000000,179175.000000,1490.565402)}
{pt3dadd(153384.000000,132516.000000,180650.000000,1490.565402)}
{pt3dadd(153204.000000,132456.000000,181600.000000,1490.565402)}
{pt3dadd(153000.000000,132216.000000,182375.000000,1823.049594)}

{create adhoc48}
{access adhoc48}
{connect adhoc48(1), adhoc14(0)}
{nseg = 1}
{strdef color color = "White"}
{pt3dclear()}
{pt3dadd(182352.000000,199632.000000,64400.000000,1430.942868)}
{pt3dadd(178200.000000,198396.000000,66075.000000,718.829820)}

{create adhoc49}
{access adhoc49}
{connect adhoc49(1), adhoc13(0)}
{nseg = 1}
{strdef color color = "White"}
{pt3dclear()}
{pt3dadd(182328.000000,195960.000000,59600.000000,1788.678450)}
{pt3dadd(182028.000000,194988.000000,58425.000000,2146.414176)}
{pt3dadd(182664.000000,194232.000000,57350.000000,1788.678450)}
{pt3dadd(183000.000000,192444.000000,56400.000000,1788.678450)}

{create adhoc50}
{access adhoc50}
{connect adhoc50(1), adhoc49(0)}
{nseg = 1}
{strdef color color = "White"}
{pt3dclear()}
{pt3dadd(183000.000000,192444.000000,56400.000000,1788.678450)}
{pt3dadd(183036.000000,191052.000000,54925.000000,862.595802)}
{pt3dadd(183924.000000,190116.000000,56525.000000,1032.965556)}
{pt3dadd(184260.000000,188964.000000,55700.000000,1203.335310)}
{pt3dadd(184704.000000,187284.000000,55450.000000,1373.705064)}
{pt3dadd(185232.000000,185664.000000,55000.000000,1242.137880)}

{create adhoc51}
{access adhoc51}
{connect adhoc51(1), adhoc50(0)}
{nseg = 1}
{strdef color color = "White"}
{pt3dclear()}
{pt3dadd(185232.000000,185664.000000,55000.000000,1242.137880)}
{pt3dadd(182328.000000,185508.000000,54850.000000,200.612214)}
{pt3dadd(182040.000000,185376.000000,54750.000000,200.612214)}
{pt3dadd(181704.000000,185340.000000,54725.000000,200.612214)}
{pt3dadd(181404.000000,185376.000000,54750.000000,200.612214)}
{pt3dadd(181140.000000,185412.000000,54775.000000,200.612214)}
{pt3dadd(180768.000000,185424.000000,54825.000000,240.734646)}
{pt3dadd(180420.000000,185436.000000,54825.000000,240.734646)}

{create adhoc52}
{access adhoc52}
{connect adhoc52(1), adhoc51(0)}
{nseg = 1}
{strdef color color = "White"}
{pt3dclear()}
{pt3dadd(180420.000000,185436.000000,54825.000000,240.734646)}
{pt3dadd(180012.000000,184860.000000,55350.000000,200.612214)}
{pt3dadd(179808.000000,184776.000000,55750.000000,192.253370)}
{pt3dadd(179688.000000,184692.000000,56050.000000,183.894525)}
{pt3dadd(180180.000000,185136.000000,56400.000000,175.535680)}
{pt3dadd(180696.000000,185400.000000,57400.000000,167.176836)}
{pt3dadd(180804.000000,185532.000000,57300.000000,200.612214)}

{create adhoc53}
{access adhoc53}
{connect adhoc53(1), adhoc51(0)}
{nseg = 1}
{strdef color color = "White"}
{pt3dclear()}
{pt3dadd(180420.000000,185436.000000,54825.000000,240.734646)}
{pt3dadd(180036.000000,185460.000000,54825.000000,139.314042)}
{pt3dadd(179820.000000,185916.000000,54750.000000,288.881586)}

{create adhoc54}
{access adhoc54}
{connect adhoc54(1), adhoc53(0)}
{nseg = 1}
{strdef color color = "White"}
{pt3dclear()}
{pt3dadd(179820.000000,185916.000000,54750.000000,288.881586)}
{pt3dadd(179508.000000,185964.000000,54450.000000,231.105276)}
{pt3dadd(179160.000000,186120.000000,54350.000000,223.482010)}
{pt3dadd(178776.000000,186192.000000,54400.000000,215.858745)}
{pt3dadd(178488.000000,186168.000000,54475.000000,208.235480)}
{pt3dadd(178188.000000,186132.000000,54550.000000,200.612214)}
{pt3dadd(177900.000000,186096.000000,54625.000000,200.612214)}
{pt3dadd(177588.000000,186060.000000,54650.000000,200.612214)}
{pt3dadd(177276.000000,185928.000000,54675.000000,200.612214)}
{pt3dadd(177024.000000,185712.000000,54700.000000,240.734646)}

{create adhoc55}
{access adhoc55}
{connect adhoc55(1), adhoc54(0)}
{nseg = 1}
{strdef color color = "White"}
{pt3dclear()}
{pt3dadd(177024.000000,185712.000000,54700.000000,240.734646)}
{pt3dadd(176652.000000,185364.000000,54025.000000,167.176836)}
{pt3dadd(176412.000000,185292.000000,53600.000000,139.379427)}
{pt3dadd(176796.000000,184896.000000,53200.000000,111.582018)}
{pt3dadd(177312.000000,185136.000000,52800.000000,83.784609)}
{pt3dadd(177528.000000,185412.000000,52625.000000,55.987200)}
{pt3dadd(177696.000000,185904.000000,52450.000000,80.621550)}
{pt3dadd(177720.000000,186120.000000,52250.000000,55.987200)}

{create adhoc56}
{access adhoc56}
{connect adhoc56(1), adhoc54(0)}
{nseg = 1}
{strdef color color = "White"}
{pt3dclear()}
{pt3dadd(177024.000000,185712.000000,54700.000000,240.734646)}
{pt3dadd(176292.000000,185460.000000,54975.000000,167.176836)}
{pt3dadd(176568.000000,185256.000000,55925.000000,96.745860)}
{pt3dadd(176952.000000,185496.000000,56350.000000,80.621550)}

{create adhoc57}
{access adhoc57}
{connect adhoc57(1), adhoc53(0)}
{nseg = 1}
{strdef color color = "White"}
{pt3dclear()}
{pt3dadd(179820.000000,185916.000000,54750.000000,288.881586)}
{pt3dadd(179676.000000,186636.000000,55025.000000,80.621550)}
{pt3dadd(179316.000000,186852.000000,55125.000000,80.621550)}
{pt3dadd(179232.000000,186828.000000,55450.000000,80.621550)}
{pt3dadd(179088.000000,186984.000000,55075.000000,80.621550)}
{pt3dadd(178740.000000,187188.000000,55050.000000,46.656000)}

{create adhoc58}
{access adhoc58}
{connect adhoc58(1), adhoc50(0)}
{nseg = 1}
{strdef color color = "White"}
{pt3dclear()}
{pt3dadd(185232.000000,185664.000000,55000.000000,1242.137880)}
{pt3dadd(185868.000000,184920.000000,54775.000000,1242.137880)}
{pt3dadd(186876.000000,183936.000000,54550.000000,1324.947054)}
{pt3dadd(186852.000000,182964.000000,54975.000000,1407.756228)}
{pt3dadd(187536.000000,181956.000000,55100.000000,1490.565402)}
{pt3dadd(187440.000000,181608.000000,54800.000000,1490.565402)}

{create adhoc59}
{access adhoc59}
{connect adhoc59(1), adhoc58(0)}
{nseg = 1}
{strdef color color = "White"}
{pt3dclear()}
{pt3dadd(187440.000000,181608.000000,54800.000000,1490.565402)}
{pt3dadd(187932.000000,180912.000000,55350.000000,1430.942742)}
{pt3dadd(184368.000000,181404.000000,54500.000000,1123.360110)}
{pt3dadd(184080.000000,181368.000000,54325.000000,815.777478)}
{pt3dadd(183780.000000,181236.000000,54275.000000,508.194846)}
{pt3dadd(183408.000000,180996.000000,54175.000000,200.612214)}
{pt3dadd(183036.000000,180912.000000,54075.000000,222.679557)}
{pt3dadd(182544.000000,180864.000000,54000.000000,244.746900)}
{pt3dadd(182196.000000,180696.000000,53950.000000,266.814243)}
{pt3dadd(181872.000000,180744.000000,53875.000000,288.881586)}
{pt3dadd(181560.000000,180228.000000,53750.000000,240.734646)}

{create adhoc60}
{access adhoc60}
{connect adhoc60(1), adhoc59(0)}
{nseg = 1}
{strdef color color = "White"}
{pt3dclear()}
{pt3dadd(181560.000000,180228.000000,53750.000000,240.734646)}
{pt3dadd(181044.000000,180360.000000,53150.000000,288.881586)}
{pt3dadd(180648.000000,180036.000000,52600.000000,231.286068)}
{pt3dadd(179892.000000,179640.000000,52150.000000,173.690550)}
{pt3dadd(179136.000000,178812.000000,51700.000000,116.095032)}
{pt3dadd(178680.000000,177768.000000,51225.000000,80.621550)}

{create adhoc61}
{access adhoc61}
{connect adhoc61(1), adhoc59(0)}
{nseg = 1}
{strdef color color = "White"}
{pt3dclear()}
{pt3dadd(181560.000000,180228.000000,53750.000000,240.734646)}
{pt3dadd(181044.000000,179760.000000,53925.000000,167.176836)}
{pt3dadd(180576.000000,179628.000000,54750.000000,133.741476)}

{create adhoc62}
{access adhoc62}
{connect adhoc62(1), adhoc58(0)}
{nseg = 1}
{strdef color color = "White"}
{pt3dclear()}
{pt3dadd(187440.000000,181608.000000,54800.000000,1490.565402)}
{pt3dadd(188760.000000,180228.000000,55325.000000,1490.565402)}

{create adhoc63}
{access adhoc63}
{connect adhoc63(1), adhoc62(0)}
{nseg = 1}
{strdef color color = "White"}
{pt3dclear()}
{pt3dadd(188760.000000,180228.000000,55325.000000,1490.565402)}
{pt3dadd(189420.000000,179484.000000,55325.000000,1490.565402)}
{pt3dadd(189780.000000,178620.000000,55250.000000,1324.947038)}
{pt3dadd(189972.000000,177876.000000,55150.000000,1159.328673)}
{pt3dadd(190164.000000,176604.000000,54975.000000,993.710309)}
{pt3dadd(190092.000000,175956.000000,54775.000000,828.091944)}
{pt3dadd(189888.000000,174864.000000,54550.000000,931.603446)}
{pt3dadd(190008.000000,173280.000000,54900.000000,1035.114948)}
{pt3dadd(189984.000000,172044.000000,55075.000000,1035.114948)}

{create adhoc64}
{access adhoc64}
{connect adhoc64(1), adhoc63(0)}
{nseg = 1}
{strdef color color = "White"}
{pt3dclear()}
{pt3dadd(189984.000000,172044.000000,55075.000000,1035.114948)}
{pt3dadd(191208.000000,171132.000000,55025.000000,1242.137880)}
{pt3dadd(191244.000000,170100.000000,55100.000000,1266.006636)}

{create adhoc65}
{access adhoc65}
{connect adhoc65(1), adhoc64(0)}
{nseg = 1}
{strdef color color = "White"}
{pt3dclear()}
{pt3dadd(191244.000000,170100.000000,55100.000000,1266.006636)}
{pt3dadd(192852.000000,169308.000000,55525.000000,1242.137880)}
{pt3dadd(192504.000000,167904.000000,55425.000000,1490.565402)}
{pt3dadd(192816.000000,167160.000000,55675.000000,1490.565402)}

{create adhoc66}
{access adhoc66}
{connect adhoc66(1), adhoc65(0)}
{nseg = 1}
{strdef color color = "White"}
{pt3dclear()}
{pt3dadd(192816.000000,167160.000000,55675.000000,1490.565402)}
{pt3dadd(192804.000000,165288.000000,55200.000000,1035.114948)}

{create adhoc67}
{access adhoc67}
{connect adhoc67(1), adhoc66(0)}
{nseg = 1}
{strdef color color = "White"}
{pt3dclear()}
{pt3dadd(192804.000000,165288.000000,55200.000000,1035.114948)}
{pt3dadd(193728.000000,164076.000000,55825.000000,953.961894)}
{pt3dadd(193164.000000,162168.000000,55400.000000,981.012912)}
{pt3dadd(193224.000000,161148.000000,55400.000000,1008.063930)}
{pt3dadd(192768.000000,159732.000000,55350.000000,1035.114948)}
{pt3dadd(192264.000000,159060.000000,55350.000000,1192.452354)}

{create adhoc68}
{access adhoc68}
{connect adhoc68(1), adhoc67(0)}
{nseg = 1}
{strdef color color = "White"}
{pt3dclear()}
{pt3dadd(192264.000000,159060.000000,55350.000000,1192.452354)}
{pt3dadd(192144.000000,157944.000000,55475.000000,1035.114948)}
{pt3dadd(191604.000000,156900.000000,55025.000000,718.829820)}

{create adhoc69}
{access adhoc69}
{connect adhoc69(1), adhoc68(0)}
{nseg = 1}
{strdef color color = "White"}
{pt3dclear()}
{pt3dadd(191604.000000,156900.000000,55025.000000,718.829820)}
{pt3dadd(191460.000000,155964.000000,54875.000000,862.595802)}
{pt3dadd(191328.000000,155088.000000,54300.000000,862.595802)}

{create adhoc70}
{access adhoc70}
{connect adhoc70(1), adhoc69(0)}
{nseg = 1}
{strdef color color = "White"}
{pt3dclear()}
{pt3dadd(191328.000000,155088.000000,54300.000000,862.595802)}
{pt3dadd(188784.000000,154620.000000,53550.000000,167.176836)}
{pt3dadd(188580.000000,154776.000000,53400.000000,158.817996)}
{pt3dadd(188292.000000,155124.000000,53350.000000,150.459156)}
{pt3dadd(187896.000000,155232.000000,53150.000000,142.100316)}
{pt3dadd(187680.000000,155520.000000,53150.000000,133.741476)}
{pt3dadd(187332.000000,155880.000000,52850.000000,80.621550)}

{create adhoc71}
{access adhoc71}
{connect adhoc71(1), adhoc69(0)}
{nseg = 1}
{strdef color color = "White"}
{pt3dclear()}
{pt3dadd(191328.000000,155088.000000,54300.000000,862.595802)}
{pt3dadd(190956.000000,153876.000000,53825.000000,1035.114948)}
{pt3dadd(191100.000000,152844.000000,53650.000000,862.595802)}

{create adhoc72}
{access adhoc72}
{connect adhoc72(1), adhoc71(0)}
{nseg = 1}
{strdef color color = "White"}
{pt3dclear()}
{pt3dadd(191100.000000,152844.000000,53650.000000,862.595802)}
{pt3dadd(191220.000000,151800.000000,53475.000000,718.829820)}
{pt3dadd(191448.000000,150192.000000,53425.000000,773.460882)}
{pt3dadd(191784.000000,148464.000000,53325.000000,828.091944)}
{pt3dadd(192036.000000,146784.000000,53900.000000,862.595802)}

{create adhoc73}
{access adhoc73}
{connect adhoc73(1), adhoc72(0)}
{nseg = 1}
{strdef color color = "White"}
{pt3dclear()}
{pt3dadd(192036.000000,146784.000000,53900.000000,862.595802)}
{pt3dadd(193056.000000,144720.000000,54075.000000,575.063856)}
{pt3dadd(193476.000000,143088.000000,54225.000000,690.076674)}

{create adhoc74}
{access adhoc74}
{connect adhoc74(1), adhoc73(0)}
{nseg = 1}
{strdef color color = "White"}
{pt3dclear()}
{pt3dadd(193476.000000,143088.000000,54225.000000,690.076674)}
{pt3dadd(191928.000000,142344.000000,52925.000000,200.612214)}
{pt3dadd(191748.000000,142128.000000,52675.000000,222.679557)}
{pt3dadd(191556.000000,141804.000000,52400.000000,244.746900)}
{pt3dadd(191340.000000,141468.000000,52025.000000,266.814243)}
{pt3dadd(191148.000000,141180.000000,51850.000000,288.881586)}
{pt3dadd(190944.000000,140832.000000,51475.000000,303.325664)}
{pt3dadd(190776.000000,140532.000000,51350.000000,317.769741)}
{pt3dadd(190536.000000,140220.000000,51075.000000,332.213819)}
{pt3dadd(190356.000000,139848.000000,50850.000000,346.657896)}
{pt3dadd(190176.000000,139428.000000,50625.000000,326.551739)}
{pt3dadd(189864.000000,139056.000000,50450.000000,306.445581)}
{pt3dadd(189780.000000,138696.000000,50150.000000,286.339424)}
{pt3dadd(189384.000000,138300.000000,49750.000000,266.233266)}
{pt3dadd(189060.000000,137940.000000,49650.000000,346.657896)}

{create adhoc75}
{access adhoc75}
{connect adhoc75(1), adhoc74(0)}
{nseg = 1}
{strdef color color = "White"}
{pt3dclear()}
{pt3dadd(189060.000000,137940.000000,49650.000000,346.657896)}
{pt3dadd(188724.000000,137556.000000,49550.000000,200.612214)}
{pt3dadd(188424.000000,137028.000000,49400.000000,167.176836)}
{pt3dadd(188124.000000,136668.000000,49250.000000,240.734646)}

{create adhoc76}
{access adhoc76}
{connect adhoc76(1), adhoc75(0)}
{nseg = 1}
{strdef color color = "White"}
{pt3dclear()}
{pt3dadd(188124.000000,136668.000000,49250.000000,240.734646)}
{pt3dadd(187836.000000,136224.000000,48950.000000,200.612214)}

{create adhoc77}
{access adhoc77}
{connect adhoc77(1), adhoc76(0)}
{nseg = 1}
{strdef color color = "White"}
{pt3dclear()}
{pt3dadd(187836.000000,136224.000000,48950.000000,200.612214)}
{pt3dadd(187620.000000,135756.000000,49225.000000,116.095032)}
{pt3dadd(187380.000000,135360.000000,49550.000000,96.745860)}

{create adhoc78}
{access adhoc78}
{connect adhoc78(1), adhoc76(0)}
{nseg = 1}
{strdef color color = "White"}
{pt3dclear()}
{pt3dadd(187836.000000,136224.000000,48950.000000,200.612214)}
{pt3dadd(187548.000000,136068.000000,48875.000000,240.734646)}
{pt3dadd(187320.000000,135960.000000,48700.000000,238.327304)}
{pt3dadd(186816.000000,135768.000000,48525.000000,235.919961)}
{pt3dadd(186384.000000,135324.000000,48150.000000,233.512618)}
{pt3dadd(186804.000000,134832.000000,47750.000000,231.105276)}
{pt3dadd(186972.000000,134328.000000,47475.000000,223.482010)}
{pt3dadd(187128.000000,134100.000000,47125.000000,215.858745)}
{pt3dadd(187584.000000,132864.000000,46700.000000,208.235480)}
{pt3dadd(187740.000000,132468.000000,46450.000000,200.612214)}
{pt3dadd(188472.000000,132048.000000,46825.000000,200.612214)}

{create adhoc79}
{access adhoc79}
{connect adhoc79(1), adhoc78(0)}
{nseg = 1}
{strdef color color = "White"}
{pt3dclear()}
{pt3dadd(188472.000000,132048.000000,46825.000000,200.612214)}
{pt3dadd(188472.000000,131676.000000,46825.000000,80.621550)}
{pt3dadd(188340.000000,131556.000000,46850.000000,80.621550)}
{pt3dadd(187824.000000,131280.000000,46850.000000,80.621550)}
{pt3dadd(187632.000000,131016.000000,46900.000000,46.656000)}

{create adhoc80}
{access adhoc80}
{connect adhoc80(1), adhoc78(0)}
{nseg = 1}
{strdef color color = "White"}
{pt3dclear()}
{pt3dadd(188472.000000,132048.000000,46825.000000,200.612214)}
{pt3dadd(188748.000000,132132.000000,46900.000000,96.745860)}
{pt3dadd(189144.000000,132432.000000,46725.000000,46.656000)}

{create adhoc81}
{access adhoc81}
{connect adhoc81(1), adhoc75(0)}
{nseg = 1}
{strdef color color = "White"}
{pt3dclear()}
{pt3dadd(188124.000000,136668.000000,49250.000000,240.734646)}
{pt3dadd(188652.000000,136392.000000,49600.000000,67.184640)}
{pt3dadd(189000.000000,136176.000000,49825.000000,67.184640)}
{pt3dadd(189036.000000,136044.000000,49850.000000,116.095032)}

{create adhoc82}
{access adhoc82}
{connect adhoc82(1), adhoc74(0)}
{nseg = 1}
{strdef color color = "White"}
{pt3dclear()}
{pt3dadd(189060.000000,137940.000000,49650.000000,346.657896)}
{pt3dadd(187440.000000,138000.000000,49375.000000,139.314042)}
{pt3dadd(185892.000000,137772.000000,48925.000000,139.314042)}
{pt3dadd(185412.000000,137700.000000,48875.000000,154.070172)}

{create adhoc83}
{access adhoc83}
{connect adhoc83(1), adhoc82(0)}
{nseg = 1}
{strdef color color = "White"}
{pt3dclear()}
{pt3dadd(185412.000000,137700.000000,48875.000000,154.070172)}
{pt3dadd(185064.000000,137484.000000,48600.000000,53.747712)}
{pt3dadd(184908.000000,137244.000000,48575.000000,67.184640)}

{create adhoc84}
{access adhoc84}
{connect adhoc84(1), adhoc82(0)}
{nseg = 1}
{strdef color color = "White"}
{pt3dclear()}
{pt3dadd(185412.000000,137700.000000,48875.000000,154.070172)}
{pt3dadd(184992.000000,138300.000000,48650.000000,80.621550)}
{pt3dadd(184776.000000,138204.000000,48450.000000,80.621550)}

{create adhoc85}
{access adhoc85}
{connect adhoc85(1), adhoc73(0)}
{nseg = 1}
{strdef color color = "White"}
{pt3dclear()}
{pt3dadd(193476.000000,143088.000000,54225.000000,690.076674)}
{pt3dadd(193308.000000,142236.000000,54100.000000,718.829820)}
{pt3dadd(193056.000000,141588.000000,54200.000000,718.829820)}
{pt3dadd(192720.000000,140352.000000,54300.000000,599.024880)}

{create adhoc86}
{access adhoc86}
{connect adhoc86(1), adhoc85(0)}
{nseg = 1}
{strdef color color = "White"}
{pt3dclear()}
{pt3dadd(192720.000000,140352.000000,54300.000000,599.024880)}
{pt3dadd(191196.000000,140256.000000,53775.000000,139.314042)}
{pt3dadd(191028.000000,140160.000000,53725.000000,139.314042)}
{pt3dadd(190764.000000,139968.000000,53675.000000,139.314042)}
{pt3dadd(190488.000000,139764.000000,53550.000000,139.314042)}
{pt3dadd(190200.000000,139632.000000,53500.000000,139.314042)}
{pt3dadd(189900.000000,139428.000000,53425.000000,139.314042)}
{pt3dadd(189576.000000,139200.000000,53425.000000,139.314042)}
{pt3dadd(189264.000000,139020.000000,53425.000000,139.314042)}
{pt3dadd(188856.000000,138876.000000,53500.000000,116.095032)}

{create adhoc87}
{access adhoc87}
{connect adhoc87(1), adhoc86(0)}
{nseg = 1}
{strdef color color = "White"}
{pt3dclear()}
{pt3dadd(188856.000000,138876.000000,53500.000000,116.095032)}
{pt3dadd(189072.000000,138528.000000,53875.000000,96.745860)}
{pt3dadd(189228.000000,138216.000000,54175.000000,67.184640)}

{create adhoc88}
{access adhoc88}
{connect adhoc88(1), adhoc86(0)}
{nseg = 1}
{strdef color color = "White"}
{pt3dclear()}
{pt3dadd(188856.000000,138876.000000,53500.000000,116.095032)}
{pt3dadd(188544.000000,138840.000000,53500.000000,116.095032)}
{pt3dadd(187476.000000,138564.000000,53500.000000,121.899785)}
{pt3dadd(187080.000000,138756.000000,53725.000000,127.704537)}
{pt3dadd(186468.000000,138564.000000,53225.000000,133.509289)}
{pt3dadd(185676.000000,138192.000000,52850.000000,139.314042)}
{pt3dadd(185652.000000,137904.000000,52875.000000,96.745860)}

{create adhoc89}
{access adhoc89}
{connect adhoc89(1), adhoc85(0)}
{nseg = 1}
{strdef color color = "White"}
{pt3dclear()}
{pt3dadd(192720.000000,140352.000000,54300.000000,599.024880)}
{pt3dadd(192684.000000,139908.000000,54325.000000,575.063856)}
{pt3dadd(192708.000000,139092.000000,54525.000000,581.054112)}
{pt3dadd(192780.000000,138288.000000,54500.000000,587.044368)}
{pt3dadd(192564.000000,137316.000000,54675.000000,593.034624)}
{pt3dadd(192096.000000,136416.000000,54875.000000,599.024880)}
{pt3dadd(191868.000000,135240.000000,55000.000000,599.024880)}
{pt3dadd(192072.000000,134640.000000,55100.000000,499.187376)}

{create adhoc90}
{access adhoc90}
{connect adhoc90(1), adhoc89(0)}
{nseg = 1}
{strdef color color = "White"}
{pt3dclear()}
{pt3dadd(192072.000000,134640.000000,55100.000000,499.187376)}
{pt3dadd(192036.000000,133944.000000,55050.000000,499.187376)}
{pt3dadd(192036.000000,133176.000000,55075.000000,524.146752)}
{pt3dadd(192024.000000,131892.000000,55350.000000,549.106128)}
{pt3dadd(191640.000000,130680.000000,55300.000000,574.065504)}
{pt3dadd(191208.000000,129384.000000,55550.000000,599.024880)}
{pt3dadd(191172.000000,128820.000000,55725.000000,574.065504)}
{pt3dadd(190872.000000,127824.000000,55600.000000,549.106128)}
{pt3dadd(190296.000000,126420.000000,55475.000000,524.146752)}
{pt3dadd(189996.000000,125448.000000,55475.000000,499.187376)}
{pt3dadd(189984.000000,124872.000000,55525.000000,499.187376)}

{create adhoc91}
{access adhoc91}
{connect adhoc91(1), adhoc90(0)}
{nseg = 1}
{strdef color color = "White"}
{pt3dclear()}
{pt3dadd(189984.000000,124872.000000,55525.000000,499.187376)}
{pt3dadd(190080.000000,124272.000000,55325.000000,499.187376)}
{pt3dadd(190080.000000,123348.000000,55200.000000,599.024880)}
{pt3dadd(189744.000000,122724.000000,55075.000000,599.024880)}

{create adhoc92}
{access adhoc92}
{connect adhoc92(1), adhoc91(0)}
{nseg = 1}
{strdef color color = "White"}
{pt3dclear()}
{pt3dadd(189744.000000,122724.000000,55075.000000,599.024880)}
{pt3dadd(189720.000000,122208.000000,55300.000000,575.063856)}
{pt3dadd(189312.000000,121344.000000,55450.000000,718.829820)}

{create adhoc93}
{access adhoc93}
{connect adhoc93(1), adhoc92(0)}
{nseg = 1}
{strdef color color = "White"}
{pt3dclear()}
{pt3dadd(189312.000000,121344.000000,55450.000000,718.829820)}
{pt3dadd(189324.000000,120612.000000,55250.000000,599.024880)}
{pt3dadd(189420.000000,120048.000000,55175.000000,718.829820)}
{pt3dadd(189120.000000,119088.000000,55400.000000,599.024880)}

{create adhoc94}
{access adhoc94}
{connect adhoc94(1), adhoc93(0)}
{nseg = 1}
{strdef color color = "White"}
{pt3dclear()}
{pt3dadd(189120.000000,119088.000000,55400.000000,599.024880)}
{pt3dadd(189144.000000,118032.000000,55950.000000,415.989486)}
{pt3dadd(188964.000000,117456.000000,56175.000000,436.788958)}
{pt3dadd(188904.000000,116628.000000,56725.000000,457.588431)}
{pt3dadd(189132.000000,115656.000000,57375.000000,478.387903)}
{pt3dadd(189264.000000,115128.000000,57750.000000,499.187376)}
{pt3dadd(189036.000000,114312.000000,58125.000000,499.187376)}
{pt3dadd(189060.000000,113616.000000,58825.000000,499.187376)}
{pt3dadd(188940.000000,113052.000000,59350.000000,599.024880)}

{create adhoc95}
{access adhoc95}
{connect adhoc95(1), adhoc94(0)}
{nseg = 1}
{strdef color color = "White"}
{pt3dclear()}
{pt3dadd(188940.000000,113052.000000,59350.000000,599.024880)}
{pt3dadd(188532.000000,112356.000000,59475.000000,599.024880)}
{pt3dadd(188100.000000,111612.000000,59450.000000,415.989486)}

{create adhoc96}
{access adhoc96}
{connect adhoc96(1), adhoc95(0)}
{nseg = 1}
{strdef color color = "White"}
{pt3dclear()}
{pt3dadd(188100.000000,111612.000000,59450.000000,415.989486)}
{pt3dadd(187572.000000,110988.000000,59250.000000,399.349908)}
{pt3dadd(187128.000000,110616.000000,59025.000000,346.657896)}

{create adhoc97}
{access adhoc97}
{connect adhoc97(1), adhoc96(0)}
{nseg = 1}
{strdef color color = "White"}
{pt3dclear()}
{pt3dadd(187128.000000,110616.000000,59025.000000,346.657896)}
{pt3dadd(186204.000000,110976.000000,58625.000000,167.176836)}
{pt3dadd(186144.000000,111420.000000,58675.000000,96.745860)}
{pt3dadd(186024.000000,112032.000000,58750.000000,92.876040)}

{create adhoc98}
{access adhoc98}
{connect adhoc98(1), adhoc97(0)}
{nseg = 1}
{strdef color color = "White"}
{pt3dclear()}
{pt3dadd(186024.000000,112032.000000,58750.000000,92.876040)}
{pt3dadd(185196.000000,112020.000000,59475.000000,77.396688)}

{create adhoc99}
{access adhoc99}
{connect adhoc99(1), adhoc97(0)}
{nseg = 1}
{strdef color color = "White"}
{pt3dclear()}
{pt3dadd(186024.000000,112032.000000,58750.000000,92.876040)}
{pt3dadd(185724.000000,112416.000000,58750.000000,96.745860)}
{pt3dadd(185664.000000,112884.000000,58825.000000,89.160984)}

{create adhoc100}
{access adhoc100}
{connect adhoc100(1), adhoc96(0)}
{nseg = 1}
{strdef color color = "White"}
{pt3dclear()}
{pt3dadd(187128.000000,110616.000000,59025.000000,346.657896)}
{pt3dadd(186876.000000,110040.000000,58900.000000,231.105276)}
{pt3dadd(186660.000000,109548.000000,58400.000000,250.364046)}
{pt3dadd(186444.000000,109464.000000,58150.000000,269.622816)}
{pt3dadd(186096.000000,109128.000000,57850.000000,288.881586)}
{pt3dadd(185976.000000,108432.000000,57275.000000,288.881586)}

{create adhoc101}
{access adhoc101}
{connect adhoc101(1), adhoc100(0)}
{nseg = 1}
{strdef color color = "White"}
{pt3dclear()}
{pt3dadd(185976.000000,108432.000000,57275.000000,288.881586)}
{pt3dadd(185796.000000,107400.000000,56875.000000,288.881586)}
{pt3dadd(185448.000000,106176.000000,56575.000000,272.832606)}
{pt3dadd(185208.000000,105540.000000,56600.000000,256.783626)}
{pt3dadd(185088.000000,105156.000000,56400.000000,240.734646)}
{pt3dadd(185100.000000,104688.000000,56425.000000,200.612214)}

{create adhoc102}
{access adhoc102}
{connect adhoc102(1), adhoc101(0)}
{nseg = 1}
{strdef color color = "White"}
{pt3dclear()}
{pt3dadd(185100.000000,104688.000000,56425.000000,200.612214)}
{pt3dadd(184836.000000,104160.000000,56575.000000,167.176836)}
{pt3dadd(184620.000000,103908.000000,56775.000000,157.889238)}
{pt3dadd(184452.000000,103500.000000,56850.000000,148.601640)}
{pt3dadd(184116.000000,102204.000000,57150.000000,139.314042)}
{pt3dadd(183792.000000,101952.000000,57350.000000,116.095032)}

{create adhoc103}
{access adhoc103}
{connect adhoc103(1), adhoc102(0)}
{nseg = 1}
{strdef color color = "White"}
{pt3dclear()}
{pt3dadd(183792.000000,101952.000000,57350.000000,116.095032)}
{pt3dadd(183924.000000,101976.000000,57625.000000,67.184640)}
{pt3dadd(184056.000000,101904.000000,57875.000000,67.184640)}

{create adhoc104}
{access adhoc104}
{connect adhoc104(1), adhoc102(0)}
{nseg = 1}
{strdef color color = "White"}
{pt3dclear()}
{pt3dadd(183792.000000,101952.000000,57350.000000,116.095032)}
{pt3dadd(183420.000000,101016.000000,57325.000000,116.095032)}
{pt3dadd(183420.000000,100860.000000,57025.000000,38.880000)}

{create adhoc105}
{access adhoc105}
{connect adhoc105(1), adhoc101(0)}
{nseg = 1}
{strdef color color = "White"}
{pt3dclear()}
{pt3dadd(185100.000000,104688.000000,56425.000000,200.612214)}
{pt3dadd(185016.000000,104136.000000,55650.000000,167.176836)}
{pt3dadd(185280.000000,103896.000000,54800.000000,149.569092)}
{pt3dadd(185484.000000,103728.000000,54025.000000,131.961348)}
{pt3dadd(185076.000000,103260.000000,53850.000000,114.353604)}
{pt3dadd(185232.000000,102924.000000,53525.000000,96.745860)}
{pt3dadd(184932.000000,102528.000000,53375.000000,46.656000)}

{create adhoc106}
{access adhoc106}
{connect adhoc106(1), adhoc100(0)}
{nseg = 1}
{strdef color color = "White"}
{pt3dclear()}
{pt3dadd(185976.000000,108432.000000,57275.000000,288.881586)}
{pt3dadd(185280.000000,108528.000000,56700.000000,139.314042)}
{pt3dadd(184836.000000,108504.000000,55825.000000,162.261850)}
{pt3dadd(184896.000000,108612.000000,55350.000000,185.209659)}
{pt3dadd(184668.000000,108540.000000,54950.000000,208.157468)}
{pt3dadd(184536.000000,108468.000000,54400.000000,231.105276)}
{pt3dadd(184524.000000,108348.000000,53800.000000,223.482010)}
{pt3dadd(184680.000000,108456.000000,53100.000000,215.858745)}
{pt3dadd(184716.000000,108744.000000,52400.000000,208.235480)}
{pt3dadd(185016.000000,108780.000000,51975.000000,200.612214)}
{pt3dadd(185340.000000,108888.000000,51650.000000,200.612214)}

{create adhoc107}
{access adhoc107}
{connect adhoc107(1), adhoc106(0)}
{nseg = 1}
{strdef color color = "White"}
{pt3dclear()}
{pt3dadd(185340.000000,108888.000000,51650.000000,200.612214)}
{pt3dadd(185448.000000,108756.000000,51250.000000,167.176836)}
{pt3dadd(185952.000000,108600.000000,50700.000000,77.396688)}
{pt3dadd(186204.000000,108720.000000,50775.000000,80.621550)}

{create adhoc108}
{access adhoc108}
{connect adhoc108(1), adhoc106(0)}
{nseg = 1}
{strdef color color = "White"}
{pt3dclear()}
{pt3dadd(185340.000000,108888.000000,51650.000000,200.612214)}
{pt3dadd(185532.000000,109368.000000,51500.000000,96.745860)}
{pt3dadd(185964.000000,109800.000000,51750.000000,74.300832)}
{pt3dadd(186120.000000,110016.000000,51975.000000,46.656000)}

{create adhoc109}
{access adhoc109}
{connect adhoc109(1), adhoc95(0)}
{nseg = 1}
{strdef color color = "White"}
{pt3dclear()}
{pt3dadd(188100.000000,111612.000000,59450.000000,415.989486)}
{pt3dadd(188364.000000,110748.000000,60025.000000,415.989486)}
{pt3dadd(188256.000000,110292.000000,60175.000000,384.212511)}
{pt3dadd(187920.000000,109740.000000,60375.000000,352.435536)}
{pt3dadd(187560.000000,109380.000000,60575.000000,320.658561)}
{pt3dadd(187368.000000,108936.000000,60725.000000,288.881586)}
{pt3dadd(186960.000000,108468.000000,60875.000000,240.734646)}
{pt3dadd(186036.000000,107760.000000,61825.000000,306.700722)}

{create adhoc110}
{access adhoc110}
{connect adhoc110(1), adhoc109(0)}
{nseg = 1}
{strdef color color = "White"}
{pt3dclear()}
{pt3dadd(186036.000000,107760.000000,61825.000000,306.700722)}
{pt3dadd(185016.000000,108060.000000,62800.000000,277.326324)}
{pt3dadd(185076.000000,108276.000000,63150.000000,256.141674)}
{pt3dadd(184956.000000,108492.000000,63575.000000,234.957024)}
{pt3dadd(184476.000000,108648.000000,64225.000000,213.772374)}
{pt3dadd(184428.000000,109380.000000,64725.000000,192.587724)}
{pt3dadd(184512.000000,109788.000000,65025.000000,139.314042)}

{create adhoc111}
{access adhoc111}
{connect adhoc111(1), adhoc110(0)}
{nseg = 1}
{strdef color color = "White"}
{pt3dclear()}
{pt3dadd(184512.000000,109788.000000,65025.000000,139.314042)}
{pt3dadd(184836.000000,110268.000000,65200.000000,167.176836)}
{pt3dadd(185208.000000,110652.000000,65625.000000,111.451230)}

{create adhoc112}
{access adhoc112}
{connect adhoc112(1), adhoc110(0)}
{nseg = 1}
{strdef color color = "White"}
{pt3dclear()}
{pt3dadd(184512.000000,109788.000000,65025.000000,139.314042)}
{pt3dadd(184392.000000,109308.000000,65250.000000,139.314042)}
{pt3dadd(184392.000000,109188.000000,65550.000000,139.314042)}
{pt3dadd(184680.000000,108552.000000,65750.000000,139.314042)}
{pt3dadd(184824.000000,108480.000000,65950.000000,139.314042)}
{pt3dadd(185112.000000,108180.000000,66025.000000,55.987200)}

{create adhoc113}
{access adhoc113}
{connect adhoc113(1), adhoc109(0)}
{nseg = 1}
{strdef color color = "White"}
{pt3dclear()}
{pt3dadd(186036.000000,107760.000000,61825.000000,306.700722)}
{pt3dadd(184980.000000,107196.000000,62400.000000,240.734646)}
{pt3dadd(184476.000000,106788.000000,61975.000000,252.771381)}
{pt3dadd(184284.000000,106272.000000,61575.000000,264.808116)}
{pt3dadd(183840.000000,105696.000000,61900.000000,276.844851)}
{pt3dadd(183588.000000,105180.000000,62125.000000,288.881586)}
{pt3dadd(183504.000000,104436.000000,61975.000000,264.808116)}
{pt3dadd(183636.000000,103824.000000,61975.000000,240.734646)}
{pt3dadd(183252.000000,103380.000000,61850.000000,139.314042)}

{create adhoc114}
{access adhoc114}
{connect adhoc114(1), adhoc94(0)}
{nseg = 1}
{strdef color color = "White"}
{pt3dclear()}
{pt3dadd(188940.000000,113052.000000,59350.000000,599.024880)}
{pt3dadd(188472.000000,112980.000000,60950.000000,200.612214)}
{pt3dadd(188424.000000,113028.000000,61250.000000,210.776568)}
{pt3dadd(187740.000000,112668.000000,61800.000000,220.940922)}
{pt3dadd(187332.000000,112392.000000,62425.000000,231.105276)}
{pt3dadd(186864.000000,113076.000000,63075.000000,200.612214)}

{create adhoc115}
{access adhoc115}
{connect adhoc115(1), adhoc114(0)}
{nseg = 1}
{strdef color color = "White"}
{pt3dclear()}
{pt3dadd(186864.000000,113076.000000,63075.000000,200.612214)}
{pt3dadd(186468.000000,113220.000000,63650.000000,200.612214)}
{pt3dadd(186324.000000,113196.000000,63700.000000,167.176836)}
{pt3dadd(186180.000000,112944.000000,63750.000000,77.396688)}

{create adhoc116}
{access adhoc116}
{connect adhoc116(1), adhoc114(0)}
{nseg = 1}
{strdef color color = "White"}
{pt3dclear()}
{pt3dadd(186864.000000,113076.000000,63075.000000,200.612214)}
{pt3dadd(186480.000000,114720.000000,63225.000000,240.734646)}
{pt3dadd(185940.000000,115380.000000,63700.000000,240.734646)}

{create adhoc117}
{access adhoc117}
{connect adhoc117(1), adhoc116(0)}
{nseg = 1}
{strdef color color = "White"}
{pt3dclear()}
{pt3dadd(185940.000000,115380.000000,63700.000000,240.734646)}
{pt3dadd(186240.000000,115752.000000,63175.000000,96.745860)}
{pt3dadd(186384.000000,116100.000000,62975.000000,80.621550)}
{pt3dadd(186588.000000,116484.000000,62775.000000,80.621550)}

{create adhoc118}
{access adhoc118}
{connect adhoc118(1), adhoc116(0)}
{nseg = 1}
{strdef color color = "White"}
{pt3dclear()}
{pt3dadd(185940.000000,115380.000000,63700.000000,240.734646)}
{pt3dadd(185580.000000,115728.000000,64225.000000,200.612214)}
{pt3dadd(185640.000000,115860.000000,64925.000000,169.963128)}
{pt3dadd(185868.000000,116352.000000,65375.000000,139.314042)}
{pt3dadd(185652.000000,116868.000000,65850.000000,116.095032)}

{create adhoc119}
{access adhoc119}
{connect adhoc119(1), adhoc118(0)}
{nseg = 1}
{strdef color color = "White"}
{pt3dclear()}
{pt3dadd(185652.000000,116868.000000,65850.000000,116.095032)}
{pt3dadd(185208.000000,116292.000000,66200.000000,167.176836)}
{pt3dadd(184476.000000,115956.000000,65825.000000,160.211138)}
{pt3dadd(183996.000000,116016.000000,65800.000000,153.245439)}
{pt3dadd(183432.000000,115716.000000,65775.000000,146.279741)}
{pt3dadd(182940.000000,115428.000000,65575.000000,139.314042)}
{pt3dadd(182400.000000,115272.000000,65550.000000,132.348339)}
{pt3dadd(181932.000000,115200.000000,65600.000000,125.382636)}
{pt3dadd(181164.000000,115188.000000,65700.000000,118.416933)}
{pt3dadd(180468.000000,115296.000000,65750.000000,111.451230)}
{pt3dadd(179856.000000,115356.000000,65950.000000,103.743810)}
{pt3dadd(179112.000000,115224.000000,65825.000000,96.036390)}
{pt3dadd(178476.000000,115152.000000,65800.000000,88.328970)}
{pt3dadd(177636.000000,114864.000000,65775.000000,80.621550)}
{pt3dadd(176844.000000,114696.000000,65750.000000,111.451230)}

{create adhoc120}
{access adhoc120}
{connect adhoc120(1), adhoc119(0)}
{nseg = 1}
{strdef color color = "White"}
{pt3dclear()}
{pt3dadd(176844.000000,114696.000000,65750.000000,111.451230)}
{pt3dadd(176964.000000,114480.000000,65700.000000,55.987200)}
{pt3dadd(177024.000000,113856.000000,65500.000000,46.656000)}

{create adhoc121}
{access adhoc121}
{connect adhoc121(1), adhoc119(0)}
{nseg = 1}
{strdef color color = "White"}
{pt3dclear()}
{pt3dadd(176844.000000,114696.000000,65750.000000,111.451230)}
{pt3dadd(175920.000000,114624.000000,65850.000000,80.621550)}
{pt3dadd(175104.000000,114960.000000,65975.000000,84.652627)}
{pt3dadd(174240.000000,115068.000000,65900.000000,88.683705)}
{pt3dadd(173292.000000,114960.000000,65950.000000,92.714782)}
{pt3dadd(172596.000000,114804.000000,66050.000000,96.745860)}
{pt3dadd(171996.000000,114756.000000,66025.000000,80.621550)}

{create adhoc122}
{access adhoc122}
{connect adhoc122(1), adhoc118(0)}
{nseg = 1}
{strdef color color = "White"}
{pt3dclear()}
{pt3dadd(185652.000000,116868.000000,65850.000000,116.095032)}
{pt3dadd(185652.000000,116628.000000,66275.000000,139.314042)}
{pt3dadd(186588.000000,117252.000000,66525.000000,123.834704)}
{pt3dadd(187020.000000,117648.000000,66550.000000,108.355365)}
{pt3dadd(187488.000000,117864.000000,66525.000000,92.876026)}
{pt3dadd(187872.000000,118068.000000,66400.000000,77.396688)}
{pt3dadd(188400.000000,118308.000000,66275.000000,139.314042)}

{create adhoc123}
{access adhoc123}
{connect adhoc123(1), adhoc122(0)}
{nseg = 1}
{strdef color color = "White"}
{pt3dclear()}
{pt3dadd(188400.000000,118308.000000,66275.000000,139.314042)}
{pt3dadd(188472.000000,117888.000000,66300.000000,167.176836)}
{pt3dadd(188532.000000,117540.000000,66275.000000,139.314042)}
{pt3dadd(188472.000000,117132.000000,66200.000000,96.745860)}

{create adhoc124}
{access adhoc124}
{connect adhoc124(1), adhoc122(0)}
{nseg = 1}
{strdef color color = "White"}
{pt3dclear()}
{pt3dadd(188400.000000,118308.000000,66275.000000,139.314042)}
{pt3dadd(188736.000000,118836.000000,66500.000000,139.314042)}
{pt3dadd(189204.000000,119412.000000,67100.000000,139.314042)}
{pt3dadd(189528.000000,120060.000000,67250.000000,139.314042)}
{pt3dadd(189672.000000,120900.000000,67175.000000,139.314042)}
{pt3dadd(189912.000000,121524.000000,67175.000000,139.314042)}
{pt3dadd(190068.000000,122160.000000,66975.000000,148.601640)}
{pt3dadd(190272.000000,122724.000000,66900.000000,157.889238)}
{pt3dadd(190836.000000,123420.000000,66250.000000,167.176836)}
{pt3dadd(191412.000000,123912.000000,66100.000000,167.176836)}

{create adhoc125}
{access adhoc125}
{connect adhoc125(1), adhoc93(0)}
{nseg = 1}
{strdef color color = "White"}
{pt3dclear()}
{pt3dadd(189120.000000,119088.000000,55400.000000,599.024880)}
{pt3dadd(189012.000000,118764.000000,55750.000000,499.187376)}
{pt3dadd(188472.000000,118824.000000,54400.000000,434.574193)}
{pt3dadd(188172.000000,118428.000000,53800.000000,369.961011)}
{pt3dadd(188088.000000,118128.000000,53225.000000,305.347828)}
{pt3dadd(188100.000000,117720.000000,52375.000000,240.734646)}
{pt3dadd(187908.000000,117264.000000,52050.000000,228.697915)}
{pt3dadd(187824.000000,116592.000000,52000.000000,216.661185)}
{pt3dadd(187704.000000,115956.000000,51800.000000,204.624455)}
{pt3dadd(186900.000000,115296.000000,51325.000000,192.587724)}
{pt3dadd(187248.000000,115296.000000,50950.000000,196.599969)}
{pt3dadd(187308.000000,115476.000000,50375.000000,200.612214)}
{pt3dadd(187188.000000,114960.000000,49850.000000,240.734646)}

{create adhoc126}
{access adhoc126}
{connect adhoc126(1), adhoc125(0)}
{nseg = 1}
{strdef color color = "White"}
{pt3dclear()}
{pt3dadd(187188.000000,114960.000000,49850.000000,240.734646)}
{pt3dadd(186972.000000,114996.000000,49525.000000,200.612214)}

{create adhoc127}
{access adhoc127}
{connect adhoc127(1), adhoc125(0)}
{nseg = 1}
{strdef color color = "White"}
{pt3dclear()}
{pt3dadd(187188.000000,114960.000000,49850.000000,240.734646)}
{pt3dadd(186204.000000,115020.000000,50000.000000,64.497240)}
{pt3dadd(185952.000000,115044.000000,50050.000000,55.987200)}

{create adhoc128}
{access adhoc128}
{connect adhoc128(1), adhoc92(0)}
{nseg = 1}
{strdef color color = "White"}
{pt3dclear()}
{pt3dadd(189312.000000,121344.000000,55450.000000,718.829820)}
{pt3dadd(187932.000000,121152.000000,55875.000000,139.314042)}
{pt3dadd(187716.000000,121164.000000,55925.000000,146.279741)}
{pt3dadd(187464.000000,121260.000000,56475.000000,153.245439)}
{pt3dadd(187344.000000,121296.000000,56975.000000,160.211138)}
{pt3dadd(187212.000000,120888.000000,57175.000000,167.176836)}
{pt3dadd(187224.000000,120708.000000,57600.000000,200.612214)}
{pt3dadd(187200.000000,120636.000000,57925.000000,139.314042)}

{create adhoc129}
{access adhoc129}
{connect adhoc129(1), adhoc91(0)}
{nseg = 1}
{strdef color color = "White"}
{pt3dclear()}
{pt3dadd(189744.000000,122724.000000,55075.000000,599.024880)}
{pt3dadd(188640.000000,122724.000000,53525.000000,139.314042)}
{pt3dadd(187848.000000,122412.000000,52550.000000,240.734646)}
{pt3dadd(187332.000000,122100.000000,51925.000000,240.734646)}

{create adhoc130}
{access adhoc130}
{connect adhoc130(1), adhoc129(0)}
{nseg = 1}
{strdef color color = "White"}
{pt3dclear()}
{pt3dadd(187332.000000,122100.000000,51925.000000,240.734646)}
{pt3dadd(186984.000000,121812.000000,51275.000000,200.612214)}
{pt3dadd(186480.000000,121488.000000,50475.000000,173.678170)}
{pt3dadd(186180.000000,121176.000000,49875.000000,146.744127)}
{pt3dadd(186576.000000,120876.000000,49350.000000,119.810083)}
{pt3dadd(187092.000000,121044.000000,49175.000000,92.876040)}
{pt3dadd(187344.000000,120960.000000,49100.000000,93.843495)}
{pt3dadd(187788.000000,121056.000000,49175.000000,94.810950)}
{pt3dadd(188244.000000,120816.000000,49150.000000,95.778405)}
{pt3dadd(188640.000000,120636.000000,49175.000000,96.745860)}
{pt3dadd(189024.000000,120780.000000,49125.000000,81.965250)}
{pt3dadd(189072.000000,120300.000000,48950.000000,67.184640)}
{pt3dadd(189060.000000,120036.000000,48950.000000,67.184640)}

{create adhoc131}
{access adhoc131}
{connect adhoc131(1), adhoc129(0)}
{nseg = 1}
{strdef color color = "White"}
{pt3dclear()}
{pt3dadd(187332.000000,122100.000000,51925.000000,240.734646)}
{pt3dadd(187740.000000,121908.000000,51775.000000,139.314042)}
{pt3dadd(188088.000000,121908.000000,51750.000000,96.745860)}

{create adhoc132}
{access adhoc132}
{connect adhoc132(1), adhoc90(0)}
{nseg = 1}
{strdef color color = "White"}
{pt3dclear()}
{pt3dadd(189984.000000,124872.000000,55525.000000,499.187376)}
{pt3dadd(188688.000000,125004.000000,55625.000000,167.176836)}
{pt3dadd(188472.000000,124704.000000,55850.000000,149.569092)}
{pt3dadd(187908.000000,124380.000000,55975.000000,131.961348)}
{pt3dadd(187104.000000,124080.000000,56000.000000,114.353604)}
{pt3dadd(186816.000000,124020.000000,56125.000000,96.745860)}
{pt3dadd(186444.000000,124152.000000,56400.000000,105.582618)}
{pt3dadd(185820.000000,124212.000000,56200.000000,114.419376)}
{pt3dadd(185340.000000,124128.000000,55400.000000,123.256134)}
{pt3dadd(185328.000000,124116.000000,55100.000000,116.095032)}

{create adhoc133}
{access adhoc133}
{connect adhoc133(1), adhoc89(0)}
{nseg = 1}
{strdef color color = "White"}
{pt3dclear()}
{pt3dadd(192072.000000,134640.000000,55100.000000,499.187376)}
{pt3dadd(191172.000000,134640.000000,54100.000000,346.657896)}
{pt3dadd(190908.000000,134424.000000,53900.000000,317.769741)}
{pt3dadd(190428.000000,134040.000000,53775.000000,288.881586)}
{pt3dadd(190056.000000,133368.000000,53450.000000,192.587724)}

{create adhoc134}
{access adhoc134}
{connect adhoc134(1), adhoc133(0)}
{nseg = 1}
{strdef color color = "White"}
{pt3dclear()}
{pt3dadd(190056.000000,133368.000000,53450.000000,192.587724)}
{pt3dadd(190044.000000,132984.000000,53425.000000,167.176836)}
{pt3dadd(189504.000000,132180.000000,53075.000000,185.566288)}
{pt3dadd(189144.000000,131256.000000,52525.000000,203.955741)}
{pt3dadd(188892.000000,130824.000000,52300.000000,222.345193)}
{pt3dadd(188556.000000,130212.000000,52275.000000,240.734646)}
{pt3dadd(188208.000000,129684.000000,51925.000000,288.881586)}

{create adhoc135}
{access adhoc135}
{connect adhoc135(1), adhoc134(0)}
{nseg = 1}
{strdef color color = "White"}
{pt3dclear()}
{pt3dadd(188208.000000,129684.000000,51925.000000,288.881586)}
{pt3dadd(188184.000000,128856.000000,51300.000000,240.734646)}
{pt3dadd(188388.000000,128160.000000,51100.000000,288.881586)}

{create adhoc136}
{access adhoc136}
{connect adhoc136(1), adhoc135(0)}
{nseg = 1}
{strdef color color = "White"}
{pt3dclear()}
{pt3dadd(188388.000000,128160.000000,51100.000000,288.881586)}
{pt3dadd(188220.000000,127692.000000,50375.000000,240.734646)}
{pt3dadd(188160.000000,127224.000000,50350.000000,215.379495)}
{pt3dadd(187800.000000,126708.000000,49825.000000,190.024344)}
{pt3dadd(187488.000000,126192.000000,49425.000000,164.669193)}
{pt3dadd(187608.000000,125904.000000,49200.000000,139.314042)}
{pt3dadd(188112.000000,125676.000000,48450.000000,139.314042)}
{pt3dadd(188820.000000,125460.000000,48300.000000,139.314042)}
{pt3dadd(189612.000000,125280.000000,48450.000000,139.314042)}
{pt3dadd(190236.000000,124944.000000,48275.000000,139.314042)}
{pt3dadd(189960.000000,124392.000000,48125.000000,200.612214)}
{pt3dadd(189840.000000,124284.000000,48300.000000,111.451230)}

{create adhoc137}
{access adhoc137}
{connect adhoc137(1), adhoc135(0)}
{nseg = 1}
{strdef color color = "White"}
{pt3dclear()}
{pt3dadd(188388.000000,128160.000000,51100.000000,288.881586)}
{pt3dadd(188880.000000,128112.000000,51600.000000,111.451230)}
{pt3dadd(189000.000000,127980.000000,51675.000000,80.621550)}

{create adhoc138}
{access adhoc138}
{connect adhoc138(1), adhoc134(0)}
{nseg = 1}
{strdef color color = "White"}
{pt3dclear()}
{pt3dadd(188208.000000,129684.000000,51925.000000,288.881586)}
{pt3dadd(187944.000000,129852.000000,51125.000000,200.612214)}
{pt3dadd(187692.000000,130752.000000,50475.000000,96.745860)}
{pt3dadd(187272.000000,130872.000000,50250.000000,67.184640)}

{create adhoc139}
{access adhoc139}
{connect adhoc139(1), adhoc133(0)}
{nseg = 1}
{strdef color color = "White"}
{pt3dclear()}
{pt3dadd(190056.000000,133368.000000,53450.000000,192.587724)}
{pt3dadd(188796.000000,133752.000000,53775.000000,240.734646)}
{pt3dadd(187992.000000,132936.000000,54350.000000,139.314042)}
{pt3dadd(187548.000000,131724.000000,54675.000000,240.734646)}

{create adhoc140}
{access adhoc140}
{connect adhoc140(1), adhoc139(0)}
{nseg = 1}
{strdef color color = "White"}
{pt3dclear()}
{pt3dadd(187548.000000,131724.000000,54675.000000,240.734646)}
{pt3dadd(187248.000000,130704.000000,54800.000000,139.314042)}
{pt3dadd(187284.000000,130284.000000,54900.000000,118.674924)}
{pt3dadd(187152.000000,129852.000000,54825.000000,98.035806)}
{pt3dadd(187080.000000,129648.000000,54725.000000,77.396688)}
{pt3dadd(186756.000000,129624.000000,54875.000000,46.656000)}

{create adhoc141}
{access adhoc141}
{connect adhoc141(1), adhoc139(0)}
{nseg = 1}
{strdef color color = "White"}
{pt3dclear()}
{pt3dadd(187548.000000,131724.000000,54675.000000,240.734646)}
{pt3dadd(187848.000000,131136.000000,55100.000000,288.881586)}
{pt3dadd(187824.000000,131340.000000,55575.000000,231.105276)}
{pt3dadd(187836.000000,131256.000000,55850.000000,80.621550)}

{create adhoc142}
{access adhoc142}
{connect adhoc142(1), adhoc72(0)}
{nseg = 1}
{strdef color color = "White"}
{pt3dclear()}
{pt3dadd(192036.000000,146784.000000,53900.000000,862.595802)}
{pt3dadd(192132.000000,145944.000000,54125.000000,499.187376)}

{create adhoc143}
{access adhoc143}
{connect adhoc143(1), adhoc142(0)}
{nseg = 1}
{strdef color color = "White"}
{pt3dclear()}
{pt3dadd(192132.000000,145944.000000,54125.000000,499.187376)}
{pt3dadd(191268.000000,145332.000000,53275.000000,575.063856)}
{pt3dadd(191376.000000,144852.000000,53550.000000,535.295264)}
{pt3dadd(191484.000000,144420.000000,53775.000000,495.526671)}
{pt3dadd(191604.000000,144036.000000,53975.000000,455.758079)}
{pt3dadd(191724.000000,143580.000000,54175.000000,415.989486)}
{pt3dadd(191844.000000,143196.000000,54375.000000,443.722116)}
{pt3dadd(191772.000000,142812.000000,54525.000000,471.454746)}
{pt3dadd(191700.000000,142416.000000,54600.000000,499.187376)}
{pt3dadd(191472.000000,141960.000000,54675.000000,499.187376)}

{create adhoc144}
{access adhoc144}
{connect adhoc144(1), adhoc143(0)}
{nseg = 1}
{strdef color color = "White"}
{pt3dclear()}
{pt3dadd(191472.000000,141960.000000,54675.000000,499.187376)}
{pt3dadd(190020.000000,141852.000000,54925.000000,167.176836)}

{create adhoc145}
{access adhoc145}
{connect adhoc145(1), adhoc144(0)}
{nseg = 1}
{strdef color color = "White"}
{pt3dclear()}
{pt3dadd(190020.000000,141852.000000,54925.000000,167.176836)}
{pt3dadd(189624.000000,141960.000000,55200.000000,139.314042)}
{pt3dadd(189792.000000,142200.000000,55450.000000,67.184640)}
{pt3dadd(190020.000000,142080.000000,55650.000000,67.184640)}

{create adhoc146}
{access adhoc146}
{connect adhoc146(1), adhoc144(0)}
{nseg = 1}
{strdef color color = "White"}
{pt3dclear()}
{pt3dadd(190020.000000,141852.000000,54925.000000,167.176836)}
{pt3dadd(189000.000000,141420.000000,54975.000000,200.612214)}
{pt3dadd(187860.000000,141240.000000,55450.000000,198.606091)}
{pt3dadd(186984.000000,140964.000000,55725.000000,196.599969)}
{pt3dadd(186348.000000,140784.000000,56125.000000,194.593846)}
{pt3dadd(185880.000000,140820.000000,56625.000000,192.587724)}
{pt3dadd(185760.000000,140820.000000,57025.000000,213.772374)}
{pt3dadd(186168.000000,140712.000000,57450.000000,234.957024)}
{pt3dadd(186324.000000,140640.000000,57900.000000,256.141674)}
{pt3dadd(186324.000000,140280.000000,58275.000000,277.326324)}
{pt3dadd(186420.000000,139716.000000,58850.000000,231.322230)}
{pt3dadd(186408.000000,139284.000000,59025.000000,185.318136)}
{pt3dadd(185916.000000,139092.000000,59225.000000,139.314042)}
{pt3dadd(185724.000000,139164.000000,59350.000000,116.095032)}

{create adhoc147}
{access adhoc147}
{connect adhoc147(1), adhoc143(0)}
{nseg = 1}
{strdef color color = "White"}
{pt3dclear()}
{pt3dadd(191472.000000,141960.000000,54675.000000,499.187376)}
{pt3dadd(191400.000000,141540.000000,54800.000000,479.219886)}
{pt3dadd(191736.000000,141120.000000,54900.000000,484.211758)}
{pt3dadd(191832.000000,140664.000000,55050.000000,489.203631)}
{pt3dadd(191844.000000,139836.000000,55450.000000,494.195504)}
{pt3dadd(191892.000000,139428.000000,55625.000000,499.187376)}
{pt3dadd(191700.000000,138960.000000,55875.000000,532.466544)}
{pt3dadd(191568.000000,138468.000000,56025.000000,565.745712)}
{pt3dadd(191436.000000,137724.000000,56175.000000,599.024880)}
{pt3dadd(190992.000000,136884.000000,56475.000000,575.063856)}

{create adhoc148}
{access adhoc148}
{connect adhoc148(1), adhoc147(0)}
{nseg = 1}
{strdef color color = "White"}
{pt3dclear()}
{pt3dadd(190992.000000,136884.000000,56475.000000,575.063856)}
{pt3dadd(191532.000000,136176.000000,56850.000000,479.219886)}
{pt3dadd(191436.000000,135156.000000,57350.000000,509.171134)}
{pt3dadd(191052.000000,134808.000000,57700.000000,539.122383)}
{pt3dadd(190992.000000,134316.000000,57625.000000,569.073631)}
{pt3dadd(190908.000000,133932.000000,58025.000000,599.024880)}
{pt3dadd(190716.000000,133560.000000,58225.000000,499.187376)}

{create adhoc149}
{access adhoc149}
{connect adhoc149(1), adhoc148(0)}
{nseg = 1}
{strdef color color = "White"}
{pt3dclear()}
{pt3dadd(190716.000000,133560.000000,58225.000000,499.187376)}
{pt3dadd(189900.000000,133452.000000,58775.000000,346.657896)}
{pt3dadd(189252.000000,133380.000000,59275.000000,346.657896)}
{pt3dadd(188352.000000,133620.000000,59650.000000,346.657896)}
{pt3dadd(187560.000000,133848.000000,60275.000000,346.657896)}
{pt3dadd(187716.000000,134640.000000,61500.000000,346.657896)}
{pt3dadd(187980.000000,135156.000000,62275.000000,327.399126)}
{pt3dadd(188472.000000,135492.000000,63000.000000,308.140356)}
{pt3dadd(189360.000000,135876.000000,64150.000000,288.881586)}
{pt3dadd(189804.000000,136032.000000,64775.000000,346.657896)}

{create adhoc150}
{access adhoc150}
{connect adhoc150(1), adhoc149(0)}
{nseg = 1}
{strdef color color = "White"}
{pt3dclear()}
{pt3dadd(189804.000000,136032.000000,64775.000000,346.657896)}
{pt3dadd(190572.000000,135732.000000,65600.000000,240.734646)}

{create adhoc151}
{access adhoc151}
{connect adhoc151(1), adhoc150(0)}
{nseg = 1}
{strdef color color = "White"}
{pt3dclear()}
{pt3dadd(190572.000000,135732.000000,65600.000000,240.734646)}
{pt3dadd(191760.000000,136872.000000,65725.000000,139.314042)}
{pt3dadd(192324.000000,137328.000000,65925.000000,67.184640)}

{create adhoc152}
{access adhoc152}
{connect adhoc152(1), adhoc150(0)}
{nseg = 1}
{strdef color color = "White"}
{pt3dclear()}
{pt3dadd(190572.000000,135732.000000,65600.000000,240.734646)}
{pt3dadd(190848.000000,135156.000000,66000.000000,200.612214)}
{pt3dadd(190860.000000,135276.000000,66450.000000,116.095032)}

{create adhoc153}
{access adhoc153}
{connect adhoc153(1), adhoc149(0)}
{nseg = 1}
{strdef color color = "White"}
{pt3dclear()}
{pt3dadd(189804.000000,136032.000000,64775.000000,346.657896)}
{pt3dadd(190020.000000,137472.000000,65475.000000,288.881586)}
{pt3dadd(190236.000000,138780.000000,65100.000000,266.814243)}
{pt3dadd(190152.000000,139308.000000,65225.000000,244.746900)}
{pt3dadd(190308.000000,139992.000000,65425.000000,222.679557)}
{pt3dadd(190476.000000,140364.000000,65500.000000,200.612214)}
{pt3dadd(190824.000000,140688.000000,65350.000000,158.353623)}
{pt3dadd(190740.000000,140964.000000,65275.000000,116.095032)}
{pt3dadd(190776.000000,141264.000000,64825.000000,96.745860)}

{create adhoc154}
{access adhoc154}
{connect adhoc154(1), adhoc148(0)}
{nseg = 1}
{strdef color color = "White"}
{pt3dclear()}
{pt3dadd(190716.000000,133560.000000,58225.000000,499.187376)}
{pt3dadd(191520.000000,132120.000000,58775.000000,499.187376)}
{pt3dadd(191748.000000,130800.000000,59275.000000,461.055006)}
{pt3dadd(191760.000000,129720.000000,59700.000000,422.922636)}
{pt3dadd(191892.000000,128484.000000,60300.000000,384.790266)}
{pt3dadd(191988.000000,127680.000000,60725.000000,346.657896)}
{pt3dadd(191724.000000,127392.000000,61125.000000,346.657896)}
{pt3dadd(191796.000000,127368.000000,61450.000000,346.657896)}
{pt3dadd(191628.000000,126744.000000,62000.000000,415.989486)}

{create adhoc155}
{access adhoc155}
{connect adhoc155(1), adhoc154(0)}
{nseg = 1}
{strdef color color = "White"}
{pt3dclear()}
{pt3dadd(191628.000000,126744.000000,62000.000000,415.989486)}
{pt3dadd(191292.000000,125160.000000,62400.000000,288.881586)}
{pt3dadd(190992.000000,124752.000000,62450.000000,303.325664)}
{pt3dadd(190980.000000,124416.000000,62575.000000,317.769741)}
{pt3dadd(190740.000000,124044.000000,62625.000000,332.213819)}
{pt3dadd(190692.000000,123660.000000,63200.000000,346.657896)}
{pt3dadd(190440.000000,123288.000000,63425.000000,381.323691)}
{pt3dadd(190188.000000,122952.000000,63650.000000,415.989486)}
{pt3dadd(189948.000000,122580.000000,63900.000000,399.349908)}

{create adhoc156}
{access adhoc156}
{connect adhoc156(1), adhoc155(0)}
{nseg = 1}
{strdef color color = "White"}
{pt3dclear()}
{pt3dadd(189948.000000,122580.000000,63900.000000,399.349908)}
{pt3dadd(188832.000000,122652.000000,63825.000000,240.734646)}
{pt3dadd(188148.000000,122376.000000,64100.000000,173.863917)}
{pt3dadd(187980.000000,122100.000000,64275.000000,106.993188)}
{pt3dadd(187872.000000,122424.000000,64650.000000,167.176836)}

{create adhoc157}
{access adhoc157}
{connect adhoc157(1), adhoc155(0)}
{nseg = 1}
{strdef color color = "White"}
{pt3dclear()}
{pt3dadd(189948.000000,122580.000000,63900.000000,399.349908)}
{pt3dadd(189996.000000,122124.000000,64125.000000,240.734646)}
{pt3dadd(189996.000000,121764.000000,64200.000000,252.771381)}
{pt3dadd(190068.000000,120984.000000,64500.000000,264.808116)}
{pt3dadd(189816.000000,120312.000000,64875.000000,276.844851)}
{pt3dadd(189792.000000,119844.000000,65050.000000,288.881586)}
{pt3dadd(189732.000000,119436.000000,65425.000000,296.531167)}
{pt3dadd(189912.000000,118944.000000,66000.000000,304.180749)}
{pt3dadd(190092.000000,118632.000000,66275.000000,311.830331)}
{pt3dadd(190236.000000,118320.000000,66450.000000,319.479912)}
{pt3dadd(190344.000000,117840.000000,66875.000000,326.274408)}
{pt3dadd(190692.000000,117456.000000,67475.000000,333.068904)}
{pt3dadd(190740.000000,117108.000000,67800.000000,339.863400)}
{pt3dadd(190728.000000,116784.000000,68025.000000,346.657896)}
{pt3dadd(190716.000000,116520.000000,68250.000000,320.177083)}
{pt3dadd(190440.000000,116160.000000,68425.000000,293.696271)}
{pt3dadd(190368.000000,115668.000000,68625.000000,267.215459)}
{pt3dadd(190512.000000,115356.000000,69025.000000,240.734646)}
{pt3dadd(190800.000000,114852.000000,69225.000000,252.771381)}
{pt3dadd(191172.000000,114276.000000,70025.000000,264.808116)}
{pt3dadd(191052.000000,113880.000000,70250.000000,276.844851)}
{pt3dadd(190872.000000,113496.000000,70175.000000,288.881586)}
{pt3dadd(190848.000000,113076.000000,70425.000000,288.881586)}
{pt3dadd(190776.000000,112620.000000,70750.000000,288.881586)}
{pt3dadd(190332.000000,112272.000000,70975.000000,288.881586)}
{pt3dadd(189924.000000,111876.000000,71200.000000,288.881586)}
{pt3dadd(189516.000000,111504.000000,71225.000000,276.844851)}
{pt3dadd(189228.000000,111072.000000,71275.000000,264.808116)}
{pt3dadd(188880.000000,110700.000000,71225.000000,252.771381)}
{pt3dadd(188880.000000,110268.000000,71300.000000,240.734646)}
{pt3dadd(188760.000000,109896.000000,71200.000000,267.215459)}
{pt3dadd(188304.000000,109440.000000,71175.000000,293.696271)}
{pt3dadd(188292.000000,109044.000000,71325.000000,320.177083)}
{pt3dadd(188244.000000,108672.000000,71475.000000,346.657896)}
{pt3dadd(188004.000000,108240.000000,71525.000000,320.177083)}
{pt3dadd(187956.000000,107820.000000,71575.000000,293.696271)}
{pt3dadd(188004.000000,107340.000000,71625.000000,267.215459)}
{pt3dadd(188220.000000,106968.000000,72075.000000,240.734646)}
{pt3dadd(187704.000000,106404.000000,72075.000000,241.891128)}
{pt3dadd(187260.000000,106020.000000,72475.000000,243.047610)}
{pt3dadd(186804.000000,105492.000000,72375.000000,244.204092)}
{pt3dadd(186240.000000,105120.000000,72550.000000,245.360574)}
{pt3dadd(185988.000000,104664.000000,72575.000000,244.204092)}
{pt3dadd(185772.000000,104220.000000,72175.000000,243.047610)}
{pt3dadd(185256.000000,103908.000000,71750.000000,241.891128)}
{pt3dadd(184236.000000,103452.000000,70750.000000,240.734646)}
{pt3dadd(183888.000000,102996.000000,70050.000000,200.612214)}
{pt3dadd(183240.000000,101220.000000,69800.000000,67.184640)}

{create adhoc158}
{access adhoc158}
{connect adhoc158(1), adhoc154(0)}
{nseg = 1}
{strdef color color = "White"}
{pt3dclear()}
{pt3dadd(191628.000000,126744.000000,62000.000000,415.989486)}
{pt3dadd(191952.000000,126984.000000,62400.000000,399.349908)}
{pt3dadd(191940.000000,126984.000000,63075.000000,359.696092)}
{pt3dadd(192192.000000,126816.000000,64675.000000,320.042277)}
{pt3dadd(192240.000000,126384.000000,65225.000000,280.388462)}
{pt3dadd(192516.000000,126024.000000,65800.000000,240.734646)}
{pt3dadd(192792.000000,125640.000000,66575.000000,252.771381)}
{pt3dadd(193116.000000,125748.000000,67175.000000,264.808116)}
{pt3dadd(193068.000000,125748.000000,67875.000000,276.844851)}
{pt3dadd(193080.000000,125616.000000,68625.000000,288.881586)}
{pt3dadd(192852.000000,125772.000000,69375.000000,288.881586)}
{pt3dadd(192504.000000,125700.000000,70275.000000,399.349908)}

{create adhoc159}
{access adhoc159}
{connect adhoc159(1), adhoc158(0)}
{nseg = 1}
{strdef color color = "White"}
{pt3dclear()}
{pt3dadd(192504.000000,125700.000000,70275.000000,399.349908)}
{pt3dadd(191760.000000,124548.000000,70550.000000,96.745860)}
{pt3dadd(191436.000000,124248.000000,70575.000000,81.965250)}
{pt3dadd(191100.000000,123864.000000,70025.000000,67.184640)}
{pt3dadd(190932.000000,123552.000000,69750.000000,80.621550)}

{create adhoc160}
{access adhoc160}
{connect adhoc160(1), adhoc158(0)}
{nseg = 1}
{strdef color color = "White"}
{pt3dclear()}
{pt3dadd(192504.000000,125700.000000,70275.000000,399.349908)}
{pt3dadd(192228.000000,125940.000000,70925.000000,288.881586)}

{create adhoc161}
{access adhoc161}
{connect adhoc161(1), adhoc160(0)}
{nseg = 1}
{strdef color color = "White"}
{pt3dclear()}
{pt3dadd(192228.000000,125940.000000,70925.000000,288.881586)}
{pt3dadd(191616.000000,126096.000000,70825.000000,67.184640)}
{pt3dadd(191304.000000,126276.000000,70675.000000,96.745860)}
{pt3dadd(191040.000000,126432.000000,70350.000000,55.987200)}

{create adhoc162}
{access adhoc162}
{connect adhoc162(1), adhoc160(0)}
{nseg = 1}
{strdef color color = "White"}
{pt3dclear()}
{pt3dadd(192228.000000,125940.000000,70925.000000,288.881586)}
{pt3dadd(192024.000000,126180.000000,71300.000000,277.326324)}
{pt3dadd(192204.000000,126576.000000,71875.000000,274.553060)}
{pt3dadd(192420.000000,126840.000000,72350.000000,271.779795)}
{pt3dadd(192336.000000,127044.000000,72550.000000,269.006531)}
{pt3dadd(192264.000000,127092.000000,72925.000000,266.233266)}
{pt3dadd(192312.000000,127248.000000,73400.000000,249.828003)}
{pt3dadd(192324.000000,127356.000000,73900.000000,233.422740)}
{pt3dadd(192420.000000,127524.000000,74175.000000,217.017477)}
{pt3dadd(192624.000000,127860.000000,74700.000000,200.612214)}
{pt3dadd(192576.000000,127800.000000,75375.000000,167.176836)}
{pt3dadd(192588.000000,127572.000000,75825.000000,111.451230)}

{create adhoc163}
{access adhoc163}
{connect adhoc163(1), adhoc147(0)}
{nseg = 1}
{strdef color color = "White"}
{pt3dclear()}
{pt3dadd(190992.000000,136884.000000,56475.000000,575.063856)}
{pt3dadd(189720.000000,136932.000000,56300.000000,116.095032)}
{pt3dadd(188688.000000,136584.000000,56500.000000,121.899785)}
{pt3dadd(188364.000000,136440.000000,56575.000000,127.704537)}
{pt3dadd(188040.000000,136536.000000,56675.000000,133.509289)}
{pt3dadd(187524.000000,136608.000000,56675.000000,139.314042)}
{pt3dadd(187044.000000,136332.000000,56475.000000,167.176836)}
{pt3dadd(186744.000000,136200.000000,56425.000000,139.314042)}

{create adhoc164}
{access adhoc164}
{connect adhoc164(1), adhoc142(0)}
{nseg = 1}
{strdef color color = "White"}
{pt3dclear()}
{pt3dadd(192132.000000,145944.000000,54125.000000,499.187376)}
{pt3dadd(190596.000000,145800.000000,54550.000000,346.657896)}
{pt3dadd(190236.000000,145728.000000,54700.000000,346.657896)}
{pt3dadd(189924.000000,145680.000000,54875.000000,346.657896)}
{pt3dadd(189672.000000,145596.000000,55050.000000,346.657896)}
{pt3dadd(189396.000000,145572.000000,55200.000000,346.657896)}
{pt3dadd(189144.000000,145584.000000,55325.000000,240.734646)}

{create adhoc165}
{access adhoc165}
{connect adhoc165(1), adhoc164(0)}
{nseg = 1}
{strdef color color = "White"}
{pt3dclear()}
{pt3dadd(189144.000000,145584.000000,55325.000000,240.734646)}
{pt3dadd(189396.000000,146040.000000,56750.000000,200.612214)}
{pt3dadd(189588.000000,146100.000000,57675.000000,210.642822)}
{pt3dadd(189720.000000,145980.000000,58525.000000,220.673430)}
{pt3dadd(189612.000000,145716.000000,59075.000000,230.704038)}
{pt3dadd(189480.000000,145272.000000,59325.000000,240.734646)}
{pt3dadd(189480.000000,145596.000000,59725.000000,192.738384)}
{pt3dadd(189492.000000,145728.000000,60325.000000,144.742122)}
{pt3dadd(189384.000000,146208.000000,60925.000000,96.745860)}
{pt3dadd(189624.000000,146880.000000,61475.000000,67.184640)}

{create adhoc166}
{access adhoc166}
{connect adhoc166(1), adhoc164(0)}
{nseg = 1}
{strdef color color = "White"}
{pt3dclear()}
{pt3dadd(189144.000000,145584.000000,55325.000000,240.734646)}
{pt3dadd(188748.000000,145500.000000,55425.000000,221.861052)}
{pt3dadd(188364.000000,145488.000000,55325.000000,167.176836)}

{create adhoc167}
{access adhoc167}
{connect adhoc167(1), adhoc166(0)}
{nseg = 1}
{strdef color color = "White"}
{pt3dclear()}
{pt3dadd(188364.000000,145488.000000,55325.000000,167.176836)}
{pt3dadd(187476.000000,144444.000000,55225.000000,111.451230)}
{pt3dadd(187020.000000,143676.000000,55750.000000,148.167720)}
{pt3dadd(186948.000000,143412.000000,56075.000000,184.884210)}
{pt3dadd(186816.000000,143532.000000,56275.000000,67.184640)}

{create adhoc168}
{access adhoc168}
{connect adhoc168(1), adhoc166(0)}
{nseg = 1}
{strdef color color = "White"}
{pt3dclear()}
{pt3dadd(188364.000000,145488.000000,55325.000000,167.176836)}
{pt3dadd(188040.000000,145896.000000,55450.000000,116.095032)}
{pt3dadd(187608.000000,146076.000000,55425.000000,167.176836)}

{create adhoc169}
{access adhoc169}
{connect adhoc169(1), adhoc168(0)}
{nseg = 1}
{strdef color color = "White"}
{pt3dclear()}
{pt3dadd(187608.000000,146076.000000,55425.000000,167.176836)}
{pt3dadd(187332.000000,147060.000000,55625.000000,67.184640)}

{create adhoc170}
{access adhoc170}
{connect adhoc170(1), adhoc168(0)}
{nseg = 1}
{strdef color color = "White"}
{pt3dclear()}
{pt3dadd(187608.000000,146076.000000,55425.000000,167.176836)}
{pt3dadd(186900.000000,145920.000000,55400.000000,38.880000)}

{create adhoc171}
{access adhoc171}
{connect adhoc171(1), adhoc164(0)}
{nseg = 1}
{strdef color color = "White"}
{pt3dclear()}
{pt3dadd(189144.000000,145584.000000,55325.000000,240.734646)}
{pt3dadd(189036.000000,145968.000000,55050.000000,200.612214)}
{pt3dadd(189048.000000,146292.000000,55100.000000,163.461804)}
{pt3dadd(188940.000000,146700.000000,55225.000000,126.311394)}
{pt3dadd(189180.000000,146976.000000,55375.000000,89.160984)}
{pt3dadd(189144.000000,147300.000000,55550.000000,55.987200)}

{create adhoc172}
{access adhoc172}
{connect adhoc172(1), adhoc72(0)}
{nseg = 1}
{strdef color color = "White"}
{pt3dclear()}
{pt3dadd(192036.000000,146784.000000,53900.000000,862.595802)}
{pt3dadd(190500.000000,146760.000000,51150.000000,346.657896)}
{pt3dadd(190656.000000,146256.000000,50625.000000,343.191321)}
{pt3dadd(190512.000000,146004.000000,50025.000000,339.724746)}
{pt3dadd(190164.000000,145524.000000,49475.000000,336.258171)}
{pt3dadd(189816.000000,144984.000000,48850.000000,332.791596)}
{pt3dadd(189468.000000,144816.000000,48200.000000,291.387906)}
{pt3dadd(189300.000000,145020.000000,47525.000000,249.984216)}
{pt3dadd(188796.000000,145104.000000,46825.000000,208.580526)}
{pt3dadd(187500.000000,146460.000000,45950.000000,167.176836)}
{pt3dadd(187524.000000,147324.000000,45625.000000,288.881586)}
{pt3dadd(187128.000000,148116.000000,45350.000000,240.734646)}

{create adhoc173}
{access adhoc173}
{connect adhoc173(1), adhoc172(0)}
{nseg = 1}
{strdef color color = "White"}
{pt3dclear()}
{pt3dadd(187128.000000,148116.000000,45350.000000,240.734646)}
{pt3dadd(187512.000000,148860.000000,44775.000000,200.612214)}
{pt3dadd(187164.000000,150072.000000,44525.000000,198.606091)}
{pt3dadd(186612.000000,150396.000000,44350.000000,196.599969)}
{pt3dadd(185952.000000,150732.000000,44000.000000,194.593846)}
{pt3dadd(185772.000000,150696.000000,43500.000000,192.587724)}
{pt3dadd(185784.000000,150996.000000,42975.000000,200.612214)}

{create adhoc174}
{access adhoc174}
{connect adhoc174(1), adhoc172(0)}
{nseg = 1}
{strdef color color = "White"}
{pt3dclear()}
{pt3dadd(187128.000000,148116.000000,45350.000000,240.734646)}
{pt3dadd(185820.000000,148572.000000,45650.000000,192.587724)}
{pt3dadd(185232.000000,148896.000000,45950.000000,179.269304)}
{pt3dadd(185124.000000,149124.000000,46150.000000,165.950883)}
{pt3dadd(185172.000000,149028.000000,46525.000000,152.632462)}
{pt3dadd(184836.000000,149232.000000,46150.000000,139.314042)}
{pt3dadd(184620.000000,149472.000000,46050.000000,96.745860)}

{create adhoc175}
{access adhoc175}
{connect adhoc175(1), adhoc71(0)}
{nseg = 1}
{strdef color color = "White"}
{pt3dclear()}
{pt3dadd(191100.000000,152844.000000,53650.000000,862.595802)}
{pt3dadd(188772.000000,152472.000000,52875.000000,240.734646)}
{pt3dadd(188460.000000,152304.000000,52775.000000,222.345193)}
{pt3dadd(188100.000000,152292.000000,52725.000000,203.955741)}
{pt3dadd(187776.000000,152112.000000,52675.000000,185.566288)}
{pt3dadd(187428.000000,151980.000000,52525.000000,167.176836)}
{pt3dadd(187044.000000,151980.000000,52500.000000,185.566288)}
{pt3dadd(186744.000000,151944.000000,52450.000000,203.955741)}
{pt3dadd(186408.000000,151812.000000,52450.000000,222.345193)}
{pt3dadd(185856.000000,151692.000000,52575.000000,240.734646)}
{pt3dadd(185184.000000,151560.000000,52375.000000,230.704038)}
{pt3dadd(184812.000000,151296.000000,51975.000000,220.673430)}
{pt3dadd(184440.000000,151068.000000,51550.000000,210.642822)}
{pt3dadd(184188.000000,150852.000000,51350.000000,200.612214)}
{pt3dadd(183996.000000,150576.000000,51050.000000,210.642822)}
{pt3dadd(183864.000000,150084.000000,50450.000000,220.673430)}
{pt3dadd(184344.000000,149976.000000,49800.000000,230.704038)}
{pt3dadd(184620.000000,150564.000000,49125.000000,240.734646)}
{pt3dadd(184668.000000,150912.000000,48825.000000,277.326324)}
{pt3dadd(184884.000000,151368.000000,48325.000000,96.745860)}

{create adhoc176}
{access adhoc176}
{connect adhoc176(1), adhoc175(0)}
{nseg = 1}
{strdef color color = "White"}
{pt3dclear()}
{pt3dadd(184884.000000,151368.000000,48325.000000,96.745860)}
{pt3dadd(184416.000000,151908.000000,48625.000000,55.987200)}
{pt3dadd(184416.000000,152400.000000,48800.000000,55.987200)}
{pt3dadd(184464.000000,152988.000000,49100.000000,46.656000)}

{create adhoc177}
{access adhoc177}
{connect adhoc177(1), adhoc175(0)}
{nseg = 1}
{strdef color color = "White"}
{pt3dclear()}
{pt3dadd(184884.000000,151368.000000,48325.000000,96.745860)}
{pt3dadd(185304.000000,151584.000000,47900.000000,128.391804)}

{create adhoc178}
{access adhoc178}
{connect adhoc178(1), adhoc68(0)}
{nseg = 1}
{strdef color color = "White"}
{pt3dclear()}
{pt3dadd(191604.000000,156900.000000,55025.000000,718.829820)}
{pt3dadd(190932.000000,157176.000000,56450.000000,288.881586)}

{create adhoc179}
{access adhoc179}
{connect adhoc179(1), adhoc67(0)}
{nseg = 1}
{strdef color color = "White"}
{pt3dclear()}
{pt3dadd(192264.000000,159060.000000,55350.000000,1192.452354)}
{pt3dadd(189480.000000,159468.000000,56450.000000,288.881586)}
{pt3dadd(189264.000000,159600.000000,56375.000000,288.881586)}
{pt3dadd(188928.000000,159768.000000,56600.000000,288.881586)}
{pt3dadd(188520.000000,159960.000000,56675.000000,288.881586)}
{pt3dadd(188112.000000,160128.000000,56925.000000,288.881586)}
{pt3dadd(187608.000000,159984.000000,57050.000000,285.992771)}
{pt3dadd(187224.000000,160236.000000,57125.000000,283.103955)}
{pt3dadd(187536.000000,160716.000000,58650.000000,280.215140)}
{pt3dadd(187512.000000,160524.000000,60175.000000,277.326324)}
{pt3dadd(187860.000000,160032.000000,60825.000000,200.612214)}

{create adhoc180}
{access adhoc180}
{connect adhoc180(1), adhoc179(0)}
{nseg = 1}
{strdef color color = "White"}
{pt3dclear()}
{pt3dadd(187860.000000,160032.000000,60825.000000,200.612214)}
{pt3dadd(188460.000000,158964.000000,60575.000000,116.095032)}
{pt3dadd(188796.000000,158724.000000,60375.000000,111.257739)}
{pt3dadd(189108.000000,158412.000000,60150.000000,106.420446)}
{pt3dadd(189060.000000,158208.000000,59875.000000,101.583153)}
{pt3dadd(189108.000000,158148.000000,59675.000000,96.745860)}
{pt3dadd(189120.000000,158112.000000,59475.000000,96.745860)}
{pt3dadd(189180.000000,158064.000000,59225.000000,96.745860)}
{pt3dadd(189312.000000,158100.000000,59125.000000,67.184640)}

{create adhoc181}
{access adhoc181}
{connect adhoc181(1), adhoc179(0)}
{nseg = 1}
{strdef color color = "White"}
{pt3dclear()}
{pt3dadd(187860.000000,160032.000000,60825.000000,200.612214)}
{pt3dadd(188340.000000,159420.000000,61550.000000,231.105276)}
{pt3dadd(188916.000000,159540.000000,62000.000000,235.919961)}
{pt3dadd(189360.000000,159384.000000,62425.000000,240.734646)}
{pt3dadd(189840.000000,159060.000000,62675.000000,167.176836)}

{create adhoc182}
{access adhoc182}
{connect adhoc182(1), adhoc181(0)}
{nseg = 1}
{strdef color color = "White"}
{pt3dclear()}
{pt3dadd(189840.000000,159060.000000,62675.000000,167.176836)}
{pt3dadd(190008.000000,158688.000000,62375.000000,139.314042)}
{pt3dadd(190248.000000,158136.000000,62250.000000,124.640919)}
{pt3dadd(190584.000000,158184.000000,62250.000000,109.967796)}
{pt3dadd(190920.000000,157872.000000,62275.000000,95.294673)}
{pt3dadd(191424.000000,157824.000000,61850.000000,80.621550)}
{pt3dadd(191976.000000,157716.000000,61575.000000,74.462963)}
{pt3dadd(192480.000000,157848.000000,61625.000000,68.304375)}
{pt3dadd(193068.000000,158124.000000,61700.000000,62.145787)}
{pt3dadd(193464.000000,158244.000000,61825.000000,55.987200)}
{pt3dadd(193968.000000,158100.000000,62100.000000,66.176865)}
{pt3dadd(194292.000000,158004.000000,62325.000000,76.366530)}
{pt3dadd(194436.000000,157932.000000,62600.000000,86.556195)}
{pt3dadd(194976.000000,157644.000000,62900.000000,96.745860)}
{pt3dadd(195288.000000,157500.000000,62875.000000,96.745860)}
{pt3dadd(195636.000000,157404.000000,62875.000000,96.745860)}
{pt3dadd(195948.000000,157284.000000,62675.000000,96.745860)}
{pt3dadd(196248.000000,157224.000000,62600.000000,96.745860)}
{pt3dadd(196584.000000,157452.000000,62325.000000,67.184640)}

{create adhoc183}
{access adhoc183}
{connect adhoc183(1), adhoc181(0)}
{nseg = 1}
{strdef color color = "White"}
{pt3dclear()}
{pt3dadd(189840.000000,159060.000000,62675.000000,167.176836)}
{pt3dadd(190248.000000,159216.000000,62975.000000,116.095032)}
{pt3dadd(190452.000000,159408.000000,63325.000000,109.645308)}
{pt3dadd(190716.000000,159420.000000,63525.000000,103.195584)}
{pt3dadd(190992.000000,159732.000000,63750.000000,96.745860)}
{pt3dadd(191196.000000,159996.000000,63950.000000,96.745860)}

{create adhoc184}
{access adhoc184}
{connect adhoc184(1), adhoc66(0)}
{nseg = 1}
{strdef color color = "White"}
{pt3dclear()}
{pt3dadd(192804.000000,165288.000000,55200.000000,1035.114948)}
{pt3dadd(191400.000000,164712.000000,52575.000000,415.989486)}
{pt3dadd(191160.000000,164376.000000,52250.000000,415.989486)}
{pt3dadd(191124.000000,163992.000000,51450.000000,415.989486)}
{pt3dadd(190356.000000,163392.000000,50550.000000,415.989486)}
{pt3dadd(189672.000000,162828.000000,49700.000000,399.349908)}

{create adhoc185}
{access adhoc185}
{connect adhoc185(1), adhoc184(0)}
{nseg = 1}
{strdef color color = "White"}
{pt3dclear()}
{pt3dadd(189672.000000,162828.000000,49700.000000,399.349908)}
{pt3dadd(188292.000000,163620.000000,49150.000000,346.657896)}
{pt3dadd(188004.000000,163764.000000,48775.000000,415.989486)}
{pt3dadd(187632.000000,164004.000000,48600.000000,332.791560)}

{create adhoc186}
{access adhoc186}
{connect adhoc186(1), adhoc185(0)}
{nseg = 1}
{strdef color color = "White"}
{pt3dclear()}
{pt3dadd(187632.000000,164004.000000,48600.000000,332.791560)}
{pt3dadd(187272.000000,164736.000000,47750.000000,240.734646)}
{pt3dadd(186948.000000,164772.000000,47575.000000,252.771381)}
{pt3dadd(186504.000000,164940.000000,47325.000000,264.808116)}
{pt3dadd(186048.000000,165132.000000,47075.000000,276.844851)}
{pt3dadd(185580.000000,165228.000000,47000.000000,288.881586)}
{pt3dadd(185016.000000,165348.000000,46850.000000,251.489700)}
{pt3dadd(184416.000000,165660.000000,46550.000000,214.097814)}
{pt3dadd(182808.000000,166104.000000,46400.000000,176.705928)}
{pt3dadd(181836.000000,166764.000000,46050.000000,139.314042)}
{pt3dadd(181392.000000,167604.000000,45975.000000,200.612214)}
{pt3dadd(181572.000000,168324.000000,45475.000000,167.176836)}

{create adhoc187}
{access adhoc187}
{connect adhoc187(1), adhoc186(0)}
{nseg = 1}
{strdef color color = "White"}
{pt3dclear()}
{pt3dadd(181572.000000,168324.000000,45475.000000,167.176836)}
{pt3dadd(181980.000000,168432.000000,45500.000000,67.184640)}
{pt3dadd(182280.000000,168624.000000,45600.000000,80.621550)}
{pt3dadd(182388.000000,169524.000000,45825.000000,80.621550)}

{create adhoc188}
{access adhoc188}
{connect adhoc188(1), adhoc186(0)}
{nseg = 1}
{strdef color color = "White"}
{pt3dclear()}
{pt3dadd(181572.000000,168324.000000,45475.000000,167.176836)}
{pt3dadd(181596.000000,168228.000000,45100.000000,139.314042)}
{pt3dadd(181452.000000,168120.000000,44925.000000,64.497240)}

{create adhoc189}
{access adhoc189}
{connect adhoc189(1), adhoc185(0)}
{nseg = 1}
{strdef color color = "White"}
{pt3dclear()}
{pt3dadd(187632.000000,164004.000000,48600.000000,332.791560)}
{pt3dadd(186972.000000,163656.000000,49050.000000,288.881586)}

{create adhoc190}
{access adhoc190}
{connect adhoc190(1), adhoc189(0)}
{nseg = 1}
{strdef color color = "White"}
{pt3dclear()}
{pt3dadd(186972.000000,163656.000000,49050.000000,288.881586)}
{pt3dadd(186420.000000,164244.000000,49050.000000,116.095032)}
{pt3dadd(185976.000000,164184.000000,48875.000000,106.420446)}
{pt3dadd(185772.000000,164340.000000,49025.000000,96.745860)}
{pt3dadd(185448.000000,164376.000000,48750.000000,46.656000)}

{create adhoc191}
{access adhoc191}
{connect adhoc191(1), adhoc189(0)}
{nseg = 1}
{strdef color color = "White"}
{pt3dclear()}
{pt3dadd(186972.000000,163656.000000,49050.000000,288.881586)}
{pt3dadd(186504.000000,163608.000000,49250.000000,200.612214)}
{pt3dadd(186252.000000,163440.000000,49675.000000,172.439820)}
{pt3dadd(185976.000000,163428.000000,49800.000000,144.267426)}
{pt3dadd(185628.000000,162936.000000,50225.000000,116.095032)}
{pt3dadd(185088.000000,162696.000000,50350.000000,139.314042)}

{create adhoc192}
{access adhoc192}
{connect adhoc192(1), adhoc191(0)}
{nseg = 1}
{strdef color color = "White"}
{pt3dclear()}
{pt3dadd(185088.000000,162696.000000,50350.000000,139.314042)}
{pt3dadd(184584.000000,162312.000000,50225.000000,46.656000)}
{pt3dadd(184416.000000,162168.000000,50050.000000,46.656000)}
{pt3dadd(183852.000000,161808.000000,49725.000000,46.656000)}
{pt3dadd(183504.000000,161604.000000,49525.000000,46.656000)}
{pt3dadd(183216.000000,161376.000000,49325.000000,38.880000)}

{create adhoc193}
{access adhoc193}
{connect adhoc193(1), adhoc191(0)}
{nseg = 1}
{strdef color color = "White"}
{pt3dclear()}
{pt3dadd(185088.000000,162696.000000,50350.000000,139.314042)}
{pt3dadd(185256.000000,162648.000000,50700.000000,139.314042)}
{pt3dadd(185388.000000,162648.000000,51175.000000,146.279741)}
{pt3dadd(185220.000000,162516.000000,51700.000000,153.245439)}
{pt3dadd(184956.000000,162480.000000,52375.000000,160.211138)}
{pt3dadd(184920.000000,162612.000000,52950.000000,167.176836)}
{pt3dadd(184788.000000,162864.000000,53425.000000,80.621550)}
{pt3dadd(184476.000000,163272.000000,53850.000000,46.656000)}

{create adhoc194}
{access adhoc194}
{connect adhoc194(1), adhoc184(0)}
{nseg = 1}
{strdef color color = "White"}
{pt3dclear()}
{pt3dadd(189672.000000,162828.000000,49700.000000,399.349908)}
{pt3dadd(189024.000000,161676.000000,49125.000000,415.989486)}
{pt3dadd(188652.000000,160452.000000,48600.000000,415.989486)}

{create adhoc195}
{access adhoc195}
{connect adhoc195(1), adhoc194(0)}
{nseg = 1}
{strdef color color = "White"}
{pt3dclear()}
{pt3dadd(188652.000000,160452.000000,48600.000000,415.989486)}
{pt3dadd(188388.000000,161316.000000,47850.000000,240.734646)}
{pt3dadd(188076.000000,161268.000000,47500.000000,209.574742)}
{pt3dadd(187860.000000,160860.000000,46875.000000,178.414839)}
{pt3dadd(187584.000000,160776.000000,46750.000000,147.254936)}
{pt3dadd(187272.000000,160536.000000,46650.000000,116.095032)}
{pt3dadd(186936.000000,160224.000000,46450.000000,137.224328)}
{pt3dadd(186480.000000,159984.000000,46050.000000,158.353623)}
{pt3dadd(185532.000000,159840.000000,45725.000000,179.482918)}
{pt3dadd(185388.000000,160308.000000,45175.000000,200.612214)}
{pt3dadd(185268.000000,160344.000000,44825.000000,128.299707)}
{pt3dadd(185160.000000,160704.000000,44475.000000,55.987200)}
{pt3dadd(184752.000000,161028.000000,44050.000000,46.656000)}

{create adhoc196}
{access adhoc196}
{connect adhoc196(1), adhoc194(0)}
{nseg = 1}
{strdef color color = "White"}
{pt3dclear()}
{pt3dadd(188652.000000,160452.000000,48600.000000,415.989486)}
{pt3dadd(188304.000000,159912.000000,48750.000000,415.989486)}
{pt3dadd(188136.000000,159804.000000,48825.000000,355.211091)}
{pt3dadd(187776.000000,159444.000000,48775.000000,294.432696)}
{pt3dadd(187416.000000,158880.000000,48725.000000,346.657896)}

{create adhoc197}
{access adhoc197}
{connect adhoc197(1), adhoc196(0)}
{nseg = 1}
{strdef color color = "White"}
{pt3dclear()}
{pt3dadd(187416.000000,158880.000000,48725.000000,346.657896)}
{pt3dadd(187320.000000,157512.000000,49350.000000,139.314042)}
{pt3dadd(186828.000000,157044.000000,49825.000000,96.745860)}

{create adhoc198}
{access adhoc198}
{connect adhoc198(1), adhoc196(0)}
{nseg = 1}
{strdef color color = "White"}
{pt3dclear()}
{pt3dadd(187416.000000,158880.000000,48725.000000,346.657896)}
{pt3dadd(186960.000000,158460.000000,48700.000000,346.657896)}
{pt3dadd(186456.000000,158076.000000,48800.000000,346.657896)}
{pt3dadd(185844.000000,157920.000000,48675.000000,277.326342)}

{create adhoc199}
{access adhoc199}
{connect adhoc199(1), adhoc198(0)}
{nseg = 1}
{strdef color color = "White"}
{pt3dclear()}
{pt3dadd(185844.000000,157920.000000,48675.000000,277.326342)}
{pt3dadd(185412.000000,158064.000000,49500.000000,160.489764)}
{pt3dadd(185040.000000,158232.000000,49925.000000,172.686987)}
{pt3dadd(184596.000000,158088.000000,49875.000000,184.884210)}
{pt3dadd(184164.000000,158172.000000,50575.000000,177.488838)}

{create adhoc200}
{access adhoc200}
{connect adhoc200(1), adhoc199(0)}
{nseg = 1}
{strdef color color = "White"}
{pt3dclear()}
{pt3dadd(184164.000000,158172.000000,50575.000000,177.488838)}
{pt3dadd(183900.000000,158436.000000,50150.000000,96.745860)}
{pt3dadd(183360.000000,158556.000000,50175.000000,96.745860)}
{pt3dadd(183084.000000,158700.000000,50075.000000,96.745860)}
{pt3dadd(182916.000000,159072.000000,49525.000000,55.987200)}

{create adhoc201}
{access adhoc201}
{connect adhoc201(1), adhoc199(0)}
{nseg = 1}
{strdef color color = "White"}
{pt3dclear()}
{pt3dadd(184164.000000,158172.000000,50575.000000,177.488838)}
{pt3dadd(183768.000000,158364.000000,50875.000000,139.314042)}
{pt3dadd(183384.000000,158616.000000,51350.000000,139.314042)}
{pt3dadd(183468.000000,158808.000000,51700.000000,139.314042)}
{pt3dadd(183780.000000,159168.000000,51875.000000,139.314042)}
{pt3dadd(184332.000000,159468.000000,52050.000000,139.314042)}
{pt3dadd(184968.000000,159756.000000,52000.000000,115.270908)}
{pt3dadd(185568.000000,159972.000000,52250.000000,91.227774)}
{pt3dadd(186000.000000,160116.000000,52450.000000,67.184640)}
{pt3dadd(186096.000000,160272.000000,52500.000000,55.987200)}

{create adhoc202}
{access adhoc202}
{connect adhoc202(1), adhoc198(0)}
{nseg = 1}
{strdef color color = "White"}
{pt3dclear()}
{pt3dadd(185844.000000,157920.000000,48675.000000,277.326342)}
{pt3dadd(185292.000000,157512.000000,48375.000000,200.612214)}
{pt3dadd(184680.000000,156876.000000,48100.000000,167.255320)}
{pt3dadd(184440.000000,156516.000000,48025.000000,133.898427)}
{pt3dadd(183972.000000,156300.000000,48025.000000,100.541533)}
{pt3dadd(183936.000000,155520.000000,48075.000000,67.184640)}
{pt3dadd(183684.000000,155124.000000,48175.000000,55.987200)}

{create adhoc203}
{access adhoc203}
{connect adhoc203(1), adhoc65(0)}
{nseg = 1}
{strdef color color = "White"}
{pt3dclear()}
{pt3dadd(192816.000000,167160.000000,55675.000000,1490.565402)}
{pt3dadd(192444.000000,166596.000000,55525.000000,1490.565402)}
{pt3dadd(190692.000000,166392.000000,57575.000000,1190.144448)}
{pt3dadd(190320.000000,166344.000000,57375.000000,889.723494)}
{pt3dadd(189948.000000,166392.000000,57500.000000,589.302540)}
{pt3dadd(189612.000000,166212.000000,57475.000000,288.881586)}
{pt3dadd(189288.000000,166116.000000,57375.000000,272.232765)}
{pt3dadd(189000.000000,166044.000000,57425.000000,255.583944)}
{pt3dadd(188664.000000,165876.000000,57450.000000,240.734646)}

{create adhoc204}
{access adhoc204}
{connect adhoc204(1), adhoc203(0)}
{nseg = 1}
{strdef color color = "White"}
{pt3dclear()}
{pt3dadd(188664.000000,165876.000000,57450.000000,240.734646)}
{pt3dadd(188412.000000,165108.000000,57425.000000,200.612214)}
{pt3dadd(188268.000000,164724.000000,57475.000000,167.176836)}

{create adhoc205}
{access adhoc205}
{connect adhoc205(1), adhoc204(0)}
{nseg = 1}
{strdef color color = "White"}
{pt3dclear()}
{pt3dadd(188268.000000,164724.000000,57475.000000,167.176836)}
{pt3dadd(188916.000000,164796.000000,57750.000000,80.621550)}
{pt3dadd(188976.000000,164916.000000,57850.000000,64.497240)}

{create adhoc206}
{access adhoc206}
{connect adhoc206(1), adhoc204(0)}
{nseg = 1}
{strdef color color = "White"}
{pt3dclear()}
{pt3dadd(188268.000000,164724.000000,57475.000000,167.176836)}
{pt3dadd(188508.000000,164352.000000,57800.000000,116.095032)}
{pt3dadd(188208.000000,164424.000000,58025.000000,96.745860)}

{create adhoc207}
{access adhoc207}
{connect adhoc207(1), adhoc203(0)}
{nseg = 1}
{strdef color color = "White"}
{pt3dclear()}
{pt3dadd(188664.000000,165876.000000,57450.000000,240.734646)}
{pt3dadd(188376.000000,166032.000000,57425.000000,288.881586)}
{pt3dadd(188040.000000,166188.000000,57450.000000,303.325664)}
{pt3dadd(187668.000000,166344.000000,57450.000000,317.769741)}
{pt3dadd(187368.000000,166404.000000,57350.000000,332.213819)}
{pt3dadd(187116.000000,166488.000000,57475.000000,346.657896)}
{pt3dadd(186732.000000,166548.000000,57850.000000,346.657896)}
{pt3dadd(186540.000000,166908.000000,58325.000000,346.657896)}
{pt3dadd(186264.000000,167016.000000,58650.000000,346.657896)}
{pt3dadd(186096.000000,167580.000000,59150.000000,346.657896)}
{pt3dadd(186048.000000,168216.000000,59750.000000,342.035796)}
{pt3dadd(186180.000000,168264.000000,60100.000000,337.413696)}
{pt3dadd(186444.000000,168420.000000,60650.000000,332.791596)}
{pt3dadd(186684.000000,168156.000000,61250.000000,288.881586)}

{create adhoc208}
{access adhoc208}
{connect adhoc208(1), adhoc207(0)}
{nseg = 1}
{strdef color color = "White"}
{pt3dclear()}
{pt3dadd(186684.000000,168156.000000,61250.000000,288.881586)}
{pt3dadd(187428.000000,168108.000000,61600.000000,167.176836)}

{create adhoc209}
{access adhoc209}
{connect adhoc209(1), adhoc208(0)}
{nseg = 1}
{strdef color color = "White"}
{pt3dclear()}
{pt3dadd(187428.000000,168108.000000,61600.000000,167.176836)}
{pt3dadd(187416.000000,167988.000000,61875.000000,167.176836)}
{pt3dadd(187632.000000,167736.000000,62150.000000,116.095032)}
{pt3dadd(188232.000000,167484.000000,62525.000000,96.745860)}

{create adhoc210}
{access adhoc210}
{connect adhoc210(1), adhoc208(0)}
{nseg = 1}
{strdef color color = "White"}
{pt3dclear()}
{pt3dadd(187428.000000,168108.000000,61600.000000,167.176836)}
{pt3dadd(188508.000000,167868.000000,61850.000000,111.451230)}
{pt3dadd(189120.000000,167736.000000,62100.000000,107.774888)}
{pt3dadd(189720.000000,167748.000000,62300.000000,104.098545)}
{pt3dadd(189912.000000,167796.000000,62500.000000,100.422203)}
{pt3dadd(190140.000000,167712.000000,62875.000000,96.745860)}
{pt3dadd(190308.000000,167328.000000,63175.000000,80.621550)}

{create adhoc211}
{access adhoc211}
{connect adhoc211(1), adhoc207(0)}
{nseg = 1}
{strdef color color = "White"}
{pt3dclear()}
{pt3dadd(186684.000000,168156.000000,61250.000000,288.881586)}
{pt3dadd(186768.000000,169284.000000,61900.000000,184.884210)}

{create adhoc212}
{access adhoc212}
{connect adhoc212(1), adhoc211(0)}
{nseg = 1}
{strdef color color = "White"}
{pt3dclear()}
{pt3dadd(186768.000000,169284.000000,61900.000000,184.884210)}
{pt3dadd(186912.000000,169140.000000,62225.000000,240.734646)}
{pt3dadd(186924.000000,169176.000000,62500.000000,116.095032)}
{pt3dadd(186912.000000,169116.000000,62925.000000,116.095032)}

{create adhoc213}
{access adhoc213}
{connect adhoc213(1), adhoc211(0)}
{nseg = 1}
{strdef color color = "White"}
{pt3dclear()}
{pt3dadd(186768.000000,169284.000000,61900.000000,184.884210)}
{pt3dadd(186828.000000,169572.000000,62050.000000,116.095032)}
{pt3dadd(186720.000000,169860.000000,62050.000000,137.224328)}
{pt3dadd(186960.000000,170208.000000,62250.000000,158.353623)}
{pt3dadd(187392.000000,170592.000000,62525.000000,179.482918)}
{pt3dadd(187308.000000,170664.000000,62875.000000,200.612214)}
{pt3dadd(187536.000000,171096.000000,63050.000000,167.176836)}
{pt3dadd(187680.000000,171228.000000,63300.000000,139.314042)}

{create adhoc214}
{access adhoc214}
{connect adhoc214(1), adhoc64(0)}
{nseg = 1}
{strdef color color = "White"}
{pt3dclear()}
{pt3dadd(191244.000000,170100.000000,55100.000000,1266.006636)}
{pt3dadd(188268.000000,169968.000000,53050.000000,346.657896)}
{pt3dadd(187896.000000,169920.000000,52750.000000,363.990794)}
{pt3dadd(187512.000000,169692.000000,52475.000000,381.323691)}
{pt3dadd(187068.000000,169632.000000,52225.000000,398.656589)}
{pt3dadd(186624.000000,169668.000000,52100.000000,415.989486)}
{pt3dadd(186180.000000,169536.000000,52075.000000,398.656589)}
{pt3dadd(185748.000000,169416.000000,51875.000000,381.323691)}
{pt3dadd(185280.000000,169152.000000,51850.000000,363.990794)}
{pt3dadd(184824.000000,169044.000000,51775.000000,346.657896)}
{pt3dadd(184320.000000,169128.000000,51425.000000,359.830899)}
{pt3dadd(184008.000000,168972.000000,51350.000000,373.003902)}
{pt3dadd(183624.000000,168900.000000,51350.000000,386.176905)}
{pt3dadd(183192.000000,168876.000000,51325.000000,399.349908)}
{pt3dadd(182304.000000,169740.000000,50750.000000,240.734646)}
{pt3dadd(181656.000000,170580.000000,50275.000000,288.881586)}

{create adhoc215}
{access adhoc215}
{connect adhoc215(1), adhoc214(0)}
{nseg = 1}
{strdef color color = "White"}
{pt3dclear()}
{pt3dadd(181656.000000,170580.000000,50275.000000,288.881586)}
{pt3dadd(181260.000000,170532.000000,49750.000000,288.881586)}

{create adhoc216}
{access adhoc216}
{connect adhoc216(1), adhoc215(0)}
{nseg = 1}
{strdef color color = "White"}
{pt3dclear()}
{pt3dadd(181260.000000,170532.000000,49750.000000,288.881586)}
{pt3dadd(180768.000000,170592.000000,49125.000000,167.176836)}
{pt3dadd(181020.000000,170688.000000,48825.000000,130.026438)}
{pt3dadd(181284.000000,171132.000000,48525.000000,92.876040)}
{pt3dadd(181488.000000,171228.000000,48325.000000,96.745860)}

{create adhoc217}
{access adhoc217}
{connect adhoc217(1), adhoc215(0)}
{nseg = 1}
{strdef color color = "White"}
{pt3dclear()}
{pt3dadd(181260.000000,170532.000000,49750.000000,288.881586)}
{pt3dadd(181116.000000,169572.000000,49575.000000,96.745860)}
{pt3dadd(181344.000000,169116.000000,49400.000000,88.683705)}
{pt3dadd(181560.000000,168756.000000,49000.000000,80.621550)}
{pt3dadd(181632.000000,168468.000000,48775.000000,96.745860)}

{create adhoc218}
{access adhoc218}
{connect adhoc218(1), adhoc214(0)}
{nseg = 1}
{strdef color color = "White"}
{pt3dclear()}
{pt3dadd(181656.000000,170580.000000,50275.000000,288.881586)}
{pt3dadd(181800.000000,171864.000000,50475.000000,167.176836)}
{pt3dadd(182112.000000,173112.000000,50625.000000,160.211138)}
{pt3dadd(182112.000000,173352.000000,50800.000000,153.245439)}
{pt3dadd(182064.000000,173712.000000,50850.000000,146.279741)}
{pt3dadd(182064.000000,173964.000000,50950.000000,139.314042)}
{pt3dadd(181512.000000,174276.000000,51150.000000,77.396688)}
{pt3dadd(180924.000000,174504.000000,51375.000000,46.656000)}

{create adhoc219}
{access adhoc219}
{connect adhoc219(1), adhoc63(0)}
{nseg = 1}
{strdef color color = "White"}
{pt3dclear()}
{pt3dadd(189984.000000,172044.000000,55075.000000,1035.114948)}
{pt3dadd(187140.000000,172092.000000,55250.000000,139.314042)}
{pt3dadd(186408.000000,172032.000000,55100.000000,139.314042)}
{pt3dadd(185808.000000,171720.000000,54800.000000,139.314042)}
{pt3dadd(185124.000000,172044.000000,54875.000000,139.314042)}
{pt3dadd(184872.000000,172104.000000,54900.000000,139.314042)}
{pt3dadd(184572.000000,172188.000000,54725.000000,139.314042)}
{pt3dadd(184116.000000,172260.000000,54800.000000,139.314042)}
{pt3dadd(183552.000000,172248.000000,54775.000000,116.095032)}

{create adhoc220}
{access adhoc220}
{connect adhoc220(1), adhoc219(0)}
{nseg = 1}
{strdef color color = "White"}
{pt3dclear()}
{pt3dadd(183552.000000,172248.000000,54775.000000,116.095032)}
{pt3dadd(183132.000000,172332.000000,55375.000000,160.489764)}
{pt3dadd(183192.000000,172644.000000,55450.000000,167.176836)}
{pt3dadd(183216.000000,173040.000000,55675.000000,200.612214)}

{create adhoc221}
{access adhoc221}
{connect adhoc221(1), adhoc219(0)}
{nseg = 1}
{strdef color color = "White"}
{pt3dclear()}
{pt3dadd(183552.000000,172248.000000,54775.000000,116.095032)}
{pt3dadd(183360.000000,172524.000000,54475.000000,139.314042)}
{pt3dadd(183012.000000,172812.000000,54300.000000,96.745860)}
{pt3dadd(182712.000000,173052.000000,54200.000000,55.987200)}

{create adhoc222}
{access adhoc222}
{connect adhoc222(1), adhoc62(0)}
{nseg = 1}
{strdef color color = "White"}
{pt3dclear()}
{pt3dadd(188760.000000,180228.000000,55325.000000,1490.565402)}
{pt3dadd(185832.000000,180360.000000,56575.000000,346.657896)}
{pt3dadd(185184.000000,180132.000000,56850.000000,363.990794)}
{pt3dadd(184860.000000,179784.000000,56950.000000,381.323691)}
{pt3dadd(184512.000000,179856.000000,57100.000000,398.656589)}
{pt3dadd(184212.000000,179856.000000,57175.000000,415.989486)}
{pt3dadd(183888.000000,179772.000000,57275.000000,352.435536)}
{pt3dadd(183612.000000,179688.000000,57375.000000,288.881586)}
{pt3dadd(183156.000000,180252.000000,57675.000000,200.612214)}

{create adhoc223}
{access adhoc223}
{connect adhoc223(1), adhoc222(0)}
{nseg = 1}
{strdef color color = "White"}
{pt3dclear()}
{pt3dadd(183156.000000,180252.000000,57675.000000,200.612214)}
{pt3dadd(182868.000000,180564.000000,58125.000000,200.612214)}
{pt3dadd(182436.000000,180540.000000,58100.000000,200.612214)}
{pt3dadd(182280.000000,180696.000000,58550.000000,200.612214)}
{pt3dadd(181848.000000,181068.000000,59125.000000,200.612214)}
{pt3dadd(181716.000000,181392.000000,59400.000000,200.612214)}
{pt3dadd(181452.000000,181704.000000,59400.000000,139.314042)}

{create adhoc224}
{access adhoc224}
{connect adhoc224(1), adhoc223(0)}
{nseg = 1}
{strdef color color = "White"}
{pt3dclear()}
{pt3dadd(181452.000000,181704.000000,59400.000000,139.314042)}
{pt3dadd(180492.000000,181524.000000,59325.000000,116.095032)}
{pt3dadd(180240.000000,181344.000000,59625.000000,67.184640)}

{create adhoc225}
{access adhoc225}
{connect adhoc225(1), adhoc223(0)}
{nseg = 1}
{strdef color color = "White"}
{pt3dclear()}
{pt3dadd(181452.000000,181704.000000,59400.000000,139.314042)}
{pt3dadd(181140.000000,182112.000000,59400.000000,139.314042)}
{pt3dadd(181104.000000,182508.000000,59250.000000,139.314042)}
{pt3dadd(181056.000000,182808.000000,59275.000000,139.314042)}
{pt3dadd(180864.000000,183216.000000,59350.000000,139.314042)}
{pt3dadd(180744.000000,183456.000000,59225.000000,52.589286)}

{create adhoc226}
{access adhoc226}
{connect adhoc226(1), adhoc222(0)}
{nseg = 1}
{strdef color color = "White"}
{pt3dclear()}
{pt3dadd(183156.000000,180252.000000,57675.000000,200.612214)}
{pt3dadd(183084.000000,178824.000000,57050.000000,200.612214)}
{pt3dadd(183276.000000,177624.000000,57275.000000,200.612214)}

{create adhoc227}
{access adhoc227}
{connect adhoc227(1), adhoc226(0)}
{nseg = 1}
{strdef color color = "White"}
{pt3dclear()}
{pt3dadd(183276.000000,177624.000000,57275.000000,200.612214)}
{pt3dadd(183312.000000,177360.000000,56950.000000,200.612214)}
{pt3dadd(183252.000000,176964.000000,56800.000000,148.679037)}
{pt3dadd(183024.000000,176700.000000,56650.000000,96.745860)}
{pt3dadd(183072.000000,176496.000000,56200.000000,96.745860)}

{create adhoc228}
{access adhoc228}
{connect adhoc228(1), adhoc226(0)}
{nseg = 1}
{strdef color color = "White"}
{pt3dclear()}
{pt3dadd(183276.000000,177624.000000,57275.000000,200.612214)}
{pt3dadd(183396.000000,177240.000000,57575.000000,55.987200)}
{pt3dadd(183576.000000,176808.000000,58100.000000,71.014158)}
{pt3dadd(183720.000000,176604.000000,58575.000000,86.041116)}
{pt3dadd(183900.000000,176424.000000,58800.000000,101.068074)}
{pt3dadd(184032.000000,175908.000000,59100.000000,116.095032)}
{pt3dadd(184332.000000,175596.000000,59325.000000,116.095032)}
{pt3dadd(184392.000000,175308.000000,59525.000000,116.095032)}
{pt3dadd(184716.000000,175284.000000,59700.000000,116.095032)}
{pt3dadd(185244.000000,175428.000000,59975.000000,55.987200)}

{create adhoc229}
{access adhoc229}
{connect adhoc229(1), adhoc49(0)}
{nseg = 1}
{strdef color color = "White"}
{pt3dclear()}
{pt3dadd(183000.000000,192444.000000,56400.000000,1788.678450)}
{pt3dadd(179196.000000,191952.000000,55500.000000,240.734646)}
{pt3dadd(178788.000000,191820.000000,55625.000000,288.881586)}
{pt3dadd(178224.000000,191568.000000,55675.000000,346.657896)}

{create adhoc230}
{access adhoc230}
{connect adhoc230(1), adhoc229(0)}
{nseg = 1}
{strdef color color = "White"}
{pt3dclear()}
{pt3dadd(178224.000000,191568.000000,55675.000000,346.657896)}
{pt3dadd(177624.000000,190596.000000,55825.000000,277.326342)}
{pt3dadd(177492.000000,190452.000000,56025.000000,207.279108)}
{pt3dadd(177588.000000,190272.000000,56250.000000,137.231874)}
{pt3dadd(177288.000000,190044.000000,56325.000000,67.184640)}
{pt3dadd(177012.000000,189996.000000,56425.000000,139.314042)}

{create adhoc231}
{access adhoc231}
{connect adhoc231(1), adhoc229(0)}
{nseg = 1}
{strdef color color = "White"}
{pt3dclear()}
{pt3dadd(178224.000000,191568.000000,55675.000000,346.657896)}
{pt3dadd(177564.000000,191292.000000,55300.000000,346.657896)}
{pt3dadd(176748.000000,191412.000000,54950.000000,288.881586)}

{create adhoc232}
{access adhoc232}
{connect adhoc232(1), adhoc231(0)}
{nseg = 1}
{strdef color color = "White"}
{pt3dclear()}
{pt3dadd(176748.000000,191412.000000,54950.000000,288.881586)}
{pt3dadd(175596.000000,191280.000000,55700.000000,288.881586)}
{pt3dadd(174156.000000,191556.000000,54950.000000,228.029211)}
{pt3dadd(173568.000000,191820.000000,54800.000000,167.176836)}
{pt3dadd(172620.000000,192300.000000,54775.000000,139.314042)}

{create adhoc233}
{access adhoc233}
{connect adhoc233(1), adhoc232(0)}
{nseg = 1}
{strdef color color = "White"}
{pt3dclear()}
{pt3dadd(172620.000000,192300.000000,54775.000000,139.314042)}
{pt3dadd(171204.000000,192612.000000,55100.000000,96.745860)}
{pt3dadd(169680.000000,192540.000000,54950.000000,85.458843)}
{pt3dadd(168336.000000,192288.000000,54900.000000,74.171826)}
{pt3dadd(167268.000000,192072.000000,54850.000000,62.884809)}
{pt3dadd(166308.000000,191688.000000,54500.000000,51.597792)}
{pt3dadd(165528.000000,190968.000000,54275.000000,58.853732)}
{pt3dadd(165252.000000,190848.000000,54050.000000,66.109671)}
{pt3dadd(164784.000000,190572.000000,54250.000000,73.365611)}
{pt3dadd(164472.000000,190296.000000,54075.000000,80.621550)}
{pt3dadd(164412.000000,190056.000000,53900.000000,55.987200)}

{create adhoc234}
{access adhoc234}
{connect adhoc234(1), adhoc232(0)}
{nseg = 1}
{strdef color color = "White"}
{pt3dclear()}
{pt3dadd(172620.000000,192300.000000,54775.000000,139.314042)}
{pt3dadd(172572.000000,193404.000000,54900.000000,80.621550)}
{pt3dadd(172428.000000,193956.000000,55200.000000,67.184640)}

{create adhoc235}
{access adhoc235}
{connect adhoc235(1), adhoc231(0)}
{nseg = 1}
{strdef color color = "White"}
{pt3dclear()}
{pt3dadd(176748.000000,191412.000000,54950.000000,288.881586)}
{pt3dadd(175908.000000,191160.000000,55275.000000,288.881586)}
{pt3dadd(175488.000000,190416.000000,55475.000000,172.434393)}
{pt3dadd(175332.000000,189804.000000,55675.000000,55.987200)}
{pt3dadd(175344.000000,189660.000000,55725.000000,55.987200)}
