# Supplementary material for: Full reconstruction of large lobula plate tangential cells in Drosophila from a 3D EM dataset
Source: PLoS One. 2018 Nov 28;13(11):e0207828. doi: 10.1371/journal.pone.0207828 (PMC6261601; doi:10.1371/journal.pone.0207828)
Supplement: S1 Dataset — (ZIP) [file pone.0207828.s001.zip › Diameter hoc/VS_VSL_preliminary/Old Diameters Mar13_VS_VSL_HS/VS2/2_14_745_gmordhorst_001.023.hoc]

/* created with nml2hocm */

{create adhoc1}
{access adhoc1}
{nseg = 1}
{strdef color color = "White"}
{pt3dclear()}
{pt3dadd(186888.000000,147060.000000,55375.000000,116.095032)}
{pt3dadd(187032.000000,146892.000000,55500.000000,167.176836)}
{pt3dadd(187212.000000,146484.000000,55400.000000,160.211138)}
{pt3dadd(187392.000000,146352.000000,55325.000000,153.245439)}
{pt3dadd(187560.000000,146172.000000,55375.000000,146.279741)}
{pt3dadd(187776.000000,145992.000000,55425.000000,139.314042)}
{pt3dadd(188004.000000,145884.000000,55400.000000,162.261850)}
{pt3dadd(188196.000000,145608.000000,55175.000000,185.209659)}
{pt3dadd(188364.000000,145440.000000,55250.000000,208.157468)}
{pt3dadd(188664.000000,145476.000000,55225.000000,231.105276)}
{pt3dadd(188976.000000,145656.000000,55400.000000,245.549354)}
{pt3dadd(189312.000000,145548.000000,55200.000000,259.993431)}
{pt3dadd(189624.000000,145368.000000,55100.000000,274.437509)}
{pt3dadd(190236.000000,145608.000000,54775.000000,288.881586)}
{pt3dadd(192864.000000,145476.000000,54525.000000,552.061332)}

{create adhoc2}
{access adhoc2}
{connect adhoc2(1), adhoc1(0)}
{nseg = 1}
{strdef color color = "White"}
{pt3dclear()}
{pt3dadd(192864.000000,145476.000000,54525.000000,552.061332)}
{pt3dadd(193308.000000,144972.000000,54350.000000,599.024880)}
{pt3dadd(193416.000000,144264.000000,54125.000000,690.076602)}
{pt3dadd(193524.000000,143736.000000,54275.000000,733.206402)}
{pt3dadd(193584.000000,143352.000000,54300.000000,776.336202)}
{pt3dadd(193560.000000,143040.000000,54050.000000,819.466002)}
{pt3dadd(193368.000000,142740.000000,53800.000000,862.595802)}
{pt3dadd(193224.000000,142464.000000,53875.000000,826.654307)}
{pt3dadd(193080.000000,142212.000000,53950.000000,790.712811)}
{pt3dadd(192912.000000,141972.000000,54100.000000,754.771316)}
{pt3dadd(192972.000000,141708.000000,54125.000000,718.829820)}
{pt3dadd(192780.000000,141456.000000,54075.000000,711.641533)}
{pt3dadd(192708.000000,141180.000000,53825.000000,704.453247)}
{pt3dadd(192744.000000,140928.000000,54150.000000,697.264960)}
{pt3dadd(192648.000000,140652.000000,54100.000000,690.076674)}
{pt3dadd(192600.000000,140352.000000,54300.000000,697.264960)}
{pt3dadd(192552.000000,140112.000000,54250.000000,704.453247)}
{pt3dadd(192732.000000,139788.000000,54425.000000,711.641533)}
{pt3dadd(192660.000000,139488.000000,54375.000000,718.829820)}
{pt3dadd(192588.000000,139272.000000,54325.000000,688.878585)}
{pt3dadd(192600.000000,139008.000000,54250.000000,658.927350)}
{pt3dadd(192708.000000,138768.000000,54250.000000,628.976115)}
{pt3dadd(192744.000000,138504.000000,54450.000000,599.024880)}
{pt3dadd(192624.000000,138252.000000,54575.000000,599.024880)}
{pt3dadd(192528.000000,137988.000000,54725.000000,599.024880)}
{pt3dadd(192456.000000,137700.000000,54700.000000,599.024880)}
{pt3dadd(192468.000000,137436.000000,54750.000000,599.024880)}
{pt3dadd(192348.000000,137232.000000,54725.000000,595.797215)}
{pt3dadd(192216.000000,136992.000000,54775.000000,592.569549)}
{pt3dadd(192156.000000,136764.000000,54775.000000,589.341883)}
{pt3dadd(192084.000000,136548.000000,54800.000000,586.114218)}
{pt3dadd(191988.000000,136368.000000,54925.000000,619.293118)}
{pt3dadd(191940.000000,136164.000000,54900.000000,652.472019)}
{pt3dadd(191868.000000,135996.000000,55025.000000,685.650919)}
{pt3dadd(191844.000000,135780.000000,55000.000000,718.829820)}
{pt3dadd(191820.000000,135588.000000,54950.000000,711.641533)}
{pt3dadd(191796.000000,135396.000000,54900.000000,704.453247)}
{pt3dadd(191772.000000,135204.000000,54850.000000,697.264960)}
{pt3dadd(191760.000000,135036.000000,54875.000000,690.076674)}
{pt3dadd(191676.000000,134904.000000,54875.000000,599.024880)}

{create adhoc3}
{access adhoc3}
{connect adhoc3(1), adhoc2(0)}
{nseg = 1}
{strdef color color = "White"}
{pt3dclear()}
{pt3dadd(191676.000000,134904.000000,54875.000000,599.024880)}
{pt3dadd(191160.000000,134712.000000,54125.000000,288.881586)}
{pt3dadd(190836.000000,134460.000000,53925.000000,272.832606)}
{pt3dadd(190608.000000,134232.000000,53825.000000,256.783626)}
{pt3dadd(190224.000000,134040.000000,53725.000000,240.734646)}
{pt3dadd(189972.000000,133872.000000,53625.000000,200.612214)}

{create adhoc4}
{access adhoc4}
{connect adhoc4(1), adhoc3(0)}
{nseg = 1}
{strdef color color = "White"}
{pt3dclear()}
{pt3dadd(189972.000000,133872.000000,53625.000000,200.612214)}
{pt3dadd(188784.000000,133692.000000,53700.000000,240.734646)}
{pt3dadd(188340.000000,133476.000000,53825.000000,209.574742)}
{pt3dadd(188280.000000,133296.000000,53950.000000,178.414839)}
{pt3dadd(188076.000000,133080.000000,54125.000000,147.254936)}
{pt3dadd(188004.000000,132828.000000,54250.000000,116.095032)}
{pt3dadd(187848.000000,132600.000000,54425.000000,159.291671)}
{pt3dadd(187848.000000,132396.000000,54500.000000,202.488309)}
{pt3dadd(187716.000000,132216.000000,54500.000000,245.684947)}
{pt3dadd(187548.000000,131448.000000,55050.000000,288.881586)}
{pt3dadd(187524.000000,131172.000000,55100.000000,236.816577)}
{pt3dadd(187536.000000,130884.000000,55025.000000,184.751568)}
{pt3dadd(187572.000000,130620.000000,55025.000000,132.686559)}
{pt3dadd(187308.000000,130380.000000,54850.000000,80.621550)}
{pt3dadd(187212.000000,130164.000000,54725.000000,80.621550)}
{pt3dadd(187116.000000,129912.000000,54775.000000,80.621550)}
{pt3dadd(187092.000000,129756.000000,54800.000000,80.621550)}
{pt3dadd(186960.000000,129792.000000,54825.000000,80.621550)}
{pt3dadd(186852.000000,129696.000000,54875.000000,77.396688)}
{pt3dadd(186720.000000,129648.000000,54925.000000,41.278248)}

{create adhoc5}
{access adhoc5}
{connect adhoc5(1), adhoc3(0)}
{nseg = 1}
{strdef color color = "White"}
{pt3dclear()}
{pt3dadd(189972.000000,133872.000000,53625.000000,200.612214)}
{pt3dadd(190464.000000,133584.000000,53575.000000,277.326324)}
{pt3dadd(190356.000000,133296.000000,53500.000000,268.178405)}
{pt3dadd(190176.000000,133020.000000,53450.000000,259.030485)}
{pt3dadd(189912.000000,132828.000000,53325.000000,249.882566)}
{pt3dadd(189720.000000,132588.000000,53300.000000,240.734646)}
{pt3dadd(189684.000000,132384.000000,53150.000000,240.734646)}
{pt3dadd(189636.000000,132180.000000,52950.000000,240.734646)}
{pt3dadd(189540.000000,131976.000000,52975.000000,240.734646)}
{pt3dadd(189408.000000,131772.000000,52925.000000,240.734646)}
{pt3dadd(189252.000000,131592.000000,52725.000000,240.734646)}
{pt3dadd(189228.000000,131400.000000,52575.000000,240.734646)}
{pt3dadd(189168.000000,131196.000000,52500.000000,240.734646)}
{pt3dadd(188952.000000,131004.000000,52400.000000,240.734646)}
{pt3dadd(188940.000000,130812.000000,52225.000000,252.771381)}
{pt3dadd(188724.000000,130608.000000,52175.000000,264.808116)}
{pt3dadd(188580.000000,130392.000000,52175.000000,276.844851)}
{pt3dadd(188352.000000,130164.000000,52050.000000,288.881586)}
{pt3dadd(188376.000000,129972.000000,51950.000000,264.808116)}
{pt3dadd(188088.000000,129744.000000,51575.000000,240.734646)}
{pt3dadd(188100.000000,129348.000000,51225.000000,277.326342)}

{create adhoc6}
{access adhoc6}
{connect adhoc6(1), adhoc5(0)}
{nseg = 1}
{strdef color color = "White"}
{pt3dclear()}
{pt3dadd(188100.000000,129348.000000,51225.000000,277.326342)}
{pt3dadd(188268.000000,128556.000000,51050.000000,200.612214)}
{pt3dadd(188364.000000,128328.000000,50775.000000,185.287671)}
{pt3dadd(188388.000000,127776.000000,50550.000000,169.963128)}
{pt3dadd(188244.000000,127392.000000,50300.000000,154.638585)}
{pt3dadd(187932.000000,127020.000000,50150.000000,139.314042)}
{pt3dadd(187752.000000,126732.000000,49925.000000,154.638585)}
{pt3dadd(187752.000000,126624.000000,49700.000000,169.963128)}
{pt3dadd(187596.000000,126552.000000,49525.000000,185.287671)}
{pt3dadd(187500.000000,126240.000000,49275.000000,200.612214)}
{pt3dadd(187596.000000,125964.000000,49100.000000,170.614548)}
{pt3dadd(187716.000000,125784.000000,48825.000000,140.616882)}
{pt3dadd(188016.000000,125772.000000,48525.000000,110.619216)}
{pt3dadd(188268.000000,125592.000000,48475.000000,80.621550)}
{pt3dadd(188472.000000,125496.000000,48400.000000,95.294673)}
{pt3dadd(188676.000000,125508.000000,48300.000000,109.967796)}
{pt3dadd(188868.000000,125520.000000,48300.000000,124.640919)}
{pt3dadd(189012.000000,125496.000000,48275.000000,139.314042)}
{pt3dadd(189180.000000,125496.000000,48450.000000,167.176836)}
{pt3dadd(189336.000000,125592.000000,48575.000000,77.396688)}

{create adhoc7}
{access adhoc7}
{connect adhoc7(1), adhoc5(0)}
{nseg = 1}
{strdef color color = "White"}
{pt3dclear()}
{pt3dadd(188100.000000,129348.000000,51225.000000,277.326342)}
{pt3dadd(187908.000000,129900.000000,51050.000000,139.314042)}
{pt3dadd(187884.000000,130164.000000,50750.000000,118.482332)}
{pt3dadd(187740.000000,130452.000000,50500.000000,97.650621)}
{pt3dadd(187752.000000,130644.000000,50500.000000,76.818910)}
{pt3dadd(187608.000000,130860.000000,50325.000000,55.987200)}
{pt3dadd(187632.000000,131052.000000,50300.000000,38.880000)}

{create adhoc8}
{access adhoc8}
{connect adhoc8(1), adhoc2(0)}
{nseg = 1}
{strdef color color = "White"}
{pt3dclear()}
{pt3dadd(191676.000000,134904.000000,54875.000000,599.024880)}
{pt3dadd(191760.000000,134652.000000,55100.000000,718.829820)}
{pt3dadd(191796.000000,134280.000000,55175.000000,670.907832)}
{pt3dadd(191736.000000,133992.000000,55150.000000,622.985844)}
{pt3dadd(191760.000000,133716.000000,55150.000000,575.063856)}
{pt3dadd(191820.000000,133464.000000,55125.000000,575.063856)}
{pt3dadd(191880.000000,133200.000000,55100.000000,575.063856)}
{pt3dadd(191940.000000,132960.000000,55075.000000,575.063856)}
{pt3dadd(191892.000000,132732.000000,55175.000000,575.063856)}
{pt3dadd(191844.000000,132444.000000,55275.000000,581.054112)}
{pt3dadd(191832.000000,132192.000000,55250.000000,587.044368)}
{pt3dadd(191820.000000,131952.000000,55275.000000,593.034624)}
{pt3dadd(191748.000000,131676.000000,55325.000000,599.024880)}
{pt3dadd(191676.000000,131532.000000,55325.000000,599.024880)}
{pt3dadd(191700.000000,131328.000000,55375.000000,599.024880)}
{pt3dadd(191724.000000,131160.000000,55425.000000,599.024880)}
{pt3dadd(191808.000000,131028.000000,55375.000000,599.024880)}
{pt3dadd(191676.000000,130920.000000,55325.000000,599.024880)}
{pt3dadd(191520.000000,130740.000000,55325.000000,599.024880)}
{pt3dadd(191580.000000,130572.000000,55400.000000,599.024880)}
{pt3dadd(191484.000000,130416.000000,55450.000000,599.024880)}
{pt3dadd(191388.000000,130260.000000,55500.000000,593.034624)}
{pt3dadd(191304.000000,130140.000000,55500.000000,587.044368)}
{pt3dadd(191244.000000,130008.000000,55425.000000,581.054112)}
{pt3dadd(191304.000000,129852.000000,55475.000000,575.063856)}
{pt3dadd(191268.000000,129672.000000,55475.000000,581.054112)}
{pt3dadd(191208.000000,129564.000000,55475.000000,587.044368)}
{pt3dadd(191148.000000,129336.000000,55475.000000,593.034624)}
{pt3dadd(191076.000000,129204.000000,55675.000000,599.024880)}
{pt3dadd(191076.000000,129072.000000,55625.000000,599.024880)}
{pt3dadd(191076.000000,128964.000000,55575.000000,599.024880)}
{pt3dadd(191076.000000,128856.000000,55525.000000,599.024880)}
{pt3dadd(191004.000000,128736.000000,55650.000000,599.024880)}
{pt3dadd(190932.000000,128628.000000,55650.000000,599.024880)}
{pt3dadd(190980.000000,128520.000000,55600.000000,599.024880)}
{pt3dadd(190920.000000,128400.000000,55625.000000,599.024880)}
{pt3dadd(190848.000000,128244.000000,55700.000000,599.024880)}
{pt3dadd(190776.000000,128064.000000,55750.000000,621.787810)}
{pt3dadd(190704.000000,127932.000000,55725.000000,644.550741)}
{pt3dadd(190632.000000,127776.000000,55675.000000,667.313671)}
{pt3dadd(190584.000000,127620.000000,55575.000000,690.076602)}
{pt3dadd(190536.000000,127512.000000,55525.000000,690.076620)}
{pt3dadd(190488.000000,127428.000000,55475.000000,690.076638)}
{pt3dadd(190488.000000,127308.000000,55550.000000,690.076656)}
{pt3dadd(190524.000000,127164.000000,55625.000000,690.076674)}
{pt3dadd(190476.000000,127044.000000,55500.000000,667.313725)}
{pt3dadd(190416.000000,126924.000000,55475.000000,644.550777)}
{pt3dadd(190476.000000,126768.000000,55475.000000,621.787828)}
{pt3dadd(190428.000000,126600.000000,55450.000000,599.024880)}
{pt3dadd(190380.000000,126480.000000,55425.000000,574.065504)}
{pt3dadd(190332.000000,126324.000000,55400.000000,549.106128)}
{pt3dadd(190284.000000,126156.000000,55375.000000,524.146752)}
{pt3dadd(190236.000000,126012.000000,55350.000000,499.187376)}
{pt3dadd(190188.000000,125856.000000,55425.000000,499.187376)}
{pt3dadd(190140.000000,125700.000000,55500.000000,499.187376)}
{pt3dadd(190176.000000,125544.000000,55550.000000,499.187376)}
{pt3dadd(190188.000000,125388.000000,55500.000000,499.187376)}
{pt3dadd(190188.000000,125196.000000,55475.000000,479.219886)}

{create adhoc9}
{access adhoc9}
{connect adhoc9(1), adhoc8(0)}
{nseg = 1}
{strdef color color = "White"}
{pt3dclear()}
{pt3dadd(190188.000000,125196.000000,55475.000000,479.219886)}
{pt3dadd(188712.000000,125028.000000,55500.000000,139.314042)}
{pt3dadd(188628.000000,124824.000000,55725.000000,146.279741)}
{pt3dadd(188448.000000,124620.000000,55950.000000,153.245439)}
{pt3dadd(188124.000000,124416.000000,56025.000000,160.211138)}
{pt3dadd(187572.000000,124308.000000,56025.000000,167.176836)}
{pt3dadd(187140.000000,124284.000000,56025.000000,203.893332)}
{pt3dadd(186816.000000,124428.000000,56275.000000,240.609828)}
{pt3dadd(186948.000000,124476.000000,56500.000000,277.326324)}
{pt3dadd(186804.000000,124200.000000,56725.000000,80.621550)}

{create adhoc10}
{access adhoc10}
{connect adhoc10(1), adhoc8(0)}
{nseg = 1}
{strdef color color = "White"}
{pt3dclear()}
{pt3dadd(190188.000000,125196.000000,55475.000000,479.219886)}
{pt3dadd(190224.000000,124812.000000,55400.000000,575.063856)}
{pt3dadd(189996.000000,124428.000000,55350.000000,587.044368)}
{pt3dadd(190080.000000,124116.000000,55375.000000,599.024880)}
{pt3dadd(190008.000000,123792.000000,55350.000000,599.024880)}
{pt3dadd(189948.000000,123516.000000,55300.000000,599.024880)}
{pt3dadd(189876.000000,123276.000000,55200.000000,599.024880)}
{pt3dadd(189780.000000,123072.000000,55225.000000,599.024880)}
{pt3dadd(189840.000000,122844.000000,55325.000000,575.063856)}

{create adhoc11}
{access adhoc11}
{connect adhoc11(1), adhoc10(0)}
{nseg = 1}
{strdef color color = "White"}
{pt3dclear()}
{pt3dadd(189840.000000,122844.000000,55325.000000,575.063856)}
{pt3dadd(188760.000000,122784.000000,53800.000000,200.612214)}
{pt3dadd(188352.000000,122688.000000,53425.000000,219.790742)}
{pt3dadd(188112.000000,122568.000000,53200.000000,238.969269)}
{pt3dadd(188028.000000,122508.000000,53025.000000,258.147797)}
{pt3dadd(187836.000000,122412.000000,52825.000000,277.326324)}
{pt3dadd(187644.000000,122340.000000,52600.000000,268.178405)}
{pt3dadd(187500.000000,122268.000000,52350.000000,259.030485)}
{pt3dadd(187308.000000,122052.000000,52125.000000,249.882566)}
{pt3dadd(187296.000000,121992.000000,51900.000000,240.734646)}
{pt3dadd(187116.000000,122040.000000,51650.000000,240.734646)}
{pt3dadd(187020.000000,122004.000000,51425.000000,240.734646)}
{pt3dadd(186948.000000,121920.000000,51150.000000,240.734646)}
{pt3dadd(186960.000000,121788.000000,50950.000000,240.734646)}
{pt3dadd(186768.000000,121656.000000,50775.000000,228.697915)}
{pt3dadd(186600.000000,121536.000000,50575.000000,216.661185)}
{pt3dadd(186528.000000,121428.000000,50325.000000,204.624455)}
{pt3dadd(186228.000000,121272.000000,50025.000000,192.587724)}
{pt3dadd(186240.000000,121188.000000,49775.000000,181.888404)}
{pt3dadd(186480.000000,121056.000000,49550.000000,171.189084)}
{pt3dadd(186552.000000,120900.000000,49325.000000,160.489764)}
{pt3dadd(186672.000000,120876.000000,49125.000000,133.741476)}

{create adhoc12}
{access adhoc12}
{connect adhoc12(1), adhoc10(0)}
{nseg = 1}
{strdef color color = "White"}
{pt3dclear()}
{pt3dadd(189840.000000,122844.000000,55325.000000,575.063856)}
{pt3dadd(189768.000000,122580.000000,55400.000000,599.024880)}
{pt3dadd(189684.000000,122364.000000,55450.000000,628.976115)}
{pt3dadd(189600.000000,122148.000000,55450.000000,658.927350)}
{pt3dadd(189564.000000,121944.000000,55450.000000,688.878585)}
{pt3dadd(189528.000000,121704.000000,55450.000000,718.829820)}
{pt3dadd(189492.000000,121476.000000,55450.000000,718.829820)}
{pt3dadd(189456.000000,121248.000000,55450.000000,718.829820)}
{pt3dadd(189384.000000,120972.000000,55425.000000,718.829820)}
{pt3dadd(189312.000000,120816.000000,55400.000000,718.829820)}
{pt3dadd(189312.000000,120648.000000,55375.000000,711.641533)}
{pt3dadd(189348.000000,120480.000000,55350.000000,704.453247)}
{pt3dadd(189384.000000,120288.000000,55325.000000,697.264960)}
{pt3dadd(189336.000000,120072.000000,55300.000000,690.076674)}
{pt3dadd(189288.000000,119916.000000,55275.000000,697.264960)}
{pt3dadd(189240.000000,119796.000000,55250.000000,704.453247)}
{pt3dadd(189264.000000,119604.000000,55275.000000,711.641533)}
{pt3dadd(189288.000000,119460.000000,55300.000000,718.829820)}
{pt3dadd(189204.000000,119316.000000,55300.000000,688.878585)}
{pt3dadd(189120.000000,119196.000000,55300.000000,658.927350)}
{pt3dadd(189036.000000,119064.000000,55300.000000,628.976115)}
{pt3dadd(189096.000000,118932.000000,55350.000000,599.024880)}
{pt3dadd(189156.000000,118824.000000,55400.000000,575.063856)}

{create adhoc13}
{access adhoc13}
{connect adhoc13(1), adhoc12(0)}
{nseg = 1}
{strdef color color = "White"}
{pt3dclear()}
{pt3dadd(189156.000000,118824.000000,55400.000000,575.063856)}
{pt3dadd(188376.000000,118716.000000,54350.000000,240.734646)}
{pt3dadd(188316.000000,118560.000000,54000.000000,249.882570)}
{pt3dadd(188124.000000,118356.000000,53725.000000,259.030494)}
{pt3dadd(188052.000000,118368.000000,53425.000000,268.178418)}
{pt3dadd(187992.000000,118248.000000,53100.000000,277.326342)}
{pt3dadd(188016.000000,118008.000000,52800.000000,265.771075)}
{pt3dadd(188076.000000,117804.000000,52525.000000,254.215809)}
{pt3dadd(188004.000000,117564.000000,52200.000000,242.660543)}
{pt3dadd(187932.000000,117348.000000,51950.000000,231.105276)}
{pt3dadd(187836.000000,117096.000000,51950.000000,233.512618)}
{pt3dadd(187836.000000,116880.000000,52025.000000,235.919961)}
{pt3dadd(187872.000000,116652.000000,51975.000000,238.327304)}
{pt3dadd(187740.000000,116460.000000,51950.000000,240.734646)}
{pt3dadd(187704.000000,116244.000000,51800.000000,220.673430)}
{pt3dadd(187680.000000,116040.000000,51725.000000,200.612214)}
{pt3dadd(187644.000000,115812.000000,51750.000000,167.176836)}

{create adhoc14}
{access adhoc14}
{connect adhoc14(1), adhoc13(0)}
{nseg = 1}
{strdef color color = "White"}
{pt3dclear()}
{pt3dadd(187644.000000,115812.000000,51750.000000,167.176836)}
{pt3dadd(187872.000000,115500.000000,51550.000000,139.314042)}
{pt3dadd(187908.000000,115332.000000,51500.000000,146.279741)}
{pt3dadd(187848.000000,115104.000000,51575.000000,153.245439)}
{pt3dadd(187920.000000,114888.000000,51400.000000,160.211138)}
{pt3dadd(187872.000000,114708.000000,51475.000000,167.176836)}
{pt3dadd(187752.000000,114552.000000,51425.000000,167.176836)}
{pt3dadd(187620.000000,114432.000000,51375.000000,167.176836)}
{pt3dadd(187452.000000,114264.000000,51425.000000,167.176836)}
{pt3dadd(187440.000000,114108.000000,51450.000000,167.176836)}
{pt3dadd(187392.000000,113904.000000,51525.000000,185.566288)}
{pt3dadd(187248.000000,113724.000000,51550.000000,203.955741)}
{pt3dadd(187236.000000,113532.000000,51425.000000,222.345193)}
{pt3dadd(187080.000000,113364.000000,51075.000000,240.734646)}
{pt3dadd(187020.000000,113196.000000,50850.000000,213.986354)}
{pt3dadd(187008.000000,113016.000000,50700.000000,187.238061)}
{pt3dadd(187032.000000,112968.000000,50400.000000,160.489769)}
{pt3dadd(187092.000000,112812.000000,50125.000000,133.741476)}
{pt3dadd(187188.000000,112560.000000,49900.000000,129.329865)}
{pt3dadd(187392.000000,112284.000000,49675.000000,124.918254)}
{pt3dadd(187536.000000,112116.000000,49450.000000,120.506643)}
{pt3dadd(187536.000000,111972.000000,49200.000000,116.095032)}
{pt3dadd(187596.000000,111912.000000,49025.000000,96.745860)}
{pt3dadd(187764.000000,111816.000000,48850.000000,67.184640)}

{create adhoc15}
{access adhoc15}
{connect adhoc15(1), adhoc13(0)}
{nseg = 1}
{strdef color color = "White"}
{pt3dclear()}
{pt3dadd(187644.000000,115812.000000,51750.000000,167.176836)}
{pt3dadd(187092.000000,115716.000000,51800.000000,139.314042)}
{pt3dadd(186888.000000,115524.000000,51700.000000,164.669193)}
{pt3dadd(186792.000000,115320.000000,51250.000000,190.024344)}
{pt3dadd(187236.000000,115284.000000,50950.000000,215.379495)}
{pt3dadd(187272.000000,115464.000000,50650.000000,240.734646)}
{pt3dadd(187212.000000,115392.000000,50325.000000,55.987200)}

{create adhoc16}
{access adhoc16}
{connect adhoc16(1), adhoc12(0)}
{nseg = 1}
{strdef color color = "White"}
{pt3dclear()}
{pt3dadd(189156.000000,118824.000000,55400.000000,575.063856)}
{pt3dadd(189108.000000,118560.000000,55700.000000,499.187376)}
{pt3dadd(189108.000000,118320.000000,55900.000000,499.187376)}
{pt3dadd(189144.000000,118128.000000,56025.000000,499.187376)}
{pt3dadd(189036.000000,117912.000000,55975.000000,499.187376)}
{pt3dadd(188952.000000,117660.000000,56050.000000,499.187376)}
{pt3dadd(188832.000000,117384.000000,56200.000000,499.187376)}
{pt3dadd(188868.000000,117144.000000,56275.000000,499.187376)}
{pt3dadd(188844.000000,116952.000000,56500.000000,499.187376)}
{pt3dadd(188976.000000,116736.000000,56550.000000,499.187376)}
{pt3dadd(189024.000000,116544.000000,56675.000000,499.187376)}
{pt3dadd(189060.000000,116328.000000,56925.000000,478.387903)}
{pt3dadd(189072.000000,116112.000000,57025.000000,457.588431)}
{pt3dadd(189096.000000,115920.000000,56975.000000,436.788958)}
{pt3dadd(189108.000000,115704.000000,57275.000000,415.989486)}
{pt3dadd(189072.000000,115536.000000,57550.000000,431.797086)}
{pt3dadd(189120.000000,115356.000000,57625.000000,447.604686)}
{pt3dadd(189180.000000,115164.000000,57775.000000,463.412286)}
{pt3dadd(189108.000000,114984.000000,57825.000000,479.219886)}
{pt3dadd(189108.000000,114768.000000,58150.000000,463.412286)}
{pt3dadd(189204.000000,114564.000000,58200.000000,447.604686)}
{pt3dadd(189132.000000,114336.000000,58275.000000,431.797086)}
{pt3dadd(189108.000000,114144.000000,58475.000000,415.989486)}
{pt3dadd(189156.000000,113976.000000,58750.000000,431.797086)}
{pt3dadd(189144.000000,113760.000000,58775.000000,447.604686)}
{pt3dadd(189072.000000,113580.000000,58900.000000,463.412286)}
{pt3dadd(189000.000000,113400.000000,59200.000000,479.219886)}
{pt3dadd(189048.000000,113220.000000,59400.000000,499.187376)}

{create adhoc17}
{access adhoc17}
{connect adhoc17(1), adhoc16(0)}
{nseg = 1}
{strdef color color = "White"}
{pt3dclear()}
{pt3dadd(189048.000000,113220.000000,59400.000000,499.187376)}
{pt3dadd(188508.000000,113064.000000,60925.000000,277.326324)}
{pt3dadd(188280.000000,112848.000000,61150.000000,258.147797)}
{pt3dadd(187968.000000,112776.000000,61525.000000,238.969269)}
{pt3dadd(187656.000000,112548.000000,61850.000000,219.790742)}
{pt3dadd(187680.000000,112548.000000,62075.000000,200.612214)}
{pt3dadd(187392.000000,112380.000000,62325.000000,210.642822)}
{pt3dadd(187236.000000,112428.000000,62575.000000,220.673430)}
{pt3dadd(187152.000000,112620.000000,62875.000000,230.704038)}
{pt3dadd(186912.000000,112944.000000,63075.000000,240.734646)}
{pt3dadd(186828.000000,113244.000000,63275.000000,216.215376)}
{pt3dadd(186636.000000,113268.000000,63525.000000,191.696106)}
{pt3dadd(186396.000000,113136.000000,63725.000000,167.176836)}
{pt3dadd(186264.000000,112968.000000,63800.000000,116.095032)}

{create adhoc18}
{access adhoc18}
{connect adhoc18(1), adhoc16(0)}
{nseg = 1}
{strdef color color = "White"}
{pt3dclear()}
{pt3dadd(189048.000000,113220.000000,59400.000000,499.187376)}
{pt3dadd(188916.000000,112908.000000,59300.000000,599.024880)}
{pt3dadd(188700.000000,112596.000000,59450.000000,575.063856)}
{pt3dadd(188568.000000,112260.000000,59450.000000,551.102864)}
{pt3dadd(188436.000000,111996.000000,59525.000000,527.141871)}
{pt3dadd(188340.000000,111756.000000,59550.000000,503.180878)}
{pt3dadd(187980.000000,111516.000000,59475.000000,479.219886)}
{pt3dadd(187920.000000,111288.000000,59450.000000,399.349908)}

{create adhoc19}
{access adhoc19}
{connect adhoc19(1), adhoc18(0)}
{nseg = 1}
{strdef color color = "White"}
{pt3dclear()}
{pt3dadd(187920.000000,111288.000000,59450.000000,399.349908)}
{pt3dadd(188556.000000,111084.000000,59800.000000,346.657896)}
{pt3dadd(188616.000000,110808.000000,60075.000000,346.657896)}
{pt3dadd(188328.000000,110580.000000,60200.000000,346.657896)}
{pt3dadd(188148.000000,110364.000000,60250.000000,346.657896)}
{pt3dadd(188076.000000,110136.000000,60300.000000,346.657896)}
{pt3dadd(188004.000000,109908.000000,60475.000000,326.551743)}
{pt3dadd(187944.000000,109692.000000,60475.000000,306.445590)}
{pt3dadd(187692.000000,109452.000000,60625.000000,286.339437)}
{pt3dadd(187500.000000,109224.000000,60575.000000,266.233284)}
{pt3dadd(187392.000000,109008.000000,60725.000000,271.895359)}
{pt3dadd(187308.000000,108792.000000,60875.000000,277.557435)}
{pt3dadd(187140.000000,108576.000000,60850.000000,283.219511)}
{pt3dadd(186996.000000,108372.000000,60975.000000,288.881586)}
{pt3dadd(186924.000000,108192.000000,61025.000000,288.881586)}
{pt3dadd(186804.000000,107988.000000,61300.000000,288.881586)}
{pt3dadd(186624.000000,107880.000000,61450.000000,288.881586)}
{pt3dadd(186420.000000,107784.000000,61600.000000,288.881586)}
{pt3dadd(186216.000000,107688.000000,61750.000000,288.881586)}
{pt3dadd(186036.000000,107736.000000,61900.000000,288.881586)}
{pt3dadd(185796.000000,107592.000000,62075.000000,288.881586)}
{pt3dadd(185616.000000,107580.000000,62200.000000,288.881586)}
{pt3dadd(185412.000000,107568.000000,62300.000000,277.326324)}
{pt3dadd(185220.000000,107604.000000,62500.000000,288.881586)}

{create adhoc20}
{access adhoc20}
{connect adhoc20(1), adhoc19(0)}
{nseg = 1}
{strdef color color = "White"}
{pt3dclear()}
{pt3dadd(185220.000000,107604.000000,62500.000000,288.881586)}
{pt3dadd(184896.000000,108360.000000,63325.000000,200.612214)}
{pt3dadd(184692.000000,108672.000000,64100.000000,200.612214)}
{pt3dadd(184488.000000,109044.000000,64475.000000,200.612214)}
{pt3dadd(184476.000000,109536.000000,64850.000000,192.587724)}

{create adhoc21}
{access adhoc21}
{connect adhoc21(1), adhoc20(0)}
{nseg = 1}
{strdef color color = "White"}
{pt3dclear()}
{pt3dadd(184476.000000,109536.000000,64850.000000,192.587724)}
{pt3dadd(184860.000000,110172.000000,65175.000000,139.314042)}
{pt3dadd(184968.000000,110520.000000,65425.000000,167.176836)}

{create adhoc22}
{access adhoc22}
{connect adhoc22(1), adhoc20(0)}
{nseg = 1}
{strdef color color = "White"}
{pt3dclear()}
{pt3dadd(184476.000000,109536.000000,64850.000000,192.587724)}
{pt3dadd(184404.000000,109356.000000,65150.000000,200.612214)}
{pt3dadd(184392.000000,109284.000000,65350.000000,180.179490)}
{pt3dadd(184440.000000,109092.000000,65625.000000,159.746766)}
{pt3dadd(184668.000000,108648.000000,65825.000000,139.314042)}
{pt3dadd(184836.000000,108540.000000,66025.000000,192.587724)}

{create adhoc23}
{access adhoc23}
{connect adhoc23(1), adhoc19(0)}
{nseg = 1}
{strdef color color = "White"}
{pt3dclear()}
{pt3dadd(185220.000000,107604.000000,62500.000000,288.881586)}
{pt3dadd(184752.000000,107268.000000,62325.000000,240.734646)}
{pt3dadd(184464.000000,106620.000000,62025.000000,238.327304)}
{pt3dadd(184248.000000,106212.000000,61875.000000,235.919961)}
{pt3dadd(184032.000000,105876.000000,61900.000000,233.512618)}
{pt3dadd(183816.000000,105456.000000,61975.000000,231.105276)}
{pt3dadd(183612.000000,105204.000000,61975.000000,231.105276)}
{pt3dadd(183432.000000,104628.000000,62050.000000,231.105276)}
{pt3dadd(183336.000000,104556.000000,61900.000000,231.105276)}
{pt3dadd(183564.000000,104364.000000,61850.000000,231.105276)}
{pt3dadd(183720.000000,104136.000000,61875.000000,240.734646)}
{pt3dadd(183732.000000,103740.000000,61800.000000,240.734646)}

{create adhoc24}
{access adhoc24}
{connect adhoc24(1), adhoc18(0)}
{nseg = 1}
{strdef color color = "White"}
{pt3dclear()}
{pt3dadd(187920.000000,111288.000000,59450.000000,399.349908)}
{pt3dadd(187476.000000,111048.000000,59200.000000,346.657896)}
{pt3dadd(187260.000000,110796.000000,59125.000000,327.399126)}
{pt3dadd(187056.000000,110532.000000,59025.000000,308.140356)}
{pt3dadd(186984.000000,110292.000000,58825.000000,288.881586)}
{pt3dadd(186828.000000,110040.000000,58600.000000,303.325664)}
{pt3dadd(186696.000000,109800.000000,58375.000000,317.769741)}
{pt3dadd(186492.000000,109536.000000,58250.000000,332.213819)}
{pt3dadd(186408.000000,109332.000000,58200.000000,346.657896)}
{pt3dadd(186252.000000,109188.000000,58100.000000,332.213819)}
{pt3dadd(186180.000000,108996.000000,57875.000000,317.769741)}
{pt3dadd(186000.000000,108804.000000,57525.000000,303.325664)}
{pt3dadd(185844.000000,108420.000000,57225.000000,288.881586)}
{pt3dadd(185724.000000,107664.000000,56950.000000,288.881586)}
{pt3dadd(185688.000000,107340.000000,56875.000000,288.881586)}
{pt3dadd(185772.000000,107016.000000,56725.000000,288.881586)}
{pt3dadd(185628.000000,106764.000000,56775.000000,288.881586)}
{pt3dadd(185448.000000,106536.000000,56725.000000,285.992771)}
{pt3dadd(185364.000000,106308.000000,56625.000000,283.103955)}
{pt3dadd(185220.000000,106044.000000,56575.000000,280.215140)}
{pt3dadd(185280.000000,105792.000000,56525.000000,277.326324)}
{pt3dadd(185112.000000,105576.000000,56500.000000,268.178405)}
{pt3dadd(185124.000000,105360.000000,56575.000000,259.030485)}
{pt3dadd(185088.000000,105168.000000,56475.000000,249.882566)}
{pt3dadd(185124.000000,104988.000000,56575.000000,240.734646)}
{pt3dadd(185136.000000,104784.000000,56450.000000,238.327304)}
{pt3dadd(185076.000000,104604.000000,56225.000000,235.919961)}
{pt3dadd(185052.000000,104412.000000,56250.000000,233.512618)}
{pt3dadd(185088.000000,104316.000000,55825.000000,231.105276)}
{pt3dadd(185004.000000,103980.000000,55500.000000,245.549354)}
{pt3dadd(185040.000000,103848.000000,55150.000000,259.993431)}
{pt3dadd(185124.000000,103800.000000,54825.000000,274.437509)}
{pt3dadd(185088.000000,103752.000000,54500.000000,288.881586)}
{pt3dadd(185220.000000,103752.000000,54150.000000,251.489700)}
{pt3dadd(185208.000000,103848.000000,53900.000000,214.097814)}
{pt3dadd(185328.000000,103920.000000,53550.000000,176.705928)}
{pt3dadd(185508.000000,103848.000000,53425.000000,139.314042)}
{pt3dadd(185940.000000,104136.000000,53250.000000,146.279741)}
{pt3dadd(186120.000000,103992.000000,53075.000000,153.245439)}
{pt3dadd(186216.000000,103944.000000,52850.000000,160.211138)}
{pt3dadd(186312.000000,104016.000000,52600.000000,167.176836)}
{pt3dadd(186384.000000,104352.000000,52325.000000,148.601637)}
{pt3dadd(186468.000000,104280.000000,52025.000000,130.026438)}
{pt3dadd(186360.000000,104340.000000,51775.000000,111.451239)}
{pt3dadd(186432.000000,104604.000000,51525.000000,92.876040)}
{pt3dadd(186276.000000,104748.000000,51150.000000,44.789760)}

{create adhoc25}
{access adhoc25}
{connect adhoc25(1), adhoc1(0)}
{nseg = 1}
{strdef color color = "White"}
{pt3dclear()}
{pt3dadd(192864.000000,145476.000000,54525.000000,552.061332)}
{pt3dadd(192264.000000,145764.000000,54250.000000,479.219886)}
{pt3dadd(192156.000000,146076.000000,54050.000000,584.648280)}
{pt3dadd(192048.000000,146436.000000,54200.000000,690.076674)}
{pt3dadd(191736.000000,146928.000000,53650.000000,862.595802)}

{create adhoc26}
{access adhoc26}
{connect adhoc26(1), adhoc25(0)}
{nseg = 1}
{strdef color color = "White"}
{pt3dclear()}
{pt3dadd(191736.000000,146928.000000,53650.000000,862.595802)}
{pt3dadd(190344.000000,146772.000000,51200.000000,288.881586)}
{pt3dadd(190500.000000,146400.000000,50775.000000,341.458034)}
{pt3dadd(190476.000000,146136.000000,50400.000000,394.034481)}
{pt3dadd(190452.000000,145884.000000,50200.000000,446.610929)}
{pt3dadd(190224.000000,145644.000000,49850.000000,499.187376)}
{pt3dadd(190236.000000,145404.000000,49500.000000,474.228009)}
{pt3dadd(190044.000000,145164.000000,49150.000000,449.268642)}
{pt3dadd(189768.000000,144852.000000,48425.000000,424.309275)}
{pt3dadd(189396.000000,144660.000000,48250.000000,399.349908)}
{pt3dadd(189324.000000,145020.000000,47800.000000,371.732827)}
{pt3dadd(188868.000000,144972.000000,47350.000000,344.115747)}
{pt3dadd(188748.000000,145212.000000,46925.000000,316.498667)}
{pt3dadd(188640.000000,145428.000000,46575.000000,288.881586)}
{pt3dadd(188040.000000,146004.000000,46300.000000,276.844851)}
{pt3dadd(187584.000000,146388.000000,45975.000000,264.808116)}
{pt3dadd(187476.000000,147108.000000,45775.000000,252.771381)}
{pt3dadd(187380.000000,147756.000000,45525.000000,240.734646)}
{pt3dadd(187128.000000,148128.000000,45375.000000,230.704038)}
{pt3dadd(187188.000000,148428.000000,45200.000000,220.673430)}
{pt3dadd(187152.000000,148728.000000,45125.000000,210.642822)}
{pt3dadd(187284.000000,148992.000000,44925.000000,200.612214)}
{pt3dadd(187416.000000,149208.000000,44725.000000,185.287671)}
{pt3dadd(187380.000000,149508.000000,44675.000000,169.963128)}
{pt3dadd(187380.000000,149700.000000,44650.000000,154.638585)}
{pt3dadd(187272.000000,149916.000000,44600.000000,139.314042)}
{pt3dadd(187164.000000,150120.000000,44550.000000,146.279741)}
{pt3dadd(186936.000000,150324.000000,44300.000000,153.245439)}
{pt3dadd(186684.000000,150492.000000,44325.000000,160.211138)}
{pt3dadd(186492.000000,150672.000000,44225.000000,167.176836)}
{pt3dadd(186240.000000,150552.000000,44125.000000,167.176836)}
{pt3dadd(185928.000000,150792.000000,43925.000000,92.876040)}

{create adhoc27}
{access adhoc27}
{connect adhoc27(1), adhoc25(0)}
{nseg = 1}
{strdef color color = "White"}
{pt3dclear()}
{pt3dadd(191736.000000,146928.000000,53650.000000,862.595802)}
{pt3dadd(191724.000000,147192.000000,53425.000000,862.595802)}
{pt3dadd(191952.000000,147432.000000,53525.000000,862.595802)}
{pt3dadd(191976.000000,147744.000000,53350.000000,862.595802)}
{pt3dadd(192024.000000,148044.000000,53425.000000,862.595802)}
{pt3dadd(192072.000000,148380.000000,53575.000000,862.595802)}
{pt3dadd(191964.000000,148740.000000,53450.000000,862.595802)}
{pt3dadd(191856.000000,149052.000000,53325.000000,862.595802)}
{pt3dadd(191844.000000,149364.000000,53450.000000,862.595802)}
{pt3dadd(191664.000000,149664.000000,53200.000000,862.595802)}
{pt3dadd(191604.000000,149988.000000,53300.000000,826.654307)}
{pt3dadd(191568.000000,150276.000000,53425.000000,790.712811)}
{pt3dadd(191388.000000,150528.000000,53350.000000,754.771316)}
{pt3dadd(191208.000000,150756.000000,53275.000000,718.829820)}
{pt3dadd(191280.000000,151032.000000,53550.000000,718.829820)}
{pt3dadd(191244.000000,151332.000000,53525.000000,718.829820)}
{pt3dadd(191232.000000,151584.000000,53525.000000,718.829820)}
{pt3dadd(190992.000000,151872.000000,53525.000000,718.829820)}
{pt3dadd(190836.000000,152184.000000,53550.000000,754.771316)}
{pt3dadd(190932.000000,152460.000000,53600.000000,790.712811)}
{pt3dadd(191028.000000,152748.000000,53650.000000,826.654307)}
{pt3dadd(191124.000000,153000.000000,53700.000000,862.595802)}
{pt3dadd(191088.000000,153252.000000,53925.000000,895.374441)}
{pt3dadd(190824.000000,153528.000000,53775.000000,928.153080)}
{pt3dadd(190764.000000,153852.000000,53925.000000,960.931719)}
{pt3dadd(190908.000000,154044.000000,54000.000000,993.710358)}
{pt3dadd(191052.000000,154332.000000,54075.000000,960.931719)}
{pt3dadd(190788.000000,154560.000000,54075.000000,928.153080)}
{pt3dadd(191160.000000,154788.000000,54525.000000,895.374441)}
{pt3dadd(191388.000000,155088.000000,54325.000000,862.595802)}
{pt3dadd(191484.000000,155352.000000,54800.000000,862.595802)}
{pt3dadd(191424.000000,155640.000000,54800.000000,862.595802)}
{pt3dadd(191472.000000,155928.000000,54375.000000,862.595802)}
{pt3dadd(191700.000000,156252.000000,54850.000000,862.595802)}
{pt3dadd(191568.000000,156468.000000,54875.000000,895.374441)}
{pt3dadd(191712.000000,156732.000000,55150.000000,928.153080)}
{pt3dadd(191808.000000,156924.000000,55200.000000,960.931719)}
{pt3dadd(191904.000000,157212.000000,55250.000000,993.710358)}
{pt3dadd(192000.000000,157500.000000,55300.000000,1055.817239)}
{pt3dadd(192096.000000,157824.000000,55350.000000,1117.924119)}
{pt3dadd(192192.000000,158172.000000,55400.000000,1180.031000)}
{pt3dadd(192156.000000,158484.000000,55200.000000,1242.137880)}
{pt3dadd(192348.000000,158784.000000,55125.000000,1190.382147)}
{pt3dadd(192396.000000,159084.000000,55350.000000,1138.626414)}
{pt3dadd(192540.000000,159444.000000,54975.000000,1086.870681)}
{pt3dadd(192684.000000,159744.000000,55075.000000,1035.114948)}
{pt3dadd(192828.000000,160068.000000,55175.000000,1035.114948)}
{pt3dadd(192900.000000,160368.000000,55100.000000,1035.114948)}
{pt3dadd(192972.000000,160656.000000,55300.000000,1035.114948)}
{pt3dadd(193020.000000,161016.000000,55375.000000,1035.114948)}
{pt3dadd(193068.000000,161328.000000,55375.000000,991.985162)}
{pt3dadd(193116.000000,161628.000000,55375.000000,948.855375)}
{pt3dadd(193212.000000,161988.000000,55425.000000,905.725589)}
{pt3dadd(193308.000000,162252.000000,55475.000000,862.595802)}
{pt3dadd(193404.000000,162600.000000,55525.000000,875.897708)}
{pt3dadd(193464.000000,162852.000000,55450.000000,889.199613)}
{pt3dadd(193452.000000,163128.000000,55750.000000,902.501519)}
{pt3dadd(193368.000000,163404.000000,55825.000000,915.803424)}
{pt3dadd(193284.000000,163728.000000,55600.000000,955.573932)}
{pt3dadd(193200.000000,164112.000000,55375.000000,995.344440)}
{pt3dadd(192960.000000,164400.000000,55325.000000,1035.114948)}
{pt3dadd(192900.000000,164952.000000,55100.000000,1035.114948)}

{create adhoc28}
{access adhoc28}
{connect adhoc28(1), adhoc27(0)}
{nseg = 1}
{strdef color color = "White"}
{pt3dclear()}
{pt3dadd(192900.000000,164952.000000,55100.000000,1035.114948)}
{pt3dadd(191424.000000,164604.000000,52750.000000,499.187376)}
{pt3dadd(191460.000000,164340.000000,52050.000000,478.387903)}
{pt3dadd(191112.000000,164052.000000,51850.000000,457.588431)}
{pt3dadd(190944.000000,163800.000000,51650.000000,436.788958)}
{pt3dadd(190692.000000,163584.000000,51175.000000,415.989486)}
{pt3dadd(190524.000000,163332.000000,50900.000000,398.656589)}
{pt3dadd(190380.000000,163260.000000,50600.000000,381.323691)}
{pt3dadd(190008.000000,162888.000000,50250.000000,363.990794)}
{pt3dadd(189780.000000,162612.000000,50000.000000,346.657896)}
{pt3dadd(189396.000000,162672.000000,49675.000000,346.657896)}

{create adhoc29}
{access adhoc29}
{connect adhoc29(1), adhoc28(0)}
{nseg = 1}
{strdef color color = "White"}
{pt3dclear()}
{pt3dadd(189396.000000,162672.000000,49675.000000,346.657896)}
{pt3dadd(188808.000000,163536.000000,49450.000000,415.989486)}
{pt3dadd(188652.000000,163596.000000,49350.000000,384.212511)}
{pt3dadd(188136.000000,163728.000000,49025.000000,352.435536)}
{pt3dadd(187788.000000,163932.000000,48675.000000,320.658561)}
{pt3dadd(187680.000000,164136.000000,48325.000000,288.881586)}
{pt3dadd(187572.000000,164508.000000,48050.000000,285.992771)}
{pt3dadd(187356.000000,164640.000000,47800.000000,283.103955)}
{pt3dadd(187068.000000,164700.000000,47625.000000,280.215140)}
{pt3dadd(186924.000000,164892.000000,47375.000000,277.326324)}
{pt3dadd(186156.000000,164952.000000,47175.000000,291.192642)}
{pt3dadd(185964.000000,165132.000000,47025.000000,305.058960)}
{pt3dadd(185796.000000,165276.000000,46850.000000,318.925278)}
{pt3dadd(185604.000000,165204.000000,46900.000000,332.791596)}
{pt3dadd(185400.000000,165288.000000,46850.000000,309.777359)}
{pt3dadd(185196.000000,165300.000000,46800.000000,286.763121)}
{pt3dadd(185016.000000,165348.000000,46700.000000,263.748884)}
{pt3dadd(184812.000000,165420.000000,46625.000000,240.734646)}
{pt3dadd(184620.000000,165456.000000,46550.000000,228.697915)}
{pt3dadd(184404.000000,165660.000000,46525.000000,216.661185)}
{pt3dadd(184188.000000,165768.000000,46500.000000,204.624455)}
{pt3dadd(184020.000000,165888.000000,46450.000000,192.587724)}
{pt3dadd(183828.000000,165744.000000,46575.000000,194.593846)}
{pt3dadd(183612.000000,165756.000000,46625.000000,196.599969)}
{pt3dadd(183420.000000,165876.000000,46550.000000,198.606091)}
{pt3dadd(183216.000000,165864.000000,46450.000000,200.612214)}
{pt3dadd(183012.000000,165912.000000,46425.000000,190.581602)}
{pt3dadd(182832.000000,166044.000000,46400.000000,180.550989)}
{pt3dadd(182628.000000,166008.000000,46375.000000,170.520377)}
{pt3dadd(182460.000000,166152.000000,46375.000000,160.489764)}
{pt3dadd(182280.000000,166212.000000,46425.000000,144.553788)}
{pt3dadd(182100.000000,166368.000000,46400.000000,128.617812)}
{pt3dadd(181932.000000,166428.000000,46450.000000,112.681836)}
{pt3dadd(181740.000000,166620.000000,46350.000000,96.745860)}
{pt3dadd(181560.000000,166800.000000,46275.000000,132.743057)}
{pt3dadd(181356.000000,166908.000000,46200.000000,168.740253)}
{pt3dadd(181344.000000,167028.000000,46000.000000,204.737450)}
{pt3dadd(181344.000000,167208.000000,46100.000000,240.734646)}
{pt3dadd(181344.000000,167472.000000,46025.000000,240.734646)}
{pt3dadd(181380.000000,167688.000000,45975.000000,240.734646)}
{pt3dadd(181416.000000,167916.000000,45925.000000,200.612214)}

{create adhoc30}
{access adhoc30}
{connect adhoc30(1), adhoc28(0)}
{nseg = 1}
{strdef color color = "White"}
{pt3dclear()}
{pt3dadd(189396.000000,162672.000000,49675.000000,346.657896)}
{pt3dadd(189504.000000,162036.000000,49400.000000,288.881586)}
{pt3dadd(188940.000000,161172.000000,49000.000000,320.658561)}
{pt3dadd(188820.000000,160920.000000,48750.000000,352.435536)}
{pt3dadd(188652.000000,160644.000000,48925.000000,384.212511)}
{pt3dadd(188580.000000,160392.000000,48975.000000,415.989486)}
{pt3dadd(188472.000000,160188.000000,48725.000000,398.656589)}
{pt3dadd(188340.000000,159960.000000,48425.000000,381.323691)}
{pt3dadd(188184.000000,159744.000000,48475.000000,363.990794)}
{pt3dadd(188136.000000,159516.000000,48650.000000,346.657896)}
{pt3dadd(187884.000000,159276.000000,48675.000000,346.657896)}
{pt3dadd(187764.000000,159120.000000,48575.000000,346.657896)}
{pt3dadd(187476.000000,158928.000000,48475.000000,346.657896)}
{pt3dadd(187392.000000,158724.000000,48550.000000,346.657896)}
{pt3dadd(186972.000000,158508.000000,48625.000000,346.657896)}
{pt3dadd(186888.000000,158268.000000,48575.000000,346.657896)}
{pt3dadd(186684.000000,158268.000000,48750.000000,346.657896)}
{pt3dadd(186456.000000,158148.000000,48825.000000,346.657896)}
{pt3dadd(186240.000000,157992.000000,48800.000000,332.213819)}
{pt3dadd(186000.000000,157980.000000,48675.000000,317.769741)}
{pt3dadd(185808.000000,157872.000000,48625.000000,303.325664)}
{pt3dadd(185604.000000,157932.000000,48650.000000,288.881586)}
{pt3dadd(185388.000000,157752.000000,48725.000000,245.684947)}
{pt3dadd(185196.000000,157596.000000,48350.000000,202.488309)}
{pt3dadd(184908.000000,157224.000000,48275.000000,159.291671)}
{pt3dadd(184716.000000,156888.000000,48125.000000,116.095032)}
{pt3dadd(184560.000000,156816.000000,48175.000000,113.773131)}
{pt3dadd(184332.000000,156768.000000,48200.000000,111.451230)}
{pt3dadd(184104.000000,156444.000000,48150.000000,116.095032)}

{create adhoc31}
{access adhoc31}
{connect adhoc31(1), adhoc27(0)}
{nseg = 1}
{strdef color color = "White"}
{pt3dclear()}
{pt3dadd(192900.000000,164952.000000,55100.000000,1035.114948)}
{pt3dadd(192924.000000,165252.000000,55075.000000,1242.137880)}
{pt3dadd(192888.000000,165564.000000,54750.000000,1304.244761)}
{pt3dadd(192876.000000,165876.000000,54925.000000,1366.351641)}
{pt3dadd(192864.000000,166116.000000,55100.000000,1428.458522)}
{pt3dadd(192852.000000,166392.000000,55250.000000,1490.565402)}
{pt3dadd(193128.000000,166656.000000,55500.000000,1490.565402)}
{pt3dadd(193068.000000,166992.000000,55500.000000,1490.565402)}
{pt3dadd(193008.000000,167280.000000,55500.000000,1490.565402)}
{pt3dadd(192948.000000,167496.000000,55500.000000,1490.565402)}
{pt3dadd(192888.000000,167736.000000,55500.000000,1428.458522)}
{pt3dadd(192828.000000,167976.000000,55400.000000,1366.351641)}
{pt3dadd(192948.000000,168204.000000,55400.000000,1304.244761)}
{pt3dadd(193020.000000,168516.000000,55350.000000,1242.137880)}
{pt3dadd(193188.000000,168828.000000,55525.000000,1229.716498)}
{pt3dadd(191856.000000,169104.000000,54800.000000,1217.295117)}
{pt3dadd(191772.000000,169356.000000,55075.000000,1204.873736)}
{pt3dadd(191688.000000,169608.000000,55000.000000,1192.452354)}
{pt3dadd(191604.000000,169872.000000,54925.000000,1242.137880)}
{pt3dadd(191568.000000,170112.000000,55050.000000,1242.137880)}

{create adhoc32}
{access adhoc32}
{connect adhoc32(1), adhoc31(0)}
{nseg = 1}
{strdef color color = "White"}
{pt3dclear()}
{pt3dadd(191568.000000,170112.000000,55050.000000,1242.137880)}
{pt3dadd(188640.000000,170112.000000,53100.000000,346.657896)}
{pt3dadd(187596.000000,169812.000000,52600.000000,332.213819)}
{pt3dadd(186408.000000,169536.000000,52125.000000,317.769741)}
{pt3dadd(184932.000000,169284.000000,51700.000000,303.325664)}
{pt3dadd(184680.000000,169056.000000,51650.000000,288.881586)}
{pt3dadd(184416.000000,168852.000000,51500.000000,303.325664)}
{pt3dadd(184200.000000,169164.000000,51525.000000,317.769741)}
{pt3dadd(183984.000000,169260.000000,51550.000000,332.213819)}
{pt3dadd(183744.000000,169032.000000,51475.000000,346.657896)}
{pt3dadd(183528.000000,168912.000000,51350.000000,346.657896)}
{pt3dadd(183312.000000,168876.000000,51250.000000,346.657896)}
{pt3dadd(183108.000000,169008.000000,51275.000000,346.657896)}
{pt3dadd(182916.000000,169140.000000,51300.000000,346.657896)}
{pt3dadd(182748.000000,169212.000000,51275.000000,323.889404)}
{pt3dadd(182520.000000,169092.000000,51275.000000,301.120911)}
{pt3dadd(182316.000000,169116.000000,51250.000000,278.352419)}
{pt3dadd(182112.000000,169848.000000,50775.000000,255.583926)}
{pt3dadd(181896.000000,170016.000000,50675.000000,263.908341)}
{pt3dadd(181680.000000,170328.000000,50425.000000,272.232756)}
{pt3dadd(181740.000000,170772.000000,50100.000000,280.557171)}
{pt3dadd(181224.000000,170388.000000,49700.000000,288.881586)}
{pt3dadd(181044.000000,170484.000000,49375.000000,251.489700)}
{pt3dadd(180960.000000,170592.000000,48925.000000,214.097814)}
{pt3dadd(180984.000000,170748.000000,48650.000000,176.705928)}
{pt3dadd(180732.000000,170736.000000,48375.000000,139.314042)}
{pt3dadd(180768.000000,170712.000000,48125.000000,80.621550)}

{create adhoc33}
{access adhoc33}
{connect adhoc33(1), adhoc31(0)}
{nseg = 1}
{strdef color color = "White"}
{pt3dclear()}
{pt3dadd(191568.000000,170112.000000,55050.000000,1242.137880)}
{pt3dadd(191436.000000,170376.000000,54975.000000,1242.137880)}
{pt3dadd(191196.000000,170664.000000,55000.000000,1242.137880)}
{pt3dadd(190884.000000,170964.000000,54825.000000,1242.137880)}
{pt3dadd(190932.000000,171228.000000,55025.000000,1242.137880)}
{pt3dadd(190752.000000,171456.000000,54725.000000,1242.137880)}
{pt3dadd(190464.000000,171744.000000,54825.000000,1190.382147)}
{pt3dadd(190248.000000,171996.000000,55050.000000,1138.626414)}
{pt3dadd(190164.000000,172284.000000,54925.000000,1086.870681)}
{pt3dadd(190080.000000,172548.000000,54800.000000,1035.114948)}
{pt3dadd(190068.000000,172800.000000,54825.000000,991.985162)}
{pt3dadd(190056.000000,173100.000000,54850.000000,948.855375)}
{pt3dadd(190044.000000,173364.000000,54875.000000,905.725589)}
{pt3dadd(190032.000000,173688.000000,54900.000000,862.595802)}
{pt3dadd(189996.000000,173976.000000,54850.000000,658.610851)}
{pt3dadd(189948.000000,174288.000000,54725.000000,454.625901)}
{pt3dadd(189888.000000,174588.000000,54875.000000,250.640951)}
{pt3dadd(189960.000000,174852.000000,54775.000000,46.656000)}
{pt3dadd(190032.000000,175128.000000,54675.000000,250.640951)}
{pt3dadd(190104.000000,175404.000000,54575.000000,454.625901)}
{pt3dadd(189996.000000,175680.000000,54625.000000,658.610851)}
{pt3dadd(189864.000000,175956.000000,54575.000000,862.595802)}
{pt3dadd(190164.000000,176208.000000,54575.000000,862.595802)}
{pt3dadd(190236.000000,176520.000000,54650.000000,862.595802)}
{pt3dadd(190152.000000,176820.000000,54850.000000,862.595802)}
{pt3dadd(190044.000000,177084.000000,54925.000000,862.595802)}
{pt3dadd(190116.000000,177264.000000,54775.000000,905.725589)}
{pt3dadd(190080.000000,177456.000000,54950.000000,948.855375)}
{pt3dadd(190128.000000,177696.000000,55000.000000,991.985162)}
{pt3dadd(190116.000000,177948.000000,55225.000000,1035.114948)}
{pt3dadd(189984.000000,178212.000000,55250.000000,1086.870681)}
{pt3dadd(189876.000000,178476.000000,55175.000000,1138.626414)}
{pt3dadd(189768.000000,178776.000000,55100.000000,1190.382147)}
{pt3dadd(189660.000000,179028.000000,55025.000000,1242.137880)}
{pt3dadd(189708.000000,179232.000000,55250.000000,1304.244761)}
{pt3dadd(189444.000000,179520.000000,55300.000000,1366.351641)}
{pt3dadd(189180.000000,179832.000000,55325.000000,1428.458522)}
{pt3dadd(188532.000000,180120.000000,55350.000000,1490.565402)}
{pt3dadd(188424.000000,180456.000000,55375.000000,1490.565402)}
{pt3dadd(187908.000000,180684.000000,55175.000000,1490.565402)}
{pt3dadd(187488.000000,180984.000000,55025.000000,1490.565402)}
{pt3dadd(187632.000000,181224.000000,55150.000000,1490.565402)}

{create adhoc34}
{access adhoc34}
{connect adhoc34(1), adhoc33(0)}
{nseg = 1}
{strdef color color = "White"}
{pt3dclear()}
{pt3dadd(187632.000000,181224.000000,55150.000000,1490.565402)}
{pt3dadd(183300.000000,181224.000000,54250.000000,240.734646)}
{pt3dadd(183096.000000,180828.000000,54100.000000,263.748884)}
{pt3dadd(182844.000000,180936.000000,54025.000000,286.763121)}
{pt3dadd(182628.000000,180804.000000,54125.000000,309.777359)}
{pt3dadd(182376.000000,180960.000000,54150.000000,332.791596)}
{pt3dadd(182124.000000,180948.000000,54025.000000,336.258171)}
{pt3dadd(181920.000000,180792.000000,53975.000000,339.724746)}
{pt3dadd(181692.000000,180492.000000,53725.000000,343.191321)}
{pt3dadd(181464.000000,180216.000000,53600.000000,346.657896)}
{pt3dadd(181260.000000,180204.000000,53675.000000,332.791596)}

{create adhoc35}
{access adhoc35}
{connect adhoc35(1), adhoc34(0)}
{nseg = 1}
{strdef color color = "White"}
{pt3dclear()}
{pt3dadd(181260.000000,180204.000000,53675.000000,332.791596)}
{pt3dadd(181104.000000,180360.000000,53300.000000,346.657896)}
{pt3dadd(180948.000000,180480.000000,53125.000000,320.177083)}
{pt3dadd(180768.000000,180372.000000,53075.000000,293.696271)}
{pt3dadd(180636.000000,180060.000000,52650.000000,267.215459)}
{pt3dadd(180492.000000,179988.000000,52500.000000,240.734646)}
{pt3dadd(180324.000000,179964.000000,52425.000000,222.345193)}
{pt3dadd(180120.000000,179892.000000,52350.000000,203.955741)}
{pt3dadd(179976.000000,179724.000000,52250.000000,185.566288)}
{pt3dadd(179832.000000,179604.000000,52100.000000,167.176836)}
{pt3dadd(179688.000000,179604.000000,52025.000000,165.505068)}
{pt3dadd(179508.000000,179472.000000,52000.000000,163.833300)}
{pt3dadd(179376.000000,179280.000000,52000.000000,162.161532)}
{pt3dadd(179232.000000,179076.000000,51925.000000,160.489764)}
{pt3dadd(179136.000000,178884.000000,51875.000000,149.391081)}
{pt3dadd(179136.000000,178740.000000,51850.000000,138.292398)}
{pt3dadd(179100.000000,178584.000000,51675.000000,127.193715)}
{pt3dadd(179004.000000,178416.000000,51775.000000,116.095032)}
{pt3dadd(178920.000000,178272.000000,51550.000000,116.095032)}
{pt3dadd(178908.000000,178152.000000,51450.000000,116.095032)}
{pt3dadd(178824.000000,177996.000000,51375.000000,116.095032)}
{pt3dadd(178680.000000,177816.000000,51375.000000,116.095032)}
{pt3dadd(178620.000000,177648.000000,51275.000000,111.257739)}
{pt3dadd(178632.000000,177540.000000,51250.000000,106.420446)}
{pt3dadd(178572.000000,177396.000000,51175.000000,101.583153)}
{pt3dadd(178620.000000,177228.000000,51125.000000,96.745860)}
{pt3dadd(178572.000000,177084.000000,51075.000000,76.366530)}
{pt3dadd(178572.000000,176820.000000,51125.000000,55.987200)}
{pt3dadd(178656.000000,176676.000000,51100.000000,46.656000)}

{create adhoc36}
{access adhoc36}
{connect adhoc36(1), adhoc34(0)}
{nseg = 1}
{strdef color color = "White"}
{pt3dclear()}
{pt3dadd(181260.000000,180204.000000,53675.000000,332.791596)}
{pt3dadd(181032.000000,179844.000000,53925.000000,167.176836)}
{pt3dadd(180888.000000,179796.000000,53900.000000,116.095032)}

{create adhoc37}
{access adhoc37}
{connect adhoc37(1), adhoc33(0)}
{nseg = 1}
{strdef color color = "White"}
{pt3dclear()}
{pt3dadd(187632.000000,181224.000000,55150.000000,1490.565402)}
{pt3dadd(187500.000000,181488.000000,55200.000000,1490.565402)}
{pt3dadd(187368.000000,181728.000000,55250.000000,1490.565402)}
{pt3dadd(187236.000000,181932.000000,55175.000000,1490.565402)}
{pt3dadd(187104.000000,182196.000000,55100.000000,1490.565402)}
{pt3dadd(187020.000000,182436.000000,54950.000000,1490.565402)}
{pt3dadd(186936.000000,182688.000000,54950.000000,1490.565402)}
{pt3dadd(186852.000000,182916.000000,54950.000000,1490.565402)}
{pt3dadd(186768.000000,183144.000000,54950.000000,1490.565402)}
{pt3dadd(186684.000000,183396.000000,54950.000000,1490.565402)}
{pt3dadd(186672.000000,183648.000000,55000.000000,1416.037140)}
{pt3dadd(186660.000000,183972.000000,54800.000000,1341.508878)}
{pt3dadd(186348.000000,184272.000000,54775.000000,1266.980616)}
{pt3dadd(185832.000000,184536.000000,54850.000000,1192.452354)}
{pt3dadd(185652.000000,184956.000000,54975.000000,1217.295117)}
{pt3dadd(185640.000000,185340.000000,55175.000000,1242.137880)}
{pt3dadd(185304.000000,185784.000000,55225.000000,1242.137880)}

{create adhoc38}
{access adhoc38}
{connect adhoc38(1), adhoc37(0)}
{nseg = 1}
{strdef color color = "White"}
{pt3dclear()}
{pt3dadd(185304.000000,185784.000000,55225.000000,1242.137880)}
{pt3dadd(182196.000000,185640.000000,54750.000000,200.612214)}
{pt3dadd(181968.000000,185520.000000,54850.000000,210.642822)}
{pt3dadd(181728.000000,185340.000000,54800.000000,220.673430)}
{pt3dadd(181404.000000,185304.000000,54775.000000,230.704038)}
{pt3dadd(181104.000000,185436.000000,54825.000000,240.734646)}
{pt3dadd(180816.000000,185436.000000,54925.000000,215.379495)}
{pt3dadd(180564.000000,185472.000000,54875.000000,190.024344)}
{pt3dadd(180336.000000,185220.000000,55050.000000,164.669193)}
{pt3dadd(180120.000000,185040.000000,55175.000000,139.314042)}
{pt3dadd(179952.000000,184860.000000,55300.000000,143.003075)}
{pt3dadd(179832.000000,184716.000000,55475.000000,146.692107)}
{pt3dadd(179772.000000,184572.000000,55675.000000,150.381139)}
{pt3dadd(179544.000000,184596.000000,55800.000000,154.070172)}
{pt3dadd(179400.000000,184608.000000,55750.000000,163.699560)}
{pt3dadd(179244.000000,184584.000000,55750.000000,173.328948)}
{pt3dadd(179688.000000,184680.000000,56000.000000,182.958336)}
{pt3dadd(179988.000000,184968.000000,56275.000000,192.587724)}
{pt3dadd(180120.000000,185064.000000,56450.000000,182.958336)}
{pt3dadd(180276.000000,185112.000000,56675.000000,173.328948)}
{pt3dadd(180288.000000,185136.000000,56850.000000,163.699560)}
{pt3dadd(180408.000000,185220.000000,56900.000000,154.070172)}
{pt3dadd(180576.000000,185184.000000,57050.000000,150.381139)}
{pt3dadd(180780.000000,185148.000000,57150.000000,146.692107)}
{pt3dadd(180900.000000,185376.000000,57200.000000,143.003075)}
{pt3dadd(181032.000000,185544.000000,57425.000000,139.314042)}
{pt3dadd(181248.000000,185304.000000,57675.000000,135.673296)}
{pt3dadd(181464.000000,185340.000000,58000.000000,132.032550)}
{pt3dadd(181644.000000,185328.000000,58125.000000,128.391804)}
{pt3dadd(181824.000000,185304.000000,58225.000000,55.987200)}

{create adhoc39}
{access adhoc39}
{connect adhoc39(1), adhoc37(0)}
{nseg = 1}
{strdef color color = "White"}
{pt3dclear()}
{pt3dadd(185304.000000,185784.000000,55225.000000,1242.137880)}
{pt3dadd(185292.000000,186108.000000,55200.000000,1192.452354)}
{pt3dadd(185388.000000,186480.000000,55400.000000,1186.027169)}
{pt3dadd(185208.000000,186768.000000,55375.000000,1179.601983)}
{pt3dadd(185028.000000,187032.000000,55350.000000,1173.176798)}
{pt3dadd(184848.000000,187380.000000,55325.000000,1166.751612)}
{pt3dadd(184788.000000,187644.000000,55425.000000,1185.598179)}
{pt3dadd(184608.000000,187896.000000,55450.000000,1204.444746)}
{pt3dadd(184500.000000,188172.000000,55625.000000,1223.291313)}
{pt3dadd(184488.000000,188400.000000,55825.000000,1242.137880)}
{pt3dadd(184248.000000,188712.000000,56000.000000,1180.031000)}
{pt3dadd(184188.000000,189000.000000,55925.000000,1117.924119)}
{pt3dadd(184128.000000,189240.000000,55850.000000,1055.817239)}
{pt3dadd(184068.000000,189492.000000,55775.000000,993.710358)}
{pt3dadd(183804.000000,189744.000000,56050.000000,1055.817239)}
{pt3dadd(183828.000000,190008.000000,56175.000000,1117.924119)}
{pt3dadd(183612.000000,190272.000000,56225.000000,1180.031000)}
{pt3dadd(183528.000000,190548.000000,56600.000000,1242.137880)}
{pt3dadd(183420.000000,190788.000000,56475.000000,1242.137880)}
{pt3dadd(183204.000000,191016.000000,56650.000000,1242.137880)}
{pt3dadd(183024.000000,191256.000000,56525.000000,1242.137880)}
{pt3dadd(183012.000000,191532.000000,56475.000000,1242.137880)}
{pt3dadd(182856.000000,192648.000000,56925.000000,1242.137880)}
{pt3dadd(182568.000000,192972.000000,57425.000000,1242.137880)}
{pt3dadd(182304.000000,194112.000000,57850.000000,1242.137880)}
{pt3dadd(181656.000000,195888.000000,58475.000000,1242.137880)}
{pt3dadd(181800.000000,196116.000000,58825.000000,1242.137880)}
{pt3dadd(181824.000000,196368.000000,59275.000000,1242.137880)}
{pt3dadd(181812.000000,196872.000000,59750.000000,1242.137880)}
{pt3dadd(181800.000000,197376.000000,60225.000000,1242.137880)}
{pt3dadd(181764.000000,197724.000000,60700.000000,1229.716498)}
{pt3dadd(182016.000000,197796.000000,61225.000000,1217.295117)}
{pt3dadd(182160.000000,198144.000000,61750.000000,1204.873736)}
{pt3dadd(182184.000000,198516.000000,62200.000000,1192.452354)}
{pt3dadd(182232.000000,199092.000000,62625.000000,1204.873736)}
{pt3dadd(182424.000000,199284.000000,63125.000000,1217.295117)}
{pt3dadd(182436.000000,199560.000000,63525.000000,1229.716498)}
{pt3dadd(182448.000000,199836.000000,63925.000000,1242.137880)}
{pt3dadd(182460.000000,200112.000000,64325.000000,1304.244761)}
{pt3dadd(182484.000000,200388.000000,64825.000000,1366.351641)}
{pt3dadd(182400.000000,200688.000000,65275.000000,1428.458522)}
{pt3dadd(182568.000000,201120.000000,65925.000000,1490.565402)}
{pt3dadd(182688.000000,201192.000000,66450.000000,1242.137880)}

{create adhoc40}
{access adhoc40}
{connect adhoc40(1), adhoc39(0)}
{nseg = 1}
{strdef color color = "White"}
{pt3dclear()}
{pt3dadd(182688.000000,201192.000000,66450.000000,1242.137880)}
{pt3dadd(178536.000000,198384.000000,66450.000000,499.187376)}
{pt3dadd(178392.000000,198516.000000,65975.000000,524.146752)}
{pt3dadd(178164.000000,198660.000000,65900.000000,549.106128)}
{pt3dadd(177960.000000,198792.000000,65825.000000,574.065504)}
{pt3dadd(177756.000000,198768.000000,65950.000000,599.024880)}
{pt3dadd(177552.000000,198804.000000,66075.000000,628.976115)}
{pt3dadd(177384.000000,198936.000000,66050.000000,658.927350)}
{pt3dadd(177216.000000,199044.000000,66025.000000,688.878585)}
{pt3dadd(176988.000000,199056.000000,65925.000000,718.829820)}
{pt3dadd(176796.000000,199068.000000,65825.000000,718.829820)}
{pt3dadd(176580.000000,199128.000000,66000.000000,718.829820)}
{pt3dadd(176328.000000,199416.000000,66275.000000,718.829820)}
{pt3dadd(176112.000000,199500.000000,66200.000000,718.829820)}
{pt3dadd(175908.000000,199452.000000,66125.000000,599.024880)}

{create adhoc41}
{access adhoc41}
{connect adhoc41(1), adhoc40(0)}
{nseg = 1}
{strdef color color = "White"}
{pt3dclear()}
{pt3dadd(175908.000000,199452.000000,66125.000000,599.024880)}
{pt3dadd(175728.000000,199008.000000,66200.000000,690.076674)}
{pt3dadd(175392.000000,199044.000000,66275.000000,661.323469)}
{pt3dadd(175164.000000,199080.000000,66125.000000,632.570265)}
{pt3dadd(174912.000000,198996.000000,66025.000000,603.817061)}
{pt3dadd(174696.000000,199128.000000,65975.000000,575.063856)}
{pt3dadd(174456.000000,198900.000000,65950.000000,581.054112)}
{pt3dadd(174240.000000,199044.000000,65950.000000,587.044368)}
{pt3dadd(173988.000000,198936.000000,66050.000000,593.034624)}
{pt3dadd(173772.000000,198828.000000,66125.000000,599.024880)}
{pt3dadd(173556.000000,198900.000000,66150.000000,599.024880)}
{pt3dadd(173352.000000,198792.000000,66200.000000,599.024880)}
{pt3dadd(173160.000000,198720.000000,66050.000000,599.024880)}
{pt3dadd(172968.000000,198756.000000,66125.000000,599.024880)}
{pt3dadd(172776.000000,198792.000000,66200.000000,599.024880)}
{pt3dadd(172572.000000,198648.000000,66275.000000,599.024880)}
{pt3dadd(172368.000000,198672.000000,66275.000000,599.024880)}
{pt3dadd(172164.000000,198600.000000,66175.000000,599.024880)}
{pt3dadd(171972.000000,198528.000000,66150.000000,569.073631)}
{pt3dadd(171780.000000,198492.000000,66200.000000,539.122383)}
{pt3dadd(171576.000000,198552.000000,66225.000000,509.171134)}
{pt3dadd(171348.000000,198432.000000,66250.000000,479.219886)}
{pt3dadd(171132.000000,198396.000000,66250.000000,484.211758)}
{pt3dadd(170928.000000,198360.000000,66250.000000,489.203631)}
{pt3dadd(170712.000000,198108.000000,66250.000000,494.195504)}
{pt3dadd(170508.000000,197952.000000,66200.000000,499.187376)}
{pt3dadd(170304.000000,197976.000000,66325.000000,512.405851)}
{pt3dadd(170100.000000,197940.000000,66275.000000,525.624327)}
{pt3dadd(169884.000000,197904.000000,66225.000000,538.842803)}
{pt3dadd(169644.000000,197688.000000,66250.000000,552.061278)}
{pt3dadd(169440.000000,197424.000000,66200.000000,593.753413)}
{pt3dadd(169236.000000,197340.000000,66275.000000,635.445549)}
{pt3dadd(169032.000000,197076.000000,66225.000000,677.137684)}
{pt3dadd(168792.000000,197004.000000,66300.000000,718.829820)}
{pt3dadd(168552.000000,196860.000000,66250.000000,661.229550)}
{pt3dadd(168360.000000,196716.000000,66200.000000,603.629280)}
{pt3dadd(168348.000000,196416.000000,65900.000000,546.029010)}
{pt3dadd(168240.000000,196176.000000,65800.000000,488.428740)}
{pt3dadd(168120.000000,195972.000000,65575.000000,516.077775)}
{pt3dadd(168000.000000,195744.000000,65375.000000,543.726810)}
{pt3dadd(167880.000000,195552.000000,65175.000000,571.375845)}
{pt3dadd(167760.000000,195336.000000,64975.000000,599.024880)}
{pt3dadd(167748.000000,195120.000000,64675.000000,574.065504)}
{pt3dadd(167820.000000,194892.000000,64525.000000,549.106128)}
{pt3dadd(167868.000000,194688.000000,64600.000000,524.146752)}
{pt3dadd(167928.000000,194496.000000,64675.000000,499.187376)}
{pt3dadd(167772.000000,194208.000000,64425.000000,499.187376)}
{pt3dadd(167700.000000,193968.000000,64450.000000,499.187376)}
{pt3dadd(167760.000000,193704.000000,64350.000000,499.187376)}
{pt3dadd(167784.000000,193440.000000,64250.000000,499.187376)}
{pt3dadd(167664.000000,193200.000000,64200.000000,478.387903)}
{pt3dadd(167724.000000,192984.000000,64150.000000,457.588431)}
{pt3dadd(167820.000000,192768.000000,64050.000000,436.788958)}
{pt3dadd(167892.000000,192504.000000,63975.000000,415.989486)}
{pt3dadd(167844.000000,192216.000000,64125.000000,411.829591)}
{pt3dadd(167880.000000,191964.000000,63975.000000,407.669697)}
{pt3dadd(167916.000000,191712.000000,63925.000000,403.509803)}
{pt3dadd(167796.000000,191460.000000,64000.000000,399.349908)}
{pt3dadd(167976.000000,191232.000000,63850.000000,419.317403)}
{pt3dadd(168108.000000,191040.000000,63875.000000,439.284897)}
{pt3dadd(168132.000000,190860.000000,63950.000000,459.252391)}
{pt3dadd(168156.000000,190656.000000,64025.000000,479.219886)}
{pt3dadd(168180.000000,190416.000000,63925.000000,484.211758)}
{pt3dadd(168276.000000,190176.000000,63950.000000,489.203631)}
{pt3dadd(168372.000000,189984.000000,63975.000000,494.195504)}
{pt3dadd(168288.000000,189768.000000,63875.000000,499.187376)}
{pt3dadd(168792.000000,189576.000000,64000.000000,494.195504)}
{pt3dadd(168684.000000,189372.000000,64000.000000,489.203631)}
{pt3dadd(168828.000000,189192.000000,64100.000000,484.211758)}
{pt3dadd(168972.000000,189024.000000,64200.000000,479.219886)}
{pt3dadd(169008.000000,188832.000000,64325.000000,463.412286)}
{pt3dadd(169044.000000,188640.000000,64350.000000,447.604686)}
{pt3dadd(169260.000000,188460.000000,64350.000000,431.797086)}
{pt3dadd(169440.000000,188292.000000,64500.000000,415.989486)}
{pt3dadd(169908.000000,188124.000000,64725.000000,415.989486)}
{pt3dadd(170040.000000,187956.000000,65050.000000,415.989486)}
{pt3dadd(170256.000000,187776.000000,64950.000000,415.989486)}
{pt3dadd(170280.000000,187560.000000,65300.000000,415.989486)}
{pt3dadd(170412.000000,187356.000000,65325.000000,328.362066)}
{pt3dadd(170544.000000,187104.000000,65350.000000,240.734646)}
{pt3dadd(170496.000000,186888.000000,65250.000000,80.621550)}

{create adhoc42}
{access adhoc42}
{connect adhoc42(1), adhoc40(0)}
{nseg = 1}
{strdef color color = "White"}
{pt3dclear()}
{pt3dadd(175908.000000,199452.000000,66125.000000,599.024880)}
{pt3dadd(175680.000000,200580.000000,66400.000000,415.989486)}
{pt3dadd(175404.000000,200940.000000,66375.000000,398.656589)}
{pt3dadd(175164.000000,201300.000000,66375.000000,381.323691)}
{pt3dadd(174924.000000,201660.000000,66375.000000,363.990794)}
{pt3dadd(174684.000000,202020.000000,66375.000000,346.657896)}
{pt3dadd(174516.000000,202716.000000,66375.000000,343.191321)}
{pt3dadd(174348.000000,203340.000000,66550.000000,339.724746)}
{pt3dadd(174168.000000,203724.000000,66600.000000,336.258171)}
{pt3dadd(173988.000000,204060.000000,66650.000000,332.791596)}
{pt3dadd(173832.000000,204372.000000,66750.000000,332.791596)}
{pt3dadd(173676.000000,204684.000000,66850.000000,332.791596)}
{pt3dadd(173532.000000,204924.000000,66975.000000,332.791596)}
{pt3dadd(173340.000000,205200.000000,66975.000000,332.791596)}
{pt3dadd(173064.000000,205404.000000,67050.000000,266.701905)}
{pt3dadd(172860.000000,205536.000000,67075.000000,200.612214)}
{pt3dadd(172752.000000,205608.000000,67100.000000,67.184640)}

{create adhoc43}
{access adhoc43}
{connect adhoc43(1), adhoc39(0)}
{nseg = 1}
{strdef color color = "White"}
{pt3dclear()}
{pt3dadd(182688.000000,201192.000000,66450.000000,1242.137880)}
{pt3dadd(182472.000000,201588.000000,66825.000000,1242.137880)}
{pt3dadd(182796.000000,201684.000000,67125.000000,1242.137880)}
{pt3dadd(182844.000000,201936.000000,67500.000000,1242.137880)}
{pt3dadd(182988.000000,202188.000000,67950.000000,1242.137880)}
{pt3dadd(183036.000000,202284.000000,68300.000000,1242.137880)}
{pt3dadd(183084.000000,202380.000000,68700.000000,1304.244761)}
{pt3dadd(183108.000000,202908.000000,68975.000000,1366.351641)}
{pt3dadd(183132.000000,203436.000000,69300.000000,1428.458522)}
{pt3dadd(183156.000000,203628.000000,69625.000000,1490.565402)}
{pt3dadd(183180.000000,203832.000000,70000.000000,1490.565402)}
{pt3dadd(183324.000000,203820.000000,70350.000000,1490.565402)}
{pt3dadd(183216.000000,203964.000000,70675.000000,1490.565402)}
{pt3dadd(183312.000000,204108.000000,71000.000000,1490.565402)}
{pt3dadd(183816.000000,204132.000000,71375.000000,1428.458522)}
{pt3dadd(184248.000000,204564.000000,71800.000000,1366.351641)}
{pt3dadd(184800.000000,205020.000000,72200.000000,1304.244761)}
{pt3dadd(184764.000000,205140.000000,72625.000000,1242.137880)}
{pt3dadd(184908.000000,205128.000000,72950.000000,1242.137880)}
{pt3dadd(184980.000000,205392.000000,73275.000000,1242.137880)}
{pt3dadd(185208.000000,205356.000000,73675.000000,1242.137880)}
{pt3dadd(185508.000000,205464.000000,74025.000000,1242.137880)}
{pt3dadd(185808.000000,205512.000000,74450.000000,1304.244761)}
{pt3dadd(185856.000000,205200.000000,74900.000000,1366.351641)}
{pt3dadd(185976.000000,205296.000000,75275.000000,1428.458522)}
{pt3dadd(186096.000000,205392.000000,75725.000000,1490.565402)}
{pt3dadd(186156.000000,205440.000000,76100.000000,1421.765618)}
{pt3dadd(186324.000000,205716.000000,76475.000000,1352.965833)}
{pt3dadd(186576.000000,205632.000000,76825.000000,1284.166049)}
{pt3dadd(186828.000000,205560.000000,77275.000000,1215.366264)}
{pt3dadd(186888.000000,205500.000000,77600.000000,1170.303435)}
{pt3dadd(186984.000000,205848.000000,77925.000000,1125.240606)}
{pt3dadd(186900.000000,205920.000000,78300.000000,1080.177777)}
{pt3dadd(187128.000000,205836.000000,78725.000000,1035.114948)}
{pt3dadd(187452.000000,205728.000000,79100.000000,1086.870681)}
{pt3dadd(187848.000000,205788.000000,79500.000000,1138.626414)}
{pt3dadd(187920.000000,205728.000000,79825.000000,1190.382147)}
{pt3dadd(187968.000000,205896.000000,80225.000000,1242.137880)}
{pt3dadd(188220.000000,205884.000000,80550.000000,1242.137880)}
{pt3dadd(188472.000000,205884.000000,80900.000000,1242.137880)}
{pt3dadd(188928.000000,205620.000000,81250.000000,1242.137880)}
{pt3dadd(189156.000000,205740.000000,81625.000000,1242.137880)}
{pt3dadd(189408.000000,205584.000000,81925.000000,1242.137880)}
{pt3dadd(189600.000000,205632.000000,82175.000000,1242.137880)}
{pt3dadd(189768.000000,205776.000000,82550.000000,1242.137880)}
{pt3dadd(189792.000000,205800.000000,82925.000000,1242.137880)}
{pt3dadd(189816.000000,205824.000000,83275.000000,1242.137880)}
{pt3dadd(190068.000000,205848.000000,83575.000000,1242.137880)}
{pt3dadd(190320.000000,205872.000000,83975.000000,1242.137880)}
{pt3dadd(190752.000000,205656.000000,84500.000000,1242.137880)}
{pt3dadd(190716.000000,205728.000000,84875.000000,1242.137880)}
{pt3dadd(191112.000000,205776.000000,85350.000000,1242.137880)}
{pt3dadd(191568.000000,205644.000000,85925.000000,1242.137880)}
{pt3dadd(191592.000000,205512.000000,86450.000000,1242.137880)}
{pt3dadd(192168.000000,205356.000000,86850.000000,1190.382147)}
{pt3dadd(191952.000000,205608.000000,87250.000000,1138.626414)}
{pt3dadd(192048.000000,205596.000000,87725.000000,1086.870681)}
{pt3dadd(191784.000000,205788.000000,88175.000000,1035.114948)}
{pt3dadd(191700.000000,205752.000000,88650.000000,1086.870681)}
{pt3dadd(191688.000000,205692.000000,89075.000000,1138.626414)}
{pt3dadd(191712.000000,205656.000000,89525.000000,1190.382147)}
{pt3dadd(191604.000000,205752.000000,89900.000000,1242.137880)}
{pt3dadd(191496.000000,205536.000000,90275.000000,1229.716498)}
{pt3dadd(191340.000000,205728.000000,90700.000000,1217.295117)}
{pt3dadd(191280.000000,205548.000000,91125.000000,1204.873736)}
{pt3dadd(191220.000000,205368.000000,91500.000000,1192.452354)}
{pt3dadd(190932.000000,205440.000000,91900.000000,1192.452354)}
{pt3dadd(190848.000000,205488.000000,92250.000000,1192.452354)}
{pt3dadd(191148.000000,205380.000000,92625.000000,1192.452354)}
{pt3dadd(191448.000000,205260.000000,93000.000000,1192.452354)}
{pt3dadd(190884.000000,205632.000000,93350.000000,1153.118003)}
{pt3dadd(191136.000000,205884.000000,93750.000000,1113.783651)}
{pt3dadd(191004.000000,205848.000000,94075.000000,1074.449300)}
{pt3dadd(190872.000000,205812.000000,94425.000000,1035.114948)}
{pt3dadd(190584.000000,206424.000000,94800.000000,1035.114948)}
{pt3dadd(190524.000000,206364.000000,95250.000000,1035.114948)}
{pt3dadd(190368.000000,206292.000000,95600.000000,1035.114948)}
{pt3dadd(190080.000000,206460.000000,95975.000000,1035.114948)}
{pt3dadd(189900.000000,206532.000000,96300.000000,1035.114948)}
{pt3dadd(189576.000000,206652.000000,96675.000000,1035.114948)}
{pt3dadd(189312.000000,206952.000000,97050.000000,1035.114948)}
{pt3dadd(189336.000000,206928.000000,97450.000000,1035.114948)}
{pt3dadd(188844.000000,206772.000000,97775.000000,1024.763782)}
{pt3dadd(188532.000000,206844.000000,98175.000000,1014.412617)}
{pt3dadd(188556.000000,206736.000000,98525.000000,1004.061452)}
{pt3dadd(188544.000000,206724.000000,98875.000000,993.710286)}
{pt3dadd(188364.000000,206568.000000,99275.000000,1043.395803)}
{pt3dadd(188052.000000,206520.000000,99625.000000,1093.081320)}
{pt3dadd(187764.000000,206460.000000,99950.000000,1142.766837)}
{pt3dadd(187548.000000,206604.000000,100350.000000,1192.452354)}
{pt3dadd(187488.000000,206568.000000,100775.000000,1204.873736)}
{pt3dadd(187428.000000,206532.000000,101275.000000,1217.295117)}
{pt3dadd(187368.000000,206628.000000,101750.000000,1229.716498)}
{pt3dadd(187236.000000,206748.000000,102150.000000,1242.137880)}
{pt3dadd(187224.000000,206460.000000,102550.000000,1242.137880)}
{pt3dadd(187044.000000,206280.000000,102825.000000,1242.137880)}
{pt3dadd(186864.000000,206196.000000,103275.000000,1242.137880)}
{pt3dadd(186828.000000,206088.000000,103675.000000,1242.137880)}
{pt3dadd(186792.000000,205980.000000,104100.000000,1242.137880)}
{pt3dadd(186480.000000,205920.000000,104575.000000,1242.137880)}
{pt3dadd(186648.000000,206016.000000,105100.000000,1242.137880)}
{pt3dadd(186336.000000,205776.000000,105625.000000,1242.137880)}
{pt3dadd(186072.000000,205488.000000,106200.000000,1190.382147)}
{pt3dadd(185964.000000,205176.000000,106700.000000,1138.626414)}
{pt3dadd(185856.000000,204864.000000,107100.000000,1086.870681)}
{pt3dadd(185748.000000,204552.000000,107450.000000,1035.114948)}
{pt3dadd(185664.000000,204444.000000,107825.000000,1074.449300)}
{pt3dadd(185580.000000,204408.000000,108275.000000,1113.783651)}
{pt3dadd(185652.000000,203964.000000,108700.000000,1153.118003)}
{pt3dadd(185748.000000,203544.000000,109075.000000,1192.452354)}
{pt3dadd(185868.000000,203124.000000,109525.000000,1109.988216)}
{pt3dadd(185652.000000,203040.000000,109850.000000,1027.524078)}
{pt3dadd(185436.000000,202956.000000,110250.000000,945.059940)}
{pt3dadd(185352.000000,202572.000000,110600.000000,862.595802)}
{pt3dadd(185268.000000,202188.000000,111000.000000,826.654307)}
{pt3dadd(185184.000000,201804.000000,111350.000000,790.712811)}
{pt3dadd(185352.000000,201360.000000,111775.000000,754.771316)}
{pt3dadd(185040.000000,201228.000000,112150.000000,718.829820)}
{pt3dadd(184776.000000,200844.000000,112525.000000,718.829820)}
{pt3dadd(184716.000000,199812.000000,112950.000000,718.829820)}
{pt3dadd(184560.000000,199740.000000,113400.000000,718.829820)}
{pt3dadd(184116.000000,199500.000000,113800.000000,718.829820)}
{pt3dadd(184140.000000,199260.000000,114200.000000,797.901102)}
{pt3dadd(184116.000000,198564.000000,114525.000000,876.972384)}
{pt3dadd(183936.000000,198228.000000,114925.000000,956.043666)}
{pt3dadd(183756.000000,198144.000000,115325.000000,1035.114948)}
{pt3dadd(183540.000000,197784.000000,115700.000000,1035.114948)}
{pt3dadd(183324.000000,197424.000000,116150.000000,1035.114948)}
{pt3dadd(183240.000000,197148.000000,116625.000000,1035.114948)}
{pt3dadd(183228.000000,196548.000000,117000.000000,1035.114948)}
{pt3dadd(182736.000000,196272.000000,117350.000000,991.985162)}
{pt3dadd(182256.000000,195984.000000,117700.000000,948.855375)}
{pt3dadd(181944.000000,195540.000000,118050.000000,905.725589)}
{pt3dadd(181680.000000,195072.000000,118425.000000,862.595802)}
{pt3dadd(181416.000000,194604.000000,118825.000000,819.466020)}
{pt3dadd(181152.000000,194136.000000,119225.000000,776.336238)}
{pt3dadd(180888.000000,193668.000000,119700.000000,733.206456)}
{pt3dadd(180444.000000,193224.000000,120075.000000,690.076674)}
{pt3dadd(180156.000000,192840.000000,120400.000000,642.354349)}
{pt3dadd(179712.000000,192612.000000,120825.000000,594.632025)}
{pt3dadd(179268.000000,192372.000000,121175.000000,546.909700)}
{pt3dadd(178908.000000,192132.000000,121550.000000,499.187376)}
{pt3dadd(178548.000000,191748.000000,121900.000000,499.187376)}
{pt3dadd(178008.000000,191100.000000,122350.000000,499.187376)}
{pt3dadd(177492.000000,190452.000000,122700.000000,499.187376)}
{pt3dadd(177312.000000,189852.000000,123050.000000,499.187376)}
{pt3dadd(176844.000000,189384.000000,123500.000000,524.146752)}
{pt3dadd(176304.000000,188760.000000,123900.000000,549.106128)}
{pt3dadd(175920.000000,188088.000000,124200.000000,574.065504)}
{pt3dadd(175224.000000,187596.000000,124575.000000,599.024880)}
{pt3dadd(174624.000000,186468.000000,125000.000000,599.024880)}
{pt3dadd(173952.000000,185292.000000,125475.000000,599.024880)}
{pt3dadd(173100.000000,184440.000000,125975.000000,599.024880)}
{pt3dadd(172404.000000,183840.000000,126375.000000,599.024880)}
{pt3dadd(171864.000000,183528.000000,126750.000000,664.917611)}
{pt3dadd(170892.000000,182928.000000,127175.000000,730.810341)}
{pt3dadd(170328.000000,182232.000000,127475.000000,796.703072)}
{pt3dadd(169380.000000,182076.000000,127850.000000,862.595802)}
{pt3dadd(168912.000000,181632.000000,128200.000000,905.725589)}
{pt3dadd(168804.000000,181344.000000,128600.000000,948.855375)}
{pt3dadd(168312.000000,181104.000000,128950.000000,991.985162)}
{pt3dadd(167688.000000,180660.000000,129375.000000,1035.114948)}
{pt3dadd(167448.000000,180300.000000,129825.000000,1035.114948)}
{pt3dadd(166884.000000,179940.000000,130150.000000,1035.114948)}
{pt3dadd(166548.000000,179556.000000,130550.000000,1035.114948)}
{pt3dadd(166008.000000,179064.000000,130875.000000,1035.114948)}
{pt3dadd(165924.000000,178392.000000,131275.000000,1024.763782)}
{pt3dadd(165408.000000,177720.000000,131675.000000,1014.412617)}
{pt3dadd(164712.000000,177096.000000,132125.000000,1004.061452)}
{pt3dadd(164340.000000,176832.000000,132625.000000,993.710286)}
{pt3dadd(164160.000000,176148.000000,133025.000000,1004.061452)}
{pt3dadd(163368.000000,175380.000000,133450.000000,1014.412617)}
{pt3dadd(163008.000000,174936.000000,133925.000000,1024.763782)}
{pt3dadd(162720.000000,174312.000000,134475.000000,1035.114948)}
{pt3dadd(162252.000000,174048.000000,134900.000000,991.985162)}
{pt3dadd(161964.000000,173688.000000,134900.000000,948.855375)}
{pt3dadd(161748.000000,173424.000000,135300.000000,905.725589)}
{pt3dadd(161532.000000,173172.000000,135750.000000,862.595802)}
{pt3dadd(161196.000000,172992.000000,136025.000000,957.481322)}
{pt3dadd(161184.000000,172728.000000,136375.000000,1052.366841)}
{pt3dadd(160800.000000,172368.000000,136675.000000,1147.252361)}
{pt3dadd(160500.000000,171828.000000,137000.000000,1242.137880)}
{pt3dadd(160284.000000,171564.000000,137375.000000,1242.137880)}
{pt3dadd(160464.000000,171348.000000,137725.000000,1242.137880)}
{pt3dadd(160800.000000,170676.000000,138050.000000,1242.137880)}
{pt3dadd(161148.000000,170004.000000,138400.000000,1242.137880)}
{pt3dadd(160908.000000,169464.000000,138725.000000,1242.137880)}
{pt3dadd(160524.000000,168492.000000,139150.000000,1242.137880)}
{pt3dadd(160404.000000,168024.000000,139525.000000,1242.137880)}
{pt3dadd(160368.000000,167352.000000,139875.000000,1242.137880)}
{pt3dadd(159840.000000,166548.000000,140225.000000,1242.137880)}
{pt3dadd(159528.000000,165984.000000,140575.000000,1242.137880)}
{pt3dadd(159036.000000,165564.000000,140975.000000,1242.137880)}
{pt3dadd(158676.000000,165000.000000,141375.000000,1242.137880)}
{pt3dadd(158436.000000,164508.000000,141850.000000,1242.137880)}
{pt3dadd(158196.000000,164016.000000,142200.000000,1242.137880)}
{pt3dadd(157980.000000,163680.000000,142550.000000,1242.137880)}
{pt3dadd(157704.000000,163188.000000,142900.000000,1242.137880)}
{pt3dadd(157284.000000,162384.000000,143225.000000,1190.382147)}
{pt3dadd(157152.000000,161784.000000,143600.000000,1138.626414)}
{pt3dadd(156996.000000,161424.000000,144025.000000,1086.870681)}
{pt3dadd(156924.000000,161472.000000,144400.000000,1035.114948)}
{pt3dadd(156828.000000,160956.000000,144725.000000,1086.870681)}
{pt3dadd(156720.000000,160440.000000,145150.000000,1138.626414)}
{pt3dadd(156588.000000,160152.000000,145550.000000,1190.382147)}
{pt3dadd(156552.000000,160224.000000,145900.000000,1242.137880)}
{pt3dadd(156444.000000,159780.000000,146225.000000,1360.886216)}
{pt3dadd(156384.000000,158952.000000,146600.000000,1479.634551)}
{pt3dadd(156456.000000,158712.000000,146975.000000,1598.382887)}
{pt3dadd(156528.000000,158472.000000,147375.000000,1717.131222)}
{pt3dadd(156240.000000,158208.000000,147725.000000,1735.018029)}
{pt3dadd(156024.000000,157848.000000,148125.000000,1752.904836)}
{pt3dadd(155940.000000,157404.000000,148525.000000,1770.791643)}
{pt3dadd(156036.000000,156708.000000,148975.000000,1788.678450)}
{pt3dadd(156108.000000,156060.000000,149450.000000,1856.648255)}
{pt3dadd(156156.000000,155700.000000,150025.000000,1924.618059)}
{pt3dadd(155796.000000,155280.000000,150425.000000,1992.587863)}
{pt3dadd(155556.000000,155040.000000,150750.000000,2060.557668)}
{pt3dadd(155640.000000,154416.000000,151200.000000,1992.587863)}
{pt3dadd(155220.000000,153672.000000,151550.000000,1924.618059)}
{pt3dadd(155160.000000,153360.000000,151875.000000,1856.648255)}
{pt3dadd(155508.000000,152916.000000,152275.000000,1788.678450)}
{pt3dadd(155496.000000,152784.000000,152625.000000,1714.150188)}
{pt3dadd(155556.000000,152424.000000,153100.000000,1639.621926)}
{pt3dadd(155400.000000,152088.000000,153575.000000,1565.093664)}
{pt3dadd(155436.000000,151704.000000,153950.000000,1490.565402)}
{pt3dadd(155664.000000,151344.000000,154275.000000,1428.458522)}
{pt3dadd(155376.000000,150984.000000,154625.000000,1366.351641)}
{pt3dadd(155400.000000,150684.000000,155000.000000,1304.244761)}
{pt3dadd(155520.000000,150600.000000,155375.000000,1242.137880)}
{pt3dadd(155364.000000,150588.000000,155850.000000,1242.137880)}
{pt3dadd(155376.000000,150456.000000,156175.000000,1242.137880)}
{pt3dadd(155592.000000,150144.000000,156475.000000,1242.137880)}
{pt3dadd(155820.000000,149844.000000,156800.000000,1242.137880)}
{pt3dadd(156192.000000,149508.000000,157125.000000,1242.137880)}
{pt3dadd(156588.000000,149016.000000,157500.000000,1242.137880)}
{pt3dadd(157020.000000,148572.000000,157925.000000,1242.137880)}
{pt3dadd(156984.000000,148104.000000,158325.000000,1242.137880)}
{pt3dadd(156744.000000,147720.000000,158650.000000,1304.244761)}
{pt3dadd(156408.000000,147300.000000,159050.000000,1366.351641)}
{pt3dadd(156276.000000,146880.000000,159400.000000,1428.458522)}
{pt3dadd(156264.000000,146412.000000,159775.000000,1490.565402)}
{pt3dadd(156168.000000,145488.000000,160175.000000,1490.565402)}
{pt3dadd(156492.000000,145128.000000,160625.000000,1490.565402)}
{pt3dadd(156540.000000,144360.000000,161125.000000,1490.565402)}
{pt3dadd(156564.000000,144144.000000,161325.000000,1490.565402)}
{pt3dadd(156552.000000,143868.000000,161675.000000,1490.565402)}
{pt3dadd(156420.000000,143616.000000,161775.000000,1490.565402)}
{pt3dadd(156060.000000,143352.000000,161925.000000,1490.565402)}
{pt3dadd(156156.000000,142788.000000,162350.000000,1490.565402)}
{pt3dadd(156300.000000,141780.000000,162725.000000,1490.565402)}
{pt3dadd(156264.000000,140628.000000,163175.000000,1490.565402)}
{pt3dadd(156456.000000,140316.000000,163725.000000,1490.565402)}
{pt3dadd(156432.000000,139776.000000,164150.000000,1490.565402)}
{pt3dadd(156420.000000,139212.000000,164625.000000,1547.206857)}
{pt3dadd(156648.000000,138876.000000,165100.000000,1603.848312)}
{pt3dadd(156972.000000,138696.000000,165550.000000,1660.489767)}
{pt3dadd(157284.000000,138516.000000,166025.000000,1717.131222)}
{pt3dadd(157404.000000,137592.000000,166500.000000,1699.960073)}
{pt3dadd(157392.000000,137664.000000,166950.000000,1682.788923)}
{pt3dadd(157380.000000,137916.000000,167400.000000,1665.617774)}
{pt3dadd(157164.000000,137964.000000,168025.000000,1648.446624)}
{pt3dadd(157248.000000,138024.000000,168500.000000,1594.070654)}
{pt3dadd(157152.000000,137880.000000,168825.000000,1539.694683)}
{pt3dadd(157056.000000,137736.000000,169125.000000,1485.318712)}
{pt3dadd(156960.000000,137592.000000,169450.000000,1430.942742)}
{pt3dadd(156864.000000,137448.000000,169750.000000,1430.942742)}
{pt3dadd(156768.000000,137484.000000,170050.000000,1430.942742)}
{pt3dadd(156924.000000,137460.000000,170350.000000,1430.942742)}
{pt3dadd(157080.000000,137208.000000,170625.000000,1430.942742)}
{pt3dadd(156936.000000,137136.000000,170925.000000,1430.942742)}
{pt3dadd(156792.000000,137064.000000,171275.000000,1430.942742)}
{pt3dadd(156648.000000,136992.000000,171525.000000,1430.942742)}
{pt3dadd(156504.000000,136920.000000,171750.000000,1430.942742)}
{pt3dadd(156360.000000,136848.000000,172125.000000,1445.848407)}
{pt3dadd(156420.000000,136596.000000,172450.000000,1460.754072)}
{pt3dadd(156480.000000,136344.000000,172725.000000,1475.659737)}
{pt3dadd(156540.000000,136092.000000,172975.000000,1490.565402)}
{pt3dadd(156600.000000,135840.000000,173275.000000,1428.458522)}
{pt3dadd(156300.000000,135948.000000,173625.000000,1366.351641)}
{pt3dadd(156000.000000,136056.000000,173925.000000,1304.244761)}
{pt3dadd(155748.000000,135936.000000,174175.000000,1242.137880)}
{pt3dadd(154788.000000,135504.000000,174525.000000,1242.137880)}
{pt3dadd(154596.000000,135372.000000,174800.000000,1242.137880)}
{pt3dadd(154728.000000,135180.000000,175075.000000,1242.137880)}
{pt3dadd(154608.000000,135108.000000,175450.000000,1242.137880)}
{pt3dadd(154488.000000,135036.000000,175800.000000,1242.137880)}
{pt3dadd(154752.000000,134604.000000,176075.000000,1242.137880)}
{pt3dadd(154488.000000,134460.000000,176425.000000,1242.137880)}
{pt3dadd(154344.000000,134316.000000,176800.000000,1242.137880)}
{pt3dadd(154452.000000,134400.000000,177225.000000,1229.716498)}
{pt3dadd(154560.000000,134484.000000,177650.000000,1217.295117)}
{pt3dadd(154008.000000,134052.000000,178075.000000,1204.873736)}
{pt3dadd(153840.000000,133968.000000,178400.000000,1192.452354)}
{pt3dadd(153672.000000,133872.000000,178775.000000,1266.980616)}
{pt3dadd(153504.000000,133776.000000,179125.000000,1341.508878)}
{pt3dadd(153720.000000,133608.000000,179500.000000,1416.037140)}
{pt3dadd(153624.000000,133440.000000,179800.000000,1490.565402)}
{pt3dadd(153528.000000,133188.000000,180100.000000,1490.565402)}
{pt3dadd(153432.000000,132936.000000,180500.000000,1490.565402)}
{pt3dadd(153336.000000,132684.000000,180800.000000,1490.565402)}
{pt3dadd(153036.000000,132336.000000,181175.000000,1490.565402)}
{pt3dadd(153000.000000,132288.000000,181525.000000,1565.093664)}
{pt3dadd(152952.000000,132240.000000,181875.000000,1639.621926)}
{pt3dadd(152904.000000,132192.000000,182300.000000,1714.150188)}
{pt3dadd(152856.000000,132144.000000,182725.000000,1788.678450)}
{pt3dadd(152808.000000,132096.000000,183075.000000,1788.678450)}
{pt3dadd(152892.000000,131640.000000,183025.000000,1788.678450)}
{pt3dadd(152772.000000,131316.000000,183225.000000,1788.678450)}
{pt3dadd(152604.000000,130992.000000,182950.000000,1788.678450)}
{pt3dadd(152460.000000,130716.000000,182900.000000,1714.150188)}
{pt3dadd(152592.000000,130464.000000,182975.000000,1639.621926)}
{pt3dadd(152724.000000,130200.000000,183050.000000,1565.093664)}
{pt3dadd(152472.000000,129948.000000,183200.000000,1490.565402)}
{pt3dadd(152532.000000,129756.000000,183175.000000,1338.748584)}
{pt3dadd(152592.000000,129588.000000,183150.000000,1186.931766)}
{pt3dadd(152424.000000,129396.000000,183250.000000,1035.114948)}
{pt3dadd(152256.000000,129228.000000,183350.000000,599.024880)}
