# Supplementary material for: Full reconstruction of large lobula plate tangential cells in Drosophila from a 3D EM dataset
Source: PLoS One. 2018 Nov 28;13(11):e0207828. doi: 10.1371/journal.pone.0207828 (PMC6261601; doi:10.1371/journal.pone.0207828)
Supplement: S1 Dataset — (ZIP) [file pone.0207828.s001.zip › Diameter hoc/VS_VSL_preliminary/Old Diameters Mar13_VS_VSL_HS/VS2/2_14_792_smaurer_002.039.hoc]

/* created with nml2hocm */

{create adhoc1}
{access adhoc1}
{nseg = 1}
{strdef color color = "White"}
{pt3dclear()}
{pt3dadd(185724.000000,116724.000000,65825.000000,96.745860)}
{pt3dadd(185796.000000,116400.000000,65575.000000,139.314042)}
{pt3dadd(185712.000000,116124.000000,65225.000000,176.705928)}
{pt3dadd(185628.000000,115764.000000,64875.000000,214.097814)}
{pt3dadd(185556.000000,115764.000000,64500.000000,251.489700)}
{pt3dadd(185640.000000,115644.000000,64000.000000,288.881586)}
{pt3dadd(185964.000000,115188.000000,63550.000000,266.814243)}
{pt3dadd(186024.000000,114912.000000,63275.000000,244.746900)}
{pt3dadd(186756.000000,114756.000000,63275.000000,222.679557)}
{pt3dadd(186660.000000,114252.000000,63250.000000,200.612214)}
{pt3dadd(186540.000000,113448.000000,63225.000000,221.861052)}

{create adhoc2}
{access adhoc2}
{connect adhoc2(1), adhoc1(0)}
{nseg = 1}
{strdef color color = "White"}
{pt3dclear()}
{pt3dadd(186540.000000,113448.000000,63225.000000,221.861052)}
{pt3dadd(186372.000000,113208.000000,63600.000000,167.176836)}

{create adhoc3}
{access adhoc3}
{connect adhoc3(1), adhoc1(0)}
{nseg = 1}
{strdef color color = "White"}
{pt3dclear()}
{pt3dadd(186540.000000,113448.000000,63225.000000,221.861052)}
{pt3dadd(186852.000000,113112.000000,63200.000000,221.861052)}
{pt3dadd(187164.000000,112644.000000,62800.000000,201.224299)}
{pt3dadd(187164.000000,112392.000000,62550.000000,180.587547)}
{pt3dadd(187380.000000,112392.000000,62225.000000,159.950795)}
{pt3dadd(187272.000000,112644.000000,61800.000000,139.314042)}
{pt3dadd(187464.000000,112584.000000,61950.000000,164.669193)}
{pt3dadd(187656.000000,112596.000000,61925.000000,190.024344)}
{pt3dadd(187848.000000,112716.000000,61675.000000,215.379495)}
{pt3dadd(188040.000000,112824.000000,61450.000000,240.734646)}
{pt3dadd(188292.000000,112992.000000,61175.000000,360.258440)}
{pt3dadd(188496.000000,113100.000000,61025.000000,479.782233)}
{pt3dadd(188556.000000,112308.000000,59300.000000,599.306026)}
{pt3dadd(189012.000000,113484.000000,58800.000000,718.829820)}
{pt3dadd(189108.000000,114300.000000,58475.000000,688.878585)}
{pt3dadd(189108.000000,114732.000000,58050.000000,658.927350)}
{pt3dadd(189144.000000,115452.000000,57575.000000,628.976115)}
{pt3dadd(189120.000000,115680.000000,57200.000000,599.024880)}
{pt3dadd(189084.000000,115944.000000,57050.000000,599.024880)}
{pt3dadd(189036.000000,116376.000000,56800.000000,599.024880)}
{pt3dadd(188880.000000,116796.000000,56525.000000,599.024880)}
{pt3dadd(188880.000000,117192.000000,56225.000000,599.024880)}
{pt3dadd(188868.000000,117612.000000,56100.000000,575.063856)}

{create adhoc4}
{access adhoc4}
{connect adhoc4(1), adhoc3(0)}
{nseg = 1}
{strdef color color = "White"}
{pt3dclear()}
{pt3dadd(188868.000000,117612.000000,56100.000000,575.063856)}
{pt3dadd(188196.000000,117780.000000,55800.000000,116.095032)}
{pt3dadd(187068.000000,117240.000000,55800.000000,116.095032)}
{pt3dadd(186732.000000,116904.000000,55750.000000,116.095032)}
{pt3dadd(186456.000000,116460.000000,55500.000000,116.095032)}
{pt3dadd(186108.000000,115620.000000,55575.000000,116.095032)}
{pt3dadd(185772.000000,115356.000000,55650.000000,127.704537)}
{pt3dadd(185544.000000,115116.000000,55600.000000,139.314042)}
{pt3dadd(185316.000000,115068.000000,55625.000000,96.745860)}

{create adhoc5}
{access adhoc5}
{connect adhoc5(1), adhoc3(0)}
{nseg = 1}
{strdef color color = "White"}
{pt3dclear()}
{pt3dadd(188868.000000,117612.000000,56100.000000,575.063856)}
{pt3dadd(189024.000000,118068.000000,56000.000000,599.024880)}
{pt3dadd(189168.000000,118596.000000,55675.000000,599.024880)}
{pt3dadd(189084.000000,118956.000000,55450.000000,599.024880)}

{create adhoc6}
{access adhoc6}
{connect adhoc6(1), adhoc5(0)}
{nseg = 1}
{strdef color color = "White"}
{pt3dclear()}
{pt3dadd(189084.000000,118956.000000,55450.000000,599.024880)}
{pt3dadd(188424.000000,118956.000000,54475.000000,288.881586)}
{pt3dadd(188280.000000,118680.000000,54150.000000,288.881586)}
{pt3dadd(188112.000000,118512.000000,53700.000000,288.881586)}
{pt3dadd(188076.000000,118308.000000,53125.000000,288.881586)}
{pt3dadd(188028.000000,117972.000000,52675.000000,288.881586)}
{pt3dadd(187908.000000,117408.000000,52075.000000,245.684947)}
{pt3dadd(187644.000000,116304.000000,51875.000000,202.488309)}
{pt3dadd(187692.000000,115896.000000,51775.000000,159.291671)}
{pt3dadd(187128.000000,115644.000000,51775.000000,116.095032)}
{pt3dadd(186888.000000,115404.000000,51450.000000,111.257739)}
{pt3dadd(187212.000000,115164.000000,50900.000000,106.420446)}
{pt3dadd(187284.000000,115356.000000,50375.000000,101.583153)}
{pt3dadd(187512.000000,115200.000000,50175.000000,96.745860)}
{pt3dadd(187824.000000,114948.000000,50100.000000,103.195584)}
{pt3dadd(188004.000000,114792.000000,50075.000000,109.645308)}
{pt3dadd(188196.000000,114588.000000,50025.000000,116.095032)}
{pt3dadd(188496.000000,114504.000000,49900.000000,80.621550)}

{create adhoc7}
{access adhoc7}
{connect adhoc7(1), adhoc5(0)}
{nseg = 1}
{strdef color color = "White"}
{pt3dclear()}
{pt3dadd(189084.000000,118956.000000,55450.000000,599.024880)}
{pt3dadd(189204.000000,119340.000000,55300.000000,690.076602)}
{pt3dadd(189204.000000,119832.000000,55275.000000,659.726028)}
{pt3dadd(189324.000000,120264.000000,55350.000000,629.375454)}
{pt3dadd(189348.000000,120696.000000,55350.000000,599.024880)}
{pt3dadd(189360.000000,121116.000000,55350.000000,718.829820)}

{create adhoc8}
{access adhoc8}
{connect adhoc8(1), adhoc7(0)}
{nseg = 1}
{strdef color color = "White"}
{pt3dclear()}
{pt3dadd(189360.000000,121116.000000,55350.000000,718.829820)}
{pt3dadd(187788.000000,121116.000000,55900.000000,200.612214)}
{pt3dadd(187668.000000,121188.000000,56050.000000,192.253370)}
{pt3dadd(187464.000000,121212.000000,56425.000000,183.894525)}
{pt3dadd(187344.000000,121236.000000,56675.000000,175.535680)}
{pt3dadd(187284.000000,121260.000000,56950.000000,167.176836)}
{pt3dadd(187140.000000,120996.000000,57250.000000,167.176836)}
{pt3dadd(187236.000000,120816.000000,57525.000000,167.176836)}
{pt3dadd(187224.000000,120804.000000,57750.000000,167.176836)}
{pt3dadd(187164.000000,120576.000000,58075.000000,167.176836)}

{create adhoc9}
{access adhoc9}
{connect adhoc9(1), adhoc7(0)}
{nseg = 1}
{strdef color color = "White"}
{pt3dclear()}
{pt3dadd(189360.000000,121116.000000,55350.000000,718.829820)}
{pt3dadd(189396.000000,121368.000000,55425.000000,599.024880)}
{pt3dadd(189504.000000,121728.000000,55450.000000,599.024880)}
{pt3dadd(189612.000000,122088.000000,55400.000000,599.024880)}
{pt3dadd(189720.000000,122508.000000,55450.000000,599.024880)}
{pt3dadd(189768.000000,122904.000000,55250.000000,599.024880)}

{create adhoc10}
{access adhoc10}
{connect adhoc10(1), adhoc9(0)}
{nseg = 1}
{strdef color color = "White"}
{pt3dclear()}
{pt3dadd(189768.000000,122904.000000,55250.000000,599.024880)}
{pt3dadd(188940.000000,122904.000000,54025.000000,240.734646)}
{pt3dadd(188520.000000,122760.000000,53625.000000,252.771381)}
{pt3dadd(188052.000000,122568.000000,53150.000000,264.808116)}
{pt3dadd(188016.000000,122496.000000,52875.000000,276.844851)}
{pt3dadd(187680.000000,122328.000000,52625.000000,288.881586)}
{pt3dadd(187584.000000,122304.000000,52350.000000,303.325664)}
{pt3dadd(187380.000000,122004.000000,52075.000000,317.769741)}
{pt3dadd(187092.000000,121896.000000,51750.000000,332.213819)}
{pt3dadd(186888.000000,121884.000000,51400.000000,346.657896)}
{pt3dadd(186852.000000,121812.000000,51050.000000,332.213819)}
{pt3dadd(186684.000000,121644.000000,50700.000000,317.769741)}
{pt3dadd(186564.000000,121548.000000,50450.000000,303.325664)}
{pt3dadd(186360.000000,121404.000000,50125.000000,288.881586)}
{pt3dadd(186204.000000,121032.000000,49750.000000,251.489700)}
{pt3dadd(186624.000000,120912.000000,49300.000000,214.097814)}
{pt3dadd(186768.000000,120852.000000,49125.000000,176.705928)}
{pt3dadd(187164.000000,120972.000000,49100.000000,139.314042)}
{pt3dadd(187500.000000,120960.000000,49100.000000,124.640919)}
{pt3dadd(187848.000000,120984.000000,49125.000000,109.967796)}
{pt3dadd(188028.000000,120864.000000,49125.000000,95.294673)}
{pt3dadd(188280.000000,120804.000000,49150.000000,80.621550)}
{pt3dadd(188496.000000,120624.000000,49100.000000,84.652627)}
{pt3dadd(188664.000000,120564.000000,49075.000000,88.683705)}
{pt3dadd(188892.000000,120660.000000,49125.000000,92.714782)}
{pt3dadd(189156.000000,120792.000000,49175.000000,96.745860)}
{pt3dadd(189312.000000,120804.000000,49350.000000,116.095032)}

{create adhoc11}
{access adhoc11}
{connect adhoc11(1), adhoc9(0)}
{nseg = 1}
{strdef color color = "White"}
{pt3dclear()}
{pt3dadd(189768.000000,122904.000000,55250.000000,599.024880)}
{pt3dadd(189852.000000,123120.000000,55200.000000,599.024880)}
{pt3dadd(189996.000000,123528.000000,55325.000000,565.745712)}
{pt3dadd(190020.000000,124116.000000,55300.000000,532.466544)}
{pt3dadd(190212.000000,124704.000000,55350.000000,499.187376)}
{pt3dadd(190200.000000,125220.000000,55375.000000,499.187376)}

{create adhoc12}
{access adhoc12}
{connect adhoc12(1), adhoc11(0)}
{nseg = 1}
{strdef color color = "White"}
{pt3dclear()}
{pt3dadd(190200.000000,125220.000000,55375.000000,499.187376)}
{pt3dadd(189132.000000,125220.000000,55375.000000,139.314042)}
{pt3dadd(188796.000000,125040.000000,55550.000000,146.279741)}
{pt3dadd(188508.000000,124836.000000,55725.000000,153.245439)}
{pt3dadd(188172.000000,124596.000000,55925.000000,160.211138)}
{pt3dadd(187944.000000,124512.000000,56000.000000,167.176836)}
{pt3dadd(187716.000000,124392.000000,56025.000000,197.603024)}
{pt3dadd(187500.000000,124296.000000,56075.000000,228.029211)}
{pt3dadd(187260.000000,124332.000000,56200.000000,258.455399)}
{pt3dadd(186756.000000,124320.000000,56175.000000,288.881586)}
{pt3dadd(186864.000000,124368.000000,56550.000000,224.836344)}
{pt3dadd(186756.000000,123996.000000,56550.000000,160.791102)}
{pt3dadd(186384.000000,123780.000000,56725.000000,96.745860)}
{pt3dadd(186036.000000,123624.000000,56750.000000,80.621550)}

{create adhoc13}
{access adhoc13}
{connect adhoc13(1), adhoc11(0)}
{nseg = 1}
{strdef color color = "White"}
{pt3dclear()}
{pt3dadd(190200.000000,125220.000000,55375.000000,499.187376)}
{pt3dadd(190152.000000,125304.000000,55425.000000,499.187376)}
{pt3dadd(190200.000000,125580.000000,55400.000000,524.146752)}
{pt3dadd(190272.000000,125940.000000,55375.000000,549.106128)}
{pt3dadd(190356.000000,126288.000000,55325.000000,574.065504)}
{pt3dadd(190320.000000,126564.000000,55450.000000,599.024880)}
{pt3dadd(190416.000000,126888.000000,55500.000000,599.024880)}
{pt3dadd(190488.000000,127032.000000,55425.000000,599.024880)}
{pt3dadd(190536.000000,127320.000000,55475.000000,599.024880)}
{pt3dadd(190620.000000,127656.000000,55600.000000,599.024880)}
{pt3dadd(190728.000000,127908.000000,55525.000000,599.024880)}
{pt3dadd(190896.000000,128160.000000,55550.000000,599.024880)}
{pt3dadd(190956.000000,128472.000000,55650.000000,599.024880)}
{pt3dadd(190944.000000,128796.000000,55525.000000,599.024880)}
{pt3dadd(190920.000000,129192.000000,55450.000000,599.024880)}
{pt3dadd(191148.000000,129480.000000,55475.000000,599.024880)}
{pt3dadd(191196.000000,129720.000000,55425.000000,599.024880)}
{pt3dadd(191256.000000,130020.000000,55425.000000,599.024880)}
{pt3dadd(191424.000000,130356.000000,55350.000000,599.024880)}
{pt3dadd(191568.000000,130692.000000,55275.000000,599.024880)}
{pt3dadd(191628.000000,131088.000000,55275.000000,599.024880)}
{pt3dadd(191640.000000,131484.000000,55225.000000,599.024880)}
{pt3dadd(191820.000000,131880.000000,55225.000000,599.024880)}
{pt3dadd(191844.000000,132336.000000,55225.000000,599.024880)}
{pt3dadd(191868.000000,132756.000000,55150.000000,599.024880)}
{pt3dadd(191928.000000,133356.000000,55075.000000,599.024880)}
{pt3dadd(191880.000000,133884.000000,55100.000000,599.024880)}
{pt3dadd(191892.000000,134388.000000,55175.000000,599.024880)}
{pt3dadd(191916.000000,134772.000000,54875.000000,599.024880)}

{create adhoc14}
{access adhoc14}
{connect adhoc14(1), adhoc13(0)}
{nseg = 1}
{strdef color color = "White"}
{pt3dclear()}
{pt3dadd(191916.000000,134772.000000,54875.000000,599.024880)}
{pt3dadd(191100.000000,134700.000000,54050.000000,346.657896)}
{pt3dadd(190752.000000,134376.000000,53800.000000,293.696271)}
{pt3dadd(190116.000000,133992.000000,53700.000000,240.734646)}
{pt3dadd(190272.000000,133632.000000,53525.000000,288.881586)}

{create adhoc15}
{access adhoc15}
{connect adhoc15(1), adhoc14(0)}
{nseg = 1}
{strdef color color = "White"}
{pt3dclear()}
{pt3dadd(190272.000000,133632.000000,53525.000000,288.881586)}
{pt3dadd(189720.000000,132516.000000,53200.000000,240.734646)}
{pt3dadd(189420.000000,131784.000000,52800.000000,240.734646)}
{pt3dadd(189012.000000,131160.000000,52450.000000,240.734646)}
{pt3dadd(188760.000000,130692.000000,52275.000000,240.734646)}
{pt3dadd(188556.000000,130380.000000,52200.000000,240.734646)}
{pt3dadd(188376.000000,130008.000000,51975.000000,264.808116)}
{pt3dadd(188208.000000,129672.000000,51775.000000,288.881586)}
{pt3dadd(188136.000000,129144.000000,51325.000000,240.734646)}

{create adhoc16}
{access adhoc16}
{connect adhoc16(1), adhoc15(0)}
{nseg = 1}
{strdef color color = "White"}
{pt3dclear()}
{pt3dadd(188136.000000,129144.000000,51325.000000,240.734646)}
{pt3dadd(188304.000000,128376.000000,51125.000000,288.881586)}
{pt3dadd(188328.000000,128244.000000,50800.000000,258.455399)}
{pt3dadd(188244.000000,127884.000000,50575.000000,228.029211)}
{pt3dadd(188232.000000,127536.000000,50350.000000,197.603024)}
{pt3dadd(187992.000000,127080.000000,50150.000000,167.176836)}
{pt3dadd(187776.000000,126840.000000,49875.000000,197.603024)}
{pt3dadd(187644.000000,126540.000000,49625.000000,228.029211)}
{pt3dadd(187536.000000,126312.000000,49425.000000,258.455399)}
{pt3dadd(187536.000000,126012.000000,49175.000000,288.881586)}
{pt3dadd(187644.000000,125832.000000,48875.000000,240.847655)}
{pt3dadd(188004.000000,125724.000000,48525.000000,192.813723)}
{pt3dadd(188232.000000,125676.000000,48400.000000,144.779792)}
{pt3dadd(188400.000000,125604.000000,48400.000000,96.745860)}
{pt3dadd(188544.000000,125460.000000,48375.000000,114.353604)}
{pt3dadd(188748.000000,125496.000000,48375.000000,131.961348)}
{pt3dadd(188964.000000,125496.000000,48275.000000,149.569092)}
{pt3dadd(189228.000000,125412.000000,48475.000000,167.176836)}
{pt3dadd(189396.000000,125412.000000,48550.000000,139.314042)}

{create adhoc17}
{access adhoc17}
{connect adhoc17(1), adhoc15(0)}
{nseg = 1}
{strdef color color = "White"}
{pt3dclear()}
{pt3dadd(188136.000000,129144.000000,51325.000000,240.734646)}
{pt3dadd(187920.000000,129804.000000,51175.000000,288.881586)}
{pt3dadd(187812.000000,129900.000000,50950.000000,240.847655)}
{pt3dadd(187812.000000,130116.000000,50725.000000,192.813723)}
{pt3dadd(187776.000000,130536.000000,50550.000000,144.779792)}
{pt3dadd(187608.000000,130848.000000,50275.000000,96.745860)}
{pt3dadd(187512.000000,130788.000000,50250.000000,139.314042)}

{create adhoc18}
{access adhoc18}
{connect adhoc18(1), adhoc14(0)}
{nseg = 1}
{strdef color color = "White"}
{pt3dclear()}
{pt3dadd(190272.000000,133632.000000,53525.000000,288.881586)}
{pt3dadd(188868.000000,133704.000000,53525.000000,240.734646)}
{pt3dadd(188532.000000,133716.000000,53875.000000,288.881586)}
{pt3dadd(188208.000000,133608.000000,53875.000000,288.881586)}

{create adhoc19}
{access adhoc19}
{connect adhoc19(1), adhoc18(0)}
{nseg = 1}
{strdef color color = "White"}
{pt3dclear()}
{pt3dadd(188208.000000,133608.000000,53875.000000,288.881586)}
{pt3dadd(188160.000000,133056.000000,54150.000000,200.612214)}
{pt3dadd(187908.000000,132540.000000,54475.000000,210.642822)}
{pt3dadd(187692.000000,132156.000000,54575.000000,220.673430)}
{pt3dadd(187692.000000,131988.000000,54675.000000,230.704038)}
{pt3dadd(187596.000000,131532.000000,54825.000000,240.734646)}
{pt3dadd(187524.000000,131604.000000,54825.000000,197.347145)}
{pt3dadd(187320.000000,131004.000000,54825.000000,153.959643)}
{pt3dadd(187488.000000,130692.000000,54975.000000,110.572141)}
{pt3dadd(187308.000000,130272.000000,54850.000000,67.184640)}
{pt3dadd(187188.000000,130104.000000,54775.000000,71.663610)}
{pt3dadd(187116.000000,129948.000000,54775.000000,76.142580)}
{pt3dadd(186996.000000,129636.000000,54750.000000,80.621550)}
{pt3dadd(186780.000000,129720.000000,54875.000000,80.621550)}

{create adhoc20}
{access adhoc20}
{connect adhoc20(1), adhoc18(0)}
{nseg = 1}
{strdef color color = "White"}
{pt3dclear()}
{pt3dadd(188208.000000,133608.000000,53875.000000,288.881586)}
{pt3dadd(187872.000000,133620.000000,53975.000000,167.176836)}
{pt3dadd(187620.000000,133764.000000,53950.000000,167.176836)}
{pt3dadd(187272.000000,133740.000000,53950.000000,96.745860)}

{create adhoc21}
{access adhoc21}
{connect adhoc21(1), adhoc13(0)}
{nseg = 1}
{strdef color color = "White"}
{pt3dclear()}
{pt3dadd(191916.000000,134772.000000,54875.000000,599.024880)}
{pt3dadd(191772.000000,135144.000000,54800.000000,718.829820)}
{pt3dadd(191760.000000,135528.000000,54800.000000,718.829820)}
{pt3dadd(191880.000000,135888.000000,54850.000000,718.829820)}
{pt3dadd(191940.000000,136284.000000,54800.000000,718.829820)}
{pt3dadd(192168.000000,136620.000000,54725.000000,718.829820)}
{pt3dadd(192348.000000,137088.000000,54625.000000,718.829820)}
{pt3dadd(192480.000000,137508.000000,54575.000000,718.829820)}
{pt3dadd(192588.000000,137892.000000,54475.000000,718.829820)}
{pt3dadd(192696.000000,138372.000000,54375.000000,718.829820)}
{pt3dadd(192660.000000,138732.000000,54300.000000,682.888329)}
{pt3dadd(192624.000000,139068.000000,54375.000000,646.946838)}
{pt3dadd(192456.000000,139428.000000,54225.000000,611.005347)}
{pt3dadd(192576.000000,139944.000000,54350.000000,575.063856)}
{pt3dadd(192504.000000,140580.000000,54200.000000,659.406576)}
{pt3dadd(192792.000000,141420.000000,54200.000000,743.749296)}
{pt3dadd(193008.000000,141960.000000,54200.000000,828.092016)}
{pt3dadd(193200.000000,142368.000000,53925.000000,862.595802)}

{create adhoc22}
{access adhoc22}
{connect adhoc22(1), adhoc21(0)}
{nseg = 1}
{strdef color color = "White"}
{pt3dclear()}
{pt3dadd(193200.000000,142368.000000,53925.000000,862.595802)}
{pt3dadd(191952.000000,142656.000000,53000.000000,346.657896)}
{pt3dadd(191520.000000,141960.000000,52575.000000,332.213819)}
{pt3dadd(191208.000000,141516.000000,52225.000000,317.769741)}
{pt3dadd(191004.000000,141048.000000,51750.000000,303.325664)}
{pt3dadd(190524.000000,140268.000000,51200.000000,288.881586)}
{pt3dadd(190140.000000,139512.000000,50700.000000,308.140356)}
{pt3dadd(189660.000000,138720.000000,50200.000000,327.399126)}
{pt3dadd(189312.000000,138240.000000,49850.000000,346.657896)}
{pt3dadd(188712.000000,137664.000000,49375.000000,240.734646)}

{create adhoc23}
{access adhoc23}
{connect adhoc23(1), adhoc22(0)}
{nseg = 1}
{strdef color color = "White"}
{pt3dclear()}
{pt3dadd(188712.000000,137664.000000,49375.000000,240.734646)}
{pt3dadd(188340.000000,136932.000000,49275.000000,200.612214)}
{pt3dadd(187800.000000,136296.000000,49000.000000,219.790742)}
{pt3dadd(187560.000000,136068.000000,48925.000000,238.969269)}
{pt3dadd(187308.000000,136008.000000,48700.000000,258.147797)}
{pt3dadd(186936.000000,135972.000000,48600.000000,277.326324)}
{pt3dadd(186624.000000,135684.000000,48500.000000,280.215140)}
{pt3dadd(186336.000000,135456.000000,48400.000000,283.103955)}
{pt3dadd(186228.000000,135240.000000,48100.000000,285.992771)}
{pt3dadd(186780.000000,134796.000000,47700.000000,288.881586)}
{pt3dadd(187152.000000,134196.000000,47200.000000,230.657990)}
{pt3dadd(187632.000000,132792.000000,46600.000000,172.434393)}
{pt3dadd(187740.000000,132492.000000,46350.000000,114.210797)}
{pt3dadd(187716.000000,132552.000000,46075.000000,55.987200)}
{pt3dadd(188160.000000,132360.000000,46475.000000,200.612214)}
{pt3dadd(188568.000000,131832.000000,46825.000000,96.745860)}

{create adhoc24}
{access adhoc24}
{connect adhoc24(1), adhoc22(0)}
{nseg = 1}
{strdef color color = "White"}
{pt3dclear()}
{pt3dadd(188712.000000,137664.000000,49375.000000,240.734646)}
{pt3dadd(187272.000000,137868.000000,49300.000000,116.095032)}
{pt3dadd(186852.000000,137892.000000,49275.000000,137.224328)}
{pt3dadd(186624.000000,137856.000000,49225.000000,158.353623)}
{pt3dadd(185928.000000,137688.000000,49000.000000,179.482918)}
{pt3dadd(185640.000000,137688.000000,48950.000000,200.612214)}
{pt3dadd(185304.000000,137712.000000,48950.000000,167.176836)}
{pt3dadd(184896.000000,137784.000000,48925.000000,80.621550)}

{create adhoc25}
{access adhoc25}
{connect adhoc25(1), adhoc21(0)}
{nseg = 1}
{strdef color color = "White"}
{pt3dclear()}
{pt3dadd(193200.000000,142368.000000,53925.000000,862.595802)}
{pt3dadd(193332.000000,142740.000000,53975.000000,828.092016)}
{pt3dadd(193320.000000,143388.000000,54125.000000,836.717962)}
{pt3dadd(193584.000000,143856.000000,55075.000000,845.343909)}
{pt3dadd(193140.000000,145704.000000,55075.000000,853.969856)}
{pt3dadd(192768.000000,146844.000000,55075.000000,862.595802)}
{pt3dadd(192012.000000,147096.000000,53775.000000,862.595802)}

{create adhoc26}
{access adhoc26}
{connect adhoc26(1), adhoc25(0)}
{nseg = 1}
{strdef color color = "White"}
{pt3dclear()}
{pt3dadd(192012.000000,147096.000000,53775.000000,862.595802)}
{pt3dadd(191244.000000,144396.000000,53750.000000,499.187376)}
{pt3dadd(191472.000000,143352.000000,54125.000000,499.187376)}
{pt3dadd(191736.000000,143016.000000,54375.000000,499.187376)}
{pt3dadd(191568.000000,142572.000000,54475.000000,499.187376)}
{pt3dadd(191544.000000,141984.000000,54550.000000,499.187376)}

{create adhoc27}
{access adhoc27}
{connect adhoc27(1), adhoc26(0)}
{nseg = 1}
{strdef color color = "White"}
{pt3dclear()}
{pt3dadd(191544.000000,141984.000000,54550.000000,499.187376)}
{pt3dadd(191700.000000,141516.000000,55025.000000,499.187376)}
{pt3dadd(191856.000000,140280.000000,55425.000000,499.187376)}
{pt3dadd(191868.000000,139692.000000,55500.000000,499.187376)}
{pt3dadd(191748.000000,139080.000000,55850.000000,499.187376)}
{pt3dadd(191556.000000,138348.000000,55950.000000,499.187376)}
{pt3dadd(191160.000000,137532.000000,56350.000000,537.125616)}
{pt3dadd(191040.000000,137088.000000,56425.000000,575.063856)}
{pt3dadd(191124.000000,137088.000000,56425.000000,599.024880)}

{create adhoc28}
{access adhoc28}
{connect adhoc28(1), adhoc27(0)}
{nseg = 1}
{strdef color color = "White"}
{pt3dclear()}
{pt3dadd(191124.000000,137088.000000,56425.000000,599.024880)}
{pt3dadd(191136.000000,135936.000000,56875.000000,499.187376)}
{pt3dadd(191088.000000,135504.000000,57175.000000,546.909700)}
{pt3dadd(191004.000000,135132.000000,57425.000000,594.632025)}
{pt3dadd(190956.000000,134748.000000,57600.000000,642.354349)}
{pt3dadd(190896.000000,134400.000000,57625.000000,690.076674)}
{pt3dadd(190812.000000,133728.000000,57950.000000,718.829820)}
{pt3dadd(190632.000000,133524.000000,57950.000000,599.024880)}

{create adhoc29}
{access adhoc29}
{connect adhoc29(1), adhoc28(0)}
{nseg = 1}
{strdef color color = "White"}
{pt3dclear()}
{pt3dadd(190632.000000,133524.000000,57950.000000,599.024880)}
{pt3dadd(191352.000000,131856.000000,58675.000000,499.187376)}
{pt3dadd(191520.000000,131472.000000,58725.000000,474.228009)}
{pt3dadd(191448.000000,130896.000000,58850.000000,449.268642)}
{pt3dadd(191652.000000,130308.000000,59200.000000,424.309275)}
{pt3dadd(191868.000000,129960.000000,59525.000000,399.349908)}
{pt3dadd(191808.000000,129348.000000,59600.000000,449.268651)}
{pt3dadd(191844.000000,128532.000000,60150.000000,499.187394)}
{pt3dadd(191808.000000,128148.000000,60675.000000,549.106137)}
{pt3dadd(191856.000000,127716.000000,61125.000000,599.024880)}
{pt3dadd(191784.000000,127392.000000,61550.000000,599.024880)}
{pt3dadd(191856.000000,127104.000000,61925.000000,599.024880)}
{pt3dadd(191748.000000,126804.000000,62025.000000,575.063856)}

{create adhoc30}
{access adhoc30}
{connect adhoc30(1), adhoc29(0)}
{nseg = 1}
{strdef color color = "White"}
{pt3dclear()}
{pt3dadd(191748.000000,126804.000000,62025.000000,575.063856)}
{pt3dadd(191256.000000,125292.000000,62275.000000,288.881586)}
{pt3dadd(191028.000000,124572.000000,62500.000000,341.458034)}
{pt3dadd(190680.000000,123960.000000,62875.000000,394.034481)}
{pt3dadd(190632.000000,123576.000000,63325.000000,446.610929)}
{pt3dadd(190248.000000,123132.000000,63650.000000,499.187376)}
{pt3dadd(190092.000000,122988.000000,63650.000000,499.187376)}
{pt3dadd(190068.000000,122820.000000,64000.000000,499.187376)}

{create adhoc31}
{access adhoc31}
{connect adhoc31(1), adhoc30(0)}
{nseg = 1}
{strdef color color = "White"}
{pt3dclear()}
{pt3dadd(190068.000000,122820.000000,64000.000000,499.187376)}
{pt3dadd(188700.000000,122544.000000,63875.000000,288.881586)}
{pt3dadd(188412.000000,122556.000000,63875.000000,272.832606)}
{pt3dadd(188088.000000,122424.000000,64275.000000,256.783626)}
{pt3dadd(187896.000000,122424.000000,64525.000000,240.734646)}
{pt3dadd(188088.000000,122244.000000,64750.000000,116.095032)}

{create adhoc32}
{access adhoc32}
{connect adhoc32(1), adhoc30(0)}
{nseg = 1}
{strdef color color = "White"}
{pt3dclear()}
{pt3dadd(190068.000000,122820.000000,64000.000000,499.187376)}
{pt3dadd(189852.000000,121980.000000,63950.000000,288.881586)}
{pt3dadd(189960.000000,121632.000000,64175.000000,303.325664)}
{pt3dadd(189960.000000,120792.000000,64675.000000,317.769741)}
{pt3dadd(189876.000000,120336.000000,64750.000000,332.213819)}
{pt3dadd(189804.000000,119820.000000,64950.000000,346.657896)}
{pt3dadd(189804.000000,119532.000000,65500.000000,379.798393)}
{pt3dadd(189804.000000,119220.000000,65725.000000,412.938891)}
{pt3dadd(190140.000000,118428.000000,66350.000000,446.079388)}
{pt3dadd(190380.000000,118116.000000,66900.000000,479.219886)}
{pt3dadd(190656.000000,117444.000000,67475.000000,431.635311)}
{pt3dadd(190704.000000,116988.000000,68000.000000,384.050736)}
{pt3dadd(190488.000000,116184.000000,68400.000000,336.466161)}
{pt3dadd(190452.000000,115752.000000,68650.000000,288.881586)}
{pt3dadd(190512.000000,115368.000000,69000.000000,288.881586)}
{pt3dadd(190836.000000,114996.000000,69250.000000,288.881586)}
{pt3dadd(191004.000000,114504.000000,69675.000000,288.881586)}
{pt3dadd(190980.000000,114048.000000,69950.000000,288.881586)}
{pt3dadd(190920.000000,113376.000000,70475.000000,299.859080)}
{pt3dadd(190464.000000,112248.000000,70900.000000,310.836573)}
{pt3dadd(189576.000000,111396.000000,71300.000000,321.814067)}
{pt3dadd(189180.000000,110820.000000,71300.000000,332.791560)}
{pt3dadd(188748.000000,110028.000000,71275.000000,336.258144)}
{pt3dadd(188400.000000,109236.000000,71350.000000,339.724728)}
{pt3dadd(188076.000000,108168.000000,71450.000000,343.191312)}
{pt3dadd(187920.000000,107988.000000,71450.000000,346.657896)}
{pt3dadd(188004.000000,107508.000000,71550.000000,332.213819)}
{pt3dadd(188220.000000,107028.000000,71925.000000,317.769741)}
{pt3dadd(188052.000000,106728.000000,72125.000000,303.325664)}
{pt3dadd(187572.000000,106404.000000,72325.000000,288.881586)}
{pt3dadd(187428.000000,106092.000000,72400.000000,303.325664)}
{pt3dadd(187104.000000,105876.000000,72375.000000,317.769741)}
{pt3dadd(186816.000000,105564.000000,72350.000000,332.213819)}
{pt3dadd(186096.000000,104652.000000,72375.000000,346.657896)}
{pt3dadd(185724.000000,104364.000000,72225.000000,332.213819)}
{pt3dadd(185364.000000,104148.000000,71925.000000,317.769741)}
{pt3dadd(185052.000000,104040.000000,71550.000000,303.325664)}
{pt3dadd(184812.000000,103908.000000,71375.000000,288.881586)}
{pt3dadd(184584.000000,103752.000000,71075.000000,251.489700)}
{pt3dadd(184260.000000,103548.000000,70825.000000,214.097814)}
{pt3dadd(183972.000000,103164.000000,70200.000000,176.705928)}
{pt3dadd(183756.000000,102732.000000,69700.000000,139.314042)}
{pt3dadd(183456.000000,102132.000000,70025.000000,200.612214)}

{create adhoc33}
{access adhoc33}
{connect adhoc33(1), adhoc29(0)}
{nseg = 1}
{strdef color color = "White"}
{pt3dclear()}
{pt3dadd(191748.000000,126804.000000,62025.000000,575.063856)}
{pt3dadd(191892.000000,126804.000000,63950.000000,479.219886)}
{pt3dadd(192024.000000,126768.000000,64450.000000,446.079388)}
{pt3dadd(192084.000000,126432.000000,65100.000000,412.938891)}
{pt3dadd(192192.000000,126240.000000,65725.000000,379.798393)}
{pt3dadd(192300.000000,126048.000000,66100.000000,346.657896)}
{pt3dadd(192360.000000,125436.000000,66400.000000,310.146476)}
{pt3dadd(192300.000000,125064.000000,66650.000000,273.635055)}
{pt3dadd(191628.000000,124296.000000,66750.000000,237.123635)}
{pt3dadd(191328.000000,124008.000000,66825.000000,200.612214)}
{pt3dadd(191076.000000,123612.000000,66975.000000,192.253370)}
{pt3dadd(190848.000000,123168.000000,67200.000000,183.894525)}
{pt3dadd(190788.000000,122772.000000,67800.000000,175.535680)}
{pt3dadd(190536.000000,122352.000000,68025.000000,167.176836)}
{pt3dadd(190656.000000,122172.000000,68700.000000,149.569092)}
{pt3dadd(190500.000000,122064.000000,68950.000000,131.961348)}
{pt3dadd(190284.000000,121980.000000,69500.000000,114.353604)}
{pt3dadd(190020.000000,121764.000000,69775.000000,96.745860)}
{pt3dadd(189648.000000,121236.000000,70100.000000,103.195584)}
{pt3dadd(189144.000000,120744.000000,70500.000000,109.645308)}
{pt3dadd(188652.000000,120516.000000,70900.000000,116.095032)}
{pt3dadd(188208.000000,119952.000000,71350.000000,80.621550)}

{create adhoc34}
{access adhoc34}
{connect adhoc34(1), adhoc28(0)}
{nseg = 1}
{strdef color color = "White"}
{pt3dclear()}
{pt3dadd(190632.000000,133524.000000,57950.000000,599.024880)}
{pt3dadd(188964.000000,133524.000000,59275.000000,415.989486)}
{pt3dadd(188184.000000,133584.000000,59825.000000,431.797086)}
{pt3dadd(187884.000000,133836.000000,60375.000000,447.604686)}
{pt3dadd(187692.000000,134304.000000,60950.000000,463.412286)}
{pt3dadd(187728.000000,134736.000000,61450.000000,479.219886)}
{pt3dadd(187836.000000,134880.000000,61875.000000,484.211758)}
{pt3dadd(188076.000000,135000.000000,62275.000000,489.203631)}
{pt3dadd(188436.000000,135372.000000,62775.000000,494.195504)}
{pt3dadd(188532.000000,135564.000000,63200.000000,499.187376)}
{pt3dadd(188724.000000,135672.000000,63450.000000,499.187376)}
{pt3dadd(189084.000000,135648.000000,63800.000000,499.187376)}
{pt3dadd(189372.000000,135792.000000,64200.000000,499.187376)}
{pt3dadd(189612.000000,135996.000000,64725.000000,499.187376)}
{pt3dadd(189972.000000,135996.000000,65325.000000,415.989486)}

{create adhoc35}
{access adhoc35}
{connect adhoc35(1), adhoc34(0)}
{nseg = 1}
{strdef color color = "White"}
{pt3dclear()}
{pt3dadd(189972.000000,135996.000000,65325.000000,415.989486)}
{pt3dadd(189900.000000,136356.000000,65050.000000,415.989486)}
{pt3dadd(189900.000000,136536.000000,65250.000000,367.457382)}
{pt3dadd(190008.000000,136848.000000,65475.000000,318.925278)}
{pt3dadd(190056.000000,137148.000000,65550.000000,270.393174)}
{pt3dadd(190128.000000,137460.000000,65550.000000,221.861070)}
{pt3dadd(190200.000000,137796.000000,65475.000000,240.734646)}

{create adhoc36}
{access adhoc36}
{connect adhoc36(1), adhoc34(0)}
{nseg = 1}
{strdef color color = "White"}
{pt3dclear()}
{pt3dadd(189972.000000,135996.000000,65325.000000,415.989486)}
{pt3dadd(189972.000000,137976.000000,65325.000000,167.176836)}
{pt3dadd(190152.000000,138372.000000,65350.000000,212.047101)}
{pt3dadd(190092.000000,138780.000000,65100.000000,256.917366)}
{pt3dadd(190068.000000,139104.000000,65100.000000,301.787631)}
{pt3dadd(190188.000000,139656.000000,65250.000000,346.657896)}
{pt3dadd(190284.000000,139956.000000,65375.000000,308.140356)}
{pt3dadd(190476.000000,140340.000000,65525.000000,269.622816)}
{pt3dadd(190788.000000,140640.000000,65350.000000,231.105276)}
{pt3dadd(190752.000000,140928.000000,65425.000000,200.612214)}

{create adhoc37}
{access adhoc37}
{connect adhoc37(1), adhoc27(0)}
{nseg = 1}
{strdef color color = "White"}
{pt3dclear()}
{pt3dadd(191124.000000,137088.000000,56425.000000,599.024880)}
{pt3dadd(189828.000000,137088.000000,56375.000000,116.095032)}
{pt3dadd(189276.000000,136848.000000,56325.000000,116.095032)}
{pt3dadd(189120.000000,136728.000000,56350.000000,116.095032)}
{pt3dadd(188880.000000,136728.000000,56475.000000,116.095032)}
{pt3dadd(188760.000000,136692.000000,56500.000000,116.095032)}
{pt3dadd(188592.000000,136632.000000,56500.000000,121.899785)}
{pt3dadd(188244.000000,136512.000000,56500.000000,127.704537)}
{pt3dadd(188052.000000,136584.000000,56600.000000,133.509289)}
{pt3dadd(187848.000000,136668.000000,56700.000000,139.314042)}
{pt3dadd(187632.000000,136680.000000,56650.000000,124.640919)}
{pt3dadd(187404.000000,136596.000000,56650.000000,109.967796)}
{pt3dadd(187152.000000,136512.000000,56550.000000,95.294673)}
{pt3dadd(186948.000000,136428.000000,56425.000000,80.621550)}
{pt3dadd(186744.000000,136272.000000,56475.000000,139.314042)}

{create adhoc38}
{access adhoc38}
{connect adhoc38(1), adhoc26(0)}
{nseg = 1}
{strdef color color = "White"}
{pt3dclear()}
{pt3dadd(191544.000000,141984.000000,54550.000000,499.187376)}
{pt3dadd(190080.000000,141984.000000,54800.000000,139.314042)}
{pt3dadd(189564.000000,141780.000000,54925.000000,146.279741)}
{pt3dadd(189324.000000,141672.000000,54950.000000,153.245439)}
{pt3dadd(189060.000000,141588.000000,55000.000000,160.211138)}
{pt3dadd(188772.000000,141420.000000,54875.000000,167.176836)}
{pt3dadd(188460.000000,141336.000000,55050.000000,197.603024)}
{pt3dadd(188268.000000,141336.000000,55100.000000,228.029211)}
{pt3dadd(188088.000000,141264.000000,55425.000000,258.455399)}
{pt3dadd(187920.000000,141144.000000,55425.000000,288.881586)}
{pt3dadd(187464.000000,141036.000000,55675.000000,258.455399)}
{pt3dadd(187260.000000,141096.000000,55675.000000,228.029211)}
{pt3dadd(187032.000000,141024.000000,55725.000000,197.603024)}
{pt3dadd(186840.000000,140916.000000,55750.000000,167.176836)}
{pt3dadd(186636.000000,140928.000000,55775.000000,185.566288)}
{pt3dadd(186444.000000,140856.000000,55975.000000,203.955741)}
{pt3dadd(186228.000000,140856.000000,56075.000000,222.345193)}
{pt3dadd(185844.000000,140868.000000,56350.000000,240.734646)}
{pt3dadd(185604.000000,140868.000000,56200.000000,249.882566)}
{pt3dadd(185772.000000,140820.000000,56650.000000,259.030485)}
{pt3dadd(185928.000000,140712.000000,57225.000000,268.178405)}
{pt3dadd(186180.000000,140628.000000,57550.000000,277.326324)}
{pt3dadd(186264.000000,140604.000000,57925.000000,242.823254)}
{pt3dadd(186372.000000,140172.000000,58300.000000,208.320183)}
{pt3dadd(186456.000000,139776.000000,58650.000000,173.817113)}
{pt3dadd(186264.000000,139392.000000,59200.000000,139.314042)}
{pt3dadd(186156.000000,139056.000000,59525.000000,139.314042)}

{create adhoc39}
{access adhoc39}
{connect adhoc39(1), adhoc25(0)}
{nseg = 1}
{strdef color color = "White"}
{pt3dclear()}
{pt3dadd(192012.000000,147096.000000,53775.000000,862.595802)}
{pt3dadd(192168.000000,146772.000000,53925.000000,862.595802)}
{pt3dadd(192060.000000,146184.000000,53800.000000,730.810341)}
{pt3dadd(192060.000000,146016.000000,53975.000000,599.024880)}
{pt3dadd(190200.000000,145824.000000,54800.000000,240.734646)}

{create adhoc40}
{access adhoc40}
{connect adhoc40(1), adhoc25(0)}
{nseg = 1}
{strdef color color = "White"}
{pt3dclear()}
{pt3dadd(192012.000000,147096.000000,53775.000000,862.595802)}
{pt3dadd(190464.000000,147096.000000,51275.000000,346.657896)}
{pt3dadd(190500.000000,146496.000000,50775.000000,415.989486)}

{create adhoc41}
{access adhoc41}
{connect adhoc41(1), adhoc40(0)}
{nseg = 1}
{strdef color color = "White"}
{pt3dclear()}
{pt3dadd(190500.000000,146496.000000,50775.000000,415.989486)}
{pt3dadd(189780.000000,146748.000000,51150.000000,167.176836)}
{pt3dadd(189396.000000,146568.000000,51050.000000,175.535680)}
{pt3dadd(188304.000000,145968.000000,51050.000000,183.894525)}
{pt3dadd(188052.000000,145620.000000,51225.000000,192.253370)}
{pt3dadd(187752.000000,145632.000000,51250.000000,200.612214)}
{pt3dadd(187500.000000,145320.000000,51275.000000,174.645625)}
{pt3dadd(187224.000000,145296.000000,51300.000000,148.679037)}
{pt3dadd(186996.000000,145260.000000,51300.000000,122.712448)}
{pt3dadd(186792.000000,144936.000000,51325.000000,96.745860)}
{pt3dadd(186564.000000,144708.000000,51375.000000,122.712448)}
{pt3dadd(186348.000000,144384.000000,51550.000000,148.679037)}
{pt3dadd(186276.000000,144000.000000,51400.000000,174.645625)}
{pt3dadd(186144.000000,143640.000000,51425.000000,200.612214)}
{pt3dadd(185916.000000,143412.000000,51375.000000,192.253370)}
{pt3dadd(185676.000000,143112.000000,51500.000000,183.894525)}
{pt3dadd(185400.000000,143016.000000,51550.000000,175.535680)}
{pt3dadd(185196.000000,142884.000000,51625.000000,167.176836)}
{pt3dadd(185352.000000,142812.000000,51875.000000,157.889238)}
{pt3dadd(185100.000000,142920.000000,52175.000000,148.601640)}
{pt3dadd(185004.000000,142980.000000,52350.000000,139.314042)}
{pt3dadd(184848.000000,143328.000000,52650.000000,116.095032)}

{create adhoc42}
{access adhoc42}
{connect adhoc42(1), adhoc40(0)}
{nseg = 1}
{strdef color color = "White"}
{pt3dclear()}
{pt3dadd(190500.000000,146496.000000,50775.000000,415.989486)}
{pt3dadd(190524.000000,146184.000000,50400.000000,415.989486)}
{pt3dadd(190320.000000,145740.000000,49800.000000,457.588431)}
{pt3dadd(189996.000000,145164.000000,49150.000000,499.187376)}
{pt3dadd(189576.000000,144900.000000,48675.000000,690.076602)}

{create adhoc43}
{access adhoc43}
{connect adhoc43(1), adhoc42(0)}
{nseg = 1}
{strdef color color = "White"}
{pt3dclear()}
{pt3dadd(189576.000000,144900.000000,48675.000000,690.076602)}
{pt3dadd(189600.000000,145068.000000,47725.000000,575.063856)}
{pt3dadd(188892.000000,145104.000000,47075.000000,491.481553)}
{pt3dadd(188304.000000,145812.000000,46450.000000,407.899251)}
{pt3dadd(187608.000000,146436.000000,46000.000000,324.316949)}
{pt3dadd(187440.000000,146904.000000,45750.000000,240.734646)}
{pt3dadd(187404.000000,147324.000000,45600.000000,222.345193)}
{pt3dadd(187224.000000,147540.000000,45650.000000,203.955741)}
{pt3dadd(187140.000000,147768.000000,45400.000000,185.566288)}
{pt3dadd(187200.000000,148224.000000,45075.000000,167.176836)}
{pt3dadd(187368.000000,148656.000000,44750.000000,160.211138)}
{pt3dadd(187320.000000,149484.000000,44550.000000,153.245439)}
{pt3dadd(187200.000000,149700.000000,44575.000000,146.279741)}
{pt3dadd(187104.000000,149880.000000,44600.000000,139.314042)}
{pt3dadd(187104.000000,150048.000000,44550.000000,162.261850)}
{pt3dadd(187104.000000,150216.000000,44500.000000,185.209659)}
{pt3dadd(186852.000000,150348.000000,44375.000000,208.157468)}
{pt3dadd(186708.000000,150504.000000,44250.000000,231.105276)}
{pt3dadd(186084.000000,150744.000000,43750.000000,220.940922)}
{pt3dadd(185784.000000,150912.000000,43250.000000,210.776568)}
{pt3dadd(185784.000000,150936.000000,43075.000000,200.612214)}
{pt3dadd(185880.000000,150924.000000,42700.000000,167.176836)}

{create adhoc44}
{access adhoc44}
{connect adhoc44(1), adhoc42(0)}
{nseg = 1}
{strdef color color = "White"}
{pt3dclear()}
{pt3dadd(189576.000000,144900.000000,48675.000000,690.076602)}
{pt3dadd(189384.000000,144732.000000,48600.000000,415.989486)}
{pt3dadd(188988.000000,144660.000000,48725.000000,336.178580)}
{pt3dadd(188772.000000,144540.000000,48750.000000,256.367673)}
{pt3dadd(188520.000000,144372.000000,48775.000000,176.556767)}
{pt3dadd(188256.000000,143976.000000,48750.000000,96.745860)}
{pt3dadd(188172.000000,143700.000000,48750.000000,107.387906)}
{pt3dadd(188004.000000,143340.000000,48775.000000,118.029951)}
{pt3dadd(187728.000000,142800.000000,48675.000000,128.671997)}
{pt3dadd(187512.000000,142428.000000,48675.000000,139.314042)}
{pt3dadd(187248.000000,142212.000000,48600.000000,96.745860)}

{create adhoc45}
{access adhoc45}
{connect adhoc45(1), adhoc25(0)}
{nseg = 1}
{strdef color color = "White"}
{pt3dclear()}
{pt3dadd(192012.000000,147096.000000,53775.000000,862.595802)}
{pt3dadd(191916.000000,147576.000000,53425.000000,1035.114948)}
{pt3dadd(191832.000000,148224.000000,53275.000000,956.043666)}
{pt3dadd(192036.000000,148932.000000,53250.000000,876.972384)}
{pt3dadd(192072.000000,149580.000000,53800.000000,797.901102)}
{pt3dadd(191352.000000,150840.000000,53375.000000,718.829820)}
{pt3dadd(191232.000000,151572.000000,53550.000000,704.453247)}
{pt3dadd(191472.000000,151980.000000,53300.000000,690.076674)}
{pt3dadd(190872.000000,152616.000000,53475.000000,828.091944)}

{create adhoc46}
{access adhoc46}
{connect adhoc46(1), adhoc45(0)}
{nseg = 1}
{strdef color color = "White"}
{pt3dclear()}
{pt3dadd(190872.000000,152616.000000,53475.000000,828.091944)}
{pt3dadd(188568.000000,152616.000000,52800.000000,240.734646)}
{pt3dadd(187920.000000,152184.000000,52800.000000,240.734646)}
{pt3dadd(187596.000000,152028.000000,52675.000000,240.734646)}
{pt3dadd(187260.000000,152028.000000,52575.000000,240.734646)}
{pt3dadd(186972.000000,151992.000000,52550.000000,240.734646)}
{pt3dadd(186720.000000,151968.000000,52475.000000,240.734646)}
{pt3dadd(186528.000000,151920.000000,52425.000000,240.734646)}
{pt3dadd(186180.000000,151824.000000,52500.000000,240.734646)}
{pt3dadd(185880.000000,151776.000000,52550.000000,240.734646)}
{pt3dadd(185568.000000,151776.000000,52500.000000,284.548356)}
{pt3dadd(185340.000000,151536.000000,52425.000000,328.362066)}
{pt3dadd(185100.000000,151500.000000,52275.000000,372.175776)}
{pt3dadd(184860.000000,151332.000000,52100.000000,415.989486)}
{pt3dadd(184548.000000,151200.000000,51850.000000,384.212511)}
{pt3dadd(184356.000000,151044.000000,51600.000000,352.435536)}
{pt3dadd(184020.000000,150684.000000,51325.000000,320.658561)}
{pt3dadd(183972.000000,150552.000000,51000.000000,288.881586)}
{pt3dadd(183900.000000,150264.000000,50650.000000,312.505187)}
{pt3dadd(183900.000000,149844.000000,50125.000000,336.128787)}
{pt3dadd(184308.000000,149892.000000,49800.000000,359.752388)}
{pt3dadd(184464.000000,150372.000000,49325.000000,383.375988)}
{pt3dadd(184548.000000,150552.000000,49075.000000,337.685045)}
{pt3dadd(184548.000000,150768.000000,48725.000000,291.994101)}
{pt3dadd(184620.000000,151068.000000,48550.000000,246.303158)}
{pt3dadd(184644.000000,151344.000000,48725.000000,200.612214)}
{pt3dadd(184788.000000,151428.000000,48200.000000,210.776568)}
{pt3dadd(185196.000000,151572.000000,47950.000000,220.940922)}
{pt3dadd(185268.000000,151932.000000,47525.000000,231.105276)}
{pt3dadd(186252.000000,152232.000000,47175.000000,139.314042)}

{create adhoc47}
{access adhoc47}
{connect adhoc47(1), adhoc45(0)}
{nseg = 1}
{strdef color color = "White"}
{pt3dclear()}
{pt3dadd(190872.000000,152616.000000,53475.000000,828.091944)}
{pt3dadd(190956.000000,152760.000000,53550.000000,862.595802)}
{pt3dadd(191112.000000,153228.000000,53675.000000,928.153044)}
{pt3dadd(191088.000000,153744.000000,53750.000000,993.710286)}
{pt3dadd(190800.000000,154296.000000,53775.000000,862.595802)}

{create adhoc48}
{access adhoc48}
{connect adhoc48(1), adhoc47(0)}
{nseg = 1}
{strdef color color = "White"}
{pt3dclear()}
{pt3dadd(190800.000000,154296.000000,53775.000000,862.595802)}
{pt3dadd(189132.000000,154296.000000,53550.000000,116.095032)}
{pt3dadd(188736.000000,154476.000000,53500.000000,144.847593)}
{pt3dadd(188136.000000,155208.000000,53225.000000,173.600154)}
{pt3dadd(187812.000000,155412.000000,53025.000000,202.352715)}
{pt3dadd(187572.000000,155688.000000,53075.000000,231.105276)}
{pt3dadd(187212.000000,155784.000000,53025.000000,259.993431)}
{pt3dadd(186636.000000,156024.000000,53150.000000,288.881586)}
{pt3dadd(186420.000000,156324.000000,53275.000000,317.769741)}
{pt3dadd(186144.000000,156708.000000,53350.000000,346.657896)}
{pt3dadd(186204.000000,156984.000000,53350.000000,242.985969)}
{pt3dadd(185952.000000,157332.000000,53225.000000,139.314042)}
{pt3dadd(186120.000000,156984.000000,53025.000000,240.734646)}

{create adhoc49}
{access adhoc49}
{connect adhoc49(1), adhoc47(0)}
{nseg = 1}
{strdef color color = "White"}
{pt3dclear()}
{pt3dadd(190800.000000,154296.000000,53775.000000,862.595802)}
{pt3dadd(191064.000000,154644.000000,54075.000000,1035.114948)}
{pt3dadd(191304.000000,155268.000000,54225.000000,977.608566)}
{pt3dadd(191532.000000,155988.000000,54575.000000,920.102184)}
{pt3dadd(191628.000000,156588.000000,54750.000000,862.595802)}
{pt3dadd(191616.000000,157068.000000,55125.000000,862.595802)}

{create adhoc50}
{access adhoc50}
{connect adhoc50(1), adhoc49(0)}
{nseg = 1}
{strdef color color = "White"}
{pt3dclear()}
{pt3dadd(191616.000000,157068.000000,55125.000000,862.595802)}
{pt3dadd(190896.000000,157068.000000,56350.000000,288.881586)}
{pt3dadd(190668.000000,156792.000000,56625.000000,274.437509)}
{pt3dadd(190440.000000,156504.000000,56775.000000,259.993431)}
{pt3dadd(190308.000000,156240.000000,56925.000000,245.549354)}
{pt3dadd(190068.000000,156060.000000,57050.000000,231.105276)}
{pt3dadd(189840.000000,155868.000000,57175.000000,245.549354)}
{pt3dadd(189588.000000,155652.000000,57225.000000,259.993431)}
{pt3dadd(189600.000000,155496.000000,57325.000000,274.437509)}
{pt3dadd(189336.000000,155328.000000,57425.000000,288.881586)}
{pt3dadd(188976.000000,155100.000000,57525.000000,479.219886)}

{create adhoc51}
{access adhoc51}
{connect adhoc51(1), adhoc50(0)}
{nseg = 1}
{strdef color color = "White"}
{pt3dclear()}
{pt3dadd(188976.000000,155100.000000,57525.000000,479.219886)}
{pt3dadd(188460.000000,154920.000000,57300.000000,200.612214)}
{pt3dadd(188196.000000,154704.000000,57200.000000,185.287671)}
{pt3dadd(187932.000000,154524.000000,57050.000000,169.963128)}
{pt3dadd(187644.000000,154296.000000,56925.000000,154.638585)}
{pt3dadd(187248.000000,154056.000000,56950.000000,139.314042)}
{pt3dadd(186996.000000,153504.000000,56950.000000,164.669193)}
{pt3dadd(186612.000000,152988.000000,56950.000000,190.024344)}
{pt3dadd(186384.000000,152652.000000,56900.000000,215.379495)}
{pt3dadd(186132.000000,152292.000000,56900.000000,240.734646)}
{pt3dadd(186108.000000,152004.000000,56850.000000,220.673430)}
{pt3dadd(186084.000000,151728.000000,56650.000000,200.612214)}
{pt3dadd(186036.000000,151608.000000,56525.000000,139.314042)}

{create adhoc52}
{access adhoc52}
{connect adhoc52(1), adhoc50(0)}
{nseg = 1}
{strdef color color = "White"}
{pt3dclear()}
{pt3dadd(188976.000000,155100.000000,57525.000000,479.219886)}
{pt3dadd(189312.000000,155124.000000,58175.000000,200.612214)}
{pt3dadd(189600.000000,154932.000000,58700.000000,222.679557)}
{pt3dadd(189732.000000,154896.000000,58775.000000,244.746900)}
{pt3dadd(189960.000000,154812.000000,58950.000000,266.814243)}
{pt3dadd(190236.000000,154392.000000,59150.000000,288.881586)}
{pt3dadd(190332.000000,154272.000000,59425.000000,303.325664)}
{pt3dadd(190404.000000,153996.000000,59675.000000,317.769741)}
{pt3dadd(190584.000000,153768.000000,59950.000000,332.213819)}
{pt3dadd(190764.000000,153516.000000,60150.000000,346.657896)}
{pt3dadd(190872.000000,153240.000000,60525.000000,288.881586)}
{pt3dadd(191028.000000,153132.000000,60900.000000,332.791596)}

{create adhoc53}
{access adhoc53}
{connect adhoc53(1), adhoc52(0)}
{nseg = 1}
{strdef color color = "White"}
{pt3dclear()}
{pt3dadd(191028.000000,153132.000000,60900.000000,332.791596)}
{pt3dadd(191160.000000,153360.000000,61150.000000,415.989486)}
{pt3dadd(191220.000000,153276.000000,61575.000000,398.656589)}
{pt3dadd(191316.000000,153312.000000,61875.000000,381.323691)}
{pt3dadd(191472.000000,153000.000000,62175.000000,363.990794)}
{pt3dadd(191496.000000,152928.000000,62525.000000,346.657896)}
{pt3dadd(191436.000000,152832.000000,62825.000000,289.017180)}
{pt3dadd(191352.000000,152796.000000,63175.000000,231.376464)}
{pt3dadd(191604.000000,152868.000000,63500.000000,173.735748)}
{pt3dadd(191904.000000,152868.000000,63750.000000,116.095032)}
{pt3dadd(192024.000000,152748.000000,64000.000000,124.918254)}
{pt3dadd(192180.000000,152628.000000,64175.000000,133.741476)}
{pt3dadd(192264.000000,152496.000000,64525.000000,139.314042)}

{create adhoc54}
{access adhoc54}
{connect adhoc54(1), adhoc52(0)}
{nseg = 1}
{strdef color color = "White"}
{pt3dclear()}
{pt3dadd(191028.000000,153132.000000,60900.000000,332.791596)}
{pt3dadd(190968.000000,152880.000000,60775.000000,200.612214)}
{pt3dadd(190776.000000,152580.000000,60725.000000,185.287671)}
{pt3dadd(190824.000000,152388.000000,60750.000000,169.963128)}
{pt3dadd(190776.000000,152208.000000,60675.000000,154.638585)}
{pt3dadd(190644.000000,151944.000000,60575.000000,139.314042)}
{pt3dadd(190416.000000,151692.000000,60550.000000,139.314042)}

{create adhoc55}
{access adhoc55}
{connect adhoc55(1), adhoc49(0)}
{nseg = 1}
{strdef color color = "White"}
{pt3dclear()}
{pt3dadd(191616.000000,157068.000000,55125.000000,862.595802)}
{pt3dadd(191772.000000,157308.000000,55225.000000,1035.114948)}
{pt3dadd(191952.000000,157872.000000,55325.000000,1138.626414)}
{pt3dadd(192156.000000,158532.000000,55275.000000,1242.137880)}
{pt3dadd(192360.000000,159156.000000,55225.000000,1192.452354)}

{create adhoc56}
{access adhoc56}
{connect adhoc56(1), adhoc55(0)}
{nseg = 1}
{strdef color color = "White"}
{pt3dclear()}
{pt3dadd(192360.000000,159156.000000,55225.000000,1192.452354)}
{pt3dadd(190116.000000,159156.000000,56100.000000,240.734646)}
{pt3dadd(189780.000000,159276.000000,56300.000000,263.748884)}
{pt3dadd(189432.000000,159456.000000,56400.000000,286.763121)}
{pt3dadd(188988.000000,159684.000000,56475.000000,309.777359)}
{pt3dadd(188640.000000,159888.000000,56575.000000,332.791596)}
{pt3dadd(188364.000000,159996.000000,56725.000000,336.258171)}
{pt3dadd(188112.000000,160116.000000,56850.000000,339.724746)}
{pt3dadd(187884.000000,160200.000000,57000.000000,343.191321)}
{pt3dadd(187608.000000,160164.000000,57175.000000,346.657896)}
{pt3dadd(187476.000000,160344.000000,57550.000000,409.749642)}
{pt3dadd(187368.000000,160452.000000,57825.000000,472.841388)}
{pt3dadd(187344.000000,160488.000000,58100.000000,535.933134)}
{pt3dadd(187368.000000,160548.000000,58375.000000,599.024880)}
{pt3dadd(187344.000000,160524.000000,58600.000000,574.065504)}
{pt3dadd(187152.000000,160632.000000,58925.000000,549.106128)}
{pt3dadd(187212.000000,160584.000000,59150.000000,524.146752)}
{pt3dadd(187356.000000,160584.000000,59500.000000,499.187376)}
{pt3dadd(187464.000000,160656.000000,59800.000000,499.187376)}
{pt3dadd(187416.000000,160656.000000,60100.000000,499.187376)}
{pt3dadd(187560.000000,160188.000000,60475.000000,499.187376)}
{pt3dadd(187884.000000,159744.000000,60825.000000,499.187376)}
{pt3dadd(188184.000000,159372.000000,61100.000000,446.610929)}
{pt3dadd(188400.000000,159552.000000,61475.000000,394.034481)}
{pt3dadd(188808.000000,159516.000000,61800.000000,341.458034)}
{pt3dadd(189108.000000,159456.000000,62125.000000,288.881586)}
{pt3dadd(189348.000000,159360.000000,62400.000000,240.847655)}
{pt3dadd(189576.000000,159228.000000,62450.000000,192.813723)}
{pt3dadd(189864.000000,159024.000000,62500.000000,144.779792)}
{pt3dadd(190212.000000,158364.000000,62175.000000,96.745860)}
{pt3dadd(190404.000000,158232.000000,62225.000000,120.222852)}
{pt3dadd(190524.000000,158196.000000,62275.000000,143.699844)}
{pt3dadd(190680.000000,158124.000000,62275.000000,167.176836)}
{pt3dadd(190944.000000,157920.000000,62325.000000,167.176836)}

{create adhoc57}
{access adhoc57}
{connect adhoc57(1), adhoc55(0)}
{nseg = 1}
{strdef color color = "White"}
{pt3dclear()}
{pt3dadd(192360.000000,159156.000000,55225.000000,1192.452354)}
{pt3dadd(192648.000000,159516.000000,55125.000000,1242.137880)}
{pt3dadd(192828.000000,160080.000000,55175.000000,1147.252361)}
{pt3dadd(192996.000000,160704.000000,55150.000000,1052.366841)}
{pt3dadd(193164.000000,161280.000000,55200.000000,957.481322)}
{pt3dadd(193248.000000,162060.000000,55300.000000,862.595802)}
{pt3dadd(193296.000000,162996.000000,55475.000000,948.855375)}
{pt3dadd(192972.000000,163992.000000,55300.000000,1035.114948)}
{pt3dadd(192684.000000,164664.000000,54975.000000,1035.114948)}

{create adhoc58}
{access adhoc58}
{connect adhoc58(1), adhoc57(0)}
{nseg = 1}
{strdef color color = "White"}
{pt3dclear()}
{pt3dadd(192684.000000,164664.000000,54975.000000,1035.114948)}
{pt3dadd(191460.000000,164988.000000,52600.000000,599.024880)}
{pt3dadd(191292.000000,164220.000000,52225.000000,593.034624)}
{pt3dadd(191172.000000,163968.000000,51850.000000,587.044368)}
{pt3dadd(190944.000000,163860.000000,51425.000000,581.054112)}
{pt3dadd(190560.000000,163512.000000,51100.000000,575.063856)}
{pt3dadd(190368.000000,163200.000000,50675.000000,494.306424)}
{pt3dadd(190272.000000,163020.000000,50250.000000,413.548992)}
{pt3dadd(189756.000000,162732.000000,49825.000000,332.791560)}
{pt3dadd(189564.000000,162780.000000,49475.000000,288.881586)}

{create adhoc59}
{access adhoc59}
{connect adhoc59(1), adhoc58(0)}
{nseg = 1}
{strdef color color = "White"}
{pt3dclear()}
{pt3dadd(189564.000000,162780.000000,49475.000000,288.881586)}
{pt3dadd(189432.000000,162036.000000,49475.000000,479.219886)}
{pt3dadd(189060.000000,161460.000000,49100.000000,463.412286)}
{pt3dadd(188880.000000,161160.000000,48825.000000,447.604686)}
{pt3dadd(188544.000000,160320.000000,48850.000000,431.797086)}
{pt3dadd(188280.000000,159924.000000,48850.000000,415.989486)}
{pt3dadd(188016.000000,159684.000000,48750.000000,398.656589)}
{pt3dadd(187740.000000,159312.000000,48750.000000,381.323691)}
{pt3dadd(187548.000000,158868.000000,48625.000000,363.990794)}
{pt3dadd(187068.000000,158640.000000,48725.000000,346.657896)}
{pt3dadd(186624.000000,158340.000000,48725.000000,329.325003)}
{pt3dadd(186408.000000,158076.000000,48825.000000,311.992110)}
{pt3dadd(186108.000000,157992.000000,48800.000000,294.659217)}
{pt3dadd(185832.000000,157884.000000,48825.000000,277.326324)}
{pt3dadd(185568.000000,157764.000000,48750.000000,288.881586)}
{pt3dadd(185268.000000,157644.000000,48500.000000,167.176836)}

{create adhoc60}
{access adhoc60}
{connect adhoc60(1), adhoc59(0)}
{nseg = 1}
{strdef color color = "White"}
{pt3dclear()}
{pt3dadd(185268.000000,157644.000000,48500.000000,167.176836)}
{pt3dadd(185040.000000,157260.000000,48200.000000,200.612214)}
{pt3dadd(184656.000000,156708.000000,47975.000000,189.467088)}
{pt3dadd(184296.000000,156384.000000,47950.000000,178.321962)}
{pt3dadd(184068.000000,156060.000000,47950.000000,167.176836)}
{pt3dadd(183840.000000,156228.000000,48000.000000,200.612214)}

{create adhoc61}
{access adhoc61}
{connect adhoc61(1), adhoc59(0)}
{nseg = 1}
{strdef color color = "White"}
{pt3dclear()}
{pt3dadd(185268.000000,157644.000000,48500.000000,167.176836)}
{pt3dadd(185472.000000,158076.000000,49250.000000,288.881586)}
{pt3dadd(185232.000000,158100.000000,49600.000000,303.325664)}
{pt3dadd(185040.000000,158100.000000,49675.000000,317.769741)}
{pt3dadd(184572.000000,158184.000000,50175.000000,332.213819)}
{pt3dadd(184308.000000,158244.000000,50450.000000,346.657896)}
{pt3dadd(184008.000000,158340.000000,50775.000000,332.213819)}
{pt3dadd(183564.000000,158556.000000,51100.000000,317.769741)}
{pt3dadd(183408.000000,158664.000000,51475.000000,303.325664)}
{pt3dadd(183432.000000,158724.000000,51875.000000,288.881586)}
{pt3dadd(183144.000000,158628.000000,51675.000000,200.612214)}
{pt3dadd(183012.000000,158628.000000,51900.000000,200.612214)}

{create adhoc62}
{access adhoc62}
{connect adhoc62(1), adhoc58(0)}
{nseg = 1}
{strdef color color = "White"}
{pt3dclear()}
{pt3dadd(189564.000000,162780.000000,49475.000000,288.881586)}
{pt3dadd(188844.000000,163464.000000,49475.000000,346.657896)}
{pt3dadd(188196.000000,163632.000000,49150.000000,346.657896)}
{pt3dadd(187872.000000,163848.000000,48875.000000,346.657896)}
{pt3dadd(187572.000000,164028.000000,48575.000000,346.657896)}
{pt3dadd(187656.000000,164328.000000,48350.000000,346.657896)}
{pt3dadd(187368.000000,164640.000000,47800.000000,320.177083)}
{pt3dadd(187008.000000,164892.000000,47375.000000,293.696271)}
{pt3dadd(186192.000000,165120.000000,47050.000000,267.215459)}
{pt3dadd(185364.000000,165336.000000,46750.000000,240.734646)}
{pt3dadd(184908.000000,165372.000000,46700.000000,222.345193)}
{pt3dadd(184512.000000,165516.000000,46575.000000,203.955741)}
{pt3dadd(184164.000000,165672.000000,46600.000000,185.566288)}
{pt3dadd(183816.000000,165816.000000,46625.000000,167.176836)}
{pt3dadd(183468.000000,165912.000000,46550.000000,175.535680)}
{pt3dadd(183156.000000,165888.000000,46525.000000,183.894525)}
{pt3dadd(182808.000000,166056.000000,46525.000000,192.253370)}
{pt3dadd(182592.000000,166188.000000,46350.000000,200.612214)}
{pt3dadd(182376.000000,166308.000000,46350.000000,179.482918)}
{pt3dadd(182172.000000,166356.000000,46400.000000,158.353623)}
{pt3dadd(181932.000000,166584.000000,46200.000000,137.224328)}
{pt3dadd(181704.000000,166764.000000,46075.000000,116.095032)}
{pt3dadd(181416.000000,167016.000000,46075.000000,121.899785)}
{pt3dadd(181320.000000,167184.000000,46075.000000,127.704537)}
{pt3dadd(180948.000000,167388.000000,45950.000000,133.509289)}
{pt3dadd(180744.000000,167520.000000,45975.000000,139.314042)}
{pt3dadd(180516.000000,168012.000000,45900.000000,139.314042)}

{create adhoc63}
{access adhoc63}
{connect adhoc63(1), adhoc57(0)}
{nseg = 1}
{strdef color color = "White"}
{pt3dclear()}
{pt3dadd(192684.000000,164664.000000,54975.000000,1035.114948)}
{pt3dadd(192984.000000,165108.000000,55125.000000,1192.452354)}
{pt3dadd(192708.000000,165564.000000,54975.000000,1341.508878)}
{pt3dadd(192756.000000,166128.000000,55075.000000,1490.565402)}
{pt3dadd(192660.000000,166596.000000,55700.000000,1717.131222)}

{create adhoc64}
{access adhoc64}
{connect adhoc64(1), adhoc63(0)}
{nseg = 1}
{strdef color color = "White"}
{pt3dclear()}
{pt3dadd(192660.000000,166596.000000,55700.000000,1717.131222)}
{pt3dadd(190788.000000,166596.000000,57200.000000,346.657896)}
{pt3dadd(190608.000000,166452.000000,57425.000000,346.657896)}
{pt3dadd(190092.000000,166368.000000,57475.000000,346.657896)}
{pt3dadd(189768.000000,166224.000000,57475.000000,346.657896)}
{pt3dadd(189264.000000,166140.000000,57425.000000,346.657896)}
{pt3dadd(188784.000000,165924.000000,57375.000000,240.734646)}

{create adhoc65}
{access adhoc65}
{connect adhoc65(1), adhoc64(0)}
{nseg = 1}
{strdef color color = "White"}
{pt3dclear()}
{pt3dadd(188784.000000,165924.000000,57375.000000,240.734646)}
{pt3dadd(187176.000000,166344.000000,57375.000000,346.657896)}
{pt3dadd(186852.000000,166500.000000,57700.000000,379.798393)}
{pt3dadd(186528.000000,166728.000000,58150.000000,412.938891)}
{pt3dadd(186132.000000,167028.000000,58675.000000,446.079388)}
{pt3dadd(186096.000000,167760.000000,59400.000000,479.219886)}
{pt3dadd(186144.000000,168072.000000,59775.000000,559.089864)}
{pt3dadd(186168.000000,168252.000000,60250.000000,638.959842)}
{pt3dadd(186348.000000,168360.000000,60625.000000,718.829820)}
{pt3dadd(186600.000000,168420.000000,61100.000000,599.024880)}

{create adhoc66}
{access adhoc66}
{connect adhoc66(1), adhoc65(0)}
{nseg = 1}
{strdef color color = "White"}
{pt3dclear()}
{pt3dadd(186600.000000,168420.000000,61100.000000,599.024880)}
{pt3dadd(187080.000000,168144.000000,61300.000000,288.881586)}
{pt3dadd(187464.000000,168084.000000,61450.000000,266.814243)}
{pt3dadd(187524.000000,167988.000000,61700.000000,244.746900)}
{pt3dadd(187692.000000,167772.000000,62100.000000,222.679557)}
{pt3dadd(187812.000000,167580.000000,62600.000000,200.612214)}
{pt3dadd(188328.000000,167424.000000,62450.000000,139.314042)}

{create adhoc67}
{access adhoc67}
{connect adhoc67(1), adhoc65(0)}
{nseg = 1}
{strdef color color = "White"}
{pt3dclear()}
{pt3dadd(186600.000000,168420.000000,61100.000000,599.024880)}
{pt3dadd(186828.000000,169020.000000,61650.000000,240.734646)}
{pt3dadd(186888.000000,169212.000000,61950.000000,215.379495)}
{pt3dadd(186864.000000,169176.000000,62325.000000,190.024344)}
{pt3dadd(187068.000000,169056.000000,62625.000000,164.669193)}
{pt3dadd(186888.000000,169104.000000,62850.000000,139.314042)}
{pt3dadd(186984.000000,168972.000000,63175.000000,139.314042)}

{create adhoc68}
{access adhoc68}
{connect adhoc68(1), adhoc64(0)}
{nseg = 1}
{strdef color color = "White"}
{pt3dclear()}
{pt3dadd(188784.000000,165924.000000,57375.000000,240.734646)}
{pt3dadd(188532.000000,165108.000000,57375.000000,200.612214)}
{pt3dadd(188340.000000,164772.000000,57400.000000,179.482918)}
{pt3dadd(188148.000000,164712.000000,57300.000000,158.353623)}
{pt3dadd(188016.000000,164724.000000,57250.000000,137.224328)}
{pt3dadd(187872.000000,164664.000000,57200.000000,116.095032)}
{pt3dadd(188208.000000,164484.000000,57100.000000,67.184640)}

{create adhoc69}
{access adhoc69}
{connect adhoc69(1), adhoc63(0)}
{nseg = 1}
{strdef color color = "White"}
{pt3dclear()}
{pt3dadd(192660.000000,166596.000000,55700.000000,1717.131222)}
{pt3dadd(192624.000000,166776.000000,55275.000000,1430.942742)}
{pt3dadd(192696.000000,167100.000000,55200.000000,1445.848407)}
{pt3dadd(192624.000000,167640.000000,55200.000000,1460.754072)}
{pt3dadd(192396.000000,168072.000000,54950.000000,1475.659737)}
{pt3dadd(192432.000000,168492.000000,55175.000000,1490.565402)}
{pt3dadd(192036.000000,169224.000000,54850.000000,1460.410908)}
{pt3dadd(191796.000000,169656.000000,55025.000000,1430.256414)}
{pt3dadd(191604.000000,170256.000000,54825.000000,1400.101920)}
{pt3dadd(190980.000000,170508.000000,54675.000000,1242.137880)}

{create adhoc70}
{access adhoc70}
{connect adhoc70(1), adhoc69(0)}
{nseg = 1}
{strdef color color = "White"}
{pt3dclear()}
{pt3dadd(190980.000000,170508.000000,54675.000000,1242.137880)}
{pt3dadd(190860.000000,171192.000000,54750.000000,1430.942868)}
{pt3dadd(189780.000000,172140.000000,54750.000000,1035.114948)}

{create adhoc71}
{access adhoc71}
{connect adhoc71(1), adhoc70(0)}
{nseg = 1}
{strdef color color = "White"}
{pt3dclear()}
{pt3dadd(189780.000000,172140.000000,54750.000000,1035.114948)}
{pt3dadd(189744.000000,172824.000000,54650.000000,1035.114948)}
{pt3dadd(189792.000000,173640.000000,54575.000000,991.985162)}
{pt3dadd(189732.000000,174312.000000,54650.000000,948.855375)}
{pt3dadd(189864.000000,175428.000000,54650.000000,905.725589)}
{pt3dadd(189564.000000,175752.000000,54400.000000,862.595802)}
{pt3dadd(189732.000000,176160.000000,54575.000000,957.481322)}
{pt3dadd(189648.000000,177804.000000,54750.000000,1052.366841)}
{pt3dadd(189348.000000,178380.000000,54850.000000,1147.252361)}
{pt3dadd(189336.000000,178908.000000,54825.000000,1242.137880)}
{pt3dadd(189312.000000,179328.000000,55050.000000,1366.351641)}
{pt3dadd(188820.000000,179976.000000,55150.000000,1490.565402)}
{pt3dadd(187716.000000,181176.000000,54875.000000,1717.131222)}

{create adhoc72}
{access adhoc72}
{connect adhoc72(1), adhoc71(0)}
{nseg = 1}
{strdef color color = "White"}
{pt3dclear()}
{pt3dadd(187716.000000,181176.000000,54875.000000,1717.131222)}
{pt3dadd(187476.000000,181572.000000,54500.000000,1717.131222)}

{create adhoc73}
{access adhoc73}
{connect adhoc73(1), adhoc72(0)}
{nseg = 1}
{strdef color color = "White"}
{pt3dclear()}
{pt3dadd(187476.000000,181572.000000,54500.000000,1717.131222)}
{pt3dadd(187092.000000,182460.000000,54775.000000,1717.131222)}
{pt3dadd(186504.000000,183672.000000,54700.000000,1660.489767)}
{pt3dadd(186480.000000,184020.000000,54425.000000,1603.848312)}
{pt3dadd(186204.000000,184500.000000,54725.000000,1547.206857)}
{pt3dadd(185820.000000,184896.000000,55025.000000,1490.565402)}
{pt3dadd(185196.000000,185904.000000,55025.000000,1242.137880)}

{create adhoc74}
{access adhoc74}
{connect adhoc74(1), adhoc73(0)}
{nseg = 1}
{strdef color color = "White"}
{pt3dclear()}
{pt3dadd(185196.000000,185904.000000,55025.000000,1242.137880)}
{pt3dadd(185076.000000,186468.000000,54950.000000,1430.942868)}
{pt3dadd(185004.000000,186900.000000,55125.000000,1368.007872)}
{pt3dadd(184896.000000,187464.000000,55200.000000,1305.072876)}
{pt3dadd(184260.000000,188052.000000,54200.000000,1242.137880)}
{pt3dadd(183816.000000,189576.000000,54375.000000,690.076602)}

{create adhoc75}
{access adhoc75}
{connect adhoc75(1), adhoc74(0)}
{nseg = 1}
{strdef color color = "White"}
{pt3dclear()}
{pt3dadd(183816.000000,189576.000000,54375.000000,690.076602)}
{pt3dadd(181596.000000,192264.000000,54375.000000,1788.678450)}
{pt3dadd(181260.000000,192120.000000,53150.000000,1490.565402)}
{pt3dadd(181104.000000,191880.000000,52025.000000,1430.942868)}

{create adhoc76}
{access adhoc76}
{connect adhoc76(1), adhoc75(0)}
{nseg = 1}
{strdef color color = "White"}
{pt3dclear()}
{pt3dadd(181104.000000,191880.000000,52025.000000,1430.942868)}
{pt3dadd(181392.000000,191100.000000,51000.000000,1035.114948)}
{pt3dadd(181764.000000,189720.000000,50000.000000,1035.114948)}
{pt3dadd(181944.000000,188820.000000,48950.000000,862.595802)}

{create adhoc77}
{access adhoc77}
{connect adhoc77(1), adhoc76(0)}
{nseg = 1}
{strdef color color = "White"}
{pt3dclear()}
{pt3dadd(181944.000000,188820.000000,48950.000000,862.595802)}
{pt3dadd(179940.000000,188628.000000,48775.000000,718.829820)}
{pt3dadd(179184.000000,188640.000000,48175.000000,718.829820)}
{pt3dadd(178776.000000,188940.000000,47675.000000,718.829820)}

{create adhoc78}
{access adhoc78}
{connect adhoc78(1), adhoc77(0)}
{nseg = 1}
{strdef color color = "White"}
{pt3dclear()}
{pt3dadd(178776.000000,188940.000000,47675.000000,718.829820)}
{pt3dadd(178476.000000,188916.000000,47300.000000,718.829820)}
{pt3dadd(178224.000000,189120.000000,46825.000000,599.024880)}

{create adhoc79}
{access adhoc79}
{connect adhoc79(1), adhoc78(0)}
{nseg = 1}
{strdef color color = "White"}
{pt3dclear()}
{pt3dadd(178224.000000,189120.000000,46825.000000,599.024880)}
{pt3dadd(176580.000000,189156.000000,46875.000000,240.734646)}
{pt3dadd(176208.000000,189408.000000,47025.000000,222.345193)}
{pt3dadd(175860.000000,189504.000000,47025.000000,203.955741)}
{pt3dadd(175620.000000,189624.000000,46925.000000,185.566288)}
{pt3dadd(175224.000000,189828.000000,46825.000000,167.176836)}
{pt3dadd(174936.000000,190068.000000,46900.000000,143.699844)}
{pt3dadd(174552.000000,190308.000000,46875.000000,120.222852)}
{pt3dadd(174264.000000,190260.000000,46875.000000,96.745860)}
{pt3dadd(173796.000000,190248.000000,47000.000000,167.176836)}

{create adhoc80}
{access adhoc80}
{connect adhoc80(1), adhoc78(0)}
{nseg = 1}
{strdef color color = "White"}
{pt3dclear()}
{pt3dadd(178224.000000,189120.000000,46825.000000,599.024880)}
{pt3dadd(177972.000000,189516.000000,46100.000000,599.024880)}
{pt3dadd(177720.000000,189672.000000,45900.000000,599.024880)}
{pt3dadd(177708.000000,189768.000000,45725.000000,599.024880)}
{pt3dadd(177540.000000,189936.000000,45450.000000,599.024880)}
{pt3dadd(177420.000000,190068.000000,45150.000000,599.024880)}
{pt3dadd(177420.000000,190164.000000,44900.000000,549.106128)}
{pt3dadd(177372.000000,190284.000000,44650.000000,499.187376)}
{pt3dadd(177456.000000,190596.000000,44400.000000,415.989486)}

{create adhoc81}
{access adhoc81}
{connect adhoc81(1), adhoc80(0)}
{nseg = 1}
{strdef color color = "White"}
{pt3dclear()}
{pt3dadd(177456.000000,190596.000000,44400.000000,415.989486)}
{pt3dadd(176772.000000,189576.000000,44400.000000,288.881586)}
{pt3dadd(176640.000000,189492.000000,44250.000000,276.844851)}
{pt3dadd(176676.000000,189372.000000,44350.000000,264.808116)}
{pt3dadd(176556.000000,189168.000000,44025.000000,252.771381)}
{pt3dadd(176508.000000,189060.000000,43950.000000,240.734646)}
{pt3dadd(176556.000000,188964.000000,44000.000000,228.697915)}
{pt3dadd(176544.000000,188856.000000,43825.000000,216.661185)}
{pt3dadd(176460.000000,188760.000000,43750.000000,204.624455)}
{pt3dadd(176424.000000,188652.000000,43700.000000,192.587724)}
{pt3dadd(176352.000000,188544.000000,43575.000000,216.661190)}
{pt3dadd(176328.000000,188400.000000,43550.000000,240.734655)}
{pt3dadd(176292.000000,188256.000000,43350.000000,264.808120)}
{pt3dadd(176196.000000,188112.000000,43275.000000,288.881586)}
{pt3dadd(176208.000000,187956.000000,43175.000000,266.814243)}
{pt3dadd(176160.000000,187812.000000,43100.000000,244.746900)}
{pt3dadd(176232.000000,187704.000000,43075.000000,222.679557)}
{pt3dadd(176412.000000,187596.000000,43050.000000,200.612214)}
{pt3dadd(176652.000000,187488.000000,42975.000000,222.679557)}
{pt3dadd(176916.000000,187248.000000,42725.000000,244.746900)}
{pt3dadd(177156.000000,186936.000000,42400.000000,266.814243)}
{pt3dadd(177396.000000,186708.000000,42175.000000,288.881586)}
{pt3dadd(177588.000000,186540.000000,42050.000000,285.992771)}
{pt3dadd(177696.000000,186408.000000,41875.000000,283.103955)}
{pt3dadd(177840.000000,186324.000000,41800.000000,280.215140)}
{pt3dadd(177948.000000,186228.000000,41800.000000,277.326324)}
{pt3dadd(177876.000000,186084.000000,41975.000000,242.823254)}
{pt3dadd(177972.000000,186240.000000,41650.000000,208.320183)}
{pt3dadd(178008.000000,186180.000000,41525.000000,173.817113)}
{pt3dadd(178044.000000,186084.000000,41325.000000,139.314042)}
{pt3dadd(178092.000000,185856.000000,41225.000000,154.638585)}
{pt3dadd(178356.000000,185796.000000,41000.000000,169.963128)}
{pt3dadd(178584.000000,185760.000000,40825.000000,185.287671)}
{pt3dadd(178716.000000,185640.000000,40600.000000,200.612214)}
{pt3dadd(178836.000000,185580.000000,40450.000000,185.287671)}
{pt3dadd(178992.000000,185544.000000,40225.000000,169.963128)}
{pt3dadd(179100.000000,185448.000000,40225.000000,154.638585)}
{pt3dadd(179184.000000,185436.000000,40150.000000,139.314042)}
{pt3dadd(179436.000000,185316.000000,39825.000000,160.489764)}
{pt3dadd(179628.000000,185256.000000,39575.000000,167.176836)}

{create adhoc82}
{access adhoc82}
{connect adhoc82(1), adhoc80(0)}
{nseg = 1}
{strdef color color = "White"}
{pt3dclear()}
{pt3dadd(177456.000000,190596.000000,44400.000000,415.989486)}
{pt3dadd(177408.000000,190812.000000,44175.000000,346.657896)}
{pt3dadd(177396.000000,191124.000000,43900.000000,327.399126)}
{pt3dadd(177360.000000,191508.000000,43700.000000,308.140356)}
{pt3dadd(177360.000000,191796.000000,43575.000000,288.881586)}
{pt3dadd(177336.000000,192060.000000,43325.000000,346.657896)}

{create adhoc83}
{access adhoc83}
{connect adhoc83(1), adhoc82(0)}
{nseg = 1}
{strdef color color = "White"}
{pt3dclear()}
{pt3dadd(177336.000000,192060.000000,43325.000000,346.657896)}
{pt3dadd(177060.000000,191424.000000,43400.000000,167.176836)}
{pt3dadd(177012.000000,191340.000000,43325.000000,145.538014)}
{pt3dadd(176880.000000,191340.000000,43075.000000,123.899193)}
{pt3dadd(176796.000000,191376.000000,43025.000000,102.260372)}
{pt3dadd(176736.000000,191376.000000,43000.000000,80.621550)}
{pt3dadd(176652.000000,191376.000000,42950.000000,96.745860)}

{create adhoc84}
{access adhoc84}
{connect adhoc84(1), adhoc82(0)}
{nseg = 1}
{strdef color color = "White"}
{pt3dclear()}
{pt3dadd(177336.000000,192060.000000,43325.000000,346.657896)}
{pt3dadd(177156.000000,192696.000000,43050.000000,346.657896)}
{pt3dadd(177276.000000,192900.000000,42925.000000,332.213819)}
{pt3dadd(177264.000000,193092.000000,42850.000000,317.769741)}
{pt3dadd(177336.000000,193284.000000,42800.000000,303.325664)}
{pt3dadd(177276.000000,193428.000000,42800.000000,288.881586)}
{pt3dadd(177156.000000,193584.000000,42775.000000,285.992771)}
{pt3dadd(177036.000000,193728.000000,42750.000000,283.103955)}
{pt3dadd(177000.000000,193896.000000,42750.000000,280.215140)}
{pt3dadd(176988.000000,194064.000000,42750.000000,277.326324)}
{pt3dadd(176856.000000,194208.000000,42650.000000,280.215140)}
{pt3dadd(176844.000000,194388.000000,42475.000000,283.103955)}
{pt3dadd(176892.000000,194532.000000,42500.000000,285.992771)}
{pt3dadd(176808.000000,194760.000000,42375.000000,288.881586)}
{pt3dadd(176520.000000,194964.000000,42375.000000,303.325664)}
{pt3dadd(176412.000000,195240.000000,42400.000000,317.769741)}
{pt3dadd(176328.000000,195432.000000,42400.000000,332.213819)}
{pt3dadd(176040.000000,195732.000000,42400.000000,346.657896)}
{pt3dadd(175824.000000,195900.000000,42525.000000,363.990794)}
{pt3dadd(175692.000000,196116.000000,42600.000000,381.323691)}
{pt3dadd(175608.000000,196332.000000,42625.000000,398.656589)}
{pt3dadd(175512.000000,196584.000000,42725.000000,415.989486)}
{pt3dadd(175284.000000,196812.000000,42825.000000,415.989486)}
{pt3dadd(174996.000000,196992.000000,42875.000000,415.989486)}
{pt3dadd(174972.000000,197184.000000,42975.000000,415.989486)}
{pt3dadd(174912.000000,197352.000000,42950.000000,415.989486)}
{pt3dadd(174720.000000,197568.000000,42950.000000,362.145168)}
{pt3dadd(174624.000000,197760.000000,42950.000000,308.300850)}
{pt3dadd(174564.000000,197952.000000,42950.000000,254.456532)}
{pt3dadd(174384.000000,198144.000000,42875.000000,200.612214)}
{pt3dadd(174312.000000,198324.000000,42850.000000,200.612214)}
{pt3dadd(174288.000000,198540.000000,42775.000000,200.612214)}
{pt3dadd(174072.000000,198696.000000,42775.000000,200.612214)}
{pt3dadd(173892.000000,198828.000000,42750.000000,200.612214)}
{pt3dadd(173832.000000,199032.000000,42725.000000,178.321973)}
{pt3dadd(173772.000000,199224.000000,42700.000000,156.031731)}
{pt3dadd(173772.000000,199368.000000,42625.000000,133.741490)}
{pt3dadd(173712.000000,199596.000000,42675.000000,111.451248)}
{pt3dadd(173676.000000,199824.000000,42700.000000,240.734646)}
{pt3dadd(173616.000000,199848.000000,42750.000000,167.176836)}

{create adhoc85}
{access adhoc85}
{connect adhoc85(1), adhoc84(0)}
{nseg = 1}
{strdef color color = "White"}
{pt3dclear()}
{pt3dadd(173616.000000,199848.000000,42750.000000,167.176836)}
{pt3dadd(174024.000000,199848.000000,42925.000000,116.095032)}
{pt3dadd(174084.000000,199800.000000,43050.000000,116.095032)}
{pt3dadd(174168.000000,199836.000000,43100.000000,116.095032)}
{pt3dadd(174300.000000,199884.000000,43150.000000,116.095032)}

{create adhoc86}
{access adhoc86}
{connect adhoc86(1), adhoc84(0)}
{nseg = 1}
{strdef color color = "White"}
{pt3dclear()}
{pt3dadd(173616.000000,199848.000000,42750.000000,167.176836)}
{pt3dadd(173496.000000,199992.000000,42750.000000,139.314042)}
{pt3dadd(173448.000000,200136.000000,42725.000000,169.963128)}
{pt3dadd(173352.000000,200268.000000,42725.000000,200.612214)}
{pt3dadd(173256.000000,200472.000000,42725.000000,240.734646)}

{create adhoc87}
{access adhoc87}
{connect adhoc87(1), adhoc86(0)}
{nseg = 1}
{strdef color color = "White"}
{pt3dclear()}
{pt3dadd(173256.000000,200472.000000,42725.000000,240.734646)}
{pt3dadd(173424.000000,200604.000000,42525.000000,240.734646)}
{pt3dadd(173424.000000,200772.000000,42400.000000,222.345193)}
{pt3dadd(173712.000000,200892.000000,42250.000000,203.955741)}
{pt3dadd(173868.000000,200676.000000,42250.000000,185.566288)}
{pt3dadd(174072.000000,200736.000000,42000.000000,167.176836)}
{pt3dadd(174288.000000,200856.000000,41925.000000,178.321962)}
{pt3dadd(174408.000000,200856.000000,41750.000000,189.467088)}
{pt3dadd(174528.000000,200808.000000,41575.000000,200.612214)}
{pt3dadd(174636.000000,200820.000000,41425.000000,200.612214)}

{create adhoc88}
{access adhoc88}
{connect adhoc88(1), adhoc87(0)}
{nseg = 1}
{strdef color color = "White"}
{pt3dclear()}
{pt3dadd(174636.000000,200820.000000,41425.000000,200.612214)}
{pt3dadd(174744.000000,201036.000000,42150.000000,200.612214)}

{create adhoc89}
{access adhoc89}
{connect adhoc89(1), adhoc87(0)}
{nseg = 1}
{strdef color color = "White"}
{pt3dclear()}
{pt3dadd(174636.000000,200820.000000,41425.000000,200.612214)}
{pt3dadd(174744.000000,200760.000000,41325.000000,200.612214)}
{pt3dadd(174612.000000,200772.000000,41175.000000,202.539672)}
{pt3dadd(174648.000000,200772.000000,40975.000000,204.467130)}
{pt3dadd(174660.000000,200700.000000,40750.000000,167.176836)}

{create adhoc90}
{access adhoc90}
{connect adhoc90(1), adhoc86(0)}
{nseg = 1}
{strdef color color = "White"}
{pt3dclear()}
{pt3dadd(173256.000000,200472.000000,42725.000000,240.734646)}
{pt3dadd(173196.000000,200700.000000,42650.000000,240.734646)}
{pt3dadd(173064.000000,201048.000000,42575.000000,228.697915)}
{pt3dadd(173112.000000,201324.000000,42450.000000,216.661185)}
{pt3dadd(173148.000000,201504.000000,42350.000000,204.624455)}
{pt3dadd(173100.000000,201648.000000,42350.000000,192.587724)}
{pt3dadd(173028.000000,201792.000000,42300.000000,213.772374)}
{pt3dadd(173052.000000,201936.000000,42375.000000,234.957024)}
{pt3dadd(173004.000000,202080.000000,42275.000000,256.141674)}
{pt3dadd(172944.000000,202284.000000,42250.000000,277.326324)}
{pt3dadd(173052.000000,202440.000000,42300.000000,268.178405)}
{pt3dadd(173088.000000,202596.000000,42350.000000,259.030485)}
{pt3dadd(172740.000000,202656.000000,42350.000000,249.882566)}
{pt3dadd(172536.000000,202944.000000,42250.000000,240.734646)}
{pt3dadd(172380.000000,203028.000000,42250.000000,252.771381)}
{pt3dadd(172248.000000,203124.000000,42300.000000,264.808116)}
{pt3dadd(172344.000000,203412.000000,42250.000000,276.844851)}
{pt3dadd(172380.000000,203712.000000,42275.000000,288.881586)}
{pt3dadd(172512.000000,203928.000000,42275.000000,288.881586)}
{pt3dadd(172620.000000,204132.000000,42100.000000,288.881586)}
{pt3dadd(172524.000000,204300.000000,41875.000000,288.881586)}
{pt3dadd(172680.000000,204636.000000,41650.000000,288.881586)}
{pt3dadd(172680.000000,204732.000000,41375.000000,346.657896)}
{pt3dadd(172644.000000,204672.000000,41200.000000,240.734646)}

{create adhoc91}
{access adhoc91}
{connect adhoc91(1), adhoc77(0)}
{nseg = 1}
{strdef color color = "White"}
{pt3dclear()}
{pt3dadd(178776.000000,188940.000000,47675.000000,718.829820)}
{pt3dadd(178920.000000,187908.000000,48675.000000,240.734646)}
{pt3dadd(178560.000000,187608.000000,48725.000000,252.771381)}
{pt3dadd(178176.000000,187536.000000,48900.000000,264.808116)}
{pt3dadd(177816.000000,187368.000000,49175.000000,276.844851)}
{pt3dadd(177456.000000,187080.000000,49325.000000,288.881586)}
{pt3dadd(177348.000000,186936.000000,49525.000000,288.881586)}
{pt3dadd(177180.000000,186612.000000,49425.000000,288.881586)}
{pt3dadd(176148.000000,186480.000000,49575.000000,288.881586)}
{pt3dadd(175752.000000,186216.000000,49850.000000,288.881586)}
{pt3dadd(175992.000000,186156.000000,49900.000000,96.745860)}
{pt3dadd(176316.000000,185736.000000,50475.000000,96.745860)}

{create adhoc92}
{access adhoc92}
{connect adhoc92(1), adhoc76(0)}
{nseg = 1}
{strdef color color = "White"}
{pt3dclear()}
{pt3dadd(181944.000000,188820.000000,48950.000000,862.595802)}
{pt3dadd(182724.000000,186684.000000,48175.000000,690.076602)}
{pt3dadd(182832.000000,186348.000000,47800.000000,617.394928)}
{pt3dadd(183084.000000,185988.000000,47600.000000,544.713255)}
{pt3dadd(183336.000000,185688.000000,47525.000000,472.031581)}
{pt3dadd(183384.000000,185376.000000,47400.000000,399.349908)}
{pt3dadd(183432.000000,185064.000000,47325.000000,403.509803)}
{pt3dadd(183360.000000,184716.000000,47075.000000,407.669697)}
{pt3dadd(183264.000000,184428.000000,46825.000000,411.829591)}
{pt3dadd(183324.000000,184116.000000,46700.000000,415.989486)}
{pt3dadd(183336.000000,183876.000000,46500.000000,461.748335)}
{pt3dadd(183264.000000,183456.000000,46250.000000,507.507183)}
{pt3dadd(183024.000000,182964.000000,45825.000000,553.266031)}
{pt3dadd(182964.000000,182592.000000,45575.000000,599.024880)}
{pt3dadd(182676.000000,182316.000000,45325.000000,574.065504)}
{pt3dadd(182304.000000,182112.000000,45325.000000,549.106128)}
{pt3dadd(182052.000000,181872.000000,45325.000000,524.146752)}
{pt3dadd(181800.000000,181416.000000,45525.000000,499.187376)}
{pt3dadd(181572.000000,181068.000000,45800.000000,461.055006)}
{pt3dadd(181356.000000,180840.000000,45850.000000,422.922636)}
{pt3dadd(181140.000000,180672.000000,45925.000000,384.790266)}
{pt3dadd(180948.000000,180552.000000,45950.000000,346.657896)}
{pt3dadd(180720.000000,180312.000000,46025.000000,346.657896)}
{pt3dadd(180516.000000,180036.000000,46025.000000,346.657896)}

{create adhoc93}
{access adhoc93}
{connect adhoc93(1), adhoc92(0)}
{nseg = 1}
{strdef color color = "White"}
{pt3dclear()}
{pt3dadd(180516.000000,180036.000000,46025.000000,346.657896)}
{pt3dadd(180072.000000,180792.000000,46050.000000,200.612214)}
{pt3dadd(179856.000000,180816.000000,46050.000000,192.253370)}
{pt3dadd(179748.000000,180792.000000,46075.000000,183.894525)}
{pt3dadd(179520.000000,180900.000000,46075.000000,175.535680)}
{pt3dadd(179292.000000,180948.000000,46075.000000,167.176836)}
{pt3dadd(179088.000000,180828.000000,45900.000000,158.817996)}
{pt3dadd(178800.000000,180924.000000,45950.000000,150.459156)}
{pt3dadd(178668.000000,180924.000000,45950.000000,142.100316)}
{pt3dadd(178560.000000,180912.000000,45900.000000,133.741476)}
{pt3dadd(178452.000000,180876.000000,45825.000000,142.100316)}
{pt3dadd(178536.000000,180840.000000,45700.000000,150.459156)}
{pt3dadd(178260.000000,180792.000000,45575.000000,158.817996)}
{pt3dadd(178056.000000,180768.000000,45525.000000,167.176836)}
{pt3dadd(177912.000000,180744.000000,45450.000000,200.612214)}

{create adhoc94}
{access adhoc94}
{connect adhoc94(1), adhoc92(0)}
{nseg = 1}
{strdef color color = "White"}
{pt3dclear()}
{pt3dadd(180516.000000,180036.000000,46025.000000,346.657896)}
{pt3dadd(180000.000000,179340.000000,46025.000000,415.989486)}
{pt3dadd(179664.000000,179040.000000,46000.000000,415.989486)}
{pt3dadd(179784.000000,178740.000000,46025.000000,415.989486)}
{pt3dadd(179724.000000,178464.000000,46025.000000,415.989486)}
{pt3dadd(179880.000000,178116.000000,46025.000000,415.989486)}
{pt3dadd(179832.000000,177840.000000,46150.000000,415.989486)}
{pt3dadd(179796.000000,177636.000000,46150.000000,415.989486)}

{create adhoc95}
{access adhoc95}
{connect adhoc95(1), adhoc94(0)}
{nseg = 1}
{strdef color color = "White"}
{pt3dclear()}
{pt3dadd(179796.000000,177636.000000,46150.000000,415.989486)}
{pt3dadd(179796.000000,177156.000000,46675.000000,200.612214)}
{pt3dadd(179472.000000,177012.000000,46725.000000,237.123635)}
{pt3dadd(179412.000000,176604.000000,47025.000000,273.635055)}
{pt3dadd(179388.000000,176544.000000,46950.000000,310.146475)}
{pt3dadd(179268.000000,176436.000000,47025.000000,346.657896)}
{pt3dadd(179184.000000,176232.000000,47175.000000,499.187376)}

{create adhoc96}
{access adhoc96}
{connect adhoc96(1), adhoc95(0)}
{nseg = 1}
{strdef color color = "White"}
{pt3dclear()}
{pt3dadd(179184.000000,176232.000000,47175.000000,499.187376)}
{pt3dadd(178920.000000,176172.000000,47450.000000,415.989486)}
{pt3dadd(178752.000000,176184.000000,47575.000000,357.571206)}
{pt3dadd(178668.000000,176316.000000,47900.000000,299.152926)}
{pt3dadd(178548.000000,176364.000000,48350.000000,240.734646)}
{pt3dadd(178680.000000,176628.000000,48475.000000,116.095032)}

{create adhoc97}
{access adhoc97}
{connect adhoc97(1), adhoc96(0)}
{nseg = 1}
{strdef color color = "White"}
{pt3dclear()}
{pt3dadd(178680.000000,176628.000000,48475.000000,116.095032)}
{pt3dadd(178272.000000,175992.000000,48450.000000,184.884210)}
{pt3dadd(178176.000000,175692.000000,48575.000000,161.954484)}
{pt3dadd(178140.000000,175572.000000,48700.000000,139.024758)}
{pt3dadd(178140.000000,175536.000000,48900.000000,116.095032)}
{pt3dadd(178140.000000,175404.000000,48750.000000,167.176836)}

{create adhoc98}
{access adhoc98}
{connect adhoc98(1), adhoc96(0)}
{nseg = 1}
{strdef color color = "White"}
{pt3dclear()}
{pt3dadd(178680.000000,176628.000000,48475.000000,116.095032)}
{pt3dadd(178788.000000,176820.000000,48650.000000,255.583944)}
{pt3dadd(178608.000000,176928.000000,48800.000000,241.841011)}
{pt3dadd(178368.000000,176976.000000,48925.000000,228.098079)}
{pt3dadd(178284.000000,177144.000000,49075.000000,214.355147)}
{pt3dadd(178224.000000,177228.000000,49175.000000,200.612214)}
{pt3dadd(178104.000000,177300.000000,49300.000000,183.894525)}
{pt3dadd(178224.000000,177348.000000,49450.000000,167.176836)}
{pt3dadd(178404.000000,177444.000000,49625.000000,200.612214)}

{create adhoc99}
{access adhoc99}
{connect adhoc99(1), adhoc95(0)}
{nseg = 1}
{strdef color color = "White"}
{pt3dclear()}
{pt3dadd(179184.000000,176232.000000,47175.000000,499.187376)}
{pt3dadd(179412.000000,175728.000000,47250.000000,192.587724)}
{pt3dadd(179568.000000,175176.000000,46850.000000,167.659803)}
{pt3dadd(179664.000000,174828.000000,46625.000000,142.731882)}
{pt3dadd(179652.000000,174588.000000,46425.000000,117.803961)}
{pt3dadd(179568.000000,174372.000000,46375.000000,92.876040)}
{pt3dadd(179640.000000,174192.000000,46400.000000,92.876040)}
{pt3dadd(179640.000000,174024.000000,46425.000000,139.314042)}

{create adhoc100}
{access adhoc100}
{connect adhoc100(1), adhoc94(0)}
{nseg = 1}
{strdef color color = "White"}
{pt3dclear()}
{pt3dadd(179796.000000,177636.000000,46150.000000,415.989486)}
{pt3dadd(179988.000000,177252.000000,45525.000000,346.657896)}
{pt3dadd(180396.000000,176868.000000,45250.000000,363.990794)}
{pt3dadd(180624.000000,176640.000000,45075.000000,381.323691)}
{pt3dadd(180732.000000,176460.000000,44875.000000,398.656589)}
{pt3dadd(180792.000000,176508.000000,44625.000000,415.989486)}
{pt3dadd(180768.000000,176508.000000,44425.000000,384.212511)}
{pt3dadd(180828.000000,176352.000000,44200.000000,352.435536)}
{pt3dadd(180768.000000,176292.000000,43925.000000,320.658561)}
{pt3dadd(180708.000000,176256.000000,43775.000000,288.881586)}
{pt3dadd(180528.000000,176196.000000,43525.000000,320.658561)}
{pt3dadd(180576.000000,176304.000000,43225.000000,352.435536)}
{pt3dadd(180732.000000,176268.000000,43000.000000,384.212511)}
{pt3dadd(180912.000000,176220.000000,42750.000000,415.989486)}
{pt3dadd(181116.000000,176088.000000,42550.000000,362.145168)}
{pt3dadd(181308.000000,175872.000000,42500.000000,308.300850)}
{pt3dadd(180636.000000,175092.000000,42300.000000,254.456532)}
{pt3dadd(180624.000000,174828.000000,42325.000000,200.612214)}
{pt3dadd(180564.000000,174684.000000,42275.000000,192.253370)}
{pt3dadd(180540.000000,174504.000000,42250.000000,183.894525)}
{pt3dadd(180480.000000,174360.000000,42200.000000,175.535680)}
{pt3dadd(180384.000000,174192.000000,42200.000000,167.176836)}
{pt3dadd(180276.000000,174024.000000,42100.000000,185.566288)}
{pt3dadd(180216.000000,173880.000000,42025.000000,203.955741)}
{pt3dadd(180156.000000,173748.000000,41950.000000,222.345193)}
{pt3dadd(179988.000000,173628.000000,42000.000000,240.734646)}
{pt3dadd(179832.000000,173580.000000,42075.000000,200.612214)}

{create adhoc101}
{access adhoc101}
{connect adhoc101(1), adhoc75(0)}
{nseg = 1}
{strdef color color = "White"}
{pt3dclear()}
{pt3dadd(181104.000000,191880.000000,52025.000000,1430.942868)}
{pt3dadd(179400.000000,191808.000000,52025.000000,346.657896)}
{pt3dadd(178992.000000,191748.000000,51900.000000,363.990794)}
{pt3dadd(178512.000000,191892.000000,51950.000000,381.323691)}
{pt3dadd(178068.000000,191856.000000,51900.000000,398.656589)}
{pt3dadd(177624.000000,191988.000000,51875.000000,415.989486)}
{pt3dadd(177264.000000,192084.000000,51875.000000,352.435536)}
{pt3dadd(176892.000000,192132.000000,51825.000000,288.881586)}
{pt3dadd(176760.000000,192444.000000,51750.000000,415.989486)}

{create adhoc102}
{access adhoc102}
{connect adhoc102(1), adhoc101(0)}
{nseg = 1}
{strdef color color = "White"}
{pt3dclear()}
{pt3dadd(176760.000000,192444.000000,51750.000000,415.989486)}
{pt3dadd(176472.000000,192732.000000,51725.000000,240.734646)}
{pt3dadd(176016.000000,192756.000000,51725.000000,267.215459)}
{pt3dadd(175908.000000,192984.000000,51600.000000,293.696271)}
{pt3dadd(175644.000000,193188.000000,51475.000000,320.177083)}
{pt3dadd(175380.000000,193152.000000,51300.000000,346.657896)}
{pt3dadd(175080.000000,193212.000000,51200.000000,301.787631)}
{pt3dadd(174780.000000,193224.000000,51125.000000,256.917366)}
{pt3dadd(174552.000000,193488.000000,51025.000000,212.047101)}
{pt3dadd(174252.000000,193512.000000,51075.000000,167.176836)}
{pt3dadd(174012.000000,193656.000000,51025.000000,150.149568)}
{pt3dadd(173784.000000,193752.000000,51100.000000,133.122300)}
{pt3dadd(173508.000000,194076.000000,51375.000000,116.095032)}
{pt3dadd(173340.000000,193980.000000,50650.000000,346.657896)}

{create adhoc103}
{access adhoc103}
{connect adhoc103(1), adhoc101(0)}
{nseg = 1}
{strdef color color = "White"}
{pt3dclear()}
{pt3dadd(176760.000000,192444.000000,51750.000000,415.989486)}
{pt3dadd(176760.000000,191712.000000,51750.000000,200.612214)}
{pt3dadd(176436.000000,191520.000000,51850.000000,200.612214)}
{pt3dadd(176004.000000,191172.000000,51850.000000,200.612214)}
{pt3dadd(175800.000000,191100.000000,51900.000000,200.612214)}
{pt3dadd(175536.000000,191016.000000,51925.000000,200.612214)}
{pt3dadd(175296.000000,190896.000000,51875.000000,222.679557)}
{pt3dadd(175104.000000,190440.000000,51525.000000,244.746900)}
{pt3dadd(174900.000000,190272.000000,51325.000000,266.814243)}
{pt3dadd(174732.000000,190152.000000,51125.000000,288.881586)}
{pt3dadd(174456.000000,190152.000000,51075.000000,240.734646)}
{pt3dadd(174672.000000,190152.000000,50775.000000,116.095032)}

{create adhoc104}
{access adhoc104}
{connect adhoc104(1), adhoc74(0)}
{nseg = 1}
{strdef color color = "White"}
{pt3dclear()}
{pt3dadd(183816.000000,189576.000000,54375.000000,690.076602)}
{pt3dadd(182448.000000,191832.000000,55125.000000,1788.678450)}
{pt3dadd(182064.000000,192072.000000,55325.000000,2060.557668)}

{create adhoc105}
{access adhoc105}
{connect adhoc105(1), adhoc104(0)}
{nseg = 1}
{strdef color color = "White"}
{pt3dclear()}
{pt3dadd(182064.000000,192072.000000,55325.000000,2060.557668)}
{pt3dadd(180024.000000,192072.000000,55500.000000,288.881586)}
{pt3dadd(179688.000000,191988.000000,55600.000000,320.658561)}
{pt3dadd(179304.000000,191916.000000,55700.000000,352.435536)}
{pt3dadd(178824.000000,191844.000000,55700.000000,384.212511)}
{pt3dadd(178476.000000,191640.000000,55625.000000,415.989486)}
{pt3dadd(178152.000000,191520.000000,55675.000000,395.190014)}
{pt3dadd(177888.000000,191244.000000,55600.000000,374.390541)}
{pt3dadd(177600.000000,191184.000000,55550.000000,353.591069)}
{pt3dadd(177312.000000,191196.000000,55550.000000,332.791596)}
{pt3dadd(177072.000000,191376.000000,55550.000000,336.258171)}
{pt3dadd(176796.000000,191448.000000,55475.000000,339.724746)}
{pt3dadd(176520.000000,191472.000000,55325.000000,343.191321)}
{pt3dadd(176280.000000,191484.000000,55425.000000,346.657896)}
{pt3dadd(176064.000000,191328.000000,55425.000000,320.177083)}
{pt3dadd(175776.000000,191220.000000,55300.000000,293.696271)}
{pt3dadd(175548.000000,191112.000000,55450.000000,267.215459)}
{pt3dadd(175272.000000,191256.000000,55450.000000,240.734646)}
{pt3dadd(175032.000000,191400.000000,55125.000000,230.704038)}
{pt3dadd(174828.000000,191316.000000,55150.000000,220.673430)}
{pt3dadd(174504.000000,191340.000000,54925.000000,210.642822)}
{pt3dadd(174216.000000,191400.000000,54850.000000,200.612214)}
{pt3dadd(173808.000000,191628.000000,54775.000000,192.253370)}
{pt3dadd(173508.000000,191688.000000,54775.000000,183.894525)}
{pt3dadd(173256.000000,191844.000000,54700.000000,175.535680)}
{pt3dadd(173052.000000,192036.000000,54800.000000,167.176836)}
{pt3dadd(172248.000000,192660.000000,54900.000000,160.211138)}
{pt3dadd(171984.000000,192900.000000,55025.000000,153.245439)}
{pt3dadd(172224.000000,193236.000000,54900.000000,146.279741)}
{pt3dadd(172560.000000,193488.000000,54925.000000,139.314042)}
{pt3dadd(172500.000000,193992.000000,55100.000000,160.489764)}

{create adhoc106}
{access adhoc106}
{connect adhoc106(1), adhoc104(0)}
{nseg = 1}
{strdef color color = "White"}
{pt3dclear()}
{pt3dadd(182064.000000,192072.000000,55325.000000,2060.557668)}
{pt3dadd(182400.000000,192288.000000,55625.000000,2060.557668)}
{pt3dadd(183072.000000,192528.000000,57075.000000,1745.750268)}
{pt3dadd(183072.000000,193032.000000,57625.000000,1430.942868)}
{pt3dadd(182832.000000,193848.000000,58000.000000,1788.678450)}

{create adhoc107}
{access adhoc107}
{connect adhoc107(1), adhoc106(0)}
{nseg = 1}
{strdef color color = "White"}
{pt3dclear()}
{pt3dadd(182832.000000,193848.000000,58000.000000,1788.678450)}
{pt3dadd(180156.000000,199188.000000,58250.000000,1192.452354)}
{pt3dadd(179004.000000,199896.000000,57225.000000,1490.565402)}

{create adhoc108}
{access adhoc108}
{connect adhoc108(1), adhoc107(0)}
{nseg = 1}
{strdef color color = "White"}
{pt3dclear()}
{pt3dadd(179004.000000,199896.000000,57225.000000,1490.565402)}
{pt3dadd(178056.000000,200796.000000,56800.000000,1192.452354)}
{pt3dadd(177996.000000,201240.000000,56150.000000,1153.118003)}
{pt3dadd(177708.000000,201768.000000,55600.000000,1113.783651)}
{pt3dadd(177408.000000,202212.000000,55525.000000,1074.449300)}
{pt3dadd(177000.000000,202524.000000,55325.000000,1035.114948)}
{pt3dadd(176496.000000,203088.000000,55100.000000,1035.114948)}

{create adhoc109}
{access adhoc109}
{connect adhoc109(1), adhoc108(0)}
{nseg = 1}
{strdef color color = "White"}
{pt3dclear()}
{pt3dadd(176496.000000,203088.000000,55100.000000,1035.114948)}
{pt3dadd(176280.000000,204072.000000,55075.000000,862.595802)}
{pt3dadd(175584.000000,205128.000000,55350.000000,853.969838)}
{pt3dadd(175092.000000,205812.000000,55375.000000,845.343873)}
{pt3dadd(174672.000000,206256.000000,55175.000000,836.717909)}
{pt3dadd(174204.000000,206916.000000,55075.000000,828.091944)}
{pt3dadd(173904.000000,207456.000000,55125.000000,931.603428)}
{pt3dadd(173640.000000,208200.000000,54925.000000,1035.114912)}
{pt3dadd(173304.000000,208644.000000,54950.000000,1138.626396)}
{pt3dadd(172920.000000,209220.000000,54675.000000,1242.137880)}
{pt3dadd(172596.000000,209700.000000,54175.000000,718.829820)}

{create adhoc110}
{access adhoc110}
{connect adhoc110(1), adhoc109(0)}
{nseg = 1}
{strdef color color = "White"}
{pt3dclear()}
{pt3dadd(172596.000000,209700.000000,54175.000000,718.829820)}
{pt3dadd(172224.000000,210336.000000,53775.000000,599.024880)}
{pt3dadd(171696.000000,211092.000000,53600.000000,574.065504)}
{pt3dadd(171132.000000,211716.000000,53375.000000,549.106128)}
{pt3dadd(170712.000000,212304.000000,53325.000000,524.146752)}
{pt3dadd(170376.000000,212748.000000,53350.000000,499.187376)}
{pt3dadd(170052.000000,213072.000000,53375.000000,524.146752)}
{pt3dadd(169764.000000,213624.000000,53350.000000,549.106128)}
{pt3dadd(169488.000000,214044.000000,53175.000000,574.065504)}
{pt3dadd(169284.000000,214524.000000,53100.000000,599.024880)}
{pt3dadd(169296.000000,214368.000000,53150.000000,718.829820)}

{create adhoc111}
{access adhoc111}
{connect adhoc111(1), adhoc110(0)}
{nseg = 1}
{strdef color color = "White"}
{pt3dclear()}
{pt3dadd(169296.000000,214368.000000,53150.000000,718.829820)}
{pt3dadd(168816.000000,214920.000000,53150.000000,599.024880)}
{pt3dadd(168540.000000,214968.000000,53525.000000,521.489056)}
{pt3dadd(168672.000000,215028.000000,53800.000000,443.953233)}
{pt3dadd(168456.000000,215400.000000,54050.000000,366.417410)}
{pt3dadd(168300.000000,215652.000000,54150.000000,288.881586)}
{pt3dadd(168108.000000,215916.000000,54250.000000,288.881586)}
{pt3dadd(167952.000000,216168.000000,54350.000000,288.881586)}
{pt3dadd(167844.000000,216456.000000,54250.000000,288.881586)}
{pt3dadd(167496.000000,216720.000000,54450.000000,288.881586)}
{pt3dadd(167424.000000,216996.000000,54400.000000,303.325664)}
{pt3dadd(167268.000000,217452.000000,54325.000000,317.769741)}
{pt3dadd(167100.000000,217788.000000,54450.000000,332.213819)}
{pt3dadd(166908.000000,218124.000000,54525.000000,346.657896)}
{pt3dadd(166704.000000,218544.000000,54675.000000,379.798393)}
{pt3dadd(166536.000000,218616.000000,54700.000000,412.938891)}
{pt3dadd(166284.000000,218688.000000,54700.000000,446.079388)}
{pt3dadd(166032.000000,219084.000000,54750.000000,479.219886)}
{pt3dadd(165792.000000,219360.000000,54875.000000,431.635311)}
{pt3dadd(165564.000000,219804.000000,54950.000000,384.050736)}
{pt3dadd(165312.000000,220164.000000,55050.000000,336.466161)}
{pt3dadd(165048.000000,220584.000000,55200.000000,288.881586)}
{pt3dadd(164832.000000,220776.000000,55400.000000,320.658561)}
{pt3dadd(164640.000000,221220.000000,55525.000000,352.435536)}
{pt3dadd(164124.000000,221460.000000,55225.000000,384.212511)}
{pt3dadd(163896.000000,221460.000000,55225.000000,415.989486)}
{pt3dadd(163620.000000,221700.000000,55325.000000,346.820625)}
{pt3dadd(163428.000000,221724.000000,55350.000000,277.651764)}
{pt3dadd(163164.000000,221964.000000,55300.000000,208.482903)}
{pt3dadd(163008.000000,222072.000000,55400.000000,139.314042)}
{pt3dadd(162852.000000,222348.000000,55425.000000,139.314042)}
{pt3dadd(162600.000000,222540.000000,55475.000000,139.314042)}
{pt3dadd(162336.000000,222696.000000,55525.000000,139.314042)}
{pt3dadd(162120.000000,222852.000000,55725.000000,139.314042)}
{pt3dadd(161880.000000,223008.000000,55850.000000,128.671997)}
{pt3dadd(161676.000000,223008.000000,56150.000000,118.029951)}
{pt3dadd(161496.000000,223236.000000,56250.000000,107.387906)}
{pt3dadd(161364.000000,223248.000000,56225.000000,96.745860)}
{pt3dadd(161148.000000,223344.000000,56200.000000,67.184640)}

{create adhoc112}
{access adhoc112}
{connect adhoc112(1), adhoc110(0)}
{nseg = 1}
{strdef color color = "White"}
{pt3dclear()}
{pt3dadd(169296.000000,214368.000000,53150.000000,718.829820)}
{pt3dadd(169296.000000,215040.000000,51325.000000,499.187376)}
{pt3dadd(169068.000000,213912.000000,50425.000000,474.228009)}
{pt3dadd(169032.000000,213444.000000,49950.000000,449.268642)}
{pt3dadd(168996.000000,213228.000000,49425.000000,424.309275)}
{pt3dadd(168972.000000,212772.000000,49025.000000,399.349908)}
{pt3dadd(168960.000000,212568.000000,48625.000000,386.176905)}
{pt3dadd(169056.000000,212292.000000,48500.000000,373.003902)}
{pt3dadd(169260.000000,212028.000000,48350.000000,359.830899)}
{pt3dadd(169356.000000,211728.000000,48350.000000,346.657896)}
{pt3dadd(169320.000000,211464.000000,48125.000000,287.856234)}
{pt3dadd(169320.000000,211032.000000,48125.000000,229.054572)}
{pt3dadd(169284.000000,210828.000000,48050.000000,170.252910)}
{pt3dadd(169584.000000,210744.000000,47750.000000,111.451248)}
{pt3dadd(169800.000000,210588.000000,47525.000000,139.314042)}

{create adhoc113}
{access adhoc113}
{connect adhoc113(1), adhoc109(0)}
{nseg = 1}
{strdef color color = "White"}
{pt3dclear()}
{pt3dadd(172596.000000,209700.000000,54175.000000,718.829820)}
{pt3dadd(172596.000000,209136.000000,55725.000000,599.024880)}
{pt3dadd(172224.000000,209388.000000,56025.000000,574.065504)}
{pt3dadd(171828.000000,209700.000000,56325.000000,549.106128)}
{pt3dadd(171492.000000,209976.000000,56675.000000,524.146752)}
{pt3dadd(171192.000000,210048.000000,56700.000000,499.187376)}
{pt3dadd(170940.000000,210072.000000,56850.000000,461.055006)}
{pt3dadd(170544.000000,210216.000000,56950.000000,422.922636)}
{pt3dadd(170316.000000,210312.000000,57200.000000,384.790266)}
{pt3dadd(169980.000000,210576.000000,57200.000000,346.657896)}
{pt3dadd(169704.000000,210600.000000,57375.000000,409.749642)}
{pt3dadd(169464.000000,210708.000000,57400.000000,472.841388)}
{pt3dadd(169128.000000,210864.000000,57475.000000,535.933134)}
{pt3dadd(168948.000000,210936.000000,57650.000000,599.024880)}
{pt3dadd(168768.000000,211044.000000,57625.000000,599.024880)}
{pt3dadd(168576.000000,211188.000000,57775.000000,599.024880)}
{pt3dadd(168336.000000,211236.000000,57825.000000,599.024880)}
{pt3dadd(167952.000000,211440.000000,57925.000000,599.024880)}
{pt3dadd(167664.000000,211704.000000,58025.000000,549.106146)}
{pt3dadd(167448.000000,211908.000000,57950.000000,499.187412)}
{pt3dadd(167040.000000,212100.000000,58375.000000,449.268678)}
{pt3dadd(165444.000000,212544.000000,58675.000000,399.349944)}
{pt3dadd(165036.000000,212832.000000,59025.000000,403.509830)}
{pt3dadd(164592.000000,212844.000000,59075.000000,407.669715)}
{pt3dadd(164160.000000,212988.000000,59125.000000,411.829601)}
{pt3dadd(163728.000000,213132.000000,59400.000000,415.989486)}
{pt3dadd(163200.000000,213192.000000,59575.000000,415.989486)}
{pt3dadd(162756.000000,213348.000000,59725.000000,415.989486)}
{pt3dadd(162420.000000,213492.000000,59875.000000,415.989486)}
{pt3dadd(162168.000000,213552.000000,60025.000000,415.989486)}
{pt3dadd(161772.000000,213636.000000,60175.000000,461.748335)}
{pt3dadd(161400.000000,213612.000000,60375.000000,507.507183)}
{pt3dadd(161112.000000,213720.000000,60525.000000,553.266031)}
{pt3dadd(160740.000000,213984.000000,61000.000000,599.024880)}
{pt3dadd(160344.000000,214164.000000,61150.000000,718.829820)}
{pt3dadd(160032.000000,214308.000000,61300.000000,575.063856)}

{create adhoc114}
{access adhoc114}
{connect adhoc114(1), adhoc113(0)}
{nseg = 1}
{strdef color color = "White"}
{pt3dclear()}
{pt3dadd(160032.000000,214308.000000,61300.000000,575.063856)}
{pt3dadd(159516.000000,215196.000000,61350.000000,415.989486)}
{pt3dadd(159180.000000,215688.000000,61525.000000,398.656589)}
{pt3dadd(158904.000000,216144.000000,61650.000000,381.323691)}
{pt3dadd(158628.000000,216684.000000,61825.000000,363.990794)}
{pt3dadd(158412.000000,217704.000000,62300.000000,346.657896)}
{pt3dadd(158172.000000,218040.000000,62400.000000,363.990794)}
{pt3dadd(157932.000000,218652.000000,62400.000000,381.323691)}
{pt3dadd(157704.000000,219264.000000,62600.000000,398.656589)}
{pt3dadd(157644.000000,219648.000000,62525.000000,415.989486)}
{pt3dadd(157692.000000,219924.000000,62700.000000,415.989486)}
{pt3dadd(157692.000000,220464.000000,63075.000000,415.989486)}
{pt3dadd(157584.000000,220920.000000,63500.000000,415.989486)}
{pt3dadd(157500.000000,221676.000000,63825.000000,415.989486)}
{pt3dadd(157440.000000,222084.000000,64100.000000,384.212511)}
{pt3dadd(157404.000000,222420.000000,64475.000000,352.435536)}
{pt3dadd(157368.000000,222900.000000,64700.000000,320.658561)}
{pt3dadd(157380.000000,223188.000000,64900.000000,288.881586)}
{pt3dadd(157440.000000,223800.000000,65225.000000,276.844851)}
{pt3dadd(157296.000000,224304.000000,65375.000000,264.808116)}
{pt3dadd(157296.000000,224832.000000,65425.000000,252.771381)}
{pt3dadd(157332.000000,225204.000000,65475.000000,240.734646)}
{pt3dadd(156996.000000,226140.000000,65625.000000,240.734646)}
{pt3dadd(156924.000000,226308.000000,65550.000000,240.734646)}
{pt3dadd(156900.000000,226656.000000,65450.000000,240.734646)}
{pt3dadd(156756.000000,226992.000000,65500.000000,240.734646)}
{pt3dadd(156756.000000,227328.000000,65575.000000,252.771381)}
{pt3dadd(156600.000000,227580.000000,65575.000000,264.808116)}
{pt3dadd(156480.000000,227856.000000,65675.000000,276.844851)}
{pt3dadd(156144.000000,228708.000000,65675.000000,288.881586)}
{pt3dadd(155976.000000,228912.000000,65600.000000,266.814243)}
{pt3dadd(155808.000000,229356.000000,65400.000000,244.746900)}
{pt3dadd(155808.000000,229236.000000,65225.000000,222.679557)}
{pt3dadd(155904.000000,229440.000000,65025.000000,200.612214)}
{pt3dadd(155820.000000,229452.000000,64850.000000,213.986358)}
{pt3dadd(155952.000000,229632.000000,64675.000000,227.360502)}
{pt3dadd(156060.000000,229776.000000,64475.000000,240.734646)}
{pt3dadd(156300.000000,229968.000000,64075.000000,116.095032)}

{create adhoc115}
{access adhoc115}
{connect adhoc115(1), adhoc113(0)}
{nseg = 1}
{strdef color color = "White"}
{pt3dclear()}
{pt3dadd(160032.000000,214308.000000,61300.000000,575.063856)}
{pt3dadd(159696.000000,213888.000000,62200.000000,415.989486)}
{pt3dadd(159480.000000,213084.000000,62675.000000,372.175776)}
{pt3dadd(159228.000000,212712.000000,63100.000000,328.362066)}
{pt3dadd(159192.000000,212364.000000,63425.000000,284.548356)}
{pt3dadd(159552.000000,211860.000000,63825.000000,240.734646)}
{pt3dadd(159696.000000,211512.000000,63925.000000,263.748870)}
{pt3dadd(159792.000000,211224.000000,64125.000000,286.763094)}
{pt3dadd(159600.000000,210984.000000,64050.000000,309.777318)}
{pt3dadd(159732.000000,210684.000000,64125.000000,332.791542)}
{pt3dadd(159780.000000,210324.000000,64175.000000,291.387865)}
{pt3dadd(159804.000000,209976.000000,64175.000000,249.984189)}
{pt3dadd(159828.000000,209760.000000,64175.000000,208.580513)}
{pt3dadd(159936.000000,209400.000000,64150.000000,167.176836)}
{pt3dadd(160116.000000,209148.000000,64075.000000,154.406385)}
{pt3dadd(160440.000000,208572.000000,64075.000000,141.635934)}
{pt3dadd(160764.000000,208188.000000,64075.000000,128.865483)}
{pt3dadd(161100.000000,207972.000000,64275.000000,116.095032)}
{pt3dadd(161328.000000,207540.000000,64600.000000,200.612214)}
{pt3dadd(161520.000000,207120.000000,64575.000000,167.176836)}

{create adhoc116}
{access adhoc116}
{connect adhoc116(1), adhoc108(0)}
{nseg = 1}
{strdef color color = "White"}
{pt3dclear()}
{pt3dadd(176496.000000,203088.000000,55100.000000,1035.114948)}
{pt3dadd(174408.000000,202824.000000,53600.000000,499.187376)}
{pt3dadd(173928.000000,202416.000000,53075.000000,457.588431)}
{pt3dadd(173736.000000,202200.000000,52825.000000,415.989486)}
{pt3dadd(173616.000000,202224.000000,52525.000000,599.024880)}

{create adhoc117}
{access adhoc117}
{connect adhoc117(1), adhoc116(0)}
{nseg = 1}
{strdef color color = "White"}
{pt3dclear()}
{pt3dadd(173616.000000,202224.000000,52525.000000,599.024880)}
{pt3dadd(173328.000000,202500.000000,52300.000000,599.024880)}
{pt3dadd(173220.000000,202416.000000,52000.000000,564.281446)}
{pt3dadd(173076.000000,202380.000000,51650.000000,529.538013)}
{pt3dadd(172956.000000,202212.000000,51350.000000,494.794580)}
{pt3dadd(172920.000000,202008.000000,51025.000000,460.051146)}
{pt3dadd(173016.000000,201720.000000,50725.000000,449.035731)}
{pt3dadd(172932.000000,201564.000000,50425.000000,438.020316)}
{pt3dadd(172944.000000,201360.000000,50150.000000,427.004901)}
{pt3dadd(172920.000000,201144.000000,49850.000000,415.989486)}
{pt3dadd(172944.000000,200892.000000,49750.000000,436.788958)}
{pt3dadd(173088.000000,200628.000000,49625.000000,457.588431)}
{pt3dadd(173052.000000,200340.000000,49425.000000,478.387903)}
{pt3dadd(172980.000000,200088.000000,49250.000000,499.187376)}
{pt3dadd(172908.000000,199812.000000,48950.000000,446.610929)}
{pt3dadd(172752.000000,199488.000000,48250.000000,394.034481)}
{pt3dadd(172644.000000,199212.000000,48250.000000,341.458034)}
{pt3dadd(172656.000000,199056.000000,47900.000000,288.881586)}
{pt3dadd(172788.000000,198732.000000,47575.000000,240.734646)}
{pt3dadd(173268.000000,198432.000000,47175.000000,139.314042)}

{create adhoc118}
{access adhoc118}
{connect adhoc118(1), adhoc116(0)}
{nseg = 1}
{strdef color color = "White"}
{pt3dclear()}
{pt3dadd(173616.000000,202224.000000,52525.000000,599.024880)}
{pt3dadd(173412.000000,201156.000000,52725.000000,116.095032)}
{pt3dadd(173520.000000,200376.000000,52575.000000,116.095032)}
{pt3dadd(173496.000000,199896.000000,52500.000000,80.621550)}

{create adhoc119}
{access adhoc119}
{connect adhoc119(1), adhoc107(0)}
{nseg = 1}
{strdef color color = "White"}
{pt3dclear()}
{pt3dadd(179004.000000,199896.000000,57225.000000,1490.565402)}
{pt3dadd(177504.000000,199512.000000,57675.000000,167.176836)}
{pt3dadd(176568.000000,199512.000000,57925.000000,212.047101)}
{pt3dadd(176004.000000,199428.000000,58125.000000,256.917366)}
{pt3dadd(175728.000000,199452.000000,58375.000000,301.787631)}
{pt3dadd(175560.000000,199404.000000,58600.000000,346.657896)}
{pt3dadd(175356.000000,199536.000000,58425.000000,363.990794)}
{pt3dadd(175404.000000,198360.000000,58700.000000,381.323691)}
{pt3dadd(175248.000000,197676.000000,58950.000000,398.656589)}
{pt3dadd(175140.000000,197304.000000,59250.000000,415.989486)}
{pt3dadd(175104.000000,197100.000000,59500.000000,499.187376)}
{pt3dadd(175116.000000,197364.000000,60075.000000,240.734646)}

{create adhoc120}
{access adhoc120}
{connect adhoc120(1), adhoc106(0)}
{nseg = 1}
{strdef color color = "White"}
{pt3dclear()}
{pt3dadd(182832.000000,193848.000000,58000.000000,1788.678450)}
{pt3dadd(182640.000000,194544.000000,58725.000000,1717.131366)}
{pt3dadd(181896.000000,196032.000000,59450.000000,1824.452069)}
{pt3dadd(181740.000000,196416.000000,59550.000000,1931.772771)}
{pt3dadd(181932.000000,196872.000000,59850.000000,2039.093474)}
{pt3dadd(181896.000000,197088.000000,60550.000000,2146.414176)}
{pt3dadd(181980.000000,197364.000000,61150.000000,2227.977945)}
{pt3dadd(182076.000000,197904.000000,62025.000000,2309.541714)}
{pt3dadd(182160.000000,198756.000000,62650.000000,2391.105483)}
{pt3dadd(182616.000000,198816.000000,63475.000000,2472.669252)}
{pt3dadd(182412.000000,199836.000000,64225.000000,2309.541714)}
{pt3dadd(182616.000000,200112.000000,64950.000000,2146.414176)}
{pt3dadd(182616.000000,199848.000000,65500.000000,2146.414176)}

{create adhoc121}
{access adhoc121}
{connect adhoc121(1), adhoc120(0)}
{nseg = 1}
{strdef color color = "White"}
{pt3dclear()}
{pt3dadd(182616.000000,199848.000000,65500.000000,2146.414176)}
{pt3dadd(179700.000000,198696.000000,65500.000000,599.024880)}
{pt3dadd(178284.000000,198804.000000,65500.000000,514.902552)}
{pt3dadd(177504.000000,198840.000000,65500.000000,430.780224)}
{pt3dadd(176328.000000,199128.000000,65500.000000,346.657896)}
{pt3dadd(175980.000000,199332.000000,66150.000000,599.024880)}

{create adhoc122}
{access adhoc122}
{connect adhoc122(1), adhoc121(0)}
{nseg = 1}
{strdef color color = "White"}
{pt3dclear()}
{pt3dadd(175980.000000,199332.000000,66150.000000,599.024880)}
{pt3dadd(175092.000000,198816.000000,66150.000000,499.187376)}
{pt3dadd(174576.000000,198864.000000,66075.000000,524.146752)}
{pt3dadd(174000.000000,198912.000000,66000.000000,549.106128)}
{pt3dadd(173376.000000,198924.000000,66000.000000,574.065504)}
{pt3dadd(172404.000000,198936.000000,66000.000000,599.024880)}
{pt3dadd(171240.000000,198816.000000,66000.000000,599.024880)}
{pt3dadd(170880.000000,198480.000000,66100.000000,599.024880)}
{pt3dadd(170280.000000,197940.000000,66100.000000,599.024880)}
{pt3dadd(169680.000000,197712.000000,66175.000000,599.024880)}
{pt3dadd(169296.000000,197460.000000,66025.000000,599.024880)}

{create adhoc123}
{access adhoc123}
{connect adhoc123(1), adhoc122(0)}
{nseg = 1}
{strdef color color = "White"}
{pt3dclear()}
{pt3dadd(169296.000000,197460.000000,66025.000000,599.024880)}
{pt3dadd(168480.000000,197184.000000,66725.000000,415.989486)}
{pt3dadd(168096.000000,197184.000000,67050.000000,411.829601)}
{pt3dadd(167892.000000,197184.000000,67375.000000,407.669715)}
{pt3dadd(167664.000000,197292.000000,67525.000000,403.509830)}
{pt3dadd(167532.000000,197376.000000,67675.000000,399.349944)}
{pt3dadd(167388.000000,197484.000000,67900.000000,449.268678)}
{pt3dadd(167352.000000,197628.000000,68250.000000,499.187412)}
{pt3dadd(167364.000000,197592.000000,68425.000000,549.106146)}
{pt3dadd(167364.000000,197616.000000,68600.000000,599.024880)}
{pt3dadd(167412.000000,197676.000000,68750.000000,599.024880)}
{pt3dadd(167496.000000,197652.000000,68925.000000,599.024880)}
{pt3dadd(167568.000000,197580.000000,69100.000000,599.024880)}
{pt3dadd(167628.000000,197568.000000,69225.000000,599.024880)}
{pt3dadd(167664.000000,197628.000000,69350.000000,574.065504)}
{pt3dadd(167652.000000,197664.000000,69500.000000,549.106128)}
{pt3dadd(167652.000000,197712.000000,69725.000000,524.146752)}
{pt3dadd(167748.000000,197796.000000,70000.000000,499.187376)}
{pt3dadd(167832.000000,197796.000000,70200.000000,429.085446)}
{pt3dadd(168024.000000,197724.000000,70375.000000,358.983516)}
{pt3dadd(168192.000000,197652.000000,70525.000000,288.881586)}
{pt3dadd(168324.000000,197580.000000,70700.000000,288.881586)}

{create adhoc124}
{access adhoc124}
{connect adhoc124(1), adhoc123(0)}
{nseg = 1}
{strdef color color = "White"}
{pt3dclear()}
{pt3dadd(168324.000000,197580.000000,70700.000000,288.881586)}
{pt3dadd(168792.000000,196932.000000,70850.000000,200.612214)}
{pt3dadd(169044.000000,196692.000000,71050.000000,210.642822)}
{pt3dadd(169272.000000,196500.000000,71025.000000,220.673430)}
{pt3dadd(169488.000000,196500.000000,71075.000000,230.704038)}
{pt3dadd(169608.000000,195972.000000,71000.000000,240.734646)}
{pt3dadd(169680.000000,195768.000000,70900.000000,215.379495)}
{pt3dadd(169860.000000,195528.000000,70725.000000,190.024344)}
{pt3dadd(169944.000000,195396.000000,70650.000000,164.669193)}
{pt3dadd(170100.000000,195204.000000,70600.000000,139.314042)}
{pt3dadd(170292.000000,194988.000000,70525.000000,146.279741)}
{pt3dadd(170460.000000,194772.000000,70425.000000,153.245439)}
{pt3dadd(170568.000000,194568.000000,70350.000000,160.211138)}
{pt3dadd(170616.000000,194352.000000,70225.000000,167.176836)}
{pt3dadd(170736.000000,194184.000000,70200.000000,154.406385)}
{pt3dadd(170832.000000,194052.000000,70100.000000,141.635934)}
{pt3dadd(170916.000000,193908.000000,70050.000000,128.865483)}
{pt3dadd(170976.000000,193764.000000,69975.000000,116.095032)}
{pt3dadd(171084.000000,193608.000000,69950.000000,137.224328)}
{pt3dadd(171204.000000,193440.000000,69875.000000,158.353623)}
{pt3dadd(171324.000000,193296.000000,69800.000000,179.482918)}
{pt3dadd(171336.000000,193164.000000,69775.000000,200.612214)}
{pt3dadd(171360.000000,193008.000000,69725.000000,200.612214)}
{pt3dadd(171396.000000,192768.000000,69775.000000,200.612214)}
{pt3dadd(171456.000000,192540.000000,69750.000000,200.612214)}
{pt3dadd(171552.000000,192396.000000,69700.000000,200.612214)}
{pt3dadd(171636.000000,192240.000000,69700.000000,192.253370)}
{pt3dadd(171732.000000,192084.000000,69750.000000,183.894525)}
{pt3dadd(171780.000000,191952.000000,69700.000000,175.535680)}
{pt3dadd(171900.000000,191808.000000,69650.000000,167.176836)}
{pt3dadd(171996.000000,191652.000000,69750.000000,185.566288)}
{pt3dadd(172164.000000,191532.000000,69800.000000,203.955741)}
{pt3dadd(172320.000000,191112.000000,69850.000000,222.345193)}
{pt3dadd(172464.000000,190944.000000,70000.000000,240.734646)}
{pt3dadd(172608.000000,190656.000000,70075.000000,252.771381)}
{pt3dadd(172752.000000,190536.000000,70200.000000,264.808116)}
{pt3dadd(172908.000000,190464.000000,70300.000000,276.844851)}
{pt3dadd(173076.000000,190404.000000,70375.000000,288.881586)}
{pt3dadd(173208.000000,190344.000000,70475.000000,288.881586)}
{pt3dadd(173388.000000,190068.000000,70575.000000,288.881586)}
{pt3dadd(173532.000000,189984.000000,70600.000000,288.881586)}
{pt3dadd(173688.000000,189948.000000,70650.000000,288.881586)}
{pt3dadd(173808.000000,189684.000000,70800.000000,251.489700)}
{pt3dadd(174000.000000,189288.000000,71000.000000,214.097814)}
{pt3dadd(174204.000000,188928.000000,71125.000000,176.705928)}
{pt3dadd(174288.000000,188664.000000,71175.000000,139.314042)}
{pt3dadd(174612.000000,188460.000000,71375.000000,133.509289)}
{pt3dadd(174852.000000,188244.000000,71525.000000,127.704537)}
{pt3dadd(175236.000000,188136.000000,71725.000000,121.899785)}
{pt3dadd(175392.000000,188148.000000,71825.000000,116.095032)}
{pt3dadd(175536.000000,188016.000000,71875.000000,147.254936)}
{pt3dadd(175692.000000,187968.000000,71925.000000,178.414839)}
{pt3dadd(175860.000000,187920.000000,71925.000000,209.574742)}
{pt3dadd(175944.000000,187836.000000,71925.000000,240.734646)}
{pt3dadd(175908.000000,187656.000000,72025.000000,216.215376)}
{pt3dadd(175836.000000,187440.000000,72425.000000,191.696106)}
{pt3dadd(175944.000000,187260.000000,72450.000000,167.176836)}
{pt3dadd(176280.000000,187080.000000,72425.000000,96.745860)}

{create adhoc125}
{access adhoc125}
{connect adhoc125(1), adhoc123(0)}
{nseg = 1}
{strdef color color = "White"}
{pt3dclear()}
{pt3dadd(168324.000000,197580.000000,70700.000000,288.881586)}
{pt3dadd(168180.000000,198024.000000,70850.000000,200.612214)}
{pt3dadd(168156.000000,198228.000000,70975.000000,185.287671)}
{pt3dadd(168108.000000,198480.000000,70975.000000,169.963128)}
{pt3dadd(168060.000000,198672.000000,71025.000000,154.638585)}
{pt3dadd(168024.000000,198840.000000,71125.000000,139.314042)}
{pt3dadd(168132.000000,199008.000000,71125.000000,146.279741)}
{pt3dadd(168060.000000,199308.000000,71050.000000,153.245439)}
{pt3dadd(167892.000000,199572.000000,71075.000000,160.211138)}
{pt3dadd(167700.000000,199860.000000,71150.000000,167.176836)}
{pt3dadd(167532.000000,200100.000000,71200.000000,183.894525)}
{pt3dadd(167820.000000,200268.000000,71600.000000,200.612214)}
{pt3dadd(167904.000000,200556.000000,71750.000000,139.314042)}

{create adhoc126}
{access adhoc126}
{connect adhoc126(1), adhoc122(0)}
{nseg = 1}
{strdef color color = "White"}
{pt3dclear()}
{pt3dadd(169296.000000,197460.000000,66025.000000,599.024880)}
{pt3dadd(168444.000000,196644.000000,65675.000000,690.076602)}
{pt3dadd(168120.000000,195840.000000,65425.000000,690.076602)}
{pt3dadd(167964.000000,195600.000000,65175.000000,690.076602)}
{pt3dadd(167676.000000,195348.000000,64775.000000,690.076602)}
{pt3dadd(167916.000000,194976.000000,64650.000000,690.076602)}
{pt3dadd(167772.000000,194628.000000,64600.000000,575.063856)}
{pt3dadd(167784.000000,194340.000000,64500.000000,599.024880)}

{create adhoc127}
{access adhoc127}
{connect adhoc127(1), adhoc126(0)}
{nseg = 1}
{strdef color color = "White"}
{pt3dclear()}
{pt3dadd(167784.000000,194340.000000,64500.000000,599.024880)}
{pt3dadd(167760.000000,193944.000000,64275.000000,499.187376)}
{pt3dadd(167700.000000,193428.000000,64125.000000,478.387903)}
{pt3dadd(167760.000000,192780.000000,64050.000000,457.588431)}
{pt3dadd(167820.000000,192372.000000,64100.000000,436.788958)}
{pt3dadd(167796.000000,191856.000000,63975.000000,415.989486)}
{pt3dadd(167796.000000,191424.000000,64025.000000,455.758079)}
{pt3dadd(167892.000000,191088.000000,63950.000000,495.526671)}
{pt3dadd(168120.000000,190752.000000,63875.000000,535.295264)}
{pt3dadd(168132.000000,190440.000000,63950.000000,575.063856)}
{pt3dadd(168192.000000,190092.000000,63900.000000,556.094736)}
{pt3dadd(168264.000000,189756.000000,63825.000000,537.125616)}
{pt3dadd(168420.000000,189480.000000,64000.000000,518.156496)}
{pt3dadd(168696.000000,189192.000000,64150.000000,499.187376)}
{pt3dadd(168876.000000,188904.000000,64275.000000,478.387903)}
{pt3dadd(169008.000000,188616.000000,64375.000000,457.588431)}
{pt3dadd(169272.000000,188352.000000,64400.000000,436.788958)}
{pt3dadd(169644.000000,188112.000000,64700.000000,415.989486)}
{pt3dadd(169956.000000,187932.000000,64950.000000,415.989486)}
{pt3dadd(170112.000000,187716.000000,65100.000000,415.989486)}
{pt3dadd(170184.000000,187464.000000,65225.000000,415.989486)}
{pt3dadd(170388.000000,187164.000000,65350.000000,240.734646)}

{create adhoc128}
{access adhoc128}
{connect adhoc128(1), adhoc127(0)}
{nseg = 1}
{strdef color color = "White"}
{pt3dclear()}
{pt3dadd(170388.000000,187164.000000,65350.000000,240.734646)}
{pt3dadd(170640.000000,187320.000000,65300.000000,240.734646)}
{pt3dadd(170844.000000,187320.000000,65350.000000,167.176836)}
{pt3dadd(170976.000000,187296.000000,65350.000000,116.095032)}

{create adhoc129}
{access adhoc129}
{connect adhoc129(1), adhoc127(0)}
{nseg = 1}
{strdef color color = "White"}
{pt3dclear()}
{pt3dadd(170388.000000,187164.000000,65350.000000,240.734646)}
{pt3dadd(170064.000000,187824.000000,65675.000000,167.176836)}
{pt3dadd(170040.000000,187968.000000,65850.000000,96.745860)}

{create adhoc130}
{access adhoc130}
{connect adhoc130(1), adhoc126(0)}
{nseg = 1}
{strdef color color = "White"}
{pt3dclear()}
{pt3dadd(167784.000000,194340.000000,64500.000000,599.024880)}
{pt3dadd(168156.000000,194340.000000,65550.000000,346.657896)}
{pt3dadd(168192.000000,194124.000000,65925.000000,200.612214)}
{pt3dadd(168324.000000,194352.000000,66000.000000,116.095032)}

{create adhoc131}
{access adhoc131}
{connect adhoc131(1), adhoc121(0)}
{nseg = 1}
{strdef color color = "White"}
{pt3dclear()}
{pt3dadd(175980.000000,199332.000000,66150.000000,599.024880)}
{pt3dadd(175776.000000,200652.000000,66150.000000,288.881586)}
{pt3dadd(175656.000000,200760.000000,66350.000000,320.658561)}
{pt3dadd(175404.000000,200952.000000,66375.000000,352.435536)}
{pt3dadd(175272.000000,201216.000000,66350.000000,384.212511)}
{pt3dadd(174972.000000,201804.000000,66350.000000,415.989486)}
{pt3dadd(174696.000000,202464.000000,66350.000000,384.212511)}
{pt3dadd(174480.000000,202836.000000,66400.000000,352.435536)}
{pt3dadd(174372.000000,203076.000000,66375.000000,320.658561)}
{pt3dadd(174180.000000,203316.000000,66425.000000,288.881586)}
{pt3dadd(174036.000000,203652.000000,66575.000000,346.657896)}
{pt3dadd(173904.000000,204072.000000,66750.000000,200.612214)}

{create adhoc132}
{access adhoc132}
{connect adhoc132(1), adhoc131(0)}
{nseg = 1}
{strdef color color = "White"}
{pt3dclear()}
{pt3dadd(173904.000000,204072.000000,66750.000000,200.612214)}
{pt3dadd(173664.000000,204480.000000,66750.000000,240.734646)}
{pt3dadd(173196.000000,205068.000000,66775.000000,230.704038)}
{pt3dadd(172968.000000,205308.000000,67175.000000,220.673430)}
{pt3dadd(173460.000000,205572.000000,67500.000000,210.642822)}
{pt3dadd(173844.000000,205536.000000,67700.000000,200.612214)}
{pt3dadd(173964.000000,205368.000000,67875.000000,96.745860)}
{pt3dadd(174168.000000,205296.000000,68025.000000,116.095032)}

{create adhoc133}
{access adhoc133}
{connect adhoc133(1), adhoc131(0)}
{nseg = 1}
{strdef color color = "White"}
{pt3dclear()}
{pt3dadd(173904.000000,204072.000000,66750.000000,200.612214)}
{pt3dadd(174312.000000,204396.000000,66600.000000,116.095032)}
{pt3dadd(174396.000000,204804.000000,66450.000000,128.865483)}
{pt3dadd(174432.000000,204900.000000,66300.000000,141.635934)}
{pt3dadd(174396.000000,205176.000000,66100.000000,154.406385)}
{pt3dadd(174504.000000,205260.000000,66100.000000,167.176836)}
{pt3dadd(174420.000000,205440.000000,66100.000000,200.612214)}

{create adhoc134}
{access adhoc134}
{connect adhoc134(1), adhoc120(0)}
{nseg = 1}
{strdef color color = "White"}
{pt3dclear()}
{pt3dadd(182616.000000,199848.000000,65500.000000,2146.414176)}
{pt3dadd(182640.000000,200268.000000,65825.000000,2146.414176)}
{pt3dadd(182736.000000,200700.000000,66375.000000,2146.414176)}
{pt3dadd(183060.000000,201264.000000,67000.000000,2146.414176)}
{pt3dadd(183432.000000,201696.000000,67975.000000,2146.414176)}
{pt3dadd(183360.000000,202284.000000,68575.000000,2146.414176)}
{pt3dadd(183624.000000,202668.000000,69275.000000,2027.168934)}
{pt3dadd(183660.000000,203832.000000,70300.000000,1907.923692)}
{pt3dadd(183804.000000,204156.000000,71075.000000,1788.678450)}
{pt3dadd(184572.000000,204312.000000,71650.000000,1788.678450)}

{create adhoc135}
{access adhoc135}
{connect adhoc135(1), adhoc134(0)}
{nseg = 1}
{strdef color color = "White"}
{pt3dclear()}
{pt3dadd(184572.000000,204312.000000,71650.000000,1788.678450)}
{pt3dadd(184500.000000,204984.000000,72175.000000,1788.678450)}
{pt3dadd(184644.000000,205176.000000,72725.000000,1985.433116)}
{pt3dadd(185196.000000,205164.000000,73200.000000,2182.187781)}
{pt3dadd(185544.000000,205356.000000,73875.000000,2378.942446)}
{pt3dadd(185952.000000,205380.000000,74575.000000,2575.697112)}
{pt3dadd(185760.000000,205380.000000,74950.000000,2468.376378)}
{pt3dadd(186036.000000,205236.000000,75850.000000,2361.055644)}
{pt3dadd(186252.000000,205404.000000,76400.000000,2253.734910)}
{pt3dadd(186636.000000,205344.000000,76950.000000,2146.414176)}
{pt3dadd(186960.000000,205308.000000,77450.000000,2227.977945)}
{pt3dadd(187080.000000,205404.000000,77900.000000,2309.541714)}
{pt3dadd(187200.000000,205500.000000,78350.000000,2391.105483)}
{pt3dadd(187320.000000,205608.000000,78825.000000,2472.669252)}
{pt3dadd(187620.000000,205608.000000,79350.000000,2391.105483)}
{pt3dadd(188160.000000,205680.000000,80075.000000,2309.541714)}
{pt3dadd(188592.000000,205704.000000,80650.000000,2227.977945)}
{pt3dadd(188844.000000,205548.000000,81025.000000,2146.414176)}
{pt3dadd(189096.000000,205392.000000,81550.000000,2146.414176)}
{pt3dadd(189432.000000,205368.000000,82150.000000,2146.414176)}
{pt3dadd(189540.000000,205620.000000,82675.000000,2146.414176)}
{pt3dadd(190224.000000,205680.000000,83175.000000,2146.414176)}
{pt3dadd(190392.000000,205836.000000,83725.000000,2146.414176)}
{pt3dadd(190512.000000,205656.000000,84175.000000,2146.414176)}
{pt3dadd(190764.000000,205512.000000,84675.000000,2146.414176)}
{pt3dadd(191100.000000,205548.000000,85150.000000,2146.414176)}
{pt3dadd(191160.000000,205560.000000,85850.000000,2351.611422)}
{pt3dadd(191844.000000,205548.000000,86875.000000,2556.808668)}
{pt3dadd(192000.000000,205680.000000,87550.000000,2762.005914)}
{pt3dadd(191856.000000,205668.000000,88175.000000,2967.203160)}
{pt3dadd(191700.000000,205536.000000,89200.000000,2998.111477)}
{pt3dadd(191640.000000,205368.000000,90150.000000,3029.019795)}
{pt3dadd(191328.000000,205164.000000,90850.000000,3059.928112)}
{pt3dadd(191016.000000,205332.000000,92125.000000,3090.836430)}
{pt3dadd(190920.000000,205368.000000,92900.000000,2833.266739)}
{pt3dadd(190824.000000,205404.000000,93700.000000,2575.697049)}
{pt3dadd(190788.000000,205560.000000,94575.000000,2318.127358)}
{pt3dadd(190416.000000,206076.000000,95300.000000,2060.557668)}
{pt3dadd(190080.000000,206364.000000,95925.000000,1992.587863)}
{pt3dadd(189768.000000,206532.000000,96425.000000,1924.618059)}
{pt3dadd(189360.000000,206592.000000,96975.000000,1856.648255)}
{pt3dadd(189420.000000,206544.000000,97475.000000,1788.678450)}
{pt3dadd(188820.000000,206664.000000,97850.000000,1788.678450)}
{pt3dadd(188748.000000,206436.000000,98375.000000,1788.678450)}
{pt3dadd(188652.000000,206328.000000,98675.000000,1788.678450)}
{pt3dadd(188472.000000,206328.000000,99000.000000,1788.678450)}
{pt3dadd(188316.000000,206184.000000,99475.000000,1856.648255)}
{pt3dadd(188004.000000,206244.000000,99875.000000,1924.618059)}
{pt3dadd(187800.000000,206148.000000,100250.000000,1992.587863)}
{pt3dadd(187560.000000,206208.000000,100775.000000,2060.557668)}
{pt3dadd(187284.000000,206232.000000,101800.000000,2189.342529)}
{pt3dadd(187104.000000,205896.000000,102475.000000,2318.127390)}
{pt3dadd(187092.000000,206088.000000,103075.000000,2446.912251)}
{pt3dadd(186912.000000,205908.000000,103750.000000,2575.697112)}
{pt3dadd(186744.000000,205644.000000,104375.000000,2378.942446)}
{pt3dadd(186720.000000,205368.000000,105100.000000,2182.187781)}
{pt3dadd(186756.000000,205380.000000,105625.000000,1985.433116)}
{pt3dadd(186408.000000,205176.000000,106125.000000,1788.678450)}
{pt3dadd(186084.000000,204768.000000,106675.000000,1699.244622)}
{pt3dadd(186084.000000,204756.000000,107175.000000,1609.810794)}
{pt3dadd(185772.000000,204336.000000,107875.000000,1520.376966)}
{pt3dadd(185676.000000,203724.000000,108825.000000,1430.943138)}
{pt3dadd(185868.000000,203280.000000,109575.000000,1383.741824)}
{pt3dadd(185784.000000,202656.000000,110125.000000,1336.540509)}
{pt3dadd(185628.000000,202284.000000,110775.000000,1289.339194)}
{pt3dadd(185472.000000,201648.000000,111300.000000,1242.137880)}
{pt3dadd(185352.000000,201324.000000,111700.000000,1229.716498)}
{pt3dadd(184884.000000,200628.000000,112575.000000,1217.295117)}
{pt3dadd(184584.000000,199848.000000,113350.000000,1204.873736)}
{pt3dadd(184284.000000,199128.000000,113925.000000,1192.452354)}
{pt3dadd(184056.000000,198708.000000,114675.000000,1266.980616)}
{pt3dadd(183840.000000,198024.000000,115325.000000,1341.508878)}
{pt3dadd(183636.000000,197400.000000,115925.000000,1416.037140)}
{pt3dadd(183468.000000,197076.000000,116575.000000,1490.565402)}
{pt3dadd(182928.000000,196296.000000,117225.000000,1297.631507)}
{pt3dadd(182376.000000,195516.000000,117750.000000,1104.697611)}
{pt3dadd(181992.000000,194736.000000,118225.000000,911.763715)}
{pt3dadd(181272.000000,194580.000000,118700.000000,718.829820)}
{pt3dadd(181320.000000,193980.000000,119100.000000,754.771316)}
{pt3dadd(181104.000000,193572.000000,119675.000000,790.712811)}
{pt3dadd(180516.000000,193236.000000,120225.000000,826.654307)}
{pt3dadd(180252.000000,192816.000000,120100.000000,862.595802)}
{pt3dadd(179964.000000,192960.000000,120475.000000,796.703072)}
{pt3dadd(179736.000000,192180.000000,120650.000000,730.810341)}
{pt3dadd(179364.000000,192144.000000,121300.000000,664.917611)}
{pt3dadd(179088.000000,191424.000000,121350.000000,599.024880)}
{pt3dadd(178752.000000,190968.000000,121625.000000,574.065504)}
{pt3dadd(178296.000000,190584.000000,121975.000000,549.106128)}
{pt3dadd(177948.000000,190164.000000,122275.000000,524.146752)}
{pt3dadd(177624.000000,189948.000000,122550.000000,499.187376)}
{pt3dadd(177228.000000,189324.000000,123050.000000,499.187376)}
{pt3dadd(176940.000000,189264.000000,123350.000000,499.187376)}
{pt3dadd(176340.000000,188784.000000,123700.000000,499.187376)}
{pt3dadd(176136.000000,187920.000000,124150.000000,499.187376)}
{pt3dadd(175716.000000,187104.000000,124650.000000,524.146752)}
{pt3dadd(174912.000000,186132.000000,125000.000000,549.106128)}
{pt3dadd(174252.000000,185220.000000,125450.000000,574.065504)}
{pt3dadd(173580.000000,184536.000000,125825.000000,599.024880)}
{pt3dadd(173112.000000,184332.000000,126050.000000,664.917611)}
{pt3dadd(172380.000000,183768.000000,126450.000000,730.810341)}
{pt3dadd(171684.000000,183408.000000,126775.000000,796.703072)}
{pt3dadd(171168.000000,183024.000000,127100.000000,862.595802)}
{pt3dadd(170352.000000,182400.000000,127400.000000,905.725589)}
{pt3dadd(169416.000000,181668.000000,127775.000000,948.855375)}
{pt3dadd(168864.000000,181464.000000,128300.000000,991.985162)}
{pt3dadd(168492.000000,180900.000000,128700.000000,1035.114948)}
{pt3dadd(167676.000000,180348.000000,129075.000000,1086.870681)}
{pt3dadd(167472.000000,180360.000000,129475.000000,1138.626414)}
{pt3dadd(167304.000000,179880.000000,129850.000000,1190.382147)}
{pt3dadd(166836.000000,179424.000000,130300.000000,1242.137880)}
{pt3dadd(166500.000000,179028.000000,130625.000000,1242.137880)}
{pt3dadd(166044.000000,178272.000000,130975.000000,1242.137880)}
{pt3dadd(165744.000000,178020.000000,131325.000000,1242.137880)}
{pt3dadd(165264.000000,177012.000000,131975.000000,1242.137880)}
{pt3dadd(164844.000000,176496.000000,132250.000000,1242.137880)}
{pt3dadd(164340.000000,176160.000000,132600.000000,1242.137880)}
{pt3dadd(164016.000000,176088.000000,132925.000000,1242.137880)}
{pt3dadd(163980.000000,175764.000000,133275.000000,1242.137880)}
{pt3dadd(163572.000000,175212.000000,133650.000000,1289.339127)}
{pt3dadd(163092.000000,174708.000000,134050.000000,1336.540374)}
{pt3dadd(161928.000000,173280.000000,135225.000000,1383.741621)}
{pt3dadd(161520.000000,172956.000000,135875.000000,1430.942868)}
{pt3dadd(161184.000000,172404.000000,136450.000000,1445.848502)}
{pt3dadd(160740.000000,171888.000000,137025.000000,1460.754135)}
{pt3dadd(160308.000000,171060.000000,137725.000000,1475.659769)}
{pt3dadd(160656.000000,170652.000000,138075.000000,1490.565402)}
{pt3dadd(160896.000000,169680.000000,138525.000000,1490.565402)}
{pt3dadd(160740.000000,168792.000000,138950.000000,1490.565402)}
{pt3dadd(160572.000000,167628.000000,139425.000000,1490.565402)}
{pt3dadd(160104.000000,167376.000000,140475.000000,1490.565402)}
{pt3dadd(159348.000000,166020.000000,141075.000000,1612.457924)}
{pt3dadd(158412.000000,164508.000000,142125.000000,1734.350445)}
{pt3dadd(157956.000000,163596.000000,142550.000000,1856.242967)}
{pt3dadd(157740.000000,163056.000000,143100.000000,1978.135488)}
{pt3dadd(157680.000000,162732.000000,143300.000000,2020.205160)}
{pt3dadd(157176.000000,161904.000000,143700.000000,2062.274832)}
{pt3dadd(156708.000000,160560.000000,144825.000000,2104.344504)}
{pt3dadd(156300.000000,160236.000000,145500.000000,2146.414176)}
{pt3dadd(156432.000000,159348.000000,146475.000000,2124.950117)}
{pt3dadd(156576.000000,158400.000000,147425.000000,2103.486057)}
{pt3dadd(156024.000000,156240.000000,148875.000000,2082.021998)}
{pt3dadd(156552.000000,155964.000000,149650.000000,2060.557938)}
{pt3dadd(156036.000000,153972.000000,150575.000000,2189.342731)}
{pt3dadd(155556.000000,153456.000000,151825.000000,2318.127525)}
{pt3dadd(155040.000000,153000.000000,153075.000000,2446.912318)}
{pt3dadd(155640.000000,151140.000000,154700.000000,2575.697112)}
{pt3dadd(156408.000000,149484.000000,156975.000000,2242.307304)}
{pt3dadd(156720.000000,149064.000000,157450.000000,1908.917496)}
{pt3dadd(156900.000000,148440.000000,157925.000000,1575.527688)}
{pt3dadd(156948.000000,147744.000000,158450.000000,1242.137880)}
{pt3dadd(156780.000000,147276.000000,158900.000000,1289.339096)}
{pt3dadd(156456.000000,146796.000000,159500.000000,1336.540311)}
{pt3dadd(156252.000000,146172.000000,159925.000000,1383.741527)}
{pt3dadd(156120.000000,145488.000000,160600.000000,1430.942742)}
{pt3dadd(156096.000000,144420.000000,161075.000000,1502.489862)}
{pt3dadd(155952.000000,143616.000000,161725.000000,1574.036982)}
{pt3dadd(155952.000000,142464.000000,162275.000000,1645.584102)}
{pt3dadd(156060.000000,141360.000000,162700.000000,1717.131222)}
{pt3dadd(156024.000000,141012.000000,163125.000000,1802.987834)}
{pt3dadd(156216.000000,139992.000000,163675.000000,1888.844445)}
{pt3dadd(156480.000000,139452.000000,164300.000000,1974.701057)}
{pt3dadd(156456.000000,139152.000000,164875.000000,2060.557668)}
{pt3dadd(156600.000000,138648.000000,165825.000000,2435.579100)}
{pt3dadd(157080.000000,138216.000000,166425.000000,2810.600532)}
{pt3dadd(157260.000000,137472.000000,167100.000000,3185.621964)}
{pt3dadd(157572.000000,137736.000000,168025.000000,3560.643396)}
{pt3dadd(157332.000000,137664.000000,168825.000000,3207.086091)}
{pt3dadd(157056.000000,137244.000000,170125.000000,2853.528786)}
{pt3dadd(156816.000000,136908.000000,171600.000000,2499.971481)}
{pt3dadd(156432.000000,135792.000000,173375.000000,2146.414176)}
{pt3dadd(156168.000000,135732.000000,173950.000000,2253.734910)}
{pt3dadd(154620.000000,135120.000000,174650.000000,2361.055644)}
{pt3dadd(154536.000000,134928.000000,175175.000000,2468.376378)}
{pt3dadd(154344.000000,134196.000000,176850.000000,2575.697112)}
{pt3dadd(153732.000000,133308.000000,179025.000000,2575.697112)}
{pt3dadd(153444.000000,132720.000000,180350.000000,2575.697112)}
{pt3dadd(153312.000000,132336.000000,180800.000000,2575.697112)}
{pt3dadd(153120.000000,131988.000000,181375.000000,2575.697112)}
{pt3dadd(153060.000000,131964.000000,182775.000000,2575.003608)}

{create adhoc136}
{access adhoc136}
{connect adhoc136(1), adhoc134(0)}
{nseg = 1}
{strdef color color = "White"}
{pt3dclear()}
{pt3dadd(184572.000000,204312.000000,71650.000000,1788.678450)}
{pt3dadd(179244.000000,205512.000000,71650.000000,862.595802)}
{pt3dadd(178848.000000,205560.000000,72025.000000,845.688929)}
{pt3dadd(178404.000000,205740.000000,72450.000000,828.782055)}
{pt3dadd(177936.000000,206016.000000,72650.000000,811.875182)}
{pt3dadd(177504.000000,206328.000000,72825.000000,794.968308)}
{pt3dadd(177180.000000,206640.000000,72825.000000,855.004968)}
{pt3dadd(176916.000000,206844.000000,72825.000000,915.041628)}
{pt3dadd(176592.000000,207048.000000,72975.000000,975.078288)}
{pt3dadd(176304.000000,207384.000000,73075.000000,1035.114948)}
{pt3dadd(176040.000000,207492.000000,73275.000000,1035.114948)}
{pt3dadd(175680.000000,207696.000000,73275.000000,1035.114948)}
{pt3dadd(175380.000000,207984.000000,73425.000000,1035.114948)}
{pt3dadd(175080.000000,208296.000000,73625.000000,1035.114948)}
{pt3dadd(174756.000000,208584.000000,73600.000000,1035.114948)}
{pt3dadd(174528.000000,208860.000000,73525.000000,1035.114948)}
{pt3dadd(174324.000000,208932.000000,73525.000000,1035.114948)}
{pt3dadd(174084.000000,209136.000000,73500.000000,1035.114948)}
{pt3dadd(173820.000000,209208.000000,73600.000000,876.972384)}
{pt3dadd(173580.000000,209280.000000,73700.000000,718.829820)}
{pt3dadd(173688.000000,209376.000000,73750.000000,599.024880)}

{create adhoc137}
{access adhoc137}
{connect adhoc137(1), adhoc136(0)}
{nseg = 1}
{strdef color color = "White"}
{pt3dclear()}
{pt3dadd(173688.000000,209376.000000,73750.000000,599.024880)}
{pt3dadd(173064.000000,210708.000000,73550.000000,415.989486)}
{pt3dadd(172752.000000,210756.000000,73425.000000,436.788958)}
{pt3dadd(172164.000000,210984.000000,73225.000000,457.588431)}
{pt3dadd(171756.000000,211248.000000,73150.000000,478.387903)}
{pt3dadd(171288.000000,211440.000000,73125.000000,499.187376)}
{pt3dadd(170772.000000,211980.000000,73275.000000,494.195504)}
{pt3dadd(170316.000000,212244.000000,73200.000000,489.203631)}
{pt3dadd(169692.000000,212400.000000,73175.000000,484.211758)}
{pt3dadd(169236.000000,212544.000000,73125.000000,479.219886)}
{pt3dadd(168792.000000,212880.000000,73275.000000,463.412286)}
{pt3dadd(168276.000000,213156.000000,73275.000000,447.604686)}
{pt3dadd(167712.000000,213492.000000,73275.000000,431.797086)}
{pt3dadd(167352.000000,213816.000000,73425.000000,415.989486)}
{pt3dadd(167004.000000,214104.000000,73475.000000,415.989486)}
{pt3dadd(166572.000000,214380.000000,73550.000000,415.989486)}
{pt3dadd(166308.000000,214572.000000,73850.000000,415.989486)}
{pt3dadd(165996.000000,214668.000000,73975.000000,415.989486)}
{pt3dadd(165612.000000,215016.000000,74025.000000,415.989486)}
{pt3dadd(165288.000000,215388.000000,74225.000000,415.989486)}
{pt3dadd(165048.000000,215736.000000,74400.000000,415.989486)}
{pt3dadd(164880.000000,216132.000000,74400.000000,415.989486)}
{pt3dadd(164604.000000,216516.000000,74400.000000,436.788958)}
{pt3dadd(164220.000000,216912.000000,74325.000000,457.588431)}
{pt3dadd(163848.000000,217260.000000,74200.000000,478.387903)}
{pt3dadd(163692.000000,217560.000000,74250.000000,499.187376)}
{pt3dadd(163464.000000,217656.000000,73900.000000,499.187376)}
{pt3dadd(163008.000000,218640.000000,73475.000000,499.187376)}
{pt3dadd(162636.000000,219228.000000,73150.000000,499.187376)}
{pt3dadd(162492.000000,219480.000000,72850.000000,499.187376)}
{pt3dadd(162228.000000,219900.000000,72650.000000,446.610929)}
{pt3dadd(162204.000000,220248.000000,72675.000000,394.034481)}
{pt3dadd(162168.000000,220524.000000,72650.000000,341.458034)}
{pt3dadd(162156.000000,220776.000000,72725.000000,288.881586)}
{pt3dadd(161940.000000,221364.000000,72725.000000,288.881586)}
{pt3dadd(161772.000000,222192.000000,72650.000000,288.881586)}
{pt3dadd(161712.000000,222456.000000,72550.000000,288.881586)}
{pt3dadd(161592.000000,222744.000000,72500.000000,288.881586)}
{pt3dadd(161616.000000,223044.000000,72500.000000,320.658561)}
{pt3dadd(161292.000000,223320.000000,72200.000000,352.435536)}
{pt3dadd(161196.000000,223512.000000,72000.000000,384.212511)}
{pt3dadd(160968.000000,223764.000000,71800.000000,415.989486)}
{pt3dadd(160824.000000,224004.000000,71575.000000,384.212511)}
{pt3dadd(160848.000000,224172.000000,71775.000000,352.435536)}
{pt3dadd(160500.000000,224460.000000,71375.000000,320.658561)}
{pt3dadd(160368.000000,224592.000000,71225.000000,288.881586)}
{pt3dadd(160128.000000,224760.000000,71400.000000,288.881586)}
{pt3dadd(159912.000000,225048.000000,71400.000000,288.881586)}
{pt3dadd(159696.000000,225516.000000,71525.000000,288.881586)}
{pt3dadd(159540.000000,226392.000000,72125.000000,288.881586)}
{pt3dadd(159612.000000,226800.000000,72350.000000,303.325664)}
{pt3dadd(159456.000000,227160.000000,72400.000000,317.769741)}
{pt3dadd(159312.000000,227448.000000,72675.000000,332.213819)}
{pt3dadd(159264.000000,227724.000000,72975.000000,346.657896)}
{pt3dadd(159228.000000,227892.000000,73075.000000,379.798393)}
{pt3dadd(159156.000000,228108.000000,73100.000000,412.938891)}
{pt3dadd(159060.000000,228396.000000,73150.000000,446.079388)}
{pt3dadd(158904.000000,228624.000000,73300.000000,479.219886)}
{pt3dadd(158760.000000,228852.000000,73375.000000,459.252401)}
{pt3dadd(158568.000000,229080.000000,73400.000000,439.284915)}
{pt3dadd(158280.000000,229236.000000,73425.000000,419.317430)}
{pt3dadd(158040.000000,229368.000000,73400.000000,399.349944)}
{pt3dadd(157872.000000,229680.000000,73500.000000,382.710357)}
{pt3dadd(157680.000000,229980.000000,73450.000000,366.070770)}
{pt3dadd(157536.000000,230172.000000,73350.000000,349.431183)}
{pt3dadd(157488.000000,230424.000000,73450.000000,332.791596)}
{pt3dadd(157284.000000,230664.000000,73450.000000,321.814093)}
{pt3dadd(157092.000000,230988.000000,73475.000000,310.836591)}
{pt3dadd(156996.000000,231288.000000,73475.000000,299.859089)}
{pt3dadd(156876.000000,232080.000000,73475.000000,288.881586)}
{pt3dadd(156792.000000,232476.000000,73500.000000,240.734646)}

{create adhoc138}
{access adhoc138}
{connect adhoc138(1), adhoc137(0)}
{nseg = 1}
{strdef color color = "White"}
{pt3dclear()}
{pt3dadd(156792.000000,232476.000000,73500.000000,240.734646)}
{pt3dadd(156900.000000,232272.000000,73850.000000,346.657896)}
{pt3dadd(157212.000000,232632.000000,74050.000000,289.017180)}
{pt3dadd(157464.000000,233016.000000,74200.000000,231.376464)}
{pt3dadd(157512.000000,233076.000000,74225.000000,173.735748)}
{pt3dadd(157368.000000,233148.000000,74275.000000,116.095032)}
{pt3dadd(157356.000000,233268.000000,74375.000000,116.095032)}

{create adhoc139}
{access adhoc139}
{connect adhoc139(1), adhoc137(0)}
{nseg = 1}
{strdef color color = "White"}
{pt3dclear()}
{pt3dadd(156792.000000,232476.000000,73500.000000,240.734646)}
{pt3dadd(156444.000000,232668.000000,73475.000000,240.734646)}
{pt3dadd(156312.000000,233268.000000,73350.000000,230.704038)}
{pt3dadd(156204.000000,233796.000000,73025.000000,220.673430)}
{pt3dadd(156300.000000,233976.000000,73100.000000,210.642822)}
{pt3dadd(156288.000000,234528.000000,72800.000000,200.612214)}
{pt3dadd(156168.000000,234816.000000,72800.000000,200.612214)}
{pt3dadd(156144.000000,234816.000000,72575.000000,231.105276)}

{create adhoc140}
{access adhoc140}
{connect adhoc140(1), adhoc139(0)}
{nseg = 1}
{strdef color color = "White"}
{pt3dclear()}
{pt3dadd(156144.000000,234816.000000,72575.000000,231.105276)}
{pt3dadd(156072.000000,234816.000000,72375.000000,116.095032)}
{pt3dadd(156108.000000,234780.000000,72250.000000,114.547098)}
{pt3dadd(155928.000000,234852.000000,72100.000000,112.999164)}
{pt3dadd(155772.000000,234924.000000,72000.000000,111.451230)}
{pt3dadd(155772.000000,234972.000000,71900.000000,139.314042)}

{create adhoc141}
{access adhoc141}
{connect adhoc141(1), adhoc139(0)}
{nseg = 1}
{strdef color color = "White"}
{pt3dclear()}
{pt3dadd(156144.000000,234816.000000,72575.000000,231.105276)}
{pt3dadd(155796.000000,235644.000000,72750.000000,240.734646)}
{pt3dadd(155688.000000,235524.000000,73025.000000,167.176836)}
{pt3dadd(155652.000000,235752.000000,73275.000000,116.095032)}

{create adhoc142}
{access adhoc142}
{connect adhoc142(1), adhoc136(0)}
{nseg = 1}
{strdef color color = "White"}
{pt3dclear()}
{pt3dadd(173688.000000,209376.000000,73750.000000,599.024880)}
{pt3dadd(173076.000000,208944.000000,74275.000000,718.829820)}
{pt3dadd(172776.000000,208920.000000,74450.000000,711.641515)}
{pt3dadd(172512.000000,208992.000000,74450.000000,704.453211)}
{pt3dadd(172236.000000,209184.000000,74475.000000,697.264906)}
{pt3dadd(171948.000000,209376.000000,74500.000000,690.076602)}
{pt3dadd(171612.000000,209376.000000,74600.000000,733.206402)}
{pt3dadd(171324.000000,209436.000000,74800.000000,776.336202)}
{pt3dadd(171024.000000,209568.000000,75000.000000,819.466002)}
{pt3dadd(170748.000000,209664.000000,75200.000000,862.595802)}
{pt3dadd(170520.000000,209892.000000,75375.000000,862.595802)}
{pt3dadd(170220.000000,210096.000000,75600.000000,862.595802)}
{pt3dadd(169800.000000,210240.000000,75750.000000,862.595802)}
{pt3dadd(169392.000000,210612.000000,75850.000000,862.595802)}

{create adhoc143}
{access adhoc143}
{connect adhoc143(1), adhoc142(0)}
{nseg = 1}
{strdef color color = "White"}
{pt3dclear()}
{pt3dadd(169392.000000,210612.000000,75850.000000,862.595802)}
{pt3dadd(168192.000000,209064.000000,75825.000000,346.657896)}
{pt3dadd(167736.000000,208560.000000,75375.000000,320.177083)}
{pt3dadd(167472.000000,208392.000000,75450.000000,293.696271)}
{pt3dadd(167424.000000,208140.000000,75350.000000,267.215459)}
{pt3dadd(167364.000000,207828.000000,75125.000000,240.734646)}
{pt3dadd(167424.000000,207264.000000,75125.000000,240.734646)}
{pt3dadd(167508.000000,207012.000000,75000.000000,240.734646)}
{pt3dadd(167400.000000,206652.000000,74825.000000,240.734646)}
{pt3dadd(167268.000000,206352.000000,74575.000000,240.734646)}
{pt3dadd(167148.000000,206052.000000,74450.000000,240.734646)}
{pt3dadd(167064.000000,205812.000000,74350.000000,240.734646)}
{pt3dadd(167064.000000,205464.000000,74200.000000,240.734646)}
{pt3dadd(167076.000000,205116.000000,74050.000000,240.734646)}
{pt3dadd(167052.000000,204924.000000,73950.000000,240.734646)}
{pt3dadd(167136.000000,204756.000000,73900.000000,288.881586)}

{create adhoc144}
{access adhoc144}
{connect adhoc144(1), adhoc143(0)}
{nseg = 1}
{strdef color color = "White"}
{pt3dclear()}
{pt3dadd(167136.000000,204756.000000,73900.000000,288.881586)}
{pt3dadd(166644.000000,204924.000000,73325.000000,96.745860)}

{create adhoc145}
{access adhoc145}
{connect adhoc145(1), adhoc143(0)}
{nseg = 1}
{strdef color color = "White"}
{pt3dclear()}
{pt3dadd(167136.000000,204756.000000,73900.000000,288.881586)}
{pt3dadd(167292.000000,204480.000000,73800.000000,288.881586)}
{pt3dadd(167460.000000,204180.000000,73850.000000,266.814243)}
{pt3dadd(167556.000000,203952.000000,73850.000000,244.746900)}
{pt3dadd(167760.000000,203700.000000,73825.000000,222.679557)}
{pt3dadd(167844.000000,203412.000000,73750.000000,200.612214)}
{pt3dadd(167844.000000,203328.000000,73750.000000,192.587706)}

{create adhoc146}
{access adhoc146}
{connect adhoc146(1), adhoc145(0)}
{nseg = 1}
{strdef color color = "White"}
{pt3dclear()}
{pt3dadd(167844.000000,203328.000000,73750.000000,192.587706)}
{pt3dadd(167520.000000,203304.000000,73150.000000,111.451248)}
{pt3dadd(167436.000000,203220.000000,72950.000000,120.738846)}
{pt3dadd(167364.000000,203160.000000,72950.000000,130.026444)}
{pt3dadd(167352.000000,203160.000000,72875.000000,139.314042)}
{pt3dadd(167232.000000,203184.000000,72625.000000,67.184640)}

{create adhoc147}
{access adhoc147}
{connect adhoc147(1), adhoc145(0)}
{nseg = 1}
{strdef color color = "White"}
{pt3dclear()}
{pt3dadd(167844.000000,203328.000000,73750.000000,192.587706)}
{pt3dadd(168072.000000,203124.000000,73850.000000,139.314042)}
{pt3dadd(168384.000000,202860.000000,74025.000000,191.150005)}
{pt3dadd(168552.000000,202644.000000,74075.000000,242.985969)}
{pt3dadd(168672.000000,202500.000000,74125.000000,294.821933)}
{pt3dadd(168792.000000,202320.000000,74175.000000,346.657896)}
{pt3dadd(168972.000000,202152.000000,74375.000000,346.657896)}
{pt3dadd(169176.000000,201972.000000,74625.000000,346.657896)}
{pt3dadd(169392.000000,201840.000000,74850.000000,346.657896)}
{pt3dadd(169620.000000,201780.000000,75100.000000,346.657896)}
{pt3dadd(169836.000000,201744.000000,75100.000000,363.990794)}
{pt3dadd(169944.000000,201468.000000,75325.000000,381.323691)}
{pt3dadd(170136.000000,201324.000000,75600.000000,398.656589)}
{pt3dadd(170424.000000,201276.000000,76000.000000,415.989486)}
{pt3dadd(170688.000000,201192.000000,76275.000000,384.212511)}
{pt3dadd(171048.000000,200904.000000,76625.000000,352.435536)}
{pt3dadd(171384.000000,200652.000000,76900.000000,320.658561)}
{pt3dadd(171540.000000,200472.000000,77200.000000,288.881586)}
{pt3dadd(171720.000000,200400.000000,77325.000000,346.657896)}
{pt3dadd(171864.000000,200124.000000,77450.000000,288.881586)}

{create adhoc148}
{access adhoc148}
{connect adhoc148(1), adhoc147(0)}
{nseg = 1}
{strdef color color = "White"}
{pt3dclear()}
{pt3dadd(171864.000000,200124.000000,77450.000000,288.881586)}
{pt3dadd(172008.000000,200448.000000,77000.000000,277.326342)}
{pt3dadd(172116.000000,200544.000000,77000.000000,196.710687)}
{pt3dadd(172308.000000,200736.000000,77300.000000,116.095032)}
{pt3dadd(172452.000000,200616.000000,77175.000000,139.314042)}

{create adhoc149}
{access adhoc149}
{connect adhoc149(1), adhoc147(0)}
{nseg = 1}
{strdef color color = "White"}
{pt3dclear()}
{pt3dadd(171864.000000,200124.000000,77450.000000,288.881586)}
{pt3dadd(172044.000000,199740.000000,77600.000000,288.881586)}
{pt3dadd(172248.000000,199620.000000,77725.000000,288.881586)}
{pt3dadd(172488.000000,199464.000000,77775.000000,288.881586)}
{pt3dadd(172680.000000,199272.000000,77950.000000,288.881586)}
{pt3dadd(172884.000000,199128.000000,78025.000000,288.881586)}
{pt3dadd(173076.000000,198936.000000,78075.000000,288.881586)}
{pt3dadd(173292.000000,198804.000000,78200.000000,288.881586)}
{pt3dadd(173496.000000,198756.000000,78275.000000,288.881586)}
{pt3dadd(173712.000000,198612.000000,78300.000000,288.881586)}
{pt3dadd(173868.000000,198348.000000,78425.000000,288.881586)}
{pt3dadd(174084.000000,198072.000000,78525.000000,288.881586)}
{pt3dadd(174300.000000,198024.000000,78675.000000,288.881586)}
{pt3dadd(174504.000000,197868.000000,78950.000000,288.881586)}
{pt3dadd(174696.000000,197676.000000,79175.000000,303.325664)}
{pt3dadd(174864.000000,197592.000000,79350.000000,317.769741)}
{pt3dadd(174972.000000,197592.000000,79625.000000,332.213819)}
{pt3dadd(174852.000000,197580.000000,79800.000000,346.657896)}
{pt3dadd(174936.000000,197568.000000,80050.000000,346.657896)}
{pt3dadd(174924.000000,197580.000000,80325.000000,346.657896)}
{pt3dadd(175080.000000,197532.000000,80625.000000,346.657896)}
{pt3dadd(175260.000000,197568.000000,80925.000000,346.657896)}

{create adhoc150}
{access adhoc150}
{connect adhoc150(1), adhoc149(0)}
{nseg = 1}
{strdef color color = "White"}
{pt3dclear()}
{pt3dadd(175260.000000,197568.000000,80925.000000,346.657896)}
{pt3dadd(175500.000000,196344.000000,80725.000000,96.745860)}
{pt3dadd(175716.000000,196332.000000,80950.000000,139.314042)}
{pt3dadd(175824.000000,196332.000000,81025.000000,96.745860)}

{create adhoc151}
{access adhoc151}
{connect adhoc151(1), adhoc149(0)}
{nseg = 1}
{strdef color color = "White"}
{pt3dclear()}
{pt3dadd(175260.000000,197568.000000,80925.000000,346.657896)}
{pt3dadd(175512.000000,197556.000000,81150.000000,346.657896)}
{pt3dadd(175596.000000,197568.000000,81375.000000,294.821933)}
{pt3dadd(175764.000000,197604.000000,81650.000000,242.985969)}
{pt3dadd(175920.000000,197616.000000,81825.000000,191.150005)}
{pt3dadd(176292.000000,197760.000000,82525.000000,139.314042)}
{pt3dadd(176316.000000,197820.000000,82750.000000,139.314042)}
{pt3dadd(176328.000000,198012.000000,82650.000000,139.314042)}

{create adhoc152}
{access adhoc152}
{connect adhoc152(1), adhoc142(0)}
{nseg = 1}
{strdef color color = "White"}
{pt3dclear()}
{pt3dadd(169392.000000,210612.000000,75850.000000,862.595802)}
{pt3dadd(169080.000000,211128.000000,76150.000000,718.829820)}
{pt3dadd(168936.000000,211380.000000,76400.000000,609.008598)}
{pt3dadd(168660.000000,211644.000000,76475.000000,499.187376)}
{pt3dadd(168456.000000,211956.000000,76450.000000,599.024880)}

{create adhoc153}
{access adhoc153}
{connect adhoc153(1), adhoc152(0)}
{nseg = 1}
{strdef color color = "White"}
{pt3dclear()}
{pt3dadd(168456.000000,211956.000000,76450.000000,599.024880)}
{pt3dadd(167076.000000,211944.000000,77200.000000,139.314042)}

{create adhoc154}
{access adhoc154}
{connect adhoc154(1), adhoc153(0)}
{nseg = 1}
{strdef color color = "White"}
{pt3dclear()}
{pt3dadd(167076.000000,211944.000000,77200.000000,139.314042)}
{pt3dadd(166380.000000,211308.000000,77250.000000,288.881586)}
{pt3dadd(166356.000000,211200.000000,77425.000000,244.746900)}
{pt3dadd(166344.000000,211116.000000,77500.000000,200.612214)}
{pt3dadd(166332.000000,211116.000000,77600.000000,139.314042)}

{create adhoc155}
{access adhoc155}
{connect adhoc155(1), adhoc153(0)}
{nseg = 1}
{strdef color color = "White"}
{pt3dclear()}
{pt3dadd(167076.000000,211944.000000,77200.000000,139.314042)}
{pt3dadd(166716.000000,212520.000000,77200.000000,116.095032)}
{pt3dadd(166620.000000,212604.000000,77200.000000,121.899785)}
{pt3dadd(166500.000000,212712.000000,77175.000000,127.704537)}
{pt3dadd(166404.000000,212808.000000,77225.000000,133.509289)}
{pt3dadd(166356.000000,212820.000000,77175.000000,139.314042)}
{pt3dadd(166248.000000,212964.000000,77275.000000,96.745860)}

{create adhoc156}
{access adhoc156}
{connect adhoc156(1), adhoc153(0)}
{nseg = 1}
{strdef color color = "White"}
{pt3dclear()}
{pt3dadd(167076.000000,211944.000000,77200.000000,139.314042)}
{pt3dadd(167220.000000,212100.000000,77475.000000,200.612214)}
{pt3dadd(167280.000000,211812.000000,77650.000000,133.741494)}

{create adhoc157}
{access adhoc157}
{connect adhoc157(1), adhoc152(0)}
{nseg = 1}
{strdef color color = "White"}
{pt3dclear()}
{pt3dadd(168456.000000,211956.000000,76450.000000,599.024880)}
{pt3dadd(168192.000000,212568.000000,76700.000000,479.219886)}
{pt3dadd(168132.000000,212844.000000,76900.000000,484.211758)}
{pt3dadd(167988.000000,213168.000000,76925.000000,489.203631)}
{pt3dadd(167868.000000,213372.000000,77000.000000,494.195504)}
{pt3dadd(167748.000000,213684.000000,77100.000000,499.187376)}
{pt3dadd(167628.000000,213888.000000,77175.000000,524.146752)}
{pt3dadd(167556.000000,214104.000000,77300.000000,549.106128)}
{pt3dadd(167484.000000,214332.000000,77475.000000,574.065504)}
{pt3dadd(167424.000000,214584.000000,77700.000000,599.024880)}
{pt3dadd(167256.000000,214788.000000,77675.000000,730.810341)}
{pt3dadd(167112.000000,215028.000000,77775.000000,862.595802)}
{pt3dadd(167160.000000,215400.000000,78000.000000,953.961894)}

{create adhoc158}
{access adhoc158}
{connect adhoc158(1), adhoc157(0)}
{nseg = 1}
{strdef color color = "White"}
{pt3dclear()}
{pt3dadd(167160.000000,215400.000000,78000.000000,953.961894)}
{pt3dadd(167520.000000,215376.000000,80225.000000,499.187376)}
{pt3dadd(167712.000000,215280.000000,80650.000000,499.187376)}
{pt3dadd(167892.000000,215124.000000,80750.000000,499.187376)}
{pt3dadd(168060.000000,215172.000000,81075.000000,499.187376)}

{create adhoc159}
{access adhoc159}
{connect adhoc159(1), adhoc158(0)}
{nseg = 1}
{strdef color color = "White"}
{pt3dclear()}
{pt3dadd(168060.000000,215172.000000,81075.000000,499.187376)}
{pt3dadd(168060.000000,214320.000000,80625.000000,167.176836)}
{pt3dadd(168288.000000,213684.000000,80700.000000,167.176836)}
{pt3dadd(168456.000000,213048.000000,80725.000000,167.176836)}
{pt3dadd(168468.000000,212832.000000,80700.000000,167.176836)}
{pt3dadd(168660.000000,212628.000000,80725.000000,167.176836)}
{pt3dadd(168720.000000,212460.000000,80700.000000,175.535680)}
{pt3dadd(168720.000000,212316.000000,80700.000000,183.894525)}
{pt3dadd(168684.000000,212124.000000,80725.000000,192.253370)}
{pt3dadd(168864.000000,211944.000000,80675.000000,200.612214)}
{pt3dadd(168960.000000,211740.000000,80550.000000,192.253370)}
{pt3dadd(169056.000000,211548.000000,80525.000000,183.894525)}
{pt3dadd(169056.000000,211380.000000,80450.000000,175.535680)}
{pt3dadd(169152.000000,211224.000000,80525.000000,167.176836)}
{pt3dadd(169176.000000,211044.000000,80450.000000,185.566288)}
{pt3dadd(169260.000000,210888.000000,80450.000000,203.955741)}
{pt3dadd(169332.000000,210732.000000,80475.000000,222.345193)}
{pt3dadd(169404.000000,210552.000000,80500.000000,240.734646)}
{pt3dadd(169500.000000,210348.000000,80475.000000,252.771381)}
{pt3dadd(169620.000000,210228.000000,80475.000000,264.808116)}
{pt3dadd(169752.000000,210120.000000,80525.000000,276.844851)}
{pt3dadd(169872.000000,209952.000000,80525.000000,288.881586)}
{pt3dadd(170004.000000,209940.000000,80450.000000,258.455399)}
{pt3dadd(170148.000000,209856.000000,80525.000000,228.029211)}
{pt3dadd(170292.000000,209676.000000,80400.000000,197.603024)}
{pt3dadd(170448.000000,209568.000000,80550.000000,167.176836)}
{pt3dadd(170604.000000,209376.000000,80725.000000,145.538014)}
{pt3dadd(170760.000000,209208.000000,80725.000000,123.899193)}
{pt3dadd(170916.000000,209148.000000,80775.000000,102.260372)}
{pt3dadd(171072.000000,208956.000000,80800.000000,80.621550)}
{pt3dadd(171144.000000,208752.000000,80800.000000,120.649824)}
{pt3dadd(171216.000000,208572.000000,80825.000000,160.678098)}
{pt3dadd(171264.000000,208416.000000,80875.000000,200.706372)}
{pt3dadd(171420.000000,208248.000000,81000.000000,240.734646)}
{pt3dadd(171480.000000,208104.000000,80950.000000,200.612214)}
{pt3dadd(171468.000000,207972.000000,81000.000000,200.612214)}

{create adhoc160}
{access adhoc160}
{connect adhoc160(1), adhoc159(0)}
{nseg = 1}
{strdef color color = "White"}
{pt3dclear()}
{pt3dadd(171468.000000,207972.000000,81000.000000,200.612214)}
{pt3dadd(171828.000000,208080.000000,80825.000000,80.621550)}
{pt3dadd(172056.000000,208080.000000,80875.000000,120.649824)}
{pt3dadd(172188.000000,208044.000000,80975.000000,160.678098)}
{pt3dadd(172296.000000,208020.000000,81050.000000,200.706372)}
{pt3dadd(172368.000000,207996.000000,81050.000000,240.734646)}
{pt3dadd(172572.000000,207780.000000,81125.000000,116.095032)}

{create adhoc161}
{access adhoc161}
{connect adhoc161(1), adhoc159(0)}
{nseg = 1}
{strdef color color = "White"}
{pt3dclear()}
{pt3dadd(171468.000000,207972.000000,81000.000000,200.612214)}
{pt3dadd(171372.000000,207816.000000,81225.000000,240.734646)}
{pt3dadd(171288.000000,207600.000000,81175.000000,252.771381)}
{pt3dadd(171204.000000,207324.000000,81250.000000,264.808116)}
{pt3dadd(171288.000000,207060.000000,81325.000000,276.844851)}
{pt3dadd(171360.000000,206880.000000,81300.000000,288.881586)}
{pt3dadd(171324.000000,206688.000000,81250.000000,266.814243)}
{pt3dadd(171276.000000,206568.000000,81200.000000,244.746900)}
{pt3dadd(171180.000000,206388.000000,81100.000000,222.679557)}
{pt3dadd(171096.000000,206208.000000,81100.000000,200.612214)}
{pt3dadd(171144.000000,206064.000000,81000.000000,182.557116)}
{pt3dadd(171156.000000,205824.000000,81000.000000,164.502018)}
{pt3dadd(171156.000000,205620.000000,80975.000000,146.446920)}
{pt3dadd(171204.000000,205476.000000,80925.000000,128.391822)}
{pt3dadd(171252.000000,205368.000000,80875.000000,131.122377)}
{pt3dadd(171312.000000,205236.000000,80900.000000,133.852932)}
{pt3dadd(171372.000000,205140.000000,80825.000000,136.583487)}
{pt3dadd(171444.000000,205032.000000,80775.000000,139.314042)}
{pt3dadd(171408.000000,204900.000000,80775.000000,133.509289)}
{pt3dadd(171624.000000,204768.000000,80800.000000,127.704537)}
{pt3dadd(171804.000000,204612.000000,80800.000000,121.899785)}
{pt3dadd(171984.000000,204468.000000,80825.000000,116.095032)}
{pt3dadd(172164.000000,204264.000000,80875.000000,128.865483)}
{pt3dadd(172320.000000,203892.000000,80900.000000,141.635934)}
{pt3dadd(172416.000000,203760.000000,80900.000000,154.406385)}
{pt3dadd(172548.000000,203700.000000,80975.000000,167.176836)}
{pt3dadd(172668.000000,203700.000000,80975.000000,139.314042)}
{pt3dadd(172752.000000,203616.000000,81100.000000,139.314042)}

{create adhoc162}
{access adhoc162}
{connect adhoc162(1), adhoc158(0)}
{nseg = 1}
{strdef color color = "White"}
{pt3dclear()}
{pt3dadd(168060.000000,215172.000000,81075.000000,499.187376)}
{pt3dadd(168036.000000,215376.000000,81300.000000,499.187376)}
{pt3dadd(168012.000000,215328.000000,81475.000000,499.187376)}
{pt3dadd(168108.000000,215268.000000,81750.000000,415.989486)}

{create adhoc163}
{access adhoc163}
{connect adhoc163(1), adhoc162(0)}
{nseg = 1}
{strdef color color = "White"}
{pt3dclear()}
{pt3dadd(168108.000000,215268.000000,81750.000000,415.989486)}
{pt3dadd(167496.000000,214860.000000,81650.000000,116.095032)}
{pt3dadd(167436.000000,214824.000000,81550.000000,178.414839)}
{pt3dadd(167328.000000,214800.000000,81575.000000,240.734646)}
{pt3dadd(167244.000000,214800.000000,81500.000000,96.745860)}

{create adhoc164}
{access adhoc164}
{connect adhoc164(1), adhoc162(0)}
{nseg = 1}
{strdef color color = "White"}
{pt3dclear()}
{pt3dadd(168108.000000,215268.000000,81750.000000,415.989486)}
{pt3dadd(168348.000000,215256.000000,81950.000000,415.989486)}
{pt3dadd(168456.000000,215268.000000,82175.000000,388.256844)}
{pt3dadd(168708.000000,215244.000000,82425.000000,360.524202)}
{pt3dadd(168912.000000,215304.000000,82625.000000,332.791560)}
{pt3dadd(169080.000000,215292.000000,82875.000000,240.734646)}

{create adhoc165}
{access adhoc165}
{connect adhoc165(1), adhoc164(0)}
{nseg = 1}
{strdef color color = "White"}
{pt3dclear()}
{pt3dadd(169080.000000,215292.000000,82875.000000,240.734646)}
{pt3dadd(168708.000000,215604.000000,82900.000000,240.734646)}
{pt3dadd(168684.000000,215736.000000,82975.000000,167.176836)}
{pt3dadd(168684.000000,215772.000000,83125.000000,80.621550)}

{create adhoc166}
{access adhoc166}
{connect adhoc166(1), adhoc164(0)}
{nseg = 1}
{strdef color color = "White"}
{pt3dclear()}
{pt3dadd(169080.000000,215292.000000,82875.000000,240.734646)}
{pt3dadd(169428.000000,215328.000000,83100.000000,277.326342)}
{pt3dadd(169488.000000,215424.000000,83275.000000,294.659230)}
{pt3dadd(169680.000000,215400.000000,83425.000000,311.992119)}
{pt3dadd(169824.000000,215400.000000,83675.000000,329.325007)}
{pt3dadd(169968.000000,215280.000000,83850.000000,346.657896)}
{pt3dadd(170088.000000,215172.000000,84100.000000,346.657896)}
{pt3dadd(170268.000000,214860.000000,84325.000000,346.657896)}
{pt3dadd(170376.000000,214680.000000,84525.000000,346.657896)}
{pt3dadd(170580.000000,214548.000000,84750.000000,499.187376)}

{create adhoc167}
{access adhoc167}
{connect adhoc167(1), adhoc166(0)}
{nseg = 1}
{strdef color color = "White"}
{pt3dclear()}
{pt3dadd(170580.000000,214548.000000,84750.000000,499.187376)}
{pt3dadd(171120.000000,213936.000000,84750.000000,139.314042)}
{pt3dadd(171120.000000,213648.000000,84500.000000,127.704537)}
{pt3dadd(171216.000000,213792.000000,84675.000000,116.095032)}
{pt3dadd(171360.000000,213888.000000,84725.000000,96.745860)}

{create adhoc168}
{access adhoc168}
{connect adhoc168(1), adhoc166(0)}
{nseg = 1}
{strdef color color = "White"}
{pt3dclear()}
{pt3dadd(170580.000000,214548.000000,84750.000000,499.187376)}
{pt3dadd(170676.000000,214428.000000,85000.000000,479.219886)}
{pt3dadd(170676.000000,214380.000000,85150.000000,419.598576)}
{pt3dadd(170700.000000,214140.000000,85375.000000,359.977266)}
{pt3dadd(170808.000000,213924.000000,85575.000000,300.355956)}
{pt3dadd(171108.000000,213684.000000,85750.000000,240.734646)}
{pt3dadd(171336.000000,213264.000000,85925.000000,240.734646)}
{pt3dadd(171456.000000,213060.000000,86100.000000,240.734646)}
{pt3dadd(171636.000000,212796.000000,86250.000000,240.734646)}
{pt3dadd(171720.000000,212388.000000,86300.000000,240.734646)}
{pt3dadd(171804.000000,212184.000000,86350.000000,240.734646)}
{pt3dadd(171900.000000,212088.000000,86450.000000,240.734646)}
{pt3dadd(172020.000000,211908.000000,86450.000000,240.734646)}
{pt3dadd(172284.000000,211584.000000,86675.000000,399.349944)}

{create adhoc169}
{access adhoc169}
{connect adhoc169(1), adhoc168(0)}
{nseg = 1}
{strdef color color = "White"}
{pt3dclear()}
{pt3dadd(172284.000000,211584.000000,86675.000000,399.349944)}
{pt3dadd(172740.000000,211500.000000,87175.000000,288.881586)}
{pt3dadd(173100.000000,211500.000000,87375.000000,303.325664)}
{pt3dadd(173208.000000,211536.000000,87550.000000,317.769741)}
{pt3dadd(173340.000000,211608.000000,87800.000000,332.213819)}
{pt3dadd(173472.000000,211632.000000,88100.000000,346.657896)}
{pt3dadd(173580.000000,211524.000000,88350.000000,320.177083)}
{pt3dadd(173712.000000,211548.000000,88625.000000,293.696271)}
{pt3dadd(173892.000000,211344.000000,88825.000000,267.215459)}
{pt3dadd(174060.000000,211296.000000,89025.000000,240.734646)}
{pt3dadd(174324.000000,211248.000000,89275.000000,288.881586)}

{create adhoc170}
{access adhoc170}
{connect adhoc170(1), adhoc169(0)}
{nseg = 1}
{strdef color color = "White"}
{pt3dclear()}
{pt3dadd(174324.000000,211248.000000,89275.000000,288.881586)}
{pt3dadd(174444.000000,211344.000000,89475.000000,288.881586)}
{pt3dadd(174576.000000,211344.000000,89525.000000,264.808116)}
{pt3dadd(174540.000000,211464.000000,89775.000000,240.734646)}
{pt3dadd(174588.000000,211536.000000,90025.000000,167.176836)}

{create adhoc171}
{access adhoc171}
{connect adhoc171(1), adhoc169(0)}
{nseg = 1}
{strdef color color = "White"}
{pt3dclear()}
{pt3dadd(174324.000000,211248.000000,89275.000000,288.881586)}
{pt3dadd(174900.000000,211008.000000,89375.000000,139.314042)}
{pt3dadd(174996.000000,210960.000000,89425.000000,131.574372)}
{pt3dadd(175152.000000,210960.000000,89475.000000,123.834702)}
{pt3dadd(175272.000000,210960.000000,89525.000000,116.095032)}
{pt3dadd(175404.000000,210972.000000,89525.000000,200.612214)}

{create adhoc172}
{access adhoc172}
{connect adhoc172(1), adhoc168(0)}
{nseg = 1}
{strdef color color = "White"}
{pt3dclear()}
{pt3dadd(172284.000000,211584.000000,86675.000000,399.349944)}
{pt3dadd(172488.000000,210996.000000,86575.000000,288.881586)}
{pt3dadd(172740.000000,210420.000000,86100.000000,251.489700)}
{pt3dadd(172872.000000,210228.000000,85900.000000,214.097814)}
{pt3dadd(172920.000000,210096.000000,85875.000000,176.705928)}
{pt3dadd(173016.000000,209880.000000,85975.000000,139.314042)}
{pt3dadd(173040.000000,209748.000000,85975.000000,139.314042)}
{pt3dadd(173052.000000,209604.000000,86000.000000,139.314042)}
{pt3dadd(173148.000000,209460.000000,85950.000000,139.314042)}
{pt3dadd(173244.000000,209340.000000,85900.000000,139.314042)}
{pt3dadd(173340.000000,209220.000000,85850.000000,146.279741)}
{pt3dadd(173436.000000,209076.000000,85800.000000,153.245439)}
{pt3dadd(173544.000000,208944.000000,85800.000000,160.211138)}
{pt3dadd(173604.000000,208812.000000,85825.000000,167.176836)}
{pt3dadd(173688.000000,208656.000000,85875.000000,167.176836)}
{pt3dadd(173772.000000,208524.000000,85875.000000,167.176836)}
{pt3dadd(173892.000000,208572.000000,85900.000000,167.176836)}
{pt3dadd(173988.000000,208188.000000,85825.000000,167.176836)}
{pt3dadd(174084.000000,207984.000000,85775.000000,173.529553)}
{pt3dadd(174204.000000,207828.000000,85750.000000,179.882271)}
{pt3dadd(174324.000000,207660.000000,85700.000000,186.234989)}
{pt3dadd(174468.000000,207456.000000,85700.000000,192.587706)}
{pt3dadd(174600.000000,207132.000000,85700.000000,186.234989)}
{pt3dadd(174708.000000,206808.000000,85700.000000,179.882271)}
{pt3dadd(174840.000000,206880.000000,85725.000000,173.529553)}
{pt3dadd(174960.000000,206700.000000,85550.000000,167.176836)}
{pt3dadd(175068.000000,206556.000000,85550.000000,191.696106)}
{pt3dadd(175020.000000,206292.000000,85300.000000,216.215376)}
{pt3dadd(175320.000000,205836.000000,85125.000000,240.734646)}
{pt3dadd(175332.000000,205308.000000,84875.000000,200.612214)}

{create adhoc173}
{access adhoc173}
{connect adhoc173(1), adhoc157(0)}
{nseg = 1}
{strdef color color = "White"}
{pt3dclear()}
{pt3dadd(167160.000000,215400.000000,78000.000000,953.961894)}
{pt3dadd(167340.000000,216084.000000,78075.000000,599.024880)}
{pt3dadd(166968.000000,216336.000000,78150.000000,599.024880)}
{pt3dadd(166560.000000,216672.000000,78075.000000,599.024880)}
{pt3dadd(166308.000000,217032.000000,78075.000000,599.024880)}
{pt3dadd(166140.000000,217428.000000,78075.000000,599.024880)}
{pt3dadd(165888.000000,217824.000000,78175.000000,593.034624)}
{pt3dadd(165672.000000,218244.000000,78225.000000,587.044368)}
{pt3dadd(165744.000000,218556.000000,78325.000000,581.054112)}
{pt3dadd(165708.000000,218856.000000,78450.000000,575.063856)}
{pt3dadd(165492.000000,219180.000000,78475.000000,575.063856)}
{pt3dadd(165492.000000,219444.000000,78475.000000,575.063856)}
{pt3dadd(165456.000000,219660.000000,78575.000000,575.063856)}
{pt3dadd(165384.000000,219972.000000,78775.000000,575.063856)}
{pt3dadd(165360.000000,220356.000000,78950.000000,499.187376)}
{pt3dadd(165276.000000,220728.000000,79175.000000,499.187376)}

{create adhoc174}
{access adhoc174}
{connect adhoc174(1), adhoc173(0)}
{nseg = 1}
{strdef color color = "White"}
{pt3dclear()}
{pt3dadd(165276.000000,220728.000000,79175.000000,499.187376)}
{pt3dadd(164424.000000,220740.000000,79600.000000,116.095032)}
{pt3dadd(164232.000000,220488.000000,79800.000000,111.257739)}
{pt3dadd(163860.000000,220980.000000,79625.000000,106.420446)}
{pt3dadd(163608.000000,221124.000000,79625.000000,101.583153)}
{pt3dadd(163404.000000,221268.000000,79775.000000,96.745860)}
{pt3dadd(163200.000000,221304.000000,79775.000000,101.583153)}
{pt3dadd(163044.000000,221076.000000,79700.000000,106.420446)}
{pt3dadd(162912.000000,221004.000000,79700.000000,111.257739)}
{pt3dadd(162984.000000,220932.000000,79600.000000,116.095032)}
{pt3dadd(162936.000000,220824.000000,79425.000000,139.314042)}

{create adhoc175}
{access adhoc175}
{connect adhoc175(1), adhoc173(0)}
{nseg = 1}
{strdef color color = "White"}
{pt3dclear()}
{pt3dadd(165276.000000,220728.000000,79175.000000,499.187376)}
{pt3dadd(165252.000000,221088.000000,79350.000000,499.187376)}
{pt3dadd(165180.000000,221340.000000,79650.000000,478.387903)}
{pt3dadd(165228.000000,221856.000000,79925.000000,457.588431)}
{pt3dadd(165300.000000,222360.000000,80225.000000,436.788958)}
{pt3dadd(165408.000000,222768.000000,80475.000000,415.989486)}
{pt3dadd(165504.000000,223200.000000,80775.000000,461.748335)}
{pt3dadd(165468.000000,223656.000000,81000.000000,507.507183)}
{pt3dadd(165480.000000,224088.000000,81300.000000,553.266031)}
{pt3dadd(165420.000000,224556.000000,81625.000000,599.024880)}
{pt3dadd(165444.000000,224940.000000,81825.000000,565.745712)}
{pt3dadd(165456.000000,225312.000000,82050.000000,532.466544)}
{pt3dadd(165456.000000,225624.000000,82325.000000,499.187376)}
{pt3dadd(165432.000000,225804.000000,82525.000000,499.187376)}

{create adhoc176}
{access adhoc176}
{connect adhoc176(1), adhoc175(0)}
{nseg = 1}
{strdef color color = "White"}
{pt3dclear()}
{pt3dadd(165432.000000,225804.000000,82525.000000,499.187376)}
{pt3dadd(163860.000000,227436.000000,82525.000000,346.657896)}
{pt3dadd(163656.000000,227736.000000,82525.000000,317.769741)}
{pt3dadd(163548.000000,228084.000000,82650.000000,288.881586)}
{pt3dadd(163212.000000,228324.000000,82700.000000,259.993431)}
{pt3dadd(163212.000000,228564.000000,82825.000000,231.105276)}
{pt3dadd(163188.000000,228816.000000,82925.000000,215.123166)}
{pt3dadd(163188.000000,229056.000000,83075.000000,199.141056)}
{pt3dadd(163188.000000,229272.000000,83225.000000,183.158946)}
{pt3dadd(163224.000000,229548.000000,83250.000000,167.176836)}
{pt3dadd(163608.000000,230148.000000,83550.000000,185.566288)}
{pt3dadd(163848.000000,230376.000000,83700.000000,203.955741)}
{pt3dadd(163980.000000,230724.000000,83925.000000,222.345193)}
{pt3dadd(164376.000000,231012.000000,84225.000000,240.734646)}
{pt3dadd(164388.000000,231288.000000,84500.000000,280.388470)}
{pt3dadd(164472.000000,231576.000000,84775.000000,320.042295)}
{pt3dadd(164460.000000,231732.000000,85075.000000,359.696120)}
{pt3dadd(164340.000000,231912.000000,85400.000000,399.349944)}
{pt3dadd(164376.000000,232092.000000,85650.000000,449.268660)}
{pt3dadd(164460.000000,231948.000000,86025.000000,499.187376)}
{pt3dadd(164556.000000,231888.000000,86350.000000,332.791596)}

{create adhoc177}
{access adhoc177}
{connect adhoc177(1), adhoc176(0)}
{nseg = 1}
{strdef color color = "White"}
{pt3dclear()}
{pt3dadd(164556.000000,231888.000000,86350.000000,332.791596)}
{pt3dadd(164928.000000,231480.000000,86650.000000,288.881586)}
{pt3dadd(164964.000000,231432.000000,86875.000000,276.844851)}
{pt3dadd(165144.000000,231348.000000,87125.000000,264.808116)}
{pt3dadd(165336.000000,231396.000000,87325.000000,252.771381)}
{pt3dadd(165444.000000,231516.000000,87525.000000,240.734646)}
{pt3dadd(165540.000000,231576.000000,87800.000000,227.360502)}
{pt3dadd(165624.000000,231732.000000,88025.000000,213.986358)}
{pt3dadd(165684.000000,231972.000000,88300.000000,200.612214)}
{pt3dadd(165696.000000,231996.000000,88625.000000,139.314042)}

{create adhoc178}
{access adhoc178}
{connect adhoc178(1), adhoc176(0)}
{nseg = 1}
{strdef color color = "White"}
{pt3dclear()}
{pt3dadd(164556.000000,231888.000000,86350.000000,332.791596)}
{pt3dadd(164556.000000,232356.000000,86650.000000,240.734646)}
{pt3dadd(164556.000000,232596.000000,86925.000000,230.704038)}
{pt3dadd(164580.000000,232764.000000,87125.000000,220.673430)}
{pt3dadd(164796.000000,233472.000000,87425.000000,210.642822)}
{pt3dadd(164832.000000,233580.000000,87625.000000,200.612214)}
{pt3dadd(164952.000000,233844.000000,87825.000000,200.612214)}
{pt3dadd(165060.000000,233976.000000,88000.000000,200.612214)}
{pt3dadd(165180.000000,233928.000000,88175.000000,200.612214)}
{pt3dadd(165204.000000,233976.000000,88375.000000,200.612214)}
{pt3dadd(165408.000000,233928.000000,87900.000000,200.612214)}
{pt3dadd(165552.000000,234000.000000,87925.000000,167.176836)}

{create adhoc179}
{access adhoc179}
{connect adhoc179(1), adhoc175(0)}
{nseg = 1}
{strdef color color = "White"}
{pt3dclear()}
{pt3dadd(165432.000000,225804.000000,82525.000000,499.187376)}
{pt3dadd(165708.000000,225684.000000,82750.000000,599.024880)}
{pt3dadd(165912.000000,225852.000000,83025.000000,686.881854)}
{pt3dadd(165972.000000,225948.000000,83350.000000,774.738828)}
{pt3dadd(166128.000000,225984.000000,83700.000000,862.595802)}
{pt3dadd(166176.000000,226008.000000,83800.000000,718.829820)}

{create adhoc180}
{access adhoc180}
{connect adhoc180(1), adhoc179(0)}
{nseg = 1}
{strdef color color = "White"}
{pt3dclear()}
{pt3dadd(166176.000000,226008.000000,83800.000000,718.829820)}
{pt3dadd(165768.000000,227064.000000,83850.000000,80.621550)}
{pt3dadd(165720.000000,227160.000000,83850.000000,96.745860)}
{pt3dadd(165600.000000,227376.000000,83900.000000,139.314042)}

{create adhoc181}
{access adhoc181}
{connect adhoc181(1), adhoc179(0)}
{nseg = 1}
{strdef color color = "White"}
{pt3dclear()}
{pt3dadd(166176.000000,226008.000000,83800.000000,718.829820)}
{pt3dadd(166260.000000,226044.000000,84075.000000,718.829820)}
{pt3dadd(166392.000000,226104.000000,84375.000000,862.595802)}

{create adhoc182}
{access adhoc182}
{connect adhoc182(1), adhoc181(0)}
{nseg = 1}
{strdef color color = "White"}
{pt3dclear()}
{pt3dadd(166392.000000,226104.000000,84375.000000,862.595802)}
{pt3dadd(166296.000000,227040.000000,84400.000000,167.176836)}
{pt3dadd(166284.000000,227208.000000,84625.000000,175.535680)}
{pt3dadd(166260.000000,227352.000000,84800.000000,183.894525)}
{pt3dadd(166200.000000,227508.000000,84850.000000,192.253370)}
{pt3dadd(166152.000000,227664.000000,84975.000000,200.612214)}
{pt3dadd(166200.000000,227820.000000,85075.000000,192.253370)}
{pt3dadd(166332.000000,227928.000000,85275.000000,183.894525)}
{pt3dadd(166344.000000,227952.000000,85500.000000,175.535680)}
{pt3dadd(166296.000000,227916.000000,85725.000000,167.176836)}
{pt3dadd(166512.000000,228216.000000,85925.000000,167.176836)}
{pt3dadd(166500.000000,228252.000000,86125.000000,200.612214)}

{create adhoc183}
{access adhoc183}
{connect adhoc183(1), adhoc181(0)}
{nseg = 1}
{strdef color color = "White"}
{pt3dclear()}
{pt3dadd(166392.000000,226104.000000,84375.000000,862.595802)}
{pt3dadd(166644.000000,225936.000000,84775.000000,599.024880)}
{pt3dadd(166716.000000,225828.000000,85125.000000,621.787810)}
{pt3dadd(166884.000000,225636.000000,85475.000000,644.550741)}
{pt3dadd(167064.000000,225588.000000,85700.000000,667.313671)}
{pt3dadd(167244.000000,225492.000000,85950.000000,690.076602)}
{pt3dadd(167388.000000,225396.000000,86175.000000,599.024880)}
{pt3dadd(167640.000000,225432.000000,86400.000000,718.829820)}

{create adhoc184}
{access adhoc184}
{connect adhoc184(1), adhoc183(0)}
{nseg = 1}
{strdef color color = "White"}
{pt3dclear()}
{pt3dadd(167640.000000,225432.000000,86400.000000,718.829820)}
{pt3dadd(167640.000000,224652.000000,85725.000000,200.612214)}
{pt3dadd(167688.000000,224496.000000,85725.000000,200.612214)}
{pt3dadd(167736.000000,224340.000000,85650.000000,200.612214)}
{pt3dadd(167748.000000,224208.000000,85575.000000,200.612214)}
{pt3dadd(167688.000000,224052.000000,85425.000000,200.612214)}
{pt3dadd(167688.000000,223920.000000,85350.000000,185.287671)}
{pt3dadd(167760.000000,223752.000000,85375.000000,169.963128)}
{pt3dadd(167820.000000,223632.000000,85350.000000,154.638585)}
{pt3dadd(167904.000000,223500.000000,85275.000000,139.314042)}
{pt3dadd(167952.000000,223368.000000,85275.000000,146.279741)}
{pt3dadd(167988.000000,223224.000000,85275.000000,153.245439)}
{pt3dadd(167904.000000,223068.000000,85300.000000,160.211138)}
{pt3dadd(167988.000000,222936.000000,85300.000000,167.176836)}
{pt3dadd(167928.000000,222804.000000,85275.000000,228.029211)}
{pt3dadd(167952.000000,222636.000000,85325.000000,288.881586)}
{pt3dadd(167832.000000,222492.000000,85250.000000,288.881586)}

{create adhoc185}
{access adhoc185}
{connect adhoc185(1), adhoc184(0)}
{nseg = 1}
{strdef color color = "White"}
{pt3dclear()}
{pt3dadd(167832.000000,222492.000000,85250.000000,288.881586)}
{pt3dadd(168216.000000,222336.000000,85225.000000,139.314042)}
{pt3dadd(168300.000000,222180.000000,85225.000000,164.669193)}
{pt3dadd(168312.000000,222024.000000,85225.000000,190.024344)}
{pt3dadd(168468.000000,221844.000000,85250.000000,215.379495)}
{pt3dadd(168516.000000,221676.000000,85200.000000,240.734646)}
{pt3dadd(168492.000000,221520.000000,85100.000000,240.734646)}
{pt3dadd(168540.000000,221412.000000,85100.000000,240.734646)}
{pt3dadd(168540.000000,221304.000000,84875.000000,240.734646)}
{pt3dadd(168552.000000,221148.000000,84725.000000,167.176836)}

{create adhoc186}
{access adhoc186}
{connect adhoc186(1), adhoc184(0)}
{nseg = 1}
{strdef color color = "White"}
{pt3dclear()}
{pt3dadd(167832.000000,222492.000000,85250.000000,288.881586)}
{pt3dadd(167448.000000,222396.000000,85150.000000,167.176836)}
{pt3dadd(167256.000000,222168.000000,85150.000000,197.603024)}
{pt3dadd(167016.000000,222012.000000,84975.000000,228.029211)}
{pt3dadd(166920.000000,221892.000000,84825.000000,258.455399)}
{pt3dadd(166896.000000,221712.000000,84750.000000,288.881586)}
{pt3dadd(166884.000000,221616.000000,84575.000000,285.992775)}
{pt3dadd(166920.000000,221484.000000,84475.000000,283.103964)}
{pt3dadd(167004.000000,221304.000000,84525.000000,280.215153)}
{pt3dadd(166776.000000,221532.000000,84250.000000,277.326342)}
{pt3dadd(166764.000000,221340.000000,84100.000000,238.969278)}
{pt3dadd(166920.000000,221172.000000,83875.000000,200.612214)}
{pt3dadd(167112.000000,221076.000000,83650.000000,116.095032)}

{create adhoc187}
{access adhoc187}
{connect adhoc187(1), adhoc183(0)}
{nseg = 1}
{strdef color color = "White"}
{pt3dclear()}
{pt3dadd(167640.000000,225432.000000,86400.000000,718.829820)}
{pt3dadd(167472.000000,225444.000000,86450.000000,718.829820)}
{pt3dadd(167520.000000,225540.000000,86650.000000,599.024880)}

{create adhoc188}
{access adhoc188}
{connect adhoc188(1), adhoc187(0)}
{nseg = 1}
{strdef color color = "White"}
{pt3dclear()}
{pt3dadd(167520.000000,225540.000000,86650.000000,599.024880)}
{pt3dadd(167772.000000,226116.000000,86650.000000,139.314042)}
{pt3dadd(167868.000000,226224.000000,86675.000000,127.704537)}
{pt3dadd(167964.000000,226320.000000,86725.000000,116.095032)}
{pt3dadd(168060.000000,226368.000000,86775.000000,116.095032)}

{create adhoc189}
{access adhoc189}
{connect adhoc189(1), adhoc187(0)}
{nseg = 1}
{strdef color color = "White"}
{pt3dclear()}
{pt3dadd(167520.000000,225540.000000,86650.000000,599.024880)}
{pt3dadd(167568.000000,225420.000000,86975.000000,499.187376)}
{pt3dadd(167832.000000,225468.000000,87200.000000,524.146752)}
{pt3dadd(167940.000000,225540.000000,87475.000000,549.106128)}
{pt3dadd(168048.000000,225480.000000,87625.000000,574.065504)}
{pt3dadd(168156.000000,225432.000000,87800.000000,599.024880)}
{pt3dadd(168252.000000,225480.000000,88050.000000,565.745712)}
{pt3dadd(168408.000000,225564.000000,88225.000000,532.466544)}
{pt3dadd(168516.000000,225636.000000,88375.000000,499.187376)}
{pt3dadd(168648.000000,225684.000000,88600.000000,479.219886)}

{create adhoc190}
{access adhoc190}
{connect adhoc190(1), adhoc189(0)}
{nseg = 1}
{strdef color color = "White"}
{pt3dclear()}
{pt3dadd(168648.000000,225684.000000,88600.000000,479.219886)}
{pt3dadd(168816.000000,225540.000000,88600.000000,499.187376)}
{pt3dadd(168936.000000,225552.000000,88700.000000,471.454746)}
{pt3dadd(169056.000000,225552.000000,88850.000000,443.722116)}
{pt3dadd(169296.000000,225432.000000,89025.000000,415.989486)}
{pt3dadd(169524.000000,225228.000000,89050.000000,332.791596)}

{create adhoc191}
{access adhoc191}
{connect adhoc191(1), adhoc190(0)}
{nseg = 1}
{strdef color color = "White"}
{pt3dclear()}
{pt3dadd(169524.000000,225228.000000,89050.000000,332.791596)}
{pt3dadd(169572.000000,225228.000000,89275.000000,346.657896)}
{pt3dadd(169776.000000,225120.000000,89325.000000,332.213819)}
{pt3dadd(170064.000000,224844.000000,89650.000000,317.769741)}
{pt3dadd(170328.000000,224556.000000,89850.000000,303.325664)}
{pt3dadd(170580.000000,224340.000000,89950.000000,288.881586)}
{pt3dadd(170844.000000,224100.000000,90075.000000,303.325664)}
{pt3dadd(170988.000000,223944.000000,90075.000000,317.769741)}
{pt3dadd(171132.000000,223704.000000,90275.000000,332.213819)}
{pt3dadd(171240.000000,223632.000000,90325.000000,346.657896)}
{pt3dadd(171396.000000,223560.000000,90400.000000,288.881586)}

{create adhoc192}
{access adhoc192}
{connect adhoc192(1), adhoc191(0)}
{nseg = 1}
{strdef color color = "White"}
{pt3dclear()}
{pt3dadd(171396.000000,223560.000000,90400.000000,288.881586)}
{pt3dadd(171660.000000,223152.000000,90375.000000,288.881586)}
{pt3dadd(171852.000000,222876.000000,90450.000000,288.881586)}
{pt3dadd(172032.000000,222468.000000,90350.000000,288.881586)}
{pt3dadd(172188.000000,222252.000000,90375.000000,288.881586)}
{pt3dadd(172380.000000,222036.000000,90325.000000,288.881586)}
{pt3dadd(172548.000000,221688.000000,90275.000000,303.325664)}
{pt3dadd(172692.000000,221448.000000,90300.000000,317.769741)}
{pt3dadd(172800.000000,221160.000000,90250.000000,332.213819)}
{pt3dadd(172932.000000,220932.000000,90300.000000,346.657896)}
{pt3dadd(173112.000000,220524.000000,90275.000000,320.177083)}
{pt3dadd(173268.000000,220140.000000,90375.000000,293.696271)}
{pt3dadd(173412.000000,220020.000000,90525.000000,267.215459)}
{pt3dadd(173544.000000,219864.000000,90625.000000,240.734646)}
{pt3dadd(173724.000000,219444.000000,90975.000000,252.771381)}
{pt3dadd(173724.000000,219240.000000,91175.000000,264.808116)}
{pt3dadd(173736.000000,219072.000000,91375.000000,276.844851)}
{pt3dadd(173844.000000,218856.000000,91575.000000,288.881586)}
{pt3dadd(173940.000000,218544.000000,91500.000000,240.734646)}

{create adhoc193}
{access adhoc193}
{connect adhoc193(1), adhoc192(0)}
{nseg = 1}
{strdef color color = "White"}
{pt3dclear()}
{pt3dadd(173940.000000,218544.000000,91500.000000,240.734646)}
{pt3dadd(173856.000000,218856.000000,91900.000000,346.657896)}
{pt3dadd(173724.000000,219096.000000,92250.000000,310.146476)}
{pt3dadd(173592.000000,219012.000000,92475.000000,273.635055)}
{pt3dadd(173592.000000,219108.000000,92675.000000,237.123635)}
{pt3dadd(173640.000000,219288.000000,92875.000000,200.612214)}
{pt3dadd(173508.000000,219492.000000,93075.000000,139.314042)}
{pt3dadd(173424.000000,219708.000000,93125.000000,139.314042)}

{create adhoc194}
{access adhoc194}
{connect adhoc194(1), adhoc192(0)}
{nseg = 1}
{strdef color color = "White"}
{pt3dclear()}
{pt3dadd(173940.000000,218544.000000,91500.000000,240.734646)}
{pt3dadd(174456.000000,217500.000000,91600.000000,200.612214)}
{pt3dadd(174732.000000,216396.000000,91325.000000,222.679557)}
{pt3dadd(174900.000000,216036.000000,91525.000000,244.746900)}
{pt3dadd(175032.000000,216000.000000,91525.000000,266.814243)}
{pt3dadd(175260.000000,215760.000000,91700.000000,288.881586)}
{pt3dadd(175404.000000,215604.000000,91750.000000,264.808116)}
{pt3dadd(175560.000000,215484.000000,91850.000000,240.734646)}
{pt3dadd(175728.000000,215424.000000,91825.000000,288.881586)}

{create adhoc195}
{access adhoc195}
{connect adhoc195(1), adhoc194(0)}
{nseg = 1}
{strdef color color = "White"}
{pt3dclear()}
{pt3dadd(175728.000000,215424.000000,91825.000000,288.881586)}
{pt3dadd(175848.000000,215148.000000,91775.000000,167.176836)}
{pt3dadd(175884.000000,214872.000000,91700.000000,175.535680)}
{pt3dadd(175920.000000,214632.000000,91650.000000,183.894525)}
{pt3dadd(175908.000000,214428.000000,91625.000000,192.253370)}
{pt3dadd(175992.000000,214296.000000,91700.000000,200.612214)}
{pt3dadd(176016.000000,214164.000000,91675.000000,192.253370)}
{pt3dadd(176076.000000,214056.000000,91700.000000,183.894525)}
{pt3dadd(176052.000000,213720.000000,91925.000000,175.535680)}
{pt3dadd(176016.000000,213612.000000,92100.000000,167.176836)}
{pt3dadd(176076.000000,213420.000000,92025.000000,116.095032)}

{create adhoc196}
{access adhoc196}
{connect adhoc196(1), adhoc194(0)}
{nseg = 1}
{strdef color color = "White"}
{pt3dclear()}
{pt3dadd(175728.000000,215424.000000,91825.000000,288.881586)}
{pt3dadd(175788.000000,215580.000000,92475.000000,139.314042)}
{pt3dadd(175884.000000,215652.000000,92400.000000,148.601640)}
{pt3dadd(175980.000000,215652.000000,92450.000000,157.889238)}
{pt3dadd(176100.000000,215664.000000,92450.000000,167.176836)}
{pt3dadd(176208.000000,215832.000000,92775.000000,116.095032)}

{create adhoc197}
{access adhoc197}
{connect adhoc197(1), adhoc191(0)}
{nseg = 1}
{strdef color color = "White"}
{pt3dclear()}
{pt3dadd(171396.000000,223560.000000,90400.000000,288.881586)}
{pt3dadd(171420.000000,223440.000000,91250.000000,346.657896)}
{pt3dadd(171588.000000,223980.000000,92200.000000,320.177083)}
{pt3dadd(171612.000000,223992.000000,92450.000000,293.696271)}
{pt3dadd(171660.000000,223884.000000,92600.000000,267.215459)}
{pt3dadd(171696.000000,223800.000000,92750.000000,240.734646)}
{pt3dadd(171720.000000,223740.000000,92925.000000,215.379495)}
{pt3dadd(171768.000000,223632.000000,93050.000000,190.024344)}
{pt3dadd(171816.000000,223572.000000,93150.000000,164.669193)}
{pt3dadd(171912.000000,223488.000000,93275.000000,139.314042)}
{pt3dadd(172116.000000,222876.000000,93100.000000,153.245439)}
{pt3dadd(172380.000000,223020.000000,93100.000000,167.176836)}
{pt3dadd(172152.000000,222444.000000,93050.000000,200.612214)}

{create adhoc198}
{access adhoc198}
{connect adhoc198(1), adhoc190(0)}
{nseg = 1}
{strdef color color = "White"}
{pt3dclear()}
{pt3dadd(169524.000000,225228.000000,89050.000000,332.791596)}
{pt3dadd(169788.000000,225708.000000,89050.000000,192.587724)}
{pt3dadd(169848.000000,225840.000000,89075.000000,144.666792)}
{pt3dadd(170040.000000,225696.000000,88850.000000,96.745860)}
{pt3dadd(170148.000000,225660.000000,88700.000000,116.095032)}

{create adhoc199}
{access adhoc199}
{connect adhoc199(1), adhoc189(0)}
{nseg = 1}
{strdef color color = "White"}
{pt3dclear()}
{pt3dadd(168648.000000,225684.000000,88600.000000,479.219886)}
{pt3dadd(168192.000000,226740.000000,88600.000000,240.734646)}
{pt3dadd(168108.000000,226908.000000,88800.000000,222.345193)}
{pt3dadd(167940.000000,227148.000000,89025.000000,203.955741)}
{pt3dadd(167832.000000,227556.000000,89250.000000,185.566288)}
{pt3dadd(167808.000000,227784.000000,89425.000000,167.176836)}
{pt3dadd(167916.000000,228060.000000,89550.000000,175.535680)}
{pt3dadd(168024.000000,228432.000000,89775.000000,183.894525)}
{pt3dadd(168168.000000,228780.000000,90000.000000,192.253370)}
{pt3dadd(168288.000000,229056.000000,90125.000000,200.612214)}
{pt3dadd(168336.000000,229248.000000,90375.000000,222.679557)}
{pt3dadd(168384.000000,229284.000000,90600.000000,244.746900)}
{pt3dadd(168528.000000,229284.000000,90725.000000,266.814243)}
{pt3dadd(168576.000000,229320.000000,90900.000000,288.881586)}
{pt3dadd(168624.000000,229368.000000,91075.000000,258.455399)}
{pt3dadd(168792.000000,229548.000000,91300.000000,228.029211)}
{pt3dadd(169116.000000,229548.000000,91500.000000,197.603024)}
{pt3dadd(169236.000000,229572.000000,91650.000000,167.176836)}
{pt3dadd(169392.000000,229596.000000,91675.000000,197.603024)}
{pt3dadd(169584.000000,229524.000000,91775.000000,228.029211)}
{pt3dadd(170076.000000,229140.000000,91975.000000,258.455399)}
{pt3dadd(170196.000000,229032.000000,92050.000000,288.881586)}
{pt3dadd(170412.000000,228888.000000,92325.000000,258.455399)}
{pt3dadd(170436.000000,228696.000000,92575.000000,228.029211)}
{pt3dadd(170472.000000,228648.000000,92800.000000,197.603024)}
{pt3dadd(170496.000000,228600.000000,93000.000000,167.176836)}
{pt3dadd(170496.000000,228540.000000,93150.000000,149.569092)}
{pt3dadd(170604.000000,228372.000000,93375.000000,131.961348)}
{pt3dadd(170976.000000,228396.000000,93625.000000,114.353604)}
{pt3dadd(171144.000000,228444.000000,93775.000000,96.745860)}
{pt3dadd(171180.000000,228468.000000,93875.000000,96.745860)}

{create adhoc200}
{access adhoc200}
{connect adhoc200(1), adhoc73(0)}
{nseg = 1}
{strdef color color = "White"}
{pt3dclear()}
{pt3dadd(185196.000000,185904.000000,55025.000000,1242.137880)}
{pt3dadd(182808.000000,185904.000000,55000.000000,167.176836)}
{pt3dadd(182400.000000,185436.000000,55000.000000,175.535680)}
{pt3dadd(181992.000000,185424.000000,54800.000000,183.894525)}
{pt3dadd(181764.000000,185400.000000,54775.000000,192.253370)}
{pt3dadd(181500.000000,185388.000000,54775.000000,200.612214)}
{pt3dadd(181200.000000,185388.000000,54850.000000,240.734646)}
{pt3dadd(180960.000000,185340.000000,54900.000000,240.734646)}

{create adhoc201}
{access adhoc201}
{connect adhoc201(1), adhoc200(0)}
{nseg = 1}
{strdef color color = "White"}
{pt3dclear()}
{pt3dadd(180960.000000,185340.000000,54900.000000,240.734646)}
{pt3dadd(180756.000000,185388.000000,54875.000000,288.881586)}
{pt3dadd(180576.000000,185388.000000,54800.000000,285.992775)}
{pt3dadd(180396.000000,185364.000000,54800.000000,283.103964)}
{pt3dadd(180240.000000,185388.000000,54750.000000,280.215153)}
{pt3dadd(180000.000000,185760.000000,54675.000000,277.326342)}
{pt3dadd(179736.000000,185928.000000,54675.000000,249.788966)}
{pt3dadd(179400.000000,186024.000000,54475.000000,222.251589)}
{pt3dadd(179208.000000,186168.000000,54425.000000,194.714212)}
{pt3dadd(179028.000000,186168.000000,54400.000000,167.176836)}
{pt3dadd(178776.000000,186132.000000,54450.000000,167.176836)}
{pt3dadd(178692.000000,186096.000000,54475.000000,167.176836)}
{pt3dadd(178524.000000,186120.000000,54475.000000,167.176836)}
{pt3dadd(178296.000000,186156.000000,54525.000000,167.176836)}
{pt3dadd(178068.000000,186180.000000,54575.000000,160.211138)}
{pt3dadd(177876.000000,186204.000000,54625.000000,153.245439)}
{pt3dadd(177708.000000,186048.000000,54600.000000,146.279741)}
{pt3dadd(177552.000000,185964.000000,54625.000000,139.314042)}
{pt3dadd(177372.000000,185856.000000,54675.000000,214.097814)}
{pt3dadd(177012.000000,185748.000000,54675.000000,288.881586)}
{pt3dadd(176784.000000,185556.000000,54450.000000,288.881586)}

{create adhoc202}
{access adhoc202}
{connect adhoc202(1), adhoc201(0)}
{nseg = 1}
{strdef color color = "White"}
{pt3dclear()}
{pt3dadd(176784.000000,185556.000000,54450.000000,288.881586)}
{pt3dadd(176568.000000,185424.000000,54125.000000,288.881586)}
{pt3dadd(176400.000000,185412.000000,53825.000000,288.881586)}

{create adhoc203}
{access adhoc203}
{connect adhoc203(1), adhoc201(0)}
{nseg = 1}
{strdef color color = "White"}
{pt3dclear()}
{pt3dadd(176784.000000,185556.000000,54450.000000,288.881586)}
{pt3dadd(176760.000000,185928.000000,55000.000000,288.881586)}
{pt3dadd(176724.000000,185928.000000,55200.000000,266.814243)}
{pt3dadd(176280.000000,185640.000000,55350.000000,244.746900)}
{pt3dadd(176172.000000,185412.000000,55650.000000,222.679557)}
{pt3dadd(176520.000000,185352.000000,55950.000000,200.612214)}
{pt3dadd(176712.000000,185436.000000,56175.000000,213.986358)}
{pt3dadd(176952.000000,185448.000000,56375.000000,227.360502)}
{pt3dadd(177060.000000,185520.000000,56600.000000,240.734646)}
{pt3dadd(177288.000000,185340.000000,56575.000000,200.612214)}

{create adhoc204}
{access adhoc204}
{connect adhoc204(1), adhoc200(0)}
{nseg = 1}
{strdef color color = "White"}
{pt3dclear()}
{pt3dadd(180960.000000,185340.000000,54900.000000,240.734646)}
{pt3dadd(180468.000000,185112.000000,55125.000000,288.881586)}
{pt3dadd(180288.000000,184944.000000,55300.000000,266.814243)}
{pt3dadd(179928.000000,184716.000000,55525.000000,244.746900)}
{pt3dadd(179712.000000,184524.000000,55775.000000,222.679557)}
{pt3dadd(179748.000000,184548.000000,55975.000000,200.612214)}
{pt3dadd(179892.000000,184728.000000,56125.000000,237.123635)}
{pt3dadd(180120.000000,184944.000000,56325.000000,273.635055)}
{pt3dadd(180216.000000,185112.000000,56550.000000,310.146475)}
{pt3dadd(180192.000000,185184.000000,56725.000000,346.657896)}
{pt3dadd(180300.000000,185196.000000,56950.000000,240.734646)}

{create adhoc205}
{access adhoc205}
{connect adhoc205(1), adhoc72(0)}
{nseg = 1}
{strdef color color = "White"}
{pt3dclear()}
{pt3dadd(187476.000000,181572.000000,54500.000000,1717.131222)}
{pt3dadd(184812.000000,181524.000000,54600.000000,240.734646)}
{pt3dadd(184656.000000,181560.000000,54600.000000,228.697925)}
{pt3dadd(184440.000000,181380.000000,54525.000000,216.661203)}
{pt3dadd(184284.000000,181404.000000,54500.000000,204.624482)}
{pt3dadd(184092.000000,181284.000000,54300.000000,192.587760)}
{pt3dadd(183864.000000,181200.000000,54200.000000,204.624482)}
{pt3dadd(183660.000000,181128.000000,54200.000000,216.661203)}
{pt3dadd(183492.000000,181068.000000,54200.000000,228.697925)}
{pt3dadd(183144.000000,181008.000000,54125.000000,240.734646)}
{pt3dadd(182844.000000,180924.000000,54050.000000,252.771381)}
{pt3dadd(182568.000000,180960.000000,54025.000000,264.808116)}
{pt3dadd(182268.000000,180840.000000,53925.000000,276.844851)}
{pt3dadd(181992.000000,180696.000000,53850.000000,288.881586)}
{pt3dadd(181704.000000,180420.000000,53725.000000,240.734646)}
{pt3dadd(181416.000000,180192.000000,53650.000000,415.989486)}

{create adhoc206}
{access adhoc206}
{connect adhoc206(1), adhoc205(0)}
{nseg = 1}
{strdef color color = "White"}
{pt3dclear()}
{pt3dadd(181416.000000,180192.000000,53650.000000,415.989486)}
{pt3dadd(181140.000000,179784.000000,53975.000000,167.176836)}
{pt3dadd(180984.000000,179628.000000,54025.000000,167.176836)}
{pt3dadd(180792.000000,179520.000000,54375.000000,167.176836)}
{pt3dadd(180696.000000,179472.000000,54550.000000,167.176836)}
{pt3dadd(180600.000000,179472.000000,54800.000000,167.176836)}
{pt3dadd(180432.000000,179544.000000,55025.000000,116.095032)}

{create adhoc207}
{access adhoc207}
{connect adhoc207(1), adhoc205(0)}
{nseg = 1}
{strdef color color = "White"}
{pt3dclear()}
{pt3dadd(181416.000000,180192.000000,53650.000000,415.989486)}
{pt3dadd(181092.000000,180192.000000,53075.000000,200.612214)}
{pt3dadd(180876.000000,180108.000000,52800.000000,198.606087)}
{pt3dadd(180696.000000,180012.000000,52675.000000,196.599960)}
{pt3dadd(180540.000000,180000.000000,52500.000000,194.593833)}
{pt3dadd(180144.000000,179880.000000,52275.000000,192.587706)}
{pt3dadd(179568.000000,179580.000000,52025.000000,173.464538)}
{pt3dadd(179220.000000,179016.000000,51800.000000,154.341369)}
{pt3dadd(179088.000000,178584.000000,51600.000000,135.218200)}
{pt3dadd(178824.000000,177984.000000,51350.000000,116.095032)}
{pt3dadd(178704.000000,177792.000000,51225.000000,106.420446)}
{pt3dadd(178584.000000,177708.000000,51125.000000,96.745860)}
{pt3dadd(178464.000000,177648.000000,51075.000000,116.095032)}

{create adhoc208}
{access adhoc208}
{connect adhoc208(1), adhoc207(0)}
{nseg = 1}
{strdef color color = "White"}
{pt3dclear()}
{pt3dadd(178464.000000,177648.000000,51075.000000,116.095032)}
{pt3dadd(178476.000000,177564.000000,50850.000000,80.621550)}

{create adhoc209}
{access adhoc209}
{connect adhoc209(1), adhoc207(0)}
{nseg = 1}
{strdef color color = "White"}
{pt3dclear()}
{pt3dadd(178464.000000,177648.000000,51075.000000,116.095032)}
{pt3dadd(178524.000000,177048.000000,51175.000000,80.621550)}
{pt3dadd(178560.000000,176736.000000,51250.000000,67.184640)}

{create adhoc210}
{access adhoc210}
{connect adhoc210(1), adhoc71(0)}
{nseg = 1}
{strdef color color = "White"}
{pt3dclear()}
{pt3dadd(187716.000000,181176.000000,54875.000000,1717.131222)}
{pt3dadd(187812.000000,180696.000000,54950.000000,1490.565402)}
{pt3dadd(187848.000000,180576.000000,55850.000000,1190.144448)}
{pt3dadd(186120.000000,180576.000000,56550.000000,889.723494)}
{pt3dadd(185772.000000,180372.000000,56550.000000,589.302540)}
{pt3dadd(185472.000000,180204.000000,56725.000000,288.881586)}
{pt3dadd(185232.000000,180072.000000,56825.000000,303.325664)}
{pt3dadd(184968.000000,180012.000000,56875.000000,317.769741)}
{pt3dadd(184668.000000,179892.000000,56975.000000,332.213819)}
{pt3dadd(184452.000000,179748.000000,57075.000000,346.657896)}
{pt3dadd(184212.000000,179772.000000,57175.000000,346.657896)}
{pt3dadd(183924.000000,179748.000000,57200.000000,346.657896)}
{pt3dadd(183732.000000,179724.000000,57225.000000,346.657896)}
{pt3dadd(183492.000000,179700.000000,57250.000000,346.657896)}
{pt3dadd(183276.000000,179760.000000,57175.000000,288.881586)}

{create adhoc211}
{access adhoc211}
{connect adhoc211(1), adhoc210(0)}
{nseg = 1}
{strdef color color = "White"}
{pt3dclear()}
{pt3dadd(183276.000000,179760.000000,57175.000000,288.881586)}
{pt3dadd(183168.000000,178716.000000,56950.000000,167.176836)}
{pt3dadd(183036.000000,178512.000000,56925.000000,175.535680)}
{pt3dadd(182856.000000,178632.000000,56925.000000,183.894525)}
{pt3dadd(182688.000000,178764.000000,57025.000000,192.253370)}
{pt3dadd(182508.000000,178848.000000,57050.000000,200.612214)}
{pt3dadd(183084.000000,178164.000000,57075.000000,192.253370)}
{pt3dadd(183384.000000,177948.000000,57050.000000,183.894525)}
{pt3dadd(183432.000000,177600.000000,57050.000000,175.535680)}
{pt3dadd(183348.000000,177204.000000,56950.000000,167.176836)}
{pt3dadd(183216.000000,176940.000000,56850.000000,185.566288)}
{pt3dadd(183252.000000,176676.000000,56725.000000,203.955741)}
{pt3dadd(183180.000000,176616.000000,56550.000000,222.345193)}
{pt3dadd(182976.000000,176400.000000,56125.000000,240.734646)}
{pt3dadd(182784.000000,175932.000000,55700.000000,167.176836)}

{create adhoc212}
{access adhoc212}
{connect adhoc212(1), adhoc210(0)}
{nseg = 1}
{strdef color color = "White"}
{pt3dclear()}
{pt3dadd(183276.000000,179760.000000,57175.000000,288.881586)}
{pt3dadd(183276.000000,180036.000000,57700.000000,240.734646)}
{pt3dadd(183084.000000,180204.000000,57775.000000,240.734646)}
{pt3dadd(182784.000000,180396.000000,57950.000000,240.734646)}
{pt3dadd(182568.000000,180588.000000,58300.000000,240.734646)}
{pt3dadd(182148.000000,180840.000000,58725.000000,240.734646)}
{pt3dadd(181968.000000,181032.000000,59075.000000,240.734646)}
{pt3dadd(181908.000000,181164.000000,59125.000000,240.734646)}
{pt3dadd(181776.000000,181332.000000,59325.000000,240.734646)}
{pt3dadd(181704.000000,181440.000000,59350.000000,240.734646)}
{pt3dadd(181584.000000,181632.000000,59400.000000,222.345193)}
{pt3dadd(181500.000000,181812.000000,59525.000000,203.955741)}
{pt3dadd(181356.000000,181968.000000,59525.000000,185.566288)}
{pt3dadd(181284.000000,182148.000000,59450.000000,167.176836)}
{pt3dadd(181080.000000,182748.000000,59200.000000,167.176836)}
{pt3dadd(180924.000000,183084.000000,59300.000000,167.176836)}
{pt3dadd(180756.000000,183192.000000,59375.000000,167.176836)}
{pt3dadd(180540.000000,183528.000000,59450.000000,167.176836)}
{pt3dadd(180348.000000,183768.000000,59350.000000,139.314042)}

{create adhoc213}
{access adhoc213}
{connect adhoc213(1), adhoc70(0)}
{nseg = 1}
{strdef color color = "White"}
{pt3dclear()}
{pt3dadd(189780.000000,172140.000000,54750.000000,1035.114948)}
{pt3dadd(187824.000000,172140.000000,55200.000000,167.176836)}
{pt3dadd(187008.000000,171960.000000,55200.000000,183.158946)}
{pt3dadd(186276.000000,171912.000000,55200.000000,199.141056)}
{pt3dadd(185976.000000,171864.000000,55100.000000,215.123166)}
{pt3dadd(185736.000000,171684.000000,55075.000000,231.105276)}
{pt3dadd(185616.000000,171384.000000,55075.000000,215.123166)}
{pt3dadd(185448.000000,171144.000000,55175.000000,199.141056)}
{pt3dadd(185856.000000,171924.000000,54875.000000,183.158946)}
{pt3dadd(185232.000000,171960.000000,54875.000000,167.176836)}
{pt3dadd(184464.000000,172152.000000,54875.000000,183.158946)}
{pt3dadd(184224.000000,172248.000000,54850.000000,199.141056)}
{pt3dadd(184020.000000,172284.000000,54775.000000,215.123166)}
{pt3dadd(183876.000000,172296.000000,54775.000000,231.105276)}
{pt3dadd(183624.000000,172356.000000,54800.000000,202.352715)}
{pt3dadd(183420.000000,172392.000000,54650.000000,173.600154)}
{pt3dadd(183168.000000,172512.000000,54500.000000,144.847593)}
{pt3dadd(182916.000000,172680.000000,54350.000000,116.095032)}
{pt3dadd(182688.000000,172896.000000,54300.000000,240.734646)}

{create adhoc214}
{access adhoc214}
{connect adhoc214(1), adhoc69(0)}
{nseg = 1}
{strdef color color = "White"}
{pt3dclear()}
{pt3dadd(190980.000000,170508.000000,54675.000000,1242.137880)}
{pt3dadd(188532.000000,170508.000000,53175.000000,499.187376)}
{pt3dadd(188316.000000,170316.000000,53000.000000,499.187376)}
{pt3dadd(187344.000000,169824.000000,52475.000000,499.187376)}
{pt3dadd(186996.000000,169620.000000,52200.000000,499.187376)}
{pt3dadd(186672.000000,169644.000000,52150.000000,499.187376)}
{pt3dadd(186348.000000,169560.000000,52025.000000,478.387903)}
{pt3dadd(186000.000000,169500.000000,51975.000000,457.588431)}
{pt3dadd(185688.000000,169440.000000,51925.000000,436.788958)}
{pt3dadd(185424.000000,169380.000000,51875.000000,415.989486)}
{pt3dadd(185184.000000,169320.000000,51825.000000,436.788958)}
{pt3dadd(184656.000000,169092.000000,51625.000000,457.588431)}
{pt3dadd(184380.000000,169056.000000,51500.000000,478.387903)}
{pt3dadd(184068.000000,168996.000000,51450.000000,499.187376)}
{pt3dadd(183744.000000,168936.000000,51300.000000,461.055006)}
{pt3dadd(183504.000000,168876.000000,51300.000000,422.922636)}
{pt3dadd(183300.000000,168912.000000,51250.000000,384.790266)}
{pt3dadd(183072.000000,168912.000000,51175.000000,346.657896)}
{pt3dadd(182808.000000,169008.000000,51225.000000,332.213819)}
{pt3dadd(182604.000000,169104.000000,51275.000000,317.769741)}
{pt3dadd(182388.000000,169320.000000,51225.000000,303.325664)}
{pt3dadd(182172.000000,169620.000000,50900.000000,288.881586)}
{pt3dadd(182004.000000,169860.000000,50600.000000,320.658561)}
{pt3dadd(181848.000000,170028.000000,50650.000000,352.435536)}
{pt3dadd(181512.000000,170280.000000,50500.000000,384.212511)}
{pt3dadd(181536.000000,170400.000000,50100.000000,415.989486)}
{pt3dadd(181284.000000,170616.000000,49625.000000,384.212511)}
{pt3dadd(181116.000000,170604.000000,49350.000000,352.435536)}
{pt3dadd(180864.000000,170688.000000,49000.000000,320.658561)}
{pt3dadd(180708.000000,170688.000000,48675.000000,288.881586)}
{pt3dadd(180600.000000,170652.000000,48425.000000,244.746900)}
{pt3dadd(180660.000000,170748.000000,48250.000000,200.612214)}
{pt3dadd(180684.000000,170736.000000,48075.000000,200.612214)}
