# Supplementary material for: Full reconstruction of large lobula plate tangential cells in Drosophila from a 3D EM dataset
Source: PLoS One. 2018 Nov 28;13(11):e0207828. doi: 10.1371/journal.pone.0207828 (PMC6261601; doi:10.1371/journal.pone.0207828)
Supplement: S1 Dataset — (ZIP) [file pone.0207828.s001.zip › Diameter hoc/VS_VSL_preliminary/Old Diameters Mar13_VS_VSL_HS/VS3/2_14_741_smaurer_001.022.hoc]

/* created with nml2hocm */

{create adhoc1}
{access adhoc1}
{nseg = 1}
{strdef color color = "White"}
{pt3dclear()}
{pt3dadd(171888.000000,204696.000000,49325.000000,139.314042)}
{pt3dadd(171804.000000,205824.000000,50000.000000,160.489764)}
{pt3dadd(171204.000000,206280.000000,50850.000000,139.314042)}
{pt3dadd(170856.000000,206220.000000,51475.000000,176.705928)}
{pt3dadd(170724.000000,206280.000000,51975.000000,214.097814)}
{pt3dadd(170532.000000,206340.000000,52525.000000,251.489700)}
{pt3dadd(170232.000000,207168.000000,53400.000000,288.881586)}
{pt3dadd(170208.000000,207804.000000,54450.000000,266.233284)}

{create adhoc2}
{access adhoc2}
{connect adhoc2(1), adhoc1(0)}
{nseg = 1}
{strdef color color = "White"}
{pt3dclear()}
{pt3dadd(170208.000000,207804.000000,54450.000000,266.233284)}
{pt3dadd(170520.000000,208800.000000,54375.000000,240.734646)}
{pt3dadd(170208.000000,209880.000000,54675.000000,293.696271)}
{pt3dadd(169860.000000,211020.000000,55250.000000,346.657896)}
{pt3dadd(169548.000000,212100.000000,55675.000000,363.990794)}
{pt3dadd(169356.000000,212544.000000,55875.000000,381.323691)}
{pt3dadd(169176.000000,213456.000000,55975.000000,398.656589)}
{pt3dadd(169128.000000,215748.000000,56350.000000,415.989486)}
{pt3dadd(169128.000000,217416.000000,56175.000000,1035.114948)}

{create adhoc3}
{access adhoc3}
{connect adhoc3(1), adhoc2(0)}
{nseg = 1}
{strdef color color = "White"}
{pt3dclear()}
{pt3dadd(169128.000000,217416.000000,56175.000000,1035.114948)}
{pt3dadd(169176.000000,217140.000000,56650.000000,1035.114948)}
{pt3dadd(169416.000000,217224.000000,57500.000000,948.855375)}
{pt3dadd(170112.000000,217188.000000,58675.000000,862.595802)}
{pt3dadd(170580.000000,217404.000000,59475.000000,862.595802)}

{create adhoc4}
{access adhoc4}
{connect adhoc4(1), adhoc3(0)}
{nseg = 1}
{strdef color color = "White"}
{pt3dclear()}
{pt3dadd(170580.000000,217404.000000,59475.000000,862.595802)}
{pt3dadd(170892.000000,217524.000000,59750.000000,862.595802)}
{pt3dadd(171036.000000,218544.000000,60600.000000,948.855375)}
{pt3dadd(171444.000000,218244.000000,60875.000000,1035.114948)}
{pt3dadd(171912.000000,218172.000000,61625.000000,1242.137880)}

{create adhoc5}
{access adhoc5}
{connect adhoc5(1), adhoc4(0)}
{nseg = 1}
{strdef color color = "White"}
{pt3dclear()}
{pt3dadd(171912.000000,218172.000000,61625.000000,1242.137880)}
{pt3dadd(172056.000000,218100.000000,62450.000000,1242.137880)}

{create adhoc6}
{access adhoc6}
{connect adhoc6(1), adhoc5(0)}
{nseg = 1}
{strdef color color = "White"}
{pt3dclear()}
{pt3dadd(172056.000000,218100.000000,62450.000000,1242.137880)}
{pt3dadd(172200.000000,218040.000000,62925.000000,1242.137880)}
{pt3dadd(174012.000000,217044.000000,64525.000000,1190.382147)}
{pt3dadd(175284.000000,216108.000000,66200.000000,1138.626414)}
{pt3dadd(175788.000000,215304.000000,67200.000000,1086.870681)}
{pt3dadd(175884.000000,215004.000000,68325.000000,1035.114948)}
{pt3dadd(175776.000000,215892.000000,69000.000000,599.024880)}

{create adhoc7}
{access adhoc7}
{connect adhoc7(1), adhoc6(0)}
{nseg = 1}
{strdef color color = "White"}
{pt3dclear()}
{pt3dadd(175776.000000,215892.000000,69000.000000,599.024880)}
{pt3dadd(173976.000000,218136.000000,69475.000000,479.219958)}
{pt3dadd(173400.000000,218892.000000,70375.000000,463.412340)}
{pt3dadd(172308.000000,219804.000000,71700.000000,447.604722)}
{pt3dadd(171192.000000,220620.000000,72600.000000,431.797104)}
{pt3dadd(169944.000000,221112.000000,73425.000000,415.989486)}
{pt3dadd(168564.000000,221928.000000,74125.000000,398.656589)}
{pt3dadd(168120.000000,222360.000000,74875.000000,381.323691)}
{pt3dadd(166416.000000,222828.000000,75950.000000,363.990794)}
{pt3dadd(166008.000000,223092.000000,76850.000000,346.657896)}
{pt3dadd(164856.000000,223452.000000,77500.000000,470.715204)}
{pt3dadd(164448.000000,223680.000000,78125.000000,594.772512)}
{pt3dadd(164292.000000,223788.000000,78775.000000,718.829820)}
{pt3dadd(164112.000000,223896.000000,78925.000000,718.829820)}

{create adhoc8}
{access adhoc8}
{connect adhoc8(1), adhoc7(0)}
{nseg = 1}
{strdef color color = "White"}
{pt3dclear()}
{pt3dadd(164112.000000,223896.000000,78925.000000,718.829820)}
{pt3dadd(164028.000000,223752.000000,79300.000000,718.829820)}
{pt3dadd(163668.000000,223500.000000,79750.000000,754.771316)}
{pt3dadd(163716.000000,223320.000000,80400.000000,790.712811)}
{pt3dadd(163728.000000,223200.000000,80900.000000,826.654307)}
{pt3dadd(163668.000000,223080.000000,81500.000000,862.595802)}
{pt3dadd(163968.000000,223092.000000,82150.000000,639.292644)}
{pt3dadd(164820.000000,223104.000000,82750.000000,415.989486)}
{pt3dadd(165288.000000,223272.000000,83325.000000,167.176836)}

{create adhoc9}
{access adhoc9}
{connect adhoc9(1), adhoc8(0)}
{nseg = 1}
{strdef color color = "White"}
{pt3dclear()}
{pt3dadd(165288.000000,223272.000000,83325.000000,167.176836)}
{pt3dadd(164976.000000,224160.000000,83775.000000,200.612214)}
{pt3dadd(164952.000000,224976.000000,84450.000000,213.986358)}
{pt3dadd(164748.000000,225852.000000,85000.000000,227.360502)}
{pt3dadd(163656.000000,226476.000000,85350.000000,240.734646)}
{pt3dadd(162984.000000,226740.000000,85925.000000,240.734646)}

{create adhoc10}
{access adhoc10}
{connect adhoc10(1), adhoc8(0)}
{nseg = 1}
{strdef color color = "White"}
{pt3dclear()}
{pt3dadd(165288.000000,223272.000000,83325.000000,167.176836)}
{pt3dadd(166140.000000,222408.000000,83375.000000,200.612214)}
{pt3dadd(166908.000000,222000.000000,83850.000000,254.456532)}
{pt3dadd(167268.000000,221724.000000,84575.000000,308.300850)}
{pt3dadd(167892.000000,221484.000000,85100.000000,362.145168)}
{pt3dadd(168132.000000,221184.000000,85625.000000,415.989486)}
{pt3dadd(167976.000000,220968.000000,87100.000000,344.197062)}
{pt3dadd(168084.000000,221244.000000,88925.000000,272.404638)}
{pt3dadd(168084.000000,221568.000000,89125.000000,200.612214)}
{pt3dadd(168096.000000,222288.000000,90875.000000,240.734646)}

{create adhoc11}
{access adhoc11}
{connect adhoc11(1), adhoc7(0)}
{nseg = 1}
{strdef color color = "White"}
{pt3dclear()}
{pt3dadd(164112.000000,223896.000000,78925.000000,718.829820)}
{pt3dadd(163956.000000,225132.000000,79175.000000,139.314042)}
{pt3dadd(163896.000000,226008.000000,79575.000000,176.705928)}
{pt3dadd(163572.000000,228204.000000,80025.000000,214.097814)}
{pt3dadd(162684.000000,229896.000000,80300.000000,251.489700)}
{pt3dadd(162408.000000,230880.000000,80925.000000,288.881586)}
{pt3dadd(162552.000000,231348.000000,81525.000000,415.989486)}

{create adhoc12}
{access adhoc12}
{connect adhoc12(1), adhoc6(0)}
{nseg = 1}
{strdef color color = "White"}
{pt3dclear()}
{pt3dadd(175776.000000,215892.000000,69000.000000,599.024880)}
{pt3dadd(177768.000000,212460.000000,69725.000000,718.829820)}
{pt3dadd(178860.000000,211428.000000,70625.000000,1242.137880)}
{pt3dadd(180660.000000,210252.000000,71475.000000,1192.452354)}

{create adhoc13}
{access adhoc13}
{connect adhoc13(1), adhoc12(0)}
{nseg = 1}
{strdef color color = "White"}
{pt3dclear()}
{pt3dadd(180660.000000,210252.000000,71475.000000,1192.452354)}
{pt3dadd(180516.000000,208224.000000,71575.000000,346.657896)}
{pt3dadd(180024.000000,208212.000000,71300.000000,346.657896)}
{pt3dadd(179532.000000,208212.000000,71050.000000,346.657896)}
{pt3dadd(179040.000000,208212.000000,70725.000000,346.657896)}
{pt3dadd(178548.000000,207984.000000,70350.000000,346.657896)}
{pt3dadd(178056.000000,207744.000000,69975.000000,320.177083)}
{pt3dadd(177312.000000,207324.000000,69675.000000,293.696271)}
{pt3dadd(176460.000000,206820.000000,69250.000000,267.215459)}
{pt3dadd(175560.000000,206340.000000,68625.000000,240.734646)}
{pt3dadd(175068.000000,206508.000000,68150.000000,216.215376)}
{pt3dadd(175068.000000,206592.000000,67400.000000,191.696106)}
{pt3dadd(175164.000000,206184.000000,66575.000000,167.176836)}
{pt3dadd(175428.000000,205488.000000,66125.000000,167.176836)}

{create adhoc14}
{access adhoc14}
{connect adhoc14(1), adhoc12(0)}
{nseg = 1}
{strdef color color = "White"}
{pt3dclear()}
{pt3dadd(180660.000000,210252.000000,71475.000000,1192.452354)}
{pt3dadd(181584.000000,208500.000000,73125.000000,1490.565402)}
{pt3dadd(182736.000000,207324.000000,74700.000000,1021.313358)}
{pt3dadd(183252.000000,205704.000000,76100.000000,552.061314)}
{pt3dadd(185904.000000,201732.000000,75925.000000,1192.452354)}

{create adhoc15}
{access adhoc15}
{connect adhoc15(1), adhoc14(0)}
{nseg = 1}
{strdef color color = "White"}
{pt3dclear()}
{pt3dadd(185904.000000,201732.000000,75925.000000,1192.452354)}
{pt3dadd(186156.000000,202080.000000,76875.000000,1035.114948)}
{pt3dadd(186048.000000,202356.000000,77675.000000,1148.977562)}
{pt3dadd(186216.000000,202860.000000,78600.000000,1262.840175)}
{pt3dadd(186480.000000,203364.000000,79425.000000,1376.702788)}
{pt3dadd(186744.000000,203868.000000,80400.000000,1490.565402)}
{pt3dadd(187032.000000,204276.000000,81950.000000,1565.093664)}
{pt3dadd(186732.000000,204684.000000,82975.000000,1639.621926)}
{pt3dadd(186684.000000,205224.000000,83850.000000,1714.150188)}
{pt3dadd(186480.000000,205704.000000,84575.000000,1788.678450)}
{pt3dadd(186504.000000,205656.000000,85900.000000,1600.287575)}
{pt3dadd(187008.000000,205488.000000,86725.000000,1411.896699)}
{pt3dadd(187416.000000,205608.000000,87550.000000,1223.505823)}
{pt3dadd(187596.000000,205596.000000,88300.000000,1035.114948)}
{pt3dadd(187776.000000,205584.000000,88925.000000,1223.505823)}
{pt3dadd(187896.000000,205836.000000,89575.000000,1411.896699)}
{pt3dadd(188148.000000,205764.000000,90075.000000,1600.287575)}
{pt3dadd(188100.000000,206172.000000,91025.000000,1788.678450)}
{pt3dadd(188316.000000,206124.000000,91750.000000,1878.112382)}
{pt3dadd(188472.000000,205764.000000,92550.000000,1967.546313)}
{pt3dadd(188424.000000,205920.000000,93125.000000,2056.980245)}
{pt3dadd(188700.000000,205452.000000,93575.000000,2146.414176)}
{pt3dadd(188976.000000,204984.000000,94400.000000,2056.980245)}
{pt3dadd(188928.000000,204456.000000,95425.000000,1967.546313)}
{pt3dadd(188988.000000,204024.000000,96225.000000,1878.112382)}
{pt3dadd(188844.000000,203760.000000,97000.000000,1788.678450)}
{pt3dadd(188700.000000,203712.000000,97975.000000,1652.043308)}
{pt3dadd(188496.000000,203604.000000,98850.000000,1515.408165)}
{pt3dadd(187968.000000,203352.000000,99575.000000,1378.773023)}
{pt3dadd(187704.000000,203244.000000,100325.000000,1242.137880)}
{pt3dadd(187692.000000,203232.000000,101250.000000,1378.773023)}
{pt3dadd(187776.000000,202836.000000,101725.000000,1515.408165)}
{pt3dadd(187860.000000,202440.000000,102275.000000,1652.043308)}
{pt3dadd(187788.000000,202524.000000,102775.000000,1788.678450)}
{pt3dadd(187716.000000,202608.000000,103225.000000,1788.678450)}
{pt3dadd(187836.000000,202368.000000,103850.000000,1788.678450)}
{pt3dadd(187956.000000,202128.000000,104475.000000,1788.678450)}
{pt3dadd(188076.000000,201888.000000,105050.000000,1788.678450)}
{pt3dadd(188196.000000,201648.000000,105575.000000,1878.112382)}
{pt3dadd(188088.000000,201540.000000,106100.000000,1967.546313)}
{pt3dadd(187980.000000,201432.000000,106550.000000,2056.980245)}
{pt3dadd(187872.000000,201324.000000,107450.000000,2146.414176)}
{pt3dadd(187764.000000,200856.000000,108025.000000,2146.414176)}
{pt3dadd(187656.000000,200388.000000,108950.000000,2146.414176)}
{pt3dadd(187932.000000,199896.000000,109625.000000,2146.414176)}
{pt3dadd(187884.000000,199788.000000,110000.000000,2146.414176)}
{pt3dadd(187836.000000,199680.000000,110925.000000,2056.980245)}
{pt3dadd(187788.000000,199572.000000,111550.000000,1967.546313)}
{pt3dadd(187680.000000,199248.000000,112025.000000,1878.112382)}
{pt3dadd(187248.000000,199056.000000,112850.000000,1788.678450)}
{pt3dadd(186816.000000,198864.000000,113500.000000,1699.244555)}
{pt3dadd(186096.000000,198396.000000,114375.000000,1609.810659)}
{pt3dadd(186372.000000,198096.000000,115150.000000,1520.376763)}
{pt3dadd(186036.000000,197952.000000,115550.000000,1430.942868)}
{pt3dadd(185700.000000,197808.000000,116150.000000,1383.741621)}
{pt3dadd(185364.000000,197484.000000,116400.000000,1336.540374)}
{pt3dadd(185220.000000,197484.000000,116800.000000,1289.339127)}
{pt3dadd(185076.000000,197484.000000,117225.000000,1242.137880)}
{pt3dadd(184932.000000,197484.000000,117900.000000,1147.252361)}
{pt3dadd(183756.000000,197220.000000,119175.000000,1052.366841)}
{pt3dadd(182808.000000,196416.000000,120375.000000,957.481322)}
{pt3dadd(182244.000000,196344.000000,121150.000000,862.595802)}
{pt3dadd(181332.000000,195912.000000,122100.000000,905.725589)}
{pt3dadd(180420.000000,195480.000000,122675.000000,948.855375)}
{pt3dadd(179124.000000,195000.000000,123575.000000,991.985162)}
{pt3dadd(177756.000000,194520.000000,124675.000000,1035.114948)}
{pt3dadd(176808.000000,193752.000000,125400.000000,991.985162)}
{pt3dadd(175608.000000,192972.000000,126000.000000,948.855375)}
{pt3dadd(174144.000000,192252.000000,126800.000000,905.725589)}
{pt3dadd(172968.000000,191436.000000,127375.000000,862.595802)}
{pt3dadd(170856.000000,190308.000000,128050.000000,945.059940)}
{pt3dadd(170040.000000,189276.000000,128550.000000,1027.524078)}
{pt3dadd(168384.000000,188364.000000,129000.000000,1109.988216)}
{pt3dadd(165984.000000,186768.000000,130075.000000,1192.452354)}
{pt3dadd(164292.000000,184920.000000,130875.000000,1109.988216)}
{pt3dadd(163812.000000,184620.000000,131525.000000,1027.524078)}
{pt3dadd(162816.000000,184548.000000,131900.000000,945.059940)}
{pt3dadd(162132.000000,183864.000000,132525.000000,862.595802)}
{pt3dadd(158964.000000,182148.000000,133050.000000,826.654307)}
{pt3dadd(157044.000000,179292.000000,133800.000000,790.712811)}
{pt3dadd(156816.000000,177672.000000,134125.000000,754.771316)}
{pt3dadd(156144.000000,176628.000000,134725.000000,718.829820)}
{pt3dadd(156000.000000,174492.000000,135175.000000,849.656835)}
{pt3dadd(156768.000000,173736.000000,135600.000000,980.483850)}
{pt3dadd(157080.000000,172656.000000,136425.000000,1111.310865)}
{pt3dadd(157008.000000,172812.000000,137100.000000,1242.137880)}
{pt3dadd(156936.000000,172968.000000,137675.000000,1229.716498)}
{pt3dadd(157956.000000,172860.000000,138725.000000,1217.295117)}
{pt3dadd(157692.000000,172116.000000,139275.000000,1204.873736)}
{pt3dadd(156648.000000,172044.000000,140050.000000,1192.452354)}
{pt3dadd(155712.000000,171804.000000,141200.000000,1153.118003)}
{pt3dadd(155388.000000,171240.000000,142075.000000,1113.783651)}
{pt3dadd(154716.000000,170520.000000,142750.000000,1074.449300)}
{pt3dadd(154128.000000,169224.000000,143675.000000,1035.114948)}
{pt3dadd(153240.000000,168036.000000,144100.000000,1223.505823)}
{pt3dadd(153072.000000,167736.000000,144775.000000,1411.896699)}
{pt3dadd(152904.000000,167436.000000,145675.000000,1600.287575)}
{pt3dadd(152568.000000,166656.000000,146425.000000,1788.678450)}
{pt3dadd(151992.000000,165456.000000,147325.000000,1985.433116)}
{pt3dadd(152004.000000,164160.000000,148275.000000,2182.187781)}
{pt3dadd(152040.000000,162864.000000,149725.000000,2378.942446)}
{pt3dadd(151740.000000,161760.000000,150550.000000,2575.697112)}
{pt3dadd(151992.000000,160752.000000,151900.000000,2468.376378)}
{pt3dadd(152244.000000,159744.000000,152875.000000,2361.055644)}
{pt3dadd(152496.000000,158748.000000,154075.000000,2253.734910)}
{pt3dadd(151632.000000,158316.000000,154775.000000,2146.414176)}
{pt3dadd(151776.000000,157788.000000,155600.000000,2124.950049)}
{pt3dadd(151920.000000,157260.000000,156350.000000,2103.485922)}
{pt3dadd(152064.000000,156732.000000,157125.000000,2082.021795)}
{pt3dadd(152220.000000,156204.000000,157775.000000,2060.557668)}
{pt3dadd(152628.000000,155736.000000,158575.000000,1992.587863)}
{pt3dadd(151932.000000,155268.000000,159225.000000,1924.618059)}
{pt3dadd(152292.000000,154356.000000,160075.000000,1856.648255)}
{pt3dadd(152676.000000,153444.000000,161175.000000,1788.678450)}
{pt3dadd(152664.000000,152784.000000,161925.000000,1878.112382)}
{pt3dadd(153168.000000,151908.000000,163000.000000,1967.546313)}
{pt3dadd(153672.000000,151032.000000,163400.000000,2056.980245)}
{pt3dadd(153756.000000,150636.000000,163675.000000,2146.414176)}
{pt3dadd(153840.000000,150240.000000,163900.000000,2146.414176)}
{pt3dadd(153924.000000,149844.000000,164925.000000,2146.414176)}
{pt3dadd(154008.000000,149448.000000,165725.000000,2146.414176)}
{pt3dadd(154440.000000,148092.000000,166325.000000,2146.414176)}
{pt3dadd(154596.000000,147744.000000,166800.000000,2047.342626)}
{pt3dadd(154524.000000,147168.000000,166825.000000,1948.271076)}
{pt3dadd(154704.000000,146652.000000,167200.000000,1849.199526)}
{pt3dadd(155244.000000,146220.000000,168025.000000,1750.127976)}
{pt3dadd(156000.000000,143676.000000,169650.000000,1759.765595)}
{pt3dadd(156552.000000,143004.000000,170350.000000,1769.403213)}
{pt3dadd(156720.000000,141984.000000,171125.000000,1779.040832)}
{pt3dadd(156924.000000,141348.000000,172025.000000,1788.678450)}
{pt3dadd(157116.000000,140712.000000,172525.000000,1714.150188)}
{pt3dadd(157308.000000,140076.000000,173175.000000,1639.621926)}
{pt3dadd(157500.000000,139440.000000,173925.000000,1565.093664)}
{pt3dadd(156276.000000,138840.000000,175000.000000,1490.565402)}
{pt3dadd(156420.000000,138624.000000,175550.000000,1565.093664)}
{pt3dadd(156564.000000,138408.000000,176150.000000,1639.621926)}
{pt3dadd(156708.000000,138192.000000,176350.000000,1714.150188)}
{pt3dadd(156456.000000,137748.000000,177425.000000,1788.678450)}
{pt3dadd(156396.000000,137472.000000,177800.000000,1878.112382)}
{pt3dadd(156348.000000,137196.000000,178300.000000,1967.546313)}
{pt3dadd(156300.000000,136920.000000,179050.000000,2056.980245)}
{pt3dadd(156252.000000,136644.000000,179800.000000,2146.414176)}
{pt3dadd(156204.000000,136368.000000,180425.000000,2124.950049)}
{pt3dadd(156000.000000,136092.000000,180700.000000,2103.485922)}
{pt3dadd(155796.000000,135816.000000,181575.000000,2082.021795)}
{pt3dadd(155592.000000,135540.000000,182100.000000,2060.557668)}
{pt3dadd(155388.000000,135264.000000,182775.000000,2575.697112)}

{create adhoc16}
{access adhoc16}
{connect adhoc16(1), adhoc14(0)}
{nseg = 1}
{strdef color color = "White"}
{pt3dclear()}
{pt3dadd(185904.000000,201732.000000,75925.000000,1192.452354)}
{pt3dadd(185928.000000,201252.000000,75900.000000,1035.114948)}
{pt3dadd(185976.000000,200940.000000,75600.000000,1035.114948)}
{pt3dadd(186120.000000,200556.000000,75325.000000,1035.114948)}
{pt3dadd(186360.000000,200040.000000,74750.000000,1035.114948)}
{pt3dadd(186516.000000,199500.000000,73950.000000,1035.114948)}
{pt3dadd(186984.000000,198504.000000,73275.000000,1074.449300)}
{pt3dadd(187176.000000,197904.000000,72700.000000,1113.783651)}
{pt3dadd(187368.000000,197304.000000,72425.000000,1153.118003)}
{pt3dadd(187560.000000,196704.000000,72050.000000,1192.452354)}
{pt3dadd(187752.000000,196104.000000,71750.000000,1192.452354)}
{pt3dadd(187392.000000,195276.000000,70925.000000,1192.452354)}
{pt3dadd(187056.000000,194448.000000,70350.000000,1192.452354)}
{pt3dadd(187080.000000,193872.000000,69825.000000,1192.452354)}
{pt3dadd(187080.000000,193296.000000,69375.000000,1341.508878)}
{pt3dadd(187272.000000,192720.000000,68725.000000,1490.565402)}
{pt3dadd(187200.000000,191568.000000,68200.000000,1639.621926)}
{pt3dadd(187416.000000,190644.000000,67375.000000,1788.678450)}
{pt3dadd(187560.000000,189684.000000,67000.000000,1537.490616)}
{pt3dadd(187692.000000,188724.000000,66725.000000,1286.302782)}
{pt3dadd(187824.000000,187764.000000,66150.000000,1035.114948)}
{pt3dadd(187596.000000,187392.000000,65925.000000,1035.114948)}

{create adhoc17}
{access adhoc17}
{connect adhoc17(1), adhoc16(0)}
{nseg = 1}
{strdef color color = "White"}
{pt3dclear()}
{pt3dadd(187596.000000,187392.000000,65925.000000,1035.114948)}
{pt3dadd(185388.000000,187272.000000,65725.000000,200.612214)}
{pt3dadd(183648.000000,187236.000000,65575.000000,220.673430)}
{pt3dadd(182028.000000,187332.000000,65200.000000,240.734646)}
{pt3dadd(181416.000000,187704.000000,64800.000000,167.176836)}

{create adhoc18}
{access adhoc18}
{connect adhoc18(1), adhoc16(0)}
{nseg = 1}
{strdef color color = "White"}
{pt3dclear()}
{pt3dadd(187596.000000,187392.000000,65925.000000,1035.114948)}
{pt3dadd(187524.000000,187008.000000,65775.000000,1035.114948)}
{pt3dadd(187872.000000,186612.000000,65300.000000,1104.122592)}
{pt3dadd(188220.000000,185808.000000,65175.000000,1173.130236)}
{pt3dadd(187992.000000,185436.000000,64925.000000,1242.137880)}
{pt3dadd(187764.000000,184896.000000,64675.000000,1242.137880)}

{create adhoc19}
{access adhoc19}
{connect adhoc19(1), adhoc18(0)}
{nseg = 1}
{strdef color color = "White"}
{pt3dclear()}
{pt3dadd(187764.000000,184896.000000,64675.000000,1242.137880)}
{pt3dadd(186096.000000,190392.000000,64725.000000,2146.414176)}
{pt3dadd(186168.000000,190824.000000,64350.000000,1982.451983)}
{pt3dadd(186012.000000,190704.000000,63775.000000,1818.489789)}
{pt3dadd(185604.000000,190332.000000,63025.000000,1654.527596)}
{pt3dadd(184836.000000,189972.000000,61800.000000,1490.565402)}
{pt3dadd(183972.000000,190080.000000,60625.000000,1192.452354)}

{create adhoc20}
{access adhoc20}
{connect adhoc20(1), adhoc19(0)}
{nseg = 1}
{strdef color color = "White"}
{pt3dclear()}
{pt3dadd(183972.000000,190080.000000,60625.000000,1192.452354)}
{pt3dadd(183480.000000,190500.000000,59775.000000,828.091944)}
{pt3dadd(183120.000000,190152.000000,59475.000000,862.595802)}
{pt3dadd(182448.000000,189672.000000,59050.000000,862.595802)}

{create adhoc21}
{access adhoc21}
{connect adhoc21(1), adhoc20(0)}
{nseg = 1}
{strdef color color = "White"}
{pt3dclear()}
{pt3dadd(182448.000000,189672.000000,59050.000000,862.595802)}
{pt3dadd(181884.000000,189816.000000,58550.000000,1035.114948)}
{pt3dadd(181524.000000,190584.000000,57725.000000,415.989486)}

{create adhoc22}
{access adhoc22}
{connect adhoc22(1), adhoc21(0)}
{nseg = 1}
{strdef color color = "White"}
{pt3dclear()}
{pt3dadd(181524.000000,190584.000000,57725.000000,415.989486)}
{pt3dadd(182088.000000,189168.000000,57475.000000,1035.114948)}
{pt3dadd(181716.000000,188772.000000,56725.000000,1035.114948)}
{pt3dadd(181632.000000,188412.000000,55950.000000,1035.114948)}
{pt3dadd(181728.000000,187668.000000,55125.000000,1035.114948)}
{pt3dadd(181944.000000,187332.000000,54475.000000,1035.114948)}

{create adhoc23}
{access adhoc23}
{connect adhoc23(1), adhoc22(0)}
{nseg = 1}
{strdef color color = "White"}
{pt3dclear()}
{pt3dadd(181944.000000,187332.000000,54475.000000,1035.114948)}
{pt3dadd(181956.000000,186696.000000,54200.000000,862.595802)}
{pt3dadd(181956.000000,186060.000000,53975.000000,948.855375)}
{pt3dadd(181956.000000,185424.000000,52975.000000,1035.114948)}
{pt3dadd(181548.000000,185376.000000,52700.000000,1035.114948)}

{create adhoc24}
{access adhoc24}
{connect adhoc24(1), adhoc23(0)}
{nseg = 1}
{strdef color color = "White"}
{pt3dclear()}
{pt3dadd(181548.000000,185376.000000,52700.000000,1035.114948)}
{pt3dadd(182412.000000,184560.000000,51925.000000,1035.114948)}
{pt3dadd(182544.000000,183216.000000,51475.000000,862.595802)}

{create adhoc25}
{access adhoc25}
{connect adhoc25(1), adhoc24(0)}
{nseg = 1}
{strdef color color = "White"}
{pt3dclear()}
{pt3dadd(182544.000000,183216.000000,51475.000000,862.595802)}
{pt3dadd(182916.000000,180840.000000,50325.000000,499.187376)}
{pt3dadd(182676.000000,180012.000000,49575.000000,549.106128)}
{pt3dadd(182760.000000,179472.000000,48950.000000,599.024880)}
{pt3dadd(183060.000000,177516.000000,47875.000000,499.187376)}

{create adhoc26}
{access adhoc26}
{connect adhoc26(1), adhoc25(0)}
{nseg = 1}
{strdef color color = "White"}
{pt3dclear()}
{pt3dadd(183060.000000,177516.000000,47875.000000,499.187376)}
{pt3dadd(182172.000000,176340.000000,48125.000000,240.734646)}
{pt3dadd(181992.000000,176124.000000,48350.000000,209.574742)}
{pt3dadd(181368.000000,175776.000000,48800.000000,178.414839)}
{pt3dadd(180864.000000,176028.000000,49250.000000,147.254936)}
{pt3dadd(179976.000000,176028.000000,49475.000000,116.095032)}
{pt3dadd(179160.000000,175704.000000,49925.000000,121.899785)}
{pt3dadd(178872.000000,175716.000000,50125.000000,127.704537)}
{pt3dadd(179004.000000,175716.000000,50525.000000,133.509289)}
{pt3dadd(179688.000000,175500.000000,51050.000000,139.314042)}
{pt3dadd(180540.000000,175296.000000,51375.000000,200.612214)}

{create adhoc27}
{access adhoc27}
{connect adhoc27(1), adhoc25(0)}
{nseg = 1}
{strdef color color = "White"}
{pt3dclear()}
{pt3dadd(183060.000000,177516.000000,47875.000000,499.187376)}
{pt3dadd(182700.000000,176904.000000,47350.000000,499.187376)}
{pt3dadd(183048.000000,175944.000000,46775.000000,537.125616)}
{pt3dadd(183240.000000,175440.000000,46225.000000,575.063856)}
{pt3dadd(183360.000000,175272.000000,46000.000000,599.024880)}

{create adhoc28}
{access adhoc28}
{connect adhoc28(1), adhoc27(0)}
{nseg = 1}
{strdef color color = "White"}
{pt3dclear()}
{pt3dadd(183360.000000,175272.000000,46000.000000,599.024880)}
{pt3dadd(182940.000000,172260.000000,45325.000000,200.612214)}
{pt3dadd(184116.000000,170796.000000,45075.000000,237.123635)}
{pt3dadd(183948.000000,169788.000000,44875.000000,273.635055)}
{pt3dadd(184020.000000,168372.000000,44525.000000,310.146475)}
{pt3dadd(184608.000000,166320.000000,44125.000000,346.657896)}
{pt3dadd(185340.000000,165396.000000,43675.000000,346.657896)}
{pt3dadd(185328.000000,164880.000000,43325.000000,346.657896)}
{pt3dadd(185220.000000,163332.000000,42100.000000,499.187376)}

{create adhoc29}
{access adhoc29}
{connect adhoc29(1), adhoc28(0)}
{nseg = 1}
{strdef color color = "White"}
{pt3dclear()}
{pt3dadd(185220.000000,163332.000000,42100.000000,499.187376)}
{pt3dadd(185340.000000,161868.000000,41200.000000,240.734646)}
{pt3dadd(185544.000000,161172.000000,40850.000000,264.808116)}
{pt3dadd(185508.000000,158496.000000,40650.000000,288.881586)}
{pt3dadd(185592.000000,156612.000000,40375.000000,288.881586)}

{create adhoc30}
{access adhoc30}
{connect adhoc30(1), adhoc29(0)}
{nseg = 1}
{strdef color color = "White"}
{pt3dclear()}
{pt3dadd(185592.000000,156612.000000,40375.000000,288.881586)}
{pt3dadd(185736.000000,155892.000000,40300.000000,240.734646)}
{pt3dadd(185988.000000,155508.000000,40575.000000,222.345193)}
{pt3dadd(186936.000000,152628.000000,40575.000000,203.955741)}
{pt3dadd(186936.000000,152316.000000,40575.000000,185.566288)}
{pt3dadd(187440.000000,151704.000000,40375.000000,167.176836)}
{pt3dadd(187428.000000,151200.000000,40400.000000,183.158946)}
{pt3dadd(187764.000000,151116.000000,40450.000000,199.141056)}
{pt3dadd(188136.000000,151104.000000,40675.000000,215.123166)}
{pt3dadd(188568.000000,150504.000000,41025.000000,231.105276)}
{pt3dadd(188796.000000,149568.000000,41025.000000,185.209659)}
{pt3dadd(188520.000000,148992.000000,41375.000000,139.314042)}
{pt3dadd(188640.000000,147228.000000,41625.000000,288.881586)}

{create adhoc31}
{access adhoc31}
{connect adhoc31(1), adhoc29(0)}
{nseg = 1}
{strdef color color = "White"}
{pt3dclear()}
{pt3dadd(185592.000000,156612.000000,40375.000000,288.881586)}
{pt3dadd(185616.000000,156228.000000,40275.000000,200.612214)}

{create adhoc32}
{access adhoc32}
{connect adhoc32(1), adhoc28(0)}
{nseg = 1}
{strdef color color = "White"}
{pt3dclear()}
{pt3dadd(185220.000000,163332.000000,42100.000000,499.187376)}
{pt3dadd(184980.000000,164268.000000,40225.000000,240.734646)}

{create adhoc33}
{access adhoc33}
{connect adhoc33(1), adhoc32(0)}
{nseg = 1}
{strdef color color = "White"}
{pt3dclear()}
{pt3dadd(184980.000000,164268.000000,40225.000000,240.734646)}
{pt3dadd(184596.000000,164448.000000,39775.000000,167.176836)}
{pt3dadd(184620.000000,164880.000000,39125.000000,288.881586)}

{create adhoc34}
{access adhoc34}
{connect adhoc34(1), adhoc33(0)}
{nseg = 1}
{strdef color color = "White"}
{pt3dclear()}
{pt3dadd(184620.000000,164880.000000,39125.000000,288.881586)}
{pt3dadd(184716.000000,165132.000000,38625.000000,240.734646)}
{pt3dadd(184932.000000,164940.000000,38150.000000,288.881586)}

{create adhoc35}
{access adhoc35}
{connect adhoc35(1), adhoc33(0)}
{nseg = 1}
{strdef color color = "White"}
{pt3dclear()}
{pt3dadd(184620.000000,164880.000000,39125.000000,288.881586)}
{pt3dadd(184284.000000,164052.000000,39075.000000,116.095032)}
{pt3dadd(182952.000000,163512.000000,39075.000000,137.224328)}
{pt3dadd(182304.000000,162960.000000,38500.000000,158.353623)}
{pt3dadd(180984.000000,162804.000000,37975.000000,179.482918)}
{pt3dadd(179460.000000,162504.000000,37575.000000,200.612214)}
{pt3dadd(178500.000000,162192.000000,37425.000000,169.963128)}
{pt3dadd(176772.000000,161760.000000,36975.000000,139.314042)}
{pt3dadd(175452.000000,162240.000000,36525.000000,96.745860)}

{create adhoc36}
{access adhoc36}
{connect adhoc36(1), adhoc32(0)}
{nseg = 1}
{strdef color color = "White"}
{pt3dclear()}
{pt3dadd(184980.000000,164268.000000,40225.000000,240.734646)}
{pt3dadd(186516.000000,164724.000000,40150.000000,200.612214)}

{create adhoc37}
{access adhoc37}
{connect adhoc37(1), adhoc27(0)}
{nseg = 1}
{strdef color color = "White"}
{pt3dclear()}
{pt3dadd(183360.000000,175272.000000,46000.000000,599.024880)}
{pt3dadd(183228.000000,174216.000000,45250.000000,499.187376)}

{create adhoc38}
{access adhoc38}
{connect adhoc38(1), adhoc37(0)}
{nseg = 1}
{strdef color color = "White"}
{pt3dclear()}
{pt3dadd(183228.000000,174216.000000,45250.000000,499.187376)}
{pt3dadd(181668.000000,174180.000000,45100.000000,139.314042)}
{pt3dadd(180672.000000,174264.000000,44900.000000,240.734646)}
{pt3dadd(179448.000000,174612.000000,44450.000000,167.176836)}

{create adhoc39}
{access adhoc39}
{connect adhoc39(1), adhoc37(0)}
{nseg = 1}
{strdef color color = "White"}
{pt3dclear()}
{pt3dadd(183228.000000,174216.000000,45250.000000,499.187376)}
{pt3dadd(182988.000000,174324.000000,44650.000000,718.829820)}
{pt3dadd(182700.000000,174324.000000,44025.000000,611.342762)}
{pt3dadd(182304.000000,174312.000000,43500.000000,503.855703)}
{pt3dadd(182208.000000,174288.000000,42850.000000,396.368644)}
{pt3dadd(182052.000000,174084.000000,42450.000000,288.881586)}
{pt3dadd(182112.000000,173892.000000,41775.000000,288.881586)}
{pt3dadd(182052.000000,173340.000000,41400.000000,288.881586)}
{pt3dadd(182028.000000,172860.000000,41200.000000,167.176836)}

{create adhoc40}
{access adhoc40}
{connect adhoc40(1), adhoc39(0)}
{nseg = 1}
{strdef color color = "White"}
{pt3dclear()}
{pt3dadd(182028.000000,172860.000000,41200.000000,167.176836)}
{pt3dadd(182064.000000,172440.000000,41250.000000,116.095032)}
{pt3dadd(181836.000000,171840.000000,41325.000000,116.095032)}

{create adhoc41}
{access adhoc41}
{connect adhoc41(1), adhoc39(0)}
{nseg = 1}
{strdef color color = "White"}
{pt3dclear()}
{pt3dadd(182028.000000,172860.000000,41200.000000,167.176836)}
{pt3dadd(181932.000000,173112.000000,40750.000000,332.791596)}
{pt3dadd(182076.000000,173016.000000,40225.000000,309.777359)}
{pt3dadd(182604.000000,172500.000000,39800.000000,286.763121)}
{pt3dadd(183192.000000,172404.000000,39375.000000,263.748884)}
{pt3dadd(183408.000000,172368.000000,39525.000000,240.734646)}
{pt3dadd(183816.000000,172296.000000,39050.000000,220.673426)}
{pt3dadd(183972.000000,172200.000000,38475.000000,200.612205)}
{pt3dadd(183948.000000,171792.000000,38200.000000,180.550985)}
{pt3dadd(185016.000000,171396.000000,38200.000000,160.489764)}
{pt3dadd(185256.000000,171240.000000,37825.000000,160.489764)}
{pt3dadd(185856.000000,170040.000000,37500.000000,160.489764)}
{pt3dadd(185496.000000,169716.000000,37600.000000,160.489764)}
{pt3dadd(185544.000000,169584.000000,37450.000000,200.612214)}

{create adhoc42}
{access adhoc42}
{connect adhoc42(1), adhoc24(0)}
{nseg = 1}
{strdef color color = "White"}
{pt3dclear()}
{pt3dadd(182544.000000,183216.000000,51475.000000,862.595802)}
{pt3dadd(180168.000000,183732.000000,47925.000000,346.657896)}

{create adhoc43}
{access adhoc43}
{connect adhoc43(1), adhoc42(0)}
{nseg = 1}
{strdef color color = "White"}
{pt3dclear()}
{pt3dadd(180168.000000,183732.000000,47925.000000,346.657896)}
{pt3dadd(178500.000000,184032.000000,47400.000000,240.734646)}
{pt3dadd(177852.000000,184980.000000,46975.000000,167.176836)}
{pt3dadd(175740.000000,185724.000000,47050.000000,116.095032)}

{create adhoc44}
{access adhoc44}
{connect adhoc44(1), adhoc42(0)}
{nseg = 1}
{strdef color color = "White"}
{pt3dclear()}
{pt3dadd(180168.000000,183732.000000,47925.000000,346.657896)}
{pt3dadd(181212.000000,183192.000000,46250.000000,415.989486)}
{pt3dadd(181404.000000,183024.000000,45825.000000,415.989486)}
{pt3dadd(181032.000000,182820.000000,45250.000000,415.989486)}
{pt3dadd(180732.000000,182616.000000,44600.000000,415.989486)}
{pt3dadd(180360.000000,182244.000000,44000.000000,415.989486)}
{pt3dadd(179628.000000,182004.000000,43550.000000,200.612214)}

{create adhoc45}
{access adhoc45}
{connect adhoc45(1), adhoc44(0)}
{nseg = 1}
{strdef color color = "White"}
{pt3dclear()}
{pt3dadd(179628.000000,182004.000000,43550.000000,200.612214)}
{pt3dadd(178584.000000,181212.000000,43650.000000,139.314042)}
{pt3dadd(177396.000000,180852.000000,43625.000000,116.095032)}

{create adhoc46}
{access adhoc46}
{connect adhoc46(1), adhoc45(0)}
{nseg = 1}
{strdef color color = "White"}
{pt3dclear()}
{pt3dadd(177396.000000,180852.000000,43625.000000,116.095032)}
{pt3dadd(177576.000000,180240.000000,44150.000000,240.734646)}
{pt3dadd(177504.000000,179928.000000,44150.000000,240.734646)}
{pt3dadd(177060.000000,179352.000000,44600.000000,139.314042)}

{create adhoc47}
{access adhoc47}
{connect adhoc47(1), adhoc45(0)}
{nseg = 1}
{strdef color color = "White"}
{pt3dclear()}
{pt3dadd(177396.000000,180852.000000,43625.000000,116.095032)}
{pt3dadd(176592.000000,181272.000000,43475.000000,116.095032)}

{create adhoc48}
{access adhoc48}
{connect adhoc48(1), adhoc44(0)}
{nseg = 1}
{strdef color color = "White"}
{pt3dclear()}
{pt3dadd(179628.000000,182004.000000,43550.000000,200.612214)}
{pt3dadd(180036.000000,182196.000000,43225.000000,499.187376)}
{pt3dadd(179904.000000,182052.000000,42700.000000,415.989486)}

{create adhoc49}
{access adhoc49}
{connect adhoc49(1), adhoc48(0)}
{nseg = 1}
{strdef color color = "White"}
{pt3dclear()}
{pt3dadd(179904.000000,182052.000000,42700.000000,415.989486)}
{pt3dadd(180312.000000,181452.000000,42375.000000,479.219886)}
{pt3dadd(180408.000000,181320.000000,41775.000000,446.079388)}
{pt3dadd(180756.000000,181188.000000,41250.000000,412.938891)}
{pt3dadd(180888.000000,181116.000000,41075.000000,379.798393)}
{pt3dadd(180888.000000,180960.000000,40500.000000,346.657896)}
{pt3dadd(180984.000000,181512.000000,40025.000000,294.821933)}
{pt3dadd(181308.000000,182328.000000,39125.000000,242.985969)}
{pt3dadd(181548.000000,182796.000000,39150.000000,191.150005)}
{pt3dadd(181560.000000,184260.000000,38850.000000,139.314042)}
{pt3dadd(181404.000000,185232.000000,38425.000000,173.120910)}
{pt3dadd(181380.000000,185784.000000,37775.000000,206.927778)}
{pt3dadd(181428.000000,186492.000000,37150.000000,240.734646)}
{pt3dadd(181800.000000,186924.000000,36625.000000,96.745860)}

{create adhoc50}
{access adhoc50}
{connect adhoc50(1), adhoc48(0)}
{nseg = 1}
{strdef color color = "White"}
{pt3dclear()}
{pt3dadd(179904.000000,182052.000000,42700.000000,415.989486)}
{pt3dadd(178800.000000,183216.000000,42450.000000,116.095032)}
{pt3dadd(176892.000000,184164.000000,41900.000000,200.612214)}
{pt3dadd(177168.000000,184572.000000,41225.000000,116.095032)}

{create adhoc51}
{access adhoc51}
{connect adhoc51(1), adhoc23(0)}
{nseg = 1}
{strdef color color = "White"}
{pt3dclear()}
{pt3dadd(181548.000000,185376.000000,52700.000000,1035.114948)}
{pt3dadd(180420.000000,184716.000000,52800.000000,240.734646)}
{pt3dadd(179808.000000,184152.000000,53125.000000,240.734646)}

{create adhoc52}
{access adhoc52}
{connect adhoc52(1), adhoc22(0)}
{nseg = 1}
{strdef color color = "White"}
{pt3dclear()}
{pt3dadd(181944.000000,187332.000000,54475.000000,1035.114948)}
{pt3dadd(180240.000000,188400.000000,54400.000000,167.176836)}
{pt3dadd(179256.000000,188400.000000,54100.000000,203.955741)}
{pt3dadd(178296.000000,188700.000000,53775.000000,240.734646)}
{pt3dadd(177216.000000,189024.000000,53275.000000,200.612214)}

{create adhoc53}
{access adhoc53}
{connect adhoc53(1), adhoc52(0)}
{nseg = 1}
{strdef color color = "White"}
{pt3dclear()}
{pt3dadd(177216.000000,189024.000000,53275.000000,200.612214)}
{pt3dadd(176556.000000,189516.000000,52975.000000,167.176836)}
{pt3dadd(173652.000000,190020.000000,53025.000000,167.176836)}

{create adhoc54}
{access adhoc54}
{connect adhoc54(1), adhoc52(0)}
{nseg = 1}
{strdef color color = "White"}
{pt3dclear()}
{pt3dadd(177216.000000,189024.000000,53275.000000,200.612214)}
{pt3dadd(176976.000000,189132.000000,53875.000000,116.095032)}
{pt3dadd(176616.000000,189480.000000,54175.000000,200.612214)}

{create adhoc55}
{access adhoc55}
{connect adhoc55(1), adhoc21(0)}
{nseg = 1}
{strdef color color = "White"}
{pt3dclear()}
{pt3dadd(181524.000000,190584.000000,57725.000000,415.989486)}
{pt3dadd(180000.000000,192036.000000,57550.000000,828.092016)}
{pt3dadd(180024.000000,192084.000000,57175.000000,718.829820)}
{pt3dadd(178788.000000,193800.000000,55800.000000,599.024880)}

{create adhoc56}
{access adhoc56}
{connect adhoc56(1), adhoc55(0)}
{nseg = 1}
{strdef color color = "White"}
{pt3dclear()}
{pt3dadd(178788.000000,193800.000000,55800.000000,599.024880)}
{pt3dadd(175440.000000,196872.000000,55775.000000,288.881586)}
{pt3dadd(174252.000000,197412.000000,56275.000000,288.881586)}
{pt3dadd(173652.000000,197652.000000,56800.000000,288.881586)}
{pt3dadd(173328.000000,197964.000000,57175.000000,288.881586)}
{pt3dadd(173004.000000,198336.000000,57850.000000,288.881586)}
{pt3dadd(172896.000000,198612.000000,58425.000000,276.844851)}
{pt3dadd(172812.000000,199176.000000,59225.000000,264.808116)}
{pt3dadd(172104.000000,199860.000000,59700.000000,252.771381)}
{pt3dadd(171600.000000,201912.000000,59900.000000,240.734646)}
{pt3dadd(171900.000000,203340.000000,59850.000000,220.673426)}
{pt3dadd(171540.000000,204060.000000,60275.000000,200.612205)}
{pt3dadd(171180.000000,205140.000000,60700.000000,180.550985)}
{pt3dadd(171468.000000,205680.000000,61100.000000,160.489764)}
{pt3dadd(171684.000000,206268.000000,61575.000000,231.105276)}
{pt3dadd(172620.000000,206616.000000,62100.000000,200.612214)}

{create adhoc57}
{access adhoc57}
{connect adhoc57(1), adhoc55(0)}
{nseg = 1}
{strdef color color = "White"}
{pt3dclear()}
{pt3dadd(178788.000000,193800.000000,55800.000000,599.024880)}
{pt3dadd(178536.000000,193920.000000,55075.000000,1035.114948)}
{pt3dadd(178536.000000,194088.000000,54075.000000,1035.114948)}
{pt3dadd(178092.000000,193932.000000,53225.000000,1035.114948)}

{create adhoc58}
{access adhoc58}
{connect adhoc58(1), adhoc57(0)}
{nseg = 1}
{strdef color color = "White"}
{pt3dclear()}
{pt3dadd(178092.000000,193932.000000,53225.000000,1035.114948)}
{pt3dadd(176760.000000,193356.000000,53200.000000,96.745860)}
{pt3dadd(176064.000000,192936.000000,53625.000000,139.314042)}

{create adhoc59}
{access adhoc59}
{connect adhoc59(1), adhoc57(0)}
{nseg = 1}
{strdef color color = "White"}
{pt3dclear()}
{pt3dadd(178092.000000,193932.000000,53225.000000,1035.114948)}
{pt3dadd(178056.000000,194172.000000,52525.000000,1242.137880)}
{pt3dadd(177912.000000,194520.000000,51475.000000,1242.137880)}

{create adhoc60}
{access adhoc60}
{connect adhoc60(1), adhoc59(0)}
{nseg = 1}
{strdef color color = "White"}
{pt3dclear()}
{pt3dadd(177912.000000,194520.000000,51475.000000,1242.137880)}
{pt3dadd(176520.000000,195840.000000,51425.000000,346.657896)}
{pt3dadd(175560.000000,196236.000000,51150.000000,310.146476)}
{pt3dadd(174864.000000,197748.000000,51175.000000,273.635055)}
{pt3dadd(174396.000000,198240.000000,51400.000000,237.123635)}
{pt3dadd(174540.000000,198768.000000,51800.000000,200.612214)}
{pt3dadd(174096.000000,199620.000000,52225.000000,167.176836)}

{create adhoc61}
{access adhoc61}
{connect adhoc61(1), adhoc59(0)}
{nseg = 1}
{strdef color color = "White"}
{pt3dclear()}
{pt3dadd(177912.000000,194520.000000,51475.000000,1242.137880)}
{pt3dadd(177900.000000,194256.000000,50800.000000,1192.452354)}
{pt3dadd(177924.000000,194124.000000,50550.000000,1252.074982)}
{pt3dadd(177588.000000,193884.000000,49675.000000,1311.697611)}
{pt3dadd(177816.000000,193752.000000,48725.000000,1371.320240)}
{pt3dadd(177708.000000,194040.000000,48125.000000,1430.942868)}
{pt3dadd(177552.000000,194340.000000,47300.000000,1092.625074)}
{pt3dadd(177636.000000,195492.000000,46600.000000,754.307280)}
{pt3dadd(177636.000000,195792.000000,46350.000000,415.989486)}
{pt3dadd(176964.000000,197328.000000,46150.000000,441.649026)}

{create adhoc62}
{access adhoc62}
{connect adhoc62(1), adhoc61(0)}
{nseg = 1}
{strdef color color = "White"}
{pt3dclear()}
{pt3dadd(176964.000000,197328.000000,46150.000000,441.649026)}
{pt3dadd(176976.000000,194028.000000,46125.000000,499.187376)}
{pt3dadd(176544.000000,193740.000000,45600.000000,478.387903)}
{pt3dadd(176004.000000,193080.000000,45025.000000,457.588431)}
{pt3dadd(175212.000000,192684.000000,44275.000000,436.788958)}
{pt3dadd(175380.000000,192300.000000,43225.000000,415.989486)}
{pt3dadd(175548.000000,192084.000000,42775.000000,240.734646)}

{create adhoc63}
{access adhoc63}
{connect adhoc63(1), adhoc62(0)}
{nseg = 1}
{strdef color color = "White"}
{pt3dclear()}
{pt3dadd(175548.000000,192084.000000,42775.000000,240.734646)}
{pt3dadd(175416.000000,192516.000000,42500.000000,240.734646)}
{pt3dadd(175836.000000,193068.000000,41550.000000,256.783626)}
{pt3dadd(176316.000000,193272.000000,40975.000000,272.832606)}
{pt3dadd(177024.000000,193764.000000,39900.000000,288.881586)}
{pt3dadd(177048.000000,194052.000000,39625.000000,240.734646)}

{create adhoc64}
{access adhoc64}
{connect adhoc64(1), adhoc62(0)}
{nseg = 1}
{strdef color color = "White"}
{pt3dclear()}
{pt3dadd(175548.000000,192084.000000,42775.000000,240.734646)}
{pt3dadd(176412.000000,190824.000000,42725.000000,200.612214)}
{pt3dadd(177456.000000,189864.000000,42200.000000,200.612214)}
{pt3dadd(177684.000000,189684.000000,41600.000000,200.612214)}
{pt3dadd(177468.000000,189504.000000,41000.000000,200.612214)}
{pt3dadd(177336.000000,189480.000000,40450.000000,200.612214)}
{pt3dadd(177144.000000,189684.000000,39900.000000,288.881586)}
{pt3dadd(177192.000000,189756.000000,39175.000000,288.881586)}

{create adhoc65}
{access adhoc65}
{connect adhoc65(1), adhoc61(0)}
{nseg = 1}
{strdef color color = "White"}
{pt3dclear()}
{pt3dadd(176964.000000,197328.000000,46150.000000,441.649026)}
{pt3dadd(174552.000000,197808.000000,46100.000000,200.612214)}
{pt3dadd(172140.000000,199548.000000,45975.000000,200.612214)}
{pt3dadd(172392.000000,201804.000000,46250.000000,167.176836)}

{create adhoc66}
{access adhoc66}
{connect adhoc66(1), adhoc61(0)}
{nseg = 1}
{strdef color color = "White"}
{pt3dclear()}
{pt3dadd(176964.000000,197328.000000,46150.000000,441.649026)}
{pt3dadd(175824.000000,199476.000000,45900.000000,346.657896)}
{pt3dadd(175860.000000,199680.000000,45450.000000,346.657896)}

{create adhoc67}
{access adhoc67}
{connect adhoc67(1), adhoc66(0)}
{nseg = 1}
{strdef color color = "White"}
{pt3dclear()}
{pt3dadd(175860.000000,199680.000000,45450.000000,346.657896)}
{pt3dadd(174492.000000,201672.000000,45250.000000,415.989486)}
{pt3dadd(173976.000000,203172.000000,44775.000000,288.881586)}

{create adhoc68}
{access adhoc68}
{connect adhoc68(1), adhoc67(0)}
{nseg = 1}
{strdef color color = "White"}
{pt3dclear()}
{pt3dadd(173976.000000,203172.000000,44775.000000,288.881586)}
{pt3dadd(172488.000000,206268.000000,44925.000000,139.314042)}
{pt3dadd(172284.000000,206748.000000,45250.000000,277.651764)}
{pt3dadd(171372.000000,207636.000000,45975.000000,415.989486)}
{pt3dadd(171336.000000,207444.000000,46975.000000,167.176836)}

{create adhoc69}
{access adhoc69}
{connect adhoc69(1), adhoc67(0)}
{nseg = 1}
{strdef color color = "White"}
{pt3dclear()}
{pt3dadd(173976.000000,203172.000000,44775.000000,288.881586)}
{pt3dadd(173460.000000,204672.000000,44500.000000,383.375880)}
{pt3dadd(173352.000000,205284.000000,43900.000000,337.684964)}
{pt3dadd(173244.000000,205896.000000,43675.000000,291.994047)}
{pt3dadd(173136.000000,206508.000000,43000.000000,246.303131)}
{pt3dadd(173028.000000,207120.000000,42600.000000,200.612214)}
{pt3dadd(173052.000000,207504.000000,42075.000000,244.746900)}
{pt3dadd(173172.000000,207888.000000,41400.000000,288.881586)}
{pt3dadd(173220.000000,208008.000000,40975.000000,346.657896)}

{create adhoc70}
{access adhoc70}
{connect adhoc70(1), adhoc69(0)}
{nseg = 1}
{strdef color color = "White"}
{pt3dclear()}
{pt3dadd(173220.000000,208008.000000,40975.000000,346.657896)}
{pt3dadd(173208.000000,208824.000000,40650.000000,200.612214)}

{create adhoc71}
{access adhoc71}
{connect adhoc71(1), adhoc69(0)}
{nseg = 1}
{strdef color color = "White"}
{pt3dclear()}
{pt3dadd(173220.000000,208008.000000,40975.000000,346.657896)}
{pt3dadd(173448.000000,207492.000000,40750.000000,240.734646)}
{pt3dadd(173844.000000,207156.000000,39975.000000,256.783626)}
{pt3dadd(174348.000000,206940.000000,39525.000000,272.832606)}
{pt3dadd(174900.000000,206580.000000,39050.000000,288.881586)}
{pt3dadd(175284.000000,206088.000000,38400.000000,288.881586)}

{create adhoc72}
{access adhoc72}
{connect adhoc72(1), adhoc66(0)}
{nseg = 1}
{strdef color color = "White"}
{pt3dclear()}
{pt3dadd(175860.000000,199680.000000,45450.000000,346.657896)}
{pt3dadd(177060.000000,197952.000000,45100.000000,346.657896)}
{pt3dadd(177324.000000,197760.000000,44500.000000,332.213819)}
{pt3dadd(177060.000000,197988.000000,43675.000000,317.769741)}
{pt3dadd(176796.000000,198216.000000,43325.000000,303.325664)}
{pt3dadd(176532.000000,198444.000000,42975.000000,288.881586)}
{pt3dadd(176268.000000,198672.000000,42650.000000,303.325664)}
{pt3dadd(176052.000000,199044.000000,42500.000000,317.769741)}
{pt3dadd(175908.000000,199140.000000,41775.000000,332.213819)}
{pt3dadd(175872.000000,199152.000000,41300.000000,346.657896)}
{pt3dadd(175584.000000,199152.000000,40775.000000,293.696271)}
{pt3dadd(174888.000000,198432.000000,40300.000000,240.734646)}
{pt3dadd(174852.000000,198192.000000,40175.000000,288.881586)}

{create adhoc73}
{access adhoc73}
{connect adhoc73(1), adhoc20(0)}
{nseg = 1}
{strdef color color = "White"}
{pt3dclear()}
{pt3dadd(182448.000000,189672.000000,59050.000000,862.595802)}
{pt3dadd(181812.000000,187548.000000,58875.000000,212.986620)}
{pt3dadd(181476.000000,187140.000000,58550.000000,246.404439)}
{pt3dadd(181212.000000,186756.000000,58400.000000,279.822258)}
{pt3dadd(180912.000000,186600.000000,58300.000000,313.240077)}
{pt3dadd(180492.000000,186516.000000,58275.000000,346.657896)}
{pt3dadd(179700.000000,186516.000000,58550.000000,415.989486)}

{create adhoc74}
{access adhoc74}
{connect adhoc74(1), adhoc19(0)}
{nseg = 1}
{strdef color color = "White"}
{pt3dclear()}
{pt3dadd(183972.000000,190080.000000,60625.000000,1192.452354)}
{pt3dadd(183852.000000,190188.000000,60350.000000,1242.137880)}
{pt3dadd(180660.000000,192216.000000,60350.000000,981.756464)}
{pt3dadd(179448.000000,193164.000000,60700.000000,721.375047)}
{pt3dadd(178260.000000,192792.000000,61125.000000,460.993630)}
{pt3dadd(178200.000000,191004.000000,61600.000000,200.612214)}
{pt3dadd(178920.000000,190632.000000,62175.000000,200.612214)}

{create adhoc75}
{access adhoc75}
{connect adhoc75(1), adhoc18(0)}
{nseg = 1}
{strdef color color = "White"}
{pt3dclear()}
{pt3dadd(187764.000000,184896.000000,64675.000000,1242.137880)}
{pt3dadd(186816.000000,184800.000000,65600.000000,346.657896)}
{pt3dadd(186672.000000,184548.000000,65875.000000,346.657896)}
{pt3dadd(186528.000000,184344.000000,66150.000000,346.657896)}
{pt3dadd(186336.000000,184236.000000,66600.000000,346.657896)}
{pt3dadd(186516.000000,184452.000000,67125.000000,346.657896)}
{pt3dadd(186204.000000,184440.000000,67625.000000,116.095032)}

{create adhoc76}
{access adhoc76}
{connect adhoc76(1), adhoc18(0)}
{nseg = 1}
{strdef color color = "White"}
{pt3dclear()}
{pt3dadd(187764.000000,184896.000000,64675.000000,1242.137880)}
{pt3dadd(188256.000000,184176.000000,64275.000000,1242.137880)}
{pt3dadd(188748.000000,183672.000000,64025.000000,1190.382147)}
{pt3dadd(188712.000000,183288.000000,64150.000000,1138.626414)}
{pt3dadd(188676.000000,182892.000000,64275.000000,1086.870681)}
{pt3dadd(188736.000000,182424.000000,64100.000000,1035.114948)}
{pt3dadd(188796.000000,182220.000000,63925.000000,1024.763782)}
{pt3dadd(188832.000000,181512.000000,63750.000000,1014.412617)}
{pt3dadd(188808.000000,181236.000000,63750.000000,1004.061452)}
{pt3dadd(188784.000000,181068.000000,63750.000000,993.710286)}
{pt3dadd(188760.000000,180840.000000,63750.000000,1098.964116)}
{pt3dadd(188736.000000,180564.000000,63750.000000,1035.114948)}

{create adhoc77}
{access adhoc77}
{connect adhoc77(1), adhoc76(0)}
{nseg = 1}
{strdef color color = "White"}
{pt3dclear()}
{pt3dadd(188736.000000,180564.000000,63750.000000,1035.114948)}
{pt3dadd(187944.000000,179844.000000,63750.000000,192.587724)}
{pt3dadd(186348.000000,179952.000000,63650.000000,194.593846)}
{pt3dadd(186108.000000,180144.000000,63700.000000,196.599969)}
{pt3dadd(185796.000000,180192.000000,63725.000000,198.606091)}
{pt3dadd(185508.000000,180552.000000,63875.000000,200.612214)}
{pt3dadd(184920.000000,180696.000000,64100.000000,183.894525)}
{pt3dadd(184272.000000,180648.000000,64450.000000,167.176836)}
{pt3dadd(184272.000000,180492.000000,64800.000000,167.176836)}

{create adhoc78}
{access adhoc78}
{connect adhoc78(1), adhoc76(0)}
{nseg = 1}
{strdef color color = "White"}
{pt3dclear()}
{pt3dadd(188736.000000,180564.000000,63750.000000,1035.114948)}
{pt3dadd(188592.000000,180408.000000,62800.000000,1035.114948)}
{pt3dadd(188580.000000,180060.000000,62825.000000,1086.870681)}
{pt3dadd(188568.000000,179544.000000,62825.000000,1138.626414)}
{pt3dadd(189228.000000,179076.000000,62700.000000,1190.382147)}
{pt3dadd(189228.000000,178452.000000,62725.000000,1242.137880)}
{pt3dadd(189228.000000,177912.000000,62750.000000,690.076674)}
{pt3dadd(189780.000000,176724.000000,61300.000000,1430.942868)}

{create adhoc79}
{access adhoc79}
{connect adhoc79(1), adhoc78(0)}
{nseg = 1}
{strdef color color = "White"}
{pt3dclear()}
{pt3dadd(189780.000000,176724.000000,61300.000000,1430.942868)}
{pt3dadd(189204.000000,176652.000000,63050.000000,96.745860)}
{pt3dadd(189084.000000,176472.000000,63400.000000,148.679037)}
{pt3dadd(188808.000000,176256.000000,64175.000000,200.612214)}
{pt3dadd(188496.000000,176148.000000,64475.000000,240.734646)}

{create adhoc80}
{access adhoc80}
{connect adhoc80(1), adhoc79(0)}
{nseg = 1}
{strdef color color = "White"}
{pt3dclear()}
{pt3dadd(188496.000000,176148.000000,64475.000000,240.734646)}
{pt3dadd(188700.000000,176004.000000,64875.000000,277.326324)}
{pt3dadd(188640.000000,175788.000000,64975.000000,265.129098)}
{pt3dadd(188952.000000,175476.000000,65150.000000,252.931872)}
{pt3dadd(189072.000000,175128.000000,65400.000000,240.734646)}
{pt3dadd(189120.000000,174756.000000,65700.000000,200.612214)}

{create adhoc81}
{access adhoc81}
{connect adhoc81(1), adhoc79(0)}
{nseg = 1}
{strdef color color = "White"}
{pt3dclear()}
{pt3dadd(188496.000000,176148.000000,64475.000000,240.734646)}
{pt3dadd(188256.000000,176424.000000,64175.000000,167.176836)}
{pt3dadd(188040.000000,176472.000000,64075.000000,178.321962)}
{pt3dadd(187800.000000,176568.000000,64150.000000,189.467088)}
{pt3dadd(187488.000000,176640.000000,64325.000000,200.612214)}
{pt3dadd(187176.000000,176352.000000,64400.000000,200.612214)}

{create adhoc82}
{access adhoc82}
{connect adhoc82(1), adhoc78(0)}
{nseg = 1}
{strdef color color = "White"}
{pt3dclear()}
{pt3dadd(189780.000000,176724.000000,61300.000000,1430.942868)}
{pt3dadd(189876.000000,176376.000000,61000.000000,1430.942868)}
{pt3dadd(189972.000000,176256.000000,60700.000000,1430.942868)}
{pt3dadd(190068.000000,176016.000000,60400.000000,1430.942868)}
{pt3dadd(190068.000000,175752.000000,60450.000000,1430.942868)}
{pt3dadd(190068.000000,175536.000000,60500.000000,1430.942868)}
{pt3dadd(190068.000000,175176.000000,60300.000000,1490.565402)}

{create adhoc83}
{access adhoc83}
{connect adhoc83(1), adhoc82(0)}
{nseg = 1}
{strdef color color = "White"}
{pt3dclear()}
{pt3dadd(190068.000000,175176.000000,60300.000000,1490.565402)}
{pt3dadd(190788.000000,171960.000000,60300.000000,1242.137880)}

{create adhoc84}
{access adhoc84}
{connect adhoc84(1), adhoc83(0)}
{nseg = 1}
{strdef color color = "White"}
{pt3dclear()}
{pt3dadd(190788.000000,171960.000000,60300.000000,1242.137880)}
{pt3dadd(191352.000000,171696.000000,58975.000000,1242.137880)}
{pt3dadd(191316.000000,171228.000000,58900.000000,1366.351641)}
{pt3dadd(191280.000000,170880.000000,58825.000000,1490.565402)}
{pt3dadd(191016.000000,170532.000000,58350.000000,1035.114948)}

{create adhoc85}
{access adhoc85}
{connect adhoc85(1), adhoc84(0)}
{nseg = 1}
{strdef color color = "White"}
{pt3dclear()}
{pt3dadd(191016.000000,170532.000000,58350.000000,1035.114948)}
{pt3dadd(190800.000000,170280.000000,57975.000000,718.829820)}
{pt3dadd(190584.000000,169920.000000,57350.000000,1035.114948)}

{create adhoc86}
{access adhoc86}
{connect adhoc86(1), adhoc85(0)}
{nseg = 1}
{strdef color color = "White"}
{pt3dclear()}
{pt3dadd(190584.000000,169920.000000,57350.000000,1035.114948)}
{pt3dadd(190128.000000,167520.000000,56125.000000,599.024880)}
{pt3dadd(189648.000000,166200.000000,54975.000000,1035.114948)}

{create adhoc87}
{access adhoc87}
{connect adhoc87(1), adhoc86(0)}
{nseg = 1}
{strdef color color = "White"}
{pt3dclear()}
{pt3dadd(189648.000000,166200.000000,54975.000000,1035.114948)}
{pt3dadd(189792.000000,165072.000000,54625.000000,862.595802)}
{pt3dadd(189984.000000,164832.000000,54350.000000,853.969838)}
{pt3dadd(190188.000000,164688.000000,54075.000000,845.343873)}
{pt3dadd(190152.000000,164556.000000,54625.000000,836.717909)}
{pt3dadd(190128.000000,164376.000000,54400.000000,828.091944)}
{pt3dadd(190308.000000,164040.000000,53850.000000,949.545414)}
{pt3dadd(190488.000000,163428.000000,53300.000000,1070.998884)}
{pt3dadd(190944.000000,163188.000000,53225.000000,1192.452354)}
{pt3dadd(191148.000000,162744.000000,52825.000000,718.829820)}

{create adhoc88}
{access adhoc88}
{connect adhoc88(1), adhoc87(0)}
{nseg = 1}
{strdef color color = "White"}
{pt3dclear()}
{pt3dadd(191148.000000,162744.000000,52825.000000,718.829820)}
{pt3dadd(191820.000000,159684.000000,52250.000000,575.063856)}
{pt3dadd(192324.000000,159396.000000,52525.000000,556.094736)}
{pt3dadd(192432.000000,158724.000000,52650.000000,537.125616)}
{pt3dadd(192648.000000,158112.000000,52800.000000,518.156496)}
{pt3dadd(192660.000000,157620.000000,52850.000000,499.187376)}
{pt3dadd(192636.000000,156912.000000,52850.000000,599.024880)}
{pt3dadd(192612.000000,156216.000000,52825.000000,599.024880)}

{create adhoc89}
{access adhoc89}
{connect adhoc89(1), adhoc88(0)}
{nseg = 1}
{strdef color color = "White"}
{pt3dclear()}
{pt3dadd(192612.000000,156216.000000,52825.000000,599.024880)}
{pt3dadd(190452.000000,156144.000000,52150.000000,240.734646)}
{pt3dadd(189996.000000,156024.000000,51800.000000,240.734646)}
{pt3dadd(189156.000000,155664.000000,51425.000000,346.657896)}

{create adhoc90}
{access adhoc90}
{connect adhoc90(1), adhoc89(0)}
{nseg = 1}
{strdef color color = "White"}
{pt3dclear()}
{pt3dadd(189156.000000,155664.000000,51425.000000,346.657896)}
{pt3dadd(188568.000000,155436.000000,50925.000000,288.881586)}
{pt3dadd(188472.000000,155172.000000,50275.000000,276.844851)}
{pt3dadd(188448.000000,154944.000000,49825.000000,264.808116)}
{pt3dadd(188376.000000,154560.000000,49475.000000,252.771381)}
{pt3dadd(187740.000000,152784.000000,49000.000000,240.734646)}
{pt3dadd(187596.000000,152148.000000,48575.000000,240.734646)}
{pt3dadd(187392.000000,151464.000000,48075.000000,240.734646)}
{pt3dadd(187020.000000,150960.000000,47575.000000,200.612214)}

{create adhoc91}
{access adhoc91}
{connect adhoc91(1), adhoc89(0)}
{nseg = 1}
{strdef color color = "White"}
{pt3dclear()}
{pt3dadd(189156.000000,155664.000000,51425.000000,346.657896)}
{pt3dadd(187320.000000,155544.000000,51400.000000,240.734646)}
{pt3dadd(187032.000000,155388.000000,51350.000000,264.808116)}
{pt3dadd(185172.000000,155340.000000,51650.000000,288.881586)}
{pt3dadd(184596.000000,155292.000000,52150.000000,240.734646)}

{create adhoc92}
{access adhoc92}
{connect adhoc92(1), adhoc88(0)}
{nseg = 1}
{strdef color color = "White"}
{pt3dclear()}
{pt3dadd(192612.000000,156216.000000,52825.000000,599.024880)}
{pt3dadd(192672.000000,155904.000000,53075.000000,599.024880)}
{pt3dadd(193092.000000,155364.000000,53350.000000,862.595802)}
{pt3dadd(193176.000000,154680.000000,53850.000000,862.595802)}

{create adhoc93}
{access adhoc93}
{connect adhoc93(1), adhoc87(0)}
{nseg = 1}
{strdef color color = "White"}
{pt3dclear()}
{pt3dadd(191148.000000,162744.000000,52825.000000,718.829820)}
{pt3dadd(189324.000000,160920.000000,52925.000000,288.881586)}
{pt3dadd(188544.000000,160452.000000,52525.000000,303.325664)}
{pt3dadd(187668.000000,160056.000000,52150.000000,317.769741)}
{pt3dadd(186792.000000,160248.000000,51400.000000,332.213819)}
{pt3dadd(186408.000000,160416.000000,50750.000000,346.657896)}
{pt3dadd(185352.000000,160512.000000,48875.000000,499.187376)}
{pt3dadd(184932.000000,160260.000000,48075.000000,346.657896)}

{create adhoc94}
{access adhoc94}
{connect adhoc94(1), adhoc86(0)}
{nseg = 1}
{strdef color color = "White"}
{pt3dclear()}
{pt3dadd(189648.000000,166200.000000,54975.000000,1035.114948)}
{pt3dadd(188532.000000,166092.000000,52875.000000,288.881586)}
{pt3dadd(188712.000000,165960.000000,52200.000000,258.455399)}
{pt3dadd(187812.000000,165480.000000,51725.000000,228.029211)}
{pt3dadd(186912.000000,165180.000000,51075.000000,197.603024)}
{pt3dadd(185964.000000,165060.000000,50350.000000,167.176836)}
{pt3dadd(185160.000000,164760.000000,49925.000000,116.095032)}
{pt3dadd(184128.000000,164376.000000,50450.000000,139.314042)}

{create adhoc95}
{access adhoc95}
{connect adhoc95(1), adhoc86(0)}
{nseg = 1}
{strdef color color = "White"}
{pt3dclear()}
{pt3dadd(189648.000000,166200.000000,54975.000000,1035.114948)}
{pt3dadd(187116.000000,165576.000000,53975.000000,200.612214)}
{pt3dadd(184908.000000,165216.000000,54200.000000,179.482918)}
{pt3dadd(183588.000000,164268.000000,54125.000000,158.353623)}
{pt3dadd(181680.000000,163788.000000,53850.000000,137.224328)}
{pt3dadd(179448.000000,163452.000000,53625.000000,116.095032)}
{pt3dadd(178212.000000,162744.000000,53400.000000,116.095032)}
{pt3dadd(176688.000000,162024.000000,53200.000000,167.176836)}

{create adhoc96}
{access adhoc96}
{connect adhoc96(1), adhoc85(0)}
{nseg = 1}
{strdef color color = "White"}
{pt3dclear()}
{pt3dadd(190584.000000,169920.000000,57350.000000,1035.114948)}
{pt3dadd(188208.000000,169668.000000,55950.000000,200.612214)}
{pt3dadd(186348.000000,169776.000000,55075.000000,210.642822)}
{pt3dadd(185676.000000,169920.000000,54700.000000,220.673430)}
{pt3dadd(184788.000000,170028.000000,54450.000000,230.704038)}
{pt3dadd(184284.000000,170184.000000,54200.000000,240.734646)}
{pt3dadd(183396.000000,170484.000000,53950.000000,222.345193)}
{pt3dadd(182304.000000,170844.000000,53600.000000,203.955741)}
{pt3dadd(180960.000000,171336.000000,53250.000000,185.566288)}
{pt3dadd(179196.000000,171696.000000,53450.000000,167.176836)}
{pt3dadd(181044.000000,171912.000000,52125.000000,288.881586)}

{create adhoc97}
{access adhoc97}
{connect adhoc97(1), adhoc84(0)}
{nseg = 1}
{strdef color color = "White"}
{pt3dclear()}
{pt3dadd(191016.000000,170532.000000,58350.000000,1035.114948)}
{pt3dadd(191220.000000,170328.000000,60150.000000,499.187376)}
{pt3dadd(191208.000000,170016.000000,59950.000000,499.187376)}
{pt3dadd(191484.000000,169656.000000,59925.000000,499.187376)}
{pt3dadd(191472.000000,169536.000000,59925.000000,499.187376)}
{pt3dadd(191460.000000,169392.000000,59900.000000,499.187376)}
{pt3dadd(191556.000000,168984.000000,59825.000000,499.187376)}
{pt3dadd(191652.000000,168732.000000,59750.000000,499.187376)}
{pt3dadd(191748.000000,168444.000000,59675.000000,499.187376)}
{pt3dadd(191820.000000,168204.000000,59725.000000,499.187376)}
{pt3dadd(191892.000000,168000.000000,59775.000000,524.146752)}
{pt3dadd(191832.000000,167652.000000,59775.000000,549.106128)}
{pt3dadd(191772.000000,167448.000000,59775.000000,574.065504)}
{pt3dadd(191844.000000,167280.000000,59975.000000,599.024880)}
{pt3dadd(191892.000000,166920.000000,59975.000000,628.976115)}
{pt3dadd(191940.000000,166668.000000,60050.000000,658.927350)}
{pt3dadd(191988.000000,166308.000000,60125.000000,688.878585)}
{pt3dadd(192036.000000,166008.000000,60200.000000,718.829820)}
{pt3dadd(192084.000000,165804.000000,60275.000000,499.187376)}
{pt3dadd(192132.000000,165684.000000,60350.000000,499.187376)}

{create adhoc98}
{access adhoc98}
{connect adhoc98(1), adhoc97(0)}
{nseg = 1}
{strdef color color = "White"}
{pt3dclear()}
{pt3dadd(192132.000000,165684.000000,60350.000000,499.187376)}
{pt3dadd(192516.000000,164856.000000,61000.000000,499.187376)}
{pt3dadd(192864.000000,163092.000000,61225.000000,599.024880)}

{create adhoc99}
{access adhoc99}
{connect adhoc99(1), adhoc98(0)}
{nseg = 1}
{strdef color color = "White"}
{pt3dclear()}
{pt3dadd(192864.000000,163092.000000,61225.000000,599.024880)}
{pt3dadd(192936.000000,160320.000000,61350.000000,499.187376)}
{pt3dadd(191424.000000,159840.000000,61550.000000,288.881586)}
{pt3dadd(190896.000000,160104.000000,62500.000000,96.745860)}

{create adhoc100}
{access adhoc100}
{connect adhoc100(1), adhoc98(0)}
{nseg = 1}
{strdef color color = "White"}
{pt3dclear()}
{pt3dadd(192864.000000,163092.000000,61225.000000,599.024880)}
{pt3dadd(192876.000000,160776.000000,61000.000000,288.881586)}
{pt3dadd(192192.000000,159852.000000,60725.000000,276.844851)}
{pt3dadd(192048.000000,159636.000000,61025.000000,264.808116)}
{pt3dadd(191664.000000,159228.000000,60975.000000,252.771381)}
{pt3dadd(190416.000000,158304.000000,60650.000000,240.734646)}
{pt3dadd(189684.000000,157668.000000,60375.000000,220.673430)}
{pt3dadd(188532.000000,157560.000000,60100.000000,200.612214)}
{pt3dadd(186276.000000,157536.000000,60900.000000,167.176836)}

{create adhoc101}
{access adhoc101}
{connect adhoc101(1), adhoc98(0)}
{nseg = 1}
{strdef color color = "White"}
{pt3dclear()}
{pt3dadd(192864.000000,163092.000000,61225.000000,599.024880)}
{pt3dadd(193380.000000,161676.000000,61725.000000,288.881586)}
{pt3dadd(193920.000000,159936.000000,61900.000000,303.325664)}
{pt3dadd(194160.000000,159552.000000,62450.000000,317.769741)}
{pt3dadd(194184.000000,158316.000000,62675.000000,332.213819)}
{pt3dadd(194064.000000,158040.000000,62750.000000,346.657896)}
{pt3dadd(194052.000000,157788.000000,62800.000000,323.547378)}
{pt3dadd(194040.000000,157656.000000,62850.000000,300.436860)}
{pt3dadd(194028.000000,157440.000000,62900.000000,277.326342)}
{pt3dadd(194016.000000,157296.000000,62950.000000,231.105276)}

{create adhoc102}
{access adhoc102}
{connect adhoc102(1), adhoc101(0)}
{nseg = 1}
{strdef color color = "White"}
{pt3dclear()}
{pt3dadd(194016.000000,157296.000000,62950.000000,231.105276)}
{pt3dadd(193308.000000,155424.000000,63325.000000,240.734646)}
{pt3dadd(193152.000000,155160.000000,63675.000000,230.704038)}
{pt3dadd(192696.000000,154920.000000,64150.000000,220.673430)}
{pt3dadd(192372.000000,154860.000000,64425.000000,210.642822)}
{pt3dadd(191052.000000,154500.000000,64450.000000,200.612214)}
{pt3dadd(190332.000000,153552.000000,64125.000000,208.235480)}
{pt3dadd(189876.000000,152268.000000,64175.000000,215.858745)}
{pt3dadd(190656.000000,151440.000000,64525.000000,223.482010)}
{pt3dadd(190644.000000,151200.000000,64925.000000,231.105276)}
{pt3dadd(190632.000000,150960.000000,65425.000000,288.881586)}

{create adhoc103}
{access adhoc103}
{connect adhoc103(1), adhoc101(0)}
{nseg = 1}
{strdef color color = "White"}
{pt3dclear()}
{pt3dadd(194016.000000,157296.000000,62950.000000,231.105276)}
{pt3dadd(193944.000000,157080.000000,62725.000000,277.326342)}
{pt3dadd(193692.000000,156816.000000,62700.000000,280.215153)}
{pt3dadd(193584.000000,156588.000000,62750.000000,283.103964)}
{pt3dadd(193356.000000,156336.000000,62600.000000,285.992775)}
{pt3dadd(193128.000000,156000.000000,62400.000000,288.881586)}
{pt3dadd(193440.000000,154116.000000,54275.000000,558.486765)}
{pt3dadd(193188.000000,152412.000000,55100.000000,828.091944)}
{pt3dadd(193272.000000,152064.000000,55275.000000,862.595802)}

{create adhoc104}
{access adhoc104}
{connect adhoc104(1), adhoc103(0)}
{nseg = 1}
{strdef color color = "White"}
{pt3dclear()}
{pt3dadd(193272.000000,152064.000000,55275.000000,862.595802)}
{pt3dadd(190716.000000,151068.000000,55250.000000,346.657896)}
{pt3dadd(190284.000000,150480.000000,54500.000000,327.399126)}
{pt3dadd(190320.000000,149964.000000,54175.000000,308.140356)}
{pt3dadd(189192.000000,148632.000000,53975.000000,288.881586)}
{pt3dadd(188112.000000,147972.000000,53525.000000,288.881586)}

{create adhoc105}
{access adhoc105}
{connect adhoc105(1), adhoc104(0)}
{nseg = 1}
{strdef color color = "White"}
{pt3dclear()}
{pt3dadd(188112.000000,147972.000000,53525.000000,288.881586)}
{pt3dadd(188064.000000,145332.000000,53125.000000,240.734646)}
{pt3dadd(187620.000000,144120.000000,52700.000000,240.734646)}
{pt3dadd(187476.000000,143328.000000,52250.000000,240.734646)}
{pt3dadd(187248.000000,142200.000000,51850.000000,167.176836)}

{create adhoc106}
{access adhoc106}
{connect adhoc106(1), adhoc104(0)}
{nseg = 1}
{strdef color color = "White"}
{pt3dclear()}
{pt3dadd(188112.000000,147972.000000,53525.000000,288.881586)}
{pt3dadd(188148.000000,148212.000000,53075.000000,346.657896)}
{pt3dadd(187560.000000,147900.000000,52750.000000,332.213819)}
{pt3dadd(187248.000000,147588.000000,52150.000000,317.769741)}
{pt3dadd(186972.000000,147336.000000,51600.000000,303.325664)}
{pt3dadd(186864.000000,147060.000000,51175.000000,288.881586)}
{pt3dadd(186756.000000,146832.000000,50750.000000,341.458034)}
{pt3dadd(186648.000000,146724.000000,50325.000000,394.034481)}
{pt3dadd(186684.000000,146520.000000,49925.000000,446.610929)}
{pt3dadd(186636.000000,146208.000000,48925.000000,499.187376)}
{pt3dadd(186612.000000,145608.000000,48225.000000,424.543586)}
{pt3dadd(186420.000000,142824.000000,47825.000000,349.899795)}
{pt3dadd(186552.000000,140388.000000,47325.000000,275.256005)}
{pt3dadd(187080.000000,139092.000000,47100.000000,200.612214)}
{pt3dadd(187740.000000,136896.000000,46625.000000,180.179490)}
{pt3dadd(188112.000000,135252.000000,45850.000000,159.746766)}
{pt3dadd(188832.000000,133020.000000,45575.000000,139.314042)}
{pt3dadd(188772.000000,132996.000000,44950.000000,240.734646)}

{create adhoc107}
{access adhoc107}
{connect adhoc107(1), adhoc103(0)}
{nseg = 1}
{strdef color color = "White"}
{pt3dclear()}
{pt3dadd(193272.000000,152064.000000,55275.000000,862.595802)}
{pt3dadd(193248.000000,150684.000000,55600.000000,862.595802)}
{pt3dadd(193200.000000,150516.000000,55875.000000,862.595802)}

{create adhoc108}
{access adhoc108}
{connect adhoc108(1), adhoc107(0)}
{nseg = 1}
{strdef color color = "White"}
{pt3dclear()}
{pt3dadd(193200.000000,150516.000000,55875.000000,862.595802)}
{pt3dadd(189552.000000,152064.000000,56025.000000,167.176836)}
{pt3dadd(188364.000000,152352.000000,56250.000000,175.535680)}
{pt3dadd(187236.000000,152640.000000,55775.000000,183.894525)}
{pt3dadd(186720.000000,152724.000000,55400.000000,192.253370)}
{pt3dadd(186084.000000,153180.000000,55000.000000,200.612214)}
{pt3dadd(186012.000000,153540.000000,54875.000000,167.176836)}

{create adhoc109}
{access adhoc109}
{connect adhoc109(1), adhoc107(0)}
{nseg = 1}
{strdef color color = "White"}
{pt3dclear()}
{pt3dadd(193200.000000,150516.000000,55875.000000,862.595802)}
{pt3dadd(193032.000000,146412.000000,56425.000000,139.314042)}
{pt3dadd(193164.000000,145800.000000,57125.000000,718.829820)}

{create adhoc110}
{access adhoc110}
{connect adhoc110(1), adhoc109(0)}
{nseg = 1}
{strdef color color = "White"}
{pt3dclear()}
{pt3dadd(193164.000000,145800.000000,57125.000000,718.829820)}
{pt3dadd(190980.000000,143376.000000,57150.000000,139.314042)}
{pt3dadd(189852.000000,143028.000000,57100.000000,139.314042)}
{pt3dadd(188364.000000,143028.000000,57350.000000,96.745860)}

{create adhoc111}
{access adhoc111}
{connect adhoc111(1), adhoc109(0)}
{nseg = 1}
{strdef color color = "White"}
{pt3dclear()}
{pt3dadd(193164.000000,145800.000000,57125.000000,718.829820)}
{pt3dadd(193404.000000,145344.000000,57475.000000,993.710358)}
{pt3dadd(193644.000000,144888.000000,57750.000000,993.710286)}

{create adhoc112}
{access adhoc112}
{connect adhoc112(1), adhoc111(0)}
{nseg = 1}
{strdef color color = "White"}
{pt3dclear()}
{pt3dadd(193644.000000,144888.000000,57750.000000,993.710286)}
{pt3dadd(192900.000000,144888.000000,60275.000000,200.612214)}
{pt3dadd(192432.000000,145152.000000,60550.000000,288.881586)}

{create adhoc113}
{access adhoc113}
{connect adhoc113(1), adhoc112(0)}
{nseg = 1}
{strdef color color = "White"}
{pt3dclear()}
{pt3dadd(192432.000000,145152.000000,60550.000000,288.881586)}
{pt3dadd(190428.000000,147372.000000,60725.000000,139.314042)}
{pt3dadd(189876.000000,148260.000000,61050.000000,160.489764)}

{create adhoc114}
{access adhoc114}
{connect adhoc114(1), adhoc112(0)}
{nseg = 1}
{strdef color color = "White"}
{pt3dclear()}
{pt3dadd(192432.000000,145152.000000,60550.000000,288.881586)}
{pt3dadd(191304.000000,143688.000000,60575.000000,116.095032)}

{create adhoc115}
{access adhoc115}
{connect adhoc115(1), adhoc111(0)}
{nseg = 1}
{strdef color color = "White"}
{pt3dclear()}
{pt3dadd(193644.000000,144888.000000,57750.000000,993.710286)}
{pt3dadd(193524.000000,143268.000000,58050.000000,1035.114948)}
{pt3dadd(193404.000000,141648.000000,58575.000000,1233.028908)}
{pt3dadd(193044.000000,140904.000000,59425.000000,1430.942868)}
{pt3dadd(192696.000000,140160.000000,59700.000000,1192.452354)}

{create adhoc116}
{access adhoc116}
{connect adhoc116(1), adhoc115(0)}
{nseg = 1}
{strdef color color = "White"}
{pt3dclear()}
{pt3dadd(192696.000000,140160.000000,59700.000000,1192.452354)}
{pt3dadd(192660.000000,140160.000000,63300.000000,599.024880)}
{pt3dadd(192576.000000,139704.000000,65525.000000,507.044979)}
{pt3dadd(192528.000000,138780.000000,66000.000000,415.065078)}
{pt3dadd(192612.000000,138012.000000,66350.000000,323.085177)}
{pt3dadd(192024.000000,137196.000000,67250.000000,231.105276)}
{pt3dadd(191988.000000,137124.000000,67750.000000,195.797520)}
{pt3dadd(190968.000000,136044.000000,67675.000000,160.489764)}
{pt3dadd(190500.000000,135252.000000,67250.000000,80.621550)}

{create adhoc117}
{access adhoc117}
{connect adhoc117(1), adhoc115(0)}
{nseg = 1}
{strdef color color = "White"}
{pt3dclear()}
{pt3dadd(192696.000000,140160.000000,59700.000000,1192.452354)}
{pt3dadd(192648.000000,138720.000000,59950.000000,993.710358)}
{pt3dadd(192420.000000,138144.000000,60400.000000,960.931719)}
{pt3dadd(192432.000000,137796.000000,60500.000000,928.153080)}
{pt3dadd(192444.000000,137532.000000,60600.000000,895.374441)}
{pt3dadd(192456.000000,137328.000000,60700.000000,862.595802)}
{pt3dadd(192468.000000,136764.000000,60800.000000,905.725589)}
{pt3dadd(192480.000000,136440.000000,60900.000000,948.855375)}
{pt3dadd(192492.000000,135996.000000,61000.000000,991.985162)}
{pt3dadd(192504.000000,135744.000000,61100.000000,1035.114948)}
{pt3dadd(192516.000000,135300.000000,61200.000000,1104.122592)}
{pt3dadd(192528.000000,134892.000000,61300.000000,1173.130236)}
{pt3dadd(192540.000000,134436.000000,61400.000000,1242.137880)}
{pt3dadd(192348.000000,134208.000000,60975.000000,1035.114948)}

{create adhoc118}
{access adhoc118}
{connect adhoc118(1), adhoc117(0)}
{nseg = 1}
{strdef color color = "White"}
{pt3dclear()}
{pt3dadd(192348.000000,134208.000000,60975.000000,1035.114948)}
{pt3dadd(192036.000000,134088.000000,62550.000000,599.024880)}
{pt3dadd(191784.000000,133668.000000,62975.000000,553.266031)}
{pt3dadd(191676.000000,133188.000000,63150.000000,507.507183)}
{pt3dadd(191568.000000,132972.000000,63325.000000,461.748335)}
{pt3dadd(191376.000000,132540.000000,63475.000000,415.989486)}
{pt3dadd(191388.000000,132144.000000,63625.000000,436.788958)}
{pt3dadd(191340.000000,131820.000000,63875.000000,457.588431)}
{pt3dadd(191412.000000,131472.000000,64050.000000,478.387903)}
{pt3dadd(191484.000000,131244.000000,64225.000000,499.187376)}
{pt3dadd(191556.000000,131076.000000,64400.000000,524.146752)}
{pt3dadd(191448.000000,130500.000000,64650.000000,549.106128)}
{pt3dadd(191580.000000,129924.000000,65075.000000,574.065504)}
{pt3dadd(191532.000000,129396.000000,65350.000000,599.024880)}
{pt3dadd(191796.000000,128832.000000,66025.000000,599.024880)}
{pt3dadd(191880.000000,128148.000000,66750.000000,599.024880)}
{pt3dadd(191904.000000,127752.000000,67625.000000,718.829820)}

{create adhoc119}
{access adhoc119}
{connect adhoc119(1), adhoc118(0)}
{nseg = 1}
{strdef color color = "White"}
{pt3dclear()}
{pt3dadd(191904.000000,127752.000000,67625.000000,718.829820)}
{pt3dadd(191880.000000,127956.000000,68650.000000,499.187376)}
{pt3dadd(191952.000000,128232.000000,69100.000000,478.387903)}
{pt3dadd(192024.000000,128748.000000,69550.000000,457.588431)}
{pt3dadd(192264.000000,129108.000000,69850.000000,436.788958)}
{pt3dadd(192504.000000,129396.000000,70150.000000,415.989486)}
{pt3dadd(192744.000000,129564.000000,70450.000000,411.829601)}
{pt3dadd(192984.000000,129912.000000,70750.000000,407.669715)}
{pt3dadd(193224.000000,130380.000000,71050.000000,403.509830)}
{pt3dadd(193464.000000,130692.000000,71350.000000,399.349944)}
{pt3dadd(193704.000000,130956.000000,71650.000000,371.732855)}
{pt3dadd(194208.000000,131736.000000,71650.000000,344.115765)}
{pt3dadd(194328.000000,131988.000000,71550.000000,316.498675)}
{pt3dadd(194652.000000,132300.000000,71800.000000,288.881586)}
{pt3dadd(194688.000000,132708.000000,71925.000000,303.518244)}
{pt3dadd(194724.000000,132888.000000,72075.000000,318.154902)}
{pt3dadd(194760.000000,133104.000000,72225.000000,332.791560)}
{pt3dadd(194532.000000,133308.000000,72750.000000,415.989486)}

{create adhoc120}
{access adhoc120}
{connect adhoc120(1), adhoc119(0)}
{nseg = 1}
{strdef color color = "White"}
{pt3dclear()}
{pt3dadd(194532.000000,133308.000000,72750.000000,415.989486)}
{pt3dadd(194076.000000,135900.000000,72450.000000,200.612214)}
{pt3dadd(194004.000000,136056.000000,72175.000000,169.963128)}
{pt3dadd(193176.000000,136524.000000,71650.000000,139.314042)}
{pt3dadd(192744.000000,136200.000000,71275.000000,200.612214)}

{create adhoc121}
{access adhoc121}
{connect adhoc121(1), adhoc119(0)}
{nseg = 1}
{strdef color color = "White"}
{pt3dclear()}
{pt3dadd(194532.000000,133308.000000,72750.000000,415.989486)}
{pt3dadd(194508.000000,133632.000000,73275.000000,288.881586)}
{pt3dadd(194280.000000,133440.000000,73800.000000,288.881586)}
{pt3dadd(194052.000000,133248.000000,74575.000000,288.881586)}
{pt3dadd(193824.000000,132852.000000,75300.000000,167.176836)}

{create adhoc122}
{access adhoc122}
{connect adhoc122(1), adhoc118(0)}
{nseg = 1}
{strdef color color = "White"}
{pt3dclear()}
{pt3dadd(191904.000000,127752.000000,67625.000000,718.829820)}
{pt3dadd(191880.000000,126540.000000,68125.000000,415.989486)}
{pt3dadd(191820.000000,124368.000000,68900.000000,436.788958)}
{pt3dadd(191796.000000,123936.000000,69200.000000,457.588431)}
{pt3dadd(191952.000000,123600.000000,69750.000000,478.387903)}
{pt3dadd(191664.000000,123084.000000,70400.000000,499.187376)}
{pt3dadd(191472.000000,122748.000000,71025.000000,499.187376)}
{pt3dadd(191076.000000,122496.000000,71500.000000,399.349908)}

{create adhoc123}
{access adhoc123}
{connect adhoc123(1), adhoc122(0)}
{nseg = 1}
{strdef color color = "White"}
{pt3dclear()}
{pt3dadd(191076.000000,122496.000000,71500.000000,399.349908)}
{pt3dadd(191064.000000,120300.000000,72675.000000,288.881586)}
{pt3dadd(191448.000000,119400.000000,73075.000000,276.844851)}
{pt3dadd(191592.000000,118824.000000,73675.000000,264.808116)}
{pt3dadd(191736.000000,118248.000000,73950.000000,252.771381)}
{pt3dadd(191880.000000,117672.000000,74300.000000,240.734646)}
{pt3dadd(191868.000000,117108.000000,74575.000000,215.379495)}
{pt3dadd(192156.000000,116568.000000,75175.000000,190.024344)}
{pt3dadd(191892.000000,116208.000000,75475.000000,164.669193)}
{pt3dadd(191760.000000,115848.000000,75950.000000,139.314042)}
{pt3dadd(191316.000000,115488.000000,76450.000000,176.705928)}
{pt3dadd(191076.000000,114648.000000,76775.000000,214.097814)}
{pt3dadd(190896.000000,114312.000000,77100.000000,251.489700)}
{pt3dadd(190800.000000,113868.000000,77325.000000,288.881586)}
{pt3dadd(190764.000000,113604.000000,77750.000000,303.325664)}
{pt3dadd(190596.000000,113592.000000,78100.000000,317.769741)}
{pt3dadd(190584.000000,113400.000000,78625.000000,332.213819)}
{pt3dadd(190584.000000,113244.000000,79175.000000,346.657896)}
{pt3dadd(190500.000000,112932.000000,79900.000000,320.177083)}
{pt3dadd(190284.000000,112416.000000,80200.000000,293.696271)}
{pt3dadd(190344.000000,111900.000000,80575.000000,267.215459)}
{pt3dadd(190596.000000,111420.000000,80900.000000,240.734646)}
{pt3dadd(190560.000000,110916.000000,81225.000000,116.095032)}

{create adhoc124}
{access adhoc124}
{connect adhoc124(1), adhoc122(0)}
{nseg = 1}
{strdef color color = "White"}
{pt3dclear()}
{pt3dadd(191076.000000,122496.000000,71500.000000,399.349908)}
{pt3dadd(191208.000000,122916.000000,73475.000000,288.881586)}
{pt3dadd(191148.000000,123036.000000,73875.000000,288.881586)}
{pt3dadd(191616.000000,123468.000000,74375.000000,288.881586)}
{pt3dadd(191736.000000,123648.000000,74725.000000,288.881586)}
{pt3dadd(191892.000000,123804.000000,75075.000000,288.881586)}
{pt3dadd(191736.000000,123804.000000,75475.000000,276.844851)}
{pt3dadd(192120.000000,123996.000000,76225.000000,264.808116)}
{pt3dadd(192264.000000,123840.000000,76825.000000,252.771381)}
{pt3dadd(192516.000000,123684.000000,77400.000000,240.734646)}
{pt3dadd(192660.000000,123684.000000,77900.000000,230.704038)}
{pt3dadd(192816.000000,123420.000000,78250.000000,220.673430)}
{pt3dadd(193080.000000,123024.000000,78800.000000,210.642822)}
{pt3dadd(193068.000000,122172.000000,79250.000000,200.612214)}
{pt3dadd(193356.000000,121440.000000,79575.000000,80.621550)}

{create adhoc125}
{access adhoc125}
{connect adhoc125(1), adhoc117(0)}
{nseg = 1}
{strdef color color = "White"}
{pt3dclear()}
{pt3dadd(192348.000000,134208.000000,60975.000000,1035.114948)}
{pt3dadd(192384.000000,133764.000000,60700.000000,862.595802)}

{create adhoc126}
{access adhoc126}
{connect adhoc126(1), adhoc125(0)}
{nseg = 1}
{strdef color color = "White"}
{pt3dclear()}
{pt3dadd(192384.000000,133764.000000,60700.000000,862.595802)}
{pt3dadd(191568.000000,133764.000000,58925.000000,288.881586)}
{pt3dadd(191676.000000,134004.000000,58450.000000,251.489700)}
{pt3dadd(191748.000000,133908.000000,57900.000000,214.097814)}
{pt3dadd(191904.000000,133860.000000,57425.000000,176.705928)}
{pt3dadd(191736.000000,133740.000000,56900.000000,139.314042)}
{pt3dadd(191472.000000,133536.000000,56725.000000,146.279741)}
{pt3dadd(191520.000000,133572.000000,56275.000000,153.245439)}
{pt3dadd(190860.000000,133536.000000,55875.000000,160.211138)}
{pt3dadd(189780.000000,133932.000000,55500.000000,167.176836)}
{pt3dadd(189324.000000,134796.000000,55200.000000,141.635934)}
{pt3dadd(188784.000000,135660.000000,54825.000000,116.095032)}
{pt3dadd(187908.000000,136464.000000,54475.000000,139.314042)}

{create adhoc127}
{access adhoc127}
{connect adhoc127(1), adhoc125(0)}
{nseg = 1}
{strdef color color = "White"}
{pt3dclear()}
{pt3dadd(192384.000000,133764.000000,60700.000000,862.595802)}
{pt3dadd(192312.000000,133464.000000,60550.000000,862.595802)}
{pt3dadd(192240.000000,133296.000000,60400.000000,826.654307)}
{pt3dadd(192168.000000,132984.000000,60250.000000,790.712811)}
{pt3dadd(192000.000000,132420.000000,60450.000000,754.771316)}
{pt3dadd(191940.000000,132252.000000,60550.000000,718.829820)}
{pt3dadd(191880.000000,131880.000000,60650.000000,754.771316)}
{pt3dadd(191820.000000,131508.000000,60750.000000,790.712811)}
{pt3dadd(191532.000000,131028.000000,60875.000000,826.654307)}
{pt3dadd(191592.000000,130812.000000,60975.000000,862.595802)}
{pt3dadd(191424.000000,130152.000000,61125.000000,790.712811)}
{pt3dadd(191256.000000,129756.000000,61275.000000,718.829820)}
{pt3dadd(190332.000000,129156.000000,61425.000000,332.791542)}

{create adhoc128}
{access adhoc128}
{connect adhoc128(1), adhoc127(0)}
{nseg = 1}
{strdef color color = "White"}
{pt3dclear()}
{pt3dadd(190332.000000,129156.000000,61425.000000,332.791542)}
{pt3dadd(189564.000000,129000.000000,61425.000000,139.314042)}
{pt3dadd(189024.000000,129204.000000,61675.000000,139.314042)}
{pt3dadd(188256.000000,129300.000000,61775.000000,167.176836)}

{create adhoc129}
{access adhoc129}
{connect adhoc129(1), adhoc127(0)}
{nseg = 1}
{strdef color color = "White"}
{pt3dclear()}
{pt3dadd(190332.000000,129156.000000,61425.000000,332.791542)}
{pt3dadd(191088.000000,128772.000000,61475.000000,718.829820)}
{pt3dadd(190896.000000,128316.000000,61600.000000,711.641533)}
{pt3dadd(190740.000000,127800.000000,61675.000000,704.453247)}
{pt3dadd(190440.000000,127428.000000,61650.000000,697.264960)}
{pt3dadd(190344.000000,126972.000000,61575.000000,690.076674)}
{pt3dadd(190236.000000,126564.000000,61575.000000,730.132668)}
{pt3dadd(190128.000000,126228.000000,61575.000000,770.188662)}
{pt3dadd(190020.000000,125952.000000,61575.000000,810.244656)}
{pt3dadd(189912.000000,125844.000000,61575.000000,794.968236)}

{create adhoc130}
{access adhoc130}
{connect adhoc130(1), adhoc129(0)}
{nseg = 1}
{strdef color color = "White"}
{pt3dclear()}
{pt3dadd(189912.000000,125844.000000,61575.000000,794.968236)}
{pt3dadd(187620.000000,125748.000000,59650.000000,499.187376)}
{pt3dadd(187416.000000,125220.000000,60025.000000,499.187376)}
{pt3dadd(187464.000000,125724.000000,59225.000000,499.187376)}
{pt3dadd(187164.000000,126108.000000,58675.000000,499.187376)}
{pt3dadd(186972.000000,126612.000000,57750.000000,499.187376)}
{pt3dadd(186960.000000,126708.000000,57275.000000,457.588431)}
{pt3dadd(186900.000000,127104.000000,56900.000000,415.989486)}
{pt3dadd(186960.000000,127356.000000,56175.000000,346.657896)}

{create adhoc131}
{access adhoc131}
{connect adhoc131(1), adhoc130(0)}
{nseg = 1}
{strdef color color = "White"}
{pt3dclear()}
{pt3dadd(186960.000000,127356.000000,56175.000000,346.657896)}
{pt3dadd(187104.000000,127740.000000,55825.000000,288.881586)}
{pt3dadd(187512.000000,128724.000000,55275.000000,248.313336)}
{pt3dadd(186960.000000,129720.000000,56750.000000,207.745086)}
{pt3dadd(186792.000000,130536.000000,57750.000000,167.176836)}
{pt3dadd(186660.000000,130848.000000,59500.000000,116.095032)}

{create adhoc132}
{access adhoc132}
{connect adhoc132(1), adhoc130(0)}
{nseg = 1}
{strdef color color = "White"}
{pt3dclear()}
{pt3dadd(186960.000000,127356.000000,56175.000000,346.657896)}
{pt3dadd(186600.000000,126780.000000,55900.000000,332.791560)}
{pt3dadd(186144.000000,126456.000000,55275.000000,299.746723)}
{pt3dadd(186192.000000,126168.000000,54550.000000,266.701887)}
{pt3dadd(186516.000000,125940.000000,54000.000000,233.657051)}
{pt3dadd(187080.000000,125400.000000,53475.000000,200.612214)}
{pt3dadd(187608.000000,124476.000000,52925.000000,192.253370)}
{pt3dadd(189192.000000,122604.000000,52750.000000,183.894525)}
{pt3dadd(189408.000000,122124.000000,52500.000000,175.535680)}
{pt3dadd(189012.000000,120660.000000,52800.000000,167.176836)}
{pt3dadd(188472.000000,120240.000000,52450.000000,167.176836)}
{pt3dadd(188436.000000,120060.000000,51975.000000,288.881586)}

{create adhoc133}
{access adhoc133}
{connect adhoc133(1), adhoc129(0)}
{nseg = 1}
{strdef color color = "White"}
{pt3dclear()}
{pt3dadd(189912.000000,125844.000000,61575.000000,794.968236)}
{pt3dadd(189996.000000,125244.000000,62100.000000,718.829820)}

{create adhoc134}
{access adhoc134}
{connect adhoc134(1), adhoc133(0)}
{nseg = 1}
{strdef color color = "White"}
{pt3dclear()}
{pt3dadd(189996.000000,125244.000000,62100.000000,718.829820)}
{pt3dadd(188664.000000,125328.000000,63275.000000,116.095032)}
{pt3dadd(188280.000000,125568.000000,63525.000000,98.358291)}
{pt3dadd(189000.000000,125628.000000,64450.000000,80.621550)}
{pt3dadd(189384.000000,124728.000000,64850.000000,96.745860)}

{create adhoc135}
{access adhoc135}
{connect adhoc135(1), adhoc133(0)}
{nseg = 1}
{strdef color color = "White"}
{pt3dclear()}
{pt3dadd(189996.000000,125244.000000,62100.000000,718.829820)}
{pt3dadd(190044.000000,124812.000000,62125.000000,718.829820)}
{pt3dadd(190092.000000,124812.000000,62150.000000,688.878585)}
{pt3dadd(190080.000000,124500.000000,62100.000000,658.927350)}
{pt3dadd(190104.000000,123972.000000,62150.000000,628.976115)}
{pt3dadd(190008.000000,123288.000000,62300.000000,599.024880)}
{pt3dadd(189900.000000,122808.000000,62400.000000,638.959860)}
{pt3dadd(189864.000000,122364.000000,62400.000000,678.894840)}
{pt3dadd(189864.000000,121788.000000,62850.000000,718.829820)}
{pt3dadd(189852.000000,121476.000000,62875.000000,828.092016)}

{create adhoc136}
{access adhoc136}
{connect adhoc136(1), adhoc135(0)}
{nseg = 1}
{strdef color color = "White"}
{pt3dclear()}
{pt3dadd(189852.000000,121476.000000,62875.000000,828.092016)}
{pt3dadd(188700.000000,121416.000000,61975.000000,200.612214)}
{pt3dadd(188316.000000,121212.000000,61825.000000,210.642822)}
{pt3dadd(187452.000000,120588.000000,61450.000000,220.673430)}
{pt3dadd(186948.000000,120180.000000,60675.000000,230.704038)}
{pt3dadd(186444.000000,119844.000000,60175.000000,240.734646)}
{pt3dadd(186180.000000,119664.000000,59975.000000,240.734646)}
{pt3dadd(185928.000000,119328.000000,59775.000000,240.734646)}
{pt3dadd(185868.000000,118932.000000,59400.000000,240.734646)}
{pt3dadd(186012.000000,118548.000000,58750.000000,240.734646)}
{pt3dadd(186036.000000,118020.000000,58025.000000,252.771381)}
{pt3dadd(186120.000000,117588.000000,57500.000000,264.808116)}
{pt3dadd(185256.000000,117192.000000,56750.000000,276.844851)}
{pt3dadd(184908.000000,117180.000000,56475.000000,288.881586)}
{pt3dadd(184800.000000,117276.000000,56050.000000,288.881586)}

{create adhoc137}
{access adhoc137}
{connect adhoc137(1), adhoc135(0)}
{nseg = 1}
{strdef color color = "White"}
{pt3dclear()}
{pt3dadd(189852.000000,121476.000000,62875.000000,828.092016)}
{pt3dadd(189816.000000,120924.000000,62825.000000,718.829820)}
{pt3dadd(189552.000000,120252.000000,63325.000000,790.712811)}
{pt3dadd(189576.000000,120072.000000,63975.000000,862.595802)}
{pt3dadd(189240.000000,119580.000000,63750.000000,575.063856)}

{create adhoc138}
{access adhoc138}
{connect adhoc138(1), adhoc137(0)}
{nseg = 1}
{strdef color color = "White"}
{pt3dclear()}
{pt3dadd(189240.000000,119580.000000,63750.000000,575.063856)}
{pt3dadd(189336.000000,119232.000000,63850.000000,599.024880)}
{pt3dadd(189396.000000,119076.000000,63950.000000,621.787810)}
{pt3dadd(189456.000000,118920.000000,64050.000000,644.550741)}
{pt3dadd(189516.000000,118776.000000,64150.000000,667.313671)}
{pt3dadd(189348.000000,118548.000000,64575.000000,690.076602)}
{pt3dadd(189432.000000,117912.000000,64725.000000,697.264906)}
{pt3dadd(189204.000000,117504.000000,65050.000000,704.453211)}
{pt3dadd(188976.000000,116964.000000,65375.000000,711.641515)}
{pt3dadd(188808.000000,116592.000000,65525.000000,718.829820)}
{pt3dadd(188712.000000,116244.000000,65825.000000,711.641515)}
{pt3dadd(188616.000000,115632.000000,66125.000000,704.453211)}
{pt3dadd(188520.000000,115308.000000,66425.000000,697.264906)}
{pt3dadd(188292.000000,114984.000000,66475.000000,690.076602)}
{pt3dadd(188088.000000,114552.000000,66475.000000,704.453211)}
{pt3dadd(188016.000000,114276.000000,66550.000000,718.829820)}
{pt3dadd(187944.000000,114024.000000,66625.000000,718.829820)}

{create adhoc139}
{access adhoc139}
{connect adhoc139(1), adhoc138(0)}
{nseg = 1}
{strdef color color = "White"}
{pt3dclear()}
{pt3dadd(187944.000000,114024.000000,66625.000000,718.829820)}
{pt3dadd(188040.000000,113808.000000,66850.000000,718.829820)}
{pt3dadd(188028.000000,113424.000000,67175.000000,663.919209)}
{pt3dadd(188016.000000,113136.000000,67700.000000,609.008598)}
{pt3dadd(188004.000000,112656.000000,67675.000000,554.097987)}
{pt3dadd(187860.000000,112140.000000,67850.000000,499.187376)}
{pt3dadd(187908.000000,111864.000000,68200.000000,499.187376)}
{pt3dadd(187560.000000,109908.000000,67650.000000,499.187376)}

{create adhoc140}
{access adhoc140}
{connect adhoc140(1), adhoc139(0)}
{nseg = 1}
{strdef color color = "White"}
{pt3dclear()}
{pt3dadd(187560.000000,109908.000000,67650.000000,499.187376)}
{pt3dadd(187800.000000,109596.000000,67100.000000,415.989486)}
{pt3dadd(187596.000000,109224.000000,66825.000000,415.989486)}
{pt3dadd(187668.000000,108264.000000,66450.000000,415.989486)}
{pt3dadd(187332.000000,108228.000000,66075.000000,415.989486)}
{pt3dadd(186624.000000,108324.000000,65800.000000,415.989486)}
{pt3dadd(186240.000000,107844.000000,65225.000000,436.788958)}
{pt3dadd(186096.000000,107496.000000,65025.000000,457.588431)}
{pt3dadd(185916.000000,106920.000000,64500.000000,478.387903)}
{pt3dadd(185784.000000,106104.000000,64000.000000,499.187376)}
{pt3dadd(185952.000000,104472.000000,63700.000000,434.574193)}
{pt3dadd(184500.000000,102468.000000,63150.000000,369.961011)}
{pt3dadd(184248.000000,102048.000000,62725.000000,305.347828)}
{pt3dadd(183696.000000,101904.000000,62350.000000,240.734646)}
{pt3dadd(183408.000000,101412.000000,61800.000000,240.734646)}
{pt3dadd(183288.000000,100968.000000,61325.000000,240.734646)}
{pt3dadd(182964.000000,100584.000000,60875.000000,240.734646)}
{pt3dadd(182604.000000,100272.000000,60200.000000,240.734646)}
{pt3dadd(182304.000000,99912.000000,59450.000000,204.737450)}
{pt3dadd(182268.000000,99708.000000,58925.000000,168.740253)}
{pt3dadd(182160.000000,99264.000000,58575.000000,132.743057)}
{pt3dadd(182052.000000,98376.000000,58525.000000,96.745860)}
{pt3dadd(182448.000000,97332.000000,58750.000000,96.745860)}

{create adhoc141}
{access adhoc141}
{connect adhoc141(1), adhoc139(0)}
{nseg = 1}
{strdef color color = "White"}
{pt3dclear()}
{pt3dadd(187560.000000,109908.000000,67650.000000,499.187376)}
{pt3dadd(187320.000000,108156.000000,67925.000000,415.989486)}
{pt3dadd(186444.000000,105816.000000,68075.000000,346.657896)}
{pt3dadd(186132.000000,104832.000000,68075.000000,415.989486)}

{create adhoc142}
{access adhoc142}
{connect adhoc142(1), adhoc138(0)}
{nseg = 1}
{strdef color color = "White"}
{pt3dclear()}
{pt3dadd(187944.000000,114024.000000,66625.000000,718.829820)}
{pt3dadd(187488.000000,113976.000000,68100.000000,200.612214)}
{pt3dadd(187416.000000,114156.000000,68375.000000,237.123635)}
{pt3dadd(187452.000000,114408.000000,68550.000000,273.635055)}
{pt3dadd(187716.000000,114792.000000,68800.000000,310.146475)}
{pt3dadd(188148.000000,115068.000000,69475.000000,346.657896)}
{pt3dadd(188064.000000,115356.000000,69525.000000,277.543278)}
{pt3dadd(188184.000000,115452.000000,69750.000000,208.428660)}
{pt3dadd(188688.000000,115080.000000,70000.000000,139.314042)}
{pt3dadd(188832.000000,114756.000000,70375.000000,240.734646)}

{create adhoc143}
{access adhoc143}
{connect adhoc143(1), adhoc142(0)}
{nseg = 1}
{strdef color color = "White"}
{pt3dclear()}
{pt3dadd(188832.000000,114756.000000,70375.000000,240.734646)}
{pt3dadd(189216.000000,115092.000000,70725.000000,346.657896)}

{create adhoc144}
{access adhoc144}
{connect adhoc144(1), adhoc142(0)}
{nseg = 1}
{strdef color color = "White"}
{pt3dclear()}
{pt3dadd(188832.000000,114756.000000,70375.000000,240.734646)}
{pt3dadd(188664.000000,113472.000000,70800.000000,200.612214)}
{pt3dadd(188772.000000,113052.000000,71125.000000,80.621550)}

{create adhoc145}
{access adhoc145}
{connect adhoc145(1), adhoc137(0)}
{nseg = 1}
{strdef color color = "White"}
{pt3dclear()}
{pt3dadd(189240.000000,119580.000000,63750.000000,575.063856)}
{pt3dadd(188328.000000,119292.000000,63000.000000,288.881586)}
{pt3dadd(187992.000000,118956.000000,62750.000000,320.658561)}
{pt3dadd(187608.000000,118464.000000,62450.000000,352.435536)}
{pt3dadd(187392.000000,118056.000000,62175.000000,384.212511)}
{pt3dadd(187176.000000,117840.000000,61925.000000,415.989486)}
{pt3dadd(186960.000000,117624.000000,61675.000000,384.212511)}
{pt3dadd(186744.000000,117372.000000,61425.000000,352.435536)}
{pt3dadd(186528.000000,117108.000000,61175.000000,320.658561)}
{pt3dadd(186312.000000,116760.000000,60925.000000,288.881586)}
{pt3dadd(186252.000000,116256.000000,60350.000000,303.325664)}
{pt3dadd(186180.000000,115884.000000,60125.000000,317.769741)}
{pt3dadd(185916.000000,115416.000000,59675.000000,332.213819)}
{pt3dadd(185700.000000,114960.000000,59500.000000,346.657896)}
{pt3dadd(185748.000000,114804.000000,59475.000000,399.349944)}
{pt3dadd(185280.000000,114288.000000,59275.000000,332.791596)}

{create adhoc146}
{access adhoc146}
{connect adhoc146(1), adhoc145(0)}
{nseg = 1}
{strdef color color = "White"}
{pt3dclear()}
{pt3dadd(185280.000000,114288.000000,59275.000000,332.791596)}
{pt3dadd(184788.000000,114156.000000,58775.000000,415.989486)}
{pt3dadd(184524.000000,114120.000000,58375.000000,384.212511)}
{pt3dadd(184416.000000,113856.000000,57875.000000,352.435536)}
{pt3dadd(184200.000000,113376.000000,57150.000000,320.658561)}
{pt3dadd(184236.000000,113076.000000,56700.000000,288.881586)}
{pt3dadd(184512.000000,112704.000000,56200.000000,266.814243)}
{pt3dadd(184656.000000,112332.000000,55725.000000,244.746900)}
{pt3dadd(185088.000000,112188.000000,54925.000000,222.679557)}
{pt3dadd(185268.000000,111744.000000,54325.000000,200.612214)}
{pt3dadd(185676.000000,111432.000000,53625.000000,222.679557)}
{pt3dadd(186636.000000,111300.000000,52700.000000,244.746900)}
{pt3dadd(187044.000000,111060.000000,51800.000000,266.814243)}
{pt3dadd(187356.000000,110136.000000,51150.000000,288.881586)}
{pt3dadd(187644.000000,109416.000000,50325.000000,200.612214)}

{create adhoc147}
{access adhoc147}
{connect adhoc147(1), adhoc145(0)}
{nseg = 1}
{strdef color color = "White"}
{pt3dclear()}
{pt3dadd(185280.000000,114288.000000,59275.000000,332.791596)}
{pt3dadd(185664.000000,114204.000000,60125.000000,240.734646)}
{pt3dadd(185424.000000,113940.000000,60300.000000,276.042396)}
{pt3dadd(185568.000000,113532.000000,60575.000000,311.350146)}
{pt3dadd(185508.000000,113184.000000,60800.000000,346.657896)}
{pt3dadd(185508.000000,112920.000000,60700.000000,288.881586)}

{create adhoc148}
{access adhoc148}
{connect adhoc148(1), adhoc147(0)}
{nseg = 1}
{strdef color color = "White"}
{pt3dclear()}
{pt3dadd(185508.000000,112920.000000,60700.000000,288.881586)}
{pt3dadd(185376.000000,113148.000000,61200.000000,200.612214)}
{pt3dadd(185388.000000,113040.000000,61700.000000,167.176836)}
{pt3dadd(185052.000000,112908.000000,62825.000000,139.314042)}

{create adhoc149}
{access adhoc149}
{connect adhoc149(1), adhoc147(0)}
{nseg = 1}
{strdef color color = "White"}
{pt3dclear()}
{pt3dadd(185508.000000,112920.000000,60700.000000,288.881586)}
{pt3dadd(185688.000000,112512.000000,60625.000000,240.734646)}
{pt3dadd(185652.000000,112068.000000,60675.000000,220.673430)}
{pt3dadd(185796.000000,111648.000000,60475.000000,200.612214)}
{pt3dadd(185460.000000,110832.000000,60075.000000,139.314042)}

{create adhoc150}
{access adhoc150}
{connect adhoc150(1), adhoc97(0)}
{nseg = 1}
{strdef color color = "White"}
{pt3dclear()}
{pt3dadd(192132.000000,165684.000000,60350.000000,499.187376)}
{pt3dadd(190968.000000,165576.000000,60875.000000,288.881586)}
{pt3dadd(189936.000000,165480.000000,61275.000000,288.881586)}
{pt3dadd(189288.000000,165204.000000,61700.000000,346.657896)}

{create adhoc151}
{access adhoc151}
{connect adhoc151(1), adhoc150(0)}
{nseg = 1}
{strdef color color = "White"}
{pt3dclear()}
{pt3dadd(189288.000000,165204.000000,61700.000000,346.657896)}
{pt3dadd(187644.000000,163992.000000,61475.000000,167.176836)}
{pt3dadd(187104.000000,163536.000000,61175.000000,160.489764)}
{pt3dadd(186612.000000,163020.000000,60650.000000,167.176836)}

{create adhoc152}
{access adhoc152}
{connect adhoc152(1), adhoc150(0)}
{nseg = 1}
{strdef color color = "White"}
{pt3dclear()}
{pt3dadd(189288.000000,165204.000000,61700.000000,346.657896)}
{pt3dadd(189660.000000,167172.000000,61375.000000,288.881586)}
{pt3dadd(189312.000000,167784.000000,61700.000000,240.734646)}

{create adhoc153}
{access adhoc153}
{connect adhoc153(1), adhoc150(0)}
{nseg = 1}
{strdef color color = "White"}
{pt3dclear()}
{pt3dadd(189288.000000,165204.000000,61700.000000,346.657896)}
{pt3dadd(188892.000000,165204.000000,62175.000000,346.657896)}
{pt3dadd(188556.000000,165204.000000,62475.000000,240.734646)}

{create adhoc154}
{access adhoc154}
{connect adhoc154(1), adhoc83(0)}
{nseg = 1}
{strdef color color = "White"}
{pt3dclear()}
{pt3dadd(190788.000000,171960.000000,60300.000000,1242.137880)}
{pt3dadd(189636.000000,170748.000000,60375.000000,346.657896)}
{pt3dadd(188688.000000,170712.000000,59950.000000,293.696271)}
{pt3dadd(188256.000000,170664.000000,59700.000000,240.734646)}
{pt3dadd(186972.000000,170316.000000,59550.000000,200.612214)}

{create adhoc155}
{access adhoc155}
{connect adhoc155(1), adhoc154(0)}
{nseg = 1}
{strdef color color = "White"}
{pt3dclear()}
{pt3dadd(186972.000000,170316.000000,59550.000000,200.612214)}
{pt3dadd(185412.000000,170604.000000,59450.000000,116.095032)}
{pt3dadd(185112.000000,170724.000000,59200.000000,92.876040)}

{create adhoc156}
{access adhoc156}
{connect adhoc156(1), adhoc154(0)}
{nseg = 1}
{strdef color color = "White"}
{pt3dclear()}
{pt3dadd(186972.000000,170316.000000,59550.000000,200.612214)}
{pt3dadd(186912.000000,169620.000000,59900.000000,167.176836)}
{pt3dadd(187008.000000,168816.000000,60225.000000,116.095032)}

{create adhoc157}
{access adhoc157}
{connect adhoc157(1), adhoc82(0)}
{nseg = 1}
{strdef color color = "White"}
{pt3dclear()}
{pt3dadd(190068.000000,175176.000000,60300.000000,1490.565402)}
{pt3dadd(188964.000000,175176.000000,57725.000000,116.095032)}
{pt3dadd(186180.000000,175092.000000,57650.000000,156.402855)}
{pt3dadd(183636.000000,175548.000000,57375.000000,196.710678)}
{pt3dadd(182916.000000,176340.000000,57800.000000,237.018501)}
{pt3dadd(182676.000000,176856.000000,58350.000000,277.326324)}
{pt3dadd(182952.000000,177288.000000,58900.000000,200.612214)}
{pt3dadd(182664.000000,177564.000000,58925.000000,346.657896)}

{create adhoc158}
{access adhoc158}
{connect adhoc158(1), adhoc157(0)}
{nseg = 1}
{strdef color color = "White"}
{pt3dclear()}
{pt3dadd(182664.000000,177564.000000,58925.000000,346.657896)}
{pt3dadd(182688.000000,177852.000000,59100.000000,200.612214)}
{pt3dadd(182400.000000,178152.000000,59500.000000,192.253370)}
{pt3dadd(182484.000000,178548.000000,59725.000000,183.894525)}
{pt3dadd(182556.000000,178656.000000,59950.000000,175.535680)}
{pt3dadd(182628.000000,178800.000000,60175.000000,167.176836)}
{pt3dadd(183144.000000,178944.000000,60575.000000,167.176836)}
{pt3dadd(183540.000000,179136.000000,60800.000000,200.612214)}

{create adhoc159}
{access adhoc159}
{connect adhoc159(1), adhoc157(0)}
{nseg = 1}
{strdef color color = "White"}
{pt3dclear()}
{pt3dadd(182664.000000,177564.000000,58925.000000,346.657896)}
{pt3dadd(181668.000000,178476.000000,58925.000000,167.176836)}

{create adhoc160}
{access adhoc160}
{connect adhoc160(1), adhoc5(0)}
{nseg = 1}
{strdef color color = "White"}
{pt3dclear()}
{pt3dadd(172056.000000,218100.000000,62450.000000,1242.137880)}
{pt3dadd(168948.000000,219420.000000,61650.000000,200.612214)}
{pt3dadd(168360.000000,219756.000000,61925.000000,200.612214)}
{pt3dadd(167844.000000,219936.000000,62300.000000,200.612214)}
{pt3dadd(167232.000000,220380.000000,62675.000000,200.612214)}

{create adhoc161}
{access adhoc161}
{connect adhoc161(1), adhoc160(0)}
{nseg = 1}
{strdef color color = "White"}
{pt3dclear()}
{pt3dadd(167232.000000,220380.000000,62675.000000,200.612214)}
{pt3dadd(166572.000000,219024.000000,63000.000000,200.612214)}
{pt3dadd(166440.000000,218712.000000,63400.000000,200.612214)}
{pt3dadd(166824.000000,217656.000000,63600.000000,200.612214)}
{pt3dadd(167124.000000,216948.000000,64075.000000,200.612214)}
{pt3dadd(167556.000000,216360.000000,64550.000000,200.612214)}
{pt3dadd(168204.000000,215076.000000,64950.000000,240.734646)}
{pt3dadd(169284.000000,213912.000000,65350.000000,139.314042)}

{create adhoc162}
{access adhoc162}
{connect adhoc162(1), adhoc160(0)}
{nseg = 1}
{strdef color color = "White"}
{pt3dclear()}
{pt3dadd(167232.000000,220380.000000,62675.000000,200.612214)}
{pt3dadd(166176.000000,221100.000000,62600.000000,96.745860)}

{create adhoc163}
{access adhoc163}
{connect adhoc163(1), adhoc4(0)}
{nseg = 1}
{strdef color color = "White"}
{pt3dclear()}
{pt3dadd(171912.000000,218172.000000,61625.000000,1242.137880)}
{pt3dadd(168984.000000,220848.000000,61975.000000,346.657896)}
{pt3dadd(166548.000000,224232.000000,62050.000000,346.657896)}
{pt3dadd(166116.000000,224844.000000,61325.000000,346.657896)}
{pt3dadd(162612.000000,229428.000000,61150.000000,96.745860)}

{create adhoc164}
{access adhoc164}
{connect adhoc164(1), adhoc3(0)}
{nseg = 1}
{strdef color color = "White"}
{pt3dclear()}
{pt3dadd(170580.000000,217404.000000,59475.000000,862.595802)}
{pt3dadd(169008.000000,217380.000000,59475.000000,96.745860)}
{pt3dadd(168900.000000,216936.000000,59600.000000,101.583153)}
{pt3dadd(168708.000000,216708.000000,59775.000000,106.420446)}
{pt3dadd(168600.000000,215604.000000,60000.000000,111.257739)}
{pt3dadd(168636.000000,214596.000000,60400.000000,116.095032)}
{pt3dadd(169296.000000,214212.000000,60575.000000,96.745860)}

{create adhoc165}
{access adhoc165}
{connect adhoc165(1), adhoc2(0)}
{nseg = 1}
{strdef color color = "White"}
{pt3dclear()}
{pt3dadd(169128.000000,217416.000000,56175.000000,1035.114948)}
{pt3dadd(167064.000000,220200.000000,55650.000000,200.612214)}
{pt3dadd(166884.000000,221028.000000,55750.000000,222.679557)}
{pt3dadd(166596.000000,221400.000000,55550.000000,244.746900)}
{pt3dadd(166164.000000,221964.000000,55650.000000,266.814243)}
{pt3dadd(165804.000000,222528.000000,55575.000000,288.881586)}
{pt3dadd(165432.000000,222828.000000,55750.000000,167.176836)}

{create adhoc166}
{access adhoc166}
{connect adhoc166(1), adhoc2(0)}
{nseg = 1}
{strdef color color = "White"}
{pt3dclear()}
{pt3dadd(169128.000000,217416.000000,56175.000000,1035.114948)}
{pt3dadd(169116.000000,216972.000000,55725.000000,718.829820)}
{pt3dadd(168972.000000,216744.000000,55475.000000,663.919209)}
{pt3dadd(168876.000000,216816.000000,55125.000000,609.008598)}
{pt3dadd(168720.000000,216516.000000,54475.000000,554.097987)}
{pt3dadd(168720.000000,216468.000000,53675.000000,499.187376)}
{pt3dadd(167964.000000,215940.000000,53175.000000,524.146752)}
{pt3dadd(167664.000000,215376.000000,52600.000000,549.106128)}
{pt3dadd(167220.000000,215100.000000,52150.000000,574.065504)}
{pt3dadd(167016.000000,214596.000000,51425.000000,599.024880)}
{pt3dadd(167076.000000,214524.000000,51125.000000,599.024880)}

{create adhoc167}
{access adhoc167}
{connect adhoc167(1), adhoc166(0)}
{nseg = 1}
{strdef color color = "White"}
{pt3dclear()}
{pt3dadd(167076.000000,214524.000000,51125.000000,599.024880)}
{pt3dadd(167436.000000,213576.000000,51125.000000,200.612214)}
{pt3dadd(167688.000000,213000.000000,50850.000000,192.253370)}
{pt3dadd(168240.000000,212256.000000,50875.000000,183.894525)}
{pt3dadd(168972.000000,211476.000000,50875.000000,175.535680)}
{pt3dadd(169332.000000,211140.000000,50625.000000,167.176836)}
{pt3dadd(170064.000000,210432.000000,50350.000000,240.734646)}

{create adhoc168}
{access adhoc168}
{connect adhoc168(1), adhoc166(0)}
{nseg = 1}
{strdef color color = "White"}
{pt3dclear()}
{pt3dadd(167076.000000,214524.000000,51125.000000,599.024880)}
{pt3dadd(167112.000000,214656.000000,50700.000000,690.076602)}
{pt3dadd(167208.000000,214884.000000,50325.000000,621.554823)}
{pt3dadd(167436.000000,214800.000000,49650.000000,553.033044)}
{pt3dadd(167700.000000,214776.000000,49175.000000,484.511265)}
{pt3dadd(168072.000000,215016.000000,48600.000000,415.989486)}
{pt3dadd(168396.000000,215688.000000,48075.000000,200.612214)}

{create adhoc169}
{access adhoc169}
{connect adhoc169(1), adhoc168(0)}
{nseg = 1}
{strdef color color = "White"}
{pt3dclear()}
{pt3dadd(168396.000000,215688.000000,48075.000000,200.612214)}
{pt3dadd(168528.000000,216540.000000,47975.000000,116.095032)}
{pt3dadd(168336.000000,217248.000000,47825.000000,240.734646)}

{create adhoc170}
{access adhoc170}
{connect adhoc170(1), adhoc169(0)}
{nseg = 1}
{strdef color color = "White"}
{pt3dclear()}
{pt3dadd(168336.000000,217248.000000,47825.000000,240.734646)}
{pt3dadd(169020.000000,217212.000000,47825.000000,200.612214)}

{create adhoc171}
{access adhoc171}
{connect adhoc171(1), adhoc169(0)}
{nseg = 1}
{strdef color color = "White"}
{pt3dclear()}
{pt3dadd(168336.000000,217248.000000,47825.000000,240.734646)}
{pt3dadd(168336.000000,217908.000000,47475.000000,288.881586)}
{pt3dadd(168036.000000,218268.000000,47100.000000,259.458462)}
{pt3dadd(167640.000000,218748.000000,46850.000000,230.035338)}
{pt3dadd(168084.000000,218964.000000,46250.000000,200.612214)}
{pt3dadd(168240.000000,219636.000000,45925.000000,200.612214)}

{create adhoc172}
{access adhoc172}
{connect adhoc172(1), adhoc168(0)}
{nseg = 1}
{strdef color color = "White"}
{pt3dclear()}
{pt3dadd(168396.000000,215688.000000,48075.000000,200.612214)}
{pt3dadd(168456.000000,215124.000000,47900.000000,499.187376)}
{pt3dadd(168732.000000,214980.000000,47675.000000,424.543586)}
{pt3dadd(169032.000000,214704.000000,47175.000000,349.899795)}
{pt3dadd(169128.000000,214668.000000,46700.000000,275.256005)}
{pt3dadd(169392.000000,214140.000000,46200.000000,200.612214)}
{pt3dadd(169656.000000,213984.000000,45575.000000,346.657896)}
{pt3dadd(169812.000000,213768.000000,45000.000000,346.657896)}

{create adhoc173}
{access adhoc173}
{connect adhoc173(1), adhoc172(0)}
{nseg = 1}
{strdef color color = "White"}
{pt3dclear()}
{pt3dadd(169812.000000,213768.000000,45000.000000,346.657896)}
{pt3dadd(170100.000000,213036.000000,44800.000000,200.612214)}
{pt3dadd(170496.000000,212760.000000,44400.000000,200.612214)}
{pt3dadd(170892.000000,212472.000000,43900.000000,139.314042)}

{create adhoc174}
{access adhoc174}
{connect adhoc174(1), adhoc172(0)}
{nseg = 1}
{strdef color color = "White"}
{pt3dclear()}
{pt3dadd(169812.000000,213768.000000,45000.000000,346.657896)}
{pt3dadd(169512.000000,214404.000000,44600.000000,346.657896)}
{pt3dadd(169584.000000,215064.000000,43825.000000,256.917366)}
{pt3dadd(170148.000000,215316.000000,43225.000000,167.176836)}
{pt3dadd(171084.000000,215640.000000,42725.000000,80.621550)}

{create adhoc175}
{access adhoc175}
{connect adhoc175(1), adhoc1(0)}
{nseg = 1}
{strdef color color = "White"}
{pt3dclear()}
{pt3dadd(170208.000000,207804.000000,54450.000000,266.233284)}
{pt3dadd(169968.000000,207444.000000,54675.000000,200.612214)}
{pt3dadd(170040.000000,207132.000000,55050.000000,169.963128)}
{pt3dadd(170148.000000,206748.000000,55450.000000,139.314042)}
{pt3dadd(170148.000000,206076.000000,55750.000000,167.176836)}
