# Supplementary material for: Full reconstruction of large lobula plate tangential cells in Drosophila from a 3D EM dataset
Source: PLoS One. 2018 Nov 28;13(11):e0207828. doi: 10.1371/journal.pone.0207828 (PMC6261601; doi:10.1371/journal.pone.0207828)
Supplement: S1 Dataset — (ZIP) [file pone.0207828.s001.zip › Diameter hoc/VS_VSL_preliminary/Old Diameters Mar13_VS_VSL_HS/VS3/2_14_743_smaurer_002.056.hoc]

/* created with nml2hocm */

{create adhoc1}
{access adhoc1}
{nseg = 1}
{strdef color color = "White"}
{pt3dclear()}
{pt3dadd(155244.000000,146220.000000,168025.000000,1978.135758)}
{pt3dadd(155172.000000,146616.000000,167825.000000,2060.558082)}
{pt3dadd(154872.000000,146928.000000,167250.000000,2082.022106)}
{pt3dadd(154608.000000,147192.000000,166875.000000,2103.486129)}
{pt3dadd(154464.000000,147540.000000,166800.000000,2124.950153)}
{pt3dadd(154488.000000,147780.000000,166675.000000,2146.414176)}
{pt3dadd(154476.000000,148008.000000,166425.000000,2146.414176)}
{pt3dadd(154428.000000,148236.000000,166225.000000,2146.414176)}
{pt3dadd(154236.000000,148500.000000,166025.000000,2146.414176)}
{pt3dadd(154116.000000,148764.000000,165800.000000,2146.414176)}
{pt3dadd(154008.000000,149028.000000,165550.000000,2146.414176)}
{pt3dadd(153876.000000,149244.000000,165225.000000,2146.414176)}
{pt3dadd(153876.000000,149496.000000,165100.000000,2146.414176)}
{pt3dadd(153876.000000,149712.000000,164975.000000,2146.414176)}
{pt3dadd(153876.000000,149892.000000,164850.000000,2146.414176)}
{pt3dadd(153828.000000,150132.000000,164775.000000,2146.414176)}
{pt3dadd(153816.000000,150444.000000,164575.000000,2146.414176)}
{pt3dadd(153744.000000,150588.000000,164375.000000,2146.414176)}
{pt3dadd(153660.000000,150924.000000,163975.000000,2146.414176)}
{pt3dadd(153312.000000,151296.000000,163550.000000,2146.414176)}
{pt3dadd(153348.000000,151596.000000,163575.000000,2146.414176)}
{pt3dadd(153300.000000,151920.000000,163300.000000,2146.414176)}
{pt3dadd(153156.000000,152208.000000,162875.000000,2146.414176)}
{pt3dadd(152928.000000,152652.000000,162350.000000,2146.414176)}
{pt3dadd(152916.000000,152892.000000,162025.000000,2146.414176)}
{pt3dadd(152616.000000,153036.000000,161625.000000,2146.414176)}
{pt3dadd(152136.000000,153564.000000,161000.000000,2146.414176)}
{pt3dadd(151980.000000,153900.000000,160575.000000,2146.414176)}
{pt3dadd(151776.000000,154236.000000,160100.000000,2146.414176)}
{pt3dadd(151860.000000,154608.000000,159550.000000,2146.414176)}
{pt3dadd(151908.000000,155160.000000,159050.000000,2146.414176)}
{pt3dadd(152172.000000,155748.000000,158475.000000,2146.414176)}
{pt3dadd(152232.000000,156324.000000,157850.000000,2146.414176)}
{pt3dadd(152112.000000,156732.000000,157200.000000,2146.414176)}
{pt3dadd(151896.000000,156864.000000,156675.000000,2146.414176)}
{pt3dadd(151560.000000,157356.000000,156075.000000,2146.414176)}
{pt3dadd(151812.000000,158004.000000,155225.000000,2146.414176)}
{pt3dadd(152064.000000,158592.000000,154575.000000,2146.414176)}
{pt3dadd(152424.000000,158700.000000,154075.000000,2253.734910)}
{pt3dadd(152244.000000,159312.000000,153600.000000,2361.055644)}
{pt3dadd(152268.000000,159528.000000,153150.000000,2468.376378)}
{pt3dadd(152220.000000,160140.000000,152400.000000,2575.697112)}
{pt3dadd(152112.000000,160812.000000,152000.000000,2468.376378)}
{pt3dadd(151968.000000,161352.000000,151225.000000,2361.055644)}
{pt3dadd(151836.000000,162516.000000,150200.000000,2253.734910)}
{pt3dadd(151920.000000,162660.000000,149625.000000,2146.414176)}
{pt3dadd(151908.000000,163332.000000,149100.000000,2146.414176)}
{pt3dadd(152040.000000,163920.000000,148450.000000,2146.414176)}
{pt3dadd(152100.000000,164460.000000,147775.000000,2146.414176)}
{pt3dadd(152148.000000,165408.000000,147300.000000,2146.414176)}
{pt3dadd(152388.000000,166512.000000,146400.000000,1967.546349)}
{pt3dadd(152904.000000,167376.000000,145450.000000,1788.678522)}
{pt3dadd(153252.000000,168096.000000,144475.000000,1609.810695)}
{pt3dadd(153948.000000,169344.000000,143625.000000,1430.942868)}
{pt3dadd(154344.000000,169920.000000,143175.000000,1383.741621)}
{pt3dadd(154740.000000,170352.000000,142725.000000,1336.540374)}
{pt3dadd(155172.000000,171144.000000,141950.000000,1289.339127)}
{pt3dadd(155676.000000,171732.000000,141200.000000,1242.137880)}
{pt3dadd(156300.000000,172092.000000,140550.000000,1190.382147)}
{pt3dadd(156876.000000,171900.000000,139975.000000,1138.626414)}
{pt3dadd(157320.000000,172260.000000,139525.000000,1086.870681)}
{pt3dadd(157656.000000,172548.000000,138900.000000,1035.114948)}
{pt3dadd(157476.000000,172836.000000,138150.000000,1086.870681)}
{pt3dadd(156816.000000,172824.000000,137600.000000,1138.626414)}
{pt3dadd(156996.000000,172812.000000,137025.000000,1190.382147)}
{pt3dadd(157164.000000,172944.000000,136500.000000,1242.137880)}
{pt3dadd(157332.000000,173112.000000,135775.000000,1111.310865)}
{pt3dadd(157248.000000,173556.000000,135325.000000,980.483850)}
{pt3dadd(157464.000000,174168.000000,134750.000000,849.656835)}
{pt3dadd(157236.000000,174636.000000,134150.000000,718.829820)}
{pt3dadd(157116.000000,175116.000000,133950.000000,718.829820)}
{pt3dadd(157188.000000,175704.000000,133675.000000,718.829820)}
{pt3dadd(157332.000000,176352.000000,133450.000000,718.829820)}
{pt3dadd(157428.000000,176916.000000,133250.000000,718.829820)}
{pt3dadd(157560.000000,177552.000000,133050.000000,688.878585)}
{pt3dadd(157596.000000,178188.000000,133025.000000,658.927350)}
{pt3dadd(157800.000000,178524.000000,132800.000000,628.976115)}
{pt3dadd(157824.000000,178776.000000,132875.000000,599.024880)}
{pt3dadd(157956.000000,178968.000000,132875.000000,599.024880)}
{pt3dadd(158136.000000,179640.000000,132875.000000,599.024880)}
{pt3dadd(158316.000000,180228.000000,132700.000000,599.024880)}
{pt3dadd(158412.000000,180792.000000,132700.000000,599.024880)}
{pt3dadd(158652.000000,181272.000000,132700.000000,664.917611)}
{pt3dadd(158820.000000,181728.000000,132600.000000,730.810341)}
{pt3dadd(159264.000000,182172.000000,132500.000000,796.703072)}
{pt3dadd(159732.000000,182472.000000,132525.000000,862.595802)}
{pt3dadd(160260.000000,182832.000000,132325.000000,862.595802)}
{pt3dadd(160716.000000,183132.000000,132125.000000,862.595802)}
{pt3dadd(161304.000000,183492.000000,132025.000000,862.595802)}
{pt3dadd(161868.000000,183744.000000,131925.000000,862.595802)}
{pt3dadd(162300.000000,183852.000000,131750.000000,957.481322)}
{pt3dadd(162708.000000,184020.000000,131450.000000,1052.366841)}
{pt3dadd(163188.000000,183876.000000,131250.000000,1147.252361)}
{pt3dadd(163632.000000,184008.000000,131000.000000,1242.137880)}
{pt3dadd(164220.000000,184440.000000,130850.000000,1242.137880)}
{pt3dadd(164676.000000,184848.000000,130700.000000,1242.137880)}
{pt3dadd(164904.000000,185208.000000,130625.000000,1242.137880)}
{pt3dadd(165360.000000,185868.000000,130425.000000,1242.137880)}
{pt3dadd(165732.000000,186168.000000,130150.000000,1190.382147)}
{pt3dadd(166212.000000,186408.000000,129950.000000,1138.626414)}
{pt3dadd(166608.000000,187092.000000,129650.000000,1086.870681)}
{pt3dadd(167184.000000,187368.000000,129400.000000,1035.114948)}
{pt3dadd(167700.000000,187668.000000,129075.000000,991.985162)}
{pt3dadd(168192.000000,188076.000000,128825.000000,948.855375)}
{pt3dadd(168684.000000,188580.000000,128650.000000,905.725589)}
{pt3dadd(169140.000000,188880.000000,128625.000000,862.595802)}
{pt3dadd(169788.000000,189168.000000,128425.000000,862.595802)}
{pt3dadd(170352.000000,189684.000000,128175.000000,862.595802)}
{pt3dadd(170856.000000,190092.000000,128050.000000,862.595802)}
{pt3dadd(171396.000000,190428.000000,127925.000000,862.595802)}
{pt3dadd(171852.000000,190704.000000,127825.000000,862.595802)}
{pt3dadd(172416.000000,191100.000000,127600.000000,862.595802)}
{pt3dadd(172872.000000,191436.000000,127350.000000,862.595802)}
{pt3dadd(173508.000000,191760.000000,127300.000000,862.595802)}
{pt3dadd(173964.000000,192084.000000,126975.000000,862.595802)}
{pt3dadd(174576.000000,192192.000000,126800.000000,862.595802)}
{pt3dadd(175164.000000,192744.000000,126400.000000,862.595802)}
{pt3dadd(175620.000000,193068.000000,126250.000000,862.595802)}
{pt3dadd(176124.000000,193500.000000,125975.000000,826.654307)}
{pt3dadd(176784.000000,193896.000000,125550.000000,790.712811)}
{pt3dadd(177396.000000,194412.000000,124925.000000,754.771316)}
{pt3dadd(178464.000000,194988.000000,124225.000000,718.829820)}
{pt3dadd(178968.000000,195084.000000,123775.000000,718.829820)}
{pt3dadd(179472.000000,195300.000000,123400.000000,718.829820)}
{pt3dadd(180072.000000,195444.000000,122950.000000,718.829820)}
{pt3dadd(180564.000000,195648.000000,122450.000000,718.829820)}
{pt3dadd(181128.000000,195816.000000,122050.000000,718.829820)}
{pt3dadd(181704.000000,196188.000000,121475.000000,718.829820)}
{pt3dadd(182148.000000,196212.000000,120925.000000,718.829820)}
{pt3dadd(182844.000000,196620.000000,120425.000000,718.829820)}
{pt3dadd(183720.000000,197208.000000,119575.000000,849.656835)}
{pt3dadd(184008.000000,197316.000000,118575.000000,980.483850)}
{pt3dadd(184548.000000,197460.000000,118000.000000,1111.310865)}
{pt3dadd(184872.000000,197424.000000,117525.000000,1242.137880)}
{pt3dadd(185160.000000,197532.000000,116900.000000,1360.886216)}
{pt3dadd(185532.000000,197664.000000,116225.000000,1479.634551)}
{pt3dadd(185892.000000,197760.000000,115550.000000,1598.382887)}
{pt3dadd(186516.000000,198204.000000,114825.000000,1717.131222)}
{pt3dadd(186552.000000,198300.000000,114275.000000,1735.018029)}
{pt3dadd(186732.000000,198468.000000,113825.000000,1752.904836)}
{pt3dadd(187032.000000,198708.000000,113100.000000,1770.791643)}
{pt3dadd(187440.000000,199188.000000,112225.000000,1788.678450)}
{pt3dadd(187800.000000,199512.000000,111300.000000,1878.112382)}
{pt3dadd(187716.000000,199704.000000,110525.000000,1967.546313)}
{pt3dadd(187644.000000,200076.000000,109575.000000,2056.980245)}
{pt3dadd(187752.000000,200448.000000,108925.000000,2146.414176)}
{pt3dadd(187764.000000,200880.000000,108125.000000,2146.414176)}
{pt3dadd(187932.000000,201120.000000,107325.000000,2146.414176)}
{pt3dadd(187980.000000,201564.000000,106650.000000,2146.414176)}
{pt3dadd(187884.000000,201636.000000,105850.000000,2146.414176)}
{pt3dadd(187944.000000,201804.000000,105100.000000,2146.414176)}
{pt3dadd(187980.000000,202044.000000,104300.000000,2146.414176)}
{pt3dadd(188004.000000,202248.000000,103675.000000,2146.414176)}
{pt3dadd(187860.000000,202488.000000,102825.000000,2146.414176)}
{pt3dadd(187752.000000,202512.000000,102375.000000,1982.451983)}
{pt3dadd(187608.000000,202800.000000,101725.000000,1818.489789)}
{pt3dadd(187644.000000,202836.000000,101000.000000,1654.527596)}
{pt3dadd(187716.000000,202932.000000,100425.000000,1490.565402)}
{pt3dadd(187848.000000,203136.000000,99775.000000,1547.206893)}
{pt3dadd(188220.000000,203472.000000,99075.000000,1603.848384)}
{pt3dadd(188700.000000,203592.000000,98475.000000,1660.489875)}
{pt3dadd(188868.000000,203880.000000,97850.000000,1717.131366)}
{pt3dadd(188736.000000,203580.000000,97175.000000,1660.489875)}
{pt3dadd(188664.000000,204048.000000,96700.000000,1603.848384)}
{pt3dadd(188664.000000,204456.000000,96250.000000,1547.206893)}
{pt3dadd(188832.000000,204756.000000,95525.000000,1490.565402)}
{pt3dadd(188796.000000,205164.000000,94900.000000,1376.702789)}
{pt3dadd(188712.000000,205404.000000,94225.000000,1262.840175)}
{pt3dadd(188760.000000,205428.000000,93750.000000,1148.977562)}
{pt3dadd(188712.000000,205560.000000,93200.000000,1035.114948)}
{pt3dadd(188400.000000,205596.000000,92475.000000,1148.977562)}
{pt3dadd(188364.000000,205848.000000,91800.000000,1262.840175)}
{pt3dadd(188076.000000,205908.000000,91125.000000,1376.702788)}
{pt3dadd(187968.000000,205824.000000,90425.000000,1490.565402)}
{pt3dadd(187932.000000,205632.000000,89900.000000,1333.573002)}
{pt3dadd(187884.000000,205560.000000,89400.000000,1176.580602)}
{pt3dadd(187848.000000,205596.000000,88925.000000,1019.588202)}
{pt3dadd(187740.000000,205596.000000,88425.000000,862.595802)}
{pt3dadd(187512.000000,205452.000000,87850.000000,862.595802)}
{pt3dadd(187128.000000,205488.000000,87275.000000,862.595802)}
{pt3dadd(186864.000000,205488.000000,86725.000000,862.595802)}
{pt3dadd(186636.000000,205476.000000,86225.000000,862.595802)}
{pt3dadd(186516.000000,205584.000000,85550.000000,957.481322)}
{pt3dadd(186504.000000,205392.000000,84650.000000,1052.366841)}
{pt3dadd(186456.000000,205320.000000,83950.000000,1147.252361)}
{pt3dadd(186408.000000,205248.000000,83375.000000,1242.137880)}
{pt3dadd(186444.000000,205020.000000,82700.000000,1190.382147)}
{pt3dadd(186636.000000,204756.000000,82175.000000,1138.626414)}
{pt3dadd(186684.000000,204504.000000,81850.000000,1086.870681)}
{pt3dadd(186612.000000,204384.000000,81250.000000,1035.114948)}
{pt3dadd(186420.000000,204096.000000,80375.000000,1014.826685)}
{pt3dadd(186384.000000,203676.000000,79625.000000,994.538421)}
{pt3dadd(186240.000000,203196.000000,78900.000000,974.250158)}
{pt3dadd(186084.000000,202668.000000,78100.000000,953.961894)}
{pt3dadd(185868.000000,202476.000000,77450.000000,981.012912)}
{pt3dadd(185760.000000,202464.000000,76925.000000,1008.063930)}
{pt3dadd(185580.000000,202248.000000,76475.000000,1035.114948)}
{pt3dadd(185412.000000,202200.000000,76175.000000,1035.114948)}

{create adhoc2}
{access adhoc2}
{connect adhoc2(1), adhoc1(0)}
{nseg = 1}
{strdef color color = "White"}
{pt3dclear()}
{pt3dadd(185412.000000,202200.000000,76175.000000,1035.114948)}
{pt3dadd(183792.000000,204396.000000,75675.000000,499.187376)}
{pt3dadd(183456.000000,204936.000000,75700.000000,546.909700)}
{pt3dadd(183048.000000,205584.000000,75700.000000,594.632025)}
{pt3dadd(182868.000000,206160.000000,75450.000000,642.354349)}
{pt3dadd(182796.000000,206520.000000,75100.000000,690.076674)}
{pt3dadd(182484.000000,207252.000000,74650.000000,937.032072)}
{pt3dadd(182268.000000,207900.000000,74150.000000,1183.987470)}
{pt3dadd(182184.000000,208092.000000,73625.000000,1430.942868)}
{pt3dadd(182004.000000,208368.000000,73150.000000,1490.565402)}

{create adhoc3}
{access adhoc3}
{connect adhoc3(1), adhoc2(0)}
{nseg = 1}
{strdef color color = "White"}
{pt3dclear()}
{pt3dadd(182004.000000,208368.000000,73150.000000,1490.565402)}
{pt3dadd(179952.000000,208284.000000,71250.000000,240.734646)}
{pt3dadd(179784.000000,208236.000000,71200.000000,252.771381)}
{pt3dadd(179580.000000,208236.000000,71075.000000,264.808116)}
{pt3dadd(179244.000000,208164.000000,70775.000000,276.844851)}
{pt3dadd(178920.000000,208104.000000,70550.000000,288.881586)}
{pt3dadd(178668.000000,207960.000000,70400.000000,285.992775)}
{pt3dadd(178368.000000,207828.000000,70250.000000,283.103964)}
{pt3dadd(178104.000000,207660.000000,70075.000000,280.215153)}
{pt3dadd(177816.000000,207528.000000,70000.000000,277.326342)}
{pt3dadd(177600.000000,207408.000000,69925.000000,265.771075)}
{pt3dadd(177384.000000,207408.000000,69825.000000,254.215809)}
{pt3dadd(177252.000000,207288.000000,69650.000000,242.660543)}
{pt3dadd(177036.000000,207156.000000,69650.000000,231.105276)}
{pt3dadd(176784.000000,207048.000000,69475.000000,192.768528)}
{pt3dadd(176508.000000,206976.000000,69350.000000,154.431780)}
{pt3dadd(176208.000000,206676.000000,69125.000000,116.095032)}
{pt3dadd(175920.000000,206556.000000,68900.000000,139.314042)}

{create adhoc4}
{access adhoc4}
{connect adhoc4(1), adhoc2(0)}
{nseg = 1}
{strdef color color = "White"}
{pt3dclear()}
{pt3dadd(182004.000000,208368.000000,73150.000000,1490.565402)}
{pt3dadd(181752.000000,208740.000000,72550.000000,1490.565402)}
{pt3dadd(181344.000000,209232.000000,72125.000000,1428.458522)}
{pt3dadd(180864.000000,209676.000000,71825.000000,1366.351641)}
{pt3dadd(180288.000000,210096.000000,71275.000000,1304.244761)}
{pt3dadd(179868.000000,210492.000000,71050.000000,1242.137880)}
{pt3dadd(179508.000000,210924.000000,70675.000000,1242.137880)}
{pt3dadd(179268.000000,211140.000000,70625.000000,1242.137880)}
{pt3dadd(179040.000000,211272.000000,70600.000000,1242.137880)}
{pt3dadd(178824.000000,211452.000000,70525.000000,1242.137880)}
{pt3dadd(178560.000000,211764.000000,70425.000000,1190.382147)}
{pt3dadd(178224.000000,212040.000000,70225.000000,1138.626414)}
{pt3dadd(177924.000000,212412.000000,70200.000000,1086.870681)}
{pt3dadd(177600.000000,212868.000000,70175.000000,1035.114948)}
{pt3dadd(177360.000000,212916.000000,70050.000000,1035.114948)}
{pt3dadd(177132.000000,213096.000000,69850.000000,1035.114948)}
{pt3dadd(176892.000000,213336.000000,69700.000000,1035.114948)}
{pt3dadd(176676.000000,213600.000000,69250.000000,1035.114948)}
{pt3dadd(176496.000000,213864.000000,68750.000000,1148.977562)}
{pt3dadd(176136.000000,214608.000000,67800.000000,1262.840175)}
{pt3dadd(175860.000000,214932.000000,67475.000000,1376.702788)}
{pt3dadd(175608.000000,215388.000000,67400.000000,1490.565402)}
{pt3dadd(175416.000000,215772.000000,67050.000000,1428.458522)}
{pt3dadd(175332.000000,216012.000000,66425.000000,1366.351641)}
{pt3dadd(174756.000000,216624.000000,65825.000000,1304.244761)}
{pt3dadd(174276.000000,216984.000000,65125.000000,1242.137880)}
{pt3dadd(174048.000000,217008.000000,64575.000000,1242.137880)}
{pt3dadd(173568.000000,217380.000000,64050.000000,1242.137880)}
{pt3dadd(173316.000000,217308.000000,63550.000000,1242.137880)}
{pt3dadd(173076.000000,217404.000000,63300.000000,1242.137880)}
{pt3dadd(172776.000000,217548.000000,62950.000000,1242.137880)}
{pt3dadd(172404.000000,217824.000000,62450.000000,1242.137880)}
{pt3dadd(172044.000000,217824.000000,62100.000000,1242.137880)}
{pt3dadd(171660.000000,217968.000000,61750.000000,1242.137880)}
{pt3dadd(171432.000000,218064.000000,61400.000000,1242.137880)}
{pt3dadd(171120.000000,218064.000000,61100.000000,1242.137880)}
{pt3dadd(171060.000000,217968.000000,60550.000000,1035.114948)}

{create adhoc5}
{access adhoc5}
{connect adhoc5(1), adhoc4(0)}
{nseg = 1}
{strdef color color = "White"}
{pt3dclear()}
{pt3dadd(171060.000000,217968.000000,60550.000000,1035.114948)}
{pt3dadd(170376.000000,219528.000000,60325.000000,599.024880)}
{pt3dadd(170376.000000,219564.000000,59950.000000,535.933134)}
{pt3dadd(170316.000000,219420.000000,59600.000000,472.841388)}
{pt3dadd(170364.000000,219192.000000,59125.000000,409.749642)}
{pt3dadd(170304.000000,219024.000000,58825.000000,346.657896)}
{pt3dadd(170292.000000,218952.000000,58500.000000,320.177083)}
{pt3dadd(170364.000000,218856.000000,58175.000000,293.696271)}
{pt3dadd(170316.000000,218712.000000,57850.000000,267.215459)}
{pt3dadd(170220.000000,218568.000000,57625.000000,240.734646)}
{pt3dadd(170208.000000,218580.000000,57425.000000,267.215459)}
{pt3dadd(170352.000000,217968.000000,57000.000000,293.696271)}
{pt3dadd(170628.000000,217644.000000,56575.000000,320.177083)}
{pt3dadd(170736.000000,217356.000000,56250.000000,346.657896)}
{pt3dadd(170796.000000,217176.000000,55900.000000,329.325007)}
{pt3dadd(170868.000000,216744.000000,55600.000000,311.992119)}
{pt3dadd(170832.000000,216408.000000,55250.000000,294.659230)}
{pt3dadd(170820.000000,216084.000000,55100.000000,277.326342)}
{pt3dadd(170844.000000,215556.000000,54725.000000,291.192656)}
{pt3dadd(170700.000000,214836.000000,54325.000000,305.058969)}
{pt3dadd(170616.000000,214500.000000,53975.000000,318.925283)}
{pt3dadd(170496.000000,214368.000000,53625.000000,332.791596)}
{pt3dadd(170436.000000,214308.000000,53250.000000,297.740623)}
{pt3dadd(170364.000000,214356.000000,52750.000000,262.689651)}
{pt3dadd(170292.000000,214764.000000,52600.000000,227.638679)}
{pt3dadd(170100.000000,215052.000000,52375.000000,192.587706)}
{pt3dadd(169920.000000,215484.000000,52150.000000,195.262542)}
{pt3dadd(169728.000000,216048.000000,51975.000000,197.937378)}
{pt3dadd(169716.000000,216432.000000,51850.000000,200.612214)}
{pt3dadd(169644.000000,216768.000000,51725.000000,200.612214)}

{create adhoc6}
{access adhoc6}
{connect adhoc6(1), adhoc4(0)}
{nseg = 1}
{strdef color color = "White"}
{pt3dclear()}
{pt3dadd(171060.000000,217968.000000,60550.000000,1035.114948)}
{pt3dadd(170832.000000,217668.000000,60025.000000,862.595802)}
{pt3dadd(170604.000000,217392.000000,59575.000000,862.595802)}
{pt3dadd(170436.000000,217284.000000,59400.000000,993.710358)}

{create adhoc7}
{access adhoc7}
{connect adhoc7(1), adhoc6(0)}
{nseg = 1}
{strdef color color = "White"}
{pt3dclear()}
{pt3dadd(170436.000000,217284.000000,59400.000000,993.710358)}
{pt3dadd(168708.000000,217596.000000,59375.000000,96.745860)}

{create adhoc8}
{access adhoc8}
{connect adhoc8(1), adhoc7(0)}
{nseg = 1}
{strdef color color = "White"}
{pt3dclear()}
{pt3dadd(168708.000000,217596.000000,59375.000000,96.745860)}
{pt3dadd(168936.000000,216996.000000,59475.000000,167.176836)}
{pt3dadd(168708.000000,216636.000000,59700.000000,167.176836)}
{pt3dadd(168480.000000,216252.000000,59825.000000,167.176836)}
{pt3dadd(168468.000000,216072.000000,59900.000000,167.176836)}
{pt3dadd(168612.000000,215808.000000,59925.000000,167.176836)}
{pt3dadd(168624.000000,215640.000000,60000.000000,185.566288)}
{pt3dadd(168684.000000,215376.000000,60000.000000,203.955741)}
{pt3dadd(168792.000000,215100.000000,60075.000000,222.345193)}
{pt3dadd(168912.000000,214848.000000,60125.000000,240.734646)}
{pt3dadd(168852.000000,214692.000000,60250.000000,220.673430)}
{pt3dadd(168948.000000,214368.000000,60225.000000,200.612214)}
{pt3dadd(169044.000000,214104.000000,59975.000000,240.734646)}

{create adhoc9}
{access adhoc9}
{connect adhoc9(1), adhoc7(0)}
{nseg = 1}
{strdef color color = "White"}
{pt3dclear()}
{pt3dadd(168708.000000,217596.000000,59375.000000,96.745860)}
{pt3dadd(168648.000000,217812.000000,59400.000000,80.621550)}

{create adhoc10}
{access adhoc10}
{connect adhoc10(1), adhoc6(0)}
{nseg = 1}
{strdef color color = "White"}
{pt3dclear()}
{pt3dadd(170436.000000,217284.000000,59400.000000,993.710358)}
{pt3dadd(170208.000000,217308.000000,58975.000000,862.595802)}
{pt3dadd(169920.000000,217224.000000,58425.000000,905.725589)}
{pt3dadd(169692.000000,217200.000000,57875.000000,948.855375)}
{pt3dadd(169404.000000,217104.000000,57475.000000,991.985162)}
{pt3dadd(169056.000000,217176.000000,56975.000000,1035.114948)}
{pt3dadd(169092.000000,217068.000000,56650.000000,1035.114948)}

{create adhoc11}
{access adhoc11}
{connect adhoc11(1), adhoc10(0)}
{nseg = 1}
{strdef color color = "White"}
{pt3dclear()}
{pt3dadd(169092.000000,217068.000000,56650.000000,1035.114948)}
{pt3dadd(168096.000000,218496.000000,56675.000000,415.989486)}
{pt3dadd(167748.000000,218940.000000,56425.000000,372.175776)}
{pt3dadd(167424.000000,219588.000000,56125.000000,328.362066)}
{pt3dadd(167124.000000,220152.000000,55850.000000,284.548356)}
{pt3dadd(166920.000000,220560.000000,55775.000000,240.734646)}
{pt3dadd(166788.000000,220860.000000,55750.000000,267.215459)}
{pt3dadd(166668.000000,221148.000000,55550.000000,293.696271)}
{pt3dadd(166572.000000,221424.000000,55625.000000,320.177083)}
{pt3dadd(166368.000000,221736.000000,55600.000000,346.657896)}
{pt3dadd(166152.000000,222012.000000,55550.000000,273.635055)}
{pt3dadd(165924.000000,222336.000000,55550.000000,200.612214)}
{pt3dadd(165756.000000,222612.000000,55600.000000,288.881586)}

{create adhoc12}
{access adhoc12}
{connect adhoc12(1), adhoc10(0)}
{nseg = 1}
{strdef color color = "White"}
{pt3dclear()}
{pt3dadd(169092.000000,217068.000000,56650.000000,1035.114948)}
{pt3dadd(169212.000000,216768.000000,56250.000000,1035.114948)}

{create adhoc13}
{access adhoc13}
{connect adhoc13(1), adhoc12(0)}
{nseg = 1}
{strdef color color = "White"}
{pt3dclear()}
{pt3dadd(169212.000000,216768.000000,56250.000000,1035.114948)}
{pt3dadd(169224.000000,215172.000000,56050.000000,415.989486)}
{pt3dadd(169224.000000,213912.000000,56050.000000,415.989486)}
{pt3dadd(169224.000000,212700.000000,55900.000000,415.989486)}
{pt3dadd(169392.000000,212448.000000,55800.000000,415.989486)}
{pt3dadd(169488.000000,212244.000000,55725.000000,415.989486)}
{pt3dadd(169596.000000,212016.000000,55700.000000,398.656589)}
{pt3dadd(169644.000000,211836.000000,55550.000000,381.323691)}
{pt3dadd(169680.000000,211464.000000,55425.000000,363.990794)}
{pt3dadd(169716.000000,211068.000000,55225.000000,346.657896)}
{pt3dadd(170040.000000,210696.000000,55025.000000,320.177083)}
{pt3dadd(170316.000000,210300.000000,54900.000000,293.696271)}
{pt3dadd(170364.000000,209952.000000,54650.000000,267.215459)}
{pt3dadd(170412.000000,209640.000000,54550.000000,240.734646)}
{pt3dadd(170280.000000,209316.000000,54625.000000,240.734646)}

{create adhoc14}
{access adhoc14}
{connect adhoc14(1), adhoc13(0)}
{nseg = 1}
{strdef color color = "White"}
{pt3dclear()}
{pt3dadd(170280.000000,209316.000000,54625.000000,240.734646)}
{pt3dadd(169836.000000,209340.000000,54900.000000,200.612214)}
{pt3dadd(169416.000000,209292.000000,55150.000000,167.176836)}

{create adhoc15}
{access adhoc15}
{connect adhoc15(1), adhoc13(0)}
{nseg = 1}
{strdef color color = "White"}
{pt3dclear()}
{pt3dadd(170280.000000,209316.000000,54625.000000,240.734646)}
{pt3dadd(170388.000000,209148.000000,54525.000000,192.587724)}
{pt3dadd(170508.000000,208848.000000,54500.000000,204.624455)}
{pt3dadd(170556.000000,208644.000000,54350.000000,216.661185)}
{pt3dadd(170484.000000,208296.000000,54325.000000,228.697915)}
{pt3dadd(170424.000000,207984.000000,54250.000000,240.734646)}
{pt3dadd(170400.000000,207720.000000,54175.000000,240.734646)}
{pt3dadd(170112.000000,207516.000000,53800.000000,240.734646)}
{pt3dadd(170076.000000,207228.000000,53400.000000,240.734646)}
{pt3dadd(170268.000000,206808.000000,53000.000000,240.734646)}
{pt3dadd(170472.000000,206568.000000,52625.000000,167.176836)}

{create adhoc16}
{access adhoc16}
{connect adhoc16(1), adhoc12(0)}
{nseg = 1}
{strdef color color = "White"}
{pt3dclear()}
{pt3dadd(169212.000000,216768.000000,56250.000000,1035.114948)}
{pt3dadd(169008.000000,215856.000000,53450.000000,599.024880)}

{create adhoc17}
{access adhoc17}
{connect adhoc17(1), adhoc1(0)}
{nseg = 1}
{strdef color color = "White"}
{pt3dclear()}
{pt3dadd(185412.000000,202200.000000,76175.000000,1035.114948)}
{pt3dadd(185820.000000,200676.000000,74725.000000,862.595802)}
{pt3dadd(186108.000000,200184.000000,74525.000000,905.725589)}
{pt3dadd(186288.000000,199656.000000,74075.000000,948.855375)}
{pt3dadd(186456.000000,199380.000000,73875.000000,991.985162)}
{pt3dadd(186588.000000,199044.000000,73475.000000,1035.114948)}
{pt3dadd(186756.000000,198768.000000,73375.000000,983.359197)}
{pt3dadd(186756.000000,198432.000000,73050.000000,931.603446)}
{pt3dadd(186684.000000,198072.000000,72500.000000,879.847695)}
{pt3dadd(186612.000000,197652.000000,72175.000000,828.091944)}
{pt3dadd(186540.000000,197292.000000,71850.000000,879.847695)}
{pt3dadd(186576.000000,196956.000000,71375.000000,931.603446)}
{pt3dadd(186564.000000,196656.000000,71275.000000,983.359197)}
{pt3dadd(186564.000000,196224.000000,70975.000000,1035.114948)}
{pt3dadd(186480.000000,195828.000000,70425.000000,1188.447732)}
{pt3dadd(186456.000000,195396.000000,70200.000000,1341.780516)}
{pt3dadd(186480.000000,194988.000000,69875.000000,1495.113300)}
{pt3dadd(186960.000000,193620.000000,69225.000000,1648.446084)}
{pt3dadd(186840.000000,192540.000000,68250.000000,1671.341178)}
{pt3dadd(186732.000000,191904.000000,67225.000000,1694.236272)}
{pt3dadd(186540.000000,191316.000000,66225.000000,1717.131366)}
{pt3dadd(186780.000000,189552.000000,65425.000000,1788.678450)}

{create adhoc18}
{access adhoc18}
{connect adhoc18(1), adhoc17(0)}
{nseg = 1}
{strdef color color = "White"}
{pt3dclear()}
{pt3dadd(186780.000000,189552.000000,65425.000000,1788.678450)}
{pt3dadd(186804.000000,189396.000000,63400.000000,862.595802)}
{pt3dadd(186780.000000,189168.000000,62475.000000,957.481322)}
{pt3dadd(186096.000000,189120.000000,61750.000000,1052.366841)}
{pt3dadd(185628.000000,189264.000000,61275.000000,1147.252361)}
{pt3dadd(184584.000000,189552.000000,60525.000000,1242.137880)}
{pt3dadd(184128.000000,189756.000000,60275.000000,1035.114948)}

{create adhoc19}
{access adhoc19}
{connect adhoc19(1), adhoc18(0)}
{nseg = 1}
{strdef color color = "White"}
{pt3dclear()}
{pt3dadd(184128.000000,189756.000000,60275.000000,1035.114948)}
{pt3dadd(183468.000000,189972.000000,59800.000000,993.710358)}
{pt3dadd(182592.000000,189996.000000,59275.000000,1035.114948)}

{create adhoc20}
{access adhoc20}
{connect adhoc20(1), adhoc19(0)}
{nseg = 1}
{strdef color color = "White"}
{pt3dclear()}
{pt3dadd(182592.000000,189996.000000,59275.000000,1035.114948)}
{pt3dadd(182076.000000,189852.000000,58950.000000,993.710358)}
{pt3dadd(181740.000000,189948.000000,58475.000000,862.595802)}
{pt3dadd(181392.000000,190320.000000,57850.000000,828.091944)}

{create adhoc21}
{access adhoc21}
{connect adhoc21(1), adhoc20(0)}
{nseg = 1}
{strdef color color = "White"}
{pt3dclear()}
{pt3dadd(181392.000000,190320.000000,57850.000000,828.091944)}
{pt3dadd(182004.000000,189024.000000,57375.000000,1242.137880)}
{pt3dadd(181788.000000,188904.000000,57025.000000,1242.137880)}

{create adhoc22}
{access adhoc22}
{connect adhoc22(1), adhoc21(0)}
{nseg = 1}
{strdef color color = "White"}
{pt3dclear()}
{pt3dadd(181788.000000,188904.000000,57025.000000,1242.137880)}
{pt3dadd(181776.000000,188592.000000,56550.000000,993.710286)}
{pt3dadd(181656.000000,188376.000000,55875.000000,993.710286)}
{pt3dadd(181764.000000,188040.000000,55350.000000,993.710286)}
{pt3dadd(181680.000000,187584.000000,54775.000000,993.710286)}
{pt3dadd(181776.000000,187500.000000,54575.000000,1035.114948)}

{create adhoc23}
{access adhoc23}
{connect adhoc23(1), adhoc22(0)}
{nseg = 1}
{strdef color color = "White"}
{pt3dclear()}
{pt3dadd(181776.000000,187500.000000,54575.000000,1035.114948)}
{pt3dadd(181884.000000,186876.000000,54125.000000,1035.114948)}
{pt3dadd(181848.000000,186468.000000,53650.000000,1035.114948)}
{pt3dadd(181800.000000,185844.000000,53075.000000,1035.114948)}
{pt3dadd(181764.000000,185628.000000,52800.000000,1192.452354)}

{create adhoc24}
{access adhoc24}
{connect adhoc24(1), adhoc23(0)}
{nseg = 1}
{strdef color color = "White"}
{pt3dclear()}
{pt3dadd(181764.000000,185628.000000,52800.000000,1192.452354)}
{pt3dadd(181908.000000,185376.000000,52325.000000,1035.114948)}
{pt3dadd(181872.000000,185004.000000,52125.000000,1035.114948)}

{create adhoc25}
{access adhoc25}
{connect adhoc25(1), adhoc24(0)}
{nseg = 1}
{strdef color color = "White"}
{pt3dclear()}
{pt3dadd(181872.000000,185004.000000,52125.000000,1035.114948)}
{pt3dadd(182172.000000,184104.000000,51800.000000,1035.114948)}
{pt3dadd(182388.000000,183612.000000,51575.000000,876.972384)}
{pt3dadd(182688.000000,182736.000000,51100.000000,718.829820)}
{pt3dadd(183156.000000,182244.000000,50500.000000,718.829820)}

{create adhoc26}
{access adhoc26}
{connect adhoc26(1), adhoc25(0)}
{nseg = 1}
{strdef color color = "White"}
{pt3dclear()}
{pt3dadd(183156.000000,182244.000000,50500.000000,718.829820)}
{pt3dadd(182508.000000,183708.000000,50100.000000,499.187376)}
{pt3dadd(182220.000000,183636.000000,49825.000000,554.097987)}
{pt3dadd(181800.000000,183648.000000,49450.000000,609.008598)}
{pt3dadd(181380.000000,183576.000000,49150.000000,663.919209)}
{pt3dadd(181296.000000,183636.000000,48675.000000,718.829820)}
{pt3dadd(180876.000000,183636.000000,48275.000000,625.786839)}
{pt3dadd(180648.000000,183636.000000,47850.000000,532.743858)}
{pt3dadd(180228.000000,183600.000000,47600.000000,439.700877)}
{pt3dadd(179784.000000,183420.000000,47725.000000,346.657896)}
{pt3dadd(179388.000000,183552.000000,47675.000000,320.177083)}
{pt3dadd(179136.000000,183636.000000,47575.000000,293.696271)}
{pt3dadd(178800.000000,183852.000000,47450.000000,267.215459)}
{pt3dadd(178560.000000,183996.000000,47200.000000,240.734646)}
{pt3dadd(178332.000000,184092.000000,47025.000000,215.379495)}
{pt3dadd(177948.000000,184620.000000,47025.000000,190.024344)}
{pt3dadd(177720.000000,185052.000000,47025.000000,164.669193)}
{pt3dadd(177240.000000,185424.000000,47025.000000,139.314042)}
{pt3dadd(177072.000000,185520.000000,47000.000000,146.279741)}
{pt3dadd(176436.000000,185580.000000,47000.000000,153.245439)}
{pt3dadd(175920.000000,185664.000000,47000.000000,160.211138)}
{pt3dadd(175764.000000,185640.000000,47150.000000,167.176836)}
{pt3dadd(175620.000000,185676.000000,47200.000000,117.180738)}
{pt3dadd(175308.000000,186012.000000,47425.000000,67.184640)}
{pt3dadd(175356.000000,186264.000000,47600.000000,96.745860)}

{create adhoc27}
{access adhoc27}
{connect adhoc27(1), adhoc25(0)}
{nseg = 1}
{strdef color color = "White"}
{pt3dclear()}
{pt3dadd(183156.000000,182244.000000,50500.000000,718.829820)}
{pt3dadd(183540.000000,182340.000000,50275.000000,240.734646)}

{create adhoc28}
{access adhoc28}
{connect adhoc28(1), adhoc25(0)}
{nseg = 1}
{strdef color color = "White"}
{pt3dclear()}
{pt3dadd(183156.000000,182244.000000,50500.000000,718.829820)}
{pt3dadd(182880.000000,180912.000000,50325.000000,499.187376)}
{pt3dadd(182652.000000,180252.000000,50100.000000,575.063856)}

{create adhoc29}
{access adhoc29}
{connect adhoc29(1), adhoc28(0)}
{nseg = 1}
{strdef color color = "White"}
{pt3dclear()}
{pt3dadd(182652.000000,180252.000000,50100.000000,575.063856)}
{pt3dadd(182616.000000,180036.000000,49725.000000,718.829820)}
{pt3dadd(182676.000000,179736.000000,49350.000000,658.927336)}
{pt3dadd(182724.000000,179340.000000,48925.000000,599.024853)}
{pt3dadd(182856.000000,178872.000000,48525.000000,539.122369)}
{pt3dadd(182964.000000,178332.000000,48200.000000,479.219886)}
{pt3dadd(182916.000000,177852.000000,47975.000000,499.187376)}

{create adhoc30}
{access adhoc30}
{connect adhoc30(1), adhoc29(0)}
{nseg = 1}
{strdef color color = "White"}
{pt3dclear()}
{pt3dadd(182916.000000,177852.000000,47975.000000,499.187376)}
{pt3dadd(182880.000000,177276.000000,47625.000000,399.349908)}
{pt3dadd(182892.000000,176832.000000,47225.000000,424.309275)}
{pt3dadd(182988.000000,176340.000000,46900.000000,449.268642)}
{pt3dadd(183048.000000,176004.000000,46625.000000,474.228009)}
{pt3dadd(183168.000000,175464.000000,46200.000000,499.187376)}
{pt3dadd(183324.000000,175248.000000,45975.000000,532.466544)}
{pt3dadd(183300.000000,174936.000000,45850.000000,565.745712)}
{pt3dadd(183336.000000,174636.000000,45525.000000,599.024880)}
{pt3dadd(183252.000000,174372.000000,45325.000000,599.024880)}

{create adhoc31}
{access adhoc31}
{connect adhoc31(1), adhoc30(0)}
{nseg = 1}
{strdef color color = "White"}
{pt3dclear()}
{pt3dadd(183252.000000,174372.000000,45325.000000,599.024880)}
{pt3dadd(183312.000000,174216.000000,45425.000000,499.187376)}

{create adhoc32}
{access adhoc32}
{connect adhoc32(1), adhoc31(0)}
{nseg = 1}
{strdef color color = "White"}
{pt3dclear()}
{pt3dadd(183312.000000,174216.000000,45425.000000,499.187376)}
{pt3dadd(183456.000000,174012.000000,45500.000000,499.187376)}
{pt3dadd(183516.000000,173724.000000,45625.000000,499.187376)}
{pt3dadd(183468.000000,173472.000000,45675.000000,499.187376)}
{pt3dadd(183456.000000,173244.000000,45700.000000,499.187376)}
{pt3dadd(183576.000000,172800.000000,45625.000000,499.187376)}
{pt3dadd(183624.000000,172548.000000,45675.000000,478.387903)}
{pt3dadd(183756.000000,172320.000000,45600.000000,457.588431)}
{pt3dadd(183852.000000,172116.000000,45525.000000,436.788958)}
{pt3dadd(183948.000000,171876.000000,45425.000000,415.989486)}
{pt3dadd(184032.000000,171624.000000,45275.000000,384.212511)}
{pt3dadd(184044.000000,171216.000000,45175.000000,352.435536)}
{pt3dadd(184080.000000,171012.000000,45025.000000,320.658561)}
{pt3dadd(183996.000000,170808.000000,44975.000000,288.881586)}
{pt3dadd(183996.000000,170580.000000,44875.000000,320.658561)}
{pt3dadd(183924.000000,170280.000000,44800.000000,352.435536)}
{pt3dadd(183876.000000,169944.000000,44825.000000,384.212511)}
{pt3dadd(183804.000000,169656.000000,44800.000000,415.989486)}
{pt3dadd(183756.000000,169356.000000,44725.000000,415.989486)}
{pt3dadd(183780.000000,169104.000000,44625.000000,415.989486)}
{pt3dadd(183828.000000,168852.000000,44450.000000,415.989486)}
{pt3dadd(183900.000000,168588.000000,44400.000000,415.989486)}
{pt3dadd(183960.000000,168300.000000,44325.000000,398.656589)}
{pt3dadd(183984.000000,167868.000000,44200.000000,381.323691)}
{pt3dadd(184224.000000,167460.000000,44225.000000,363.990794)}
{pt3dadd(184272.000000,167232.000000,44250.000000,346.657896)}
{pt3dadd(184428.000000,166896.000000,44275.000000,332.213819)}
{pt3dadd(184500.000000,166620.000000,44125.000000,317.769741)}
{pt3dadd(184692.000000,166248.000000,44050.000000,303.325664)}
{pt3dadd(184920.000000,165924.000000,44050.000000,288.881586)}
{pt3dadd(185148.000000,165624.000000,43925.000000,320.658561)}
{pt3dadd(185268.000000,165348.000000,43725.000000,352.435536)}
{pt3dadd(185316.000000,165072.000000,43500.000000,384.212511)}
{pt3dadd(185352.000000,164796.000000,43300.000000,415.989486)}
{pt3dadd(185304.000000,164496.000000,43125.000000,436.788958)}
{pt3dadd(185208.000000,164208.000000,42875.000000,457.588431)}
{pt3dadd(185052.000000,163596.000000,42450.000000,478.387903)}
{pt3dadd(185028.000000,163224.000000,42100.000000,499.187376)}
{pt3dadd(185064.000000,163020.000000,42025.000000,446.610929)}
{pt3dadd(185124.000000,162756.000000,41950.000000,394.034481)}
{pt3dadd(185172.000000,162456.000000,41825.000000,341.458034)}
{pt3dadd(185352.000000,162252.000000,41500.000000,288.881586)}
{pt3dadd(185556.000000,161940.000000,41250.000000,266.814243)}
{pt3dadd(185640.000000,161640.000000,41000.000000,244.746900)}
{pt3dadd(185664.000000,161340.000000,41050.000000,222.679557)}
{pt3dadd(185580.000000,160992.000000,40950.000000,200.612214)}
{pt3dadd(185652.000000,160680.000000,40900.000000,222.679557)}
{pt3dadd(185604.000000,160332.000000,40800.000000,244.746900)}
{pt3dadd(185532.000000,159492.000000,40625.000000,266.814243)}
{pt3dadd(185328.000000,158556.000000,40425.000000,288.881586)}
{pt3dadd(185352.000000,158172.000000,40450.000000,303.325664)}
{pt3dadd(185292.000000,157776.000000,40425.000000,317.769741)}
{pt3dadd(185256.000000,157464.000000,40450.000000,332.213819)}
{pt3dadd(185316.000000,157212.000000,40425.000000,346.657896)}
{pt3dadd(185448.000000,156792.000000,40375.000000,310.146476)}
{pt3dadd(185532.000000,156588.000000,40200.000000,273.635055)}
{pt3dadd(185592.000000,156360.000000,40225.000000,237.123635)}
{pt3dadd(185628.000000,156180.000000,40275.000000,200.612214)}
{pt3dadd(185664.000000,155952.000000,40325.000000,210.642822)}
{pt3dadd(185748.000000,155748.000000,40450.000000,220.673430)}
{pt3dadd(185880.000000,155568.000000,40525.000000,230.704038)}
{pt3dadd(186288.000000,155172.000000,40725.000000,240.734646)}
{pt3dadd(186504.000000,155028.000000,40725.000000,227.360502)}
{pt3dadd(186900.000000,154320.000000,40825.000000,213.986358)}
{pt3dadd(187092.000000,153672.000000,40850.000000,200.612214)}
{pt3dadd(187104.000000,153228.000000,40875.000000,346.657896)}

{create adhoc33}
{access adhoc33}
{connect adhoc33(1), adhoc32(0)}
{nseg = 1}
{strdef color color = "White"}
{pt3dclear()}
{pt3dadd(187104.000000,153228.000000,40875.000000,346.657896)}
{pt3dadd(186960.000000,152856.000000,40725.000000,240.734646)}
{pt3dadd(187020.000000,152508.000000,40575.000000,240.734646)}

{create adhoc34}
{access adhoc34}
{connect adhoc34(1), adhoc33(0)}
{nseg = 1}
{strdef color color = "White"}
{pt3dclear()}
{pt3dadd(187020.000000,152508.000000,40575.000000,240.734646)}
{pt3dadd(186984.000000,152208.000000,40500.000000,288.881586)}
{pt3dadd(187212.000000,151956.000000,40500.000000,274.437509)}
{pt3dadd(187404.000000,151680.000000,40450.000000,259.993431)}
{pt3dadd(187608.000000,151416.000000,40450.000000,245.549354)}
{pt3dadd(187608.000000,151152.000000,40450.000000,231.105276)}
{pt3dadd(187812.000000,150948.000000,40525.000000,200.612214)}

{create adhoc35}
{access adhoc35}
{connect adhoc35(1), adhoc33(0)}
{nseg = 1}
{strdef color color = "White"}
{pt3dclear()}
{pt3dadd(187020.000000,152508.000000,40575.000000,240.734646)}
{pt3dadd(187524.000000,152532.000000,40025.000000,200.612214)}
{pt3dadd(187896.000000,152532.000000,39800.000000,167.176836)}
{pt3dadd(188040.000000,152364.000000,39575.000000,116.095032)}

{create adhoc36}
{access adhoc36}
{connect adhoc36(1), adhoc32(0)}
{nseg = 1}
{strdef color color = "White"}
{pt3dclear()}
{pt3dadd(187104.000000,153228.000000,40875.000000,346.657896)}
{pt3dadd(187344.000000,153180.000000,41475.000000,200.612214)}
{pt3dadd(187560.000000,153180.000000,41925.000000,160.489764)}

{create adhoc37}
{access adhoc37}
{connect adhoc37(1), adhoc31(0)}
{nseg = 1}
{strdef color color = "White"}
{pt3dclear()}
{pt3dadd(183312.000000,174216.000000,45425.000000,499.187376)}
{pt3dadd(181992.000000,174216.000000,45200.000000,80.621550)}
{pt3dadd(181752.000000,174108.000000,45050.000000,84.652627)}
{pt3dadd(181572.000000,174132.000000,45125.000000,88.683705)}
{pt3dadd(181428.000000,174132.000000,45075.000000,92.714782)}
{pt3dadd(181164.000000,174156.000000,45075.000000,96.745860)}
{pt3dadd(180924.000000,174240.000000,45050.000000,148.679037)}
{pt3dadd(180540.000000,174324.000000,44825.000000,200.612214)}
{pt3dadd(180276.000000,174312.000000,44575.000000,139.314042)}

{create adhoc38}
{access adhoc38}
{connect adhoc38(1), adhoc30(0)}
{nseg = 1}
{strdef color color = "White"}
{pt3dclear()}
{pt3dadd(183252.000000,174372.000000,45325.000000,599.024880)}
{pt3dadd(182664.000000,174372.000000,43975.000000,599.024880)}
{pt3dadd(182448.000000,174384.000000,43625.000000,499.187376)}

{create adhoc39}
{access adhoc39}
{connect adhoc39(1), adhoc38(0)}
{nseg = 1}
{strdef color color = "White"}
{pt3dclear()}
{pt3dadd(182448.000000,174384.000000,43625.000000,499.187376)}
{pt3dadd(182304.000000,174408.000000,43225.000000,346.657896)}
{pt3dadd(182160.000000,174300.000000,42825.000000,332.213819)}
{pt3dadd(182208.000000,174084.000000,42300.000000,317.769741)}
{pt3dadd(182172.000000,173952.000000,42175.000000,303.325664)}
{pt3dadd(182208.000000,173820.000000,41750.000000,288.881586)}
{pt3dadd(182148.000000,173520.000000,41525.000000,303.325664)}
{pt3dadd(182124.000000,173352.000000,41250.000000,317.769741)}
{pt3dadd(182052.000000,173148.000000,40975.000000,332.213819)}
{pt3dadd(181932.000000,173184.000000,40600.000000,346.657896)}
{pt3dadd(182016.000000,173076.000000,40300.000000,288.881586)}

{create adhoc40}
{access adhoc40}
{connect adhoc40(1), adhoc39(0)}
{nseg = 1}
{strdef color color = "White"}
{pt3dclear()}
{pt3dadd(182016.000000,173076.000000,40300.000000,288.881586)}
{pt3dadd(181932.000000,173208.000000,39875.000000,288.881586)}
{pt3dadd(181896.000000,173232.000000,39675.000000,264.808116)}
{pt3dadd(181848.000000,173424.000000,39475.000000,240.734646)}
{pt3dadd(181788.000000,173376.000000,39250.000000,139.314042)}

{create adhoc41}
{access adhoc41}
{connect adhoc41(1), adhoc39(0)}
{nseg = 1}
{strdef color color = "White"}
{pt3dclear()}
{pt3dadd(182016.000000,173076.000000,40300.000000,288.881586)}
{pt3dadd(182208.000000,172608.000000,39900.000000,200.612214)}
{pt3dadd(182436.000000,172488.000000,39725.000000,210.642822)}
{pt3dadd(182772.000000,172392.000000,39500.000000,220.673430)}
{pt3dadd(183120.000000,172320.000000,39300.000000,230.704038)}
{pt3dadd(183528.000000,172320.000000,39100.000000,240.734646)}
{pt3dadd(183684.000000,172272.000000,38900.000000,299.152926)}
{pt3dadd(183816.000000,172308.000000,38675.000000,357.571206)}
{pt3dadd(183912.000000,172260.000000,38450.000000,415.989486)}
{pt3dadd(184008.000000,172260.000000,38225.000000,346.657896)}

{create adhoc42}
{access adhoc42}
{connect adhoc42(1), adhoc38(0)}
{nseg = 1}
{strdef color color = "White"}
{pt3dclear()}
{pt3dadd(182448.000000,174384.000000,43625.000000,499.187376)}
{pt3dadd(181992.000000,173760.000000,43625.000000,80.621550)}
{pt3dadd(181884.000000,173616.000000,43600.000000,80.621550)}

{create adhoc43}
{access adhoc43}
{connect adhoc43(1), adhoc29(0)}
{nseg = 1}
{strdef color color = "White"}
{pt3dclear()}
{pt3dadd(182916.000000,177852.000000,47975.000000,499.187376)}
{pt3dadd(182436.000000,176760.000000,48025.000000,139.314042)}
{pt3dadd(182160.000000,176388.000000,48125.000000,162.261850)}
{pt3dadd(181860.000000,176088.000000,48375.000000,185.209659)}
{pt3dadd(181464.000000,175896.000000,48675.000000,208.157468)}
{pt3dadd(181128.000000,175944.000000,49000.000000,231.105276)}
{pt3dadd(180924.000000,176016.000000,49175.000000,215.123166)}
{pt3dadd(180576.000000,176004.000000,49150.000000,199.141056)}
{pt3dadd(180276.000000,176076.000000,49275.000000,183.158946)}
{pt3dadd(179988.000000,176112.000000,49350.000000,167.176836)}
{pt3dadd(179700.000000,176064.000000,49525.000000,197.603024)}
{pt3dadd(179388.000000,175956.000000,49800.000000,228.029211)}
{pt3dadd(179040.000000,175800.000000,50300.000000,258.455399)}
{pt3dadd(179364.000000,175716.000000,50775.000000,288.881586)}
{pt3dadd(179460.000000,175584.000000,51050.000000,346.657896)}

{create adhoc44}
{access adhoc44}
{connect adhoc44(1), adhoc28(0)}
{nseg = 1}
{strdef color color = "White"}
{pt3dclear()}
{pt3dadd(182652.000000,180252.000000,50100.000000,575.063856)}
{pt3dadd(181536.000000,179880.000000,50100.000000,116.095032)}
{pt3dadd(180972.000000,179568.000000,50100.000000,121.899785)}
{pt3dadd(180528.000000,179520.000000,50175.000000,127.704537)}
{pt3dadd(180276.000000,179556.000000,50175.000000,133.509289)}
{pt3dadd(179868.000000,179724.000000,50425.000000,139.314042)}
{pt3dadd(179724.000000,179832.000000,50425.000000,116.095032)}

{create adhoc45}
{access adhoc45}
{connect adhoc45(1), adhoc24(0)}
{nseg = 1}
{strdef color color = "White"}
{pt3dclear()}
{pt3dadd(181872.000000,185004.000000,52125.000000,1035.114948)}
{pt3dadd(180036.000000,185304.000000,52125.000000,167.176836)}
{pt3dadd(179688.000000,185388.000000,51975.000000,143.699844)}
{pt3dadd(179436.000000,185460.000000,51775.000000,120.222852)}
{pt3dadd(179076.000000,185580.000000,51600.000000,96.745860)}
{pt3dadd(178932.000000,185616.000000,51550.000000,116.095032)}

{create adhoc46}
{access adhoc46}
{connect adhoc46(1), adhoc23(0)}
{nseg = 1}
{strdef color color = "White"}
{pt3dclear()}
{pt3dadd(181764.000000,185628.000000,52800.000000,1192.452354)}
{pt3dadd(180372.000000,184620.000000,52800.000000,200.612214)}
{pt3dadd(180216.000000,184464.000000,52850.000000,192.253370)}
{pt3dadd(179916.000000,184404.000000,52825.000000,183.894525)}
{pt3dadd(179748.000000,184356.000000,52925.000000,175.535680)}
{pt3dadd(179388.000000,184068.000000,52850.000000,167.176836)}
{pt3dadd(179196.000000,183924.000000,52850.000000,149.569092)}
{pt3dadd(178836.000000,183804.000000,52850.000000,131.961348)}
{pt3dadd(178692.000000,183780.000000,52875.000000,114.353604)}
{pt3dadd(178536.000000,183840.000000,52950.000000,96.745860)}
{pt3dadd(178392.000000,183864.000000,52975.000000,111.451230)}
{pt3dadd(178260.000000,183840.000000,52975.000000,116.095032)}

{create adhoc47}
{access adhoc47}
{connect adhoc47(1), adhoc22(0)}
{nseg = 1}
{strdef color color = "White"}
{pt3dclear()}
{pt3dadd(181776.000000,187500.000000,54575.000000,1035.114948)}
{pt3dadd(180312.000000,188340.000000,54425.000000,200.612214)}
{pt3dadd(180132.000000,188376.000000,54375.000000,200.612214)}
{pt3dadd(179988.000000,188400.000000,54325.000000,200.612214)}
{pt3dadd(179820.000000,188412.000000,54300.000000,200.612214)}
{pt3dadd(179520.000000,188448.000000,54050.000000,200.612214)}
{pt3dadd(179316.000000,188424.000000,54000.000000,210.642822)}
{pt3dadd(178992.000000,188448.000000,53950.000000,220.673430)}
{pt3dadd(178716.000000,188544.000000,53825.000000,230.704038)}
{pt3dadd(178416.000000,188592.000000,53775.000000,240.734646)}
{pt3dadd(178236.000000,188616.000000,53725.000000,215.379495)}
{pt3dadd(178044.000000,188664.000000,53675.000000,190.024344)}
{pt3dadd(177792.000000,188736.000000,53575.000000,164.669193)}
{pt3dadd(177576.000000,188904.000000,53425.000000,139.314042)}
{pt3dadd(177240.000000,189036.000000,53350.000000,128.671997)}
{pt3dadd(176988.000000,189300.000000,53175.000000,118.029951)}
{pt3dadd(176544.000000,189492.000000,53100.000000,107.387906)}
{pt3dadd(176196.000000,189564.000000,53100.000000,96.745860)}
{pt3dadd(175896.000000,189564.000000,53075.000000,132.743057)}
{pt3dadd(175704.000000,189528.000000,53075.000000,168.740253)}
{pt3dadd(175416.000000,189636.000000,53075.000000,204.737450)}
{pt3dadd(175008.000000,189756.000000,53075.000000,240.734646)}
{pt3dadd(174780.000000,189720.000000,53050.000000,116.095032)}

{create adhoc48}
{access adhoc48}
{connect adhoc48(1), adhoc21(0)}
{nseg = 1}
{strdef color color = "White"}
{pt3dclear()}
{pt3dadd(181788.000000,188904.000000,57025.000000,1242.137880)}
{pt3dadd(180360.000000,189384.000000,56900.000000,139.314042)}
{pt3dadd(179892.000000,189444.000000,56700.000000,162.261850)}
{pt3dadd(179400.000000,189504.000000,56400.000000,185.209659)}
{pt3dadd(179112.000000,189468.000000,56125.000000,208.157468)}
{pt3dadd(178680.000000,189264.000000,55925.000000,231.105276)}
{pt3dadd(178392.000000,189168.000000,55800.000000,231.105276)}
{pt3dadd(178140.000000,189024.000000,55700.000000,231.105276)}
{pt3dadd(177912.000000,188904.000000,55700.000000,231.105276)}
{pt3dadd(177636.000000,188748.000000,55700.000000,231.105276)}
{pt3dadd(177420.000000,188580.000000,55700.000000,223.482010)}
{pt3dadd(177096.000000,188208.000000,55375.000000,215.858745)}
{pt3dadd(176868.000000,188160.000000,55300.000000,208.235480)}
{pt3dadd(176688.000000,188100.000000,55175.000000,200.612214)}
{pt3dadd(176556.000000,188004.000000,55225.000000,174.645625)}
{pt3dadd(176328.000000,187956.000000,55200.000000,148.679037)}
{pt3dadd(176112.000000,188004.000000,55175.000000,122.712448)}
{pt3dadd(175944.000000,188016.000000,55225.000000,96.745860)}
{pt3dadd(175704.000000,188124.000000,55225.000000,139.314042)}

{create adhoc49}
{access adhoc49}
{connect adhoc49(1), adhoc20(0)}
{nseg = 1}
{strdef color color = "White"}
{pt3dclear()}
{pt3dadd(181392.000000,190320.000000,57850.000000,828.091944)}
{pt3dadd(180648.000000,191448.000000,57600.000000,862.595802)}
{pt3dadd(180120.000000,191880.000000,57225.000000,862.595802)}
{pt3dadd(179712.000000,192240.000000,56825.000000,862.595802)}
{pt3dadd(179244.000000,192660.000000,56550.000000,862.595802)}
{pt3dadd(178968.000000,193008.000000,56200.000000,862.595802)}
{pt3dadd(178764.000000,193308.000000,55825.000000,957.481322)}
{pt3dadd(178572.000000,193656.000000,55075.000000,1052.366841)}
{pt3dadd(178320.000000,193908.000000,54225.000000,1147.252361)}
{pt3dadd(178356.000000,193944.000000,53575.000000,1242.137880)}
{pt3dadd(178236.000000,193896.000000,53325.000000,1035.114948)}
{pt3dadd(178116.000000,193848.000000,53225.000000,1242.137880)}

{create adhoc50}
{access adhoc50}
{connect adhoc50(1), adhoc49(0)}
{nseg = 1}
{strdef color color = "White"}
{pt3dclear()}
{pt3dadd(178116.000000,193848.000000,53225.000000,1242.137880)}
{pt3dadd(177972.000000,194004.000000,52975.000000,862.595802)}
{pt3dadd(177960.000000,194136.000000,52500.000000,972.547986)}
{pt3dadd(177972.000000,194196.000000,52025.000000,1082.500170)}
{pt3dadd(177948.000000,194292.000000,51650.000000,1192.452354)}
{pt3dadd(177828.000000,194388.000000,51475.000000,1242.137880)}

{create adhoc51}
{access adhoc51}
{connect adhoc51(1), adhoc50(0)}
{nseg = 1}
{strdef color color = "White"}
{pt3dclear()}
{pt3dadd(177828.000000,194388.000000,51475.000000,1242.137880)}
{pt3dadd(177900.000000,194340.000000,51100.000000,1192.452480)}
{pt3dadd(177816.000000,194220.000000,50725.000000,1204.873830)}
{pt3dadd(177696.000000,193932.000000,50275.000000,1217.295180)}
{pt3dadd(177600.000000,193812.000000,49875.000000,1229.716530)}
{pt3dadd(177564.000000,193764.000000,49400.000000,1242.137880)}
{pt3dadd(177516.000000,193884.000000,49075.000000,1242.137880)}

{create adhoc52}
{access adhoc52}
{connect adhoc52(1), adhoc51(0)}
{nseg = 1}
{strdef color color = "White"}
{pt3dclear()}
{pt3dadd(177516.000000,193884.000000,49075.000000,1242.137880)}
{pt3dadd(177672.000000,193824.000000,48575.000000,1035.114948)}
{pt3dadd(177684.000000,194040.000000,48075.000000,1035.114948)}
{pt3dadd(177552.000000,194160.000000,47550.000000,1035.114948)}
{pt3dadd(177516.000000,194400.000000,47225.000000,718.829820)}

{create adhoc53}
{access adhoc53}
{connect adhoc53(1), adhoc52(0)}
{nseg = 1}
{strdef color color = "White"}
{pt3dclear()}
{pt3dadd(177516.000000,194400.000000,47225.000000,718.829820)}
{pt3dadd(177264.000000,193992.000000,46225.000000,415.989486)}
{pt3dadd(177120.000000,193788.000000,45925.000000,392.878956)}
{pt3dadd(176556.000000,193644.000000,45500.000000,369.768426)}
{pt3dadd(176220.000000,193404.000000,45225.000000,346.657896)}
{pt3dadd(175920.000000,193164.000000,45025.000000,288.881586)}

{create adhoc54}
{access adhoc54}
{connect adhoc54(1), adhoc53(0)}
{nseg = 1}
{strdef color color = "White"}
{pt3dclear()}
{pt3dadd(175920.000000,193164.000000,45025.000000,288.881586)}
{pt3dadd(175500.000000,193608.000000,45025.000000,139.314042)}
{pt3dadd(175428.000000,193776.000000,45050.000000,118.029951)}
{pt3dadd(175344.000000,193908.000000,45050.000000,96.745860)}
{pt3dadd(175032.000000,194100.000000,45050.000000,116.095032)}

{create adhoc55}
{access adhoc55}
{connect adhoc55(1), adhoc53(0)}
{nseg = 1}
{strdef color color = "White"}
{pt3dclear()}
{pt3dadd(175920.000000,193164.000000,45025.000000,288.881586)}
{pt3dadd(175680.000000,192852.000000,44725.000000,240.734646)}
{pt3dadd(175500.000000,192648.000000,44450.000000,299.152926)}
{pt3dadd(175296.000000,192624.000000,44175.000000,357.571206)}
{pt3dadd(175248.000000,192552.000000,43775.000000,415.989486)}
{pt3dadd(175200.000000,192516.000000,43550.000000,415.989486)}

{create adhoc56}
{access adhoc56}
{connect adhoc56(1), adhoc55(0)}
{nseg = 1}
{strdef color color = "White"}
{pt3dclear()}
{pt3dadd(175200.000000,192516.000000,43550.000000,415.989486)}
{pt3dadd(174588.000000,192840.000000,43550.000000,116.095032)}
{pt3dadd(174420.000000,192924.000000,43500.000000,116.095032)}

{create adhoc57}
{access adhoc57}
{connect adhoc57(1), adhoc55(0)}
{nseg = 1}
{strdef color color = "White"}
{pt3dclear()}
{pt3dadd(175200.000000,192516.000000,43550.000000,415.989486)}
{pt3dadd(175224.000000,192324.000000,43275.000000,288.881586)}
{pt3dadd(175392.000000,192108.000000,42925.000000,415.989486)}
{pt3dadd(175572.000000,192108.000000,42775.000000,415.989486)}

{create adhoc58}
{access adhoc58}
{connect adhoc58(1), adhoc57(0)}
{nseg = 1}
{strdef color color = "White"}
{pt3dclear()}
{pt3dadd(175572.000000,192108.000000,42775.000000,415.989486)}
{pt3dadd(175992.000000,191316.000000,42775.000000,160.489764)}
{pt3dadd(176496.000000,190620.000000,42575.000000,139.314042)}

{create adhoc59}
{access adhoc59}
{connect adhoc59(1), adhoc58(0)}
{nseg = 1}
{strdef color color = "White"}
{pt3dclear()}
{pt3dadd(176496.000000,190620.000000,42575.000000,139.314042)}
{pt3dadd(177204.000000,190872.000000,42625.000000,80.621550)}
{pt3dadd(177300.000000,190980.000000,42600.000000,80.621550)}

{create adhoc60}
{access adhoc60}
{connect adhoc60(1), adhoc58(0)}
{nseg = 1}
{strdef color color = "White"}
{pt3dclear()}
{pt3dadd(176496.000000,190620.000000,42575.000000,139.314042)}
{pt3dadd(177096.000000,190032.000000,42625.000000,200.612214)}
{pt3dadd(177300.000000,189780.000000,42200.000000,210.642822)}
{pt3dadd(177588.000000,189708.000000,41900.000000,220.673430)}
{pt3dadd(177696.000000,189456.000000,41450.000000,230.704038)}
{pt3dadd(177588.000000,189468.000000,41050.000000,240.734646)}
{pt3dadd(177528.000000,189492.000000,40725.000000,328.362066)}
{pt3dadd(177384.000000,189492.000000,40350.000000,415.989486)}
{pt3dadd(177336.000000,189516.000000,40150.000000,415.989486)}

{create adhoc61}
{access adhoc61}
{connect adhoc61(1), adhoc60(0)}
{nseg = 1}
{strdef color color = "White"}
{pt3dclear()}
{pt3dadd(177336.000000,189516.000000,40150.000000,415.989486)}
{pt3dadd(178056.000000,189804.000000,40075.000000,167.176836)}
{pt3dadd(178260.000000,189924.000000,40150.000000,116.095032)}

{create adhoc62}
{access adhoc62}
{connect adhoc62(1), adhoc61(0)}
{nseg = 1}
{strdef color color = "White"}
{pt3dclear()}
{pt3dadd(178260.000000,189924.000000,40150.000000,116.095032)}
{pt3dadd(178368.000000,190224.000000,39950.000000,116.095032)}
{pt3dadd(178524.000000,190260.000000,39950.000000,116.095032)}

{create adhoc63}
{access adhoc63}
{connect adhoc63(1), adhoc61(0)}
{nseg = 1}
{strdef color color = "White"}
{pt3dclear()}
{pt3dadd(178260.000000,189924.000000,40150.000000,116.095032)}
{pt3dadd(178368.000000,189804.000000,40200.000000,167.176836)}
{pt3dadd(178524.000000,189768.000000,40275.000000,131.961348)}
{pt3dadd(178668.000000,189696.000000,40250.000000,96.745860)}
{pt3dadd(178836.000000,189612.000000,40225.000000,96.745860)}

{create adhoc64}
{access adhoc64}
{connect adhoc64(1), adhoc60(0)}
{nseg = 1}
{strdef color color = "White"}
{pt3dclear()}
{pt3dadd(177336.000000,189516.000000,40150.000000,415.989486)}
{pt3dadd(177096.000000,189696.000000,39825.000000,240.734646)}
{pt3dadd(177096.000000,189720.000000,39425.000000,328.362066)}
{pt3dadd(177168.000000,189840.000000,39125.000000,415.989486)}
{pt3dadd(177156.000000,189996.000000,38875.000000,415.989486)}

{create adhoc65}
{access adhoc65}
{connect adhoc65(1), adhoc57(0)}
{nseg = 1}
{strdef color color = "White"}
{pt3dclear()}
{pt3dadd(175572.000000,192108.000000,42775.000000,415.989486)}
{pt3dadd(175416.000000,192576.000000,42475.000000,288.881586)}
{pt3dadd(175476.000000,192732.000000,42125.000000,288.881586)}
{pt3dadd(175632.000000,192912.000000,41850.000000,288.881586)}
{pt3dadd(175800.000000,193044.000000,41525.000000,346.657896)}

{create adhoc66}
{access adhoc66}
{connect adhoc66(1), adhoc65(0)}
{nseg = 1}
{strdef color color = "White"}
{pt3dclear()}
{pt3dadd(175800.000000,193044.000000,41525.000000,346.657896)}
{pt3dadd(176028.000000,192564.000000,41525.000000,116.095032)}
{pt3dadd(176208.000000,192420.000000,41425.000000,167.176836)}

{create adhoc67}
{access adhoc67}
{connect adhoc67(1), adhoc65(0)}
{nseg = 1}
{strdef color color = "White"}
{pt3dclear()}
{pt3dadd(175800.000000,193044.000000,41525.000000,346.657896)}
{pt3dadd(176016.000000,193272.000000,41250.000000,346.657896)}
{pt3dadd(176220.000000,193320.000000,40975.000000,363.990794)}
{pt3dadd(176448.000000,193512.000000,40625.000000,381.323691)}
{pt3dadd(176640.000000,193620.000000,40300.000000,398.656589)}
{pt3dadd(176976.000000,193728.000000,39950.000000,415.989486)}
{pt3dadd(177516.000000,193836.000000,39650.000000,200.612214)}
{pt3dadd(178008.000000,193980.000000,39400.000000,116.095032)}

{create adhoc68}
{access adhoc68}
{connect adhoc68(1), adhoc52(0)}
{nseg = 1}
{strdef color color = "White"}
{pt3dclear()}
{pt3dadd(177516.000000,194400.000000,47225.000000,718.829820)}
{pt3dadd(177480.000000,194964.000000,46975.000000,499.187376)}
{pt3dadd(177408.000000,195456.000000,46750.000000,474.228009)}
{pt3dadd(177300.000000,195816.000000,46625.000000,449.268642)}
{pt3dadd(177288.000000,196044.000000,46525.000000,424.309275)}
{pt3dadd(177396.000000,196404.000000,46450.000000,399.349908)}
{pt3dadd(177312.000000,196668.000000,46325.000000,479.219886)}
{pt3dadd(177324.000000,196872.000000,46125.000000,559.089864)}
{pt3dadd(177216.000000,197148.000000,45850.000000,638.959842)}
{pt3dadd(177036.000000,197448.000000,45700.000000,718.829820)}
{pt3dadd(177000.000000,197640.000000,45575.000000,599.024880)}

{create adhoc69}
{access adhoc69}
{connect adhoc69(1), adhoc68(0)}
{nseg = 1}
{strdef color color = "White"}
{pt3dclear()}
{pt3dadd(177000.000000,197640.000000,45575.000000,599.024880)}
{pt3dadd(176892.000000,197820.000000,45575.000000,599.024880)}

{create adhoc70}
{access adhoc70}
{connect adhoc70(1), adhoc69(0)}
{nseg = 1}
{strdef color color = "White"}
{pt3dclear()}
{pt3dadd(176892.000000,197820.000000,45575.000000,599.024880)}
{pt3dadd(176796.000000,197964.000000,45700.000000,499.187376)}

{create adhoc71}
{access adhoc71}
{connect adhoc71(1), adhoc70(0)}
{nseg = 1}
{strdef color color = "White"}
{pt3dclear()}
{pt3dadd(176796.000000,197964.000000,45700.000000,499.187376)}
{pt3dadd(176712.000000,198204.000000,45600.000000,415.989486)}
{pt3dadd(176460.000000,198492.000000,45650.000000,415.989486)}
{pt3dadd(176268.000000,198780.000000,45700.000000,415.989486)}
{pt3dadd(176052.000000,199140.000000,45675.000000,415.989486)}
{pt3dadd(175896.000000,199488.000000,45650.000000,415.989486)}
{pt3dadd(175668.000000,199800.000000,45625.000000,398.656589)}
{pt3dadd(175404.000000,200100.000000,45800.000000,381.323691)}
{pt3dadd(175260.000000,200412.000000,45775.000000,363.990794)}
{pt3dadd(175044.000000,200712.000000,45800.000000,346.657896)}
{pt3dadd(174996.000000,200928.000000,45625.000000,343.191321)}
{pt3dadd(174768.000000,201264.000000,45575.000000,339.724746)}
{pt3dadd(174576.000000,201612.000000,45400.000000,336.258171)}
{pt3dadd(174468.000000,201984.000000,45175.000000,332.791596)}
{pt3dadd(174444.000000,202284.000000,45100.000000,321.814093)}
{pt3dadd(174216.000000,202548.000000,44900.000000,310.836591)}
{pt3dadd(174060.000000,202860.000000,44850.000000,299.859089)}
{pt3dadd(174012.000000,203028.000000,44775.000000,288.881586)}
{pt3dadd(173916.000000,203280.000000,44725.000000,288.881586)}
{pt3dadd(173952.000000,203484.000000,44600.000000,288.881586)}
{pt3dadd(173856.000000,203676.000000,44525.000000,288.881586)}
{pt3dadd(173460.000000,204072.000000,44500.000000,288.881586)}
{pt3dadd(173436.000000,204348.000000,44375.000000,320.658561)}
{pt3dadd(173436.000000,204648.000000,44275.000000,352.435536)}
{pt3dadd(173328.000000,205032.000000,44150.000000,384.212511)}
{pt3dadd(173232.000000,205380.000000,44050.000000,415.989486)}
{pt3dadd(173088.000000,205728.000000,43950.000000,499.187376)}
{pt3dadd(173088.000000,205884.000000,43975.000000,575.063856)}

{create adhoc72}
{access adhoc72}
{connect adhoc72(1), adhoc71(0)}
{nseg = 1}
{strdef color color = "White"}
{pt3dclear()}
{pt3dadd(173088.000000,205884.000000,43975.000000,575.063856)}
{pt3dadd(173076.000000,206208.000000,43775.000000,499.187376)}
{pt3dadd(173028.000000,206496.000000,43250.000000,434.574193)}
{pt3dadd(173016.000000,206748.000000,42950.000000,369.961011)}
{pt3dadd(173016.000000,206904.000000,42825.000000,305.347828)}
{pt3dadd(172956.000000,207096.000000,42650.000000,240.734646)}
{pt3dadd(172956.000000,207252.000000,42475.000000,267.215459)}
{pt3dadd(172884.000000,207528.000000,42175.000000,293.696271)}
{pt3dadd(173028.000000,207612.000000,41800.000000,320.177083)}
{pt3dadd(173172.000000,207816.000000,41400.000000,346.657896)}
{pt3dadd(173268.000000,207900.000000,41000.000000,346.657896)}

{create adhoc73}
{access adhoc73}
{connect adhoc73(1), adhoc72(0)}
{nseg = 1}
{strdef color color = "White"}
{pt3dclear()}
{pt3dadd(173268.000000,207900.000000,41000.000000,346.657896)}
{pt3dadd(173400.000000,207528.000000,40725.000000,221.861070)}
{pt3dadd(173532.000000,207444.000000,40500.000000,238.616199)}
{pt3dadd(173628.000000,207288.000000,40275.000000,255.371328)}
{pt3dadd(173784.000000,207276.000000,40050.000000,272.126457)}
{pt3dadd(174012.000000,207108.000000,39750.000000,288.881586)}
{pt3dadd(174276.000000,206964.000000,39475.000000,303.325664)}
{pt3dadd(174552.000000,206880.000000,39325.000000,317.769741)}
{pt3dadd(174852.000000,206544.000000,39050.000000,332.213819)}
{pt3dadd(175200.000000,206136.000000,38525.000000,346.657896)}
{pt3dadd(175536.000000,205860.000000,38000.000000,196.288470)}

{create adhoc74}
{access adhoc74}
{connect adhoc74(1), adhoc72(0)}
{nseg = 1}
{strdef color color = "White"}
{pt3dclear()}
{pt3dadd(173268.000000,207900.000000,41000.000000,346.657896)}
{pt3dadd(173244.000000,208620.000000,40825.000000,167.176836)}
{pt3dadd(173232.000000,208956.000000,40500.000000,240.734646)}
{pt3dadd(173316.000000,209100.000000,40575.000000,200.612214)}

{create adhoc75}
{access adhoc75}
{connect adhoc75(1), adhoc71(0)}
{nseg = 1}
{strdef color color = "White"}
{pt3dclear()}
{pt3dadd(173088.000000,205884.000000,43975.000000,575.063856)}
{pt3dadd(172572.000000,206112.000000,44725.000000,288.881586)}
{pt3dadd(172560.000000,206244.000000,44900.000000,303.325664)}
{pt3dadd(172392.000000,206496.000000,45350.000000,317.769741)}
{pt3dadd(172164.000000,206784.000000,45400.000000,332.213819)}
{pt3dadd(171912.000000,207072.000000,45600.000000,346.657896)}
{pt3dadd(171672.000000,207456.000000,45875.000000,415.989486)}
{pt3dadd(171324.000000,207660.000000,46125.000000,288.881586)}

{create adhoc76}
{access adhoc76}
{connect adhoc76(1), adhoc75(0)}
{nseg = 1}
{strdef color color = "White"}
{pt3dclear()}
{pt3dadd(171324.000000,207660.000000,46125.000000,288.881586)}
{pt3dadd(171348.000000,208008.000000,46475.000000,332.791596)}

{create adhoc77}
{access adhoc77}
{connect adhoc77(1), adhoc76(0)}
{nseg = 1}
{strdef color color = "White"}
{pt3dclear()}
{pt3dadd(171348.000000,208008.000000,46475.000000,332.791596)}
{pt3dadd(171312.000000,207720.000000,46875.000000,200.612214)}
{pt3dadd(171336.000000,207456.000000,46975.000000,139.314042)}
{pt3dadd(171216.000000,207396.000000,47150.000000,167.176836)}

{create adhoc78}
{access adhoc78}
{connect adhoc78(1), adhoc76(0)}
{nseg = 1}
{strdef color color = "White"}
{pt3dclear()}
{pt3dadd(171348.000000,208008.000000,46475.000000,332.791596)}
{pt3dadd(171444.000000,208392.000000,46550.000000,139.314042)}
{pt3dadd(171612.000000,208716.000000,46625.000000,96.745860)}

{create adhoc79}
{access adhoc79}
{connect adhoc79(1), adhoc75(0)}
{nseg = 1}
{strdef color color = "White"}
{pt3dclear()}
{pt3dadd(171324.000000,207660.000000,46125.000000,288.881586)}
{pt3dadd(170196.000000,208044.000000,46125.000000,167.176836)}
{pt3dadd(169848.000000,208104.000000,46125.000000,167.176836)}
{pt3dadd(169596.000000,208320.000000,46125.000000,167.176836)}
{pt3dadd(169536.000000,208464.000000,46125.000000,96.745860)}

{create adhoc80}
{access adhoc80}
{connect adhoc80(1), adhoc70(0)}
{nseg = 1}
{strdef color color = "White"}
{pt3dclear()}
{pt3dadd(176796.000000,197964.000000,45700.000000,499.187376)}
{pt3dadd(175704.000000,197940.000000,46250.000000,139.314042)}
{pt3dadd(175572.000000,197916.000000,46200.000000,154.638585)}
{pt3dadd(175320.000000,197820.000000,46150.000000,169.963128)}
{pt3dadd(175140.000000,197844.000000,46150.000000,185.287671)}
{pt3dadd(174900.000000,197892.000000,46175.000000,200.612214)}
{pt3dadd(174432.000000,197880.000000,46175.000000,172.439820)}
{pt3dadd(174264.000000,197856.000000,46025.000000,144.267426)}
{pt3dadd(173916.000000,197808.000000,46175.000000,116.095032)}
{pt3dadd(173580.000000,197904.000000,46250.000000,139.314042)}

{create adhoc81}
{access adhoc81}
{connect adhoc81(1), adhoc69(0)}
{nseg = 1}
{strdef color color = "White"}
{pt3dclear()}
{pt3dadd(176892.000000,197820.000000,45575.000000,599.024880)}
{pt3dadd(177324.000000,197820.000000,44375.000000,288.881586)}
{pt3dadd(177288.000000,197760.000000,44100.000000,288.881586)}
{pt3dadd(177204.000000,197976.000000,43825.000000,288.881586)}
{pt3dadd(177000.000000,197988.000000,43625.000000,288.881586)}
{pt3dadd(176832.000000,198252.000000,43300.000000,288.881586)}
{pt3dadd(176700.000000,198444.000000,43025.000000,366.417410)}
{pt3dadd(176400.000000,198756.000000,42725.000000,443.953233)}
{pt3dadd(176256.000000,199044.000000,42450.000000,521.489056)}
{pt3dadd(176100.000000,199200.000000,42100.000000,599.024880)}
{pt3dadd(175980.000000,199212.000000,41925.000000,599.024880)}

{create adhoc82}
{access adhoc82}
{connect adhoc82(1), adhoc81(0)}
{nseg = 1}
{strdef color color = "White"}
{pt3dclear()}
{pt3dadd(175980.000000,199212.000000,41925.000000,599.024880)}
{pt3dadd(175896.000000,199188.000000,41550.000000,415.989486)}
{pt3dadd(175788.000000,199188.000000,41175.000000,346.657896)}
{pt3dadd(175668.000000,198912.000000,40600.000000,346.657896)}

{create adhoc83}
{access adhoc83}
{connect adhoc83(1), adhoc82(0)}
{nseg = 1}
{strdef color color = "White"}
{pt3dclear()}
{pt3dadd(175668.000000,198912.000000,40600.000000,346.657896)}
{pt3dadd(175920.000000,198888.000000,40125.000000,240.734646)}
{pt3dadd(176652.000000,198876.000000,39875.000000,252.771381)}
{pt3dadd(176712.000000,198876.000000,39575.000000,264.808116)}
{pt3dadd(176856.000000,198924.000000,39250.000000,276.844851)}
{pt3dadd(176736.000000,198912.000000,38900.000000,288.881586)}
{pt3dadd(176580.000000,199140.000000,38600.000000,139.314042)}

{create adhoc84}
{access adhoc84}
{connect adhoc84(1), adhoc82(0)}
{nseg = 1}
{strdef color color = "White"}
{pt3dclear()}
{pt3dadd(175668.000000,198912.000000,40600.000000,346.657896)}
{pt3dadd(174924.000000,198492.000000,40350.000000,200.612214)}
{pt3dadd(174828.000000,198264.000000,40200.000000,277.326342)}
{pt3dadd(175140.000000,198144.000000,39925.000000,240.734646)}

{create adhoc85}
{access adhoc85}
{connect adhoc85(1), adhoc81(0)}
{nseg = 1}
{strdef color color = "White"}
{pt3dclear()}
{pt3dadd(175980.000000,199212.000000,41925.000000,599.024880)}
{pt3dadd(175368.000000,199452.000000,41925.000000,200.612214)}
{pt3dadd(175128.000000,199560.000000,41925.000000,116.095032)}

{create adhoc86}
{access adhoc86}
{connect adhoc86(1), adhoc68(0)}
{nseg = 1}
{strdef color color = "White"}
{pt3dclear()}
{pt3dadd(177000.000000,197640.000000,45575.000000,599.024880)}
{pt3dadd(175548.000000,197712.000000,45150.000000,240.734646)}
{pt3dadd(175044.000000,197712.000000,45050.000000,240.734646)}
{pt3dadd(174708.000000,197796.000000,44775.000000,240.734646)}
{pt3dadd(174516.000000,197784.000000,44700.000000,240.734646)}
{pt3dadd(174144.000000,197808.000000,44500.000000,240.734646)}
{pt3dadd(173772.000000,197904.000000,44400.000000,230.704038)}
{pt3dadd(173448.000000,198000.000000,44375.000000,220.673430)}
{pt3dadd(173172.000000,198024.000000,44350.000000,210.642822)}
{pt3dadd(172980.000000,198108.000000,44300.000000,200.612214)}
{pt3dadd(172728.000000,198144.000000,44275.000000,185.287671)}
{pt3dadd(172488.000000,198168.000000,44250.000000,169.963128)}
{pt3dadd(172308.000000,198192.000000,44225.000000,154.638585)}
{pt3dadd(172068.000000,198192.000000,44200.000000,139.314042)}
{pt3dadd(171840.000000,198180.000000,44200.000000,164.669193)}
{pt3dadd(171636.000000,198168.000000,44200.000000,190.024344)}
{pt3dadd(171444.000000,198228.000000,44200.000000,215.379495)}
{pt3dadd(171252.000000,198288.000000,44200.000000,240.734646)}
{pt3dadd(171036.000000,198336.000000,44200.000000,230.704038)}
{pt3dadd(170844.000000,198336.000000,44250.000000,220.673430)}
{pt3dadd(170652.000000,198360.000000,44300.000000,210.642822)}
{pt3dadd(170340.000000,198444.000000,44350.000000,200.612214)}
{pt3dadd(170160.000000,198456.000000,44275.000000,192.253370)}
{pt3dadd(169980.000000,198456.000000,44250.000000,183.894525)}
{pt3dadd(169800.000000,198468.000000,44225.000000,175.535680)}
{pt3dadd(169644.000000,198456.000000,44250.000000,167.176836)}
{pt3dadd(169464.000000,198444.000000,44275.000000,160.211138)}
{pt3dadd(169272.000000,198456.000000,44200.000000,153.245439)}
{pt3dadd(168984.000000,198396.000000,44200.000000,146.279741)}
{pt3dadd(168732.000000,198396.000000,44125.000000,139.314042)}
{pt3dadd(168528.000000,198228.000000,44050.000000,146.279741)}
{pt3dadd(168348.000000,198156.000000,43925.000000,153.245439)}
{pt3dadd(168132.000000,197988.000000,43825.000000,160.211138)}
{pt3dadd(167832.000000,197916.000000,43775.000000,167.176836)}
{pt3dadd(167556.000000,197796.000000,43725.000000,160.211138)}
{pt3dadd(167232.000000,197748.000000,43725.000000,153.245439)}
{pt3dadd(166992.000000,197760.000000,43750.000000,146.279741)}
{pt3dadd(166752.000000,197796.000000,43700.000000,139.314042)}
{pt3dadd(166548.000000,197808.000000,43625.000000,133.509289)}
{pt3dadd(166296.000000,197712.000000,43650.000000,127.704537)}
{pt3dadd(165924.000000,197592.000000,43675.000000,121.899785)}
{pt3dadd(165624.000000,197544.000000,43675.000000,116.095032)}
{pt3dadd(165384.000000,197460.000000,43650.000000,111.257739)}
{pt3dadd(165180.000000,197400.000000,43675.000000,106.420446)}
{pt3dadd(164964.000000,197352.000000,43700.000000,101.583153)}
{pt3dadd(164724.000000,197304.000000,43675.000000,96.745860)}
{pt3dadd(164508.000000,197328.000000,43650.000000,107.387906)}
{pt3dadd(164268.000000,197388.000000,43675.000000,118.029951)}
{pt3dadd(164064.000000,197460.000000,43750.000000,128.671997)}
{pt3dadd(163884.000000,197448.000000,43675.000000,139.314042)}
{pt3dadd(163668.000000,197472.000000,43675.000000,146.279741)}
{pt3dadd(163488.000000,197448.000000,43525.000000,153.245439)}
{pt3dadd(163260.000000,197460.000000,43450.000000,160.211138)}
{pt3dadd(163128.000000,197412.000000,43425.000000,167.176836)}
{pt3dadd(162948.000000,197316.000000,43325.000000,160.211138)}
{pt3dadd(162768.000000,197160.000000,43200.000000,153.245439)}
{pt3dadd(162600.000000,197112.000000,43100.000000,146.279741)}
{pt3dadd(162396.000000,197124.000000,43075.000000,139.314042)}
{pt3dadd(162216.000000,197136.000000,42925.000000,146.279741)}
{pt3dadd(162000.000000,197172.000000,42825.000000,153.245439)}
{pt3dadd(161808.000000,197184.000000,42725.000000,160.211138)}
{pt3dadd(161580.000000,197172.000000,42625.000000,167.176836)}
{pt3dadd(161424.000000,197184.000000,42550.000000,167.176836)}
{pt3dadd(161220.000000,197220.000000,42450.000000,167.176836)}
{pt3dadd(161016.000000,197268.000000,42375.000000,167.176836)}
{pt3dadd(160716.000000,197172.000000,42325.000000,167.176836)}

{create adhoc87}
{access adhoc87}
{connect adhoc87(1), adhoc86(0)}
{nseg = 1}
{strdef color color = "White"}
{pt3dclear()}
{pt3dadd(160716.000000,197172.000000,42325.000000,167.176836)}
{pt3dadd(160452.000000,197112.000000,42225.000000,139.314042)}
{pt3dadd(160284.000000,197028.000000,42150.000000,154.638585)}
{pt3dadd(160008.000000,196992.000000,42125.000000,169.963128)}
{pt3dadd(159792.000000,196968.000000,42025.000000,185.287671)}
{pt3dadd(159588.000000,196980.000000,41975.000000,200.612214)}
{pt3dadd(159336.000000,196956.000000,41900.000000,192.253370)}
{pt3dadd(158856.000000,197136.000000,41700.000000,183.894525)}
{pt3dadd(158520.000000,197112.000000,41525.000000,175.535680)}
{pt3dadd(158184.000000,196992.000000,41625.000000,167.176836)}
{pt3dadd(157860.000000,196932.000000,41600.000000,158.817996)}
{pt3dadd(157512.000000,196980.000000,41625.000000,150.459156)}
{pt3dadd(157224.000000,196992.000000,41650.000000,142.100316)}
{pt3dadd(156924.000000,197172.000000,41650.000000,133.741476)}
{pt3dadd(156672.000000,197316.000000,41575.000000,142.100316)}
{pt3dadd(156444.000000,197364.000000,41475.000000,150.459156)}
{pt3dadd(156168.000000,197412.000000,41375.000000,158.817996)}
{pt3dadd(155856.000000,197544.000000,41350.000000,167.176836)}
{pt3dadd(155364.000000,197580.000000,41350.000000,96.745860)}

{create adhoc88}
{access adhoc88}
{connect adhoc88(1), adhoc86(0)}
{nseg = 1}
{strdef color color = "White"}
{pt3dclear()}
{pt3dadd(160716.000000,197172.000000,42325.000000,167.176836)}
{pt3dadd(161328.000000,197484.000000,42325.000000,139.314042)}
{pt3dadd(161556.000000,197652.000000,42375.000000,139.314042)}
{pt3dadd(161736.000000,197832.000000,42250.000000,139.314042)}
{pt3dadd(161892.000000,198000.000000,42225.000000,139.314042)}
{pt3dadd(162324.000000,198036.000000,42175.000000,139.314042)}
{pt3dadd(162852.000000,197916.000000,42000.000000,164.669193)}
{pt3dadd(163188.000000,197796.000000,41975.000000,190.024344)}
{pt3dadd(163440.000000,197772.000000,41950.000000,215.379495)}
{pt3dadd(163632.000000,197748.000000,41900.000000,240.734646)}
{pt3dadd(163932.000000,197652.000000,41850.000000,240.734646)}

{create adhoc89}
{access adhoc89}
{connect adhoc89(1), adhoc88(0)}
{nseg = 1}
{strdef color color = "White"}
{pt3dclear()}
{pt3dadd(163932.000000,197652.000000,41850.000000,240.734646)}
{pt3dadd(164148.000000,197616.000000,41875.000000,240.734646)}
{pt3dadd(164376.000000,197568.000000,41850.000000,200.706372)}
{pt3dadd(164604.000000,197652.000000,41925.000000,160.678098)}
{pt3dadd(164736.000000,197688.000000,41925.000000,120.649824)}
{pt3dadd(164952.000000,197724.000000,41925.000000,80.621550)}
{pt3dadd(165132.000000,197772.000000,41950.000000,116.095032)}

{create adhoc90}
{access adhoc90}
{connect adhoc90(1), adhoc89(0)}
{nseg = 1}
{strdef color color = "White"}
{pt3dclear()}
{pt3dadd(165132.000000,197772.000000,41950.000000,116.095032)}
{pt3dadd(165336.000000,197784.000000,42050.000000,139.314042)}
{pt3dadd(165576.000000,197796.000000,42200.000000,176.705928)}
{pt3dadd(165816.000000,197748.000000,42300.000000,214.097814)}
{pt3dadd(166044.000000,197736.000000,42400.000000,251.489700)}
{pt3dadd(166608.000000,197628.000000,42600.000000,288.881586)}
{pt3dadd(166968.000000,197736.000000,42725.000000,288.881586)}
{pt3dadd(167256.000000,197916.000000,43075.000000,240.734646)}

{create adhoc91}
{access adhoc91}
{connect adhoc91(1), adhoc90(0)}
{nseg = 1}
{strdef color color = "White"}
{pt3dclear()}
{pt3dadd(167256.000000,197916.000000,43075.000000,240.734646)}
{pt3dadd(167568.000000,198108.000000,43300.000000,96.745860)}
{pt3dadd(167652.000000,198624.000000,43400.000000,114.353604)}
{pt3dadd(167688.000000,198780.000000,43425.000000,131.961348)}
{pt3dadd(167820.000000,199008.000000,43550.000000,149.569092)}
{pt3dadd(167988.000000,199176.000000,43750.000000,167.176836)}
{pt3dadd(168012.000000,199308.000000,43875.000000,203.955741)}
{pt3dadd(168024.000000,199512.000000,44200.000000,240.734646)}
{pt3dadd(168180.000000,199668.000000,44425.000000,139.314042)}

{create adhoc92}
{access adhoc92}
{connect adhoc92(1), adhoc91(0)}
{nseg = 1}
{strdef color color = "White"}
{pt3dclear()}
{pt3dadd(168180.000000,199668.000000,44425.000000,139.314042)}
{pt3dadd(168732.000000,199692.000000,44650.000000,167.176836)}

{create adhoc93}
{access adhoc93}
{connect adhoc93(1), adhoc91(0)}
{nseg = 1}
{strdef color color = "White"}
{pt3dclear()}
{pt3dadd(168180.000000,199668.000000,44425.000000,139.314042)}
{pt3dadd(167736.000000,200124.000000,44575.000000,116.095032)}
{pt3dadd(167760.000000,200376.000000,44675.000000,107.226662)}
{pt3dadd(168024.000000,200604.000000,44850.000000,98.358291)}
{pt3dadd(168132.000000,200988.000000,44975.000000,89.489920)}
{pt3dadd(168420.000000,201132.000000,45000.000000,80.621550)}
{pt3dadd(168564.000000,201276.000000,44925.000000,88.683705)}
{pt3dadd(168804.000000,201372.000000,44875.000000,96.745860)}
{pt3dadd(169068.000000,201288.000000,44900.000000,116.095032)}

{create adhoc94}
{access adhoc94}
{connect adhoc94(1), adhoc90(0)}
{nseg = 1}
{strdef color color = "White"}
{pt3dclear()}
{pt3dadd(167256.000000,197916.000000,43075.000000,240.734646)}
{pt3dadd(167400.000000,197604.000000,43175.000000,240.734646)}
{pt3dadd(167688.000000,197244.000000,43250.000000,240.734646)}
{pt3dadd(167844.000000,196932.000000,43500.000000,240.734646)}
{pt3dadd(167988.000000,196608.000000,43475.000000,240.734646)}
{pt3dadd(168096.000000,196392.000000,43550.000000,240.734646)}
{pt3dadd(168192.000000,196188.000000,43550.000000,288.881586)}

{create adhoc95}
{access adhoc95}
{connect adhoc95(1), adhoc94(0)}
{nseg = 1}
{strdef color color = "White"}
{pt3dclear()}
{pt3dadd(168192.000000,196188.000000,43550.000000,288.881586)}
{pt3dadd(168504.000000,195864.000000,43525.000000,288.881586)}
{pt3dadd(168720.000000,195660.000000,43625.000000,288.881586)}
{pt3dadd(168900.000000,195492.000000,43725.000000,332.791560)}

{create adhoc96}
{access adhoc96}
{connect adhoc96(1), adhoc95(0)}
{nseg = 1}
{strdef color color = "White"}
{pt3dclear()}
{pt3dadd(168900.000000,195492.000000,43725.000000,332.791560)}
{pt3dadd(169188.000000,195348.000000,43925.000000,346.657896)}
{pt3dadd(169380.000000,195300.000000,44050.000000,310.146476)}
{pt3dadd(169608.000000,195264.000000,44250.000000,273.635055)}
{pt3dadd(169752.000000,195240.000000,44525.000000,237.123635)}
{pt3dadd(169884.000000,195324.000000,44800.000000,200.612214)}
{pt3dadd(170100.000000,195516.000000,45125.000000,210.642822)}
{pt3dadd(170280.000000,195612.000000,45475.000000,220.673430)}
{pt3dadd(170496.000000,195564.000000,45775.000000,230.704038)}
{pt3dadd(170856.000000,195576.000000,46000.000000,240.734646)}
{pt3dadd(171216.000000,195576.000000,46075.000000,249.882570)}
{pt3dadd(171384.000000,195504.000000,46175.000000,259.030494)}
{pt3dadd(171636.000000,195492.000000,46175.000000,268.178418)}
{pt3dadd(171804.000000,195408.000000,46175.000000,277.326342)}
{pt3dadd(172020.000000,195372.000000,46275.000000,249.788966)}
{pt3dadd(172212.000000,195360.000000,46375.000000,222.251589)}
{pt3dadd(172368.000000,195396.000000,46450.000000,194.714212)}
{pt3dadd(172560.000000,195384.000000,46500.000000,167.176836)}
{pt3dadd(172788.000000,195264.000000,46500.000000,175.535680)}
{pt3dadd(173016.000000,195264.000000,46600.000000,183.894525)}
{pt3dadd(173280.000000,195240.000000,46625.000000,192.253370)}
{pt3dadd(173592.000000,195228.000000,46650.000000,200.612214)}
{pt3dadd(173940.000000,195216.000000,46650.000000,200.612214)}
{pt3dadd(174228.000000,195300.000000,46750.000000,200.612214)}
{pt3dadd(174516.000000,195288.000000,46800.000000,200.612214)}
{pt3dadd(174720.000000,195300.000000,46900.000000,200.612214)}
{pt3dadd(174936.000000,195312.000000,46950.000000,200.612214)}

{create adhoc97}
{access adhoc97}
{connect adhoc97(1), adhoc96(0)}
{nseg = 1}
{strdef color color = "White"}
{pt3dclear()}
{pt3dadd(174936.000000,195312.000000,46950.000000,200.612214)}
{pt3dadd(175080.000000,195192.000000,47025.000000,288.881586)}
{pt3dadd(175272.000000,195168.000000,47200.000000,258.455399)}
{pt3dadd(175512.000000,195204.000000,47275.000000,228.029211)}
{pt3dadd(175812.000000,195252.000000,47525.000000,197.603024)}
{pt3dadd(175956.000000,195300.000000,47650.000000,167.176836)}
{pt3dadd(176100.000000,195324.000000,47825.000000,154.406385)}
{pt3dadd(176400.000000,195420.000000,48050.000000,141.635934)}
{pt3dadd(176544.000000,195432.000000,48125.000000,128.865483)}
{pt3dadd(176808.000000,195228.000000,48275.000000,116.095032)}
{pt3dadd(177024.000000,195096.000000,48325.000000,120.506643)}
{pt3dadd(177168.000000,195012.000000,48350.000000,124.918254)}
{pt3dadd(177456.000000,194868.000000,48425.000000,129.329865)}
{pt3dadd(177720.000000,194700.000000,48450.000000,133.741476)}
{pt3dadd(177972.000000,194664.000000,48425.000000,129.329865)}
{pt3dadd(178212.000000,194616.000000,48425.000000,124.918254)}
{pt3dadd(178416.000000,194640.000000,48450.000000,120.506643)}
{pt3dadd(178596.000000,194580.000000,48475.000000,116.095032)}
{pt3dadd(178812.000000,194592.000000,48600.000000,147.254936)}
{pt3dadd(178992.000000,194820.000000,48850.000000,178.414839)}
{pt3dadd(179040.000000,195108.000000,49175.000000,209.574742)}
{pt3dadd(179088.000000,195252.000000,49475.000000,240.734646)}
{pt3dadd(178968.000000,195456.000000,49725.000000,288.881586)}
{pt3dadd(179316.000000,195528.000000,50150.000000,192.587724)}

{create adhoc98}
{access adhoc98}
{connect adhoc98(1), adhoc96(0)}
{nseg = 1}
{strdef color color = "White"}
{pt3dclear()}
{pt3dadd(174936.000000,195312.000000,46950.000000,200.612214)}
{pt3dadd(175080.000000,195840.000000,47050.000000,240.734646)}
{pt3dadd(175152.000000,196020.000000,47175.000000,215.379495)}
{pt3dadd(175200.000000,196224.000000,47250.000000,190.024344)}
{pt3dadd(175320.000000,196368.000000,47450.000000,164.669193)}
{pt3dadd(175392.000000,196500.000000,47550.000000,139.314042)}
{pt3dadd(175428.000000,196620.000000,47675.000000,154.638585)}
{pt3dadd(175452.000000,196752.000000,47800.000000,169.963128)}
{pt3dadd(175584.000000,196980.000000,47975.000000,185.287671)}
{pt3dadd(175704.000000,197208.000000,48175.000000,200.612214)}
{pt3dadd(175776.000000,197508.000000,48300.000000,192.253370)}
{pt3dadd(175656.000000,197688.000000,48325.000000,183.894525)}
{pt3dadd(175692.000000,197844.000000,48275.000000,175.535680)}
{pt3dadd(175644.000000,198012.000000,48225.000000,167.176836)}
{pt3dadd(175584.000000,198168.000000,48250.000000,139.314042)}
{pt3dadd(175524.000000,198264.000000,48225.000000,167.176836)}

{create adhoc99}
{access adhoc99}
{connect adhoc99(1), adhoc98(0)}
{nseg = 1}
{strdef color color = "White"}
{pt3dclear()}
{pt3dadd(175524.000000,198264.000000,48225.000000,167.176836)}
{pt3dadd(175104.000000,198252.000000,48450.000000,116.095032)}
{pt3dadd(174744.000000,198228.000000,48600.000000,109.645308)}
{pt3dadd(174396.000000,198228.000000,48850.000000,103.195584)}
{pt3dadd(174252.000000,198192.000000,48925.000000,96.745860)}
{pt3dadd(174120.000000,198240.000000,49025.000000,80.621550)}

{create adhoc100}
{access adhoc100}
{connect adhoc100(1), adhoc98(0)}
{nseg = 1}
{strdef color color = "White"}
{pt3dclear()}
{pt3dadd(175524.000000,198264.000000,48225.000000,167.176836)}
{pt3dadd(175524.000000,198408.000000,48200.000000,240.734646)}
{pt3dadd(175440.000000,198588.000000,48125.000000,222.345193)}
{pt3dadd(175428.000000,198768.000000,48100.000000,203.955741)}
{pt3dadd(175332.000000,198924.000000,48050.000000,185.566288)}
{pt3dadd(175344.000000,199152.000000,47725.000000,167.176836)}
{pt3dadd(175320.000000,199404.000000,47550.000000,167.176836)}
{pt3dadd(175248.000000,199560.000000,47700.000000,167.176836)}
{pt3dadd(175260.000000,199716.000000,47800.000000,167.176836)}
{pt3dadd(175200.000000,199872.000000,47850.000000,167.176836)}
{pt3dadd(175140.000000,200016.000000,47850.000000,167.176836)}
{pt3dadd(175032.000000,200172.000000,47900.000000,167.176836)}
{pt3dadd(174960.000000,200376.000000,47875.000000,167.176836)}
{pt3dadd(174960.000000,200496.000000,47875.000000,167.176836)}
{pt3dadd(174600.000000,200844.000000,47850.000000,154.406385)}
{pt3dadd(174660.000000,201156.000000,47800.000000,141.635934)}
{pt3dadd(174612.000000,201420.000000,47625.000000,128.865483)}
{pt3dadd(174564.000000,201636.000000,47550.000000,116.095032)}
{pt3dadd(174528.000000,201804.000000,47525.000000,111.257739)}
{pt3dadd(174504.000000,201948.000000,47575.000000,106.420446)}
{pt3dadd(174456.000000,202128.000000,47550.000000,101.583153)}
{pt3dadd(174480.000000,202320.000000,47550.000000,96.745860)}
{pt3dadd(174456.000000,202488.000000,47525.000000,107.387906)}
{pt3dadd(174396.000000,202644.000000,47575.000000,118.029951)}
{pt3dadd(174300.000000,202812.000000,47725.000000,128.671997)}
{pt3dadd(174240.000000,203160.000000,47850.000000,139.314042)}
{pt3dadd(174204.000000,203304.000000,47875.000000,128.671997)}
{pt3dadd(174168.000000,203448.000000,47925.000000,118.029951)}
{pt3dadd(174024.000000,203628.000000,47950.000000,107.387906)}
{pt3dadd(174072.000000,203916.000000,48150.000000,96.745860)}
{pt3dadd(173868.000000,204144.000000,48250.000000,92.714782)}
{pt3dadd(173856.000000,204312.000000,48375.000000,88.683705)}
{pt3dadd(173628.000000,204444.000000,48575.000000,84.652627)}
{pt3dadd(173316.000000,204636.000000,48850.000000,80.621550)}
{pt3dadd(173004.000000,204588.000000,49075.000000,110.619216)}
{pt3dadd(172620.000000,204624.000000,49225.000000,140.616882)}
{pt3dadd(172620.000000,204624.000000,49550.000000,170.614548)}
{pt3dadd(172524.000000,204624.000000,49925.000000,200.612214)}
{pt3dadd(172452.000000,204744.000000,50350.000000,185.287671)}
{pt3dadd(172368.000000,204516.000000,50650.000000,169.963128)}
{pt3dadd(171936.000000,204540.000000,50950.000000,154.638585)}
{pt3dadd(171864.000000,204408.000000,51250.000000,139.314042)}
{pt3dadd(171816.000000,204336.000000,51450.000000,139.314042)}
{pt3dadd(171888.000000,204240.000000,51625.000000,116.095032)}

{create adhoc101}
{access adhoc101}
{connect adhoc101(1), adhoc95(0)}
{nseg = 1}
{strdef color color = "White"}
{pt3dclear()}
{pt3dadd(168900.000000,195492.000000,43725.000000,332.791560)}
{pt3dadd(168888.000000,195204.000000,43275.000000,200.612214)}
{pt3dadd(168876.000000,194952.000000,43000.000000,185.287671)}
{pt3dadd(168468.000000,194520.000000,42775.000000,169.963128)}
{pt3dadd(168336.000000,194004.000000,42650.000000,154.638585)}
{pt3dadd(168408.000000,193824.000000,42525.000000,139.314042)}
{pt3dadd(168360.000000,193632.000000,42525.000000,139.314042)}
{pt3dadd(168228.000000,193440.000000,42550.000000,240.734646)}

{create adhoc102}
{access adhoc102}
{connect adhoc102(1), adhoc101(0)}
{nseg = 1}
{strdef color color = "White"}
{pt3dclear()}
{pt3dadd(168228.000000,193440.000000,42550.000000,240.734646)}
{pt3dadd(168348.000000,193428.000000,42875.000000,167.176836)}
{pt3dadd(168288.000000,193308.000000,43075.000000,131.961348)}
{pt3dadd(168228.000000,193164.000000,43200.000000,96.745860)}
{pt3dadd(168000.000000,192972.000000,43400.000000,96.745860)}

{create adhoc103}
{access adhoc103}
{connect adhoc103(1), adhoc101(0)}
{nseg = 1}
{strdef color color = "White"}
{pt3dclear()}
{pt3dadd(168228.000000,193440.000000,42550.000000,240.734646)}
{pt3dadd(168144.000000,193308.000000,42475.000000,415.989486)}

{create adhoc104}
{access adhoc104}
{connect adhoc104(1), adhoc94(0)}
{nseg = 1}
{strdef color color = "White"}
{pt3dclear()}
{pt3dadd(168192.000000,196188.000000,43550.000000,288.881586)}
{pt3dadd(167484.000000,195960.000000,43825.000000,139.314042)}
{pt3dadd(167292.000000,195900.000000,43975.000000,154.638585)}
{pt3dadd(167016.000000,195852.000000,44200.000000,169.963128)}
{pt3dadd(166848.000000,195828.000000,44325.000000,185.287671)}
{pt3dadd(166608.000000,195864.000000,44650.000000,200.612214)}
{pt3dadd(166560.000000,195540.000000,45075.000000,240.734646)}
{pt3dadd(166596.000000,195504.000000,45525.000000,200.612214)}

{create adhoc105}
{access adhoc105}
{connect adhoc105(1), adhoc104(0)}
{nseg = 1}
{strdef color color = "White"}
{pt3dclear()}
{pt3dadd(166596.000000,195504.000000,45525.000000,200.612214)}
{pt3dadd(166512.000000,195108.000000,45500.000000,96.745860)}

{create adhoc106}
{access adhoc106}
{connect adhoc106(1), adhoc104(0)}
{nseg = 1}
{strdef color color = "White"}
{pt3dclear()}
{pt3dadd(166596.000000,195504.000000,45525.000000,200.612214)}
{pt3dadd(166764.000000,195672.000000,45775.000000,167.176836)}
{pt3dadd(166932.000000,195876.000000,46050.000000,203.955741)}
{pt3dadd(167196.000000,195792.000000,46275.000000,240.734646)}
{pt3dadd(167388.000000,195732.000000,46550.000000,116.095032)}

{create adhoc107}
{access adhoc107}
{connect adhoc107(1), adhoc89(0)}
{nseg = 1}
{strdef color color = "White"}
{pt3dclear()}
{pt3dadd(165132.000000,197772.000000,41950.000000,116.095032)}
{pt3dadd(165228.000000,197412.000000,41950.000000,116.095032)}
{pt3dadd(165420.000000,197208.000000,41850.000000,114.547098)}
{pt3dadd(165564.000000,197172.000000,41850.000000,112.999164)}
{pt3dadd(165696.000000,197196.000000,41850.000000,111.451230)}
{pt3dadd(165816.000000,197436.000000,41775.000000,116.095032)}

{create adhoc108}
{access adhoc108}
{connect adhoc108(1), adhoc88(0)}
{nseg = 1}
{strdef color color = "White"}
{pt3dclear()}
{pt3dadd(163932.000000,197652.000000,41850.000000,240.734646)}
{pt3dadd(163788.000000,197304.000000,41400.000000,200.612214)}
{pt3dadd(163584.000000,196932.000000,41175.000000,174.645625)}
{pt3dadd(163416.000000,196896.000000,41175.000000,148.679037)}
{pt3dadd(163260.000000,196764.000000,41150.000000,122.712448)}
{pt3dadd(163092.000000,196560.000000,41100.000000,96.745860)}
{pt3dadd(162936.000000,196404.000000,41075.000000,103.195584)}
{pt3dadd(163008.000000,196236.000000,41025.000000,109.645308)}
{pt3dadd(163080.000000,196020.000000,41000.000000,116.095032)}
{pt3dadd(163056.000000,195744.000000,40975.000000,240.734646)}

{create adhoc109}
{access adhoc109}
{connect adhoc109(1), adhoc108(0)}
{nseg = 1}
{strdef color color = "White"}
{pt3dclear()}
{pt3dadd(163056.000000,195744.000000,40975.000000,240.734646)}
{pt3dadd(162900.000000,195828.000000,41300.000000,96.745860)}
{pt3dadd(162792.000000,195720.000000,41350.000000,96.745860)}
{pt3dadd(162744.000000,195624.000000,41375.000000,96.745860)}
{pt3dadd(162720.000000,195516.000000,41475.000000,116.095032)}

{create adhoc110}
{access adhoc110}
{connect adhoc110(1), adhoc108(0)}
{nseg = 1}
{strdef color color = "White"}
{pt3dclear()}
{pt3dadd(163056.000000,195744.000000,40975.000000,240.734646)}
{pt3dadd(163056.000000,195624.000000,40925.000000,240.734646)}
{pt3dadd(162936.000000,195468.000000,40875.000000,222.345193)}
{pt3dadd(162864.000000,195288.000000,40875.000000,203.955741)}
{pt3dadd(162768.000000,195132.000000,40725.000000,185.566288)}
{pt3dadd(162624.000000,194892.000000,40575.000000,167.176836)}
{pt3dadd(162468.000000,194712.000000,40325.000000,167.176836)}

{create adhoc111}
{access adhoc111}
{connect adhoc111(1), adhoc51(0)}
{nseg = 1}
{strdef color color = "White"}
{pt3dclear()}
{pt3dadd(177516.000000,193884.000000,49075.000000,1242.137880)}
{pt3dadd(176412.000000,194328.000000,49075.000000,116.095032)}

{create adhoc112}
{access adhoc112}
{connect adhoc112(1), adhoc111(0)}
{nseg = 1}
{strdef color color = "White"}
{pt3dclear()}
{pt3dadd(176412.000000,194328.000000,49075.000000,116.095032)}
{pt3dadd(176136.000000,194100.000000,48700.000000,167.176836)}
{pt3dadd(175764.000000,194040.000000,48375.000000,154.406385)}
{pt3dadd(175092.000000,194136.000000,48400.000000,141.635934)}
{pt3dadd(174444.000000,194268.000000,48400.000000,128.865483)}
{pt3dadd(174300.000000,194268.000000,48350.000000,116.095032)}
{pt3dadd(174048.000000,194304.000000,48475.000000,96.745860)}

{create adhoc113}
{access adhoc113}
{connect adhoc113(1), adhoc111(0)}
{nseg = 1}
{strdef color color = "White"}
{pt3dclear()}
{pt3dadd(176412.000000,194328.000000,49075.000000,116.095032)}
{pt3dadd(176292.000000,194772.000000,49050.000000,139.314042)}
{pt3dadd(176316.000000,195132.000000,49200.000000,139.314042)}
{pt3dadd(176280.000000,195324.000000,49300.000000,139.314042)}
{pt3dadd(176412.000000,195492.000000,49150.000000,139.314042)}
{pt3dadd(176436.000000,195648.000000,49050.000000,139.314042)}

{create adhoc114}
{access adhoc114}
{connect adhoc114(1), adhoc50(0)}
{nseg = 1}
{strdef color color = "White"}
{pt3dclear()}
{pt3dadd(177828.000000,194388.000000,51475.000000,1242.137880)}
{pt3dadd(177048.000000,195516.000000,51475.000000,346.657896)}
{pt3dadd(176688.000000,195804.000000,51250.000000,346.657896)}
{pt3dadd(176076.000000,196068.000000,51225.000000,346.657896)}
{pt3dadd(175824.000000,196200.000000,51050.000000,346.657896)}
{pt3dadd(175488.000000,196404.000000,51075.000000,346.657896)}
{pt3dadd(175296.000000,196860.000000,51100.000000,308.140349)}
{pt3dadd(175092.000000,197340.000000,51100.000000,269.622801)}
{pt3dadd(174900.000000,197640.000000,51100.000000,231.105254)}
{pt3dadd(174912.000000,197844.000000,51175.000000,192.587706)}
{pt3dadd(174744.000000,198048.000000,51200.000000,139.314042)}
{pt3dadd(174288.000000,198156.000000,51350.000000,139.314042)}

{create adhoc115}
{access adhoc115}
{connect adhoc115(1), adhoc49(0)}
{nseg = 1}
{strdef color color = "White"}
{pt3dclear()}
{pt3dadd(178116.000000,193848.000000,53225.000000,1242.137880)}
{pt3dadd(177240.000000,193500.000000,53225.000000,116.095032)}
{pt3dadd(176928.000000,193332.000000,53225.000000,116.095032)}
{pt3dadd(176604.000000,193236.000000,53225.000000,116.095032)}
{pt3dadd(176364.000000,193260.000000,53225.000000,116.095032)}
{pt3dadd(176244.000000,193068.000000,53475.000000,116.095032)}
{pt3dadd(176052.000000,192876.000000,53625.000000,64.497240)}

{create adhoc116}
{access adhoc116}
{connect adhoc116(1), adhoc19(0)}
{nseg = 1}
{strdef color color = "White"}
{pt3dclear()}
{pt3dadd(182592.000000,189996.000000,59275.000000,1035.114948)}
{pt3dadd(182556.000000,188184.000000,59125.000000,200.612214)}
{pt3dadd(182448.000000,187956.000000,59125.000000,200.612214)}
{pt3dadd(182112.000000,187824.000000,59200.000000,200.612214)}
{pt3dadd(181920.000000,187572.000000,58950.000000,200.612214)}
{pt3dadd(181680.000000,187464.000000,58975.000000,200.612214)}
{pt3dadd(181548.000000,187152.000000,58575.000000,222.679557)}
{pt3dadd(181176.000000,186900.000000,58275.000000,244.746900)}
{pt3dadd(180888.000000,186732.000000,58250.000000,266.814243)}
{pt3dadd(180660.000000,186612.000000,58175.000000,288.881586)}
{pt3dadd(180360.000000,186528.000000,58175.000000,384.050736)}
{pt3dadd(180072.000000,186456.000000,58325.000000,479.219886)}
{pt3dadd(179724.000000,186372.000000,58350.000000,346.657896)}

{create adhoc117}
{access adhoc117}
{connect adhoc117(1), adhoc116(0)}
{nseg = 1}
{strdef color color = "White"}
{pt3dclear()}
{pt3dadd(179724.000000,186372.000000,58350.000000,346.657896)}
{pt3dadd(179688.000000,185856.000000,57750.000000,80.621550)}
{pt3dadd(179736.000000,185556.000000,57700.000000,167.176836)}

{create adhoc118}
{access adhoc118}
{connect adhoc118(1), adhoc116(0)}
{nseg = 1}
{strdef color color = "White"}
{pt3dclear()}
{pt3dadd(179724.000000,186372.000000,58350.000000,346.657896)}
{pt3dadd(179460.000000,186324.000000,58250.000000,96.745860)}
{pt3dadd(179160.000000,186576.000000,58525.000000,200.612214)}
{pt3dadd(178908.000000,186864.000000,58625.000000,139.314042)}

{create adhoc119}
{access adhoc119}
{connect adhoc119(1), adhoc18(0)}
{nseg = 1}
{strdef color color = "White"}
{pt3dclear()}
{pt3dadd(184128.000000,189756.000000,60275.000000,1035.114948)}
{pt3dadd(181464.000000,191700.000000,60325.000000,240.734646)}
{pt3dadd(181200.000000,191892.000000,60350.000000,240.734646)}
{pt3dadd(180900.000000,192156.000000,60350.000000,240.734646)}
{pt3dadd(180696.000000,192180.000000,60425.000000,240.734646)}
{pt3dadd(180516.000000,192360.000000,60550.000000,240.734646)}
{pt3dadd(180276.000000,192576.000000,60575.000000,252.771381)}
{pt3dadd(180012.000000,192876.000000,60600.000000,264.808116)}
{pt3dadd(179772.000000,193152.000000,60750.000000,276.844851)}
{pt3dadd(179496.000000,193308.000000,60900.000000,288.881586)}
{pt3dadd(179172.000000,193320.000000,61000.000000,240.734646)}
{pt3dadd(178824.000000,193404.000000,61150.000000,288.881586)}

{create adhoc120}
{access adhoc120}
{connect adhoc120(1), adhoc119(0)}
{nseg = 1}
{strdef color color = "White"}
{pt3dclear()}
{pt3dadd(178824.000000,193404.000000,61150.000000,288.881586)}
{pt3dadd(178812.000000,194124.000000,61375.000000,167.176836)}

{create adhoc121}
{access adhoc121}
{connect adhoc121(1), adhoc119(0)}
{nseg = 1}
{strdef color color = "White"}
{pt3dclear()}
{pt3dadd(178824.000000,193404.000000,61150.000000,288.881586)}
{pt3dadd(178656.000000,193296.000000,61150.000000,346.657896)}
{pt3dadd(178512.000000,193152.000000,61225.000000,346.657896)}
{pt3dadd(178356.000000,193020.000000,61375.000000,346.657896)}
{pt3dadd(178188.000000,192876.000000,61325.000000,346.657896)}
{pt3dadd(178044.000000,192432.000000,61425.000000,346.657896)}
{pt3dadd(177768.000000,192096.000000,61375.000000,288.881586)}
{pt3dadd(177504.000000,192096.000000,61225.000000,288.881586)}

{create adhoc122}
{access adhoc122}
{connect adhoc122(1), adhoc121(0)}
{nseg = 1}
{strdef color color = "White"}
{pt3dclear()}
{pt3dadd(177504.000000,192096.000000,61225.000000,288.881586)}
{pt3dadd(177840.000000,191280.000000,61400.000000,240.734646)}
{pt3dadd(178080.000000,191016.000000,61550.000000,213.986358)}
{pt3dadd(178404.000000,190824.000000,61800.000000,187.238070)}
{pt3dadd(178752.000000,190548.000000,61900.000000,160.489782)}
{pt3dadd(178884.000000,190224.000000,62200.000000,200.612214)}

{create adhoc123}
{access adhoc123}
{connect adhoc123(1), adhoc121(0)}
{nseg = 1}
{strdef color color = "White"}
{pt3dclear()}
{pt3dadd(177504.000000,192096.000000,61225.000000,288.881586)}
{pt3dadd(177312.000000,192192.000000,61125.000000,288.881586)}
{pt3dadd(177072.000000,192144.000000,61000.000000,251.489700)}
{pt3dadd(176892.000000,192060.000000,60525.000000,214.097814)}
{pt3dadd(176712.000000,191904.000000,60475.000000,176.705928)}
{pt3dadd(176544.000000,191868.000000,60350.000000,139.314042)}
{pt3dadd(176496.000000,191544.000000,60025.000000,139.314042)}

{create adhoc124}
{access adhoc124}
{connect adhoc124(1), adhoc17(0)}
{nseg = 1}
{strdef color color = "White"}
{pt3dclear()}
{pt3dadd(186780.000000,189552.000000,65425.000000,1788.678450)}
{pt3dadd(186804.000000,187920.000000,65650.000000,1035.114948)}
{pt3dadd(187320.000000,187368.000000,65750.000000,1035.114948)}
{pt3dadd(187392.000000,187152.000000,65800.000000,1035.114948)}
{pt3dadd(187488.000000,186960.000000,65650.000000,1035.114948)}

{create adhoc125}
{access adhoc125}
{connect adhoc125(1), adhoc124(0)}
{nseg = 1}
{strdef color color = "White"}
{pt3dclear()}
{pt3dadd(187488.000000,186960.000000,65650.000000,1035.114948)}
{pt3dadd(185460.000000,187020.000000,66225.000000,139.314042)}
{pt3dadd(185148.000000,187104.000000,66425.000000,96.745860)}
{pt3dadd(184596.000000,187296.000000,66625.000000,139.314042)}

{create adhoc126}
{access adhoc126}
{connect adhoc126(1), adhoc125(0)}
{nseg = 1}
{strdef color color = "White"}
{pt3dclear()}
{pt3dadd(184596.000000,187296.000000,66625.000000,139.314042)}
{pt3dadd(184344.000000,187224.000000,67000.000000,139.314042)}
{pt3dadd(184140.000000,187224.000000,67275.000000,96.745860)}

{create adhoc127}
{access adhoc127}
{connect adhoc127(1), adhoc125(0)}
{nseg = 1}
{strdef color color = "White"}
{pt3dclear()}
{pt3dadd(184596.000000,187296.000000,66625.000000,139.314042)}
{pt3dadd(184692.000000,187620.000000,67000.000000,139.314042)}
{pt3dadd(184500.000000,187968.000000,67200.000000,133.509289)}
{pt3dadd(184272.000000,188268.000000,67400.000000,127.704537)}
{pt3dadd(183912.000000,188556.000000,67400.000000,121.899785)}
{pt3dadd(183504.000000,188832.000000,67375.000000,116.095032)}
{pt3dadd(183192.000000,188964.000000,67325.000000,116.095032)}

{create adhoc128}
{access adhoc128}
{connect adhoc128(1), adhoc124(0)}
{nseg = 1}
{strdef color color = "White"}
{pt3dclear()}
{pt3dadd(187488.000000,186960.000000,65650.000000,1035.114948)}
{pt3dadd(187704.000000,186732.000000,65575.000000,1242.137880)}
{pt3dadd(187920.000000,186348.000000,65275.000000,1242.137880)}

{create adhoc129}
{access adhoc129}
{connect adhoc129(1), adhoc128(0)}
{nseg = 1}
{strdef color color = "White"}
{pt3dclear()}
{pt3dadd(187920.000000,186348.000000,65275.000000,1242.137880)}
{pt3dadd(186732.000000,184632.000000,65825.000000,240.734646)}
{pt3dadd(186480.000000,183984.000000,65825.000000,215.379495)}
{pt3dadd(186456.000000,183780.000000,65800.000000,190.024344)}
{pt3dadd(186372.000000,183480.000000,65750.000000,164.669193)}
{pt3dadd(186432.000000,183276.000000,65750.000000,139.314042)}
{pt3dadd(186384.000000,182988.000000,65900.000000,118.029951)}
{pt3dadd(186336.000000,182784.000000,65925.000000,96.745860)}
{pt3dadd(186264.000000,182592.000000,65925.000000,167.176836)}

{create adhoc130}
{access adhoc130}
{connect adhoc130(1), adhoc128(0)}
{nseg = 1}
{strdef color color = "White"}
{pt3dclear()}
{pt3dadd(187920.000000,186348.000000,65275.000000,1242.137880)}
{pt3dadd(187956.000000,185208.000000,64950.000000,1242.137880)}
{pt3dadd(188124.000000,184668.000000,64675.000000,1304.244761)}
{pt3dadd(188268.000000,184428.000000,64525.000000,1366.351641)}
{pt3dadd(188556.000000,183996.000000,64325.000000,1428.458522)}
{pt3dadd(188616.000000,183756.000000,64325.000000,1490.565402)}
{pt3dadd(188748.000000,183180.000000,64125.000000,1376.702789)}
{pt3dadd(188880.000000,182664.000000,63975.000000,1262.840175)}
{pt3dadd(189156.000000,182244.000000,63925.000000,1148.977562)}
{pt3dadd(189036.000000,181956.000000,63775.000000,1035.114948)}
{pt3dadd(188916.000000,181716.000000,63600.000000,1035.114948)}
{pt3dadd(188832.000000,181476.000000,63400.000000,1035.114948)}
{pt3dadd(188832.000000,181272.000000,63375.000000,1035.114948)}
{pt3dadd(188868.000000,181044.000000,63275.000000,1035.114948)}
{pt3dadd(188892.000000,180696.000000,63150.000000,1035.114948)}
{pt3dadd(188928.000000,180492.000000,63000.000000,1035.114948)}
{pt3dadd(188964.000000,180120.000000,62850.000000,1035.114948)}
{pt3dadd(188928.000000,179868.000000,62850.000000,1035.114948)}

{create adhoc131}
{access adhoc131}
{connect adhoc131(1), adhoc130(0)}
{nseg = 1}
{strdef color color = "White"}
{pt3dclear()}
{pt3dadd(188928.000000,179868.000000,62850.000000,1035.114948)}
{pt3dadd(187488.000000,179868.000000,63725.000000,167.176836)}
{pt3dadd(187212.000000,179928.000000,63775.000000,154.406385)}
{pt3dadd(186996.000000,179964.000000,63750.000000,141.635934)}
{pt3dadd(186744.000000,180024.000000,63750.000000,128.865483)}
{pt3dadd(186552.000000,180000.000000,63725.000000,116.095032)}
{pt3dadd(186384.000000,180024.000000,63725.000000,111.257739)}
{pt3dadd(186228.000000,180036.000000,63675.000000,106.420446)}
{pt3dadd(186060.000000,180192.000000,63725.000000,101.583153)}
{pt3dadd(185856.000000,180264.000000,63725.000000,96.745860)}
{pt3dadd(185640.000000,180468.000000,63800.000000,116.095032)}

{create adhoc132}
{access adhoc132}
{connect adhoc132(1), adhoc131(0)}
{nseg = 1}
{strdef color color = "White"}
{pt3dclear()}
{pt3dadd(185640.000000,180468.000000,63800.000000,116.095032)}
{pt3dadd(185928.000000,180768.000000,63800.000000,139.314042)}
{pt3dadd(186252.000000,180852.000000,63975.000000,80.621550)}

{create adhoc133}
{access adhoc133}
{connect adhoc133(1), adhoc131(0)}
{nseg = 1}
{strdef color color = "White"}
{pt3dclear()}
{pt3dadd(185640.000000,180468.000000,63800.000000,116.095032)}
{pt3dadd(185148.000000,180636.000000,63975.000000,139.314042)}
{pt3dadd(184668.000000,180804.000000,64225.000000,118.029951)}
{pt3dadd(184284.000000,180684.000000,64525.000000,96.745860)}
{pt3dadd(184308.000000,180504.000000,64775.000000,167.176836)}

{create adhoc134}
{access adhoc134}
{connect adhoc134(1), adhoc130(0)}
{nseg = 1}
{strdef color color = "White"}
{pt3dclear()}
{pt3dadd(188928.000000,179868.000000,62850.000000,1035.114948)}
{pt3dadd(188964.000000,179460.000000,62800.000000,1242.137880)}

{create adhoc135}
{access adhoc135}
{connect adhoc135(1), adhoc134(0)}
{nseg = 1}
{strdef color color = "White"}
{pt3dclear()}
{pt3dadd(188964.000000,179460.000000,62800.000000,1242.137880)}
{pt3dadd(187932.000000,179436.000000,63925.000000,96.745860)}
{pt3dadd(187728.000000,179436.000000,64025.000000,122.712448)}
{pt3dadd(187560.000000,179376.000000,64350.000000,148.679037)}
{pt3dadd(187548.000000,179256.000000,64625.000000,174.645625)}
{pt3dadd(187548.000000,179220.000000,64975.000000,200.612214)}
{pt3dadd(187776.000000,179100.000000,65250.000000,167.176836)}
{pt3dadd(187920.000000,178980.000000,65425.000000,116.095032)}

{create adhoc136}
{access adhoc136}
{connect adhoc136(1), adhoc134(0)}
{nseg = 1}
{strdef color color = "White"}
{pt3dclear()}
{pt3dadd(188964.000000,179460.000000,62800.000000,1242.137880)}
{pt3dadd(189096.000000,179220.000000,62525.000000,1242.137880)}
{pt3dadd(189240.000000,178824.000000,62450.000000,1242.137880)}
{pt3dadd(189348.000000,178488.000000,62250.000000,1242.137880)}
{pt3dadd(189492.000000,178212.000000,62125.000000,1242.137880)}
{pt3dadd(189588.000000,177948.000000,61900.000000,1242.137880)}
{pt3dadd(189720.000000,177648.000000,61800.000000,1304.244761)}
{pt3dadd(189852.000000,177408.000000,61650.000000,1366.351641)}
{pt3dadd(189804.000000,177192.000000,61325.000000,1428.458522)}
{pt3dadd(189792.000000,176940.000000,61300.000000,1490.565402)}
{pt3dadd(189828.000000,176652.000000,61150.000000,1430.942868)}

{create adhoc137}
{access adhoc137}
{connect adhoc137(1), adhoc136(0)}
{nseg = 1}
{strdef color color = "White"}
{pt3dclear()}
{pt3dadd(189828.000000,176652.000000,61150.000000,1430.942868)}
{pt3dadd(189240.000000,176664.000000,63050.000000,167.176836)}
{pt3dadd(189108.000000,176460.000000,63425.000000,185.566288)}
{pt3dadd(188988.000000,176316.000000,63725.000000,203.955741)}
{pt3dadd(188772.000000,176064.000000,64775.000000,222.345193)}
{pt3dadd(188688.000000,175812.000000,64925.000000,240.734646)}
{pt3dadd(188892.000000,175512.000000,65100.000000,222.345193)}
{pt3dadd(189000.000000,175356.000000,65225.000000,203.955741)}
{pt3dadd(189036.000000,175224.000000,65325.000000,185.566288)}
{pt3dadd(189144.000000,174996.000000,65525.000000,167.176836)}
{pt3dadd(189144.000000,174768.000000,65750.000000,200.612214)}
{pt3dadd(189180.000000,174672.000000,66050.000000,139.314042)}

{create adhoc138}
{access adhoc138}
{connect adhoc138(1), adhoc136(0)}
{nseg = 1}
{strdef color color = "White"}
{pt3dclear()}
{pt3dadd(189828.000000,176652.000000,61150.000000,1430.942868)}
{pt3dadd(189828.000000,176592.000000,61100.000000,1490.565402)}

{create adhoc139}
{access adhoc139}
{connect adhoc139(1), adhoc138(0)}
{nseg = 1}
{strdef color color = "White"}
{pt3dclear()}
{pt3dadd(189828.000000,176592.000000,61100.000000,1490.565402)}
{pt3dadd(187848.000000,176628.000000,61200.000000,200.612214)}
{pt3dadd(187428.000000,176412.000000,61375.000000,254.456532)}
{pt3dadd(187236.000000,176328.000000,61450.000000,308.300850)}
{pt3dadd(186996.000000,176184.000000,61675.000000,362.145168)}
{pt3dadd(186672.000000,176112.000000,62000.000000,415.989486)}
{pt3dadd(186624.000000,175788.000000,62300.000000,415.989486)}

{create adhoc140}
{access adhoc140}
{connect adhoc140(1), adhoc139(0)}
{nseg = 1}
{strdef color color = "White"}
{pt3dclear()}
{pt3dadd(186624.000000,175788.000000,62300.000000,415.989486)}
{pt3dadd(185988.000000,175500.000000,62450.000000,116.095032)}
{pt3dadd(185568.000000,175380.000000,62450.000000,116.095032)}
{pt3dadd(185304.000000,175428.000000,62200.000000,116.095032)}
{pt3dadd(184860.000000,175488.000000,62200.000000,116.095032)}
{pt3dadd(184416.000000,175740.000000,62200.000000,116.095032)}
{pt3dadd(184212.000000,175968.000000,62300.000000,121.899785)}
{pt3dadd(183984.000000,176172.000000,62375.000000,127.704537)}
{pt3dadd(183840.000000,176352.000000,62325.000000,133.509289)}
{pt3dadd(183792.000000,176664.000000,62375.000000,139.314042)}
{pt3dadd(183804.000000,176844.000000,62425.000000,127.704537)}
{pt3dadd(183828.000000,177024.000000,62425.000000,116.095032)}
{pt3dadd(183780.000000,177312.000000,62425.000000,96.745860)}

{create adhoc141}
{access adhoc141}
{connect adhoc141(1), adhoc139(0)}
{nseg = 1}
{strdef color color = "White"}
{pt3dclear()}
{pt3dadd(186624.000000,175788.000000,62300.000000,415.989486)}
{pt3dadd(186480.000000,175260.000000,62600.000000,200.612214)}
{pt3dadd(186480.000000,175080.000000,62625.000000,179.482918)}
{pt3dadd(186456.000000,174828.000000,62700.000000,158.353623)}
{pt3dadd(186516.000000,174624.000000,62850.000000,137.224328)}
{pt3dadd(186660.000000,174168.000000,62875.000000,116.095032)}
{pt3dadd(186576.000000,173976.000000,62925.000000,139.314042)}
{pt3dadd(186684.000000,173844.000000,63025.000000,116.095032)}

{create adhoc142}
{access adhoc142}
{connect adhoc142(1), adhoc139(0)}
{nseg = 1}
{strdef color color = "White"}
{pt3dclear()}
{pt3dadd(186624.000000,175788.000000,62300.000000,415.989486)}
{pt3dadd(186636.000000,175932.000000,62600.000000,139.314042)}

{create adhoc143}
{access adhoc143}
{connect adhoc143(1), adhoc138(0)}
{nseg = 1}
{strdef color color = "White"}
{pt3dclear()}
{pt3dadd(189828.000000,176592.000000,61100.000000,1490.565402)}
{pt3dadd(189972.000000,176268.000000,60825.000000,1490.565402)}
{pt3dadd(190080.000000,176052.000000,60375.000000,1490.565402)}
{pt3dadd(190032.000000,175800.000000,60150.000000,1490.565402)}
{pt3dadd(190092.000000,175464.000000,59975.000000,1490.565402)}
{pt3dadd(190164.000000,175176.000000,59925.000000,1242.137880)}

{create adhoc144}
{access adhoc144}
{connect adhoc144(1), adhoc143(0)}
{nseg = 1}
{strdef color color = "White"}
{pt3dclear()}
{pt3dadd(190164.000000,175176.000000,59925.000000,1242.137880)}
{pt3dadd(188640.000000,175164.000000,57625.000000,139.314042)}
{pt3dadd(188124.000000,175044.000000,57475.000000,154.638585)}
{pt3dadd(187884.000000,175056.000000,57375.000000,169.963128)}
{pt3dadd(187584.000000,175092.000000,57425.000000,185.287671)}
{pt3dadd(187356.000000,175152.000000,57425.000000,200.612214)}
{pt3dadd(187128.000000,175092.000000,57475.000000,210.642822)}
{pt3dadd(186900.000000,175092.000000,57525.000000,220.673430)}
{pt3dadd(186660.000000,175104.000000,57575.000000,230.704038)}
{pt3dadd(186276.000000,175104.000000,57625.000000,240.734646)}
{pt3dadd(186012.000000,175068.000000,57525.000000,230.704038)}
{pt3dadd(185844.000000,175080.000000,57525.000000,220.673430)}
{pt3dadd(185616.000000,175188.000000,57500.000000,210.642822)}
{pt3dadd(185292.000000,175260.000000,57500.000000,200.612214)}
{pt3dadd(185052.000000,175236.000000,57475.000000,210.642822)}
{pt3dadd(184788.000000,175224.000000,57425.000000,220.673430)}
{pt3dadd(184404.000000,175332.000000,57350.000000,230.704038)}
{pt3dadd(184164.000000,175392.000000,57350.000000,240.734646)}
{pt3dadd(183900.000000,175548.000000,57375.000000,240.734646)}
{pt3dadd(183552.000000,175680.000000,57350.000000,240.734646)}
{pt3dadd(183288.000000,175764.000000,57400.000000,240.734646)}
{pt3dadd(183024.000000,176028.000000,57475.000000,240.734646)}
{pt3dadd(182856.000000,176388.000000,57700.000000,222.345193)}
{pt3dadd(182664.000000,176472.000000,57800.000000,203.955741)}
{pt3dadd(182592.000000,176676.000000,58175.000000,185.566288)}
{pt3dadd(182508.000000,176928.000000,58575.000000,167.176836)}
{pt3dadd(182616.000000,177456.000000,58950.000000,207.745086)}
{pt3dadd(182592.000000,177804.000000,59125.000000,248.313336)}
{pt3dadd(182448.000000,177996.000000,59250.000000,288.881586)}
{pt3dadd(182376.000000,178188.000000,59325.000000,288.881586)}

{create adhoc145}
{access adhoc145}
{connect adhoc145(1), adhoc144(0)}
{nseg = 1}
{strdef color color = "White"}
{pt3dclear()}
{pt3dadd(182376.000000,178188.000000,59325.000000,288.881586)}
{pt3dadd(182124.000000,178260.000000,59050.000000,96.745860)}
{pt3dadd(181896.000000,178464.000000,58775.000000,122.712448)}
{pt3dadd(181680.000000,178656.000000,58750.000000,148.679037)}
{pt3dadd(181464.000000,178860.000000,58800.000000,174.645625)}
{pt3dadd(181200.000000,179052.000000,58900.000000,200.612214)}
{pt3dadd(181092.000000,179196.000000,59050.000000,179.482918)}
{pt3dadd(181044.000000,179496.000000,59350.000000,158.353623)}
{pt3dadd(180912.000000,179616.000000,59525.000000,137.224328)}
{pt3dadd(180924.000000,179772.000000,59700.000000,116.095032)}
{pt3dadd(181152.000000,180024.000000,59900.000000,96.745860)}

{create adhoc146}
{access adhoc146}
{connect adhoc146(1), adhoc144(0)}
{nseg = 1}
{strdef color color = "White"}
{pt3dclear()}
{pt3dadd(182376.000000,178188.000000,59325.000000,288.881586)}
{pt3dadd(182376.000000,178332.000000,59625.000000,139.314042)}
{pt3dadd(182532.000000,178584.000000,59750.000000,133.509289)}
{pt3dadd(182628.000000,178704.000000,60050.000000,127.704537)}
{pt3dadd(182688.000000,178884.000000,60375.000000,121.899785)}
{pt3dadd(183204.000000,178944.000000,60650.000000,116.095032)}
{pt3dadd(183468.000000,179076.000000,60875.000000,139.314042)}

{create adhoc147}
{access adhoc147}
{connect adhoc147(1), adhoc143(0)}
{nseg = 1}
{strdef color color = "White"}
{pt3dclear()}
{pt3dadd(190164.000000,175176.000000,59925.000000,1242.137880)}
{pt3dadd(190260.000000,174804.000000,59775.000000,1242.137880)}
{pt3dadd(190176.000000,174492.000000,59725.000000,1296.213341)}
{pt3dadd(190104.000000,174252.000000,59625.000000,1350.288801)}
{pt3dadd(190392.000000,174000.000000,59575.000000,1404.364261)}
{pt3dadd(190692.000000,173736.000000,59625.000000,1458.439722)}
{pt3dadd(190788.000000,173364.000000,59600.000000,1404.364261)}
{pt3dadd(190920.000000,172968.000000,59625.000000,1350.288801)}
{pt3dadd(191016.000000,172524.000000,59225.000000,1296.213341)}
{pt3dadd(191088.000000,172080.000000,58950.000000,1242.137880)}
{pt3dadd(191160.000000,171540.000000,58750.000000,1209.676692)}
{pt3dadd(191076.000000,171216.000000,58850.000000,1177.215504)}
{pt3dadd(190956.000000,170952.000000,58725.000000,1144.754316)}
{pt3dadd(190836.000000,170844.000000,58600.000000,993.710286)}

{create adhoc148}
{access adhoc148}
{connect adhoc148(1), adhoc147(0)}
{nseg = 1}
{strdef color color = "White"}
{pt3dclear()}
{pt3dadd(190836.000000,170844.000000,58600.000000,993.710286)}
{pt3dadd(189372.000000,170832.000000,60125.000000,167.176836)}
{pt3dadd(189132.000000,170664.000000,60225.000000,212.047101)}
{pt3dadd(188928.000000,170712.000000,60200.000000,256.917366)}
{pt3dadd(188712.000000,170724.000000,60100.000000,301.787631)}
{pt3dadd(188448.000000,170784.000000,60100.000000,346.657896)}
{pt3dadd(188304.000000,170856.000000,60025.000000,288.881586)}

{create adhoc149}
{access adhoc149}
{connect adhoc149(1), adhoc148(0)}
{nseg = 1}
{strdef color color = "White"}
{pt3dclear()}
{pt3dadd(188304.000000,170856.000000,60025.000000,288.881586)}
{pt3dadd(188256.000000,170880.000000,60425.000000,200.612214)}
{pt3dadd(188184.000000,170892.000000,60625.000000,139.314042)}
{pt3dadd(188220.000000,170868.000000,61025.000000,240.734646)}

{create adhoc150}
{access adhoc150}
{connect adhoc150(1), adhoc149(0)}
{nseg = 1}
{strdef color color = "White"}
{pt3dclear()}
{pt3dadd(188220.000000,170868.000000,61025.000000,240.734646)}
{pt3dadd(188484.000000,170556.000000,61150.000000,139.314042)}
{pt3dadd(188592.000000,170364.000000,61200.000000,139.314042)}
{pt3dadd(188616.000000,170136.000000,61275.000000,139.314042)}
{pt3dadd(188628.000000,169896.000000,61300.000000,139.314042)}
{pt3dadd(188724.000000,169704.000000,61250.000000,139.314042)}
{pt3dadd(188952.000000,169572.000000,61350.000000,127.704537)}
{pt3dadd(189096.000000,169584.000000,61375.000000,116.095032)}
{pt3dadd(189240.000000,169584.000000,61450.000000,55.987200)}

{create adhoc151}
{access adhoc151}
{connect adhoc151(1), adhoc149(0)}
{nseg = 1}
{strdef color color = "White"}
{pt3dclear()}
{pt3dadd(188220.000000,170868.000000,61025.000000,240.734646)}
{pt3dadd(188136.000000,171024.000000,61350.000000,192.587724)}
{pt3dadd(187908.000000,171120.000000,61700.000000,220.833924)}
{pt3dadd(187884.000000,171084.000000,62100.000000,249.080124)}
{pt3dadd(187872.000000,171072.000000,62275.000000,277.326324)}
{pt3dadd(188268.000000,171180.000000,62300.000000,139.314042)}

{create adhoc152}
{access adhoc152}
{connect adhoc152(1), adhoc148(0)}
{nseg = 1}
{strdef color color = "White"}
{pt3dclear()}
{pt3dadd(188304.000000,170856.000000,60025.000000,288.881586)}
{pt3dadd(188184.000000,170616.000000,59675.000000,167.176836)}
{pt3dadd(188004.000000,170544.000000,59675.000000,160.211138)}
{pt3dadd(187776.000000,170448.000000,59650.000000,153.245439)}
{pt3dadd(187584.000000,170412.000000,59625.000000,146.279741)}
{pt3dadd(187404.000000,170316.000000,59525.000000,139.314042)}
{pt3dadd(187152.000000,170244.000000,59625.000000,200.612214)}
{pt3dadd(187020.000000,170208.000000,59700.000000,167.176836)}

{create adhoc153}
{access adhoc153}
{connect adhoc153(1), adhoc152(0)}
{nseg = 1}
{strdef color color = "White"}
{pt3dclear()}
{pt3dadd(187020.000000,170208.000000,59700.000000,167.176836)}
{pt3dadd(187020.000000,169824.000000,59875.000000,80.621550)}
{pt3dadd(186912.000000,169632.000000,59875.000000,154.070172)}
{pt3dadd(186840.000000,169464.000000,60025.000000,139.314042)}

{create adhoc154}
{access adhoc154}
{connect adhoc154(1), adhoc152(0)}
{nseg = 1}
{strdef color color = "White"}
{pt3dclear()}
{pt3dadd(187020.000000,170208.000000,59700.000000,167.176836)}
{pt3dadd(186852.000000,170304.000000,59625.000000,167.176836)}
{pt3dadd(186612.000000,170316.000000,59525.000000,139.314042)}
{pt3dadd(186372.000000,170340.000000,59450.000000,139.314042)}

{create adhoc155}
{access adhoc155}
{connect adhoc155(1), adhoc154(0)}
{nseg = 1}
{strdef color color = "White"}
{pt3dclear()}
{pt3dadd(186372.000000,170340.000000,59450.000000,139.314042)}
{pt3dadd(186408.000000,170784.000000,59525.000000,116.095032)}
{pt3dadd(186456.000000,170928.000000,59550.000000,80.621550)}

{create adhoc156}
{access adhoc156}
{connect adhoc156(1), adhoc154(0)}
{nseg = 1}
{strdef color color = "White"}
{pt3dclear()}
{pt3dadd(186372.000000,170340.000000,59450.000000,139.314042)}
{pt3dadd(186144.000000,170376.000000,59475.000000,116.095032)}
{pt3dadd(185880.000000,170388.000000,59450.000000,147.254936)}
{pt3dadd(185628.000000,170532.000000,59450.000000,178.414839)}
{pt3dadd(185376.000000,170616.000000,59500.000000,209.574742)}
{pt3dadd(185124.000000,170724.000000,59525.000000,240.734646)}
{pt3dadd(184836.000000,170784.000000,59500.000000,209.574742)}
{pt3dadd(184692.000000,170868.000000,59225.000000,178.414839)}
{pt3dadd(184512.000000,170868.000000,59200.000000,147.254936)}
{pt3dadd(184344.000000,170916.000000,59050.000000,116.095032)}
{pt3dadd(184188.000000,170928.000000,58950.000000,116.095032)}
{pt3dadd(183984.000000,170988.000000,58875.000000,116.095032)}
{pt3dadd(183804.000000,170964.000000,58850.000000,96.745860)}

{create adhoc157}
{access adhoc157}
{connect adhoc157(1), adhoc147(0)}
{nseg = 1}
{strdef color color = "White"}
{pt3dclear()}
{pt3dadd(190836.000000,170844.000000,58600.000000,993.710286)}
{pt3dadd(190932.000000,170556.000000,58400.000000,862.595802)}
{pt3dadd(190956.000000,170400.000000,58075.000000,718.829820)}

{create adhoc158}
{access adhoc158}
{connect adhoc158(1), adhoc157(0)}
{nseg = 1}
{strdef color color = "White"}
{pt3dclear()}
{pt3dadd(190956.000000,170400.000000,58075.000000,718.829820)}
{pt3dadd(191124.000000,170436.000000,59825.000000,499.187376)}
{pt3dadd(191460.000000,169440.000000,59850.000000,499.187376)}
{pt3dadd(191628.000000,168996.000000,59800.000000,499.187376)}
{pt3dadd(191712.000000,168636.000000,59750.000000,499.187376)}
{pt3dadd(191832.000000,168504.000000,59775.000000,499.187376)}
{pt3dadd(191784.000000,168156.000000,59800.000000,546.909682)}
{pt3dadd(191796.000000,167772.000000,59900.000000,594.631989)}
{pt3dadd(191916.000000,167328.000000,60050.000000,642.354295)}
{pt3dadd(191928.000000,166836.000000,60100.000000,690.076602)}
{pt3dadd(191856.000000,166476.000000,60150.000000,659.726028)}
{pt3dadd(191928.000000,166056.000000,60250.000000,629.375454)}
{pt3dadd(191952.000000,165780.000000,60400.000000,599.024880)}
{pt3dadd(191952.000000,165612.000000,60550.000000,479.219886)}

{create adhoc159}
{access adhoc159}
{connect adhoc159(1), adhoc158(0)}
{nseg = 1}
{strdef color color = "White"}
{pt3dclear()}
{pt3dadd(191952.000000,165612.000000,60550.000000,479.219886)}
{pt3dadd(192168.000000,165408.000000,60600.000000,415.989486)}
{pt3dadd(192252.000000,165180.000000,60625.000000,436.788958)}
{pt3dadd(192360.000000,164964.000000,60750.000000,457.588431)}
{pt3dadd(192504.000000,164736.000000,60900.000000,478.387903)}
{pt3dadd(192720.000000,164352.000000,61075.000000,499.187376)}
{pt3dadd(192852.000000,164016.000000,61325.000000,499.187376)}
{pt3dadd(192792.000000,163680.000000,61425.000000,499.187376)}
{pt3dadd(192876.000000,163308.000000,61550.000000,499.187376)}
{pt3dadd(192972.000000,162924.000000,61625.000000,499.187376)}
{pt3dadd(193080.000000,162564.000000,61625.000000,446.610929)}
{pt3dadd(193164.000000,162252.000000,61600.000000,394.034481)}
{pt3dadd(193212.000000,161952.000000,61525.000000,341.458034)}
{pt3dadd(193260.000000,161688.000000,61450.000000,288.881586)}
{pt3dadd(193308.000000,161532.000000,61375.000000,303.325664)}
{pt3dadd(193356.000000,161304.000000,61350.000000,317.769741)}
{pt3dadd(193356.000000,161052.000000,61275.000000,332.213819)}
{pt3dadd(193296.000000,160860.000000,61200.000000,346.657896)}
{pt3dadd(193248.000000,160668.000000,61250.000000,430.780224)}
{pt3dadd(193152.000000,160464.000000,61275.000000,514.902552)}
{pt3dadd(193092.000000,160248.000000,61275.000000,599.024880)}
{pt3dadd(192984.000000,160080.000000,61200.000000,499.187376)}

{create adhoc160}
{access adhoc160}
{connect adhoc160(1), adhoc159(0)}
{nseg = 1}
{strdef color color = "White"}
{pt3dclear()}
{pt3dadd(192984.000000,160080.000000,61200.000000,499.187376)}
{pt3dadd(192516.000000,159900.000000,61000.000000,499.187376)}
{pt3dadd(192240.000000,159768.000000,61050.000000,457.588431)}
{pt3dadd(191916.000000,159624.000000,61050.000000,415.989486)}
{pt3dadd(191616.000000,159540.000000,61150.000000,288.881586)}

{create adhoc161}
{access adhoc161}
{connect adhoc161(1), adhoc160(0)}
{nseg = 1}
{strdef color color = "White"}
{pt3dclear()}
{pt3dadd(191616.000000,159540.000000,61150.000000,288.881586)}
{pt3dadd(191280.000000,159624.000000,61500.000000,240.734646)}
{pt3dadd(191016.000000,159936.000000,61850.000000,267.215459)}
{pt3dadd(190812.000000,160020.000000,62100.000000,293.696271)}
{pt3dadd(190812.000000,160128.000000,62525.000000,320.177083)}
{pt3dadd(190656.000000,160284.000000,62975.000000,346.657896)}
{pt3dadd(190608.000000,160368.000000,63350.000000,332.213819)}
{pt3dadd(190920.000000,160440.000000,63825.000000,317.769741)}
{pt3dadd(191220.000000,160488.000000,64250.000000,303.325664)}
{pt3dadd(191412.000000,160440.000000,64500.000000,288.881586)}
{pt3dadd(191652.000000,160488.000000,64725.000000,320.658561)}
{pt3dadd(191700.000000,160656.000000,65175.000000,352.435536)}
{pt3dadd(191748.000000,160764.000000,65550.000000,384.212511)}
{pt3dadd(191736.000000,160824.000000,65825.000000,415.989486)}
{pt3dadd(191796.000000,160860.000000,66125.000000,167.176836)}

{create adhoc162}
{access adhoc162}
{connect adhoc162(1), adhoc160(0)}
{nseg = 1}
{strdef color color = "White"}
{pt3dclear()}
{pt3dadd(191616.000000,159540.000000,61150.000000,288.881586)}
{pt3dadd(191424.000000,159072.000000,60875.000000,240.734646)}
{pt3dadd(191076.000000,158700.000000,60800.000000,230.704038)}
{pt3dadd(190776.000000,158520.000000,60800.000000,220.673430)}
{pt3dadd(190560.000000,158436.000000,60700.000000,210.642822)}
{pt3dadd(190320.000000,158268.000000,60625.000000,200.612214)}
{pt3dadd(190080.000000,158112.000000,60550.000000,220.673430)}
{pt3dadd(189876.000000,157896.000000,60525.000000,240.734646)}
{pt3dadd(189876.000000,157596.000000,60500.000000,167.176836)}

{create adhoc163}
{access adhoc163}
{connect adhoc163(1), adhoc162(0)}
{nseg = 1}
{strdef color color = "White"}
{pt3dclear()}
{pt3dadd(189876.000000,157596.000000,60500.000000,167.176836)}
{pt3dadd(189876.000000,157452.000000,60375.000000,96.745860)}

{create adhoc164}
{access adhoc164}
{connect adhoc164(1), adhoc162(0)}
{nseg = 1}
{strdef color color = "White"}
{pt3dclear()}
{pt3dadd(189876.000000,157596.000000,60500.000000,167.176836)}
{pt3dadd(189456.000000,157596.000000,60400.000000,116.095032)}
{pt3dadd(189300.000000,157644.000000,60275.000000,121.899785)}
{pt3dadd(189000.000000,157632.000000,60175.000000,127.704537)}
{pt3dadd(188748.000000,157584.000000,59925.000000,133.509289)}
{pt3dadd(188436.000000,157620.000000,59625.000000,139.314042)}
{pt3dadd(188508.000000,157512.000000,59275.000000,109.967796)}
{pt3dadd(188448.000000,157368.000000,58950.000000,80.621550)}
{pt3dadd(188652.000000,157416.000000,58725.000000,116.095032)}

{create adhoc165}
{access adhoc165}
{connect adhoc165(1), adhoc159(0)}
{nseg = 1}
{strdef color color = "White"}
{pt3dclear()}
{pt3dadd(192984.000000,160080.000000,61200.000000,499.187376)}
{pt3dadd(193596.000000,160032.000000,61925.000000,240.734646)}
{pt3dadd(193896.000000,159864.000000,62125.000000,240.734646)}
{pt3dadd(194004.000000,159696.000000,62275.000000,240.734646)}
{pt3dadd(194112.000000,159528.000000,62450.000000,240.734646)}
{pt3dadd(194196.000000,159336.000000,62575.000000,240.734646)}
{pt3dadd(194268.000000,159156.000000,62525.000000,252.771381)}
{pt3dadd(194316.000000,159000.000000,62525.000000,264.808116)}
{pt3dadd(194364.000000,158808.000000,62550.000000,276.844851)}
{pt3dadd(194388.000000,158616.000000,62700.000000,288.881586)}
{pt3dadd(194232.000000,158412.000000,62775.000000,303.325664)}
{pt3dadd(194088.000000,158208.000000,62850.000000,317.769741)}
{pt3dadd(194040.000000,158064.000000,62900.000000,332.213819)}
{pt3dadd(193980.000000,157884.000000,62800.000000,346.657896)}
{pt3dadd(193932.000000,157644.000000,62825.000000,332.213819)}
{pt3dadd(193836.000000,157272.000000,62725.000000,317.769741)}
{pt3dadd(193740.000000,156900.000000,62675.000000,303.325664)}
{pt3dadd(193548.000000,156600.000000,62800.000000,288.881586)}
{pt3dadd(193332.000000,156336.000000,62625.000000,317.769741)}
{pt3dadd(193236.000000,156048.000000,62525.000000,346.657896)}
{pt3dadd(193128.000000,155736.000000,62700.000000,346.657896)}

{create adhoc166}
{access adhoc166}
{connect adhoc166(1), adhoc165(0)}
{nseg = 1}
{strdef color color = "White"}
{pt3dclear()}
{pt3dadd(193128.000000,155736.000000,62700.000000,346.657896)}
{pt3dadd(193188.000000,155484.000000,63025.000000,346.657896)}
{pt3dadd(193128.000000,155280.000000,63425.000000,363.990794)}
{pt3dadd(192840.000000,155076.000000,63975.000000,381.323691)}
{pt3dadd(192576.000000,154944.000000,64275.000000,398.656589)}
{pt3dadd(192336.000000,154824.000000,64500.000000,415.989486)}
{pt3dadd(192120.000000,154788.000000,64550.000000,277.326324)}

{create adhoc167}
{access adhoc167}
{connect adhoc167(1), adhoc166(0)}
{nseg = 1}
{strdef color color = "White"}
{pt3dclear()}
{pt3dadd(192120.000000,154788.000000,64550.000000,277.326324)}
{pt3dadd(191892.000000,154752.000000,64550.000000,240.734646)}
{pt3dadd(191616.000000,154704.000000,64600.000000,230.704038)}
{pt3dadd(191388.000000,154608.000000,64575.000000,220.673430)}
{pt3dadd(191136.000000,154524.000000,64500.000000,210.642822)}
{pt3dadd(190932.000000,154464.000000,64400.000000,200.612214)}
{pt3dadd(190752.000000,154236.000000,64125.000000,237.123635)}
{pt3dadd(190512.000000,153960.000000,64050.000000,273.635055)}
{pt3dadd(190260.000000,153528.000000,63900.000000,310.146475)}
{pt3dadd(189972.000000,153096.000000,63875.000000,346.657896)}
{pt3dadd(189732.000000,152832.000000,63925.000000,320.177083)}
{pt3dadd(189816.000000,152520.000000,64025.000000,293.696271)}
{pt3dadd(189876.000000,152292.000000,64200.000000,267.215459)}
{pt3dadd(189984.000000,152028.000000,64150.000000,240.734646)}
{pt3dadd(190032.000000,151788.000000,64125.000000,220.673430)}
{pt3dadd(190296.000000,151620.000000,64275.000000,200.612214)}
{pt3dadd(190440.000000,151440.000000,64475.000000,200.612214)}

{create adhoc168}
{access adhoc168}
{connect adhoc168(1), adhoc166(0)}
{nseg = 1}
{strdef color color = "White"}
{pt3dclear()}
{pt3dadd(192120.000000,154788.000000,64550.000000,277.326324)}
{pt3dadd(192096.000000,154644.000000,65075.000000,139.314042)}
{pt3dadd(192072.000000,154560.000000,65200.000000,128.671997)}
{pt3dadd(192060.000000,154464.000000,65350.000000,118.029951)}
{pt3dadd(191952.000000,154356.000000,65450.000000,107.387906)}
{pt3dadd(191964.000000,154260.000000,65575.000000,96.745860)}
{pt3dadd(191904.000000,154164.000000,65700.000000,96.745860)}
{pt3dadd(191868.000000,154056.000000,65825.000000,96.745860)}
{pt3dadd(191844.000000,153960.000000,65875.000000,96.745860)}
{pt3dadd(191892.000000,153864.000000,66000.000000,116.095032)}

{create adhoc169}
{access adhoc169}
{connect adhoc169(1), adhoc165(0)}
{nseg = 1}
{strdef color color = "White"}
{pt3dclear()}
{pt3dadd(193128.000000,155736.000000,62700.000000,346.657896)}
{pt3dadd(192780.000000,155592.000000,62425.000000,139.314042)}

{create adhoc170}
{access adhoc170}
{connect adhoc170(1), adhoc158(0)}
{nseg = 1}
{strdef color color = "White"}
{pt3dclear()}
{pt3dadd(191952.000000,165612.000000,60550.000000,479.219886)}
{pt3dadd(191040.000000,165612.000000,60900.000000,288.881586)}
{pt3dadd(190404.000000,165420.000000,60900.000000,341.458034)}
{pt3dadd(190092.000000,165396.000000,61175.000000,394.034481)}
{pt3dadd(189888.000000,165372.000000,61250.000000,446.610929)}
{pt3dadd(189588.000000,165324.000000,61450.000000,499.187376)}
{pt3dadd(189444.000000,165276.000000,61500.000000,499.187376)}

{create adhoc171}
{access adhoc171}
{connect adhoc171(1), adhoc170(0)}
{nseg = 1}
{strdef color color = "White"}
{pt3dclear()}
{pt3dadd(189444.000000,165276.000000,61500.000000,499.187376)}
{pt3dadd(189096.000000,165228.000000,61775.000000,499.187376)}
{pt3dadd(188772.000000,165252.000000,61925.000000,457.588431)}
{pt3dadd(188544.000000,165264.000000,62000.000000,415.989486)}
{pt3dadd(188640.000000,165276.000000,62475.000000,240.734646)}

{create adhoc172}
{access adhoc172}
{connect adhoc172(1), adhoc170(0)}
{nseg = 1}
{strdef color color = "White"}
{pt3dclear()}
{pt3dadd(189444.000000,165276.000000,61500.000000,499.187376)}
{pt3dadd(189444.000000,165924.000000,61350.000000,116.095032)}
{pt3dadd(189516.000000,166212.000000,61375.000000,137.224328)}
{pt3dadd(189636.000000,166452.000000,61425.000000,158.353623)}
{pt3dadd(189672.000000,166968.000000,61375.000000,179.482918)}
{pt3dadd(189564.000000,167400.000000,61375.000000,200.612214)}
{pt3dadd(189336.000000,167736.000000,61375.000000,180.179490)}
{pt3dadd(189312.000000,167988.000000,61525.000000,159.746766)}
{pt3dadd(189312.000000,168084.000000,61625.000000,139.314042)}
{pt3dadd(189264.000000,168216.000000,61625.000000,96.745860)}

{create adhoc173}
{access adhoc173}
{connect adhoc173(1), adhoc157(0)}
{nseg = 1}
{strdef color color = "White"}
{pt3dclear()}
{pt3dadd(190956.000000,170400.000000,58075.000000,718.829820)}
{pt3dadd(190728.000000,170148.000000,57825.000000,718.829820)}
{pt3dadd(190248.000000,169932.000000,57400.000000,1035.114948)}
{pt3dadd(190380.000000,169644.000000,57300.000000,1035.114948)}

{create adhoc174}
{access adhoc174}
{connect adhoc174(1), adhoc173(0)}
{nseg = 1}
{strdef color color = "White"}
{pt3dclear()}
{pt3dadd(190380.000000,169644.000000,57300.000000,1035.114948)}
{pt3dadd(188280.000000,169644.000000,56050.000000,288.881586)}
{pt3dadd(187356.000000,169644.000000,55575.000000,303.325664)}
{pt3dadd(186420.000000,169644.000000,55125.000000,317.769741)}
{pt3dadd(185880.000000,169884.000000,54800.000000,332.213819)}
{pt3dadd(185508.000000,169956.000000,54700.000000,346.657896)}
{pt3dadd(185256.000000,169980.000000,54600.000000,310.146476)}
{pt3dadd(184860.000000,170088.000000,54400.000000,273.635055)}
{pt3dadd(184536.000000,170100.000000,54400.000000,237.123635)}
{pt3dadd(184236.000000,170244.000000,54200.000000,200.612214)}
{pt3dadd(183984.000000,170256.000000,54075.000000,254.456532)}
{pt3dadd(183648.000000,170400.000000,53925.000000,308.300850)}
{pt3dadd(183372.000000,170508.000000,53750.000000,362.145168)}
{pt3dadd(183132.000000,170580.000000,53700.000000,415.989486)}
{pt3dadd(182916.000000,170544.000000,53650.000000,415.989486)}
{pt3dadd(182460.000000,170784.000000,53475.000000,415.989486)}
{pt3dadd(182172.000000,171000.000000,53325.000000,415.989486)}
{pt3dadd(181908.000000,171192.000000,53275.000000,415.989486)}
{pt3dadd(181548.000000,171444.000000,53050.000000,353.786324)}
{pt3dadd(180540.000000,171432.000000,53125.000000,291.583161)}
{pt3dadd(179976.000000,171468.000000,53125.000000,229.379999)}
{pt3dadd(179568.000000,171468.000000,53300.000000,167.176836)}
{pt3dadd(179316.000000,171648.000000,53400.000000,149.569092)}
{pt3dadd(179088.000000,171756.000000,53525.000000,131.961348)}
{pt3dadd(178812.000000,171816.000000,53525.000000,114.353604)}
{pt3dadd(178512.000000,171684.000000,53475.000000,96.745860)}
{pt3dadd(178296.000000,171564.000000,53450.000000,89.355555)}
{pt3dadd(178032.000000,171588.000000,53400.000000,81.965250)}
{pt3dadd(177852.000000,171636.000000,53375.000000,74.574945)}
{pt3dadd(177684.000000,171672.000000,53400.000000,67.184640)}
{pt3dadd(177504.000000,171684.000000,53375.000000,80.030340)}
{pt3dadd(177312.000000,171672.000000,53325.000000,92.876040)}
{pt3dadd(177132.000000,171636.000000,53425.000000,80.621550)}

{create adhoc175}
{access adhoc175}
{connect adhoc175(1), adhoc173(0)}
{nseg = 1}
{strdef color color = "White"}
{pt3dclear()}
{pt3dadd(190380.000000,169644.000000,57300.000000,1035.114948)}
{pt3dadd(190476.000000,169320.000000,57175.000000,993.710358)}
{pt3dadd(190584.000000,168996.000000,56825.000000,895.038988)}
{pt3dadd(190392.000000,168636.000000,56725.000000,796.367619)}
{pt3dadd(190320.000000,168384.000000,56600.000000,697.696250)}
{pt3dadd(190380.000000,168000.000000,56425.000000,599.024880)}
{pt3dadd(190368.000000,167688.000000,56175.000000,664.917611)}
{pt3dadd(190188.000000,167280.000000,55900.000000,730.810341)}
{pt3dadd(189768.000000,166920.000000,55575.000000,796.703072)}
{pt3dadd(189468.000000,166524.000000,55100.000000,862.595802)}
{pt3dadd(189576.000000,166344.000000,55125.000000,845.343873)}
{pt3dadd(189600.000000,166104.000000,55000.000000,828.091944)}
{pt3dadd(189600.000000,165996.000000,54750.000000,862.595802)}

{create adhoc176}
{access adhoc176}
{connect adhoc176(1), adhoc175(0)}
{nseg = 1}
{strdef color color = "White"}
{pt3dclear()}
{pt3dadd(189600.000000,165996.000000,54750.000000,862.595802)}
{pt3dadd(188376.000000,166008.000000,52825.000000,499.187376)}
{pt3dadd(188124.000000,165852.000000,52325.000000,446.610929)}
{pt3dadd(187932.000000,165684.000000,51900.000000,394.034481)}
{pt3dadd(187500.000000,165492.000000,51450.000000,341.458034)}
{pt3dadd(186852.000000,165204.000000,51000.000000,288.881586)}
{pt3dadd(186360.000000,165060.000000,50575.000000,244.746900)}
{pt3dadd(185460.000000,164844.000000,50150.000000,200.612214)}
{pt3dadd(185220.000000,164676.000000,50150.000000,200.612214)}

{create adhoc177}
{access adhoc177}
{connect adhoc177(1), adhoc176(0)}
{nseg = 1}
{strdef color color = "White"}
{pt3dclear()}
{pt3dadd(185220.000000,164676.000000,50150.000000,200.612214)}
{pt3dadd(184548.000000,164760.000000,50250.000000,80.621550)}
{pt3dadd(184116.000000,164376.000000,50450.000000,89.489920)}
{pt3dadd(183852.000000,164268.000000,50500.000000,98.358291)}
{pt3dadd(183600.000000,163740.000000,50725.000000,107.226662)}
{pt3dadd(183300.000000,163548.000000,50700.000000,116.095032)}
{pt3dadd(182952.000000,163356.000000,50400.000000,200.612214)}
{pt3dadd(182604.000000,162912.000000,50000.000000,231.105276)}

{create adhoc178}
{access adhoc178}
{connect adhoc178(1), adhoc176(0)}
{nseg = 1}
{strdef color color = "White"}
{pt3dclear()}
{pt3dadd(185220.000000,164676.000000,50150.000000,200.612214)}
{pt3dadd(184908.000000,164736.000000,49975.000000,240.734646)}
{pt3dadd(184632.000000,164988.000000,49725.000000,209.574742)}
{pt3dadd(184368.000000,165072.000000,49475.000000,178.414839)}
{pt3dadd(184464.000000,165072.000000,49100.000000,147.254936)}
{pt3dadd(184500.000000,165072.000000,48775.000000,116.095032)}
{pt3dadd(184236.000000,164832.000000,48625.000000,116.095032)}

{create adhoc179}
{access adhoc179}
{connect adhoc179(1), adhoc175(0)}
{nseg = 1}
{strdef color color = "White"}
{pt3dclear()}
{pt3dadd(189600.000000,165996.000000,54750.000000,862.595802)}
{pt3dadd(189816.000000,165816.000000,54850.000000,862.595802)}
{pt3dadd(189816.000000,165552.000000,54800.000000,862.595802)}
{pt3dadd(189852.000000,165192.000000,54625.000000,862.595802)}
{pt3dadd(190020.000000,164832.000000,54325.000000,862.595802)}
{pt3dadd(190116.000000,164448.000000,54175.000000,862.595802)}
{pt3dadd(190260.000000,164088.000000,54050.000000,905.725589)}
{pt3dadd(190392.000000,163800.000000,54000.000000,948.855375)}
{pt3dadd(190572.000000,163488.000000,53850.000000,991.985162)}
{pt3dadd(190968.000000,163176.000000,53175.000000,1035.114948)}
{pt3dadd(191256.000000,162864.000000,52925.000000,1035.114948)}
{pt3dadd(191256.000000,162576.000000,52800.000000,1035.114948)}
{pt3dadd(191256.000000,162276.000000,52675.000000,1035.114948)}
{pt3dadd(191256.000000,161856.000000,52650.000000,1035.114948)}
{pt3dadd(191256.000000,161472.000000,52625.000000,993.710286)}
{pt3dadd(191400.000000,161172.000000,52575.000000,1035.114948)}

{create adhoc180}
{access adhoc180}
{connect adhoc180(1), adhoc179(0)}
{nseg = 1}
{strdef color color = "White"}
{pt3dclear()}
{pt3dadd(191400.000000,161172.000000,52575.000000,1035.114948)}
{pt3dadd(189912.000000,161208.000000,53000.000000,240.734646)}
{pt3dadd(189420.000000,161064.000000,52925.000000,252.771381)}
{pt3dadd(189096.000000,160836.000000,52850.000000,264.808116)}
{pt3dadd(188820.000000,160572.000000,52675.000000,276.844851)}
{pt3dadd(188592.000000,160416.000000,52625.000000,288.881586)}
{pt3dadd(188352.000000,160248.000000,52500.000000,303.325664)}
{pt3dadd(188148.000000,160116.000000,52425.000000,317.769741)}
{pt3dadd(187848.000000,160032.000000,52175.000000,332.213819)}
{pt3dadd(187536.000000,159996.000000,52000.000000,346.657896)}
{pt3dadd(187248.000000,159960.000000,51950.000000,415.989486)}
{pt3dadd(187032.000000,159912.000000,51775.000000,288.881586)}

{create adhoc181}
{access adhoc181}
{connect adhoc181(1), adhoc180(0)}
{nseg = 1}
{strdef color color = "White"}
{pt3dclear()}
{pt3dadd(187032.000000,159912.000000,51775.000000,288.881586)}
{pt3dadd(186792.000000,160176.000000,51325.000000,415.989486)}
{pt3dadd(186564.000000,160320.000000,51075.000000,398.656589)}
{pt3dadd(186324.000000,160428.000000,50875.000000,381.323691)}
{pt3dadd(186204.000000,160536.000000,50400.000000,363.990794)}
{pt3dadd(186072.000000,160632.000000,50050.000000,346.657896)}
{pt3dadd(185856.000000,160620.000000,49775.000000,332.213819)}
{pt3dadd(185592.000000,160668.000000,49325.000000,317.769741)}
{pt3dadd(185400.000000,160536.000000,48825.000000,303.325664)}
{pt3dadd(185268.000000,160380.000000,48500.000000,288.881586)}
{pt3dadd(185028.000000,160284.000000,48075.000000,200.612214)}
{pt3dadd(184992.000000,160164.000000,47850.000000,80.621550)}

{create adhoc182}
{access adhoc182}
{connect adhoc182(1), adhoc181(0)}
{nseg = 1}
{strdef color color = "White"}
{pt3dclear()}
{pt3dadd(184992.000000,160164.000000,47850.000000,80.621550)}
{pt3dadd(185220.000000,159672.000000,47725.000000,116.095032)}
{pt3dadd(185472.000000,159324.000000,47875.000000,96.745860)}

{create adhoc183}
{access adhoc183}
{connect adhoc183(1), adhoc181(0)}
{nseg = 1}
{strdef color color = "White"}
{pt3dclear()}
{pt3dadd(184992.000000,160164.000000,47850.000000,80.621550)}
{pt3dadd(184740.000000,160368.000000,47725.000000,111.451230)}
{pt3dadd(184488.000000,160416.000000,47475.000000,141.364742)}
{pt3dadd(184476.000000,160596.000000,47175.000000,171.278253)}
{pt3dadd(184296.000000,160776.000000,46775.000000,201.191764)}
{pt3dadd(184140.000000,161100.000000,46375.000000,231.105276)}
{pt3dadd(183756.000000,161652.000000,45950.000000,235.919961)}
{pt3dadd(183504.000000,161892.000000,45675.000000,240.734646)}
{pt3dadd(183192.000000,162120.000000,45675.000000,167.176836)}

{create adhoc184}
{access adhoc184}
{connect adhoc184(1), adhoc183(0)}
{nseg = 1}
{strdef color color = "White"}
{pt3dclear()}
{pt3dadd(183192.000000,162120.000000,45675.000000,167.176836)}
{pt3dadd(182940.000000,162612.000000,45600.000000,139.314042)}
{pt3dadd(182868.000000,162852.000000,45650.000000,148.601640)}
{pt3dadd(182640.000000,163176.000000,45650.000000,157.889238)}
{pt3dadd(182580.000000,163500.000000,45975.000000,167.176836)}
{pt3dadd(182340.000000,164028.000000,46250.000000,139.314042)}

{create adhoc185}
{access adhoc185}
{connect adhoc185(1), adhoc183(0)}
{nseg = 1}
{strdef color color = "White"}
{pt3dclear()}
{pt3dadd(183192.000000,162120.000000,45675.000000,167.176836)}
{pt3dadd(182868.000000,162060.000000,45550.000000,139.314042)}

{create adhoc186}
{access adhoc186}
{connect adhoc186(1), adhoc180(0)}
{nseg = 1}
{strdef color color = "White"}
{pt3dclear()}
{pt3dadd(187032.000000,159912.000000,51775.000000,288.881586)}
{pt3dadd(187032.000000,159852.000000,52325.000000,240.734646)}
{pt3dadd(186720.000000,159780.000000,52750.000000,240.734646)}
{pt3dadd(186504.000000,159672.000000,52875.000000,240.734646)}
{pt3dadd(186156.000000,159252.000000,53175.000000,346.657896)}

{create adhoc187}
{access adhoc187}
{connect adhoc187(1), adhoc186(0)}
{nseg = 1}
{strdef color color = "White"}
{pt3dclear()}
{pt3dadd(186156.000000,159252.000000,53175.000000,346.657896)}
{pt3dadd(186324.000000,158952.000000,53075.000000,139.314042)}

{create adhoc188}
{access adhoc188}
{connect adhoc188(1), adhoc186(0)}
{nseg = 1}
{strdef color color = "White"}
{pt3dclear()}
{pt3dadd(186156.000000,159252.000000,53175.000000,346.657896)}
{pt3dadd(185940.000000,159240.000000,53725.000000,200.612214)}
{pt3dadd(185832.000000,158976.000000,53900.000000,116.095032)}
{pt3dadd(186096.000000,158772.000000,54125.000000,80.621550)}

{create adhoc189}
{access adhoc189}
{connect adhoc189(1), adhoc179(0)}
{nseg = 1}
{strdef color color = "White"}
{pt3dclear()}
{pt3dadd(191400.000000,161172.000000,52575.000000,1035.114948)}
{pt3dadd(191736.000000,160788.000000,52525.000000,718.829820)}
{pt3dadd(192060.000000,160368.000000,52475.000000,688.878585)}
{pt3dadd(191976.000000,160080.000000,52475.000000,658.927350)}
{pt3dadd(191964.000000,159792.000000,52425.000000,628.976115)}
{pt3dadd(191952.000000,159504.000000,52375.000000,599.024880)}
{pt3dadd(191940.000000,159276.000000,52325.000000,599.024880)}
{pt3dadd(191928.000000,159012.000000,52425.000000,599.024880)}
{pt3dadd(192252.000000,158544.000000,52600.000000,599.024880)}
{pt3dadd(192468.000000,158232.000000,52725.000000,599.024880)}
{pt3dadd(192720.000000,157932.000000,52875.000000,621.787810)}
{pt3dadd(192852.000000,157596.000000,52975.000000,644.550741)}
{pt3dadd(192876.000000,157320.000000,52950.000000,667.313671)}
{pt3dadd(192864.000000,157080.000000,52875.000000,690.076602)}
{pt3dadd(192828.000000,156852.000000,52825.000000,659.726028)}
{pt3dadd(192720.000000,156624.000000,52700.000000,629.375454)}
{pt3dadd(192600.000000,156396.000000,52650.000000,599.024880)}
{pt3dadd(192516.000000,156228.000000,52675.000000,599.024880)}

{create adhoc190}
{access adhoc190}
{connect adhoc190(1), adhoc189(0)}
{nseg = 1}
{strdef color color = "White"}
{pt3dclear()}
{pt3dadd(192516.000000,156228.000000,52675.000000,599.024880)}
{pt3dadd(190296.000000,156228.000000,52125.000000,288.881586)}
{pt3dadd(189876.000000,155988.000000,51800.000000,331.250886)}
{pt3dadd(189276.000000,155736.000000,51500.000000,373.620186)}
{pt3dadd(188952.000000,155580.000000,51175.000000,415.989486)}
{pt3dadd(188712.000000,155436.000000,50925.000000,346.657896)}

{create adhoc191}
{access adhoc191}
{connect adhoc191(1), adhoc190(0)}
{nseg = 1}
{strdef color color = "White"}
{pt3dclear()}
{pt3dadd(188712.000000,155436.000000,50925.000000,346.657896)}
{pt3dadd(188652.000000,155292.000000,50600.000000,415.989486)}
{pt3dadd(188412.000000,155088.000000,50150.000000,398.656589)}
{pt3dadd(188424.000000,154884.000000,49800.000000,381.323691)}
{pt3dadd(188352.000000,154500.000000,49500.000000,363.990794)}
{pt3dadd(188220.000000,154164.000000,49175.000000,346.657896)}
{pt3dadd(188136.000000,153648.000000,49175.000000,310.146476)}
{pt3dadd(187956.000000,153288.000000,49100.000000,273.635055)}
{pt3dadd(187860.000000,153024.000000,49025.000000,237.123635)}
{pt3dadd(187680.000000,152760.000000,48925.000000,200.612214)}
{pt3dadd(187584.000000,152508.000000,48850.000000,288.881586)}
{pt3dadd(187536.000000,152256.000000,48725.000000,240.734646)}

{create adhoc192}
{access adhoc192}
{connect adhoc192(1), adhoc191(0)}
{nseg = 1}
{strdef color color = "White"}
{pt3dclear()}
{pt3dadd(187536.000000,152256.000000,48725.000000,240.734646)}
{pt3dadd(187584.000000,152028.000000,48525.000000,200.612214)}
{pt3dadd(187536.000000,151716.000000,48275.000000,200.612214)}
{pt3dadd(187332.000000,151332.000000,47925.000000,200.612214)}
{pt3dadd(187032.000000,150840.000000,47375.000000,200.612214)}
{pt3dadd(186948.000000,150552.000000,46800.000000,200.612214)}
{pt3dadd(187188.000000,150444.000000,46525.000000,169.963128)}
{pt3dadd(187680.000000,150444.000000,46500.000000,139.314042)}
{pt3dadd(188220.000000,150600.000000,46625.000000,139.314042)}

{create adhoc193}
{access adhoc193}
{connect adhoc193(1), adhoc191(0)}
{nseg = 1}
{strdef color color = "White"}
{pt3dclear()}
{pt3dadd(187536.000000,152256.000000,48725.000000,240.734646)}
{pt3dadd(187356.000000,152256.000000,48950.000000,139.314042)}
{pt3dadd(187092.000000,152256.000000,49275.000000,125.124648)}
{pt3dadd(186780.000000,152088.000000,49550.000000,110.935254)}
{pt3dadd(186336.000000,151920.000000,49550.000000,96.745860)}
{pt3dadd(185976.000000,151656.000000,49550.000000,80.621550)}

{create adhoc194}
{access adhoc194}
{connect adhoc194(1), adhoc190(0)}
{nseg = 1}
{strdef color color = "White"}
{pt3dclear()}
{pt3dadd(188712.000000,155436.000000,50925.000000,346.657896)}
{pt3dadd(187968.000000,155976.000000,50900.000000,288.881586)}
{pt3dadd(187620.000000,156492.000000,51025.000000,236.816577)}
{pt3dadd(187236.000000,156732.000000,50925.000000,184.751568)}
{pt3dadd(186900.000000,156972.000000,50950.000000,132.686559)}
{pt3dadd(186504.000000,157524.000000,50950.000000,80.621550)}
{pt3dadd(186240.000000,157812.000000,50875.000000,200.612214)}

{create adhoc195}
{access adhoc195}
{connect adhoc195(1), adhoc189(0)}
{nseg = 1}
{strdef color color = "White"}
{pt3dclear()}
{pt3dadd(192516.000000,156228.000000,52675.000000,599.024880)}
{pt3dadd(192840.000000,156048.000000,52875.000000,718.829820)}
{pt3dadd(192900.000000,155616.000000,53175.000000,754.771316)}
{pt3dadd(193020.000000,155232.000000,53350.000000,790.712811)}
{pt3dadd(193008.000000,154884.000000,53750.000000,826.654307)}
{pt3dadd(193008.000000,154524.000000,54050.000000,862.595802)}
{pt3dadd(193104.000000,154104.000000,54175.000000,862.595802)}
{pt3dadd(193200.000000,153768.000000,54350.000000,862.595802)}
{pt3dadd(193296.000000,153456.000000,54600.000000,862.595802)}
{pt3dadd(193320.000000,153096.000000,54750.000000,862.595802)}
{pt3dadd(193320.000000,152748.000000,54900.000000,862.595802)}
{pt3dadd(193344.000000,152472.000000,55225.000000,862.595802)}
{pt3dadd(193260.000000,152040.000000,55400.000000,862.595802)}
{pt3dadd(192852.000000,151860.000000,55325.000000,862.595802)}
{pt3dadd(192480.000000,151788.000000,55275.000000,575.063856)}

{create adhoc196}
{access adhoc196}
{connect adhoc196(1), adhoc195(0)}
{nseg = 1}
{strdef color color = "White"}
{pt3dclear()}
{pt3dadd(192480.000000,151788.000000,55275.000000,575.063856)}
{pt3dadd(190668.000000,151788.000000,55775.000000,167.176836)}
{pt3dadd(190224.000000,151884.000000,55950.000000,167.176836)}
{pt3dadd(189696.000000,152004.000000,56100.000000,167.176836)}
{pt3dadd(189432.000000,152052.000000,56200.000000,167.176836)}
{pt3dadd(189120.000000,152112.000000,56175.000000,167.176836)}
{pt3dadd(188916.000000,152148.000000,56200.000000,197.603024)}
{pt3dadd(188676.000000,152352.000000,56150.000000,228.029211)}
{pt3dadd(188424.000000,152412.000000,56150.000000,258.455399)}
{pt3dadd(188160.000000,152508.000000,56125.000000,288.881586)}
{pt3dadd(187932.000000,152508.000000,56100.000000,285.992771)}
{pt3dadd(187620.000000,152448.000000,56025.000000,283.103955)}
{pt3dadd(187332.000000,152544.000000,55950.000000,280.215140)}
{pt3dadd(187044.000000,152688.000000,55625.000000,277.326324)}
{pt3dadd(186804.000000,152724.000000,55500.000000,268.178405)}
{pt3dadd(186528.000000,152736.000000,55325.000000,259.030485)}
{pt3dadd(186204.000000,152976.000000,55050.000000,249.882566)}
{pt3dadd(185988.000000,153252.000000,55025.000000,240.734646)}
{pt3dadd(185916.000000,153660.000000,55000.000000,203.955741)}
{pt3dadd(186168.000000,153948.000000,54925.000000,167.176836)}
{pt3dadd(186072.000000,154272.000000,54900.000000,139.314042)}

{create adhoc197}
{access adhoc197}
{connect adhoc197(1), adhoc195(0)}
{nseg = 1}
{strdef color color = "White"}
{pt3dclear()}
{pt3dadd(192480.000000,151788.000000,55275.000000,575.063856)}
{pt3dadd(192720.000000,151512.000000,55400.000000,690.076674)}
{pt3dadd(192600.000000,151212.000000,55475.000000,644.550777)}
{pt3dadd(192516.000000,150900.000000,55650.000000,599.024880)}
{pt3dadd(192612.000000,150720.000000,55625.000000,499.187376)}

{create adhoc198}
{access adhoc198}
{connect adhoc198(1), adhoc197(0)}
{nseg = 1}
{strdef color color = "White"}
{pt3dclear()}
{pt3dadd(192612.000000,150720.000000,55625.000000,499.187376)}
{pt3dadd(190740.000000,150720.000000,54750.000000,346.657896)}
{pt3dadd(190344.000000,150528.000000,54675.000000,346.657896)}
{pt3dadd(190104.000000,150264.000000,54550.000000,346.657896)}
{pt3dadd(189864.000000,150024.000000,54475.000000,415.989486)}

{create adhoc199}
{access adhoc199}
{connect adhoc199(1), adhoc198(0)}
{nseg = 1}
{strdef color color = "White"}
{pt3dclear()}
{pt3dadd(189864.000000,150024.000000,54475.000000,415.989486)}
{pt3dadd(189396.000000,150024.000000,55150.000000,167.176836)}
{pt3dadd(189168.000000,149892.000000,55175.000000,203.955741)}
{pt3dadd(188976.000000,149664.000000,55275.000000,240.734646)}
{pt3dadd(188604.000000,149436.000000,55750.000000,240.734646)}

{create adhoc200}
{access adhoc200}
{connect adhoc200(1), adhoc199(0)}
{nseg = 1}
{strdef color color = "White"}
{pt3dclear()}
{pt3dadd(188604.000000,149436.000000,55750.000000,240.734646)}
{pt3dadd(188364.000000,149352.000000,55900.000000,240.734646)}
{pt3dadd(188136.000000,149292.000000,56050.000000,222.345193)}
{pt3dadd(187908.000000,149232.000000,56250.000000,203.955741)}
{pt3dadd(187596.000000,149148.000000,56400.000000,185.566288)}
{pt3dadd(187332.000000,149004.000000,56875.000000,167.176836)}
{pt3dadd(187200.000000,148956.000000,56950.000000,116.095032)}
{pt3dadd(187032.000000,148812.000000,56700.000000,116.095032)}

{create adhoc201}
{access adhoc201}
{connect adhoc201(1), adhoc199(0)}
{nseg = 1}
{strdef color color = "White"}
{pt3dclear()}
{pt3dadd(188604.000000,149436.000000,55750.000000,240.734646)}
{pt3dadd(188952.000000,149220.000000,55525.000000,167.176836)}
{pt3dadd(189084.000000,149052.000000,55450.000000,131.961348)}
{pt3dadd(189192.000000,148824.000000,55475.000000,96.745860)}
{pt3dadd(189432.000000,148512.000000,55525.000000,80.621550)}

{create adhoc202}
{access adhoc202}
{connect adhoc202(1), adhoc198(0)}
{nseg = 1}
{strdef color color = "White"}
{pt3dclear()}
{pt3dadd(189864.000000,150024.000000,54475.000000,415.989486)}
{pt3dadd(189900.000000,149868.000000,54350.000000,499.187376)}
{pt3dadd(189816.000000,149628.000000,54125.000000,446.610929)}
{pt3dadd(189672.000000,149388.000000,54000.000000,394.034481)}
{pt3dadd(189468.000000,149172.000000,53925.000000,341.458034)}
{pt3dadd(189192.000000,148968.000000,53825.000000,288.881586)}
{pt3dadd(188808.000000,148716.000000,53650.000000,358.983516)}
{pt3dadd(188580.000000,148416.000000,53575.000000,429.085446)}
{pt3dadd(188352.000000,148128.000000,53475.000000,499.187376)}
{pt3dadd(188196.000000,147900.000000,53475.000000,346.657896)}

{create adhoc203}
{access adhoc203}
{connect adhoc203(1), adhoc202(0)}
{nseg = 1}
{strdef color color = "White"}
{pt3dclear()}
{pt3dadd(188196.000000,147900.000000,53475.000000,346.657896)}
{pt3dadd(187656.000000,147876.000000,52775.000000,346.657896)}
{pt3dadd(187224.000000,147660.000000,52275.000000,363.990794)}
{pt3dadd(187044.000000,147468.000000,51750.000000,381.323691)}
{pt3dadd(186888.000000,147168.000000,51275.000000,398.656589)}
{pt3dadd(186780.000000,147132.000000,51075.000000,415.989486)}
{pt3dadd(186840.000000,146784.000000,50500.000000,461.748335)}
{pt3dadd(186780.000000,146544.000000,50000.000000,507.507183)}
{pt3dadd(186720.000000,146364.000000,49525.000000,553.266031)}
{pt3dadd(186576.000000,146304.000000,49050.000000,599.024880)}
{pt3dadd(186564.000000,146004.000000,48600.000000,499.421713)}
{pt3dadd(186552.000000,145680.000000,48275.000000,399.818547)}
{pt3dadd(186672.000000,145140.000000,48000.000000,300.215380)}
{pt3dadd(186636.000000,144816.000000,47900.000000,200.612214)}
{pt3dadd(186648.000000,144528.000000,47875.000000,200.612214)}
{pt3dadd(186648.000000,144348.000000,47725.000000,200.612214)}
{pt3dadd(186588.000000,144048.000000,47750.000000,200.612214)}
{pt3dadd(186564.000000,143736.000000,47825.000000,200.612214)}
{pt3dadd(186504.000000,143412.000000,47750.000000,196.680213)}
{pt3dadd(186468.000000,143232.000000,47675.000000,192.748212)}
{pt3dadd(186348.000000,142908.000000,47700.000000,188.816211)}
{pt3dadd(186348.000000,142644.000000,47650.000000,184.884210)}
{pt3dadd(186432.000000,142308.000000,47650.000000,173.491668)}
{pt3dadd(186588.000000,142044.000000,47500.000000,162.099126)}
{pt3dadd(186636.000000,141612.000000,47600.000000,150.706584)}
{pt3dadd(186684.000000,141240.000000,47500.000000,139.314042)}
{pt3dadd(186708.000000,140916.000000,47450.000000,154.638585)}
{pt3dadd(186720.000000,140556.000000,47375.000000,169.963128)}
{pt3dadd(186792.000000,140160.000000,47275.000000,185.287671)}
{pt3dadd(186816.000000,139920.000000,47275.000000,200.612214)}
{pt3dadd(186984.000000,139632.000000,47100.000000,222.679557)}
{pt3dadd(187032.000000,139284.000000,47175.000000,244.746900)}
{pt3dadd(187056.000000,139068.000000,47125.000000,266.814243)}
{pt3dadd(187056.000000,138828.000000,47050.000000,288.881586)}
{pt3dadd(187104.000000,138576.000000,46825.000000,251.489700)}
{pt3dadd(187140.000000,138372.000000,46725.000000,214.097814)}
{pt3dadd(187296.000000,138036.000000,46625.000000,176.705928)}
{pt3dadd(187428.000000,137724.000000,46625.000000,139.314042)}
{pt3dadd(187548.000000,137496.000000,46675.000000,139.314042)}
{pt3dadd(187656.000000,137244.000000,46675.000000,139.314042)}
{pt3dadd(187740.000000,136896.000000,46700.000000,139.314042)}
{pt3dadd(187764.000000,136632.000000,46625.000000,139.314042)}
{pt3dadd(187824.000000,136368.000000,46450.000000,146.279741)}
{pt3dadd(187872.000000,136104.000000,46225.000000,153.245439)}
{pt3dadd(187872.000000,135876.000000,46025.000000,160.211138)}
{pt3dadd(188004.000000,135588.000000,45875.000000,167.176836)}
{pt3dadd(188088.000000,135420.000000,45850.000000,167.176836)}
{pt3dadd(188124.000000,135204.000000,45800.000000,167.176836)}
{pt3dadd(188220.000000,134892.000000,45725.000000,167.176836)}
{pt3dadd(188280.000000,134712.000000,45700.000000,167.176836)}
{pt3dadd(188256.000000,134544.000000,45625.000000,175.535680)}
{pt3dadd(188376.000000,134352.000000,45550.000000,183.894525)}
{pt3dadd(188532.000000,134076.000000,45550.000000,192.253370)}
{pt3dadd(188580.000000,133848.000000,45500.000000,200.612214)}
{pt3dadd(188604.000000,133560.000000,45325.000000,210.642822)}
{pt3dadd(188856.000000,133176.000000,45225.000000,220.673430)}
{pt3dadd(188892.000000,132780.000000,45275.000000,230.704038)}
{pt3dadd(188772.000000,132420.000000,45400.000000,240.734646)}
{pt3dadd(188796.000000,132144.000000,45550.000000,168.740253)}
{pt3dadd(188760.000000,131856.000000,45775.000000,96.745860)}
{pt3dadd(188700.000000,131652.000000,46025.000000,139.314042)}

{create adhoc204}
{access adhoc204}
{connect adhoc204(1), adhoc203(0)}
{nseg = 1}
{strdef color color = "White"}
{pt3dclear()}
{pt3dadd(188700.000000,131652.000000,46025.000000,139.314042)}
{pt3dadd(188784.000000,131568.000000,46100.000000,96.745860)}
{pt3dadd(188928.000000,131448.000000,46175.000000,106.420446)}
{pt3dadd(189048.000000,131292.000000,46275.000000,116.095032)}
{pt3dadd(188952.000000,131148.000000,46250.000000,139.314042)}

{create adhoc205}
{access adhoc205}
{connect adhoc205(1), adhoc203(0)}
{nseg = 1}
{strdef color color = "White"}
{pt3dclear()}
{pt3dadd(188700.000000,131652.000000,46025.000000,139.314042)}
{pt3dadd(188544.000000,131568.000000,46200.000000,167.176836)}

{create adhoc206}
{access adhoc206}
{connect adhoc206(1), adhoc202(0)}
{nseg = 1}
{strdef color color = "White"}
{pt3dclear()}
{pt3dadd(188196.000000,147900.000000,53475.000000,346.657896)}
{pt3dadd(188136.000000,147720.000000,53625.000000,240.734646)}
{pt3dadd(188052.000000,147528.000000,53625.000000,209.574742)}
{pt3dadd(187992.000000,147348.000000,53600.000000,178.414839)}
{pt3dadd(187944.000000,147120.000000,53575.000000,147.254936)}
{pt3dadd(188016.000000,146892.000000,53500.000000,116.095032)}
{pt3dadd(188064.000000,146664.000000,53475.000000,107.226662)}
{pt3dadd(188040.000000,146412.000000,53450.000000,98.358291)}
{pt3dadd(187980.000000,146196.000000,53375.000000,89.489920)}
{pt3dadd(188004.000000,145992.000000,53350.000000,80.621550)}
{pt3dadd(188028.000000,145740.000000,53250.000000,120.649824)}
{pt3dadd(188040.000000,145500.000000,53125.000000,160.678098)}
{pt3dadd(188076.000000,145176.000000,53025.000000,200.706372)}
{pt3dadd(188076.000000,144816.000000,52950.000000,240.734646)}
{pt3dadd(188052.000000,144420.000000,52650.000000,252.771381)}
{pt3dadd(187632.000000,144048.000000,52375.000000,264.808116)}
{pt3dadd(187560.000000,143784.000000,52400.000000,276.844851)}
{pt3dadd(187500.000000,143544.000000,52400.000000,288.881586)}
{pt3dadd(187440.000000,143220.000000,52375.000000,352.435536)}
{pt3dadd(187236.000000,142944.000000,52425.000000,415.989486)}
{pt3dadd(187188.000000,142572.000000,52425.000000,346.657896)}

{create adhoc207}
{access adhoc207}
{connect adhoc207(1), adhoc206(0)}
{nseg = 1}
{strdef color color = "White"}
{pt3dclear()}
{pt3dadd(187188.000000,142572.000000,52425.000000,346.657896)}
{pt3dadd(187176.000000,142524.000000,52925.000000,288.881586)}
{pt3dadd(186888.000000,142260.000000,53425.000000,236.816577)}
{pt3dadd(186996.000000,142224.000000,53750.000000,184.751568)}
{pt3dadd(186852.000000,142116.000000,54050.000000,132.686559)}
{pt3dadd(186324.000000,141936.000000,54350.000000,80.621550)}
{pt3dadd(186192.000000,141696.000000,54550.000000,116.095032)}

{create adhoc208}
{access adhoc208}
{connect adhoc208(1), adhoc206(0)}
{nseg = 1}
{strdef color color = "White"}
{pt3dclear()}
{pt3dadd(187188.000000,142572.000000,52425.000000,346.657896)}
{pt3dadd(187260.000000,142344.000000,52025.000000,192.587724)}
{pt3dadd(187236.000000,142104.000000,51875.000000,204.624455)}
{pt3dadd(187272.000000,141624.000000,51525.000000,216.661185)}
{pt3dadd(187320.000000,140724.000000,51225.000000,228.697915)}
{pt3dadd(187236.000000,140376.000000,51125.000000,240.734646)}
{pt3dadd(187260.000000,140148.000000,51175.000000,167.176836)}
{pt3dadd(187296.000000,139920.000000,51125.000000,167.176836)}

{create adhoc209}
{access adhoc209}
{connect adhoc209(1), adhoc208(0)}
{nseg = 1}
{strdef color color = "White"}
{pt3dclear()}
{pt3dadd(187296.000000,139920.000000,51125.000000,167.176836)}
{pt3dadd(187560.000000,139800.000000,51300.000000,116.095032)}

{create adhoc210}
{access adhoc210}
{connect adhoc210(1), adhoc208(0)}
{nseg = 1}
{strdef color color = "White"}
{pt3dclear()}
{pt3dadd(187296.000000,139920.000000,51125.000000,167.176836)}
{pt3dadd(187200.000000,139728.000000,51100.000000,139.314042)}
{pt3dadd(187212.000000,139452.000000,51025.000000,128.671997)}
{pt3dadd(187140.000000,139284.000000,51025.000000,118.029951)}
{pt3dadd(187188.000000,139020.000000,50975.000000,107.387906)}
{pt3dadd(187044.000000,138768.000000,50925.000000,96.745860)}
{pt3dadd(186912.000000,138540.000000,50875.000000,107.387906)}
{pt3dadd(186840.000000,138384.000000,50850.000000,118.029951)}
{pt3dadd(186864.000000,138192.000000,50825.000000,128.671997)}
{pt3dadd(186912.000000,137964.000000,50875.000000,139.314042)}
{pt3dadd(186948.000000,137736.000000,50850.000000,154.638585)}
{pt3dadd(187044.000000,137508.000000,50900.000000,169.963128)}
{pt3dadd(187152.000000,137280.000000,50850.000000,185.287671)}
{pt3dadd(187356.000000,136908.000000,50650.000000,200.612214)}
{pt3dadd(187596.000000,136620.000000,50475.000000,192.253370)}
{pt3dadd(187776.000000,136428.000000,50425.000000,183.894525)}
{pt3dadd(188004.000000,136272.000000,50475.000000,175.535680)}
{pt3dadd(188280.000000,136020.000000,50475.000000,167.176836)}
{pt3dadd(188352.000000,135468.000000,50475.000000,160.211138)}
{pt3dadd(188280.000000,135180.000000,50475.000000,153.245439)}
{pt3dadd(188064.000000,134976.000000,50200.000000,146.279741)}
{pt3dadd(187836.000000,134160.000000,50300.000000,139.314042)}
{pt3dadd(187524.000000,133620.000000,50225.000000,116.095032)}

{create adhoc211}
{access adhoc211}
{connect adhoc211(1), adhoc197(0)}
{nseg = 1}
{strdef color color = "White"}
{pt3dclear()}
{pt3dadd(192612.000000,150720.000000,55625.000000,499.187376)}
{pt3dadd(192912.000000,150348.000000,55825.000000,862.595802)}
{pt3dadd(193044.000000,149952.000000,56025.000000,862.595802)}
{pt3dadd(193140.000000,149568.000000,56150.000000,862.595802)}
{pt3dadd(193236.000000,149160.000000,56225.000000,862.595802)}
{pt3dadd(193380.000000,148728.000000,56325.000000,862.595802)}
{pt3dadd(193416.000000,148320.000000,56550.000000,853.969856)}
{pt3dadd(193260.000000,147900.000000,56800.000000,845.343909)}
{pt3dadd(193296.000000,147516.000000,56900.000000,836.717962)}
{pt3dadd(193404.000000,147192.000000,56975.000000,828.092016)}
{pt3dadd(193500.000000,146904.000000,57225.000000,869.496602)}
{pt3dadd(193464.000000,146436.000000,57325.000000,910.901187)}
{pt3dadd(193428.000000,146076.000000,57375.000000,952.305772)}
{pt3dadd(193428.000000,145716.000000,57400.000000,993.710358)}
{pt3dadd(193596.000000,145440.000000,57625.000000,1014.412653)}
{pt3dadd(193632.000000,145020.000000,57775.000000,1035.114948)}
{pt3dadd(193560.000000,144804.000000,57975.000000,993.710358)}

{create adhoc212}
{access adhoc212}
{connect adhoc212(1), adhoc211(0)}
{nseg = 1}
{strdef color color = "White"}
{pt3dclear()}
{pt3dadd(193560.000000,144804.000000,57975.000000,993.710358)}
{pt3dadd(193224.000000,144768.000000,59575.000000,346.657896)}
{pt3dadd(193128.000000,144792.000000,59875.000000,293.696271)}
{pt3dadd(192768.000000,144924.000000,60250.000000,240.734646)}
{pt3dadd(192372.000000,145104.000000,60525.000000,346.657896)}

{create adhoc213}
{access adhoc213}
{connect adhoc213(1), adhoc212(0)}
{nseg = 1}
{strdef color color = "White"}
{pt3dclear()}
{pt3dadd(192372.000000,145104.000000,60525.000000,346.657896)}
{pt3dadd(191796.000000,145728.000000,60525.000000,240.734646)}
{pt3dadd(191736.000000,145908.000000,60450.000000,222.345193)}
{pt3dadd(191568.000000,146064.000000,60475.000000,203.955741)}
{pt3dadd(191436.000000,146232.000000,60475.000000,185.566288)}
{pt3dadd(191100.000000,146364.000000,60475.000000,167.176836)}
{pt3dadd(190932.000000,146592.000000,60575.000000,185.566288)}
{pt3dadd(190680.000000,146796.000000,60700.000000,203.955741)}
{pt3dadd(190416.000000,147000.000000,60800.000000,222.345193)}
{pt3dadd(190464.000000,147216.000000,60775.000000,240.734646)}
{pt3dadd(190392.000000,147444.000000,60725.000000,230.704038)}
{pt3dadd(190188.000000,147684.000000,60700.000000,220.673430)}
{pt3dadd(189876.000000,147852.000000,60750.000000,210.642822)}
{pt3dadd(189648.000000,148008.000000,60875.000000,200.612214)}
{pt3dadd(189780.000000,148212.000000,61100.000000,200.612214)}

{create adhoc214}
{access adhoc214}
{connect adhoc214(1), adhoc213(0)}
{nseg = 1}
{strdef color color = "White"}
{pt3dclear()}
{pt3dadd(189780.000000,148212.000000,61100.000000,200.612214)}
{pt3dadd(189876.000000,148356.000000,61350.000000,240.734646)}
{pt3dadd(189888.000000,148452.000000,61600.000000,288.881586)}

{create adhoc215}
{access adhoc215}
{connect adhoc215(1), adhoc213(0)}
{nseg = 1}
{strdef color color = "White"}
{pt3dclear()}
{pt3dadd(189780.000000,148212.000000,61100.000000,200.612214)}
{pt3dadd(189360.000000,147912.000000,61100.000000,139.314042)}
{pt3dadd(189240.000000,147924.000000,61050.000000,96.745860)}
{pt3dadd(188856.000000,147852.000000,61050.000000,133.741476)}

{create adhoc216}
{access adhoc216}
{connect adhoc216(1), adhoc212(0)}
{nseg = 1}
{strdef color color = "White"}
{pt3dclear()}
{pt3dadd(192372.000000,145104.000000,60525.000000,346.657896)}
{pt3dadd(191520.000000,144120.000000,60525.000000,200.612214)}
{pt3dadd(191256.000000,143868.000000,60550.000000,179.482918)}
{pt3dadd(191016.000000,143760.000000,60725.000000,158.353623)}
{pt3dadd(190836.000000,143460.000000,60950.000000,137.224328)}
{pt3dadd(190728.000000,143316.000000,61250.000000,116.095032)}
{pt3dadd(190620.000000,143232.000000,61300.000000,144.267426)}
{pt3dadd(190512.000000,143196.000000,61400.000000,172.439820)}
{pt3dadd(190392.000000,143196.000000,61525.000000,200.612214)}
{pt3dadd(190260.000000,143160.000000,61550.000000,139.314042)}

{create adhoc217}
{access adhoc217}
{connect adhoc217(1), adhoc211(0)}
{nseg = 1}
{strdef color color = "White"}
{pt3dclear()}
{pt3dadd(193560.000000,144804.000000,57975.000000,993.710358)}
{pt3dadd(193380.000000,144240.000000,57925.000000,993.710286)}
{pt3dadd(193308.000000,143868.000000,57925.000000,1035.114948)}
{pt3dadd(193260.000000,143568.000000,58000.000000,862.595802)}

{create adhoc218}
{access adhoc218}
{connect adhoc218(1), adhoc217(0)}
{nseg = 1}
{strdef color color = "White"}
{pt3dclear()}
{pt3dadd(193260.000000,143568.000000,58000.000000,862.595802)}
{pt3dadd(191532.000000,143568.000000,57150.000000,116.095032)}
{pt3dadd(191376.000000,143508.000000,57125.000000,147.254936)}
{pt3dadd(191184.000000,143472.000000,57150.000000,178.414839)}
{pt3dadd(190992.000000,143400.000000,57100.000000,209.574742)}
{pt3dadd(190836.000000,143376.000000,57025.000000,240.734646)}
{pt3dadd(190704.000000,143364.000000,57050.000000,252.771381)}
{pt3dadd(190548.000000,143340.000000,57050.000000,264.808116)}
{pt3dadd(190404.000000,143304.000000,57050.000000,276.844851)}
{pt3dadd(190188.000000,143244.000000,56950.000000,288.881586)}
{pt3dadd(189828.000000,143088.000000,57175.000000,116.095032)}
{pt3dadd(189468.000000,143076.000000,57175.000000,96.745860)}

{create adhoc219}
{access adhoc219}
{connect adhoc219(1), adhoc217(0)}
{nseg = 1}
{strdef color color = "White"}
{pt3dclear()}
{pt3dadd(193260.000000,143568.000000,58000.000000,862.595802)}
{pt3dadd(193140.000000,143328.000000,58025.000000,1035.114948)}
{pt3dadd(193104.000000,143064.000000,58150.000000,1035.114948)}
{pt3dadd(193284.000000,142788.000000,58450.000000,1035.114948)}
{pt3dadd(193272.000000,142524.000000,58625.000000,1035.114948)}
{pt3dadd(193152.000000,142152.000000,58900.000000,1035.114948)}
{pt3dadd(193104.000000,141804.000000,59100.000000,1134.071928)}
{pt3dadd(193032.000000,141444.000000,59225.000000,1233.028908)}
{pt3dadd(192924.000000,140904.000000,59500.000000,1331.985888)}
{pt3dadd(192984.000000,140640.000000,59750.000000,1430.942868)}
{pt3dadd(192936.000000,140412.000000,59700.000000,1242.137880)}

{create adhoc220}
{access adhoc220}
{connect adhoc220(1), adhoc219(0)}
{nseg = 1}
{strdef color color = "White"}
{pt3dclear()}
{pt3dadd(192936.000000,140412.000000,59700.000000,1242.137880)}
{pt3dadd(192900.000000,140328.000000,62275.000000,288.881586)}
{pt3dadd(192756.000000,140352.000000,62675.000000,346.657896)}
{pt3dadd(192672.000000,140412.000000,63050.000000,499.187376)}

{create adhoc221}
{access adhoc221}
{connect adhoc221(1), adhoc220(0)}
{nseg = 1}
{strdef color color = "White"}
{pt3dclear()}
{pt3dadd(192672.000000,140412.000000,63050.000000,499.187376)}
{pt3dadd(192720.000000,140544.000000,63400.000000,599.024880)}
{pt3dadd(192744.000000,140676.000000,63725.000000,658.927350)}
{pt3dadd(192744.000000,140700.000000,64150.000000,718.829820)}
{pt3dadd(192744.000000,140736.000000,64475.000000,240.734646)}

{create adhoc222}
{access adhoc222}
{connect adhoc222(1), adhoc221(0)}
{nseg = 1}
{strdef color color = "White"}
{pt3dclear()}
{pt3dadd(192744.000000,140736.000000,64475.000000,240.734646)}
{pt3dadd(192468.000000,141204.000000,64925.000000,288.881586)}
{pt3dadd(192336.000000,141444.000000,65175.000000,308.140356)}
{pt3dadd(192216.000000,141708.000000,65425.000000,327.399126)}
{pt3dadd(192132.000000,141888.000000,65675.000000,346.657896)}
{pt3dadd(192036.000000,142020.000000,66050.000000,415.989486)}

{create adhoc223}
{access adhoc223}
{connect adhoc223(1), adhoc221(0)}
{nseg = 1}
{strdef color color = "White"}
{pt3dclear()}
{pt3dadd(192744.000000,140736.000000,64475.000000,240.734646)}
{pt3dadd(192792.000000,140364.000000,64825.000000,240.734646)}
{pt3dadd(192504.000000,139800.000000,65050.000000,328.362066)}
{pt3dadd(192552.000000,139632.000000,65350.000000,415.989486)}
{pt3dadd(192624.000000,139644.000000,65550.000000,415.989486)}

{create adhoc224}
{access adhoc224}
{connect adhoc224(1), adhoc223(0)}
{nseg = 1}
{strdef color color = "White"}
{pt3dclear()}
{pt3dadd(192624.000000,139644.000000,65550.000000,415.989486)}
{pt3dadd(192504.000000,139284.000000,65750.000000,346.657896)}
{pt3dadd(192504.000000,138924.000000,65900.000000,332.213819)}
{pt3dadd(192408.000000,138648.000000,66000.000000,317.769741)}
{pt3dadd(192300.000000,138384.000000,66025.000000,303.325664)}
{pt3dadd(192408.000000,138096.000000,66200.000000,288.881586)}
{pt3dadd(192468.000000,137844.000000,66525.000000,288.881586)}
{pt3dadd(192336.000000,137808.000000,66825.000000,288.881586)}
{pt3dadd(192228.000000,137520.000000,67075.000000,288.881586)}
{pt3dadd(192036.000000,137280.000000,67300.000000,288.881586)}
{pt3dadd(191976.000000,137208.000000,67525.000000,258.455399)}
{pt3dadd(191820.000000,136932.000000,67525.000000,228.029211)}
{pt3dadd(191532.000000,136728.000000,67575.000000,197.603024)}
{pt3dadd(191280.000000,136500.000000,67775.000000,167.176836)}
{pt3dadd(190956.000000,135948.000000,67700.000000,160.211138)}
{pt3dadd(190764.000000,135828.000000,67625.000000,153.245439)}
{pt3dadd(190572.000000,135564.000000,67425.000000,146.279741)}
{pt3dadd(190272.000000,134964.000000,67050.000000,139.314042)}
{pt3dadd(190152.000000,134796.000000,66850.000000,167.176836)}
{pt3dadd(190116.000000,134568.000000,66625.000000,80.621550)}

{create adhoc225}
{access adhoc225}
{connect adhoc225(1), adhoc223(0)}
{nseg = 1}
{strdef color color = "White"}
{pt3dclear()}
{pt3dadd(192624.000000,139644.000000,65550.000000,415.989486)}
{pt3dadd(193104.000000,139524.000000,65525.000000,139.314042)}

{create adhoc226}
{access adhoc226}
{connect adhoc226(1), adhoc220(0)}
{nseg = 1}
{strdef color color = "White"}
{pt3dclear()}
{pt3dadd(192672.000000,140412.000000,63050.000000,499.187376)}
{pt3dadd(192036.000000,139944.000000,63050.000000,96.745860)}
{pt3dadd(191880.000000,139932.000000,63075.000000,114.353604)}
{pt3dadd(191712.000000,139932.000000,63125.000000,131.961348)}
{pt3dadd(191556.000000,139920.000000,63175.000000,149.569092)}
{pt3dadd(191376.000000,139872.000000,63175.000000,167.176836)}
{pt3dadd(191208.000000,139812.000000,63075.000000,167.176836)}
{pt3dadd(190992.000000,139548.000000,63050.000000,167.176836)}
{pt3dadd(190824.000000,139500.000000,63025.000000,167.176836)}
{pt3dadd(190632.000000,139248.000000,63050.000000,167.176836)}
{pt3dadd(190488.000000,139056.000000,63075.000000,197.603024)}
{pt3dadd(190344.000000,138936.000000,63100.000000,228.029211)}
{pt3dadd(190176.000000,138648.000000,63150.000000,258.455399)}
{pt3dadd(190032.000000,138636.000000,63250.000000,288.881586)}
{pt3dadd(189912.000000,138684.000000,63325.000000,224.836344)}
{pt3dadd(189828.000000,138612.000000,63525.000000,160.791102)}
{pt3dadd(189720.000000,138540.000000,63625.000000,96.745860)}
{pt3dadd(189612.000000,138516.000000,63650.000000,96.745860)}

{create adhoc227}
{access adhoc227}
{connect adhoc227(1), adhoc219(0)}
{nseg = 1}
{strdef color color = "White"}
{pt3dclear()}
{pt3dadd(192936.000000,140412.000000,59700.000000,1242.137880)}
{pt3dadd(192816.000000,140028.000000,59825.000000,1242.137880)}

{create adhoc228}
{access adhoc228}
{connect adhoc228(1), adhoc227(0)}
{nseg = 1}
{strdef color color = "White"}
{pt3dclear()}
{pt3dadd(192816.000000,140028.000000,59825.000000,1242.137880)}
{pt3dadd(191328.000000,140028.000000,58925.000000,167.176836)}
{pt3dadd(191100.000000,139932.000000,58925.000000,167.176836)}
{pt3dadd(190956.000000,139908.000000,58875.000000,167.176836)}
{pt3dadd(190812.000000,139872.000000,58800.000000,167.176836)}
{pt3dadd(190644.000000,139848.000000,58800.000000,167.176836)}
{pt3dadd(190488.000000,139824.000000,58775.000000,154.406385)}
{pt3dadd(190344.000000,139788.000000,58750.000000,141.635934)}
{pt3dadd(190116.000000,139680.000000,58625.000000,128.865483)}
{pt3dadd(189924.000000,139536.000000,58600.000000,116.095032)}
{pt3dadd(189768.000000,139404.000000,58575.000000,147.254936)}
{pt3dadd(189516.000000,139236.000000,58575.000000,178.414839)}
{pt3dadd(189216.000000,139056.000000,58550.000000,209.574742)}
{pt3dadd(189048.000000,138852.000000,58550.000000,240.734646)}
{pt3dadd(188844.000000,138900.000000,58375.000000,230.704038)}
{pt3dadd(188664.000000,138756.000000,58275.000000,220.673430)}
{pt3dadd(188496.000000,138660.000000,58200.000000,210.642822)}
{pt3dadd(188304.000000,138576.000000,58225.000000,200.612214)}
{pt3dadd(188088.000000,138492.000000,58125.000000,200.612214)}
{pt3dadd(187836.000000,138504.000000,58100.000000,200.612214)}
{pt3dadd(187608.000000,138420.000000,58100.000000,200.612214)}
{pt3dadd(187308.000000,138312.000000,58100.000000,200.612214)}
{pt3dadd(187056.000000,138228.000000,58150.000000,240.734646)}

{create adhoc229}
{access adhoc229}
{connect adhoc229(1), adhoc227(0)}
{nseg = 1}
{strdef color color = "White"}
{pt3dclear()}
{pt3dadd(192816.000000,140028.000000,59825.000000,1242.137880)}
{pt3dadd(192732.000000,139764.000000,60000.000000,993.710286)}
{pt3dadd(192612.000000,139500.000000,60000.000000,1004.061452)}
{pt3dadd(192528.000000,139236.000000,60100.000000,1014.412617)}
{pt3dadd(192480.000000,138948.000000,60200.000000,1024.763782)}
{pt3dadd(192432.000000,138660.000000,60375.000000,1035.114948)}
{pt3dadd(192528.000000,138360.000000,60400.000000,991.985162)}
{pt3dadd(192552.000000,138120.000000,60450.000000,948.855375)}
{pt3dadd(192516.000000,137904.000000,60525.000000,905.725589)}
{pt3dadd(192504.000000,137700.000000,60575.000000,862.595802)}
{pt3dadd(192564.000000,137448.000000,60600.000000,905.725589)}
{pt3dadd(192588.000000,137208.000000,60650.000000,948.855375)}
{pt3dadd(192552.000000,136812.000000,60850.000000,991.985162)}
{pt3dadd(192540.000000,136500.000000,60875.000000,1035.114948)}
{pt3dadd(192504.000000,136200.000000,60825.000000,1086.870681)}
{pt3dadd(192492.000000,135960.000000,60850.000000,1138.626414)}
{pt3dadd(192492.000000,135528.000000,60950.000000,1190.382147)}
{pt3dadd(192564.000000,135024.000000,61050.000000,1242.137880)}
{pt3dadd(192480.000000,134640.000000,61225.000000,1242.137880)}
{pt3dadd(192444.000000,134292.000000,60950.000000,1035.114948)}

{create adhoc230}
{access adhoc230}
{connect adhoc230(1), adhoc229(0)}
{nseg = 1}
{strdef color color = "White"}
{pt3dclear()}
{pt3dadd(192444.000000,134292.000000,60950.000000,1035.114948)}
{pt3dadd(192252.000000,134292.000000,62350.000000,499.187376)}
{pt3dadd(191952.000000,134088.000000,62775.000000,499.187376)}
{pt3dadd(191892.000000,133800.000000,62875.000000,499.187376)}
{pt3dadd(191772.000000,133500.000000,62975.000000,499.187376)}
{pt3dadd(191604.000000,133260.000000,63075.000000,499.187376)}
{pt3dadd(191532.000000,133044.000000,63200.000000,478.387903)}
{pt3dadd(191388.000000,132828.000000,63250.000000,457.588431)}
{pt3dadd(191244.000000,132636.000000,63375.000000,436.788958)}
{pt3dadd(191256.000000,132408.000000,63500.000000,415.989486)}
{pt3dadd(191316.000000,132180.000000,63600.000000,461.748335)}
{pt3dadd(191316.000000,131976.000000,63825.000000,507.507183)}
{pt3dadd(191352.000000,131700.000000,63975.000000,553.266031)}
{pt3dadd(191280.000000,131412.000000,64150.000000,599.024880)}
{pt3dadd(191364.000000,131160.000000,64325.000000,599.024880)}
{pt3dadd(191424.000000,130896.000000,64475.000000,599.024880)}
{pt3dadd(191448.000000,130560.000000,64700.000000,599.024880)}
{pt3dadd(191412.000000,130260.000000,64800.000000,599.024880)}
{pt3dadd(191544.000000,129960.000000,65100.000000,599.024880)}
{pt3dadd(191508.000000,129624.000000,65250.000000,599.024880)}
{pt3dadd(191484.000000,129372.000000,65475.000000,599.024880)}
{pt3dadd(191496.000000,129108.000000,65625.000000,599.024880)}
{pt3dadd(191544.000000,128832.000000,65800.000000,628.976115)}
{pt3dadd(191652.000000,128616.000000,66075.000000,658.927350)}
{pt3dadd(191820.000000,128400.000000,66550.000000,688.878585)}
{pt3dadd(191736.000000,127968.000000,67000.000000,718.829820)}
{pt3dadd(191700.000000,127596.000000,67400.000000,862.595802)}
{pt3dadd(191736.000000,127260.000000,67775.000000,718.829820)}

{create adhoc231}
{access adhoc231}
{connect adhoc231(1), adhoc230(0)}
{nseg = 1}
{strdef color color = "White"}
{pt3dclear()}
{pt3dadd(191736.000000,127260.000000,67775.000000,718.829820)}
{pt3dadd(191832.000000,126936.000000,67775.000000,499.187376)}
{pt3dadd(191796.000000,126624.000000,67950.000000,461.055006)}
{pt3dadd(191676.000000,126300.000000,68050.000000,422.922636)}
{pt3dadd(191652.000000,126048.000000,68100.000000,384.790266)}
{pt3dadd(191580.000000,125820.000000,68250.000000,346.657896)}
{pt3dadd(191532.000000,125592.000000,68275.000000,346.657896)}

{create adhoc232}
{access adhoc232}
{connect adhoc232(1), adhoc231(0)}
{nseg = 1}
{strdef color color = "White"}
{pt3dclear()}
{pt3dadd(191532.000000,125592.000000,68275.000000,346.657896)}
{pt3dadd(191520.000000,125412.000000,68300.000000,346.657896)}
{pt3dadd(191520.000000,125100.000000,68375.000000,381.323691)}
{pt3dadd(191496.000000,124800.000000,68450.000000,415.989486)}
{pt3dadd(191388.000000,124524.000000,68600.000000,415.989486)}

{create adhoc233}
{access adhoc233}
{connect adhoc233(1), adhoc232(0)}
{nseg = 1}
{strdef color color = "White"}
{pt3dclear()}
{pt3dadd(191388.000000,124524.000000,68600.000000,415.989486)}
{pt3dadd(191496.000000,124176.000000,68825.000000,415.989486)}
{pt3dadd(191580.000000,123996.000000,69000.000000,430.676718)}
{pt3dadd(191700.000000,123828.000000,69300.000000,445.363950)}
{pt3dadd(191820.000000,123588.000000,69725.000000,460.051182)}
{pt3dadd(191796.000000,123504.000000,70050.000000,599.024880)}

{create adhoc234}
{access adhoc234}
{connect adhoc234(1), adhoc233(0)}
{nseg = 1}
{strdef color color = "White"}
{pt3dclear()}
{pt3dadd(191796.000000,123504.000000,70050.000000,599.024880)}
{pt3dadd(191592.000000,123072.000000,70450.000000,415.989486)}
{pt3dadd(191472.000000,122952.000000,70925.000000,443.722116)}
{pt3dadd(191196.000000,122604.000000,71350.000000,471.454746)}
{pt3dadd(191040.000000,122400.000000,71650.000000,499.187376)}
{pt3dadd(190956.000000,121980.000000,72000.000000,346.657896)}

{create adhoc235}
{access adhoc235}
{connect adhoc235(1), adhoc234(0)}
{nseg = 1}
{strdef color color = "White"}
{pt3dclear()}
{pt3dadd(190956.000000,121980.000000,72000.000000,346.657896)}
{pt3dadd(190884.000000,122352.000000,72425.000000,599.024880)}
{pt3dadd(190800.000000,122496.000000,72750.000000,415.989486)}

{create adhoc236}
{access adhoc236}
{connect adhoc236(1), adhoc235(0)}
{nseg = 1}
{strdef color color = "White"}
{pt3dclear()}
{pt3dadd(190800.000000,122496.000000,72750.000000,415.989486)}
{pt3dadd(190956.000000,122628.000000,73125.000000,415.989486)}
{pt3dadd(191016.000000,122844.000000,73425.000000,372.175776)}
{pt3dadd(191100.000000,122940.000000,73650.000000,328.362066)}
{pt3dadd(191136.000000,123060.000000,73900.000000,284.548356)}
{pt3dadd(191436.000000,123300.000000,74225.000000,240.734646)}
{pt3dadd(191688.000000,123576.000000,74475.000000,284.548356)}
{pt3dadd(191772.000000,123708.000000,74725.000000,328.362066)}
{pt3dadd(191904.000000,123876.000000,75100.000000,372.175776)}
{pt3dadd(191832.000000,123816.000000,75400.000000,415.989486)}
{pt3dadd(191784.000000,123804.000000,75700.000000,398.656589)}
{pt3dadd(191976.000000,123924.000000,76000.000000,381.323691)}
{pt3dadd(192084.000000,124032.000000,76225.000000,363.990794)}
{pt3dadd(192144.000000,123996.000000,76525.000000,346.657896)}
{pt3dadd(192276.000000,123888.000000,76850.000000,320.177083)}
{pt3dadd(192312.000000,123792.000000,77225.000000,293.696271)}
{pt3dadd(192528.000000,123828.000000,77600.000000,267.215459)}
{pt3dadd(192636.000000,123612.000000,78025.000000,240.734646)}
{pt3dadd(192948.000000,123444.000000,78425.000000,227.360502)}
{pt3dadd(192972.000000,123024.000000,78825.000000,213.986358)}
{pt3dadd(193044.000000,122472.000000,79175.000000,200.612214)}
{pt3dadd(193020.000000,122052.000000,79300.000000,167.176836)}

{create adhoc237}
{access adhoc237}
{connect adhoc237(1), adhoc236(0)}
{nseg = 1}
{strdef color color = "White"}
{pt3dclear()}
{pt3dadd(193020.000000,122052.000000,79300.000000,167.176836)}
{pt3dadd(192828.000000,122184.000000,79425.000000,96.745860)}

{create adhoc238}
{access adhoc238}
{connect adhoc238(1), adhoc236(0)}
{nseg = 1}
{strdef color color = "White"}
{pt3dclear()}
{pt3dadd(193020.000000,122052.000000,79300.000000,167.176836)}
{pt3dadd(193080.000000,121788.000000,79400.000000,116.095032)}
{pt3dadd(193188.000000,121440.000000,79550.000000,96.745860)}
{pt3dadd(193644.000000,121452.000000,79675.000000,96.745860)}

{create adhoc239}
{access adhoc239}
{connect adhoc239(1), adhoc235(0)}
{nseg = 1}
{strdef color color = "White"}
{pt3dclear()}
{pt3dadd(190800.000000,122496.000000,72750.000000,415.989486)}
{pt3dadd(190692.000000,122028.000000,72900.000000,116.095032)}
{pt3dadd(190440.000000,121824.000000,72975.000000,107.226662)}
{pt3dadd(190356.000000,121908.000000,73125.000000,98.358291)}
{pt3dadd(190272.000000,121884.000000,73175.000000,89.489920)}
{pt3dadd(190176.000000,121872.000000,73125.000000,80.621550)}
{pt3dadd(190080.000000,121764.000000,73200.000000,89.489920)}
{pt3dadd(189996.000000,121728.000000,73150.000000,98.358291)}
{pt3dadd(189888.000000,121680.000000,73150.000000,107.226662)}
{pt3dadd(189804.000000,121668.000000,73125.000000,116.095032)}
{pt3dadd(189708.000000,121620.000000,73150.000000,147.254936)}
{pt3dadd(189612.000000,121608.000000,73175.000000,178.414839)}
{pt3dadd(189516.000000,121536.000000,73200.000000,209.574742)}
{pt3dadd(189432.000000,121512.000000,73250.000000,240.734646)}
{pt3dadd(189336.000000,121428.000000,73225.000000,240.734646)}
{pt3dadd(189240.000000,121332.000000,73075.000000,139.314042)}

{create adhoc240}
{access adhoc240}
{connect adhoc240(1), adhoc234(0)}
{nseg = 1}
{strdef color color = "White"}
{pt3dclear()}
{pt3dadd(190956.000000,121980.000000,72000.000000,346.657896)}
{pt3dadd(190824.000000,121020.000000,72225.000000,240.734646)}
{pt3dadd(190896.000000,120372.000000,72475.000000,264.808116)}
{pt3dadd(190980.000000,119916.000000,72775.000000,288.881586)}
{pt3dadd(191244.000000,119604.000000,73075.000000,288.881586)}

{create adhoc241}
{access adhoc241}
{connect adhoc241(1), adhoc240(0)}
{nseg = 1}
{strdef color color = "White"}
{pt3dclear()}
{pt3dadd(191244.000000,119604.000000,73075.000000,288.881586)}
{pt3dadd(191448.000000,119268.000000,73350.000000,346.657896)}
{pt3dadd(191496.000000,118884.000000,73675.000000,399.349944)}
{pt3dadd(191676.000000,118572.000000,73900.000000,288.881586)}

{create adhoc242}
{access adhoc242}
{connect adhoc242(1), adhoc241(0)}
{nseg = 1}
{strdef color color = "White"}
{pt3dclear()}
{pt3dadd(191676.000000,118572.000000,73900.000000,288.881586)}
{pt3dadd(192000.000000,118008.000000,74125.000000,288.881586)}
{pt3dadd(191976.000000,117588.000000,74350.000000,276.844851)}
{pt3dadd(191904.000000,117240.000000,74650.000000,264.808116)}
{pt3dadd(191940.000000,116868.000000,74925.000000,252.771381)}
{pt3dadd(192168.000000,116604.000000,75200.000000,240.734646)}
{pt3dadd(191940.000000,116232.000000,75450.000000,240.734646)}
{pt3dadd(191820.000000,116064.000000,75675.000000,240.734646)}
{pt3dadd(191784.000000,115932.000000,75925.000000,240.734646)}
{pt3dadd(191544.000000,115812.000000,76200.000000,240.734646)}
{pt3dadd(191340.000000,115620.000000,76450.000000,222.345193)}
{pt3dadd(191148.000000,115320.000000,76675.000000,203.955741)}
{pt3dadd(191100.000000,114924.000000,76825.000000,185.566288)}
{pt3dadd(190968.000000,114600.000000,76875.000000,167.176836)}
{pt3dadd(190860.000000,114276.000000,77000.000000,288.881586)}
{pt3dadd(190788.000000,113952.000000,77100.000000,346.657896)}

{create adhoc243}
{access adhoc243}
{connect adhoc243(1), adhoc242(0)}
{nseg = 1}
{strdef color color = "White"}
{pt3dclear()}
{pt3dadd(190788.000000,113952.000000,77100.000000,346.657896)}
{pt3dadd(190800.000000,113772.000000,77275.000000,346.657896)}
{pt3dadd(190752.000000,113676.000000,77675.000000,346.657896)}
{pt3dadd(190728.000000,113508.000000,78150.000000,346.657896)}
{pt3dadd(190608.000000,113496.000000,78500.000000,346.657896)}
{pt3dadd(190560.000000,113424.000000,78775.000000,346.657896)}
{pt3dadd(190620.000000,113364.000000,79075.000000,289.017180)}
{pt3dadd(190620.000000,113256.000000,79375.000000,231.376464)}
{pt3dadd(190560.000000,113112.000000,79600.000000,173.735748)}
{pt3dadd(190608.000000,113016.000000,79875.000000,116.095032)}
{pt3dadd(190392.000000,112800.000000,80000.000000,111.257739)}
{pt3dadd(190284.000000,112524.000000,80150.000000,106.420446)}
{pt3dadd(190296.000000,112200.000000,80325.000000,101.583153)}
{pt3dadd(190260.000000,111984.000000,80525.000000,96.745860)}
{pt3dadd(190452.000000,111756.000000,80675.000000,116.095032)}
{pt3dadd(190560.000000,111480.000000,80875.000000,277.326342)}

{create adhoc244}
{access adhoc244}
{connect adhoc244(1), adhoc243(0)}
{nseg = 1}
{strdef color color = "White"}
{pt3dclear()}
{pt3dadd(190560.000000,111480.000000,80875.000000,277.326342)}
{pt3dadd(190572.000000,111036.000000,81050.000000,96.745860)}
{pt3dadd(190668.000000,110892.000000,81175.000000,116.095032)}
{pt3dadd(190764.000000,110916.000000,81175.000000,80.621550)}

{create adhoc245}
{access adhoc245}
{connect adhoc245(1), adhoc243(0)}
{nseg = 1}
{strdef color color = "White"}
{pt3dclear()}
{pt3dadd(190560.000000,111480.000000,80875.000000,277.326342)}
{pt3dadd(190572.000000,111600.000000,81050.000000,96.745860)}

{create adhoc246}
{access adhoc246}
{connect adhoc246(1), adhoc242(0)}
{nseg = 1}
{strdef color color = "White"}
{pt3dclear()}
{pt3dadd(190788.000000,113952.000000,77100.000000,346.657896)}
{pt3dadd(190524.000000,113880.000000,76725.000000,288.881586)}
{pt3dadd(190320.000000,113796.000000,76575.000000,139.314042)}
{pt3dadd(190116.000000,113712.000000,76400.000000,139.314042)}

{create adhoc247}
{access adhoc247}
{connect adhoc247(1), adhoc246(0)}
{nseg = 1}
{strdef color color = "White"}
{pt3dclear()}
{pt3dadd(190116.000000,113712.000000,76400.000000,139.314042)}
{pt3dadd(190128.000000,113796.000000,76175.000000,139.314042)}

{create adhoc248}
{access adhoc248}
{connect adhoc248(1), adhoc246(0)}
{nseg = 1}
{strdef color color = "White"}
{pt3dclear()}
{pt3dadd(190116.000000,113712.000000,76400.000000,139.314042)}
{pt3dadd(189876.000000,113364.000000,76175.000000,116.095032)}
{pt3dadd(189648.000000,113196.000000,76075.000000,106.420446)}
{pt3dadd(189516.000000,113136.000000,75950.000000,96.745860)}
{pt3dadd(189396.000000,113076.000000,75950.000000,80.621550)}

{create adhoc249}
{access adhoc249}
{connect adhoc249(1), adhoc241(0)}
{nseg = 1}
{strdef color color = "White"}
{pt3dclear()}
{pt3dadd(191676.000000,118572.000000,73900.000000,288.881586)}
{pt3dadd(191280.000000,118956.000000,73975.000000,167.176836)}

{create adhoc250}
{access adhoc250}
{connect adhoc250(1), adhoc240(0)}
{nseg = 1}
{strdef color color = "White"}
{pt3dclear()}
{pt3dadd(191244.000000,119604.000000,73075.000000,288.881586)}
{pt3dadd(190668.000000,119784.000000,73075.000000,96.745860)}
{pt3dadd(190548.000000,119712.000000,73050.000000,96.745860)}
{pt3dadd(190416.000000,119568.000000,73100.000000,96.745860)}
{pt3dadd(190308.000000,119460.000000,73125.000000,96.745860)}
{pt3dadd(190320.000000,119112.000000,73275.000000,96.745860)}

{create adhoc251}
{access adhoc251}
{connect adhoc251(1), adhoc233(0)}
{nseg = 1}
{strdef color color = "White"}
{pt3dclear()}
{pt3dadd(191796.000000,123504.000000,70050.000000,599.024880)}
{pt3dadd(192000.000000,123924.000000,70100.000000,139.314042)}
{pt3dadd(192096.000000,124056.000000,70250.000000,96.745860)}
{pt3dadd(192276.000000,124416.000000,70375.000000,116.095032)}

{create adhoc252}
{access adhoc252}
{connect adhoc252(1), adhoc232(0)}
{nseg = 1}
{strdef color color = "White"}
{pt3dclear()}
{pt3dadd(191388.000000,124524.000000,68600.000000,415.989486)}
{pt3dadd(190464.000000,124392.000000,68600.000000,240.734646)}
{pt3dadd(190200.000000,124320.000000,68575.000000,204.737450)}
{pt3dadd(190056.000000,124296.000000,68550.000000,168.740253)}
{pt3dadd(189888.000000,124224.000000,68500.000000,132.743057)}
{pt3dadd(189732.000000,124224.000000,68475.000000,96.745860)}
{pt3dadd(189528.000000,124248.000000,68475.000000,101.583153)}
{pt3dadd(189288.000000,124188.000000,68375.000000,106.420446)}
{pt3dadd(189096.000000,124044.000000,68350.000000,111.257739)}
{pt3dadd(188964.000000,123900.000000,68300.000000,116.095032)}
{pt3dadd(188844.000000,123768.000000,68150.000000,158.353623)}
{pt3dadd(188736.000000,123624.000000,68075.000000,200.612214)}
{pt3dadd(188640.000000,123480.000000,67925.000000,96.745860)}

{create adhoc253}
{access adhoc253}
{connect adhoc253(1), adhoc231(0)}
{nseg = 1}
{strdef color color = "White"}
{pt3dclear()}
{pt3dadd(191532.000000,125592.000000,68275.000000,346.657896)}
{pt3dadd(191004.000000,125592.000000,68075.000000,96.745860)}
{pt3dadd(190824.000000,125556.000000,67950.000000,167.176836)}

{create adhoc254}
{access adhoc254}
{connect adhoc254(1), adhoc230(0)}
{nseg = 1}
{strdef color color = "White"}
{pt3dclear()}
{pt3dadd(191736.000000,127260.000000,67775.000000,718.829820)}
{pt3dadd(191868.000000,127812.000000,68550.000000,415.989486)}
{pt3dadd(191820.000000,127908.000000,68875.000000,398.656589)}
{pt3dadd(191904.000000,128196.000000,69125.000000,381.323691)}
{pt3dadd(191928.000000,128508.000000,69350.000000,363.990794)}
{pt3dadd(192012.000000,128772.000000,69550.000000,346.657896)}
{pt3dadd(192240.000000,128988.000000,69800.000000,384.790266)}
{pt3dadd(192420.000000,129216.000000,70025.000000,422.922636)}
{pt3dadd(192564.000000,129420.000000,70350.000000,461.055006)}
{pt3dadd(192720.000000,129576.000000,70425.000000,499.187376)}
{pt3dadd(192780.000000,129744.000000,70575.000000,415.989486)}

{create adhoc255}
{access adhoc255}
{connect adhoc255(1), adhoc254(0)}
{nseg = 1}
{strdef color color = "White"}
{pt3dclear()}
{pt3dadd(192780.000000,129744.000000,70575.000000,415.989486)}
{pt3dadd(192972.000000,129972.000000,70700.000000,415.989486)}
{pt3dadd(193128.000000,130152.000000,70800.000000,415.989486)}

{create adhoc256}
{access adhoc256}
{connect adhoc256(1), adhoc255(0)}
{nseg = 1}
{strdef color color = "White"}
{pt3dclear()}
{pt3dadd(193128.000000,130152.000000,70800.000000,415.989486)}
{pt3dadd(193308.000000,130248.000000,70850.000000,346.657896)}
{pt3dadd(193500.000000,130524.000000,71100.000000,346.657896)}
{pt3dadd(193716.000000,130824.000000,71300.000000,346.657896)}
{pt3dadd(193872.000000,131148.000000,71400.000000,346.657896)}
{pt3dadd(193932.000000,131388.000000,71425.000000,346.657896)}
{pt3dadd(194052.000000,131652.000000,71425.000000,373.003920)}
{pt3dadd(194304.000000,131952.000000,71425.000000,399.349944)}
{pt3dadd(194436.000000,132096.000000,71500.000000,332.791596)}

{create adhoc257}
{access adhoc257}
{connect adhoc257(1), adhoc256(0)}
{nseg = 1}
{strdef color color = "White"}
{pt3dclear()}
{pt3dadd(194436.000000,132096.000000,71500.000000,332.791596)}
{pt3dadd(194580.000000,132240.000000,71700.000000,346.657896)}
{pt3dadd(194688.000000,132516.000000,71825.000000,346.657896)}
{pt3dadd(194736.000000,132744.000000,72075.000000,346.657896)}
{pt3dadd(194676.000000,132948.000000,72300.000000,346.657896)}
{pt3dadd(194568.000000,133188.000000,72400.000000,346.657896)}
{pt3dadd(194640.000000,133608.000000,72575.000000,599.024880)}

{create adhoc258}
{access adhoc258}
{connect adhoc258(1), adhoc257(0)}
{nseg = 1}
{strdef color color = "White"}
{pt3dclear()}
{pt3dadd(194640.000000,133608.000000,72575.000000,599.024880)}
{pt3dadd(194628.000000,133800.000000,73025.000000,599.024880)}
{pt3dadd(194520.000000,133596.000000,73300.000000,553.266031)}
{pt3dadd(194304.000000,133560.000000,73575.000000,507.507183)}
{pt3dadd(194244.000000,133452.000000,73850.000000,461.748335)}
{pt3dadd(194316.000000,133404.000000,74100.000000,415.989486)}
{pt3dadd(194220.000000,133368.000000,74350.000000,384.212511)}
{pt3dadd(194244.000000,133320.000000,74625.000000,352.435536)}
{pt3dadd(194172.000000,133236.000000,74925.000000,320.658561)}
{pt3dadd(194088.000000,133008.000000,75150.000000,288.881586)}
{pt3dadd(194016.000000,132804.000000,75150.000000,240.734646)}

{create adhoc259}
{access adhoc259}
{connect adhoc259(1), adhoc257(0)}
{nseg = 1}
{strdef color color = "White"}
{pt3dclear()}
{pt3dadd(194640.000000,133608.000000,72575.000000,599.024880)}
{pt3dadd(194532.000000,134664.000000,72575.000000,288.881586)}
{pt3dadd(194520.000000,135012.000000,72750.000000,258.455399)}
{pt3dadd(194400.000000,135324.000000,72750.000000,228.029211)}
{pt3dadd(194364.000000,135552.000000,72525.000000,197.603024)}
{pt3dadd(194268.000000,135768.000000,72425.000000,167.176836)}
{pt3dadd(194040.000000,135936.000000,72325.000000,229.379999)}
{pt3dadd(193824.000000,136188.000000,72150.000000,291.583161)}
{pt3dadd(193776.000000,136440.000000,72100.000000,353.786324)}
{pt3dadd(193572.000000,136692.000000,71975.000000,415.989486)}
{pt3dadd(193380.000000,136608.000000,71600.000000,167.176836)}

{create adhoc260}
{access adhoc260}
{connect adhoc260(1), adhoc259(0)}
{nseg = 1}
{strdef color color = "White"}
{pt3dclear()}
{pt3dadd(193380.000000,136608.000000,71600.000000,167.176836)}
{pt3dadd(192924.000000,136356.000000,71400.000000,200.612214)}
{pt3dadd(192672.000000,136092.000000,71150.000000,240.734646)}

{create adhoc261}
{access adhoc261}
{connect adhoc261(1), adhoc259(0)}
{nseg = 1}
{strdef color color = "White"}
{pt3dclear()}
{pt3dadd(193380.000000,136608.000000,71600.000000,167.176836)}
{pt3dadd(193800.000000,136692.000000,71475.000000,139.314042)}
{pt3dadd(193776.000000,136644.000000,71325.000000,169.963128)}
{pt3dadd(193848.000000,136764.000000,71150.000000,200.612214)}
{pt3dadd(194028.000000,136788.000000,70975.000000,80.621550)}

{create adhoc262}
{access adhoc262}
{connect adhoc262(1), adhoc256(0)}
{nseg = 1}
{strdef color color = "White"}
{pt3dclear()}
{pt3dadd(194436.000000,132096.000000,71500.000000,332.791596)}
{pt3dadd(194124.000000,132120.000000,71125.000000,200.612214)}
{pt3dadd(194124.000000,132276.000000,70825.000000,139.314042)}

{create adhoc263}
{access adhoc263}
{connect adhoc263(1), adhoc255(0)}
{nseg = 1}
{strdef color color = "White"}
{pt3dclear()}
{pt3dadd(193128.000000,130152.000000,70800.000000,415.989486)}
{pt3dadd(193104.000000,129552.000000,70450.000000,240.734646)}

{create adhoc264}
{access adhoc264}
{connect adhoc264(1), adhoc254(0)}
{nseg = 1}
{strdef color color = "White"}
{pt3dclear()}
{pt3dadd(192780.000000,129744.000000,70575.000000,415.989486)}
{pt3dadd(192648.000000,129708.000000,71250.000000,133.741476)}
{pt3dadd(192528.000000,129768.000000,71425.000000,116.095032)}

{create adhoc265}
{access adhoc265}
{connect adhoc265(1), adhoc229(0)}
{nseg = 1}
{strdef color color = "White"}
{pt3dclear()}
{pt3dadd(192444.000000,134292.000000,60950.000000,1035.114948)}
{pt3dadd(192324.000000,133896.000000,60675.000000,862.595802)}
{pt3dadd(192204.000000,133764.000000,60400.000000,828.092016)}

{create adhoc266}
{access adhoc266}
{connect adhoc266(1), adhoc265(0)}
{nseg = 1}
{strdef color color = "White"}
{pt3dclear()}
{pt3dadd(192204.000000,133764.000000,60400.000000,828.092016)}
{pt3dadd(191820.000000,133764.000000,59100.000000,200.612214)}
{pt3dadd(191628.000000,133764.000000,58800.000000,254.456532)}
{pt3dadd(191592.000000,133992.000000,58375.000000,308.300850)}
{pt3dadd(191712.000000,133968.000000,58000.000000,362.145168)}
{pt3dadd(191940.000000,133860.000000,57575.000000,415.989486)}
{pt3dadd(191928.000000,133764.000000,57225.000000,346.657896)}
{pt3dadd(192024.000000,133644.000000,57100.000000,116.095032)}

{create adhoc267}
{access adhoc267}
{connect adhoc267(1), adhoc265(0)}
{nseg = 1}
{strdef color color = "White"}
{pt3dclear()}
{pt3dadd(192204.000000,133764.000000,60400.000000,828.092016)}
{pt3dadd(192204.000000,133392.000000,60475.000000,862.595802)}
{pt3dadd(192060.000000,133008.000000,60500.000000,826.654307)}
{pt3dadd(191952.000000,132624.000000,60500.000000,790.712811)}
{pt3dadd(191880.000000,132240.000000,60500.000000,754.771316)}
{pt3dadd(191808.000000,131832.000000,60600.000000,718.829820)}
{pt3dadd(191664.000000,131424.000000,60700.000000,711.641533)}
{pt3dadd(191520.000000,130968.000000,60875.000000,704.453247)}
{pt3dadd(191412.000000,130572.000000,61025.000000,697.264960)}
{pt3dadd(191340.000000,130200.000000,61125.000000,690.076674)}
{pt3dadd(191232.000000,129792.000000,61200.000000,704.453247)}
{pt3dadd(191088.000000,129372.000000,61275.000000,718.829820)}
{pt3dadd(191040.000000,129072.000000,61350.000000,718.829820)}

{create adhoc268}
{access adhoc268}
{connect adhoc268(1), adhoc267(0)}
{nseg = 1}
{strdef color color = "White"}
{pt3dclear()}
{pt3dadd(191040.000000,129072.000000,61350.000000,718.829820)}
{pt3dadd(189612.000000,129072.000000,61450.000000,139.314042)}
{pt3dadd(189348.000000,129144.000000,61500.000000,146.279741)}
{pt3dadd(189132.000000,129216.000000,61600.000000,153.245439)}
{pt3dadd(188976.000000,129216.000000,61700.000000,160.211138)}
{pt3dadd(188736.000000,129180.000000,61775.000000,167.176836)}
{pt3dadd(188496.000000,129324.000000,61750.000000,175.535680)}
{pt3dadd(188316.000000,129300.000000,61725.000000,183.894525)}
{pt3dadd(188148.000000,129336.000000,61750.000000,192.253370)}
{pt3dadd(187872.000000,129348.000000,61800.000000,200.612214)}
{pt3dadd(187692.000000,129576.000000,61750.000000,200.612214)}

{create adhoc269}
{access adhoc269}
{connect adhoc269(1), adhoc267(0)}
{nseg = 1}
{strdef color color = "White"}
{pt3dclear()}
{pt3dadd(191040.000000,129072.000000,61350.000000,718.829820)}
{pt3dadd(191112.000000,128760.000000,61400.000000,718.829820)}
{pt3dadd(191064.000000,128304.000000,61525.000000,718.829820)}
{pt3dadd(190884.000000,127956.000000,61700.000000,718.829820)}
{pt3dadd(190548.000000,127572.000000,61750.000000,718.829820)}
{pt3dadd(190320.000000,127236.000000,61600.000000,718.829820)}
{pt3dadd(190236.000000,126864.000000,61575.000000,645.615672)}
{pt3dadd(190128.000000,126540.000000,61650.000000,572.401524)}
{pt3dadd(189972.000000,126228.000000,61675.000000,499.187376)}
{pt3dadd(189864.000000,125964.000000,61700.000000,499.187376)}

{create adhoc270}
{access adhoc270}
{connect adhoc270(1), adhoc269(0)}
{nseg = 1}
{strdef color color = "White"}
{pt3dclear()}
{pt3dadd(189864.000000,125964.000000,61700.000000,499.187376)}
{pt3dadd(188508.000000,125856.000000,60775.000000,288.881586)}
{pt3dadd(188316.000000,125628.000000,60725.000000,366.417410)}
{pt3dadd(188088.000000,125532.000000,60425.000000,443.953233)}
{pt3dadd(187812.000000,125484.000000,60000.000000,521.489056)}
{pt3dadd(187560.000000,125568.000000,59725.000000,599.024880)}
{pt3dadd(187368.000000,125592.000000,59450.000000,549.106137)}
{pt3dadd(187368.000000,125712.000000,59200.000000,499.187394)}
{pt3dadd(187308.000000,125940.000000,58850.000000,449.268651)}
{pt3dadd(187068.000000,126180.000000,58575.000000,399.349908)}
{pt3dadd(186936.000000,126324.000000,58250.000000,449.268651)}
{pt3dadd(186972.000000,126444.000000,57750.000000,499.187394)}
{pt3dadd(187032.000000,126732.000000,57325.000000,549.106137)}
{pt3dadd(186948.000000,126960.000000,56925.000000,599.024880)}
{pt3dadd(186804.000000,127044.000000,56525.000000,479.219886)}
{pt3dadd(186780.000000,127116.000000,56225.000000,288.881586)}

{create adhoc271}
{access adhoc271}
{connect adhoc271(1), adhoc270(0)}
{nseg = 1}
{strdef color color = "White"}
{pt3dclear()}
{pt3dadd(186780.000000,127116.000000,56225.000000,288.881586)}
{pt3dadd(186984.000000,127596.000000,55925.000000,346.657896)}
{pt3dadd(187128.000000,127860.000000,55700.000000,320.177083)}
{pt3dadd(187164.000000,128136.000000,55550.000000,293.696271)}
{pt3dadd(187272.000000,128412.000000,55550.000000,267.215459)}
{pt3dadd(187356.000000,128652.000000,55475.000000,240.734646)}
{pt3dadd(187260.000000,128928.000000,55650.000000,203.955741)}
{pt3dadd(187152.000000,129192.000000,55900.000000,167.176836)}
{pt3dadd(186876.000000,129300.000000,56200.000000,240.734646)}

{create adhoc272}
{access adhoc272}
{connect adhoc272(1), adhoc270(0)}
{nseg = 1}
{strdef color color = "White"}
{pt3dclear()}
{pt3dadd(186780.000000,127116.000000,56225.000000,288.881586)}
{pt3dadd(186612.000000,126816.000000,56050.000000,332.791596)}
{pt3dadd(186480.000000,126660.000000,55825.000000,353.591069)}
{pt3dadd(186360.000000,126516.000000,55500.000000,374.390541)}
{pt3dadd(186156.000000,126408.000000,55225.000000,395.190014)}
{pt3dadd(186180.000000,126360.000000,54925.000000,415.989486)}
{pt3dadd(186192.000000,126252.000000,54650.000000,398.656589)}
{pt3dadd(186216.000000,126180.000000,54375.000000,381.323691)}
{pt3dadd(186444.000000,125976.000000,54100.000000,363.990794)}
{pt3dadd(186564.000000,125820.000000,53825.000000,346.657896)}
{pt3dadd(186708.000000,125580.000000,53600.000000,346.657896)}
{pt3dadd(186960.000000,125472.000000,53375.000000,240.734646)}

{create adhoc273}
{access adhoc273}
{connect adhoc273(1), adhoc272(0)}
{nseg = 1}
{strdef color color = "White"}
{pt3dclear()}
{pt3dadd(186960.000000,125472.000000,53375.000000,240.734646)}
{pt3dadd(187428.000000,125112.000000,53225.000000,167.176836)}
{pt3dadd(187620.000000,124704.000000,53000.000000,167.176836)}
{pt3dadd(187668.000000,124560.000000,52925.000000,167.176836)}
{pt3dadd(187740.000000,124260.000000,52750.000000,167.176836)}
{pt3dadd(187776.000000,123948.000000,52675.000000,167.176836)}
{pt3dadd(187992.000000,123792.000000,52675.000000,160.211138)}
{pt3dadd(188340.000000,123636.000000,52675.000000,153.245439)}
{pt3dadd(188580.000000,123336.000000,52700.000000,146.279741)}
{pt3dadd(188856.000000,123084.000000,52700.000000,139.314042)}
{pt3dadd(189084.000000,122796.000000,52700.000000,176.705928)}
{pt3dadd(189300.000000,122556.000000,52600.000000,214.097814)}
{pt3dadd(189384.000000,122280.000000,52675.000000,251.489700)}
{pt3dadd(189408.000000,121992.000000,52750.000000,288.881586)}
{pt3dadd(189276.000000,121692.000000,52775.000000,266.814243)}
{pt3dadd(189132.000000,121476.000000,52950.000000,244.746900)}
{pt3dadd(189132.000000,121284.000000,52925.000000,222.679557)}
{pt3dadd(189144.000000,121056.000000,52925.000000,200.612214)}
{pt3dadd(189000.000000,120780.000000,52800.000000,210.642822)}
{pt3dadd(188688.000000,120384.000000,52575.000000,220.673430)}
{pt3dadd(188340.000000,120276.000000,52350.000000,230.704038)}
{pt3dadd(188292.000000,120000.000000,52100.000000,240.734646)}
{pt3dadd(188436.000000,120048.000000,51900.000000,200.612214)}

{create adhoc274}
{access adhoc274}
{connect adhoc274(1), adhoc272(0)}
{nseg = 1}
{strdef color color = "White"}
{pt3dclear()}
{pt3dadd(186960.000000,125472.000000,53375.000000,240.734646)}
{pt3dadd(186972.000000,125652.000000,53225.000000,200.612214)}
{pt3dadd(186876.000000,125856.000000,53050.000000,200.612214)}
{pt3dadd(186852.000000,125856.000000,52775.000000,200.612214)}
{pt3dadd(186960.000000,125940.000000,52550.000000,200.612214)}
{pt3dadd(187116.000000,125856.000000,52350.000000,200.612214)}
{pt3dadd(187248.000000,125844.000000,52125.000000,237.123635)}
{pt3dadd(187428.000000,125844.000000,51850.000000,273.635055)}
{pt3dadd(187632.000000,125868.000000,51600.000000,310.146475)}
{pt3dadd(187740.000000,125796.000000,51200.000000,346.657896)}
{pt3dadd(187944.000000,125796.000000,50800.000000,242.985969)}
{pt3dadd(187920.000000,125544.000000,50375.000000,139.314042)}
{pt3dadd(188016.000000,125328.000000,50175.000000,77.396688)}

{create adhoc275}
{access adhoc275}
{connect adhoc275(1), adhoc274(0)}
{nseg = 1}
{strdef color color = "White"}
{pt3dclear()}
{pt3dadd(188016.000000,125328.000000,50175.000000,77.396688)}
{pt3dadd(188220.000000,125472.000000,50000.000000,96.745860)}

{create adhoc276}
{access adhoc276}
{connect adhoc276(1), adhoc274(0)}
{nseg = 1}
{strdef color color = "White"}
{pt3dclear()}
{pt3dadd(188016.000000,125328.000000,50175.000000,77.396688)}
{pt3dadd(187848.000000,125004.000000,50175.000000,96.745860)}
{pt3dadd(187788.000000,124764.000000,50175.000000,80.621550)}

{create adhoc277}
{access adhoc277}
{connect adhoc277(1), adhoc269(0)}
{nseg = 1}
{strdef color color = "White"}
{pt3dclear()}
{pt3dadd(189864.000000,125964.000000,61700.000000,499.187376)}
{pt3dadd(190080.000000,125808.000000,61875.000000,718.829820)}
{pt3dadd(189960.000000,125556.000000,61900.000000,658.927350)}
{pt3dadd(189924.000000,125328.000000,62000.000000,599.024880)}
{pt3dadd(189960.000000,125232.000000,62025.000000,718.829820)}

{create adhoc278}
{access adhoc278}
{connect adhoc278(1), adhoc277(0)}
{nseg = 1}
{strdef color color = "White"}
{pt3dclear()}
{pt3dadd(189960.000000,125232.000000,62025.000000,718.829820)}
{pt3dadd(189252.000000,125232.000000,62850.000000,116.095032)}
{pt3dadd(189048.000000,125196.000000,62900.000000,147.254936)}
{pt3dadd(188868.000000,125112.000000,62925.000000,178.414839)}
{pt3dadd(188640.000000,125052.000000,62900.000000,209.574742)}
{pt3dadd(188508.000000,125148.000000,63075.000000,240.734646)}
{pt3dadd(188376.000000,125412.000000,63375.000000,230.704038)}
{pt3dadd(188160.000000,125652.000000,63675.000000,220.673430)}
{pt3dadd(188316.000000,125808.000000,63950.000000,210.642822)}
{pt3dadd(188580.000000,125880.000000,64175.000000,200.612214)}
{pt3dadd(188928.000000,125772.000000,64400.000000,210.642822)}
{pt3dadd(189192.000000,125232.000000,64650.000000,220.673430)}
{pt3dadd(189420.000000,124632.000000,64900.000000,230.704038)}
{pt3dadd(189420.000000,124332.000000,65150.000000,240.734646)}
{pt3dadd(189408.000000,123972.000000,65375.000000,192.738384)}
{pt3dadd(189420.000000,123720.000000,65600.000000,144.742122)}
{pt3dadd(189456.000000,123924.000000,65875.000000,96.745860)}
{pt3dadd(189480.000000,123840.000000,66125.000000,139.314042)}

{create adhoc279}
{access adhoc279}
{connect adhoc279(1), adhoc277(0)}
{nseg = 1}
{strdef color color = "White"}
{pt3dclear()}
{pt3dadd(189960.000000,125232.000000,62025.000000,718.829820)}
{pt3dadd(190032.000000,124848.000000,62125.000000,828.092016)}
{pt3dadd(190068.000000,124536.000000,62200.000000,793.588180)}
{pt3dadd(190032.000000,124332.000000,62225.000000,759.084345)}
{pt3dadd(189960.000000,123900.000000,62325.000000,724.580509)}
{pt3dadd(189852.000000,123480.000000,62375.000000,690.076674)}
{pt3dadd(189804.000000,123036.000000,62375.000000,733.206456)}
{pt3dadd(189840.000000,122712.000000,62475.000000,776.336238)}
{pt3dadd(189804.000000,122400.000000,62525.000000,819.466020)}
{pt3dadd(189696.000000,122124.000000,62650.000000,862.595802)}
{pt3dadd(189624.000000,121824.000000,62775.000000,862.595802)}
{pt3dadd(189468.000000,121500.000000,62825.000000,862.595802)}

{create adhoc280}
{access adhoc280}
{connect adhoc280(1), adhoc279(0)}
{nseg = 1}
{strdef color color = "White"}
{pt3dclear()}
{pt3dadd(189468.000000,121500.000000,62825.000000,862.595802)}
{pt3dadd(188736.000000,121476.000000,61900.000000,200.612214)}
{pt3dadd(188412.000000,121344.000000,61950.000000,222.679557)}
{pt3dadd(188100.000000,121152.000000,61775.000000,244.746900)}
{pt3dadd(187824.000000,120996.000000,61675.000000,266.814243)}
{pt3dadd(187656.000000,120876.000000,61600.000000,288.881586)}
{pt3dadd(187488.000000,120696.000000,61550.000000,288.881586)}
{pt3dadd(187332.000000,120504.000000,61375.000000,288.881586)}
{pt3dadd(187188.000000,120372.000000,61150.000000,139.314042)}

{create adhoc281}
{access adhoc281}
{connect adhoc281(1), adhoc280(0)}
{nseg = 1}
{strdef color color = "White"}
{pt3dclear()}
{pt3dadd(187188.000000,120372.000000,61150.000000,139.314042)}
{pt3dadd(186924.000000,120276.000000,60775.000000,200.612214)}
{pt3dadd(186696.000000,120072.000000,60475.000000,249.294108)}
{pt3dadd(186312.000000,119844.000000,60275.000000,297.976002)}
{pt3dadd(186156.000000,119604.000000,60000.000000,346.657896)}
{pt3dadd(185964.000000,119376.000000,59750.000000,288.881586)}

{create adhoc282}
{access adhoc282}
{connect adhoc282(1), adhoc281(0)}
{nseg = 1}
{strdef color color = "White"}
{pt3dclear()}
{pt3dadd(185964.000000,119376.000000,59750.000000,288.881586)}
{pt3dadd(185916.000000,119088.000000,59525.000000,240.734646)}
{pt3dadd(185976.000000,118764.000000,59225.000000,267.215459)}
{pt3dadd(186024.000000,118608.000000,58900.000000,293.696271)}
{pt3dadd(186060.000000,118332.000000,58450.000000,320.177083)}
{pt3dadd(185940.000000,118080.000000,58075.000000,346.657896)}
{pt3dadd(185976.000000,118020.000000,57825.000000,288.881586)}

{create adhoc283}
{access adhoc283}
{connect adhoc283(1), adhoc282(0)}
{nseg = 1}
{strdef color color = "White"}
{pt3dclear()}
{pt3dadd(185976.000000,118020.000000,57825.000000,288.881586)}
{pt3dadd(186048.000000,117804.000000,57675.000000,288.881586)}
{pt3dadd(186132.000000,117576.000000,57400.000000,266.814243)}
{pt3dadd(185964.000000,117456.000000,57125.000000,244.746900)}
{pt3dadd(185544.000000,117324.000000,56975.000000,222.679557)}
{pt3dadd(185328.000000,117252.000000,56800.000000,200.612214)}
{pt3dadd(185064.000000,117276.000000,56575.000000,200.612214)}
{pt3dadd(184836.000000,117264.000000,56375.000000,200.612214)}
{pt3dadd(184548.000000,117204.000000,56300.000000,200.612214)}
{pt3dadd(184764.000000,117276.000000,55950.000000,96.745860)}

{create adhoc284}
{access adhoc284}
{connect adhoc284(1), adhoc283(0)}
{nseg = 1}
{strdef color color = "White"}
{pt3dclear()}
{pt3dadd(184764.000000,117276.000000,55950.000000,96.745860)}
{pt3dadd(185172.000000,117588.000000,55750.000000,167.176836)}
{pt3dadd(185340.000000,117768.000000,55550.000000,183.894525)}
{pt3dadd(185424.000000,117852.000000,55300.000000,200.612214)}
{pt3dadd(185484.000000,118104.000000,55050.000000,200.612214)}

{create adhoc285}
{access adhoc285}
{connect adhoc285(1), adhoc283(0)}
{nseg = 1}
{strdef color color = "White"}
{pt3dclear()}
{pt3dadd(184764.000000,117276.000000,55950.000000,96.745860)}
{pt3dadd(184512.000000,117120.000000,55850.000000,67.184640)}
{pt3dadd(184428.000000,116952.000000,55650.000000,81.965250)}
{pt3dadd(184392.000000,116784.000000,55500.000000,96.745860)}
{pt3dadd(184344.000000,116568.000000,55300.000000,167.176836)}

{create adhoc286}
{access adhoc286}
{connect adhoc286(1), adhoc282(0)}
{nseg = 1}
{strdef color color = "White"}
{pt3dclear()}
{pt3dadd(185976.000000,118020.000000,57825.000000,288.881586)}
{pt3dadd(185460.000000,117888.000000,57825.000000,96.745860)}
{pt3dadd(185328.000000,117732.000000,57800.000000,80.621550)}

{create adhoc287}
{access adhoc287}
{connect adhoc287(1), adhoc281(0)}
{nseg = 1}
{strdef color color = "White"}
{pt3dclear()}
{pt3dadd(185964.000000,119376.000000,59750.000000,288.881586)}
{pt3dadd(185568.000000,119508.000000,59775.000000,116.095032)}
{pt3dadd(185412.000000,119568.000000,59775.000000,80.621550)}

{create adhoc288}
{access adhoc288}
{connect adhoc288(1), adhoc280(0)}
{nseg = 1}
{strdef color color = "White"}
{pt3dclear()}
{pt3dadd(187188.000000,120372.000000,61150.000000,139.314042)}
{pt3dadd(187104.000000,120324.000000,61475.000000,116.095032)}
{pt3dadd(186912.000000,120156.000000,61625.000000,96.745860)}
{pt3dadd(186768.000000,119988.000000,61600.000000,96.745860)}

{create adhoc289}
{access adhoc289}
{connect adhoc289(1), adhoc279(0)}
{nseg = 1}
{strdef color color = "White"}
{pt3dclear()}
{pt3dadd(189468.000000,121500.000000,62825.000000,862.595802)}
{pt3dadd(189636.000000,121200.000000,63000.000000,862.595802)}
{pt3dadd(189636.000000,120852.000000,63100.000000,862.595802)}
{pt3dadd(189528.000000,120504.000000,63200.000000,862.595802)}
{pt3dadd(189372.000000,120120.000000,63375.000000,862.595802)}
{pt3dadd(189300.000000,119832.000000,63500.000000,862.595802)}
{pt3dadd(189048.000000,119508.000000,63600.000000,599.024880)}

{create adhoc290}
{access adhoc290}
{connect adhoc290(1), adhoc289(0)}
{nseg = 1}
{strdef color color = "White"}
{pt3dclear()}
{pt3dadd(189048.000000,119508.000000,63600.000000,599.024880)}
{pt3dadd(188376.000000,119436.000000,63150.000000,346.657896)}
{pt3dadd(188172.000000,119268.000000,63025.000000,359.830899)}
{pt3dadd(188004.000000,119076.000000,62925.000000,373.003902)}
{pt3dadd(187836.000000,118860.000000,62825.000000,386.176905)}
{pt3dadd(187740.000000,118644.000000,62825.000000,399.349908)}
{pt3dadd(187500.000000,118440.000000,62500.000000,424.309275)}
{pt3dadd(187176.000000,118044.000000,62175.000000,449.268642)}
{pt3dadd(187020.000000,117732.000000,61750.000000,474.228009)}
{pt3dadd(186744.000000,117420.000000,61425.000000,499.187376)}
{pt3dadd(186504.000000,117024.000000,61100.000000,415.989486)}

{create adhoc291}
{access adhoc291}
{connect adhoc291(1), adhoc290(0)}
{nseg = 1}
{strdef color color = "White"}
{pt3dclear()}
{pt3dadd(186504.000000,117024.000000,61100.000000,415.989486)}
{pt3dadd(186324.000000,116700.000000,60800.000000,346.657896)}
{pt3dadd(186240.000000,116268.000000,60475.000000,363.990794)}
{pt3dadd(186132.000000,115992.000000,60225.000000,381.323691)}
{pt3dadd(186108.000000,115836.000000,59975.000000,398.656589)}
{pt3dadd(185844.000000,115104.000000,59675.000000,415.989486)}
{pt3dadd(185652.000000,114828.000000,59475.000000,457.588431)}
{pt3dadd(185496.000000,114576.000000,59400.000000,499.187376)}
{pt3dadd(185304.000000,114384.000000,59375.000000,479.219922)}

{create adhoc292}
{access adhoc292}
{connect adhoc292(1), adhoc291(0)}
{nseg = 1}
{strdef color color = "White"}
{pt3dclear()}
{pt3dadd(185304.000000,114384.000000,59375.000000,479.219922)}
{pt3dadd(184824.000000,114216.000000,58925.000000,415.989486)}
{pt3dadd(184548.000000,114012.000000,58600.000000,240.734646)}
{pt3dadd(184476.000000,113880.000000,58175.000000,288.881586)}

{create adhoc293}
{access adhoc293}
{connect adhoc293(1), adhoc292(0)}
{nseg = 1}
{strdef color color = "White"}
{pt3dclear()}
{pt3dadd(184476.000000,113880.000000,58175.000000,288.881586)}
{pt3dadd(184404.000000,113844.000000,57875.000000,288.881586)}
{pt3dadd(184440.000000,113796.000000,57700.000000,200.612214)}

{create adhoc294}
{access adhoc294}
{connect adhoc294(1), adhoc293(0)}
{nseg = 1}
{strdef color color = "White"}
{pt3dclear()}
{pt3dadd(184440.000000,113796.000000,57700.000000,200.612214)}
{pt3dadd(184236.000000,113544.000000,57450.000000,288.881586)}
{pt3dadd(184164.000000,113352.000000,57100.000000,266.814243)}
{pt3dadd(184164.000000,113136.000000,56825.000000,244.746900)}
{pt3dadd(184200.000000,113040.000000,56575.000000,222.679557)}
{pt3dadd(184272.000000,112956.000000,56300.000000,200.612214)}
{pt3dadd(184512.000000,112608.000000,56075.000000,288.881586)}

{create adhoc295}
{access adhoc295}
{connect adhoc295(1), adhoc294(0)}
{nseg = 1}
{strdef color color = "White"}
{pt3dclear()}
{pt3dadd(184512.000000,112608.000000,56075.000000,288.881586)}
{pt3dadd(184656.000000,112452.000000,55775.000000,415.989486)}
{pt3dadd(184800.000000,112428.000000,55450.000000,381.323691)}
{pt3dadd(184812.000000,112212.000000,55200.000000,346.657896)}
{pt3dadd(184944.000000,112212.000000,54975.000000,288.881586)}

{create adhoc296}
{access adhoc296}
{connect adhoc296(1), adhoc295(0)}
{nseg = 1}
{strdef color color = "White"}
{pt3dclear()}
{pt3dadd(184944.000000,112212.000000,54975.000000,288.881586)}
{pt3dadd(185100.000000,112044.000000,54700.000000,240.734646)}
{pt3dadd(185220.000000,111936.000000,54575.000000,222.345193)}
{pt3dadd(185292.000000,111780.000000,54375.000000,203.955741)}
{pt3dadd(185352.000000,111708.000000,54125.000000,185.566288)}
{pt3dadd(185484.000000,111612.000000,53925.000000,167.176836)}
{pt3dadd(185640.000000,111504.000000,53575.000000,149.569092)}
{pt3dadd(185844.000000,111444.000000,53300.000000,131.961348)}
{pt3dadd(186120.000000,111444.000000,53050.000000,114.353604)}
{pt3dadd(186300.000000,111432.000000,53175.000000,96.745860)}
{pt3dadd(186480.000000,111444.000000,53100.000000,80.621550)}

{create adhoc297}
{access adhoc297}
{connect adhoc297(1), adhoc295(0)}
{nseg = 1}
{strdef color color = "White"}
{pt3dclear()}
{pt3dadd(184944.000000,112212.000000,54975.000000,288.881586)}
{pt3dadd(185328.000000,112608.000000,54875.000000,67.184640)}
{pt3dadd(185364.000000,112740.000000,54850.000000,80.621550)}

{create adhoc298}
{access adhoc298}
{connect adhoc298(1), adhoc294(0)}
{nseg = 1}
{strdef color color = "White"}
{pt3dclear()}
{pt3dadd(184512.000000,112608.000000,56075.000000,288.881586)}
{pt3dadd(185160.000000,112512.000000,56100.000000,167.176836)}
{pt3dadd(185256.000000,112572.000000,56125.000000,96.745860)}
{pt3dadd(185352.000000,112632.000000,56200.000000,67.184640)}

{create adhoc299}
{access adhoc299}
{connect adhoc299(1), adhoc293(0)}
{nseg = 1}
{strdef color color = "White"}
{pt3dclear()}
{pt3dadd(184440.000000,113796.000000,57700.000000,200.612214)}
{pt3dadd(184836.000000,113844.000000,57700.000000,80.621550)}
{pt3dadd(185004.000000,113928.000000,57700.000000,116.095032)}
{pt3dadd(185160.000000,113964.000000,57675.000000,80.621550)}

{create adhoc300}
{access adhoc300}
{connect adhoc300(1), adhoc292(0)}
{nseg = 1}
{strdef color color = "White"}
{pt3dclear()}
{pt3dadd(184476.000000,113880.000000,58175.000000,288.881586)}
{pt3dadd(184356.000000,114288.000000,58200.000000,80.621550)}
{pt3dadd(184152.000000,114408.000000,58175.000000,116.095032)}

{create adhoc301}
{access adhoc301}
{connect adhoc301(1), adhoc291(0)}
{nseg = 1}
{strdef color color = "White"}
{pt3dclear()}
{pt3dadd(185304.000000,114384.000000,59375.000000,479.219922)}
{pt3dadd(185580.000000,114288.000000,60050.000000,288.881586)}
{pt3dadd(185544.000000,113964.000000,60275.000000,288.881586)}
{pt3dadd(185448.000000,113796.000000,60450.000000,288.881586)}
{pt3dadd(185448.000000,113616.000000,60450.000000,288.881586)}
{pt3dadd(185508.000000,113484.000000,60725.000000,288.881586)}
{pt3dadd(185592.000000,113340.000000,60775.000000,346.657896)}
{pt3dadd(185472.000000,113160.000000,60725.000000,415.989486)}

{create adhoc302}
{access adhoc302}
{connect adhoc302(1), adhoc301(0)}
{nseg = 1}
{strdef color color = "White"}
{pt3dclear()}
{pt3dadd(185472.000000,113160.000000,60725.000000,415.989486)}
{pt3dadd(185388.000000,112896.000000,60825.000000,200.612214)}
{pt3dadd(185484.000000,112740.000000,60700.000000,230.035338)}
{pt3dadd(185664.000000,112476.000000,60725.000000,259.458462)}
{pt3dadd(185640.000000,112200.000000,60725.000000,288.881586)}
{pt3dadd(185664.000000,111984.000000,60675.000000,288.881586)}

{create adhoc303}
{access adhoc303}
{connect adhoc303(1), adhoc302(0)}
{nseg = 1}
{strdef color color = "White"}
{pt3dclear()}
{pt3dadd(185664.000000,111984.000000,60675.000000,288.881586)}
{pt3dadd(185700.000000,111816.000000,60500.000000,240.734646)}
{pt3dadd(185676.000000,111540.000000,60400.000000,222.345193)}
{pt3dadd(185604.000000,111336.000000,60425.000000,203.955741)}
{pt3dadd(185568.000000,111192.000000,60375.000000,185.566288)}
{pt3dadd(185592.000000,110940.000000,60225.000000,167.176836)}
{pt3dadd(185376.000000,110772.000000,60050.000000,77.396688)}
{pt3dadd(185352.000000,110616.000000,59975.000000,80.621550)}

{create adhoc304}
{access adhoc304}
{connect adhoc304(1), adhoc302(0)}
{nseg = 1}
{strdef color color = "White"}
{pt3dclear()}
{pt3dadd(185664.000000,111984.000000,60675.000000,288.881586)}
{pt3dadd(185172.000000,111984.000000,60950.000000,96.745860)}
{pt3dadd(185016.000000,111864.000000,61175.000000,80.621550)}

{create adhoc305}
{access adhoc305}
{connect adhoc305(1), adhoc301(0)}
{nseg = 1}
{strdef color color = "White"}
{pt3dclear()}
{pt3dadd(185472.000000,113160.000000,60725.000000,415.989486)}
{pt3dadd(185364.000000,113100.000000,61450.000000,167.176836)}
{pt3dadd(185376.000000,113088.000000,61725.000000,160.211138)}
{pt3dadd(185436.000000,113124.000000,61975.000000,153.245439)}
{pt3dadd(185472.000000,113148.000000,62225.000000,146.279741)}
{pt3dadd(185328.000000,112992.000000,62450.000000,139.314042)}
{pt3dadd(185172.000000,112956.000000,62700.000000,116.095032)}
{pt3dadd(185016.000000,112932.000000,62925.000000,139.314042)}

{create adhoc306}
{access adhoc306}
{connect adhoc306(1), adhoc290(0)}
{nseg = 1}
{strdef color color = "White"}
{pt3dclear()}
{pt3dadd(186504.000000,117024.000000,61100.000000,415.989486)}
{pt3dadd(185892.000000,117156.000000,61125.000000,80.621550)}
{pt3dadd(185592.000000,117300.000000,61100.000000,98.358291)}
{pt3dadd(185088.000000,117408.000000,61100.000000,116.095032)}
{pt3dadd(185100.000000,117492.000000,61150.000000,133.741476)}

{create adhoc307}
{access adhoc307}
{connect adhoc307(1), adhoc289(0)}
{nseg = 1}
{strdef color color = "White"}
{pt3dclear()}
{pt3dadd(189048.000000,119508.000000,63600.000000,599.024880)}
{pt3dadd(189192.000000,119316.000000,63850.000000,599.024880)}
{pt3dadd(189252.000000,119028.000000,64075.000000,599.024880)}
{pt3dadd(189348.000000,118764.000000,64225.000000,599.024880)}
{pt3dadd(189348.000000,118488.000000,64375.000000,599.024880)}
{pt3dadd(189348.000000,118236.000000,64500.000000,599.024880)}
{pt3dadd(189348.000000,117936.000000,64675.000000,599.024880)}
{pt3dadd(189168.000000,117624.000000,64900.000000,599.024880)}
{pt3dadd(189012.000000,117240.000000,65100.000000,599.024880)}
{pt3dadd(188856.000000,116916.000000,65375.000000,599.024880)}
{pt3dadd(188712.000000,116520.000000,65500.000000,574.065504)}
{pt3dadd(188556.000000,116196.000000,65575.000000,549.106128)}
{pt3dadd(188400.000000,115764.000000,65750.000000,524.146752)}
{pt3dadd(188184.000000,115380.000000,65925.000000,499.187376)}
{pt3dadd(188172.000000,114960.000000,66100.000000,572.401524)}
{pt3dadd(188064.000000,114456.000000,66350.000000,645.615672)}
{pt3dadd(187992.000000,113940.000000,66700.000000,718.829820)}
{pt3dadd(187956.000000,113844.000000,66950.000000,718.829820)}

{create adhoc308}
{access adhoc308}
{connect adhoc308(1), adhoc307(0)}
{nseg = 1}
{strdef color color = "White"}
{pt3dclear()}
{pt3dadd(187956.000000,113844.000000,66950.000000,718.829820)}
{pt3dadd(187296.000000,113724.000000,66375.000000,96.745860)}
{pt3dadd(187044.000000,113592.000000,66225.000000,116.095032)}
{pt3dadd(186876.000000,113544.000000,66075.000000,139.314042)}

{create adhoc309}
{access adhoc309}
{connect adhoc309(1), adhoc307(0)}
{nseg = 1}
{strdef color color = "White"}
{pt3dclear()}
{pt3dadd(187956.000000,113844.000000,66950.000000,718.829820)}
{pt3dadd(187884.000000,113484.000000,67100.000000,718.829820)}
{pt3dadd(187848.000000,113148.000000,67325.000000,682.888329)}
{pt3dadd(187908.000000,112872.000000,67575.000000,646.946838)}
{pt3dadd(187908.000000,112500.000000,67650.000000,611.005347)}
{pt3dadd(187836.000000,112248.000000,67700.000000,575.063856)}
{pt3dadd(187800.000000,111852.000000,67800.000000,556.094736)}
{pt3dadd(187788.000000,111516.000000,67850.000000,537.125616)}
{pt3dadd(187752.000000,111120.000000,67725.000000,518.156496)}
{pt3dadd(187704.000000,110748.000000,67700.000000,499.187376)}
{pt3dadd(187776.000000,110316.000000,67625.000000,532.466544)}
{pt3dadd(187776.000000,109932.000000,67500.000000,565.745712)}
{pt3dadd(187692.000000,109632.000000,67450.000000,599.024880)}
{pt3dadd(187548.000000,109344.000000,67400.000000,599.024880)}

{create adhoc310}
{access adhoc310}
{connect adhoc310(1), adhoc309(0)}
{nseg = 1}
{strdef color color = "White"}
{pt3dclear()}
{pt3dadd(187548.000000,109344.000000,67400.000000,599.024880)}
{pt3dadd(187236.000000,109308.000000,68425.000000,200.612214)}
{pt3dadd(186744.000000,109116.000000,68775.000000,222.679557)}
{pt3dadd(186732.000000,108792.000000,69175.000000,244.746900)}
{pt3dadd(186480.000000,108648.000000,69575.000000,266.814243)}
{pt3dadd(186360.000000,108468.000000,69750.000000,288.881586)}
{pt3dadd(186276.000000,108264.000000,69975.000000,303.325664)}
{pt3dadd(186120.000000,108180.000000,70300.000000,317.769741)}
{pt3dadd(185988.000000,107952.000000,70650.000000,332.213819)}
{pt3dadd(185784.000000,108000.000000,70900.000000,346.657896)}
{pt3dadd(185868.000000,108240.000000,71275.000000,381.323691)}
{pt3dadd(185808.000000,108216.000000,71575.000000,415.989486)}
{pt3dadd(185760.000000,108336.000000,71900.000000,200.612214)}

{create adhoc311}
{access adhoc311}
{connect adhoc311(1), adhoc310(0)}
{nseg = 1}
{strdef color color = "White"}
{pt3dclear()}
{pt3dadd(185760.000000,108336.000000,71900.000000,200.612214)}
{pt3dadd(186012.000000,108408.000000,72225.000000,288.881586)}
{pt3dadd(186168.000000,108420.000000,72425.000000,167.176836)}

{create adhoc312}
{access adhoc312}
{connect adhoc312(1), adhoc311(0)}
{nseg = 1}
{strdef color color = "White"}
{pt3dclear()}
{pt3dadd(186168.000000,108420.000000,72425.000000,167.176836)}
{pt3dadd(186312.000000,108576.000000,72600.000000,139.314042)}
{pt3dadd(186408.000000,108732.000000,72775.000000,154.638585)}
{pt3dadd(186696.000000,108996.000000,72925.000000,169.963128)}
{pt3dadd(186804.000000,109248.000000,73175.000000,185.287671)}
{pt3dadd(186936.000000,109404.000000,73350.000000,200.612214)}
{pt3dadd(187104.000000,109452.000000,73400.000000,139.314042)}

{create adhoc313}
{access adhoc313}
{connect adhoc313(1), adhoc311(0)}
{nseg = 1}
{strdef color color = "White"}
{pt3dclear()}
{pt3dadd(186168.000000,108420.000000,72425.000000,167.176836)}
{pt3dadd(186240.000000,108132.000000,72475.000000,96.745860)}

{create adhoc314}
{access adhoc314}
{connect adhoc314(1), adhoc310(0)}
{nseg = 1}
{strdef color color = "White"}
{pt3dclear()}
{pt3dadd(185760.000000,108336.000000,71900.000000,200.612214)}
{pt3dadd(185784.000000,107952.000000,71950.000000,116.095032)}
{pt3dadd(185772.000000,107928.000000,72150.000000,80.621550)}

{create adhoc315}
{access adhoc315}
{connect adhoc315(1), adhoc309(0)}
{nseg = 1}
{strdef color color = "White"}
{pt3dclear()}
{pt3dadd(187548.000000,109344.000000,67400.000000,599.024880)}
{pt3dadd(187536.000000,109080.000000,67275.000000,599.024880)}
{pt3dadd(187572.000000,108804.000000,67250.000000,499.187376)}

{create adhoc316}
{access adhoc316}
{connect adhoc316(1), adhoc315(0)}
{nseg = 1}
{strdef color color = "White"}
{pt3dclear()}
{pt3dadd(187572.000000,108804.000000,67250.000000,499.187376)}
{pt3dadd(187272.000000,108828.000000,66625.000000,575.063856)}
{pt3dadd(186888.000000,108540.000000,66300.000000,503.518289)}
{pt3dadd(186684.000000,108588.000000,66175.000000,431.972721)}
{pt3dadd(186456.000000,108348.000000,65975.000000,360.427153)}
{pt3dadd(186336.000000,108108.000000,65500.000000,288.881586)}
{pt3dadd(186096.000000,107592.000000,64900.000000,341.458034)}
{pt3dadd(185940.000000,107016.000000,64525.000000,394.034481)}
{pt3dadd(185808.000000,106644.000000,64225.000000,446.610929)}
{pt3dadd(185724.000000,106272.000000,63975.000000,499.187376)}
{pt3dadd(185760.000000,105960.000000,63775.000000,499.187376)}

{create adhoc317}
{access adhoc317}
{connect adhoc317(1), adhoc316(0)}
{nseg = 1}
{strdef color color = "White"}
{pt3dclear()}
{pt3dadd(185760.000000,105960.000000,63775.000000,499.187376)}
{pt3dadd(185736.000000,105840.000000,63575.000000,415.989486)}
{pt3dadd(185760.000000,105600.000000,63675.000000,362.145168)}
{pt3dadd(185844.000000,105360.000000,63650.000000,308.300850)}
{pt3dadd(185796.000000,105228.000000,63600.000000,254.456532)}
{pt3dadd(185928.000000,104772.000000,63650.000000,200.612214)}
{pt3dadd(185856.000000,104448.000000,63600.000000,200.612214)}
{pt3dadd(185712.000000,104136.000000,63450.000000,200.612214)}
{pt3dadd(185496.000000,103884.000000,63475.000000,200.612214)}
{pt3dadd(185376.000000,103656.000000,63450.000000,200.612214)}
{pt3dadd(185100.000000,103440.000000,63625.000000,208.235480)}
{pt3dadd(184884.000000,103200.000000,63650.000000,215.858745)}
{pt3dadd(184860.000000,103008.000000,63500.000000,223.482010)}
{pt3dadd(184716.000000,102840.000000,63325.000000,231.105276)}
{pt3dadd(184668.000000,102696.000000,63100.000000,223.482010)}
{pt3dadd(184512.000000,102444.000000,63000.000000,215.858745)}
{pt3dadd(184296.000000,102192.000000,62850.000000,208.235480)}
{pt3dadd(184140.000000,101964.000000,62675.000000,200.612214)}
{pt3dadd(183816.000000,102060.000000,62675.000000,210.642822)}
{pt3dadd(183768.000000,102024.000000,62500.000000,220.673430)}
{pt3dadd(183540.000000,101964.000000,62375.000000,230.704038)}
{pt3dadd(183468.000000,101664.000000,62050.000000,240.734646)}
{pt3dadd(183324.000000,101544.000000,61775.000000,240.734646)}
{pt3dadd(183324.000000,101136.000000,61525.000000,240.734646)}
{pt3dadd(183276.000000,100992.000000,61300.000000,167.176836)}

{create adhoc318}
{access adhoc318}
{connect adhoc318(1), adhoc317(0)}
{nseg = 1}
{strdef color color = "White"}
{pt3dclear()}
{pt3dadd(183276.000000,100992.000000,61300.000000,167.176836)}
{pt3dadd(183564.000000,101016.000000,61150.000000,96.745860)}

{create adhoc319}
{access adhoc319}
{connect adhoc319(1), adhoc317(0)}
{nseg = 1}
{strdef color color = "White"}
{pt3dclear()}
{pt3dadd(183276.000000,100992.000000,61300.000000,167.176836)}
{pt3dadd(183072.000000,100788.000000,61225.000000,167.176836)}
{pt3dadd(182988.000000,100620.000000,60875.000000,212.047101)}
{pt3dadd(182904.000000,100404.000000,60500.000000,256.917366)}
{pt3dadd(182580.000000,100320.000000,60125.000000,301.787631)}
{pt3dadd(182508.000000,100296.000000,59775.000000,346.657896)}
{pt3dadd(182448.000000,100128.000000,59450.000000,297.976002)}
{pt3dadd(182364.000000,99900.000000,59150.000000,249.294108)}
{pt3dadd(182280.000000,99648.000000,58850.000000,200.612214)}
{pt3dadd(182244.000000,99300.000000,58575.000000,139.314042)}

{create adhoc320}
{access adhoc320}
{connect adhoc320(1), adhoc316(0)}
{nseg = 1}
{strdef color color = "White"}
{pt3dclear()}
{pt3dadd(185760.000000,105960.000000,63775.000000,499.187376)}
{pt3dadd(185448.000000,106008.000000,62725.000000,346.657896)}
{pt3dadd(185448.000000,106056.000000,62450.000000,310.146476)}
{pt3dadd(185448.000000,106176.000000,62125.000000,273.635055)}
{pt3dadd(185460.000000,106116.000000,61800.000000,237.123635)}
{pt3dadd(185520.000000,106176.000000,61550.000000,200.612214)}
{pt3dadd(185628.000000,106236.000000,61325.000000,210.642822)}
{pt3dadd(185640.000000,106344.000000,61050.000000,220.673430)}
{pt3dadd(185664.000000,106488.000000,60775.000000,230.704038)}
{pt3dadd(185712.000000,106440.000000,60500.000000,240.734646)}
{pt3dadd(185628.000000,106416.000000,60200.000000,252.771381)}
{pt3dadd(185388.000000,106536.000000,59950.000000,264.808116)}
{pt3dadd(185016.000000,106752.000000,59775.000000,276.844851)}
{pt3dadd(184740.000000,106836.000000,59675.000000,288.881586)}
{pt3dadd(184500.000000,106932.000000,59600.000000,288.881586)}
{pt3dadd(184260.000000,107064.000000,59550.000000,288.881586)}

{create adhoc321}
{access adhoc321}
{connect adhoc321(1), adhoc320(0)}
{nseg = 1}
{strdef color color = "White"}
{pt3dclear()}
{pt3dadd(184260.000000,107064.000000,59550.000000,288.881586)}
{pt3dadd(184128.000000,107292.000000,59625.000000,240.734646)}

{create adhoc322}
{access adhoc322}
{connect adhoc322(1), adhoc321(0)}
{nseg = 1}
{strdef color color = "White"}
{pt3dclear()}
{pt3dadd(184128.000000,107292.000000,59625.000000,240.734646)}
{pt3dadd(183996.000000,107532.000000,59625.000000,167.176836)}
{pt3dadd(183876.000000,107508.000000,59575.000000,96.745860)}
{pt3dadd(183756.000000,107496.000000,59525.000000,96.745860)}

{create adhoc323}
{access adhoc323}
{connect adhoc323(1), adhoc321(0)}
{nseg = 1}
{strdef color color = "White"}
{pt3dclear()}
{pt3dadd(184128.000000,107292.000000,59625.000000,240.734646)}
{pt3dadd(184128.000000,106596.000000,59675.000000,80.621550)}
{pt3dadd(183996.000000,106536.000000,59600.000000,80.621550)}
{pt3dadd(183804.000000,106452.000000,59600.000000,67.184640)}

{create adhoc324}
{access adhoc324}
{connect adhoc324(1), adhoc320(0)}
{nseg = 1}
{strdef color color = "White"}
{pt3dclear()}
{pt3dadd(184260.000000,107064.000000,59550.000000,288.881586)}
{pt3dadd(184200.000000,107760.000000,59175.000000,139.314042)}
{pt3dadd(184116.000000,107736.000000,59050.000000,80.621550)}

{create adhoc325}
{access adhoc325}
{connect adhoc325(1), adhoc316(0)}
{nseg = 1}
{strdef color color = "White"}
{pt3dclear()}
{pt3dadd(185760.000000,105960.000000,63775.000000,499.187376)}
{pt3dadd(185004.000000,106056.000000,63425.000000,96.745860)}
{pt3dadd(184836.000000,106044.000000,63450.000000,101.583153)}
{pt3dadd(184668.000000,106128.000000,63450.000000,106.420446)}
{pt3dadd(184500.000000,106104.000000,63475.000000,111.257739)}
{pt3dadd(184332.000000,106140.000000,63400.000000,116.095032)}
{pt3dadd(184188.000000,106248.000000,63325.000000,167.176836)}
{pt3dadd(184008.000000,106572.000000,63125.000000,67.184640)}

{create adhoc326}
{access adhoc326}
{connect adhoc326(1), adhoc315(0)}
{nseg = 1}
{strdef color color = "White"}
{pt3dclear()}
{pt3dadd(187572.000000,108804.000000,67250.000000,499.187376)}
{pt3dadd(187596.000000,108636.000000,67475.000000,415.989486)}
{pt3dadd(187524.000000,108396.000000,67625.000000,415.989486)}
{pt3dadd(187296.000000,108084.000000,67700.000000,415.989486)}
{pt3dadd(187176.000000,107856.000000,67750.000000,415.989486)}
{pt3dadd(186924.000000,107604.000000,67700.000000,415.989486)}
{pt3dadd(186672.000000,107280.000000,67800.000000,415.989486)}
{pt3dadd(186528.000000,107040.000000,67875.000000,415.989486)}

{create adhoc327}
{access adhoc327}
{connect adhoc327(1), adhoc326(0)}
{nseg = 1}
{strdef color color = "White"}
{pt3dclear()}
{pt3dadd(186528.000000,107040.000000,67875.000000,415.989486)}
{pt3dadd(185868.000000,107040.000000,67825.000000,240.734646)}

{create adhoc328}
{access adhoc328}
{connect adhoc328(1), adhoc326(0)}
{nseg = 1}
{strdef color color = "White"}
{pt3dclear()}
{pt3dadd(186528.000000,107040.000000,67875.000000,415.989486)}
{pt3dadd(186516.000000,106848.000000,67925.000000,499.187376)}
{pt3dadd(186408.000000,106560.000000,68050.000000,478.387903)}
{pt3dadd(186516.000000,106332.000000,68075.000000,457.588431)}
{pt3dadd(186444.000000,106068.000000,68175.000000,436.788958)}
{pt3dadd(186252.000000,105600.000000,68250.000000,415.989486)}
{pt3dadd(186096.000000,105216.000000,68200.000000,415.989486)}
{pt3dadd(185988.000000,104820.000000,68150.000000,415.989486)}
{pt3dadd(185988.000000,104436.000000,68200.000000,415.989486)}
{pt3dadd(185988.000000,104112.000000,68300.000000,415.989486)}
{pt3dadd(185916.000000,103800.000000,68350.000000,461.748335)}
{pt3dadd(185880.000000,103488.000000,68500.000000,507.507183)}
{pt3dadd(185832.000000,103140.000000,68525.000000,553.266031)}
{pt3dadd(185856.000000,102816.000000,68650.000000,599.024880)}
{pt3dadd(185748.000000,102576.000000,68700.000000,718.829820)}
{pt3dadd(185676.000000,102432.000000,68725.000000,599.024880)}

{create adhoc329}
{access adhoc329}
{connect adhoc329(1), adhoc328(0)}
{nseg = 1}
{strdef color color = "White"}
{pt3dclear()}
{pt3dadd(185676.000000,102432.000000,68725.000000,599.024880)}
{pt3dadd(185880.000000,102288.000000,69625.000000,499.187376)}
{pt3dadd(186048.000000,102144.000000,70125.000000,549.106128)}
{pt3dadd(185976.000000,102024.000000,70625.000000,599.024880)}
{pt3dadd(186012.000000,101952.000000,71050.000000,415.989486)}

{create adhoc330}
{access adhoc330}
{connect adhoc330(1), adhoc329(0)}
{nseg = 1}
{strdef color color = "White"}
{pt3dclear()}
{pt3dadd(186012.000000,101952.000000,71050.000000,415.989486)}
{pt3dadd(185448.000000,101580.000000,71125.000000,288.881586)}
{pt3dadd(185016.000000,101388.000000,71325.000000,320.658561)}
{pt3dadd(184824.000000,101280.000000,71575.000000,352.435536)}
{pt3dadd(184668.000000,101148.000000,71750.000000,384.212511)}
{pt3dadd(184488.000000,100944.000000,72175.000000,415.989486)}
{pt3dadd(184260.000000,100836.000000,72350.000000,384.212511)}
{pt3dadd(184056.000000,100716.000000,72550.000000,352.435536)}
{pt3dadd(183840.000000,100620.000000,72775.000000,320.658561)}
{pt3dadd(183684.000000,100332.000000,72900.000000,288.881586)}
{pt3dadd(183396.000000,100020.000000,72975.000000,276.844851)}
{pt3dadd(183312.000000,99744.000000,73100.000000,264.808116)}
{pt3dadd(183276.000000,99408.000000,73075.000000,252.771381)}
{pt3dadd(183180.000000,99168.000000,73050.000000,240.734646)}
{pt3dadd(183180.000000,98928.000000,73050.000000,227.360502)}
{pt3dadd(183072.000000,98700.000000,73025.000000,213.986358)}
{pt3dadd(182964.000000,98448.000000,73050.000000,200.612214)}
{pt3dadd(182856.000000,98244.000000,73075.000000,200.612214)}

{create adhoc331}
{access adhoc331}
{connect adhoc331(1), adhoc330(0)}
{nseg = 1}
{strdef color color = "White"}
{pt3dclear()}
{pt3dadd(182856.000000,98244.000000,73075.000000,200.612214)}
{pt3dadd(182508.000000,98040.000000,73100.000000,139.314042)}
{pt3dadd(182364.000000,97836.000000,73125.000000,173.120910)}
{pt3dadd(182232.000000,97632.000000,73200.000000,206.927778)}
{pt3dadd(182004.000000,97416.000000,73250.000000,240.734646)}
{pt3dadd(181740.000000,97212.000000,73350.000000,240.734646)}

{create adhoc332}
{access adhoc332}
{connect adhoc332(1), adhoc331(0)}
{nseg = 1}
{strdef color color = "White"}
{pt3dclear()}
{pt3dadd(181740.000000,97212.000000,73350.000000,240.734646)}
{pt3dadd(181644.000000,97080.000000,73350.000000,240.734646)}
{pt3dadd(181752.000000,96948.000000,73100.000000,227.360502)}
{pt3dadd(181788.000000,96768.000000,72850.000000,213.986358)}
{pt3dadd(181728.000000,96540.000000,72750.000000,200.612214)}
{pt3dadd(181788.000000,96648.000000,72450.000000,116.095032)}

{create adhoc333}
{access adhoc333}
{connect adhoc333(1), adhoc331(0)}
{nseg = 1}
{strdef color color = "White"}
{pt3dclear()}
{pt3dadd(181740.000000,97212.000000,73350.000000,240.734646)}
{pt3dadd(181392.000000,97080.000000,73825.000000,240.734646)}
{pt3dadd(181380.000000,97080.000000,74075.000000,240.734646)}
{pt3dadd(181572.000000,97092.000000,74325.000000,240.734646)}
{pt3dadd(181872.000000,97032.000000,74625.000000,240.734646)}
{pt3dadd(182532.000000,96828.000000,74925.000000,240.734646)}
{pt3dadd(182592.000000,96840.000000,75175.000000,96.745860)}

{create adhoc334}
{access adhoc334}
{connect adhoc334(1), adhoc330(0)}
{nseg = 1}
{strdef color color = "White"}
{pt3dclear()}
{pt3dadd(182856.000000,98244.000000,73075.000000,200.612214)}
{pt3dadd(182988.000000,98256.000000,73375.000000,288.881586)}
{pt3dadd(183096.000000,98256.000000,73625.000000,258.455399)}
{pt3dadd(183132.000000,98232.000000,73900.000000,228.029211)}
{pt3dadd(183168.000000,98328.000000,74100.000000,197.603024)}
{pt3dadd(183240.000000,98424.000000,74375.000000,167.176836)}
{pt3dadd(183348.000000,98676.000000,74650.000000,200.612214)}

{create adhoc335}
{access adhoc335}
{connect adhoc335(1), adhoc329(0)}
{nseg = 1}
{strdef color color = "White"}
{pt3dclear()}
{pt3dadd(186012.000000,101952.000000,71050.000000,415.989486)}
{pt3dadd(186192.000000,102204.000000,71375.000000,415.989486)}
{pt3dadd(186192.000000,102240.000000,71700.000000,455.758079)}
{pt3dadd(186408.000000,102264.000000,72050.000000,495.526671)}
{pt3dadd(186504.000000,102252.000000,72425.000000,535.295264)}
{pt3dadd(186504.000000,102312.000000,72775.000000,575.063856)}
{pt3dadd(186648.000000,102492.000000,73200.000000,535.295264)}
{pt3dadd(186780.000000,102444.000000,73575.000000,495.526671)}
{pt3dadd(186780.000000,102408.000000,73925.000000,455.758079)}
{pt3dadd(186732.000000,102480.000000,74225.000000,415.989486)}
{pt3dadd(186828.000000,102480.000000,74550.000000,384.212511)}
{pt3dadd(186792.000000,102396.000000,74825.000000,352.435536)}
{pt3dadd(186636.000000,102240.000000,75200.000000,320.658561)}
{pt3dadd(186048.000000,102168.000000,75475.000000,288.881586)}
{pt3dadd(186228.000000,101988.000000,75875.000000,303.325664)}
{pt3dadd(186360.000000,102132.000000,76175.000000,317.769741)}
{pt3dadd(186504.000000,102156.000000,76450.000000,332.213819)}
{pt3dadd(186684.000000,102288.000000,76900.000000,346.657896)}
{pt3dadd(186900.000000,102456.000000,77150.000000,346.657896)}
{pt3dadd(186924.000000,102588.000000,77600.000000,346.657896)}
{pt3dadd(186960.000000,102624.000000,77850.000000,288.881586)}

{create adhoc336}
{access adhoc336}
{connect adhoc336(1), adhoc335(0)}
{nseg = 1}
{strdef color color = "White"}
{pt3dclear()}
{pt3dadd(186960.000000,102624.000000,77850.000000,288.881586)}
{pt3dadd(186576.000000,102180.000000,77875.000000,96.745860)}
{pt3dadd(186408.000000,101988.000000,77850.000000,80.621550)}
{pt3dadd(186276.000000,101976.000000,77850.000000,80.621550)}

{create adhoc337}
{access adhoc337}
{connect adhoc337(1), adhoc335(0)}
{nseg = 1}
{strdef color color = "White"}
{pt3dclear()}
{pt3dadd(186960.000000,102624.000000,77850.000000,288.881586)}
{pt3dadd(186888.000000,102864.000000,78250.000000,240.734646)}
{pt3dadd(186960.000000,103032.000000,78575.000000,240.734646)}
{pt3dadd(186972.000000,103512.000000,79100.000000,240.734646)}
{pt3dadd(187068.000000,103848.000000,79425.000000,240.734646)}
{pt3dadd(187056.000000,104244.000000,79675.000000,240.734646)}
{pt3dadd(187104.000000,104424.000000,79950.000000,267.215459)}
{pt3dadd(187212.000000,104496.000000,80275.000000,293.696271)}
{pt3dadd(187128.000000,104592.000000,80725.000000,320.177083)}
{pt3dadd(186948.000000,104436.000000,81100.000000,346.657896)}
{pt3dadd(186768.000000,104052.000000,81325.000000,346.657896)}
{pt3dadd(186828.000000,103932.000000,81575.000000,346.657896)}
{pt3dadd(186492.000000,103896.000000,81950.000000,346.657896)}
{pt3dadd(186384.000000,103968.000000,82250.000000,346.657896)}
{pt3dadd(186444.000000,104112.000000,82575.000000,329.325003)}
{pt3dadd(186396.000000,104208.000000,82850.000000,311.992110)}
{pt3dadd(186528.000000,104280.000000,83175.000000,294.659217)}
{pt3dadd(186636.000000,104580.000000,83550.000000,277.326324)}
{pt3dadd(186564.000000,104796.000000,83825.000000,240.734646)}
{pt3dadd(186708.000000,104868.000000,84075.000000,116.095032)}

{create adhoc338}
{access adhoc338}
{connect adhoc338(1), adhoc328(0)}
{nseg = 1}
{strdef color color = "White"}
{pt3dclear()}
{pt3dadd(185676.000000,102432.000000,68725.000000,599.024880)}
{pt3dadd(185520.000000,102288.000000,68175.000000,346.657896)}
{pt3dadd(185220.000000,102108.000000,68000.000000,310.146476)}
{pt3dadd(184920.000000,101904.000000,68050.000000,273.635055)}
{pt3dadd(184728.000000,101712.000000,68050.000000,237.123635)}
{pt3dadd(184344.000000,101496.000000,68125.000000,200.612214)}
{pt3dadd(184020.000000,101316.000000,68150.000000,210.642822)}
{pt3dadd(183780.000000,101064.000000,68075.000000,220.673430)}
{pt3dadd(183624.000000,100716.000000,67925.000000,230.704038)}
{pt3dadd(183408.000000,100440.000000,67850.000000,240.734646)}
{pt3dadd(183156.000000,99996.000000,67850.000000,190.024344)}
{pt3dadd(183120.000000,99768.000000,67950.000000,139.314042)}
{pt3dadd(183036.000000,99528.000000,67900.000000,96.745860)}
