# Supplementary material for: Full reconstruction of large lobula plate tangential cells in Drosophila from a 3D EM dataset
Source: PLoS One. 2018 Nov 28;13(11):e0207828. doi: 10.1371/journal.pone.0207828 (PMC6261601; doi:10.1371/journal.pone.0207828)
Supplement: S1 Dataset — (ZIP) [file pone.0207828.s001.zip › Diameter hoc/VS_VSL_preliminary/Old Diameters Mar13_VS_VSL_HS/VS3/2_14_806_smaurer_002.033.hoc]

/* created with nml2hocm */

{create adhoc1}
{access adhoc1}
{nseg = 1}
{strdef color color = "White"}
{pt3dclear()}
{pt3dadd(186072.000000,103848.000000,84300.000000,167.176836)}
{pt3dadd(186144.000000,104004.000000,84200.000000,139.314042)}
{pt3dadd(186240.000000,104088.000000,84125.000000,139.314042)}
{pt3dadd(186348.000000,104136.000000,84025.000000,139.314042)}
{pt3dadd(186408.000000,104124.000000,83950.000000,139.314042)}
{pt3dadd(186504.000000,104160.000000,83900.000000,139.314042)}
{pt3dadd(186540.000000,104244.000000,83675.000000,167.176836)}
{pt3dadd(186588.000000,104592.000000,83475.000000,288.881586)}

{create adhoc2}
{access adhoc2}
{connect adhoc2(1), adhoc1(0)}
{nseg = 1}
{strdef color color = "White"}
{pt3dclear()}
{pt3dadd(186588.000000,104592.000000,83475.000000,288.881586)}
{pt3dadd(186624.000000,104724.000000,83650.000000,399.349944)}

{create adhoc3}
{access adhoc3}
{connect adhoc3(1), adhoc2(0)}
{nseg = 1}
{strdef color color = "White"}
{pt3dclear()}
{pt3dadd(186624.000000,104724.000000,83650.000000,399.349944)}
{pt3dadd(186240.000000,104844.000000,83700.000000,167.176836)}
{pt3dadd(186144.000000,104844.000000,83675.000000,160.211138)}
{pt3dadd(186036.000000,104880.000000,83575.000000,153.245439)}
{pt3dadd(185952.000000,104940.000000,83525.000000,146.279741)}
{pt3dadd(185892.000000,104964.000000,83525.000000,139.314042)}
{pt3dadd(185808.000000,104976.000000,83525.000000,111.451230)}
{pt3dadd(185700.000000,105132.000000,83475.000000,139.314042)}

{create adhoc4}
{access adhoc4}
{connect adhoc4(1), adhoc2(0)}
{nseg = 1}
{strdef color color = "White"}
{pt3dclear()}
{pt3dadd(186624.000000,104724.000000,83650.000000,399.349944)}
{pt3dadd(186624.000000,104796.000000,83800.000000,399.349908)}
{pt3dadd(186672.000000,104796.000000,83950.000000,269.331975)}
{pt3dadd(186708.000000,104892.000000,84050.000000,139.314042)}
{pt3dadd(186864.000000,104964.000000,84175.000000,96.745860)}

{create adhoc5}
{access adhoc5}
{connect adhoc5(1), adhoc1(0)}
{nseg = 1}
{strdef color color = "White"}
{pt3dclear()}
{pt3dadd(186588.000000,104592.000000,83475.000000,288.881586)}
{pt3dadd(186600.000000,104340.000000,83100.000000,277.326324)}
{pt3dadd(186468.000000,104256.000000,82750.000000,294.659217)}
{pt3dadd(186420.000000,104124.000000,82625.000000,311.992110)}
{pt3dadd(186420.000000,104016.000000,82400.000000,329.325003)}
{pt3dadd(186504.000000,103932.000000,82200.000000,346.657896)}
{pt3dadd(186516.000000,103992.000000,82000.000000,479.219886)}
{pt3dadd(186648.000000,103836.000000,81325.000000,346.657896)}

{create adhoc6}
{access adhoc6}
{connect adhoc6(1), adhoc5(0)}
{nseg = 1}
{strdef color color = "White"}
{pt3dclear()}
{pt3dadd(186648.000000,103836.000000,81325.000000,346.657896)}
{pt3dadd(186804.000000,103656.000000,81350.000000,288.881586)}
{pt3dadd(186948.000000,103524.000000,81525.000000,192.813723)}
{pt3dadd(186972.000000,103416.000000,81725.000000,96.745860)}
{pt3dadd(187188.000000,103704.000000,81725.000000,240.734646)}

{create adhoc7}
{access adhoc7}
{connect adhoc7(1), adhoc5(0)}
{nseg = 1}
{strdef color color = "White"}
{pt3dclear()}
{pt3dadd(186648.000000,103836.000000,81325.000000,346.657896)}
{pt3dadd(186792.000000,104004.000000,81375.000000,288.881586)}
{pt3dadd(186948.000000,104256.000000,81225.000000,320.658561)}
{pt3dadd(187056.000000,104532.000000,80950.000000,352.435536)}
{pt3dadd(187068.000000,104592.000000,80800.000000,384.212511)}
{pt3dadd(187224.000000,104520.000000,80600.000000,415.989486)}
{pt3dadd(187224.000000,104520.000000,80375.000000,372.175776)}
{pt3dadd(187152.000000,104484.000000,80100.000000,328.362066)}
{pt3dadd(187152.000000,104424.000000,79850.000000,284.548356)}
{pt3dadd(187020.000000,104160.000000,79575.000000,240.734646)}
{pt3dadd(187044.000000,103668.000000,79325.000000,220.673426)}
{pt3dadd(187020.000000,103512.000000,79125.000000,200.612205)}
{pt3dadd(186948.000000,103380.000000,78850.000000,180.550985)}
{pt3dadd(186924.000000,103056.000000,78575.000000,160.489764)}
{pt3dadd(186876.000000,102936.000000,78275.000000,224.364694)}
{pt3dadd(186852.000000,102780.000000,78175.000000,288.239625)}
{pt3dadd(186864.000000,102600.000000,78025.000000,352.114556)}
{pt3dadd(186936.000000,102576.000000,77775.000000,415.989486)}
{pt3dadd(186888.000000,102528.000000,77525.000000,415.989486)}
{pt3dadd(186828.000000,102456.000000,77325.000000,415.989486)}
{pt3dadd(186828.000000,102432.000000,77075.000000,415.989486)}
{pt3dadd(186648.000000,102276.000000,76850.000000,415.989486)}
{pt3dadd(186588.000000,102120.000000,76550.000000,395.190014)}
{pt3dadd(186360.000000,102132.000000,76200.000000,374.390541)}
{pt3dadd(186192.000000,101964.000000,76025.000000,353.591069)}
{pt3dadd(186060.000000,101952.000000,75825.000000,332.791596)}
{pt3dadd(185952.000000,102060.000000,75600.000000,353.591069)}
{pt3dadd(186000.000000,102180.000000,75350.000000,374.390541)}
{pt3dadd(186732.000000,102276.000000,75150.000000,395.190014)}
{pt3dadd(186792.000000,102348.000000,74900.000000,415.989486)}
{pt3dadd(186792.000000,102468.000000,74625.000000,415.989486)}
{pt3dadd(186804.000000,102480.000000,74350.000000,415.989486)}
{pt3dadd(186768.000000,102492.000000,74150.000000,415.989486)}
{pt3dadd(186744.000000,102456.000000,73875.000000,415.989486)}
{pt3dadd(186696.000000,102408.000000,73600.000000,436.788958)}
{pt3dadd(186708.000000,102468.000000,73325.000000,457.588431)}
{pt3dadd(186672.000000,102492.000000,73125.000000,478.387903)}
{pt3dadd(186600.000000,102456.000000,73000.000000,499.187376)}
{pt3dadd(186528.000000,102396.000000,72775.000000,499.187376)}
{pt3dadd(186516.000000,102312.000000,72550.000000,499.187376)}
{pt3dadd(186504.000000,102228.000000,72325.000000,499.187376)}
{pt3dadd(186420.000000,102204.000000,72075.000000,499.187376)}
{pt3dadd(186240.000000,102180.000000,71800.000000,471.454746)}
{pt3dadd(186108.000000,102216.000000,71525.000000,443.722116)}
{pt3dadd(186108.000000,102168.000000,71350.000000,415.989486)}
{pt3dadd(185988.000000,101916.000000,71075.000000,499.187376)}

{create adhoc8}
{access adhoc8}
{connect adhoc8(1), adhoc7(0)}
{nseg = 1}
{strdef color color = "White"}
{pt3dclear()}
{pt3dadd(185988.000000,101916.000000,71075.000000,499.187376)}
{pt3dadd(185196.000000,101448.000000,71225.000000,240.734646)}
{pt3dadd(184908.000000,101292.000000,71400.000000,252.771381)}
{pt3dadd(184860.000000,101244.000000,71600.000000,264.808116)}
{pt3dadd(184656.000000,101136.000000,71750.000000,276.844851)}
{pt3dadd(184524.000000,101016.000000,71900.000000,288.881586)}
{pt3dadd(184392.000000,100908.000000,72050.000000,320.658561)}
{pt3dadd(184380.000000,100908.000000,72225.000000,352.435536)}
{pt3dadd(184368.000000,100896.000000,72325.000000,384.212511)}
{pt3dadd(184284.000000,100836.000000,72450.000000,415.989486)}
{pt3dadd(184056.000000,100656.000000,72650.000000,353.786324)}
{pt3dadd(183960.000000,100620.000000,72650.000000,291.583161)}
{pt3dadd(183840.000000,100584.000000,72725.000000,229.379999)}
{pt3dadd(183732.000000,100392.000000,72850.000000,167.176836)}
{pt3dadd(183624.000000,100224.000000,72975.000000,185.566288)}
{pt3dadd(183456.000000,99996.000000,73000.000000,203.955741)}
{pt3dadd(183384.000000,99816.000000,73025.000000,222.345193)}
{pt3dadd(183276.000000,99612.000000,73100.000000,240.734646)}
{pt3dadd(183276.000000,99408.000000,73050.000000,240.734646)}
{pt3dadd(183180.000000,99216.000000,73075.000000,240.734646)}
{pt3dadd(183168.000000,99012.000000,73025.000000,240.734646)}
{pt3dadd(183132.000000,98808.000000,73025.000000,240.734646)}
{pt3dadd(183036.000000,98556.000000,73025.000000,222.345193)}
{pt3dadd(182916.000000,98352.000000,73025.000000,203.955741)}
{pt3dadd(182688.000000,98088.000000,73075.000000,185.566288)}
{pt3dadd(182508.000000,97992.000000,73075.000000,167.176836)}
{pt3dadd(182364.000000,97812.000000,73150.000000,194.714212)}
{pt3dadd(182280.000000,97644.000000,73225.000000,222.251589)}
{pt3dadd(182040.000000,97452.000000,73225.000000,249.788966)}
{pt3dadd(181848.000000,97284.000000,73275.000000,277.326342)}
{pt3dadd(181620.000000,97152.000000,73400.000000,415.989486)}

{create adhoc9}
{access adhoc9}
{connect adhoc9(1), adhoc8(0)}
{nseg = 1}
{strdef color color = "White"}
{pt3dclear()}
{pt3dadd(181620.000000,97152.000000,73400.000000,415.989486)}
{pt3dadd(181800.000000,97020.000000,73175.000000,200.612214)}
{pt3dadd(181848.000000,96912.000000,72975.000000,222.679557)}
{pt3dadd(181812.000000,96744.000000,72800.000000,244.746900)}
{pt3dadd(181764.000000,96660.000000,72650.000000,266.814243)}
{pt3dadd(181836.000000,96648.000000,72525.000000,288.881586)}
{pt3dadd(181872.000000,96516.000000,72275.000000,139.314042)}

{create adhoc10}
{access adhoc10}
{connect adhoc10(1), adhoc8(0)}
{nseg = 1}
{strdef color color = "White"}
{pt3dclear()}
{pt3dadd(181620.000000,97152.000000,73400.000000,415.989486)}
{pt3dadd(181416.000000,97116.000000,73975.000000,288.881586)}
{pt3dadd(181464.000000,97104.000000,74200.000000,266.814243)}
{pt3dadd(181644.000000,97020.000000,74475.000000,244.746900)}
{pt3dadd(182040.000000,96936.000000,74750.000000,222.679557)}
{pt3dadd(182268.000000,96804.000000,74825.000000,200.612214)}
{pt3dadd(182496.000000,96852.000000,75025.000000,210.642822)}
{pt3dadd(182724.000000,96660.000000,74875.000000,220.673430)}
{pt3dadd(182904.000000,96756.000000,75025.000000,230.704038)}
{pt3dadd(182796.000000,96480.000000,74775.000000,240.734646)}
{pt3dadd(182988.000000,96312.000000,74775.000000,200.612214)}

{create adhoc11}
{access adhoc11}
{connect adhoc11(1), adhoc7(0)}
{nseg = 1}
{strdef color color = "White"}
{pt3dclear()}
{pt3dadd(185988.000000,101916.000000,71075.000000,499.187376)}
{pt3dadd(185880.000000,101940.000000,70900.000000,479.219886)}
{pt3dadd(185988.000000,102024.000000,70650.000000,509.171134)}
{pt3dadd(186108.000000,102192.000000,70325.000000,539.122383)}
{pt3dadd(186096.000000,102180.000000,70050.000000,569.073631)}
{pt3dadd(186096.000000,102336.000000,69850.000000,599.024880)}
{pt3dadd(185988.000000,102456.000000,69575.000000,574.065504)}
{pt3dadd(185940.000000,102540.000000,69375.000000,549.106128)}
{pt3dadd(185976.000000,102684.000000,69050.000000,524.146752)}
{pt3dadd(185916.000000,102888.000000,68775.000000,499.187376)}
{pt3dadd(185916.000000,103116.000000,68550.000000,494.195504)}
{pt3dadd(185952.000000,103428.000000,68425.000000,489.203631)}
{pt3dadd(185904.000000,103680.000000,68325.000000,484.211758)}
{pt3dadd(186096.000000,103764.000000,68450.000000,479.219886)}
{pt3dadd(185964.000000,103968.000000,68225.000000,463.412286)}
{pt3dadd(186120.000000,104592.000000,68225.000000,447.604686)}
{pt3dadd(186228.000000,104964.000000,68225.000000,431.797086)}
{pt3dadd(186372.000000,105912.000000,68225.000000,415.989486)}
{pt3dadd(186540.000000,106368.000000,68050.000000,436.788958)}
{pt3dadd(186756.000000,107088.000000,67925.000000,457.588431)}
{pt3dadd(187008.000000,107688.000000,67775.000000,478.387903)}
{pt3dadd(187296.000000,108048.000000,67550.000000,499.187376)}
{pt3dadd(187536.000000,108576.000000,67550.000000,492.531546)}
{pt3dadd(187548.000000,108816.000000,67300.000000,485.875716)}
{pt3dadd(187596.000000,109092.000000,67300.000000,479.219886)}
{pt3dadd(187680.000000,109380.000000,67525.000000,575.063766)}

{create adhoc12}
{access adhoc12}
{connect adhoc12(1), adhoc11(0)}
{nseg = 1}
{strdef color color = "White"}
{pt3dclear()}
{pt3dadd(187680.000000,109380.000000,67525.000000,575.063766)}
{pt3dadd(187692.000000,109632.000000,67525.000000,599.024880)}
{pt3dadd(187764.000000,109848.000000,67450.000000,574.065504)}
{pt3dadd(187776.000000,110184.000000,67550.000000,549.106128)}
{pt3dadd(187776.000000,110484.000000,67725.000000,524.146752)}
{pt3dadd(187764.000000,110724.000000,67750.000000,499.187376)}
{pt3dadd(187752.000000,111036.000000,67775.000000,499.187376)}
{pt3dadd(187812.000000,111348.000000,67900.000000,499.187376)}
{pt3dadd(187848.000000,112104.000000,67825.000000,499.187376)}
{pt3dadd(187968.000000,112500.000000,67750.000000,499.187376)}
{pt3dadd(187932.000000,112728.000000,67625.000000,554.097987)}
{pt3dadd(187920.000000,112980.000000,67400.000000,609.008598)}
{pt3dadd(187980.000000,113280.000000,67275.000000,663.919209)}
{pt3dadd(187980.000000,113580.000000,67125.000000,718.829820)}
{pt3dadd(187956.000000,113772.000000,66925.000000,718.829820)}

{create adhoc13}
{access adhoc13}
{connect adhoc13(1), adhoc12(0)}
{nseg = 1}
{strdef color color = "White"}
{pt3dclear()}
{pt3dadd(187956.000000,113772.000000,66925.000000,718.829820)}
{pt3dadd(188064.000000,113964.000000,66700.000000,690.076674)}
{pt3dadd(188040.000000,114264.000000,66600.000000,642.354349)}
{pt3dadd(188256.000000,114660.000000,66300.000000,594.632025)}
{pt3dadd(188328.000000,115056.000000,66350.000000,546.909700)}
{pt3dadd(188172.000000,115416.000000,65850.000000,499.187376)}
{pt3dadd(188364.000000,115812.000000,65750.000000,524.146752)}
{pt3dadd(188448.000000,116028.000000,65675.000000,549.106128)}
{pt3dadd(188580.000000,116304.000000,65550.000000,574.065504)}
{pt3dadd(188712.000000,116556.000000,65475.000000,599.024880)}
{pt3dadd(188868.000000,116928.000000,65350.000000,599.024880)}
{pt3dadd(189144.000000,117324.000000,65075.000000,599.024880)}
{pt3dadd(189216.000000,117504.000000,65025.000000,599.024880)}
{pt3dadd(189324.000000,117732.000000,64850.000000,599.024880)}
{pt3dadd(189324.000000,117972.000000,64675.000000,628.976115)}
{pt3dadd(189396.000000,118212.000000,64525.000000,658.927350)}
{pt3dadd(189396.000000,118380.000000,64400.000000,688.878585)}
{pt3dadd(189360.000000,118644.000000,64300.000000,718.829820)}
{pt3dadd(189312.000000,118908.000000,64250.000000,646.946838)}
{pt3dadd(189288.000000,119124.000000,64050.000000,575.063856)}
{pt3dadd(189072.000000,119448.000000,63575.000000,599.024880)}

{create adhoc14}
{access adhoc14}
{connect adhoc14(1), adhoc13(0)}
{nseg = 1}
{strdef color color = "White"}
{pt3dclear()}
{pt3dadd(189072.000000,119448.000000,63575.000000,599.024880)}
{pt3dadd(189204.000000,119688.000000,63600.000000,690.076602)}
{pt3dadd(189372.000000,119964.000000,63475.000000,699.661008)}
{pt3dadd(189516.000000,120324.000000,63225.000000,709.245414)}
{pt3dadd(189636.000000,120624.000000,63200.000000,718.829820)}
{pt3dadd(189648.000000,121308.000000,62875.000000,862.595802)}

{create adhoc15}
{access adhoc15}
{connect adhoc15(1), adhoc14(0)}
{nseg = 1}
{strdef color color = "White"}
{pt3dclear()}
{pt3dadd(189648.000000,121308.000000,62875.000000,862.595802)}
{pt3dadd(189684.000000,121872.000000,62675.000000,718.829820)}
{pt3dadd(189768.000000,122736.000000,62425.000000,718.829820)}
{pt3dadd(189792.000000,123108.000000,62275.000000,718.829820)}
{pt3dadd(189948.000000,123792.000000,62175.000000,718.829820)}
{pt3dadd(189984.000000,124128.000000,62125.000000,718.829820)}
{pt3dadd(190044.000000,124476.000000,62125.000000,718.829820)}
{pt3dadd(190032.000000,124920.000000,62075.000000,718.829820)}
{pt3dadd(189972.000000,125748.000000,61550.000000,718.829820)}

{create adhoc16}
{access adhoc16}
{connect adhoc16(1), adhoc15(0)}
{nseg = 1}
{strdef color color = "White"}
{pt3dclear()}
{pt3dadd(189972.000000,125748.000000,61550.000000,718.829820)}
{pt3dadd(190032.000000,126072.000000,61500.000000,862.595802)}
{pt3dadd(190092.000000,126384.000000,61450.000000,826.654307)}
{pt3dadd(190164.000000,126624.000000,61600.000000,790.712811)}
{pt3dadd(190284.000000,126984.000000,61500.000000,754.771316)}
{pt3dadd(190356.000000,127224.000000,61350.000000,718.829820)}
{pt3dadd(190608.000000,127476.000000,61250.000000,718.829820)}
{pt3dadd(190668.000000,127764.000000,61375.000000,718.829820)}
{pt3dadd(190788.000000,128040.000000,61600.000000,718.829820)}
{pt3dadd(190860.000000,128292.000000,61250.000000,718.829820)}
{pt3dadd(191124.000000,129144.000000,61250.000000,718.829820)}

{create adhoc17}
{access adhoc17}
{connect adhoc17(1), adhoc16(0)}
{nseg = 1}
{strdef color color = "White"}
{pt3dclear()}
{pt3dadd(191124.000000,129144.000000,61250.000000,718.829820)}
{pt3dadd(191316.000000,129936.000000,61125.000000,599.024880)}
{pt3dadd(191400.000000,130416.000000,61025.000000,628.976115)}
{pt3dadd(191616.000000,131280.000000,60750.000000,658.927350)}
{pt3dadd(191736.000000,131688.000000,60500.000000,688.878585)}
{pt3dadd(191928.000000,132000.000000,60675.000000,718.829820)}
{pt3dadd(191928.000000,132480.000000,60400.000000,718.829820)}
{pt3dadd(192288.000000,132900.000000,60900.000000,718.829820)}
{pt3dadd(192408.000000,134424.000000,61050.000000,1242.137880)}

{create adhoc18}
{access adhoc18}
{connect adhoc18(1), adhoc17(0)}
{nseg = 1}
{strdef color color = "White"}
{pt3dclear()}
{pt3dadd(192408.000000,134424.000000,61050.000000,1242.137880)}
{pt3dadd(192468.000000,134640.000000,61025.000000,1242.137880)}
{pt3dadd(192528.000000,134940.000000,61000.000000,1190.382147)}
{pt3dadd(192612.000000,135348.000000,60975.000000,1138.626414)}
{pt3dadd(192600.000000,135696.000000,60875.000000,1086.870681)}
{pt3dadd(192516.000000,135972.000000,60875.000000,1035.114948)}
{pt3dadd(192648.000000,136224.000000,60925.000000,1024.763801)}
{pt3dadd(192612.000000,136488.000000,60800.000000,1014.412653)}
{pt3dadd(192576.000000,136812.000000,60675.000000,1004.061506)}
{pt3dadd(192492.000000,137220.000000,60575.000000,993.710358)}
{pt3dadd(192480.000000,137592.000000,60475.000000,1055.817239)}
{pt3dadd(192408.000000,138036.000000,60375.000000,1117.924119)}
{pt3dadd(192468.000000,138408.000000,60300.000000,1180.031000)}
{pt3dadd(193128.000000,141660.000000,59150.000000,1242.137880)}
{pt3dadd(193272.000000,142284.000000,58925.000000,1173.130236)}
{pt3dadd(193260.000000,143016.000000,58550.000000,1104.122592)}
{pt3dadd(193512.000000,143556.000000,58125.000000,1035.114948)}
{pt3dadd(193488.000000,145032.000000,57700.000000,1035.114948)}

{create adhoc19}
{access adhoc19}
{connect adhoc19(1), adhoc18(0)}
{nseg = 1}
{strdef color color = "White"}
{pt3dclear()}
{pt3dadd(193488.000000,145032.000000,57700.000000,1035.114948)}
{pt3dadd(192996.000000,144672.000000,59925.000000,240.734646)}
{pt3dadd(192792.000000,144996.000000,60300.000000,252.771381)}
{pt3dadd(192528.000000,145068.000000,60500.000000,264.808116)}
{pt3dadd(192276.000000,145104.000000,60650.000000,276.844851)}
{pt3dadd(192048.000000,145416.000000,60525.000000,288.881586)}
{pt3dadd(191880.000000,145428.000000,60500.000000,288.881586)}

{create adhoc20}
{access adhoc20}
{connect adhoc20(1), adhoc19(0)}
{nseg = 1}
{strdef color color = "White"}
{pt3dclear()}
{pt3dadd(191880.000000,145428.000000,60500.000000,288.881586)}
{pt3dadd(191808.000000,144588.000000,60550.000000,139.314042)}
{pt3dadd(191676.000000,144288.000000,60500.000000,154.638585)}
{pt3dadd(191460.000000,144048.000000,60575.000000,169.963128)}
{pt3dadd(191184.000000,143748.000000,60700.000000,185.287671)}
{pt3dadd(191064.000000,143700.000000,60625.000000,200.612214)}
{pt3dadd(190848.000000,143544.000000,60825.000000,192.253370)}
{pt3dadd(190680.000000,143412.000000,60725.000000,183.894525)}
{pt3dadd(190752.000000,143328.000000,61125.000000,175.535680)}
{pt3dadd(190416.000000,143220.000000,61325.000000,167.176836)}
{pt3dadd(190248.000000,143088.000000,61550.000000,80.621550)}

{create adhoc21}
{access adhoc21}
{connect adhoc21(1), adhoc19(0)}
{nseg = 1}
{strdef color color = "White"}
{pt3dclear()}
{pt3dadd(191880.000000,145428.000000,60500.000000,288.881586)}
{pt3dadd(191400.000000,146244.000000,60500.000000,167.176836)}
{pt3dadd(191244.000000,146400.000000,60500.000000,185.566288)}
{pt3dadd(191052.000000,146544.000000,60575.000000,203.955741)}
{pt3dadd(190872.000000,146676.000000,60650.000000,222.345193)}
{pt3dadd(190716.000000,146808.000000,60725.000000,240.734646)}
{pt3dadd(190536.000000,146904.000000,60750.000000,215.379495)}
{pt3dadd(190380.000000,147096.000000,60750.000000,190.024344)}
{pt3dadd(190224.000000,147204.000000,60750.000000,164.669193)}
{pt3dadd(190212.000000,147840.000000,60775.000000,139.314042)}
{pt3dadd(190044.000000,148068.000000,60750.000000,164.669193)}
{pt3dadd(189876.000000,148284.000000,60900.000000,190.024344)}
{pt3dadd(189900.000000,148344.000000,61050.000000,215.379495)}
{pt3dadd(189924.000000,148368.000000,61275.000000,240.734646)}
{pt3dadd(189924.000000,148560.000000,61475.000000,230.704038)}
{pt3dadd(189972.000000,148596.000000,61625.000000,220.673430)}
{pt3dadd(189912.000000,148620.000000,61550.000000,210.642822)}
{pt3dadd(189972.000000,148560.000000,61700.000000,200.612214)}
{pt3dadd(190068.000000,148392.000000,61925.000000,237.123635)}
{pt3dadd(190188.000000,148392.000000,62100.000000,273.635055)}
{pt3dadd(190344.000000,148488.000000,62200.000000,310.146475)}
{pt3dadd(190464.000000,148548.000000,62325.000000,346.657896)}
{pt3dadd(190584.000000,148500.000000,62800.000000,310.146476)}
{pt3dadd(190716.000000,148512.000000,63225.000000,273.635055)}
{pt3dadd(190836.000000,148572.000000,63775.000000,237.123635)}
{pt3dadd(190896.000000,148644.000000,64175.000000,200.612214)}
{pt3dadd(191076.000000,148524.000000,64500.000000,200.612214)}
{pt3dadd(191220.000000,148380.000000,64725.000000,200.612214)}

{create adhoc22}
{access adhoc22}
{connect adhoc22(1), adhoc18(0)}
{nseg = 1}
{strdef color color = "White"}
{pt3dclear()}
{pt3dadd(193488.000000,145032.000000,57700.000000,1035.114948)}
{pt3dadd(193632.000000,145368.000000,57650.000000,1035.114948)}
{pt3dadd(193392.000000,146460.000000,57375.000000,991.985162)}
{pt3dadd(193296.000000,146796.000000,57125.000000,948.855375)}
{pt3dadd(193008.000000,147192.000000,56700.000000,905.725589)}
{pt3dadd(193164.000000,149352.000000,56175.000000,862.595802)}
{pt3dadd(193104.000000,149676.000000,55925.000000,851.094516)}
{pt3dadd(192996.000000,150228.000000,55725.000000,839.593230)}
{pt3dadd(192804.000000,150924.000000,55550.000000,828.091944)}
{pt3dadd(192936.000000,151896.000000,55175.000000,1035.114948)}

{create adhoc23}
{access adhoc23}
{connect adhoc23(1), adhoc22(0)}
{nseg = 1}
{strdef color color = "White"}
{pt3dclear()}
{pt3dadd(192936.000000,151896.000000,55175.000000,1035.114948)}
{pt3dadd(193140.000000,152328.000000,55250.000000,862.595802)}
{pt3dadd(193236.000000,152712.000000,55050.000000,853.969838)}
{pt3dadd(193344.000000,153384.000000,54775.000000,845.343873)}
{pt3dadd(193224.000000,153780.000000,54450.000000,836.717909)}
{pt3dadd(193116.000000,154200.000000,54425.000000,828.091944)}
{pt3dadd(192840.000000,154596.000000,53825.000000,800.776413)}
{pt3dadd(192984.000000,154920.000000,53625.000000,773.460882)}
{pt3dadd(192936.000000,155256.000000,53225.000000,746.145351)}
{pt3dadd(192828.000000,155712.000000,52950.000000,718.829820)}
{pt3dadd(192696.000000,156144.000000,52900.000000,718.829820)}
{pt3dadd(192936.000000,156840.000000,52875.000000,718.829820)}
{pt3dadd(192960.000000,157368.000000,53300.000000,718.829820)}
{pt3dadd(192036.000000,158532.000000,52575.000000,718.829820)}
{pt3dadd(191712.000000,160464.000000,52975.000000,718.829820)}
{pt3dadd(191520.000000,161520.000000,52975.000000,599.024880)}

{create adhoc24}
{access adhoc24}
{connect adhoc24(1), adhoc23(0)}
{nseg = 1}
{strdef color color = "White"}
{pt3dclear()}
{pt3dadd(191520.000000,161520.000000,52975.000000,599.024880)}
{pt3dadd(191040.000000,161652.000000,53175.000000,1035.114948)}
{pt3dadd(191052.000000,162444.000000,54075.000000,1035.114948)}
{pt3dadd(190668.000000,163332.000000,54325.000000,1035.114948)}
{pt3dadd(190452.000000,163908.000000,54575.000000,1035.114948)}
{pt3dadd(189924.000000,165300.000000,54825.000000,862.595802)}

{create adhoc25}
{access adhoc25}
{connect adhoc25(1), adhoc24(0)}
{nseg = 1}
{strdef color color = "White"}
{pt3dclear()}
{pt3dadd(189924.000000,165300.000000,54825.000000,862.595802)}
{pt3dadd(189840.000000,165768.000000,55175.000000,1035.114948)}
{pt3dadd(190056.000000,166608.000000,55600.000000,920.102175)}
{pt3dadd(190200.000000,167220.000000,55975.000000,805.089402)}
{pt3dadd(190296.000000,168036.000000,56225.000000,690.076629)}
{pt3dadd(190308.000000,168396.000000,56475.000000,575.063856)}
{pt3dadd(190524.000000,168912.000000,56850.000000,718.829829)}
{pt3dadd(190764.000000,169272.000000,57200.000000,862.595802)}
{pt3dadd(190764.000000,169584.000000,57500.000000,718.829820)}

{create adhoc26}
{access adhoc26}
{connect adhoc26(1), adhoc25(0)}
{nseg = 1}
{strdef color color = "White"}
{pt3dclear()}
{pt3dadd(190764.000000,169584.000000,57500.000000,718.829820)}
{pt3dadd(190584.000000,169956.000000,57725.000000,828.092016)}
{pt3dadd(191052.000000,170244.000000,57575.000000,993.710362)}
{pt3dadd(190908.000000,171624.000000,58225.000000,1159.328709)}
{pt3dadd(190872.000000,172536.000000,58725.000000,1324.947056)}
{pt3dadd(190920.000000,173328.000000,59175.000000,1490.565402)}
{pt3dadd(190836.000000,173352.000000,59600.000000,1490.565402)}

{create adhoc27}
{access adhoc27}
{connect adhoc27(1), adhoc26(0)}
{nseg = 1}
{strdef color color = "White"}
{pt3dclear()}
{pt3dadd(190836.000000,173352.000000,59600.000000,1490.565402)}
{pt3dadd(190620.000000,173796.000000,60000.000000,1490.565402)}
{pt3dadd(190320.000000,175104.000000,60000.000000,1366.351641)}
{pt3dadd(190560.000000,175344.000000,60950.000000,1242.137880)}
{pt3dadd(190212.000000,176328.000000,61225.000000,1430.942868)}

{create adhoc28}
{access adhoc28}
{connect adhoc28(1), adhoc27(0)}
{nseg = 1}
{strdef color color = "White"}
{pt3dclear()}
{pt3dadd(190212.000000,176328.000000,61225.000000,1430.942868)}
{pt3dadd(190056.000000,177060.000000,61500.000000,1242.137880)}
{pt3dadd(189480.000000,177696.000000,61800.000000,1242.137880)}
{pt3dadd(189324.000000,178176.000000,61925.000000,1242.137880)}
{pt3dadd(189192.000000,178824.000000,62475.000000,1242.137880)}
{pt3dadd(189060.000000,179484.000000,62675.000000,1242.137880)}
{pt3dadd(188856.000000,179904.000000,62950.000000,993.710430)}

{create adhoc29}
{access adhoc29}
{connect adhoc29(1), adhoc28(0)}
{nseg = 1}
{strdef color color = "White"}
{pt3dclear()}
{pt3dadd(188856.000000,179904.000000,62950.000000,993.710430)}
{pt3dadd(188856.000000,180168.000000,62950.000000,1035.114948)}
{pt3dadd(188856.000000,180516.000000,62975.000000,1014.826685)}
{pt3dadd(188772.000000,180852.000000,63175.000000,994.538421)}
{pt3dadd(188820.000000,181164.000000,63325.000000,974.250158)}
{pt3dadd(188952.000000,181488.000000,63450.000000,953.961894)}
{pt3dadd(189072.000000,182016.000000,63750.000000,1013.584509)}
{pt3dadd(188868.000000,182364.000000,63850.000000,1073.207124)}
{pt3dadd(188736.000000,182700.000000,63825.000000,1132.829739)}
{pt3dadd(188676.000000,183048.000000,64025.000000,1192.452354)}
{pt3dadd(188568.000000,183732.000000,64075.000000,1074.046721)}
{pt3dadd(188436.000000,184332.000000,64300.000000,955.641087)}
{pt3dadd(188316.000000,184680.000000,64450.000000,837.235453)}
{pt3dadd(186132.000000,187008.000000,64750.000000,718.829820)}
{pt3dadd(186132.000000,188088.000000,65375.000000,828.092016)}
{pt3dadd(186180.000000,190464.000000,65075.000000,2146.414176)}

{create adhoc30}
{access adhoc30}
{connect adhoc30(1), adhoc29(0)}
{nseg = 1}
{strdef color color = "White"}
{pt3dclear()}
{pt3dadd(186180.000000,190464.000000,65075.000000,2146.414176)}
{pt3dadd(186456.000000,190860.000000,65525.000000,2060.557668)}
{pt3dadd(186648.000000,191400.000000,66275.000000,1974.701057)}
{pt3dadd(186840.000000,191808.000000,67025.000000,1888.844445)}
{pt3dadd(186900.000000,192120.000000,67550.000000,1802.987834)}
{pt3dadd(186564.000000,192660.000000,67800.000000,1717.131222)}
{pt3dadd(186756.000000,193272.000000,68825.000000,1598.382887)}
{pt3dadd(186648.000000,194052.000000,69225.000000,1479.634551)}
{pt3dadd(187116.000000,194316.000000,69975.000000,1360.886216)}
{pt3dadd(187020.000000,194700.000000,70450.000000,1242.137880)}
{pt3dadd(187164.000000,195240.000000,70850.000000,1190.382147)}
{pt3dadd(187056.000000,195816.000000,71250.000000,1138.626414)}
{pt3dadd(187056.000000,196068.000000,71500.000000,1086.870681)}
{pt3dadd(186984.000000,196560.000000,71825.000000,1035.114948)}
{pt3dadd(187092.000000,196884.000000,72075.000000,991.985162)}
{pt3dadd(186948.000000,197208.000000,72400.000000,948.855375)}
{pt3dadd(187032.000000,197700.000000,72775.000000,905.725589)}
{pt3dadd(187092.000000,198288.000000,73200.000000,862.595802)}
{pt3dadd(187044.000000,198624.000000,73575.000000,957.481322)}
{pt3dadd(186636.000000,199236.000000,73675.000000,1052.366841)}
{pt3dadd(185988.000000,199848.000000,74600.000000,1147.252361)}
{pt3dadd(185928.000000,200520.000000,75175.000000,1242.137880)}
{pt3dadd(185952.000000,201144.000000,75800.000000,1190.382147)}
{pt3dadd(185964.000000,201528.000000,76225.000000,1138.626414)}
{pt3dadd(185904.000000,201840.000000,76400.000000,1086.870681)}
{pt3dadd(185628.000000,202356.000000,76775.000000,1035.114948)}
{pt3dadd(185868.000000,202416.000000,77100.000000,991.985162)}
{pt3dadd(186036.000000,202440.000000,77625.000000,948.855375)}
{pt3dadd(186240.000000,202512.000000,77850.000000,905.725589)}
{pt3dadd(186264.000000,202740.000000,78175.000000,862.595802)}
{pt3dadd(186288.000000,202692.000000,78450.000000,826.654307)}
{pt3dadd(186228.000000,202920.000000,78650.000000,790.712811)}
{pt3dadd(186312.000000,203064.000000,78900.000000,754.771316)}
{pt3dadd(186456.000000,203184.000000,79150.000000,718.829820)}
{pt3dadd(186456.000000,203376.000000,79500.000000,754.771316)}
{pt3dadd(186444.000000,203604.000000,79750.000000,790.712811)}
{pt3dadd(186564.000000,203640.000000,80050.000000,826.654307)}
{pt3dadd(186612.000000,203796.000000,80300.000000,862.595802)}
{pt3dadd(186600.000000,204240.000000,80575.000000,1019.588202)}
{pt3dadd(186600.000000,204396.000000,81025.000000,1176.580602)}
{pt3dadd(186720.000000,204216.000000,81425.000000,1333.573002)}
{pt3dadd(186660.000000,204504.000000,81825.000000,1490.565402)}
{pt3dadd(186648.000000,204660.000000,82100.000000,1565.093664)}
{pt3dadd(186636.000000,204816.000000,82325.000000,1639.621926)}
{pt3dadd(186636.000000,204804.000000,82475.000000,1714.150188)}
{pt3dadd(186636.000000,204792.000000,82750.000000,1788.678450)}
{pt3dadd(186636.000000,204780.000000,82975.000000,1770.791747)}
{pt3dadd(186636.000000,204768.000000,83175.000000,1752.905043)}
{pt3dadd(186636.000000,204756.000000,83350.000000,1735.018340)}
{pt3dadd(186576.000000,204864.000000,83575.000000,1717.131636)}
{pt3dadd(186660.000000,205008.000000,83975.000000,1598.383197)}
{pt3dadd(186384.000000,205644.000000,84250.000000,1479.634758)}
{pt3dadd(186468.000000,205620.000000,84800.000000,1360.886319)}
{pt3dadd(186420.000000,205620.000000,85050.000000,1242.137880)}
{pt3dadd(186372.000000,205620.000000,85300.000000,1190.382147)}
{pt3dadd(186432.000000,205680.000000,85525.000000,1138.626414)}
{pt3dadd(186492.000000,205632.000000,85775.000000,1086.870681)}
{pt3dadd(186492.000000,205716.000000,86050.000000,1035.114948)}
{pt3dadd(186564.000000,205668.000000,86200.000000,991.985162)}
{pt3dadd(186732.000000,205620.000000,86500.000000,948.855375)}
{pt3dadd(186924.000000,205548.000000,86750.000000,905.725589)}
{pt3dadd(186948.000000,205488.000000,86975.000000,862.595802)}
{pt3dadd(187152.000000,205476.000000,87200.000000,945.059940)}
{pt3dadd(187320.000000,205512.000000,87450.000000,1027.524078)}
{pt3dadd(187392.000000,205632.000000,87700.000000,1109.988216)}
{pt3dadd(187536.000000,205656.000000,87950.000000,1192.452354)}
{pt3dadd(187524.000000,205680.000000,88225.000000,1204.873736)}
{pt3dadd(187560.000000,205656.000000,88425.000000,1217.295117)}
{pt3dadd(187644.000000,205644.000000,88650.000000,1229.716498)}
{pt3dadd(187836.000000,205656.000000,88925.000000,1242.137880)}
{pt3dadd(188064.000000,205824.000000,89250.000000,1304.244761)}
{pt3dadd(187932.000000,205776.000000,89575.000000,1366.351641)}
{pt3dadd(188232.000000,205632.000000,89975.000000,1428.458522)}
{pt3dadd(188244.000000,205560.000000,90325.000000,1490.565402)}
{pt3dadd(188232.000000,205788.000000,90575.000000,1565.093664)}
{pt3dadd(188340.000000,205632.000000,90825.000000,1639.621926)}
{pt3dadd(188340.000000,205692.000000,91100.000000,1714.150188)}
{pt3dadd(188340.000000,205752.000000,91375.000000,1788.678450)}
{pt3dadd(188340.000000,205812.000000,91675.000000,1878.112382)}
{pt3dadd(188340.000000,205872.000000,91875.000000,1967.546313)}
{pt3dadd(188340.000000,205932.000000,92150.000000,2056.980245)}
{pt3dadd(188496.000000,205776.000000,92575.000000,2146.414176)}
{pt3dadd(188616.000000,205620.000000,92875.000000,2253.734910)}
{pt3dadd(188556.000000,205704.000000,93025.000000,2361.055644)}
{pt3dadd(188496.000000,205788.000000,93200.000000,2468.376378)}
{pt3dadd(188556.000000,205728.000000,93375.000000,2575.697112)}
{pt3dadd(188616.000000,205668.000000,93525.000000,2575.697112)}
{pt3dadd(188724.000000,205476.000000,93700.000000,2575.697112)}
{pt3dadd(188796.000000,205536.000000,93925.000000,2575.697112)}
{pt3dadd(188832.000000,205248.000000,94175.000000,2575.697112)}
{pt3dadd(188868.000000,205152.000000,94525.000000,2304.414184)}
{pt3dadd(188904.000000,205056.000000,94800.000000,2033.131257)}
{pt3dadd(188928.000000,204864.000000,95025.000000,1761.848329)}
{pt3dadd(188952.000000,204672.000000,95350.000000,1490.565402)}
{pt3dadd(188976.000000,204480.000000,95750.000000,1490.565402)}
{pt3dadd(188820.000000,204600.000000,96000.000000,1490.565402)}
{pt3dadd(188772.000000,204468.000000,96250.000000,1490.565402)}
{pt3dadd(188880.000000,204180.000000,96525.000000,1490.565402)}
{pt3dadd(188748.000000,204132.000000,96750.000000,1565.093664)}
{pt3dadd(188784.000000,203772.000000,97000.000000,1639.621926)}
{pt3dadd(188820.000000,203772.000000,97200.000000,1714.150188)}
{pt3dadd(188856.000000,203772.000000,97550.000000,1788.678450)}
{pt3dadd(188784.000000,203772.000000,98025.000000,1600.287575)}
{pt3dadd(188604.000000,203676.000000,98475.000000,1411.896699)}
{pt3dadd(188460.000000,203616.000000,98925.000000,1223.505823)}
{pt3dadd(188184.000000,203424.000000,99275.000000,1035.114948)}
{pt3dadd(188076.000000,203244.000000,99675.000000,1086.870681)}
{pt3dadd(187848.000000,203112.000000,99950.000000,1138.626414)}
{pt3dadd(187872.000000,203040.000000,100175.000000,1190.382147)}
{pt3dadd(187896.000000,202980.000000,100450.000000,1242.137880)}
{pt3dadd(187872.000000,202884.000000,100675.000000,1468.206954)}
{pt3dadd(187800.000000,202752.000000,101075.000000,1694.276028)}
{pt3dadd(187788.000000,202824.000000,101425.000000,1920.345102)}
{pt3dadd(187788.000000,202644.000000,102325.000000,2146.414176)}
{pt3dadd(187908.000000,202572.000000,103000.000000,2146.414176)}
{pt3dadd(188076.000000,202476.000000,103525.000000,2146.414176)}
{pt3dadd(187968.000000,202332.000000,103900.000000,2146.414176)}
{pt3dadd(187860.000000,202236.000000,104250.000000,2146.414176)}
{pt3dadd(187860.000000,202056.000000,104575.000000,2039.093474)}
{pt3dadd(187968.000000,201900.000000,104975.000000,1931.772771)}
{pt3dadd(188076.000000,201744.000000,105450.000000,1824.452069)}
{pt3dadd(187980.000000,201516.000000,106000.000000,1717.131366)}
{pt3dadd(187956.000000,201468.000000,106450.000000,1802.987942)}
{pt3dadd(188016.000000,201468.000000,106775.000000,1888.844517)}
{pt3dadd(187956.000000,201372.000000,107150.000000,1974.701093)}
{pt3dadd(187908.000000,201192.000000,107375.000000,2060.557668)}
{pt3dadd(187884.000000,200880.000000,107750.000000,2189.342529)}
{pt3dadd(187872.000000,200856.000000,108200.000000,2318.127390)}
{pt3dadd(187824.000000,200568.000000,108875.000000,2446.912251)}
{pt3dadd(187716.000000,200292.000000,109325.000000,2575.697112)}
{pt3dadd(187788.000000,200076.000000,110025.000000,18.000000)}
{pt3dadd(187740.000000,199920.000000,110325.000000,727.471392)}
{pt3dadd(187776.000000,199812.000000,110600.000000,1436.942784)}
{pt3dadd(187788.000000,199704.000000,110950.000000,2146.414176)}
{pt3dadd(187800.000000,199620.000000,111300.000000,2056.980245)}
{pt3dadd(187776.000000,199524.000000,111850.000000,1967.546313)}
{pt3dadd(187536.000000,199140.000000,112475.000000,1878.112382)}
{pt3dadd(187356.000000,199080.000000,112875.000000,1788.678450)}
{pt3dadd(187200.000000,198756.000000,113450.000000,1770.791643)}
{pt3dadd(186828.000000,198576.000000,113975.000000,1752.904836)}
{pt3dadd(186552.000000,198468.000000,114450.000000,1735.018029)}
{pt3dadd(186372.000000,198252.000000,114750.000000,1717.131222)}
{pt3dadd(186132.000000,197976.000000,115500.000000,1585.961505)}
{pt3dadd(185724.000000,197772.000000,116225.000000,1454.791788)}
{pt3dadd(185364.000000,197544.000000,116800.000000,1323.622071)}
{pt3dadd(185208.000000,197508.000000,117300.000000,1192.452354)}
{pt3dadd(184908.000000,197292.000000,117875.000000,1074.046721)}
{pt3dadd(184512.000000,197160.000000,118250.000000,955.641087)}
{pt3dadd(184308.000000,197076.000000,118625.000000,837.235453)}
{pt3dadd(183792.000000,197076.000000,119075.000000,718.829820)}
{pt3dadd(184080.000000,197208.000000,119450.000000,754.771316)}
{pt3dadd(183588.000000,196800.000000,119775.000000,790.712811)}
{pt3dadd(183120.000000,196620.000000,120100.000000,826.654307)}
{pt3dadd(183156.000000,196440.000000,120500.000000,862.595802)}
{pt3dadd(182700.000000,196200.000000,120850.000000,862.595802)}
{pt3dadd(182220.000000,196068.000000,121225.000000,862.595802)}
{pt3dadd(181728.000000,196068.000000,121725.000000,862.595802)}
{pt3dadd(181428.000000,195936.000000,121950.000000,862.595802)}
{pt3dadd(181068.000000,195684.000000,122275.000000,862.595802)}
{pt3dadd(180348.000000,195432.000000,122800.000000,862.595802)}
{pt3dadd(179868.000000,195192.000000,123125.000000,862.595802)}
{pt3dadd(179460.000000,195252.000000,123550.000000,862.595802)}
{pt3dadd(178620.000000,194832.000000,124125.000000,862.595802)}
{pt3dadd(178164.000000,194556.000000,124400.000000,862.595802)}
{pt3dadd(177960.000000,194556.000000,124675.000000,862.595802)}
{pt3dadd(177252.000000,194196.000000,124975.000000,862.595802)}
{pt3dadd(176520.000000,193560.000000,125525.000000,826.654307)}
{pt3dadd(175452.000000,192912.000000,126200.000000,790.712811)}
{pt3dadd(174432.000000,192372.000000,126600.000000,754.771316)}
{pt3dadd(174156.000000,192180.000000,126875.000000,718.829820)}
{pt3dadd(173628.000000,192060.000000,127175.000000,746.145351)}
{pt3dadd(173016.000000,191712.000000,127400.000000,773.460882)}
{pt3dadd(172512.000000,191352.000000,127550.000000,800.776413)}
{pt3dadd(171720.000000,190944.000000,127725.000000,828.091944)}
{pt3dadd(171312.000000,190560.000000,127875.000000,828.091962)}
{pt3dadd(170808.000000,190320.000000,128025.000000,828.091980)}
{pt3dadd(170448.000000,189600.000000,128050.000000,828.091998)}
{pt3dadd(170124.000000,189600.000000,128175.000000,828.092016)}
{pt3dadd(169692.000000,189108.000000,128300.000000,836.717962)}
{pt3dadd(169524.000000,188940.000000,128450.000000,845.343909)}
{pt3dadd(169260.000000,188832.000000,128450.000000,853.969856)}
{pt3dadd(168852.000000,188496.000000,128600.000000,862.595802)}
{pt3dadd(168564.000000,188376.000000,128750.000000,905.725589)}
{pt3dadd(168264.000000,188292.000000,128750.000000,948.855375)}
{pt3dadd(168000.000000,188124.000000,128900.000000,991.985162)}
{pt3dadd(167772.000000,187836.000000,129050.000000,1035.114948)}
{pt3dadd(167424.000000,187584.000000,129350.000000,1086.870681)}
{pt3dadd(167136.000000,187308.000000,129450.000000,1138.626414)}
{pt3dadd(166692.000000,186924.000000,129600.000000,1190.382147)}
{pt3dadd(166356.000000,186672.000000,129700.000000,1242.137880)}
{pt3dadd(165948.000000,186384.000000,129800.000000,1289.339127)}
{pt3dadd(165600.000000,185916.000000,130250.000000,1336.540374)}
{pt3dadd(165276.000000,185580.000000,130400.000000,1383.741621)}
{pt3dadd(164688.000000,185220.000000,130675.000000,1430.942868)}
{pt3dadd(164412.000000,184752.000000,130775.000000,1321.634723)}
{pt3dadd(164028.000000,184512.000000,131000.000000,1212.326577)}
{pt3dadd(163800.000000,184272.000000,131200.000000,1103.018431)}
{pt3dadd(163164.000000,184032.000000,131400.000000,993.710286)}
{pt3dadd(162456.000000,183696.000000,131700.000000,960.931665)}
{pt3dadd(161664.000000,183552.000000,132125.000000,928.153044)}
{pt3dadd(161148.000000,183564.000000,132300.000000,895.374423)}
{pt3dadd(160644.000000,183276.000000,132500.000000,862.595802)}
{pt3dadd(159792.000000,182592.000000,132650.000000,790.712816)}
{pt3dadd(159300.000000,182148.000000,132525.000000,718.829829)}
{pt3dadd(158592.000000,181500.000000,132925.000000,646.946843)}
{pt3dadd(158400.000000,180972.000000,132925.000000,575.063856)}
{pt3dadd(158256.000000,180300.000000,132800.000000,575.063856)}
{pt3dadd(158256.000000,179892.000000,132950.000000,575.063856)}
{pt3dadd(158028.000000,179280.000000,132950.000000,575.063856)}
{pt3dadd(157956.000000,178440.000000,132925.000000,575.063856)}
{pt3dadd(157788.000000,177564.000000,132950.000000,581.054112)}
{pt3dadd(157452.000000,176940.000000,133275.000000,587.044368)}
{pt3dadd(157368.000000,176220.000000,133500.000000,593.034624)}
{pt3dadd(157224.000000,175476.000000,133850.000000,599.024880)}
{pt3dadd(157176.000000,174744.000000,134225.000000,697.696232)}
{pt3dadd(157308.000000,174060.000000,135050.000000,796.367583)}
{pt3dadd(157236.000000,173376.000000,135775.000000,895.038934)}
{pt3dadd(157152.000000,172956.000000,136550.000000,993.710286)}
{pt3dadd(157152.000000,172932.000000,137025.000000,1004.061452)}
{pt3dadd(156984.000000,172908.000000,137550.000000,1014.412617)}
{pt3dadd(156816.000000,172884.000000,138125.000000,1024.763782)}
{pt3dadd(157620.000000,172776.000000,138450.000000,1035.114948)}
{pt3dadd(157800.000000,172584.000000,138900.000000,1035.114948)}
{pt3dadd(157560.000000,172284.000000,139550.000000,1035.114948)}
{pt3dadd(157008.000000,172032.000000,139900.000000,1035.114948)}
{pt3dadd(156468.000000,171708.000000,140600.000000,1035.114948)}
{pt3dadd(156132.000000,171624.000000,141125.000000,1086.870681)}
{pt3dadd(155928.000000,171504.000000,141425.000000,1138.626414)}
{pt3dadd(155424.000000,171144.000000,141975.000000,1190.382147)}
{pt3dadd(155124.000000,170760.000000,142550.000000,1242.137880)}
{pt3dadd(154752.000000,170172.000000,143075.000000,1289.339096)}
{pt3dadd(154164.000000,169536.000000,143550.000000,1336.540311)}
{pt3dadd(153924.000000,168780.000000,143975.000000,1383.741527)}
{pt3dadd(153564.000000,168156.000000,144550.000000,1430.942742)}
{pt3dadd(153120.000000,167568.000000,145325.000000,1520.376669)}
{pt3dadd(153060.000000,167364.000000,145575.000000,1609.810596)}
{pt3dadd(153072.000000,166944.000000,146100.000000,1699.244523)}
{pt3dadd(152448.000000,166092.000000,146750.000000,1788.678450)}
{pt3dadd(152388.000000,165552.000000,147275.000000,1985.433116)}
{pt3dadd(152196.000000,164796.000000,147925.000000,2182.187781)}
{pt3dadd(152088.000000,164256.000000,148325.000000,2378.942446)}
{pt3dadd(152016.000000,163356.000000,148975.000000,2575.697112)}
{pt3dadd(151956.000000,162912.000000,149625.000000,2468.376378)}
{pt3dadd(152136.000000,162612.000000,150150.000000,2361.055644)}
{pt3dadd(151248.000000,161976.000000,150550.000000,2253.734910)}
{pt3dadd(151944.000000,161496.000000,150975.000000,2146.414176)}
{pt3dadd(152292.000000,161052.000000,151500.000000,2253.734910)}
{pt3dadd(152148.000000,160668.000000,152075.000000,2361.055644)}
{pt3dadd(152088.000000,160260.000000,152625.000000,2468.376378)}
{pt3dadd(152232.000000,159972.000000,153200.000000,2575.697112)}
{pt3dadd(152364.000000,159312.000000,153975.000000,2575.697112)}
{pt3dadd(152388.000000,158724.000000,154500.000000,2575.697112)}
{pt3dadd(152016.000000,158496.000000,155050.000000,2575.697112)}
{pt3dadd(151740.000000,157476.000000,155525.000000,2575.697112)}
{pt3dadd(151872.000000,157416.000000,155975.000000,2575.697112)}
{pt3dadd(151788.000000,157272.000000,156350.000000,2575.697112)}
{pt3dadd(151740.000000,156948.000000,156900.000000,2575.697112)}
{pt3dadd(151980.000000,156840.000000,157325.000000,2575.697112)}
{pt3dadd(152352.000000,156336.000000,157875.000000,2468.376378)}
{pt3dadd(152520.000000,156132.000000,158350.000000,2361.055644)}
{pt3dadd(152232.000000,155592.000000,158975.000000,2253.734910)}
{pt3dadd(151860.000000,155040.000000,159375.000000,2146.414176)}
{pt3dadd(151872.000000,154596.000000,159975.000000,2146.414176)}
{pt3dadd(151884.000000,153996.000000,160475.000000,2146.414176)}
{pt3dadd(151944.000000,153840.000000,161025.000000,2146.414176)}
{pt3dadd(152724.000000,153084.000000,161475.000000,2146.414176)}
{pt3dadd(153048.000000,152880.000000,162125.000000,2146.414176)}
{pt3dadd(153060.000000,152040.000000,162700.000000,2146.414176)}
{pt3dadd(153276.000000,151356.000000,163425.000000,2146.414176)}
{pt3dadd(153744.000000,150540.000000,164025.000000,2146.414176)}
{pt3dadd(153708.000000,150300.000000,164450.000000,2146.414176)}
{pt3dadd(153564.000000,149844.000000,164900.000000,2146.414176)}
{pt3dadd(153720.000000,149388.000000,165250.000000,2146.414176)}
{pt3dadd(153948.000000,148848.000000,165650.000000,2146.414176)}
{pt3dadd(154596.000000,147996.000000,166325.000000,2039.093474)}
{pt3dadd(154512.000000,146772.000000,166950.000000,1931.772771)}
{pt3dadd(154908.000000,146088.000000,167675.000000,1824.452069)}
{pt3dadd(155172.000000,145884.000000,168175.000000,1717.131366)}
{pt3dadd(155484.000000,145284.000000,168675.000000,1802.987942)}
{pt3dadd(155616.000000,144900.000000,169050.000000,1888.844517)}
{pt3dadd(155724.000000,144060.000000,169450.000000,1974.701093)}
{pt3dadd(156072.000000,143484.000000,169950.000000,2060.557668)}
{pt3dadd(156480.000000,142284.000000,170675.000000,1992.587863)}
{pt3dadd(156660.000000,141768.000000,171225.000000,1924.618059)}
{pt3dadd(156876.000000,141084.000000,171825.000000,1856.648255)}
{pt3dadd(156768.000000,141012.000000,172350.000000,1788.678450)}
{pt3dadd(156924.000000,140304.000000,172875.000000,1770.791679)}
{pt3dadd(157188.000000,139788.000000,173375.000000,1752.904908)}
{pt3dadd(157284.000000,139620.000000,173725.000000,1735.018137)}
{pt3dadd(157080.000000,139260.000000,174275.000000,1717.131366)}
{pt3dadd(156216.000000,138924.000000,174700.000000,1824.452069)}
{pt3dadd(156180.000000,138600.000000,175325.000000,1931.772771)}
{pt3dadd(156276.000000,138192.000000,175975.000000,2039.093474)}
{pt3dadd(156216.000000,137940.000000,176625.000000,2146.414176)}
{pt3dadd(156240.000000,137520.000000,177525.000000,2146.414176)}
{pt3dadd(156084.000000,137316.000000,178225.000000,2146.414176)}
{pt3dadd(155928.000000,137076.000000,178750.000000,2146.414176)}
{pt3dadd(155796.000000,136884.000000,179125.000000,2146.414176)}
{pt3dadd(155760.000000,136800.000000,179750.000000,2146.414176)}
{pt3dadd(155760.000000,136248.000000,180225.000000,2146.414176)}
{pt3dadd(155700.000000,135972.000000,180650.000000,2146.414176)}
{pt3dadd(155712.000000,135720.000000,181150.000000,2146.414176)}
{pt3dadd(155628.000000,135516.000000,181825.000000,2146.414176)}
{pt3dadd(155772.000000,135324.000000,182500.000000,2146.414176)}
{pt3dadd(155688.000000,134916.000000,182700.000000,2146.414176)}
{pt3dadd(155604.000000,134664.000000,182800.000000,2146.414176)}

{create adhoc31}
{access adhoc31}
{connect adhoc31(1), adhoc29(0)}
{nseg = 1}
{strdef color color = "White"}
{pt3dclear()}
{pt3dadd(186180.000000,190464.000000,65075.000000,2146.414176)}
{pt3dadd(186180.000000,189828.000000,63175.000000,1242.137880)}

{create adhoc32}
{access adhoc32}
{connect adhoc32(1), adhoc29(0)}
{nseg = 1}
{strdef color color = "White"}
{pt3dclear()}
{pt3dadd(186180.000000,190464.000000,65075.000000,2146.414176)}
{pt3dadd(185484.000000,190104.000000,62575.000000,1490.565402)}
{pt3dadd(185040.000000,189996.000000,61900.000000,1407.756228)}
{pt3dadd(184548.000000,189912.000000,61375.000000,1324.947054)}
{pt3dadd(184188.000000,189924.000000,60550.000000,1242.137880)}
{pt3dadd(184020.000000,190020.000000,60425.000000,1035.114948)}

{create adhoc33}
{access adhoc33}
{connect adhoc33(1), adhoc32(0)}
{nseg = 1}
{strdef color color = "White"}
{pt3dclear()}
{pt3dadd(184020.000000,190020.000000,60425.000000,1035.114948)}
{pt3dadd(181392.000000,191808.000000,60250.000000,200.612214)}
{pt3dadd(180552.000000,192396.000000,60500.000000,230.035338)}
{pt3dadd(179868.000000,193008.000000,60775.000000,259.458462)}
{pt3dadd(179424.000000,193272.000000,60925.000000,288.881586)}
{pt3dadd(178968.000000,193416.000000,61100.000000,346.657896)}

{create adhoc34}
{access adhoc34}
{connect adhoc34(1), adhoc33(0)}
{nseg = 1}
{strdef color color = "White"}
{pt3dclear()}
{pt3dadd(178968.000000,193416.000000,61100.000000,346.657896)}
{pt3dadd(178932.000000,193800.000000,61200.000000,167.176836)}
{pt3dadd(178812.000000,193992.000000,61350.000000,154.406385)}
{pt3dadd(178728.000000,194172.000000,61450.000000,141.635934)}
{pt3dadd(178584.000000,194172.000000,61450.000000,128.865483)}
{pt3dadd(178404.000000,194376.000000,61550.000000,116.095032)}
{pt3dadd(178056.000000,194688.000000,61750.000000,137.224328)}
{pt3dadd(177924.000000,194868.000000,61875.000000,158.353623)}
{pt3dadd(177804.000000,194940.000000,61875.000000,179.482918)}
{pt3dadd(177672.000000,195012.000000,61975.000000,200.612214)}
{pt3dadd(177492.000000,195192.000000,62225.000000,198.606091)}
{pt3dadd(177300.000000,195372.000000,62325.000000,196.599969)}
{pt3dadd(177084.000000,195516.000000,62275.000000,194.593846)}
{pt3dadd(176832.000000,195720.000000,62300.000000,192.587724)}
{pt3dadd(176544.000000,195900.000000,62350.000000,204.624455)}
{pt3dadd(176304.000000,196128.000000,62425.000000,216.661185)}
{pt3dadd(176280.000000,196176.000000,62475.000000,228.697915)}
{pt3dadd(176076.000000,196176.000000,62425.000000,240.734646)}
{pt3dadd(175896.000000,196476.000000,62300.000000,200.612214)}
{pt3dadd(175716.000000,196620.000000,62425.000000,200.612214)}

{create adhoc35}
{access adhoc35}
{connect adhoc35(1), adhoc33(0)}
{nseg = 1}
{strdef color color = "White"}
{pt3dclear()}
{pt3dadd(178968.000000,193416.000000,61100.000000,346.657896)}
{pt3dadd(177696.000000,192240.000000,61150.000000,332.791560)}

{create adhoc36}
{access adhoc36}
{connect adhoc36(1), adhoc35(0)}
{nseg = 1}
{strdef color color = "White"}
{pt3dclear()}
{pt3dadd(177696.000000,192240.000000,61150.000000,332.791560)}
{pt3dadd(177216.000000,192144.000000,60825.000000,288.881586)}
{pt3dadd(176940.000000,192012.000000,60575.000000,251.489700)}
{pt3dadd(176748.000000,191976.000000,60375.000000,214.097814)}
{pt3dadd(176592.000000,191700.000000,60175.000000,176.705928)}
{pt3dadd(176460.000000,191604.000000,60000.000000,139.314042)}
{pt3dadd(176352.000000,191532.000000,59825.000000,128.671997)}
{pt3dadd(176196.000000,191496.000000,59750.000000,118.029951)}
{pt3dadd(176076.000000,191592.000000,59775.000000,107.387906)}
{pt3dadd(175968.000000,191700.000000,59825.000000,96.745860)}
{pt3dadd(175884.000000,191808.000000,59900.000000,116.095032)}
{pt3dadd(175752.000000,191940.000000,59925.000000,139.314042)}

{create adhoc37}
{access adhoc37}
{connect adhoc37(1), adhoc35(0)}
{nseg = 1}
{strdef color color = "White"}
{pt3dclear()}
{pt3dadd(177696.000000,192240.000000,61150.000000,332.791560)}
{pt3dadd(177684.000000,191280.000000,61450.000000,200.612214)}
{pt3dadd(177984.000000,191172.000000,61450.000000,200.612214)}
{pt3dadd(178212.000000,191064.000000,61500.000000,200.612214)}
{pt3dadd(178428.000000,190920.000000,61675.000000,200.612214)}
{pt3dadd(178572.000000,190824.000000,61850.000000,200.612214)}
{pt3dadd(178788.000000,190692.000000,61975.000000,240.734646)}

{create adhoc38}
{access adhoc38}
{connect adhoc38(1), adhoc37(0)}
{nseg = 1}
{strdef color color = "White"}
{pt3dclear()}
{pt3dadd(178788.000000,190692.000000,61975.000000,240.734646)}
{pt3dadd(178908.000000,190776.000000,62050.000000,200.612214)}
{pt3dadd(179280.000000,190872.000000,62125.000000,133.741476)}
{pt3dadd(179328.000000,190968.000000,62325.000000,231.105276)}

{create adhoc39}
{access adhoc39}
{connect adhoc39(1), adhoc37(0)}
{nseg = 1}
{strdef color color = "White"}
{pt3dclear()}
{pt3dadd(178788.000000,190692.000000,61975.000000,240.734646)}
{pt3dadd(178920.000000,190356.000000,62125.000000,231.105276)}
{pt3dadd(178944.000000,190248.000000,62175.000000,215.123166)}
{pt3dadd(179016.000000,190128.000000,62200.000000,199.141056)}
{pt3dadd(179112.000000,189960.000000,62375.000000,183.158946)}
{pt3dadd(179184.000000,189864.000000,62450.000000,167.176836)}
{pt3dadd(179448.000000,189912.000000,62550.000000,96.745860)}

{create adhoc40}
{access adhoc40}
{connect adhoc40(1), adhoc32(0)}
{nseg = 1}
{strdef color color = "White"}
{pt3dclear()}
{pt3dadd(184020.000000,190020.000000,60425.000000,1035.114948)}
{pt3dadd(183384.000000,190092.000000,59750.000000,1035.114948)}
{pt3dadd(182628.000000,190056.000000,59275.000000,862.595802)}
{pt3dadd(182256.000000,189852.000000,58950.000000,862.595802)}

{create adhoc41}
{access adhoc41}
{connect adhoc41(1), adhoc40(0)}
{nseg = 1}
{strdef color color = "White"}
{pt3dclear()}
{pt3dadd(182256.000000,189852.000000,58950.000000,862.595802)}
{pt3dadd(182628.000000,189612.000000,59200.000000,862.595802)}
{pt3dadd(182436.000000,187992.000000,59200.000000,688.741061)}
{pt3dadd(182244.000000,187824.000000,59200.000000,514.886319)}
{pt3dadd(182136.000000,187776.000000,59150.000000,341.031578)}
{pt3dadd(181992.000000,187716.000000,59075.000000,167.176836)}
{pt3dadd(181812.000000,187608.000000,58950.000000,185.566288)}
{pt3dadd(181668.000000,187404.000000,58875.000000,203.955741)}
{pt3dadd(181548.000000,187308.000000,58675.000000,222.345193)}
{pt3dadd(181464.000000,187140.000000,58475.000000,240.734646)}
{pt3dadd(181260.000000,186924.000000,58425.000000,252.771381)}
{pt3dadd(181128.000000,186792.000000,58450.000000,264.808116)}
{pt3dadd(181008.000000,186732.000000,58425.000000,276.844851)}
{pt3dadd(180780.000000,186600.000000,58300.000000,288.881586)}
{pt3dadd(180552.000000,186504.000000,58225.000000,320.658561)}
{pt3dadd(180360.000000,186492.000000,58250.000000,352.435536)}
{pt3dadd(180156.000000,186444.000000,58300.000000,384.212511)}
{pt3dadd(179964.000000,186456.000000,58350.000000,415.989486)}
{pt3dadd(179772.000000,186444.000000,58400.000000,346.820625)}
{pt3dadd(179604.000000,186408.000000,58400.000000,277.651764)}
{pt3dadd(179448.000000,186348.000000,58300.000000,208.482903)}
{pt3dadd(179172.000000,186444.000000,58375.000000,139.314042)}
{pt3dadd(179196.000000,186660.000000,58500.000000,154.638585)}
{pt3dadd(179100.000000,186708.000000,58475.000000,169.963128)}
{pt3dadd(179052.000000,186780.000000,58475.000000,185.287671)}
{pt3dadd(179004.000000,186852.000000,58475.000000,200.612214)}
{pt3dadd(178872.000000,186864.000000,58625.000000,185.287671)}
{pt3dadd(178596.000000,187068.000000,58875.000000,169.963128)}
{pt3dadd(178332.000000,187164.000000,59175.000000,154.638585)}
{pt3dadd(178236.000000,187152.000000,59200.000000,139.314042)}
{pt3dadd(178344.000000,187200.000000,59375.000000,146.279741)}
{pt3dadd(178356.000000,187236.000000,59600.000000,153.245439)}
{pt3dadd(178644.000000,187224.000000,59875.000000,160.211138)}
{pt3dadd(178896.000000,187152.000000,60075.000000,167.176836)}
{pt3dadd(179304.000000,186972.000000,60100.000000,167.176836)}
{pt3dadd(179748.000000,186660.000000,60350.000000,139.314042)}

{create adhoc42}
{access adhoc42}
{connect adhoc42(1), adhoc40(0)}
{nseg = 1}
{strdef color color = "White"}
{pt3dclear()}
{pt3dadd(182256.000000,189852.000000,58950.000000,862.595802)}
{pt3dadd(181980.000000,189972.000000,58675.000000,1242.137880)}
{pt3dadd(181848.000000,189996.000000,58425.000000,1366.351641)}
{pt3dadd(181560.000000,190188.000000,58000.000000,1490.565402)}
{pt3dadd(181632.000000,190368.000000,57725.000000,1144.754172)}

{create adhoc43}
{access adhoc43}
{connect adhoc43(1), adhoc42(0)}
{nseg = 1}
{strdef color color = "White"}
{pt3dclear()}
{pt3dadd(181632.000000,190368.000000,57725.000000,1144.754172)}
{pt3dadd(180348.000000,191916.000000,57725.000000,862.595802)}
{pt3dadd(180240.000000,191856.000000,57500.000000,862.595802)}
{pt3dadd(180036.000000,191928.000000,57200.000000,862.595802)}
{pt3dadd(179952.000000,192180.000000,56900.000000,862.595802)}
{pt3dadd(179496.000000,192564.000000,56675.000000,862.595802)}
{pt3dadd(179244.000000,192900.000000,56400.000000,905.725589)}
{pt3dadd(179040.000000,193188.000000,56175.000000,948.855375)}
{pt3dadd(178776.000000,193500.000000,56000.000000,991.985162)}
{pt3dadd(178536.000000,194028.000000,55650.000000,1035.114948)}
{pt3dadd(178452.000000,193836.000000,53850.000000,1138.626414)}
{pt3dadd(178152.000000,193896.000000,53375.000000,1242.137880)}
{pt3dadd(177996.000000,193992.000000,53250.000000,1192.452354)}

{create adhoc44}
{access adhoc44}
{connect adhoc44(1), adhoc43(0)}
{nseg = 1}
{strdef color color = "White"}
{pt3dclear()}
{pt3dadd(177996.000000,193992.000000,53250.000000,1192.452354)}
{pt3dadd(176652.000000,193284.000000,53200.000000,139.314042)}
{pt3dadd(176532.000000,193260.000000,53275.000000,139.314042)}
{pt3dadd(176412.000000,193248.000000,53325.000000,139.314042)}
{pt3dadd(176280.000000,193284.000000,53375.000000,139.314042)}
{pt3dadd(176160.000000,193212.000000,53475.000000,139.314042)}
{pt3dadd(176028.000000,192912.000000,53575.000000,128.671997)}
{pt3dadd(175908.000000,192852.000000,53725.000000,118.029951)}
{pt3dadd(175932.000000,192672.000000,53800.000000,107.387906)}
{pt3dadd(175944.000000,192504.000000,53900.000000,96.745860)}
{pt3dadd(175164.000000,192504.000000,53900.000000,107.387906)}
{pt3dadd(175068.000000,192492.000000,53925.000000,118.029951)}
{pt3dadd(174948.000000,192576.000000,53925.000000,128.671997)}
{pt3dadd(174780.000000,192564.000000,53950.000000,139.314042)}
{pt3dadd(174612.000000,192528.000000,54050.000000,123.834704)}
{pt3dadd(174444.000000,192552.000000,54050.000000,108.355365)}
{pt3dadd(174264.000000,192540.000000,54050.000000,92.876026)}
{pt3dadd(174072.000000,192540.000000,54050.000000,77.396688)}
{pt3dadd(173976.000000,192648.000000,54050.000000,96.745860)}
{pt3dadd(173844.000000,192720.000000,54050.000000,116.095032)}
{pt3dadd(173784.000000,192732.000000,54025.000000,116.095032)}

{create adhoc45}
{access adhoc45}
{connect adhoc45(1), adhoc43(0)}
{nseg = 1}
{strdef color color = "White"}
{pt3dclear()}
{pt3dadd(177996.000000,193992.000000,53250.000000,1192.452354)}
{pt3dadd(178104.000000,193980.000000,52825.000000,1242.137880)}
{pt3dadd(178092.000000,194136.000000,52650.000000,1304.244761)}
{pt3dadd(177972.000000,194136.000000,52425.000000,1366.351641)}
{pt3dadd(177996.000000,194148.000000,52300.000000,1428.458522)}
{pt3dadd(178008.000000,194352.000000,51925.000000,1490.565402)}
{pt3dadd(177996.000000,194580.000000,51750.000000,1262.840175)}
{pt3dadd(177756.000000,194460.000000,51425.000000,1035.114948)}
{pt3dadd(177744.000000,194496.000000,51325.000000,1242.137880)}

{create adhoc46}
{access adhoc46}
{connect adhoc46(1), adhoc45(0)}
{nseg = 1}
{strdef color color = "White"}
{pt3dclear()}
{pt3dadd(177744.000000,194496.000000,51325.000000,1242.137880)}
{pt3dadd(176388.000000,195876.000000,51325.000000,240.734646)}
{pt3dadd(176100.000000,195924.000000,51175.000000,240.734646)}
{pt3dadd(175836.000000,196104.000000,51075.000000,346.657896)}

{create adhoc47}
{access adhoc47}
{connect adhoc47(1), adhoc46(0)}
{nseg = 1}
{strdef color color = "White"}
{pt3dclear()}
{pt3dadd(175836.000000,196104.000000,51075.000000,346.657896)}
{pt3dadd(175740.000000,196224.000000,51000.000000,346.657896)}
{pt3dadd(175404.000000,196584.000000,50975.000000,332.213819)}
{pt3dadd(175296.000000,196884.000000,51000.000000,317.769741)}
{pt3dadd(175272.000000,196956.000000,51050.000000,303.325664)}
{pt3dadd(175248.000000,197136.000000,51125.000000,288.881586)}
{pt3dadd(175152.000000,197244.000000,51175.000000,276.844851)}
{pt3dadd(175140.000000,197388.000000,51200.000000,264.808116)}
{pt3dadd(174948.000000,197604.000000,51325.000000,252.771381)}
{pt3dadd(174936.000000,197724.000000,51150.000000,240.734646)}
{pt3dadd(174828.000000,197916.000000,51250.000000,240.734646)}
{pt3dadd(174648.000000,198048.000000,51300.000000,240.734646)}
{pt3dadd(174312.000000,198228.000000,51400.000000,240.734646)}
{pt3dadd(174192.000000,198252.000000,51600.000000,240.734646)}
{pt3dadd(174024.000000,198312.000000,51725.000000,209.574742)}
{pt3dadd(173748.000000,198504.000000,51750.000000,178.414839)}
{pt3dadd(173556.000000,198672.000000,51800.000000,147.254936)}
{pt3dadd(173412.000000,198828.000000,51750.000000,116.095032)}
{pt3dadd(173088.000000,199020.000000,51850.000000,200.612214)}
{pt3dadd(172860.000000,199020.000000,51900.000000,167.176836)}

{create adhoc48}
{access adhoc48}
{connect adhoc48(1), adhoc46(0)}
{nseg = 1}
{strdef color color = "White"}
{pt3dclear()}
{pt3dadd(175836.000000,196104.000000,51075.000000,346.657896)}
{pt3dadd(175152.000000,196056.000000,51400.000000,96.745860)}
{pt3dadd(174948.000000,196068.000000,51500.000000,139.314042)}
{pt3dadd(174876.000000,196068.000000,51550.000000,167.176836)}

{create adhoc49}
{access adhoc49}
{connect adhoc49(1), adhoc45(0)}
{nseg = 1}
{strdef color color = "White"}
{pt3dclear()}
{pt3dadd(177744.000000,194496.000000,51325.000000,1242.137880)}
{pt3dadd(177732.000000,194160.000000,50525.000000,1318.757076)}
{pt3dadd(177720.000000,193956.000000,50325.000000,1299.602277)}
{pt3dadd(177648.000000,193908.000000,49975.000000,1280.447478)}
{pt3dadd(177576.000000,193860.000000,49700.000000,1261.292679)}
{pt3dadd(177600.000000,193860.000000,49325.000000,1242.137880)}
{pt3dadd(177708.000000,193740.000000,49025.000000,1147.252361)}
{pt3dadd(177804.000000,193860.000000,48775.000000,1052.366841)}
{pt3dadd(177804.000000,193848.000000,48475.000000,957.481322)}
{pt3dadd(177840.000000,193956.000000,48300.000000,862.595802)}
{pt3dadd(177828.000000,193956.000000,48025.000000,895.374423)}
{pt3dadd(177792.000000,194040.000000,47750.000000,928.153044)}
{pt3dadd(177696.000000,194220.000000,47575.000000,960.931665)}
{pt3dadd(177552.000000,194208.000000,47400.000000,993.710286)}
{pt3dadd(177588.000000,194424.000000,47200.000000,796.367583)}
{pt3dadd(177576.000000,194736.000000,47000.000000,599.024880)}
{pt3dadd(177564.000000,195396.000000,46675.000000,575.063856)}

{create adhoc50}
{access adhoc50}
{connect adhoc50(1), adhoc49(0)}
{nseg = 1}
{strdef color color = "White"}
{pt3dclear()}
{pt3dadd(177564.000000,195396.000000,46675.000000,575.063856)}
{pt3dadd(177240.000000,194292.000000,46450.000000,415.989486)}
{pt3dadd(177000.000000,193980.000000,46050.000000,415.989486)}
{pt3dadd(176844.000000,193824.000000,45800.000000,415.989486)}
{pt3dadd(176628.000000,193632.000000,45550.000000,415.989486)}
{pt3dadd(176424.000000,193452.000000,45350.000000,415.989486)}
{pt3dadd(176148.000000,193332.000000,45150.000000,398.656589)}
{pt3dadd(175956.000000,193200.000000,44975.000000,381.323691)}
{pt3dadd(175812.000000,192864.000000,44775.000000,363.990794)}
{pt3dadd(175620.000000,192672.000000,44550.000000,346.657896)}
{pt3dadd(175416.000000,192624.000000,44350.000000,384.790266)}
{pt3dadd(175260.000000,192588.000000,44150.000000,422.922636)}
{pt3dadd(175248.000000,192564.000000,43975.000000,461.055006)}
{pt3dadd(175236.000000,192528.000000,43825.000000,499.187376)}
{pt3dadd(175212.000000,192480.000000,43650.000000,474.228009)}
{pt3dadd(175200.000000,192492.000000,43475.000000,449.268642)}
{pt3dadd(175272.000000,192276.000000,43250.000000,424.309275)}
{pt3dadd(175368.000000,192108.000000,43000.000000,399.349908)}
{pt3dadd(175560.000000,192096.000000,42775.000000,346.657896)}

{create adhoc51}
{access adhoc51}
{connect adhoc51(1), adhoc50(0)}
{nseg = 1}
{strdef color color = "White"}
{pt3dclear()}
{pt3dadd(175560.000000,192096.000000,42775.000000,346.657896)}
{pt3dadd(176400.000000,190740.000000,42650.000000,332.791596)}
{pt3dadd(176640.000000,190572.000000,42525.000000,321.814093)}
{pt3dadd(176760.000000,190560.000000,42550.000000,310.836591)}
{pt3dadd(176976.000000,190272.000000,42500.000000,299.859089)}
{pt3dadd(177168.000000,189948.000000,42425.000000,288.881586)}
{pt3dadd(177420.000000,189888.000000,42425.000000,303.325664)}
{pt3dadd(177624.000000,189768.000000,41950.000000,317.769741)}
{pt3dadd(177840.000000,189708.000000,41600.000000,332.213819)}
{pt3dadd(177732.000000,189624.000000,41300.000000,346.657896)}
{pt3dadd(177552.000000,189504.000000,41075.000000,363.990794)}
{pt3dadd(177444.000000,189480.000000,40775.000000,381.323691)}
{pt3dadd(177384.000000,189492.000000,40550.000000,398.656589)}
{pt3dadd(177372.000000,189528.000000,40325.000000,415.989486)}
{pt3dadd(177408.000000,189636.000000,40100.000000,398.656589)}
{pt3dadd(177216.000000,189636.000000,39900.000000,381.323691)}
{pt3dadd(177108.000000,189684.000000,39775.000000,363.990794)}
{pt3dadd(177084.000000,189732.000000,39675.000000,346.657896)}
{pt3dadd(177048.000000,189828.000000,39425.000000,311.350146)}
{pt3dadd(177180.000000,189816.000000,39250.000000,276.042396)}
{pt3dadd(177204.000000,189936.000000,39125.000000,240.734646)}
{pt3dadd(177204.000000,189960.000000,39000.000000,231.105276)}

{create adhoc52}
{access adhoc52}
{connect adhoc52(1), adhoc50(0)}
{nseg = 1}
{strdef color color = "White"}
{pt3dclear()}
{pt3dadd(175560.000000,192096.000000,42775.000000,346.657896)}
{pt3dadd(175476.000000,192456.000000,42525.000000,277.326324)}
{pt3dadd(175476.000000,192720.000000,42350.000000,294.659217)}
{pt3dadd(175464.000000,192720.000000,42225.000000,311.992110)}
{pt3dadd(175464.000000,192804.000000,42050.000000,329.325003)}
{pt3dadd(175560.000000,192900.000000,41875.000000,346.657896)}
{pt3dadd(175692.000000,193008.000000,41725.000000,332.213819)}
{pt3dadd(175800.000000,193080.000000,41575.000000,317.769741)}
{pt3dadd(175908.000000,193188.000000,41425.000000,303.325664)}
{pt3dadd(175968.000000,193236.000000,41300.000000,288.881586)}
{pt3dadd(176112.000000,193332.000000,41100.000000,303.325664)}
{pt3dadd(176208.000000,193344.000000,41025.000000,317.769741)}
{pt3dadd(176484.000000,193440.000000,40575.000000,332.213819)}
{pt3dadd(176784.000000,193560.000000,40125.000000,346.657896)}
{pt3dadd(176976.000000,193632.000000,39850.000000,293.696271)}
{pt3dadd(177072.000000,193776.000000,39700.000000,240.734646)}
{pt3dadd(177036.000000,193752.000000,39450.000000,346.657896)}

{create adhoc53}
{access adhoc53}
{connect adhoc53(1), adhoc52(0)}
{nseg = 1}
{strdef color color = "White"}
{pt3dclear()}
{pt3dadd(177036.000000,193752.000000,39450.000000,346.657896)}
{pt3dadd(176904.000000,193596.000000,39075.000000,346.657896)}
{pt3dadd(176748.000000,193452.000000,38825.000000,346.657896)}
{pt3dadd(176652.000000,193332.000000,38775.000000,346.657896)}
{pt3dadd(176580.000000,193212.000000,38750.000000,346.657896)}
{pt3dadd(176700.000000,193056.000000,38700.000000,346.657896)}
{pt3dadd(176616.000000,193272.000000,38500.000000,317.769741)}
{pt3dadd(176652.000000,193284.000000,38425.000000,288.881586)}
{pt3dadd(176316.000000,193272.000000,38750.000000,167.176836)}

{create adhoc54}
{access adhoc54}
{connect adhoc54(1), adhoc52(0)}
{nseg = 1}
{strdef color color = "White"}
{pt3dclear()}
{pt3dadd(177036.000000,193752.000000,39450.000000,346.657896)}
{pt3dadd(177024.000000,193956.000000,39750.000000,346.657896)}
{pt3dadd(176952.000000,194040.000000,39750.000000,317.769741)}
{pt3dadd(176988.000000,194196.000000,39650.000000,288.881586)}
{pt3dadd(177048.000000,194292.000000,39675.000000,288.881586)}

{create adhoc55}
{access adhoc55}
{connect adhoc55(1), adhoc49(0)}
{nseg = 1}
{strdef color color = "White"}
{pt3dclear()}
{pt3dadd(177564.000000,195396.000000,46675.000000,575.063856)}
{pt3dadd(177360.000000,196524.000000,46250.000000,399.349908)}
{pt3dadd(177360.000000,196800.000000,46225.000000,449.268651)}
{pt3dadd(177372.000000,196992.000000,46100.000000,499.187394)}
{pt3dadd(177312.000000,197148.000000,45925.000000,549.106137)}
{pt3dadd(177276.000000,197232.000000,45725.000000,599.024880)}
{pt3dadd(177132.000000,197388.000000,45725.000000,565.745712)}
{pt3dadd(177036.000000,197520.000000,45675.000000,532.466544)}
{pt3dadd(177072.000000,197688.000000,45300.000000,499.187376)}
{pt3dadd(176784.000000,197964.000000,45700.000000,499.187376)}

{create adhoc56}
{access adhoc56}
{connect adhoc56(1), adhoc55(0)}
{nseg = 1}
{strdef color color = "White"}
{pt3dclear()}
{pt3dadd(176784.000000,197964.000000,45700.000000,499.187376)}
{pt3dadd(175608.000000,197880.000000,46200.000000,139.314042)}
{pt3dadd(175500.000000,197868.000000,46200.000000,139.314042)}
{pt3dadd(175380.000000,197856.000000,46200.000000,139.314042)}
{pt3dadd(175272.000000,197820.000000,46200.000000,139.314042)}
{pt3dadd(175176.000000,197868.000000,46150.000000,139.314042)}
{pt3dadd(175092.000000,197868.000000,46150.000000,164.669193)}
{pt3dadd(174984.000000,197844.000000,46175.000000,190.024344)}
{pt3dadd(174852.000000,197916.000000,46175.000000,215.379495)}
{pt3dadd(174732.000000,197964.000000,46250.000000,240.734646)}
{pt3dadd(174612.000000,197832.000000,46250.000000,209.574742)}
{pt3dadd(174456.000000,197868.000000,46150.000000,178.414839)}
{pt3dadd(174144.000000,197880.000000,46150.000000,147.254936)}
{pt3dadd(173856.000000,197940.000000,46150.000000,116.095032)}
{pt3dadd(173676.000000,197916.000000,46200.000000,116.095032)}
{pt3dadd(173532.000000,198048.000000,46125.000000,116.095032)}
{pt3dadd(173484.000000,198228.000000,46050.000000,116.095032)}
{pt3dadd(173232.000000,198432.000000,46050.000000,116.095032)}
{pt3dadd(173184.000000,198432.000000,46075.000000,137.224328)}
{pt3dadd(173088.000000,198636.000000,46025.000000,158.353623)}
{pt3dadd(172956.000000,198816.000000,46000.000000,179.482918)}
{pt3dadd(172824.000000,198960.000000,46075.000000,200.612214)}
{pt3dadd(172692.000000,199116.000000,46125.000000,237.123635)}
{pt3dadd(172536.000000,199260.000000,46150.000000,273.635055)}
{pt3dadd(172224.000000,199536.000000,46150.000000,310.146475)}
{pt3dadd(172152.000000,199632.000000,46150.000000,346.657896)}
{pt3dadd(172032.000000,199704.000000,46175.000000,301.787631)}
{pt3dadd(171888.000000,199728.000000,46175.000000,256.917366)}
{pt3dadd(171780.000000,199752.000000,46175.000000,212.047101)}
{pt3dadd(171708.000000,199884.000000,46150.000000,167.176836)}
{pt3dadd(171588.000000,200076.000000,46175.000000,150.149568)}
{pt3dadd(171456.000000,200076.000000,46275.000000,133.122300)}
{pt3dadd(171348.000000,200076.000000,46375.000000,116.095032)}
{pt3dadd(171240.000000,200076.000000,46375.000000,116.095032)}

{create adhoc57}
{access adhoc57}
{connect adhoc57(1), adhoc55(0)}
{nseg = 1}
{strdef color color = "White"}
{pt3dclear()}
{pt3dadd(176784.000000,197964.000000,45700.000000,499.187376)}
{pt3dadd(176304.000000,198972.000000,45700.000000,346.657896)}
{pt3dadd(176184.000000,199296.000000,45700.000000,363.990794)}
{pt3dadd(175992.000000,199476.000000,45550.000000,381.323691)}
{pt3dadd(175944.000000,199680.000000,45600.000000,398.656589)}
{pt3dadd(175620.000000,199860.000000,45675.000000,415.989486)}
{pt3dadd(175500.000000,200004.000000,45675.000000,415.989486)}
{pt3dadd(175440.000000,200148.000000,45700.000000,415.989486)}
{pt3dadd(175368.000000,200304.000000,45700.000000,415.989486)}
{pt3dadd(175332.000000,200436.000000,45700.000000,415.989486)}
{pt3dadd(175188.000000,200604.000000,45725.000000,398.656589)}
{pt3dadd(175080.000000,200868.000000,45625.000000,381.323691)}
{pt3dadd(174924.000000,201036.000000,45575.000000,363.990794)}
{pt3dadd(174852.000000,201240.000000,45575.000000,346.657896)}
{pt3dadd(174780.000000,201408.000000,45425.000000,384.790266)}
{pt3dadd(174696.000000,201552.000000,45350.000000,422.922636)}
{pt3dadd(174420.000000,201720.000000,45225.000000,461.055006)}
{pt3dadd(174468.000000,201888.000000,45200.000000,499.187376)}
{pt3dadd(174456.000000,202020.000000,45225.000000,461.055006)}
{pt3dadd(174144.000000,202368.000000,45050.000000,422.922636)}
{pt3dadd(174192.000000,202608.000000,44950.000000,384.790266)}
{pt3dadd(173940.000000,203268.000000,44725.000000,346.657896)}
{pt3dadd(173700.000000,203808.000000,44550.000000,363.990794)}
{pt3dadd(173688.000000,204132.000000,44450.000000,381.323691)}
{pt3dadd(173568.000000,204540.000000,44275.000000,398.656589)}
{pt3dadd(173364.000000,205008.000000,44125.000000,415.989486)}
{pt3dadd(173184.000000,205476.000000,44075.000000,457.588431)}
{pt3dadd(173160.000000,205872.000000,43900.000000,499.187376)}
{pt3dadd(172980.000000,206004.000000,44125.000000,415.989486)}

{create adhoc58}
{access adhoc58}
{connect adhoc58(1), adhoc57(0)}
{nseg = 1}
{strdef color color = "White"}
{pt3dclear()}
{pt3dadd(172980.000000,206004.000000,44125.000000,415.989486)}
{pt3dadd(172620.000000,206196.000000,44775.000000,200.612214)}
{pt3dadd(172452.000000,206388.000000,45150.000000,222.679557)}
{pt3dadd(172332.000000,206532.000000,45325.000000,244.746900)}
{pt3dadd(172212.000000,206724.000000,45375.000000,266.814243)}
{pt3dadd(172200.000000,206964.000000,45400.000000,288.881586)}
{pt3dadd(171996.000000,207192.000000,45525.000000,288.881586)}
{pt3dadd(171792.000000,207408.000000,45825.000000,288.881586)}
{pt3dadd(171660.000000,207576.000000,45875.000000,288.881586)}
{pt3dadd(171576.000000,207720.000000,46025.000000,288.881586)}
{pt3dadd(171432.000000,207948.000000,46275.000000,346.657896)}
{pt3dadd(171300.000000,208140.000000,46375.000000,240.734646)}

{create adhoc59}
{access adhoc59}
{connect adhoc59(1), adhoc58(0)}
{nseg = 1}
{strdef color color = "White"}
{pt3dclear()}
{pt3dadd(171300.000000,208140.000000,46375.000000,240.734646)}
{pt3dadd(170352.000000,208068.000000,46075.000000,167.176836)}
{pt3dadd(170172.000000,207972.000000,45925.000000,154.406385)}
{pt3dadd(169932.000000,208080.000000,46050.000000,141.635934)}
{pt3dadd(169800.000000,208152.000000,46050.000000,128.865483)}
{pt3dadd(169536.000000,208380.000000,46125.000000,116.095032)}
{pt3dadd(169452.000000,208548.000000,46300.000000,167.176836)}
{pt3dadd(169440.000000,208812.000000,46200.000000,116.095032)}

{create adhoc60}
{access adhoc60}
{connect adhoc60(1), adhoc58(0)}
{nseg = 1}
{strdef color color = "White"}
{pt3dclear()}
{pt3dadd(171300.000000,208140.000000,46375.000000,240.734646)}
{pt3dadd(171324.000000,208056.000000,46575.000000,167.176836)}
{pt3dadd(171312.000000,207876.000000,46750.000000,160.211138)}
{pt3dadd(171372.000000,207756.000000,46900.000000,153.245439)}
{pt3dadd(171252.000000,207588.000000,46900.000000,146.279741)}
{pt3dadd(171264.000000,207396.000000,47050.000000,139.314042)}
{pt3dadd(171300.000000,207156.000000,47050.000000,116.095032)}

{create adhoc61}
{access adhoc61}
{connect adhoc61(1), adhoc58(0)}
{nseg = 1}
{strdef color color = "White"}
{pt3dclear()}
{pt3dadd(171300.000000,208140.000000,46375.000000,240.734646)}
{pt3dadd(171324.000000,208284.000000,46350.000000,200.612214)}
{pt3dadd(171396.000000,208452.000000,46400.000000,139.314042)}
{pt3dadd(171420.000000,208680.000000,46375.000000,139.314042)}

{create adhoc62}
{access adhoc62}
{connect adhoc62(1), adhoc57(0)}
{nseg = 1}
{strdef color color = "White"}
{pt3dclear()}
{pt3dadd(172980.000000,206004.000000,44125.000000,415.989486)}
{pt3dadd(173100.000000,206292.000000,43550.000000,415.989486)}
{pt3dadd(173148.000000,206448.000000,43225.000000,372.175776)}
{pt3dadd(173160.000000,206652.000000,43000.000000,328.362066)}
{pt3dadd(172968.000000,206796.000000,42950.000000,284.548356)}
{pt3dadd(172956.000000,206928.000000,42825.000000,240.734646)}
{pt3dadd(172944.000000,207132.000000,42575.000000,284.548356)}
{pt3dadd(172992.000000,207324.000000,42275.000000,328.362066)}
{pt3dadd(173004.000000,207504.000000,42025.000000,372.175776)}
{pt3dadd(173004.000000,207648.000000,41850.000000,415.989486)}
{pt3dadd(173124.000000,207780.000000,41675.000000,392.878956)}
{pt3dadd(173220.000000,207828.000000,41500.000000,369.768426)}
{pt3dadd(173220.000000,207816.000000,41275.000000,346.657896)}
{pt3dadd(173256.000000,207900.000000,41000.000000,288.881586)}

{create adhoc63}
{access adhoc63}
{connect adhoc63(1), adhoc62(0)}
{nseg = 1}
{strdef color color = "White"}
{pt3dclear()}
{pt3dadd(173256.000000,207900.000000,41000.000000,288.881586)}
{pt3dadd(173448.000000,207660.000000,40800.000000,288.881586)}
{pt3dadd(173496.000000,207540.000000,40650.000000,245.684947)}
{pt3dadd(173604.000000,207348.000000,40525.000000,202.488309)}
{pt3dadd(173700.000000,207252.000000,40175.000000,159.291671)}
{pt3dadd(173784.000000,207204.000000,40125.000000,116.095032)}
{pt3dadd(173856.000000,207252.000000,39975.000000,147.254936)}
{pt3dadd(173964.000000,207216.000000,39800.000000,178.414839)}
{pt3dadd(174024.000000,207036.000000,39600.000000,209.574742)}
{pt3dadd(174168.000000,207024.000000,39600.000000,240.734646)}
{pt3dadd(174288.000000,206868.000000,39550.000000,252.771381)}
{pt3dadd(174396.000000,206736.000000,39425.000000,264.808116)}
{pt3dadd(174516.000000,206880.000000,39350.000000,276.844851)}
{pt3dadd(174648.000000,206796.000000,39300.000000,288.881586)}
{pt3dadd(174744.000000,206820.000000,39250.000000,288.881586)}
{pt3dadd(174876.000000,206772.000000,39175.000000,288.881586)}
{pt3dadd(174996.000000,206604.000000,39050.000000,288.881586)}
{pt3dadd(175116.000000,206508.000000,38950.000000,288.881586)}
{pt3dadd(175200.000000,206268.000000,38425.000000,245.684947)}
{pt3dadd(175392.000000,206076.000000,38200.000000,202.488309)}
{pt3dadd(175524.000000,205908.000000,38000.000000,159.291671)}
{pt3dadd(175440.000000,205644.000000,38225.000000,116.095032)}
{pt3dadd(175572.000000,205428.000000,38200.000000,139.314042)}

{create adhoc64}
{access adhoc64}
{connect adhoc64(1), adhoc62(0)}
{nseg = 1}
{strdef color color = "White"}
{pt3dclear()}
{pt3dadd(173256.000000,207900.000000,41000.000000,288.881586)}
{pt3dadd(173208.000000,208476.000000,40925.000000,200.612214)}
{pt3dadd(173292.000000,208680.000000,40775.000000,185.287671)}
{pt3dadd(173196.000000,208932.000000,40550.000000,169.963128)}
{pt3dadd(173292.000000,209016.000000,40450.000000,154.638585)}
{pt3dadd(173316.000000,209160.000000,40450.000000,139.314042)}
{pt3dadd(173328.000000,209292.000000,40375.000000,164.669193)}
{pt3dadd(173364.000000,209412.000000,40250.000000,190.024344)}
{pt3dadd(173328.000000,209580.000000,40200.000000,215.379495)}
{pt3dadd(173364.000000,209916.000000,40125.000000,240.734646)}
{pt3dadd(173532.000000,209880.000000,39850.000000,230.704038)}
{pt3dadd(173688.000000,209928.000000,39675.000000,220.673430)}
{pt3dadd(173664.000000,209976.000000,39575.000000,210.642822)}
{pt3dadd(173700.000000,210012.000000,39450.000000,200.612214)}
{pt3dadd(173808.000000,209964.000000,39250.000000,139.314042)}

{create adhoc65}
{access adhoc65}
{connect adhoc65(1), adhoc42(0)}
{nseg = 1}
{strdef color color = "White"}
{pt3dclear()}
{pt3dadd(181632.000000,190368.000000,57725.000000,1144.754172)}
{pt3dadd(182004.000000,189024.000000,57250.000000,1430.942868)}
{pt3dadd(181872.000000,188916.000000,56900.000000,1383.741621)}
{pt3dadd(181788.000000,188748.000000,56650.000000,1336.540374)}
{pt3dadd(181776.000000,188544.000000,56375.000000,1289.339127)}
{pt3dadd(181608.000000,188412.000000,56100.000000,1242.137880)}
{pt3dadd(181680.000000,188280.000000,55800.000000,1289.339127)}
{pt3dadd(181800.000000,188040.000000,55525.000000,1336.540374)}
{pt3dadd(181788.000000,187884.000000,55275.000000,1383.741621)}
{pt3dadd(181680.000000,187740.000000,55050.000000,1430.942868)}
{pt3dadd(181704.000000,187500.000000,54825.000000,1371.320240)}
{pt3dadd(181680.000000,187440.000000,54575.000000,1311.697611)}
{pt3dadd(181812.000000,187308.000000,54325.000000,1252.074982)}
{pt3dadd(181896.000000,186828.000000,54050.000000,1192.452354)}
{pt3dadd(181956.000000,186492.000000,53800.000000,1153.118003)}
{pt3dadd(181944.000000,186300.000000,53525.000000,1113.783651)}
{pt3dadd(181776.000000,186120.000000,53300.000000,1074.449300)}
{pt3dadd(181764.000000,185880.000000,53100.000000,1035.114948)}
{pt3dadd(181848.000000,185832.000000,52875.000000,1035.114948)}
{pt3dadd(181836.000000,185496.000000,52625.000000,1035.114948)}

{create adhoc66}
{access adhoc66}
{connect adhoc66(1), adhoc65(0)}
{nseg = 1}
{strdef color color = "White"}
{pt3dclear()}
{pt3dadd(181836.000000,185496.000000,52625.000000,1035.114948)}
{pt3dadd(180312.000000,184812.000000,52725.000000,200.612214)}
{pt3dadd(179976.000000,184404.000000,52825.000000,210.642822)}
{pt3dadd(179868.000000,184236.000000,52950.000000,220.673430)}
{pt3dadd(179784.000000,184080.000000,53050.000000,230.704038)}
{pt3dadd(179652.000000,183864.000000,53050.000000,240.734646)}
{pt3dadd(179328.000000,183576.000000,52925.000000,240.734646)}
{pt3dadd(179196.000000,183348.000000,52925.000000,240.734646)}
{pt3dadd(178500.000000,182604.000000,52925.000000,240.734646)}
{pt3dadd(178332.000000,182436.000000,52975.000000,240.734646)}
{pt3dadd(178188.000000,182232.000000,53150.000000,240.734646)}
{pt3dadd(178176.000000,182088.000000,53325.000000,240.734646)}
{pt3dadd(178236.000000,181920.000000,53400.000000,240.734646)}
{pt3dadd(178236.000000,181788.000000,53475.000000,240.734646)}
{pt3dadd(178656.000000,181728.000000,53800.000000,167.176836)}

{create adhoc67}
{access adhoc67}
{connect adhoc67(1), adhoc66(0)}
{nseg = 1}
{strdef color color = "White"}
{pt3dclear()}
{pt3dadd(178656.000000,181728.000000,53800.000000,167.176836)}
{pt3dadd(178776.000000,181812.000000,54100.000000,200.612214)}
{pt3dadd(178920.000000,181920.000000,54350.000000,222.679557)}
{pt3dadd(179172.000000,182028.000000,54525.000000,244.746900)}
{pt3dadd(179208.000000,182160.000000,54625.000000,266.814243)}
{pt3dadd(179244.000000,182280.000000,54750.000000,288.881586)}
{pt3dadd(179256.000000,182292.000000,54850.000000,245.684947)}
{pt3dadd(179388.000000,182388.000000,55025.000000,202.488309)}
{pt3dadd(179484.000000,182424.000000,55175.000000,159.291671)}
{pt3dadd(179568.000000,182424.000000,55125.000000,116.095032)}
{pt3dadd(179580.000000,182436.000000,55125.000000,123.834702)}
{pt3dadd(179568.000000,182724.000000,55325.000000,131.574372)}
{pt3dadd(179676.000000,182928.000000,55375.000000,139.314042)}
{pt3dadd(179772.000000,182916.000000,55350.000000,240.734646)}

{create adhoc68}
{access adhoc68}
{connect adhoc68(1), adhoc66(0)}
{nseg = 1}
{strdef color color = "White"}
{pt3dclear()}
{pt3dadd(178656.000000,181728.000000,53800.000000,167.176836)}
{pt3dadd(178644.000000,181212.000000,53900.000000,240.734646)}
{pt3dadd(178632.000000,180984.000000,54025.000000,222.345193)}
{pt3dadd(178632.000000,180840.000000,54100.000000,203.955741)}
{pt3dadd(178680.000000,180636.000000,54075.000000,185.566288)}
{pt3dadd(178932.000000,180528.000000,53850.000000,167.176836)}
{pt3dadd(178896.000000,180384.000000,53850.000000,185.566288)}
{pt3dadd(178944.000000,180252.000000,53825.000000,203.955741)}
{pt3dadd(178956.000000,180180.000000,53875.000000,222.345193)}
{pt3dadd(178944.000000,180012.000000,53850.000000,240.734646)}
{pt3dadd(178932.000000,179808.000000,53825.000000,240.734646)}
{pt3dadd(178956.000000,179652.000000,53800.000000,240.734646)}
{pt3dadd(179004.000000,179484.000000,53700.000000,240.734646)}
{pt3dadd(178908.000000,179340.000000,53450.000000,240.734646)}
{pt3dadd(178800.000000,179256.000000,53250.000000,203.955741)}
{pt3dadd(179076.000000,178968.000000,53075.000000,167.176836)}
{pt3dadd(179220.000000,178956.000000,52875.000000,200.612214)}

{create adhoc69}
{access adhoc69}
{connect adhoc69(1), adhoc65(0)}
{nseg = 1}
{strdef color color = "White"}
{pt3dclear()}
{pt3dadd(181836.000000,185496.000000,52625.000000,1035.114948)}
{pt3dadd(182064.000000,184644.000000,51950.000000,828.091944)}
{pt3dadd(182232.000000,184128.000000,51750.000000,770.825178)}
{pt3dadd(182604.000000,183552.000000,51675.000000,713.558412)}
{pt3dadd(182904.000000,182700.000000,51250.000000,656.291646)}
{pt3dadd(183204.000000,182040.000000,50775.000000,599.024880)}
{pt3dadd(183132.000000,181896.000000,50525.000000,599.024880)}

{create adhoc70}
{access adhoc70}
{connect adhoc70(1), adhoc69(0)}
{nseg = 1}
{strdef color color = "White"}
{pt3dclear()}
{pt3dadd(183132.000000,181896.000000,50525.000000,599.024880)}
{pt3dadd(182688.000000,183672.000000,50200.000000,794.968236)}
{pt3dadd(182292.000000,183612.000000,49975.000000,811.875127)}
{pt3dadd(182100.000000,183588.000000,49750.000000,828.782019)}
{pt3dadd(181728.000000,183564.000000,49525.000000,845.688911)}
{pt3dadd(181608.000000,183588.000000,49325.000000,862.595802)}
{pt3dadd(181380.000000,183588.000000,49150.000000,957.481322)}
{pt3dadd(181320.000000,183600.000000,48925.000000,1052.366841)}
{pt3dadd(181260.000000,183672.000000,48675.000000,1147.252361)}
{pt3dadd(181152.000000,183612.000000,48425.000000,1242.137880)}
{pt3dadd(180948.000000,183672.000000,48150.000000,1035.600782)}
{pt3dadd(180876.000000,183552.000000,47900.000000,829.063683)}
{pt3dadd(180540.000000,183564.000000,47675.000000,622.526585)}
{pt3dadd(180132.000000,183576.000000,47475.000000,415.989486)}
{pt3dadd(179892.000000,183468.000000,47650.000000,384.212511)}
{pt3dadd(179580.000000,183408.000000,47725.000000,352.435536)}
{pt3dadd(179328.000000,183516.000000,47650.000000,320.658561)}
{pt3dadd(179136.000000,183612.000000,47575.000000,288.881586)}
{pt3dadd(178944.000000,183684.000000,47600.000000,276.844851)}
{pt3dadd(178872.000000,183732.000000,47525.000000,264.808116)}
{pt3dadd(178728.000000,183852.000000,47375.000000,252.771381)}
{pt3dadd(178596.000000,183984.000000,47350.000000,240.734646)}
{pt3dadd(178332.000000,184020.000000,47250.000000,240.734646)}
{pt3dadd(178092.000000,184344.000000,47125.000000,240.734646)}
{pt3dadd(177936.000000,184452.000000,46925.000000,240.734646)}
{pt3dadd(177768.000000,184884.000000,46825.000000,240.734646)}
{pt3dadd(177576.000000,185220.000000,46650.000000,230.704038)}
{pt3dadd(177360.000000,185364.000000,46650.000000,220.673430)}
{pt3dadd(177120.000000,185508.000000,46750.000000,210.642822)}
{pt3dadd(176940.000000,185448.000000,46775.000000,200.612214)}
{pt3dadd(176772.000000,185484.000000,46875.000000,185.287671)}
{pt3dadd(176484.000000,185508.000000,47000.000000,169.963128)}
{pt3dadd(176292.000000,185532.000000,47050.000000,154.638585)}
{pt3dadd(176076.000000,185688.000000,47125.000000,139.314042)}
{pt3dadd(175872.000000,185700.000000,47075.000000,133.509289)}
{pt3dadd(175692.000000,185700.000000,47075.000000,127.704537)}
{pt3dadd(175536.000000,185676.000000,47150.000000,121.899785)}
{pt3dadd(175392.000000,185748.000000,47200.000000,116.095032)}
{pt3dadd(175332.000000,185796.000000,47200.000000,116.095032)}
{pt3dadd(175296.000000,185988.000000,47325.000000,116.095032)}
{pt3dadd(175296.000000,186060.000000,47450.000000,116.095032)}
{pt3dadd(175332.000000,185988.000000,47375.000000,116.095032)}
{pt3dadd(175344.000000,186324.000000,47600.000000,123.834702)}
{pt3dadd(175296.000000,186456.000000,47675.000000,131.574372)}
{pt3dadd(175344.000000,186504.000000,47800.000000,139.314042)}
{pt3dadd(175272.000000,186576.000000,47875.000000,139.314042)}

{create adhoc71}
{access adhoc71}
{connect adhoc71(1), adhoc69(0)}
{nseg = 1}
{strdef color color = "White"}
{pt3dclear()}
{pt3dadd(183132.000000,181896.000000,50525.000000,599.024880)}
{pt3dadd(182808.000000,180300.000000,50125.000000,662.473602)}
{pt3dadd(182724.000000,180180.000000,49950.000000,718.829820)}

{create adhoc72}
{access adhoc72}
{connect adhoc72(1), adhoc71(0)}
{nseg = 1}
{strdef color color = "White"}
{pt3dclear()}
{pt3dadd(182724.000000,180180.000000,49950.000000,718.829820)}
{pt3dadd(181404.000000,179736.000000,50075.000000,96.745860)}
{pt3dadd(181320.000000,179748.000000,50075.000000,122.712448)}
{pt3dadd(181152.000000,179604.000000,50100.000000,148.679037)}
{pt3dadd(180876.000000,179400.000000,50075.000000,174.645625)}
{pt3dadd(180576.000000,179316.000000,50000.000000,200.612214)}
{pt3dadd(180324.000000,179316.000000,50025.000000,183.894525)}
{pt3dadd(180156.000000,179136.000000,49875.000000,167.176836)}
{pt3dadd(179940.000000,179040.000000,49875.000000,200.612214)}

{create adhoc73}
{access adhoc73}
{connect adhoc73(1), adhoc72(0)}
{nseg = 1}
{strdef color color = "White"}
{pt3dclear()}
{pt3dadd(179940.000000,179040.000000,49875.000000,200.612214)}
{pt3dadd(179952.000000,179712.000000,50325.000000,139.314042)}
{pt3dadd(180084.000000,179784.000000,50350.000000,139.314042)}
{pt3dadd(179796.000000,179796.000000,50325.000000,139.314042)}
{pt3dadd(179616.000000,179880.000000,50400.000000,116.095032)}

{create adhoc74}
{access adhoc74}
{connect adhoc74(1), adhoc72(0)}
{nseg = 1}
{strdef color color = "White"}
{pt3dclear()}
{pt3dadd(179940.000000,179040.000000,49875.000000,200.612214)}
{pt3dadd(179784.000000,178920.000000,49700.000000,240.734646)}
{pt3dadd(179640.000000,178836.000000,49550.000000,209.574742)}
{pt3dadd(179496.000000,178788.000000,49600.000000,178.414839)}
{pt3dadd(179364.000000,178728.000000,49550.000000,147.254936)}
{pt3dadd(179208.000000,178632.000000,49575.000000,116.095032)}
{pt3dadd(179424.000000,178632.000000,49400.000000,116.095032)}
{pt3dadd(179532.000000,178692.000000,49225.000000,116.095032)}
{pt3dadd(179232.000000,178512.000000,48750.000000,116.095032)}
{pt3dadd(179160.000000,178476.000000,48700.000000,116.095032)}
{pt3dadd(179016.000000,178380.000000,48725.000000,139.314042)}

{create adhoc75}
{access adhoc75}
{connect adhoc75(1), adhoc71(0)}
{nseg = 1}
{strdef color color = "White"}
{pt3dclear()}
{pt3dadd(182724.000000,180180.000000,49950.000000,718.829820)}
{pt3dadd(182784.000000,179868.000000,49675.000000,718.829820)}
{pt3dadd(182796.000000,179760.000000,49275.000000,643.119736)}
{pt3dadd(182808.000000,179400.000000,48950.000000,567.409653)}
{pt3dadd(182760.000000,179076.000000,48675.000000,491.699570)}
{pt3dadd(182952.000000,178644.000000,48400.000000,415.989486)}
{pt3dadd(182868.000000,178440.000000,48250.000000,346.657896)}

{create adhoc76}
{access adhoc76}
{connect adhoc76(1), adhoc75(0)}
{nseg = 1}
{strdef color color = "White"}
{pt3dclear()}
{pt3dadd(182868.000000,178440.000000,48250.000000,346.657896)}
{pt3dadd(181560.000000,179172.000000,48250.000000,116.095032)}
{pt3dadd(181452.000000,179100.000000,48225.000000,116.095032)}
{pt3dadd(181404.000000,179076.000000,48125.000000,116.095032)}

{create adhoc77}
{access adhoc77}
{connect adhoc77(1), adhoc75(0)}
{nseg = 1}
{strdef color color = "White"}
{pt3dclear()}
{pt3dadd(182868.000000,178440.000000,48250.000000,346.657896)}
{pt3dadd(183048.000000,177864.000000,48025.000000,399.349908)}

{create adhoc78}
{access adhoc78}
{connect adhoc78(1), adhoc77(0)}
{nseg = 1}
{strdef color color = "White"}
{pt3dclear()}
{pt3dadd(183048.000000,177864.000000,48025.000000,399.349908)}
{pt3dadd(182304.000000,176364.000000,48000.000000,288.881586)}
{pt3dadd(182136.000000,176220.000000,48175.000000,288.881586)}
{pt3dadd(181992.000000,176136.000000,48300.000000,288.881586)}
{pt3dadd(181692.000000,176004.000000,48525.000000,288.881586)}
{pt3dadd(181476.000000,175896.000000,48750.000000,288.881586)}
{pt3dadd(181272.000000,175848.000000,48975.000000,258.455399)}
{pt3dadd(181020.000000,175932.000000,49225.000000,228.029211)}
{pt3dadd(180876.000000,175968.000000,49250.000000,197.603024)}
{pt3dadd(180672.000000,176040.000000,49225.000000,167.176836)}
{pt3dadd(180468.000000,176076.000000,49250.000000,167.176836)}
{pt3dadd(180276.000000,176136.000000,49300.000000,167.176836)}
{pt3dadd(180084.000000,176136.000000,49350.000000,167.176836)}
{pt3dadd(179916.000000,176088.000000,49425.000000,167.176836)}
{pt3dadd(179736.000000,176028.000000,49550.000000,183.158946)}
{pt3dadd(179568.000000,175980.000000,49600.000000,199.141056)}
{pt3dadd(179400.000000,175896.000000,49775.000000,215.123166)}
{pt3dadd(179244.000000,175860.000000,50125.000000,231.105276)}
{pt3dadd(179136.000000,175752.000000,50175.000000,292.733346)}
{pt3dadd(178812.000000,175776.000000,50250.000000,354.361416)}
{pt3dadd(179196.000000,175704.000000,50700.000000,415.989486)}
{pt3dadd(179496.000000,175596.000000,51050.000000,184.884210)}

{create adhoc79}
{access adhoc79}
{connect adhoc79(1), adhoc77(0)}
{nseg = 1}
{strdef color color = "White"}
{pt3dclear()}
{pt3dadd(183048.000000,177864.000000,48025.000000,399.349908)}
{pt3dadd(182904.000000,177276.000000,47725.000000,415.989486)}
{pt3dadd(182868.000000,177048.000000,47475.000000,436.788958)}
{pt3dadd(182796.000000,176796.000000,47275.000000,457.588431)}
{pt3dadd(182856.000000,176724.000000,47100.000000,478.387903)}
{pt3dadd(182916.000000,176352.000000,46875.000000,499.187376)}
{pt3dadd(182964.000000,175884.000000,46650.000000,499.187376)}
{pt3dadd(183120.000000,175656.000000,46450.000000,499.187376)}
{pt3dadd(183180.000000,175416.000000,46250.000000,499.187376)}
{pt3dadd(183156.000000,175176.000000,46025.000000,499.187376)}

{create adhoc80}
{access adhoc80}
{connect adhoc80(1), adhoc79(0)}
{nseg = 1}
{strdef color color = "White"}
{pt3dclear()}
{pt3dadd(183156.000000,175176.000000,46025.000000,499.187376)}
{pt3dadd(183768.000000,173292.000000,46025.000000,415.989486)}
{pt3dadd(183852.000000,173208.000000,46225.000000,415.989486)}

{create adhoc81}
{access adhoc81}
{connect adhoc81(1), adhoc79(0)}
{nseg = 1}
{strdef color color = "White"}
{pt3dclear()}
{pt3dadd(183156.000000,175176.000000,46025.000000,499.187376)}
{pt3dadd(183516.000000,173064.000000,45600.000000,499.187376)}
{pt3dadd(183816.000000,172512.000000,45250.000000,478.387903)}
{pt3dadd(183912.000000,171372.000000,45075.000000,457.588431)}
{pt3dadd(183936.000000,170664.000000,44975.000000,436.788958)}
{pt3dadd(183972.000000,170160.000000,44900.000000,415.989486)}
{pt3dadd(183852.000000,169800.000000,44675.000000,384.212511)}
{pt3dadd(183780.000000,169128.000000,44425.000000,352.435536)}
{pt3dadd(183936.000000,168528.000000,44325.000000,320.658561)}
{pt3dadd(184176.000000,167796.000000,44200.000000,288.881586)}
{pt3dadd(184308.000000,167460.000000,44300.000000,288.881586)}
{pt3dadd(184416.000000,166872.000000,44225.000000,288.881586)}
{pt3dadd(184620.000000,166356.000000,44125.000000,288.881586)}
{pt3dadd(185028.000000,165900.000000,44050.000000,288.881586)}
{pt3dadd(185256.000000,165492.000000,43850.000000,299.859089)}
{pt3dadd(185304.000000,165168.000000,43600.000000,310.836591)}
{pt3dadd(185340.000000,164856.000000,43375.000000,321.814093)}
{pt3dadd(185280.000000,164568.000000,43175.000000,332.791596)}
{pt3dadd(185100.000000,164364.000000,43000.000000,374.390541)}
{pt3dadd(185100.000000,164088.000000,42900.000000,415.989486)}
{pt3dadd(185052.000000,163740.000000,42600.000000,457.588431)}
{pt3dadd(185052.000000,163488.000000,42175.000000,499.187376)}
{pt3dadd(185112.000000,163200.000000,42150.000000,499.187376)}

{create adhoc82}
{access adhoc82}
{connect adhoc82(1), adhoc81(0)}
{nseg = 1}
{strdef color color = "White"}
{pt3dclear()}
{pt3dadd(185112.000000,163200.000000,42150.000000,499.187376)}
{pt3dadd(185136.000000,163164.000000,41950.000000,460.051146)}

{create adhoc83}
{access adhoc83}
{connect adhoc83(1), adhoc82(0)}
{nseg = 1}
{strdef color color = "White"}
{pt3dclear()}
{pt3dadd(185136.000000,163164.000000,41950.000000,460.051146)}
{pt3dadd(184812.000000,163296.000000,42200.000000,499.187376)}
{pt3dadd(184632.000000,163368.000000,42250.000000,394.034481)}
{pt3dadd(184524.000000,163416.000000,42125.000000,288.881586)}
{pt3dadd(184368.000000,163392.000000,41975.000000,277.326342)}

{create adhoc84}
{access adhoc84}
{connect adhoc84(1), adhoc82(0)}
{nseg = 1}
{strdef color color = "White"}
{pt3dclear()}
{pt3dadd(185136.000000,163164.000000,41950.000000,460.051146)}
{pt3dadd(185136.000000,163608.000000,41150.000000,288.881586)}
{pt3dadd(185052.000000,163668.000000,40975.000000,285.992775)}
{pt3dadd(185124.000000,163812.000000,40800.000000,283.103964)}
{pt3dadd(185232.000000,164112.000000,40625.000000,280.215153)}
{pt3dadd(185388.000000,164220.000000,40425.000000,277.326342)}
{pt3dadd(185832.000000,164304.000000,40250.000000,167.176836)}

{create adhoc85}
{access adhoc85}
{connect adhoc85(1), adhoc84(0)}
{nseg = 1}
{strdef color color = "White"}
{pt3dclear()}
{pt3dadd(185832.000000,164304.000000,40250.000000,167.176836)}
{pt3dadd(185064.000000,164256.000000,40225.000000,200.612214)}
{pt3dadd(184848.000000,164316.000000,40050.000000,237.123635)}
{pt3dadd(184776.000000,164472.000000,39750.000000,273.635055)}
{pt3dadd(184596.000000,164484.000000,39675.000000,310.146475)}
{pt3dadd(184596.000000,164520.000000,39450.000000,346.657896)}
{pt3dadd(184524.000000,164628.000000,39225.000000,346.657896)}
{pt3dadd(184560.000000,164808.000000,39050.000000,346.657896)}
{pt3dadd(184584.000000,165048.000000,38900.000000,346.657896)}

{create adhoc86}
{access adhoc86}
{connect adhoc86(1), adhoc85(0)}
{nseg = 1}
{strdef color color = "White"}
{pt3dclear()}
{pt3dadd(184584.000000,165048.000000,38900.000000,346.657896)}
{pt3dadd(184668.000000,165624.000000,39225.000000,139.314042)}
{pt3dadd(184620.000000,165780.000000,39375.000000,139.314042)}
{pt3dadd(184608.000000,165924.000000,39550.000000,160.489764)}

{create adhoc87}
{access adhoc87}
{connect adhoc87(1), adhoc85(0)}
{nseg = 1}
{strdef color color = "White"}
{pt3dclear()}
{pt3dadd(184584.000000,165048.000000,38900.000000,346.657896)}
{pt3dadd(184632.000000,165168.000000,38750.000000,240.734646)}
{pt3dadd(184836.000000,165156.000000,38625.000000,227.360502)}
{pt3dadd(184836.000000,165036.000000,38250.000000,213.986358)}
{pt3dadd(184956.000000,165012.000000,38125.000000,200.612214)}
{pt3dadd(185208.000000,164964.000000,38050.000000,240.734646)}

{create adhoc88}
{access adhoc88}
{connect adhoc88(1), adhoc84(0)}
{nseg = 1}
{strdef color color = "White"}
{pt3dclear()}
{pt3dadd(185832.000000,164304.000000,40250.000000,167.176836)}
{pt3dadd(186348.000000,164532.000000,40100.000000,200.612214)}
{pt3dadd(186480.000000,164664.000000,40025.000000,200.612214)}

{create adhoc89}
{access adhoc89}
{connect adhoc89(1), adhoc82(0)}
{nseg = 1}
{strdef color color = "White"}
{pt3dclear()}
{pt3dadd(185136.000000,163164.000000,41950.000000,460.051146)}
{pt3dadd(185280.000000,161868.000000,41225.000000,240.734646)}
{pt3dadd(185652.000000,161472.000000,41025.000000,220.673430)}
{pt3dadd(185580.000000,160956.000000,40800.000000,200.612214)}
{pt3dadd(185508.000000,160068.000000,40800.000000,240.734646)}

{create adhoc90}
{access adhoc90}
{connect adhoc90(1), adhoc81(0)}
{nseg = 1}
{strdef color color = "White"}
{pt3dclear()}
{pt3dadd(185112.000000,163200.000000,42150.000000,499.187376)}
{pt3dadd(184752.000000,162132.000000,42350.000000,133.741494)}
{pt3dadd(184680.000000,161760.000000,42575.000000,135.134631)}
{pt3dadd(184608.000000,161568.000000,42600.000000,136.527768)}
{pt3dadd(184656.000000,161352.000000,42600.000000,137.920905)}
{pt3dadd(184656.000000,161112.000000,42600.000000,139.314042)}
{pt3dadd(184704.000000,160524.000000,42625.000000,146.279741)}
{pt3dadd(184800.000000,160224.000000,42725.000000,153.245439)}
{pt3dadd(184728.000000,159984.000000,42725.000000,160.211138)}
{pt3dadd(184728.000000,159828.000000,42775.000000,167.176836)}
{pt3dadd(184740.000000,159576.000000,42825.000000,197.603024)}
{pt3dadd(184692.000000,159384.000000,42975.000000,228.029211)}
{pt3dadd(184704.000000,159144.000000,42900.000000,258.455399)}
{pt3dadd(184980.000000,158724.000000,42850.000000,288.881586)}
{pt3dadd(185376.000000,158436.000000,42925.000000,245.684947)}
{pt3dadd(185376.000000,158208.000000,43025.000000,202.488309)}
{pt3dadd(185424.000000,157992.000000,43150.000000,159.291671)}
{pt3dadd(185592.000000,157596.000000,43250.000000,116.095032)}
{pt3dadd(186000.000000,157428.000000,43450.000000,167.176836)}
{pt3dadd(186276.000000,157128.000000,43500.000000,139.314042)}

{create adhoc91}
{access adhoc91}
{connect adhoc91(1), adhoc79(0)}
{nseg = 1}
{strdef color color = "White"}
{pt3dclear()}
{pt3dadd(183156.000000,175176.000000,46025.000000,499.187376)}
{pt3dadd(183180.000000,174372.000000,44700.000000,240.734646)}
{pt3dadd(183108.000000,174288.000000,44750.000000,230.704038)}
{pt3dadd(182904.000000,174288.000000,44500.000000,220.673430)}
{pt3dadd(182748.000000,174288.000000,44350.000000,210.642822)}
{pt3dadd(182664.000000,174288.000000,44100.000000,200.612214)}
{pt3dadd(182592.000000,174360.000000,43925.000000,275.256004)}
{pt3dadd(182484.000000,174408.000000,43750.000000,349.899795)}
{pt3dadd(182424.000000,174384.000000,43600.000000,424.543586)}
{pt3dadd(182340.000000,174324.000000,43425.000000,499.187376)}
{pt3dadd(182100.000000,174288.000000,43225.000000,461.055006)}
{pt3dadd(182232.000000,174264.000000,43025.000000,422.922636)}
{pt3dadd(182112.000000,174240.000000,42775.000000,384.790266)}
{pt3dadd(182040.000000,173952.000000,42150.000000,346.657896)}
{pt3dadd(182052.000000,173892.000000,41925.000000,310.146476)}
{pt3dadd(182064.000000,173772.000000,41700.000000,273.635055)}
{pt3dadd(182028.000000,173472.000000,41575.000000,237.123635)}
{pt3dadd(181956.000000,173328.000000,41375.000000,200.612214)}
{pt3dadd(182016.000000,173292.000000,41225.000000,200.612214)}
{pt3dadd(181992.000000,173100.000000,41025.000000,346.657896)}

{create adhoc92}
{access adhoc92}
{connect adhoc92(1), adhoc91(0)}
{nseg = 1}
{strdef color color = "White"}
{pt3dclear()}
{pt3dadd(181992.000000,173100.000000,41025.000000,346.657896)}
{pt3dadd(181848.000000,173172.000000,40850.000000,288.881586)}
{pt3dadd(181872.000000,173172.000000,40700.000000,266.814243)}
{pt3dadd(182004.000000,173160.000000,40400.000000,244.746900)}
{pt3dadd(182040.000000,172992.000000,40150.000000,222.679557)}
{pt3dadd(182148.000000,172800.000000,39925.000000,200.612214)}
{pt3dadd(182376.000000,172512.000000,39750.000000,222.679557)}
{pt3dadd(182532.000000,172476.000000,39575.000000,244.746900)}
{pt3dadd(182808.000000,172440.000000,39425.000000,266.814243)}
{pt3dadd(183300.000000,172344.000000,39200.000000,288.881586)}
{pt3dadd(183444.000000,172356.000000,39100.000000,320.658561)}
{pt3dadd(183660.000000,172320.000000,38900.000000,352.435536)}
{pt3dadd(183912.000000,172320.000000,38700.000000,384.212511)}
{pt3dadd(183972.000000,172284.000000,38500.000000,415.989486)}
{pt3dadd(184044.000000,172152.000000,38275.000000,372.175776)}
{pt3dadd(184068.000000,172128.000000,38075.000000,328.362066)}
{pt3dadd(184632.000000,171504.000000,38225.000000,284.548356)}
{pt3dadd(184932.000000,171300.000000,37950.000000,240.734646)}
{pt3dadd(185052.000000,171132.000000,37800.000000,167.176836)}

{create adhoc93}
{access adhoc93}
{connect adhoc93(1), adhoc91(0)}
{nseg = 1}
{strdef color color = "White"}
{pt3dclear()}
{pt3dadd(181992.000000,173100.000000,41025.000000,346.657896)}
{pt3dadd(181992.000000,172500.000000,41200.000000,200.612214)}
{pt3dadd(181932.000000,172332.000000,41125.000000,179.482918)}
{pt3dadd(181848.000000,172104.000000,40975.000000,158.353623)}
{pt3dadd(181776.000000,171816.000000,40800.000000,137.224328)}
{pt3dadd(181824.000000,171696.000000,41050.000000,116.095032)}
{pt3dadd(181656.000000,171564.000000,41000.000000,135.218200)}
{pt3dadd(181656.000000,171360.000000,40975.000000,154.341369)}
{pt3dadd(181608.000000,171216.000000,41000.000000,173.464538)}
{pt3dadd(181584.000000,171060.000000,40950.000000,192.587706)}
{pt3dadd(181584.000000,170916.000000,40875.000000,200.612214)}
{pt3dadd(181584.000000,170760.000000,40800.000000,200.612214)}

{create adhoc94}
{access adhoc94}
{connect adhoc94(1), adhoc28(0)}
{nseg = 1}
{strdef color color = "White"}
{pt3dclear()}
{pt3dadd(188856.000000,179904.000000,62950.000000,993.710430)}
{pt3dadd(186804.000000,179904.000000,63675.000000,167.176836)}

{create adhoc95}
{access adhoc95}
{connect adhoc95(1), adhoc94(0)}
{nseg = 1}
{strdef color color = "White"}
{pt3dclear()}
{pt3dadd(186804.000000,179904.000000,63675.000000,167.176836)}
{pt3dadd(185724.000000,180396.000000,63800.000000,139.314042)}
{pt3dadd(185568.000000,180444.000000,63825.000000,154.638585)}
{pt3dadd(185436.000000,180540.000000,63850.000000,169.963128)}
{pt3dadd(185352.000000,180576.000000,63875.000000,185.287671)}
{pt3dadd(185268.000000,180612.000000,63975.000000,200.612214)}
{pt3dadd(185076.000000,180684.000000,64050.000000,185.287671)}
{pt3dadd(184848.000000,180756.000000,64150.000000,169.963128)}
{pt3dadd(184680.000000,180780.000000,64250.000000,154.638585)}
{pt3dadd(184476.000000,180732.000000,64375.000000,139.314042)}
{pt3dadd(184344.000000,180708.000000,64475.000000,133.509289)}
{pt3dadd(184236.000000,180588.000000,64550.000000,127.704537)}
{pt3dadd(184332.000000,180516.000000,64850.000000,121.899785)}
{pt3dadd(184440.000000,180360.000000,65025.000000,116.095032)}
{pt3dadd(184596.000000,180312.000000,65150.000000,240.734646)}

{create adhoc96}
{access adhoc96}
{connect adhoc96(1), adhoc94(0)}
{nseg = 1}
{strdef color color = "White"}
{pt3dclear()}
{pt3dadd(186804.000000,179904.000000,63675.000000,167.176836)}
{pt3dadd(187740.000000,179580.000000,64050.000000,200.612214)}
{pt3dadd(187596.000000,179316.000000,64725.000000,185.287671)}
{pt3dadd(187536.000000,179244.000000,64900.000000,169.963128)}
{pt3dadd(187584.000000,179196.000000,65050.000000,154.638585)}
{pt3dadd(187728.000000,179112.000000,65275.000000,139.314042)}
{pt3dadd(187860.000000,178956.000000,65375.000000,146.279741)}
{pt3dadd(188028.000000,178992.000000,65525.000000,153.245439)}
{pt3dadd(188160.000000,178944.000000,65700.000000,160.211138)}
{pt3dadd(188328.000000,178884.000000,65925.000000,167.176836)}
{pt3dadd(188460.000000,178836.000000,66025.000000,183.894525)}
{pt3dadd(188736.000000,178692.000000,66175.000000,200.612214)}
{pt3dadd(189120.000000,178608.000000,66550.000000,139.314042)}

{create adhoc97}
{access adhoc97}
{connect adhoc97(1), adhoc27(0)}
{nseg = 1}
{strdef color color = "White"}
{pt3dclear()}
{pt3dadd(190212.000000,176328.000000,61225.000000,1430.942868)}
{pt3dadd(187608.000000,176508.000000,61325.000000,200.612214)}
{pt3dadd(187092.000000,176280.000000,61425.000000,240.734646)}
{pt3dadd(186648.000000,176292.000000,61625.000000,346.657896)}

{create adhoc98}
{access adhoc98}
{connect adhoc98(1), adhoc97(0)}
{nseg = 1}
{strdef color color = "White"}
{pt3dclear()}
{pt3dadd(186648.000000,176292.000000,61625.000000,346.657896)}
{pt3dadd(186624.000000,176208.000000,61775.000000,399.349908)}
{pt3dadd(186624.000000,176088.000000,62025.000000,362.527134)}
{pt3dadd(186636.000000,175872.000000,62275.000000,325.704360)}
{pt3dadd(186636.000000,175704.000000,62400.000000,288.881586)}
{pt3dadd(185124.000000,175560.000000,62400.000000,167.176836)}

{create adhoc99}
{access adhoc99}
{connect adhoc99(1), adhoc98(0)}
{nseg = 1}
{strdef color color = "White"}
{pt3dclear()}
{pt3dadd(185124.000000,175560.000000,62400.000000,167.176836)}
{pt3dadd(184980.000000,175620.000000,62450.000000,200.612214)}
{pt3dadd(184848.000000,175728.000000,62525.000000,192.253370)}
{pt3dadd(184680.000000,175848.000000,62525.000000,183.894525)}
{pt3dadd(184548.000000,175836.000000,62425.000000,175.535680)}
{pt3dadd(184404.000000,175908.000000,62425.000000,167.176836)}
{pt3dadd(184272.000000,175956.000000,62350.000000,175.535680)}
{pt3dadd(184128.000000,176076.000000,62300.000000,183.894525)}
{pt3dadd(184020.000000,176256.000000,62300.000000,192.253370)}
{pt3dadd(183900.000000,176364.000000,62275.000000,200.612214)}
{pt3dadd(183876.000000,176616.000000,62400.000000,183.894525)}
{pt3dadd(183828.000000,176844.000000,62450.000000,167.176836)}
{pt3dadd(183804.000000,177084.000000,62375.000000,96.745860)}

{create adhoc100}
{access adhoc100}
{connect adhoc100(1), adhoc98(0)}
{nseg = 1}
{strdef color color = "White"}
{pt3dclear()}
{pt3dadd(185124.000000,175560.000000,62400.000000,167.176836)}
{pt3dadd(185124.000000,175416.000000,62375.000000,221.861052)}
{pt3dadd(185148.000000,175236.000000,62400.000000,194.345382)}
{pt3dadd(184920.000000,174936.000000,62125.000000,166.829712)}
{pt3dadd(184788.000000,174876.000000,62125.000000,139.314042)}
{pt3dadd(184620.000000,174744.000000,62250.000000,116.095032)}

{create adhoc101}
{access adhoc101}
{connect adhoc101(1), adhoc97(0)}
{nseg = 1}
{strdef color color = "White"}
{pt3dclear()}
{pt3dadd(186648.000000,176292.000000,61625.000000,346.657896)}
{pt3dadd(186192.000000,176460.000000,61750.000000,231.105276)}
{pt3dadd(185856.000000,176592.000000,61675.000000,200.508198)}
{pt3dadd(185256.000000,176652.000000,61425.000000,169.911120)}
{pt3dadd(185160.000000,176736.000000,61300.000000,139.314042)}
{pt3dadd(185124.000000,176760.000000,61225.000000,167.176836)}

{create adhoc102}
{access adhoc102}
{connect adhoc102(1), adhoc26(0)}
{nseg = 1}
{strdef color color = "White"}
{pt3dclear()}
{pt3dadd(190836.000000,173352.000000,59600.000000,1490.565402)}
{pt3dadd(191460.000000,168804.000000,59700.000000,399.349944)}
{pt3dadd(191724.000000,168612.000000,59725.000000,419.317430)}
{pt3dadd(191844.000000,168420.000000,59825.000000,439.284915)}
{pt3dadd(191820.000000,168276.000000,59825.000000,459.252401)}
{pt3dadd(191832.000000,168144.000000,59900.000000,479.219886)}
{pt3dadd(192036.000000,167952.000000,60125.000000,503.180888)}
{pt3dadd(191928.000000,167700.000000,60075.000000,527.141889)}
{pt3dadd(191856.000000,167460.000000,60000.000000,551.102891)}
{pt3dadd(191952.000000,167220.000000,60050.000000,575.063892)}
{pt3dadd(191964.000000,167004.000000,60100.000000,581.054139)}
{pt3dadd(191880.000000,166764.000000,59975.000000,587.044386)}
{pt3dadd(191892.000000,166512.000000,60075.000000,593.034633)}
{pt3dadd(191940.000000,166308.000000,60225.000000,599.024880)}
{pt3dadd(191976.000000,166068.000000,60275.000000,599.024880)}
{pt3dadd(191976.000000,165888.000000,60275.000000,599.024880)}
{pt3dadd(192000.000000,165684.000000,60475.000000,499.187376)}

{create adhoc103}
{access adhoc103}
{connect adhoc103(1), adhoc102(0)}
{nseg = 1}
{strdef color color = "White"}
{pt3dclear()}
{pt3dadd(192000.000000,165684.000000,60475.000000,499.187376)}
{pt3dadd(190464.000000,165468.000000,60900.000000,288.881586)}
{pt3dadd(189564.000000,165312.000000,61450.000000,266.814243)}
{pt3dadd(189180.000000,165192.000000,61675.000000,244.746900)}
{pt3dadd(188988.000000,165024.000000,61825.000000,222.679557)}
{pt3dadd(188796.000000,164820.000000,61650.000000,200.612214)}
{pt3dadd(188136.000000,164496.000000,61425.000000,179.482918)}
{pt3dadd(187992.000000,164268.000000,61500.000000,158.353623)}
{pt3dadd(187704.000000,164052.000000,61500.000000,137.224328)}
{pt3dadd(187500.000000,163812.000000,61400.000000,116.095032)}
{pt3dadd(187272.000000,163680.000000,61275.000000,135.218205)}
{pt3dadd(187140.000000,163596.000000,61250.000000,154.341378)}
{pt3dadd(187008.000000,163380.000000,61025.000000,173.464551)}
{pt3dadd(186960.000000,163260.000000,60900.000000,192.587724)}
{pt3dadd(186780.000000,163044.000000,60725.000000,172.303605)}
{pt3dadd(186708.000000,162960.000000,60625.000000,152.019486)}
{pt3dadd(186612.000000,162912.000000,60625.000000,131.735367)}
{pt3dadd(186480.000000,162696.000000,60650.000000,111.451248)}
{pt3dadd(186384.000000,162552.000000,60650.000000,80.621550)}

{create adhoc104}
{access adhoc104}
{connect adhoc104(1), adhoc102(0)}
{nseg = 1}
{strdef color color = "White"}
{pt3dclear()}
{pt3dadd(192000.000000,165684.000000,60475.000000,499.187376)}
{pt3dadd(192216.000000,165552.000000,60750.000000,460.051110)}
{pt3dadd(192564.000000,164844.000000,61050.000000,469.835176)}
{pt3dadd(192696.000000,164112.000000,61150.000000,479.619243)}
{pt3dadd(192828.000000,163320.000000,61425.000000,489.403310)}
{pt3dadd(193116.000000,162420.000000,61600.000000,499.187376)}
{pt3dadd(193164.000000,162516.000000,61850.000000,415.989486)}

{create adhoc105}
{access adhoc105}
{connect adhoc105(1), adhoc104(0)}
{nseg = 1}
{strdef color color = "White"}
{pt3dclear()}
{pt3dadd(193164.000000,162516.000000,61850.000000,415.989486)}
{pt3dadd(192948.000000,160416.000000,61050.000000,499.187376)}
{pt3dadd(192516.000000,160032.000000,60850.000000,478.387903)}
{pt3dadd(192300.000000,159924.000000,61050.000000,457.588431)}
{pt3dadd(192144.000000,159768.000000,60950.000000,436.788958)}
{pt3dadd(191952.000000,159600.000000,60975.000000,415.989486)}
{pt3dadd(191796.000000,159600.000000,61025.000000,373.620186)}
{pt3dadd(191604.000000,159564.000000,61125.000000,331.250886)}
{pt3dadd(191424.000000,159540.000000,61200.000000,288.881586)}
{pt3dadd(191304.000000,159828.000000,61600.000000,288.881586)}

{create adhoc106}
{access adhoc106}
{connect adhoc106(1), adhoc105(0)}
{nseg = 1}
{strdef color color = "White"}
{pt3dclear()}
{pt3dadd(191304.000000,159828.000000,61600.000000,288.881586)}
{pt3dadd(191388.000000,158988.000000,60825.000000,200.612214)}
{pt3dadd(191184.000000,158832.000000,60775.000000,210.642822)}
{pt3dadd(191004.000000,158664.000000,60675.000000,220.673430)}
{pt3dadd(190740.000000,158520.000000,60600.000000,230.704038)}
{pt3dadd(190536.000000,158412.000000,60625.000000,240.734646)}
{pt3dadd(189876.000000,157920.000000,60625.000000,240.734646)}
{pt3dadd(189756.000000,157836.000000,60525.000000,240.734646)}
{pt3dadd(189624.000000,157788.000000,60550.000000,240.734646)}
{pt3dadd(189468.000000,157752.000000,60400.000000,240.734646)}
{pt3dadd(189288.000000,157644.000000,60225.000000,240.734646)}
{pt3dadd(189132.000000,157644.000000,60150.000000,240.734646)}
{pt3dadd(188964.000000,157596.000000,60125.000000,240.734646)}
{pt3dadd(188772.000000,157608.000000,60000.000000,240.734646)}
{pt3dadd(188604.000000,157632.000000,59875.000000,240.734646)}
{pt3dadd(188448.000000,157632.000000,59775.000000,240.734646)}
{pt3dadd(188304.000000,157512.000000,59800.000000,240.734646)}
{pt3dadd(188184.000000,157620.000000,59900.000000,240.734646)}
{pt3dadd(188040.000000,157656.000000,59975.000000,240.734646)}
{pt3dadd(187932.000000,157644.000000,60175.000000,240.734646)}
{pt3dadd(187812.000000,157632.000000,60350.000000,240.734646)}
{pt3dadd(187692.000000,157632.000000,60475.000000,240.734646)}
{pt3dadd(187644.000000,157560.000000,60775.000000,240.734646)}
{pt3dadd(187524.000000,157356.000000,61000.000000,240.734646)}
{pt3dadd(187380.000000,157248.000000,61225.000000,240.734646)}
{pt3dadd(187392.000000,157188.000000,61450.000000,240.734646)}
{pt3dadd(187008.000000,157020.000000,61300.000000,209.574742)}
{pt3dadd(186876.000000,156852.000000,61325.000000,178.414839)}
{pt3dadd(186840.000000,156780.000000,61375.000000,147.254936)}
{pt3dadd(186732.000000,156816.000000,61325.000000,116.095032)}
{pt3dadd(186588.000000,156816.000000,61350.000000,106.420446)}
{pt3dadd(186456.000000,156792.000000,61325.000000,96.745860)}
{pt3dadd(186300.000000,156792.000000,61350.000000,116.095032)}

{create adhoc107}
{access adhoc107}
{connect adhoc107(1), adhoc105(0)}
{nseg = 1}
{strdef color color = "White"}
{pt3dclear()}
{pt3dadd(191304.000000,159828.000000,61600.000000,288.881586)}
{pt3dadd(190932.000000,160080.000000,62025.000000,167.176836)}
{pt3dadd(190764.000000,159984.000000,62300.000000,229.379999)}
{pt3dadd(190788.000000,160068.000000,62525.000000,291.583161)}
{pt3dadd(190848.000000,160128.000000,62675.000000,353.786324)}
{pt3dadd(190752.000000,160260.000000,62900.000000,415.989486)}
{pt3dadd(190728.000000,160332.000000,63375.000000,398.656589)}
{pt3dadd(190764.000000,160464.000000,63525.000000,381.323691)}
{pt3dadd(190884.000000,160404.000000,63800.000000,363.990794)}
{pt3dadd(191076.000000,160464.000000,64025.000000,346.657896)}
{pt3dadd(191244.000000,160476.000000,64250.000000,332.213819)}
{pt3dadd(191436.000000,160488.000000,64475.000000,317.769741)}
{pt3dadd(191592.000000,160596.000000,64675.000000,303.325664)}
{pt3dadd(191676.000000,160572.000000,64850.000000,288.881586)}
{pt3dadd(191700.000000,160596.000000,65075.000000,228.029211)}
{pt3dadd(191772.000000,160620.000000,65275.000000,167.176836)}
{pt3dadd(191688.000000,160644.000000,65475.000000,288.881586)}

{create adhoc108}
{access adhoc108}
{connect adhoc108(1), adhoc107(0)}
{nseg = 1}
{strdef color color = "White"}
{pt3dclear()}
{pt3dadd(191688.000000,160644.000000,65475.000000,288.881586)}
{pt3dadd(191772.000000,160740.000000,65625.000000,346.657896)}
{pt3dadd(191832.000000,160812.000000,65875.000000,297.976002)}
{pt3dadd(191832.000000,160824.000000,66125.000000,249.294108)}
{pt3dadd(191880.000000,160848.000000,66125.000000,200.612214)}
{pt3dadd(192204.000000,160884.000000,65950.000000,116.095032)}

{create adhoc109}
{access adhoc109}
{connect adhoc109(1), adhoc107(0)}
{nseg = 1}
{strdef color color = "White"}
{pt3dclear()}
{pt3dadd(191688.000000,160644.000000,65475.000000,288.881586)}
{pt3dadd(191760.000000,160548.000000,66025.000000,167.176836)}
{pt3dadd(191928.000000,160524.000000,66375.000000,208.580526)}
{pt3dadd(192000.000000,160368.000000,66575.000000,249.984216)}
{pt3dadd(192096.000000,160296.000000,66675.000000,291.387906)}
{pt3dadd(192216.000000,160212.000000,66800.000000,332.791596)}
{pt3dadd(192324.000000,160212.000000,66775.000000,278.617455)}
{pt3dadd(192456.000000,160236.000000,66825.000000,224.443314)}
{pt3dadd(192588.000000,160188.000000,66875.000000,170.269173)}
{pt3dadd(192684.000000,160212.000000,66875.000000,116.095032)}
{pt3dadd(192576.000000,160032.000000,66850.000000,200.612214)}
{pt3dadd(192252.000000,160116.000000,67200.000000,200.612214)}

{create adhoc110}
{access adhoc110}
{connect adhoc110(1), adhoc104(0)}
{nseg = 1}
{strdef color color = "White"}
{pt3dclear()}
{pt3dadd(193164.000000,162516.000000,61850.000000,415.989486)}
{pt3dadd(193344.000000,161580.000000,61525.000000,346.657896)}
{pt3dadd(193500.000000,161340.000000,61525.000000,332.213819)}
{pt3dadd(193716.000000,160476.000000,61800.000000,317.769741)}
{pt3dadd(193860.000000,160068.000000,61975.000000,303.325664)}
{pt3dadd(194016.000000,159816.000000,62125.000000,288.881586)}
{pt3dadd(194220.000000,159336.000000,62425.000000,288.881586)}
{pt3dadd(194328.000000,158736.000000,62700.000000,288.881586)}
{pt3dadd(194268.000000,158460.000000,62725.000000,288.881586)}
{pt3dadd(194136.000000,158196.000000,62825.000000,288.881586)}
{pt3dadd(194076.000000,157980.000000,62875.000000,276.844851)}
{pt3dadd(193980.000000,157764.000000,62875.000000,264.808116)}
{pt3dadd(193968.000000,157536.000000,62825.000000,252.771381)}
{pt3dadd(193980.000000,157344.000000,62750.000000,240.734646)}
{pt3dadd(193896.000000,157176.000000,62725.000000,240.734646)}
{pt3dadd(193884.000000,156984.000000,62725.000000,240.734646)}
{pt3dadd(193752.000000,156780.000000,62725.000000,240.734646)}
{pt3dadd(193704.000000,156600.000000,62750.000000,240.734646)}
{pt3dadd(193560.000000,156372.000000,62725.000000,267.215459)}
{pt3dadd(193440.000000,156168.000000,62675.000000,293.696271)}
{pt3dadd(193272.000000,155940.000000,62575.000000,320.177083)}
{pt3dadd(193260.000000,155736.000000,62725.000000,346.657896)}
{pt3dadd(193248.000000,155568.000000,62825.000000,332.213819)}
{pt3dadd(193236.000000,155376.000000,62975.000000,317.769741)}
{pt3dadd(193176.000000,155304.000000,63350.000000,303.325664)}
{pt3dadd(193152.000000,155196.000000,63575.000000,288.881586)}
{pt3dadd(193008.000000,155100.000000,63850.000000,288.881586)}
{pt3dadd(192816.000000,154896.000000,64100.000000,288.881586)}
{pt3dadd(192540.000000,154860.000000,64325.000000,288.881586)}
{pt3dadd(191796.000000,154728.000000,64600.000000,288.881586)}
{pt3dadd(191652.000000,154716.000000,64600.000000,266.814243)}
{pt3dadd(191388.000000,154620.000000,64600.000000,244.746900)}
{pt3dadd(191148.000000,154512.000000,64475.000000,222.679557)}
{pt3dadd(190908.000000,154452.000000,64350.000000,200.612214)}
{pt3dadd(190728.000000,154176.000000,64100.000000,237.123635)}
{pt3dadd(190536.000000,153948.000000,64050.000000,273.635055)}
{pt3dadd(190440.000000,153756.000000,64000.000000,310.146475)}
{pt3dadd(190248.000000,153552.000000,63975.000000,346.657896)}
{pt3dadd(190080.000000,153348.000000,63825.000000,320.177083)}
{pt3dadd(189972.000000,153120.000000,63825.000000,293.696271)}
{pt3dadd(189828.000000,152904.000000,63875.000000,267.215459)}
{pt3dadd(189816.000000,152736.000000,63975.000000,240.734646)}
{pt3dadd(189816.000000,152580.000000,63975.000000,222.345193)}
{pt3dadd(189804.000000,152388.000000,64000.000000,203.955741)}
{pt3dadd(189888.000000,152268.000000,64100.000000,185.566288)}
{pt3dadd(189948.000000,152064.000000,64200.000000,167.176836)}
{pt3dadd(190272.000000,151824.000000,64350.000000,197.603024)}
{pt3dadd(190488.000000,151668.000000,64475.000000,228.029211)}
{pt3dadd(190500.000000,151524.000000,64550.000000,258.455399)}
{pt3dadd(190572.000000,151356.000000,64625.000000,288.881586)}
{pt3dadd(190596.000000,151188.000000,64775.000000,276.844851)}
{pt3dadd(190656.000000,151068.000000,65075.000000,264.808116)}
{pt3dadd(190716.000000,150960.000000,65325.000000,252.771381)}
{pt3dadd(190632.000000,150852.000000,65475.000000,240.734646)}
{pt3dadd(190548.000000,150384.000000,65700.000000,227.360502)}
{pt3dadd(190560.000000,150192.000000,65900.000000,213.986358)}
{pt3dadd(190572.000000,150096.000000,66050.000000,200.612214)}
{pt3dadd(190416.000000,150180.000000,65825.000000,240.734646)}

{create adhoc111}
{access adhoc111}
{connect adhoc111(1), adhoc25(0)}
{nseg = 1}
{strdef color color = "White"}
{pt3dclear()}
{pt3dadd(190764.000000,169584.000000,57500.000000,718.829820)}
{pt3dadd(187356.000000,169632.000000,55550.000000,346.657896)}
{pt3dadd(187032.000000,169608.000000,55350.000000,320.177083)}
{pt3dadd(186708.000000,169788.000000,55150.000000,293.696271)}
{pt3dadd(186372.000000,169788.000000,55025.000000,267.215459)}
{pt3dadd(185976.000000,169908.000000,54850.000000,240.734646)}
{pt3dadd(185448.000000,169920.000000,54675.000000,230.704038)}
{pt3dadd(185052.000000,169992.000000,54500.000000,220.673430)}
{pt3dadd(184476.000000,170040.000000,54325.000000,210.642822)}
{pt3dadd(184248.000000,170124.000000,54225.000000,200.612214)}
{pt3dadd(183852.000000,170268.000000,54100.000000,254.456532)}
{pt3dadd(183636.000000,170400.000000,53975.000000,308.300850)}
{pt3dadd(183516.000000,170424.000000,53850.000000,362.145168)}
{pt3dadd(183396.000000,170484.000000,53825.000000,415.989486)}
{pt3dadd(183240.000000,170520.000000,53775.000000,384.212511)}
{pt3dadd(183108.000000,170628.000000,53775.000000,352.435536)}
{pt3dadd(182700.000000,170724.000000,53700.000000,320.658561)}
{pt3dadd(182472.000000,170844.000000,53450.000000,288.881586)}
{pt3dadd(182256.000000,171000.000000,53450.000000,288.881586)}
{pt3dadd(182052.000000,171108.000000,53350.000000,288.881586)}
{pt3dadd(181860.000000,171168.000000,53375.000000,288.881586)}
{pt3dadd(181656.000000,171312.000000,53300.000000,288.881586)}
{pt3dadd(181488.000000,171384.000000,53225.000000,276.844851)}
{pt3dadd(181284.000000,171540.000000,53225.000000,264.808116)}
{pt3dadd(181056.000000,171600.000000,53100.000000,252.771381)}
{pt3dadd(180768.000000,171384.000000,53175.000000,240.734646)}
{pt3dadd(180552.000000,171384.000000,53150.000000,240.734646)}
{pt3dadd(180312.000000,171396.000000,53250.000000,240.734646)}
{pt3dadd(180060.000000,171396.000000,53300.000000,240.734646)}
{pt3dadd(179856.000000,171396.000000,53300.000000,240.734646)}
{pt3dadd(179640.000000,171396.000000,53300.000000,240.734646)}
{pt3dadd(179460.000000,171528.000000,53350.000000,240.734646)}
{pt3dadd(179316.000000,171648.000000,53400.000000,240.734646)}
{pt3dadd(179172.000000,171888.000000,53700.000000,240.734646)}
{pt3dadd(179052.000000,171972.000000,53725.000000,209.574742)}
{pt3dadd(179136.000000,172164.000000,53950.000000,178.414839)}
{pt3dadd(179136.000000,172320.000000,53975.000000,147.254936)}
{pt3dadd(179256.000000,172464.000000,54125.000000,116.095032)}
{pt3dadd(179412.000000,172704.000000,54150.000000,137.224328)}
{pt3dadd(179604.000000,172908.000000,54250.000000,158.353623)}
{pt3dadd(179748.000000,172908.000000,54275.000000,179.482918)}
{pt3dadd(179940.000000,173016.000000,54300.000000,200.612214)}
{pt3dadd(180084.000000,173088.000000,54425.000000,200.612214)}
{pt3dadd(180204.000000,173220.000000,54350.000000,200.612214)}
{pt3dadd(180312.000000,173388.000000,54425.000000,200.612214)}
{pt3dadd(180420.000000,173580.000000,54450.000000,200.612214)}
{pt3dadd(180516.000000,173700.000000,54500.000000,158.353623)}
{pt3dadd(180636.000000,173856.000000,54550.000000,116.095032)}
{pt3dadd(180660.000000,173952.000000,54550.000000,116.095032)}

{create adhoc112}
{access adhoc112}
{connect adhoc112(1), adhoc24(0)}
{nseg = 1}
{strdef color color = "White"}
{pt3dclear()}
{pt3dadd(189924.000000,165300.000000,54825.000000,862.595802)}
{pt3dadd(188448.000000,166080.000000,53350.000000,200.612214)}
{pt3dadd(188424.000000,166116.000000,52750.000000,210.642822)}
{pt3dadd(188376.000000,166032.000000,52500.000000,220.673430)}
{pt3dadd(188292.000000,165984.000000,52450.000000,230.704038)}
{pt3dadd(188124.000000,165912.000000,52350.000000,240.734646)}
{pt3dadd(188232.000000,165792.000000,52250.000000,267.215459)}
{pt3dadd(188064.000000,165744.000000,51975.000000,293.696271)}
{pt3dadd(187836.000000,165636.000000,51800.000000,320.177083)}
{pt3dadd(187608.000000,165444.000000,51625.000000,346.657896)}
{pt3dadd(187524.000000,165408.000000,51475.000000,346.657896)}
{pt3dadd(186984.000000,165276.000000,51175.000000,346.657896)}
{pt3dadd(186768.000000,165192.000000,51000.000000,346.657896)}
{pt3dadd(186516.000000,165132.000000,50825.000000,346.657896)}
{pt3dadd(186408.000000,165156.000000,50650.000000,308.140353)}
{pt3dadd(186132.000000,165000.000000,50450.000000,269.622810)}
{pt3dadd(185892.000000,165024.000000,50300.000000,231.105267)}
{pt3dadd(185316.000000,164820.000000,50150.000000,192.587724)}
{pt3dadd(185064.000000,164796.000000,50000.000000,186.235002)}
{pt3dadd(184896.000000,164916.000000,49950.000000,179.882280)}
{pt3dadd(184692.000000,164856.000000,49675.000000,173.529558)}
{pt3dadd(184464.000000,165096.000000,49700.000000,167.176836)}
{pt3dadd(184284.000000,165228.000000,49650.000000,185.566288)}
{pt3dadd(184080.000000,165504.000000,49425.000000,203.955741)}
{pt3dadd(183924.000000,165696.000000,49350.000000,222.345193)}
{pt3dadd(183660.000000,165804.000000,49275.000000,240.734646)}
{pt3dadd(183432.000000,165816.000000,49225.000000,249.882566)}
{pt3dadd(183276.000000,165924.000000,48950.000000,259.030485)}
{pt3dadd(183120.000000,165948.000000,48850.000000,268.178405)}
{pt3dadd(182700.000000,165864.000000,48600.000000,277.326324)}
{pt3dadd(182640.000000,166092.000000,48375.000000,249.788952)}
{pt3dadd(182556.000000,166200.000000,48225.000000,222.251580)}
{pt3dadd(182292.000000,166212.000000,48225.000000,194.714208)}
{pt3dadd(182160.000000,166248.000000,48275.000000,167.176836)}
{pt3dadd(182532.000000,166512.000000,48300.000000,116.095032)}

{create adhoc113}
{access adhoc113}
{connect adhoc113(1), adhoc23(0)}
{nseg = 1}
{strdef color color = "White"}
{pt3dclear()}
{pt3dadd(191520.000000,161520.000000,52975.000000,599.024880)}
{pt3dadd(189348.000000,160932.000000,52975.000000,240.734646)}
{pt3dadd(188736.000000,160524.000000,52775.000000,267.215459)}
{pt3dadd(188400.000000,160296.000000,52625.000000,293.696271)}
{pt3dadd(187992.000000,160116.000000,52450.000000,320.177083)}
{pt3dadd(187872.000000,159900.000000,52275.000000,346.657896)}
{pt3dadd(187668.000000,159936.000000,52150.000000,346.657896)}
{pt3dadd(187500.000000,159912.000000,52050.000000,346.657896)}
{pt3dadd(187308.000000,159912.000000,51975.000000,415.989486)}

{create adhoc114}
{access adhoc114}
{connect adhoc114(1), adhoc113(0)}
{nseg = 1}
{strdef color color = "White"}
{pt3dclear()}
{pt3dadd(187308.000000,159912.000000,51975.000000,415.989486)}
{pt3dadd(187032.000000,160020.000000,51800.000000,288.881586)}
{pt3dadd(186900.000000,160128.000000,51525.000000,303.325664)}
{pt3dadd(186708.000000,160212.000000,51300.000000,317.769741)}
{pt3dadd(186576.000000,160260.000000,51100.000000,332.213819)}
{pt3dadd(186444.000000,160380.000000,50825.000000,346.657896)}
{pt3dadd(186288.000000,160512.000000,50525.000000,363.990794)}
{pt3dadd(186144.000000,160620.000000,50175.000000,381.323691)}
{pt3dadd(185988.000000,160596.000000,49975.000000,398.656589)}
{pt3dadd(185868.000000,160584.000000,49850.000000,415.989486)}
{pt3dadd(185724.000000,160572.000000,49650.000000,398.656589)}
{pt3dadd(185592.000000,160584.000000,49375.000000,381.323691)}
{pt3dadd(185472.000000,160512.000000,48850.000000,363.990794)}
{pt3dadd(185304.000000,160380.000000,48600.000000,346.657896)}
{pt3dadd(184992.000000,160356.000000,48300.000000,294.821933)}
{pt3dadd(185028.000000,160260.000000,48025.000000,242.985969)}
{pt3dadd(185028.000000,160140.000000,47775.000000,191.150005)}
{pt3dadd(185112.000000,159564.000000,47525.000000,139.314042)}
{pt3dadd(184932.000000,159312.000000,47375.000000,139.314042)}
{pt3dadd(184800.000000,159108.000000,47225.000000,139.314042)}
{pt3dadd(184764.000000,158988.000000,47150.000000,200.612214)}

{create adhoc115}
{access adhoc115}
{connect adhoc115(1), adhoc113(0)}
{nseg = 1}
{strdef color color = "White"}
{pt3dclear()}
{pt3dadd(187308.000000,159912.000000,51975.000000,415.989486)}
{pt3dadd(186876.000000,159768.000000,52675.000000,200.612214)}
{pt3dadd(186684.000000,159708.000000,52875.000000,200.612214)}
{pt3dadd(186504.000000,159672.000000,52900.000000,200.612214)}
{pt3dadd(186324.000000,159552.000000,53150.000000,200.612214)}
{pt3dadd(186024.000000,159408.000000,53450.000000,200.612214)}
{pt3dadd(185916.000000,159240.000000,53675.000000,200.612214)}
{pt3dadd(185904.000000,159168.000000,53800.000000,200.612214)}
{pt3dadd(185772.000000,159060.000000,53800.000000,200.612214)}

{create adhoc116}
{access adhoc116}
{connect adhoc116(1), adhoc22(0)}
{nseg = 1}
{strdef color color = "White"}
{pt3dclear()}
{pt3dadd(192936.000000,151896.000000,55175.000000,1035.114948)}
{pt3dadd(190704.000000,151776.000000,55850.000000,167.176836)}
{pt3dadd(189972.000000,151920.000000,55975.000000,185.566288)}
{pt3dadd(189864.000000,151956.000000,56000.000000,203.955741)}
{pt3dadd(189720.000000,152040.000000,56125.000000,222.345193)}
{pt3dadd(189600.000000,152040.000000,56100.000000,240.734646)}
{pt3dadd(189504.000000,152052.000000,56125.000000,220.673426)}
{pt3dadd(189360.000000,152064.000000,56200.000000,200.612205)}
{pt3dadd(189240.000000,152100.000000,56200.000000,180.550985)}
{pt3dadd(189084.000000,152124.000000,56200.000000,160.489764)}
{pt3dadd(188856.000000,152124.000000,56200.000000,178.143642)}
{pt3dadd(188688.000000,152256.000000,56225.000000,195.797520)}
{pt3dadd(188508.000000,152376.000000,56175.000000,213.451398)}
{pt3dadd(188352.000000,152496.000000,56150.000000,231.105276)}
{pt3dadd(188196.000000,152568.000000,56125.000000,223.482010)}
{pt3dadd(188076.000000,152544.000000,56125.000000,215.858745)}
{pt3dadd(187932.000000,152532.000000,56100.000000,208.235480)}
{pt3dadd(187776.000000,152496.000000,56100.000000,200.612214)}
{pt3dadd(187596.000000,152532.000000,56050.000000,210.642822)}
{pt3dadd(187452.000000,152568.000000,56000.000000,220.673430)}
{pt3dadd(187320.000000,152580.000000,56000.000000,230.704038)}
{pt3dadd(187152.000000,152664.000000,55625.000000,240.734646)}
{pt3dadd(187008.000000,152724.000000,55575.000000,240.734646)}
{pt3dadd(186900.000000,152748.000000,55550.000000,240.734646)}
{pt3dadd(186756.000000,152724.000000,55525.000000,240.734646)}
{pt3dadd(186528.000000,152688.000000,55375.000000,240.734646)}
{pt3dadd(186348.000000,152724.000000,55250.000000,222.345193)}
{pt3dadd(186180.000000,153012.000000,55125.000000,203.955741)}
{pt3dadd(186036.000000,153180.000000,55075.000000,185.566288)}
{pt3dadd(185880.000000,153312.000000,55000.000000,167.176836)}
{pt3dadd(185736.000000,153360.000000,54975.000000,185.566288)}
{pt3dadd(185592.000000,153492.000000,54900.000000,203.955741)}
{pt3dadd(186036.000000,153792.000000,54875.000000,222.345193)}
{pt3dadd(186132.000000,153864.000000,54825.000000,240.734646)}
{pt3dadd(186288.000000,153900.000000,54900.000000,167.176836)}
{pt3dadd(186396.000000,153900.000000,54950.000000,167.176836)}

{create adhoc117}
{access adhoc117}
{connect adhoc117(1), adhoc22(0)}
{nseg = 1}
{strdef color color = "White"}
{pt3dclear()}
{pt3dadd(192936.000000,151896.000000,55175.000000,1035.114948)}
{pt3dadd(190752.000000,151092.000000,55150.000000,332.791596)}
{pt3dadd(190320.000000,150552.000000,54650.000000,336.258171)}
{pt3dadd(190068.000000,150156.000000,54425.000000,339.724746)}
{pt3dadd(189936.000000,149784.000000,54225.000000,343.191321)}
{pt3dadd(189708.000000,149532.000000,54150.000000,346.657896)}
{pt3dadd(189456.000000,149280.000000,54025.000000,346.657896)}
{pt3dadd(189180.000000,149016.000000,53900.000000,346.657896)}
{pt3dadd(188868.000000,148716.000000,53775.000000,346.657896)}
{pt3dadd(188496.000000,148392.000000,53700.000000,346.657896)}
{pt3dadd(188196.000000,148296.000000,53625.000000,415.989486)}

{create adhoc118}
{access adhoc118}
{connect adhoc118(1), adhoc117(0)}
{nseg = 1}
{strdef color color = "White"}
{pt3dclear()}
{pt3dadd(188196.000000,148296.000000,53625.000000,415.989486)}
{pt3dadd(187944.000000,146880.000000,53525.000000,139.314042)}
{pt3dadd(187956.000000,146292.000000,53350.000000,164.669193)}
{pt3dadd(187944.000000,145320.000000,53200.000000,190.024344)}
{pt3dadd(188064.000000,145092.000000,53075.000000,215.379495)}
{pt3dadd(188076.000000,145008.000000,52900.000000,240.734646)}
{pt3dadd(187992.000000,144384.000000,52725.000000,267.215459)}
{pt3dadd(187860.000000,144192.000000,52550.000000,293.696271)}
{pt3dadd(187608.000000,143988.000000,52350.000000,320.177083)}
{pt3dadd(187548.000000,143712.000000,52450.000000,346.657896)}
{pt3dadd(187536.000000,143400.000000,52375.000000,346.657896)}
{pt3dadd(187308.000000,143016.000000,52425.000000,346.657896)}
{pt3dadd(187272.000000,142704.000000,52450.000000,346.657896)}
{pt3dadd(187224.000000,142488.000000,52475.000000,346.657896)}
{pt3dadd(187296.000000,142308.000000,52050.000000,310.146476)}
{pt3dadd(187272.000000,142140.000000,51975.000000,273.635055)}
{pt3dadd(187224.000000,141996.000000,51800.000000,237.123635)}
{pt3dadd(187224.000000,141840.000000,51700.000000,200.612214)}
{pt3dadd(187236.000000,141636.000000,51650.000000,185.287671)}
{pt3dadd(187188.000000,140676.000000,51325.000000,169.963128)}
{pt3dadd(187188.000000,139992.000000,51100.000000,154.638585)}
{pt3dadd(187176.000000,139344.000000,51050.000000,139.314042)}
{pt3dadd(187092.000000,139080.000000,51025.000000,139.314042)}
{pt3dadd(187008.000000,138744.000000,50925.000000,139.314042)}
{pt3dadd(186984.000000,138288.000000,50825.000000,139.314042)}
{pt3dadd(187056.000000,137724.000000,50825.000000,139.314042)}
{pt3dadd(187260.000000,137472.000000,50750.000000,176.705928)}
{pt3dadd(187356.000000,137316.000000,50750.000000,214.097814)}
{pt3dadd(187344.000000,137052.000000,50750.000000,251.489700)}
{pt3dadd(187632.000000,136812.000000,50625.000000,288.881586)}
{pt3dadd(187788.000000,136392.000000,50550.000000,276.844851)}
{pt3dadd(188112.000000,135924.000000,50475.000000,264.808116)}
{pt3dadd(188220.000000,135840.000000,50450.000000,252.771381)}
{pt3dadd(188364.000000,135636.000000,50450.000000,240.734646)}
{pt3dadd(188472.000000,135684.000000,50450.000000,167.176836)}
{pt3dadd(188700.000000,135624.000000,50525.000000,139.314042)}

{create adhoc119}
{access adhoc119}
{connect adhoc119(1), adhoc117(0)}
{nseg = 1}
{strdef color color = "White"}
{pt3dclear()}
{pt3dadd(188196.000000,148296.000000,53625.000000,415.989486)}
{pt3dadd(188016.000000,148236.000000,53300.000000,240.734646)}
{pt3dadd(188028.000000,148128.000000,53025.000000,252.771381)}
{pt3dadd(187680.000000,148068.000000,52800.000000,264.808116)}
{pt3dadd(187572.000000,147936.000000,52575.000000,276.844851)}
{pt3dadd(187404.000000,147852.000000,52300.000000,288.881586)}
{pt3dadd(187236.000000,147672.000000,52075.000000,303.325664)}
{pt3dadd(187176.000000,147564.000000,51875.000000,317.769741)}
{pt3dadd(187008.000000,147360.000000,51550.000000,332.213819)}
{pt3dadd(186840.000000,147276.000000,51425.000000,346.657896)}
{pt3dadd(186936.000000,147156.000000,51275.000000,384.790266)}
{pt3dadd(186804.000000,147216.000000,51100.000000,422.922636)}
{pt3dadd(186828.000000,146928.000000,50925.000000,461.055006)}
{pt3dadd(186816.000000,146700.000000,50300.000000,499.187376)}
{pt3dadd(186744.000000,146544.000000,49925.000000,478.387903)}
{pt3dadd(186588.000000,146328.000000,49450.000000,457.588431)}
{pt3dadd(186756.000000,146304.000000,49150.000000,436.788958)}
{pt3dadd(186600.000000,146040.000000,48675.000000,415.989486)}
{pt3dadd(186612.000000,145836.000000,48300.000000,362.145168)}
{pt3dadd(186720.000000,145224.000000,48025.000000,308.300850)}
{pt3dadd(186732.000000,144792.000000,47850.000000,254.456532)}
{pt3dadd(186732.000000,144552.000000,47875.000000,200.612214)}
{pt3dadd(186552.000000,144168.000000,47700.000000,200.612214)}
{pt3dadd(186648.000000,143904.000000,47825.000000,200.612214)}
{pt3dadd(186660.000000,143616.000000,47850.000000,200.612214)}
{pt3dadd(186504.000000,143304.000000,47725.000000,200.612214)}
{pt3dadd(186348.000000,143076.000000,47625.000000,198.606087)}
{pt3dadd(186432.000000,142836.000000,47675.000000,196.599960)}
{pt3dadd(186336.000000,142656.000000,47725.000000,194.593833)}
{pt3dadd(186480.000000,142452.000000,47575.000000,192.587706)}
{pt3dadd(186504.000000,142212.000000,47600.000000,204.624441)}
{pt3dadd(186576.000000,141924.000000,47575.000000,216.661176)}
{pt3dadd(186696.000000,141156.000000,47450.000000,228.697911)}
{pt3dadd(186780.000000,140304.000000,47300.000000,240.734646)}
{pt3dadd(186972.000000,139692.000000,47275.000000,252.771381)}
{pt3dadd(187044.000000,139380.000000,47150.000000,264.808116)}
{pt3dadd(187032.000000,139008.000000,47200.000000,276.844851)}
{pt3dadd(187068.000000,138708.000000,47075.000000,288.881586)}
{pt3dadd(187080.000000,138360.000000,46750.000000,274.437509)}
{pt3dadd(187476.000000,137640.000000,46550.000000,259.993431)}
{pt3dadd(187848.000000,136572.000000,46375.000000,245.549354)}
{pt3dadd(187836.000000,136308.000000,46200.000000,231.105276)}
{pt3dadd(187824.000000,136020.000000,46075.000000,202.352715)}
{pt3dadd(187932.000000,135684.000000,45950.000000,173.600154)}
{pt3dadd(188112.000000,135360.000000,45800.000000,144.847593)}
{pt3dadd(188208.000000,135204.000000,45800.000000,116.095032)}
{pt3dadd(188316.000000,134652.000000,45650.000000,137.224328)}
{pt3dadd(188304.000000,134448.000000,45500.000000,158.353623)}
{pt3dadd(188364.000000,134160.000000,45500.000000,179.482918)}
{pt3dadd(188532.000000,133968.000000,45525.000000,200.612214)}
{pt3dadd(188664.000000,133800.000000,45475.000000,192.253370)}
{pt3dadd(188664.000000,133248.000000,45225.000000,183.894525)}
{pt3dadd(188772.000000,133020.000000,45025.000000,175.535680)}
{pt3dadd(189120.000000,133176.000000,44725.000000,167.176836)}
{pt3dadd(189384.000000,133080.000000,45275.000000,200.612214)}

{create adhoc120}
{access adhoc120}
{connect adhoc120(1), adhoc17(0)}
{nseg = 1}
{strdef color color = "White"}
{pt3dclear()}
{pt3dadd(192408.000000,134424.000000,61050.000000,1242.137880)}
{pt3dadd(192108.000000,134184.000000,62750.000000,575.063856)}
{pt3dadd(191748.000000,133584.000000,63000.000000,516.492540)}
{pt3dadd(191592.000000,133092.000000,63350.000000,457.921224)}
{pt3dadd(191340.000000,132360.000000,63625.000000,399.349908)}
{pt3dadd(191436.000000,132168.000000,63775.000000,499.187376)}

{create adhoc121}
{access adhoc121}
{connect adhoc121(1), adhoc120(0)}
{nseg = 1}
{strdef color color = "White"}
{pt3dclear()}
{pt3dadd(191436.000000,132168.000000,63775.000000,499.187376)}
{pt3dadd(190236.000000,133356.000000,63775.000000,96.745860)}
{pt3dadd(190344.000000,133524.000000,63875.000000,96.745860)}
{pt3dadd(190416.000000,133656.000000,63975.000000,96.745860)}
{pt3dadd(190428.000000,133680.000000,64075.000000,167.176836)}

{create adhoc122}
{access adhoc122}
{connect adhoc122(1), adhoc120(0)}
{nseg = 1}
{strdef color color = "White"}
{pt3dclear()}
{pt3dadd(191436.000000,132168.000000,63775.000000,499.187376)}
{pt3dadd(191304.000000,131484.000000,63950.000000,599.024880)}
{pt3dadd(191364.000000,131304.000000,64075.000000,599.024880)}
{pt3dadd(191316.000000,131064.000000,64225.000000,599.024880)}
{pt3dadd(191340.000000,130944.000000,64375.000000,599.024880)}
{pt3dadd(191316.000000,130800.000000,64575.000000,599.024880)}
{pt3dadd(191580.000000,130500.000000,64750.000000,569.073631)}
{pt3dadd(191532.000000,130284.000000,64950.000000,539.122383)}
{pt3dadd(191520.000000,130188.000000,65125.000000,509.171134)}
{pt3dadd(191544.000000,129960.000000,65325.000000,479.219886)}
{pt3dadd(191556.000000,129624.000000,65500.000000,484.211758)}
{pt3dadd(191556.000000,129288.000000,65675.000000,489.203631)}
{pt3dadd(191568.000000,129120.000000,65875.000000,494.195504)}
{pt3dadd(191964.000000,128760.000000,66125.000000,499.187376)}
{pt3dadd(192108.000000,128472.000000,66325.000000,524.146752)}
{pt3dadd(192024.000000,128364.000000,66550.000000,549.106128)}
{pt3dadd(191856.000000,128160.000000,66775.000000,574.065504)}
{pt3dadd(191760.000000,127980.000000,66975.000000,599.024880)}
{pt3dadd(191736.000000,127848.000000,67200.000000,614.887042)}
{pt3dadd(191712.000000,127692.000000,67425.000000,630.749205)}
{pt3dadd(191760.000000,127440.000000,67600.000000,646.611368)}
{pt3dadd(191796.000000,127224.000000,67775.000000,662.473530)}
{pt3dadd(191784.000000,126888.000000,67925.000000,415.989486)}

{create adhoc123}
{access adhoc123}
{connect adhoc123(1), adhoc122(0)}
{nseg = 1}
{strdef color color = "White"}
{pt3dclear()}
{pt3dadd(191784.000000,126888.000000,67925.000000,415.989486)}
{pt3dadd(191796.000000,128100.000000,68925.000000,415.989486)}
{pt3dadd(191940.000000,128424.000000,69250.000000,398.656589)}
{pt3dadd(192096.000000,128748.000000,69575.000000,381.323691)}
{pt3dadd(192324.000000,129084.000000,70000.000000,363.990794)}
{pt3dadd(192468.000000,129336.000000,70225.000000,346.657896)}
{pt3dadd(192600.000000,129564.000000,70350.000000,332.213819)}
{pt3dadd(192756.000000,129732.000000,70550.000000,317.769741)}
{pt3dadd(192900.000000,129708.000000,70675.000000,303.325664)}
{pt3dadd(193032.000000,129948.000000,70750.000000,288.881586)}
{pt3dadd(193176.000000,130056.000000,70825.000000,303.325664)}
{pt3dadd(193368.000000,130320.000000,70950.000000,317.769741)}
{pt3dadd(193548.000000,130644.000000,71225.000000,332.213819)}
{pt3dadd(193704.000000,130932.000000,71350.000000,346.657896)}
{pt3dadd(193824.000000,131052.000000,71225.000000,346.657896)}
{pt3dadd(193944.000000,131304.000000,71325.000000,346.657896)}
{pt3dadd(194076.000000,131544.000000,71400.000000,346.657896)}
{pt3dadd(194196.000000,131784.000000,71375.000000,346.657896)}
{pt3dadd(194316.000000,131976.000000,71450.000000,320.177083)}
{pt3dadd(194472.000000,132096.000000,71600.000000,293.696271)}
{pt3dadd(194628.000000,132240.000000,71675.000000,267.215459)}
{pt3dadd(194700.000000,132612.000000,71950.000000,240.734646)}
{pt3dadd(194580.000000,132936.000000,72225.000000,328.362066)}
{pt3dadd(194532.000000,133248.000000,72425.000000,415.989486)}
{pt3dadd(194472.000000,133452.000000,72725.000000,499.187376)}

{create adhoc124}
{access adhoc124}
{connect adhoc124(1), adhoc123(0)}
{nseg = 1}
{strdef color color = "White"}
{pt3dclear()}
{pt3dadd(194472.000000,133452.000000,72725.000000,499.187376)}
{pt3dadd(194616.000000,134580.000000,72800.000000,288.881586)}
{pt3dadd(194532.000000,134820.000000,72800.000000,276.844851)}
{pt3dadd(194532.000000,135084.000000,72800.000000,264.808116)}
{pt3dadd(194472.000000,135384.000000,72825.000000,252.771381)}
{pt3dadd(194412.000000,135564.000000,72575.000000,240.734646)}
{pt3dadd(194304.000000,135792.000000,72500.000000,305.347828)}
{pt3dadd(193956.000000,136020.000000,72225.000000,369.961011)}
{pt3dadd(193800.000000,136236.000000,72075.000000,434.574193)}
{pt3dadd(193692.000000,136464.000000,72025.000000,499.187376)}
{pt3dadd(193572.000000,136716.000000,72025.000000,499.187376)}

{create adhoc125}
{access adhoc125}
{connect adhoc125(1), adhoc124(0)}
{nseg = 1}
{strdef color color = "White"}
{pt3dclear()}
{pt3dadd(193572.000000,136716.000000,72025.000000,499.187376)}
{pt3dadd(193824.000000,136716.000000,72875.000000,167.176836)}
{pt3dadd(193728.000000,136704.000000,72800.000000,185.566288)}
{pt3dadd(193764.000000,136920.000000,73100.000000,203.955741)}
{pt3dadd(193764.000000,136956.000000,73275.000000,222.345193)}
{pt3dadd(193932.000000,137040.000000,73500.000000,240.734646)}
{pt3dadd(194136.000000,137172.000000,73725.000000,252.771381)}
{pt3dadd(194280.000000,137316.000000,73900.000000,264.808116)}
{pt3dadd(194412.000000,137460.000000,73875.000000,276.844851)}
{pt3dadd(194532.000000,137604.000000,73875.000000,288.881586)}
{pt3dadd(194664.000000,137772.000000,73825.000000,266.814243)}
{pt3dadd(194796.000000,138000.000000,73750.000000,244.746900)}
{pt3dadd(194904.000000,138240.000000,73650.000000,222.679557)}
{pt3dadd(195036.000000,138432.000000,73600.000000,200.612214)}
{pt3dadd(195228.000000,138660.000000,73575.000000,185.287671)}
{pt3dadd(194928.000000,138840.000000,73275.000000,169.963128)}
{pt3dadd(195012.000000,138972.000000,73250.000000,154.638585)}
{pt3dadd(195048.000000,139104.000000,73275.000000,139.314042)}
{pt3dadd(195048.000000,139284.000000,73325.000000,152.632463)}
{pt3dadd(195036.000000,139440.000000,73350.000000,165.950883)}
{pt3dadd(195024.000000,139596.000000,73325.000000,179.269304)}
{pt3dadd(195036.000000,139776.000000,73325.000000,192.587724)}
{pt3dadd(195036.000000,139980.000000,73150.000000,139.314042)}

{create adhoc126}
{access adhoc126}
{connect adhoc126(1), adhoc124(0)}
{nseg = 1}
{strdef color color = "White"}
{pt3dclear()}
{pt3dadd(193572.000000,136716.000000,72025.000000,499.187376)}
{pt3dadd(193584.000000,136956.000000,71975.000000,529.978824)}
{pt3dadd(193572.000000,136992.000000,71900.000000,469.704515)}
{pt3dadd(193704.000000,137160.000000,71975.000000,409.430205)}
{pt3dadd(193416.000000,136716.000000,71575.000000,349.155895)}
{pt3dadd(193008.000000,136524.000000,71550.000000,288.881586)}
{pt3dadd(192936.000000,136380.000000,71400.000000,266.814243)}
{pt3dadd(192744.000000,136236.000000,71250.000000,244.746900)}
{pt3dadd(192528.000000,136056.000000,71100.000000,222.679557)}
{pt3dadd(192516.000000,136020.000000,70950.000000,200.612214)}
{pt3dadd(192516.000000,135900.000000,70950.000000,192.253370)}
{pt3dadd(192444.000000,135684.000000,70900.000000,183.894525)}
{pt3dadd(192432.000000,135480.000000,70950.000000,175.535680)}
{pt3dadd(192372.000000,135324.000000,70775.000000,167.176836)}
{pt3dadd(192420.000000,135204.000000,70700.000000,240.734646)}
{pt3dadd(192432.000000,135096.000000,70725.000000,288.881586)}

{create adhoc127}
{access adhoc127}
{connect adhoc127(1), adhoc123(0)}
{nseg = 1}
{strdef color color = "White"}
{pt3dclear()}
{pt3dadd(194472.000000,133452.000000,72725.000000,499.187376)}
{pt3dadd(194508.000000,133476.000000,73025.000000,332.791596)}
{pt3dadd(194484.000000,133500.000000,73300.000000,374.390541)}
{pt3dadd(194412.000000,133560.000000,73525.000000,415.989486)}
{pt3dadd(194292.000000,133548.000000,73725.000000,457.588431)}
{pt3dadd(194304.000000,133428.000000,73925.000000,499.187376)}
{pt3dadd(194256.000000,133404.000000,74125.000000,446.610929)}
{pt3dadd(194208.000000,133308.000000,74350.000000,394.034481)}
{pt3dadd(194160.000000,133296.000000,74575.000000,341.458034)}
{pt3dadd(194268.000000,133260.000000,74800.000000,288.881586)}
{pt3dadd(194160.000000,133164.000000,75025.000000,303.325664)}
{pt3dadd(194076.000000,132972.000000,75125.000000,317.769741)}
{pt3dadd(194028.000000,132804.000000,75250.000000,332.213819)}
{pt3dadd(193992.000000,132444.000000,75575.000000,346.657896)}
{pt3dadd(193872.000000,132396.000000,75750.000000,355.837401)}
{pt3dadd(193788.000000,132264.000000,75925.000000,365.016906)}
{pt3dadd(193704.000000,132168.000000,75925.000000,374.196411)}
{pt3dadd(194100.000000,132012.000000,76175.000000,383.375916)}
{pt3dadd(194136.000000,132048.000000,76450.000000,348.026052)}
{pt3dadd(194124.000000,132228.000000,76725.000000,312.676188)}
{pt3dadd(193884.000000,132216.000000,76900.000000,277.326324)}
{pt3dadd(193884.000000,132108.000000,77075.000000,167.176836)}

{create adhoc128}
{access adhoc128}
{connect adhoc128(1), adhoc122(0)}
{nseg = 1}
{strdef color color = "White"}
{pt3dclear()}
{pt3dadd(191784.000000,126888.000000,67925.000000,415.989486)}
{pt3dadd(191784.000000,126192.000000,68100.000000,277.326324)}
{pt3dadd(191784.000000,125640.000000,68325.000000,332.791596)}
{pt3dadd(191784.000000,124848.000000,68650.000000,346.657896)}

{create adhoc129}
{access adhoc129}
{connect adhoc129(1), adhoc128(0)}
{nseg = 1}
{strdef color color = "White"}
{pt3dclear()}
{pt3dadd(191784.000000,124848.000000,68650.000000,346.657896)}
{pt3dadd(191784.000000,124212.000000,69125.000000,499.187376)}
{pt3dadd(191784.000000,123540.000000,69675.000000,499.187376)}
{pt3dadd(191784.000000,123336.000000,70050.000000,499.187376)}
{pt3dadd(191712.000000,123168.000000,70325.000000,499.187376)}
{pt3dadd(191520.000000,122964.000000,70625.000000,499.187376)}
{pt3dadd(191400.000000,122892.000000,70825.000000,471.454746)}
{pt3dadd(191220.000000,122532.000000,71525.000000,443.722116)}
{pt3dadd(190884.000000,121968.000000,71875.000000,415.989486)}
{pt3dadd(190920.000000,121704.000000,72100.000000,415.989486)}

{create adhoc130}
{access adhoc130}
{connect adhoc130(1), adhoc129(0)}
{nseg = 1}
{strdef color color = "White"}
{pt3dclear()}
{pt3dadd(190920.000000,121704.000000,72100.000000,415.989486)}
{pt3dadd(190944.000000,122268.000000,72350.000000,599.024880)}
{pt3dadd(190812.000000,122388.000000,72575.000000,535.933134)}
{pt3dadd(190776.000000,122460.000000,72850.000000,472.841388)}
{pt3dadd(190944.000000,122664.000000,73075.000000,409.749642)}
{pt3dadd(190992.000000,122772.000000,73300.000000,346.657896)}
{pt3dadd(191064.000000,122892.000000,73525.000000,320.177083)}
{pt3dadd(191136.000000,123012.000000,73750.000000,293.696271)}
{pt3dadd(191256.000000,123132.000000,74025.000000,267.215459)}
{pt3dadd(191412.000000,123288.000000,74225.000000,240.734646)}
{pt3dadd(191568.000000,123480.000000,74475.000000,267.215459)}
{pt3dadd(191688.000000,123672.000000,74650.000000,293.696271)}
{pt3dadd(191808.000000,123732.000000,74875.000000,320.177083)}
{pt3dadd(191928.000000,123876.000000,75125.000000,346.657896)}
{pt3dadd(191976.000000,123948.000000,75250.000000,320.177083)}
{pt3dadd(191868.000000,123864.000000,75675.000000,293.696271)}
{pt3dadd(191880.000000,123912.000000,75975.000000,267.215459)}
{pt3dadd(191976.000000,124032.000000,76350.000000,240.734646)}
{pt3dadd(192228.000000,124020.000000,76650.000000,263.748875)}
{pt3dadd(192324.000000,123888.000000,76925.000000,286.763103)}
{pt3dadd(192300.000000,123732.000000,77275.000000,309.777332)}
{pt3dadd(192480.000000,123744.000000,77525.000000,332.791560)}
{pt3dadd(192624.000000,123696.000000,77850.000000,309.777332)}
{pt3dadd(192744.000000,123612.000000,78125.000000,286.763103)}
{pt3dadd(192828.000000,123492.000000,78325.000000,263.748875)}
{pt3dadd(192900.000000,123360.000000,78575.000000,240.734646)}
{pt3dadd(193020.000000,123048.000000,78800.000000,222.345193)}
{pt3dadd(193056.000000,122544.000000,79050.000000,203.955741)}
{pt3dadd(193044.000000,122064.000000,79275.000000,185.566288)}
{pt3dadd(193056.000000,121692.000000,79350.000000,167.176836)}
{pt3dadd(193164.000000,121476.000000,79525.000000,123.899193)}
{pt3dadd(193596.000000,121476.000000,79700.000000,80.621550)}
{pt3dadd(193704.000000,121464.000000,79700.000000,139.314042)}

{create adhoc131}
{access adhoc131}
{connect adhoc131(1), adhoc129(0)}
{nseg = 1}
{strdef color color = "White"}
{pt3dclear()}
{pt3dadd(190920.000000,121704.000000,72100.000000,415.989486)}
{pt3dadd(190848.000000,120408.000000,72425.000000,231.105276)}
{pt3dadd(190980.000000,119856.000000,72825.000000,277.326328)}
{pt3dadd(191328.000000,119592.000000,73050.000000,323.547381)}
{pt3dadd(191424.000000,119268.000000,73250.000000,369.768433)}
{pt3dadd(191472.000000,119088.000000,73475.000000,415.989486)}
{pt3dadd(191544.000000,118824.000000,73725.000000,398.656589)}
{pt3dadd(191796.000000,118368.000000,73925.000000,381.323691)}
{pt3dadd(191940.000000,117684.000000,74175.000000,363.990794)}
{pt3dadd(191880.000000,117312.000000,74450.000000,346.657896)}
{pt3dadd(191880.000000,117036.000000,74725.000000,294.821933)}
{pt3dadd(191940.000000,116688.000000,75050.000000,242.985969)}
{pt3dadd(192144.000000,116688.000000,75050.000000,191.150005)}
{pt3dadd(192048.000000,116148.000000,75350.000000,139.314042)}
{pt3dadd(191796.000000,116112.000000,75600.000000,176.705928)}
{pt3dadd(191748.000000,116004.000000,75825.000000,214.097814)}
{pt3dadd(191628.000000,115824.000000,76050.000000,251.489700)}
{pt3dadd(191520.000000,115704.000000,76275.000000,288.881586)}
{pt3dadd(191244.000000,115512.000000,76500.000000,276.844851)}
{pt3dadd(191148.000000,115392.000000,76675.000000,264.808116)}
{pt3dadd(191052.000000,114996.000000,76900.000000,252.771381)}
{pt3dadd(190824.000000,114240.000000,77100.000000,240.734646)}
{pt3dadd(190752.000000,113916.000000,77250.000000,267.215459)}
{pt3dadd(190800.000000,113724.000000,77550.000000,293.696271)}
{pt3dadd(190680.000000,113640.000000,77775.000000,320.177083)}
{pt3dadd(190584.000000,113556.000000,78025.000000,346.657896)}
{pt3dadd(190656.000000,113472.000000,78250.000000,346.657896)}
{pt3dadd(190620.000000,113496.000000,78550.000000,346.657896)}

{create adhoc132}
{access adhoc132}
{connect adhoc132(1), adhoc131(0)}
{nseg = 1}
{strdef color color = "White"}
{pt3dclear()}
{pt3dadd(190620.000000,113496.000000,78550.000000,346.657896)}
{pt3dadd(190608.000000,113460.000000,78750.000000,240.734646)}
{pt3dadd(190584.000000,113352.000000,78950.000000,252.771381)}
{pt3dadd(190560.000000,113268.000000,79125.000000,264.808116)}
{pt3dadd(190572.000000,113232.000000,79275.000000,276.844851)}
{pt3dadd(190608.000000,113208.000000,79475.000000,288.881586)}
{pt3dadd(190620.000000,113052.000000,79775.000000,240.847655)}
{pt3dadd(190452.000000,112836.000000,79925.000000,192.813723)}
{pt3dadd(190296.000000,112608.000000,80075.000000,144.779792)}
{pt3dadd(190272.000000,112140.000000,80400.000000,96.745860)}
{pt3dadd(190296.000000,111900.000000,80575.000000,107.387906)}
{pt3dadd(190476.000000,111684.000000,80700.000000,118.029951)}
{pt3dadd(190536.000000,111240.000000,80900.000000,128.671997)}
{pt3dadd(190548.000000,111024.000000,81000.000000,139.314042)}
{pt3dadd(190644.000000,110916.000000,81150.000000,116.095032)}

{create adhoc133}
{access adhoc133}
{connect adhoc133(1), adhoc131(0)}
{nseg = 1}
{strdef color color = "White"}
{pt3dclear()}
{pt3dadd(190620.000000,113496.000000,78550.000000,346.657896)}
{pt3dadd(190356.000000,113016.000000,78575.000000,96.745860)}
{pt3dadd(190296.000000,112656.000000,78475.000000,107.387906)}
{pt3dadd(190176.000000,112908.000000,78500.000000,118.029951)}
{pt3dadd(190380.000000,112392.000000,78475.000000,128.671997)}
{pt3dadd(190380.000000,112032.000000,78375.000000,139.314042)}
{pt3dadd(190344.000000,111924.000000,78375.000000,127.704537)}
{pt3dadd(190332.000000,111804.000000,78425.000000,116.095032)}
{pt3dadd(190332.000000,111696.000000,78375.000000,96.745860)}

{create adhoc134}
{access adhoc134}
{connect adhoc134(1), adhoc128(0)}
{nseg = 1}
{strdef color color = "White"}
{pt3dclear()}
{pt3dadd(191784.000000,124848.000000,68650.000000,346.657896)}
{pt3dadd(191508.000000,124524.000000,68575.000000,346.657896)}
{pt3dadd(190596.000000,124332.000000,68550.000000,301.787631)}
{pt3dadd(189576.000000,124248.000000,68525.000000,256.917366)}
{pt3dadd(189480.000000,124224.000000,68450.000000,212.047101)}
{pt3dadd(189360.000000,124224.000000,68475.000000,167.176836)}
{pt3dadd(189180.000000,124224.000000,68475.000000,160.211138)}
{pt3dadd(189024.000000,123924.000000,68350.000000,153.245439)}
{pt3dadd(188928.000000,123780.000000,68275.000000,146.279741)}
{pt3dadd(188796.000000,123624.000000,68100.000000,139.314042)}
{pt3dadd(188688.000000,123504.000000,67950.000000,139.314042)}
{pt3dadd(188580.000000,123456.000000,67750.000000,200.612214)}

{create adhoc135}
{access adhoc135}
{connect adhoc135(1), adhoc134(0)}
{nseg = 1}
{strdef color color = "White"}
{pt3dclear()}
{pt3dadd(188580.000000,123456.000000,67750.000000,200.612214)}
{pt3dadd(188460.000000,123408.000000,67650.000000,288.881586)}
{pt3dadd(188352.000000,123336.000000,67475.000000,266.814243)}
{pt3dadd(188316.000000,123252.000000,67300.000000,244.746900)}
{pt3dadd(188172.000000,123180.000000,67100.000000,222.679557)}
{pt3dadd(187980.000000,123180.000000,66900.000000,200.612214)}
{pt3dadd(188028.000000,123180.000000,66675.000000,169.963128)}
{pt3dadd(187896.000000,122988.000000,66425.000000,139.314042)}
{pt3dadd(187692.000000,122820.000000,66225.000000,96.745860)}

{create adhoc136}
{access adhoc136}
{connect adhoc136(1), adhoc134(0)}
{nseg = 1}
{strdef color color = "White"}
{pt3dclear()}
{pt3dadd(188580.000000,123456.000000,67750.000000,200.612214)}
{pt3dadd(188316.000000,123060.000000,68050.000000,139.314042)}
{pt3dadd(188064.000000,122916.000000,68225.000000,96.745860)}
{pt3dadd(187848.000000,122760.000000,68425.000000,116.095032)}

{create adhoc137}
{access adhoc137}
{connect adhoc137(1), adhoc16(0)}
{nseg = 1}
{strdef color color = "White"}
{pt3dclear()}
{pt3dadd(191124.000000,129144.000000,61250.000000,718.829820)}
{pt3dadd(190080.000000,129144.000000,61450.000000,80.621550)}
{pt3dadd(189456.000000,129024.000000,61450.000000,84.652627)}
{pt3dadd(189336.000000,129096.000000,61475.000000,88.683705)}
{pt3dadd(189108.000000,129204.000000,61625.000000,92.714782)}
{pt3dadd(188976.000000,129228.000000,61675.000000,96.745860)}
{pt3dadd(188808.000000,129180.000000,61675.000000,101.583153)}
{pt3dadd(188580.000000,129192.000000,61775.000000,106.420446)}
{pt3dadd(188436.000000,129300.000000,61750.000000,111.257739)}
{pt3dadd(188244.000000,129240.000000,61725.000000,116.095032)}
{pt3dadd(188076.000000,129312.000000,61750.000000,121.899785)}
{pt3dadd(187572.000000,129408.000000,61875.000000,127.704537)}
{pt3dadd(187488.000000,129444.000000,62075.000000,133.509289)}
{pt3dadd(187296.000000,129420.000000,62075.000000,139.314042)}
{pt3dadd(187080.000000,129276.000000,62275.000000,109.967796)}
{pt3dadd(186948.000000,129192.000000,62225.000000,80.621550)}
{pt3dadd(186792.000000,129084.000000,62250.000000,80.621550)}

{create adhoc138}
{access adhoc138}
{connect adhoc138(1), adhoc15(0)}
{nseg = 1}
{strdef color color = "White"}
{pt3dclear()}
{pt3dadd(189972.000000,125748.000000,61550.000000,718.829820)}
{pt3dadd(189972.000000,125436.000000,61825.000000,599.024880)}
{pt3dadd(188004.000000,125436.000000,60350.000000,574.065504)}
{pt3dadd(187812.000000,125496.000000,60175.000000,549.106128)}
{pt3dadd(187356.000000,125604.000000,59575.000000,524.146752)}
{pt3dadd(187116.000000,125400.000000,59600.000000,499.187376)}
{pt3dadd(187320.000000,125604.000000,59400.000000,489.403296)}
{pt3dadd(187320.000000,125796.000000,59100.000000,479.619216)}
{pt3dadd(187248.000000,126072.000000,58700.000000,469.835136)}
{pt3dadd(186972.000000,126288.000000,58425.000000,460.051056)}
{pt3dadd(186912.000000,126408.000000,58125.000000,469.835136)}
{pt3dadd(187008.000000,126528.000000,57825.000000,479.619216)}
{pt3dadd(187008.000000,126648.000000,57550.000000,489.403296)}
{pt3dadd(187032.000000,126816.000000,57275.000000,499.187376)}
{pt3dadd(186948.000000,126912.000000,56975.000000,457.588431)}
{pt3dadd(186780.000000,127068.000000,56575.000000,415.989486)}
{pt3dadd(186756.000000,127164.000000,56125.000000,346.657896)}

{create adhoc139}
{access adhoc139}
{connect adhoc139(1), adhoc138(0)}
{nseg = 1}
{strdef color color = "White"}
{pt3dclear()}
{pt3dadd(186756.000000,127164.000000,56125.000000,346.657896)}
{pt3dadd(186996.000000,127740.000000,55725.000000,240.734646)}
{pt3dadd(187260.000000,127980.000000,55525.000000,240.734646)}
{pt3dadd(187152.000000,127860.000000,55300.000000,240.734646)}
{pt3dadd(187212.000000,128412.000000,55500.000000,240.734646)}
{pt3dadd(187272.000000,128712.000000,55500.000000,240.734646)}
{pt3dadd(187248.000000,129000.000000,55650.000000,240.734646)}
{pt3dadd(187272.000000,129276.000000,55825.000000,240.734646)}
{pt3dadd(187368.000000,129576.000000,55750.000000,240.734646)}
{pt3dadd(187368.000000,129852.000000,55750.000000,240.734646)}
{pt3dadd(187668.000000,130080.000000,55525.000000,200.612214)}
{pt3dadd(187860.000000,130428.000000,55575.000000,200.612214)}

{create adhoc140}
{access adhoc140}
{connect adhoc140(1), adhoc138(0)}
{nseg = 1}
{strdef color color = "White"}
{pt3dclear()}
{pt3dadd(186756.000000,127164.000000,56125.000000,346.657896)}
{pt3dadd(186444.000000,126732.000000,55950.000000,346.657896)}
{pt3dadd(186372.000000,126564.000000,55725.000000,332.213819)}
{pt3dadd(186372.000000,126444.000000,55350.000000,317.769741)}
{pt3dadd(186372.000000,126324.000000,54850.000000,303.325664)}
{pt3dadd(186372.000000,126012.000000,54300.000000,288.881586)}
{pt3dadd(186396.000000,125904.000000,54025.000000,394.034481)}
{pt3dadd(186612.000000,125700.000000,53700.000000,499.187376)}
{pt3dadd(186912.000000,125532.000000,53400.000000,288.881586)}

{create adhoc141}
{access adhoc141}
{connect adhoc141(1), adhoc140(0)}
{nseg = 1}
{strdef color color = "White"}
{pt3dclear()}
{pt3dadd(186912.000000,125532.000000,53400.000000,288.881586)}
{pt3dadd(186852.000000,125700.000000,53150.000000,346.657896)}
{pt3dadd(186864.000000,125892.000000,52950.000000,320.177083)}
{pt3dadd(186936.000000,125964.000000,52800.000000,293.696271)}
{pt3dadd(187008.000000,125976.000000,52525.000000,267.215459)}
{pt3dadd(187104.000000,125916.000000,52350.000000,240.734646)}
{pt3dadd(187308.000000,125844.000000,52150.000000,240.734646)}
{pt3dadd(187356.000000,125808.000000,51925.000000,240.734646)}
{pt3dadd(187500.000000,125856.000000,51725.000000,240.734646)}
{pt3dadd(187608.000000,125772.000000,51525.000000,240.734646)}
{pt3dadd(187716.000000,125820.000000,51200.000000,233.797635)}
{pt3dadd(187824.000000,125844.000000,50975.000000,226.860624)}
{pt3dadd(187896.000000,125904.000000,50750.000000,219.923613)}
{pt3dadd(187908.000000,125604.000000,50525.000000,212.986602)}
{pt3dadd(187848.000000,125532.000000,50400.000000,167.176836)}

{create adhoc142}
{access adhoc142}
{connect adhoc142(1), adhoc140(0)}
{nseg = 1}
{strdef color color = "White"}
{pt3dclear()}
{pt3dadd(186912.000000,125532.000000,53400.000000,288.881586)}
{pt3dadd(187416.000000,125100.000000,53150.000000,200.612214)}
{pt3dadd(187632.000000,124572.000000,52900.000000,185.287671)}
{pt3dadd(187788.000000,124344.000000,52825.000000,169.963128)}
{pt3dadd(187908.000000,124056.000000,52775.000000,154.638585)}
{pt3dadd(188112.000000,123852.000000,52725.000000,139.314042)}
{pt3dadd(188352.000000,123504.000000,52725.000000,154.638585)}
{pt3dadd(188640.000000,123288.000000,52675.000000,169.963128)}
{pt3dadd(188904.000000,122976.000000,52675.000000,185.287671)}
{pt3dadd(189156.000000,122616.000000,52625.000000,200.612214)}
{pt3dadd(189396.000000,122364.000000,52625.000000,200.612214)}
{pt3dadd(189372.000000,122040.000000,52675.000000,200.612214)}
{pt3dadd(189336.000000,121740.000000,52675.000000,200.612214)}
{pt3dadd(189252.000000,121476.000000,52975.000000,200.612214)}
{pt3dadd(189180.000000,121212.000000,52900.000000,200.612214)}
{pt3dadd(189108.000000,120948.000000,52775.000000,200.612214)}
{pt3dadd(188892.000000,120624.000000,52725.000000,200.612214)}
{pt3dadd(188592.000000,120372.000000,52500.000000,200.612214)}
{pt3dadd(188484.000000,120264.000000,52325.000000,180.179490)}
{pt3dadd(188352.000000,120060.000000,52075.000000,159.746766)}
{pt3dadd(188328.000000,119988.000000,51875.000000,139.314042)}
{pt3dadd(188448.000000,120012.000000,51725.000000,200.612214)}

{create adhoc143}
{access adhoc143}
{connect adhoc143(1), adhoc14(0)}
{nseg = 1}
{strdef color color = "White"}
{pt3dclear()}
{pt3dadd(189648.000000,121308.000000,62875.000000,862.595802)}
{pt3dadd(188280.000000,121188.000000,61950.000000,288.881586)}
{pt3dadd(187740.000000,120900.000000,61750.000000,266.814243)}
{pt3dadd(187428.000000,120792.000000,61600.000000,244.746900)}
{pt3dadd(187164.000000,120516.000000,61425.000000,222.679557)}
{pt3dadd(186912.000000,120216.000000,60850.000000,200.612214)}
{pt3dadd(186888.000000,120144.000000,60675.000000,222.679557)}
{pt3dadd(186492.000000,120000.000000,60425.000000,244.746900)}
{pt3dadd(186276.000000,119868.000000,60200.000000,266.814243)}
{pt3dadd(186132.000000,119580.000000,59950.000000,288.881586)}
{pt3dadd(186036.000000,119376.000000,59825.000000,276.844851)}
{pt3dadd(185976.000000,119040.000000,59550.000000,264.808116)}
{pt3dadd(185952.000000,118812.000000,59300.000000,252.771381)}
{pt3dadd(185988.000000,118680.000000,58950.000000,240.734646)}
{pt3dadd(186024.000000,118452.000000,58650.000000,252.771381)}
{pt3dadd(186036.000000,118248.000000,58350.000000,264.808116)}
{pt3dadd(186024.000000,118008.000000,58050.000000,276.844851)}
{pt3dadd(186000.000000,117792.000000,57700.000000,288.881586)}
{pt3dadd(186048.000000,117588.000000,57400.000000,288.881586)}
{pt3dadd(185976.000000,117456.000000,57075.000000,288.881586)}
{pt3dadd(185568.000000,117228.000000,56900.000000,288.881586)}
{pt3dadd(185160.000000,117192.000000,56700.000000,288.881586)}
{pt3dadd(184944.000000,117180.000000,56475.000000,245.684947)}
{pt3dadd(184740.000000,117288.000000,56275.000000,202.488309)}
{pt3dadd(184800.000000,117324.000000,56050.000000,159.291671)}
{pt3dadd(184848.000000,117324.000000,55825.000000,116.095032)}
{pt3dadd(185232.000000,117672.000000,55675.000000,133.122300)}
{pt3dadd(185412.000000,117828.000000,55350.000000,150.149568)}
{pt3dadd(185532.000000,118164.000000,55050.000000,167.176836)}
{pt3dadd(185424.000000,118332.000000,55050.000000,116.095032)}

{create adhoc144}
{access adhoc144}
{connect adhoc144(1), adhoc13(0)}
{nseg = 1}
{strdef color color = "White"}
{pt3dclear()}
{pt3dadd(189072.000000,119448.000000,63575.000000,599.024880)}
{pt3dadd(188172.000000,119208.000000,62950.000000,288.881586)}
{pt3dadd(187836.000000,118944.000000,62825.000000,320.658561)}
{pt3dadd(187860.000000,118740.000000,62725.000000,352.435536)}
{pt3dadd(187584.000000,118512.000000,62550.000000,384.212511)}
{pt3dadd(187380.000000,118260.000000,62225.000000,415.989486)}
{pt3dadd(187272.000000,118044.000000,62025.000000,398.656589)}
{pt3dadd(187080.000000,117732.000000,61800.000000,381.323691)}
{pt3dadd(186900.000000,117420.000000,61575.000000,363.990794)}
{pt3dadd(186600.000000,117108.000000,61250.000000,346.657896)}
{pt3dadd(186468.000000,116760.000000,61000.000000,332.213819)}
{pt3dadd(186312.000000,116496.000000,60750.000000,317.769741)}
{pt3dadd(186276.000000,116256.000000,60425.000000,303.325664)}
{pt3dadd(186156.000000,115980.000000,60200.000000,288.881586)}
{pt3dadd(186132.000000,115728.000000,59975.000000,303.325664)}
{pt3dadd(185964.000000,115500.000000,59725.000000,317.769741)}
{pt3dadd(185880.000000,115260.000000,59550.000000,332.213819)}
{pt3dadd(185844.000000,115032.000000,59475.000000,346.657896)}
{pt3dadd(185688.000000,114780.000000,59450.000000,381.323691)}
{pt3dadd(185508.000000,114540.000000,59250.000000,415.989486)}
{pt3dadd(185232.000000,114348.000000,59050.000000,288.881586)}

{create adhoc145}
{access adhoc145}
{connect adhoc145(1), adhoc144(0)}
{nseg = 1}
{strdef color color = "White"}
{pt3dclear()}
{pt3dadd(185232.000000,114348.000000,59050.000000,288.881586)}
{pt3dadd(185616.000000,114012.000000,60250.000000,200.612214)}
{pt3dadd(185652.000000,113376.000000,60675.000000,214.355142)}
{pt3dadd(185568.000000,112932.000000,60550.000000,228.098070)}
{pt3dadd(185664.000000,112608.000000,60675.000000,241.840998)}
{pt3dadd(185724.000000,112308.000000,60700.000000,255.583926)}
{pt3dadd(185700.000000,112044.000000,60700.000000,220.711703)}
{pt3dadd(185712.000000,111816.000000,60500.000000,185.839479)}
{pt3dadd(185724.000000,111564.000000,60450.000000,150.967255)}
{pt3dadd(185508.000000,111360.000000,60400.000000,116.095032)}
{pt3dadd(185448.000000,110844.000000,60125.000000,141.635934)}
{pt3dadd(185340.000000,110664.000000,60025.000000,167.176836)}
{pt3dadd(185268.000000,110508.000000,60050.000000,139.314042)}

{create adhoc146}
{access adhoc146}
{connect adhoc146(1), adhoc144(0)}
{nseg = 1}
{strdef color color = "White"}
{pt3dclear()}
{pt3dadd(185232.000000,114348.000000,59050.000000,288.881586)}
{pt3dadd(184656.000000,114168.000000,58500.000000,288.881586)}
{pt3dadd(184572.000000,113988.000000,58325.000000,276.844851)}
{pt3dadd(184440.000000,113892.000000,57900.000000,264.808116)}
{pt3dadd(184260.000000,113532.000000,57475.000000,252.771381)}
{pt3dadd(184260.000000,113292.000000,57050.000000,240.734646)}
{pt3dadd(184248.000000,113100.000000,56750.000000,230.704038)}
{pt3dadd(184236.000000,113088.000000,56550.000000,220.673430)}
{pt3dadd(184224.000000,112920.000000,56350.000000,210.642822)}
{pt3dadd(184248.000000,112776.000000,56125.000000,200.612214)}
{pt3dadd(184572.000000,112584.000000,55975.000000,233.657060)}
{pt3dadd(184656.000000,112428.000000,55775.000000,266.701905)}
{pt3dadd(184800.000000,112452.000000,55600.000000,299.746750)}
{pt3dadd(184812.000000,112128.000000,55200.000000,332.791596)}
{pt3dadd(184944.000000,112128.000000,54925.000000,240.734646)}
{pt3dadd(185028.000000,112188.000000,54925.000000,288.881586)}

{create adhoc147}
{access adhoc147}
{connect adhoc147(1), adhoc146(0)}
{nseg = 1}
{strdef color color = "White"}
{pt3dclear()}
{pt3dadd(185028.000000,112188.000000,54925.000000,288.881586)}
{pt3dadd(185028.000000,111636.000000,54925.000000,116.095032)}
{pt3dadd(185076.000000,111360.000000,54925.000000,80.621550)}
{pt3dadd(185244.000000,110988.000000,54925.000000,167.176836)}

{create adhoc148}
{access adhoc148}
{connect adhoc148(1), adhoc146(0)}
{nseg = 1}
{strdef color color = "White"}
{pt3dclear()}
{pt3dadd(185028.000000,112188.000000,54925.000000,288.881586)}
{pt3dadd(185292.000000,111888.000000,54475.000000,288.881586)}
{pt3dadd(185304.000000,111708.000000,54250.000000,288.881586)}
{pt3dadd(185412.000000,111600.000000,54025.000000,288.881586)}
{pt3dadd(185604.000000,111516.000000,53800.000000,288.881586)}
{pt3dadd(185616.000000,111468.000000,53550.000000,288.881586)}
{pt3dadd(185712.000000,111432.000000,53400.000000,288.881586)}
{pt3dadd(185976.000000,111456.000000,53300.000000,288.881586)}
{pt3dadd(186264.000000,111492.000000,53225.000000,288.881586)}
{pt3dadd(186588.000000,111264.000000,52600.000000,288.881586)}
{pt3dadd(186720.000000,111156.000000,52350.000000,276.844851)}
{pt3dadd(186852.000000,111156.000000,52050.000000,264.808116)}
{pt3dadd(186996.000000,111096.000000,51775.000000,252.771381)}
{pt3dadd(187176.000000,110736.000000,51525.000000,240.734646)}
{pt3dadd(187296.000000,110364.000000,51275.000000,240.734646)}
{pt3dadd(187332.000000,110100.000000,51000.000000,240.734646)}
{pt3dadd(187548.000000,109848.000000,50700.000000,240.734646)}
{pt3dadd(187596.000000,109596.000000,50425.000000,240.734646)}
{pt3dadd(187608.000000,109320.000000,50175.000000,167.176836)}
{pt3dadd(187584.000000,109164.000000,50125.000000,167.176836)}

{create adhoc149}
{access adhoc149}
{connect adhoc149(1), adhoc12(0)}
{nseg = 1}
{strdef color color = "White"}
{pt3dclear()}
{pt3dadd(187956.000000,113772.000000,66925.000000,718.829820)}
{pt3dadd(187488.000000,113772.000000,67850.000000,240.734646)}
{pt3dadd(187380.000000,114000.000000,68200.000000,252.771381)}
{pt3dadd(187488.000000,114408.000000,68600.000000,264.808116)}
{pt3dadd(187608.000000,114804.000000,68875.000000,276.844851)}
{pt3dadd(187656.000000,114828.000000,68700.000000,288.881586)}
{pt3dadd(187692.000000,114948.000000,69000.000000,266.814243)}
{pt3dadd(187848.000000,115020.000000,69000.000000,244.746900)}
{pt3dadd(188052.000000,115188.000000,69300.000000,222.679557)}
{pt3dadd(188244.000000,115164.000000,69775.000000,200.612214)}
{pt3dadd(188400.000000,115116.000000,69950.000000,240.734646)}
{pt3dadd(188928.000000,114948.000000,70275.000000,200.612214)}

{create adhoc150}
{access adhoc150}
{connect adhoc150(1), adhoc149(0)}
{nseg = 1}
{strdef color color = "White"}
{pt3dclear()}
{pt3dadd(188928.000000,114948.000000,70275.000000,200.612214)}
{pt3dadd(189396.000000,115212.000000,70500.000000,200.612214)}
{pt3dadd(189648.000000,115308.000000,70750.000000,203.705816)}
{pt3dadd(189792.000000,115296.000000,70750.000000,206.799417)}
{pt3dadd(189912.000000,115164.000000,70700.000000,209.893019)}
{pt3dadd(190032.000000,115224.000000,70875.000000,212.986620)}
{pt3dadd(190152.000000,115212.000000,70850.000000,197.716692)}
{pt3dadd(189624.000000,115188.000000,71225.000000,182.446764)}
{pt3dadd(189444.000000,115056.000000,71475.000000,167.176836)}
{pt3dadd(189336.000000,115044.000000,71650.000000,139.314042)}

{create adhoc151}
{access adhoc151}
{connect adhoc151(1), adhoc149(0)}
{nseg = 1}
{strdef color color = "White"}
{pt3dclear()}
{pt3dadd(188928.000000,114948.000000,70275.000000,200.612214)}
{pt3dadd(188628.000000,114144.000000,70375.000000,200.612214)}
{pt3dadd(188676.000000,113904.000000,70550.000000,185.287671)}
{pt3dadd(188604.000000,113436.000000,70750.000000,169.963128)}
{pt3dadd(188628.000000,113292.000000,70900.000000,154.638585)}
{pt3dadd(188748.000000,113136.000000,71050.000000,139.314042)}
{pt3dadd(188724.000000,113172.000000,71225.000000,240.734646)}

{create adhoc152}
{access adhoc152}
{connect adhoc152(1), adhoc11(0)}
{nseg = 1}
{strdef color color = "White"}
{pt3dclear()}
{pt3dadd(187680.000000,109380.000000,67525.000000,575.063766)}
{pt3dadd(186912.000000,109284.000000,68650.000000,139.314042)}
{pt3dadd(186744.000000,109044.000000,68875.000000,176.705928)}
{pt3dadd(186732.000000,108888.000000,68950.000000,214.097814)}
{pt3dadd(186624.000000,108732.000000,69275.000000,251.489700)}
{pt3dadd(186492.000000,108624.000000,69550.000000,288.881586)}
{pt3dadd(186384.000000,108480.000000,69775.000000,288.881586)}
{pt3dadd(186216.000000,108204.000000,70125.000000,288.881586)}
{pt3dadd(186108.000000,108108.000000,70350.000000,288.881586)}
{pt3dadd(186024.000000,107928.000000,70700.000000,288.881586)}
{pt3dadd(185868.000000,108228.000000,71125.000000,276.844851)}
{pt3dadd(185856.000000,108216.000000,71375.000000,264.808116)}
{pt3dadd(185808.000000,108204.000000,71625.000000,252.771381)}
{pt3dadd(185796.000000,108360.000000,71900.000000,240.734646)}
{pt3dadd(186000.000000,108372.000000,72225.000000,209.574742)}
{pt3dadd(186168.000000,108384.000000,72500.000000,178.414839)}
{pt3dadd(186312.000000,108612.000000,72650.000000,147.254936)}
{pt3dadd(186528.000000,108864.000000,72850.000000,116.095032)}
{pt3dadd(186732.000000,109020.000000,73025.000000,144.267426)}
{pt3dadd(186936.000000,109356.000000,73150.000000,172.439820)}
{pt3dadd(187032.000000,109476.000000,73400.000000,200.612214)}
{pt3dadd(187080.000000,109368.000000,73550.000000,96.745860)}
