# Supplementary material for: Full reconstruction of large lobula plate tangential cells in Drosophila from a 3D EM dataset
Source: PLoS One. 2018 Nov 28;13(11):e0207828. doi: 10.1371/journal.pone.0207828 (PMC6261601; doi:10.1371/journal.pone.0207828)
Supplement: S1 Dataset — (ZIP) [file pone.0207828.s001.zip › Diameter hoc/VS_VSL_preliminary/Old Diameters Mar13_VS_VSL_HS/VS3/2_14_808_smaurer_003.035.hoc]

/* created with nml2hocm */

{create adhoc1}
{access adhoc1}
{nseg = 1}
{strdef color color = "White"}
{pt3dclear()}
{pt3dadd(187680.000000,130164.000000,55550.000000,240.734646)}
{pt3dadd(187536.000000,129984.000000,55525.000000,231.105276)}
{pt3dadd(187416.000000,129816.000000,55700.000000,215.858745)}
{pt3dadd(187500.000000,129564.000000,55775.000000,200.612214)}
{pt3dadd(187440.000000,129384.000000,55675.000000,192.253370)}
{pt3dadd(187320.000000,129204.000000,55675.000000,183.894525)}
{pt3dadd(187164.000000,129012.000000,55625.000000,175.535680)}
{pt3dadd(187296.000000,128880.000000,55475.000000,167.176836)}
{pt3dadd(187320.000000,128676.000000,55450.000000,185.566288)}
{pt3dadd(187176.000000,128532.000000,55475.000000,203.955741)}
{pt3dadd(187164.000000,128388.000000,55475.000000,222.345193)}
{pt3dadd(187164.000000,128184.000000,55550.000000,240.734646)}
{pt3dadd(187152.000000,128052.000000,55650.000000,267.215459)}
{pt3dadd(187080.000000,127896.000000,55750.000000,293.696271)}
{pt3dadd(187104.000000,127716.000000,55750.000000,320.177083)}
{pt3dadd(186936.000000,127596.000000,55950.000000,346.657896)}
{pt3dadd(186792.000000,127140.000000,56200.000000,288.881586)}

{create adhoc2}
{access adhoc2}
{connect adhoc2(1), adhoc1(0)}
{nseg = 1}
{strdef color color = "White"}
{pt3dclear()}
{pt3dadd(186792.000000,127140.000000,56200.000000,288.881586)}
{pt3dadd(186492.000000,126720.000000,56000.000000,346.657896)}
{pt3dadd(186408.000000,126612.000000,55700.000000,346.657896)}
{pt3dadd(186300.000000,126480.000000,55450.000000,346.657896)}
{pt3dadd(186072.000000,126324.000000,55225.000000,346.657896)}
{pt3dadd(186168.000000,126396.000000,55000.000000,346.657896)}
{pt3dadd(186144.000000,126180.000000,54775.000000,332.213819)}
{pt3dadd(186180.000000,126192.000000,54500.000000,317.769741)}
{pt3dadd(186132.000000,126108.000000,54325.000000,303.325664)}
{pt3dadd(186360.000000,126024.000000,54100.000000,288.881586)}
{pt3dadd(186480.000000,125880.000000,53875.000000,288.881586)}
{pt3dadd(186720.000000,125688.000000,53625.000000,288.881586)}
{pt3dadd(186696.000000,125556.000000,53425.000000,288.881586)}
{pt3dadd(186924.000000,125628.000000,53275.000000,288.881586)}
{pt3dadd(186840.000000,125808.000000,53125.000000,288.881586)}
{pt3dadd(186792.000000,125808.000000,52975.000000,288.881586)}

{create adhoc3}
{access adhoc3}
{connect adhoc3(1), adhoc1(0)}
{nseg = 1}
{strdef color color = "White"}
{pt3dclear()}
{pt3dadd(186792.000000,127140.000000,56200.000000,288.881586)}
{pt3dadd(186612.000000,126912.000000,56400.000000,415.989486)}
{pt3dadd(186684.000000,126960.000000,56600.000000,507.507183)}
{pt3dadd(186816.000000,126900.000000,56775.000000,599.024880)}
{pt3dadd(186948.000000,126840.000000,57000.000000,574.065504)}
{pt3dadd(186876.000000,126840.000000,57275.000000,549.106128)}
{pt3dadd(187020.000000,126684.000000,57450.000000,524.146752)}
{pt3dadd(186972.000000,126540.000000,57750.000000,499.187376)}
{pt3dadd(186912.000000,126396.000000,58000.000000,461.055006)}
{pt3dadd(187020.000000,126240.000000,58250.000000,422.922636)}
{pt3dadd(187008.000000,126228.000000,58500.000000,384.790266)}
{pt3dadd(187164.000000,126132.000000,58625.000000,346.657896)}
{pt3dadd(187308.000000,125904.000000,58825.000000,409.749642)}
{pt3dadd(187272.000000,125676.000000,59025.000000,472.841388)}
{pt3dadd(187380.000000,125664.000000,59250.000000,535.933134)}
{pt3dadd(187488.000000,125652.000000,59500.000000,599.024880)}
{pt3dadd(187308.000000,125304.000000,59750.000000,553.266031)}
{pt3dadd(187392.000000,125292.000000,60000.000000,507.507183)}
{pt3dadd(187476.000000,125280.000000,60200.000000,461.748335)}
{pt3dadd(188112.000000,125496.000000,60450.000000,415.989486)}
{pt3dadd(190140.000000,125508.000000,61950.000000,718.829820)}

{create adhoc4}
{access adhoc4}
{connect adhoc4(1), adhoc3(0)}
{nseg = 1}
{strdef color color = "White"}
{pt3dclear()}
{pt3dadd(190140.000000,125508.000000,61950.000000,718.829820)}
{pt3dadd(190044.000000,125832.000000,61800.000000,718.829820)}
{pt3dadd(189948.000000,126024.000000,61650.000000,790.712811)}
{pt3dadd(189936.000000,126228.000000,61625.000000,862.595802)}
{pt3dadd(190044.000000,126372.000000,61675.000000,826.654307)}
{pt3dadd(190152.000000,126696.000000,61725.000000,790.712811)}
{pt3dadd(190284.000000,126876.000000,61675.000000,754.771316)}
{pt3dadd(190212.000000,127044.000000,61600.000000,718.829820)}
{pt3dadd(190236.000000,127188.000000,61325.000000,746.145369)}
{pt3dadd(190260.000000,127308.000000,61475.000000,773.460918)}
{pt3dadd(190452.000000,127488.000000,61725.000000,800.776467)}
{pt3dadd(190704.000000,127764.000000,61775.000000,828.092016)}
{pt3dadd(190776.000000,128016.000000,61550.000000,836.717962)}
{pt3dadd(190848.000000,128172.000000,61500.000000,845.343909)}
{pt3dadd(190920.000000,128412.000000,61450.000000,853.969856)}
{pt3dadd(190992.000000,128652.000000,61400.000000,862.595802)}
{pt3dadd(191244.000000,128940.000000,61375.000000,796.703072)}
{pt3dadd(190932.000000,129108.000000,61350.000000,730.810341)}
{pt3dadd(191088.000000,129432.000000,61275.000000,664.917611)}
{pt3dadd(191244.000000,129876.000000,61200.000000,599.024880)}
{pt3dadd(191484.000000,130824.000000,60925.000000,628.976115)}
{pt3dadd(191568.000000,131280.000000,60950.000000,658.927350)}
{pt3dadd(191868.000000,131736.000000,60850.000000,688.878585)}
{pt3dadd(191940.000000,131976.000000,60750.000000,718.829820)}
{pt3dadd(192012.000000,132420.000000,60650.000000,718.829820)}
{pt3dadd(192036.000000,132612.000000,60550.000000,718.829820)}
{pt3dadd(192060.000000,132732.000000,60450.000000,718.829820)}
{pt3dadd(191940.000000,132876.000000,60425.000000,718.829820)}
{pt3dadd(191988.000000,133032.000000,60450.000000,754.771316)}
{pt3dadd(192036.000000,133164.000000,60500.000000,790.712811)}
{pt3dadd(192084.000000,133308.000000,60550.000000,826.654307)}
{pt3dadd(192132.000000,133452.000000,60600.000000,862.595802)}
{pt3dadd(192180.000000,133896.000000,60650.000000,953.961894)}

{create adhoc5}
{access adhoc5}
{connect adhoc5(1), adhoc4(0)}
{nseg = 1}
{strdef color color = "White"}
{pt3dclear()}
{pt3dadd(192180.000000,133896.000000,60650.000000,953.961894)}
{pt3dadd(192456.000000,134160.000000,61000.000000,862.595802)}

{create adhoc6}
{access adhoc6}
{connect adhoc6(1), adhoc5(0)}
{nseg = 1}
{strdef color color = "White"}
{pt3dclear()}
{pt3dadd(192456.000000,134160.000000,61000.000000,862.595802)}
{pt3dadd(191892.000000,133932.000000,62925.000000,599.024880)}
{pt3dadd(191820.000000,133716.000000,62825.000000,574.065504)}
{pt3dadd(191652.000000,133560.000000,62975.000000,549.106128)}
{pt3dadd(191580.000000,133248.000000,63125.000000,524.146752)}
{pt3dadd(191508.000000,133056.000000,63275.000000,499.187376)}
{pt3dadd(191292.000000,132588.000000,63400.000000,524.146752)}
{pt3dadd(191364.000000,132084.000000,63850.000000,549.106128)}
{pt3dadd(191292.000000,131928.000000,63925.000000,574.065504)}
{pt3dadd(191304.000000,131736.000000,63950.000000,599.024880)}
{pt3dadd(191364.000000,131604.000000,63925.000000,599.024880)}
{pt3dadd(191280.000000,131328.000000,64075.000000,599.024880)}
{pt3dadd(191352.000000,131160.000000,64325.000000,599.024880)}
{pt3dadd(191388.000000,130896.000000,64425.000000,599.024880)}
{pt3dadd(191424.000000,130752.000000,64525.000000,599.024880)}
{pt3dadd(191460.000000,130608.000000,64625.000000,599.024880)}
{pt3dadd(191496.000000,130488.000000,64725.000000,599.024880)}
{pt3dadd(191532.000000,130368.000000,64825.000000,599.024880)}
{pt3dadd(191400.000000,130212.000000,64850.000000,599.024880)}
{pt3dadd(191520.000000,130008.000000,64900.000000,599.024880)}
{pt3dadd(191496.000000,129756.000000,65075.000000,599.024880)}
{pt3dadd(191496.000000,129420.000000,65400.000000,599.024880)}
{pt3dadd(191496.000000,129216.000000,65425.000000,574.065504)}
{pt3dadd(191508.000000,129036.000000,65625.000000,549.106128)}
{pt3dadd(191664.000000,128808.000000,65900.000000,524.146752)}
{pt3dadd(191892.000000,128400.000000,66400.000000,499.187376)}
{pt3dadd(191736.000000,128124.000000,66675.000000,590.039483)}
{pt3dadd(191724.000000,127908.000000,67000.000000,680.891589)}
{pt3dadd(191700.000000,127692.000000,67300.000000,771.743696)}
{pt3dadd(191712.000000,127476.000000,67575.000000,862.595802)}
{pt3dadd(191712.000000,127176.000000,67775.000000,639.292644)}
{pt3dadd(191712.000000,126480.000000,68025.000000,415.989486)}
{pt3dadd(191664.000000,125892.000000,68300.000000,332.791596)}

{create adhoc7}
{access adhoc7}
{connect adhoc7(1), adhoc6(0)}
{nseg = 1}
{strdef color color = "White"}
{pt3dclear()}
{pt3dadd(191664.000000,125892.000000,68300.000000,332.791596)}
{pt3dadd(191532.000000,125760.000000,68300.000000,332.791596)}
{pt3dadd(191508.000000,125376.000000,68300.000000,353.591069)}
{pt3dadd(191460.000000,124956.000000,68450.000000,374.390541)}
{pt3dadd(191460.000000,124728.000000,68450.000000,395.190014)}
{pt3dadd(191352.000000,124524.000000,68600.000000,415.989486)}
{pt3dadd(191280.000000,124356.000000,68675.000000,436.788958)}
{pt3dadd(191400.000000,124212.000000,68750.000000,457.588431)}
{pt3dadd(191640.000000,123972.000000,69100.000000,478.387903)}
{pt3dadd(191700.000000,123696.000000,69350.000000,499.187376)}
{pt3dadd(191784.000000,123672.000000,69575.000000,499.187376)}
{pt3dadd(191880.000000,123540.000000,69875.000000,499.187376)}
{pt3dadd(191748.000000,123384.000000,70125.000000,499.187376)}
{pt3dadd(191664.000000,123216.000000,70300.000000,499.187376)}
{pt3dadd(191532.000000,123048.000000,70525.000000,499.187376)}
{pt3dadd(191412.000000,122880.000000,70825.000000,499.187376)}
{pt3dadd(191352.000000,122772.000000,71150.000000,499.187376)}
{pt3dadd(191160.000000,122616.000000,71350.000000,499.187376)}
{pt3dadd(190968.000000,122172.000000,71825.000000,499.187376)}
{pt3dadd(190920.000000,121752.000000,72100.000000,288.881586)}

{create adhoc8}
{access adhoc8}
{connect adhoc8(1), adhoc7(0)}
{nseg = 1}
{strdef color color = "White"}
{pt3dclear()}
{pt3dadd(190920.000000,121752.000000,72100.000000,288.881586)}
{pt3dadd(190848.000000,121536.000000,71950.000000,240.734646)}
{pt3dadd(190860.000000,121356.000000,72050.000000,252.771381)}
{pt3dadd(190836.000000,121164.000000,72050.000000,264.808116)}
{pt3dadd(190812.000000,121044.000000,72050.000000,276.844851)}
{pt3dadd(190824.000000,120828.000000,72225.000000,288.881586)}
{pt3dadd(190800.000000,120648.000000,72325.000000,288.881586)}
{pt3dadd(190776.000000,120492.000000,72400.000000,288.881586)}
{pt3dadd(190872.000000,120216.000000,72550.000000,288.881586)}
{pt3dadd(190968.000000,120060.000000,72550.000000,288.881586)}
{pt3dadd(190968.000000,119916.000000,72675.000000,320.658561)}
{pt3dadd(191004.000000,119832.000000,72900.000000,352.435536)}
{pt3dadd(191316.000000,119352.000000,73150.000000,384.212511)}
{pt3dadd(191400.000000,119100.000000,73450.000000,415.989486)}
{pt3dadd(191496.000000,118848.000000,73650.000000,398.656589)}
{pt3dadd(191676.000000,118488.000000,73850.000000,381.323691)}
{pt3dadd(191916.000000,117768.000000,74100.000000,363.990794)}
{pt3dadd(191916.000000,117528.000000,74300.000000,346.657896)}
{pt3dadd(191868.000000,117360.000000,74500.000000,332.213819)}
{pt3dadd(191880.000000,117120.000000,74725.000000,317.769741)}
{pt3dadd(191892.000000,116880.000000,74925.000000,303.325664)}
{pt3dadd(192072.000000,116628.000000,75100.000000,288.881586)}
{pt3dadd(192048.000000,116268.000000,75325.000000,276.844851)}
{pt3dadd(191724.000000,116136.000000,75575.000000,264.808116)}
{pt3dadd(191844.000000,116076.000000,75825.000000,252.771381)}
{pt3dadd(191460.000000,115824.000000,76100.000000,240.734646)}
{pt3dadd(191160.000000,115416.000000,76600.000000,240.734646)}
{pt3dadd(190920.000000,114324.000000,77025.000000,240.734646)}
{pt3dadd(190752.000000,113856.000000,77350.000000,240.734646)}
{pt3dadd(190812.000000,113724.000000,77600.000000,240.734646)}
{pt3dadd(190644.000000,113616.000000,77975.000000,252.771381)}
{pt3dadd(190572.000000,113472.000000,78250.000000,264.808116)}
{pt3dadd(190548.000000,113448.000000,78750.000000,276.844851)}
{pt3dadd(190608.000000,113340.000000,79050.000000,288.881586)}
{pt3dadd(190608.000000,113208.000000,79275.000000,258.455399)}
{pt3dadd(190584.000000,113160.000000,79550.000000,228.029211)}
{pt3dadd(190560.000000,112992.000000,79875.000000,197.603024)}
{pt3dadd(190284.000000,112272.000000,80275.000000,167.176836)}
{pt3dadd(190512.000000,111492.000000,80850.000000,167.176836)}

{create adhoc9}
{access adhoc9}
{connect adhoc9(1), adhoc7(0)}
{nseg = 1}
{strdef color color = "White"}
{pt3dclear()}
{pt3dadd(190920.000000,121752.000000,72100.000000,288.881586)}
{pt3dadd(190872.000000,122244.000000,72300.000000,599.024880)}
{pt3dadd(190764.000000,122424.000000,72550.000000,553.266031)}
{pt3dadd(190764.000000,122484.000000,72825.000000,507.507183)}
{pt3dadd(191028.000000,122640.000000,73050.000000,461.748335)}
{pt3dadd(190956.000000,122748.000000,73300.000000,415.989486)}
{pt3dadd(191052.000000,123036.000000,73625.000000,384.212511)}
{pt3dadd(191172.000000,123108.000000,73900.000000,352.435536)}
{pt3dadd(191316.000000,123204.000000,74150.000000,320.658561)}
{pt3dadd(191628.000000,123636.000000,74500.000000,288.881586)}
{pt3dadd(191736.000000,123696.000000,74750.000000,276.844851)}
{pt3dadd(191880.000000,123876.000000,75325.000000,264.808116)}
{pt3dadd(191724.000000,123828.000000,75750.000000,252.771381)}
{pt3dadd(192048.000000,124008.000000,76075.000000,240.734646)}
{pt3dadd(192084.000000,124068.000000,76375.000000,240.734646)}
{pt3dadd(192120.000000,123900.000000,76625.000000,240.734646)}
{pt3dadd(192192.000000,123828.000000,76850.000000,240.734646)}
{pt3dadd(192168.000000,123744.000000,77100.000000,240.734646)}
{pt3dadd(192396.000000,123720.000000,77350.000000,240.734646)}
{pt3dadd(192552.000000,123756.000000,77575.000000,240.734646)}
{pt3dadd(192624.000000,123588.000000,77900.000000,240.734646)}
{pt3dadd(192636.000000,123540.000000,78075.000000,240.734646)}
{pt3dadd(192816.000000,123456.000000,78300.000000,215.379495)}
{pt3dadd(192888.000000,123348.000000,78550.000000,190.024344)}
{pt3dadd(192984.000000,122964.000000,78750.000000,164.669193)}
{pt3dadd(192996.000000,122628.000000,78975.000000,139.314042)}
{pt3dadd(192996.000000,122268.000000,79225.000000,153.245439)}
{pt3dadd(193032.000000,121656.000000,79400.000000,167.176836)}
{pt3dadd(193692.000000,121500.000000,79700.000000,116.095032)}

{create adhoc10}
{access adhoc10}
{connect adhoc10(1), adhoc6(0)}
{nseg = 1}
{strdef color color = "White"}
{pt3dclear()}
{pt3dadd(191664.000000,125892.000000,68300.000000,332.791596)}
{pt3dadd(191736.000000,127728.000000,68450.000000,599.024880)}
{pt3dadd(191796.000000,127764.000000,68725.000000,545.112648)}
{pt3dadd(191856.000000,127992.000000,69025.000000,491.200416)}
{pt3dadd(191916.000000,128220.000000,69275.000000,437.288184)}
{pt3dadd(191952.000000,128736.000000,69575.000000,383.375952)}
{pt3dadd(192240.000000,129000.000000,69750.000000,391.529336)}
{pt3dadd(192276.000000,129096.000000,69975.000000,399.682719)}
{pt3dadd(192516.000000,129468.000000,70125.000000,407.836103)}
{pt3dadd(192648.000000,129612.000000,70400.000000,415.989486)}
{pt3dadd(192804.000000,129840.000000,70600.000000,398.656589)}
{pt3dadd(192960.000000,130068.000000,70875.000000,381.323691)}
{pt3dadd(193932.000000,131184.000000,71375.000000,363.990794)}
{pt3dadd(193860.000000,131304.000000,71475.000000,346.657896)}
{pt3dadd(193920.000000,131520.000000,71450.000000,363.990794)}
{pt3dadd(193980.000000,131688.000000,71425.000000,381.323691)}
{pt3dadd(194220.000000,131868.000000,71525.000000,398.656589)}
{pt3dadd(194364.000000,132084.000000,71425.000000,415.989486)}
{pt3dadd(194424.000000,132216.000000,71725.000000,398.656589)}
{pt3dadd(194616.000000,132372.000000,71725.000000,381.323691)}
{pt3dadd(194712.000000,132504.000000,71850.000000,363.990794)}
{pt3dadd(194664.000000,132660.000000,71875.000000,346.657896)}
{pt3dadd(194640.000000,132852.000000,72125.000000,346.657896)}
{pt3dadd(194532.000000,133008.000000,72250.000000,346.657896)}
{pt3dadd(194424.000000,133176.000000,72375.000000,346.657896)}
{pt3dadd(194544.000000,133608.000000,72575.000000,599.024880)}

{create adhoc11}
{access adhoc11}
{connect adhoc11(1), adhoc10(0)}
{nseg = 1}
{strdef color color = "White"}
{pt3dclear()}
{pt3dadd(194544.000000,133608.000000,72575.000000,599.024880)}
{pt3dadd(194748.000000,133968.000000,72800.000000,399.349908)}
{pt3dadd(194700.000000,134172.000000,72850.000000,359.696092)}
{pt3dadd(194652.000000,134304.000000,72800.000000,320.042277)}
{pt3dadd(194628.000000,134484.000000,72800.000000,280.388462)}
{pt3dadd(194580.000000,134616.000000,72875.000000,240.734646)}
{pt3dadd(194580.000000,134808.000000,72825.000000,230.704038)}
{pt3dadd(194508.000000,134940.000000,72825.000000,220.673430)}
{pt3dadd(194460.000000,135096.000000,72900.000000,210.642822)}
{pt3dadd(194496.000000,135204.000000,72825.000000,200.612214)}
{pt3dadd(194364.000000,135312.000000,72775.000000,192.253370)}
{pt3dadd(194364.000000,135468.000000,72600.000000,183.894525)}
{pt3dadd(194280.000000,135588.000000,72450.000000,175.535680)}
{pt3dadd(194256.000000,135768.000000,72425.000000,167.176836)}
{pt3dadd(194016.000000,135924.000000,72325.000000,229.379999)}
{pt3dadd(193800.000000,136068.000000,72225.000000,291.583161)}
{pt3dadd(193776.000000,136212.000000,72100.000000,353.786324)}
{pt3dadd(193500.000000,136344.000000,71925.000000,415.989486)}
{pt3dadd(193284.000000,136608.000000,71600.000000,392.878956)}
{pt3dadd(192852.000000,136272.000000,71400.000000,369.768426)}
{pt3dadd(192684.000000,136116.000000,71175.000000,346.657896)}
{pt3dadd(192444.000000,136044.000000,70950.000000,139.314042)}

{create adhoc12}
{access adhoc12}
{connect adhoc12(1), adhoc10(0)}
{nseg = 1}
{strdef color color = "White"}
{pt3dclear()}
{pt3dadd(194544.000000,133608.000000,72575.000000,599.024880)}
{pt3dadd(194580.000000,133764.000000,73100.000000,415.989486)}
{pt3dadd(194364.000000,133524.000000,73375.000000,415.989486)}
{pt3dadd(194244.000000,133536.000000,73625.000000,415.989486)}
{pt3dadd(194220.000000,133464.000000,73825.000000,415.989486)}
{pt3dadd(194280.000000,133392.000000,74075.000000,415.989486)}
{pt3dadd(194136.000000,133320.000000,74350.000000,381.323687)}
{pt3dadd(194196.000000,133296.000000,74575.000000,346.657887)}
{pt3dadd(194208.000000,133212.000000,74800.000000,311.992088)}
{pt3dadd(194136.000000,133128.000000,75050.000000,277.326288)}
{pt3dadd(193980.000000,132852.000000,75225.000000,277.326297)}
{pt3dadd(193884.000000,132384.000000,75675.000000,277.326306)}
{pt3dadd(193956.000000,132108.000000,76125.000000,277.326315)}
{pt3dadd(194064.000000,132084.000000,76425.000000,277.326324)}
{pt3dadd(193896.000000,132120.000000,77000.000000,200.612214)}

{create adhoc13}
{access adhoc13}
{connect adhoc13(1), adhoc5(0)}
{nseg = 1}
{strdef color color = "White"}
{pt3dclear()}
{pt3dadd(192456.000000,134160.000000,61000.000000,862.595802)}
{pt3dadd(192480.000000,134232.000000,61100.000000,862.595802)}
{pt3dadd(192504.000000,134448.000000,61225.000000,905.725589)}
{pt3dadd(192528.000000,134928.000000,61075.000000,948.855375)}
{pt3dadd(192516.000000,135108.000000,61025.000000,991.985162)}
{pt3dadd(192600.000000,135444.000000,61025.000000,1035.114948)}
{pt3dadd(192588.000000,135684.000000,61025.000000,1035.114948)}
{pt3dadd(192552.000000,136200.000000,60950.000000,1035.114948)}
{pt3dadd(192492.000000,136428.000000,60975.000000,1035.114948)}
{pt3dadd(192432.000000,136644.000000,61000.000000,1035.114948)}
{pt3dadd(192516.000000,136872.000000,60925.000000,991.985162)}
{pt3dadd(192444.000000,137376.000000,60625.000000,948.855375)}
{pt3dadd(192468.000000,137988.000000,60550.000000,905.725589)}
{pt3dadd(192492.000000,138192.000000,60475.000000,862.595802)}
{pt3dadd(192516.000000,138420.000000,60400.000000,905.725589)}
{pt3dadd(192540.000000,138708.000000,60325.000000,948.855375)}
{pt3dadd(192528.000000,138924.000000,60350.000000,991.985162)}
{pt3dadd(192516.000000,139080.000000,60200.000000,1035.114948)}
{pt3dadd(192588.000000,139260.000000,60200.000000,1035.114948)}
{pt3dadd(192660.000000,139452.000000,60200.000000,1035.114948)}
{pt3dadd(192648.000000,139632.000000,60050.000000,1035.114948)}
{pt3dadd(192636.000000,139776.000000,59900.000000,1035.114948)}
{pt3dadd(192852.000000,139944.000000,59950.000000,1242.137880)}

{create adhoc14}
{access adhoc14}
{connect adhoc14(1), adhoc13(0)}
{nseg = 1}
{strdef color color = "White"}
{pt3dclear()}
{pt3dadd(192852.000000,139944.000000,59950.000000,1242.137880)}
{pt3dadd(191412.000000,140040.000000,59025.000000,116.095032)}
{pt3dadd(191268.000000,140100.000000,59025.000000,121.899785)}
{pt3dadd(191100.000000,139968.000000,58925.000000,127.704537)}
{pt3dadd(190932.000000,139884.000000,58875.000000,133.509289)}
{pt3dadd(190752.000000,139836.000000,58775.000000,139.314042)}
{pt3dadd(190572.000000,139812.000000,58775.000000,139.314042)}
{pt3dadd(190356.000000,139788.000000,58700.000000,139.314042)}
{pt3dadd(190212.000000,139716.000000,58650.000000,139.314042)}
{pt3dadd(190080.000000,139692.000000,58575.000000,139.314042)}
{pt3dadd(189972.000000,139560.000000,58550.000000,139.314042)}
{pt3dadd(189852.000000,139536.000000,58575.000000,139.314042)}
{pt3dadd(189672.000000,139380.000000,58575.000000,139.314042)}
{pt3dadd(189540.000000,139296.000000,58525.000000,139.314042)}
{pt3dadd(189384.000000,139164.000000,58450.000000,154.638585)}
{pt3dadd(189252.000000,139116.000000,58450.000000,169.963128)}
{pt3dadd(189072.000000,139008.000000,58450.000000,185.287671)}
{pt3dadd(188952.000000,138876.000000,58400.000000,200.612214)}
{pt3dadd(188856.000000,138888.000000,58300.000000,200.612214)}
{pt3dadd(188724.000000,138864.000000,58275.000000,200.612214)}
{pt3dadd(188484.000000,138672.000000,58275.000000,200.612214)}
{pt3dadd(188304.000000,138624.000000,58175.000000,200.612214)}
{pt3dadd(188148.000000,138516.000000,58125.000000,210.642822)}
{pt3dadd(187872.000000,138516.000000,58000.000000,220.673430)}
{pt3dadd(187656.000000,138384.000000,58000.000000,230.704038)}
{pt3dadd(187332.000000,138312.000000,58050.000000,240.734646)}
{pt3dadd(187092.000000,138240.000000,58100.000000,284.548356)}
{pt3dadd(186804.000000,137988.000000,58250.000000,328.362066)}
{pt3dadd(186564.000000,137988.000000,58725.000000,372.175776)}
{pt3dadd(186600.000000,137772.000000,59075.000000,415.989486)}
{pt3dadd(186696.000000,137748.000000,59500.000000,240.734646)}

{create adhoc15}
{access adhoc15}
{connect adhoc15(1), adhoc13(0)}
{nseg = 1}
{strdef color color = "White"}
{pt3dclear()}
{pt3dadd(192852.000000,139944.000000,59950.000000,1242.137880)}
{pt3dadd(192900.000000,140208.000000,59775.000000,1242.137880)}
{pt3dadd(192948.000000,140520.000000,59900.000000,1242.137880)}

{create adhoc16}
{access adhoc16}
{connect adhoc16(1), adhoc15(0)}
{nseg = 1}
{strdef color color = "White"}
{pt3dclear()}
{pt3dadd(192948.000000,140520.000000,59900.000000,1242.137880)}
{pt3dadd(193068.000000,140520.000000,61750.000000,499.187376)}
{pt3dadd(192972.000000,140280.000000,62300.000000,499.187376)}
{pt3dadd(192744.000000,140208.000000,62600.000000,499.187376)}
{pt3dadd(192612.000000,140328.000000,62950.000000,499.187376)}
{pt3dadd(192648.000000,140424.000000,63100.000000,599.024880)}

{create adhoc17}
{access adhoc17}
{connect adhoc17(1), adhoc16(0)}
{nseg = 1}
{strdef color color = "White"}
{pt3dclear()}
{pt3dadd(192648.000000,140424.000000,63100.000000,599.024880)}
{pt3dadd(192792.000000,140628.000000,63425.000000,599.024880)}
{pt3dadd(192684.000000,140664.000000,63800.000000,638.959860)}
{pt3dadd(192744.000000,140700.000000,64125.000000,678.894840)}
{pt3dadd(192612.000000,140676.000000,64425.000000,718.829820)}
{pt3dadd(192624.000000,140676.000000,64725.000000,499.187376)}

{create adhoc18}
{access adhoc18}
{connect adhoc18(1), adhoc17(0)}
{nseg = 1}
{strdef color color = "White"}
{pt3dclear()}
{pt3dadd(192624.000000,140676.000000,64725.000000,499.187376)}
{pt3dadd(192516.000000,140004.000000,65000.000000,288.881586)}
{pt3dadd(192528.000000,139584.000000,65325.000000,266.814243)}
{pt3dadd(192480.000000,139392.000000,65675.000000,244.746900)}
{pt3dadd(192348.000000,138804.000000,65900.000000,222.679557)}
{pt3dadd(192312.000000,138528.000000,65925.000000,200.612214)}
{pt3dadd(192516.000000,137916.000000,66300.000000,222.679557)}
{pt3dadd(192468.000000,137928.000000,66550.000000,244.746900)}
{pt3dadd(192276.000000,137772.000000,66775.000000,266.814243)}
{pt3dadd(192168.000000,137532.000000,67000.000000,288.881586)}
{pt3dadd(192096.000000,137316.000000,67250.000000,258.455399)}
{pt3dadd(191856.000000,137184.000000,67500.000000,228.029211)}
{pt3dadd(191412.000000,136536.000000,67650.000000,197.603024)}
{pt3dadd(191232.000000,136488.000000,67725.000000,167.176836)}
{pt3dadd(190992.000000,136080.000000,67675.000000,175.535680)}
{pt3dadd(190488.000000,135432.000000,67325.000000,183.894525)}
{pt3dadd(190164.000000,134904.000000,66975.000000,192.253370)}
{pt3dadd(190092.000000,134652.000000,66775.000000,200.612214)}
{pt3dadd(190044.000000,134316.000000,66550.000000,167.176836)}

{create adhoc19}
{access adhoc19}
{connect adhoc19(1), adhoc17(0)}
{nseg = 1}
{strdef color color = "White"}
{pt3dclear()}
{pt3dadd(192624.000000,140676.000000,64725.000000,499.187376)}
{pt3dadd(192432.000000,141252.000000,64925.000000,231.105312)}
{pt3dadd(192264.000000,141456.000000,65175.000000,256.526883)}
{pt3dadd(192132.000000,141636.000000,65400.000000,281.948454)}
{pt3dadd(192108.000000,141816.000000,65675.000000,307.370025)}
{pt3dadd(192024.000000,142020.000000,66000.000000,332.791596)}
{pt3dadd(192168.000000,141720.000000,66425.000000,382.088403)}
{pt3dadd(192024.000000,141924.000000,66750.000000,431.385210)}
{pt3dadd(191868.000000,141984.000000,67125.000000,480.682017)}
{pt3dadd(191964.000000,142044.000000,67325.000000,529.978824)}
{pt3dadd(191892.000000,142104.000000,67550.000000,501.481490)}
{pt3dadd(191892.000000,142248.000000,67800.000000,472.984155)}
{pt3dadd(192012.000000,142488.000000,68125.000000,444.486821)}
{pt3dadd(192084.000000,142716.000000,68375.000000,415.989486)}
{pt3dadd(192168.000000,142752.000000,68700.000000,384.212511)}
{pt3dadd(192180.000000,142680.000000,68975.000000,352.435536)}
{pt3dadd(192276.000000,143136.000000,69250.000000,320.658561)}
{pt3dadd(192312.000000,143316.000000,69550.000000,288.881586)}
{pt3dadd(192516.000000,143424.000000,69550.000000,276.844851)}
{pt3dadd(192864.000000,144228.000000,69925.000000,264.808116)}
{pt3dadd(192864.000000,144396.000000,69925.000000,252.771381)}
{pt3dadd(193092.000000,144576.000000,69925.000000,240.734646)}
{pt3dadd(193164.000000,144732.000000,69850.000000,230.704038)}
{pt3dadd(193236.000000,144888.000000,70000.000000,220.673430)}
{pt3dadd(193380.000000,145044.000000,70100.000000,210.642822)}
{pt3dadd(193560.000000,145224.000000,70200.000000,200.612214)}
{pt3dadd(193704.000000,145392.000000,70300.000000,192.253370)}
{pt3dadd(193860.000000,145548.000000,70300.000000,183.894525)}
{pt3dadd(194064.000000,145704.000000,70475.000000,175.535680)}
{pt3dadd(194136.000000,145848.000000,70475.000000,167.176836)}
{pt3dadd(194136.000000,146028.000000,70400.000000,139.314042)}
{pt3dadd(194028.000000,146160.000000,70350.000000,167.176836)}

{create adhoc20}
{access adhoc20}
{connect adhoc20(1), adhoc16(0)}
{nseg = 1}
{strdef color color = "White"}
{pt3dclear()}
{pt3dadd(192648.000000,140424.000000,63100.000000,599.024880)}
{pt3dadd(192012.000000,140016.000000,63100.000000,116.095032)}
{pt3dadd(191028.000000,139584.000000,63100.000000,144.267426)}
{pt3dadd(190356.000000,138960.000000,63100.000000,172.439820)}
{pt3dadd(189996.000000,138636.000000,63400.000000,200.612214)}
{pt3dadd(189660.000000,138480.000000,63725.000000,139.314042)}

{create adhoc21}
{access adhoc21}
{connect adhoc21(1), adhoc15(0)}
{nseg = 1}
{strdef color color = "White"}
{pt3dclear()}
{pt3dadd(192948.000000,140520.000000,59900.000000,1242.137880)}
{pt3dadd(192912.000000,140712.000000,59750.000000,1242.137880)}
{pt3dadd(192996.000000,140952.000000,59600.000000,1225.576038)}
{pt3dadd(193080.000000,141204.000000,59450.000000,1209.014196)}
{pt3dadd(193104.000000,141420.000000,59225.000000,1192.452354)}
{pt3dadd(193104.000000,141624.000000,59300.000000,1192.452354)}
{pt3dadd(193188.000000,141864.000000,58975.000000,1192.452354)}
{pt3dadd(193068.000000,142260.000000,58850.000000,1192.452354)}
{pt3dadd(193176.000000,142464.000000,58700.000000,1192.452354)}
{pt3dadd(193164.000000,142632.000000,58550.000000,1109.988216)}
{pt3dadd(193152.000000,142920.000000,58400.000000,1027.524078)}
{pt3dadd(193140.000000,143100.000000,58250.000000,945.059940)}
{pt3dadd(193128.000000,143244.000000,58100.000000,862.595802)}
{pt3dadd(193116.000000,143508.000000,57950.000000,828.091944)}

{create adhoc22}
{access adhoc22}
{connect adhoc22(1), adhoc21(0)}
{nseg = 1}
{strdef color color = "White"}
{pt3dclear()}
{pt3dadd(193116.000000,143508.000000,57950.000000,828.091944)}
{pt3dadd(191688.000000,143508.000000,57175.000000,160.489764)}
{pt3dadd(191556.000000,143628.000000,57200.000000,170.520377)}
{pt3dadd(191340.000000,143436.000000,57075.000000,180.550989)}
{pt3dadd(190884.000000,143388.000000,57025.000000,190.581602)}
{pt3dadd(190560.000000,143256.000000,57025.000000,200.612214)}
{pt3dadd(190332.000000,143328.000000,57025.000000,192.253370)}
{pt3dadd(189696.000000,143136.000000,57175.000000,183.894525)}
{pt3dadd(189024.000000,143028.000000,57350.000000,175.535680)}
{pt3dadd(188724.000000,142992.000000,57350.000000,167.176836)}
{pt3dadd(188532.000000,142920.000000,57350.000000,200.612214)}

{create adhoc23}
{access adhoc23}
{connect adhoc23(1), adhoc21(0)}
{nseg = 1}
{strdef color color = "White"}
{pt3dclear()}
{pt3dadd(193116.000000,143508.000000,57950.000000,828.091944)}
{pt3dadd(193200.000000,143784.000000,57950.000000,993.710358)}
{pt3dadd(193284.000000,144360.000000,57950.000000,1117.924119)}
{pt3dadd(193368.000000,144720.000000,57950.000000,1242.137880)}
{pt3dadd(193524.000000,144948.000000,57675.000000,1035.114948)}

{create adhoc24}
{access adhoc24}
{connect adhoc24(1), adhoc23(0)}
{nseg = 1}
{strdef color color = "White"}
{pt3dclear()}
{pt3dadd(193524.000000,144948.000000,57675.000000,1035.114948)}
{pt3dadd(193164.000000,144948.000000,59825.000000,288.881586)}
{pt3dadd(192756.000000,144948.000000,60250.000000,240.734646)}

{create adhoc25}
{access adhoc25}
{connect adhoc25(1), adhoc24(0)}
{nseg = 1}
{strdef color color = "White"}
{pt3dclear()}
{pt3dadd(192756.000000,144948.000000,60250.000000,240.734646)}
{pt3dadd(191712.000000,144468.000000,60400.000000,167.176836)}
{pt3dadd(191556.000000,144240.000000,60525.000000,150.149568)}
{pt3dadd(191304.000000,143988.000000,60525.000000,133.122300)}
{pt3dadd(191088.000000,143820.000000,60575.000000,116.095032)}
{pt3dadd(190908.000000,143568.000000,60675.000000,167.176836)}

{create adhoc26}
{access adhoc26}
{connect adhoc26(1), adhoc24(0)}
{nseg = 1}
{strdef color color = "White"}
{pt3dclear()}
{pt3dadd(192756.000000,144948.000000,60250.000000,240.734646)}
{pt3dadd(192420.000000,145212.000000,60475.000000,240.734646)}
{pt3dadd(192096.000000,145476.000000,60625.000000,240.734646)}
{pt3dadd(191856.000000,145644.000000,60625.000000,240.734646)}
{pt3dadd(191856.000000,145776.000000,60575.000000,240.734646)}
{pt3dadd(191616.000000,145908.000000,60550.000000,240.734646)}
{pt3dadd(191484.000000,146040.000000,60400.000000,230.704038)}
{pt3dadd(191400.000000,146184.000000,60450.000000,220.673430)}
{pt3dadd(191232.000000,146340.000000,60425.000000,210.642822)}
{pt3dadd(191016.000000,146520.000000,60575.000000,200.612214)}
{pt3dadd(190848.000000,146688.000000,60575.000000,200.612214)}
{pt3dadd(190608.000000,146844.000000,60725.000000,200.612214)}
{pt3dadd(190452.000000,147036.000000,60800.000000,200.612214)}
{pt3dadd(190488.000000,147216.000000,60725.000000,200.612214)}
{pt3dadd(190356.000000,147384.000000,60675.000000,222.679557)}
{pt3dadd(190272.000000,147588.000000,60750.000000,244.746900)}
{pt3dadd(189852.000000,148104.000000,60775.000000,266.814243)}
{pt3dadd(189900.000000,148392.000000,61325.000000,288.881586)}
{pt3dadd(189996.000000,148368.000000,61900.000000,331.673985)}
{pt3dadd(190152.000000,148368.000000,62150.000000,374.466384)}
{pt3dadd(190524.000000,148632.000000,62375.000000,417.258783)}
{pt3dadd(190956.000000,148632.000000,63225.000000,460.051182)}
{pt3dadd(190932.000000,148560.000000,63625.000000,330.331698)}
{pt3dadd(190848.000000,148656.000000,64050.000000,200.612214)}
{pt3dadd(191028.000000,148584.000000,64300.000000,240.734646)}

{create adhoc27}
{access adhoc27}
{connect adhoc27(1), adhoc23(0)}
{nseg = 1}
{strdef color color = "White"}
{pt3dclear()}
{pt3dadd(193524.000000,144948.000000,57675.000000,1035.114948)}
{pt3dadd(193524.000000,145080.000000,57700.000000,1035.114948)}
{pt3dadd(193548.000000,145320.000000,57725.000000,1035.114948)}
{pt3dadd(193620.000000,145608.000000,57575.000000,991.985162)}
{pt3dadd(193440.000000,145788.000000,57275.000000,948.855375)}
{pt3dadd(193380.000000,145968.000000,57275.000000,905.725589)}
{pt3dadd(193320.000000,146160.000000,57275.000000,862.595802)}
{pt3dadd(193260.000000,146424.000000,57275.000000,862.595802)}
{pt3dadd(193188.000000,146880.000000,56950.000000,862.595802)}
{pt3dadd(193236.000000,147312.000000,56950.000000,862.595802)}
{pt3dadd(193284.000000,147552.000000,57000.000000,862.595802)}
{pt3dadd(193140.000000,147864.000000,56875.000000,905.725589)}
{pt3dadd(193248.000000,148248.000000,56700.000000,948.855375)}
{pt3dadd(193356.000000,148536.000000,56525.000000,991.985162)}
{pt3dadd(193464.000000,148824.000000,56350.000000,1035.114948)}
{pt3dadd(193344.000000,149028.000000,56250.000000,983.359215)}
{pt3dadd(193224.000000,149280.000000,56150.000000,931.603482)}
{pt3dadd(193104.000000,149460.000000,56050.000000,879.847749)}
{pt3dadd(192984.000000,149724.000000,55950.000000,828.092016)}
{pt3dadd(193056.000000,149928.000000,55950.000000,836.717962)}
{pt3dadd(193128.000000,150156.000000,55975.000000,845.343909)}
{pt3dadd(192864.000000,150360.000000,55800.000000,853.969856)}
{pt3dadd(192864.000000,150588.000000,55975.000000,862.595802)}
{pt3dadd(192636.000000,150780.000000,55650.000000,499.187376)}

{create adhoc28}
{access adhoc28}
{connect adhoc28(1), adhoc27(0)}
{nseg = 1}
{strdef color color = "White"}
{pt3dclear()}
{pt3dadd(192636.000000,150780.000000,55650.000000,499.187376)}
{pt3dadd(190380.000000,150672.000000,54700.000000,346.657896)}
{pt3dadd(190128.000000,150504.000000,54625.000000,346.657896)}
{pt3dadd(189960.000000,150324.000000,54575.000000,346.657896)}
{pt3dadd(189792.000000,150024.000000,54525.000000,346.657896)}
{pt3dadd(189708.000000,149796.000000,54275.000000,346.657896)}
{pt3dadd(189672.000000,149604.000000,54225.000000,346.657896)}
{pt3dadd(189648.000000,149472.000000,53975.000000,346.657896)}
{pt3dadd(189624.000000,149256.000000,53925.000000,346.657896)}
{pt3dadd(189432.000000,149100.000000,53925.000000,346.657896)}
{pt3dadd(189096.000000,148956.000000,53800.000000,379.798393)}
{pt3dadd(188760.000000,148620.000000,53675.000000,412.938891)}
{pt3dadd(188424.000000,148320.000000,53550.000000,446.079388)}
{pt3dadd(188316.000000,148008.000000,53525.000000,479.219886)}
{pt3dadd(188232.000000,147828.000000,53550.000000,409.567968)}
{pt3dadd(187992.000000,147636.000000,53575.000000,339.916050)}
{pt3dadd(187968.000000,147384.000000,53500.000000,270.264132)}
{pt3dadd(187896.000000,147204.000000,53525.000000,200.612214)}
{pt3dadd(187992.000000,147000.000000,53550.000000,185.287671)}
{pt3dadd(187920.000000,146832.000000,53500.000000,169.963128)}
{pt3dadd(187920.000000,146316.000000,53375.000000,154.638585)}
{pt3dadd(187896.000000,146124.000000,53375.000000,139.314042)}
{pt3dadd(187932.000000,145944.000000,53375.000000,154.638585)}
{pt3dadd(187992.000000,145764.000000,53250.000000,169.963128)}
{pt3dadd(188064.000000,145644.000000,53175.000000,185.287671)}
{pt3dadd(187980.000000,145440.000000,53175.000000,200.612214)}
{pt3dadd(188040.000000,145260.000000,53175.000000,222.679557)}
{pt3dadd(188076.000000,144720.000000,52975.000000,244.746900)}
{pt3dadd(188028.000000,144468.000000,52800.000000,266.814243)}
{pt3dadd(187980.000000,144288.000000,52650.000000,288.881586)}
{pt3dadd(187680.000000,144132.000000,52425.000000,303.325664)}
{pt3dadd(187572.000000,143964.000000,52375.000000,317.769741)}
{pt3dadd(187608.000000,143808.000000,52375.000000,332.213819)}
{pt3dadd(187500.000000,143592.000000,52425.000000,346.657896)}
{pt3dadd(187416.000000,143424.000000,52425.000000,332.213819)}
{pt3dadd(187332.000000,143184.000000,52425.000000,317.769741)}
{pt3dadd(187200.000000,143016.000000,52350.000000,303.325664)}
{pt3dadd(187176.000000,142848.000000,52450.000000,288.881586)}
{pt3dadd(187104.000000,142608.000000,52550.000000,346.657896)}

{create adhoc29}
{access adhoc29}
{connect adhoc29(1), adhoc28(0)}
{nseg = 1}
{strdef color color = "White"}
{pt3dclear()}
{pt3dadd(187104.000000,142608.000000,52550.000000,346.657896)}
{pt3dadd(187200.000000,142680.000000,52850.000000,346.657896)}
{pt3dadd(187176.000000,142488.000000,53025.000000,364.221900)}
{pt3dadd(187008.000000,142236.000000,53300.000000,381.785904)}
{pt3dadd(186840.000000,142236.000000,53575.000000,399.349908)}
{pt3dadd(186732.000000,142080.000000,54025.000000,139.314042)}

{create adhoc30}
{access adhoc30}
{connect adhoc30(1), adhoc28(0)}
{nseg = 1}
{strdef color color = "White"}
{pt3dclear()}
{pt3dadd(187104.000000,142608.000000,52550.000000,346.657896)}
{pt3dadd(187224.000000,142224.000000,51925.000000,240.734646)}
{pt3dadd(187236.000000,141972.000000,51650.000000,240.734646)}
{pt3dadd(187272.000000,141216.000000,51400.000000,240.734646)}
{pt3dadd(187188.000000,140520.000000,51200.000000,240.734646)}
{pt3dadd(187260.000000,139716.000000,51000.000000,240.734646)}
{pt3dadd(187152.000000,139104.000000,50975.000000,222.345193)}
{pt3dadd(186936.000000,138636.000000,50850.000000,203.955741)}
{pt3dadd(186744.000000,137988.000000,50850.000000,185.566288)}
{pt3dadd(186864.000000,137808.000000,50850.000000,167.176836)}
{pt3dadd(186900.000000,137604.000000,50850.000000,167.176836)}
{pt3dadd(187188.000000,137268.000000,50800.000000,167.176836)}
{pt3dadd(187284.000000,137004.000000,50650.000000,167.176836)}
{pt3dadd(187320.000000,136764.000000,50575.000000,167.176836)}
{pt3dadd(187548.000000,136572.000000,50500.000000,175.535680)}
{pt3dadd(187944.000000,136356.000000,50400.000000,183.894525)}
{pt3dadd(188100.000000,136044.000000,50425.000000,192.253370)}
{pt3dadd(188328.000000,135852.000000,50475.000000,200.612214)}
{pt3dadd(188364.000000,135660.000000,50500.000000,220.673430)}
{pt3dadd(188376.000000,135468.000000,50500.000000,240.734646)}
{pt3dadd(188388.000000,135264.000000,50550.000000,240.734646)}

{create adhoc31}
{access adhoc31}
{connect adhoc31(1), adhoc27(0)}
{nseg = 1}
{strdef color color = "White"}
{pt3dclear()}
{pt3dadd(192636.000000,150780.000000,55650.000000,499.187376)}
{pt3dadd(192432.000000,150960.000000,55525.000000,479.219958)}
{pt3dadd(192564.000000,151380.000000,55325.000000,499.187376)}
{pt3dadd(192588.000000,151644.000000,55250.000000,590.039483)}
{pt3dadd(192612.000000,151824.000000,55200.000000,680.891589)}
{pt3dadd(192972.000000,151992.000000,55150.000000,771.743696)}
{pt3dadd(193140.000000,152160.000000,55125.000000,862.595802)}
{pt3dadd(193164.000000,152412.000000,55100.000000,862.595802)}
{pt3dadd(193068.000000,152592.000000,54925.000000,862.595802)}
{pt3dadd(193092.000000,152760.000000,54800.000000,862.595802)}
{pt3dadd(193140.000000,152940.000000,54800.000000,862.595802)}
{pt3dadd(193188.000000,153096.000000,54800.000000,853.969838)}
{pt3dadd(193236.000000,153252.000000,54800.000000,845.343873)}
{pt3dadd(193284.000000,153468.000000,54800.000000,836.717909)}
{pt3dadd(193128.000000,153660.000000,54550.000000,828.091944)}
{pt3dadd(193092.000000,153840.000000,54375.000000,836.717909)}
{pt3dadd(193056.000000,154200.000000,54125.000000,845.343873)}
{pt3dadd(193044.000000,154464.000000,53975.000000,853.969838)}
{pt3dadd(193152.000000,154872.000000,53825.000000,862.595802)}
{pt3dadd(193260.000000,155052.000000,53675.000000,826.654307)}
{pt3dadd(193260.000000,155220.000000,53650.000000,790.712811)}
{pt3dadd(193056.000000,155508.000000,53325.000000,754.771316)}
{pt3dadd(192912.000000,155880.000000,53250.000000,718.829820)}
{pt3dadd(192516.000000,156156.000000,52800.000000,599.024880)}

{create adhoc32}
{access adhoc32}
{connect adhoc32(1), adhoc31(0)}
{nseg = 1}
{strdef color color = "White"}
{pt3dclear()}
{pt3dadd(192516.000000,156156.000000,52800.000000,599.024880)}
{pt3dadd(190236.000000,156156.000000,52125.000000,346.657896)}
{pt3dadd(189912.000000,155952.000000,51800.000000,363.990794)}
{pt3dadd(189348.000000,155772.000000,51375.000000,381.323691)}
{pt3dadd(188784.000000,155616.000000,51150.000000,398.656589)}
{pt3dadd(188544.000000,155412.000000,50900.000000,415.989486)}
{pt3dadd(188496.000000,155304.000000,50675.000000,384.212511)}
{pt3dadd(188412.000000,155172.000000,50350.000000,352.435536)}
{pt3dadd(188400.000000,154980.000000,50025.000000,320.658561)}
{pt3dadd(188460.000000,154680.000000,49650.000000,288.881586)}
{pt3dadd(188136.000000,154236.000000,49300.000000,288.881586)}
{pt3dadd(188124.000000,153516.000000,48975.000000,288.881586)}
{pt3dadd(188052.000000,153336.000000,49050.000000,288.881586)}
{pt3dadd(187812.000000,153036.000000,49000.000000,288.881586)}
{pt3dadd(187764.000000,152880.000000,49000.000000,288.881586)}
{pt3dadd(187656.000000,152628.000000,48875.000000,288.881586)}
{pt3dadd(187464.000000,152448.000000,48750.000000,288.881586)}
{pt3dadd(187440.000000,152208.000000,48725.000000,288.881586)}
{pt3dadd(187536.000000,152028.000000,48575.000000,288.881586)}
{pt3dadd(187572.000000,151872.000000,48450.000000,288.881586)}
{pt3dadd(187548.000000,151632.000000,48275.000000,288.881586)}
{pt3dadd(187188.000000,151344.000000,47850.000000,288.881586)}
{pt3dadd(186996.000000,150960.000000,47525.000000,277.326342)}
{pt3dadd(187056.000000,150288.000000,46375.000000,288.881586)}

{create adhoc33}
{access adhoc33}
{connect adhoc33(1), adhoc31(0)}
{nseg = 1}
{strdef color color = "White"}
{pt3dclear()}
{pt3dadd(192516.000000,156156.000000,52800.000000,599.024880)}
{pt3dadd(192624.000000,156636.000000,52900.000000,599.024880)}
{pt3dadd(192588.000000,157104.000000,52900.000000,628.976115)}
{pt3dadd(192552.000000,157680.000000,52900.000000,658.927350)}
{pt3dadd(192540.000000,158112.000000,52950.000000,688.878585)}
{pt3dadd(191856.000000,158448.000000,52650.000000,718.829820)}
{pt3dadd(191844.000000,159516.000000,52475.000000,688.878585)}
{pt3dadd(191640.000000,160428.000000,52725.000000,658.927350)}
{pt3dadd(191436.000000,161280.000000,52975.000000,628.976115)}
{pt3dadd(191544.000000,161700.000000,52925.000000,599.024880)}
{pt3dadd(191340.000000,162204.000000,52825.000000,708.047397)}
{pt3dadd(191136.000000,162756.000000,52725.000000,817.069914)}
{pt3dadd(190932.000000,163344.000000,53500.000000,926.092431)}
{pt3dadd(190500.000000,163560.000000,53825.000000,1035.114948)}
{pt3dadd(190272.000000,163908.000000,54100.000000,975.078270)}
{pt3dadd(190044.000000,164436.000000,54375.000000,915.041592)}
{pt3dadd(189816.000000,165084.000000,54650.000000,855.004914)}
{pt3dadd(189588.000000,165672.000000,54950.000000,794.968236)}
{pt3dadd(189744.000000,165948.000000,54925.000000,1035.114948)}

{create adhoc34}
{access adhoc34}
{connect adhoc34(1), adhoc33(0)}
{nseg = 1}
{strdef color color = "White"}
{pt3dclear()}
{pt3dadd(189744.000000,165948.000000,54925.000000,1035.114948)}
{pt3dadd(188256.000000,165948.000000,52425.000000,415.989486)}
{pt3dadd(187872.000000,165780.000000,52025.000000,381.323709)}
{pt3dadd(187680.000000,165552.000000,51825.000000,346.657932)}
{pt3dadd(187356.000000,165288.000000,51375.000000,311.992155)}
{pt3dadd(186888.000000,165264.000000,51150.000000,277.326378)}
{pt3dadd(186528.000000,165096.000000,50775.000000,280.215180)}
{pt3dadd(185976.000000,164928.000000,50450.000000,283.103982)}
{pt3dadd(185472.000000,164892.000000,50200.000000,285.992784)}
{pt3dadd(184884.000000,164676.000000,49975.000000,288.881586)}
{pt3dadd(184836.000000,164880.000000,49725.000000,266.814243)}
{pt3dadd(184248.000000,165168.000000,49475.000000,244.746900)}
{pt3dadd(184260.000000,165420.000000,49475.000000,222.679557)}
{pt3dadd(183696.000000,165660.000000,49325.000000,200.612214)}
{pt3dadd(183288.000000,165924.000000,49075.000000,210.642822)}
{pt3dadd(182844.000000,165876.000000,48775.000000,220.673430)}
{pt3dadd(182688.000000,165852.000000,48550.000000,230.704038)}
{pt3dadd(182616.000000,166008.000000,48400.000000,240.734646)}
{pt3dadd(182400.000000,166332.000000,48150.000000,167.176836)}

{create adhoc35}
{access adhoc35}
{connect adhoc35(1), adhoc33(0)}
{nseg = 1}
{strdef color color = "White"}
{pt3dclear()}
{pt3dadd(189744.000000,165948.000000,54925.000000,1035.114948)}
{pt3dadd(189312.000000,166224.000000,55025.000000,862.595802)}
{pt3dadd(189756.000000,166680.000000,55450.000000,730.810341)}
{pt3dadd(189756.000000,167052.000000,55675.000000,599.024880)}
{pt3dadd(190056.000000,167304.000000,56025.000000,599.024880)}
{pt3dadd(190188.000000,167520.000000,56200.000000,599.024880)}
{pt3dadd(190260.000000,167904.000000,56325.000000,599.024880)}
{pt3dadd(190284.000000,168276.000000,56675.000000,599.024880)}
{pt3dadd(190284.000000,168528.000000,56700.000000,664.917611)}
{pt3dadd(190284.000000,168696.000000,56725.000000,730.810341)}
{pt3dadd(190536.000000,168912.000000,56725.000000,796.703072)}
{pt3dadd(190392.000000,169284.000000,57075.000000,862.595802)}
{pt3dadd(190476.000000,169476.000000,57275.000000,1035.114948)}

{create adhoc36}
{access adhoc36}
{connect adhoc36(1), adhoc35(0)}
{nseg = 1}
{strdef color color = "White"}
{pt3dclear()}
{pt3dadd(190476.000000,169476.000000,57275.000000,1035.114948)}
{pt3dadd(188088.000000,169632.000000,56000.000000,288.881586)}
{pt3dadd(187884.000000,169560.000000,55975.000000,276.844851)}
{pt3dadd(187740.000000,169596.000000,55875.000000,264.808116)}
{pt3dadd(187572.000000,169548.000000,55700.000000,252.771381)}
{pt3dadd(187392.000000,169500.000000,55575.000000,240.734646)}
{pt3dadd(187284.000000,169536.000000,55475.000000,267.215459)}
{pt3dadd(187164.000000,169572.000000,55475.000000,293.696271)}
{pt3dadd(187068.000000,169584.000000,55475.000000,320.177083)}
{pt3dadd(186864.000000,169644.000000,55450.000000,346.657896)}
{pt3dadd(186732.000000,169704.000000,55425.000000,329.325003)}
{pt3dadd(186588.000000,169680.000000,55200.000000,311.992110)}
{pt3dadd(186396.000000,169656.000000,54975.000000,294.659217)}
{pt3dadd(186228.000000,169656.000000,55025.000000,277.326324)}
{pt3dadd(186072.000000,169836.000000,54950.000000,268.178405)}
{pt3dadd(185904.000000,169848.000000,54800.000000,259.030485)}
{pt3dadd(185760.000000,169860.000000,54650.000000,249.882566)}
{pt3dadd(185196.000000,169872.000000,54500.000000,240.734646)}
{pt3dadd(184644.000000,170076.000000,54325.000000,230.704038)}
{pt3dadd(184512.000000,170088.000000,54350.000000,220.673430)}
{pt3dadd(184344.000000,170148.000000,54175.000000,210.642822)}
{pt3dadd(184128.000000,170244.000000,54025.000000,200.612214)}
{pt3dadd(183768.000000,170316.000000,53925.000000,222.679557)}
{pt3dadd(183432.000000,170436.000000,53775.000000,244.746900)}
{pt3dadd(182952.000000,170328.000000,53675.000000,266.814243)}
{pt3dadd(182604.000000,170640.000000,53625.000000,288.881586)}
{pt3dadd(182364.000000,170820.000000,53400.000000,276.844851)}
{pt3dadd(181812.000000,171216.000000,53400.000000,264.808116)}
{pt3dadd(181560.000000,171360.000000,53400.000000,252.771381)}
{pt3dadd(181212.000000,171396.000000,53325.000000,240.734646)}
{pt3dadd(180936.000000,171408.000000,53125.000000,222.345193)}
{pt3dadd(180480.000000,171336.000000,53125.000000,203.955741)}
{pt3dadd(180084.000000,171336.000000,53250.000000,185.566288)}
{pt3dadd(179604.000000,171456.000000,53250.000000,167.176836)}
{pt3dadd(178992.000000,171780.000000,53475.000000,183.894525)}
{pt3dadd(179064.000000,172020.000000,53750.000000,200.612214)}
{pt3dadd(179268.000000,172536.000000,54150.000000,139.314042)}

{create adhoc37}
{access adhoc37}
{connect adhoc37(1), adhoc35(0)}
{nseg = 1}
{strdef color color = "White"}
{pt3dclear()}
{pt3dadd(190476.000000,169476.000000,57275.000000,1035.114948)}
{pt3dadd(190440.000000,169740.000000,57425.000000,1035.114948)}
{pt3dadd(190344.000000,169884.000000,57525.000000,929.686572)}
{pt3dadd(190584.000000,170040.000000,57875.000000,824.258196)}
{pt3dadd(190716.000000,170220.000000,57875.000000,718.829820)}
{pt3dadd(191160.000000,170448.000000,59000.000000,1242.137880)}

{create adhoc38}
{access adhoc38}
{connect adhoc38(1), adhoc37(0)}
{nseg = 1}
{strdef color color = "White"}
{pt3dclear()}
{pt3dadd(191160.000000,170448.000000,59000.000000,1242.137880)}
{pt3dadd(191232.000000,170052.000000,60225.000000,499.187376)}
{pt3dadd(191196.000000,169896.000000,60025.000000,478.387903)}
{pt3dadd(191292.000000,169728.000000,60000.000000,457.588431)}
{pt3dadd(191448.000000,169548.000000,60025.000000,436.788958)}
{pt3dadd(191544.000000,169344.000000,59925.000000,415.989486)}
{pt3dadd(191592.000000,169080.000000,59825.000000,436.788958)}
{pt3dadd(191616.000000,168888.000000,59875.000000,457.588431)}
{pt3dadd(191688.000000,168732.000000,59825.000000,478.387903)}
{pt3dadd(191736.000000,168576.000000,59800.000000,499.187376)}
{pt3dadd(191856.000000,168420.000000,59925.000000,524.146752)}
{pt3dadd(191844.000000,168168.000000,59725.000000,549.106128)}
{pt3dadd(191808.000000,167508.000000,59875.000000,574.065504)}
{pt3dadd(191856.000000,167244.000000,60000.000000,599.024880)}
{pt3dadd(191820.000000,167052.000000,60050.000000,599.024880)}
{pt3dadd(191868.000000,166824.000000,60075.000000,599.024880)}
{pt3dadd(191964.000000,166596.000000,60075.000000,599.024880)}
{pt3dadd(191904.000000,166416.000000,60225.000000,599.024880)}
{pt3dadd(191916.000000,166116.000000,60200.000000,574.065504)}
{pt3dadd(191988.000000,165936.000000,60375.000000,549.106128)}
{pt3dadd(192120.000000,165828.000000,60300.000000,524.146752)}
{pt3dadd(191904.000000,165624.000000,60525.000000,499.187376)}
{pt3dadd(192264.000000,165432.000000,60550.000000,499.187376)}
{pt3dadd(192516.000000,164616.000000,61050.000000,499.187376)}
{pt3dadd(192696.000000,164448.000000,61175.000000,499.187376)}
{pt3dadd(192852.000000,164256.000000,61275.000000,499.187376)}
{pt3dadd(192840.000000,163920.000000,61375.000000,461.055006)}
{pt3dadd(192672.000000,163548.000000,61475.000000,422.922636)}
{pt3dadd(192792.000000,163332.000000,61450.000000,384.790266)}
{pt3dadd(192864.000000,163152.000000,61600.000000,346.657896)}
{pt3dadd(192960.000000,162864.000000,61625.000000,346.657896)}
{pt3dadd(193056.000000,162684.000000,61650.000000,346.657896)}
{pt3dadd(193152.000000,162468.000000,61675.000000,346.657896)}
{pt3dadd(193068.000000,162276.000000,61600.000000,346.657896)}
{pt3dadd(193164.000000,162072.000000,61525.000000,346.657896)}
{pt3dadd(193188.000000,161856.000000,61400.000000,346.657896)}
{pt3dadd(193212.000000,161724.000000,61525.000000,346.657896)}
{pt3dadd(193152.000000,161508.000000,61375.000000,346.657896)}
{pt3dadd(193284.000000,161352.000000,61300.000000,346.657896)}
{pt3dadd(193356.000000,161208.000000,61275.000000,346.657896)}
{pt3dadd(193332.000000,161016.000000,61250.000000,346.657896)}
{pt3dadd(193320.000000,160848.000000,61275.000000,346.657896)}
{pt3dadd(193260.000000,160668.000000,61275.000000,397.501056)}
{pt3dadd(193200.000000,160404.000000,61275.000000,448.344216)}
{pt3dadd(193068.000000,160272.000000,61350.000000,499.187376)}
{pt3dadd(193116.000000,160104.000000,61275.000000,479.219886)}

{create adhoc39}
{access adhoc39}
{connect adhoc39(1), adhoc38(0)}
{nseg = 1}
{strdef color color = "White"}
{pt3dclear()}
{pt3dadd(193116.000000,160104.000000,61275.000000,479.219886)}
{pt3dadd(192504.000000,159996.000000,61050.000000,415.989486)}
{pt3dadd(192096.000000,159756.000000,60800.000000,346.657896)}

{create adhoc40}
{access adhoc40}
{connect adhoc40(1), adhoc39(0)}
{nseg = 1}
{strdef color color = "White"}
{pt3dclear()}
{pt3dadd(192096.000000,159756.000000,60800.000000,346.657896)}
{pt3dadd(191832.000000,159444.000000,60925.000000,346.657896)}
{pt3dadd(191748.000000,159276.000000,60875.000000,320.177083)}
{pt3dadd(191580.000000,159132.000000,60925.000000,293.696271)}
{pt3dadd(191184.000000,158904.000000,60775.000000,267.215459)}
{pt3dadd(191016.000000,158724.000000,60625.000000,240.734646)}
{pt3dadd(190620.000000,158544.000000,60550.000000,230.704038)}
{pt3dadd(190608.000000,158352.000000,60550.000000,220.673430)}
{pt3dadd(190176.000000,158208.000000,60600.000000,210.642822)}
{pt3dadd(189912.000000,158088.000000,60450.000000,200.612214)}
{pt3dadd(189648.000000,157860.000000,60500.000000,222.679557)}
{pt3dadd(188616.000000,157512.000000,60125.000000,244.746900)}
{pt3dadd(188412.000000,157512.000000,59800.000000,266.814243)}
{pt3dadd(188208.000000,157668.000000,59900.000000,288.881586)}
{pt3dadd(187968.000000,157560.000000,60050.000000,167.176836)}
{pt3dadd(187704.000000,157560.000000,60450.000000,167.176836)}

{create adhoc41}
{access adhoc41}
{connect adhoc41(1), adhoc39(0)}
{nseg = 1}
{strdef color color = "White"}
{pt3dclear()}
{pt3dadd(192096.000000,159756.000000,60800.000000,346.657896)}
{pt3dadd(191424.000000,159804.000000,61525.000000,288.881586)}
{pt3dadd(191148.000000,159876.000000,61825.000000,288.881586)}
{pt3dadd(190692.000000,160080.000000,62150.000000,288.881586)}
{pt3dadd(190764.000000,160032.000000,62400.000000,288.881586)}
{pt3dadd(190704.000000,159948.000000,62600.000000,240.734646)}

{create adhoc42}
{access adhoc42}
{connect adhoc42(1), adhoc38(0)}
{nseg = 1}
{strdef color color = "White"}
{pt3dclear()}
{pt3dadd(193116.000000,160104.000000,61275.000000,479.219886)}
{pt3dadd(193776.000000,159948.000000,62075.000000,288.881586)}
{pt3dadd(193896.000000,159780.000000,62200.000000,276.844851)}
{pt3dadd(194016.000000,159600.000000,62300.000000,264.808116)}
{pt3dadd(194112.000000,159372.000000,62425.000000,252.771381)}
{pt3dadd(194136.000000,159168.000000,62550.000000,240.734646)}
{pt3dadd(194208.000000,158952.000000,62700.000000,240.734646)}
{pt3dadd(194196.000000,158736.000000,62625.000000,240.734646)}
{pt3dadd(194220.000000,158460.000000,62700.000000,240.734646)}
{pt3dadd(194088.000000,158208.000000,62850.000000,240.734646)}
{pt3dadd(193980.000000,157992.000000,62775.000000,240.734646)}
{pt3dadd(193920.000000,157812.000000,62800.000000,240.734646)}
{pt3dadd(194016.000000,157644.000000,62750.000000,240.734646)}
{pt3dadd(193980.000000,157476.000000,62800.000000,240.734646)}
{pt3dadd(193968.000000,157332.000000,62600.000000,240.734646)}
{pt3dadd(193908.000000,157152.000000,62650.000000,240.734646)}
{pt3dadd(193848.000000,156984.000000,62650.000000,240.734646)}
{pt3dadd(193716.000000,156804.000000,62650.000000,240.734646)}
{pt3dadd(193704.000000,156636.000000,62750.000000,240.734646)}
{pt3dadd(193488.000000,156480.000000,62725.000000,240.734646)}
{pt3dadd(193296.000000,156324.000000,62575.000000,240.734646)}
{pt3dadd(193236.000000,156180.000000,62525.000000,240.734646)}
{pt3dadd(193044.000000,155976.000000,62375.000000,240.734646)}
{pt3dadd(192912.000000,155820.000000,62425.000000,240.734646)}
{pt3dadd(192912.000000,155688.000000,62350.000000,346.657896)}

{create adhoc43}
{access adhoc43}
{connect adhoc43(1), adhoc37(0)}
{nseg = 1}
{strdef color color = "White"}
{pt3dclear()}
{pt3dadd(191160.000000,170448.000000,59000.000000,1242.137880)}
{pt3dadd(191088.000000,170556.000000,58350.000000,1242.137880)}
{pt3dadd(190992.000000,170808.000000,58775.000000,1242.137880)}

{create adhoc44}
{access adhoc44}
{connect adhoc44(1), adhoc43(0)}
{nseg = 1}
{strdef color color = "White"}
{pt3dclear()}
{pt3dadd(190992.000000,170808.000000,58775.000000,1242.137880)}
{pt3dadd(188712.000000,170808.000000,60050.000000,346.657896)}
{pt3dadd(188556.000000,170748.000000,60100.000000,310.146476)}
{pt3dadd(188340.000000,170868.000000,60025.000000,273.635055)}
{pt3dadd(187836.000000,170460.000000,59625.000000,237.123635)}
{pt3dadd(187044.000000,170316.000000,59625.000000,200.612214)}
{pt3dadd(186768.000000,170280.000000,59625.000000,192.253370)}
{pt3dadd(185388.000000,170640.000000,59500.000000,183.894525)}
{pt3dadd(184992.000000,170784.000000,59225.000000,175.535680)}
{pt3dadd(184248.000000,170988.000000,59000.000000,167.176836)}
{pt3dadd(183948.000000,170976.000000,58750.000000,200.612214)}

{create adhoc45}
{access adhoc45}
{connect adhoc45(1), adhoc43(0)}
{nseg = 1}
{strdef color color = "White"}
{pt3dclear()}
{pt3dadd(190992.000000,170808.000000,58775.000000,1242.137880)}
{pt3dadd(190944.000000,171156.000000,58950.000000,1192.452354)}
{pt3dadd(191028.000000,171360.000000,58975.000000,1217.295117)}
{pt3dadd(191112.000000,171516.000000,59175.000000,1242.137880)}
{pt3dadd(191256.000000,171912.000000,59075.000000,1304.244761)}
{pt3dadd(191100.000000,172860.000000,59650.000000,1366.351641)}
{pt3dadd(190764.000000,173136.000000,59725.000000,1428.458522)}
{pt3dadd(190872.000000,173448.000000,59825.000000,1490.565402)}
{pt3dadd(190620.000000,173712.000000,59675.000000,1461.350354)}
{pt3dadd(190488.000000,174036.000000,59825.000000,1432.135305)}
{pt3dadd(190356.000000,174264.000000,59975.000000,1402.920257)}
{pt3dadd(190284.000000,174648.000000,59875.000000,1373.705208)}
{pt3dadd(190188.000000,174996.000000,60000.000000,1242.137880)}

{create adhoc46}
{access adhoc46}
{connect adhoc46(1), adhoc45(0)}
{nseg = 1}
{strdef color color = "White"}
{pt3dclear()}
{pt3dadd(190188.000000,174996.000000,60000.000000,1242.137880)}
{pt3dadd(188832.000000,174996.000000,58000.000000,415.989486)}
{pt3dadd(188292.000000,174996.000000,57700.000000,384.212511)}
{pt3dadd(188136.000000,175044.000000,57550.000000,352.435536)}
{pt3dadd(188028.000000,175092.000000,57500.000000,320.658561)}
{pt3dadd(187860.000000,175080.000000,57600.000000,288.881586)}
{pt3dadd(187716.000000,175044.000000,57600.000000,276.844851)}
{pt3dadd(187440.000000,175092.000000,57450.000000,264.808116)}
{pt3dadd(187308.000000,175116.000000,57425.000000,252.771381)}
{pt3dadd(187188.000000,175056.000000,57475.000000,240.734646)}
{pt3dadd(187044.000000,175104.000000,57500.000000,230.704038)}
{pt3dadd(186924.000000,175068.000000,57450.000000,220.673430)}
{pt3dadd(186768.000000,175092.000000,57550.000000,210.642822)}
{pt3dadd(186600.000000,175008.000000,57625.000000,200.612214)}
{pt3dadd(186456.000000,175032.000000,57650.000000,210.642822)}
{pt3dadd(186300.000000,175032.000000,57600.000000,220.673430)}
{pt3dadd(186156.000000,174948.000000,57600.000000,230.704038)}
{pt3dadd(185412.000000,175068.000000,57600.000000,240.734646)}
{pt3dadd(184716.000000,175188.000000,57600.000000,240.734646)}
{pt3dadd(184572.000000,175188.000000,57450.000000,240.734646)}
{pt3dadd(184428.000000,175308.000000,57425.000000,240.734646)}
{pt3dadd(184284.000000,175356.000000,57375.000000,240.734646)}
{pt3dadd(184116.000000,175404.000000,57400.000000,252.771381)}
{pt3dadd(183924.000000,175656.000000,57325.000000,264.808116)}
{pt3dadd(183708.000000,175644.000000,57450.000000,276.844851)}
{pt3dadd(183528.000000,175536.000000,57425.000000,288.881586)}
{pt3dadd(183180.000000,175824.000000,57400.000000,303.325664)}
{pt3dadd(183024.000000,175944.000000,57525.000000,317.769741)}
{pt3dadd(182880.000000,176388.000000,57825.000000,332.213819)}
{pt3dadd(182784.000000,176544.000000,58050.000000,346.657896)}
{pt3dadd(182640.000000,176748.000000,58250.000000,346.657896)}
{pt3dadd(182556.000000,176880.000000,58450.000000,346.657896)}
{pt3dadd(182460.000000,177132.000000,58650.000000,346.657896)}
{pt3dadd(182448.000000,177396.000000,58825.000000,346.657896)}
{pt3dadd(182676.000000,177576.000000,58975.000000,310.146476)}
{pt3dadd(182436.000000,177840.000000,59250.000000,273.635055)}
{pt3dadd(182436.000000,177888.000000,59450.000000,237.123635)}
{pt3dadd(182424.000000,178416.000000,59675.000000,200.612214)}
{pt3dadd(182556.000000,178668.000000,59950.000000,192.253370)}
{pt3dadd(182580.000000,178824.000000,60150.000000,183.894525)}
{pt3dadd(182676.000000,178872.000000,60350.000000,175.535680)}
{pt3dadd(182904.000000,178872.000000,60575.000000,167.176836)}
{pt3dadd(183300.000000,178992.000000,60725.000000,167.176836)}
{pt3dadd(183300.000000,179016.000000,60950.000000,200.612214)}

{create adhoc47}
{access adhoc47}
{connect adhoc47(1), adhoc45(0)}
{nseg = 1}
{strdef color color = "White"}
{pt3dclear()}
{pt3dadd(190188.000000,174996.000000,60000.000000,1242.137880)}
{pt3dadd(190068.000000,175212.000000,59950.000000,1430.942868)}
{pt3dadd(190152.000000,175404.000000,60025.000000,1430.942868)}
{pt3dadd(190080.000000,175656.000000,60475.000000,1445.848502)}
{pt3dadd(190056.000000,175920.000000,60450.000000,1460.754135)}
{pt3dadd(190068.000000,176172.000000,60775.000000,1475.659769)}
{pt3dadd(189996.000000,176424.000000,61175.000000,1490.565402)}
{pt3dadd(189996.000000,176592.000000,61150.000000,1490.565402)}

{create adhoc48}
{access adhoc48}
{connect adhoc48(1), adhoc47(0)}
{nseg = 1}
{strdef color color = "White"}
{pt3dclear()}
{pt3dadd(189996.000000,176592.000000,61150.000000,1490.565402)}
{pt3dadd(187776.000000,176592.000000,61200.000000,240.734646)}
{pt3dadd(187608.000000,176496.000000,61300.000000,222.345193)}
{pt3dadd(187464.000000,176436.000000,61375.000000,203.955741)}
{pt3dadd(187344.000000,176352.000000,61400.000000,185.566288)}
{pt3dadd(187224.000000,176376.000000,61300.000000,167.176836)}
{pt3dadd(187068.000000,176292.000000,61400.000000,185.566288)}
{pt3dadd(186936.000000,176232.000000,61450.000000,203.955741)}
{pt3dadd(186504.000000,176220.000000,61675.000000,222.345193)}
{pt3dadd(186276.000000,176268.000000,61700.000000,240.734646)}
{pt3dadd(186096.000000,176388.000000,61625.000000,267.215459)}
{pt3dadd(185928.000000,176376.000000,61650.000000,293.696271)}
{pt3dadd(186576.000000,176004.000000,61975.000000,320.177083)}
{pt3dadd(186516.000000,175764.000000,62250.000000,346.657896)}
{pt3dadd(186432.000000,175548.000000,62375.000000,240.734646)}

{create adhoc49}
{access adhoc49}
{connect adhoc49(1), adhoc48(0)}
{nseg = 1}
{strdef color color = "White"}
{pt3dclear()}
{pt3dadd(186432.000000,175548.000000,62375.000000,240.734646)}
{pt3dadd(186024.000000,175488.000000,62375.000000,167.176836)}
{pt3dadd(185304.000000,175344.000000,62450.000000,183.894525)}
{pt3dadd(184956.000000,175212.000000,62325.000000,200.612214)}
{pt3dadd(184428.000000,175908.000000,62325.000000,200.612214)}

{create adhoc50}
{access adhoc50}
{connect adhoc50(1), adhoc48(0)}
{nseg = 1}
{strdef color color = "White"}
{pt3dclear()}
{pt3dadd(186432.000000,175548.000000,62375.000000,240.734646)}
{pt3dadd(186396.000000,175068.000000,62675.000000,116.095032)}
{pt3dadd(186528.000000,174264.000000,62900.000000,139.314042)}
{pt3dadd(186540.000000,174024.000000,63100.000000,167.176836)}

{create adhoc51}
{access adhoc51}
{connect adhoc51(1), adhoc47(0)}
{nseg = 1}
{strdef color color = "White"}
{pt3dclear()}
{pt3dadd(189996.000000,176592.000000,61150.000000,1490.565402)}
{pt3dadd(189876.000000,176724.000000,61250.000000,1490.565402)}
{pt3dadd(189540.000000,176904.000000,61275.000000,1416.037172)}
{pt3dadd(189780.000000,177072.000000,61525.000000,1341.508941)}
{pt3dadd(189816.000000,177504.000000,61800.000000,1266.980711)}
{pt3dadd(189348.000000,178128.000000,61925.000000,1192.452480)}
{pt3dadd(189384.000000,178416.000000,62100.000000,1204.873830)}
{pt3dadd(189288.000000,178668.000000,62400.000000,1217.295180)}
{pt3dadd(189192.000000,178980.000000,62700.000000,1229.716530)}
{pt3dadd(189096.000000,179376.000000,62950.000000,1242.137880)}
{pt3dadd(189000.000000,179520.000000,62975.000000,993.710286)}

{create adhoc52}
{access adhoc52}
{connect adhoc52(1), adhoc51(0)}
{nseg = 1}
{strdef color color = "White"}
{pt3dclear()}
{pt3dadd(189000.000000,179520.000000,62975.000000,993.710286)}
{pt3dadd(187752.000000,179520.000000,63900.000000,116.095032)}
{pt3dadd(187668.000000,179544.000000,64050.000000,116.095032)}
{pt3dadd(187584.000000,179412.000000,64225.000000,116.095032)}
{pt3dadd(187476.000000,179340.000000,64400.000000,116.095032)}
{pt3dadd(187488.000000,179268.000000,64625.000000,116.095032)}
{pt3dadd(187440.000000,179304.000000,64900.000000,116.095032)}
{pt3dadd(187716.000000,179124.000000,65150.000000,116.095032)}
{pt3dadd(187860.000000,178980.000000,65325.000000,116.095032)}
{pt3dadd(188016.000000,179016.000000,65550.000000,116.095032)}
{pt3dadd(188268.000000,178884.000000,65775.000000,139.314042)}
{pt3dadd(188376.000000,178896.000000,66025.000000,167.176836)}

{create adhoc53}
{access adhoc53}
{connect adhoc53(1), adhoc51(0)}
{nseg = 1}
{strdef color color = "White"}
{pt3dclear()}
{pt3dadd(189000.000000,179520.000000,62975.000000,993.710286)}
{pt3dadd(188976.000000,179652.000000,63025.000000,1035.114948)}
{pt3dadd(189012.000000,179928.000000,63175.000000,1035.114948)}

{create adhoc54}
{access adhoc54}
{connect adhoc54(1), adhoc53(0)}
{nseg = 1}
{strdef color color = "White"}
{pt3dclear()}
{pt3dadd(189012.000000,179928.000000,63175.000000,1035.114948)}
{pt3dadd(186996.000000,179928.000000,63625.000000,139.314042)}
{pt3dadd(186864.000000,179844.000000,63700.000000,133.509289)}
{pt3dadd(186732.000000,179976.000000,63775.000000,127.704537)}
{pt3dadd(186612.000000,180024.000000,63775.000000,121.899785)}
{pt3dadd(186492.000000,179928.000000,63675.000000,116.095032)}
{pt3dadd(186324.000000,179940.000000,63700.000000,116.095032)}
{pt3dadd(186192.000000,180048.000000,63675.000000,116.095032)}
{pt3dadd(186036.000000,180156.000000,63675.000000,116.095032)}
{pt3dadd(185928.000000,180252.000000,63725.000000,116.095032)}
{pt3dadd(185820.000000,180252.000000,63725.000000,121.899785)}
{pt3dadd(185652.000000,180228.000000,63725.000000,127.704537)}
{pt3dadd(185376.000000,180540.000000,63800.000000,133.509289)}
{pt3dadd(184992.000000,180660.000000,64050.000000,139.314042)}
{pt3dadd(184860.000000,180744.000000,64025.000000,133.509289)}
{pt3dadd(184704.000000,180780.000000,64100.000000,127.704537)}
{pt3dadd(184512.000000,180768.000000,64250.000000,121.899785)}
{pt3dadd(184404.000000,180708.000000,64400.000000,116.095032)}
{pt3dadd(184296.000000,180672.000000,64450.000000,116.095032)}
{pt3dadd(184152.000000,180624.000000,64550.000000,116.095032)}

{create adhoc55}
{access adhoc55}
{connect adhoc55(1), adhoc53(0)}
{nseg = 1}
{strdef color color = "White"}
{pt3dclear()}
{pt3dadd(189012.000000,179928.000000,63175.000000,1035.114948)}
{pt3dadd(188856.000000,180348.000000,63250.000000,993.710430)}
{pt3dadd(188700.000000,180504.000000,63200.000000,1014.412689)}
{pt3dadd(189012.000000,180708.000000,63400.000000,1035.114948)}
{pt3dadd(188964.000000,180828.000000,63375.000000,1024.763819)}
{pt3dadd(188916.000000,180960.000000,63350.000000,1014.412689)}
{pt3dadd(188868.000000,181188.000000,63325.000000,1004.061560)}
{pt3dadd(188928.000000,181308.000000,63450.000000,993.710430)}
{pt3dadd(188988.000000,181452.000000,63575.000000,1004.061560)}
{pt3dadd(188904.000000,181560.000000,63600.000000,1014.412689)}
{pt3dadd(188820.000000,181632.000000,63500.000000,1024.763819)}
{pt3dadd(188856.000000,181728.000000,63600.000000,1035.114948)}
{pt3dadd(189096.000000,181896.000000,63750.000000,1074.449300)}
{pt3dadd(189240.000000,182076.000000,64000.000000,1113.783651)}
{pt3dadd(189132.000000,182196.000000,64050.000000,1153.118003)}
{pt3dadd(189024.000000,182340.000000,64125.000000,1192.452354)}
{pt3dadd(189024.000000,182448.000000,64125.000000,1153.118003)}
{pt3dadd(189024.000000,182592.000000,64125.000000,1113.783651)}
{pt3dadd(189024.000000,182772.000000,64150.000000,1074.449300)}
{pt3dadd(188724.000000,182880.000000,64050.000000,1035.114948)}
{pt3dadd(188844.000000,183000.000000,64150.000000,1086.870681)}
{pt3dadd(188856.000000,183120.000000,64200.000000,1138.626414)}
{pt3dadd(188868.000000,183264.000000,64250.000000,1190.382147)}
{pt3dadd(188880.000000,183432.000000,64300.000000,1242.137880)}
{pt3dadd(188700.000000,183636.000000,64500.000000,1289.339127)}
{pt3dadd(188784.000000,183780.000000,64475.000000,1336.540374)}
{pt3dadd(188604.000000,183960.000000,64475.000000,1383.741621)}
{pt3dadd(188424.000000,184212.000000,64475.000000,1430.942868)}
{pt3dadd(188532.000000,184308.000000,64600.000000,1445.848502)}
{pt3dadd(188364.000000,184392.000000,64750.000000,1460.754135)}
{pt3dadd(188328.000000,184500.000000,64725.000000,1475.659769)}
{pt3dadd(188292.000000,184716.000000,64700.000000,1490.565402)}
{pt3dadd(188304.000000,184884.000000,64875.000000,1416.037140)}
{pt3dadd(188016.000000,185064.000000,65125.000000,1341.508878)}
{pt3dadd(188148.000000,186024.000000,65350.000000,1266.980616)}
{pt3dadd(187824.000000,186660.000000,65550.000000,1192.452354)}
{pt3dadd(187416.000000,187176.000000,65925.000000,1074.046721)}
{pt3dadd(187416.000000,187368.000000,65900.000000,955.641087)}
{pt3dadd(187452.000000,187788.000000,66050.000000,837.235453)}
{pt3dadd(186216.000000,188292.000000,65825.000000,718.829820)}
{pt3dadd(186216.000000,190932.000000,65225.000000,2146.414176)}

{create adhoc56}
{access adhoc56}
{connect adhoc56(1), adhoc55(0)}
{nseg = 1}
{strdef color color = "White"}
{pt3dclear()}
{pt3dadd(186216.000000,190932.000000,65225.000000,2146.414176)}
{pt3dadd(186612.000000,191064.000000,66125.000000,1788.678450)}
{pt3dadd(186708.000000,191436.000000,66575.000000,1788.678450)}
{pt3dadd(186576.000000,191640.000000,66825.000000,1788.678450)}
{pt3dadd(186732.000000,191892.000000,66925.000000,1788.678450)}
{pt3dadd(186696.000000,192192.000000,67550.000000,1788.678450)}
{pt3dadd(186648.000000,192720.000000,68175.000000,1652.043308)}
{pt3dadd(186732.000000,193524.000000,68975.000000,1515.408165)}
{pt3dadd(186684.000000,194232.000000,69450.000000,1378.773023)}
{pt3dadd(186792.000000,194544.000000,69725.000000,1242.137880)}
{pt3dadd(186624.000000,194856.000000,70025.000000,1242.137880)}
{pt3dadd(186768.000000,195120.000000,70200.000000,1242.137880)}
{pt3dadd(186672.000000,195468.000000,70325.000000,1242.137880)}
{pt3dadd(186576.000000,195984.000000,71000.000000,1242.137880)}
{pt3dadd(187152.000000,196476.000000,71800.000000,1147.252361)}
{pt3dadd(186984.000000,197112.000000,72150.000000,1052.366841)}
{pt3dadd(186816.000000,197748.000000,72575.000000,957.481322)}
{pt3dadd(186636.000000,198384.000000,72900.000000,862.595802)}
{pt3dadd(186768.000000,198876.000000,73425.000000,1094.116464)}
{pt3dadd(187008.000000,199212.000000,73800.000000,1325.637126)}
{pt3dadd(186780.000000,199500.000000,74325.000000,1557.157788)}
{pt3dadd(186180.000000,199716.000000,74650.000000,1788.678450)}
{pt3dadd(186228.000000,200028.000000,75050.000000,1600.287575)}
{pt3dadd(186336.000000,200340.000000,75350.000000,1411.896699)}
{pt3dadd(186072.000000,200724.000000,75700.000000,1223.505823)}
{pt3dadd(186252.000000,201084.000000,75900.000000,1035.114948)}
{pt3dadd(185400.000000,202572.000000,76550.000000,1035.114948)}

{create adhoc57}
{access adhoc57}
{connect adhoc57(1), adhoc56(0)}
{nseg = 1}
{strdef color color = "White"}
{pt3dclear()}
{pt3dadd(185400.000000,202572.000000,76550.000000,1035.114948)}
{pt3dadd(185436.000000,202632.000000,77000.000000,1035.114948)}
{pt3dadd(186192.000000,202404.000000,77750.000000,956.043666)}
{pt3dadd(186396.000000,202656.000000,78250.000000,876.972384)}
{pt3dadd(186324.000000,202992.000000,78775.000000,797.901102)}
{pt3dadd(186240.000000,203328.000000,79350.000000,718.829820)}
{pt3dadd(186360.000000,203700.000000,79800.000000,797.901102)}
{pt3dadd(186492.000000,204072.000000,80375.000000,876.972384)}
{pt3dadd(186540.000000,204156.000000,80775.000000,956.043666)}
{pt3dadd(186456.000000,204444.000000,81225.000000,1035.114948)}
{pt3dadd(186696.000000,204648.000000,81750.000000,1223.505823)}
{pt3dadd(186672.000000,204804.000000,82225.000000,1411.896699)}
{pt3dadd(186648.000000,204960.000000,82650.000000,1600.287575)}
{pt3dadd(186528.000000,205116.000000,83125.000000,1788.678450)}
{pt3dadd(186432.000000,205224.000000,83525.000000,1699.244523)}
{pt3dadd(186312.000000,205788.000000,84475.000000,1609.810596)}
{pt3dadd(186408.000000,205704.000000,85050.000000,1520.376669)}
{pt3dadd(186372.000000,205716.000000,85575.000000,1430.942742)}
{pt3dadd(186480.000000,205692.000000,85925.000000,1331.985794)}
{pt3dadd(186588.000000,205668.000000,86300.000000,1233.028845)}
{pt3dadd(186876.000000,205596.000000,86825.000000,1134.071896)}
{pt3dadd(186960.000000,205704.000000,87275.000000,1035.114948)}
{pt3dadd(187344.000000,205680.000000,87675.000000,1148.977562)}
{pt3dadd(187404.000000,205644.000000,88150.000000,1262.840175)}
{pt3dadd(187632.000000,205620.000000,88650.000000,1376.702788)}
{pt3dadd(187728.000000,205764.000000,89075.000000,1490.565402)}
{pt3dadd(187764.000000,206052.000000,89600.000000,1565.093664)}
{pt3dadd(188052.000000,205596.000000,90000.000000,1639.621926)}
{pt3dadd(187980.000000,205896.000000,90550.000000,1714.150188)}
{pt3dadd(188076.000000,206028.000000,91175.000000,1788.678450)}
{pt3dadd(188268.000000,206076.000000,91675.000000,1959.676218)}
{pt3dadd(188412.000000,206124.000000,92425.000000,2130.673986)}
{pt3dadd(188424.000000,205812.000000,92850.000000,2301.671754)}
{pt3dadd(188652.000000,205632.000000,93500.000000,2472.669522)}
{pt3dadd(188796.000000,205212.000000,94475.000000,2227.143492)}
{pt3dadd(188856.000000,205296.000000,95000.000000,1981.617462)}
{pt3dadd(188820.000000,205128.000000,95450.000000,1736.091432)}
{pt3dadd(188772.000000,204660.000000,95975.000000,1490.565402)}
{pt3dadd(188700.000000,204276.000000,96450.000000,1565.093664)}
{pt3dadd(188652.000000,203580.000000,96925.000000,1639.621926)}
{pt3dadd(188844.000000,203664.000000,97375.000000,1714.150188)}
{pt3dadd(188880.000000,203760.000000,97800.000000,1788.678450)}
{pt3dadd(188640.000000,203748.000000,98400.000000,1600.287575)}
{pt3dadd(188280.000000,203616.000000,98975.000000,1411.896699)}
{pt3dadd(188112.000000,203388.000000,99500.000000,1223.505823)}
{pt3dadd(187824.000000,203220.000000,99875.000000,1035.114948)}
{pt3dadd(187704.000000,203040.000000,100350.000000,1312.939755)}
{pt3dadd(187584.000000,202860.000000,101550.000000,1590.764562)}
{pt3dadd(187632.000000,202836.000000,102325.000000,1868.589369)}
{pt3dadd(187680.000000,202812.000000,102875.000000,2146.414176)}
{pt3dadd(187716.000000,202692.000000,103425.000000,2253.734910)}
{pt3dadd(187752.000000,202368.000000,103875.000000,2361.055644)}
{pt3dadd(187980.000000,202092.000000,104625.000000,2468.376378)}
{pt3dadd(187908.000000,201852.000000,105150.000000,2575.697112)}
{pt3dadd(187740.000000,201252.000000,107150.000000,2575.697112)}
{pt3dadd(187860.000000,201264.000000,107600.000000,2575.697112)}
{pt3dadd(187836.000000,201036.000000,108100.000000,2575.697112)}
{pt3dadd(187812.000000,200808.000000,108600.000000,2575.697112)}
{pt3dadd(187776.000000,200580.000000,108925.000000,1723.131408)}
{pt3dadd(187704.000000,200172.000000,109700.000000,870.565704)}
{pt3dadd(187788.000000,200076.000000,110025.000000,18.000000)}
{pt3dadd(187728.000000,199872.000000,110475.000000,2472.669252)}
{pt3dadd(187728.000000,199776.000000,110875.000000,2301.671551)}
{pt3dadd(187776.000000,199524.000000,111275.000000,2130.673851)}
{pt3dadd(187812.000000,199488.000000,111675.000000,1959.676150)}
{pt3dadd(187572.000000,199404.000000,112275.000000,1788.678450)}
{pt3dadd(187464.000000,199284.000000,112625.000000,1714.150188)}
{pt3dadd(187368.000000,199152.000000,113025.000000,1639.621926)}
{pt3dadd(187140.000000,198948.000000,113300.000000,1565.093664)}
{pt3dadd(187008.000000,198744.000000,113650.000000,1490.565402)}
{pt3dadd(186876.000000,198540.000000,113975.000000,1490.565402)}
{pt3dadd(186648.000000,198360.000000,114350.000000,1490.565402)}
{pt3dadd(186372.000000,198276.000000,114700.000000,1490.565402)}
{pt3dadd(186192.000000,198276.000000,115050.000000,1490.565402)}
{pt3dadd(186084.000000,198240.000000,115400.000000,1428.458522)}
{pt3dadd(185904.000000,198096.000000,115750.000000,1366.351641)}
{pt3dadd(185796.000000,197856.000000,116100.000000,1304.244761)}
{pt3dadd(185676.000000,197616.000000,116450.000000,1242.137880)}
{pt3dadd(185340.000000,197652.000000,116775.000000,1190.382147)}
{pt3dadd(185160.000000,197652.000000,117100.000000,1138.626414)}
{pt3dadd(185076.000000,197568.000000,117400.000000,1086.870681)}
{pt3dadd(184884.000000,197604.000000,117750.000000,1035.114948)}
{pt3dadd(184740.000000,197496.000000,118050.000000,956.043666)}
{pt3dadd(184452.000000,197448.000000,118450.000000,876.972384)}
{pt3dadd(184128.000000,197412.000000,118725.000000,797.901102)}
{pt3dadd(183684.000000,197268.000000,119100.000000,718.829820)}
{pt3dadd(183636.000000,197376.000000,119525.000000,718.829820)}
{pt3dadd(183216.000000,196992.000000,119875.000000,718.829820)}
{pt3dadd(182796.000000,196596.000000,120125.000000,718.829820)}
{pt3dadd(182652.000000,196452.000000,120475.000000,718.829820)}
{pt3dadd(182508.000000,196368.000000,120875.000000,718.829820)}
{pt3dadd(182112.000000,196188.000000,121375.000000,718.829820)}
{pt3dadd(181476.000000,196272.000000,121950.000000,718.829820)}
{pt3dadd(180900.000000,195924.000000,122425.000000,718.829820)}
{pt3dadd(180468.000000,195792.000000,122700.000000,718.829820)}
{pt3dadd(180048.000000,195552.000000,123025.000000,718.829820)}
{pt3dadd(179772.000000,195300.000000,123325.000000,718.829820)}
{pt3dadd(179328.000000,195048.000000,123725.000000,718.829820)}
{pt3dadd(178944.000000,194916.000000,124050.000000,718.829820)}
{pt3dadd(178068.000000,194628.000000,124500.000000,718.829820)}
{pt3dadd(177528.000000,194460.000000,124875.000000,718.829820)}
{pt3dadd(177096.000000,194136.000000,125175.000000,718.829820)}
{pt3dadd(176796.000000,193860.000000,125475.000000,746.145369)}
{pt3dadd(176400.000000,193536.000000,125800.000000,773.460918)}
{pt3dadd(175884.000000,193212.000000,126075.000000,800.776467)}
{pt3dadd(175224.000000,192888.000000,126375.000000,828.092016)}
{pt3dadd(174564.000000,192612.000000,126700.000000,836.717962)}
{pt3dadd(173940.000000,192336.000000,126900.000000,845.343909)}
{pt3dadd(173688.000000,192144.000000,127025.000000,853.969856)}
{pt3dadd(173472.000000,191964.000000,127125.000000,862.595802)}
{pt3dadd(173256.000000,191784.000000,127225.000000,862.595802)}
{pt3dadd(173004.000000,191676.000000,127300.000000,862.595802)}
{pt3dadd(172812.000000,191532.000000,127400.000000,862.595802)}
{pt3dadd(172536.000000,191400.000000,127475.000000,862.595802)}
{pt3dadd(172260.000000,191196.000000,127600.000000,862.595802)}
{pt3dadd(171960.000000,191004.000000,127675.000000,862.595802)}
{pt3dadd(171684.000000,190812.000000,127750.000000,862.595802)}
{pt3dadd(171444.000000,190656.000000,127825.000000,862.595802)}
{pt3dadd(171120.000000,190524.000000,127950.000000,862.595802)}
{pt3dadd(170796.000000,190392.000000,128075.000000,862.595802)}
{pt3dadd(170556.000000,190212.000000,128125.000000,862.595802)}
{pt3dadd(170316.000000,189984.000000,128075.000000,862.595802)}
{pt3dadd(170028.000000,189732.000000,128125.000000,862.595802)}
{pt3dadd(169836.000000,189312.000000,128150.000000,862.595802)}
{pt3dadd(169668.000000,189060.000000,128175.000000,862.595802)}
{pt3dadd(169512.000000,189084.000000,128350.000000,862.595802)}
{pt3dadd(169320.000000,188892.000000,128375.000000,862.595802)}
{pt3dadd(169128.000000,188700.000000,128450.000000,862.595802)}
{pt3dadd(168888.000000,188592.000000,128525.000000,862.595802)}
{pt3dadd(168732.000000,188484.000000,128600.000000,862.595802)}
{pt3dadd(168540.000000,188376.000000,128700.000000,862.595802)}
{pt3dadd(168348.000000,188280.000000,128725.000000,862.595802)}
{pt3dadd(168156.000000,188052.000000,128825.000000,862.595802)}
{pt3dadd(167916.000000,187848.000000,129050.000000,862.595802)}
{pt3dadd(167484.000000,187608.000000,129300.000000,957.481322)}
{pt3dadd(167040.000000,187332.000000,129475.000000,1052.366841)}
{pt3dadd(166836.000000,187140.000000,129425.000000,1147.252361)}
{pt3dadd(166560.000000,186960.000000,129550.000000,1242.137880)}
{pt3dadd(166368.000000,186744.000000,129650.000000,1229.716498)}
{pt3dadd(166200.000000,186816.000000,129725.000000,1217.295117)}
{pt3dadd(166068.000000,186540.000000,129800.000000,1204.873736)}
{pt3dadd(165876.000000,186240.000000,129825.000000,1192.452354)}
{pt3dadd(165708.000000,185940.000000,129950.000000,1204.873736)}
{pt3dadd(165468.000000,185760.000000,130125.000000,1217.295117)}
{pt3dadd(165264.000000,185484.000000,130175.000000,1229.716498)}
{pt3dadd(165012.000000,185304.000000,130200.000000,1242.137880)}
{pt3dadd(164832.000000,185148.000000,130350.000000,1242.137880)}
{pt3dadd(164664.000000,185004.000000,130475.000000,1242.137880)}
{pt3dadd(164376.000000,184764.000000,130475.000000,1242.137880)}
{pt3dadd(164160.000000,184572.000000,130600.000000,1242.137880)}
{pt3dadd(163968.000000,184392.000000,130875.000000,1242.137880)}
{pt3dadd(163788.000000,184212.000000,131125.000000,1242.137880)}
{pt3dadd(163596.000000,184116.000000,131025.000000,1242.137880)}
{pt3dadd(163404.000000,183984.000000,131050.000000,1242.137880)}
{pt3dadd(163152.000000,183840.000000,131175.000000,1190.382147)}
{pt3dadd(162936.000000,183792.000000,131375.000000,1138.626414)}
{pt3dadd(162768.000000,183816.000000,131600.000000,1086.870681)}
{pt3dadd(162588.000000,183888.000000,131650.000000,1035.114948)}
{pt3dadd(162420.000000,183840.000000,131625.000000,1035.114948)}
{pt3dadd(162252.000000,183792.000000,131650.000000,1035.114948)}
{pt3dadd(162096.000000,183684.000000,131725.000000,1035.114948)}
{pt3dadd(161952.000000,183552.000000,131875.000000,1035.114948)}
{pt3dadd(161772.000000,183624.000000,131875.000000,991.985162)}
{pt3dadd(161592.000000,183660.000000,132000.000000,948.855375)}
{pt3dadd(161340.000000,183648.000000,132075.000000,905.725589)}
{pt3dadd(161004.000000,183564.000000,132100.000000,862.595802)}
{pt3dadd(160704.000000,183432.000000,132175.000000,853.969838)}
{pt3dadd(160476.000000,183192.000000,132400.000000,845.343873)}
{pt3dadd(160068.000000,182940.000000,132300.000000,836.717909)}
{pt3dadd(159828.000000,182520.000000,132275.000000,828.091944)}
{pt3dadd(159552.000000,182220.000000,132250.000000,836.717909)}
{pt3dadd(159348.000000,181872.000000,132250.000000,845.343873)}
{pt3dadd(158616.000000,181572.000000,132775.000000,853.969838)}
{pt3dadd(158364.000000,181068.000000,132950.000000,862.595802)}
{pt3dadd(158316.000000,180660.000000,132900.000000,771.743696)}
{pt3dadd(158172.000000,180348.000000,132975.000000,680.891589)}
{pt3dadd(158076.000000,180036.000000,132925.000000,590.039483)}
{pt3dadd(157932.000000,179712.000000,133000.000000,499.187376)}
{pt3dadd(157836.000000,179412.000000,133075.000000,524.146752)}
{pt3dadd(157872.000000,178980.000000,133075.000000,549.106128)}
{pt3dadd(157740.000000,178752.000000,133025.000000,574.065504)}
{pt3dadd(157644.000000,178476.000000,132950.000000,599.024880)}
{pt3dadd(157596.000000,178176.000000,132975.000000,599.024880)}
{pt3dadd(157392.000000,177924.000000,133150.000000,599.024880)}
{pt3dadd(157428.000000,177576.000000,133225.000000,599.024880)}
{pt3dadd(157464.000000,177276.000000,133300.000000,599.024880)}
{pt3dadd(157500.000000,176964.000000,133250.000000,628.976115)}
{pt3dadd(157416.000000,176568.000000,133250.000000,658.927350)}
{pt3dadd(157356.000000,176328.000000,133425.000000,688.878585)}
{pt3dadd(157428.000000,175908.000000,133550.000000,718.829820)}
{pt3dadd(157524.000000,175404.000000,133700.000000,754.771316)}
{pt3dadd(157416.000000,175044.000000,133975.000000,790.712811)}
{pt3dadd(157092.000000,174720.000000,134600.000000,826.654307)}
{pt3dadd(157212.000000,173904.000000,135175.000000,862.595802)}
{pt3dadd(157104.000000,173436.000000,135900.000000,1183.550396)}
{pt3dadd(157176.000000,173016.000000,136625.000000,1504.504989)}
{pt3dadd(156948.000000,172908.000000,137300.000000,1825.459583)}
{pt3dadd(156996.000000,173184.000000,138000.000000,2146.414176)}
{pt3dadd(157848.000000,172956.000000,138325.000000,1825.459583)}
{pt3dadd(157896.000000,172824.000000,138775.000000,1504.504989)}
{pt3dadd(157800.000000,172740.000000,139175.000000,1183.550396)}
{pt3dadd(157704.000000,172644.000000,139500.000000,862.595802)}
{pt3dadd(157512.000000,172548.000000,139700.000000,905.725589)}
{pt3dadd(157164.000000,172296.000000,139950.000000,948.855375)}
{pt3dadd(156684.000000,171876.000000,140225.000000,991.985162)}
{pt3dadd(156300.000000,171648.000000,140625.000000,1035.114948)}
{pt3dadd(156060.000000,171504.000000,140875.000000,1086.870681)}
{pt3dadd(155964.000000,171768.000000,141150.000000,1138.626414)}
{pt3dadd(155880.000000,171732.000000,141425.000000,1190.382147)}
{pt3dadd(155604.000000,171600.000000,141700.000000,1242.137880)}
{pt3dadd(155352.000000,171396.000000,141925.000000,1242.137880)}
{pt3dadd(155220.000000,171156.000000,142175.000000,1242.137880)}
{pt3dadd(155088.000000,170904.000000,142375.000000,1242.137880)}
{pt3dadd(154944.000000,170628.000000,142625.000000,1242.137880)}
{pt3dadd(154764.000000,170424.000000,142850.000000,1242.137880)}
{pt3dadd(154584.000000,170280.000000,143075.000000,1242.137880)}
{pt3dadd(154356.000000,170136.000000,143350.000000,1242.137880)}
{pt3dadd(154104.000000,169908.000000,143675.000000,1242.137880)}
{pt3dadd(153828.000000,169188.000000,143900.000000,1304.244761)}
{pt3dadd(153648.000000,168528.000000,144100.000000,1366.351641)}
{pt3dadd(153384.000000,168096.000000,144400.000000,1428.458522)}
{pt3dadd(153144.000000,167916.000000,145075.000000,1490.565402)}
{pt3dadd(153024.000000,167724.000000,145400.000000,1490.565402)}
{pt3dadd(153072.000000,167592.000000,145350.000000,1490.565402)}
{pt3dadd(153060.000000,167472.000000,145300.000000,1490.565402)}
{pt3dadd(153024.000000,167340.000000,145275.000000,1490.565402)}
{pt3dadd(152940.000000,167220.000000,145400.000000,1565.093664)}
{pt3dadd(152856.000000,166992.000000,145875.000000,1639.621926)}
{pt3dadd(153096.000000,166776.000000,145775.000000,1714.150188)}
{pt3dadd(152772.000000,166512.000000,145875.000000,1788.678450)}
{pt3dadd(152496.000000,166212.000000,146450.000000,1959.676150)}
{pt3dadd(152400.000000,165936.000000,146875.000000,2130.673851)}
{pt3dadd(152400.000000,165612.000000,147250.000000,2301.671551)}
{pt3dadd(152400.000000,165288.000000,147500.000000,2472.669252)}
{pt3dadd(152292.000000,164916.000000,147750.000000,2391.105483)}
{pt3dadd(151872.000000,164052.000000,148175.000000,2309.541714)}
{pt3dadd(151872.000000,164172.000000,148475.000000,2227.977945)}
{pt3dadd(151776.000000,163512.000000,148750.000000,2146.414176)}
{pt3dadd(151884.000000,163272.000000,148975.000000,2146.414176)}
{pt3dadd(151980.000000,163128.000000,149275.000000,2146.414176)}
{pt3dadd(151932.000000,162876.000000,149650.000000,2146.414176)}
{pt3dadd(151932.000000,162624.000000,149850.000000,2146.414176)}
{pt3dadd(151584.000000,162108.000000,150425.000000,2253.734910)}
{pt3dadd(152244.000000,161592.000000,150925.000000,2361.055644)}
{pt3dadd(152112.000000,161268.000000,151275.000000,2468.376378)}
{pt3dadd(151992.000000,160944.000000,151675.000000,2575.697112)}
{pt3dadd(151908.000000,160620.000000,152225.000000,2575.697112)}
{pt3dadd(152184.000000,160104.000000,152625.000000,2575.697112)}
{pt3dadd(152268.000000,160008.000000,153050.000000,2575.697112)}
{pt3dadd(152256.000000,159576.000000,153525.000000,2575.697112)}
{pt3dadd(152244.000000,159132.000000,153875.000000,2575.697112)}
{pt3dadd(152244.000000,158688.000000,154250.000000,2575.697112)}
{pt3dadd(152004.000000,158412.000000,154750.000000,2575.697112)}
{pt3dadd(151908.000000,157968.000000,155250.000000,2575.697112)}
{pt3dadd(151620.000000,157452.000000,156200.000000,2468.376378)}
{pt3dadd(152364.000000,156888.000000,156950.000000,2361.055644)}
{pt3dadd(151884.000000,156804.000000,157200.000000,2253.734910)}
{pt3dadd(152256.000000,156468.000000,157750.000000,2146.414176)}
{pt3dadd(152424.000000,156108.000000,158150.000000,2146.414176)}
{pt3dadd(152580.000000,155772.000000,158625.000000,2146.414176)}
{pt3dadd(152196.000000,155472.000000,159100.000000,2146.414176)}
{pt3dadd(152088.000000,154764.000000,159650.000000,2146.414176)}
{pt3dadd(151920.000000,154608.000000,160075.000000,2146.414176)}
{pt3dadd(151872.000000,154356.000000,160425.000000,2146.414176)}
{pt3dadd(152100.000000,153696.000000,161025.000000,2146.414176)}
{pt3dadd(152316.000000,153036.000000,161650.000000,2146.414176)}
{pt3dadd(153024.000000,152832.000000,162075.000000,2146.414176)}
{pt3dadd(152784.000000,152448.000000,162475.000000,2146.414176)}
{pt3dadd(153192.000000,151716.000000,162925.000000,2146.414176)}
{pt3dadd(153396.000000,151416.000000,163150.000000,2146.414176)}
{pt3dadd(153612.000000,151128.000000,163800.000000,2146.414176)}
{pt3dadd(153732.000000,150360.000000,164125.000000,2146.414176)}
{pt3dadd(153624.000000,149688.000000,164675.000000,2146.414176)}
{pt3dadd(153804.000000,149496.000000,165175.000000,2146.414176)}
{pt3dadd(153828.000000,149244.000000,165500.000000,2146.414176)}
{pt3dadd(154188.000000,149016.000000,165825.000000,2146.414176)}
{pt3dadd(154272.000000,148596.000000,166125.000000,2146.414176)}
{pt3dadd(154404.000000,148296.000000,166425.000000,2146.414176)}
{pt3dadd(154332.000000,147540.000000,166700.000000,2039.093474)}
{pt3dadd(154608.000000,146916.000000,167150.000000,1931.772771)}
{pt3dadd(154872.000000,146292.000000,167575.000000,1824.452069)}
{pt3dadd(155184.000000,145896.000000,167925.000000,1717.131366)}
{pt3dadd(155400.000000,145380.000000,168425.000000,1717.131366)}
{pt3dadd(155496.000000,144984.000000,168650.000000,1717.131366)}
{pt3dadd(155628.000000,143976.000000,169475.000000,1717.131366)}
{pt3dadd(155724.000000,143736.000000,169575.000000,1717.131366)}
{pt3dadd(155820.000000,143460.000000,169675.000000,1735.018137)}
{pt3dadd(156048.000000,142968.000000,170550.000000,1752.904908)}
{pt3dadd(156312.000000,142248.000000,171125.000000,1770.791679)}
{pt3dadd(156576.000000,141540.000000,171625.000000,1788.678450)}
{pt3dadd(156840.000000,141156.000000,172000.000000,1714.150188)}
{pt3dadd(156792.000000,140832.000000,172350.000000,1639.621926)}
{pt3dadd(156972.000000,140376.000000,172975.000000,1565.093664)}
{pt3dadd(157152.000000,139812.000000,173675.000000,1490.565402)}
{pt3dadd(157020.000000,139320.000000,174150.000000,1565.093664)}
{pt3dadd(156072.000000,138948.000000,174675.000000,1639.621926)}
{pt3dadd(156192.000000,138396.000000,175925.000000,1714.150188)}
{pt3dadd(156312.000000,137832.000000,176750.000000,1788.678450)}
{pt3dadd(156216.000000,137556.000000,177550.000000,1878.112382)}
{pt3dadd(155892.000000,137400.000000,178200.000000,1967.546313)}
{pt3dadd(155964.000000,137004.000000,178775.000000,2056.980245)}
{pt3dadd(155880.000000,136896.000000,179300.000000,2146.414176)}
{pt3dadd(155748.000000,136620.000000,179875.000000,2146.414176)}
{pt3dadd(155700.000000,136128.000000,180550.000000,2146.414176)}
{pt3dadd(155652.000000,135876.000000,181075.000000,2146.414176)}
{pt3dadd(155592.000000,135816.000000,181450.000000,2146.414176)}
{pt3dadd(155664.000000,135396.000000,182450.000000,2056.980245)}
{pt3dadd(155928.000000,135012.000000,181950.000000,1967.546313)}
{pt3dadd(156000.000000,134736.000000,182225.000000,1878.112382)}
{pt3dadd(155940.000000,134448.000000,182125.000000,1788.678450)}
{pt3dadd(155940.000000,134148.000000,182150.000000,1491.265058)}
{pt3dadd(155940.000000,133728.000000,182175.000000,1193.851665)}
{pt3dadd(155940.000000,133224.000000,182100.000000,896.438272)}
{pt3dadd(155880.000000,132864.000000,182400.000000,599.024880)}
{pt3dadd(155964.000000,132720.000000,182475.000000,415.989486)}
{pt3dadd(156036.000000,132492.000000,182550.000000,346.657896)}

{create adhoc58}
{access adhoc58}
{connect adhoc58(1), adhoc56(0)}
{nseg = 1}
{strdef color color = "White"}
{pt3dclear()}
{pt3dadd(185400.000000,202572.000000,76550.000000,1035.114948)}
{pt3dadd(185280.000000,202824.000000,76550.000000,1242.137880)}
{pt3dadd(184812.000000,203340.000000,76550.000000,1104.122561)}
{pt3dadd(184536.000000,202776.000000,75275.000000,966.107241)}
{pt3dadd(184284.000000,203100.000000,75325.000000,828.091922)}
{pt3dadd(183528.000000,204744.000000,75600.000000,690.076602)}
{pt3dadd(183516.000000,205128.000000,75600.000000,697.264906)}
{pt3dadd(184020.000000,204768.000000,75250.000000,704.453211)}
{pt3dadd(183372.000000,205404.000000,75250.000000,711.641515)}
{pt3dadd(183012.000000,205752.000000,75250.000000,718.829820)}
{pt3dadd(182760.000000,206196.000000,75250.000000,849.656835)}
{pt3dadd(182496.000000,207336.000000,74775.000000,980.483850)}
{pt3dadd(182304.000000,207708.000000,74375.000000,1111.310865)}
{pt3dadd(182184.000000,208080.000000,73925.000000,1242.137880)}
{pt3dadd(181908.000000,208464.000000,73150.000000,1304.244761)}
{pt3dadd(181752.000000,208680.000000,72700.000000,1366.351641)}
{pt3dadd(181512.000000,208872.000000,72675.000000,1428.458522)}
{pt3dadd(181248.000000,209088.000000,72500.000000,1490.565402)}
{pt3dadd(181176.000000,209364.000000,72000.000000,1428.458522)}
{pt3dadd(180912.000000,209616.000000,72000.000000,1366.351641)}
{pt3dadd(180684.000000,209928.000000,71625.000000,1304.244761)}
{pt3dadd(179400.000000,210864.000000,70975.000000,1242.137880)}
{pt3dadd(179172.000000,211104.000000,70675.000000,1190.382147)}
{pt3dadd(179076.000000,211440.000000,70650.000000,1138.626414)}
{pt3dadd(178212.000000,211956.000000,70375.000000,1086.870681)}
{pt3dadd(178380.000000,212160.000000,70375.000000,1035.114948)}
{pt3dadd(177960.000000,212376.000000,70100.000000,991.985162)}
{pt3dadd(177732.000000,212688.000000,70000.000000,948.855375)}
{pt3dadd(177480.000000,212820.000000,69825.000000,905.725589)}
{pt3dadd(177432.000000,213048.000000,69725.000000,862.595802)}
{pt3dadd(177036.000000,213360.000000,69475.000000,895.374441)}
{pt3dadd(176832.000000,213564.000000,69475.000000,928.153080)}
{pt3dadd(176676.000000,213684.000000,69300.000000,960.931719)}
{pt3dadd(176388.000000,214224.000000,69125.000000,993.710358)}
{pt3dadd(176028.000000,214560.000000,68425.000000,1055.817239)}
{pt3dadd(175980.000000,214788.000000,67650.000000,1117.924119)}
{pt3dadd(175800.000000,215172.000000,67375.000000,1180.031000)}
{pt3dadd(175416.000000,215568.000000,66725.000000,1242.137880)}
{pt3dadd(175188.000000,216072.000000,66525.000000,1490.565402)}

{create adhoc59}
{access adhoc59}
{connect adhoc59(1), adhoc58(0)}
{nseg = 1}
{strdef color color = "White"}
{pt3dclear()}
{pt3dadd(175188.000000,216072.000000,66525.000000,1490.565402)}
{pt3dadd(174876.000000,216996.000000,68175.000000,953.962020)}
{pt3dadd(174300.000000,217668.000000,69275.000000,819.468887)}
{pt3dadd(174048.000000,218064.000000,69525.000000,684.975753)}
{pt3dadd(173892.000000,218244.000000,69500.000000,550.482619)}
{pt3dadd(173772.000000,218412.000000,69650.000000,415.989486)}
{pt3dadd(173508.000000,218676.000000,69925.000000,415.989486)}
{pt3dadd(173436.000000,218856.000000,70150.000000,415.989486)}
{pt3dadd(173412.000000,218856.000000,70400.000000,415.989486)}
{pt3dadd(173124.000000,219156.000000,70725.000000,415.989486)}
{pt3dadd(172788.000000,219384.000000,71125.000000,398.656589)}
{pt3dadd(172536.000000,219576.000000,71450.000000,381.323691)}
{pt3dadd(172248.000000,219756.000000,71700.000000,363.990794)}
{pt3dadd(171864.000000,219924.000000,72000.000000,346.657896)}
{pt3dadd(171984.000000,220104.000000,72100.000000,384.790266)}
{pt3dadd(171696.000000,220308.000000,72225.000000,422.922636)}
{pt3dadd(171228.000000,220548.000000,72475.000000,461.055006)}
{pt3dadd(170544.000000,220824.000000,72925.000000,499.187376)}
{pt3dadd(170028.000000,221040.000000,73175.000000,478.387903)}
{pt3dadd(169800.000000,221268.000000,73425.000000,457.588431)}
{pt3dadd(169428.000000,221460.000000,73725.000000,436.788958)}
{pt3dadd(169068.000000,221712.000000,73975.000000,415.989486)}
{pt3dadd(168444.000000,221916.000000,74325.000000,384.212511)}
{pt3dadd(168180.000000,222084.000000,74625.000000,352.435536)}
{pt3dadd(168000.000000,222240.000000,74900.000000,320.658561)}
{pt3dadd(167100.000000,222324.000000,75300.000000,288.881586)}
{pt3dadd(166836.000000,222432.000000,75575.000000,341.458034)}
{pt3dadd(166656.000000,222504.000000,75800.000000,394.034481)}
{pt3dadd(166236.000000,222744.000000,76100.000000,446.610929)}
{pt3dadd(165924.000000,222852.000000,76375.000000,499.187376)}
{pt3dadd(165660.000000,223020.000000,76800.000000,499.187376)}
{pt3dadd(165372.000000,223200.000000,76975.000000,499.187376)}
{pt3dadd(164904.000000,223320.000000,77475.000000,499.187376)}
{pt3dadd(164640.000000,223512.000000,77775.000000,499.187376)}
{pt3dadd(164304.000000,223632.000000,78075.000000,554.097987)}
{pt3dadd(164280.000000,223716.000000,78350.000000,609.008598)}
{pt3dadd(164256.000000,223800.000000,78600.000000,663.919209)}
{pt3dadd(164052.000000,223908.000000,78950.000000,718.829820)}
{pt3dadd(164052.000000,224280.000000,79100.000000,407.023758)}

{create adhoc60}
{access adhoc60}
{connect adhoc60(1), adhoc59(0)}
{nseg = 1}
{strdef color color = "White"}
{pt3dclear()}
{pt3dadd(164052.000000,224280.000000,79100.000000,407.023758)}
{pt3dadd(163920.000000,225240.000000,79175.000000,167.176836)}
{pt3dadd(163728.000000,225744.000000,79450.000000,197.603024)}
{pt3dadd(163740.000000,226020.000000,79700.000000,228.029211)}
{pt3dadd(163476.000000,226344.000000,80025.000000,258.455399)}
{pt3dadd(163584.000000,226656.000000,80275.000000,288.881586)}
{pt3dadd(163560.000000,226896.000000,80225.000000,276.844851)}
{pt3dadd(163644.000000,227064.000000,80175.000000,264.808116)}
{pt3dadd(163620.000000,227268.000000,80250.000000,252.771381)}
{pt3dadd(163620.000000,227484.000000,80250.000000,240.734646)}
{pt3dadd(163488.000000,227616.000000,80175.000000,228.697911)}
{pt3dadd(163572.000000,227880.000000,80150.000000,216.661176)}
{pt3dadd(163344.000000,228264.000000,80100.000000,204.624441)}
{pt3dadd(163488.000000,228408.000000,80000.000000,192.587706)}
{pt3dadd(163368.000000,228624.000000,80075.000000,194.593833)}
{pt3dadd(163320.000000,228876.000000,80075.000000,196.599960)}
{pt3dadd(163224.000000,229020.000000,80125.000000,198.606087)}
{pt3dadd(162960.000000,229296.000000,80175.000000,200.612214)}
{pt3dadd(162936.000000,229500.000000,80175.000000,192.253370)}
{pt3dadd(162804.000000,229716.000000,80300.000000,183.894525)}
{pt3dadd(162780.000000,229884.000000,80325.000000,175.535680)}
{pt3dadd(162648.000000,230040.000000,80375.000000,167.176836)}
{pt3dadd(162552.000000,230220.000000,80400.000000,175.535680)}
{pt3dadd(162528.000000,230412.000000,80375.000000,183.894525)}
{pt3dadd(162396.000000,230448.000000,80675.000000,192.253370)}
{pt3dadd(162396.000000,230604.000000,80675.000000,200.612214)}
{pt3dadd(162324.000000,230976.000000,80925.000000,237.123635)}
{pt3dadd(162480.000000,231360.000000,81350.000000,273.635055)}
{pt3dadd(162432.000000,231480.000000,81625.000000,310.146475)}
{pt3dadd(162228.000000,231648.000000,82025.000000,346.657896)}
{pt3dadd(161964.000000,231528.000000,82375.000000,301.787631)}
{pt3dadd(161472.000000,231480.000000,82750.000000,256.917366)}
{pt3dadd(161352.000000,231480.000000,82725.000000,212.047101)}
{pt3dadd(161244.000000,231456.000000,82750.000000,167.176836)}
{pt3dadd(161124.000000,231408.000000,82800.000000,185.566288)}
{pt3dadd(159984.000000,231264.000000,83025.000000,203.955741)}
{pt3dadd(159768.000000,231240.000000,83050.000000,222.345193)}
{pt3dadd(159516.000000,231264.000000,83075.000000,240.734646)}
{pt3dadd(159264.000000,231336.000000,83100.000000,92.876040)}

{create adhoc61}
{access adhoc61}
{connect adhoc61(1), adhoc59(0)}
{nseg = 1}
{strdef color color = "White"}
{pt3dclear()}
{pt3dadd(164052.000000,224280.000000,79100.000000,407.023758)}
{pt3dadd(163872.000000,223740.000000,79450.000000,718.829820)}
{pt3dadd(163716.000000,223608.000000,79725.000000,688.878585)}
{pt3dadd(163680.000000,223584.000000,79975.000000,658.927350)}
{pt3dadd(163632.000000,223476.000000,80175.000000,628.976115)}
{pt3dadd(163536.000000,223332.000000,80400.000000,599.024880)}
{pt3dadd(163608.000000,223284.000000,80675.000000,687.759165)}
{pt3dadd(163584.000000,223200.000000,80950.000000,776.493450)}
{pt3dadd(163668.000000,223092.000000,81150.000000,865.227735)}
{pt3dadd(163680.000000,223068.000000,81400.000000,953.962020)}
{pt3dadd(163680.000000,223032.000000,81700.000000,887.990683)}
{pt3dadd(163812.000000,223008.000000,82025.000000,822.019347)}
{pt3dadd(163812.000000,222972.000000,82300.000000,756.048011)}
{pt3dadd(163992.000000,223092.000000,82625.000000,690.076674)}
{pt3dadd(164580.000000,223164.000000,83000.000000,567.710559)}
{pt3dadd(164808.000000,223752.000000,83375.000000,445.344444)}
{pt3dadd(164952.000000,223920.000000,83575.000000,322.978329)}
{pt3dadd(165012.000000,224172.000000,83775.000000,200.612214)}
{pt3dadd(164940.000000,224436.000000,84000.000000,200.612214)}
{pt3dadd(165024.000000,224676.000000,84225.000000,200.612214)}
{pt3dadd(164940.000000,224976.000000,84425.000000,200.612214)}
{pt3dadd(164700.000000,225396.000000,84625.000000,200.612214)}
{pt3dadd(164484.000000,225924.000000,84925.000000,210.642822)}
{pt3dadd(163296.000000,226380.000000,85425.000000,220.673430)}
{pt3dadd(162936.000000,226536.000000,85650.000000,230.704038)}
{pt3dadd(162960.000000,226704.000000,85850.000000,240.734646)}
{pt3dadd(162876.000000,226944.000000,86050.000000,240.734646)}
{pt3dadd(162780.000000,227124.000000,86250.000000,240.734646)}
{pt3dadd(162792.000000,227412.000000,86450.000000,240.734646)}
{pt3dadd(162720.000000,227652.000000,86650.000000,240.734646)}
{pt3dadd(162732.000000,227748.000000,86875.000000,267.215459)}
{pt3dadd(162804.000000,228012.000000,87125.000000,293.696271)}
{pt3dadd(162948.000000,228240.000000,87425.000000,320.177083)}
{pt3dadd(163116.000000,228204.000000,87700.000000,346.657896)}
{pt3dadd(163176.000000,227928.000000,87900.000000,317.769741)}
{pt3dadd(163188.000000,227856.000000,88150.000000,288.881586)}
{pt3dadd(163248.000000,227928.000000,88350.000000,259.993431)}
{pt3dadd(163836.000000,227772.000000,88725.000000,231.105276)}
{pt3dadd(164340.000000,227628.000000,89025.000000,208.157467)}
{pt3dadd(164424.000000,227424.000000,89050.000000,185.209659)}
{pt3dadd(164544.000000,227184.000000,89150.000000,162.261850)}
{pt3dadd(164472.000000,227064.000000,89225.000000,139.314042)}
{pt3dadd(164376.000000,226944.000000,89275.000000,116.095032)}

{create adhoc62}
{access adhoc62}
{connect adhoc62(1), adhoc58(0)}
{nseg = 1}
{strdef color color = "White"}
{pt3dclear()}
{pt3dadd(175188.000000,216072.000000,66525.000000,1490.565402)}
{pt3dadd(175116.000000,216288.000000,66125.000000,1430.942742)}
{pt3dadd(174672.000000,216744.000000,65850.000000,1368.007788)}
{pt3dadd(174348.000000,216996.000000,65350.000000,1305.072834)}
{pt3dadd(173796.000000,217008.000000,64925.000000,1242.137880)}
{pt3dadd(173880.000000,217212.000000,64475.000000,1242.137880)}
{pt3dadd(173496.000000,217452.000000,64075.000000,1242.137880)}
{pt3dadd(173112.000000,217692.000000,63675.000000,1242.137880)}
{pt3dadd(172668.000000,217860.000000,63275.000000,1242.137880)}
{pt3dadd(172152.000000,218004.000000,62875.000000,1190.382147)}
{pt3dadd(171828.000000,218112.000000,61750.000000,1138.626414)}
{pt3dadd(171684.000000,218220.000000,61600.000000,1086.870681)}
{pt3dadd(171192.000000,218088.000000,61225.000000,1035.114948)}
{pt3dadd(171036.000000,217752.000000,60550.000000,983.359215)}
{pt3dadd(170976.000000,217704.000000,60225.000000,931.603482)}
{pt3dadd(170856.000000,217608.000000,59925.000000,879.847749)}
{pt3dadd(170628.000000,217476.000000,59525.000000,828.092016)}
{pt3dadd(170268.000000,217368.000000,59225.000000,836.717962)}
{pt3dadd(170172.000000,217368.000000,58950.000000,845.343909)}
{pt3dadd(170148.000000,217248.000000,58650.000000,853.969856)}
{pt3dadd(169728.000000,217284.000000,58350.000000,862.595802)}
{pt3dadd(169680.000000,217260.000000,57975.000000,895.374441)}
{pt3dadd(169392.000000,217080.000000,57575.000000,928.153080)}
{pt3dadd(169272.000000,217140.000000,57225.000000,960.931719)}
{pt3dadd(169152.000000,217200.000000,57050.000000,993.710358)}
{pt3dadd(168996.000000,217452.000000,56350.000000,1035.114948)}

{create adhoc63}
{access adhoc63}
{connect adhoc63(1), adhoc62(0)}
{nseg = 1}
{strdef color color = "White"}
{pt3dclear()}
{pt3dadd(168996.000000,217452.000000,56350.000000,1035.114948)}
{pt3dadd(169212.000000,216852.000000,55925.000000,993.710286)}

{create adhoc64}
{access adhoc64}
{connect adhoc64(1), adhoc63(0)}
{nseg = 1}
{strdef color color = "White"}
{pt3dclear()}
{pt3dadd(169212.000000,216852.000000,55925.000000,993.710286)}
{pt3dadd(168828.000000,216936.000000,55325.000000,828.092016)}
{pt3dadd(168804.000000,216804.000000,55000.000000,770.825232)}
{pt3dadd(168840.000000,216756.000000,54775.000000,713.558448)}
{pt3dadd(168792.000000,216756.000000,54500.000000,656.291664)}
{pt3dadd(168588.000000,216504.000000,54250.000000,599.024880)}
{pt3dadd(168648.000000,216408.000000,53900.000000,553.266031)}
{pt3dadd(168312.000000,216120.000000,53125.000000,507.507183)}
{pt3dadd(167664.000000,215472.000000,52650.000000,461.748335)}
{pt3dadd(167112.000000,215160.000000,52325.000000,415.989486)}
{pt3dadd(167124.000000,214992.000000,51800.000000,491.699570)}
{pt3dadd(166920.000000,214740.000000,51400.000000,567.409653)}
{pt3dadd(167088.000000,214668.000000,50675.000000,643.119737)}
{pt3dadd(167148.000000,214884.000000,50425.000000,718.829820)}
{pt3dadd(167328.000000,214920.000000,50150.000000,643.119736)}
{pt3dadd(167364.000000,214848.000000,49675.000000,567.409653)}
{pt3dadd(167508.000000,214800.000000,49225.000000,491.699570)}
{pt3dadd(167760.000000,214920.000000,48950.000000,415.989486)}
{pt3dadd(168108.000000,214980.000000,48550.000000,411.829601)}
{pt3dadd(168192.000000,215064.000000,48250.000000,407.669715)}
{pt3dadd(168432.000000,215316.000000,48025.000000,403.509830)}
{pt3dadd(168468.000000,215184.000000,47850.000000,399.349944)}
{pt3dadd(168612.000000,214956.000000,47650.000000,424.309302)}
{pt3dadd(168744.000000,214824.000000,47375.000000,449.268660)}
{pt3dadd(169068.000000,214644.000000,47150.000000,474.228018)}
{pt3dadd(169044.000000,214620.000000,46850.000000,499.187376)}
{pt3dadd(169128.000000,214596.000000,46625.000000,478.387903)}
{pt3dadd(169236.000000,214344.000000,46325.000000,457.588431)}
{pt3dadd(169344.000000,214140.000000,45625.000000,436.788958)}
{pt3dadd(169428.000000,213912.000000,45275.000000,415.989486)}
{pt3dadd(169800.000000,213480.000000,45250.000000,374.390541)}
{pt3dadd(169812.000000,213648.000000,44850.000000,332.791596)}
{pt3dadd(169812.000000,213756.000000,44700.000000,346.657896)}

{create adhoc65}
{access adhoc65}
{connect adhoc65(1), adhoc64(0)}
{nseg = 1}
{strdef color color = "White"}
{pt3dclear()}
{pt3dadd(169812.000000,213756.000000,44700.000000,346.657896)}
{pt3dadd(170136.000000,212988.000000,44700.000000,167.176836)}
{pt3dadd(170772.000000,212520.000000,44075.000000,200.612214)}

{create adhoc66}
{access adhoc66}
{connect adhoc66(1), adhoc64(0)}
{nseg = 1}
{strdef color color = "White"}
{pt3dclear()}
{pt3dadd(169812.000000,213756.000000,44700.000000,346.657896)}
{pt3dadd(169548.000000,214056.000000,44625.000000,346.657896)}
{pt3dadd(169536.000000,214620.000000,44175.000000,320.177083)}
{pt3dadd(169500.000000,214860.000000,43925.000000,293.696271)}
{pt3dadd(169740.000000,215100.000000,43575.000000,267.215459)}
{pt3dadd(169860.000000,215112.000000,43300.000000,240.734646)}
{pt3dadd(171000.000000,215592.000000,42725.000000,240.734646)}

{create adhoc67}
{access adhoc67}
{connect adhoc67(1), adhoc63(0)}
{nseg = 1}
{strdef color color = "White"}
{pt3dclear()}
{pt3dadd(169212.000000,216852.000000,55925.000000,993.710286)}
{pt3dadd(168876.000000,214668.000000,56050.000000,288.881586)}
{pt3dadd(168852.000000,214548.000000,55975.000000,276.844851)}
{pt3dadd(168828.000000,214452.000000,55975.000000,264.808116)}
{pt3dadd(168804.000000,214344.000000,55975.000000,252.771381)}
{pt3dadd(168864.000000,214200.000000,56075.000000,240.734646)}
{pt3dadd(168924.000000,213996.000000,56175.000000,240.734646)}
{pt3dadd(168924.000000,213732.000000,56050.000000,240.734646)}
{pt3dadd(169032.000000,213588.000000,56050.000000,240.734646)}
{pt3dadd(168984.000000,213432.000000,55975.000000,240.734646)}
{pt3dadd(168996.000000,213288.000000,55975.000000,252.771381)}
{pt3dadd(169080.000000,213108.000000,55875.000000,264.808116)}
{pt3dadd(169092.000000,212964.000000,55900.000000,276.844851)}
{pt3dadd(169176.000000,212796.000000,55925.000000,288.881586)}
{pt3dadd(169320.000000,212628.000000,55800.000000,303.325664)}
{pt3dadd(169332.000000,212436.000000,55825.000000,317.769741)}
{pt3dadd(169416.000000,212232.000000,55550.000000,332.213819)}
{pt3dadd(169524.000000,212028.000000,55750.000000,346.657896)}
{pt3dadd(169608.000000,211812.000000,55575.000000,320.177083)}
{pt3dadd(169608.000000,211620.000000,55350.000000,293.696271)}
{pt3dadd(169668.000000,211416.000000,55325.000000,267.215459)}
{pt3dadd(169596.000000,211068.000000,55275.000000,240.734646)}
{pt3dadd(169836.000000,210840.000000,55100.000000,240.734646)}
{pt3dadd(169944.000000,210636.000000,55075.000000,240.734646)}
{pt3dadd(170160.000000,210444.000000,55025.000000,240.734646)}
{pt3dadd(170328.000000,210108.000000,54675.000000,240.734646)}
{pt3dadd(170256.000000,209940.000000,54575.000000,240.734646)}
{pt3dadd(170256.000000,209376.000000,54625.000000,240.734646)}
{pt3dadd(170472.000000,209076.000000,54425.000000,240.734646)}
{pt3dadd(170508.000000,208872.000000,54275.000000,240.734646)}
{pt3dadd(170520.000000,208716.000000,54325.000000,215.379495)}
{pt3dadd(170532.000000,208452.000000,54075.000000,190.024344)}
{pt3dadd(170532.000000,208308.000000,54200.000000,164.669193)}
{pt3dadd(170460.000000,208092.000000,54175.000000,139.314042)}
{pt3dadd(170280.000000,207804.000000,53900.000000,146.279741)}
{pt3dadd(170160.000000,207612.000000,53725.000000,153.245439)}
{pt3dadd(170172.000000,207408.000000,53500.000000,160.211138)}
{pt3dadd(170172.000000,207156.000000,53400.000000,167.176836)}
{pt3dadd(170148.000000,206952.000000,53200.000000,160.211138)}
{pt3dadd(170268.000000,206820.000000,52950.000000,153.245439)}
{pt3dadd(170148.000000,206616.000000,52925.000000,146.279741)}
{pt3dadd(170496.000000,206700.000000,52575.000000,139.314042)}
{pt3dadd(170580.000000,206364.000000,52225.000000,288.881586)}
{pt3dadd(170796.000000,206136.000000,51450.000000,240.734646)}

{create adhoc68}
{access adhoc68}
{connect adhoc68(1), adhoc62(0)}
{nseg = 1}
{strdef color color = "White"}
{pt3dclear()}
{pt3dadd(168996.000000,217452.000000,56350.000000,1035.114948)}
{pt3dadd(167568.000000,219288.000000,56225.000000,332.791596)}
{pt3dadd(167496.000000,219408.000000,56200.000000,339.724746)}
{pt3dadd(167424.000000,219540.000000,56125.000000,346.657896)}
{pt3dadd(167244.000000,219720.000000,56075.000000,320.177083)}
{pt3dadd(167160.000000,219816.000000,56075.000000,293.696271)}
{pt3dadd(167160.000000,219948.000000,55975.000000,267.215459)}
{pt3dadd(167076.000000,220104.000000,55975.000000,240.734646)}
{pt3dadd(167004.000000,220260.000000,55875.000000,267.215459)}
{pt3dadd(166908.000000,220464.000000,55875.000000,293.696271)}
{pt3dadd(166812.000000,220584.000000,55875.000000,320.177083)}
{pt3dadd(166716.000000,220728.000000,55875.000000,346.657896)}
{pt3dadd(166620.000000,220872.000000,55875.000000,346.657896)}
{pt3dadd(166704.000000,221016.000000,55650.000000,346.657896)}
{pt3dadd(166632.000000,221196.000000,55625.000000,346.657896)}
{pt3dadd(166584.000000,221436.000000,55525.000000,346.657896)}
{pt3dadd(166440.000000,221580.000000,55600.000000,310.146476)}
{pt3dadd(166296.000000,221760.000000,55675.000000,273.635055)}
{pt3dadd(166152.000000,221964.000000,55750.000000,237.123635)}
{pt3dadd(166104.000000,222084.000000,55600.000000,200.612214)}
{pt3dadd(166056.000000,222240.000000,55550.000000,208.235480)}
{pt3dadd(165840.000000,222372.000000,55550.000000,215.858745)}
{pt3dadd(165708.000000,222516.000000,55575.000000,223.482010)}
{pt3dadd(165528.000000,222744.000000,55600.000000,231.105276)}
{pt3dadd(165444.000000,222900.000000,55675.000000,170.389278)}

{create adhoc69}
{access adhoc69}
{connect adhoc69(1), adhoc55(0)}
{nseg = 1}
{strdef color color = "White"}
{pt3dclear()}
{pt3dadd(186216.000000,190932.000000,65225.000000,2146.414176)}
{pt3dadd(186216.000000,189912.000000,63125.000000,1035.114948)}
{pt3dadd(185508.000000,190152.000000,62600.000000,1086.870681)}
{pt3dadd(184920.000000,190152.000000,62200.000000,1138.626414)}
{pt3dadd(184776.000000,190116.000000,61800.000000,1190.382147)}
{pt3dadd(184488.000000,190104.000000,61300.000000,1242.137880)}
{pt3dadd(184296.000000,190044.000000,60875.000000,1173.130236)}
{pt3dadd(183972.000000,190116.000000,60450.000000,1104.122592)}
{pt3dadd(183648.000000,190188.000000,60275.000000,1035.114948)}
{pt3dadd(182112.000000,191268.000000,60275.000000,599.024880)}

{create adhoc70}
{access adhoc70}
{connect adhoc70(1), adhoc69(0)}
{nseg = 1}
{strdef color color = "White"}
{pt3dclear()}
{pt3dadd(182112.000000,191268.000000,60275.000000,599.024880)}
{pt3dadd(180780.000000,192192.000000,60350.000000,200.612214)}
{pt3dadd(180576.000000,192360.000000,60425.000000,222.679557)}
{pt3dadd(180036.000000,192936.000000,60575.000000,244.746900)}
{pt3dadd(179784.000000,193200.000000,60700.000000,266.814243)}
{pt3dadd(179496.000000,193248.000000,60825.000000,288.881586)}
{pt3dadd(179136.000000,193272.000000,61000.000000,258.455399)}
{pt3dadd(178884.000000,193272.000000,61050.000000,228.029211)}
{pt3dadd(178584.000000,193092.000000,61150.000000,197.603024)}
{pt3dadd(178332.000000,192996.000000,61375.000000,167.176836)}
{pt3dadd(178164.000000,192660.000000,61350.000000,167.176836)}
{pt3dadd(177780.000000,192312.000000,61325.000000,167.176836)}
{pt3dadd(177648.000000,192000.000000,61125.000000,167.176836)}
{pt3dadd(177744.000000,191592.000000,61350.000000,167.176836)}
{pt3dadd(177876.000000,191256.000000,61425.000000,165.505073)}
{pt3dadd(178260.000000,190908.000000,61650.000000,163.833309)}
{pt3dadd(178548.000000,190728.000000,61875.000000,162.161545)}
{pt3dadd(178920.000000,190572.000000,62150.000000,160.489782)}
{pt3dadd(179052.000000,190272.000000,62050.000000,288.881586)}

{create adhoc71}
{access adhoc71}
{connect adhoc71(1), adhoc69(0)}
{nseg = 1}
{strdef color color = "White"}
{pt3dclear()}
{pt3dadd(182112.000000,191268.000000,60275.000000,599.024880)}
{pt3dadd(183468.000000,190212.000000,59925.000000,1035.114948)}
{pt3dadd(183084.000000,190260.000000,59575.000000,993.710358)}
{pt3dadd(182376.000000,190296.000000,59250.000000,862.595802)}

{create adhoc72}
{access adhoc72}
{connect adhoc72(1), adhoc71(0)}
{nseg = 1}
{strdef color color = "White"}
{pt3dclear()}
{pt3dadd(182376.000000,190296.000000,59250.000000,862.595802)}
{pt3dadd(182700.000000,188232.000000,59250.000000,167.176836)}
{pt3dadd(182436.000000,188004.000000,59175.000000,185.566288)}
{pt3dadd(182196.000000,187812.000000,59150.000000,203.955741)}
{pt3dadd(181944.000000,187668.000000,59025.000000,222.345193)}
{pt3dadd(181752.000000,187512.000000,58900.000000,240.734646)}
{pt3dadd(181500.000000,187092.000000,58500.000000,252.771381)}
{pt3dadd(181260.000000,186792.000000,58350.000000,264.808116)}
{pt3dadd(181080.000000,186744.000000,58350.000000,276.844851)}
{pt3dadd(180888.000000,186636.000000,58300.000000,288.881586)}
{pt3dadd(180684.000000,186576.000000,58250.000000,276.844851)}
{pt3dadd(180396.000000,186252.000000,58375.000000,264.808116)}
{pt3dadd(179988.000000,186324.000000,58400.000000,252.771381)}
{pt3dadd(179628.000000,186420.000000,58425.000000,240.734646)}
{pt3dadd(179412.000000,186336.000000,58325.000000,200.612214)}
{pt3dadd(179592.000000,185904.000000,57750.000000,116.095032)}

{create adhoc73}
{access adhoc73}
{connect adhoc73(1), adhoc71(0)}
{nseg = 1}
{strdef color color = "White"}
{pt3dclear()}
{pt3dadd(182376.000000,190296.000000,59250.000000,862.595802)}
{pt3dadd(181956.000000,190248.000000,58775.000000,1035.114948)}
{pt3dadd(181668.000000,190212.000000,58300.000000,1014.412653)}
{pt3dadd(181320.000000,190500.000000,57900.000000,993.710358)}
{pt3dadd(181584.000000,190836.000000,57675.000000,828.092016)}

{create adhoc74}
{access adhoc74}
{connect adhoc74(1), adhoc73(0)}
{nseg = 1}
{strdef color color = "White"}
{pt3dclear()}
{pt3dadd(181584.000000,190836.000000,57675.000000,828.092016)}
{pt3dadd(182004.000000,189120.000000,57575.000000,1242.137880)}
{pt3dadd(181764.000000,188844.000000,56950.000000,1242.137880)}
{pt3dadd(181680.000000,188664.000000,56500.000000,1242.137880)}
{pt3dadd(181728.000000,188460.000000,56225.000000,1242.137880)}
{pt3dadd(181728.000000,188172.000000,55700.000000,1242.137880)}
{pt3dadd(181752.000000,187992.000000,55300.000000,1173.130236)}
{pt3dadd(181692.000000,187740.000000,54975.000000,1104.122592)}
{pt3dadd(181728.000000,187536.000000,54625.000000,1035.114948)}
{pt3dadd(181776.000000,187488.000000,54475.000000,1035.114948)}

{create adhoc75}
{access adhoc75}
{connect adhoc75(1), adhoc74(0)}
{nseg = 1}
{strdef color color = "White"}
{pt3dclear()}
{pt3dadd(181776.000000,187488.000000,54475.000000,1035.114948)}
{pt3dadd(179784.000000,188352.000000,54300.000000,167.176836)}
{pt3dadd(179352.000000,188352.000000,54075.000000,197.603024)}
{pt3dadd(178620.000000,188532.000000,53875.000000,228.029211)}
{pt3dadd(178332.000000,188616.000000,53725.000000,258.455399)}
{pt3dadd(178020.000000,188700.000000,53625.000000,288.881586)}
{pt3dadd(177828.000000,188820.000000,53525.000000,251.489700)}
{pt3dadd(177516.000000,188952.000000,53475.000000,214.097814)}
{pt3dadd(177336.000000,189024.000000,53275.000000,176.705928)}
{pt3dadd(177036.000000,189096.000000,53200.000000,139.314042)}
{pt3dadd(177072.000000,189048.000000,53075.000000,139.314042)}
{pt3dadd(176592.000000,189420.000000,53075.000000,139.314042)}
{pt3dadd(176364.000000,189456.000000,52950.000000,139.314042)}
{pt3dadd(176136.000000,189588.000000,53025.000000,139.314042)}
{pt3dadd(175944.000000,189624.000000,53000.000000,139.314042)}
{pt3dadd(175524.000000,189612.000000,53050.000000,139.314042)}
{pt3dadd(175380.000000,189708.000000,52975.000000,139.314042)}
{pt3dadd(174984.000000,189828.000000,52975.000000,139.314042)}
{pt3dadd(174864.000000,189852.000000,52950.000000,146.279741)}
{pt3dadd(174732.000000,189912.000000,52950.000000,153.245439)}
{pt3dadd(174204.000000,189912.000000,52900.000000,160.211138)}
{pt3dadd(174000.000000,189924.000000,52900.000000,167.176836)}
{pt3dadd(173676.000000,189996.000000,53025.000000,250.179471)}
{pt3dadd(173388.000000,190068.000000,53050.000000,333.182106)}
{pt3dadd(173220.000000,190164.000000,53050.000000,416.184741)}
{pt3dadd(172284.000000,190248.000000,53225.000000,499.187376)}
{pt3dadd(172080.000000,190116.000000,53450.000000,388.256832)}
{pt3dadd(172044.000000,190236.000000,53675.000000,277.326288)}
{pt3dadd(172044.000000,190308.000000,53900.000000,167.176836)}

{create adhoc76}
{access adhoc76}
{connect adhoc76(1), adhoc74(0)}
{nseg = 1}
{strdef color color = "White"}
{pt3dclear()}
{pt3dadd(181776.000000,187488.000000,54475.000000,1035.114948)}
{pt3dadd(181896.000000,186996.000000,54150.000000,1035.114948)}
{pt3dadd(181776.000000,186660.000000,53950.000000,1035.114948)}
{pt3dadd(181788.000000,186348.000000,53600.000000,1035.114948)}
{pt3dadd(181800.000000,186036.000000,53275.000000,1035.114948)}
{pt3dadd(181752.000000,185784.000000,52975.000000,1035.114948)}
{pt3dadd(181704.000000,185532.000000,52775.000000,1035.114948)}

{create adhoc77}
{access adhoc77}
{connect adhoc77(1), adhoc76(0)}
{nseg = 1}
{strdef color color = "White"}
{pt3dclear()}
{pt3dadd(181704.000000,185532.000000,52775.000000,1035.114948)}
{pt3dadd(180492.000000,185016.000000,52775.000000,346.657896)}
{pt3dadd(180348.000000,184572.000000,52775.000000,289.017180)}
{pt3dadd(180084.000000,184548.000000,52700.000000,231.376464)}
{pt3dadd(179844.000000,184368.000000,52850.000000,173.735748)}
{pt3dadd(179496.000000,184428.000000,52950.000000,116.095032)}
{pt3dadd(179424.000000,183876.000000,52875.000000,137.224328)}
{pt3dadd(179268.000000,183600.000000,52875.000000,158.353623)}
{pt3dadd(178968.000000,183456.000000,52925.000000,179.482918)}
{pt3dadd(178860.000000,183264.000000,52975.000000,200.612214)}
{pt3dadd(178548.000000,183096.000000,52975.000000,200.612214)}
{pt3dadd(178488.000000,182892.000000,52900.000000,200.612214)}
{pt3dadd(178248.000000,182676.000000,52900.000000,200.612214)}
{pt3dadd(178296.000000,182532.000000,53000.000000,200.612214)}
{pt3dadd(178140.000000,182328.000000,53125.000000,210.642822)}
{pt3dadd(178152.000000,182172.000000,53250.000000,220.673430)}
{pt3dadd(178188.000000,182016.000000,53350.000000,230.704038)}
{pt3dadd(178224.000000,181884.000000,53425.000000,240.734646)}
{pt3dadd(178428.000000,181428.000000,53700.000000,252.771381)}
{pt3dadd(178476.000000,181212.000000,53925.000000,264.808116)}
{pt3dadd(178572.000000,181020.000000,53975.000000,276.844851)}
{pt3dadd(178572.000000,180852.000000,54100.000000,288.881586)}
{pt3dadd(178836.000000,180600.000000,53975.000000,288.881586)}
{pt3dadd(178896.000000,180396.000000,53850.000000,288.881586)}
{pt3dadd(178968.000000,180180.000000,53800.000000,288.881586)}
{pt3dadd(178896.000000,179976.000000,53875.000000,288.881586)}
{pt3dadd(178908.000000,179832.000000,53825.000000,288.881586)}
{pt3dadd(178920.000000,179724.000000,53750.000000,288.881586)}
{pt3dadd(178908.000000,179616.000000,53725.000000,288.881586)}
{pt3dadd(178956.000000,179460.000000,53700.000000,288.881586)}
{pt3dadd(178788.000000,179316.000000,53450.000000,244.746900)}
{pt3dadd(178692.000000,179220.000000,53275.000000,200.612214)}
{pt3dadd(179004.000000,178968.000000,53125.000000,167.176836)}

{create adhoc78}
{access adhoc78}
{connect adhoc78(1), adhoc76(0)}
{nseg = 1}
{strdef color color = "White"}
{pt3dclear()}
{pt3dadd(181704.000000,185532.000000,52775.000000,1035.114948)}
{pt3dadd(181932.000000,184776.000000,52300.000000,1035.114948)}
{pt3dadd(182220.000000,184632.000000,52125.000000,1035.114948)}
{pt3dadd(182244.000000,184464.000000,51675.000000,1035.114948)}
{pt3dadd(182352.000000,184308.000000,51250.000000,1035.114948)}
{pt3dadd(182364.000000,184116.000000,51125.000000,1035.114948)}
{pt3dadd(182376.000000,183948.000000,51000.000000,1035.114948)}
{pt3dadd(182340.000000,183756.000000,50825.000000,1035.114948)}
{pt3dadd(182220.000000,183588.000000,50675.000000,1242.137880)}

{create adhoc79}
{access adhoc79}
{connect adhoc79(1), adhoc78(0)}
{nseg = 1}
{strdef color color = "White"}
{pt3dclear()}
{pt3dadd(182220.000000,183588.000000,50675.000000,1242.137880)}
{pt3dadd(182712.000000,183096.000000,51050.000000,1035.114948)}
{pt3dadd(182880.000000,182808.000000,51075.000000,956.043666)}
{pt3dadd(183024.000000,182616.000000,51000.000000,876.972384)}
{pt3dadd(183036.000000,182352.000000,50975.000000,797.901102)}
{pt3dadd(183228.000000,182196.000000,50975.000000,718.829820)}
{pt3dadd(183240.000000,182040.000000,51075.000000,663.919209)}
{pt3dadd(183252.000000,181812.000000,51050.000000,609.008598)}
{pt3dadd(183276.000000,181488.000000,50875.000000,554.097987)}
{pt3dadd(183180.000000,181308.000000,50825.000000,499.187376)}
{pt3dadd(183144.000000,181140.000000,50825.000000,554.097987)}
{pt3dadd(183108.000000,180984.000000,50825.000000,609.008598)}
{pt3dadd(183072.000000,180804.000000,50600.000000,663.919209)}
{pt3dadd(183036.000000,180636.000000,50375.000000,718.829820)}
{pt3dadd(182856.000000,180492.000000,50200.000000,746.145369)}
{pt3dadd(182700.000000,180300.000000,50075.000000,773.460918)}
{pt3dadd(182664.000000,180132.000000,50075.000000,800.776467)}
{pt3dadd(182676.000000,179952.000000,49800.000000,828.092016)}
{pt3dadd(182640.000000,179760.000000,49475.000000,725.066383)}
{pt3dadd(182724.000000,179520.000000,49250.000000,622.040751)}
{pt3dadd(182748.000000,179220.000000,48975.000000,519.015118)}
{pt3dadd(182760.000000,178944.000000,48675.000000,415.989486)}
{pt3dadd(182736.000000,178728.000000,48575.000000,427.004883)}
{pt3dadd(182988.000000,178560.000000,48500.000000,438.020280)}
{pt3dadd(183012.000000,178332.000000,48225.000000,449.035677)}
{pt3dadd(182844.000000,178068.000000,47925.000000,460.051074)}
{pt3dadd(182892.000000,177876.000000,47950.000000,449.035677)}
{pt3dadd(182868.000000,177684.000000,47850.000000,438.020280)}
{pt3dadd(182844.000000,177372.000000,47700.000000,427.004883)}
{pt3dadd(182892.000000,177204.000000,47625.000000,415.989486)}
{pt3dadd(182940.000000,177036.000000,47550.000000,461.748335)}
{pt3dadd(182868.000000,176856.000000,47350.000000,507.507183)}
{pt3dadd(182796.000000,176652.000000,47150.000000,553.266031)}
{pt3dadd(182784.000000,176508.000000,47125.000000,599.024880)}
{pt3dadd(182772.000000,176508.000000,47100.000000,553.266031)}
{pt3dadd(182892.000000,176304.000000,47025.000000,507.507183)}
{pt3dadd(183036.000000,175968.000000,46725.000000,461.748335)}
{pt3dadd(183180.000000,175632.000000,46400.000000,415.989486)}
{pt3dadd(183156.000000,175284.000000,46125.000000,499.187376)}

{create adhoc80}
{access adhoc80}
{connect adhoc80(1), adhoc79(0)}
{nseg = 1}
{strdef color color = "White"}
{pt3dclear()}
{pt3dadd(183156.000000,175284.000000,46125.000000,499.187376)}
{pt3dadd(183132.000000,175056.000000,46050.000000,415.989486)}
{pt3dadd(183252.000000,174912.000000,45875.000000,415.989486)}
{pt3dadd(183324.000000,174672.000000,45600.000000,415.989486)}
{pt3dadd(183228.000000,174396.000000,45450.000000,499.187376)}

{create adhoc81}
{access adhoc81}
{connect adhoc81(1), adhoc80(0)}
{nseg = 1}
{strdef color color = "White"}
{pt3dclear()}
{pt3dadd(183228.000000,174396.000000,45450.000000,499.187376)}
{pt3dadd(183300.000000,174324.000000,44975.000000,575.063856)}
{pt3dadd(183108.000000,174336.000000,44750.000000,481.450945)}
{pt3dadd(182940.000000,174324.000000,44550.000000,387.838035)}
{pt3dadd(182820.000000,174324.000000,44350.000000,294.225124)}
{pt3dadd(182664.000000,174348.000000,44050.000000,200.612214)}
{pt3dadd(182496.000000,174420.000000,43850.000000,254.456532)}
{pt3dadd(182448.000000,174432.000000,43575.000000,308.300850)}
{pt3dadd(182016.000000,174336.000000,43100.000000,362.145168)}
{pt3dadd(182028.000000,174168.000000,42725.000000,415.989486)}
{pt3dadd(182040.000000,173988.000000,42450.000000,346.820625)}
{pt3dadd(181896.000000,173832.000000,42150.000000,277.651764)}
{pt3dadd(181992.000000,173784.000000,41850.000000,208.482903)}
{pt3dadd(182052.000000,173508.000000,41575.000000,139.314042)}
{pt3dadd(182076.000000,173328.000000,41275.000000,200.612214)}
{pt3dadd(181968.000000,173040.000000,41150.000000,139.314042)}

{create adhoc82}
{access adhoc82}
{connect adhoc82(1), adhoc81(0)}
{nseg = 1}
{strdef color color = "White"}
{pt3dclear()}
{pt3dadd(181968.000000,173040.000000,41150.000000,139.314042)}
{pt3dadd(181860.000000,173160.000000,40875.000000,288.881586)}
{pt3dadd(181800.000000,173196.000000,40625.000000,276.844851)}
{pt3dadd(181908.000000,173112.000000,40375.000000,264.808116)}
{pt3dadd(182064.000000,172944.000000,40050.000000,252.771381)}
{pt3dadd(182292.000000,172524.000000,39800.000000,240.734646)}
{pt3dadd(182640.000000,172512.000000,39625.000000,252.771381)}
{pt3dadd(183036.000000,172428.000000,39625.000000,264.808116)}
{pt3dadd(183720.000000,172356.000000,39125.000000,276.844851)}
{pt3dadd(183972.000000,172380.000000,38825.000000,288.881586)}
{pt3dadd(184080.000000,172428.000000,38525.000000,224.836344)}
{pt3dadd(184164.000000,172836.000000,37925.000000,160.791102)}
{pt3dadd(184452.000000,172872.000000,37700.000000,96.745860)}
{pt3dadd(184644.000000,172932.000000,37575.000000,116.095032)}

{create adhoc83}
{access adhoc83}
{connect adhoc83(1), adhoc81(0)}
{nseg = 1}
{strdef color color = "White"}
{pt3dclear()}
{pt3dadd(181968.000000,173040.000000,41150.000000,139.314042)}
{pt3dadd(181968.000000,172464.000000,41150.000000,139.314042)}
{pt3dadd(181968.000000,172332.000000,41100.000000,154.638585)}
{pt3dadd(181908.000000,172200.000000,41050.000000,169.963128)}
{pt3dadd(181884.000000,172068.000000,41025.000000,185.287671)}
{pt3dadd(181788.000000,171948.000000,41025.000000,200.612214)}
{pt3dadd(181680.000000,171816.000000,41000.000000,185.287671)}
{pt3dadd(181536.000000,171648.000000,41025.000000,169.963128)}
{pt3dadd(181560.000000,171528.000000,41025.000000,154.638585)}
{pt3dadd(181680.000000,171396.000000,41025.000000,139.314042)}
{pt3dadd(181608.000000,171252.000000,41025.000000,125.124648)}
{pt3dadd(181704.000000,171084.000000,40900.000000,110.935254)}
{pt3dadd(181716.000000,170892.000000,40725.000000,96.745860)}
{pt3dadd(181548.000000,170760.000000,40800.000000,96.745860)}

{create adhoc84}
{access adhoc84}
{connect adhoc84(1), adhoc80(0)}
{nseg = 1}
{strdef color color = "White"}
{pt3dclear()}
{pt3dadd(183228.000000,174396.000000,45450.000000,499.187376)}
{pt3dadd(183432.000000,174096.000000,45400.000000,499.187376)}
{pt3dadd(183540.000000,173844.000000,45600.000000,499.187376)}
{pt3dadd(183552.000000,173556.000000,45725.000000,499.187376)}
{pt3dadd(183516.000000,173100.000000,45650.000000,499.187376)}
{pt3dadd(183552.000000,172740.000000,45650.000000,499.187376)}
{pt3dadd(183588.000000,172476.000000,45650.000000,461.055006)}
{pt3dadd(183744.000000,172140.000000,45425.000000,422.922636)}
{pt3dadd(183972.000000,171924.000000,45325.000000,384.790266)}
{pt3dadd(184044.000000,171780.000000,45325.000000,346.657896)}
{pt3dadd(183948.000000,171648.000000,45200.000000,332.213819)}
{pt3dadd(183948.000000,171504.000000,45225.000000,317.769741)}
{pt3dadd(183972.000000,171384.000000,45200.000000,303.325664)}
{pt3dadd(183996.000000,171264.000000,45175.000000,288.881586)}
{pt3dadd(184152.000000,171132.000000,45150.000000,288.881586)}
{pt3dadd(184080.000000,171000.000000,45075.000000,288.881586)}
{pt3dadd(183876.000000,170832.000000,44925.000000,288.881586)}
{pt3dadd(183888.000000,170676.000000,44850.000000,288.881586)}
{pt3dadd(183900.000000,170508.000000,44775.000000,303.325664)}
{pt3dadd(183876.000000,170376.000000,44875.000000,317.769741)}
{pt3dadd(183888.000000,170220.000000,44875.000000,332.213819)}
{pt3dadd(183900.000000,170076.000000,44875.000000,346.657896)}
{pt3dadd(183912.000000,169932.000000,44875.000000,363.990794)}
{pt3dadd(183924.000000,169776.000000,44875.000000,381.323691)}
{pt3dadd(183828.000000,169620.000000,44850.000000,398.656589)}
{pt3dadd(183768.000000,169416.000000,44725.000000,415.989486)}
{pt3dadd(183720.000000,169272.000000,44650.000000,398.656589)}
{pt3dadd(183720.000000,169032.000000,44575.000000,381.323691)}
{pt3dadd(183816.000000,168876.000000,44500.000000,363.990794)}
{pt3dadd(183912.000000,168684.000000,44425.000000,346.657896)}
{pt3dadd(183792.000000,168504.000000,44325.000000,320.177083)}
{pt3dadd(183864.000000,168300.000000,44350.000000,293.696271)}
{pt3dadd(183792.000000,168036.000000,44250.000000,267.215459)}
{pt3dadd(183912.000000,167784.000000,44175.000000,240.734646)}
{pt3dadd(184032.000000,167544.000000,44275.000000,252.771381)}
{pt3dadd(184272.000000,167412.000000,44250.000000,264.808116)}
{pt3dadd(184308.000000,167184.000000,44325.000000,276.844851)}
{pt3dadd(184416.000000,167016.000000,44175.000000,288.881586)}
{pt3dadd(184368.000000,166860.000000,44175.000000,288.881586)}
{pt3dadd(184404.000000,166704.000000,44200.000000,288.881586)}
{pt3dadd(184524.000000,166524.000000,44250.000000,288.881586)}
{pt3dadd(184632.000000,166344.000000,44125.000000,288.881586)}
{pt3dadd(184884.000000,166176.000000,44175.000000,288.881586)}
{pt3dadd(185088.000000,165960.000000,44150.000000,288.881586)}
{pt3dadd(185052.000000,165756.000000,44000.000000,288.881586)}
{pt3dadd(185016.000000,165576.000000,43850.000000,288.881586)}
{pt3dadd(185244.000000,165396.000000,43825.000000,303.325664)}
{pt3dadd(185220.000000,165168.000000,43675.000000,317.769741)}
{pt3dadd(185340.000000,164736.000000,43300.000000,332.213819)}
{pt3dadd(185268.000000,164340.000000,43075.000000,346.657896)}
{pt3dadd(185160.000000,164064.000000,42900.000000,369.768426)}
{pt3dadd(185268.000000,163944.000000,42700.000000,392.878956)}
{pt3dadd(185160.000000,163716.000000,42550.000000,415.989486)}
{pt3dadd(185040.000000,163380.000000,42500.000000,415.989486)}

{create adhoc85}
{access adhoc85}
{connect adhoc85(1), adhoc84(0)}
{nseg = 1}
{strdef color color = "White"}
{pt3dclear()}
{pt3dadd(185040.000000,163380.000000,42500.000000,415.989486)}
{pt3dadd(185028.000000,163416.000000,41525.000000,346.657896)}
{pt3dadd(184908.000000,163488.000000,41325.000000,301.787631)}
{pt3dadd(185016.000000,163596.000000,41125.000000,256.917366)}
{pt3dadd(185064.000000,163728.000000,40925.000000,212.047101)}
{pt3dadd(185208.000000,163944.000000,40700.000000,167.176836)}
{pt3dadd(185352.000000,164160.000000,40525.000000,173.529553)}
{pt3dadd(185472.000000,164304.000000,40350.000000,179.882271)}
{pt3dadd(185628.000000,164292.000000,40400.000000,186.234989)}
{pt3dadd(185748.000000,164304.000000,40325.000000,192.587706)}
{pt3dadd(185868.000000,164280.000000,40275.000000,173.464538)}
{pt3dadd(185988.000000,164292.000000,40250.000000,154.341369)}
{pt3dadd(186108.000000,164328.000000,40225.000000,135.218200)}
{pt3dadd(186228.000000,164376.000000,40275.000000,116.095032)}
{pt3dadd(186312.000000,164352.000000,40250.000000,178.414839)}
{pt3dadd(186468.000000,164604.000000,40075.000000,240.734646)}
{pt3dadd(186588.000000,164700.000000,40150.000000,288.881586)}

{create adhoc86}
{access adhoc86}
{connect adhoc86(1), adhoc84(0)}
{nseg = 1}
{strdef color color = "White"}
{pt3dclear()}
{pt3dadd(185040.000000,163380.000000,42500.000000,415.989486)}
{pt3dadd(185160.000000,163152.000000,42100.000000,499.187376)}
{pt3dadd(185148.000000,162840.000000,42000.000000,434.574193)}
{pt3dadd(185184.000000,162672.000000,41875.000000,369.961011)}
{pt3dadd(185196.000000,162456.000000,41750.000000,305.347828)}
{pt3dadd(185280.000000,162144.000000,41350.000000,240.734646)}
{pt3dadd(185388.000000,161964.000000,41300.000000,230.704038)}
{pt3dadd(185472.000000,161796.000000,41175.000000,220.673430)}
{pt3dadd(185628.000000,161496.000000,41025.000000,210.642822)}
{pt3dadd(185532.000000,161304.000000,41000.000000,200.612214)}
{pt3dadd(185676.000000,161160.000000,40975.000000,192.253370)}
{pt3dadd(185664.000000,161040.000000,40975.000000,183.894525)}
{pt3dadd(185604.000000,160800.000000,40950.000000,175.535680)}
{pt3dadd(185664.000000,160644.000000,40900.000000,167.176836)}
{pt3dadd(185640.000000,160356.000000,40825.000000,185.566288)}
{pt3dadd(185688.000000,160188.000000,40775.000000,203.955741)}
{pt3dadd(185400.000000,160044.000000,40675.000000,222.345193)}
{pt3dadd(185460.000000,159876.000000,40575.000000,240.734646)}
{pt3dadd(185388.000000,159672.000000,40475.000000,252.771381)}
{pt3dadd(185316.000000,159492.000000,40475.000000,264.808116)}
{pt3dadd(185352.000000,159324.000000,40475.000000,276.844851)}
{pt3dadd(185232.000000,159060.000000,40475.000000,288.881586)}
{pt3dadd(185112.000000,158856.000000,40475.000000,276.844851)}
{pt3dadd(185280.000000,158676.000000,40475.000000,264.808116)}
{pt3dadd(185292.000000,158340.000000,40550.000000,252.771381)}
{pt3dadd(185220.000000,158088.000000,40425.000000,240.734646)}
{pt3dadd(185184.000000,157944.000000,40475.000000,267.215459)}
{pt3dadd(185292.000000,157668.000000,40400.000000,293.696271)}
{pt3dadd(185316.000000,157476.000000,40400.000000,320.177083)}
{pt3dadd(185340.000000,157224.000000,40400.000000,346.657896)}
{pt3dadd(185448.000000,156900.000000,40350.000000,320.177083)}
{pt3dadd(185364.000000,156576.000000,40225.000000,293.696271)}
{pt3dadd(185472.000000,156396.000000,40250.000000,267.215459)}
{pt3dadd(185580.000000,156204.000000,40275.000000,240.734646)}
{pt3dadd(185604.000000,155928.000000,40275.000000,240.734646)}
{pt3dadd(185796.000000,155652.000000,40425.000000,240.734646)}
{pt3dadd(185856.000000,155508.000000,40425.000000,240.734646)}
{pt3dadd(186084.000000,155340.000000,40475.000000,240.734646)}
{pt3dadd(186204.000000,155148.000000,40575.000000,240.734646)}
{pt3dadd(186204.000000,154956.000000,40400.000000,240.734646)}
{pt3dadd(186228.000000,154764.000000,40475.000000,240.734646)}
{pt3dadd(186396.000000,154632.000000,40600.000000,240.734646)}
{pt3dadd(186504.000000,154464.000000,40525.000000,228.697911)}
{pt3dadd(186624.000000,154344.000000,40500.000000,216.661176)}
{pt3dadd(186732.000000,154212.000000,40625.000000,204.624441)}
{pt3dadd(186684.000000,154020.000000,40700.000000,192.587706)}
{pt3dadd(186696.000000,153756.000000,40725.000000,216.661176)}
{pt3dadd(186912.000000,153552.000000,40825.000000,240.734646)}
{pt3dadd(186924.000000,153384.000000,40825.000000,264.808116)}
{pt3dadd(186936.000000,153192.000000,40825.000000,288.881586)}
{pt3dadd(186972.000000,153036.000000,40750.000000,276.844851)}
{pt3dadd(186960.000000,152904.000000,40625.000000,264.808116)}
{pt3dadd(186972.000000,152760.000000,40575.000000,252.771381)}
{pt3dadd(187008.000000,152556.000000,40475.000000,240.734646)}
{pt3dadd(186852.000000,152304.000000,40450.000000,222.345193)}
{pt3dadd(187092.000000,152184.000000,40500.000000,203.955741)}
{pt3dadd(187164.000000,152064.000000,40500.000000,185.566288)}
{pt3dadd(187200.000000,151944.000000,40500.000000,167.176836)}
{pt3dadd(187284.000000,151752.000000,40375.000000,185.566288)}
{pt3dadd(187476.000000,151596.000000,40325.000000,203.955741)}
{pt3dadd(187452.000000,151440.000000,40325.000000,222.345193)}
{pt3dadd(187608.000000,151332.000000,40350.000000,240.734646)}
{pt3dadd(187584.000000,151224.000000,40400.000000,230.704038)}
{pt3dadd(187740.000000,151164.000000,40700.000000,220.673430)}
{pt3dadd(187692.000000,151020.000000,40625.000000,210.642822)}
{pt3dadd(187800.000000,150924.000000,40625.000000,200.612214)}
{pt3dadd(188028.000000,150828.000000,40825.000000,192.253370)}
{pt3dadd(188136.000000,150696.000000,40850.000000,183.894525)}
{pt3dadd(188628.000000,149376.000000,41300.000000,175.535680)}
{pt3dadd(188640.000000,149244.000000,41350.000000,167.176836)}
{pt3dadd(188592.000000,149136.000000,41425.000000,173.529553)}
{pt3dadd(188568.000000,149028.000000,41400.000000,179.882271)}
{pt3dadd(188544.000000,148908.000000,41325.000000,186.234989)}
{pt3dadd(188496.000000,148752.000000,41200.000000,192.587706)}
{pt3dadd(188460.000000,148368.000000,41475.000000,194.593833)}
{pt3dadd(188472.000000,148260.000000,41500.000000,196.599960)}
{pt3dadd(188436.000000,148104.000000,41500.000000,198.606087)}
{pt3dadd(188472.000000,147972.000000,41475.000000,200.612214)}
{pt3dadd(188508.000000,147804.000000,41450.000000,192.253370)}
{pt3dadd(188520.000000,147696.000000,41450.000000,183.894525)}
{pt3dadd(188532.000000,147552.000000,41575.000000,175.535680)}
{pt3dadd(188592.000000,147384.000000,41600.000000,167.176836)}
{pt3dadd(188652.000000,147264.000000,41600.000000,175.535680)}
{pt3dadd(188664.000000,147108.000000,41625.000000,183.894525)}
{pt3dadd(188664.000000,146988.000000,41650.000000,192.253370)}
{pt3dadd(188616.000000,146856.000000,41625.000000,200.612214)}
{pt3dadd(188688.000000,146580.000000,41550.000000,200.612214)}
{pt3dadd(188664.000000,146448.000000,41475.000000,200.612214)}
{pt3dadd(188664.000000,146352.000000,41425.000000,200.612214)}
{pt3dadd(188556.000000,146232.000000,41475.000000,200.612214)}
{pt3dadd(188664.000000,145812.000000,41250.000000,185.287671)}
{pt3dadd(188652.000000,145716.000000,41250.000000,169.963128)}
{pt3dadd(188640.000000,145620.000000,41250.000000,154.638585)}
{pt3dadd(188592.000000,145524.000000,41375.000000,139.314042)}
{pt3dadd(188676.000000,145416.000000,41425.000000,127.704537)}
{pt3dadd(188700.000000,145296.000000,41500.000000,116.095032)}
{pt3dadd(188556.000000,145188.000000,41550.000000,167.176836)}

{create adhoc87}
{access adhoc87}
{connect adhoc87(1), adhoc79(0)}
{nseg = 1}
{strdef color color = "White"}
{pt3dclear()}
{pt3dadd(183156.000000,175284.000000,46125.000000,499.187376)}
{pt3dadd(184380.000000,174912.000000,45700.000000,240.734646)}

{create adhoc88}
{access adhoc88}
{connect adhoc88(1), adhoc78(0)}
{nseg = 1}
{strdef color color = "White"}
{pt3dclear()}
{pt3dadd(182220.000000,183588.000000,50675.000000,1242.137880)}
{pt3dadd(181824.000000,183588.000000,49575.000000,862.595802)}
{pt3dadd(181608.000000,183600.000000,49375.000000,862.595802)}
{pt3dadd(181464.000000,183540.000000,49225.000000,862.595802)}
{pt3dadd(181344.000000,183588.000000,48850.000000,862.595802)}
{pt3dadd(181272.000000,183600.000000,48525.000000,862.595802)}
{pt3dadd(181056.000000,183684.000000,48325.000000,671.357730)}
{pt3dadd(180612.000000,183684.000000,47875.000000,480.119658)}
{pt3dadd(180012.000000,183600.000000,47725.000000,288.881586)}
{pt3dadd(179940.000000,183540.000000,47575.000000,288.881586)}

{create adhoc89}
{access adhoc89}
{connect adhoc89(1), adhoc88(0)}
{nseg = 1}
{strdef color color = "White"}
{pt3dclear()}
{pt3dadd(179940.000000,183540.000000,47575.000000,288.881586)}
{pt3dadd(181164.000000,183612.000000,47200.000000,499.187376)}
{pt3dadd(181224.000000,183600.000000,46900.000000,461.055006)}
{pt3dadd(181308.000000,183540.000000,46675.000000,422.922636)}
{pt3dadd(181296.000000,183420.000000,46450.000000,384.790266)}
{pt3dadd(181176.000000,183168.000000,46225.000000,346.657896)}
{pt3dadd(181308.000000,183084.000000,46000.000000,409.749642)}
{pt3dadd(181188.000000,183024.000000,45725.000000,472.841388)}
{pt3dadd(181020.000000,182808.000000,45400.000000,535.933134)}
{pt3dadd(180804.000000,182616.000000,44650.000000,599.024880)}
{pt3dadd(180576.000000,182532.000000,44450.000000,574.065504)}
{pt3dadd(180480.000000,182352.000000,44250.000000,549.106128)}
{pt3dadd(180276.000000,182328.000000,44050.000000,524.146752)}
{pt3dadd(180180.000000,182136.000000,43825.000000,499.187376)}
{pt3dadd(180012.000000,182016.000000,43600.000000,474.228018)}
{pt3dadd(179784.000000,182064.000000,43275.000000,449.268660)}
{pt3dadd(179880.000000,181824.000000,42700.000000,424.309302)}
{pt3dadd(180132.000000,181584.000000,42525.000000,399.349944)}
{pt3dadd(180228.000000,181428.000000,42325.000000,386.176932)}
{pt3dadd(180120.000000,181392.000000,42175.000000,373.003920)}
{pt3dadd(180216.000000,181428.000000,41975.000000,359.830908)}
{pt3dadd(180324.000000,181332.000000,41775.000000,346.657896)}
{pt3dadd(180480.000000,181176.000000,41575.000000,346.657896)}
{pt3dadd(180600.000000,181200.000000,41325.000000,346.657896)}
{pt3dadd(180744.000000,181188.000000,41150.000000,346.657896)}
{pt3dadd(180852.000000,181128.000000,41000.000000,346.657896)}
{pt3dadd(180912.000000,181056.000000,40825.000000,373.003920)}
{pt3dadd(181008.000000,181092.000000,40500.000000,399.349944)}
{pt3dadd(181056.000000,181212.000000,40225.000000,277.326324)}

{create adhoc90}
{access adhoc90}
{connect adhoc90(1), adhoc89(0)}
{nseg = 1}
{strdef color color = "White"}
{pt3dclear()}
{pt3dadd(181056.000000,181212.000000,40225.000000,277.326324)}
{pt3dadd(181140.000000,181560.000000,40025.000000,288.881586)}
{pt3dadd(181128.000000,181668.000000,39800.000000,276.844851)}
{pt3dadd(181236.000000,181788.000000,39575.000000,264.808116)}
{pt3dadd(181476.000000,181956.000000,39375.000000,252.771381)}
{pt3dadd(181452.000000,182088.000000,39325.000000,240.734646)}
{pt3dadd(181512.000000,182172.000000,39325.000000,249.882579)}
{pt3dadd(181596.000000,182316.000000,39200.000000,259.030512)}
{pt3dadd(181704.000000,182424.000000,39175.000000,268.178445)}
{pt3dadd(181752.000000,182556.000000,39175.000000,277.326378)}
{pt3dadd(181800.000000,182700.000000,39175.000000,258.147837)}
{pt3dadd(181752.000000,182832.000000,39175.000000,238.969296)}
{pt3dadd(181704.000000,182964.000000,39175.000000,219.790755)}
{pt3dadd(181788.000000,183132.000000,39225.000000,200.612214)}
{pt3dadd(181824.000000,183276.000000,39250.000000,210.642822)}
{pt3dadd(181800.000000,183396.000000,39300.000000,220.673430)}
{pt3dadd(181824.000000,183504.000000,39300.000000,230.704038)}
{pt3dadd(181716.000000,183648.000000,39375.000000,240.734646)}
{pt3dadd(181740.000000,183804.000000,39375.000000,240.734646)}
{pt3dadd(181572.000000,183948.000000,39350.000000,167.176836)}

{create adhoc91}
{access adhoc91}
{connect adhoc91(1), adhoc89(0)}
{nseg = 1}
{strdef color color = "White"}
{pt3dclear()}
{pt3dadd(181056.000000,181212.000000,40225.000000,277.326324)}
{pt3dadd(181056.000000,180636.000000,40375.000000,288.881586)}
{pt3dadd(181152.000000,180504.000000,40375.000000,288.881586)}
{pt3dadd(181080.000000,180384.000000,40300.000000,288.881586)}
{pt3dadd(181044.000000,180216.000000,40225.000000,288.881586)}
{pt3dadd(181056.000000,180228.000000,40025.000000,288.881586)}
{pt3dadd(181212.000000,180108.000000,39850.000000,266.814243)}
{pt3dadd(181188.000000,179988.000000,39700.000000,244.746900)}
{pt3dadd(181152.000000,179832.000000,39500.000000,222.679557)}
{pt3dadd(181116.000000,179544.000000,39300.000000,200.612214)}
{pt3dadd(180900.000000,179304.000000,39150.000000,167.176836)}
{pt3dadd(180360.000000,178308.000000,39225.000000,200.612214)}

{create adhoc92}
{access adhoc92}
{connect adhoc92(1), adhoc88(0)}
{nseg = 1}
{strdef color color = "White"}
{pt3dclear()}
{pt3dadd(179940.000000,183540.000000,47575.000000,288.881586)}
{pt3dadd(179820.000000,183468.000000,47675.000000,288.881586)}
{pt3dadd(179580.000000,183444.000000,47675.000000,276.844851)}
{pt3dadd(179460.000000,183468.000000,47700.000000,264.808116)}
{pt3dadd(179364.000000,183612.000000,47625.000000,252.771381)}
{pt3dadd(179244.000000,183672.000000,47550.000000,240.734646)}
{pt3dadd(179148.000000,183612.000000,47525.000000,230.704038)}
{pt3dadd(179040.000000,183696.000000,47450.000000,220.673430)}
{pt3dadd(178920.000000,183756.000000,47475.000000,210.642822)}
{pt3dadd(178776.000000,183864.000000,47375.000000,200.612214)}
{pt3dadd(178644.000000,183972.000000,47300.000000,192.253370)}
{pt3dadd(178512.000000,183984.000000,47250.000000,183.894525)}
{pt3dadd(177984.000000,184584.000000,47025.000000,175.535680)}
{pt3dadd(177588.000000,185268.000000,47025.000000,167.176836)}
{pt3dadd(177408.000000,185352.000000,46650.000000,212.047101)}
{pt3dadd(177516.000000,185280.000000,46450.000000,256.917366)}
{pt3dadd(177528.000000,185256.000000,46225.000000,301.787631)}
{pt3dadd(177528.000000,185424.000000,46000.000000,346.657896)}
{pt3dadd(177588.000000,185436.000000,45850.000000,301.787631)}
{pt3dadd(177540.000000,185496.000000,45600.000000,256.917366)}
{pt3dadd(177324.000000,185484.000000,45425.000000,212.047101)}
{pt3dadd(177360.000000,185472.000000,45225.000000,167.176836)}
{pt3dadd(177216.000000,185628.000000,45025.000000,197.603024)}
{pt3dadd(177084.000000,185736.000000,44825.000000,228.029211)}
{pt3dadd(177000.000000,185832.000000,44625.000000,258.455399)}
{pt3dadd(176928.000000,185700.000000,44475.000000,288.881586)}
{pt3dadd(176592.000000,185688.000000,44225.000000,240.734646)}
{pt3dadd(176448.000000,185580.000000,44075.000000,167.176836)}

{create adhoc93}
{access adhoc93}
{connect adhoc93(1), adhoc73(0)}
{nseg = 1}
{strdef color color = "White"}
{pt3dclear()}
{pt3dadd(181584.000000,190836.000000,57675.000000,828.092016)}
{pt3dadd(180624.000000,191628.000000,57675.000000,862.595802)}
{pt3dadd(180264.000000,191868.000000,57500.000000,862.595802)}
{pt3dadd(180072.000000,191976.000000,57250.000000,862.595802)}
{pt3dadd(179664.000000,192276.000000,57050.000000,862.595802)}
{pt3dadd(179688.000000,192384.000000,56750.000000,862.595802)}
{pt3dadd(179292.000000,192960.000000,56350.000000,862.595802)}
{pt3dadd(178980.000000,193476.000000,56200.000000,862.595802)}
{pt3dadd(178620.000000,193944.000000,55875.000000,862.595802)}
{pt3dadd(178596.000000,194004.000000,55750.000000,862.595802)}

{create adhoc94}
{access adhoc94}
{connect adhoc94(1), adhoc93(0)}
{nseg = 1}
{strdef color color = "White"}
{pt3dclear()}
{pt3dadd(178596.000000,194004.000000,55750.000000,862.595802)}
{pt3dadd(177780.000000,195072.000000,55750.000000,288.881586)}
{pt3dadd(177660.000000,195192.000000,55625.000000,303.325664)}
{pt3dadd(177504.000000,195360.000000,55725.000000,317.769741)}
{pt3dadd(177372.000000,195432.000000,55700.000000,332.213819)}
{pt3dadd(177216.000000,195708.000000,55625.000000,346.657896)}
{pt3dadd(177048.000000,195792.000000,55650.000000,310.146476)}
{pt3dadd(176904.000000,195816.000000,55750.000000,273.635055)}
{pt3dadd(176700.000000,195912.000000,55650.000000,237.123635)}
{pt3dadd(176484.000000,196080.000000,55650.000000,200.612214)}
{pt3dadd(176136.000000,196272.000000,55800.000000,222.679557)}
{pt3dadd(175872.000000,196452.000000,55650.000000,244.746900)}
{pt3dadd(175632.000000,196524.000000,55750.000000,266.814243)}
{pt3dadd(175416.000000,196728.000000,55775.000000,288.881586)}
{pt3dadd(175260.000000,196884.000000,55800.000000,303.325664)}
{pt3dadd(175104.000000,196980.000000,55775.000000,317.769741)}
{pt3dadd(174948.000000,197136.000000,55875.000000,332.213819)}
{pt3dadd(174768.000000,197316.000000,55825.000000,346.657896)}
{pt3dadd(174612.000000,197376.000000,55875.000000,363.990794)}
{pt3dadd(174432.000000,197436.000000,55875.000000,381.323691)}
{pt3dadd(174168.000000,197508.000000,55850.000000,398.656589)}
{pt3dadd(173952.000000,197604.000000,56200.000000,415.989486)}
{pt3dadd(173712.000000,197664.000000,56300.000000,395.190000)}
{pt3dadd(173496.000000,197760.000000,56525.000000,374.390514)}
{pt3dadd(173268.000000,197820.000000,57175.000000,353.591028)}
{pt3dadd(173004.000000,198240.000000,57650.000000,332.791542)}
{pt3dadd(172908.000000,198456.000000,58050.000000,336.258130)}
{pt3dadd(172836.000000,198588.000000,58400.000000,339.724719)}
{pt3dadd(172812.000000,198672.000000,58700.000000,343.191307)}
{pt3dadd(172740.000000,198816.000000,58950.000000,346.657896)}
{pt3dadd(172464.000000,199128.000000,59150.000000,332.213819)}
{pt3dadd(172488.000000,199260.000000,59175.000000,317.769741)}
{pt3dadd(172488.000000,199392.000000,59275.000000,303.325664)}
{pt3dadd(172464.000000,199536.000000,59325.000000,288.881586)}
{pt3dadd(172176.000000,199692.000000,59500.000000,303.325664)}
{pt3dadd(172236.000000,199812.000000,59550.000000,317.769741)}
{pt3dadd(172020.000000,199884.000000,59675.000000,332.213819)}
{pt3dadd(171960.000000,200028.000000,59725.000000,346.657896)}
{pt3dadd(171900.000000,200148.000000,59950.000000,363.990794)}
{pt3dadd(171828.000000,200304.000000,59975.000000,381.323691)}
{pt3dadd(171780.000000,200484.000000,60175.000000,398.656589)}
{pt3dadd(171792.000000,200628.000000,60100.000000,415.989486)}
{pt3dadd(171708.000000,200784.000000,60150.000000,372.175776)}
{pt3dadd(171636.000000,201000.000000,60075.000000,328.362066)}
{pt3dadd(171636.000000,201132.000000,60075.000000,284.548356)}
{pt3dadd(171636.000000,201264.000000,60075.000000,240.734646)}
{pt3dadd(171624.000000,201420.000000,60075.000000,240.734646)}
{pt3dadd(171660.000000,201564.000000,60075.000000,240.734646)}
{pt3dadd(171684.000000,201696.000000,60075.000000,240.734646)}
{pt3dadd(171672.000000,201888.000000,60000.000000,240.734646)}
{pt3dadd(171624.000000,202068.000000,59875.000000,240.734646)}
{pt3dadd(171648.000000,202296.000000,59800.000000,240.734646)}
{pt3dadd(171756.000000,202464.000000,59825.000000,240.734646)}
{pt3dadd(171864.000000,202716.000000,59850.000000,240.734646)}
{pt3dadd(171816.000000,202848.000000,59850.000000,228.697915)}
{pt3dadd(171828.000000,203076.000000,59825.000000,216.661185)}
{pt3dadd(171840.000000,203232.000000,59800.000000,204.624455)}
{pt3dadd(171816.000000,203460.000000,59925.000000,192.587724)}
{pt3dadd(171696.000000,203700.000000,59975.000000,186.235002)}
{pt3dadd(171648.000000,203916.000000,60025.000000,179.882280)}
{pt3dadd(171624.000000,204084.000000,60200.000000,173.529558)}
{pt3dadd(171300.000000,204444.000000,60400.000000,167.176836)}
{pt3dadd(171096.000000,204972.000000,60625.000000,167.176836)}
{pt3dadd(171084.000000,205356.000000,60800.000000,167.176836)}
{pt3dadd(171024.000000,205560.000000,60975.000000,167.176836)}
{pt3dadd(171540.000000,205968.000000,61325.000000,167.176836)}
{pt3dadd(171576.000000,206280.000000,61525.000000,167.176836)}
{pt3dadd(171756.000000,206376.000000,61750.000000,167.176836)}
{pt3dadd(172296.000000,206496.000000,61975.000000,167.176836)}
{pt3dadd(172788.000000,206784.000000,62000.000000,167.176836)}
{pt3dadd(173136.000000,206928.000000,61875.000000,153.245439)}
{pt3dadd(173244.000000,206952.000000,61675.000000,139.314042)}
{pt3dadd(173364.000000,207120.000000,61675.000000,139.314042)}

{create adhoc95}
{access adhoc95}
{connect adhoc95(1), adhoc93(0)}
{nseg = 1}
{strdef color color = "White"}
{pt3dclear()}
{pt3dadd(178596.000000,194004.000000,55750.000000,862.595802)}
{pt3dadd(178452.000000,193956.000000,55300.000000,1035.114948)}
{pt3dadd(178452.000000,193920.000000,54875.000000,1086.870681)}
{pt3dadd(178452.000000,193884.000000,54625.000000,1138.626414)}
{pt3dadd(178464.000000,193956.000000,54275.000000,1190.382147)}
{pt3dadd(178536.000000,193908.000000,54000.000000,1242.137880)}
{pt3dadd(178368.000000,193968.000000,53625.000000,1242.137880)}
{pt3dadd(178212.000000,193980.000000,53225.000000,1242.137880)}
{pt3dadd(178056.000000,193992.000000,52925.000000,1242.137880)}
{pt3dadd(177936.000000,193932.000000,52700.000000,1242.137880)}
{pt3dadd(177924.000000,194244.000000,52450.000000,1190.382147)}
{pt3dadd(177972.000000,194268.000000,51975.000000,1138.626414)}
{pt3dadd(177900.000000,194460.000000,51725.000000,1086.870681)}
{pt3dadd(177756.000000,194472.000000,51475.000000,1035.114948)}
{pt3dadd(177744.000000,194436.000000,51250.000000,1035.114948)}

{create adhoc96}
{access adhoc96}
{connect adhoc96(1), adhoc95(0)}
{nseg = 1}
{strdef color color = "White"}
{pt3dclear()}
{pt3dadd(177744.000000,194436.000000,51250.000000,1035.114948)}
{pt3dadd(177792.000000,194124.000000,50850.000000,1242.137880)}
{pt3dadd(177720.000000,194028.000000,50525.000000,1229.716498)}
{pt3dadd(177648.000000,193932.000000,50150.000000,1217.295117)}
{pt3dadd(177576.000000,193836.000000,49600.000000,1204.873736)}
{pt3dadd(177504.000000,193740.000000,49175.000000,1192.452354)}
{pt3dadd(177660.000000,193884.000000,48850.000000,1153.118003)}
{pt3dadd(177720.000000,193920.000000,48475.000000,1113.783651)}
{pt3dadd(177648.000000,194028.000000,48150.000000,1074.449300)}
{pt3dadd(177588.000000,194136.000000,47625.000000,1035.114948)}
{pt3dadd(177504.000000,194316.000000,47375.000000,901.133055)}
{pt3dadd(177492.000000,194760.000000,47175.000000,767.151162)}
{pt3dadd(177408.000000,194916.000000,47000.000000,633.169269)}
{pt3dadd(177276.000000,195168.000000,46800.000000,499.187376)}
{pt3dadd(177480.000000,195564.000000,46650.000000,415.989486)}
{pt3dadd(177528.000000,195852.000000,46350.000000,499.187376)}

{create adhoc97}
{access adhoc97}
{connect adhoc97(1), adhoc96(0)}
{nseg = 1}
{strdef color color = "White"}
{pt3dclear()}
{pt3dadd(177528.000000,195852.000000,46350.000000,499.187376)}
{pt3dadd(177048.000000,194148.000000,46150.000000,415.989486)}
{pt3dadd(176880.000000,193884.000000,45875.000000,398.656589)}
{pt3dadd(176676.000000,193656.000000,45600.000000,381.323691)}
{pt3dadd(176208.000000,193296.000000,45075.000000,363.990794)}
{pt3dadd(175848.000000,193080.000000,44875.000000,346.657896)}
{pt3dadd(175680.000000,192780.000000,44650.000000,384.790266)}
{pt3dadd(175512.000000,192552.000000,44400.000000,422.922636)}
{pt3dadd(175212.000000,192600.000000,44075.000000,461.055006)}
{pt3dadd(175296.000000,192504.000000,43800.000000,499.187376)}
{pt3dadd(175272.000000,192432.000000,43550.000000,499.187376)}
{pt3dadd(175152.000000,192384.000000,43300.000000,499.187376)}
{pt3dadd(175356.000000,192168.000000,43100.000000,499.187376)}
{pt3dadd(175356.000000,192108.000000,42925.000000,499.187376)}
{pt3dadd(175464.000000,192144.000000,42775.000000,499.187376)}

{create adhoc98}
{access adhoc98}
{connect adhoc98(1), adhoc97(0)}
{nseg = 1}
{strdef color color = "White"}
{pt3dclear()}
{pt3dadd(175464.000000,192144.000000,42775.000000,499.187376)}
{pt3dadd(176436.000000,190716.000000,42775.000000,231.105312)}
{pt3dadd(176664.000000,190584.000000,42600.000000,233.512646)}
{pt3dadd(176784.000000,190356.000000,42400.000000,235.919979)}
{pt3dadd(177180.000000,189756.000000,42250.000000,238.327313)}
{pt3dadd(177480.000000,189756.000000,42075.000000,240.734646)}
{pt3dadd(177660.000000,189732.000000,41800.000000,240.734646)}
{pt3dadd(177768.000000,189708.000000,41575.000000,240.734646)}
{pt3dadd(177732.000000,189636.000000,41375.000000,240.734646)}
{pt3dadd(177744.000000,189540.000000,41225.000000,240.734646)}
{pt3dadd(177588.000000,189516.000000,41050.000000,267.215459)}
{pt3dadd(177408.000000,189540.000000,40875.000000,293.696271)}
{pt3dadd(177348.000000,189648.000000,40625.000000,320.177083)}
{pt3dadd(177324.000000,189564.000000,40350.000000,346.657896)}
{pt3dadd(177324.000000,189528.000000,40175.000000,308.140362)}
{pt3dadd(176964.000000,189576.000000,39900.000000,269.622828)}
{pt3dadd(176988.000000,189660.000000,39650.000000,231.105294)}
{pt3dadd(176964.000000,189720.000000,39475.000000,192.587760)}
{pt3dadd(177072.000000,189792.000000,39300.000000,184.117452)}
{pt3dadd(177168.000000,189948.000000,39100.000000,175.647144)}
{pt3dadd(177228.000000,190200.000000,38900.000000,167.176836)}
{pt3dadd(177204.000000,190320.000000,39000.000000,111.451248)}

{create adhoc99}
{access adhoc99}
{connect adhoc99(1), adhoc97(0)}
{nseg = 1}
{strdef color color = "White"}
{pt3dclear()}
{pt3dadd(175464.000000,192144.000000,42775.000000,499.187376)}
{pt3dadd(175344.000000,192588.000000,42500.000000,288.881586)}
{pt3dadd(175356.000000,192792.000000,42250.000000,288.682920)}
{pt3dadd(175428.000000,192768.000000,42050.000000,288.484254)}
{pt3dadd(175512.000000,192864.000000,41875.000000,288.285588)}
{pt3dadd(175620.000000,192972.000000,41750.000000,288.086922)}
{pt3dadd(175824.000000,193056.000000,41550.000000,288.285588)}
{pt3dadd(175824.000000,193236.000000,41275.000000,288.484254)}
{pt3dadd(176172.000000,193368.000000,41000.000000,288.682920)}
{pt3dadd(176328.000000,193488.000000,40750.000000,288.881586)}
{pt3dadd(176436.000000,193572.000000,40500.000000,288.881586)}
{pt3dadd(176724.000000,193548.000000,40300.000000,288.881586)}
{pt3dadd(176796.000000,193620.000000,40025.000000,288.881586)}
{pt3dadd(176928.000000,193836.000000,39825.000000,288.881586)}
{pt3dadd(176988.000000,193860.000000,39575.000000,200.612214)}
{pt3dadd(177048.000000,194076.000000,39550.000000,116.095032)}

{create adhoc100}
{access adhoc100}
{connect adhoc100(1), adhoc96(0)}
{nseg = 1}
{strdef color color = "White"}
{pt3dclear()}
{pt3dadd(177528.000000,195852.000000,46350.000000,499.187376)}
{pt3dadd(177528.000000,196500.000000,46075.000000,415.989486)}
{pt3dadd(177216.000000,196692.000000,46350.000000,461.748335)}
{pt3dadd(177348.000000,196920.000000,46100.000000,507.507183)}
{pt3dadd(177276.000000,197112.000000,45900.000000,553.266031)}
{pt3dadd(177012.000000,197436.000000,45625.000000,599.024880)}
{pt3dadd(176952.000000,197592.000000,45625.000000,599.024880)}
{pt3dadd(176952.000000,197724.000000,45350.000000,499.187376)}

{create adhoc101}
{access adhoc101}
{connect adhoc101(1), adhoc100(0)}
{nseg = 1}
{strdef color color = "White"}
{pt3dclear()}
{pt3dadd(176952.000000,197724.000000,45350.000000,499.187376)}
{pt3dadd(177348.000000,197796.000000,44200.000000,288.881586)}
{pt3dadd(177276.000000,197772.000000,44000.000000,288.881586)}
{pt3dadd(177204.000000,197904.000000,43800.000000,288.881586)}
{pt3dadd(177036.000000,198012.000000,43675.000000,288.881586)}
{pt3dadd(176916.000000,198144.000000,43475.000000,288.881586)}
{pt3dadd(176712.000000,198348.000000,43175.000000,276.844851)}
{pt3dadd(176580.000000,198492.000000,42950.000000,264.808116)}
{pt3dadd(176340.000000,198660.000000,42750.000000,252.771381)}
{pt3dadd(176088.000000,198936.000000,42625.000000,240.734646)}
{pt3dadd(176016.000000,199116.000000,42450.000000,284.548356)}
{pt3dadd(176076.000000,199224.000000,42200.000000,328.362066)}
{pt3dadd(175956.000000,199200.000000,41925.000000,372.175776)}
{pt3dadd(175836.000000,199176.000000,41700.000000,415.989486)}
{pt3dadd(175788.000000,199188.000000,41375.000000,384.212511)}
{pt3dadd(175752.000000,199152.000000,41100.000000,352.435536)}
{pt3dadd(175668.000000,199152.000000,40875.000000,320.658561)}
{pt3dadd(175584.000000,199068.000000,40675.000000,288.881586)}
{pt3dadd(175608.000000,198972.000000,40475.000000,266.814243)}
{pt3dadd(175596.000000,198852.000000,40250.000000,244.746900)}
{pt3dadd(176136.000000,198840.000000,40075.000000,222.679557)}
{pt3dadd(176628.000000,198900.000000,39900.000000,200.612214)}
{pt3dadd(176880.000000,198900.000000,39525.000000,200.612214)}
{pt3dadd(176808.000000,198864.000000,39325.000000,200.612214)}
{pt3dadd(176676.000000,198924.000000,38950.000000,200.612214)}
{pt3dadd(176568.000000,198948.000000,38800.000000,139.314042)}

{create adhoc102}
{access adhoc102}
{connect adhoc102(1), adhoc100(0)}
{nseg = 1}
{strdef color color = "White"}
{pt3dclear()}
{pt3dadd(176952.000000,197724.000000,45350.000000,499.187376)}
{pt3dadd(176760.000000,198012.000000,45700.000000,499.187376)}
{pt3dadd(176688.000000,198168.000000,45625.000000,461.055006)}
{pt3dadd(176640.000000,198312.000000,45575.000000,422.922636)}
{pt3dadd(176340.000000,198648.000000,45675.000000,384.790266)}
{pt3dadd(176124.000000,198864.000000,45775.000000,346.657896)}
{pt3dadd(176196.000000,199008.000000,45575.000000,346.657896)}
{pt3dadd(176112.000000,199140.000000,45575.000000,346.657896)}
{pt3dadd(176028.000000,199308.000000,45575.000000,346.657896)}
{pt3dadd(175800.000000,199644.000000,45675.000000,346.657896)}
{pt3dadd(175644.000000,199884.000000,45700.000000,363.990794)}
{pt3dadd(175488.000000,200040.000000,45725.000000,381.323691)}
{pt3dadd(175332.000000,200280.000000,45750.000000,398.656589)}
{pt3dadd(175176.000000,200532.000000,45775.000000,415.989486)}
{pt3dadd(175080.000000,200724.000000,45750.000000,398.656589)}
{pt3dadd(174960.000000,200964.000000,45575.000000,381.323691)}
{pt3dadd(174804.000000,201132.000000,45650.000000,363.990794)}
{pt3dadd(174864.000000,201300.000000,45400.000000,346.657896)}
{pt3dadd(174756.000000,201468.000000,45450.000000,363.990794)}
{pt3dadd(174588.000000,201600.000000,45375.000000,381.323691)}
{pt3dadd(174480.000000,201768.000000,45300.000000,398.656589)}
{pt3dadd(174456.000000,201936.000000,45175.000000,415.989486)}
{pt3dadd(174252.000000,202344.000000,45100.000000,398.656589)}
{pt3dadd(174168.000000,202560.000000,45000.000000,381.323691)}
{pt3dadd(174168.000000,202752.000000,44875.000000,363.990794)}
{pt3dadd(174084.000000,202908.000000,44750.000000,346.657896)}
{pt3dadd(173964.000000,203064.000000,44850.000000,332.213819)}
{pt3dadd(173844.000000,203208.000000,44775.000000,317.769741)}
{pt3dadd(173772.000000,203748.000000,44625.000000,303.325664)}
{pt3dadd(173700.000000,203892.000000,44475.000000,288.881586)}
{pt3dadd(173424.000000,204024.000000,44500.000000,288.881586)}
{pt3dadd(173304.000000,204180.000000,44475.000000,288.881586)}
{pt3dadd(173316.000000,204348.000000,44475.000000,288.881586)}
{pt3dadd(173352.000000,204540.000000,44400.000000,288.881586)}
{pt3dadd(173280.000000,204780.000000,44300.000000,341.458034)}
{pt3dadd(173304.000000,205104.000000,44225.000000,394.034481)}
{pt3dadd(173280.000000,205320.000000,44100.000000,446.610929)}
{pt3dadd(173040.000000,205728.000000,44100.000000,499.187376)}
{pt3dadd(173040.000000,205896.000000,44075.000000,575.063856)}

{create adhoc103}
{access adhoc103}
{connect adhoc103(1), adhoc102(0)}
{nseg = 1}
{strdef color color = "White"}
{pt3dclear()}
{pt3dadd(173040.000000,205896.000000,44075.000000,575.063856)}
{pt3dadd(173292.000000,205764.000000,43725.000000,346.657896)}
{pt3dadd(173172.000000,206064.000000,43425.000000,301.787631)}
{pt3dadd(173028.000000,206472.000000,43175.000000,256.917366)}
{pt3dadd(173112.000000,206604.000000,42875.000000,212.047101)}
{pt3dadd(172968.000000,206940.000000,42650.000000,167.176836)}
{pt3dadd(172860.000000,207264.000000,42400.000000,208.580526)}
{pt3dadd(172944.000000,207492.000000,42100.000000,249.984216)}
{pt3dadd(173052.000000,207552.000000,41875.000000,291.387906)}
{pt3dadd(173208.000000,207660.000000,41625.000000,332.791596)}
{pt3dadd(173220.000000,207768.000000,41400.000000,374.390541)}
{pt3dadd(173148.000000,207828.000000,41175.000000,415.989486)}
{pt3dadd(173196.000000,208020.000000,41000.000000,415.989486)}

{create adhoc104}
{access adhoc104}
{connect adhoc104(1), adhoc103(0)}
{nseg = 1}
{strdef color color = "White"}
{pt3dclear()}
{pt3dadd(173196.000000,208020.000000,41000.000000,415.989486)}
{pt3dadd(173472.000000,207576.000000,40825.000000,499.187376)}
{pt3dadd(173448.000000,207516.000000,40575.000000,424.543586)}
{pt3dadd(173628.000000,207228.000000,40225.000000,349.899795)}
{pt3dadd(173736.000000,207300.000000,40050.000000,275.256005)}
{pt3dadd(173892.000000,207168.000000,39850.000000,200.612214)}
{pt3dadd(174036.000000,207156.000000,39700.000000,210.642822)}
{pt3dadd(174552.000000,206832.000000,39175.000000,220.673430)}
{pt3dadd(174972.000000,206532.000000,38950.000000,230.704038)}
{pt3dadd(175200.000000,206292.000000,38675.000000,240.734646)}
{pt3dadd(175272.000000,205944.000000,38300.000000,240.734646)}
{pt3dadd(175488.000000,205812.000000,37700.000000,288.881586)}

{create adhoc105}
{access adhoc105}
{connect adhoc105(1), adhoc103(0)}
{nseg = 1}
{strdef color color = "White"}
{pt3dclear()}
{pt3dadd(173196.000000,208020.000000,41000.000000,415.989486)}
{pt3dadd(173328.000000,208608.000000,40775.000000,200.612214)}
{pt3dadd(173232.000000,208872.000000,40575.000000,192.253370)}
{pt3dadd(173280.000000,209292.000000,40400.000000,183.894525)}
{pt3dadd(173016.000000,209520.000000,40550.000000,175.535680)}
{pt3dadd(173004.000000,210024.000000,40475.000000,167.176836)}
{pt3dadd(172632.000000,210936.000000,40425.000000,183.894525)}
{pt3dadd(172512.000000,211212.000000,40450.000000,200.612214)}
{pt3dadd(172224.000000,210996.000000,40250.000000,200.612214)}

{create adhoc106}
{access adhoc106}
{connect adhoc106(1), adhoc102(0)}
{nseg = 1}
{strdef color color = "White"}
{pt3dclear()}
{pt3dadd(173040.000000,205896.000000,44075.000000,575.063856)}
{pt3dadd(172548.000000,206040.000000,44875.000000,231.105276)}
{pt3dadd(172380.000000,206748.000000,45050.000000,245.549354)}
{pt3dadd(172236.000000,206820.000000,45300.000000,259.993431)}
{pt3dadd(172008.000000,206940.000000,45525.000000,274.437509)}
{pt3dadd(171744.000000,207264.000000,45800.000000,288.881586)}
{pt3dadd(171420.000000,207732.000000,46050.000000,251.489700)}
{pt3dadd(171180.000000,207864.000000,46350.000000,214.097814)}
{pt3dadd(171288.000000,207936.000000,46625.000000,176.705928)}
{pt3dadd(171288.000000,207576.000000,46900.000000,139.314042)}
{pt3dadd(171168.000000,207384.000000,47175.000000,139.314042)}

{create adhoc107}
{access adhoc107}
{connect adhoc107(1), adhoc95(0)}
{nseg = 1}
{strdef color color = "White"}
{pt3dclear()}
{pt3dadd(177744.000000,194436.000000,51250.000000,1035.114948)}
{pt3dadd(176784.000000,195576.000000,51250.000000,288.881586)}
{pt3dadd(176676.000000,195660.000000,51225.000000,266.814243)}
{pt3dadd(176568.000000,195720.000000,51200.000000,244.746900)}
{pt3dadd(176484.000000,195852.000000,51275.000000,222.679557)}
{pt3dadd(176388.000000,195984.000000,51350.000000,200.612214)}
{pt3dadd(176280.000000,196032.000000,51375.000000,222.679557)}
{pt3dadd(175692.000000,196164.000000,51150.000000,244.746900)}
{pt3dadd(175584.000000,196404.000000,51050.000000,266.814243)}
{pt3dadd(175464.000000,196344.000000,51075.000000,288.881586)}
{pt3dadd(175464.000000,196524.000000,51050.000000,299.859080)}
{pt3dadd(175236.000000,196692.000000,51125.000000,310.836573)}
{pt3dadd(175272.000000,196932.000000,51075.000000,321.814067)}
{pt3dadd(175212.000000,197184.000000,51150.000000,332.791560)}
{pt3dadd(175128.000000,197352.000000,51450.000000,278.617428)}
{pt3dadd(175044.000000,197532.000000,51325.000000,224.443296)}
{pt3dadd(174948.000000,197676.000000,51275.000000,170.269164)}
{pt3dadd(174888.000000,197808.000000,51250.000000,116.095032)}
{pt3dadd(174780.000000,197928.000000,51275.000000,111.257739)}
{pt3dadd(174564.000000,198072.000000,51350.000000,106.420446)}
{pt3dadd(174432.000000,198228.000000,51350.000000,101.583153)}
{pt3dadd(174288.000000,198156.000000,51375.000000,96.745860)}
{pt3dadd(174000.000000,198180.000000,51700.000000,131.367978)}
{pt3dadd(173868.000000,198372.000000,51700.000000,165.990096)}
{pt3dadd(173496.000000,198552.000000,51725.000000,200.612214)}
{pt3dadd(173544.000000,198672.000000,51775.000000,167.176836)}

{create adhoc108}
{access adhoc108}
{connect adhoc108(1), adhoc4(0)}
{nseg = 1}
{strdef color color = "White"}
{pt3dclear()}
{pt3dadd(192180.000000,133896.000000,60650.000000,953.961894)}
{pt3dadd(191880.000000,133896.000000,59325.000000,288.881586)}
{pt3dadd(191604.000000,133848.000000,59125.000000,288.881586)}
{pt3dadd(191424.000000,133848.000000,58900.000000,288.881586)}
{pt3dadd(191448.000000,134028.000000,58700.000000,288.881586)}
{pt3dadd(191676.000000,134040.000000,58475.000000,288.881586)}
{pt3dadd(191640.000000,133920.000000,58225.000000,276.844851)}
{pt3dadd(191700.000000,133944.000000,57975.000000,264.808116)}
{pt3dadd(191820.000000,133920.000000,57675.000000,252.771381)}
{pt3dadd(191988.000000,133824.000000,57475.000000,240.734646)}
{pt3dadd(191892.000000,133728.000000,57250.000000,263.748875)}
{pt3dadd(191964.000000,133644.000000,57050.000000,286.763103)}
{pt3dadd(191748.000000,133644.000000,56750.000000,309.777332)}
{pt3dadd(191484.000000,133608.000000,56375.000000,332.791560)}
{pt3dadd(191340.000000,133584.000000,56125.000000,291.387879)}
{pt3dadd(190860.000000,133548.000000,55925.000000,249.984198)}
{pt3dadd(190536.000000,133572.000000,55675.000000,208.580517)}
{pt3dadd(189840.000000,133788.000000,55425.000000,167.176836)}
{pt3dadd(189372.000000,134664.000000,55225.000000,167.176836)}
{pt3dadd(189012.000000,135348.000000,55000.000000,167.176836)}
{pt3dadd(188628.000000,135756.000000,54750.000000,167.176836)}
{pt3dadd(188040.000000,136488.000000,54575.000000,167.176836)}
{pt3dadd(187860.000000,136608.000000,54425.000000,175.535680)}
{pt3dadd(187680.000000,136476.000000,54500.000000,183.894525)}
{pt3dadd(187044.000000,136404.000000,54525.000000,192.253370)}
{pt3dadd(186936.000000,136320.000000,54525.000000,200.612214)}
{pt3dadd(186720.000000,136188.000000,54525.000000,169.963128)}
{pt3dadd(186468.000000,135972.000000,54425.000000,139.314042)}
{pt3dadd(186288.000000,135840.000000,54325.000000,200.612214)}

{create adhoc109}
{access adhoc109}
{connect adhoc109(1), adhoc3(0)}
{nseg = 1}
{strdef color color = "White"}
{pt3dclear()}
{pt3dadd(190140.000000,125508.000000,61950.000000,718.829820)}
{pt3dadd(189936.000000,125388.000000,62000.000000,718.829820)}
{pt3dadd(189948.000000,125100.000000,62025.000000,718.829820)}
{pt3dadd(190068.000000,124956.000000,62175.000000,718.829820)}
{pt3dadd(190068.000000,124812.000000,62050.000000,718.829820)}
{pt3dadd(189984.000000,124692.000000,62125.000000,718.829820)}
{pt3dadd(189900.000000,124548.000000,62200.000000,718.829820)}
{pt3dadd(189936.000000,124440.000000,62100.000000,718.829820)}
{pt3dadd(189912.000000,124296.000000,62100.000000,718.829820)}
{pt3dadd(189828.000000,124044.000000,62225.000000,718.829820)}
{pt3dadd(189864.000000,123792.000000,62250.000000,711.641533)}
{pt3dadd(189816.000000,123660.000000,62250.000000,704.453247)}
{pt3dadd(189816.000000,123540.000000,62300.000000,697.264960)}
{pt3dadd(189816.000000,123420.000000,62350.000000,690.076674)}
{pt3dadd(189816.000000,123192.000000,62400.000000,697.264960)}
{pt3dadd(189816.000000,123072.000000,62325.000000,704.453247)}
{pt3dadd(189768.000000,122940.000000,62400.000000,711.641533)}
{pt3dadd(189720.000000,122748.000000,62475.000000,718.829820)}
{pt3dadd(189780.000000,122616.000000,62425.000000,718.829820)}
{pt3dadd(189732.000000,122424.000000,62575.000000,718.829820)}
{pt3dadd(189732.000000,122316.000000,62575.000000,718.829820)}
{pt3dadd(189732.000000,122172.000000,62575.000000,718.829820)}
{pt3dadd(189708.000000,122028.000000,62725.000000,754.771316)}
{pt3dadd(189684.000000,121908.000000,62875.000000,790.712811)}
{pt3dadd(189600.000000,121764.000000,62675.000000,826.654307)}
{pt3dadd(189636.000000,121680.000000,62675.000000,862.595802)}
{pt3dadd(189612.000000,121416.000000,62825.000000,862.595802)}

{create adhoc110}
{access adhoc110}
{connect adhoc110(1), adhoc109(0)}
{nseg = 1}
{strdef color color = "White"}
{pt3dclear()}
{pt3dadd(189612.000000,121416.000000,62825.000000,862.595802)}
{pt3dadd(188604.000000,121416.000000,61950.000000,200.612214)}
{pt3dadd(188460.000000,121368.000000,61875.000000,210.642822)}
{pt3dadd(188340.000000,121260.000000,61875.000000,220.673430)}
{pt3dadd(188256.000000,121212.000000,61725.000000,230.704038)}
{pt3dadd(188064.000000,121140.000000,61725.000000,240.734646)}
{pt3dadd(187896.000000,121032.000000,61675.000000,252.771381)}
{pt3dadd(187776.000000,120876.000000,61625.000000,264.808116)}
{pt3dadd(187692.000000,120876.000000,61625.000000,276.844851)}
{pt3dadd(187572.000000,120768.000000,61450.000000,288.881586)}
{pt3dadd(187488.000000,120624.000000,61500.000000,288.881586)}
{pt3dadd(187380.000000,120660.000000,61475.000000,288.881586)}
{pt3dadd(187284.000000,120564.000000,61450.000000,288.881586)}
{pt3dadd(187164.000000,120432.000000,61450.000000,288.881586)}
{pt3dadd(187164.000000,120408.000000,61025.000000,276.844851)}
{pt3dadd(187020.000000,120156.000000,60750.000000,264.808116)}
{pt3dadd(186864.000000,120108.000000,60725.000000,252.771381)}
{pt3dadd(186744.000000,120120.000000,60575.000000,240.734646)}
{pt3dadd(186588.000000,119988.000000,60325.000000,230.704038)}
{pt3dadd(186444.000000,119892.000000,60175.000000,220.673430)}
{pt3dadd(186168.000000,119448.000000,59725.000000,210.642822)}
{pt3dadd(185856.000000,119052.000000,59450.000000,200.612214)}
{pt3dadd(185940.000000,118788.000000,59250.000000,237.123635)}
{pt3dadd(185904.000000,118668.000000,59025.000000,273.635055)}
{pt3dadd(186024.000000,118404.000000,58600.000000,310.146475)}
{pt3dadd(185904.000000,118176.000000,58325.000000,346.657896)}
{pt3dadd(185964.000000,118044.000000,58175.000000,332.213819)}
{pt3dadd(185892.000000,117996.000000,57975.000000,317.769741)}
{pt3dadd(186036.000000,117864.000000,57725.000000,303.325664)}
{pt3dadd(186072.000000,117708.000000,57525.000000,288.881586)}
{pt3dadd(186048.000000,117528.000000,57250.000000,288.881586)}
{pt3dadd(185976.000000,117504.000000,57100.000000,288.881586)}
{pt3dadd(185652.000000,117216.000000,56950.000000,288.881586)}
{pt3dadd(185124.000000,117216.000000,56675.000000,288.881586)}
{pt3dadd(184872.000000,117144.000000,56450.000000,228.029211)}
{pt3dadd(184848.000000,117336.000000,56100.000000,167.176836)}
{pt3dadd(184824.000000,117312.000000,55875.000000,139.314042)}

{create adhoc111}
{access adhoc111}
{connect adhoc111(1), adhoc109(0)}
{nseg = 1}
{strdef color color = "White"}
{pt3dclear()}
{pt3dadd(189612.000000,121416.000000,62825.000000,862.595802)}
{pt3dadd(189648.000000,121296.000000,63075.000000,862.595802)}
{pt3dadd(189588.000000,120528.000000,63325.000000,790.712811)}
{pt3dadd(189216.000000,119616.000000,63775.000000,718.829820)}
{pt3dadd(189216.000000,119304.000000,63800.000000,575.063856)}

{create adhoc112}
{access adhoc112}
{connect adhoc112(1), adhoc111(0)}
{nseg = 1}
{strdef color color = "White"}
{pt3dclear()}
{pt3dadd(189216.000000,119304.000000,63800.000000,575.063856)}
{pt3dadd(188244.000000,119304.000000,63000.000000,346.657896)}
{pt3dadd(188112.000000,119172.000000,62975.000000,343.191321)}
{pt3dadd(187980.000000,119076.000000,62950.000000,339.724746)}
{pt3dadd(187824.000000,118932.000000,62775.000000,336.258171)}
{pt3dadd(187704.000000,118752.000000,62675.000000,332.791596)}
{pt3dadd(187632.000000,118596.000000,62675.000000,353.591069)}
{pt3dadd(187512.000000,118452.000000,62600.000000,374.390541)}
{pt3dadd(187356.000000,118224.000000,62350.000000,395.190014)}
{pt3dadd(186972.000000,117780.000000,62125.000000,415.989486)}
{pt3dadd(186840.000000,117444.000000,61600.000000,411.829601)}
{pt3dadd(186672.000000,117264.000000,61350.000000,407.669715)}
{pt3dadd(186288.000000,116880.000000,60975.000000,403.509830)}
{pt3dadd(186348.000000,116592.000000,60775.000000,399.349944)}
{pt3dadd(186240.000000,116340.000000,60525.000000,368.844039)}
{pt3dadd(186108.000000,116028.000000,60300.000000,338.338134)}
{pt3dadd(186084.000000,115872.000000,60050.000000,307.832229)}
{pt3dadd(185892.000000,115416.000000,59650.000000,277.326324)}
{pt3dadd(185664.000000,114852.000000,59375.000000,332.791587)}
{pt3dadd(185088.000000,114588.000000,59175.000000,388.256850)}
{pt3dadd(184956.000000,114384.000000,58950.000000,443.722113)}
{pt3dadd(184644.000000,114228.000000,58625.000000,499.187376)}
{pt3dadd(184572.000000,114072.000000,58275.000000,434.574193)}
{pt3dadd(184392.000000,113844.000000,58025.000000,369.961011)}
{pt3dadd(184404.000000,113796.000000,57825.000000,305.347828)}
{pt3dadd(184308.000000,113664.000000,57625.000000,240.734646)}
{pt3dadd(184212.000000,113532.000000,57450.000000,252.771381)}
{pt3dadd(184212.000000,113436.000000,57225.000000,264.808116)}
{pt3dadd(184188.000000,113148.000000,56800.000000,276.844851)}
{pt3dadd(184284.000000,112968.000000,56575.000000,288.881586)}
{pt3dadd(184296.000000,112764.000000,56275.000000,303.325664)}
{pt3dadd(184680.000000,112476.000000,55900.000000,317.769741)}
{pt3dadd(184716.000000,112404.000000,55600.000000,332.213819)}
{pt3dadd(184800.000000,112176.000000,55225.000000,346.657896)}
{pt3dadd(185004.000000,112152.000000,54950.000000,320.177083)}
{pt3dadd(185148.000000,111900.000000,54575.000000,293.696271)}
{pt3dadd(185244.000000,111636.000000,54250.000000,267.215459)}
{pt3dadd(185544.000000,111516.000000,53850.000000,240.734646)}
{pt3dadd(185736.000000,111492.000000,53450.000000,252.771381)}
{pt3dadd(186588.000000,111444.000000,52975.000000,264.808116)}
{pt3dadd(186624.000000,111300.000000,52775.000000,276.844851)}
{pt3dadd(186624.000000,111300.000000,52425.000000,288.881586)}
{pt3dadd(186996.000000,111156.000000,51850.000000,288.881586)}
{pt3dadd(187188.000000,110364.000000,51350.000000,288.881586)}
{pt3dadd(187332.000000,110112.000000,51100.000000,288.881586)}
{pt3dadd(187524.000000,109848.000000,50900.000000,288.881586)}
{pt3dadd(187476.000000,109560.000000,50525.000000,240.734646)}

{create adhoc113}
{access adhoc113}
{connect adhoc113(1), adhoc111(0)}
{nseg = 1}
{strdef color color = "White"}
{pt3dclear()}
{pt3dadd(189216.000000,119304.000000,63800.000000,575.063856)}
{pt3dadd(189228.000000,119184.000000,63975.000000,599.024880)}
{pt3dadd(189240.000000,119016.000000,64150.000000,599.024880)}
{pt3dadd(189252.000000,118668.000000,64325.000000,599.024880)}
{pt3dadd(189264.000000,118380.000000,64500.000000,599.024880)}
{pt3dadd(189276.000000,118080.000000,64675.000000,599.024880)}
{pt3dadd(189120.000000,117516.000000,65000.000000,599.024880)}
{pt3dadd(188940.000000,117216.000000,65150.000000,599.024880)}
{pt3dadd(188736.000000,116760.000000,65550.000000,599.024880)}
{pt3dadd(188688.000000,116496.000000,65450.000000,599.024880)}
{pt3dadd(188508.000000,116244.000000,65550.000000,621.787810)}
{pt3dadd(188412.000000,115848.000000,65750.000000,644.550741)}
{pt3dadd(188148.000000,115452.000000,65850.000000,667.313671)}
{pt3dadd(188448.000000,115068.000000,66150.000000,690.076602)}
{pt3dadd(188112.000000,114780.000000,66325.000000,667.313671)}
{pt3dadd(188196.000000,114480.000000,66625.000000,644.550741)}
{pt3dadd(188028.000000,114120.000000,66825.000000,621.787810)}
{pt3dadd(188016.000000,113940.000000,66950.000000,599.024880)}
{pt3dadd(187884.000000,112992.000000,67650.000000,569.073631)}
{pt3dadd(187884.000000,112848.000000,67625.000000,539.122383)}
{pt3dadd(187884.000000,112656.000000,67675.000000,509.171134)}
{pt3dadd(187884.000000,112440.000000,67675.000000,479.219886)}
{pt3dadd(187884.000000,112320.000000,67675.000000,509.171134)}
{pt3dadd(187788.000000,111924.000000,67900.000000,539.122383)}
{pt3dadd(187788.000000,111816.000000,67750.000000,569.073631)}
{pt3dadd(187800.000000,111504.000000,67750.000000,599.024880)}
{pt3dadd(187836.000000,111180.000000,67825.000000,574.065504)}
{pt3dadd(187704.000000,110844.000000,67700.000000,549.106128)}
{pt3dadd(187764.000000,110280.000000,67550.000000,524.146752)}
{pt3dadd(187728.000000,109872.000000,67500.000000,499.187376)}
{pt3dadd(187608.000000,109224.000000,67425.000000,461.055006)}
{pt3dadd(187488.000000,108924.000000,67350.000000,422.922636)}
{pt3dadd(187512.000000,108456.000000,67550.000000,384.790266)}
{pt3dadd(187392.000000,108204.000000,67625.000000,346.657896)}
{pt3dadd(187320.000000,108036.000000,67675.000000,384.790266)}
{pt3dadd(187140.000000,107808.000000,67675.000000,422.922636)}
{pt3dadd(186852.000000,107544.000000,67700.000000,461.055006)}
{pt3dadd(186780.000000,107328.000000,67725.000000,499.187376)}
{pt3dadd(186468.000000,106872.000000,67925.000000,478.387903)}
{pt3dadd(186576.000000,106560.000000,68125.000000,457.588431)}
{pt3dadd(186372.000000,105936.000000,68125.000000,436.788958)}
{pt3dadd(186144.000000,105528.000000,68225.000000,415.989486)}
{pt3dadd(186096.000000,105192.000000,68100.000000,415.989486)}
{pt3dadd(186024.000000,104808.000000,68200.000000,415.989486)}
{pt3dadd(185928.000000,104196.000000,68250.000000,415.989486)}
{pt3dadd(185904.000000,103644.000000,68475.000000,415.989486)}
{pt3dadd(185904.000000,103236.000000,68450.000000,457.588431)}
{pt3dadd(185916.000000,102840.000000,68650.000000,499.187376)}
{pt3dadd(185928.000000,102720.000000,68850.000000,599.024880)}

{create adhoc114}
{access adhoc114}
{connect adhoc114(1), adhoc113(0)}
{nseg = 1}
{strdef color color = "White"}
{pt3dclear()}
{pt3dadd(185928.000000,102720.000000,68850.000000,599.024880)}
{pt3dadd(185244.000000,102120.000000,68000.000000,240.734646)}
{pt3dadd(185136.000000,102096.000000,68000.000000,240.734646)}
{pt3dadd(184944.000000,101916.000000,67975.000000,240.734646)}
{pt3dadd(184656.000000,101784.000000,67975.000000,240.734646)}
{pt3dadd(184344.000000,101496.000000,68100.000000,240.734646)}
{pt3dadd(184044.000000,101292.000000,68200.000000,267.215459)}
{pt3dadd(183840.000000,100932.000000,68000.000000,293.696271)}
{pt3dadd(183492.000000,100704.000000,67825.000000,320.177083)}
{pt3dadd(183276.000000,100308.000000,67825.000000,346.657896)}
{pt3dadd(182844.000000,99924.000000,68025.000000,332.213819)}
{pt3dadd(182616.000000,99660.000000,67800.000000,317.769741)}
{pt3dadd(182436.000000,99660.000000,67875.000000,303.325664)}
{pt3dadd(182304.000000,99540.000000,67875.000000,288.881586)}
{pt3dadd(181860.000000,98676.000000,68225.000000,251.489700)}
{pt3dadd(181440.000000,97704.000000,68475.000000,214.097814)}
{pt3dadd(181248.000000,97548.000000,68400.000000,176.705928)}
{pt3dadd(181140.000000,97416.000000,68450.000000,139.314042)}
{pt3dadd(181044.000000,97344.000000,68450.000000,128.671997)}
{pt3dadd(181068.000000,97248.000000,68450.000000,118.029951)}
{pt3dadd(181032.000000,97128.000000,68425.000000,107.387906)}
{pt3dadd(180972.000000,97008.000000,68475.000000,96.745860)}
{pt3dadd(180948.000000,96888.000000,68425.000000,96.745860)}
{pt3dadd(180876.000000,96780.000000,68450.000000,96.745860)}
{pt3dadd(180792.000000,96660.000000,68500.000000,96.745860)}
{pt3dadd(180732.000000,96552.000000,68450.000000,96.745860)}
{pt3dadd(180660.000000,96456.000000,68325.000000,107.387906)}
{pt3dadd(180588.000000,96288.000000,68400.000000,118.029951)}
{pt3dadd(180492.000000,96276.000000,68425.000000,128.671997)}
{pt3dadd(180336.000000,95976.000000,68550.000000,139.314042)}
{pt3dadd(180036.000000,95640.000000,68800.000000,139.314042)}

{create adhoc115}
{access adhoc115}
{connect adhoc115(1), adhoc113(0)}
{nseg = 1}
{strdef color color = "White"}
{pt3dclear()}
{pt3dadd(185928.000000,102720.000000,68850.000000,599.024880)}
{pt3dadd(185796.000000,102648.000000,69075.000000,718.829820)}
{pt3dadd(185892.000000,102516.000000,69375.000000,682.888329)}
{pt3dadd(185964.000000,102360.000000,69675.000000,646.946838)}
{pt3dadd(186036.000000,102204.000000,70075.000000,611.005347)}
{pt3dadd(186096.000000,102012.000000,70425.000000,575.063856)}
{pt3dadd(185880.000000,102036.000000,70750.000000,537.125616)}
{pt3dadd(185856.000000,101904.000000,70975.000000,499.187376)}
{pt3dadd(185712.000000,101760.000000,71125.000000,346.657896)}

{create adhoc116}
{access adhoc116}
{connect adhoc116(1), adhoc115(0)}
{nseg = 1}
{strdef color color = "White"}
{pt3dclear()}
{pt3dadd(185712.000000,101760.000000,71125.000000,346.657896)}
{pt3dadd(185064.000000,101400.000000,71275.000000,240.734646)}
{pt3dadd(184812.000000,101292.000000,71475.000000,284.548356)}
{pt3dadd(184620.000000,101076.000000,71750.000000,328.362066)}
{pt3dadd(184440.000000,100932.000000,72050.000000,372.175776)}
{pt3dadd(184320.000000,100848.000000,72300.000000,415.989486)}
{pt3dadd(184116.000000,100704.000000,72600.000000,372.175776)}
{pt3dadd(183828.000000,100548.000000,72725.000000,328.362066)}
{pt3dadd(183708.000000,100392.000000,72875.000000,284.548356)}
{pt3dadd(183600.000000,100260.000000,72825.000000,240.734646)}
{pt3dadd(183504.000000,100056.000000,73000.000000,240.734646)}
{pt3dadd(183420.000000,99900.000000,73000.000000,240.734646)}
{pt3dadd(183336.000000,99780.000000,73050.000000,240.734646)}
{pt3dadd(183336.000000,99576.000000,73075.000000,240.734646)}
{pt3dadd(183156.000000,99336.000000,73025.000000,240.734646)}
{pt3dadd(183192.000000,99180.000000,73050.000000,240.734646)}
{pt3dadd(183156.000000,98988.000000,73050.000000,240.734646)}
{pt3dadd(183168.000000,98868.000000,73075.000000,240.734646)}
{pt3dadd(183084.000000,98712.000000,73050.000000,230.704038)}
{pt3dadd(183120.000000,98508.000000,73050.000000,220.673430)}
{pt3dadd(182964.000000,98352.000000,73000.000000,210.642822)}
{pt3dadd(182748.000000,98148.000000,73125.000000,200.612214)}
{pt3dadd(182424.000000,98004.000000,73075.000000,200.612214)}
{pt3dadd(182340.000000,97740.000000,73225.000000,200.612214)}
{pt3dadd(182232.000000,97644.000000,73300.000000,200.612214)}
{pt3dadd(182100.000000,97524.000000,73300.000000,200.612214)}
{pt3dadd(181824.000000,97344.000000,73300.000000,210.642822)}
{pt3dadd(181632.000000,97116.000000,73350.000000,220.673430)}
{pt3dadd(181536.000000,97248.000000,73675.000000,230.704038)}
{pt3dadd(181392.000000,97092.000000,73800.000000,240.734646)}
{pt3dadd(181404.000000,97152.000000,74050.000000,230.704038)}
{pt3dadd(181536.000000,97104.000000,74275.000000,220.673430)}
{pt3dadd(181656.000000,97068.000000,74500.000000,210.642822)}
{pt3dadd(181980.000000,96912.000000,74600.000000,200.612214)}
{pt3dadd(182328.000000,96792.000000,74750.000000,192.253370)}
{pt3dadd(182460.000000,96876.000000,74825.000000,183.894525)}
{pt3dadd(182652.000000,96732.000000,74825.000000,175.535680)}
{pt3dadd(182820.000000,96720.000000,75000.000000,167.176836)}
{pt3dadd(182928.000000,96708.000000,75050.000000,116.095032)}

{create adhoc117}
{access adhoc117}
{connect adhoc117(1), adhoc115(0)}
{nseg = 1}
{strdef color color = "White"}
{pt3dclear()}
{pt3dadd(185712.000000,101760.000000,71125.000000,346.657896)}
{pt3dadd(186216.000000,102276.000000,71325.000000,499.187376)}
{pt3dadd(186108.000000,102276.000000,71525.000000,461.055006)}
{pt3dadd(186276.000000,102132.000000,71800.000000,422.922636)}
{pt3dadd(186396.000000,102168.000000,72075.000000,384.790266)}
{pt3dadd(186528.000000,102264.000000,72325.000000,346.657896)}
{pt3dadd(186480.000000,102324.000000,72575.000000,359.830899)}
{pt3dadd(186432.000000,102384.000000,72775.000000,373.003902)}
{pt3dadd(186576.000000,102420.000000,73000.000000,386.176905)}
{pt3dadd(186660.000000,102492.000000,73250.000000,399.349908)}
{pt3dadd(186720.000000,102408.000000,73500.000000,403.509803)}
{pt3dadd(186672.000000,102432.000000,73725.000000,407.669697)}
{pt3dadd(186744.000000,102444.000000,73875.000000,411.829591)}
{pt3dadd(186816.000000,102456.000000,74425.000000,415.989486)}
{pt3dadd(186792.000000,102432.000000,74675.000000,398.656589)}
{pt3dadd(186756.000000,102360.000000,74875.000000,381.323691)}
{pt3dadd(186684.000000,102324.000000,75100.000000,363.990794)}
{pt3dadd(185964.000000,102168.000000,75350.000000,346.657896)}
{pt3dadd(185976.000000,102060.000000,75550.000000,363.990794)}
{pt3dadd(186060.000000,101976.000000,75775.000000,381.323691)}
{pt3dadd(186288.000000,102096.000000,76075.000000,398.656589)}
{pt3dadd(186540.000000,102180.000000,76625.000000,415.989486)}
{pt3dadd(186852.000000,102432.000000,77250.000000,384.212511)}
{pt3dadd(186912.000000,102552.000000,77500.000000,352.435536)}
{pt3dadd(186936.000000,102576.000000,77800.000000,320.658561)}
{pt3dadd(186900.000000,102648.000000,78000.000000,288.881586)}
{pt3dadd(186864.000000,102828.000000,78225.000000,258.455399)}
{pt3dadd(186888.000000,102948.000000,78425.000000,228.029211)}
{pt3dadd(186948.000000,103080.000000,78675.000000,197.603024)}
{pt3dadd(186948.000000,103368.000000,78850.000000,167.176836)}
{pt3dadd(187008.000000,103488.000000,79075.000000,185.566288)}
{pt3dadd(187068.000000,103692.000000,79325.000000,203.955741)}
{pt3dadd(186924.000000,104112.000000,79525.000000,222.345193)}
{pt3dadd(187056.000000,104316.000000,79725.000000,240.734646)}
{pt3dadd(187140.000000,104436.000000,79950.000000,267.215459)}
{pt3dadd(187164.000000,104532.000000,80200.000000,293.696271)}
{pt3dadd(187224.000000,104508.000000,80450.000000,320.177083)}
{pt3dadd(187128.000000,104592.000000,80725.000000,346.657896)}
{pt3dadd(186972.000000,104448.000000,81100.000000,384.790266)}
{pt3dadd(186780.000000,104040.000000,81275.000000,422.922636)}
{pt3dadd(186456.000000,103932.000000,81825.000000,461.055006)}
{pt3dadd(186408.000000,103956.000000,82075.000000,499.187376)}
{pt3dadd(186372.000000,103968.000000,82300.000000,461.055006)}
{pt3dadd(186372.000000,104088.000000,82475.000000,422.922636)}
{pt3dadd(186468.000000,104208.000000,82675.000000,384.790266)}
{pt3dadd(186564.000000,104220.000000,82900.000000,346.657896)}
{pt3dadd(186660.000000,104400.000000,83125.000000,297.976002)}
{pt3dadd(186660.000000,104628.000000,83500.000000,249.294108)}
{pt3dadd(186624.000000,104760.000000,83800.000000,200.612214)}
{pt3dadd(186720.000000,104892.000000,84025.000000,167.176836)}
