# Supplementary material for: Full reconstruction of large lobula plate tangential cells in Drosophila from a 3D EM dataset
Source: PLoS One. 2018 Nov 28;13(11):e0207828. doi: 10.1371/journal.pone.0207828 (PMC6261601; doi:10.1371/journal.pone.0207828)
Supplement: S1 Dataset — (ZIP) [file pone.0207828.s001.zip › Diameter hoc/VS_VSL_preliminary/Old Diameters Mar13_VS_VSL_HS/VS4/2_14_762_gmordhorst_001.027.hoc]

/* created with nml2hocm */

{create adhoc1}
{access adhoc1}
{nseg = 1}
{strdef color color = "White"}
{pt3dclear()}
{pt3dadd(190008.000000,182280.000000,73125.000000,192.587724)}
{pt3dadd(190200.000000,182184.000000,73250.000000,200.612214)}
{pt3dadd(190908.000000,182148.000000,73625.000000,167.176836)}
{pt3dadd(192144.000000,182676.000000,73775.000000,499.187376)}

{create adhoc2}
{access adhoc2}
{connect adhoc2(1), adhoc1(0)}
{nseg = 1}
{strdef color color = "White"}
{pt3dclear()}
{pt3dadd(192144.000000,182676.000000,73775.000000,499.187376)}
{pt3dadd(192216.000000,182328.000000,73325.000000,346.657896)}
{pt3dadd(192072.000000,182040.000000,72950.000000,346.657896)}
{pt3dadd(191916.000000,181716.000000,72375.000000,346.657896)}
{pt3dadd(191640.000000,181392.000000,71875.000000,346.657896)}
{pt3dadd(191496.000000,181092.000000,71450.000000,346.657896)}
{pt3dadd(191484.000000,180840.000000,71050.000000,359.830908)}
{pt3dadd(191472.000000,180792.000000,70500.000000,373.003920)}
{pt3dadd(191172.000000,180684.000000,69950.000000,386.176932)}
{pt3dadd(190884.000000,180408.000000,69450.000000,399.349944)}
{pt3dadd(190728.000000,180360.000000,68900.000000,386.176932)}
{pt3dadd(190584.000000,180300.000000,68550.000000,373.003920)}
{pt3dadd(190584.000000,180456.000000,68075.000000,359.830908)}
{pt3dadd(190356.000000,180684.000000,67550.000000,346.657896)}
{pt3dadd(190080.000000,180684.000000,67050.000000,346.657896)}
{pt3dadd(189888.000000,180756.000000,66700.000000,346.657896)}
{pt3dadd(189312.000000,180840.000000,66175.000000,346.657896)}
{pt3dadd(188304.000000,181488.000000,65600.000000,346.657896)}
{pt3dadd(187860.000000,181572.000000,65125.000000,332.213819)}
{pt3dadd(187296.000000,181860.000000,64575.000000,317.769741)}
{pt3dadd(186780.000000,182184.000000,64025.000000,303.325664)}
{pt3dadd(186456.000000,182100.000000,63650.000000,288.881586)}
{pt3dadd(186480.000000,182292.000000,63225.000000,276.844851)}
{pt3dadd(186240.000000,182244.000000,62700.000000,264.808116)}
{pt3dadd(186060.000000,182208.000000,62250.000000,252.771381)}
{pt3dadd(185736.000000,182160.000000,61725.000000,240.734646)}
{pt3dadd(185484.000000,182028.000000,61250.000000,240.734646)}
{pt3dadd(185040.000000,181968.000000,60775.000000,240.734646)}
{pt3dadd(184344.000000,181884.000000,60300.000000,240.734646)}
{pt3dadd(184260.000000,181872.000000,60075.000000,240.734646)}
{pt3dadd(184044.000000,181896.000000,59975.000000,222.345193)}
{pt3dadd(183852.000000,182064.000000,59975.000000,203.955741)}
{pt3dadd(183600.000000,182148.000000,60050.000000,185.566288)}
{pt3dadd(183360.000000,182256.000000,60125.000000,167.176836)}
{pt3dadd(183144.000000,182424.000000,60275.000000,173.529558)}
{pt3dadd(182928.000000,182544.000000,60275.000000,179.882280)}
{pt3dadd(182712.000000,182772.000000,60400.000000,186.235002)}
{pt3dadd(182472.000000,183084.000000,60525.000000,192.587724)}
{pt3dadd(182244.000000,183432.000000,60750.000000,231.105267)}
{pt3dadd(182124.000000,183612.000000,60800.000000,269.622810)}
{pt3dadd(182040.000000,183792.000000,60900.000000,308.140353)}
{pt3dadd(182076.000000,184032.000000,61000.000000,346.657896)}
{pt3dadd(182052.000000,184260.000000,61050.000000,301.787631)}
{pt3dadd(182076.000000,184512.000000,61250.000000,256.917366)}
{pt3dadd(181896.000000,184776.000000,61250.000000,212.047101)}
{pt3dadd(181680.000000,185028.000000,61175.000000,167.176836)}
{pt3dadd(181440.000000,185280.000000,61175.000000,167.176836)}
{pt3dadd(181236.000000,185472.000000,61250.000000,167.176836)}
{pt3dadd(181020.000000,185712.000000,61350.000000,167.176836)}
{pt3dadd(180768.000000,186012.000000,61400.000000,167.176836)}
{pt3dadd(180588.000000,185988.000000,61325.000000,154.406385)}
{pt3dadd(180336.000000,186024.000000,61275.000000,141.635934)}
{pt3dadd(180156.000000,186096.000000,61300.000000,128.865483)}
{pt3dadd(179952.000000,186180.000000,61200.000000,116.095032)}
{pt3dadd(179724.000000,186756.000000,61400.000000,55.987200)}

{create adhoc3}
{access adhoc3}
{connect adhoc3(1), adhoc1(0)}
{nseg = 1}
{strdef color color = "White"}
{pt3dclear()}
{pt3dadd(192144.000000,182676.000000,73775.000000,499.187376)}
{pt3dadd(192288.000000,183000.000000,74250.000000,599.024880)}
{pt3dadd(193380.000000,182772.000000,74775.000000,817.069914)}
{pt3dadd(193524.000000,182736.000000,75400.000000,1035.114948)}
{pt3dadd(193704.000000,182784.000000,75850.000000,1242.137880)}

{create adhoc4}
{access adhoc4}
{connect adhoc4(1), adhoc3(0)}
{nseg = 1}
{strdef color color = "White"}
{pt3dclear()}
{pt3dadd(193704.000000,182784.000000,75850.000000,1242.137880)}
{pt3dadd(194088.000000,182292.000000,75800.000000,1242.137880)}
{pt3dadd(194280.000000,182052.000000,75825.000000,1242.137880)}
{pt3dadd(194376.000000,181824.000000,75725.000000,1242.137880)}
{pt3dadd(194664.000000,181596.000000,75775.000000,1242.137880)}
{pt3dadd(194928.000000,181368.000000,75650.000000,1242.137880)}
{pt3dadd(195192.000000,181152.000000,75525.000000,1242.137880)}
{pt3dadd(195264.000000,180924.000000,75425.000000,1242.137880)}
{pt3dadd(195492.000000,180684.000000,75350.000000,1242.137880)}
{pt3dadd(195756.000000,180456.000000,75275.000000,1242.137880)}
{pt3dadd(195876.000000,180216.000000,75100.000000,1242.137880)}
{pt3dadd(195900.000000,179988.000000,75150.000000,1242.137880)}
{pt3dadd(195924.000000,179760.000000,75100.000000,1242.137880)}
{pt3dadd(195972.000000,179388.000000,75150.000000,1242.137880)}
{pt3dadd(196092.000000,179136.000000,75175.000000,1242.137880)}
{pt3dadd(196188.000000,178884.000000,75025.000000,1242.137880)}
{pt3dadd(196332.000000,178668.000000,74925.000000,1242.137880)}
{pt3dadd(196452.000000,178440.000000,74825.000000,1242.137880)}
{pt3dadd(196500.000000,178176.000000,74725.000000,1242.137880)}
{pt3dadd(196644.000000,177888.000000,74675.000000,1242.137880)}
{pt3dadd(196836.000000,177660.000000,74650.000000,1242.137880)}
{pt3dadd(196872.000000,177420.000000,74575.000000,1242.137880)}
{pt3dadd(197196.000000,177156.000000,74575.000000,1229.716498)}
{pt3dadd(197340.000000,176904.000000,74650.000000,1217.295117)}
{pt3dadd(197388.000000,176604.000000,74575.000000,1204.873736)}
{pt3dadd(197508.000000,176328.000000,74600.000000,1192.452354)}
{pt3dadd(197604.000000,176100.000000,74550.000000,1198.180863)}
{pt3dadd(197604.000000,175800.000000,74550.000000,1203.909372)}
{pt3dadd(197628.000000,175428.000000,74300.000000,1209.637881)}
{pt3dadd(197616.000000,175152.000000,74150.000000,1215.366390)}
{pt3dadd(197580.000000,174888.000000,74100.000000,1170.303530)}
{pt3dadd(197532.000000,174588.000000,74000.000000,1125.240669)}
{pt3dadd(197436.000000,174348.000000,73900.000000,1080.177809)}
{pt3dadd(197484.000000,174072.000000,73875.000000,1035.114948)}
{pt3dadd(197448.000000,173844.000000,73675.000000,1035.114948)}

{create adhoc5}
{access adhoc5}
{connect adhoc5(1), adhoc4(0)}
{nseg = 1}
{strdef color color = "White"}
{pt3dclear()}
{pt3dadd(197448.000000,173844.000000,73675.000000,1035.114948)}
{pt3dadd(197400.000000,173868.000000,74150.000000,1242.137880)}
{pt3dadd(197724.000000,173868.000000,74525.000000,1018.267884)}
{pt3dadd(198048.000000,173868.000000,75075.000000,794.397888)}
{pt3dadd(197820.000000,173952.000000,75625.000000,570.527892)}
{pt3dadd(197724.000000,173496.000000,76050.000000,346.657896)}
{pt3dadd(197376.000000,173100.000000,76425.000000,346.657896)}
{pt3dadd(197244.000000,172800.000000,76800.000000,288.881586)}

{create adhoc6}
{access adhoc6}
{connect adhoc6(1), adhoc5(0)}
{nseg = 1}
{strdef color color = "White"}
{pt3dclear()}
{pt3dadd(197244.000000,172800.000000,76800.000000,288.881586)}
{pt3dadd(196992.000000,172836.000000,76575.000000,200.612214)}
{pt3dadd(196812.000000,172848.000000,76625.000000,173.678170)}
{pt3dadd(196572.000000,172836.000000,76775.000000,146.744127)}
{pt3dadd(196344.000000,172728.000000,76800.000000,119.810083)}
{pt3dadd(196056.000000,172680.000000,76875.000000,92.876040)}
{pt3dadd(195840.000000,172596.000000,76875.000000,92.876040)}
{pt3dadd(195612.000000,172548.000000,76925.000000,92.876040)}
{pt3dadd(195324.000000,172596.000000,76825.000000,67.184640)}

{create adhoc7}
{access adhoc7}
{connect adhoc7(1), adhoc5(0)}
{nseg = 1}
{strdef color color = "White"}
{pt3dclear()}
{pt3dadd(197244.000000,172800.000000,76800.000000,288.881586)}
{pt3dadd(197436.000000,172284.000000,77150.000000,288.881586)}
{pt3dadd(197376.000000,171948.000000,77475.000000,276.844851)}
{pt3dadd(197508.000000,171660.000000,77875.000000,264.808116)}
{pt3dadd(197580.000000,171372.000000,78300.000000,252.771381)}
{pt3dadd(197472.000000,171180.000000,78675.000000,240.734646)}
{pt3dadd(197472.000000,171132.000000,78850.000000,288.881586)}

{create adhoc8}
{access adhoc8}
{connect adhoc8(1), adhoc7(0)}
{nseg = 1}
{strdef color color = "White"}
{pt3dclear()}
{pt3dadd(197472.000000,171132.000000,78850.000000,288.881586)}
{pt3dadd(197424.000000,170880.000000,78850.000000,167.176836)}
{pt3dadd(197388.000000,170604.000000,78875.000000,167.176836)}
{pt3dadd(197268.000000,170400.000000,78925.000000,167.176836)}
{pt3dadd(197148.000000,170148.000000,78925.000000,167.176836)}
{pt3dadd(197124.000000,169920.000000,78950.000000,167.176836)}
{pt3dadd(197112.000000,169668.000000,78950.000000,167.176836)}
{pt3dadd(197076.000000,169464.000000,78900.000000,167.176836)}
{pt3dadd(196944.000000,169212.000000,78850.000000,167.176836)}
{pt3dadd(196920.000000,169008.000000,78825.000000,167.176836)}
{pt3dadd(196932.000000,168780.000000,78750.000000,116.095032)}

{create adhoc9}
{access adhoc9}
{connect adhoc9(1), adhoc7(0)}
{nseg = 1}
{strdef color color = "White"}
{pt3dclear()}
{pt3dadd(197472.000000,171132.000000,78850.000000,288.881586)}
{pt3dadd(197340.000000,171264.000000,79175.000000,240.734646)}
{pt3dadd(197112.000000,171348.000000,79525.000000,267.215459)}
{pt3dadd(196536.000000,171336.000000,79900.000000,293.696271)}
{pt3dadd(196188.000000,171528.000000,80275.000000,320.177083)}
{pt3dadd(195996.000000,171696.000000,80575.000000,346.657896)}
{pt3dadd(195660.000000,171840.000000,80975.000000,320.177083)}
{pt3dadd(195264.000000,172404.000000,81325.000000,293.696271)}
{pt3dadd(195204.000000,172572.000000,81600.000000,267.215459)}
{pt3dadd(195168.000000,172836.000000,81675.000000,240.734646)}
{pt3dadd(195120.000000,173064.000000,81800.000000,240.734646)}
{pt3dadd(195108.000000,173280.000000,81800.000000,240.734646)}
{pt3dadd(195024.000000,173484.000000,81700.000000,200.612214)}

{create adhoc10}
{access adhoc10}
{connect adhoc10(1), adhoc9(0)}
{nseg = 1}
{strdef color color = "White"}
{pt3dclear()}
{pt3dadd(195024.000000,173484.000000,81700.000000,200.612214)}
{pt3dadd(195372.000000,173400.000000,81725.000000,192.587724)}
{pt3dadd(195528.000000,173544.000000,81775.000000,174.829830)}
{pt3dadd(195732.000000,173532.000000,81800.000000,157.071936)}
{pt3dadd(195972.000000,173592.000000,81800.000000,139.314042)}
{pt3dadd(196212.000000,173664.000000,81875.000000,96.745860)}

{create adhoc11}
{access adhoc11}
{connect adhoc11(1), adhoc9(0)}
{nseg = 1}
{strdef color color = "White"}
{pt3dclear()}
{pt3dadd(195024.000000,173484.000000,81700.000000,200.612214)}
{pt3dadd(194868.000000,173652.000000,81675.000000,160.489764)}
{pt3dadd(194688.000000,173880.000000,81750.000000,162.161532)}
{pt3dadd(194568.000000,174012.000000,81775.000000,163.833300)}
{pt3dadd(194400.000000,174264.000000,81800.000000,165.505068)}
{pt3dadd(194412.000000,174528.000000,81775.000000,167.176836)}
{pt3dadd(194364.000000,174732.000000,81700.000000,154.406385)}
{pt3dadd(194160.000000,174948.000000,81675.000000,141.635934)}
{pt3dadd(194040.000000,175116.000000,81675.000000,128.865483)}
{pt3dadd(193836.000000,175272.000000,81650.000000,116.095032)}
{pt3dadd(193680.000000,175392.000000,81500.000000,159.291671)}
{pt3dadd(193596.000000,175668.000000,81475.000000,202.488309)}
{pt3dadd(193668.000000,175884.000000,81525.000000,245.684947)}
{pt3dadd(193656.000000,176100.000000,81425.000000,288.881586)}
{pt3dadd(193788.000000,176148.000000,81425.000000,258.455399)}
{pt3dadd(194028.000000,176304.000000,81375.000000,228.029211)}
{pt3dadd(194268.000000,176364.000000,81325.000000,197.603024)}
{pt3dadd(194496.000000,176676.000000,81575.000000,167.176836)}
{pt3dadd(194640.000000,176820.000000,81775.000000,67.184640)}

{create adhoc12}
{access adhoc12}
{connect adhoc12(1), adhoc4(0)}
{nseg = 1}
{strdef color color = "White"}
{pt3dclear()}
{pt3dadd(197448.000000,173844.000000,73675.000000,1035.114948)}
{pt3dadd(197220.000000,173544.000000,73525.000000,1035.114948)}
{pt3dadd(197160.000000,173268.000000,73450.000000,1035.114948)}
{pt3dadd(197064.000000,173004.000000,73400.000000,1035.114948)}
{pt3dadd(196968.000000,172776.000000,73200.000000,1035.114948)}
{pt3dadd(196968.000000,172536.000000,73200.000000,1035.114948)}
{pt3dadd(196908.000000,172308.000000,73125.000000,1035.114948)}
{pt3dadd(196848.000000,172116.000000,72975.000000,1035.114948)}
{pt3dadd(196824.000000,171936.000000,72925.000000,1035.114948)}
{pt3dadd(196788.000000,171744.000000,72875.000000,1035.114948)}
{pt3dadd(196752.000000,171576.000000,72825.000000,1086.870681)}
{pt3dadd(196752.000000,171408.000000,72775.000000,1138.626414)}
{pt3dadd(196656.000000,171156.000000,72700.000000,1190.382147)}
{pt3dadd(196608.000000,170964.000000,72750.000000,1242.137880)}
{pt3dadd(196608.000000,170748.000000,72625.000000,1242.137880)}
{pt3dadd(196596.000000,170508.000000,72575.000000,1242.137880)}
{pt3dadd(196548.000000,170316.000000,72575.000000,1242.137880)}
{pt3dadd(196548.000000,170088.000000,72575.000000,1242.137880)}

{create adhoc13}
{access adhoc13}
{connect adhoc13(1), adhoc12(0)}
{nseg = 1}
{strdef color color = "White"}
{pt3dclear()}
{pt3dadd(196548.000000,170088.000000,72575.000000,1242.137880)}
{pt3dadd(196368.000000,170136.000000,72650.000000,1242.137880)}
{pt3dadd(196176.000000,170172.000000,72500.000000,1190.382147)}
{pt3dadd(195960.000000,170160.000000,72400.000000,1138.626414)}
{pt3dadd(195732.000000,170184.000000,72400.000000,1086.870681)}
{pt3dadd(195540.000000,170208.000000,72300.000000,1035.114948)}
{pt3dadd(195300.000000,170232.000000,72125.000000,848.556607)}
{pt3dadd(195120.000000,170256.000000,71950.000000,661.998267)}
{pt3dadd(194916.000000,170280.000000,71775.000000,475.439927)}
{pt3dadd(194724.000000,170184.000000,71125.000000,288.881586)}
{pt3dadd(194556.000000,170148.000000,70875.000000,266.814243)}
{pt3dadd(194340.000000,170112.000000,70700.000000,244.746900)}
{pt3dadd(194124.000000,170100.000000,70625.000000,222.679557)}
{pt3dadd(193860.000000,169956.000000,70475.000000,200.612214)}
{pt3dadd(193680.000000,170100.000000,70325.000000,210.642822)}
{pt3dadd(193500.000000,170040.000000,70300.000000,220.673430)}
{pt3dadd(193320.000000,170088.000000,70175.000000,230.704038)}
{pt3dadd(193104.000000,169944.000000,70025.000000,240.734646)}
{pt3dadd(192900.000000,170064.000000,69800.000000,230.704038)}
{pt3dadd(192744.000000,169968.000000,69725.000000,220.673430)}
{pt3dadd(192432.000000,169968.000000,69500.000000,210.642822)}
{pt3dadd(192108.000000,170304.000000,69325.000000,200.612214)}
{pt3dadd(191868.000000,170616.000000,69200.000000,210.642822)}
{pt3dadd(191580.000000,170868.000000,69375.000000,220.673430)}
{pt3dadd(191472.000000,171108.000000,69300.000000,230.704038)}
{pt3dadd(191172.000000,171360.000000,69300.000000,240.734646)}
{pt3dadd(191256.000000,171600.000000,69350.000000,222.345193)}
{pt3dadd(191100.000000,171912.000000,69175.000000,203.955741)}
{pt3dadd(190620.000000,172056.000000,68850.000000,185.566288)}
{pt3dadd(190392.000000,172044.000000,68450.000000,167.176836)}
{pt3dadd(190164.000000,171924.000000,68075.000000,165.505068)}
{pt3dadd(190020.000000,172008.000000,67600.000000,163.833300)}
{pt3dadd(189960.000000,172284.000000,67175.000000,162.161532)}
{pt3dadd(189924.000000,172452.000000,67125.000000,160.489764)}
{pt3dadd(189636.000000,172680.000000,67100.000000,200.612214)}
{pt3dadd(189444.000000,172884.000000,67125.000000,139.314042)}

{create adhoc14}
{access adhoc14}
{connect adhoc14(1), adhoc12(0)}
{nseg = 1}
{strdef color color = "White"}
{pt3dclear()}
{pt3dadd(196548.000000,170088.000000,72575.000000,1242.137880)}
{pt3dadd(196584.000000,169860.000000,72650.000000,1242.137880)}
{pt3dadd(196608.000000,169620.000000,72725.000000,1190.382147)}
{pt3dadd(196656.000000,169392.000000,72675.000000,1138.626414)}
{pt3dadd(196680.000000,169164.000000,72675.000000,1086.870681)}
{pt3dadd(196596.000000,168948.000000,72650.000000,1035.114948)}
{pt3dadd(196512.000000,168708.000000,72625.000000,1035.114948)}
{pt3dadd(196500.000000,168468.000000,72625.000000,1035.114948)}
{pt3dadd(196488.000000,168264.000000,72625.000000,1035.114948)}
{pt3dadd(196428.000000,168048.000000,72625.000000,1035.114948)}
{pt3dadd(196368.000000,167772.000000,72625.000000,1035.114948)}
{pt3dadd(196308.000000,167556.000000,72625.000000,1035.114948)}

{create adhoc15}
{access adhoc15}
{connect adhoc15(1), adhoc14(0)}
{nseg = 1}
{strdef color color = "White"}
{pt3dclear()}
{pt3dadd(196308.000000,167556.000000,72625.000000,1035.114948)}
{pt3dadd(196308.000000,167616.000000,73125.000000,499.187376)}
{pt3dadd(196308.000000,167604.000000,73400.000000,446.610929)}
{pt3dadd(196308.000000,167580.000000,73750.000000,394.034481)}
{pt3dadd(196344.000000,167508.000000,74075.000000,341.458034)}
{pt3dadd(196428.000000,167388.000000,74450.000000,288.881586)}
{pt3dadd(196428.000000,167124.000000,74900.000000,288.881586)}
{pt3dadd(196488.000000,166896.000000,75200.000000,288.881586)}
{pt3dadd(196404.000000,166260.000000,75425.000000,288.881586)}
{pt3dadd(196248.000000,166056.000000,75700.000000,288.881586)}
{pt3dadd(196452.000000,165888.000000,75950.000000,259.458462)}
{pt3dadd(196452.000000,165552.000000,76250.000000,230.035338)}
{pt3dadd(196572.000000,165276.000000,76525.000000,200.612214)}
{pt3dadd(196512.000000,165036.000000,76850.000000,200.612214)}

{create adhoc16}
{access adhoc16}
{connect adhoc16(1), adhoc15(0)}
{nseg = 1}
{strdef color color = "White"}
{pt3dclear()}
{pt3dadd(196512.000000,165036.000000,76850.000000,200.612214)}
{pt3dadd(196524.000000,164796.000000,77075.000000,240.734646)}
{pt3dadd(196404.000000,164616.000000,77025.000000,204.737450)}
{pt3dadd(196236.000000,164484.000000,76975.000000,168.740253)}
{pt3dadd(196140.000000,164268.000000,76925.000000,132.743057)}
{pt3dadd(196236.000000,164076.000000,76925.000000,96.745860)}
{pt3dadd(196284.000000,163920.000000,76900.000000,95.778405)}
{pt3dadd(196320.000000,163704.000000,76800.000000,94.810950)}
{pt3dadd(196344.000000,163536.000000,76800.000000,93.843495)}
{pt3dadd(196296.000000,163392.000000,76800.000000,92.876040)}
{pt3dadd(196356.000000,163176.000000,76725.000000,104.485541)}
{pt3dadd(196320.000000,162972.000000,76700.000000,116.095041)}
{pt3dadd(196356.000000,162852.000000,76725.000000,127.704541)}
{pt3dadd(196452.000000,162660.000000,76825.000000,139.314042)}
{pt3dadd(196524.000000,162504.000000,76900.000000,77.396688)}

{create adhoc17}
{access adhoc17}
{connect adhoc17(1), adhoc15(0)}
{nseg = 1}
{strdef color color = "White"}
{pt3dclear()}
{pt3dadd(196512.000000,165036.000000,76850.000000,200.612214)}
{pt3dadd(196620.000000,165084.000000,77175.000000,240.734646)}
{pt3dadd(196944.000000,165036.000000,77475.000000,252.771381)}
{pt3dadd(197160.000000,165072.000000,77775.000000,264.808116)}
{pt3dadd(197436.000000,164868.000000,78150.000000,276.844851)}
{pt3dadd(197556.000000,164952.000000,78425.000000,288.881586)}
{pt3dadd(197808.000000,165084.000000,78800.000000,288.881586)}
{pt3dadd(198000.000000,165084.000000,79200.000000,288.881586)}
{pt3dadd(198132.000000,165204.000000,79600.000000,288.881586)}
{pt3dadd(198180.000000,165216.000000,80025.000000,288.881586)}
{pt3dadd(198192.000000,165204.000000,80350.000000,346.657896)}
{pt3dadd(198132.000000,165216.000000,80675.000000,288.881586)}

{create adhoc18}
{access adhoc18}
{connect adhoc18(1), adhoc17(0)}
{nseg = 1}
{strdef color color = "White"}
{pt3dclear()}
{pt3dadd(198132.000000,165216.000000,80675.000000,288.881586)}
{pt3dadd(198120.000000,164916.000000,80575.000000,240.734646)}
{pt3dadd(198204.000000,164688.000000,80600.000000,208.413792)}
{pt3dadd(198360.000000,164556.000000,80700.000000,176.092938)}
{pt3dadd(198432.000000,164352.000000,80825.000000,143.772084)}
{pt3dadd(198480.000000,164220.000000,80875.000000,111.451230)}
{pt3dadd(198540.000000,164088.000000,80925.000000,96.036390)}
{pt3dadd(198480.000000,163872.000000,81000.000000,80.621550)}
{pt3dadd(198420.000000,163716.000000,80950.000000,67.184640)}

{create adhoc19}
{access adhoc19}
{connect adhoc19(1), adhoc17(0)}
{nseg = 1}
{strdef color color = "White"}
{pt3dclear()}
{pt3dadd(198132.000000,165216.000000,80675.000000,288.881586)}
{pt3dadd(197856.000000,165576.000000,81100.000000,415.989486)}
{pt3dadd(197460.000000,165852.000000,81450.000000,415.989486)}
{pt3dadd(197256.000000,166128.000000,81875.000000,415.989486)}
{pt3dadd(197112.000000,166260.000000,82250.000000,415.989486)}
{pt3dadd(196848.000000,166368.000000,82725.000000,415.989486)}
{pt3dadd(196608.000000,166068.000000,83100.000000,346.657896)}

{create adhoc20}
{access adhoc20}
{connect adhoc20(1), adhoc19(0)}
{nseg = 1}
{strdef color color = "White"}
{pt3dclear()}
{pt3dadd(196608.000000,166068.000000,83100.000000,346.657896)}
{pt3dadd(196728.000000,166248.000000,83475.000000,240.734646)}
{pt3dadd(197148.000000,166296.000000,83900.000000,222.345193)}
{pt3dadd(197400.000000,166548.000000,84300.000000,203.955741)}
{pt3dadd(197592.000000,166812.000000,84625.000000,185.566288)}
{pt3dadd(197532.000000,167388.000000,85000.000000,167.176836)}
{pt3dadd(197436.000000,167652.000000,85100.000000,139.314033)}
{pt3dadd(197316.000000,167856.000000,85200.000000,111.451230)}
{pt3dadd(197172.000000,168120.000000,85400.000000,80.621550)}

{create adhoc21}
{access adhoc21}
{connect adhoc21(1), adhoc19(0)}
{nseg = 1}
{strdef color color = "White"}
{pt3dclear()}
{pt3dadd(196608.000000,166068.000000,83100.000000,346.657896)}
{pt3dadd(196260.000000,165576.000000,83375.000000,346.657896)}
{pt3dadd(196248.000000,165312.000000,83700.000000,327.399126)}
{pt3dadd(196260.000000,164868.000000,84075.000000,308.140356)}
{pt3dadd(196368.000000,164772.000000,84425.000000,288.881586)}
{pt3dadd(196476.000000,164352.000000,84725.000000,240.734646)}

{create adhoc22}
{access adhoc22}
{connect adhoc22(1), adhoc21(0)}
{nseg = 1}
{strdef color color = "White"}
{pt3dclear()}
{pt3dadd(196476.000000,164352.000000,84725.000000,240.734646)}
{pt3dadd(196464.000000,164136.000000,84850.000000,240.734646)}
{pt3dadd(196380.000000,163956.000000,84875.000000,238.327304)}
{pt3dadd(196380.000000,163800.000000,84925.000000,235.919961)}
{pt3dadd(196368.000000,163632.000000,85025.000000,233.512618)}
{pt3dadd(196380.000000,163428.000000,85000.000000,231.105276)}
{pt3dadd(196440.000000,163212.000000,84900.000000,245.549354)}
{pt3dadd(196536.000000,163032.000000,84700.000000,259.993431)}
{pt3dadd(196548.000000,162876.000000,84650.000000,274.437509)}
{pt3dadd(196584.000000,162696.000000,84475.000000,288.881586)}
{pt3dadd(196656.000000,162528.000000,84425.000000,259.993431)}
{pt3dadd(196668.000000,162324.000000,84550.000000,231.105276)}
{pt3dadd(196680.000000,162144.000000,84775.000000,133.741476)}

{create adhoc23}
{access adhoc23}
{connect adhoc23(1), adhoc21(0)}
{nseg = 1}
{strdef color color = "White"}
{pt3dclear()}
{pt3dadd(196476.000000,164352.000000,84725.000000,240.734646)}
{pt3dadd(196908.000000,164760.000000,85125.000000,240.734646)}
{pt3dadd(197184.000000,164904.000000,85475.000000,215.379495)}
{pt3dadd(197412.000000,165156.000000,85825.000000,190.024344)}
{pt3dadd(197592.000000,165276.000000,86075.000000,164.669193)}
{pt3dadd(197700.000000,165252.000000,86425.000000,139.314042)}
{pt3dadd(197724.000000,165024.000000,86675.000000,139.314042)}
{pt3dadd(197580.000000,165120.000000,87050.000000,116.095032)}

{create adhoc24}
{access adhoc24}
{connect adhoc24(1), adhoc14(0)}
{nseg = 1}
{strdef color color = "White"}
{pt3dclear()}
{pt3dadd(196308.000000,167556.000000,72625.000000,1035.114948)}
{pt3dadd(196152.000000,167292.000000,72475.000000,993.710358)}
{pt3dadd(196020.000000,167064.000000,72200.000000,960.931719)}
{pt3dadd(196092.000000,166788.000000,72150.000000,928.153080)}
{pt3dadd(196164.000000,166560.000000,71925.000000,895.374441)}
{pt3dadd(196164.000000,166368.000000,71725.000000,862.595802)}
{pt3dadd(196212.000000,166092.000000,71525.000000,905.725589)}
{pt3dadd(196344.000000,165840.000000,71400.000000,948.855375)}
{pt3dadd(196368.000000,165564.000000,71350.000000,991.985162)}
{pt3dadd(196392.000000,165372.000000,71300.000000,1035.114948)}
{pt3dadd(196332.000000,165156.000000,71200.000000,1074.449331)}
{pt3dadd(196416.000000,164868.000000,71150.000000,1113.783714)}
{pt3dadd(196416.000000,164568.000000,71100.000000,1153.118097)}
{pt3dadd(196548.000000,164292.000000,70975.000000,1192.452480)}
{pt3dadd(196488.000000,164088.000000,70825.000000,1204.873830)}
{pt3dadd(196548.000000,163884.000000,70800.000000,1217.295180)}
{pt3dadd(196488.000000,163716.000000,70750.000000,1229.716530)}
{pt3dadd(196392.000000,163452.000000,70650.000000,1242.137880)}
{pt3dadd(196332.000000,163164.000000,70575.000000,1267.677522)}
{pt3dadd(196368.000000,162960.000000,70500.000000,1293.217164)}
{pt3dadd(196392.000000,162744.000000,70425.000000,1318.756806)}
{pt3dadd(196308.000000,162552.000000,70300.000000,1242.137880)}

{create adhoc25}
{access adhoc25}
{connect adhoc25(1), adhoc24(0)}
{nseg = 1}
{strdef color color = "White"}
{pt3dclear()}
{pt3dadd(196308.000000,162552.000000,70300.000000,1242.137880)}
{pt3dadd(196296.000000,162600.000000,69875.000000,1192.452354)}
{pt3dadd(196284.000000,162648.000000,69450.000000,1044.095486)}
{pt3dadd(196104.000000,162540.000000,69100.000000,895.738617)}
{pt3dadd(195732.000000,162144.000000,68675.000000,747.381748)}
{pt3dadd(195324.000000,161748.000000,68250.000000,599.024880)}
{pt3dadd(194784.000000,161592.000000,67900.000000,599.024880)}

{create adhoc26}
{access adhoc26}
{connect adhoc26(1), adhoc25(0)}
{nseg = 1}
{strdef color color = "White"}
{pt3dclear()}
{pt3dadd(194784.000000,161592.000000,67900.000000,599.024880)}
{pt3dadd(194700.000000,161328.000000,67800.000000,399.349908)}
{pt3dadd(194580.000000,161124.000000,67800.000000,499.187376)}
{pt3dadd(194316.000000,161052.000000,67800.000000,200.612214)}

{create adhoc27}
{access adhoc27}
{connect adhoc27(1), adhoc26(0)}
{nseg = 1}
{strdef color color = "White"}
{pt3dclear()}
{pt3dadd(194316.000000,161052.000000,67800.000000,200.612214)}
{pt3dadd(194316.000000,160836.000000,67725.000000,200.612214)}
{pt3dadd(194388.000000,160716.000000,68025.000000,189.467088)}
{pt3dadd(194112.000000,160500.000000,68025.000000,178.321962)}
{pt3dadd(193992.000000,160296.000000,68125.000000,167.176836)}
{pt3dadd(193692.000000,160104.000000,68225.000000,133.741476)}

{create adhoc28}
{access adhoc28}
{connect adhoc28(1), adhoc26(0)}
{nseg = 1}
{strdef color color = "White"}
{pt3dclear()}
{pt3dadd(194316.000000,161052.000000,67800.000000,200.612214)}
{pt3dadd(194124.000000,161124.000000,67800.000000,346.657896)}
{pt3dadd(193968.000000,161196.000000,67800.000000,301.787631)}
{pt3dadd(193836.000000,161220.000000,67750.000000,256.917366)}
{pt3dadd(193716.000000,161160.000000,67850.000000,212.047101)}
{pt3dadd(193596.000000,161136.000000,67775.000000,167.176836)}
{pt3dadd(193440.000000,161100.000000,67925.000000,167.176836)}
{pt3dadd(193248.000000,161064.000000,67900.000000,167.176836)}
{pt3dadd(193068.000000,161088.000000,67900.000000,167.176836)}
{pt3dadd(192900.000000,161076.000000,67925.000000,167.176836)}
{pt3dadd(192696.000000,161100.000000,67875.000000,175.535680)}
{pt3dadd(192504.000000,161184.000000,67875.000000,183.894525)}
{pt3dadd(192132.000000,161520.000000,67625.000000,192.253370)}
{pt3dadd(191940.000000,161556.000000,67450.000000,200.612214)}
{pt3dadd(191580.000000,161544.000000,67250.000000,133.741476)}

{create adhoc29}
{access adhoc29}
{connect adhoc29(1), adhoc25(0)}
{nseg = 1}
{strdef color color = "White"}
{pt3dclear()}
{pt3dadd(194784.000000,161592.000000,67900.000000,599.024880)}
{pt3dadd(194772.000000,161640.000000,67475.000000,399.349908)}
{pt3dadd(194592.000000,161688.000000,67100.000000,399.349944)}

{create adhoc30}
{access adhoc30}
{connect adhoc30(1), adhoc29(0)}
{nseg = 1}
{strdef color color = "White"}
{pt3dclear()}
{pt3dadd(194592.000000,161688.000000,67100.000000,399.349944)}
{pt3dadd(194520.000000,161268.000000,66625.000000,332.791596)}
{pt3dadd(194640.000000,160836.000000,66275.000000,309.777359)}
{pt3dadd(194364.000000,161112.000000,66000.000000,286.763121)}
{pt3dadd(194328.000000,161052.000000,65625.000000,263.748884)}
{pt3dadd(194292.000000,160860.000000,65275.000000,240.734646)}
{pt3dadd(194352.000000,160548.000000,64750.000000,267.215459)}
{pt3dadd(194304.000000,160368.000000,64450.000000,293.696271)}
{pt3dadd(194136.000000,160092.000000,64075.000000,320.177083)}
{pt3dadd(193920.000000,159660.000000,63700.000000,346.657896)}
{pt3dadd(193692.000000,159276.000000,63375.000000,332.213819)}
{pt3dadd(193608.000000,159060.000000,63225.000000,317.769741)}
{pt3dadd(193464.000000,158868.000000,63150.000000,303.325664)}
{pt3dadd(193344.000000,158676.000000,63075.000000,288.881586)}
{pt3dadd(193224.000000,158496.000000,63000.000000,288.881586)}
{pt3dadd(193044.000000,158304.000000,62975.000000,288.881586)}
{pt3dadd(192972.000000,158112.000000,62950.000000,288.881586)}
{pt3dadd(192816.000000,157896.000000,62875.000000,288.881586)}
{pt3dadd(192732.000000,157716.000000,62825.000000,288.881586)}
{pt3dadd(192564.000000,157500.000000,62750.000000,288.881586)}
{pt3dadd(192336.000000,157284.000000,62700.000000,288.881586)}
{pt3dadd(192060.000000,157056.000000,62600.000000,288.881586)}
{pt3dadd(191868.000000,156816.000000,62550.000000,276.844851)}
{pt3dadd(191616.000000,156624.000000,62475.000000,264.808116)}
{pt3dadd(191400.000000,156552.000000,62450.000000,252.771381)}
{pt3dadd(191220.000000,156564.000000,62425.000000,240.734646)}
{pt3dadd(191064.000000,156516.000000,62375.000000,230.704038)}
{pt3dadd(190872.000000,156456.000000,62375.000000,220.673430)}
{pt3dadd(190632.000000,156420.000000,62300.000000,210.642822)}
{pt3dadd(190428.000000,156216.000000,62150.000000,200.612214)}
{pt3dadd(190236.000000,156012.000000,61925.000000,192.253370)}
{pt3dadd(190044.000000,155928.000000,61650.000000,183.894525)}
{pt3dadd(189792.000000,155700.000000,61500.000000,175.535680)}
{pt3dadd(189612.000000,155736.000000,61475.000000,167.176836)}
{pt3dadd(189420.000000,155604.000000,61325.000000,167.176836)}
{pt3dadd(189204.000000,155460.000000,61300.000000,167.176836)}
{pt3dadd(189012.000000,155400.000000,61175.000000,167.176836)}
{pt3dadd(188724.000000,155292.000000,60800.000000,167.176836)}
{pt3dadd(188544.000000,155088.000000,60375.000000,167.176836)}
{pt3dadd(188256.000000,154884.000000,60050.000000,167.176836)}
{pt3dadd(188136.000000,154476.000000,59725.000000,167.176836)}
{pt3dadd(188136.000000,154332.000000,59375.000000,167.176836)}
{pt3dadd(188328.000000,154008.000000,58975.000000,240.734646)}
{pt3dadd(188244.000000,153516.000000,58675.000000,167.176836)}

{create adhoc31}
{access adhoc31}
{connect adhoc31(1), adhoc29(0)}
{nseg = 1}
{strdef color color = "White"}
{pt3dclear()}
{pt3dadd(194592.000000,161688.000000,67100.000000,399.349944)}
{pt3dadd(194484.000000,161760.000000,66675.000000,346.657896)}
{pt3dadd(194472.000000,161832.000000,66350.000000,379.798393)}
{pt3dadd(194052.000000,162624.000000,65950.000000,412.938891)}
{pt3dadd(193728.000000,163128.000000,65475.000000,446.079388)}
{pt3dadd(193596.000000,163512.000000,65000.000000,479.219886)}
{pt3dadd(193344.000000,163920.000000,64575.000000,499.187376)}
{pt3dadd(193068.000000,164160.000000,64300.000000,499.187376)}

{create adhoc32}
{access adhoc32}
{connect adhoc32(1), adhoc31(0)}
{nseg = 1}
{strdef color color = "White"}
{pt3dclear()}
{pt3dadd(193068.000000,164160.000000,64300.000000,499.187376)}
{pt3dadd(193176.000000,164376.000000,64175.000000,415.989486)}
{pt3dadd(193008.000000,164604.000000,64125.000000,398.656589)}
{pt3dadd(192828.000000,164760.000000,64075.000000,381.323691)}
{pt3dadd(192648.000000,164928.000000,64025.000000,363.990794)}
{pt3dadd(192420.000000,165084.000000,64000.000000,346.657896)}
{pt3dadd(192264.000000,165288.000000,63975.000000,332.213819)}
{pt3dadd(192060.000000,165492.000000,63850.000000,317.769741)}
{pt3dadd(191988.000000,165684.000000,63725.000000,303.325664)}
{pt3dadd(191892.000000,165852.000000,63625.000000,288.881586)}
{pt3dadd(191772.000000,166068.000000,63525.000000,360.427153)}
{pt3dadd(191676.000000,166236.000000,63350.000000,431.972721)}
{pt3dadd(191448.000000,166932.000000,63025.000000,503.518289)}
{pt3dadd(190992.000000,167244.000000,62650.000000,575.063856)}
{pt3dadd(190656.000000,167496.000000,62200.000000,487.206882)}
{pt3dadd(190428.000000,167688.000000,61825.000000,399.349908)}
{pt3dadd(189828.000000,168468.000000,61400.000000,499.187376)}

{create adhoc33}
{access adhoc33}
{connect adhoc33(1), adhoc32(0)}
{nseg = 1}
{strdef color color = "White"}
{pt3dclear()}
{pt3dadd(189828.000000,168468.000000,61400.000000,499.187376)}
{pt3dadd(189600.000000,168384.000000,61650.000000,240.734646)}
{pt3dadd(189324.000000,168564.000000,61575.000000,206.927778)}
{pt3dadd(189132.000000,168552.000000,61575.000000,173.120910)}
{pt3dadd(188928.000000,168564.000000,61850.000000,139.314042)}
{pt3dadd(188604.000000,168516.000000,62125.000000,111.451230)}

{create adhoc34}
{access adhoc34}
{connect adhoc34(1), adhoc32(0)}
{nseg = 1}
{strdef color color = "White"}
{pt3dclear()}
{pt3dadd(189828.000000,168468.000000,61400.000000,499.187376)}
{pt3dadd(189456.000000,168768.000000,61050.000000,346.657896)}
{pt3dadd(189192.000000,169128.000000,60800.000000,332.213819)}
{pt3dadd(188976.000000,169368.000000,60675.000000,317.769741)}
{pt3dadd(188796.000000,169440.000000,60675.000000,303.325664)}
{pt3dadd(188640.000000,169560.000000,60550.000000,288.881586)}
{pt3dadd(188424.000000,169728.000000,60600.000000,288.881586)}
{pt3dadd(188220.000000,169872.000000,60575.000000,288.881586)}
{pt3dadd(188028.000000,169992.000000,60650.000000,288.881586)}
{pt3dadd(187872.000000,170292.000000,60425.000000,288.881586)}
{pt3dadd(187644.000000,170544.000000,60375.000000,288.881586)}
{pt3dadd(187452.000000,170832.000000,60200.000000,288.881586)}
{pt3dadd(187260.000000,171024.000000,60150.000000,288.881586)}
{pt3dadd(187056.000000,171168.000000,60075.000000,288.881586)}
{pt3dadd(186816.000000,171456.000000,59750.000000,299.859089)}
{pt3dadd(186564.000000,171624.000000,59500.000000,310.836591)}
{pt3dadd(186276.000000,171792.000000,59250.000000,321.814093)}
{pt3dadd(185988.000000,172092.000000,58975.000000,332.791596)}
{pt3dadd(185856.000000,172344.000000,58625.000000,339.724746)}
{pt3dadd(185592.000000,172596.000000,58300.000000,346.657896)}
{pt3dadd(185268.000000,172800.000000,58000.000000,288.881586)}

{create adhoc35}
{access adhoc35}
{connect adhoc35(1), adhoc34(0)}
{nseg = 1}
{strdef color color = "White"}
{pt3dclear()}
{pt3dadd(185268.000000,172800.000000,58000.000000,288.881586)}
{pt3dadd(184968.000000,172860.000000,57675.000000,346.657896)}
{pt3dadd(184752.000000,172884.000000,57550.000000,308.140353)}
{pt3dadd(184548.000000,172848.000000,57650.000000,269.622810)}
{pt3dadd(184332.000000,172800.000000,57700.000000,231.105267)}
{pt3dadd(184128.000000,172848.000000,57825.000000,192.587724)}
{pt3dadd(183936.000000,172992.000000,57825.000000,204.624455)}
{pt3dadd(183744.000000,173064.000000,57850.000000,216.661185)}
{pt3dadd(183564.000000,173136.000000,57875.000000,228.697915)}
{pt3dadd(183384.000000,173208.000000,57900.000000,240.734646)}
{pt3dadd(183228.000000,173256.000000,57875.000000,222.345193)}
{pt3dadd(183048.000000,173340.000000,57875.000000,203.955741)}
{pt3dadd(182796.000000,173592.000000,57825.000000,185.566288)}
{pt3dadd(182628.000000,173808.000000,57900.000000,167.176836)}
{pt3dadd(182508.000000,173916.000000,57850.000000,148.601634)}
{pt3dadd(182292.000000,174060.000000,57775.000000,130.026432)}
{pt3dadd(182160.000000,174240.000000,57650.000000,111.451230)}
{pt3dadd(182232.000000,174336.000000,57550.000000,96.745860)}

{create adhoc36}
{access adhoc36}
{connect adhoc36(1), adhoc34(0)}
{nseg = 1}
{strdef color color = "White"}
{pt3dclear()}
{pt3dadd(185268.000000,172800.000000,58000.000000,288.881586)}
{pt3dadd(185052.000000,172932.000000,57650.000000,346.657896)}
{pt3dadd(185076.000000,172956.000000,57275.000000,343.191312)}
{pt3dadd(185160.000000,173028.000000,57050.000000,339.724728)}
{pt3dadd(184968.000000,173016.000000,56825.000000,336.258144)}
{pt3dadd(184944.000000,173088.000000,56475.000000,332.791560)}
{pt3dadd(184944.000000,173520.000000,56150.000000,309.777332)}
{pt3dadd(184620.000000,173832.000000,55825.000000,286.763103)}
{pt3dadd(184128.000000,173892.000000,55525.000000,263.748875)}
{pt3dadd(183528.000000,174000.000000,55175.000000,240.734646)}
{pt3dadd(183300.000000,173952.000000,54950.000000,230.704038)}
{pt3dadd(183132.000000,174024.000000,54925.000000,220.673430)}
{pt3dadd(182952.000000,174048.000000,54900.000000,210.642822)}
{pt3dadd(182772.000000,174132.000000,54875.000000,200.612214)}
{pt3dadd(182628.000000,174204.000000,54950.000000,200.612214)}
{pt3dadd(182376.000000,174300.000000,54900.000000,200.612214)}
{pt3dadd(182172.000000,174312.000000,54875.000000,200.612214)}
{pt3dadd(181992.000000,174408.000000,54825.000000,200.612214)}

{create adhoc37}
{access adhoc37}
{connect adhoc37(1), adhoc36(0)}
{nseg = 1}
{strdef color color = "White"}
{pt3dclear()}
{pt3dadd(181992.000000,174408.000000,54825.000000,200.612214)}
{pt3dadd(181416.000000,174480.000000,54975.000000,139.314042)}
{pt3dadd(181200.000000,174612.000000,55050.000000,96.745860)}

{create adhoc38}
{access adhoc38}
{connect adhoc38(1), adhoc36(0)}
{nseg = 1}
{strdef color color = "White"}
{pt3dclear()}
{pt3dadd(181992.000000,174408.000000,54825.000000,200.612214)}
{pt3dadd(181860.000000,174768.000000,54500.000000,167.176836)}
{pt3dadd(181644.000000,175032.000000,54175.000000,167.176836)}
{pt3dadd(181428.000000,175092.000000,53900.000000,167.176836)}
{pt3dadd(181152.000000,175356.000000,53600.000000,116.095032)}

{create adhoc39}
{access adhoc39}
{connect adhoc39(1), adhoc31(0)}
{nseg = 1}
{strdef color color = "White"}
{pt3dclear()}
{pt3dadd(193068.000000,164160.000000,64300.000000,499.187376)}
{pt3dadd(193164.000000,164148.000000,64000.000000,399.349908)}
{pt3dadd(193236.000000,164136.000000,63575.000000,386.176905)}
{pt3dadd(193404.000000,163932.000000,63275.000000,373.003902)}
{pt3dadd(193440.000000,163824.000000,62925.000000,359.830899)}
{pt3dadd(193488.000000,163776.000000,62675.000000,346.657896)}
{pt3dadd(193560.000000,163728.000000,62375.000000,310.146476)}
{pt3dadd(193548.000000,163620.000000,62150.000000,273.635055)}
{pt3dadd(193488.000000,163620.000000,61850.000000,237.123635)}
{pt3dadd(193392.000000,163656.000000,61500.000000,200.612214)}
{pt3dadd(193152.000000,163608.000000,61200.000000,192.253370)}
{pt3dadd(193008.000000,163548.000000,60800.000000,183.894525)}
{pt3dadd(192804.000000,163464.000000,60550.000000,175.535680)}
{pt3dadd(192372.000000,163308.000000,60225.000000,167.176836)}
{pt3dadd(192168.000000,163224.000000,59975.000000,185.566288)}
{pt3dadd(192036.000000,163092.000000,59750.000000,203.955741)}
{pt3dadd(191640.000000,162936.000000,59425.000000,222.345193)}
{pt3dadd(191100.000000,162792.000000,59050.000000,240.734646)}
{pt3dadd(190704.000000,162744.000000,58700.000000,288.881586)}

{create adhoc40}
{access adhoc40}
{connect adhoc40(1), adhoc39(0)}
{nseg = 1}
{strdef color color = "White"}
{pt3dclear()}
{pt3dadd(190704.000000,162744.000000,58700.000000,288.881586)}
{pt3dadd(190608.000000,162600.000000,58350.000000,167.176836)}
{pt3dadd(190476.000000,162864.000000,58050.000000,160.211138)}
{pt3dadd(190224.000000,162804.000000,57800.000000,153.245439)}
{pt3dadd(189564.000000,162996.000000,57425.000000,146.279741)}
{pt3dadd(188916.000000,162924.000000,57150.000000,139.314042)}
{pt3dadd(188640.000000,162960.000000,56875.000000,139.314042)}

{create adhoc41}
{access adhoc41}
{connect adhoc41(1), adhoc39(0)}
{nseg = 1}
{strdef color color = "White"}
{pt3dclear()}
{pt3dadd(190704.000000,162744.000000,58700.000000,288.881586)}
{pt3dadd(190212.000000,162120.000000,58475.000000,200.612214)}
{pt3dadd(189840.000000,161676.000000,58075.000000,192.253370)}
{pt3dadd(189528.000000,160620.000000,57725.000000,183.894525)}
{pt3dadd(189444.000000,160476.000000,57750.000000,175.535680)}
{pt3dadd(189468.000000,160296.000000,57750.000000,167.176836)}
{pt3dadd(189372.000000,160140.000000,57800.000000,183.894525)}
{pt3dadd(189336.000000,159924.000000,57875.000000,200.612214)}
{pt3dadd(189240.000000,159708.000000,58025.000000,116.095032)}

{create adhoc42}
{access adhoc42}
{connect adhoc42(1), adhoc24(0)}
{nseg = 1}
{strdef color color = "White"}
{pt3dclear()}
{pt3dadd(196308.000000,162552.000000,70300.000000,1242.137880)}
{pt3dadd(196332.000000,162300.000000,70250.000000,1242.137880)}
{pt3dadd(196428.000000,162000.000000,70375.000000,1170.093884)}
{pt3dadd(196524.000000,161712.000000,70500.000000,1098.049887)}
{pt3dadd(196740.000000,161448.000000,70675.000000,1026.005891)}
{pt3dadd(196908.000000,161172.000000,70925.000000,953.961894)}
{pt3dadd(196980.000000,161004.000000,71050.000000,974.250158)}
{pt3dadd(197064.000000,160800.000000,71075.000000,994.538421)}
{pt3dadd(197088.000000,160620.000000,71150.000000,1014.826685)}
{pt3dadd(197040.000000,160416.000000,71225.000000,1035.114948)}
{pt3dadd(197088.000000,160164.000000,71225.000000,1035.114948)}
{pt3dadd(197040.000000,159864.000000,71225.000000,1035.114948)}
{pt3dadd(197040.000000,159600.000000,71300.000000,1035.114948)}
{pt3dadd(196932.000000,159360.000000,71475.000000,1035.114948)}
{pt3dadd(196872.000000,159120.000000,71525.000000,828.091944)}
{pt3dadd(196908.000000,158964.000000,71550.000000,862.595802)}

{create adhoc43}
{access adhoc43}
{connect adhoc43(1), adhoc42(0)}
{nseg = 1}
{strdef color color = "White"}
{pt3dclear()}
{pt3dadd(196908.000000,158964.000000,71550.000000,862.595802)}
{pt3dadd(196704.000000,158964.000000,71350.000000,828.091944)}
{pt3dadd(196440.000000,158964.000000,71200.000000,707.733432)}
{pt3dadd(196188.000000,158964.000000,71175.000000,587.374920)}
{pt3dadd(195996.000000,158988.000000,71300.000000,467.016408)}
{pt3dadd(195780.000000,159012.000000,71325.000000,346.657896)}
{pt3dadd(195588.000000,159096.000000,71325.000000,310.146476)}
{pt3dadd(195384.000000,159036.000000,71275.000000,273.635055)}
{pt3dadd(195204.000000,158916.000000,71350.000000,237.123635)}
{pt3dadd(195048.000000,158820.000000,71400.000000,200.612214)}
{pt3dadd(194892.000000,158640.000000,71475.000000,208.235480)}
{pt3dadd(194772.000000,158544.000000,71450.000000,215.858745)}
{pt3dadd(194580.000000,158604.000000,71475.000000,223.482010)}
{pt3dadd(194436.000000,158556.000000,71525.000000,231.105276)}
{pt3dadd(194256.000000,158568.000000,71525.000000,197.515422)}
{pt3dadd(194052.000000,158496.000000,71475.000000,163.925568)}
{pt3dadd(193932.000000,158448.000000,71425.000000,130.335714)}
{pt3dadd(193728.000000,158412.000000,71375.000000,96.745860)}
{pt3dadd(193560.000000,158484.000000,71450.000000,112.681836)}
{pt3dadd(193404.000000,158448.000000,71450.000000,128.617812)}
{pt3dadd(193248.000000,158568.000000,71600.000000,144.553788)}
{pt3dadd(193056.000000,158556.000000,71625.000000,160.489764)}
{pt3dadd(192888.000000,158544.000000,71750.000000,162.161532)}
{pt3dadd(192720.000000,158544.000000,71725.000000,163.833300)}
{pt3dadd(192576.000000,158760.000000,71650.000000,165.505068)}
{pt3dadd(192408.000000,158904.000000,71625.000000,167.176836)}
{pt3dadd(192252.000000,159072.000000,71575.000000,167.176836)}
{pt3dadd(192012.000000,159300.000000,71525.000000,167.176836)}
{pt3dadd(191964.000000,159504.000000,71500.000000,167.176836)}
{pt3dadd(192204.000000,159744.000000,71500.000000,128.391822)}

{create adhoc44}
{access adhoc44}
{connect adhoc44(1), adhoc42(0)}
{nseg = 1}
{strdef color color = "White"}
{pt3dclear()}
{pt3dadd(196908.000000,158964.000000,71550.000000,862.595802)}
{pt3dadd(196872.000000,158772.000000,71525.000000,828.091944)}
{pt3dadd(196920.000000,158568.000000,71475.000000,836.717909)}
{pt3dadd(196968.000000,158328.000000,71550.000000,845.343873)}
{pt3dadd(196884.000000,158100.000000,71500.000000,853.969838)}
{pt3dadd(196932.000000,157860.000000,71550.000000,862.595802)}
{pt3dadd(196932.000000,157596.000000,71575.000000,862.595802)}
{pt3dadd(197004.000000,157404.000000,71700.000000,862.595802)}
{pt3dadd(196956.000000,157128.000000,71750.000000,862.595802)}
{pt3dadd(196980.000000,156924.000000,71750.000000,862.595802)}
{pt3dadd(196944.000000,156684.000000,71725.000000,862.595802)}
{pt3dadd(196992.000000,156444.000000,71675.000000,862.595802)}
{pt3dadd(197040.000000,156216.000000,71725.000000,862.595802)}
{pt3dadd(197088.000000,155928.000000,71800.000000,862.595802)}
{pt3dadd(197112.000000,155712.000000,71825.000000,826.654307)}
{pt3dadd(197064.000000,155556.000000,71725.000000,790.712811)}
{pt3dadd(197052.000000,155340.000000,71775.000000,754.771316)}
{pt3dadd(197040.000000,155172.000000,71875.000000,718.829820)}
{pt3dadd(197040.000000,154980.000000,71900.000000,754.771316)}
{pt3dadd(197028.000000,154788.000000,71900.000000,790.712811)}
{pt3dadd(196968.000000,154548.000000,71850.000000,826.654307)}
{pt3dadd(196776.000000,154356.000000,71800.000000,862.595802)}
{pt3dadd(196800.000000,154200.000000,71825.000000,862.595802)}
{pt3dadd(196824.000000,153996.000000,71900.000000,862.595802)}
{pt3dadd(196872.000000,153804.000000,72025.000000,862.595802)}
{pt3dadd(196920.000000,153552.000000,72250.000000,862.595802)}

{create adhoc45}
{access adhoc45}
{connect adhoc45(1), adhoc44(0)}
{nseg = 1}
{strdef color color = "White"}
{pt3dclear()}
{pt3dadd(196920.000000,153552.000000,72250.000000,862.595802)}
{pt3dadd(196872.000000,153348.000000,72200.000000,862.595802)}
{pt3dadd(196836.000000,153144.000000,72150.000000,905.725589)}
{pt3dadd(196824.000000,152952.000000,72250.000000,948.855375)}
{pt3dadd(197040.000000,152760.000000,72550.000000,991.985162)}
{pt3dadd(197124.000000,152508.000000,72600.000000,1035.114948)}
{pt3dadd(197160.000000,152316.000000,72625.000000,991.985162)}
{pt3dadd(197304.000000,152160.000000,72700.000000,948.855375)}
{pt3dadd(197304.000000,151980.000000,72725.000000,905.725589)}
{pt3dadd(197292.000000,151824.000000,72775.000000,862.595802)}
{pt3dadd(197340.000000,151608.000000,72800.000000,862.595802)}
{pt3dadd(197340.000000,151392.000000,72825.000000,862.595802)}
{pt3dadd(197292.000000,151176.000000,72775.000000,862.595802)}
{pt3dadd(197244.000000,151020.000000,72725.000000,862.595802)}
{pt3dadd(197184.000000,150780.000000,72725.000000,862.595802)}
{pt3dadd(197184.000000,150540.000000,72850.000000,862.595802)}
{pt3dadd(197184.000000,150360.000000,72925.000000,862.595802)}
{pt3dadd(197148.000000,150180.000000,72925.000000,862.595802)}
{pt3dadd(197040.000000,149928.000000,72925.000000,826.654307)}
{pt3dadd(196860.000000,149772.000000,72825.000000,790.712811)}
{pt3dadd(196824.000000,149616.000000,72850.000000,754.771316)}
{pt3dadd(196860.000000,149460.000000,72850.000000,718.829820)}
{pt3dadd(196800.000000,149244.000000,72725.000000,688.878585)}
{pt3dadd(196824.000000,149028.000000,72675.000000,658.927350)}
{pt3dadd(196920.000000,148812.000000,72600.000000,628.976115)}
{pt3dadd(196968.000000,148620.000000,72550.000000,599.024880)}
{pt3dadd(197100.000000,148428.000000,72500.000000,628.976115)}
{pt3dadd(197196.000000,148248.000000,72450.000000,658.927350)}
{pt3dadd(197112.000000,148044.000000,72500.000000,688.878585)}
{pt3dadd(197148.000000,147684.000000,72450.000000,718.829820)}
{pt3dadd(197088.000000,147540.000000,72525.000000,718.829820)}
{pt3dadd(197004.000000,147372.000000,72500.000000,718.829820)}
{pt3dadd(197004.000000,147156.000000,72525.000000,718.829820)}
{pt3dadd(197004.000000,146988.000000,72550.000000,718.829820)}
{pt3dadd(197004.000000,146820.000000,72575.000000,754.771316)}
{pt3dadd(197004.000000,146604.000000,72600.000000,790.712811)}
{pt3dadd(197004.000000,146448.000000,72625.000000,826.654307)}
{pt3dadd(196968.000000,146292.000000,72600.000000,862.595802)}
{pt3dadd(196956.000000,146160.000000,72575.000000,826.654307)}
{pt3dadd(196956.000000,145980.000000,72650.000000,790.712811)}
{pt3dadd(196980.000000,145812.000000,72675.000000,754.771316)}
{pt3dadd(197052.000000,145632.000000,72700.000000,718.829820)}
{pt3dadd(197052.000000,145428.000000,72725.000000,718.829820)}
{pt3dadd(197040.000000,145260.000000,72750.000000,718.829820)}
{pt3dadd(196956.000000,145068.000000,72775.000000,718.829820)}
{pt3dadd(196992.000000,144888.000000,72900.000000,718.829820)}
{pt3dadd(196956.000000,144732.000000,72950.000000,718.829820)}
{pt3dadd(196944.000000,144516.000000,72975.000000,718.829820)}
{pt3dadd(196908.000000,144336.000000,73000.000000,718.829820)}

{create adhoc46}
{access adhoc46}
{connect adhoc46(1), adhoc45(0)}
{nseg = 1}
{strdef color color = "White"}
{pt3dclear()}
{pt3dadd(196908.000000,144336.000000,73000.000000,718.829820)}
{pt3dadd(196980.000000,144228.000000,72900.000000,718.829820)}
{pt3dadd(196932.000000,144000.000000,72950.000000,718.829820)}
{pt3dadd(196980.000000,143796.000000,72925.000000,718.829820)}
{pt3dadd(196980.000000,143580.000000,73000.000000,718.829820)}
{pt3dadd(196980.000000,143400.000000,73100.000000,718.829820)}
{pt3dadd(197100.000000,143220.000000,73050.000000,704.453247)}
{pt3dadd(197052.000000,143016.000000,73050.000000,690.076674)}
{pt3dadd(197088.000000,142812.000000,73125.000000,718.829820)}

{create adhoc47}
{access adhoc47}
{connect adhoc47(1), adhoc46(0)}
{nseg = 1}
{strdef color color = "White"}
{pt3dclear()}
{pt3dadd(197088.000000,142812.000000,73125.000000,718.829820)}
{pt3dadd(197232.000000,142596.000000,73275.000000,718.829820)}
{pt3dadd(197304.000000,142404.000000,73325.000000,718.829820)}
{pt3dadd(197592.000000,142188.000000,73400.000000,718.829820)}
{pt3dadd(197616.000000,141984.000000,73525.000000,718.829820)}
{pt3dadd(197580.000000,141780.000000,73475.000000,718.829820)}
{pt3dadd(197604.000000,141600.000000,73600.000000,790.712811)}
{pt3dadd(197568.000000,141396.000000,73825.000000,862.595802)}
{pt3dadd(197568.000000,141180.000000,73925.000000,718.829820)}

{create adhoc48}
{access adhoc48}
{connect adhoc48(1), adhoc47(0)}
{nseg = 1}
{strdef color color = "White"}
{pt3dclear()}
{pt3dadd(197568.000000,141180.000000,73925.000000,718.829820)}
{pt3dadd(197484.000000,140952.000000,74125.000000,862.595802)}
{pt3dadd(197580.000000,140748.000000,74350.000000,826.654307)}
{pt3dadd(197544.000000,140556.000000,74325.000000,790.712811)}
{pt3dadd(197532.000000,140388.000000,74375.000000,754.771316)}
{pt3dadd(197496.000000,140244.000000,74325.000000,718.829820)}
{pt3dadd(197496.000000,140028.000000,74375.000000,718.829820)}
{pt3dadd(197628.000000,139776.000000,74425.000000,718.829820)}
{pt3dadd(197592.000000,139500.000000,74400.000000,718.829820)}
{pt3dadd(197676.000000,139284.000000,74475.000000,718.829820)}
{pt3dadd(197724.000000,139044.000000,74600.000000,718.829820)}
{pt3dadd(197772.000000,138864.000000,74725.000000,718.829820)}
{pt3dadd(197820.000000,138660.000000,74850.000000,718.829820)}
{pt3dadd(197904.000000,138492.000000,75025.000000,718.829820)}
{pt3dadd(197940.000000,138360.000000,74975.000000,718.829820)}
{pt3dadd(197904.000000,138192.000000,74975.000000,718.829820)}
{pt3dadd(197820.000000,138036.000000,75100.000000,718.829820)}
{pt3dadd(197868.000000,137832.000000,75150.000000,718.829820)}
{pt3dadd(197772.000000,137664.000000,75175.000000,718.829820)}
{pt3dadd(197760.000000,137484.000000,75225.000000,718.829820)}
{pt3dadd(197676.000000,137364.000000,75300.000000,718.829820)}
{pt3dadd(197616.000000,137184.000000,75350.000000,718.829820)}
{pt3dadd(197604.000000,137004.000000,75450.000000,599.024880)}
{pt3dadd(197640.000000,136860.000000,75500.000000,599.024880)}

{create adhoc49}
{access adhoc49}
{connect adhoc49(1), adhoc48(0)}
{nseg = 1}
{strdef color color = "White"}
{pt3dclear()}
{pt3dadd(197640.000000,136860.000000,75500.000000,599.024880)}
{pt3dadd(197508.000000,136692.000000,75475.000000,599.024880)}
{pt3dadd(197556.000000,136548.000000,75475.000000,599.024880)}
{pt3dadd(197520.000000,136368.000000,75550.000000,599.024880)}
{pt3dadd(197484.000000,136212.000000,75625.000000,599.024880)}
{pt3dadd(197484.000000,136032.000000,75675.000000,599.024880)}
{pt3dadd(197400.000000,135828.000000,75825.000000,569.073631)}
{pt3dadd(197388.000000,135636.000000,76000.000000,539.122383)}
{pt3dadd(197388.000000,135468.000000,76000.000000,509.171134)}
{pt3dadd(197412.000000,135288.000000,76025.000000,479.219886)}
{pt3dadd(197352.000000,135096.000000,75925.000000,479.219886)}
{pt3dadd(197316.000000,134904.000000,75950.000000,479.219886)}
{pt3dadd(197280.000000,134748.000000,75925.000000,479.219886)}
{pt3dadd(197352.000000,134580.000000,75950.000000,479.219886)}
{pt3dadd(197352.000000,134388.000000,75975.000000,479.219886)}

{create adhoc50}
{access adhoc50}
{connect adhoc50(1), adhoc49(0)}
{nseg = 1}
{strdef color color = "White"}
{pt3dclear()}
{pt3dadd(197352.000000,134388.000000,75975.000000,479.219886)}
{pt3dadd(197316.000000,134232.000000,76100.000000,499.187376)}
{pt3dadd(197388.000000,134040.000000,76325.000000,457.588431)}
{pt3dadd(197460.000000,133836.000000,76450.000000,415.989486)}
{pt3dadd(197484.000000,133716.000000,76550.000000,374.390541)}
{pt3dadd(197484.000000,133428.000000,76775.000000,332.791596)}
{pt3dadd(197580.000000,133188.000000,77200.000000,344.541348)}
{pt3dadd(197604.000000,132948.000000,77525.000000,356.291100)}
{pt3dadd(197676.000000,132744.000000,77975.000000,368.040852)}
{pt3dadd(197712.000000,132564.000000,78200.000000,332.791596)}

{create adhoc51}
{access adhoc51}
{connect adhoc51(1), adhoc50(0)}
{nseg = 1}
{strdef color color = "White"}
{pt3dclear()}
{pt3dadd(197712.000000,132564.000000,78200.000000,332.791596)}
{pt3dadd(197892.000000,132360.000000,78600.000000,346.657896)}
{pt3dadd(197916.000000,132168.000000,78850.000000,343.191312)}
{pt3dadd(197904.000000,131976.000000,79025.000000,339.724728)}
{pt3dadd(198024.000000,131772.000000,79225.000000,336.258144)}
{pt3dadd(198024.000000,131580.000000,79400.000000,332.791560)}
{pt3dadd(198120.000000,131412.000000,79525.000000,353.591042)}
{pt3dadd(198108.000000,131232.000000,79700.000000,374.390523)}
{pt3dadd(198072.000000,131052.000000,80050.000000,395.190005)}
{pt3dadd(197988.000000,130872.000000,80075.000000,415.989486)}
{pt3dadd(197928.000000,130680.000000,80225.000000,399.349908)}
{pt3dadd(197784.000000,130488.000000,80125.000000,399.349908)}

{create adhoc52}
{access adhoc52}
{connect adhoc52(1), adhoc51(0)}
{nseg = 1}
{strdef color color = "White"}
{pt3dclear()}
{pt3dadd(197784.000000,130488.000000,80125.000000,399.349908)}
{pt3dadd(197856.000000,130332.000000,79925.000000,288.881586)}
{pt3dadd(197820.000000,130032.000000,79825.000000,285.992771)}
{pt3dadd(197940.000000,129852.000000,79825.000000,283.103955)}
{pt3dadd(197988.000000,129636.000000,79950.000000,280.215140)}
{pt3dadd(197976.000000,129432.000000,79950.000000,277.326324)}
{pt3dadd(197964.000000,129228.000000,79925.000000,294.659217)}
{pt3dadd(198048.000000,129024.000000,80000.000000,311.992110)}
{pt3dadd(197988.000000,128820.000000,80025.000000,329.325003)}
{pt3dadd(197928.000000,128568.000000,79950.000000,346.657896)}
{pt3dadd(197844.000000,128316.000000,79975.000000,346.657896)}
{pt3dadd(197736.000000,128112.000000,79925.000000,346.657896)}
{pt3dadd(197688.000000,127908.000000,79975.000000,346.657896)}
{pt3dadd(197652.000000,127728.000000,79925.000000,346.657896)}
{pt3dadd(197568.000000,127512.000000,79975.000000,346.657896)}
{pt3dadd(197568.000000,127308.000000,80000.000000,346.657896)}
{pt3dadd(197508.000000,127104.000000,80025.000000,346.657896)}
{pt3dadd(197328.000000,126852.000000,80050.000000,346.657896)}
{pt3dadd(197184.000000,126660.000000,80050.000000,363.990794)}
{pt3dadd(197136.000000,126396.000000,80075.000000,381.323691)}
{pt3dadd(196980.000000,126132.000000,80200.000000,398.656589)}
{pt3dadd(196932.000000,125892.000000,80175.000000,415.989486)}
{pt3dadd(196800.000000,125724.000000,80150.000000,415.989486)}
{pt3dadd(196836.000000,125484.000000,80200.000000,415.989486)}
{pt3dadd(196788.000000,125292.000000,80250.000000,415.989486)}
{pt3dadd(196812.000000,125076.000000,80300.000000,415.989486)}
{pt3dadd(196716.000000,124848.000000,80325.000000,398.656589)}
{pt3dadd(196680.000000,124596.000000,80450.000000,381.323691)}
{pt3dadd(196644.000000,124344.000000,80450.000000,363.990794)}
{pt3dadd(196596.000000,124092.000000,80400.000000,346.657896)}
{pt3dadd(196512.000000,123816.000000,80400.000000,363.990794)}
{pt3dadd(196512.000000,123516.000000,80375.000000,381.323691)}
{pt3dadd(196428.000000,123264.000000,80300.000000,398.656589)}
{pt3dadd(196368.000000,122976.000000,80375.000000,415.989486)}
{pt3dadd(196236.000000,122760.000000,80450.000000,411.829591)}
{pt3dadd(196128.000000,122472.000000,80525.000000,407.669697)}
{pt3dadd(196080.000000,122244.000000,80525.000000,403.509803)}
{pt3dadd(195900.000000,121968.000000,80625.000000,399.349908)}
{pt3dadd(195900.000000,121764.000000,80600.000000,386.176905)}
{pt3dadd(195840.000000,121572.000000,80750.000000,373.003902)}
{pt3dadd(195792.000000,121344.000000,80775.000000,359.830899)}
{pt3dadd(195660.000000,121128.000000,80825.000000,346.657896)}
{pt3dadd(195684.000000,120840.000000,80825.000000,346.657896)}
{pt3dadd(195504.000000,120612.000000,80900.000000,346.657896)}
{pt3dadd(195456.000000,120348.000000,80950.000000,346.657896)}
{pt3dadd(195360.000000,120084.000000,81025.000000,346.657896)}
{pt3dadd(195168.000000,119772.000000,81075.000000,359.830908)}
{pt3dadd(194928.000000,119544.000000,81200.000000,373.003920)}
{pt3dadd(194748.000000,119316.000000,81275.000000,386.176932)}
{pt3dadd(194568.000000,119064.000000,81325.000000,399.349944)}
{pt3dadd(194508.000000,118824.000000,81350.000000,382.710357)}
{pt3dadd(194364.000000,118500.000000,81525.000000,366.070770)}
{pt3dadd(194232.000000,118260.000000,81575.000000,349.431183)}
{pt3dadd(194136.000000,117984.000000,81700.000000,332.791596)}
{pt3dadd(194088.000000,117780.000000,81825.000000,309.777359)}
{pt3dadd(194076.000000,117528.000000,81800.000000,286.763121)}
{pt3dadd(193980.000000,117324.000000,81875.000000,263.748884)}
{pt3dadd(193884.000000,117096.000000,81875.000000,240.734646)}
{pt3dadd(193800.000000,116868.000000,81925.000000,252.771381)}
{pt3dadd(193596.000000,116676.000000,82000.000000,264.808116)}
{pt3dadd(193500.000000,116436.000000,82025.000000,276.844851)}
{pt3dadd(193260.000000,116124.000000,81950.000000,288.881586)}
{pt3dadd(193224.000000,115920.000000,81975.000000,303.325664)}
{pt3dadd(193188.000000,115728.000000,81825.000000,317.769741)}
{pt3dadd(193080.000000,115536.000000,81875.000000,332.213819)}
{pt3dadd(193020.000000,115284.000000,81825.000000,346.657896)}
{pt3dadd(192912.000000,115032.000000,81725.000000,346.657896)}
{pt3dadd(192780.000000,114864.000000,81825.000000,346.657896)}
{pt3dadd(192696.000000,114696.000000,81850.000000,346.657896)}
{pt3dadd(192636.000000,114492.000000,81800.000000,346.657896)}
{pt3dadd(192588.000000,114240.000000,81750.000000,346.657896)}
{pt3dadd(192528.000000,114000.000000,81700.000000,346.657896)}
{pt3dadd(192444.000000,113748.000000,81750.000000,346.657896)}
{pt3dadd(192408.000000,113496.000000,81700.000000,346.657896)}
{pt3dadd(192360.000000,113292.000000,81575.000000,310.146476)}
{pt3dadd(192408.000000,113040.000000,81575.000000,273.635055)}
{pt3dadd(192432.000000,112788.000000,81525.000000,237.123635)}
{pt3dadd(192456.000000,112560.000000,81500.000000,200.612214)}
{pt3dadd(192372.000000,112320.000000,81450.000000,192.253370)}
{pt3dadd(192324.000000,112056.000000,81475.000000,183.894525)}
{pt3dadd(192276.000000,111780.000000,81375.000000,175.535680)}
{pt3dadd(192216.000000,111540.000000,81425.000000,167.176836)}
{pt3dadd(192180.000000,111288.000000,81375.000000,185.566288)}
{pt3dadd(192096.000000,111060.000000,81325.000000,203.955741)}
{pt3dadd(191868.000000,110868.000000,81225.000000,222.345193)}
{pt3dadd(191736.000000,110676.000000,81175.000000,240.734646)}
{pt3dadd(191628.000000,110448.000000,81150.000000,249.882566)}
{pt3dadd(191592.000000,110244.000000,81075.000000,259.030485)}
{pt3dadd(191568.000000,110040.000000,81000.000000,268.178405)}
{pt3dadd(191520.000000,109800.000000,80875.000000,277.326324)}
{pt3dadd(191544.000000,109548.000000,80750.000000,280.215140)}
{pt3dadd(191556.000000,109272.000000,80575.000000,283.103955)}
{pt3dadd(191484.000000,109044.000000,80400.000000,285.992771)}
{pt3dadd(191424.000000,108816.000000,80250.000000,288.881586)}
{pt3dadd(191376.000000,108624.000000,80075.000000,299.859089)}
{pt3dadd(191424.000000,108384.000000,80000.000000,310.836591)}
{pt3dadd(191208.000000,108096.000000,79875.000000,321.814093)}
{pt3dadd(190956.000000,107856.000000,79725.000000,332.791596)}
{pt3dadd(190740.000000,107628.000000,79625.000000,332.791587)}
{pt3dadd(190428.000000,107352.000000,79575.000000,332.791578)}
{pt3dadd(190200.000000,107124.000000,79500.000000,332.791569)}
{pt3dadd(190116.000000,106872.000000,79425.000000,332.791560)}
{pt3dadd(189960.000000,106596.000000,79300.000000,321.814067)}
{pt3dadd(189864.000000,106344.000000,79225.000000,310.836573)}
{pt3dadd(189588.000000,106104.000000,79025.000000,299.859080)}
{pt3dadd(189348.000000,105852.000000,78850.000000,288.881586)}
{pt3dadd(189048.000000,105636.000000,78650.000000,276.844851)}
{pt3dadd(188820.000000,105516.000000,78525.000000,264.808116)}
{pt3dadd(188604.000000,105456.000000,78475.000000,252.771381)}
{pt3dadd(188388.000000,105276.000000,78400.000000,240.734646)}
{pt3dadd(188184.000000,105036.000000,78300.000000,228.697915)}
{pt3dadd(187968.000000,105192.000000,78250.000000,216.661185)}
{pt3dadd(187716.000000,105204.000000,78250.000000,204.624455)}
{pt3dadd(187500.000000,105048.000000,78175.000000,192.587724)}
{pt3dadd(187320.000000,104940.000000,78000.000000,194.593846)}
{pt3dadd(187116.000000,104712.000000,77800.000000,196.599969)}
{pt3dadd(186912.000000,104652.000000,77800.000000,198.606091)}
{pt3dadd(186756.000000,104688.000000,77800.000000,200.612214)}
{pt3dadd(186588.000000,104496.000000,77750.000000,200.612214)}
{pt3dadd(186480.000000,104292.000000,77700.000000,200.612214)}
{pt3dadd(186336.000000,104076.000000,77725.000000,200.612214)}
{pt3dadd(186156.000000,103824.000000,77600.000000,139.314042)}

{create adhoc53}
{access adhoc53}
{connect adhoc53(1), adhoc51(0)}
{nseg = 1}
{strdef color color = "White"}
{pt3dclear()}
{pt3dadd(197784.000000,130488.000000,80125.000000,399.349908)}
{pt3dadd(197496.000000,130524.000000,80450.000000,346.657896)}
{pt3dadd(197268.000000,130488.000000,80850.000000,277.326324)}
{pt3dadd(197160.000000,130404.000000,81125.000000,240.734646)}

{create adhoc54}
{access adhoc54}
{connect adhoc54(1), adhoc53(0)}
{nseg = 1}
{strdef color color = "White"}
{pt3dclear()}
{pt3dadd(197160.000000,130404.000000,81125.000000,240.734646)}
{pt3dadd(196944.000000,130308.000000,81350.000000,266.233266)}
{pt3dadd(196716.000000,130104.000000,81600.000000,233.422740)}
{pt3dadd(196476.000000,129912.000000,81700.000000,200.612214)}
{pt3dadd(196152.000000,129564.000000,81900.000000,55.987200)}

{create adhoc55}
{access adhoc55}
{connect adhoc55(1), adhoc53(0)}
{nseg = 1}
{strdef color color = "White"}
{pt3dclear()}
{pt3dadd(197160.000000,130404.000000,81125.000000,240.734646)}
{pt3dadd(197232.000000,130596.000000,81075.000000,346.657896)}
{pt3dadd(197028.000000,130836.000000,81150.000000,289.017180)}
{pt3dadd(196956.000000,131052.000000,81350.000000,231.376464)}
{pt3dadd(196968.000000,131232.000000,81500.000000,173.735748)}
{pt3dadd(196824.000000,131436.000000,81675.000000,116.095032)}
{pt3dadd(196800.000000,131712.000000,81775.000000,147.254936)}
{pt3dadd(196788.000000,131904.000000,81900.000000,178.414839)}
{pt3dadd(196692.000000,132120.000000,81950.000000,209.574742)}
{pt3dadd(196764.000000,132348.000000,82075.000000,240.734646)}
{pt3dadd(196704.000000,132648.000000,82400.000000,222.345193)}
{pt3dadd(196776.000000,132864.000000,82650.000000,203.955741)}
{pt3dadd(196800.000000,133056.000000,82950.000000,185.566288)}
{pt3dadd(197124.000000,133248.000000,83475.000000,167.176836)}
{pt3dadd(197124.000000,133308.000000,84025.000000,175.535680)}
{pt3dadd(197076.000000,133452.000000,84325.000000,183.894525)}
{pt3dadd(197076.000000,133632.000000,84425.000000,192.253370)}
{pt3dadd(197112.000000,133740.000000,84700.000000,200.612214)}
{pt3dadd(197124.000000,133968.000000,84800.000000,185.287671)}
{pt3dadd(196980.000000,133920.000000,85175.000000,169.963128)}
{pt3dadd(197088.000000,133500.000000,85450.000000,154.638585)}
{pt3dadd(197160.000000,133428.000000,85725.000000,139.314042)}
{pt3dadd(197556.000000,133104.000000,86050.000000,118.029951)}
{pt3dadd(197868.000000,132672.000000,86250.000000,96.745860)}
{pt3dadd(197928.000000,132492.000000,86200.000000,67.184640)}

{create adhoc56}
{access adhoc56}
{connect adhoc56(1), adhoc50(0)}
{nseg = 1}
{strdef color color = "White"}
{pt3dclear()}
{pt3dadd(197712.000000,132564.000000,78200.000000,332.791596)}
{pt3dadd(197712.000000,133524.000000,78475.000000,346.657896)}
{pt3dadd(197640.000000,133680.000000,78625.000000,320.177083)}
{pt3dadd(197628.000000,133812.000000,78875.000000,293.696271)}
{pt3dadd(197508.000000,133968.000000,79075.000000,267.215459)}
{pt3dadd(197400.000000,134232.000000,79375.000000,240.734646)}
{pt3dadd(197304.000000,134604.000000,79550.000000,213.986354)}
{pt3dadd(197184.000000,134784.000000,79550.000000,187.238061)}
{pt3dadd(197172.000000,135024.000000,79625.000000,160.489769)}
{pt3dadd(197172.000000,135192.000000,79625.000000,133.741476)}
{pt3dadd(197184.000000,135384.000000,79675.000000,142.100316)}
{pt3dadd(197016.000000,135540.000000,79725.000000,150.459156)}
{pt3dadd(196992.000000,135744.000000,79725.000000,158.817996)}
{pt3dadd(196968.000000,135972.000000,79700.000000,167.176836)}
{pt3dadd(196872.000000,136140.000000,79600.000000,173.529558)}
{pt3dadd(196836.000000,136332.000000,79650.000000,179.882280)}
{pt3dadd(196764.000000,136584.000000,79800.000000,186.235002)}
{pt3dadd(196740.000000,136740.000000,79875.000000,192.587724)}
{pt3dadd(196620.000000,136980.000000,79975.000000,186.235002)}
{pt3dadd(196680.000000,137196.000000,80150.000000,179.882280)}
{pt3dadd(196752.000000,137436.000000,80400.000000,173.529558)}
{pt3dadd(196812.000000,137652.000000,80500.000000,167.176836)}
{pt3dadd(196920.000000,137832.000000,80700.000000,175.535680)}
{pt3dadd(197028.000000,138180.000000,80975.000000,183.894525)}
{pt3dadd(197268.000000,138528.000000,81250.000000,192.253370)}
{pt3dadd(197328.000000,138792.000000,81350.000000,200.612214)}
{pt3dadd(197340.000000,139044.000000,81400.000000,192.253370)}
{pt3dadd(197364.000000,139260.000000,81375.000000,183.894525)}
{pt3dadd(197424.000000,139488.000000,81375.000000,175.535680)}
{pt3dadd(197496.000000,139668.000000,81425.000000,167.176836)}
{pt3dadd(197652.000000,139908.000000,81425.000000,145.538014)}
{pt3dadd(197808.000000,140184.000000,81375.000000,123.899193)}
{pt3dadd(197868.000000,140472.000000,81325.000000,102.260372)}
{pt3dadd(197856.000000,140688.000000,81300.000000,80.621550)}
{pt3dadd(197868.000000,140832.000000,81325.000000,67.184640)}

{create adhoc57}
{access adhoc57}
{connect adhoc57(1), adhoc49(0)}
{nseg = 1}
{strdef color color = "White"}
{pt3dclear()}
{pt3dadd(197352.000000,134388.000000,75975.000000,479.219886)}
{pt3dadd(197352.000000,134064.000000,75975.000000,599.024880)}
{pt3dadd(197340.000000,133788.000000,76000.000000,574.065504)}
{pt3dadd(197304.000000,133560.000000,76025.000000,549.106128)}
{pt3dadd(197304.000000,133236.000000,76050.000000,524.146752)}
{pt3dadd(197220.000000,132984.000000,76125.000000,499.187376)}
{pt3dadd(197100.000000,132696.000000,76275.000000,446.610929)}
{pt3dadd(197004.000000,132420.000000,76150.000000,394.034481)}
{pt3dadd(196668.000000,132084.000000,76125.000000,341.458034)}
{pt3dadd(196644.000000,131784.000000,76025.000000,288.881586)}
{pt3dadd(196452.000000,131436.000000,75950.000000,299.859089)}
{pt3dadd(196224.000000,131196.000000,75950.000000,310.836591)}
{pt3dadd(196116.000000,131028.000000,75950.000000,321.814093)}
{pt3dadd(195936.000000,130824.000000,75925.000000,332.791596)}
{pt3dadd(195816.000000,130644.000000,75850.000000,318.925278)}
{pt3dadd(195840.000000,130488.000000,75825.000000,305.058960)}
{pt3dadd(195708.000000,130344.000000,75825.000000,291.192642)}
{pt3dadd(195576.000000,130176.000000,75825.000000,277.326324)}
{pt3dadd(195504.000000,130020.000000,75850.000000,294.659217)}
{pt3dadd(195336.000000,129828.000000,75875.000000,311.992110)}
{pt3dadd(195300.000000,129600.000000,75850.000000,329.325003)}
{pt3dadd(195204.000000,129384.000000,75875.000000,346.657896)}
{pt3dadd(195024.000000,129192.000000,75850.000000,332.213819)}
{pt3dadd(194952.000000,128976.000000,75700.000000,317.769741)}
{pt3dadd(194928.000000,128820.000000,75775.000000,303.325664)}
{pt3dadd(194952.000000,128652.000000,75850.000000,288.881586)}
{pt3dadd(195012.000000,128472.000000,75850.000000,288.881586)}
{pt3dadd(194856.000000,128292.000000,75750.000000,288.881586)}
{pt3dadd(194784.000000,128124.000000,75650.000000,288.881586)}
{pt3dadd(194736.000000,127920.000000,75575.000000,288.881586)}
{pt3dadd(194688.000000,127752.000000,75500.000000,303.325664)}
{pt3dadd(194652.000000,127596.000000,75500.000000,317.769741)}
{pt3dadd(194664.000000,127392.000000,75500.000000,332.213819)}
{pt3dadd(194640.000000,127272.000000,75475.000000,346.657896)}
{pt3dadd(194568.000000,127116.000000,75400.000000,363.990794)}
{pt3dadd(194508.000000,126972.000000,75350.000000,381.323691)}
{pt3dadd(194448.000000,126852.000000,75350.000000,398.656589)}
{pt3dadd(194484.000000,126720.000000,75300.000000,415.989486)}
{pt3dadd(194484.000000,126540.000000,75250.000000,398.656589)}
{pt3dadd(194364.000000,126372.000000,75250.000000,381.323691)}
{pt3dadd(194280.000000,126192.000000,75250.000000,363.990794)}
{pt3dadd(194172.000000,126036.000000,75350.000000,346.657896)}
{pt3dadd(194148.000000,125832.000000,75375.000000,343.191321)}
{pt3dadd(194160.000000,125664.000000,75375.000000,339.724746)}
{pt3dadd(194088.000000,125484.000000,75325.000000,336.258171)}
{pt3dadd(193980.000000,125256.000000,75350.000000,332.791596)}
{pt3dadd(193944.000000,125100.000000,75325.000000,336.258171)}
{pt3dadd(193896.000000,124932.000000,75375.000000,339.724746)}
{pt3dadd(193812.000000,124776.000000,75425.000000,343.191321)}
{pt3dadd(193668.000000,124596.000000,75425.000000,346.657896)}
{pt3dadd(193536.000000,124368.000000,75450.000000,363.990794)}
{pt3dadd(193476.000000,124188.000000,75450.000000,381.323691)}
{pt3dadd(193452.000000,123996.000000,75425.000000,398.656589)}
{pt3dadd(193368.000000,123828.000000,75475.000000,415.989486)}
{pt3dadd(193284.000000,123636.000000,75450.000000,384.212511)}
{pt3dadd(193212.000000,123432.000000,75375.000000,352.435536)}
{pt3dadd(193152.000000,123264.000000,75375.000000,320.658561)}
{pt3dadd(192996.000000,123072.000000,75425.000000,288.881586)}
{pt3dadd(192876.000000,122892.000000,75425.000000,303.325664)}
{pt3dadd(192792.000000,122700.000000,75400.000000,317.769741)}
{pt3dadd(192696.000000,122496.000000,75375.000000,332.213819)}
{pt3dadd(192636.000000,122304.000000,75250.000000,346.657896)}
{pt3dadd(192672.000000,122124.000000,75250.000000,363.990794)}
{pt3dadd(192636.000000,121932.000000,75225.000000,381.323691)}
{pt3dadd(192588.000000,121764.000000,75225.000000,398.656589)}
{pt3dadd(192516.000000,121572.000000,75150.000000,415.989486)}
{pt3dadd(192468.000000,121380.000000,75150.000000,415.989486)}
{pt3dadd(192420.000000,121236.000000,75075.000000,415.989486)}
{pt3dadd(192348.000000,121044.000000,75075.000000,415.989486)}
{pt3dadd(192312.000000,120840.000000,75075.000000,415.989486)}
{pt3dadd(192288.000000,120684.000000,75050.000000,384.212511)}
{pt3dadd(192180.000000,120492.000000,74975.000000,352.435536)}
{pt3dadd(192096.000000,120312.000000,74975.000000,320.658561)}
{pt3dadd(191976.000000,120084.000000,74925.000000,288.881586)}
{pt3dadd(191904.000000,119868.000000,74925.000000,303.325664)}
{pt3dadd(191880.000000,119724.000000,74925.000000,317.769741)}
{pt3dadd(191856.000000,119520.000000,74875.000000,332.213819)}
{pt3dadd(191808.000000,119316.000000,74850.000000,346.657896)}
{pt3dadd(191772.000000,119172.000000,74750.000000,346.657896)}
{pt3dadd(191748.000000,119004.000000,74825.000000,346.657896)}
{pt3dadd(191712.000000,118824.000000,74725.000000,346.657896)}
{pt3dadd(191616.000000,118668.000000,74600.000000,346.657896)}
{pt3dadd(191496.000000,118488.000000,74475.000000,346.657896)}
{pt3dadd(191424.000000,118272.000000,74450.000000,346.657896)}

{create adhoc58}
{access adhoc58}
{connect adhoc58(1), adhoc57(0)}
{nseg = 1}
{strdef color color = "White"}
{pt3dclear()}
{pt3dadd(191424.000000,118272.000000,74450.000000,346.657896)}
{pt3dadd(191424.000000,118128.000000,74300.000000,332.791596)}
{pt3dadd(191424.000000,117936.000000,74150.000000,329.463675)}
{pt3dadd(191364.000000,117696.000000,73925.000000,326.135754)}
{pt3dadd(191340.000000,117516.000000,73750.000000,322.807833)}
{pt3dadd(191184.000000,117324.000000,73575.000000,319.479912)}
{pt3dadd(191016.000000,117120.000000,73300.000000,288.881586)}
{pt3dadd(190812.000000,116832.000000,73000.000000,332.791596)}

{create adhoc59}
{access adhoc59}
{connect adhoc59(1), adhoc58(0)}
{nseg = 1}
{strdef color color = "White"}
{pt3dclear()}
{pt3dadd(190812.000000,116832.000000,73000.000000,332.791596)}
{pt3dadd(190620.000000,116784.000000,72675.000000,399.349908)}
{pt3dadd(190572.000000,116868.000000,72375.000000,386.176905)}
{pt3dadd(190332.000000,116928.000000,72050.000000,373.003902)}
{pt3dadd(189996.000000,116904.000000,71650.000000,359.830899)}
{pt3dadd(189900.000000,116784.000000,71275.000000,346.657896)}
{pt3dadd(189864.000000,116988.000000,71150.000000,320.177083)}
{pt3dadd(189816.000000,117144.000000,71175.000000,293.696271)}
{pt3dadd(189660.000000,117312.000000,71050.000000,267.215459)}
{pt3dadd(189552.000000,117516.000000,70950.000000,240.734646)}
{pt3dadd(189384.000000,117684.000000,70725.000000,240.734646)}

{create adhoc60}
{access adhoc60}
{connect adhoc60(1), adhoc59(0)}
{nseg = 1}
{strdef color color = "White"}
{pt3dclear()}
{pt3dadd(189384.000000,117684.000000,70725.000000,240.734646)}
{pt3dadd(189420.000000,117876.000000,70725.000000,240.734646)}
{pt3dadd(189468.000000,118032.000000,70650.000000,240.734646)}
{pt3dadd(189552.000000,118272.000000,70650.000000,240.734646)}
{pt3dadd(189576.000000,118428.000000,70600.000000,240.734646)}
{pt3dadd(189564.000000,118668.000000,70575.000000,240.734646)}
{pt3dadd(189588.000000,118800.000000,70550.000000,222.345193)}
{pt3dadd(189540.000000,118944.000000,70550.000000,203.955741)}
{pt3dadd(189504.000000,119100.000000,70475.000000,185.566288)}
{pt3dadd(189576.000000,119340.000000,70250.000000,167.176836)}
{pt3dadd(189528.000000,119520.000000,70175.000000,167.176836)}
{pt3dadd(189540.000000,119664.000000,70150.000000,167.176836)}
{pt3dadd(189516.000000,119808.000000,70050.000000,167.176836)}
{pt3dadd(189456.000000,119928.000000,70025.000000,167.176836)}
{pt3dadd(189384.000000,120060.000000,70025.000000,167.176836)}
{pt3dadd(189360.000000,120276.000000,70050.000000,167.176836)}
{pt3dadd(189288.000000,120384.000000,70050.000000,167.176836)}
{pt3dadd(189024.000000,120528.000000,70050.000000,167.176836)}
{pt3dadd(188880.000000,120696.000000,70150.000000,197.603024)}
{pt3dadd(188856.000000,120840.000000,70150.000000,228.029211)}
{pt3dadd(188916.000000,120996.000000,70150.000000,258.455399)}
{pt3dadd(188940.000000,121128.000000,70150.000000,288.881586)}
{pt3dadd(189036.000000,121344.000000,70250.000000,245.684947)}
{pt3dadd(189012.000000,121500.000000,70250.000000,202.488309)}
{pt3dadd(189024.000000,121644.000000,70375.000000,159.291671)}
{pt3dadd(189036.000000,121824.000000,70525.000000,116.095032)}
{pt3dadd(189048.000000,121992.000000,70525.000000,111.257739)}
{pt3dadd(189372.000000,122112.000000,70450.000000,106.420446)}
{pt3dadd(189468.000000,122256.000000,70275.000000,101.583153)}
{pt3dadd(189672.000000,122652.000000,70050.000000,96.745860)}
{pt3dadd(189720.000000,122820.000000,69775.000000,95.778405)}
{pt3dadd(189708.000000,123072.000000,69700.000000,94.810950)}
{pt3dadd(189720.000000,123276.000000,69625.000000,93.843495)}
{pt3dadd(189828.000000,123516.000000,69725.000000,92.876040)}
{pt3dadd(189972.000000,123756.000000,69725.000000,104.485541)}
{pt3dadd(190116.000000,123972.000000,69800.000000,116.095041)}
{pt3dadd(190320.000000,124368.000000,69700.000000,127.704541)}
{pt3dadd(190368.000000,124524.000000,69550.000000,139.314042)}
{pt3dadd(190404.000000,124920.000000,69400.000000,200.612214)}
{pt3dadd(190392.000000,125220.000000,69225.000000,332.791596)}

{create adhoc61}
{access adhoc61}
{connect adhoc61(1), adhoc59(0)}
{nseg = 1}
{strdef color color = "White"}
{pt3dclear()}
{pt3dadd(189384.000000,117684.000000,70725.000000,240.734646)}
{pt3dadd(189180.000000,117660.000000,70575.000000,167.176836)}
{pt3dadd(189000.000000,117516.000000,70400.000000,153.245439)}
{pt3dadd(188904.000000,117228.000000,70225.000000,139.314042)}
{pt3dadd(188916.000000,116940.000000,70075.000000,160.489764)}

{create adhoc62}
{access adhoc62}
{connect adhoc62(1), adhoc58(0)}
{nseg = 1}
{strdef color color = "White"}
{pt3dclear()}
{pt3dadd(190812.000000,116832.000000,73000.000000,332.791596)}
{pt3dadd(190704.000000,116664.000000,72800.000000,346.657896)}
{pt3dadd(190620.000000,116436.000000,72775.000000,301.787631)}
{pt3dadd(190500.000000,116244.000000,72775.000000,256.917366)}
{pt3dadd(190476.000000,116016.000000,72825.000000,212.047101)}
{pt3dadd(190452.000000,115812.000000,72800.000000,167.176836)}
{pt3dadd(190416.000000,115608.000000,72750.000000,185.566288)}
{pt3dadd(190452.000000,115368.000000,72775.000000,203.955741)}
{pt3dadd(190380.000000,115116.000000,72750.000000,222.345193)}
{pt3dadd(190380.000000,114816.000000,72775.000000,240.734646)}
{pt3dadd(190296.000000,114636.000000,72775.000000,252.771381)}
{pt3dadd(190212.000000,114408.000000,72775.000000,264.808116)}
{pt3dadd(190248.000000,114168.000000,72850.000000,276.844851)}
{pt3dadd(190212.000000,114024.000000,73050.000000,288.881586)}
{pt3dadd(190104.000000,113748.000000,73150.000000,276.844851)}
{pt3dadd(189852.000000,113568.000000,73250.000000,264.808116)}
{pt3dadd(189588.000000,113364.000000,73225.000000,252.771381)}
{pt3dadd(189372.000000,113148.000000,73050.000000,240.734646)}
{pt3dadd(189324.000000,112944.000000,73075.000000,240.734646)}
{pt3dadd(189192.000000,112656.000000,73175.000000,240.734646)}
{pt3dadd(189072.000000,112404.000000,73200.000000,240.734646)}
{pt3dadd(189072.000000,112212.000000,73200.000000,240.734646)}
{pt3dadd(189000.000000,111996.000000,73200.000000,240.734646)}
{pt3dadd(188904.000000,111756.000000,73125.000000,240.734646)}
{pt3dadd(188832.000000,111516.000000,73150.000000,240.734646)}
{pt3dadd(188808.000000,111276.000000,73175.000000,240.734646)}
{pt3dadd(188832.000000,111036.000000,73325.000000,197.640174)}
{pt3dadd(188808.000000,110808.000000,73575.000000,154.545702)}
{pt3dadd(188844.000000,110808.000000,73875.000000,111.451230)}
{pt3dadd(188772.000000,110652.000000,74100.000000,96.745860)}

{create adhoc63}
{access adhoc63}
{connect adhoc63(1), adhoc57(0)}
{nseg = 1}
{strdef color color = "White"}
{pt3dclear()}
{pt3dadd(191424.000000,118272.000000,74450.000000,346.657896)}
{pt3dadd(191028.000000,118224.000000,74600.000000,288.881586)}
{pt3dadd(190872.000000,118020.000000,74825.000000,266.814243)}
{pt3dadd(190680.000000,117852.000000,74950.000000,244.746900)}
{pt3dadd(190488.000000,117672.000000,75125.000000,222.679557)}
{pt3dadd(190344.000000,117624.000000,75450.000000,200.612214)}
{pt3dadd(190272.000000,117516.000000,75700.000000,165.990096)}
{pt3dadd(190368.000000,117528.000000,75975.000000,131.367978)}
{pt3dadd(190296.000000,117444.000000,76175.000000,96.745860)}
{pt3dadd(190248.000000,117576.000000,76450.000000,139.314042)}

{create adhoc64}
{access adhoc64}
{connect adhoc64(1), adhoc48(0)}
{nseg = 1}
{strdef color color = "White"}
{pt3dclear()}
{pt3dadd(197640.000000,136860.000000,75500.000000,599.024880)}
{pt3dadd(197484.000000,136896.000000,75500.000000,599.024880)}
{pt3dadd(197220.000000,136908.000000,75525.000000,491.062869)}
{pt3dadd(196992.000000,136884.000000,75525.000000,383.100858)}
{pt3dadd(196788.000000,136776.000000,75400.000000,275.138847)}
{pt3dadd(196560.000000,136764.000000,75425.000000,167.176836)}
{pt3dadd(196368.000000,136692.000000,75400.000000,183.158946)}
{pt3dadd(196200.000000,136632.000000,75450.000000,199.141056)}
{pt3dadd(196044.000000,136572.000000,75525.000000,215.123166)}
{pt3dadd(195864.000000,136512.000000,75600.000000,231.105276)}
{pt3dadd(195660.000000,136500.000000,75625.000000,193.484345)}
{pt3dadd(195444.000000,136404.000000,75725.000000,155.863413)}
{pt3dadd(195192.000000,136428.000000,75625.000000,118.242482)}
{pt3dadd(194988.000000,136296.000000,75550.000000,80.621550)}
{pt3dadd(194796.000000,136224.000000,75350.000000,116.095032)}
{pt3dadd(194580.000000,136116.000000,75325.000000,77.396688)}

{create adhoc65}
{access adhoc65}
{connect adhoc65(1), adhoc47(0)}
{nseg = 1}
{strdef color color = "White"}
{pt3dclear()}
{pt3dadd(197568.000000,141180.000000,73925.000000,718.829820)}
{pt3dadd(197172.000000,141096.000000,72850.000000,346.657896)}
{pt3dadd(197100.000000,140796.000000,72450.000000,336.668603)}
{pt3dadd(197004.000000,140592.000000,72175.000000,326.679309)}
{pt3dadd(196812.000000,140364.000000,71875.000000,316.690015)}
{pt3dadd(196740.000000,140136.000000,71900.000000,306.700722)}
{pt3dadd(196728.000000,139920.000000,71800.000000,302.245938)}
{pt3dadd(196704.000000,139692.000000,71675.000000,297.791154)}
{pt3dadd(196620.000000,139416.000000,71500.000000,293.336370)}
{pt3dadd(196584.000000,139212.000000,71275.000000,288.881586)}
{pt3dadd(196536.000000,138960.000000,71275.000000,316.498657)}
{pt3dadd(196416.000000,138744.000000,71125.000000,344.115729)}
{pt3dadd(196356.000000,138480.000000,70975.000000,371.732801)}
{pt3dadd(196296.000000,138288.000000,70800.000000,399.349872)}
{pt3dadd(196164.000000,138084.000000,70625.000000,415.989486)}
{pt3dadd(195996.000000,137880.000000,70500.000000,415.989486)}

{create adhoc66}
{access adhoc66}
{connect adhoc66(1), adhoc65(0)}
{nseg = 1}
{strdef color color = "White"}
{pt3dclear()}
{pt3dadd(195996.000000,137880.000000,70500.000000,415.989486)}
{pt3dadd(195924.000000,137664.000000,70325.000000,346.657896)}
{pt3dadd(195720.000000,137448.000000,70025.000000,329.325003)}
{pt3dadd(195576.000000,137208.000000,69875.000000,311.992110)}
{pt3dadd(195456.000000,136920.000000,69675.000000,294.659217)}
{pt3dadd(195348.000000,136704.000000,69500.000000,277.326324)}
{pt3dadd(195276.000000,136524.000000,69300.000000,311.992115)}
{pt3dadd(195168.000000,136368.000000,69150.000000,346.657905)}
{pt3dadd(194952.000000,136128.000000,68700.000000,381.323696)}
{pt3dadd(194784.000000,135912.000000,68300.000000,415.989486)}
{pt3dadd(194424.000000,135756.000000,68025.000000,415.989486)}
{pt3dadd(194256.000000,135768.000000,67850.000000,415.989486)}
{pt3dadd(194076.000000,135660.000000,67675.000000,415.989486)}
{pt3dadd(193908.000000,135576.000000,67550.000000,415.989486)}
{pt3dadd(193728.000000,135456.000000,67475.000000,415.989486)}
{pt3dadd(193608.000000,135432.000000,67275.000000,415.989486)}
{pt3dadd(193440.000000,135336.000000,67200.000000,415.989486)}
{pt3dadd(193272.000000,135204.000000,67350.000000,415.989486)}
{pt3dadd(193068.000000,135048.000000,67350.000000,384.212511)}
{pt3dadd(192900.000000,134928.000000,67275.000000,352.435536)}
{pt3dadd(192744.000000,134784.000000,67250.000000,320.658561)}
{pt3dadd(192552.000000,134652.000000,67250.000000,288.881586)}
{pt3dadd(192408.000000,134604.000000,67250.000000,276.844851)}
{pt3dadd(192192.000000,134484.000000,67250.000000,264.808116)}
{pt3dadd(192036.000000,134388.000000,67250.000000,252.771381)}
{pt3dadd(191844.000000,134280.000000,67150.000000,240.734646)}
{pt3dadd(191700.000000,134196.000000,67125.000000,238.327304)}
{pt3dadd(191532.000000,134100.000000,67075.000000,235.919961)}
{pt3dadd(191316.000000,133920.000000,67075.000000,233.512618)}
{pt3dadd(191148.000000,133788.000000,67050.000000,231.105276)}
{pt3dadd(190968.000000,133668.000000,67050.000000,231.105276)}
{pt3dadd(190740.000000,133452.000000,67100.000000,231.105276)}
{pt3dadd(190584.000000,133380.000000,67125.000000,231.105276)}
{pt3dadd(190404.000000,133212.000000,67125.000000,231.105276)}
{pt3dadd(190224.000000,133008.000000,67175.000000,266.233284)}
{pt3dadd(190020.000000,132924.000000,67125.000000,200.612214)}

{create adhoc67}
{access adhoc67}
{connect adhoc67(1), adhoc66(0)}
{nseg = 1}
{strdef color color = "White"}
{pt3dclear()}
{pt3dadd(190020.000000,132924.000000,67125.000000,200.612214)}
{pt3dadd(189888.000000,132684.000000,66975.000000,240.734646)}
{pt3dadd(189696.000000,132468.000000,67025.000000,222.345193)}
{pt3dadd(189540.000000,132204.000000,67000.000000,203.955741)}
{pt3dadd(189372.000000,131928.000000,67000.000000,185.566288)}
{pt3dadd(189204.000000,131664.000000,67000.000000,167.176836)}
{pt3dadd(189048.000000,131484.000000,67100.000000,173.529558)}
{pt3dadd(189000.000000,131268.000000,66975.000000,179.882280)}
{pt3dadd(189000.000000,131016.000000,66850.000000,186.235002)}
{pt3dadd(188964.000000,130800.000000,66825.000000,192.587724)}
{pt3dadd(188988.000000,130560.000000,66775.000000,208.636698)}
{pt3dadd(189084.000000,130344.000000,66650.000000,224.685672)}
{pt3dadd(189156.000000,130140.000000,66475.000000,240.734646)}
{pt3dadd(189408.000000,129828.000000,66475.000000,288.881586)}

{create adhoc68}
{access adhoc68}
{connect adhoc68(1), adhoc67(0)}
{nseg = 1}
{strdef color color = "White"}
{pt3dclear()}
{pt3dadd(189408.000000,129828.000000,66475.000000,288.881586)}
{pt3dadd(189432.000000,129744.000000,66150.000000,346.657896)}
{pt3dadd(189000.000000,129876.000000,65875.000000,294.821933)}
{pt3dadd(188844.000000,129756.000000,65550.000000,242.985969)}
{pt3dadd(188844.000000,129888.000000,65250.000000,191.150005)}
{pt3dadd(188820.000000,129948.000000,65000.000000,139.314042)}
{pt3dadd(188928.000000,129804.000000,64725.000000,80.621550)}

{create adhoc69}
{access adhoc69}
{connect adhoc69(1), adhoc67(0)}
{nseg = 1}
{strdef color color = "White"}
{pt3dclear()}
{pt3dadd(189408.000000,129828.000000,66475.000000,288.881586)}
{pt3dadd(189372.000000,129624.000000,66375.000000,288.881586)}
{pt3dadd(189408.000000,129432.000000,66375.000000,258.455399)}
{pt3dadd(189360.000000,129216.000000,66325.000000,228.029211)}
{pt3dadd(189324.000000,129048.000000,66325.000000,197.603024)}
{pt3dadd(189156.000000,128808.000000,66325.000000,167.176836)}
{pt3dadd(189120.000000,128592.000000,66300.000000,158.817996)}
{pt3dadd(188952.000000,128292.000000,66300.000000,150.459156)}
{pt3dadd(188988.000000,128052.000000,66375.000000,142.100316)}
{pt3dadd(188892.000000,127836.000000,66300.000000,133.741476)}
{pt3dadd(188844.000000,127620.000000,66175.000000,136.527759)}
{pt3dadd(188724.000000,127356.000000,66175.000000,139.314042)}
{pt3dadd(188664.000000,127080.000000,66125.000000,96.745860)}

{create adhoc70}
{access adhoc70}
{connect adhoc70(1), adhoc66(0)}
{nseg = 1}
{strdef color color = "White"}
{pt3dclear()}
{pt3dadd(190020.000000,132924.000000,67125.000000,200.612214)}
{pt3dadd(190164.000000,133104.000000,67450.000000,200.612214)}
{pt3dadd(189888.000000,133032.000000,67725.000000,169.034364)}
{pt3dadd(189600.000000,133056.000000,67975.000000,137.456514)}
{pt3dadd(189348.000000,133104.000000,67975.000000,105.878664)}
{pt3dadd(189180.000000,133164.000000,67950.000000,74.300814)}
{pt3dadd(188988.000000,133224.000000,67975.000000,67.184640)}
{pt3dadd(188724.000000,133332.000000,68075.000000,67.184640)}

{create adhoc71}
{access adhoc71}
{connect adhoc71(1), adhoc65(0)}
{nseg = 1}
{strdef color color = "White"}
{pt3dclear()}
{pt3dadd(195996.000000,137880.000000,70500.000000,415.989486)}
{pt3dadd(195804.000000,137940.000000,70500.000000,288.881586)}
{pt3dadd(195648.000000,138024.000000,70525.000000,250.096559)}
{pt3dadd(195444.000000,138084.000000,70450.000000,211.311531)}
{pt3dadd(195240.000000,138096.000000,70450.000000,172.526503)}
{pt3dadd(195096.000000,138108.000000,70475.000000,133.741476)}
{pt3dadd(194916.000000,138192.000000,70475.000000,124.492572)}
{pt3dadd(194940.000000,138264.000000,70600.000000,115.243668)}
{pt3dadd(194832.000000,138348.000000,70700.000000,105.994764)}
{pt3dadd(194664.000000,138408.000000,70750.000000,96.745860)}
{pt3dadd(194448.000000,138516.000000,70800.000000,114.353604)}
{pt3dadd(194316.000000,138564.000000,70875.000000,131.961348)}
{pt3dadd(194172.000000,138600.000000,70950.000000,149.569092)}
{pt3dadd(193956.000000,138684.000000,71125.000000,167.176836)}
{pt3dadd(193740.000000,138660.000000,71150.000000,141.635934)}
{pt3dadd(193524.000000,138528.000000,71350.000000,116.095032)}
{pt3dadd(193404.000000,138432.000000,71625.000000,116.095032)}

{create adhoc72}
{access adhoc72}
{connect adhoc72(1), adhoc46(0)}
{nseg = 1}
{strdef color color = "White"}
{pt3dclear()}
{pt3dadd(197088.000000,142812.000000,73125.000000,718.829820)}
{pt3dadd(196080.000000,142812.000000,72400.000000,240.734646)}
{pt3dadd(195888.000000,142920.000000,72450.000000,217.527831)}
{pt3dadd(195552.000000,142680.000000,72225.000000,194.321016)}
{pt3dadd(195312.000000,142656.000000,72175.000000,171.114201)}
{pt3dadd(195012.000000,142632.000000,72225.000000,147.907386)}
{pt3dadd(194724.000000,142620.000000,72150.000000,130.279711)}
{pt3dadd(194460.000000,142596.000000,72125.000000,112.652037)}
{pt3dadd(194196.000000,142560.000000,72300.000000,95.024362)}
{pt3dadd(194016.000000,142344.000000,72450.000000,77.396688)}
{pt3dadd(193872.000000,142428.000000,72425.000000,80.621550)}

{create adhoc73}
{access adhoc73}
{connect adhoc73(1), adhoc45(0)}
{nseg = 1}
{strdef color color = "White"}
{pt3dclear()}
{pt3dadd(196908.000000,144336.000000,73000.000000,718.829820)}
{pt3dadd(197160.000000,144336.000000,74050.000000,231.105276)}
{pt3dadd(197148.000000,144168.000000,74350.000000,223.482010)}
{pt3dadd(197052.000000,144048.000000,74675.000000,215.858745)}
{pt3dadd(196956.000000,143928.000000,74975.000000,208.235480)}
{pt3dadd(196836.000000,143940.000000,75225.000000,200.612214)}
{pt3dadd(196632.000000,143784.000000,75425.000000,200.612214)}
{pt3dadd(196512.000000,143892.000000,75650.000000,200.612214)}
{pt3dadd(196632.000000,143928.000000,75950.000000,200.612214)}
{pt3dadd(196668.000000,143988.000000,76150.000000,200.612214)}
{pt3dadd(196644.000000,144168.000000,76500.000000,222.679557)}
{pt3dadd(196644.000000,144264.000000,76825.000000,244.746900)}
{pt3dadd(196620.000000,144432.000000,77100.000000,266.814243)}
{pt3dadd(196680.000000,144516.000000,77375.000000,288.881586)}
{pt3dadd(196740.000000,144600.000000,77650.000000,266.814243)}
{pt3dadd(196416.000000,144708.000000,77925.000000,244.746900)}
{pt3dadd(196464.000000,144912.000000,78150.000000,222.679557)}
{pt3dadd(196524.000000,145020.000000,78450.000000,200.612214)}
{pt3dadd(196668.000000,145416.000000,78750.000000,192.253370)}
{pt3dadd(196848.000000,145320.000000,79075.000000,183.894525)}
{pt3dadd(196944.000000,145284.000000,79325.000000,175.535680)}
{pt3dadd(197052.000000,145092.000000,79650.000000,167.176836)}
{pt3dadd(197400.000000,144708.000000,79925.000000,154.406385)}
{pt3dadd(197484.000000,144348.000000,80175.000000,141.635934)}
{pt3dadd(197592.000000,144084.000000,80450.000000,128.865483)}
{pt3dadd(197676.000000,144300.000000,80775.000000,116.095032)}
{pt3dadd(197844.000000,144312.000000,80975.000000,106.420446)}
{pt3dadd(198132.000000,144240.000000,81250.000000,96.745860)}
{pt3dadd(198480.000000,144024.000000,81450.000000,67.184640)}

{create adhoc74}
{access adhoc74}
{connect adhoc74(1), adhoc44(0)}
{nseg = 1}
{strdef color color = "White"}
{pt3dclear()}
{pt3dadd(196920.000000,153552.000000,72250.000000,862.595802)}
{pt3dadd(196932.000000,153528.000000,72575.000000,915.803352)}
{pt3dadd(197316.000000,153456.000000,72975.000000,770.050413)}
{pt3dadd(197400.000000,153168.000000,73425.000000,624.297474)}
{pt3dadd(197448.000000,153024.000000,73875.000000,478.544535)}
{pt3dadd(197424.000000,153156.000000,74150.000000,332.791596)}
{pt3dadd(197484.000000,153132.000000,74475.000000,321.814093)}
{pt3dadd(197544.000000,153216.000000,74875.000000,310.836591)}
{pt3dadd(197568.000000,153240.000000,75200.000000,299.859089)}
{pt3dadd(197544.000000,153168.000000,75500.000000,288.881586)}
{pt3dadd(197676.000000,153372.000000,75850.000000,296.531176)}
{pt3dadd(197460.000000,153528.000000,76250.000000,304.180767)}
{pt3dadd(197376.000000,153648.000000,76650.000000,311.830357)}
{pt3dadd(197184.000000,153900.000000,77000.000000,319.479948)}
{pt3dadd(196992.000000,154128.000000,77350.000000,326.274435)}
{pt3dadd(196836.000000,154488.000000,77750.000000,333.068922)}
{pt3dadd(196692.000000,154896.000000,78200.000000,339.863409)}
{pt3dadd(196668.000000,155412.000000,78650.000000,346.657896)}
{pt3dadd(196608.000000,155712.000000,78975.000000,346.657896)}
{pt3dadd(196620.000000,156120.000000,79300.000000,346.657896)}
{pt3dadd(196716.000000,156684.000000,79600.000000,346.657896)}
{pt3dadd(196956.000000,157284.000000,80025.000000,346.657896)}
{pt3dadd(197268.000000,157824.000000,80425.000000,320.177083)}
{pt3dadd(197544.000000,158220.000000,80825.000000,293.696271)}
{pt3dadd(197580.000000,158232.000000,81175.000000,267.215459)}
{pt3dadd(197868.000000,158412.000000,81550.000000,240.734646)}
{pt3dadd(198120.000000,158532.000000,81875.000000,252.771381)}
{pt3dadd(198216.000000,158256.000000,82300.000000,264.808116)}
{pt3dadd(198192.000000,158004.000000,82800.000000,276.844851)}
{pt3dadd(198168.000000,157788.000000,82925.000000,288.881586)}
{pt3dadd(198708.000000,157548.000000,83100.000000,266.814243)}
{pt3dadd(198720.000000,157368.000000,83000.000000,244.746900)}
{pt3dadd(198708.000000,157152.000000,82950.000000,222.679557)}
{pt3dadd(198732.000000,156948.000000,82950.000000,200.612214)}
{pt3dadd(198816.000000,156732.000000,82900.000000,200.612214)}
{pt3dadd(198744.000000,156492.000000,82800.000000,200.612214)}
{pt3dadd(198768.000000,156300.000000,82825.000000,200.612214)}
{pt3dadd(198744.000000,156048.000000,82750.000000,200.612214)}
{pt3dadd(198684.000000,155796.000000,82700.000000,200.612214)}
{pt3dadd(198648.000000,155616.000000,82700.000000,200.612214)}
{pt3dadd(198588.000000,155352.000000,82750.000000,200.612214)}
{pt3dadd(198528.000000,155148.000000,82750.000000,200.612214)}
{pt3dadd(198540.000000,154944.000000,82750.000000,210.642822)}
{pt3dadd(198540.000000,154716.000000,82750.000000,220.673430)}
{pt3dadd(198516.000000,154476.000000,82850.000000,230.704038)}
{pt3dadd(198576.000000,154248.000000,82775.000000,240.734646)}
{pt3dadd(198720.000000,154020.000000,82825.000000,203.769995)}
{pt3dadd(198888.000000,153804.000000,82875.000000,166.805343)}
{pt3dadd(198936.000000,153588.000000,82725.000000,129.840691)}
{pt3dadd(199068.000000,153372.000000,82625.000000,92.876040)}
{pt3dadd(199308.000000,153144.000000,82600.000000,96.745860)}
{pt3dadd(199404.000000,152952.000000,82625.000000,80.621550)}

{create adhoc75}
{access adhoc75}
{connect adhoc75(1), adhoc3(0)}
{nseg = 1}
{strdef color color = "White"}
{pt3dclear()}
{pt3dadd(193704.000000,182784.000000,75850.000000,1242.137880)}
{pt3dadd(193380.000000,183096.000000,75650.000000,1242.137880)}
{pt3dadd(193308.000000,183288.000000,75675.000000,1242.137880)}
{pt3dadd(193140.000000,183468.000000,75725.000000,1242.137880)}
{pt3dadd(193092.000000,183636.000000,75650.000000,1242.137880)}
{pt3dadd(193044.000000,183864.000000,75575.000000,1242.137880)}
{pt3dadd(192864.000000,184092.000000,75575.000000,1242.137880)}
{pt3dadd(192588.000000,184284.000000,75500.000000,1242.137880)}
{pt3dadd(192492.000000,184476.000000,75500.000000,1242.137880)}
{pt3dadd(192324.000000,184680.000000,75375.000000,1242.137880)}
{pt3dadd(192144.000000,184872.000000,75250.000000,1242.137880)}
{pt3dadd(192012.000000,185112.000000,75325.000000,1242.137880)}
{pt3dadd(191820.000000,185340.000000,75425.000000,1242.137880)}
{pt3dadd(191532.000000,185556.000000,75350.000000,1242.137880)}
{pt3dadd(191352.000000,185736.000000,75375.000000,1242.137880)}
{pt3dadd(191208.000000,185964.000000,75450.000000,1242.137880)}
{pt3dadd(190932.000000,186156.000000,75475.000000,1242.137880)}
{pt3dadd(190764.000000,186324.000000,75150.000000,1242.137880)}

{create adhoc76}
{access adhoc76}
{connect adhoc76(1), adhoc75(0)}
{nseg = 1}
{strdef color color = "White"}
{pt3dclear()}
{pt3dadd(190764.000000,186324.000000,75150.000000,1242.137880)}
{pt3dadd(190596.000000,186540.000000,75100.000000,1430.942868)}
{pt3dadd(190464.000000,186708.000000,74950.000000,1368.007872)}
{pt3dadd(190344.000000,186912.000000,74900.000000,1305.072876)}
{pt3dadd(189984.000000,187092.000000,74700.000000,1242.137880)}
{pt3dadd(189936.000000,187284.000000,74550.000000,1242.137880)}
{pt3dadd(189792.000000,187476.000000,74425.000000,1242.137880)}
{pt3dadd(189804.000000,187656.000000,74375.000000,1242.137880)}
{pt3dadd(189852.000000,187872.000000,74200.000000,1242.137880)}
{pt3dadd(189720.000000,188076.000000,74025.000000,1242.137880)}

{create adhoc77}
{access adhoc77}
{connect adhoc77(1), adhoc76(0)}
{nseg = 1}
{strdef color color = "White"}
{pt3dclear()}
{pt3dadd(189720.000000,188076.000000,74025.000000,1242.137880)}
{pt3dadd(189672.000000,188304.000000,73975.000000,1242.137880)}
{pt3dadd(189636.000000,188520.000000,73950.000000,1242.137880)}
{pt3dadd(189600.000000,188736.000000,73925.000000,1211.623799)}
{pt3dadd(189636.000000,188964.000000,73850.000000,1181.109717)}
{pt3dadd(189552.000000,189132.000000,73825.000000,1150.595636)}
{pt3dadd(189456.000000,189360.000000,73875.000000,1120.081554)}
{pt3dadd(189324.000000,189540.000000,73925.000000,1150.595636)}
{pt3dadd(189336.000000,189720.000000,73950.000000,1181.109717)}
{pt3dadd(189312.000000,189900.000000,74050.000000,1211.623799)}
{pt3dadd(189360.000000,190104.000000,74100.000000,1242.137880)}
{pt3dadd(189036.000000,190260.000000,74175.000000,1289.339096)}
{pt3dadd(188988.000000,190440.000000,74225.000000,1336.540311)}
{pt3dadd(188952.000000,190608.000000,74275.000000,1383.741527)}
{pt3dadd(188952.000000,190800.000000,74300.000000,1430.942742)}
{pt3dadd(189012.000000,190992.000000,74350.000000,1445.848407)}
{pt3dadd(188928.000000,191160.000000,74450.000000,1460.754072)}
{pt3dadd(188808.000000,191352.000000,74475.000000,1475.659737)}
{pt3dadd(188820.000000,191520.000000,74500.000000,1490.565402)}
{pt3dadd(188832.000000,191700.000000,74525.000000,1428.458522)}
{pt3dadd(188832.000000,191856.000000,74550.000000,1366.351641)}
{pt3dadd(188808.000000,192024.000000,74650.000000,1304.244761)}
{pt3dadd(188580.000000,192204.000000,74675.000000,1242.137880)}
{pt3dadd(188616.000000,192420.000000,74825.000000,1242.137880)}
{pt3dadd(188592.000000,192624.000000,74850.000000,1242.137880)}
{pt3dadd(188424.000000,192852.000000,74925.000000,1242.137880)}
{pt3dadd(188292.000000,193032.000000,75025.000000,1242.137880)}
{pt3dadd(188172.000000,193212.000000,75125.000000,1190.382147)}
{pt3dadd(188088.000000,193380.000000,75050.000000,1138.626414)}
{pt3dadd(188184.000000,193560.000000,75300.000000,1086.870681)}
{pt3dadd(187920.000000,193752.000000,75425.000000,1035.114948)}
{pt3dadd(187824.000000,193932.000000,75475.000000,1035.114948)}
{pt3dadd(187800.000000,194088.000000,75525.000000,1035.114948)}
{pt3dadd(187680.000000,194256.000000,75575.000000,1035.114948)}
{pt3dadd(187608.000000,194460.000000,75600.000000,1035.114948)}
{pt3dadd(187332.000000,194628.000000,75750.000000,1035.114948)}
{pt3dadd(187164.000000,194796.000000,75900.000000,1035.114948)}
{pt3dadd(187140.000000,194952.000000,75950.000000,1035.114948)}
{pt3dadd(187068.000000,195108.000000,76000.000000,1035.114948)}
{pt3dadd(186972.000000,195252.000000,76050.000000,1086.870681)}
{pt3dadd(186900.000000,195420.000000,76125.000000,1138.626414)}
{pt3dadd(186912.000000,195588.000000,76275.000000,1190.382147)}
{pt3dadd(186780.000000,195756.000000,76350.000000,1242.137880)}
{pt3dadd(186648.000000,195924.000000,76425.000000,1190.382147)}
{pt3dadd(186648.000000,196092.000000,76500.000000,1138.626414)}
{pt3dadd(186612.000000,196260.000000,76550.000000,1086.870681)}
{pt3dadd(186564.000000,196428.000000,76650.000000,1035.114948)}
{pt3dadd(186516.000000,196632.000000,76750.000000,1035.114948)}
{pt3dadd(186516.000000,196848.000000,76800.000000,1035.114948)}
{pt3dadd(186516.000000,197028.000000,76900.000000,1035.114948)}
{pt3dadd(186552.000000,197208.000000,77000.000000,1035.114948)}
{pt3dadd(186504.000000,197400.000000,77100.000000,1035.114948)}
{pt3dadd(186360.000000,197568.000000,77075.000000,1035.114948)}
{pt3dadd(186264.000000,197760.000000,77075.000000,1035.114948)}
{pt3dadd(186312.000000,197952.000000,77225.000000,1035.114948)}
{pt3dadd(186192.000000,198168.000000,78025.000000,862.595802)}

{create adhoc78}
{access adhoc78}
{connect adhoc78(1), adhoc77(0)}
{nseg = 1}
{strdef color color = "White"}
{pt3dclear()}
{pt3dadd(186192.000000,198168.000000,78025.000000,862.595802)}
{pt3dadd(186588.000000,198888.000000,78650.000000,862.595802)}
{pt3dadd(186696.000000,199380.000000,79375.000000,790.712811)}
{pt3dadd(186600.000000,199920.000000,80200.000000,718.829820)}
{pt3dadd(186684.000000,200556.000000,80975.000000,718.829820)}
{pt3dadd(186540.000000,201120.000000,81800.000000,718.829820)}
{pt3dadd(186600.000000,201612.000000,82700.000000,718.829820)}
{pt3dadd(186276.000000,202176.000000,83425.000000,718.829820)}
{pt3dadd(186084.000000,202608.000000,84025.000000,862.595802)}

{create adhoc79}
{access adhoc79}
{connect adhoc79(1), adhoc78(0)}
{nseg = 1}
{strdef color color = "White"}
{pt3dclear()}
{pt3dadd(186084.000000,202608.000000,84025.000000,862.595802)}
{pt3dadd(186384.000000,202392.000000,84325.000000,690.076674)}
{pt3dadd(186516.000000,202368.000000,84675.000000,697.264960)}
{pt3dadd(187140.000000,202224.000000,85150.000000,704.453247)}
{pt3dadd(187776.000000,202596.000000,85925.000000,711.641533)}
{pt3dadd(188352.000000,202692.000000,86625.000000,718.829820)}
{pt3dadd(188868.000000,202932.000000,87300.000000,754.771316)}
{pt3dadd(189312.000000,203124.000000,88050.000000,790.712811)}
{pt3dadd(189660.000000,203052.000000,88775.000000,826.654307)}
{pt3dadd(189840.000000,203304.000000,89500.000000,862.595802)}
{pt3dadd(189972.000000,203172.000000,90350.000000,862.595802)}
{pt3dadd(190356.000000,202932.000000,91250.000000,862.595802)}
{pt3dadd(190536.000000,202524.000000,92050.000000,862.595802)}
{pt3dadd(190680.000000,202188.000000,92675.000000,862.595802)}
{pt3dadd(191076.000000,202056.000000,93500.000000,905.725589)}
{pt3dadd(191472.000000,202164.000000,94100.000000,948.855375)}
{pt3dadd(191424.000000,202500.000000,94575.000000,991.985162)}
{pt3dadd(191604.000000,202944.000000,95250.000000,1035.114948)}
{pt3dadd(191628.000000,203100.000000,96100.000000,1086.870681)}
{pt3dadd(191448.000000,203616.000000,97125.000000,1138.626414)}
{pt3dadd(191304.000000,203856.000000,98050.000000,1190.382147)}
{pt3dadd(191280.000000,203820.000000,98850.000000,1242.137880)}
{pt3dadd(191112.000000,203856.000000,99550.000000,1190.382147)}
{pt3dadd(190872.000000,203964.000000,100350.000000,1138.626414)}
{pt3dadd(190392.000000,203904.000000,101150.000000,1086.870681)}
{pt3dadd(190128.000000,204012.000000,101725.000000,1035.114948)}
{pt3dadd(189696.000000,203988.000000,102625.000000,1035.114948)}
{pt3dadd(189672.000000,204180.000000,103400.000000,1035.114948)}
{pt3dadd(189672.000000,204192.000000,103725.000000,1035.114948)}
{pt3dadd(189552.000000,204060.000000,104425.000000,1035.114948)}
{pt3dadd(189432.000000,204156.000000,105375.000000,991.985162)}
{pt3dadd(189432.000000,204336.000000,106075.000000,948.855375)}
{pt3dadd(189252.000000,204312.000000,106600.000000,905.725589)}
{pt3dadd(188988.000000,204120.000000,107325.000000,862.595802)}
{pt3dadd(188664.000000,204024.000000,108175.000000,826.654307)}
{pt3dadd(188520.000000,203784.000000,108875.000000,790.712811)}
{pt3dadd(188016.000000,203592.000000,109850.000000,754.771316)}
{pt3dadd(187512.000000,203040.000000,110925.000000,718.829820)}
{pt3dadd(187056.000000,202728.000000,111800.000000,718.829820)}
{pt3dadd(186312.000000,202272.000000,112450.000000,718.829820)}
{pt3dadd(186132.000000,202056.000000,113175.000000,718.829820)}
{pt3dadd(185244.000000,201648.000000,113925.000000,718.829820)}
{pt3dadd(184644.000000,201516.000000,114775.000000,688.878585)}
{pt3dadd(183852.000000,201036.000000,115825.000000,658.927350)}
{pt3dadd(183384.000000,200784.000000,116500.000000,628.976115)}
{pt3dadd(182820.000000,200424.000000,117250.000000,599.024880)}
{pt3dadd(182148.000000,199764.000000,118025.000000,621.787828)}
{pt3dadd(181164.000000,199440.000000,118875.000000,644.550777)}
{pt3dadd(180888.000000,198600.000000,119675.000000,667.313725)}
{pt3dadd(179784.000000,197640.000000,120450.000000,690.076674)}
{pt3dadd(179172.000000,197160.000000,120925.000000,667.313725)}
{pt3dadd(179004.000000,196788.000000,121275.000000,644.550777)}
{pt3dadd(178584.000000,196380.000000,121525.000000,621.787828)}
{pt3dadd(178188.000000,196200.000000,121750.000000,599.024880)}
{pt3dadd(177792.000000,195672.000000,122075.000000,599.024880)}
{pt3dadd(177312.000000,195168.000000,122625.000000,599.024880)}
{pt3dadd(176916.000000,194784.000000,122975.000000,599.024880)}
{pt3dadd(176556.000000,194424.000000,123300.000000,599.024880)}
{pt3dadd(176196.000000,194040.000000,123600.000000,621.787828)}
{pt3dadd(175932.000000,193728.000000,123775.000000,644.550777)}
{pt3dadd(175740.000000,193272.000000,123875.000000,667.313725)}
{pt3dadd(175440.000000,192960.000000,124025.000000,690.076674)}
{pt3dadd(175080.000000,192192.000000,124075.000000,667.313725)}
{pt3dadd(174804.000000,191856.000000,124300.000000,644.550777)}
{pt3dadd(174468.000000,191436.000000,124450.000000,621.787828)}
{pt3dadd(174276.000000,190992.000000,124550.000000,599.024880)}
{pt3dadd(174012.000000,190584.000000,124850.000000,599.024880)}
{pt3dadd(173748.000000,190116.000000,125075.000000,599.024880)}
{pt3dadd(173292.000000,189648.000000,125425.000000,599.024880)}
{pt3dadd(172932.000000,189180.000000,125725.000000,599.024880)}
{pt3dadd(172608.000000,188760.000000,125925.000000,587.283993)}
{pt3dadd(172380.000000,188280.000000,125975.000000,575.543106)}
{pt3dadd(172116.000000,187932.000000,126225.000000,563.802219)}
{pt3dadd(171840.000000,187524.000000,126375.000000,552.061332)}
{pt3dadd(171336.000000,187140.000000,126575.000000,538.842843)}
{pt3dadd(171000.000000,186792.000000,126675.000000,525.624354)}
{pt3dadd(170568.000000,186420.000000,126875.000000,512.405865)}
{pt3dadd(170148.000000,186036.000000,126950.000000,499.187376)}
{pt3dadd(169548.000000,185700.000000,127150.000000,518.156496)}
{pt3dadd(168972.000000,185220.000000,127375.000000,537.125616)}
{pt3dadd(168708.000000,184788.000000,127575.000000,556.094736)}
{pt3dadd(168108.000000,184404.000000,127850.000000,575.063856)}
{pt3dadd(167544.000000,183996.000000,128000.000000,581.054112)}
{pt3dadd(166968.000000,183588.000000,128050.000000,587.044368)}
{pt3dadd(166788.000000,183096.000000,128025.000000,593.034624)}
{pt3dadd(166524.000000,182676.000000,128050.000000,599.024880)}
{pt3dadd(166116.000000,182232.000000,128400.000000,574.065504)}
{pt3dadd(165792.000000,181848.000000,128725.000000,549.106128)}
{pt3dadd(165660.000000,181440.000000,128825.000000,524.146752)}
{pt3dadd(165672.000000,181116.000000,128875.000000,499.187376)}
{pt3dadd(165444.000000,180696.000000,129000.000000,524.146752)}
{pt3dadd(165300.000000,180384.000000,129125.000000,549.106128)}
{pt3dadd(165156.000000,179940.000000,129375.000000,574.065504)}
{pt3dadd(164892.000000,179508.000000,129425.000000,599.024880)}
{pt3dadd(164700.000000,179148.000000,129675.000000,599.024880)}
{pt3dadd(164340.000000,178764.000000,129950.000000,599.024880)}
{pt3dadd(163776.000000,178440.000000,130350.000000,599.024880)}
{pt3dadd(163500.000000,178128.000000,130400.000000,599.024880)}
{pt3dadd(163176.000000,177804.000000,130800.000000,621.787828)}
{pt3dadd(162996.000000,177456.000000,130950.000000,644.550777)}
{pt3dadd(161952.000000,176772.000000,131675.000000,667.313725)}
{pt3dadd(160896.000000,175908.000000,132475.000000,690.076674)}
{pt3dadd(160308.000000,174972.000000,133250.000000,697.264960)}
{pt3dadd(159924.000000,174120.000000,133925.000000,704.453247)}
{pt3dadd(159624.000000,173028.000000,134600.000000,711.641533)}
{pt3dadd(159000.000000,171852.000000,135350.000000,718.829820)}
{pt3dadd(158436.000000,171204.000000,136000.000000,754.771316)}
{pt3dadd(157500.000000,170316.000000,136650.000000,790.712811)}
{pt3dadd(156648.000000,169644.000000,137375.000000,826.654307)}
{pt3dadd(156264.000000,169284.000000,137875.000000,862.595802)}
{pt3dadd(157044.000000,168828.000000,138400.000000,790.712816)}
{pt3dadd(156780.000000,168084.000000,139075.000000,718.829829)}
{pt3dadd(156600.000000,168060.000000,139575.000000,646.946843)}
{pt3dadd(156180.000000,167544.000000,140275.000000,575.063856)}
{pt3dadd(155580.000000,167544.000000,141125.000000,646.946843)}
{pt3dadd(155052.000000,166920.000000,141900.000000,718.829829)}
{pt3dadd(154596.000000,165420.000000,142875.000000,790.712816)}
{pt3dadd(154104.000000,164304.000000,143625.000000,862.595802)}
{pt3dadd(153516.000000,163308.000000,144375.000000,895.374441)}
{pt3dadd(153528.000000,162648.000000,145150.000000,928.153080)}
{pt3dadd(153348.000000,162084.000000,146100.000000,960.931719)}
{pt3dadd(153036.000000,161328.000000,146850.000000,993.710358)}
{pt3dadd(153180.000000,160728.000000,147550.000000,1055.817239)}
{pt3dadd(153372.000000,160212.000000,148275.000000,1117.924119)}
{pt3dadd(153708.000000,159564.000000,149025.000000,1180.031000)}
{pt3dadd(153864.000000,159000.000000,149775.000000,1242.137880)}
{pt3dadd(153900.000000,158808.000000,150400.000000,1147.252361)}
{pt3dadd(154008.000000,158160.000000,151150.000000,1052.366841)}
{pt3dadd(154236.000000,157464.000000,151850.000000,957.481322)}
{pt3dadd(154176.000000,156756.000000,152450.000000,862.595802)}
{pt3dadd(154464.000000,156156.000000,153175.000000,853.969838)}
{pt3dadd(154692.000000,155544.000000,153875.000000,845.343873)}
{pt3dadd(155016.000000,154824.000000,154625.000000,836.717909)}
{pt3dadd(155172.000000,154164.000000,155325.000000,828.091944)}
{pt3dadd(155304.000000,153660.000000,156075.000000,931.603428)}
{pt3dadd(155916.000000,153432.000000,156550.000000,1035.114912)}
{pt3dadd(156984.000000,153120.000000,157050.000000,1138.626396)}
{pt3dadd(157224.000000,152712.000000,157625.000000,1242.137880)}
{pt3dadd(157896.000000,152292.000000,158175.000000,1190.382147)}
{pt3dadd(157872.000000,151548.000000,159000.000000,1138.626414)}
{pt3dadd(158100.000000,150780.000000,159825.000000,1086.870681)}
{pt3dadd(158856.000000,149760.000000,160350.000000,1035.114948)}
{pt3dadd(159144.000000,149496.000000,160900.000000,1086.870681)}
{pt3dadd(159552.000000,148608.000000,161750.000000,1138.626414)}
{pt3dadd(159852.000000,148032.000000,162350.000000,1190.382147)}
{pt3dadd(160164.000000,147276.000000,163000.000000,1242.137880)}
{pt3dadd(160560.000000,146436.000000,163750.000000,1242.137880)}
{pt3dadd(160980.000000,145848.000000,164125.000000,1242.137880)}
{pt3dadd(160800.000000,145188.000000,164800.000000,1242.137880)}
{pt3dadd(161088.000000,144432.000000,165450.000000,1242.137880)}
{pt3dadd(162048.000000,143784.000000,166275.000000,1304.244761)}
{pt3dadd(162480.000000,142776.000000,167000.000000,1366.351641)}
{pt3dadd(163176.000000,142548.000000,167725.000000,1428.458522)}
{pt3dadd(163488.000000,142116.000000,168425.000000,1490.565402)}
{pt3dadd(163308.000000,141900.000000,169025.000000,18.000000)}
{pt3dadd(163584.000000,141180.000000,169600.000000,426.045960)}
{pt3dadd(163932.000000,140736.000000,170150.000000,834.091920)}
{pt3dadd(163968.000000,140436.000000,170625.000000,1242.137880)}
{pt3dadd(163896.000000,139908.000000,171200.000000,1304.244761)}
{pt3dadd(164076.000000,139512.000000,171675.000000,1366.351641)}
{pt3dadd(164016.000000,139020.000000,172250.000000,1428.458522)}
{pt3dadd(164208.000000,138480.000000,172825.000000,1490.565402)}
{pt3dadd(164244.000000,138108.000000,173425.000000,1490.565402)}
{pt3dadd(164148.000000,137832.000000,174000.000000,1490.565402)}
{pt3dadd(163440.000000,137484.000000,174600.000000,1490.565402)}
{pt3dadd(163308.000000,137064.000000,175250.000000,1490.565402)}
{pt3dadd(163656.000000,136740.000000,175975.000000,1490.565402)}
{pt3dadd(163548.000000,136536.000000,176575.000000,1490.565402)}
{pt3dadd(163740.000000,136404.000000,177225.000000,1490.565402)}
{pt3dadd(163728.000000,136212.000000,177825.000000,1490.565402)}
{pt3dadd(163584.000000,135984.000000,178700.000000,1428.458522)}
{pt3dadd(163596.000000,135312.000000,179425.000000,1366.351641)}
{pt3dadd(163500.000000,134544.000000,180150.000000,1304.244761)}
{pt3dadd(163404.000000,133836.000000,180825.000000,1242.137880)}
{pt3dadd(163212.000000,133296.000000,181600.000000,1173.130236)}
{pt3dadd(163032.000000,133152.000000,182100.000000,1104.122592)}
{pt3dadd(162852.000000,132780.000000,182475.000000,1035.114948)}
{pt3dadd(162756.000000,132648.000000,182800.000000,1035.114948)}

{create adhoc80}
{access adhoc80}
{connect adhoc80(1), adhoc78(0)}
{nseg = 1}
{strdef color color = "White"}
{pt3dclear()}
{pt3dadd(186084.000000,202608.000000,84025.000000,862.595802)}
{pt3dadd(185976.000000,202872.000000,84150.000000,862.595802)}
{pt3dadd(185832.000000,203160.000000,84275.000000,920.102184)}
{pt3dadd(185556.000000,203412.000000,83700.000000,977.608566)}
{pt3dadd(185400.000000,203652.000000,83250.000000,1035.114948)}
{pt3dadd(185208.000000,203904.000000,82750.000000,901.133055)}
{pt3dadd(184932.000000,204108.000000,82550.000000,767.151162)}
{pt3dadd(184896.000000,204300.000000,82650.000000,633.169269)}
{pt3dadd(184764.000000,204564.000000,82600.000000,499.187376)}
{pt3dadd(184716.000000,204720.000000,82675.000000,518.156496)}
{pt3dadd(184812.000000,204888.000000,82700.000000,537.125616)}
{pt3dadd(184812.000000,205092.000000,82675.000000,556.094736)}
{pt3dadd(184668.000000,205224.000000,82900.000000,575.063856)}
{pt3dadd(184608.000000,205380.000000,82975.000000,611.005347)}
{pt3dadd(184512.000000,205572.000000,82900.000000,646.946838)}
{pt3dadd(184596.000000,205716.000000,82875.000000,682.888329)}
{pt3dadd(184548.000000,205848.000000,82950.000000,718.829820)}
{pt3dadd(184488.000000,205980.000000,82975.000000,711.641515)}
{pt3dadd(184512.000000,206112.000000,82975.000000,704.453211)}
{pt3dadd(184560.000000,206268.000000,82975.000000,697.264906)}
{pt3dadd(184500.000000,206460.000000,83000.000000,690.076602)}
{pt3dadd(184524.000000,206712.000000,83025.000000,697.264906)}
{pt3dadd(184524.000000,206988.000000,82875.000000,704.453211)}
{pt3dadd(184512.000000,207180.000000,82950.000000,711.641515)}
{pt3dadd(184512.000000,207324.000000,82850.000000,718.829820)}
{pt3dadd(184548.000000,207528.000000,82900.000000,663.919209)}
{pt3dadd(184596.000000,207756.000000,82850.000000,609.008598)}
{pt3dadd(184536.000000,208020.000000,82925.000000,554.097987)}
{pt3dadd(184632.000000,208212.000000,82975.000000,499.187376)}
{pt3dadd(184716.000000,208524.000000,82950.000000,524.146752)}
{pt3dadd(184752.000000,208716.000000,83125.000000,549.106128)}
{pt3dadd(184500.000000,208884.000000,83075.000000,574.065504)}
{pt3dadd(184416.000000,209136.000000,83250.000000,599.024880)}
{pt3dadd(184188.000000,209496.000000,82975.000000,549.106137)}
{pt3dadd(184056.000000,209748.000000,82900.000000,499.187394)}
{pt3dadd(183972.000000,210072.000000,83125.000000,449.268651)}
{pt3dadd(183744.000000,210456.000000,83000.000000,399.349908)}
{pt3dadd(183540.000000,210756.000000,82925.000000,386.176905)}
{pt3dadd(183384.000000,211008.000000,82800.000000,373.003902)}
{pt3dadd(183336.000000,211260.000000,82775.000000,359.830899)}
{pt3dadd(183300.000000,211512.000000,82850.000000,346.657896)}
{pt3dadd(183216.000000,211704.000000,82725.000000,320.177083)}
{pt3dadd(183036.000000,211992.000000,82575.000000,293.696271)}
{pt3dadd(183024.000000,212184.000000,82625.000000,267.215459)}
{pt3dadd(183060.000000,212448.000000,82625.000000,240.734646)}
{pt3dadd(183012.000000,212748.000000,82650.000000,230.704038)}
{pt3dadd(182976.000000,212916.000000,82625.000000,220.673430)}
{pt3dadd(183300.000000,213216.000000,82700.000000,210.642822)}
{pt3dadd(183372.000000,213444.000000,82625.000000,200.612214)}
{pt3dadd(182016.000000,213708.000000,82100.000000,300.215380)}
{pt3dadd(181440.000000,213960.000000,81850.000000,399.818547)}
{pt3dadd(181104.000000,214296.000000,81425.000000,499.421713)}
{pt3dadd(180996.000000,214572.000000,81575.000000,599.024880)}
{pt3dadd(181020.000000,214920.000000,81575.000000,628.976115)}
{pt3dadd(180876.000000,215172.000000,81550.000000,658.927350)}
{pt3dadd(180840.000000,215424.000000,81325.000000,688.878585)}
{pt3dadd(180756.000000,215580.000000,81000.000000,718.829820)}
{pt3dadd(180468.000000,215844.000000,80800.000000,718.829820)}
{pt3dadd(180264.000000,216096.000000,80800.000000,718.829820)}
{pt3dadd(180084.000000,216252.000000,80700.000000,718.829820)}
{pt3dadd(180024.000000,216564.000000,80500.000000,718.829820)}
{pt3dadd(179844.000000,216828.000000,80150.000000,737.864442)}
{pt3dadd(179364.000000,217200.000000,79675.000000,756.899064)}
{pt3dadd(178992.000000,218136.000000,79225.000000,775.933686)}
{pt3dadd(178524.000000,218280.000000,78800.000000,794.968308)}
{pt3dadd(178176.000000,218352.000000,78375.000000,993.710286)}

{create adhoc81}
{access adhoc81}
{connect adhoc81(1), adhoc80(0)}
{nseg = 1}
{strdef color color = "White"}
{pt3dclear()}
{pt3dadd(178176.000000,218352.000000,78375.000000,993.710286)}
{pt3dadd(177888.000000,218448.000000,77850.000000,1035.114948)}
{pt3dadd(177636.000000,218388.000000,77425.000000,1035.114948)}
{pt3dadd(177288.000000,218580.000000,76850.000000,1035.114948)}
{pt3dadd(177036.000000,218760.000000,76375.000000,1035.114948)}
{pt3dadd(176856.000000,218808.000000,75975.000000,1035.114948)}
{pt3dadd(176508.000000,218844.000000,75625.000000,1035.114948)}
{pt3dadd(176268.000000,219180.000000,75225.000000,1035.114948)}
{pt3dadd(176136.000000,219216.000000,75000.000000,1035.114948)}

{create adhoc82}
{access adhoc82}
{connect adhoc82(1), adhoc81(0)}
{nseg = 1}
{strdef color color = "White"}
{pt3dclear()}
{pt3dadd(176136.000000,219216.000000,75000.000000,1035.114948)}
{pt3dadd(175884.000000,219360.000000,74575.000000,993.710358)}
{pt3dadd(175560.000000,219552.000000,74025.000000,960.931719)}
{pt3dadd(175260.000000,219576.000000,73575.000000,928.153080)}
{pt3dadd(174960.000000,219516.000000,73175.000000,895.374441)}
{pt3dadd(174576.000000,219744.000000,72800.000000,862.595802)}
{pt3dadd(174180.000000,219972.000000,72450.000000,796.703072)}
{pt3dadd(173748.000000,220140.000000,72100.000000,730.810341)}
{pt3dadd(173544.000000,220248.000000,72000.000000,664.917611)}
{pt3dadd(173352.000000,220344.000000,71875.000000,599.024880)}
{pt3dadd(173172.000000,220464.000000,71825.000000,599.024880)}
{pt3dadd(172980.000000,220512.000000,71450.000000,599.024880)}
{pt3dadd(172788.000000,220536.000000,71425.000000,599.024880)}
{pt3dadd(172608.000000,220764.000000,71225.000000,599.024880)}
{pt3dadd(172428.000000,220992.000000,71225.000000,599.024880)}
{pt3dadd(172248.000000,221208.000000,71150.000000,599.024880)}
{pt3dadd(172044.000000,221196.000000,71000.000000,599.024880)}
{pt3dadd(171864.000000,221364.000000,70900.000000,599.024880)}
{pt3dadd(171672.000000,221604.000000,70850.000000,574.065504)}
{pt3dadd(171528.000000,221772.000000,70775.000000,549.106128)}
{pt3dadd(171336.000000,221904.000000,70750.000000,524.146752)}
{pt3dadd(171144.000000,222132.000000,70925.000000,499.187376)}
{pt3dadd(170976.000000,222276.000000,70950.000000,499.187376)}
{pt3dadd(171288.000000,222420.000000,71325.000000,499.187376)}
{pt3dadd(171096.000000,222708.000000,71300.000000,499.187376)}
{pt3dadd(170952.000000,222960.000000,71250.000000,499.187376)}
{pt3dadd(170796.000000,223128.000000,71275.000000,478.387903)}
{pt3dadd(170700.000000,223308.000000,71350.000000,457.588431)}
{pt3dadd(170400.000000,223500.000000,71325.000000,436.788958)}
{pt3dadd(170160.000000,223716.000000,71400.000000,415.989486)}
{pt3dadd(169788.000000,223932.000000,71500.000000,422.404371)}
{pt3dadd(169512.000000,224208.000000,71425.000000,428.819256)}
{pt3dadd(169296.000000,224688.000000,71300.000000,435.234141)}
{pt3dadd(168996.000000,224964.000000,71200.000000,441.649026)}
{pt3dadd(168708.000000,225264.000000,71225.000000,435.234141)}
{pt3dadd(168396.000000,225516.000000,71225.000000,428.819256)}
{pt3dadd(168132.000000,225816.000000,71025.000000,422.404371)}
{pt3dadd(167796.000000,226092.000000,71150.000000,415.989486)}
{pt3dadd(167568.000000,226272.000000,71250.000000,457.588431)}
{pt3dadd(167280.000000,226596.000000,71300.000000,499.187376)}
{pt3dadd(166812.000000,226932.000000,71625.000000,346.657896)}

{create adhoc83}
{access adhoc83}
{connect adhoc83(1), adhoc82(0)}
{nseg = 1}
{strdef color color = "White"}
{pt3dclear()}
{pt3dadd(166812.000000,226932.000000,71625.000000,346.657896)}
{pt3dadd(166452.000000,227196.000000,71750.000000,499.187376)}
{pt3dadd(166080.000000,227616.000000,72175.000000,454.260519)}
{pt3dadd(165816.000000,227916.000000,72250.000000,409.333662)}
{pt3dadd(165444.000000,228504.000000,72575.000000,364.406805)}
{pt3dadd(165120.000000,229056.000000,72825.000000,319.479948)}
{pt3dadd(165180.000000,229356.000000,72875.000000,328.539264)}
{pt3dadd(165060.000000,229584.000000,72875.000000,337.598580)}
{pt3dadd(164856.000000,229812.000000,72900.000000,346.657896)}
{pt3dadd(164676.000000,230076.000000,72675.000000,240.734646)}

{create adhoc84}
{access adhoc84}
{connect adhoc84(1), adhoc82(0)}
{nseg = 1}
{strdef color color = "White"}
{pt3dclear()}
{pt3dadd(166812.000000,226932.000000,71625.000000,346.657896)}
{pt3dadd(167004.000000,226704.000000,71175.000000,332.791596)}
{pt3dadd(167112.000000,226740.000000,70850.000000,278.617455)}
{pt3dadd(167040.000000,226800.000000,70675.000000,224.443314)}
{pt3dadd(166896.000000,227184.000000,70400.000000,170.269173)}
{pt3dadd(166884.000000,227424.000000,70125.000000,116.095032)}
{pt3dadd(166932.000000,227724.000000,69875.000000,116.095032)}

{create adhoc85}
{access adhoc85}
{connect adhoc85(1), adhoc81(0)}
{nseg = 1}
{strdef color color = "White"}
{pt3dclear()}
{pt3dadd(176136.000000,219216.000000,75000.000000,1035.114948)}
{pt3dadd(175860.000000,219036.000000,75125.000000,862.595802)}
{pt3dadd(175536.000000,218856.000000,75250.000000,688.741061)}
{pt3dadd(175224.000000,218748.000000,74900.000000,514.886319)}
{pt3dadd(174948.000000,218556.000000,74850.000000,341.031578)}
{pt3dadd(174660.000000,218268.000000,74850.000000,167.176836)}
{pt3dadd(174324.000000,218088.000000,75000.000000,167.176836)}
{pt3dadd(174072.000000,217908.000000,75125.000000,167.176836)}
{pt3dadd(173856.000000,217740.000000,75200.000000,167.176836)}
{pt3dadd(173544.000000,217488.000000,75175.000000,167.176836)}
{pt3dadd(173208.000000,216888.000000,75025.000000,139.314042)}
{pt3dadd(173352.000000,216396.000000,74725.000000,167.176836)}

{create adhoc86}
{access adhoc86}
{connect adhoc86(1), adhoc80(0)}
{nseg = 1}
{strdef color color = "White"}
{pt3dclear()}
{pt3dadd(178176.000000,218352.000000,78375.000000,993.710286)}
{pt3dadd(177684.000000,218520.000000,78100.000000,1035.114948)}
{pt3dadd(177324.000000,218628.000000,77900.000000,836.519873)}
{pt3dadd(177036.000000,218748.000000,77950.000000,637.924797)}
{pt3dadd(176748.000000,218988.000000,78100.000000,439.329722)}
{pt3dadd(176436.000000,219060.000000,78150.000000,240.734646)}
{pt3dadd(176148.000000,219216.000000,78200.000000,252.771381)}
{pt3dadd(175800.000000,219552.000000,78400.000000,264.808116)}
{pt3dadd(175500.000000,219804.000000,78600.000000,276.844851)}
{pt3dadd(175200.000000,220140.000000,78700.000000,288.881586)}
{pt3dadd(174888.000000,220500.000000,78925.000000,299.859080)}
{pt3dadd(174540.000000,220836.000000,78975.000000,310.836573)}
{pt3dadd(174312.000000,221196.000000,78975.000000,321.814067)}
{pt3dadd(174132.000000,221508.000000,79175.000000,332.791560)}
{pt3dadd(174048.000000,221844.000000,79150.000000,289.716116)}
{pt3dadd(173808.000000,222096.000000,79250.000000,246.640671)}
{pt3dadd(173628.000000,222456.000000,79400.000000,203.565227)}
{pt3dadd(173424.000000,222864.000000,79525.000000,160.489782)}
{pt3dadd(173328.000000,223236.000000,79925.000000,192.587733)}
{pt3dadd(173280.000000,223440.000000,79925.000000,224.685684)}
{pt3dadd(173088.000000,223860.000000,80150.000000,256.783635)}
{pt3dadd(173088.000000,224220.000000,80325.000000,288.881586)}
{pt3dadd(172944.000000,224592.000000,80650.000000,266.814243)}
{pt3dadd(172908.000000,224868.000000,80825.000000,244.746900)}
{pt3dadd(172896.000000,225012.000000,81400.000000,222.679557)}
{pt3dadd(172776.000000,225396.000000,81975.000000,200.612214)}
{pt3dadd(172596.000000,225960.000000,82700.000000,192.253370)}
{pt3dadd(172872.000000,225876.000000,83300.000000,183.894525)}
{pt3dadd(173712.000000,225612.000000,83675.000000,175.535680)}
{pt3dadd(174024.000000,225756.000000,84275.000000,167.176836)}
{pt3dadd(174408.000000,225888.000000,84950.000000,167.176836)}
{pt3dadd(174480.000000,226200.000000,85650.000000,167.176836)}
{pt3dadd(174444.000000,226788.000000,86250.000000,167.176836)}
{pt3dadd(174720.000000,227208.000000,86800.000000,167.176836)}
{pt3dadd(174072.000000,227928.000000,87225.000000,80.621550)}

{create adhoc87}
{access adhoc87}
{connect adhoc87(1), adhoc77(0)}
{nseg = 1}
{strdef color color = "White"}
{pt3dclear()}
{pt3dadd(186192.000000,198168.000000,78025.000000,862.595802)}
{pt3dadd(185484.000000,198408.000000,77175.000000,1242.137880)}
{pt3dadd(185232.000000,198300.000000,76450.000000,1104.122578)}
{pt3dadd(184716.000000,198660.000000,75725.000000,966.107277)}
{pt3dadd(184152.000000,199224.000000,75050.000000,828.091975)}
{pt3dadd(183948.000000,199308.000000,74375.000000,690.076674)}
{pt3dadd(183516.000000,199272.000000,73600.000000,690.076602)}
{pt3dadd(183312.000000,199332.000000,73050.000000,718.829820)}

{create adhoc88}
{access adhoc88}
{connect adhoc88(1), adhoc87(0)}
{nseg = 1}
{strdef color color = "White"}
{pt3dclear()}
{pt3dadd(183312.000000,199332.000000,73050.000000,718.829820)}
{pt3dadd(183096.000000,199548.000000,73600.000000,599.024880)}
{pt3dadd(182928.000000,199608.000000,73925.000000,553.266031)}
{pt3dadd(182712.000000,199704.000000,73550.000000,507.507183)}
{pt3dadd(182484.000000,199776.000000,73050.000000,461.748335)}
{pt3dadd(182304.000000,199932.000000,73050.000000,415.989486)}
{pt3dadd(182136.000000,200076.000000,73100.000000,362.145168)}
{pt3dadd(181956.000000,200184.000000,73100.000000,308.300850)}
{pt3dadd(181800.000000,200556.000000,73050.000000,254.456532)}
{pt3dadd(181632.000000,200688.000000,73000.000000,200.612214)}
{pt3dadd(181428.000000,200904.000000,73000.000000,200.612214)}
{pt3dadd(181260.000000,200952.000000,73050.000000,200.612214)}
{pt3dadd(181068.000000,201144.000000,73050.000000,200.612214)}
{pt3dadd(180924.000000,201348.000000,73150.000000,200.612214)}
{pt3dadd(180720.000000,201492.000000,73250.000000,210.642822)}
{pt3dadd(180492.000000,201780.000000,73425.000000,220.673430)}
{pt3dadd(180336.000000,201888.000000,73525.000000,230.704038)}
{pt3dadd(180192.000000,201960.000000,73550.000000,240.734646)}
{pt3dadd(180048.000000,202032.000000,73575.000000,230.704038)}
{pt3dadd(179868.000000,202200.000000,73650.000000,220.673430)}
{pt3dadd(179676.000000,202560.000000,73625.000000,210.642822)}
{pt3dadd(179112.000000,203304.000000,73950.000000,200.612214)}
{pt3dadd(179148.000000,203760.000000,74275.000000,185.287671)}
{pt3dadd(179076.000000,203928.000000,74325.000000,169.963128)}
{pt3dadd(179016.000000,204084.000000,74425.000000,154.638585)}
{pt3dadd(178992.000000,204252.000000,74500.000000,139.314042)}
{pt3dadd(178932.000000,204468.000000,74600.000000,146.279741)}
{pt3dadd(178980.000000,204624.000000,74650.000000,153.245439)}
{pt3dadd(179004.000000,204816.000000,74725.000000,160.211138)}
{pt3dadd(179052.000000,204972.000000,74825.000000,167.176836)}
{pt3dadd(179112.000000,205560.000000,75025.000000,139.314042)}

{create adhoc89}
{access adhoc89}
{connect adhoc89(1), adhoc87(0)}
{nseg = 1}
{strdef color color = "White"}
{pt3dclear()}
{pt3dadd(183312.000000,199332.000000,73050.000000,718.829820)}
{pt3dadd(183384.000000,199140.000000,72700.000000,718.829820)}
{pt3dadd(183276.000000,199164.000000,72025.000000,704.453247)}
{pt3dadd(183408.000000,199056.000000,71300.000000,690.076674)}
{pt3dadd(183216.000000,199092.000000,70650.000000,862.595802)}

{create adhoc90}
{access adhoc90}
{connect adhoc90(1), adhoc89(0)}
{nseg = 1}
{strdef color color = "White"}
{pt3dclear()}
{pt3dadd(183216.000000,199092.000000,70650.000000,862.595802)}
{pt3dadd(183960.000000,197832.000000,70175.000000,288.881586)}
{pt3dadd(183948.000000,197400.000000,69875.000000,276.844851)}
{pt3dadd(183948.000000,197112.000000,69575.000000,264.808116)}
{pt3dadd(183972.000000,196836.000000,69225.000000,252.771381)}
{pt3dadd(183768.000000,196548.000000,68850.000000,240.734646)}
{pt3dadd(183576.000000,196308.000000,68450.000000,252.771381)}
{pt3dadd(183180.000000,196260.000000,68125.000000,264.808116)}
{pt3dadd(182952.000000,196008.000000,67775.000000,276.844851)}
{pt3dadd(182568.000000,195816.000000,67375.000000,288.881586)}
{pt3dadd(182220.000000,195516.000000,66975.000000,285.992771)}
{pt3dadd(182184.000000,195384.000000,66675.000000,283.103955)}
{pt3dadd(182256.000000,194316.000000,66325.000000,280.215140)}
{pt3dadd(181908.000000,194484.000000,66000.000000,277.326324)}
{pt3dadd(181680.000000,194100.000000,65650.000000,294.659217)}
{pt3dadd(181356.000000,193560.000000,65300.000000,311.992110)}
{pt3dadd(181188.000000,193548.000000,65150.000000,329.325003)}
{pt3dadd(181032.000000,193536.000000,65025.000000,346.657896)}
{pt3dadd(180816.000000,193524.000000,65000.000000,310.146476)}
{pt3dadd(180660.000000,193392.000000,64925.000000,273.635055)}
{pt3dadd(180468.000000,193104.000000,65000.000000,237.123635)}
{pt3dadd(180312.000000,193068.000000,64950.000000,200.612214)}
{pt3dadd(180144.000000,192972.000000,65000.000000,192.253370)}
{pt3dadd(179940.000000,192552.000000,64650.000000,183.894525)}
{pt3dadd(179676.000000,192168.000000,64625.000000,175.535680)}
{pt3dadd(179460.000000,191892.000000,64550.000000,167.176836)}
{pt3dadd(179352.000000,191688.000000,64425.000000,139.314042)}
{pt3dadd(179172.000000,191520.000000,64225.000000,200.612214)}

{create adhoc91}
{access adhoc91}
{connect adhoc91(1), adhoc90(0)}
{nseg = 1}
{strdef color color = "White"}
{pt3dclear()}
{pt3dadd(179172.000000,191520.000000,64225.000000,200.612214)}
{pt3dadd(179124.000000,191256.000000,64450.000000,167.176836)}
{pt3dadd(179016.000000,191064.000000,64400.000000,167.176836)}
{pt3dadd(179136.000000,190908.000000,64425.000000,167.176836)}
{pt3dadd(179160.000000,190668.000000,64375.000000,167.176836)}
{pt3dadd(179184.000000,190476.000000,64500.000000,167.176836)}
{pt3dadd(179328.000000,190212.000000,64500.000000,185.566288)}
{pt3dadd(179544.000000,190020.000000,64425.000000,203.955741)}
{pt3dadd(179808.000000,189696.000000,64350.000000,222.345193)}
{pt3dadd(180012.000000,189564.000000,64275.000000,240.734646)}
{pt3dadd(180192.000000,189600.000000,64600.000000,209.574742)}
{pt3dadd(180948.000000,189264.000000,64925.000000,178.414839)}
{pt3dadd(181488.000000,189180.000000,65150.000000,147.254936)}
{pt3dadd(181680.000000,189228.000000,65425.000000,116.095032)}
{pt3dadd(182088.000000,189240.000000,65700.000000,80.621550)}
{pt3dadd(182436.000000,189168.000000,65925.000000,96.745860)}

{create adhoc92}
{access adhoc92}
{connect adhoc92(1), adhoc90(0)}
{nseg = 1}
{strdef color color = "White"}
{pt3dclear()}
{pt3dadd(179172.000000,191520.000000,64225.000000,200.612214)}
{pt3dadd(179112.000000,191340.000000,63925.000000,167.176836)}
{pt3dadd(179112.000000,191304.000000,63600.000000,139.314042)}
{pt3dadd(179100.000000,191472.000000,63250.000000,116.095032)}

{create adhoc93}
{access adhoc93}
{connect adhoc93(1), adhoc89(0)}
{nseg = 1}
{strdef color color = "White"}
{pt3dclear()}
{pt3dadd(183216.000000,199092.000000,70650.000000,862.595802)}
{pt3dadd(182748.000000,199512.000000,70000.000000,862.595802)}
{pt3dadd(181872.000000,199884.000000,69200.000000,862.595802)}
{pt3dadd(180960.000000,200256.000000,68500.000000,862.595802)}
{pt3dadd(180228.000000,200376.000000,67700.000000,862.595802)}
{pt3dadd(179472.000000,200676.000000,66925.000000,862.595802)}
{pt3dadd(178896.000000,200988.000000,66150.000000,790.712811)}
{pt3dadd(178284.000000,202032.000000,65500.000000,718.829820)}
{pt3dadd(177864.000000,202728.000000,64650.000000,828.091944)}

{create adhoc94}
{access adhoc94}
{connect adhoc94(1), adhoc93(0)}
{nseg = 1}
{strdef color color = "White"}
{pt3dclear()}
{pt3dadd(177864.000000,202728.000000,64650.000000,828.091944)}
{pt3dadd(177900.000000,201204.000000,64325.000000,718.829820)}
{pt3dadd(177828.000000,200880.000000,64050.000000,663.919209)}
{pt3dadd(177540.000000,200736.000000,63725.000000,609.008598)}
{pt3dadd(177504.000000,200520.000000,63375.000000,554.097987)}
{pt3dadd(177240.000000,200232.000000,62975.000000,499.187376)}
{pt3dadd(177156.000000,200052.000000,62675.000000,457.588431)}
{pt3dadd(177072.000000,199812.000000,62325.000000,415.989486)}
{pt3dadd(176664.000000,199320.000000,62000.000000,575.063856)}

{create adhoc95}
{access adhoc95}
{connect adhoc95(1), adhoc94(0)}
{nseg = 1}
{strdef color color = "White"}
{pt3dclear()}
{pt3dadd(176664.000000,199320.000000,62000.000000,575.063856)}
{pt3dadd(176604.000000,199404.000000,61625.000000,399.349908)}
{pt3dadd(176472.000000,199584.000000,61250.000000,368.844012)}
{pt3dadd(176184.000000,199584.000000,60925.000000,338.338116)}
{pt3dadd(175992.000000,199572.000000,60600.000000,307.832220)}
{pt3dadd(175476.000000,199560.000000,60275.000000,277.326324)}
{pt3dadd(175032.000000,199644.000000,59975.000000,294.659217)}
{pt3dadd(174492.000000,199548.000000,59600.000000,311.992110)}
{pt3dadd(174288.000000,199692.000000,59275.000000,329.325003)}
{pt3dadd(174000.000000,199740.000000,58850.000000,346.657896)}
{pt3dadd(173748.000000,199740.000000,58450.000000,415.989486)}
{pt3dadd(173736.000000,199692.000000,58200.000000,415.989486)}

{create adhoc96}
{access adhoc96}
{connect adhoc96(1), adhoc95(0)}
{nseg = 1}
{strdef color color = "White"}
{pt3dclear()}
{pt3dadd(173736.000000,199692.000000,58200.000000,415.989486)}
{pt3dadd(173124.000000,199968.000000,58025.000000,167.176836)}
{pt3dadd(172800.000000,200148.000000,57700.000000,183.894525)}
{pt3dadd(172236.000000,200364.000000,57400.000000,200.612214)}
{pt3dadd(172140.000000,200436.000000,57100.000000,96.745860)}

{create adhoc97}
{access adhoc97}
{connect adhoc97(1), adhoc95(0)}
{nseg = 1}
{strdef color color = "White"}
{pt3dclear()}
{pt3dadd(173736.000000,199692.000000,58200.000000,415.989486)}
{pt3dadd(173808.000000,199680.000000,57950.000000,319.479912)}
{pt3dadd(173892.000000,199644.000000,57675.000000,277.326324)}

{create adhoc98}
{access adhoc98}
{connect adhoc98(1), adhoc94(0)}
{nseg = 1}
{strdef color color = "White"}
{pt3dclear()}
{pt3dadd(176664.000000,199320.000000,62000.000000,575.063856)}
{pt3dadd(176712.000000,199104.000000,61750.000000,415.989486)}
{pt3dadd(176628.000000,198912.000000,61650.000000,436.788958)}
{pt3dadd(176592.000000,198732.000000,61575.000000,457.588431)}
{pt3dadd(176640.000000,198600.000000,61475.000000,478.387903)}
{pt3dadd(176532.000000,198468.000000,61500.000000,499.187376)}
{pt3dadd(176472.000000,198324.000000,61500.000000,478.387903)}
{pt3dadd(176520.000000,198168.000000,61475.000000,457.588431)}
{pt3dadd(176568.000000,197964.000000,61375.000000,436.788958)}
{pt3dadd(176568.000000,197820.000000,61375.000000,415.989486)}
{pt3dadd(176532.000000,197664.000000,61275.000000,384.212511)}
{pt3dadd(176604.000000,197496.000000,61250.000000,352.435536)}
{pt3dadd(176628.000000,197316.000000,61225.000000,320.658561)}
{pt3dadd(176652.000000,197136.000000,61100.000000,288.881586)}
{pt3dadd(176616.000000,196956.000000,61000.000000,288.881586)}
{pt3dadd(176640.000000,196812.000000,60950.000000,288.881586)}
{pt3dadd(176604.000000,196632.000000,60950.000000,288.881586)}
{pt3dadd(176592.000000,196404.000000,60875.000000,288.881586)}
{pt3dadd(176580.000000,196236.000000,60775.000000,274.437509)}
{pt3dadd(176664.000000,196032.000000,60650.000000,259.993431)}
{pt3dadd(176616.000000,195852.000000,60600.000000,245.549354)}
{pt3dadd(176640.000000,195708.000000,60525.000000,231.105276)}
{pt3dadd(176544.000000,195552.000000,60475.000000,231.105276)}
{pt3dadd(176616.000000,195372.000000,60500.000000,231.105276)}
{pt3dadd(176604.000000,195216.000000,60500.000000,231.105276)}
{pt3dadd(176724.000000,195072.000000,60525.000000,231.105276)}
{pt3dadd(176772.000000,194868.000000,60475.000000,259.993431)}
{pt3dadd(176772.000000,194652.000000,60400.000000,288.881586)}
{pt3dadd(176772.000000,194472.000000,60275.000000,317.769741)}
{pt3dadd(176964.000000,194292.000000,60300.000000,346.657896)}
{pt3dadd(177048.000000,194100.000000,60100.000000,343.191312)}
{pt3dadd(177216.000000,193872.000000,59950.000000,339.724728)}
{pt3dadd(177348.000000,193692.000000,59950.000000,336.258144)}
{pt3dadd(177516.000000,193512.000000,59700.000000,332.791560)}
{pt3dadd(177516.000000,193332.000000,59625.000000,288.881586)}
{pt3dadd(177516.000000,193164.000000,59500.000000,192.587724)}

{create adhoc99}
{access adhoc99}
{connect adhoc99(1), adhoc98(0)}
{nseg = 1}
{strdef color color = "White"}
{pt3dclear()}
{pt3dadd(177516.000000,193164.000000,59500.000000,192.587724)}
{pt3dadd(177180.000000,193164.000000,59225.000000,192.587724)}
{pt3dadd(176844.000000,192912.000000,58900.000000,204.624455)}
{pt3dadd(177024.000000,192912.000000,58525.000000,216.661185)}
{pt3dadd(177144.000000,192948.000000,58250.000000,228.697915)}
{pt3dadd(176952.000000,192900.000000,57900.000000,240.734646)}
{pt3dadd(176940.000000,193092.000000,57525.000000,230.704038)}
{pt3dadd(176796.000000,193116.000000,57300.000000,220.673430)}
{pt3dadd(176592.000000,193140.000000,57025.000000,210.642822)}
{pt3dadd(176160.000000,193128.000000,56775.000000,200.612214)}
{pt3dadd(176016.000000,193080.000000,56875.000000,197.937378)}
{pt3dadd(175860.000000,193116.000000,56825.000000,195.262542)}
{pt3dadd(175704.000000,193212.000000,56850.000000,192.587706)}
{pt3dadd(175548.000000,193260.000000,56925.000000,116.095032)}

{create adhoc100}
{access adhoc100}
{connect adhoc100(1), adhoc98(0)}
{nseg = 1}
{strdef color color = "White"}
{pt3dclear()}
{pt3dadd(177516.000000,193164.000000,59500.000000,192.587724)}
{pt3dadd(177804.000000,192984.000000,59575.000000,288.881586)}
{pt3dadd(178116.000000,192792.000000,59650.000000,288.881586)}
{pt3dadd(178296.000000,192624.000000,59650.000000,288.881586)}
{pt3dadd(178332.000000,192432.000000,59550.000000,288.881586)}
{pt3dadd(178452.000000,192264.000000,59450.000000,288.881586)}
{pt3dadd(178620.000000,192096.000000,59400.000000,285.992771)}
{pt3dadd(178656.000000,191916.000000,59250.000000,283.103955)}
{pt3dadd(178596.000000,191748.000000,59050.000000,280.215140)}
{pt3dadd(178536.000000,191592.000000,58950.000000,277.326324)}
{pt3dadd(178560.000000,191424.000000,58925.000000,268.178405)}
{pt3dadd(178608.000000,191256.000000,58925.000000,259.030485)}
{pt3dadd(178572.000000,191100.000000,58775.000000,249.882566)}
{pt3dadd(178572.000000,190932.000000,58700.000000,240.734646)}
{pt3dadd(178608.000000,190752.000000,58550.000000,252.771381)}
{pt3dadd(178644.000000,190596.000000,58450.000000,264.808116)}
{pt3dadd(178608.000000,190428.000000,58400.000000,276.844851)}
{pt3dadd(178572.000000,190236.000000,58275.000000,288.881586)}
{pt3dadd(178536.000000,190080.000000,58250.000000,274.437509)}
{pt3dadd(178536.000000,189912.000000,58200.000000,259.993431)}
{pt3dadd(178476.000000,189744.000000,58175.000000,245.549354)}
{pt3dadd(178332.000000,189564.000000,58075.000000,231.105276)}
{pt3dadd(178284.000000,189396.000000,57925.000000,231.105276)}
{pt3dadd(178320.000000,189228.000000,57825.000000,231.105276)}
{pt3dadd(178164.000000,189060.000000,57625.000000,200.612214)}

{create adhoc101}
{access adhoc101}
{connect adhoc101(1), adhoc93(0)}
{nseg = 1}
{strdef color color = "White"}
{pt3dclear()}
{pt3dadd(177864.000000,202728.000000,64650.000000,828.091944)}
{pt3dadd(177852.000000,202992.000000,64725.000000,862.595802)}
{pt3dadd(177756.000000,203232.000000,64700.000000,853.969856)}
{pt3dadd(177528.000000,203532.000000,64650.000000,845.343909)}
{pt3dadd(177228.000000,203796.000000,64350.000000,836.717962)}
{pt3dadd(176844.000000,204120.000000,64000.000000,828.092016)}
{pt3dadd(176652.000000,204420.000000,64025.000000,800.776467)}
{pt3dadd(176568.000000,204564.000000,63925.000000,773.460918)}
{pt3dadd(176340.000000,204756.000000,63700.000000,746.145369)}
{pt3dadd(176304.000000,204888.000000,63650.000000,718.829820)}
{pt3dadd(176196.000000,205008.000000,63600.000000,718.829820)}
{pt3dadd(176112.000000,205128.000000,63450.000000,718.829820)}
{pt3dadd(176028.000000,205248.000000,63500.000000,718.829820)}
{pt3dadd(175944.000000,205368.000000,63350.000000,718.829820)}
{pt3dadd(175860.000000,205488.000000,63200.000000,754.771316)}
{pt3dadd(175764.000000,205608.000000,62975.000000,790.712811)}
{pt3dadd(175788.000000,205728.000000,62925.000000,826.654307)}
{pt3dadd(175692.000000,205848.000000,62950.000000,862.595802)}
{pt3dadd(175692.000000,205992.000000,62875.000000,826.654307)}
{pt3dadd(175644.000000,206124.000000,62775.000000,790.712811)}
{pt3dadd(175608.000000,206256.000000,62775.000000,754.771316)}
{pt3dadd(175572.000000,206448.000000,62675.000000,718.829820)}
{pt3dadd(175476.000000,206628.000000,62475.000000,754.771316)}
{pt3dadd(175344.000000,206808.000000,62425.000000,790.712811)}
{pt3dadd(175212.000000,206940.000000,62500.000000,826.654307)}
{pt3dadd(175128.000000,207072.000000,62475.000000,862.595802)}
{pt3dadd(175128.000000,207204.000000,62375.000000,862.595802)}
{pt3dadd(174972.000000,207336.000000,62225.000000,862.595802)}
{pt3dadd(174816.000000,207504.000000,62175.000000,862.595802)}
{pt3dadd(174708.000000,207636.000000,62125.000000,862.595802)}
{pt3dadd(174612.000000,207768.000000,62100.000000,862.595802)}
{pt3dadd(174480.000000,207900.000000,62075.000000,862.595802)}

{create adhoc102}
{access adhoc102}
{connect adhoc102(1), adhoc101(0)}
{nseg = 1}
{strdef color color = "White"}
{pt3dclear()}
{pt3dadd(174480.000000,207900.000000,62075.000000,862.595802)}
{pt3dadd(173880.000000,208044.000000,63125.000000,240.734646)}
{pt3dadd(173724.000000,208020.000000,63200.000000,263.748884)}
{pt3dadd(173556.000000,208044.000000,63250.000000,286.763121)}
{pt3dadd(173400.000000,208068.000000,63300.000000,309.777359)}
{pt3dadd(173244.000000,208176.000000,63325.000000,332.791596)}
{pt3dadd(173076.000000,208332.000000,63375.000000,284.422208)}
{pt3dadd(172932.000000,208416.000000,63525.000000,236.052819)}
{pt3dadd(172788.000000,208464.000000,63650.000000,187.683430)}
{pt3dadd(172632.000000,208464.000000,63775.000000,139.314042)}
{pt3dadd(172476.000000,208464.000000,63825.000000,176.705928)}
{pt3dadd(172296.000000,208512.000000,64050.000000,214.097814)}
{pt3dadd(171900.000000,208932.000000,64225.000000,251.489700)}
{pt3dadd(172032.000000,208836.000000,64450.000000,288.881586)}
{pt3dadd(172104.000000,208752.000000,64750.000000,266.814243)}
{pt3dadd(172104.000000,208716.000000,65075.000000,244.746900)}
{pt3dadd(172176.000000,208668.000000,65425.000000,222.679557)}
{pt3dadd(171984.000000,208740.000000,65675.000000,200.612214)}
{pt3dadd(171804.000000,208788.000000,65950.000000,80.621550)}

{create adhoc103}
{access adhoc103}
{connect adhoc103(1), adhoc101(0)}
{nseg = 1}
{strdef color color = "White"}
{pt3dclear()}
{pt3dadd(174480.000000,207900.000000,62075.000000,862.595802)}
{pt3dadd(174396.000000,208044.000000,61600.000000,718.829820)}
{pt3dadd(174348.000000,208176.000000,61500.000000,622.320264)}
{pt3dadd(174168.000000,208332.000000,61325.000000,525.810708)}
{pt3dadd(173844.000000,208476.000000,61100.000000,429.301152)}
{pt3dadd(173508.000000,208620.000000,60825.000000,332.791596)}
{pt3dadd(173016.000000,208800.000000,60525.000000,336.258171)}
{pt3dadd(172488.000000,209064.000000,60225.000000,339.724746)}
{pt3dadd(172236.000000,209208.000000,59925.000000,343.191321)}
{pt3dadd(171936.000000,209352.000000,59650.000000,346.657896)}
{pt3dadd(171612.000000,209520.000000,59325.000000,381.323691)}
{pt3dadd(171456.000000,209592.000000,59050.000000,415.989486)}
{pt3dadd(171300.000000,209688.000000,58750.000000,415.989486)}

{create adhoc104}
{access adhoc104}
{connect adhoc104(1), adhoc103(0)}
{nseg = 1}
{strdef color color = "White"}
{pt3dclear()}
{pt3dadd(171300.000000,209688.000000,58750.000000,415.989486)}
{pt3dadd(171108.000000,210168.000000,58575.000000,266.233284)}
{pt3dadd(171036.000000,210348.000000,58500.000000,257.451282)}
{pt3dadd(170904.000000,210540.000000,58375.000000,248.669280)}
{pt3dadd(170832.000000,210684.000000,58250.000000,239.887278)}
{pt3dadd(170712.000000,210840.000000,58125.000000,231.105276)}
{pt3dadd(170568.000000,210996.000000,58075.000000,223.482010)}
{pt3dadd(170544.000000,211176.000000,58125.000000,215.858745)}
{pt3dadd(170376.000000,211320.000000,57925.000000,208.235480)}
{pt3dadd(170328.000000,211476.000000,57825.000000,200.612214)}
{pt3dadd(170352.000000,211620.000000,57750.000000,273.635055)}
{pt3dadd(170064.000000,211800.000000,57675.000000,346.657896)}
{pt3dadd(169980.000000,211968.000000,57625.000000,288.881586)}

{create adhoc105}
{access adhoc105}
{connect adhoc105(1), adhoc103(0)}
{nseg = 1}
{strdef color color = "White"}
{pt3dclear()}
{pt3dadd(171300.000000,209688.000000,58750.000000,415.989486)}
{pt3dadd(171240.000000,209340.000000,58625.000000,288.881586)}
{pt3dadd(171048.000000,209100.000000,58450.000000,264.808120)}
{pt3dadd(170904.000000,208872.000000,58225.000000,240.734655)}
{pt3dadd(170712.000000,208728.000000,58000.000000,216.661190)}
{pt3dadd(170556.000000,208440.000000,57825.000000,192.587724)}
{pt3dadd(170388.000000,208344.000000,57650.000000,139.314042)}

{create adhoc106}
{access adhoc106}
{connect adhoc106(1), adhoc76(0)}
{nseg = 1}
{strdef color color = "White"}
{pt3dclear()}
{pt3dadd(189720.000000,188076.000000,74025.000000,1242.137880)}
{pt3dadd(189504.000000,187896.000000,74150.000000,1242.137880)}
{pt3dadd(189336.000000,187884.000000,74125.000000,981.756464)}
{pt3dadd(189132.000000,187872.000000,74175.000000,721.375047)}
{pt3dadd(188856.000000,187584.000000,74100.000000,460.993630)}
{pt3dadd(188592.000000,187200.000000,74175.000000,200.612214)}
{pt3dadd(188412.000000,186960.000000,74125.000000,200.612214)}
{pt3dadd(188232.000000,186672.000000,74000.000000,200.612214)}
{pt3dadd(187980.000000,186432.000000,73675.000000,200.612214)}
{pt3dadd(188124.000000,186144.000000,73400.000000,200.612214)}
{pt3dadd(187920.000000,185868.000000,73000.000000,180.550998)}
{pt3dadd(187920.000000,185772.000000,72575.000000,160.489782)}
{pt3dadd(187992.000000,185352.000000,72325.000000,139.314042)}

{create adhoc107}
{access adhoc107}
{connect adhoc107(1), adhoc75(0)}
{nseg = 1}
{strdef color color = "White"}
{pt3dclear()}
{pt3dadd(190764.000000,186324.000000,75150.000000,1242.137880)}
{pt3dadd(190536.000000,186324.000000,75400.000000,1242.137880)}
{pt3dadd(190308.000000,186324.000000,75625.000000,1035.600782)}
{pt3dadd(190080.000000,186192.000000,75900.000000,829.063683)}
{pt3dadd(189888.000000,186168.000000,76125.000000,622.526585)}
{pt3dadd(189804.000000,186168.000000,76425.000000,415.989486)}
{pt3dadd(189612.000000,186396.000000,76700.000000,398.656589)}
{pt3dadd(189528.000000,186420.000000,76900.000000,381.323691)}
{pt3dadd(189420.000000,186372.000000,77075.000000,363.990794)}
{pt3dadd(189192.000000,186504.000000,77350.000000,346.657896)}
{pt3dadd(189108.000000,186564.000000,77475.000000,332.213819)}
{pt3dadd(189108.000000,186612.000000,77625.000000,317.769741)}
{pt3dadd(189096.000000,186600.000000,77900.000000,303.325664)}
{pt3dadd(189168.000000,186600.000000,78250.000000,288.881586)}
{pt3dadd(189288.000000,186504.000000,78700.000000,288.881586)}
{pt3dadd(189420.000000,186372.000000,79100.000000,288.881586)}
{pt3dadd(189564.000000,186324.000000,79425.000000,288.881586)}
{pt3dadd(189696.000000,186180.000000,79725.000000,288.881586)}
{pt3dadd(190272.000000,186000.000000,80250.000000,288.881586)}
{pt3dadd(190596.000000,185856.000000,80625.000000,288.881586)}
{pt3dadd(190668.000000,185556.000000,81025.000000,288.881586)}
{pt3dadd(190872.000000,185352.000000,81550.000000,288.881586)}
{pt3dadd(191136.000000,185328.000000,82000.000000,332.791596)}

{create adhoc108}
{access adhoc108}
{connect adhoc108(1), adhoc107(0)}
{nseg = 1}
{strdef color color = "White"}
{pt3dclear()}
{pt3dadd(191136.000000,185328.000000,82000.000000,332.791596)}
{pt3dadd(191556.000000,185136.000000,82525.000000,415.989486)}
{pt3dadd(192012.000000,184896.000000,82825.000000,369.768434)}
{pt3dadd(192372.000000,184572.000000,83100.000000,323.547381)}
{pt3dadd(192696.000000,184344.000000,83150.000000,277.326328)}
{pt3dadd(192936.000000,184140.000000,83250.000000,231.105276)}
{pt3dadd(192840.000000,183900.000000,83175.000000,245.549354)}
{pt3dadd(192684.000000,183636.000000,83125.000000,259.993431)}
{pt3dadd(192708.000000,183384.000000,83200.000000,274.437509)}
{pt3dadd(192612.000000,183156.000000,83250.000000,288.881586)}
{pt3dadd(192564.000000,182892.000000,83350.000000,288.881586)}
{pt3dadd(192732.000000,182688.000000,83375.000000,288.881586)}
{pt3dadd(192720.000000,182412.000000,83550.000000,288.881586)}
{pt3dadd(193200.000000,182304.000000,83800.000000,288.881586)}
{pt3dadd(193440.000000,181356.000000,84325.000000,200.612214)}
{pt3dadd(193764.000000,181200.000000,84625.000000,192.587706)}

{create adhoc109}
{access adhoc109}
{connect adhoc109(1), adhoc107(0)}
{nseg = 1}
{strdef color color = "White"}
{pt3dclear()}
{pt3dadd(191136.000000,185328.000000,82000.000000,332.791596)}
{pt3dadd(191076.000000,186228.000000,82675.000000,288.881586)}
{pt3dadd(191148.000000,186972.000000,82950.000000,200.612214)}
