# Supplementary material for: Full reconstruction of large lobula plate tangential cells in Drosophila from a 3D EM dataset
Source: PLoS One. 2018 Nov 28;13(11):e0207828. doi: 10.1371/journal.pone.0207828 (PMC6261601; doi:10.1371/journal.pone.0207828)
Supplement: S1 Dataset — (ZIP) [file pone.0207828.s001.zip › Diameter hoc/VS_VSL_preliminary/Old Diameters Mar13_VS_VSL_HS/VS4/2_14_763_smaurer_001.004.hoc]

/* created with nml2hocm */

{create adhoc1}
{access adhoc1}
{nseg = 1}
{strdef color color = "White"}
{pt3dclear()}
{pt3dadd(166368.000000,226656.000000,65925.000000,116.095032)}
{pt3dadd(166056.000000,226428.000000,65600.000000,240.734646)}
{pt3dadd(166104.000000,226080.000000,65100.000000,240.734646)}
{pt3dadd(166968.000000,225180.000000,64250.000000,415.989486)}

{create adhoc2}
{access adhoc2}
{connect adhoc2(1), adhoc1(0)}
{nseg = 1}
{strdef color color = "White"}
{pt3dclear()}
{pt3dadd(166968.000000,225180.000000,64250.000000,415.989486)}
{pt3dadd(166440.000000,225708.000000,63825.000000,415.989486)}
{pt3dadd(166200.000000,225900.000000,63375.000000,333.051936)}
{pt3dadd(166284.000000,226212.000000,63675.000000,250.114386)}
{pt3dadd(166152.000000,226488.000000,63600.000000,167.176836)}
{pt3dadd(166020.000000,226692.000000,63525.000000,96.745860)}

{create adhoc3}
{access adhoc3}
{connect adhoc3(1), adhoc1(0)}
{nseg = 1}
{strdef color color = "White"}
{pt3dclear()}
{pt3dadd(166968.000000,225180.000000,64250.000000,415.989486)}
{pt3dadd(167460.000000,224244.000000,64725.000000,346.657896)}
{pt3dadd(168024.000000,222024.000000,65075.000000,599.024880)}

{create adhoc4}
{access adhoc4}
{connect adhoc4(1), adhoc3(0)}
{nseg = 1}
{strdef color color = "White"}
{pt3dclear()}
{pt3dadd(168024.000000,222024.000000,65075.000000,599.024880)}
{pt3dadd(167472.000000,221184.000000,64075.000000,346.657896)}
{pt3dadd(167244.000000,221232.000000,64025.000000,346.657896)}
{pt3dadd(166980.000000,221076.000000,63500.000000,346.657896)}
{pt3dadd(166596.000000,220836.000000,63025.000000,346.657896)}
{pt3dadd(166260.000000,220428.000000,62450.000000,346.657896)}
{pt3dadd(165792.000000,220392.000000,61900.000000,346.657896)}
{pt3dadd(165516.000000,220572.000000,61525.000000,346.657896)}
{pt3dadd(165564.000000,220860.000000,61125.000000,415.989486)}

{create adhoc5}
{access adhoc5}
{connect adhoc5(1), adhoc4(0)}
{nseg = 1}
{strdef color color = "White"}
{pt3dclear()}
{pt3dadd(165564.000000,220860.000000,61125.000000,415.989486)}
{pt3dadd(165696.000000,220116.000000,60550.000000,499.187376)}
{pt3dadd(165900.000000,220020.000000,59850.000000,415.989486)}
{pt3dadd(166404.000000,219912.000000,59075.000000,415.989486)}

{create adhoc6}
{access adhoc6}
{connect adhoc6(1), adhoc5(0)}
{nseg = 1}
{strdef color color = "White"}
{pt3dclear()}
{pt3dadd(166404.000000,219912.000000,59075.000000,415.989486)}
{pt3dadd(166272.000000,220176.000000,58625.000000,240.734646)}
{pt3dadd(166440.000000,220368.000000,58075.000000,200.706372)}
{pt3dadd(166356.000000,219912.000000,57425.000000,160.678098)}
{pt3dadd(166380.000000,219864.000000,56800.000000,120.649824)}
{pt3dadd(166224.000000,219768.000000,56325.000000,80.621550)}
{pt3dadd(166248.000000,219420.000000,56275.000000,67.184640)}

{create adhoc7}
{access adhoc7}
{connect adhoc7(1), adhoc5(0)}
{nseg = 1}
{strdef color color = "White"}
{pt3dclear()}
{pt3dadd(166404.000000,219912.000000,59075.000000,415.989486)}
{pt3dadd(167052.000000,219216.000000,58825.000000,139.314042)}

{create adhoc8}
{access adhoc8}
{connect adhoc8(1), adhoc4(0)}
{nseg = 1}
{strdef color color = "White"}
{pt3dclear()}
{pt3dadd(165564.000000,220860.000000,61125.000000,415.989486)}
{pt3dadd(165192.000000,221460.000000,61275.000000,130.858974)}
{pt3dadd(164988.000000,222336.000000,61625.000000,125.937660)}
{pt3dadd(164880.000000,222816.000000,61975.000000,121.016346)}
{pt3dadd(164628.000000,223320.000000,62200.000000,116.095032)}
{pt3dadd(164568.000000,223776.000000,62500.000000,139.314042)}

{create adhoc9}
{access adhoc9}
{connect adhoc9(1), adhoc3(0)}
{nseg = 1}
{strdef color color = "White"}
{pt3dclear()}
{pt3dadd(168024.000000,222024.000000,65075.000000,599.024880)}
{pt3dadd(167952.000000,221856.000000,65350.000000,599.024880)}
{pt3dadd(167988.000000,221460.000000,65825.000000,658.927350)}
{pt3dadd(168252.000000,220656.000000,66475.000000,718.829820)}
{pt3dadd(168216.000000,220752.000000,67025.000000,611.342762)}
{pt3dadd(168492.000000,220788.000000,67975.000000,503.855703)}
{pt3dadd(168708.000000,221064.000000,68600.000000,396.368644)}
{pt3dadd(168996.000000,221172.000000,69125.000000,288.881586)}
{pt3dadd(169428.000000,221640.000000,69525.000000,303.325664)}
{pt3dadd(169740.000000,221556.000000,69575.000000,317.769741)}
{pt3dadd(170052.000000,221376.000000,69650.000000,332.213819)}
{pt3dadd(170448.000000,221388.000000,69750.000000,346.657896)}
{pt3dadd(171168.000000,222252.000000,70700.000000,599.024880)}

{create adhoc10}
{access adhoc10}
{connect adhoc10(1), adhoc9(0)}
{nseg = 1}
{strdef color color = "White"}
{pt3dclear()}
{pt3dadd(171168.000000,222252.000000,70700.000000,599.024880)}
{pt3dadd(170592.000000,223332.000000,71200.000000,499.187376)}
{pt3dadd(170100.000000,223860.000000,71250.000000,478.387903)}
{pt3dadd(169560.000000,224160.000000,71375.000000,457.588431)}
{pt3dadd(169224.000000,224352.000000,71675.000000,436.788958)}
{pt3dadd(168984.000000,224904.000000,71275.000000,415.989486)}
{pt3dadd(168768.000000,225156.000000,71225.000000,346.657896)}

{create adhoc11}
{access adhoc11}
{connect adhoc11(1), adhoc10(0)}
{nseg = 1}
{strdef color color = "White"}
{pt3dclear()}
{pt3dadd(168768.000000,225156.000000,71225.000000,346.657896)}
{pt3dadd(168468.000000,225420.000000,71200.000000,415.989486)}
{pt3dadd(168240.000000,225684.000000,71175.000000,415.989486)}
{pt3dadd(168024.000000,225948.000000,71150.000000,415.989486)}
{pt3dadd(167652.000000,226260.000000,71075.000000,415.989486)}
{pt3dadd(167172.000000,226584.000000,71250.000000,599.024880)}

{create adhoc12}
{access adhoc12}
{connect adhoc12(1), adhoc11(0)}
{nseg = 1}
{strdef color color = "White"}
{pt3dclear()}
{pt3dadd(167172.000000,226584.000000,71250.000000,599.024880)}
{pt3dadd(166548.000000,227112.000000,71625.000000,415.989486)}
{pt3dadd(166212.000000,227436.000000,72125.000000,410.442960)}
{pt3dadd(165936.000000,227916.000000,72350.000000,404.896434)}
{pt3dadd(165648.000000,228180.000000,72500.000000,399.349908)}
{pt3dadd(165396.000000,228480.000000,72650.000000,359.696092)}
{pt3dadd(165096.000000,229380.000000,73025.000000,320.042277)}
{pt3dadd(165048.000000,229824.000000,73250.000000,280.388462)}
{pt3dadd(164676.000000,230100.000000,72875.000000,240.734646)}
{pt3dadd(164580.000000,229920.000000,72450.000000,245.360574)}

{create adhoc13}
{access adhoc13}
{connect adhoc13(1), adhoc11(0)}
{nseg = 1}
{strdef color color = "White"}
{pt3dclear()}
{pt3dadd(167172.000000,226584.000000,71250.000000,599.024880)}
{pt3dadd(166908.000000,227112.000000,70525.000000,200.612214)}
{pt3dadd(166908.000000,227388.000000,70175.000000,220.673430)}
{pt3dadd(167088.000000,227916.000000,69700.000000,240.734646)}
{pt3dadd(167040.000000,227736.000000,69300.000000,240.734646)}

{create adhoc14}
{access adhoc14}
{connect adhoc14(1), adhoc10(0)}
{nseg = 1}
{strdef color color = "White"}
{pt3dclear()}
{pt3dadd(168768.000000,225156.000000,71225.000000,346.657896)}
{pt3dadd(169200.000000,225744.000000,71025.000000,116.095032)}
{pt3dadd(169188.000000,225924.000000,70775.000000,200.612214)}

{create adhoc15}
{access adhoc15}
{connect adhoc15(1), adhoc9(0)}
{nseg = 1}
{strdef color color = "White"}
{pt3dclear()}
{pt3dadd(171168.000000,222252.000000,70700.000000,599.024880)}
{pt3dadd(171444.000000,222036.000000,71100.000000,599.024880)}
{pt3dadd(171708.000000,221724.000000,71100.000000,599.024880)}
{pt3dadd(172056.000000,221280.000000,71100.000000,599.024880)}
{pt3dadd(172452.000000,220980.000000,71200.000000,599.024880)}
{pt3dadd(172800.000000,220704.000000,71325.000000,599.024880)}
{pt3dadd(173040.000000,220512.000000,71675.000000,628.976115)}
{pt3dadd(173304.000000,220368.000000,71875.000000,658.927350)}
{pt3dadd(173640.000000,220272.000000,71975.000000,688.878585)}
{pt3dadd(174000.000000,220152.000000,72125.000000,718.829820)}
{pt3dadd(174948.000000,219672.000000,73025.000000,849.656835)}
{pt3dadd(175152.000000,219816.000000,73850.000000,980.483850)}
{pt3dadd(175572.000000,219468.000000,74500.000000,1111.310865)}
{pt3dadd(176064.000000,219096.000000,75000.000000,1242.137880)}
{pt3dadd(176532.000000,219000.000000,75650.000000,1190.382147)}
{pt3dadd(177096.000000,218592.000000,76425.000000,1138.626414)}
{pt3dadd(177456.000000,218508.000000,77100.000000,1086.870681)}
{pt3dadd(177708.000000,218484.000000,77650.000000,1035.114948)}
{pt3dadd(178032.000000,218412.000000,78200.000000,956.043666)}
{pt3dadd(178848.000000,218340.000000,78900.000000,876.972384)}
{pt3dadd(179352.000000,217416.000000,79550.000000,797.901102)}
{pt3dadd(179916.000000,216684.000000,80650.000000,718.829820)}
{pt3dadd(180120.000000,216192.000000,80575.000000,718.829820)}
{pt3dadd(180804.000000,215700.000000,81075.000000,862.595802)}

{create adhoc16}
{access adhoc16}
{connect adhoc16(1), adhoc15(0)}
{nseg = 1}
{strdef color color = "White"}
{pt3dclear()}
{pt3dadd(180804.000000,215700.000000,81075.000000,862.595802)}
{pt3dadd(178992.000000,216936.000000,81650.000000,200.612214)}
{pt3dadd(178500.000000,217296.000000,82100.000000,200.612214)}
{pt3dadd(178416.000000,217548.000000,82550.000000,200.612214)}
{pt3dadd(178332.000000,217740.000000,82975.000000,200.612214)}
{pt3dadd(178236.000000,218496.000000,83675.000000,200.612214)}
{pt3dadd(178200.000000,219036.000000,84100.000000,200.612214)}
{pt3dadd(178188.000000,219612.000000,84625.000000,200.612214)}
{pt3dadd(178248.000000,220320.000000,85025.000000,200.612214)}

{create adhoc17}
{access adhoc17}
{connect adhoc17(1), adhoc16(0)}
{nseg = 1}
{strdef color color = "White"}
{pt3dclear()}
{pt3dadd(178248.000000,220320.000000,85025.000000,200.612214)}
{pt3dadd(178728.000000,221076.000000,85775.000000,139.314042)}
{pt3dadd(178896.000000,221412.000000,86050.000000,167.176836)}

{create adhoc18}
{access adhoc18}
{connect adhoc18(1), adhoc16(0)}
{nseg = 1}
{strdef color color = "White"}
{pt3dclear()}
{pt3dadd(178248.000000,220320.000000,85025.000000,200.612214)}
{pt3dadd(178236.000000,220440.000000,85475.000000,167.176836)}
{pt3dadd(177900.000000,220740.000000,86000.000000,185.566288)}
{pt3dadd(177492.000000,221376.000000,86450.000000,203.955741)}
{pt3dadd(177348.000000,221568.000000,86850.000000,222.345193)}
{pt3dadd(177036.000000,221640.000000,87325.000000,240.734646)}
{pt3dadd(176904.000000,221796.000000,87750.000000,230.704038)}
{pt3dadd(177108.000000,221928.000000,88350.000000,220.673430)}
{pt3dadd(177180.000000,222000.000000,88625.000000,210.642822)}
{pt3dadd(177324.000000,222156.000000,88875.000000,200.612214)}
{pt3dadd(177540.000000,222216.000000,89200.000000,96.745860)}
{pt3dadd(177624.000000,222372.000000,89475.000000,67.184640)}

{create adhoc19}
{access adhoc19}
{connect adhoc19(1), adhoc15(0)}
{nseg = 1}
{strdef color color = "White"}
{pt3dclear()}
{pt3dadd(180804.000000,215700.000000,81075.000000,862.595802)}
{pt3dadd(181488.000000,215220.000000,81600.000000,599.024880)}
{pt3dadd(181908.000000,214092.000000,82175.000000,549.106137)}
{pt3dadd(182796.000000,212892.000000,82475.000000,499.187394)}
{pt3dadd(183120.000000,212064.000000,82625.000000,449.268651)}
{pt3dadd(183408.000000,211464.000000,83025.000000,399.349908)}
{pt3dadd(183444.000000,210948.000000,82900.000000,479.219886)}
{pt3dadd(183540.000000,210504.000000,82750.000000,559.089864)}
{pt3dadd(184140.000000,209652.000000,82800.000000,638.959842)}
{pt3dadd(184500.000000,209184.000000,83050.000000,718.829820)}
{pt3dadd(184608.000000,208416.000000,83100.000000,718.829820)}
{pt3dadd(184740.000000,207960.000000,82975.000000,718.829820)}
{pt3dadd(184620.000000,207144.000000,82800.000000,718.829820)}
{pt3dadd(184596.000000,206124.000000,83050.000000,718.829820)}
{pt3dadd(184680.000000,205476.000000,82925.000000,849.656835)}
{pt3dadd(184944.000000,205056.000000,82725.000000,980.483850)}
{pt3dadd(185616.000000,203856.000000,83575.000000,1111.310865)}
{pt3dadd(185880.000000,202896.000000,83250.000000,1242.137880)}
{pt3dadd(186240.000000,202776.000000,84200.000000,1190.382147)}
{pt3dadd(186804.000000,202908.000000,85000.000000,1138.626414)}
{pt3dadd(187716.000000,202764.000000,85825.000000,1086.870681)}
{pt3dadd(188328.000000,202956.000000,86450.000000,1035.114948)}
{pt3dadd(188940.000000,203136.000000,87300.000000,1223.505823)}
{pt3dadd(189348.000000,203016.000000,88100.000000,1411.896699)}
{pt3dadd(189756.000000,203148.000000,88775.000000,1600.287575)}
{pt3dadd(189984.000000,203424.000000,89725.000000,1788.678450)}
{pt3dadd(190320.000000,203208.000000,90875.000000,1714.150188)}
{pt3dadd(190404.000000,202776.000000,91675.000000,1639.621926)}
{pt3dadd(190824.000000,202392.000000,92825.000000,1565.093664)}
{pt3dadd(191340.000000,202212.000000,93700.000000,1490.565402)}
{pt3dadd(191748.000000,202572.000000,94650.000000,1633.063469)}
{pt3dadd(191568.000000,202932.000000,95550.000000,1775.561535)}
{pt3dadd(191844.000000,203304.000000,96000.000000,1918.059601)}
{pt3dadd(191616.000000,203820.000000,97225.000000,2060.557668)}
{pt3dadd(191436.000000,204036.000000,98600.000000,1974.701057)}
{pt3dadd(191256.000000,203868.000000,99150.000000,1888.844445)}
{pt3dadd(190980.000000,203976.000000,99875.000000,1802.987834)}
{pt3dadd(190704.000000,204084.000000,100500.000000,1717.131222)}
{pt3dadd(190608.000000,204000.000000,101000.000000,1645.584102)}
{pt3dadd(189924.000000,203928.000000,101975.000000,1574.036982)}
{pt3dadd(189816.000000,204240.000000,102925.000000,1502.489862)}
{pt3dadd(189768.000000,203940.000000,104000.000000,1430.942742)}
{pt3dadd(189468.000000,204324.000000,104950.000000,1445.848407)}
{pt3dadd(189420.000000,204324.000000,106325.000000,1460.754072)}
{pt3dadd(188820.000000,204156.000000,107725.000000,1475.659737)}
{pt3dadd(188748.000000,204204.000000,108325.000000,1490.565402)}
{pt3dadd(188076.000000,203844.000000,109525.000000,1376.702789)}
{pt3dadd(187524.000000,203040.000000,110975.000000,1262.840175)}
{pt3dadd(187116.000000,202968.000000,111650.000000,1148.977562)}
{pt3dadd(186228.000000,202416.000000,112375.000000,1035.114948)}
{pt3dadd(185808.000000,201972.000000,113450.000000,1086.870681)}
{pt3dadd(185088.000000,201804.000000,114075.000000,1138.626414)}
{pt3dadd(184404.000000,201432.000000,114950.000000,1190.382147)}
{pt3dadd(183408.000000,200952.000000,115800.000000,1242.137880)}
{pt3dadd(183288.000000,200724.000000,116825.000000,1147.252361)}
{pt3dadd(182616.000000,200052.000000,117700.000000,1052.366841)}
{pt3dadd(181968.000000,199788.000000,118500.000000,957.481322)}
{pt3dadd(181380.000000,199620.000000,119225.000000,862.595802)}
{pt3dadd(180312.000000,198708.000000,119675.000000,853.969856)}
{pt3dadd(179700.000000,197748.000000,120550.000000,845.343909)}
{pt3dadd(179052.000000,196944.000000,121250.000000,836.717962)}
{pt3dadd(178332.000000,195996.000000,121775.000000,828.092016)}
{pt3dadd(178236.000000,195468.000000,122200.000000,836.717962)}
{pt3dadd(177336.000000,194952.000000,122900.000000,845.343909)}
{pt3dadd(176904.000000,194388.000000,123075.000000,853.969856)}
{pt3dadd(176676.000000,193908.000000,123700.000000,862.595802)}
{pt3dadd(175968.000000,193380.000000,123850.000000,819.466002)}
{pt3dadd(175644.000000,192828.000000,123725.000000,776.336202)}
{pt3dadd(175140.000000,192276.000000,124150.000000,733.206402)}
{pt3dadd(174552.000000,191736.000000,124700.000000,690.076602)}
{pt3dadd(173352.000000,189528.000000,125350.000000,642.354295)}
{pt3dadd(173040.000000,188952.000000,125600.000000,594.631989)}
{pt3dadd(172524.000000,188640.000000,125850.000000,546.909682)}
{pt3dadd(170964.000000,186084.000000,126400.000000,499.187376)}
{pt3dadd(169008.000000,184068.000000,127100.000000,524.146752)}
{pt3dadd(167508.000000,182808.000000,127650.000000,549.106128)}
{pt3dadd(165756.000000,181428.000000,128725.000000,574.065504)}
{pt3dadd(164868.000000,179832.000000,129675.000000,599.024880)}
{pt3dadd(163212.000000,177912.000000,130600.000000,664.917611)}
{pt3dadd(162396.000000,177000.000000,131375.000000,730.810341)}
{pt3dadd(161484.000000,176520.000000,132050.000000,796.703072)}
{pt3dadd(160620.000000,175692.000000,132725.000000,862.595802)}
{pt3dadd(160476.000000,174996.000000,132950.000000,796.703072)}
{pt3dadd(160164.000000,174348.000000,133525.000000,730.810341)}
{pt3dadd(159552.000000,172704.000000,134800.000000,664.917611)}
{pt3dadd(158784.000000,171432.000000,135675.000000,599.024880)}
{pt3dadd(157332.000000,170412.000000,136700.000000,708.047397)}
{pt3dadd(156528.000000,169692.000000,137450.000000,817.069914)}
{pt3dadd(157212.000000,168876.000000,138025.000000,926.092431)}
{pt3dadd(156912.000000,168564.000000,138925.000000,1035.114948)}
{pt3dadd(156276.000000,167892.000000,139675.000000,1035.114948)}
{pt3dadd(155928.000000,167628.000000,140775.000000,1035.114948)}
{pt3dadd(155268.000000,167124.000000,141625.000000,1035.114948)}
{pt3dadd(154692.000000,166080.000000,142375.000000,1035.114948)}
{pt3dadd(153984.000000,164028.000000,143850.000000,1312.939755)}
{pt3dadd(153444.000000,163224.000000,144900.000000,1590.764562)}
{pt3dadd(153384.000000,162012.000000,146125.000000,1868.589369)}
{pt3dadd(153636.000000,161088.000000,147425.000000,2146.414176)}
{pt3dadd(153792.000000,160020.000000,149025.000000,1868.589369)}
{pt3dadd(153972.000000,158724.000000,150525.000000,1590.764562)}
{pt3dadd(154080.000000,157560.000000,151950.000000,1312.939755)}
{pt3dadd(154260.000000,155952.000000,153500.000000,1035.114948)}
{pt3dadd(154548.000000,154620.000000,155025.000000,1223.505823)}
{pt3dadd(155328.000000,154032.000000,155950.000000,1411.896699)}
{pt3dadd(156828.000000,153264.000000,157050.000000,1600.287575)}
{pt3dadd(157308.000000,152760.000000,158075.000000,1788.678450)}
{pt3dadd(157872.000000,151272.000000,159450.000000,1714.150188)}
{pt3dadd(159084.000000,149568.000000,160700.000000,1639.621926)}
{pt3dadd(159744.000000,148536.000000,161525.000000,1565.093664)}
{pt3dadd(159912.000000,148068.000000,162625.000000,1490.565402)}
{pt3dadd(160620.000000,146796.000000,163500.000000,1565.093664)}
{pt3dadd(161076.000000,145260.000000,164550.000000,1639.621926)}
{pt3dadd(162036.000000,144048.000000,166125.000000,1714.150188)}
{pt3dadd(163320.000000,142740.000000,167425.000000,1788.678450)}
{pt3dadd(163464.000000,142608.000000,168175.000000,1198.452300)}
{pt3dadd(163572.000000,142488.000000,168575.000000,608.226150)}
{pt3dadd(163308.000000,141900.000000,169025.000000,18.000000)}
{pt3dadd(164196.000000,140772.000000,170225.000000,2146.414176)}
{pt3dadd(164400.000000,140364.000000,170950.000000,2253.734910)}
{pt3dadd(164136.000000,139476.000000,172025.000000,2361.055644)}
{pt3dadd(164124.000000,138912.000000,172975.000000,2468.376378)}
{pt3dadd(164268.000000,138144.000000,174000.000000,2575.697112)}
{pt3dadd(163380.000000,137376.000000,174900.000000,2704.481942)}
{pt3dadd(163824.000000,137088.000000,175875.000000,2833.266771)}
{pt3dadd(164076.000000,136548.000000,176675.000000,2962.051600)}
{pt3dadd(164064.000000,136500.000000,177475.000000,3090.836430)}
{pt3dadd(163728.000000,136260.000000,178400.000000,2936.294635)}
{pt3dadd(163884.000000,135660.000000,179625.000000,2781.752841)}
{pt3dadd(163680.000000,134340.000000,180675.000000,2627.211046)}
{pt3dadd(163344.000000,133488.000000,182050.000000,2472.669252)}
{pt3dadd(163104.000000,132804.000000,182550.000000,2575.697112)}
