# Supplementary material for: Full reconstruction of large lobula plate tangential cells in Drosophila from a 3D EM dataset
Source: PLoS One. 2018 Nov 28;13(11):e0207828. doi: 10.1371/journal.pone.0207828 (PMC6261601; doi:10.1371/journal.pone.0207828)
Supplement: S1 Dataset — (ZIP) [file pone.0207828.s001.zip › Diameter hoc/VS_VSL_preliminary/Old Diameters Mar13_VS_VSL_HS/VS5/2_14_747_gmordhorst_001.035.hoc]

/* created with nml2hocm */

{create adhoc1}
{access adhoc1}
{nseg = 1}
{strdef color color = "White"}
{pt3dclear()}
{pt3dadd(185880.000000,202356.000000,91925.000000,92.876040)}
{pt3dadd(185760.000000,202512.000000,91950.000000,67.184640)}
{pt3dadd(185628.000000,202692.000000,91975.000000,80.621550)}
{pt3dadd(185628.000000,203028.000000,92175.000000,282.655350)}

{create adhoc2}
{access adhoc2}
{connect adhoc2(1), adhoc1(0)}
{nseg = 1}
{strdef color color = "White"}
{pt3dclear()}
{pt3dadd(185628.000000,203028.000000,92175.000000,282.655350)}
{pt3dadd(185496.000000,202980.000000,92600.000000,288.881586)}
{pt3dadd(185508.000000,202968.000000,92975.000000,288.881586)}
{pt3dadd(185424.000000,203112.000000,93275.000000,288.881586)}
{pt3dadd(185472.000000,203268.000000,93650.000000,288.881586)}
{pt3dadd(185448.000000,203580.000000,93850.000000,139.314042)}

{create adhoc3}
{access adhoc3}
{connect adhoc3(1), adhoc1(0)}
{nseg = 1}
{strdef color color = "White"}
{pt3dclear()}
{pt3dadd(185628.000000,203028.000000,92175.000000,282.655350)}
{pt3dadd(185592.000000,203220.000000,91900.000000,240.734646)}
{pt3dadd(185592.000000,203472.000000,91600.000000,240.734646)}
{pt3dadd(185604.000000,203916.000000,91575.000000,346.657896)}

{create adhoc4}
{access adhoc4}
{connect adhoc4(1), adhoc3(0)}
{nseg = 1}
{strdef color color = "White"}
{pt3dclear()}
{pt3dadd(185604.000000,203916.000000,91575.000000,346.657896)}
{pt3dadd(185760.000000,204240.000000,91600.000000,240.734646)}
{pt3dadd(185796.000000,204564.000000,91925.000000,240.734646)}
{pt3dadd(185724.000000,204888.000000,92200.000000,240.734646)}
{pt3dadd(185580.000000,205296.000000,92400.000000,240.734646)}
{pt3dadd(185532.000000,205512.000000,92600.000000,240.734646)}
{pt3dadd(185472.000000,205704.000000,92675.000000,231.105276)}
{pt3dadd(185424.000000,205848.000000,92675.000000,139.314042)}

{create adhoc5}
{access adhoc5}
{connect adhoc5(1), adhoc4(0)}
{nseg = 1}
{strdef color color = "White"}
{pt3dclear()}
{pt3dadd(185424.000000,205848.000000,92675.000000,139.314042)}
{pt3dadd(185628.000000,206028.000000,93100.000000,204.467130)}
{pt3dadd(185712.000000,206208.000000,93450.000000,225.570744)}
{pt3dadd(185688.000000,206364.000000,93550.000000,246.674358)}
{pt3dadd(185712.000000,206532.000000,93675.000000,267.777972)}
{pt3dadd(185700.000000,206712.000000,93775.000000,288.881586)}
{pt3dadd(185652.000000,206868.000000,93850.000000,288.881586)}
{pt3dadd(185652.000000,206808.000000,94100.000000,288.881586)}
{pt3dadd(185568.000000,206832.000000,94475.000000,200.612214)}

{create adhoc6}
{access adhoc6}
{connect adhoc6(1), adhoc5(0)}
{nseg = 1}
{strdef color color = "White"}
{pt3dclear()}
{pt3dadd(185568.000000,206832.000000,94475.000000,200.612214)}
{pt3dadd(185544.000000,206568.000000,94725.000000,160.489764)}
{pt3dadd(185508.000000,206268.000000,94900.000000,128.617812)}
{pt3dadd(185508.000000,205908.000000,95075.000000,96.745860)}
{pt3dadd(185796.000000,205476.000000,95150.000000,55.987200)}

{create adhoc7}
{access adhoc7}
{connect adhoc7(1), adhoc5(0)}
{nseg = 1}
{strdef color color = "White"}
{pt3dclear()}
{pt3dadd(185568.000000,206832.000000,94475.000000,200.612214)}
{pt3dadd(185544.000000,207396.000000,94500.000000,139.314042)}
{pt3dadd(185508.000000,207528.000000,94475.000000,67.184640)}

{create adhoc8}
{access adhoc8}
{connect adhoc8(1), adhoc4(0)}
{nseg = 1}
{strdef color color = "White"}
{pt3dclear()}
{pt3dadd(185424.000000,205848.000000,92675.000000,139.314042)}
{pt3dadd(185076.000000,205908.000000,92550.000000,139.314042)}
{pt3dadd(184920.000000,206148.000000,92575.000000,123.834704)}
{pt3dadd(184836.000000,206304.000000,92600.000000,108.355365)}
{pt3dadd(184800.000000,206424.000000,92600.000000,92.876026)}
{pt3dadd(184692.000000,206592.000000,92625.000000,77.396688)}
{pt3dadd(184548.000000,206916.000000,92650.000000,92.876026)}
{pt3dadd(184416.000000,207336.000000,92650.000000,108.355365)}
{pt3dadd(184380.000000,207888.000000,92650.000000,123.834704)}
{pt3dadd(184488.000000,208044.000000,92775.000000,139.314042)}
{pt3dadd(184548.000000,208212.000000,92775.000000,139.314042)}
{pt3dadd(184524.000000,208380.000000,92775.000000,139.314042)}
{pt3dadd(184524.000000,208536.000000,92725.000000,139.314042)}
{pt3dadd(184464.000000,208680.000000,92800.000000,116.095032)}

{create adhoc9}
{access adhoc9}
{connect adhoc9(1), adhoc3(0)}
{nseg = 1}
{strdef color color = "White"}
{pt3dclear()}
{pt3dadd(185604.000000,203916.000000,91575.000000,346.657896)}
{pt3dadd(185616.000000,203736.000000,91225.000000,288.881586)}
{pt3dadd(185640.000000,203484.000000,90850.000000,288.881586)}
{pt3dadd(185748.000000,203172.000000,90425.000000,288.881586)}
{pt3dadd(186192.000000,202812.000000,90100.000000,288.881586)}
{pt3dadd(186372.000000,202596.000000,89775.000000,288.881586)}
{pt3dadd(186516.000000,202392.000000,89575.000000,276.844851)}
{pt3dadd(186696.000000,202164.000000,89325.000000,264.808116)}
{pt3dadd(186888.000000,201900.000000,89025.000000,252.771381)}
{pt3dadd(187068.000000,201708.000000,88825.000000,240.734646)}
{pt3dadd(187248.000000,201480.000000,88650.000000,300.355956)}
{pt3dadd(187464.000000,201264.000000,88350.000000,359.977266)}
{pt3dadd(187656.000000,201072.000000,88075.000000,419.598576)}
{pt3dadd(187824.000000,200892.000000,88000.000000,479.219886)}
{pt3dadd(188040.000000,200556.000000,88050.000000,463.412286)}
{pt3dadd(188424.000000,200472.000000,87775.000000,447.604686)}
{pt3dadd(188724.000000,200604.000000,87275.000000,431.797086)}
{pt3dadd(189060.000000,200700.000000,86850.000000,415.989486)}
{pt3dadd(189240.000000,200688.000000,86525.000000,346.657905)}
{pt3dadd(189852.000000,200688.000000,86125.000000,277.326324)}
{pt3dadd(189744.000000,200688.000000,84175.000000,599.024880)}

{create adhoc10}
{access adhoc10}
{connect adhoc10(1), adhoc9(0)}
{nseg = 1}
{strdef color color = "White"}
{pt3dclear()}
{pt3dadd(189744.000000,200688.000000,84175.000000,599.024880)}
{pt3dadd(189624.000000,200448.000000,83625.000000,599.024880)}
{pt3dadd(189504.000000,200328.000000,83500.000000,599.024880)}

{create adhoc11}
{access adhoc11}
{connect adhoc11(1), adhoc10(0)}
{nseg = 1}
{strdef color color = "White"}
{pt3dclear()}
{pt3dadd(189504.000000,200328.000000,83500.000000,599.024880)}
{pt3dadd(189432.000000,200112.000000,83450.000000,690.076674)}

{create adhoc12}
{access adhoc12}
{connect adhoc12(1), adhoc11(0)}
{nseg = 1}
{strdef color color = "White"}
{pt3dclear()}
{pt3dadd(189432.000000,200112.000000,83450.000000,690.076674)}
{pt3dadd(189468.000000,199908.000000,83150.000000,718.829820)}
{pt3dadd(189432.000000,199644.000000,83000.000000,754.771316)}
{pt3dadd(189504.000000,199428.000000,82925.000000,790.712811)}
{pt3dadd(189792.000000,199200.000000,82750.000000,826.654307)}
{pt3dadd(189720.000000,198972.000000,82450.000000,862.595802)}
{pt3dadd(189828.000000,198768.000000,82300.000000,826.654307)}
{pt3dadd(189744.000000,198612.000000,82100.000000,790.712811)}
{pt3dadd(189708.000000,198408.000000,82050.000000,754.771316)}
{pt3dadd(189732.000000,198240.000000,81775.000000,718.829820)}
{pt3dadd(189756.000000,198060.000000,81500.000000,766.751814)}
{pt3dadd(189744.000000,197844.000000,81375.000000,814.673808)}
{pt3dadd(189732.000000,197664.000000,81250.000000,862.595802)}
{pt3dadd(189732.000000,197496.000000,81150.000000,862.595802)}

{create adhoc13}
{access adhoc13}
{connect adhoc13(1), adhoc12(0)}
{nseg = 1}
{strdef color color = "White"}
{pt3dclear()}
{pt3dadd(189732.000000,197496.000000,81150.000000,862.595802)}
{pt3dadd(189756.000000,197244.000000,80875.000000,828.091944)}
{pt3dadd(189648.000000,196980.000000,80550.000000,845.343873)}
{pt3dadd(189648.000000,196788.000000,80450.000000,862.595802)}
{pt3dadd(189612.000000,196608.000000,80250.000000,1035.114948)}

{create adhoc14}
{access adhoc14}
{connect adhoc14(1), adhoc13(0)}
{nseg = 1}
{strdef color color = "White"}
{pt3dclear()}
{pt3dadd(189612.000000,196608.000000,80250.000000,1035.114948)}
{pt3dadd(189636.000000,196368.000000,80025.000000,862.595802)}
{pt3dadd(189660.000000,196176.000000,79800.000000,862.595802)}
{pt3dadd(189684.000000,195972.000000,79575.000000,862.595802)}
{pt3dadd(189636.000000,195732.000000,79600.000000,862.595802)}
{pt3dadd(189588.000000,195528.000000,79625.000000,862.595802)}
{pt3dadd(189648.000000,195336.000000,79525.000000,853.969838)}
{pt3dadd(189708.000000,195180.000000,79425.000000,845.343873)}
{pt3dadd(189672.000000,194988.000000,79225.000000,836.717909)}
{pt3dadd(189780.000000,194784.000000,79025.000000,828.091944)}
{pt3dadd(189804.000000,194592.000000,78975.000000,836.717909)}
{pt3dadd(189804.000000,194364.000000,78850.000000,845.343873)}
{pt3dadd(189840.000000,194088.000000,78625.000000,853.969838)}
{pt3dadd(189948.000000,193848.000000,78450.000000,862.595802)}
{pt3dadd(190044.000000,193596.000000,78400.000000,853.969838)}
{pt3dadd(190140.000000,193380.000000,78275.000000,845.343873)}
{pt3dadd(190236.000000,193164.000000,78150.000000,836.717909)}
{pt3dadd(190236.000000,192912.000000,78075.000000,828.091944)}
{pt3dadd(190260.000000,192720.000000,78000.000000,836.717909)}
{pt3dadd(190332.000000,192528.000000,77800.000000,845.343873)}
{pt3dadd(190392.000000,192336.000000,77650.000000,853.969838)}
{pt3dadd(190440.000000,192132.000000,77500.000000,862.595802)}
{pt3dadd(190500.000000,191916.000000,77450.000000,905.725589)}
{pt3dadd(190668.000000,191664.000000,77325.000000,948.855375)}
{pt3dadd(190692.000000,191460.000000,77325.000000,991.985162)}
{pt3dadd(190752.000000,191208.000000,77275.000000,1035.114948)}
{pt3dadd(190788.000000,190980.000000,77150.000000,862.595802)}
{pt3dadd(190824.000000,190788.000000,77025.000000,794.968308)}

{create adhoc15}
{access adhoc15}
{connect adhoc15(1), adhoc14(0)}
{nseg = 1}
{strdef color color = "White"}
{pt3dclear()}
{pt3dadd(190824.000000,190788.000000,77025.000000,794.968308)}
{pt3dadd(191028.000000,190548.000000,77025.000000,862.595802)}
{pt3dadd(191208.000000,190308.000000,76775.000000,862.595802)}
{pt3dadd(191208.000000,190080.000000,76700.000000,862.595802)}
{pt3dadd(191316.000000,189828.000000,76625.000000,862.595802)}
{pt3dadd(191484.000000,189612.000000,76425.000000,862.595802)}
{pt3dadd(191652.000000,189396.000000,76225.000000,853.969838)}
{pt3dadd(191688.000000,189132.000000,76175.000000,845.343873)}
{pt3dadd(191856.000000,188880.000000,76175.000000,836.717909)}
{pt3dadd(191988.000000,188640.000000,76125.000000,828.091944)}
{pt3dadd(192120.000000,188568.000000,76075.000000,1035.114948)}

{create adhoc16}
{access adhoc16}
{connect adhoc16(1), adhoc15(0)}
{nseg = 1}
{strdef color color = "White"}
{pt3dclear()}
{pt3dadd(192120.000000,188568.000000,76075.000000,1035.114948)}
{pt3dadd(192144.000000,188436.000000,75875.000000,862.595802)}

{create adhoc17}
{access adhoc17}
{connect adhoc17(1), adhoc16(0)}
{nseg = 1}
{strdef color color = "White"}
{pt3dclear()}
{pt3dadd(192144.000000,188436.000000,75875.000000,862.595802)}
{pt3dadd(192204.000000,188232.000000,75750.000000,862.595802)}
{pt3dadd(192408.000000,187980.000000,75375.000000,905.725589)}
{pt3dadd(192660.000000,187764.000000,75000.000000,948.855375)}
{pt3dadd(192396.000000,187536.000000,74450.000000,991.985162)}
{pt3dadd(192252.000000,187284.000000,74125.000000,1035.114948)}
{pt3dadd(192024.000000,187032.000000,73500.000000,1035.114948)}
{pt3dadd(191928.000000,186792.000000,73350.000000,1035.114948)}
{pt3dadd(191988.000000,186576.000000,73300.000000,828.091944)}

{create adhoc18}
{access adhoc18}
{connect adhoc18(1), adhoc17(0)}
{nseg = 1}
{strdef color color = "White"}
{pt3dclear()}
{pt3dadd(191988.000000,186576.000000,73300.000000,828.091944)}
{pt3dadd(192384.000000,186348.000000,73325.000000,862.595802)}
{pt3dadd(192624.000000,186120.000000,73475.000000,905.725589)}
{pt3dadd(192792.000000,185892.000000,73375.000000,948.855375)}
{pt3dadd(192888.000000,185640.000000,73175.000000,991.985162)}
{pt3dadd(192888.000000,185388.000000,72900.000000,1035.114948)}
{pt3dadd(193164.000000,185172.000000,72775.000000,1035.114948)}
{pt3dadd(193332.000000,184944.000000,72750.000000,1035.114948)}
{pt3dadd(193500.000000,184716.000000,72675.000000,1035.114948)}
{pt3dadd(193560.000000,184440.000000,72700.000000,1035.114948)}
{pt3dadd(193764.000000,184200.000000,72650.000000,1035.114948)}
{pt3dadd(193824.000000,183972.000000,72625.000000,1035.114948)}
{pt3dadd(193812.000000,183696.000000,72650.000000,1035.114948)}
{pt3dadd(193944.000000,183468.000000,72700.000000,1035.114948)}
{pt3dadd(193980.000000,183252.000000,72725.000000,1035.114948)}
{pt3dadd(193788.000000,183012.000000,72750.000000,1035.114948)}
{pt3dadd(193752.000000,182772.000000,72775.000000,1035.114948)}
{pt3dadd(193596.000000,182484.000000,72875.000000,1035.114948)}
{pt3dadd(193596.000000,182268.000000,72850.000000,991.985162)}
{pt3dadd(193596.000000,182004.000000,72850.000000,948.855375)}
{pt3dadd(193560.000000,181776.000000,72800.000000,905.725589)}
{pt3dadd(193524.000000,181572.000000,72750.000000,862.595802)}
{pt3dadd(193488.000000,181368.000000,72825.000000,853.969838)}
{pt3dadd(193452.000000,181140.000000,72900.000000,845.343873)}
{pt3dadd(193440.000000,180948.000000,72850.000000,836.717909)}
{pt3dadd(193428.000000,180732.000000,72800.000000,828.091944)}
{pt3dadd(193176.000000,180564.000000,72950.000000,718.829820)}

{create adhoc19}
{access adhoc19}
{connect adhoc19(1), adhoc18(0)}
{nseg = 1}
{strdef color color = "White"}
{pt3dclear()}
{pt3dadd(193176.000000,180564.000000,72950.000000,718.829820)}
{pt3dadd(193140.000000,180288.000000,73000.000000,718.829820)}
{pt3dadd(193212.000000,179976.000000,72950.000000,797.901102)}
{pt3dadd(193320.000000,179724.000000,72975.000000,876.972384)}
{pt3dadd(193464.000000,179484.000000,73000.000000,956.043666)}
{pt3dadd(193608.000000,179184.000000,73075.000000,1035.114948)}
{pt3dadd(193644.000000,178908.000000,73175.000000,983.359197)}
{pt3dadd(193752.000000,178656.000000,73300.000000,931.603446)}
{pt3dadd(193860.000000,178380.000000,73425.000000,879.847695)}
{pt3dadd(193968.000000,178140.000000,73550.000000,828.091944)}
{pt3dadd(193884.000000,177888.000000,73550.000000,800.776413)}
{pt3dadd(193800.000000,177612.000000,73550.000000,773.460882)}
{pt3dadd(195720.000000,176592.000000,73700.000000,746.145351)}
{pt3dadd(195708.000000,175800.000000,73700.000000,718.829820)}
{pt3dadd(195348.000000,175572.000000,73850.000000,718.829820)}
{pt3dadd(195060.000000,175380.000000,73950.000000,718.829820)}
{pt3dadd(194844.000000,175200.000000,73950.000000,718.829820)}
{pt3dadd(194628.000000,174984.000000,73975.000000,718.829820)}
{pt3dadd(194724.000000,174744.000000,74075.000000,718.829820)}
{pt3dadd(194904.000000,174504.000000,74225.000000,718.829820)}
{pt3dadd(195072.000000,174300.000000,74300.000000,718.829820)}
{pt3dadd(195216.000000,174048.000000,74550.000000,718.829820)}
{pt3dadd(195312.000000,173820.000000,74650.000000,718.829820)}

{create adhoc20}
{access adhoc20}
{connect adhoc20(1), adhoc19(0)}
{nseg = 1}
{strdef color color = "White"}
{pt3dclear()}
{pt3dadd(195312.000000,173820.000000,74650.000000,718.829820)}
{pt3dadd(195648.000000,173592.000000,74975.000000,690.076674)}
{pt3dadd(196008.000000,173340.000000,75100.000000,690.076674)}
{pt3dadd(196104.000000,173124.000000,75125.000000,690.076674)}
{pt3dadd(196176.000000,172836.000000,75250.000000,690.076674)}
{pt3dadd(196380.000000,172572.000000,75325.000000,690.076674)}
{pt3dadd(196632.000000,172308.000000,75500.000000,697.264960)}
{pt3dadd(196812.000000,172044.000000,75675.000000,704.453247)}
{pt3dadd(196944.000000,171780.000000,75825.000000,711.641533)}
{pt3dadd(196968.000000,171576.000000,75825.000000,718.829820)}
{pt3dadd(196968.000000,171336.000000,75875.000000,709.245438)}
{pt3dadd(196956.000000,171132.000000,75950.000000,699.661056)}
{pt3dadd(196932.000000,170916.000000,76100.000000,690.076674)}
{pt3dadd(197016.000000,170628.000000,76225.000000,718.829820)}

{create adhoc21}
{access adhoc21}
{connect adhoc21(1), adhoc20(0)}
{nseg = 1}
{strdef color color = "White"}
{pt3dclear()}
{pt3dadd(197016.000000,170628.000000,76225.000000,718.829820)}
{pt3dadd(195768.000000,170628.000000,76975.000000,116.095032)}
{pt3dadd(195444.000000,170592.000000,77175.000000,141.635934)}
{pt3dadd(195204.000000,170580.000000,77375.000000,167.176836)}
{pt3dadd(195108.000000,170724.000000,77575.000000,139.314042)}

{create adhoc22}
{access adhoc22}
{connect adhoc22(1), adhoc21(0)}
{nseg = 1}
{strdef color color = "White"}
{pt3dclear()}
{pt3dadd(195108.000000,170724.000000,77575.000000,139.314042)}
{pt3dadd(194880.000000,171084.000000,77775.000000,96.745860)}
{pt3dadd(194784.000000,171336.000000,78075.000000,128.617821)}
{pt3dadd(194832.000000,171396.000000,78325.000000,160.489782)}
{pt3dadd(194952.000000,171336.000000,78525.000000,46.656000)}

{create adhoc23}
{access adhoc23}
{connect adhoc23(1), adhoc21(0)}
{nseg = 1}
{strdef color color = "White"}
{pt3dclear()}
{pt3dadd(195108.000000,170724.000000,77575.000000,139.314042)}
{pt3dadd(195216.000000,170364.000000,77575.000000,80.621550)}
{pt3dadd(195348.000000,170268.000000,77700.000000,46.656000)}

{create adhoc24}
{access adhoc24}
{connect adhoc24(1), adhoc20(0)}
{nseg = 1}
{strdef color color = "White"}
{pt3dclear()}
{pt3dadd(197016.000000,170628.000000,76225.000000,718.829820)}
{pt3dadd(197196.000000,170340.000000,76225.000000,718.829820)}
{pt3dadd(197376.000000,170124.000000,76275.000000,718.829820)}
{pt3dadd(197472.000000,169884.000000,76175.000000,718.829820)}
{pt3dadd(197520.000000,169704.000000,76325.000000,718.829820)}
{pt3dadd(197580.000000,169500.000000,76475.000000,718.829820)}
{pt3dadd(197568.000000,169260.000000,76525.000000,718.829820)}
{pt3dadd(197952.000000,169032.000000,76550.000000,718.829820)}
{pt3dadd(197976.000000,168840.000000,76625.000000,718.829820)}
{pt3dadd(198132.000000,168588.000000,76675.000000,718.829820)}
{pt3dadd(198252.000000,168396.000000,76700.000000,718.829820)}
{pt3dadd(198336.000000,168180.000000,76725.000000,718.829820)}
{pt3dadd(198420.000000,167916.000000,76775.000000,718.829820)}
{pt3dadd(198540.000000,167664.000000,76875.000000,718.829820)}
{pt3dadd(198636.000000,167472.000000,76925.000000,718.829820)}

{create adhoc25}
{access adhoc25}
{connect adhoc25(1), adhoc24(0)}
{nseg = 1}
{strdef color color = "White"}
{pt3dclear()}
{pt3dadd(198636.000000,167472.000000,76925.000000,718.829820)}
{pt3dadd(197748.000000,167472.000000,77975.000000,96.745860)}
{pt3dadd(197592.000000,167388.000000,78175.000000,96.745860)}
{pt3dadd(197424.000000,167268.000000,78400.000000,96.745860)}
{pt3dadd(197448.000000,167256.000000,78675.000000,96.745860)}
{pt3dadd(197508.000000,167220.000000,78925.000000,96.745860)}
{pt3dadd(197568.000000,167184.000000,79125.000000,100.161636)}
{pt3dadd(197520.000000,167052.000000,79275.000000,103.577412)}
{pt3dadd(197460.000000,166920.000000,79550.000000,106.993188)}
{pt3dadd(197388.000000,166800.000000,79725.000000,55.987200)}

{create adhoc26}
{access adhoc26}
{connect adhoc26(1), adhoc24(0)}
{nseg = 1}
{strdef color color = "White"}
{pt3dclear()}
{pt3dadd(198636.000000,167472.000000,76925.000000,718.829820)}
{pt3dadd(198852.000000,167220.000000,77000.000000,862.595802)}
{pt3dadd(198900.000000,166992.000000,76975.000000,862.595802)}
{pt3dadd(198948.000000,166776.000000,76950.000000,862.595802)}
{pt3dadd(198960.000000,166572.000000,77000.000000,862.595802)}
{pt3dadd(198972.000000,166344.000000,77050.000000,862.595802)}
{pt3dadd(198984.000000,166128.000000,77025.000000,862.595802)}
{pt3dadd(198924.000000,165876.000000,77050.000000,862.595802)}
{pt3dadd(199008.000000,165564.000000,77050.000000,862.595802)}
{pt3dadd(199008.000000,165432.000000,77025.000000,828.091944)}

{create adhoc27}
{access adhoc27}
{connect adhoc27(1), adhoc26(0)}
{nseg = 1}
{strdef color color = "White"}
{pt3dclear()}
{pt3dadd(199008.000000,165432.000000,77025.000000,828.091944)}
{pt3dadd(198012.000000,165432.000000,77425.000000,96.745860)}
{pt3dadd(197892.000000,165420.000000,77725.000000,100.422203)}
{pt3dadd(197652.000000,165420.000000,78050.000000,104.098545)}
{pt3dadd(197328.000000,165252.000000,78250.000000,107.774888)}
{pt3dadd(196908.000000,165012.000000,78400.000000,111.451230)}
{pt3dadd(196512.000000,164628.000000,78525.000000,111.451230)}
{pt3dadd(196320.000000,164244.000000,78675.000000,111.451230)}
{pt3dadd(196056.000000,163692.000000,78775.000000,111.451230)}
{pt3dadd(195708.000000,163320.000000,78875.000000,111.451230)}
{pt3dadd(195144.000000,163164.000000,78875.000000,107.774888)}
{pt3dadd(194940.000000,163164.000000,78775.000000,104.098545)}
{pt3dadd(194724.000000,163068.000000,78800.000000,100.422203)}
{pt3dadd(194484.000000,163068.000000,78650.000000,96.745860)}
{pt3dadd(194352.000000,163104.000000,78625.000000,101.583153)}
{pt3dadd(194196.000000,163128.000000,78650.000000,106.420446)}
{pt3dadd(194064.000000,163092.000000,78625.000000,111.257739)}
{pt3dadd(193920.000000,163056.000000,78600.000000,116.095032)}
{pt3dadd(193764.000000,163008.000000,78525.000000,107.226662)}
{pt3dadd(193620.000000,163020.000000,78550.000000,98.358291)}
{pt3dadd(193488.000000,163020.000000,78525.000000,89.489920)}
{pt3dadd(193224.000000,162972.000000,78525.000000,80.621550)}
{pt3dadd(193092.000000,163020.000000,78650.000000,89.489920)}
{pt3dadd(192960.000000,163032.000000,78675.000000,98.358291)}
{pt3dadd(192528.000000,163044.000000,78675.000000,107.226662)}
{pt3dadd(192324.000000,163044.000000,78775.000000,116.095032)}
{pt3dadd(192204.000000,163176.000000,78850.000000,110.290284)}
{pt3dadd(192072.000000,163200.000000,78850.000000,104.485536)}
{pt3dadd(191520.000000,163284.000000,78850.000000,98.680788)}
{pt3dadd(190800.000000,163080.000000,78850.000000,92.876040)}
{pt3dadd(190512.000000,162852.000000,78850.000000,158.211222)}
{pt3dadd(190332.000000,162708.000000,78875.000000,223.546404)}
{pt3dadd(190200.000000,162396.000000,78825.000000,288.881586)}
{pt3dadd(190032.000000,162036.000000,78750.000000,277.326324)}

{create adhoc28}
{access adhoc28}
{connect adhoc28(1), adhoc27(0)}
{nseg = 1}
{strdef color color = "White"}
{pt3dclear()}
{pt3dadd(190032.000000,162036.000000,78750.000000,277.326324)}
{pt3dadd(189528.000000,162036.000000,78300.000000,139.314042)}
{pt3dadd(189168.000000,162036.000000,78225.000000,139.314042)}
{pt3dadd(188628.000000,161880.000000,78225.000000,139.314042)}
{pt3dadd(188196.000000,161760.000000,78225.000000,139.314042)}
{pt3dadd(187908.000000,161640.000000,78125.000000,139.314042)}
{pt3dadd(187392.000000,161640.000000,78125.000000,133.509289)}
{pt3dadd(187272.000000,161700.000000,77975.000000,127.704537)}
{pt3dadd(187164.000000,161712.000000,77875.000000,121.899785)}
{pt3dadd(187044.000000,161772.000000,77825.000000,116.095032)}
{pt3dadd(186924.000000,161784.000000,77850.000000,116.095032)}

{create adhoc29}
{access adhoc29}
{connect adhoc29(1), adhoc28(0)}
{nseg = 1}
{strdef color color = "White"}
{pt3dclear()}
{pt3dadd(186924.000000,161784.000000,77850.000000,116.095032)}
{pt3dadd(186936.000000,162180.000000,77900.000000,74.300832)}
{pt3dadd(186936.000000,162300.000000,77925.000000,71.928768)}
{pt3dadd(186972.000000,162420.000000,77925.000000,69.556704)}
{pt3dadd(186984.000000,162528.000000,77975.000000,67.184640)}
{pt3dadd(186972.000000,162600.000000,77975.000000,64.497240)}

{create adhoc30}
{access adhoc30}
{connect adhoc30(1), adhoc28(0)}
{nseg = 1}
{strdef color color = "White"}
{pt3dclear()}
{pt3dadd(186924.000000,161784.000000,77850.000000,116.095032)}
{pt3dadd(186780.000000,161772.000000,77800.000000,139.314042)}
{pt3dadd(186648.000000,161784.000000,77775.000000,154.638585)}
{pt3dadd(186384.000000,161700.000000,77775.000000,169.963128)}
{pt3dadd(185856.000000,161628.000000,77775.000000,185.287671)}
{pt3dadd(185556.000000,161616.000000,77700.000000,200.612214)}
{pt3dadd(185220.000000,161496.000000,77850.000000,222.679557)}
{pt3dadd(184824.000000,161472.000000,77900.000000,244.746900)}
{pt3dadd(184668.000000,161400.000000,77700.000000,266.814243)}
{pt3dadd(184296.000000,161448.000000,77750.000000,288.881586)}
{pt3dadd(183972.000000,161424.000000,77575.000000,258.455399)}
{pt3dadd(183756.000000,161376.000000,77525.000000,228.029211)}
{pt3dadd(183408.000000,161364.000000,77450.000000,197.603024)}
{pt3dadd(183108.000000,161412.000000,77500.000000,167.176836)}
{pt3dadd(182760.000000,161424.000000,77550.000000,167.176836)}
{pt3dadd(182412.000000,161412.000000,77550.000000,167.176836)}
{pt3dadd(182136.000000,161400.000000,77550.000000,167.176836)}
{pt3dadd(181788.000000,161436.000000,77525.000000,167.176836)}
{pt3dadd(181440.000000,161544.000000,77500.000000,185.566288)}
{pt3dadd(181128.000000,161688.000000,77550.000000,203.955741)}
{pt3dadd(180816.000000,161724.000000,77525.000000,222.345193)}
{pt3dadd(180516.000000,161688.000000,77400.000000,240.734646)}
{pt3dadd(180204.000000,161652.000000,77250.000000,215.379495)}
{pt3dadd(179940.000000,161664.000000,77150.000000,190.024344)}
{pt3dadd(179556.000000,161628.000000,76975.000000,164.669193)}
{pt3dadd(179244.000000,161484.000000,76750.000000,139.314042)}
{pt3dadd(178908.000000,161256.000000,76475.000000,133.509289)}
{pt3dadd(178560.000000,160992.000000,76225.000000,127.704537)}
{pt3dadd(178176.000000,160908.000000,76125.000000,121.899785)}
{pt3dadd(177948.000000,160812.000000,76050.000000,116.095032)}
{pt3dadd(177708.000000,160752.000000,76025.000000,128.865483)}
{pt3dadd(177228.000000,160392.000000,75800.000000,141.635934)}
{pt3dadd(176928.000000,160164.000000,75425.000000,154.406385)}
{pt3dadd(176652.000000,159984.000000,75000.000000,167.176836)}
{pt3dadd(176172.000000,159720.000000,74575.000000,167.176836)}
{pt3dadd(175476.000000,159264.000000,74050.000000,167.176836)}
{pt3dadd(174948.000000,158820.000000,73400.000000,167.176836)}
{pt3dadd(174468.000000,158316.000000,72600.000000,167.176836)}
{pt3dadd(174216.000000,157992.000000,72050.000000,160.211138)}
{pt3dadd(173916.000000,157644.000000,71575.000000,153.245439)}
{pt3dadd(173736.000000,157248.000000,71100.000000,146.279741)}
{pt3dadd(173220.000000,156984.000000,70625.000000,139.314042)}
{pt3dadd(172668.000000,156888.000000,70175.000000,139.314042)}
{pt3dadd(171972.000000,156780.000000,69625.000000,139.314042)}
{pt3dadd(171420.000000,156612.000000,69000.000000,139.314042)}
{pt3dadd(170736.000000,156312.000000,68300.000000,139.314042)}
{pt3dadd(170136.000000,156072.000000,67650.000000,185.209659)}
{pt3dadd(169416.000000,155796.000000,66900.000000,231.105276)}
{pt3dadd(168312.000000,155784.000000,66100.000000,231.105276)}

{create adhoc31}
{access adhoc31}
{connect adhoc31(1), adhoc27(0)}
{nseg = 1}
{strdef color color = "White"}
{pt3dclear()}
{pt3dadd(190032.000000,162036.000000,78750.000000,277.326324)}
{pt3dadd(190044.000000,161784.000000,78875.000000,192.587724)}
{pt3dadd(190056.000000,161616.000000,78950.000000,139.314042)}

{create adhoc32}
{access adhoc32}
{connect adhoc32(1), adhoc26(0)}
{nseg = 1}
{strdef color color = "White"}
{pt3dclear()}
{pt3dadd(199008.000000,165432.000000,77025.000000,828.091944)}
{pt3dadd(199056.000000,165108.000000,76950.000000,862.595802)}
{pt3dadd(199104.000000,164916.000000,77075.000000,862.595802)}
{pt3dadd(199104.000000,164640.000000,77075.000000,862.595802)}
{pt3dadd(199200.000000,164364.000000,77050.000000,862.595802)}
{pt3dadd(199200.000000,164088.000000,77025.000000,862.595802)}
{pt3dadd(199056.000000,163884.000000,77050.000000,895.374423)}
{pt3dadd(199068.000000,163608.000000,77075.000000,928.153044)}
{pt3dadd(199080.000000,163368.000000,77125.000000,960.931665)}
{pt3dadd(199068.000000,163068.000000,77200.000000,993.710286)}
{pt3dadd(199044.000000,162804.000000,77275.000000,924.990169)}
{pt3dadd(199008.000000,162576.000000,77275.000000,856.270053)}
{pt3dadd(198996.000000,162360.000000,77325.000000,787.549937)}
{pt3dadd(198768.000000,162096.000000,77450.000000,718.829820)}
{pt3dadd(198768.000000,161856.000000,77475.000000,688.878585)}
{pt3dadd(198768.000000,161616.000000,77500.000000,658.927350)}
{pt3dadd(198768.000000,161376.000000,77525.000000,628.976115)}
{pt3dadd(198660.000000,161112.000000,77600.000000,599.024880)}
{pt3dadd(198648.000000,160860.000000,77600.000000,628.976115)}
{pt3dadd(198624.000000,160644.000000,77650.000000,658.927350)}
{pt3dadd(198636.000000,160380.000000,77600.000000,688.878585)}
{pt3dadd(198648.000000,160152.000000,77650.000000,718.829820)}
{pt3dadd(198672.000000,160020.000000,77725.000000,599.024880)}

{create adhoc33}
{access adhoc33}
{connect adhoc33(1), adhoc32(0)}
{nseg = 1}
{strdef color color = "White"}
{pt3dclear()}
{pt3dadd(198672.000000,160020.000000,77725.000000,599.024880)}
{pt3dadd(197760.000000,160020.000000,78600.000000,116.095032)}
{pt3dadd(197496.000000,160020.000000,78825.000000,107.226662)}
{pt3dadd(197376.000000,159864.000000,79200.000000,98.358291)}
{pt3dadd(197460.000000,159888.000000,79350.000000,89.489920)}
{pt3dadd(197484.000000,159960.000000,79800.000000,80.621550)}
{pt3dadd(197484.000000,160044.000000,80225.000000,102.260372)}
{pt3dadd(197484.000000,160320.000000,80475.000000,123.899193)}
{pt3dadd(197700.000000,160548.000000,80750.000000,145.538014)}
{pt3dadd(197880.000000,160800.000000,80975.000000,167.176836)}
{pt3dadd(197880.000000,160848.000000,81175.000000,141.635934)}
{pt3dadd(198048.000000,160956.000000,81400.000000,116.095032)}
{pt3dadd(198108.000000,161004.000000,81575.000000,116.095032)}

{create adhoc34}
{access adhoc34}
{connect adhoc34(1), adhoc32(0)}
{nseg = 1}
{strdef color color = "White"}
{pt3dclear()}
{pt3dadd(198672.000000,160020.000000,77725.000000,599.024880)}
{pt3dadd(198696.000000,159768.000000,77525.000000,575.063856)}
{pt3dadd(198792.000000,159468.000000,77525.000000,611.005347)}
{pt3dadd(198888.000000,159216.000000,77525.000000,646.946838)}
{pt3dadd(198960.000000,158988.000000,77600.000000,682.888329)}
{pt3dadd(199032.000000,158748.000000,77650.000000,718.829820)}
{pt3dadd(199056.000000,158520.000000,77625.000000,754.771316)}
{pt3dadd(199080.000000,158268.000000,77600.000000,790.712811)}
{pt3dadd(199092.000000,157992.000000,77650.000000,826.654307)}
{pt3dadd(199056.000000,157728.000000,77725.000000,862.595802)}
{pt3dadd(199020.000000,157500.000000,77800.000000,862.595802)}
{pt3dadd(199044.000000,157236.000000,77925.000000,862.595802)}
{pt3dadd(199068.000000,156996.000000,77900.000000,828.091944)}

{create adhoc35}
{access adhoc35}
{connect adhoc35(1), adhoc34(0)}
{nseg = 1}
{strdef color color = "White"}
{pt3dclear()}
{pt3dadd(199068.000000,156996.000000,77900.000000,828.091944)}
{pt3dadd(198060.000000,156960.000000,77050.000000,116.095032)}
{pt3dadd(197808.000000,156816.000000,76875.000000,121.899785)}
{pt3dadd(197688.000000,156672.000000,76775.000000,127.704537)}
{pt3dadd(197556.000000,156540.000000,76625.000000,133.509289)}
{pt3dadd(197448.000000,156396.000000,76450.000000,139.314042)}
{pt3dadd(197148.000000,156120.000000,76325.000000,185.318136)}
{pt3dadd(196872.000000,156012.000000,76075.000000,231.322230)}
{pt3dadd(196536.000000,155772.000000,75775.000000,277.326324)}
{pt3dadd(196548.000000,155688.000000,75350.000000,240.734646)}

{create adhoc36}
{access adhoc36}
{connect adhoc36(1), adhoc34(0)}
{nseg = 1}
{strdef color color = "White"}
{pt3dclear()}
{pt3dadd(199068.000000,156996.000000,77900.000000,828.091944)}
{pt3dadd(199164.000000,156732.000000,77875.000000,828.091944)}
{pt3dadd(199212.000000,156492.000000,77925.000000,800.776413)}
{pt3dadd(199260.000000,156228.000000,77925.000000,773.460882)}
{pt3dadd(199392.000000,155964.000000,78025.000000,746.145351)}
{pt3dadd(199320.000000,155736.000000,78075.000000,718.829820)}
{pt3dadd(199368.000000,155424.000000,77975.000000,711.641533)}
{pt3dadd(199584.000000,155160.000000,78125.000000,704.453247)}
{pt3dadd(199608.000000,154956.000000,78125.000000,697.264960)}
{pt3dadd(199632.000000,154704.000000,78125.000000,690.076674)}
{pt3dadd(199488.000000,154464.000000,77925.000000,683.175888)}
{pt3dadd(199476.000000,154188.000000,77950.000000,676.275102)}
{pt3dadd(199380.000000,153972.000000,77925.000000,669.374316)}
{pt3dadd(199296.000000,153732.000000,77925.000000,662.473530)}
{pt3dadd(199284.000000,153492.000000,77925.000000,646.611368)}
{pt3dadd(199200.000000,153204.000000,77975.000000,630.749205)}
{pt3dadd(199212.000000,152988.000000,77950.000000,614.887042)}
{pt3dadd(199080.000000,152724.000000,77900.000000,599.024880)}
{pt3dadd(198948.000000,152484.000000,77900.000000,599.024880)}
{pt3dadd(198888.000000,152196.000000,77875.000000,599.024880)}
{pt3dadd(198876.000000,151968.000000,77875.000000,599.024880)}
{pt3dadd(198780.000000,151764.000000,77825.000000,599.024880)}
{pt3dadd(198684.000000,151524.000000,77825.000000,599.024880)}
{pt3dadd(198624.000000,151236.000000,77825.000000,599.024880)}
{pt3dadd(198564.000000,151032.000000,77825.000000,599.024880)}
{pt3dadd(198612.000000,150768.000000,77675.000000,599.024880)}
{pt3dadd(198576.000000,150528.000000,77625.000000,628.976115)}
{pt3dadd(198564.000000,150336.000000,77525.000000,658.927350)}
{pt3dadd(198564.000000,150120.000000,77425.000000,688.878585)}
{pt3dadd(198576.000000,149844.000000,77425.000000,718.829820)}
{pt3dadd(198624.000000,149580.000000,77425.000000,718.829820)}
{pt3dadd(198696.000000,149376.000000,77450.000000,718.829820)}
{pt3dadd(198600.000000,149148.000000,77250.000000,718.829820)}

{create adhoc37}
{access adhoc37}
{connect adhoc37(1), adhoc36(0)}
{nseg = 1}
{strdef color color = "White"}
{pt3dclear()}
{pt3dadd(198600.000000,149148.000000,77250.000000,718.829820)}
{pt3dadd(198600.000000,148980.000000,76025.000000,346.657896)}
{pt3dadd(198408.000000,148824.000000,75800.000000,346.657896)}
{pt3dadd(198348.000000,148776.000000,75525.000000,346.657896)}
{pt3dadd(198492.000000,149052.000000,75200.000000,346.657896)}
{pt3dadd(198324.000000,149136.000000,74800.000000,346.657896)}
{pt3dadd(198192.000000,149232.000000,74400.000000,346.657896)}
{pt3dadd(198168.000000,149244.000000,74050.000000,346.657896)}
{pt3dadd(198144.000000,149424.000000,73700.000000,346.657896)}
{pt3dadd(198084.000000,149508.000000,73350.000000,346.657896)}
{pt3dadd(197928.000000,149520.000000,73000.000000,359.830908)}
{pt3dadd(197808.000000,149664.000000,72550.000000,373.003920)}
{pt3dadd(197784.000000,149664.000000,72275.000000,386.176932)}
{pt3dadd(197784.000000,149652.000000,71900.000000,399.349944)}
{pt3dadd(197784.000000,149640.000000,71750.000000,404.896458)}
{pt3dadd(197616.000000,149376.000000,71450.000000,410.442972)}
{pt3dadd(197340.000000,149148.000000,71200.000000,415.989486)}
{pt3dadd(197424.000000,149316.000000,71050.000000,415.989486)}

{create adhoc38}
{access adhoc38}
{connect adhoc38(1), adhoc37(0)}
{nseg = 1}
{strdef color color = "White"}
{pt3dclear()}
{pt3dadd(197424.000000,149316.000000,71050.000000,415.989486)}
{pt3dadd(196800.000000,148392.000000,70975.000000,240.734646)}
{pt3dadd(196572.000000,147900.000000,70775.000000,230.704038)}
{pt3dadd(196452.000000,147708.000000,70775.000000,220.673430)}
{pt3dadd(196296.000000,147504.000000,70675.000000,210.642822)}
{pt3dadd(196176.000000,147336.000000,70675.000000,200.612214)}
{pt3dadd(196092.000000,147120.000000,70700.000000,208.235480)}
{pt3dadd(195888.000000,146916.000000,70550.000000,215.858745)}
{pt3dadd(195672.000000,146736.000000,70425.000000,223.482010)}
{pt3dadd(195624.000000,146532.000000,70425.000000,231.105276)}
{pt3dadd(195564.000000,146352.000000,70500.000000,223.482010)}
{pt3dadd(195708.000000,146184.000000,70550.000000,215.858745)}
{pt3dadd(195684.000000,146028.000000,70450.000000,208.235480)}
{pt3dadd(195804.000000,145920.000000,70425.000000,200.612214)}
{pt3dadd(195744.000000,145740.000000,70325.000000,210.642822)}
{pt3dadd(195624.000000,145536.000000,70225.000000,220.673430)}
{pt3dadd(195636.000000,145416.000000,70300.000000,230.704038)}
{pt3dadd(195504.000000,145260.000000,70200.000000,240.734646)}
{pt3dadd(195408.000000,145080.000000,70125.000000,215.379495)}
{pt3dadd(195312.000000,144960.000000,70075.000000,190.024344)}
{pt3dadd(195228.000000,144804.000000,69850.000000,164.669193)}
{pt3dadd(195132.000000,144648.000000,69750.000000,139.314042)}
{pt3dadd(195036.000000,144528.000000,69650.000000,154.638585)}
{pt3dadd(194904.000000,144384.000000,69575.000000,169.963128)}
{pt3dadd(194796.000000,144228.000000,69475.000000,185.287671)}
{pt3dadd(194772.000000,144084.000000,69400.000000,200.612214)}
{pt3dadd(194724.000000,143940.000000,69300.000000,190.581602)}
{pt3dadd(194628.000000,143796.000000,69200.000000,180.550989)}
{pt3dadd(194544.000000,143640.000000,69150.000000,170.520377)}
{pt3dadd(194376.000000,143460.000000,69000.000000,160.489764)}
{pt3dadd(194340.000000,143292.000000,68925.000000,162.161532)}
{pt3dadd(194220.000000,143100.000000,68750.000000,163.833300)}
{pt3dadd(194100.000000,142908.000000,68675.000000,165.505068)}
{pt3dadd(193980.000000,142728.000000,68625.000000,167.176836)}
{pt3dadd(193896.000000,142560.000000,68525.000000,167.176836)}
{pt3dadd(193800.000000,142344.000000,68450.000000,167.176836)}
{pt3dadd(193752.000000,142152.000000,68375.000000,167.176836)}
{pt3dadd(193716.000000,141960.000000,68350.000000,167.176836)}
{pt3dadd(193620.000000,141756.000000,68350.000000,167.176836)}
{pt3dadd(193500.000000,141612.000000,68100.000000,167.176836)}
{pt3dadd(193392.000000,141444.000000,68000.000000,167.176836)}
{pt3dadd(193380.000000,141420.000000,67725.000000,167.176836)}
{pt3dadd(193260.000000,141324.000000,67475.000000,203.955741)}
{pt3dadd(193260.000000,141300.000000,67075.000000,240.734646)}
{pt3dadd(193320.000000,141072.000000,66600.000000,80.621550)}

{create adhoc39}
{access adhoc39}
{connect adhoc39(1), adhoc37(0)}
{nseg = 1}
{strdef color color = "White"}
{pt3dclear()}
{pt3dadd(197424.000000,149316.000000,71050.000000,415.989486)}
{pt3dadd(197280.000000,149964.000000,70975.000000,167.176836)}
{pt3dadd(196884.000000,150144.000000,70725.000000,194.714208)}
{pt3dadd(196560.000000,150456.000000,70425.000000,222.251580)}
{pt3dadd(196572.000000,150612.000000,70275.000000,249.788952)}
{pt3dadd(196440.000000,150804.000000,70025.000000,277.326324)}
{pt3dadd(196164.000000,151020.000000,69800.000000,258.147797)}
{pt3dadd(195948.000000,151464.000000,69525.000000,238.969269)}
{pt3dadd(195816.000000,151704.000000,69100.000000,219.790742)}
{pt3dadd(195552.000000,151956.000000,68750.000000,200.612214)}
{pt3dadd(195192.000000,152196.000000,68500.000000,210.642822)}
{pt3dadd(194940.000000,152604.000000,68125.000000,220.673430)}
{pt3dadd(194580.000000,152700.000000,67750.000000,230.704038)}
{pt3dadd(194256.000000,152892.000000,67425.000000,240.734646)}
{pt3dadd(193980.000000,153372.000000,67150.000000,263.748875)}
{pt3dadd(193992.000000,153552.000000,67150.000000,286.763103)}
{pt3dadd(193836.000000,153744.000000,66925.000000,309.777332)}
{pt3dadd(193680.000000,153960.000000,66850.000000,332.791560)}
{pt3dadd(193740.000000,154152.000000,66850.000000,284.422181)}
{pt3dadd(193788.000000,154296.000000,66750.000000,236.052801)}
{pt3dadd(193728.000000,154428.000000,66650.000000,187.683421)}
{pt3dadd(193500.000000,154560.000000,66650.000000,139.314042)}
{pt3dadd(193356.000000,154728.000000,66700.000000,154.638585)}
{pt3dadd(193092.000000,154860.000000,66775.000000,169.963128)}
{pt3dadd(193008.000000,155064.000000,66825.000000,185.287671)}
{pt3dadd(193020.000000,155280.000000,67000.000000,200.612214)}
{pt3dadd(193032.000000,155472.000000,67250.000000,192.587724)}
{pt3dadd(193044.000000,155640.000000,67300.000000,167.176836)}

{create adhoc40}
{access adhoc40}
{connect adhoc40(1), adhoc36(0)}
{nseg = 1}
{strdef color color = "White"}
{pt3dclear()}
{pt3dadd(198600.000000,149148.000000,77250.000000,718.829820)}
{pt3dadd(198600.000000,147900.000000,77350.000000,332.791596)}
{pt3dadd(198768.000000,147684.000000,77625.000000,336.258171)}
{pt3dadd(198912.000000,147468.000000,77775.000000,339.724746)}
{pt3dadd(198984.000000,147264.000000,77925.000000,343.191321)}
{pt3dadd(199044.000000,147060.000000,78075.000000,346.657896)}
{pt3dadd(199008.000000,146820.000000,78100.000000,346.657896)}
{pt3dadd(199008.000000,146580.000000,78025.000000,346.657896)}
{pt3dadd(199068.000000,146364.000000,78025.000000,346.657896)}
{pt3dadd(199080.000000,146196.000000,78000.000000,346.657896)}
{pt3dadd(199128.000000,146028.000000,78000.000000,363.990794)}
{pt3dadd(199152.000000,145848.000000,78025.000000,381.323691)}
{pt3dadd(199116.000000,145644.000000,78000.000000,398.656589)}
{pt3dadd(199140.000000,145404.000000,77900.000000,415.989486)}
{pt3dadd(199140.000000,145200.000000,77850.000000,491.699570)}
{pt3dadd(199200.000000,144972.000000,77850.000000,567.409653)}
{pt3dadd(199320.000000,144744.000000,77775.000000,643.119737)}
{pt3dadd(199332.000000,144552.000000,77700.000000,718.829820)}
{pt3dadd(199356.000000,144372.000000,77700.000000,746.145369)}
{pt3dadd(199200.000000,144156.000000,77725.000000,773.460918)}
{pt3dadd(199224.000000,143928.000000,77725.000000,800.776467)}
{pt3dadd(199236.000000,143688.000000,77775.000000,828.092016)}
{pt3dadd(199152.000000,143532.000000,77750.000000,800.776467)}
{pt3dadd(199152.000000,143304.000000,77850.000000,773.460918)}
{pt3dadd(199092.000000,143100.000000,77900.000000,746.145369)}
{pt3dadd(199032.000000,142956.000000,77950.000000,718.829820)}
{pt3dadd(199020.000000,142740.000000,78025.000000,711.641533)}
{pt3dadd(198996.000000,142512.000000,78175.000000,704.453247)}
{pt3dadd(199020.000000,142296.000000,78100.000000,697.264960)}
{pt3dadd(199032.000000,142032.000000,78275.000000,690.076674)}
{pt3dadd(199044.000000,141780.000000,78450.000000,828.091944)}
{pt3dadd(198984.000000,141588.000000,78525.000000,718.829820)}

{create adhoc41}
{access adhoc41}
{connect adhoc41(1), adhoc40(0)}
{nseg = 1}
{strdef color color = "White"}
{pt3dclear()}
{pt3dadd(198984.000000,141588.000000,78525.000000,718.829820)}
{pt3dadd(199140.000000,141588.000000,79825.000000,167.176836)}
{pt3dadd(199080.000000,141588.000000,80425.000000,175.535680)}
{pt3dadd(199068.000000,141588.000000,80925.000000,183.894525)}
{pt3dadd(199128.000000,141768.000000,81200.000000,192.253370)}
{pt3dadd(199200.000000,141924.000000,81400.000000,200.612214)}
{pt3dadd(199224.000000,142068.000000,81675.000000,184.884210)}
{pt3dadd(198972.000000,142104.000000,81900.000000,200.612214)}

{create adhoc42}
{access adhoc42}
{connect adhoc42(1), adhoc41(0)}
{nseg = 1}
{strdef color color = "White"}
{pt3dclear()}
{pt3dadd(198972.000000,142104.000000,81900.000000,200.612214)}
{pt3dadd(198108.000000,142092.000000,81900.000000,184.884210)}
{pt3dadd(197880.000000,142068.000000,81775.000000,160.489764)}
{pt3dadd(197844.000000,142008.000000,81600.000000,133.741476)}

{create adhoc43}
{access adhoc43}
{connect adhoc43(1), adhoc41(0)}
{nseg = 1}
{strdef color color = "White"}
{pt3dclear()}
{pt3dadd(198972.000000,142104.000000,81900.000000,200.612214)}
{pt3dadd(198936.000000,142188.000000,82225.000000,167.176836)}
{pt3dadd(199188.000000,142416.000000,82475.000000,183.158946)}
{pt3dadd(199092.000000,142404.000000,82800.000000,199.141056)}
{pt3dadd(198900.000000,142488.000000,83100.000000,215.123166)}
{pt3dadd(198816.000000,142536.000000,83375.000000,231.105276)}
{pt3dadd(198732.000000,142764.000000,83650.000000,222.045948)}
{pt3dadd(198708.000000,142992.000000,83875.000000,212.986620)}
{pt3dadd(198768.000000,143124.000000,84125.000000,116.095032)}

{create adhoc44}
{access adhoc44}
{connect adhoc44(1), adhoc43(0)}
{nseg = 1}
{strdef color color = "White"}
{pt3dclear()}
{pt3dadd(198768.000000,143124.000000,84125.000000,116.095032)}
{pt3dadd(198816.000000,142788.000000,84125.000000,75.728574)}
{pt3dadd(198816.000000,142728.000000,84350.000000,92.876040)}

{create adhoc45}
{access adhoc45}
{connect adhoc45(1), adhoc43(0)}
{nseg = 1}
{strdef color color = "White"}
{pt3dclear()}
{pt3dadd(198768.000000,143124.000000,84125.000000,116.095032)}
{pt3dadd(198888.000000,143268.000000,84225.000000,67.184640)}

{create adhoc46}
{access adhoc46}
{connect adhoc46(1), adhoc40(0)}
{nseg = 1}
{strdef color color = "White"}
{pt3dclear()}
{pt3dadd(198984.000000,141588.000000,78525.000000,718.829820)}
{pt3dadd(198912.000000,141384.000000,78325.000000,690.076674)}
{pt3dadd(198912.000000,141168.000000,78225.000000,667.313725)}
{pt3dadd(198780.000000,140964.000000,78200.000000,644.550777)}
{pt3dadd(198636.000000,140736.000000,78200.000000,621.787828)}
{pt3dadd(198540.000000,140532.000000,78200.000000,599.024880)}
{pt3dadd(198564.000000,140340.000000,78200.000000,593.034624)}
{pt3dadd(198576.000000,140172.000000,78225.000000,587.044368)}
{pt3dadd(198564.000000,139992.000000,78275.000000,581.054112)}
{pt3dadd(198564.000000,139812.000000,78275.000000,575.063856)}
{pt3dadd(198540.000000,139608.000000,78200.000000,551.102864)}
{pt3dadd(198480.000000,139440.000000,78175.000000,527.141871)}
{pt3dadd(198468.000000,139248.000000,78200.000000,503.180878)}
{pt3dadd(198396.000000,139068.000000,78175.000000,479.219886)}
{pt3dadd(198408.000000,138888.000000,78175.000000,496.139532)}
{pt3dadd(198396.000000,138708.000000,78150.000000,513.059178)}
{pt3dadd(198384.000000,138516.000000,78125.000000,529.978824)}
{pt3dadd(198372.000000,138432.000000,78125.000000,575.063856)}

{create adhoc47}
{access adhoc47}
{connect adhoc47(1), adhoc46(0)}
{nseg = 1}
{strdef color color = "White"}
{pt3dclear()}
{pt3dadd(198372.000000,138432.000000,78125.000000,575.063856)}
{pt3dadd(198276.000000,138396.000000,79075.000000,116.095032)}
{pt3dadd(198132.000000,138264.000000,79175.000000,133.122300)}
{pt3dadd(197976.000000,138180.000000,79425.000000,150.149568)}
{pt3dadd(197880.000000,138144.000000,79650.000000,167.176836)}
{pt3dadd(197772.000000,138000.000000,79775.000000,167.176836)}

{create adhoc48}
{access adhoc48}
{connect adhoc48(1), adhoc46(0)}
{nseg = 1}
{strdef color color = "White"}
{pt3dclear()}
{pt3dadd(198372.000000,138432.000000,78125.000000,575.063856)}
{pt3dadd(198276.000000,138204.000000,78050.000000,499.187376)}
{pt3dadd(198264.000000,137964.000000,78050.000000,478.387903)}
{pt3dadd(198252.000000,137760.000000,78050.000000,457.588431)}
{pt3dadd(198120.000000,137556.000000,77900.000000,436.788958)}
{pt3dadd(198060.000000,137340.000000,77875.000000,415.989486)}
{pt3dadd(198024.000000,137136.000000,77925.000000,415.989486)}
{pt3dadd(197964.000000,136932.000000,77825.000000,415.989486)}
{pt3dadd(197892.000000,136728.000000,77875.000000,415.989486)}
{pt3dadd(197808.000000,136500.000000,77750.000000,415.989486)}
{pt3dadd(197832.000000,136296.000000,77700.000000,411.829591)}
{pt3dadd(197760.000000,136080.000000,77675.000000,407.669697)}
{pt3dadd(197688.000000,135840.000000,77675.000000,403.509803)}
{pt3dadd(197604.000000,135588.000000,77575.000000,399.349908)}
{pt3dadd(197520.000000,135396.000000,77500.000000,403.509803)}
{pt3dadd(197364.000000,135168.000000,77475.000000,407.669697)}
{pt3dadd(197280.000000,134964.000000,77525.000000,411.829591)}
{pt3dadd(197172.000000,134700.000000,77525.000000,415.989486)}
{pt3dadd(197040.000000,134460.000000,77500.000000,415.989486)}
{pt3dadd(196956.000000,134232.000000,77475.000000,415.989486)}
{pt3dadd(196944.000000,134004.000000,77300.000000,415.989486)}
{pt3dadd(196848.000000,133812.000000,77350.000000,415.989486)}
{pt3dadd(196812.000000,133572.000000,77250.000000,415.989486)}
{pt3dadd(196776.000000,133356.000000,77150.000000,415.989486)}
{pt3dadd(196608.000000,133128.000000,77075.000000,415.989486)}
{pt3dadd(196164.000000,132060.000000,77075.000000,415.989486)}
{pt3dadd(195888.000000,131880.000000,76450.000000,457.588431)}
{pt3dadd(195792.000000,131688.000000,76575.000000,499.187376)}
{pt3dadd(195756.000000,131484.000000,76475.000000,499.187376)}

{create adhoc49}
{access adhoc49}
{connect adhoc49(1), adhoc48(0)}
{nseg = 1}
{strdef color color = "White"}
{pt3dclear()}
{pt3dadd(195756.000000,131484.000000,76475.000000,499.187376)}
{pt3dadd(195624.000000,131388.000000,75675.000000,288.881586)}
{pt3dadd(195432.000000,131244.000000,75450.000000,258.455399)}
{pt3dadd(195336.000000,131340.000000,75075.000000,228.029211)}
{pt3dadd(194976.000000,131052.000000,74850.000000,197.603024)}
{pt3dadd(194772.000000,130860.000000,74675.000000,167.176836)}
{pt3dadd(194484.000000,130668.000000,74500.000000,185.566288)}
{pt3dadd(194172.000000,130440.000000,74250.000000,203.955741)}
{pt3dadd(193512.000000,130176.000000,74050.000000,222.345193)}
{pt3dadd(193296.000000,129936.000000,73775.000000,240.734646)}
{pt3dadd(193020.000000,129600.000000,73425.000000,230.704038)}
{pt3dadd(193008.000000,129216.000000,73150.000000,220.673430)}
{pt3dadd(192912.000000,128976.000000,72850.000000,210.642822)}
{pt3dadd(192840.000000,128748.000000,72575.000000,200.612214)}
{pt3dadd(192720.000000,128208.000000,72350.000000,160.489764)}
{pt3dadd(192720.000000,128064.000000,72300.000000,139.314042)}

{create adhoc50}
{access adhoc50}
{connect adhoc50(1), adhoc48(0)}
{nseg = 1}
{strdef color color = "White"}
{pt3dclear()}
{pt3dadd(195756.000000,131484.000000,76475.000000,499.187376)}
{pt3dadd(195804.000000,131340.000000,76950.000000,399.349908)}
{pt3dadd(195672.000000,131076.000000,77125.000000,387.842251)}
{pt3dadd(195612.000000,130860.000000,77200.000000,376.334595)}
{pt3dadd(195576.000000,130644.000000,77275.000000,364.826938)}
{pt3dadd(195576.000000,130428.000000,77275.000000,353.319282)}
{pt3dadd(195576.000000,130128.000000,77275.000000,368.986833)}
{pt3dadd(195516.000000,129912.000000,77400.000000,384.654384)}
{pt3dadd(195492.000000,129552.000000,77500.000000,400.321935)}
{pt3dadd(195432.000000,129312.000000,77475.000000,415.989486)}
{pt3dadd(195396.000000,129120.000000,77475.000000,398.656589)}
{pt3dadd(195396.000000,128904.000000,77450.000000,381.323691)}
{pt3dadd(195336.000000,128676.000000,77575.000000,363.990794)}
{pt3dadd(195228.000000,128412.000000,77600.000000,346.657896)}
{pt3dadd(195288.000000,128112.000000,77575.000000,363.990794)}
{pt3dadd(195216.000000,127860.000000,77625.000000,381.323691)}
{pt3dadd(195156.000000,127632.000000,77650.000000,398.656589)}
{pt3dadd(195108.000000,127404.000000,77650.000000,415.989486)}
{pt3dadd(194976.000000,127128.000000,77725.000000,415.989486)}
{pt3dadd(194952.000000,126864.000000,77675.000000,415.989486)}
{pt3dadd(194928.000000,126588.000000,77750.000000,415.989486)}
{pt3dadd(194916.000000,126336.000000,77825.000000,415.989486)}
{pt3dadd(194832.000000,126120.000000,77950.000000,415.989486)}
{pt3dadd(194796.000000,125892.000000,77975.000000,415.989486)}
{pt3dadd(194832.000000,125640.000000,78025.000000,415.989486)}
{pt3dadd(194724.000000,125352.000000,78175.000000,415.989486)}
{pt3dadd(194688.000000,125160.000000,78200.000000,415.989486)}
{pt3dadd(194556.000000,124920.000000,78150.000000,415.989486)}
{pt3dadd(194388.000000,124728.000000,78250.000000,415.989486)}
{pt3dadd(194424.000000,124500.000000,78350.000000,415.989486)}
{pt3dadd(194544.000000,124236.000000,78425.000000,499.187376)}
{pt3dadd(194592.000000,123984.000000,78450.000000,441.649026)}

{create adhoc51}
{access adhoc51}
{connect adhoc51(1), adhoc50(0)}
{nseg = 1}
{strdef color color = "White"}
{pt3dclear()}
{pt3dadd(194592.000000,123984.000000,78450.000000,441.649026)}
{pt3dadd(194424.000000,123984.000000,79125.000000,139.314042)}
{pt3dadd(194472.000000,123984.000000,79450.000000,139.314042)}
{pt3dadd(194520.000000,123864.000000,79675.000000,139.314042)}
{pt3dadd(194580.000000,123792.000000,79875.000000,139.314042)}
{pt3dadd(194580.000000,123684.000000,80125.000000,139.314042)}
{pt3dadd(194544.000000,123588.000000,80350.000000,190.024344)}
{pt3dadd(194592.000000,123468.000000,80650.000000,240.734646)}
{pt3dadd(194640.000000,123444.000000,80950.000000,221.861052)}

{create adhoc52}
{access adhoc52}
{connect adhoc52(1), adhoc51(0)}
{nseg = 1}
{strdef color color = "White"}
{pt3dclear()}
{pt3dadd(194640.000000,123444.000000,80950.000000,221.861052)}
{pt3dadd(194376.000000,123228.000000,81100.000000,116.095032)}
{pt3dadd(194304.000000,123096.000000,80975.000000,111.451230)}

{create adhoc53}
{access adhoc53}
{connect adhoc53(1), adhoc51(0)}
{nseg = 1}
{strdef color color = "White"}
{pt3dclear()}
{pt3dadd(194640.000000,123444.000000,80950.000000,221.861052)}
{pt3dadd(194988.000000,123708.000000,81300.000000,200.612214)}
{pt3dadd(195168.000000,123876.000000,81550.000000,167.176845)}
{pt3dadd(195348.000000,123996.000000,81800.000000,133.741476)}
{pt3dadd(195528.000000,124356.000000,81975.000000,116.095032)}

{create adhoc54}
{access adhoc54}
{connect adhoc54(1), adhoc50(0)}
{nseg = 1}
{strdef color color = "White"}
{pt3dclear()}
{pt3dadd(194592.000000,123984.000000,78450.000000,441.649026)}
{pt3dadd(194580.000000,123792.000000,78300.000000,415.989486)}
{pt3dadd(194592.000000,123540.000000,78200.000000,384.212511)}
{pt3dadd(194628.000000,123300.000000,78150.000000,352.435536)}
{pt3dadd(194556.000000,123072.000000,78125.000000,320.658561)}
{pt3dadd(194580.000000,122844.000000,78150.000000,288.881586)}
{pt3dadd(194604.000000,122652.000000,78175.000000,303.325664)}
{pt3dadd(194556.000000,122448.000000,78050.000000,317.769741)}
{pt3dadd(194580.000000,122232.000000,78050.000000,332.213819)}
{pt3dadd(194592.000000,122028.000000,78075.000000,346.657896)}
{pt3dadd(194520.000000,121752.000000,78125.000000,346.657896)}
{pt3dadd(194412.000000,121524.000000,78200.000000,346.657896)}
{pt3dadd(194532.000000,121308.000000,78175.000000,346.657896)}
{pt3dadd(194544.000000,121104.000000,78225.000000,346.657896)}
{pt3dadd(194460.000000,120900.000000,78175.000000,346.657896)}
{pt3dadd(194496.000000,120660.000000,78225.000000,346.657896)}
{pt3dadd(194532.000000,120456.000000,78275.000000,346.657896)}
{pt3dadd(194508.000000,120276.000000,78300.000000,346.657896)}
{pt3dadd(194448.000000,120036.000000,78325.000000,339.724746)}
{pt3dadd(194400.000000,119832.000000,78425.000000,332.791596)}
{pt3dadd(194400.000000,119712.000000,78475.000000,346.657896)}

{create adhoc55}
{access adhoc55}
{connect adhoc55(1), adhoc54(0)}
{nseg = 1}
{strdef color color = "White"}
{pt3dclear()}
{pt3dadd(194400.000000,119712.000000,78475.000000,346.657896)}
{pt3dadd(194460.000000,119712.000000,78950.000000,80.621550)}
{pt3dadd(194544.000000,119724.000000,79125.000000,67.184640)}

{create adhoc56}
{access adhoc56}
{connect adhoc56(1), adhoc54(0)}
{nseg = 1}
{strdef color color = "White"}
{pt3dclear()}
{pt3dadd(194400.000000,119712.000000,78475.000000,346.657896)}
{pt3dadd(194460.000000,119472.000000,78400.000000,288.881586)}
{pt3dadd(194472.000000,119268.000000,78400.000000,320.658561)}
{pt3dadd(194532.000000,119076.000000,78425.000000,352.435536)}
{pt3dadd(194592.000000,118884.000000,78425.000000,384.212511)}
{pt3dadd(194532.000000,118692.000000,78450.000000,415.989486)}
{pt3dadd(194532.000000,118488.000000,78450.000000,391.862093)}
{pt3dadd(194448.000000,118260.000000,78350.000000,367.734699)}
{pt3dadd(194424.000000,118008.000000,78325.000000,343.607306)}
{pt3dadd(194400.000000,117768.000000,78375.000000,319.479912)}
{pt3dadd(194352.000000,117504.000000,78550.000000,339.447411)}
{pt3dadd(194304.000000,117276.000000,78625.000000,359.414910)}
{pt3dadd(194172.000000,117060.000000,78575.000000,379.382409)}
{pt3dadd(194016.000000,116760.000000,78600.000000,399.349908)}
{pt3dadd(193932.000000,116496.000000,78700.000000,382.710330)}
{pt3dadd(193740.000000,116292.000000,78875.000000,366.070752)}
{pt3dadd(193620.000000,116076.000000,79025.000000,349.431174)}
{pt3dadd(193524.000000,115896.000000,79125.000000,332.791596)}
{pt3dadd(193392.000000,115620.000000,79300.000000,339.724746)}
{pt3dadd(193296.000000,115464.000000,79375.000000,346.657896)}
{pt3dadd(193212.000000,115332.000000,79425.000000,415.989486)}

{create adhoc57}
{access adhoc57}
{connect adhoc57(1), adhoc56(0)}
{nseg = 1}
{strdef color color = "White"}
{pt3dclear()}
{pt3dadd(193212.000000,115332.000000,79425.000000,415.989486)}
{pt3dadd(192456.000000,115332.000000,78525.000000,80.621550)}
{pt3dadd(192348.000000,115344.000000,78150.000000,107.181513)}
{pt3dadd(192192.000000,115248.000000,78225.000000,133.741476)}
{pt3dadd(192084.000000,115380.000000,78200.000000,55.987200)}

{create adhoc58}
{access adhoc58}
{connect adhoc58(1), adhoc56(0)}
{nseg = 1}
{strdef color color = "White"}
{pt3dclear()}
{pt3dadd(193212.000000,115332.000000,79425.000000,415.989486)}
{pt3dadd(193116.000000,115116.000000,79425.000000,415.989486)}
{pt3dadd(193200.000000,114852.000000,79500.000000,391.862093)}
{pt3dadd(193236.000000,114636.000000,79750.000000,367.734699)}
{pt3dadd(193248.000000,114408.000000,79975.000000,343.607306)}
{pt3dadd(193200.000000,114204.000000,80150.000000,319.479912)}
{pt3dadd(193164.000000,113976.000000,80250.000000,299.793596)}
{pt3dadd(193140.000000,113772.000000,80325.000000,280.107279)}
{pt3dadd(193140.000000,113556.000000,80450.000000,260.420962)}
{pt3dadd(193020.000000,113340.000000,80600.000000,240.734646)}
{pt3dadd(192996.000000,113076.000000,80800.000000,240.734646)}
{pt3dadd(192996.000000,112848.000000,80975.000000,240.734646)}
{pt3dadd(192960.000000,112620.000000,81175.000000,240.734646)}
{pt3dadd(192924.000000,112404.000000,81275.000000,240.734646)}
{pt3dadd(192876.000000,112212.000000,81375.000000,267.215459)}
{pt3dadd(192888.000000,111996.000000,81550.000000,293.696271)}
{pt3dadd(192828.000000,111744.000000,81750.000000,320.177083)}
{pt3dadd(192744.000000,111516.000000,81925.000000,346.657896)}
{pt3dadd(192624.000000,111276.000000,82125.000000,343.191321)}
{pt3dadd(192420.000000,111060.000000,82500.000000,339.724746)}
{pt3dadd(192240.000000,110844.000000,82800.000000,336.258171)}
{pt3dadd(192120.000000,110640.000000,83100.000000,332.791596)}
{pt3dadd(192036.000000,110448.000000,83375.000000,321.814093)}
{pt3dadd(191868.000000,110124.000000,83675.000000,310.836591)}
{pt3dadd(191664.000000,109752.000000,83900.000000,299.859089)}
{pt3dadd(191472.000000,109584.000000,84225.000000,288.881586)}
{pt3dadd(191424.000000,109404.000000,84625.000000,288.881586)}
{pt3dadd(191388.000000,109260.000000,85000.000000,288.881586)}
{pt3dadd(191472.000000,109056.000000,85400.000000,288.881586)}
{pt3dadd(191424.000000,109152.000000,85725.000000,288.881586)}
{pt3dadd(191400.000000,109104.000000,86075.000000,276.844851)}
{pt3dadd(191448.000000,109128.000000,86425.000000,264.808116)}
{pt3dadd(191664.000000,109056.000000,86775.000000,252.771381)}
{pt3dadd(191664.000000,109092.000000,87125.000000,240.734646)}
{pt3dadd(191700.000000,109200.000000,87550.000000,266.983068)}
{pt3dadd(191736.000000,109260.000000,87875.000000,293.231490)}
{pt3dadd(191760.000000,109344.000000,88250.000000,319.479912)}
{pt3dadd(191856.000000,109680.000000,88525.000000,346.657896)}

{create adhoc59}
{access adhoc59}
{connect adhoc59(1), adhoc58(0)}
{nseg = 1}
{strdef color color = "White"}
{pt3dclear()}
{pt3dadd(191856.000000,109680.000000,88525.000000,346.657896)}
{pt3dadd(191304.000000,108840.000000,88525.000000,167.176836)}
{pt3dadd(191256.000000,108828.000000,88875.000000,165.505068)}
{pt3dadd(191016.000000,108684.000000,89175.000000,163.833300)}
{pt3dadd(190860.000000,108624.000000,89575.000000,162.161532)}
{pt3dadd(190620.000000,108540.000000,89775.000000,160.489764)}
{pt3dadd(190536.000000,108528.000000,89975.000000,144.553788)}
{pt3dadd(190416.000000,108528.000000,90225.000000,128.617812)}
{pt3dadd(190452.000000,108612.000000,90575.000000,112.681836)}
{pt3dadd(190368.000000,108492.000000,90875.000000,96.745860)}
{pt3dadd(190164.000000,108384.000000,91175.000000,94.849641)}
{pt3dadd(190116.000000,108216.000000,91450.000000,92.953422)}
{pt3dadd(190140.000000,108276.000000,91650.000000,91.057203)}
{pt3dadd(190236.000000,108432.000000,91900.000000,89.160984)}
{pt3dadd(190308.000000,108708.000000,92200.000000,80.621550)}

{create adhoc60}
{access adhoc60}
{connect adhoc60(1), adhoc58(0)}
{nseg = 1}
{strdef color color = "White"}
{pt3dclear()}
{pt3dadd(191856.000000,109680.000000,88525.000000,346.657896)}
{pt3dadd(191832.000000,110388.000000,88625.000000,240.734646)}
{pt3dadd(191808.000000,110544.000000,88650.000000,230.704038)}
{pt3dadd(191844.000000,110688.000000,88675.000000,220.673430)}
{pt3dadd(191784.000000,110832.000000,88625.000000,210.642822)}
{pt3dadd(191736.000000,111000.000000,88725.000000,200.612214)}
{pt3dadd(191772.000000,111192.000000,88700.000000,208.235480)}
{pt3dadd(191832.000000,111396.000000,88775.000000,215.858745)}
{pt3dadd(191820.000000,111600.000000,88900.000000,223.482010)}
{pt3dadd(191808.000000,111780.000000,89000.000000,231.105276)}
{pt3dadd(191796.000000,111936.000000,89075.000000,208.157467)}
{pt3dadd(191796.000000,112116.000000,89175.000000,185.209659)}
{pt3dadd(191820.000000,112332.000000,89250.000000,162.261850)}
{pt3dadd(191880.000000,112500.000000,89275.000000,139.314042)}
{pt3dadd(191928.000000,112680.000000,89250.000000,139.314042)}
{pt3dadd(191940.000000,112848.000000,89325.000000,139.314042)}
{pt3dadd(191988.000000,112980.000000,89300.000000,139.314042)}
{pt3dadd(192024.000000,113148.000000,89325.000000,139.314042)}
{pt3dadd(191964.000000,113268.000000,89300.000000,176.705928)}
{pt3dadd(191880.000000,113400.000000,89250.000000,214.097814)}
{pt3dadd(191892.000000,113520.000000,89175.000000,251.489700)}
{pt3dadd(191856.000000,113676.000000,89100.000000,288.881586)}
{pt3dadd(191808.000000,113844.000000,88950.000000,240.734646)}
{pt3dadd(191724.000000,113676.000000,88725.000000,200.612214)}

{create adhoc61}
{access adhoc61}
{connect adhoc61(1), adhoc19(0)}
{nseg = 1}
{strdef color color = "White"}
{pt3dclear()}
{pt3dadd(195312.000000,173820.000000,74650.000000,718.829820)}
{pt3dadd(194964.000000,173760.000000,72950.000000,346.657896)}
{pt3dadd(194964.000000,173232.000000,72150.000000,346.657896)}
{pt3dadd(195012.000000,172884.000000,71725.000000,346.657896)}
{pt3dadd(194784.000000,172644.000000,71350.000000,346.657896)}
{pt3dadd(194676.000000,172596.000000,71175.000000,415.989486)}

{create adhoc62}
{access adhoc62}
{connect adhoc62(1), adhoc61(0)}
{nseg = 1}
{strdef color color = "White"}
{pt3dclear()}
{pt3dadd(194676.000000,172596.000000,71175.000000,415.989486)}
{pt3dadd(194268.000000,172272.000000,70850.000000,499.187376)}

{create adhoc63}
{access adhoc63}
{connect adhoc63(1), adhoc62(0)}
{nseg = 1}
{strdef color color = "White"}
{pt3dclear()}
{pt3dadd(194268.000000,172272.000000,70850.000000,499.187376)}
{pt3dadd(194268.000000,172344.000000,70550.000000,499.187376)}
{pt3dadd(194052.000000,172488.000000,70150.000000,499.187376)}
{pt3dadd(193788.000000,172476.000000,69750.000000,499.187376)}
{pt3dadd(193548.000000,172512.000000,69275.000000,499.187376)}
{pt3dadd(193020.000000,172548.000000,68800.000000,499.187376)}
{pt3dadd(192660.000000,172548.000000,68500.000000,288.881586)}
{pt3dadd(192732.000000,172464.000000,68350.000000,306.700722)}

{create adhoc64}
{access adhoc64}
{connect adhoc64(1), adhoc63(0)}
{nseg = 1}
{strdef color color = "White"}
{pt3dclear()}
{pt3dadd(192732.000000,172464.000000,68350.000000,306.700722)}
{pt3dadd(192816.000000,172296.000000,68100.000000,277.326324)}
{pt3dadd(192636.000000,171852.000000,67775.000000,294.659217)}
{pt3dadd(192396.000000,171528.000000,67400.000000,311.992110)}
{pt3dadd(192120.000000,171132.000000,67150.000000,329.325003)}
{pt3dadd(191880.000000,170820.000000,66900.000000,346.657896)}
{pt3dadd(191748.000000,170364.000000,66675.000000,332.213819)}
{pt3dadd(191364.000000,169896.000000,66425.000000,317.769741)}
{pt3dadd(191124.000000,169476.000000,66175.000000,303.325664)}
{pt3dadd(190872.000000,169332.000000,65975.000000,288.881586)}
{pt3dadd(190536.000000,168996.000000,65775.000000,320.658561)}
{pt3dadd(190332.000000,168780.000000,65600.000000,352.435536)}
{pt3dadd(190236.000000,168552.000000,65475.000000,384.212511)}
{pt3dadd(190152.000000,168300.000000,65425.000000,415.989486)}
{pt3dadd(190260.000000,168084.000000,65525.000000,384.212511)}
{pt3dadd(190296.000000,167892.000000,65625.000000,352.435536)}
{pt3dadd(190248.000000,167688.000000,65600.000000,320.658561)}
{pt3dadd(190284.000000,167484.000000,65525.000000,288.881586)}
{pt3dadd(190236.000000,167292.000000,65500.000000,288.881586)}
{pt3dadd(190236.000000,167040.000000,65450.000000,288.881586)}
{pt3dadd(190236.000000,166836.000000,65450.000000,288.881586)}
{pt3dadd(190236.000000,166596.000000,65475.000000,288.881586)}
{pt3dadd(190212.000000,166392.000000,65350.000000,280.557171)}
{pt3dadd(190248.000000,166188.000000,65275.000000,272.232756)}
{pt3dadd(190260.000000,165912.000000,65225.000000,263.908341)}
{pt3dadd(190104.000000,165708.000000,65175.000000,255.583926)}
{pt3dadd(190128.000000,165492.000000,65200.000000,233.482154)}
{pt3dadd(190176.000000,165168.000000,65175.000000,211.380381)}
{pt3dadd(190116.000000,164952.000000,65125.000000,189.278608)}
{pt3dadd(190068.000000,164748.000000,65225.000000,167.176836)}
{pt3dadd(190080.000000,164508.000000,65300.000000,197.603024)}
{pt3dadd(190200.000000,164316.000000,65525.000000,228.029211)}
{pt3dadd(190212.000000,164124.000000,65625.000000,258.455399)}
{pt3dadd(190164.000000,163788.000000,65650.000000,288.881586)}
{pt3dadd(190092.000000,163584.000000,65525.000000,288.881586)}
{pt3dadd(189948.000000,163368.000000,65425.000000,288.881586)}
{pt3dadd(189840.000000,163104.000000,65500.000000,288.881586)}
{pt3dadd(189756.000000,162900.000000,65525.000000,288.881586)}
{pt3dadd(189684.000000,162648.000000,65425.000000,276.844851)}
{pt3dadd(189552.000000,162384.000000,65300.000000,264.808116)}
{pt3dadd(189648.000000,162168.000000,65200.000000,252.771381)}
{pt3dadd(189600.000000,161988.000000,65075.000000,240.734646)}
{pt3dadd(189636.000000,161832.000000,65075.000000,96.745860)}
{pt3dadd(189660.000000,161664.000000,65075.000000,61.917354)}

{create adhoc65}
{access adhoc65}
{connect adhoc65(1), adhoc63(0)}
{nseg = 1}
{strdef color color = "White"}
{pt3dclear()}
{pt3dadd(192732.000000,172464.000000,68350.000000,306.700722)}
{pt3dadd(191976.000000,172884.000000,68350.000000,167.176836)}
{pt3dadd(191556.000000,173112.000000,68100.000000,183.894525)}
{pt3dadd(191268.000000,173220.000000,67800.000000,200.612214)}
{pt3dadd(190920.000000,173280.000000,67450.000000,240.734646)}

{create adhoc66}
{access adhoc66}
{connect adhoc66(1), adhoc62(0)}
{nseg = 1}
{strdef color color = "White"}
{pt3dclear()}
{pt3dadd(194268.000000,172272.000000,70850.000000,499.187376)}
{pt3dadd(192792.000000,172224.000000,70950.000000,139.314042)}
{pt3dadd(192624.000000,172368.000000,70950.000000,133.509289)}
{pt3dadd(192468.000000,172500.000000,71150.000000,127.704537)}
{pt3dadd(192276.000000,172632.000000,71175.000000,121.899785)}
{pt3dadd(192036.000000,172752.000000,71275.000000,116.095032)}
{pt3dadd(191856.000000,172920.000000,71300.000000,111.257739)}
{pt3dadd(191568.000000,173064.000000,71325.000000,106.420446)}
{pt3dadd(191352.000000,173196.000000,71300.000000,101.583153)}
{pt3dadd(191172.000000,173340.000000,71275.000000,96.745860)}
{pt3dadd(191040.000000,173496.000000,71200.000000,131.961348)}
{pt3dadd(191124.000000,173664.000000,71200.000000,167.176836)}
{pt3dadd(191112.000000,173832.000000,71175.000000,111.451230)}

{create adhoc67}
{access adhoc67}
{connect adhoc67(1), adhoc61(0)}
{nseg = 1}
{strdef color color = "White"}
{pt3dclear()}
{pt3dadd(194676.000000,172596.000000,71175.000000,415.989486)}
{pt3dadd(193884.000000,171828.000000,71175.000000,139.314042)}
{pt3dadd(193704.000000,171516.000000,71175.000000,139.314042)}
{pt3dadd(193560.000000,171168.000000,71250.000000,139.314042)}
{pt3dadd(193440.000000,170832.000000,71300.000000,139.314042)}
{pt3dadd(193320.000000,170664.000000,71275.000000,139.314042)}
{pt3dadd(193200.000000,170556.000000,71325.000000,124.640919)}
{pt3dadd(193080.000000,170388.000000,71450.000000,109.967796)}
{pt3dadd(192948.000000,170184.000000,71500.000000,95.294673)}
{pt3dadd(192804.000000,170004.000000,71525.000000,80.621550)}
{pt3dadd(192672.000000,169764.000000,71600.000000,108.613094)}
{pt3dadd(192540.000000,169476.000000,71675.000000,136.604637)}
{pt3dadd(192360.000000,169332.000000,71700.000000,164.596181)}
{pt3dadd(192240.000000,169128.000000,71575.000000,192.587724)}
{pt3dadd(192120.000000,168780.000000,71525.000000,139.314042)}
{pt3dadd(191940.000000,168552.000000,71475.000000,200.612214)}

{create adhoc68}
{access adhoc68}
{connect adhoc68(1), adhoc18(0)}
{nseg = 1}
{strdef color color = "White"}
{pt3dclear()}
{pt3dadd(193176.000000,180564.000000,72950.000000,718.829820)}
{pt3dadd(191472.000000,180564.000000,73200.000000,167.176836)}
{pt3dadd(190848.000000,180564.000000,73175.000000,175.535680)}
{pt3dadd(190644.000000,180420.000000,73150.000000,183.894525)}
{pt3dadd(190464.000000,180444.000000,73100.000000,192.253370)}
{pt3dadd(190296.000000,180480.000000,73125.000000,200.612214)}
{pt3dadd(190104.000000,180516.000000,73200.000000,200.612214)}
{pt3dadd(189984.000000,180660.000000,73525.000000,200.612214)}
{pt3dadd(189900.000000,180804.000000,73725.000000,200.612214)}
{pt3dadd(189804.000000,181116.000000,73875.000000,200.612214)}
{pt3dadd(189672.000000,181416.000000,74125.000000,200.612214)}
{pt3dadd(189528.000000,181704.000000,74350.000000,200.612214)}
{pt3dadd(189372.000000,182100.000000,74575.000000,200.612214)}
{pt3dadd(189432.000000,182436.000000,74850.000000,200.612214)}
{pt3dadd(189444.000000,182376.000000,75050.000000,240.734646)}

{create adhoc69}
{access adhoc69}
{connect adhoc69(1), adhoc17(0)}
{nseg = 1}
{strdef color color = "White"}
{pt3dclear()}
{pt3dadd(191988.000000,186576.000000,73300.000000,828.091944)}
{pt3dadd(189708.000000,186576.000000,70800.000000,499.187376)}
{pt3dadd(189336.000000,186576.000000,69975.000000,369.961011)}
{pt3dadd(189384.000000,186432.000000,69650.000000,240.734646)}
{pt3dadd(189324.000000,186492.000000,69525.000000,200.612214)}

{create adhoc70}
{access adhoc70}
{connect adhoc70(1), adhoc69(0)}
{nseg = 1}
{strdef color color = "White"}
{pt3dclear()}
{pt3dadd(189324.000000,186492.000000,69525.000000,200.612214)}
{pt3dadd(188616.000000,186840.000000,69225.000000,319.479912)}
{pt3dadd(187524.000000,186984.000000,68950.000000,326.274408)}
{pt3dadd(187308.000000,187164.000000,68625.000000,333.068904)}
{pt3dadd(187188.000000,187320.000000,68350.000000,339.863400)}
{pt3dadd(186552.000000,187584.000000,68075.000000,346.657896)}
{pt3dadd(186168.000000,187728.000000,67650.000000,363.990794)}
{pt3dadd(185832.000000,188112.000000,67275.000000,381.323691)}
{pt3dadd(185304.000000,188436.000000,66875.000000,398.656589)}
{pt3dadd(184992.000000,188664.000000,66750.000000,415.989486)}
{pt3dadd(184956.000000,188820.000000,66475.000000,384.212511)}
{pt3dadd(184836.000000,189120.000000,66450.000000,352.435536)}
{pt3dadd(184524.000000,189264.000000,66625.000000,320.658561)}
{pt3dadd(184092.000000,189480.000000,67000.000000,288.881586)}
{pt3dadd(183768.000000,189660.000000,66975.000000,167.176836)}
{pt3dadd(183624.000000,189744.000000,66925.000000,139.314042)}

{create adhoc71}
{access adhoc71}
{connect adhoc71(1), adhoc70(0)}
{nseg = 1}
{strdef color color = "White"}
{pt3dclear()}
{pt3dadd(183624.000000,189744.000000,66925.000000,139.314042)}
{pt3dadd(183420.000000,189876.000000,66825.000000,96.745860)}
{pt3dadd(182952.000000,190044.000000,66825.000000,100.422203)}
{pt3dadd(182556.000000,190188.000000,66825.000000,104.098545)}
{pt3dadd(182136.000000,190428.000000,66825.000000,107.774888)}
{pt3dadd(181980.000000,190440.000000,66775.000000,111.451230)}
{pt3dadd(181812.000000,190476.000000,66725.000000,125.382636)}
{pt3dadd(181656.000000,190596.000000,66750.000000,139.314042)}
{pt3dadd(181512.000000,190656.000000,66750.000000,167.176836)}

{create adhoc72}
{access adhoc72}
{connect adhoc72(1), adhoc70(0)}
{nseg = 1}
{strdef color color = "White"}
{pt3dclear()}
{pt3dadd(183624.000000,189744.000000,66925.000000,139.314042)}
{pt3dadd(183948.000000,189744.000000,67525.000000,80.621550)}
{pt3dadd(183852.000000,189816.000000,67775.000000,116.095032)}

{create adhoc73}
{access adhoc73}
{connect adhoc73(1), adhoc69(0)}
{nseg = 1}
{strdef color color = "White"}
{pt3dclear()}
{pt3dadd(189324.000000,186492.000000,69525.000000,200.612214)}
{pt3dadd(189744.000000,185448.000000,69525.000000,346.657896)}
{pt3dadd(189780.000000,184788.000000,69250.000000,310.146476)}
{pt3dadd(189684.000000,184116.000000,68950.000000,273.635055)}
{pt3dadd(189444.000000,183732.000000,68625.000000,237.123635)}
{pt3dadd(189288.000000,183252.000000,68350.000000,200.612214)}
{pt3dadd(189252.000000,182964.000000,68025.000000,230.035338)}
{pt3dadd(189324.000000,182496.000000,67650.000000,259.458462)}
{pt3dadd(189096.000000,182208.000000,67275.000000,288.881586)}
{pt3dadd(188844.000000,182112.000000,67075.000000,346.657896)}

{create adhoc74}
{access adhoc74}
{connect adhoc74(1), adhoc73(0)}
{nseg = 1}
{strdef color color = "White"}
{pt3dclear()}
{pt3dadd(188844.000000,182112.000000,67075.000000,346.657896)}
{pt3dadd(188796.000000,182208.000000,66725.000000,240.734646)}
{pt3dadd(188808.000000,181980.000000,66350.000000,200.612214)}

{create adhoc75}
{access adhoc75}
{connect adhoc75(1), adhoc74(0)}
{nseg = 1}
{strdef color color = "White"}
{pt3dclear()}
{pt3dadd(188808.000000,181980.000000,66350.000000,200.612214)}
{pt3dadd(188844.000000,181536.000000,66150.000000,167.176836)}

{create adhoc76}
{access adhoc76}
{connect adhoc76(1), adhoc74(0)}
{nseg = 1}
{strdef color color = "White"}
{pt3dclear()}
{pt3dadd(188808.000000,181980.000000,66350.000000,200.612214)}
{pt3dadd(188880.000000,181956.000000,66175.000000,139.314042)}

{create adhoc77}
{access adhoc77}
{connect adhoc77(1), adhoc73(0)}
{nseg = 1}
{strdef color color = "White"}
{pt3dclear()}
{pt3dadd(188844.000000,182112.000000,67075.000000,346.657896)}
{pt3dadd(188484.000000,181392.000000,67175.000000,96.745860)}
{pt3dadd(188460.000000,180840.000000,67125.000000,114.353604)}
{pt3dadd(188424.000000,180648.000000,67000.000000,131.961348)}
{pt3dadd(188424.000000,180492.000000,67000.000000,149.569092)}
{pt3dadd(188400.000000,180288.000000,66950.000000,167.176836)}
{pt3dadd(188220.000000,180084.000000,66975.000000,154.406385)}
{pt3dadd(188016.000000,179940.000000,67050.000000,141.635934)}
{pt3dadd(187956.000000,179808.000000,67075.000000,128.865483)}
{pt3dadd(187896.000000,179628.000000,67125.000000,116.095032)}
{pt3dadd(187872.000000,179484.000000,67150.000000,80.621550)}

{create adhoc78}
{access adhoc78}
{connect adhoc78(1), adhoc16(0)}
{nseg = 1}
{strdef color color = "White"}
{pt3dclear()}
{pt3dadd(192144.000000,188436.000000,75875.000000,862.595802)}
{pt3dadd(191112.000000,188520.000000,77550.000000,200.612214)}
{pt3dadd(191112.000000,188220.000000,78125.000000,192.253370)}
{pt3dadd(190896.000000,187692.000000,78375.000000,183.894525)}
{pt3dadd(190908.000000,187620.000000,78700.000000,175.535680)}
{pt3dadd(190944.000000,187320.000000,78575.000000,167.176836)}
{pt3dadd(191040.000000,186852.000000,78700.000000,165.505068)}
{pt3dadd(191136.000000,186612.000000,78975.000000,163.833300)}
{pt3dadd(191400.000000,186456.000000,79175.000000,162.161532)}
{pt3dadd(191592.000000,186336.000000,79400.000000,160.489764)}
{pt3dadd(191748.000000,186336.000000,79525.000000,139.314042)}
{pt3dadd(191904.000000,186300.000000,79825.000000,96.745860)}

{create adhoc79}
{access adhoc79}
{connect adhoc79(1), adhoc15(0)}
{nseg = 1}
{strdef color color = "White"}
{pt3dclear()}
{pt3dadd(192120.000000,188568.000000,76075.000000,1035.114948)}
{pt3dadd(190092.000000,188568.000000,77350.000000,116.095032)}
{pt3dadd(189960.000000,188604.000000,77400.000000,116.095032)}
{pt3dadd(189768.000000,188592.000000,77425.000000,116.095032)}
{pt3dadd(189432.000000,188604.000000,77425.000000,116.095032)}
{pt3dadd(189204.000000,188652.000000,77425.000000,116.095032)}
{pt3dadd(188844.000000,188604.000000,77525.000000,102.713454)}
{pt3dadd(188556.000000,188640.000000,77525.000000,55.987200)}

{create adhoc80}
{access adhoc80}
{connect adhoc80(1), adhoc14(0)}
{nseg = 1}
{strdef color color = "White"}
{pt3dclear()}
{pt3dadd(190824.000000,190788.000000,77025.000000,794.968308)}
{pt3dadd(189300.000000,190740.000000,78200.000000,139.314042)}
{pt3dadd(189240.000000,190584.000000,78475.000000,139.314042)}
{pt3dadd(189204.000000,190308.000000,78775.000000,139.314042)}
{pt3dadd(189312.000000,190200.000000,79025.000000,139.314042)}
{pt3dadd(189552.000000,189996.000000,79275.000000,139.314042)}
{pt3dadd(189720.000000,189708.000000,79475.000000,116.095032)}
{pt3dadd(189840.000000,189612.000000,79600.000000,80.621550)}

{create adhoc81}
{access adhoc81}
{connect adhoc81(1), adhoc13(0)}
{nseg = 1}
{strdef color color = "White"}
{pt3dclear()}
{pt3dadd(189612.000000,196608.000000,80250.000000,1035.114948)}
{pt3dadd(189324.000000,196608.000000,77325.000000,346.657896)}
{pt3dadd(189120.000000,196428.000000,77000.000000,384.790266)}
{pt3dadd(188700.000000,196284.000000,76700.000000,422.922636)}
{pt3dadd(188580.000000,196404.000000,76400.000000,461.055006)}
{pt3dadd(188352.000000,196728.000000,75925.000000,499.187376)}
{pt3dadd(187956.000000,196968.000000,75425.000000,479.219886)}
{pt3dadd(188172.000000,197172.000000,75000.000000,415.989486)}

{create adhoc82}
{access adhoc82}
{connect adhoc82(1), adhoc81(0)}
{nseg = 1}
{strdef color color = "White"}
{pt3dclear()}
{pt3dadd(188172.000000,197172.000000,75000.000000,415.989486)}
{pt3dadd(188556.000000,197196.000000,74525.000000,479.219886)}
{pt3dadd(188736.000000,197328.000000,73875.000000,415.989486)}
{pt3dadd(188688.000000,197448.000000,73400.000000,415.989486)}

{create adhoc83}
{access adhoc83}
{connect adhoc83(1), adhoc82(0)}
{nseg = 1}
{strdef color color = "White"}
{pt3dclear()}
{pt3dadd(188688.000000,197448.000000,73400.000000,415.989486)}
{pt3dadd(188688.000000,197664.000000,73000.000000,288.881586)}
{pt3dadd(188616.000000,197760.000000,72675.000000,285.992771)}
{pt3dadd(188220.000000,197964.000000,72350.000000,283.103955)}
{pt3dadd(188184.000000,197940.000000,72100.000000,280.215140)}
{pt3dadd(187920.000000,197916.000000,71850.000000,277.326324)}
{pt3dadd(187728.000000,198120.000000,71850.000000,268.178405)}
{pt3dadd(187500.000000,198252.000000,71800.000000,259.030485)}
{pt3dadd(187260.000000,198228.000000,71825.000000,249.882566)}
{pt3dadd(187104.000000,198444.000000,72000.000000,240.734646)}
{pt3dadd(186936.000000,198336.000000,71750.000000,284.548356)}
{pt3dadd(186780.000000,198456.000000,71700.000000,328.362066)}
{pt3dadd(186600.000000,198684.000000,71275.000000,372.175776)}
{pt3dadd(186444.000000,198816.000000,71125.000000,415.989486)}
{pt3dadd(186228.000000,198984.000000,71100.000000,415.989486)}
{pt3dadd(186036.000000,199128.000000,70975.000000,415.989486)}
{pt3dadd(185844.000000,199224.000000,70875.000000,415.989486)}
{pt3dadd(185616.000000,199344.000000,70825.000000,415.989486)}
{pt3dadd(185376.000000,199344.000000,70700.000000,411.829591)}
{pt3dadd(184920.000000,199392.000000,70675.000000,407.669697)}
{pt3dadd(184440.000000,199476.000000,70600.000000,403.509803)}
{pt3dadd(183264.000000,200400.000000,70700.000000,399.349908)}
{pt3dadd(182544.000000,201204.000000,70700.000000,359.696092)}
{pt3dadd(181488.000000,201384.000000,70000.000000,320.042277)}
{pt3dadd(180864.000000,201660.000000,69575.000000,280.388462)}
{pt3dadd(180432.000000,201756.000000,69350.000000,240.734646)}
{pt3dadd(180048.000000,201684.000000,68925.000000,260.420962)}
{pt3dadd(179700.000000,201696.000000,68725.000000,280.107279)}
{pt3dadd(179376.000000,201720.000000,68550.000000,299.793596)}
{pt3dadd(178848.000000,201864.000000,68050.000000,319.479912)}
{pt3dadd(178452.000000,202092.000000,67750.000000,311.830331)}
{pt3dadd(178068.000000,202188.000000,67200.000000,304.180749)}
{pt3dadd(177504.000000,201936.000000,66625.000000,296.531167)}
{pt3dadd(177108.000000,201756.000000,66050.000000,288.881586)}
{pt3dadd(176340.000000,202260.000000,65375.000000,303.325664)}
{pt3dadd(176292.000000,202212.000000,64625.000000,317.769741)}
{pt3dadd(176052.000000,201900.000000,63900.000000,332.213819)}
{pt3dadd(175872.000000,201720.000000,63325.000000,346.657896)}
{pt3dadd(175452.000000,201588.000000,62725.000000,294.821933)}
{pt3dadd(174744.000000,201696.000000,62150.000000,242.985969)}
{pt3dadd(174504.000000,201852.000000,61600.000000,191.150005)}
{pt3dadd(173952.000000,202632.000000,61250.000000,139.314042)}
{pt3dadd(173844.000000,202992.000000,61150.000000,154.638585)}
{pt3dadd(173904.000000,202692.000000,60525.000000,169.963128)}
{pt3dadd(173712.000000,202800.000000,60000.000000,185.287671)}
{pt3dadd(173664.000000,202920.000000,59425.000000,200.612214)}
{pt3dadd(173700.000000,202944.000000,58900.000000,249.294108)}
{pt3dadd(173292.000000,203028.000000,58400.000000,297.976002)}
{pt3dadd(172908.000000,203244.000000,57850.000000,346.657896)}
{pt3dadd(172284.000000,203460.000000,57475.000000,240.734646)}

{create adhoc84}
{access adhoc84}
{connect adhoc84(1), adhoc82(0)}
{nseg = 1}
{strdef color color = "White"}
{pt3dclear()}
{pt3dadd(188688.000000,197448.000000,73400.000000,415.989486)}
{pt3dadd(188436.000000,196860.000000,73450.000000,96.745860)}

{create adhoc85}
{access adhoc85}
{connect adhoc85(1), adhoc81(0)}
{nseg = 1}
{strdef color color = "White"}
{pt3dclear()}
{pt3dadd(188172.000000,197172.000000,75000.000000,415.989486)}
{pt3dadd(186564.000000,197448.000000,75000.000000,288.881586)}
{pt3dadd(186192.000000,197676.000000,74750.000000,240.734646)}
{pt3dadd(185712.000000,197700.000000,74500.000000,167.176836)}

{create adhoc86}
{access adhoc86}
{connect adhoc86(1), adhoc12(0)}
{nseg = 1}
{strdef color color = "White"}
{pt3dclear()}
{pt3dadd(189732.000000,197496.000000,81150.000000,862.595802)}
{pt3dadd(188628.000000,197496.000000,82625.000000,167.176836)}
{pt3dadd(188376.000000,197232.000000,82850.000000,185.566288)}
{pt3dadd(188376.000000,197016.000000,83125.000000,203.955741)}
{pt3dadd(188616.000000,196776.000000,83425.000000,222.345193)}
{pt3dadd(188748.000000,196512.000000,83750.000000,240.734646)}
{pt3dadd(188904.000000,196260.000000,84050.000000,288.881586)}
{pt3dadd(188808.000000,196356.000000,84375.000000,231.105276)}

{create adhoc87}
{access adhoc87}
{connect adhoc87(1), adhoc11(0)}
{nseg = 1}
{strdef color color = "White"}
{pt3dclear()}
{pt3dadd(189432.000000,200112.000000,83450.000000,690.076674)}
{pt3dadd(187248.000000,200196.000000,83575.000000,139.314042)}

{create adhoc88}
{access adhoc88}
{connect adhoc88(1), adhoc10(0)}
{nseg = 1}
{strdef color color = "White"}
{pt3dclear()}
{pt3dadd(189504.000000,200328.000000,83500.000000,599.024880)}
{pt3dadd(187296.000000,200328.000000,84175.000000,167.176836)}
{pt3dadd(187008.000000,199920.000000,84175.000000,167.176836)}
{pt3dadd(186804.000000,199632.000000,84150.000000,167.176836)}
{pt3dadd(186576.000000,199440.000000,84025.000000,167.176836)}
{pt3dadd(186528.000000,199272.000000,84025.000000,167.176836)}
{pt3dadd(186384.000000,199116.000000,83950.000000,160.211138)}
{pt3dadd(186336.000000,198936.000000,83900.000000,153.245439)}
{pt3dadd(185988.000000,198720.000000,83900.000000,146.279741)}
{pt3dadd(185928.000000,198312.000000,83900.000000,139.314042)}
{pt3dadd(185880.000000,198156.000000,83900.000000,96.745860)}

{create adhoc89}
{access adhoc89}
{connect adhoc89(1), adhoc9(0)}
{nseg = 1}
{strdef color color = "White"}
{pt3dclear()}
{pt3dadd(189744.000000,200688.000000,84175.000000,599.024880)}
{pt3dadd(189708.000000,200868.000000,84125.000000,499.187376)}
{pt3dadd(189648.000000,201060.000000,84200.000000,518.156496)}
{pt3dadd(189588.000000,201252.000000,84275.000000,537.125616)}
{pt3dadd(189468.000000,201444.000000,84200.000000,556.094736)}
{pt3dadd(189324.000000,201636.000000,84225.000000,575.063856)}
{pt3dadd(189132.000000,201816.000000,84250.000000,596.916274)}
{pt3dadd(188940.000000,201984.000000,84275.000000,618.768693)}
{pt3dadd(188952.000000,202152.000000,84250.000000,640.621112)}
{pt3dadd(188160.000000,203184.000000,84250.000000,662.473530)}
{pt3dadd(187524.000000,208572.000000,84575.000000,1192.452354)}

{create adhoc90}
{access adhoc90}
{connect adhoc90(1), adhoc89(0)}
{nseg = 1}
{strdef color color = "White"}
{pt3dclear()}
{pt3dadd(187524.000000,208572.000000,84575.000000,1192.452354)}
{pt3dadd(187620.000000,208404.000000,84950.000000,1490.565402)}
{pt3dadd(187728.000000,208164.000000,85375.000000,1513.551101)}
{pt3dadd(187908.000000,207756.000000,85725.000000,1536.536799)}
{pt3dadd(188172.000000,207828.000000,86175.000000,1559.522498)}
{pt3dadd(188412.000000,207780.000000,86600.000000,1582.508196)}
{pt3dadd(188508.000000,207756.000000,86950.000000,1582.508196)}
{pt3dadd(188604.000000,207840.000000,87350.000000,1582.508196)}
{pt3dadd(188544.000000,208068.000000,87725.000000,1582.508196)}
{pt3dadd(188472.000000,208368.000000,88175.000000,1582.508196)}
{pt3dadd(188448.000000,208332.000000,88625.000000,1497.415617)}
{pt3dadd(188784.000000,208512.000000,89075.000000,1412.323038)}
{pt3dadd(189072.000000,208728.000000,89675.000000,1327.230459)}
{pt3dadd(189192.000000,208944.000000,90250.000000,1242.137880)}
{pt3dadd(189312.000000,208944.000000,90725.000000,1147.252361)}
{pt3dadd(189504.000000,208848.000000,91175.000000,1052.366841)}
{pt3dadd(189792.000000,208848.000000,91600.000000,957.481322)}
{pt3dadd(190044.000000,208932.000000,92050.000000,862.595802)}
{pt3dadd(189948.000000,209004.000000,92475.000000,862.595802)}
{pt3dadd(190068.000000,208980.000000,92850.000000,862.595802)}
{pt3dadd(190188.000000,208956.000000,93225.000000,862.595802)}
{pt3dadd(190716.000000,209076.000000,94100.000000,862.595802)}
{pt3dadd(190944.000000,208944.000000,95100.000000,905.725589)}
{pt3dadd(191244.000000,208404.000000,95950.000000,948.855375)}
{pt3dadd(191592.000000,208032.000000,96725.000000,991.985162)}
{pt3dadd(191784.000000,207444.000000,97475.000000,1035.114948)}
{pt3dadd(191952.000000,206724.000000,98350.000000,1035.114948)}
{pt3dadd(192240.000000,206100.000000,99250.000000,1035.114948)}
{pt3dadd(192324.000000,205668.000000,100225.000000,1035.114948)}
{pt3dadd(192444.000000,205056.000000,101050.000000,1035.114948)}
{pt3dadd(192444.000000,204624.000000,102000.000000,991.985162)}
{pt3dadd(192144.000000,203784.000000,102700.000000,948.855375)}
{pt3dadd(192000.000000,203100.000000,103450.000000,905.725589)}
{pt3dadd(192048.000000,202668.000000,104175.000000,862.595802)}
{pt3dadd(191916.000000,202524.000000,104475.000000,945.059940)}
{pt3dadd(191988.000000,202488.000000,104700.000000,1027.524078)}
{pt3dadd(191964.000000,202452.000000,104825.000000,1109.988216)}
{pt3dadd(191940.000000,202320.000000,105200.000000,1192.452354)}
{pt3dadd(191988.000000,202104.000000,105600.000000,1074.046721)}
{pt3dadd(192024.000000,201936.000000,105950.000000,955.641087)}
{pt3dadd(191940.000000,201396.000000,106300.000000,837.235453)}
{pt3dadd(191748.000000,201660.000000,106700.000000,718.829820)}
{pt3dadd(191412.000000,201108.000000,107050.000000,625.786839)}
{pt3dadd(191076.000000,200388.000000,107675.000000,532.743858)}
{pt3dadd(190944.000000,199524.000000,108525.000000,439.700877)}
{pt3dadd(190884.000000,199356.000000,108950.000000,346.657896)}
{pt3dadd(190716.000000,199392.000000,109250.000000,475.642373)}
{pt3dadd(190680.000000,199464.000000,109825.000000,604.626849)}
{pt3dadd(190656.000000,199476.000000,110475.000000,733.611326)}
{pt3dadd(190764.000000,199512.000000,110950.000000,862.595802)}
{pt3dadd(190800.000000,199332.000000,111625.000000,905.725589)}
{pt3dadd(190728.000000,198972.000000,112250.000000,948.855375)}
{pt3dadd(190728.000000,198456.000000,112975.000000,991.985162)}
{pt3dadd(190740.000000,198324.000000,113300.000000,1035.114948)}
{pt3dadd(190464.000000,198000.000000,113700.000000,1035.114948)}
{pt3dadd(190140.000000,197784.000000,114075.000000,1035.114948)}
{pt3dadd(189636.000000,197460.000000,114825.000000,1035.114948)}
{pt3dadd(189240.000000,196776.000000,115500.000000,1035.114948)}
{pt3dadd(189000.000000,196500.000000,116075.000000,1024.763782)}
{pt3dadd(188676.000000,196248.000000,116500.000000,1014.412617)}
{pt3dadd(188196.000000,195708.000000,116925.000000,1004.061452)}
{pt3dadd(187824.000000,195408.000000,117400.000000,993.710286)}
{pt3dadd(187536.000000,195084.000000,117825.000000,952.305701)}
{pt3dadd(186744.000000,194808.000000,118175.000000,910.901115)}
{pt3dadd(186204.000000,194400.000000,118625.000000,869.496529)}
{pt3dadd(185772.000000,194112.000000,119050.000000,828.091944)}
{pt3dadd(185304.000000,193872.000000,119450.000000,836.717909)}
{pt3dadd(184620.000000,193476.000000,119875.000000,845.343873)}
{pt3dadd(183972.000000,193032.000000,120325.000000,853.969838)}
{pt3dadd(183420.000000,192516.000000,120800.000000,862.595802)}
{pt3dadd(182988.000000,192192.000000,121225.000000,826.654307)}
{pt3dadd(182508.000000,191760.000000,121600.000000,790.712811)}
{pt3dadd(181740.000000,191292.000000,122025.000000,754.771316)}
{pt3dadd(180984.000000,191052.000000,122475.000000,718.829820)}
{pt3dadd(180264.000000,190548.000000,123025.000000,718.829820)}
{pt3dadd(179520.000000,189900.000000,123450.000000,718.829820)}
{pt3dadd(179016.000000,189216.000000,123900.000000,718.829820)}
{pt3dadd(178428.000000,188256.000000,124400.000000,718.829820)}
{pt3dadd(177924.000000,187236.000000,124800.000000,754.771316)}
{pt3dadd(177252.000000,186396.000000,125225.000000,790.712811)}
{pt3dadd(176844.000000,185820.000000,125600.000000,826.654307)}
{pt3dadd(176256.000000,184392.000000,125950.000000,862.595802)}
{pt3dadd(175692.000000,183660.000000,126350.000000,812.565234)}
{pt3dadd(175080.000000,183012.000000,126750.000000,762.534666)}
{pt3dadd(174504.000000,182580.000000,127275.000000,712.504098)}
{pt3dadd(173592.000000,182028.000000,127750.000000,662.473530)}
{pt3dadd(172632.000000,181560.000000,128150.000000,676.562602)}
{pt3dadd(171900.000000,180756.000000,128575.000000,690.651675)}
{pt3dadd(171492.000000,179988.000000,128850.000000,704.740748)}
{pt3dadd(170880.000000,179544.000000,129225.000000,718.829820)}
{pt3dadd(170448.000000,179052.000000,129525.000000,754.771316)}
{pt3dadd(169764.000000,178536.000000,129850.000000,790.712811)}
{pt3dadd(169224.000000,177924.000000,130225.000000,826.654307)}
{pt3dadd(168744.000000,177348.000000,130600.000000,862.595802)}
{pt3dadd(168444.000000,176772.000000,130750.000000,905.725589)}
{pt3dadd(168348.000000,176568.000000,130800.000000,948.855375)}
{pt3dadd(168216.000000,176364.000000,130825.000000,991.985162)}
{pt3dadd(167748.000000,175884.000000,131150.000000,1035.114948)}
{pt3dadd(167424.000000,175476.000000,131425.000000,1035.114948)}
{pt3dadd(167064.000000,174912.000000,131550.000000,1035.114948)}
{pt3dadd(167004.000000,174696.000000,131550.000000,1035.114948)}
{pt3dadd(166800.000000,174456.000000,131750.000000,1035.114948)}
{pt3dadd(166512.000000,174252.000000,131800.000000,1035.114948)}
{pt3dadd(166272.000000,174036.000000,132025.000000,1035.114948)}
{pt3dadd(166056.000000,173820.000000,132475.000000,1035.114948)}
{pt3dadd(165696.000000,172572.000000,132975.000000,1035.114948)}
{pt3dadd(165084.000000,172068.000000,133325.000000,991.985162)}
{pt3dadd(164484.000000,171552.000000,133725.000000,948.855375)}
{pt3dadd(164016.000000,171048.000000,134125.000000,905.725589)}
{pt3dadd(163404.000000,170088.000000,134500.000000,862.595802)}
{pt3dadd(162972.000000,169536.000000,134950.000000,905.725589)}
{pt3dadd(162432.000000,169320.000000,135325.000000,948.855375)}
{pt3dadd(162108.000000,168960.000000,135750.000000,991.985162)}
{pt3dadd(161700.000000,168336.000000,136175.000000,1035.114948)}
{pt3dadd(161604.000000,168132.000000,136300.000000,967.128597)}
{pt3dadd(161388.000000,167904.000000,136450.000000,899.142246)}
{pt3dadd(161208.000000,167448.000000,136775.000000,831.155895)}
{pt3dadd(161220.000000,167220.000000,136900.000000,763.169544)}
{pt3dadd(161148.000000,166956.000000,137075.000000,752.084613)}
{pt3dadd(161088.000000,166752.000000,137200.000000,740.999682)}
{pt3dadd(160980.000000,165972.000000,137325.000000,729.914751)}
{pt3dadd(160740.000000,165276.000000,137600.000000,718.829820)}
{pt3dadd(160668.000000,164568.000000,137750.000000,787.549937)}
{pt3dadd(160500.000000,163848.000000,138150.000000,856.270053)}
{pt3dadd(160536.000000,163668.000000,138250.000000,924.990169)}
{pt3dadd(160428.000000,163416.000000,138325.000000,993.710286)}
{pt3dadd(160224.000000,163200.000000,138525.000000,1020.023726)}
{pt3dadd(160080.000000,162972.000000,138650.000000,1046.337165)}
{pt3dadd(159648.000000,162264.000000,138900.000000,1072.650605)}
{pt3dadd(159324.000000,162012.000000,139075.000000,1098.964044)}
{pt3dadd(159144.000000,161724.000000,139125.000000,1083.001770)}
{pt3dadd(159012.000000,161484.000000,139250.000000,1067.039496)}
{pt3dadd(158904.000000,161280.000000,139300.000000,1051.077222)}
{pt3dadd(158832.000000,161076.000000,139400.000000,1035.114948)}
{pt3dadd(158760.000000,160860.000000,139525.000000,1035.114948)}
{pt3dadd(158724.000000,160632.000000,139650.000000,1035.114948)}
{pt3dadd(158700.000000,160404.000000,139700.000000,1035.114948)}
{pt3dadd(158592.000000,160212.000000,139975.000000,1035.114948)}
{pt3dadd(158700.000000,159996.000000,140025.000000,1035.114948)}
{pt3dadd(158700.000000,159780.000000,140100.000000,1035.114948)}
{pt3dadd(158772.000000,159600.000000,140175.000000,1035.114948)}
{pt3dadd(158784.000000,159420.000000,140375.000000,1035.114948)}
{pt3dadd(158796.000000,159240.000000,140475.000000,1086.870681)}
{pt3dadd(158808.000000,159036.000000,140575.000000,1138.626414)}
{pt3dadd(158820.000000,158808.000000,140675.000000,1190.382147)}
{pt3dadd(158820.000000,158592.000000,140775.000000,1242.137880)}
{pt3dadd(158820.000000,158364.000000,140875.000000,1206.344421)}
{pt3dadd(158832.000000,158172.000000,141000.000000,1170.550962)}
{pt3dadd(158772.000000,157968.000000,141200.000000,1134.757503)}
{pt3dadd(158712.000000,157776.000000,141200.000000,1098.964044)}
{pt3dadd(158748.000000,157548.000000,141325.000000,1083.001770)}
{pt3dadd(158724.000000,157344.000000,141450.000000,1067.039496)}
{pt3dadd(158616.000000,157176.000000,141600.000000,1051.077222)}
{pt3dadd(158436.000000,156156.000000,141975.000000,1035.114948)}
{pt3dadd(158340.000000,155688.000000,142300.000000,1062.524772)}
{pt3dadd(158100.000000,154848.000000,142650.000000,1089.934596)}
{pt3dadd(157764.000000,154164.000000,143050.000000,1117.344420)}
{pt3dadd(157404.000000,153504.000000,143400.000000,1144.754244)}
{pt3dadd(157224.000000,152784.000000,143875.000000,1038.273138)}
{pt3dadd(156888.000000,152280.000000,144275.000000,931.792032)}
{pt3dadd(156084.000000,151548.000000,144725.000000,825.310926)}
{pt3dadd(155472.000000,151308.000000,145150.000000,718.829820)}
{pt3dadd(154920.000000,151092.000000,145600.000000,797.901102)}
{pt3dadd(154236.000000,150732.000000,146075.000000,876.972384)}
{pt3dadd(153984.000000,150636.000000,146525.000000,956.043666)}
{pt3dadd(153732.000000,150756.000000,147000.000000,1035.114948)}
{pt3dadd(153360.000000,151128.000000,147450.000000,1014.826685)}
{pt3dadd(152448.000000,151104.000000,148275.000000,994.538421)}
{pt3dadd(152268.000000,150804.000000,148975.000000,974.250158)}
{pt3dadd(152196.000000,150588.000000,149650.000000,953.961894)}
{pt3dadd(151692.000000,150492.000000,150550.000000,931.120371)}
{pt3dadd(151560.000000,150456.000000,151500.000000,908.278848)}
{pt3dadd(151716.000000,150132.000000,152550.000000,885.437325)}
{pt3dadd(152004.000000,150168.000000,153775.000000,862.595802)}
{pt3dadd(152040.000000,150384.000000,154650.000000,885.437325)}
{pt3dadd(152196.000000,150240.000000,155050.000000,908.278848)}
{pt3dadd(152496.000000,149868.000000,155450.000000,931.120371)}
{pt3dadd(152544.000000,150636.000000,155850.000000,953.961894)}
{pt3dadd(152616.000000,150888.000000,156325.000000,963.898992)}
{pt3dadd(152652.000000,150972.000000,156700.000000,973.836090)}
{pt3dadd(153612.000000,151128.000000,157050.000000,983.773188)}
{pt3dadd(153432.000000,151236.000000,157400.000000,993.710286)}
{pt3dadd(153624.000000,151200.000000,157825.000000,1004.061452)}
{pt3dadd(153876.000000,151092.000000,158225.000000,1014.412617)}
{pt3dadd(153804.000000,151020.000000,158650.000000,1024.763782)}
{pt3dadd(153708.000000,150780.000000,159150.000000,1035.114948)}
{pt3dadd(153648.000000,150552.000000,159575.000000,991.985162)}
{pt3dadd(154392.000000,149928.000000,159975.000000,948.855375)}
{pt3dadd(154392.000000,149844.000000,160450.000000,905.725589)}
{pt3dadd(155388.000000,149304.000000,161225.000000,862.595802)}
{pt3dadd(155760.000000,149220.000000,161575.000000,905.725589)}
{pt3dadd(156276.000000,149052.000000,162000.000000,948.855375)}
{pt3dadd(156168.000000,148692.000000,162350.000000,991.985162)}
{pt3dadd(156468.000000,148188.000000,162725.000000,1035.114948)}
{pt3dadd(156684.000000,147912.000000,163075.000000,1086.870681)}
{pt3dadd(156864.000000,147636.000000,163550.000000,1138.626414)}
{pt3dadd(157284.000000,147120.000000,164050.000000,1190.382147)}
{pt3dadd(157068.000000,146688.000000,164525.000000,1242.137880)}
{pt3dadd(157260.000000,146412.000000,164875.000000,1180.030982)}
{pt3dadd(157440.000000,145656.000000,165625.000000,1117.924083)}
{pt3dadd(158040.000000,144768.000000,166125.000000,1055.817185)}
{pt3dadd(158340.000000,143076.000000,166975.000000,993.710286)}
{pt3dadd(159072.000000,142308.000000,167825.000000,505.855143)}
{pt3dadd(159564.000000,141612.000000,168625.000000,18.000000)}
{pt3dadd(159528.000000,141324.000000,169025.000000,630.068940)}
{pt3dadd(159600.000000,140904.000000,169450.000000,1242.137880)}
{pt3dadd(159672.000000,140484.000000,169825.000000,1242.137880)}
{pt3dadd(160116.000000,139956.000000,170150.000000,1242.137880)}
{pt3dadd(160320.000000,139476.000000,170525.000000,1242.137880)}
{pt3dadd(160152.000000,138888.000000,171075.000000,1242.137880)}
{pt3dadd(160296.000000,138324.000000,171700.000000,1242.137880)}
{pt3dadd(160152.000000,137736.000000,172175.000000,1242.137880)}
{pt3dadd(159972.000000,136884.000000,172650.000000,1242.137880)}
{pt3dadd(160020.000000,136572.000000,173125.000000,1242.137880)}
{pt3dadd(159636.000000,136224.000000,173625.000000,1190.382147)}
{pt3dadd(159456.000000,135996.000000,174000.000000,1138.626414)}
{pt3dadd(158712.000000,135660.000000,174425.000000,1086.870681)}
{pt3dadd(158268.000000,135444.000000,174825.000000,1035.114948)}
{pt3dadd(158088.000000,135156.000000,175250.000000,1035.114948)}
{pt3dadd(158220.000000,135012.000000,175675.000000,1035.114948)}
{pt3dadd(158184.000000,134820.000000,176075.000000,1035.114948)}
{pt3dadd(158148.000000,134880.000000,176475.000000,1035.114948)}
{pt3dadd(158172.000000,134700.000000,177000.000000,1035.114948)}
{pt3dadd(158160.000000,134724.000000,177450.000000,1035.114948)}
{pt3dadd(158052.000000,134604.000000,177825.000000,1035.114948)}
{pt3dadd(157908.000000,134496.000000,178325.000000,1035.114948)}
{pt3dadd(157980.000000,134280.000000,178750.000000,991.985162)}
{pt3dadd(158040.000000,134124.000000,179225.000000,948.855375)}
{pt3dadd(157956.000000,134076.000000,179625.000000,905.725589)}
{pt3dadd(157992.000000,133632.000000,180150.000000,862.595802)}
{pt3dadd(157980.000000,133320.000000,180700.000000,862.595802)}
{pt3dadd(157932.000000,133020.000000,181175.000000,862.595802)}
{pt3dadd(158004.000000,132840.000000,181625.000000,862.595802)}
{pt3dadd(157896.000000,132804.000000,182150.000000,862.595802)}
{pt3dadd(157896.000000,132684.000000,182800.000000,862.595802)}

{create adhoc91}
{access adhoc91}
{connect adhoc91(1), adhoc89(0)}
{nseg = 1}
{strdef color color = "White"}
{pt3dclear()}
{pt3dadd(187524.000000,208572.000000,84575.000000,1192.452354)}
{pt3dadd(187080.000000,208752.000000,83975.000000,1490.565402)}
{pt3dadd(186672.000000,209184.000000,83550.000000,1490.565402)}
{pt3dadd(186168.000000,209556.000000,83175.000000,1490.565402)}
{pt3dadd(185640.000000,210060.000000,82750.000000,1490.565402)}
{pt3dadd(185256.000000,210612.000000,82375.000000,1490.565402)}
{pt3dadd(185076.000000,210912.000000,81975.000000,1428.458522)}
{pt3dadd(184860.000000,211188.000000,81875.000000,1366.351641)}
{pt3dadd(184656.000000,211464.000000,81750.000000,1304.244761)}
{pt3dadd(184428.000000,211560.000000,81625.000000,1242.137880)}
{pt3dadd(183972.000000,211728.000000,81250.000000,1190.382147)}
{pt3dadd(183624.000000,211872.000000,81375.000000,1138.626414)}
{pt3dadd(183432.000000,212460.000000,81075.000000,1086.870681)}
{pt3dadd(183252.000000,212268.000000,80800.000000,1035.114948)}
{pt3dadd(183036.000000,212448.000000,80625.000000,983.359197)}
{pt3dadd(183132.000000,211920.000000,80125.000000,931.603446)}
{pt3dadd(182748.000000,211944.000000,79700.000000,879.847695)}
{pt3dadd(182160.000000,211968.000000,79275.000000,828.091944)}
{pt3dadd(181488.000000,212388.000000,78850.000000,836.717909)}
{pt3dadd(181296.000000,212412.000000,78625.000000,845.343873)}
{pt3dadd(181104.000000,212436.000000,78600.000000,853.969838)}
{pt3dadd(180888.000000,212544.000000,78275.000000,862.595802)}
{pt3dadd(180696.000000,212568.000000,78175.000000,905.725589)}
{pt3dadd(180492.000000,212640.000000,77900.000000,948.855375)}
{pt3dadd(180276.000000,212820.000000,77800.000000,991.985162)}
{pt3dadd(180024.000000,212880.000000,77475.000000,1035.114948)}
{pt3dadd(179508.000000,213156.000000,76800.000000,1086.870681)}
{pt3dadd(179256.000000,213300.000000,76325.000000,1138.626414)}
{pt3dadd(178968.000000,213468.000000,75650.000000,1190.382147)}
{pt3dadd(178728.000000,213672.000000,75375.000000,1242.137880)}
{pt3dadd(178476.000000,213780.000000,75075.000000,1190.382147)}
{pt3dadd(178188.000000,214056.000000,74525.000000,1138.626414)}
{pt3dadd(177972.000000,214116.000000,74325.000000,1086.870681)}
{pt3dadd(177684.000000,214332.000000,74175.000000,1035.114948)}
{pt3dadd(177408.000000,214512.000000,73825.000000,991.985162)}
{pt3dadd(177204.000000,214644.000000,73725.000000,948.855375)}
{pt3dadd(177000.000000,214716.000000,73450.000000,905.725589)}
{pt3dadd(176748.000000,214812.000000,73175.000000,862.595802)}
{pt3dadd(176532.000000,214920.000000,73075.000000,905.725589)}
{pt3dadd(176340.000000,214992.000000,73100.000000,948.855375)}
{pt3dadd(176160.000000,215088.000000,72825.000000,991.985162)}
{pt3dadd(175992.000000,215160.000000,72725.000000,1035.114948)}
{pt3dadd(175824.000000,215232.000000,72550.000000,991.985162)}
{pt3dadd(175668.000000,215328.000000,72325.000000,948.855375)}
{pt3dadd(175320.000000,215496.000000,72075.000000,905.725589)}
{pt3dadd(175104.000000,215628.000000,71925.000000,862.595802)}
{pt3dadd(174912.000000,215628.000000,71775.000000,895.374423)}
{pt3dadd(174720.000000,215736.000000,71600.000000,928.153044)}
{pt3dadd(174528.000000,215796.000000,71475.000000,960.931665)}
{pt3dadd(174312.000000,215892.000000,71225.000000,993.710286)}
{pt3dadd(174096.000000,215988.000000,70925.000000,1004.061452)}
{pt3dadd(173904.000000,216168.000000,70825.000000,1014.412617)}
{pt3dadd(173712.000000,216360.000000,70625.000000,1024.763782)}
{pt3dadd(173520.000000,216396.000000,70425.000000,1035.114948)}
{pt3dadd(173280.000000,216468.000000,70225.000000,1104.122592)}
{pt3dadd(173016.000000,216660.000000,69900.000000,1173.130236)}
{pt3dadd(172788.000000,216888.000000,69700.000000,1242.137880)}
{pt3dadd(172620.000000,216924.000000,69600.000000,1035.114948)}

{create adhoc92}
{access adhoc92}
{connect adhoc92(1), adhoc91(0)}
{nseg = 1}
{strdef color color = "White"}
{pt3dclear()}
{pt3dadd(172620.000000,216924.000000,69600.000000,1035.114948)}
{pt3dadd(172620.000000,215208.000000,67525.000000,266.233284)}
{pt3dadd(172620.000000,214644.000000,66850.000000,271.895359)}
{pt3dadd(172620.000000,214404.000000,66500.000000,277.557435)}
{pt3dadd(172188.000000,214308.000000,66200.000000,283.219511)}
{pt3dadd(171708.000000,214608.000000,65850.000000,288.881586)}
{pt3dadd(171648.000000,214548.000000,65600.000000,331.250886)}
{pt3dadd(171684.000000,214428.000000,65350.000000,373.620186)}
{pt3dadd(171720.000000,214320.000000,65125.000000,415.989486)}
{pt3dadd(171708.000000,214212.000000,64850.000000,346.657896)}

{create adhoc93}
{access adhoc93}
{connect adhoc93(1), adhoc92(0)}
{nseg = 1}
{strdef color color = "White"}
{pt3dclear()}
{pt3dadd(171708.000000,214212.000000,64850.000000,346.657896)}
{pt3dadd(171660.000000,214128.000000,64575.000000,288.881586)}
{pt3dadd(171564.000000,214068.000000,64275.000000,303.325664)}
{pt3dadd(171492.000000,213972.000000,64000.000000,317.769741)}
{pt3dadd(171432.000000,213804.000000,63750.000000,332.213819)}
{pt3dadd(171372.000000,213636.000000,63450.000000,346.657896)}
{pt3dadd(171336.000000,213528.000000,63150.000000,346.657896)}
{pt3dadd(171216.000000,213444.000000,62975.000000,346.657896)}
{pt3dadd(171240.000000,213288.000000,62675.000000,346.657896)}

{create adhoc94}
{access adhoc94}
{connect adhoc94(1), adhoc93(0)}
{nseg = 1}
{strdef color color = "White"}
{pt3dclear()}
{pt3dadd(171240.000000,213288.000000,62675.000000,346.657896)}
{pt3dadd(171360.000000,213168.000000,62400.000000,288.881586)}
{pt3dadd(171396.000000,212964.000000,62125.000000,258.455399)}
{pt3dadd(171360.000000,212820.000000,61850.000000,228.029211)}
{pt3dadd(171264.000000,212724.000000,61600.000000,197.603024)}
{pt3dadd(171096.000000,212556.000000,61325.000000,167.176836)}
{pt3dadd(170856.000000,212340.000000,61100.000000,175.535680)}
{pt3dadd(170568.000000,212160.000000,60975.000000,183.894525)}
{pt3dadd(170328.000000,212028.000000,60775.000000,192.253370)}
{pt3dadd(170196.000000,211896.000000,60875.000000,200.612214)}
{pt3dadd(170028.000000,211812.000000,60900.000000,237.123635)}
{pt3dadd(169860.000000,211788.000000,60950.000000,273.635055)}
{pt3dadd(169680.000000,211776.000000,60900.000000,310.146475)}
{pt3dadd(169452.000000,211644.000000,60800.000000,346.657896)}
{pt3dadd(169272.000000,211572.000000,60725.000000,231.105276)}

{create adhoc95}
{access adhoc95}
{connect adhoc95(1), adhoc94(0)}
{nseg = 1}
{strdef color color = "White"}
{pt3dclear()}
{pt3dadd(169272.000000,211572.000000,60725.000000,231.105276)}
{pt3dadd(169116.000000,211824.000000,60725.000000,288.881586)}
{pt3dadd(168924.000000,211980.000000,60700.000000,288.881586)}
{pt3dadd(168756.000000,212100.000000,60825.000000,288.881586)}
{pt3dadd(168576.000000,212208.000000,60825.000000,288.881586)}
{pt3dadd(168432.000000,212316.000000,60950.000000,240.734646)}

{create adhoc96}
{access adhoc96}
{connect adhoc96(1), adhoc95(0)}
{nseg = 1}
{strdef color color = "White"}
{pt3dclear()}
{pt3dadd(168432.000000,212316.000000,60950.000000,240.734646)}
{pt3dadd(168312.000000,212400.000000,60975.000000,192.587724)}
{pt3dadd(168132.000000,212544.000000,61025.000000,186.235002)}
{pt3dadd(167976.000000,212628.000000,61025.000000,179.882280)}
{pt3dadd(167844.000000,212892.000000,61100.000000,173.529558)}
{pt3dadd(167700.000000,212820.000000,61100.000000,167.176836)}
{pt3dadd(167556.000000,212904.000000,61100.000000,167.176836)}
{pt3dadd(167364.000000,212940.000000,61300.000000,167.176836)}
{pt3dadd(167220.000000,212964.000000,61425.000000,167.176836)}
{pt3dadd(167052.000000,213024.000000,61475.000000,167.176836)}
{pt3dadd(166872.000000,213084.000000,61475.000000,167.176836)}
{pt3dadd(166740.000000,213048.000000,61450.000000,167.176836)}
{pt3dadd(166596.000000,212940.000000,61375.000000,167.176836)}
{pt3dadd(166440.000000,212964.000000,61300.000000,167.176836)}
{pt3dadd(166284.000000,212964.000000,61250.000000,150.459156)}
{pt3dadd(166128.000000,212976.000000,61225.000000,133.741476)}
{pt3dadd(165972.000000,212988.000000,61200.000000,139.314042)}

{create adhoc97}
{access adhoc97}
{connect adhoc97(1), adhoc96(0)}
{nseg = 1}
{strdef color color = "White"}
{pt3dclear()}
{pt3dadd(165972.000000,212988.000000,61200.000000,139.314042)}
{pt3dadd(165900.000000,212976.000000,61250.000000,139.314042)}
{pt3dadd(165732.000000,212988.000000,61275.000000,124.640919)}
{pt3dadd(165528.000000,213012.000000,61275.000000,109.967796)}
{pt3dadd(165348.000000,213096.000000,61275.000000,95.294673)}
{pt3dadd(164676.000000,213096.000000,61400.000000,80.621550)}
{pt3dadd(164556.000000,213072.000000,61375.000000,92.564114)}
{pt3dadd(163992.000000,213216.000000,61375.000000,104.506677)}
{pt3dadd(163872.000000,213228.000000,61375.000000,116.449241)}
{pt3dadd(163752.000000,213108.000000,61400.000000,128.391804)}
{pt3dadd(163620.000000,213060.000000,61425.000000,131.122364)}
{pt3dadd(163464.000000,213024.000000,61425.000000,133.852923)}
{pt3dadd(163320.000000,213036.000000,61450.000000,136.583483)}
{pt3dadd(163164.000000,213012.000000,61425.000000,139.314042)}
{pt3dadd(163008.000000,212988.000000,61400.000000,146.279741)}
{pt3dadd(162852.000000,212892.000000,61450.000000,153.245439)}
{pt3dadd(162660.000000,212868.000000,61425.000000,160.211138)}
{pt3dadd(162480.000000,212916.000000,61375.000000,167.176836)}
{pt3dadd(162300.000000,212904.000000,61275.000000,154.406385)}
{pt3dadd(162096.000000,212904.000000,61275.000000,141.635934)}
{pt3dadd(161916.000000,212904.000000,61275.000000,128.865483)}
{pt3dadd(161772.000000,212940.000000,61300.000000,116.095032)}
{pt3dadd(161424.000000,212976.000000,61300.000000,116.095032)}
{pt3dadd(161292.000000,213012.000000,61325.000000,116.095032)}
{pt3dadd(161112.000000,213024.000000,61275.000000,116.095032)}
{pt3dadd(160944.000000,213036.000000,61225.000000,116.095032)}
{pt3dadd(160752.000000,213048.000000,61225.000000,107.226662)}
{pt3dadd(160632.000000,212988.000000,61325.000000,98.358291)}
{pt3dadd(160524.000000,213048.000000,61300.000000,89.489920)}
{pt3dadd(160416.000000,213108.000000,61300.000000,80.621550)}
{pt3dadd(160296.000000,213120.000000,61275.000000,84.652627)}
{pt3dadd(160188.000000,213144.000000,61300.000000,88.683705)}
{pt3dadd(160092.000000,213108.000000,61325.000000,92.714782)}
{pt3dadd(159984.000000,213144.000000,61300.000000,96.745860)}
{pt3dadd(159876.000000,213132.000000,61275.000000,105.994764)}
{pt3dadd(159756.000000,213096.000000,61300.000000,115.243668)}
{pt3dadd(159648.000000,213120.000000,61325.000000,124.492572)}
{pt3dadd(159552.000000,213144.000000,61275.000000,133.741476)}
{pt3dadd(159444.000000,213132.000000,61225.000000,123.525117)}
{pt3dadd(159312.000000,213120.000000,61250.000000,113.308758)}
{pt3dadd(159192.000000,213144.000000,61250.000000,103.092399)}
{pt3dadd(159060.000000,213204.000000,61200.000000,92.876040)}
{pt3dadd(158940.000000,213096.000000,61225.000000,98.680788)}
{pt3dadd(158628.000000,213108.000000,61225.000000,104.485536)}
{pt3dadd(158520.000000,213108.000000,61225.000000,110.290284)}
{pt3dadd(158388.000000,213108.000000,61150.000000,116.095032)}
{pt3dadd(158268.000000,213048.000000,61150.000000,107.226662)}
{pt3dadd(158148.000000,213036.000000,61175.000000,98.358291)}
{pt3dadd(158016.000000,213000.000000,61175.000000,89.489920)}
{pt3dadd(157896.000000,212916.000000,61175.000000,80.621550)}
{pt3dadd(157776.000000,212868.000000,61200.000000,84.652627)}
{pt3dadd(157680.000000,212832.000000,61125.000000,88.683705)}
{pt3dadd(157584.000000,212772.000000,61175.000000,92.714782)}
{pt3dadd(157464.000000,212736.000000,61225.000000,96.745860)}
{pt3dadd(157128.000000,212748.000000,61350.000000,107.387906)}
{pt3dadd(156996.000000,212796.000000,61375.000000,118.029951)}
{pt3dadd(156636.000000,212856.000000,61550.000000,128.671997)}
{pt3dadd(156396.000000,212892.000000,61525.000000,139.314042)}
{pt3dadd(156252.000000,212952.000000,61575.000000,111.451230)}
{pt3dadd(156120.000000,212976.000000,61575.000000,80.621550)}

{create adhoc98}
{access adhoc98}
{connect adhoc98(1), adhoc96(0)}
{nseg = 1}
{strdef color color = "White"}
{pt3dclear()}
{pt3dadd(165972.000000,212988.000000,61200.000000,139.314042)}
{pt3dadd(166056.000000,213360.000000,61225.000000,96.745860)}
{pt3dadd(166056.000000,213540.000000,61075.000000,103.195584)}
{pt3dadd(166116.000000,213660.000000,60925.000000,109.645308)}
{pt3dadd(166296.000000,213912.000000,60875.000000,116.095032)}
{pt3dadd(166296.000000,214068.000000,60875.000000,80.621550)}

{create adhoc99}
{access adhoc99}
{connect adhoc99(1), adhoc95(0)}
{nseg = 1}
{strdef color color = "White"}
{pt3dclear()}
{pt3dadd(168432.000000,212316.000000,60950.000000,240.734646)}
{pt3dadd(168480.000000,212796.000000,61150.000000,106.993188)}
{pt3dadd(168480.000000,212976.000000,61275.000000,80.621550)}

{create adhoc100}
{access adhoc100}
{connect adhoc100(1), adhoc94(0)}
{nseg = 1}
{strdef color color = "White"}
{pt3dclear()}
{pt3dadd(169272.000000,211572.000000,60725.000000,231.105276)}
{pt3dadd(169260.000000,211044.000000,60425.000000,96.745860)}
{pt3dadd(169332.000000,210924.000000,60400.000000,107.387906)}
{pt3dadd(169440.000000,210804.000000,60275.000000,118.029951)}
{pt3dadd(169428.000000,210672.000000,60150.000000,128.671997)}
{pt3dadd(169392.000000,210516.000000,60150.000000,139.314042)}
{pt3dadd(169464.000000,210300.000000,60150.000000,167.176836)}
{pt3dadd(169464.000000,209772.000000,60150.000000,139.314042)}

{create adhoc101}
{access adhoc101}
{connect adhoc101(1), adhoc93(0)}
{nseg = 1}
{strdef color color = "White"}
{pt3dclear()}
{pt3dadd(171240.000000,213288.000000,62675.000000,346.657896)}
{pt3dadd(171036.000000,212304.000000,62975.000000,116.095032)}
{pt3dadd(171000.000000,211944.000000,62975.000000,137.224328)}
{pt3dadd(170940.000000,211788.000000,63125.000000,158.353623)}
{pt3dadd(170904.000000,211596.000000,63150.000000,179.482918)}
{pt3dadd(170964.000000,211404.000000,63225.000000,200.612214)}
{pt3dadd(171084.000000,211260.000000,63225.000000,185.287671)}
{pt3dadd(171156.000000,211116.000000,63225.000000,169.963128)}
{pt3dadd(171228.000000,210972.000000,63225.000000,154.638585)}
{pt3dadd(171288.000000,210840.000000,63225.000000,139.314042)}
{pt3dadd(171348.000000,210696.000000,63200.000000,153.245439)}
{pt3dadd(171432.000000,210576.000000,63150.000000,167.176836)}
{pt3dadd(171540.000000,210432.000000,63125.000000,139.314042)}

{create adhoc102}
{access adhoc102}
{connect adhoc102(1), adhoc101(0)}
{nseg = 1}
{strdef color color = "White"}
{pt3dclear()}
{pt3dadd(171540.000000,210432.000000,63125.000000,139.314042)}
{pt3dadd(171840.000000,210492.000000,63200.000000,64.497240)}
{pt3dadd(171972.000000,210564.000000,63200.000000,46.656000)}

{create adhoc103}
{access adhoc103}
{connect adhoc103(1), adhoc101(0)}
{nseg = 1}
{strdef color color = "White"}
{pt3dclear()}
{pt3dadd(171540.000000,210432.000000,63125.000000,139.314042)}
{pt3dadd(171588.000000,210264.000000,63075.000000,167.176836)}
{pt3dadd(171672.000000,210120.000000,62975.000000,194.714208)}
{pt3dadd(171816.000000,209976.000000,62875.000000,222.251580)}
{pt3dadd(171972.000000,209808.000000,62750.000000,249.788952)}
{pt3dadd(172032.000000,209652.000000,62625.000000,277.326324)}
{pt3dadd(172056.000000,209472.000000,62550.000000,222.251580)}
{pt3dadd(172140.000000,209304.000000,62500.000000,167.176836)}
{pt3dadd(172404.000000,209172.000000,62725.000000,96.745860)}

{create adhoc104}
{access adhoc104}
{connect adhoc104(1), adhoc92(0)}
{nseg = 1}
{strdef color color = "White"}
{pt3dclear()}
{pt3dadd(171708.000000,214212.000000,64850.000000,346.657896)}
{pt3dadd(171300.000000,213540.000000,64800.000000,55.987200)}
{pt3dadd(171288.000000,213300.000000,64800.000000,68.304375)}
{pt3dadd(171120.000000,213192.000000,64725.000000,80.621550)}
{pt3dadd(170976.000000,213132.000000,64600.000000,111.451230)}

{create adhoc105}
{access adhoc105}
{connect adhoc105(1), adhoc104(0)}
{nseg = 1}
{strdef color color = "White"}
{pt3dclear()}
{pt3dadd(170976.000000,213132.000000,64600.000000,111.451230)}
{pt3dadd(171240.000000,212832.000000,64750.000000,80.621550)}
{pt3dadd(171324.000000,212676.000000,64750.000000,55.987200)}
{pt3dadd(171360.000000,212568.000000,64775.000000,55.987200)}

{create adhoc106}
{access adhoc106}
{connect adhoc106(1), adhoc104(0)}
{nseg = 1}
{strdef color color = "White"}
{pt3dclear()}
{pt3dadd(170976.000000,213132.000000,64600.000000,111.451230)}
{pt3dadd(170604.000000,213180.000000,64375.000000,116.095032)}
{pt3dadd(170088.000000,213012.000000,64375.000000,111.257739)}
{pt3dadd(169836.000000,213024.000000,64300.000000,106.420446)}
{pt3dadd(169692.000000,213024.000000,64350.000000,101.583153)}
{pt3dadd(169584.000000,213048.000000,64400.000000,96.745860)}
{pt3dadd(169452.000000,213072.000000,64500.000000,74.300832)}

{create adhoc107}
{access adhoc107}
{connect adhoc107(1), adhoc91(0)}
{nseg = 1}
{strdef color color = "White"}
{pt3dclear()}
{pt3dadd(172620.000000,216924.000000,69600.000000,1035.114948)}
{pt3dadd(172392.000000,217092.000000,69500.000000,1192.452354)}
{pt3dadd(172152.000000,217404.000000,69400.000000,1204.873736)}
{pt3dadd(171972.000000,217716.000000,69175.000000,1217.295117)}
{pt3dadd(171744.000000,217896.000000,69025.000000,1229.716498)}
{pt3dadd(171480.000000,218424.000000,68675.000000,1242.137880)}
{pt3dadd(171264.000000,218592.000000,68500.000000,1180.030982)}
{pt3dadd(171072.000000,218928.000000,68325.000000,1117.924083)}
{pt3dadd(170868.000000,219144.000000,68200.000000,1055.817185)}
{pt3dadd(170640.000000,219432.000000,68000.000000,993.710286)}
{pt3dadd(170400.000000,219792.000000,67900.000000,862.595802)}

{create adhoc108}
{access adhoc108}
{connect adhoc108(1), adhoc107(0)}
{nseg = 1}
{strdef color color = "White"}
{pt3dclear()}
{pt3dadd(170400.000000,219792.000000,67900.000000,862.595802)}
{pt3dadd(170436.000000,218604.000000,66600.000000,96.745860)}
{pt3dadd(170064.000000,218568.000000,66400.000000,132.743057)}
{pt3dadd(169884.000000,218544.000000,66300.000000,168.740253)}
{pt3dadd(169728.000000,218532.000000,66275.000000,204.737450)}
{pt3dadd(169560.000000,218556.000000,66200.000000,240.734646)}
{pt3dadd(169368.000000,218604.000000,66025.000000,227.360502)}
{pt3dadd(169344.000000,218736.000000,65975.000000,213.986358)}
{pt3dadd(169020.000000,218712.000000,65975.000000,200.612214)}
{pt3dadd(168840.000000,218772.000000,65825.000000,167.176836)}

{create adhoc109}
{access adhoc109}
{connect adhoc109(1), adhoc108(0)}
{nseg = 1}
{strdef color color = "White"}
{pt3dclear()}
{pt3dadd(168840.000000,218772.000000,65825.000000,167.176836)}
{pt3dadd(168672.000000,218652.000000,65825.000000,167.176836)}
{pt3dadd(168528.000000,218604.000000,65850.000000,160.211138)}
{pt3dadd(168372.000000,218508.000000,65800.000000,153.245439)}
{pt3dadd(168228.000000,218364.000000,65775.000000,146.279741)}
{pt3dadd(168084.000000,218340.000000,65750.000000,139.314042)}
{pt3dadd(167964.000000,218160.000000,65625.000000,164.669193)}
{pt3dadd(167820.000000,218196.000000,65600.000000,190.024344)}
{pt3dadd(167688.000000,218040.000000,65575.000000,215.379495)}
{pt3dadd(167556.000000,217944.000000,65500.000000,240.734646)}
{pt3dadd(167436.000000,217812.000000,65375.000000,230.704038)}
{pt3dadd(167544.000000,217788.000000,65150.000000,220.673430)}
{pt3dadd(167472.000000,217716.000000,64950.000000,210.642822)}
{pt3dadd(167340.000000,217536.000000,64750.000000,200.612214)}
{pt3dadd(167148.000000,217344.000000,64525.000000,148.679037)}
{pt3dadd(167256.000000,217248.000000,64325.000000,96.745860)}
{pt3dadd(167244.000000,217272.000000,64075.000000,55.987200)}

{create adhoc110}
{access adhoc110}
{connect adhoc110(1), adhoc108(0)}
{nseg = 1}
{strdef color color = "White"}
{pt3dclear()}
{pt3dadd(168840.000000,218772.000000,65825.000000,167.176836)}
{pt3dadd(168792.000000,219084.000000,65600.000000,116.095032)}
{pt3dadd(168600.000000,219240.000000,65375.000000,116.095032)}
{pt3dadd(168528.000000,219312.000000,65250.000000,116.095032)}

{create adhoc111}
{access adhoc111}
{connect adhoc111(1), adhoc107(0)}
{nseg = 1}
{strdef color color = "White"}
{pt3dclear()}
{pt3dadd(170400.000000,219792.000000,67900.000000,862.595802)}
{pt3dadd(170184.000000,220152.000000,67875.000000,862.595802)}
{pt3dadd(169920.000000,220440.000000,67800.000000,862.595802)}
{pt3dadd(169824.000000,220620.000000,67725.000000,828.091944)}

{create adhoc112}
{access adhoc112}
{connect adhoc112(1), adhoc111(0)}
{nseg = 1}
{strdef color color = "White"}
{pt3dclear()}
{pt3dadd(169824.000000,220620.000000,67725.000000,828.091944)}
{pt3dadd(169824.000000,219564.000000,69150.000000,346.657896)}
{pt3dadd(169692.000000,219576.000000,69375.000000,320.177083)}
{pt3dadd(169524.000000,219672.000000,69475.000000,293.696271)}
{pt3dadd(169368.000000,219744.000000,69525.000000,267.215459)}
{pt3dadd(169224.000000,219828.000000,69575.000000,240.734646)}
{pt3dadd(169068.000000,219948.000000,69675.000000,276.042396)}
{pt3dadd(168900.000000,220140.000000,69825.000000,311.350146)}
{pt3dadd(168732.000000,220248.000000,69875.000000,346.657896)}
{pt3dadd(168564.000000,220452.000000,70100.000000,346.657896)}

{create adhoc113}
{access adhoc113}
{connect adhoc113(1), adhoc112(0)}
{nseg = 1}
{strdef color color = "White"}
{pt3dclear()}
{pt3dadd(168564.000000,220452.000000,70100.000000,346.657896)}
{pt3dadd(167964.000000,220452.000000,70125.000000,240.734646)}
{pt3dadd(167640.000000,220560.000000,70125.000000,247.109306)}
{pt3dadd(167484.000000,220620.000000,70275.000000,253.483965)}
{pt3dadd(167328.000000,220692.000000,70300.000000,259.858625)}
{pt3dadd(167160.000000,220752.000000,70300.000000,266.233284)}
{pt3dadd(166992.000000,220800.000000,70350.000000,247.821890)}
{pt3dadd(166812.000000,220860.000000,70400.000000,229.410495)}
{pt3dadd(166632.000000,220896.000000,70450.000000,210.999101)}
{pt3dadd(166464.000000,220932.000000,70475.000000,192.587706)}
{pt3dadd(166284.000000,220860.000000,70525.000000,204.624441)}
{pt3dadd(166068.000000,220872.000000,70550.000000,216.661176)}
{pt3dadd(165888.000000,220908.000000,70550.000000,228.697911)}
{pt3dadd(165720.000000,220812.000000,70625.000000,240.734646)}
{pt3dadd(165540.000000,220788.000000,70650.000000,240.734646)}
{pt3dadd(165396.000000,220776.000000,70650.000000,240.734646)}
{pt3dadd(165240.000000,220788.000000,70650.000000,240.734646)}
{pt3dadd(165096.000000,220800.000000,70650.000000,240.734646)}
{pt3dadd(164928.000000,220848.000000,70650.000000,222.345193)}
{pt3dadd(164772.000000,220920.000000,70725.000000,203.955741)}
{pt3dadd(164604.000000,220968.000000,70750.000000,185.566288)}
{pt3dadd(164436.000000,221016.000000,70850.000000,167.176836)}
{pt3dadd(164280.000000,221004.000000,70850.000000,185.566288)}
{pt3dadd(164124.000000,221004.000000,70925.000000,203.955741)}
{pt3dadd(163968.000000,221016.000000,70950.000000,222.345193)}
{pt3dadd(163812.000000,221076.000000,71000.000000,240.734646)}
{pt3dadd(163620.000000,221052.000000,71050.000000,233.797640)}
{pt3dadd(163440.000000,221004.000000,71050.000000,226.860633)}
{pt3dadd(163260.000000,220956.000000,71025.000000,219.923626)}
{pt3dadd(163116.000000,220932.000000,71000.000000,212.986620)}
{pt3dadd(162984.000000,220872.000000,70975.000000,194.568476)}
{pt3dadd(162852.000000,220812.000000,70950.000000,176.150331)}
{pt3dadd(162708.000000,220704.000000,70850.000000,157.732187)}
{pt3dadd(162180.000000,220632.000000,70825.000000,139.314042)}
{pt3dadd(162024.000000,220620.000000,70850.000000,191.150005)}
{pt3dadd(161856.000000,220596.000000,70875.000000,242.985969)}
{pt3dadd(161700.000000,220500.000000,70775.000000,294.821933)}
{pt3dadd(161532.000000,220356.000000,70725.000000,346.657896)}
{pt3dadd(161364.000000,220332.000000,70725.000000,343.191321)}
{pt3dadd(161196.000000,220260.000000,70725.000000,339.724746)}
{pt3dadd(161040.000000,220200.000000,70725.000000,336.258171)}
{pt3dadd(160884.000000,220128.000000,70700.000000,332.791596)}
{pt3dadd(160728.000000,220116.000000,70675.000000,309.777359)}
{pt3dadd(160584.000000,220020.000000,70675.000000,286.763121)}
{pt3dadd(160428.000000,219924.000000,70625.000000,263.748884)}
{pt3dadd(160272.000000,219864.000000,70625.000000,240.734646)}
{pt3dadd(160104.000000,219876.000000,70700.000000,230.704038)}
{pt3dadd(159948.000000,219624.000000,70625.000000,220.673430)}
{pt3dadd(159816.000000,219492.000000,70525.000000,210.642822)}
{pt3dadd(159672.000000,219420.000000,70500.000000,200.612214)}
{pt3dadd(159492.000000,219276.000000,70375.000000,192.253370)}
{pt3dadd(159360.000000,219108.000000,70275.000000,183.894525)}
{pt3dadd(159228.000000,219000.000000,70250.000000,175.535680)}
{pt3dadd(159072.000000,218880.000000,70250.000000,167.176836)}
{pt3dadd(158928.000000,218856.000000,70225.000000,175.535680)}
{pt3dadd(158796.000000,218832.000000,70225.000000,183.894525)}
{pt3dadd(158652.000000,218760.000000,70200.000000,192.253370)}
{pt3dadd(158292.000000,218868.000000,70200.000000,200.612214)}
{pt3dadd(158124.000000,218772.000000,70175.000000,200.612214)}
{pt3dadd(157956.000000,218724.000000,70100.000000,200.612214)}
{pt3dadd(157812.000000,218652.000000,70000.000000,200.612214)}
{pt3dadd(157704.000000,218460.000000,69900.000000,200.612214)}
{pt3dadd(157560.000000,218244.000000,69675.000000,233.657060)}
{pt3dadd(157416.000000,218172.000000,69650.000000,266.701905)}
{pt3dadd(157260.000000,218100.000000,69475.000000,299.746750)}
{pt3dadd(157080.000000,217932.000000,69400.000000,332.791596)}
{pt3dadd(156924.000000,217824.000000,69400.000000,336.258171)}
{pt3dadd(156756.000000,217776.000000,69375.000000,339.724746)}
{pt3dadd(156612.000000,217812.000000,69300.000000,343.191321)}
{pt3dadd(156468.000000,217824.000000,69225.000000,346.657896)}
{pt3dadd(156288.000000,217836.000000,69150.000000,308.140356)}
{pt3dadd(156108.000000,217752.000000,69075.000000,269.622816)}
{pt3dadd(155940.000000,217716.000000,68975.000000,231.105276)}
{pt3dadd(155796.000000,217704.000000,68875.000000,167.176836)}

{create adhoc114}
{access adhoc114}
{connect adhoc114(1), adhoc113(0)}
{nseg = 1}
{strdef color color = "White"}
{pt3dclear()}
{pt3dadd(155796.000000,217704.000000,68875.000000,167.176836)}
{pt3dadd(155892.000000,216900.000000,68800.000000,200.612214)}
{pt3dadd(155892.000000,216648.000000,68800.000000,200.612214)}
{pt3dadd(155952.000000,216492.000000,68525.000000,200.612214)}
{pt3dadd(155976.000000,216336.000000,68475.000000,200.612214)}
{pt3dadd(156024.000000,216180.000000,68450.000000,200.612214)}
{pt3dadd(156072.000000,216012.000000,68450.000000,200.612214)}
{pt3dadd(156060.000000,215808.000000,68375.000000,200.612214)}
{pt3dadd(156132.000000,215628.000000,68225.000000,200.612214)}
{pt3dadd(156156.000000,215472.000000,68175.000000,200.612214)}
{pt3dadd(156156.000000,215316.000000,68150.000000,198.606091)}
{pt3dadd(156180.000000,215136.000000,68175.000000,196.599969)}
{pt3dadd(156204.000000,214980.000000,68150.000000,194.593846)}
{pt3dadd(156204.000000,214812.000000,68125.000000,192.587724)}
{pt3dadd(156132.000000,214620.000000,68125.000000,179.269304)}
{pt3dadd(156108.000000,214452.000000,68100.000000,165.950883)}
{pt3dadd(156096.000000,214260.000000,68075.000000,152.632462)}
{pt3dadd(156036.000000,214080.000000,68050.000000,139.314042)}
{pt3dadd(155904.000000,213924.000000,68025.000000,154.638585)}
{pt3dadd(155880.000000,213768.000000,68075.000000,169.963128)}
{pt3dadd(155856.000000,213612.000000,68100.000000,185.287671)}
{pt3dadd(155784.000000,213492.000000,68075.000000,200.612214)}
{pt3dadd(155748.000000,213384.000000,68100.000000,200.612214)}
{pt3dadd(155736.000000,213252.000000,67950.000000,200.612214)}
{pt3dadd(155556.000000,213084.000000,67850.000000,200.612214)}
{pt3dadd(155448.000000,212988.000000,67575.000000,200.612214)}
{pt3dadd(155328.000000,212868.000000,67300.000000,198.606091)}
{pt3dadd(155172.000000,212568.000000,67075.000000,196.599969)}
{pt3dadd(155184.000000,212340.000000,66850.000000,194.593846)}
{pt3dadd(155184.000000,212028.000000,66625.000000,192.587724)}
{pt3dadd(155112.000000,211776.000000,66425.000000,167.090160)}
{pt3dadd(155100.000000,211572.000000,66175.000000,141.592596)}
{pt3dadd(155136.000000,211284.000000,65975.000000,116.095032)}
{pt3dadd(155160.000000,211032.000000,65750.000000,80.621550)}

{create adhoc115}
{access adhoc115}
{connect adhoc115(1), adhoc113(0)}
{nseg = 1}
{strdef color color = "White"}
{pt3dclear()}
{pt3dadd(155796.000000,217704.000000,68875.000000,167.176836)}
{pt3dadd(155724.000000,217944.000000,68650.000000,167.176836)}
{pt3dadd(155364.000000,217992.000000,68525.000000,165.505068)}
{pt3dadd(155232.000000,218040.000000,68475.000000,163.833300)}
{pt3dadd(155112.000000,218148.000000,68475.000000,162.161532)}
{pt3dadd(154992.000000,218256.000000,68400.000000,160.489764)}
{pt3dadd(154836.000000,218340.000000,68325.000000,170.520377)}
{pt3dadd(154656.000000,218472.000000,68300.000000,180.550989)}
{pt3dadd(154488.000000,218556.000000,68275.000000,190.581602)}
{pt3dadd(154356.000000,218712.000000,68275.000000,200.612214)}
{pt3dadd(154212.000000,218820.000000,68325.000000,185.287671)}
{pt3dadd(154080.000000,218844.000000,68350.000000,169.963128)}
{pt3dadd(153936.000000,218904.000000,68275.000000,154.638585)}
{pt3dadd(153792.000000,218976.000000,68200.000000,139.314042)}
{pt3dadd(153612.000000,219048.000000,68250.000000,240.734646)}
{pt3dadd(153432.000000,219012.000000,68300.000000,200.612214)}

{create adhoc116}
{access adhoc116}
{connect adhoc116(1), adhoc115(0)}
{nseg = 1}
{strdef color color = "White"}
{pt3dclear()}
{pt3dadd(153432.000000,219012.000000,68300.000000,200.612214)}
{pt3dadd(153276.000000,219192.000000,68350.000000,167.176836)}
{pt3dadd(153132.000000,219300.000000,68375.000000,149.569092)}
{pt3dadd(153012.000000,219504.000000,68325.000000,131.961348)}
{pt3dadd(152880.000000,219600.000000,68325.000000,114.353604)}
{pt3dadd(152760.000000,219672.000000,68275.000000,96.745860)}
{pt3dadd(152652.000000,219816.000000,68300.000000,107.387906)}
{pt3dadd(152532.000000,220044.000000,68350.000000,118.029951)}
{pt3dadd(152412.000000,220140.000000,68325.000000,128.671997)}
{pt3dadd(152304.000000,220308.000000,68425.000000,139.314042)}
{pt3dadd(152220.000000,220512.000000,68575.000000,144.607973)}
{pt3dadd(152220.000000,221100.000000,68850.000000,149.901903)}
{pt3dadd(152136.000000,221376.000000,69075.000000,155.195833)}
{pt3dadd(151956.000000,221736.000000,69225.000000,160.489764)}
{pt3dadd(151668.000000,222156.000000,69525.000000,137.163483)}
{pt3dadd(151500.000000,222492.000000,69800.000000,113.837202)}
{pt3dadd(151272.000000,222732.000000,69850.000000,90.510921)}
{pt3dadd(151164.000000,222996.000000,69925.000000,67.184640)}
{pt3dadd(151140.000000,223116.000000,69900.000000,64.385280)}
{pt3dadd(151104.000000,223176.000000,69900.000000,61.585920)}
{pt3dadd(151044.000000,223296.000000,69900.000000,58.786560)}
{pt3dadd(150960.000000,223368.000000,69950.000000,55.987200)}
{pt3dadd(150984.000000,223620.000000,69925.000000,68.304375)}
{pt3dadd(150984.000000,223824.000000,69925.000000,80.621550)}
{pt3dadd(151032.000000,223992.000000,69925.000000,96.745860)}

{create adhoc117}
{access adhoc117}
{connect adhoc117(1), adhoc115(0)}
{nseg = 1}
{strdef color color = "White"}
{pt3dclear()}
{pt3dadd(153432.000000,219012.000000,68300.000000,200.612214)}
{pt3dadd(153420.000000,218664.000000,68300.000000,96.745860)}

{create adhoc118}
{access adhoc118}
{connect adhoc118(1), adhoc112(0)}
{nseg = 1}
{strdef color color = "White"}
{pt3dclear()}
{pt3dadd(168564.000000,220452.000000,70100.000000,346.657896)}
{pt3dadd(168672.000000,220716.000000,70125.000000,184.884210)}
{pt3dadd(168660.000000,220872.000000,70150.000000,138.808140)}
{pt3dadd(168672.000000,220992.000000,70200.000000,92.732070)}
{pt3dadd(168672.000000,221088.000000,70200.000000,46.656000)}
{pt3dadd(168684.000000,221172.000000,70250.000000,46.656000)}

{create adhoc119}
{access adhoc119}
{connect adhoc119(1), adhoc111(0)}
{nseg = 1}
{strdef color color = "White"}
{pt3dclear()}
{pt3dadd(169824.000000,220620.000000,67725.000000,828.091944)}
{pt3dadd(169584.000000,221136.000000,67575.000000,828.091944)}
{pt3dadd(169332.000000,221256.000000,67475.000000,800.776413)}
{pt3dadd(169092.000000,221568.000000,67425.000000,773.460882)}
{pt3dadd(168828.000000,221904.000000,67475.000000,746.145351)}
{pt3dadd(168576.000000,222048.000000,67500.000000,718.829820)}
{pt3dadd(168420.000000,222240.000000,67425.000000,718.829820)}
{pt3dadd(168252.000000,222552.000000,67450.000000,718.829820)}
{pt3dadd(168084.000000,222540.000000,67450.000000,718.829820)}
{pt3dadd(168048.000000,222528.000000,67350.000000,718.829820)}

{create adhoc120}
{access adhoc120}
{connect adhoc120(1), adhoc119(0)}
{nseg = 1}
{strdef color color = "White"}
{pt3dclear()}
{pt3dadd(168048.000000,222528.000000,67350.000000,718.829820)}
{pt3dadd(168228.000000,224508.000000,68675.000000,200.612214)}
{pt3dadd(168336.000000,224640.000000,68875.000000,183.894525)}
{pt3dadd(168432.000000,224808.000000,68875.000000,167.176836)}
{pt3dadd(168528.000000,224976.000000,68950.000000,200.612214)}

{create adhoc121}
{access adhoc121}
{connect adhoc121(1), adhoc120(0)}
{nseg = 1}
{strdef color color = "White"}
{pt3dclear()}
{pt3dadd(168528.000000,224976.000000,68950.000000,200.612214)}
{pt3dadd(168468.000000,225564.000000,68900.000000,116.095032)}
{pt3dadd(168300.000000,226032.000000,68900.000000,94.595952)}
{pt3dadd(168204.000000,226200.000000,68975.000000,73.096872)}
{pt3dadd(168156.000000,226332.000000,69025.000000,51.597792)}
{pt3dadd(168012.000000,226464.000000,69000.000000,46.656000)}

{create adhoc122}
{access adhoc122}
{connect adhoc122(1), adhoc120(0)}
{nseg = 1}
{strdef color color = "White"}
{pt3dclear()}
{pt3dadd(168528.000000,224976.000000,68950.000000,200.612214)}
{pt3dadd(168996.000000,224952.000000,68900.000000,139.314042)}

{create adhoc123}
{access adhoc123}
{connect adhoc123(1), adhoc119(0)}
{nseg = 1}
{strdef color color = "White"}
{pt3dclear()}
{pt3dadd(168048.000000,222528.000000,67350.000000,718.829820)}
{pt3dadd(167856.000000,222720.000000,67300.000000,718.829820)}
{pt3dadd(167652.000000,222840.000000,67325.000000,754.771316)}
{pt3dadd(167448.000000,222960.000000,67250.000000,790.712811)}
{pt3dadd(167196.000000,223008.000000,67150.000000,826.654307)}
{pt3dadd(166968.000000,223056.000000,67100.000000,862.595802)}
{pt3dadd(166764.000000,223296.000000,67025.000000,853.969856)}
{pt3dadd(166488.000000,223512.000000,67000.000000,845.343909)}
{pt3dadd(166296.000000,223632.000000,67000.000000,836.717962)}
{pt3dadd(166080.000000,223728.000000,66975.000000,828.092016)}
{pt3dadd(165636.000000,223860.000000,66750.000000,845.343909)}
{pt3dadd(165420.000000,224028.000000,66475.000000,862.595802)}
{pt3dadd(165264.000000,224160.000000,66425.000000,862.595802)}

{create adhoc124}
{access adhoc124}
{connect adhoc124(1), adhoc123(0)}
{nseg = 1}
{strdef color color = "White"}
{pt3dclear()}
{pt3dadd(165264.000000,224160.000000,66425.000000,862.595802)}
{pt3dadd(164700.000000,225816.000000,66425.000000,499.187376)}
{pt3dadd(164664.000000,226020.000000,66300.000000,461.055006)}
{pt3dadd(164628.000000,226212.000000,66175.000000,422.922636)}
{pt3dadd(164484.000000,226392.000000,66050.000000,384.790266)}
{pt3dadd(164460.000000,226584.000000,65925.000000,346.657896)}
{pt3dadd(164436.000000,226764.000000,65850.000000,332.213819)}
{pt3dadd(164256.000000,226968.000000,65900.000000,317.769741)}
{pt3dadd(164136.000000,227184.000000,65950.000000,303.325664)}
{pt3dadd(164052.000000,227352.000000,66000.000000,288.881586)}
{pt3dadd(164004.000000,227544.000000,65975.000000,288.881586)}
{pt3dadd(163884.000000,227724.000000,66000.000000,288.881586)}
{pt3dadd(163764.000000,227880.000000,66100.000000,288.881586)}
{pt3dadd(163740.000000,228060.000000,65975.000000,288.881586)}
{pt3dadd(163596.000000,228228.000000,66000.000000,303.325664)}
{pt3dadd(163476.000000,228396.000000,66050.000000,317.769741)}
{pt3dadd(163248.000000,228564.000000,66175.000000,332.213819)}
{pt3dadd(163068.000000,228732.000000,66250.000000,346.657896)}
{pt3dadd(163008.000000,228900.000000,66225.000000,332.213819)}
{pt3dadd(162936.000000,229056.000000,66250.000000,317.769741)}
{pt3dadd(162924.000000,229224.000000,66275.000000,303.325664)}
{pt3dadd(162780.000000,229404.000000,66250.000000,288.881586)}
{pt3dadd(162660.000000,229560.000000,66250.000000,288.881586)}
{pt3dadd(162528.000000,229728.000000,66225.000000,288.881586)}
{pt3dadd(162288.000000,229956.000000,66150.000000,288.881586)}
{pt3dadd(162024.000000,230172.000000,66200.000000,288.881586)}
{pt3dadd(161856.000000,230364.000000,66200.000000,288.881586)}
{pt3dadd(161688.000000,230532.000000,66125.000000,288.881586)}
{pt3dadd(161700.000000,230928.000000,66150.000000,288.881586)}
{pt3dadd(161736.000000,231096.000000,66150.000000,288.881586)}
{pt3dadd(161784.000000,231276.000000,66200.000000,258.455399)}
{pt3dadd(161616.000000,231468.000000,66150.000000,228.029211)}
{pt3dadd(161616.000000,231624.000000,66250.000000,197.603024)}
{pt3dadd(161664.000000,231804.000000,66175.000000,167.176836)}
{pt3dadd(161640.000000,231972.000000,66150.000000,216.705060)}
{pt3dadd(161652.000000,232140.000000,65975.000000,266.233284)}
{pt3dadd(161736.000000,232296.000000,65900.000000,288.881586)}

{create adhoc125}
{access adhoc125}
{connect adhoc125(1), adhoc124(0)}
{nseg = 1}
{strdef color color = "White"}
{pt3dclear()}
{pt3dadd(161736.000000,232296.000000,65900.000000,288.881586)}
{pt3dadd(161892.000000,232440.000000,65600.000000,240.734646)}
{pt3dadd(161880.000000,232500.000000,65325.000000,240.734646)}
{pt3dadd(161784.000000,232476.000000,65000.000000,240.734646)}
{pt3dadd(161892.000000,232584.000000,64725.000000,240.734646)}
{pt3dadd(161964.000000,232740.000000,64450.000000,240.734646)}
{pt3dadd(161916.000000,232932.000000,64175.000000,215.379495)}
{pt3dadd(162072.000000,232980.000000,63900.000000,190.024344)}
{pt3dadd(162168.000000,233028.000000,63675.000000,164.669193)}
{pt3dadd(162264.000000,232716.000000,63400.000000,139.314042)}
{pt3dadd(162408.000000,232644.000000,63150.000000,124.640919)}
{pt3dadd(162660.000000,232404.000000,62875.000000,109.967796)}
{pt3dadd(163260.000000,232248.000000,62725.000000,95.294673)}
{pt3dadd(163716.000000,231900.000000,62725.000000,80.621550)}
{pt3dadd(163824.000000,231756.000000,62725.000000,84.652627)}
{pt3dadd(164004.000000,231636.000000,62725.000000,88.683705)}
{pt3dadd(164016.000000,231492.000000,62700.000000,92.714782)}
{pt3dadd(164184.000000,231348.000000,62750.000000,96.745860)}
{pt3dadd(164292.000000,231180.000000,62725.000000,104.098545)}
{pt3dadd(164208.000000,231012.000000,62775.000000,111.451230)}
{pt3dadd(164220.000000,230748.000000,62775.000000,80.621550)}

{create adhoc126}
{access adhoc126}
{connect adhoc126(1), adhoc124(0)}
{nseg = 1}
{strdef color color = "White"}
{pt3dclear()}
{pt3dadd(161736.000000,232296.000000,65900.000000,288.881586)}
{pt3dadd(161244.000000,232560.000000,65800.000000,111.451230)}
{pt3dadd(161232.000000,232692.000000,65775.000000,112.612180)}
{pt3dadd(161256.000000,232824.000000,65775.000000,113.773131)}
{pt3dadd(161268.000000,232932.000000,65725.000000,114.934082)}
{pt3dadd(161448.000000,233328.000000,65700.000000,116.095032)}
{pt3dadd(161424.000000,233484.000000,65700.000000,123.834702)}
{pt3dadd(161532.000000,233616.000000,65725.000000,131.574372)}
{pt3dadd(161628.000000,233736.000000,65800.000000,139.314042)}
{pt3dadd(161628.000000,233868.000000,65875.000000,116.095032)}

{create adhoc127}
{access adhoc127}
{connect adhoc127(1), adhoc123(0)}
{nseg = 1}
{strdef color color = "White"}
{pt3dclear()}
{pt3dadd(165264.000000,224160.000000,66425.000000,862.595802)}
{pt3dadd(164796.000000,224484.000000,66350.000000,718.829820)}
{pt3dadd(164340.000000,224472.000000,66275.000000,688.878585)}
{pt3dadd(163956.000000,224460.000000,66325.000000,658.927350)}
{pt3dadd(163752.000000,224496.000000,66400.000000,628.976115)}
{pt3dadd(163572.000000,224496.000000,66375.000000,599.024880)}
{pt3dadd(163404.000000,224496.000000,66350.000000,599.024880)}
{pt3dadd(163212.000000,224496.000000,66325.000000,599.024880)}
{pt3dadd(163020.000000,224484.000000,66250.000000,599.024880)}
{pt3dadd(162840.000000,224472.000000,66175.000000,599.024880)}
{pt3dadd(162612.000000,224544.000000,66225.000000,599.024880)}
{pt3dadd(162384.000000,224628.000000,66225.000000,599.024880)}
{pt3dadd(162180.000000,224676.000000,66225.000000,599.024880)}
{pt3dadd(161952.000000,224688.000000,66200.000000,599.024880)}
{pt3dadd(161760.000000,224616.000000,66150.000000,593.034624)}
{pt3dadd(161544.000000,224676.000000,66000.000000,587.044368)}
{pt3dadd(161292.000000,224688.000000,65925.000000,581.054112)}
{pt3dadd(161100.000000,224748.000000,65900.000000,575.063856)}
{pt3dadd(160908.000000,224772.000000,65800.000000,581.054112)}
{pt3dadd(160680.000000,224892.000000,65700.000000,587.044368)}
{pt3dadd(160416.000000,224976.000000,65675.000000,593.034624)}
{pt3dadd(160212.000000,225024.000000,65625.000000,599.024880)}
{pt3dadd(159984.000000,225072.000000,65525.000000,599.024880)}
{pt3dadd(159756.000000,225012.000000,65500.000000,599.024880)}
{pt3dadd(159492.000000,224988.000000,65425.000000,599.024880)}
{pt3dadd(159228.000000,224928.000000,65325.000000,599.024880)}
{pt3dadd(159036.000000,224892.000000,65225.000000,587.283993)}
{pt3dadd(158820.000000,224940.000000,65050.000000,575.543106)}
{pt3dadd(158592.000000,224964.000000,64975.000000,563.802219)}
{pt3dadd(158364.000000,224796.000000,64750.000000,552.061332)}
{pt3dadd(158160.000000,224700.000000,64750.000000,538.842843)}
{pt3dadd(157956.000000,224628.000000,64650.000000,525.624354)}
{pt3dadd(157692.000000,224592.000000,64575.000000,512.405865)}
{pt3dadd(157464.000000,224604.000000,64325.000000,499.187376)}
{pt3dadd(157224.000000,224532.000000,64375.000000,461.055006)}
{pt3dadd(156972.000000,224448.000000,64375.000000,422.922636)}
{pt3dadd(156732.000000,224280.000000,64200.000000,384.790266)}
{pt3dadd(156564.000000,224208.000000,64175.000000,346.657896)}
{pt3dadd(156324.000000,223956.000000,64075.000000,409.749642)}
{pt3dadd(156096.000000,223776.000000,64000.000000,472.841388)}
{pt3dadd(155856.000000,223776.000000,63975.000000,535.933134)}
{pt3dadd(155676.000000,223632.000000,63925.000000,599.024880)}
{pt3dadd(155460.000000,223488.000000,63875.000000,574.065504)}
{pt3dadd(155208.000000,223344.000000,63800.000000,549.106128)}
{pt3dadd(155016.000000,223248.000000,63650.000000,524.146752)}
{pt3dadd(154812.000000,223152.000000,63500.000000,499.187376)}
{pt3dadd(154608.000000,222780.000000,63300.000000,599.024880)}
{pt3dadd(154488.000000,222636.000000,63125.000000,499.187376)}

{create adhoc128}
{access adhoc128}
{connect adhoc128(1), adhoc127(0)}
{nseg = 1}
{strdef color color = "White"}
{pt3dclear()}
{pt3dadd(154488.000000,222636.000000,63125.000000,499.187376)}
{pt3dadd(154488.000000,224784.000000,64450.000000,231.105276)}
{pt3dadd(154344.000000,224940.000000,64475.000000,259.993431)}
{pt3dadd(154200.000000,225096.000000,64550.000000,288.881586)}
{pt3dadd(154032.000000,225276.000000,64625.000000,317.769741)}
{pt3dadd(153912.000000,225516.000000,64750.000000,346.657896)}
{pt3dadd(153780.000000,225768.000000,64850.000000,369.768426)}
{pt3dadd(153624.000000,225924.000000,64850.000000,392.878956)}
{pt3dadd(153468.000000,226104.000000,64900.000000,415.989486)}
{pt3dadd(153336.000000,226200.000000,64925.000000,415.989486)}

{create adhoc129}
{access adhoc129}
{connect adhoc129(1), adhoc128(0)}
{nseg = 1}
{strdef color color = "White"}
{pt3dclear()}
{pt3dadd(153336.000000,226200.000000,64925.000000,415.989486)}
{pt3dadd(153096.000000,226188.000000,64850.000000,266.233284)}
{pt3dadd(152904.000000,226164.000000,64950.000000,271.895359)}
{pt3dadd(152748.000000,226152.000000,65050.000000,277.557435)}
{pt3dadd(152580.000000,226152.000000,65125.000000,283.219511)}
{pt3dadd(152436.000000,226188.000000,65075.000000,288.881586)}
{pt3dadd(152292.000000,226152.000000,64950.000000,266.814243)}
{pt3dadd(152160.000000,226140.000000,64925.000000,244.746900)}
{pt3dadd(151956.000000,226152.000000,64875.000000,222.679557)}
{pt3dadd(151740.000000,226104.000000,64875.000000,200.612214)}
{pt3dadd(151536.000000,226020.000000,64825.000000,200.612214)}
{pt3dadd(151368.000000,226032.000000,64775.000000,200.612214)}
{pt3dadd(151212.000000,226104.000000,64850.000000,200.612214)}
{pt3dadd(151032.000000,226128.000000,64900.000000,200.612214)}
{pt3dadd(150912.000000,226308.000000,64950.000000,192.253370)}
{pt3dadd(150744.000000,226356.000000,64900.000000,183.894525)}
{pt3dadd(150540.000000,226308.000000,64825.000000,175.535680)}
{pt3dadd(150372.000000,226320.000000,64725.000000,167.176836)}
{pt3dadd(150216.000000,226296.000000,64525.000000,175.535680)}
{pt3dadd(150072.000000,226248.000000,64350.000000,183.894525)}
{pt3dadd(149976.000000,226152.000000,64025.000000,192.253370)}
{pt3dadd(149736.000000,226140.000000,63675.000000,200.612214)}
{pt3dadd(149640.000000,225972.000000,63325.000000,198.606091)}
{pt3dadd(149592.000000,225996.000000,63025.000000,196.599969)}
{pt3dadd(149532.000000,226332.000000,62725.000000,194.593846)}
{pt3dadd(149532.000000,226404.000000,62400.000000,192.587724)}
{pt3dadd(149364.000000,226308.000000,62075.000000,186.235002)}
{pt3dadd(149268.000000,226236.000000,61825.000000,179.882280)}
{pt3dadd(149400.000000,226056.000000,61475.000000,173.529558)}
{pt3dadd(149472.000000,226068.000000,61075.000000,167.176836)}
{pt3dadd(149568.000000,226056.000000,60675.000000,167.176836)}
{pt3dadd(149640.000000,226140.000000,60275.000000,167.176836)}
{pt3dadd(149700.000000,226332.000000,59925.000000,167.176836)}
{pt3dadd(149808.000000,226356.000000,59600.000000,167.176836)}
{pt3dadd(149892.000000,226500.000000,59300.000000,175.535680)}
{pt3dadd(150012.000000,226416.000000,59050.000000,183.894525)}
{pt3dadd(150312.000000,226356.000000,58725.000000,192.253370)}
{pt3dadd(150468.000000,226320.000000,58600.000000,200.612214)}
{pt3dadd(150444.000000,226248.000000,58450.000000,200.612214)}

{create adhoc130}
{access adhoc130}
{connect adhoc130(1), adhoc129(0)}
{nseg = 1}
{strdef color color = "White"}
{pt3dclear()}
{pt3dadd(150444.000000,226248.000000,58450.000000,200.612214)}
{pt3dadd(150936.000000,226620.000000,58425.000000,109.049184)}
{pt3dadd(151032.000000,226632.000000,58275.000000,116.095032)}

{create adhoc131}
{access adhoc131}
{connect adhoc131(1), adhoc129(0)}
{nseg = 1}
{strdef color color = "White"}
{pt3dclear()}
{pt3dadd(150444.000000,226248.000000,58450.000000,200.612214)}
{pt3dadd(150588.000000,226164.000000,58250.000000,139.314042)}
{pt3dadd(150816.000000,226020.000000,58150.000000,146.372622)}
{pt3dadd(150960.000000,225840.000000,58025.000000,153.431202)}
{pt3dadd(151188.000000,225648.000000,57850.000000,160.489782)}
{pt3dadd(151296.000000,225480.000000,57850.000000,139.314042)}

{create adhoc132}
{access adhoc132}
{connect adhoc132(1), adhoc128(0)}
{nseg = 1}
{strdef color color = "White"}
{pt3dclear()}
{pt3dadd(153336.000000,226200.000000,64925.000000,415.989486)}
{pt3dadd(153180.000000,226968.000000,65050.000000,80.621550)}
{pt3dadd(153096.000000,227316.000000,65050.000000,113.712818)}
{pt3dadd(153096.000000,227472.000000,65050.000000,146.804085)}
{pt3dadd(153084.000000,227652.000000,65050.000000,179.895353)}
{pt3dadd(153060.000000,227784.000000,65125.000000,212.986620)}
{pt3dadd(153084.000000,227868.000000,65125.000000,179.895353)}
{pt3dadd(152976.000000,228264.000000,65125.000000,146.804085)}
{pt3dadd(152988.000000,228420.000000,65125.000000,113.712818)}
{pt3dadd(152868.000000,228588.000000,65100.000000,80.621550)}
{pt3dadd(152772.000000,228732.000000,65150.000000,84.652627)}
{pt3dadd(152724.000000,228864.000000,65200.000000,88.683705)}
{pt3dadd(152664.000000,229008.000000,65175.000000,92.714782)}
{pt3dadd(152640.000000,229140.000000,65175.000000,96.745860)}
{pt3dadd(152532.000000,229296.000000,65175.000000,53.747712)}
{pt3dadd(152520.000000,229440.000000,65225.000000,46.656000)}

{create adhoc133}
{access adhoc133}
{connect adhoc133(1), adhoc127(0)}
{nseg = 1}
{strdef color color = "White"}
{pt3dclear()}
{pt3dadd(154488.000000,222636.000000,63125.000000,499.187376)}
{pt3dadd(154272.000000,222444.000000,63050.000000,599.024880)}
{pt3dadd(154092.000000,222156.000000,62950.000000,591.037872)}
{pt3dadd(153792.000000,221628.000000,62550.000000,583.050864)}
{pt3dadd(153480.000000,220956.000000,62150.000000,575.063856)}
{pt3dadd(153456.000000,220464.000000,62025.000000,718.829820)}

{create adhoc134}
{access adhoc134}
{connect adhoc134(1), adhoc133(0)}
{nseg = 1}
{strdef color color = "White"}
{pt3dclear()}
{pt3dadd(153456.000000,220464.000000,62025.000000,718.829820)}
{pt3dadd(154248.000000,221844.000000,62000.000000,499.187376)}

{create adhoc135}
{access adhoc135}
{connect adhoc135(1), adhoc133(0)}
{nseg = 1}
{strdef color color = "White"}
{pt3dclear()}
{pt3dadd(153456.000000,220464.000000,62025.000000,718.829820)}
{pt3dadd(153240.000000,220044.000000,61625.000000,599.024880)}
{pt3dadd(153336.000000,219816.000000,61325.000000,599.024880)}
{pt3dadd(153156.000000,219576.000000,61275.000000,599.024880)}
{pt3dadd(153012.000000,219348.000000,61200.000000,599.024880)}
{pt3dadd(152976.000000,219144.000000,61025.000000,599.024880)}
{pt3dadd(152952.000000,218940.000000,60975.000000,658.927350)}
{pt3dadd(152976.000000,218748.000000,60900.000000,718.829820)}
{pt3dadd(153000.000000,218556.000000,60825.000000,599.024880)}

{create adhoc136}
{access adhoc136}
{connect adhoc136(1), adhoc135(0)}
{nseg = 1}
{strdef color color = "White"}
{pt3dclear()}
{pt3dadd(153000.000000,218556.000000,60825.000000,599.024880)}
{pt3dadd(152172.000000,218556.000000,59300.000000,200.612214)}
{pt3dadd(152088.000000,218556.000000,59050.000000,222.679557)}
{pt3dadd(152076.000000,218304.000000,58775.000000,244.746900)}
{pt3dadd(151968.000000,218076.000000,58525.000000,266.814243)}
{pt3dadd(151896.000000,217932.000000,58225.000000,288.881586)}
{pt3dadd(151908.000000,217692.000000,57925.000000,288.881586)}
{pt3dadd(151884.000000,217620.000000,57650.000000,288.881586)}
{pt3dadd(151860.000000,217392.000000,57350.000000,288.881586)}
{pt3dadd(151836.000000,217116.000000,57100.000000,288.881586)}
{pt3dadd(151824.000000,216744.000000,56925.000000,266.814243)}
{pt3dadd(151752.000000,216420.000000,56650.000000,244.746900)}
{pt3dadd(151836.000000,216072.000000,56350.000000,222.679557)}
{pt3dadd(151800.000000,215544.000000,56150.000000,200.612214)}
{pt3dadd(151824.000000,215052.000000,55975.000000,222.679557)}
{pt3dadd(151908.000000,214764.000000,55850.000000,244.746900)}
{pt3dadd(151980.000000,214584.000000,55625.000000,266.814243)}
{pt3dadd(151932.000000,214416.000000,55500.000000,288.881586)}
{pt3dadd(151968.000000,214224.000000,55500.000000,303.325664)}
{pt3dadd(152040.000000,214056.000000,55475.000000,317.769741)}
{pt3dadd(152160.000000,213888.000000,55450.000000,332.213819)}
{pt3dadd(152268.000000,213708.000000,55275.000000,346.657896)}
{pt3dadd(152400.000000,213528.000000,55050.000000,346.657896)}
{pt3dadd(152556.000000,213384.000000,54775.000000,346.657896)}
{pt3dadd(152628.000000,213204.000000,54650.000000,346.657896)}
{pt3dadd(152580.000000,213120.000000,54350.000000,346.657896)}
{pt3dadd(152604.000000,213036.000000,54075.000000,301.787631)}
{pt3dadd(152688.000000,212832.000000,53775.000000,256.917366)}
{pt3dadd(152772.000000,212580.000000,53575.000000,212.047101)}
{pt3dadd(152928.000000,212328.000000,53400.000000,167.176836)}
{pt3dadd(153000.000000,212004.000000,53225.000000,185.566288)}
{pt3dadd(153096.000000,211812.000000,53050.000000,203.955741)}
{pt3dadd(153108.000000,211728.000000,52800.000000,222.345193)}
{pt3dadd(153036.000000,211512.000000,52575.000000,240.734646)}
{pt3dadd(153192.000000,211428.000000,52500.000000,230.704038)}
{pt3dadd(153192.000000,211296.000000,52400.000000,220.673430)}
{pt3dadd(153276.000000,211128.000000,52300.000000,210.642822)}
{pt3dadd(153312.000000,210984.000000,52225.000000,200.612214)}
{pt3dadd(153360.000000,210840.000000,52200.000000,179.482918)}
{pt3dadd(153492.000000,210708.000000,52125.000000,158.353623)}
{pt3dadd(153504.000000,210576.000000,52050.000000,137.224328)}
{pt3dadd(153468.000000,210432.000000,52075.000000,116.095032)}
{pt3dadd(153564.000000,210300.000000,51950.000000,114.934082)}
{pt3dadd(153600.000000,210168.000000,51825.000000,113.773131)}
{pt3dadd(153636.000000,210036.000000,51750.000000,112.612180)}
{pt3dadd(153972.000000,209604.000000,51750.000000,111.451230)}
{pt3dadd(154020.000000,209304.000000,51750.000000,67.184640)}

{create adhoc137}
{access adhoc137}
{connect adhoc137(1), adhoc135(0)}
{nseg = 1}
{strdef color color = "White"}
{pt3dclear()}
{pt3dadd(153000.000000,218556.000000,60825.000000,599.024880)}
{pt3dadd(152928.000000,218376.000000,60675.000000,599.024880)}
{pt3dadd(152868.000000,218160.000000,60650.000000,621.787828)}
{pt3dadd(152928.000000,217920.000000,60550.000000,644.550777)}
{pt3dadd(152940.000000,217692.000000,60425.000000,667.313725)}
{pt3dadd(152940.000000,217488.000000,60300.000000,690.076674)}
{pt3dadd(152940.000000,217284.000000,60225.000000,667.313725)}
{pt3dadd(152988.000000,217104.000000,60150.000000,644.550777)}
{pt3dadd(152976.000000,216924.000000,60150.000000,621.787828)}
{pt3dadd(152976.000000,216720.000000,60150.000000,599.024880)}
{pt3dadd(153060.000000,216516.000000,60100.000000,599.024880)}
{pt3dadd(153108.000000,216264.000000,59975.000000,599.024880)}
{pt3dadd(153132.000000,216048.000000,59875.000000,599.024880)}
{pt3dadd(153192.000000,215832.000000,59700.000000,599.024880)}
{pt3dadd(153216.000000,215604.000000,59675.000000,599.024880)}
{pt3dadd(153264.000000,215364.000000,59600.000000,599.024880)}
{pt3dadd(153312.000000,215184.000000,59525.000000,599.024880)}
{pt3dadd(153324.000000,215040.000000,59450.000000,599.024880)}
{pt3dadd(153348.000000,214836.000000,59425.000000,593.034624)}
{pt3dadd(153432.000000,214632.000000,59400.000000,587.044368)}
{pt3dadd(153492.000000,214440.000000,59375.000000,581.054112)}
{pt3dadd(153468.000000,214260.000000,59300.000000,575.063856)}
{pt3dadd(153492.000000,214104.000000,59225.000000,581.054112)}
{pt3dadd(153480.000000,213924.000000,59225.000000,587.044368)}
{pt3dadd(153444.000000,213732.000000,59225.000000,593.034624)}
{pt3dadd(153456.000000,213540.000000,59225.000000,599.024880)}
{pt3dadd(153528.000000,213324.000000,59150.000000,593.034624)}
{pt3dadd(153516.000000,213072.000000,59075.000000,587.044368)}
{pt3dadd(153564.000000,212820.000000,58925.000000,581.054112)}
{pt3dadd(153612.000000,212592.000000,58825.000000,575.063856)}
{pt3dadd(153636.000000,212376.000000,58775.000000,556.094736)}
{pt3dadd(153624.000000,212160.000000,58775.000000,537.125616)}
{pt3dadd(153612.000000,211956.000000,58775.000000,518.156496)}
{pt3dadd(153600.000000,211788.000000,58775.000000,499.187376)}
{pt3dadd(153588.000000,211608.000000,58775.000000,524.146752)}
{pt3dadd(153576.000000,211428.000000,58750.000000,549.106128)}
{pt3dadd(153588.000000,211248.000000,58725.000000,574.065504)}
{pt3dadd(153684.000000,211044.000000,58700.000000,599.024880)}
{pt3dadd(153732.000000,210840.000000,58700.000000,593.034624)}
{pt3dadd(153732.000000,210648.000000,58700.000000,587.044368)}
{pt3dadd(153732.000000,210468.000000,58700.000000,581.054112)}
{pt3dadd(153708.000000,210216.000000,58675.000000,575.063856)}
{pt3dadd(153720.000000,210000.000000,58600.000000,611.005347)}
{pt3dadd(153780.000000,209784.000000,58525.000000,646.946838)}
{pt3dadd(153828.000000,209568.000000,58500.000000,682.888329)}
{pt3dadd(153888.000000,209328.000000,58475.000000,718.829820)}
{pt3dadd(153936.000000,209088.000000,58450.000000,682.888329)}
{pt3dadd(154056.000000,208860.000000,58425.000000,646.946838)}
{pt3dadd(154128.000000,208656.000000,58375.000000,611.005347)}
{pt3dadd(154200.000000,208440.000000,58325.000000,575.063856)}
{pt3dadd(154200.000000,208224.000000,58250.000000,611.005347)}
{pt3dadd(154272.000000,207936.000000,58225.000000,646.946838)}
{pt3dadd(154368.000000,207732.000000,58150.000000,682.888329)}
{pt3dadd(154380.000000,207504.000000,58075.000000,718.829820)}
{pt3dadd(154440.000000,207300.000000,57975.000000,688.878585)}
{pt3dadd(154500.000000,207084.000000,57875.000000,658.927350)}
{pt3dadd(154560.000000,206880.000000,57775.000000,628.976115)}
{pt3dadd(154608.000000,206700.000000,57725.000000,599.024880)}
{pt3dadd(154584.000000,206460.000000,57700.000000,599.024880)}
{pt3dadd(154668.000000,206220.000000,57675.000000,599.024880)}
{pt3dadd(154824.000000,206016.000000,57600.000000,599.024880)}
{pt3dadd(154992.000000,205824.000000,57650.000000,599.024880)}
{pt3dadd(155052.000000,205584.000000,57675.000000,599.024880)}
{pt3dadd(155208.000000,205368.000000,57700.000000,599.024880)}
{pt3dadd(155352.000000,205140.000000,57675.000000,599.024880)}
{pt3dadd(155376.000000,204948.000000,57650.000000,599.024880)}
{pt3dadd(155448.000000,204732.000000,57750.000000,599.024880)}
{pt3dadd(155460.000000,204516.000000,57725.000000,599.024880)}
{pt3dadd(155472.000000,204312.000000,57700.000000,599.024880)}
{pt3dadd(155484.000000,204096.000000,57675.000000,599.024880)}
{pt3dadd(155556.000000,203868.000000,57600.000000,549.106128)}
{pt3dadd(155652.000000,203652.000000,57450.000000,499.187376)}
{pt3dadd(155736.000000,203460.000000,57375.000000,529.978896)}

{create adhoc138}
{access adhoc138}
{connect adhoc138(1), adhoc137(0)}
{nseg = 1}
{strdef color color = "White"}
{pt3dclear()}
{pt3dadd(155736.000000,203460.000000,57375.000000,529.978896)}
{pt3dadd(155184.000000,203472.000000,58275.000000,240.734646)}
{pt3dadd(155136.000000,203520.000000,58575.000000,240.734646)}
{pt3dadd(154932.000000,203520.000000,58800.000000,240.734646)}
{pt3dadd(154920.000000,202860.000000,59125.000000,240.734646)}
{pt3dadd(154860.000000,202332.000000,59325.000000,240.734646)}

{create adhoc139}
{access adhoc139}
{connect adhoc139(1), adhoc138(0)}
{nseg = 1}
{strdef color color = "White"}
{pt3dclear()}
{pt3dadd(154860.000000,202332.000000,59325.000000,240.734646)}
{pt3dadd(154920.000000,201912.000000,59575.000000,240.734646)}
{pt3dadd(154992.000000,201576.000000,59775.000000,222.345193)}
{pt3dadd(155028.000000,201204.000000,60025.000000,203.955741)}
{pt3dadd(155124.000000,200856.000000,60150.000000,185.566288)}
{pt3dadd(155388.000000,200472.000000,60300.000000,167.176836)}
{pt3dadd(155628.000000,200328.000000,60275.000000,185.566288)}
{pt3dadd(155772.000000,200172.000000,60275.000000,203.955741)}
{pt3dadd(155844.000000,200004.000000,60300.000000,222.345193)}
{pt3dadd(155940.000000,199860.000000,60325.000000,240.734646)}
{pt3dadd(156072.000000,199680.000000,60500.000000,236.016248)}
{pt3dadd(156216.000000,199524.000000,60475.000000,231.297849)}
{pt3dadd(156756.000000,198744.000000,60475.000000,226.579451)}
{pt3dadd(156960.000000,198588.000000,60575.000000,221.861052)}
{pt3dadd(157116.000000,198396.000000,60600.000000,216.548843)}
{pt3dadd(157152.000000,198228.000000,60625.000000,211.236633)}
{pt3dadd(157188.000000,198084.000000,60575.000000,205.924423)}
{pt3dadd(157224.000000,197952.000000,60500.000000,200.612214)}
{pt3dadd(157236.000000,197820.000000,60450.000000,210.642822)}
{pt3dadd(157260.000000,197676.000000,60400.000000,220.673430)}
{pt3dadd(157296.000000,197532.000000,60375.000000,230.704038)}
{pt3dadd(157308.000000,197388.000000,60300.000000,240.734646)}
{pt3dadd(157320.000000,197256.000000,60225.000000,233.797640)}
{pt3dadd(157368.000000,197136.000000,60275.000000,226.860633)}
{pt3dadd(157440.000000,197004.000000,60300.000000,219.923626)}
{pt3dadd(157464.000000,196884.000000,60300.000000,212.986620)}
{pt3dadd(157488.000000,196716.000000,60275.000000,231.960361)}
{pt3dadd(157524.000000,196548.000000,60300.000000,250.934103)}
{pt3dadd(157536.000000,196392.000000,60250.000000,269.907845)}
{pt3dadd(157584.000000,196236.000000,60225.000000,288.881586)}
{pt3dadd(157644.000000,196080.000000,60250.000000,303.325664)}
{pt3dadd(157716.000000,195900.000000,60200.000000,317.769741)}
{pt3dadd(157788.000000,195732.000000,60150.000000,332.213819)}
{pt3dadd(157800.000000,195564.000000,60025.000000,346.657896)}
{pt3dadd(157836.000000,195396.000000,60000.000000,332.213819)}
{pt3dadd(157824.000000,195216.000000,59925.000000,317.769741)}
{pt3dadd(157860.000000,195072.000000,59725.000000,303.325664)}
{pt3dadd(157848.000000,194928.000000,59650.000000,288.881586)}
{pt3dadd(157884.000000,194784.000000,59700.000000,276.844851)}
{pt3dadd(157836.000000,194640.000000,59675.000000,264.808116)}
{pt3dadd(157884.000000,194448.000000,59300.000000,252.771381)}
{pt3dadd(158124.000000,194232.000000,59050.000000,240.734646)}
{pt3dadd(158424.000000,193788.000000,58750.000000,240.734646)}
{pt3dadd(158772.000000,193248.000000,58475.000000,240.734646)}
{pt3dadd(158772.000000,192792.000000,58175.000000,240.734646)}
{pt3dadd(158784.000000,192612.000000,58125.000000,240.734646)}
{pt3dadd(158940.000000,192384.000000,58050.000000,230.704038)}
{pt3dadd(159084.000000,192192.000000,57975.000000,220.673430)}
{pt3dadd(159144.000000,191988.000000,57925.000000,210.642822)}
{pt3dadd(159276.000000,191832.000000,57875.000000,200.612214)}
{pt3dadd(159384.000000,191676.000000,57825.000000,200.612214)}
{pt3dadd(159492.000000,191508.000000,57800.000000,200.612214)}
{pt3dadd(159624.000000,191340.000000,57775.000000,200.612214)}
{pt3dadd(159804.000000,190788.000000,57550.000000,200.612214)}
{pt3dadd(159936.000000,190260.000000,57275.000000,200.612214)}
{pt3dadd(160164.000000,189360.000000,56975.000000,200.612214)}
{pt3dadd(160104.000000,188952.000000,56725.000000,167.176836)}

{create adhoc140}
{access adhoc140}
{connect adhoc140(1), adhoc138(0)}
{nseg = 1}
{strdef color color = "White"}
{pt3dclear()}
{pt3dadd(154860.000000,202332.000000,59325.000000,240.734646)}
{pt3dadd(154716.000000,203076.000000,59375.000000,192.587724)}
{pt3dadd(154740.000000,203232.000000,59375.000000,240.734646)}

{create adhoc141}
{access adhoc141}
{connect adhoc141(1), adhoc137(0)}
{nseg = 1}
{strdef color color = "White"}
{pt3dclear()}
{pt3dadd(155736.000000,203460.000000,57375.000000,529.978896)}
{pt3dadd(155952.000000,203304.000000,56950.000000,415.989486)}
{pt3dadd(156048.000000,203124.000000,56900.000000,436.788958)}
{pt3dadd(156204.000000,202932.000000,56675.000000,457.588431)}
{pt3dadd(156216.000000,202752.000000,56600.000000,478.387903)}
{pt3dadd(156204.000000,202536.000000,56525.000000,499.187376)}
{pt3dadd(156204.000000,202356.000000,56525.000000,478.387903)}
{pt3dadd(156252.000000,202152.000000,56450.000000,457.588431)}
{pt3dadd(156300.000000,201936.000000,56300.000000,436.788958)}
{pt3dadd(156348.000000,201732.000000,56200.000000,415.989486)}
{pt3dadd(156504.000000,201552.000000,56150.000000,415.989486)}
{pt3dadd(156588.000000,201336.000000,56125.000000,415.989486)}
{pt3dadd(156672.000000,201144.000000,56075.000000,415.989486)}
{pt3dadd(156744.000000,200952.000000,55925.000000,415.989486)}
{pt3dadd(156792.000000,200736.000000,55775.000000,436.788958)}
{pt3dadd(156696.000000,200508.000000,55600.000000,457.588431)}
{pt3dadd(156840.000000,200316.000000,55400.000000,478.387903)}
{pt3dadd(156900.000000,200124.000000,55225.000000,499.187376)}
{pt3dadd(156924.000000,199932.000000,55150.000000,478.387903)}
{pt3dadd(156972.000000,199740.000000,54975.000000,457.588431)}
{pt3dadd(156948.000000,199560.000000,54925.000000,436.788958)}
{pt3dadd(156876.000000,199356.000000,54775.000000,415.989486)}
{pt3dadd(156840.000000,199164.000000,54600.000000,346.657896)}

{create adhoc142}
{access adhoc142}
{connect adhoc142(1), adhoc141(0)}
{nseg = 1}
{strdef color color = "White"}
{pt3dclear()}
{pt3dadd(156840.000000,199164.000000,54600.000000,346.657896)}
{pt3dadd(156684.000000,199008.000000,54325.000000,332.791596)}
{pt3dadd(156516.000000,198816.000000,54025.000000,332.791596)}
{pt3dadd(156372.000000,198624.000000,53750.000000,332.791596)}
{pt3dadd(156336.000000,198432.000000,53550.000000,332.791596)}
{pt3dadd(156072.000000,198312.000000,53225.000000,332.791596)}
{pt3dadd(155916.000000,198144.000000,52950.000000,353.591069)}
{pt3dadd(155856.000000,198096.000000,52625.000000,374.390541)}
{pt3dadd(155724.000000,197856.000000,52325.000000,395.190014)}
{pt3dadd(155664.000000,197700.000000,51950.000000,415.989486)}
{pt3dadd(155616.000000,197640.000000,51625.000000,388.256856)}
{pt3dadd(155592.000000,197472.000000,51275.000000,360.524226)}
{pt3dadd(155616.000000,197292.000000,50925.000000,332.791596)}
{pt3dadd(155760.000000,196920.000000,50575.000000,288.881586)}

{create adhoc143}
{access adhoc143}
{connect adhoc143(1), adhoc142(0)}
{nseg = 1}
{strdef color color = "White"}
{pt3dclear()}
{pt3dadd(155760.000000,196920.000000,50575.000000,288.881586)}
{pt3dadd(155868.000000,196740.000000,50200.000000,160.489764)}
{pt3dadd(155592.000000,196608.000000,49925.000000,192.587720)}
{pt3dadd(155472.000000,196344.000000,49600.000000,224.685675)}
{pt3dadd(155400.000000,196056.000000,49300.000000,256.783631)}
{pt3dadd(155376.000000,195924.000000,49000.000000,288.881586)}
{pt3dadd(155316.000000,195588.000000,48675.000000,276.844851)}
{pt3dadd(155424.000000,195276.000000,48325.000000,264.808116)}
{pt3dadd(155544.000000,195108.000000,48000.000000,252.771381)}
{pt3dadd(155472.000000,195048.000000,47725.000000,240.734646)}
{pt3dadd(155412.000000,195024.000000,47450.000000,240.734646)}
{pt3dadd(155472.000000,194856.000000,47075.000000,240.734646)}
{pt3dadd(155604.000000,194808.000000,46750.000000,240.734646)}
{pt3dadd(155784.000000,194664.000000,46475.000000,240.734646)}
{pt3dadd(155796.000000,194580.000000,46125.000000,252.771381)}
{pt3dadd(155892.000000,194460.000000,45825.000000,264.808116)}
{pt3dadd(155964.000000,194112.000000,45575.000000,276.844851)}
{pt3dadd(156096.000000,193944.000000,45325.000000,288.881586)}
{pt3dadd(156240.000000,193884.000000,45000.000000,266.814243)}
{pt3dadd(156516.000000,193668.000000,44725.000000,244.746900)}
{pt3dadd(156756.000000,193392.000000,44375.000000,222.679557)}
{pt3dadd(156840.000000,192876.000000,44050.000000,200.612214)}
{pt3dadd(156924.000000,192444.000000,43850.000000,200.612214)}
{pt3dadd(157056.000000,192108.000000,43600.000000,200.612214)}
{pt3dadd(157092.000000,191940.000000,43650.000000,200.612214)}
{pt3dadd(157068.000000,191772.000000,43650.000000,200.612214)}
{pt3dadd(157080.000000,191604.000000,43650.000000,200.612214)}
{pt3dadd(157176.000000,191436.000000,43600.000000,200.612214)}
{pt3dadd(157308.000000,191256.000000,43550.000000,200.612214)}
{pt3dadd(157428.000000,191088.000000,43575.000000,200.612214)}
{pt3dadd(157440.000000,190908.000000,43625.000000,158.353623)}
{pt3dadd(157440.000000,190740.000000,43675.000000,116.095032)}
{pt3dadd(157440.000000,190596.000000,43725.000000,67.184640)}

{create adhoc144}
{access adhoc144}
{connect adhoc144(1), adhoc142(0)}
{nseg = 1}
{strdef color color = "White"}
{pt3dclear()}
{pt3dadd(155760.000000,196920.000000,50575.000000,288.881586)}
{pt3dadd(156216.000000,195216.000000,50575.000000,240.734646)}
{pt3dadd(156216.000000,195060.000000,50450.000000,252.771381)}
{pt3dadd(156144.000000,194892.000000,50450.000000,264.808116)}
{pt3dadd(156108.000000,194712.000000,50525.000000,276.844851)}
{pt3dadd(156036.000000,194556.000000,50600.000000,288.881586)}
{pt3dadd(155952.000000,194388.000000,50625.000000,264.808116)}
{pt3dadd(155868.000000,194220.000000,50625.000000,240.734646)}
{pt3dadd(155844.000000,194052.000000,50650.000000,288.881586)}

{create adhoc145}
{access adhoc145}
{connect adhoc145(1), adhoc144(0)}
{nseg = 1}
{strdef color color = "White"}
{pt3dclear()}
{pt3dadd(155844.000000,194052.000000,50650.000000,288.881586)}
{pt3dadd(155880.000000,193872.000000,50625.000000,288.881586)}
{pt3dadd(155892.000000,193692.000000,50600.000000,276.844851)}
{pt3dadd(155904.000000,193524.000000,50500.000000,264.808116)}
{pt3dadd(155880.000000,193368.000000,50450.000000,252.771381)}
{pt3dadd(155856.000000,193188.000000,50450.000000,240.734646)}
{pt3dadd(155880.000000,193056.000000,50425.000000,267.215459)}
{pt3dadd(155880.000000,192876.000000,50400.000000,293.696271)}
{pt3dadd(155868.000000,192708.000000,50400.000000,320.177083)}
{pt3dadd(155832.000000,192528.000000,50450.000000,346.657896)}
{pt3dadd(155808.000000,192336.000000,50450.000000,333.601596)}
{pt3dadd(155712.000000,192144.000000,50475.000000,320.545296)}
{pt3dadd(155616.000000,191940.000000,50500.000000,307.488996)}
{pt3dadd(155520.000000,191760.000000,50525.000000,294.432696)}
{pt3dadd(155556.000000,191580.000000,50525.000000,281.008184)}
{pt3dadd(155544.000000,191400.000000,50550.000000,267.583671)}
{pt3dadd(155520.000000,191220.000000,50525.000000,254.159159)}
{pt3dadd(155520.000000,191040.000000,50475.000000,240.734646)}
{pt3dadd(155496.000000,190860.000000,50425.000000,230.704038)}
{pt3dadd(155460.000000,190692.000000,50375.000000,220.673430)}
{pt3dadd(155400.000000,190512.000000,50325.000000,210.642822)}
{pt3dadd(155376.000000,190332.000000,50300.000000,200.612214)}
{pt3dadd(155400.000000,190188.000000,50275.000000,254.456532)}
{pt3dadd(155388.000000,190008.000000,50225.000000,308.300850)}
{pt3dadd(155460.000000,189840.000000,50275.000000,362.145168)}
{pt3dadd(155472.000000,189684.000000,50400.000000,415.989486)}
{pt3dadd(155568.000000,189516.000000,50550.000000,372.175776)}
{pt3dadd(155712.000000,189372.000000,50600.000000,328.362066)}
{pt3dadd(155748.000000,189204.000000,50600.000000,284.548356)}
{pt3dadd(155772.000000,189024.000000,50625.000000,240.734646)}
{pt3dadd(155868.000000,188844.000000,50775.000000,236.016248)}
{pt3dadd(155988.000000,188688.000000,50875.000000,231.297849)}
{pt3dadd(156036.000000,188532.000000,50950.000000,226.579451)}
{pt3dadd(156108.000000,188364.000000,50925.000000,221.861052)}
{pt3dadd(156204.000000,188196.000000,50900.000000,208.189998)}
{pt3dadd(156336.000000,188052.000000,50925.000000,194.518944)}
{pt3dadd(156456.000000,187908.000000,50925.000000,180.847890)}
{pt3dadd(156504.000000,187752.000000,50950.000000,167.176836)}
{pt3dadd(156804.000000,187308.000000,51000.000000,154.406385)}
{pt3dadd(156876.000000,187152.000000,50875.000000,141.635934)}
{pt3dadd(156972.000000,186996.000000,50850.000000,128.865483)}
{pt3dadd(156804.000000,187032.000000,50625.000000,116.095032)}
{pt3dadd(156984.000000,186636.000000,50475.000000,121.899785)}
{pt3dadd(157080.000000,186204.000000,50350.000000,127.704537)}
{pt3dadd(157152.000000,185820.000000,50225.000000,133.509289)}
{pt3dadd(157116.000000,185544.000000,50075.000000,139.314042)}
{pt3dadd(157080.000000,185496.000000,49900.000000,116.095032)}

{create adhoc146}
{access adhoc146}
{connect adhoc146(1), adhoc144(0)}
{nseg = 1}
{strdef color color = "White"}
{pt3dclear()}
{pt3dadd(155844.000000,194052.000000,50650.000000,288.881586)}
{pt3dadd(155208.000000,193920.000000,50575.000000,133.741476)}
{pt3dadd(154812.000000,193992.000000,50650.000000,94.864338)}
{pt3dadd(154584.000000,194088.000000,50725.000000,55.987200)}
{pt3dadd(154500.000000,194196.000000,50725.000000,46.656000)}

{create adhoc147}
{access adhoc147}
{connect adhoc147(1), adhoc141(0)}
{nseg = 1}
{strdef color color = "White"}
{pt3dclear()}
{pt3dadd(156840.000000,199164.000000,54600.000000,346.657896)}
{pt3dadd(156888.000000,199116.000000,55375.000000,133.741476)}
{pt3dadd(156732.000000,199032.000000,55600.000000,120.461494)}
{pt3dadd(156720.000000,198888.000000,55675.000000,107.181513)}
{pt3dadd(156624.000000,198744.000000,55725.000000,93.901532)}
{pt3dadd(156468.000000,198600.000000,55600.000000,80.621550)}
{pt3dadd(156360.000000,198432.000000,55550.000000,109.967796)}
{pt3dadd(156228.000000,198348.000000,55650.000000,139.314042)}
{pt3dadd(156096.000000,198156.000000,55675.000000,167.176836)}
