# Supplementary material for: Full reconstruction of large lobula plate tangential cells in Drosophila from a 3D EM dataset
Source: PLoS One. 2018 Nov 28;13(11):e0207828. doi: 10.1371/journal.pone.0207828 (PMC6261601; doi:10.1371/journal.pone.0207828)
Supplement: S1 Dataset — (ZIP) [file pone.0207828.s001.zip › Diameter hoc/VS_VSL_preliminary/Old Diameters Mar13_VS_VSL_HS/VS6/2_14_734_smaurer_001.012.hoc]

/* created with nml2hocm */

{create adhoc1}
{access adhoc1}
{nseg = 1}
{strdef color color = "White"}
{pt3dclear()}
{pt3dadd(184488.000000,192768.000000,73625.000000,116.095032)}
{pt3dadd(184116.000000,193092.000000,73500.000000,67.184640)}
{pt3dadd(184260.000000,193176.000000,73575.000000,110.572142)}
{pt3dadd(184476.000000,193320.000000,73575.000000,153.959643)}
{pt3dadd(184656.000000,193776.000000,73050.000000,197.347145)}
{pt3dadd(185088.000000,194112.000000,72375.000000,240.734646)}
{pt3dadd(185004.000000,194544.000000,72525.000000,288.881586)}

{create adhoc2}
{access adhoc2}
{connect adhoc2(1), adhoc1(0)}
{nseg = 1}
{strdef color color = "White"}
{pt3dclear()}
{pt3dadd(185004.000000,194544.000000,72525.000000,288.881586)}
{pt3dadd(184956.000000,194112.000000,72150.000000,167.176836)}
{pt3dadd(184572.000000,193776.000000,71650.000000,203.955741)}
{pt3dadd(184344.000000,193404.000000,71100.000000,240.734646)}
{pt3dadd(184140.000000,193116.000000,70575.000000,346.657896)}

{create adhoc3}
{access adhoc3}
{connect adhoc3(1), adhoc2(0)}
{nseg = 1}
{strdef color color = "White"}
{pt3dclear()}
{pt3dadd(184140.000000,193116.000000,70575.000000,346.657896)}
{pt3dadd(182844.000000,193236.000000,70625.000000,116.095032)}

{create adhoc4}
{access adhoc4}
{connect adhoc4(1), adhoc2(0)}
{nseg = 1}
{strdef color color = "White"}
{pt3dclear()}
{pt3dadd(184140.000000,193116.000000,70575.000000,346.657896)}
{pt3dadd(184188.000000,192396.000000,69900.000000,346.657896)}
{pt3dadd(184080.000000,192036.000000,69625.000000,289.017180)}
{pt3dadd(184056.000000,191832.000000,69350.000000,231.376464)}
{pt3dadd(183660.000000,192156.000000,69300.000000,173.735748)}
{pt3dadd(183564.000000,192144.000000,69250.000000,116.095032)}
{pt3dadd(183384.000000,192264.000000,69075.000000,80.621550)}
{pt3dadd(183264.000000,192276.000000,69000.000000,80.621550)}

{create adhoc5}
{access adhoc5}
{connect adhoc5(1), adhoc1(0)}
{nseg = 1}
{strdef color color = "White"}
{pt3dclear()}
{pt3dadd(185004.000000,194544.000000,72525.000000,288.881586)}
{pt3dadd(185208.000000,194868.000000,72450.000000,288.881586)}
{pt3dadd(185184.000000,196068.000000,73175.000000,479.219886)}
{pt3dadd(185064.000000,196848.000000,74050.000000,531.934065)}
{pt3dadd(184920.000000,197040.000000,74925.000000,584.648244)}
{pt3dadd(184872.000000,196644.000000,75550.000000,637.362423)}
{pt3dadd(184860.000000,196476.000000,76225.000000,690.076602)}
{pt3dadd(185016.000000,196716.000000,76950.000000,621.554823)}
{pt3dadd(185064.000000,196848.000000,77575.000000,553.033044)}
{pt3dadd(184932.000000,197136.000000,78000.000000,484.511265)}
{pt3dadd(185184.000000,197364.000000,78575.000000,415.989486)}
{pt3dadd(185328.000000,197916.000000,79325.000000,346.820625)}
{pt3dadd(185556.000000,198456.000000,79900.000000,277.651764)}
{pt3dadd(185304.000000,198960.000000,80150.000000,208.482903)}
{pt3dadd(184896.000000,199860.000000,80425.000000,139.314042)}
{pt3dadd(184788.000000,201480.000000,81200.000000,346.657896)}

{create adhoc6}
{access adhoc6}
{connect adhoc6(1), adhoc5(0)}
{nseg = 1}
{strdef color color = "White"}
{pt3dclear()}
{pt3dadd(184788.000000,201480.000000,81200.000000,346.657896)}
{pt3dadd(183600.000000,201624.000000,81425.000000,116.095032)}
{pt3dadd(183444.000000,201624.000000,81400.000000,107.226662)}
{pt3dadd(183144.000000,201708.000000,81375.000000,98.358291)}
{pt3dadd(182424.000000,202440.000000,81525.000000,89.489920)}
{pt3dadd(182388.000000,202764.000000,81450.000000,80.621550)}
{pt3dadd(182292.000000,203088.000000,81475.000000,100.185714)}
{pt3dadd(182052.000000,203388.000000,81675.000000,119.749878)}
{pt3dadd(181908.000000,203544.000000,81875.000000,139.314042)}
{pt3dadd(181716.000000,203688.000000,82000.000000,96.745860)}

{create adhoc7}
{access adhoc7}
{connect adhoc7(1), adhoc5(0)}
{nseg = 1}
{strdef color color = "White"}
{pt3dclear()}
{pt3dadd(184788.000000,201480.000000,81200.000000,346.657896)}
{pt3dadd(184800.000000,202152.000000,81800.000000,415.989486)}
{pt3dadd(184512.000000,203100.000000,82425.000000,357.571206)}
{pt3dadd(183948.000000,203772.000000,83000.000000,299.152926)}
{pt3dadd(184188.000000,204312.000000,83475.000000,240.734646)}
{pt3dadd(184464.000000,204816.000000,83900.000000,240.734646)}
{pt3dadd(184632.000000,205440.000000,84425.000000,240.734646)}
{pt3dadd(184740.000000,205692.000000,84625.000000,240.734646)}
{pt3dadd(185196.000000,206220.000000,85075.000000,240.734646)}
{pt3dadd(185028.000000,206652.000000,85450.000000,499.187376)}

{create adhoc8}
{access adhoc8}
{connect adhoc8(1), adhoc7(0)}
{nseg = 1}
{strdef color color = "White"}
{pt3dclear()}
{pt3dadd(185028.000000,206652.000000,85450.000000,499.187376)}
{pt3dadd(182676.000000,207324.000000,85075.000000,116.095032)}
{pt3dadd(182340.000000,207300.000000,85150.000000,98.358291)}
{pt3dadd(182100.000000,207312.000000,85050.000000,80.621550)}
{pt3dadd(181740.000000,207444.000000,84850.000000,80.621550)}

{create adhoc9}
{access adhoc9}
{connect adhoc9(1), adhoc7(0)}
{nseg = 1}
{strdef color color = "White"}
{pt3dclear()}
{pt3dadd(185028.000000,206652.000000,85450.000000,499.187376)}
{pt3dadd(182724.000000,207912.000000,81700.000000,828.092016)}
{pt3dadd(182520.000000,208080.000000,81050.000000,879.847749)}
{pt3dadd(182424.000000,208140.000000,80325.000000,931.603482)}
{pt3dadd(182028.000000,208416.000000,79550.000000,983.359215)}
{pt3dadd(181548.000000,208632.000000,78750.000000,1035.114948)}
{pt3dadd(181284.000000,208764.000000,77975.000000,862.595802)}

{create adhoc10}
{access adhoc10}
{connect adhoc10(1), adhoc9(0)}
{nseg = 1}
{strdef color color = "White"}
{pt3dclear()}
{pt3dadd(181284.000000,208764.000000,77975.000000,862.595802)}
{pt3dadd(180588.000000,208956.000000,77225.000000,718.829820)}
{pt3dadd(179892.000000,209460.000000,76775.000000,599.024880)}

{create adhoc11}
{access adhoc11}
{connect adhoc11(1), adhoc10(0)}
{nseg = 1}
{strdef color color = "White"}
{pt3dclear()}
{pt3dadd(179892.000000,209460.000000,76775.000000,599.024880)}
{pt3dadd(178416.000000,210360.000000,77150.000000,116.095032)}
{pt3dadd(178080.000000,210996.000000,77525.000000,137.224328)}
{pt3dadd(177852.000000,210996.000000,77500.000000,158.353623)}
{pt3dadd(177576.000000,211092.000000,77675.000000,179.482918)}
{pt3dadd(177696.000000,211488.000000,77800.000000,200.612214)}
{pt3dadd(177684.000000,211788.000000,77925.000000,174.645625)}
{pt3dadd(177504.000000,211908.000000,78200.000000,148.679037)}
{pt3dadd(177288.000000,212220.000000,78050.000000,122.712448)}
{pt3dadd(177048.000000,212520.000000,78125.000000,96.745860)}
{pt3dadd(176400.000000,212808.000000,78200.000000,87.071274)}
{pt3dadd(176136.000000,212616.000000,78200.000000,77.396688)}
{pt3dadd(176052.000000,212616.000000,78225.000000,96.745860)}

{create adhoc12}
{access adhoc12}
{connect adhoc12(1), adhoc10(0)}
{nseg = 1}
{strdef color color = "White"}
{pt3dclear()}
{pt3dadd(179892.000000,209460.000000,76775.000000,599.024880)}
{pt3dadd(179172.000000,209904.000000,75975.000000,690.076674)}
{pt3dadd(178440.000000,210348.000000,74875.000000,659.726076)}
{pt3dadd(177696.000000,210288.000000,74125.000000,629.375478)}
{pt3dadd(177468.000000,209844.000000,73425.000000,599.024880)}
{pt3dadd(176976.000000,209736.000000,72600.000000,718.829820)}

{create adhoc13}
{access adhoc13}
{connect adhoc13(1), adhoc12(0)}
{nseg = 1}
{strdef color color = "White"}
{pt3dclear()}
{pt3dadd(176976.000000,209736.000000,72600.000000,718.829820)}
{pt3dadd(176820.000000,210288.000000,71600.000000,346.657896)}
{pt3dadd(176940.000000,210420.000000,71225.000000,310.146476)}
{pt3dadd(176568.000000,210828.000000,70725.000000,273.635055)}
{pt3dadd(175836.000000,211188.000000,70300.000000,237.123635)}
{pt3dadd(175272.000000,211752.000000,69900.000000,200.612214)}
{pt3dadd(174576.000000,211920.000000,69500.000000,200.612214)}
{pt3dadd(173628.000000,211980.000000,68950.000000,200.612214)}
{pt3dadd(173340.000000,211428.000000,68400.000000,200.612214)}
{pt3dadd(173232.000000,210768.000000,68025.000000,200.612214)}
{pt3dadd(173436.000000,210348.000000,67600.000000,288.881586)}
{pt3dadd(173628.000000,210024.000000,67300.000000,167.176836)}

{create adhoc14}
{access adhoc14}
{connect adhoc14(1), adhoc12(0)}
{nseg = 1}
{strdef color color = "White"}
{pt3dclear()}
{pt3dadd(176976.000000,209736.000000,72600.000000,718.829820)}
{pt3dadd(176376.000000,209628.000000,71850.000000,288.881586)}
{pt3dadd(175428.000000,209244.000000,71225.000000,320.658561)}
{pt3dadd(174996.000000,208956.000000,70875.000000,352.435536)}
{pt3dadd(173796.000000,208752.000000,70500.000000,384.212511)}
{pt3dadd(173520.000000,208764.000000,70725.000000,415.989486)}
{pt3dadd(172452.000000,208668.000000,71250.000000,384.212511)}
{pt3dadd(172080.000000,208212.000000,71525.000000,352.435536)}
{pt3dadd(171696.000000,207984.000000,71375.000000,320.658561)}
{pt3dadd(171372.000000,207828.000000,71350.000000,288.881586)}
{pt3dadd(171072.000000,207732.000000,71400.000000,288.881586)}
{pt3dadd(170700.000000,207636.000000,71150.000000,288.881586)}
{pt3dadd(170436.000000,207552.000000,71000.000000,288.881586)}
{pt3dadd(170208.000000,207600.000000,70975.000000,288.881586)}
{pt3dadd(169872.000000,207744.000000,70825.000000,276.844851)}
{pt3dadd(169572.000000,207552.000000,70625.000000,264.808116)}
{pt3dadd(169224.000000,207540.000000,70475.000000,252.771381)}
{pt3dadd(168912.000000,207612.000000,70275.000000,240.734646)}
{pt3dadd(168588.000000,207456.000000,70000.000000,284.548356)}
{pt3dadd(168252.000000,207408.000000,69750.000000,328.362066)}
{pt3dadd(167904.000000,207396.000000,69500.000000,372.175776)}
{pt3dadd(167532.000000,207384.000000,69375.000000,415.989486)}
{pt3dadd(167172.000000,207192.000000,69250.000000,398.656589)}
{pt3dadd(166680.000000,207192.000000,69175.000000,381.323691)}
{pt3dadd(166416.000000,207048.000000,68850.000000,363.990794)}
{pt3dadd(166116.000000,206808.000000,68725.000000,346.657896)}
{pt3dadd(165684.000000,206832.000000,68600.000000,346.657896)}
{pt3dadd(165372.000000,206628.000000,68400.000000,346.657896)}
{pt3dadd(165000.000000,206352.000000,68150.000000,346.657896)}
{pt3dadd(164700.000000,206064.000000,67925.000000,346.657896)}
{pt3dadd(164400.000000,205776.000000,67700.000000,363.990794)}
{pt3dadd(164124.000000,205512.000000,67675.000000,381.323691)}
{pt3dadd(163848.000000,205380.000000,67625.000000,398.656589)}
{pt3dadd(163572.000000,205368.000000,67700.000000,415.989486)}
{pt3dadd(163320.000000,205140.000000,67650.000000,398.656589)}
{pt3dadd(161988.000000,204876.000000,67350.000000,381.323691)}
{pt3dadd(161496.000000,203976.000000,66750.000000,363.990794)}
{pt3dadd(160812.000000,202908.000000,66125.000000,346.657896)}
{pt3dadd(160392.000000,202872.000000,65675.000000,346.657896)}
{pt3dadd(160704.000000,202080.000000,65075.000000,415.989486)}

{create adhoc15}
{access adhoc15}
{connect adhoc15(1), adhoc14(0)}
{nseg = 1}
{strdef color color = "White"}
{pt3dclear()}
{pt3dadd(160704.000000,202080.000000,65075.000000,415.989486)}
{pt3dadd(160896.000000,200328.000000,64675.000000,288.881586)}
{pt3dadd(161028.000000,199968.000000,64525.000000,303.325664)}
{pt3dadd(161124.000000,199632.000000,64575.000000,317.769741)}
{pt3dadd(161208.000000,199296.000000,64475.000000,332.213819)}
{pt3dadd(161304.000000,198912.000000,64300.000000,346.657896)}
{pt3dadd(161292.000000,198540.000000,64000.000000,343.191321)}
{pt3dadd(161424.000000,198132.000000,63900.000000,339.724746)}
{pt3dadd(161544.000000,197796.000000,63775.000000,336.258171)}
{pt3dadd(161484.000000,197400.000000,63575.000000,332.791596)}
{pt3dadd(161616.000000,197088.000000,63375.000000,321.814093)}
{pt3dadd(161640.000000,196512.000000,62925.000000,310.836591)}
{pt3dadd(161556.000000,195540.000000,62400.000000,299.859089)}
{pt3dadd(161772.000000,194700.000000,61975.000000,288.881586)}
{pt3dadd(161880.000000,193560.000000,61150.000000,266.814243)}
{pt3dadd(161496.000000,192588.000000,60725.000000,244.746900)}
{pt3dadd(161184.000000,191208.000000,60350.000000,222.679557)}
{pt3dadd(161076.000000,190884.000000,60150.000000,200.612214)}
{pt3dadd(160752.000000,190584.000000,59775.000000,192.253370)}
{pt3dadd(160548.000000,189852.000000,59500.000000,183.894525)}
{pt3dadd(160320.000000,189156.000000,59200.000000,175.535680)}
{pt3dadd(160032.000000,188724.000000,59075.000000,167.176836)}
{pt3dadd(159768.000000,188004.000000,58700.000000,167.176836)}
{pt3dadd(160116.000000,187212.000000,58525.000000,167.176836)}
{pt3dadd(160308.000000,186888.000000,57975.000000,167.176836)}
{pt3dadd(160392.000000,186192.000000,57450.000000,167.176836)}
{pt3dadd(160668.000000,186060.000000,57100.000000,250.114386)}
{pt3dadd(160404.000000,185364.000000,55950.000000,333.051936)}
{pt3dadd(160644.000000,185148.000000,55475.000000,415.989486)}
{pt3dadd(160728.000000,184584.000000,54700.000000,399.349944)}

{create adhoc16}
{access adhoc16}
{connect adhoc16(1), adhoc14(0)}
{nseg = 1}
{strdef color color = "White"}
{pt3dclear()}
{pt3dadd(160704.000000,202080.000000,65075.000000,415.989486)}
{pt3dadd(159984.000000,202356.000000,64300.000000,346.657896)}
{pt3dadd(159708.000000,201876.000000,63475.000000,320.177083)}
{pt3dadd(159396.000000,201540.000000,63050.000000,293.696271)}
{pt3dadd(159036.000000,201408.000000,62750.000000,267.215459)}
{pt3dadd(158832.000000,201096.000000,62200.000000,240.734646)}
{pt3dadd(158520.000000,201000.000000,61675.000000,222.345193)}
{pt3dadd(158112.000000,200736.000000,61100.000000,203.955741)}
{pt3dadd(157536.000000,200760.000000,60325.000000,185.566288)}
{pt3dadd(157512.000000,200580.000000,60075.000000,167.176836)}
{pt3dadd(157404.000000,200496.000000,59850.000000,160.211138)}
{pt3dadd(157080.000000,200256.000000,59450.000000,153.245439)}
{pt3dadd(156924.000000,200076.000000,59150.000000,146.279741)}
{pt3dadd(156732.000000,200076.000000,59150.000000,139.314042)}
{pt3dadd(156588.000000,199884.000000,58850.000000,152.632463)}
{pt3dadd(156156.000000,199848.000000,58650.000000,165.950883)}
{pt3dadd(155832.000000,199644.000000,58400.000000,179.269304)}
{pt3dadd(155640.000000,199524.000000,58175.000000,192.587724)}
{pt3dadd(155304.000000,199464.000000,57750.000000,231.105267)}
{pt3dadd(154992.000000,199212.000000,57300.000000,269.622810)}
{pt3dadd(154872.000000,199092.000000,56925.000000,308.140353)}
{pt3dadd(154968.000000,198768.000000,56600.000000,346.657896)}
{pt3dadd(155004.000000,198540.000000,56275.000000,310.146476)}
{pt3dadd(154716.000000,198684.000000,55775.000000,273.635055)}
{pt3dadd(154728.000000,198588.000000,54950.000000,237.123635)}
{pt3dadd(154608.000000,198396.000000,54725.000000,200.612214)}
{pt3dadd(154512.000000,197928.000000,54175.000000,288.881586)}

{create adhoc17}
{access adhoc17}
{connect adhoc17(1), adhoc9(0)}
{nseg = 1}
{strdef color color = "White"}
{pt3dclear()}
{pt3dadd(181284.000000,208764.000000,77975.000000,862.595802)}
{pt3dadd(180276.000000,206976.000000,77300.000000,167.176836)}
{pt3dadd(180588.000000,206028.000000,77150.000000,142.178787)}
{pt3dadd(180828.000000,205392.000000,77325.000000,117.180738)}
{pt3dadd(180864.000000,205188.000000,77325.000000,92.182689)}
{pt3dadd(181020.000000,205104.000000,77550.000000,67.184640)}
{pt3dadd(181200.000000,204684.000000,78050.000000,73.607490)}
{pt3dadd(181284.000000,204396.000000,78325.000000,80.030340)}
{pt3dadd(181392.000000,204216.000000,78525.000000,86.453190)}
{pt3dadd(181644.000000,203844.000000,78750.000000,92.876040)}
{pt3dadd(181656.000000,203520.000000,78875.000000,96.745860)}

{create adhoc18}
{access adhoc18}
{connect adhoc18(1), adhoc7(0)}
{nseg = 1}
{strdef color color = "White"}
{pt3dclear()}
{pt3dadd(185028.000000,206652.000000,85450.000000,499.187376)}
{pt3dadd(185472.000000,207048.000000,89275.000000,1242.137880)}

{create adhoc19}
{access adhoc19}
{connect adhoc19(1), adhoc18(0)}
{nseg = 1}
{strdef color color = "White"}
{pt3dclear()}
{pt3dadd(185472.000000,207048.000000,89275.000000,1242.137880)}
{pt3dadd(185748.000000,206220.000000,89650.000000,1035.114948)}
{pt3dadd(186408.000000,205380.000000,89800.000000,1035.114948)}
{pt3dadd(187068.000000,204816.000000,90000.000000,1035.114948)}
{pt3dadd(187632.000000,204000.000000,89875.000000,1035.114948)}
{pt3dadd(188004.000000,203424.000000,90300.000000,1035.114948)}
{pt3dadd(188376.000000,202920.000000,90725.000000,1134.071964)}
{pt3dadd(188748.000000,202248.000000,91150.000000,1233.028980)}
{pt3dadd(189120.000000,201768.000000,91575.000000,1331.985996)}
{pt3dadd(189492.000000,201264.000000,92000.000000,1430.943012)}
{pt3dadd(189864.000000,200760.000000,92425.000000,1383.741729)}
{pt3dadd(190812.000000,200292.000000,93050.000000,1336.540446)}
{pt3dadd(191724.000000,199716.000000,93625.000000,1289.339163)}
{pt3dadd(191988.000000,199224.000000,93400.000000,1242.137880)}
{pt3dadd(192144.000000,199092.000000,94400.000000,1490.565402)}

{create adhoc20}
{access adhoc20}
{connect adhoc20(1), adhoc19(0)}
{nseg = 1}
{strdef color color = "White"}
{pt3dclear()}
{pt3dadd(192144.000000,199092.000000,94400.000000,1490.565402)}
{pt3dadd(193476.000000,197256.000000,93550.000000,1098.964044)}
{pt3dadd(193428.000000,196836.000000,93275.000000,1003.930488)}
{pt3dadd(193380.000000,196164.000000,93000.000000,908.896932)}
{pt3dadd(193500.000000,195684.000000,92725.000000,813.863376)}
{pt3dadd(193620.000000,194928.000000,92475.000000,718.829820)}
{pt3dadd(193980.000000,194196.000000,92425.000000,754.771316)}
{pt3dadd(194148.000000,193740.000000,91975.000000,790.712811)}
{pt3dadd(194364.000000,193164.000000,91400.000000,826.654307)}
{pt3dadd(194544.000000,192732.000000,90825.000000,862.595802)}
{pt3dadd(194736.000000,192240.000000,90250.000000,895.374441)}
{pt3dadd(195084.000000,191736.000000,89625.000000,928.153080)}
{pt3dadd(195492.000000,191136.000000,89200.000000,960.931719)}
{pt3dadd(195768.000000,190716.000000,88625.000000,993.710358)}
{pt3dadd(196296.000000,189612.000000,87975.000000,1004.061506)}
{pt3dadd(196236.000000,189120.000000,87350.000000,1014.412653)}
{pt3dadd(196452.000000,188544.000000,86900.000000,1024.763801)}
{pt3dadd(196824.000000,188052.000000,86750.000000,1035.114948)}
{pt3dadd(196860.000000,187524.000000,86725.000000,966.107280)}
{pt3dadd(196596.000000,187092.000000,86675.000000,897.099612)}
{pt3dadd(196368.000000,186660.000000,86550.000000,828.091944)}
{pt3dadd(196488.000000,186276.000000,86550.000000,1035.114948)}

{create adhoc21}
{access adhoc21}
{connect adhoc21(1), adhoc20(0)}
{nseg = 1}
{strdef color color = "White"}
{pt3dclear()}
{pt3dadd(196488.000000,186276.000000,86550.000000,1035.114948)}
{pt3dadd(194676.000000,187020.000000,87975.000000,200.612214)}

{create adhoc22}
{access adhoc22}
{connect adhoc22(1), adhoc21(0)}
{nseg = 1}
{strdef color color = "White"}
{pt3dclear()}
{pt3dadd(194676.000000,187020.000000,87975.000000,200.612214)}
{pt3dadd(194676.000000,186480.000000,88950.000000,200.612214)}
{pt3dadd(194904.000000,186192.000000,89050.000000,192.253370)}
{pt3dadd(195144.000000,185700.000000,89225.000000,183.894525)}
{pt3dadd(195540.000000,184452.000000,89650.000000,175.535680)}
{pt3dadd(195384.000000,184056.000000,89725.000000,167.176836)}
{pt3dadd(195216.000000,184056.000000,90100.000000,160.211138)}
{pt3dadd(195120.000000,184008.000000,90475.000000,153.245439)}
{pt3dadd(195264.000000,184164.000000,90975.000000,146.279741)}
{pt3dadd(195432.000000,183960.000000,91350.000000,139.314042)}
{pt3dadd(195576.000000,183648.000000,91650.000000,153.245439)}
{pt3dadd(195528.000000,183372.000000,91825.000000,167.176836)}
{pt3dadd(195624.000000,183252.000000,91875.000000,116.095032)}

{create adhoc23}
{access adhoc23}
{connect adhoc23(1), adhoc21(0)}
{nseg = 1}
{strdef color color = "White"}
{pt3dclear()}
{pt3dadd(194676.000000,187020.000000,87975.000000,200.612214)}
{pt3dadd(194016.000000,187284.000000,88050.000000,96.745860)}
{pt3dadd(193464.000000,187692.000000,88350.000000,111.076938)}
{pt3dadd(193260.000000,187980.000000,88400.000000,125.408016)}
{pt3dadd(192840.000000,188256.000000,88250.000000,139.739094)}
{pt3dadd(192528.000000,188508.000000,88200.000000,154.070172)}
{pt3dadd(192516.000000,188652.000000,88075.000000,116.095032)}

{create adhoc24}
{access adhoc24}
{connect adhoc24(1), adhoc20(0)}
{nseg = 1}
{strdef color color = "White"}
{pt3dclear()}
{pt3dadd(196488.000000,186276.000000,86550.000000,1035.114948)}
{pt3dadd(196512.000000,185760.000000,86300.000000,993.710286)}
{pt3dadd(196548.000000,185100.000000,85950.000000,1007.511840)}
{pt3dadd(196548.000000,184272.000000,85650.000000,1021.313394)}
{pt3dadd(196452.000000,183564.000000,85375.000000,1035.114948)}
{pt3dadd(196356.000000,183000.000000,85100.000000,828.091944)}

{create adhoc25}
{access adhoc25}
{connect adhoc25(1), adhoc24(0)}
{nseg = 1}
{strdef color color = "White"}
{pt3dclear()}
{pt3dadd(196356.000000,183000.000000,85100.000000,828.091944)}
{pt3dadd(196836.000000,182664.000000,85325.000000,862.595802)}
{pt3dadd(196800.000000,182292.000000,85400.000000,862.595802)}
{pt3dadd(196788.000000,181572.000000,85200.000000,862.595802)}
{pt3dadd(196860.000000,181188.000000,85100.000000,862.595802)}
{pt3dadd(197184.000000,180780.000000,85050.000000,862.595802)}
{pt3dadd(197256.000000,180408.000000,85100.000000,862.595802)}
{pt3dadd(196872.000000,179940.000000,85125.000000,862.595802)}
{pt3dadd(196920.000000,179292.000000,84850.000000,862.595802)}
{pt3dadd(196992.000000,178644.000000,84525.000000,862.595802)}
{pt3dadd(197040.000000,177972.000000,84225.000000,885.437343)}
{pt3dadd(196776.000000,177480.000000,84300.000000,908.278884)}
{pt3dadd(196800.000000,177000.000000,83975.000000,931.120425)}
{pt3dadd(197292.000000,176544.000000,83575.000000,953.961966)}
{pt3dadd(197232.000000,176064.000000,83500.000000,1035.114948)}
{pt3dadd(197652.000000,175632.000000,83300.000000,1192.452354)}

{create adhoc26}
{access adhoc26}
{connect adhoc26(1), adhoc25(0)}
{nseg = 1}
{strdef color color = "White"}
{pt3dclear()}
{pt3dadd(197652.000000,175632.000000,83300.000000,1192.452354)}
{pt3dadd(197544.000000,175512.000000,81425.000000,718.829820)}
{pt3dadd(197592.000000,175464.000000,80800.000000,746.145369)}
{pt3dadd(197628.000000,175416.000000,80150.000000,773.460918)}
{pt3dadd(197304.000000,175308.000000,79475.000000,800.776467)}
{pt3dadd(197064.000000,175356.000000,78800.000000,828.092016)}
{pt3dadd(196644.000000,175452.000000,78125.000000,718.829820)}

{create adhoc27}
{access adhoc27}
{connect adhoc27(1), adhoc26(0)}
{nseg = 1}
{strdef color color = "White"}
{pt3dclear()}
{pt3dadd(196644.000000,175452.000000,78125.000000,718.829820)}
{pt3dadd(195444.000000,174420.000000,78075.000000,167.176836)}
{pt3dadd(195108.000000,174480.000000,78125.000000,149.569092)}
{pt3dadd(194772.000000,174396.000000,78175.000000,131.961348)}
{pt3dadd(194124.000000,174384.000000,78025.000000,114.353604)}
{pt3dadd(193788.000000,174192.000000,77725.000000,96.745860)}
{pt3dadd(193620.000000,174108.000000,77450.000000,116.095032)}

{create adhoc28}
{access adhoc28}
{connect adhoc28(1), adhoc26(0)}
{nseg = 1}
{strdef color color = "White"}
{pt3dclear()}
{pt3dadd(196644.000000,175452.000000,78125.000000,718.829820)}
{pt3dadd(196260.000000,175416.000000,77750.000000,718.829820)}
{pt3dadd(195936.000000,175440.000000,77350.000000,663.919209)}
{pt3dadd(195648.000000,175572.000000,77025.000000,609.008598)}
{pt3dadd(195036.000000,175572.000000,76625.000000,554.097987)}
{pt3dadd(194436.000000,175632.000000,76250.000000,499.187376)}
{pt3dadd(194004.000000,175524.000000,75775.000000,499.187376)}
{pt3dadd(193512.000000,175620.000000,75250.000000,499.187376)}
{pt3dadd(192936.000000,175764.000000,74775.000000,499.187376)}
{pt3dadd(192660.000000,175884.000000,74300.000000,415.989486)}

{create adhoc29}
{access adhoc29}
{connect adhoc29(1), adhoc28(0)}
{nseg = 1}
{strdef color color = "White"}
{pt3dclear()}
{pt3dadd(192660.000000,175884.000000,74300.000000,415.989486)}
{pt3dadd(192768.000000,175116.000000,74250.000000,167.176836)}
{pt3dadd(192732.000000,174828.000000,74025.000000,167.176836)}
{pt3dadd(192732.000000,174348.000000,73800.000000,167.176836)}
{pt3dadd(192732.000000,174024.000000,73550.000000,167.176836)}
{pt3dadd(192612.000000,173988.000000,73350.000000,167.176836)}
{pt3dadd(192456.000000,174144.000000,73325.000000,116.095032)}

{create adhoc30}
{access adhoc30}
{connect adhoc30(1), adhoc28(0)}
{nseg = 1}
{strdef color color = "White"}
{pt3dclear()}
{pt3dadd(192660.000000,175884.000000,74300.000000,415.989486)}
{pt3dadd(192492.000000,175920.000000,74025.000000,415.989486)}
{pt3dadd(192384.000000,176184.000000,73750.000000,436.788958)}
{pt3dadd(192144.000000,176352.000000,73325.000000,457.588431)}
{pt3dadd(191928.000000,176364.000000,72950.000000,478.387903)}
{pt3dadd(191928.000000,176580.000000,72450.000000,499.187376)}
{pt3dadd(192264.000000,176856.000000,71925.000000,478.387903)}
{pt3dadd(192084.000000,177060.000000,71375.000000,457.588431)}
{pt3dadd(191712.000000,177324.000000,70875.000000,436.788958)}
{pt3dadd(190860.000000,177552.000000,70200.000000,415.989486)}
{pt3dadd(189924.000000,177588.000000,69850.000000,499.187376)}
{pt3dadd(189300.000000,177684.000000,69400.000000,599.024880)}

{create adhoc31}
{access adhoc31}
{connect adhoc31(1), adhoc30(0)}
{nseg = 1}
{strdef color color = "White"}
{pt3dclear()}
{pt3dadd(189300.000000,177684.000000,69400.000000,599.024880)}
{pt3dadd(187776.000000,180228.000000,69000.000000,160.489782)}
{pt3dadd(187584.000000,180408.000000,68800.000000,200.612214)}
{pt3dadd(187464.000000,180552.000000,68475.000000,240.734646)}

{create adhoc32}
{access adhoc32}
{connect adhoc32(1), adhoc30(0)}
{nseg = 1}
{strdef color color = "White"}
{pt3dclear()}
{pt3dadd(189300.000000,177684.000000,69400.000000,599.024880)}
{pt3dadd(188964.000000,177720.000000,68850.000000,599.024880)}
{pt3dadd(188652.000000,177768.000000,68775.000000,599.024880)}

{create adhoc33}
{access adhoc33}
{connect adhoc33(1), adhoc32(0)}
{nseg = 1}
{strdef color color = "White"}
{pt3dclear()}
{pt3dadd(188652.000000,177768.000000,68775.000000,599.024880)}
{pt3dadd(187860.000000,180144.000000,69725.000000,116.095032)}
{pt3dadd(188136.000000,180576.000000,70175.000000,126.203238)}
{pt3dadd(188352.000000,180744.000000,70625.000000,136.311444)}
{pt3dadd(188376.000000,180924.000000,71075.000000,167.176836)}

{create adhoc34}
{access adhoc34}
{connect adhoc34(1), adhoc32(0)}
{nseg = 1}
{strdef color color = "White"}
{pt3dclear()}
{pt3dadd(188652.000000,177768.000000,68775.000000,599.024880)}
{pt3dadd(188472.000000,177588.000000,68400.000000,499.187376)}
{pt3dadd(188448.000000,177528.000000,68100.000000,288.881586)}
{pt3dadd(188268.000000,177372.000000,67700.000000,167.176836)}

{create adhoc35}
{access adhoc35}
{connect adhoc35(1), adhoc34(0)}
{nseg = 1}
{strdef color color = "White"}
{pt3dclear()}
{pt3dadd(188268.000000,177372.000000,67700.000000,167.176836)}
{pt3dadd(187716.000000,178008.000000,67575.000000,167.176836)}
{pt3dadd(187512.000000,178092.000000,67375.000000,208.580517)}
{pt3dadd(187020.000000,178068.000000,66975.000000,249.984198)}
{pt3dadd(186696.000000,178248.000000,66700.000000,291.387879)}
{pt3dadd(186636.000000,178416.000000,66300.000000,332.791560)}
{pt3dadd(186600.000000,178320.000000,66075.000000,288.881586)}

{create adhoc36}
{access adhoc36}
{connect adhoc36(1), adhoc34(0)}
{nseg = 1}
{strdef color color = "White"}
{pt3dclear()}
{pt3dadd(188268.000000,177372.000000,67700.000000,167.176836)}
{pt3dadd(188148.000000,176916.000000,67350.000000,240.734646)}
{pt3dadd(188040.000000,176664.000000,67050.000000,206.927778)}
{pt3dadd(188052.000000,176268.000000,66625.000000,173.120910)}
{pt3dadd(188100.000000,175656.000000,66375.000000,139.314042)}
{pt3dadd(188124.000000,175332.000000,66200.000000,192.587706)}

{create adhoc37}
{access adhoc37}
{connect adhoc37(1), adhoc36(0)}
{nseg = 1}
{strdef color color = "White"}
{pt3dclear()}
{pt3dadd(188124.000000,175332.000000,66200.000000,192.587706)}
{pt3dadd(187752.000000,174264.000000,65775.000000,200.612214)}

{create adhoc38}
{access adhoc38}
{connect adhoc38(1), adhoc36(0)}
{nseg = 1}
{strdef color color = "White"}
{pt3dclear()}
{pt3dadd(188124.000000,175332.000000,66200.000000,192.587706)}
{pt3dadd(187824.000000,174636.000000,65075.000000,240.734646)}
{pt3dadd(187596.000000,174636.000000,64675.000000,240.734646)}
{pt3dadd(187332.000000,174576.000000,64250.000000,240.734646)}
{pt3dadd(187500.000000,174132.000000,63875.000000,240.734646)}
{pt3dadd(187512.000000,173232.000000,63525.000000,240.734646)}
{pt3dadd(187752.000000,173052.000000,63325.000000,187.363614)}
{pt3dadd(187800.000000,172956.000000,63050.000000,133.992582)}
{pt3dadd(187248.000000,172020.000000,63150.000000,80.621550)}
{pt3dadd(186936.000000,171672.000000,63050.000000,80.621550)}

{create adhoc39}
{access adhoc39}
{connect adhoc39(1), adhoc25(0)}
{nseg = 1}
{strdef color color = "White"}
{pt3dclear()}
{pt3dadd(197652.000000,175632.000000,83300.000000,1192.452354)}
{pt3dadd(197772.000000,175272.000000,83575.000000,1035.114948)}
{pt3dadd(197748.000000,174756.000000,83125.000000,805.629264)}
{pt3dadd(198936.000000,170244.000000,83575.000000,576.143580)}
{pt3dadd(199116.000000,169344.000000,84000.000000,346.657896)}
{pt3dadd(199056.000000,168828.000000,83450.000000,794.968308)}

{create adhoc40}
{access adhoc40}
{connect adhoc40(1), adhoc39(0)}
{nseg = 1}
{strdef color color = "White"}
{pt3dclear()}
{pt3dadd(199056.000000,168828.000000,83450.000000,794.968308)}
{pt3dadd(198420.000000,168264.000000,82075.000000,139.314042)}
{pt3dadd(198216.000000,167976.000000,81675.000000,124.640919)}
{pt3dadd(198012.000000,167904.000000,81400.000000,109.967796)}
{pt3dadd(197808.000000,167844.000000,80950.000000,95.294673)}
{pt3dadd(197388.000000,167844.000000,80575.000000,80.621550)}
{pt3dadd(197076.000000,167724.000000,80050.000000,89.489920)}
{pt3dadd(197052.000000,167820.000000,79575.000000,98.358291)}
{pt3dadd(196884.000000,167952.000000,79075.000000,107.226662)}
{pt3dadd(196344.000000,168108.000000,78600.000000,116.095032)}
{pt3dadd(196008.000000,168156.000000,78325.000000,192.587724)}
{pt3dadd(195924.000000,168096.000000,78100.000000,240.734646)}

{create adhoc41}
{access adhoc41}
{connect adhoc41(1), adhoc40(0)}
{nseg = 1}
{strdef color color = "White"}
{pt3dclear()}
{pt3dadd(195924.000000,168096.000000,78100.000000,240.734646)}
{pt3dadd(195948.000000,167700.000000,77825.000000,167.176836)}
{pt3dadd(195804.000000,167568.000000,77675.000000,153.245439)}
{pt3dadd(195684.000000,166860.000000,77350.000000,139.314042)}
{pt3dadd(195588.000000,166428.000000,77125.000000,80.621550)}

{create adhoc42}
{access adhoc42}
{connect adhoc42(1), adhoc40(0)}
{nseg = 1}
{strdef color color = "White"}
{pt3dclear()}
{pt3dadd(195924.000000,168096.000000,78100.000000,240.734646)}
{pt3dadd(195636.000000,168072.000000,78175.000000,200.612214)}

{create adhoc43}
{access adhoc43}
{connect adhoc43(1), adhoc39(0)}
{nseg = 1}
{strdef color color = "White"}
{pt3dclear()}
{pt3dadd(199056.000000,168828.000000,83450.000000,794.968308)}
{pt3dadd(199020.000000,168108.000000,83725.000000,690.076674)}
{pt3dadd(199116.000000,167712.000000,83950.000000,718.829820)}
{pt3dadd(199080.000000,167232.000000,84150.000000,794.968308)}

{create adhoc44}
{access adhoc44}
{connect adhoc44(1), adhoc43(0)}
{nseg = 1}
{strdef color color = "White"}
{pt3dclear()}
{pt3dadd(199080.000000,167232.000000,84150.000000,794.968308)}
{pt3dadd(199212.000000,166704.000000,84125.000000,718.829820)}
{pt3dadd(199308.000000,166044.000000,84000.000000,682.888329)}
{pt3dadd(199308.000000,165768.000000,84125.000000,646.946838)}
{pt3dadd(199500.000000,165300.000000,84375.000000,611.005347)}
{pt3dadd(199692.000000,164904.000000,84425.000000,575.063856)}
{pt3dadd(199932.000000,164496.000000,84600.000000,599.024880)}

{create adhoc45}
{access adhoc45}
{connect adhoc45(1), adhoc44(0)}
{nseg = 1}
{strdef color color = "White"}
{pt3dclear()}
{pt3dadd(199932.000000,164496.000000,84600.000000,599.024880)}
{pt3dadd(199260.000000,164556.000000,85925.000000,116.095032)}
{pt3dadd(199176.000000,164652.000000,86175.000000,121.899785)}
{pt3dadd(199212.000000,164784.000000,86375.000000,127.704537)}
{pt3dadd(199236.000000,164916.000000,86550.000000,133.509289)}
{pt3dadd(199080.000000,164964.000000,86750.000000,139.314042)}
{pt3dadd(199080.000000,165096.000000,87075.000000,139.314042)}

{create adhoc46}
{access adhoc46}
{connect adhoc46(1), adhoc44(0)}
{nseg = 1}
{strdef color color = "White"}
{pt3dclear()}
{pt3dadd(199932.000000,164496.000000,84600.000000,599.024880)}
{pt3dadd(199836.000000,163992.000000,84750.000000,575.063856)}
{pt3dadd(199824.000000,163608.000000,84725.000000,613.401462)}
{pt3dadd(200028.000000,163080.000000,84950.000000,651.739068)}
{pt3dadd(199920.000000,162504.000000,84900.000000,690.076674)}
{pt3dadd(199968.000000,162072.000000,85000.000000,862.595802)}

{create adhoc47}
{access adhoc47}
{connect adhoc47(1), adhoc46(0)}
{nseg = 1}
{strdef color color = "White"}
{pt3dclear()}
{pt3dadd(199968.000000,162072.000000,85000.000000,862.595802)}
{pt3dadd(198420.000000,161736.000000,84250.000000,167.176836)}

{create adhoc48}
{access adhoc48}
{connect adhoc48(1), adhoc47(0)}
{nseg = 1}
{strdef color color = "White"}
{pt3dclear()}
{pt3dadd(198420.000000,161736.000000,84250.000000,167.176836)}
{pt3dadd(197568.000000,161868.000000,85075.000000,139.314042)}
{pt3dadd(197652.000000,162072.000000,85350.000000,125.124648)}
{pt3dadd(197388.000000,162408.000000,85725.000000,110.935254)}
{pt3dadd(197436.000000,162768.000000,85950.000000,96.745860)}
{pt3dadd(197460.000000,163056.000000,86050.000000,116.095032)}

{create adhoc49}
{access adhoc49}
{connect adhoc49(1), adhoc47(0)}
{nseg = 1}
{strdef color color = "White"}
{pt3dclear()}
{pt3dadd(198420.000000,161736.000000,84250.000000,167.176836)}
{pt3dadd(198240.000000,161808.000000,83875.000000,240.734646)}
{pt3dadd(197748.000000,161340.000000,83550.000000,263.748884)}
{pt3dadd(197508.000000,161352.000000,83350.000000,286.763121)}
{pt3dadd(197388.000000,161232.000000,83050.000000,309.777359)}
{pt3dadd(197364.000000,161268.000000,82625.000000,332.791596)}
{pt3dadd(197400.000000,161232.000000,82125.000000,244.255944)}
{pt3dadd(197808.000000,161376.000000,81850.000000,155.720292)}
{pt3dadd(198156.000000,161652.000000,81700.000000,67.184640)}
{pt3dadd(198648.000000,161808.000000,81300.000000,92.876040)}

{create adhoc50}
{access adhoc50}
{connect adhoc50(1), adhoc46(0)}
{nseg = 1}
{strdef color color = "White"}
{pt3dclear()}
{pt3dadd(199968.000000,162072.000000,85000.000000,862.595802)}
{pt3dadd(199956.000000,161676.000000,85050.000000,828.092016)}
{pt3dadd(200256.000000,161328.000000,85225.000000,869.496602)}
{pt3dadd(200448.000000,160884.000000,85150.000000,910.901187)}
{pt3dadd(200628.000000,160560.000000,85325.000000,952.305772)}
{pt3dadd(200604.000000,160284.000000,85425.000000,993.710358)}
{pt3dadd(200388.000000,159984.000000,85600.000000,862.595802)}

{create adhoc51}
{access adhoc51}
{connect adhoc51(1), adhoc50(0)}
{nseg = 1}
{strdef color color = "White"}
{pt3dclear()}
{pt3dadd(200388.000000,159984.000000,85600.000000,862.595802)}
{pt3dadd(200652.000000,159600.000000,85375.000000,862.595802)}
{pt3dadd(200532.000000,159072.000000,85600.000000,845.343909)}
{pt3dadd(200568.000000,158448.000000,85800.000000,828.092016)}
{pt3dadd(200832.000000,157872.000000,85925.000000,599.024880)}

{create adhoc52}
{access adhoc52}
{connect adhoc52(1), adhoc51(0)}
{nseg = 1}
{strdef color color = "White"}
{pt3dclear()}
{pt3dadd(200832.000000,157872.000000,85925.000000,599.024880)}
{pt3dadd(201072.000000,157392.000000,86225.000000,399.349908)}
{pt3dadd(201240.000000,157128.000000,86425.000000,515.161381)}
{pt3dadd(201612.000000,156612.000000,86825.000000,630.972855)}
{pt3dadd(201648.000000,156192.000000,87200.000000,746.784329)}
{pt3dadd(201480.000000,155796.000000,87525.000000,862.595802)}
{pt3dadd(201528.000000,155244.000000,87825.000000,819.466020)}
{pt3dadd(201624.000000,154680.000000,88150.000000,776.336238)}
{pt3dadd(201708.000000,154200.000000,88275.000000,733.206456)}
{pt3dadd(201984.000000,153720.000000,88425.000000,690.076674)}
{pt3dadd(202032.000000,152952.000000,88575.000000,667.313725)}
{pt3dadd(202188.000000,152424.000000,88725.000000,644.550777)}
{pt3dadd(202320.000000,151896.000000,88675.000000,621.787828)}
{pt3dadd(202272.000000,151464.000000,88675.000000,599.024880)}
{pt3dadd(202152.000000,151020.000000,88875.000000,499.187376)}
{pt3dadd(202032.000000,150564.000000,88825.000000,499.187376)}

{create adhoc53}
{access adhoc53}
{connect adhoc53(1), adhoc52(0)}
{nseg = 1}
{strdef color color = "White"}
{pt3dclear()}
{pt3dadd(202032.000000,150564.000000,88825.000000,499.187376)}
{pt3dadd(201324.000000,150072.000000,87975.000000,116.095032)}
{pt3dadd(201132.000000,149820.000000,87800.000000,116.095032)}
{pt3dadd(200976.000000,149508.000000,87625.000000,116.095032)}
{pt3dadd(200796.000000,149076.000000,87175.000000,116.095032)}
{pt3dadd(200712.000000,148812.000000,86800.000000,116.095032)}
{pt3dadd(200340.000000,147948.000000,85650.000000,116.095032)}
{pt3dadd(200304.000000,147648.000000,85300.000000,116.095032)}
{pt3dadd(200376.000000,147408.000000,84950.000000,116.095032)}
{pt3dadd(200352.000000,147312.000000,84725.000000,116.095032)}

{create adhoc54}
{access adhoc54}
{connect adhoc54(1), adhoc52(0)}
{nseg = 1}
{strdef color color = "White"}
{pt3dclear()}
{pt3dadd(202032.000000,150564.000000,88825.000000,499.187376)}
{pt3dadd(202008.000000,150132.000000,88875.000000,479.219886)}
{pt3dadd(201984.000000,149808.000000,88900.000000,509.171134)}
{pt3dadd(202080.000000,149424.000000,88950.000000,539.122383)}
{pt3dadd(202044.000000,149100.000000,88950.000000,569.073631)}
{pt3dadd(202008.000000,148728.000000,88950.000000,599.024880)}
{pt3dadd(202116.000000,148068.000000,89275.000000,658.927350)}
{pt3dadd(202176.000000,147708.000000,89300.000000,718.829820)}
{pt3dadd(202176.000000,147312.000000,89475.000000,718.829820)}

{create adhoc55}
{access adhoc55}
{connect adhoc55(1), adhoc54(0)}
{nseg = 1}
{strdef color color = "White"}
{pt3dclear()}
{pt3dadd(202176.000000,147312.000000,89475.000000,718.829820)}
{pt3dadd(201756.000000,147192.000000,88000.000000,116.095032)}
{pt3dadd(201636.000000,146952.000000,87675.000000,107.226662)}
{pt3dadd(201516.000000,146724.000000,87350.000000,98.358291)}
{pt3dadd(201300.000000,146484.000000,87250.000000,89.489920)}
{pt3dadd(200928.000000,145800.000000,87250.000000,80.621550)}
{pt3dadd(200472.000000,145464.000000,87300.000000,240.734646)}

{create adhoc56}
{access adhoc56}
{connect adhoc56(1), adhoc55(0)}
{nseg = 1}
{strdef color color = "White"}
{pt3dclear()}
{pt3dadd(200472.000000,145464.000000,87300.000000,240.734646)}
{pt3dadd(200208.000000,145464.000000,87575.000000,116.095032)}
{pt3dadd(199956.000000,145536.000000,87850.000000,141.635934)}
{pt3dadd(199644.000000,145356.000000,88275.000000,167.176836)}
{pt3dadd(199440.000000,145320.000000,88875.000000,139.314042)}

{create adhoc57}
{access adhoc57}
{connect adhoc57(1), adhoc55(0)}
{nseg = 1}
{strdef color color = "White"}
{pt3dclear()}
{pt3dadd(200472.000000,145464.000000,87300.000000,240.734646)}
{pt3dadd(200244.000000,145092.000000,87275.000000,200.612214)}
{pt3dadd(200220.000000,145104.000000,87050.000000,160.615326)}
{pt3dadd(200028.000000,144744.000000,86825.000000,120.618438)}
{pt3dadd(199740.000000,144456.000000,86700.000000,80.621550)}
{pt3dadd(199560.000000,144108.000000,86475.000000,200.612214)}

{create adhoc58}
{access adhoc58}
{connect adhoc58(1), adhoc54(0)}
{nseg = 1}
{strdef color color = "White"}
{pt3dclear()}
{pt3dadd(202176.000000,147312.000000,89475.000000,718.829820)}
{pt3dadd(202212.000000,147000.000000,89675.000000,718.829820)}
{pt3dadd(202260.000000,146520.000000,89950.000000,688.878585)}
{pt3dadd(202212.000000,146076.000000,90175.000000,658.927350)}
{pt3dadd(201972.000000,145488.000000,90275.000000,628.976115)}
{pt3dadd(201732.000000,144996.000000,90375.000000,599.024880)}
{pt3dadd(201480.000000,143976.000000,90275.000000,574.065504)}
{pt3dadd(201420.000000,143424.000000,90325.000000,549.106128)}
{pt3dadd(201276.000000,142968.000000,90225.000000,524.146752)}
{pt3dadd(201168.000000,142296.000000,90325.000000,499.187376)}
{pt3dadd(201120.000000,141708.000000,90225.000000,524.146752)}
{pt3dadd(201012.000000,141036.000000,90250.000000,549.106128)}
{pt3dadd(201192.000000,140544.000000,90150.000000,574.065504)}
{pt3dadd(201156.000000,139980.000000,90075.000000,599.024880)}
{pt3dadd(201252.000000,139440.000000,90250.000000,599.024880)}
{pt3dadd(201252.000000,138948.000000,90200.000000,599.024880)}
{pt3dadd(201168.000000,138192.000000,90175.000000,599.024880)}
{pt3dadd(200928.000000,137592.000000,90450.000000,599.024880)}

{create adhoc59}
{access adhoc59}
{connect adhoc59(1), adhoc58(0)}
{nseg = 1}
{strdef color color = "White"}
{pt3dclear()}
{pt3dadd(200928.000000,137592.000000,90450.000000,599.024880)}
{pt3dadd(200772.000000,137004.000000,90075.000000,346.657896)}

{create adhoc60}
{access adhoc60}
{connect adhoc60(1), adhoc58(0)}
{nseg = 1}
{strdef color color = "White"}
{pt3dclear()}
{pt3dadd(200928.000000,137592.000000,90450.000000,599.024880)}
{pt3dadd(200580.000000,137148.000000,91400.000000,288.881586)}
{pt3dadd(200496.000000,136776.000000,91625.000000,283.219502)}
{pt3dadd(200364.000000,136368.000000,91700.000000,277.557417)}
{pt3dadd(200268.000000,135828.000000,92025.000000,271.895332)}
{pt3dadd(199908.000000,135300.000000,92225.000000,266.233248)}
{pt3dadd(199728.000000,134868.000000,92475.000000,269.006517)}
{pt3dadd(199524.000000,134412.000000,92425.000000,271.779786)}
{pt3dadd(199236.000000,133944.000000,92500.000000,274.553055)}
{pt3dadd(199152.000000,133416.000000,92700.000000,277.326324)}
{pt3dadd(199044.000000,132948.000000,92650.000000,280.215140)}
{pt3dadd(198708.000000,132528.000000,92550.000000,283.103955)}
{pt3dadd(198600.000000,132072.000000,92625.000000,285.992771)}
{pt3dadd(198492.000000,131616.000000,92775.000000,288.881586)}
{pt3dadd(198444.000000,131124.000000,92875.000000,288.881586)}
{pt3dadd(198480.000000,130668.000000,93150.000000,288.881586)}
{pt3dadd(198444.000000,130152.000000,93350.000000,288.881586)}
{pt3dadd(198384.000000,129768.000000,93625.000000,288.881586)}
{pt3dadd(198204.000000,129204.000000,93725.000000,288.881586)}
{pt3dadd(198060.000000,128760.000000,93850.000000,288.881586)}
{pt3dadd(197796.000000,128220.000000,94100.000000,288.881586)}
{pt3dadd(197664.000000,127680.000000,94025.000000,288.881586)}
{pt3dadd(197808.000000,126984.000000,94150.000000,303.325664)}
{pt3dadd(197676.000000,126636.000000,94200.000000,317.769741)}
{pt3dadd(197616.000000,126204.000000,94225.000000,332.213819)}
{pt3dadd(197508.000000,125664.000000,94300.000000,346.657896)}
{pt3dadd(197304.000000,125328.000000,94250.000000,415.989486)}
{pt3dadd(197100.000000,124956.000000,94325.000000,599.024880)}

{create adhoc61}
{access adhoc61}
{connect adhoc61(1), adhoc60(0)}
{nseg = 1}
{strdef color color = "White"}
{pt3dclear()}
{pt3dadd(197100.000000,124956.000000,94325.000000,599.024880)}
{pt3dadd(197124.000000,124536.000000,93525.000000,200.612214)}
{pt3dadd(197064.000000,124200.000000,93475.000000,192.253370)}
{pt3dadd(196800.000000,123672.000000,93325.000000,183.894525)}
{pt3dadd(196620.000000,123144.000000,93225.000000,175.535680)}
{pt3dadd(196428.000000,122520.000000,92975.000000,167.176836)}
{pt3dadd(196248.000000,122052.000000,92875.000000,185.566288)}
{pt3dadd(196056.000000,121728.000000,92675.000000,203.955741)}
{pt3dadd(195852.000000,121188.000000,92425.000000,222.345193)}
{pt3dadd(195612.000000,120744.000000,92300.000000,240.734646)}
{pt3dadd(195204.000000,120312.000000,92100.000000,240.734646)}
{pt3dadd(195024.000000,119916.000000,92000.000000,240.734646)}
{pt3dadd(194712.000000,119688.000000,91700.000000,160.489764)}

{create adhoc62}
{access adhoc62}
{connect adhoc62(1), adhoc61(0)}
{nseg = 1}
{strdef color color = "White"}
{pt3dclear()}
{pt3dadd(194712.000000,119688.000000,91700.000000,160.489764)}
{pt3dadd(194436.000000,119220.000000,91325.000000,96.745860)}
{pt3dadd(194184.000000,118872.000000,91050.000000,67.184640)}

{create adhoc63}
{access adhoc63}
{connect adhoc63(1), adhoc61(0)}
{nseg = 1}
{strdef color color = "White"}
{pt3dclear()}
{pt3dadd(194712.000000,119688.000000,91700.000000,160.489764)}
{pt3dadd(194436.000000,119904.000000,91225.000000,116.095032)}
{pt3dadd(194244.000000,119748.000000,91000.000000,106.420446)}
{pt3dadd(194136.000000,119748.000000,90675.000000,96.745860)}
{pt3dadd(193800.000000,119760.000000,90350.000000,80.621550)}

{create adhoc64}
{access adhoc64}
{connect adhoc64(1), adhoc60(0)}
{nseg = 1}
{strdef color color = "White"}
{pt3dclear()}
{pt3dadd(197100.000000,124956.000000,94325.000000,599.024880)}
{pt3dadd(196884.000000,124692.000000,95025.000000,288.881586)}
{pt3dadd(196608.000000,124668.000000,95350.000000,228.029211)}
{pt3dadd(196284.000000,124572.000000,95575.000000,167.176836)}
{pt3dadd(195912.000000,124296.000000,95650.000000,139.314042)}

{create adhoc65}
{access adhoc65}
{connect adhoc65(1), adhoc51(0)}
{nseg = 1}
{strdef color color = "White"}
{pt3dclear()}
{pt3dadd(200832.000000,157872.000000,85925.000000,599.024880)}
{pt3dadd(199932.000000,157548.000000,85200.000000,288.881586)}
{pt3dadd(199728.000000,157224.000000,85325.000000,320.658561)}
{pt3dadd(199620.000000,156696.000000,85400.000000,352.435536)}
{pt3dadd(199572.000000,156144.000000,85250.000000,384.212511)}
{pt3dadd(199284.000000,155616.000000,84875.000000,415.989486)}
{pt3dadd(199092.000000,155076.000000,84425.000000,415.989486)}

{create adhoc66}
{access adhoc66}
{connect adhoc66(1), adhoc65(0)}
{nseg = 1}
{strdef color color = "White"}
{pt3dclear()}
{pt3dadd(199092.000000,155076.000000,84425.000000,415.989486)}
{pt3dadd(199044.000000,154560.000000,84225.000000,346.657896)}
{pt3dadd(199008.000000,154176.000000,84200.000000,346.657896)}
{pt3dadd(199080.000000,153804.000000,83900.000000,346.657896)}
{pt3dadd(199152.000000,153468.000000,83700.000000,346.657896)}
{pt3dadd(199116.000000,153108.000000,83450.000000,346.657896)}
{pt3dadd(199056.000000,152772.000000,83200.000000,379.798393)}
{pt3dadd(198996.000000,152460.000000,82950.000000,412.938891)}
{pt3dadd(198936.000000,152088.000000,82875.000000,446.079388)}
{pt3dadd(198936.000000,151680.000000,82675.000000,479.219886)}
{pt3dadd(198936.000000,151344.000000,82100.000000,431.635311)}
{pt3dadd(198852.000000,150996.000000,81475.000000,384.050736)}
{pt3dadd(198672.000000,151092.000000,81000.000000,336.466161)}
{pt3dadd(198084.000000,150516.000000,80400.000000,288.881586)}
{pt3dadd(197268.000000,150012.000000,79725.000000,341.458034)}
{pt3dadd(196836.000000,149940.000000,78975.000000,394.034481)}
{pt3dadd(196188.000000,149820.000000,78100.000000,446.610929)}
{pt3dadd(195780.000000,150144.000000,77400.000000,499.187376)}
{pt3dadd(195492.000000,150372.000000,76325.000000,478.387903)}
{pt3dadd(195108.000000,150876.000000,75500.000000,457.588431)}
{pt3dadd(194772.000000,151092.000000,74400.000000,436.788958)}
{pt3dadd(194412.000000,150756.000000,73300.000000,415.989486)}
{pt3dadd(194484.000000,150252.000000,72475.000000,139.314042)}

{create adhoc67}
{access adhoc67}
{connect adhoc67(1), adhoc66(0)}
{nseg = 1}
{strdef color color = "White"}
{pt3dclear()}
{pt3dadd(194484.000000,150252.000000,72475.000000,139.314042)}
{pt3dadd(194796.000000,148824.000000,72150.000000,116.095032)}
{pt3dadd(194712.000000,148656.000000,72175.000000,173.600154)}
{pt3dadd(195024.000000,148296.000000,71925.000000,231.105276)}
{pt3dadd(195120.000000,148032.000000,71875.000000,139.314042)}

{create adhoc68}
{access adhoc68}
{connect adhoc68(1), adhoc67(0)}
{nseg = 1}
{strdef color color = "White"}
{pt3dclear()}
{pt3dadd(195120.000000,148032.000000,71875.000000,139.314042)}
{pt3dadd(195312.000000,147756.000000,71950.000000,116.095032)}
{pt3dadd(195540.000000,147816.000000,72225.000000,96.745860)}

{create adhoc69}
{access adhoc69}
{connect adhoc69(1), adhoc67(0)}
{nseg = 1}
{strdef color color = "White"}
{pt3dclear()}
{pt3dadd(195120.000000,148032.000000,71875.000000,139.314042)}
{pt3dadd(194928.000000,147744.000000,71650.000000,80.621550)}
{pt3dadd(194472.000000,147444.000000,71450.000000,67.184640)}

{create adhoc70}
{access adhoc70}
{connect adhoc70(1), adhoc66(0)}
{nseg = 1}
{strdef color color = "White"}
{pt3dclear()}
{pt3dadd(194484.000000,150252.000000,72475.000000,139.314042)}
{pt3dadd(194700.000000,150792.000000,72175.000000,139.314042)}
{pt3dadd(195060.000000,151512.000000,72125.000000,96.745860)}

{create adhoc71}
{access adhoc71}
{connect adhoc71(1), adhoc65(0)}
{nseg = 1}
{strdef color color = "White"}
{pt3dclear()}
{pt3dadd(199092.000000,155076.000000,84425.000000,415.989486)}
{pt3dadd(198264.000000,155388.000000,83425.000000,167.176836)}
{pt3dadd(197724.000000,155436.000000,82800.000000,149.569092)}
{pt3dadd(196776.000000,155424.000000,81875.000000,131.961348)}
{pt3dadd(196644.000000,155544.000000,81425.000000,114.353604)}
{pt3dadd(196812.000000,155712.000000,81225.000000,96.745860)}
{pt3dadd(197172.000000,155916.000000,80850.000000,92.714782)}
{pt3dadd(197184.000000,156168.000000,80600.000000,88.683705)}
{pt3dadd(197532.000000,156720.000000,80175.000000,84.652627)}
{pt3dadd(197928.000000,157152.000000,80075.000000,80.621550)}
{pt3dadd(198432.000000,157596.000000,79875.000000,80.621550)}

{create adhoc72}
{access adhoc72}
{connect adhoc72(1), adhoc50(0)}
{nseg = 1}
{strdef color color = "White"}
{pt3dclear()}
{pt3dadd(200388.000000,159984.000000,85600.000000,862.595802)}
{pt3dadd(198972.000000,160236.000000,86525.000000,80.621550)}
{pt3dadd(198300.000000,160080.000000,86300.000000,96.745860)}

{create adhoc73}
{access adhoc73}
{connect adhoc73(1), adhoc43(0)}
{nseg = 1}
{strdef color color = "White"}
{pt3dclear()}
{pt3dadd(199080.000000,167232.000000,84150.000000,794.968308)}
{pt3dadd(197940.000000,167364.000000,85950.000000,55.987200)}
{pt3dadd(197760.000000,167400.000000,86175.000000,69.573420)}
{pt3dadd(197832.000000,167556.000000,86775.000000,83.159640)}
{pt3dadd(197676.000000,167844.000000,87325.000000,96.745860)}
{pt3dadd(197556.000000,168096.000000,87700.000000,139.314042)}

{create adhoc74}
{access adhoc74}
{connect adhoc74(1), adhoc24(0)}
{nseg = 1}
{strdef color color = "White"}
{pt3dclear()}
{pt3dadd(196356.000000,183000.000000,85100.000000,828.091944)}
{pt3dadd(195216.000000,183132.000000,83275.000000,116.095032)}
{pt3dadd(194904.000000,182916.000000,82950.000000,137.224328)}
{pt3dadd(194628.000000,182604.000000,82725.000000,158.353623)}
{pt3dadd(194268.000000,182208.000000,82400.000000,179.482918)}
{pt3dadd(193896.000000,181908.000000,82025.000000,200.612214)}
{pt3dadd(193608.000000,181992.000000,81700.000000,111.451230)}

{create adhoc75}
{access adhoc75}
{connect adhoc75(1), adhoc74(0)}
{nseg = 1}
{strdef color color = "White"}
{pt3dclear()}
{pt3dadd(193608.000000,181992.000000,81700.000000,111.451230)}
{pt3dadd(193320.000000,182304.000000,82100.000000,415.989486)}
{pt3dadd(193308.000000,182304.000000,82475.000000,240.734646)}
{pt3dadd(193044.000000,182352.000000,82525.000000,139.314042)}

{create adhoc76}
{access adhoc76}
{connect adhoc76(1), adhoc74(0)}
{nseg = 1}
{strdef color color = "White"}
{pt3dclear()}
{pt3dadd(193608.000000,181992.000000,81700.000000,111.451230)}
{pt3dadd(193404.000000,182016.000000,81500.000000,96.745860)}
{pt3dadd(192852.000000,182004.000000,81350.000000,139.314042)}
{pt3dadd(192720.000000,181776.000000,80825.000000,139.314042)}

{create adhoc77}
{access adhoc77}
{connect adhoc77(1), adhoc76(0)}
{nseg = 1}
{strdef color color = "White"}
{pt3dclear()}
{pt3dadd(192720.000000,181776.000000,80825.000000,139.314042)}
{pt3dadd(191964.000000,182424.000000,81025.000000,96.745860)}
{pt3dadd(191904.000000,182508.000000,81200.000000,80.621550)}

{create adhoc78}
{access adhoc78}
{connect adhoc78(1), adhoc76(0)}
{nseg = 1}
{strdef color color = "White"}
{pt3dclear()}
{pt3dadd(192720.000000,181776.000000,80825.000000,139.314042)}
{pt3dadd(192744.000000,181464.000000,80450.000000,200.612214)}
{pt3dadd(192816.000000,181056.000000,80250.000000,169.963128)}
{pt3dadd(192816.000000,180696.000000,79875.000000,139.314042)}
{pt3dadd(193452.000000,180384.000000,79775.000000,80.621550)}

{create adhoc79}
{access adhoc79}
{connect adhoc79(1), adhoc19(0)}
{nseg = 1}
{strdef color color = "White"}
{pt3dclear()}
{pt3dadd(192144.000000,199092.000000,94400.000000,1490.565402)}
{pt3dadd(192348.000000,198792.000000,95475.000000,2146.414176)}
{pt3dadd(192480.000000,198672.000000,96475.000000,2253.734910)}
{pt3dadd(192672.000000,198324.000000,97200.000000,2361.055644)}
{pt3dadd(192816.000000,198300.000000,98250.000000,2468.376378)}
{pt3dadd(193080.000000,198276.000000,99600.000000,2575.697112)}
{pt3dadd(193344.000000,198252.000000,100800.000000,2304.414184)}
{pt3dadd(193320.000000,198036.000000,101825.000000,2033.131257)}
{pt3dadd(192900.000000,197988.000000,103100.000000,1761.848329)}
{pt3dadd(192540.000000,197916.000000,103975.000000,1490.565402)}
{pt3dadd(192444.000000,197112.000000,104800.000000,1565.093664)}
{pt3dadd(192420.000000,196260.000000,105950.000000,1639.621926)}
{pt3dadd(192384.000000,196068.000000,106875.000000,1714.150188)}
{pt3dadd(192072.000000,195396.000000,108025.000000,1788.678450)}
{pt3dadd(192036.000000,195072.000000,109475.000000,1652.043308)}
{pt3dadd(191952.000000,194700.000000,110525.000000,1515.408165)}
{pt3dadd(191136.000000,193692.000000,111475.000000,1378.773023)}
{pt3dadd(190140.000000,193176.000000,112050.000000,1242.137880)}
{pt3dadd(189396.000000,192240.000000,113600.000000,1147.252361)}
{pt3dadd(188544.000000,190524.000000,114675.000000,1052.366841)}
{pt3dadd(187668.000000,188856.000000,116300.000000,957.481322)}
{pt3dadd(186900.000000,188304.000000,117275.000000,862.595802)}
{pt3dadd(186024.000000,187404.000000,118225.000000,826.654307)}
{pt3dadd(184932.000000,186396.000000,120175.000000,790.712811)}
{pt3dadd(184356.000000,185388.000000,121300.000000,754.771316)}
{pt3dadd(182664.000000,184548.000000,122350.000000,718.829820)}
{pt3dadd(180840.000000,183816.000000,124225.000000,754.771316)}
{pt3dadd(178956.000000,182748.000000,125375.000000,790.712811)}
{pt3dadd(178236.000000,181740.000000,126200.000000,826.654307)}
{pt3dadd(177516.000000,180948.000000,126900.000000,862.595802)}
{pt3dadd(176268.000000,180180.000000,127550.000000,771.743696)}
{pt3dadd(175392.000000,179064.000000,127600.000000,680.891589)}
{pt3dadd(174660.000000,179160.000000,127850.000000,590.039483)}
{pt3dadd(174096.000000,177828.000000,127875.000000,499.187376)}
{pt3dadd(173292.000000,177360.000000,127975.000000,518.156496)}
{pt3dadd(172548.000000,177348.000000,128875.000000,537.125616)}
{pt3dadd(172332.000000,176712.000000,128500.000000,556.094736)}
{pt3dadd(171372.000000,176460.000000,128850.000000,575.063856)}
{pt3dadd(169812.000000,174576.000000,130250.000000,611.005347)}
{pt3dadd(168624.000000,172692.000000,130975.000000,646.946838)}
{pt3dadd(167544.000000,171060.000000,132025.000000,682.888329)}
{pt3dadd(165852.000000,169584.000000,133050.000000,718.829820)}
{pt3dadd(164988.000000,168408.000000,133550.000000,718.829820)}
{pt3dadd(163656.000000,167232.000000,134050.000000,718.829820)}
{pt3dadd(162828.000000,166908.000000,134475.000000,718.829820)}
{pt3dadd(161028.000000,166068.000000,135400.000000,718.829820)}
{pt3dadd(158880.000000,165384.000000,136750.000000,746.145369)}
{pt3dadd(157980.000000,165000.000000,137600.000000,773.460918)}
{pt3dadd(158352.000000,164400.000000,138600.000000,800.776467)}
{pt3dadd(156336.000000,162552.000000,140350.000000,828.092016)}
{pt3dadd(155292.000000,161232.000000,141350.000000,931.603482)}
{pt3dadd(154704.000000,160704.000000,143050.000000,1035.114948)}
{pt3dadd(154020.000000,159264.000000,144025.000000,1138.626414)}
{pt3dadd(153180.000000,158604.000000,145175.000000,1242.137880)}
{pt3dadd(152400.000000,157644.000000,146250.000000,1408.832784)}
{pt3dadd(151392.000000,156612.000000,148425.000000,1575.527688)}
{pt3dadd(151476.000000,156552.000000,150425.000000,1742.222592)}
{pt3dadd(150984.000000,154884.000000,151750.000000,1908.917496)}
{pt3dadd(151164.000000,153732.000000,153525.000000,2075.612400)}
{pt3dadd(150648.000000,153072.000000,154650.000000,2242.307304)}
{pt3dadd(150624.000000,152544.000000,155950.000000,2409.002208)}
{pt3dadd(150684.000000,151860.000000,157150.000000,2575.697112)}
{pt3dadd(150420.000000,151176.000000,158750.000000,2304.414184)}
{pt3dadd(150504.000000,150024.000000,159850.000000,2033.131257)}
{pt3dadd(151068.000000,149124.000000,160775.000000,1761.848329)}
{pt3dadd(152580.000000,148272.000000,161600.000000,1490.565402)}
{pt3dadd(154068.000000,147024.000000,162450.000000,1297.631507)}
{pt3dadd(155388.000000,146076.000000,163250.000000,1104.697611)}
{pt3dadd(156816.000000,144912.000000,163525.000000,911.763715)}
{pt3dadd(157428.000000,143976.000000,163975.000000,718.829820)}
{pt3dadd(158796.000000,142752.000000,164850.000000,911.763715)}
{pt3dadd(159852.000000,141360.000000,165650.000000,1104.697611)}
{pt3dadd(160860.000000,140244.000000,166275.000000,1297.631507)}
{pt3dadd(161424.000000,138864.000000,167025.000000,1490.565402)}
{pt3dadd(162252.000000,138444.000000,167825.000000,18.000000)}
{pt3dadd(162588.000000,137364.000000,168275.000000,803.254122)}
{pt3dadd(162432.000000,136716.000000,169025.000000,1588.508244)}
{pt3dadd(162384.000000,135888.000000,169625.000000,2373.762366)}
{pt3dadd(162480.000000,135540.000000,170625.000000,2316.925319)}
{pt3dadd(162588.000000,135216.000000,171725.000000,2260.088271)}
{pt3dadd(162696.000000,134568.000000,173600.000000,2203.251223)}
{pt3dadd(161904.000000,133920.000000,174900.000000,2146.414176)}
{pt3dadd(161316.000000,133848.000000,176000.000000,2146.414176)}
{pt3dadd(161184.000000,133908.000000,177325.000000,2146.414176)}
{pt3dadd(161088.000000,133968.000000,178525.000000,2146.414176)}
{pt3dadd(160992.000000,133980.000000,179800.000000,2146.414176)}
{pt3dadd(160668.000000,133548.000000,181100.000000,2060.557668)}
{pt3dadd(160272.000000,132852.000000,182550.000000,1788.678450)}

{create adhoc80}
{access adhoc80}
{connect adhoc80(1), adhoc18(0)}
{nseg = 1}
{strdef color color = "White"}
{pt3dclear()}
{pt3dadd(185472.000000,207048.000000,89275.000000,1242.137880)}
{pt3dadd(184812.000000,208440.000000,89300.000000,1242.137880)}
{pt3dadd(184812.000000,209616.000000,87950.000000,1479.634551)}
{pt3dadd(184692.000000,209904.000000,87225.000000,1717.131222)}
{pt3dadd(184188.000000,210888.000000,87075.000000,1490.565402)}

{create adhoc81}
{access adhoc81}
{connect adhoc81(1), adhoc80(0)}
{nseg = 1}
{strdef color color = "White"}
{pt3dclear()}
{pt3dadd(184188.000000,210888.000000,87075.000000,1490.565402)}
{pt3dadd(182304.000000,211140.000000,86300.000000,116.095032)}
{pt3dadd(181236.000000,211284.000000,86000.000000,144.267426)}
{pt3dadd(180600.000000,211392.000000,85575.000000,172.439820)}
{pt3dadd(180288.000000,211104.000000,85050.000000,200.612214)}
{pt3dadd(180120.000000,211008.000000,84850.000000,184.884210)}

{create adhoc82}
{access adhoc82}
{connect adhoc82(1), adhoc80(0)}
{nseg = 1}
{strdef color color = "White"}
{pt3dclear()}
{pt3dadd(184188.000000,210888.000000,87075.000000,1490.565402)}
{pt3dadd(183864.000000,211704.000000,86800.000000,1430.942742)}
{pt3dadd(183576.000000,212388.000000,86475.000000,1430.942784)}
{pt3dadd(183372.000000,213120.000000,86100.000000,1430.942826)}
{pt3dadd(183168.000000,213816.000000,85700.000000,1430.942868)}
{pt3dadd(183084.000000,214416.000000,85450.000000,1430.942868)}
