# Supplementary material for: Full reconstruction of large lobula plate tangential cells in Drosophila from a 3D EM dataset
Source: PLoS One. 2018 Nov 28;13(11):e0207828. doi: 10.1371/journal.pone.0207828 (PMC6261601; doi:10.1371/journal.pone.0207828)
Supplement: S1 Dataset — (ZIP) [file pone.0207828.s001.zip › Diameter hoc/VS_VSL_preliminary/Old Diameters Mar13_VS_VSL_HS/VS6/2_14_795_smaurer_003.018.hoc]

/* created with nml2hocm */

{create adhoc1}
{access adhoc1}
{nseg = 1}
{strdef color color = "White"}
{pt3dclear()}
{pt3dadd(169584.000000,231084.000000,78900.000000,200.612214)}
{pt3dadd(169560.000000,230916.000000,78900.000000,200.612214)}
{pt3dadd(169392.000000,230712.000000,78825.000000,196.599960)}
{pt3dadd(169296.000000,230532.000000,78800.000000,192.587706)}
{pt3dadd(169296.000000,230172.000000,79000.000000,192.587711)}
{pt3dadd(169464.000000,229908.000000,79350.000000,192.587715)}
{pt3dadd(169692.000000,229644.000000,79400.000000,192.587720)}
{pt3dadd(169896.000000,229380.000000,79650.000000,192.587724)}
{pt3dadd(170208.000000,228780.000000,79550.000000,240.734646)}

{create adhoc2}
{access adhoc2}
{connect adhoc2(1), adhoc1(0)}
{nseg = 1}
{strdef color color = "White"}
{pt3dclear()}
{pt3dadd(170208.000000,228780.000000,79550.000000,240.734646)}
{pt3dadd(170196.000000,229716.000000,80400.000000,200.612214)}
{pt3dadd(170364.000000,230028.000000,80700.000000,139.314042)}

{create adhoc3}
{access adhoc3}
{connect adhoc3(1), adhoc1(0)}
{nseg = 1}
{strdef color color = "White"}
{pt3dclear()}
{pt3dadd(170208.000000,228780.000000,79550.000000,240.734646)}
{pt3dadd(170400.000000,228576.000000,79375.000000,399.349944)}
{pt3dadd(170592.000000,228480.000000,79250.000000,320.042295)}
{pt3dadd(170772.000000,228288.000000,79075.000000,240.734646)}
{pt3dadd(171036.000000,226344.000000,77525.000000,862.595802)}

{create adhoc4}
{access adhoc4}
{connect adhoc4(1), adhoc3(0)}
{nseg = 1}
{strdef color color = "White"}
{pt3dclear()}
{pt3dadd(171036.000000,226344.000000,77525.000000,862.595802)}
{pt3dadd(171360.000000,226224.000000,77675.000000,862.595802)}
{pt3dadd(171600.000000,226128.000000,77825.000000,993.710358)}
{pt3dadd(171900.000000,226104.000000,77950.000000,1004.061506)}
{pt3dadd(172176.000000,226020.000000,78100.000000,1014.412653)}
{pt3dadd(172584.000000,225864.000000,78175.000000,1024.763801)}
{pt3dadd(172968.000000,225864.000000,78325.000000,1035.114948)}
{pt3dadd(173292.000000,225768.000000,78325.000000,1086.870681)}
{pt3dadd(173676.000000,225648.000000,78700.000000,1138.626414)}
{pt3dadd(174048.000000,225552.000000,79000.000000,1190.382147)}
{pt3dadd(174540.000000,225216.000000,79300.000000,1242.137880)}
{pt3dadd(174960.000000,224832.000000,79550.000000,1229.716530)}
{pt3dadd(175356.000000,224592.000000,79925.000000,1217.295180)}
{pt3dadd(175752.000000,224136.000000,80150.000000,1204.873830)}
{pt3dadd(176148.000000,223932.000000,80375.000000,1192.452480)}
{pt3dadd(176568.000000,223500.000000,80600.000000,1142.766968)}
{pt3dadd(177024.000000,223308.000000,81100.000000,1093.081455)}
{pt3dadd(177396.000000,223212.000000,81175.000000,1043.395943)}
{pt3dadd(177744.000000,222864.000000,81650.000000,993.710430)}
{pt3dadd(178140.000000,222480.000000,81975.000000,1035.114948)}

{create adhoc5}
{access adhoc5}
{connect adhoc5(1), adhoc4(0)}
{nseg = 1}
{strdef color color = "White"}
{pt3dclear()}
{pt3dadd(178140.000000,222480.000000,81975.000000,1035.114948)}
{pt3dadd(178368.000000,222276.000000,81925.000000,1035.114948)}
{pt3dadd(178800.000000,222108.000000,81900.000000,1138.626414)}
{pt3dadd(179148.000000,221748.000000,82325.000000,1242.137880)}
{pt3dadd(179460.000000,221412.000000,82575.000000,1242.137880)}
{pt3dadd(179856.000000,221052.000000,82850.000000,1242.137880)}
{pt3dadd(180168.000000,220848.000000,82925.000000,1242.137880)}
{pt3dadd(180480.000000,220344.000000,83200.000000,1242.137880)}
{pt3dadd(180660.000000,220056.000000,83275.000000,1229.716498)}
{pt3dadd(180840.000000,219624.000000,83350.000000,1217.295117)}
{pt3dadd(181128.000000,219300.000000,83650.000000,1204.873736)}
{pt3dadd(181260.000000,219048.000000,83950.000000,1192.452354)}
{pt3dadd(181356.000000,218700.000000,84250.000000,1035.114948)}

{create adhoc6}
{access adhoc6}
{connect adhoc6(1), adhoc5(0)}
{nseg = 1}
{strdef color color = "White"}
{pt3dclear()}
{pt3dadd(181356.000000,218700.000000,84250.000000,1035.114948)}
{pt3dadd(181380.000000,218556.000000,84250.000000,1035.114948)}
{pt3dadd(181620.000000,218220.000000,84225.000000,1035.114948)}
{pt3dadd(182028.000000,217932.000000,84525.000000,1035.114948)}

{create adhoc7}
{access adhoc7}
{connect adhoc7(1), adhoc6(0)}
{nseg = 1}
{strdef color color = "White"}
{pt3dclear()}
{pt3dadd(182028.000000,217932.000000,84525.000000,1035.114948)}
{pt3dadd(182232.000000,217488.000000,84900.000000,1242.137880)}
{pt3dadd(182172.000000,217104.000000,84875.000000,1242.137880)}
{pt3dadd(182340.000000,216660.000000,84825.000000,1242.137880)}
{pt3dadd(182508.000000,216300.000000,84775.000000,1242.137880)}
{pt3dadd(182676.000000,215964.000000,84725.000000,1242.137880)}
{pt3dadd(182892.000000,215532.000000,85025.000000,1242.137880)}
{pt3dadd(183108.000000,215004.000000,85325.000000,1190.382147)}
{pt3dadd(183324.000000,214560.000000,85625.000000,1138.626414)}
{pt3dadd(183420.000000,214140.000000,85850.000000,1086.870681)}
{pt3dadd(183444.000000,213840.000000,85800.000000,1035.114948)}
{pt3dadd(183468.000000,213516.000000,85750.000000,1148.977562)}
{pt3dadd(183480.000000,213516.000000,85850.000000,1262.840175)}
{pt3dadd(183516.000000,213156.000000,86100.000000,1376.702788)}
{pt3dadd(183552.000000,212784.000000,86350.000000,1490.565402)}
{pt3dadd(183552.000000,212532.000000,86425.000000,1475.659769)}
{pt3dadd(183756.000000,212220.000000,86700.000000,1460.754135)}
{pt3dadd(183960.000000,211884.000000,86975.000000,1445.848502)}
{pt3dadd(184164.000000,211512.000000,87250.000000,1430.942868)}
{pt3dadd(184344.000000,211152.000000,87375.000000,1510.739042)}
{pt3dadd(184332.000000,210816.000000,87475.000000,1590.535215)}
{pt3dadd(184536.000000,210588.000000,87400.000000,1670.331389)}
{pt3dadd(184524.000000,210240.000000,87550.000000,1750.127562)}
{pt3dadd(184512.000000,209832.000000,87700.000000,1827.735156)}
{pt3dadd(184692.000000,209496.000000,87800.000000,1905.342750)}
{pt3dadd(184908.000000,209160.000000,88100.000000,1982.950344)}
{pt3dadd(185148.000000,208740.000000,88600.000000,2060.557938)}
{pt3dadd(185436.000000,208440.000000,87925.000000,1903.154171)}
{pt3dadd(185388.000000,208104.000000,88575.000000,1745.750403)}
{pt3dadd(185340.000000,207780.000000,89225.000000,1588.346636)}
{pt3dadd(185400.000000,207468.000000,89125.000000,1430.942868)}
{pt3dadd(185352.000000,207276.000000,88900.000000,1242.137880)}

{create adhoc8}
{access adhoc8}
{connect adhoc8(1), adhoc7(0)}
{nseg = 1}
{strdef color color = "White"}
{pt3dclear()}
{pt3dadd(185352.000000,207276.000000,88900.000000,1242.137880)}
{pt3dadd(185664.000000,206844.000000,89375.000000,1242.137880)}
{pt3dadd(185796.000000,206484.000000,90050.000000,1035.114912)}
{pt3dadd(186012.000000,206232.000000,90125.000000,828.091944)}
{pt3dadd(186156.000000,205908.000000,90100.000000,869.496547)}
{pt3dadd(186444.000000,205596.000000,90450.000000,910.901151)}
{pt3dadd(186768.000000,205272.000000,90425.000000,952.305755)}
{pt3dadd(187140.000000,204852.000000,90825.000000,993.710358)}
{pt3dadd(187584.000000,204276.000000,91000.000000,1117.924119)}
{pt3dadd(187608.000000,203904.000000,91150.000000,1242.137880)}
{pt3dadd(187956.000000,203448.000000,91400.000000,1366.351641)}
{pt3dadd(188460.000000,202956.000000,91575.000000,1490.565402)}
{pt3dadd(188856.000000,202512.000000,91800.000000,1428.458522)}
{pt3dadd(189300.000000,202176.000000,93500.000000,1366.351641)}
{pt3dadd(189876.000000,201048.000000,93500.000000,1304.244761)}
{pt3dadd(190992.000000,199584.000000,93500.000000,1242.137880)}
{pt3dadd(192312.000000,198792.000000,93500.000000,1490.565402)}

{create adhoc9}
{access adhoc9}
{connect adhoc9(1), adhoc8(0)}
{nseg = 1}
{strdef color color = "White"}
{pt3dclear()}
{pt3dadd(192312.000000,198792.000000,93500.000000,1490.565402)}
{pt3dadd(192264.000000,198708.000000,93850.000000,1788.678450)}
{pt3dadd(192180.000000,198888.000000,94400.000000,1878.112382)}
{pt3dadd(192420.000000,198732.000000,95225.000000,1967.546313)}
{pt3dadd(192528.000000,198492.000000,96325.000000,2056.980245)}
{pt3dadd(192588.000000,198480.000000,96975.000000,2146.414176)}
{pt3dadd(192840.000000,198240.000000,97575.000000,2253.734910)}
{pt3dadd(192816.000000,198048.000000,98200.000000,2361.055644)}
{pt3dadd(192792.000000,197928.000000,98850.000000,2468.376378)}
{pt3dadd(193152.000000,197844.000000,99650.000000,2575.697112)}
{pt3dadd(193284.000000,197904.000000,100450.000000,2426.306670)}
{pt3dadd(193284.000000,197820.000000,101175.000000,2276.916228)}
{pt3dadd(193272.000000,197892.000000,102000.000000,2127.525786)}
{pt3dadd(192924.000000,197772.000000,102650.000000,1978.135344)}
{pt3dadd(192732.000000,197640.000000,103450.000000,2127.525786)}
{pt3dadd(192636.000000,197280.000000,104350.000000,2276.916228)}
{pt3dadd(192708.000000,196968.000000,105025.000000,2426.306670)}
{pt3dadd(192636.000000,196680.000000,105500.000000,2575.697112)}
{pt3dadd(192444.000000,196188.000000,106125.000000,2575.697112)}
{pt3dadd(192312.000000,195876.000000,106850.000000,2575.697112)}
{pt3dadd(192276.000000,195744.000000,107350.000000,2575.697112)}
{pt3dadd(192120.000000,195468.000000,108025.000000,2575.697112)}
{pt3dadd(192216.000000,195384.000000,108450.000000,1296.848556)}
{pt3dadd(192012.000000,195660.000000,108825.000000,18.000000)}
{pt3dadd(191952.000000,195084.000000,109150.000000,867.565683)}
{pt3dadd(192012.000000,194808.000000,109525.000000,1717.131366)}
{pt3dadd(191868.000000,194664.000000,109950.000000,1598.382995)}
{pt3dadd(191772.000000,194424.000000,110400.000000,1479.634623)}
{pt3dadd(191424.000000,193944.000000,110900.000000,1360.886252)}
{pt3dadd(191256.000000,193692.000000,111250.000000,1242.137880)}
{pt3dadd(190860.000000,193548.000000,111650.000000,1190.382147)}
{pt3dadd(190620.000000,192996.000000,112175.000000,1138.626414)}
{pt3dadd(190116.000000,192348.000000,112825.000000,1086.870681)}
{pt3dadd(189804.000000,192000.000000,113200.000000,1035.114948)}
{pt3dadd(189456.000000,191640.000000,113625.000000,991.985162)}
{pt3dadd(189192.000000,191028.000000,114100.000000,948.855375)}
{pt3dadd(188796.000000,190656.000000,114625.000000,905.725589)}
{pt3dadd(188544.000000,190164.000000,115150.000000,862.595802)}
{pt3dadd(188400.000000,189480.000000,115650.000000,905.725589)}
{pt3dadd(188124.000000,188964.000000,116100.000000,948.855375)}
{pt3dadd(187728.000000,188376.000000,116675.000000,991.985162)}
{pt3dadd(187332.000000,188004.000000,117150.000000,1035.114948)}
{pt3dadd(186936.000000,187572.000000,117750.000000,991.985162)}
{pt3dadd(186540.000000,187128.000000,118225.000000,948.855375)}
{pt3dadd(186132.000000,186912.000000,118800.000000,905.725589)}
{pt3dadd(185760.000000,186768.000000,119350.000000,862.595802)}
{pt3dadd(185652.000000,186432.000000,119750.000000,853.969856)}
{pt3dadd(185412.000000,185952.000000,120100.000000,845.343909)}
{pt3dadd(184812.000000,185712.000000,120500.000000,836.717962)}
{pt3dadd(184596.000000,185532.000000,121000.000000,828.092016)}
{pt3dadd(184236.000000,185148.000000,121525.000000,800.776467)}
{pt3dadd(183540.000000,184896.000000,121975.000000,773.460918)}
{pt3dadd(182856.000000,184440.000000,122450.000000,746.145369)}
{pt3dadd(182232.000000,184008.000000,122975.000000,718.829820)}
{pt3dadd(181644.000000,183828.000000,123425.000000,754.771316)}
{pt3dadd(180984.000000,183516.000000,123975.000000,790.712811)}
{pt3dadd(180324.000000,183252.000000,124425.000000,826.654307)}
{pt3dadd(179820.000000,182940.000000,124825.000000,862.595802)}
{pt3dadd(179316.000000,182628.000000,125200.000000,862.595802)}
{pt3dadd(178956.000000,182088.000000,125750.000000,862.595802)}
{pt3dadd(178308.000000,181572.000000,126250.000000,862.595802)}
{pt3dadd(177660.000000,181056.000000,126625.000000,862.595802)}
{pt3dadd(177468.000000,180768.000000,127050.000000,719.167248)}
{pt3dadd(175728.000000,179124.000000,127425.000000,575.738694)}
{pt3dadd(175488.000000,178956.000000,127425.000000,432.310140)}
{pt3dadd(175200.000000,178812.000000,127475.000000,288.881586)}
{pt3dadd(174840.000000,178380.000000,127525.000000,396.368644)}
{pt3dadd(174468.000000,178164.000000,127675.000000,503.855703)}
{pt3dadd(174156.000000,177996.000000,127825.000000,611.342762)}
{pt3dadd(173892.000000,177672.000000,127875.000000,718.829820)}
{pt3dadd(173652.000000,177420.000000,127925.000000,787.549955)}
{pt3dadd(173352.000000,177180.000000,128025.000000,856.270089)}
{pt3dadd(173076.000000,177204.000000,128225.000000,924.990223)}
{pt3dadd(172788.000000,176964.000000,128175.000000,993.710358)}
{pt3dadd(172512.000000,176832.000000,128375.000000,960.931719)}
{pt3dadd(172188.000000,176556.000000,128650.000000,928.153080)}
{pt3dadd(171864.000000,176016.000000,128725.000000,895.374441)}
{pt3dadd(171576.000000,175812.000000,128900.000000,862.595802)}
{pt3dadd(171360.000000,175632.000000,129025.000000,796.703072)}
{pt3dadd(171036.000000,175392.000000,129100.000000,730.810341)}
{pt3dadd(170772.000000,175152.000000,129200.000000,664.917611)}
{pt3dadd(170472.000000,174912.000000,129325.000000,599.024880)}
{pt3dadd(170184.000000,174516.000000,129525.000000,628.976115)}
{pt3dadd(169932.000000,174444.000000,129725.000000,658.927350)}
{pt3dadd(169632.000000,174000.000000,130025.000000,688.878585)}
{pt3dadd(169344.000000,173712.000000,130250.000000,718.829820)}
{pt3dadd(169092.000000,173388.000000,130575.000000,797.901102)}
{pt3dadd(168828.000000,172980.000000,130875.000000,876.972384)}
{pt3dadd(168564.000000,172728.000000,131100.000000,956.043666)}
{pt3dadd(168312.000000,172380.000000,131225.000000,1035.114948)}
{pt3dadd(168048.000000,172020.000000,131375.000000,991.985162)}
{pt3dadd(167784.000000,171708.000000,131600.000000,948.855375)}
{pt3dadd(167544.000000,171168.000000,131850.000000,905.725589)}
{pt3dadd(167268.000000,170964.000000,131975.000000,862.595802)}
{pt3dadd(166896.000000,170640.000000,132325.000000,862.595802)}
{pt3dadd(166536.000000,169944.000000,132425.000000,862.595802)}
{pt3dadd(166092.000000,169548.000000,132600.000000,862.595802)}
{pt3dadd(165732.000000,169032.000000,132725.000000,862.595802)}
{pt3dadd(165408.000000,168792.000000,133000.000000,826.654307)}
{pt3dadd(165096.000000,168432.000000,133125.000000,790.712811)}
{pt3dadd(164748.000000,168228.000000,133225.000000,754.771316)}
{pt3dadd(164400.000000,167784.000000,133425.000000,718.829820)}
{pt3dadd(163320.000000,167124.000000,133775.000000,746.145369)}
{pt3dadd(162372.000000,166488.000000,134275.000000,773.460918)}
{pt3dadd(161352.000000,165924.000000,134950.000000,800.776467)}
{pt3dadd(161100.000000,165648.000000,135300.000000,828.092016)}
{pt3dadd(160776.000000,165372.000000,135475.000000,770.825232)}
{pt3dadd(160404.000000,165384.000000,135675.000000,713.558448)}
{pt3dadd(160116.000000,165396.000000,135875.000000,656.291664)}
{pt3dadd(159828.000000,165408.000000,136075.000000,599.024880)}
{pt3dadd(159588.000000,165420.000000,136200.000000,599.024880)}
{pt3dadd(159216.000000,165444.000000,136275.000000,599.024880)}
{pt3dadd(158976.000000,165096.000000,136800.000000,599.024880)}
{pt3dadd(158088.000000,164748.000000,137450.000000,599.024880)}
{pt3dadd(158172.000000,164604.000000,138225.000000,593.034624)}
{pt3dadd(158352.000000,163824.000000,138675.000000,587.044368)}
{pt3dadd(157908.000000,163176.000000,139175.000000,581.054112)}
{pt3dadd(157476.000000,162672.000000,139700.000000,575.063856)}
{pt3dadd(156564.000000,162240.000000,140350.000000,690.076629)}
{pt3dadd(155916.000000,162072.000000,140925.000000,805.089402)}
{pt3dadd(155340.000000,161388.000000,141575.000000,920.102175)}
{pt3dadd(155016.000000,160608.000000,142175.000000,1035.114948)}
{pt3dadd(154836.000000,160176.000000,142725.000000,956.043666)}
{pt3dadd(154560.000000,159900.000000,143375.000000,876.972384)}
{pt3dadd(154080.000000,159324.000000,144000.000000,797.901102)}
{pt3dadd(153648.000000,158328.000000,144625.000000,718.829820)}
{pt3dadd(153288.000000,157932.000000,145250.000000,754.771316)}
{pt3dadd(152856.000000,157584.000000,145925.000000,790.712811)}
{pt3dadd(152508.000000,156852.000000,146450.000000,826.654307)}
{pt3dadd(152256.000000,156576.000000,146900.000000,862.595802)}
{pt3dadd(152160.000000,156660.000000,147350.000000,1094.116464)}
{pt3dadd(151920.000000,156744.000000,147975.000000,1325.637126)}
{pt3dadd(151680.000000,156144.000000,148550.000000,1557.157788)}
{pt3dadd(151584.000000,156108.000000,149050.000000,1788.678450)}
{pt3dadd(151596.000000,156012.000000,149575.000000,1788.678450)}
{pt3dadd(151788.000000,155772.000000,150025.000000,1788.678450)}
{pt3dadd(151428.000000,155892.000000,150675.000000,1788.678450)}
{pt3dadd(151260.000000,155652.000000,151350.000000,1788.678450)}
{pt3dadd(151164.000000,154872.000000,151975.000000,1878.112382)}
{pt3dadd(151212.000000,154368.000000,152625.000000,1967.546313)}
{pt3dadd(151224.000000,154008.000000,153375.000000,2056.980245)}
{pt3dadd(151092.000000,153384.000000,154025.000000,2146.414176)}
{pt3dadd(151044.000000,152940.000000,154675.000000,2253.734910)}
{pt3dadd(150960.000000,152868.000000,155325.000000,2361.055644)}
{pt3dadd(150744.000000,152796.000000,156125.000000,2468.376378)}
{pt3dadd(150600.000000,152352.000000,156725.000000,2575.697112)}
{pt3dadd(150624.000000,151920.000000,157400.000000,2378.942446)}
{pt3dadd(150684.000000,151560.000000,157975.000000,2182.187781)}
{pt3dadd(150624.000000,151164.000000,158750.000000,1985.433116)}
{pt3dadd(150564.000000,150612.000000,159425.000000,1788.678450)}
{pt3dadd(150780.000000,150144.000000,160075.000000,1714.150188)}
{pt3dadd(151200.000000,149556.000000,160650.000000,1639.621926)}
{pt3dadd(151992.000000,148812.000000,161300.000000,1565.093664)}
{pt3dadd(152856.000000,148248.000000,161800.000000,1490.565402)}
{pt3dadd(153672.000000,147552.000000,162500.000000,1267.680271)}
{pt3dadd(155112.000000,145908.000000,163025.000000,1044.795141)}
{pt3dadd(155808.000000,145464.000000,163225.000000,821.910011)}
{pt3dadd(156576.000000,145128.000000,163350.000000,599.024880)}
{pt3dadd(157152.000000,144804.000000,163375.000000,708.047397)}
{pt3dadd(157344.000000,144396.000000,163500.000000,817.069914)}
{pt3dadd(157536.000000,144072.000000,163775.000000,926.092431)}
{pt3dadd(158064.000000,143712.000000,164000.000000,1035.114948)}
{pt3dadd(158604.000000,143400.000000,164125.000000,1086.870681)}
{pt3dadd(158772.000000,143076.000000,164400.000000,1138.626414)}
{pt3dadd(159156.000000,142692.000000,164475.000000,1190.382147)}
{pt3dadd(159420.000000,142392.000000,164625.000000,1242.137880)}
{pt3dadd(159780.000000,142080.000000,164950.000000,1304.244761)}
{pt3dadd(159972.000000,141732.000000,165075.000000,1366.351641)}
{pt3dadd(160128.000000,141336.000000,165200.000000,1428.458522)}
{pt3dadd(160356.000000,140880.000000,165550.000000,1490.565402)}
{pt3dadd(160968.000000,140436.000000,166100.000000,1490.565402)}
{pt3dadd(161052.000000,139980.000000,166325.000000,1490.565402)}
{pt3dadd(161172.000000,139668.000000,166725.000000,1490.565402)}
{pt3dadd(161604.000000,139308.000000,166975.000000,1490.565402)}
{pt3dadd(161904.000000,138864.000000,167250.000000,1565.093664)}
{pt3dadd(162240.000000,138420.000000,167650.000000,1639.621926)}
{pt3dadd(162300.000000,138072.000000,168200.000000,1714.150188)}
{pt3dadd(162348.000000,137640.000000,168725.000000,1788.678450)}
{pt3dadd(162708.000000,137340.000000,169275.000000,1959.676150)}
{pt3dadd(162804.000000,137028.000000,169375.000000,2130.673851)}
{pt3dadd(162744.000000,136656.000000,169575.000000,2301.671551)}
/*{pt3dadd(162708.000000,135768.000000,170325.000000,2472.669252)}
{pt3dadd(162672.000000,135420.000000,171000.000000,2627.211046)}
{pt3dadd(162636.000000,135072.000000,171625.000000,2781.752841)}
{pt3dadd(162600.000000,134724.000000,172225.000000,2936.294635)}
{pt3dadd(162564.000000,134484.000000,172700.000000,3090.836430)}
{pt3dadd(162912.000000,134388.000000,173325.000000,3090.836430)}
{pt3dadd(162840.000000,134388.000000,174000.000000,3090.836430)}
{pt3dadd(161724.000000,134148.000000,174575.000000,3090.836430)}
{pt3dadd(161616.000000,134004.000000,175175.000000,3090.836430)}
{pt3dadd(161640.000000,134004.000000,175775.000000,2854.730867)}
{pt3dadd(161616.000000,133908.000000,176375.000000,2618.625303)}
{pt3dadd(161544.000000,133872.000000,177175.000000,2382.519739)}
{pt3dadd(161256.000000,134004.000000,178050.000000,2146.414176)}
{pt3dadd(161112.000000,134028.000000,178800.000000,2146.414176)}
{pt3dadd(161052.000000,134028.000000,179250.000000,2146.414176)}
{pt3dadd(160908.000000,133824.000000,179850.000000,2146.414176)}
{pt3dadd(160848.000000,133428.000000,180525.000000,2146.414176)}
{pt3dadd(160620.000000,133104.000000,181425.000000,2146.414176)}
{pt3dadd(160560.000000,132960.000000,182025.000000,2146.414176)}
{pt3dadd(160560.000000,132708.000000,182500.000000,2146.414176)}
{pt3dadd(160416.000000,132540.000000,182800.000000,2060.557668)}*/

{create adhoc10}
{access adhoc10}
{connect adhoc10(1), adhoc8(0)}
{nseg = 1}
{strdef color color = "White"}
{pt3dclear()}
{pt3dadd(192312.000000,198792.000000,93500.000000,1490.565402)}
{pt3dadd(193212.000000,196716.000000,92925.000000,718.829820)}
{pt3dadd(193632.000000,195600.000000,92375.000000,876.972384)}
{pt3dadd(194004.000000,194088.000000,92175.000000,1035.114948)}
{pt3dadd(194088.000000,193848.000000,91875.000000,1035.114948)}
{pt3dadd(194232.000000,193620.000000,91800.000000,1035.114948)}
{pt3dadd(194436.000000,193380.000000,91650.000000,1035.114948)}
{pt3dadd(194520.000000,193032.000000,91225.000000,1035.114948)}
{pt3dadd(194712.000000,192684.000000,90800.000000,956.043666)}
{pt3dadd(194688.000000,192396.000000,90475.000000,876.972384)}
{pt3dadd(194784.000000,192120.000000,90125.000000,797.901102)}
{pt3dadd(194940.000000,191856.000000,89600.000000,718.829820)}
{pt3dadd(194988.000000,191592.000000,89200.000000,797.901102)}
{pt3dadd(195072.000000,191328.000000,88825.000000,876.972384)}
{pt3dadd(195348.000000,191064.000000,88500.000000,956.043666)}
{pt3dadd(195372.000000,190740.000000,88250.000000,1035.114948)}
{pt3dadd(196200.000000,189564.000000,88250.000000,1035.114948)}
{pt3dadd(196860.000000,187896.000000,87950.000000,1035.114948)}
{pt3dadd(196788.000000,187524.000000,86750.000000,1035.114948)}
{pt3dadd(196788.000000,187128.000000,86525.000000,1035.114948)}
{pt3dadd(196608.000000,186624.000000,86425.000000,993.710358)}

{create adhoc11}
{access adhoc11}
{connect adhoc11(1), adhoc10(0)}
{nseg = 1}
{strdef color color = "White"}
{pt3dclear()}
{pt3dadd(196608.000000,186624.000000,86425.000000,993.710358)}
{pt3dadd(196536.000000,186156.000000,86300.000000,993.710358)}
{pt3dadd(196596.000000,185772.000000,86025.000000,952.305772)}
{pt3dadd(196680.000000,185364.000000,85975.000000,910.901187)}
{pt3dadd(196584.000000,185076.000000,85700.000000,869.496602)}
{pt3dadd(196512.000000,184764.000000,85625.000000,828.092016)}
{pt3dadd(196488.000000,184488.000000,85625.000000,869.496638)}
{pt3dadd(196584.000000,184116.000000,85475.000000,910.901259)}
{pt3dadd(196632.000000,183756.000000,85250.000000,952.305880)}
{pt3dadd(196596.000000,183468.000000,85100.000000,993.710502)}
{pt3dadd(196596.000000,183108.000000,85275.000000,924.990331)}
{pt3dadd(196716.000000,182712.000000,85225.000000,856.270161)}
{pt3dadd(196800.000000,182436.000000,85275.000000,787.549991)}
{pt3dadd(196860.000000,182004.000000,85200.000000,718.829820)}
{pt3dadd(196908.000000,181608.000000,85125.000000,754.771316)}
{pt3dadd(196992.000000,181008.000000,85150.000000,790.712811)}
{pt3dadd(197052.000000,180540.000000,85025.000000,826.654307)}
{pt3dadd(197016.000000,180108.000000,84975.000000,862.595802)}
{pt3dadd(196944.000000,179772.000000,84900.000000,862.595802)}
{pt3dadd(196956.000000,179640.000000,84900.000000,862.595802)}

{create adhoc12}
{access adhoc12}
{connect adhoc12(1), adhoc11(0)}
{nseg = 1}
{strdef color color = "White"}
{pt3dclear()}
{pt3dadd(196956.000000,179640.000000,84900.000000,862.595802)}
{pt3dadd(197076.000000,179304.000000,84700.000000,862.595802)}
{pt3dadd(197100.000000,178956.000000,84600.000000,862.595802)}
{pt3dadd(197184.000000,178440.000000,84425.000000,862.595802)}
{pt3dadd(197184.000000,177888.000000,84225.000000,862.595802)}
{pt3dadd(197184.000000,177480.000000,84075.000000,862.595802)}
{pt3dadd(197196.000000,177060.000000,83875.000000,895.374441)}
{pt3dadd(197220.000000,176172.000000,83625.000000,928.153080)}
{pt3dadd(197484.000000,175644.000000,83200.000000,960.931719)}
{pt3dadd(197544.000000,174948.000000,83275.000000,993.710358)}
{pt3dadd(197844.000000,174612.000000,83550.000000,924.990223)}
{pt3dadd(197904.000000,174348.000000,83400.000000,856.270089)}
{pt3dadd(197940.000000,174072.000000,83475.000000,787.549955)}
{pt3dadd(197940.000000,173868.000000,83525.000000,718.829820)}
{pt3dadd(198036.000000,173496.000000,83450.000000,688.878585)}
{pt3dadd(198204.000000,173196.000000,83500.000000,658.927350)}
{pt3dadd(198288.000000,172896.000000,83550.000000,628.976115)}
{pt3dadd(198252.000000,172632.000000,83400.000000,599.024880)}
{pt3dadd(198468.000000,171216.000000,83400.000000,599.024880)}
{pt3dadd(198960.000000,168516.000000,83400.000000,718.829820)}

{create adhoc13}
{access adhoc13}
{connect adhoc13(1), adhoc12(0)}
{nseg = 1}
{strdef color color = "White"}
{pt3dclear()}
{pt3dadd(198960.000000,168516.000000,83400.000000,718.829820)}
{pt3dadd(198996.000000,166224.000000,83400.000000,690.076602)}
{pt3dadd(199044.000000,165768.000000,83400.000000,594.631989)}
{pt3dadd(199356.000000,165564.000000,84225.000000,499.187376)}
{pt3dadd(200028.000000,162000.000000,84225.000000,862.595802)}

{create adhoc14}
{access adhoc14}
{connect adhoc14(1), adhoc13(0)}
{nseg = 1}
{strdef color color = "White"}
{pt3dclear()}
{pt3dadd(200028.000000,162000.000000,84225.000000,862.595802)}
{pt3dadd(200340.000000,160356.000000,84225.000000,862.595802)}
{pt3dadd(200412.000000,159960.000000,85275.000000,862.595802)}
{pt3dadd(200496.000000,159600.000000,85325.000000,862.595802)}
{pt3dadd(200520.000000,157980.000000,85325.000000,718.829820)}

{create adhoc15}
{access adhoc15}
{connect adhoc15(1), adhoc14(0)}
{nseg = 1}
{strdef color color = "White"}
{pt3dclear()}
{pt3dadd(200520.000000,157980.000000,85325.000000,718.829820)}
{pt3dadd(199896.000000,157572.000000,85200.000000,288.881586)}
{pt3dadd(199788.000000,157332.000000,85300.000000,288.881586)}
{pt3dadd(199680.000000,157128.000000,85325.000000,288.881586)}
{pt3dadd(199584.000000,156888.000000,85350.000000,288.881586)}
{pt3dadd(199560.000000,156600.000000,85350.000000,288.881586)}
{pt3dadd(199524.000000,156312.000000,85250.000000,320.658561)}
{pt3dadd(199488.000000,156072.000000,85125.000000,352.435536)}
{pt3dadd(199428.000000,155820.000000,84900.000000,384.212511)}
{pt3dadd(199296.000000,155496.000000,84700.000000,415.989486)}
{pt3dadd(199152.000000,155208.000000,84425.000000,398.656589)}
{pt3dadd(198936.000000,154848.000000,84250.000000,381.323691)}
{pt3dadd(198996.000000,154596.000000,84250.000000,363.990794)}
{pt3dadd(199092.000000,154296.000000,84175.000000,346.657896)}
{pt3dadd(199092.000000,152628.000000,83225.000000,384.790266)}
{pt3dadd(199092.000000,151296.000000,82000.000000,422.922636)}
{pt3dadd(198768.000000,150948.000000,81600.000000,461.055006)}
{pt3dadd(198456.000000,150684.000000,80900.000000,499.187376)}
{pt3dadd(198060.000000,150456.000000,80350.000000,524.146752)}
{pt3dadd(197520.000000,150204.000000,79825.000000,549.106128)}
{pt3dadd(196608.000000,150204.000000,78500.000000,574.065504)}
{pt3dadd(195768.000000,150204.000000,76800.000000,599.024880)}
{pt3dadd(195480.000000,150480.000000,76350.000000,574.065504)}
{pt3dadd(195240.000000,150636.000000,75925.000000,549.106128)}
{pt3dadd(195060.000000,151008.000000,75450.000000,524.146752)}
{pt3dadd(195072.000000,151068.000000,75050.000000,499.187376)}
{pt3dadd(194976.000000,151128.000000,74650.000000,484.802789)}
{pt3dadd(194580.000000,151104.000000,74200.000000,470.418201)}
{pt3dadd(194520.000000,150888.000000,73750.000000,456.033614)}
{pt3dadd(194424.000000,150720.000000,73325.000000,441.649026)}
{pt3dadd(194448.000000,150396.000000,72750.000000,415.989486)}
{pt3dadd(194604.000000,150228.000000,72275.000000,415.989486)}

{create adhoc16}
{access adhoc16}
{connect adhoc16(1), adhoc14(0)}
{nseg = 1}
{strdef color color = "White"}
{pt3dclear()}
{pt3dadd(200520.000000,157980.000000,85325.000000,718.829820)}
{pt3dadd(201084.000000,157596.000000,85975.000000,499.187376)}
{pt3dadd(201132.000000,157344.000000,86300.000000,524.146752)}
{pt3dadd(201264.000000,157020.000000,86550.000000,549.106128)}
{pt3dadd(201360.000000,156708.000000,86650.000000,574.065504)}
{pt3dadd(201456.000000,156444.000000,86925.000000,599.024880)}
{pt3dadd(201540.000000,156180.000000,87200.000000,664.917611)}
{pt3dadd(201504.000000,155928.000000,87325.000000,730.810341)}
{pt3dadd(201528.000000,155700.000000,87325.000000,796.703072)}
{pt3dadd(201540.000000,155448.000000,87325.000000,862.595802)}
{pt3dadd(201540.000000,155160.000000,87550.000000,826.654307)}
{pt3dadd(201480.000000,154812.000000,87825.000000,790.712811)}
{pt3dadd(201792.000000,154500.000000,87950.000000,754.771316)}
{pt3dadd(201660.000000,154200.000000,88050.000000,718.829820)}
{pt3dadd(201756.000000,153936.000000,88250.000000,718.829820)}
{pt3dadd(201924.000000,153636.000000,88375.000000,718.829820)}
{pt3dadd(202008.000000,153408.000000,88450.000000,718.829820)}
{pt3dadd(201972.000000,153228.000000,88525.000000,718.829820)}
{pt3dadd(201972.000000,153000.000000,88575.000000,711.641515)}
{pt3dadd(202020.000000,152808.000000,88575.000000,704.453211)}
{pt3dadd(202068.000000,152604.000000,88575.000000,697.264906)}
{pt3dadd(202116.000000,152388.000000,88625.000000,690.076602)}
{pt3dadd(202164.000000,152172.000000,88625.000000,667.313671)}
{pt3dadd(202188.000000,152016.000000,88625.000000,644.550741)}
{pt3dadd(202212.000000,151812.000000,88550.000000,621.787810)}
{pt3dadd(202236.000000,151680.000000,88650.000000,599.024880)}
{pt3dadd(202236.000000,151500.000000,88700.000000,553.266031)}
{pt3dadd(202200.000000,151284.000000,88675.000000,507.507183)}
{pt3dadd(202128.000000,149928.000000,88675.000000,461.748335)}
{pt3dadd(201756.000000,148128.000000,88675.000000,415.989486)}
{pt3dadd(202116.000000,147900.000000,89250.000000,567.409653)}
{pt3dadd(202200.000000,147684.000000,89375.000000,718.829820)}
{pt3dadd(202272.000000,147204.000000,89375.000000,718.829820)}

{create adhoc17}
{access adhoc17}
{connect adhoc17(1), adhoc16(0)}
{nseg = 1}
{strdef color color = "White"}
{pt3dclear()}
{pt3dadd(202272.000000,147204.000000,89375.000000,718.829820)}
{pt3dadd(202236.000000,146148.000000,89375.000000,718.829820)}
{pt3dadd(202008.000000,145620.000000,90200.000000,688.878585)}
{pt3dadd(201372.000000,143100.000000,90200.000000,658.927350)}
{pt3dadd(201096.000000,140040.000000,90200.000000,628.976115)}
{pt3dadd(200880.000000,137724.000000,90200.000000,599.024880)}
{pt3dadd(201012.000000,137496.000000,90200.000000,499.187376)}

{create adhoc18}
{access adhoc18}
{connect adhoc18(1), adhoc17(0)}
{nseg = 1}
{strdef color color = "White"}
{pt3dclear()}
{pt3dadd(201012.000000,137496.000000,90200.000000,499.187376)}
{pt3dadd(200760.000000,137076.000000,90050.000000,415.989486)}
{pt3dadd(200688.000000,136848.000000,90000.000000,436.788958)}
{pt3dadd(200604.000000,135432.000000,90000.000000,457.588431)}
{pt3dadd(200472.000000,135024.000000,89700.000000,478.387903)}
{pt3dadd(200472.000000,134688.000000,89550.000000,499.187376)}
{pt3dadd(200472.000000,134388.000000,89400.000000,524.146752)}
{pt3dadd(200400.000000,134112.000000,89250.000000,549.106128)}
{pt3dadd(200268.000000,133788.000000,89025.000000,574.065504)}
{pt3dadd(199800.000000,132996.000000,89050.000000,599.024880)}
{pt3dadd(199224.000000,131148.000000,89050.000000,574.065504)}
{pt3dadd(199164.000000,130896.000000,88650.000000,549.106128)}
{pt3dadd(199128.000000,130716.000000,88625.000000,524.146752)}
{pt3dadd(198768.000000,129384.000000,88625.000000,499.187376)}
{pt3dadd(198672.000000,129024.000000,88000.000000,461.055006)}
{pt3dadd(198648.000000,128664.000000,87800.000000,422.922636)}
{pt3dadd(198624.000000,128340.000000,87825.000000,384.790266)}
{pt3dadd(198624.000000,128064.000000,87800.000000,346.657896)}
{pt3dadd(198672.000000,127824.000000,87725.000000,384.790266)}
{pt3dadd(198732.000000,127524.000000,87850.000000,422.922636)}
{pt3dadd(198672.000000,127188.000000,87900.000000,461.055006)}
{pt3dadd(198420.000000,125340.000000,87900.000000,499.187376)}
{pt3dadd(198312.000000,124992.000000,87400.000000,478.387903)}
{pt3dadd(198072.000000,124656.000000,87250.000000,457.588431)}
{pt3dadd(197100.000000,122676.000000,87250.000000,436.788958)}
{pt3dadd(196800.000000,122376.000000,86825.000000,415.989486)}
{pt3dadd(196668.000000,122004.000000,86725.000000,436.788958)}
{pt3dadd(196524.000000,121764.000000,86625.000000,457.588431)}
{pt3dadd(196308.000000,121500.000000,86400.000000,478.387903)}
{pt3dadd(195780.000000,120012.000000,86400.000000,499.187376)}
{pt3dadd(195504.000000,119724.000000,85925.000000,432.166851)}
{pt3dadd(195504.000000,119424.000000,85975.000000,365.146326)}
{pt3dadd(195444.000000,119100.000000,85950.000000,298.125801)}
{pt3dadd(195336.000000,118776.000000,85800.000000,231.105276)}
{pt3dadd(195276.000000,118464.000000,85675.000000,233.512618)}
{pt3dadd(195108.000000,118104.000000,85625.000000,235.919961)}
{pt3dadd(194940.000000,117804.000000,85575.000000,238.327304)}
{pt3dadd(194796.000000,117468.000000,85425.000000,240.734646)}
{pt3dadd(194580.000000,117072.000000,85275.000000,252.771381)}
{pt3dadd(194400.000000,116772.000000,85100.000000,264.808116)}
{pt3dadd(194328.000000,116460.000000,85025.000000,276.844851)}
{pt3dadd(193932.000000,116088.000000,84600.000000,288.881586)}
{pt3dadd(194064.000000,115980.000000,84675.000000,167.176836)}

{create adhoc19}
{access adhoc19}
{connect adhoc19(1), adhoc18(0)}
{nseg = 1}
{strdef color color = "White"}
{pt3dclear()}
{pt3dadd(194064.000000,115980.000000,84675.000000,167.176836)}
{pt3dadd(193632.000000,115776.000000,84475.000000,288.881586)}
{pt3dadd(192720.000000,115392.000000,84400.000000,258.455399)}
{pt3dadd(192540.000000,114924.000000,84525.000000,228.029211)}
{pt3dadd(192264.000000,114624.000000,84475.000000,197.603024)}
{pt3dadd(192228.000000,114312.000000,84350.000000,167.176836)}
{pt3dadd(192096.000000,114084.000000,84400.000000,161.604277)}
{pt3dadd(191748.000000,113520.000000,84400.000000,156.031718)}
{pt3dadd(191712.000000,113232.000000,84600.000000,150.459160)}
{pt3dadd(191616.000000,113040.000000,85000.000000,144.886601)}
{pt3dadd(191616.000000,112968.000000,85000.000000,139.314042)}

{create adhoc20}
{access adhoc20}
{connect adhoc20(1), adhoc18(0)}
{nseg = 1}
{strdef color color = "White"}
{pt3dclear()}
{pt3dadd(194064.000000,115980.000000,84675.000000,167.176836)}
{pt3dadd(194604.000000,115896.000000,84875.000000,116.095032)}
{pt3dadd(194700.000000,115680.000000,84975.000000,240.734646)}
{pt3dadd(194628.000000,115428.000000,85025.000000,96.745860)}

{create adhoc21}
{access adhoc21}
{connect adhoc21(1), adhoc17(0)}
{nseg = 1}
{strdef color color = "White"}
{pt3dclear()}
{pt3dadd(201012.000000,137496.000000,90200.000000,499.187376)}
{pt3dadd(200616.000000,137184.000000,91325.000000,240.734646)}
{pt3dadd(200448.000000,136860.000000,91550.000000,240.734646)}
{pt3dadd(200340.000000,136644.000000,91675.000000,240.734646)}
{pt3dadd(200280.000000,136356.000000,91675.000000,240.734646)}
{pt3dadd(200244.000000,136104.000000,91800.000000,240.734646)}
{pt3dadd(200148.000000,135912.000000,92075.000000,267.215459)}
{pt3dadd(200016.000000,135588.000000,92150.000000,293.696271)}
{pt3dadd(199872.000000,135360.000000,92350.000000,320.177083)}
{pt3dadd(199764.000000,135144.000000,92350.000000,346.657896)}
{pt3dadd(199692.000000,134856.000000,92500.000000,346.657896)}
{pt3dadd(199560.000000,134544.000000,92450.000000,346.657896)}
{pt3dadd(199416.000000,134268.000000,92475.000000,346.657896)}
{pt3dadd(199272.000000,134004.000000,92525.000000,346.657896)}
{pt3dadd(199164.000000,133668.000000,92550.000000,332.213819)}
{pt3dadd(199092.000000,133404.000000,92600.000000,317.769741)}
{pt3dadd(198996.000000,133176.000000,92650.000000,303.325664)}
{pt3dadd(198900.000000,132960.000000,92650.000000,288.881586)}
{pt3dadd(198828.000000,132732.000000,92600.000000,288.881586)}
{pt3dadd(198768.000000,132504.000000,92600.000000,288.881586)}
{pt3dadd(198696.000000,132288.000000,92650.000000,288.881586)}
{pt3dadd(198528.000000,132048.000000,92700.000000,288.881586)}
{pt3dadd(198492.000000,131844.000000,92725.000000,288.881586)}
{pt3dadd(198468.000000,131592.000000,92800.000000,288.881586)}
{pt3dadd(198480.000000,131364.000000,92950.000000,288.881586)}
{pt3dadd(198492.000000,131124.000000,93000.000000,288.881586)}
{pt3dadd(198504.000000,130872.000000,93050.000000,288.881586)}
{pt3dadd(198528.000000,130668.000000,93250.000000,288.881586)}
{pt3dadd(198504.000000,130476.000000,93375.000000,288.881586)}
{pt3dadd(198444.000000,130260.000000,93375.000000,288.881586)}
{pt3dadd(198336.000000,130056.000000,93425.000000,288.881586)}
{pt3dadd(198348.000000,129840.000000,93575.000000,288.881586)}
{pt3dadd(198288.000000,129576.000000,93700.000000,288.881586)}
{pt3dadd(198300.000000,129360.000000,93725.000000,288.881586)}
{pt3dadd(198324.000000,129120.000000,93775.000000,288.881586)}
{pt3dadd(198288.000000,128868.000000,93775.000000,288.881586)}
{pt3dadd(198120.000000,128700.000000,93800.000000,288.881586)}
{pt3dadd(197940.000000,128664.000000,93800.000000,288.881586)}
{pt3dadd(197844.000000,128412.000000,93925.000000,288.881586)}
{pt3dadd(197736.000000,127272.000000,93925.000000,288.881586)}
{pt3dadd(197712.000000,127128.000000,94100.000000,288.881586)}
{pt3dadd(197544.000000,125832.000000,94100.000000,288.881586)}
{pt3dadd(197460.000000,125640.000000,94250.000000,396.368644)}
{pt3dadd(197280.000000,125424.000000,94225.000000,503.855703)}
{pt3dadd(197208.000000,125196.000000,94125.000000,611.342762)}
{pt3dadd(197100.000000,124932.000000,94400.000000,718.829820)}
{pt3dadd(197124.000000,124692.000000,94375.000000,399.349908)}

{create adhoc22}
{access adhoc22}
{connect adhoc22(1), adhoc21(0)}
{nseg = 1}
{strdef color color = "White"}
{pt3dclear()}
{pt3dadd(197124.000000,124692.000000,94375.000000,399.349908)}
{pt3dadd(196776.000000,124548.000000,95125.000000,288.881586)}
{pt3dadd(196512.000000,124272.000000,95300.000000,256.783635)}
{pt3dadd(196416.000000,124044.000000,95275.000000,224.685684)}
{pt3dadd(196236.000000,124560.000000,95600.000000,192.587733)}
{pt3dadd(195936.000000,124428.000000,95875.000000,160.489782)}
{pt3dadd(195912.000000,124476.000000,96025.000000,167.176836)}

{create adhoc23}
{access adhoc23}
{connect adhoc23(1), adhoc21(0)}
{nseg = 1}
{strdef color color = "White"}
{pt3dclear()}
{pt3dadd(197124.000000,124692.000000,94375.000000,399.349908)}
{pt3dadd(197184.000000,124608.000000,93600.000000,277.326342)}
{pt3dadd(197040.000000,124380.000000,93500.000000,237.018514)}
{pt3dadd(196980.000000,124140.000000,93475.000000,196.710687)}
{pt3dadd(196920.000000,123900.000000,93350.000000,156.402860)}
{pt3dadd(196824.000000,123696.000000,93350.000000,116.095032)}
{pt3dadd(196752.000000,123480.000000,93275.000000,116.095032)}
{pt3dadd(196644.000000,123204.000000,93275.000000,116.095032)}
{pt3dadd(196572.000000,122964.000000,93125.000000,116.095032)}
{pt3dadd(196500.000000,122736.000000,93125.000000,116.095032)}
{pt3dadd(196356.000000,122496.000000,93050.000000,147.254936)}
{pt3dadd(196380.000000,122280.000000,92925.000000,178.414839)}
{pt3dadd(196248.000000,122040.000000,92825.000000,209.574742)}
{pt3dadd(196032.000000,121764.000000,92675.000000,240.734646)}
{pt3dadd(196032.000000,121548.000000,92700.000000,252.771381)}
{pt3dadd(195936.000000,121320.000000,92550.000000,264.808116)}
{pt3dadd(195804.000000,121140.000000,92500.000000,276.844851)}
{pt3dadd(195216.000000,120600.000000,92475.000000,288.881586)}
{pt3dadd(195192.000000,120348.000000,92100.000000,288.881586)}
{pt3dadd(195120.000000,120168.000000,92025.000000,288.881586)}
{pt3dadd(194952.000000,119928.000000,91650.000000,288.881586)}
{pt3dadd(194640.000000,119736.000000,91650.000000,288.881586)}
{pt3dadd(194568.000000,119580.000000,91525.000000,200.612214)}
{pt3dadd(194544.000000,119400.000000,91450.000000,96.745860)}

{create adhoc24}
{access adhoc24}
{connect adhoc24(1), adhoc16(0)}
{nseg = 1}
{strdef color color = "White"}
{pt3dclear()}
{pt3dadd(202272.000000,147204.000000,89375.000000,718.829820)}
{pt3dadd(201720.000000,147204.000000,88000.000000,116.095032)}
{pt3dadd(201588.000000,146940.000000,87650.000000,142.536550)}
{pt3dadd(201564.000000,146688.000000,87425.000000,168.978069)}
{pt3dadd(201336.000000,146580.000000,87325.000000,195.419588)}
{pt3dadd(201120.000000,146292.000000,87175.000000,221.861106)}
{pt3dadd(200940.000000,146124.000000,87350.000000,226.579491)}
{pt3dadd(200724.000000,145872.000000,87400.000000,231.297876)}
{pt3dadd(200532.000000,145428.000000,87350.000000,236.016261)}
{pt3dadd(200244.000000,145152.000000,87325.000000,240.734646)}
{pt3dadd(200004.000000,145080.000000,87275.000000,139.314042)}
{pt3dadd(199764.000000,144720.000000,87050.000000,167.176836)}

{create adhoc25}
{access adhoc25}
{connect adhoc25(1), adhoc13(0)}
{nseg = 1}
{strdef color color = "White"}
{pt3dclear()}
{pt3dadd(200028.000000,162000.000000,84225.000000,862.595802)}
{pt3dadd(198504.000000,161760.000000,84350.000000,306.700722)}
{pt3dadd(197988.000000,161448.000000,83725.000000,264.854052)}
{pt3dadd(197556.000000,161256.000000,83425.000000,223.007382)}
{pt3dadd(197340.000000,161148.000000,82825.000000,181.160712)}
{pt3dadd(197352.000000,160980.000000,82250.000000,139.314042)}
{pt3dadd(197544.000000,160716.000000,82125.000000,96.745860)}

{create adhoc26}
{access adhoc26}
{connect adhoc26(1), adhoc12(0)}
{nseg = 1}
{strdef color color = "White"}
{pt3dclear()}
{pt3dadd(198960.000000,168516.000000,83400.000000,718.829820)}
{pt3dadd(198384.000000,168276.000000,82150.000000,167.176836)}
{pt3dadd(198252.000000,168048.000000,81875.000000,217.392840)}
{pt3dadd(197880.000000,167904.000000,81150.000000,267.608844)}
{pt3dadd(197184.000000,167748.000000,79975.000000,317.824848)}
{pt3dadd(196908.000000,167760.000000,79625.000000,368.040852)}
{pt3dadd(197040.000000,167868.000000,79250.000000,375.868125)}
{pt3dadd(196608.000000,167928.000000,78900.000000,383.695398)}
{pt3dadd(196332.000000,168132.000000,78500.000000,391.522671)}
{pt3dadd(195864.000000,168156.000000,78175.000000,399.349944)}
{pt3dadd(195768.000000,168084.000000,77725.000000,167.176836)}

{create adhoc27}
{access adhoc27}
{connect adhoc27(1), adhoc11(0)}
{nseg = 1}
{strdef color color = "White"}
{pt3dclear()}
{pt3dadd(196956.000000,179640.000000,84900.000000,862.595802)}
{pt3dadd(195888.000000,179496.000000,86100.000000,167.176836)}
{pt3dadd(195648.000000,179196.000000,86125.000000,175.535680)}
{pt3dadd(195552.000000,179004.000000,86250.000000,183.894525)}
{pt3dadd(195444.000000,178776.000000,86450.000000,192.253370)}
{pt3dadd(195408.000000,178476.000000,86850.000000,200.612214)}
{pt3dadd(195576.000000,178224.000000,87425.000000,210.642822)}
{pt3dadd(195624.000000,177984.000000,87550.000000,220.673430)}
{pt3dadd(195600.000000,177756.000000,87775.000000,230.704038)}
{pt3dadd(195564.000000,177552.000000,87925.000000,240.734646)}
{pt3dadd(195528.000000,177348.000000,88150.000000,284.548356)}
{pt3dadd(195312.000000,177264.000000,89125.000000,328.362066)}
{pt3dadd(195432.000000,177504.000000,89550.000000,372.175776)}
{pt3dadd(195444.000000,177432.000000,89950.000000,415.989486)}
{pt3dadd(195420.000000,177228.000000,90350.000000,345.427483)}
{pt3dadd(195444.000000,176880.000000,90750.000000,274.865481)}
{pt3dadd(195516.000000,176808.000000,91200.000000,204.303479)}
{pt3dadd(195852.000000,176736.000000,91550.000000,133.741476)}
{pt3dadd(196152.000000,176004.000000,91925.000000,96.745860)}

{create adhoc28}
{access adhoc28}
{connect adhoc28(1), adhoc10(0)}
{nseg = 1}
{strdef color color = "White"}
{pt3dclear()}
{pt3dadd(196608.000000,186624.000000,86425.000000,993.710358)}
{pt3dadd(194568.000000,186972.000000,87875.000000,288.881586)}
{pt3dadd(194256.000000,187164.000000,88150.000000,239.025738)}
{pt3dadd(193944.000000,187368.000000,88225.000000,189.169890)}
{pt3dadd(193620.000000,187608.000000,88300.000000,139.314042)}
{pt3dadd(193332.000000,187908.000000,88575.000000,154.638585)}
{pt3dadd(192864.000000,188184.000000,88275.000000,169.963128)}
{pt3dadd(192612.000000,188412.000000,88250.000000,185.287671)}
{pt3dadd(192468.000000,188616.000000,88175.000000,200.612214)}
{pt3dadd(192372.000000,188808.000000,88175.000000,139.314042)}

{create adhoc29}
{access adhoc29}
{connect adhoc29(1), adhoc7(0)}
{nseg = 1}
{strdef color color = "White"}
{pt3dclear()}
{pt3dadd(185352.000000,207276.000000,88900.000000,1242.137880)}
{pt3dadd(185184.000000,207252.000000,86025.000000,718.829820)}
{pt3dadd(184248.000000,207252.000000,85100.000000,499.187376)}
{pt3dadd(183936.000000,206928.000000,84100.000000,499.187376)}

{create adhoc30}
{access adhoc30}
{connect adhoc30(1), adhoc29(0)}
{nseg = 1}
{strdef color color = "White"}
{pt3dclear()}
{pt3dadd(183936.000000,206928.000000,84100.000000,499.187376)}
{pt3dadd(182988.000000,206928.000000,81700.000000,346.657896)}
{pt3dadd(182760.000000,207768.000000,81300.000000,508.421012)}
{pt3dadd(182520.000000,207960.000000,80775.000000,670.184127)}
{pt3dadd(182304.000000,208080.000000,80350.000000,831.947242)}
{pt3dadd(182172.000000,208248.000000,79900.000000,993.710358)}
{pt3dadd(181944.000000,208476.000000,79450.000000,960.931719)}
{pt3dadd(181668.000000,208560.000000,78950.000000,928.153080)}
{pt3dadd(181344.000000,208728.000000,78525.000000,895.374441)}
{pt3dadd(181104.000000,208872.000000,77975.000000,862.595802)}
{pt3dadd(180744.000000,208980.000000,77550.000000,599.024880)}
{pt3dadd(180492.000000,208908.000000,77350.000000,499.187376)}

{create adhoc31}
{access adhoc31}
{connect adhoc31(1), adhoc30(0)}
{nseg = 1}
{strdef color color = "White"}
{pt3dclear()}
{pt3dadd(180492.000000,208908.000000,77350.000000,499.187376)}
{pt3dadd(179712.000000,209412.000000,76800.000000,575.063856)}
{pt3dadd(179232.000000,209748.000000,76275.000000,581.054112)}
{pt3dadd(178836.000000,209832.000000,75825.000000,587.044368)}
{pt3dadd(178656.000000,209880.000000,75325.000000,593.034624)}
{pt3dadd(178248.000000,210180.000000,74800.000000,599.024880)}
{pt3dadd(177888.000000,210336.000000,74325.000000,599.024880)}
{pt3dadd(177600.000000,210012.000000,73850.000000,599.024880)}
{pt3dadd(177324.000000,209772.000000,73475.000000,599.024880)}
{pt3dadd(177156.000000,209712.000000,73000.000000,599.024880)}
{pt3dadd(176952.000000,209640.000000,72650.000000,587.044368)}
{pt3dadd(176484.000000,209568.000000,72175.000000,575.063856)}
{pt3dadd(176496.000000,209700.000000,71925.000000,288.881586)}

{create adhoc32}
{access adhoc32}
{connect adhoc32(1), adhoc31(0)}
{nseg = 1}
{strdef color color = "White"}
{pt3dclear()}
{pt3dadd(176496.000000,209700.000000,71925.000000,288.881586)}
{pt3dadd(175752.000000,209352.000000,71475.000000,346.657896)}
{pt3dadd(175236.000000,209028.000000,71050.000000,293.696271)}
{pt3dadd(173832.000000,208812.000000,70700.000000,240.734646)}
{pt3dadd(173544.000000,208632.000000,70375.000000,200.612214)}

{create adhoc33}
{access adhoc33}
{connect adhoc33(1), adhoc31(0)}
{nseg = 1}
{strdef color color = "White"}
{pt3dclear()}
{pt3dadd(176496.000000,209700.000000,71925.000000,288.881586)}
{pt3dadd(176760.000000,210060.000000,71725.000000,415.989486)}
{pt3dadd(176916.000000,210228.000000,71350.000000,362.145168)}
{pt3dadd(176760.000000,210564.000000,70975.000000,308.300850)}
{pt3dadd(176448.000000,210864.000000,70575.000000,254.456532)}
{pt3dadd(175896.000000,211188.000000,70175.000000,200.612214)}
{pt3dadd(175008.000000,211788.000000,69800.000000,210.642822)}
{pt3dadd(174384.000000,211848.000000,69375.000000,220.673430)}
{pt3dadd(173688.000000,212076.000000,68950.000000,230.704038)}
{pt3dadd(173220.000000,211524.000000,68525.000000,240.734646)}
{pt3dadd(173208.000000,210972.000000,68150.000000,256.783626)}
{pt3dadd(173316.000000,210528.000000,67725.000000,272.832606)}
{pt3dadd(173580.000000,209880.000000,67325.000000,288.881586)}
{pt3dadd(173568.000000,209856.000000,67125.000000,139.314042)}

{create adhoc34}
{access adhoc34}
{connect adhoc34(1), adhoc30(0)}
{nseg = 1}
{strdef color color = "White"}
{pt3dclear()}
{pt3dadd(180492.000000,208908.000000,77350.000000,499.187376)}
{pt3dadd(180228.000000,207312.000000,77425.000000,167.176836)}
{pt3dadd(180240.000000,206844.000000,77225.000000,154.406385)}
{pt3dadd(180504.000000,206028.000000,77225.000000,141.635934)}
{pt3dadd(180684.000000,205848.000000,77200.000000,128.865483)}
{pt3dadd(180816.000000,205608.000000,77175.000000,116.095032)}
{pt3dadd(180864.000000,205260.000000,77225.000000,200.612214)}

{create adhoc35}
{access adhoc35}
{connect adhoc35(1), adhoc29(0)}
{nseg = 1}
{strdef color color = "White"}
{pt3dclear()}
{pt3dadd(183936.000000,206928.000000,84100.000000,499.187376)}
{pt3dadd(184728.000000,205548.000000,84575.000000,139.314042)}
{pt3dadd(184344.000000,205152.000000,84175.000000,176.705928)}
{pt3dadd(184080.000000,204408.000000,83725.000000,214.097814)}
{pt3dadd(184008.000000,204156.000000,83300.000000,251.489700)}
{pt3dadd(184212.000000,203640.000000,82850.000000,288.881586)}
{pt3dadd(184548.000000,203016.000000,82425.000000,299.859080)}
{pt3dadd(184704.000000,202656.000000,82025.000000,310.836573)}
{pt3dadd(184800.000000,201924.000000,81575.000000,321.814067)}
{pt3dadd(184608.000000,201336.000000,81125.000000,332.791560)}
{pt3dadd(184848.000000,200388.000000,80700.000000,167.176836)}

{create adhoc36}
{access adhoc36}
{connect adhoc36(1), adhoc35(0)}
{nseg = 1}
{strdef color color = "White"}
{pt3dclear()}
{pt3dadd(184848.000000,200388.000000,80700.000000,167.176836)}
{pt3dadd(184944.000000,199980.000000,80475.000000,167.176836)}
{pt3dadd(185304.000000,198792.000000,80075.000000,212.047101)}
{pt3dadd(185496.000000,198420.000000,79650.000000,256.917366)}
{pt3dadd(185340.000000,197688.000000,79225.000000,301.787631)}
{pt3dadd(185244.000000,197436.000000,78850.000000,346.657896)}
{pt3dadd(185244.000000,197304.000000,78425.000000,346.657896)}
{pt3dadd(185100.000000,197052.000000,78100.000000,346.657896)}
{pt3dadd(185064.000000,196920.000000,77750.000000,346.657896)}
{pt3dadd(185064.000000,196896.000000,77425.000000,346.657896)}
{pt3dadd(185076.000000,196872.000000,77100.000000,475.642373)}
{pt3dadd(184860.000000,196764.000000,76675.000000,604.626849)}
{pt3dadd(184788.000000,196728.000000,76350.000000,733.611326)}
{pt3dadd(184692.000000,196668.000000,76000.000000,862.595802)}
{pt3dadd(184716.000000,196680.000000,75625.000000,862.595802)}
{pt3dadd(184812.000000,196776.000000,75250.000000,862.595802)}
{pt3dadd(184968.000000,196860.000000,74850.000000,862.595802)}
{pt3dadd(184944.000000,196908.000000,74400.000000,862.595802)}
{pt3dadd(185004.000000,196692.000000,73950.000000,733.611326)}
{pt3dadd(185088.000000,196176.000000,73450.000000,604.626849)}
{pt3dadd(185064.000000,195672.000000,73025.000000,475.642373)}
{pt3dadd(185124.000000,194892.000000,72625.000000,346.657896)}
{pt3dadd(185052.000000,194304.000000,72250.000000,310.146476)}
{pt3dadd(184812.000000,194064.000000,71900.000000,273.635055)}
{pt3dadd(184608.000000,193740.000000,71575.000000,237.123635)}
{pt3dadd(184368.000000,193560.000000,71225.000000,200.612214)}
{pt3dadd(184080.000000,193272.000000,70800.000000,222.679557)}
{pt3dadd(184080.000000,192912.000000,70400.000000,244.746900)}
{pt3dadd(184212.000000,192600.000000,70025.000000,266.814243)}
{pt3dadd(184188.000000,192024.000000,69650.000000,288.881586)}
{pt3dadd(183936.000000,191928.000000,69250.000000,116.095032)}

{create adhoc37}
{access adhoc37}
{connect adhoc37(1), adhoc35(0)}
{nseg = 1}
{strdef color color = "White"}
{pt3dclear()}
{pt3dadd(184848.000000,200388.000000,80700.000000,167.176836)}
{pt3dadd(184092.000000,201540.000000,80525.000000,139.314042)}
{pt3dadd(183816.000000,201936.000000,80425.000000,146.279741)}
{pt3dadd(183552.000000,202368.000000,80350.000000,153.245439)}
{pt3dadd(183324.000000,202632.000000,80225.000000,160.211138)}
{pt3dadd(183072.000000,203028.000000,80225.000000,167.176836)}
{pt3dadd(182832.000000,203160.000000,80250.000000,145.538014)}
{pt3dadd(182484.000000,203208.000000,80250.000000,123.899193)}
{pt3dadd(182328.000000,203364.000000,80200.000000,102.260372)}
{pt3dadd(182076.000000,203364.000000,80175.000000,80.621550)}
{pt3dadd(181860.000000,203364.000000,80150.000000,96.745860)}

{create adhoc38}
{access adhoc38}
{connect adhoc38(1), adhoc6(0)}
{nseg = 1}
{strdef color color = "White"}
{pt3dclear()}
{pt3dadd(182028.000000,217932.000000,84525.000000,1035.114948)}
{pt3dadd(179868.000000,218280.000000,85850.000000,167.176836)}
{pt3dadd(179916.000000,217944.000000,86325.000000,167.176836)}
{pt3dadd(179916.000000,217704.000000,86375.000000,167.176836)}
{pt3dadd(179892.000000,217476.000000,86300.000000,167.176836)}
{pt3dadd(179916.000000,217140.000000,86200.000000,167.176836)}
{pt3dadd(179976.000000,216792.000000,86100.000000,167.176836)}
{pt3dadd(180072.000000,216588.000000,86100.000000,167.176836)}
{pt3dadd(180156.000000,216312.000000,85950.000000,167.176836)}
{pt3dadd(180156.000000,216000.000000,85875.000000,116.095032)}

{create adhoc39}
{access adhoc39}
{connect adhoc39(1), adhoc5(0)}
{nseg = 1}
{strdef color color = "White"}
{pt3dclear()}
{pt3dadd(181356.000000,218700.000000,84250.000000,1035.114948)}
{pt3dadd(179604.000000,218772.000000,85575.000000,200.612214)}
{pt3dadd(179196.000000,218988.000000,85875.000000,210.642822)}
{pt3dadd(178956.000000,219204.000000,86275.000000,220.673430)}
{pt3dadd(178788.000000,219432.000000,86725.000000,230.704038)}
{pt3dadd(178740.000000,219456.000000,87050.000000,240.734646)}
{pt3dadd(178164.000000,219816.000000,87275.000000,252.771381)}
{pt3dadd(178056.000000,220044.000000,87700.000000,264.808116)}
{pt3dadd(177948.000000,220068.000000,88075.000000,276.844851)}
{pt3dadd(177816.000000,220188.000000,88450.000000,288.881586)}
{pt3dadd(177780.000000,220152.000000,88700.000000,276.844851)}
{pt3dadd(177900.000000,220200.000000,89100.000000,264.808116)}
{pt3dadd(178368.000000,220356.000000,89500.000000,252.771381)}
{pt3dadd(178896.000000,220788.000000,89925.000000,240.734646)}
{pt3dadd(179256.000000,221172.000000,90225.000000,200.612214)}

{create adhoc40}
{access adhoc40}
{connect adhoc40(1), adhoc4(0)}
{nseg = 1}
{strdef color color = "White"}
{pt3dclear()}
{pt3dadd(178140.000000,222480.000000,81975.000000,1035.114948)}
{pt3dadd(178020.000000,221196.000000,83225.000000,240.734646)}
{pt3dadd(177408.000000,221472.000000,83825.000000,252.771381)}
{pt3dadd(177144.000000,221784.000000,84025.000000,264.808116)}
{pt3dadd(176892.000000,221976.000000,84350.000000,276.844851)}
{pt3dadd(176628.000000,222336.000000,84875.000000,288.881586)}
{pt3dadd(176196.000000,222732.000000,85125.000000,303.325664)}
{pt3dadd(176016.000000,222828.000000,85050.000000,317.769741)}
{pt3dadd(175716.000000,223128.000000,85150.000000,332.213819)}
{pt3dadd(175404.000000,223332.000000,85250.000000,346.657896)}
{pt3dadd(175080.000000,223680.000000,85175.000000,284.179887)}
{pt3dadd(174792.000000,223812.000000,85175.000000,221.701878)}
{pt3dadd(174480.000000,223932.000000,85175.000000,159.223869)}
{pt3dadd(174240.000000,224292.000000,85100.000000,96.745860)}
{pt3dadd(174048.000000,224568.000000,85075.000000,114.353604)}
{pt3dadd(173892.000000,224820.000000,85100.000000,131.961348)}
{pt3dadd(173208.000000,225504.000000,85025.000000,149.569092)}
{pt3dadd(172932.000000,225900.000000,85075.000000,167.176836)}
{pt3dadd(172788.000000,226164.000000,84900.000000,167.176836)}
{pt3dadd(172584.000000,226320.000000,84875.000000,167.176836)}
{pt3dadd(172464.000000,226332.000000,84900.000000,240.734646)}

{create adhoc41}
{access adhoc41}
{connect adhoc41(1), adhoc3(0)}
{nseg = 1}
{strdef color color = "White"}
{pt3dclear()}
{pt3dadd(171036.000000,226344.000000,77525.000000,862.595802)}
{pt3dadd(170616.000000,226236.000000,77100.000000,1035.114948)}
{pt3dadd(170364.000000,226104.000000,76575.000000,991.985162)}
{pt3dadd(170064.000000,226200.000000,76625.000000,948.855375)}
{pt3dadd(169716.000000,226368.000000,76525.000000,905.725589)}
{pt3dadd(169428.000000,226272.000000,76300.000000,862.595802)}
{pt3dadd(169152.000000,226368.000000,76075.000000,895.374441)}
{pt3dadd(168636.000000,226332.000000,75700.000000,928.153080)}
{pt3dadd(168192.000000,226188.000000,75400.000000,960.931719)}
{pt3dadd(167892.000000,226236.000000,75150.000000,993.710358)}
{pt3dadd(167604.000000,226200.000000,74900.000000,862.595802)}
{pt3dadd(167400.000000,225984.000000,74475.000000,1035.114948)}

{create adhoc42}
{access adhoc42}
{connect adhoc42(1), adhoc41(0)}
{nseg = 1}
{strdef color color = "White"}
{pt3dclear()}
{pt3dadd(167400.000000,225984.000000,74475.000000,1035.114948)}
{pt3dadd(167208.000000,225552.000000,72475.000000,415.989486)}
{pt3dadd(167208.000000,225240.000000,71975.000000,398.656589)}
{pt3dadd(167460.000000,224496.000000,71625.000000,381.323691)}
{pt3dadd(167700.000000,223920.000000,71250.000000,363.990794)}
{pt3dadd(167904.000000,223488.000000,70975.000000,346.657896)}
{pt3dadd(167868.000000,223248.000000,70475.000000,310.146476)}
{pt3dadd(167808.000000,223308.000000,70100.000000,273.635055)}
{pt3dadd(168108.000000,223380.000000,69750.000000,237.123635)}
{pt3dadd(168312.000000,223248.000000,69500.000000,200.612214)}
{pt3dadd(168708.000000,223296.000000,69275.000000,169.963128)}
{pt3dadd(168936.000000,223344.000000,69075.000000,139.314042)}
{pt3dadd(168900.000000,223248.000000,68950.000000,288.881586)}

{create adhoc43}
{access adhoc43}
{connect adhoc43(1), adhoc41(0)}
{nseg = 1}
{strdef color color = "White"}
{pt3dclear()}
{pt3dadd(167400.000000,225984.000000,74475.000000,1035.114948)}
{pt3dadd(167028.000000,225984.000000,73900.000000,1242.137880)}
{pt3dadd(166608.000000,225960.000000,73900.000000,1147.252361)}
{pt3dadd(166308.000000,225936.000000,73975.000000,1052.366841)}
{pt3dadd(166008.000000,225912.000000,73925.000000,957.481322)}
{pt3dadd(165720.000000,225924.000000,73925.000000,862.595802)}
{pt3dadd(165420.000000,225972.000000,73900.000000,862.595802)}
{pt3dadd(165168.000000,225948.000000,73825.000000,862.595802)}
{pt3dadd(164856.000000,225804.000000,73625.000000,862.595802)}
{pt3dadd(164580.000000,225852.000000,73475.000000,862.595802)}
{pt3dadd(164304.000000,225864.000000,73325.000000,862.595802)}
{pt3dadd(163920.000000,225864.000000,73250.000000,862.595802)}
{pt3dadd(163596.000000,225804.000000,73250.000000,862.595802)}
{pt3dadd(163212.000000,225816.000000,73250.000000,862.595802)}
{pt3dadd(162852.000000,225504.000000,72950.000000,862.595802)}
{pt3dadd(162468.000000,225396.000000,72800.000000,862.595802)}
{pt3dadd(162048.000000,225516.000000,72800.000000,862.595802)}
{pt3dadd(161808.000000,225612.000000,72800.000000,862.595802)}
{pt3dadd(161508.000000,225516.000000,72800.000000,862.595802)}
{pt3dadd(161112.000000,225648.000000,72575.000000,862.595802)}
{pt3dadd(160800.000000,225648.000000,72350.000000,862.595802)}
{pt3dadd(160524.000000,225516.000000,72375.000000,862.595802)}
{pt3dadd(160116.000000,225456.000000,72350.000000,599.024880)}
{pt3dadd(159696.000000,225288.000000,72075.000000,575.063856)}

{create adhoc44}
{access adhoc44}
{connect adhoc44(1), adhoc43(0)}
{nseg = 1}
{strdef color color = "White"}
{pt3dclear()}
{pt3dadd(159696.000000,225288.000000,72075.000000,575.063856)}
{pt3dadd(159708.000000,226644.000000,71525.000000,346.657896)}
{pt3dadd(159396.000000,226728.000000,71425.000000,384.790266)}
{pt3dadd(159108.000000,226776.000000,71275.000000,422.922636)}
{pt3dadd(158808.000000,226800.000000,71200.000000,461.055006)}
{pt3dadd(158508.000000,226764.000000,71100.000000,499.187376)}
{pt3dadd(158280.000000,226776.000000,71175.000000,499.187376)}
{pt3dadd(157968.000000,226968.000000,71225.000000,499.187376)}
{pt3dadd(157704.000000,227100.000000,71175.000000,499.187376)}
{pt3dadd(157428.000000,227196.000000,71175.000000,499.187376)}
{pt3dadd(157152.000000,227280.000000,71125.000000,524.146752)}
{pt3dadd(156840.000000,227292.000000,71025.000000,549.106128)}
{pt3dadd(156540.000000,227304.000000,70875.000000,574.065504)}
{pt3dadd(156324.000000,227436.000000,70775.000000,599.024880)}
{pt3dadd(156012.000000,227532.000000,70775.000000,599.024880)}
{pt3dadd(155808.000000,227664.000000,70775.000000,599.024880)}
{pt3dadd(155568.000000,227712.000000,70750.000000,599.024880)}
{pt3dadd(155280.000000,227712.000000,70700.000000,599.024880)}
{pt3dadd(155136.000000,227736.000000,70625.000000,628.976115)}
{pt3dadd(154824.000000,227904.000000,70400.000000,658.927350)}
{pt3dadd(154620.000000,227952.000000,70275.000000,688.878585)}
{pt3dadd(154440.000000,228108.000000,70300.000000,718.829820)}
{pt3dadd(154176.000000,228048.000000,70175.000000,718.829820)}

{create adhoc45}
{access adhoc45}
{connect adhoc45(1), adhoc44(0)}
{nseg = 1}
{strdef color color = "White"}
{pt3dclear()}
{pt3dadd(154176.000000,228048.000000,70175.000000,718.829820)}
{pt3dadd(154212.000000,228468.000000,71475.000000,240.734646)}
{pt3dadd(154032.000000,228768.000000,71900.000000,230.704038)}
{pt3dadd(153720.000000,228672.000000,72400.000000,220.673430)}
{pt3dadd(153648.000000,228720.000000,72825.000000,210.642822)}
{pt3dadd(153552.000000,228780.000000,73225.000000,200.612214)}
{pt3dadd(153348.000000,228708.000000,73625.000000,180.179490)}
{pt3dadd(152976.000000,228768.000000,74000.000000,159.746766)}
{pt3dadd(152712.000000,229212.000000,74050.000000,139.314042)}
{pt3dadd(152472.000000,229380.000000,74325.000000,139.314042)}

{create adhoc46}
{access adhoc46}
{connect adhoc46(1), adhoc44(0)}
{nseg = 1}
{strdef color color = "White"}
{pt3dclear()}
{pt3dadd(154176.000000,228048.000000,70175.000000,718.829820)}
{pt3dadd(153888.000000,228276.000000,70000.000000,718.829820)}
{pt3dadd(153672.000000,228336.000000,69800.000000,718.829820)}
{pt3dadd(153468.000000,228312.000000,69750.000000,718.829820)}
{pt3dadd(153216.000000,228468.000000,69625.000000,718.829820)}
{pt3dadd(152976.000000,228552.000000,69300.000000,718.829820)}
{pt3dadd(152688.000000,228684.000000,68850.000000,754.771316)}
{pt3dadd(152532.000000,228840.000000,68750.000000,790.712811)}
{pt3dadd(152304.000000,228936.000000,68475.000000,826.654307)}
{pt3dadd(152088.000000,229140.000000,68225.000000,862.595802)}
{pt3dadd(151860.000000,229296.000000,67800.000000,718.829820)}
{pt3dadd(151740.000000,229500.000000,67575.000000,862.595802)}

{create adhoc47}
{access adhoc47}
{connect adhoc47(1), adhoc46(0)}
{nseg = 1}
{strdef color color = "White"}
{pt3dclear()}
{pt3dadd(151740.000000,229500.000000,67575.000000,862.595802)}
{pt3dadd(151692.000000,230928.000000,67025.000000,346.657896)}
{pt3dadd(151884.000000,231276.000000,66300.000000,320.177083)}
{pt3dadd(151884.000000,233040.000000,63850.000000,293.696271)}
{pt3dadd(151956.000000,232872.000000,63500.000000,267.215459)}
{pt3dadd(152016.000000,232968.000000,63275.000000,240.734646)}
{pt3dadd(151956.000000,233052.000000,62925.000000,267.215459)}
{pt3dadd(152220.000000,233436.000000,62400.000000,293.696271)}
{pt3dadd(152220.000000,233628.000000,61875.000000,320.177083)}
{pt3dadd(152460.000000,233652.000000,61350.000000,346.657896)}
{pt3dadd(152520.000000,233736.000000,60875.000000,381.323691)}
{pt3dadd(152652.000000,233676.000000,60425.000000,415.989486)}
{pt3dadd(152772.000000,233676.000000,59975.000000,415.989486)}

{create adhoc48}
{access adhoc48}
{connect adhoc48(1), adhoc46(0)}
{nseg = 1}
{strdef color color = "White"}
{pt3dclear()}
{pt3dadd(151740.000000,229500.000000,67575.000000,862.595802)}
{pt3dadd(151392.000000,229440.000000,67275.000000,690.076530)}
{pt3dadd(151104.000000,229284.000000,66425.000000,776.336134)}
{pt3dadd(150924.000000,229476.000000,65850.000000,862.595739)}
{pt3dadd(150672.000000,229740.000000,64150.000000,948.855344)}
{pt3dadd(150564.000000,229836.000000,63600.000000,1035.114948)}
{pt3dadd(150600.000000,229800.000000,63225.000000,956.043666)}
{pt3dadd(150600.000000,229488.000000,62750.000000,876.972384)}
{pt3dadd(150528.000000,229356.000000,62325.000000,797.901102)}
{pt3dadd(150492.000000,229248.000000,61925.000000,718.829820)}
{pt3dadd(150396.000000,229176.000000,61550.000000,787.549955)}
{pt3dadd(150420.000000,229188.000000,61150.000000,856.270089)}
{pt3dadd(150420.000000,229164.000000,60725.000000,924.990223)}
{pt3dadd(150504.000000,228840.000000,60325.000000,993.710358)}
{pt3dadd(150540.000000,228768.000000,59900.000000,1004.061506)}
{pt3dadd(150624.000000,228492.000000,59475.000000,1014.412653)}
{pt3dadd(150696.000000,228360.000000,59075.000000,1024.763801)}
{pt3dadd(150816.000000,228252.000000,58775.000000,1035.114948)}
{pt3dadd(150876.000000,228048.000000,58275.000000,926.092431)}
{pt3dadd(151044.000000,228048.000000,57725.000000,817.069914)}
{pt3dadd(151272.000000,227724.000000,57225.000000,708.047397)}
{pt3dadd(151380.000000,227616.000000,56750.000000,599.024880)}
{pt3dadd(151584.000000,227424.000000,56200.000000,574.065504)}
{pt3dadd(151896.000000,227256.000000,55650.000000,549.106128)}
{pt3dadd(152196.000000,227148.000000,55175.000000,524.146752)}
{pt3dadd(152592.000000,226980.000000,54650.000000,499.187376)}
{pt3dadd(152940.000000,226548.000000,54125.000000,524.146752)}
{pt3dadd(153240.000000,226224.000000,53600.000000,549.106128)}
{pt3dadd(153492.000000,225672.000000,53150.000000,574.065504)}
{pt3dadd(153768.000000,225300.000000,52675.000000,599.024880)}
{pt3dadd(154032.000000,224832.000000,52175.000000,593.034624)}
{pt3dadd(154188.000000,224688.000000,51900.000000,587.044368)}
{pt3dadd(154428.000000,224544.000000,51525.000000,581.054112)}
{pt3dadd(154668.000000,224268.000000,51125.000000,575.063856)}
{pt3dadd(154776.000000,223992.000000,50750.000000,556.094736)}
{pt3dadd(154992.000000,223740.000000,50325.000000,537.125616)}
{pt3dadd(155232.000000,223488.000000,49975.000000,518.156496)}
{pt3dadd(155388.000000,223320.000000,49550.000000,499.187376)}
{pt3dadd(155616.000000,223116.000000,49175.000000,499.187376)}
{pt3dadd(155772.000000,222744.000000,48800.000000,499.187376)}
{pt3dadd(155928.000000,222528.000000,48375.000000,499.187376)}
{pt3dadd(156240.000000,222324.000000,47925.000000,499.187376)}
{pt3dadd(156516.000000,222048.000000,47550.000000,499.187376)}
{pt3dadd(156696.000000,221616.000000,47125.000000,499.187376)}
{pt3dadd(156996.000000,221100.000000,46750.000000,499.187376)}
{pt3dadd(157284.000000,220824.000000,46325.000000,499.187376)}
{pt3dadd(157584.000000,220356.000000,45925.000000,478.387903)}
{pt3dadd(157980.000000,219696.000000,45550.000000,457.588431)}
{pt3dadd(158292.000000,219156.000000,45150.000000,436.788958)}
{pt3dadd(158532.000000,218748.000000,44775.000000,415.989486)}
{pt3dadd(158628.000000,218376.000000,44450.000000,436.788958)}
{pt3dadd(158976.000000,217788.000000,44075.000000,457.588431)}
{pt3dadd(159324.000000,217284.000000,43675.000000,478.387903)}
{pt3dadd(159768.000000,216852.000000,43275.000000,499.187376)}
{pt3dadd(159996.000000,216504.000000,42900.000000,478.387903)}
{pt3dadd(160344.000000,216108.000000,42525.000000,457.588431)}
{pt3dadd(160536.000000,215640.000000,42125.000000,436.788958)}
{pt3dadd(160728.000000,215208.000000,41775.000000,415.989486)}
{pt3dadd(161148.000000,214500.000000,41350.000000,415.989486)}
{pt3dadd(161532.000000,214068.000000,40925.000000,415.989486)}
{pt3dadd(161844.000000,213264.000000,40550.000000,415.989486)}
{pt3dadd(162180.000000,212460.000000,40125.000000,415.989486)}
{pt3dadd(162636.000000,211536.000000,39675.000000,415.989486)}
{pt3dadd(162816.000000,211356.000000,39675.000000,415.989486)}
{pt3dadd(162816.000000,211140.000000,39600.000000,415.989486)}
{pt3dadd(162984.000000,210876.000000,39475.000000,415.989486)}
{pt3dadd(163188.000000,210612.000000,39350.000000,499.187376)}
{pt3dadd(163188.000000,210288.000000,39325.000000,288.881586)}

{create adhoc49}
{access adhoc49}
{connect adhoc49(1), adhoc48(0)}
{nseg = 1}
{strdef color color = "White"}
{pt3dclear()}
{pt3dadd(163188.000000,210288.000000,39325.000000,288.881586)}
{pt3dadd(164100.000000,210240.000000,38225.000000,200.612214)}
{pt3dadd(164292.000000,209976.000000,38025.000000,200.612214)}
{pt3dadd(164496.000000,209796.000000,37975.000000,200.612214)}
{pt3dadd(164628.000000,209568.000000,37850.000000,200.612214)}
{pt3dadd(164724.000000,209376.000000,37750.000000,200.612214)}
{pt3dadd(164916.000000,209196.000000,37650.000000,192.253370)}
{pt3dadd(164928.000000,209028.000000,37550.000000,183.894525)}
{pt3dadd(165024.000000,208836.000000,37475.000000,175.535680)}
{pt3dadd(165084.000000,208668.000000,37425.000000,167.176836)}
{pt3dadd(165144.000000,208440.000000,37425.000000,175.535680)}
{pt3dadd(165204.000000,208236.000000,37300.000000,183.894525)}
{pt3dadd(165180.000000,208056.000000,37250.000000,192.253370)}
{pt3dadd(165180.000000,207864.000000,37275.000000,200.612214)}
{pt3dadd(165276.000000,207672.000000,37050.000000,210.642822)}
{pt3dadd(165276.000000,207492.000000,36975.000000,220.673430)}
{pt3dadd(165240.000000,207300.000000,36875.000000,230.704038)}
{pt3dadd(165264.000000,207096.000000,36850.000000,240.734646)}
{pt3dadd(165204.000000,206904.000000,36725.000000,267.215459)}
{pt3dadd(165360.000000,206652.000000,36500.000000,293.696271)}
{pt3dadd(165360.000000,206376.000000,36375.000000,320.177083)}
{pt3dadd(165324.000000,206112.000000,36325.000000,346.657896)}
{pt3dadd(165420.000000,205848.000000,36375.000000,320.177083)}
{pt3dadd(165660.000000,205620.000000,36350.000000,293.696271)}
{pt3dadd(165624.000000,205380.000000,36300.000000,267.215459)}
{pt3dadd(165708.000000,205164.000000,36225.000000,240.734646)}
{pt3dadd(165768.000000,204996.000000,36150.000000,328.362066)}
{pt3dadd(165852.000000,204780.000000,35950.000000,415.989486)}
{pt3dadd(165900.000000,204528.000000,35900.000000,231.105276)}

{create adhoc50}
{access adhoc50}
{connect adhoc50(1), adhoc49(0)}
{nseg = 1}
{strdef color color = "White"}
{pt3dclear()}
{pt3dadd(165900.000000,204528.000000,35900.000000,231.105276)}
{pt3dadd(166644.000000,204276.000000,35900.000000,139.314042)}
{pt3dadd(167076.000000,204060.000000,36000.000000,152.632471)}
{pt3dadd(167568.000000,203748.000000,35775.000000,165.950901)}
{pt3dadd(167904.000000,203652.000000,35550.000000,179.269331)}
{pt3dadd(167988.000000,203364.000000,35200.000000,192.587760)}
{pt3dadd(168000.000000,203196.000000,34875.000000,167.176836)}
{pt3dadd(168000.000000,203196.000000,34600.000000,139.314042)}

{create adhoc51}
{access adhoc51}
{connect adhoc51(1), adhoc49(0)}
{nseg = 1}
{strdef color color = "White"}
{pt3dclear()}
{pt3dadd(165900.000000,204528.000000,35900.000000,231.105276)}
{pt3dadd(165864.000000,204300.000000,35825.000000,163.573722)}
{pt3dadd(165732.000000,204036.000000,35675.000000,116.095032)}

{create adhoc52}
{access adhoc52}
{connect adhoc52(1), adhoc48(0)}
{nseg = 1}
{strdef color color = "White"}
{pt3dclear()}
{pt3dadd(163188.000000,210288.000000,39325.000000,288.881586)}
{pt3dadd(162984.000000,210036.000000,39675.000000,319.479912)}
{pt3dadd(163104.000000,209832.000000,39725.000000,311.830331)}
{pt3dadd(163080.000000,209604.000000,39675.000000,304.180749)}
{pt3dadd(163080.000000,209388.000000,39625.000000,296.531167)}
{pt3dadd(163164.000000,209148.000000,39625.000000,288.881586)}
{pt3dadd(163356.000000,208932.000000,39450.000000,266.814243)}
{pt3dadd(163488.000000,208728.000000,39425.000000,244.746900)}
{pt3dadd(163500.000000,208512.000000,39400.000000,222.679557)}
{pt3dadd(163476.000000,208344.000000,39275.000000,200.612214)}
{pt3dadd(163536.000000,208164.000000,39200.000000,192.253370)}
{pt3dadd(163596.000000,207972.000000,39175.000000,183.894525)}
{pt3dadd(163572.000000,207744.000000,39200.000000,175.535680)}
{pt3dadd(163620.000000,207552.000000,39125.000000,167.176836)}
{pt3dadd(163644.000000,207360.000000,39150.000000,191.940948)}
{pt3dadd(163608.000000,207156.000000,39100.000000,216.705060)}
{pt3dadd(163704.000000,206964.000000,39075.000000,241.469172)}
{pt3dadd(163716.000000,206724.000000,39050.000000,266.233284)}
{pt3dadd(163656.000000,206544.000000,38975.000000,241.469172)}
{pt3dadd(163776.000000,206256.000000,38825.000000,216.705060)}
{pt3dadd(163824.000000,206016.000000,38750.000000,191.940948)}
{pt3dadd(163920.000000,205776.000000,38550.000000,167.176836)}
{pt3dadd(163896.000000,205560.000000,38550.000000,167.176836)}
{pt3dadd(163980.000000,205368.000000,38525.000000,167.176836)}
{pt3dadd(164004.000000,205176.000000,38450.000000,167.176836)}
{pt3dadd(164016.000000,204996.000000,38375.000000,167.176836)}
{pt3dadd(164064.000000,204852.000000,38375.000000,197.603024)}
{pt3dadd(163992.000000,204684.000000,38375.000000,228.029211)}
{pt3dadd(163956.000000,204468.000000,38275.000000,258.455399)}
{pt3dadd(164088.000000,204276.000000,38200.000000,288.881586)}
{pt3dadd(164148.000000,204072.000000,38150.000000,276.844851)}
{pt3dadd(164148.000000,203868.000000,38075.000000,264.808116)}
{pt3dadd(164160.000000,203580.000000,38050.000000,252.771381)}
{pt3dadd(164016.000000,203352.000000,38050.000000,240.734646)}
{pt3dadd(164028.000000,203100.000000,37825.000000,230.704038)}
{pt3dadd(164520.000000,202668.000000,37550.000000,220.673430)}
{pt3dadd(164820.000000,202032.000000,37475.000000,210.642822)}
{pt3dadd(165108.000000,201756.000000,37175.000000,200.612214)}
{pt3dadd(165276.000000,201420.000000,37025.000000,222.679557)}
{pt3dadd(165852.000000,201552.000000,36700.000000,244.746900)}
{pt3dadd(166212.000000,201120.000000,36250.000000,266.814243)}
{pt3dadd(166596.000000,200712.000000,35875.000000,288.881586)}
{pt3dadd(166716.000000,200520.000000,35575.000000,288.881586)}
{pt3dadd(166872.000000,200304.000000,35400.000000,288.881586)}
{pt3dadd(167136.000000,200088.000000,35325.000000,288.881586)}
{pt3dadd(167436.000000,199896.000000,35050.000000,288.881586)}
{pt3dadd(167712.000000,199668.000000,35000.000000,288.881586)}
{pt3dadd(167832.000000,199488.000000,34825.000000,288.881586)}
{pt3dadd(167808.000000,199284.000000,34600.000000,288.881586)}
{pt3dadd(167940.000000,199080.000000,34600.000000,288.881586)}
{pt3dadd(168180.000000,198648.000000,34600.000000,303.325664)}
{pt3dadd(168384.000000,198444.000000,34375.000000,317.769741)}
{pt3dadd(168588.000000,198228.000000,34225.000000,332.213819)}
{pt3dadd(168636.000000,198000.000000,34075.000000,346.657896)}
{pt3dadd(168996.000000,197376.000000,34075.000000,301.787631)}
{pt3dadd(169296.000000,196752.000000,33625.000000,256.917366)}
{pt3dadd(169716.000000,196512.000000,33400.000000,212.047101)}
{pt3dadd(170052.000000,195816.000000,33100.000000,167.176836)}
{pt3dadd(170376.000000,195624.000000,33025.000000,175.535680)}
{pt3dadd(171312.000000,195396.000000,32350.000000,183.894525)}
{pt3dadd(171576.000000,195060.000000,32150.000000,192.253370)}
{pt3dadd(171852.000000,194712.000000,31825.000000,200.612214)}
{pt3dadd(172008.000000,194448.000000,31625.000000,185.287671)}
{pt3dadd(172200.000000,194184.000000,31450.000000,169.963128)}
{pt3dadd(172368.000000,193944.000000,31350.000000,154.638585)}
{pt3dadd(172368.000000,193692.000000,31325.000000,139.314042)}
{pt3dadd(173052.000000,193296.000000,31000.000000,139.314042)}
{pt3dadd(173616.000000,192684.000000,30625.000000,139.314042)}
{pt3dadd(173940.000000,192444.000000,30500.000000,139.314042)}
{pt3dadd(174096.000000,192204.000000,30325.000000,139.314042)}
{pt3dadd(174588.000000,191868.000000,29900.000000,154.638585)}
{pt3dadd(175008.000000,191568.000000,29750.000000,169.963128)}
{pt3dadd(175104.000000,191184.000000,29625.000000,185.287671)}
{pt3dadd(174996.000000,190944.000000,29625.000000,200.612214)}
{pt3dadd(175044.000000,190680.000000,29700.000000,167.176836)}
{pt3dadd(175068.000000,190512.000000,29575.000000,200.612214)}

{create adhoc53}
{access adhoc53}
{connect adhoc53(1), adhoc43(0)}
{nseg = 1}
{strdef color color = "White"}
{pt3dclear()}
{pt3dadd(159696.000000,225288.000000,72075.000000,575.063856)}
{pt3dadd(159444.000000,224748.000000,72250.000000,599.024880)}
{pt3dadd(159096.000000,224544.000000,72200.000000,599.024880)}
{pt3dadd(158772.000000,224196.000000,72000.000000,599.024880)}
{pt3dadd(158508.000000,224028.000000,71900.000000,599.024880)}
{pt3dadd(158232.000000,224112.000000,71725.000000,599.024880)}
{pt3dadd(157956.000000,224124.000000,71550.000000,599.024880)}
{pt3dadd(157668.000000,223656.000000,71450.000000,599.024880)}
{pt3dadd(157344.000000,223488.000000,71150.000000,599.024880)}
{pt3dadd(157020.000000,223272.000000,71000.000000,599.024880)}
{pt3dadd(156900.000000,222840.000000,70950.000000,574.065504)}
{pt3dadd(156732.000000,222468.000000,70725.000000,549.106128)}
{pt3dadd(156516.000000,222096.000000,70225.000000,524.146752)}
{pt3dadd(156348.000000,221712.000000,69600.000000,499.187376)}
{pt3dadd(155988.000000,221400.000000,68975.000000,524.146752)}
{pt3dadd(155748.000000,221124.000000,68650.000000,549.106128)}
{pt3dadd(155712.000000,220776.000000,68375.000000,574.065504)}
{pt3dadd(155652.000000,220488.000000,68075.000000,599.024880)}
{pt3dadd(155460.000000,220188.000000,67750.000000,628.976115)}
{pt3dadd(155220.000000,219900.000000,67425.000000,658.927350)}
{pt3dadd(155112.000000,219636.000000,67375.000000,688.878585)}
{pt3dadd(154968.000000,219336.000000,67025.000000,718.829820)}
{pt3dadd(154824.000000,219084.000000,66650.000000,688.878585)}
{pt3dadd(154692.000000,218796.000000,66350.000000,658.927350)}
{pt3dadd(154080.000000,218472.000000,65725.000000,628.976115)}
{pt3dadd(153756.000000,217848.000000,65200.000000,599.024880)}
{pt3dadd(153504.000000,217344.000000,64650.000000,574.065504)}
{pt3dadd(153180.000000,217068.000000,64000.000000,549.106128)}
{pt3dadd(152748.000000,216564.000000,63475.000000,524.146752)}
{pt3dadd(152604.000000,216024.000000,63000.000000,499.187376)}
{pt3dadd(152172.000000,215700.000000,62475.000000,554.097987)}
{pt3dadd(151884.000000,214896.000000,61975.000000,609.008598)}
{pt3dadd(151692.000000,214284.000000,61325.000000,663.919209)}
{pt3dadd(151716.000000,213852.000000,60850.000000,718.829820)}
{pt3dadd(151728.000000,213192.000000,60350.000000,718.829820)}
{pt3dadd(151500.000000,212916.000000,59975.000000,718.829820)}
{pt3dadd(151380.000000,212400.000000,59475.000000,718.829820)}
{pt3dadd(151284.000000,211692.000000,59050.000000,718.829820)}
{pt3dadd(151284.000000,211188.000000,58500.000000,746.145369)}
{pt3dadd(151260.000000,210492.000000,57875.000000,773.460918)}
{pt3dadd(151128.000000,209724.000000,57250.000000,800.776467)}
{pt3dadd(151188.000000,209112.000000,56750.000000,828.092016)}
{pt3dadd(151452.000000,208764.000000,56225.000000,836.717962)}
{pt3dadd(151668.000000,208332.000000,55725.000000,845.343909)}
{pt3dadd(151932.000000,208092.000000,55225.000000,853.969856)}
{pt3dadd(152124.000000,207504.000000,54750.000000,862.595802)}
{pt3dadd(152388.000000,207216.000000,54350.000000,862.595802)}
{pt3dadd(152556.000000,206856.000000,53900.000000,862.595802)}
{pt3dadd(152580.000000,206412.000000,53450.000000,862.595802)}

{create adhoc54}
{access adhoc54}
{connect adhoc54(1), adhoc53(0)}
{nseg = 1}
{strdef color color = "White"}
{pt3dclear()}
{pt3dadd(152580.000000,206412.000000,53450.000000,862.595802)}
{pt3dadd(152820.000000,205536.000000,53575.000000,200.612214)}
{pt3dadd(153420.000000,204612.000000,53575.000000,185.287671)}
{pt3dadd(153612.000000,204336.000000,53600.000000,169.963128)}
{pt3dadd(153852.000000,204060.000000,53450.000000,154.638585)}
{pt3dadd(153816.000000,203748.000000,53375.000000,139.314042)}
{pt3dadd(153876.000000,203460.000000,53375.000000,116.095032)}
{pt3dadd(154380.000000,203592.000000,53100.000000,111.451230)}

{create adhoc55}
{access adhoc55}
{connect adhoc55(1), adhoc53(0)}
{nseg = 1}
{strdef color color = "White"}
{pt3dclear()}
{pt3dadd(152580.000000,206412.000000,53450.000000,862.595802)}
{pt3dadd(152844.000000,206268.000000,53000.000000,718.829820)}
{pt3dadd(152904.000000,206160.000000,52475.000000,754.771316)}
{pt3dadd(152916.000000,205716.000000,52000.000000,790.712811)}
{pt3dadd(153000.000000,205440.000000,51450.000000,826.654307)}
{pt3dadd(153300.000000,205152.000000,51025.000000,862.595802)}
{pt3dadd(153600.000000,204912.000000,50450.000000,845.343873)}
{pt3dadd(153828.000000,204828.000000,49975.000000,828.091944)}
{pt3dadd(153948.000000,204180.000000,49450.000000,599.024880)}

{create adhoc56}
{access adhoc56}
{connect adhoc56(1), adhoc55(0)}
{nseg = 1}
{strdef color color = "White"}
{pt3dclear()}
{pt3dadd(153948.000000,204180.000000,49450.000000,599.024880)}
{pt3dadd(153912.000000,205368.000000,49225.000000,718.829820)}
{pt3dadd(153936.000000,205644.000000,48650.000000,643.119736)}
{pt3dadd(153948.000000,205908.000000,48125.000000,567.409653)}
{pt3dadd(154104.000000,205992.000000,47625.000000,491.699570)}
{pt3dadd(154128.000000,206040.000000,47225.000000,415.989486)}
{pt3dadd(154296.000000,205932.000000,46775.000000,398.656589)}
{pt3dadd(154308.000000,206244.000000,46325.000000,381.323691)}
{pt3dadd(154692.000000,206328.000000,45800.000000,363.990794)}
{pt3dadd(155256.000000,206076.000000,45325.000000,346.657896)}
{pt3dadd(155592.000000,205908.000000,44900.000000,346.657896)}
{pt3dadd(156060.000000,205800.000000,44575.000000,346.657896)}
{pt3dadd(156084.000000,205620.000000,44200.000000,346.657896)}
{pt3dadd(156312.000000,205452.000000,43900.000000,346.657896)}
{pt3dadd(156444.000000,205176.000000,43550.000000,332.213819)}
{pt3dadd(156744.000000,205080.000000,43250.000000,317.769741)}
{pt3dadd(157008.000000,204576.000000,42925.000000,303.325664)}
{pt3dadd(157236.000000,204036.000000,42575.000000,288.881586)}
{pt3dadd(157368.000000,203724.000000,42275.000000,276.844851)}
{pt3dadd(157788.000000,203436.000000,41850.000000,264.808116)}
{pt3dadd(158388.000000,203112.000000,41475.000000,252.771381)}
{pt3dadd(158652.000000,202344.000000,40925.000000,240.734646)}
{pt3dadd(159372.000000,201432.000000,40400.000000,222.345193)}
{pt3dadd(159540.000000,200580.000000,40250.000000,203.955741)}
{pt3dadd(160044.000000,199740.000000,40025.000000,185.566288)}
{pt3dadd(160548.000000,199200.000000,39525.000000,167.176836)}
{pt3dadd(160884.000000,198504.000000,39350.000000,229.379999)}
{pt3dadd(161112.000000,198000.000000,38950.000000,291.583161)}
{pt3dadd(161316.000000,197268.000000,38550.000000,353.786324)}
{pt3dadd(161532.000000,196956.000000,38175.000000,415.989486)}
{pt3dadd(161880.000000,196380.000000,37875.000000,384.212511)}
{pt3dadd(161976.000000,196164.000000,37775.000000,352.435536)}
{pt3dadd(161988.000000,195924.000000,37550.000000,320.658561)}
{pt3dadd(162216.000000,195720.000000,37475.000000,288.881586)}
{pt3dadd(162264.000000,195552.000000,37350.000000,274.437509)}
{pt3dadd(162240.000000,195360.000000,37250.000000,259.993431)}
{pt3dadd(162144.000000,195156.000000,37175.000000,245.549354)}
{pt3dadd(162276.000000,194964.000000,37150.000000,231.105276)}
{pt3dadd(162324.000000,194640.000000,36775.000000,133.741476)}
{pt3dadd(162336.000000,194448.000000,36775.000000,167.176836)}

{create adhoc57}
{access adhoc57}
{connect adhoc57(1), adhoc55(0)}
{nseg = 1}
{strdef color color = "White"}
{pt3dclear()}
{pt3dadd(153948.000000,204180.000000,49450.000000,599.024880)}
{pt3dadd(154548.000000,203196.000000,49075.000000,575.063856)}
{pt3dadd(154848.000000,202620.000000,48575.000000,611.005347)}
{pt3dadd(155112.000000,202344.000000,48250.000000,646.946838)}
{pt3dadd(155280.000000,202140.000000,47775.000000,682.888329)}
{pt3dadd(155544.000000,201828.000000,47275.000000,718.829820)}
{pt3dadd(155736.000000,201348.000000,46750.000000,663.919209)}
{pt3dadd(156000.000000,200880.000000,46250.000000,609.008598)}
{pt3dadd(156300.000000,200364.000000,45750.000000,554.097987)}
{pt3dadd(156648.000000,199848.000000,45175.000000,499.187376)}
{pt3dadd(156936.000000,199368.000000,44650.000000,471.454746)}
{pt3dadd(157284.000000,199008.000000,44125.000000,443.722116)}
{pt3dadd(157500.000000,198504.000000,43600.000000,415.989486)}
{pt3dadd(157968.000000,198024.000000,43050.000000,346.657896)}

{create adhoc58}
{access adhoc58}
{connect adhoc58(1), adhoc57(0)}
{nseg = 1}
{strdef color color = "White"}
{pt3dclear()}
{pt3dadd(157968.000000,198024.000000,43050.000000,346.657896)}
{pt3dadd(158052.000000,196908.000000,43375.000000,200.612214)}
{pt3dadd(158004.000000,196584.000000,43725.000000,174.645625)}
{pt3dadd(158280.000000,196176.000000,44275.000000,148.679037)}
{pt3dadd(158280.000000,195708.000000,44650.000000,122.712448)}
{pt3dadd(157296.000000,195420.000000,44650.000000,96.745860)}
{pt3dadd(156612.000000,195072.000000,44375.000000,96.745860)}
{pt3dadd(156732.000000,194880.000000,44225.000000,167.176836)}

{create adhoc59}
{access adhoc59}
{connect adhoc59(1), adhoc57(0)}
{nseg = 1}
{strdef color color = "White"}
{pt3dclear()}
{pt3dadd(157968.000000,198024.000000,43050.000000,346.657896)}
{pt3dadd(158196.000000,197736.000000,42750.000000,415.989486)}
{pt3dadd(158436.000000,197304.000000,42175.000000,398.656589)}
{pt3dadd(158772.000000,196248.000000,41650.000000,381.323691)}
{pt3dadd(159180.000000,195660.000000,41275.000000,363.990794)}
{pt3dadd(159420.000000,195252.000000,40875.000000,346.657896)}
{pt3dadd(159588.000000,194568.000000,40475.000000,310.146476)}
{pt3dadd(159852.000000,194136.000000,40050.000000,273.635055)}
{pt3dadd(160140.000000,193740.000000,39675.000000,237.123635)}
{pt3dadd(160728.000000,192624.000000,39125.000000,200.612214)}
{pt3dadd(160860.000000,191784.000000,38975.000000,200.612214)}

{create adhoc60}
{access adhoc60}
{connect adhoc60(1), adhoc59(0)}
{nseg = 1}
{strdef color color = "White"}
{pt3dclear()}
{pt3dadd(160860.000000,191784.000000,38975.000000,200.612214)}
{pt3dadd(161460.000000,192012.000000,38575.000000,288.881586)}
{pt3dadd(162036.000000,191556.000000,38200.000000,303.325664)}
{pt3dadd(162348.000000,190620.000000,37700.000000,317.769741)}
{pt3dadd(162912.000000,190812.000000,36875.000000,332.213819)}
{pt3dadd(163548.000000,190716.000000,36225.000000,346.657896)}
{pt3dadd(163668.000000,190584.000000,35975.000000,346.657896)}

{create adhoc61}
{access adhoc61}
{connect adhoc61(1), adhoc59(0)}
{nseg = 1}
{strdef color color = "White"}
{pt3dclear()}
{pt3dadd(160860.000000,191784.000000,38975.000000,200.612214)}
{pt3dadd(160500.000000,190644.000000,39275.000000,240.734646)}
{pt3dadd(159888.000000,189336.000000,39275.000000,252.771381)}
{pt3dadd(159768.000000,189156.000000,39500.000000,264.808116)}
{pt3dadd(159408.000000,188892.000000,39650.000000,276.844851)}
{pt3dadd(159312.000000,188652.000000,39875.000000,288.881586)}
{pt3dadd(159096.000000,188388.000000,39800.000000,245.684947)}
{pt3dadd(158952.000000,188160.000000,39800.000000,202.488309)}
{pt3dadd(159072.000000,187968.000000,39850.000000,159.291671)}
{pt3dadd(159084.000000,187752.000000,39800.000000,116.095032)}
{pt3dadd(159144.000000,187524.000000,39750.000000,80.621550)}
{pt3dadd(159204.000000,187296.000000,39725.000000,128.391822)}
