# Supplementary material for: Full reconstruction of large lobula plate tangential cells in Drosophila from a 3D EM dataset
Source: PLoS One. 2018 Nov 28;13(11):e0207828. doi: 10.1371/journal.pone.0207828 (PMC6261601; doi:10.1371/journal.pone.0207828)
Supplement: S1 Dataset — (ZIP) [file pone.0207828.s001.zip › Diameter hoc/VS_VSL_preliminary/Old Diameters Mar13_VS_VSL_HS/VS6/2_14_797_smaurer_001.008.hoc]

/* created with nml2hocm */

{create adhoc1}
{access adhoc1}
{nseg = 1}
{strdef color color = "White"}
{pt3dclear()}
{pt3dadd(170712.000000,224592.000000,75950.000000,200.612214)}
{pt3dadd(169044.000000,226224.000000,75950.000000,862.595802)}

{create adhoc2}
{access adhoc2}
{connect adhoc2(1), adhoc1(0)}
{nseg = 1}
{strdef color color = "White"}
{pt3dclear()}
{pt3dadd(169044.000000,226224.000000,75950.000000,862.595802)}
{pt3dadd(168108.000000,226104.000000,75350.000000,862.595802)}
{pt3dadd(167364.000000,226140.000000,74875.000000,862.595802)}
{pt3dadd(166644.000000,226176.000000,74475.000000,862.595802)}
{pt3dadd(165876.000000,225996.000000,74125.000000,862.595802)}
{pt3dadd(165600.000000,225924.000000,73775.000000,862.595802)}
{pt3dadd(165276.000000,225900.000000,73725.000000,826.654307)}
{pt3dadd(164964.000000,225912.000000,73600.000000,790.712811)}
{pt3dadd(164628.000000,225840.000000,73400.000000,754.771316)}
{pt3dadd(164400.000000,225924.000000,73425.000000,718.829820)}
{pt3dadd(164184.000000,225876.000000,73325.000000,754.771316)}
{pt3dadd(163956.000000,225828.000000,73300.000000,790.712811)}
{pt3dadd(163752.000000,225936.000000,73300.000000,826.654307)}
{pt3dadd(163500.000000,225732.000000,73150.000000,862.595802)}
{pt3dadd(163236.000000,225684.000000,73150.000000,862.595802)}
{pt3dadd(163008.000000,225768.000000,73075.000000,862.595802)}
{pt3dadd(162660.000000,225516.000000,72875.000000,862.595802)}
{pt3dadd(162408.000000,225264.000000,72775.000000,862.595802)}
{pt3dadd(162204.000000,225276.000000,72775.000000,862.595802)}
{pt3dadd(161976.000000,225540.000000,72775.000000,862.595802)}
{pt3dadd(161808.000000,225552.000000,72725.000000,862.595802)}
{pt3dadd(161568.000000,225636.000000,72700.000000,862.595802)}
{pt3dadd(161376.000000,225540.000000,72650.000000,905.725589)}
{pt3dadd(161160.000000,225552.000000,72525.000000,948.855375)}
{pt3dadd(160860.000000,225528.000000,72450.000000,991.985162)}
{pt3dadd(160596.000000,225588.000000,72525.000000,1035.114948)}
{pt3dadd(160296.000000,225600.000000,72300.000000,862.595802)}
{pt3dadd(160032.000000,225660.000000,72250.000000,690.076674)}

{create adhoc3}
{access adhoc3}
{connect adhoc3(1), adhoc2(0)}
{nseg = 1}
{strdef color color = "White"}
{pt3dclear()}
{pt3dadd(160032.000000,225660.000000,72250.000000,690.076674)}
{pt3dadd(160020.000000,226608.000000,71575.000000,499.187376)}
{pt3dadd(159864.000000,226536.000000,71625.000000,478.387903)}
{pt3dadd(159672.000000,226572.000000,71475.000000,457.588431)}
{pt3dadd(159516.000000,226608.000000,71325.000000,436.788958)}
{pt3dadd(159348.000000,226692.000000,71300.000000,415.989486)}
{pt3dadd(159132.000000,226752.000000,71200.000000,436.788958)}
{pt3dadd(158940.000000,226764.000000,71225.000000,457.588431)}
{pt3dadd(158724.000000,226776.000000,71200.000000,478.387903)}
{pt3dadd(158520.000000,226788.000000,71075.000000,499.187376)}
{pt3dadd(158280.000000,226740.000000,71025.000000,499.187376)}
{pt3dadd(158052.000000,226824.000000,71150.000000,499.187376)}
{pt3dadd(157836.000000,227040.000000,71125.000000,499.187376)}
{pt3dadd(157632.000000,227076.000000,71175.000000,499.187376)}
{pt3dadd(157404.000000,227160.000000,71050.000000,524.146752)}
{pt3dadd(157212.000000,227112.000000,71000.000000,549.106128)}
{pt3dadd(157032.000000,227244.000000,71000.000000,574.065504)}
{pt3dadd(156708.000000,227352.000000,70950.000000,599.024880)}
{pt3dadd(156456.000000,227436.000000,70850.000000,614.887042)}
{pt3dadd(156240.000000,227472.000000,70775.000000,630.749205)}
{pt3dadd(155928.000000,227580.000000,70750.000000,646.611368)}
{pt3dadd(155640.000000,227664.000000,70650.000000,662.473530)}
{pt3dadd(155340.000000,227676.000000,70550.000000,676.562602)}
{pt3dadd(155088.000000,227784.000000,70475.000000,690.651675)}
{pt3dadd(154788.000000,227952.000000,70350.000000,704.740748)}
{pt3dadd(154608.000000,227988.000000,70300.000000,718.829820)}
{pt3dadd(154320.000000,228096.000000,70225.000000,688.878585)}
{pt3dadd(154068.000000,228288.000000,70150.000000,658.927350)}
{pt3dadd(153816.000000,228324.000000,69875.000000,628.976115)}
{pt3dadd(153564.000000,228384.000000,69800.000000,599.024880)}
{pt3dadd(153348.000000,228468.000000,69575.000000,628.976115)}
{pt3dadd(153060.000000,228576.000000,69450.000000,658.927350)}
{pt3dadd(152772.000000,228636.000000,69025.000000,688.878585)}
{pt3dadd(152568.000000,228876.000000,68900.000000,718.829820)}
{pt3dadd(152364.000000,228960.000000,68450.000000,790.712811)}
{pt3dadd(152124.000000,229092.000000,68150.000000,862.595802)}
{pt3dadd(151788.000000,229332.000000,67675.000000,1035.114948)}

{create adhoc4}
{access adhoc4}
{connect adhoc4(1), adhoc3(0)}
{nseg = 1}
{strdef color color = "White"}
{pt3dclear()}
{pt3dadd(151788.000000,229332.000000,67675.000000,1035.114948)}
{pt3dadd(151692.000000,230928.000000,67150.000000,240.734646)}
{pt3dadd(151884.000000,231096.000000,66750.000000,215.379495)}
{pt3dadd(151860.000000,231204.000000,66450.000000,190.024344)}
{pt3dadd(151896.000000,231336.000000,66175.000000,164.669193)}
{pt3dadd(151884.000000,231648.000000,65925.000000,139.314042)}
{pt3dadd(152040.000000,231636.000000,65625.000000,167.176836)}

{create adhoc5}
{access adhoc5}
{connect adhoc5(1), adhoc3(0)}
{nseg = 1}
{strdef color color = "White"}
{pt3dclear()}
{pt3dadd(151788.000000,229332.000000,67675.000000,1035.114948)}
{pt3dadd(151656.000000,229236.000000,67425.000000,1035.114948)}
{pt3dadd(151404.000000,229344.000000,67150.000000,1148.977562)}
{pt3dadd(151200.000000,229416.000000,66700.000000,1262.840175)}
{pt3dadd(150996.000000,229392.000000,66300.000000,1376.702788)}
{pt3dadd(150840.000000,229476.000000,64775.000000,1490.565402)}
{pt3dadd(150540.000000,229728.000000,64300.000000,1376.702789)}
{pt3dadd(150552.000000,229908.000000,63900.000000,1262.840175)}
{pt3dadd(150528.000000,229920.000000,63500.000000,1148.977562)}
{pt3dadd(150540.000000,229776.000000,63050.000000,1035.114948)}
{pt3dadd(150504.000000,229548.000000,62550.000000,1074.449300)}
{pt3dadd(150432.000000,229272.000000,62125.000000,1113.783651)}
{pt3dadd(150420.000000,229176.000000,61650.000000,1153.118003)}
{pt3dadd(150348.000000,229344.000000,61150.000000,1192.452354)}
{pt3dadd(150360.000000,229068.000000,60650.000000,1153.118003)}
{pt3dadd(150456.000000,228888.000000,60150.000000,1113.783651)}
{pt3dadd(150624.000000,228612.000000,59700.000000,1074.449300)}
{pt3dadd(150720.000000,228408.000000,59250.000000,1035.114948)}
{pt3dadd(150780.000000,228228.000000,58850.000000,1035.114948)}
{pt3dadd(150948.000000,228156.000000,58450.000000,1035.114948)}
{pt3dadd(151032.000000,228060.000000,57975.000000,1035.114948)}
{pt3dadd(151320.000000,227832.000000,57525.000000,1035.114948)}
{pt3dadd(151272.000000,227808.000000,57150.000000,926.092431)}
{pt3dadd(151248.000000,227424.000000,56800.000000,817.069914)}
{pt3dadd(151572.000000,227376.000000,56375.000000,708.047397)}
{pt3dadd(151896.000000,227412.000000,55825.000000,599.024880)}
{pt3dadd(152160.000000,227268.000000,55375.000000,574.065504)}
{pt3dadd(152448.000000,226992.000000,55000.000000,549.106128)}
{pt3dadd(152664.000000,226884.000000,54550.000000,524.146752)}
{pt3dadd(152856.000000,226584.000000,54150.000000,499.187376)}
{pt3dadd(153168.000000,226200.000000,53650.000000,499.187376)}
{pt3dadd(153540.000000,225840.000000,53175.000000,499.187376)}
{pt3dadd(153624.000000,225444.000000,52850.000000,499.187376)}
{pt3dadd(153912.000000,225012.000000,52425.000000,499.187376)}
{pt3dadd(154128.000000,224784.000000,52075.000000,524.146752)}
{pt3dadd(154476.000000,224532.000000,51575.000000,549.106128)}
{pt3dadd(154644.000000,224136.000000,51025.000000,574.065504)}
{pt3dadd(154968.000000,223932.000000,50600.000000,599.024880)}
{pt3dadd(155100.000000,223644.000000,50200.000000,574.065504)}
{pt3dadd(155328.000000,223392.000000,49800.000000,549.106128)}
{pt3dadd(155520.000000,223272.000000,49450.000000,524.146752)}
{pt3dadd(155652.000000,223020.000000,49125.000000,499.187376)}
{pt3dadd(155784.000000,222744.000000,48825.000000,478.387903)}
{pt3dadd(155844.000000,222516.000000,48575.000000,457.588431)}
{pt3dadd(156132.000000,222312.000000,48125.000000,436.788958)}
{pt3dadd(156300.000000,222144.000000,47700.000000,415.989486)}
{pt3dadd(156624.000000,221736.000000,47200.000000,384.212511)}
{pt3dadd(156936.000000,221328.000000,46800.000000,352.435536)}
{pt3dadd(157212.000000,220968.000000,46325.000000,320.658561)}
{pt3dadd(157740.000000,220380.000000,45850.000000,288.881586)}
{pt3dadd(158124.000000,219504.000000,45450.000000,316.498675)}
{pt3dadd(158340.000000,218964.000000,44975.000000,344.115765)}
{pt3dadd(158448.000000,218628.000000,44575.000000,371.732855)}
{pt3dadd(158772.000000,218112.000000,44225.000000,399.349944)}
{pt3dadd(159300.000000,217392.000000,43800.000000,386.176932)}
{pt3dadd(159672.000000,216960.000000,43375.000000,373.003920)}
{pt3dadd(159948.000000,216468.000000,42925.000000,359.830908)}
{pt3dadd(160416.000000,216168.000000,42525.000000,346.657896)}
{pt3dadd(160500.000000,215652.000000,42125.000000,346.657896)}
{pt3dadd(161004.000000,214956.000000,41550.000000,346.657896)}
{pt3dadd(161496.000000,214284.000000,41050.000000,346.657896)}
{pt3dadd(161784.000000,213384.000000,40675.000000,346.657896)}
{pt3dadd(162252.000000,212796.000000,40250.000000,346.657896)}
{pt3dadd(162420.000000,211896.000000,40025.000000,346.657896)}
{pt3dadd(162636.000000,211596.000000,39700.000000,346.657896)}
{pt3dadd(162852.000000,211356.000000,39600.000000,346.657896)}
{pt3dadd(162864.000000,211140.000000,39550.000000,363.990794)}
{pt3dadd(162996.000000,210936.000000,39475.000000,381.323691)}
{pt3dadd(162972.000000,210696.000000,39475.000000,398.656589)}
{pt3dadd(163008.000000,210492.000000,39475.000000,415.989486)}
{pt3dadd(162960.000000,210288.000000,39525.000000,415.989486)}
{pt3dadd(162972.000000,209976.000000,39625.000000,415.989486)}
{pt3dadd(162948.000000,209772.000000,39650.000000,415.989486)}
{pt3dadd(163008.000000,209580.000000,39675.000000,415.989486)}
{pt3dadd(163092.000000,209328.000000,39600.000000,372.175776)}
{pt3dadd(163224.000000,209040.000000,39550.000000,328.362066)}
{pt3dadd(163416.000000,208800.000000,39425.000000,284.548356)}
{pt3dadd(163452.000000,208560.000000,39275.000000,240.734646)}
{pt3dadd(163512.000000,208320.000000,39175.000000,230.704038)}
{pt3dadd(163548.000000,208116.000000,39175.000000,220.673430)}
{pt3dadd(163524.000000,207912.000000,39150.000000,210.642822)}
{pt3dadd(163608.000000,207708.000000,39175.000000,200.612214)}
{pt3dadd(163692.000000,207708.000000,39200.000000,210.642822)}
{pt3dadd(163668.000000,207504.000000,39075.000000,220.673430)}
{pt3dadd(163800.000000,207324.000000,39025.000000,230.704038)}
{pt3dadd(163908.000000,206364.000000,38750.000000,240.734646)}
{pt3dadd(164016.000000,205332.000000,38475.000000,252.771381)}
{pt3dadd(164040.000000,204372.000000,38200.000000,264.808116)}
{pt3dadd(164148.000000,203700.000000,37950.000000,276.844851)}
{pt3dadd(164196.000000,203496.000000,37850.000000,288.881586)}
{pt3dadd(164232.000000,203316.000000,37750.000000,299.859080)}
{pt3dadd(164472.000000,203112.000000,37625.000000,310.836573)}
{pt3dadd(164532.000000,202908.000000,37475.000000,321.814067)}
{pt3dadd(164628.000000,202728.000000,37400.000000,332.791560)}
{pt3dadd(164844.000000,202512.000000,37300.000000,284.422181)}
{pt3dadd(164952.000000,202296.000000,37275.000000,236.052801)}
{pt3dadd(165036.000000,202128.000000,37225.000000,187.683421)}
{pt3dadd(165360.000000,201948.000000,36950.000000,139.314042)}
{pt3dadd(165840.000000,201708.000000,36700.000000,164.669193)}
{pt3dadd(165948.000000,201432.000000,36550.000000,190.024344)}
{pt3dadd(166272.000000,201168.000000,36275.000000,215.379495)}
{pt3dadd(166464.000000,200976.000000,36050.000000,240.734646)}
{pt3dadd(166548.000000,200712.000000,35825.000000,252.771381)}
{pt3dadd(166740.000000,200460.000000,35675.000000,264.808116)}
{pt3dadd(166824.000000,200232.000000,35475.000000,276.844851)}
{pt3dadd(167028.000000,200184.000000,35250.000000,288.881586)}
{pt3dadd(167196.000000,200004.000000,35125.000000,276.844851)}
{pt3dadd(167424.000000,199776.000000,35150.000000,264.808116)}
{pt3dadd(167568.000000,199548.000000,34900.000000,252.771381)}
{pt3dadd(167820.000000,199500.000000,34750.000000,240.734646)}
{pt3dadd(168012.000000,199200.000000,34650.000000,230.704038)}
{pt3dadd(168288.000000,198660.000000,34275.000000,220.673430)}
{pt3dadd(168528.000000,198588.000000,34350.000000,210.642822)}
{pt3dadd(168756.000000,198540.000000,34125.000000,200.612214)}
{pt3dadd(168780.000000,198300.000000,34125.000000,237.123635)}
{pt3dadd(168888.000000,198036.000000,34075.000000,273.635055)}
{pt3dadd(168948.000000,197736.000000,33825.000000,310.146475)}
{pt3dadd(169032.000000,197508.000000,33775.000000,346.657896)}
{pt3dadd(169212.000000,196956.000000,33750.000000,284.179887)}
{pt3dadd(169428.000000,196932.000000,33550.000000,221.701878)}
{pt3dadd(169608.000000,196680.000000,33425.000000,159.223869)}
{pt3dadd(169788.000000,196380.000000,33400.000000,96.745860)}
{pt3dadd(169932.000000,196176.000000,33275.000000,114.353604)}
{pt3dadd(170364.000000,195528.000000,32900.000000,131.961348)}
{pt3dadd(170856.000000,195408.000000,32625.000000,149.569092)}
{pt3dadd(171300.000000,194976.000000,32275.000000,167.176836)}
{pt3dadd(171624.000000,194676.000000,31800.000000,160.211138)}
{pt3dadd(171996.000000,194328.000000,31525.000000,153.245439)}
{pt3dadd(172284.000000,193932.000000,31250.000000,146.279741)}
{pt3dadd(172572.000000,193860.000000,31325.000000,139.314042)}
{pt3dadd(172608.000000,193656.000000,31325.000000,167.176836)}

{create adhoc6}
{access adhoc6}
{connect adhoc6(1), adhoc2(0)}
{nseg = 1}
{strdef color color = "White"}
{pt3dclear()}
{pt3dadd(160032.000000,225660.000000,72250.000000,690.076674)}
{pt3dadd(159840.000000,224652.000000,72375.000000,499.187376)}
{pt3dadd(159540.000000,224604.000000,72300.000000,524.146752)}
{pt3dadd(159252.000000,224484.000000,72150.000000,549.106128)}
{pt3dadd(159024.000000,224340.000000,72100.000000,574.065504)}
{pt3dadd(158772.000000,224376.000000,72025.000000,599.024880)}
{pt3dadd(158556.000000,224172.000000,71875.000000,599.024880)}
{pt3dadd(158352.000000,224232.000000,71875.000000,599.024880)}
{pt3dadd(158100.000000,224136.000000,71575.000000,599.024880)}
{pt3dadd(157848.000000,223992.000000,71550.000000,599.024880)}
{pt3dadd(157548.000000,223896.000000,71425.000000,628.976115)}
{pt3dadd(157332.000000,223644.000000,71275.000000,658.927350)}
{pt3dadd(157008.000000,222996.000000,70975.000000,688.878585)}
{pt3dadd(156816.000000,222636.000000,70725.000000,718.829820)}
{pt3dadd(156624.000000,222276.000000,70475.000000,718.829820)}

{create adhoc7}
{access adhoc7}
{connect adhoc7(1), adhoc6(0)}
{nseg = 1}
{strdef color color = "White"}
{pt3dclear()}
{pt3dadd(156624.000000,222276.000000,70475.000000,718.829820)}
{pt3dadd(156624.000000,224628.000000,70675.000000,599.024880)}
{pt3dadd(156324.000000,224532.000000,70250.000000,553.266031)}
{pt3dadd(155868.000000,224472.000000,69850.000000,507.507183)}
{pt3dadd(155592.000000,224436.000000,69450.000000,461.748335)}
{pt3dadd(155004.000000,224472.000000,68950.000000,415.989486)}
{pt3dadd(154668.000000,224340.000000,68400.000000,499.187376)}

{create adhoc8}
{access adhoc8}
{connect adhoc8(1), adhoc7(0)}
{nseg = 1}
{strdef color color = "White"}
{pt3dclear()}
{pt3dadd(154668.000000,224340.000000,68400.000000,499.187376)}
{pt3dadd(153708.000000,224784.000000,68300.000000,200.612214)}
{pt3dadd(153444.000000,224748.000000,68050.000000,200.612214)}
{pt3dadd(153180.000000,224628.000000,67750.000000,200.612214)}
{pt3dadd(153000.000000,224628.000000,67425.000000,200.612214)}
{pt3dadd(152220.000000,224340.000000,67050.000000,200.612214)}
{pt3dadd(151572.000000,224352.000000,66725.000000,308.300850)}
{pt3dadd(151272.000000,224280.000000,66350.000000,415.989486)}
{pt3dadd(151164.000000,224280.000000,66100.000000,415.989486)}

{create adhoc9}
{access adhoc9}
{connect adhoc9(1), adhoc7(0)}
{nseg = 1}
{strdef color color = "White"}
{pt3dclear()}
{pt3dadd(154668.000000,224340.000000,68400.000000,499.187376)}
{pt3dadd(154620.000000,224040.000000,67950.000000,599.024880)}
{pt3dadd(154608.000000,223836.000000,67525.000000,569.073631)}
{pt3dadd(154428.000000,223536.000000,67050.000000,539.122383)}
{pt3dadd(154248.000000,223392.000000,66650.000000,509.171134)}
{pt3dadd(154308.000000,222984.000000,66225.000000,479.219886)}
{pt3dadd(153744.000000,222912.000000,65675.000000,484.211758)}
{pt3dadd(153408.000000,222516.000000,65100.000000,489.203631)}
{pt3dadd(153024.000000,222336.000000,64600.000000,494.195504)}
{pt3dadd(152724.000000,222312.000000,64125.000000,499.187376)}
{pt3dadd(152544.000000,222072.000000,63700.000000,554.097987)}
{pt3dadd(152244.000000,222024.000000,63275.000000,609.008598)}
{pt3dadd(151968.000000,221892.000000,62825.000000,663.919209)}
{pt3dadd(151848.000000,221760.000000,62300.000000,718.829820)}
{pt3dadd(151764.000000,221580.000000,61900.000000,658.927345)}
{pt3dadd(151668.000000,221352.000000,61250.000000,599.024871)}
{pt3dadd(151464.000000,220680.000000,60725.000000,539.122396)}
{pt3dadd(151452.000000,220536.000000,60300.000000,479.219922)}
{pt3dadd(151428.000000,220236.000000,60025.000000,509.171161)}
{pt3dadd(151368.000000,220092.000000,59575.000000,539.122401)}
{pt3dadd(151404.000000,219840.000000,59300.000000,569.073640)}
{pt3dadd(151284.000000,219720.000000,58875.000000,599.024880)}
{pt3dadd(151296.000000,219696.000000,58575.000000,664.917611)}
{pt3dadd(151464.000000,219600.000000,58250.000000,730.810341)}
{pt3dadd(151368.000000,219576.000000,57850.000000,796.703072)}
{pt3dadd(151476.000000,219348.000000,57475.000000,862.595802)}
{pt3dadd(151332.000000,219168.000000,57075.000000,796.703072)}
{pt3dadd(151440.000000,219072.000000,56700.000000,730.810341)}
{pt3dadd(151524.000000,218868.000000,56275.000000,664.917611)}
{pt3dadd(151560.000000,218700.000000,55925.000000,599.024880)}
{pt3dadd(151596.000000,218604.000000,55525.000000,553.266031)}
{pt3dadd(151584.000000,218496.000000,55125.000000,507.507183)}
{pt3dadd(151836.000000,218388.000000,54750.000000,461.748335)}
{pt3dadd(152064.000000,218316.000000,54425.000000,415.989486)}
{pt3dadd(152436.000000,218160.000000,54125.000000,455.758079)}
{pt3dadd(152640.000000,218004.000000,53725.000000,495.526671)}
{pt3dadd(152916.000000,217764.000000,53275.000000,535.295264)}
{pt3dadd(153084.000000,217572.000000,52900.000000,575.063856)}
{pt3dadd(153240.000000,217404.000000,52575.000000,503.518289)}
{pt3dadd(153288.000000,217188.000000,52200.000000,431.972721)}
{pt3dadd(153576.000000,216912.000000,51825.000000,360.427153)}
{pt3dadd(153888.000000,216588.000000,51450.000000,288.881586)}
{pt3dadd(154020.000000,216432.000000,51100.000000,303.325664)}
{pt3dadd(154128.000000,216252.000000,50800.000000,317.769741)}
{pt3dadd(154212.000000,216048.000000,50500.000000,332.213819)}
{pt3dadd(154296.000000,215472.000000,50150.000000,346.657896)}
{pt3dadd(154296.000000,214788.000000,49675.000000,384.790266)}
{pt3dadd(154476.000000,214392.000000,49225.000000,422.922636)}
{pt3dadd(154512.000000,214164.000000,48850.000000,461.055006)}
{pt3dadd(154548.000000,213780.000000,48400.000000,499.187376)}
{pt3dadd(154680.000000,213636.000000,47975.000000,457.588422)}
{pt3dadd(154896.000000,213432.000000,47525.000000,415.989468)}
{pt3dadd(155028.000000,213456.000000,47250.000000,374.390514)}
{pt3dadd(155160.000000,213408.000000,47000.000000,332.791560)}
{pt3dadd(155316.000000,213228.000000,46950.000000,200.612214)}

{create adhoc10}
{access adhoc10}
{connect adhoc10(1), adhoc6(0)}
{nseg = 1}
{strdef color color = "White"}
{pt3dclear()}
{pt3dadd(156624.000000,222276.000000,70475.000000,718.829820)}
{pt3dadd(156348.000000,221760.000000,69700.000000,599.024880)}
{pt3dadd(156156.000000,221268.000000,69175.000000,628.976115)}
{pt3dadd(155952.000000,220992.000000,68825.000000,658.927350)}
{pt3dadd(155676.000000,220560.000000,68375.000000,688.878585)}
{pt3dadd(155556.000000,220332.000000,68100.000000,718.829820)}
{pt3dadd(155352.000000,220080.000000,67725.000000,688.878585)}
{pt3dadd(155148.000000,219744.000000,67400.000000,658.927350)}
{pt3dadd(154896.000000,219312.000000,66875.000000,628.976115)}
{pt3dadd(154728.000000,218664.000000,66375.000000,599.024880)}
{pt3dadd(154272.000000,218592.000000,66000.000000,621.787828)}
{pt3dadd(153972.000000,218220.000000,65550.000000,644.550777)}
{pt3dadd(153744.000000,217860.000000,65125.000000,667.313725)}
{pt3dadd(153636.000000,217452.000000,64750.000000,690.076674)}
{pt3dadd(153408.000000,217152.000000,64400.000000,642.354349)}
{pt3dadd(153264.000000,216960.000000,64400.000000,594.632025)}
{pt3dadd(153048.000000,217104.000000,64025.000000,546.909700)}
{pt3dadd(153132.000000,216660.000000,63800.000000,499.187376)}
{pt3dadd(152952.000000,216408.000000,63550.000000,499.187376)}
{pt3dadd(152652.000000,216204.000000,63250.000000,499.187376)}
{pt3dadd(152448.000000,215964.000000,63075.000000,499.187376)}
{pt3dadd(152424.000000,215736.000000,62850.000000,499.187376)}
{pt3dadd(152088.000000,215400.000000,62375.000000,554.097987)}
{pt3dadd(152016.000000,215016.000000,62050.000000,609.008598)}
{pt3dadd(151788.000000,214692.000000,61625.000000,663.919209)}
{pt3dadd(151764.000000,214380.000000,61250.000000,718.829820)}
{pt3dadd(151644.000000,213816.000000,60825.000000,711.641515)}
{pt3dadd(151572.000000,213516.000000,60450.000000,704.453211)}
{pt3dadd(151512.000000,213084.000000,60075.000000,697.264906)}
{pt3dadd(151440.000000,212544.000000,59625.000000,690.076602)}
{pt3dadd(151236.000000,212160.000000,59250.000000,697.264906)}
{pt3dadd(151248.000000,211548.000000,58825.000000,704.453211)}
{pt3dadd(151200.000000,211056.000000,58525.000000,711.641515)}
{pt3dadd(151260.000000,210468.000000,58025.000000,718.829820)}
{pt3dadd(151164.000000,210012.000000,57525.000000,754.771316)}
{pt3dadd(151140.000000,209496.000000,57050.000000,790.712811)}
{pt3dadd(151248.000000,209004.000000,56550.000000,826.654307)}
{pt3dadd(151332.000000,208752.000000,56075.000000,862.595802)}
{pt3dadd(151620.000000,208452.000000,55700.000000,862.595802)}
{pt3dadd(151848.000000,208020.000000,55275.000000,862.595802)}
{pt3dadd(152136.000000,207636.000000,54800.000000,862.595802)}
{pt3dadd(152352.000000,207300.000000,54425.000000,862.595802)}
{pt3dadd(152532.000000,207000.000000,54050.000000,905.725589)}
{pt3dadd(152652.000000,206664.000000,53600.000000,948.855375)}
{pt3dadd(152772.000000,206520.000000,53275.000000,991.985162)}
{pt3dadd(152808.000000,206292.000000,52875.000000,1035.114948)}
{pt3dadd(152904.000000,205992.000000,52475.000000,991.985162)}
{pt3dadd(152988.000000,205716.000000,51950.000000,948.855375)}
{pt3dadd(153108.000000,205512.000000,51500.000000,905.725589)}
{pt3dadd(153348.000000,205260.000000,51025.000000,862.595802)}
{pt3dadd(153564.000000,205032.000000,50675.000000,840.053304)}
{pt3dadd(153696.000000,204828.000000,50250.000000,817.510806)}
{pt3dadd(153780.000000,204648.000000,49875.000000,794.968308)}
{pt3dadd(153912.000000,204372.000000,49500.000000,599.024880)}

{create adhoc11}
{access adhoc11}
{connect adhoc11(1), adhoc10(0)}
{nseg = 1}
{strdef color color = "White"}
{pt3dclear()}
{pt3dadd(153912.000000,204372.000000,49500.000000,599.024880)}
{pt3dadd(153972.000000,205296.000000,49375.000000,575.063856)}
{pt3dadd(154284.000000,206028.000000,47400.000000,531.135378)}
{pt3dadd(154608.000000,206028.000000,46500.000000,487.206900)}
{pt3dadd(154884.000000,206088.000000,45975.000000,443.278422)}
{pt3dadd(155076.000000,205992.000000,45625.000000,399.349944)}
{pt3dadd(155340.000000,205848.000000,45575.000000,399.349944)}
{pt3dadd(155568.000000,205752.000000,45200.000000,399.349944)}
{pt3dadd(155904.000000,205728.000000,44600.000000,399.349944)}
{pt3dadd(156156.000000,205644.000000,44200.000000,399.349944)}
{pt3dadd(156372.000000,205380.000000,44000.000000,349.665511)}
{pt3dadd(156540.000000,205200.000000,43550.000000,299.981079)}
{pt3dadd(156768.000000,204984.000000,43250.000000,250.296647)}
{pt3dadd(156972.000000,204828.000000,43250.000000,200.612214)}
{pt3dadd(157092.000000,204156.000000,42825.000000,249.294108)}
{pt3dadd(157368.000000,203616.000000,42425.000000,297.976002)}
{pt3dadd(157764.000000,203472.000000,42000.000000,346.657896)}
{pt3dadd(157944.000000,203232.000000,41700.000000,231.105276)}

{create adhoc12}
{access adhoc12}
{connect adhoc12(1), adhoc10(0)}
{nseg = 1}
{strdef color color = "White"}
{pt3dclear()}
{pt3dadd(153912.000000,204372.000000,49500.000000,599.024880)}
{pt3dadd(154356.000000,203724.000000,49375.000000,479.219886)}
{pt3dadd(154644.000000,203208.000000,49025.000000,509.171134)}
{pt3dadd(154884.000000,202644.000000,48550.000000,539.122383)}
{pt3dadd(155208.000000,202236.000000,48175.000000,569.073631)}
{pt3dadd(155364.000000,201960.000000,47700.000000,599.024880)}
{pt3dadd(155364.000000,201732.000000,47350.000000,599.024880)}
{pt3dadd(155928.000000,201192.000000,46575.000000,599.024880)}
{pt3dadd(156036.000000,200832.000000,46200.000000,599.024880)}
{pt3dadd(156168.000000,200652.000000,45950.000000,599.024880)}
{pt3dadd(156456.000000,200160.000000,45575.000000,574.065504)}
{pt3dadd(156552.000000,199800.000000,45225.000000,549.106128)}
{pt3dadd(156840.000000,199368.000000,44825.000000,524.146752)}
{pt3dadd(157056.000000,199116.000000,44425.000000,499.187376)}
{pt3dadd(157344.000000,198864.000000,43950.000000,499.187376)}
{pt3dadd(157608.000000,198456.000000,43450.000000,499.187376)}
{pt3dadd(158088.000000,197916.000000,43075.000000,499.187376)}
{pt3dadd(158280.000000,197664.000000,42700.000000,499.187376)}
{pt3dadd(158472.000000,197304.000000,42325.000000,474.228018)}
{pt3dadd(158688.000000,196788.000000,41950.000000,449.268660)}
{pt3dadd(159024.000000,196020.000000,41600.000000,424.309302)}
{pt3dadd(159264.000000,195660.000000,41225.000000,399.349944)}
{pt3dadd(159456.000000,195072.000000,40875.000000,386.176932)}
{pt3dadd(159672.000000,194688.000000,40500.000000,373.003920)}
{pt3dadd(159912.000000,194148.000000,40000.000000,359.830908)}
{pt3dadd(160128.000000,193536.000000,39650.000000,346.657896)}
{pt3dadd(160416.000000,192948.000000,39300.000000,320.177083)}
{pt3dadd(160344.000000,192612.000000,39125.000000,293.696271)}
{pt3dadd(160716.000000,192384.000000,38750.000000,267.215459)}
{pt3dadd(160932.000000,192144.000000,38850.000000,240.734646)}
{pt3dadd(161748.000000,191784.000000,38475.000000,252.771381)}
{pt3dadd(161964.000000,191448.000000,38250.000000,264.808116)}
{pt3dadd(161988.000000,191136.000000,38000.000000,276.844851)}
{pt3dadd(162060.000000,191016.000000,37750.000000,288.881586)}
{pt3dadd(162324.000000,190620.000000,37450.000000,266.814243)}
{pt3dadd(162504.000000,190728.000000,37225.000000,244.746900)}
{pt3dadd(162756.000000,190752.000000,37025.000000,222.679557)}
{pt3dadd(163212.000000,190956.000000,36775.000000,200.612214)}
{pt3dadd(163392.000000,190776.000000,36525.000000,240.734646)}
{pt3dadd(163572.000000,190740.000000,36200.000000,200.612214)}

{create adhoc13}
{access adhoc13}
{connect adhoc13(1), adhoc1(0)}
{nseg = 1}
{strdef color color = "White"}
{pt3dclear()}
{pt3dadd(169044.000000,226224.000000,75950.000000,862.595802)}
{pt3dadd(169188.000000,226368.000000,76075.000000,862.595802)}
{pt3dadd(169644.000000,226236.000000,76500.000000,906.300654)}
{pt3dadd(170160.000000,226308.000000,76925.000000,950.005506)}
{pt3dadd(170460.000000,226452.000000,77075.000000,993.710358)}
{pt3dadd(170760.000000,226320.000000,77275.000000,862.595802)}

{create adhoc14}
{access adhoc14}
{connect adhoc14(1), adhoc13(0)}
{nseg = 1}
{strdef color color = "White"}
{pt3dclear()}
{pt3dadd(170760.000000,226320.000000,77275.000000,862.595802)}
{pt3dadd(170760.000000,228300.000000,79100.000000,288.881586)}
{pt3dadd(170508.000000,228540.000000,79400.000000,266.814243)}
{pt3dadd(170280.000000,228780.000000,79575.000000,244.746900)}
{pt3dadd(170088.000000,229224.000000,79850.000000,222.679557)}
{pt3dadd(170136.000000,229596.000000,80250.000000,200.612214)}
{pt3dadd(170244.000000,229860.000000,80550.000000,167.176836)}
{pt3dadd(170340.000000,230052.000000,80750.000000,167.176836)}

{create adhoc15}
{access adhoc15}
{connect adhoc15(1), adhoc13(0)}
{nseg = 1}
{strdef color color = "White"}
{pt3dclear()}
{pt3dadd(170760.000000,226320.000000,77275.000000,862.595802)}
{pt3dadd(171000.000000,226308.000000,77425.000000,862.595802)}
{pt3dadd(171348.000000,226272.000000,77525.000000,920.102184)}
{pt3dadd(171732.000000,226140.000000,77775.000000,977.608566)}
{pt3dadd(172092.000000,226032.000000,77900.000000,1035.114948)}
{pt3dadd(172440.000000,225996.000000,78025.000000,1035.114948)}
{pt3dadd(172704.000000,225960.000000,78175.000000,1035.114948)}
{pt3dadd(173004.000000,225744.000000,78250.000000,1035.114948)}
{pt3dadd(173304.000000,225840.000000,78325.000000,1035.114948)}
{pt3dadd(173592.000000,225672.000000,78575.000000,1086.870681)}
{pt3dadd(173856.000000,225540.000000,78825.000000,1138.626414)}
{pt3dadd(174204.000000,225408.000000,78950.000000,1190.382147)}
{pt3dadd(174504.000000,225276.000000,79100.000000,1242.137880)}
{pt3dadd(174840.000000,225012.000000,79400.000000,1190.382147)}
{pt3dadd(175140.000000,224796.000000,79400.000000,1138.626414)}
{pt3dadd(175452.000000,224580.000000,79725.000000,1086.870681)}
{pt3dadd(175764.000000,224388.000000,79975.000000,1035.114948)}
{pt3dadd(176076.000000,224196.000000,80225.000000,1035.114948)}
{pt3dadd(176424.000000,223980.000000,80575.000000,1035.114948)}
{pt3dadd(176844.000000,223536.000000,80775.000000,1035.114948)}
{pt3dadd(177144.000000,223404.000000,81150.000000,1035.114948)}
{pt3dadd(177468.000000,223008.000000,81225.000000,1086.870681)}
{pt3dadd(177780.000000,222996.000000,81550.000000,1138.626414)}
{pt3dadd(178044.000000,222804.000000,81800.000000,1190.382147)}
{pt3dadd(178224.000000,222612.000000,81825.000000,1242.137880)}
{pt3dadd(178476.000000,222288.000000,81950.000000,1242.137880)}
{pt3dadd(178860.000000,222156.000000,82225.000000,1242.137880)}
{pt3dadd(179208.000000,222048.000000,82250.000000,1242.137880)}
{pt3dadd(179412.000000,221868.000000,82350.000000,1242.137880)}
{pt3dadd(179748.000000,221580.000000,82650.000000,1144.754316)}

{create adhoc16}
{access adhoc16}
{connect adhoc16(1), adhoc15(0)}
{nseg = 1}
{strdef color color = "White"}
{pt3dclear()}
{pt3dadd(179748.000000,221580.000000,82650.000000,1144.754316)}
{pt3dadd(177468.000000,221580.000000,83650.000000,240.734646)}
{pt3dadd(177264.000000,221664.000000,84025.000000,230.704038)}
{pt3dadd(176856.000000,221772.000000,84275.000000,220.673430)}
{pt3dadd(176448.000000,222192.000000,84700.000000,210.642822)}
{pt3dadd(176172.000000,222744.000000,85100.000000,200.612214)}
{pt3dadd(176040.000000,222804.000000,84975.000000,222.679557)}
{pt3dadd(175872.000000,223020.000000,85250.000000,244.746900)}
{pt3dadd(175692.000000,223152.000000,85175.000000,266.814243)}
{pt3dadd(175512.000000,223344.000000,85200.000000,288.881586)}
{pt3dadd(175332.000000,223380.000000,85200.000000,276.844851)}
{pt3dadd(175152.000000,223548.000000,85325.000000,264.808116)}
{pt3dadd(174912.000000,223632.000000,85300.000000,252.771381)}
{pt3dadd(174720.000000,223740.000000,85200.000000,240.734646)}
{pt3dadd(174540.000000,223932.000000,85225.000000,209.574742)}
{pt3dadd(174420.000000,224064.000000,85225.000000,178.414839)}
{pt3dadd(174252.000000,224256.000000,85100.000000,147.254936)}
{pt3dadd(174072.000000,224484.000000,85100.000000,116.095032)}
{pt3dadd(173916.000000,224748.000000,85000.000000,121.899785)}
{pt3dadd(173856.000000,224964.000000,84850.000000,127.704537)}
{pt3dadd(173580.000000,225120.000000,84875.000000,133.509289)}
{pt3dadd(173424.000000,225336.000000,85000.000000,139.314042)}
{pt3dadd(173220.000000,225408.000000,85025.000000,139.314042)}

{create adhoc17}
{access adhoc17}
{connect adhoc17(1), adhoc15(0)}
{nseg = 1}
{strdef color color = "White"}
{pt3dclear()}
{pt3dadd(179748.000000,221580.000000,82650.000000,1144.754316)}
{pt3dadd(180024.000000,221316.000000,82800.000000,1242.137880)}
{pt3dadd(180324.000000,221004.000000,83025.000000,1242.137880)}
{pt3dadd(180444.000000,220668.000000,83150.000000,1242.137880)}
{pt3dadd(180648.000000,220332.000000,83425.000000,1242.137880)}
{pt3dadd(180852.000000,219996.000000,83550.000000,1229.716498)}
{pt3dadd(180924.000000,219696.000000,83750.000000,1217.295117)}
{pt3dadd(181200.000000,219360.000000,83975.000000,1204.873736)}
{pt3dadd(181452.000000,219024.000000,84200.000000,1192.452354)}
{pt3dadd(181572.000000,218832.000000,84300.000000,1035.114948)}

{create adhoc18}
{access adhoc18}
{connect adhoc18(1), adhoc17(0)}
{nseg = 1}
{strdef color color = "White"}
{pt3dclear()}
{pt3dadd(181572.000000,218832.000000,84300.000000,1035.114948)}
{pt3dadd(179580.000000,218832.000000,85625.000000,139.314042)}
{pt3dadd(179196.000000,219024.000000,85900.000000,269.331993)}
{pt3dadd(178968.000000,219240.000000,86200.000000,399.349944)}
{pt3dadd(178848.000000,219456.000000,86500.000000,346.657896)}

{create adhoc19}
{access adhoc19}
{connect adhoc19(1), adhoc17(0)}
{nseg = 1}
{strdef color color = "White"}
{pt3dclear()}
{pt3dadd(181572.000000,218832.000000,84300.000000,1035.114948)}
{pt3dadd(181668.000000,218568.000000,84350.000000,1192.452354)}
{pt3dadd(181608.000000,218256.000000,84225.000000,1113.783651)}
{pt3dadd(181944.000000,217896.000000,84300.000000,1035.114948)}
{pt3dadd(182124.000000,217488.000000,84450.000000,1086.870681)}
{pt3dadd(182220.000000,217152.000000,84500.000000,1138.626414)}
{pt3dadd(182316.000000,216876.000000,84725.000000,1190.382147)}
{pt3dadd(182568.000000,216612.000000,84725.000000,1242.137880)}
{pt3dadd(182664.000000,216336.000000,84725.000000,1180.031018)}
{pt3dadd(182844.000000,216012.000000,85000.000000,1117.924155)}
{pt3dadd(183024.000000,215556.000000,85250.000000,1055.817293)}
{pt3dadd(183096.000000,215220.000000,85325.000000,993.710430)}
{pt3dadd(183276.000000,214956.000000,85625.000000,1004.061560)}
{pt3dadd(183480.000000,214596.000000,85750.000000,1014.412689)}
{pt3dadd(183396.000000,214284.000000,85850.000000,1024.763819)}
{pt3dadd(183384.000000,213984.000000,85975.000000,1035.114948)}
{pt3dadd(183480.000000,213648.000000,86075.000000,1086.870681)}
{pt3dadd(183552.000000,213276.000000,86275.000000,1138.626414)}
{pt3dadd(183648.000000,212964.000000,86500.000000,1190.382147)}
{pt3dadd(183828.000000,212604.000000,86750.000000,1242.137880)}
{pt3dadd(184032.000000,212232.000000,86825.000000,1242.137880)}
{pt3dadd(184056.000000,211884.000000,87050.000000,1242.137880)}
{pt3dadd(184236.000000,211536.000000,87175.000000,1242.137880)}
{pt3dadd(184308.000000,211152.000000,87400.000000,1242.137880)}
{pt3dadd(184296.000000,210816.000000,87525.000000,1378.773023)}
{pt3dadd(184392.000000,210564.000000,87975.000000,1515.408165)}
{pt3dadd(184608.000000,209988.000000,88025.000000,1652.043308)}
{pt3dadd(184824.000000,209664.000000,88150.000000,1788.678450)}
{pt3dadd(185112.000000,208740.000000,88575.000000,1652.043308)}
{pt3dadd(185328.000000,207636.000000,88625.000000,1515.408165)}
{pt3dadd(185460.000000,207384.000000,88700.000000,1378.773023)}
{pt3dadd(185580.000000,207048.000000,89375.000000,1242.137880)}
{pt3dadd(185700.000000,206724.000000,89625.000000,1147.252361)}
{pt3dadd(185820.000000,206388.000000,89800.000000,1052.366841)}
{pt3dadd(186048.000000,206100.000000,90075.000000,957.481322)}
{pt3dadd(186348.000000,205764.000000,90375.000000,862.595802)}
{pt3dadd(186420.000000,205500.000000,90500.000000,957.481322)}
{pt3dadd(187008.000000,205176.000000,91100.000000,1052.366841)}
{pt3dadd(187260.000000,204492.000000,91000.000000,1147.252361)}
{pt3dadd(187488.000000,204120.000000,91075.000000,1242.137880)}
{pt3dadd(187776.000000,203568.000000,91350.000000,1304.244761)}
{pt3dadd(188100.000000,203124.000000,91450.000000,1366.351641)}
{pt3dadd(188436.000000,202680.000000,91575.000000,1428.458522)}
{pt3dadd(188724.000000,202296.000000,91825.000000,1490.565402)}
{pt3dadd(189000.000000,202188.000000,92100.000000,1565.093664)}
{pt3dadd(189240.000000,201588.000000,92300.000000,1639.621926)}
{pt3dadd(189516.000000,201324.000000,92525.000000,1714.150188)}
{pt3dadd(189768.000000,201132.000000,92450.000000,1788.678450)}
{pt3dadd(190068.000000,200688.000000,92675.000000,1788.678450)}
{pt3dadd(190368.000000,200316.000000,93050.000000,1788.678450)}
{pt3dadd(190656.000000,199992.000000,93300.000000,1788.678450)}
{pt3dadd(190932.000000,199740.000000,93850.000000,1788.678450)}
{pt3dadd(191184.000000,199620.000000,94100.000000,1490.565402)}

{create adhoc20}
{access adhoc20}
{connect adhoc20(1), adhoc19(0)}
{nseg = 1}
{strdef color color = "White"}
{pt3dclear()}
{pt3dadd(191184.000000,199620.000000,94100.000000,1490.565402)}
{pt3dadd(191316.000000,198240.000000,99725.000000,862.595802)}
{pt3dadd(191148.000000,198120.000000,100425.000000,905.725589)}
{pt3dadd(190896.000000,198468.000000,100325.000000,948.855375)}
{pt3dadd(190692.000000,198756.000000,100275.000000,991.985162)}
{pt3dadd(190428.000000,199200.000000,99850.000000,1035.114948)}
{pt3dadd(190236.000000,199464.000000,99575.000000,1086.870681)}
{pt3dadd(190020.000000,199968.000000,99525.000000,1138.626414)}
{pt3dadd(189780.000000,200496.000000,98875.000000,1190.382147)}
{pt3dadd(189564.000000,200760.000000,98450.000000,1242.137880)}
{pt3dadd(189360.000000,201108.000000,98250.000000,1190.382147)}
{pt3dadd(189084.000000,201480.000000,98025.000000,1138.626414)}
{pt3dadd(188892.000000,201540.000000,97800.000000,1086.870681)}
{pt3dadd(188652.000000,201936.000000,97700.000000,1035.114948)}
{pt3dadd(188424.000000,202152.000000,97475.000000,926.092431)}
{pt3dadd(188172.000000,202440.000000,97325.000000,817.069914)}
{pt3dadd(187944.000000,202680.000000,97125.000000,708.047397)}
{pt3dadd(187824.000000,202944.000000,97050.000000,599.024880)}
{pt3dadd(187572.000000,203148.000000,96975.000000,574.065504)}
{pt3dadd(187392.000000,203472.000000,96900.000000,549.106128)}
{pt3dadd(187272.000000,203736.000000,96850.000000,524.146752)}
{pt3dadd(187128.000000,204000.000000,96650.000000,499.187376)}
{pt3dadd(187056.000000,204252.000000,96575.000000,524.146752)}
{pt3dadd(186960.000000,204528.000000,96500.000000,549.106128)}
{pt3dadd(186972.000000,204828.000000,96400.000000,574.065504)}
{pt3dadd(186924.000000,205044.000000,96325.000000,599.024880)}
{pt3dadd(187008.000000,205332.000000,96400.000000,621.787828)}
{pt3dadd(187068.000000,205620.000000,96325.000000,644.550777)}
{pt3dadd(186996.000000,205836.000000,96225.000000,667.313725)}
{pt3dadd(186876.000000,206028.000000,96075.000000,690.076674)}
{pt3dadd(186828.000000,206220.000000,95950.000000,697.264960)}
{pt3dadd(186756.000000,206436.000000,95925.000000,704.453247)}
{pt3dadd(186504.000000,206664.000000,95850.000000,711.641533)}
{pt3dadd(186480.000000,206856.000000,95700.000000,718.829820)}
{pt3dadd(186456.000000,207012.000000,95700.000000,682.888329)}
{pt3dadd(186360.000000,207252.000000,95600.000000,646.946838)}
{pt3dadd(186372.000000,207492.000000,95450.000000,611.005347)}
{pt3dadd(186252.000000,207696.000000,95050.000000,575.063856)}
{pt3dadd(186072.000000,207888.000000,95150.000000,383.375916)}

{create adhoc21}
{access adhoc21}
{connect adhoc21(1), adhoc19(0)}
{nseg = 1}
{strdef color color = "White"}
{pt3dclear()}
{pt3dadd(191184.000000,199620.000000,94100.000000,1490.565402)}
{pt3dadd(191376.000000,199452.000000,94175.000000,1490.565402)}
{pt3dadd(191664.000000,199320.000000,93875.000000,1654.527596)}
{pt3dadd(191688.000000,199248.000000,94325.000000,1818.489789)}
{pt3dadd(191964.000000,199032.000000,94700.000000,1982.451983)}
{pt3dadd(192084.000000,198900.000000,95375.000000,2146.414176)}
{pt3dadd(192336.000000,198840.000000,95850.000000,2146.414176)}
{pt3dadd(192540.000000,198492.000000,96425.000000,2146.414176)}
{pt3dadd(192720.000000,198408.000000,97150.000000,2146.414176)}
{pt3dadd(192900.000000,198276.000000,97925.000000,2146.414176)}
{pt3dadd(192972.000000,198072.000000,98650.000000,2382.519740)}
{pt3dadd(192840.000000,197988.000000,99450.000000,2618.625303)}
{pt3dadd(193248.000000,198108.000000,100400.000000,2854.730867)}
{pt3dadd(193164.000000,198060.000000,101100.000000,3090.836430)}
{pt3dadd(193392.000000,197976.000000,101850.000000,2765.296935)}
{pt3dadd(193260.000000,198000.000000,102325.000000,2439.757440)}
{pt3dadd(192972.000000,197808.000000,102875.000000,2114.217945)}
{pt3dadd(193020.000000,197748.000000,103425.000000,1788.678450)}
{pt3dadd(192708.000000,197556.000000,104000.000000,1788.678450)}
{pt3dadd(192492.000000,197316.000000,104575.000000,1788.678450)}
{pt3dadd(192588.000000,197028.000000,104975.000000,1788.678450)}
{pt3dadd(192456.000000,196632.000000,105500.000000,1788.678450)}
{pt3dadd(192372.000000,196236.000000,106050.000000,1788.678450)}
{pt3dadd(192324.000000,196260.000000,106600.000000,1788.678450)}
{pt3dadd(192252.000000,195996.000000,107150.000000,1788.678450)}
{pt3dadd(192084.000000,195756.000000,107700.000000,1788.678450)}
{pt3dadd(192048.000000,195540.000000,108275.000000,903.339225)}
{pt3dadd(192012.000000,195660.000000,108825.000000,18.000000)}
{pt3dadd(191868.000000,195120.000000,109200.000000,903.339225)}
{pt3dadd(191880.000000,194736.000000,109700.000000,1788.678450)}
{pt3dadd(191700.000000,194556.000000,110100.000000,1652.043308)}
{pt3dadd(191472.000000,194196.000000,110600.000000,1515.408165)}
{pt3dadd(191148.000000,193812.000000,111200.000000,1378.773023)}
{pt3dadd(190896.000000,193536.000000,111625.000000,1242.137880)}
{pt3dadd(190620.000000,193044.000000,112025.000000,1190.382147)}
{pt3dadd(190128.000000,192636.000000,112425.000000,1138.626414)}
{pt3dadd(189984.000000,192396.000000,112800.000000,1086.870681)}
{pt3dadd(189576.000000,191880.000000,113225.000000,1035.114948)}
{pt3dadd(189372.000000,191544.000000,113625.000000,1035.114948)}
{pt3dadd(189120.000000,191052.000000,114050.000000,1035.114948)}
{pt3dadd(188796.000000,190596.000000,114625.000000,1035.114948)}
{pt3dadd(188580.000000,190164.000000,115075.000000,1035.114948)}
{pt3dadd(188484.000000,189600.000000,115475.000000,1035.114948)}
{pt3dadd(188244.000000,189192.000000,115875.000000,1035.114948)}
{pt3dadd(187848.000000,188736.000000,116400.000000,1035.114948)}
{pt3dadd(187428.000000,188460.000000,116800.000000,1035.114948)}
{pt3dadd(187092.000000,188028.000000,117225.000000,991.985162)}
{pt3dadd(186840.000000,187536.000000,117775.000000,948.855375)}
{pt3dadd(186264.000000,187392.000000,118225.000000,905.725589)}
{pt3dadd(185964.000000,187032.000000,118675.000000,862.595802)}
{pt3dadd(185772.000000,186804.000000,119125.000000,862.595802)}
{pt3dadd(185688.000000,186396.000000,119725.000000,862.595802)}
{pt3dadd(185100.000000,185988.000000,120150.000000,862.595802)}
{pt3dadd(184764.000000,185628.000000,120700.000000,862.595802)}
{pt3dadd(184272.000000,185448.000000,121225.000000,826.654307)}
{pt3dadd(183708.000000,184956.000000,121775.000000,790.712811)}
{pt3dadd(182988.000000,184416.000000,122425.000000,754.771316)}
{pt3dadd(182292.000000,184056.000000,122950.000000,718.829820)}
{pt3dadd(181524.000000,183888.000000,123425.000000,787.549955)}
{pt3dadd(180984.000000,183744.000000,123825.000000,856.270089)}
{pt3dadd(180552.000000,183384.000000,124250.000000,924.990223)}
{pt3dadd(179856.000000,183036.000000,124850.000000,993.710358)}
{pt3dadd(179316.000000,182592.000000,125250.000000,960.931719)}
{pt3dadd(178956.000000,182256.000000,125775.000000,928.153080)}
{pt3dadd(178260.000000,181716.000000,126225.000000,895.374441)}
{pt3dadd(177924.000000,181308.000000,126475.000000,862.595802)}
{pt3dadd(177624.000000,181008.000000,126775.000000,826.654307)}
{pt3dadd(177324.000000,180804.000000,126975.000000,790.712811)}
{pt3dadd(177060.000000,180576.000000,127050.000000,754.771316)}
{pt3dadd(176760.000000,180324.000000,127150.000000,718.829820)}
{pt3dadd(176460.000000,179940.000000,127175.000000,611.342762)}
{pt3dadd(176112.000000,179604.000000,127425.000000,503.855703)}
{pt3dadd(175764.000000,179196.000000,127425.000000,396.368644)}
{pt3dadd(175440.000000,178992.000000,127450.000000,288.881586)}
{pt3dadd(175116.000000,178788.000000,127525.000000,320.658561)}
{pt3dadd(174756.000000,178536.000000,127650.000000,352.435536)}
{pt3dadd(174420.000000,178260.000000,127750.000000,384.212511)}
{pt3dadd(174144.000000,177960.000000,127800.000000,415.989486)}
{pt3dadd(173844.000000,177528.000000,127900.000000,527.641065)}
{pt3dadd(173556.000000,177348.000000,127950.000000,639.292644)}
{pt3dadd(173148.000000,177228.000000,128150.000000,750.944223)}
{pt3dadd(172872.000000,177132.000000,128275.000000,862.595802)}
{pt3dadd(172596.000000,176952.000000,128550.000000,862.595802)}
{pt3dadd(172272.000000,176496.000000,128750.000000,862.595802)}
{pt3dadd(172044.000000,176400.000000,128775.000000,862.595802)}
{pt3dadd(171756.000000,176124.000000,128950.000000,862.595802)}
{pt3dadd(171444.000000,175848.000000,129100.000000,796.703072)}
{pt3dadd(171072.000000,175572.000000,129250.000000,730.810341)}
{pt3dadd(170664.000000,175164.000000,129425.000000,664.917611)}
{pt3dadd(170280.000000,174888.000000,129650.000000,599.024880)}
{pt3dadd(169896.000000,174396.000000,129900.000000,708.047397)}
{pt3dadd(169620.000000,174144.000000,130150.000000,817.069914)}
{pt3dadd(169284.000000,173448.000000,130450.000000,926.092431)}
{pt3dadd(168708.000000,173088.000000,130825.000000,1035.114948)}
{pt3dadd(168192.000000,172260.000000,131125.000000,956.043666)}
{pt3dadd(167928.000000,171672.000000,131550.000000,876.972384)}
{pt3dadd(167076.000000,170640.000000,132000.000000,797.901102)}
{pt3dadd(166392.000000,170124.000000,132575.000000,718.829820)}
{pt3dadd(166116.000000,169032.000000,132875.000000,754.771316)}
{pt3dadd(165468.000000,168492.000000,133300.000000,790.712811)}
{pt3dadd(164280.000000,167652.000000,133700.000000,826.654307)}
{pt3dadd(163272.000000,167004.000000,134150.000000,862.595802)}
{pt3dadd(162528.000000,166524.000000,134575.000000,826.654307)}
{pt3dadd(162072.000000,166068.000000,134975.000000,790.712811)}
{pt3dadd(160932.000000,165660.000000,135550.000000,754.771316)}
{pt3dadd(160212.000000,165432.000000,135900.000000,718.829820)}
{pt3dadd(159720.000000,165108.000000,136375.000000,797.901102)}
{pt3dadd(158556.000000,165084.000000,136950.000000,876.972384)}
{pt3dadd(158016.000000,164820.000000,137375.000000,956.043666)}
{pt3dadd(157836.000000,164856.000000,137800.000000,1035.114948)}
{pt3dadd(158496.000000,164316.000000,138375.000000,956.043666)}
{pt3dadd(158268.000000,163740.000000,138800.000000,876.972384)}
{pt3dadd(157692.000000,162864.000000,139325.000000,797.901102)}
{pt3dadd(157176.000000,162480.000000,139900.000000,718.829820)}
{pt3dadd(156636.000000,162060.000000,140325.000000,797.901102)}
{pt3dadd(155964.000000,162036.000000,140775.000000,876.972384)}
{pt3dadd(155664.000000,161484.000000,141175.000000,956.043666)}
{pt3dadd(155316.000000,161208.000000,141700.000000,1035.114948)}
{pt3dadd(155136.000000,160548.000000,142125.000000,935.329856)}
{pt3dadd(154848.000000,160272.000000,142700.000000,835.544763)}
{pt3dadd(154668.000000,159936.000000,143275.000000,735.759670)}
{pt3dadd(154068.000000,159636.000000,143700.000000,635.974578)}
{pt3dadd(153768.000000,159024.000000,144250.000000,656.688389)}
{pt3dadd(153540.000000,158664.000000,144650.000000,677.402199)}
{pt3dadd(153012.000000,158484.000000,145225.000000,698.116010)}
{pt3dadd(152760.000000,158100.000000,145675.000000,718.829820)}
{pt3dadd(152484.000000,157380.000000,146350.000000,911.763715)}
{pt3dadd(152088.000000,156636.000000,146875.000000,1104.697611)}
{pt3dadd(152064.000000,156768.000000,147425.000000,1297.631507)}
{pt3dadd(151764.000000,156780.000000,147925.000000,1490.565402)}
{pt3dadd(151536.000000,156396.000000,148450.000000,1565.093664)}
{pt3dadd(151488.000000,156372.000000,148900.000000,1639.621926)}
{pt3dadd(151524.000000,156096.000000,149625.000000,1714.150188)}
{pt3dadd(151572.000000,156108.000000,150275.000000,1788.678450)}
{pt3dadd(151272.000000,155856.000000,150850.000000,1788.678450)}
{pt3dadd(151068.000000,155640.000000,151350.000000,1788.678450)}
{pt3dadd(151008.000000,154944.000000,151875.000000,1788.678450)}
{pt3dadd(150960.000000,154332.000000,152500.000000,1788.678450)}
{pt3dadd(151176.000000,153972.000000,153100.000000,1856.648255)}
{pt3dadd(151236.000000,153720.000000,153700.000000,1924.618059)}
{pt3dadd(151296.000000,153420.000000,154300.000000,1992.587863)}
{pt3dadd(151020.000000,153372.000000,154900.000000,2060.557668)}
{pt3dadd(151236.000000,152100.000000,155425.000000,2082.021795)}
{pt3dadd(150660.000000,152760.000000,155875.000000,2103.485922)}
{pt3dadd(150564.000000,152460.000000,156400.000000,2124.950049)}
{pt3dadd(150768.000000,152076.000000,156925.000000,2146.414176)}
{pt3dadd(150744.000000,151848.000000,157375.000000,2124.950049)}
{pt3dadd(150600.000000,151644.000000,157775.000000,2103.485922)}
{pt3dadd(150732.000000,151392.000000,158225.000000,2082.021795)}
{pt3dadd(150504.000000,150828.000000,158800.000000,2060.557668)}
{pt3dadd(150516.000000,150708.000000,159350.000000,1992.587863)}
{pt3dadd(150648.000000,150300.000000,159875.000000,1924.618059)}
{pt3dadd(150840.000000,149760.000000,160275.000000,1856.648255)}
{pt3dadd(151344.000000,149556.000000,160825.000000,1788.678450)}
{pt3dadd(152136.000000,148704.000000,161350.000000,1714.150188)}
{pt3dadd(152580.000000,148212.000000,161725.000000,1639.621926)}
{pt3dadd(152916.000000,147960.000000,161525.000000,1565.093664)}
{pt3dadd(153264.000000,147636.000000,161850.000000,1490.565402)}
{pt3dadd(153612.000000,147372.000000,162050.000000,1376.702789)}
{pt3dadd(153984.000000,147072.000000,162325.000000,1262.840175)}
{pt3dadd(154224.000000,146844.000000,162400.000000,1148.977562)}
{pt3dadd(154512.000000,146580.000000,162675.000000,1035.114948)}
{pt3dadd(154860.000000,146352.000000,162975.000000,956.043666)}
{pt3dadd(155136.000000,146016.000000,163125.000000,876.972384)}
{pt3dadd(155460.000000,145764.000000,163400.000000,797.901102)}
{pt3dadd(155736.000000,145464.000000,163425.000000,718.829820)}
{pt3dadd(156060.000000,145212.000000,163550.000000,718.829820)}
{pt3dadd(156276.000000,144912.000000,163525.000000,718.829820)}
{pt3dadd(156588.000000,144816.000000,163575.000000,718.829820)}
{pt3dadd(156900.000000,144588.000000,163625.000000,718.829820)}
{pt3dadd(157164.000000,144564.000000,163650.000000,797.901102)}
{pt3dadd(157440.000000,144516.000000,163725.000000,876.972384)}
{pt3dadd(157704.000000,144288.000000,163925.000000,956.043666)}
{pt3dadd(157968.000000,144036.000000,164025.000000,1035.114948)}
{pt3dadd(157944.000000,143736.000000,164100.000000,1134.071928)}
{pt3dadd(158112.000000,143424.000000,164200.000000,1233.028908)}
{pt3dadd(158556.000000,143124.000000,164475.000000,1331.985888)}
{pt3dadd(159000.000000,142836.000000,164400.000000,1430.942868)}
{pt3dadd(159168.000000,142524.000000,164675.000000,1371.320271)}
{pt3dadd(159492.000000,142272.000000,164850.000000,1311.697674)}
{pt3dadd(159684.000000,141960.000000,164950.000000,1252.075077)}
{pt3dadd(159768.000000,141648.000000,165125.000000,1192.452480)}
{pt3dadd(160032.000000,141372.000000,165175.000000,1266.980711)}
{pt3dadd(160200.000000,141048.000000,165400.000000,1341.508941)}
{pt3dadd(160392.000000,140760.000000,165550.000000,1416.037172)}
{pt3dadd(160680.000000,140436.000000,165925.000000,1490.565402)}
{pt3dadd(160944.000000,140088.000000,166300.000000,1490.565402)}
{pt3dadd(161364.000000,138684.000000,166700.000000,1490.565402)}
{pt3dadd(161532.000000,138408.000000,167075.000000,1490.565402)}
{pt3dadd(161688.000000,138156.000000,167475.000000,1490.565402)}
{pt3dadd(162012.000000,137700.000000,167900.000000,1633.063536)}
{pt3dadd(162324.000000,137184.000000,168350.000000,1775.561670)}
{pt3dadd(162432.000000,136644.000000,168925.000000,1918.059804)}
{pt3dadd(162444.000000,136188.000000,169500.000000,2060.557938)}
/*{pt3dadd(162576.000000,135912.000000,170075.000000,2287.219243)}
{pt3dadd(162612.000000,135456.000000,170600.000000,2513.880549)}
{pt3dadd(162552.000000,135252.000000,171150.000000,2740.541855)}
{pt3dadd(162684.000000,134976.000000,171700.000000,2967.203160)}
{pt3dadd(162588.000000,134832.000000,172225.000000,2869.326648)}
{pt3dadd(162780.000000,134496.000000,172825.000000,2771.450136)}
{pt3dadd(162732.000000,134352.000000,173400.000000,2673.573624)}
{pt3dadd(162684.000000,134232.000000,174150.000000,2575.697112)}
{pt3dadd(161628.000000,133980.000000,174750.000000,2468.376378)}
{pt3dadd(161484.000000,134004.000000,175450.000000,2361.055644)}
{pt3dadd(161520.000000,133812.000000,176000.000000,2253.734910)}
{pt3dadd(161496.000000,133896.000000,176725.000000,2146.414176)}
{pt3dadd(161508.000000,133956.000000,177275.000000,2146.414176)}
{pt3dadd(161016.000000,134040.000000,177875.000000,2146.414176)}
{pt3dadd(161028.000000,134076.000000,178450.000000,2146.414176)}
{pt3dadd(160932.000000,134112.000000,179300.000000,2146.414176)}
{pt3dadd(160836.000000,133992.000000,179800.000000,2146.414176)}
{pt3dadd(160788.000000,133632.000000,180300.000000,2146.414176)}
{pt3dadd(160800.000000,133584.000000,180800.000000,2146.414176)}
{pt3dadd(160704.000000,133224.000000,181200.000000,2146.414176)}
{pt3dadd(160524.000000,133176.000000,181675.000000,1967.546313)}
{pt3dadd(160560.000000,132744.000000,182250.000000,1788.678450)}
{pt3dadd(160320.000000,132444.000000,182800.000000,2060.557668)}*/
