# Supplementary material for: Full reconstruction of large lobula plate tangential cells in Drosophila from a 3D EM dataset
Source: PLoS One. 2018 Nov 28;13(11):e0207828. doi: 10.1371/journal.pone.0207828 (PMC6261601; doi:10.1371/journal.pone.0207828)
Supplement: S1 Dataset — (ZIP) [file pone.0207828.s001.zip › Diameter hoc/VS_VSL_preliminary/Old Diameters Mar13_VS_VSL_HS/VSlike1/2_14_757_smaurer_001.015.hoc]

/* created with nml2hocm */

{create adhoc1}
{access adhoc1}
{nseg = 1}
{strdef color color = "White"}
{pt3dclear()}
{pt3dadd(168732.000000,209196.000000,71875.000000,200.612214)}
{pt3dadd(169092.000000,209268.000000,71675.000000,200.612214)}
{pt3dadd(169380.000000,209244.000000,71625.000000,185.287671)}
{pt3dadd(169668.000000,209136.000000,71450.000000,169.963128)}
{pt3dadd(169944.000000,209112.000000,71300.000000,154.638585)}
{pt3dadd(170232.000000,209064.000000,71175.000000,139.314042)}
{pt3dadd(170556.000000,209004.000000,71100.000000,128.671997)}
{pt3dadd(170832.000000,208992.000000,70975.000000,118.029951)}
{pt3dadd(170976.000000,209052.000000,70975.000000,107.387906)}
{pt3dadd(171312.000000,209088.000000,70950.000000,96.745860)}
{pt3dadd(171624.000000,209184.000000,70875.000000,114.353604)}
{pt3dadd(171876.000000,209280.000000,70850.000000,131.961348)}
{pt3dadd(172224.000000,209448.000000,70900.000000,149.569092)}
{pt3dadd(172572.000000,209592.000000,70825.000000,167.176836)}
{pt3dadd(172860.000000,209724.000000,70775.000000,160.211138)}
{pt3dadd(173220.000000,209784.000000,70725.000000,153.245439)}
{pt3dadd(173580.000000,209844.000000,70450.000000,146.279741)}
{pt3dadd(173892.000000,209808.000000,70375.000000,139.314042)}
{pt3dadd(174168.000000,209928.000000,70325.000000,128.671997)}
{pt3dadd(174528.000000,209916.000000,70300.000000,118.029951)}
{pt3dadd(174876.000000,209880.000000,70200.000000,107.387906)}
{pt3dadd(175188.000000,209796.000000,70025.000000,96.745860)}
{pt3dadd(175464.000000,209724.000000,69975.000000,114.353604)}
{pt3dadd(175764.000000,209748.000000,69900.000000,131.961348)}
{pt3dadd(176076.000000,209688.000000,69850.000000,149.569092)}
{pt3dadd(176292.000000,209724.000000,69875.000000,167.176836)}
{pt3dadd(176604.000000,209856.000000,69850.000000,154.406385)}
{pt3dadd(176820.000000,209736.000000,69850.000000,141.635934)}
{pt3dadd(176940.000000,209712.000000,69825.000000,128.865483)}
{pt3dadd(177144.000000,209616.000000,69800.000000,116.095032)}
{pt3dadd(177420.000000,209580.000000,69825.000000,128.865483)}
{pt3dadd(177624.000000,209484.000000,69850.000000,141.635934)}
{pt3dadd(177792.000000,209424.000000,69900.000000,154.406385)}
{pt3dadd(177960.000000,209364.000000,69900.000000,167.176836)}
{pt3dadd(178200.000000,209280.000000,69900.000000,183.894525)}
{pt3dadd(178356.000000,209280.000000,69900.000000,200.612214)}
{pt3dadd(179136.000000,209256.000000,69225.000000,828.092016)}

{create adhoc2}
{access adhoc2}
{connect adhoc2(1), adhoc1(0)}
{nseg = 1}
{strdef color color = "White"}
{pt3dclear()}
{pt3dadd(179136.000000,209256.000000,69225.000000,828.092016)}
{pt3dadd(179112.000000,209640.000000,69025.000000,718.829820)}
{pt3dadd(178884.000000,210012.000000,68850.000000,643.119736)}
{pt3dadd(178752.000000,210348.000000,68750.000000,567.409653)}
{pt3dadd(178728.000000,210588.000000,68675.000000,491.699570)}
{pt3dadd(178560.000000,210792.000000,68650.000000,415.989486)}
{pt3dadd(178548.000000,211128.000000,68575.000000,461.748335)}
{pt3dadd(178500.000000,211404.000000,68450.000000,507.507183)}
{pt3dadd(178428.000000,211704.000000,68350.000000,553.266031)}
{pt3dadd(178308.000000,212004.000000,68150.000000,599.024880)}
{pt3dadd(178248.000000,212232.000000,68075.000000,599.024880)}
{pt3dadd(178152.000000,212484.000000,68000.000000,599.024880)}
{pt3dadd(178092.000000,212688.000000,67900.000000,599.024880)}
{pt3dadd(178044.000000,212868.000000,67900.000000,599.024880)}
{pt3dadd(177840.000000,213084.000000,67850.000000,574.065504)}
{pt3dadd(177732.000000,213372.000000,67725.000000,549.106128)}
{pt3dadd(177348.000000,213696.000000,67525.000000,524.146752)}
{pt3dadd(177240.000000,213696.000000,67075.000000,499.187376)}
{pt3dadd(176844.000000,213924.000000,66600.000000,499.187376)}
{pt3dadd(176520.000000,213948.000000,66425.000000,499.187376)}
{pt3dadd(175992.000000,214392.000000,66000.000000,499.187376)}
{pt3dadd(175584.000000,214596.000000,65675.000000,499.187376)}
{pt3dadd(175404.000000,214704.000000,65575.000000,478.387903)}
{pt3dadd(175140.000000,214824.000000,65450.000000,457.588431)}
{pt3dadd(174876.000000,214980.000000,65350.000000,436.788958)}
{pt3dadd(174576.000000,215160.000000,65250.000000,415.989486)}
{pt3dadd(174300.000000,215352.000000,65150.000000,362.145168)}
{pt3dadd(173988.000000,215604.000000,65100.000000,308.300850)}
{pt3dadd(173772.000000,215796.000000,65125.000000,254.456532)}
{pt3dadd(173508.000000,215952.000000,65075.000000,200.612214)}
{pt3dadd(173304.000000,216252.000000,65050.000000,222.679557)}
{pt3dadd(173184.000000,216468.000000,64900.000000,244.746900)}
{pt3dadd(172944.000000,216792.000000,64950.000000,266.814243)}
{pt3dadd(172692.000000,217092.000000,64900.000000,288.881586)}
{pt3dadd(172440.000000,217524.000000,64850.000000,320.658561)}
{pt3dadd(172188.000000,217860.000000,64775.000000,352.435536)}
{pt3dadd(171948.000000,218232.000000,64600.000000,384.212511)}
{pt3dadd(171816.000000,218556.000000,64575.000000,415.989486)}
{pt3dadd(171816.000000,218844.000000,64400.000000,436.788958)}
{pt3dadd(171792.000000,219144.000000,64100.000000,457.588431)}
{pt3dadd(171744.000000,219420.000000,63525.000000,478.387903)}
{pt3dadd(171780.000000,219624.000000,63125.000000,499.187376)}
{pt3dadd(171732.000000,219696.000000,62725.000000,478.387903)}
{pt3dadd(171720.000000,219768.000000,62425.000000,457.588431)}
{pt3dadd(171696.000000,219768.000000,62175.000000,436.788958)}
{pt3dadd(171480.000000,219864.000000,61700.000000,415.989486)}
{pt3dadd(171228.000000,219912.000000,61375.000000,415.989486)}
{pt3dadd(170700.000000,219960.000000,61125.000000,415.989486)}
{pt3dadd(170484.000000,219996.000000,60725.000000,415.989486)}
{pt3dadd(170424.000000,219792.000000,60275.000000,415.989486)}
{pt3dadd(170340.000000,219648.000000,59950.000000,415.989486)}
{pt3dadd(170292.000000,219432.000000,59625.000000,415.989486)}
{pt3dadd(170352.000000,219276.000000,59250.000000,415.989486)}
{pt3dadd(170328.000000,219012.000000,58825.000000,415.989486)}
{pt3dadd(170364.000000,219000.000000,58325.000000,373.620186)}
{pt3dadd(170352.000000,218772.000000,57950.000000,331.250886)}
{pt3dadd(170220.000000,218544.000000,57550.000000,288.881586)}
{pt3dadd(170256.000000,218388.000000,57325.000000,288.881586)}

{create adhoc3}
{access adhoc3}
{connect adhoc3(1), adhoc2(0)}
{nseg = 1}
{strdef color color = "White"}
{pt3dclear()}
{pt3dadd(170256.000000,218388.000000,57325.000000,288.881586)}
{pt3dadd(170328.000000,218016.000000,56950.000000,346.657896)}
{pt3dadd(170592.000000,217632.000000,56575.000000,332.213819)}
{pt3dadd(170856.000000,217332.000000,56125.000000,317.769741)}
{pt3dadd(170928.000000,216996.000000,55750.000000,303.325664)}
{pt3dadd(170868.000000,216336.000000,55275.000000,288.881586)}
{pt3dadd(170880.000000,215844.000000,54925.000000,288.881586)}
{pt3dadd(170844.000000,215268.000000,54525.000000,288.881586)}
{pt3dadd(170772.000000,214764.000000,54250.000000,288.881586)}
{pt3dadd(170700.000000,214524.000000,53975.000000,288.881586)}
{pt3dadd(170472.000000,214368.000000,53650.000000,331.250886)}
{pt3dadd(170436.000000,214272.000000,53250.000000,373.620186)}
{pt3dadd(170496.000000,214296.000000,52850.000000,415.989486)}
{pt3dadd(170484.000000,214284.000000,52675.000000,240.734646)}

{create adhoc4}
{access adhoc4}
{connect adhoc4(1), adhoc3(0)}
{nseg = 1}
{strdef color color = "White"}
{pt3dclear()}
{pt3dadd(170484.000000,214284.000000,52675.000000,240.734646)}
{pt3dadd(170568.000000,213960.000000,52550.000000,240.734646)}
{pt3dadd(170292.000000,213912.000000,52350.000000,139.314042)}
{pt3dadd(170376.000000,213564.000000,52100.000000,139.314042)}

{create adhoc5}
{access adhoc5}
{connect adhoc5(1), adhoc3(0)}
{nseg = 1}
{strdef color color = "White"}
{pt3dclear()}
{pt3dadd(170484.000000,214284.000000,52675.000000,240.734646)}
{pt3dadd(170208.000000,214872.000000,52550.000000,139.314042)}
{pt3dadd(169920.000000,215172.000000,52325.000000,154.638585)}
{pt3dadd(169932.000000,215472.000000,52100.000000,169.963128)}
{pt3dadd(169848.000000,215724.000000,52175.000000,185.287671)}
{pt3dadd(169680.000000,216084.000000,52100.000000,200.612214)}
{pt3dadd(169680.000000,216576.000000,51825.000000,240.734646)}
{pt3dadd(169644.000000,217008.000000,51625.000000,167.176836)}

{create adhoc6}
{access adhoc6}
{connect adhoc6(1), adhoc2(0)}
{nseg = 1}
{strdef color color = "White"}
{pt3dclear()}
{pt3dadd(170256.000000,218388.000000,57325.000000,288.881586)}
{pt3dadd(169968.000000,219204.000000,57275.000000,167.176836)}

{create adhoc7}
{access adhoc7}
{connect adhoc7(1), adhoc1(0)}
{nseg = 1}
{strdef color color = "White"}
{pt3dclear()}
{pt3dadd(179136.000000,209256.000000,69225.000000,828.092016)}
{pt3dadd(179424.000000,208824.000000,69175.000000,599.024880)}
{pt3dadd(179904.000000,208380.000000,69200.000000,621.787810)}
{pt3dadd(180120.000000,207900.000000,69275.000000,644.550741)}
{pt3dadd(180720.000000,207276.000000,69450.000000,667.313671)}
{pt3dadd(180876.000000,206928.000000,69525.000000,690.076602)}
{pt3dadd(181224.000000,206592.000000,69425.000000,642.354295)}
{pt3dadd(181476.000000,206208.000000,69300.000000,594.631989)}
{pt3dadd(181812.000000,205728.000000,69100.000000,546.909682)}
{pt3dadd(182328.000000,205416.000000,68750.000000,499.187376)}
{pt3dadd(182880.000000,205116.000000,68600.000000,446.610929)}
{pt3dadd(183324.000000,204864.000000,68450.000000,394.034481)}
{pt3dadd(183852.000000,204456.000000,68300.000000,341.458034)}
{pt3dadd(184404.000000,204072.000000,68225.000000,288.881586)}
{pt3dadd(184908.000000,203664.000000,68275.000000,214.097814)}
{pt3dadd(185124.000000,203232.000000,68600.000000,139.314042)}
{pt3dadd(186168.000000,201780.000000,68525.000000,718.829820)}

{create adhoc8}
{access adhoc8}
{connect adhoc8(1), adhoc7(0)}
{nseg = 1}
{strdef color color = "White"}
{pt3dclear()}
{pt3dadd(186168.000000,201780.000000,68525.000000,718.829820)}
{pt3dadd(186408.000000,202068.000000,68900.000000,862.595802)}
{pt3dadd(186660.000000,202380.000000,69475.000000,771.743696)}
{pt3dadd(186840.000000,202788.000000,70000.000000,680.891589)}
{pt3dadd(187152.000000,203088.000000,70525.000000,590.039483)}
{pt3dadd(187500.000000,203208.000000,71075.000000,499.187376)}
{pt3dadd(187620.000000,203364.000000,71600.000000,633.169269)}
{pt3dadd(187776.000000,203328.000000,72200.000000,767.151162)}
{pt3dadd(187956.000000,203472.000000,72900.000000,901.133055)}
{pt3dadd(188076.000000,203424.000000,73450.000000,1035.114948)}
{pt3dadd(188376.000000,203400.000000,74100.000000,1086.870681)}
{pt3dadd(188664.000000,203556.000000,74750.000000,1138.626414)}
{pt3dadd(188844.000000,203388.000000,75325.000000,1190.382147)}
{pt3dadd(188964.000000,203532.000000,75800.000000,1242.137880)}
{pt3dadd(189108.000000,203508.000000,76400.000000,1242.137880)}
{pt3dadd(189480.000000,203544.000000,76950.000000,1242.137880)}
{pt3dadd(189768.000000,203580.000000,77550.000000,1242.137880)}
{pt3dadd(189768.000000,203652.000000,77975.000000,1242.137880)}
{pt3dadd(189744.000000,203724.000000,78425.000000,1378.773023)}
{pt3dadd(189888.000000,203628.000000,78975.000000,1515.408165)}
{pt3dadd(190068.000000,203544.000000,79500.000000,1652.043308)}
{pt3dadd(190332.000000,203400.000000,80000.000000,1788.678450)}
{pt3dadd(190860.000000,203412.000000,80500.000000,1652.043308)}
{pt3dadd(191208.000000,203316.000000,81125.000000,1515.408165)}
{pt3dadd(191472.000000,203244.000000,81650.000000,1378.773023)}
{pt3dadd(191700.000000,203256.000000,82225.000000,1242.137880)}
{pt3dadd(191988.000000,203148.000000,82800.000000,1147.252361)}
{pt3dadd(192252.000000,203124.000000,83200.000000,1052.366841)}
{pt3dadd(192360.000000,203100.000000,83650.000000,957.481322)}
{pt3dadd(192768.000000,203004.000000,84075.000000,862.595802)}
{pt3dadd(192888.000000,202932.000000,84650.000000,862.595802)}
{pt3dadd(193176.000000,202944.000000,85175.000000,862.595802)}
{pt3dadd(193368.000000,202980.000000,85725.000000,862.595802)}
{pt3dadd(193560.000000,202836.000000,86275.000000,862.595802)}
{pt3dadd(193644.000000,202812.000000,86625.000000,957.481322)}
{pt3dadd(193824.000000,202692.000000,86950.000000,1052.366841)}
{pt3dadd(194088.000000,202584.000000,87575.000000,1147.252361)}
{pt3dadd(194088.000000,202452.000000,87950.000000,1242.137880)}
{pt3dadd(194172.000000,202356.000000,88300.000000,1147.252361)}
{pt3dadd(194388.000000,202296.000000,88875.000000,1052.366841)}
{pt3dadd(194808.000000,202236.000000,89375.000000,957.481322)}
{pt3dadd(195108.000000,202164.000000,89850.000000,862.595802)}
{pt3dadd(195144.000000,202104.000000,90400.000000,905.725589)}
{pt3dadd(195288.000000,201960.000000,90875.000000,948.855375)}
{pt3dadd(195432.000000,201972.000000,91350.000000,991.985162)}
{pt3dadd(195516.000000,201900.000000,91775.000000,1035.114948)}
{pt3dadd(195420.000000,201732.000000,92375.000000,1035.114948)}
{pt3dadd(195420.000000,201624.000000,92825.000000,1035.114948)}
{pt3dadd(195612.000000,201552.000000,93300.000000,1035.114948)}
{pt3dadd(195720.000000,201480.000000,93800.000000,1035.114948)}
{pt3dadd(195684.000000,201336.000000,94425.000000,1035.114948)}
{pt3dadd(195792.000000,201228.000000,94925.000000,1035.114948)}
{pt3dadd(195648.000000,201120.000000,95475.000000,1035.114948)}
{pt3dadd(195684.000000,201012.000000,95925.000000,1035.114948)}
{pt3dadd(195504.000000,201048.000000,96450.000000,991.985162)}
{pt3dadd(195252.000000,200976.000000,97150.000000,948.855375)}
{pt3dadd(195156.000000,200832.000000,97675.000000,905.725589)}
{pt3dadd(194952.000000,200592.000000,98200.000000,862.595802)}
{pt3dadd(194772.000000,200376.000000,98600.000000,1019.588202)}
{pt3dadd(194604.000000,200304.000000,99175.000000,1176.580602)}
{pt3dadd(194244.000000,200232.000000,99775.000000,1333.573002)}
{pt3dadd(194388.000000,200052.000000,100275.000000,1490.565402)}
{pt3dadd(194388.000000,200124.000000,100575.000000,1475.659737)}
{pt3dadd(194184.000000,200136.000000,101025.000000,1460.754072)}
{pt3dadd(194160.000000,200292.000000,101625.000000,1445.848407)}
{pt3dadd(194124.000000,200328.000000,102225.000000,1430.942742)}
{pt3dadd(193872.000000,200304.000000,102650.000000,1331.985794)}
{pt3dadd(193944.000000,200268.000000,103125.000000,1233.028845)}
{pt3dadd(193908.000000,200232.000000,103750.000000,1134.071896)}
{pt3dadd(193740.000000,200136.000000,104225.000000,1035.114948)}
{pt3dadd(193404.000000,199980.000000,104650.000000,926.092431)}
{pt3dadd(193008.000000,199656.000000,105150.000000,817.069914)}
{pt3dadd(192720.000000,199296.000000,105575.000000,708.047397)}
{pt3dadd(192348.000000,198708.000000,106100.000000,599.024880)}
{pt3dadd(192252.000000,198396.000000,106500.000000,821.910011)}
{pt3dadd(192564.000000,198144.000000,107125.000000,1044.795141)}
{pt3dadd(192528.000000,198048.000000,107600.000000,1267.680271)}
{pt3dadd(192540.000000,197976.000000,108100.000000,1490.565402)}
{pt3dadd(192576.000000,197988.000000,108625.000000,1428.458522)}
{pt3dadd(192660.000000,197928.000000,109300.000000,1366.351641)}
{pt3dadd(192708.000000,197820.000000,109675.000000,1304.244761)}
{pt3dadd(192636.000000,197724.000000,110175.000000,1242.137880)}
{pt3dadd(192792.000000,197616.000000,110575.000000,1147.252361)}
{pt3dadd(192840.000000,197436.000000,111175.000000,1052.366841)}
{pt3dadd(192792.000000,197232.000000,111675.000000,957.481322)}
{pt3dadd(192588.000000,196896.000000,112175.000000,862.595802)}
{pt3dadd(192228.000000,196524.000000,112575.000000,771.743696)}
{pt3dadd(192084.000000,196284.000000,112725.000000,680.891589)}
{pt3dadd(191880.000000,196080.000000,112975.000000,590.039483)}
{pt3dadd(191688.000000,195792.000000,113100.000000,499.187376)}
{pt3dadd(191244.000000,195276.000000,113300.000000,524.146752)}
{pt3dadd(190956.000000,195072.000000,113275.000000,549.106128)}
{pt3dadd(190944.000000,194832.000000,113500.000000,574.065504)}
{pt3dadd(190320.000000,194004.000000,113975.000000,599.024880)}
{pt3dadd(189708.000000,193668.000000,114400.000000,628.976115)}
{pt3dadd(189456.000000,193464.000000,114725.000000,658.927350)}
{pt3dadd(189300.000000,193428.000000,114975.000000,688.878585)}
{pt3dadd(189072.000000,193320.000000,115200.000000,718.829820)}
{pt3dadd(188796.000000,193248.000000,115450.000000,688.878585)}
{pt3dadd(188556.000000,193248.000000,115675.000000,658.927350)}
{pt3dadd(188400.000000,193140.000000,115850.000000,628.976115)}
{pt3dadd(188172.000000,192972.000000,116100.000000,599.024880)}
{pt3dadd(187920.000000,192804.000000,116375.000000,599.024880)}
{pt3dadd(187680.000000,192516.000000,116750.000000,599.024880)}
{pt3dadd(187440.000000,192492.000000,116875.000000,599.024880)}
{pt3dadd(187260.000000,192468.000000,117050.000000,599.024880)}
{pt3dadd(187008.000000,192360.000000,117175.000000,574.065504)}
{pt3dadd(186708.000000,192084.000000,117375.000000,549.106128)}
{pt3dadd(186444.000000,191916.000000,117825.000000,524.146752)}
{pt3dadd(185724.000000,191592.000000,118175.000000,499.187376)}
{pt3dadd(185172.000000,191100.000000,118625.000000,474.228009)}
{pt3dadd(184692.000000,190824.000000,119050.000000,449.268642)}
{pt3dadd(184176.000000,190500.000000,119625.000000,424.309275)}
{pt3dadd(183732.000000,189852.000000,120000.000000,399.349908)}
{pt3dadd(183252.000000,189456.000000,120600.000000,371.732827)}
{pt3dadd(182484.000000,189048.000000,121025.000000,344.115747)}
{pt3dadd(181752.000000,188364.000000,121600.000000,316.498667)}
{pt3dadd(180996.000000,187860.000000,121950.000000,288.881586)}
{pt3dadd(180312.000000,187104.000000,122425.000000,303.325664)}
{pt3dadd(179616.000000,186312.000000,122950.000000,317.769741)}
{pt3dadd(179028.000000,185736.000000,123350.000000,332.213819)}
{pt3dadd(178344.000000,185124.000000,123700.000000,346.657896)}
{pt3dadd(177576.000000,184356.000000,124100.000000,329.325007)}
{pt3dadd(176472.000000,183564.000000,124575.000000,311.992119)}
{pt3dadd(176124.000000,183348.000000,124800.000000,294.659230)}
{pt3dadd(175836.000000,183168.000000,124925.000000,277.326342)}
{pt3dadd(175596.000000,183072.000000,125100.000000,332.791600)}
{pt3dadd(175344.000000,182856.000000,125300.000000,388.256859)}
{pt3dadd(175116.000000,182640.000000,125400.000000,443.722118)}
{pt3dadd(174792.000000,182436.000000,125500.000000,499.187376)}
{pt3dadd(174516.000000,182292.000000,125600.000000,499.187376)}
{pt3dadd(174180.000000,182004.000000,125850.000000,499.187376)}
{pt3dadd(173784.000000,181680.000000,125900.000000,499.187376)}
{pt3dadd(173532.000000,181536.000000,125875.000000,499.187376)}
{pt3dadd(173268.000000,181368.000000,125950.000000,478.387903)}
{pt3dadd(173052.000000,181224.000000,126000.000000,457.588431)}
{pt3dadd(172812.000000,181020.000000,126050.000000,436.788958)}
{pt3dadd(172500.000000,180720.000000,126025.000000,415.989486)}
{pt3dadd(172236.000000,180432.000000,125975.000000,398.656589)}
{pt3dadd(171972.000000,180132.000000,126050.000000,381.323691)}
{pt3dadd(171696.000000,179916.000000,126175.000000,363.990794)}
{pt3dadd(171300.000000,179676.000000,126375.000000,346.657896)}
{pt3dadd(170940.000000,179508.000000,126475.000000,363.990794)}
{pt3dadd(170652.000000,179580.000000,126600.000000,381.323691)}
{pt3dadd(170268.000000,179004.000000,126725.000000,398.656589)}
{pt3dadd(169956.000000,179016.000000,126775.000000,415.989486)}
{pt3dadd(169320.000000,178584.000000,127050.000000,436.788958)}
{pt3dadd(168288.000000,178104.000000,127550.000000,457.588431)}
{pt3dadd(167532.000000,177792.000000,128075.000000,478.387903)}
{pt3dadd(166800.000000,177588.000000,128525.000000,499.187376)}
{pt3dadd(166272.000000,177480.000000,128950.000000,524.146752)}
{pt3dadd(165984.000000,177108.000000,129325.000000,549.106128)}
{pt3dadd(165744.000000,176904.000000,129525.000000,574.065504)}
{pt3dadd(165396.000000,176808.000000,129900.000000,599.024880)}
{pt3dadd(165036.000000,176484.000000,130125.000000,569.073631)}
{pt3dadd(164772.000000,176208.000000,130250.000000,539.122383)}
{pt3dadd(164508.000000,175956.000000,130350.000000,509.171134)}
{pt3dadd(164184.000000,175620.000000,130625.000000,479.219886)}
{pt3dadd(163908.000000,175560.000000,130675.000000,446.079388)}
{pt3dadd(163332.000000,175056.000000,131050.000000,412.938891)}
{pt3dadd(162804.000000,174480.000000,131450.000000,379.798393)}
{pt3dadd(162348.000000,173784.000000,131825.000000,346.657896)}
{pt3dadd(161880.000000,173136.000000,132350.000000,384.790266)}
{pt3dadd(161472.000000,172656.000000,132800.000000,422.922636)}
{pt3dadd(161112.000000,171852.000000,133275.000000,461.055006)}
{pt3dadd(160632.000000,171336.000000,133725.000000,499.187376)}
{pt3dadd(160392.000000,170928.000000,134175.000000,478.387903)}
{pt3dadd(159816.000000,170136.000000,134625.000000,457.588431)}
{pt3dadd(159348.000000,169440.000000,135050.000000,436.788958)}
{pt3dadd(158628.000000,168828.000000,135475.000000,415.989486)}
{pt3dadd(158292.000000,168384.000000,135925.000000,415.989486)}
{pt3dadd(158052.000000,168240.000000,135950.000000,415.989486)}
{pt3dadd(157716.000000,167760.000000,136425.000000,415.989486)}
{pt3dadd(157284.000000,167364.000000,136850.000000,415.989486)}
{pt3dadd(156984.000000,166992.000000,137300.000000,461.748335)}
{pt3dadd(156996.000000,166620.000000,137675.000000,507.507183)}
{pt3dadd(157440.000000,166176.000000,138125.000000,553.266031)}
{pt3dadd(157524.000000,165816.000000,138575.000000,599.024880)}
{pt3dadd(157308.000000,165600.000000,139100.000000,708.047397)}
{pt3dadd(157068.000000,165396.000000,139650.000000,817.069914)}
{pt3dadd(156888.000000,165228.000000,140000.000000,926.092431)}
{pt3dadd(156684.000000,165096.000000,140475.000000,1035.114948)}
{pt3dadd(156552.000000,165240.000000,140875.000000,991.985162)}
{pt3dadd(156384.000000,165072.000000,141350.000000,948.855375)}
{pt3dadd(156132.000000,164892.000000,141750.000000,905.725589)}
{pt3dadd(156132.000000,164496.000000,142150.000000,862.595802)}
{pt3dadd(155892.000000,164292.000000,142525.000000,796.703072)}
{pt3dadd(155760.000000,164064.000000,142575.000000,730.810341)}
{pt3dadd(155652.000000,163776.000000,142850.000000,664.917611)}
{pt3dadd(155376.000000,163476.000000,143225.000000,599.024880)}
{pt3dadd(155160.000000,163080.000000,143425.000000,628.976115)}
{pt3dadd(155196.000000,162876.000000,143475.000000,658.927350)}
{pt3dadd(155064.000000,162684.000000,143550.000000,688.878585)}
{pt3dadd(154920.000000,162504.000000,143725.000000,718.829820)}
{pt3dadd(154776.000000,162288.000000,143925.000000,849.656835)}
{pt3dadd(154572.000000,162048.000000,144175.000000,980.483850)}
{pt3dadd(154464.000000,161808.000000,144200.000000,1111.310865)}
{pt3dadd(154440.000000,161604.000000,144450.000000,1242.137880)}
{pt3dadd(154308.000000,161340.000000,144750.000000,1111.310865)}
{pt3dadd(154308.000000,161076.000000,144900.000000,980.483850)}
{pt3dadd(154284.000000,160644.000000,145250.000000,849.656835)}
{pt3dadd(154284.000000,160128.000000,145325.000000,718.829820)}
{pt3dadd(154212.000000,159924.000000,145400.000000,718.829820)}
{pt3dadd(154140.000000,159684.000000,145300.000000,718.829820)}
{pt3dadd(154116.000000,159480.000000,145625.000000,718.829820)}
{pt3dadd(154056.000000,159204.000000,145650.000000,718.829820)}
{pt3dadd(154008.000000,158976.000000,145675.000000,754.771316)}
{pt3dadd(153984.000000,158328.000000,146075.000000,790.712811)}
{pt3dadd(153828.000000,158304.000000,146475.000000,826.654307)}
{pt3dadd(153756.000000,157884.000000,147050.000000,862.595802)}
{pt3dadd(153840.000000,157656.000000,147025.000000,862.595802)}
{pt3dadd(153780.000000,157284.000000,147375.000000,862.595802)}
{pt3dadd(153720.000000,157032.000000,147625.000000,862.595802)}
{pt3dadd(153552.000000,156588.000000,147875.000000,862.595802)}
{pt3dadd(153264.000000,156216.000000,148300.000000,826.654307)}
{pt3dadd(153204.000000,156000.000000,148425.000000,790.712811)}
{pt3dadd(153216.000000,155736.000000,148600.000000,754.771316)}
{pt3dadd(153072.000000,155424.000000,148700.000000,718.829820)}
{pt3dadd(153000.000000,155028.000000,148975.000000,718.829820)}
{pt3dadd(153036.000000,154776.000000,149200.000000,718.829820)}
{pt3dadd(152796.000000,154224.000000,149600.000000,718.829820)}
{pt3dadd(152568.000000,153828.000000,149850.000000,718.829820)}
{pt3dadd(152328.000000,153324.000000,150250.000000,688.878585)}
{pt3dadd(152088.000000,153108.000000,150425.000000,658.927350)}
{pt3dadd(151908.000000,152976.000000,150550.000000,628.976115)}
{pt3dadd(151680.000000,152952.000000,150575.000000,599.024880)}
{pt3dadd(151476.000000,152712.000000,150750.000000,664.917611)}
{pt3dadd(150768.000000,152544.000000,151225.000000,730.810341)}
{pt3dadd(150444.000000,152040.000000,151625.000000,796.703072)}
{pt3dadd(150144.000000,151572.000000,152025.000000,862.595802)}
{pt3dadd(150144.000000,151368.000000,152425.000000,957.481322)}
{pt3dadd(150012.000000,151128.000000,152875.000000,1052.366841)}
{pt3dadd(150060.000000,151284.000000,153300.000000,1147.252361)}
{pt3dadd(150036.000000,150972.000000,153450.000000,1242.137880)}
{pt3dadd(150000.000000,150696.000000,153675.000000,1242.137880)}
{pt3dadd(149976.000000,150252.000000,154225.000000,1242.137880)}
{pt3dadd(149916.000000,149964.000000,154300.000000,1242.137880)}
{pt3dadd(149928.000000,149760.000000,154375.000000,1242.137880)}
{pt3dadd(149964.000000,149496.000000,154475.000000,1229.716498)}
{pt3dadd(150036.000000,149268.000000,154500.000000,1217.295117)}
{pt3dadd(150120.000000,149004.000000,154700.000000,1204.873736)}
{pt3dadd(150132.000000,148668.000000,154800.000000,1192.452354)}
{pt3dadd(150168.000000,148224.000000,154900.000000,1142.766837)}
{pt3dadd(150168.000000,147936.000000,155025.000000,1093.081320)}
{pt3dadd(150096.000000,147732.000000,155100.000000,1043.395803)}
{pt3dadd(149988.000000,147516.000000,155175.000000,993.710286)}
{pt3dadd(149892.000000,147312.000000,155250.000000,952.305701)}
{pt3dadd(149856.000000,147084.000000,155375.000000,910.901115)}
{pt3dadd(149796.000000,146796.000000,155500.000000,869.496529)}
{pt3dadd(149580.000000,146448.000000,155625.000000,828.091944)}
{pt3dadd(149556.000000,146100.000000,155775.000000,879.847695)}
{pt3dadd(149604.000000,145704.000000,155975.000000,931.603446)}
{pt3dadd(149652.000000,145440.000000,156175.000000,983.359197)}
{pt3dadd(149580.000000,145140.000000,156375.000000,1035.114948)}
{pt3dadd(149736.000000,144684.000000,156725.000000,1086.870681)}
{pt3dadd(150252.000000,144504.000000,157000.000000,1138.626414)}
{pt3dadd(150180.000000,144264.000000,157475.000000,1190.382147)}
{pt3dadd(150516.000000,143928.000000,157950.000000,1242.137880)}
{pt3dadd(150540.000000,143856.000000,158425.000000,1190.382147)}
{pt3dadd(150324.000000,143160.000000,158800.000000,1138.626414)}
{pt3dadd(150324.000000,143052.000000,159225.000000,1086.870681)}
{pt3dadd(150300.000000,142776.000000,159500.000000,1035.114948)}
{pt3dadd(150288.000000,142536.000000,159575.000000,991.985162)}
{pt3dadd(150324.000000,142320.000000,160050.000000,948.855375)}
{pt3dadd(150408.000000,142104.000000,160225.000000,905.725589)}
{pt3dadd(150624.000000,141840.000000,160400.000000,862.595802)}
{pt3dadd(150876.000000,141528.000000,160675.000000,905.725589)}
{pt3dadd(151212.000000,141252.000000,160925.000000,948.855375)}
{pt3dadd(151356.000000,141060.000000,161000.000000,991.985162)}
{pt3dadd(151548.000000,140844.000000,161200.000000,1035.114948)}
{pt3dadd(151668.000000,140616.000000,161250.000000,1035.114948)}
{pt3dadd(151920.000000,140328.000000,161525.000000,1035.114948)}
{pt3dadd(151968.000000,140124.000000,161575.000000,1035.114948)}
{pt3dadd(152040.000000,139920.000000,161675.000000,1035.114948)}
{pt3dadd(152388.000000,139644.000000,161850.000000,1086.870681)}
{pt3dadd(152508.000000,139428.000000,162000.000000,1138.626414)}
{pt3dadd(152580.000000,139164.000000,162125.000000,1190.382147)}
{pt3dadd(152628.000000,138888.000000,162250.000000,1242.137880)}
{pt3dadd(152664.000000,138624.000000,162425.000000,1304.244761)}
{pt3dadd(152784.000000,138408.000000,162450.000000,1366.351641)}
{pt3dadd(153336.000000,137880.000000,163075.000000,1428.458522)}
{pt3dadd(153504.000000,137556.000000,163625.000000,1490.565402)}
{pt3dadd(153960.000000,137076.000000,164025.000000,1428.458522)}
{pt3dadd(154032.000000,136632.000000,164450.000000,1366.351641)}
{pt3dadd(154344.000000,136344.000000,165000.000000,1304.244761)}
{pt3dadd(154344.000000,136200.000000,165225.000000,1242.137880)}
{pt3dadd(154860.000000,135732.000000,165750.000000,1343.714963)}
{pt3dadd(155004.000000,135492.000000,166475.000000,1445.292045)}
{pt3dadd(155352.000000,134784.000000,167050.000000,1546.869128)}
{pt3dadd(155760.000000,135084.000000,167775.000000,1648.446210)}
{pt3dadd(155724.000000,135372.000000,168625.000000,18.000000)}
{pt3dadd(155196.000000,134880.000000,169250.000000,508.855134)}
{pt3dadd(155160.000000,134760.000000,169900.000000,999.710268)}
{pt3dadd(154908.000000,134724.000000,170400.000000,1490.565402)}
{pt3dadd(154800.000000,134712.000000,170875.000000,1589.936418)}
{pt3dadd(154452.000000,134532.000000,171325.000000,1689.307434)}
{pt3dadd(154344.000000,134436.000000,171900.000000,1788.678450)}
{pt3dadd(154008.000000,134028.000000,172450.000000,1490.565402)}

{create adhoc9}
{access adhoc9}
{connect adhoc9(1), adhoc8(0)}
{nseg = 1}
{strdef color color = "White"}
{pt3dclear()}
{pt3dadd(154008.000000,134028.000000,172450.000000,1490.565402)}
{pt3dadd(153564.000000,133848.000000,173100.000000,1242.137880)}
{pt3dadd(153228.000000,133812.000000,173600.000000,1144.754442)}

{create adhoc10}
{access adhoc10}
{connect adhoc10(1), adhoc9(0)}
{nseg = 1}
{strdef color color = "White"}
{pt3dclear()}
{pt3dadd(153228.000000,133812.000000,173600.000000,1144.754442)}
{pt3dadd(153072.000000,133764.000000,173800.000000,1035.114948)}
{pt3dadd(153024.000000,133764.000000,174025.000000,1086.870681)}
{pt3dadd(151992.000000,133500.000000,174450.000000,1138.626414)}
{pt3dadd(151404.000000,133200.000000,174950.000000,1190.382147)}
{pt3dadd(151152.000000,133092.000000,175525.000000,1242.137880)}
{pt3dadd(151152.000000,133056.000000,176150.000000,1304.244761)}
{pt3dadd(150840.000000,133128.000000,176650.000000,1366.351641)}
{pt3dadd(150432.000000,133308.000000,177150.000000,1428.458522)}
{pt3dadd(149904.000000,133560.000000,177575.000000,1490.565402)}
{pt3dadd(149592.000000,133548.000000,178000.000000,1242.137880)}

{create adhoc11}
{access adhoc11}
{connect adhoc11(1), adhoc10(0)}
{nseg = 1}
{strdef color color = "White"}
{pt3dclear()}
{pt3dadd(149592.000000,133548.000000,178000.000000,1242.137880)}
{pt3dadd(151428.000000,131424.000000,178000.000000,828.092016)}
{pt3dadd(152664.000000,131136.000000,177725.000000,879.847749)}
{pt3dadd(152688.000000,130260.000000,179275.000000,931.603482)}
{pt3dadd(152688.000000,129420.000000,179925.000000,983.359215)}
{pt3dadd(152688.000000,128580.000000,180600.000000,1035.114948)}
{pt3dadd(152688.000000,128100.000000,180550.000000,828.091944)}

{create adhoc12}
{access adhoc12}
{connect adhoc12(1), adhoc11(0)}
{nseg = 1}
{strdef color color = "White"}
{pt3dclear()}
{pt3dadd(152688.000000,128100.000000,180550.000000,828.091944)}
{pt3dadd(152724.000000,127920.000000,181300.000000,415.989486)}
{pt3dadd(153420.000000,127752.000000,181900.000000,381.323691)}
{pt3dadd(153600.000000,127524.000000,182375.000000,346.657896)}
{pt3dadd(153768.000000,127272.000000,182550.000000,288.881586)}

{create adhoc13}
{access adhoc13}
{connect adhoc13(1), adhoc11(0)}
{nseg = 1}
{strdef color color = "White"}
{pt3dclear()}
{pt3dadd(152688.000000,128100.000000,180550.000000,828.091944)}
{pt3dadd(153636.000000,127920.000000,179800.000000,415.989486)}
{pt3dadd(153888.000000,127956.000000,179275.000000,341.015873)}
{pt3dadd(154248.000000,127668.000000,178825.000000,266.042259)}
{pt3dadd(154464.000000,127560.000000,178575.000000,191.068646)}
{pt3dadd(155232.000000,127416.000000,178600.000000,116.095032)}
{pt3dadd(155892.000000,126564.000000,178600.000000,403.085817)}
{pt3dadd(156564.000000,126528.000000,179225.000000,690.076602)}
{pt3dadd(156888.000000,126504.000000,179325.000000,415.989486)}

{create adhoc14}
{access adhoc14}
{connect adhoc14(1), adhoc10(0)}
{nseg = 1}
{strdef color color = "White"}
{pt3dclear()}
{pt3dadd(149592.000000,133548.000000,178000.000000,1242.137880)}
{pt3dadd(149220.000000,133920.000000,178300.000000,1242.137880)}
{pt3dadd(148848.000000,134028.000000,178575.000000,1242.137880)}

{create adhoc15}
{access adhoc15}
{connect adhoc15(1), adhoc14(0)}
{nseg = 1}
{strdef color color = "White"}
{pt3dclear()}
{pt3dadd(148848.000000,134028.000000,178575.000000,1242.137880)}
{pt3dadd(148560.000000,134196.000000,178950.000000,1242.137880)}

{create adhoc16}
{access adhoc16}
{connect adhoc16(1), adhoc15(0)}
{nseg = 1}
{strdef color color = "White"}
{pt3dclear()}
{pt3dadd(148560.000000,134196.000000,178950.000000,1242.137880)}
{pt3dadd(148152.000000,134040.000000,179150.000000,1430.942868)}
{pt3dadd(147648.000000,134136.000000,179525.000000,1490.565402)}
{pt3dadd(147456.000000,134196.000000,179525.000000,1490.565402)}

{create adhoc17}
{access adhoc17}
{connect adhoc17(1), adhoc16(0)}
{nseg = 1}
{strdef color color = "White"}
{pt3dclear()}
{pt3dadd(147456.000000,134196.000000,179525.000000,1490.565402)}
{pt3dadd(147156.000000,134364.000000,179725.000000,1490.565402)}
{pt3dadd(146856.000000,134460.000000,180400.000000,1376.702789)}
{pt3dadd(146568.000000,134460.000000,180825.000000,1262.840175)}
{pt3dadd(146232.000000,134496.000000,181125.000000,1148.977562)}
{pt3dadd(145644.000000,134568.000000,181575.000000,1035.114948)}
{pt3dadd(145404.000000,134640.000000,181750.000000,862.595802)}
{pt3dadd(145140.000000,134748.000000,181850.000000,718.829820)}

{create adhoc18}
{access adhoc18}
{connect adhoc18(1), adhoc17(0)}
{nseg = 1}
{strdef color color = "White"}
{pt3dclear()}
{pt3dadd(145140.000000,134748.000000,181850.000000,718.829820)}
{pt3dadd(144588.000000,134952.000000,181900.000000,599.024880)}
{pt3dadd(143304.000000,134880.000000,181925.000000,479.219886)}

{create adhoc19}
{access adhoc19}
{connect adhoc19(1), adhoc18(0)}
{nseg = 1}
{strdef color color = "White"}
{pt3dclear()}
{pt3dadd(143304.000000,134880.000000,181925.000000,479.219886)}
{pt3dadd(141672.000000,136140.000000,182100.000000,499.187376)}
{pt3dadd(141180.000000,136380.000000,182075.000000,524.146752)}
{pt3dadd(140820.000000,136596.000000,182050.000000,549.106128)}
{pt3dadd(140352.000000,136584.000000,181900.000000,574.065504)}
{pt3dadd(140196.000000,136656.000000,181575.000000,599.024880)}
{pt3dadd(140040.000000,136908.000000,181350.000000,664.917611)}
{pt3dadd(140184.000000,137088.000000,181050.000000,730.810341)}
{pt3dadd(139332.000000,137916.000000,180725.000000,796.703072)}
{pt3dadd(138852.000000,138228.000000,180250.000000,862.595802)}
{pt3dadd(138600.000000,138300.000000,179700.000000,989.109828)}
{pt3dadd(138156.000000,138120.000000,178925.000000,1115.623854)}
{pt3dadd(137976.000000,138276.000000,178525.000000,1242.137880)}
{pt3dadd(137964.000000,138264.000000,178075.000000,1242.137880)}

{create adhoc20}
{access adhoc20}
{connect adhoc20(1), adhoc19(0)}
{nseg = 1}
{strdef color color = "White"}
{pt3dclear()}
{pt3dadd(137964.000000,138264.000000,178075.000000,1242.137880)}
{pt3dadd(137712.000000,137712.000000,177525.000000,993.710358)}
{pt3dadd(137664.000000,137664.000000,177100.000000,415.989486)}

{create adhoc21}
{access adhoc21}
{connect adhoc21(1), adhoc20(0)}
{nseg = 1}
{strdef color color = "White"}
{pt3dclear()}
{pt3dadd(137664.000000,137664.000000,177100.000000,415.989486)}
{pt3dadd(137100.000000,137148.000000,176900.000000,718.829820)}
{pt3dadd(136572.000000,136656.000000,176500.000000,755.250552)}
{pt3dadd(135840.000000,136320.000000,176025.000000,791.671284)}
{pt3dadd(135576.000000,136104.000000,175400.000000,828.092016)}
{pt3dadd(135648.000000,135660.000000,175100.000000,718.829820)}

{create adhoc22}
{access adhoc22}
{connect adhoc22(1), adhoc21(0)}
{nseg = 1}
{strdef color color = "White"}
{pt3dclear()}
{pt3dadd(135648.000000,135660.000000,175100.000000,718.829820)}
{pt3dadd(135780.000000,135288.000000,174600.000000,599.024880)}
{pt3dadd(136536.000000,135108.000000,174275.000000,599.024880)}
{pt3dadd(136752.000000,135444.000000,174100.000000,346.657896)}

{create adhoc23}
{access adhoc23}
{connect adhoc23(1), adhoc21(0)}
{nseg = 1}
{strdef color color = "White"}
{pt3dclear()}
{pt3dadd(135648.000000,135660.000000,175100.000000,718.829820)}
{pt3dadd(134124.000000,135948.000000,175100.000000,139.314042)}
{pt3dadd(133860.000000,135840.000000,174925.000000,146.279741)}
{pt3dadd(133572.000000,135840.000000,174675.000000,153.245439)}
{pt3dadd(134040.000000,135984.000000,174375.000000,160.211138)}
{pt3dadd(134412.000000,136320.000000,174000.000000,167.176836)}
{pt3dadd(134592.000000,136452.000000,173575.000000,384.161364)}
{pt3dadd(134412.000000,136332.000000,173225.000000,601.145892)}
{pt3dadd(134148.000000,136080.000000,172750.000000,818.130420)}
{pt3dadd(133920.000000,135936.000000,172325.000000,1035.114948)}
{pt3dadd(133704.000000,135792.000000,171925.000000,1138.626414)}
{pt3dadd(133812.000000,135936.000000,171475.000000,1242.137880)}
{pt3dadd(133668.000000,135936.000000,171200.000000,1242.137880)}

{create adhoc24}
{access adhoc24}
{connect adhoc24(1), adhoc23(0)}
{nseg = 1}
{strdef color color = "White"}
{pt3dclear()}
{pt3dadd(133668.000000,135936.000000,171200.000000,1242.137880)}
{pt3dadd(133740.000000,136212.000000,170775.000000,1035.114948)}
{pt3dadd(133752.000000,136056.000000,170450.000000,926.092431)}
{pt3dadd(133632.000000,135864.000000,169975.000000,817.069914)}
{pt3dadd(133416.000000,135888.000000,169725.000000,708.047397)}
{pt3dadd(133584.000000,136188.000000,169250.000000,599.024880)}
{pt3dadd(133872.000000,136356.000000,168900.000000,599.024880)}
{pt3dadd(134076.000000,136476.000000,168650.000000,167.176836)}

{create adhoc25}
{access adhoc25}
{connect adhoc25(1), adhoc23(0)}
{nseg = 1}
{strdef color color = "White"}
{pt3dclear()}
{pt3dadd(133668.000000,135936.000000,171200.000000,1242.137880)}
{pt3dadd(133908.000000,135336.000000,171100.000000,240.734646)}
{pt3dadd(133608.000000,134952.000000,171025.000000,139.314042)}
{pt3dadd(133428.000000,134724.000000,171025.000000,139.314042)}

{create adhoc26}
{access adhoc26}
{connect adhoc26(1), adhoc20(0)}
{nseg = 1}
{strdef color color = "White"}
{pt3dclear()}
{pt3dadd(137664.000000,137664.000000,177100.000000,415.989486)}
{pt3dadd(137832.000000,138768.000000,177050.000000,167.176836)}

{create adhoc27}
{access adhoc27}
{connect adhoc27(1), adhoc19(0)}
{nseg = 1}
{strdef color color = "White"}
{pt3dclear()}
{pt3dadd(137964.000000,138264.000000,178075.000000,1242.137880)}
{pt3dadd(138096.000000,140856.000000,178075.000000,690.076674)}
{pt3dadd(138168.000000,140772.000000,177925.000000,599.024880)}
{pt3dadd(138204.000000,140880.000000,177800.000000,200.612214)}

{create adhoc28}
{access adhoc28}
{connect adhoc28(1), adhoc18(0)}
{nseg = 1}
{strdef color color = "White"}
{pt3dclear()}
{pt3dadd(143304.000000,134880.000000,181925.000000,479.219886)}
{pt3dadd(141780.000000,134016.000000,182050.000000,599.024880)}

{create adhoc29}
{access adhoc29}
{connect adhoc29(1), adhoc28(0)}
{nseg = 1}
{strdef color color = "White"}
{pt3dclear()}
{pt3dadd(141780.000000,134016.000000,182050.000000,599.024880)}
{pt3dadd(140808.000000,133188.000000,180975.000000,499.187376)}
{pt3dadd(140796.000000,133200.000000,180725.000000,415.989486)}
{pt3dadd(140652.000000,133008.000000,180500.000000,288.881586)}

{create adhoc30}
{access adhoc30}
{connect adhoc30(1), adhoc28(0)}
{nseg = 1}
{strdef color color = "White"}
{pt3dclear()}
{pt3dadd(141780.000000,134016.000000,182050.000000,599.024880)}
{pt3dadd(141960.000000,134532.000000,182475.000000,167.176836)}

{create adhoc31}
{access adhoc31}
{connect adhoc31(1), adhoc17(0)}
{nseg = 1}
{strdef color color = "White"}
{pt3dclear()}
{pt3dadd(145140.000000,134748.000000,181850.000000,718.829820)}
{pt3dadd(146904.000000,132612.000000,182100.000000,499.187376)}
{pt3dadd(146748.000000,132120.000000,182400.000000,478.387903)}
{pt3dadd(146700.000000,131676.000000,182450.000000,457.588431)}
{pt3dadd(146808.000000,131376.000000,182325.000000,436.788958)}
{pt3dadd(147024.000000,131148.000000,181975.000000,415.989486)}
{pt3dadd(146988.000000,130848.000000,181925.000000,415.989486)}
{pt3dadd(146916.000000,130608.000000,181875.000000,415.989486)}
{pt3dadd(146916.000000,130392.000000,181750.000000,415.989486)}
{pt3dadd(146952.000000,130224.000000,181750.000000,288.881586)}

{create adhoc32}
{access adhoc32}
{connect adhoc32(1), adhoc31(0)}
{nseg = 1}
{strdef color color = "White"}
{pt3dclear()}
{pt3dadd(146952.000000,130224.000000,181750.000000,288.881586)}
{pt3dadd(147384.000000,130164.000000,181625.000000,288.881586)}
{pt3dadd(147708.000000,130008.000000,181550.000000,240.734646)}
{pt3dadd(147840.000000,129828.000000,181475.000000,116.095032)}

{create adhoc33}
{access adhoc33}
{connect adhoc33(1), adhoc31(0)}
{nseg = 1}
{strdef color color = "White"}
{pt3dclear()}
{pt3dadd(146952.000000,130224.000000,181750.000000,288.881586)}
{pt3dadd(146256.000000,130164.000000,181475.000000,240.734646)}
{pt3dadd(145992.000000,129960.000000,181500.000000,267.215459)}
{pt3dadd(145872.000000,129768.000000,181375.000000,293.696271)}
{pt3dadd(145680.000000,129600.000000,181250.000000,320.177083)}
{pt3dadd(145464.000000,129384.000000,181050.000000,346.657896)}
{pt3dadd(145344.000000,129168.000000,180875.000000,475.642373)}
{pt3dadd(145188.000000,128880.000000,180800.000000,604.626849)}
{pt3dadd(144876.000000,128616.000000,180525.000000,733.611326)}
{pt3dadd(144912.000000,128316.000000,180475.000000,862.595802)}
{pt3dadd(144864.000000,128016.000000,180275.000000,948.855375)}
{pt3dadd(144672.000000,128040.000000,179800.000000,1035.114948)}
{pt3dadd(144804.000000,127860.000000,179375.000000,862.595802)}

{create adhoc34}
{access adhoc34}
{connect adhoc34(1), adhoc33(0)}
{nseg = 1}
{strdef color color = "White"}
{pt3dclear()}
{pt3dadd(144804.000000,127860.000000,179375.000000,862.595802)}
{pt3dadd(144468.000000,127488.000000,178875.000000,1035.114948)}
{pt3dadd(143820.000000,127344.000000,178375.000000,929.686572)}
{pt3dadd(143784.000000,127332.000000,177925.000000,824.258196)}
{pt3dadd(144192.000000,127428.000000,177575.000000,718.829820)}
{pt3dadd(144396.000000,127788.000000,177375.000000,346.657896)}

{create adhoc35}
{access adhoc35}
{connect adhoc35(1), adhoc34(0)}
{nseg = 1}
{strdef color color = "White"}
{pt3dclear()}
{pt3dadd(144396.000000,127788.000000,177375.000000,346.657896)}
{pt3dadd(144600.000000,128124.000000,177050.000000,139.314042)}

{create adhoc36}
{access adhoc36}
{connect adhoc36(1), adhoc34(0)}
{nseg = 1}
{strdef color color = "White"}
{pt3dclear()}
{pt3dadd(144396.000000,127788.000000,177375.000000,346.657896)}
{pt3dadd(144372.000000,127188.000000,177350.000000,288.881586)}
{pt3dadd(144468.000000,127008.000000,177250.000000,139.314042)}

{create adhoc37}
{access adhoc37}
{connect adhoc37(1), adhoc33(0)}
{nseg = 1}
{strdef color color = "White"}
{pt3dclear()}
{pt3dadd(144804.000000,127860.000000,179375.000000,862.595802)}
{pt3dadd(144132.000000,127860.000000,180900.000000,599.024880)}
{pt3dadd(144096.000000,127452.000000,181325.000000,599.024880)}
{pt3dadd(144012.000000,127284.000000,181350.000000,599.024880)}
{pt3dadd(143856.000000,127308.000000,181750.000000,499.187376)}

{create adhoc38}
{access adhoc38}
{connect adhoc38(1), adhoc37(0)}
{nseg = 1}
{strdef color color = "White"}
{pt3dclear()}
{pt3dadd(143856.000000,127308.000000,181750.000000,499.187376)}
{pt3dadd(144372.000000,127200.000000,182025.000000,167.176836)}

{create adhoc39}
{access adhoc39}
{connect adhoc39(1), adhoc37(0)}
{nseg = 1}
{strdef color color = "White"}
{pt3dclear()}
{pt3dadd(143856.000000,127308.000000,181750.000000,499.187376)}
{pt3dadd(143556.000000,127440.000000,181950.000000,240.734646)}
{pt3dadd(143376.000000,127536.000000,182100.000000,240.734646)}

{create adhoc40}
{access adhoc40}
{connect adhoc40(1), adhoc16(0)}
{nseg = 1}
{strdef color color = "White"}
{pt3dclear()}
{pt3dadd(147456.000000,134196.000000,179525.000000,1490.565402)}
{pt3dadd(147396.000000,132720.000000,178225.000000,415.989486)}
{pt3dadd(147216.000000,132648.000000,177850.000000,461.748335)}
{pt3dadd(147048.000000,132672.000000,177725.000000,507.507183)}
{pt3dadd(146784.000000,132636.000000,177450.000000,553.266031)}
{pt3dadd(146568.000000,132456.000000,177000.000000,599.024880)}
{pt3dadd(146304.000000,132144.000000,176700.000000,862.595802)}
{pt3dadd(146148.000000,132096.000000,176525.000000,828.092016)}

{create adhoc41}
{access adhoc41}
{connect adhoc41(1), adhoc40(0)}
{nseg = 1}
{strdef color color = "White"}
{pt3dclear()}
{pt3dadd(146148.000000,132096.000000,176525.000000,828.092016)}
{pt3dadd(146064.000000,131832.000000,175925.000000,718.829820)}

{create adhoc42}
{access adhoc42}
{connect adhoc42(1), adhoc41(0)}
{nseg = 1}
{strdef color color = "White"}
{pt3dclear()}
{pt3dadd(146064.000000,131832.000000,175925.000000,718.829820)}
{pt3dadd(146004.000000,132084.000000,175400.000000,332.791596)}
{pt3dadd(145992.000000,132480.000000,175200.000000,249.984216)}
{pt3dadd(146280.000000,132660.000000,174925.000000,167.176836)}
{pt3dadd(146388.000000,132480.000000,174775.000000,167.176836)}

{create adhoc43}
{access adhoc43}
{connect adhoc43(1), adhoc41(0)}
{nseg = 1}
{strdef color color = "White"}
{pt3dclear()}
{pt3dadd(146064.000000,131832.000000,175925.000000,718.829820)}
{pt3dadd(146352.000000,130692.000000,175825.000000,288.881586)}
{pt3dadd(146484.000000,130380.000000,175925.000000,116.095032)}

{create adhoc44}
{access adhoc44}
{connect adhoc44(1), adhoc40(0)}
{nseg = 1}
{strdef color color = "White"}
{pt3dclear()}
{pt3dadd(146148.000000,132096.000000,176525.000000,828.092016)}
{pt3dadd(145344.000000,131508.000000,176475.000000,167.176836)}
{pt3dadd(145344.000000,131316.000000,176350.000000,167.176836)}

{create adhoc45}
{access adhoc45}
{connect adhoc45(1), adhoc15(0)}
{nseg = 1}
{strdef color color = "White"}
{pt3dclear()}
{pt3dadd(148560.000000,134196.000000,178950.000000,1242.137880)}
{pt3dadd(148632.000000,136248.000000,180350.000000,415.989486)}
{pt3dadd(149508.000000,137076.000000,180925.000000,527.641065)}
{pt3dadd(149724.000000,137316.000000,181150.000000,639.292644)}
{pt3dadd(150048.000000,137544.000000,181325.000000,750.944223)}
{pt3dadd(150456.000000,138096.000000,181825.000000,862.595802)}
{pt3dadd(150720.000000,138300.000000,181925.000000,1176.580602)}
{pt3dadd(151116.000000,138144.000000,182675.000000,1490.565402)}
{pt3dadd(151140.000000,138168.000000,182775.000000,1490.565402)}

{create adhoc46}
{access adhoc46}
{connect adhoc46(1), adhoc14(0)}
{nseg = 1}
{strdef color color = "White"}
{pt3dclear()}
{pt3dadd(148848.000000,134028.000000,178575.000000,1242.137880)}
{pt3dadd(148848.000000,135432.000000,176675.000000,599.024880)}
{pt3dadd(148800.000000,135288.000000,176500.000000,415.989486)}

{create adhoc47}
{access adhoc47}
{connect adhoc47(1), adhoc10(0)}
{nseg = 1}
{strdef color color = "White"}
{pt3dclear()}
{pt3dadd(149592.000000,133548.000000,178000.000000,1242.137880)}
{pt3dadd(147828.000000,131820.000000,178050.000000,288.881586)}
{pt3dadd(148008.000000,131184.000000,178250.000000,384.050736)}
{pt3dadd(148056.000000,130440.000000,177200.000000,479.219886)}
{pt3dadd(148152.000000,130464.000000,176875.000000,346.657896)}

{create adhoc48}
{access adhoc48}
{connect adhoc48(1), adhoc9(0)}
{nseg = 1}
{strdef color color = "White"}
{pt3dclear()}
{pt3dadd(153228.000000,133812.000000,173600.000000,1144.754442)}
{pt3dadd(151164.000000,135612.000000,173800.000000,240.734646)}
{pt3dadd(150864.000000,136404.000000,173900.000000,252.771381)}
{pt3dadd(150612.000000,136548.000000,173925.000000,264.808116)}
{pt3dadd(150324.000000,136692.000000,174025.000000,276.844851)}
{pt3dadd(150624.000000,137040.000000,174050.000000,288.881586)}
{pt3dadd(150576.000000,137424.000000,174050.000000,288.881586)}
{pt3dadd(150504.000000,137844.000000,173925.000000,288.881586)}
{pt3dadd(150564.000000,138072.000000,173950.000000,288.881586)}
{pt3dadd(150552.000000,138312.000000,173950.000000,288.881586)}
{pt3dadd(150552.000000,138540.000000,173975.000000,259.458462)}
{pt3dadd(150540.000000,138744.000000,173925.000000,230.035338)}
{pt3dadd(150828.000000,139068.000000,173850.000000,200.612214)}
{pt3dadd(151032.000000,139212.000000,173875.000000,200.612214)}

{create adhoc49}
{access adhoc49}
{connect adhoc49(1), adhoc8(0)}
{nseg = 1}
{strdef color color = "White"}
{pt3dclear()}
{pt3dadd(154008.000000,134028.000000,172450.000000,1490.565402)}
{pt3dadd(151464.000000,133428.000000,172525.000000,415.989486)}
{pt3dadd(151416.000000,133560.000000,172175.000000,346.657896)}
{pt3dadd(151332.000000,133560.000000,172050.000000,167.176836)}

{create adhoc50}
{access adhoc50}
{connect adhoc50(1), adhoc8(0)}
{nseg = 1}
{strdef color color = "White"}
{pt3dclear()}
{pt3dadd(154008.000000,134028.000000,172450.000000,1490.565402)}
{pt3dadd(156180.000000,133404.000000,172575.000000,499.187376)}
{pt3dadd(157044.000000,133260.000000,172800.000000,200.612214)}
{pt3dadd(157140.000000,133332.000000,173100.000000,200.612214)}

{create adhoc51}
{access adhoc51}
{connect adhoc51(1), adhoc7(0)}
{nseg = 1}
{strdef color color = "White"}
{pt3dclear()}
{pt3dadd(186168.000000,201780.000000,68525.000000,718.829820)}
{pt3dadd(186276.000000,201624.000000,68150.000000,862.595802)}
{pt3dadd(186312.000000,201480.000000,67950.000000,862.595802)}
{pt3dadd(186312.000000,201216.000000,67600.000000,862.595802)}
{pt3dadd(186276.000000,201024.000000,67300.000000,862.595802)}
{pt3dadd(186096.000000,200760.000000,66750.000000,862.595802)}
{pt3dadd(186024.000000,200160.000000,66300.000000,826.654307)}
{pt3dadd(185688.000000,200340.000000,65875.000000,790.712811)}
{pt3dadd(185760.000000,200028.000000,65400.000000,754.771316)}
{pt3dadd(185496.000000,199740.000000,64925.000000,718.829820)}
{pt3dadd(185448.000000,199320.000000,64350.000000,638.959842)}
{pt3dadd(185400.000000,198804.000000,63775.000000,559.089864)}
{pt3dadd(185364.000000,198552.000000,63125.000000,479.219886)}
{pt3dadd(185148.000000,197736.000000,62575.000000,399.349908)}
{pt3dadd(184884.000000,197628.000000,62075.000000,479.219886)}
{pt3dadd(184632.000000,197736.000000,61525.000000,559.089864)}
{pt3dadd(184116.000000,197700.000000,60625.000000,638.959842)}
{pt3dadd(183888.000000,197508.000000,60025.000000,718.829820)}
{pt3dadd(183624.000000,197472.000000,59575.000000,718.829820)}
{pt3dadd(183180.000000,197544.000000,59025.000000,718.829820)}
{pt3dadd(182772.000000,197604.000000,58550.000000,718.829820)}
{pt3dadd(182460.000000,197496.000000,57975.000000,718.829820)}
{pt3dadd(182316.000000,197460.000000,57425.000000,797.901102)}
{pt3dadd(181980.000000,197568.000000,57000.000000,876.972384)}
{pt3dadd(181836.000000,197628.000000,56550.000000,956.043666)}
{pt3dadd(181620.000000,197616.000000,56025.000000,1035.114948)}
{pt3dadd(181320.000000,197652.000000,55550.000000,862.595802)}
{pt3dadd(181176.000000,197484.000000,55175.000000,599.024880)}

{create adhoc52}
{access adhoc52}
{connect adhoc52(1), adhoc51(0)}
{nseg = 1}
{strdef color color = "White"}
{pt3dclear()}
{pt3dadd(181176.000000,197484.000000,55175.000000,599.024880)}
{pt3dadd(179160.000000,198024.000000,55175.000000,288.881586)}
{pt3dadd(178884.000000,198036.000000,55225.000000,266.814243)}
{pt3dadd(178644.000000,197916.000000,55200.000000,244.746900)}
{pt3dadd(178416.000000,197796.000000,55175.000000,222.679557)}
{pt3dadd(178212.000000,197856.000000,55175.000000,200.612214)}
{pt3dadd(177852.000000,197988.000000,55150.000000,194.831379)}
{pt3dadd(177552.000000,198048.000000,55075.000000,189.050544)}
{pt3dadd(177276.000000,198084.000000,55000.000000,183.269709)}
{pt3dadd(177000.000000,198156.000000,54925.000000,177.488874)}
{pt3dadd(176700.000000,198156.000000,54750.000000,205.337052)}
{pt3dadd(176436.000000,198264.000000,54625.000000,233.185230)}
{pt3dadd(176232.000000,198300.000000,54575.000000,261.033408)}
{pt3dadd(175944.000000,198396.000000,54450.000000,288.881586)}
{pt3dadd(175692.000000,198636.000000,54450.000000,240.734646)}

{create adhoc53}
{access adhoc53}
{connect adhoc53(1), adhoc52(0)}
{nseg = 1}
{strdef color color = "White"}
{pt3dclear()}
{pt3dadd(175692.000000,198636.000000,54450.000000,240.734646)}
{pt3dadd(175560.000000,198984.000000,54625.000000,200.612214)}
{pt3dadd(175356.000000,199236.000000,54600.000000,192.253370)}
{pt3dadd(175104.000000,199524.000000,54750.000000,183.894525)}
{pt3dadd(174840.000000,199776.000000,54925.000000,175.535680)}
{pt3dadd(174588.000000,200028.000000,55000.000000,167.176836)}
{pt3dadd(174336.000000,200112.000000,55050.000000,185.566288)}
{pt3dadd(174060.000000,200220.000000,55125.000000,203.955741)}
{pt3dadd(173772.000000,200316.000000,55200.000000,222.345193)}
{pt3dadd(173400.000000,200400.000000,55225.000000,240.734646)}
{pt3dadd(173088.000000,200484.000000,55325.000000,230.704038)}
{pt3dadd(172812.000000,200568.000000,55550.000000,220.673430)}
{pt3dadd(172308.000000,200724.000000,55875.000000,210.642822)}
{pt3dadd(171444.000000,200988.000000,56350.000000,200.612214)}
{pt3dadd(170724.000000,201276.000000,56925.000000,185.287671)}
{pt3dadd(170472.000000,201408.000000,57150.000000,169.963128)}
{pt3dadd(170112.000000,201528.000000,57300.000000,154.638585)}
{pt3dadd(169824.000000,201648.000000,57200.000000,139.314042)}
{pt3dadd(169140.000000,201744.000000,57200.000000,146.279741)}
{pt3dadd(168852.000000,201876.000000,57200.000000,153.245439)}
{pt3dadd(168480.000000,201936.000000,57275.000000,160.211138)}
{pt3dadd(168132.000000,202152.000000,57375.000000,167.176836)}
{pt3dadd(167916.000000,202212.000000,57375.000000,200.612214)}
{pt3dadd(167400.000000,202368.000000,57350.000000,346.657896)}

{create adhoc54}
{access adhoc54}
{connect adhoc54(1), adhoc52(0)}
{nseg = 1}
{strdef color color = "White"}
{pt3dclear()}
{pt3dadd(175692.000000,198636.000000,54450.000000,240.734646)}
{pt3dadd(175560.000000,198528.000000,54025.000000,346.657896)}
{pt3dadd(175308.000000,198432.000000,53775.000000,310.146476)}
{pt3dadd(175056.000000,198492.000000,53575.000000,273.635055)}
{pt3dadd(174804.000000,198576.000000,53500.000000,237.123635)}
{pt3dadd(174576.000000,198660.000000,53375.000000,200.612214)}
{pt3dadd(174192.000000,198732.000000,53375.000000,174.645625)}
{pt3dadd(173844.000000,198684.000000,53375.000000,148.679037)}
{pt3dadd(173460.000000,198780.000000,53350.000000,122.712448)}
{pt3dadd(173148.000000,198792.000000,53400.000000,96.745860)}
{pt3dadd(172800.000000,198840.000000,53475.000000,101.583153)}
{pt3dadd(172476.000000,198840.000000,53475.000000,106.420446)}
{pt3dadd(171204.000000,198780.000000,53575.000000,111.257739)}
{pt3dadd(170724.000000,198816.000000,53575.000000,116.095032)}
{pt3dadd(170136.000000,198720.000000,53375.000000,128.865483)}
{pt3dadd(169428.000000,198888.000000,53375.000000,141.635934)}
{pt3dadd(168516.000000,199188.000000,53375.000000,154.406385)}
{pt3dadd(168252.000000,199464.000000,53325.000000,167.176836)}
{pt3dadd(167412.000000,199692.000000,53325.000000,167.176836)}
{pt3dadd(166584.000000,199920.000000,53325.000000,167.176836)}
{pt3dadd(165792.000000,199968.000000,53725.000000,167.176836)}
{pt3dadd(165336.000000,200064.000000,53800.000000,167.176836)}
{pt3dadd(164952.000000,200136.000000,53975.000000,160.211138)}
{pt3dadd(164628.000000,200148.000000,54050.000000,153.245439)}
{pt3dadd(164256.000000,200292.000000,54125.000000,146.279741)}
{pt3dadd(164016.000000,200292.000000,54175.000000,139.314042)}
{pt3dadd(163704.000000,200424.000000,54200.000000,167.176836)}
{pt3dadd(162960.000000,200448.000000,54275.000000,240.734646)}

{create adhoc55}
{access adhoc55}
{connect adhoc55(1), adhoc51(0)}
{nseg = 1}
{strdef color color = "White"}
{pt3dclear()}
{pt3dadd(181176.000000,197484.000000,55175.000000,599.024880)}
{pt3dadd(181752.000000,196752.000000,54725.000000,288.881586)}
{pt3dadd(181884.000000,196392.000000,54500.000000,396.368644)}
{pt3dadd(181536.000000,196032.000000,54275.000000,503.855703)}
{pt3dadd(181380.000000,195876.000000,54175.000000,611.342762)}
{pt3dadd(181200.000000,195144.000000,53750.000000,718.829820)}
{pt3dadd(180792.000000,194916.000000,53325.000000,711.641533)}
{pt3dadd(180636.000000,194520.000000,52925.000000,704.453247)}
{pt3dadd(180492.000000,194184.000000,52425.000000,697.264960)}
{pt3dadd(180492.000000,193956.000000,52000.000000,690.076674)}
{pt3dadd(180444.000000,193764.000000,51350.000000,697.264960)}
{pt3dadd(180780.000000,193332.000000,51300.000000,704.453247)}
{pt3dadd(180888.000000,193152.000000,50750.000000,711.641533)}
{pt3dadd(181032.000000,192636.000000,50250.000000,718.829820)}
{pt3dadd(181212.000000,192156.000000,49850.000000,688.878585)}
{pt3dadd(181608.000000,191676.000000,49325.000000,658.927350)}
{pt3dadd(181848.000000,191220.000000,48750.000000,628.976115)}
{pt3dadd(182448.000000,190368.000000,48350.000000,599.024880)}
{pt3dadd(182724.000000,190128.000000,48075.000000,599.024880)}
{pt3dadd(182892.000000,189864.000000,47925.000000,599.024880)}
{pt3dadd(183024.000000,189636.000000,47800.000000,599.024880)}
{pt3dadd(183096.000000,189408.000000,47625.000000,599.024880)}
{pt3dadd(183096.000000,189216.000000,47500.000000,599.024880)}
{pt3dadd(183096.000000,189012.000000,47450.000000,599.024880)}
{pt3dadd(183084.000000,188844.000000,47250.000000,599.024880)}
{pt3dadd(183192.000000,188628.000000,47025.000000,599.024880)}
{pt3dadd(183192.000000,188340.000000,46900.000000,599.024880)}
{pt3dadd(183228.000000,188112.000000,46850.000000,599.024880)}
{pt3dadd(183120.000000,187860.000000,46800.000000,599.024880)}
{pt3dadd(183048.000000,187632.000000,46750.000000,599.024880)}
{pt3dadd(183048.000000,187428.000000,46600.000000,553.266031)}
{pt3dadd(182964.000000,187152.000000,46550.000000,507.507183)}
{pt3dadd(183132.000000,186876.000000,46475.000000,461.748335)}
{pt3dadd(183048.000000,186492.000000,46425.000000,415.989486)}
{pt3dadd(183012.000000,186036.000000,46350.000000,457.588431)}
{pt3dadd(183120.000000,185892.000000,46225.000000,499.187376)}
{pt3dadd(183228.000000,185772.000000,46100.000000,479.219886)}

{create adhoc56}
{access adhoc56}
{connect adhoc56(1), adhoc55(0)}
{nseg = 1}
{strdef color color = "White"}
{pt3dclear()}
{pt3dadd(183228.000000,185772.000000,46100.000000,479.219886)}
{pt3dadd(182592.000000,185772.000000,46900.000000,200.612214)}
{pt3dadd(182460.000000,185580.000000,47175.000000,200.612214)}
{pt3dadd(182496.000000,185316.000000,47525.000000,200.612214)}
{pt3dadd(182628.000000,185088.000000,47625.000000,200.612214)}
{pt3dadd(182712.000000,184920.000000,47725.000000,200.612214)}
{pt3dadd(182784.000000,184764.000000,47675.000000,308.300850)}
{pt3dadd(182940.000000,184608.000000,47725.000000,415.989486)}

{create adhoc57}
{access adhoc57}
{connect adhoc57(1), adhoc56(0)}
{nseg = 1}
{strdef color color = "White"}
{pt3dclear()}
{pt3dadd(182940.000000,184608.000000,47725.000000,415.989486)}
{pt3dadd(182748.000000,184296.000000,47825.000000,96.745860)}
{pt3dadd(182676.000000,184020.000000,47825.000000,103.195584)}
{pt3dadd(182448.000000,183744.000000,47850.000000,109.645308)}
{pt3dadd(182040.000000,183540.000000,47950.000000,116.095032)}
{pt3dadd(181848.000000,183456.000000,47950.000000,80.621550)}

{create adhoc58}
{access adhoc58}
{connect adhoc58(1), adhoc56(0)}
{nseg = 1}
{strdef color color = "White"}
{pt3dclear()}
{pt3dadd(182940.000000,184608.000000,47725.000000,415.989486)}
{pt3dadd(183300.000000,184752.000000,47800.000000,96.745860)}
{pt3dadd(183456.000000,184860.000000,48000.000000,144.779792)}
{pt3dadd(183552.000000,185016.000000,48275.000000,192.813723)}
{pt3dadd(183480.000000,185208.000000,48500.000000,240.847655)}
{pt3dadd(183564.000000,185472.000000,48900.000000,288.881586)}
{pt3dadd(183804.000000,185424.000000,49625.000000,317.769741)}
{pt3dadd(184032.000000,185208.000000,50425.000000,346.657896)}
{pt3dadd(184056.000000,184968.000000,50975.000000,240.734646)}

{create adhoc59}
{access adhoc59}
{connect adhoc59(1), adhoc55(0)}
{nseg = 1}
{strdef color color = "White"}
{pt3dclear()}
{pt3dadd(183228.000000,185772.000000,46100.000000,479.219886)}
{pt3dadd(183324.000000,185520.000000,46125.000000,575.063856)}
{pt3dadd(183492.000000,185196.000000,45925.000000,556.094736)}
{pt3dadd(183564.000000,184956.000000,45775.000000,537.125616)}
{pt3dadd(183480.000000,184584.000000,45450.000000,518.156496)}
{pt3dadd(183396.000000,184320.000000,45075.000000,499.187376)}
{pt3dadd(183672.000000,183864.000000,44625.000000,478.387903)}
{pt3dadd(183696.000000,183492.000000,44300.000000,457.588431)}
{pt3dadd(184092.000000,183144.000000,44150.000000,436.788958)}
{pt3dadd(184200.000000,182892.000000,44050.000000,415.989486)}
{pt3dadd(184260.000000,182712.000000,43975.000000,415.989486)}
{pt3dadd(184236.000000,182472.000000,43900.000000,415.989486)}
{pt3dadd(184308.000000,182256.000000,43750.000000,415.989486)}
{pt3dadd(184236.000000,182028.000000,43700.000000,415.989486)}
{pt3dadd(184212.000000,181668.000000,43550.000000,415.989486)}
{pt3dadd(184236.000000,181428.000000,43400.000000,415.989486)}
{pt3dadd(184380.000000,181176.000000,43350.000000,415.989486)}
{pt3dadd(184428.000000,180948.000000,43050.000000,415.989486)}
{pt3dadd(184368.000000,180708.000000,42925.000000,398.656589)}
{pt3dadd(184332.000000,180504.000000,42800.000000,381.323691)}
{pt3dadd(184212.000000,180276.000000,42625.000000,363.990794)}
{pt3dadd(184452.000000,179916.000000,42450.000000,346.657896)}
{pt3dadd(184560.000000,179604.000000,42400.000000,363.990794)}
{pt3dadd(184560.000000,179280.000000,42375.000000,381.323691)}
{pt3dadd(184764.000000,179016.000000,42400.000000,398.656589)}
{pt3dadd(185256.000000,178764.000000,42550.000000,415.989486)}
{pt3dadd(185544.000000,178464.000000,42575.000000,415.989486)}
{pt3dadd(185772.000000,178236.000000,42625.000000,415.989486)}
{pt3dadd(185904.000000,177972.000000,42525.000000,415.989486)}
{pt3dadd(186012.000000,177732.000000,42500.000000,415.989486)}
{pt3dadd(186240.000000,177420.000000,42275.000000,436.788958)}
{pt3dadd(186348.000000,177132.000000,42275.000000,457.588431)}
{pt3dadd(186396.000000,176904.000000,42200.000000,478.387903)}
{pt3dadd(186372.000000,176688.000000,42100.000000,499.187376)}
{pt3dadd(186480.000000,176304.000000,42050.000000,415.989486)}

{create adhoc60}
{access adhoc60}
{connect adhoc60(1), adhoc59(0)}
{nseg = 1}
{strdef color color = "White"}
{pt3dclear()}
{pt3dadd(186480.000000,176304.000000,42050.000000,415.989486)}
{pt3dadd(186024.000000,176352.000000,41550.000000,415.989486)}
{pt3dadd(185892.000000,176172.000000,41250.000000,398.656589)}
{pt3dadd(185748.000000,176064.000000,41000.000000,381.323691)}
{pt3dadd(185568.000000,175920.000000,40725.000000,363.990794)}
{pt3dadd(185424.000000,175776.000000,40400.000000,346.657896)}
{pt3dadd(185268.000000,175776.000000,40175.000000,310.146476)}
{pt3dadd(185004.000000,175800.000000,39875.000000,273.635055)}
{pt3dadd(185076.000000,175860.000000,38950.000000,237.123635)}
{pt3dadd(185304.000000,176040.000000,38250.000000,200.612214)}
{pt3dadd(185364.000000,176088.000000,37950.000000,210.642822)}
{pt3dadd(185604.000000,176184.000000,37625.000000,220.673430)}
{pt3dadd(185784.000000,176124.000000,37350.000000,230.704038)}
{pt3dadd(185784.000000,175932.000000,36700.000000,240.734646)}
{pt3dadd(185784.000000,175752.000000,36375.000000,230.704038)}
{pt3dadd(185892.000000,175656.000000,36000.000000,220.673430)}
{pt3dadd(185892.000000,175680.000000,35825.000000,210.642822)}
{pt3dadd(186120.000000,175788.000000,35475.000000,200.612214)}
{pt3dadd(186348.000000,175896.000000,35000.000000,240.734646)}
{pt3dadd(186576.000000,175848.000000,34725.000000,346.657896)}

{create adhoc61}
{access adhoc61}
{connect adhoc61(1), adhoc59(0)}
{nseg = 1}
{strdef color color = "White"}
{pt3dclear()}
{pt3dadd(186480.000000,176304.000000,42050.000000,415.989486)}
{pt3dadd(186636.000000,176064.000000,42100.000000,415.989486)}
{pt3dadd(186792.000000,175596.000000,42075.000000,415.989486)}
{pt3dadd(186888.000000,175272.000000,42000.000000,415.989486)}
{pt3dadd(186960.000000,175044.000000,41900.000000,415.989486)}
{pt3dadd(187104.000000,174864.000000,41900.000000,415.989486)}
{pt3dadd(187068.000000,174588.000000,41925.000000,461.748335)}
{pt3dadd(187284.000000,174276.000000,42025.000000,507.507183)}
{pt3dadd(187272.000000,173868.000000,42025.000000,553.266031)}
{pt3dadd(187272.000000,173496.000000,42050.000000,599.024880)}
{pt3dadd(187344.000000,173172.000000,42050.000000,587.044368)}
{pt3dadd(187464.000000,172824.000000,42025.000000,575.063856)}
{pt3dadd(187560.000000,172656.000000,41850.000000,718.829820)}

{create adhoc62}
{access adhoc62}
{connect adhoc62(1), adhoc61(0)}
{nseg = 1}
{strdef color color = "White"}
{pt3dclear()}
{pt3dadd(187560.000000,172656.000000,41850.000000,718.829820)}
{pt3dadd(187572.000000,172656.000000,40700.000000,288.881586)}
{pt3dadd(187536.000000,172560.000000,40375.000000,266.814243)}
{pt3dadd(187668.000000,172500.000000,40000.000000,244.746900)}
{pt3dadd(187788.000000,172392.000000,39650.000000,222.679557)}
{pt3dadd(187776.000000,172296.000000,39425.000000,200.612214)}
{pt3dadd(187860.000000,171972.000000,38600.000000,200.612214)}
{pt3dadd(187836.000000,171732.000000,38300.000000,200.612214)}
{pt3dadd(187836.000000,171636.000000,37850.000000,200.612214)}
{pt3dadd(187980.000000,171408.000000,37650.000000,200.612214)}
{pt3dadd(188064.000000,171120.000000,37375.000000,192.253370)}
{pt3dadd(188100.000000,170724.000000,37025.000000,183.894525)}
{pt3dadd(188016.000000,170040.000000,36575.000000,175.535680)}
{pt3dadd(187692.000000,169704.000000,36275.000000,167.176836)}
{pt3dadd(187152.000000,169260.000000,35975.000000,150.149568)}
{pt3dadd(187044.000000,168792.000000,35450.000000,133.122300)}
{pt3dadd(186984.000000,168432.000000,35325.000000,116.095032)}
{pt3dadd(187068.000000,168108.000000,35250.000000,139.314042)}

{create adhoc63}
{access adhoc63}
{connect adhoc63(1), adhoc61(0)}
{nseg = 1}
{strdef color color = "White"}
{pt3dclear()}
{pt3dadd(187560.000000,172656.000000,41850.000000,718.829820)}
{pt3dadd(187512.000000,172452.000000,41850.000000,718.829820)}

{create adhoc64}
{access adhoc64}
{connect adhoc64(1), adhoc63(0)}
{nseg = 1}
{strdef color color = "White"}
{pt3dclear()}
{pt3dadd(187512.000000,172452.000000,41850.000000,718.829820)}
{pt3dadd(187164.000000,172620.000000,42675.000000,288.881586)}
{pt3dadd(186936.000000,172380.000000,43150.000000,258.455399)}
{pt3dadd(187008.000000,172200.000000,43300.000000,228.029211)}
{pt3dadd(186684.000000,171888.000000,43800.000000,197.603024)}
{pt3dadd(186576.000000,171720.000000,44000.000000,167.176836)}
{pt3dadd(186204.000000,171552.000000,44300.000000,197.603024)}
{pt3dadd(185784.000000,171564.000000,44650.000000,228.029211)}
{pt3dadd(185472.000000,171348.000000,44875.000000,258.455399)}
{pt3dadd(185232.000000,171336.000000,45250.000000,288.881586)}
{pt3dadd(185076.000000,171432.000000,45650.000000,167.176836)}

{create adhoc65}
{access adhoc65}
{connect adhoc65(1), adhoc63(0)}
{nseg = 1}
{strdef color color = "White"}
{pt3dclear()}
{pt3dadd(187512.000000,172452.000000,41850.000000,718.829820)}
{pt3dadd(187416.000000,172188.000000,41825.000000,575.063856)}
{pt3dadd(187596.000000,171828.000000,42000.000000,517.962366)}
{pt3dadd(187632.000000,171600.000000,42025.000000,460.860876)}
{pt3dadd(187668.000000,171384.000000,42050.000000,403.759386)}
{pt3dadd(187812.000000,171120.000000,42125.000000,346.657896)}
{pt3dadd(187884.000000,170832.000000,42100.000000,363.990794)}
{pt3dadd(187932.000000,170580.000000,42075.000000,381.323691)}
{pt3dadd(188016.000000,170292.000000,42025.000000,398.656589)}
{pt3dadd(188064.000000,170016.000000,42025.000000,415.989486)}
{pt3dadd(188112.000000,169812.000000,42025.000000,415.989486)}
{pt3dadd(188076.000000,169572.000000,42050.000000,415.989486)}
{pt3dadd(188208.000000,169368.000000,42000.000000,415.989486)}
{pt3dadd(188148.000000,169104.000000,41850.000000,415.989486)}
{pt3dadd(188088.000000,168684.000000,41800.000000,372.175776)}
{pt3dadd(188004.000000,168420.000000,41850.000000,328.362066)}
{pt3dadd(187920.000000,168108.000000,41975.000000,284.548356)}
{pt3dadd(187956.000000,167832.000000,42025.000000,240.734646)}
{pt3dadd(187944.000000,167604.000000,42075.000000,252.771381)}
{pt3dadd(187884.000000,167352.000000,42125.000000,264.808116)}
{pt3dadd(187668.000000,167136.000000,42075.000000,276.844851)}
{pt3dadd(187680.000000,166860.000000,42075.000000,288.881586)}
{pt3dadd(187692.000000,166620.000000,42075.000000,303.325664)}
{pt3dadd(187704.000000,166428.000000,42075.000000,317.769741)}
{pt3dadd(187620.000000,166224.000000,42025.000000,332.213819)}
{pt3dadd(187572.000000,165900.000000,42025.000000,346.657896)}
{pt3dadd(187728.000000,165564.000000,41875.000000,310.146476)}
{pt3dadd(187884.000000,165432.000000,41725.000000,273.635055)}
{pt3dadd(188244.000000,165192.000000,41575.000000,237.123635)}
{pt3dadd(188592.000000,164880.000000,41550.000000,200.612214)}
{pt3dadd(188844.000000,164916.000000,41525.000000,237.123635)}
{pt3dadd(189120.000000,164892.000000,41600.000000,273.635055)}
{pt3dadd(189384.000000,164724.000000,41575.000000,310.146475)}
{pt3dadd(189684.000000,164616.000000,41475.000000,346.657896)}
{pt3dadd(189912.000000,164592.000000,41450.000000,332.213819)}
{pt3dadd(190188.000000,164124.000000,41500.000000,317.769741)}
{pt3dadd(190380.000000,163812.000000,41600.000000,303.325664)}
{pt3dadd(190500.000000,163560.000000,41700.000000,288.881586)}
{pt3dadd(190500.000000,163224.000000,41700.000000,336.466161)}
{pt3dadd(190596.000000,163032.000000,41775.000000,384.050736)}
{pt3dadd(190680.000000,162756.000000,41750.000000,431.635311)}
{pt3dadd(190932.000000,162420.000000,41650.000000,479.219886)}
{pt3dadd(191028.000000,162144.000000,41625.000000,484.211758)}
{pt3dadd(191304.000000,161868.000000,41600.000000,489.203631)}
{pt3dadd(191436.000000,161664.000000,41625.000000,494.195504)}
{pt3dadd(191508.000000,161424.000000,41650.000000,499.187376)}
{pt3dadd(191736.000000,161172.000000,41525.000000,478.387903)}
{pt3dadd(191820.000000,160884.000000,41550.000000,457.588431)}
{pt3dadd(191856.000000,160584.000000,41625.000000,436.788958)}
{pt3dadd(191868.000000,160344.000000,41600.000000,415.989486)}
{pt3dadd(191760.000000,159996.000000,41625.000000,415.989486)}
{pt3dadd(191688.000000,159744.000000,41700.000000,415.989486)}
{pt3dadd(191616.000000,159444.000000,41725.000000,415.989486)}
{pt3dadd(191652.000000,159204.000000,41750.000000,415.989486)}
{pt3dadd(191676.000000,158904.000000,41775.000000,415.989486)}
{pt3dadd(191688.000000,158652.000000,41725.000000,415.989486)}
{pt3dadd(191640.000000,158388.000000,41675.000000,415.989486)}
{pt3dadd(191604.000000,158136.000000,41675.000000,415.989486)}
{pt3dadd(191724.000000,157704.000000,41650.000000,415.989486)}
{pt3dadd(191772.000000,157440.000000,41725.000000,415.989486)}
{pt3dadd(191844.000000,157356.000000,41750.000000,346.657896)}

{create adhoc66}
{access adhoc66}
{connect adhoc66(1), adhoc65(0)}
{nseg = 1}
{strdef color color = "White"}
{pt3dclear()}
{pt3dadd(191844.000000,157356.000000,41750.000000,346.657896)}
{pt3dadd(191628.000000,157356.000000,40975.000000,67.184640)}
{pt3dadd(191640.000000,156936.000000,40300.000000,137.052954)}
{pt3dadd(191784.000000,156528.000000,39975.000000,206.921268)}
{pt3dadd(191724.000000,156060.000000,39575.000000,276.789582)}
{pt3dadd(191880.000000,155724.000000,39150.000000,346.657896)}
{pt3dadd(191904.000000,155268.000000,38775.000000,293.696271)}
{pt3dadd(191976.000000,154872.000000,38500.000000,240.734646)}
{pt3dadd(192048.000000,154464.000000,38325.000000,116.095032)}

{create adhoc67}
{access adhoc67}
{connect adhoc67(1), adhoc65(0)}
{nseg = 1}
{strdef color color = "White"}
{pt3dclear()}
{pt3dadd(191844.000000,157356.000000,41750.000000,346.657896)}
{pt3dadd(191892.000000,157152.000000,41900.000000,415.989486)}
{pt3dadd(191976.000000,156876.000000,41900.000000,372.175776)}
{pt3dadd(192108.000000,156672.000000,41925.000000,328.362066)}
{pt3dadd(192096.000000,156384.000000,42150.000000,284.548356)}
{pt3dadd(192096.000000,156168.000000,42175.000000,240.734646)}
{pt3dadd(192192.000000,155952.000000,42275.000000,240.734646)}
{pt3dadd(192336.000000,155760.000000,42350.000000,240.734646)}
{pt3dadd(192372.000000,155568.000000,42350.000000,240.734646)}
{pt3dadd(192288.000000,155304.000000,42375.000000,240.734646)}
{pt3dadd(192288.000000,155100.000000,42425.000000,284.548356)}
{pt3dadd(192300.000000,154920.000000,42475.000000,328.362066)}
{pt3dadd(192408.000000,154644.000000,42550.000000,372.175776)}
{pt3dadd(192408.000000,154488.000000,42550.000000,415.989486)}
{pt3dadd(192336.000000,154176.000000,42550.000000,398.656589)}
{pt3dadd(192324.000000,153924.000000,42575.000000,381.323691)}
{pt3dadd(192252.000000,153768.000000,42625.000000,363.990794)}
{pt3dadd(192312.000000,153600.000000,42725.000000,346.657896)}
{pt3dadd(192276.000000,153396.000000,42775.000000,363.990794)}
{pt3dadd(192240.000000,153168.000000,42850.000000,381.323691)}
{pt3dadd(192312.000000,152928.000000,42925.000000,398.656589)}
{pt3dadd(192288.000000,152604.000000,42950.000000,415.989486)}
{pt3dadd(192180.000000,152256.000000,43075.000000,362.145168)}
{pt3dadd(192336.000000,151908.000000,43325.000000,308.300850)}
{pt3dadd(192480.000000,151632.000000,43325.000000,254.456532)}
{pt3dadd(192528.000000,151416.000000,43275.000000,200.612214)}
{pt3dadd(192576.000000,151044.000000,43225.000000,275.256004)}
{pt3dadd(192540.000000,150684.000000,43325.000000,349.899795)}
{pt3dadd(192588.000000,150384.000000,43450.000000,424.543586)}
{pt3dadd(192468.000000,150072.000000,43675.000000,499.187376)}
{pt3dadd(192444.000000,149748.000000,43775.000000,461.055006)}
{pt3dadd(192540.000000,149400.000000,43900.000000,422.922636)}
{pt3dadd(192612.000000,149172.000000,43950.000000,384.790266)}
{pt3dadd(192672.000000,149004.000000,43950.000000,346.657896)}
{pt3dadd(192648.000000,148788.000000,43825.000000,352.003635)}
{pt3dadd(192564.000000,148536.000000,43800.000000,357.349374)}
{pt3dadd(192516.000000,148344.000000,43700.000000,362.695113)}
{pt3dadd(192504.000000,148188.000000,43650.000000,368.040852)}
{pt3dadd(192528.000000,147900.000000,43650.000000,362.695113)}
{pt3dadd(192516.000000,147708.000000,43700.000000,357.349374)}
{pt3dadd(192636.000000,147048.000000,44200.000000,352.003635)}
{pt3dadd(192504.000000,146820.000000,44150.000000,346.657896)}
{pt3dadd(192384.000000,146616.000000,44100.000000,288.881586)}

{create adhoc68}
{access adhoc68}
{connect adhoc68(1), adhoc67(0)}
{nseg = 1}
{strdef color color = "White"}
{pt3dclear()}
{pt3dadd(192384.000000,146616.000000,44100.000000,288.881586)}
{pt3dadd(192048.000000,146376.000000,43650.000000,167.176836)}
{pt3dadd(191976.000000,146184.000000,43550.000000,185.566288)}
{pt3dadd(191892.000000,145884.000000,43250.000000,203.955741)}
{pt3dadd(191964.000000,145680.000000,43100.000000,222.345193)}
{pt3dadd(192252.000000,145464.000000,43100.000000,240.734646)}
{pt3dadd(192468.000000,145296.000000,43100.000000,328.362066)}
{pt3dadd(192804.000000,145080.000000,42975.000000,415.989486)}
{pt3dadd(192876.000000,144780.000000,42700.000000,288.881586)}

{create adhoc69}
{access adhoc69}
{connect adhoc69(1), adhoc68(0)}
{nseg = 1}
{strdef color color = "White"}
{pt3dclear()}
{pt3dadd(192876.000000,144780.000000,42700.000000,288.881586)}
{pt3dadd(192552.000000,144924.000000,42400.000000,346.657896)}

{create adhoc70}
{access adhoc70}
{connect adhoc70(1), adhoc68(0)}
{nseg = 1}
{strdef color color = "White"}
{pt3dclear()}
{pt3dadd(192876.000000,144780.000000,42700.000000,288.881586)}
{pt3dadd(193308.000000,144720.000000,42625.000000,346.657896)}
{pt3dadd(193368.000000,144612.000000,42450.000000,310.146476)}
{pt3dadd(193512.000000,144600.000000,42075.000000,273.635055)}
{pt3dadd(193728.000000,144744.000000,41750.000000,237.123635)}
{pt3dadd(193752.000000,144888.000000,41575.000000,200.612214)}
{pt3dadd(193488.000000,145092.000000,41325.000000,167.176845)}
{pt3dadd(193284.000000,145296.000000,41275.000000,133.741476)}
{pt3dadd(193068.000000,145428.000000,41125.000000,116.095032)}

{create adhoc71}
{access adhoc71}
{connect adhoc71(1), adhoc67(0)}
{nseg = 1}
{strdef color color = "White"}
{pt3dclear()}
{pt3dadd(192384.000000,146616.000000,44100.000000,288.881586)}
{pt3dadd(192612.000000,146376.000000,44525.000000,240.734646)}
{pt3dadd(192564.000000,146004.000000,44550.000000,240.734646)}
{pt3dadd(192708.000000,145572.000000,44675.000000,240.734646)}
{pt3dadd(192708.000000,145200.000000,44750.000000,240.734646)}
{pt3dadd(192744.000000,144768.000000,44825.000000,240.734646)}
{pt3dadd(192648.000000,144324.000000,44800.000000,222.345193)}
{pt3dadd(192348.000000,143988.000000,44875.000000,203.955741)}
{pt3dadd(192120.000000,143664.000000,45150.000000,185.566288)}
{pt3dadd(192036.000000,143292.000000,45250.000000,167.176836)}
{pt3dadd(192072.000000,142992.000000,45275.000000,175.535680)}
{pt3dadd(192060.000000,142512.000000,45225.000000,183.894525)}
{pt3dadd(191976.000000,142272.000000,45275.000000,192.253370)}
{pt3dadd(191940.000000,142032.000000,45275.000000,200.612214)}
{pt3dadd(191940.000000,141732.000000,45175.000000,192.253370)}
{pt3dadd(191844.000000,141492.000000,45100.000000,183.894525)}
{pt3dadd(191808.000000,141180.000000,45025.000000,175.535680)}
{pt3dadd(191784.000000,140904.000000,44975.000000,167.176836)}
{pt3dadd(191880.000000,140580.000000,44950.000000,185.566288)}
{pt3dadd(191892.000000,140244.000000,44850.000000,203.955741)}
{pt3dadd(191832.000000,139932.000000,44825.000000,222.345193)}
{pt3dadd(191880.000000,139644.000000,44800.000000,240.734646)}
{pt3dadd(192132.000000,139308.000000,44625.000000,230.704038)}
{pt3dadd(192288.000000,138948.000000,44600.000000,220.673430)}
{pt3dadd(192516.000000,138552.000000,44300.000000,210.642822)}
{pt3dadd(193008.000000,138240.000000,43825.000000,200.612214)}
{pt3dadd(193080.000000,137880.000000,43325.000000,192.253370)}
{pt3dadd(193200.000000,137436.000000,42975.000000,183.894525)}
{pt3dadd(193332.000000,137184.000000,42950.000000,175.535680)}
{pt3dadd(193464.000000,136980.000000,42625.000000,167.176836)}
{pt3dadd(193560.000000,136800.000000,42525.000000,160.211138)}
{pt3dadd(193740.000000,136596.000000,42400.000000,153.245439)}
{pt3dadd(193800.000000,136392.000000,42150.000000,146.279741)}
{pt3dadd(193908.000000,136152.000000,42075.000000,139.314042)}
{pt3dadd(194088.000000,135936.000000,41850.000000,164.669193)}
{pt3dadd(194268.000000,135528.000000,41575.000000,190.024344)}
{pt3dadd(194220.000000,134964.000000,41275.000000,215.379495)}
{pt3dadd(194232.000000,134460.000000,41025.000000,240.734646)}
{pt3dadd(194208.000000,134208.000000,40875.000000,200.612214)}
