# Supplementary material for: Full reconstruction of large lobula plate tangential cells in Drosophila from a 3D EM dataset
Source: PLoS One. 2018 Nov 28;13(11):e0207828. doi: 10.1371/journal.pone.0207828 (PMC6261601; doi:10.1371/journal.pone.0207828)
Supplement: S1 Dataset — (ZIP) [file pone.0207828.s001.zip › Diameter hoc/VS_VSL_preliminary/Old Diameters Mar13_VS_VSL_HS/VSlike2/2_14_766_sbeyer_002.072.hoc]

/* created with nml2hocm */

{create adhoc1}
{access adhoc1}
{nseg = 1}
{strdef color color = "White"}
{pt3dclear()}
{pt3dadd(157620.000000,129516.000000,181525.000000,200.612214)}
{pt3dadd(157632.000000,129648.000000,181325.000000,240.734646)}
{pt3dadd(157704.000000,129648.000000,181125.000000,465.405624)}
{pt3dadd(157608.000000,129864.000000,180950.000000,690.076602)}
{pt3dadd(157584.000000,129996.000000,180800.000000,683.175852)}
{pt3dadd(157320.000000,130128.000000,180625.000000,676.275102)}
{pt3dadd(157260.000000,130164.000000,180425.000000,669.374352)}
{pt3dadd(157236.000000,130176.000000,180225.000000,662.473602)}
{pt3dadd(157236.000000,130080.000000,180000.000000,640.621165)}
{pt3dadd(157164.000000,130128.000000,179800.000000,618.768729)}
{pt3dadd(157104.000000,130260.000000,179625.000000,596.916293)}
{pt3dadd(156804.000000,130356.000000,179450.000000,575.063856)}
{pt3dadd(156540.000000,130404.000000,179300.000000,464.733261)}
{pt3dadd(156456.000000,130500.000000,179125.000000,354.402666)}
{pt3dadd(156468.000000,130812.000000,179050.000000,244.072071)}
{pt3dadd(156288.000000,131112.000000,178975.000000,133.741476)}
{pt3dadd(156252.000000,131376.000000,178825.000000,186.970581)}
{pt3dadd(156096.000000,131424.000000,178650.000000,240.199686)}
{pt3dadd(156036.000000,131592.000000,178450.000000,293.428791)}
{pt3dadd(156108.000000,131592.000000,178275.000000,346.657896)}
{pt3dadd(156048.000000,131628.000000,178125.000000,276.117732)}
{pt3dadd(155880.000000,131664.000000,177900.000000,205.577568)}
{pt3dadd(156288.000000,131664.000000,177800.000000,135.037404)}
{pt3dadd(156492.000000,131904.000000,177775.000000,64.497240)}
{pt3dadd(156468.000000,132072.000000,177475.000000,168.177901)}
{pt3dadd(156780.000000,132180.000000,177475.000000,271.858563)}
{pt3dadd(157296.000000,132180.000000,177475.000000,375.539224)}
{pt3dadd(157740.000000,132192.000000,177475.000000,479.219886)}
{pt3dadd(158208.000000,132204.000000,177475.000000,575.063892)}

{create adhoc2}
{access adhoc2}
{connect adhoc2(1), adhoc1(0)}
{nseg = 1}
{strdef color color = "White"}
{pt3dclear()}
{pt3dadd(158208.000000,132204.000000,177475.000000,575.063892)}
{pt3dadd(158172.000000,131904.000000,177275.000000,552.061332)}
{pt3dadd(158040.000000,131592.000000,177075.000000,579.664400)}
{pt3dadd(157896.000000,131352.000000,176900.000000,607.267467)}
{pt3dadd(157392.000000,131088.000000,176625.000000,634.870534)}
{pt3dadd(157284.000000,130872.000000,176400.000000,662.473602)}
{pt3dadd(157188.000000,130668.000000,176225.000000,646.611421)}
{pt3dadd(156888.000000,130524.000000,176100.000000,630.749241)}
{pt3dadd(156720.000000,130620.000000,176175.000000,614.887060)}
{pt3dadd(156612.000000,130584.000000,176250.000000,599.024880)}
{pt3dadd(156504.000000,130548.000000,176300.000000,569.073631)}
{pt3dadd(156384.000000,130536.000000,176225.000000,539.122383)}
{pt3dadd(156264.000000,130536.000000,176125.000000,509.171134)}
{pt3dadd(156144.000000,130596.000000,176175.000000,479.219886)}
{pt3dadd(156048.000000,130596.000000,176150.000000,459.252391)}
{pt3dadd(155940.000000,130632.000000,176075.000000,439.284897)}
{pt3dadd(155844.000000,130656.000000,176025.000000,419.317403)}
{pt3dadd(155748.000000,130608.000000,176075.000000,399.349908)}
{pt3dadd(155652.000000,130632.000000,176025.000000,405.508216)}
{pt3dadd(155532.000000,130656.000000,176000.000000,411.666525)}
{pt3dadd(155436.000000,130752.000000,176025.000000,417.824834)}
{pt3dadd(155328.000000,130716.000000,176025.000000,423.983142)}
{pt3dadd(155220.000000,130716.000000,175975.000000,404.651831)}
{pt3dadd(155124.000000,130644.000000,175925.000000,385.320519)}
{pt3dadd(155016.000000,130668.000000,175875.000000,365.989207)}
{pt3dadd(154908.000000,130632.000000,175850.000000,346.657896)}
{pt3dadd(154836.000000,130560.000000,175850.000000,332.213819)}
{pt3dadd(154740.000000,130584.000000,175800.000000,317.769741)}
{pt3dadd(154632.000000,130548.000000,175750.000000,303.325664)}
{pt3dadd(154524.000000,130572.000000,175775.000000,288.881586)}
{pt3dadd(154416.000000,130500.000000,175725.000000,288.881586)}
{pt3dadd(154296.000000,130500.000000,175725.000000,288.881586)}
{pt3dadd(154188.000000,130500.000000,175625.000000,288.881586)}
{pt3dadd(154080.000000,130488.000000,175700.000000,288.881586)}
{pt3dadd(153972.000000,130512.000000,175575.000000,288.881586)}
{pt3dadd(153876.000000,130536.000000,175625.000000,288.881586)}
{pt3dadd(153780.000000,130536.000000,175575.000000,288.881586)}
{pt3dadd(153684.000000,130524.000000,175525.000000,288.881586)}
{pt3dadd(153576.000000,130476.000000,175475.000000,288.881586)}
{pt3dadd(153468.000000,130404.000000,175400.000000,288.881586)}
{pt3dadd(153360.000000,130332.000000,175400.000000,288.881586)}
{pt3dadd(153264.000000,130296.000000,175300.000000,288.881586)}
{pt3dadd(153180.000000,130224.000000,175250.000000,251.489700)}
{pt3dadd(153096.000000,130152.000000,175300.000000,214.097814)}
{pt3dadd(153000.000000,130140.000000,175350.000000,176.705928)}
{pt3dadd(152904.000000,130200.000000,175375.000000,139.314042)}
{pt3dadd(152808.000000,130128.000000,175425.000000,129.136756)}
{pt3dadd(152688.000000,129984.000000,175450.000000,118.959471)}
{pt3dadd(152568.000000,129936.000000,175500.000000,108.782186)}
{pt3dadd(152436.000000,129972.000000,175575.000000,98.604900)}
{pt3dadd(152340.000000,129996.000000,175525.000000,107.389049)}
{pt3dadd(152256.000000,129996.000000,175550.000000,116.173197)}
{pt3dadd(152160.000000,129996.000000,175550.000000,124.957346)}
{pt3dadd(152064.000000,129960.000000,175625.000000,133.741494)}
{pt3dadd(151980.000000,129984.000000,175650.000000,183.504020)}
{pt3dadd(151872.000000,129936.000000,175625.000000,233.266545)}
{pt3dadd(151776.000000,129900.000000,175700.000000,283.029070)}
{pt3dadd(151668.000000,129888.000000,175675.000000,332.791596)}
{pt3dadd(151572.000000,129948.000000,175625.000000,332.791587)}
{pt3dadd(151440.000000,129972.000000,175600.000000,332.791578)}
{pt3dadd(151344.000000,129996.000000,175575.000000,332.791569)}
{pt3dadd(151212.000000,130020.000000,175650.000000,332.791560)}
{pt3dadd(151116.000000,130056.000000,175725.000000,316.151991)}
{pt3dadd(150996.000000,130020.000000,175675.000000,299.512422)}
{pt3dadd(150888.000000,130008.000000,175700.000000,282.872853)}
{pt3dadd(150804.000000,130008.000000,175700.000000,266.233284)}
{pt3dadd(150696.000000,129972.000000,175725.000000,245.896015)}
{pt3dadd(150588.000000,130008.000000,175800.000000,225.558747)}
{pt3dadd(150480.000000,130068.000000,175800.000000,205.221479)}
{pt3dadd(150384.000000,129972.000000,175925.000000,184.884210)}
{pt3dadd(150288.000000,129960.000000,175950.000000,221.861048)}
{pt3dadd(150180.000000,129960.000000,175975.000000,258.837885)}
{pt3dadd(150072.000000,129864.000000,176025.000000,295.814723)}
{pt3dadd(149976.000000,129864.000000,176075.000000,332.791560)}
{pt3dadd(149856.000000,129888.000000,176100.000000,353.591042)}
{pt3dadd(149748.000000,129888.000000,176050.000000,374.390523)}
{pt3dadd(149640.000000,129852.000000,176075.000000,395.190005)}
{pt3dadd(149556.000000,129840.000000,176075.000000,415.989486)}
{pt3dadd(149436.000000,129768.000000,176075.000000,431.797086)}
{pt3dadd(149328.000000,129672.000000,176025.000000,447.604686)}
{pt3dadd(149220.000000,129600.000000,176075.000000,463.412286)}
{pt3dadd(149088.000000,129552.000000,176050.000000,479.219886)}
{pt3dadd(148968.000000,129516.000000,176050.000000,503.180878)}
{pt3dadd(148860.000000,129516.000000,176000.000000,527.141871)}
{pt3dadd(148752.000000,129552.000000,176025.000000,551.102864)}
{pt3dadd(148620.000000,129540.000000,175975.000000,575.063856)}
{pt3dadd(148500.000000,129528.000000,175925.000000,581.054112)}
{pt3dadd(148404.000000,129588.000000,175925.000000,587.044368)}
{pt3dadd(148284.000000,129588.000000,175900.000000,593.034624)}
{pt3dadd(148164.000000,129612.000000,175925.000000,599.024880)}
{pt3dadd(148044.000000,129612.000000,175875.000000,574.065504)}
{pt3dadd(147924.000000,129672.000000,175825.000000,549.106128)}
{pt3dadd(147804.000000,129708.000000,175775.000000,524.146752)}
{pt3dadd(147696.000000,129708.000000,175750.000000,499.187376)}
{pt3dadd(147576.000000,129696.000000,175775.000000,422.537463)}
{pt3dadd(147456.000000,129648.000000,175800.000000,345.887550)}
{pt3dadd(147336.000000,129708.000000,175875.000000,269.237637)}
{pt3dadd(147216.000000,129732.000000,175850.000000,192.587724)}
{pt3dadd(147108.000000,129864.000000,175825.000000,177.876162)}
{pt3dadd(147000.000000,129996.000000,175800.000000,163.164600)}
{pt3dadd(146880.000000,130080.000000,175775.000000,148.453038)}
{pt3dadd(146748.000000,130104.000000,175725.000000,133.741476)}
{pt3dadd(146628.000000,130164.000000,175750.000000,116.034834)}
{pt3dadd(146532.000000,130428.000000,175675.000000,98.328192)}
{pt3dadd(146460.000000,130596.000000,175675.000000,80.621550)}
{pt3dadd(146352.000000,130752.000000,175675.000000,38.880000)}

{create adhoc3}
{access adhoc3}
{connect adhoc3(1), adhoc1(0)}
{nseg = 1}
{strdef color color = "White"}
{pt3dclear()}
{pt3dadd(158208.000000,132204.000000,177475.000000,575.063892)}
{pt3dadd(158532.000000,132444.000000,177650.000000,499.187376)}
{pt3dadd(158664.000000,132648.000000,177775.000000,449.268642)}
{pt3dadd(158640.000000,132792.000000,177975.000000,399.349908)}
{pt3dadd(158952.000000,132732.000000,178150.000000,382.710330)}
{pt3dadd(158652.000000,132948.000000,178325.000000,366.070752)}
{pt3dadd(158880.000000,133080.000000,178475.000000,349.431174)}
{pt3dadd(159036.000000,133356.000000,178475.000000,332.791596)}
{pt3dadd(159192.000000,133632.000000,178475.000000,349.431183)}
{pt3dadd(159372.000000,133980.000000,178475.000000,366.070770)}
{pt3dadd(159504.000000,134244.000000,178475.000000,382.710357)}
{pt3dadd(159624.000000,134508.000000,178475.000000,399.349944)}
{pt3dadd(159720.000000,134808.000000,178525.000000,379.382445)}
{pt3dadd(159720.000000,134940.000000,178550.000000,359.414946)}
{pt3dadd(159636.000000,135060.000000,178475.000000,339.447447)}
{pt3dadd(159612.000000,135180.000000,178525.000000,319.479948)}
{pt3dadd(159624.000000,135312.000000,178525.000000,308.941542)}
{pt3dadd(159540.000000,135444.000000,178600.000000,298.403136)}
{pt3dadd(159444.000000,135564.000000,178575.000000,287.864730)}
{pt3dadd(159384.000000,135696.000000,178525.000000,277.326324)}
{pt3dadd(159348.000000,135804.000000,178575.000000,280.215140)}
{pt3dadd(159264.000000,135912.000000,178625.000000,283.103955)}
{pt3dadd(159132.000000,136020.000000,178675.000000,285.992771)}
{pt3dadd(159012.000000,136116.000000,178800.000000,288.881586)}
{pt3dadd(158988.000000,136224.000000,178850.000000,256.783631)}
{pt3dadd(158952.000000,136320.000000,178900.000000,224.685675)}
{pt3dadd(158916.000000,136428.000000,179000.000000,192.587720)}
{pt3dadd(158880.000000,136536.000000,179050.000000,160.489764)}
{pt3dadd(158880.000000,136644.000000,179100.000000,170.520377)}
{pt3dadd(158892.000000,136752.000000,179150.000000,180.550989)}
{pt3dadd(158868.000000,136848.000000,179225.000000,190.581602)}
{pt3dadd(158868.000000,136980.000000,179225.000000,200.612214)}
{pt3dadd(158868.000000,137124.000000,179225.000000,300.215380)}
{pt3dadd(158964.000000,137508.000000,179225.000000,399.818547)}
{pt3dadd(159060.000000,137892.000000,179225.000000,499.421713)}
{pt3dadd(159060.000000,138396.000000,179225.000000,599.024880)}
{pt3dadd(159060.000000,138876.000000,179225.000000,807.004346)}
{pt3dadd(159060.000000,139308.000000,179225.000000,1014.983811)}
{pt3dadd(159132.000000,139620.000000,179225.000000,1222.963277)}
{pt3dadd(159180.000000,139968.000000,179225.000000,1430.942742)}
{pt3dadd(159180.000000,140244.000000,179225.000000,1430.942868)}

{create adhoc4}
{access adhoc4}
{connect adhoc4(1), adhoc3(0)}
{nseg = 1}
{strdef color color = "White"}
{pt3dclear()}
{pt3dadd(159180.000000,140244.000000,179225.000000,1430.942868)}
{pt3dadd(159216.000000,140268.000000,179450.000000,1373.705208)}
{pt3dadd(159156.000000,140172.000000,179675.000000,1340.813376)}
{pt3dadd(159012.000000,140052.000000,179900.000000,1307.921544)}
{pt3dadd(158916.000000,139692.000000,180150.000000,1275.029712)}
{pt3dadd(158892.000000,139464.000000,180350.000000,1242.137880)}
{pt3dadd(158616.000000,139200.000000,180525.000000,844.004466)}

{create adhoc5}
{access adhoc5}
{connect adhoc5(1), adhoc4(0)}
{nseg = 1}
{strdef color color = "White"}
{pt3dclear()}
{pt3dadd(158616.000000,139200.000000,180525.000000,844.004466)}
{pt3dadd(158472.000000,139008.000000,180525.000000,862.595802)}
{pt3dadd(158268.000000,138756.000000,180525.000000,697.099905)}
{pt3dadd(158064.000000,138504.000000,180525.000000,531.604008)}
{pt3dadd(157860.000000,138300.000000,180525.000000,366.108111)}
{pt3dadd(157656.000000,138192.000000,180525.000000,200.612214)}
{pt3dadd(157620.000000,138084.000000,180750.000000,185.287671)}
{pt3dadd(157500.000000,138072.000000,180925.000000,169.963128)}
{pt3dadd(157212.000000,137976.000000,181075.000000,154.638585)}
{pt3dadd(156936.000000,137916.000000,181300.000000,139.314042)}
{pt3dadd(156744.000000,137916.000000,181400.000000,200.612214)}

{create adhoc6}
{access adhoc6}
{connect adhoc6(1), adhoc5(0)}
{nseg = 1}
{strdef color color = "White"}
{pt3dclear()}
{pt3dadd(156744.000000,137916.000000,181400.000000,200.612214)}
{pt3dadd(156444.000000,137928.000000,181350.000000,67.184640)}

{create adhoc7}
{access adhoc7}
{connect adhoc7(1), adhoc5(0)}
{nseg = 1}
{strdef color color = "White"}
{pt3dclear()}
{pt3dadd(156744.000000,137916.000000,181400.000000,200.612214)}
{pt3dadd(156720.000000,137964.000000,181600.000000,184.884228)}
{pt3dadd(156564.000000,137904.000000,181850.000000,221.861061)}
{pt3dadd(156360.000000,137940.000000,182000.000000,258.837894)}
{pt3dadd(156156.000000,137892.000000,182175.000000,295.814727)}
{pt3dadd(155820.000000,137856.000000,182325.000000,332.791560)}
{pt3dadd(155436.000000,137892.000000,182425.000000,406.005723)}
{pt3dadd(155160.000000,137928.000000,182425.000000,479.219886)}
{pt3dadd(154872.000000,137868.000000,182675.000000,415.989486)}

{create adhoc8}
{access adhoc8}
{connect adhoc8(1), adhoc4(0)}
{nseg = 1}
{strdef color color = "White"}
{pt3dclear()}
{pt3dadd(158616.000000,139200.000000,180525.000000,844.004466)}
{pt3dadd(158688.000000,139416.000000,180725.000000,972.293328)}
{pt3dadd(158592.000000,139332.000000,180875.000000,908.927451)}
{pt3dadd(158640.000000,139164.000000,181075.000000,845.561574)}
{pt3dadd(158712.000000,139164.000000,181300.000000,782.195697)}
{pt3dadd(158736.000000,139212.000000,181475.000000,718.829820)}
{pt3dadd(158652.000000,139176.000000,181675.000000,711.641533)}
{pt3dadd(158676.000000,139224.000000,181900.000000,704.453247)}
{pt3dadd(158676.000000,139248.000000,182100.000000,697.264960)}
{pt3dadd(158616.000000,139296.000000,182250.000000,690.076674)}
{pt3dadd(158472.000000,139260.000000,182400.000000,759.084345)}
{pt3dadd(158436.000000,139248.000000,182600.000000,828.092016)}
{pt3dadd(158256.000000,139236.000000,182775.000000,690.076674)}

{create adhoc9}
{access adhoc9}
{connect adhoc9(1), adhoc3(0)}
{nseg = 1}
{strdef color color = "White"}
{pt3dclear()}
{pt3dadd(159180.000000,140244.000000,179225.000000,1430.942868)}
{pt3dadd(159264.000000,140364.000000,179125.000000,1430.942868)}
{pt3dadd(159300.000000,140508.000000,178925.000000,1491.601176)}
{pt3dadd(159360.000000,140832.000000,178700.000000,1552.259484)}
{pt3dadd(159360.000000,141036.000000,178475.000000,1612.917792)}
{pt3dadd(159396.000000,141120.000000,178300.000000,1638.971186)}
{pt3dadd(159348.000000,141132.000000,178125.000000,1665.024579)}
{pt3dadd(159444.000000,141192.000000,178000.000000,1691.077973)}
{pt3dadd(159612.000000,141108.000000,177800.000000,1717.131366)}
{pt3dadd(159696.000000,141060.000000,177600.000000,1667.650522)}
{pt3dadd(159732.000000,141240.000000,177400.000000,1618.169679)}
{pt3dadd(159828.000000,141360.000000,177200.000000,1568.688835)}
{pt3dadd(160008.000000,141480.000000,176950.000000,1519.207992)}
{pt3dadd(160176.000000,141540.000000,176750.000000,1648.446084)}

{create adhoc10}
{access adhoc10}
{connect adhoc10(1), adhoc9(0)}
{nseg = 1}
{strdef color color = "White"}
{pt3dclear()}
{pt3dadd(160176.000000,141540.000000,176750.000000,1648.446084)}
{pt3dadd(159912.000000,141336.000000,176750.000000,1788.678450)}
{pt3dadd(159684.000000,141144.000000,176750.000000,1441.346306)}
{pt3dadd(159396.000000,140928.000000,176750.000000,1094.014161)}
{pt3dadd(159072.000000,140760.000000,176750.000000,746.682017)}
{pt3dadd(158664.000000,140544.000000,176750.000000,399.349872)}
{pt3dadd(158208.000000,140352.000000,176750.000000,349.665458)}
{pt3dadd(157800.000000,140220.000000,176750.000000,299.981043)}
{pt3dadd(157452.000000,140040.000000,176750.000000,250.296629)}
{pt3dadd(157332.000000,140016.000000,176675.000000,200.612214)}
{pt3dadd(157224.000000,140040.000000,176675.000000,208.235480)}
{pt3dadd(157116.000000,140040.000000,176700.000000,215.858745)}
{pt3dadd(157008.000000,140064.000000,176725.000000,223.482010)}
{pt3dadd(156888.000000,140004.000000,176825.000000,231.105276)}
{pt3dadd(156780.000000,139992.000000,176800.000000,231.105276)}
{pt3dadd(156684.000000,139980.000000,176800.000000,231.105276)}
{pt3dadd(156588.000000,139968.000000,176850.000000,231.105276)}
{pt3dadd(156492.000000,140016.000000,176850.000000,231.105276)}
{pt3dadd(156408.000000,140040.000000,176875.000000,269.172927)}
{pt3dadd(156312.000000,140112.000000,176900.000000,307.240578)}
{pt3dadd(156228.000000,140112.000000,176925.000000,345.308229)}
{pt3dadd(156144.000000,140112.000000,176950.000000,383.375880)}
{pt3dadd(156060.000000,140160.000000,177025.000000,421.713495)}
{pt3dadd(155976.000000,140160.000000,177050.000000,460.051110)}
{pt3dadd(155892.000000,140160.000000,177175.000000,499.187376)}

{create adhoc11}
{access adhoc11}
{connect adhoc11(1), adhoc10(0)}
{nseg = 1}
{strdef color color = "White"}
{pt3dclear()}
{pt3dadd(155892.000000,140160.000000,177175.000000,499.187376)}
{pt3dadd(155652.000000,140100.000000,177175.000000,415.989486)}
{pt3dadd(155364.000000,140040.000000,177175.000000,381.323687)}
{pt3dadd(155052.000000,139968.000000,177175.000000,346.657887)}
{pt3dadd(154704.000000,139956.000000,177175.000000,311.992088)}
{pt3dadd(154500.000000,139812.000000,177175.000000,277.326288)}
{pt3dadd(154380.000000,139728.000000,177025.000000,287.864703)}
{pt3dadd(154284.000000,139608.000000,176975.000000,298.403118)}
{pt3dadd(154176.000000,139524.000000,176925.000000,308.941533)}
{pt3dadd(154068.000000,139464.000000,176925.000000,319.479948)}
{pt3dadd(153972.000000,139452.000000,176875.000000,306.168282)}
{pt3dadd(153876.000000,139416.000000,176900.000000,292.856616)}
{pt3dadd(153780.000000,139356.000000,176875.000000,279.544950)}
{pt3dadd(153684.000000,139296.000000,176825.000000,266.233284)}
{pt3dadd(153588.000000,139260.000000,176850.000000,259.858625)}
{pt3dadd(153504.000000,139248.000000,176875.000000,253.483965)}
{pt3dadd(153420.000000,139248.000000,176875.000000,247.109306)}
{pt3dadd(153312.000000,139164.000000,176850.000000,240.734646)}
{pt3dadd(153204.000000,139128.000000,176875.000000,228.697915)}
{pt3dadd(153084.000000,139116.000000,176825.000000,216.661185)}
{pt3dadd(152988.000000,139104.000000,176925.000000,204.624455)}
{pt3dadd(152892.000000,139092.000000,176875.000000,192.587724)}
{pt3dadd(152772.000000,139092.000000,176900.000000,186.235002)}
{pt3dadd(152652.000000,139116.000000,176900.000000,179.882280)}
{pt3dadd(152532.000000,139116.000000,176850.000000,173.529558)}
{pt3dadd(152436.000000,139140.000000,176850.000000,167.176836)}
{pt3dadd(152340.000000,139212.000000,176950.000000,172.491863)}
{pt3dadd(152220.000000,139212.000000,176950.000000,177.806889)}
{pt3dadd(152112.000000,139176.000000,177000.000000,183.121916)}
{pt3dadd(151992.000000,139176.000000,176975.000000,188.436942)}
{pt3dadd(151884.000000,139224.000000,177025.000000,224.525606)}
{pt3dadd(151764.000000,139224.000000,176975.000000,260.614269)}
{pt3dadd(151632.000000,139224.000000,177025.000000,296.702933)}
{pt3dadd(151512.000000,139224.000000,177050.000000,332.791596)}
{pt3dadd(151392.000000,139296.000000,177325.000000,369.398677)}
{pt3dadd(151284.000000,139380.000000,177300.000000,406.005759)}
{pt3dadd(151164.000000,139428.000000,177325.000000,442.612840)}
{pt3dadd(151044.000000,139368.000000,177275.000000,479.219922)}
{pt3dadd(150912.000000,139392.000000,177325.000000,486.609903)}
{pt3dadd(150804.000000,139440.000000,177375.000000,493.999884)}
{pt3dadd(150684.000000,139404.000000,177425.000000,501.389865)}
{pt3dadd(150576.000000,139344.000000,177400.000000,508.779846)}
{pt3dadd(150480.000000,139332.000000,177425.000000,525.350848)}
{pt3dadd(150360.000000,139272.000000,177350.000000,541.921851)}
{pt3dadd(150252.000000,139212.000000,177250.000000,558.492854)}
{pt3dadd(150156.000000,139212.000000,177250.000000,575.063856)}
{pt3dadd(150036.000000,139152.000000,177250.000000,569.313225)}
{pt3dadd(149928.000000,139092.000000,177225.000000,563.562594)}
{pt3dadd(149820.000000,139032.000000,177250.000000,557.811963)}
{pt3dadd(149712.000000,139056.000000,177225.000000,552.061332)}
{pt3dadd(149616.000000,138996.000000,177175.000000,538.842843)}
{pt3dadd(149496.000000,138960.000000,177200.000000,525.624354)}
{pt3dadd(149388.000000,138924.000000,177225.000000,512.405865)}
{pt3dadd(149256.000000,138864.000000,177250.000000,499.187376)}
{pt3dadd(149112.000000,138828.000000,177200.000000,457.588431)}
{pt3dadd(148968.000000,138876.000000,177025.000000,415.989486)}
{pt3dadd(148860.000000,138780.000000,176875.000000,374.390541)}
{pt3dadd(148764.000000,138696.000000,176700.000000,332.791596)}
{pt3dadd(148656.000000,138684.000000,176600.000000,310.836591)}
{pt3dadd(148416.000000,138600.000000,176375.000000,288.881586)}
{pt3dadd(148320.000000,138528.000000,176175.000000,240.734646)}

{create adhoc12}
{access adhoc12}
{connect adhoc12(1), adhoc11(0)}
{nseg = 1}
{strdef color color = "White"}
{pt3dclear()}
{pt3dadd(148320.000000,138528.000000,176175.000000,240.734646)}
{pt3dadd(148488.000000,138828.000000,176025.000000,167.176836)}
{pt3dadd(148596.000000,138912.000000,175900.000000,250.179471)}
{pt3dadd(148668.000000,138936.000000,175725.000000,333.182106)}
{pt3dadd(148668.000000,138852.000000,175550.000000,416.184741)}
{pt3dadd(148632.000000,138900.000000,175375.000000,499.187376)}
{pt3dadd(148764.000000,138816.000000,175150.000000,429.085446)}
{pt3dadd(148788.000000,138744.000000,174975.000000,358.983516)}
{pt3dadd(148860.000000,138876.000000,174825.000000,288.881586)}
{pt3dadd(148968.000000,138792.000000,174675.000000,277.326378)}

{create adhoc13}
{access adhoc13}
{connect adhoc13(1), adhoc12(0)}
{nseg = 1}
{strdef color color = "White"}
{pt3dclear()}
{pt3dadd(148968.000000,138792.000000,174675.000000,277.326378)}
{pt3dadd(148704.000000,138552.000000,174675.000000,200.612214)}
{pt3dadd(148692.000000,138372.000000,174575.000000,169.808333)}
{pt3dadd(149052.000000,138240.000000,174425.000000,139.004451)}
{pt3dadd(149508.000000,138060.000000,174275.000000,108.200569)}
{pt3dadd(149532.000000,138012.000000,174125.000000,77.396688)}
{pt3dadd(149616.000000,137964.000000,173925.000000,44.789760)}

{create adhoc14}
{access adhoc14}
{connect adhoc14(1), adhoc12(0)}
{nseg = 1}
{strdef color color = "White"}
{pt3dclear()}
{pt3dadd(148968.000000,138792.000000,174675.000000,277.326378)}
{pt3dadd(149220.000000,138900.000000,174500.000000,288.881586)}
{pt3dadd(149496.000000,138732.000000,174375.000000,167.176836)}
{pt3dadd(149676.000000,138708.000000,174250.000000,133.741476)}

{create adhoc15}
{access adhoc15}
{connect adhoc15(1), adhoc11(0)}
{nseg = 1}
{strdef color color = "White"}
{pt3dclear()}
{pt3dadd(148320.000000,138528.000000,176175.000000,240.734646)}
{pt3dadd(148032.000000,138684.000000,176025.000000,231.105276)}
{pt3dadd(147600.000000,138840.000000,175900.000000,388.977908)}
{pt3dadd(147216.000000,138924.000000,175800.000000,546.850539)}
{pt3dadd(146952.000000,138888.000000,175650.000000,704.723171)}
{pt3dadd(146748.000000,138900.000000,175475.000000,862.595802)}
{pt3dadd(146604.000000,138936.000000,175275.000000,819.466020)}
{pt3dadd(146436.000000,138936.000000,175100.000000,776.336238)}
{pt3dadd(146340.000000,138888.000000,174900.000000,733.206456)}
{pt3dadd(146292.000000,138816.000000,174700.000000,690.076674)}
{pt3dadd(146256.000000,138780.000000,174525.000000,737.350312)}
{pt3dadd(146952.000000,138780.000000,174300.000000,784.623951)}
{pt3dadd(147156.000000,138780.000000,174150.000000,831.897589)}
{pt3dadd(147312.000000,138900.000000,173950.000000,879.171228)}
{pt3dadd(147264.000000,138792.000000,173750.000000,993.710430)}

{create adhoc16}
{access adhoc16}
{connect adhoc16(1), adhoc15(0)}
{nseg = 1}
{strdef color color = "White"}
{pt3dclear()}
{pt3dadd(147264.000000,138792.000000,173750.000000,993.710430)}
{pt3dadd(147252.000000,138756.000000,173575.000000,915.803424)}
{pt3dadd(147276.000000,138840.000000,173450.000000,993.710286)}

{create adhoc17}
{access adhoc17}
{connect adhoc17(1), adhoc16(0)}
{nseg = 1}
{strdef color color = "White"}
{pt3dclear()}
{pt3dadd(147276.000000,138840.000000,173450.000000,993.710286)}
{pt3dadd(147444.000000,139368.000000,173325.000000,599.024880)}
{pt3dadd(147264.000000,139764.000000,173200.000000,499.421713)}
{pt3dadd(147288.000000,140088.000000,172975.000000,399.818547)}
{pt3dadd(147156.000000,140376.000000,172825.000000,300.215380)}
{pt3dadd(147024.000000,140568.000000,172700.000000,200.612214)}
{pt3dadd(146976.000000,140688.000000,172525.000000,220.673430)}
{pt3dadd(146844.000000,140808.000000,172350.000000,240.734646)}
{pt3dadd(146748.000000,140928.000000,172425.000000,231.105276)}

{create adhoc18}
{access adhoc18}
{connect adhoc18(1), adhoc16(0)}
{nseg = 1}
{strdef color color = "White"}
{pt3dclear()}
{pt3dadd(147276.000000,138840.000000,173450.000000,993.710286)}
{pt3dadd(147180.000000,138504.000000,173375.000000,844.004466)}
{pt3dadd(146940.000000,138204.000000,173300.000000,716.201240)}
{pt3dadd(146640.000000,137988.000000,173175.000000,588.398013)}
{pt3dadd(146628.000000,137976.000000,173025.000000,460.594787)}
{pt3dadd(146652.000000,137832.000000,172900.000000,332.791560)}
{pt3dadd(146580.000000,137724.000000,172725.000000,415.212053)}
{pt3dadd(146532.000000,137676.000000,172575.000000,497.632545)}
{pt3dadd(146484.000000,137700.000000,172400.000000,580.053038)}
{pt3dadd(146544.000000,137724.000000,172225.000000,662.473530)}
{pt3dadd(146700.000000,137688.000000,172025.000000,669.374316)}
{pt3dadd(147084.000000,137748.000000,171900.000000,676.275102)}
{pt3dadd(147480.000000,137832.000000,171675.000000,683.175888)}
{pt3dadd(147612.000000,137784.000000,171500.000000,690.076674)}
{pt3dadd(147648.000000,137688.000000,171300.000000,704.453247)}
{pt3dadd(147672.000000,137676.000000,171100.000000,718.829820)}
{pt3dadd(147708.000000,137664.000000,170900.000000,690.076602)}

{create adhoc19}
{access adhoc19}
{connect adhoc19(1), adhoc18(0)}
{nseg = 1}
{strdef color color = "White"}
{pt3dclear()}
{pt3dadd(147708.000000,137664.000000,170900.000000,690.076602)}
{pt3dadd(148164.000000,137628.000000,170900.000000,599.024880)}
{pt3dadd(148344.000000,137520.000000,171100.000000,569.073631)}
{pt3dadd(148500.000000,137424.000000,171075.000000,539.122383)}
{pt3dadd(148656.000000,137448.000000,171150.000000,509.171134)}
{pt3dadd(148812.000000,137532.000000,171225.000000,479.219886)}
{pt3dadd(148980.000000,137652.000000,171300.000000,332.791596)}
{pt3dadd(149112.000000,137688.000000,171450.000000,192.587706)}

{create adhoc20}
{access adhoc20}
{connect adhoc20(1), adhoc18(0)}
{nseg = 1}
{strdef color color = "White"}
{pt3dclear()}
{pt3dadd(147708.000000,137664.000000,170900.000000,690.076602)}
{pt3dadd(147036.000000,137820.000000,170850.000000,862.595802)}
{pt3dadd(146904.000000,137844.000000,170700.000000,719.167248)}
{pt3dadd(147060.000000,137832.000000,170500.000000,575.738694)}
{pt3dadd(147192.000000,138000.000000,170300.000000,432.310140)}
{pt3dadd(147276.000000,137856.000000,170125.000000,288.881586)}
{pt3dadd(147144.000000,137844.000000,169975.000000,214.097814)}
{pt3dadd(147168.000000,137640.000000,169675.000000,139.314042)}
{pt3dadd(147204.000000,137700.000000,169525.000000,111.451230)}

{create adhoc21}
{access adhoc21}
{connect adhoc21(1), adhoc15(0)}
{nseg = 1}
{strdef color color = "White"}
{pt3dclear()}
{pt3dadd(147264.000000,138792.000000,173750.000000,993.710430)}
{pt3dadd(147120.000000,138480.000000,173750.000000,993.710358)}
{pt3dadd(146904.000000,138132.000000,173750.000000,769.469233)}
{pt3dadd(146748.000000,137760.000000,173750.000000,545.228109)}
{pt3dadd(146556.000000,137556.000000,173750.000000,320.986985)}
{pt3dadd(146496.000000,137220.000000,173700.000000,96.745860)}
{pt3dadd(146508.000000,137004.000000,173650.000000,55.987200)}
{pt3dadd(146460.000000,136752.000000,173800.000000,55.987200)}

{create adhoc22}
{access adhoc22}
{connect adhoc22(1), adhoc10(0)}
{nseg = 1}
{strdef color color = "White"}
{pt3dclear()}
{pt3dadd(155892.000000,140160.000000,177175.000000,499.187376)}
{pt3dadd(155808.000000,140244.000000,177375.000000,415.989486)}
{pt3dadd(155748.000000,140232.000000,177575.000000,353.319282)}
{pt3dadd(155664.000000,140196.000000,177800.000000,415.989486)}

{create adhoc23}
{access adhoc23}
{connect adhoc23(1), adhoc9(0)}
{nseg = 1}
{strdef color color = "White"}
{pt3dclear()}
{pt3dadd(160176.000000,141540.000000,176750.000000,1648.446084)}
{pt3dadd(160176.000000,141768.000000,176525.000000,1788.678450)}
{pt3dadd(160320.000000,141996.000000,176300.000000,1714.150188)}
{pt3dadd(160260.000000,142224.000000,176025.000000,1639.621926)}
{pt3dadd(160296.000000,142488.000000,175825.000000,1565.093664)}
{pt3dadd(160296.000000,142608.000000,175600.000000,1490.565402)}
{pt3dadd(160248.000000,142788.000000,175325.000000,1475.659769)}
{pt3dadd(160224.000000,142992.000000,175075.000000,1460.754135)}
{pt3dadd(160224.000000,143304.000000,174825.000000,1445.848502)}
{pt3dadd(160308.000000,143532.000000,174575.000000,1430.942868)}
{pt3dadd(161112.000000,143760.000000,174350.000000,1321.634740)}
{pt3dadd(161196.000000,143940.000000,174100.000000,1212.326613)}
{pt3dadd(161196.000000,144036.000000,173875.000000,1103.018486)}
{pt3dadd(161148.000000,144156.000000,173575.000000,993.710358)}
{pt3dadd(161124.000000,144384.000000,173275.000000,993.710358)}

{create adhoc24}
{access adhoc24}
{connect adhoc24(1), adhoc23(0)}
{nseg = 1}
{strdef color color = "White"}
{pt3dclear()}
{pt3dadd(161124.000000,144384.000000,173275.000000,993.710358)}
{pt3dadd(160992.000000,144084.000000,173275.000000,1098.964116)}
{pt3dadd(160848.000000,143772.000000,173275.000000,896.443484)}
{pt3dadd(160728.000000,143460.000000,173275.000000,693.922851)}
{pt3dadd(160608.000000,143112.000000,173275.000000,491.402219)}
{pt3dadd(160488.000000,142716.000000,173275.000000,288.881586)}
{pt3dadd(160368.000000,142308.000000,173275.000000,274.437509)}
{pt3dadd(160284.000000,141984.000000,173275.000000,259.993431)}
{pt3dadd(160212.000000,141660.000000,173275.000000,245.549354)}
{pt3dadd(160080.000000,141540.000000,173275.000000,231.105276)}
{pt3dadd(160080.000000,141408.000000,173125.000000,245.549354)}
{pt3dadd(160104.000000,141396.000000,172975.000000,259.993431)}
{pt3dadd(160104.000000,141132.000000,172825.000000,274.437509)}
{pt3dadd(159960.000000,140952.000000,172700.000000,288.881586)}
{pt3dadd(160044.000000,140808.000000,172550.000000,231.286068)}
{pt3dadd(160020.000000,140916.000000,172375.000000,173.690550)}
{pt3dadd(159852.000000,141216.000000,172200.000000,116.095032)}
{pt3dadd(159756.000000,141516.000000,172075.000000,53.747712)}

{create adhoc25}
{access adhoc25}
{connect adhoc25(1), adhoc24(0)}
{nseg = 1}
{strdef color color = "White"}
{pt3dclear()}
{pt3dadd(159756.000000,141516.000000,172075.000000,53.747712)}
{pt3dadd(159492.000000,141492.000000,172000.000000,80.621550)}
{pt3dadd(159396.000000,141612.000000,171850.000000,73.903095)}
{pt3dadd(159516.000000,141900.000000,171700.000000,67.184640)}
{pt3dadd(159636.000000,142128.000000,171600.000000,32.400000)}

{create adhoc26}
{access adhoc26}
{connect adhoc26(1), adhoc24(0)}
{nseg = 1}
{strdef color color = "White"}
{pt3dclear()}
{pt3dadd(159756.000000,141516.000000,172075.000000,53.747712)}
{pt3dadd(159804.000000,141912.000000,171975.000000,46.656000)}

{create adhoc27}
{access adhoc27}
{connect adhoc27(1), adhoc23(0)}
{nseg = 1}
{strdef color color = "White"}
{pt3dclear()}
{pt3dadd(161124.000000,144384.000000,173275.000000,993.710358)}
{pt3dadd(161112.000000,144780.000000,173025.000000,1098.964116)}
{pt3dadd(161004.000000,145044.000000,172800.000000,1050.630042)}
{pt3dadd(160812.000000,145272.000000,172525.000000,1002.295968)}
{pt3dadd(160680.000000,145476.000000,172300.000000,953.961894)}
{pt3dadd(160680.000000,145800.000000,172075.000000,963.898992)}
{pt3dadd(160632.000000,146148.000000,171775.000000,973.836090)}
{pt3dadd(160488.000000,146352.000000,171550.000000,983.773188)}
{pt3dadd(160332.000000,146616.000000,171325.000000,993.710286)}
{pt3dadd(160248.000000,146784.000000,171075.000000,960.931665)}
{pt3dadd(160224.000000,146988.000000,170850.000000,928.153044)}
{pt3dadd(160176.000000,147168.000000,170625.000000,895.374423)}
{pt3dadd(160164.000000,147408.000000,170400.000000,862.595802)}
{pt3dadd(160020.000000,147648.000000,170175.000000,746.784329)}
{pt3dadd(159948.000000,147876.000000,169925.000000,630.972855)}
{pt3dadd(159732.000000,148248.000000,169650.000000,515.161381)}
{pt3dadd(159660.000000,148476.000000,169450.000000,399.349908)}
{pt3dadd(159360.000000,148908.000000,169250.000000,208.674954)}
{pt3dadd(159276.000000,149388.000000,169025.000000,18.000000)}
{pt3dadd(159132.000000,149460.000000,168775.000000,440.297901)}
{pt3dadd(159048.000000,149508.000000,168575.000000,862.595802)}
{pt3dadd(158820.000000,149592.000000,168375.000000,862.595802)}
{pt3dadd(158724.000000,149688.000000,168225.000000,862.595802)}
{pt3dadd(158640.000000,149796.000000,167975.000000,862.595802)}
{pt3dadd(158400.000000,149928.000000,167725.000000,862.595802)}
{pt3dadd(158112.000000,150012.000000,167525.000000,771.743696)}
{pt3dadd(157992.000000,150024.000000,167325.000000,680.891589)}
{pt3dadd(157764.000000,150180.000000,167100.000000,590.039483)}
{pt3dadd(157452.000000,150264.000000,166825.000000,499.187376)}
{pt3dadd(157452.000000,150708.000000,166600.000000,524.146752)}
{pt3dadd(157416.000000,151188.000000,166400.000000,549.106128)}
{pt3dadd(157248.000000,151524.000000,166200.000000,574.065504)}
{pt3dadd(157140.000000,151752.000000,166000.000000,599.024880)}
{pt3dadd(156876.000000,151920.000000,165775.000000,621.787810)}
{pt3dadd(156708.000000,152124.000000,165525.000000,644.550741)}
{pt3dadd(156480.000000,152376.000000,165300.000000,667.313671)}
{pt3dadd(156528.000000,152568.000000,165075.000000,690.076602)}
{pt3dadd(156432.000000,152796.000000,164875.000000,661.323416)}
{pt3dadd(156252.000000,153048.000000,164700.000000,632.570229)}
{pt3dadd(156072.000000,153204.000000,164475.000000,603.817043)}
{pt3dadd(156228.000000,153396.000000,164250.000000,575.063856)}
{pt3dadd(156228.000000,153612.000000,164025.000000,575.063856)}
{pt3dadd(155904.000000,153864.000000,163850.000000,575.063856)}
{pt3dadd(155904.000000,154056.000000,163650.000000,575.063856)}
{pt3dadd(155736.000000,154140.000000,163425.000000,575.063856)}
{pt3dadd(155760.000000,154356.000000,163125.000000,603.817043)}
{pt3dadd(155592.000000,154608.000000,162900.000000,632.570229)}
{pt3dadd(155388.000000,154836.000000,162650.000000,661.323416)}
{pt3dadd(155256.000000,155112.000000,162425.000000,690.076602)}
{pt3dadd(155316.000000,155412.000000,162175.000000,697.264906)}
{pt3dadd(155268.000000,155640.000000,162000.000000,704.453211)}
{pt3dadd(155184.000000,155772.000000,161775.000000,711.641515)}
{pt3dadd(155100.000000,155856.000000,161550.000000,718.829820)}
{pt3dadd(155040.000000,156012.000000,161325.000000,688.878585)}
{pt3dadd(154980.000000,156144.000000,161100.000000,658.927350)}
{pt3dadd(154884.000000,156312.000000,160875.000000,628.976115)}
{pt3dadd(154740.000000,156540.000000,160675.000000,599.024880)}
{pt3dadd(154380.000000,156732.000000,160475.000000,628.976115)}
{pt3dadd(154488.000000,156792.000000,160250.000000,658.927350)}
{pt3dadd(154680.000000,157212.000000,160025.000000,688.878585)}
{pt3dadd(154704.000000,157404.000000,159775.000000,718.829820)}
{pt3dadd(154536.000000,157536.000000,159550.000000,797.901102)}
{pt3dadd(154752.000000,157680.000000,159325.000000,876.972384)}
{pt3dadd(154884.000000,157800.000000,159075.000000,956.043666)}
{pt3dadd(155136.000000,157908.000000,158850.000000,1035.114948)}
{pt3dadd(155472.000000,158100.000000,158625.000000,956.043666)}
{pt3dadd(155688.000000,158208.000000,158375.000000,876.972384)}
{pt3dadd(155592.000000,158280.000000,158100.000000,797.901102)}
{pt3dadd(155508.000000,158436.000000,157875.000000,718.829820)}
{pt3dadd(155388.000000,158424.000000,157525.000000,718.829820)}
{pt3dadd(155244.000000,158580.000000,157250.000000,718.829820)}
{pt3dadd(155208.000000,158688.000000,156950.000000,718.829820)}
{pt3dadd(154836.000000,158760.000000,156700.000000,718.829820)}
{pt3dadd(154824.000000,159024.000000,156500.000000,746.145369)}
{pt3dadd(154632.000000,159324.000000,156250.000000,773.460918)}
{pt3dadd(154488.000000,159660.000000,156000.000000,800.776467)}
{pt3dadd(154488.000000,159744.000000,155750.000000,828.092016)}
{pt3dadd(154512.000000,159960.000000,155500.000000,836.717962)}
{pt3dadd(154428.000000,160344.000000,155300.000000,845.343909)}
{pt3dadd(154428.000000,160512.000000,155075.000000,853.969856)}
{pt3dadd(154476.000000,160764.000000,154825.000000,862.595802)}
{pt3dadd(154548.000000,161016.000000,154600.000000,853.969838)}
{pt3dadd(154680.000000,160896.000000,154375.000000,845.343873)}
{pt3dadd(154812.000000,160920.000000,154150.000000,836.717909)}
{pt3dadd(154632.000000,161448.000000,153925.000000,828.091944)}
{pt3dadd(154716.000000,161700.000000,153700.000000,836.717909)}
{pt3dadd(154824.000000,161772.000000,153425.000000,845.343873)}
{pt3dadd(154812.000000,161772.000000,153150.000000,853.969838)}
{pt3dadd(154716.000000,161988.000000,152950.000000,862.595802)}
{pt3dadd(154788.000000,162036.000000,152725.000000,845.688929)}
{pt3dadd(154692.000000,162372.000000,152500.000000,828.782055)}
{pt3dadd(154716.000000,162360.000000,152300.000000,811.875182)}
{pt3dadd(154704.000000,162468.000000,152075.000000,794.968308)}
{pt3dadd(154752.000000,162624.000000,151875.000000,775.933686)}
{pt3dadd(154944.000000,162624.000000,151650.000000,756.899064)}
{pt3dadd(155100.000000,162708.000000,151425.000000,737.864442)}
{pt3dadd(154956.000000,162840.000000,151150.000000,718.829820)}
{pt3dadd(154956.000000,162828.000000,150925.000000,663.919209)}
{pt3dadd(155004.000000,163272.000000,150700.000000,609.008598)}
{pt3dadd(154464.000000,163212.000000,150575.000000,554.097987)}
{pt3dadd(155124.000000,163596.000000,149875.000000,499.187376)}
{pt3dadd(154944.000000,163824.000000,149625.000000,478.387903)}
{pt3dadd(154884.000000,163896.000000,149350.000000,457.588431)}
{pt3dadd(154944.000000,163884.000000,149150.000000,436.788958)}
{pt3dadd(154908.000000,163968.000000,148875.000000,415.989486)}
{pt3dadd(155160.000000,164304.000000,148600.000000,398.656589)}
{pt3dadd(155232.000000,164700.000000,148350.000000,381.323691)}
{pt3dadd(155316.000000,164892.000000,148125.000000,363.990794)}
{pt3dadd(155544.000000,165108.000000,147875.000000,346.657896)}
{pt3dadd(155364.000000,165240.000000,147600.000000,363.990794)}
{pt3dadd(155496.000000,165672.000000,147300.000000,381.323691)}
{pt3dadd(155604.000000,165804.000000,147075.000000,398.656589)}
{pt3dadd(155472.000000,165936.000000,146800.000000,415.989486)}
{pt3dadd(155604.000000,166140.000000,146550.000000,436.788958)}
{pt3dadd(155784.000000,166440.000000,146300.000000,457.588431)}
{pt3dadd(156072.000000,166536.000000,146025.000000,478.387903)}
{pt3dadd(156240.000000,166692.000000,145775.000000,499.187376)}
{pt3dadd(156240.000000,166932.000000,145500.000000,554.097987)}
{pt3dadd(156372.000000,166968.000000,145225.000000,609.008598)}
{pt3dadd(156540.000000,167100.000000,144950.000000,663.919209)}
{pt3dadd(156576.000000,167232.000000,144675.000000,718.829820)}
{pt3dadd(156648.000000,167604.000000,144475.000000,625.786839)}
{pt3dadd(156816.000000,167784.000000,144250.000000,532.743858)}
{pt3dadd(157104.000000,168036.000000,144025.000000,439.700877)}
{pt3dadd(157356.000000,168336.000000,143825.000000,346.657896)}
{pt3dadd(157632.000000,168648.000000,143600.000000,409.749642)}
{pt3dadd(157884.000000,168804.000000,143375.000000,472.841388)}
{pt3dadd(157824.000000,168984.000000,143150.000000,535.933134)}
{pt3dadd(158040.000000,169116.000000,142950.000000,599.024880)}
{pt3dadd(158220.000000,169356.000000,142700.000000,664.917611)}
{pt3dadd(158508.000000,169512.000000,142450.000000,730.810341)}
{pt3dadd(158532.000000,169692.000000,142200.000000,796.703072)}
{pt3dadd(158580.000000,169848.000000,142000.000000,862.595802)}
{pt3dadd(158544.000000,169920.000000,141800.000000,862.595802)}
{pt3dadd(158712.000000,169992.000000,141550.000000,862.595802)}
{pt3dadd(158784.000000,170064.000000,141300.000000,862.595802)}
{pt3dadd(158880.000000,170148.000000,141050.000000,862.595802)}
{pt3dadd(158916.000000,170220.000000,140800.000000,826.654307)}
{pt3dadd(158952.000000,170268.000000,140550.000000,790.712811)}
{pt3dadd(159036.000000,170400.000000,140325.000000,754.771316)}
{pt3dadd(159096.000000,170640.000000,140125.000000,718.829820)}
{pt3dadd(159228.000000,170976.000000,139900.000000,594.587632)}
{pt3dadd(159300.000000,171396.000000,139700.000000,470.345445)}
{pt3dadd(159432.000000,171732.000000,139500.000000,346.103257)}
{pt3dadd(159624.000000,172104.000000,139275.000000,221.861070)}
{pt3dadd(159648.000000,172500.000000,139000.000000,238.616199)}
{pt3dadd(159696.000000,172788.000000,138775.000000,255.371328)}
{pt3dadd(159744.000000,172992.000000,138575.000000,272.126457)}
{pt3dadd(159792.000000,173148.000000,138375.000000,288.881586)}
{pt3dadd(159408.000000,173484.000000,138150.000000,360.427153)}
{pt3dadd(158868.000000,173652.000000,137950.000000,431.972721)}
{pt3dadd(159024.000000,173724.000000,137750.000000,503.518289)}
{pt3dadd(159072.000000,173976.000000,137525.000000,575.063856)}
{pt3dadd(159036.000000,174144.000000,137300.000000,575.063856)}
{pt3dadd(159120.000000,174360.000000,137050.000000,575.063856)}
{pt3dadd(159204.000000,174444.000000,136825.000000,575.063856)}
{pt3dadd(159156.000000,174624.000000,136625.000000,575.063856)}
{pt3dadd(159336.000000,174672.000000,136425.000000,581.054112)}
{pt3dadd(159432.000000,174744.000000,136200.000000,587.044368)}
{pt3dadd(159588.000000,174864.000000,135975.000000,593.034624)}
{pt3dadd(159708.000000,174984.000000,135850.000000,599.024880)}
{pt3dadd(159936.000000,175080.000000,135575.000000,574.065504)}
{pt3dadd(160092.000000,175128.000000,135375.000000,549.106128)}
{pt3dadd(160380.000000,175284.000000,135125.000000,524.146752)}
{pt3dadd(160632.000000,175572.000000,134950.000000,499.187376)}
{pt3dadd(160800.000000,175728.000000,134750.000000,518.156496)}
{pt3dadd(160968.000000,175980.000000,134550.000000,537.125616)}
{pt3dadd(161208.000000,176352.000000,134325.000000,556.094736)}
{pt3dadd(161292.000000,176436.000000,134100.000000,575.063856)}
{pt3dadd(161556.000000,176700.000000,133925.000000,569.313225)}
{pt3dadd(161628.000000,176736.000000,133725.000000,563.562594)}
{pt3dadd(161724.000000,176808.000000,133500.000000,557.811963)}
{pt3dadd(162024.000000,177024.000000,133300.000000,552.061332)}
{pt3dadd(162156.000000,177324.000000,133075.000000,483.377585)}
{pt3dadd(162240.000000,177660.000000,132850.000000,414.693837)}
{pt3dadd(162504.000000,177900.000000,132600.000000,346.010089)}
{pt3dadd(163020.000000,178152.000000,132375.000000,277.326342)}
{pt3dadd(163176.000000,178620.000000,132200.000000,311.992128)}
{pt3dadd(163320.000000,179148.000000,132050.000000,346.657914)}
{pt3dadd(163680.000000,179520.000000,131825.000000,381.323700)}
{pt3dadd(163728.000000,179940.000000,131575.000000,415.989486)}
{pt3dadd(163728.000000,180408.000000,131425.000000,384.212511)}
{pt3dadd(164124.000000,181308.000000,131200.000000,352.435536)}
{pt3dadd(164484.000000,181908.000000,130975.000000,320.658561)}
{pt3dadd(164904.000000,182388.000000,130725.000000,288.881586)}
{pt3dadd(165408.000000,182940.000000,130625.000000,303.325664)}
{pt3dadd(165864.000000,183372.000000,130400.000000,317.769741)}
{pt3dadd(166476.000000,184152.000000,130175.000000,332.213819)}
{pt3dadd(167064.000000,184836.000000,129900.000000,346.657896)}
{pt3dadd(167316.000000,184956.000000,129650.000000,346.657896)}
{pt3dadd(167712.000000,185136.000000,129425.000000,346.657896)}
{pt3dadd(168168.000000,185400.000000,129175.000000,346.657896)}
{pt3dadd(168588.000000,185556.000000,128975.000000,346.657896)}
{pt3dadd(168972.000000,185844.000000,128825.000000,363.990794)}
{pt3dadd(169704.000000,186048.000000,128650.000000,381.323691)}
{pt3dadd(170364.000000,186600.000000,128375.000000,398.656589)}
{pt3dadd(170760.000000,186900.000000,128175.000000,415.989486)}
{pt3dadd(171408.000000,187104.000000,127900.000000,461.748335)}
{pt3dadd(172224.000000,187500.000000,127675.000000,507.507183)}
{pt3dadd(172692.000000,187656.000000,127425.000000,553.266031)}
{pt3dadd(173160.000000,188004.000000,127200.000000,599.024880)}
{pt3dadd(173532.000000,188244.000000,126975.000000,599.024880)}
{pt3dadd(173928.000000,188472.000000,126750.000000,599.024880)}
{pt3dadd(174216.000000,188628.000000,126550.000000,599.024880)}
{pt3dadd(174504.000000,188784.000000,126375.000000,599.024880)}
{pt3dadd(174768.000000,188904.000000,126250.000000,587.283988)}
{pt3dadd(175104.000000,189288.000000,125975.000000,575.543097)}
{pt3dadd(175404.000000,189588.000000,125725.000000,563.802206)}
{pt3dadd(175704.000000,189804.000000,125500.000000,552.061314)}
{pt3dadd(175968.000000,190020.000000,125275.000000,533.850957)}
{pt3dadd(176232.000000,190392.000000,125050.000000,515.640600)}
{pt3dadd(176736.000000,190740.000000,124775.000000,497.430243)}
{pt3dadd(176904.000000,190932.000000,124575.000000,479.219886)}
{pt3dadd(177168.000000,191028.000000,124375.000000,463.412286)}
{pt3dadd(177420.000000,191196.000000,124200.000000,447.604686)}
{pt3dadd(177756.000000,191448.000000,123925.000000,431.797086)}
{pt3dadd(178020.000000,191604.000000,123675.000000,415.989486)}
{pt3dadd(178320.000000,191796.000000,123425.000000,431.797086)}
{pt3dadd(178656.000000,192036.000000,123200.000000,447.604686)}
{pt3dadd(178860.000000,192120.000000,122950.000000,463.412286)}
{pt3dadd(179100.000000,192276.000000,122700.000000,479.219886)}
{pt3dadd(179232.000000,192360.000000,122425.000000,463.412286)}
{pt3dadd(179496.000000,192480.000000,122200.000000,447.604686)}
{pt3dadd(179796.000000,192648.000000,122000.000000,431.797086)}
{pt3dadd(180084.000000,192888.000000,121775.000000,415.989486)}
{pt3dadd(180336.000000,192972.000000,121575.000000,411.829591)}
{pt3dadd(180552.000000,193140.000000,121375.000000,407.669697)}
{pt3dadd(180768.000000,193308.000000,121175.000000,403.509803)}
{pt3dadd(180936.000000,193260.000000,121000.000000,399.349908)}
{pt3dadd(181176.000000,193284.000000,120725.000000,382.710330)}
{pt3dadd(181428.000000,193356.000000,120550.000000,366.070752)}
{pt3dadd(181608.000000,193404.000000,120250.000000,349.431174)}
{pt3dadd(181848.000000,193524.000000,120000.000000,332.791596)}
{pt3dadd(182088.000000,193644.000000,119775.000000,399.349917)}
{pt3dadd(182436.000000,193860.000000,119575.000000,465.908238)}
{pt3dadd(182568.000000,194004.000000,119375.000000,532.466559)}
{pt3dadd(182664.000000,194076.000000,119125.000000,599.024880)}
{pt3dadd(182796.000000,194112.000000,118900.000000,599.024880)}
{pt3dadd(182964.000000,194052.000000,118650.000000,599.024880)}
{pt3dadd(183012.000000,194208.000000,118425.000000,599.024880)}
{pt3dadd(183252.000000,194304.000000,118175.000000,599.024880)}
{pt3dadd(183552.000000,194196.000000,117925.000000,574.065504)}
{pt3dadd(183732.000000,194232.000000,117700.000000,549.106128)}
{pt3dadd(183816.000000,194352.000000,117425.000000,524.146752)}
{pt3dadd(183984.000000,194424.000000,117175.000000,499.187376)}
{pt3dadd(184104.000000,194556.000000,116925.000000,478.387903)}
{pt3dadd(184320.000000,194544.000000,116650.000000,457.588431)}
{pt3dadd(184524.000000,194436.000000,116425.000000,436.788958)}
{pt3dadd(184620.000000,194508.000000,116175.000000,415.989486)}
{pt3dadd(184716.000000,194460.000000,115900.000000,455.758079)}
{pt3dadd(184764.000000,194352.000000,115650.000000,495.526671)}
{pt3dadd(184764.000000,194424.000000,115400.000000,535.295264)}
{pt3dadd(184860.000000,194508.000000,115150.000000,575.063856)}
{pt3dadd(184896.000000,194592.000000,114850.000000,556.094736)}
{pt3dadd(185016.000000,194676.000000,114575.000000,537.125616)}
{pt3dadd(185172.000000,194700.000000,114325.000000,518.156496)}
{pt3dadd(185328.000000,194700.000000,114075.000000,499.187376)}
{pt3dadd(185508.000000,194568.000000,113800.000000,478.387903)}
{pt3dadd(185676.000000,194436.000000,113575.000000,457.588431)}
{pt3dadd(185748.000000,194484.000000,113325.000000,436.788958)}
{pt3dadd(185880.000000,194448.000000,113100.000000,415.989486)}
{pt3dadd(186012.000000,194436.000000,112875.000000,431.797086)}
{pt3dadd(186168.000000,194424.000000,112625.000000,447.604686)}
{pt3dadd(186324.000000,194376.000000,112375.000000,463.412286)}
{pt3dadd(186480.000000,194412.000000,112100.000000,479.219886)}
{pt3dadd(186612.000000,194400.000000,111850.000000,509.171134)}
{pt3dadd(186708.000000,194304.000000,111600.000000,539.122383)}
{pt3dadd(186792.000000,194220.000000,111350.000000,569.073631)}
{pt3dadd(186924.000000,194088.000000,111125.000000,599.024880)}
{pt3dadd(187020.000000,193896.000000,110925.000000,569.073631)}
{pt3dadd(187092.000000,193812.000000,110700.000000,539.122383)}
{pt3dadd(187164.000000,193800.000000,110475.000000,509.171134)}
{pt3dadd(187404.000000,193692.000000,110225.000000,479.219886)}
{pt3dadd(187752.000000,193572.000000,110000.000000,566.437901)}
{pt3dadd(188172.000000,193488.000000,109775.000000,653.655915)}
{pt3dadd(188652.000000,193380.000000,109525.000000,740.873929)}
{pt3dadd(188988.000000,193356.000000,109325.000000,828.091944)}
{pt3dadd(189168.000000,193440.000000,109075.000000,836.717909)}
{pt3dadd(189216.000000,193464.000000,108825.000000,845.343873)}
{pt3dadd(189168.000000,193512.000000,108575.000000,853.969838)}
{pt3dadd(189192.000000,193476.000000,108300.000000,862.595802)}
{pt3dadd(189324.000000,193512.000000,108050.000000,799.580750)}
{pt3dadd(189444.000000,193476.000000,107825.000000,736.565697)}
{pt3dadd(189624.000000,193416.000000,107575.000000,673.550644)}
{pt3dadd(189720.000000,193452.000000,107350.000000,610.535592)}
{pt3dadd(189804.000000,193476.000000,107125.000000,575.063856)}

{create adhoc28}
{access adhoc28}
{connect adhoc28(1), adhoc27(0)}
{nseg = 1}
{strdef color color = "White"}
{pt3dclear()}
{pt3dadd(189804.000000,193476.000000,107125.000000,575.063856)}
{pt3dadd(189756.000000,193848.000000,107125.000000,399.349908)}
{pt3dadd(189552.000000,194196.000000,107125.000000,381.785904)}
{pt3dadd(189528.000000,194664.000000,107125.000000,364.221900)}
{pt3dadd(189876.000000,195036.000000,106975.000000,346.657896)}
{pt3dadd(190008.000000,195156.000000,106725.000000,301.787631)}
{pt3dadd(190320.000000,195108.000000,106375.000000,256.917366)}
{pt3dadd(190548.000000,195192.000000,106175.000000,212.047101)}
{pt3dadd(190680.000000,195564.000000,105925.000000,167.176836)}
{pt3dadd(190560.000000,195780.000000,105600.000000,202.057808)}
{pt3dadd(190572.000000,195756.000000,105300.000000,236.938779)}
{pt3dadd(190536.000000,195756.000000,105025.000000,271.819751)}
{pt3dadd(190704.000000,195972.000000,104825.000000,306.700722)}
{pt3dadd(190860.000000,196128.000000,104675.000000,280.178595)}
{pt3dadd(190860.000000,196236.000000,104425.000000,253.656468)}
{pt3dadd(190740.000000,196260.000000,104250.000000,227.134341)}
{pt3dadd(190680.000000,196392.000000,104050.000000,200.612214)}
{pt3dadd(190848.000000,196872.000000,103900.000000,210.642822)}
{pt3dadd(191028.000000,197100.000000,103700.000000,220.673430)}
{pt3dadd(190992.000000,197292.000000,103500.000000,230.704038)}
{pt3dadd(190992.000000,197316.000000,103300.000000,240.734646)}
{pt3dadd(191076.000000,197544.000000,103100.000000,220.673426)}
{pt3dadd(190896.000000,197592.000000,102900.000000,200.612205)}
{pt3dadd(190968.000000,197820.000000,102700.000000,180.550985)}
{pt3dadd(190872.000000,198072.000000,102500.000000,160.489764)}
{pt3dadd(190644.000000,198324.000000,102275.000000,224.364694)}
{pt3dadd(190356.000000,198432.000000,102050.000000,288.239625)}
{pt3dadd(190116.000000,198600.000000,101825.000000,352.114556)}
{pt3dadd(189948.000000,198900.000000,101625.000000,415.989486)}
{pt3dadd(189768.000000,198984.000000,101450.000000,395.190005)}
{pt3dadd(189648.000000,199260.000000,101275.000000,374.390523)}
{pt3dadd(189456.000000,199572.000000,101075.000000,353.591042)}
{pt3dadd(189300.000000,199932.000000,100925.000000,332.791560)}
{pt3dadd(189132.000000,200316.000000,100725.000000,353.591042)}
{pt3dadd(189012.000000,200616.000000,100550.000000,374.390523)}
{pt3dadd(188976.000000,200844.000000,100375.000000,395.190005)}
{pt3dadd(188892.000000,201120.000000,100200.000000,415.989486)}
{pt3dadd(188832.000000,201192.000000,99925.000000,415.989486)}

{create adhoc29}
{access adhoc29}
{connect adhoc29(1), adhoc28(0)}
{nseg = 1}
{strdef color color = "White"}
{pt3dclear()}
{pt3dadd(188832.000000,201192.000000,99925.000000,415.989486)}
{pt3dadd(188736.000000,201324.000000,99750.000000,415.989486)}
{pt3dadd(188568.000000,201528.000000,99550.000000,415.989486)}
{pt3dadd(188508.000000,201600.000000,99375.000000,415.989486)}
{pt3dadd(188340.000000,201912.000000,99175.000000,415.989486)}
{pt3dadd(188136.000000,202224.000000,99000.000000,415.989486)}
{pt3dadd(188028.000000,202320.000000,98875.000000,415.989486)}
{pt3dadd(187860.000000,202584.000000,98725.000000,415.989486)}
{pt3dadd(187680.000000,203004.000000,98575.000000,415.989486)}
{pt3dadd(187596.000000,203376.000000,98400.000000,382.655970)}
{pt3dadd(187476.000000,203580.000000,98200.000000,349.322454)}
{pt3dadd(187332.000000,203604.000000,97950.000000,315.988938)}
{pt3dadd(187236.000000,203844.000000,97775.000000,282.655422)}
{pt3dadd(187128.000000,204276.000000,97575.000000,252.114012)}
{pt3dadd(187128.000000,204624.000000,97400.000000,221.572602)}
{pt3dadd(187272.000000,204672.000000,97425.000000,191.031192)}
{pt3dadd(187416.000000,204540.000000,97325.000000,160.489782)}
{pt3dadd(187500.000000,204624.000000,97200.000000,140.522724)}
{pt3dadd(187500.000000,204864.000000,97275.000000,120.555666)}
{pt3dadd(187500.000000,205116.000000,97300.000000,100.588608)}
{pt3dadd(187536.000000,205368.000000,97325.000000,80.621550)}
{pt3dadd(187536.000000,205608.000000,97050.000000,102.260372)}
{pt3dadd(187692.000000,205572.000000,97025.000000,123.899193)}
{pt3dadd(187860.000000,205572.000000,97025.000000,145.538014)}
{pt3dadd(188004.000000,205644.000000,97075.000000,167.176836)}
{pt3dadd(188148.000000,205692.000000,97175.000000,185.566288)}
{pt3dadd(188004.000000,205980.000000,96825.000000,203.955741)}
{pt3dadd(187860.000000,206160.000000,96675.000000,222.345193)}
{pt3dadd(187800.000000,206400.000000,96450.000000,240.734646)}
{pt3dadd(187704.000000,206580.000000,96200.000000,284.548356)}
{pt3dadd(187668.000000,206880.000000,95975.000000,328.362066)}
{pt3dadd(187716.000000,207132.000000,95775.000000,372.175776)}
{pt3dadd(187716.000000,207336.000000,95600.000000,415.989486)}
{pt3dadd(187788.000000,207516.000000,95325.000000,436.788958)}
{pt3dadd(187920.000000,207696.000000,95100.000000,457.588431)}
{pt3dadd(187860.000000,207792.000000,94900.000000,478.387903)}
{pt3dadd(187944.000000,207948.000000,94675.000000,499.187376)}
{pt3dadd(187980.000000,207996.000000,94400.000000,461.055006)}
{pt3dadd(188028.000000,208044.000000,94150.000000,422.922636)}
{pt3dadd(188064.000000,208176.000000,93925.000000,384.790266)}
{pt3dadd(187932.000000,208260.000000,93675.000000,346.657896)}
{pt3dadd(187848.000000,208296.000000,93500.000000,363.990794)}
{pt3dadd(187704.000000,208428.000000,93325.000000,381.323691)}
{pt3dadd(187392.000000,208596.000000,93100.000000,398.656589)}
{pt3dadd(187284.000000,208716.000000,92925.000000,415.989486)}
{pt3dadd(186984.000000,209004.000000,92675.000000,384.212511)}
{pt3dadd(186804.000000,209316.000000,92450.000000,352.435536)}
{pt3dadd(186648.000000,209520.000000,92375.000000,320.658561)}
{pt3dadd(186516.000000,209676.000000,92250.000000,288.881586)}
{pt3dadd(186336.000000,209940.000000,92075.000000,251.489700)}
{pt3dadd(186192.000000,210312.000000,91900.000000,214.097814)}
{pt3dadd(186024.000000,210408.000000,91800.000000,176.705928)}
{pt3dadd(185892.000000,210576.000000,91725.000000,139.314042)}
{pt3dadd(185712.000000,210816.000000,91650.000000,139.314042)}
{pt3dadd(185568.000000,211032.000000,91575.000000,139.314042)}
{pt3dadd(185412.000000,211152.000000,91500.000000,139.314042)}
{pt3dadd(185256.000000,211332.000000,91475.000000,139.314042)}
{pt3dadd(184776.000000,211704.000000,91300.000000,128.671997)}
{pt3dadd(184560.000000,211980.000000,91250.000000,118.029951)}
{pt3dadd(184428.000000,212064.000000,91225.000000,107.387906)}
{pt3dadd(184284.000000,212268.000000,91175.000000,96.745860)}
{pt3dadd(184152.000000,212424.000000,91000.000000,111.076938)}
{pt3dadd(184056.000000,212628.000000,90900.000000,125.408016)}
{pt3dadd(183744.000000,212772.000000,90650.000000,139.739094)}
{pt3dadd(183516.000000,213108.000000,90425.000000,154.070172)}
{pt3dadd(183168.000000,213396.000000,90000.000000,175.736291)}
{pt3dadd(182964.000000,213552.000000,89800.000000,197.402409)}
{pt3dadd(182784.000000,213792.000000,89625.000000,219.068528)}
{pt3dadd(182520.000000,214032.000000,89400.000000,240.734646)}
{pt3dadd(182460.000000,214452.000000,89250.000000,240.734646)}
{pt3dadd(182184.000000,214740.000000,89125.000000,240.734646)}
{pt3dadd(181920.000000,215028.000000,88900.000000,240.734646)}
{pt3dadd(181536.000000,215376.000000,88700.000000,240.734646)}
{pt3dadd(181272.000000,215568.000000,88600.000000,230.704038)}
{pt3dadd(181044.000000,215556.000000,88350.000000,220.673430)}
{pt3dadd(180912.000000,215628.000000,88100.000000,210.642822)}
{pt3dadd(180648.000000,215844.000000,88100.000000,200.612214)}
{pt3dadd(180384.000000,216264.000000,88100.000000,233.657051)}
{pt3dadd(180144.000000,216816.000000,88100.000000,266.701887)}
{pt3dadd(179952.000000,217476.000000,88100.000000,299.746724)}
{pt3dadd(179796.000000,218220.000000,88100.000000,332.791560)}
{pt3dadd(179760.000000,218916.000000,88100.000000,299.746723)}
{pt3dadd(179760.000000,219612.000000,88100.000000,266.701887)}
{pt3dadd(179676.000000,220356.000000,88100.000000,233.657051)}
{pt3dadd(179496.000000,221088.000000,88100.000000,200.612214)}
{pt3dadd(179148.000000,221700.000000,88100.000000,210.642822)}
{pt3dadd(178764.000000,222300.000000,88100.000000,220.673430)}
{pt3dadd(178908.000000,222480.000000,88300.000000,230.704038)}
{pt3dadd(178812.000000,222816.000000,88300.000000,240.734646)}
{pt3dadd(178644.000000,223236.000000,88300.000000,305.347828)}
{pt3dadd(178392.000000,223740.000000,88300.000000,369.961011)}
{pt3dadd(178092.000000,224292.000000,88300.000000,434.574193)}
{pt3dadd(177744.000000,224892.000000,88300.000000,499.187376)}
{pt3dadd(177300.000000,225492.000000,88300.000000,499.187376)}
{pt3dadd(177072.000000,225612.000000,88400.000000,499.187376)}
{pt3dadd(176856.000000,225864.000000,88400.000000,499.187376)}
{pt3dadd(176628.000000,226212.000000,88400.000000,499.187376)}
{pt3dadd(176472.000000,226632.000000,88400.000000,461.055006)}
{pt3dadd(176124.000000,226932.000000,88400.000000,422.922636)}
{pt3dadd(175980.000000,227172.000000,88375.000000,384.790266)}
{pt3dadd(175836.000000,227304.000000,88300.000000,346.657896)}
{pt3dadd(175716.000000,227484.000000,88225.000000,346.657896)}
{pt3dadd(175644.000000,227616.000000,88150.000000,346.657896)}
{pt3dadd(175560.000000,227736.000000,88125.000000,346.657896)}
{pt3dadd(175452.000000,227976.000000,88100.000000,346.657896)}
{pt3dadd(175356.000000,228228.000000,88100.000000,359.830908)}
{pt3dadd(175272.000000,228480.000000,88050.000000,373.003920)}
{pt3dadd(175188.000000,228720.000000,88025.000000,386.176932)}
{pt3dadd(175080.000000,228852.000000,87975.000000,399.349944)}
{pt3dadd(174948.000000,229104.000000,87850.000000,403.509830)}
{pt3dadd(174840.000000,229344.000000,87850.000000,407.669715)}
{pt3dadd(174708.000000,229584.000000,87825.000000,411.829601)}
{pt3dadd(174576.000000,229704.000000,87750.000000,415.989486)}
{pt3dadd(174456.000000,229704.000000,87550.000000,398.656589)}
{pt3dadd(174336.000000,229800.000000,87425.000000,381.323691)}
{pt3dadd(174228.000000,229920.000000,87425.000000,363.990794)}
{pt3dadd(174096.000000,230016.000000,87325.000000,346.657896)}
{pt3dadd(173988.000000,230100.000000,87200.000000,332.213819)}
{pt3dadd(173868.000000,230100.000000,87025.000000,317.769741)}
{pt3dadd(173736.000000,230196.000000,87050.000000,303.325664)}
{pt3dadd(173628.000000,230220.000000,86875.000000,288.881586)}
{pt3dadd(173520.000000,230292.000000,86850.000000,288.881586)}
{pt3dadd(173388.000000,230340.000000,86850.000000,288.881586)}
{pt3dadd(173256.000000,230340.000000,86750.000000,288.881586)}
{pt3dadd(173124.000000,230388.000000,86700.000000,288.881586)}
{pt3dadd(172992.000000,230376.000000,86625.000000,303.325664)}
{pt3dadd(172860.000000,230400.000000,86500.000000,317.769741)}
{pt3dadd(172716.000000,230364.000000,86425.000000,332.213819)}
{pt3dadd(172356.000000,230520.000000,86325.000000,346.657896)}
{pt3dadd(172080.000000,230568.000000,86150.000000,346.657896)}
{pt3dadd(171768.000000,230652.000000,85950.000000,346.657896)}
{pt3dadd(171588.000000,230652.000000,85775.000000,346.657896)}
{pt3dadd(171288.000000,230640.000000,85550.000000,346.657896)}
{pt3dadd(170964.000000,230412.000000,85350.000000,346.657896)}
{pt3dadd(170616.000000,230520.000000,85175.000000,346.657896)}
{pt3dadd(170184.000000,230580.000000,84950.000000,346.657896)}
{pt3dadd(169860.000000,230532.000000,84725.000000,346.657896)}
{pt3dadd(169596.000000,230496.000000,84500.000000,317.769741)}
{pt3dadd(169272.000000,230688.000000,84250.000000,288.881586)}
{pt3dadd(168888.000000,230688.000000,84050.000000,259.993431)}
{pt3dadd(168444.000000,230652.000000,83875.000000,231.105276)}
{pt3dadd(168048.000000,230544.000000,83675.000000,223.482010)}
{pt3dadd(167580.000000,230484.000000,83475.000000,215.858745)}
{pt3dadd(166920.000000,230472.000000,83325.000000,208.235480)}
{pt3dadd(166152.000000,230472.000000,83325.000000,200.612214)}
{pt3dadd(166116.000000,230352.000000,83125.000000,210.642822)}
{pt3dadd(165852.000000,230136.000000,82925.000000,220.673430)}
{pt3dadd(165540.000000,230136.000000,82750.000000,230.704038)}
{pt3dadd(165072.000000,230220.000000,82575.000000,240.734646)}
{pt3dadd(164940.000000,230172.000000,82700.000000,240.734646)}
{pt3dadd(164832.000000,230172.000000,82650.000000,240.734646)}
{pt3dadd(164736.000000,230208.000000,82625.000000,240.734646)}
{pt3dadd(164640.000000,230208.000000,82625.000000,240.734646)}
{pt3dadd(164544.000000,230172.000000,82600.000000,249.882566)}
{pt3dadd(164448.000000,230244.000000,82525.000000,259.030485)}
{pt3dadd(164364.000000,230244.000000,82475.000000,268.178405)}
{pt3dadd(163848.000000,230148.000000,82275.000000,277.326324)}
{pt3dadd(163716.000000,230184.000000,82300.000000,294.659217)}
{pt3dadd(163596.000000,230232.000000,82350.000000,311.992110)}
{pt3dadd(163488.000000,230256.000000,82325.000000,329.325003)}
{pt3dadd(163380.000000,230292.000000,82375.000000,346.657896)}
{pt3dadd(163272.000000,230316.000000,82375.000000,306.214475)}
{pt3dadd(163164.000000,230340.000000,82425.000000,265.771053)}
{pt3dadd(163056.000000,230244.000000,82350.000000,225.327632)}
{pt3dadd(162960.000000,230232.000000,82375.000000,184.884210)}
{pt3dadd(162852.000000,230232.000000,82375.000000,188.816211)}
{pt3dadd(162732.000000,230280.000000,82400.000000,192.748212)}
{pt3dadd(162636.000000,230280.000000,82425.000000,196.680213)}
{pt3dadd(162540.000000,230268.000000,82400.000000,200.612214)}
{pt3dadd(162420.000000,230184.000000,82350.000000,208.235480)}
{pt3dadd(162312.000000,230184.000000,82325.000000,215.858745)}
{pt3dadd(162204.000000,230100.000000,82300.000000,223.482010)}
{pt3dadd(162084.000000,230220.000000,82325.000000,231.105276)}
{pt3dadd(162000.000000,230292.000000,82325.000000,242.660543)}
{pt3dadd(161904.000000,230232.000000,82300.000000,254.215809)}
{pt3dadd(161808.000000,230136.000000,82300.000000,265.771075)}
{pt3dadd(161700.000000,230100.000000,82300.000000,277.326342)}
{pt3dadd(161580.000000,230232.000000,82400.000000,268.178418)}
{pt3dadd(161460.000000,230172.000000,82450.000000,259.030494)}
{pt3dadd(161352.000000,230124.000000,82450.000000,249.882570)}
{pt3dadd(161232.000000,230088.000000,82525.000000,240.734646)}
{pt3dadd(161136.000000,230028.000000,82575.000000,231.105276)}

{create adhoc30}
{access adhoc30}
{connect adhoc30(1), adhoc29(0)}
{nseg = 1}
{strdef color color = "White"}
{pt3dclear()}
{pt3dadd(161136.000000,230028.000000,82575.000000,231.105276)}
{pt3dadd(160992.000000,229836.000000,82625.000000,240.734646)}
{pt3dadd(160872.000000,229800.000000,82675.000000,266.233284)}
{pt3dadd(160788.000000,229704.000000,82775.000000,360.108558)}

{create adhoc31}
{access adhoc31}
{connect adhoc31(1), adhoc30(0)}
{nseg = 1}
{strdef color color = "White"}
{pt3dclear()}
{pt3dadd(160788.000000,229704.000000,82775.000000,360.108558)}
{pt3dadd(160692.000000,229752.000000,82925.000000,383.375952)}
{pt3dadd(160608.000000,229836.000000,82975.000000,399.349944)}

{create adhoc32}
{access adhoc32}
{connect adhoc32(1), adhoc31(0)}
{nseg = 1}
{strdef color color = "White"}
{pt3dclear()}
{pt3dadd(160608.000000,229836.000000,82975.000000,399.349944)}
{pt3dadd(160716.000000,229692.000000,83200.000000,200.612214)}
{pt3dadd(160692.000000,229764.000000,83375.000000,200.612214)}
{pt3dadd(160680.000000,229848.000000,83550.000000,200.612214)}
{pt3dadd(160596.000000,229848.000000,83700.000000,200.612214)}
{pt3dadd(160584.000000,230004.000000,83875.000000,200.612214)}
{pt3dadd(160584.000000,230076.000000,84075.000000,222.679557)}
{pt3dadd(160620.000000,230112.000000,84250.000000,244.746900)}
{pt3dadd(160656.000000,230268.000000,84425.000000,266.814243)}
{pt3dadd(160608.000000,230256.000000,84575.000000,288.881586)}
{pt3dadd(160560.000000,230328.000000,84775.000000,288.881586)}
{pt3dadd(160560.000000,230424.000000,84950.000000,288.881586)}
{pt3dadd(160584.000000,230544.000000,85150.000000,288.881586)}
{pt3dadd(160584.000000,230568.000000,85300.000000,288.881586)}
{pt3dadd(160632.000000,230532.000000,85525.000000,288.881586)}
{pt3dadd(160704.000000,230556.000000,85700.000000,288.881586)}
{pt3dadd(160800.000000,230592.000000,85900.000000,288.881586)}
{pt3dadd(160968.000000,230592.000000,86125.000000,288.881586)}
{pt3dadd(161016.000000,230616.000000,86325.000000,276.844851)}
{pt3dadd(161136.000000,230652.000000,86525.000000,264.808116)}
{pt3dadd(161232.000000,230508.000000,86700.000000,252.771381)}
{pt3dadd(161316.000000,230364.000000,86925.000000,240.734646)}
{pt3dadd(161352.000000,230232.000000,87100.000000,215.379495)}
{pt3dadd(161520.000000,230148.000000,87300.000000,190.024344)}
{pt3dadd(161724.000000,229956.000000,87375.000000,164.669193)}
{pt3dadd(161940.000000,229764.000000,87625.000000,139.314042)}
{pt3dadd(162108.000000,229512.000000,87625.000000,164.669193)}
{pt3dadd(162204.000000,229332.000000,87775.000000,190.024344)}
{pt3dadd(162276.000000,229200.000000,88000.000000,215.379495)}
{pt3dadd(162300.000000,229224.000000,88175.000000,240.734646)}
{pt3dadd(162552.000000,229224.000000,88425.000000,222.345193)}
{pt3dadd(163032.000000,229248.000000,88725.000000,203.955741)}
{pt3dadd(163320.000000,229368.000000,88975.000000,185.566288)}
{pt3dadd(163560.000000,229320.000000,89175.000000,167.176836)}
{pt3dadd(164016.000000,229068.000000,89300.000000,183.158946)}
{pt3dadd(164580.000000,228972.000000,89450.000000,199.141056)}
{pt3dadd(164832.000000,228876.000000,89600.000000,215.123166)}
{pt3dadd(165084.000000,228660.000000,89750.000000,231.105276)}
{pt3dadd(165336.000000,228492.000000,89950.000000,206.764326)}
{pt3dadd(165408.000000,228408.000000,90175.000000,182.423376)}
{pt3dadd(165492.000000,228240.000000,90400.000000,158.082426)}
{pt3dadd(165588.000000,228012.000000,90475.000000,133.741476)}
{pt3dadd(165708.000000,227712.000000,90650.000000,135.134617)}
{pt3dadd(165828.000000,227328.000000,90650.000000,136.527759)}
{pt3dadd(165948.000000,227028.000000,90725.000000,137.920900)}
{pt3dadd(166032.000000,226728.000000,90725.000000,139.314042)}
{pt3dadd(166056.000000,226428.000000,90725.000000,154.638585)}
{pt3dadd(166068.000000,226116.000000,90725.000000,169.963128)}
{pt3dadd(166032.000000,225816.000000,90675.000000,185.287671)}
{pt3dadd(165996.000000,225552.000000,90675.000000,200.612214)}
{pt3dadd(166092.000000,225336.000000,90525.000000,187.238064)}
{pt3dadd(166272.000000,225108.000000,90400.000000,173.863914)}
{pt3dadd(166524.000000,224712.000000,90375.000000,160.489764)}
{pt3dadd(166812.000000,224352.000000,90375.000000,177.488856)}

{create adhoc33}
{access adhoc33}
{connect adhoc33(1), adhoc32(0)}
{nseg = 1}
{strdef color color = "White"}
{pt3dclear()}
{pt3dadd(166812.000000,224352.000000,90375.000000,177.488856)}
{pt3dadd(167016.000000,223968.000000,90200.000000,111.451230)}
{pt3dadd(167268.000000,223752.000000,90050.000000,141.364742)}
{pt3dadd(167352.000000,223428.000000,89925.000000,171.278253)}
{pt3dadd(167436.000000,223284.000000,89925.000000,201.191764)}
{pt3dadd(167544.000000,223056.000000,89850.000000,231.105276)}
{pt3dadd(167664.000000,222948.000000,89800.000000,245.549354)}
{pt3dadd(167772.000000,222816.000000,89725.000000,259.993431)}
{pt3dadd(167892.000000,222708.000000,89725.000000,274.437509)}
{pt3dadd(167940.000000,222624.000000,89750.000000,288.881586)}
{pt3dadd(167952.000000,222480.000000,89825.000000,245.684947)}
{pt3dadd(168060.000000,222312.000000,89850.000000,202.488309)}
{pt3dadd(168096.000000,222156.000000,89850.000000,159.291671)}
{pt3dadd(168168.000000,222024.000000,89825.000000,116.095032)}
{pt3dadd(168204.000000,221904.000000,90025.000000,116.095032)}
{pt3dadd(168300.000000,221796.000000,90200.000000,116.095032)}
{pt3dadd(168408.000000,221676.000000,90250.000000,116.095032)}
{pt3dadd(168456.000000,221544.000000,90475.000000,116.095032)}
{pt3dadd(168636.000000,221412.000000,90600.000000,98.735274)}
{pt3dadd(168744.000000,221304.000000,90775.000000,81.375516)}
{pt3dadd(168864.000000,220980.000000,90925.000000,64.015758)}
{pt3dadd(169128.000000,221064.000000,91100.000000,46.656000)}
{pt3dadd(169260.000000,221160.000000,91100.000000,44.064000)}
{pt3dadd(169416.000000,221232.000000,91175.000000,41.472000)}
{pt3dadd(169524.000000,221340.000000,91175.000000,38.880000)}
{pt3dadd(169692.000000,221484.000000,91075.000000,55.987200)}

{create adhoc34}
{access adhoc34}
{connect adhoc34(1), adhoc32(0)}
{nseg = 1}
{strdef color color = "White"}
{pt3dclear()}
{pt3dadd(166812.000000,224352.000000,90375.000000,177.488856)}
{pt3dadd(166908.000000,224280.000000,90500.000000,67.184640)}
{pt3dadd(167064.000000,224160.000000,90575.000000,46.656000)}

{create adhoc35}
{access adhoc35}
{connect adhoc35(1), adhoc31(0)}
{nseg = 1}
{strdef color color = "White"}
{pt3dclear()}
{pt3dadd(160608.000000,229836.000000,82975.000000,399.349944)}
{pt3dadd(160500.000000,229824.000000,82775.000000,139.314042)}
{pt3dadd(160344.000000,229836.000000,82750.000000,55.987200)}
{pt3dadd(160164.000000,229920.000000,82775.000000,32.400000)}

{create adhoc36}
{access adhoc36}
{connect adhoc36(1), adhoc30(0)}
{nseg = 1}
{strdef color color = "White"}
{pt3dclear()}
{pt3dadd(160788.000000,229704.000000,82775.000000,360.108558)}
{pt3dadd(160848.000000,229560.000000,82725.000000,346.657896)}
{pt3dadd(160920.000000,229404.000000,82800.000000,276.789582)}
{pt3dadd(160980.000000,229236.000000,82700.000000,206.921268)}
{pt3dadd(160896.000000,229044.000000,82650.000000,137.052954)}
{pt3dadd(160764.000000,228936.000000,82575.000000,67.184640)}
{pt3dadd(160692.000000,228828.000000,82550.000000,62.052480)}
{pt3dadd(160608.000000,228672.000000,82525.000000,56.920320)}
{pt3dadd(160464.000000,228516.000000,82500.000000,51.788160)}
{pt3dadd(160392.000000,228372.000000,82425.000000,46.656000)}
{pt3dadd(160224.000000,228252.000000,82275.000000,44.712000)}
{pt3dadd(160212.000000,228144.000000,82100.000000,42.768000)}
{pt3dadd(160164.000000,227904.000000,82025.000000,40.824000)}
{pt3dadd(160176.000000,227760.000000,82025.000000,38.880000)}
{pt3dadd(160152.000000,227652.000000,82050.000000,43.156800)}
{pt3dadd(160188.000000,227544.000000,82100.000000,47.433600)}
{pt3dadd(160164.000000,227424.000000,82075.000000,51.710400)}
{pt3dadd(160212.000000,227304.000000,82075.000000,55.987200)}
{pt3dadd(160164.000000,227184.000000,82050.000000,53.654400)}
{pt3dadd(160164.000000,227052.000000,82025.000000,51.321600)}
{pt3dadd(160176.000000,226956.000000,82050.000000,48.988800)}
{pt3dadd(160248.000000,226848.000000,82075.000000,46.656000)}
{pt3dadd(160272.000000,226740.000000,82050.000000,50.471338)}
{pt3dadd(160284.000000,226632.000000,82075.000000,54.286677)}
{pt3dadd(160260.000000,226524.000000,82050.000000,58.102016)}
{pt3dadd(160320.000000,226416.000000,82150.000000,61.917354)}
{pt3dadd(160344.000000,226308.000000,82150.000000,58.102016)}
{pt3dadd(160368.000000,226200.000000,82200.000000,54.286677)}
{pt3dadd(160404.000000,226104.000000,82250.000000,50.471338)}
{pt3dadd(160524.000000,225888.000000,82350.000000,46.656000)}
{pt3dadd(160704.000000,225744.000000,82475.000000,46.656000)}
{pt3dadd(160788.000000,225420.000000,82600.000000,46.656000)}
{pt3dadd(160848.000000,225252.000000,82725.000000,46.656000)}
{pt3dadd(161028.000000,225216.000000,82825.000000,46.656000)}
{pt3dadd(161160.000000,225216.000000,83000.000000,59.178465)}
{pt3dadd(161352.000000,225216.000000,83225.000000,71.700930)}
{pt3dadd(161628.000000,225228.000000,83375.000000,84.223395)}
{pt3dadd(161760.000000,224988.000000,83550.000000,96.745860)}
{pt3dadd(161940.000000,224916.000000,83700.000000,128.024658)}
{pt3dadd(162048.000000,224808.000000,83850.000000,159.303456)}
{pt3dadd(162192.000000,224640.000000,84050.000000,190.582254)}
{pt3dadd(162396.000000,224604.000000,84200.000000,221.861052)}
{pt3dadd(162564.000000,224532.000000,84350.000000,195.419547)}
{pt3dadd(162660.000000,224436.000000,84650.000000,168.978042)}
{pt3dadd(162756.000000,224232.000000,84775.000000,142.536537)}
{pt3dadd(162840.000000,224148.000000,84975.000000,116.095032)}
{pt3dadd(162912.000000,223920.000000,85125.000000,159.291671)}
{pt3dadd(163008.000000,223608.000000,85225.000000,202.488309)}
{pt3dadd(163128.000000,223332.000000,85450.000000,245.684947)}
{pt3dadd(163236.000000,223308.000000,85475.000000,288.881586)}
{pt3dadd(163368.000000,223236.000000,85550.000000,227.858630)}
{pt3dadd(163524.000000,223176.000000,85575.000000,166.835673)}
{pt3dadd(163632.000000,223044.000000,85625.000000,105.812716)}
{pt3dadd(163656.000000,222732.000000,85650.000000,44.789760)}
{pt3dadd(163728.000000,222492.000000,85675.000000,46.491768)}
{pt3dadd(163824.000000,222192.000000,85625.000000,48.193776)}
{pt3dadd(163920.000000,222060.000000,85650.000000,49.895784)}
{pt3dadd(164052.000000,221964.000000,85750.000000,51.597792)}
{pt3dadd(164316.000000,221676.000000,85850.000000,55.987200)}

{create adhoc37}
{access adhoc37}
{connect adhoc37(1), adhoc29(0)}
{nseg = 1}
{strdef color color = "White"}
{pt3dclear()}
{pt3dadd(161136.000000,230028.000000,82575.000000,231.105276)}
{pt3dadd(161196.000000,230268.000000,82525.000000,240.734646)}
{pt3dadd(161340.000000,230424.000000,82600.000000,264.808116)}
{pt3dadd(161424.000000,230568.000000,82550.000000,288.881586)}
{pt3dadd(161280.000000,230700.000000,82500.000000,256.783631)}
{pt3dadd(161064.000000,230820.000000,82525.000000,224.685675)}
{pt3dadd(160824.000000,230940.000000,82475.000000,192.587720)}
{pt3dadd(160704.000000,230892.000000,82450.000000,160.489764)}
{pt3dadd(160560.000000,230904.000000,82400.000000,162.161532)}
{pt3dadd(160452.000000,230976.000000,82375.000000,163.833300)}
{pt3dadd(160356.000000,231024.000000,82325.000000,165.505068)}
{pt3dadd(160248.000000,231072.000000,82300.000000,167.176836)}
{pt3dadd(160140.000000,231132.000000,82325.000000,185.566288)}
{pt3dadd(160044.000000,231192.000000,82325.000000,203.955741)}
{pt3dadd(159912.000000,231240.000000,82300.000000,222.345193)}
{pt3dadd(159780.000000,231348.000000,82250.000000,240.734646)}
{pt3dadd(159648.000000,231348.000000,82200.000000,267.215459)}
{pt3dadd(159540.000000,231348.000000,82025.000000,293.696271)}
{pt3dadd(159432.000000,231384.000000,81925.000000,320.177083)}
{pt3dadd(159324.000000,231420.000000,81900.000000,346.657896)}
{pt3dadd(159216.000000,231456.000000,81750.000000,333.601587)}
{pt3dadd(159108.000000,231468.000000,81575.000000,320.545278)}
{pt3dadd(158988.000000,231540.000000,81550.000000,307.488969)}
{pt3dadd(158856.000000,231612.000000,81425.000000,294.432660)}
{pt3dadd(158724.000000,231672.000000,81350.000000,281.008157)}
{pt3dadd(158616.000000,231744.000000,81275.000000,267.583653)}
{pt3dadd(158508.000000,231780.000000,81250.000000,254.159149)}
{pt3dadd(158412.000000,231756.000000,81125.000000,240.734646)}
{pt3dadd(158316.000000,231756.000000,81050.000000,251.214822)}
{pt3dadd(158208.000000,231792.000000,81050.000000,261.694998)}
{pt3dadd(158100.000000,231852.000000,81025.000000,272.175174)}
{pt3dadd(157992.000000,231840.000000,80950.000000,282.655350)}
{pt3dadd(157956.000000,231840.000000,80900.000000,267.456775)}
{pt3dadd(157848.000000,231852.000000,80800.000000,252.258201)}
{pt3dadd(157716.000000,231900.000000,80775.000000,237.059627)}
{pt3dadd(157596.000000,231960.000000,80800.000000,221.861052)}
{pt3dadd(157476.000000,232020.000000,80825.000000,186.551177)}
{pt3dadd(157356.000000,232092.000000,80750.000000,151.241301)}
{pt3dadd(157248.000000,232248.000000,80750.000000,115.931426)}
{pt3dadd(157140.000000,232332.000000,80750.000000,80.621550)}
{pt3dadd(157020.000000,232332.000000,80675.000000,95.294673)}
{pt3dadd(156912.000000,232416.000000,80650.000000,109.967796)}
{pt3dadd(156792.000000,232476.000000,80600.000000,124.640919)}
{pt3dadd(156684.000000,232560.000000,80550.000000,139.314042)}
{pt3dadd(156588.000000,232608.000000,80500.000000,133.509289)}
{pt3dadd(156480.000000,232656.000000,80500.000000,127.704537)}
{pt3dadd(156348.000000,232728.000000,80425.000000,121.899785)}
{pt3dadd(156240.000000,232764.000000,80325.000000,116.095032)}
{pt3dadd(156132.000000,232848.000000,80300.000000,147.254936)}
{pt3dadd(156012.000000,232968.000000,80300.000000,178.414839)}
{pt3dadd(155892.000000,233100.000000,80250.000000,209.574742)}
{pt3dadd(155796.000000,233316.000000,80150.000000,240.734646)}
{pt3dadd(155712.000000,233388.000000,80025.000000,241.891128)}
{pt3dadd(155532.000000,233400.000000,79800.000000,243.047610)}
{pt3dadd(155460.000000,233472.000000,79600.000000,244.204092)}
{pt3dadd(155376.000000,233580.000000,79425.000000,245.360574)}
{pt3dadd(155244.000000,233580.000000,79225.000000,225.814640)}
{pt3dadd(155076.000000,233568.000000,79050.000000,206.268705)}
{pt3dadd(155208.000000,233640.000000,78925.000000,186.722771)}
{pt3dadd(155052.000000,233640.000000,78775.000000,167.176836)}
{pt3dadd(154992.000000,233688.000000,78600.000000,178.629282)}
{pt3dadd(154896.000000,233868.000000,78400.000000,190.081728)}
{pt3dadd(154800.000000,234024.000000,78125.000000,201.534174)}
{pt3dadd(154704.000000,234096.000000,77925.000000,212.986620)}
{pt3dadd(154608.000000,234324.000000,77750.000000,217.516284)}
{pt3dadd(154548.000000,234648.000000,77625.000000,222.045948)}
{pt3dadd(154500.000000,234864.000000,77475.000000,226.575612)}
{pt3dadd(154440.000000,235044.000000,77275.000000,231.105276)}
{pt3dadd(154452.000000,235188.000000,77075.000000,245.549354)}
{pt3dadd(154440.000000,235416.000000,76875.000000,259.993431)}
{pt3dadd(154356.000000,235560.000000,76725.000000,274.437509)}
{pt3dadd(154464.000000,235752.000000,76400.000000,288.881586)}
{pt3dadd(154404.000000,235860.000000,76150.000000,251.489700)}
{pt3dadd(154248.000000,235968.000000,75900.000000,214.097814)}
{pt3dadd(153984.000000,236112.000000,75675.000000,176.705928)}
{pt3dadd(153840.000000,236184.000000,75475.000000,139.314042)}
{pt3dadd(153984.000000,236436.000000,75225.000000,150.706584)}
{pt3dadd(153792.000000,236508.000000,74950.000000,162.099126)}
{pt3dadd(153600.000000,236616.000000,74750.000000,173.491668)}
{pt3dadd(153480.000000,236664.000000,74550.000000,184.884210)}
{pt3dadd(153492.000000,236664.000000,74375.000000,202.559139)}
{pt3dadd(153432.000000,236664.000000,74175.000000,220.234068)}
{pt3dadd(153468.000000,236580.000000,73925.000000,237.908997)}
{pt3dadd(153408.000000,236520.000000,73750.000000,255.583926)}
{pt3dadd(153408.000000,236232.000000,73600.000000,230.945634)}
{pt3dadd(153396.000000,236136.000000,73400.000000,206.307342)}
{pt3dadd(153276.000000,236148.000000,73175.000000,181.669050)}
{pt3dadd(153204.000000,236148.000000,72900.000000,157.030758)}
{pt3dadd(153132.000000,236160.000000,72675.000000,141.959533)}
{pt3dadd(153072.000000,236220.000000,72525.000000,126.888309)}
{pt3dadd(152940.000000,236220.000000,72475.000000,111.817085)}
{pt3dadd(152940.000000,236280.000000,72275.000000,96.745860)}
{pt3dadd(152808.000000,236328.000000,72100.000000,46.656000)}

{create adhoc38}
{access adhoc38}
{connect adhoc38(1), adhoc28(0)}
{nseg = 1}
{strdef color color = "White"}
{pt3dclear()}
{pt3dadd(188832.000000,201192.000000,99925.000000,415.989486)}
{pt3dadd(188664.000000,201012.000000,99900.000000,200.612214)}
{pt3dadd(188424.000000,200808.000000,99900.000000,185.287671)}
{pt3dadd(188112.000000,200640.000000,99900.000000,169.963128)}
{pt3dadd(188004.000000,200472.000000,99750.000000,154.638585)}
{pt3dadd(187860.000000,200520.000000,99775.000000,139.314042)}
{pt3dadd(187524.000000,200544.000000,99875.000000,80.621550)}

{create adhoc39}
{access adhoc39}
{connect adhoc39(1), adhoc27(0)}
{nseg = 1}
{strdef color color = "White"}
{pt3dclear()}
{pt3dadd(189804.000000,193476.000000,107125.000000,575.063856)}
{pt3dadd(190020.000000,193284.000000,106950.000000,599.024880)}
{pt3dadd(190152.000000,193152.000000,106750.000000,621.787828)}
{pt3dadd(190332.000000,192852.000000,106475.000000,644.550777)}
{pt3dadd(190548.000000,192468.000000,106275.000000,667.313725)}
{pt3dadd(190644.000000,192324.000000,106050.000000,690.076674)}
{pt3dadd(190776.000000,192108.000000,105825.000000,697.264960)}
{pt3dadd(191028.000000,191880.000000,105550.000000,704.453247)}
{pt3dadd(191244.000000,191448.000000,105300.000000,711.641533)}
{pt3dadd(191376.000000,190812.000000,105100.000000,718.829820)}
{pt3dadd(191388.000000,190512.000000,104900.000000,754.771316)}
{pt3dadd(191484.000000,190344.000000,104550.000000,790.712811)}
{pt3dadd(191520.000000,190236.000000,104275.000000,826.654307)}
{pt3dadd(191544.000000,190188.000000,103950.000000,862.595802)}
{pt3dadd(191664.000000,189792.000000,103700.000000,862.595802)}
{pt3dadd(191880.000000,189348.000000,103400.000000,862.595802)}
{pt3dadd(192060.000000,188964.000000,103100.000000,862.595802)}
{pt3dadd(192084.000000,188748.000000,102800.000000,862.595802)}
{pt3dadd(192264.000000,188436.000000,102550.000000,862.595802)}
{pt3dadd(192468.000000,188556.000000,102275.000000,862.595802)}
{pt3dadd(192624.000000,188100.000000,102050.000000,862.595802)}
{pt3dadd(192792.000000,187692.000000,101725.000000,862.595802)}
{pt3dadd(193092.000000,187176.000000,101450.000000,702.855840)}
{pt3dadd(193656.000000,186180.000000,101100.000000,543.115878)}
{pt3dadd(194232.000000,185520.000000,100775.000000,383.375916)}
{pt3dadd(194352.000000,185232.000000,100350.000000,571.904838)}

{create adhoc40}
{access adhoc40}
{connect adhoc40(1), adhoc39(0)}
{nseg = 1}
{strdef color color = "White"}
{pt3dclear()}
{pt3dadd(194352.000000,185232.000000,100350.000000,571.904838)}
{pt3dadd(194316.000000,185016.000000,100400.000000,575.063856)}
{pt3dadd(194400.000000,184788.000000,100375.000000,551.102864)}
{pt3dadd(194496.000000,184584.000000,100275.000000,527.141871)}
{pt3dadd(194676.000000,184392.000000,100125.000000,503.180878)}
{pt3dadd(194592.000000,184212.000000,100050.000000,479.219886)}
{pt3dadd(194664.000000,183540.000000,99975.000000,479.219886)}
{pt3dadd(194640.000000,183348.000000,99975.000000,479.219886)}
{pt3dadd(194712.000000,183120.000000,99950.000000,479.219886)}
{pt3dadd(194772.000000,182892.000000,100000.000000,479.219886)}
{pt3dadd(194832.000000,182664.000000,99925.000000,508.759110)}
{pt3dadd(194916.000000,182460.000000,99975.000000,538.298334)}
{pt3dadd(194904.000000,182244.000000,99575.000000,567.837558)}
{pt3dadd(195060.000000,181788.000000,99500.000000,597.376782)}
{pt3dadd(195072.000000,181404.000000,99600.000000,534.697061)}
{pt3dadd(195096.000000,181008.000000,99600.000000,472.017339)}
{pt3dadd(195156.000000,180576.000000,99600.000000,409.337618)}
{pt3dadd(195300.000000,180432.000000,99350.000000,346.657896)}
{pt3dadd(195360.000000,180252.000000,99300.000000,363.990794)}
{pt3dadd(195384.000000,180096.000000,99200.000000,381.323691)}
{pt3dadd(195444.000000,179916.000000,99100.000000,398.656589)}
{pt3dadd(195480.000000,179736.000000,98950.000000,415.989486)}
{pt3dadd(195504.000000,179556.000000,98900.000000,411.829601)}
{pt3dadd(195528.000000,179412.000000,98800.000000,407.669715)}
{pt3dadd(195576.000000,179232.000000,98850.000000,403.509830)}
{pt3dadd(195600.000000,179064.000000,98875.000000,399.349944)}
{pt3dadd(195684.000000,178908.000000,98750.000000,424.309302)}
{pt3dadd(195696.000000,178776.000000,98750.000000,449.268660)}
{pt3dadd(195732.000000,178620.000000,98650.000000,474.228018)}
{pt3dadd(195792.000000,178476.000000,98500.000000,499.187376)}
{pt3dadd(195756.000000,178296.000000,98350.000000,494.195513)}
{pt3dadd(195792.000000,178152.000000,98150.000000,489.203649)}
{pt3dadd(195804.000000,178056.000000,97950.000000,484.211785)}
{pt3dadd(195864.000000,177900.000000,97975.000000,479.219922)}
{pt3dadd(195888.000000,177756.000000,97975.000000,463.412313)}
{pt3dadd(195948.000000,177624.000000,97850.000000,447.604704)}
{pt3dadd(195972.000000,177468.000000,97750.000000,431.797095)}
{pt3dadd(196056.000000,177288.000000,97675.000000,415.989486)}
{pt3dadd(196068.000000,177132.000000,97625.000000,415.989486)}
{pt3dadd(196140.000000,176988.000000,97625.000000,415.989486)}
{pt3dadd(196248.000000,176844.000000,97575.000000,415.989486)}
{pt3dadd(196272.000000,176700.000000,97525.000000,415.989486)}
{pt3dadd(196404.000000,176556.000000,97450.000000,436.788958)}
{pt3dadd(196488.000000,176436.000000,97350.000000,457.588431)}
{pt3dadd(196512.000000,176292.000000,97325.000000,478.387903)}
{pt3dadd(196608.000000,176124.000000,97225.000000,499.187376)}
{pt3dadd(196788.000000,175968.000000,97150.000000,457.588431)}
{pt3dadd(196848.000000,175836.000000,97150.000000,415.989486)}
{pt3dadd(196896.000000,175692.000000,97150.000000,374.390541)}
{pt3dadd(196944.000000,175500.000000,97175.000000,332.791596)}
{pt3dadd(196968.000000,175344.000000,97175.000000,336.258171)}
{pt3dadd(197028.000000,175200.000000,97175.000000,339.724746)}
{pt3dadd(197076.000000,175056.000000,97100.000000,343.191321)}
{pt3dadd(197100.000000,174924.000000,97075.000000,346.657896)}
{pt3dadd(197172.000000,174780.000000,97100.000000,363.990794)}
{pt3dadd(197172.000000,174600.000000,97150.000000,381.323691)}
{pt3dadd(197268.000000,174432.000000,97250.000000,398.656589)}
{pt3dadd(197364.000000,174288.000000,97300.000000,415.989486)}
{pt3dadd(197460.000000,174156.000000,97350.000000,436.788958)}
{pt3dadd(197472.000000,174012.000000,97300.000000,457.588431)}
{pt3dadd(197556.000000,173880.000000,97325.000000,478.387903)}
{pt3dadd(197736.000000,173712.000000,97400.000000,499.187376)}
{pt3dadd(197772.000000,173568.000000,97575.000000,474.228009)}
{pt3dadd(197784.000000,173424.000000,97700.000000,449.268642)}
{pt3dadd(197880.000000,173268.000000,97750.000000,424.309275)}
{pt3dadd(197940.000000,173136.000000,97750.000000,399.349908)}
{pt3dadd(198024.000000,173004.000000,97750.000000,424.309275)}
{pt3dadd(198084.000000,172884.000000,97700.000000,449.268642)}
{pt3dadd(198144.000000,172764.000000,97650.000000,474.228009)}
{pt3dadd(198180.000000,172644.000000,97625.000000,499.187376)}
{pt3dadd(198168.000000,172548.000000,97650.000000,518.156505)}
{pt3dadd(198168.000000,172452.000000,97675.000000,537.125634)}
{pt3dadd(198180.000000,172332.000000,97700.000000,556.094763)}
{pt3dadd(198216.000000,172224.000000,97750.000000,575.063892)}
{pt3dadd(198192.000000,172116.000000,97750.000000,611.005374)}
{pt3dadd(198180.000000,172008.000000,97775.000000,646.946856)}
{pt3dadd(198144.000000,171912.000000,97800.000000,682.888338)}
{pt3dadd(198156.000000,171804.000000,97825.000000,718.829820)}
{pt3dadd(198168.000000,171696.000000,97850.000000,688.878585)}
{pt3dadd(198180.000000,171552.000000,97975.000000,658.927350)}
{pt3dadd(198276.000000,171432.000000,98025.000000,628.976115)}
{pt3dadd(198348.000000,171324.000000,97975.000000,599.024880)}
{pt3dadd(198384.000000,171216.000000,97900.000000,599.024880)}
{pt3dadd(198420.000000,171108.000000,97825.000000,599.024880)}
{pt3dadd(198492.000000,171000.000000,97850.000000,599.024880)}
{pt3dadd(198552.000000,170892.000000,97875.000000,599.024880)}
{pt3dadd(198552.000000,170772.000000,97925.000000,569.073631)}
{pt3dadd(198552.000000,170664.000000,97925.000000,539.122383)}
{pt3dadd(198552.000000,170556.000000,97925.000000,509.171134)}
{pt3dadd(198576.000000,170472.000000,97950.000000,479.219886)}
{pt3dadd(198600.000000,170376.000000,97975.000000,463.412286)}
{pt3dadd(198648.000000,170280.000000,98000.000000,447.604686)}
{pt3dadd(198768.000000,170184.000000,98025.000000,431.797086)}
{pt3dadd(198888.000000,170064.000000,98075.000000,415.989486)}
{pt3dadd(198948.000000,169956.000000,98175.000000,455.758079)}
{pt3dadd(199008.000000,169848.000000,98275.000000,495.526671)}
{pt3dadd(199044.000000,169728.000000,98375.000000,535.295264)}
{pt3dadd(199080.000000,169620.000000,98475.000000,575.063856)}
{pt3dadd(199164.000000,169512.000000,98525.000000,556.094736)}
{pt3dadd(199260.000000,169392.000000,98600.000000,537.125616)}
{pt3dadd(199284.000000,169272.000000,98575.000000,518.156496)}
{pt3dadd(199428.000000,169152.000000,98650.000000,499.187376)}
{pt3dadd(199476.000000,169044.000000,98875.000000,554.097987)}
{pt3dadd(199572.000000,168936.000000,99050.000000,609.008598)}
{pt3dadd(199668.000000,168852.000000,99250.000000,663.919209)}
{pt3dadd(199704.000000,168756.000000,99525.000000,718.829820)}
{pt3dadd(199692.000000,168624.000000,99800.000000,643.119736)}
{pt3dadd(199716.000000,168528.000000,99950.000000,567.409653)}
{pt3dadd(199740.000000,168420.000000,99975.000000,491.699570)}
{pt3dadd(199692.000000,168312.000000,100050.000000,415.989486)}
{pt3dadd(199728.000000,168216.000000,100100.000000,411.829591)}
{pt3dadd(199680.000000,168096.000000,100300.000000,407.669697)}
{pt3dadd(199596.000000,167988.000000,100400.000000,403.509803)}
{pt3dadd(199596.000000,167868.000000,100525.000000,399.349908)}
{pt3dadd(199596.000000,167760.000000,100650.000000,419.317403)}
{pt3dadd(199572.000000,167640.000000,100775.000000,439.284897)}
{pt3dadd(199632.000000,167508.000000,100750.000000,459.252391)}
{pt3dadd(199632.000000,167352.000000,100850.000000,479.219886)}
{pt3dadd(199656.000000,167208.000000,100925.000000,455.258894)}
{pt3dadd(199680.000000,167088.000000,100975.000000,431.297901)}
{pt3dadd(199668.000000,166944.000000,101000.000000,407.336908)}
{pt3dadd(199620.000000,166824.000000,100975.000000,383.375916)}
{pt3dadd(199608.000000,166716.000000,100950.000000,391.529309)}
{pt3dadd(199656.000000,166596.000000,100925.000000,399.682701)}
{pt3dadd(199656.000000,166476.000000,100875.000000,407.836094)}
{pt3dadd(199608.000000,166344.000000,100900.000000,415.989486)}
{pt3dadd(199560.000000,166236.000000,100925.000000,398.656589)}
{pt3dadd(199512.000000,166116.000000,100950.000000,381.323691)}
{pt3dadd(199476.000000,166008.000000,100925.000000,363.990794)}
{pt3dadd(199440.000000,165888.000000,100900.000000,346.657896)}
{pt3dadd(199476.000000,165780.000000,100950.000000,332.213819)}
{pt3dadd(199416.000000,165672.000000,101000.000000,317.769741)}
{pt3dadd(199368.000000,165528.000000,101000.000000,303.325664)}
{pt3dadd(199356.000000,165396.000000,100975.000000,288.881586)}
{pt3dadd(199344.000000,165276.000000,100950.000000,336.466161)}
{pt3dadd(199332.000000,165168.000000,100925.000000,384.050736)}
{pt3dadd(199320.000000,165072.000000,100900.000000,431.635311)}
{pt3dadd(199308.000000,164964.000000,100875.000000,479.219886)}
{pt3dadd(199296.000000,164844.000000,100875.000000,463.412286)}
{pt3dadd(199284.000000,164736.000000,100875.000000,447.604686)}
{pt3dadd(199272.000000,164628.000000,100875.000000,431.797086)}
{pt3dadd(199260.000000,164520.000000,100825.000000,415.989486)}
{pt3dadd(199236.000000,164424.000000,100750.000000,436.788958)}
{pt3dadd(199176.000000,164316.000000,100650.000000,457.588431)}
{pt3dadd(199140.000000,164220.000000,100625.000000,478.387903)}
{pt3dadd(199128.000000,164112.000000,100625.000000,499.187376)}
{pt3dadd(199140.000000,163968.000000,100525.000000,499.187376)}
{pt3dadd(199176.000000,163824.000000,100500.000000,499.187376)}
{pt3dadd(199212.000000,163680.000000,100425.000000,499.187376)}
{pt3dadd(199212.000000,163560.000000,100325.000000,499.187376)}
{pt3dadd(199236.000000,163428.000000,100350.000000,499.187376)}
{pt3dadd(199236.000000,163308.000000,100275.000000,499.187376)}
{pt3dadd(199248.000000,163200.000000,100150.000000,499.187376)}
{pt3dadd(199260.000000,163080.000000,100050.000000,499.187376)}
{pt3dadd(199308.000000,162936.000000,99950.000000,499.187376)}
{pt3dadd(199392.000000,162816.000000,99900.000000,499.187376)}
{pt3dadd(199404.000000,162720.000000,99900.000000,499.187376)}
{pt3dadd(199416.000000,162612.000000,99875.000000,499.187376)}
{pt3dadd(199416.000000,162468.000000,99825.000000,474.228009)}
{pt3dadd(199464.000000,162348.000000,99750.000000,449.268642)}
{pt3dadd(199512.000000,162216.000000,99675.000000,424.309275)}
{pt3dadd(199596.000000,162084.000000,99600.000000,399.349908)}
{pt3dadd(199644.000000,161964.000000,99525.000000,386.176905)}
{pt3dadd(199704.000000,161844.000000,99425.000000,373.003902)}
{pt3dadd(199776.000000,161724.000000,99375.000000,359.830899)}
{pt3dadd(199812.000000,161592.000000,99300.000000,346.657896)}
{pt3dadd(199932.000000,161460.000000,99100.000000,346.657896)}
{pt3dadd(200040.000000,161352.000000,99075.000000,346.657896)}
{pt3dadd(200148.000000,161232.000000,99050.000000,346.657896)}
{pt3dadd(200220.000000,161124.000000,99050.000000,346.657896)}
{pt3dadd(200292.000000,161004.000000,99050.000000,359.830899)}
{pt3dadd(200472.000000,160884.000000,99025.000000,373.003902)}
{pt3dadd(200460.000000,160776.000000,99025.000000,386.176905)}
{pt3dadd(200556.000000,160668.000000,99025.000000,399.349908)}
{pt3dadd(200568.000000,160560.000000,99000.000000,379.382427)}
{pt3dadd(200616.000000,160416.000000,99025.000000,359.414946)}
{pt3dadd(200796.000000,160296.000000,99025.000000,339.447465)}
{pt3dadd(200940.000000,160164.000000,99025.000000,319.479984)}
{pt3dadd(200916.000000,160032.000000,99000.000000,326.274462)}
{pt3dadd(200952.000000,159900.000000,99025.000000,333.068940)}
{pt3dadd(200988.000000,159768.000000,99050.000000,339.863418)}
{pt3dadd(200952.000000,159660.000000,99000.000000,346.657896)}
{pt3dadd(201024.000000,159552.000000,99050.000000,359.830908)}
{pt3dadd(201096.000000,159444.000000,99100.000000,373.003920)}
{pt3dadd(201120.000000,159324.000000,99075.000000,386.176932)}
{pt3dadd(201108.000000,159204.000000,99050.000000,399.349944)}
{pt3dadd(201132.000000,159084.000000,99075.000000,403.509830)}
{pt3dadd(201084.000000,158964.000000,99050.000000,407.669715)}
{pt3dadd(201060.000000,158856.000000,99025.000000,411.829601)}
{pt3dadd(201036.000000,158736.000000,99000.000000,415.989486)}
{pt3dadd(201120.000000,158628.000000,99025.000000,436.788958)}
{pt3dadd(201192.000000,158472.000000,99050.000000,457.588431)}
{pt3dadd(201192.000000,158340.000000,99025.000000,478.387903)}
{pt3dadd(201204.000000,158208.000000,99100.000000,499.187376)}
{pt3dadd(201192.000000,158136.000000,99100.000000,494.195504)}
{pt3dadd(201216.000000,158028.000000,99075.000000,489.203631)}
{pt3dadd(201168.000000,157932.000000,99075.000000,484.211758)}
{pt3dadd(201168.000000,157812.000000,99075.000000,479.219886)}
{pt3dadd(201192.000000,157680.000000,99100.000000,479.219886)}
{pt3dadd(201216.000000,157548.000000,99125.000000,479.219886)}
{pt3dadd(201240.000000,157428.000000,99150.000000,479.219886)}
{pt3dadd(201264.000000,157344.000000,99150.000000,479.219886)}
{pt3dadd(201252.000000,157248.000000,99125.000000,484.211758)}
{pt3dadd(201240.000000,157092.000000,99100.000000,489.203631)}
{pt3dadd(201300.000000,156948.000000,99150.000000,494.195504)}
{pt3dadd(201336.000000,156816.000000,99150.000000,499.187376)}
{pt3dadd(201360.000000,156684.000000,99150.000000,499.187376)}
{pt3dadd(201276.000000,156552.000000,99175.000000,499.187376)}
{pt3dadd(201228.000000,156444.000000,99175.000000,499.187376)}
{pt3dadd(201324.000000,156324.000000,99250.000000,499.187376)}
{pt3dadd(201372.000000,156216.000000,99225.000000,474.228018)}
{pt3dadd(201420.000000,156084.000000,99300.000000,449.268660)}
{pt3dadd(201396.000000,155952.000000,99350.000000,424.309302)}
{pt3dadd(201372.000000,155820.000000,99400.000000,399.349944)}
{pt3dadd(201348.000000,155688.000000,99400.000000,382.710357)}
{pt3dadd(201396.000000,155556.000000,99400.000000,366.070770)}
{pt3dadd(201432.000000,155436.000000,99375.000000,349.431183)}
{pt3dadd(201444.000000,155304.000000,99400.000000,332.791596)}
{pt3dadd(201456.000000,155184.000000,99550.000000,332.791587)}
{pt3dadd(201432.000000,155064.000000,99650.000000,332.791578)}
{pt3dadd(201396.000000,154944.000000,99700.000000,332.791569)}
{pt3dadd(201372.000000,154836.000000,99750.000000,332.791560)}
{pt3dadd(201360.000000,154692.000000,99750.000000,345.437640)}
{pt3dadd(201348.000000,154548.000000,99750.000000,358.083720)}
{pt3dadd(201336.000000,154416.000000,99750.000000,370.729800)}
{pt3dadd(201324.000000,154296.000000,99750.000000,383.375880)}
{pt3dadd(201312.000000,154164.000000,99750.000000,425.547239)}
{pt3dadd(201300.000000,154056.000000,99750.000000,467.718597)}
{pt3dadd(201252.000000,153936.000000,99775.000000,509.889955)}
{pt3dadd(201204.000000,153828.000000,99800.000000,552.061314)}
{pt3dadd(201156.000000,153732.000000,99825.000000,538.842829)}
{pt3dadd(201132.000000,153612.000000,99850.000000,525.624345)}
{pt3dadd(201108.000000,153516.000000,99875.000000,512.405860)}
{pt3dadd(201084.000000,153432.000000,99900.000000,499.187376)}
{pt3dadd(201036.000000,153348.000000,99925.000000,494.195504)}
{pt3dadd(200988.000000,153252.000000,99950.000000,489.203631)}
{pt3dadd(200988.000000,153156.000000,99950.000000,484.211758)}
{pt3dadd(200988.000000,153036.000000,99950.000000,479.219886)}
{pt3dadd(200988.000000,152928.000000,99950.000000,484.211758)}
{pt3dadd(200988.000000,152832.000000,99950.000000,489.203631)}
{pt3dadd(201036.000000,152736.000000,99900.000000,494.195504)}
{pt3dadd(201084.000000,152628.000000,99850.000000,499.187376)}
{pt3dadd(201132.000000,152520.000000,99800.000000,518.156496)}
{pt3dadd(201180.000000,152400.000000,99750.000000,537.125616)}
{pt3dadd(201228.000000,152280.000000,99725.000000,556.094736)}
{pt3dadd(201228.000000,152148.000000,99700.000000,575.063856)}
{pt3dadd(201228.000000,152040.000000,99675.000000,575.063856)}
{pt3dadd(201228.000000,151944.000000,99650.000000,575.063856)}
{pt3dadd(201228.000000,151836.000000,99625.000000,575.063856)}
{pt3dadd(201228.000000,151716.000000,99600.000000,575.063856)}
{pt3dadd(201228.000000,151608.000000,99575.000000,575.063856)}
{pt3dadd(201228.000000,151524.000000,99550.000000,575.063856)}
{pt3dadd(201228.000000,151416.000000,99525.000000,575.063856)}
{pt3dadd(201228.000000,151296.000000,99500.000000,575.063856)}
{pt3dadd(201228.000000,151188.000000,99475.000000,575.063856)}
{pt3dadd(201216.000000,151080.000000,99475.000000,575.063856)}
{pt3dadd(201204.000000,150972.000000,99475.000000,575.063856)}
{pt3dadd(201192.000000,150864.000000,99475.000000,575.063856)}
{pt3dadd(201180.000000,150744.000000,99475.000000,575.063856)}
{pt3dadd(201168.000000,150636.000000,99475.000000,575.063856)}
{pt3dadd(201156.000000,150552.000000,99475.000000,575.063856)}
{pt3dadd(201144.000000,150432.000000,99475.000000,575.063856)}
{pt3dadd(201132.000000,150348.000000,99475.000000,575.063856)}
{pt3dadd(201120.000000,150240.000000,99475.000000,575.063856)}
{pt3dadd(201108.000000,150132.000000,99475.000000,575.063856)}
{pt3dadd(201108.000000,150024.000000,99475.000000,575.063856)}
{pt3dadd(201108.000000,149904.000000,99425.000000,581.054112)}
{pt3dadd(201108.000000,149808.000000,99375.000000,587.044368)}
{pt3dadd(201108.000000,149712.000000,99325.000000,593.034624)}
{pt3dadd(201108.000000,149604.000000,99350.000000,599.024880)}
{pt3dadd(201096.000000,149472.000000,99400.000000,599.024880)}
{pt3dadd(201084.000000,149376.000000,99400.000000,599.024880)}
{pt3dadd(201072.000000,149256.000000,99400.000000,599.024880)}
{pt3dadd(201060.000000,149136.000000,99400.000000,599.024880)}
{pt3dadd(201048.000000,149016.000000,99400.000000,599.024880)}
{pt3dadd(201036.000000,148908.000000,99400.000000,599.024880)}
{pt3dadd(201024.000000,148812.000000,99400.000000,599.024880)}
{pt3dadd(201024.000000,148728.000000,99425.000000,599.024880)}
{pt3dadd(201084.000000,148620.000000,99450.000000,599.024880)}
{pt3dadd(201144.000000,148536.000000,99475.000000,599.024880)}
{pt3dadd(201192.000000,148416.000000,99500.000000,599.024880)}
{pt3dadd(201156.000000,148308.000000,99425.000000,599.024880)}
{pt3dadd(201060.000000,148140.000000,99475.000000,628.976115)}
{pt3dadd(201072.000000,148020.000000,99500.000000,658.927350)}
{pt3dadd(201096.000000,147900.000000,99525.000000,688.878585)}
{pt3dadd(201132.000000,147756.000000,99525.000000,718.829820)}
{pt3dadd(201120.000000,147636.000000,99525.000000,718.829820)}
{pt3dadd(201108.000000,147528.000000,99525.000000,718.829820)}
{pt3dadd(201096.000000,147420.000000,99525.000000,718.829820)}
{pt3dadd(201084.000000,147312.000000,99525.000000,718.829820)}
{pt3dadd(201060.000000,147216.000000,99525.000000,688.878585)}
{pt3dadd(201036.000000,147096.000000,99525.000000,658.927350)}
{pt3dadd(201012.000000,146964.000000,99525.000000,628.976115)}
{pt3dadd(200988.000000,146844.000000,99525.000000,599.024880)}
{pt3dadd(200964.000000,146712.000000,99525.000000,574.065504)}
{pt3dadd(201000.000000,146580.000000,99450.000000,549.106128)}
{pt3dadd(201036.000000,146472.000000,99375.000000,524.146752)}
{pt3dadd(201072.000000,146340.000000,99300.000000,499.187376)}
{pt3dadd(201096.000000,146208.000000,99225.000000,499.187376)}
{pt3dadd(201072.000000,146088.000000,99175.000000,499.187376)}
{pt3dadd(201048.000000,145968.000000,99200.000000,499.187376)}
{pt3dadd(200976.000000,145872.000000,99225.000000,499.187376)}
{pt3dadd(200928.000000,145776.000000,99250.000000,518.156496)}
{pt3dadd(200880.000000,145668.000000,99275.000000,537.125616)}
{pt3dadd(200880.000000,145548.000000,99325.000000,556.094736)}
{pt3dadd(200880.000000,145416.000000,99350.000000,575.063856)}
{pt3dadd(200892.000000,145320.000000,99300.000000,581.054112)}
{pt3dadd(200892.000000,145212.000000,99250.000000,587.044368)}
{pt3dadd(200892.000000,145104.000000,99200.000000,593.034624)}
{pt3dadd(200892.000000,145008.000000,99150.000000,599.024880)}
{pt3dadd(200868.000000,144900.000000,99100.000000,621.787810)}
{pt3dadd(200832.000000,144780.000000,99050.000000,644.550741)}
{pt3dadd(200784.000000,144672.000000,99050.000000,667.313671)}
{pt3dadd(200736.000000,144552.000000,99050.000000,690.076602)}
{pt3dadd(200700.000000,144444.000000,99050.000000,697.264906)}
{pt3dadd(200676.000000,144336.000000,99075.000000,704.453211)}
{pt3dadd(200676.000000,144252.000000,99100.000000,711.641515)}
{pt3dadd(200700.000000,144156.000000,99175.000000,718.829820)}
{pt3dadd(200664.000000,144072.000000,99175.000000,645.118141)}
{pt3dadd(200640.000000,143988.000000,99200.000000,571.406463)}
{pt3dadd(200616.000000,143880.000000,99225.000000,497.694784)}
{pt3dadd(200592.000000,143784.000000,99300.000000,423.983106)}
{pt3dadd(200556.000000,143676.000000,99375.000000,421.984701)}
{pt3dadd(200424.000000,143568.000000,99350.000000,419.986296)}
{pt3dadd(200328.000000,143472.000000,99325.000000,417.987891)}
{pt3dadd(200256.000000,143352.000000,99300.000000,415.989486)}
{pt3dadd(200172.000000,143256.000000,99325.000000,455.758079)}
{pt3dadd(200088.000000,143148.000000,99350.000000,495.526671)}
{pt3dadd(200064.000000,143028.000000,99300.000000,535.295264)}
{pt3dadd(200004.000000,142920.000000,99275.000000,575.063856)}
{pt3dadd(199944.000000,142812.000000,99250.000000,556.094736)}
{pt3dadd(199836.000000,142704.000000,99250.000000,537.125616)}
{pt3dadd(199728.000000,142608.000000,99250.000000,518.156496)}
{pt3dadd(199680.000000,142500.000000,99225.000000,499.187376)}
{pt3dadd(199632.000000,142392.000000,99200.000000,499.187376)}
{pt3dadd(199584.000000,142284.000000,99175.000000,499.187376)}
{pt3dadd(199536.000000,142176.000000,99150.000000,499.187376)}
{pt3dadd(199488.000000,142044.000000,99125.000000,499.187376)}
{pt3dadd(199464.000000,141900.000000,99100.000000,499.187376)}
{pt3dadd(199440.000000,141804.000000,99100.000000,499.187376)}
{pt3dadd(199416.000000,141696.000000,99100.000000,499.187376)}
{pt3dadd(199404.000000,141588.000000,99125.000000,499.187376)}
{pt3dadd(199392.000000,141468.000000,99150.000000,518.156496)}
{pt3dadd(199380.000000,141348.000000,99200.000000,537.125616)}
{pt3dadd(199332.000000,141240.000000,99150.000000,556.094736)}
{pt3dadd(199332.000000,141132.000000,99175.000000,575.063856)}
{pt3dadd(199332.000000,141012.000000,99200.000000,581.054112)}
{pt3dadd(199308.000000,140880.000000,99225.000000,587.044368)}
{pt3dadd(199284.000000,140760.000000,99250.000000,593.034624)}
{pt3dadd(199260.000000,140616.000000,99275.000000,599.024880)}
{pt3dadd(199236.000000,140484.000000,99300.000000,569.073631)}
{pt3dadd(199212.000000,140352.000000,99325.000000,539.122383)}
{pt3dadd(199188.000000,140244.000000,99275.000000,509.171134)}
{pt3dadd(199164.000000,140136.000000,99225.000000,479.219886)}
{pt3dadd(199140.000000,140028.000000,99225.000000,484.211758)}
{pt3dadd(199116.000000,139932.000000,99225.000000,489.203631)}
{pt3dadd(199092.000000,139824.000000,99250.000000,494.195504)}
{pt3dadd(199068.000000,139716.000000,99275.000000,499.187376)}
{pt3dadd(199068.000000,139620.000000,99275.000000,489.403301)}
{pt3dadd(199068.000000,139512.000000,99275.000000,479.619225)}
{pt3dadd(199032.000000,139392.000000,99275.000000,469.835150)}
{pt3dadd(198996.000000,139284.000000,99275.000000,460.051074)}
{pt3dadd(198960.000000,139188.000000,99350.000000,488.804269)}
{pt3dadd(198924.000000,139080.000000,99425.000000,517.557465)}
{pt3dadd(198888.000000,138960.000000,99425.000000,546.310660)}
{pt3dadd(198852.000000,138840.000000,99400.000000,575.063856)}
{pt3dadd(198828.000000,138744.000000,99450.000000,569.313220)}
{pt3dadd(198804.000000,138624.000000,99525.000000,563.562585)}
{pt3dadd(198780.000000,138516.000000,99600.000000,557.811949)}
{pt3dadd(198744.000000,138408.000000,99575.000000,552.061314)}
{pt3dadd(198744.000000,138312.000000,99575.000000,563.802206)}
{pt3dadd(198756.000000,138192.000000,99650.000000,575.543097)}
{pt3dadd(198708.000000,138084.000000,99675.000000,587.283988)}
{pt3dadd(198636.000000,137976.000000,99650.000000,599.024880)}
{pt3dadd(198612.000000,137844.000000,99700.000000,587.283988)}
{pt3dadd(198588.000000,137736.000000,99725.000000,575.543097)}
{pt3dadd(198564.000000,137616.000000,99725.000000,563.802206)}
{pt3dadd(198540.000000,137508.000000,99725.000000,552.061314)}
{pt3dadd(198540.000000,137412.000000,99725.000000,557.811949)}
{pt3dadd(198588.000000,137316.000000,99750.000000,563.562585)}
{pt3dadd(198576.000000,137220.000000,99750.000000,569.313220)}
{pt3dadd(198564.000000,137136.000000,99750.000000,575.063856)}
{pt3dadd(198552.000000,137028.000000,99750.000000,581.054112)}
{pt3dadd(198576.000000,136920.000000,99850.000000,587.044368)}
{pt3dadd(198600.000000,136800.000000,99950.000000,593.034624)}
{pt3dadd(198636.000000,136692.000000,99950.000000,599.024880)}
{pt3dadd(198672.000000,136584.000000,99950.000000,599.024880)}
{pt3dadd(198660.000000,136428.000000,99925.000000,599.024880)}
{pt3dadd(198720.000000,136272.000000,100000.000000,599.024880)}
{pt3dadd(198768.000000,136128.000000,100075.000000,599.024880)}
{pt3dadd(198732.000000,135996.000000,100075.000000,599.024880)}

{create adhoc41}
{access adhoc41}
{connect adhoc41(1), adhoc40(0)}
{nseg = 1}
{strdef color color = "White"}
{pt3dclear()}
{pt3dadd(198732.000000,135996.000000,100075.000000,599.024880)}
{pt3dadd(198816.000000,135852.000000,100200.000000,552.061404)}
{pt3dadd(198876.000000,135672.000000,100225.000000,557.812017)}
{pt3dadd(198864.000000,135528.000000,100250.000000,563.562630)}
{pt3dadd(198864.000000,135384.000000,100275.000000,569.313243)}
{pt3dadd(198912.000000,135252.000000,100375.000000,575.063856)}
{pt3dadd(198852.000000,135132.000000,100400.000000,590.291550)}
{pt3dadd(198888.000000,135012.000000,100425.000000,605.519244)}
{pt3dadd(198924.000000,134904.000000,100400.000000,620.746938)}
{pt3dadd(198984.000000,134784.000000,100425.000000,635.974632)}
{pt3dadd(198912.000000,134664.000000,100450.000000,620.746938)}
{pt3dadd(198912.000000,134532.000000,100425.000000,605.519244)}
{pt3dadd(198912.000000,134388.000000,100375.000000,590.291550)}
{pt3dadd(198828.000000,134268.000000,100325.000000,575.063856)}
{pt3dadd(198816.000000,134136.000000,100300.000000,575.063856)}
{pt3dadd(198756.000000,134016.000000,100300.000000,575.063856)}
{pt3dadd(198732.000000,133872.000000,100275.000000,575.063856)}
{pt3dadd(198648.000000,133752.000000,100275.000000,575.063856)}
{pt3dadd(198636.000000,133632.000000,100200.000000,556.094736)}
{pt3dadd(198672.000000,133524.000000,100100.000000,537.125616)}
{pt3dadd(198624.000000,133404.000000,100100.000000,518.156496)}
{pt3dadd(198612.000000,133272.000000,100125.000000,499.187376)}
{pt3dadd(198564.000000,133152.000000,100125.000000,494.195504)}
{pt3dadd(198564.000000,133032.000000,100125.000000,489.203631)}
{pt3dadd(198564.000000,132876.000000,100075.000000,484.211758)}
{pt3dadd(198564.000000,132756.000000,100050.000000,479.219886)}
{pt3dadd(198564.000000,132636.000000,100050.000000,484.211758)}
{pt3dadd(198516.000000,132528.000000,100050.000000,489.203631)}
{pt3dadd(198468.000000,132420.000000,100050.000000,494.195504)}
{pt3dadd(198468.000000,132324.000000,100050.000000,499.187376)}
{pt3dadd(198504.000000,132216.000000,100025.000000,470.234511)}
{pt3dadd(198540.000000,132108.000000,100000.000000,441.281646)}
{pt3dadd(198576.000000,132024.000000,99975.000000,412.328781)}
{pt3dadd(198612.000000,131916.000000,99950.000000,383.375916)}
{pt3dadd(198552.000000,131820.000000,99900.000000,425.547265)}
{pt3dadd(198540.000000,131724.000000,99850.000000,467.718615)}
{pt3dadd(198528.000000,131616.000000,99800.000000,509.889965)}
{pt3dadd(198540.000000,131508.000000,99775.000000,552.061314)}
{pt3dadd(198576.000000,131412.000000,99800.000000,538.842829)}
{pt3dadd(198612.000000,131292.000000,99825.000000,525.624345)}
{pt3dadd(198648.000000,131196.000000,99850.000000,512.405860)}
{pt3dadd(198660.000000,131100.000000,99875.000000,499.187376)}
{pt3dadd(198612.000000,131016.000000,99875.000000,499.187376)}
{pt3dadd(198564.000000,130932.000000,99875.000000,499.187376)}
{pt3dadd(198516.000000,130836.000000,99850.000000,499.187376)}
{pt3dadd(198516.000000,130752.000000,99800.000000,499.187376)}
{pt3dadd(198516.000000,130668.000000,99750.000000,501.585467)}
{pt3dadd(198516.000000,130572.000000,99725.000000,503.983557)}
{pt3dadd(198468.000000,130476.000000,99700.000000,506.381647)}
{pt3dadd(198444.000000,130404.000000,99700.000000,508.779738)}
{pt3dadd(198420.000000,130296.000000,99700.000000,506.381647)}
{pt3dadd(198396.000000,130200.000000,99700.000000,503.983557)}
{pt3dadd(198372.000000,130104.000000,99700.000000,501.585467)}
{pt3dadd(198348.000000,130008.000000,99700.000000,499.187376)}
{pt3dadd(198324.000000,129924.000000,99700.000000,512.405860)}
{pt3dadd(198300.000000,129828.000000,99700.000000,525.624345)}
{pt3dadd(198240.000000,129732.000000,99650.000000,538.842829)}
{pt3dadd(198192.000000,129636.000000,99625.000000,552.061314)}
{pt3dadd(198168.000000,129540.000000,99600.000000,563.802206)}
{pt3dadd(198204.000000,129432.000000,99575.000000,575.543097)}
{pt3dadd(198144.000000,129336.000000,99525.000000,587.283988)}
{pt3dadd(198084.000000,129240.000000,99475.000000,599.024880)}
{pt3dadd(198036.000000,129144.000000,99425.000000,581.763393)}
{pt3dadd(198036.000000,129048.000000,99425.000000,564.501906)}
{pt3dadd(198048.000000,128940.000000,99400.000000,547.240419)}
{pt3dadd(198060.000000,128868.000000,99375.000000,529.978932)}
{pt3dadd(198072.000000,128760.000000,99350.000000,524.679124)}
{pt3dadd(198084.000000,128664.000000,99300.000000,519.379317)}
{pt3dadd(198096.000000,128544.000000,99200.000000,514.079509)}
{pt3dadd(198096.000000,128472.000000,99100.000000,508.779702)}
{pt3dadd(198048.000000,128376.000000,99050.000000,525.350750)}
{pt3dadd(197988.000000,128280.000000,99050.000000,541.921797)}
{pt3dadd(197940.000000,128196.000000,99000.000000,558.492845)}
{pt3dadd(197940.000000,128064.000000,98900.000000,575.063892)}
{pt3dadd(197928.000000,127968.000000,98875.000000,569.313270)}
{pt3dadd(197916.000000,127860.000000,98850.000000,563.562648)}
{pt3dadd(197904.000000,127752.000000,98825.000000,557.812026)}
{pt3dadd(197892.000000,127656.000000,98800.000000,552.061404)}
{pt3dadd(197928.000000,127524.000000,98750.000000,529.978860)}

{create adhoc42}
{access adhoc42}
{connect adhoc42(1), adhoc41(0)}
{nseg = 1}
{strdef color color = "White"}
{pt3dclear()}
{pt3dadd(197928.000000,127524.000000,98750.000000,529.978860)}
{pt3dadd(197880.000000,127572.000000,98950.000000,552.061278)}
{pt3dadd(197760.000000,127548.000000,99150.000000,428.042758)}
{pt3dadd(197520.000000,127548.000000,99300.000000,304.024239)}
{pt3dadd(197388.000000,127476.000000,99400.000000,180.005720)}
{pt3dadd(197364.000000,127392.000000,99575.000000,55.987200)}
{pt3dadd(197460.000000,127080.000000,99675.000000,55.987200)}
{pt3dadd(197448.000000,126936.000000,99850.000000,55.987200)}
{pt3dadd(197316.000000,126792.000000,99950.000000,55.987200)}
{pt3dadd(197172.000000,126912.000000,100100.000000,38.880000)}

{create adhoc43}
{access adhoc43}
{connect adhoc43(1), adhoc41(0)}
{nseg = 1}
{strdef color color = "White"}
{pt3dclear()}
{pt3dadd(197928.000000,127524.000000,98750.000000,529.978860)}
{pt3dadd(197928.000000,127440.000000,98700.000000,499.187376)}
{pt3dadd(197976.000000,127356.000000,98650.000000,512.405860)}
{pt3dadd(197928.000000,127176.000000,98575.000000,525.624345)}
{pt3dadd(198000.000000,127020.000000,98475.000000,538.842829)}
{pt3dadd(198036.000000,126888.000000,98400.000000,552.061314)}
{pt3dadd(198060.000000,126756.000000,98300.000000,538.842829)}
{pt3dadd(198000.000000,126636.000000,98275.000000,525.624345)}
{pt3dadd(198024.000000,126516.000000,98225.000000,512.405860)}
{pt3dadd(198048.000000,126408.000000,98200.000000,499.187376)}
{pt3dadd(198048.000000,126300.000000,98175.000000,524.146752)}
{pt3dadd(198048.000000,126192.000000,98150.000000,549.106128)}
{pt3dadd(198048.000000,126096.000000,98125.000000,574.065504)}
{pt3dadd(198084.000000,125976.000000,98125.000000,599.024880)}
{pt3dadd(198108.000000,125892.000000,98125.000000,599.024880)}
{pt3dadd(198060.000000,125808.000000,98100.000000,599.024880)}
{pt3dadd(198024.000000,125700.000000,98125.000000,599.024880)}
{pt3dadd(198048.000000,125568.000000,98175.000000,599.024880)}
{pt3dadd(198096.000000,125472.000000,98150.000000,628.976115)}
{pt3dadd(198144.000000,125364.000000,98125.000000,658.927350)}
{pt3dadd(198132.000000,125268.000000,98100.000000,688.878585)}
{pt3dadd(198120.000000,125160.000000,98075.000000,718.829820)}
{pt3dadd(198108.000000,125052.000000,98050.000000,746.145369)}
{pt3dadd(198096.000000,124944.000000,98050.000000,773.460918)}
{pt3dadd(198084.000000,124836.000000,98050.000000,800.776467)}
{pt3dadd(198072.000000,124740.000000,98050.000000,828.092016)}
{pt3dadd(198060.000000,124644.000000,98050.000000,828.092016)}
{pt3dadd(198048.000000,124548.000000,98050.000000,828.092016)}
{pt3dadd(198000.000000,124440.000000,98000.000000,828.092016)}
{pt3dadd(197964.000000,124368.000000,97950.000000,828.092016)}
{pt3dadd(197952.000000,124284.000000,97875.000000,819.811071)}
{pt3dadd(197952.000000,124200.000000,97800.000000,811.530126)}
{pt3dadd(197952.000000,124104.000000,97725.000000,803.249181)}
{pt3dadd(197940.000000,123984.000000,97725.000000,794.968236)}
{pt3dadd(197904.000000,123876.000000,97725.000000,811.875127)}
{pt3dadd(197856.000000,123756.000000,97725.000000,828.782019)}
{pt3dadd(197808.000000,123660.000000,97725.000000,845.688911)}
{pt3dadd(197760.000000,123552.000000,97725.000000,862.595802)}
{pt3dadd(197712.000000,123396.000000,97725.000000,819.466020)}
{pt3dadd(197664.000000,123300.000000,97725.000000,776.336238)}
{pt3dadd(197616.000000,123192.000000,97725.000000,733.206456)}
{pt3dadd(197568.000000,123096.000000,97725.000000,690.076674)}
{pt3dadd(197520.000000,122988.000000,97725.000000,690.076656)}
{pt3dadd(197472.000000,122904.000000,97650.000000,690.076638)}
{pt3dadd(197388.000000,122808.000000,97575.000000,690.076620)}
{pt3dadd(197340.000000,122712.000000,97500.000000,690.076602)}
{pt3dadd(197364.000000,122604.000000,97450.000000,711.359694)}
{pt3dadd(197388.000000,122508.000000,97450.000000,732.642786)}
{pt3dadd(197376.000000,122412.000000,97450.000000,662.473530)}

{create adhoc44}
{access adhoc44}
{connect adhoc44(1), adhoc43(0)}
{nseg = 1}
{strdef color color = "White"}
{pt3dclear()}
{pt3dadd(197376.000000,122412.000000,97450.000000,662.473530)}
{pt3dadd(197340.000000,122412.000000,97725.000000,690.076674)}
{pt3dadd(197304.000000,122412.000000,98000.000000,531.554305)}
{pt3dadd(197328.000000,122412.000000,98275.000000,373.031937)}
{pt3dadd(197292.000000,122412.000000,98600.000000,214.509568)}
{pt3dadd(197076.000000,122412.000000,98750.000000,55.987200)}
{pt3dadd(196908.000000,122256.000000,98900.000000,51.710400)}
{pt3dadd(196812.000000,122076.000000,99075.000000,47.433600)}
{pt3dadd(196692.000000,122112.000000,99225.000000,43.156800)}
{pt3dadd(196548.000000,121980.000000,99400.000000,38.880000)}
{pt3dadd(196368.000000,121848.000000,99400.000000,45.956160)}
{pt3dadd(196188.000000,121716.000000,99400.000000,53.032320)}
{pt3dadd(195996.000000,121584.000000,99400.000000,60.108480)}
{pt3dadd(195780.000000,121500.000000,99400.000000,67.184640)}
{pt3dadd(195612.000000,121308.000000,99200.000000,53.032320)}
{pt3dadd(195312.000000,121248.000000,99275.000000,38.880000)}
{pt3dadd(195192.000000,121212.000000,99375.000000,38.880000)}

{create adhoc45}
{access adhoc45}
{connect adhoc45(1), adhoc43(0)}
{nseg = 1}
{strdef color color = "White"}
{pt3dclear()}
{pt3dadd(197376.000000,122412.000000,97450.000000,662.473530)}
{pt3dadd(197292.000000,122280.000000,97400.000000,662.473530)}
{pt3dadd(197304.000000,122160.000000,97375.000000,635.974632)}
{pt3dadd(197268.000000,122064.000000,97300.000000,599.024880)}

{create adhoc46}
{access adhoc46}
{connect adhoc46(1), adhoc45(0)}
{nseg = 1}
{strdef color color = "White"}
{pt3dclear()}
{pt3dadd(197268.000000,122064.000000,97300.000000,599.024880)}
{pt3dadd(197244.000000,122040.000000,97025.000000,575.063856)}
{pt3dadd(197220.000000,122040.000000,96775.000000,455.484357)}
{pt3dadd(197124.000000,122040.000000,96600.000000,335.904858)}
{pt3dadd(196980.000000,122040.000000,96475.000000,216.325359)}
{pt3dadd(196884.000000,121992.000000,96475.000000,96.745860)}
{pt3dadd(196788.000000,121968.000000,96450.000000,101.583153)}
{pt3dadd(196668.000000,121932.000000,96375.000000,106.420446)}
{pt3dadd(196560.000000,121944.000000,96350.000000,111.257739)}
{pt3dadd(196464.000000,121956.000000,96250.000000,116.095032)}
{pt3dadd(196368.000000,121992.000000,96275.000000,103.867434)}
{pt3dadd(196296.000000,122016.000000,96275.000000,91.639836)}
{pt3dadd(196212.000000,122088.000000,96325.000000,79.412238)}
{pt3dadd(196092.000000,122220.000000,96275.000000,67.184640)}
{pt3dadd(196008.000000,122316.000000,96150.000000,64.385280)}
{pt3dadd(195840.000000,122532.000000,96150.000000,61.585920)}
{pt3dadd(195672.000000,122676.000000,96050.000000,58.786560)}
{pt3dadd(195456.000000,122892.000000,96050.000000,55.987200)}
{pt3dadd(195372.000000,123072.000000,96050.000000,55.987200)}
{pt3dadd(195312.000000,123264.000000,96175.000000,55.987200)}
{pt3dadd(195288.000000,123552.000000,96200.000000,55.987200)}
{pt3dadd(195252.000000,123864.000000,96200.000000,55.987200)}
{pt3dadd(195084.000000,124104.000000,96200.000000,51.710400)}
{pt3dadd(195048.000000,124236.000000,96275.000000,47.433600)}
{pt3dadd(194976.000000,124428.000000,96275.000000,43.156800)}
{pt3dadd(194868.000000,124584.000000,96325.000000,38.880000)}
{pt3dadd(194760.000000,124812.000000,96400.000000,46.656000)}
{pt3dadd(194796.000000,124932.000000,96450.000000,38.880000)}

{create adhoc47}
{access adhoc47}
{connect adhoc47(1), adhoc45(0)}
{nseg = 1}
{strdef color color = "White"}
{pt3dclear()}
{pt3dadd(197268.000000,122064.000000,97300.000000,599.024880)}
{pt3dadd(197280.000000,121920.000000,97275.000000,575.063856)}
{pt3dadd(197280.000000,121812.000000,97250.000000,556.094736)}
{pt3dadd(197232.000000,121728.000000,97275.000000,537.125616)}
{pt3dadd(197208.000000,121644.000000,97300.000000,518.156496)}
{pt3dadd(197148.000000,121488.000000,97250.000000,499.187376)}
{pt3dadd(197112.000000,121368.000000,97250.000000,524.146752)}
{pt3dadd(197052.000000,121248.000000,97225.000000,549.106128)}
{pt3dadd(197028.000000,121128.000000,97175.000000,574.065504)}
{pt3dadd(197004.000000,121020.000000,97125.000000,599.024880)}
{pt3dadd(196968.000000,120924.000000,97075.000000,628.976115)}
{pt3dadd(196908.000000,120828.000000,96975.000000,658.927350)}
{pt3dadd(196860.000000,120732.000000,96925.000000,688.878585)}
{pt3dadd(196836.000000,120624.000000,96900.000000,718.829820)}
{pt3dadd(196812.000000,120540.000000,96875.000000,711.641515)}
{pt3dadd(196800.000000,120444.000000,96900.000000,704.453211)}
{pt3dadd(196788.000000,120336.000000,96875.000000,697.264906)}
{pt3dadd(196776.000000,120240.000000,96850.000000,690.076602)}
{pt3dadd(196764.000000,120144.000000,96825.000000,676.551110)}
{pt3dadd(196752.000000,120024.000000,96775.000000,663.025617)}
{pt3dadd(196740.000000,119916.000000,96775.000000,649.500124)}
{pt3dadd(196752.000000,119820.000000,96800.000000,635.974632)}
{pt3dadd(196680.000000,119712.000000,96825.000000,488.428452)}

{create adhoc48}
{access adhoc48}
{connect adhoc48(1), adhoc47(0)}
{nseg = 1}
{strdef color color = "White"}
{pt3dclear()}
{pt3dadd(196680.000000,119712.000000,96825.000000,488.428452)}
{pt3dadd(196572.000000,119712.000000,96950.000000,599.024880)}
{pt3dadd(196464.000000,119712.000000,97150.000000,466.064820)}
{pt3dadd(196344.000000,119712.000000,97325.000000,333.104760)}
{pt3dadd(196188.000000,119712.000000,97475.000000,200.144700)}
{pt3dadd(195996.000000,119712.000000,97650.000000,67.184640)}
{pt3dadd(195720.000000,119712.000000,97800.000000,62.052480)}
{pt3dadd(195528.000000,119784.000000,97950.000000,56.920320)}
{pt3dadd(195276.000000,119784.000000,98075.000000,51.788160)}
{pt3dadd(194940.000000,120012.000000,98150.000000,46.656000)}
{pt3dadd(194580.000000,120216.000000,98200.000000,44.712000)}
{pt3dadd(194340.000000,120348.000000,98175.000000,42.768000)}
{pt3dadd(194280.000000,120564.000000,98175.000000,40.824000)}
{pt3dadd(194208.000000,120792.000000,98175.000000,38.880000)}
{pt3dadd(194148.000000,120996.000000,98175.000000,45.284310)}
{pt3dadd(194148.000000,121272.000000,98375.000000,51.688620)}
{pt3dadd(194220.000000,121452.000000,98600.000000,58.092930)}
{pt3dadd(194220.000000,121632.000000,98800.000000,64.497240)}
{pt3dadd(194196.000000,121728.000000,99000.000000,62.369730)}
{pt3dadd(194232.000000,121932.000000,99175.000000,60.242220)}
{pt3dadd(194280.000000,122064.000000,99300.000000,58.114710)}
{pt3dadd(194316.000000,122316.000000,99375.000000,55.987200)}
{pt3dadd(194472.000000,122268.000000,99600.000000,64.198650)}
{pt3dadd(194652.000000,122316.000000,99725.000000,72.410100)}
{pt3dadd(194724.000000,122208.000000,99900.000000,80.621550)}
{pt3dadd(194964.000000,122520.000000,100175.000000,38.880000)}

{create adhoc49}
{access adhoc49}
{connect adhoc49(1), adhoc47(0)}
{nseg = 1}
{strdef color color = "White"}
{pt3dclear()}
{pt3dadd(196680.000000,119712.000000,96825.000000,488.428452)}
{pt3dadd(196656.000000,119592.000000,96750.000000,599.024880)}
{pt3dadd(196584.000000,119448.000000,96600.000000,599.024880)}
{pt3dadd(196548.000000,119280.000000,96500.000000,599.024880)}
{pt3dadd(196512.000000,119184.000000,96425.000000,599.024880)}
{pt3dadd(196440.000000,119076.000000,96300.000000,599.024880)}
{pt3dadd(196404.000000,118968.000000,96225.000000,628.976115)}
{pt3dadd(196332.000000,118848.000000,96025.000000,658.927350)}
{pt3dadd(196260.000000,118728.000000,95925.000000,688.878585)}
{pt3dadd(196128.000000,118464.000000,95700.000000,718.829820)}
{pt3dadd(196032.000000,118368.000000,95550.000000,690.651675)}
{pt3dadd(195960.000000,118176.000000,95350.000000,662.473530)}
{pt3dadd(195696.000000,117876.000000,95100.000000,662.473602)}

{create adhoc50}
{access adhoc50}
{connect adhoc50(1), adhoc49(0)}
{nseg = 1}
{strdef color color = "White"}
{pt3dclear()}
{pt3dadd(195696.000000,117876.000000,95100.000000,662.473602)}
{pt3dadd(195624.000000,117588.000000,95075.000000,635.974578)}
{pt3dadd(195576.000000,117396.000000,95075.000000,439.535052)}
{pt3dadd(195528.000000,117180.000000,95075.000000,243.095526)}
{pt3dadd(195480.000000,116952.000000,95075.000000,46.656000)}
{pt3dadd(195492.000000,116688.000000,95075.000000,55.987200)}

{create adhoc51}
{access adhoc51}
{connect adhoc51(1), adhoc49(0)}
{nseg = 1}
{strdef color color = "White"}
{pt3dclear()}
{pt3dadd(195696.000000,117876.000000,95100.000000,662.473602)}
{pt3dadd(195612.000000,117792.000000,94925.000000,690.076602)}
{pt3dadd(195360.000000,117624.000000,94700.000000,642.354295)}
{pt3dadd(195288.000000,117504.000000,94525.000000,594.631989)}
{pt3dadd(195276.000000,117372.000000,94375.000000,546.909682)}
{pt3dadd(195228.000000,117252.000000,94200.000000,499.187376)}
{pt3dadd(195132.000000,117108.000000,94050.000000,494.195504)}
{pt3dadd(195072.000000,116988.000000,93900.000000,489.203631)}
{pt3dadd(194952.000000,116856.000000,93775.000000,484.211758)}
{pt3dadd(194868.000000,116748.000000,93600.000000,479.219886)}
{pt3dadd(194796.000000,116604.000000,93425.000000,460.051146)}

{create adhoc52}
{access adhoc52}
{connect adhoc52(1), adhoc51(0)}
{nseg = 1}
{strdef color color = "White"}
{pt3dclear()}
{pt3dadd(194796.000000,116604.000000,93425.000000,460.051146)}
{pt3dadd(194628.000000,116460.000000,93425.000000,479.219886)}
{pt3dadd(194424.000000,116328.000000,93425.000000,381.705165)}
{pt3dadd(194208.000000,116256.000000,93425.000000,284.190444)}
{pt3dadd(193992.000000,116184.000000,93425.000000,186.675723)}
{pt3dadd(193776.000000,116160.000000,93425.000000,89.161002)}
{pt3dadd(193608.000000,116160.000000,93525.000000,42.998166)}
{pt3dadd(193476.000000,116112.000000,93600.000000,32.400000)}

{create adhoc53}
{access adhoc53}
{connect adhoc53(1), adhoc51(0)}
{nseg = 1}
{strdef color color = "White"}
{pt3dclear()}
{pt3dadd(194796.000000,116604.000000,93425.000000,460.051146)}
{pt3dadd(194544.000000,116340.000000,93175.000000,479.219886)}
{pt3dadd(194436.000000,116016.000000,92850.000000,446.079388)}
{pt3dadd(194388.000000,115848.000000,92725.000000,412.938891)}
{pt3dadd(194364.000000,115608.000000,92550.000000,379.798393)}
{pt3dadd(194316.000000,115368.000000,92375.000000,346.657896)}
{pt3dadd(194292.000000,115272.000000,92350.000000,359.830908)}
{pt3dadd(194268.000000,115152.000000,92250.000000,373.003920)}
{pt3dadd(194232.000000,115044.000000,92200.000000,386.176932)}
{pt3dadd(194196.000000,114936.000000,92150.000000,399.349944)}
{pt3dadd(194160.000000,114840.000000,92100.000000,399.349935)}
{pt3dadd(194100.000000,114744.000000,92025.000000,399.349926)}
{pt3dadd(194088.000000,114660.000000,91950.000000,399.349917)}
{pt3dadd(194004.000000,114588.000000,91925.000000,399.349908)}
{pt3dadd(193884.000000,114528.000000,91825.000000,414.525199)}
{pt3dadd(193764.000000,114420.000000,91700.000000,429.700491)}
{pt3dadd(193680.000000,114312.000000,91650.000000,444.875782)}
{pt3dadd(193632.000000,114204.000000,91625.000000,460.051074)}
{pt3dadd(193572.000000,114036.000000,91550.000000,535.830692)}
{pt3dadd(193464.000000,113904.000000,91525.000000,611.610309)}
{pt3dadd(193320.000000,113784.000000,91450.000000,687.389926)}
{pt3dadd(193308.000000,113676.000000,91375.000000,763.169544)}
{pt3dadd(193260.000000,113532.000000,91300.000000,828.092016)}
{pt3dadd(193248.000000,113400.000000,91225.000000,794.968308)}

{create adhoc54}
{access adhoc54}
{connect adhoc54(1), adhoc53(0)}
{nseg = 1}
{strdef color color = "White"}
{pt3dclear()}
{pt3dadd(193248.000000,113400.000000,91225.000000,794.968308)}
{pt3dadd(193368.000000,113352.000000,91500.000000,718.829820)}
{pt3dadd(193404.000000,113352.000000,91775.000000,585.343417)}
{pt3dadd(193344.000000,113352.000000,92100.000000,451.857015)}
{pt3dadd(193260.000000,113256.000000,92150.000000,318.370612)}
{pt3dadd(193164.000000,113112.000000,92250.000000,184.884210)}
{pt3dadd(193080.000000,113004.000000,92350.000000,198.846819)}
{pt3dadd(193020.000000,112884.000000,92375.000000,212.809428)}
{pt3dadd(192912.000000,112788.000000,92375.000000,226.772037)}
{pt3dadd(192900.000000,112704.000000,92425.000000,240.734646)}
{pt3dadd(192888.000000,112632.000000,92475.000000,249.234192)}
{pt3dadd(192708.000000,112500.000000,92675.000000,257.733738)}
{pt3dadd(192540.000000,112404.000000,92775.000000,266.233284)}
{pt3dadd(192444.000000,112308.000000,92850.000000,277.326324)}

{create adhoc55}
{access adhoc55}
{connect adhoc55(1), adhoc54(0)}
{nseg = 1}
{strdef color color = "White"}
{pt3dclear()}
{pt3dadd(192444.000000,112308.000000,92850.000000,277.326324)}
{pt3dadd(192300.000000,112392.000000,93025.000000,346.657896)}
{pt3dadd(192108.000000,112392.000000,93225.000000,213.639723)}
{pt3dadd(191808.000000,112392.000000,93325.000000,80.621550)}
{pt3dadd(191508.000000,112392.000000,93350.000000,80.621550)}

{create adhoc56}
{access adhoc56}
{connect adhoc56(1), adhoc55(0)}
{nseg = 1}
{strdef color color = "White"}
{pt3dclear()}
{pt3dadd(191508.000000,112392.000000,93350.000000,80.621550)}
{pt3dadd(191328.000000,112248.000000,93275.000000,55.987200)}
{pt3dadd(191280.000000,112140.000000,93200.000000,55.987200)}
{pt3dadd(191172.000000,112128.000000,93100.000000,55.987200)}
{pt3dadd(191040.000000,111912.000000,92975.000000,55.987200)}
{pt3dadd(190956.000000,111744.000000,92825.000000,55.987200)}
{pt3dadd(190836.000000,111480.000000,92650.000000,38.880000)}
{pt3dadd(190752.000000,111420.000000,92600.000000,38.880000)}

{create adhoc57}
{access adhoc57}
{connect adhoc57(1), adhoc55(0)}
{nseg = 1}
{strdef color color = "White"}
{pt3dclear()}
{pt3dadd(191508.000000,112392.000000,93350.000000,80.621550)}
{pt3dadd(191460.000000,112572.000000,93350.000000,80.621550)}

{create adhoc58}
{access adhoc58}
{connect adhoc58(1), adhoc57(0)}
{nseg = 1}
{strdef color color = "White"}
{pt3dclear()}
{pt3dadd(191460.000000,112572.000000,93350.000000,80.621550)}
{pt3dadd(191280.000000,112788.000000,93450.000000,38.880000)}
{pt3dadd(191016.000000,113004.000000,93450.000000,67.184640)}
{pt3dadd(190872.000000,113016.000000,93325.000000,46.656000)}

{create adhoc59}
{access adhoc59}
{connect adhoc59(1), adhoc57(0)}
{nseg = 1}
{strdef color color = "White"}
{pt3dclear()}
{pt3dadd(191460.000000,112572.000000,93350.000000,80.621550)}
{pt3dadd(191448.000000,112680.000000,93600.000000,96.745860)}
{pt3dadd(191364.000000,112572.000000,93700.000000,80.049240)}
{pt3dadd(191436.000000,112464.000000,93800.000000,63.352620)}
{pt3dadd(191316.000000,112284.000000,93925.000000,46.656000)}
{pt3dadd(191292.000000,112128.000000,93925.000000,32.400000)}

{create adhoc60}
{access adhoc60}
{connect adhoc60(1), adhoc54(0)}
{nseg = 1}
{strdef color color = "White"}
{pt3dclear()}
{pt3dadd(192444.000000,112308.000000,92850.000000,277.326324)}
{pt3dadd(192432.000000,112164.000000,92825.000000,346.657896)}
{pt3dadd(192420.000000,112032.000000,92825.000000,332.213819)}
{pt3dadd(192444.000000,111936.000000,92850.000000,317.769741)}
{pt3dadd(192468.000000,111816.000000,92850.000000,303.325664)}
{pt3dadd(192456.000000,111696.000000,92850.000000,288.881586)}
{pt3dadd(192396.000000,111576.000000,92900.000000,274.437509)}
{pt3dadd(192432.000000,111468.000000,92975.000000,259.993431)}
{pt3dadd(192348.000000,111348.000000,92975.000000,245.549354)}
{pt3dadd(192300.000000,111228.000000,92975.000000,231.105276)}
{pt3dadd(192288.000000,111108.000000,92975.000000,223.482010)}
{pt3dadd(192204.000000,110988.000000,92950.000000,215.858745)}
{pt3dadd(192156.000000,110880.000000,92900.000000,208.235480)}
{pt3dadd(192108.000000,110772.000000,92900.000000,200.612214)}
{pt3dadd(191976.000000,110664.000000,92925.000000,210.642822)}
{pt3dadd(191916.000000,110556.000000,92900.000000,220.673430)}
{pt3dadd(191832.000000,110460.000000,92875.000000,230.704038)}
{pt3dadd(191820.000000,110376.000000,92850.000000,240.734646)}
{pt3dadd(191760.000000,110280.000000,92825.000000,238.327304)}
{pt3dadd(191748.000000,110160.000000,92800.000000,235.919961)}
{pt3dadd(191640.000000,110124.000000,92775.000000,233.512618)}
{pt3dadd(191520.000000,109944.000000,92750.000000,231.105276)}
{pt3dadd(191412.000000,109644.000000,92725.000000,231.105276)}
{pt3dadd(191304.000000,109476.000000,92725.000000,231.105276)}
{pt3dadd(191160.000000,109332.000000,92725.000000,231.105276)}
{pt3dadd(191064.000000,109188.000000,92775.000000,231.105276)}
{pt3dadd(190968.000000,109032.000000,92825.000000,202.352715)}
{pt3dadd(190992.000000,108900.000000,92700.000000,173.600154)}
{pt3dadd(190920.000000,108804.000000,92625.000000,144.847593)}
{pt3dadd(190848.000000,108684.000000,92625.000000,116.095032)}
{pt3dadd(190800.000000,108564.000000,92650.000000,127.193719)}
{pt3dadd(190800.000000,108444.000000,92650.000000,138.292407)}
{pt3dadd(190752.000000,108336.000000,92625.000000,149.391095)}
{pt3dadd(190728.000000,108240.000000,92575.000000,160.489782)}
{pt3dadd(190704.000000,108144.000000,92550.000000,160.489778)}
{pt3dadd(190716.000000,108048.000000,92550.000000,160.489773)}
{pt3dadd(190692.000000,107952.000000,92550.000000,160.489769)}
{pt3dadd(190644.000000,107856.000000,92525.000000,160.489764)}
{pt3dadd(190620.000000,107760.000000,92500.000000,168.514254)}
{pt3dadd(190572.000000,107700.000000,92425.000000,176.538744)}
{pt3dadd(190548.000000,107604.000000,92400.000000,184.563234)}
{pt3dadd(190512.000000,107508.000000,92375.000000,192.587724)}
{pt3dadd(190500.000000,107412.000000,92350.000000,194.593846)}
{pt3dadd(190488.000000,107328.000000,92350.000000,196.599969)}
{pt3dadd(190392.000000,107244.000000,92225.000000,198.606091)}
{pt3dadd(190332.000000,107160.000000,92150.000000,200.612214)}
{pt3dadd(190236.000000,107076.000000,92075.000000,198.606091)}
{pt3dadd(190128.000000,106992.000000,92000.000000,196.599969)}
{pt3dadd(189840.000000,106896.000000,91950.000000,194.593846)}
{pt3dadd(189684.000000,106800.000000,91925.000000,192.587724)}
{pt3dadd(189540.000000,106692.000000,91925.000000,167.176836)}

{create adhoc61}
{access adhoc61}
{connect adhoc61(1), adhoc60(0)}
{nseg = 1}
{strdef color color = "White"}
{pt3dclear()}
{pt3dadd(189540.000000,106692.000000,91925.000000,167.176836)}
{pt3dadd(189288.000000,106320.000000,91700.000000,67.184640)}

{create adhoc62}
{access adhoc62}
{connect adhoc62(1), adhoc61(0)}
{nseg = 1}
{strdef color color = "White"}
{pt3dclear()}
{pt3dadd(189288.000000,106320.000000,91700.000000,67.184640)}
{pt3dadd(189276.000000,106668.000000,91925.000000,167.176836)}
{pt3dadd(189132.000000,106632.000000,92225.000000,67.184640)}
{pt3dadd(189036.000000,106680.000000,92450.000000,46.656000)}

{create adhoc63}
{access adhoc63}
{connect adhoc63(1), adhoc61(0)}
{nseg = 1}
{strdef color color = "White"}
{pt3dclear()}
{pt3dadd(189288.000000,106320.000000,91700.000000,67.184640)}
{pt3dadd(189156.000000,106248.000000,91700.000000,67.184640)}
{pt3dadd(189048.000000,106164.000000,91700.000000,67.184640)}
{pt3dadd(188904.000000,106092.000000,91675.000000,67.184640)}
{pt3dadd(188808.000000,106032.000000,91650.000000,67.184640)}
{pt3dadd(188688.000000,105984.000000,91500.000000,67.184640)}
{pt3dadd(188604.000000,105924.000000,91475.000000,110.572142)}
{pt3dadd(188496.000000,105816.000000,91450.000000,153.959643)}
{pt3dadd(188352.000000,105696.000000,91375.000000,197.347145)}
{pt3dadd(188196.000000,105480.000000,91250.000000,240.734646)}
{pt3dadd(188100.000000,105420.000000,91100.000000,168.740253)}
{pt3dadd(187968.000000,105504.000000,90950.000000,96.745860)}
{pt3dadd(187824.000000,105648.000000,90925.000000,38.880000)}

{create adhoc64}
{access adhoc64}
{connect adhoc64(1), adhoc60(0)}
{nseg = 1}
{strdef color color = "White"}
{pt3dclear()}
{pt3dadd(189540.000000,106692.000000,91925.000000,167.176836)}
{pt3dadd(189492.000000,106848.000000,92150.000000,231.105276)}
{pt3dadd(189468.000000,107160.000000,92250.000000,190.125117)}
{pt3dadd(189372.000000,107448.000000,92400.000000,149.144958)}
{pt3dadd(189264.000000,107676.000000,92475.000000,108.164799)}
{pt3dadd(189156.000000,107940.000000,92675.000000,67.184640)}
{pt3dadd(189156.000000,108096.000000,92800.000000,80.621550)}

{create adhoc65}
{access adhoc65}
{connect adhoc65(1), adhoc53(0)}
{nseg = 1}
{strdef color color = "White"}
{pt3dclear()}
{pt3dadd(193248.000000,113400.000000,91225.000000,794.968308)}
{pt3dadd(193152.000000,113208.000000,90900.000000,599.024880)}
{pt3dadd(193044.000000,112992.000000,90750.000000,644.550741)}
{pt3dadd(192984.000000,112860.000000,90575.000000,690.076602)}
{pt3dadd(192924.000000,112776.000000,90425.000000,763.169472)}

{create adhoc66}
{access adhoc66}
{connect adhoc66(1), adhoc65(0)}
{nseg = 1}
{strdef color color = "White"}
{pt3dclear()}
{pt3dadd(192924.000000,112776.000000,90425.000000,763.169472)}
{pt3dadd(192840.000000,112560.000000,90425.000000,635.974632)}
{pt3dadd(192708.000000,112368.000000,90425.000000,469.122342)}
{pt3dadd(192516.000000,112236.000000,90425.000000,276.475468)}
{pt3dadd(192300.000000,112140.000000,90500.000000,116.248518)}
{pt3dadd(192180.000000,111984.000000,90450.000000,46.656000)}
{pt3dadd(192108.000000,111864.000000,90500.000000,42.475348)}
{pt3dadd(192048.000000,111732.000000,90550.000000,39.813674)}
{pt3dadd(191940.000000,111588.000000,90525.000000,38.880000)}
{pt3dadd(191784.000000,111468.000000,90475.000000,39.883348)}

{create adhoc67}
{access adhoc67}
{connect adhoc67(1), adhoc65(0)}
{nseg = 1}
{strdef color color = "White"}
{pt3dclear()}
{pt3dadd(192924.000000,112776.000000,90425.000000,763.169472)}
{pt3dadd(192912.000000,112536.000000,90275.000000,915.803496)}
{pt3dadd(192888.000000,112488.000000,90150.000000,893.875608)}
{pt3dadd(192840.000000,112380.000000,90050.000000,871.947720)}
{pt3dadd(192792.000000,112308.000000,89850.000000,850.019832)}
{pt3dadd(192768.000000,112272.000000,89750.000000,828.091944)}
{pt3dadd(192720.000000,112224.000000,89600.000000,869.496547)}
{pt3dadd(192672.000000,112188.000000,89450.000000,910.901151)}
{pt3dadd(192660.000000,112140.000000,89275.000000,952.305755)}
{pt3dadd(192600.000000,112068.000000,89150.000000,993.710358)}
{pt3dadd(192564.000000,112032.000000,89025.000000,1043.395857)}
{pt3dadd(192528.000000,111972.000000,88875.000000,1093.081356)}
{pt3dadd(192516.000000,111972.000000,88700.000000,1142.766855)}
{pt3dadd(192492.000000,111972.000000,88575.000000,1192.452354)}
{pt3dadd(192444.000000,111960.000000,88425.000000,1192.452354)}
{pt3dadd(192396.000000,111888.000000,88300.000000,1192.452354)}
{pt3dadd(192348.000000,111828.000000,88175.000000,1192.452354)}
{pt3dadd(192312.000000,111744.000000,88025.000000,993.710286)}

{create adhoc68}
{access adhoc68}
{connect adhoc68(1), adhoc67(0)}
{nseg = 1}
{strdef color color = "White"}
{pt3dclear()}
{pt3dadd(192312.000000,111744.000000,88025.000000,993.710286)}
{pt3dadd(192312.000000,111708.000000,87775.000000,810.244314)}
{pt3dadd(192336.000000,111708.000000,87675.000000,694.347709)}
{pt3dadd(192336.000000,111840.000000,87400.000000,578.451105)}
{pt3dadd(192276.000000,111948.000000,87200.000000,462.554501)}
{pt3dadd(192228.000000,111960.000000,87000.000000,346.657896)}
{pt3dadd(192180.000000,111972.000000,86825.000000,346.657896)}
{pt3dadd(192132.000000,112092.000000,86650.000000,346.657896)}
{pt3dadd(192132.000000,112308.000000,86525.000000,415.989486)}

{create adhoc69}
{access adhoc69}
{connect adhoc69(1), adhoc68(0)}
{nseg = 1}
{strdef color color = "White"}
{pt3dclear()}
{pt3dadd(192132.000000,112308.000000,86525.000000,415.989486)}
{pt3dadd(191856.000000,111888.000000,86500.000000,415.989486)}
{pt3dadd(191736.000000,111684.000000,86350.000000,384.212511)}
{pt3dadd(191592.000000,111696.000000,86150.000000,352.435536)}
{pt3dadd(191484.000000,111660.000000,85950.000000,320.658561)}
{pt3dadd(191316.000000,111600.000000,85825.000000,288.881586)}
{pt3dadd(191112.000000,111480.000000,85675.000000,240.734646)}

{create adhoc70}
{access adhoc70}
{connect adhoc70(1), adhoc69(0)}
{nseg = 1}
{strdef color color = "White"}
{pt3dclear()}
{pt3dadd(191112.000000,111480.000000,85675.000000,240.734646)}
{pt3dadd(191208.000000,111564.000000,85550.000000,192.587706)}
{pt3dadd(191268.000000,111600.000000,85425.000000,115.733853)}
{pt3dadd(191304.000000,111912.000000,85300.000000,38.880000)}
{pt3dadd(191424.000000,112044.000000,85200.000000,32.400000)}

{create adhoc71}
{access adhoc71}
{connect adhoc71(1), adhoc69(0)}
{nseg = 1}
{strdef color color = "White"}
{pt3dclear()}
{pt3dadd(191112.000000,111480.000000,85675.000000,240.734646)}
{pt3dadd(190932.000000,111360.000000,85575.000000,212.986620)}
{pt3dadd(190836.000000,111228.000000,85475.000000,207.886896)}
{pt3dadd(190728.000000,111168.000000,85450.000000,202.787172)}
{pt3dadd(190608.000000,111120.000000,85425.000000,197.687448)}
{pt3dadd(190488.000000,111084.000000,85400.000000,192.587724)}
{pt3dadd(190380.000000,111120.000000,85375.000000,204.624455)}
{pt3dadd(190284.000000,111072.000000,85350.000000,216.661185)}
{pt3dadd(190164.000000,111036.000000,85325.000000,228.697915)}
{pt3dadd(190044.000000,110988.000000,85325.000000,240.734646)}
{pt3dadd(189936.000000,110964.000000,85300.000000,220.673426)}
{pt3dadd(189816.000000,110976.000000,85250.000000,200.612205)}
{pt3dadd(189708.000000,110988.000000,85200.000000,180.550985)}
{pt3dadd(189612.000000,110988.000000,85125.000000,160.489764)}
{pt3dadd(189444.000000,110844.000000,85100.000000,162.161532)}
{pt3dadd(188964.000000,110712.000000,84950.000000,163.833300)}
{pt3dadd(188460.000000,110628.000000,84875.000000,165.505068)}
{pt3dadd(188052.000000,110532.000000,84750.000000,167.176836)}
{pt3dadd(187716.000000,110412.000000,84725.000000,185.566288)}
{pt3dadd(187308.000000,110292.000000,84775.000000,203.955741)}
{pt3dadd(186936.000000,110196.000000,84800.000000,222.345193)}
{pt3dadd(186672.000000,110100.000000,84925.000000,240.734646)}
{pt3dadd(186396.000000,110016.000000,84975.000000,260.420972)}
{pt3dadd(186300.000000,109920.000000,85025.000000,280.107297)}
{pt3dadd(186036.000000,109812.000000,85125.000000,299.793622)}
{pt3dadd(185796.000000,109704.000000,85200.000000,319.479948)}
{pt3dadd(185580.000000,109608.000000,85125.000000,311.830357)}
{pt3dadd(185412.000000,109500.000000,85100.000000,304.180767)}
{pt3dadd(185172.000000,109380.000000,85075.000000,296.531176)}
{pt3dadd(184872.000000,109260.000000,85150.000000,288.881586)}
{pt3dadd(184536.000000,109140.000000,85200.000000,288.881586)}
{pt3dadd(184356.000000,109020.000000,85300.000000,288.881586)}
{pt3dadd(184056.000000,108912.000000,85525.000000,288.881586)}
{pt3dadd(183948.000000,108756.000000,85550.000000,288.881586)}
{pt3dadd(183804.000000,108708.000000,85600.000000,303.325664)}
{pt3dadd(183648.000000,108684.000000,85600.000000,317.769741)}
{pt3dadd(183516.000000,108624.000000,85725.000000,332.213819)}
{pt3dadd(183396.000000,108576.000000,85725.000000,346.657896)}
{pt3dadd(183264.000000,108528.000000,85750.000000,332.213819)}
{pt3dadd(183144.000000,108468.000000,85825.000000,317.769741)}
{pt3dadd(183036.000000,108456.000000,85825.000000,303.325664)}
{pt3dadd(182916.000000,108384.000000,85825.000000,288.881586)}
{pt3dadd(182784.000000,108396.000000,85850.000000,288.881586)}
{pt3dadd(182664.000000,108372.000000,85875.000000,288.881586)}
{pt3dadd(182544.000000,108276.000000,85875.000000,288.881586)}
{pt3dadd(182424.000000,108216.000000,85900.000000,288.881586)}
{pt3dadd(182316.000000,108156.000000,85925.000000,288.881586)}
{pt3dadd(182196.000000,108168.000000,85950.000000,288.881586)}
{pt3dadd(182088.000000,108120.000000,85975.000000,288.881586)}
{pt3dadd(181980.000000,108120.000000,86050.000000,288.881586)}
{pt3dadd(181872.000000,108072.000000,86075.000000,288.881586)}
{pt3dadd(181752.000000,108024.000000,86100.000000,288.881586)}
{pt3dadd(181632.000000,108060.000000,86175.000000,288.881586)}
{pt3dadd(181512.000000,107988.000000,86250.000000,288.881586)}
{pt3dadd(181392.000000,107988.000000,86325.000000,276.844851)}
{pt3dadd(181260.000000,107964.000000,86425.000000,264.808116)}
{pt3dadd(181140.000000,107940.000000,86425.000000,252.771381)}
{pt3dadd(181020.000000,107892.000000,86450.000000,240.734646)}
{pt3dadd(180900.000000,107832.000000,86525.000000,252.771381)}
{pt3dadd(180768.000000,107808.000000,86550.000000,264.808116)}
{pt3dadd(180648.000000,107760.000000,86550.000000,276.844851)}
{pt3dadd(180528.000000,107712.000000,86625.000000,288.881586)}
{pt3dadd(180396.000000,107640.000000,86650.000000,303.325664)}
{pt3dadd(180276.000000,107628.000000,86700.000000,317.769741)}
{pt3dadd(180204.000000,107604.000000,86700.000000,332.213819)}
{pt3dadd(180096.000000,107532.000000,86750.000000,346.657896)}
{pt3dadd(180000.000000,107544.000000,86750.000000,343.191312)}
{pt3dadd(179892.000000,107496.000000,86725.000000,339.724728)}
{pt3dadd(179772.000000,107496.000000,86700.000000,336.258144)}
{pt3dadd(179652.000000,107472.000000,86750.000000,332.791560)}
{pt3dadd(179532.000000,107520.000000,86850.000000,316.151991)}
{pt3dadd(179436.000000,107556.000000,86875.000000,299.512422)}
{pt3dadd(179340.000000,107556.000000,86900.000000,282.872853)}
{pt3dadd(179232.000000,107532.000000,86900.000000,266.233284)}
{pt3dadd(179124.000000,107520.000000,86900.000000,257.451282)}
{pt3dadd(179016.000000,107532.000000,86925.000000,248.669280)}
{pt3dadd(178896.000000,107520.000000,86950.000000,239.887278)}
{pt3dadd(178776.000000,107520.000000,86925.000000,231.105276)}
{pt3dadd(178680.000000,107472.000000,86900.000000,233.512618)}
{pt3dadd(178572.000000,107484.000000,86900.000000,235.919961)}
{pt3dadd(178452.000000,107412.000000,86900.000000,238.327304)}
{pt3dadd(178344.000000,107400.000000,86925.000000,240.734646)}
{pt3dadd(178236.000000,107352.000000,86925.000000,247.109306)}
{pt3dadd(178140.000000,107304.000000,86925.000000,253.483965)}
{pt3dadd(178044.000000,107232.000000,86950.000000,259.858625)}
{pt3dadd(177936.000000,107160.000000,86975.000000,266.233284)}
{pt3dadd(177840.000000,107148.000000,87075.000000,288.419376)}
{pt3dadd(177696.000000,107088.000000,87125.000000,310.605468)}
{pt3dadd(177576.000000,107076.000000,87175.000000,332.791560)}
{pt3dadd(177444.000000,107028.000000,87200.000000,245.360574)}

{create adhoc72}
{access adhoc72}
{connect adhoc72(1), adhoc71(0)}
{nseg = 1}
{strdef color color = "White"}
{pt3dclear()}
{pt3dadd(177444.000000,107028.000000,87200.000000,245.360574)}
{pt3dadd(177552.000000,106884.000000,87350.000000,288.881586)}
{pt3dadd(177636.000000,106812.000000,87525.000000,303.325664)}
{pt3dadd(177564.000000,106740.000000,87700.000000,317.769741)}
{pt3dadd(177468.000000,106644.000000,87875.000000,332.213819)}
{pt3dadd(177456.000000,106584.000000,88100.000000,346.657896)}
{pt3dadd(177396.000000,106524.000000,88275.000000,329.324994)}
{pt3dadd(177480.000000,106512.000000,88450.000000,311.992092)}
{pt3dadd(177588.000000,106500.000000,88575.000000,294.659190)}
{pt3dadd(177972.000000,106440.000000,88700.000000,277.326288)}
{pt3dadd(178092.000000,106296.000000,88850.000000,292.791335)}
{pt3dadd(178224.000000,106224.000000,89025.000000,308.256381)}
{pt3dadd(178236.000000,106212.000000,89225.000000,323.721427)}
{pt3dadd(178284.000000,106128.000000,89425.000000,339.186474)}
{pt3dadd(178404.000000,106032.000000,89600.000000,346.657896)}
{pt3dadd(178536.000000,106008.000000,89850.000000,288.881586)}

{create adhoc73}
{access adhoc73}
{connect adhoc73(1), adhoc72(0)}
{nseg = 1}
{strdef color color = "White"}
{pt3dclear()}
{pt3dadd(178536.000000,106008.000000,89850.000000,288.881586)}
{pt3dadd(178704.000000,106176.000000,89950.000000,64.497240)}
{pt3dadd(178800.000000,106428.000000,89975.000000,68.528318)}
{pt3dadd(178920.000000,106716.000000,90050.000000,72.559395)}
{pt3dadd(179064.000000,106932.000000,90050.000000,76.590473)}
{pt3dadd(179100.000000,107184.000000,90050.000000,80.621550)}
{pt3dadd(179100.000000,107388.000000,90050.000000,67.184631)}
{pt3dadd(179040.000000,107640.000000,90050.000000,53.747712)}
{pt3dadd(178908.000000,107712.000000,90075.000000,38.880000)}

{create adhoc74}
{access adhoc74}
{connect adhoc74(1), adhoc72(0)}
{nseg = 1}
{strdef color color = "White"}
{pt3dclear()}
{pt3dadd(178536.000000,106008.000000,89850.000000,288.881586)}
{pt3dadd(178524.000000,105960.000000,90025.000000,240.734646)}
{pt3dadd(178452.000000,105816.000000,90200.000000,240.734646)}
{pt3dadd(178524.000000,105768.000000,90400.000000,240.734646)}
{pt3dadd(178560.000000,105804.000000,90575.000000,240.734646)}
{pt3dadd(178572.000000,105864.000000,90775.000000,240.734646)}
{pt3dadd(178572.000000,105792.000000,90975.000000,209.574742)}
{pt3dadd(178656.000000,105672.000000,91175.000000,178.414839)}
{pt3dadd(178680.000000,105456.000000,91325.000000,147.254936)}
{pt3dadd(178716.000000,105228.000000,91500.000000,116.095032)}
{pt3dadd(178596.000000,105072.000000,91500.000000,67.184640)}
{pt3dadd(178452.000000,104928.000000,91500.000000,44.789760)}

{create adhoc75}
{access adhoc75}
{connect adhoc75(1), adhoc74(0)}
{nseg = 1}
{strdef color color = "White"}
{pt3dclear()}
{pt3dadd(178452.000000,104928.000000,91500.000000,44.789760)}
{pt3dadd(178428.000000,104748.000000,91500.000000,55.987200)}
{pt3dadd(178356.000000,104556.000000,91500.000000,62.145787)}
{pt3dadd(178248.000000,104364.000000,91400.000000,68.304375)}
{pt3dadd(178116.000000,104124.000000,91400.000000,74.462963)}
{pt3dadd(178140.000000,103896.000000,91325.000000,80.621550)}
{pt3dadd(178068.000000,103884.000000,91175.000000,80.621550)}
{pt3dadd(178020.000000,103608.000000,91075.000000,55.987200)}

{create adhoc76}
{access adhoc76}
{connect adhoc76(1), adhoc74(0)}
{nseg = 1}
{strdef color color = "White"}
{pt3dclear()}
{pt3dadd(178452.000000,104928.000000,91500.000000,44.789760)}
{pt3dadd(178320.000000,104904.000000,91600.000000,96.745860)}
{pt3dadd(178224.000000,104988.000000,91850.000000,80.621550)}
{pt3dadd(178140.000000,105120.000000,91875.000000,55.987200)}

{create adhoc77}
{access adhoc77}
{connect adhoc77(1), adhoc71(0)}
{nseg = 1}
{strdef color color = "White"}
{pt3dclear()}
{pt3dadd(177444.000000,107028.000000,87200.000000,245.360574)}
{pt3dadd(177312.000000,107184.000000,87125.000000,167.176836)}
{pt3dadd(177204.000000,107268.000000,87125.000000,165.505073)}
{pt3dadd(177096.000000,107268.000000,87150.000000,163.833309)}
{pt3dadd(176988.000000,107304.000000,87150.000000,162.161545)}
{pt3dadd(176892.000000,107244.000000,87175.000000,160.489782)}
{pt3dadd(176808.000000,107280.000000,87150.000000,160.489778)}
{pt3dadd(176700.000000,107268.000000,87150.000000,160.489773)}
{pt3dadd(176604.000000,107256.000000,87200.000000,160.489769)}
{pt3dadd(176508.000000,107160.000000,87250.000000,160.489764)}
{pt3dadd(176436.000000,107148.000000,87250.000000,193.975497)}
{pt3dadd(176352.000000,107160.000000,87225.000000,227.461230)}
{pt3dadd(176268.000000,107148.000000,87200.000000,260.946963)}
{pt3dadd(176184.000000,107196.000000,87125.000000,294.432696)}
{pt3dadd(176124.000000,107196.000000,87000.000000,277.326342)}

{create adhoc78}
{access adhoc78}
{connect adhoc78(1), adhoc77(0)}
{nseg = 1}
{strdef color color = "White"}
{pt3dclear()}
{pt3dadd(176124.000000,107196.000000,87000.000000,277.326342)}
{pt3dadd(176124.000000,107136.000000,87300.000000,277.326342)}
{pt3dadd(176052.000000,107100.000000,87325.000000,228.150144)}
{pt3dadd(175908.000000,107004.000000,87325.000000,178.973946)}
{pt3dadd(175776.000000,106884.000000,87275.000000,129.797748)}
{pt3dadd(175716.000000,106620.000000,87150.000000,80.621550)}
{pt3dadd(175680.000000,106380.000000,87125.000000,110.619216)}
{pt3dadd(175620.000000,106104.000000,87100.000000,140.616882)}
{pt3dadd(175620.000000,105828.000000,86875.000000,170.614548)}
{pt3dadd(175704.000000,105600.000000,86725.000000,200.612214)}
{pt3dadd(175740.000000,105180.000000,86650.000000,222.679557)}
{pt3dadd(175692.000000,104892.000000,86500.000000,244.746900)}
{pt3dadd(175704.000000,104748.000000,86375.000000,266.814243)}
{pt3dadd(175632.000000,104616.000000,86225.000000,288.881586)}
{pt3dadd(175572.000000,104520.000000,86050.000000,276.844851)}
{pt3dadd(175560.000000,104496.000000,85900.000000,264.808116)}
{pt3dadd(175488.000000,104376.000000,85750.000000,252.771381)}
{pt3dadd(175440.000000,104280.000000,85600.000000,240.734646)}
{pt3dadd(175452.000000,104088.000000,85450.000000,226.772037)}
{pt3dadd(175356.000000,104160.000000,85275.000000,212.809428)}
{pt3dadd(175224.000000,104148.000000,85100.000000,198.846819)}
{pt3dadd(175164.000000,104100.000000,84950.000000,184.884210)}
{pt3dadd(175104.000000,104076.000000,84800.000000,242.660529)}
{pt3dadd(175080.000000,104064.000000,84675.000000,300.436848)}
{pt3dadd(175020.000000,104064.000000,84475.000000,358.213167)}
{pt3dadd(174948.000000,103992.000000,84300.000000,415.989486)}
{pt3dadd(174888.000000,103920.000000,84125.000000,332.791596)}
{pt3dadd(174780.000000,103908.000000,83950.000000,221.861070)}

{create adhoc79}
{access adhoc79}
{connect adhoc79(1), adhoc78(0)}
{nseg = 1}
{strdef color color = "White"}
{pt3dclear()}
{pt3dadd(174780.000000,103908.000000,83950.000000,221.861070)}
{pt3dadd(174780.000000,103644.000000,84000.000000,200.612214)}
{pt3dadd(174624.000000,103524.000000,83975.000000,166.583471)}
{pt3dadd(174564.000000,103260.000000,83875.000000,132.554727)}
{pt3dadd(174480.000000,103092.000000,83850.000000,98.525984)}
{pt3dadd(174360.000000,102960.000000,83775.000000,64.497240)}
{pt3dadd(174252.000000,102876.000000,83800.000000,66.948138)}
{pt3dadd(174144.000000,102684.000000,83750.000000,69.399036)}
{pt3dadd(174060.000000,102612.000000,83750.000000,71.849934)}
{pt3dadd(173976.000000,102480.000000,83725.000000,74.300832)}
{pt3dadd(173880.000000,102408.000000,83675.000000,75.881012)}
{pt3dadd(173796.000000,102240.000000,83525.000000,77.461191)}
{pt3dadd(173700.000000,102216.000000,83500.000000,79.041370)}
{pt3dadd(173604.000000,102144.000000,83400.000000,80.621550)}
{pt3dadd(173520.000000,102012.000000,83400.000000,98.358291)}
{pt3dadd(173424.000000,102012.000000,83350.000000,116.095032)}
{pt3dadd(173316.000000,102048.000000,83300.000000,55.987200)}

{create adhoc80}
{access adhoc80}
{connect adhoc80(1), adhoc78(0)}
{nseg = 1}
{strdef color color = "White"}
{pt3dclear()}
{pt3dadd(174780.000000,103908.000000,83950.000000,221.861070)}
{pt3dadd(174696.000000,103884.000000,83975.000000,240.734646)}
{pt3dadd(174564.000000,103896.000000,84000.000000,133.741476)}
{pt3dadd(174432.000000,104016.000000,84000.000000,96.745860)}

{create adhoc81}
{access adhoc81}
{connect adhoc81(1), adhoc77(0)}
{nseg = 1}
{strdef color color = "White"}
{pt3dclear()}
{pt3dadd(176124.000000,107196.000000,87000.000000,277.326342)}
{pt3dadd(176052.000000,107196.000000,86850.000000,200.612214)}
{pt3dadd(175956.000000,107208.000000,86775.000000,192.253370)}
{pt3dadd(175860.000000,107208.000000,86725.000000,183.894525)}
{pt3dadd(175788.000000,107208.000000,86700.000000,175.535680)}
{pt3dadd(175680.000000,107196.000000,86575.000000,167.176836)}
{pt3dadd(175572.000000,107196.000000,86525.000000,145.538014)}
{pt3dadd(175464.000000,107256.000000,86475.000000,123.899193)}
{pt3dadd(175356.000000,107268.000000,86400.000000,102.260372)}
{pt3dadd(175164.000000,107184.000000,86350.000000,80.621550)}
{pt3dadd(174960.000000,107088.000000,86275.000000,92.564123)}
{pt3dadd(174732.000000,106932.000000,86150.000000,104.506695)}
{pt3dadd(174600.000000,106788.000000,86075.000000,116.449267)}
{pt3dadd(174336.000000,106548.000000,85925.000000,128.391840)}
{pt3dadd(174204.000000,106416.000000,85825.000000,107.957880)}
{pt3dadd(174048.000000,106224.000000,85775.000000,87.523920)}
{pt3dadd(173892.000000,106080.000000,85775.000000,67.089960)}
{pt3dadd(173760.000000,105876.000000,85775.000000,46.656000)}
{pt3dadd(173628.000000,105672.000000,85775.000000,48.988800)}
{pt3dadd(173544.000000,105480.000000,85850.000000,51.321600)}
{pt3dadd(173424.000000,105396.000000,85875.000000,53.654400)}
{pt3dadd(173304.000000,105204.000000,85750.000000,55.987200)}
{pt3dadd(173172.000000,105060.000000,85575.000000,38.880000)}

{create adhoc82}
{access adhoc82}
{connect adhoc82(1), adhoc68(0)}
{nseg = 1}
{strdef color color = "White"}
{pt3dclear()}
{pt3dadd(192132.000000,112308.000000,86525.000000,415.989486)}
{pt3dadd(192564.000000,112944.000000,86450.000000,192.587706)}
{pt3dadd(192768.000000,113412.000000,86275.000000,186.234989)}
{pt3dadd(192972.000000,113760.000000,86200.000000,179.882271)}
{pt3dadd(193080.000000,113892.000000,86025.000000,173.529553)}
{pt3dadd(193224.000000,114144.000000,85950.000000,167.176836)}
{pt3dadd(193332.000000,114372.000000,85950.000000,197.603024)}
{pt3dadd(193416.000000,114552.000000,85950.000000,228.029211)}
{pt3dadd(193524.000000,114732.000000,85900.000000,258.455399)}
{pt3dadd(193620.000000,114768.000000,85900.000000,288.881586)}
{pt3dadd(193728.000000,114876.000000,85925.000000,276.844851)}
{pt3dadd(193836.000000,114960.000000,85900.000000,264.808116)}
{pt3dadd(193944.000000,115116.000000,85875.000000,252.771381)}
{pt3dadd(194088.000000,115224.000000,85825.000000,240.734646)}
{pt3dadd(194196.000000,115356.000000,85750.000000,230.704038)}
{pt3dadd(194304.000000,115548.000000,85725.000000,220.673430)}
{pt3dadd(194412.000000,115680.000000,85675.000000,210.642822)}
{pt3dadd(194520.000000,115800.000000,85575.000000,200.612214)}
{pt3dadd(194640.000000,115908.000000,85625.000000,210.642822)}
{pt3dadd(194748.000000,116088.000000,85675.000000,220.673430)}
{pt3dadd(194880.000000,116472.000000,85775.000000,230.704038)}
{pt3dadd(195000.000000,116556.000000,85675.000000,240.734646)}
{pt3dadd(195108.000000,116712.000000,85700.000000,233.797635)}
{pt3dadd(195120.000000,116868.000000,85725.000000,226.860624)}
{pt3dadd(195156.000000,117000.000000,85750.000000,219.923613)}
{pt3dadd(195240.000000,117132.000000,85750.000000,212.986602)}
{pt3dadd(195276.000000,117288.000000,85825.000000,201.534161)}
{pt3dadd(195360.000000,117444.000000,85925.000000,190.081719)}
{pt3dadd(195360.000000,117564.000000,86000.000000,178.629278)}
{pt3dadd(195336.000000,117708.000000,86100.000000,167.176836)}
{pt3dadd(195324.000000,117840.000000,86150.000000,167.176836)}
{pt3dadd(195324.000000,117996.000000,86200.000000,167.176836)}
{pt3dadd(195264.000000,118128.000000,86300.000000,200.612214)}

{create adhoc83}
{access adhoc83}
{connect adhoc83(1), adhoc82(0)}
{nseg = 1}
{strdef color color = "White"}
{pt3dclear()}
{pt3dadd(195264.000000,118128.000000,86300.000000,200.612214)}
{pt3dadd(194976.000000,118068.000000,86450.000000,46.656000)}
{pt3dadd(194700.000000,118080.000000,86450.000000,46.656000)}
{pt3dadd(194592.000000,118068.000000,86450.000000,46.656000)}
{pt3dadd(194484.000000,117996.000000,86425.000000,44.789760)}

{create adhoc84}
{access adhoc84}
{connect adhoc84(1), adhoc82(0)}
{nseg = 1}
{strdef color color = "White"}
{pt3dclear()}
{pt3dadd(195264.000000,118128.000000,86300.000000,200.612214)}
{pt3dadd(195144.000000,118296.000000,86375.000000,231.105276)}
{pt3dadd(195144.000000,118392.000000,86350.000000,250.004146)}
{pt3dadd(195192.000000,118512.000000,86400.000000,268.903017)}
{pt3dadd(195132.000000,118632.000000,86475.000000,287.801888)}
{pt3dadd(195108.000000,118740.000000,86450.000000,306.700758)}
{pt3dadd(195048.000000,118848.000000,86425.000000,316.690043)}
{pt3dadd(194976.000000,118956.000000,86400.000000,326.679327)}
{pt3dadd(194964.000000,119100.000000,86350.000000,336.668612)}
{pt3dadd(195000.000000,119004.000000,86125.000000,346.657896)}
{pt3dadd(194940.000000,119196.000000,85925.000000,301.787631)}
{pt3dadd(194940.000000,119208.000000,85750.000000,256.917366)}
{pt3dadd(194976.000000,119112.000000,85575.000000,212.047101)}
{pt3dadd(195084.000000,119016.000000,85425.000000,167.176836)}
{pt3dadd(195132.000000,119160.000000,85250.000000,133.741476)}
{pt3dadd(195084.000000,119244.000000,85100.000000,160.489782)}

{create adhoc85}
{access adhoc85}
{connect adhoc85(1), adhoc84(0)}
{nseg = 1}
{strdef color color = "White"}
{pt3dclear()}
{pt3dadd(195084.000000,119244.000000,85100.000000,160.489782)}
{pt3dadd(195276.000000,119328.000000,85100.000000,141.991074)}
{pt3dadd(195348.000000,119412.000000,85100.000000,120.490106)}
{pt3dadd(195480.000000,119412.000000,85125.000000,98.989137)}
{pt3dadd(195576.000000,119424.000000,85125.000000,77.488168)}
{pt3dadd(195684.000000,119628.000000,85100.000000,55.987200)}
{pt3dadd(195792.000000,119748.000000,85050.000000,62.145787)}
{pt3dadd(195924.000000,119880.000000,85050.000000,68.304375)}
{pt3dadd(196020.000000,119988.000000,85000.000000,74.462963)}
{pt3dadd(196116.000000,120048.000000,85025.000000,80.621550)}
{pt3dadd(196212.000000,120168.000000,85075.000000,71.663602)}
{pt3dadd(196320.000000,120288.000000,85100.000000,62.705655)}
{pt3dadd(196416.000000,120492.000000,85200.000000,53.747707)}
{pt3dadd(196452.000000,120780.000000,85200.000000,44.789760)}
{pt3dadd(196380.000000,120972.000000,85200.000000,45.256320)}
{pt3dadd(196356.000000,121200.000000,85200.000000,45.722880)}
{pt3dadd(196332.000000,121428.000000,85200.000000,46.189440)}
{pt3dadd(196332.000000,121608.000000,85200.000000,46.656000)}
{pt3dadd(196416.000000,121788.000000,85200.000000,38.880000)}

{create adhoc86}
{access adhoc86}
{connect adhoc86(1), adhoc84(0)}
{nseg = 1}
{strdef color color = "White"}
{pt3dclear()}
{pt3dadd(195084.000000,119244.000000,85100.000000,160.489782)}
{pt3dadd(194796.000000,119028.000000,84975.000000,167.176836)}
{pt3dadd(194700.000000,118980.000000,84775.000000,180.847890)}
{pt3dadd(194628.000000,119064.000000,84575.000000,194.518944)}
{pt3dadd(194616.000000,119136.000000,84400.000000,208.189998)}
{pt3dadd(194628.000000,119172.000000,84275.000000,221.861052)}
{pt3dadd(194664.000000,119160.000000,84100.000000,195.419547)}
{pt3dadd(194664.000000,119196.000000,83925.000000,168.978042)}
{pt3dadd(194472.000000,119208.000000,83800.000000,142.536537)}
{pt3dadd(194400.000000,119220.000000,83650.000000,116.095032)}
{pt3dadd(194304.000000,119208.000000,83525.000000,123.834702)}
{pt3dadd(194208.000000,119088.000000,83400.000000,131.574372)}
{pt3dadd(194280.000000,119160.000000,83225.000000,139.314042)}
{pt3dadd(194196.000000,119112.000000,83075.000000,80.621550)}

{create adhoc87}
{access adhoc87}
{connect adhoc87(1), adhoc86(0)}
{nseg = 1}
{strdef color color = "White"}
{pt3dclear()}
{pt3dadd(194196.000000,119112.000000,83075.000000,80.621550)}
{pt3dadd(194352.000000,119196.000000,82950.000000,67.184640)}
{pt3dadd(194472.000000,119304.000000,82800.000000,89.370252)}
{pt3dadd(194556.000000,119316.000000,82625.000000,111.555864)}
{pt3dadd(194616.000000,119436.000000,82475.000000,133.741476)}
{pt3dadd(194724.000000,119592.000000,82350.000000,44.789760)}

{create adhoc88}
{access adhoc88}
{connect adhoc88(1), adhoc86(0)}
{nseg = 1}
{strdef color color = "White"}
{pt3dclear()}
{pt3dadd(194196.000000,119112.000000,83075.000000,80.621550)}
{pt3dadd(194076.000000,119064.000000,83150.000000,92.876040)}
{pt3dadd(193968.000000,118944.000000,83050.000000,104.485541)}
{pt3dadd(193932.000000,118812.000000,82825.000000,116.095041)}
{pt3dadd(193860.000000,118692.000000,82675.000000,127.704541)}
{pt3dadd(193692.000000,118572.000000,82550.000000,139.314042)}
{pt3dadd(193680.000000,118644.000000,82350.000000,133.509289)}
{pt3dadd(193656.000000,118584.000000,82200.000000,127.704537)}
{pt3dadd(193692.000000,118560.000000,82025.000000,121.899785)}
{pt3dadd(193536.000000,118464.000000,81875.000000,116.095032)}
{pt3dadd(193548.000000,118416.000000,81700.000000,116.095032)}
{pt3dadd(193548.000000,118404.000000,81500.000000,116.095032)}
{pt3dadd(193548.000000,118392.000000,81275.000000,96.745860)}

{create adhoc89}
{access adhoc89}
{connect adhoc89(1), adhoc67(0)}
{nseg = 1}
{strdef color color = "White"}
{pt3dclear()}
{pt3dadd(192312.000000,111744.000000,88025.000000,993.710286)}
{pt3dadd(192276.000000,111516.000000,87950.000000,862.595802)}
{pt3dadd(192216.000000,111252.000000,87950.000000,668.756682)}
{pt3dadd(192144.000000,111036.000000,87950.000000,474.917562)}
{pt3dadd(192024.000000,110892.000000,87950.000000,281.078442)}
{pt3dadd(191892.000000,110724.000000,87950.000000,87.239322)}
{pt3dadd(191688.000000,110592.000000,87950.000000,77.093491)}
{pt3dadd(191460.000000,110472.000000,87950.000000,66.947661)}
{pt3dadd(191316.000000,110328.000000,87950.000000,56.801831)}
{pt3dadd(191208.000000,110160.000000,87950.000000,46.656000)}
{pt3dadd(191052.000000,110016.000000,87950.000000,80.621550)}
{pt3dadd(190860.000000,109872.000000,87950.000000,200.612214)}

{create adhoc90}
{access adhoc90}
{connect adhoc90(1), adhoc89(0)}
{nseg = 1}
{strdef color color = "White"}
{pt3dclear()}
{pt3dadd(190860.000000,109872.000000,87950.000000,200.612214)}
{pt3dadd(190776.000000,109704.000000,88200.000000,240.734646)}
{pt3dadd(190764.000000,109560.000000,88400.000000,96.745860)}
{pt3dadd(190692.000000,109332.000000,88600.000000,55.987200)}

{create adhoc91}
{access adhoc91}
{connect adhoc91(1), adhoc89(0)}
{nseg = 1}
{strdef color color = "White"}
{pt3dclear()}
{pt3dadd(190860.000000,109872.000000,87950.000000,200.612214)}
{pt3dadd(190704.000000,109584.000000,87850.000000,139.314042)}
{pt3dadd(190572.000000,109296.000000,87700.000000,46.656000)}

{create adhoc92}
{access adhoc92}
{connect adhoc92(1), adhoc40(0)}
{nseg = 1}
{strdef color color = "White"}
{pt3dclear()}
{pt3dadd(198732.000000,135996.000000,100075.000000,599.024880)}
{pt3dadd(198528.000000,135996.000000,99850.000000,399.349944)}
{pt3dadd(198324.000000,135996.000000,99700.000000,314.991796)}
{pt3dadd(198120.000000,135996.000000,99625.000000,230.633649)}
{pt3dadd(197928.000000,135996.000000,99675.000000,146.275502)}
{pt3dadd(197724.000000,135996.000000,99775.000000,61.917354)}
{pt3dadd(197640.000000,135900.000000,99775.000000,60.434815)}
{pt3dadd(197556.000000,135792.000000,99800.000000,58.952277)}
{pt3dadd(197424.000000,135684.000000,99750.000000,57.469738)}
{pt3dadd(197172.000000,135612.000000,99775.000000,55.987200)}
{pt3dadd(197004.000000,135528.000000,99800.000000,68.304375)}
{pt3dadd(196896.000000,135420.000000,99850.000000,80.621550)}
{pt3dadd(196680.000000,135324.000000,99975.000000,192.587724)}

{create adhoc93}
{access adhoc93}
{connect adhoc93(1), adhoc92(0)}
{nseg = 1}
{strdef color color = "White"}
{pt3dclear()}
{pt3dadd(196680.000000,135324.000000,99975.000000,192.587724)}
{pt3dadd(196680.000000,135084.000000,99800.000000,55.987200)}
{pt3dadd(196704.000000,135000.000000,99625.000000,64.198650)}
{pt3dadd(196608.000000,134784.000000,99525.000000,72.410100)}
{pt3dadd(196488.000000,134700.000000,99425.000000,80.621550)}
{pt3dadd(196404.000000,134544.000000,99325.000000,46.656000)}

{create adhoc94}
{access adhoc94}
{connect adhoc94(1), adhoc92(0)}
{nseg = 1}
{strdef color color = "White"}
{pt3dclear()}
{pt3dadd(196680.000000,135324.000000,99975.000000,192.587724)}
{pt3dadd(196464.000000,135384.000000,100125.000000,240.734646)}
{pt3dadd(196368.000000,135444.000000,100275.000000,288.881586)}

{create adhoc95}
{access adhoc95}
{connect adhoc95(1), adhoc94(0)}
{nseg = 1}
{strdef color color = "White"}
{pt3dclear()}
{pt3dadd(196368.000000,135444.000000,100275.000000,288.881586)}
{pt3dadd(196404.000000,135588.000000,100425.000000,200.612214)}
{pt3dadd(196320.000000,135708.000000,100425.000000,162.123161)}
{pt3dadd(196188.000000,135900.000000,100425.000000,123.634107)}
{pt3dadd(196140.000000,136128.000000,100425.000000,85.145054)}
{pt3dadd(196116.000000,136344.000000,100525.000000,46.656000)}
{pt3dadd(196008.000000,136608.000000,100575.000000,69.766020)}
{pt3dadd(195948.000000,136908.000000,100675.000000,92.876040)}
{pt3dadd(195888.000000,137136.000000,100750.000000,139.314042)}

{create adhoc96}
{access adhoc96}
{connect adhoc96(1), adhoc95(0)}
{nseg = 1}
{strdef color color = "White"}
{pt3dclear()}
{pt3dadd(195888.000000,137136.000000,100750.000000,139.314042)}
{pt3dadd(195936.000000,137472.000000,100675.000000,67.184640)}
{pt3dadd(195972.000000,137676.000000,100600.000000,46.656000)}
{pt3dadd(196044.000000,137952.000000,100425.000000,44.789760)}

{create adhoc97}
{access adhoc97}
{connect adhoc97(1), adhoc95(0)}
{nseg = 1}
{strdef color color = "White"}
{pt3dclear()}
{pt3dadd(195888.000000,137136.000000,100750.000000,139.314042)}
{pt3dadd(195900.000000,137112.000000,100975.000000,125.624628)}
{pt3dadd(195948.000000,137016.000000,101125.000000,80.621550)}

{create adhoc98}
{access adhoc98}
{connect adhoc98(1), adhoc94(0)}
{nseg = 1}
{strdef color color = "White"}
{pt3dclear()}
{pt3dadd(196368.000000,135444.000000,100275.000000,288.881586)}
{pt3dadd(196284.000000,135420.000000,100450.000000,346.657896)}
{pt3dadd(196080.000000,135360.000000,100475.000000,365.697598)}
{pt3dadd(196044.000000,135396.000000,100800.000000,384.737301)}
{pt3dadd(196140.000000,135492.000000,101050.000000,403.777003)}
{pt3dadd(196068.000000,135528.000000,101275.000000,422.816706)}
{pt3dadd(196056.000000,135552.000000,101525.000000,288.881586)}
{pt3dadd(196164.000000,135744.000000,101725.000000,116.095032)}

{create adhoc99}
{access adhoc99}
{connect adhoc99(1), adhoc98(0)}
{nseg = 1}
{strdef color color = "White"}
{pt3dclear()}
{pt3dadd(196164.000000,135744.000000,101725.000000,116.095032)}
{pt3dadd(196272.000000,136032.000000,101775.000000,32.400000)}
{pt3dadd(196260.000000,136260.000000,101900.000000,38.880000)}
{pt3dadd(196224.000000,136476.000000,102075.000000,38.880000)}

{create adhoc100}
{access adhoc100}
{connect adhoc100(1), adhoc98(0)}
{nseg = 1}
{strdef color color = "White"}
{pt3dclear()}
{pt3dadd(196164.000000,135744.000000,101725.000000,116.095032)}
{pt3dadd(196368.000000,135612.000000,101900.000000,65.736612)}

{create adhoc101}
{access adhoc101}
{connect adhoc101(1), adhoc39(0)}
{nseg = 1}
{strdef color color = "White"}
{pt3dclear()}
{pt3dadd(194352.000000,185232.000000,100350.000000,571.904838)}
{pt3dadd(194508.000000,185784.000000,100050.000000,862.595802)}
{pt3dadd(194388.000000,186288.000000,99850.000000,796.703072)}
{pt3dadd(194328.000000,186384.000000,99575.000000,730.810341)}
{pt3dadd(194376.000000,186288.000000,99275.000000,664.917611)}
{pt3dadd(194508.000000,186384.000000,99000.000000,599.024880)}
{pt3dadd(194640.000000,186468.000000,98675.000000,628.976115)}
{pt3dadd(194712.000000,186528.000000,98425.000000,658.927350)}
{pt3dadd(194952.000000,186816.000000,98075.000000,688.878585)}
{pt3dadd(195144.000000,186888.000000,97800.000000,718.829820)}
{pt3dadd(195012.000000,186984.000000,97550.000000,754.771316)}
{pt3dadd(194844.000000,187080.000000,97350.000000,790.712811)}
{pt3dadd(194892.000000,187164.000000,97050.000000,826.654307)}
{pt3dadd(194808.000000,187248.000000,96800.000000,862.595802)}
{pt3dadd(194808.000000,187296.000000,96525.000000,730.144750)}
{pt3dadd(194712.000000,187332.000000,96225.000000,597.693699)}
{pt3dadd(194700.000000,187512.000000,95950.000000,465.242648)}
{pt3dadd(194796.000000,187776.000000,95725.000000,332.791596)}
{pt3dadd(194976.000000,188028.000000,95475.000000,399.349917)}
{pt3dadd(195012.000000,188148.000000,95225.000000,465.908238)}
{pt3dadd(195276.000000,188436.000000,94950.000000,532.466559)}
{pt3dadd(195264.000000,188532.000000,94725.000000,599.024880)}
{pt3dadd(195168.000000,188688.000000,94375.000000,664.917611)}
{pt3dadd(195264.000000,188688.000000,94075.000000,730.810341)}
{pt3dadd(195204.000000,188712.000000,93825.000000,796.703072)}
{pt3dadd(195324.000000,188700.000000,93600.000000,862.595802)}
{pt3dadd(195192.000000,188724.000000,93300.000000,862.595802)}
{pt3dadd(195048.000000,188724.000000,93075.000000,915.803424)}

{create adhoc102}
{access adhoc102}
{connect adhoc102(1), adhoc101(0)}
{nseg = 1}
{strdef color color = "White"}
{pt3dclear()}
{pt3dadd(195048.000000,188724.000000,93075.000000,915.803424)}
{pt3dadd(194904.000000,189144.000000,92825.000000,718.829820)}
{pt3dadd(194604.000000,189528.000000,92500.000000,797.901102)}
{pt3dadd(194472.000000,189828.000000,92275.000000,876.972384)}
{pt3dadd(194304.000000,190416.000000,92000.000000,956.043666)}
{pt3dadd(194256.000000,190596.000000,91800.000000,1035.114948)}
{pt3dadd(194196.000000,190860.000000,91525.000000,991.985162)}
{pt3dadd(194004.000000,190896.000000,91250.000000,948.855375)}
{pt3dadd(193908.000000,191016.000000,90975.000000,905.725589)}
{pt3dadd(193848.000000,191112.000000,90700.000000,862.595802)}
{pt3dadd(193704.000000,191232.000000,90550.000000,826.654307)}
{pt3dadd(193596.000000,191400.000000,90250.000000,790.712811)}
{pt3dadd(193452.000000,191604.000000,90000.000000,754.771316)}
{pt3dadd(193224.000000,191676.000000,89775.000000,718.829820)}
{pt3dadd(192816.000000,191844.000000,89525.000000,746.145369)}
{pt3dadd(192516.000000,192108.000000,89275.000000,773.460918)}
{pt3dadd(192408.000000,192312.000000,88950.000000,800.776467)}
{pt3dadd(192240.000000,192564.000000,88675.000000,828.092016)}
{pt3dadd(191964.000000,192960.000000,88450.000000,800.776467)}
{pt3dadd(191808.000000,193224.000000,88200.000000,773.460918)}
{pt3dadd(191772.000000,193272.000000,87975.000000,746.145369)}
{pt3dadd(191544.000000,193488.000000,87725.000000,718.829820)}
{pt3dadd(191400.000000,193752.000000,87425.000000,711.641533)}
{pt3dadd(191292.000000,193932.000000,87175.000000,704.453247)}
{pt3dadd(191028.000000,194400.000000,86925.000000,697.264960)}
{pt3dadd(190728.000000,194712.000000,86600.000000,690.076674)}
{pt3dadd(190572.000000,195180.000000,86350.000000,724.580509)}
{pt3dadd(190464.000000,195612.000000,86150.000000,759.084345)}
{pt3dadd(190296.000000,196032.000000,85800.000000,793.588180)}
{pt3dadd(190128.000000,196416.000000,85500.000000,828.092016)}
{pt3dadd(189852.000000,196980.000000,85250.000000,793.588162)}
{pt3dadd(189576.000000,197508.000000,84950.000000,759.084309)}
{pt3dadd(189372.000000,197856.000000,84650.000000,724.580455)}
{pt3dadd(189252.000000,198144.000000,84425.000000,690.076602)}
{pt3dadd(188952.000000,198360.000000,84150.000000,667.313671)}
{pt3dadd(188688.000000,198660.000000,83925.000000,644.550741)}
{pt3dadd(188340.000000,198816.000000,83625.000000,621.787810)}
{pt3dadd(188208.000000,198984.000000,83400.000000,599.024880)}
{pt3dadd(187728.000000,199332.000000,83200.000000,569.073631)}
{pt3dadd(187236.000000,199692.000000,83025.000000,539.122383)}
{pt3dadd(186984.000000,199884.000000,82825.000000,509.171134)}
{pt3dadd(186828.000000,199932.000000,82850.000000,479.219886)}
{pt3dadd(186672.000000,200064.000000,82825.000000,420.755058)}
{pt3dadd(186480.000000,200124.000000,82775.000000,362.290230)}
{pt3dadd(186264.000000,200244.000000,82775.000000,303.825402)}
{pt3dadd(186084.000000,200328.000000,82700.000000,245.360574)}
{pt3dadd(185472.000000,200544.000000,82400.000000,288.017802)}
{pt3dadd(184992.000000,200892.000000,82175.000000,330.675030)}
{pt3dadd(184644.000000,201204.000000,81925.000000,373.332258)}
{pt3dadd(184512.000000,201456.000000,81750.000000,415.989486)}
{pt3dadd(184296.000000,201696.000000,81675.000000,461.748335)}
{pt3dadd(184128.000000,202116.000000,81450.000000,507.507183)}
{pt3dadd(184044.000000,202632.000000,81300.000000,553.266031)}
{pt3dadd(183960.000000,202944.000000,81100.000000,599.024880)}
{pt3dadd(184092.000000,203160.000000,80850.000000,664.917611)}
{pt3dadd(184020.000000,203508.000000,80625.000000,730.810341)}
{pt3dadd(183828.000000,203856.000000,80425.000000,796.703072)}
{pt3dadd(183648.000000,204120.000000,80250.000000,862.595802)}
{pt3dadd(183384.000000,204468.000000,80000.000000,826.654307)}
{pt3dadd(183096.000000,204948.000000,79825.000000,790.712811)}
{pt3dadd(182712.000000,205128.000000,79575.000000,754.771316)}
{pt3dadd(182568.000000,205212.000000,79525.000000,718.829820)}
{pt3dadd(182424.000000,205344.000000,79575.000000,688.878585)}
{pt3dadd(182292.000000,205416.000000,79375.000000,658.927350)}
{pt3dadd(182124.000000,205536.000000,79400.000000,628.976115)}
{pt3dadd(181992.000000,205692.000000,79400.000000,599.024880)}
{pt3dadd(181860.000000,205848.000000,79400.000000,574.065504)}
{pt3dadd(181716.000000,205980.000000,79300.000000,549.106128)}
{pt3dadd(181608.000000,206016.000000,79250.000000,524.146752)}
{pt3dadd(181476.000000,206256.000000,79225.000000,499.187376)}
{pt3dadd(181368.000000,206328.000000,79200.000000,448.344216)}
{pt3dadd(181236.000000,206424.000000,79225.000000,397.501056)}
{pt3dadd(181104.000000,206508.000000,79225.000000,346.657896)}
{pt3dadd(180984.000000,206604.000000,79275.000000,277.326324)}

{create adhoc103}
{access adhoc103}
{connect adhoc103(1), adhoc102(0)}
{nseg = 1}
{strdef color color = "White"}
{pt3dclear()}
{pt3dadd(180984.000000,206604.000000,79275.000000,277.326324)}
{pt3dadd(181008.000000,206868.000000,79275.000000,423.983070)}
{pt3dadd(181116.000000,207132.000000,79275.000000,352.815813)}
{pt3dadd(181176.000000,207396.000000,79275.000000,281.648556)}
{pt3dadd(181188.000000,207684.000000,79275.000000,210.481299)}
{pt3dadd(181176.000000,207936.000000,79275.000000,139.314042)}
{pt3dadd(180936.000000,208008.000000,79125.000000,173.817117)}
{pt3dadd(180804.000000,208140.000000,78975.000000,208.320192)}
{pt3dadd(180708.000000,208296.000000,78925.000000,242.823267)}
{pt3dadd(180684.000000,208428.000000,78900.000000,277.326342)}
{pt3dadd(180660.000000,208560.000000,78875.000000,311.992128)}
{pt3dadd(180612.000000,208692.000000,78875.000000,346.657914)}
{pt3dadd(180540.000000,208812.000000,78775.000000,381.323700)}
{pt3dadd(180432.000000,208932.000000,78675.000000,415.989486)}
{pt3dadd(180348.000000,209028.000000,78600.000000,388.667295)}
{pt3dadd(180288.000000,209124.000000,78600.000000,361.345104)}
{pt3dadd(180240.000000,209244.000000,78600.000000,334.022913)}
{pt3dadd(180144.000000,209340.000000,78500.000000,306.700722)}
{pt3dadd(180048.000000,209448.000000,78450.000000,313.223432)}
{pt3dadd(180000.000000,209544.000000,78425.000000,319.746141)}
{pt3dadd(179952.000000,209664.000000,78350.000000,326.268850)}
{pt3dadd(179856.000000,209976.000000,78275.000000,332.791560)}
{pt3dadd(179772.000000,210132.000000,78275.000000,336.258144)}
{pt3dadd(179700.000000,210132.000000,78150.000000,339.724728)}
{pt3dadd(179592.000000,210264.000000,78050.000000,343.191312)}
{pt3dadd(179520.000000,210312.000000,77925.000000,346.657896)}
{pt3dadd(179436.000000,210456.000000,77800.000000,384.790266)}
{pt3dadd(179352.000000,210612.000000,77700.000000,422.922636)}
{pt3dadd(179256.000000,210732.000000,77675.000000,461.055006)}
{pt3dadd(179160.000000,210840.000000,77525.000000,499.187376)}
{pt3dadd(179064.000000,210876.000000,77475.000000,461.055006)}
{pt3dadd(178956.000000,210912.000000,77375.000000,422.922636)}
{pt3dadd(178836.000000,211020.000000,77300.000000,384.790266)}
{pt3dadd(178728.000000,211116.000000,77150.000000,346.657896)}
{pt3dadd(178632.000000,211236.000000,77050.000000,317.769741)}
{pt3dadd(178524.000000,211296.000000,76925.000000,288.881586)}
{pt3dadd(178392.000000,211368.000000,76850.000000,259.993431)}
{pt3dadd(178260.000000,211428.000000,76800.000000,231.105276)}
{pt3dadd(178140.000000,211488.000000,76775.000000,245.549354)}
{pt3dadd(178032.000000,211596.000000,76775.000000,259.993431)}
{pt3dadd(177840.000000,211680.000000,76725.000000,274.437509)}
{pt3dadd(177720.000000,211764.000000,76675.000000,288.881586)}
{pt3dadd(177588.000000,211944.000000,76625.000000,303.325664)}
{pt3dadd(177456.000000,212028.000000,76550.000000,317.769741)}
{pt3dadd(177324.000000,212136.000000,76550.000000,332.213819)}
{pt3dadd(177204.000000,212220.000000,76500.000000,346.657896)}
{pt3dadd(177096.000000,212280.000000,76425.000000,326.551734)}
{pt3dadd(176976.000000,212376.000000,76400.000000,306.445572)}
{pt3dadd(176868.000000,212436.000000,76325.000000,286.339410)}
{pt3dadd(176748.000000,212556.000000,76325.000000,266.233248)}
{pt3dadd(176652.000000,212580.000000,76300.000000,271.895332)}
{pt3dadd(176568.000000,212640.000000,76325.000000,277.557417)}
{pt3dadd(176472.000000,212664.000000,76325.000000,283.219502)}
{pt3dadd(176388.000000,212676.000000,76225.000000,288.881586)}
{pt3dadd(176280.000000,212700.000000,76200.000000,303.325664)}
{pt3dadd(176160.000000,212712.000000,76150.000000,317.769741)}
{pt3dadd(176064.000000,212784.000000,76100.000000,332.213819)}
{pt3dadd(175968.000000,212820.000000,76050.000000,346.657896)}
{pt3dadd(175884.000000,212856.000000,76125.000000,343.191321)}
{pt3dadd(175776.000000,212868.000000,76125.000000,339.724746)}
{pt3dadd(175680.000000,212892.000000,76125.000000,336.258171)}
{pt3dadd(175584.000000,212868.000000,76025.000000,332.791596)}
{pt3dadd(175488.000000,212928.000000,75975.000000,336.258171)}
{pt3dadd(175404.000000,212940.000000,75925.000000,339.724746)}
{pt3dadd(175308.000000,212952.000000,75875.000000,343.191321)}
{pt3dadd(175236.000000,212988.000000,75875.000000,346.657896)}
{pt3dadd(175152.000000,213024.000000,75875.000000,359.830908)}
{pt3dadd(175056.000000,213060.000000,75900.000000,373.003920)}
{pt3dadd(174984.000000,213072.000000,75825.000000,386.176932)}
{pt3dadd(174912.000000,213084.000000,75775.000000,399.349944)}
{pt3dadd(174852.000000,213096.000000,75775.000000,403.509830)}
{pt3dadd(174780.000000,213120.000000,75750.000000,407.669715)}
{pt3dadd(174708.000000,213132.000000,75675.000000,411.829601)}
{pt3dadd(174528.000000,213240.000000,75800.000000,415.989486)}
{pt3dadd(174324.000000,213300.000000,75750.000000,411.829591)}
{pt3dadd(174216.000000,213372.000000,75700.000000,407.669697)}
{pt3dadd(174084.000000,213396.000000,75700.000000,403.509803)}
{pt3dadd(173976.000000,213420.000000,75725.000000,399.349908)}
{pt3dadd(173856.000000,213504.000000,75625.000000,424.309275)}
{pt3dadd(173748.000000,213540.000000,75625.000000,449.268642)}
{pt3dadd(173652.000000,213660.000000,75575.000000,474.228009)}
{pt3dadd(173532.000000,213696.000000,75550.000000,499.187376)}
{pt3dadd(173412.000000,213732.000000,75575.000000,478.387903)}
{pt3dadd(173304.000000,213720.000000,75500.000000,457.588431)}
{pt3dadd(173196.000000,213708.000000,75450.000000,436.788958)}
{pt3dadd(173088.000000,213792.000000,75475.000000,415.989486)}
{pt3dadd(172968.000000,213876.000000,75550.000000,411.829591)}
{pt3dadd(172860.000000,213912.000000,75550.000000,407.669697)}
{pt3dadd(172740.000000,213948.000000,75475.000000,403.509803)}
{pt3dadd(172632.000000,213984.000000,75425.000000,399.349908)}
{pt3dadd(172512.000000,214020.000000,75400.000000,399.349908)}
{pt3dadd(172416.000000,214056.000000,75400.000000,399.349908)}
{pt3dadd(172308.000000,214092.000000,75425.000000,399.349908)}
{pt3dadd(172200.000000,214128.000000,75375.000000,399.349908)}
{pt3dadd(172092.000000,214164.000000,75325.000000,399.349908)}
{pt3dadd(171996.000000,214188.000000,75300.000000,399.349908)}
{pt3dadd(171864.000000,214212.000000,75250.000000,399.349908)}
{pt3dadd(171768.000000,214272.000000,75200.000000,399.349908)}
{pt3dadd(171648.000000,214272.000000,75150.000000,386.176905)}
{pt3dadd(171552.000000,214236.000000,75175.000000,373.003902)}
{pt3dadd(171432.000000,214356.000000,75125.000000,359.830899)}
{pt3dadd(171276.000000,214356.000000,75075.000000,346.657896)}
{pt3dadd(171144.000000,214392.000000,75050.000000,363.990794)}
{pt3dadd(171012.000000,214428.000000,75050.000000,381.323691)}
{pt3dadd(170892.000000,214488.000000,75025.000000,398.656589)}
{pt3dadd(170760.000000,214548.000000,75025.000000,415.989486)}
{pt3dadd(170628.000000,214668.000000,74950.000000,415.989486)}
{pt3dadd(170508.000000,214752.000000,74900.000000,415.989486)}
{pt3dadd(170400.000000,214716.000000,74925.000000,415.989486)}
{pt3dadd(170304.000000,214704.000000,74950.000000,415.989486)}
{pt3dadd(170160.000000,214800.000000,74975.000000,398.656589)}
{pt3dadd(170040.000000,214896.000000,74975.000000,381.323691)}
{pt3dadd(169920.000000,214932.000000,74950.000000,363.990794)}
{pt3dadd(169812.000000,214992.000000,74950.000000,346.657896)}
{pt3dadd(169692.000000,215076.000000,75025.000000,320.177083)}
{pt3dadd(169572.000000,215076.000000,75025.000000,293.696271)}
{pt3dadd(169476.000000,215100.000000,75050.000000,267.215459)}
{pt3dadd(169344.000000,215196.000000,75125.000000,240.734646)}
{pt3dadd(169224.000000,215292.000000,75025.000000,240.734646)}
{pt3dadd(169080.000000,215376.000000,74950.000000,240.734646)}
{pt3dadd(168960.000000,215412.000000,74875.000000,240.734646)}
{pt3dadd(168840.000000,215436.000000,74825.000000,240.734646)}
{pt3dadd(168732.000000,215340.000000,74775.000000,240.734646)}
{pt3dadd(168588.000000,215376.000000,74725.000000,240.734646)}
{pt3dadd(168456.000000,215412.000000,74725.000000,240.734646)}
{pt3dadd(168324.000000,215472.000000,74750.000000,240.734646)}
{pt3dadd(168180.000000,215496.000000,74700.000000,267.215459)}
{pt3dadd(168072.000000,215580.000000,74650.000000,293.696271)}
{pt3dadd(167988.000000,215532.000000,74625.000000,320.177083)}
{pt3dadd(167856.000000,215532.000000,74575.000000,346.657896)}
{pt3dadd(167748.000000,215556.000000,74550.000000,363.990794)}
{pt3dadd(167628.000000,215580.000000,74525.000000,381.323691)}
{pt3dadd(167496.000000,215640.000000,74675.000000,398.656589)}
{pt3dadd(167376.000000,215688.000000,74575.000000,415.989486)}
{pt3dadd(167256.000000,215724.000000,74475.000000,415.989486)}
{pt3dadd(167112.000000,215712.000000,74475.000000,415.989486)}
{pt3dadd(166980.000000,215700.000000,74475.000000,415.989486)}
{pt3dadd(166836.000000,215688.000000,74425.000000,415.989486)}
{pt3dadd(166716.000000,215688.000000,74375.000000,415.989486)}
{pt3dadd(166596.000000,215820.000000,74275.000000,415.989486)}
{pt3dadd(166488.000000,215952.000000,74225.000000,415.989486)}
{pt3dadd(166368.000000,215952.000000,74250.000000,415.989486)}
{pt3dadd(166248.000000,215940.000000,74200.000000,398.656589)}
{pt3dadd(166116.000000,215940.000000,74150.000000,381.323691)}
{pt3dadd(165924.000000,216024.000000,74050.000000,363.990794)}
{pt3dadd(165816.000000,215988.000000,73925.000000,346.657896)}
{pt3dadd(165696.000000,216084.000000,73900.000000,343.191321)}
{pt3dadd(165564.000000,216084.000000,73850.000000,339.724746)}
{pt3dadd(165432.000000,216144.000000,73775.000000,336.258171)}
{pt3dadd(165300.000000,216228.000000,73650.000000,332.791596)}
{pt3dadd(165144.000000,216180.000000,73475.000000,318.925278)}
{pt3dadd(165012.000000,216180.000000,73450.000000,305.058960)}
{pt3dadd(164880.000000,216168.000000,73425.000000,291.192642)}
{pt3dadd(164724.000000,216264.000000,73450.000000,277.326324)}
{pt3dadd(164568.000000,216300.000000,73425.000000,242.823254)}
{pt3dadd(164412.000000,216336.000000,73400.000000,208.320183)}
{pt3dadd(164292.000000,216288.000000,73300.000000,173.817113)}
{pt3dadd(164160.000000,216288.000000,73325.000000,139.314042)}
{pt3dadd(164028.000000,216276.000000,73325.000000,176.705928)}
{pt3dadd(163896.000000,216312.000000,73400.000000,214.097814)}
{pt3dadd(163752.000000,216336.000000,73350.000000,251.489700)}
{pt3dadd(163584.000000,216372.000000,73425.000000,288.881586)}
{pt3dadd(163428.000000,216492.000000,73575.000000,303.325664)}
{pt3dadd(163284.000000,216624.000000,73650.000000,317.769741)}
{pt3dadd(163152.000000,216720.000000,73675.000000,332.213819)}
{pt3dadd(163008.000000,216744.000000,73650.000000,346.657896)}
{pt3dadd(162912.000000,216828.000000,73625.000000,320.177083)}
{pt3dadd(162792.000000,216984.000000,73700.000000,293.696271)}
{pt3dadd(162672.000000,217008.000000,73650.000000,267.215459)}
{pt3dadd(162552.000000,217092.000000,73650.000000,240.734646)}
{pt3dadd(162420.000000,217176.000000,73675.000000,294.432660)}
{pt3dadd(162276.000000,217200.000000,73700.000000,306.700722)}

{create adhoc104}
{access adhoc104}
{connect adhoc104(1), adhoc103(0)}
{nseg = 1}
{strdef color color = "White"}
{pt3dclear()}
{pt3dadd(162276.000000,217200.000000,73700.000000,306.700722)}
{pt3dadd(162276.000000,216936.000000,73675.000000,288.881586)}
{pt3dadd(162276.000000,216780.000000,73525.000000,245.684947)}
{pt3dadd(162096.000000,216636.000000,73400.000000,202.488309)}
{pt3dadd(161508.000000,216720.000000,73150.000000,159.291671)}
{pt3dadd(161112.000000,216804.000000,72975.000000,116.095032)}
{pt3dadd(160776.000000,216768.000000,72875.000000,121.899785)}
{pt3dadd(160620.000000,216648.000000,72725.000000,127.704537)}
{pt3dadd(160548.000000,216600.000000,72550.000000,133.509289)}
{pt3dadd(160212.000000,216540.000000,72350.000000,139.314042)}
{pt3dadd(160152.000000,216480.000000,72175.000000,151.594763)}
{pt3dadd(160008.000000,216396.000000,72025.000000,163.875483)}
{pt3dadd(159900.000000,216372.000000,71875.000000,176.156204)}
{pt3dadd(159732.000000,216336.000000,71700.000000,188.436924)}
{pt3dadd(159564.000000,216312.000000,71550.000000,169.190501)}
{pt3dadd(159528.000000,216276.000000,71350.000000,149.944077)}
{pt3dadd(159444.000000,216300.000000,71175.000000,130.697654)}
{pt3dadd(159192.000000,216360.000000,71025.000000,111.451230)}
{pt3dadd(159096.000000,216300.000000,70750.000000,133.741476)}
{pt3dadd(158976.000000,216180.000000,70600.000000,156.031722)}
{pt3dadd(158652.000000,216084.000000,70575.000000,178.321968)}
{pt3dadd(158340.000000,216060.000000,70400.000000,200.612214)}
{pt3dadd(158076.000000,216204.000000,70225.000000,210.642822)}
{pt3dadd(157908.000000,216432.000000,70100.000000,220.673430)}
{pt3dadd(157524.000000,216516.000000,69900.000000,230.704038)}
{pt3dadd(157452.000000,216564.000000,69725.000000,240.734646)}
{pt3dadd(157296.000000,216672.000000,69525.000000,288.881586)}
{pt3dadd(157272.000000,216672.000000,69350.000000,288.881586)}

{create adhoc105}
{access adhoc105}
{connect adhoc105(1), adhoc104(0)}
{nseg = 1}
{strdef color color = "White"}
{pt3dclear()}
{pt3dadd(157272.000000,216672.000000,69350.000000,288.881586)}
{pt3dadd(157164.000000,216420.000000,69350.000000,55.987200)}
{pt3dadd(157032.000000,216036.000000,69250.000000,61.339572)}
{pt3dadd(157020.000000,215832.000000,69075.000000,66.691944)}
{pt3dadd(156972.000000,215688.000000,68900.000000,72.044316)}
{pt3dadd(156972.000000,215544.000000,68725.000000,77.396688)}
{pt3dadd(156972.000000,215400.000000,68525.000000,81.266526)}
{pt3dadd(156912.000000,215172.000000,68425.000000,85.136364)}
{pt3dadd(156744.000000,215124.000000,68125.000000,89.006202)}
{pt3dadd(156672.000000,214980.000000,67800.000000,92.876040)}
{pt3dadd(156540.000000,214824.000000,67425.000000,83.093958)}
{pt3dadd(156480.000000,214680.000000,67125.000000,73.311876)}
{pt3dadd(156408.000000,214512.000000,66775.000000,63.529794)}
{pt3dadd(156420.000000,214260.000000,66600.000000,53.747712)}
{pt3dadd(156372.000000,214068.000000,66525.000000,55.987200)}
{pt3dadd(156288.000000,213816.000000,66450.000000,51.597792)}

{create adhoc106}
{access adhoc106}
{connect adhoc106(1), adhoc104(0)}
{nseg = 1}
{strdef color color = "White"}
{pt3dclear()}
{pt3dadd(157272.000000,216672.000000,69350.000000,288.881586)}
{pt3dadd(157032.000000,216876.000000,69125.000000,167.176836)}
{pt3dadd(156912.000000,217008.000000,68925.000000,175.535680)}
{pt3dadd(156804.000000,217092.000000,68775.000000,183.894525)}
{pt3dadd(156648.000000,217320.000000,68575.000000,192.253370)}
{pt3dadd(156576.000000,217428.000000,68450.000000,200.612214)}
{pt3dadd(156444.000000,217488.000000,68250.000000,208.235480)}
{pt3dadd(156396.000000,217608.000000,68025.000000,215.858745)}
{pt3dadd(156360.000000,217836.000000,67800.000000,223.482010)}
{pt3dadd(156264.000000,217968.000000,67600.000000,231.105276)}
{pt3dadd(156240.000000,218172.000000,67375.000000,245.549354)}
{pt3dadd(156036.000000,218412.000000,67200.000000,259.993431)}
{pt3dadd(155940.000000,218532.000000,67075.000000,274.437509)}
{pt3dadd(155916.000000,218688.000000,66900.000000,288.881586)}
{pt3dadd(155796.000000,218844.000000,66700.000000,251.489700)}
{pt3dadd(155772.000000,218916.000000,66500.000000,214.097814)}
{pt3dadd(155676.000000,219060.000000,66300.000000,176.705928)}
{pt3dadd(155472.000000,219216.000000,66100.000000,139.314042)}
{pt3dadd(155052.000000,219624.000000,66000.000000,118.482332)}
{pt3dadd(154656.000000,219696.000000,65850.000000,97.650621)}
{pt3dadd(154308.000000,219816.000000,65700.000000,76.818910)}
{pt3dadd(154020.000000,219912.000000,65525.000000,55.987200)}
{pt3dadd(153756.000000,219996.000000,65400.000000,75.425769)}
{pt3dadd(153600.000000,220020.000000,65250.000000,94.864338)}
{pt3dadd(153528.000000,219924.000000,65050.000000,114.302907)}
{pt3dadd(153504.000000,219876.000000,64850.000000,133.741476)}
{pt3dadd(153468.000000,219840.000000,64675.000000,160.489769)}
{pt3dadd(153444.000000,219792.000000,64475.000000,187.238061)}
{pt3dadd(153468.000000,219744.000000,64300.000000,213.986354)}
{pt3dadd(153432.000000,219648.000000,64100.000000,240.734646)}
{pt3dadd(153468.000000,219588.000000,63950.000000,252.771381)}
{pt3dadd(153528.000000,219516.000000,63725.000000,264.808116)}
{pt3dadd(153552.000000,219444.000000,63525.000000,276.844851)}
{pt3dadd(153576.000000,219324.000000,63275.000000,288.881586)}
{pt3dadd(153576.000000,219240.000000,63000.000000,266.814243)}
{pt3dadd(153516.000000,219156.000000,62800.000000,244.746900)}
{pt3dadd(153528.000000,219096.000000,62600.000000,222.679557)}
{pt3dadd(153504.000000,219060.000000,62400.000000,200.612214)}
{pt3dadd(153612.000000,218892.000000,62200.000000,210.642822)}
{pt3dadd(153612.000000,218712.000000,61950.000000,220.673430)}
{pt3dadd(153756.000000,218544.000000,61575.000000,230.704038)}
{pt3dadd(153696.000000,218496.000000,61375.000000,240.734646)}
{pt3dadd(153612.000000,218304.000000,61075.000000,240.734646)}
{pt3dadd(153612.000000,218256.000000,60800.000000,240.734646)}
{pt3dadd(153684.000000,218292.000000,60550.000000,133.741476)}

{create adhoc107}
{access adhoc107}
{connect adhoc107(1), adhoc103(0)}
{nseg = 1}
{strdef color color = "White"}
{pt3dclear()}
{pt3dadd(162276.000000,217200.000000,73700.000000,306.700722)}
{pt3dadd(162132.000000,217200.000000,73725.000000,288.881586)}
{pt3dadd(161988.000000,217320.000000,73800.000000,258.455399)}
{pt3dadd(161856.000000,217416.000000,73925.000000,228.029211)}
{pt3dadd(161772.000000,217908.000000,74275.000000,197.603024)}
{pt3dadd(161640.000000,218136.000000,74500.000000,167.176836)}
{pt3dadd(161544.000000,218100.000000,74525.000000,212.047101)}
{pt3dadd(161400.000000,218232.000000,74600.000000,256.917366)}
{pt3dadd(161280.000000,218316.000000,74550.000000,301.787631)}
{pt3dadd(161160.000000,218352.000000,74625.000000,346.657896)}
{pt3dadd(160980.000000,218448.000000,74650.000000,332.213819)}
{pt3dadd(160764.000000,218604.000000,74750.000000,317.769741)}
{pt3dadd(160596.000000,218796.000000,74800.000000,303.325664)}
{pt3dadd(160428.000000,218832.000000,74800.000000,288.881586)}
{pt3dadd(160284.000000,218892.000000,74775.000000,296.531167)}
{pt3dadd(160152.000000,219024.000000,74800.000000,304.180749)}
{pt3dadd(160020.000000,219144.000000,74775.000000,311.830331)}
{pt3dadd(159888.000000,219204.000000,74725.000000,319.479912)}
{pt3dadd(159780.000000,219240.000000,74725.000000,306.700758)}

{create adhoc108}
{access adhoc108}
{connect adhoc108(1), adhoc107(0)}
{nseg = 1}
{strdef color color = "White"}
{pt3dclear()}
{pt3dadd(159780.000000,219240.000000,74725.000000,306.700758)}
{pt3dadd(159852.000000,219804.000000,74925.000000,231.105276)}
{pt3dadd(159972.000000,219864.000000,75200.000000,143.546238)}
{pt3dadd(159708.000000,220200.000000,75525.000000,55.987200)}
{pt3dadd(159660.000000,220428.000000,75725.000000,116.095032)}

{create adhoc109}
{access adhoc109}
{connect adhoc109(1), adhoc107(0)}
{nseg = 1}
{strdef color color = "White"}
{pt3dclear()}
{pt3dadd(159780.000000,219240.000000,74725.000000,306.700758)}
{pt3dadd(159648.000000,219240.000000,74625.000000,288.881586)}
{pt3dadd(159528.000000,219336.000000,74575.000000,258.455399)}
{pt3dadd(159420.000000,219660.000000,74475.000000,228.029211)}
{pt3dadd(159276.000000,220020.000000,74425.000000,197.603024)}
{pt3dadd(159132.000000,220116.000000,74375.000000,167.176836)}
{pt3dadd(158988.000000,220308.000000,74400.000000,185.566288)}
{pt3dadd(158844.000000,220404.000000,74350.000000,203.955741)}
{pt3dadd(158712.000000,220596.000000,74300.000000,222.345193)}
{pt3dadd(158592.000000,220728.000000,74250.000000,240.734646)}
{pt3dadd(158460.000000,220764.000000,74175.000000,222.345193)}
{pt3dadd(158340.000000,220968.000000,74200.000000,203.955741)}
{pt3dadd(158220.000000,221232.000000,74025.000000,185.566288)}
{pt3dadd(158124.000000,221484.000000,74125.000000,167.176836)}
{pt3dadd(158028.000000,221652.000000,74150.000000,175.535680)}
{pt3dadd(157884.000000,221820.000000,74150.000000,183.894525)}
{pt3dadd(157752.000000,221940.000000,74050.000000,192.253370)}
{pt3dadd(157632.000000,222240.000000,74025.000000,200.612214)}
{pt3dadd(157536.000000,222492.000000,73975.000000,222.679557)}
{pt3dadd(157428.000000,222828.000000,73825.000000,244.746900)}
{pt3dadd(157308.000000,223116.000000,73675.000000,266.814243)}
{pt3dadd(157188.000000,223320.000000,73625.000000,288.881586)}
{pt3dadd(157020.000000,223488.000000,73400.000000,303.325664)}
{pt3dadd(156888.000000,223548.000000,73325.000000,317.769741)}
{pt3dadd(156780.000000,223608.000000,73250.000000,332.213819)}
{pt3dadd(156636.000000,223692.000000,73100.000000,346.657896)}
{pt3dadd(156528.000000,223848.000000,73050.000000,320.177083)}
{pt3dadd(156348.000000,223944.000000,72825.000000,293.696271)}
{pt3dadd(156084.000000,224136.000000,72650.000000,267.215459)}
{pt3dadd(155748.000000,224460.000000,72400.000000,240.734646)}
{pt3dadd(155448.000000,224652.000000,72200.000000,230.704038)}
{pt3dadd(155304.000000,224700.000000,72025.000000,220.673430)}
{pt3dadd(155040.000000,224748.000000,71850.000000,210.642822)}
{pt3dadd(154824.000000,224976.000000,71700.000000,200.612214)}
{pt3dadd(154476.000000,225228.000000,71550.000000,210.642822)}
{pt3dadd(154332.000000,225276.000000,71375.000000,220.673430)}
{pt3dadd(154164.000000,225396.000000,71300.000000,230.704038)}
{pt3dadd(154020.000000,225528.000000,71325.000000,240.734646)}
{pt3dadd(153888.000000,225660.000000,71400.000000,222.345193)}
{pt3dadd(153732.000000,225792.000000,71375.000000,203.955741)}
{pt3dadd(153600.000000,225888.000000,71450.000000,185.566288)}
{pt3dadd(153480.000000,225972.000000,71425.000000,167.176836)}
{pt3dadd(153336.000000,226128.000000,71325.000000,175.535680)}
{pt3dadd(153252.000000,226188.000000,71150.000000,183.894525)}
{pt3dadd(152952.000000,226308.000000,71100.000000,192.253370)}
{pt3dadd(152832.000000,226308.000000,70950.000000,200.612214)}
{pt3dadd(152664.000000,226428.000000,70875.000000,210.642822)}
{pt3dadd(152484.000000,226680.000000,70900.000000,220.673430)}
{pt3dadd(152304.000000,226824.000000,70850.000000,230.704038)}
{pt3dadd(152088.000000,226920.000000,70800.000000,240.734646)}
{pt3dadd(151932.000000,226944.000000,70675.000000,240.734646)}
{pt3dadd(151788.000000,227004.000000,70450.000000,240.734646)}
{pt3dadd(151572.000000,227148.000000,70275.000000,240.734646)}
{pt3dadd(151428.000000,227172.000000,70075.000000,240.734646)}
{pt3dadd(151308.000000,227148.000000,69875.000000,240.734646)}
{pt3dadd(151236.000000,227172.000000,69675.000000,240.734646)}
{pt3dadd(151164.000000,227244.000000,69500.000000,240.734646)}
{pt3dadd(150852.000000,227496.000000,69275.000000,240.734646)}
{pt3dadd(150744.000000,227736.000000,69025.000000,284.548356)}
{pt3dadd(150636.000000,227952.000000,68750.000000,328.362066)}
{pt3dadd(150492.000000,227988.000000,68625.000000,372.175776)}
{pt3dadd(150552.000000,228084.000000,68350.000000,415.989486)}
{pt3dadd(150492.000000,228276.000000,68250.000000,372.175776)}
{pt3dadd(150504.000000,228432.000000,68050.000000,328.362066)}
{pt3dadd(150504.000000,228528.000000,67850.000000,284.548356)}
{pt3dadd(150384.000000,228636.000000,67600.000000,240.734646)}
{pt3dadd(150348.000000,228708.000000,67300.000000,267.215459)}
{pt3dadd(150300.000000,228888.000000,67075.000000,293.696271)}
{pt3dadd(150252.000000,228864.000000,66825.000000,320.177083)}
{pt3dadd(149976.000000,228960.000000,66725.000000,346.657896)}
{pt3dadd(149880.000000,228984.000000,66425.000000,336.668603)}
{pt3dadd(149820.000000,229092.000000,66100.000000,326.679309)}
{pt3dadd(149604.000000,229200.000000,66050.000000,316.690015)}
{pt3dadd(149556.000000,229512.000000,65825.000000,306.700722)}
{pt3dadd(149436.000000,229488.000000,65600.000000,280.178595)}
{pt3dadd(149376.000000,229524.000000,65350.000000,253.656468)}
{pt3dadd(149280.000000,229560.000000,65200.000000,227.134341)}
{pt3dadd(149292.000000,229572.000000,65050.000000,200.612214)}
{pt3dadd(149448.000000,229644.000000,64875.000000,210.642822)}
{pt3dadd(149424.000000,229776.000000,64650.000000,220.673430)}
{pt3dadd(149448.000000,230040.000000,64450.000000,230.704038)}
{pt3dadd(149520.000000,230088.000000,64300.000000,240.734646)}
{pt3dadd(149604.000000,230136.000000,64025.000000,230.704038)}
{pt3dadd(149568.000000,230124.000000,63850.000000,220.673430)}
{pt3dadd(149580.000000,230328.000000,63625.000000,210.642822)}
{pt3dadd(149592.000000,230340.000000,63400.000000,200.612214)}
{pt3dadd(149772.000000,230448.000000,63175.000000,192.253370)}
{pt3dadd(149868.000000,230508.000000,62975.000000,183.894525)}
{pt3dadd(149952.000000,230496.000000,62775.000000,175.535680)}
{pt3dadd(150036.000000,230520.000000,62525.000000,167.176836)}
{pt3dadd(150168.000000,230520.000000,62425.000000,175.535680)}
{pt3dadd(150264.000000,230424.000000,62250.000000,183.894525)}
{pt3dadd(150624.000000,230244.000000,62050.000000,192.253370)}
{pt3dadd(150576.000000,230244.000000,61875.000000,200.612214)}
{pt3dadd(150660.000000,230148.000000,61650.000000,185.287671)}
{pt3dadd(150816.000000,230052.000000,61400.000000,169.963128)}
{pt3dadd(150852.000000,229992.000000,61125.000000,154.638585)}
{pt3dadd(150972.000000,229740.000000,60875.000000,139.314042)}
{pt3dadd(151092.000000,229752.000000,60650.000000,162.261850)}
{pt3dadd(151044.000000,229740.000000,60425.000000,185.209659)}
{pt3dadd(151128.000000,229668.000000,60075.000000,208.157468)}
{pt3dadd(151188.000000,229548.000000,59850.000000,231.105276)}
{pt3dadd(151200.000000,229416.000000,59600.000000,173.600154)}
{pt3dadd(151260.000000,229344.000000,59425.000000,116.095032)}
{pt3dadd(151284.000000,229344.000000,59250.000000,67.184640)}

{create adhoc110}
{access adhoc110}
{connect adhoc110(1), adhoc102(0)}
{nseg = 1}
{strdef color color = "White"}
{pt3dclear()}
{pt3dadd(180984.000000,206604.000000,79275.000000,277.326324)}
{pt3dadd(180888.000000,206412.000000,79250.000000,332.791560)}
{pt3dadd(180780.000000,206100.000000,79125.000000,353.591042)}
{pt3dadd(180660.000000,205920.000000,79075.000000,374.390523)}
{pt3dadd(180516.000000,205824.000000,79000.000000,395.190005)}
{pt3dadd(180396.000000,205896.000000,79000.000000,415.989486)}
{pt3dadd(180264.000000,205920.000000,79000.000000,398.656589)}
{pt3dadd(180168.000000,205992.000000,79100.000000,381.323691)}
{pt3dadd(180060.000000,206088.000000,79150.000000,363.990794)}
{pt3dadd(179952.000000,206088.000000,79150.000000,346.657896)}
{pt3dadd(179820.000000,206124.000000,79100.000000,346.657896)}
{pt3dadd(179700.000000,206088.000000,79075.000000,346.657896)}
{pt3dadd(179592.000000,206136.000000,79075.000000,346.657896)}
{pt3dadd(179460.000000,206100.000000,79025.000000,346.657896)}
{pt3dadd(179352.000000,206040.000000,78975.000000,343.191321)}
{pt3dadd(179244.000000,206028.000000,78950.000000,339.724746)}
{pt3dadd(179148.000000,205992.000000,78900.000000,336.258171)}
{pt3dadd(179052.000000,205992.000000,78825.000000,332.791596)}
{pt3dadd(178932.000000,205944.000000,78800.000000,336.258171)}
{pt3dadd(178800.000000,206040.000000,78775.000000,339.724746)}
{pt3dadd(178692.000000,206040.000000,78775.000000,343.191321)}
{pt3dadd(178596.000000,206028.000000,78750.000000,346.657896)}
{pt3dadd(178500.000000,205980.000000,78725.000000,329.325003)}
{pt3dadd(178392.000000,205980.000000,78700.000000,311.992110)}
{pt3dadd(178296.000000,206016.000000,78650.000000,294.659217)}
{pt3dadd(178188.000000,206040.000000,78625.000000,277.326324)}
{pt3dadd(178080.000000,206004.000000,78550.000000,294.659217)}
{pt3dadd(177960.000000,206004.000000,78550.000000,311.992110)}
{pt3dadd(177852.000000,206004.000000,78550.000000,329.325003)}
{pt3dadd(177756.000000,206040.000000,78525.000000,346.657896)}
{pt3dadd(177660.000000,206064.000000,78500.000000,339.863400)}
{pt3dadd(177576.000000,206028.000000,78500.000000,333.068904)}
{pt3dadd(177504.000000,206028.000000,78500.000000,326.274408)}
{pt3dadd(177456.000000,206052.000000,78475.000000,319.479912)}
{pt3dadd(177372.000000,206052.000000,78450.000000,339.447420)}
{pt3dadd(177276.000000,206004.000000,78425.000000,359.414928)}
{pt3dadd(177168.000000,206028.000000,78400.000000,379.382436)}
{pt3dadd(177072.000000,206052.000000,78350.000000,399.349944)}
{pt3dadd(176964.000000,206088.000000,78400.000000,403.509830)}
{pt3dadd(176868.000000,206088.000000,78350.000000,407.669715)}
{pt3dadd(176760.000000,206112.000000,78350.000000,411.829601)}
{pt3dadd(176664.000000,206112.000000,78350.000000,415.989486)}
{pt3dadd(176556.000000,206112.000000,78350.000000,398.656589)}
{pt3dadd(176448.000000,206112.000000,78350.000000,381.323691)}
{pt3dadd(176340.000000,206112.000000,78350.000000,363.990794)}
{pt3dadd(176256.000000,206112.000000,78350.000000,346.657896)}
{pt3dadd(176160.000000,206112.000000,78350.000000,359.830908)}
{pt3dadd(176088.000000,206100.000000,78275.000000,373.003920)}
{pt3dadd(176004.000000,206124.000000,78275.000000,386.176932)}
{pt3dadd(175920.000000,206148.000000,78275.000000,399.349944)}
{pt3dadd(175836.000000,206172.000000,78275.000000,399.349944)}
{pt3dadd(175740.000000,206172.000000,78225.000000,399.349944)}
{pt3dadd(175632.000000,206172.000000,78200.000000,399.349944)}
{pt3dadd(175536.000000,206172.000000,78175.000000,399.349944)}
{pt3dadd(175428.000000,206172.000000,78150.000000,399.349944)}
{pt3dadd(175332.000000,206220.000000,78150.000000,399.349944)}
{pt3dadd(175236.000000,206256.000000,78150.000000,399.349944)}
{pt3dadd(175128.000000,206292.000000,78150.000000,399.349944)}
{pt3dadd(175032.000000,206328.000000,78150.000000,382.710357)}
{pt3dadd(174960.000000,206328.000000,78150.000000,366.070770)}
{pt3dadd(174864.000000,206352.000000,78125.000000,349.431183)}
{pt3dadd(174768.000000,206352.000000,78125.000000,332.791596)}
{pt3dadd(174684.000000,206352.000000,78100.000000,336.258171)}
{pt3dadd(174612.000000,206352.000000,78050.000000,339.724746)}
{pt3dadd(174540.000000,206352.000000,78000.000000,343.191321)}
{pt3dadd(174456.000000,206352.000000,77950.000000,346.657896)}
{pt3dadd(174372.000000,206352.000000,77900.000000,346.657896)}
{pt3dadd(174288.000000,206352.000000,77900.000000,346.657896)}
{pt3dadd(174204.000000,206352.000000,77850.000000,346.657896)}
{pt3dadd(174132.000000,206388.000000,77850.000000,346.657896)}
{pt3dadd(174036.000000,206424.000000,77850.000000,339.863400)}
{pt3dadd(173928.000000,206508.000000,77875.000000,333.068904)}
{pt3dadd(173820.000000,206544.000000,77875.000000,326.274408)}
{pt3dadd(173736.000000,206580.000000,77875.000000,319.479912)}
{pt3dadd(173652.000000,206580.000000,77850.000000,326.274408)}
{pt3dadd(173568.000000,206580.000000,77775.000000,333.068904)}
{pt3dadd(173460.000000,206604.000000,77700.000000,339.863400)}
{pt3dadd(173340.000000,206592.000000,77650.000000,346.657896)}
{pt3dadd(173256.000000,206628.000000,77650.000000,346.657896)}
{pt3dadd(173136.000000,206664.000000,77650.000000,346.657896)}
{pt3dadd(173028.000000,206700.000000,77650.000000,346.657896)}
{pt3dadd(172932.000000,206724.000000,77650.000000,346.657896)}
{pt3dadd(172860.000000,206748.000000,77600.000000,343.191321)}
{pt3dadd(172776.000000,206736.000000,77550.000000,339.724746)}
{pt3dadd(172680.000000,206724.000000,77500.000000,336.258171)}
{pt3dadd(172584.000000,206712.000000,77475.000000,332.791596)}
{pt3dadd(172488.000000,206748.000000,77500.000000,349.431183)}
{pt3dadd(172404.000000,206784.000000,77500.000000,366.070770)}
{pt3dadd(172308.000000,206820.000000,77500.000000,382.710357)}
{pt3dadd(172212.000000,206856.000000,77500.000000,399.349944)}
{pt3dadd(172116.000000,206892.000000,77500.000000,403.509830)}
{pt3dadd(172044.000000,206892.000000,77475.000000,407.669715)}
{pt3dadd(171960.000000,206916.000000,77475.000000,411.829601)}
{pt3dadd(171864.000000,206868.000000,77450.000000,415.989486)}
{pt3dadd(171780.000000,206856.000000,77425.000000,395.190014)}
{pt3dadd(171696.000000,206892.000000,77375.000000,374.390541)}
{pt3dadd(171600.000000,206856.000000,77375.000000,353.591069)}
{pt3dadd(171504.000000,206880.000000,77375.000000,332.791596)}
{pt3dadd(171396.000000,206904.000000,77350.000000,353.591069)}
{pt3dadd(171300.000000,206928.000000,77325.000000,374.390541)}
{pt3dadd(171204.000000,206952.000000,77300.000000,395.190014)}
{pt3dadd(171108.000000,206976.000000,77275.000000,415.989486)}
{pt3dadd(171012.000000,207000.000000,77250.000000,398.656589)}
{pt3dadd(170916.000000,207024.000000,77225.000000,381.323691)}
{pt3dadd(170808.000000,207012.000000,77225.000000,363.990794)}
{pt3dadd(170724.000000,207084.000000,77250.000000,346.657896)}
{pt3dadd(170616.000000,207084.000000,77225.000000,363.990794)}
{pt3dadd(170508.000000,207120.000000,77225.000000,381.323691)}
{pt3dadd(170400.000000,207168.000000,77200.000000,398.656589)}
{pt3dadd(170292.000000,207204.000000,77200.000000,415.989486)}
{pt3dadd(170184.000000,207240.000000,77200.000000,415.989486)}
{pt3dadd(170100.000000,207276.000000,77200.000000,415.989486)}
{pt3dadd(169992.000000,207312.000000,77150.000000,415.989486)}
{pt3dadd(169920.000000,207312.000000,77125.000000,415.989486)}

{create adhoc111}
{access adhoc111}
{connect adhoc111(1), adhoc110(0)}
{nseg = 1}
{strdef color color = "White"}
{pt3dclear()}
{pt3dadd(169920.000000,207312.000000,77125.000000,415.989486)}
{pt3dadd(169920.000000,207084.000000,76950.000000,200.612214)}
{pt3dadd(169920.000000,206856.000000,76800.000000,173.678170)}
{pt3dadd(169920.000000,206580.000000,76600.000000,146.744127)}
{pt3dadd(169824.000000,206496.000000,76575.000000,119.810083)}
{pt3dadd(169680.000000,206352.000000,76575.000000,92.876040)}
{pt3dadd(169560.000000,206220.000000,76550.000000,103.092399)}
{pt3dadd(169440.000000,205980.000000,76450.000000,113.308758)}
{pt3dadd(169344.000000,205932.000000,76350.000000,123.525117)}
{pt3dadd(169248.000000,205968.000000,76425.000000,133.741476)}
{pt3dadd(169140.000000,205920.000000,76425.000000,119.655279)}
{pt3dadd(169008.000000,205800.000000,76375.000000,105.569082)}
{pt3dadd(168912.000000,205788.000000,76375.000000,91.482885)}
{pt3dadd(168804.000000,205788.000000,76350.000000,77.396688)}
{pt3dadd(168696.000000,205800.000000,76325.000000,87.071274)}
{pt3dadd(168588.000000,205716.000000,76400.000000,96.745860)}
{pt3dadd(168468.000000,205584.000000,76375.000000,106.420446)}
{pt3dadd(168372.000000,205500.000000,76375.000000,116.095032)}
{pt3dadd(168276.000000,205512.000000,76400.000000,116.095032)}
{pt3dadd(168156.000000,205524.000000,76375.000000,116.095032)}
{pt3dadd(168036.000000,205452.000000,76375.000000,116.095032)}
{pt3dadd(167904.000000,205440.000000,76350.000000,116.095032)}
{pt3dadd(167784.000000,205416.000000,76300.000000,128.865483)}
{pt3dadd(167676.000000,205368.000000,76225.000000,141.635934)}
{pt3dadd(167556.000000,205368.000000,76150.000000,154.406385)}
{pt3dadd(167436.000000,205308.000000,76125.000000,167.176836)}
{pt3dadd(167340.000000,205284.000000,76125.000000,175.535680)}
{pt3dadd(167244.000000,205188.000000,76000.000000,183.894525)}
{pt3dadd(167148.000000,205140.000000,75950.000000,192.253370)}
{pt3dadd(167028.000000,205008.000000,75825.000000,200.612214)}
{pt3dadd(166908.000000,204852.000000,75750.000000,210.642822)}
{pt3dadd(166392.000000,204828.000000,75825.000000,220.673430)}
{pt3dadd(166176.000000,204780.000000,75575.000000,230.704038)}
{pt3dadd(166056.000000,204588.000000,75425.000000,240.734646)}
{pt3dadd(166068.000000,204660.000000,75200.000000,200.706372)}
{pt3dadd(165948.000000,204660.000000,75050.000000,160.678098)}
{pt3dadd(165744.000000,204660.000000,74875.000000,120.649824)}
{pt3dadd(165624.000000,204600.000000,74725.000000,80.621550)}
{pt3dadd(165504.000000,204396.000000,74575.000000,74.462963)}
{pt3dadd(165288.000000,204336.000000,74325.000000,68.304375)}
{pt3dadd(165276.000000,204156.000000,74125.000000,62.145787)}
{pt3dadd(165156.000000,204048.000000,73975.000000,55.987200)}
{pt3dadd(165012.000000,203988.000000,73875.000000,58.786560)}
{pt3dadd(165012.000000,203868.000000,73725.000000,61.585920)}
{pt3dadd(165036.000000,203736.000000,73650.000000,64.385280)}
{pt3dadd(164916.000000,203556.000000,73525.000000,67.184640)}
{pt3dadd(164868.000000,203436.000000,73400.000000,122.608877)}
{pt3dadd(164796.000000,203364.000000,73200.000000,178.033113)}
{pt3dadd(164676.000000,203208.000000,72975.000000,233.457350)}
{pt3dadd(164580.000000,202872.000000,72725.000000,288.881586)}
{pt3dadd(164520.000000,202776.000000,72625.000000,271.349226)}

{create adhoc112}
{access adhoc112}
{connect adhoc112(1), adhoc111(0)}
{nseg = 1}
{strdef color color = "White"}
{pt3dclear()}
{pt3dadd(164520.000000,202776.000000,72625.000000,271.349226)}
{pt3dadd(164556.000000,202488.000000,72725.000000,133.741476)}
{pt3dadd(164532.000000,202224.000000,72725.000000,114.302907)}
{pt3dadd(164424.000000,202032.000000,72725.000000,94.864338)}
{pt3dadd(164304.000000,201816.000000,72725.000000,75.425769)}
{pt3dadd(164184.000000,201600.000000,72725.000000,55.987200)}
{pt3dadd(164040.000000,201408.000000,72850.000000,58.114710)}
{pt3dadd(163956.000000,201192.000000,72850.000000,60.242220)}
{pt3dadd(163884.000000,200928.000000,72900.000000,62.369730)}
{pt3dadd(163932.000000,200700.000000,72950.000000,64.497240)}
{pt3dadd(164052.000000,200436.000000,73150.000000,68.528318)}
{pt3dadd(164280.000000,200208.000000,73275.000000,72.559395)}
{pt3dadd(164388.000000,200160.000000,73400.000000,76.590473)}
{pt3dadd(164484.000000,200004.000000,73550.000000,80.621550)}
{pt3dadd(164580.000000,199896.000000,73725.000000,77.262323)}
{pt3dadd(164700.000000,199632.000000,73825.000000,73.903095)}
{pt3dadd(164808.000000,199404.000000,73925.000000,70.543867)}
{pt3dadd(164880.000000,199140.000000,73975.000000,67.184640)}
{pt3dadd(165024.000000,198948.000000,73950.000000,38.880000)}

{create adhoc113}
{access adhoc113}
{connect adhoc113(1), adhoc111(0)}
{nseg = 1}
{strdef color color = "White"}
{pt3dclear()}
{pt3dadd(164520.000000,202776.000000,72625.000000,271.349226)}
{pt3dadd(164544.000000,202704.000000,72500.000000,192.587724)}

{create adhoc114}
{access adhoc114}
{connect adhoc114(1), adhoc110(0)}
{nseg = 1}
{strdef color color = "White"}
{pt3dclear()}
{pt3dadd(169920.000000,207312.000000,77125.000000,415.989486)}
{pt3dadd(169824.000000,207300.000000,77100.000000,332.791596)}
{pt3dadd(169704.000000,207300.000000,77100.000000,321.814093)}
{pt3dadd(169608.000000,207324.000000,77025.000000,310.836591)}
{pt3dadd(169500.000000,207372.000000,77025.000000,299.859089)}
{pt3dadd(169380.000000,207312.000000,77075.000000,288.881586)}
{pt3dadd(169272.000000,207384.000000,77050.000000,274.437509)}
{pt3dadd(169176.000000,207468.000000,77025.000000,259.993431)}
{pt3dadd(169068.000000,207504.000000,77025.000000,245.549354)}
{pt3dadd(168960.000000,207516.000000,77050.000000,231.105276)}
{pt3dadd(168864.000000,207624.000000,77050.000000,242.660538)}
{pt3dadd(168744.000000,207672.000000,77050.000000,254.215800)}
{pt3dadd(168636.000000,207684.000000,77000.000000,265.771062)}
{pt3dadd(168552.000000,207804.000000,77025.000000,277.326324)}
{pt3dadd(168456.000000,207852.000000,77025.000000,280.215140)}
{pt3dadd(168360.000000,207924.000000,77000.000000,283.103955)}
{pt3dadd(168252.000000,207924.000000,76975.000000,285.992771)}
{pt3dadd(168168.000000,207936.000000,76975.000000,288.881586)}
{pt3dadd(168084.000000,207948.000000,76975.000000,288.881586)}
{pt3dadd(167988.000000,208056.000000,77050.000000,288.881586)}
{pt3dadd(167916.000000,208176.000000,77100.000000,288.881586)}
{pt3dadd(167820.000000,208236.000000,77100.000000,288.881586)}
{pt3dadd(167724.000000,208272.000000,77100.000000,299.859080)}
{pt3dadd(167616.000000,208320.000000,77075.000000,310.836573)}
{pt3dadd(167520.000000,208440.000000,77050.000000,321.814067)}
{pt3dadd(167460.000000,208500.000000,77050.000000,332.791560)}
{pt3dadd(167376.000000,208500.000000,77050.000000,321.814067)}
{pt3dadd(167280.000000,208536.000000,77075.000000,310.836573)}
{pt3dadd(167184.000000,208572.000000,77075.000000,299.859080)}
{pt3dadd(167088.000000,208620.000000,77075.000000,288.881586)}
{pt3dadd(166980.000000,208668.000000,77100.000000,303.325664)}
{pt3dadd(166884.000000,208716.000000,77050.000000,317.769741)}
{pt3dadd(166812.000000,208800.000000,77075.000000,332.213819)}
{pt3dadd(166704.000000,208860.000000,77075.000000,346.657896)}
{pt3dadd(166596.000000,208848.000000,77000.000000,343.191321)}
{pt3dadd(166500.000000,208920.000000,77000.000000,339.724746)}
{pt3dadd(166392.000000,209004.000000,77000.000000,336.258171)}
{pt3dadd(166308.000000,209052.000000,77000.000000,332.791596)}
{pt3dadd(166236.000000,209088.000000,76975.000000,332.791596)}
{pt3dadd(166128.000000,209124.000000,76950.000000,332.791596)}
{pt3dadd(166008.000000,209124.000000,76900.000000,332.791596)}
{pt3dadd(165876.000000,209136.000000,76875.000000,332.791596)}
{pt3dadd(165768.000000,209196.000000,76925.000000,346.657896)}
{pt3dadd(165672.000000,209328.000000,77025.000000,399.349944)}

{create adhoc115}
{access adhoc115}
{connect adhoc115(1), adhoc114(0)}
{nseg = 1}
{strdef color color = "White"}
{pt3dclear()}
{pt3dadd(165672.000000,209328.000000,77025.000000,399.349944)}
{pt3dadd(165576.000000,209340.000000,76975.000000,346.657896)}
{pt3dadd(165468.000000,209292.000000,76875.000000,332.213819)}
{pt3dadd(165360.000000,209292.000000,76825.000000,317.769741)}
{pt3dadd(165276.000000,209304.000000,76700.000000,303.325664)}
{pt3dadd(165120.000000,209256.000000,76650.000000,288.881586)}
{pt3dadd(165012.000000,209304.000000,76775.000000,276.844851)}
{pt3dadd(165276.000000,209016.000000,76475.000000,264.808116)}
{pt3dadd(165120.000000,208800.000000,76250.000000,252.771381)}
{pt3dadd(165000.000000,208704.000000,76100.000000,240.734646)}
{pt3dadd(164652.000000,208584.000000,75925.000000,267.215459)}
{pt3dadd(164376.000000,208464.000000,75750.000000,293.696271)}
{pt3dadd(164244.000000,208392.000000,75575.000000,320.177083)}
{pt3dadd(164112.000000,208320.000000,75375.000000,346.657896)}
{pt3dadd(163908.000000,208272.000000,75075.000000,346.657896)}
{pt3dadd(163704.000000,208248.000000,74925.000000,346.657896)}
{pt3dadd(163500.000000,208200.000000,74725.000000,346.657896)}
{pt3dadd(163308.000000,208188.000000,74525.000000,346.657896)}
{pt3dadd(163152.000000,208116.000000,74325.000000,329.325003)}
{pt3dadd(162960.000000,207972.000000,74075.000000,311.992110)}
{pt3dadd(162888.000000,207780.000000,73900.000000,294.659217)}
{pt3dadd(162756.000000,207588.000000,73700.000000,277.326324)}
{pt3dadd(162552.000000,207444.000000,73500.000000,265.771053)}
{pt3dadd(162420.000000,207312.000000,73250.000000,254.215782)}
{pt3dadd(162324.000000,207228.000000,73000.000000,242.660511)}
{pt3dadd(162372.000000,207072.000000,72850.000000,231.105240)}
{pt3dadd(162528.000000,206652.000000,72650.000000,202.352688)}
{pt3dadd(162576.000000,206256.000000,72525.000000,173.600136)}
{pt3dadd(162624.000000,206016.000000,72375.000000,144.847584)}
{pt3dadd(162624.000000,205824.000000,72275.000000,116.095032)}
{pt3dadd(162624.000000,205608.000000,72175.000000,121.899785)}
{pt3dadd(162624.000000,205380.000000,72025.000000,127.704537)}
{pt3dadd(162624.000000,205068.000000,71875.000000,133.509289)}
{pt3dadd(162708.000000,204792.000000,71725.000000,139.314042)}
{pt3dadd(162804.000000,204444.000000,71575.000000,146.279741)}
{pt3dadd(162852.000000,204216.000000,71425.000000,153.245439)}
{pt3dadd(162768.000000,204012.000000,71225.000000,160.211138)}
{pt3dadd(162828.000000,203736.000000,71050.000000,167.176836)}
{pt3dadd(162888.000000,203448.000000,70875.000000,167.176836)}
{pt3dadd(162972.000000,203076.000000,70775.000000,167.176836)}
{pt3dadd(163020.000000,202800.000000,70725.000000,167.176836)}
{pt3dadd(163020.000000,202584.000000,70550.000000,167.176836)}
{pt3dadd(163056.000000,202272.000000,70550.000000,167.176836)}
{pt3dadd(163056.000000,201840.000000,70425.000000,167.176836)}
{pt3dadd(162924.000000,201564.000000,70300.000000,167.176836)}
{pt3dadd(162996.000000,201264.000000,70100.000000,167.176836)}
{pt3dadd(163092.000000,200964.000000,70075.000000,154.406385)}
{pt3dadd(163236.000000,200592.000000,70075.000000,141.635934)}
{pt3dadd(163368.000000,200220.000000,70075.000000,128.865483)}
{pt3dadd(163488.000000,199848.000000,70075.000000,116.095032)}
{pt3dadd(163536.000000,199476.000000,70075.000000,116.095032)}
{pt3dadd(163632.000000,199080.000000,70075.000000,116.095032)}
{pt3dadd(163680.000000,198816.000000,70050.000000,116.095032)}
{pt3dadd(163764.000000,198588.000000,70050.000000,116.095032)}
{pt3dadd(163752.000000,198432.000000,70050.000000,128.865483)}
{pt3dadd(163704.000000,198240.000000,70050.000000,141.635934)}
{pt3dadd(163824.000000,198024.000000,70050.000000,154.406385)}
{pt3dadd(163980.000000,197760.000000,70050.000000,167.176836)}
{pt3dadd(164184.000000,197484.000000,70050.000000,169.754841)}
{pt3dadd(164232.000000,197196.000000,69875.000000,172.332846)}
{pt3dadd(164364.000000,196860.000000,69775.000000,174.910851)}
{pt3dadd(164460.000000,196644.000000,69750.000000,177.488856)}
{pt3dadd(164568.000000,196488.000000,69825.000000,157.303107)}
{pt3dadd(164688.000000,196320.000000,69825.000000,137.117358)}
{pt3dadd(164808.000000,196224.000000,69800.000000,116.931609)}
{pt3dadd(164892.000000,196032.000000,69825.000000,96.745860)}
{pt3dadd(165000.000000,195828.000000,69825.000000,101.583153)}
{pt3dadd(165120.000000,195708.000000,69850.000000,106.420446)}
{pt3dadd(165228.000000,195588.000000,69825.000000,111.257739)}
{pt3dadd(165324.000000,195420.000000,69800.000000,116.095032)}
{pt3dadd(165420.000000,195276.000000,69825.000000,116.095032)}
{pt3dadd(165492.000000,195132.000000,69825.000000,116.095032)}
{pt3dadd(165600.000000,194988.000000,69775.000000,116.095032)}
{pt3dadd(165708.000000,194760.000000,69800.000000,116.095032)}
{pt3dadd(165816.000000,194544.000000,69950.000000,111.257739)}
{pt3dadd(165864.000000,194268.000000,70075.000000,106.420446)}
{pt3dadd(165996.000000,194064.000000,70200.000000,101.583153)}
{pt3dadd(165996.000000,193824.000000,70375.000000,96.745860)}
{pt3dadd(166092.000000,193740.000000,70425.000000,105.994764)}
{pt3dadd(166200.000000,193428.000000,70575.000000,115.243668)}
{pt3dadd(166176.000000,193140.000000,70650.000000,124.492572)}
{pt3dadd(166176.000000,192840.000000,70675.000000,133.741476)}
{pt3dadd(166176.000000,192504.000000,70675.000000,135.134617)}
{pt3dadd(166176.000000,192192.000000,70575.000000,136.527759)}
{pt3dadd(166176.000000,191892.000000,70525.000000,137.920900)}
{pt3dadd(166176.000000,191688.000000,70325.000000,139.314042)}
{pt3dadd(166188.000000,191460.000000,70150.000000,128.671997)}
{pt3dadd(166188.000000,191232.000000,70000.000000,118.029951)}
{pt3dadd(166188.000000,190956.000000,69850.000000,107.387906)}
{pt3dadd(166368.000000,190716.000000,69800.000000,96.745860)}
{pt3dadd(166620.000000,190524.000000,69900.000000,101.583153)}
{pt3dadd(166728.000000,190392.000000,69850.000000,106.420446)}
{pt3dadd(166848.000000,190284.000000,69900.000000,111.257739)}
{pt3dadd(167052.000000,190128.000000,70100.000000,116.095032)}
{pt3dadd(167292.000000,190080.000000,70050.000000,103.867434)}
{pt3dadd(167436.000000,189960.000000,70150.000000,91.639836)}
{pt3dadd(167760.000000,189792.000000,70300.000000,79.412238)}
{pt3dadd(168048.000000,189504.000000,70475.000000,67.184640)}
{pt3dadd(168312.000000,189192.000000,70750.000000,46.656000)}

{create adhoc116}
{access adhoc116}
{connect adhoc116(1), adhoc114(0)}
{nseg = 1}
{strdef color color = "White"}
{pt3dclear()}
{pt3dadd(165672.000000,209328.000000,77025.000000,399.349944)}
{pt3dadd(165384.000000,209580.000000,77150.000000,346.657896)}
{pt3dadd(165216.000000,209796.000000,77300.000000,311.992110)}
{pt3dadd(165036.000000,209928.000000,77350.000000,277.326324)}
{pt3dadd(164844.000000,210324.000000,77525.000000,240.734646)}

{create adhoc117}
{access adhoc117}
{connect adhoc117(1), adhoc116(0)}
{nseg = 1}
{strdef color color = "White"}
{pt3dclear()}
{pt3dadd(164844.000000,210324.000000,77525.000000,240.734646)}
{pt3dadd(164532.000000,210576.000000,77525.000000,240.734646)}
{pt3dadd(164532.000000,210468.000000,77350.000000,200.706372)}
{pt3dadd(164364.000000,210600.000000,77350.000000,160.678098)}
{pt3dadd(164040.000000,210840.000000,77350.000000,120.649824)}
{pt3dadd(163920.000000,210972.000000,77350.000000,80.621550)}
{pt3dadd(163704.000000,211116.000000,77250.000000,72.130163)}
{pt3dadd(163560.000000,211248.000000,77275.000000,63.638775)}
{pt3dadd(163392.000000,211392.000000,77125.000000,55.147388)}
{pt3dadd(163272.000000,211548.000000,77025.000000,46.656000)}
{pt3dadd(163164.000000,211656.000000,77025.000000,48.988800)}
{pt3dadd(162960.000000,211860.000000,76925.000000,51.321600)}
{pt3dadd(162792.000000,212052.000000,76750.000000,53.654400)}
{pt3dadd(162648.000000,212136.000000,76600.000000,55.987200)}
{pt3dadd(162624.000000,212412.000000,76475.000000,102.174061)}
{pt3dadd(162576.000000,212736.000000,76375.000000,148.360923)}
{pt3dadd(162468.000000,212736.000000,76100.000000,194.547785)}
{pt3dadd(162480.000000,212748.000000,75900.000000,240.734646)}
{pt3dadd(162468.000000,212676.000000,75650.000000,167.176836)}
{pt3dadd(162264.000000,212460.000000,75450.000000,96.745860)}

{create adhoc118}
{access adhoc118}
{connect adhoc118(1), adhoc116(0)}
{nseg = 1}
{strdef color color = "White"}
{pt3dclear()}
{pt3dadd(164844.000000,210324.000000,77525.000000,240.734646)}
{pt3dadd(164688.000000,210588.000000,77750.000000,200.612214)}
{pt3dadd(164592.000000,210768.000000,77900.000000,198.606091)}
{pt3dadd(164460.000000,210924.000000,78050.000000,196.599969)}
{pt3dadd(164328.000000,211188.000000,78400.000000,194.593846)}
{pt3dadd(164328.000000,211344.000000,78625.000000,192.587724)}
{pt3dadd(164220.000000,211524.000000,78900.000000,269.622810)}
{pt3dadd(164208.000000,211704.000000,79150.000000,346.657896)}
{pt3dadd(164376.000000,211860.000000,79350.000000,332.791560)}

{create adhoc119}
{access adhoc119}
{connect adhoc119(1), adhoc118(0)}
{nseg = 1}
{strdef color color = "White"}
{pt3dclear()}
{pt3dadd(164376.000000,211860.000000,79350.000000,332.791560)}
{pt3dadd(164100.000000,212088.000000,79525.000000,200.612214)}
{pt3dadd(164004.000000,212460.000000,79575.000000,167.255320)}
{pt3dadd(163968.000000,212700.000000,79700.000000,133.898427)}
{pt3dadd(163800.000000,212904.000000,79800.000000,100.541533)}
{pt3dadd(163800.000000,213168.000000,80000.000000,67.184640)}
{pt3dadd(163728.000000,213264.000000,80100.000000,70.543867)}
{pt3dadd(163728.000000,213576.000000,80250.000000,73.903095)}
{pt3dadd(163704.000000,213840.000000,80425.000000,77.262323)}
{pt3dadd(163764.000000,214224.000000,80575.000000,80.621550)}
{pt3dadd(163812.000000,214728.000000,80775.000000,206.706573)}
{pt3dadd(163776.000000,215064.000000,80950.000000,332.791596)}
{pt3dadd(163764.000000,215208.000000,81075.000000,353.319246)}

{create adhoc120}
{access adhoc120}
{connect adhoc120(1), adhoc119(0)}
{nseg = 1}
{strdef color color = "White"}
{pt3dclear()}
{pt3dadd(163764.000000,215208.000000,81075.000000,353.319246)}
{pt3dadd(163716.000000,215412.000000,81025.000000,200.612214)}
{pt3dadd(163656.000000,215580.000000,81000.000000,166.583471)}
{pt3dadd(163620.000000,215736.000000,81075.000000,132.554727)}
{pt3dadd(163656.000000,215964.000000,81200.000000,98.525984)}
{pt3dadd(163548.000000,216216.000000,81250.000000,64.497240)}
{pt3dadd(163476.000000,216408.000000,81250.000000,67.722102)}
{pt3dadd(163476.000000,216660.000000,81200.000000,70.946964)}
{pt3dadd(163284.000000,216780.000000,81175.000000,74.171826)}
{pt3dadd(163344.000000,216960.000000,81100.000000,77.396688)}
{pt3dadd(163068.000000,217224.000000,80975.000000,82.233981)}
{pt3dadd(162840.000000,217368.000000,80825.000000,87.071274)}
{pt3dadd(162576.000000,217512.000000,80825.000000,91.908567)}
{pt3dadd(162456.000000,217752.000000,80800.000000,96.745860)}
{pt3dadd(162372.000000,217896.000000,80625.000000,105.994764)}
{pt3dadd(162240.000000,218112.000000,80500.000000,115.243668)}
{pt3dadd(162132.000000,218244.000000,80475.000000,124.492572)}
{pt3dadd(162012.000000,218232.000000,80500.000000,133.741476)}
{pt3dadd(161856.000000,218256.000000,80525.000000,116.095032)}
{pt3dadd(161832.000000,218412.000000,80550.000000,116.095032)}

{create adhoc121}
{access adhoc121}
{connect adhoc121(1), adhoc119(0)}
{nseg = 1}
{strdef color color = "White"}
{pt3dclear()}
{pt3dadd(163764.000000,215208.000000,81075.000000,353.319246)}
{pt3dadd(163920.000000,215160.000000,81325.000000,111.451230)}
{pt3dadd(164028.000000,215184.000000,81525.000000,100.384582)}
{pt3dadd(164196.000000,215316.000000,81850.000000,89.317935)}
{pt3dadd(164340.000000,215448.000000,82075.000000,78.251288)}
{pt3dadd(164520.000000,215484.000000,82325.000000,67.184640)}
{pt3dadd(164676.000000,215580.000000,82575.000000,67.184640)}
{pt3dadd(164748.000000,215688.000000,82725.000000,55.987200)}

{create adhoc122}
{access adhoc122}
{connect adhoc122(1), adhoc118(0)}
{nseg = 1}
{strdef color color = "White"}
{pt3dclear()}
{pt3dadd(164376.000000,211860.000000,79350.000000,332.791560)}
{pt3dadd(164532.000000,211836.000000,79550.000000,383.375880)}
{pt3dadd(164520.000000,211848.000000,79775.000000,399.682683)}
{pt3dadd(164580.000000,211764.000000,79975.000000,415.989486)}
{pt3dadd(164724.000000,211776.000000,80150.000000,240.734646)}

{create adhoc123}
{access adhoc123}
{connect adhoc123(1), adhoc122(0)}
{nseg = 1}
{strdef color color = "White"}
{pt3dclear()}
{pt3dadd(164724.000000,211776.000000,80150.000000,240.734646)}
{pt3dadd(164436.000000,211536.000000,80150.000000,96.745896)}
{pt3dadd(164376.000000,211284.000000,80200.000000,83.159664)}
{pt3dadd(164244.000000,211044.000000,80175.000000,69.573432)}
{pt3dadd(164436.000000,210840.000000,80300.000000,55.987200)}
{pt3dadd(164508.000000,210648.000000,80525.000000,46.656000)}

{create adhoc124}
{access adhoc124}
{connect adhoc124(1), adhoc122(0)}
{nseg = 1}
{strdef color color = "White"}
{pt3dclear()}
{pt3dadd(164724.000000,211776.000000,80150.000000,240.734646)}
{pt3dadd(164856.000000,211776.000000,80400.000000,200.612214)}
{pt3dadd(164964.000000,211704.000000,80575.000000,139.314042)}

{create adhoc125}
{access adhoc125}
{connect adhoc125(1), adhoc124(0)}
{nseg = 1}
{strdef color color = "White"}
{pt3dclear()}
{pt3dadd(164964.000000,211704.000000,80575.000000,139.314042)}
{pt3dadd(165240.000000,211740.000000,80750.000000,139.314042)}
{pt3dadd(165420.000000,211752.000000,80925.000000,146.279741)}
{pt3dadd(165672.000000,211752.000000,81125.000000,153.245439)}
{pt3dadd(165888.000000,211692.000000,81275.000000,160.211138)}
{pt3dadd(166104.000000,211692.000000,81500.000000,167.176836)}
{pt3dadd(166320.000000,211608.000000,81650.000000,167.176836)}
{pt3dadd(166584.000000,211512.000000,81800.000000,167.176836)}
{pt3dadd(166848.000000,211548.000000,81925.000000,167.176836)}
{pt3dadd(167004.000000,211536.000000,82075.000000,167.176836)}
{pt3dadd(167088.000000,211476.000000,82250.000000,160.211138)}
{pt3dadd(167388.000000,211188.000000,82425.000000,153.245439)}
{pt3dadd(167616.000000,210912.000000,82575.000000,146.279741)}
{pt3dadd(167724.000000,210696.000000,82725.000000,139.314042)}
{pt3dadd(167856.000000,210420.000000,82575.000000,137.920900)}
{pt3dadd(168000.000000,210324.000000,82500.000000,136.527759)}
{pt3dadd(168108.000000,210096.000000,82450.000000,135.134617)}
{pt3dadd(168228.000000,210000.000000,82450.000000,133.741476)}
{pt3dadd(168348.000000,209904.000000,82400.000000,150.459161)}
{pt3dadd(168480.000000,209772.000000,82325.000000,167.176845)}
{pt3dadd(168576.000000,209496.000000,82275.000000,183.894530)}
{pt3dadd(168684.000000,209292.000000,82250.000000,200.612214)}
{pt3dadd(168792.000000,209124.000000,82175.000000,210.642822)}
{pt3dadd(168888.000000,208956.000000,82125.000000,220.673430)}
{pt3dadd(168972.000000,208860.000000,82150.000000,230.704038)}
{pt3dadd(169068.000000,208728.000000,82150.000000,240.734646)}
{pt3dadd(169152.000000,208560.000000,82175.000000,215.379495)}
{pt3dadd(169236.000000,208296.000000,82325.000000,190.024344)}
{pt3dadd(169356.000000,208128.000000,82450.000000,164.669193)}
{pt3dadd(169416.000000,207852.000000,82625.000000,139.314042)}
{pt3dadd(169476.000000,207648.000000,83000.000000,191.150005)}
{pt3dadd(169548.000000,207432.000000,83225.000000,242.985969)}
{pt3dadd(169668.000000,207192.000000,83425.000000,294.821933)}
{pt3dadd(169740.000000,206976.000000,83700.000000,346.657896)}
{pt3dadd(169752.000000,206904.000000,83900.000000,364.221900)}
{pt3dadd(169788.000000,206748.000000,84075.000000,381.785904)}
{pt3dadd(169920.000000,206532.000000,84275.000000,399.349908)}
{pt3dadd(170052.000000,206328.000000,84575.000000,415.989486)}

{create adhoc126}
{access adhoc126}
{connect adhoc126(1), adhoc125(0)}
{nseg = 1}
{strdef color color = "White"}
{pt3dclear()}
{pt3dadd(170052.000000,206328.000000,84575.000000,415.989486)}
{pt3dadd(170124.000000,206508.000000,84775.000000,141.991056)}
{pt3dadd(170244.000000,206652.000000,85025.000000,67.184640)}

{create adhoc127}
{access adhoc127}
{connect adhoc127(1), adhoc125(0)}
{nseg = 1}
{strdef color color = "White"}
{pt3dclear()}
{pt3dadd(170052.000000,206328.000000,84575.000000,415.989486)}
{pt3dadd(170088.000000,205992.000000,84575.000000,288.881586)}
{pt3dadd(170232.000000,205488.000000,84700.000000,240.847655)}
{pt3dadd(170352.000000,205224.000000,84825.000000,192.813723)}
{pt3dadd(170640.000000,205056.000000,85025.000000,144.779792)}
{pt3dadd(170868.000000,204732.000000,85225.000000,96.745860)}
{pt3dadd(171072.000000,204660.000000,85425.000000,96.745860)}
{pt3dadd(171372.000000,204528.000000,85575.000000,96.745860)}
{pt3dadd(171624.000000,204276.000000,85675.000000,96.745860)}
{pt3dadd(171840.000000,204192.000000,85850.000000,96.745860)}
{pt3dadd(172236.000000,203916.000000,86025.000000,105.994764)}
{pt3dadd(172620.000000,203904.000000,86200.000000,115.243668)}
{pt3dadd(172944.000000,203808.000000,86350.000000,124.492572)}
{pt3dadd(173292.000000,203784.000000,86525.000000,133.741476)}
{pt3dadd(173436.000000,203724.000000,86725.000000,118.325916)}
{pt3dadd(173664.000000,203700.000000,86925.000000,116.095032)}

{create adhoc128}
{access adhoc128}
{connect adhoc128(1), adhoc127(0)}
{nseg = 1}
{strdef color color = "White"}
{pt3dclear()}
{pt3dadd(173664.000000,203700.000000,86925.000000,116.095032)}
{pt3dadd(173808.000000,203508.000000,87125.000000,80.621550)}
{pt3dadd(174060.000000,203292.000000,87325.000000,84.652627)}
{pt3dadd(174216.000000,203028.000000,87475.000000,88.683705)}
{pt3dadd(174408.000000,202860.000000,87600.000000,92.714782)}
{pt3dadd(174768.000000,202848.000000,87925.000000,96.745860)}
{pt3dadd(174936.000000,202704.000000,88075.000000,107.387906)}
{pt3dadd(175212.000000,202560.000000,88275.000000,118.029951)}
{pt3dadd(175308.000000,202452.000000,88450.000000,128.671997)}
{pt3dadd(175404.000000,202392.000000,88450.000000,139.314042)}
{pt3dadd(175656.000000,202296.000000,88725.000000,121.281691)}
{pt3dadd(175692.000000,202332.000000,88950.000000,103.249341)}
{pt3dadd(175860.000000,202332.000000,89025.000000,85.216990)}
{pt3dadd(176004.000000,202332.000000,89500.000000,67.184640)}
{pt3dadd(176280.000000,202668.000000,90050.000000,79.412238)}
{pt3dadd(176424.000000,202836.000000,90300.000000,91.639836)}
{pt3dadd(176544.000000,203004.000000,90575.000000,103.867434)}
{pt3dadd(176652.000000,203004.000000,90900.000000,116.095032)}
{pt3dadd(176820.000000,203136.000000,91250.000000,116.095032)}
{pt3dadd(177144.000000,203208.000000,91575.000000,67.184640)}

{create adhoc129}
{access adhoc129}
{connect adhoc129(1), adhoc127(0)}
{nseg = 1}
{strdef color color = "White"}
{pt3dclear()}
{pt3dadd(173664.000000,203700.000000,86925.000000,116.095032)}
{pt3dadd(173916.000000,203772.000000,87125.000000,67.184640)}
{pt3dadd(174216.000000,203880.000000,87275.000000,74.574945)}
{pt3dadd(174240.000000,203988.000000,87425.000000,81.965250)}
{pt3dadd(174240.000000,204132.000000,87650.000000,89.355555)}
{pt3dadd(174276.000000,204312.000000,87875.000000,96.745860)}
{pt3dadd(174444.000000,204324.000000,88025.000000,122.712448)}
{pt3dadd(174648.000000,204456.000000,88200.000000,148.679037)}
{pt3dadd(174792.000000,204480.000000,88250.000000,174.645625)}
{pt3dadd(174924.000000,204516.000000,88325.000000,200.612214)}
{pt3dadd(175032.000000,204684.000000,88650.000000,170.614548)}
{pt3dadd(175020.000000,204852.000000,88925.000000,140.616882)}
{pt3dadd(175008.000000,205056.000000,89275.000000,110.619216)}
{pt3dadd(175140.000000,205320.000000,89575.000000,80.621550)}
{pt3dadd(175104.000000,205620.000000,89850.000000,74.462963)}
{pt3dadd(174984.000000,205848.000000,90050.000000,68.304375)}
{pt3dadd(174984.000000,206040.000000,90300.000000,62.145787)}
{pt3dadd(175008.000000,206304.000000,90475.000000,55.987200)}
{pt3dadd(174912.000000,206508.000000,90700.000000,74.475210)}
{pt3dadd(175068.000000,206700.000000,90975.000000,92.963220)}
{pt3dadd(175236.000000,206868.000000,91150.000000,111.451230)}
{pt3dadd(175380.000000,207024.000000,91350.000000,55.987200)}

{create adhoc130}
{access adhoc130}
{connect adhoc130(1), adhoc124(0)}
{nseg = 1}
{strdef color color = "White"}
{pt3dclear()}
{pt3dadd(164964.000000,211704.000000,80575.000000,139.314042)}
{pt3dadd(164880.000000,211884.000000,80725.000000,160.489764)}
{pt3dadd(164592.000000,211968.000000,80800.000000,46.656000)}

{create adhoc131}
{access adhoc131}
{connect adhoc131(1), adhoc101(0)}
{nseg = 1}
{strdef color color = "White"}
{pt3dclear()}
{pt3dadd(195048.000000,188724.000000,93075.000000,915.803424)}
{pt3dadd(195504.000000,188340.000000,93075.000000,1098.964188)}
{pt3dadd(195804.000000,187896.000000,93075.000000,866.017350)}
{pt3dadd(196068.000000,187584.000000,93075.000000,633.070512)}
{pt3dadd(196380.000000,187236.000000,93075.000000,400.123674)}
{pt3dadd(196644.000000,186972.000000,92925.000000,167.176836)}
{pt3dadd(196776.000000,186828.000000,92725.000000,141.506937)}
{pt3dadd(196896.000000,186660.000000,92550.000000,115.837038)}
{pt3dadd(197016.000000,186576.000000,92325.000000,90.167139)}
{pt3dadd(197100.000000,186336.000000,92075.000000,64.497240)}
{pt3dadd(196956.000000,186108.000000,91850.000000,83.201441)}
{pt3dadd(196992.000000,185892.000000,91650.000000,101.905641)}
{pt3dadd(197016.000000,185748.000000,91475.000000,120.609842)}
{pt3dadd(197136.000000,185400.000000,91275.000000,139.314042)}
{pt3dadd(197076.000000,185268.000000,91100.000000,111.451230)}

{create adhoc132}
{access adhoc132}
{connect adhoc132(1), adhoc131(0)}
{nseg = 1}
{strdef color color = "White"}
{pt3dclear()}
{pt3dadd(197076.000000,185268.000000,91100.000000,111.451230)}
{pt3dadd(197232.000000,185088.000000,91300.000000,71.328780)}
{pt3dadd(197316.000000,184812.000000,91450.000000,63.657990)}
{pt3dadd(197244.000000,184512.000000,91550.000000,55.987200)}
{pt3dadd(197244.000000,184224.000000,91575.000000,46.656000)}

{create adhoc133}
{access adhoc133}
{connect adhoc133(1), adhoc131(0)}
{nseg = 1}
{strdef color color = "White"}
{pt3dclear()}
{pt3dadd(197076.000000,185268.000000,91100.000000,111.451230)}
{pt3dadd(197100.000000,185100.000000,90925.000000,133.741476)}
{pt3dadd(197040.000000,184932.000000,90725.000000,129.329865)}
{pt3dadd(197040.000000,184824.000000,90500.000000,124.918254)}
{pt3dadd(197028.000000,184596.000000,90125.000000,120.506643)}
{pt3dadd(197028.000000,184488.000000,89825.000000,116.095032)}
{pt3dadd(197028.000000,184260.000000,89625.000000,135.218200)}
{pt3dadd(197028.000000,184008.000000,89425.000000,154.341369)}
{pt3dadd(197028.000000,183816.000000,89200.000000,173.464538)}
{pt3dadd(197016.000000,183708.000000,89000.000000,192.587706)}
{pt3dadd(196968.000000,183600.000000,88800.000000,168.627244)}
{pt3dadd(196860.000000,183468.000000,88600.000000,144.666783)}
{pt3dadd(196764.000000,183372.000000,88375.000000,120.706322)}
{pt3dadd(196632.000000,183264.000000,88125.000000,96.745860)}
{pt3dadd(196584.000000,183168.000000,87875.000000,132.743057)}
{pt3dadd(196584.000000,182976.000000,87675.000000,168.740253)}
{pt3dadd(196584.000000,182712.000000,87400.000000,204.737450)}
{pt3dadd(196632.000000,182520.000000,87100.000000,240.734646)}
{pt3dadd(196536.000000,182424.000000,86850.000000,206.229353)}
{pt3dadd(196404.000000,182064.000000,86500.000000,171.724059)}
{pt3dadd(196404.000000,181788.000000,86275.000000,137.218766)}
{pt3dadd(196272.000000,181608.000000,86100.000000,102.713472)}
{pt3dadd(195900.000000,181620.000000,86050.000000,79.350336)}
{pt3dadd(195876.000000,181440.000000,85950.000000,55.987200)}
{pt3dadd(195696.000000,181248.000000,85825.000000,46.656000)}
