# Supplementary material for: Full reconstruction of large lobula plate tangential cells in Drosophila from a 3D EM dataset
Source: PLoS One. 2018 Nov 28;13(11):e0207828. doi: 10.1371/journal.pone.0207828 (PMC6261601; doi:10.1371/journal.pone.0207828)
Supplement: S1 Dataset — (ZIP) [file pone.0207828.s001.zip › Diameter hoc/VS_VSL_preliminary/Old Diameters Mar13_VS_VSL_HS/VSlike2/2_14_767_gmordhorst_001.008.hoc]

/* created with nml2hocm */

{create adhoc1}
{access adhoc1}
{nseg = 1}
{strdef color color = "White"}
{pt3dclear()}
{pt3dadd(190284.000000,193548.000000,109175.000000,77.396688)}
{pt3dadd(190020.000000,193404.000000,108900.000000,346.657896)}
{pt3dadd(189840.000000,193512.000000,107100.000000,499.187376)}

{create adhoc2}
{access adhoc2}
{connect adhoc2(1), adhoc1(0)}
{nseg = 1}
{strdef color color = "White"}
{pt3dclear()}
{pt3dadd(189840.000000,193512.000000,107100.000000,499.187376)}
{pt3dadd(189552.000000,193632.000000,107575.000000,499.187376)}
{pt3dadd(189348.000000,193536.000000,108025.000000,499.187376)}
{pt3dadd(189216.000000,193428.000000,108550.000000,499.187376)}
{pt3dadd(188916.000000,193536.000000,108825.000000,499.187376)}
{pt3dadd(188700.000000,193584.000000,109050.000000,499.187376)}
{pt3dadd(188472.000000,193548.000000,109350.000000,499.187376)}
{pt3dadd(188328.000000,193596.000000,109450.000000,499.187376)}
{pt3dadd(188124.000000,193740.000000,109575.000000,499.187376)}
{pt3dadd(187908.000000,193848.000000,109675.000000,499.187376)}
{pt3dadd(187716.000000,193860.000000,109900.000000,524.146752)}
{pt3dadd(187524.000000,193872.000000,110125.000000,549.106128)}
{pt3dadd(187296.000000,193944.000000,110450.000000,574.065504)}
{pt3dadd(187080.000000,194124.000000,110875.000000,599.024880)}
{pt3dadd(186828.000000,194352.000000,111300.000000,553.266031)}
{pt3dadd(186540.000000,194496.000000,111800.000000,507.507183)}
{pt3dadd(186288.000000,194508.000000,112325.000000,461.748335)}
{pt3dadd(186072.000000,194520.000000,112650.000000,415.989486)}
{pt3dadd(185832.000000,194568.000000,113000.000000,436.788958)}
{pt3dadd(185628.000000,194532.000000,113425.000000,457.588431)}
{pt3dadd(185460.000000,194580.000000,113750.000000,478.387903)}
{pt3dadd(185316.000000,194580.000000,114125.000000,499.187376)}
{pt3dadd(185064.000000,194580.000000,114525.000000,499.187376)}
{pt3dadd(184896.000000,194616.000000,115000.000000,499.187376)}
{pt3dadd(184824.000000,194544.000000,115400.000000,499.187376)}
{pt3dadd(184788.000000,194628.000000,115775.000000,499.187376)}
{pt3dadd(184548.000000,194484.000000,116200.000000,461.055006)}
{pt3dadd(184332.000000,194448.000000,116700.000000,422.922636)}
{pt3dadd(183888.000000,194460.000000,117225.000000,384.790266)}
{pt3dadd(183564.000000,194364.000000,117675.000000,346.657896)}
{pt3dadd(183324.000000,194268.000000,118100.000000,363.990794)}
{pt3dadd(182724.000000,194136.000000,118675.000000,381.323691)}
{pt3dadd(182520.000000,193932.000000,119325.000000,398.656589)}
{pt3dadd(182004.000000,193572.000000,119875.000000,415.989486)}
{pt3dadd(181608.000000,193416.000000,120200.000000,415.989486)}
{pt3dadd(181272.000000,193236.000000,120625.000000,415.989486)}
{pt3dadd(180792.000000,193104.000000,121075.000000,415.989486)}
{pt3dadd(180480.000000,192936.000000,121525.000000,415.989486)}
{pt3dadd(180240.000000,192840.000000,121675.000000,436.788958)}
{pt3dadd(180000.000000,192696.000000,121875.000000,457.588431)}
{pt3dadd(179580.000000,192588.000000,122275.000000,478.387903)}
{pt3dadd(179412.000000,192408.000000,122475.000000,499.187376)}
{pt3dadd(179232.000000,192336.000000,122650.000000,499.187376)}
{pt3dadd(179064.000000,192216.000000,122800.000000,499.187376)}
{pt3dadd(178872.000000,192156.000000,122950.000000,499.187376)}
{pt3dadd(178656.000000,192060.000000,123125.000000,499.187376)}
{pt3dadd(178440.000000,191988.000000,123475.000000,494.195504)}
{pt3dadd(178104.000000,191748.000000,123800.000000,489.203631)}
{pt3dadd(177876.000000,191532.000000,123900.000000,484.211758)}
{pt3dadd(177348.000000,191100.000000,124275.000000,479.219886)}
{pt3dadd(176796.000000,190596.000000,124750.000000,509.171134)}
{pt3dadd(176376.000000,190416.000000,125000.000000,539.122383)}
{pt3dadd(175956.000000,190044.000000,125400.000000,569.073631)}
{pt3dadd(175476.000000,189360.000000,125800.000000,599.024880)}
{pt3dadd(175092.000000,189144.000000,126025.000000,599.024880)}
{pt3dadd(174768.000000,188892.000000,126325.000000,599.024880)}
{pt3dadd(174348.000000,188592.000000,126575.000000,599.024880)}
{pt3dadd(174000.000000,188424.000000,126800.000000,599.024880)}
{pt3dadd(173532.000000,188352.000000,127125.000000,535.933134)}
{pt3dadd(172908.000000,188208.000000,127725.000000,472.841388)}
{pt3dadd(172212.000000,187872.000000,127975.000000,409.749642)}
{pt3dadd(171924.000000,187572.000000,128050.000000,346.657896)}
{pt3dadd(171732.000000,187464.000000,128125.000000,332.213819)}
{pt3dadd(171540.000000,187404.000000,128125.000000,317.769741)}
{pt3dadd(171144.000000,187128.000000,128125.000000,303.325664)}
{pt3dadd(170796.000000,186732.000000,128250.000000,288.881586)}
{pt3dadd(170400.000000,186432.000000,128275.000000,288.881586)}
{pt3dadd(170196.000000,186360.000000,128350.000000,288.881586)}
{pt3dadd(169968.000000,186180.000000,128475.000000,288.881586)}
{pt3dadd(169656.000000,186048.000000,128625.000000,288.881586)}
{pt3dadd(169272.000000,185808.000000,128750.000000,320.658561)}
{pt3dadd(168900.000000,185700.000000,128950.000000,352.435536)}
{pt3dadd(168648.000000,185628.000000,129050.000000,384.212511)}
{pt3dadd(168252.000000,185328.000000,129275.000000,415.989486)}
{pt3dadd(168012.000000,185184.000000,129400.000000,398.656589)}
{pt3dadd(167604.000000,184884.000000,129525.000000,381.323691)}
{pt3dadd(167364.000000,184860.000000,129625.000000,363.990794)}
{pt3dadd(167172.000000,184728.000000,129700.000000,346.657896)}
{pt3dadd(166632.000000,184344.000000,130025.000000,329.325007)}
{pt3dadd(166224.000000,183924.000000,130300.000000,311.992119)}
{pt3dadd(165864.000000,183468.000000,130500.000000,294.659230)}
{pt3dadd(165768.000000,183252.000000,130600.000000,277.326342)}
{pt3dadd(165444.000000,182928.000000,130625.000000,294.659230)}
{pt3dadd(165336.000000,182748.000000,130750.000000,311.992119)}
{pt3dadd(165120.000000,182556.000000,130825.000000,329.325007)}
{pt3dadd(164916.000000,182316.000000,130875.000000,346.657896)}
{pt3dadd(164580.000000,181956.000000,131000.000000,332.213819)}
{pt3dadd(164280.000000,181668.000000,131050.000000,317.769741)}
{pt3dadd(164220.000000,181464.000000,131125.000000,303.325664)}
{pt3dadd(164148.000000,181224.000000,131150.000000,288.881586)}
{pt3dadd(163968.000000,181008.000000,131275.000000,320.658561)}
{pt3dadd(163860.000000,180588.000000,131450.000000,352.435536)}
{pt3dadd(163764.000000,180336.000000,131700.000000,384.212511)}
{pt3dadd(163776.000000,179880.000000,131775.000000,415.989486)}
{pt3dadd(163632.000000,179496.000000,131900.000000,395.190014)}
{pt3dadd(163440.000000,179280.000000,132075.000000,374.390541)}
{pt3dadd(163080.000000,178584.000000,132250.000000,353.591069)}
{pt3dadd(162744.000000,178260.000000,132575.000000,332.791596)}
{pt3dadd(162492.000000,177828.000000,132875.000000,374.390541)}
{pt3dadd(162240.000000,177552.000000,133050.000000,415.989486)}
{pt3dadd(161868.000000,177108.000000,133525.000000,457.588431)}
{pt3dadd(161400.000000,176484.000000,134200.000000,499.187376)}
{pt3dadd(160776.000000,175596.000000,134850.000000,499.187376)}
{pt3dadd(160164.000000,175200.000000,135400.000000,499.187376)}
{pt3dadd(159888.000000,175080.000000,135700.000000,499.187376)}
{pt3dadd(159552.000000,174864.000000,136075.000000,499.187376)}
{pt3dadd(159348.000000,174576.000000,136500.000000,478.387903)}
{pt3dadd(159216.000000,174408.000000,136850.000000,457.588431)}
{pt3dadd(159000.000000,174072.000000,137275.000000,436.788958)}
{pt3dadd(159552.000000,173412.000000,138100.000000,415.989486)}
{pt3dadd(159792.000000,172908.000000,138600.000000,415.989486)}
{pt3dadd(159576.000000,172428.000000,139100.000000,415.989486)}
{pt3dadd(159444.000000,171600.000000,139575.000000,415.989486)}
{pt3dadd(159048.000000,170712.000000,140125.000000,415.989486)}
{pt3dadd(158988.000000,170340.000000,140550.000000,415.989486)}
{pt3dadd(158784.000000,170172.000000,141050.000000,415.989486)}
{pt3dadd(158712.000000,169992.000000,141500.000000,415.989486)}
{pt3dadd(158568.000000,169812.000000,141975.000000,415.989486)}
{pt3dadd(158148.000000,169272.000000,142600.000000,398.656589)}
{pt3dadd(157908.000000,168984.000000,142975.000000,381.323691)}
{pt3dadd(157512.000000,168696.000000,143400.000000,363.990794)}
{pt3dadd(157272.000000,168456.000000,143750.000000,346.657896)}
{pt3dadd(156732.000000,167808.000000,144250.000000,359.830908)}
{pt3dadd(156492.000000,167364.000000,144800.000000,373.003920)}
{pt3dadd(156396.000000,166968.000000,145225.000000,386.176932)}
{pt3dadd(156072.000000,166800.000000,145700.000000,399.349944)}
{pt3dadd(155976.000000,166488.000000,146075.000000,386.176932)}
{pt3dadd(155640.000000,166272.000000,146475.000000,373.003920)}
{pt3dadd(155460.000000,165792.000000,146850.000000,359.830908)}
{pt3dadd(155424.000000,165660.000000,147300.000000,346.657896)}
{pt3dadd(155472.000000,165156.000000,147675.000000,409.749642)}
{pt3dadd(155376.000000,164796.000000,148050.000000,472.841388)}
{pt3dadd(155088.000000,164004.000000,148725.000000,535.933134)}
{pt3dadd(154992.000000,163896.000000,149375.000000,599.024880)}
{pt3dadd(155208.000000,163620.000000,149850.000000,628.976115)}
{pt3dadd(154932.000000,163560.000000,150275.000000,658.927350)}
{pt3dadd(154764.000000,163152.000000,150725.000000,688.878585)}
{pt3dadd(154620.000000,162792.000000,151500.000000,718.829820)}
{pt3dadd(154812.000000,162492.000000,152075.000000,682.888329)}
{pt3dadd(154692.000000,162420.000000,152475.000000,646.946838)}
{pt3dadd(154704.000000,162096.000000,152950.000000,611.005347)}
{pt3dadd(154884.000000,161736.000000,153375.000000,575.063856)}
{pt3dadd(154596.000000,161808.000000,153800.000000,581.054112)}
{pt3dadd(154860.000000,161088.000000,154125.000000,587.044368)}
{pt3dadd(154560.000000,161028.000000,154550.000000,593.034624)}
{pt3dadd(154488.000000,160416.000000,155050.000000,599.024880)}
{pt3dadd(154512.000000,159912.000000,155500.000000,574.065504)}
{pt3dadd(154620.000000,159540.000000,155975.000000,549.106128)}
{pt3dadd(154812.000000,159168.000000,156350.000000,524.146752)}
{pt3dadd(154812.000000,158820.000000,156725.000000,499.187376)}
{pt3dadd(155268.000000,158616.000000,157125.000000,499.187376)}
{pt3dadd(155460.000000,158364.000000,157625.000000,499.187376)}
{pt3dadd(155640.000000,158268.000000,158300.000000,499.187376)}
{pt3dadd(155172.000000,157992.000000,158875.000000,499.187376)}
{pt3dadd(154776.000000,157692.000000,159325.000000,494.195504)}
{pt3dadd(154452.000000,157248.000000,159850.000000,489.203631)}
{pt3dadd(154428.000000,156732.000000,160250.000000,484.211758)}
{pt3dadd(154800.000000,156456.000000,160750.000000,479.219886)}
{pt3dadd(155028.000000,156012.000000,161225.000000,509.171134)}
{pt3dadd(155172.000000,155604.000000,161825.000000,539.122383)}
{pt3dadd(155220.000000,155196.000000,162325.000000,569.073631)}
{pt3dadd(155532.000000,154620.000000,162825.000000,599.024880)}
{pt3dadd(155736.000000,154224.000000,163350.000000,599.024880)}
{pt3dadd(155856.000000,153900.000000,163825.000000,599.024880)}
{pt3dadd(156144.000000,153420.000000,164275.000000,599.024880)}
{pt3dadd(156300.000000,152988.000000,164825.000000,599.024880)}
{pt3dadd(156480.000000,152328.000000,165400.000000,574.065504)}
{pt3dadd(157032.000000,151716.000000,165975.000000,549.106128)}
{pt3dadd(157440.000000,151308.000000,166375.000000,524.146752)}
{pt3dadd(157488.000000,150300.000000,166775.000000,499.187376)}
{pt3dadd(157944.000000,150132.000000,167225.000000,518.156532)}
{pt3dadd(158544.000000,149820.000000,167925.000000,537.125688)}
{pt3dadd(158928.000000,149568.000000,168475.000000,556.094844)}
{pt3dadd(159276.000000,149388.000000,169025.000000,575.064000)}
{pt3dadd(159564.000000,148572.000000,169475.000000,611.005455)}
{pt3dadd(160008.000000,147948.000000,169950.000000,646.946910)}
{pt3dadd(160128.000000,147468.000000,170400.000000,682.888365)}
{pt3dadd(160200.000000,147060.000000,170825.000000,718.829820)}
{pt3dadd(160380.000000,146688.000000,171300.000000,797.901102)}
{pt3dadd(160692.000000,146064.000000,171975.000000,876.972384)}
{pt3dadd(160800.000000,145476.000000,172525.000000,956.043666)}
{pt3dadd(161076.000000,144852.000000,173000.000000,1035.114948)}
{pt3dadd(161088.000000,144192.000000,173400.000000,991.985162)}
{pt3dadd(161088.000000,143820.000000,174075.000000,948.855375)}
{pt3dadd(160200.000000,143448.000000,174650.000000,905.725589)}
{pt3dadd(160128.000000,142656.000000,175525.000000,862.595802)}
{pt3dadd(160380.000000,142020.000000,176300.000000,862.595802)}
{pt3dadd(159996.000000,141504.000000,177000.000000,862.595802)}

{create adhoc3}
{access adhoc3}
{connect adhoc3(1), adhoc2(0)}
{nseg = 1}
{strdef color color = "White"}
{pt3dclear()}
{pt3dadd(159996.000000,141504.000000,177000.000000,862.595802)}
{pt3dadd(157464.000000,140100.000000,176950.000000,244.685574)}
{pt3dadd(156420.000000,140052.000000,176950.000000,243.697842)}
{pt3dadd(155976.000000,140172.000000,177100.000000,242.710110)}
{pt3dadd(155532.000000,140280.000000,177275.000000,241.722378)}
{pt3dadd(155340.000000,140280.000000,177225.000000,240.734646)}
{pt3dadd(155100.000000,139992.000000,177025.000000,240.734646)}
{pt3dadd(154644.000000,139800.000000,176975.000000,240.734646)}
{pt3dadd(154464.000000,139728.000000,177050.000000,240.734646)}
{pt3dadd(154116.000000,139548.000000,177075.000000,240.734646)}
{pt3dadd(153900.000000,139392.000000,177000.000000,228.697915)}
{pt3dadd(153684.000000,139320.000000,176875.000000,216.661185)}
{pt3dadd(153480.000000,139248.000000,176925.000000,204.624455)}
{pt3dadd(153144.000000,139176.000000,176950.000000,192.587724)}
{pt3dadd(152784.000000,139200.000000,176925.000000,231.105267)}
{pt3dadd(152280.000000,139236.000000,176950.000000,269.622810)}
{pt3dadd(151860.000000,139200.000000,177050.000000,308.140353)}
{pt3dadd(151320.000000,139236.000000,177125.000000,346.657896)}
{pt3dadd(150768.000000,139404.000000,177375.000000,384.790266)}
{pt3dadd(150180.000000,139296.000000,177375.000000,422.922636)}
{pt3dadd(149940.000000,139284.000000,177400.000000,461.055006)}
{pt3dadd(149652.000000,139092.000000,177350.000000,499.187376)}
{pt3dadd(149412.000000,138912.000000,177300.000000,434.574193)}
{pt3dadd(149016.000000,138840.000000,177050.000000,369.961011)}
{pt3dadd(148680.000000,138684.000000,176675.000000,305.347828)}
{pt3dadd(148476.000000,138600.000000,176525.000000,240.734646)}
{pt3dadd(148188.000000,138624.000000,176125.000000,192.587724)}
{pt3dadd(147888.000000,138708.000000,176000.000000,167.176836)}

{create adhoc4}
{access adhoc4}
{connect adhoc4(1), adhoc3(0)}
{nseg = 1}
{strdef color color = "White"}
{pt3dclear()}
{pt3dadd(147888.000000,138708.000000,176000.000000,167.176836)}
{pt3dadd(148440.000000,138876.000000,175925.000000,116.095032)}
{pt3dadd(148644.000000,138876.000000,175775.000000,159.291671)}
{pt3dadd(148704.000000,138912.000000,175550.000000,202.488309)}
{pt3dadd(148524.000000,138900.000000,175250.000000,245.684947)}
{pt3dadd(148776.000000,138828.000000,174825.000000,288.881586)}
{pt3dadd(149112.000000,138816.000000,174600.000000,231.105276)}

{create adhoc5}
{access adhoc5}
{connect adhoc5(1), adhoc3(0)}
{nseg = 1}
{strdef color color = "White"}
{pt3dclear()}
{pt3dadd(147888.000000,138708.000000,176000.000000,167.176836)}
{pt3dadd(147072.000000,138912.000000,175675.000000,277.326342)}
{pt3dadd(146508.000000,138912.000000,175275.000000,424.494168)}
{pt3dadd(146280.000000,138792.000000,174700.000000,571.661994)}
{pt3dadd(147156.000000,138900.000000,174275.000000,718.829820)}
{pt3dadd(147324.000000,138888.000000,173900.000000,575.063856)}

{create adhoc6}
{access adhoc6}
{connect adhoc6(1), adhoc5(0)}
{nseg = 1}
{strdef color color = "White"}
{pt3dclear()}
{pt3dadd(147324.000000,138888.000000,173900.000000,575.063856)}
{pt3dadd(148752.000000,138912.000000,173900.000000,346.657896)}
{pt3dadd(148920.000000,139008.000000,173900.000000,288.881586)}

{create adhoc7}
{access adhoc7}
{connect adhoc7(1), adhoc5(0)}
{nseg = 1}
{strdef color color = "White"}
{pt3dclear()}
{pt3dadd(147324.000000,138888.000000,173900.000000,575.063856)}
{pt3dadd(147360.000000,138852.000000,173650.000000,599.024880)}

{create adhoc8}
{access adhoc8}
{connect adhoc8(1), adhoc7(0)}
{nseg = 1}
{strdef color color = "White"}
{pt3dclear()}
{pt3dadd(147360.000000,138852.000000,173650.000000,599.024880)}
{pt3dadd(146592.000000,137520.000000,173625.000000,116.095032)}
{pt3dadd(146472.000000,137148.000000,173625.000000,80.621550)}
{pt3dadd(146508.000000,137016.000000,173650.000000,55.987200)}

{create adhoc9}
{access adhoc9}
{connect adhoc9(1), adhoc7(0)}
{nseg = 1}
{strdef color color = "White"}
{pt3dclear()}
{pt3dadd(147360.000000,138852.000000,173650.000000,599.024880)}
{pt3dadd(147432.000000,138852.000000,173475.000000,499.187376)}
{pt3dadd(147384.000000,139368.000000,173300.000000,415.989486)}

{create adhoc10}
{access adhoc10}
{connect adhoc10(1), adhoc9(0)}
{nseg = 1}
{strdef color color = "White"}
{pt3dclear()}
{pt3dadd(147384.000000,139368.000000,173300.000000,415.989486)}
{pt3dadd(146976.000000,138180.000000,173300.000000,200.612214)}
{pt3dadd(146592.000000,138024.000000,173150.000000,275.256004)}
{pt3dadd(146628.000000,137844.000000,172900.000000,349.899795)}
{pt3dadd(146520.000000,137700.000000,172350.000000,424.543586)}
{pt3dadd(147324.000000,137700.000000,171825.000000,499.187376)}
{pt3dadd(147696.000000,137808.000000,171350.000000,494.195504)}
{pt3dadd(147972.000000,137736.000000,171300.000000,489.203631)}
{pt3dadd(148164.000000,137664.000000,171225.000000,484.211758)}
{pt3dadd(148356.000000,137592.000000,171200.000000,479.219886)}
{pt3dadd(148656.000000,137580.000000,171150.000000,460.051110)}
{pt3dadd(148812.000000,137568.000000,171200.000000,399.349908)}

{create adhoc11}
{access adhoc11}
{connect adhoc11(1), adhoc10(0)}
{nseg = 1}
{strdef color color = "White"}
{pt3dclear()}
{pt3dadd(148812.000000,137568.000000,171200.000000,399.349908)}
{pt3dadd(148812.000000,138300.000000,170600.000000,200.612214)}

{create adhoc12}
{access adhoc12}
{connect adhoc12(1), adhoc10(0)}
{nseg = 1}
{strdef color color = "White"}
{pt3dclear()}
{pt3dadd(148812.000000,137568.000000,171200.000000,399.349908)}
{pt3dadd(148980.000000,137640.000000,171375.000000,332.791596)}

{create adhoc13}
{access adhoc13}
{connect adhoc13(1), adhoc9(0)}
{nseg = 1}
{strdef color color = "White"}
{pt3dclear()}
{pt3dadd(147384.000000,139368.000000,173300.000000,415.989486)}
{pt3dadd(147216.000000,139776.000000,173175.000000,240.734646)}
{pt3dadd(147324.000000,140112.000000,172950.000000,240.734646)}
{pt3dadd(147096.000000,140472.000000,172750.000000,240.734646)}
{pt3dadd(146964.000000,140760.000000,172550.000000,240.734646)}
{pt3dadd(146820.000000,140796.000000,172275.000000,200.612214)}

{create adhoc14}
{access adhoc14}
{connect adhoc14(1), adhoc2(0)}
{nseg = 1}
{strdef color color = "White"}
{pt3dclear()}
{pt3dadd(159996.000000,141504.000000,177000.000000,862.595802)}
{pt3dadd(159720.000000,141240.000000,177525.000000,953.962020)}
{pt3dadd(159456.000000,141120.000000,178025.000000,923.506614)}
{pt3dadd(159444.000000,141108.000000,178525.000000,893.051208)}
{pt3dadd(159300.000000,140472.000000,178925.000000,862.595802)}
{pt3dadd(159156.000000,140292.000000,179275.000000,862.595802)}

{create adhoc15}
{access adhoc15}
{connect adhoc15(1), adhoc14(0)}
{nseg = 1}
{strdef color color = "White"}
{pt3dclear()}
{pt3dadd(159156.000000,140292.000000,179275.000000,862.595802)}
{pt3dadd(158868.000000,137388.000000,179300.000000,240.734646)}
{pt3dadd(158856.000000,137064.000000,179275.000000,240.734646)}
{pt3dadd(158892.000000,136704.000000,179125.000000,240.734646)}
{pt3dadd(158964.000000,136320.000000,179000.000000,240.734646)}
{pt3dadd(159024.000000,136116.000000,178775.000000,240.734646)}
{pt3dadd(159204.000000,135924.000000,178650.000000,227.360502)}
{pt3dadd(159348.000000,135732.000000,178625.000000,213.986358)}
{pt3dadd(159564.000000,135372.000000,178600.000000,200.612214)}
{pt3dadd(159708.000000,134976.000000,178550.000000,200.612214)}

{create adhoc16}
{access adhoc16}
{connect adhoc16(1), adhoc14(0)}
{nseg = 1}
{strdef color color = "White"}
{pt3dclear()}
{pt3dadd(159156.000000,140292.000000,179275.000000,862.595802)}
{pt3dadd(158904.000000,139848.000000,179975.000000,718.829820)}
{pt3dadd(158568.000000,139224.000000,180525.000000,415.989486)}

{create adhoc17}
{access adhoc17}
{connect adhoc17(1), adhoc16(0)}
{nseg = 1}
{strdef color color = "White"}
{pt3dclear()}
{pt3dadd(158568.000000,139224.000000,180525.000000,415.989486)}
{pt3dadd(157824.000000,138288.000000,180650.000000,192.587706)}
{pt3dadd(157452.000000,138108.000000,180925.000000,179.269290)}
{pt3dadd(157140.000000,137940.000000,181200.000000,165.950874)}
{pt3dadd(156768.000000,138012.000000,181475.000000,152.632458)}
{pt3dadd(156516.000000,137880.000000,181850.000000,139.314042)}
{pt3dadd(156036.000000,137844.000000,182250.000000,242.985969)}
{pt3dadd(155160.000000,137916.000000,182475.000000,346.657896)}
{pt3dadd(154740.000000,138012.000000,182800.000000,415.989486)}

{create adhoc18}
{access adhoc18}
{connect adhoc18(1), adhoc16(0)}
{nseg = 1}
{strdef color color = "White"}
{pt3dclear()}
{pt3dadd(158568.000000,139224.000000,180525.000000,415.989486)}
{pt3dadd(158604.000000,139320.000000,180925.000000,167.176836)}
{pt3dadd(158628.000000,139200.000000,181075.000000,250.179471)}
{pt3dadd(158700.000000,139236.000000,181375.000000,333.182106)}
{pt3dadd(158652.000000,139272.000000,181725.000000,416.184741)}
{pt3dadd(158580.000000,139308.000000,182350.000000,499.187376)}
{pt3dadd(158232.000000,139236.000000,182775.000000,415.989486)}

{create adhoc19}
{access adhoc19}
{connect adhoc19(1), adhoc1(0)}
{nseg = 1}
{strdef color color = "White"}
{pt3dclear()}
{pt3dadd(189840.000000,193512.000000,107100.000000,499.187376)}
{pt3dadd(190092.000000,193008.000000,107050.000000,415.989486)}
{pt3dadd(190308.000000,192792.000000,106525.000000,436.788958)}
{pt3dadd(190572.000000,192504.000000,106200.000000,457.588431)}
{pt3dadd(190824.000000,192216.000000,105900.000000,478.387903)}
{pt3dadd(191124.000000,191688.000000,105450.000000,499.187376)}
{pt3dadd(191364.000000,190836.000000,104975.000000,499.187376)}
{pt3dadd(191496.000000,190416.000000,104500.000000,499.187376)}
{pt3dadd(191640.000000,190104.000000,104175.000000,499.187376)}
{pt3dadd(191628.000000,189648.000000,103800.000000,499.187376)}
{pt3dadd(191880.000000,189192.000000,103400.000000,494.195504)}
{pt3dadd(192144.000000,188844.000000,102925.000000,489.203631)}
{pt3dadd(192312.000000,188532.000000,102500.000000,484.211758)}
{pt3dadd(192492.000000,188124.000000,102100.000000,479.219886)}
{pt3dadd(192672.000000,187788.000000,101775.000000,509.171134)}
{pt3dadd(192876.000000,187404.000000,101550.000000,539.122383)}
{pt3dadd(193116.000000,187056.000000,101250.000000,569.073631)}
{pt3dadd(193416.000000,186612.000000,100925.000000,599.024880)}
{pt3dadd(193728.000000,186288.000000,100925.000000,621.787828)}
{pt3dadd(193968.000000,186108.000000,100725.000000,644.550777)}
{pt3dadd(194316.000000,185928.000000,100500.000000,667.313725)}
{pt3dadd(194604.000000,185784.000000,100375.000000,690.076674)}
{pt3dadd(194412.000000,184536.000000,100400.000000,642.354349)}
{pt3dadd(194652.000000,183636.000000,100400.000000,594.632025)}
{pt3dadd(194688.000000,183384.000000,100225.000000,546.909700)}
{pt3dadd(194724.000000,183156.000000,100250.000000,499.187376)}
{pt3dadd(194832.000000,182832.000000,100200.000000,499.187376)}
{pt3dadd(194868.000000,182484.000000,100150.000000,499.187376)}
{pt3dadd(194904.000000,182268.000000,99925.000000,499.187376)}
{pt3dadd(195000.000000,182088.000000,99850.000000,499.187376)}
{pt3dadd(195240.000000,181752.000000,99575.000000,499.187376)}
{pt3dadd(195348.000000,181404.000000,99550.000000,499.187376)}
{pt3dadd(195384.000000,181020.000000,99525.000000,499.187376)}
{pt3dadd(195420.000000,180720.000000,99500.000000,499.187376)}
{pt3dadd(195348.000000,180408.000000,99450.000000,478.387903)}
{pt3dadd(195936.000000,179808.000000,99475.000000,457.588431)}
{pt3dadd(195744.000000,179256.000000,98825.000000,436.788958)}
{pt3dadd(195696.000000,178860.000000,98650.000000,415.989486)}
{pt3dadd(195792.000000,178644.000000,98500.000000,431.797086)}
{pt3dadd(195816.000000,178272.000000,98225.000000,447.604686)}
{pt3dadd(195912.000000,177888.000000,98050.000000,463.412286)}
{pt3dadd(196080.000000,177492.000000,97775.000000,479.219886)}
{pt3dadd(196140.000000,177096.000000,97575.000000,463.412286)}
{pt3dadd(196392.000000,176652.000000,97500.000000,447.604686)}
{pt3dadd(196560.000000,176292.000000,97350.000000,431.797086)}
{pt3dadd(196776.000000,175944.000000,97150.000000,415.989486)}
{pt3dadd(196944.000000,175572.000000,97075.000000,398.656589)}
{pt3dadd(196944.000000,175200.000000,97150.000000,381.323691)}
{pt3dadd(197196.000000,174828.000000,97100.000000,363.990794)}
{pt3dadd(197304.000000,174456.000000,97225.000000,346.657896)}
{pt3dadd(197412.000000,174144.000000,97350.000000,384.790266)}
{pt3dadd(197556.000000,173832.000000,97375.000000,422.922636)}
{pt3dadd(197760.000000,173520.000000,97525.000000,461.055006)}
{pt3dadd(197928.000000,173196.000000,97625.000000,499.187376)}
{pt3dadd(197988.000000,172884.000000,97850.000000,499.187376)}
{pt3dadd(198084.000000,172488.000000,97975.000000,499.187376)}
{pt3dadd(198120.000000,172080.000000,98050.000000,499.187376)}
{pt3dadd(198252.000000,171636.000000,98075.000000,499.187376)}
{pt3dadd(198420.000000,171288.000000,98000.000000,524.146752)}
{pt3dadd(198552.000000,170916.000000,97975.000000,549.106128)}
{pt3dadd(198612.000000,170592.000000,97925.000000,574.065504)}
{pt3dadd(198720.000000,170244.000000,98025.000000,599.024880)}
{pt3dadd(198828.000000,169908.000000,98050.000000,628.976115)}
{pt3dadd(198936.000000,169620.000000,98100.000000,658.927350)}
{pt3dadd(199068.000000,169308.000000,98425.000000,688.878585)}
{pt3dadd(199308.000000,168984.000000,98500.000000,718.829820)}
{pt3dadd(199380.000000,169308.000000,99000.000000,663.919209)}
{pt3dadd(199656.000000,169056.000000,99425.000000,609.008598)}
{pt3dadd(199764.000000,168672.000000,99775.000000,554.097987)}
{pt3dadd(199752.000000,168084.000000,100125.000000,499.187376)}
{pt3dadd(199824.000000,167592.000000,100500.000000,461.055006)}
{pt3dadd(199452.000000,166308.000000,100775.000000,422.922636)}
{pt3dadd(199488.000000,166200.000000,101150.000000,384.790266)}
{pt3dadd(199404.000000,165720.000000,100975.000000,346.657896)}
{pt3dadd(199356.000000,165444.000000,100925.000000,384.790266)}
{pt3dadd(199272.000000,165096.000000,100875.000000,422.922636)}
{pt3dadd(199272.000000,164688.000000,100850.000000,461.055006)}
{pt3dadd(199296.000000,164520.000000,100875.000000,499.187376)}
{pt3dadd(199320.000000,164340.000000,100900.000000,499.187376)}
{pt3dadd(199284.000000,164184.000000,100725.000000,499.187376)}
{pt3dadd(199248.000000,163764.000000,100575.000000,499.187376)}
{pt3dadd(199212.000000,163428.000000,100375.000000,499.187376)}
{pt3dadd(199212.000000,163128.000000,100200.000000,494.195504)}
{pt3dadd(199320.000000,162840.000000,100000.000000,489.203631)}
{pt3dadd(199464.000000,162564.000000,99800.000000,484.211758)}
{pt3dadd(199524.000000,162240.000000,99650.000000,479.219886)}
{pt3dadd(199620.000000,161880.000000,99450.000000,463.412286)}
{pt3dadd(199752.000000,161568.000000,99325.000000,447.604686)}
{pt3dadd(199992.000000,161244.000000,99200.000000,431.797086)}
{pt3dadd(200352.000000,160920.000000,99075.000000,415.989486)}
{pt3dadd(200628.000000,160572.000000,99050.000000,415.989486)}
{pt3dadd(200808.000000,160212.000000,99125.000000,415.989486)}
{pt3dadd(200988.000000,159852.000000,99150.000000,415.989486)}
{pt3dadd(201084.000000,159456.000000,99100.000000,415.989486)}
{pt3dadd(201108.000000,159060.000000,99075.000000,415.989486)}
{pt3dadd(201132.000000,158664.000000,99075.000000,415.989486)}
{pt3dadd(201120.000000,158448.000000,99025.000000,415.989486)}
{pt3dadd(201144.000000,158100.000000,99075.000000,415.989486)}
{pt3dadd(201276.000000,157848.000000,99125.000000,436.788958)}
{pt3dadd(201240.000000,157476.000000,99225.000000,457.588431)}
{pt3dadd(201240.000000,157152.000000,99325.000000,478.387903)}
{pt3dadd(201300.000000,156792.000000,99250.000000,499.187376)}
{pt3dadd(201432.000000,156384.000000,99125.000000,554.097987)}
{pt3dadd(201420.000000,156036.000000,99300.000000,609.008598)}
{pt3dadd(201372.000000,155712.000000,99425.000000,663.919209)}
{pt3dadd(201444.000000,155268.000000,99675.000000,718.829820)}
{pt3dadd(201408.000000,154740.000000,99775.000000,663.919209)}
{pt3dadd(201336.000000,154296.000000,99750.000000,609.008598)}
{pt3dadd(201264.000000,153888.000000,99825.000000,554.097987)}
{pt3dadd(201180.000000,153456.000000,99850.000000,499.187376)}
{pt3dadd(201096.000000,153012.000000,99875.000000,499.187376)}
{pt3dadd(201060.000000,152640.000000,99775.000000,499.187376)}
{pt3dadd(201168.000000,152244.000000,99775.000000,499.187376)}
{pt3dadd(201132.000000,151848.000000,99675.000000,499.187376)}
{pt3dadd(201168.000000,151548.000000,99650.000000,524.146752)}
{pt3dadd(201204.000000,151272.000000,99600.000000,549.106128)}
{pt3dadd(201228.000000,150924.000000,99425.000000,574.065504)}
{pt3dadd(201228.000000,150684.000000,99450.000000,599.024880)}
{pt3dadd(201192.000000,150516.000000,99475.000000,599.024880)}
{pt3dadd(201156.000000,150336.000000,99500.000000,599.024880)}
{pt3dadd(201120.000000,150168.000000,99525.000000,599.024880)}
{pt3dadd(201084.000000,149988.000000,99400.000000,599.024880)}
{pt3dadd(201084.000000,149820.000000,99375.000000,574.065504)}
{pt3dadd(201084.000000,149628.000000,99350.000000,549.106128)}
{pt3dadd(201120.000000,149472.000000,99450.000000,524.146752)}
{pt3dadd(201108.000000,149280.000000,99525.000000,499.187376)}
{pt3dadd(201168.000000,149064.000000,99475.000000,494.195504)}
{pt3dadd(201084.000000,148848.000000,99425.000000,489.203631)}
{pt3dadd(201012.000000,148620.000000,99375.000000,484.211758)}
{pt3dadd(201036.000000,148272.000000,99375.000000,479.219886)}
{pt3dadd(201060.000000,147900.000000,99400.000000,509.171134)}
{pt3dadd(201096.000000,147480.000000,99450.000000,539.122383)}
{pt3dadd(201120.000000,147108.000000,99475.000000,569.073631)}
{pt3dadd(201144.000000,146772.000000,99400.000000,599.024880)}
{pt3dadd(201096.000000,146448.000000,99400.000000,599.024880)}
{pt3dadd(201024.000000,146136.000000,99275.000000,599.024880)}
{pt3dadd(200952.000000,145788.000000,99275.000000,599.024880)}
{pt3dadd(200880.000000,145428.000000,99275.000000,599.024880)}
{pt3dadd(200832.000000,145284.000000,99275.000000,628.976115)}
{pt3dadd(200820.000000,144852.000000,99150.000000,658.927350)}
{pt3dadd(200784.000000,144612.000000,99150.000000,688.878585)}
{pt3dadd(200712.000000,144372.000000,99150.000000,718.829820)}
{pt3dadd(200640.000000,144144.000000,99150.000000,718.829820)}
{pt3dadd(200556.000000,143988.000000,99100.000000,690.076602)}

{create adhoc20}
{access adhoc20}
{connect adhoc20(1), adhoc19(0)}
{nseg = 1}
{strdef color color = "White"}
{pt3dclear()}
{pt3dadd(200556.000000,143988.000000,99100.000000,690.076602)}
{pt3dadd(200412.000000,143892.000000,97750.000000,240.734646)}
{pt3dadd(200496.000000,143664.000000,97425.000000,252.771381)}
{pt3dadd(200568.000000,143328.000000,97050.000000,264.808116)}
{pt3dadd(200508.000000,143004.000000,96750.000000,276.844851)}
{pt3dadd(200544.000000,142632.000000,96425.000000,288.881586)}
{pt3dadd(200508.000000,142320.000000,96125.000000,258.455399)}
{pt3dadd(200424.000000,141828.000000,95825.000000,228.029211)}
{pt3dadd(200412.000000,141636.000000,95625.000000,197.603024)}
{pt3dadd(200436.000000,141408.000000,95575.000000,167.176836)}
{pt3dadd(200460.000000,141192.000000,95425.000000,165.505068)}
{pt3dadd(200592.000000,140964.000000,95050.000000,163.833300)}
{pt3dadd(200676.000000,140916.000000,94825.000000,162.161532)}
{pt3dadd(200688.000000,140880.000000,94550.000000,160.489764)}
{pt3dadd(200760.000000,140820.000000,94325.000000,167.176836)}

{create adhoc21}
{access adhoc21}
{connect adhoc21(1), adhoc20(0)}
{nseg = 1}
{strdef color color = "White"}
{pt3dclear()}
{pt3dadd(200760.000000,140820.000000,94325.000000,167.176836)}
{pt3dadd(200844.000000,140784.000000,93975.000000,200.612214)}
{pt3dadd(200856.000000,140700.000000,93750.000000,185.287671)}
{pt3dadd(200724.000000,140664.000000,93450.000000,169.963128)}
{pt3dadd(200664.000000,140640.000000,93200.000000,154.638585)}
{pt3dadd(200544.000000,140628.000000,92975.000000,139.314042)}
{pt3dadd(200520.000000,140592.000000,92700.000000,164.669193)}
{pt3dadd(200412.000000,140544.000000,92475.000000,190.024344)}
{pt3dadd(200532.000000,140448.000000,92150.000000,215.379495)}
{pt3dadd(200472.000000,140304.000000,91875.000000,240.734646)}
{pt3dadd(200400.000000,140352.000000,91550.000000,215.379495)}
{pt3dadd(200484.000000,140364.000000,91325.000000,190.024344)}
{pt3dadd(200496.000000,140340.000000,91050.000000,164.669193)}
{pt3dadd(200460.000000,140352.000000,90725.000000,139.314042)}
{pt3dadd(200304.000000,140508.000000,90300.000000,139.314042)}
{pt3dadd(200220.000000,140652.000000,89975.000000,139.314042)}
{pt3dadd(200172.000000,140784.000000,89700.000000,139.314042)}
{pt3dadd(200268.000000,140820.000000,89450.000000,139.314042)}
{pt3dadd(200388.000000,140892.000000,89150.000000,176.705928)}
{pt3dadd(200472.000000,140736.000000,88825.000000,214.097814)}
{pt3dadd(200448.000000,140616.000000,88475.000000,251.489700)}
{pt3dadd(200472.000000,140772.000000,88100.000000,288.881586)}
{pt3dadd(200460.000000,140832.000000,87650.000000,266.814243)}
{pt3dadd(200400.000000,140856.000000,87400.000000,244.746900)}
{pt3dadd(200220.000000,140892.000000,87175.000000,222.679557)}
{pt3dadd(200124.000000,140892.000000,86875.000000,200.612214)}
{pt3dadd(199860.000000,141072.000000,86625.000000,192.253370)}
{pt3dadd(199584.000000,141084.000000,86300.000000,183.894525)}
{pt3dadd(199392.000000,141144.000000,86025.000000,175.535680)}
{pt3dadd(199200.000000,141120.000000,85750.000000,167.176836)}
{pt3dadd(199092.000000,141084.000000,85525.000000,185.566288)}
{pt3dadd(198804.000000,141084.000000,85225.000000,203.955741)}
{pt3dadd(198588.000000,141060.000000,84875.000000,222.345193)}
{pt3dadd(198468.000000,141036.000000,84725.000000,240.734646)}
{pt3dadd(198240.000000,141144.000000,84725.000000,222.345193)}
{pt3dadd(198276.000000,141744.000000,84625.000000,203.955741)}
{pt3dadd(198276.000000,141912.000000,84700.000000,185.566288)}
{pt3dadd(198204.000000,142104.000000,84675.000000,167.176836)}
{pt3dadd(198168.000000,142284.000000,84650.000000,167.176836)}
{pt3dadd(198144.000000,142476.000000,84625.000000,167.176836)}
{pt3dadd(198084.000000,142680.000000,84600.000000,167.176836)}
{pt3dadd(198132.000000,142848.000000,84600.000000,167.176836)}
{pt3dadd(198060.000000,143016.000000,84475.000000,175.535680)}
{pt3dadd(198084.000000,143196.000000,84375.000000,183.894525)}
{pt3dadd(198024.000000,143448.000000,84350.000000,192.253370)}
{pt3dadd(198036.000000,143676.000000,84250.000000,200.612214)}
{pt3dadd(197916.000000,143892.000000,84075.000000,179.482918)}
{pt3dadd(197892.000000,144108.000000,84025.000000,158.353623)}
{pt3dadd(197916.000000,144360.000000,83800.000000,137.224328)}
{pt3dadd(197964.000000,144564.000000,83775.000000,116.095032)}
{pt3dadd(198048.000000,144744.000000,83700.000000,107.226662)}
{pt3dadd(198108.000000,144876.000000,83675.000000,98.358291)}
{pt3dadd(198144.000000,145044.000000,83650.000000,89.489920)}
{pt3dadd(198156.000000,145200.000000,83700.000000,80.621550)}
{pt3dadd(198252.000000,145392.000000,83725.000000,89.489920)}
{pt3dadd(198384.000000,145560.000000,83800.000000,98.358291)}
{pt3dadd(198468.000000,145680.000000,83800.000000,107.226662)}
{pt3dadd(198492.000000,145824.000000,83850.000000,116.095032)}
{pt3dadd(198540.000000,145968.000000,83850.000000,159.291671)}
{pt3dadd(198552.000000,146172.000000,83925.000000,202.488309)}
{pt3dadd(198540.000000,146340.000000,83975.000000,245.684947)}
{pt3dadd(198420.000000,146592.000000,84125.000000,288.881586)}
{pt3dadd(198396.000000,146820.000000,84225.000000,245.684947)}
{pt3dadd(198420.000000,147036.000000,84325.000000,202.488309)}
{pt3dadd(198396.000000,147252.000000,84425.000000,159.291671)}
{pt3dadd(198456.000000,147516.000000,84525.000000,116.095032)}
{pt3dadd(198600.000000,147672.000000,84650.000000,116.095032)}

{create adhoc22}
{access adhoc22}
{connect adhoc22(1), adhoc20(0)}
{nseg = 1}
{strdef color color = "White"}
{pt3dclear()}
{pt3dadd(200760.000000,140820.000000,94325.000000,167.176836)}
{pt3dadd(200472.000000,140820.000000,94300.000000,96.745860)}
{pt3dadd(200376.000000,140844.000000,94275.000000,67.184640)}
{pt3dadd(200280.000000,140856.000000,94250.000000,55.987200)}

{create adhoc23}
{access adhoc23}
{connect adhoc23(1), adhoc19(0)}
{nseg = 1}
{strdef color color = "White"}
{pt3dclear()}
{pt3dadd(200556.000000,143988.000000,99100.000000,690.076602)}
{pt3dadd(200520.000000,143820.000000,99350.000000,479.219886)}
{pt3dadd(200340.000000,143628.000000,99375.000000,509.171134)}
{pt3dadd(200196.000000,143424.000000,99400.000000,539.122383)}
{pt3dadd(200052.000000,143232.000000,99325.000000,569.073631)}
{pt3dadd(199980.000000,143028.000000,99350.000000,599.024880)}
{pt3dadd(199836.000000,142848.000000,99375.000000,569.073631)}
{pt3dadd(199716.000000,142644.000000,99350.000000,539.122383)}
{pt3dadd(199596.000000,142464.000000,99275.000000,509.171134)}
{pt3dadd(199488.000000,142272.000000,99325.000000,479.219886)}
{pt3dadd(199416.000000,142080.000000,99300.000000,479.219886)}
{pt3dadd(199452.000000,141900.000000,99275.000000,479.219886)}
{pt3dadd(199440.000000,141672.000000,99200.000000,479.219886)}
{pt3dadd(199368.000000,141444.000000,99200.000000,479.219886)}
{pt3dadd(199296.000000,141240.000000,99200.000000,509.171134)}
{pt3dadd(199260.000000,141024.000000,99275.000000,539.122383)}
{pt3dadd(199296.000000,140832.000000,99225.000000,569.073631)}
{pt3dadd(199260.000000,140628.000000,99250.000000,599.024880)}
{pt3dadd(199212.000000,140448.000000,99325.000000,574.065504)}
{pt3dadd(199164.000000,140268.000000,99250.000000,549.106128)}
{pt3dadd(199152.000000,140028.000000,99250.000000,524.146752)}
{pt3dadd(199116.000000,139788.000000,99275.000000,499.187376)}
{pt3dadd(199080.000000,139668.000000,99300.000000,524.146752)}
{pt3dadd(198960.000000,139284.000000,99375.000000,549.106128)}
{pt3dadd(198840.000000,138972.000000,99450.000000,574.065504)}
{pt3dadd(198768.000000,138696.000000,99400.000000,599.024880)}
{pt3dadd(198696.000000,138480.000000,99500.000000,574.065504)}
{pt3dadd(198648.000000,138180.000000,99550.000000,549.106128)}
{pt3dadd(198576.000000,137832.000000,99625.000000,524.146752)}
{pt3dadd(198492.000000,137544.000000,99700.000000,499.187376)}
{pt3dadd(198528.000000,137220.000000,99750.000000,524.146752)}
{pt3dadd(198564.000000,136956.000000,99800.000000,549.106128)}
{pt3dadd(198624.000000,136656.000000,99850.000000,574.065504)}
{pt3dadd(198660.000000,136308.000000,99900.000000,599.024880)}
{pt3dadd(198660.000000,136020.000000,99950.000000,628.976115)}
{pt3dadd(198792.000000,135828.000000,100200.000000,658.927350)}
{pt3dadd(198828.000000,135648.000000,100300.000000,688.878585)}
{pt3dadd(198828.000000,135468.000000,100300.000000,718.829820)}
{pt3dadd(198888.000000,135240.000000,100350.000000,711.641533)}
{pt3dadd(198948.000000,135048.000000,100400.000000,704.453247)}
{pt3dadd(198936.000000,134832.000000,100400.000000,697.264960)}
{pt3dadd(198912.000000,134628.000000,100375.000000,690.076674)}
{pt3dadd(198888.000000,134448.000000,100425.000000,661.323469)}
{pt3dadd(198888.000000,134160.000000,100375.000000,632.570265)}
{pt3dadd(198744.000000,133872.000000,100275.000000,603.817061)}
{pt3dadd(198660.000000,133656.000000,100200.000000,575.063856)}
{pt3dadd(198648.000000,133464.000000,100175.000000,556.094736)}
{pt3dadd(198612.000000,133260.000000,100125.000000,537.125616)}
{pt3dadd(198636.000000,133056.000000,100050.000000,518.156496)}
{pt3dadd(198612.000000,132732.000000,99975.000000,499.187376)}
{pt3dadd(198612.000000,132444.000000,99950.000000,478.387903)}
{pt3dadd(198588.000000,132252.000000,99950.000000,457.588431)}
{pt3dadd(198564.000000,132048.000000,100000.000000,436.788958)}
{pt3dadd(198588.000000,131796.000000,99950.000000,415.989486)}
{pt3dadd(198600.000000,131592.000000,99875.000000,431.797086)}
{pt3dadd(198588.000000,131388.000000,99850.000000,447.604686)}
{pt3dadd(198564.000000,131184.000000,99850.000000,463.412286)}
{pt3dadd(198552.000000,130932.000000,99850.000000,479.219886)}
{pt3dadd(198528.000000,130704.000000,99825.000000,484.211758)}
{pt3dadd(198468.000000,130488.000000,99750.000000,489.203631)}
{pt3dadd(198432.000000,130260.000000,99725.000000,494.195504)}
{pt3dadd(198420.000000,130044.000000,99700.000000,499.187376)}
{pt3dadd(198204.000000,129828.000000,99600.000000,499.187376)}
{pt3dadd(198192.000000,129672.000000,99575.000000,499.187376)}

{create adhoc24}
{access adhoc24}
{connect adhoc24(1), adhoc23(0)}
{nseg = 1}
{strdef color color = "White"}
{pt3dclear()}
{pt3dadd(198192.000000,129672.000000,99575.000000,499.187376)}
{pt3dadd(198180.000000,129456.000000,99525.000000,499.187376)}
{pt3dadd(198204.000000,129264.000000,99500.000000,499.187376)}
{pt3dadd(198168.000000,129096.000000,99400.000000,499.187376)}
{pt3dadd(198084.000000,128892.000000,99325.000000,499.187376)}
{pt3dadd(198060.000000,128604.000000,99225.000000,499.187376)}
{pt3dadd(197964.000000,128352.000000,99050.000000,499.187376)}
{pt3dadd(198024.000000,128184.000000,99000.000000,499.187376)}
{pt3dadd(197952.000000,127980.000000,98925.000000,499.187376)}
{pt3dadd(197940.000000,127776.000000,98800.000000,499.187376)}
{pt3dadd(197904.000000,127596.000000,98775.000000,499.187376)}
{pt3dadd(197964.000000,127416.000000,98700.000000,499.187376)}
{pt3dadd(197976.000000,127224.000000,98625.000000,499.187376)}
{pt3dadd(197964.000000,127020.000000,98525.000000,499.187376)}
{pt3dadd(197976.000000,126816.000000,98425.000000,524.146752)}
{pt3dadd(197988.000000,126564.000000,98275.000000,549.106128)}
{pt3dadd(197976.000000,126288.000000,98225.000000,574.065504)}
{pt3dadd(198096.000000,126024.000000,98125.000000,599.024880)}
{pt3dadd(198108.000000,125760.000000,98075.000000,628.976115)}
{pt3dadd(198096.000000,125544.000000,98050.000000,658.927350)}
{pt3dadd(198084.000000,125304.000000,98025.000000,688.878585)}
{pt3dadd(198084.000000,125004.000000,98025.000000,718.829820)}
{pt3dadd(198072.000000,124608.000000,98050.000000,704.740765)}
{pt3dadd(197988.000000,124332.000000,97925.000000,690.651711)}
{pt3dadd(197928.000000,124020.000000,97825.000000,676.562656)}
{pt3dadd(197832.000000,123756.000000,97725.000000,662.473602)}
{pt3dadd(197736.000000,123516.000000,97700.000000,669.374352)}
{pt3dadd(197592.000000,123192.000000,97600.000000,676.275102)}
{pt3dadd(197496.000000,122916.000000,97600.000000,683.175852)}
{pt3dadd(197436.000000,122664.000000,97475.000000,690.076602)}
{pt3dadd(197340.000000,122328.000000,97350.000000,632.570229)}
{pt3dadd(197304.000000,122112.000000,97275.000000,575.063856)}
{pt3dadd(197244.000000,121992.000000,97200.000000,599.024880)}

{create adhoc25}
{access adhoc25}
{connect adhoc25(1), adhoc24(0)}
{nseg = 1}
{strdef color color = "White"}
{pt3dclear()}
{pt3dadd(197244.000000,121992.000000,97200.000000,599.024880)}
{pt3dadd(197232.000000,121776.000000,97275.000000,599.024880)}
{pt3dadd(197160.000000,121488.000000,97250.000000,599.024880)}
{pt3dadd(197004.000000,121260.000000,97250.000000,599.024880)}
{pt3dadd(196944.000000,121020.000000,97175.000000,599.024880)}
{pt3dadd(196860.000000,120780.000000,97100.000000,599.024880)}
{pt3dadd(196824.000000,120588.000000,97000.000000,599.024880)}
{pt3dadd(196752.000000,120336.000000,96975.000000,599.024880)}
{pt3dadd(196752.000000,120084.000000,96950.000000,599.024880)}
{pt3dadd(196728.000000,119856.000000,96825.000000,599.024880)}
{pt3dadd(196656.000000,119724.000000,96750.000000,599.024880)}

{create adhoc26}
{access adhoc26}
{connect adhoc26(1), adhoc25(0)}
{nseg = 1}
{strdef color color = "White"}
{pt3dclear()}
{pt3dadd(196656.000000,119724.000000,96750.000000,599.024880)}
{pt3dadd(196596.000000,119484.000000,96575.000000,599.024880)}
{pt3dadd(196560.000000,119292.000000,96500.000000,593.034624)}
{pt3dadd(196344.000000,119028.000000,96225.000000,587.044368)}
{pt3dadd(196236.000000,118788.000000,96000.000000,581.054112)}
{pt3dadd(196104.000000,118584.000000,95825.000000,575.063856)}
{pt3dadd(196080.000000,118332.000000,95650.000000,535.295264)}
{pt3dadd(195756.000000,118080.000000,95200.000000,495.526671)}
{pt3dadd(195516.000000,117816.000000,94850.000000,455.758079)}
{pt3dadd(195228.000000,117468.000000,94425.000000,415.989486)}
{pt3dadd(195168.000000,117180.000000,94125.000000,415.989486)}
{pt3dadd(194988.000000,116976.000000,93775.000000,415.989486)}
{pt3dadd(194808.000000,116760.000000,93550.000000,415.989486)}
{pt3dadd(194628.000000,116520.000000,93350.000000,415.989486)}
{pt3dadd(194604.000000,116304.000000,93175.000000,415.989486)}
{pt3dadd(194544.000000,116136.000000,93025.000000,415.989486)}

{create adhoc27}
{access adhoc27}
{connect adhoc27(1), adhoc26(0)}
{nseg = 1}
{strdef color color = "White"}
{pt3dclear()}
{pt3dadd(194544.000000,116136.000000,93025.000000,415.989486)}
{pt3dadd(194388.000000,115908.000000,92750.000000,346.657896)}
{pt3dadd(194328.000000,115692.000000,92600.000000,346.657896)}
{pt3dadd(194244.000000,115500.000000,92425.000000,346.657896)}
{pt3dadd(194268.000000,115284.000000,92325.000000,346.657896)}
{pt3dadd(194280.000000,115068.000000,92225.000000,346.657896)}
{pt3dadd(194112.000000,114780.000000,91975.000000,384.790266)}
{pt3dadd(193872.000000,114576.000000,91875.000000,422.922636)}
{pt3dadd(193692.000000,114336.000000,91675.000000,461.055006)}
{pt3dadd(193596.000000,114132.000000,91625.000000,499.187376)}
{pt3dadd(193404.000000,113856.000000,91500.000000,549.106128)}
{pt3dadd(193320.000000,113628.000000,91350.000000,599.024880)}
{pt3dadd(193236.000000,113316.000000,91275.000000,499.187376)}

{create adhoc28}
{access adhoc28}
{connect adhoc28(1), adhoc27(0)}
{nseg = 1}
{strdef color color = "White"}
{pt3dclear()}
{pt3dadd(193236.000000,113316.000000,91275.000000,499.187376)}
{pt3dadd(193140.000000,113220.000000,90950.000000,415.989486)}
{pt3dadd(193008.000000,113016.000000,90675.000000,436.788958)}
{pt3dadd(192900.000000,112824.000000,90300.000000,457.588431)}
{pt3dadd(192840.000000,112500.000000,90075.000000,478.387903)}
{pt3dadd(192672.000000,112236.000000,89575.000000,499.187376)}
{pt3dadd(192660.000000,112128.000000,89225.000000,499.187376)}
{pt3dadd(192516.000000,112044.000000,88800.000000,499.187376)}
{pt3dadd(192456.000000,111972.000000,88325.000000,499.187376)}
{pt3dadd(192372.000000,111828.000000,87950.000000,552.061314)}

{create adhoc29}
{access adhoc29}
{connect adhoc29(1), adhoc28(0)}
{nseg = 1}
{strdef color color = "White"}
{pt3dclear()}
{pt3dadd(192372.000000,111828.000000,87950.000000,552.061314)}
{pt3dadd(192360.000000,111768.000000,87525.000000,479.219886)}
{pt3dadd(192192.000000,111972.000000,87175.000000,412.938891)}
{pt3dadd(192108.000000,112092.000000,86675.000000,346.657896)}
{pt3dadd(191892.000000,111960.000000,86475.000000,240.734646)}

{create adhoc30}
{access adhoc30}
{connect adhoc30(1), adhoc29(0)}
{nseg = 1}
{strdef color color = "White"}
{pt3dclear()}
{pt3dadd(191892.000000,111960.000000,86475.000000,240.734646)}
{pt3dadd(191700.000000,111684.000000,86225.000000,277.326324)}
{pt3dadd(191376.000000,111612.000000,85875.000000,256.141670)}
{pt3dadd(191112.000000,111516.000000,85700.000000,234.957015)}
{pt3dadd(190944.000000,111372.000000,85600.000000,213.772361)}
{pt3dadd(190716.000000,111204.000000,85450.000000,192.587706)}
{pt3dadd(190488.000000,111132.000000,85375.000000,204.624441)}
{pt3dadd(190272.000000,111060.000000,85375.000000,216.661176)}
{pt3dadd(189996.000000,110988.000000,85300.000000,228.697911)}
{pt3dadd(189816.000000,110940.000000,85275.000000,240.734646)}
{pt3dadd(189648.000000,111012.000000,85175.000000,228.697915)}
{pt3dadd(189468.000000,110904.000000,85150.000000,216.661185)}
{pt3dadd(189264.000000,110844.000000,85075.000000,204.624455)}
{pt3dadd(189000.000000,110772.000000,85025.000000,192.587724)}
{pt3dadd(188772.000000,110676.000000,84975.000000,202.217112)}
{pt3dadd(188568.000000,110676.000000,84900.000000,211.846500)}
{pt3dadd(188316.000000,110640.000000,84900.000000,221.475888)}
{pt3dadd(188136.000000,110604.000000,84900.000000,231.105276)}
{pt3dadd(187920.000000,110556.000000,84850.000000,233.512618)}
{pt3dadd(187740.000000,110484.000000,84800.000000,235.919961)}
{pt3dadd(187536.000000,110424.000000,84850.000000,238.327304)}
{pt3dadd(187320.000000,110364.000000,84875.000000,240.734646)}
{pt3dadd(187080.000000,110292.000000,84850.000000,230.704038)}
{pt3dadd(186840.000000,110184.000000,84825.000000,220.673430)}
{pt3dadd(186612.000000,110052.000000,84875.000000,210.642822)}
{pt3dadd(186360.000000,109944.000000,84925.000000,200.612214)}
{pt3dadd(186180.000000,109860.000000,85050.000000,210.642822)}
{pt3dadd(186000.000000,109776.000000,85100.000000,220.673430)}
{pt3dadd(185784.000000,109680.000000,85150.000000,230.704038)}
{pt3dadd(185544.000000,109512.000000,85050.000000,240.734646)}
{pt3dadd(185400.000000,109428.000000,85050.000000,252.771381)}
{pt3dadd(185160.000000,109320.000000,85100.000000,264.808116)}
{pt3dadd(184908.000000,109224.000000,85200.000000,276.844851)}
{pt3dadd(184728.000000,109188.000000,85250.000000,288.881586)}
{pt3dadd(184488.000000,109116.000000,85300.000000,288.881586)}
{pt3dadd(184212.000000,109008.000000,85375.000000,288.881586)}
{pt3dadd(184020.000000,108804.000000,85500.000000,288.881586)}
{pt3dadd(183768.000000,108684.000000,85600.000000,288.881586)}
{pt3dadd(183504.000000,108636.000000,85675.000000,276.844851)}
{pt3dadd(183264.000000,108564.000000,85700.000000,264.808116)}
{pt3dadd(183048.000000,108432.000000,85800.000000,252.771381)}
{pt3dadd(182808.000000,108348.000000,85825.000000,240.734646)}
{pt3dadd(182532.000000,108312.000000,85900.000000,252.771381)}
{pt3dadd(182256.000000,108204.000000,85975.000000,264.808116)}
{pt3dadd(182040.000000,108156.000000,86025.000000,276.844851)}
{pt3dadd(181836.000000,108072.000000,86075.000000,288.881586)}
{pt3dadd(181680.000000,108060.000000,86075.000000,288.881586)}
{pt3dadd(181476.000000,108012.000000,86200.000000,288.881586)}
{pt3dadd(181272.000000,107988.000000,86425.000000,288.881586)}
{pt3dadd(181080.000000,107928.000000,86450.000000,288.881586)}
{pt3dadd(180840.000000,107868.000000,86500.000000,288.881586)}
{pt3dadd(180636.000000,107796.000000,86550.000000,288.881586)}
{pt3dadd(180456.000000,107772.000000,86600.000000,288.881586)}
{pt3dadd(180288.000000,107640.000000,86725.000000,288.881586)}
{pt3dadd(180072.000000,107568.000000,86775.000000,273.192269)}
{pt3dadd(179868.000000,107556.000000,86725.000000,257.502951)}
{pt3dadd(179640.000000,107520.000000,86850.000000,241.813633)}
{pt3dadd(179448.000000,107556.000000,86875.000000,226.124316)}
{pt3dadd(179244.000000,107568.000000,86950.000000,219.746291)}
{pt3dadd(179004.000000,107556.000000,86950.000000,213.368265)}
{pt3dadd(178800.000000,107520.000000,86950.000000,206.990240)}
{pt3dadd(178608.000000,107472.000000,86950.000000,200.612214)}
{pt3dadd(178392.000000,107388.000000,86925.000000,208.235480)}
{pt3dadd(178152.000000,107304.000000,86950.000000,215.858745)}
{pt3dadd(177936.000000,107256.000000,86975.000000,223.482010)}
{pt3dadd(177732.000000,107124.000000,87150.000000,231.105276)}
{pt3dadd(177576.000000,107028.000000,87125.000000,240.734646)}
{pt3dadd(177408.000000,107088.000000,87075.000000,240.734646)}

{create adhoc31}
{access adhoc31}
{connect adhoc31(1), adhoc30(0)}
{nseg = 1}
{strdef color color = "White"}
{pt3dclear()}
{pt3dadd(177408.000000,107088.000000,87075.000000,240.734646)}
{pt3dadd(177240.000000,107280.000000,87150.000000,167.176836)}
{pt3dadd(177072.000000,107280.000000,87150.000000,175.535680)}
{pt3dadd(176844.000000,107304.000000,87175.000000,183.894525)}
{pt3dadd(176652.000000,107316.000000,87200.000000,192.253370)}
{pt3dadd(176448.000000,107184.000000,87250.000000,200.612214)}
{pt3dadd(176220.000000,107172.000000,87125.000000,200.612214)}
{pt3dadd(176052.000000,107064.000000,87275.000000,133.741476)}

{create adhoc32}
{access adhoc32}
{connect adhoc32(1), adhoc31(0)}
{nseg = 1}
{strdef color color = "White"}
{pt3dclear()}
{pt3dadd(176052.000000,107064.000000,87275.000000,133.741476)}
{pt3dadd(175884.000000,106968.000000,87325.000000,167.176836)}
{pt3dadd(175716.000000,106692.000000,87175.000000,175.535680)}
{pt3dadd(175560.000000,106512.000000,87150.000000,183.894525)}
{pt3dadd(175572.000000,106260.000000,87050.000000,192.253370)}
{pt3dadd(175584.000000,106056.000000,87000.000000,200.612214)}
{pt3dadd(175608.000000,105828.000000,86975.000000,179.482918)}
{pt3dadd(175656.000000,105624.000000,86875.000000,158.353623)}
{pt3dadd(175668.000000,105432.000000,86675.000000,137.224328)}
{pt3dadd(175716.000000,105240.000000,86600.000000,116.095032)}
{pt3dadd(175740.000000,105036.000000,86575.000000,121.899785)}
{pt3dadd(175752.000000,104844.000000,86450.000000,127.704537)}
{pt3dadd(175764.000000,104700.000000,86275.000000,133.509289)}
{pt3dadd(175548.000000,104556.000000,85975.000000,139.314042)}
{pt3dadd(175464.000000,104340.000000,85700.000000,128.671997)}
{pt3dadd(175488.000000,104112.000000,85475.000000,118.029951)}
{pt3dadd(175272.000000,104184.000000,85225.000000,107.387906)}
{pt3dadd(175236.000000,104100.000000,85025.000000,96.745860)}
{pt3dadd(175080.000000,104076.000000,84725.000000,144.742122)}
{pt3dadd(174984.000000,104064.000000,84425.000000,192.738384)}
{pt3dadd(174756.000000,103956.000000,84050.000000,240.734646)}
{pt3dadd(174732.000000,103896.000000,83925.000000,240.734646)}

{create adhoc33}
{access adhoc33}
{connect adhoc33(1), adhoc32(0)}
{nseg = 1}
{strdef color color = "White"}
{pt3dclear()}
{pt3dadd(174732.000000,103896.000000,83925.000000,240.734646)}
{pt3dadd(174732.000000,103908.000000,83775.000000,116.095032)}

{create adhoc34}
{access adhoc34}
{connect adhoc34(1), adhoc32(0)}
{nseg = 1}
{strdef color color = "White"}
{pt3dclear()}
{pt3dadd(174732.000000,103896.000000,83925.000000,240.734646)}
{pt3dadd(174636.000000,103404.000000,83925.000000,80.621550)}
{pt3dadd(174516.000000,103212.000000,83900.000000,84.652627)}
{pt3dadd(174396.000000,103056.000000,83850.000000,88.683705)}
{pt3dadd(174264.000000,102900.000000,83775.000000,92.714782)}
{pt3dadd(174084.000000,102636.000000,83750.000000,96.745860)}
{pt3dadd(173928.000000,102504.000000,83675.000000,87.071274)}
{pt3dadd(173604.000000,102204.000000,83500.000000,77.396688)}
{pt3dadd(173472.000000,102048.000000,83300.000000,133.741476)}

{create adhoc35}
{access adhoc35}
{connect adhoc35(1), adhoc31(0)}
{nseg = 1}
{strdef color color = "White"}
{pt3dclear()}
{pt3dadd(176052.000000,107064.000000,87275.000000,133.741476)}
{pt3dadd(176052.000000,107220.000000,86825.000000,139.314042)}
{pt3dadd(175704.000000,107196.000000,86600.000000,116.095041)}
{pt3dadd(175116.000000,107172.000000,86275.000000,92.876040)}
{pt3dadd(174852.000000,107148.000000,86125.000000,80.621550)}

{create adhoc36}
{access adhoc36}
{connect adhoc36(1), adhoc30(0)}
{nseg = 1}
{strdef color color = "White"}
{pt3dclear()}
{pt3dadd(177408.000000,107088.000000,87075.000000,240.734646)}
{pt3dadd(177408.000000,106620.000000,87925.000000,200.612214)}
{pt3dadd(177444.000000,106524.000000,88325.000000,237.123635)}
{pt3dadd(177624.000000,106476.000000,88550.000000,273.635055)}
{pt3dadd(177972.000000,106344.000000,88775.000000,310.146475)}
{pt3dadd(178188.000000,106236.000000,89125.000000,346.657896)}
{pt3dadd(178320.000000,106080.000000,89475.000000,242.985969)}
{pt3dadd(178464.000000,106056.000000,89750.000000,139.314042)}
{pt3dadd(178584.000000,106032.000000,89975.000000,160.489764)}

{create adhoc37}
{access adhoc37}
{connect adhoc37(1), adhoc36(0)}
{nseg = 1}
{strdef color color = "White"}
{pt3dclear()}
{pt3dadd(178584.000000,106032.000000,89975.000000,160.489764)}
{pt3dadd(178512.000000,105816.000000,90175.000000,167.176836)}
{pt3dadd(178596.000000,105816.000000,90475.000000,160.211138)}
{pt3dadd(178584.000000,105876.000000,90725.000000,153.245439)}
{pt3dadd(178608.000000,105792.000000,91050.000000,146.279741)}
{pt3dadd(178704.000000,105480.000000,91350.000000,139.314042)}
{pt3dadd(178680.000000,105252.000000,91500.000000,116.095032)}

{create adhoc38}
{access adhoc38}
{connect adhoc38(1), adhoc37(0)}
{nseg = 1}
{strdef color color = "White"}
{pt3dclear()}
{pt3dadd(178680.000000,105252.000000,91500.000000,116.095032)}
{pt3dadd(178932.000000,105228.000000,91750.000000,167.176836)}
{pt3dadd(179028.000000,105240.000000,91975.000000,160.211138)}
{pt3dadd(179148.000000,105204.000000,92275.000000,153.245439)}
{pt3dadd(179184.000000,105312.000000,92450.000000,146.279741)}
{pt3dadd(179292.000000,105516.000000,92700.000000,139.314042)}
{pt3dadd(179496.000000,105744.000000,93025.000000,139.314042)}
{pt3dadd(179652.000000,105984.000000,93275.000000,139.314042)}
{pt3dadd(179760.000000,106032.000000,93475.000000,139.314042)}
{pt3dadd(179964.000000,106248.000000,93775.000000,139.314042)}
{pt3dadd(179952.000000,106392.000000,94100.000000,139.314042)}

{create adhoc39}
{access adhoc39}
{connect adhoc39(1), adhoc37(0)}
{nseg = 1}
{strdef color color = "White"}
{pt3dclear()}
{pt3dadd(178680.000000,105252.000000,91500.000000,116.095032)}
{pt3dadd(178476.000000,104976.000000,91575.000000,116.095032)}
{pt3dadd(178188.000000,105012.000000,91775.000000,80.621550)}
{pt3dadd(178200.000000,105024.000000,91850.000000,67.184640)}

{create adhoc40}
{access adhoc40}
{connect adhoc40(1), adhoc36(0)}
{nseg = 1}
{strdef color color = "White"}
{pt3dclear()}
{pt3dadd(178584.000000,106032.000000,89975.000000,160.489764)}
{pt3dadd(178788.000000,106404.000000,90000.000000,80.621550)}
{pt3dadd(178944.000000,106680.000000,90075.000000,76.142580)}
{pt3dadd(179088.000000,106980.000000,90100.000000,71.663610)}
{pt3dadd(179100.000000,107160.000000,90125.000000,67.184640)}
{pt3dadd(179136.000000,107352.000000,90100.000000,55.987200)}

{create adhoc41}
{access adhoc41}
{connect adhoc41(1), adhoc29(0)}
{nseg = 1}
{strdef color color = "White"}
{pt3dclear()}
{pt3dadd(191892.000000,111960.000000,86475.000000,240.734646)}
{pt3dadd(192432.000000,112764.000000,86475.000000,200.612214)}
{pt3dadd(192600.000000,112968.000000,86475.000000,210.642822)}
{pt3dadd(192648.000000,113196.000000,86375.000000,220.673430)}
{pt3dadd(192732.000000,113388.000000,86225.000000,230.704038)}
{pt3dadd(192864.000000,113616.000000,86150.000000,240.734646)}
{pt3dadd(192948.000000,113820.000000,86050.000000,240.734646)}
{pt3dadd(193092.000000,114036.000000,86025.000000,240.734646)}
{pt3dadd(193212.000000,114192.000000,85950.000000,240.734646)}
{pt3dadd(193380.000000,114420.000000,85875.000000,240.734646)}
{pt3dadd(193536.000000,114636.000000,85900.000000,240.734646)}
{pt3dadd(193680.000000,114888.000000,85900.000000,240.734646)}
{pt3dadd(193824.000000,115104.000000,85900.000000,240.734646)}
{pt3dadd(193932.000000,115284.000000,85875.000000,240.734646)}
{pt3dadd(194244.000000,115524.000000,85750.000000,222.345193)}
{pt3dadd(194520.000000,115764.000000,85625.000000,203.955741)}
{pt3dadd(194724.000000,115992.000000,85600.000000,185.566288)}
{pt3dadd(194880.000000,116220.000000,85600.000000,167.176836)}
{pt3dadd(195000.000000,116436.000000,85650.000000,167.176836)}
{pt3dadd(195060.000000,116652.000000,85700.000000,167.176836)}
{pt3dadd(195156.000000,116904.000000,85725.000000,167.176836)}
{pt3dadd(195252.000000,117108.000000,85725.000000,167.176836)}
{pt3dadd(195312.000000,117336.000000,85825.000000,175.535680)}
{pt3dadd(195360.000000,117552.000000,85900.000000,183.894525)}
{pt3dadd(195336.000000,117720.000000,86050.000000,192.253370)}
{pt3dadd(195348.000000,117924.000000,86150.000000,200.612214)}
{pt3dadd(195216.000000,118188.000000,86325.000000,210.642822)}
{pt3dadd(195156.000000,118416.000000,86350.000000,220.673430)}
{pt3dadd(195096.000000,118644.000000,86350.000000,230.704038)}
{pt3dadd(195036.000000,118920.000000,86350.000000,240.734646)}
{pt3dadd(194976.000000,119064.000000,86350.000000,277.326324)}
{pt3dadd(194976.000000,119220.000000,86275.000000,346.657896)}

{create adhoc42}
{access adhoc42}
{connect adhoc42(1), adhoc41(0)}
{nseg = 1}
{strdef color color = "White"}
{pt3dclear()}
{pt3dadd(194976.000000,119220.000000,86275.000000,346.657896)}
{pt3dadd(194988.000000,119424.000000,86225.000000,240.734646)}
{pt3dadd(195000.000000,119508.000000,86125.000000,111.451230)}

{create adhoc43}
{access adhoc43}
{connect adhoc43(1), adhoc41(0)}
{nseg = 1}
{strdef color color = "White"}
{pt3dclear()}
{pt3dadd(194976.000000,119220.000000,86275.000000,346.657896)}
{pt3dadd(195024.000000,119220.000000,85400.000000,167.176836)}
{pt3dadd(195156.000000,119376.000000,85200.000000,133.846104)}
{pt3dadd(195432.000000,119496.000000,85175.000000,100.515372)}
{pt3dadd(195528.000000,119472.000000,85175.000000,67.184640)}
{pt3dadd(195636.000000,119532.000000,85150.000000,96.745860)}

{create adhoc44}
{access adhoc44}
{connect adhoc44(1), adhoc28(0)}
{nseg = 1}
{strdef color color = "White"}
{pt3dclear()}
{pt3dadd(192372.000000,111828.000000,87950.000000,552.061314)}
{pt3dadd(191976.000000,110784.000000,87925.000000,96.745860)}

{create adhoc45}
{access adhoc45}
{connect adhoc45(1), adhoc44(0)}
{nseg = 1}
{strdef color color = "White"}
{pt3dclear()}
{pt3dadd(191976.000000,110784.000000,87925.000000,96.745860)}
{pt3dadd(191784.000000,110688.000000,87875.000000,128.391822)}
{pt3dadd(191556.000000,110508.000000,87850.000000,124.156674)}
{pt3dadd(191376.000000,110352.000000,87850.000000,119.921526)}
{pt3dadd(191316.000000,110208.000000,87900.000000,115.686378)}
{pt3dadd(191064.000000,110076.000000,87900.000000,111.451230)}
{pt3dadd(190968.000000,109968.000000,87900.000000,120.738834)}
{pt3dadd(190944.000000,109800.000000,87850.000000,130.026438)}
{pt3dadd(190716.000000,109536.000000,87850.000000,139.314042)}
{pt3dadd(190536.000000,109488.000000,87900.000000,133.741476)}

{create adhoc46}
{access adhoc46}
{connect adhoc46(1), adhoc44(0)}
{nseg = 1}
{strdef color color = "White"}
{pt3dclear()}
{pt3dadd(191976.000000,110784.000000,87925.000000,96.745860)}
{pt3dadd(192084.000000,110688.000000,87750.000000,116.095032)}
{pt3dadd(192204.000000,110580.000000,87675.000000,200.612214)}

{create adhoc47}
{access adhoc47}
{connect adhoc47(1), adhoc27(0)}
{nseg = 1}
{strdef color color = "White"}
{pt3dclear()}
{pt3dadd(193236.000000,113316.000000,91275.000000,499.187376)}
{pt3dadd(193284.000000,113220.000000,92125.000000,200.612214)}
{pt3dadd(193128.000000,113100.000000,92325.000000,222.679557)}
{pt3dadd(192984.000000,112884.000000,92375.000000,244.746900)}
{pt3dadd(192876.000000,112656.000000,92475.000000,266.814243)}
{pt3dadd(192564.000000,112440.000000,92750.000000,288.881586)}
{pt3dadd(192348.000000,111672.000000,92950.000000,276.844851)}
{pt3dadd(192360.000000,111396.000000,92950.000000,264.808116)}
{pt3dadd(192300.000000,111144.000000,92925.000000,252.771381)}
{pt3dadd(192132.000000,110940.000000,92900.000000,240.734646)}
{pt3dadd(192048.000000,110748.000000,92875.000000,230.704038)}
{pt3dadd(191904.000000,110532.000000,92825.000000,220.673430)}
{pt3dadd(191772.000000,110340.000000,92800.000000,210.642822)}
{pt3dadd(191592.000000,110052.000000,92775.000000,200.612214)}
{pt3dadd(191568.000000,109836.000000,92800.000000,200.612214)}
{pt3dadd(191376.000000,109620.000000,92775.000000,200.612214)}
{pt3dadd(191268.000000,109428.000000,92750.000000,200.612214)}
{pt3dadd(191148.000000,109224.000000,92775.000000,200.612214)}
{pt3dadd(191028.000000,109044.000000,92800.000000,185.287671)}
{pt3dadd(191004.000000,108876.000000,92725.000000,169.963128)}
{pt3dadd(190836.000000,108648.000000,92650.000000,154.638585)}
{pt3dadd(190728.000000,108408.000000,92600.000000,139.314042)}
{pt3dadd(190704.000000,108156.000000,92575.000000,146.279741)}
{pt3dadd(190668.000000,107928.000000,92525.000000,153.245439)}
{pt3dadd(190560.000000,107616.000000,92425.000000,160.211138)}
{pt3dadd(190464.000000,107400.000000,92350.000000,167.176836)}
{pt3dadd(190320.000000,107184.000000,92125.000000,154.406385)}
{pt3dadd(189840.000000,106848.000000,91975.000000,141.635934)}
{pt3dadd(189600.000000,106788.000000,91875.000000,128.865483)}
{pt3dadd(189384.000000,106668.000000,91875.000000,116.095032)}
{pt3dadd(189252.000000,106704.000000,91950.000000,167.176836)}

{create adhoc48}
{access adhoc48}
{connect adhoc48(1), adhoc47(0)}
{nseg = 1}
{strdef color color = "White"}
{pt3dclear()}
{pt3dadd(189252.000000,106704.000000,91950.000000,167.176836)}
{pt3dadd(189156.000000,106644.000000,92075.000000,96.745860)}

{create adhoc49}
{access adhoc49}
{connect adhoc49(1), adhoc47(0)}
{nseg = 1}
{strdef color color = "White"}
{pt3dclear()}
{pt3dadd(189252.000000,106704.000000,91950.000000,167.176836)}
{pt3dadd(189288.000000,106392.000000,91775.000000,77.396688)}
{pt3dadd(189072.000000,106224.000000,91700.000000,78.471642)}
{pt3dadd(188904.000000,106068.000000,91650.000000,79.546596)}
{pt3dadd(188784.000000,106068.000000,91600.000000,80.621550)}
{pt3dadd(188580.000000,105900.000000,91500.000000,106.993188)}

{create adhoc50}
{access adhoc50}
{connect adhoc50(1), adhoc26(0)}
{nseg = 1}
{strdef color color = "White"}
{pt3dclear()}
{pt3dadd(194544.000000,116136.000000,93025.000000,415.989486)}
{pt3dadd(193716.000000,116136.000000,93400.000000,80.621550)}
{pt3dadd(193572.000000,116160.000000,93525.000000,67.184640)}

{create adhoc51}
{access adhoc51}
{connect adhoc51(1), adhoc25(0)}
{nseg = 1}
{strdef color color = "White"}
{pt3dclear()}
{pt3dadd(196656.000000,119724.000000,96750.000000,599.024880)}
{pt3dadd(196044.000000,119724.000000,97650.000000,80.621550)}
{pt3dadd(195900.000000,119724.000000,97725.000000,80.621550)}
{pt3dadd(195780.000000,119736.000000,97825.000000,80.621550)}
{pt3dadd(195648.000000,119748.000000,97850.000000,80.621550)}
{pt3dadd(195504.000000,119784.000000,97950.000000,80.621550)}
{pt3dadd(195144.000000,119856.000000,98025.000000,80.621550)}
{pt3dadd(194856.000000,119904.000000,98025.000000,80.621550)}
{pt3dadd(194724.000000,120060.000000,98125.000000,116.095032)}

{create adhoc52}
{access adhoc52}
{connect adhoc52(1), adhoc24(0)}
{nseg = 1}
{strdef color color = "White"}
{pt3dclear()}
{pt3dadd(197244.000000,121992.000000,97200.000000,599.024880)}
{pt3dadd(196956.000000,121980.000000,96450.000000,100.499688)}
{pt3dadd(196512.000000,121980.000000,96350.000000,99.561231)}
{pt3dadd(196356.000000,121992.000000,96250.000000,98.622774)}
{pt3dadd(196200.000000,122112.000000,96250.000000,97.684317)}
{pt3dadd(196080.000000,122232.000000,96225.000000,96.745860)}
{pt3dadd(195948.000000,122364.000000,96150.000000,96.745860)}
{pt3dadd(195816.000000,122532.000000,96125.000000,96.745860)}
{pt3dadd(195660.000000,122652.000000,96075.000000,96.745860)}
{pt3dadd(195492.000000,122868.000000,96125.000000,96.745860)}
{pt3dadd(195336.000000,123084.000000,96075.000000,92.714782)}
{pt3dadd(195312.000000,123312.000000,96175.000000,88.683705)}
{pt3dadd(195240.000000,123528.000000,96175.000000,84.652627)}
{pt3dadd(195240.000000,123864.000000,96250.000000,80.621550)}
{pt3dadd(195132.000000,124056.000000,96250.000000,76.142580)}
{pt3dadd(195072.000000,124212.000000,96250.000000,71.663610)}
{pt3dadd(194880.000000,124548.000000,96275.000000,67.184640)}
{pt3dadd(194724.000000,124800.000000,96400.000000,55.987200)}

{create adhoc53}
{access adhoc53}
{connect adhoc53(1), adhoc23(0)}
{nseg = 1}
{strdef color color = "White"}
{pt3dclear()}
{pt3dadd(198192.000000,129672.000000,99575.000000,499.187376)}
{pt3dadd(197256.000000,129672.000000,99550.000000,83.749752)}
{pt3dadd(197076.000000,129708.000000,99675.000000,80.621550)}
{pt3dadd(196980.000000,129732.000000,99650.000000,67.184640)}
