# Supplementary material for: Full reconstruction of large lobula plate tangential cells in Drosophila from a 3D EM dataset
Source: PLoS One. 2018 Nov 28;13(11):e0207828. doi: 10.1371/journal.pone.0207828 (PMC6261601; doi:10.1371/journal.pone.0207828)
Supplement: S1 Dataset — (ZIP) [file pone.0207828.s001.zip › Diameter hoc/VS_VSL_preliminary/Old Diameters Mar13_VS_VSL_HS/VSlike2/2_14_768_gmordhorst_001.006.hoc]

/* created with nml2hocm */

{create adhoc1}
{access adhoc1}
{nseg = 1}
{strdef color color = "White"}
{pt3dclear()}
{pt3dadd(195564.000000,134652.000000,101925.000000,67.184640)}
{pt3dadd(196356.000000,134736.000000,100375.000000,96.745860)}
{pt3dadd(197076.000000,135204.000000,99750.000000,96.745860)}
{pt3dadd(197892.000000,135900.000000,99850.000000,96.745860)}
{pt3dadd(198744.000000,135552.000000,100250.000000,599.024880)}

{create adhoc2}
{access adhoc2}
{connect adhoc2(1), adhoc1(0)}
{nseg = 1}
{strdef color color = "White"}
{pt3dclear()}
{pt3dadd(198744.000000,135552.000000,100250.000000,599.024880)}
{pt3dadd(198924.000000,134760.000000,100375.000000,599.024880)}
{pt3dadd(198888.000000,134052.000000,100300.000000,574.065504)}
{pt3dadd(198636.000000,133404.000000,100125.000000,549.106128)}
{pt3dadd(198540.000000,132444.000000,99875.000000,524.146752)}
{pt3dadd(198696.000000,131604.000000,99925.000000,499.187376)}
{pt3dadd(198432.000000,130368.000000,99700.000000,479.219886)}
{pt3dadd(198396.000000,129732.000000,99625.000000,499.187376)}

{create adhoc3}
{access adhoc3}
{connect adhoc3(1), adhoc2(0)}
{nseg = 1}
{strdef color color = "White"}
{pt3dclear()}
{pt3dadd(198396.000000,129732.000000,99625.000000,499.187376)}
{pt3dadd(197364.000000,129648.000000,99450.000000,67.184640)}
{pt3dadd(197004.000000,129912.000000,99750.000000,110.572142)}
{pt3dadd(196752.000000,130164.000000,99275.000000,153.959643)}
{pt3dadd(196596.000000,130332.000000,98725.000000,197.347145)}
{pt3dadd(196260.000000,130224.000000,98325.000000,240.734646)}
{pt3dadd(195456.000000,130488.000000,98050.000000,96.745860)}

{create adhoc4}
{access adhoc4}
{connect adhoc4(1), adhoc2(0)}
{nseg = 1}
{strdef color color = "White"}
{pt3dclear()}
{pt3dadd(198396.000000,129732.000000,99625.000000,499.187376)}
{pt3dadd(198144.000000,129000.000000,99300.000000,499.187376)}
{pt3dadd(198060.000000,127632.000000,98825.000000,554.097987)}
{pt3dadd(197988.000000,126900.000000,98350.000000,609.008598)}
{pt3dadd(198096.000000,125688.000000,98125.000000,663.919209)}
{pt3dadd(198192.000000,125208.000000,97900.000000,718.829820)}
{pt3dadd(198096.000000,124608.000000,97975.000000,682.888329)}
{pt3dadd(197916.000000,123744.000000,97750.000000,646.946838)}
{pt3dadd(197736.000000,123048.000000,97525.000000,611.005347)}
{pt3dadd(197556.000000,122508.000000,97300.000000,575.063856)}
{pt3dadd(197400.000000,122412.000000,97225.000000,690.076674)}

{create adhoc5}
{access adhoc5}
{connect adhoc5(1), adhoc4(0)}
{nseg = 1}
{strdef color color = "White"}
{pt3dclear()}
{pt3dadd(197400.000000,122412.000000,97225.000000,690.076674)}
{pt3dadd(197328.000000,122400.000000,98500.000000,116.095032)}
{pt3dadd(196932.000000,122268.000000,98875.000000,99.791568)}
{pt3dadd(196800.000000,122100.000000,99250.000000,83.488104)}
{pt3dadd(196092.000000,121572.000000,99325.000000,67.184640)}
{pt3dadd(195396.000000,121332.000000,99250.000000,67.184640)}

{create adhoc6}
{access adhoc6}
{connect adhoc6(1), adhoc4(0)}
{nseg = 1}
{strdef color color = "White"}
{pt3dclear()}
{pt3dadd(197400.000000,122412.000000,97225.000000,690.076674)}
{pt3dadd(197376.000000,121980.000000,96775.000000,599.024880)}

{create adhoc7}
{access adhoc7}
{connect adhoc7(1), adhoc6(0)}
{nseg = 1}
{strdef color color = "White"}
{pt3dclear()}
{pt3dadd(197376.000000,121980.000000,96775.000000,599.024880)}
{pt3dadd(197004.000000,121992.000000,96525.000000,116.095032)}
{pt3dadd(196380.000000,122004.000000,96275.000000,96.059088)}
{pt3dadd(195504.000000,122832.000000,96000.000000,76.023144)}
{pt3dadd(195072.000000,124260.000000,96300.000000,55.987200)}
{pt3dadd(194700.000000,124812.000000,96375.000000,55.987200)}

{create adhoc8}
{access adhoc8}
{connect adhoc8(1), adhoc6(0)}
{nseg = 1}
{strdef color color = "White"}
{pt3dclear()}
{pt3dadd(197376.000000,121980.000000,96775.000000,599.024880)}
{pt3dadd(197088.000000,120996.000000,96950.000000,499.187376)}
{pt3dadd(196800.000000,120576.000000,97100.000000,718.829820)}
{pt3dadd(196692.000000,119724.000000,96800.000000,599.024880)}

{create adhoc9}
{access adhoc9}
{connect adhoc9(1), adhoc8(0)}
{nseg = 1}
{strdef color color = "White"}
{pt3dclear()}
{pt3dadd(196692.000000,119724.000000,96800.000000,599.024880)}
{pt3dadd(196572.000000,119988.000000,97575.000000,240.734646)}
{pt3dadd(195900.000000,119700.000000,97775.000000,215.379495)}
{pt3dadd(195132.000000,119952.000000,98100.000000,190.024344)}
{pt3dadd(194520.000000,120216.000000,98175.000000,164.669193)}
{pt3dadd(194256.000000,120600.000000,98125.000000,139.314042)}
{pt3dadd(194136.000000,121164.000000,98275.000000,124.640919)}
{pt3dadd(194184.000000,121644.000000,98825.000000,109.967796)}
{pt3dadd(194304.000000,122004.000000,99250.000000,95.294673)}
{pt3dadd(194472.000000,122268.000000,99575.000000,80.621550)}
{pt3dadd(194736.000000,122340.000000,100025.000000,77.396688)}

{create adhoc10}
{access adhoc10}
{connect adhoc10(1), adhoc8(0)}
{nseg = 1}
{strdef color color = "White"}
{pt3dclear()}
{pt3dadd(196692.000000,119724.000000,96800.000000,599.024880)}
{pt3dadd(196272.000000,119064.000000,96300.000000,599.024880)}
{pt3dadd(196092.000000,118320.000000,95775.000000,575.063856)}

{create adhoc11}
{access adhoc11}
{connect adhoc11(1), adhoc10(0)}
{nseg = 1}
{strdef color color = "White"}
{pt3dclear()}
{pt3dadd(196092.000000,118320.000000,95775.000000,575.063856)}
{pt3dadd(196056.000000,118320.000000,96725.000000,200.612214)}
{pt3dadd(195576.000000,118176.000000,97025.000000,185.287671)}
{pt3dadd(194508.000000,117048.000000,97125.000000,169.963128)}
{pt3dadd(194088.000000,116304.000000,97250.000000,154.638585)}
{pt3dadd(194184.000000,115476.000000,97175.000000,139.314042)}
{pt3dadd(194112.000000,115140.000000,97025.000000,67.184640)}
{pt3dadd(193812.000000,114228.000000,96775.000000,67.184640)}

{create adhoc12}
{access adhoc12}
{connect adhoc12(1), adhoc10(0)}
{nseg = 1}
{strdef color color = "White"}
{pt3dclear()}
{pt3dadd(196092.000000,118320.000000,95775.000000,575.063856)}
{pt3dadd(195912.000000,117984.000000,95250.000000,499.187376)}
{pt3dadd(195336.000000,117336.000000,94375.000000,474.228009)}
{pt3dadd(195144.000000,117180.000000,94150.000000,449.268642)}
{pt3dadd(194952.000000,116916.000000,93925.000000,424.309275)}
{pt3dadd(194760.000000,116712.000000,93700.000000,399.349908)}
{pt3dadd(194568.000000,116556.000000,93475.000000,449.268651)}
{pt3dadd(194376.000000,115968.000000,92750.000000,499.187394)}
{pt3dadd(194196.000000,114900.000000,92025.000000,549.106137)}
{pt3dadd(193632.000000,114108.000000,91600.000000,599.024880)}
{pt3dadd(193380.000000,113328.000000,91375.000000,599.024880)}

{create adhoc13}
{access adhoc13}
{connect adhoc13(1), adhoc12(0)}
{nseg = 1}
{strdef color color = "White"}
{pt3dclear()}
{pt3dadd(193380.000000,113328.000000,91375.000000,599.024880)}
{pt3dadd(193128.000000,113304.000000,92300.000000,200.612214)}
{pt3dadd(192876.000000,112428.000000,92575.000000,210.642822)}
{pt3dadd(192516.000000,111552.000000,92850.000000,220.673430)}
{pt3dadd(192144.000000,110844.000000,92850.000000,230.704038)}
{pt3dadd(191808.000000,110448.000000,92850.000000,240.734646)}
{pt3dadd(191472.000000,109728.000000,92850.000000,240.734646)}
{pt3dadd(190992.000000,109128.000000,92850.000000,240.734646)}
{pt3dadd(190812.000000,107688.000000,92600.000000,240.734646)}
{pt3dadd(190440.000000,107232.000000,92250.000000,240.734646)}
{pt3dadd(189804.000000,106800.000000,91975.000000,148.360923)}
{pt3dadd(188724.000000,105984.000000,91525.000000,55.987200)}
{pt3dadd(188556.000000,105876.000000,91500.000000,92.876040)}

{create adhoc14}
{access adhoc14}
{connect adhoc14(1), adhoc12(0)}
{nseg = 1}
{strdef color color = "White"}
{pt3dclear()}
{pt3dadd(193380.000000,113328.000000,91375.000000,599.024880)}
{pt3dadd(193128.000000,113184.000000,91125.000000,599.024880)}
{pt3dadd(192924.000000,112872.000000,90275.000000,599.024880)}
{pt3dadd(192708.000000,112608.000000,89325.000000,599.024880)}
{pt3dadd(192492.000000,112368.000000,88375.000000,599.024880)}
{pt3dadd(192408.000000,111756.000000,87925.000000,599.024880)}

{create adhoc15}
{access adhoc15}
{connect adhoc15(1), adhoc14(0)}
{nseg = 1}
{strdef color color = "White"}
{pt3dclear()}
{pt3dadd(192408.000000,111756.000000,87925.000000,599.024880)}
{pt3dadd(192048.000000,110952.000000,87925.000000,67.184640)}
{pt3dadd(191076.000000,110016.000000,87850.000000,117.180738)}
{pt3dadd(190860.000000,109800.000000,87950.000000,167.176836)}
{pt3dadd(190644.000000,109584.000000,88050.000000,240.734646)}

{create adhoc16}
{access adhoc16}
{connect adhoc16(1), adhoc14(0)}
{nseg = 1}
{strdef color color = "White"}
{pt3dclear()}
{pt3dadd(192408.000000,111756.000000,87925.000000,599.024880)}
{pt3dadd(192144.000000,111996.000000,86750.000000,499.187376)}
{pt3dadd(192204.000000,112320.000000,86575.000000,346.657896)}

{create adhoc17}
{access adhoc17}
{connect adhoc17(1), adhoc16(0)}
{nseg = 1}
{strdef color color = "White"}
{pt3dclear()}
{pt3dadd(192204.000000,112320.000000,86575.000000,346.657896)}
{pt3dadd(191808.000000,111684.000000,86325.000000,346.657896)}
{pt3dadd(191028.000000,111492.000000,85650.000000,320.177083)}
{pt3dadd(190188.000000,111120.000000,85300.000000,293.696271)}
{pt3dadd(189348.000000,110916.000000,85050.000000,267.215459)}
{pt3dadd(188556.000000,110580.000000,84850.000000,240.734646)}
{pt3dadd(187872.000000,110460.000000,84750.000000,228.697915)}
{pt3dadd(187380.000000,110328.000000,84850.000000,216.661185)}
{pt3dadd(185988.000000,109716.000000,84800.000000,204.624455)}
{pt3dadd(184596.000000,109104.000000,85175.000000,192.587724)}
{pt3dadd(183576.000000,108444.000000,85500.000000,204.624455)}
{pt3dadd(183132.000000,108348.000000,85825.000000,216.661185)}
{pt3dadd(182424.000000,108156.000000,86000.000000,228.697915)}
{pt3dadd(181728.000000,107964.000000,86100.000000,240.734646)}
{pt3dadd(181032.000000,107892.000000,86450.000000,240.734646)}
{pt3dadd(180384.000000,107604.000000,86625.000000,240.734646)}
{pt3dadd(179592.000000,107364.000000,86800.000000,240.734646)}
{pt3dadd(179280.000000,107568.000000,86975.000000,240.734646)}
{pt3dadd(177732.000000,107088.000000,87175.000000,288.881586)}

{create adhoc18}
{access adhoc18}
{connect adhoc18(1), adhoc17(0)}
{nseg = 1}
{strdef color color = "White"}
{pt3dclear()}
{pt3dadd(177732.000000,107088.000000,87175.000000,288.881586)}
{pt3dadd(177636.000000,106824.000000,87600.000000,200.612214)}
{pt3dadd(177540.000000,106560.000000,88350.000000,273.635055)}
{pt3dadd(178176.000000,106272.000000,88900.000000,346.657896)}
{pt3dadd(178620.000000,105984.000000,89900.000000,167.176836)}

{create adhoc19}
{access adhoc19}
{connect adhoc19(1), adhoc18(0)}
{nseg = 1}
{strdef color color = "White"}
{pt3dclear()}
{pt3dadd(178620.000000,105984.000000,89900.000000,167.176836)}
{pt3dadd(178632.000000,105780.000000,90425.000000,160.489764)}
{pt3dadd(178728.000000,105672.000000,91150.000000,144.553788)}
{pt3dadd(178812.000000,105312.000000,91575.000000,128.617812)}
{pt3dadd(179136.000000,105132.000000,92025.000000,112.681836)}
{pt3dadd(179520.000000,105840.000000,93100.000000,96.745860)}
{pt3dadd(179724.000000,106080.000000,93450.000000,107.387906)}
{pt3dadd(180000.000000,106272.000000,93900.000000,118.029951)}
{pt3dadd(180012.000000,106368.000000,94100.000000,128.671997)}
{pt3dadd(180192.000000,106368.000000,94775.000000,139.314042)}
{pt3dadd(180564.000000,106704.000000,95375.000000,96.745860)}
{pt3dadd(180432.000000,107112.000000,95950.000000,80.621550)}

{create adhoc20}
{access adhoc20}
{connect adhoc20(1), adhoc18(0)}
{nseg = 1}
{strdef color color = "White"}
{pt3dclear()}
{pt3dadd(178620.000000,105984.000000,89900.000000,167.176836)}
{pt3dadd(179088.000000,106896.000000,90150.000000,116.095032)}

{create adhoc21}
{access adhoc21}
{connect adhoc21(1), adhoc17(0)}
{nseg = 1}
{strdef color color = "White"}
{pt3dclear()}
{pt3dadd(177732.000000,107088.000000,87175.000000,288.881586)}
{pt3dadd(177012.000000,107244.000000,87125.000000,167.176836)}
{pt3dadd(176208.000000,107232.000000,87250.000000,167.176836)}

{create adhoc22}
{access adhoc22}
{connect adhoc22(1), adhoc21(0)}
{nseg = 1}
{strdef color color = "White"}
{pt3dclear()}
{pt3dadd(176208.000000,107232.000000,87250.000000,167.176836)}
{pt3dadd(176136.000000,107244.000000,86850.000000,116.095032)}
{pt3dadd(175404.000000,107124.000000,86350.000000,106.420446)}
{pt3dadd(174864.000000,107148.000000,86150.000000,96.745860)}
{pt3dadd(174360.000000,106680.000000,85975.000000,111.451230)}

{create adhoc23}
{access adhoc23}
{connect adhoc23(1), adhoc21(0)}
{nseg = 1}
{strdef color color = "White"}
{pt3dclear()}
{pt3dadd(176208.000000,107232.000000,87250.000000,167.176836)}
{pt3dadd(176016.000000,107052.000000,87375.000000,116.095032)}
{pt3dadd(175656.000000,106560.000000,87100.000000,137.224328)}
{pt3dadd(175584.000000,105744.000000,86800.000000,158.353623)}
{pt3dadd(175680.000000,104928.000000,86500.000000,179.482918)}
{pt3dadd(175560.000000,104328.000000,85725.000000,200.612214)}
{pt3dadd(175212.000000,104124.000000,85050.000000,244.746900)}
{pt3dadd(174996.000000,104028.000000,84350.000000,288.881586)}
{pt3dadd(174780.000000,103932.000000,84050.000000,240.734646)}

{create adhoc24}
{access adhoc24}
{connect adhoc24(1), adhoc23(0)}
{nseg = 1}
{strdef color color = "White"}
{pt3dclear()}
{pt3dadd(174780.000000,103932.000000,84050.000000,240.734646)}
{pt3dadd(174732.000000,103944.000000,83700.000000,116.095032)}
{pt3dadd(174744.000000,104112.000000,83200.000000,200.612214)}

{create adhoc25}
{access adhoc25}
{connect adhoc25(1), adhoc23(0)}
{nseg = 1}
{strdef color color = "White"}
{pt3dclear()}
{pt3dadd(174780.000000,103932.000000,84050.000000,240.734646)}
{pt3dadd(174564.000000,103224.000000,83925.000000,80.621550)}
{pt3dadd(174216.000000,102744.000000,83725.000000,73.903095)}
{pt3dadd(173736.000000,102288.000000,83525.000000,67.184640)}
{pt3dadd(173460.000000,102036.000000,83325.000000,116.095032)}

{create adhoc26}
{access adhoc26}
{connect adhoc26(1), adhoc16(0)}
{nseg = 1}
{strdef color color = "White"}
{pt3dclear()}
{pt3dadd(192204.000000,112320.000000,86575.000000,346.657896)}
{pt3dadd(192840.000000,113580.000000,86225.000000,240.734646)}
{pt3dadd(193764.000000,114864.000000,85825.000000,249.882566)}
{pt3dadd(194532.000000,115824.000000,85650.000000,259.030485)}
{pt3dadd(195108.000000,117120.000000,85850.000000,268.178405)}
{pt3dadd(195264.000000,118704.000000,86350.000000,277.326324)}
{pt3dadd(194988.000000,119052.000000,86000.000000,232.181208)}
{pt3dadd(195060.000000,119136.000000,85350.000000,187.036092)}
{pt3dadd(195132.000000,119220.000000,85175.000000,141.890976)}
{pt3dadd(195780.000000,119772.000000,85075.000000,96.745860)}
{pt3dadd(196380.000000,120396.000000,85175.000000,96.745860)}
{pt3dadd(196284.000000,121572.000000,85150.000000,67.184640)}

{create adhoc27}
{access adhoc27}
{connect adhoc27(1), adhoc1(0)}
{nseg = 1}
{strdef color color = "White"}
{pt3dclear()}
{pt3dadd(198744.000000,135552.000000,100250.000000,599.024880)}
{pt3dadd(198624.000000,136836.000000,99950.000000,599.024880)}
{pt3dadd(198744.000000,137868.000000,99600.000000,599.024880)}
{pt3dadd(198876.000000,138768.000000,99250.000000,599.024880)}
{pt3dadd(199116.000000,139680.000000,99275.000000,599.024880)}
{pt3dadd(199356.000000,140616.000000,99300.000000,599.024880)}
{pt3dadd(199416.000000,141528.000000,99225.000000,599.024880)}
{pt3dadd(199908.000000,142800.000000,99250.000000,599.024880)}
{pt3dadd(200388.000000,143448.000000,99450.000000,599.024880)}
{pt3dadd(200640.000000,143856.000000,99275.000000,599.024880)}
{pt3dadd(200892.000000,144828.000000,99100.000000,690.076602)}

{create adhoc28}
{access adhoc28}
{connect adhoc28(1), adhoc27(0)}
{nseg = 1}
{strdef color color = "White"}
{pt3dclear()}
{pt3dadd(200892.000000,144828.000000,99100.000000,690.076602)}
{pt3dadd(201024.000000,145152.000000,99200.000000,599.024880)}
{pt3dadd(201156.000000,145956.000000,99300.000000,628.976115)}
{pt3dadd(201132.000000,146340.000000,99400.000000,658.927350)}
{pt3dadd(201108.000000,147240.000000,99500.000000,688.878585)}
{pt3dadd(201120.000000,147984.000000,99425.000000,718.829820)}
{pt3dadd(201132.000000,149808.000000,99350.000000,688.878585)}
{pt3dadd(201348.000000,150768.000000,99475.000000,658.927350)}
{pt3dadd(201264.000000,152280.000000,99700.000000,628.976115)}
{pt3dadd(201180.000000,153564.000000,99950.000000,599.024880)}
{pt3dadd(201612.000000,155460.000000,99575.000000,574.065504)}
{pt3dadd(201372.000000,157644.000000,99050.000000,549.106128)}
{pt3dadd(201072.000000,158904.000000,98975.000000,524.146752)}
{pt3dadd(200748.000000,160404.000000,99050.000000,499.187376)}
{pt3dadd(199740.000000,162012.000000,99450.000000,478.387903)}
{pt3dadd(199284.000000,163140.000000,99950.000000,457.588431)}
{pt3dadd(199272.000000,164184.000000,100675.000000,436.788958)}
{pt3dadd(199476.000000,165612.000000,101000.000000,415.989486)}
{pt3dadd(199848.000000,166524.000000,100900.000000,461.748335)}
{pt3dadd(199908.000000,167508.000000,100475.000000,507.507183)}
{pt3dadd(199752.000000,168660.000000,99700.000000,553.266031)}
{pt3dadd(199164.000000,169212.000000,98500.000000,599.024880)}
{pt3dadd(198936.000000,171060.000000,97550.000000,553.266031)}
{pt3dadd(198504.000000,172320.000000,97350.000000,507.507183)}
{pt3dadd(197412.000000,174456.000000,97025.000000,461.748335)}
{pt3dadd(196752.000000,175932.000000,97475.000000,415.989486)}
{pt3dadd(195912.000000,177564.000000,98250.000000,436.788958)}
{pt3dadd(195528.000000,179100.000000,99100.000000,457.588431)}
{pt3dadd(195132.000000,181008.000000,99900.000000,478.387903)}
{pt3dadd(194916.000000,183180.000000,100650.000000,499.187376)}
{pt3dadd(194364.000000,185136.000000,100925.000000,575.063856)}
{pt3dadd(193224.000000,186828.000000,101325.000000,718.829820)}

{create adhoc29}
{access adhoc29}
{connect adhoc29(1), adhoc28(0)}
{nseg = 1}
{strdef color color = "White"}
{pt3dclear()}
{pt3dadd(193224.000000,186828.000000,101325.000000,718.829820)}
{pt3dadd(194508.000000,186480.000000,99350.000000,599.024880)}
{pt3dadd(194568.000000,186420.000000,98450.000000,574.065504)}
{pt3dadd(195204.000000,186948.000000,97875.000000,549.106128)}
{pt3dadd(195012.000000,186828.000000,97500.000000,524.146752)}
{pt3dadd(194844.000000,187128.000000,96650.000000,499.187376)}
{pt3dadd(194676.000000,187428.000000,96150.000000,448.344216)}
{pt3dadd(195228.000000,188268.000000,95175.000000,397.501056)}
{pt3dadd(195300.000000,188700.000000,94150.000000,346.657896)}
{pt3dadd(195228.000000,188700.000000,93325.000000,479.219886)}

{create adhoc30}
{access adhoc30}
{connect adhoc30(1), adhoc29(0)}
{nseg = 1}
{strdef color color = "White"}
{pt3dclear()}
{pt3dadd(195228.000000,188700.000000,93325.000000,479.219886)}
{pt3dadd(194760.000000,189420.000000,92975.000000,575.063856)}
{pt3dadd(194304.000000,190140.000000,92325.000000,581.054112)}
{pt3dadd(194028.000000,190944.000000,91425.000000,587.044368)}
{pt3dadd(193308.000000,191688.000000,89850.000000,593.034624)}
{pt3dadd(192384.000000,192492.000000,88850.000000,599.024880)}
{pt3dadd(191868.000000,193260.000000,88250.000000,628.976115)}
{pt3dadd(191352.000000,194028.000000,87525.000000,658.927350)}
{pt3dadd(190836.000000,194796.000000,86850.000000,688.878585)}
{pt3dadd(190320.000000,195564.000000,86175.000000,718.829820)}
{pt3dadd(189600.000000,197484.000000,85375.000000,682.888329)}
{pt3dadd(189384.000000,198360.000000,84525.000000,646.946838)}
{pt3dadd(188640.000000,198804.000000,83950.000000,611.005347)}
{pt3dadd(187884.000000,199248.000000,83350.000000,575.063856)}
{pt3dadd(187128.000000,199692.000000,83000.000000,517.962366)}
{pt3dadd(186372.000000,200136.000000,82800.000000,460.860876)}
{pt3dadd(185592.000000,200556.000000,82575.000000,403.759386)}
{pt3dadd(185124.000000,200976.000000,82350.000000,346.657896)}
{pt3dadd(184632.000000,201396.000000,82125.000000,409.749642)}
{pt3dadd(184392.000000,201720.000000,82125.000000,472.841388)}
{pt3dadd(184200.000000,202044.000000,82125.000000,535.933134)}
{pt3dadd(183936.000000,202692.000000,81575.000000,599.024880)}
{pt3dadd(183732.000000,203340.000000,81050.000000,599.024880)}
{pt3dadd(183528.000000,203988.000000,80525.000000,599.024880)}
{pt3dadd(183228.000000,204636.000000,80000.000000,599.024880)}
{pt3dadd(182580.000000,205284.000000,79475.000000,599.024880)}
{pt3dadd(181860.000000,205764.000000,79275.000000,538.013082)}
{pt3dadd(181452.000000,206316.000000,79250.000000,477.001284)}
{pt3dadd(181224.000000,206868.000000,79225.000000,415.989486)}
{pt3dadd(180960.000000,206940.000000,79225.000000,346.657896)}

{create adhoc31}
{access adhoc31}
{connect adhoc31(1), adhoc30(0)}
{nseg = 1}
{strdef color color = "White"}
{pt3dclear()}
{pt3dadd(180960.000000,206940.000000,79225.000000,346.657896)}
{pt3dadd(180792.000000,207708.000000,78950.000000,288.881586)}
{pt3dadd(180552.000000,208620.000000,78850.000000,288.881586)}
{pt3dadd(180204.000000,209532.000000,78775.000000,288.881586)}
{pt3dadd(179856.000000,210264.000000,78475.000000,288.881586)}
{pt3dadd(179328.000000,210852.000000,77850.000000,288.881586)}
{pt3dadd(178812.000000,211308.000000,77225.000000,283.219511)}
{pt3dadd(178416.000000,211464.000000,76950.000000,277.557435)}
{pt3dadd(177900.000000,211800.000000,76775.000000,271.895359)}
{pt3dadd(177516.000000,212136.000000,76600.000000,266.233284)}
{pt3dadd(176916.000000,212472.000000,76425.000000,271.895359)}
{pt3dadd(176280.000000,212808.000000,76250.000000,277.557435)}
{pt3dadd(175644.000000,212952.000000,76125.000000,283.219511)}
{pt3dadd(175032.000000,213096.000000,76025.000000,288.881586)}
{pt3dadd(174672.000000,213240.000000,75925.000000,320.658561)}
{pt3dadd(174204.000000,213384.000000,75825.000000,352.435536)}
{pt3dadd(173880.000000,213528.000000,75725.000000,384.212511)}
{pt3dadd(173580.000000,213672.000000,75625.000000,415.989486)}
{pt3dadd(173328.000000,213816.000000,75525.000000,411.829601)}
{pt3dadd(173040.000000,213960.000000,75425.000000,407.669715)}
{pt3dadd(172668.000000,214104.000000,75325.000000,403.509830)}
{pt3dadd(172272.000000,214164.000000,75475.000000,399.349944)}
{pt3dadd(172008.000000,214224.000000,75600.000000,382.710357)}
{pt3dadd(171624.000000,214284.000000,75200.000000,366.070770)}
{pt3dadd(170964.000000,214488.000000,75000.000000,349.431183)}
{pt3dadd(170352.000000,214752.000000,74975.000000,332.791596)}
{pt3dadd(170064.000000,215016.000000,74950.000000,321.814093)}
{pt3dadd(169260.000000,215280.000000,74925.000000,310.836591)}
{pt3dadd(168804.000000,215544.000000,74900.000000,299.859089)}
{pt3dadd(168072.000000,215592.000000,74725.000000,288.881586)}
{pt3dadd(166920.000000,215640.000000,74550.000000,303.325664)}
{pt3dadd(165960.000000,215964.000000,74100.000000,317.769741)}
{pt3dadd(165552.000000,216240.000000,73825.000000,332.213819)}
{pt3dadd(165060.000000,216216.000000,73575.000000,346.657896)}
{pt3dadd(164076.000000,216300.000000,73200.000000,240.734646)}
{pt3dadd(162648.000000,216564.000000,73425.000000,240.734646)}

{create adhoc32}
{access adhoc32}
{connect adhoc32(1), adhoc31(0)}
{nseg = 1}
{strdef color color = "White"}
{pt3dclear()}
{pt3dadd(162648.000000,216564.000000,73425.000000,240.734646)}
{pt3dadd(162636.000000,217032.000000,73900.000000,288.881586)}
{pt3dadd(162060.000000,217560.000000,74200.000000,288.881586)}
{pt3dadd(160428.000000,218580.000000,74425.000000,288.881586)}
{pt3dadd(159708.000000,219768.000000,74650.000000,288.881586)}
{pt3dadd(158772.000000,220740.000000,74425.000000,288.881586)}
{pt3dadd(157824.000000,221940.000000,74150.000000,274.437509)}
{pt3dadd(157308.000000,223032.000000,73875.000000,259.993431)}
{pt3dadd(156612.000000,223872.000000,73150.000000,245.549354)}
{pt3dadd(155760.000000,224568.000000,72450.000000,231.105276)}
{pt3dadd(154668.000000,225036.000000,71625.000000,223.482010)}
{pt3dadd(153420.000000,225744.000000,71125.000000,215.858745)}
{pt3dadd(152544.000000,226704.000000,70850.000000,208.235480)}
{pt3dadd(151476.000000,227232.000000,70125.000000,200.612214)}
{pt3dadd(150648.000000,227856.000000,69000.000000,237.123635)}
{pt3dadd(150492.000000,228384.000000,67950.000000,273.635055)}
{pt3dadd(150336.000000,228924.000000,67175.000000,310.146475)}
{pt3dadd(149952.000000,228948.000000,66625.000000,346.657896)}
{pt3dadd(149436.000000,229428.000000,65675.000000,294.821933)}
{pt3dadd(149340.000000,229608.000000,64925.000000,242.985969)}
{pt3dadd(149508.000000,230196.000000,63850.000000,191.150005)}
{pt3dadd(149844.000000,230496.000000,63025.000000,139.314042)}
{pt3dadd(150300.000000,230532.000000,62125.000000,154.638585)}
{pt3dadd(150840.000000,230112.000000,61225.000000,169.963128)}
{pt3dadd(151044.000000,229824.000000,60450.000000,185.287671)}
{pt3dadd(151236.000000,229536.000000,59775.000000,200.612214)}
{pt3dadd(151116.000000,229332.000000,59075.000000,167.176836)}

{create adhoc33}
{access adhoc33}
{connect adhoc33(1), adhoc31(0)}
{nseg = 1}
{strdef color color = "White"}
{pt3dclear()}
{pt3dadd(162648.000000,216564.000000,73425.000000,240.734646)}
{pt3dadd(161688.000000,216816.000000,73175.000000,240.734646)}
{pt3dadd(160632.000000,216636.000000,72750.000000,215.379495)}
{pt3dadd(159900.000000,216300.000000,72000.000000,190.024344)}
{pt3dadd(159456.000000,216300.000000,71250.000000,164.669193)}
{pt3dadd(158520.000000,216312.000000,70600.000000,139.314042)}
{pt3dadd(157764.000000,216540.000000,70000.000000,139.314042)}
{pt3dadd(157308.000000,216732.000000,69475.000000,139.314042)}
{pt3dadd(156948.000000,217104.000000,68875.000000,139.314042)}
{pt3dadd(156504.000000,217428.000000,68350.000000,139.314042)}
{pt3dadd(156288.000000,218052.000000,67600.000000,137.920900)}
{pt3dadd(155892.000000,218688.000000,66800.000000,136.527759)}
{pt3dadd(155340.000000,219228.000000,66050.000000,135.134617)}
{pt3dadd(154356.000000,219744.000000,65650.000000,133.741476)}
{pt3dadd(153756.000000,219816.000000,65275.000000,135.134617)}
{pt3dadd(153516.000000,219828.000000,64625.000000,136.527759)}
{pt3dadd(153456.000000,219624.000000,64100.000000,137.920900)}
{pt3dadd(153420.000000,219372.000000,63550.000000,139.314042)}
{pt3dadd(153480.000000,219252.000000,62925.000000,159.746766)}
{pt3dadd(153624.000000,219012.000000,62275.000000,180.179490)}
{pt3dadd(153768.000000,218436.000000,61400.000000,200.612214)}
{pt3dadd(153696.000000,218280.000000,60700.000000,200.612214)}

{create adhoc34}
{access adhoc34}
{connect adhoc34(1), adhoc30(0)}
{nseg = 1}
{strdef color color = "White"}
{pt3dclear()}
{pt3dadd(180960.000000,206940.000000,79225.000000,346.657896)}
{pt3dadd(180744.000000,205872.000000,79150.000000,415.989486)}
{pt3dadd(180144.000000,206172.000000,79250.000000,398.656589)}
{pt3dadd(179664.000000,206088.000000,79075.000000,381.323691)}
{pt3dadd(179532.000000,206004.000000,78925.000000,363.990794)}
{pt3dadd(179232.000000,205920.000000,78775.000000,346.657896)}
{pt3dadd(178692.000000,206040.000000,78700.000000,363.990794)}
{pt3dadd(178140.000000,206160.000000,78625.000000,381.323691)}
{pt3dadd(177360.000000,206100.000000,78500.000000,398.656589)}
{pt3dadd(176880.000000,206040.000000,78375.000000,415.989486)}
{pt3dadd(176040.000000,206136.000000,78250.000000,398.656589)}
{pt3dadd(175596.000000,206232.000000,78125.000000,381.323691)}
{pt3dadd(175092.000000,206328.000000,78000.000000,363.990794)}
{pt3dadd(174492.000000,206424.000000,77875.000000,346.657896)}
{pt3dadd(173868.000000,206520.000000,77750.000000,329.325003)}
{pt3dadd(173256.000000,206616.000000,77625.000000,311.992110)}
{pt3dadd(172716.000000,206712.000000,77500.000000,294.659217)}
{pt3dadd(172092.000000,206808.000000,77375.000000,277.326324)}
{pt3dadd(171624.000000,206904.000000,77250.000000,300.436848)}
{pt3dadd(170928.000000,207000.000000,77125.000000,323.547372)}
{pt3dadd(170352.000000,207156.000000,77225.000000,346.657896)}
{pt3dadd(169680.000000,207336.000000,77075.000000,346.657896)}

{create adhoc35}
{access adhoc35}
{connect adhoc35(1), adhoc34(0)}
{nseg = 1}
{strdef color color = "White"}
{pt3dclear()}
{pt3dadd(169680.000000,207336.000000,77075.000000,346.657896)}
{pt3dadd(169020.000000,207588.000000,76975.000000,346.657896)}
{pt3dadd(168360.000000,207948.000000,77050.000000,332.213819)}
{pt3dadd(167712.000000,208308.000000,77125.000000,317.769741)}
{pt3dadd(167076.000000,208668.000000,77200.000000,303.325664)}
{pt3dadd(166380.000000,209028.000000,77025.000000,288.881586)}
{pt3dadd(165648.000000,209364.000000,76925.000000,346.657896)}

{create adhoc36}
{access adhoc36}
{connect adhoc36(1), adhoc35(0)}
{nseg = 1}
{strdef color color = "White"}
{pt3dclear()}
{pt3dadd(165648.000000,209364.000000,76925.000000,346.657896)}
{pt3dadd(165216.000000,208932.000000,76350.000000,277.326324)}
{pt3dadd(164376.000000,208512.000000,75825.000000,300.436848)}
{pt3dadd(163536.000000,208092.000000,74575.000000,323.547372)}
{pt3dadd(162696.000000,207672.000000,73800.000000,346.657896)}
{pt3dadd(162252.000000,207252.000000,72950.000000,288.881586)}

{create adhoc37}
{access adhoc37}
{connect adhoc37(1), adhoc36(0)}
{nseg = 1}
{strdef color color = "White"}
{pt3dclear()}
{pt3dadd(162252.000000,207252.000000,72950.000000,288.881586)}
{pt3dadd(161784.000000,207492.000000,72675.000000,167.176836)}
{pt3dadd(161472.000000,207504.000000,71675.000000,185.566288)}
{pt3dadd(161316.000000,207324.000000,70950.000000,203.955741)}
{pt3dadd(161076.000000,207072.000000,70150.000000,222.345193)}
{pt3dadd(160836.000000,206820.000000,69850.000000,240.734646)}
{pt3dadd(160596.000000,206568.000000,69525.000000,228.697915)}
{pt3dadd(159768.000000,206352.000000,68400.000000,216.661185)}
{pt3dadd(159528.000000,206040.000000,67750.000000,204.624455)}
{pt3dadd(158928.000000,205932.000000,66950.000000,192.587724)}
{pt3dadd(158640.000000,205716.000000,66600.000000,139.314042)}

{create adhoc38}
{access adhoc38}
{connect adhoc38(1), adhoc37(0)}
{nseg = 1}
{strdef color color = "White"}
{pt3dclear()}
{pt3dadd(158640.000000,205716.000000,66600.000000,139.314042)}
{pt3dadd(158124.000000,205080.000000,66275.000000,139.314042)}
{pt3dadd(157476.000000,204468.000000,66325.000000,139.314042)}

{create adhoc39}
{access adhoc39}
{connect adhoc39(1), adhoc37(0)}
{nseg = 1}
{strdef color color = "White"}
{pt3dclear()}
{pt3dadd(158640.000000,205716.000000,66600.000000,139.314042)}
{pt3dadd(158568.000000,206100.000000,66325.000000,139.314042)}

{create adhoc40}
{access adhoc40}
{connect adhoc40(1), adhoc36(0)}
{nseg = 1}
{strdef color color = "White"}
{pt3dclear()}
{pt3dadd(162252.000000,207252.000000,72950.000000,288.881586)}
{pt3dadd(162576.000000,206484.000000,72625.000000,167.176836)}
{pt3dadd(162732.000000,205596.000000,72150.000000,154.406385)}
{pt3dadd(162888.000000,204708.000000,71675.000000,141.635934)}
{pt3dadd(162900.000000,203940.000000,71200.000000,128.865483)}
{pt3dadd(163044.000000,203016.000000,70800.000000,116.095032)}
{pt3dadd(162936.000000,201780.000000,70450.000000,128.865483)}
{pt3dadd(163224.000000,200832.000000,70025.000000,141.635934)}
{pt3dadd(163596.000000,199500.000000,70100.000000,154.406385)}
{pt3dadd(163896.000000,197952.000000,70000.000000,167.176836)}
{pt3dadd(164772.000000,196356.000000,69775.000000,167.176836)}
{pt3dadd(165840.000000,194736.000000,69800.000000,167.176836)}
{pt3dadd(165996.000000,194064.000000,70125.000000,167.176836)}
{pt3dadd(166152.000000,192804.000000,70550.000000,167.176836)}
{pt3dadd(166032.000000,191652.000000,70325.000000,200.612214)}
{pt3dadd(166224.000000,190812.000000,69825.000000,167.176836)}

{create adhoc41}
{access adhoc41}
{connect adhoc41(1), adhoc35(0)}
{nseg = 1}
{strdef color color = "White"}
{pt3dclear()}
{pt3dadd(165648.000000,209364.000000,76925.000000,346.657896)}
{pt3dadd(164544.000000,210564.000000,77725.000000,231.105276)}
{pt3dadd(164328.000000,211380.000000,78625.000000,208.157467)}
{pt3dadd(164352.000000,211968.000000,79425.000000,185.209659)}
{pt3dadd(164868.000000,211800.000000,80500.000000,162.261850)}
{pt3dadd(165528.000000,211752.000000,80950.000000,139.314042)}
{pt3dadd(166188.000000,211692.000000,81500.000000,164.669193)}
{pt3dadd(166848.000000,211632.000000,82000.000000,190.024344)}
{pt3dadd(167880.000000,210384.000000,82450.000000,215.379495)}
{pt3dadd(168768.000000,209184.000000,82225.000000,240.734646)}
{pt3dadd(169416.000000,207924.000000,82550.000000,240.734646)}
{pt3dadd(169428.000000,207660.000000,83000.000000,240.734646)}
{pt3dadd(169704.000000,207240.000000,83650.000000,240.734646)}
{pt3dadd(169740.000000,206760.000000,83975.000000,240.734646)}
{pt3dadd(170712.000000,205092.000000,85000.000000,199.900157)}
{pt3dadd(171600.000000,204264.000000,85675.000000,159.065667)}
{pt3dadd(172896.000000,203796.000000,86175.000000,118.231178)}
{pt3dadd(173988.000000,203424.000000,87200.000000,77.396688)}
{pt3dadd(174888.000000,202692.000000,88075.000000,139.314042)}
{pt3dadd(175524.000000,202368.000000,88550.000000,231.105276)}

{create adhoc42}
{access adhoc42}
{connect adhoc42(1), adhoc34(0)}
{nseg = 1}
{strdef color color = "White"}
{pt3dclear()}
{pt3dadd(169680.000000,207336.000000,77075.000000,346.657896)}
{pt3dadd(170316.000000,207036.000000,76650.000000,200.612214)}
{pt3dadd(169512.000000,206244.000000,76450.000000,185.287671)}
{pt3dadd(167796.000000,205428.000000,76300.000000,169.963128)}
{pt3dadd(166872.000000,205092.000000,75925.000000,154.638585)}
{pt3dadd(165948.000000,204756.000000,75400.000000,139.314042)}
{pt3dadd(165840.000000,204648.000000,74925.000000,133.741476)}

{create adhoc43}
{access adhoc43}
{connect adhoc43(1), adhoc29(0)}
{nseg = 1}
{strdef color color = "White"}
{pt3dclear()}
{pt3dadd(195228.000000,188700.000000,93325.000000,479.219886)}
{pt3dadd(196044.000000,187536.000000,93350.000000,240.734646)}
{pt3dadd(196692.000000,186888.000000,93000.000000,80.621550)}
{pt3dadd(197112.000000,186228.000000,91950.000000,55.987200)}

{create adhoc44}
{access adhoc44}
{connect adhoc44(1), adhoc28(0)}
{nseg = 1}
{strdef color color = "White"}
{pt3dclear()}
{pt3dadd(193224.000000,186828.000000,101325.000000,718.829820)}
{pt3dadd(192612.000000,188400.000000,102650.000000,599.024880)}
{pt3dadd(191820.000000,189456.000000,103675.000000,599.024880)}
{pt3dadd(191448.000000,190812.000000,105025.000000,599.024880)}
{pt3dadd(190980.000000,191940.000000,105750.000000,599.024880)}
{pt3dadd(190152.000000,193020.000000,106875.000000,599.024880)}
{pt3dadd(189048.000000,193464.000000,109200.000000,574.065504)}
{pt3dadd(187932.000000,193584.000000,110025.000000,549.106128)}
{pt3dadd(186696.000000,194568.000000,111875.000000,524.146752)}
{pt3dadd(185424.000000,194700.000000,113975.000000,499.187376)}
{pt3dadd(184908.000000,194532.000000,115025.000000,478.387903)}
{pt3dadd(184644.000000,194556.000000,116000.000000,457.588431)}
{pt3dadd(183720.000000,194136.000000,117900.000000,436.788958)}
{pt3dadd(182304.000000,193692.000000,119700.000000,415.989486)}
{pt3dadd(180888.000000,193248.000000,121025.000000,431.797086)}
{pt3dadd(179472.000000,192816.000000,122450.000000,447.604686)}
{pt3dadd(178008.000000,191856.000000,123925.000000,463.412286)}
{pt3dadd(176400.000000,190404.000000,125150.000000,479.219886)}
{pt3dadd(175476.000000,189492.000000,126050.000000,463.412286)}
{pt3dadd(173880.000000,188772.000000,127150.000000,447.604686)}
{pt3dadd(172188.000000,187980.000000,128025.000000,431.797086)}
{pt3dadd(170748.000000,187092.000000,128450.000000,415.989486)}
{pt3dadd(169308.000000,186204.000000,128750.000000,384.212511)}
{pt3dadd(167868.000000,185316.000000,129400.000000,352.435536)}
{pt3dadd(166788.000000,184224.000000,130075.000000,320.658561)}
{pt3dadd(165708.000000,183132.000000,130650.000000,288.881586)}
{pt3dadd(164640.000000,182040.000000,131150.000000,341.458034)}
{pt3dadd(163860.000000,180408.000000,131600.000000,394.034481)}
{pt3dadd(163032.000000,178668.000000,132300.000000,446.610929)}
{pt3dadd(161916.000000,177072.000000,133400.000000,499.187376)}
{pt3dadd(161100.000000,176148.000000,134375.000000,446.610929)}
{pt3dadd(159936.000000,175188.000000,135575.000000,394.034481)}
{pt3dadd(159120.000000,174468.000000,137050.000000,341.458034)}
{pt3dadd(159744.000000,173148.000000,138475.000000,288.881586)}
{pt3dadd(159648.000000,171792.000000,139450.000000,288.881586)}
{pt3dadd(159144.000000,170268.000000,140625.000000,288.881586)}
{pt3dadd(158640.000000,169860.000000,142000.000000,288.881586)}
{pt3dadd(157644.000000,168672.000000,143675.000000,288.881586)}
{pt3dadd(156540.000000,167412.000000,144725.000000,299.859089)}
{pt3dadd(155928.000000,166512.000000,146125.000000,310.836591)}
{pt3dadd(155508.000000,165396.000000,147500.000000,321.814093)}
{pt3dadd(155076.000000,164280.000000,148650.000000,332.791596)}
{pt3dadd(155064.000000,163656.000000,150275.000000,422.112847)}
{pt3dadd(154896.000000,162600.000000,151700.000000,511.434099)}
{pt3dadd(154644.000000,162120.000000,152950.000000,600.755351)}
{pt3dadd(154500.000000,160608.000000,154800.000000,690.076602)}
{pt3dadd(154764.000000,159144.000000,156325.000000,667.313671)}
{pt3dadd(155436.000000,158412.000000,157375.000000,644.550741)}
{pt3dadd(155232.000000,157884.000000,158875.000000,621.787810)}
{pt3dadd(154560.000000,157620.000000,159575.000000,599.024880)}
{pt3dadd(154908.000000,156564.000000,160700.000000,553.266031)}
{pt3dadd(155256.000000,155508.000000,162000.000000,507.507183)}
{pt3dadd(155604.000000,154452.000000,162975.000000,461.748335)}
{pt3dadd(156348.000000,153552.000000,164150.000000,415.989486)}
{pt3dadd(156600.000000,152556.000000,165100.000000,527.641065)}
{pt3dadd(157380.000000,151644.000000,166275.000000,639.292644)}
{pt3dadd(157476.000000,150516.000000,166975.000000,750.944223)}
{pt3dadd(158076.000000,150144.000000,167375.000000,862.595802)}
{pt3dadd(158676.000000,149772.000000,168200.000000,440.297901)}
{pt3dadd(159276.000000,149388.000000,169025.000000,18.000000)}
{pt3dadd(159684.000000,148320.000000,169600.000000,368.414910)}
{pt3dadd(160092.000000,147252.000000,170275.000000,718.829820)}
{pt3dadd(160164.000000,146616.000000,170900.000000,709.245438)}
{pt3dadd(160608.000000,145848.000000,171925.000000,699.661056)}
{pt3dadd(161052.000000,145080.000000,172375.000000,690.076674)}
{pt3dadd(161124.000000,144180.000000,173225.000000,718.829820)}

{create adhoc45}
{access adhoc45}
{connect adhoc45(1), adhoc44(0)}
{nseg = 1}
{strdef color color = "White"}
{pt3dclear()}
{pt3dadd(161124.000000,144180.000000,173225.000000,718.829820)}
{pt3dadd(159876.000000,143340.000000,173025.000000,116.095032)}
{pt3dadd(159792.000000,143136.000000,172500.000000,116.095032)}

{create adhoc46}
{access adhoc46}
{connect adhoc46(1), adhoc44(0)}
{nseg = 1}
{strdef color color = "White"}
{pt3dclear()}
{pt3dadd(161124.000000,144180.000000,173225.000000,718.829820)}
{pt3dadd(160188.000000,141684.000000,173375.000000,200.612214)}
{pt3dadd(160164.000000,141264.000000,172875.000000,240.734646)}
{pt3dadd(159864.000000,141252.000000,172175.000000,116.095032)}

{create adhoc47}
{access adhoc47}
{connect adhoc47(1), adhoc44(0)}
{nseg = 1}
{strdef color color = "White"}
{pt3dclear()}
{pt3dadd(161124.000000,144180.000000,173225.000000,718.829820)}
{pt3dadd(161040.000000,143628.000000,173925.000000,718.829820)}
{pt3dadd(160020.000000,143148.000000,174625.000000,790.712811)}
{pt3dadd(160260.000000,142344.000000,175450.000000,862.595802)}
{pt3dadd(160008.000000,141528.000000,176650.000000,862.595802)}

{create adhoc48}
{access adhoc48}
{connect adhoc48(1), adhoc47(0)}
{nseg = 1}
{strdef color color = "White"}
{pt3dclear()}
{pt3dadd(160008.000000,141528.000000,176650.000000,862.595802)}
{pt3dadd(158376.000000,140352.000000,176700.000000,240.734646)}
{pt3dadd(156468.000000,140088.000000,176950.000000,305.347828)}
{pt3dadd(154380.000000,139728.000000,176800.000000,369.961011)}
{pt3dadd(152376.000000,139116.000000,176950.000000,434.574193)}
{pt3dadd(150228.000000,139092.000000,176925.000000,499.187376)}
{pt3dadd(148536.000000,138612.000000,176500.000000,200.612214)}
{pt3dadd(148104.000000,138660.000000,176075.000000,200.612214)}

{create adhoc49}
{access adhoc49}
{connect adhoc49(1), adhoc48(0)}
{nseg = 1}
{strdef color color = "White"}
{pt3dclear()}
{pt3dadd(148104.000000,138660.000000,176075.000000,200.612214)}
{pt3dadd(148728.000000,138900.000000,175650.000000,167.176836)}
{pt3dadd(148932.000000,138780.000000,174850.000000,240.734646)}
{pt3dadd(149748.000000,138660.000000,174275.000000,116.095032)}

{create adhoc50}
{access adhoc50}
{connect adhoc50(1), adhoc48(0)}
{nseg = 1}
{strdef color color = "White"}
{pt3dclear()}
{pt3dadd(148104.000000,138660.000000,176075.000000,200.612214)}
{pt3dadd(146856.000000,138948.000000,175625.000000,346.657896)}
{pt3dadd(147360.000000,138780.000000,174175.000000,718.829820)}
{pt3dadd(147324.000000,138888.000000,173400.000000,288.881586)}

{create adhoc51}
{access adhoc51}
{connect adhoc51(1), adhoc50(0)}
{nseg = 1}
{strdef color color = "White"}
{pt3dclear()}
{pt3dadd(147324.000000,138888.000000,173400.000000,288.881586)}
{pt3dadd(147156.000000,139800.000000,173200.000000,167.176836)}
{pt3dadd(146988.000000,140712.000000,172725.000000,200.612214)}
{pt3dadd(146772.000000,140772.000000,172275.000000,200.612214)}

{create adhoc52}
{access adhoc52}
{connect adhoc52(1), adhoc50(0)}
{nseg = 1}
{strdef color color = "White"}
{pt3dclear()}
{pt3dadd(147324.000000,138888.000000,173400.000000,288.881586)}
{pt3dadd(146724.000000,138012.000000,173200.000000,231.105276)}
{pt3dadd(146544.000000,137640.000000,172550.000000,365.146326)}
{pt3dadd(147324.000000,137724.000000,171900.000000,499.187376)}
{pt3dadd(147876.000000,137652.000000,170800.000000,499.187376)}

{create adhoc53}
{access adhoc53}
{connect adhoc53(1), adhoc47(0)}
{nseg = 1}
{strdef color color = "White"}
{pt3dclear()}
{pt3dadd(160008.000000,141528.000000,176650.000000,862.595802)}
{pt3dadd(159672.000000,140868.000000,177525.000000,1035.114948)}
{pt3dadd(159348.000000,140352.000000,178775.000000,920.102175)}
{pt3dadd(159036.000000,139728.000000,179400.000000,805.089402)}
{pt3dadd(158916.000000,139632.000000,180000.000000,690.076629)}
{pt3dadd(158796.000000,139536.000000,180250.000000,575.063856)}
{pt3dadd(158712.000000,139476.000000,180650.000000,479.219886)}

{create adhoc54}
{access adhoc54}
{connect adhoc54(1), adhoc53(0)}
{nseg = 1}
{strdef color color = "White"}
{pt3dclear()}
{pt3dadd(158712.000000,139476.000000,180650.000000,479.219886)}
{pt3dadd(157776.000000,138084.000000,180675.000000,139.314042)}
{pt3dadd(157056.000000,137976.000000,181225.000000,231.539190)}
{pt3dadd(156312.000000,137976.000000,182050.000000,323.764338)}
{pt3dadd(155148.000000,137988.000000,182375.000000,415.989486)}
{pt3dadd(154428.000000,137856.000000,182750.000000,288.881586)}

{create adhoc55}
{access adhoc55}
{connect adhoc55(1), adhoc53(0)}
{nseg = 1}
{strdef color color = "White"}
{pt3dclear()}
{pt3dadd(158712.000000,139476.000000,180650.000000,479.219886)}
{pt3dadd(158628.000000,139416.000000,180975.000000,346.657896)}
{pt3dadd(158760.000000,139188.000000,181625.000000,346.657896)}
{pt3dadd(158472.000000,138984.000000,182550.000000,346.657896)}
{pt3dadd(158376.000000,139116.000000,182750.000000,288.881586)}

{create adhoc56}
{access adhoc56}
{connect adhoc56(1), adhoc27(0)}
{nseg = 1}
{strdef color color = "White"}
{pt3dclear()}
{pt3dadd(200892.000000,144828.000000,99100.000000,690.076602)}
{pt3dadd(200892.000000,144852.000000,98500.000000,200.612214)}
{pt3dadd(200412.000000,144060.000000,97950.000000,192.587706)}
{pt3dadd(200508.000000,143532.000000,97350.000000,204.624441)}
{pt3dadd(200580.000000,143004.000000,96825.000000,216.661176)}
{pt3dadd(200652.000000,142476.000000,96200.000000,228.697911)}
{pt3dadd(200472.000000,141504.000000,95575.000000,240.734646)}
{pt3dadd(200676.000000,140940.000000,94800.000000,222.345193)}
{pt3dadd(200820.000000,140736.000000,93850.000000,203.955741)}
{pt3dadd(200628.000000,140604.000000,93175.000000,185.566288)}
{pt3dadd(200436.000000,140472.000000,92400.000000,167.176836)}
{pt3dadd(200520.000000,140340.000000,91700.000000,175.535680)}
{pt3dadd(200424.000000,140400.000000,90850.000000,183.894525)}
{pt3dadd(200340.000000,140460.000000,90450.000000,192.253370)}
{pt3dadd(200256.000000,140520.000000,90150.000000,200.612214)}
{pt3dadd(200172.000000,140580.000000,89925.000000,237.123635)}
{pt3dadd(200364.000000,140928.000000,89225.000000,273.635055)}
{pt3dadd(200412.000000,140688.000000,88600.000000,310.146475)}
{pt3dadd(200472.000000,140448.000000,88100.000000,346.657896)}
{pt3dadd(200412.000000,140748.000000,87450.000000,320.177083)}
{pt3dadd(200124.000000,140868.000000,86800.000000,293.696271)}
{pt3dadd(199836.000000,140976.000000,86525.000000,267.215459)}
{pt3dadd(199548.000000,141084.000000,86300.000000,240.734646)}
{pt3dadd(199260.000000,141192.000000,85875.000000,230.704038)}
{pt3dadd(198804.000000,141084.000000,85225.000000,220.673430)}
{pt3dadd(198348.000000,140988.000000,84625.000000,210.642822)}
{pt3dadd(198132.000000,143184.000000,84375.000000,200.612214)}
{pt3dadd(198060.000000,143376.000000,84150.000000,200.612214)}
{pt3dadd(197904.000000,144108.000000,83875.000000,200.612214)}
{pt3dadd(198240.000000,145224.000000,83725.000000,200.612214)}
{pt3dadd(198552.000000,146340.000000,83975.000000,200.612214)}
{pt3dadd(198384.000000,147156.000000,84775.000000,192.587724)}
