# Supplementary material for: Full reconstruction of large lobula plate tangential cells in Drosophila from a 3D EM dataset
Source: PLoS One. 2018 Nov 28;13(11):e0207828. doi: 10.1371/journal.pone.0207828 (PMC6261601; doi:10.1371/journal.pone.0207828)
Supplement: S1 Dataset — (ZIP) [file pone.0207828.s001.zip › Diameter hoc/VS_VSL_preliminary/Old Diameters Mar13_VS_VSL_HS/VSlike3/2_14_750_sbeyer_001.091.hoc]

/* created with nml2hocm */

{create adhoc1}
{access adhoc1}
{nseg = 1}
{strdef color color = "White"}
{pt3dclear()}
{pt3dadd(177900.000000,221388.000000,88900.000000,46.656000)}
{pt3dadd(178032.000000,221220.000000,88875.000000,55.987200)}
{pt3dadd(178188.000000,220860.000000,88775.000000,58.786560)}
{pt3dadd(178296.000000,220596.000000,88825.000000,61.585920)}
{pt3dadd(178416.000000,220296.000000,88825.000000,64.385280)}
{pt3dadd(178500.000000,220092.000000,88825.000000,67.184640)}
{pt3dadd(178572.000000,219888.000000,88875.000000,95.613349)}
{pt3dadd(178716.000000,219876.000000,88925.000000,124.042059)}
{pt3dadd(178944.000000,219804.000000,89050.000000,152.470768)}
{pt3dadd(179256.000000,219804.000000,89325.000000,180.899478)}
{pt3dadd(179400.000000,219780.000000,89575.000000,185.827662)}
{pt3dadd(179712.000000,219780.000000,89825.000000,190.755846)}
{pt3dadd(179976.000000,219924.000000,90050.000000,195.684030)}
{pt3dadd(180456.000000,220128.000000,90325.000000,200.612214)}
{pt3dadd(180936.000000,220272.000000,90500.000000,439.009284)}
{pt3dadd(181344.000000,220332.000000,90500.000000,677.406354)}
{pt3dadd(181680.000000,220368.000000,90750.000000,915.803424)}
{pt3dadd(181824.000000,220368.000000,90675.000000,915.803424)}

{create adhoc2}
{access adhoc2}
{connect adhoc2(1), adhoc1(0)}
{nseg = 1}
{strdef color color = "White"}
{pt3dclear()}
{pt3dadd(181824.000000,220368.000000,90675.000000,915.803424)}
{pt3dadd(181836.000000,220200.000000,90800.000000,828.092016)}
{pt3dadd(182076.000000,219996.000000,91025.000000,836.717962)}
{pt3dadd(182172.000000,219780.000000,91200.000000,845.343909)}
{pt3dadd(182220.000000,219588.000000,91350.000000,853.969856)}
{pt3dadd(182292.000000,219384.000000,91475.000000,862.595802)}
{pt3dadd(182304.000000,219144.000000,91650.000000,853.969856)}
{pt3dadd(182340.000000,218940.000000,91625.000000,845.343909)}
{pt3dadd(182412.000000,218700.000000,91675.000000,836.717962)}
{pt3dadd(182460.000000,218496.000000,91625.000000,828.092016)}
{pt3dadd(182568.000000,218292.000000,91750.000000,836.717962)}
{pt3dadd(182508.000000,218100.000000,91675.000000,845.343909)}
{pt3dadd(182640.000000,217920.000000,91950.000000,853.969856)}
{pt3dadd(182616.000000,217740.000000,91950.000000,862.595802)}
{pt3dadd(182748.000000,217524.000000,92200.000000,862.595802)}
{pt3dadd(182760.000000,217356.000000,92250.000000,862.595802)}
{pt3dadd(182820.000000,217140.000000,92275.000000,862.595802)}
{pt3dadd(182904.000000,216948.000000,92300.000000,862.595802)}
{pt3dadd(182988.000000,216756.000000,92475.000000,845.688911)}
{pt3dadd(182988.000000,216588.000000,92400.000000,828.782019)}
{pt3dadd(183084.000000,216408.000000,92325.000000,811.875127)}
{pt3dadd(183180.000000,216204.000000,92425.000000,794.968236)}
{pt3dadd(183264.000000,215988.000000,92500.000000,768.745327)}
{pt3dadd(183276.000000,215760.000000,92550.000000,742.522419)}
{pt3dadd(183396.000000,215496.000000,92575.000000,716.299511)}
{pt3dadd(183516.000000,215268.000000,92625.000000,690.076602)}
{pt3dadd(183516.000000,215064.000000,92450.000000,661.323416)}
{pt3dadd(183516.000000,214848.000000,92725.000000,632.570229)}
{pt3dadd(183600.000000,214620.000000,92725.000000,603.817043)}
{pt3dadd(183492.000000,214428.000000,92525.000000,575.063856)}
{pt3dadd(183588.000000,214224.000000,92500.000000,531.135369)}
{pt3dadd(183768.000000,213924.000000,92475.000000,487.206882)}
{pt3dadd(183780.000000,213672.000000,92550.000000,443.278395)}
{pt3dadd(183792.000000,213468.000000,92575.000000,399.349908)}
{pt3dadd(183804.000000,213228.000000,92825.000000,424.309275)}
{pt3dadd(183900.000000,212976.000000,92975.000000,449.268642)}
{pt3dadd(183984.000000,212796.000000,93125.000000,474.228009)}
{pt3dadd(184044.000000,212532.000000,93175.000000,499.187376)}
{pt3dadd(184056.000000,212328.000000,93300.000000,424.543586)}
{pt3dadd(183972.000000,212100.000000,93450.000000,349.899795)}
{pt3dadd(183840.000000,211776.000000,93425.000000,275.256005)}
{pt3dadd(184032.000000,211500.000000,93425.000000,200.612214)}
{pt3dadd(184224.000000,211188.000000,93450.000000,237.123635)}
{pt3dadd(184416.000000,210960.000000,93500.000000,273.635055)}
{pt3dadd(184680.000000,210648.000000,93525.000000,310.146475)}
{pt3dadd(184872.000000,210396.000000,93625.000000,346.657896)}
{pt3dadd(185076.000000,210120.000000,93650.000000,332.213819)}
{pt3dadd(185280.000000,209964.000000,93750.000000,317.769741)}
{pt3dadd(185508.000000,209568.000000,93825.000000,303.325664)}
{pt3dadd(185736.000000,209256.000000,93875.000000,288.881586)}
{pt3dadd(185964.000000,208728.000000,94075.000000,341.458034)}
{pt3dadd(186120.000000,208188.000000,94550.000000,394.034481)}
{pt3dadd(186264.000000,207792.000000,94850.000000,446.610929)}
{pt3dadd(186360.000000,207564.000000,95075.000000,499.187376)}
{pt3dadd(186372.000000,207324.000000,95375.000000,554.097987)}
{pt3dadd(186576.000000,206784.000000,95750.000000,609.008598)}
{pt3dadd(186792.000000,206400.000000,96000.000000,663.919209)}
{pt3dadd(186912.000000,206148.000000,96150.000000,718.829820)}
{pt3dadd(187116.000000,205896.000000,96300.000000,711.641515)}
{pt3dadd(187236.000000,205620.000000,96350.000000,704.453211)}
{pt3dadd(187128.000000,205380.000000,96400.000000,697.264906)}
{pt3dadd(186960.000000,205152.000000,96350.000000,690.076602)}
{pt3dadd(186960.000000,204888.000000,96425.000000,642.354295)}
{pt3dadd(186972.000000,204648.000000,96475.000000,594.631989)}
{pt3dadd(186984.000000,204408.000000,96475.000000,546.909682)}
{pt3dadd(187068.000000,204144.000000,96800.000000,499.187376)}
{pt3dadd(187236.000000,203880.000000,96925.000000,499.187376)}
{pt3dadd(187380.000000,203652.000000,96875.000000,499.187376)}
{pt3dadd(187440.000000,203424.000000,96925.000000,499.187376)}
{pt3dadd(187476.000000,203208.000000,96925.000000,499.187376)}
{pt3dadd(187704.000000,203004.000000,97050.000000,554.097987)}
{pt3dadd(187884.000000,202764.000000,97100.000000,609.008598)}
{pt3dadd(188028.000000,202524.000000,97150.000000,663.919209)}
{pt3dadd(188124.000000,202308.000000,97300.000000,718.829820)}
{pt3dadd(188448.000000,202116.000000,97475.000000,787.549937)}
{pt3dadd(188544.000000,201900.000000,97625.000000,856.270053)}
{pt3dadd(188724.000000,201720.000000,97700.000000,924.990169)}
{pt3dadd(189036.000000,201528.000000,97975.000000,993.710286)}
{pt3dadd(189120.000000,201312.000000,98150.000000,983.773188)}
{pt3dadd(189324.000000,201096.000000,98225.000000,973.836090)}
{pt3dadd(189444.000000,200892.000000,98325.000000,963.898992)}
{pt3dadd(189564.000000,200652.000000,98425.000000,953.961894)}
{pt3dadd(189660.000000,200436.000000,98700.000000,974.250158)}
{pt3dadd(189756.000000,200196.000000,99100.000000,994.538421)}
{pt3dadd(189996.000000,199968.000000,99300.000000,1014.826685)}
{pt3dadd(190128.000000,199776.000000,99475.000000,1035.114948)}
{pt3dadd(190392.000000,199584.000000,99525.000000,1086.870681)}
{pt3dadd(190428.000000,199356.000000,99825.000000,1138.626414)}
{pt3dadd(190500.000000,199140.000000,100000.000000,1190.382147)}
{pt3dadd(190560.000000,198912.000000,100300.000000,1242.137880)}
{pt3dadd(190740.000000,198720.000000,100350.000000,1242.137880)}
{pt3dadd(190884.000000,198504.000000,100675.000000,1242.137880)}
{pt3dadd(191088.000000,198288.000000,100725.000000,1242.137880)}
{pt3dadd(191184.000000,198096.000000,100975.000000,1242.137880)}
{pt3dadd(191388.000000,197868.000000,101225.000000,1003.823807)}
{pt3dadd(191616.000000,197640.000000,101375.000000,765.509733)}
{pt3dadd(191796.000000,197412.000000,101525.000000,527.195660)}
{pt3dadd(192060.000000,197232.000000,101475.000000,288.881586)}
{pt3dadd(192324.000000,197040.000000,101600.000000,274.437509)}
{pt3dadd(192468.000000,196764.000000,101825.000000,259.993431)}
{pt3dadd(192504.000000,196476.000000,101900.000000,245.549354)}
{pt3dadd(192708.000000,196236.000000,101825.000000,231.105276)}
{pt3dadd(193020.000000,195984.000000,101525.000000,323.547381)}
{pt3dadd(192684.000000,195828.000000,101900.000000,415.989486)}
{pt3dadd(192660.000000,194832.000000,102100.000000,1192.452480)}

{create adhoc3}
{access adhoc3}
{connect adhoc3(1), adhoc2(0)}
{nseg = 1}
{strdef color color = "White"}
{pt3dclear()}
{pt3dadd(192660.000000,194832.000000,102100.000000,1192.452480)}
{pt3dadd(192768.000000,194544.000000,102350.000000,1035.114948)}
{pt3dadd(192984.000000,194436.000000,102700.000000,1223.505823)}
{pt3dadd(193356.000000,194376.000000,103075.000000,1411.896699)}
{pt3dadd(193464.000000,194436.000000,103375.000000,1600.287575)}
{pt3dadd(193728.000000,194472.000000,103775.000000,1788.678450)}
{pt3dadd(194064.000000,194136.000000,104150.000000,1714.150188)}
{pt3dadd(194184.000000,193836.000000,104500.000000,1639.621926)}
{pt3dadd(194064.000000,193512.000000,104875.000000,1565.093664)}
{pt3dadd(193908.000000,193284.000000,105175.000000,1490.565402)}
{pt3dadd(193644.000000,193260.000000,105500.000000,1592.676558)}
{pt3dadd(193488.000000,193128.000000,105975.000000,1694.787714)}
{pt3dadd(193500.000000,192936.000000,106350.000000,1796.898870)}
{pt3dadd(193464.000000,192672.000000,106750.000000,1899.010026)}
{pt3dadd(193428.000000,192540.000000,107175.000000,1993.960566)}
{pt3dadd(193344.000000,192480.000000,107500.000000,2088.911106)}
{pt3dadd(193212.000000,192324.000000,107850.000000,2183.861646)}
{pt3dadd(193152.000000,192228.000000,108200.000000,2278.812186)}
{pt3dadd(193284.000000,192240.000000,108550.000000,2327.276453)}
{pt3dadd(193356.000000,192120.000000,108900.000000,2375.740719)}
{pt3dadd(193404.000000,191892.000000,109250.000000,2424.204986)}
{pt3dadd(193320.000000,191832.000000,109600.000000,2472.669252)}
{pt3dadd(193236.000000,191796.000000,109975.000000,2283.784744)}
{pt3dadd(193176.000000,191772.000000,110450.000000,2094.900237)}
{pt3dadd(193092.000000,191616.000000,110900.000000,1906.015730)}
{pt3dadd(193044.000000,191532.000000,111300.000000,1717.131222)}
{pt3dadd(192888.000000,191700.000000,111600.000000,1617.537654)}
{pt3dadd(192816.000000,191616.000000,111900.000000,1517.944086)}
{pt3dadd(192516.000000,191556.000000,112250.000000,1418.350518)}
{pt3dadd(192348.000000,191496.000000,112575.000000,1318.756950)}
{pt3dadd(192216.000000,191436.000000,112950.000000,1287.180801)}
{pt3dadd(192132.000000,191340.000000,113350.000000,1255.604652)}
{pt3dadd(191940.000000,191208.000000,113750.000000,1224.028503)}
{pt3dadd(191412.000000,191076.000000,114300.000000,1192.452354)}
{pt3dadd(191160.000000,190944.000000,114775.000000,1109.988216)}
{pt3dadd(190740.000000,190824.000000,115225.000000,1027.524078)}
{pt3dadd(190140.000000,190728.000000,115750.000000,945.059940)}
{pt3dadd(189648.000000,190668.000000,116150.000000,862.595802)}
{pt3dadd(189048.000000,190548.000000,116600.000000,853.969856)}
{pt3dadd(188592.000000,190356.000000,117025.000000,845.343909)}
{pt3dadd(188004.000000,190212.000000,117550.000000,836.717962)}
{pt3dadd(187512.000000,190020.000000,118050.000000,828.092016)}
{pt3dadd(186948.000000,189708.000000,118375.000000,836.717962)}
{pt3dadd(186420.000000,189504.000000,118825.000000,845.343909)}
{pt3dadd(185988.000000,189408.000000,119275.000000,853.969856)}
{pt3dadd(185856.000000,189312.000000,119700.000000,862.595802)}
{pt3dadd(185364.000000,189048.000000,120100.000000,826.654307)}
{pt3dadd(185112.000000,188928.000000,120500.000000,790.712811)}
{pt3dadd(184764.000000,188748.000000,120850.000000,754.771316)}
{pt3dadd(184272.000000,188712.000000,121225.000000,718.829820)}
{pt3dadd(183888.000000,188508.000000,121600.000000,718.829820)}
{pt3dadd(183468.000000,188484.000000,122025.000000,718.829820)}
{pt3dadd(182976.000000,188532.000000,122400.000000,718.829820)}
{pt3dadd(182556.000000,188520.000000,122850.000000,718.829820)}
{pt3dadd(181956.000000,188232.000000,123250.000000,711.641533)}
{pt3dadd(181560.000000,188112.000000,123700.000000,704.453247)}
{pt3dadd(181236.000000,188208.000000,124050.000000,697.264960)}
{pt3dadd(180732.000000,188244.000000,124425.000000,690.076674)}
{pt3dadd(180624.000000,188184.000000,124800.000000,600.755395)}
{pt3dadd(179964.000000,188148.000000,125175.000000,511.434117)}
{pt3dadd(179640.000000,188388.000000,125475.000000,422.112839)}
{pt3dadd(178680.000000,188100.000000,125875.000000,332.791560)}
{pt3dadd(177624.000000,187656.000000,126250.000000,399.349890)}
{pt3dadd(176460.000000,187428.000000,126625.000000,465.908220)}
{pt3dadd(175800.000000,187236.000000,126950.000000,532.466550)}
{pt3dadd(175092.000000,186852.000000,127225.000000,599.024880)}
{pt3dadd(174096.000000,186600.000000,127550.000000,587.283988)}
{pt3dadd(173100.000000,186348.000000,127875.000000,575.543097)}
{pt3dadd(172632.000000,186288.000000,128225.000000,563.802206)}
{pt3dadd(171000.000000,185076.000000,128500.000000,552.061314)}
{pt3dadd(170136.000000,184560.000000,129000.000000,579.664386)}
{pt3dadd(169344.000000,184272.000000,129550.000000,607.267458)}
{pt3dadd(168816.000000,183984.000000,129950.000000,634.870530)}
{pt3dadd(167784.000000,183540.000000,130525.000000,662.473602)}
{pt3dadd(167220.000000,183120.000000,130900.000000,662.473584)}
{pt3dadd(166692.000000,182652.000000,131150.000000,662.473566)}
{pt3dadd(166056.000000,182064.000000,131575.000000,662.473548)}
{pt3dadd(165156.000000,181260.000000,132075.000000,662.473530)}
{pt3dadd(164592.000000,180600.000000,132500.000000,640.621112)}
{pt3dadd(164208.000000,179940.000000,132925.000000,618.768693)}
{pt3dadd(163680.000000,179268.000000,133350.000000,596.916274)}
{pt3dadd(163056.000000,178944.000000,133800.000000,575.063856)}
{pt3dadd(162996.000000,178380.000000,134200.000000,611.005347)}
{pt3dadd(162600.000000,177984.000000,134650.000000,646.946838)}
{pt3dadd(162276.000000,177648.000000,134975.000000,682.888329)}
{pt3dadd(161748.000000,177132.000000,135325.000000,718.829820)}
{pt3dadd(161364.000000,176868.000000,135800.000000,746.145351)}
{pt3dadd(160764.000000,176532.000000,136225.000000,773.460882)}
{pt3dadd(160176.000000,176472.000000,136600.000000,800.776413)}
{pt3dadd(159840.000000,176232.000000,136950.000000,828.091944)}
{pt3dadd(159480.000000,175980.000000,137300.000000,793.588126)}
{pt3dadd(159480.000000,175812.000000,137700.000000,759.084309)}
{pt3dadd(160092.000000,175320.000000,138075.000000,724.580491)}
{pt3dadd(160092.000000,174960.000000,138450.000000,690.076674)}
{pt3dadd(160032.000000,174696.000000,138775.000000,667.313725)}
{pt3dadd(159936.000000,174312.000000,139175.000000,644.550777)}
{pt3dadd(159648.000000,173856.000000,139525.000000,621.787828)}
{pt3dadd(159288.000000,173628.000000,139875.000000,599.024880)}
{pt3dadd(158868.000000,173400.000000,140200.000000,599.024880)}
{pt3dadd(158556.000000,173004.000000,140550.000000,599.024880)}
{pt3dadd(158232.000000,172560.000000,140900.000000,599.024880)}
{pt3dadd(158040.000000,171936.000000,141325.000000,599.024880)}
{pt3dadd(157776.000000,171672.000000,141700.000000,599.024880)}
{pt3dadd(157656.000000,171276.000000,142075.000000,599.024880)}
{pt3dadd(157428.000000,170712.000000,142450.000000,599.024880)}
{pt3dadd(157260.000000,170388.000000,142850.000000,599.024880)}
{pt3dadd(156876.000000,170136.000000,143225.000000,656.291664)}
{pt3dadd(156528.000000,169488.000000,143675.000000,713.558448)}
{pt3dadd(156276.000000,169260.000000,144000.000000,770.825232)}
{pt3dadd(155916.000000,168840.000000,144450.000000,828.092016)}
{pt3dadd(155760.000000,168612.000000,144875.000000,740.873983)}
{pt3dadd(155592.000000,168528.000000,145275.000000,653.655951)}
{pt3dadd(155376.000000,168360.000000,145675.000000,566.437919)}
{pt3dadd(155184.000000,168132.000000,146150.000000,479.219886)}
{pt3dadd(154896.000000,167568.000000,146575.000000,509.171134)}
{pt3dadd(154800.000000,167148.000000,146950.000000,539.122383)}
{pt3dadd(154836.000000,167148.000000,147300.000000,569.073631)}
{pt3dadd(154716.000000,166896.000000,147625.000000,599.024880)}
{pt3dadd(154200.000000,166776.000000,147925.000000,599.024880)}
{pt3dadd(153900.000000,166080.000000,148250.000000,599.024880)}
{pt3dadd(153780.000000,165696.000000,148625.000000,599.024880)}
{pt3dadd(153516.000000,165444.000000,148975.000000,599.024880)}
{pt3dadd(153480.000000,165276.000000,149325.000000,759.803130)}
{pt3dadd(153420.000000,165108.000000,149675.000000,920.581380)}
{pt3dadd(153588.000000,164940.000000,150000.000000,1081.359630)}
{pt3dadd(153588.000000,164736.000000,150300.000000,1242.137880)}
{pt3dadd(153324.000000,164376.000000,150600.000000,1304.244761)}
{pt3dadd(153528.000000,164076.000000,150975.000000,1366.351641)}
{pt3dadd(153564.000000,164016.000000,151325.000000,1428.458522)}
{pt3dadd(153408.000000,163956.000000,151650.000000,1490.565402)}
{pt3dadd(153264.000000,163836.000000,151950.000000,1428.458522)}
{pt3dadd(153276.000000,163608.000000,152350.000000,1366.351641)}
{pt3dadd(153480.000000,163308.000000,152625.000000,1304.244761)}
{pt3dadd(153384.000000,163116.000000,152925.000000,1242.137880)}
{pt3dadd(153480.000000,163080.000000,153350.000000,1304.244761)}
{pt3dadd(153384.000000,162816.000000,153725.000000,1366.351641)}
{pt3dadd(153516.000000,162444.000000,154075.000000,1428.458522)}
{pt3dadd(153300.000000,162240.000000,154425.000000,1490.565402)}
{pt3dadd(153144.000000,161904.000000,154800.000000,1428.458522)}
{pt3dadd(153156.000000,161700.000000,155150.000000,1366.351641)}
{pt3dadd(153252.000000,161304.000000,155475.000000,1304.244761)}
{pt3dadd(153096.000000,161016.000000,155825.000000,1242.137880)}
{pt3dadd(152988.000000,160860.000000,156225.000000,1289.339127)}
{pt3dadd(153120.000000,160632.000000,156550.000000,1336.540374)}
{pt3dadd(153324.000000,160296.000000,156800.000000,1383.741621)}
{pt3dadd(153624.000000,160164.000000,157175.000000,1430.942868)}
{pt3dadd(153696.000000,159936.000000,157525.000000,1371.320240)}
{pt3dadd(153960.000000,159648.000000,157900.000000,1311.697611)}
{pt3dadd(154056.000000,159324.000000,158275.000000,1252.074982)}
{pt3dadd(153852.000000,159300.000000,158500.000000,1192.452354)}
{pt3dadd(153372.000000,159084.000000,158925.000000,1142.766855)}
{pt3dadd(153264.000000,158712.000000,159325.000000,1093.081356)}
{pt3dadd(152784.000000,158316.000000,159850.000000,1043.395857)}
{pt3dadd(152844.000000,158184.000000,160100.000000,993.710358)}
{pt3dadd(152592.000000,157800.000000,160425.000000,1043.395857)}
{pt3dadd(153132.000000,157476.000000,160800.000000,1093.081356)}
{pt3dadd(153312.000000,157152.000000,161125.000000,1142.766855)}
{pt3dadd(153312.000000,156900.000000,161450.000000,1192.452354)}
{pt3dadd(153408.000000,156864.000000,161825.000000,1204.873736)}
{pt3dadd(153576.000000,156636.000000,162150.000000,1217.295117)}
{pt3dadd(153516.000000,156276.000000,162525.000000,1229.716498)}
{pt3dadd(153756.000000,155808.000000,162850.000000,1242.137880)}
{pt3dadd(153852.000000,155616.000000,163125.000000,1304.244761)}
{pt3dadd(153816.000000,155460.000000,163450.000000,1366.351641)}
{pt3dadd(153912.000000,155196.000000,163750.000000,1428.458522)}
{pt3dadd(154092.000000,154764.000000,164075.000000,1490.565402)}
{pt3dadd(153864.000000,154476.000000,164450.000000,1461.350354)}
{pt3dadd(153912.000000,154248.000000,164775.000000,1432.135305)}
{pt3dadd(154092.000000,153996.000000,165100.000000,1402.920257)}
{pt3dadd(153960.000000,153900.000000,165450.000000,1373.705208)}
{pt3dadd(154164.000000,153708.000000,165750.000000,1340.813376)}
{pt3dadd(154536.000000,153480.000000,166100.000000,1307.921544)}
{pt3dadd(154764.000000,153348.000000,166300.000000,1275.029712)}
{pt3dadd(154896.000000,152676.000000,166575.000000,1242.137880)}
{pt3dadd(154968.000000,152388.000000,166900.000000,1229.716498)}
{pt3dadd(155208.000000,152292.000000,167200.000000,1217.295117)}
{pt3dadd(155592.000000,152004.000000,167500.000000,1204.873736)}
{pt3dadd(155760.000000,151884.000000,167850.000000,1192.452354)}
{pt3dadd(155868.000000,151728.000000,168200.000000,605.226177)}
{pt3dadd(155916.000000,151596.000000,168625.000000,18.000000)}
{pt3dadd(156132.000000,151356.000000,168625.000000,630.068940)}
{pt3dadd(156096.000000,151032.000000,169325.000000,1242.137880)}
{pt3dadd(156360.000000,150360.000000,169975.000000,1170.093902)}
{pt3dadd(156648.000000,149964.000000,170325.000000,1098.049923)}
{pt3dadd(156744.000000,149544.000000,170825.000000,1026.005944)}
{pt3dadd(157236.000000,148848.000000,171325.000000,953.961966)}
{pt3dadd(157560.000000,148404.000000,171700.000000,1102.571726)}
{pt3dadd(157896.000000,147816.000000,172250.000000,1251.181485)}
{pt3dadd(158232.000000,146856.000000,172775.000000,1399.791244)}
{pt3dadd(158532.000000,146064.000000,173275.000000,1548.401004)}
{pt3dadd(158520.000000,146136.000000,173650.000000,1376.949704)}
{pt3dadd(158568.000000,145824.000000,174100.000000,1205.498403)}
{pt3dadd(157776.000000,145284.000000,174525.000000,1034.047103)}
{pt3dadd(157632.000000,144804.000000,174950.000000,862.595802)}
{pt3dadd(157656.000000,144084.000000,175375.000000,956.648592)}
{pt3dadd(157740.000000,143340.000000,175875.000000,1050.701382)}
{pt3dadd(157452.000000,142308.000000,176675.000000,1144.754172)}
{pt3dadd(157284.000000,141984.000000,177175.000000,1373.705208)}

{create adhoc4}
{access adhoc4}
{connect adhoc4(1), adhoc3(0)}
{nseg = 1}
{strdef color color = "White"}
{pt3dclear()}
{pt3dadd(157284.000000,141984.000000,177175.000000,1373.705208)}
{pt3dadd(157104.000000,141036.000000,177600.000000,1648.445940)}

{create adhoc5}
{access adhoc5}
{connect adhoc5(1), adhoc4(0)}
{nseg = 1}
{strdef color color = "White"}
{pt3dclear()}
{pt3dadd(157104.000000,141036.000000,177600.000000,1648.445940)}
{pt3dadd(157068.000000,140460.000000,178300.000000,1717.131222)}
{pt3dadd(157440.000000,139752.000000,178650.000000,1430.942742)}

{create adhoc6}
{access adhoc6}
{connect adhoc6(1), adhoc5(0)}
{nseg = 1}
{strdef color color = "White"}
{pt3dclear()}
{pt3dadd(157440.000000,139752.000000,178650.000000,1430.942742)}
{pt3dadd(157548.000000,139428.000000,178975.000000,1373.705064)}
{pt3dadd(157224.000000,139188.000000,179750.000000,1203.335310)}
{pt3dadd(157248.000000,138960.000000,180500.000000,1032.965556)}
{pt3dadd(157068.000000,139116.000000,180900.000000,862.595802)}
{pt3dadd(157176.000000,138708.000000,181275.000000,953.961894)}

{create adhoc7}
{access adhoc7}
{connect adhoc7(1), adhoc6(0)}
{nseg = 1}
{strdef color color = "White"}
{pt3dclear()}
{pt3dadd(157176.000000,138708.000000,181275.000000,953.961894)}
{pt3dadd(157404.000000,138624.000000,181450.000000,794.968308)}
{pt3dadd(157488.000000,138240.000000,181825.000000,794.968335)}
{pt3dadd(157572.000000,137832.000000,182250.000000,794.968362)}
{pt3dadd(157536.000000,137772.000000,182575.000000,763.169544)}

{create adhoc8}
{access adhoc8}
{connect adhoc8(1), adhoc6(0)}
{nseg = 1}
{strdef color color = "White"}
{pt3dclear()}
{pt3dadd(157176.000000,138708.000000,181275.000000,953.961894)}
{pt3dadd(156684.000000,138840.000000,181275.000000,450.135648)}
{pt3dadd(156276.000000,138840.000000,181000.000000,397.785398)}
{pt3dadd(155652.000000,138780.000000,181000.000000,345.435147)}
{pt3dadd(155472.000000,138744.000000,181125.000000,293.084897)}
{pt3dadd(155256.000000,138792.000000,181250.000000,240.734646)}
{pt3dadd(155052.000000,138708.000000,181350.000000,160.678098)}
{pt3dadd(154824.000000,138756.000000,181300.000000,80.621550)}
{pt3dadd(154656.000000,138744.000000,181250.000000,64.497240)}

{create adhoc9}
{access adhoc9}
{connect adhoc9(1), adhoc5(0)}
{nseg = 1}
{strdef color color = "White"}
{pt3dclear()}
{pt3dadd(157440.000000,139752.000000,178650.000000,1430.942742)}
{pt3dadd(157716.000000,139260.000000,178650.000000,499.187376)}
{pt3dadd(158076.000000,138780.000000,178650.000000,443.722113)}
{pt3dadd(158412.000000,138300.000000,178650.000000,388.256850)}
{pt3dadd(158796.000000,137820.000000,178650.000000,332.791587)}
{pt3dadd(158976.000000,137532.000000,178825.000000,277.326324)}
{pt3dadd(159192.000000,137280.000000,178900.000000,277.326324)}
{pt3dadd(159276.000000,137040.000000,179025.000000,277.326324)}
{pt3dadd(159432.000000,136824.000000,179075.000000,277.326324)}
{pt3dadd(159432.000000,136608.000000,179200.000000,277.326324)}
{pt3dadd(159480.000000,136392.000000,179225.000000,311.992115)}
{pt3dadd(159420.000000,136200.000000,179275.000000,346.657905)}
{pt3dadd(159588.000000,135900.000000,179225.000000,381.323696)}
{pt3dadd(159636.000000,135708.000000,179175.000000,415.989486)}
{pt3dadd(159660.000000,135504.000000,179100.000000,398.656589)}
{pt3dadd(159600.000000,135288.000000,179100.000000,381.323691)}
{pt3dadd(159672.000000,135108.000000,179100.000000,363.990794)}
{pt3dadd(159720.000000,134892.000000,179075.000000,346.657896)}
{pt3dadd(159708.000000,134640.000000,179100.000000,346.657896)}
{pt3dadd(159708.000000,134388.000000,179050.000000,346.657896)}
{pt3dadd(159648.000000,134124.000000,179025.000000,346.657896)}
{pt3dadd(159528.000000,133896.000000,178950.000000,346.657896)}
{pt3dadd(159432.000000,133656.000000,178875.000000,398.008750)}
{pt3dadd(159264.000000,133380.000000,178800.000000,449.359605)}
{pt3dadd(159120.000000,133164.000000,179025.000000,500.710460)}
{pt3dadd(158952.000000,132948.000000,179100.000000,552.061314)}
{pt3dadd(158856.000000,132672.000000,179125.000000,621.068990)}
{pt3dadd(158556.000000,132324.000000,179050.000000,690.076665)}
{pt3dadd(158328.000000,132180.000000,178975.000000,759.084340)}
{pt3dadd(158064.000000,131976.000000,178925.000000,828.092016)}
{pt3dadd(157380.000000,131484.000000,178850.000000,862.595802)}

{create adhoc10}
{access adhoc10}
{connect adhoc10(1), adhoc9(0)}
{nseg = 1}
{strdef color color = "White"}
{pt3dclear()}
{pt3dadd(157380.000000,131484.000000,178850.000000,862.595802)}
{pt3dadd(157584.000000,131568.000000,178450.000000,862.595802)}
{pt3dadd(157740.000000,131868.000000,178350.000000,718.829820)}

{create adhoc11}
{access adhoc11}
{connect adhoc11(1), adhoc10(0)}
{nseg = 1}
{strdef color color = "White"}
{pt3dclear()}
{pt3dadd(157740.000000,131868.000000,178350.000000,718.829820)}
{pt3dadd(157356.000000,130884.000000,177825.000000,499.187376)}
{pt3dadd(157176.000000,130632.000000,177500.000000,424.543586)}
{pt3dadd(156492.000000,130548.000000,177100.000000,349.899795)}
{pt3dadd(155916.000000,130068.000000,176825.000000,275.256005)}
{pt3dadd(155796.000000,129996.000000,176725.000000,200.612214)}
{pt3dadd(155220.000000,129924.000000,176450.000000,254.456532)}
{pt3dadd(154080.000000,129588.000000,176275.000000,308.300850)}
{pt3dadd(153840.000000,129636.000000,176200.000000,362.145168)}
{pt3dadd(153588.000000,129540.000000,176175.000000,415.989486)}
{pt3dadd(153324.000000,129648.000000,176125.000000,477.610497)}
{pt3dadd(153072.000000,129564.000000,176125.000000,539.231508)}
{pt3dadd(152832.000000,129300.000000,176350.000000,600.852519)}
{pt3dadd(152688.000000,129120.000000,176475.000000,662.473530)}
{pt3dadd(152412.000000,128940.000000,176550.000000,690.076674)}
{pt3dadd(152136.000000,128856.000000,176500.000000,690.076602)}

{create adhoc12}
{access adhoc12}
{connect adhoc12(1), adhoc11(0)}
{nseg = 1}
{strdef color color = "White"}
{pt3dclear()}
{pt3dadd(152136.000000,128856.000000,176500.000000,690.076602)}
{pt3dadd(151848.000000,128844.000000,176475.000000,662.473530)}
{pt3dadd(151572.000000,128868.000000,176375.000000,621.651992)}
{pt3dadd(151260.000000,129096.000000,176125.000000,580.830453)}
{pt3dadd(150972.000000,129348.000000,175900.000000,540.008914)}
{pt3dadd(150756.000000,129432.000000,175600.000000,499.187376)}
{pt3dadd(150468.000000,129276.000000,175450.000000,443.722116)}
{pt3dadd(150192.000000,129324.000000,175375.000000,388.256856)}
{pt3dadd(149940.000000,129288.000000,175200.000000,332.791596)}
{pt3dadd(149772.000000,129144.000000,175125.000000,288.881586)}

{create adhoc13}
{access adhoc13}
{connect adhoc13(1), adhoc12(0)}
{nseg = 1}
{strdef color color = "White"}
{pt3dclear()}
{pt3dadd(149772.000000,129144.000000,175125.000000,288.881586)}
{pt3dadd(149520.000000,129336.000000,175200.000000,200.612214)}
{pt3dadd(149196.000000,129492.000000,175150.000000,219.790746)}
{pt3dadd(148872.000000,129204.000000,174950.000000,238.969278)}
{pt3dadd(148632.000000,129144.000000,174950.000000,258.147810)}
{pt3dadd(148380.000000,129024.000000,174925.000000,277.326342)}
{pt3dadd(148116.000000,129072.000000,175025.000000,231.105276)}
{pt3dadd(147888.000000,128988.000000,175075.000000,167.176836)}

{create adhoc14}
{access adhoc14}
{connect adhoc14(1), adhoc12(0)}
{nseg = 1}
{strdef color color = "White"}
{pt3dclear()}
{pt3dadd(149772.000000,129144.000000,175125.000000,288.881586)}
{pt3dadd(149688.000000,129048.000000,174975.000000,319.479948)}
{pt3dadd(149880.000000,128820.000000,174700.000000,166.716936)}

{create adhoc15}
{access adhoc15}
{connect adhoc15(1), adhoc11(0)}
{nseg = 1}
{strdef color color = "White"}
{pt3dclear()}
{pt3dadd(152136.000000,128856.000000,176500.000000,690.076602)}
{pt3dadd(152064.000000,128976.000000,177000.000000,703.336968)}

{create adhoc16}
{access adhoc16}
{connect adhoc16(1), adhoc10(0)}
{nseg = 1}
{strdef color color = "White"}
{pt3dclear()}
{pt3dadd(157740.000000,131868.000000,178350.000000,718.829820)}
{pt3dadd(157284.000000,132492.000000,178325.000000,184.375584)}
{pt3dadd(157416.000000,132876.000000,178125.000000,235.668174)}
{pt3dadd(157344.000000,132948.000000,177800.000000,286.960764)}
{pt3dadd(157248.000000,133032.000000,177475.000000,338.253354)}
{pt3dadd(157212.000000,132996.000000,177175.000000,277.326324)}

{create adhoc17}
{access adhoc17}
{connect adhoc17(1), adhoc9(0)}
{nseg = 1}
{strdef color color = "White"}
{pt3dclear()}
{pt3dadd(157380.000000,131484.000000,178850.000000,862.595802)}
{pt3dadd(157884.000000,131868.000000,179300.000000,732.642732)}
{pt3dadd(157608.000000,131784.000000,179800.000000,693.248013)}
{pt3dadd(156900.000000,131700.000000,180075.000000,653.853294)}
{pt3dadd(156804.000000,131640.000000,180325.000000,614.458575)}
{pt3dadd(156768.000000,131724.000000,179825.000000,575.063856)}
{pt3dadd(156528.000000,131700.000000,179750.000000,463.395848)}
{pt3dadd(156132.000000,131748.000000,179575.000000,351.727839)}
{pt3dadd(155832.000000,131424.000000,179625.000000,240.059830)}
{pt3dadd(155604.000000,131160.000000,179900.000000,128.391822)}
{pt3dadd(155328.000000,130992.000000,179850.000000,112.568841)}
{pt3dadd(155064.000000,130704.000000,179825.000000,96.745860)}
{pt3dadd(154704.000000,130500.000000,179950.000000,44.789760)}

{create adhoc18}
{access adhoc18}
{connect adhoc18(1), adhoc4(0)}
{nseg = 1}
{strdef color color = "White"}
{pt3dclear()}
{pt3dadd(157104.000000,141036.000000,177600.000000,1648.445940)}
{pt3dadd(157380.000000,140436.000000,177600.000000,1519.207992)}
{pt3dadd(157920.000000,139776.000000,177600.000000,1079.676066)}
{pt3dadd(158076.000000,139800.000000,177200.000000,640.144140)}
{pt3dadd(158016.000000,139812.000000,176900.000000,200.612214)}
{pt3dadd(158004.000000,139944.000000,176600.000000,240.734646)}

{create adhoc19}
{access adhoc19}
{connect adhoc19(1), adhoc4(0)}
{nseg = 1}
{strdef color color = "White"}
{pt3dclear()}
{pt3dadd(157104.000000,141036.000000,177600.000000,1648.445940)}
{pt3dadd(157248.000000,141024.000000,177100.000000,1458.439596)}
{pt3dadd(157512.000000,141024.000000,176675.000000,1243.585917)}
{pt3dadd(157908.000000,141024.000000,176225.000000,1028.732238)}
{pt3dadd(158196.000000,141024.000000,175725.000000,813.878559)}
{pt3dadd(158556.000000,140688.000000,175625.000000,599.024880)}
{pt3dadd(158640.000000,140388.000000,175525.000000,574.065504)}
{pt3dadd(158664.000000,140184.000000,175350.000000,549.106128)}
{pt3dadd(158628.000000,139980.000000,175150.000000,524.146752)}
{pt3dadd(158652.000000,139860.000000,174850.000000,499.187376)}
{pt3dadd(158808.000000,139596.000000,174750.000000,461.055006)}
{pt3dadd(158976.000000,139284.000000,174425.000000,422.922636)}
{pt3dadd(159708.000000,138948.000000,174100.000000,384.790266)}
{pt3dadd(160032.000000,138924.000000,173750.000000,346.657896)}
{pt3dadd(160320.000000,139116.000000,173300.000000,286.830876)}
{pt3dadd(160356.000000,139368.000000,173000.000000,227.003856)}
{pt3dadd(160008.000000,139536.000000,172650.000000,167.176836)}
{pt3dadd(159996.000000,139812.000000,172325.000000,67.184640)}

{create adhoc20}
{access adhoc20}
{connect adhoc20(1), adhoc3(0)}
{nseg = 1}
{strdef color color = "White"}
{pt3dclear()}
{pt3dadd(157284.000000,141984.000000,177175.000000,1373.705208)}
{pt3dadd(156372.000000,141528.000000,177050.000000,1242.137880)}
{pt3dadd(155664.000000,141216.000000,177050.000000,1046.616188)}
{pt3dadd(155316.000000,140784.000000,176700.000000,851.094495)}
{pt3dadd(154980.000000,140856.000000,176375.000000,655.572803)}
{pt3dadd(154644.000000,140760.000000,176300.000000,460.051110)}
{pt3dadd(154296.000000,140700.000000,176075.000000,405.221994)}
{pt3dadd(153936.000000,140472.000000,176100.000000,350.392878)}
{pt3dadd(153612.000000,140100.000000,176025.000000,295.563762)}
{pt3dadd(153324.000000,139728.000000,176025.000000,240.734646)}
{pt3dadd(153012.000000,139584.000000,175975.000000,284.548356)}
{pt3dadd(152724.000000,139440.000000,175925.000000,328.362066)}
{pt3dadd(152424.000000,139440.000000,175875.000000,372.175776)}
{pt3dadd(152088.000000,139380.000000,176000.000000,415.989486)}
{pt3dadd(151800.000000,139344.000000,175975.000000,436.788958)}
{pt3dadd(151404.000000,139224.000000,176025.000000,457.588431)}
{pt3dadd(151008.000000,139296.000000,176125.000000,478.387903)}
{pt3dadd(150648.000000,139368.000000,176125.000000,499.187376)}
{pt3dadd(150300.000000,139140.000000,176025.000000,454.260519)}
{pt3dadd(149952.000000,139020.000000,175775.000000,409.333662)}
{pt3dadd(149592.000000,138588.000000,175725.000000,364.406805)}
{pt3dadd(149268.000000,138132.000000,175675.000000,319.479948)}
{pt3dadd(148992.000000,137676.000000,175650.000000,379.382424)}
{pt3dadd(148740.000000,137196.000000,175350.000000,439.284900)}
{pt3dadd(148416.000000,136764.000000,175175.000000,499.187376)}
{pt3dadd(148392.000000,136620.000000,174800.000000,479.219886)}

{create adhoc21}
{access adhoc21}
{connect adhoc21(1), adhoc20(0)}
{nseg = 1}
{strdef color color = "White"}
{pt3dclear()}
{pt3dadd(148392.000000,136620.000000,174800.000000,479.219886)}
{pt3dadd(148368.000000,136416.000000,174625.000000,499.187376)}
{pt3dadd(149460.000000,135816.000000,174225.000000,540.008932)}
{pt3dadd(149568.000000,135048.000000,173925.000000,580.830489)}
{pt3dadd(149508.000000,134280.000000,173350.000000,621.652045)}
{pt3dadd(149268.000000,134184.000000,172575.000000,662.473602)}
{pt3dadd(149280.000000,133920.000000,172500.000000,640.621165)}
{pt3dadd(149220.000000,133584.000000,172525.000000,618.768729)}
{pt3dadd(149184.000000,133236.000000,172475.000000,596.916293)}
{pt3dadd(149148.000000,132948.000000,172500.000000,575.063856)}
{pt3dadd(149196.000000,132576.000000,172475.000000,463.620786)}
{pt3dadd(149472.000000,132252.000000,172425.000000,352.177716)}
{pt3dadd(149748.000000,131916.000000,172350.000000,240.734646)}
{pt3dadd(149940.000000,131664.000000,172375.000000,90.874296)}

{create adhoc22}
{access adhoc22}
{connect adhoc22(1), adhoc20(0)}
{nseg = 1}
{strdef color color = "White"}
{pt3dclear()}
{pt3dadd(148392.000000,136620.000000,174800.000000,479.219886)}
{pt3dadd(148212.000000,137088.000000,174800.000000,479.219886)}
{pt3dadd(147948.000000,137616.000000,174800.000000,509.171134)}
{pt3dadd(148284.000000,137808.000000,174300.000000,539.122383)}
{pt3dadd(148368.000000,137580.000000,173900.000000,569.073631)}
{pt3dadd(148260.000000,137292.000000,173425.000000,599.024880)}
{pt3dadd(147948.000000,136812.000000,172975.000000,747.381748)}
{pt3dadd(147612.000000,136464.000000,172650.000000,895.738617)}
{pt3dadd(147492.000000,136380.000000,172325.000000,1044.095486)}
{pt3dadd(147600.000000,136224.000000,171850.000000,1192.452354)}
{pt3dadd(147552.000000,136056.000000,171450.000000,1204.873736)}
{pt3dadd(147348.000000,135912.000000,171125.000000,1217.295117)}
{pt3dadd(147120.000000,135960.000000,170775.000000,1229.716498)}
{pt3dadd(147108.000000,136044.000000,170375.000000,1242.137880)}
{pt3dadd(146928.000000,135756.000000,169800.000000,794.397888)}
{pt3dadd(146700.000000,135276.000000,169450.000000,346.657896)}
{pt3dadd(146784.000000,135192.000000,169125.000000,150.749532)}

{create adhoc23}
{access adhoc23}
{connect adhoc23(1), adhoc2(0)}
{nseg = 1}
{strdef color color = "White"}
{pt3dclear()}
{pt3dadd(192660.000000,194832.000000,102100.000000,1192.452480)}
{pt3dadd(192780.000000,194652.000000,101775.000000,1144.754316)}
{pt3dadd(192348.000000,194040.000000,101450.000000,1106.993327)}
{pt3dadd(192240.000000,193236.000000,101200.000000,1069.232337)}
{pt3dadd(192036.000000,192984.000000,101250.000000,1031.471348)}
{pt3dadd(191940.000000,192696.000000,101200.000000,993.710358)}
{pt3dadd(191772.000000,192408.000000,101100.000000,960.931719)}
{pt3dadd(191940.000000,192204.000000,101100.000000,928.153080)}
{pt3dadd(191904.000000,191940.000000,101100.000000,895.374441)}
{pt3dadd(191892.000000,191628.000000,101000.000000,862.595802)}
{pt3dadd(191844.000000,191340.000000,100850.000000,853.969838)}
{pt3dadd(191964.000000,191112.000000,100700.000000,845.343873)}
{pt3dadd(192156.000000,190836.000000,100600.000000,836.717909)}
{pt3dadd(192288.000000,190584.000000,100650.000000,828.091944)}
{pt3dadd(192240.000000,190308.000000,100475.000000,836.717909)}
{pt3dadd(192276.000000,190080.000000,100300.000000,845.343873)}
{pt3dadd(192264.000000,189840.000000,100250.000000,853.969838)}
{pt3dadd(192324.000000,189648.000000,100275.000000,862.595802)}
{pt3dadd(192348.000000,189360.000000,100225.000000,826.654307)}
{pt3dadd(192300.000000,189084.000000,100000.000000,790.712811)}
{pt3dadd(192300.000000,188844.000000,99875.000000,754.771316)}
{pt3dadd(192420.000000,188592.000000,99775.000000,718.829820)}
{pt3dadd(192540.000000,188376.000000,99750.000000,688.878585)}
{pt3dadd(192492.000000,188052.000000,99525.000000,658.927350)}
{pt3dadd(192492.000000,187764.000000,99250.000000,628.976115)}
{pt3dadd(192396.000000,187488.000000,99175.000000,599.024880)}
{pt3dadd(192432.000000,187224.000000,99100.000000,628.976115)}
{pt3dadd(192660.000000,186996.000000,99025.000000,658.927350)}
{pt3dadd(192924.000000,186732.000000,98975.000000,688.878585)}
{pt3dadd(193176.000000,186468.000000,98825.000000,718.829820)}
{pt3dadd(193272.000000,186204.000000,98675.000000,718.829820)}
{pt3dadd(193596.000000,185928.000000,98200.000000,828.092016)}

{create adhoc24}
{access adhoc24}
{connect adhoc24(1), adhoc23(0)}
{nseg = 1}
{strdef color color = "White"}
{pt3dclear()}
{pt3dadd(193596.000000,185928.000000,98200.000000,828.092016)}
{pt3dadd(194184.000000,185928.000000,97650.000000,862.595802)}
{pt3dadd(194484.000000,185928.000000,97100.000000,826.654307)}
{pt3dadd(194280.000000,186204.000000,96525.000000,790.712811)}
{pt3dadd(194280.000000,186276.000000,96325.000000,754.771316)}
{pt3dadd(194268.000000,186360.000000,95875.000000,718.829820)}
{pt3dadd(194400.000000,186384.000000,95475.000000,746.145369)}
{pt3dadd(194556.000000,186348.000000,95250.000000,773.460918)}
{pt3dadd(194808.000000,186600.000000,94825.000000,800.776467)}
{pt3dadd(194964.000000,186756.000000,94475.000000,828.092016)}
{pt3dadd(194952.000000,186828.000000,94100.000000,836.717962)}
{pt3dadd(194952.000000,186960.000000,93725.000000,845.343909)}
{pt3dadd(195084.000000,187116.000000,93400.000000,853.969856)}
{pt3dadd(195204.000000,187248.000000,93050.000000,862.595802)}
{pt3dadd(195228.000000,187416.000000,92750.000000,910.698241)}
{pt3dadd(195300.000000,187548.000000,92400.000000,958.800681)}
{pt3dadd(195456.000000,187632.000000,92050.000000,1006.903121)}
{pt3dadd(195480.000000,187764.000000,91750.000000,1055.005560)}
{pt3dadd(195360.000000,187764.000000,91450.000000,1163.895521)}
{pt3dadd(195360.000000,187680.000000,91150.000000,1272.785481)}
{pt3dadd(195276.000000,187752.000000,90850.000000,1381.675442)}
{pt3dadd(195240.000000,187836.000000,90550.000000,1490.565402)}
{pt3dadd(195204.000000,187944.000000,90250.000000,1470.691224)}
{pt3dadd(195204.000000,187992.000000,89975.000000,1450.817046)}
{pt3dadd(195204.000000,188076.000000,89675.000000,1430.942868)}
{pt3dadd(195168.000000,188124.000000,89375.000000,1490.565402)}

{create adhoc25}
{access adhoc25}
{connect adhoc25(1), adhoc24(0)}
{nseg = 1}
{strdef color color = "White"}
{pt3dclear()}
{pt3dadd(195168.000000,188124.000000,89375.000000,1490.565402)}
{pt3dadd(195072.000000,188292.000000,89050.000000,1242.137880)}
{pt3dadd(194844.000000,188568.000000,88800.000000,1242.137880)}
{pt3dadd(194652.000000,188760.000000,88550.000000,1242.137880)}
{pt3dadd(194328.000000,189072.000000,88275.000000,1242.137880)}
{pt3dadd(194376.000000,189204.000000,87975.000000,1242.137880)}
{pt3dadd(194280.000000,189168.000000,87675.000000,1114.764125)}
{pt3dadd(194112.000000,189240.000000,87425.000000,987.390369)}
{pt3dadd(194052.000000,189156.000000,87275.000000,860.016613)}
{pt3dadd(193884.000000,189324.000000,86975.000000,732.642858)}
{pt3dadd(193932.000000,189552.000000,86625.000000,674.278987)}
{pt3dadd(193896.000000,189744.000000,86600.000000,615.915117)}
{pt3dadd(193800.000000,189936.000000,86425.000000,557.551247)}
{pt3dadd(193560.000000,190128.000000,86075.000000,499.187376)}
{pt3dadd(193248.000000,190860.000000,85725.000000,590.039483)}
{pt3dadd(192840.000000,191088.000000,85450.000000,680.891589)}
{pt3dadd(192384.000000,191496.000000,85175.000000,771.743696)}
{pt3dadd(192072.000000,191712.000000,84850.000000,862.595802)}
{pt3dadd(191724.000000,192048.000000,84600.000000,828.092016)}

{create adhoc26}
{access adhoc26}
{connect adhoc26(1), adhoc25(0)}
{nseg = 1}
{strdef color color = "White"}
{pt3dclear()}
{pt3dadd(191724.000000,192048.000000,84600.000000,828.092016)}
{pt3dadd(191460.000000,192252.000000,84500.000000,828.092016)}
{pt3dadd(191088.000000,192480.000000,84075.000000,800.776467)}
{pt3dadd(190692.000000,192744.000000,83750.000000,773.460918)}
{pt3dadd(190380.000000,192972.000000,83625.000000,746.145369)}
{pt3dadd(190176.000000,193236.000000,83450.000000,718.829820)}
{pt3dadd(189864.000000,193464.000000,83150.000000,754.771316)}
{pt3dadd(189804.000000,193668.000000,83025.000000,790.712811)}
{pt3dadd(189684.000000,193920.000000,82875.000000,826.654307)}
{pt3dadd(189564.000000,194136.000000,82725.000000,862.595802)}
{pt3dadd(189420.000000,194364.000000,82525.000000,837.739238)}
{pt3dadd(189252.000000,194544.000000,82275.000000,812.882673)}
{pt3dadd(189168.000000,194796.000000,82275.000000,788.026109)}
{pt3dadd(189048.000000,195012.000000,82200.000000,763.169544)}
{pt3dadd(188964.000000,195204.000000,81975.000000,771.119217)}
{pt3dadd(188868.000000,195468.000000,81925.000000,779.068890)}
{pt3dadd(188688.000000,195696.000000,81850.000000,787.018563)}
{pt3dadd(188652.000000,195888.000000,81800.000000,794.968236)}
{pt3dadd(188412.000000,196116.000000,81700.000000,739.992141)}
{pt3dadd(188244.000000,196332.000000,81575.000000,685.016046)}
{pt3dadd(188040.000000,196488.000000,81500.000000,630.039951)}
{pt3dadd(187812.000000,196680.000000,81350.000000,575.063856)}
{pt3dadd(187668.000000,196884.000000,81250.000000,535.295264)}
{pt3dadd(187272.000000,197088.000000,81150.000000,495.526671)}
{pt3dadd(187068.000000,197244.000000,81125.000000,455.758079)}
{pt3dadd(186756.000000,197460.000000,81025.000000,415.989486)}
{pt3dadd(186516.000000,197664.000000,81025.000000,381.323696)}
{pt3dadd(186144.000000,197880.000000,81000.000000,346.657905)}
{pt3dadd(185712.000000,198072.000000,80900.000000,311.992115)}
{pt3dadd(185256.000000,198264.000000,80700.000000,277.326324)}
{pt3dadd(185040.000000,198480.000000,80625.000000,387.702198)}
{pt3dadd(184776.000000,198660.000000,80475.000000,498.078072)}
{pt3dadd(184740.000000,198888.000000,80450.000000,608.453946)}
{pt3dadd(184560.000000,199116.000000,80375.000000,718.829820)}
{pt3dadd(184332.000000,199308.000000,80300.000000,704.740765)}
{pt3dadd(184104.000000,199488.000000,80250.000000,690.651711)}
{pt3dadd(184020.000000,199656.000000,80125.000000,676.562656)}
{pt3dadd(183888.000000,199836.000000,79900.000000,662.473602)}
{pt3dadd(183768.000000,200040.000000,79675.000000,676.562656)}
{pt3dadd(183684.000000,200244.000000,79425.000000,690.651711)}
{pt3dadd(183684.000000,200436.000000,79350.000000,704.740765)}
{pt3dadd(183732.000000,200616.000000,78975.000000,718.829820)}
{pt3dadd(183900.000000,200856.000000,78675.000000,825.310926)}
{pt3dadd(183780.000000,201036.000000,78425.000000,931.792032)}
{pt3dadd(183720.000000,201276.000000,78350.000000,1038.273138)}
{pt3dadd(183600.000000,201516.000000,78000.000000,1144.754244)}
{pt3dadd(183396.000000,201744.000000,77750.000000,1117.344420)}
{pt3dadd(183216.000000,201972.000000,77425.000000,1089.934596)}
{pt3dadd(183048.000000,202152.000000,77175.000000,1062.524772)}
{pt3dadd(182868.000000,202368.000000,76850.000000,1035.114948)}
{pt3dadd(182688.000000,202560.000000,76500.000000,1024.763801)}
{pt3dadd(182520.000000,202752.000000,76125.000000,1014.412653)}
{pt3dadd(182256.000000,202980.000000,75975.000000,1004.061506)}
{pt3dadd(181740.000000,203136.000000,75700.000000,993.710358)}
{pt3dadd(181500.000000,203352.000000,75400.000000,1004.061506)}
{pt3dadd(181176.000000,203808.000000,75050.000000,1014.412653)}
{pt3dadd(180828.000000,204024.000000,74675.000000,1024.763801)}
{pt3dadd(180624.000000,204084.000000,74275.000000,1035.114948)}
{pt3dadd(180252.000000,204192.000000,73900.000000,991.985162)}
{pt3dadd(179796.000000,204336.000000,73550.000000,948.855375)}
{pt3dadd(179316.000000,204420.000000,73175.000000,905.725589)}
{pt3dadd(178740.000000,204552.000000,72800.000000,862.595802)}
{pt3dadd(178224.000000,204780.000000,72525.000000,862.595802)}
{pt3dadd(177900.000000,204720.000000,72250.000000,862.595802)}
{pt3dadd(177408.000000,205116.000000,72025.000000,862.595802)}
{pt3dadd(177012.000000,205416.000000,71800.000000,862.595802)}
{pt3dadd(176688.000000,205824.000000,71500.000000,796.703072)}
{pt3dadd(176508.000000,205872.000000,71475.000000,730.810341)}
{pt3dadd(176304.000000,206040.000000,71400.000000,664.917611)}
{pt3dadd(176076.000000,206208.000000,71325.000000,599.024880)}
{pt3dadd(175848.000000,206364.000000,71175.000000,599.024880)}
{pt3dadd(175632.000000,206496.000000,71075.000000,599.024880)}
{pt3dadd(175476.000000,206604.000000,71025.000000,599.024880)}
{pt3dadd(175272.000000,206688.000000,70975.000000,599.024880)}
{pt3dadd(175056.000000,206676.000000,70925.000000,601.902576)}
{pt3dadd(174876.000000,206892.000000,70825.000000,604.780272)}
{pt3dadd(174660.000000,207000.000000,70800.000000,607.657968)}
{pt3dadd(174432.000000,207156.000000,70900.000000,610.535664)}
{pt3dadd(174216.000000,207312.000000,70825.000000,607.657968)}
{pt3dadd(174024.000000,207528.000000,70900.000000,604.780272)}
{pt3dadd(173796.000000,207516.000000,70775.000000,601.902576)}
{pt3dadd(173604.000000,207564.000000,70700.000000,599.024880)}
{pt3dadd(173388.000000,207864.000000,70625.000000,574.065504)}
{pt3dadd(173160.000000,207804.000000,70650.000000,549.106128)}
{pt3dadd(172980.000000,207888.000000,70575.000000,524.146752)}
{pt3dadd(172704.000000,207972.000000,70625.000000,499.187376)}
{pt3dadd(172488.000000,207876.000000,70475.000000,499.187376)}
{pt3dadd(172308.000000,207960.000000,70425.000000,499.187376)}
{pt3dadd(172056.000000,208044.000000,70450.000000,499.187376)}
{pt3dadd(171828.000000,208128.000000,70475.000000,499.187376)}
{pt3dadd(171636.000000,208236.000000,70475.000000,499.187376)}
{pt3dadd(171372.000000,208320.000000,70475.000000,499.187376)}
{pt3dadd(171156.000000,208344.000000,70525.000000,499.187376)}
{pt3dadd(170940.000000,208392.000000,70525.000000,499.187376)}
{pt3dadd(170712.000000,208440.000000,70475.000000,524.146752)}
{pt3dadd(170424.000000,208524.000000,70450.000000,549.106128)}
{pt3dadd(170184.000000,208572.000000,70425.000000,574.065504)}
{pt3dadd(169968.000000,208620.000000,70450.000000,599.024880)}
{pt3dadd(169716.000000,208668.000000,70525.000000,564.281437)}
{pt3dadd(169488.000000,208752.000000,70425.000000,529.537995)}
{pt3dadd(169272.000000,208692.000000,70425.000000,494.794553)}
{pt3dadd(169092.000000,208740.000000,70450.000000,460.051110)}
{pt3dadd(168912.000000,208728.000000,70525.000000,488.804296)}
{pt3dadd(168696.000000,208692.000000,70625.000000,517.557483)}
{pt3dadd(168504.000000,208656.000000,70675.000000,546.310670)}
{pt3dadd(168312.000000,208620.000000,70725.000000,575.063856)}
{pt3dadd(168120.000000,208476.000000,70675.000000,556.094736)}
{pt3dadd(167904.000000,208584.000000,70800.000000,537.125616)}
{pt3dadd(167736.000000,208572.000000,70750.000000,518.156496)}
{pt3dadd(167544.000000,208488.000000,70750.000000,499.187376)}
{pt3dadd(167364.000000,208452.000000,70775.000000,494.195504)}
{pt3dadd(167196.000000,208440.000000,70750.000000,489.203631)}
{pt3dadd(167028.000000,208464.000000,70775.000000,484.211758)}
{pt3dadd(166836.000000,208368.000000,70725.000000,479.219886)}
{pt3dadd(166656.000000,208308.000000,70675.000000,469.827184)}
{pt3dadd(166440.000000,208272.000000,70700.000000,460.434483)}
{pt3dadd(166188.000000,208188.000000,70600.000000,451.041781)}
{pt3dadd(165960.000000,208104.000000,70500.000000,441.649080)}
{pt3dadd(165732.000000,208260.000000,70450.000000,456.033654)}
{pt3dadd(165528.000000,208200.000000,70475.000000,470.418228)}
{pt3dadd(165324.000000,208272.000000,70350.000000,484.802802)}
{pt3dadd(165132.000000,208260.000000,70325.000000,499.187376)}
{pt3dadd(164952.000000,208344.000000,70350.000000,499.187376)}
{pt3dadd(164748.000000,208344.000000,70250.000000,499.187376)}
{pt3dadd(164556.000000,208344.000000,70250.000000,499.187376)}
{pt3dadd(164352.000000,208416.000000,70200.000000,499.187376)}
{pt3dadd(164076.000000,208320.000000,70050.000000,524.146752)}
{pt3dadd(163848.000000,208284.000000,69925.000000,549.106128)}
{pt3dadd(163620.000000,208272.000000,69925.000000,574.065504)}
{pt3dadd(163404.000000,208320.000000,69850.000000,599.024880)}
{pt3dadd(163188.000000,208308.000000,69900.000000,574.065504)}
{pt3dadd(162948.000000,208416.000000,69875.000000,549.106128)}
{pt3dadd(162696.000000,208668.000000,70075.000000,524.146752)}
{pt3dadd(162456.000000,208632.000000,69925.000000,499.187376)}
{pt3dadd(162204.000000,208764.000000,69925.000000,609.008598)}
{pt3dadd(161988.000000,208752.000000,69875.000000,718.829820)}
{pt3dadd(161784.000000,208980.000000,69950.000000,635.974632)}

{create adhoc27}
{access adhoc27}
{connect adhoc27(1), adhoc26(0)}
{nseg = 1}
{strdef color color = "White"}
{pt3dclear()}
{pt3dadd(161784.000000,208980.000000,69950.000000,635.974632)}
{pt3dadd(161976.000000,208608.000000,69750.000000,415.989486)}
{pt3dadd(162132.000000,208236.000000,69525.000000,369.768434)}
{pt3dadd(162336.000000,208032.000000,69325.000000,323.547381)}
{pt3dadd(161028.000000,207840.000000,69125.000000,277.326328)}
{pt3dadd(160260.000000,207696.000000,68875.000000,231.105276)}
{pt3dadd(159624.000000,207384.000000,68625.000000,259.993431)}
{pt3dadd(159084.000000,207240.000000,68475.000000,288.881586)}
{pt3dadd(158988.000000,206928.000000,68200.000000,288.881586)}

{create adhoc28}
{access adhoc28}
{connect adhoc28(1), adhoc27(0)}
{nseg = 1}
{strdef color color = "White"}
{pt3dclear()}
{pt3dadd(158988.000000,206928.000000,68200.000000,288.881586)}
{pt3dadd(159108.000000,206568.000000,68200.000000,266.233266)}
{pt3dadd(159096.000000,206376.000000,68400.000000,80.621550)}
{pt3dadd(159108.000000,206184.000000,68525.000000,55.987200)}

{create adhoc29}
{access adhoc29}
{connect adhoc29(1), adhoc27(0)}
{nseg = 1}
{strdef color color = "White"}
{pt3dclear()}
{pt3dadd(158988.000000,206928.000000,68200.000000,288.881586)}
{pt3dadd(158760.000000,206580.000000,67925.000000,167.176836)}

{create adhoc30}
{access adhoc30}
{connect adhoc30(1), adhoc29(0)}
{nseg = 1}
{strdef color color = "White"}
{pt3dclear()}
{pt3dadd(158760.000000,206580.000000,67925.000000,167.176836)}
{pt3dadd(158604.000000,206928.000000,67825.000000,277.326324)}
{pt3dadd(158184.000000,207012.000000,67750.000000,268.178405)}
{pt3dadd(157680.000000,207132.000000,67700.000000,259.030485)}
{pt3dadd(157464.000000,207132.000000,67525.000000,249.882566)}
{pt3dadd(157188.000000,206988.000000,67350.000000,240.734646)}
{pt3dadd(157032.000000,206772.000000,67100.000000,238.327304)}
{pt3dadd(156696.000000,206544.000000,66925.000000,235.919961)}
{pt3dadd(156552.000000,206424.000000,66800.000000,233.512618)}
{pt3dadd(156492.000000,206220.000000,66600.000000,231.105276)}
{pt3dadd(156420.000000,206136.000000,66450.000000,220.940922)}
{pt3dadd(156156.000000,205968.000000,66200.000000,210.776568)}
{pt3dadd(155952.000000,205908.000000,65975.000000,200.612214)}
{pt3dadd(155760.000000,205776.000000,65625.000000,49.533894)}

{create adhoc31}
{access adhoc31}
{connect adhoc31(1), adhoc29(0)}
{nseg = 1}
{strdef color color = "White"}
{pt3dclear()}
{pt3dadd(158760.000000,206580.000000,67925.000000,167.176836)}
{pt3dadd(158628.000000,205980.000000,67725.000000,240.734646)}
{pt3dadd(158544.000000,205524.000000,67550.000000,267.215459)}
{pt3dadd(158448.000000,204972.000000,67300.000000,293.696271)}
{pt3dadd(158208.000000,204516.000000,67100.000000,320.177083)}
{pt3dadd(157968.000000,203976.000000,66875.000000,346.657896)}
{pt3dadd(157800.000000,203748.000000,66600.000000,381.323691)}
{pt3dadd(157776.000000,203256.000000,66350.000000,415.989486)}
{pt3dadd(157896.000000,202764.000000,66100.000000,415.989486)}

{create adhoc32}
{access adhoc32}
{connect adhoc32(1), adhoc31(0)}
{nseg = 1}
{strdef color color = "White"}
{pt3dclear()}
{pt3dadd(157896.000000,202764.000000,66100.000000,415.989486)}
{pt3dadd(157728.000000,203076.000000,65900.000000,240.734646)}
{pt3dadd(157608.000000,203076.000000,65625.000000,220.673426)}
{pt3dadd(157452.000000,203232.000000,65400.000000,200.612205)}
{pt3dadd(157380.000000,203112.000000,65150.000000,180.550985)}
{pt3dadd(157332.000000,203016.000000,64850.000000,160.489764)}
{pt3dadd(157356.000000,202848.000000,64525.000000,168.514254)}
{pt3dadd(157368.000000,202740.000000,64275.000000,176.538744)}
{pt3dadd(157464.000000,202536.000000,64125.000000,184.563234)}
{pt3dadd(157548.000000,202416.000000,64125.000000,192.587724)}
{pt3dadd(157608.000000,202248.000000,63925.000000,216.661190)}
{pt3dadd(157716.000000,201984.000000,63625.000000,240.734655)}
{pt3dadd(157788.000000,201600.000000,63375.000000,264.808120)}
{pt3dadd(157908.000000,201300.000000,63125.000000,288.881586)}
{pt3dadd(157956.000000,201084.000000,62850.000000,256.783631)}
{pt3dadd(158040.000000,200892.000000,62525.000000,224.685675)}
{pt3dadd(158040.000000,200688.000000,62275.000000,192.587720)}
{pt3dadd(158040.000000,200472.000000,62025.000000,160.489764)}
{pt3dadd(157908.000000,200340.000000,61800.000000,189.698908)}
{pt3dadd(158004.000000,200136.000000,61650.000000,218.908053)}
{pt3dadd(158064.000000,199944.000000,61425.000000,248.117198)}
{pt3dadd(158100.000000,199752.000000,61250.000000,277.326342)}
{pt3dadd(158100.000000,199584.000000,61175.000000,258.147810)}
{pt3dadd(158124.000000,199404.000000,61100.000000,238.969278)}
{pt3dadd(158148.000000,199188.000000,60925.000000,219.790746)}
{pt3dadd(158244.000000,198996.000000,60825.000000,200.612214)}
{pt3dadd(158232.000000,198804.000000,60700.000000,222.679557)}
{pt3dadd(158340.000000,198648.000000,60575.000000,244.746900)}
{pt3dadd(158304.000000,198264.000000,60275.000000,266.814243)}
{pt3dadd(158496.000000,197604.000000,60025.000000,288.881586)}
{pt3dadd(158532.000000,197376.000000,59825.000000,266.814243)}
{pt3dadd(158544.000000,197136.000000,59600.000000,244.746900)}
{pt3dadd(158316.000000,196836.000000,59450.000000,222.679557)}
{pt3dadd(158244.000000,196524.000000,59250.000000,200.612214)}
{pt3dadd(158196.000000,196212.000000,58950.000000,222.679557)}
{pt3dadd(158244.000000,195768.000000,58575.000000,244.746900)}
{pt3dadd(158256.000000,195504.000000,58250.000000,266.814243)}
{pt3dadd(158292.000000,195216.000000,57850.000000,288.881586)}
{pt3dadd(158304.000000,195012.000000,57550.000000,251.489700)}
{pt3dadd(158328.000000,194592.000000,57125.000000,214.097814)}
{pt3dadd(158436.000000,194160.000000,56875.000000,176.705928)}
{pt3dadd(158580.000000,193488.000000,56675.000000,139.314042)}
{pt3dadd(158604.000000,193164.000000,56650.000000,152.632463)}
{pt3dadd(158532.000000,192888.000000,56575.000000,165.950883)}
{pt3dadd(158280.000000,192576.000000,56375.000000,179.269304)}
{pt3dadd(158148.000000,192252.000000,56125.000000,192.587724)}
{pt3dadd(158208.000000,192000.000000,56000.000000,167.090160)}
{pt3dadd(158148.000000,191796.000000,55975.000000,141.592596)}
{pt3dadd(158088.000000,191532.000000,56000.000000,116.095032)}
{pt3dadd(158028.000000,191328.000000,56000.000000,139.314042)}

{create adhoc33}
{access adhoc33}
{connect adhoc33(1), adhoc31(0)}
{nseg = 1}
{strdef color color = "White"}
{pt3dclear()}
{pt3dadd(157896.000000,202764.000000,66100.000000,415.989486)}
{pt3dadd(158124.000000,202560.000000,66000.000000,415.989486)}
{pt3dadd(158280.000000,202080.000000,66075.000000,372.175776)}
{pt3dadd(158448.000000,201708.000000,66000.000000,328.362066)}
{pt3dadd(158604.000000,201384.000000,65875.000000,284.548356)}
{pt3dadd(158580.000000,201024.000000,65725.000000,240.734646)}
{pt3dadd(158652.000000,200748.000000,65575.000000,139.314042)}
{pt3dadd(158760.000000,200448.000000,65400.000000,96.745860)}

{create adhoc34}
{access adhoc34}
{connect adhoc34(1), adhoc33(0)}
{nseg = 1}
{strdef color color = "White"}
{pt3dclear()}
{pt3dadd(158760.000000,200448.000000,65400.000000,96.745860)}
{pt3dadd(159072.000000,200400.000000,65650.000000,116.095032)}
{pt3dadd(159420.000000,200196.000000,65750.000000,141.635934)}
{pt3dadd(159708.000000,200028.000000,65875.000000,167.176836)}
{pt3dadd(160092.000000,199992.000000,66000.000000,116.095032)}

{create adhoc35}
{access adhoc35}
{connect adhoc35(1), adhoc33(0)}
{nseg = 1}
{strdef color color = "White"}
{pt3dclear()}
{pt3dadd(158760.000000,200448.000000,65400.000000,96.745860)}
{pt3dadd(159096.000000,199932.000000,65325.000000,139.314042)}
{pt3dadd(159180.000000,199560.000000,65325.000000,139.314042)}
{pt3dadd(159144.000000,199248.000000,65325.000000,139.314042)}
{pt3dadd(159156.000000,198948.000000,65325.000000,139.314042)}
{pt3dadd(159204.000000,198528.000000,65100.000000,139.314042)}
{pt3dadd(159420.000000,198156.000000,64950.000000,139.314042)}
{pt3dadd(159444.000000,197940.000000,64750.000000,139.314042)}
{pt3dadd(159420.000000,197724.000000,64500.000000,139.314042)}
{pt3dadd(159456.000000,197448.000000,64250.000000,139.314042)}
{pt3dadd(159456.000000,197124.000000,64075.000000,133.509289)}
{pt3dadd(159564.000000,196824.000000,64075.000000,127.704537)}
{pt3dadd(159708.000000,196536.000000,64075.000000,121.899785)}
{pt3dadd(159852.000000,196164.000000,64025.000000,116.095032)}
{pt3dadd(159912.000000,195648.000000,63875.000000,121.899785)}
{pt3dadd(159912.000000,195264.000000,63875.000000,127.704537)}
{pt3dadd(159996.000000,194940.000000,63725.000000,133.509289)}
{pt3dadd(160092.000000,194544.000000,63450.000000,139.314042)}
{pt3dadd(160164.000000,194088.000000,63250.000000,133.509289)}
{pt3dadd(160284.000000,193380.000000,63025.000000,127.704537)}
{pt3dadd(160296.000000,193200.000000,62650.000000,121.899785)}
{pt3dadd(160428.000000,192828.000000,62350.000000,116.095032)}
{pt3dadd(160548.000000,192456.000000,61850.000000,80.621550)}

{create adhoc36}
{access adhoc36}
{connect adhoc36(1), adhoc26(0)}
{nseg = 1}
{strdef color color = "White"}
{pt3dclear()}
{pt3dadd(161784.000000,208980.000000,69950.000000,635.974632)}
{pt3dadd(161604.000000,209256.000000,70075.000000,599.024880)}
{pt3dadd(161412.000000,209784.000000,70075.000000,575.063856)}

{create adhoc37}
{access adhoc37}
{connect adhoc37(1), adhoc36(0)}
{nseg = 1}
{strdef color color = "White"}
{pt3dclear()}
{pt3dadd(161412.000000,209784.000000,70075.000000,575.063856)}
{pt3dadd(161496.000000,209832.000000,70650.000000,599.024880)}
{pt3dadd(161196.000000,209796.000000,70850.000000,499.421713)}
{pt3dadd(160920.000000,209952.000000,70975.000000,399.818547)}
{pt3dadd(160776.000000,210048.000000,71200.000000,300.215380)}
{pt3dadd(160644.000000,210180.000000,71425.000000,200.612214)}
{pt3dadd(160452.000000,210300.000000,71625.000000,211.799304)}
{pt3dadd(160440.000000,210444.000000,71950.000000,222.986394)}
{pt3dadd(160572.000000,210648.000000,72300.000000,234.173484)}
{pt3dadd(160752.000000,210732.000000,72650.000000,245.360574)}
{pt3dadd(160932.000000,210732.000000,73025.000000,244.204092)}
{pt3dadd(161400.000000,210720.000000,73475.000000,243.047610)}
{pt3dadd(161472.000000,210372.000000,73900.000000,241.891128)}
{pt3dadd(161328.000000,210096.000000,74100.000000,240.734646)}
{pt3dadd(161256.000000,210048.000000,74350.000000,235.919943)}
{pt3dadd(161484.000000,210060.000000,74625.000000,231.105240)}
{pt3dadd(161700.000000,210096.000000,74675.000000,167.176836)}

{create adhoc38}
{access adhoc38}
{connect adhoc38(1), adhoc36(0)}
{nseg = 1}
{strdef color color = "White"}
{pt3dclear()}
{pt3dadd(161412.000000,209784.000000,70075.000000,575.063856)}
{pt3dadd(161244.000000,210060.000000,70125.000000,415.989486)}
{pt3dadd(161040.000000,210252.000000,70000.000000,411.829591)}
{pt3dadd(160860.000000,210444.000000,69850.000000,407.669697)}
{pt3dadd(160668.000000,210720.000000,69875.000000,403.509803)}
{pt3dadd(160452.000000,210828.000000,69850.000000,399.349908)}
{pt3dadd(160248.000000,210936.000000,69850.000000,424.309275)}
{pt3dadd(160008.000000,211164.000000,69750.000000,449.268642)}
{pt3dadd(159804.000000,211296.000000,69700.000000,474.228009)}
{pt3dadd(159588.000000,211524.000000,69650.000000,499.187376)}
{pt3dadd(159348.000000,211884.000000,69500.000000,499.187376)}
{pt3dadd(159120.000000,212076.000000,69450.000000,499.187376)}
{pt3dadd(158952.000000,212328.000000,69275.000000,499.187376)}
{pt3dadd(158784.000000,212484.000000,69125.000000,499.187376)}
{pt3dadd(158532.000000,212844.000000,69075.000000,492.531546)}
{pt3dadd(158304.000000,213300.000000,68875.000000,485.875716)}
{pt3dadd(158100.000000,213516.000000,68500.000000,479.219886)}
{pt3dadd(157908.000000,213648.000000,68150.000000,415.989486)}

{create adhoc39}
{access adhoc39}
{connect adhoc39(1), adhoc38(0)}
{nseg = 1}
{strdef color color = "White"}
{pt3dclear()}
{pt3dadd(157908.000000,213648.000000,68150.000000,415.989486)}
{pt3dadd(157740.000000,213660.000000,67800.000000,499.187376)}
{pt3dadd(157572.000000,213600.000000,67525.000000,466.400772)}
{pt3dadd(157416.000000,213540.000000,67125.000000,433.614168)}
{pt3dadd(157224.000000,213456.000000,66925.000000,400.827564)}
{pt3dadd(157068.000000,213396.000000,66400.000000,368.040960)}
{pt3dadd(156924.000000,213444.000000,66250.000000,346.657896)}
{pt3dadd(156696.000000,213552.000000,65875.000000,346.657896)}

{create adhoc40}
{access adhoc40}
{connect adhoc40(1), adhoc39(0)}
{nseg = 1}
{strdef color color = "White"}
{pt3dclear()}
{pt3dadd(156696.000000,213552.000000,65875.000000,346.657896)}
{pt3dadd(156804.000000,213240.000000,65825.000000,240.734646)}
{pt3dadd(156660.000000,212976.000000,65650.000000,230.704038)}
{pt3dadd(156432.000000,212568.000000,65300.000000,220.673430)}
{pt3dadd(156192.000000,212364.000000,65000.000000,210.642822)}
{pt3dadd(156096.000000,211764.000000,64700.000000,200.612214)}
{pt3dadd(155988.000000,211332.000000,64600.000000,179.482918)}
{pt3dadd(155988.000000,210756.000000,64350.000000,158.353623)}
{pt3dadd(155988.000000,210432.000000,64050.000000,137.224328)}
{pt3dadd(155904.000000,210084.000000,63825.000000,116.095032)}
{pt3dadd(155844.000000,209868.000000,63650.000000,128.865483)}
{pt3dadd(155868.000000,209544.000000,63250.000000,141.635934)}
{pt3dadd(155700.000000,209328.000000,63150.000000,154.406385)}
{pt3dadd(155676.000000,209148.000000,62975.000000,167.176836)}
{pt3dadd(155664.000000,208968.000000,62800.000000,175.535680)}
{pt3dadd(155616.000000,208716.000000,62625.000000,183.894525)}
{pt3dadd(155496.000000,208500.000000,62500.000000,192.253370)}
{pt3dadd(155448.000000,208260.000000,62200.000000,200.612214)}
{pt3dadd(155448.000000,207948.000000,61875.000000,170.614548)}
{pt3dadd(154968.000000,207528.000000,61500.000000,140.616882)}
{pt3dadd(154860.000000,207324.000000,61325.000000,110.619216)}
{pt3dadd(154452.000000,207012.000000,60975.000000,80.621550)}
{pt3dadd(154200.000000,206748.000000,60700.000000,147.130637)}
{pt3dadd(153852.000000,206556.000000,60225.000000,213.639723)}
{pt3dadd(153636.000000,206232.000000,59900.000000,280.148809)}
{pt3dadd(153420.000000,206040.000000,59550.000000,346.657896)}
{pt3dadd(153264.000000,205800.000000,59125.000000,310.146476)}
{pt3dadd(153132.000000,205308.000000,58725.000000,273.635055)}
{pt3dadd(153072.000000,204672.000000,58425.000000,237.123635)}
{pt3dadd(153120.000000,204264.000000,58000.000000,200.612214)}
{pt3dadd(153192.000000,203856.000000,57650.000000,167.255320)}
{pt3dadd(153456.000000,203520.000000,57275.000000,133.898427)}
{pt3dadd(153408.000000,203376.000000,57100.000000,100.541533)}
{pt3dadd(153360.000000,203256.000000,56875.000000,67.184640)}
{pt3dadd(153504.000000,202992.000000,56450.000000,133.586379)}
{pt3dadd(153660.000000,202728.000000,56100.000000,199.988118)}
{pt3dadd(154032.000000,202320.000000,55875.000000,266.389857)}
{pt3dadd(154056.000000,202260.000000,55500.000000,332.791596)}
{pt3dadd(153984.000000,202056.000000,55175.000000,309.777359)}
{pt3dadd(153936.000000,201708.000000,54850.000000,286.763121)}
{pt3dadd(154104.000000,201444.000000,54600.000000,263.748884)}
{pt3dadd(154248.000000,201324.000000,54350.000000,240.734646)}
{pt3dadd(154380.000000,201204.000000,54050.000000,203.955741)}
{pt3dadd(154488.000000,200964.000000,53725.000000,167.176836)}
{pt3dadd(154488.000000,201024.000000,53375.000000,200.612214)}

{create adhoc41}
{access adhoc41}
{connect adhoc41(1), adhoc39(0)}
{nseg = 1}
{strdef color color = "White"}
{pt3dclear()}
{pt3dadd(156696.000000,213552.000000,65875.000000,346.657896)}
{pt3dadd(156588.000000,213984.000000,65875.000000,240.734646)}
{pt3dadd(156420.000000,214104.000000,65600.000000,240.734646)}
{pt3dadd(156048.000000,214224.000000,65225.000000,240.734646)}
{pt3dadd(155784.000000,214212.000000,64900.000000,240.734646)}
{pt3dadd(155568.000000,214272.000000,64575.000000,240.734646)}
{pt3dadd(155304.000000,214296.000000,64350.000000,200.612214)}

{create adhoc42}
{access adhoc42}
{connect adhoc42(1), adhoc41(0)}
{nseg = 1}
{strdef color color = "White"}
{pt3dclear()}
{pt3dadd(155304.000000,214296.000000,64350.000000,200.612214)}
{pt3dadd(155124.000000,213828.000000,63725.000000,167.176836)}
{pt3dadd(155016.000000,213732.000000,63350.000000,175.535680)}
{pt3dadd(154812.000000,213588.000000,63125.000000,183.894525)}
{pt3dadd(154728.000000,213624.000000,63000.000000,192.253370)}
{pt3dadd(154560.000000,213420.000000,62600.000000,200.612214)}
{pt3dadd(154524.000000,213324.000000,62300.000000,222.679557)}
{pt3dadd(154320.000000,213252.000000,61775.000000,244.746900)}
{pt3dadd(154116.000000,213216.000000,61325.000000,266.814243)}
{pt3dadd(153948.000000,213120.000000,61050.000000,288.881586)}
{pt3dadd(153840.000000,212988.000000,60575.000000,321.100398)}
{pt3dadd(153840.000000,212844.000000,60300.000000,353.319210)}
{pt3dadd(153468.000000,212712.000000,59950.000000,55.987200)}

{create adhoc43}
{access adhoc43}
{connect adhoc43(1), adhoc41(0)}
{nseg = 1}
{strdef color color = "White"}
{pt3dclear()}
{pt3dadd(155304.000000,214296.000000,64350.000000,200.612214)}
{pt3dadd(155136.000000,214548.000000,64475.000000,200.612214)}
{pt3dadd(154788.000000,214872.000000,64550.000000,164.455961)}
{pt3dadd(154188.000000,215196.000000,64775.000000,128.299707)}
{pt3dadd(153936.000000,215436.000000,64775.000000,92.143454)}
{pt3dadd(153612.000000,215568.000000,64800.000000,55.987200)}
{pt3dadd(153168.000000,215724.000000,64875.000000,55.987200)}
{pt3dadd(152892.000000,215916.000000,64875.000000,55.987200)}

{create adhoc44}
{access adhoc44}
{connect adhoc44(1), adhoc38(0)}
{nseg = 1}
{strdef color color = "White"}
{pt3dclear()}
{pt3dadd(157908.000000,213648.000000,68150.000000,415.989486)}
{pt3dadd(157536.000000,214068.000000,67900.000000,415.989486)}
{pt3dadd(157344.000000,214620.000000,67900.000000,372.388880)}
{pt3dadd(157092.000000,214932.000000,67875.000000,328.788275)}
{pt3dadd(156936.000000,215388.000000,67800.000000,285.187669)}
{pt3dadd(156792.000000,215688.000000,67650.000000,241.587063)}
{pt3dadd(156648.000000,216132.000000,67525.000000,197.986457)}
{pt3dadd(156492.000000,216384.000000,67525.000000,154.385852)}
{pt3dadd(156264.000000,216492.000000,67475.000000,110.785246)}
{pt3dadd(156048.000000,216768.000000,67450.000000,67.184640)}
{pt3dadd(155748.000000,216540.000000,67225.000000,55.987200)}

{create adhoc45}
{access adhoc45}
{connect adhoc45(1), adhoc25(0)}
{nseg = 1}
{strdef color color = "White"}
{pt3dclear()}
{pt3dadd(191724.000000,192048.000000,84600.000000,828.092016)}
{pt3dadd(191724.000000,191964.000000,84200.000000,732.642732)}
{pt3dadd(191724.000000,191796.000000,83825.000000,582.917418)}
{pt3dadd(191748.000000,191556.000000,83550.000000,433.192104)}
{pt3dadd(191640.000000,191352.000000,83250.000000,283.466790)}
{pt3dadd(191460.000000,191208.000000,83125.000000,133.741476)}
{pt3dadd(191280.000000,191124.000000,83000.000000,107.181513)}
{pt3dadd(191232.000000,190860.000000,82850.000000,80.621550)}
{pt3dadd(190944.000000,190716.000000,82575.000000,80.621550)}

{create adhoc46}
{access adhoc46}
{connect adhoc46(1), adhoc24(0)}
{nseg = 1}
{strdef color color = "White"}
{pt3dclear()}
{pt3dadd(195168.000000,188124.000000,89375.000000,1490.565402)}
{pt3dadd(195672.000000,187716.000000,89375.000000,1055.005614)}
{pt3dadd(196008.000000,187224.000000,89375.000000,820.277969)}
{pt3dadd(195948.000000,186792.000000,89125.000000,585.550323)}
{pt3dadd(195864.000000,186528.000000,89050.000000,350.822678)}
{pt3dadd(195900.000000,186204.000000,88750.000000,116.095032)}
{pt3dadd(195924.000000,185916.000000,88600.000000,80.621550)}
{pt3dadd(196008.000000,185736.000000,88475.000000,46.656000)}

{create adhoc47}
{access adhoc47}
{connect adhoc47(1), adhoc23(0)}
{nseg = 1}
{strdef color color = "White"}
{pt3dclear()}
{pt3dadd(193596.000000,185928.000000,98200.000000,828.092016)}
{pt3dadd(193632.000000,185676.000000,98050.000000,575.063856)}
{pt3dadd(193932.000000,185352.000000,98100.000000,690.076629)}
{pt3dadd(194256.000000,185052.000000,98200.000000,805.089402)}
{pt3dadd(194508.000000,184728.000000,98250.000000,920.102175)}
{pt3dadd(194832.000000,184392.000000,98200.000000,1035.114948)}
{pt3dadd(195000.000000,184056.000000,97950.000000,991.985162)}
{pt3dadd(195132.000000,183720.000000,97975.000000,948.855375)}
{pt3dadd(195300.000000,183396.000000,98025.000000,905.725589)}
{pt3dadd(195600.000000,183144.000000,98050.000000,862.595802)}
{pt3dadd(195636.000000,182844.000000,98025.000000,796.703072)}
{pt3dadd(195768.000000,182592.000000,98025.000000,730.810341)}
{pt3dadd(196056.000000,182040.000000,98075.000000,664.917611)}
{pt3dadd(196188.000000,181752.000000,97975.000000,599.024880)}
{pt3dadd(196152.000000,181452.000000,98175.000000,621.787828)}
{pt3dadd(196008.000000,181200.000000,98275.000000,644.550777)}
{pt3dadd(196140.000000,180888.000000,98250.000000,667.313725)}
{pt3dadd(196140.000000,180612.000000,98275.000000,690.076674)}
{pt3dadd(196236.000000,180336.000000,98550.000000,697.264960)}
{pt3dadd(196356.000000,180072.000000,98825.000000,704.453247)}
{pt3dadd(196476.000000,179808.000000,98725.000000,711.641533)}
{pt3dadd(196680.000000,179532.000000,98650.000000,718.829820)}
{pt3dadd(196680.000000,179304.000000,98600.000000,711.641515)}
{pt3dadd(196764.000000,179016.000000,98625.000000,704.453211)}
{pt3dadd(196788.000000,178728.000000,98675.000000,697.264906)}
{pt3dadd(196752.000000,178416.000000,98575.000000,690.076602)}
{pt3dadd(196776.000000,178092.000000,98650.000000,733.206402)}
{pt3dadd(196728.000000,177756.000000,98675.000000,776.336202)}
{pt3dadd(196692.000000,177468.000000,98850.000000,819.466002)}
{pt3dadd(196692.000000,177216.000000,99050.000000,862.595802)}
{pt3dadd(196692.000000,176940.000000,98925.000000,819.466002)}
{pt3dadd(196644.000000,176652.000000,98975.000000,776.336202)}
{pt3dadd(196632.000000,176352.000000,98825.000000,733.206402)}
{pt3dadd(196584.000000,176016.000000,98825.000000,690.076602)}
{pt3dadd(196608.000000,175752.000000,98800.000000,733.206402)}
{pt3dadd(196560.000000,175464.000000,98825.000000,776.336202)}
{pt3dadd(196416.000000,175200.000000,98850.000000,819.466002)}
{pt3dadd(196416.000000,174924.000000,98850.000000,862.595802)}
{pt3dadd(196620.000000,174672.000000,98900.000000,895.374441)}
{pt3dadd(196644.000000,174420.000000,99000.000000,928.153080)}
{pt3dadd(196728.000000,174216.000000,99075.000000,960.931719)}
{pt3dadd(196668.000000,173976.000000,99150.000000,993.710358)}
{pt3dadd(196716.000000,173736.000000,99000.000000,1004.061506)}
{pt3dadd(196824.000000,173448.000000,99000.000000,1014.412653)}
{pt3dadd(196896.000000,173232.000000,98950.000000,1024.763801)}
{pt3dadd(196980.000000,172992.000000,99025.000000,1035.114948)}
{pt3dadd(197064.000000,172740.000000,99100.000000,996.129054)}
{pt3dadd(197148.000000,172488.000000,99325.000000,957.143160)}
{pt3dadd(197148.000000,172176.000000,99325.000000,918.157266)}
{pt3dadd(197232.000000,171912.000000,99525.000000,879.171372)}
{pt3dadd(197388.000000,171636.000000,99475.000000,794.968236)}

{create adhoc48}
{access adhoc48}
{connect adhoc48(1), adhoc47(0)}
{nseg = 1}
{strdef color color = "White"}
{pt3dclear()}
{pt3dadd(197388.000000,171636.000000,99475.000000,794.968236)}
{pt3dadd(197220.000000,171636.000000,99775.000000,993.710358)}
{pt3dadd(197052.000000,171636.000000,100075.000000,780.111279)}
{pt3dadd(196740.000000,171636.000000,100500.000000,566.512200)}
{pt3dadd(196608.000000,171852.000000,100625.000000,352.913121)}
{pt3dadd(196368.000000,171852.000000,100975.000000,139.314042)}
{pt3dadd(196332.000000,171840.000000,101250.000000,164.669193)}
{pt3dadd(196128.000000,171900.000000,101425.000000,190.024344)}
{pt3dadd(195960.000000,171984.000000,101625.000000,215.379495)}
{pt3dadd(195816.000000,172080.000000,101950.000000,240.734646)}
{pt3dadd(195576.000000,172080.000000,102150.000000,230.704038)}
{pt3dadd(195504.000000,172080.000000,102375.000000,220.673430)}
{pt3dadd(195336.000000,172200.000000,102650.000000,210.642822)}
{pt3dadd(195192.000000,172236.000000,102825.000000,200.612214)}
{pt3dadd(195072.000000,172344.000000,103025.000000,192.253370)}
{pt3dadd(194940.000000,172392.000000,103125.000000,183.894525)}
{pt3dadd(194796.000000,172524.000000,103300.000000,175.535680)}
{pt3dadd(194652.000000,172680.000000,103650.000000,167.176836)}
{pt3dadd(194472.000000,172764.000000,103950.000000,222.251616)}
{pt3dadd(194256.000000,172908.000000,104225.000000,277.326396)}
{pt3dadd(194064.000000,172896.000000,104300.000000,288.881586)}

{create adhoc49}
{access adhoc49}
{connect adhoc49(1), adhoc48(0)}
{nseg = 1}
{strdef color color = "White"}
{pt3dclear()}
{pt3dadd(194064.000000,172896.000000,104300.000000,288.881586)}
{pt3dadd(193668.000000,172836.000000,104500.000000,80.621550)}
{pt3dadd(193428.000000,172920.000000,104500.000000,67.184640)}
{pt3dadd(193260.000000,173016.000000,104850.000000,80.621550)}

{create adhoc50}
{access adhoc50}
{connect adhoc50(1), adhoc48(0)}
{nseg = 1}
{strdef color color = "White"}
{pt3dclear()}
{pt3dadd(194064.000000,172896.000000,104300.000000,288.881586)}
{pt3dadd(193884.000000,172776.000000,104600.000000,240.734646)}
{pt3dadd(193668.000000,172416.000000,104875.000000,213.986354)}
{pt3dadd(193512.000000,172236.000000,105075.000000,187.238061)}
{pt3dadd(193356.000000,171996.000000,105250.000000,160.489769)}
{pt3dadd(193200.000000,171936.000000,105350.000000,133.741476)}
{pt3dadd(193008.000000,171624.000000,105700.000000,96.745896)}
{pt3dadd(192684.000000,171432.000000,105975.000000,55.987200)}

{create adhoc51}
{access adhoc51}
{connect adhoc51(1), adhoc47(0)}
{nseg = 1}
{strdef color color = "White"}
{pt3dclear()}
{pt3dadd(197388.000000,171636.000000,99475.000000,794.968236)}
{pt3dadd(197544.000000,171336.000000,99625.000000,915.803424)}
{pt3dadd(197532.000000,171048.000000,99800.000000,902.501519)}
{pt3dadd(197676.000000,170784.000000,99800.000000,889.199613)}
{pt3dadd(197736.000000,170508.000000,99875.000000,875.897708)}
{pt3dadd(197856.000000,170196.000000,99950.000000,862.595802)}
{pt3dadd(198060.000000,169884.000000,100025.000000,862.595802)}
{pt3dadd(198060.000000,169572.000000,100000.000000,862.595802)}
{pt3dadd(198072.000000,169236.000000,100150.000000,862.595802)}
{pt3dadd(198204.000000,168924.000000,100050.000000,862.595802)}
{pt3dadd(198252.000000,168624.000000,100050.000000,905.725589)}
{pt3dadd(198312.000000,168372.000000,100050.000000,948.855375)}
{pt3dadd(198228.000000,168132.000000,100000.000000,991.985162)}
{pt3dadd(198504.000000,167868.000000,99700.000000,1035.114948)}
{pt3dadd(198612.000000,167640.000000,99600.000000,991.985162)}
{pt3dadd(198840.000000,167328.000000,99600.000000,948.855375)}
{pt3dadd(199020.000000,167052.000000,99425.000000,905.725589)}
{pt3dadd(199140.000000,166788.000000,99425.000000,862.595802)}
{pt3dadd(199344.000000,166512.000000,99350.000000,895.374441)}
{pt3dadd(199608.000000,166236.000000,99225.000000,928.153080)}
{pt3dadd(199788.000000,165960.000000,99150.000000,960.931719)}
{pt3dadd(199848.000000,165708.000000,99175.000000,993.710358)}
{pt3dadd(199884.000000,165504.000000,99250.000000,1009.034159)}
{pt3dadd(200028.000000,165312.000000,99250.000000,1024.357959)}
{pt3dadd(200160.000000,165048.000000,99225.000000,1039.681760)}
{pt3dadd(200172.000000,164772.000000,99250.000000,1055.005560)}
{pt3dadd(200292.000000,164532.000000,99225.000000,1089.367258)}
{pt3dadd(200340.000000,164292.000000,99350.000000,1123.728957)}
{pt3dadd(200400.000000,164052.000000,99450.000000,1158.090655)}
{pt3dadd(200508.000000,163764.000000,99500.000000,1192.452354)}
{pt3dadd(200520.000000,163476.000000,99575.000000,1192.452354)}

{create adhoc52}
{access adhoc52}
{connect adhoc52(1), adhoc51(0)}
{nseg = 1}
{strdef color color = "White"}
{pt3dclear()}
{pt3dadd(200520.000000,163476.000000,99575.000000,1192.452354)}
{pt3dadd(200424.000000,163476.000000,99125.000000,1192.452354)}
{pt3dadd(200328.000000,163476.000000,98750.000000,923.363024)}
{pt3dadd(200232.000000,163476.000000,98300.000000,654.273693)}
{pt3dadd(200340.000000,163308.000000,98000.000000,385.184363)}
{pt3dadd(200412.000000,163116.000000,97850.000000,116.095032)}
{pt3dadd(200484.000000,162792.000000,97650.000000,173.735748)}
{pt3dadd(200532.000000,162408.000000,97400.000000,231.376464)}
{pt3dadd(200556.000000,162168.000000,97150.000000,289.017180)}
{pt3dadd(200556.000000,161904.000000,96875.000000,346.657896)}
{pt3dadd(200508.000000,161820.000000,96725.000000,365.989189)}
{pt3dadd(200496.000000,161736.000000,96425.000000,385.320483)}
{pt3dadd(200436.000000,161892.000000,96225.000000,404.651776)}
{pt3dadd(200256.000000,161724.000000,95900.000000,423.983070)}
{pt3dadd(200220.000000,161724.000000,95625.000000,378.170964)}
{pt3dadd(200160.000000,161604.000000,95375.000000,332.358858)}
{pt3dadd(200148.000000,161436.000000,95150.000000,286.546752)}
{pt3dadd(200172.000000,161316.000000,94950.000000,240.734646)}
{pt3dadd(200112.000000,161256.000000,94825.000000,222.345193)}
{pt3dadd(200280.000000,161028.000000,94550.000000,203.955741)}
{pt3dadd(200424.000000,160956.000000,94475.000000,185.566288)}
{pt3dadd(200364.000000,160764.000000,94325.000000,167.176836)}
{pt3dadd(200376.000000,160512.000000,94100.000000,175.535680)}
{pt3dadd(200340.000000,160272.000000,93975.000000,183.894525)}
{pt3dadd(200364.000000,160032.000000,93875.000000,192.253370)}
{pt3dadd(200412.000000,159816.000000,93625.000000,200.612214)}
{pt3dadd(200352.000000,159612.000000,93300.000000,167.176836)}
{pt3dadd(200184.000000,159420.000000,92925.000000,200.612214)}

{create adhoc53}
{access adhoc53}
{connect adhoc53(1), adhoc52(0)}
{nseg = 1}
{strdef color color = "White"}
{pt3dclear()}
{pt3dadd(200184.000000,159420.000000,92925.000000,200.612214)}
{pt3dadd(200364.000000,159180.000000,92925.000000,200.612214)}
{pt3dadd(200544.000000,159048.000000,92975.000000,55.987200)}

{create adhoc54}
{access adhoc54}
{connect adhoc54(1), adhoc52(0)}
{nseg = 1}
{strdef color color = "White"}
{pt3dclear()}
{pt3dadd(200184.000000,159420.000000,92925.000000,200.612214)}
{pt3dadd(200172.000000,159228.000000,92725.000000,240.734646)}

{create adhoc55}
{access adhoc55}
{connect adhoc55(1), adhoc54(0)}
{nseg = 1}
{strdef color color = "White"}
{pt3dclear()}
{pt3dadd(200172.000000,159228.000000,92725.000000,240.734646)}
{pt3dadd(199956.000000,159216.000000,92350.000000,116.095032)}
{pt3dadd(199788.000000,159756.000000,92100.000000,116.095032)}
{pt3dadd(199632.000000,159912.000000,92000.000000,116.095032)}
{pt3dadd(199392.000000,160248.000000,91900.000000,116.095032)}
{pt3dadd(199416.000000,160524.000000,91825.000000,67.184640)}

{create adhoc56}
{access adhoc56}
{connect adhoc56(1), adhoc54(0)}
{nseg = 1}
{strdef color color = "White"}
{pt3dclear()}
{pt3dadd(200172.000000,159228.000000,92725.000000,240.734646)}
{pt3dadd(200076.000000,159012.000000,92550.000000,200.612214)}
{pt3dadd(200100.000000,158772.000000,92500.000000,208.235480)}
{pt3dadd(200328.000000,158328.000000,92225.000000,215.858745)}
{pt3dadd(200376.000000,158040.000000,92025.000000,223.482010)}
{pt3dadd(200136.000000,157752.000000,91800.000000,231.105276)}
{pt3dadd(200064.000000,157344.000000,91525.000000,217.701171)}
{pt3dadd(199860.000000,156708.000000,91175.000000,204.297066)}
{pt3dadd(199788.000000,156156.000000,90975.000000,190.892961)}
{pt3dadd(199824.000000,155748.000000,90850.000000,177.488856)}
{pt3dadd(199776.000000,155568.000000,90700.000000,168.614406)}
{pt3dadd(199692.000000,155280.000000,90725.000000,159.739956)}
{pt3dadd(199716.000000,154992.000000,90725.000000,150.865506)}
{pt3dadd(199728.000000,154596.000000,90525.000000,141.991056)}
{pt3dadd(199728.000000,154176.000000,90325.000000,135.517050)}
{pt3dadd(199788.000000,153876.000000,90150.000000,129.043044)}
{pt3dadd(199884.000000,153624.000000,90000.000000,122.569038)}
{pt3dadd(199836.000000,153300.000000,89850.000000,116.095032)}
{pt3dadd(199848.000000,152880.000000,89650.000000,91.639836)}
{pt3dadd(199956.000000,152412.000000,89450.000000,67.184640)}
{pt3dadd(199980.000000,152160.000000,89375.000000,96.745860)}

{create adhoc57}
{access adhoc57}
{connect adhoc57(1), adhoc51(0)}
{nseg = 1}
{strdef color color = "White"}
{pt3dclear()}
{pt3dadd(200520.000000,163476.000000,99575.000000,1192.452354)}
{pt3dadd(200400.000000,163224.000000,99725.000000,1373.705208)}
{pt3dadd(200460.000000,162960.000000,99875.000000,1278.706477)}
{pt3dadd(200448.000000,162732.000000,100125.000000,1183.707747)}
{pt3dadd(200448.000000,162528.000000,100275.000000,1088.709017)}
{pt3dadd(200436.000000,162264.000000,100275.000000,993.710286)}
{pt3dadd(200412.000000,161976.000000,100525.000000,1004.061452)}
{pt3dadd(200400.000000,161760.000000,100525.000000,1014.412617)}
{pt3dadd(200448.000000,161532.000000,100775.000000,1024.763782)}
{pt3dadd(200388.000000,161328.000000,100850.000000,1035.114948)}
{pt3dadd(200376.000000,161148.000000,100975.000000,1074.449300)}
{pt3dadd(200436.000000,160944.000000,101050.000000,1113.783651)}
{pt3dadd(200412.000000,160740.000000,101150.000000,1153.118003)}
{pt3dadd(200448.000000,160488.000000,101125.000000,1192.452354)}
{pt3dadd(200448.000000,160200.000000,101200.000000,1192.452354)}
{pt3dadd(200592.000000,159948.000000,101400.000000,1192.452354)}
{pt3dadd(200532.000000,159684.000000,101375.000000,1192.452354)}
{pt3dadd(200604.000000,159456.000000,101450.000000,1192.452354)}
{pt3dadd(200664.000000,159264.000000,101525.000000,1132.829739)}
{pt3dadd(200676.000000,159012.000000,101425.000000,1073.207124)}
{pt3dadd(200676.000000,158784.000000,101325.000000,1013.584509)}
{pt3dadd(200748.000000,158544.000000,101375.000000,953.961894)}
{pt3dadd(200760.000000,158328.000000,101500.000000,974.250158)}
{pt3dadd(200844.000000,158172.000000,101425.000000,994.538421)}
{pt3dadd(200820.000000,157992.000000,101475.000000,1014.826685)}
{pt3dadd(200808.000000,157776.000000,101500.000000,1035.114948)}
{pt3dadd(200820.000000,157548.000000,101400.000000,1035.114948)}
{pt3dadd(200832.000000,157308.000000,101375.000000,1035.114948)}
{pt3dadd(200820.000000,157056.000000,101425.000000,1035.114948)}
{pt3dadd(200796.000000,156780.000000,101475.000000,1035.114948)}
{pt3dadd(200772.000000,156528.000000,101500.000000,1024.763782)}
{pt3dadd(200784.000000,156288.000000,101475.000000,1014.412617)}
{pt3dadd(200736.000000,156060.000000,101450.000000,1004.061452)}
{pt3dadd(200688.000000,155820.000000,101400.000000,993.710286)}
{pt3dadd(200520.000000,155616.000000,101375.000000,1192.452354)}
{pt3dadd(200520.000000,155412.000000,101375.000000,1266.006492)}

{create adhoc58}
{access adhoc58}
{connect adhoc58(1), adhoc57(0)}
{nseg = 1}
{strdef color color = "White"}
{pt3dclear()}
{pt3dadd(200520.000000,155412.000000,101375.000000,1266.006492)}
{pt3dadd(200520.000000,155328.000000,100850.000000,1192.452354)}
{pt3dadd(200520.000000,155304.000000,100350.000000,981.003740)}
{pt3dadd(200520.000000,155244.000000,99900.000000,769.555125)}
{pt3dadd(200388.000000,155160.000000,99900.000000,558.106511)}
{pt3dadd(200340.000000,155004.000000,99600.000000,346.657896)}
{pt3dadd(200196.000000,154860.000000,99250.000000,384.790266)}
{pt3dadd(200172.000000,154716.000000,98975.000000,422.922636)}
{pt3dadd(200184.000000,154692.000000,98800.000000,461.055006)}
{pt3dadd(200196.000000,154500.000000,98475.000000,499.187376)}
{pt3dadd(200184.000000,154368.000000,98175.000000,461.055006)}
{pt3dadd(200124.000000,154284.000000,97975.000000,422.922636)}
{pt3dadd(200172.000000,154068.000000,97675.000000,384.790266)}
{pt3dadd(200256.000000,153912.000000,97350.000000,346.657896)}
{pt3dadd(200376.000000,153624.000000,97025.000000,301.787631)}
{pt3dadd(200448.000000,153276.000000,96825.000000,256.917366)}
{pt3dadd(200448.000000,152940.000000,96675.000000,212.047101)}
{pt3dadd(200268.000000,152472.000000,96475.000000,167.176836)}
{pt3dadd(200064.000000,152004.000000,96275.000000,167.176836)}
{pt3dadd(199872.000000,151668.000000,96175.000000,167.176836)}
{pt3dadd(199872.000000,151428.000000,96175.000000,167.176836)}
{pt3dadd(199788.000000,151260.000000,96000.000000,167.176836)}
{pt3dadd(199836.000000,151056.000000,95825.000000,207.745086)}
{pt3dadd(199848.000000,150780.000000,96025.000000,248.313336)}
{pt3dadd(199848.000000,150480.000000,96175.000000,288.881586)}
{pt3dadd(199896.000000,150252.000000,96325.000000,288.881586)}

{create adhoc59}
{access adhoc59}
{connect adhoc59(1), adhoc58(0)}
{nseg = 1}
{strdef color color = "White"}
{pt3dclear()}
{pt3dadd(199896.000000,150252.000000,96325.000000,288.881586)}
{pt3dadd(199848.000000,149952.000000,96400.000000,46.656000)}
{pt3dadd(199812.000000,149652.000000,96575.000000,55.987200)}
{pt3dadd(199692.000000,149424.000000,96725.000000,44.789760)}

{create adhoc60}
{access adhoc60}
{connect adhoc60(1), adhoc58(0)}
{nseg = 1}
{strdef color color = "White"}
{pt3dclear()}
{pt3dadd(199896.000000,150252.000000,96325.000000,288.881586)}
{pt3dadd(199896.000000,150288.000000,96650.000000,204.467130)}
{pt3dadd(199836.000000,150336.000000,96850.000000,162.022019)}
{pt3dadd(199812.000000,150408.000000,97050.000000,127.838795)}
{pt3dadd(199848.000000,150564.000000,97325.000000,105.039421)}
{pt3dadd(200280.000000,150864.000000,97550.000000,96.745860)}
{pt3dadd(200436.000000,151140.000000,97700.000000,129.123785)}
{pt3dadd(200544.000000,151296.000000,98000.000000,200.612214)}
{pt3dadd(200736.000000,151560.000000,98400.000000,272.743129)}

{create adhoc61}
{access adhoc61}
{connect adhoc61(1), adhoc57(0)}
{nseg = 1}
{strdef color color = "White"}
{pt3dclear()}
{pt3dadd(200520.000000,155412.000000,101375.000000,1266.006492)}
{pt3dadd(200580.000000,155208.000000,101475.000000,1242.137880)}
{pt3dadd(200592.000000,154968.000000,101500.000000,1242.137880)}
{pt3dadd(200532.000000,154704.000000,101725.000000,1242.137880)}
{pt3dadd(200580.000000,154464.000000,101875.000000,1242.137880)}
{pt3dadd(200688.000000,154212.000000,101975.000000,1242.137880)}
{pt3dadd(200664.000000,153960.000000,102100.000000,1229.716498)}
{pt3dadd(200592.000000,153696.000000,102225.000000,1217.295117)}
{pt3dadd(200688.000000,153444.000000,102350.000000,1204.873736)}
{pt3dadd(200676.000000,153192.000000,102350.000000,1192.452354)}
{pt3dadd(200712.000000,152892.000000,102350.000000,1144.754244)}

{create adhoc62}
{access adhoc62}
{connect adhoc62(1), adhoc61(0)}
{nseg = 1}
{strdef color color = "White"}
{pt3dclear()}
{pt3dadd(200712.000000,152892.000000,102350.000000,1144.754244)}
{pt3dadd(200448.000000,152892.000000,102475.000000,1242.137880)}
{pt3dadd(200100.000000,152892.000000,102675.000000,945.600210)}
{pt3dadd(199704.000000,152868.000000,102650.000000,649.062540)}
{pt3dadd(199500.000000,152772.000000,102725.000000,352.524870)}
{pt3dadd(199308.000000,152712.000000,102825.000000,55.987200)}
{pt3dadd(199044.000000,152700.000000,103000.000000,53.187840)}
{pt3dadd(198804.000000,152772.000000,103100.000000,50.388480)}
{pt3dadd(198816.000000,152868.000000,103050.000000,47.589120)}
{pt3dadd(198804.000000,153060.000000,103050.000000,44.789760)}
{pt3dadd(198660.000000,153288.000000,103125.000000,139.314042)}
{pt3dadd(198444.000000,153468.000000,103200.000000,55.987200)}

{create adhoc63}
{access adhoc63}
{connect adhoc63(1), adhoc61(0)}
{nseg = 1}
{strdef color color = "White"}
{pt3dclear()}
{pt3dadd(200712.000000,152892.000000,102350.000000,1144.754244)}
{pt3dadd(200640.000000,152664.000000,102350.000000,1144.754388)}
{pt3dadd(200616.000000,152448.000000,102325.000000,1156.678880)}
{pt3dadd(200592.000000,152256.000000,102300.000000,1168.603371)}
{pt3dadd(200544.000000,152064.000000,102425.000000,1180.527862)}
{pt3dadd(200592.000000,151872.000000,102475.000000,1192.452354)}
{pt3dadd(200652.000000,151668.000000,102500.000000,1145.708199)}
{pt3dadd(200688.000000,151440.000000,102400.000000,1098.964044)}
{pt3dadd(200760.000000,151212.000000,102600.000000,1032.267294)}

{create adhoc64}
{access adhoc64}
{connect adhoc64(1), adhoc63(0)}
{nseg = 1}
{strdef color color = "White"}
{pt3dclear()}
{pt3dadd(200760.000000,151212.000000,102600.000000,1032.267294)}
{pt3dadd(200556.000000,151188.000000,102275.000000,1192.452354)}
{pt3dadd(200376.000000,151188.000000,102025.000000,954.522927)}
{pt3dadd(200244.000000,151188.000000,101750.000000,716.593500)}
{pt3dadd(200136.000000,151188.000000,101425.000000,478.664073)}
{pt3dadd(199968.000000,151188.000000,101075.000000,240.734646)}
{pt3dadd(199740.000000,151032.000000,100850.000000,92.876040)}

{create adhoc65}
{access adhoc65}
{connect adhoc65(1), adhoc64(0)}
{nseg = 1}
{strdef color color = "White"}
{pt3dclear()}
{pt3dadd(199740.000000,151032.000000,100850.000000,92.876040)}
{pt3dadd(199680.000000,150996.000000,100575.000000,67.184640)}
{pt3dadd(199572.000000,150876.000000,100450.000000,64.497240)}
{pt3dadd(199464.000000,150780.000000,100225.000000,64.497240)}

{create adhoc66}
{access adhoc66}
{connect adhoc66(1), adhoc64(0)}
{nseg = 1}
{strdef color color = "White"}
{pt3dclear()}
{pt3dadd(199740.000000,151032.000000,100850.000000,92.876040)}
{pt3dadd(199524.000000,150936.000000,100900.000000,46.656000)}
{pt3dadd(199248.000000,150900.000000,100900.000000,51.116310)}
{pt3dadd(199032.000000,150804.000000,100900.000000,55.576620)}
{pt3dadd(198972.000000,150588.000000,100900.000000,60.036930)}
{pt3dadd(198924.000000,150276.000000,100900.000000,64.497240)}
{pt3dadd(198828.000000,150072.000000,100975.000000,61.660560)}
{pt3dadd(198792.000000,149844.000000,101000.000000,58.823880)}
{pt3dadd(198708.000000,149652.000000,100975.000000,55.987200)}
{pt3dadd(198648.000000,149448.000000,100725.000000,38.880000)}

{create adhoc67}
{access adhoc67}
{connect adhoc67(1), adhoc63(0)}
{nseg = 1}
{strdef color color = "White"}
{pt3dclear()}
{pt3dadd(200760.000000,151212.000000,102600.000000,1032.267294)}
{pt3dadd(200688.000000,151008.000000,102450.000000,1012.805352)}
{pt3dadd(200700.000000,150792.000000,102475.000000,1057.717103)}
{pt3dadd(200700.000000,150540.000000,102500.000000,1102.628853)}
{pt3dadd(200652.000000,150336.000000,102400.000000,1147.540604)}
{pt3dadd(200688.000000,150132.000000,102425.000000,1192.452354)}
{pt3dadd(200700.000000,149916.000000,102475.000000,1153.118003)}
{pt3dadd(200700.000000,149712.000000,102525.000000,1113.783651)}
{pt3dadd(200640.000000,149484.000000,102575.000000,1074.449300)}
{pt3dadd(200580.000000,149244.000000,102625.000000,1035.114948)}
{pt3dadd(200520.000000,149052.000000,102700.000000,1024.763801)}
{pt3dadd(200460.000000,148824.000000,102775.000000,1014.412653)}
{pt3dadd(200400.000000,148608.000000,102800.000000,1004.061506)}
{pt3dadd(200340.000000,148428.000000,102700.000000,993.710358)}
{pt3dadd(200268.000000,148236.000000,102600.000000,993.710358)}
{pt3dadd(200196.000000,148032.000000,102475.000000,993.710358)}
{pt3dadd(200148.000000,147804.000000,102450.000000,993.710358)}
{pt3dadd(200100.000000,147648.000000,102400.000000,993.710358)}
{pt3dadd(200088.000000,147456.000000,102475.000000,1004.061506)}
{pt3dadd(200040.000000,147276.000000,102525.000000,1014.412653)}
{pt3dadd(199992.000000,147096.000000,102425.000000,1024.763801)}
{pt3dadd(199968.000000,146856.000000,102450.000000,1035.114948)}
{pt3dadd(199836.000000,146652.000000,102450.000000,983.359215)}
{pt3dadd(199644.000000,146388.000000,102475.000000,931.603482)}
{pt3dadd(199620.000000,146172.000000,102425.000000,879.847749)}
{pt3dadd(199560.000000,146016.000000,102375.000000,828.092016)}
{pt3dadd(199572.000000,145836.000000,102350.000000,794.968308)}

{create adhoc68}
{access adhoc68}
{connect adhoc68(1), adhoc67(0)}
{nseg = 1}
{strdef color color = "White"}
{pt3dclear()}
{pt3dadd(199572.000000,145836.000000,102350.000000,794.968308)}
{pt3dadd(199056.000000,145956.000000,102450.000000,862.595802)}
{pt3dadd(198672.000000,146028.000000,102450.000000,479.670831)}
{pt3dadd(198240.000000,146196.000000,102450.000000,96.745860)}
{pt3dadd(197964.000000,146568.000000,102750.000000,46.656000)}

{create adhoc69}
{access adhoc69}
{connect adhoc69(1), adhoc67(0)}
{nseg = 1}
{strdef color color = "White"}
{pt3dclear()}
{pt3dadd(199572.000000,145836.000000,102350.000000,794.968308)}
{pt3dadd(199824.000000,145836.000000,101950.000000,716.852412)}
{pt3dadd(200016.000000,145836.000000,101525.000000,620.837217)}
{pt3dadd(199944.000000,145836.000000,100975.000000,524.822022)}
{pt3dadd(199848.000000,145668.000000,100725.000000,428.806827)}
{pt3dadd(199776.000000,145368.000000,100475.000000,332.791632)}
{pt3dadd(199788.000000,145260.000000,100275.000000,326.268904)}
{pt3dadd(199776.000000,145080.000000,100050.000000,319.746177)}
{pt3dadd(199776.000000,144912.000000,99875.000000,313.223450)}
{pt3dadd(199908.000000,144708.000000,99675.000000,306.700722)}
{pt3dadd(199896.000000,144564.000000,99525.000000,277.326324)}

{create adhoc70}
{access adhoc70}
{connect adhoc70(1), adhoc69(0)}
{nseg = 1}
{strdef color color = "White"}
{pt3dclear()}
{pt3dadd(199896.000000,144564.000000,99525.000000,277.326324)}
{pt3dadd(199596.000000,144528.000000,99525.000000,200.612214)}
{pt3dadd(199320.000000,144456.000000,99525.000000,53.747712)}
{pt3dadd(199128.000000,144360.000000,99350.000000,68.475654)}

{create adhoc71}
{access adhoc71}
{connect adhoc71(1), adhoc69(0)}
{nseg = 1}
{strdef color color = "White"}
{pt3dclear()}
{pt3dadd(199896.000000,144564.000000,99525.000000,277.326324)}
{pt3dadd(199992.000000,144396.000000,99375.000000,332.791596)}
{pt3dadd(199992.000000,144300.000000,99175.000000,374.390541)}
{pt3dadd(199992.000000,144036.000000,98950.000000,415.989486)}
{pt3dadd(200016.000000,143856.000000,98675.000000,457.588431)}
{pt3dadd(200004.000000,143640.000000,98425.000000,499.187376)}
{pt3dadd(199908.000000,143544.000000,98275.000000,512.405860)}
{pt3dadd(199944.000000,143232.000000,98050.000000,525.624345)}
{pt3dadd(199944.000000,143052.000000,97825.000000,538.842829)}
{pt3dadd(200064.000000,143016.000000,97575.000000,552.061314)}
{pt3dadd(199968.000000,142968.000000,97350.000000,662.473530)}
{pt3dadd(199992.000000,142860.000000,97200.000000,718.829820)}

{create adhoc72}
{access adhoc72}
{connect adhoc72(1), adhoc71(0)}
{nseg = 1}
{strdef color color = "White"}
{pt3dclear()}
{pt3dadd(199992.000000,142860.000000,97200.000000,718.829820)}
{pt3dadd(199848.000000,143112.000000,97200.000000,599.024880)}
{pt3dadd(199464.000000,143364.000000,97200.000000,469.811349)}
{pt3dadd(199284.000000,143628.000000,97075.000000,340.597818)}
{pt3dadd(199116.000000,143784.000000,97050.000000,211.384287)}
{pt3dadd(198912.000000,143916.000000,97050.000000,82.170756)}
{pt3dadd(198876.000000,144072.000000,97100.000000,97.125835)}
{pt3dadd(198732.000000,144528.000000,97250.000000,112.080915)}
{pt3dadd(198708.000000,144984.000000,97400.000000,127.035995)}
{pt3dadd(198720.000000,145104.000000,97550.000000,141.991074)}
{pt3dadd(198708.000000,145260.000000,97775.000000,96.745860)}
{pt3dadd(198636.000000,145560.000000,97825.000000,46.656000)}

{create adhoc73}
{access adhoc73}
{connect adhoc73(1), adhoc71(0)}
{nseg = 1}
{strdef color color = "White"}
{pt3dclear()}
{pt3dadd(199992.000000,142860.000000,97200.000000,718.829820)}
{pt3dadd(200052.000000,142680.000000,96925.000000,599.024880)}
{pt3dadd(200076.000000,142476.000000,96700.000000,541.278873)}
{pt3dadd(200028.000000,142368.000000,96425.000000,483.532866)}
{pt3dadd(199932.000000,142164.000000,96125.000000,425.786859)}
{pt3dadd(199800.000000,141900.000000,95850.000000,368.040852)}
{pt3dadd(199824.000000,141636.000000,95600.000000,346.657896)}
{pt3dadd(199944.000000,141588.000000,95300.000000,332.791560)}

{create adhoc74}
{access adhoc74}
{connect adhoc74(1), adhoc73(0)}
{nseg = 1}
{strdef color color = "White"}
{pt3dclear()}
{pt3dadd(199944.000000,141588.000000,95300.000000,332.791560)}
{pt3dadd(199944.000000,141588.000000,95075.000000,346.657896)}
{pt3dadd(199776.000000,141588.000000,94825.000000,273.990222)}
{pt3dadd(199512.000000,141564.000000,94650.000000,201.322548)}
{pt3dadd(199320.000000,141792.000000,94675.000000,128.654874)}
{pt3dadd(199284.000000,142068.000000,94575.000000,55.987200)}
{pt3dadd(199188.000000,142332.000000,94550.000000,55.987200)}
{pt3dadd(199272.000000,142596.000000,94525.000000,55.987200)}
{pt3dadd(199296.000000,142848.000000,94525.000000,55.987200)}
{pt3dadd(199464.000000,143064.000000,94450.000000,55.987200)}
{pt3dadd(199536.000000,143280.000000,94400.000000,59.719680)}
{pt3dadd(199668.000000,143508.000000,94200.000000,63.452160)}
{pt3dadd(199800.000000,143652.000000,94125.000000,67.184640)}
{pt3dadd(200112.000000,143760.000000,94150.000000,53.747712)}

{create adhoc75}
{access adhoc75}
{connect adhoc75(1), adhoc73(0)}
{nseg = 1}
{strdef color color = "White"}
{pt3dclear()}
{pt3dadd(199944.000000,141588.000000,95300.000000,332.791560)}
{pt3dadd(199800.000000,141204.000000,94925.000000,346.657896)}
{pt3dadd(199692.000000,140988.000000,94700.000000,369.768426)}
{pt3dadd(199584.000000,140712.000000,94450.000000,392.878956)}
{pt3dadd(199608.000000,140580.000000,94175.000000,415.989486)}
{pt3dadd(199476.000000,140400.000000,93900.000000,399.349908)}

{create adhoc76}
{access adhoc76}
{connect adhoc76(1), adhoc75(0)}
{nseg = 1}
{strdef color color = "White"}
{pt3dclear()}
{pt3dadd(199476.000000,140400.000000,93900.000000,399.349908)}
{pt3dadd(199224.000000,140172.000000,93775.000000,346.657896)}
{pt3dadd(199056.000000,140028.000000,94125.000000,201.322548)}
{pt3dadd(198888.000000,140028.000000,94150.000000,55.987200)}
{pt3dadd(198600.000000,139668.000000,94400.000000,46.656000)}

{create adhoc77}
{access adhoc77}
{connect adhoc77(1), adhoc75(0)}
{nseg = 1}
{strdef color color = "White"}
{pt3dclear()}
{pt3dadd(199476.000000,140400.000000,93900.000000,399.349908)}
{pt3dadd(199368.000000,140016.000000,93600.000000,383.375952)}
{pt3dadd(199404.000000,139884.000000,93375.000000,347.715625)}
{pt3dadd(199392.000000,139572.000000,93125.000000,312.055299)}
{pt3dadd(199320.000000,139164.000000,93025.000000,276.394972)}
{pt3dadd(199284.000000,138816.000000,92850.000000,240.734646)}
{pt3dadd(199272.000000,138444.000000,92600.000000,252.771381)}
{pt3dadd(199248.000000,137976.000000,92325.000000,264.808116)}
{pt3dadd(199140.000000,137736.000000,92100.000000,276.844851)}
{pt3dadd(199080.000000,137496.000000,91850.000000,288.881586)}
{pt3dadd(198984.000000,137328.000000,91600.000000,303.325664)}
{pt3dadd(198876.000000,137028.000000,91325.000000,317.769741)}
{pt3dadd(198780.000000,136584.000000,91050.000000,332.213819)}
{pt3dadd(198732.000000,136452.000000,90825.000000,346.657896)}
{pt3dadd(198624.000000,136356.000000,90575.000000,329.325003)}
{pt3dadd(198528.000000,136176.000000,90300.000000,311.992110)}
{pt3dadd(198480.000000,136008.000000,90025.000000,294.659217)}
{pt3dadd(198408.000000,135660.000000,89775.000000,277.326324)}
{pt3dadd(198336.000000,135444.000000,89600.000000,294.659217)}
{pt3dadd(198288.000000,135240.000000,89425.000000,311.992110)}
{pt3dadd(198240.000000,135012.000000,89325.000000,329.325003)}
{pt3dadd(198204.000000,134808.000000,89275.000000,346.657896)}
{pt3dadd(198240.000000,134604.000000,89075.000000,370.405701)}
{pt3dadd(198228.000000,134424.000000,88775.000000,394.153506)}
{pt3dadd(198060.000000,134232.000000,88425.000000,417.901311)}
{pt3dadd(198096.000000,133968.000000,88150.000000,441.649116)}
{pt3dadd(198072.000000,133692.000000,87925.000000,499.187376)}
{pt3dadd(198048.000000,133524.000000,87700.000000,479.219922)}

{create adhoc78}
{access adhoc78}
{connect adhoc78(1), adhoc77(0)}
{nseg = 1}
{strdef color color = "White"}
{pt3dclear()}
{pt3dadd(198048.000000,133524.000000,87700.000000,479.219922)}
{pt3dadd(198000.000000,133524.000000,87425.000000,499.187376)}
{pt3dadd(197964.000000,133524.000000,87125.000000,412.802113)}
{pt3dadd(197928.000000,133584.000000,86925.000000,326.416851)}
{pt3dadd(197784.000000,133884.000000,86675.000000,240.031588)}
{pt3dadd(197664.000000,133920.000000,86375.000000,153.646326)}
{pt3dadd(197700.000000,133884.000000,85950.000000,184.566326)}
{pt3dadd(197736.000000,133872.000000,85700.000000,215.486325)}
{pt3dadd(197904.000000,133908.000000,85400.000000,246.406325)}
{pt3dadd(197976.000000,134040.000000,85250.000000,277.326324)}
{pt3dadd(198024.000000,134220.000000,85050.000000,268.178405)}
{pt3dadd(198168.000000,134412.000000,84825.000000,259.030485)}
{pt3dadd(198156.000000,134628.000000,84575.000000,249.882566)}
{pt3dadd(198240.000000,134964.000000,84300.000000,240.734646)}
{pt3dadd(198372.000000,135216.000000,83925.000000,240.734646)}
{pt3dadd(198576.000000,135408.000000,83800.000000,55.987200)}

{create adhoc79}
{access adhoc79}
{connect adhoc79(1), adhoc77(0)}
{nseg = 1}
{strdef color color = "White"}
{pt3dclear()}
{pt3dadd(198048.000000,133524.000000,87700.000000,479.219922)}
{pt3dadd(198108.000000,133092.000000,87375.000000,346.657896)}
{pt3dadd(198168.000000,132876.000000,87250.000000,320.177083)}
{pt3dadd(198264.000000,132636.000000,87275.000000,293.696271)}
{pt3dadd(198228.000000,132420.000000,87225.000000,267.215459)}
{pt3dadd(198264.000000,132168.000000,87225.000000,240.734646)}
{pt3dadd(198252.000000,131916.000000,87250.000000,209.574742)}
{pt3dadd(198336.000000,131688.000000,87350.000000,178.414839)}
{pt3dadd(198492.000000,131412.000000,87350.000000,147.254936)}
{pt3dadd(198516.000000,131040.000000,87350.000000,116.095032)}
{pt3dadd(198408.000000,130524.000000,87550.000000,105.377877)}
{pt3dadd(198384.000000,130248.000000,87700.000000,94.660722)}
{pt3dadd(198264.000000,129972.000000,87725.000000,55.987200)}

{create adhoc80}
{access adhoc80}
{connect adhoc80(1), adhoc67(0)}
{nseg = 1}
{strdef color color = "White"}
{pt3dclear()}
{pt3dadd(199572.000000,145836.000000,102350.000000,794.968308)}
{pt3dadd(199440.000000,145668.000000,102450.000000,763.169544)}
{pt3dadd(199308.000000,145500.000000,102500.000000,788.026109)}
{pt3dadd(199188.000000,145344.000000,102525.000000,812.882673)}
{pt3dadd(199032.000000,145164.000000,102500.000000,837.739238)}
{pt3dadd(198984.000000,144984.000000,102575.000000,862.595802)}
{pt3dadd(198972.000000,144792.000000,102600.000000,885.437343)}
{pt3dadd(198816.000000,144588.000000,102725.000000,908.278884)}
{pt3dadd(198660.000000,144396.000000,102700.000000,931.120425)}
{pt3dadd(198588.000000,144216.000000,102650.000000,953.961966)}
{pt3dadd(198516.000000,144012.000000,102600.000000,922.494460)}
{pt3dadd(198444.000000,143808.000000,102550.000000,891.026955)}
{pt3dadd(198372.000000,143568.000000,102500.000000,859.559450)}
{pt3dadd(198240.000000,143352.000000,102575.000000,828.091944)}
{pt3dadd(198072.000000,143136.000000,102675.000000,828.091944)}
{pt3dadd(197952.000000,142968.000000,102650.000000,828.091944)}
{pt3dadd(197904.000000,142836.000000,102575.000000,828.091944)}
{pt3dadd(197880.000000,142668.000000,102625.000000,828.091944)}
{pt3dadd(197724.000000,142488.000000,102700.000000,832.070075)}
{pt3dadd(197676.000000,142260.000000,102750.000000,836.048205)}
{pt3dadd(197532.000000,142044.000000,102700.000000,840.026335)}
{pt3dadd(197448.000000,141876.000000,102600.000000,844.004466)}
{pt3dadd(197460.000000,141732.000000,102675.000000,848.652300)}
{pt3dadd(197412.000000,141576.000000,102575.000000,853.300134)}
{pt3dadd(197364.000000,141360.000000,102600.000000,857.947968)}
{pt3dadd(197364.000000,141192.000000,102600.000000,862.595802)}
{pt3dadd(197376.000000,141060.000000,102475.000000,862.595802)}
{pt3dadd(197316.000000,140868.000000,102450.000000,862.595802)}
{pt3dadd(197292.000000,140640.000000,102525.000000,862.595802)}
{pt3dadd(197328.000000,140448.000000,102600.000000,862.595802)}
{pt3dadd(197316.000000,140292.000000,102625.000000,812.565234)}
{pt3dadd(197316.000000,140088.000000,102575.000000,762.534666)}
{pt3dadd(197364.000000,139884.000000,102650.000000,712.504098)}
{pt3dadd(197436.000000,139668.000000,102600.000000,662.473530)}
{pt3dadd(197364.000000,139464.000000,102625.000000,676.562602)}
{pt3dadd(197268.000000,139236.000000,102600.000000,690.651675)}
{pt3dadd(197208.000000,139056.000000,102625.000000,704.740748)}
{pt3dadd(197220.000000,138876.000000,102650.000000,718.829820)}
{pt3dadd(197256.000000,138660.000000,102750.000000,711.641533)}
{pt3dadd(197244.000000,138456.000000,102700.000000,704.453247)}
{pt3dadd(197352.000000,138276.000000,102600.000000,697.264960)}
{pt3dadd(197364.000000,138072.000000,102550.000000,690.076674)}
{pt3dadd(197412.000000,137892.000000,102675.000000,733.206456)}
{pt3dadd(197424.000000,137688.000000,102750.000000,776.336238)}
{pt3dadd(197484.000000,137520.000000,102650.000000,819.466020)}
{pt3dadd(197616.000000,137364.000000,102475.000000,862.595802)}
{pt3dadd(197616.000000,137184.000000,102400.000000,828.092016)}

{create adhoc81}
{access adhoc81}
{connect adhoc81(1), adhoc80(0)}
{nseg = 1}
{strdef color color = "White"}
{pt3dclear()}
{pt3dadd(197616.000000,137184.000000,102400.000000,828.092016)}
{pt3dadd(197304.000000,137184.000000,102525.000000,915.803424)}
{pt3dadd(196824.000000,137184.000000,102650.000000,721.681079)}
{pt3dadd(196416.000000,137184.000000,102700.000000,527.558733)}
{pt3dadd(196104.000000,137184.000000,102525.000000,333.436388)}
{pt3dadd(195936.000000,137076.000000,102250.000000,139.314042)}
{pt3dadd(195708.000000,136992.000000,102000.000000,152.632463)}
{pt3dadd(195480.000000,137004.000000,101800.000000,165.950883)}
{pt3dadd(195396.000000,137004.000000,101625.000000,179.269304)}
{pt3dadd(195300.000000,137028.000000,101425.000000,192.587724)}
{pt3dadd(195300.000000,137028.000000,101250.000000,211.846500)}
{pt3dadd(195300.000000,136992.000000,101050.000000,231.105276)}
{pt3dadd(195264.000000,136956.000000,100850.000000,231.105276)}

{create adhoc82}
{access adhoc82}
{connect adhoc82(1), adhoc81(0)}
{nseg = 1}
{strdef color color = "White"}
{pt3dclear()}
{pt3dadd(195264.000000,136956.000000,100850.000000,231.105276)}
{pt3dadd(195312.000000,136788.000000,100800.000000,67.184640)}
{pt3dadd(195408.000000,136560.000000,100650.000000,57.231360)}
{pt3dadd(195516.000000,136332.000000,100525.000000,47.278080)}
{pt3dadd(195600.000000,136152.000000,100500.000000,37.324800)}
{pt3dadd(195696.000000,135828.000000,100350.000000,38.880000)}

{create adhoc83}
{access adhoc83}
{connect adhoc83(1), adhoc81(0)}
{nseg = 1}
{strdef color color = "White"}
{pt3dclear()}
{pt3dadd(195264.000000,136956.000000,100850.000000,231.105276)}
{pt3dadd(195336.000000,137112.000000,100675.000000,200.612214)}
{pt3dadd(195408.000000,137244.000000,100475.000000,189.467088)}
{pt3dadd(195432.000000,137148.000000,100250.000000,178.321962)}
{pt3dadd(195456.000000,137052.000000,100050.000000,167.176836)}
{pt3dadd(195456.000000,137028.000000,99825.000000,54.780516)}

{create adhoc84}
{access adhoc84}
{connect adhoc84(1), adhoc80(0)}
{nseg = 1}
{strdef color color = "White"}
{pt3dclear()}
{pt3dadd(197616.000000,137184.000000,102400.000000,828.092016)}
{pt3dadd(197724.000000,137076.000000,102425.000000,794.968308)}
{pt3dadd(197712.000000,136872.000000,102425.000000,811.875182)}
{pt3dadd(197760.000000,136668.000000,102375.000000,828.782055)}
{pt3dadd(197892.000000,136476.000000,102350.000000,845.688929)}
{pt3dadd(197892.000000,136392.000000,102450.000000,862.595802)}
{pt3dadd(197952.000000,136212.000000,102425.000000,862.595802)}
{pt3dadd(198012.000000,135996.000000,102450.000000,862.595802)}
{pt3dadd(198084.000000,135804.000000,102350.000000,862.595802)}
{pt3dadd(198036.000000,135612.000000,102300.000000,862.595802)}
{pt3dadd(198156.000000,135444.000000,102425.000000,862.595802)}
{pt3dadd(198024.000000,135228.000000,102400.000000,862.595802)}
{pt3dadd(198108.000000,134976.000000,102325.000000,862.595802)}
{pt3dadd(198180.000000,134748.000000,102400.000000,862.595802)}
{pt3dadd(198060.000000,134556.000000,102225.000000,905.725589)}
{pt3dadd(198012.000000,134352.000000,102250.000000,948.855375)}
{pt3dadd(197988.000000,134172.000000,102200.000000,991.985162)}
{pt3dadd(197964.000000,133992.000000,102150.000000,1035.114948)}
{pt3dadd(197892.000000,133824.000000,102125.000000,1024.763782)}
{pt3dadd(197820.000000,133644.000000,102100.000000,1014.412617)}
{pt3dadd(197856.000000,133476.000000,102050.000000,1004.061452)}
{pt3dadd(197772.000000,133332.000000,101950.000000,993.710286)}
{pt3dadd(197772.000000,133164.000000,101950.000000,993.710304)}
{pt3dadd(197784.000000,132972.000000,101850.000000,993.710322)}
{pt3dadd(197760.000000,132804.000000,101775.000000,993.710340)}
{pt3dadd(197820.000000,132612.000000,101750.000000,993.710358)}
{pt3dadd(197760.000000,132408.000000,101850.000000,952.305755)}
{pt3dadd(197688.000000,132216.000000,101875.000000,910.901151)}
{pt3dadd(197628.000000,132000.000000,101875.000000,869.496547)}
{pt3dadd(197472.000000,131820.000000,101725.000000,828.091944)}
{pt3dadd(197388.000000,131628.000000,101700.000000,859.559450)}
{pt3dadd(197388.000000,131436.000000,101700.000000,891.026955)}
{pt3dadd(197184.000000,131208.000000,101675.000000,922.494460)}
{pt3dadd(197160.000000,131052.000000,101575.000000,953.961966)}
{pt3dadd(197076.000000,130884.000000,101525.000000,953.961966)}
{pt3dadd(197028.000000,130692.000000,101525.000000,953.961966)}
{pt3dadd(197004.000000,130512.000000,101650.000000,953.961966)}
{pt3dadd(196956.000000,130308.000000,101675.000000,953.961966)}
{pt3dadd(197028.000000,130128.000000,101675.000000,916.566633)}
{pt3dadd(196968.000000,129984.000000,101625.000000,879.171300)}
{pt3dadd(196884.000000,129792.000000,101650.000000,828.092016)}

{create adhoc85}
{access adhoc85}
{connect adhoc85(1), adhoc84(0)}
{nseg = 1}
{strdef color color = "White"}
{pt3dclear()}
{pt3dadd(196884.000000,129792.000000,101650.000000,828.092016)}
{pt3dadd(196872.000000,130032.000000,101175.000000,953.961966)}
{pt3dadd(196872.000000,130260.000000,100700.000000,798.669365)}
{pt3dadd(196728.000000,130056.000000,100400.000000,643.376763)}
{pt3dadd(196548.000000,129912.000000,100175.000000,488.084161)}
{pt3dadd(196524.000000,129648.000000,99850.000000,332.791560)}
{pt3dadd(196608.000000,129696.000000,99525.000000,415.212071)}
{pt3dadd(196872.000000,129744.000000,99250.000000,497.632581)}
{pt3dadd(196848.000000,129780.000000,99025.000000,580.053092)}
{pt3dadd(196992.000000,129888.000000,98850.000000,662.473602)}
{pt3dadd(197148.000000,129828.000000,98625.000000,641.324028)}
{pt3dadd(197196.000000,129840.000000,98425.000000,620.174454)}
{pt3dadd(197052.000000,129840.000000,98200.000000,599.024880)}
{pt3dadd(197004.000000,130032.000000,98100.000000,499.187376)}

{create adhoc86}
{access adhoc86}
{connect adhoc86(1), adhoc85(0)}
{nseg = 1}
{strdef color color = "White"}
{pt3dclear()}
{pt3dadd(197004.000000,130032.000000,98100.000000,499.187376)}
{pt3dadd(196980.000000,130332.000000,98100.000000,319.479948)}
{pt3dadd(196968.000000,130740.000000,98100.000000,256.406121)}
{pt3dadd(196944.000000,130800.000000,97925.000000,193.332294)}
{pt3dadd(196728.000000,130992.000000,97950.000000,130.258467)}
{pt3dadd(196560.000000,131172.000000,97950.000000,67.184640)}
{pt3dadd(196260.000000,131352.000000,97950.000000,117.180738)}
{pt3dadd(196020.000000,131532.000000,97950.000000,167.176836)}
{pt3dadd(195672.000000,131724.000000,97950.000000,77.396688)}

{create adhoc87}
{access adhoc87}
{connect adhoc87(1), adhoc85(0)}
{nseg = 1}
{strdef color color = "White"}
{pt3dclear()}
{pt3dadd(197004.000000,130032.000000,98100.000000,499.187376)}
{pt3dadd(196908.000000,129600.000000,97850.000000,479.219886)}
{pt3dadd(196872.000000,129528.000000,97600.000000,499.187376)}
{pt3dadd(196596.000000,129264.000000,97275.000000,277.326342)}

{create adhoc88}
{access adhoc88}
{connect adhoc88(1), adhoc87(0)}
{nseg = 1}
{strdef color color = "White"}
{pt3dclear()}
{pt3dadd(196596.000000,129264.000000,97275.000000,277.326342)}
{pt3dadd(196392.000000,129180.000000,97275.000000,200.612214)}
{pt3dadd(196140.000000,129084.000000,97275.000000,164.455961)}
{pt3dadd(195804.000000,129240.000000,97475.000000,128.299707)}
{pt3dadd(195576.000000,129336.000000,97550.000000,92.143454)}
{pt3dadd(195312.000000,129372.000000,97550.000000,55.987200)}
{pt3dadd(194988.000000,129396.000000,97750.000000,47.692800)}
{pt3dadd(194724.000000,129636.000000,97725.000000,39.398400)}
{pt3dadd(194664.000000,129852.000000,97825.000000,31.104000)}

{create adhoc89}
{access adhoc89}
{connect adhoc89(1), adhoc87(0)}
{nseg = 1}
{strdef color color = "White"}
{pt3dclear()}
{pt3dadd(196596.000000,129264.000000,97275.000000,277.326342)}
{pt3dadd(196596.000000,129192.000000,97125.000000,288.881586)}
{pt3dadd(196680.000000,129120.000000,96850.000000,331.250886)}
{pt3dadd(196680.000000,128952.000000,96575.000000,373.620186)}
{pt3dadd(196656.000000,128880.000000,96325.000000,415.989486)}
{pt3dadd(196560.000000,128772.000000,96075.000000,325.619010)}

{create adhoc90}
{access adhoc90}
{connect adhoc90(1), adhoc89(0)}
{nseg = 1}
{strdef color color = "White"}
{pt3dclear()}
{pt3dadd(196560.000000,128772.000000,96075.000000,325.619010)}
{pt3dadd(196344.000000,128616.000000,96075.000000,415.989486)}
{pt3dadd(196128.000000,128472.000000,96075.000000,167.176836)}

{create adhoc91}
{access adhoc91}
{connect adhoc91(1), adhoc90(0)}
{nseg = 1}
{strdef color color = "White"}
{pt3dclear()}
{pt3dadd(196128.000000,128472.000000,96075.000000,167.176836)}
{pt3dadd(195972.000000,128544.000000,96225.000000,67.184640)}
{pt3dadd(195792.000000,128556.000000,96350.000000,38.880000)}
{pt3dadd(195720.000000,128772.000000,96425.000000,46.656000)}

{create adhoc92}
{access adhoc92}
{connect adhoc92(1), adhoc90(0)}
{nseg = 1}
{strdef color color = "White"}
{pt3dclear()}
{pt3dadd(196128.000000,128472.000000,96075.000000,167.176836)}
{pt3dadd(196128.000000,128256.000000,96025.000000,67.184640)}
{pt3dadd(196128.000000,128028.000000,96075.000000,64.385280)}
{pt3dadd(195984.000000,127788.000000,95975.000000,61.585920)}
{pt3dadd(195864.000000,127500.000000,96000.000000,58.786560)}
{pt3dadd(195744.000000,127176.000000,96025.000000,55.987200)}
{pt3dadd(195636.000000,126948.000000,96025.000000,63.389034)}
{pt3dadd(195528.000000,126756.000000,96000.000000,70.790868)}
{pt3dadd(195408.000000,126480.000000,96025.000000,78.192702)}
{pt3dadd(195300.000000,126336.000000,96025.000000,85.594536)}
{pt3dadd(195216.000000,126132.000000,95950.000000,32.400000)}
{pt3dadd(195096.000000,125904.000000,95950.000000,38.880000)}

{create adhoc93}
{access adhoc93}
{connect adhoc93(1), adhoc89(0)}
{nseg = 1}
{strdef color color = "White"}
{pt3dclear()}
{pt3dadd(196560.000000,128772.000000,96075.000000,325.619010)}
{pt3dadd(196500.000000,128712.000000,95800.000000,415.989486)}
{pt3dadd(196500.000000,128736.000000,95575.000000,362.145168)}
{pt3dadd(196620.000000,128700.000000,95300.000000,308.300850)}
{pt3dadd(196692.000000,128472.000000,95125.000000,254.456532)}
{pt3dadd(196632.000000,128328.000000,94875.000000,200.612214)}
{pt3dadd(196560.000000,128484.000000,94650.000000,240.734646)}

{create adhoc94}
{access adhoc94}
{connect adhoc94(1), adhoc93(0)}
{nseg = 1}
{strdef color color = "White"}
{pt3dclear()}
{pt3dadd(196560.000000,128484.000000,94650.000000,240.734646)}
{pt3dadd(196644.000000,128724.000000,94650.000000,167.176836)}
{pt3dadd(196740.000000,128916.000000,94600.000000,157.889238)}
{pt3dadd(196728.000000,129060.000000,94550.000000,148.601640)}
{pt3dadd(196740.000000,129204.000000,94425.000000,139.314042)}
{pt3dadd(196788.000000,129228.000000,94200.000000,139.314042)}

{create adhoc95}
{access adhoc95}
{connect adhoc95(1), adhoc93(0)}
{nseg = 1}
{strdef color color = "White"}
{pt3dclear()}
{pt3dadd(196560.000000,128484.000000,94650.000000,240.734646)}
{pt3dadd(196488.000000,128256.000000,94400.000000,332.791560)}
{pt3dadd(196428.000000,128172.000000,94225.000000,325.899968)}
{pt3dadd(196416.000000,128088.000000,94075.000000,290.413831)}
{pt3dadd(196356.000000,127932.000000,93875.000000,204.116108)}
{pt3dadd(196224.000000,127896.000000,93700.000000,44.789760)}
{pt3dadd(196080.000000,127824.000000,93475.000000,-209.782254)}

{create adhoc96}
{access adhoc96}
{connect adhoc96(1), adhoc84(0)}
{nseg = 1}
{strdef color color = "White"}
{pt3dclear()}
{pt3dadd(196884.000000,129792.000000,101650.000000,828.092016)}
{pt3dadd(196896.000000,129576.000000,101675.000000,862.595802)}
{pt3dadd(196836.000000,129348.000000,101700.000000,895.374423)}
{pt3dadd(196872.000000,129144.000000,101725.000000,928.153044)}
{pt3dadd(196812.000000,128940.000000,101700.000000,960.931665)}
{pt3dadd(196692.000000,128772.000000,101575.000000,993.710286)}
{pt3dadd(196572.000000,128592.000000,101650.000000,1004.061452)}
{pt3dadd(196512.000000,128328.000000,101650.000000,1014.412617)}
{pt3dadd(196320.000000,128124.000000,101575.000000,1024.763782)}
{pt3dadd(196296.000000,127920.000000,101450.000000,1035.114948)}
{pt3dadd(196236.000000,127716.000000,101400.000000,993.710358)}
{pt3dadd(196164.000000,127464.000000,101375.000000,1055.005614)}

{create adhoc97}
{access adhoc97}
{connect adhoc97(1), adhoc96(0)}
{nseg = 1}
{strdef color color = "White"}
{pt3dclear()}
{pt3dadd(196164.000000,127464.000000,101375.000000,1055.005614)}
{pt3dadd(196248.000000,127464.000000,101750.000000,1035.114948)}
{pt3dadd(196332.000000,127464.000000,102150.000000,872.180190)}
{pt3dadd(196548.000000,127464.000000,102450.000000,709.245432)}
{pt3dadd(196464.000000,127164.000000,102425.000000,546.310674)}
{pt3dadd(196404.000000,126828.000000,102450.000000,383.375916)}
{pt3dadd(196308.000000,126504.000000,102475.000000,345.308256)}
{pt3dadd(196212.000000,126240.000000,102425.000000,307.240596)}
{pt3dadd(196176.000000,126036.000000,102450.000000,269.172936)}
{pt3dadd(196176.000000,125844.000000,102450.000000,231.105276)}
{pt3dadd(196116.000000,125628.000000,102400.000000,199.141056)}
{pt3dadd(196188.000000,125400.000000,102375.000000,167.176836)}
{pt3dadd(196332.000000,125220.000000,102375.000000,82.170756)}

{create adhoc98}
{access adhoc98}
{connect adhoc98(1), adhoc96(0)}
{nseg = 1}
{strdef color color = "White"}
{pt3dclear()}
{pt3dadd(196164.000000,127464.000000,101375.000000,1055.005614)}
{pt3dadd(196092.000000,127296.000000,101275.000000,1098.964116)}
{pt3dadd(195948.000000,127116.000000,101150.000000,1031.246091)}
{pt3dadd(196020.000000,127020.000000,100950.000000,963.528066)}
{pt3dadd(195780.000000,126732.000000,100800.000000,895.810041)}
{pt3dadd(195768.000000,126456.000000,100750.000000,828.092016)}
{pt3dadd(195756.000000,126216.000000,100425.000000,828.091944)}
{pt3dadd(195660.000000,125940.000000,100300.000000,794.968308)}

{create adhoc99}
{access adhoc99}
{connect adhoc99(1), adhoc98(0)}
{nseg = 1}
{strdef color color = "White"}
{pt3dclear()}
{pt3dadd(195660.000000,125940.000000,100300.000000,794.968308)}
{pt3dadd(195660.000000,125940.000000,100600.000000,862.595802)}
{pt3dadd(195648.000000,125940.000000,100925.000000,668.345486)}
{pt3dadd(195552.000000,125940.000000,101100.000000,474.095169)}
{pt3dadd(195288.000000,125940.000000,101200.000000,279.844853)}
{pt3dadd(195120.000000,125844.000000,101125.000000,85.594536)}
{pt3dadd(194880.000000,125664.000000,101025.000000,91.170198)}
{pt3dadd(194784.000000,125352.000000,101125.000000,96.745860)}
{pt3dadd(194628.000000,125292.000000,101075.000000,46.656000)}

{create adhoc100}
{access adhoc100}
{connect adhoc100(1), adhoc98(0)}
{nseg = 1}
{strdef color color = "White"}
{pt3dclear()}
{pt3dadd(195660.000000,125940.000000,100300.000000,794.968308)}
{pt3dadd(195684.000000,125700.000000,100100.000000,635.974578)}
{pt3dadd(195732.000000,125412.000000,100075.000000,656.688389)}
{pt3dadd(195612.000000,125124.000000,99850.000000,677.402199)}
{pt3dadd(195684.000000,124824.000000,99700.000000,698.116010)}
{pt3dadd(195672.000000,124584.000000,99675.000000,718.829820)}
{pt3dadd(195696.000000,124332.000000,99525.000000,737.864442)}
{pt3dadd(195768.000000,124068.000000,99375.000000,756.899064)}
{pt3dadd(195732.000000,123804.000000,99275.000000,775.933686)}
{pt3dadd(195732.000000,123540.000000,99175.000000,794.968308)}
{pt3dadd(195648.000000,123288.000000,99075.000000,811.530162)}
{pt3dadd(195648.000000,123060.000000,99000.000000,828.092016)}
{pt3dadd(195648.000000,122844.000000,98875.000000,828.092016)}

{create adhoc101}
{access adhoc101}
{connect adhoc101(1), adhoc100(0)}
{nseg = 1}
{strdef color color = "White"}
{pt3dclear()}
{pt3dadd(195648.000000,122844.000000,98875.000000,828.092016)}
{pt3dadd(195648.000000,122604.000000,98775.000000,828.092016)}
{pt3dadd(195720.000000,122412.000000,98800.000000,879.171300)}

{create adhoc102}
{access adhoc102}
{connect adhoc102(1), adhoc101(0)}
{nseg = 1}
{strdef color color = "White"}
{pt3dclear()}
{pt3dadd(195720.000000,122412.000000,98800.000000,879.171300)}
{pt3dadd(195720.000000,122232.000000,99125.000000,862.595802)}
{pt3dadd(195720.000000,122112.000000,99500.000000,590.615868)}
{pt3dadd(195528.000000,122016.000000,99525.000000,318.635934)}
{pt3dadd(195336.000000,121836.000000,99575.000000,46.656000)}
{pt3dadd(194988.000000,121656.000000,99600.000000,46.656000)}

{create adhoc103}
{access adhoc103}
{connect adhoc103(1), adhoc101(0)}
{nseg = 1}
{strdef color color = "White"}
{pt3dclear()}
{pt3dadd(195720.000000,122412.000000,98800.000000,879.171300)}
{pt3dadd(195684.000000,122172.000000,98450.000000,862.595802)}
{pt3dadd(195672.000000,121932.000000,98225.000000,853.969856)}
{pt3dadd(195492.000000,121692.000000,98075.000000,845.343909)}
{pt3dadd(195540.000000,121488.000000,97925.000000,836.717962)}
{pt3dadd(195420.000000,121296.000000,97675.000000,828.092016)}
{pt3dadd(195384.000000,121140.000000,97700.000000,828.092016)}

{create adhoc104}
{access adhoc104}
{connect adhoc104(1), adhoc103(0)}
{nseg = 1}
{strdef color color = "White"}
{pt3dclear()}
{pt3dadd(195384.000000,121140.000000,97700.000000,828.092016)}
{pt3dadd(195324.000000,120828.000000,97525.000000,763.169472)}
{pt3dadd(195240.000000,120576.000000,97425.000000,722.133324)}
{pt3dadd(195228.000000,120324.000000,97375.000000,681.097176)}
{pt3dadd(195144.000000,120108.000000,97325.000000,640.061028)}
{pt3dadd(195144.000000,119856.000000,97125.000000,599.024880)}
{pt3dadd(195024.000000,119580.000000,97050.000000,628.976115)}
{pt3dadd(194904.000000,119352.000000,96925.000000,658.927350)}
{pt3dadd(194760.000000,119172.000000,96825.000000,688.878585)}
{pt3dadd(194700.000000,118980.000000,96800.000000,718.829820)}
{pt3dadd(194616.000000,118776.000000,96700.000000,704.740748)}
{pt3dadd(194532.000000,118596.000000,96600.000000,690.651675)}
{pt3dadd(194532.000000,118452.000000,96625.000000,676.562602)}
{pt3dadd(194436.000000,118236.000000,96675.000000,662.473530)}
{pt3dadd(194376.000000,117984.000000,96575.000000,690.651675)}
{pt3dadd(194376.000000,117732.000000,96300.000000,718.829820)}
{pt3dadd(194460.000000,117588.000000,96000.000000,662.473602)}

{create adhoc105}
{access adhoc105}
{connect adhoc105(1), adhoc104(0)}
{nseg = 1}
{strdef color color = "White"}
{pt3dclear()}
{pt3dadd(194460.000000,117588.000000,96000.000000,662.473602)}
{pt3dadd(194232.000000,117588.000000,96425.000000,718.829820)}
{pt3dadd(193884.000000,117588.000000,96925.000000,625.786839)}
{pt3dadd(193392.000000,117588.000000,97300.000000,532.743858)}
{pt3dadd(193428.000000,117420.000000,97200.000000,439.700877)}
{pt3dadd(193260.000000,117192.000000,97200.000000,346.657896)}
{pt3dadd(193128.000000,117012.000000,97175.000000,365.989207)}
{pt3dadd(192960.000000,116832.000000,97175.000000,385.320519)}
{pt3dadd(193008.000000,116640.000000,97175.000000,404.651831)}
{pt3dadd(192912.000000,116448.000000,97175.000000,423.983142)}
{pt3dadd(192852.000000,116280.000000,97200.000000,479.219886)}
{pt3dadd(192840.000000,116088.000000,97200.000000,499.187376)}

{create adhoc106}
{access adhoc106}
{connect adhoc106(1), adhoc105(0)}
{nseg = 1}
{strdef color color = "White"}
{pt3dclear()}
{pt3dadd(192840.000000,116088.000000,97200.000000,499.187376)}
{pt3dadd(193200.000000,116088.000000,97075.000000,479.219886)}
{pt3dadd(193692.000000,116088.000000,96875.000000,371.078915)}
{pt3dadd(193836.000000,115968.000000,96850.000000,262.937943)}
{pt3dadd(193956.000000,115920.000000,96800.000000,154.796971)}
{pt3dadd(194148.000000,115692.000000,96825.000000,46.656000)}
{pt3dadd(194304.000000,115536.000000,96700.000000,44.712000)}
{pt3dadd(194232.000000,115296.000000,96725.000000,42.768000)}
{pt3dadd(194160.000000,115140.000000,96750.000000,40.824000)}
{pt3dadd(194076.000000,115008.000000,96775.000000,38.880000)}
{pt3dadd(193980.000000,114936.000000,96775.000000,38.880000)}

{create adhoc107}
{access adhoc107}
{connect adhoc107(1), adhoc105(0)}
{nseg = 1}
{strdef color color = "White"}
{pt3dclear()}
{pt3dadd(192840.000000,116088.000000,97200.000000,499.187376)}
{pt3dadd(192828.000000,115956.000000,97125.000000,552.061314)}
{pt3dadd(192768.000000,115812.000000,97125.000000,513.883472)}
{pt3dadd(192708.000000,115644.000000,97100.000000,475.705629)}
{pt3dadd(192612.000000,115476.000000,97050.000000,437.527786)}
{pt3dadd(192576.000000,115296.000000,97050.000000,399.349944)}
{pt3dadd(192540.000000,115104.000000,96975.000000,401.268397)}
{pt3dadd(192492.000000,114900.000000,96850.000000,403.186851)}
{pt3dadd(192360.000000,114696.000000,96775.000000,405.105305)}
{pt3dadd(192348.000000,114528.000000,96750.000000,407.023758)}
{pt3dadd(192372.000000,114348.000000,96625.000000,460.051074)}
{pt3dadd(192312.000000,114276.000000,96550.000000,441.649080)}

{create adhoc108}
{access adhoc108}
{connect adhoc108(1), adhoc107(0)}
{nseg = 1}
{strdef color color = "White"}
{pt3dclear()}
{pt3dadd(192312.000000,114276.000000,96550.000000,441.649080)}
{pt3dadd(192228.000000,114276.000000,96200.000000,415.989486)}
{pt3dadd(192000.000000,114276.000000,95975.000000,323.764338)}
{pt3dadd(191652.000000,114276.000000,95725.000000,231.539190)}
{pt3dadd(191496.000000,114204.000000,95450.000000,139.314042)}
{pt3dadd(191472.000000,114132.000000,95250.000000,123.256134)}

{create adhoc109}
{access adhoc109}
{connect adhoc109(1), adhoc107(0)}
{nseg = 1}
{strdef color color = "White"}
{pt3dclear()}
{pt3dadd(192312.000000,114276.000000,96550.000000,441.649080)}
{pt3dadd(192336.000000,114084.000000,96550.000000,415.989486)}
{pt3dadd(192324.000000,113892.000000,96475.000000,431.797086)}
{pt3dadd(192288.000000,113700.000000,96375.000000,447.604686)}
{pt3dadd(192288.000000,113520.000000,96300.000000,463.412286)}
{pt3dadd(192240.000000,113364.000000,96250.000000,479.219886)}
{pt3dadd(192204.000000,113172.000000,96200.000000,446.079388)}
{pt3dadd(192192.000000,112920.000000,96075.000000,412.938891)}
{pt3dadd(192084.000000,112692.000000,95900.000000,379.798393)}
{pt3dadd(192072.000000,112536.000000,95850.000000,346.657896)}
{pt3dadd(192060.000000,112368.000000,95825.000000,332.791560)}

{create adhoc110}
{access adhoc110}
{connect adhoc110(1), adhoc109(0)}
{nseg = 1}
{strdef color color = "White"}
{pt3dclear()}
{pt3dadd(192060.000000,112368.000000,95825.000000,332.791560)}
{pt3dadd(192204.000000,112560.000000,95550.000000,319.479912)}
{pt3dadd(192564.000000,112428.000000,95400.000000,326.274408)}
{pt3dadd(192960.000000,112020.000000,95075.000000,333.068904)}
{pt3dadd(193056.000000,111936.000000,94950.000000,339.863400)}
{pt3dadd(193176.000000,111804.000000,94725.000000,346.657896)}
{pt3dadd(193188.000000,111528.000000,94450.000000,294.821933)}
{pt3dadd(193104.000000,111264.000000,94225.000000,242.985969)}
{pt3dadd(193092.000000,111024.000000,94025.000000,191.150005)}
{pt3dadd(192960.000000,110748.000000,93800.000000,139.314042)}
{pt3dadd(192888.000000,110520.000000,93600.000000,139.314042)}
{pt3dadd(192840.000000,110256.000000,93375.000000,116.095032)}

{create adhoc111}
{access adhoc111}
{connect adhoc111(1), adhoc110(0)}
{nseg = 1}
{strdef color color = "White"}
{pt3dclear()}
{pt3dadd(192840.000000,110256.000000,93375.000000,116.095032)}
{pt3dadd(193224.000000,110448.000000,93375.000000,53.747712)}
{pt3dadd(193416.000000,110520.000000,93275.000000,38.880000)}

{create adhoc112}
{access adhoc112}
{connect adhoc112(1), adhoc110(0)}
{nseg = 1}
{strdef color color = "White"}
{pt3dclear()}
{pt3dadd(192840.000000,110256.000000,93375.000000,116.095032)}
{pt3dadd(192576.000000,109908.000000,93275.000000,235.546146)}
{pt3dadd(192528.000000,109800.000000,93050.000000,236.843271)}
{pt3dadd(192504.000000,109620.000000,93000.000000,238.140396)}
{pt3dadd(192420.000000,109428.000000,93025.000000,239.437521)}
{pt3dadd(192420.000000,109224.000000,93000.000000,240.734646)}
{pt3dadd(192336.000000,109056.000000,92900.000000,209.574742)}
{pt3dadd(192240.000000,108816.000000,92800.000000,178.414839)}
{pt3dadd(192072.000000,108624.000000,92725.000000,147.254936)}
{pt3dadd(191880.000000,108432.000000,92700.000000,116.095032)}
{pt3dadd(191520.000000,108036.000000,92400.000000,139.314042)}
{pt3dadd(191460.000000,107832.000000,92275.000000,85.594554)}

{create adhoc113}
{access adhoc113}
{connect adhoc113(1), adhoc109(0)}
{nseg = 1}
{strdef color color = "White"}
{pt3dclear()}
{pt3dadd(192060.000000,112368.000000,95825.000000,332.791560)}
{pt3dadd(191748.000000,112188.000000,95900.000000,346.657896)}
{pt3dadd(191616.000000,112020.000000,95975.000000,332.213819)}
{pt3dadd(191472.000000,111804.000000,96000.000000,317.769741)}
{pt3dadd(191436.000000,111612.000000,96125.000000,303.325664)}
{pt3dadd(191328.000000,111432.000000,95950.000000,288.881586)}
{pt3dadd(191268.000000,111252.000000,96000.000000,320.658561)}
{pt3dadd(191172.000000,111036.000000,96100.000000,352.435536)}
{pt3dadd(191172.000000,110856.000000,95975.000000,384.212511)}
{pt3dadd(191136.000000,110676.000000,95775.000000,415.989486)}
{pt3dadd(191124.000000,110460.000000,95825.000000,415.989486)}
{pt3dadd(191028.000000,110268.000000,95750.000000,415.989486)}
{pt3dadd(190932.000000,109968.000000,95800.000000,415.989486)}
{pt3dadd(190680.000000,109704.000000,95875.000000,415.989486)}
{pt3dadd(190548.000000,109488.000000,95800.000000,415.989486)}
{pt3dadd(190356.000000,109260.000000,95725.000000,415.989486)}
{pt3dadd(190188.000000,109032.000000,95725.000000,415.989486)}
{pt3dadd(190092.000000,108840.000000,95800.000000,415.989486)}
{pt3dadd(189816.000000,108648.000000,95900.000000,415.989486)}
{pt3dadd(189372.000000,108492.000000,95925.000000,415.989486)}
{pt3dadd(189120.000000,108312.000000,96075.000000,415.989486)}
{pt3dadd(188832.000000,108120.000000,96225.000000,415.989486)}
{pt3dadd(188520.000000,107928.000000,96275.000000,381.323696)}
{pt3dadd(188196.000000,107784.000000,96375.000000,346.657905)}
{pt3dadd(188028.000000,107688.000000,96425.000000,311.992115)}
{pt3dadd(187860.000000,107472.000000,96525.000000,277.326324)}
{pt3dadd(187584.000000,107316.000000,96650.000000,170.389296)}

{create adhoc114}
{access adhoc114}
{connect adhoc114(1), adhoc113(0)}
{nseg = 1}
{strdef color color = "White"}
{pt3dclear()}
{pt3dadd(187584.000000,107316.000000,96650.000000,170.389296)}
{pt3dadd(187932.000000,107316.000000,96350.000000,288.881586)}
{pt3dadd(187848.000000,107148.000000,96225.000000,200.612214)}
{pt3dadd(187596.000000,106992.000000,96025.000000,200.612214)}

{create adhoc115}
{access adhoc115}
{connect adhoc115(1), adhoc114(0)}
{nseg = 1}
{strdef color color = "White"}
{pt3dclear()}
{pt3dadd(187596.000000,106992.000000,96025.000000,200.612214)}
{pt3dadd(187404.000000,107064.000000,96025.000000,37.324800)}
{pt3dadd(187128.000000,107184.000000,96025.000000,67.184640)}
{pt3dadd(187080.000000,107436.000000,96125.000000,67.184640)}

{create adhoc116}
{access adhoc116}
{connect adhoc116(1), adhoc114(0)}
{nseg = 1}
{strdef color color = "White"}
{pt3dclear()}
{pt3dadd(187596.000000,106992.000000,96025.000000,200.612214)}
{pt3dadd(187584.000000,106848.000000,95975.000000,200.612214)}
{pt3dadd(187488.000000,106728.000000,95800.000000,188.976708)}
{pt3dadd(187452.000000,106512.000000,95625.000000,177.341202)}
{pt3dadd(187476.000000,106212.000000,95525.000000,165.705696)}
{pt3dadd(187500.000000,106044.000000,95300.000000,154.070190)}
{pt3dadd(187620.000000,105912.000000,95025.000000,146.366681)}
{pt3dadd(187584.000000,105900.000000,94875.000000,138.663171)}
{pt3dadd(187656.000000,105840.000000,94675.000000,130.959662)}
{pt3dadd(187608.000000,105636.000000,94425.000000,123.256152)}
{pt3dadd(187464.000000,105456.000000,94375.000000,110.001006)}
{pt3dadd(187560.000000,105372.000000,94125.000000,96.745860)}
{pt3dadd(187632.000000,105276.000000,93925.000000,38.880000)}

{create adhoc117}
{access adhoc117}
{connect adhoc117(1), adhoc113(0)}
{nseg = 1}
{strdef color color = "White"}
{pt3dclear()}
{pt3dadd(187584.000000,107316.000000,96650.000000,170.389296)}
{pt3dadd(187056.000000,107208.000000,96825.000000,200.612214)}

{create adhoc118}
{access adhoc118}
{connect adhoc118(1), adhoc117(0)}
{nseg = 1}
{strdef color color = "White"}
{pt3dclear()}
{pt3dadd(187056.000000,107208.000000,96825.000000,200.612214)}
{pt3dadd(187488.000000,107616.000000,96975.000000,240.734646)}
{pt3dadd(187320.000000,107892.000000,97150.000000,147.907368)}
{pt3dadd(187332.000000,108036.000000,97375.000000,80.621550)}

{create adhoc119}
{access adhoc119}
{connect adhoc119(1), adhoc118(0)}
{nseg = 1}
{strdef color color = "White"}
{pt3dclear()}
{pt3dadd(187332.000000,108036.000000,97375.000000,80.621550)}
{pt3dadd(187248.000000,107688.000000,97375.000000,116.095032)}
{pt3dadd(187080.000000,107580.000000,97550.000000,116.095032)}
{pt3dadd(186888.000000,107460.000000,97700.000000,67.184640)}

{create adhoc120}
{access adhoc120}
{connect adhoc120(1), adhoc118(0)}
{nseg = 1}
{strdef color color = "White"}
{pt3dclear()}
{pt3dadd(187332.000000,108036.000000,97375.000000,80.621550)}
{pt3dadd(187392.000000,108324.000000,97425.000000,80.621550)}

{create adhoc121}
{access adhoc121}
{connect adhoc121(1), adhoc117(0)}
{nseg = 1}
{strdef color color = "White"}
{pt3dclear()}
{pt3dadd(187056.000000,107208.000000,96825.000000,200.612214)}
{pt3dadd(186792.000000,107016.000000,96900.000000,200.612214)}
{pt3dadd(186600.000000,106800.000000,96950.000000,192.587724)}

{create adhoc122}
{access adhoc122}
{connect adhoc122(1), adhoc121(0)}
{nseg = 1}
{strdef color color = "White"}
{pt3dclear()}
{pt3dadd(186600.000000,106800.000000,96950.000000,192.587724)}
{pt3dadd(186420.000000,106908.000000,97050.000000,226.124280)}
{pt3dadd(186252.000000,106908.000000,97350.000000,109.049148)}

{create adhoc123}
{access adhoc123}
{connect adhoc123(1), adhoc121(0)}
{nseg = 1}
{strdef color color = "White"}
{pt3dclear()}
{pt3dadd(186600.000000,106800.000000,96950.000000,192.587724)}
{pt3dadd(186516.000000,106668.000000,96850.000000,200.612214)}
{pt3dadd(186480.000000,106440.000000,96725.000000,200.612214)}
{pt3dadd(186444.000000,106200.000000,96700.000000,200.612214)}
{pt3dadd(186432.000000,105972.000000,96625.000000,200.612214)}
{pt3dadd(186372.000000,105768.000000,96550.000000,200.612214)}
{pt3dadd(186360.000000,105516.000000,96450.000000,166.583471)}
{pt3dadd(186168.000000,105276.000000,96375.000000,132.554727)}
{pt3dadd(185988.000000,105096.000000,96200.000000,98.525984)}
{pt3dadd(185856.000000,104940.000000,96125.000000,64.497240)}
{pt3dadd(185820.000000,104736.000000,96000.000000,80.621550)}
{pt3dadd(185760.000000,104568.000000,95775.000000,55.987200)}

{create adhoc124}
{access adhoc124}
{connect adhoc124(1), adhoc104(0)}
{nseg = 1}
{strdef color color = "White"}
{pt3dclear()}
{pt3dadd(194460.000000,117588.000000,96000.000000,662.473602)}
{pt3dadd(194496.000000,117240.000000,95750.000000,718.829820)}
{pt3dadd(194376.000000,117000.000000,95450.000000,746.145369)}
{pt3dadd(194292.000000,116280.000000,95025.000000,773.460918)}
{pt3dadd(194148.000000,115896.000000,94750.000000,800.776467)}
{pt3dadd(194088.000000,115584.000000,94475.000000,828.092016)}
{pt3dadd(194076.000000,115260.000000,94075.000000,793.588162)}
{pt3dadd(193992.000000,114828.000000,93700.000000,759.084309)}
{pt3dadd(193908.000000,114708.000000,93400.000000,724.580455)}
{pt3dadd(193824.000000,114468.000000,93050.000000,690.076602)}
{pt3dadd(193908.000000,114144.000000,92700.000000,690.076602)}

{create adhoc125}
{access adhoc125}
{connect adhoc125(1), adhoc124(0)}
{nseg = 1}
{strdef color color = "White"}
{pt3dclear()}
{pt3dadd(193908.000000,114144.000000,92700.000000,690.076602)}
{pt3dadd(193680.000000,114396.000000,92700.000000,599.024880)}
{pt3dadd(193356.000000,114732.000000,92700.000000,678.219516)}
{pt3dadd(193176.000000,115068.000000,92700.000000,757.414152)}
{pt3dadd(193176.000000,115116.000000,92450.000000,836.608788)}
{pt3dadd(193284.000000,115080.000000,92250.000000,915.803424)}
{pt3dadd(193440.000000,115104.000000,91925.000000,877.644954)}
{pt3dadd(193548.000000,115068.000000,91675.000000,839.486484)}
{pt3dadd(193656.000000,115200.000000,91450.000000,801.328014)}
{pt3dadd(193752.000000,115200.000000,91250.000000,763.169544)}
{pt3dadd(193824.000000,115356.000000,91075.000000,710.392486)}
{pt3dadd(193848.000000,115440.000000,90875.000000,657.615429)}
{pt3dadd(193872.000000,115632.000000,90650.000000,604.838371)}
{pt3dadd(193860.000000,115824.000000,90400.000000,552.061314)}
{pt3dadd(193944.000000,115932.000000,90200.000000,399.349944)}

{create adhoc126}
{access adhoc126}
{connect adhoc126(1), adhoc125(0)}
{nseg = 1}
{strdef color color = "White"}
{pt3dclear()}
{pt3dadd(193944.000000,115932.000000,90200.000000,399.349944)}
{pt3dadd(193680.000000,116016.000000,90200.000000,288.881586)}
{pt3dadd(193356.000000,116208.000000,90200.000000,251.489700)}
{pt3dadd(192960.000000,116484.000000,90200.000000,214.097814)}
{pt3dadd(192816.000000,116796.000000,90475.000000,176.705928)}
{pt3dadd(192648.000000,116976.000000,90425.000000,139.314042)}
{pt3dadd(192588.000000,117204.000000,90450.000000,164.669193)}
{pt3dadd(192552.000000,117468.000000,90550.000000,190.024344)}
{pt3dadd(192624.000000,117660.000000,90550.000000,215.379495)}
{pt3dadd(192624.000000,117816.000000,90525.000000,240.734646)}
{pt3dadd(192720.000000,117996.000000,90525.000000,253.483947)}
{pt3dadd(192840.000000,118176.000000,90575.000000,266.233248)}
{pt3dadd(192972.000000,118320.000000,90525.000000,332.791596)}

{create adhoc127}
{access adhoc127}
{connect adhoc127(1), adhoc126(0)}
{nseg = 1}
{strdef color color = "White"}
{pt3dclear()}
{pt3dadd(192972.000000,118320.000000,90525.000000,332.791596)}
{pt3dadd(193236.000000,118440.000000,90525.000000,200.612214)}
{pt3dadd(193416.000000,118596.000000,90750.000000,170.614548)}
{pt3dadd(193728.000000,118884.000000,90750.000000,140.616882)}
{pt3dadd(193716.000000,119040.000000,90975.000000,110.619216)}
{pt3dadd(193884.000000,119208.000000,91125.000000,80.621550)}
{pt3dadd(194052.000000,119412.000000,91175.000000,32.400000)}

{create adhoc128}
{access adhoc128}
{connect adhoc128(1), adhoc126(0)}
{nseg = 1}
{strdef color color = "White"}
{pt3dclear()}
{pt3dadd(192972.000000,118320.000000,90525.000000,332.791596)}
{pt3dadd(192888.000000,118488.000000,90575.000000,200.612214)}
{pt3dadd(192588.000000,118668.000000,90575.000000,266.233284)}
{pt3dadd(192492.000000,118812.000000,90725.000000,277.326342)}

{create adhoc129}
{access adhoc129}
{connect adhoc129(1), adhoc128(0)}
{nseg = 1}
{strdef color color = "White"}
{pt3dclear()}
{pt3dadd(192492.000000,118812.000000,90725.000000,277.326342)}
{pt3dadd(192768.000000,118800.000000,90325.000000,111.451230)}
{pt3dadd(192924.000000,118908.000000,90250.000000,54.794943)}
{pt3dadd(193056.000000,119280.000000,90275.000000,32.400000)}
{pt3dadd(193092.000000,119592.000000,90125.000000,60.059213)}

{create adhoc130}
{access adhoc130}
{connect adhoc130(1), adhoc128(0)}
{nseg = 1}
{strdef color color = "White"}
{pt3dclear()}
{pt3dadd(192492.000000,118812.000000,90725.000000,277.326342)}
{pt3dadd(192228.000000,118836.000000,90875.000000,67.184640)}

{create adhoc131}
{access adhoc131}
{connect adhoc131(1), adhoc125(0)}
{nseg = 1}
{strdef color color = "White"}
{pt3dclear()}
{pt3dadd(193944.000000,115932.000000,90200.000000,399.349944)}
{pt3dadd(193908.000000,115932.000000,90000.000000,415.989486)}
{pt3dadd(194268.000000,116244.000000,89800.000000,491.699570)}
{pt3dadd(194424.000000,116400.000000,89575.000000,567.409653)}
{pt3dadd(194412.000000,116448.000000,89325.000000,643.119737)}
{pt3dadd(194496.000000,116604.000000,89025.000000,718.829820)}
{pt3dadd(194436.000000,116832.000000,88775.000000,666.317290)}
{pt3dadd(194424.000000,116964.000000,88550.000000,613.804761)}
{pt3dadd(194364.000000,117096.000000,88300.000000,561.292231)}
{pt3dadd(194364.000000,117228.000000,88025.000000,508.779702)}
{pt3dadd(194196.000000,117336.000000,87775.000000,508.779666)}

{create adhoc132}
{access adhoc132}
{connect adhoc132(1), adhoc131(0)}
{nseg = 1}
{strdef color color = "White"}
{pt3dclear()}
{pt3dadd(194196.000000,117336.000000,87775.000000,508.779666)}
{pt3dadd(193884.000000,117624.000000,87775.000000,346.657896)}
{pt3dadd(193488.000000,117864.000000,87775.000000,284.179887)}
{pt3dadd(193176.000000,118212.000000,87775.000000,221.701878)}
{pt3dadd(193008.000000,118248.000000,87725.000000,159.223869)}
{pt3dadd(193272.000000,118728.000000,87425.000000,96.745860)}
{pt3dadd(193440.000000,119112.000000,87250.000000,67.184640)}

{create adhoc133}
{access adhoc133}
{connect adhoc133(1), adhoc132(0)}
{nseg = 1}
{strdef color color = "White"}
{pt3dclear()}
{pt3dadd(193440.000000,119112.000000,87250.000000,67.184640)}
{pt3dadd(193644.000000,119328.000000,87375.000000,96.745860)}
{pt3dadd(193860.000000,119352.000000,87500.000000,44.789760)}

{create adhoc134}
{access adhoc134}
{connect adhoc134(1), adhoc132(0)}
{nseg = 1}
{strdef color color = "White"}
{pt3dclear()}
{pt3dadd(193440.000000,119112.000000,87250.000000,67.184640)}
{pt3dadd(193428.000000,119376.000000,87100.000000,67.184640)}

{create adhoc135}
{access adhoc135}
{connect adhoc135(1), adhoc131(0)}
{nseg = 1}
{strdef color color = "White"}
{pt3dclear()}
{pt3dadd(194196.000000,117336.000000,87775.000000,508.779666)}
{pt3dadd(194112.000000,117432.000000,87525.000000,415.989486)}

{create adhoc136}
{access adhoc136}
{connect adhoc136(1), adhoc135(0)}
{nseg = 1}
{strdef color color = "White"}
{pt3dclear()}
{pt3dadd(194112.000000,117432.000000,87525.000000,415.989486)}
{pt3dadd(194568.000000,117372.000000,87525.000000,499.187376)}
{pt3dadd(194964.000000,117624.000000,87525.000000,432.166851)}
{pt3dadd(195144.000000,117828.000000,87300.000000,365.146326)}
{pt3dadd(195300.000000,118068.000000,87300.000000,298.125801)}
{pt3dadd(195468.000000,118236.000000,87225.000000,231.105276)}
{pt3dadd(195612.000000,118320.000000,87150.000000,231.105276)}
{pt3dadd(195768.000000,118308.000000,87050.000000,231.105276)}
{pt3dadd(195948.000000,118464.000000,86900.000000,231.105276)}
{pt3dadd(196140.000000,118620.000000,86725.000000,231.105276)}
{pt3dadd(196308.000000,118740.000000,86650.000000,269.622816)}
{pt3dadd(196416.000000,119028.000000,86525.000000,308.140356)}
{pt3dadd(196668.000000,119208.000000,86300.000000,346.657896)}
{pt3dadd(196740.000000,119424.000000,86300.000000,288.881586)}

{create adhoc137}
{access adhoc137}
{connect adhoc137(1), adhoc136(0)}
{nseg = 1}
{strdef color color = "White"}
{pt3dclear()}
{pt3dadd(196740.000000,119424.000000,86300.000000,288.881586)}
{pt3dadd(196572.000000,119424.000000,86475.000000,156.598776)}
{pt3dadd(196356.000000,119424.000000,86675.000000,55.987200)}

{create adhoc138}
{access adhoc138}
{connect adhoc138(1), adhoc136(0)}
{nseg = 1}
{strdef color color = "White"}
{pt3dclear()}
{pt3dadd(196740.000000,119424.000000,86300.000000,288.881586)}
{pt3dadd(196896.000000,119592.000000,86225.000000,231.105276)}
{pt3dadd(197052.000000,119856.000000,86200.000000,233.512618)}
{pt3dadd(196968.000000,120048.000000,86175.000000,235.919961)}
{pt3dadd(197040.000000,120228.000000,86225.000000,238.327304)}
{pt3dadd(197160.000000,120420.000000,86225.000000,240.734646)}
{pt3dadd(197244.000000,120612.000000,86225.000000,240.734646)}
{pt3dadd(197292.000000,120828.000000,86225.000000,240.734646)}
{pt3dadd(197376.000000,121032.000000,86225.000000,240.734646)}
{pt3dadd(197340.000000,121236.000000,86275.000000,240.734646)}
{pt3dadd(197412.000000,121440.000000,86225.000000,222.345193)}
{pt3dadd(197616.000000,121680.000000,86200.000000,203.955741)}
{pt3dadd(197484.000000,121920.000000,85950.000000,185.566288)}
{pt3dadd(197520.000000,122064.000000,85750.000000,167.176836)}
{pt3dadd(197484.000000,121980.000000,85475.000000,67.184640)}
{pt3dadd(197340.000000,122076.000000,85500.000000,53.747712)}

{create adhoc139}
{access adhoc139}
{connect adhoc139(1), adhoc135(0)}
{nseg = 1}
{strdef color color = "White"}
{pt3dclear()}
{pt3dadd(194112.000000,117432.000000,87525.000000,415.989486)}
{pt3dadd(193884.000000,117288.000000,87250.000000,204.467130)}
{pt3dadd(193740.000000,117156.000000,87100.000000,185.821983)}
{pt3dadd(193536.000000,117156.000000,86950.000000,167.176836)}
{pt3dadd(193416.000000,117264.000000,86650.000000,200.612214)}

{create adhoc140}
{access adhoc140}
{connect adhoc140(1), adhoc139(0)}
{nseg = 1}
{strdef color color = "White"}
{pt3dclear()}
{pt3dadd(193416.000000,117264.000000,86650.000000,200.612214)}
{pt3dadd(193200.000000,117072.000000,86650.000000,80.621550)}
{pt3dadd(192876.000000,117060.000000,86450.000000,88.328970)}
{pt3dadd(192684.000000,116856.000000,86325.000000,96.036390)}
{pt3dadd(192456.000000,116580.000000,86325.000000,103.743810)}
{pt3dadd(192276.000000,116496.000000,86175.000000,111.451230)}
{pt3dadd(192192.000000,116436.000000,86025.000000,103.743810)}
{pt3dadd(191964.000000,116208.000000,85950.000000,96.036390)}
{pt3dadd(191832.000000,116064.000000,85850.000000,88.328970)}
{pt3dadd(191484.000000,115884.000000,85850.000000,80.621550)}
{pt3dadd(191340.000000,115860.000000,86050.000000,55.987200)}

{create adhoc141}
{access adhoc141}
{connect adhoc141(1), adhoc139(0)}
{nseg = 1}
{strdef color color = "White"}
{pt3dclear()}
{pt3dadd(193416.000000,117264.000000,86650.000000,200.612214)}
{pt3dadd(193440.000000,117420.000000,86400.000000,200.612214)}
{pt3dadd(193512.000000,117648.000000,86150.000000,185.287671)}
{pt3dadd(193584.000000,117960.000000,85975.000000,169.963128)}
{pt3dadd(193728.000000,118236.000000,85975.000000,154.638585)}
{pt3dadd(193896.000000,118368.000000,86025.000000,139.314042)}
{pt3dadd(194064.000000,118524.000000,86075.000000,103.249341)}
{pt3dadd(194184.000000,118908.000000,86250.000000,67.184640)}
{pt3dadd(194100.000000,119268.000000,86450.000000,38.880000)}

{create adhoc142}
{access adhoc142}
{connect adhoc142(1), adhoc124(0)}
{nseg = 1}
{strdef color color = "White"}
{pt3dclear()}
{pt3dadd(193908.000000,114144.000000,92700.000000,690.076602)}
{pt3dadd(193956.000000,113748.000000,92575.000000,599.024880)}
{pt3dadd(194172.000000,113508.000000,92225.000000,778.957861)}
{pt3dadd(194352.000000,113244.000000,91950.000000,958.890843)}
{pt3dadd(194376.000000,113100.000000,91675.000000,1138.823825)}
{pt3dadd(194376.000000,112932.000000,91325.000000,1318.756806)}
{pt3dadd(194460.000000,112920.000000,91025.000000,1287.180693)}
{pt3dadd(194364.000000,112908.000000,90650.000000,1255.604580)}
{pt3dadd(194304.000000,112788.000000,90225.000000,1224.028467)}
{pt3dadd(194136.000000,112644.000000,89925.000000,1192.452354)}
{pt3dadd(193992.000000,112416.000000,89800.000000,1098.964116)}
{pt3dadd(194028.000000,112488.000000,89300.000000,1098.964188)}

{create adhoc143}
{access adhoc143}
{connect adhoc143(1), adhoc142(0)}
{nseg = 1}
{strdef color color = "White"}
{pt3dclear()}
{pt3dadd(194028.000000,112488.000000,89300.000000,1098.964188)}
{pt3dadd(193764.000000,112056.000000,89300.000000,953.961894)}
{pt3dadd(193428.000000,111540.000000,89300.000000,775.655082)}
{pt3dadd(193116.000000,111228.000000,89400.000000,597.348270)}
{pt3dadd(192672.000000,110952.000000,89400.000000,419.041458)}
{pt3dadd(192504.000000,110892.000000,89600.000000,240.734646)}
{pt3dadd(192288.000000,110892.000000,89650.000000,240.734646)}

{create adhoc144}
{access adhoc144}
{connect adhoc144(1), adhoc143(0)}
{nseg = 1}
{strdef color color = "White"}
{pt3dclear()}
{pt3dadd(192288.000000,110892.000000,89650.000000,240.734646)}
{pt3dadd(192132.000000,111048.000000,89750.000000,255.583944)}
{pt3dadd(192192.000000,111192.000000,89950.000000,227.930377)}
{pt3dadd(191772.000000,111624.000000,90075.000000,165.021413)}
{pt3dadd(191700.000000,111852.000000,90075.000000,96.934656)}
{pt3dadd(191448.000000,112104.000000,90325.000000,53.747712)}
{pt3dadd(191424.000000,112296.000000,90475.000000,38.880000)}
{pt3dadd(191460.000000,112464.000000,90675.000000,40.798450)}

{create adhoc145}
{access adhoc145}
{connect adhoc145(1), adhoc143(0)}
{nseg = 1}
{strdef color color = "White"}
{pt3dclear()}
{pt3dadd(192288.000000,110892.000000,89650.000000,240.734646)}
{pt3dadd(192060.000000,110724.000000,89625.000000,196.288470)}
{pt3dadd(191844.000000,110508.000000,89575.000000,225.364901)}
{pt3dadd(191616.000000,110208.000000,89525.000000,254.441331)}
{pt3dadd(191412.000000,110196.000000,89525.000000,283.517762)}
{pt3dadd(191196.000000,110148.000000,89600.000000,312.594192)}
{pt3dadd(190968.000000,110016.000000,89750.000000,231.105276)}

{create adhoc146}
{access adhoc146}
{connect adhoc146(1), adhoc145(0)}
{nseg = 1}
{strdef color color = "White"}
{pt3dclear()}
{pt3dadd(190968.000000,110016.000000,89750.000000,231.105276)}
{pt3dadd(191028.000000,110136.000000,90100.000000,133.741476)}
{pt3dadd(191100.000000,110112.000000,90300.000000,127.859328)}
{pt3dadd(191028.000000,110196.000000,90575.000000,121.977180)}
{pt3dadd(190944.000000,110172.000000,90900.000000,116.095032)}
{pt3dadd(190992.000000,110316.000000,91075.000000,80.621550)}

{create adhoc147}
{access adhoc147}
{connect adhoc147(1), adhoc145(0)}
{nseg = 1}
{strdef color color = "White"}
{pt3dclear()}
{pt3dadd(190968.000000,110016.000000,89750.000000,231.105276)}
{pt3dadd(190752.000000,110004.000000,89825.000000,200.612214)}
{pt3dadd(190536.000000,109824.000000,89800.000000,210.642822)}
{pt3dadd(190308.000000,109752.000000,89750.000000,220.673430)}
{pt3dadd(190068.000000,109572.000000,89625.000000,230.704038)}
{pt3dadd(189888.000000,109512.000000,89700.000000,240.734646)}
{pt3dadd(189708.000000,109368.000000,89550.000000,266.983068)}
{pt3dadd(189540.000000,109164.000000,89475.000000,293.231490)}
{pt3dadd(189324.000000,109020.000000,89425.000000,319.479912)}
{pt3dadd(189180.000000,108564.000000,89275.000000,192.587706)}

{create adhoc148}
{access adhoc148}
{connect adhoc148(1), adhoc147(0)}
{nseg = 1}
{strdef color color = "White"}
{pt3dclear()}
{pt3dadd(189180.000000,108564.000000,89275.000000,192.587706)}
{pt3dadd(189180.000000,108216.000000,89175.000000,160.489764)}
{pt3dadd(189360.000000,108132.000000,89100.000000,140.522710)}
{pt3dadd(189360.000000,107784.000000,89100.000000,120.555657)}
{pt3dadd(189360.000000,107388.000000,89275.000000,100.588604)}
{pt3dadd(189444.000000,107148.000000,89525.000000,80.621550)}
{pt3dadd(189456.000000,106908.000000,89725.000000,93.901532)}
{pt3dadd(189432.000000,106860.000000,89925.000000,107.181513)}
{pt3dadd(189468.000000,106980.000000,90125.000000,120.461494)}
{pt3dadd(189648.000000,106992.000000,90325.000000,133.741476)}
{pt3dadd(189816.000000,107004.000000,90625.000000,46.656000)}

{create adhoc149}
{access adhoc149}
{connect adhoc149(1), adhoc147(0)}
{nseg = 1}
{strdef color color = "White"}
{pt3dclear()}
{pt3dadd(189180.000000,108564.000000,89275.000000,192.587706)}
{pt3dadd(188964.000000,108276.000000,89200.000000,111.451230)}
{pt3dadd(188760.000000,108156.000000,89225.000000,67.184640)}

{create adhoc150}
{access adhoc150}
{connect adhoc150(1), adhoc142(0)}
{nseg = 1}
{strdef color color = "White"}
{pt3dclear()}
{pt3dadd(194028.000000,112488.000000,89300.000000,1098.964188)}
{pt3dadd(194076.000000,112476.000000,89075.000000,1192.452354)}
{pt3dadd(194124.000000,112332.000000,88825.000000,1142.766837)}
{pt3dadd(193956.000000,112296.000000,88500.000000,1093.081320)}
{pt3dadd(194028.000000,112380.000000,88175.000000,1043.395803)}
{pt3dadd(193932.000000,112296.000000,87875.000000,993.710286)}
{pt3dadd(193836.000000,112176.000000,87575.000000,860.295483)}
{pt3dadd(193572.000000,112092.000000,87275.000000,726.880680)}
{pt3dadd(193332.000000,112176.000000,87075.000000,593.465877)}
{pt3dadd(193212.000000,112080.000000,86875.000000,460.051074)}
{pt3dadd(193044.000000,112104.000000,86700.000000,440.882284)}
{pt3dadd(192612.000000,112188.000000,86425.000000,421.713495)}
{pt3dadd(192408.000000,112248.000000,86225.000000,402.544706)}
{pt3dadd(192288.000000,112236.000000,86025.000000,383.375916)}
{pt3dadd(192000.000000,112284.000000,85750.000000,415.989486)}

{create adhoc151}
{access adhoc151}
{connect adhoc151(1), adhoc150(0)}
{nseg = 1}
{strdef color color = "White"}
{pt3dclear()}
{pt3dadd(192000.000000,112284.000000,85750.000000,415.989486)}
{pt3dadd(192528.000000,112152.000000,85750.000000,499.187376)}
{pt3dadd(192780.000000,112212.000000,85600.000000,394.545920)}
{pt3dadd(193104.000000,112500.000000,85225.000000,289.904463)}
{pt3dadd(193296.000000,112860.000000,85050.000000,185.263007)}
{pt3dadd(193632.000000,113316.000000,84825.000000,80.621550)}
{pt3dadd(193824.000000,113712.000000,84825.000000,99.723856)}
{pt3dadd(193992.000000,113844.000000,84625.000000,118.826163)}
{pt3dadd(194184.000000,114168.000000,84375.000000,137.928470)}
{pt3dadd(194340.000000,114372.000000,84200.000000,157.030776)}
{pt3dadd(194400.000000,114336.000000,84025.000000,116.095032)}
{pt3dadd(194592.000000,114636.000000,84000.000000,55.987200)}

{create adhoc152}
{access adhoc152}
{connect adhoc152(1), adhoc150(0)}
{nseg = 1}
{strdef color color = "White"}
{pt3dclear()}
{pt3dadd(192000.000000,112284.000000,85750.000000,415.989486)}
{pt3dadd(191628.000000,112284.000000,85475.000000,399.349944)}
{pt3dadd(191076.000000,112392.000000,85250.000000,373.003920)}
{pt3dadd(190452.000000,112296.000000,85050.000000,346.657896)}
{pt3dadd(190020.000000,111948.000000,84850.000000,383.375952)}

{create adhoc153}
{access adhoc153}
{connect adhoc153(1), adhoc152(0)}
{nseg = 1}
{strdef color color = "White"}
{pt3dclear()}
{pt3dadd(190020.000000,111948.000000,84850.000000,383.375952)}
{pt3dadd(190068.000000,111612.000000,84400.000000,116.095032)}
{pt3dadd(190212.000000,111468.000000,84275.000000,46.656000)}

{create adhoc154}
{access adhoc154}
{connect adhoc154(1), adhoc152(0)}
{nseg = 1}
{strdef color color = "White"}
{pt3dclear()}
{pt3dadd(190020.000000,111948.000000,84850.000000,383.375952)}
{pt3dadd(189828.000000,111852.000000,84675.000000,346.657896)}
{pt3dadd(189648.000000,111732.000000,84700.000000,346.657896)}
{pt3dadd(189432.000000,111720.000000,84650.000000,346.657896)}
{pt3dadd(189228.000000,111600.000000,84575.000000,346.657896)}
{pt3dadd(189060.000000,111564.000000,84650.000000,346.657896)}
{pt3dadd(188856.000000,111384.000000,84600.000000,379.798393)}
{pt3dadd(188688.000000,111348.000000,84750.000000,412.938891)}
{pt3dadd(188484.000000,111264.000000,84650.000000,446.079388)}
{pt3dadd(188280.000000,111180.000000,84600.000000,479.219886)}
{pt3dadd(188064.000000,111180.000000,84650.000000,479.219886)}
{pt3dadd(187860.000000,111096.000000,84675.000000,479.219886)}
{pt3dadd(187656.000000,111036.000000,84700.000000,479.219886)}
{pt3dadd(187440.000000,110976.000000,84650.000000,479.219886)}
{pt3dadd(187212.000000,110892.000000,84625.000000,463.412286)}
{pt3dadd(187008.000000,110796.000000,84600.000000,447.604686)}
{pt3dadd(186804.000000,110784.000000,84625.000000,431.797086)}
{pt3dadd(186588.000000,110724.000000,84750.000000,415.989486)}
{pt3dadd(186360.000000,110580.000000,84725.000000,415.989486)}
{pt3dadd(186180.000000,110484.000000,84775.000000,415.989486)}
{pt3dadd(185988.000000,110304.000000,84675.000000,415.989486)}
{pt3dadd(185772.000000,110124.000000,84700.000000,415.989486)}
{pt3dadd(185592.000000,110088.000000,84750.000000,415.989486)}
{pt3dadd(185424.000000,109944.000000,84750.000000,415.989486)}
{pt3dadd(185220.000000,109776.000000,84700.000000,415.989486)}
{pt3dadd(185004.000000,109680.000000,84675.000000,415.989486)}
{pt3dadd(184776.000000,109584.000000,84650.000000,415.989486)}
{pt3dadd(184560.000000,109500.000000,84750.000000,415.989486)}
{pt3dadd(184320.000000,109416.000000,84775.000000,415.989486)}
{pt3dadd(184116.000000,109356.000000,84725.000000,415.989486)}
{pt3dadd(183876.000000,109212.000000,84750.000000,436.788958)}
{pt3dadd(183612.000000,109152.000000,84850.000000,457.588431)}
{pt3dadd(183372.000000,109068.000000,84900.000000,478.387903)}
{pt3dadd(183168.000000,109020.000000,84925.000000,499.187376)}
{pt3dadd(182940.000000,108924.000000,84925.000000,499.187376)}
{pt3dadd(182688.000000,108864.000000,84925.000000,499.187376)}
{pt3dadd(182460.000000,108816.000000,84925.000000,499.187376)}
{pt3dadd(182292.000000,108708.000000,84925.000000,499.187376)}
{pt3dadd(182064.000000,108576.000000,85025.000000,474.228018)}
{pt3dadd(181872.000000,108492.000000,85075.000000,449.268660)}
{pt3dadd(181680.000000,108408.000000,85100.000000,424.309302)}
{pt3dadd(181476.000000,108312.000000,85175.000000,399.349944)}
{pt3dadd(181284.000000,108228.000000,85175.000000,399.349935)}
{pt3dadd(181032.000000,108192.000000,85175.000000,399.349926)}
{pt3dadd(180792.000000,108024.000000,85225.000000,399.349917)}
{pt3dadd(180612.000000,107856.000000,85350.000000,399.349908)}
{pt3dadd(180384.000000,107748.000000,85400.000000,386.176905)}
{pt3dadd(180204.000000,107604.000000,85550.000000,373.003902)}
{pt3dadd(179964.000000,107520.000000,85525.000000,359.830899)}
{pt3dadd(179772.000000,107436.000000,85675.000000,346.657896)}
{pt3dadd(179544.000000,107352.000000,85725.000000,346.657896)}
{pt3dadd(179292.000000,107292.000000,85875.000000,346.657896)}
{pt3dadd(179028.000000,107196.000000,85925.000000,346.657896)}
{pt3dadd(178788.000000,107100.000000,86075.000000,346.657896)}
{pt3dadd(178560.000000,106992.000000,86075.000000,368.040888)}

{create adhoc155}
{access adhoc155}
{connect adhoc155(1), adhoc154(0)}
{nseg = 1}
{strdef color color = "White"}
{pt3dclear()}
{pt3dadd(178560.000000,106992.000000,86075.000000,368.040888)}
{pt3dadd(178740.000000,106668.000000,86075.000000,346.657896)}
{pt3dadd(178680.000000,106500.000000,86375.000000,363.990794)}
{pt3dadd(178404.000000,106320.000000,86675.000000,381.323691)}
{pt3dadd(178440.000000,106344.000000,86950.000000,398.656589)}
{pt3dadd(178392.000000,106368.000000,87200.000000,415.989486)}
{pt3dadd(178200.000000,106176.000000,87475.000000,399.349908)}

{create adhoc156}
{access adhoc156}
{connect adhoc156(1), adhoc155(0)}
{nseg = 1}
{strdef color color = "White"}
{pt3dclear()}
{pt3dadd(178200.000000,106176.000000,87475.000000,399.349908)}
{pt3dadd(178464.000000,106632.000000,87475.000000,200.612214)}
{pt3dadd(178476.000000,106752.000000,87700.000000,123.634107)}
{pt3dadd(178440.000000,107076.000000,87925.000000,46.656000)}
{pt3dadd(178428.000000,107196.000000,88075.000000,55.987200)}

{create adhoc157}
{access adhoc157}
{connect adhoc157(1), adhoc155(0)}
{nseg = 1}
{strdef color color = "White"}
{pt3dclear()}
{pt3dadd(178200.000000,106176.000000,87475.000000,399.349908)}
{pt3dadd(178116.000000,105948.000000,87700.000000,508.779666)}
{pt3dadd(178092.000000,105864.000000,88050.000000,479.219886)}
{pt3dadd(178128.000000,105852.000000,88325.000000,415.989486)}

{create adhoc158}
{access adhoc158}
{connect adhoc158(1), adhoc157(0)}
{nseg = 1}
{strdef color color = "White"}
{pt3dclear()}
{pt3dadd(178128.000000,105852.000000,88325.000000,415.989486)}
{pt3dadd(178200.000000,105468.000000,88325.000000,55.987200)}
{pt3dadd(178224.000000,105252.000000,88325.000000,67.184640)}
{pt3dadd(178260.000000,105096.000000,88300.000000,46.656000)}

{create adhoc159}
{access adhoc159}
{connect adhoc159(1), adhoc157(0)}
{nseg = 1}
{strdef color color = "White"}
{pt3dclear()}
{pt3dadd(178128.000000,105852.000000,88325.000000,415.989486)}
{pt3dadd(177852.000000,105840.000000,88525.000000,139.314042)}
{pt3dadd(177624.000000,105816.000000,88750.000000,176.705928)}
{pt3dadd(177408.000000,105864.000000,88950.000000,214.097814)}
{pt3dadd(177432.000000,105900.000000,89175.000000,251.489700)}
{pt3dadd(177288.000000,105924.000000,89425.000000,288.881586)}
{pt3dadd(177240.000000,105972.000000,89650.000000,268.760223)}
{pt3dadd(177264.000000,106044.000000,89925.000000,248.638860)}
{pt3dadd(177168.000000,106212.000000,90225.000000,228.517497)}
{pt3dadd(177264.000000,106296.000000,90550.000000,208.396134)}
{pt3dadd(177384.000000,106428.000000,90900.000000,151.890756)}
{pt3dadd(177300.000000,106260.000000,91250.000000,95.385378)}
{pt3dadd(177204.000000,105900.000000,91450.000000,38.880000)}
{pt3dadd(177480.000000,106044.000000,91600.000000,55.987200)}

{create adhoc160}
{access adhoc160}
{connect adhoc160(1), adhoc154(0)}
{nseg = 1}
{strdef color color = "White"}
{pt3dclear()}
{pt3dadd(178560.000000,106992.000000,86075.000000,368.040888)}
{pt3dadd(178380.000000,107112.000000,86000.000000,415.989486)}
{pt3dadd(178164.000000,107136.000000,85975.000000,415.989486)}
{pt3dadd(177984.000000,107124.000000,85925.000000,415.989486)}
{pt3dadd(177756.000000,107124.000000,85850.000000,415.989486)}
{pt3dadd(177528.000000,107064.000000,85725.000000,415.989486)}
{pt3dadd(177300.000000,106968.000000,85600.000000,372.175776)}
{pt3dadd(177096.000000,106908.000000,85350.000000,328.362066)}
{pt3dadd(176892.000000,106740.000000,85050.000000,284.548356)}
{pt3dadd(176712.000000,106608.000000,84750.000000,240.734646)}
{pt3dadd(176484.000000,106500.000000,84475.000000,240.734646)}
{pt3dadd(176256.000000,106308.000000,84250.000000,240.734646)}
{pt3dadd(176040.000000,106128.000000,84025.000000,240.734646)}
{pt3dadd(175536.000000,105672.000000,83725.000000,240.734646)}
{pt3dadd(175404.000000,105528.000000,83550.000000,230.704038)}
{pt3dadd(175296.000000,105300.000000,83400.000000,220.673430)}
{pt3dadd(174972.000000,105084.000000,83275.000000,210.642822)}
{pt3dadd(174780.000000,104820.000000,83025.000000,200.612214)}
{pt3dadd(174588.000000,104688.000000,82825.000000,192.587724)}

{create adhoc161}
{access adhoc161}
{connect adhoc161(1), adhoc160(0)}
{nseg = 1}
{strdef color color = "White"}
{pt3dclear()}
{pt3dadd(174588.000000,104688.000000,82825.000000,192.587724)}
{pt3dadd(175188.000000,105036.000000,82825.000000,346.657896)}
{pt3dadd(175308.000000,104916.000000,82625.000000,338.141970)}
{pt3dadd(175656.000000,104844.000000,82425.000000,329.626044)}
{pt3dadd(175776.000000,104856.000000,82150.000000,321.110118)}
{pt3dadd(175764.000000,104856.000000,81825.000000,312.594192)}
{pt3dadd(175752.000000,104580.000000,81550.000000,80.621550)}

{create adhoc162}
{access adhoc162}
{connect adhoc162(1), adhoc160(0)}
{nseg = 1}
{strdef color color = "White"}
{pt3dclear()}
{pt3dadd(174588.000000,104688.000000,82825.000000,192.587724)}
{pt3dadd(174060.000000,104256.000000,82675.000000,200.612214)}
{pt3dadd(173832.000000,104124.000000,82525.000000,233.657060)}
{pt3dadd(173652.000000,103884.000000,82325.000000,266.701905)}
{pt3dadd(173676.000000,103788.000000,82075.000000,299.746750)}
{pt3dadd(173616.000000,103608.000000,81800.000000,332.791596)}
{pt3dadd(173568.000000,103380.000000,81525.000000,277.586676)}
{pt3dadd(173508.000000,103032.000000,81300.000000,222.381756)}
{pt3dadd(173640.000000,102864.000000,81125.000000,167.176836)}
{pt3dadd(173580.000000,102828.000000,80950.000000,130.858974)}

{create adhoc163}
{access adhoc163}
{connect adhoc163(1), adhoc103(0)}
{nseg = 1}
{strdef color color = "White"}
{pt3dclear()}
{pt3dadd(195384.000000,121140.000000,97700.000000,828.092016)}
{pt3dadd(195408.000000,121140.000000,98075.000000,844.004466)}
{pt3dadd(195348.000000,121140.000000,98400.000000,612.919482)}
{pt3dadd(195252.000000,121140.000000,98725.000000,381.834498)}
{pt3dadd(195168.000000,120984.000000,99000.000000,150.749514)}
{pt3dadd(195144.000000,120900.000000,98975.000000,94.660722)}

{create adhoc164}
{access adhoc164}
{connect adhoc164(1), adhoc100(0)}
{nseg = 1}
{strdef color color = "White"}
{pt3dclear()}
{pt3dadd(195648.000000,122844.000000,98875.000000,828.092016)}
{pt3dadd(195840.000000,122844.000000,98375.000000,763.169544)}
{pt3dadd(196032.000000,122844.000000,97850.000000,541.028316)}
{pt3dadd(196104.000000,122844.000000,97325.000000,318.887088)}
{pt3dadd(196272.000000,123000.000000,97275.000000,96.745860)}
{pt3dadd(196404.000000,123420.000000,97125.000000,96.745860)}

{create adhoc165}
{access adhoc165}
{connect adhoc165(1), adhoc164(0)}
{nseg = 1}
{strdef color color = "White"}
{pt3dclear()}
{pt3dadd(196404.000000,123420.000000,97125.000000,96.745860)}
{pt3dadd(196512.000000,123984.000000,97300.000000,200.612214)}

{create adhoc166}
{access adhoc166}
{connect adhoc166(1), adhoc165(0)}
{nseg = 1}
{strdef color color = "White"}
{pt3dclear()}
{pt3dadd(196512.000000,123984.000000,97300.000000,200.612214)}
{pt3dadd(196572.000000,124260.000000,97375.000000,160.489764)}
{pt3dadd(196512.000000,124488.000000,97375.000000,96.745860)}

{create adhoc167}
{access adhoc167}
{connect adhoc167(1), adhoc166(0)}
{nseg = 1}
{strdef color color = "White"}
{pt3dclear()}
{pt3dadd(196512.000000,124488.000000,97375.000000,96.745860)}
{pt3dadd(196284.000000,124692.000000,97350.000000,80.621550)}
{pt3dadd(196080.000000,124872.000000,97300.000000,70.186163)}
{pt3dadd(195732.000000,125088.000000,97275.000000,59.750775)}
{pt3dadd(195156.000000,125280.000000,97325.000000,49.315388)}
{pt3dadd(194844.000000,125280.000000,97375.000000,38.880000)}
{pt3dadd(194640.000000,125220.000000,97325.000000,46.656000)}

{create adhoc168}
{access adhoc168}
{connect adhoc168(1), adhoc166(0)}
{nseg = 1}
{strdef color color = "White"}
{pt3dclear()}
{pt3dadd(196512.000000,124488.000000,97375.000000,96.745860)}
{pt3dadd(196800.000000,124668.000000,97475.000000,55.987200)}
{pt3dadd(196884.000000,125100.000000,97600.000000,53.654400)}
{pt3dadd(196788.000000,125232.000000,97775.000000,51.321600)}
{pt3dadd(196728.000000,125448.000000,97925.000000,48.988800)}
{pt3dadd(196728.000000,125868.000000,98050.000000,46.656000)}
{pt3dadd(196764.000000,126108.000000,98275.000000,55.147388)}
{pt3dadd(196824.000000,126420.000000,98425.000000,63.638775)}
{pt3dadd(196800.000000,126576.000000,98650.000000,72.130163)}
{pt3dadd(196752.000000,126744.000000,98850.000000,80.621550)}
{pt3dadd(196920.000000,126852.000000,99125.000000,46.656000)}

{create adhoc169}
{access adhoc169}
{connect adhoc169(1), adhoc165(0)}
{nseg = 1}
{strdef color color = "White"}
{pt3dclear()}
{pt3dadd(196512.000000,123984.000000,97300.000000,200.612214)}
{pt3dadd(196500.000000,123984.000000,97450.000000,200.612214)}
{pt3dadd(196224.000000,123984.000000,97575.000000,128.299707)}
{pt3dadd(196044.000000,124056.000000,97675.000000,55.987200)}
{pt3dadd(195912.000000,124140.000000,97675.000000,38.880000)}

{create adhoc170}
{access adhoc170}
{connect adhoc170(1), adhoc164(0)}
{nseg = 1}
{strdef color color = "White"}
{pt3dclear()}
{pt3dadd(196404.000000,123420.000000,97125.000000,96.745860)}
{pt3dadd(196632.000000,123444.000000,97075.000000,67.184640)}
{pt3dadd(196824.000000,123288.000000,97025.000000,89.160984)}

{create adhoc171}
{access adhoc171}
{connect adhoc171(1), adhoc170(0)}
{nseg = 1}
{strdef color color = "White"}
{pt3dclear()}
{pt3dadd(196824.000000,123288.000000,97025.000000,89.160984)}
{pt3dadd(197004.000000,123180.000000,96850.000000,38.880000)}
{pt3dadd(197112.000000,123132.000000,96750.000000,38.880000)}

{create adhoc172}
{access adhoc172}
{connect adhoc172(1), adhoc170(0)}
{nseg = 1}
{strdef color color = "White"}
{pt3dclear()}
{pt3dadd(196824.000000,123288.000000,97025.000000,89.160984)}
{pt3dadd(196692.000000,123252.000000,96875.000000,80.621550)}
{pt3dadd(196620.000000,123264.000000,96725.000000,46.656000)}
{pt3dadd(196464.000000,123252.000000,96650.000000,38.880000)}

{create adhoc173}
{access adhoc173}
{connect adhoc173(1), adhoc1(0)}
{nseg = 1}
{strdef color color = "White"}
{pt3dclear()}
{pt3dadd(181824.000000,220368.000000,90675.000000,915.803424)}
{pt3dadd(181932.000000,220968.000000,90000.000000,993.710286)}
{pt3dadd(182028.000000,221112.000000,89850.000000,1192.452327)}
{pt3dadd(182256.000000,221328.000000,89625.000000,1391.194368)}
{pt3dadd(182280.000000,221244.000000,89375.000000,1589.936409)}
{pt3dadd(182220.000000,221244.000000,89025.000000,1788.678450)}
{pt3dadd(182292.000000,221244.000000,88700.000000,1737.135923)}
{pt3dadd(182208.000000,221496.000000,88375.000000,1685.593395)}
{pt3dadd(182004.000000,221484.000000,88050.000000,1634.050867)}
{pt3dadd(181884.000000,221448.000000,87750.000000,1582.508340)}
{pt3dadd(181824.000000,221520.000000,87475.000000,1359.400406)}
{pt3dadd(181452.000000,221604.000000,87200.000000,1136.292471)}
{pt3dadd(181272.000000,221880.000000,86925.000000,913.184537)}
{pt3dadd(181008.000000,222108.000000,86575.000000,690.076602)}
{pt3dadd(180636.000000,222384.000000,86225.000000,617.394928)}
{pt3dadd(180216.000000,222480.000000,85975.000000,544.713255)}
{pt3dadd(179760.000000,222612.000000,85700.000000,472.031581)}
{pt3dadd(179208.000000,222912.000000,85400.000000,399.349908)}
{pt3dadd(178776.000000,223008.000000,85175.000000,443.278395)}
{pt3dadd(178440.000000,223224.000000,84875.000000,487.206882)}
{pt3dadd(178260.000000,223104.000000,84600.000000,531.135369)}
{pt3dadd(177828.000000,223260.000000,84350.000000,575.063856)}
{pt3dadd(177516.000000,223416.000000,84075.000000,499.187376)}
{pt3dadd(177168.000000,223632.000000,83775.000000,599.024880)}

{create adhoc174}
{access adhoc174}
{connect adhoc174(1), adhoc173(0)}
{nseg = 1}
{strdef color color = "White"}
{pt3dclear()}
{pt3dadd(177168.000000,223632.000000,83775.000000,599.024880)}
{pt3dadd(176796.000000,223872.000000,83525.000000,599.024880)}
{pt3dadd(176556.000000,224040.000000,83250.000000,549.106137)}
{pt3dadd(176328.000000,224220.000000,83025.000000,499.187394)}
{pt3dadd(176064.000000,224424.000000,83000.000000,449.268651)}
{pt3dadd(175920.000000,224664.000000,83075.000000,399.349908)}
{pt3dadd(175800.000000,224880.000000,83050.000000,382.710330)}
{pt3dadd(175680.000000,225096.000000,82950.000000,366.070752)}
{pt3dadd(175440.000000,225276.000000,82900.000000,349.431174)}
{pt3dadd(175044.000000,225444.000000,82750.000000,332.791596)}
{pt3dadd(174900.000000,225660.000000,82825.000000,353.591069)}
{pt3dadd(174180.000000,225888.000000,82625.000000,374.390541)}
{pt3dadd(173724.000000,226056.000000,82300.000000,395.190014)}
{pt3dadd(173208.000000,226236.000000,82075.000000,415.989486)}
{pt3dadd(172692.000000,226332.000000,81825.000000,415.989486)}
{pt3dadd(171960.000000,226632.000000,81525.000000,415.989486)}
{pt3dadd(171492.000000,226812.000000,81300.000000,415.989486)}
{pt3dadd(171204.000000,226968.000000,81025.000000,415.989486)}
{pt3dadd(170664.000000,227124.000000,80725.000000,415.989486)}
{pt3dadd(169920.000000,227316.000000,80450.000000,415.989486)}
{pt3dadd(169296.000000,227520.000000,80150.000000,415.989486)}
{pt3dadd(168720.000000,227472.000000,79825.000000,415.989486)}
{pt3dadd(167976.000000,227640.000000,79600.000000,398.656589)}
{pt3dadd(167760.000000,227616.000000,79450.000000,381.323691)}
{pt3dadd(167592.000000,227616.000000,79475.000000,363.990794)}
{pt3dadd(167412.000000,227616.000000,79400.000000,346.657896)}
{pt3dadd(167220.000000,227640.000000,79375.000000,343.191321)}
{pt3dadd(167028.000000,227628.000000,79325.000000,339.724746)}
{pt3dadd(166836.000000,227784.000000,79450.000000,336.258171)}
{pt3dadd(166644.000000,227892.000000,79375.000000,332.791596)}
{pt3dadd(166452.000000,227856.000000,79300.000000,321.814093)}
{pt3dadd(166248.000000,228012.000000,79350.000000,310.836591)}
{pt3dadd(166092.000000,228012.000000,79325.000000,299.859089)}
{pt3dadd(165912.000000,228060.000000,79300.000000,288.881586)}
{pt3dadd(165744.000000,228060.000000,79325.000000,320.658561)}
{pt3dadd(165564.000000,228108.000000,79200.000000,352.435536)}
{pt3dadd(165384.000000,228132.000000,79075.000000,384.212511)}
{pt3dadd(165204.000000,228216.000000,79075.000000,415.989486)}
{pt3dadd(165012.000000,228240.000000,79025.000000,398.656589)}
{pt3dadd(164832.000000,228204.000000,78975.000000,381.323691)}
{pt3dadd(164664.000000,228060.000000,78825.000000,363.990794)}
{pt3dadd(164496.000000,227964.000000,78675.000000,346.657896)}
{pt3dadd(164340.000000,227964.000000,78550.000000,375.006199)}
{pt3dadd(164160.000000,228036.000000,78450.000000,403.354503)}
{pt3dadd(163968.000000,228036.000000,78400.000000,431.702807)}
{pt3dadd(163788.000000,228120.000000,78150.000000,460.051110)}
{pt3dadd(163620.000000,228096.000000,78150.000000,431.702807)}
{pt3dadd(163428.000000,228168.000000,78100.000000,403.354503)}
{pt3dadd(163224.000000,228108.000000,78000.000000,375.006199)}
{pt3dadd(163056.000000,228156.000000,77825.000000,346.657896)}
{pt3dadd(162876.000000,228144.000000,77725.000000,355.837392)}
{pt3dadd(162696.000000,228336.000000,77675.000000,365.016888)}
{pt3dadd(162492.000000,228384.000000,77550.000000,374.196384)}
{pt3dadd(162264.000000,228468.000000,77500.000000,383.375880)}
{pt3dadd(162060.000000,228456.000000,77475.000000,359.752307)}
{pt3dadd(161880.000000,228228.000000,77300.000000,336.128733)}
{pt3dadd(161652.000000,228144.000000,77100.000000,312.505160)}
{pt3dadd(161460.000000,228060.000000,76950.000000,288.881586)}
{pt3dadd(161280.000000,228000.000000,76850.000000,316.498667)}
{pt3dadd(161076.000000,228000.000000,76750.000000,344.115747)}
{pt3dadd(160920.000000,228084.000000,76650.000000,371.732827)}
{pt3dadd(160776.000000,227988.000000,76425.000000,399.349908)}
{pt3dadd(160632.000000,228036.000000,76300.000000,379.382409)}
{pt3dadd(160488.000000,228024.000000,76150.000000,359.414910)}
{pt3dadd(160344.000000,228012.000000,76000.000000,339.447411)}
{pt3dadd(160188.000000,227952.000000,75850.000000,319.479912)}
{pt3dadd(160044.000000,228036.000000,75800.000000,351.649770)}
{pt3dadd(159888.000000,228036.000000,75750.000000,383.819628)}
{pt3dadd(159720.000000,228024.000000,75700.000000,415.989486)}
{pt3dadd(159576.000000,227964.000000,75675.000000,399.349944)}

{create adhoc175}
{access adhoc175}
{connect adhoc175(1), adhoc174(0)}
{nseg = 1}
{strdef color color = "White"}
{pt3dclear()}
{pt3dadd(159576.000000,227964.000000,75675.000000,399.349944)}
{pt3dadd(159420.000000,227964.000000,75600.000000,383.375880)}
{pt3dadd(158868.000000,227928.000000,75250.000000,407.336882)}
{pt3dadd(158292.000000,227712.000000,74800.000000,431.297883)}
{pt3dadd(157968.000000,227304.000000,74300.000000,455.258885)}
{pt3dadd(157440.000000,227100.000000,73950.000000,479.219886)}
{pt3dadd(156960.000000,226932.000000,73675.000000,484.211758)}
{pt3dadd(156564.000000,226740.000000,73225.000000,489.203631)}
{pt3dadd(156216.000000,226776.000000,72975.000000,494.195504)}
{pt3dadd(155736.000000,226968.000000,72925.000000,499.187376)}
{pt3dadd(155424.000000,227172.000000,72925.000000,461.055006)}
{pt3dadd(155112.000000,227376.000000,72775.000000,422.922636)}
{pt3dadd(154824.000000,227568.000000,72725.000000,384.790266)}
{pt3dadd(154392.000000,227760.000000,72675.000000,346.657896)}
{pt3dadd(153936.000000,227940.000000,72525.000000,346.657896)}
{pt3dadd(153588.000000,228132.000000,72375.000000,346.657896)}
{pt3dadd(153276.000000,228276.000000,72300.000000,346.657896)}
{pt3dadd(152952.000000,228456.000000,72275.000000,346.657896)}
{pt3dadd(152784.000000,228588.000000,72300.000000,346.657896)}
{pt3dadd(152580.000000,228696.000000,72250.000000,240.734646)}

{create adhoc176}
{access adhoc176}
{connect adhoc176(1), adhoc175(0)}
{nseg = 1}
{strdef color color = "White"}
{pt3dclear()}
{pt3dadd(152580.000000,228696.000000,72250.000000,240.734646)}
{pt3dadd(152340.000000,228744.000000,72200.000000,200.612214)}
{pt3dadd(152148.000000,228732.000000,72100.000000,222.679557)}
{pt3dadd(151944.000000,228732.000000,72050.000000,244.746900)}
{pt3dadd(151764.000000,228696.000000,71900.000000,266.814243)}
{pt3dadd(151560.000000,228576.000000,71750.000000,288.881586)}
{pt3dadd(151368.000000,228576.000000,71525.000000,320.658561)}
{pt3dadd(151104.000000,228408.000000,71100.000000,352.435536)}
{pt3dadd(150972.000000,228348.000000,70800.000000,384.212511)}
{pt3dadd(150816.000000,228348.000000,70425.000000,415.989486)}
{pt3dadd(150744.000000,228288.000000,70100.000000,392.878956)}
{pt3dadd(150528.000000,228300.000000,69800.000000,369.768426)}
{pt3dadd(150384.000000,228372.000000,69400.000000,346.657896)}
{pt3dadd(150216.000000,228504.000000,69025.000000,399.349908)}

{create adhoc177}
{access adhoc177}
{connect adhoc177(1), adhoc176(0)}
{nseg = 1}
{strdef color color = "White"}
{pt3dclear()}
{pt3dadd(150216.000000,228504.000000,69025.000000,399.349908)}
{pt3dadd(150060.000000,228372.000000,68775.000000,288.881586)}
{pt3dadd(149976.000000,228372.000000,68475.000000,288.881586)}

{create adhoc178}
{access adhoc178}
{connect adhoc178(1), adhoc176(0)}
{nseg = 1}
{strdef color color = "White"}
{pt3dclear()}
{pt3dadd(150216.000000,228504.000000,69025.000000,399.349908)}
{pt3dadd(150048.000000,228840.000000,68625.000000,499.187376)}
{pt3dadd(149880.000000,229308.000000,68325.000000,478.387903)}
{pt3dadd(149700.000000,229596.000000,68025.000000,457.588431)}
{pt3dadd(149688.000000,230088.000000,67850.000000,436.788958)}
{pt3dadd(149496.000000,230676.000000,67425.000000,415.989486)}
{pt3dadd(149280.000000,231180.000000,67125.000000,434.099245)}
{pt3dadd(149064.000000,231312.000000,66850.000000,452.209005)}
{pt3dadd(149016.000000,231456.000000,66525.000000,470.318764)}
{pt3dadd(149004.000000,231540.000000,66175.000000,488.428524)}
{pt3dadd(148788.000000,231600.000000,65775.000000,470.318764)}
{pt3dadd(148824.000000,231624.000000,65650.000000,452.209005)}
{pt3dadd(148920.000000,231756.000000,65325.000000,434.099245)}
{pt3dadd(148944.000000,231612.000000,65025.000000,415.989486)}
{pt3dadd(148908.000000,231564.000000,64750.000000,415.989486)}
{pt3dadd(148872.000000,231516.000000,64375.000000,415.989486)}
{pt3dadd(148932.000000,231408.000000,64075.000000,415.989486)}
{pt3dadd(149016.000000,231264.000000,63775.000000,415.989486)}
{pt3dadd(149040.000000,230892.000000,63450.000000,415.989486)}
{pt3dadd(149196.000000,230844.000000,63075.000000,415.989486)}
{pt3dadd(149316.000000,230664.000000,62725.000000,415.989486)}
{pt3dadd(149436.000000,230556.000000,62550.000000,415.989486)}
{pt3dadd(149496.000000,230448.000000,62150.000000,415.989486)}

{create adhoc179}
{access adhoc179}
{connect adhoc179(1), adhoc175(0)}
{nseg = 1}
{strdef color color = "White"}
{pt3dclear()}
{pt3dadd(152580.000000,228696.000000,72250.000000,240.734646)}
{pt3dadd(152412.000000,228948.000000,72325.000000,200.612214)}
{pt3dadd(152148.000000,229308.000000,72325.000000,185.287671)}
{pt3dadd(151968.000000,229644.000000,72325.000000,169.963128)}
{pt3dadd(151788.000000,230160.000000,72550.000000,154.638585)}
{pt3dadd(151680.000000,230688.000000,72650.000000,139.314042)}
{pt3dadd(151596.000000,231240.000000,72625.000000,137.920900)}
{pt3dadd(151488.000000,231672.000000,72600.000000,136.527759)}
{pt3dadd(151368.000000,231972.000000,72525.000000,135.134617)}
{pt3dadd(151260.000000,232296.000000,72625.000000,133.741476)}
{pt3dadd(151140.000000,232632.000000,72625.000000,135.134617)}
{pt3dadd(151140.000000,232836.000000,72475.000000,136.527759)}
{pt3dadd(151152.000000,233148.000000,72300.000000,137.920900)}
{pt3dadd(151068.000000,233508.000000,72075.000000,139.314042)}
{pt3dadd(151056.000000,234204.000000,71800.000000,139.314042)}
{pt3dadd(151032.000000,234540.000000,71725.000000,139.314042)}
{pt3dadd(150924.000000,234900.000000,71475.000000,139.314042)}
{pt3dadd(150888.000000,235092.000000,71475.000000,139.314042)}
{pt3dadd(150864.000000,235272.000000,71475.000000,143.743225)}
{pt3dadd(150876.000000,235464.000000,71400.000000,148.172409)}
{pt3dadd(150780.000000,235680.000000,71475.000000,152.601593)}
{pt3dadd(150576.000000,235872.000000,71475.000000,157.030776)}
{pt3dadd(150492.000000,236148.000000,71525.000000,152.601593)}
{pt3dadd(150684.000000,236820.000000,71850.000000,148.172409)}
{pt3dadd(150768.000000,237180.000000,72075.000000,143.743225)}
{pt3dadd(151176.000000,237336.000000,72250.000000,139.314042)}
{pt3dadd(151500.000000,237528.000000,72275.000000,151.876224)}
{pt3dadd(151728.000000,237828.000000,72375.000000,164.438406)}
{pt3dadd(151812.000000,237924.000000,72700.000000,177.000588)}
{pt3dadd(151800.000000,238188.000000,73075.000000,139.314042)}

{create adhoc180}
{access adhoc180}
{connect adhoc180(1), adhoc174(0)}
{nseg = 1}
{strdef color color = "White"}
{pt3dclear()}
{pt3dadd(159576.000000,227964.000000,75675.000000,399.349944)}
{pt3dadd(159384.000000,228216.000000,76000.000000,499.187376)}
{pt3dadd(158976.000000,228288.000000,76000.000000,434.574193)}
{pt3dadd(158604.000000,228348.000000,76250.000000,369.961011)}
{pt3dadd(158460.000000,228480.000000,76475.000000,305.347828)}
{pt3dadd(158328.000000,228564.000000,76500.000000,240.734646)}
{pt3dadd(158184.000000,228636.000000,76625.000000,264.808116)}
{pt3dadd(158028.000000,228744.000000,76650.000000,288.881586)}
{pt3dadd(157692.000000,228804.000000,76850.000000,415.989486)}

{create adhoc181}
{access adhoc181}
{connect adhoc181(1), adhoc180(0)}
{nseg = 1}
{strdef color color = "White"}
{pt3dclear()}
{pt3dadd(157692.000000,228804.000000,76850.000000,415.989486)}
{pt3dadd(157452.000000,228792.000000,77200.000000,399.349872)}
{pt3dadd(157404.000000,228888.000000,77575.000000,387.842206)}
{pt3dadd(157368.000000,229008.000000,78025.000000,376.334541)}
{pt3dadd(157536.000000,229332.000000,78475.000000,364.826875)}
{pt3dadd(157632.000000,229404.000000,79050.000000,353.319210)}
{pt3dadd(157632.000000,229404.000000,79500.000000,337.209804)}
{pt3dadd(157752.000000,229308.000000,79875.000000,321.100398)}
{pt3dadd(157800.000000,229140.000000,80075.000000,304.990992)}
{pt3dadd(157752.000000,228948.000000,80325.000000,288.881586)}
{pt3dadd(157908.000000,228840.000000,80650.000000,233.457350)}
{pt3dadd(158076.000000,228912.000000,81025.000000,178.033113)}
{pt3dadd(158040.000000,229224.000000,81050.000000,122.608876)}
{pt3dadd(158064.000000,229620.000000,81275.000000,67.184640)}
{pt3dadd(158184.000000,230040.000000,81425.000000,117.180738)}
{pt3dadd(158292.000000,230340.000000,81525.000000,167.176836)}
{pt3dadd(158136.000000,230556.000000,81800.000000,80.621550)}

{create adhoc182}
{access adhoc182}
{connect adhoc182(1), adhoc180(0)}
{nseg = 1}
{strdef color color = "White"}
{pt3dclear()}
{pt3dadd(157692.000000,228804.000000,76850.000000,415.989486)}
{pt3dadd(157488.000000,228852.000000,76575.000000,277.326342)}
{pt3dadd(157272.000000,228924.000000,76575.000000,258.147810)}
{pt3dadd(157092.000000,228948.000000,76550.000000,238.969278)}
{pt3dadd(156876.000000,228996.000000,76425.000000,219.790746)}
{pt3dadd(156684.000000,229080.000000,76400.000000,200.612214)}
{pt3dadd(156504.000000,229128.000000,76350.000000,183.894530)}
{pt3dadd(156312.000000,229308.000000,76300.000000,167.176845)}
{pt3dadd(156084.000000,229392.000000,76225.000000,150.459160)}
{pt3dadd(155832.000000,229560.000000,76075.000000,133.741476)}
{pt3dadd(155580.000000,229740.000000,76075.000000,115.243668)}
{pt3dadd(155304.000000,229956.000000,76075.000000,96.745860)}
{pt3dadd(154920.000000,230064.000000,76075.000000,38.880000)}

{create adhoc183}
{access adhoc183}
{connect adhoc183(1), adhoc173(0)}
{nseg = 1}
{strdef color color = "White"}
{pt3dclear()}
{pt3dadd(177168.000000,223632.000000,83775.000000,599.024880)}
{pt3dadd(177204.000000,223260.000000,83725.000000,599.024880)}
{pt3dadd(177276.000000,222936.000000,83750.000000,553.266031)}
{pt3dadd(177240.000000,222660.000000,83625.000000,507.507183)}
{pt3dadd(177120.000000,222444.000000,83475.000000,461.748335)}
{pt3dadd(176856.000000,222228.000000,83325.000000,415.989486)}
{pt3dadd(176460.000000,222012.000000,83100.000000,369.768434)}
{pt3dadd(175428.000000,221856.000000,82975.000000,323.547381)}
{pt3dadd(174768.000000,221664.000000,82875.000000,277.326328)}
{pt3dadd(174444.000000,221496.000000,82750.000000,231.105276)}
{pt3dadd(173700.000000,221304.000000,82425.000000,245.549354)}
{pt3dadd(173076.000000,221136.000000,82325.000000,259.993431)}
{pt3dadd(172560.000000,220956.000000,82125.000000,274.437509)}
{pt3dadd(172152.000000,220824.000000,81925.000000,288.881586)}
{pt3dadd(171948.000000,220632.000000,81875.000000,288.881586)}
{pt3dadd(171708.000000,220440.000000,81775.000000,288.881586)}
{pt3dadd(171312.000000,220248.000000,81775.000000,288.881586)}
{pt3dadd(170904.000000,220056.000000,81725.000000,288.881586)}
{pt3dadd(170412.000000,219900.000000,81650.000000,288.881586)}
{pt3dadd(170208.000000,219696.000000,81625.000000,288.881586)}
{pt3dadd(170004.000000,219612.000000,81500.000000,288.881586)}
{pt3dadd(169824.000000,219468.000000,81450.000000,288.881586)}
{pt3dadd(169644.000000,219516.000000,81425.000000,276.844851)}
{pt3dadd(169464.000000,219456.000000,81225.000000,264.808116)}
{pt3dadd(169296.000000,219312.000000,81225.000000,252.771381)}
{pt3dadd(169092.000000,219228.000000,81175.000000,240.734646)}
{pt3dadd(168912.000000,219216.000000,81125.000000,280.388470)}
{pt3dadd(168744.000000,219180.000000,81000.000000,320.042295)}
{pt3dadd(168528.000000,219144.000000,80850.000000,359.696120)}
{pt3dadd(168324.000000,219168.000000,80850.000000,399.349944)}
{pt3dadd(168108.000000,219084.000000,80800.000000,386.176932)}
{pt3dadd(167940.000000,219108.000000,80775.000000,373.003920)}
{pt3dadd(167688.000000,218988.000000,80650.000000,359.830908)}
{pt3dadd(167508.000000,218952.000000,80625.000000,346.657896)}
{pt3dadd(167352.000000,218808.000000,80475.000000,332.213819)}
{pt3dadd(167160.000000,218724.000000,80375.000000,317.769741)}
{pt3dadd(166944.000000,218808.000000,80375.000000,303.325664)}
{pt3dadd(166740.000000,218796.000000,80300.000000,288.881586)}
{pt3dadd(166548.000000,218796.000000,80250.000000,288.881586)}
{pt3dadd(166368.000000,218868.000000,80275.000000,288.881586)}
{pt3dadd(166212.000000,218856.000000,80300.000000,288.881586)}
{pt3dadd(166044.000000,218904.000000,80325.000000,288.881586)}
{pt3dadd(165876.000000,218820.000000,80250.000000,288.881586)}
{pt3dadd(165684.000000,218844.000000,80250.000000,288.881586)}
{pt3dadd(165516.000000,218868.000000,80275.000000,288.881586)}
{pt3dadd(165348.000000,218856.000000,80250.000000,288.881586)}
{pt3dadd(165168.000000,218856.000000,80250.000000,303.325664)}
{pt3dadd(165000.000000,218904.000000,80175.000000,317.769741)}
{pt3dadd(164844.000000,218820.000000,80100.000000,332.213819)}
{pt3dadd(164700.000000,218760.000000,80025.000000,346.657896)}
{pt3dadd(164568.000000,218808.000000,80050.000000,363.990794)}
{pt3dadd(164436.000000,218832.000000,80025.000000,381.323691)}
{pt3dadd(164304.000000,218820.000000,79975.000000,398.656589)}
{pt3dadd(164148.000000,218736.000000,79850.000000,415.989486)}
{pt3dadd(163968.000000,218844.000000,79875.000000,415.989486)}
{pt3dadd(163776.000000,218844.000000,79875.000000,415.989486)}
{pt3dadd(163596.000000,218832.000000,79900.000000,415.989486)}

{create adhoc184}
{access adhoc184}
{connect adhoc184(1), adhoc183(0)}
{nseg = 1}
{strdef color color = "White"}
{pt3dclear()}
{pt3dadd(163596.000000,218832.000000,79900.000000,415.989486)}
{pt3dadd(163596.000000,219288.000000,80100.000000,288.881586)}
{pt3dadd(163596.000000,219744.000000,80200.000000,264.808120)}
{pt3dadd(163596.000000,220140.000000,80250.000000,240.734655)}
{pt3dadd(163464.000000,220212.000000,80250.000000,216.661190)}
{pt3dadd(163308.000000,220356.000000,80250.000000,192.587724)}
{pt3dadd(163152.000000,220632.000000,80400.000000,173.464551)}
{pt3dadd(163008.000000,220860.000000,80525.000000,154.341378)}
{pt3dadd(162876.000000,221004.000000,80625.000000,135.218205)}
{pt3dadd(162744.000000,221124.000000,80675.000000,116.095032)}
{pt3dadd(162600.000000,221400.000000,80700.000000,137.224328)}
{pt3dadd(162468.000000,221736.000000,80775.000000,158.353623)}
{pt3dadd(162324.000000,221940.000000,80850.000000,179.482918)}
{pt3dadd(162204.000000,221976.000000,80800.000000,200.612214)}
{pt3dadd(161976.000000,222036.000000,80950.000000,160.615326)}
{pt3dadd(161796.000000,222108.000000,81025.000000,120.618438)}
{pt3dadd(161604.000000,222084.000000,81050.000000,80.621550)}
{pt3dadd(161412.000000,221964.000000,80975.000000,67.184640)}

{create adhoc185}
{access adhoc185}
{connect adhoc185(1), adhoc183(0)}
{nseg = 1}
{strdef color color = "White"}
{pt3dclear()}
{pt3dadd(163596.000000,218832.000000,79900.000000,415.989486)}
{pt3dadd(163428.000000,218736.000000,79800.000000,399.349908)}
{pt3dadd(163260.000000,218676.000000,79650.000000,479.219886)}
{pt3dadd(163092.000000,218652.000000,79650.000000,479.219886)}

{create adhoc186}
{access adhoc186}
{connect adhoc186(1), adhoc185(0)}
{nseg = 1}
{strdef color color = "White"}
{pt3dclear()}
{pt3dadd(163092.000000,218652.000000,79650.000000,479.219886)}
{pt3dadd(162948.000000,218640.000000,79300.000000,479.219886)}
{pt3dadd(162780.000000,218640.000000,79175.000000,431.635311)}
{pt3dadd(162600.000000,218436.000000,79000.000000,384.050736)}
{pt3dadd(162432.000000,218340.000000,78850.000000,336.466161)}
{pt3dadd(162276.000000,218364.000000,78775.000000,288.881586)}
{pt3dadd(162084.000000,218304.000000,78725.000000,288.881586)}
{pt3dadd(161928.000000,218184.000000,78575.000000,288.881586)}
{pt3dadd(161760.000000,218184.000000,78325.000000,288.881586)}
{pt3dadd(161592.000000,218172.000000,78125.000000,288.881586)}
{pt3dadd(161436.000000,218112.000000,77950.000000,317.769741)}
{pt3dadd(161328.000000,218100.000000,77775.000000,346.657896)}
{pt3dadd(161196.000000,218208.000000,77800.000000,288.881586)}

{create adhoc187}
{access adhoc187}
{connect adhoc187(1), adhoc186(0)}
{nseg = 1}
{strdef color color = "White"}
{pt3dclear()}
{pt3dadd(161196.000000,218208.000000,77800.000000,288.881586)}
{pt3dadd(161004.000000,218460.000000,77475.000000,277.326324)}
{pt3dadd(160596.000000,218772.000000,77225.000000,249.788952)}
{pt3dadd(160308.000000,218928.000000,76975.000000,222.251580)}
{pt3dadd(159996.000000,219228.000000,76675.000000,194.714208)}
{pt3dadd(159588.000000,219696.000000,76475.000000,167.176836)}
{pt3dadd(159216.000000,219828.000000,76275.000000,185.566288)}
{pt3dadd(158904.000000,219984.000000,76075.000000,203.955741)}
{pt3dadd(158676.000000,220068.000000,75875.000000,222.345193)}
{pt3dadd(158364.000000,220080.000000,75600.000000,240.734646)}
{pt3dadd(157956.000000,220068.000000,75350.000000,252.771381)}
{pt3dadd(157896.000000,220320.000000,75250.000000,264.808116)}
{pt3dadd(157524.000000,220392.000000,75050.000000,276.844851)}
{pt3dadd(157428.000000,220464.000000,74850.000000,288.881586)}
{pt3dadd(157188.000000,220116.000000,74575.000000,288.881586)}
{pt3dadd(156816.000000,219948.000000,74425.000000,288.881586)}
{pt3dadd(156696.000000,219756.000000,74225.000000,288.881586)}
{pt3dadd(156348.000000,219588.000000,73975.000000,288.881586)}
{pt3dadd(156228.000000,219420.000000,73675.000000,230.657990)}
{pt3dadd(156132.000000,219300.000000,73275.000000,172.434393)}
{pt3dadd(155988.000000,219492.000000,73100.000000,114.210797)}
{pt3dadd(155844.000000,219828.000000,72875.000000,55.987200)}
{pt3dadd(155796.000000,220008.000000,72850.000000,92.143454)}
{pt3dadd(155700.000000,220212.000000,72725.000000,128.299707)}
{pt3dadd(155520.000000,220332.000000,72600.000000,164.455961)}
{pt3dadd(155388.000000,220404.000000,72450.000000,200.612214)}
{pt3dadd(155172.000000,220704.000000,72175.000000,169.808333)}
{pt3dadd(154932.000000,220932.000000,72250.000000,139.004451)}
{pt3dadd(154824.000000,221076.000000,72250.000000,108.200569)}
{pt3dadd(154656.000000,221208.000000,72400.000000,77.396688)}
{pt3dadd(154488.000000,221496.000000,72400.000000,55.987200)}

{create adhoc188}
{access adhoc188}
{connect adhoc188(1), adhoc186(0)}
{nseg = 1}
{strdef color color = "White"}
{pt3dclear()}
{pt3dadd(161196.000000,218208.000000,77800.000000,288.881586)}
{pt3dadd(161316.000000,217800.000000,77725.000000,240.734646)}
{pt3dadd(161052.000000,217404.000000,77500.000000,176.041764)}
{pt3dadd(160860.000000,217104.000000,77400.000000,111.348882)}
{pt3dadd(160740.000000,216936.000000,77525.000000,46.656000)}
{pt3dadd(160404.000000,216756.000000,77475.000000,200.612214)}

{create adhoc189}
{access adhoc189}
{connect adhoc189(1), adhoc188(0)}
{nseg = 1}
{strdef color color = "White"}
{pt3dclear()}
{pt3dadd(160404.000000,216756.000000,77475.000000,200.612214)}
{pt3dadd(160404.000000,216588.000000,77500.000000,167.176836)}
{pt3dadd(160440.000000,216360.000000,77525.000000,143.214822)}
{pt3dadd(160440.000000,216132.000000,77450.000000,119.252808)}
{pt3dadd(160560.000000,215928.000000,77525.000000,95.290794)}
{pt3dadd(160692.000000,215664.000000,77475.000000,71.328780)}
{pt3dadd(160728.000000,215388.000000,77400.000000,96.745860)}

{create adhoc190}
{access adhoc190}
{connect adhoc190(1), adhoc188(0)}
{nseg = 1}
{strdef color color = "White"}
{pt3dclear()}
{pt3dadd(160404.000000,216756.000000,77475.000000,200.612214)}
{pt3dadd(160056.000000,216756.000000,77250.000000,116.095032)}
{pt3dadd(159840.000000,216756.000000,77025.000000,137.224328)}
{pt3dadd(159540.000000,216756.000000,76725.000000,158.353623)}
{pt3dadd(159408.000000,216612.000000,76575.000000,179.482918)}
{pt3dadd(159288.000000,216492.000000,76350.000000,200.612214)}
{pt3dadd(159204.000000,216348.000000,76050.000000,179.482918)}
{pt3dadd(159348.000000,216180.000000,75800.000000,158.353623)}
{pt3dadd(159456.000000,216036.000000,75625.000000,137.224328)}
{pt3dadd(159564.000000,215796.000000,75400.000000,116.095032)}
{pt3dadd(159648.000000,215664.000000,75300.000000,92.948688)}
{pt3dadd(159708.000000,215508.000000,74900.000000,69.802344)}
{pt3dadd(159840.000000,215292.000000,74650.000000,46.656000)}
{pt3dadd(159984.000000,215160.000000,74650.000000,38.880000)}

{create adhoc191}
{access adhoc191}
{connect adhoc191(1), adhoc185(0)}
{nseg = 1}
{strdef color color = "White"}
{pt3dclear()}
{pt3dadd(163092.000000,218652.000000,79650.000000,479.219886)}
{pt3dadd(163068.000000,218340.000000,79825.000000,499.187376)}
{pt3dadd(163176.000000,218220.000000,80025.000000,394.545920)}
{pt3dadd(162996.000000,217872.000000,80025.000000,289.904463)}
{pt3dadd(162876.000000,217572.000000,80025.000000,185.263007)}
{pt3dadd(162816.000000,217212.000000,80025.000000,80.621550)}
{pt3dadd(162696.000000,216900.000000,80050.000000,102.260372)}
{pt3dadd(162600.000000,216732.000000,80175.000000,123.899193)}
{pt3dadd(162612.000000,216492.000000,80250.000000,145.538014)}
{pt3dadd(162732.000000,216300.000000,80325.000000,167.176836)}
{pt3dadd(162672.000000,216120.000000,80400.000000,212.047101)}
{pt3dadd(162612.000000,215916.000000,80425.000000,256.917366)}
{pt3dadd(162636.000000,215724.000000,80600.000000,301.787631)}
{pt3dadd(162696.000000,215640.000000,80950.000000,346.657896)}
{pt3dadd(162648.000000,215472.000000,81150.000000,294.821933)}
{pt3dadd(162720.000000,215268.000000,81225.000000,242.985969)}
{pt3dadd(162828.000000,215064.000000,81325.000000,191.150005)}
{pt3dadd(162864.000000,214872.000000,81275.000000,139.314042)}
{pt3dadd(162900.000000,214644.000000,81325.000000,139.314042)}
{pt3dadd(163032.000000,214464.000000,81375.000000,139.314042)}
{pt3dadd(163116.000000,214260.000000,81350.000000,139.314042)}
{pt3dadd(163236.000000,214056.000000,81325.000000,139.314042)}
{pt3dadd(163356.000000,213852.000000,81325.000000,128.671997)}
{pt3dadd(163464.000000,213660.000000,81275.000000,118.029951)}
{pt3dadd(163512.000000,213468.000000,81250.000000,107.387906)}
{pt3dadd(163560.000000,213216.000000,81350.000000,96.745860)}
{pt3dadd(163608.000000,212868.000000,81350.000000,168.740253)}
{pt3dadd(163656.000000,212472.000000,81350.000000,240.734646)}
{pt3dadd(163704.000000,212268.000000,81550.000000,217.079298)}

{create adhoc192}
{access adhoc192}
{connect adhoc192(1), adhoc191(0)}
{nseg = 1}
{strdef color color = "White"}
{pt3dclear()}
{pt3dadd(163704.000000,212268.000000,81550.000000,217.079298)}
{pt3dadd(163908.000000,212568.000000,81650.000000,106.993188)}
{pt3dadd(164136.000000,212700.000000,81825.000000,97.041051)}
{pt3dadd(164460.000000,212892.000000,82025.000000,87.088914)}
{pt3dadd(164748.000000,212976.000000,82250.000000,77.136777)}
{pt3dadd(165000.000000,213084.000000,82500.000000,67.184640)}
{pt3dadd(165132.000000,213216.000000,82700.000000,32.400000)}

{create adhoc193}
{access adhoc193}
{connect adhoc193(1), adhoc191(0)}
{nseg = 1}
{strdef color color = "White"}
{pt3dclear()}
{pt3dadd(163704.000000,212268.000000,81550.000000,217.079298)}
{pt3dadd(163716.000000,212388.000000,81025.000000,160.489764)}
{pt3dadd(163656.000000,212196.000000,80800.000000,145.691520)}
{pt3dadd(163572.000000,212076.000000,80575.000000,130.893276)}
{pt3dadd(163428.000000,212064.000000,80325.000000,116.095032)}
{pt3dadd(163368.000000,212052.000000,80100.000000,77.396688)}
