# Supplementary material for: Full reconstruction of large lobula plate tangential cells in Drosophila from a 3D EM dataset
Source: PLoS One. 2018 Nov 28;13(11):e0207828. doi: 10.1371/journal.pone.0207828 (PMC6261601; doi:10.1371/journal.pone.0207828)
Supplement: S1 Dataset — (ZIP) [file pone.0207828.s001.zip › Diameter hoc/VS_VSL_preliminary/Old Diameters Mar13_VS_VSL_HS/VSlike3/2_14_800_smaurer_001.015.hoc]

/* created with nml2hocm */

{create adhoc1}
{access adhoc1}
{nseg = 1}
{strdef color color = "White"}
{pt3dclear()}
{pt3dadd(159504.000000,196764.000000,63575.000000,116.095032)}
{pt3dadd(159492.000000,196968.000000,63725.000000,167.176836)}
{pt3dadd(159468.000000,197436.000000,64225.000000,192.587724)}
{pt3dadd(159468.000000,198012.000000,64750.000000,194.593846)}
{pt3dadd(159468.000000,199200.000000,65525.000000,196.599969)}
{pt3dadd(159132.000000,200136.000000,65525.000000,198.606091)}
{pt3dadd(158436.000000,201324.000000,65800.000000,200.612214)}
{pt3dadd(157896.000000,202572.000000,65825.000000,200.612214)}
{pt3dadd(157920.000000,203004.000000,66225.000000,200.612214)}
{pt3dadd(157944.000000,203772.000000,66775.000000,200.612214)}
{pt3dadd(158520.000000,204888.000000,67375.000000,200.612214)}
{pt3dadd(158364.000000,207072.000000,67950.000000,231.105276)}

{create adhoc2}
{access adhoc2}
{connect adhoc2(1), adhoc1(0)}
{nseg = 1}
{strdef color color = "White"}
{pt3dclear()}
{pt3dadd(158364.000000,207072.000000,67950.000000,231.105276)}
{pt3dadd(158016.000000,206964.000000,68025.000000,116.095032)}
{pt3dadd(157692.000000,207156.000000,68150.000000,127.704537)}
{pt3dadd(157452.000000,207204.000000,68200.000000,139.314042)}
{pt3dadd(157320.000000,207168.000000,68225.000000,167.176836)}

{create adhoc3}
{access adhoc3}
{connect adhoc3(1), adhoc1(0)}
{nseg = 1}
{strdef color color = "White"}
{pt3dclear()}
{pt3dadd(158364.000000,207072.000000,67950.000000,231.105276)}
{pt3dadd(158736.000000,207024.000000,67900.000000,346.657896)}
{pt3dadd(159180.000000,207024.000000,68275.000000,311.350146)}
{pt3dadd(159468.000000,207276.000000,68375.000000,276.042396)}
{pt3dadd(159888.000000,207564.000000,68675.000000,240.734646)}
{pt3dadd(160248.000000,207852.000000,68900.000000,215.379495)}
{pt3dadd(160596.000000,207924.000000,69125.000000,190.024344)}
{pt3dadd(160908.000000,208104.000000,69275.000000,164.669193)}
{pt3dadd(161160.000000,208200.000000,69800.000000,139.314042)}
{pt3dadd(161604.000000,209040.000000,69800.000000,346.657896)}

{create adhoc4}
{access adhoc4}
{connect adhoc4(1), adhoc3(0)}
{nseg = 1}
{strdef color color = "White"}
{pt3dclear()}
{pt3dadd(161604.000000,209040.000000,69800.000000,346.657896)}
{pt3dadd(159708.000000,211668.000000,69800.000000,346.657896)}
{pt3dadd(159480.000000,211608.000000,69600.000000,384.790266)}
{pt3dadd(159276.000000,211812.000000,69525.000000,422.922636)}
{pt3dadd(159000.000000,212172.000000,69375.000000,461.055006)}
{pt3dadd(158724.000000,212592.000000,69100.000000,499.187376)}
{pt3dadd(158460.000000,212868.000000,68925.000000,461.055006)}
{pt3dadd(158316.000000,213132.000000,68725.000000,422.922636)}
{pt3dadd(158076.000000,213324.000000,68600.000000,384.790266)}
{pt3dadd(157836.000000,213564.000000,68225.000000,346.657896)}
{pt3dadd(157620.000000,213564.000000,67775.000000,415.989486)}
{pt3dadd(157284.000000,213624.000000,67250.000000,479.219886)}

{create adhoc5}
{access adhoc5}
{connect adhoc5(1), adhoc4(0)}
{nseg = 1}
{strdef color color = "White"}
{pt3dclear()}
{pt3dadd(157284.000000,213624.000000,67250.000000,479.219886)}
{pt3dadd(157344.000000,214536.000000,68225.000000,200.612214)}
{pt3dadd(157092.000000,214932.000000,68000.000000,192.253370)}
{pt3dadd(156828.000000,215508.000000,67800.000000,183.894525)}
{pt3dadd(156588.000000,216072.000000,67600.000000,175.535680)}
{pt3dadd(156336.000000,216432.000000,67475.000000,167.176836)}
{pt3dadd(156120.000000,216660.000000,67400.000000,167.176836)}
{pt3dadd(155892.000000,216708.000000,67350.000000,167.176836)}
{pt3dadd(155736.000000,216708.000000,67350.000000,167.176836)}

{create adhoc6}
{access adhoc6}
{connect adhoc6(1), adhoc4(0)}
{nseg = 1}
{strdef color color = "White"}
{pt3dclear()}
{pt3dadd(157284.000000,213624.000000,67250.000000,479.219886)}
{pt3dadd(156996.000000,213252.000000,66400.000000,288.881586)}
{pt3dadd(156720.000000,213456.000000,66050.000000,288.881586)}
{pt3dadd(156384.000000,214056.000000,65675.000000,240.734646)}

{create adhoc7}
{access adhoc7}
{connect adhoc7(1), adhoc6(0)}
{nseg = 1}
{strdef color color = "White"}
{pt3dclear()}
{pt3dadd(156384.000000,214056.000000,65675.000000,240.734646)}
{pt3dadd(156552.000000,212796.000000,65575.000000,288.881586)}
{pt3dadd(156264.000000,212220.000000,65025.000000,288.881586)}
{pt3dadd(155952.000000,211332.000000,64475.000000,288.881586)}
{pt3dadd(155964.000000,211092.000000,64600.000000,288.881586)}
{pt3dadd(155976.000000,210840.000000,64450.000000,288.881586)}
{pt3dadd(155880.000000,210552.000000,64150.000000,251.489700)}
{pt3dadd(155772.000000,210324.000000,63900.000000,214.097814)}
{pt3dadd(155760.000000,210012.000000,63750.000000,176.705928)}
{pt3dadd(155784.000000,209772.000000,63475.000000,139.314042)}
{pt3dadd(155760.000000,209520.000000,63325.000000,176.705928)}
{pt3dadd(155808.000000,209292.000000,63250.000000,214.097814)}
{pt3dadd(155664.000000,209064.000000,63050.000000,251.489700)}
{pt3dadd(155712.000000,208800.000000,62675.000000,288.881586)}
{pt3dadd(155544.000000,208584.000000,62675.000000,288.881586)}
{pt3dadd(155412.000000,208344.000000,62325.000000,288.881586)}
{pt3dadd(155400.000000,208068.000000,61950.000000,288.881586)}
{pt3dadd(155076.000000,207720.000000,61800.000000,288.881586)}
{pt3dadd(154800.000000,207444.000000,61500.000000,276.844851)}
{pt3dadd(154824.000000,207216.000000,61375.000000,264.808116)}
{pt3dadd(154656.000000,207000.000000,61200.000000,252.771381)}
{pt3dadd(154548.000000,206796.000000,61125.000000,240.734646)}
{pt3dadd(154368.000000,206640.000000,60725.000000,200.612214)}

{create adhoc8}
{access adhoc8}
{connect adhoc8(1), adhoc6(0)}
{nseg = 1}
{strdef color color = "White"}
{pt3dclear()}
{pt3dadd(156384.000000,214056.000000,65675.000000,240.734646)}
{pt3dadd(155988.000000,214224.000000,65225.000000,288.881586)}
{pt3dadd(155484.000000,214392.000000,64700.000000,258.455399)}
{pt3dadd(155208.000000,214656.000000,64625.000000,228.029211)}
{pt3dadd(154932.000000,214788.000000,64700.000000,197.603024)}
{pt3dadd(154692.000000,214872.000000,64625.000000,167.176836)}
{pt3dadd(154464.000000,215112.000000,64650.000000,167.176836)}
{pt3dadd(154308.000000,215316.000000,64675.000000,167.176836)}
{pt3dadd(154104.000000,215400.000000,64700.000000,167.176836)}
{pt3dadd(153972.000000,215484.000000,64725.000000,167.176836)}
{pt3dadd(153816.000000,215424.000000,64775.000000,139.314042)}
{pt3dadd(153564.000000,215592.000000,64825.000000,116.095032)}

{create adhoc9}
{access adhoc9}
{connect adhoc9(1), adhoc3(0)}
{nseg = 1}
{strdef color color = "White"}
{pt3dclear()}
{pt3dadd(161604.000000,209040.000000,69800.000000,346.657896)}
{pt3dadd(161904.000000,208776.000000,69825.000000,415.989486)}
{pt3dadd(162252.000000,208656.000000,69950.000000,415.989486)}
{pt3dadd(162900.000000,208500.000000,70025.000000,415.989486)}
{pt3dadd(164424.000000,208344.000000,70025.000000,415.989486)}
{pt3dadd(164760.000000,208548.000000,70725.000000,436.788958)}
{pt3dadd(165540.000000,208272.000000,70725.000000,457.588431)}
{pt3dadd(167688.000000,208476.000000,70725.000000,478.387903)}
{pt3dadd(167856.000000,208464.000000,70725.000000,499.187376)}
{pt3dadd(168120.000000,208536.000000,70725.000000,499.187376)}
{pt3dadd(168348.000000,208608.000000,70725.000000,499.187376)}
{pt3dadd(168528.000000,208644.000000,70675.000000,499.187376)}
{pt3dadd(168780.000000,208716.000000,70625.000000,499.187376)}
{pt3dadd(169068.000000,208620.000000,70500.000000,499.187376)}
{pt3dadd(169344.000000,208656.000000,70500.000000,499.187376)}
{pt3dadd(169572.000000,208596.000000,70475.000000,499.187376)}
{pt3dadd(169836.000000,208572.000000,70450.000000,499.187376)}
{pt3dadd(170100.000000,208548.000000,70425.000000,499.187376)}
{pt3dadd(170328.000000,208500.000000,70375.000000,499.187376)}
{pt3dadd(170580.000000,208572.000000,70575.000000,499.187376)}
{pt3dadd(170820.000000,208308.000000,70600.000000,499.187376)}
{pt3dadd(171048.000000,208368.000000,70675.000000,494.195504)}
{pt3dadd(171312.000000,208368.000000,70700.000000,489.203631)}
{pt3dadd(171528.000000,208308.000000,70650.000000,484.211758)}
{pt3dadd(171768.000000,208212.000000,70600.000000,479.219886)}
{pt3dadd(172056.000000,208092.000000,70550.000000,484.211758)}
{pt3dadd(172308.000000,207996.000000,70475.000000,489.203631)}
{pt3dadd(172536.000000,207900.000000,70400.000000,494.195504)}
{pt3dadd(172872.000000,207852.000000,70525.000000,499.187376)}
{pt3dadd(173172.000000,207768.000000,70650.000000,499.187376)}
{pt3dadd(173412.000000,207684.000000,70775.000000,499.187376)}
{pt3dadd(173652.000000,207600.000000,70900.000000,499.187376)}
{pt3dadd(173916.000000,207540.000000,70900.000000,499.187376)}
{pt3dadd(174228.000000,207276.000000,70900.000000,512.405851)}
{pt3dadd(174600.000000,207072.000000,70675.000000,525.624327)}
{pt3dadd(175452.000000,206676.000000,71150.000000,538.842803)}
{pt3dadd(175956.000000,206160.000000,71300.000000,552.061278)}
{pt3dadd(176460.000000,205764.000000,71425.000000,629.694909)}
{pt3dadd(177012.000000,205404.000000,71525.000000,707.328540)}
{pt3dadd(177516.000000,205044.000000,71850.000000,784.962171)}
{pt3dadd(178920.000000,204708.000000,72750.000000,862.595802)}
{pt3dadd(180168.000000,204288.000000,73775.000000,862.595802)}
{pt3dadd(181008.000000,203820.000000,74400.000000,862.595802)}
{pt3dadd(181296.000000,203520.000000,75325.000000,862.595802)}
{pt3dadd(181572.000000,203244.000000,75775.000000,862.595802)}
{pt3dadd(182040.000000,202932.000000,75950.000000,905.725589)}
{pt3dadd(182664.000000,202512.000000,76450.000000,948.855375)}
{pt3dadd(182916.000000,202272.000000,76850.000000,991.985162)}
{pt3dadd(183228.000000,201984.000000,77200.000000,1035.114948)}
{pt3dadd(183672.000000,201660.000000,77675.000000,956.043666)}
{pt3dadd(183840.000000,201252.000000,78125.000000,876.972384)}
{pt3dadd(183792.000000,200916.000000,78575.000000,797.901102)}
{pt3dadd(183624.000000,200460.000000,79000.000000,718.829820)}
{pt3dadd(183792.000000,200016.000000,79675.000000,688.878585)}
{pt3dadd(184068.000000,199524.000000,79950.000000,658.927350)}
{pt3dadd(184344.000000,199188.000000,80250.000000,628.976115)}
{pt3dadd(184848.000000,198876.000000,80500.000000,599.024880)}
{pt3dadd(185400.000000,198276.000000,80725.000000,599.024880)}
{pt3dadd(185952.000000,197880.000000,80950.000000,599.024880)}
{pt3dadd(186492.000000,197508.000000,80875.000000,599.024880)}
{pt3dadd(187176.000000,197088.000000,81100.000000,599.024880)}
{pt3dadd(187884.000000,196668.000000,81250.000000,664.917611)}
{pt3dadd(188244.000000,196320.000000,81425.000000,730.810341)}
{pt3dadd(188568.000000,195936.000000,81650.000000,796.703072)}
{pt3dadd(188892.000000,195432.000000,81900.000000,862.595802)}
{pt3dadd(188880.000000,194892.000000,82175.000000,796.703072)}
{pt3dadd(189228.000000,194520.000000,82275.000000,730.810341)}
{pt3dadd(189552.000000,194064.000000,82700.000000,664.917611)}
{pt3dadd(189900.000000,193596.000000,83125.000000,599.024880)}
{pt3dadd(190404.000000,193008.000000,83525.000000,628.976115)}
{pt3dadd(190908.000000,192588.000000,83925.000000,658.927350)}
{pt3dadd(191556.000000,192132.000000,84325.000000,688.878585)}
{pt3dadd(191808.000000,191784.000000,84275.000000,718.829820)}
{pt3dadd(192456.000000,191388.000000,84900.000000,746.145369)}
{pt3dadd(193440.000000,190716.000000,85700.000000,773.460918)}
{pt3dadd(194028.000000,189732.000000,86375.000000,800.776467)}
{pt3dadd(193980.000000,189504.000000,87025.000000,828.092016)}
{pt3dadd(194304.000000,189228.000000,87850.000000,931.603482)}
{pt3dadd(194700.000000,188760.000000,88675.000000,1035.114948)}
{pt3dadd(195288.000000,188112.000000,89375.000000,1138.626414)}
{pt3dadd(195264.000000,187920.000000,90175.000000,1242.137880)}
{pt3dadd(195432.000000,187680.000000,90925.000000,1147.252361)}
{pt3dadd(195432.000000,187560.000000,91700.000000,1052.366841)}
{pt3dadd(195228.000000,187428.000000,92525.000000,957.481322)}
{pt3dadd(195204.000000,187200.000000,93200.000000,862.595802)}
{pt3dadd(194796.000000,186960.000000,93800.000000,826.654307)}
{pt3dadd(194868.000000,186684.000000,94425.000000,790.712811)}
{pt3dadd(194676.000000,186516.000000,95025.000000,754.771316)}
{pt3dadd(194700.000000,186204.000000,95625.000000,718.829820)}
{pt3dadd(193356.000000,186228.000000,98350.000000,690.076674)}

{create adhoc10}
{access adhoc10}
{connect adhoc10(1), adhoc9(0)}
{nseg = 1}
{strdef color color = "White"}
{pt3dclear()}
{pt3dadd(193356.000000,186228.000000,98350.000000,690.076674)}
{pt3dadd(193152.000000,186408.000000,98750.000000,718.829820)}
{pt3dadd(192852.000000,186720.000000,99050.000000,658.927350)}
{pt3dadd(192720.000000,187020.000000,99200.000000,599.024880)}
{pt3dadd(192756.000000,187464.000000,99400.000000,664.917611)}
{pt3dadd(192588.000000,187932.000000,99550.000000,730.810341)}
{pt3dadd(192384.000000,188472.000000,99800.000000,796.703072)}
{pt3dadd(192372.000000,189024.000000,100025.000000,862.595802)}
{pt3dadd(192312.000000,189756.000000,100550.000000,862.595802)}
{pt3dadd(192144.000000,190260.000000,100525.000000,862.595802)}
{pt3dadd(192120.000000,190632.000000,100575.000000,862.595802)}
{pt3dadd(192384.000000,193920.000000,101200.000000,862.595802)}
{pt3dadd(192780.000000,194184.000000,102100.000000,1035.114948)}

{create adhoc11}
{access adhoc11}
{connect adhoc11(1), adhoc10(0)}
{nseg = 1}
{strdef color color = "White"}
{pt3dclear()}
{pt3dadd(192780.000000,194184.000000,102100.000000,1035.114948)}
{pt3dadd(191736.000000,197328.000000,101725.000000,718.829820)}
{pt3dadd(191376.000000,197940.000000,101250.000000,797.901102)}
{pt3dadd(191124.000000,198336.000000,100825.000000,876.972384)}
{pt3dadd(190776.000000,198732.000000,100375.000000,956.043666)}
{pt3dadd(190512.000000,199116.000000,99550.000000,1035.114948)}
{pt3dadd(190176.000000,199512.000000,99600.000000,1035.114948)}
{pt3dadd(189900.000000,200160.000000,99175.000000,1035.114948)}
{pt3dadd(189576.000000,200844.000000,98775.000000,1035.114948)}
{pt3dadd(189264.000000,201180.000000,98625.000000,1035.114948)}
{pt3dadd(189000.000000,201600.000000,98050.000000,956.043666)}
{pt3dadd(188664.000000,201768.000000,97825.000000,876.972384)}
{pt3dadd(188352.000000,202164.000000,97475.000000,797.901102)}
{pt3dadd(188052.000000,202560.000000,97100.000000,718.829820)}
{pt3dadd(187812.000000,202800.000000,96800.000000,688.878585)}
{pt3dadd(187524.000000,203256.000000,96725.000000,658.927350)}
{pt3dadd(187224.000000,203748.000000,96650.000000,628.976115)}
{pt3dadd(187008.000000,204960.000000,96650.000000,599.024880)}
{pt3dadd(186504.000000,206196.000000,96650.000000,535.933134)}
{pt3dadd(186624.000000,206628.000000,96100.000000,472.841388)}
{pt3dadd(186408.000000,207096.000000,95850.000000,409.749642)}
{pt3dadd(186672.000000,207456.000000,94875.000000,346.657896)}
{pt3dadd(186264.000000,207888.000000,94875.000000,332.213819)}
{pt3dadd(186228.000000,208188.000000,94650.000000,317.769741)}
{pt3dadd(185748.000000,208872.000000,94650.000000,303.325664)}
{pt3dadd(185160.000000,210444.000000,94650.000000,288.881586)}
{pt3dadd(184728.000000,210996.000000,94000.000000,341.458034)}
{pt3dadd(184548.000000,211344.000000,94250.000000,394.034481)}
{pt3dadd(184416.000000,211704.000000,93950.000000,446.610929)}
{pt3dadd(184164.000000,212112.000000,93675.000000,499.187376)}
{pt3dadd(183912.000000,212676.000000,93400.000000,524.146752)}
{pt3dadd(183912.000000,213192.000000,93175.000000,549.106128)}
{pt3dadd(183852.000000,213552.000000,92825.000000,574.065504)}
{pt3dadd(183672.000000,214128.000000,92750.000000,599.024880)}
{pt3dadd(183492.000000,214512.000000,92675.000000,628.976115)}
{pt3dadd(183396.000000,214740.000000,92775.000000,658.927350)}
{pt3dadd(183552.000000,215076.000000,92575.000000,688.878585)}
{pt3dadd(183636.000000,215496.000000,92575.000000,718.829820)}
{pt3dadd(183432.000000,215772.000000,92600.000000,718.829820)}
{pt3dadd(183264.000000,216048.000000,92325.000000,718.829820)}
{pt3dadd(183084.000000,216252.000000,92425.000000,718.829820)}
{pt3dadd(182904.000000,216552.000000,92500.000000,718.829820)}
{pt3dadd(182832.000000,216552.000000,92525.000000,754.771316)}
{pt3dadd(182844.000000,216936.000000,92325.000000,790.712811)}
{pt3dadd(182664.000000,217272.000000,92125.000000,826.654307)}
{pt3dadd(182484.000000,217608.000000,91925.000000,862.595802)}
{pt3dadd(182448.000000,217920.000000,91650.000000,862.595802)}
{pt3dadd(182412.000000,218388.000000,91375.000000,862.595802)}
{pt3dadd(182316.000000,218664.000000,91575.000000,862.595802)}
{pt3dadd(182208.000000,218976.000000,91550.000000,862.595802)}
{pt3dadd(182112.000000,219384.000000,91225.000000,862.595802)}
{pt3dadd(182016.000000,219756.000000,90900.000000,862.595802)}
{pt3dadd(181920.000000,220188.000000,90575.000000,862.595802)}
{pt3dadd(181812.000000,220356.000000,90575.000000,862.595802)}
{pt3dadd(181932.000000,220500.000000,90675.000000,862.595802)}
{pt3dadd(181908.000000,220776.000000,90525.000000,862.595802)}
{pt3dadd(182040.000000,220980.000000,90300.000000,828.091944)}

{create adhoc12}
{access adhoc12}
{connect adhoc12(1), adhoc11(0)}
{nseg = 1}
{strdef color color = "White"}
{pt3dclear()}
{pt3dadd(182040.000000,220980.000000,90300.000000,828.091944)}
{pt3dadd(182088.000000,221628.000000,90000.000000,1242.137880)}
{pt3dadd(181800.000000,222204.000000,88375.000000,1111.310865)}
{pt3dadd(181260.000000,222948.000000,86700.000000,980.483850)}
{pt3dadd(178608.000000,223176.000000,85000.000000,849.656835)}
{pt3dadd(177324.000000,223176.000000,83700.000000,718.829820)}
{pt3dadd(176736.000000,223044.000000,82900.000000,499.187376)}

{create adhoc13}
{access adhoc13}
{connect adhoc13(1), adhoc12(0)}
{nseg = 1}
{strdef color color = "White"}
{pt3dclear()}
{pt3dadd(176736.000000,223044.000000,82900.000000,499.187376)}
{pt3dadd(174636.000000,221580.000000,82900.000000,288.881586)}
{pt3dadd(174312.000000,221460.000000,82750.000000,303.325664)}
{pt3dadd(174012.000000,221424.000000,82550.000000,317.769741)}
{pt3dadd(173712.000000,221352.000000,82600.000000,332.213819)}
{pt3dadd(173508.000000,221352.000000,82375.000000,346.657896)}
{pt3dadd(173208.000000,221400.000000,82375.000000,332.213819)}
{pt3dadd(172896.000000,221220.000000,82150.000000,317.769741)}
{pt3dadd(172572.000000,221016.000000,82150.000000,303.325664)}
{pt3dadd(172320.000000,220884.000000,81950.000000,288.881586)}
{pt3dadd(172032.000000,220644.000000,81825.000000,276.844851)}
{pt3dadd(171852.000000,220392.000000,81775.000000,264.808116)}
{pt3dadd(170436.000000,219888.000000,81775.000000,252.771381)}
{pt3dadd(170016.000000,219624.000000,81500.000000,240.734646)}
{pt3dadd(169668.000000,219552.000000,81375.000000,267.215459)}
{pt3dadd(169332.000000,219420.000000,81200.000000,293.696271)}
{pt3dadd(169068.000000,219288.000000,81100.000000,320.177083)}
{pt3dadd(168696.000000,219180.000000,80950.000000,346.657896)}
{pt3dadd(168300.000000,219180.000000,80800.000000,332.213819)}
{pt3dadd(167904.000000,219072.000000,80800.000000,317.769741)}
{pt3dadd(167628.000000,218904.000000,80625.000000,303.325664)}
{pt3dadd(167220.000000,218916.000000,80450.000000,288.881586)}
{pt3dadd(166884.000000,218844.000000,80325.000000,288.881586)}
{pt3dadd(166560.000000,218856.000000,80250.000000,288.881586)}
{pt3dadd(166152.000000,218976.000000,80300.000000,288.881586)}
{pt3dadd(165780.000000,218760.000000,80300.000000,288.881586)}
{pt3dadd(165528.000000,219024.000000,80300.000000,336.466161)}
{pt3dadd(165228.000000,218880.000000,80150.000000,384.050736)}
{pt3dadd(164760.000000,218784.000000,80025.000000,431.635311)}
{pt3dadd(164172.000000,218616.000000,80025.000000,479.219886)}
{pt3dadd(163656.000000,218844.000000,79925.000000,415.989486)}

{create adhoc14}
{access adhoc14}
{connect adhoc14(1), adhoc13(0)}
{nseg = 1}
{strdef color color = "White"}
{pt3dclear()}
{pt3dadd(163656.000000,218844.000000,79925.000000,415.989486)}
{pt3dadd(163332.000000,218532.000000,79725.000000,499.187376)}
{pt3dadd(162972.000000,218556.000000,79650.000000,461.055006)}
{pt3dadd(162636.000000,218340.000000,78850.000000,422.922636)}
{pt3dadd(162336.000000,218064.000000,78725.000000,384.790266)}
{pt3dadd(162048.000000,218232.000000,78675.000000,346.657896)}
{pt3dadd(161772.000000,218124.000000,78275.000000,346.657896)}
{pt3dadd(161532.000000,218088.000000,78050.000000,346.657896)}
{pt3dadd(161304.000000,218052.000000,77775.000000,346.657896)}
{pt3dadd(161028.000000,218292.000000,77725.000000,288.881586)}

{create adhoc15}
{access adhoc15}
{connect adhoc15(1), adhoc14(0)}
{nseg = 1}
{strdef color color = "White"}
{pt3dclear()}
{pt3dadd(161028.000000,218292.000000,77725.000000,288.881586)}
{pt3dadd(160728.000000,218688.000000,77500.000000,288.881586)}
{pt3dadd(160404.000000,218892.000000,77125.000000,288.881586)}
{pt3dadd(160056.000000,219060.000000,76725.000000,288.881586)}
{pt3dadd(159684.000000,219564.000000,76400.000000,288.881586)}
{pt3dadd(159240.000000,219828.000000,76175.000000,288.881586)}
{pt3dadd(158820.000000,219984.000000,76100.000000,288.881586)}
{pt3dadd(158436.000000,220080.000000,75950.000000,288.881586)}
{pt3dadd(158076.000000,220080.000000,75500.000000,288.881586)}
{pt3dadd(157536.000000,220272.000000,75100.000000,288.881586)}
{pt3dadd(157296.000000,220404.000000,74825.000000,288.881586)}

{create adhoc16}
{access adhoc16}
{connect adhoc16(1), adhoc15(0)}
{nseg = 1}
{strdef color color = "White"}
{pt3dclear()}
{pt3dadd(157296.000000,220404.000000,74825.000000,288.881586)}
{pt3dadd(156972.000000,220008.000000,74450.000000,240.734646)}
{pt3dadd(156624.000000,219696.000000,74150.000000,240.734646)}
{pt3dadd(156288.000000,219420.000000,73800.000000,240.734646)}
{pt3dadd(155964.000000,219420.000000,73625.000000,240.734646)}
{pt3dadd(155748.000000,219504.000000,73600.000000,139.314042)}

{create adhoc17}
{access adhoc17}
{connect adhoc17(1), adhoc15(0)}
{nseg = 1}
{strdef color color = "White"}
{pt3dclear()}
{pt3dadd(157296.000000,220404.000000,74825.000000,288.881586)}
{pt3dadd(157152.000000,221004.000000,74925.000000,116.095032)}
{pt3dadd(156984.000000,221172.000000,74925.000000,139.314042)}
{pt3dadd(156792.000000,221244.000000,74800.000000,167.176836)}

{create adhoc18}
{access adhoc18}
{connect adhoc18(1), adhoc14(0)}
{nseg = 1}
{strdef color color = "White"}
{pt3dclear()}
{pt3dadd(161028.000000,218292.000000,77725.000000,288.881586)}
{pt3dadd(161028.000000,217344.000000,77475.000000,167.176836)}
{pt3dadd(160812.000000,217128.000000,77500.000000,160.211138)}
{pt3dadd(160572.000000,217140.000000,77525.000000,153.245439)}
{pt3dadd(160200.000000,216864.000000,77350.000000,146.279741)}
{pt3dadd(159888.000000,216864.000000,77175.000000,139.314042)}
{pt3dadd(159648.000000,216804.000000,76950.000000,146.279741)}
{pt3dadd(159408.000000,216828.000000,76650.000000,153.245439)}
{pt3dadd(159180.000000,216960.000000,76775.000000,160.211138)}
{pt3dadd(158916.000000,217200.000000,76700.000000,167.176836)}
{pt3dadd(158676.000000,217320.000000,76650.000000,139.314042)}

{create adhoc19}
{access adhoc19}
{connect adhoc19(1), adhoc13(0)}
{nseg = 1}
{strdef color color = "White"}
{pt3dclear()}
{pt3dadd(163656.000000,218844.000000,79925.000000,415.989486)}
{pt3dadd(163560.000000,220200.000000,80225.000000,200.612214)}
{pt3dadd(163212.000000,220476.000000,80300.000000,200.612214)}
{pt3dadd(163044.000000,220740.000000,80425.000000,200.612214)}
{pt3dadd(162648.000000,221016.000000,80475.000000,200.612214)}
{pt3dadd(162504.000000,221460.000000,80825.000000,200.612214)}
{pt3dadd(162336.000000,221724.000000,80875.000000,220.673430)}
{pt3dadd(162192.000000,221964.000000,80900.000000,240.734646)}
{pt3dadd(162048.000000,222168.000000,80900.000000,200.612214)}

{create adhoc20}
{access adhoc20}
{connect adhoc20(1), adhoc12(0)}
{nseg = 1}
{strdef color color = "White"}
{pt3dclear()}
{pt3dadd(176736.000000,223044.000000,82900.000000,499.187376)}
{pt3dadd(175668.000000,225144.000000,82825.000000,415.989486)}
{pt3dadd(174348.000000,226116.000000,82825.000000,398.656589)}
{pt3dadd(174024.000000,225912.000000,82575.000000,381.323691)}
{pt3dadd(173640.000000,226080.000000,82475.000000,363.990794)}
{pt3dadd(173292.000000,226200.000000,82100.000000,346.657896)}
{pt3dadd(172992.000000,226284.000000,81925.000000,384.790266)}
{pt3dadd(172692.000000,226440.000000,81900.000000,422.922636)}
{pt3dadd(172332.000000,226464.000000,81625.000000,461.055006)}
{pt3dadd(171984.000000,226560.000000,81325.000000,499.187376)}
{pt3dadd(171564.000000,226752.000000,81150.000000,461.055006)}
{pt3dadd(171108.000000,227112.000000,81100.000000,422.922636)}
{pt3dadd(170748.000000,227052.000000,80800.000000,384.790266)}
{pt3dadd(170412.000000,227184.000000,80600.000000,346.657896)}
{pt3dadd(170088.000000,227076.000000,80425.000000,363.990794)}
{pt3dadd(169776.000000,227424.000000,80400.000000,381.323691)}
{pt3dadd(169380.000000,227556.000000,80050.000000,398.656589)}
{pt3dadd(169020.000000,227520.000000,79925.000000,415.989486)}
{pt3dadd(168588.000000,227604.000000,79700.000000,398.656589)}
{pt3dadd(168132.000000,227580.000000,79400.000000,381.323691)}
{pt3dadd(167748.000000,227580.000000,79375.000000,363.990794)}
{pt3dadd(167340.000000,227700.000000,79300.000000,346.657896)}
{pt3dadd(167100.000000,227676.000000,79300.000000,320.177083)}
{pt3dadd(166824.000000,227916.000000,79350.000000,293.696271)}
{pt3dadd(166512.000000,227916.000000,79275.000000,267.215459)}
{pt3dadd(166236.000000,227892.000000,79250.000000,240.734646)}
{pt3dadd(165996.000000,227976.000000,79175.000000,284.548356)}
{pt3dadd(165660.000000,227940.000000,79150.000000,328.362066)}
{pt3dadd(165276.000000,228180.000000,79150.000000,372.175776)}
{pt3dadd(164976.000000,228108.000000,78800.000000,415.989486)}
{pt3dadd(164592.000000,228132.000000,78750.000000,436.788958)}
{pt3dadd(164088.000000,228132.000000,78575.000000,457.588431)}
{pt3dadd(163740.000000,228144.000000,78250.000000,478.387903)}
{pt3dadd(163404.000000,228156.000000,78025.000000,499.187376)}
{pt3dadd(162996.000000,228156.000000,77825.000000,461.055006)}
{pt3dadd(162636.000000,227916.000000,77475.000000,422.922636)}
{pt3dadd(162288.000000,228036.000000,77375.000000,384.790266)}
{pt3dadd(161832.000000,227832.000000,77100.000000,346.657896)}
{pt3dadd(161568.000000,228000.000000,76950.000000,363.990794)}
{pt3dadd(161208.000000,228012.000000,76800.000000,381.323691)}
{pt3dadd(160860.000000,227904.000000,76475.000000,398.656589)}
{pt3dadd(160512.000000,227952.000000,76175.000000,415.989486)}
{pt3dadd(160104.000000,227964.000000,75800.000000,415.989486)}
{pt3dadd(159792.000000,227892.000000,75725.000000,415.989486)}
{pt3dadd(159432.000000,227988.000000,75500.000000,415.989486)}
{pt3dadd(159120.000000,228000.000000,75325.000000,415.989486)}
{pt3dadd(158844.000000,228048.000000,75400.000000,415.989486)}
{pt3dadd(158628.000000,227796.000000,75125.000000,415.989486)}

{create adhoc21}
{access adhoc21}
{connect adhoc21(1), adhoc20(0)}
{nseg = 1}
{strdef color color = "White"}
{pt3dclear()}
{pt3dadd(158628.000000,227796.000000,75125.000000,415.989486)}
{pt3dadd(158292.000000,227544.000000,74675.000000,415.989486)}
{pt3dadd(157980.000000,227340.000000,74200.000000,491.699570)}
{pt3dadd(157656.000000,227100.000000,73950.000000,567.409653)}
{pt3dadd(157188.000000,226896.000000,73575.000000,643.119737)}
{pt3dadd(156804.000000,226860.000000,73175.000000,718.829820)}
{pt3dadd(156696.000000,226752.000000,73175.000000,718.829820)}

{create adhoc22}
{access adhoc22}
{connect adhoc22(1), adhoc21(0)}
{nseg = 1}
{strdef color color = "White"}
{pt3dclear()}
{pt3dadd(156696.000000,226752.000000,73175.000000,718.829820)}
{pt3dadd(156300.000000,226716.000000,72725.000000,718.829820)}
{pt3dadd(156216.000000,226716.000000,72775.000000,690.076602)}

{create adhoc23}
{access adhoc23}
{connect adhoc23(1), adhoc22(0)}
{nseg = 1}
{strdef color color = "White"}
{pt3dclear()}
{pt3dadd(156216.000000,226716.000000,72775.000000,690.076602)}
{pt3dadd(155916.000000,226884.000000,72925.000000,599.024880)}
{pt3dadd(155544.000000,227040.000000,72875.000000,535.933134)}
{pt3dadd(155244.000000,227208.000000,72875.000000,472.841388)}
{pt3dadd(154944.000000,227412.000000,72750.000000,409.749642)}
{pt3dadd(154644.000000,227436.000000,72675.000000,346.657896)}
{pt3dadd(154332.000000,227736.000000,72775.000000,332.213819)}
{pt3dadd(153984.000000,227904.000000,72650.000000,317.769741)}
{pt3dadd(153636.000000,228180.000000,72425.000000,303.325664)}
{pt3dadd(153336.000000,228276.000000,72300.000000,288.881586)}
{pt3dadd(153024.000000,228432.000000,72350.000000,276.844851)}
{pt3dadd(152784.000000,228528.000000,72200.000000,264.808116)}
{pt3dadd(152496.000000,228684.000000,72175.000000,252.771381)}
{pt3dadd(152100.000000,228660.000000,72050.000000,240.734646)}
{pt3dadd(151884.000000,228720.000000,72000.000000,346.657896)}
{pt3dadd(152112.000000,229212.000000,72475.000000,346.657896)}

{create adhoc24}
{access adhoc24}
{connect adhoc24(1), adhoc23(0)}
{nseg = 1}
{strdef color color = "White"}
{pt3dclear()}
{pt3dadd(152112.000000,229212.000000,72475.000000,346.657896)}
{pt3dadd(151620.000000,228624.000000,71750.000000,499.187376)}
{pt3dadd(151332.000000,228552.000000,71475.000000,499.187376)}
{pt3dadd(150888.000000,228372.000000,70850.000000,499.187376)}
{pt3dadd(150456.000000,228312.000000,69725.000000,499.187376)}
{pt3dadd(150108.000000,228840.000000,68850.000000,499.187376)}
{pt3dadd(149832.000000,229632.000000,68375.000000,478.387903)}
{pt3dadd(149496.000000,230604.000000,67525.000000,457.588431)}
{pt3dadd(149208.000000,231168.000000,66775.000000,436.788958)}
{pt3dadd(148968.000000,231336.000000,66250.000000,415.989486)}
{pt3dadd(148824.000000,231420.000000,65700.000000,398.656589)}
{pt3dadd(148848.000000,231540.000000,65075.000000,381.323691)}
{pt3dadd(148872.000000,231396.000000,64625.000000,363.990794)}
{pt3dadd(148836.000000,231324.000000,64175.000000,346.657896)}
{pt3dadd(148968.000000,230892.000000,63725.000000,332.213819)}
{pt3dadd(149220.000000,230712.000000,63075.000000,317.769741)}
{pt3dadd(149424.000000,230544.000000,62525.000000,303.325664)}
{pt3dadd(149388.000000,230304.000000,62200.000000,288.881586)}
{pt3dadd(149364.000000,230244.000000,61800.000000,258.455399)}
{pt3dadd(149448.000000,230400.000000,61325.000000,228.029211)}
{pt3dadd(149712.000000,230460.000000,60750.000000,197.603024)}
{pt3dadd(150408.000000,230400.000000,60150.000000,167.176836)}
{pt3dadd(150912.000000,230112.000000,59525.000000,200.612214)}
{pt3dadd(151440.000000,230160.000000,59050.000000,167.176836)}

{create adhoc25}
{access adhoc25}
{connect adhoc25(1), adhoc23(0)}
{nseg = 1}
{strdef color color = "White"}
{pt3dclear()}
{pt3dadd(152112.000000,229212.000000,72475.000000,346.657896)}
{pt3dadd(151776.000000,229944.000000,72550.000000,200.612214)}
{pt3dadd(151704.000000,230256.000000,72700.000000,192.253370)}
{pt3dadd(151632.000000,230772.000000,72650.000000,183.894525)}
{pt3dadd(151632.000000,231048.000000,72700.000000,175.535680)}
{pt3dadd(151428.000000,231480.000000,72800.000000,167.176836)}
{pt3dadd(151164.000000,232284.000000,72650.000000,167.176836)}
{pt3dadd(150948.000000,232296.000000,72725.000000,167.176836)}

{create adhoc26}
{access adhoc26}
{connect adhoc26(1), adhoc22(0)}
{nseg = 1}
{strdef color color = "White"}
{pt3dclear()}
{pt3dadd(156216.000000,226716.000000,72775.000000,690.076602)}
{pt3dadd(156036.000000,225228.000000,71975.000000,288.881586)}
{pt3dadd(155628.000000,224892.000000,71450.000000,303.325664)}
{pt3dadd(154932.000000,224448.000000,70575.000000,317.769741)}
{pt3dadd(154152.000000,224064.000000,69475.000000,332.213819)}
{pt3dadd(153756.000000,223776.000000,68950.000000,346.657896)}
{pt3dadd(153576.000000,223464.000000,68625.000000,301.787631)}
{pt3dadd(153612.000000,223320.000000,68175.000000,256.917366)}
{pt3dadd(153444.000000,223260.000000,67700.000000,212.047101)}
{pt3dadd(153300.000000,222828.000000,67125.000000,167.176836)}
{pt3dadd(153084.000000,222216.000000,66575.000000,229.379999)}
{pt3dadd(152868.000000,222240.000000,66000.000000,291.583161)}
{pt3dadd(152520.000000,222180.000000,65550.000000,353.786324)}
{pt3dadd(152304.000000,222036.000000,64900.000000,415.989486)}
{pt3dadd(151836.000000,221796.000000,64325.000000,384.212511)}
{pt3dadd(151548.000000,221520.000000,63775.000000,352.435536)}
{pt3dadd(151272.000000,221184.000000,63275.000000,320.658561)}
{pt3dadd(151068.000000,221040.000000,62875.000000,288.881586)}
{pt3dadd(150852.000000,220752.000000,62400.000000,266.814243)}
{pt3dadd(150636.000000,220584.000000,62100.000000,244.746900)}
{pt3dadd(150612.000000,220596.000000,61600.000000,222.679557)}
{pt3dadd(150588.000000,220452.000000,61050.000000,200.612214)}
{pt3dadd(150600.000000,220320.000000,60725.000000,96.745860)}

{create adhoc27}
{access adhoc27}
{connect adhoc27(1), adhoc21(0)}
{nseg = 1}
{strdef color color = "White"}
{pt3dclear()}
{pt3dadd(156696.000000,226752.000000,73175.000000,718.829820)}
{pt3dadd(156660.000000,227592.000000,74125.000000,200.612214)}
{pt3dadd(156456.000000,227604.000000,74225.000000,240.734646)}

{create adhoc28}
{access adhoc28}
{connect adhoc28(1), adhoc20(0)}
{nseg = 1}
{strdef color color = "White"}
{pt3dclear()}
{pt3dadd(158628.000000,227796.000000,75125.000000,415.989486)}
{pt3dadd(158664.000000,228360.000000,76175.000000,240.734646)}
{pt3dadd(158328.000000,228480.000000,76450.000000,284.548356)}
{pt3dadd(157992.000000,228456.000000,76750.000000,328.362066)}
{pt3dadd(157704.000000,228312.000000,76750.000000,372.175776)}
{pt3dadd(157344.000000,228504.000000,76775.000000,415.989486)}
{pt3dadd(157080.000000,228804.000000,76525.000000,139.314042)}
{pt3dadd(156840.000000,228768.000000,76525.000000,96.745860)}

{create adhoc29}
{access adhoc29}
{connect adhoc29(1), adhoc11(0)}
{nseg = 1}
{strdef color color = "White"}
{pt3dclear()}
{pt3dadd(182040.000000,220980.000000,90300.000000,828.091944)}
{pt3dadd(180264.000000,220068.000000,90150.000000,167.176836)}
{pt3dadd(179688.000000,219732.000000,89750.000000,160.211138)}
{pt3dadd(179172.000000,219816.000000,89325.000000,153.245439)}
{pt3dadd(178776.000000,219840.000000,88875.000000,146.279741)}
{pt3dadd(178596.000000,219924.000000,88625.000000,139.314042)}
{pt3dadd(178416.000000,220008.000000,88450.000000,139.314042)}

{create adhoc30}
{access adhoc30}
{connect adhoc30(1), adhoc10(0)}
{nseg = 1}
{strdef color color = "White"}
{pt3dclear()}
{pt3dadd(192780.000000,194184.000000,102100.000000,1035.114948)}
{pt3dadd(193152.000000,194328.000000,102250.000000,1192.452354)}
{pt3dadd(193188.000000,194460.000000,102900.000000,1242.137880)}
{pt3dadd(193800.000000,194004.000000,103850.000000,1304.244761)}
{pt3dadd(194316.000000,193644.000000,104725.000000,1366.351641)}
{pt3dadd(193548.000000,193116.000000,105775.000000,1428.458522)}
{pt3dadd(193284.000000,192648.000000,106750.000000,1490.565402)}
{pt3dadd(193188.000000,192444.000000,107650.000000,1788.679134)}

{create adhoc31}
{access adhoc31}
{connect adhoc31(1), adhoc30(0)}
{nseg = 1}
{strdef color color = "White"}
{pt3dclear()}
{pt3dadd(193188.000000,192444.000000,107650.000000,1788.679134)}
{pt3dadd(193404.000000,192084.000000,108475.000000,1788.678450)}
{pt3dadd(193644.000000,192396.000000,109225.000000,18.000000)}
{pt3dadd(193512.000000,191880.000000,109575.000000,608.226150)}
{pt3dadd(193260.000000,191784.000000,110200.000000,1198.452300)}
{pt3dadd(193152.000000,191688.000000,111000.000000,1788.678450)}
{pt3dadd(192828.000000,191580.000000,111775.000000,1639.621926)}
{pt3dadd(192384.000000,191484.000000,112775.000000,1490.565402)}
{pt3dadd(191796.000000,191304.000000,113575.000000,1341.508878)}
{pt3dadd(191208.000000,191232.000000,114350.000000,1192.452354)}
{pt3dadd(190440.000000,191016.000000,115125.000000,1109.988216)}
{pt3dadd(189924.000000,190668.000000,115925.000000,1027.524078)}
{pt3dadd(189048.000000,190572.000000,116675.000000,945.059940)}
{pt3dadd(188232.000000,190332.000000,117350.000000,862.595802)}
{pt3dadd(187320.000000,190092.000000,118275.000000,862.595802)}
{pt3dadd(186168.000000,189528.000000,119150.000000,862.595802)}
{pt3dadd(185400.000000,189276.000000,119975.000000,862.595802)}
{pt3dadd(184704.000000,188988.000000,120825.000000,862.595802)}
{pt3dadd(183972.000000,188844.000000,121575.000000,826.654307)}
{pt3dadd(183120.000000,188592.000000,122225.000000,790.712811)}
{pt3dadd(182460.000000,188508.000000,122975.000000,754.771316)}
{pt3dadd(181608.000000,188268.000000,123675.000000,718.829820)}
{pt3dadd(180900.000000,188400.000000,124350.000000,663.919209)}
{pt3dadd(180060.000000,188364.000000,125050.000000,609.008598)}
{pt3dadd(179064.000000,188232.000000,125725.000000,554.097987)}
{pt3dadd(177624.000000,187704.000000,126350.000000,499.187376)}
{pt3dadd(177240.000000,187680.000000,126550.000000,524.146752)}
{pt3dadd(176832.000000,187572.000000,126575.000000,549.106128)}
{pt3dadd(176424.000000,187500.000000,126650.000000,574.065504)}
{pt3dadd(176052.000000,187332.000000,126900.000000,599.024880)}
{pt3dadd(175632.000000,187308.000000,127050.000000,628.976115)}
{pt3dadd(175128.000000,187248.000000,127150.000000,658.927350)}
{pt3dadd(174660.000000,186876.000000,127275.000000,688.878585)}
{pt3dadd(174252.000000,186696.000000,127450.000000,718.829820)}
{pt3dadd(173784.000000,186564.000000,127775.000000,663.919209)}
{pt3dadd(173364.000000,186168.000000,127700.000000,609.008598)}
{pt3dadd(172860.000000,185952.000000,127850.000000,554.097987)}
{pt3dadd(172416.000000,185772.000000,127900.000000,499.187376)}
{pt3dadd(171984.000000,185496.000000,128025.000000,554.097987)}
{pt3dadd(171564.000000,185256.000000,128225.000000,609.008598)}
{pt3dadd(171084.000000,185076.000000,128450.000000,663.919209)}
{pt3dadd(170748.000000,184836.000000,128800.000000,718.829820)}
{pt3dadd(170304.000000,184620.000000,128925.000000,754.771316)}
{pt3dadd(169920.000000,184380.000000,129150.000000,790.712811)}
{pt3dadd(169404.000000,184272.000000,129525.000000,826.654307)}
{pt3dadd(168996.000000,184092.000000,129650.000000,862.595802)}
{pt3dadd(168636.000000,183960.000000,129850.000000,826.654307)}
{pt3dadd(168192.000000,183636.000000,130050.000000,790.712811)}
{pt3dadd(167736.000000,183324.000000,130500.000000,754.771316)}
{pt3dadd(167352.000000,183156.000000,130925.000000,718.829820)}
{pt3dadd(166944.000000,182880.000000,131050.000000,688.878585)}
{pt3dadd(166512.000000,182604.000000,131375.000000,658.927350)}
{pt3dadd(166104.000000,182232.000000,131625.000000,628.976115)}
{pt3dadd(165852.000000,182016.000000,131700.000000,599.024880)}
{pt3dadd(165504.000000,181740.000000,131900.000000,599.024880)}
{pt3dadd(165168.000000,181332.000000,132025.000000,599.024880)}
{pt3dadd(164856.000000,181092.000000,132300.000000,599.024880)}
{pt3dadd(164460.000000,180540.000000,132575.000000,599.024880)}
{pt3dadd(164100.000000,179964.000000,132800.000000,628.976115)}
{pt3dadd(163764.000000,179568.000000,133025.000000,658.927350)}
{pt3dadd(163488.000000,179208.000000,133425.000000,688.878585)}
{pt3dadd(163140.000000,178728.000000,133600.000000,718.829820)}
{pt3dadd(162756.000000,178452.000000,133875.000000,718.829820)}
{pt3dadd(162468.000000,178236.000000,134075.000000,718.829820)}
{pt3dadd(162096.000000,178020.000000,134275.000000,718.829820)}
{pt3dadd(161760.000000,177312.000000,134825.000000,718.829820)}
{pt3dadd(161364.000000,176904.000000,135475.000000,746.145369)}
{pt3dadd(160932.000000,176688.000000,136125.000000,773.460918)}
{pt3dadd(160020.000000,176244.000000,136875.000000,800.776467)}
{pt3dadd(159468.000000,175968.000000,137575.000000,828.092016)}
{pt3dadd(159888.000000,175404.000000,138125.000000,770.825232)}
{pt3dadd(159972.000000,174756.000000,138775.000000,713.558448)}
{pt3dadd(159492.000000,173832.000000,139675.000000,656.291664)}
{pt3dadd(158676.000000,172908.000000,140525.000000,599.024880)}
{pt3dadd(158016.000000,171888.000000,141475.000000,628.976115)}
{pt3dadd(157440.000000,170928.000000,142275.000000,658.927350)}
{pt3dadd(157224.000000,170592.000000,142825.000000,688.878585)}
{pt3dadd(157056.000000,170172.000000,143150.000000,718.829820)}
{pt3dadd(156768.000000,169776.000000,143500.000000,754.771316)}
{pt3dadd(156108.000000,169380.000000,144025.000000,790.712811)}
{pt3dadd(155856.000000,168852.000000,144950.000000,826.654307)}
{pt3dadd(155460.000000,168576.000000,145575.000000,862.595802)}
{pt3dadd(154980.000000,168144.000000,146275.000000,746.784337)}
{pt3dadd(154812.000000,166848.000000,146925.000000,630.972873)}
{pt3dadd(154512.000000,167112.000000,147600.000000,515.161408)}
{pt3dadd(153936.000000,166260.000000,148275.000000,399.349944)}
{pt3dadd(153804.000000,165936.000000,148500.000000,547.940084)}
{pt3dadd(153672.000000,165516.000000,148775.000000,696.530223)}
{pt3dadd(153792.000000,165132.000000,149325.000000,845.120363)}
{pt3dadd(153648.000000,164916.000000,149900.000000,993.710502)}
{pt3dadd(153312.000000,164544.000000,150650.000000,1055.817347)}
{pt3dadd(153408.000000,163812.000000,151800.000000,1117.924191)}
{pt3dadd(153492.000000,163332.000000,152775.000000,1180.031036)}
{pt3dadd(153492.000000,162936.000000,153475.000000,1242.137880)}
{pt3dadd(153552.000000,162252.000000,154375.000000,1242.137880)}
{pt3dadd(153144.000000,161568.000000,155275.000000,1242.137880)}
{pt3dadd(153156.000000,160860.000000,156250.000000,1242.137880)}
{pt3dadd(153456.000000,160164.000000,157050.000000,1242.137880)}
{pt3dadd(153792.000000,159504.000000,157750.000000,1242.137880)}
{pt3dadd(154008.000000,159432.000000,158450.000000,1242.137880)}
{pt3dadd(153324.000000,158820.000000,159125.000000,1242.137880)}
{pt3dadd(153228.000000,158520.000000,159750.000000,1242.137880)}
{pt3dadd(152724.000000,157932.000000,160525.000000,1180.031018)}
{pt3dadd(153288.000000,157152.000000,161375.000000,1117.924155)}
{pt3dadd(153672.000000,156780.000000,162200.000000,1055.817293)}
{pt3dadd(153840.000000,155832.000000,163025.000000,993.710430)}
{pt3dadd(154068.000000,154920.000000,163925.000000,1088.709124)}
{pt3dadd(153972.000000,154404.000000,164625.000000,1183.707819)}
{pt3dadd(154224.000000,153780.000000,165475.000000,1278.706514)}
{pt3dadd(155160.000000,153072.000000,166475.000000,1373.705208)}
{pt3dadd(155508.000000,152304.000000,167325.000000,1289.057643)}
{pt3dadd(155856.000000,151656.000000,168275.000000,1204.410078)}
{pt3dadd(156156.000000,151032.000000,169250.000000,1119.762513)}
{pt3dadd(156720.000000,149916.000000,170275.000000,1035.114948)}
{pt3dadd(157020.000000,149136.000000,171025.000000,1086.870681)}
{pt3dadd(157584.000000,148332.000000,171700.000000,1138.626414)}
{pt3dadd(157932.000000,147636.000000,172325.000000,1190.382147)}
{pt3dadd(158580.000000,146412.000000,173325.000000,1242.137880)}
{pt3dadd(158556.000000,145536.000000,174250.000000,1117.924119)}
{pt3dadd(157788.000000,144792.000000,174950.000000,993.710358)}
{pt3dadd(157656.000000,144504.000000,175325.000000,862.595802)}

{create adhoc32}
{access adhoc32}
{connect adhoc32(1), adhoc31(0)}
{nseg = 1}
{strdef color color = "White"}
{pt3dclear()}
{pt3dadd(157656.000000,144504.000000,175325.000000,862.595802)}
{pt3dadd(157320.000000,142104.000000,176150.000000,1242.137880)}

{create adhoc33}
{access adhoc33}
{connect adhoc33(1), adhoc32(0)}
{nseg = 1}
{strdef color color = "White"}
{pt3dclear()}
{pt3dadd(157320.000000,142104.000000,176150.000000,1242.137880)}
{pt3dadd(157296.000000,142488.000000,177025.000000,1242.137880)}
{pt3dadd(157320.000000,141156.000000,177650.000000,1366.351641)}
{pt3dadd(157236.000000,140652.000000,178225.000000,1490.565402)}
{pt3dadd(157164.000000,140076.000000,178900.000000,1490.565402)}

{create adhoc34}
{access adhoc34}
{connect adhoc34(1), adhoc33(0)}
{nseg = 1}
{strdef color color = "White"}
{pt3dclear()}
{pt3dadd(157164.000000,140076.000000,178900.000000,1490.565402)}
{pt3dadd(156852.000000,140076.000000,179525.000000,1430.942742)}
{pt3dadd(156816.000000,139680.000000,180375.000000,862.595802)}
{pt3dadd(156840.000000,139164.000000,181125.000000,346.657896)}

{create adhoc35}
{access adhoc35}
{connect adhoc35(1), adhoc34(0)}
{nseg = 1}
{strdef color color = "White"}
{pt3dclear()}
{pt3dadd(156840.000000,139164.000000,181125.000000,346.657896)}
{pt3dadd(157476.000000,138432.000000,181600.000000,718.829820)}
{pt3dadd(157428.000000,138060.000000,182150.000000,740.999817)}
{pt3dadd(157692.000000,137700.000000,182500.000000,763.169814)}
{pt3dadd(157548.000000,137760.000000,182925.000000,1192.452354)}

{create adhoc36}
{access adhoc36}
{connect adhoc36(1), adhoc34(0)}
{nseg = 1}
{strdef color color = "White"}
{pt3dclear()}
{pt3dadd(156840.000000,139164.000000,181125.000000,346.657896)}
{pt3dadd(155484.000000,138768.000000,181175.000000,415.989486)}
{pt3dadd(155136.000000,138828.000000,181450.000000,240.734646)}
{pt3dadd(155112.000000,138828.000000,181700.000000,167.176836)}

{create adhoc37}
{access adhoc37}
{connect adhoc37(1), adhoc33(0)}
{nseg = 1}
{strdef color color = "White"}
{pt3dclear()}
{pt3dadd(157164.000000,140076.000000,178900.000000,1490.565402)}
{pt3dadd(158592.000000,137904.000000,178900.000000,415.989486)}
{pt3dadd(158928.000000,137616.000000,178850.000000,384.212511)}
{pt3dadd(159168.000000,137280.000000,178925.000000,352.435536)}
{pt3dadd(159336.000000,136980.000000,179100.000000,320.658561)}
{pt3dadd(159504.000000,136632.000000,179225.000000,288.881586)}
{pt3dadd(159528.000000,136176.000000,179275.000000,299.859089)}
{pt3dadd(159648.000000,135864.000000,179275.000000,310.836591)}
{pt3dadd(159612.000000,135552.000000,179325.000000,321.814093)}
{pt3dadd(159624.000000,135204.000000,179300.000000,332.791596)}
{pt3dadd(159624.000000,134856.000000,179300.000000,321.814093)}
{pt3dadd(159624.000000,134568.000000,179300.000000,310.836591)}
{pt3dadd(159672.000000,134400.000000,179350.000000,299.859089)}
{pt3dadd(159672.000000,134076.000000,179250.000000,288.881586)}
{pt3dadd(159528.000000,133800.000000,179325.000000,366.417410)}
{pt3dadd(159420.000000,133488.000000,179125.000000,443.953233)}
{pt3dadd(159132.000000,133116.000000,179175.000000,521.489056)}
{pt3dadd(158820.000000,132720.000000,179075.000000,599.024880)}
{pt3dadd(158640.000000,132312.000000,179075.000000,697.696250)}
{pt3dadd(158100.000000,131880.000000,179000.000000,796.367619)}
{pt3dadd(157560.000000,131556.000000,179050.000000,895.038988)}
{pt3dadd(157656.000000,131424.000000,178750.000000,993.710358)}
{pt3dadd(157560.000000,131028.000000,178250.000000,805.466430)}
{pt3dadd(157488.000000,130716.000000,177775.000000,617.222502)}
{pt3dadd(156312.000000,130404.000000,177000.000000,428.978574)}
{pt3dadd(155832.000000,130056.000000,176725.000000,240.734646)}
{pt3dadd(155556.000000,129924.000000,176525.000000,284.548356)}
{pt3dadd(155244.000000,129828.000000,176375.000000,328.362066)}
{pt3dadd(154956.000000,129768.000000,176175.000000,372.175776)}
{pt3dadd(154596.000000,129552.000000,176075.000000,415.989486)}
{pt3dadd(154272.000000,129456.000000,175975.000000,431.797104)}
{pt3dadd(154008.000000,129360.000000,176025.000000,447.604722)}
{pt3dadd(153720.000000,129564.000000,176100.000000,463.412340)}
{pt3dadd(153396.000000,129564.000000,176100.000000,479.219958)}
{pt3dadd(152880.000000,129324.000000,176350.000000,539.122423)}
{pt3dadd(152292.000000,128976.000000,176550.000000,599.024889)}
{pt3dadd(151860.000000,128940.000000,176450.000000,658.927354)}
{pt3dadd(151644.000000,128952.000000,176450.000000,718.829820)}
{pt3dadd(151224.000000,129048.000000,176375.000000,611.342762)}
{pt3dadd(150840.000000,129240.000000,175950.000000,503.855703)}
{pt3dadd(150540.000000,129396.000000,175600.000000,396.368644)}
{pt3dadd(150180.000000,129312.000000,175450.000000,288.881586)}
{pt3dadd(149928.000000,129312.000000,175325.000000,266.814243)}
{pt3dadd(149628.000000,129168.000000,175250.000000,244.746900)}
{pt3dadd(149256.000000,129480.000000,175125.000000,222.679557)}
{pt3dadd(148932.000000,129264.000000,174975.000000,200.612214)}
{pt3dadd(148608.000000,129060.000000,174900.000000,192.253370)}
{pt3dadd(148320.000000,129060.000000,174850.000000,183.894525)}
{pt3dadd(148068.000000,129060.000000,175025.000000,175.535680)}
{pt3dadd(147864.000000,128952.000000,174950.000000,167.176836)}
{pt3dadd(147648.000000,129000.000000,175000.000000,96.745860)}

{create adhoc38}
{access adhoc38}
{connect adhoc38(1), adhoc32(0)}
{nseg = 1}
{strdef color color = "White"}
{pt3dclear()}
{pt3dadd(157320.000000,142104.000000,176150.000000,1242.137880)}
{pt3dadd(159264.000000,140232.000000,176150.000000,167.176836)}
{pt3dadd(159468.000000,140016.000000,176225.000000,228.029211)}
{pt3dadd(159708.000000,140064.000000,176225.000000,288.881586)}
{pt3dadd(159876.000000,140028.000000,176275.000000,240.734646)}

{create adhoc39}
{access adhoc39}
{connect adhoc39(1), adhoc32(0)}
{nseg = 1}
{strdef color color = "White"}
{pt3dclear()}
{pt3dadd(157320.000000,142104.000000,176150.000000,1242.137880)}
{pt3dadd(154704.000000,140616.000000,176150.000000,346.657896)}
{pt3dadd(153540.000000,139812.000000,176150.000000,346.657896)}
{pt3dadd(153168.000000,139692.000000,176050.000000,346.657896)}
{pt3dadd(152496.000000,139320.000000,176125.000000,346.657896)}
{pt3dadd(151380.000000,139248.000000,176125.000000,346.657896)}
{pt3dadd(150648.000000,139164.000000,176125.000000,329.325003)}
{pt3dadd(150324.000000,139104.000000,176025.000000,311.992110)}
{pt3dadd(149952.000000,138936.000000,175700.000000,294.659217)}
{pt3dadd(149736.000000,138732.000000,175700.000000,277.326324)}
{pt3dadd(149424.000000,138300.000000,175600.000000,351.760707)}
{pt3dadd(149100.000000,137928.000000,175650.000000,426.195090)}
{pt3dadd(148896.000000,137604.000000,175525.000000,500.629473)}
{pt3dadd(148500.000000,137052.000000,175575.000000,575.063856)}
{pt3dadd(148548.000000,136644.000000,174925.000000,517.962366)}
{pt3dadd(148476.000000,136260.000000,174950.000000,460.860876)}
{pt3dadd(148440.000000,135972.000000,174875.000000,403.759386)}
{pt3dadd(148596.000000,135504.000000,174775.000000,346.657896)}
{pt3dadd(149316.000000,135156.000000,174275.000000,409.749642)}
{pt3dadd(149508.000000,134856.000000,173725.000000,472.841388)}
{pt3dadd(149412.000000,133884.000000,173225.000000,535.933134)}
{pt3dadd(149208.000000,133068.000000,172500.000000,599.024880)}
{pt3dadd(149208.000000,132504.000000,172425.000000,443.953233)}
{pt3dadd(149748.000000,131976.000000,172375.000000,288.881586)}
{pt3dadd(149976.000000,131556.000000,172425.000000,139.314042)}

{create adhoc40}
{access adhoc40}
{connect adhoc40(1), adhoc31(0)}
{nseg = 1}
{strdef color color = "White"}
{pt3dclear()}
{pt3dadd(157656.000000,144504.000000,175325.000000,862.595802)}
{pt3dadd(158688.000000,139884.000000,175350.000000,499.187376)}
{pt3dadd(158856.000000,139620.000000,175275.000000,434.574193)}
{pt3dadd(158856.000000,139260.000000,175275.000000,369.961011)}
{pt3dadd(159948.000000,138996.000000,173675.000000,305.347828)}
{pt3dadd(160260.000000,139404.000000,173000.000000,240.734646)}
{pt3dadd(160008.000000,139752.000000,172400.000000,200.612214)}
{pt3dadd(159984.000000,139944.000000,172200.000000,139.314042)}

{create adhoc41}
{access adhoc41}
{connect adhoc41(1), adhoc30(0)}
{nseg = 1}
{strdef color color = "White"}
{pt3dclear()}
{pt3dadd(193188.000000,192444.000000,107650.000000,1788.679134)}
{pt3dadd(193128.000000,193608.000000,108125.000000,415.989486)}
{pt3dadd(193404.000000,193356.000000,108650.000000,352.435536)}
{pt3dadd(193860.000000,193044.000000,109700.000000,288.881586)}
{pt3dadd(194052.000000,193248.000000,110625.000000,288.881586)}
{pt3dadd(193776.000000,193368.000000,111425.000000,288.881586)}
{pt3dadd(193344.000000,193488.000000,112050.000000,288.881586)}
{pt3dadd(192204.000000,193500.000000,113025.000000,288.881586)}
{pt3dadd(191508.000000,193392.000000,113875.000000,288.881586)}
{pt3dadd(190968.000000,193680.000000,114725.000000,288.881586)}
{pt3dadd(190464.000000,193944.000000,115500.000000,288.881586)}
{pt3dadd(190116.000000,194712.000000,116275.000000,288.881586)}
{pt3dadd(189948.000000,195168.000000,116825.000000,288.881586)}
{pt3dadd(189372.000000,196212.000000,117725.000000,288.881586)}
{pt3dadd(187440.000000,196884.000000,118450.000000,288.881586)}
{pt3dadd(185964.000000,197736.000000,118450.000000,288.881586)}
{pt3dadd(185940.000000,198168.000000,117950.000000,276.844851)}
{pt3dadd(185772.000000,199032.000000,117200.000000,264.808116)}
{pt3dadd(186312.000000,199860.000000,116050.000000,252.771381)}
{pt3dadd(187956.000000,200664.000000,115200.000000,240.734646)}
{pt3dadd(188832.000000,200388.000000,114325.000000,220.673426)}
{pt3dadd(189108.000000,200220.000000,113750.000000,200.612205)}
{pt3dadd(189228.000000,199944.000000,113225.000000,180.550985)}
{pt3dadd(189348.000000,199800.000000,112825.000000,160.489764)}
{pt3dadd(189432.000000,199740.000000,112400.000000,139.314042)}

{create adhoc42}
{access adhoc42}
{connect adhoc42(1), adhoc9(0)}
{nseg = 1}
{strdef color color = "White"}
{pt3dclear()}
{pt3dadd(193356.000000,186228.000000,98350.000000,690.076674)}
{pt3dadd(193896.000000,185568.000000,97975.000000,718.829820)}
{pt3dadd(194328.000000,185148.000000,97675.000000,718.829820)}
{pt3dadd(195600.000000,182808.000000,97850.000000,718.829820)}
{pt3dadd(195720.000000,182580.000000,97800.000000,718.829820)}
{pt3dadd(195912.000000,182256.000000,97900.000000,718.829820)}
{pt3dadd(196212.000000,181716.000000,97850.000000,663.919209)}
{pt3dadd(196332.000000,181296.000000,97900.000000,609.008598)}
{pt3dadd(196464.000000,180816.000000,97725.000000,554.097987)}
{pt3dadd(196656.000000,180408.000000,97850.000000,499.187376)}
{pt3dadd(196548.000000,180048.000000,98275.000000,524.146752)}
{pt3dadd(196824.000000,179712.000000,98125.000000,549.106128)}
{pt3dadd(196824.000000,179424.000000,98150.000000,574.065504)}
{pt3dadd(196956.000000,179052.000000,98375.000000,599.024880)}
{pt3dadd(196824.000000,178692.000000,98500.000000,628.976115)}
{pt3dadd(196836.000000,178392.000000,98550.000000,658.927350)}
{pt3dadd(196812.000000,178020.000000,98575.000000,688.878585)}
{pt3dadd(196788.000000,177624.000000,98850.000000,718.829820)}
{pt3dadd(196620.000000,177216.000000,98975.000000,718.829820)}
{pt3dadd(196620.000000,176856.000000,98975.000000,718.829820)}
{pt3dadd(196620.000000,176508.000000,98950.000000,718.829820)}
{pt3dadd(196632.000000,176268.000000,98925.000000,718.829820)}
{pt3dadd(196560.000000,175944.000000,98825.000000,718.829820)}
{pt3dadd(196464.000000,175488.000000,98775.000000,718.829820)}
{pt3dadd(196548.000000,175008.000000,98900.000000,718.829820)}
{pt3dadd(196608.000000,174684.000000,99125.000000,718.829820)}
{pt3dadd(196668.000000,174252.000000,99050.000000,754.771316)}
{pt3dadd(196644.000000,173988.000000,99100.000000,790.712811)}
{pt3dadd(197280.000000,173484.000000,99150.000000,826.654307)}
{pt3dadd(196932.000000,173100.000000,99150.000000,862.595802)}
{pt3dadd(197268.000000,172692.000000,99150.000000,862.595802)}
{pt3dadd(197136.000000,172248.000000,99275.000000,862.595802)}
{pt3dadd(197364.000000,171876.000000,99400.000000,862.595802)}
{pt3dadd(197532.000000,171384.000000,99525.000000,862.595802)}
{pt3dadd(197700.000000,170916.000000,99650.000000,905.725589)}
{pt3dadd(197832.000000,170532.000000,99775.000000,948.855375)}
{pt3dadd(197964.000000,170040.000000,99950.000000,991.985162)}
{pt3dadd(198120.000000,169716.000000,100100.000000,1035.114948)}
{pt3dadd(198276.000000,169368.000000,100125.000000,1035.114948)}
{pt3dadd(198372.000000,168840.000000,100150.000000,1035.114948)}
{pt3dadd(198396.000000,168456.000000,100000.000000,1035.114948)}
{pt3dadd(198420.000000,168168.000000,99925.000000,1035.114948)}
{pt3dadd(198444.000000,167940.000000,99825.000000,991.985162)}
{pt3dadd(198684.000000,167628.000000,99600.000000,948.855375)}
{pt3dadd(198996.000000,167220.000000,99475.000000,905.725589)}
{pt3dadd(199416.000000,166836.000000,99350.000000,862.595802)}
{pt3dadd(199584.000000,166464.000000,99275.000000,862.595802)}
{pt3dadd(199716.000000,166188.000000,99175.000000,862.595802)}
{pt3dadd(199836.000000,165900.000000,99050.000000,862.595802)}
{pt3dadd(199956.000000,165708.000000,99075.000000,862.595802)}
{pt3dadd(200052.000000,165324.000000,99350.000000,957.481322)}
{pt3dadd(200208.000000,164880.000000,99450.000000,1052.366841)}
{pt3dadd(200448.000000,164472.000000,99575.000000,1147.252361)}
{pt3dadd(200460.000000,164064.000000,99425.000000,1242.137880)}
{pt3dadd(200484.000000,163680.000000,99750.000000,1035.114948)}
{pt3dadd(200448.000000,163236.000000,99875.000000,1266.006492)}

{create adhoc43}
{access adhoc43}
{connect adhoc43(1), adhoc42(0)}
{nseg = 1}
{strdef color color = "White"}
{pt3dclear()}
{pt3dadd(200448.000000,163236.000000,99875.000000,1266.006492)}
{pt3dadd(200388.000000,163068.000000,97775.000000,139.314042)}
{pt3dadd(200484.000000,162696.000000,97625.000000,208.482903)}
{pt3dadd(200532.000000,162372.000000,97350.000000,277.651764)}
{pt3dadd(200532.000000,161856.000000,96875.000000,346.820625)}
{pt3dadd(200424.000000,161784.000000,96125.000000,415.989486)}
{pt3dadd(199992.000000,161616.000000,95425.000000,372.175776)}
{pt3dadd(200148.000000,161292.000000,94725.000000,328.362066)}
{pt3dadd(200388.000000,160824.000000,94350.000000,284.548356)}
{pt3dadd(200388.000000,159948.000000,93850.000000,240.734646)}
{pt3dadd(200292.000000,159552.000000,93325.000000,267.215459)}
{pt3dadd(200184.000000,159144.000000,92850.000000,293.696271)}
{pt3dadd(199824.000000,159636.000000,92150.000000,320.177083)}
{pt3dadd(199944.000000,159636.000000,91550.000000,346.657896)}
{pt3dadd(199956.000000,160020.000000,91175.000000,200.612214)}
{pt3dadd(199956.000000,159996.000000,90975.000000,288.881586)}

{create adhoc44}
{access adhoc44}
{connect adhoc44(1), adhoc42(0)}
{nseg = 1}
{strdef color color = "White"}
{pt3dclear()}
{pt3dadd(200448.000000,163236.000000,99875.000000,1266.006492)}
{pt3dadd(200472.000000,162900.000000,100000.000000,1035.114948)}
{pt3dadd(200448.000000,162444.000000,100350.000000,1035.114948)}
{pt3dadd(200568.000000,162000.000000,100350.000000,1035.114948)}
{pt3dadd(200424.000000,161640.000000,100625.000000,1035.114948)}
{pt3dadd(200424.000000,161352.000000,100825.000000,1035.114948)}
{pt3dadd(200352.000000,161028.000000,101000.000000,1086.870681)}
{pt3dadd(200508.000000,160716.000000,101000.000000,1138.626414)}
{pt3dadd(200568.000000,160344.000000,101000.000000,1190.382147)}
{pt3dadd(200628.000000,160020.000000,101100.000000,1242.137880)}
{pt3dadd(200688.000000,159684.000000,101200.000000,1242.137880)}
{pt3dadd(200700.000000,159384.000000,101400.000000,1242.137880)}
{pt3dadd(200664.000000,158988.000000,101500.000000,1242.137880)}
{pt3dadd(200640.000000,158892.000000,101350.000000,1192.452354)}

{create adhoc45}
{access adhoc45}
{connect adhoc45(1), adhoc44(0)}
{nseg = 1}
{strdef color color = "White"}
{pt3dclear()}
{pt3dadd(200640.000000,158892.000000,101350.000000,1192.452354)}
{pt3dadd(199560.000000,158784.000000,100425.000000,139.314042)}
{pt3dadd(199728.000000,158340.000000,100150.000000,139.314042)}
{pt3dadd(199776.000000,157956.000000,99925.000000,139.314042)}
{pt3dadd(200196.000000,157620.000000,99600.000000,139.314042)}
{pt3dadd(200208.000000,157440.000000,99575.000000,160.489764)}

{create adhoc46}
{access adhoc46}
{connect adhoc46(1), adhoc44(0)}
{nseg = 1}
{strdef color color = "White"}
{pt3dclear()}
{pt3dadd(200640.000000,158892.000000,101350.000000,1192.452354)}
{pt3dadd(200868.000000,158376.000000,101475.000000,1242.137880)}
{pt3dadd(200772.000000,157872.000000,101400.000000,1190.382147)}
{pt3dadd(200892.000000,157428.000000,101400.000000,1138.626414)}
{pt3dadd(200856.000000,156816.000000,101300.000000,1086.870681)}
{pt3dadd(200820.000000,156456.000000,101225.000000,1035.114948)}
{pt3dadd(200844.000000,155928.000000,101550.000000,1104.122592)}
{pt3dadd(200640.000000,155460.000000,101550.000000,1173.130236)}
{pt3dadd(200496.000000,155028.000000,101500.000000,1242.137880)}
{pt3dadd(200520.000000,154908.000000,101525.000000,1242.137880)}

{create adhoc47}
{access adhoc47}
{connect adhoc47(1), adhoc46(0)}
{nseg = 1}
{strdef color color = "White"}
{pt3dclear()}
{pt3dadd(200520.000000,154908.000000,101525.000000,1242.137880)}
{pt3dadd(200292.000000,154932.000000,99350.000000,240.734646)}
{pt3dadd(200100.000000,154620.000000,98725.000000,230.704038)}
{pt3dadd(200208.000000,154332.000000,98075.000000,220.673430)}
{pt3dadd(200232.000000,153924.000000,97400.000000,210.642822)}
{pt3dadd(200472.000000,152964.000000,96725.000000,200.612214)}
{pt3dadd(199848.000000,151008.000000,96000.000000,200.612214)}
{pt3dadd(199920.000000,150876.000000,95475.000000,167.176836)}

{create adhoc48}
{access adhoc48}
{connect adhoc48(1), adhoc46(0)}
{nseg = 1}
{strdef color color = "White"}
{pt3dclear()}
{pt3dadd(200520.000000,154908.000000,101525.000000,1242.137880)}
{pt3dadd(200652.000000,154596.000000,101850.000000,1242.137880)}
{pt3dadd(200580.000000,154164.000000,102175.000000,1242.137880)}
{pt3dadd(200484.000000,153876.000000,101925.000000,1242.137880)}
{pt3dadd(200508.000000,153516.000000,102100.000000,1242.137880)}
{pt3dadd(200640.000000,153228.000000,102275.000000,1242.137880)}
{pt3dadd(200544.000000,152820.000000,102225.000000,1190.382147)}
{pt3dadd(200676.000000,152496.000000,102450.000000,1138.626414)}
{pt3dadd(200616.000000,152172.000000,102275.000000,1086.870681)}
{pt3dadd(200688.000000,151824.000000,102300.000000,1035.114948)}
{pt3dadd(200688.000000,151440.000000,102425.000000,1014.412617)}
{pt3dadd(200688.000000,151128.000000,102375.000000,993.710286)}
{pt3dadd(200688.000000,151056.000000,102325.000000,1035.114948)}

{create adhoc49}
{access adhoc49}
{connect adhoc49(1), adhoc48(0)}
{nseg = 1}
{strdef color color = "White"}
{pt3dclear()}
{pt3dadd(200688.000000,151056.000000,102325.000000,1035.114948)}
{pt3dadd(199536.000000,150888.000000,100700.000000,116.095032)}
{pt3dadd(199320.000000,150864.000000,100800.000000,133.122300)}
{pt3dadd(199092.000000,150840.000000,100850.000000,150.149568)}
{pt3dadd(198804.000000,149964.000000,100975.000000,167.176836)}
{pt3dadd(198588.000000,149424.000000,100850.000000,240.734646)}

{create adhoc50}
{access adhoc50}
{connect adhoc50(1), adhoc48(0)}
{nseg = 1}
{strdef color color = "White"}
{pt3dclear()}
{pt3dadd(200688.000000,151056.000000,102325.000000,1035.114948)}
{pt3dadd(200688.000000,150648.000000,102375.000000,1035.114948)}
{pt3dadd(200700.000000,150288.000000,102425.000000,1035.114948)}
{pt3dadd(200640.000000,149856.000000,102475.000000,1035.114948)}
{pt3dadd(200640.000000,149508.000000,102625.000000,1035.114948)}
{pt3dadd(200400.000000,149148.000000,102675.000000,1035.114948)}
{pt3dadd(200400.000000,148824.000000,102625.000000,983.359197)}
{pt3dadd(200376.000000,148572.000000,102575.000000,931.603446)}
{pt3dadd(200172.000000,148212.000000,102625.000000,879.847695)}
{pt3dadd(200076.000000,147696.000000,102450.000000,828.091944)}
{pt3dadd(199932.000000,147264.000000,102550.000000,836.717909)}
{pt3dadd(199860.000000,146796.000000,102400.000000,845.343873)}
{pt3dadd(199788.000000,146364.000000,102250.000000,853.969838)}
{pt3dadd(199464.000000,146028.000000,102600.000000,862.595802)}
{pt3dadd(199224.000000,145752.000000,102525.000000,828.091944)}

{create adhoc51}
{access adhoc51}
{connect adhoc51(1), adhoc50(0)}
{nseg = 1}
{strdef color color = "White"}
{pt3dclear()}
{pt3dadd(199224.000000,145752.000000,102525.000000,828.091944)}
{pt3dadd(199896.000000,145728.000000,100775.000000,415.989486)}
{pt3dadd(199764.000000,145212.000000,100275.000000,436.788958)}
{pt3dadd(199860.000000,144624.000000,99525.000000,457.588431)}
{pt3dadd(200004.000000,144072.000000,98925.000000,478.387903)}
{pt3dadd(199968.000000,143568.000000,98250.000000,499.187376)}
{pt3dadd(200064.000000,143028.000000,97700.000000,499.187376)}
{pt3dadd(199992.000000,143004.000000,97225.000000,499.187376)}

{create adhoc52}
{access adhoc52}
{connect adhoc52(1), adhoc51(0)}
{nseg = 1}
{strdef color color = "White"}
{pt3dclear()}
{pt3dadd(199992.000000,143004.000000,97225.000000,499.187376)}
{pt3dadd(198960.000000,143808.000000,97050.000000,80.621550)}
{pt3dadd(198684.000000,144912.000000,97425.000000,140.616882)}
{pt3dadd(198648.000000,145356.000000,97625.000000,200.612214)}
{pt3dadd(198612.000000,145704.000000,97700.000000,240.734646)}

{create adhoc53}
{access adhoc53}
{connect adhoc53(1), adhoc51(0)}
{nseg = 1}
{strdef color color = "White"}
{pt3dclear()}
{pt3dadd(199992.000000,143004.000000,97225.000000,499.187376)}
{pt3dadd(199992.000000,142356.000000,96575.000000,499.187376)}
{pt3dadd(199896.000000,141924.000000,95900.000000,499.187376)}
{pt3dadd(199860.000000,141600.000000,95250.000000,499.187376)}
{pt3dadd(199752.000000,140940.000000,94700.000000,499.187376)}
{pt3dadd(199488.000000,140580.000000,94125.000000,499.187376)}
{pt3dadd(199332.000000,139896.000000,93475.000000,446.610929)}
{pt3dadd(199308.000000,138648.000000,92725.000000,394.034481)}
{pt3dadd(199308.000000,138144.000000,92425.000000,341.458034)}
{pt3dadd(199140.000000,137796.000000,92100.000000,288.881586)}
{pt3dadd(198960.000000,137424.000000,91650.000000,303.325664)}
{pt3dadd(199008.000000,137160.000000,91525.000000,317.769741)}
{pt3dadd(198912.000000,136848.000000,91225.000000,332.213819)}
{pt3dadd(198660.000000,136500.000000,90800.000000,346.657896)}
{pt3dadd(198444.000000,136092.000000,90200.000000,332.213819)}
{pt3dadd(198468.000000,135732.000000,89750.000000,317.769741)}
{pt3dadd(198324.000000,135444.000000,89575.000000,303.325664)}
{pt3dadd(198288.000000,135084.000000,89450.000000,288.881586)}
{pt3dadd(198228.000000,134748.000000,89225.000000,320.658561)}
{pt3dadd(198168.000000,134424.000000,88850.000000,352.435536)}
{pt3dadd(198060.000000,134088.000000,88000.000000,384.212511)}
{pt3dadd(198060.000000,133476.000000,87500.000000,415.989486)}
{pt3dadd(197832.000000,133704.000000,86825.000000,240.734646)}
{pt3dadd(197760.000000,133608.000000,86500.000000,240.734646)}

{create adhoc54}
{access adhoc54}
{connect adhoc54(1), adhoc50(0)}
{nseg = 1}
{strdef color color = "White"}
{pt3dclear()}
{pt3dadd(199224.000000,145752.000000,102525.000000,828.091944)}
{pt3dadd(198948.000000,145296.000000,102650.000000,862.595802)}
{pt3dadd(198780.000000,144744.000000,102675.000000,853.969856)}
{pt3dadd(198504.000000,144264.000000,102675.000000,845.343909)}
{pt3dadd(198324.000000,143868.000000,102675.000000,836.717962)}
{pt3dadd(198120.000000,143520.000000,102675.000000,828.092016)}
{pt3dadd(198084.000000,143124.000000,102700.000000,836.717962)}
{pt3dadd(197988.000000,142908.000000,102675.000000,845.343909)}
{pt3dadd(197736.000000,142596.000000,102675.000000,853.969856)}
{pt3dadd(197496.000000,142176.000000,102600.000000,862.595802)}
{pt3dadd(197496.000000,141828.000000,102675.000000,862.595802)}
{pt3dadd(197460.000000,141456.000000,102725.000000,862.595802)}
{pt3dadd(197292.000000,141216.000000,102575.000000,862.595802)}
{pt3dadd(197232.000000,140928.000000,102500.000000,862.595802)}
{pt3dadd(197172.000000,140580.000000,102725.000000,826.654307)}
{pt3dadd(197232.000000,140304.000000,102650.000000,790.712811)}
{pt3dadd(197424.000000,139992.000000,102775.000000,754.771316)}
{pt3dadd(197208.000000,139596.000000,102700.000000,718.829820)}
{pt3dadd(197208.000000,139140.000000,102625.000000,718.829820)}
{pt3dadd(197328.000000,138612.000000,102725.000000,718.829820)}
{pt3dadd(197328.000000,138192.000000,102675.000000,718.829820)}
{pt3dadd(197412.000000,137952.000000,102675.000000,718.829820)}
{pt3dadd(197436.000000,137544.000000,102500.000000,718.829820)}
{pt3dadd(197556.000000,137136.000000,102550.000000,862.595802)}

{create adhoc55}
{access adhoc55}
{connect adhoc55(1), adhoc54(0)}
{nseg = 1}
{strdef color color = "White"}
{pt3dclear()}
{pt3dadd(197556.000000,137136.000000,102550.000000,862.595802)}
{pt3dadd(195864.000000,137088.000000,102200.000000,240.734646)}
{pt3dadd(195396.000000,137052.000000,101600.000000,230.704038)}
{pt3dadd(195252.000000,136956.000000,101025.000000,220.673430)}
{pt3dadd(195336.000000,137184.000000,100450.000000,210.642822)}
{pt3dadd(195588.000000,137112.000000,99875.000000,200.612214)}
{pt3dadd(195720.000000,137160.000000,99600.000000,139.314042)}

{create adhoc56}
{access adhoc56}
{connect adhoc56(1), adhoc54(0)}
{nseg = 1}
{strdef color color = "White"}
{pt3dclear()}
{pt3dadd(197556.000000,137136.000000,102550.000000,862.595802)}
{pt3dadd(197604.000000,136764.000000,102600.000000,862.595802)}
{pt3dadd(198024.000000,136368.000000,102450.000000,862.595802)}
{pt3dadd(198036.000000,135912.000000,102300.000000,862.595802)}
{pt3dadd(198048.000000,135372.000000,102700.000000,862.595802)}
{pt3dadd(198048.000000,134964.000000,102425.000000,862.595802)}
{pt3dadd(198024.000000,134688.000000,102350.000000,905.725589)}
{pt3dadd(197928.000000,134436.000000,102250.000000,948.855375)}
{pt3dadd(197988.000000,134076.000000,102250.000000,991.985162)}
{pt3dadd(197928.000000,133632.000000,102175.000000,1035.114948)}
{pt3dadd(197856.000000,133260.000000,102125.000000,991.985162)}
{pt3dadd(197784.000000,132912.000000,102050.000000,948.855375)}
{pt3dadd(197748.000000,132444.000000,101950.000000,905.725589)}
{pt3dadd(197712.000000,132156.000000,101850.000000,862.595802)}
{pt3dadd(197676.000000,131832.000000,101825.000000,862.595802)}
{pt3dadd(197544.000000,131544.000000,101825.000000,862.595802)}
{pt3dadd(197376.000000,131364.000000,101825.000000,862.595802)}
{pt3dadd(197208.000000,131148.000000,101825.000000,862.595802)}
{pt3dadd(197040.000000,130860.000000,101825.000000,862.595802)}
{pt3dadd(197100.000000,130608.000000,101775.000000,862.595802)}
{pt3dadd(197148.000000,130344.000000,101700.000000,862.595802)}
{pt3dadd(197076.000000,130128.000000,101750.000000,862.595802)}
{pt3dadd(197004.000000,129972.000000,101800.000000,862.595802)}
{pt3dadd(196932.000000,129816.000000,101800.000000,862.595802)}

{create adhoc57}
{access adhoc57}
{connect adhoc57(1), adhoc56(0)}
{nseg = 1}
{strdef color color = "White"}
{pt3dclear()}
{pt3dadd(196932.000000,129816.000000,101800.000000,862.595802)}
{pt3dadd(196560.000000,129768.000000,100175.000000,240.734646)}
{pt3dadd(196620.000000,129672.000000,99800.000000,326.885556)}
{pt3dadd(196848.000000,129732.000000,99250.000000,413.036466)}
{pt3dadd(197148.000000,129792.000000,98700.000000,499.187376)}
{pt3dadd(196896.000000,129840.000000,98100.000000,346.657896)}

{create adhoc58}
{access adhoc58}
{connect adhoc58(1), adhoc57(0)}
{nseg = 1}
{strdef color color = "White"}
{pt3dclear()}
{pt3dadd(196896.000000,129840.000000,98100.000000,346.657896)}
{pt3dadd(196908.000000,130788.000000,98000.000000,167.176836)}
{pt3dadd(195996.000000,131520.000000,97950.000000,197.603024)}
{pt3dadd(195780.000000,131808.000000,97900.000000,228.029211)}
{pt3dadd(195552.000000,131736.000000,97925.000000,258.455399)}
{pt3dadd(195300.000000,132012.000000,98150.000000,288.881586)}
{pt3dadd(195048.000000,132060.000000,98200.000000,202.488309)}
{pt3dadd(194724.000000,132108.000000,98225.000000,116.095032)}
{pt3dadd(194460.000000,132204.000000,98250.000000,116.095032)}

{create adhoc59}
{access adhoc59}
{connect adhoc59(1), adhoc57(0)}
{nseg = 1}
{strdef color color = "White"}
{pt3dclear()}
{pt3dadd(196896.000000,129840.000000,98100.000000,346.657896)}
{pt3dadd(196836.000000,129492.000000,97575.000000,288.881586)}
{pt3dadd(196548.000000,129204.000000,97025.000000,276.844851)}
{pt3dadd(196632.000000,128856.000000,96475.000000,264.808116)}
{pt3dadd(196368.000000,128784.000000,95975.000000,252.771381)}
{pt3dadd(196680.000000,128760.000000,95300.000000,240.734646)}
{pt3dadd(196476.000000,128352.000000,94775.000000,206.927778)}
{pt3dadd(196404.000000,128172.000000,94275.000000,173.120910)}
{pt3dadd(196296.000000,127920.000000,93800.000000,139.314042)}
{pt3dadd(196272.000000,127824.000000,93500.000000,139.314042)}

{create adhoc60}
{access adhoc60}
{connect adhoc60(1), adhoc56(0)}
{nseg = 1}
{strdef color color = "White"}
{pt3dclear()}
{pt3dadd(196932.000000,129816.000000,101800.000000,862.595802)}
{pt3dadd(197136.000000,129516.000000,101850.000000,828.091944)}
{pt3dadd(196848.000000,129204.000000,101600.000000,879.847695)}
{pt3dadd(196716.000000,128916.000000,101675.000000,931.603446)}
{pt3dadd(196584.000000,128664.000000,101650.000000,983.359197)}
{pt3dadd(196596.000000,128472.000000,101575.000000,1035.114948)}
{pt3dadd(196596.000000,128304.000000,101700.000000,991.985162)}
{pt3dadd(196416.000000,128136.000000,101600.000000,948.855375)}
{pt3dadd(196236.000000,127932.000000,101500.000000,905.725589)}
{pt3dadd(196212.000000,127596.000000,101275.000000,862.595802)}
{pt3dadd(196176.000000,127344.000000,101400.000000,948.855375)}
{pt3dadd(196008.000000,127068.000000,101325.000000,1035.114948)}
{pt3dadd(195876.000000,126804.000000,101075.000000,862.595802)}

{create adhoc61}
{access adhoc61}
{connect adhoc61(1), adhoc60(0)}
{nseg = 1}
{strdef color color = "White"}
{pt3dclear()}
{pt3dadd(195876.000000,126804.000000,101075.000000,862.595802)}
{pt3dadd(196404.000000,126600.000000,102400.000000,346.657896)}
{pt3dadd(196116.000000,126180.000000,102425.000000,311.350146)}
{pt3dadd(196176.000000,125832.000000,102400.000000,276.042396)}
{pt3dadd(196152.000000,125472.000000,102450.000000,240.734646)}
{pt3dadd(196284.000000,125052.000000,102375.000000,80.621550)}

{create adhoc62}
{access adhoc62}
{connect adhoc62(1), adhoc60(0)}
{nseg = 1}
{strdef color color = "White"}
{pt3dclear()}
{pt3dadd(195876.000000,126804.000000,101075.000000,862.595802)}
{pt3dadd(195840.000000,126336.000000,100500.000000,862.595802)}
{pt3dadd(195864.000000,126012.000000,100425.000000,826.654307)}
{pt3dadd(195828.000000,125640.000000,100200.000000,790.712811)}
{pt3dadd(195756.000000,125316.000000,99900.000000,754.771316)}
{pt3dadd(195624.000000,124980.000000,99700.000000,718.829820)}
{pt3dadd(195672.000000,124632.000000,99650.000000,711.641533)}
{pt3dadd(195768.000000,124224.000000,99425.000000,704.453247)}
{pt3dadd(195768.000000,123804.000000,99350.000000,697.264960)}
{pt3dadd(195708.000000,123336.000000,99175.000000,690.076674)}
{pt3dadd(195648.000000,123036.000000,99000.000000,862.595802)}
{pt3dadd(195732.000000,122844.000000,98550.000000,862.595802)}

{create adhoc63}
{access adhoc63}
{connect adhoc63(1), adhoc62(0)}
{nseg = 1}
{strdef color color = "White"}
{pt3dclear()}
{pt3dadd(195732.000000,122844.000000,98550.000000,862.595802)}
{pt3dadd(196164.000000,123000.000000,97350.000000,288.881586)}
{pt3dadd(196428.000000,123348.000000,97125.000000,248.313336)}
{pt3dadd(196512.000000,123816.000000,97275.000000,207.745086)}
{pt3dadd(196560.000000,124320.000000,97400.000000,167.176836)}
{pt3dadd(196044.000000,124800.000000,97225.000000,139.314042)}

{create adhoc64}
{access adhoc64}
{connect adhoc64(1), adhoc63(0)}
{nseg = 1}
{strdef color color = "White"}
{pt3dclear()}
{pt3dadd(196044.000000,124800.000000,97225.000000,139.314042)}
{pt3dadd(194856.000000,125232.000000,97350.000000,346.657896)}
{pt3dadd(194616.000000,125208.000000,97275.000000,273.635055)}
{pt3dadd(194376.000000,125148.000000,97275.000000,200.612214)}
{pt3dadd(194208.000000,125124.000000,97275.000000,139.314042)}

{create adhoc65}
{access adhoc65}
{connect adhoc65(1), adhoc63(0)}
{nseg = 1}
{strdef color color = "White"}
{pt3dclear()}
{pt3dadd(196044.000000,124800.000000,97225.000000,139.314042)}
{pt3dadd(195936.000000,125268.000000,97425.000000,116.095032)}
{pt3dadd(196056.000000,125532.000000,97425.000000,139.314042)}
{pt3dadd(196140.000000,125700.000000,97450.000000,240.734646)}

{create adhoc66}
{access adhoc66}
{connect adhoc66(1), adhoc62(0)}
{nseg = 1}
{strdef color color = "White"}
{pt3dclear()}
{pt3dadd(195732.000000,122844.000000,98550.000000,862.595802)}
{pt3dadd(195744.000000,122460.000000,98675.000000,862.595802)}
{pt3dadd(195672.000000,122016.000000,98375.000000,862.595802)}
{pt3dadd(195576.000000,121668.000000,98100.000000,862.595802)}
{pt3dadd(195552.000000,121296.000000,97975.000000,862.595802)}
{pt3dadd(195480.000000,120924.000000,97525.000000,862.595802)}
{pt3dadd(195384.000000,120540.000000,97425.000000,796.703072)}
{pt3dadd(195216.000000,120288.000000,97350.000000,730.810341)}
{pt3dadd(195216.000000,120084.000000,97325.000000,664.917611)}
{pt3dadd(195000.000000,119724.000000,97025.000000,599.024880)}
{pt3dadd(194928.000000,119436.000000,97200.000000,638.959860)}
{pt3dadd(194796.000000,119064.000000,96875.000000,678.894840)}
{pt3dadd(194448.000000,118692.000000,96775.000000,718.829820)}
{pt3dadd(194460.000000,118344.000000,96700.000000,718.829820)}

{create adhoc67}
{access adhoc67}
{connect adhoc67(1), adhoc66(0)}
{nseg = 1}
{strdef color color = "White"}
{pt3dclear()}
{pt3dadd(194460.000000,118344.000000,96700.000000,718.829820)}
{pt3dadd(192660.000000,115272.000000,96800.000000,346.657896)}
{pt3dadd(192408.000000,115044.000000,96875.000000,381.323691)}
{pt3dadd(192492.000000,114576.000000,96675.000000,415.989486)}
{pt3dadd(192384.000000,114252.000000,96575.000000,479.219886)}

{create adhoc68}
{access adhoc68}
{connect adhoc68(1), adhoc67(0)}
{nseg = 1}
{strdef color color = "White"}
{pt3dclear()}
{pt3dadd(192384.000000,114252.000000,96575.000000,479.219886)}
{pt3dadd(191508.000000,114144.000000,95450.000000,240.734646)}
{pt3dadd(191184.000000,113952.000000,95000.000000,256.783626)}
{pt3dadd(191040.000000,113616.000000,94600.000000,272.832606)}
{pt3dadd(190752.000000,112884.000000,94050.000000,288.881586)}
{pt3dadd(190716.000000,112848.000000,93750.000000,240.734646)}

{create adhoc69}
{access adhoc69}
{connect adhoc69(1), adhoc67(0)}
{nseg = 1}
{strdef color color = "White"}
{pt3dclear()}
{pt3dadd(192384.000000,114252.000000,96575.000000,479.219886)}
{pt3dadd(192240.000000,113844.000000,96350.000000,415.989486)}
{pt3dadd(192324.000000,113520.000000,96200.000000,398.656589)}
{pt3dadd(192228.000000,113160.000000,96050.000000,381.323691)}
{pt3dadd(192132.000000,112836.000000,95950.000000,363.990794)}
{pt3dadd(192036.000000,112536.000000,95850.000000,346.657896)}
{pt3dadd(191940.000000,112416.000000,95775.000000,346.657896)}
{pt3dadd(191868.000000,112248.000000,95775.000000,346.657896)}

{create adhoc70}
{access adhoc70}
{connect adhoc70(1), adhoc69(0)}
{nseg = 1}
{strdef color color = "White"}
{pt3dclear()}
{pt3dadd(191868.000000,112248.000000,95775.000000,346.657896)}
{pt3dadd(192852.000000,112224.000000,95175.000000,288.881586)}
{pt3dadd(193056.000000,111924.000000,94850.000000,288.881586)}
{pt3dadd(193104.000000,111216.000000,94250.000000,288.881586)}
{pt3dadd(192804.000000,110604.000000,93625.000000,288.881586)}
{pt3dadd(192492.000000,109824.000000,93175.000000,288.881586)}
{pt3dadd(191916.000000,108468.000000,92700.000000,244.746900)}
{pt3dadd(191412.000000,107856.000000,92225.000000,200.612214)}
{pt3dadd(191388.000000,107568.000000,92175.000000,240.734646)}

{create adhoc71}
{access adhoc71}
{connect adhoc71(1), adhoc69(0)}
{nseg = 1}
{strdef color color = "White"}
{pt3dclear()}
{pt3dadd(191868.000000,112248.000000,95775.000000,346.657896)}
{pt3dadd(191628.000000,111972.000000,95975.000000,277.326324)}
{pt3dadd(191352.000000,111672.000000,95950.000000,311.992115)}
{pt3dadd(191436.000000,111240.000000,95825.000000,346.657905)}
{pt3dadd(191184.000000,110820.000000,95875.000000,381.323696)}
{pt3dadd(191088.000000,110376.000000,95725.000000,415.989486)}
{pt3dadd(190908.000000,110052.000000,96025.000000,411.829601)}
{pt3dadd(190704.000000,109776.000000,95950.000000,407.669715)}
{pt3dadd(190356.000000,109332.000000,95800.000000,403.509830)}
{pt3dadd(190176.000000,108972.000000,95750.000000,399.349944)}
{pt3dadd(189744.000000,108624.000000,95950.000000,381.785928)}
{pt3dadd(189048.000000,108288.000000,96150.000000,364.221912)}
{pt3dadd(188568.000000,108000.000000,96325.000000,346.657896)}
{pt3dadd(188172.000000,107796.000000,96250.000000,288.881586)}

{create adhoc72}
{access adhoc72}
{connect adhoc72(1), adhoc71(0)}
{nseg = 1}
{strdef color color = "White"}
{pt3dclear()}
{pt3dadd(188172.000000,107796.000000,96250.000000,288.881586)}
{pt3dadd(187440.000000,107808.000000,96950.000000,167.176836)}

{create adhoc73}
{access adhoc73}
{connect adhoc73(1), adhoc72(0)}
{nseg = 1}
{strdef color color = "White"}
{pt3dclear()}
{pt3dadd(187440.000000,107808.000000,96950.000000,167.176836)}
{pt3dadd(186528.000000,106776.000000,96950.000000,200.612214)}
{pt3dadd(186480.000000,106464.000000,96725.000000,179.482918)}
{pt3dadd(186420.000000,106092.000000,96575.000000,158.353623)}
{pt3dadd(186324.000000,105672.000000,96475.000000,137.224328)}
{pt3dadd(186120.000000,105252.000000,96325.000000,116.095032)}
{pt3dadd(185808.000000,104940.000000,96100.000000,106.420446)}
{pt3dadd(185868.000000,104640.000000,95950.000000,96.745860)}
{pt3dadd(185724.000000,104400.000000,95900.000000,200.612214)}

{create adhoc74}
{access adhoc74}
{connect adhoc74(1), adhoc72(0)}
{nseg = 1}
{strdef color color = "White"}
{pt3dclear()}
{pt3dadd(187440.000000,107808.000000,96950.000000,167.176836)}
{pt3dadd(187272.000000,107856.000000,97225.000000,167.176836)}
{pt3dadd(187020.000000,107460.000000,97525.000000,167.176836)}
{pt3dadd(186888.000000,107268.000000,97550.000000,200.612214)}

{create adhoc75}
{access adhoc75}
{connect adhoc75(1), adhoc71(0)}
{nseg = 1}
{strdef color color = "White"}
{pt3dclear()}
{pt3dadd(188172.000000,107796.000000,96250.000000,288.881586)}
{pt3dadd(187860.000000,107340.000000,96500.000000,346.657896)}
{pt3dadd(187644.000000,107028.000000,96125.000000,320.177083)}
{pt3dadd(187476.000000,106740.000000,95900.000000,293.696271)}
{pt3dadd(187500.000000,106524.000000,95550.000000,267.215459)}
{pt3dadd(187512.000000,106260.000000,95475.000000,240.734646)}
{pt3dadd(187488.000000,105864.000000,95225.000000,200.612214)}
{pt3dadd(187464.000000,105732.000000,95150.000000,167.176836)}

{create adhoc76}
{access adhoc76}
{connect adhoc76(1), adhoc66(0)}
{nseg = 1}
{strdef color color = "White"}
{pt3dclear()}
{pt3dadd(194460.000000,118344.000000,96700.000000,718.829820)}
{pt3dadd(194388.000000,118056.000000,96550.000000,718.829820)}
{pt3dadd(194364.000000,117864.000000,96425.000000,718.829820)}
{pt3dadd(194340.000000,117720.000000,96350.000000,718.829820)}
{pt3dadd(194340.000000,117492.000000,96125.000000,718.829820)}

{create adhoc77}
{access adhoc77}
{connect adhoc77(1), adhoc76(0)}
{nseg = 1}
{strdef color color = "White"}
{pt3dclear()}
{pt3dadd(194340.000000,117492.000000,96125.000000,718.829820)}
{pt3dadd(195240.000000,119508.000000,96150.000000,139.314042)}
{pt3dadd(195528.000000,119832.000000,95700.000000,125.382636)}
{pt3dadd(195156.000000,120096.000000,95550.000000,111.451230)}
{pt3dadd(195096.000000,120216.000000,95550.000000,116.095032)}

{create adhoc78}
{access adhoc78}
{connect adhoc78(1), adhoc76(0)}
{nseg = 1}
{strdef color color = "White"}
{pt3dclear()}
{pt3dadd(194340.000000,117492.000000,96125.000000,718.829820)}
{pt3dadd(194496.000000,117108.000000,95650.000000,718.829820)}
{pt3dadd(194436.000000,116940.000000,95350.000000,718.829820)}

{create adhoc79}
{access adhoc79}
{connect adhoc79(1), adhoc78(0)}
{nseg = 1}
{strdef color color = "White"}
{pt3dclear()}
{pt3dadd(194436.000000,116940.000000,95350.000000,718.829820)}
{pt3dadd(194868.000000,118416.000000,95275.000000,346.657896)}
{pt3dadd(194904.000000,118356.000000,94725.000000,294.821933)}
{pt3dadd(195264.000000,118452.000000,94275.000000,242.985969)}
{pt3dadd(195732.000000,119016.000000,93875.000000,191.150005)}
{pt3dadd(196128.000000,119424.000000,93800.000000,139.314042)}
{pt3dadd(196260.000000,119616.000000,93875.000000,128.671997)}
{pt3dadd(196380.000000,119868.000000,93925.000000,118.029951)}
{pt3dadd(196476.000000,120288.000000,93975.000000,107.387906)}
{pt3dadd(196596.000000,120564.000000,93925.000000,96.745860)}
{pt3dadd(196608.000000,120672.000000,93900.000000,80.621550)}

{create adhoc80}
{access adhoc80}
{connect adhoc80(1), adhoc78(0)}
{nseg = 1}
{strdef color color = "White"}
{pt3dclear()}
{pt3dadd(194436.000000,116940.000000,95350.000000,718.829820)}
{pt3dadd(194160.000000,115800.000000,94575.000000,718.829820)}
{pt3dadd(193860.000000,114888.000000,93700.000000,690.076674)}
{pt3dadd(193752.000000,114240.000000,92700.000000,599.024880)}

{create adhoc81}
{access adhoc81}
{connect adhoc81(1), adhoc80(0)}
{nseg = 1}
{strdef color color = "White"}
{pt3dclear()}
{pt3dadd(193752.000000,114240.000000,92700.000000,599.024880)}
{pt3dadd(193164.000000,115044.000000,92500.000000,718.829820)}
{pt3dadd(193272.000000,115068.000000,92175.000000,663.919209)}
{pt3dadd(193656.000000,115116.000000,91575.000000,609.008598)}
{pt3dadd(193752.000000,115284.000000,91125.000000,554.097987)}
{pt3dadd(193800.000000,115752.000000,90650.000000,499.187376)}
{pt3dadd(194004.000000,115836.000000,90200.000000,499.187376)}

{create adhoc82}
{access adhoc82}
{connect adhoc82(1), adhoc81(0)}
{nseg = 1}
{strdef color color = "White"}
{pt3dclear()}
{pt3dadd(194004.000000,115836.000000,90200.000000,499.187376)}
{pt3dadd(192900.000000,116532.000000,90250.000000,240.734646)}
{pt3dadd(192648.000000,116880.000000,90400.000000,249.882566)}
{pt3dadd(192552.000000,117228.000000,90475.000000,259.030485)}
{pt3dadd(192576.000000,117612.000000,90525.000000,268.178405)}
{pt3dadd(192780.000000,118044.000000,90575.000000,277.326324)}
{pt3dadd(192780.000000,118428.000000,90550.000000,277.326342)}

{create adhoc83}
{access adhoc83}
{connect adhoc83(1), adhoc82(0)}
{nseg = 1}
{strdef color color = "White"}
{pt3dclear()}
{pt3dadd(192780.000000,118428.000000,90550.000000,277.326342)}
{pt3dadd(193356.000000,118656.000000,90725.000000,139.314042)}
{pt3dadd(193776.000000,119028.000000,90825.000000,148.601640)}
{pt3dadd(193896.000000,119268.000000,91125.000000,157.889238)}
{pt3dadd(194316.000000,119484.000000,91150.000000,167.176836)}
{pt3dadd(194364.000000,119628.000000,91350.000000,139.314042)}

{create adhoc84}
{access adhoc84}
{connect adhoc84(1), adhoc82(0)}
{nseg = 1}
{strdef color color = "White"}
{pt3dclear()}
{pt3dadd(192780.000000,118428.000000,90550.000000,277.326342)}
{pt3dadd(192492.000000,118752.000000,90575.000000,240.734646)}
{pt3dadd(192888.000000,119088.000000,90350.000000,240.734646)}
{pt3dadd(192852.000000,119208.000000,90350.000000,288.881586)}

{create adhoc85}
{access adhoc85}
{connect adhoc85(1), adhoc81(0)}
{nseg = 1}
{strdef color color = "White"}
{pt3dclear()}
{pt3dadd(194004.000000,115836.000000,90200.000000,499.187376)}
{pt3dadd(194388.000000,116340.000000,89525.000000,599.024880)}
{pt3dadd(194412.000000,116532.000000,89100.000000,565.745712)}
{pt3dadd(194424.000000,116916.000000,88500.000000,532.466544)}
{pt3dadd(194208.000000,117300.000000,87950.000000,499.187376)}
{pt3dadd(194208.000000,117420.000000,87550.000000,415.989486)}

{create adhoc86}
{access adhoc86}
{connect adhoc86(1), adhoc85(0)}
{nseg = 1}
{strdef color color = "White"}
{pt3dclear()}
{pt3dadd(194208.000000,117420.000000,87550.000000,415.989486)}
{pt3dadd(193236.000000,117924.000000,87675.000000,167.176836)}
{pt3dadd(193248.000000,118560.000000,87450.000000,175.535680)}
{pt3dadd(193260.000000,118848.000000,87350.000000,183.894525)}
{pt3dadd(193488.000000,119124.000000,87325.000000,192.253370)}
{pt3dadd(193680.000000,119328.000000,87525.000000,200.612214)}
{pt3dadd(193740.000000,119580.000000,87475.000000,167.176836)}
{pt3dadd(193788.000000,119712.000000,87500.000000,139.314042)}

{create adhoc87}
{access adhoc87}
{connect adhoc87(1), adhoc85(0)}
{nseg = 1}
{strdef color color = "White"}
{pt3dclear()}
{pt3dadd(194208.000000,117420.000000,87550.000000,415.989486)}
{pt3dadd(194184.000000,117348.000000,87425.000000,415.989486)}

{create adhoc88}
{access adhoc88}
{connect adhoc88(1), adhoc87(0)}
{nseg = 1}
{strdef color color = "White"}
{pt3dclear()}
{pt3dadd(194184.000000,117348.000000,87425.000000,415.989486)}
{pt3dadd(195252.000000,118020.000000,87325.000000,240.734646)}
{pt3dadd(195492.000000,118188.000000,87175.000000,230.704038)}
{pt3dadd(195744.000000,118320.000000,87050.000000,220.673430)}
{pt3dadd(196092.000000,118416.000000,86825.000000,210.642822)}
{pt3dadd(196308.000000,118812.000000,86525.000000,200.612214)}
{pt3dadd(196632.000000,119208.000000,86375.000000,208.235480)}
{pt3dadd(196812.000000,119340.000000,86300.000000,215.858745)}
{pt3dadd(196956.000000,119832.000000,86150.000000,223.482010)}
{pt3dadd(197088.000000,120228.000000,86225.000000,231.105276)}
{pt3dadd(197256.000000,120540.000000,86300.000000,223.482010)}
{pt3dadd(197304.000000,120828.000000,86250.000000,215.858745)}
{pt3dadd(197304.000000,121188.000000,86225.000000,208.235480)}
{pt3dadd(197472.000000,121536.000000,86225.000000,200.612214)}
{pt3dadd(197520.000000,121824.000000,86100.000000,140.616882)}
{pt3dadd(197604.000000,122028.000000,86075.000000,80.621550)}
{pt3dadd(197580.000000,122100.000000,86125.000000,96.745860)}

{create adhoc89}
{access adhoc89}
{connect adhoc89(1), adhoc87(0)}
{nseg = 1}
{strdef color color = "White"}
{pt3dclear()}
{pt3dadd(194184.000000,117348.000000,87425.000000,415.989486)}
{pt3dadd(193716.000000,117096.000000,87125.000000,288.881586)}
{pt3dadd(193464.000000,117228.000000,86725.000000,240.734646)}
{pt3dadd(193092.000000,117168.000000,86350.000000,167.176836)}

{create adhoc90}
{access adhoc90}
{connect adhoc90(1), adhoc89(0)}
{nseg = 1}
{strdef color color = "White"}
{pt3dclear()}
{pt3dadd(193092.000000,117168.000000,86350.000000,167.176836)}
{pt3dadd(192276.000000,116508.000000,86200.000000,139.314042)}
{pt3dadd(192108.000000,116268.000000,85800.000000,167.176836)}

{create adhoc91}
{access adhoc91}
{connect adhoc91(1), adhoc89(0)}
{nseg = 1}
{strdef color color = "White"}
{pt3dclear()}
{pt3dadd(193092.000000,117168.000000,86350.000000,167.176836)}
{pt3dadd(193476.000000,117648.000000,86150.000000,240.734646)}
{pt3dadd(193644.000000,117996.000000,85800.000000,288.881586)}
{pt3dadd(193656.000000,117960.000000,85525.000000,288.881586)}

{create adhoc92}
{access adhoc92}
{connect adhoc92(1), adhoc80(0)}
{nseg = 1}
{strdef color color = "White"}
{pt3dclear()}
{pt3dadd(193752.000000,114240.000000,92700.000000,599.024880)}
{pt3dadd(194148.000000,113532.000000,92275.000000,718.829820)}
{pt3dadd(194508.000000,113064.000000,91425.000000,893.265840)}
{pt3dadd(194364.000000,112932.000000,90600.000000,1067.701860)}
{pt3dadd(194184.000000,112788.000000,90025.000000,1242.137880)}
{pt3dadd(194004.000000,112440.000000,89525.000000,1430.942868)}

{create adhoc93}
{access adhoc93}
{connect adhoc93(1), adhoc92(0)}
{nseg = 1}
{strdef color color = "White"}
{pt3dclear()}
{pt3dadd(194004.000000,112440.000000,89525.000000,1430.942868)}
{pt3dadd(191664.000000,110400.000000,89525.000000,288.881586)}
{pt3dadd(191376.000000,110160.000000,89525.000000,266.814243)}
{pt3dadd(190944.000000,110064.000000,89875.000000,244.746900)}
{pt3dadd(190656.000000,109956.000000,89850.000000,222.679557)}
{pt3dadd(190308.000000,109644.000000,89750.000000,200.612214)}
{pt3dadd(189996.000000,109512.000000,89600.000000,192.253370)}
{pt3dadd(189624.000000,109236.000000,89500.000000,183.894525)}
{pt3dadd(189288.000000,108828.000000,89250.000000,175.535680)}
{pt3dadd(188988.000000,108396.000000,89175.000000,167.176836)}
{pt3dadd(188724.000000,108144.000000,89150.000000,96.745860)}
{pt3dadd(188556.000000,108144.000000,89200.000000,139.314042)}

{create adhoc94}
{access adhoc94}
{connect adhoc94(1), adhoc92(0)}
{nseg = 1}
{strdef color color = "White"}
{pt3dclear()}
{pt3dadd(194004.000000,112440.000000,89525.000000,1430.942868)}
{pt3dadd(193992.000000,112296.000000,88900.000000,1242.137880)}
{pt3dadd(194016.000000,112260.000000,88075.000000,1056.400254)}
{pt3dadd(193848.000000,112116.000000,87450.000000,870.662628)}
{pt3dadd(193368.000000,112044.000000,86975.000000,684.925002)}
{pt3dadd(192420.000000,112188.000000,86325.000000,499.187376)}
{pt3dadd(191712.000000,112368.000000,85725.000000,415.989486)}

{create adhoc95}
{access adhoc95}
{connect adhoc95(1), adhoc94(0)}
{nseg = 1}
{strdef color color = "White"}
{pt3dclear()}
{pt3dadd(191712.000000,112368.000000,85725.000000,415.989486)}
{pt3dadd(192936.000000,112128.000000,85400.000000,200.612214)}
{pt3dadd(193368.000000,112920.000000,84950.000000,200.612214)}
{pt3dadd(193560.000000,113232.000000,84950.000000,200.612214)}
{pt3dadd(193656.000000,113508.000000,84850.000000,200.612214)}
{pt3dadd(193860.000000,113820.000000,84725.000000,200.612214)}
{pt3dadd(194136.000000,114192.000000,84325.000000,180.179490)}
{pt3dadd(194340.000000,114408.000000,84150.000000,159.746766)}
{pt3dadd(194604.000000,114612.000000,84200.000000,139.314042)}
{pt3dadd(194664.000000,114804.000000,84200.000000,116.095032)}

{create adhoc96}
{access adhoc96}
{connect adhoc96(1), adhoc94(0)}
{nseg = 1}
{strdef color color = "White"}
{pt3dclear()}
{pt3dadd(191712.000000,112368.000000,85725.000000,415.989486)}
{pt3dadd(191100.000000,112440.000000,85325.000000,346.657896)}
{pt3dadd(190404.000000,112224.000000,85000.000000,346.657896)}
{pt3dadd(190020.000000,111912.000000,84625.000000,346.657896)}
{pt3dadd(189708.000000,111756.000000,84650.000000,346.657896)}
{pt3dadd(189384.000000,111720.000000,84575.000000,346.657896)}
{pt3dadd(188916.000000,111480.000000,84500.000000,355.837410)}
{pt3dadd(188568.000000,111336.000000,84625.000000,365.016924)}
{pt3dadd(188256.000000,111264.000000,84600.000000,374.196438)}
{pt3dadd(187884.000000,111120.000000,84725.000000,383.375952)}
{pt3dadd(187404.000000,110916.000000,84650.000000,391.529336)}
{pt3dadd(186960.000000,110784.000000,84700.000000,399.682719)}
{pt3dadd(186516.000000,110580.000000,84700.000000,407.836103)}
{pt3dadd(186120.000000,110412.000000,84750.000000,415.989486)}
{pt3dadd(185640.000000,110100.000000,84750.000000,398.656589)}
{pt3dadd(185232.000000,109860.000000,84675.000000,381.323691)}
{pt3dadd(184692.000000,109536.000000,84700.000000,363.990794)}
{pt3dadd(184176.000000,109368.000000,84750.000000,346.657896)}
{pt3dadd(183660.000000,109152.000000,84800.000000,384.790266)}
{pt3dadd(183300.000000,109044.000000,84875.000000,422.922636)}
{pt3dadd(182892.000000,108840.000000,84875.000000,461.055006)}
{pt3dadd(182556.000000,108708.000000,85000.000000,499.187376)}
{pt3dadd(182208.000000,108564.000000,85200.000000,478.387903)}
{pt3dadd(181788.000000,108396.000000,85200.000000,457.588431)}
{pt3dadd(181368.000000,108180.000000,85150.000000,436.788958)}
{pt3dadd(180816.000000,108048.000000,85200.000000,415.989486)}
{pt3dadd(180444.000000,107808.000000,85475.000000,407.669715)}
{pt3dadd(180036.000000,107520.000000,85475.000000,399.349944)}
{pt3dadd(179796.000000,107352.000000,85575.000000,346.657896)}

{create adhoc97}
{access adhoc97}
{connect adhoc97(1), adhoc96(0)}
{nseg = 1}
{strdef color color = "White"}
{pt3dclear()}
{pt3dadd(179796.000000,107352.000000,85575.000000,346.657896)}
{pt3dadd(180156.000000,108192.000000,85400.000000,139.314042)}
{pt3dadd(179988.000000,108384.000000,85300.000000,139.314042)}
{pt3dadd(179700.000000,108612.000000,85275.000000,139.314042)}
{pt3dadd(179592.000000,108816.000000,85250.000000,139.314042)}

{create adhoc98}
{access adhoc98}
{connect adhoc98(1), adhoc96(0)}
{nseg = 1}
{strdef color color = "White"}
{pt3dclear()}
{pt3dadd(179796.000000,107352.000000,85575.000000,346.657896)}
{pt3dadd(179424.000000,107352.000000,85825.000000,346.657896)}
{pt3dadd(178920.000000,107112.000000,85975.000000,288.881586)}
{pt3dadd(178524.000000,107172.000000,86025.000000,346.657896)}

{create adhoc99}
{access adhoc99}
{connect adhoc99(1), adhoc98(0)}
{nseg = 1}
{strdef color color = "White"}
{pt3dclear()}
{pt3dadd(178524.000000,107172.000000,86025.000000,346.657896)}
{pt3dadd(178536.000000,106440.000000,86400.000000,240.734646)}
{pt3dadd(178200.000000,106296.000000,87175.000000,346.657896)}
{pt3dadd(178356.000000,106332.000000,87650.000000,139.314042)}

{create adhoc100}
{access adhoc100}
{connect adhoc100(1), adhoc99(0)}
{nseg = 1}
{strdef color color = "White"}
{pt3dclear()}
{pt3dadd(178356.000000,106332.000000,87650.000000,139.314042)}
{pt3dadd(178512.000000,106944.000000,87850.000000,240.734646)}
{pt3dadd(178344.000000,107220.000000,88200.000000,200.612214)}

{create adhoc101}
{access adhoc101}
{connect adhoc101(1), adhoc99(0)}
{nseg = 1}
{strdef color color = "White"}
{pt3dclear()}
{pt3dadd(178356.000000,106332.000000,87650.000000,139.314042)}
{pt3dadd(178116.000000,105864.000000,87875.000000,499.187376)}
{pt3dadd(177792.000000,105828.000000,88525.000000,461.055006)}
{pt3dadd(177384.000000,105876.000000,88950.000000,422.922636)}
{pt3dadd(177204.000000,106032.000000,89550.000000,384.790266)}
{pt3dadd(177180.000000,106200.000000,90175.000000,346.657896)}
{pt3dadd(177300.000000,106320.000000,90625.000000,242.985969)}
{pt3dadd(177384.000000,106404.000000,91100.000000,139.314042)}
{pt3dadd(177276.000000,106008.000000,91500.000000,200.612214)}

{create adhoc102}
{access adhoc102}
{connect adhoc102(1), adhoc98(0)}
{nseg = 1}
{strdef color color = "White"}
{pt3dclear()}
{pt3dadd(178524.000000,107172.000000,86025.000000,346.657896)}
{pt3dadd(178188.000000,107100.000000,85900.000000,415.989486)}
{pt3dadd(177924.000000,107148.000000,85850.000000,398.656589)}
{pt3dadd(177564.000000,107076.000000,85650.000000,381.323691)}
{pt3dadd(177216.000000,106932.000000,85450.000000,363.990794)}
{pt3dadd(176820.000000,106728.000000,84950.000000,346.657896)}
{pt3dadd(176460.000000,106476.000000,84525.000000,320.177083)}
{pt3dadd(176136.000000,106188.000000,84050.000000,293.696271)}
{pt3dadd(175860.000000,105876.000000,83875.000000,267.215459)}
{pt3dadd(175500.000000,105528.000000,83575.000000,240.734646)}
{pt3dadd(175296.000000,105120.000000,83100.000000,240.734646)}

{create adhoc103}
{access adhoc103}
{connect adhoc103(1), adhoc102(0)}
{nseg = 1}
{strdef color color = "White"}
{pt3dclear()}
{pt3dadd(175296.000000,105120.000000,83100.000000,240.734646)}
{pt3dadd(175404.000000,104904.000000,82525.000000,240.734646)}
{pt3dadd(175752.000000,104880.000000,82125.000000,240.734646)}
{pt3dadd(175752.000000,104904.000000,81700.000000,240.734646)}
{pt3dadd(175716.000000,104772.000000,81425.000000,200.612214)}

{create adhoc104}
{access adhoc104}
{connect adhoc104(1), adhoc102(0)}
{nseg = 1}
{strdef color color = "White"}
{pt3dclear()}
{pt3dadd(175296.000000,105120.000000,83100.000000,240.734646)}
{pt3dadd(174852.000000,104988.000000,83125.000000,240.734646)}
{pt3dadd(174468.000000,104556.000000,82900.000000,263.748884)}
{pt3dadd(174144.000000,104304.000000,82675.000000,286.763121)}
{pt3dadd(173820.000000,104088.000000,82450.000000,309.777359)}
{pt3dadd(173604.000000,103656.000000,81875.000000,332.791596)}
{pt3dadd(173520.000000,103032.000000,81200.000000,240.734646)}
{pt3dadd(173520.000000,102828.000000,80675.000000,116.095032)}
