# Supplementary material for: Full reconstruction of large lobula plate tangential cells in Drosophila from a 3D EM dataset
Source: PLoS One. 2018 Nov 28;13(11):e0207828. doi: 10.1371/journal.pone.0207828 (PMC6261601; doi:10.1371/journal.pone.0207828)
Supplement: S1 Dataset — (ZIP) [file pone.0207828.s001.zip › Diameter hoc/VS_VSL_preliminary/VS1_5skels_ck.001_completed.hoc0007.hoc]

/* created with convertKnossosNmlToHoc.m */

{create adhoc1}
{access adhoc1}
{nseg = 1}
{strdef color color = "White"}
{pt3dclear()}
{pt3dadd(184380.000000,204396.000000,74875.000000,13.374147)}
{pt3dadd(184608.000000,204036.000000,74875.000000,8.524488)}
{pt3dadd(185040.000000,203604.000000,74875.000000,9.266447)}
{pt3dadd(185448.000000,203172.000000,74875.000000,36.975776)}
{pt3dadd(185976.000000,202308.000000,74875.000000,57.559854)}
{pt3dadd(188580.000000,200952.000000,74875.000000,151.920790)}

{create adhoc2}
{access adhoc2}
{connect adhoc2(1), adhoc1(0)}
{nseg = 1}
{strdef color color = "White"}
{pt3dclear()}
{pt3dadd(188580.000000,200952.000000,74875.000000,151.920790)}
{pt3dadd(188604.000000,200808.000000,74375.000000,98.838357)}
{pt3dadd(188220.000000,200952.000000,73925.000000,87.077116)}
{pt3dadd(187932.000000,200940.000000,73475.000000,80.542004)}
{pt3dadd(187704.000000,200904.000000,72950.000000,86.038580)}
{pt3dadd(187368.000000,200832.000000,72375.000000,119.245230)}

{create adhoc3}
{access adhoc3}
{connect adhoc3(1), adhoc2(0)}
{nseg = 1}
{strdef color color = "White"}
{pt3dclear()}
{pt3dadd(187368.000000,200832.000000,72375.000000,119.245230)}
{pt3dadd(187548.000000,200448.000000,71675.000000,79.996820)}
{pt3dadd(187620.000000,200004.000000,71125.000000,71.193177)}
{pt3dadd(187584.000000,199560.000000,70300.000000,69.323413)}
{pt3dadd(187440.000000,198960.000000,69600.000000,75.290612)}
{pt3dadd(187164.000000,198216.000000,68925.000000,109.896410)}

{create adhoc4}
{access adhoc4}
{connect adhoc4(1), adhoc3(0)}
{nseg = 1}
{strdef color color = "White"}
{pt3dclear()}
{pt3dadd(187164.000000,198216.000000,68925.000000,109.896410)}
{pt3dadd(187044.000000,198048.000000,68425.000000,76.880547)}
{pt3dadd(186888.000000,197796.000000,67800.000000,46.728328)}
{pt3dadd(186864.000000,197532.000000,67275.000000,53.367902)}
{pt3dadd(186900.000000,197424.000000,66675.000000,29.818856)}
{pt3dadd(186720.000000,197376.000000,66225.000000,29.818856)}
{pt3dadd(186576.000000,196920.000000,65700.000000,29.818856)}
{pt3dadd(186612.000000,196692.000000,65200.000000,53.367902)}
{pt3dadd(186612.000000,196344.000000,64725.000000,25.049046)}
{pt3dadd(186828.000000,195468.000000,62750.000000,25.049046)}
{pt3dadd(186768.000000,195312.000000,62225.000000,25.049046)}
{pt3dadd(186552.000000,194892.000000,61400.000000,53.367902)}
{pt3dadd(186432.000000,194484.000000,60525.000000,29.818856)}
{pt3dadd(186468.000000,194184.000000,59750.000000,29.818856)}
{pt3dadd(186528.000000,194076.000000,58975.000000,29.818856)}
{pt3dadd(185784.000000,194412.000000,58200.000000,43.320388)}
{pt3dadd(185328.000000,194400.000000,57425.000000,15.001532)}
{pt3dadd(184908.000000,194184.000000,56725.000000,24.285930)}
{pt3dadd(184164.000000,194688.000000,56100.000000,33.186952)}
{pt3dadd(183708.000000,194652.000000,55450.000000,31.809033)}
{pt3dadd(183876.000000,193524.000000,54825.000000,46.005108)}

{create adhoc5}
{access adhoc5}
{connect adhoc5(1), adhoc4(0)}
{nseg = 1}
{strdef color color = "White"}
{pt3dclear()}
{pt3dadd(183876.000000,193524.000000,54825.000000,46.005108)}
{pt3dadd(184608.000000,192096.000000,54150.000000,42.333978)}
{pt3dadd(184536.000000,191460.000000,53575.000000,26.000387)}
{pt3dadd(184488.000000,190788.000000,53050.000000,33.361203)}
{pt3dadd(184548.000000,190224.000000,52575.000000,17.761838)}
{pt3dadd(184596.000000,189708.000000,52175.000000,17.761838)}
{pt3dadd(184560.000000,189408.000000,51650.000000,17.761838)}
{pt3dadd(184644.000000,188676.000000,51225.000000,36.541074)}
{pt3dadd(184704.000000,187980.000000,50825.000000,20.279236)}
{pt3dadd(184776.000000,187800.000000,50350.000000,20.279236)}
{pt3dadd(184944.000000,187524.000000,50150.000000,20.279236)}
{pt3dadd(185040.000000,187224.000000,49900.000000,35.878600)}
{pt3dadd(185148.000000,187032.000000,49750.000000,17.099364)}
{pt3dadd(185184.000000,186516.000000,49625.000000,17.099364)}
{pt3dadd(185364.000000,186012.000000,49500.000000,17.099364)}
{pt3dadd(185532.000000,185388.000000,49250.000000,30.600896)}
{pt3dadd(185412.000000,184872.000000,48925.000000,27.951002)}
{pt3dadd(185400.000000,184332.000000,48775.000000,43.550366)}
{pt3dadd(185316.000000,183852.000000,48725.000000,71.583943)}
{pt3dadd(185244.000000,183408.000000,48825.000000,79.496820)}

{create adhoc6}
{access adhoc6}
{connect adhoc6(1), adhoc5(0)}
{nseg = 1}
{strdef color color = "White"}
{pt3dclear()}
{pt3dadd(185244.000000,183408.000000,48825.000000,79.496820)}
{pt3dadd(185496.000000,182892.000000,48725.000000,58.797667)}
{pt3dadd(185484.000000,182364.000000,48450.000000,55.452805)}
{pt3dadd(185652.000000,181860.000000,48125.000000,55.452805)}
{pt3dadd(185748.000000,181368.000000,47600.000000,60.122615)}
{pt3dadd(186084.000000,180972.000000,46800.000000,79.496820)}

{create adhoc7}
{access adhoc7}
{connect adhoc7(1), adhoc6(0)}
{nseg = 1}
{strdef color color = "White"}
{pt3dclear()}
{pt3dadd(186084.000000,180972.000000,46800.000000,79.496820)}
{pt3dadd(186192.000000,180672.000000,46525.000000,51.420363)}
{pt3dadd(186324.000000,180444.000000,46250.000000,31.452218)}
{pt3dadd(186432.000000,180168.000000,45675.000000,39.401900)}
{pt3dadd(186600.000000,179844.000000,45200.000000,41.310884)}
{pt3dadd(186684.000000,179556.000000,45000.000000,67.851473)}
{pt3dadd(186756.000000,179280.000000,44950.000000,82.809190)}

{create adhoc8}
{access adhoc8}
{connect adhoc8(1), adhoc7(0)}
{nseg = 1}
{strdef color color = "White"}
{pt3dclear()}
{pt3dadd(186756.000000,179280.000000,44950.000000,82.809190)}
{pt3dadd(186756.000000,179148.000000,45050.000000,82.809190)}

{create adhoc9}
{access adhoc9}
{connect adhoc9(1), adhoc8(0)}
{nseg = 1}
{strdef color color = "White"}
{pt3dclear()}
{pt3dadd(186756.000000,179148.000000,45050.000000,82.809190)}
{pt3dadd(187128.000000,178824.000000,45525.000000,80.600943)}
{pt3dadd(187296.000000,178632.000000,45525.000000,79.496822)}
{pt3dadd(187464.000000,178536.000000,45425.000000,79.496826)}

{create adhoc10}
{access adhoc10}
{connect adhoc10(1), adhoc9(0)}
{nseg = 1}
{strdef color color = "White"}
{pt3dclear()}
{pt3dadd(187464.000000,178536.000000,45425.000000,79.496826)}
{pt3dadd(187680.000000,178308.000000,45325.000000,50.001495)}
{pt3dadd(187752.000000,178068.000000,45250.000000,30.600897)}
{pt3dadd(187776.000000,177792.000000,45000.000000,28.503064)}
{pt3dadd(187800.000000,177600.000000,45000.000000,15.001532)}
{pt3dadd(187932.000000,177360.000000,45000.000000,15.001532)}
{pt3dadd(188100.000000,177144.000000,44875.000000,15.001532)}
{pt3dadd(188088.000000,176928.000000,44725.000000,30.600897)}
{pt3dadd(188112.000000,176748.000000,44600.000000,17.099365)}
{pt3dadd(188184.000000,176568.000000,44525.000000,17.099365)}
{pt3dadd(188328.000000,176376.000000,44500.000000,17.099365)}
{pt3dadd(188496.000000,176196.000000,44525.000000,33.361203)}
{pt3dadd(188520.000000,176004.000000,44525.000000,17.761838)}
{pt3dadd(188520.000000,175632.000000,44575.000000,17.761838)}
{pt3dadd(188484.000000,175260.000000,44425.000000,17.761838)}
{pt3dadd(188256.000000,174996.000000,44225.000000,32.725228)}
{pt3dadd(188400.000000,174768.000000,44100.000000,16.463390)}
{pt3dadd(188436.000000,174504.000000,43950.000000,29.964922)}
{pt3dadd(188472.000000,174288.000000,43775.000000,42.914392)}
{pt3dadd(188472.000000,173736.000000,43725.000000,45.585003)}
{pt3dadd(188472.000000,173628.000000,43725.000000,66.247350)}

{create adhoc11}
{access adhoc11}
{connect adhoc11(1), adhoc10(0)}
{nseg = 1}
{strdef color color = "White"}
{pt3dclear()}
{pt3dadd(188472.000000,173628.000000,43725.000000,66.247350)}
{pt3dadd(188832.000000,173388.000000,43750.000000,45.585003)}
{pt3dadd(188928.000000,173160.000000,43775.000000,27.951002)}
{pt3dadd(189024.000000,172932.000000,43800.000000,28.503064)}
{pt3dadd(189120.000000,172764.000000,43825.000000,15.001532)}
{pt3dadd(189216.000000,172560.000000,43850.000000,15.001532)}
{pt3dadd(189516.000000,172356.000000,43825.000000,15.001532)}
{pt3dadd(189324.000000,172140.000000,43775.000000,26.202809)}
{pt3dadd(189432.000000,171828.000000,43775.000000,12.701277)}
{pt3dadd(189672.000000,171180.000000,43800.000000,12.701277)}
{pt3dadd(189888.000000,170676.000000,43750.000000,12.701277)}
{pt3dadd(190320.000000,170136.000000,43600.000000,23.902554)}
{pt3dadd(190272.000000,169872.000000,43350.000000,12.701277)}
{pt3dadd(190260.000000,169632.000000,43250.000000,12.701277)}
{pt3dadd(190224.000000,169344.000000,43175.000000,12.701277)}
{pt3dadd(190176.000000,169092.000000,43200.000000,23.902554)}
{pt3dadd(190128.000000,168924.000000,43225.000000,12.701277)}
{pt3dadd(190236.000000,168780.000000,43250.000000,12.701277)}
{pt3dadd(190236.000000,168588.000000,43225.000000,12.701277)}
{pt3dadd(190044.000000,168384.000000,43150.000000,23.902554)}
{pt3dadd(189792.000000,168156.000000,43100.000000,12.701277)}
{pt3dadd(189864.000000,167724.000000,42975.000000,12.701277)}
{pt3dadd(190104.000000,167256.000000,42875.000000,12.701277)}
{pt3dadd(190200.000000,167028.000000,42700.000000,23.902554)}
{pt3dadd(190236.000000,166836.000000,42600.000000,12.701277)}
{pt3dadd(190164.000000,166572.000000,42600.000000,12.701277)}
{pt3dadd(190056.000000,166380.000000,42550.000000,12.701277)}
{pt3dadd(189972.000000,166176.000000,42500.000000,23.442503)}
{pt3dadd(189888.000000,166008.000000,42450.000000,21.525623)}
{pt3dadd(189852.000000,165780.000000,42625.000000,34.876039)}
{pt3dadd(189948.000000,165564.000000,42750.000000,47.921990)}

{create adhoc12}
{access adhoc12}
{connect adhoc12(1), adhoc11(0)}
{nseg = 1}
{strdef color color = "White"}
{pt3dclear()}
{pt3dadd(189948.000000,165564.000000,42750.000000,47.921990)}
{pt3dadd(190308.000000,165372.000000,42850.000000,31.809033)}
{pt3dadd(190440.000000,165180.000000,42900.000000,19.685420)}
{pt3dadd(190572.000000,165000.000000,42950.000000,18.088020)}
{pt3dadd(190596.000000,164796.000000,42975.000000,9.186998)}
{pt3dadd(190668.000000,164604.000000,43000.000000,9.186998)}
{pt3dadd(190740.000000,164400.000000,43025.000000,9.186998)}
{pt3dadd(190812.000000,164208.000000,43050.000000,13.998677)}
{pt3dadd(190800.000000,163980.000000,43025.000000,6.311679)}
{pt3dadd(190788.000000,163800.000000,43000.000000,6.311679)}
{pt3dadd(190824.000000,163596.000000,43000.000000,6.311679)}
{pt3dadd(190896.000000,163272.000000,42975.000000,12.401277)}
{pt3dadd(190932.000000,162996.000000,43050.000000,7.589598)}
{pt3dadd(191148.000000,162804.000000,43150.000000,7.589598)}
{pt3dadd(191256.000000,162588.000000,43175.000000,7.589598)}
{pt3dadd(191316.000000,162420.000000,43200.000000,13.679197)}
{pt3dadd(191376.000000,162168.000000,43200.000000,7.589598)}
{pt3dadd(191580.000000,161928.000000,43225.000000,7.589598)}
{pt3dadd(191688.000000,161640.000000,43250.000000,7.589598)}
{pt3dadd(191724.000000,161412.000000,43250.000000,15.276596)}
{pt3dadd(191748.000000,161184.000000,43275.000000,9.186998)}
{pt3dadd(191772.000000,160992.000000,43300.000000,9.186998)}
{pt3dadd(191760.000000,160800.000000,43300.000000,9.186998)}
{pt3dadd(191712.000000,160632.000000,43300.000000,16.554517)}
{pt3dadd(191712.000000,160380.000000,43325.000000,8.867519)}
{pt3dadd(191808.000000,160104.000000,43300.000000,8.867519)}
{pt3dadd(191904.000000,159864.000000,43375.000000,8.867519)}
{pt3dadd(191868.000000,159696.000000,43400.000000,16.554517)}
{pt3dadd(191868.000000,159468.000000,43400.000000,9.186998)}
{pt3dadd(191868.000000,159276.000000,43400.000000,9.186998)}
{pt3dadd(191868.000000,159096.000000,43400.000000,9.186998)}
{pt3dadd(191892.000000,158916.000000,43425.000000,16.247816)}
{pt3dadd(191916.000000,158748.000000,43450.000000,8.560818)}
{pt3dadd(191832.000000,158568.000000,43475.000000,8.560818)}
{pt3dadd(191856.000000,158376.000000,43475.000000,8.560818)}
{pt3dadd(191880.000000,158184.000000,43475.000000,17.461840)}
{pt3dadd(191916.000000,158016.000000,43600.000000,10.401022)}
{pt3dadd(191916.000000,157740.000000,43625.000000,10.401022)}
{pt3dadd(191916.000000,157464.000000,43650.000000,10.401022)}
{pt3dadd(191952.000000,157236.000000,43750.000000,19.685420)}
{pt3dadd(192132.000000,156996.000000,43850.000000,10.784398)}
{pt3dadd(192156.000000,156792.000000,43875.000000,10.784398)}
{pt3dadd(192228.000000,156612.000000,43900.000000,10.784398)}
{pt3dadd(192216.000000,156336.000000,43925.000000,21.985675)}
{pt3dadd(192036.000000,156096.000000,43725.000000,21.985675)}
{pt3dadd(191928.000000,155832.000000,43625.000000,35.642792)}
{pt3dadd(191820.000000,155700.000000,43525.000000,47.921990)}

{create adhoc13}
{access adhoc13}
{connect adhoc13(1), adhoc12(0)}
{nseg = 1}
{strdef color color = "White"}
{pt3dclear()}
{pt3dadd(191820.000000,155700.000000,43525.000000,47.921990)}
{pt3dadd(192300.000000,155520.000000,44050.000000,34.876040)}
{pt3dadd(192252.000000,155340.000000,44150.000000,21.525624)}
{pt3dadd(192216.000000,155124.000000,44175.000000,21.525624)}
{pt3dadd(192288.000000,154944.000000,44250.000000,10.784398)}
{pt3dadd(192360.000000,154752.000000,44325.000000,10.784398)}
{pt3dadd(192288.000000,154524.000000,44375.000000,10.784398)}
{pt3dadd(192360.000000,154332.000000,44450.000000,21.985675)}
{pt3dadd(192384.000000,154140.000000,44525.000000,12.701277)}
{pt3dadd(192372.000000,153960.000000,44675.000000,12.701277)}
{pt3dadd(192360.000000,153732.000000,44700.000000,12.701277)}
{pt3dadd(192396.000000,153516.000000,44775.000000,23.000854)}
{pt3dadd(192396.000000,153324.000000,44800.000000,11.799577)}
{pt3dadd(192348.000000,153084.000000,44750.000000,22.540803)}
{pt3dadd(192384.000000,152868.000000,44775.000000,33.742080)}
{pt3dadd(192456.000000,152688.000000,44875.000000,38.070839)}
{pt3dadd(192528.000000,152616.000000,44975.000000,57.506386)}

{create adhoc14}
{access adhoc14}
{connect adhoc14(1), adhoc13(0)}
{nseg = 1}
{strdef color color = "White"}
{pt3dclear()}
{pt3dadd(192528.000000,152616.000000,44975.000000,57.506386)}
{pt3dadd(192588.000000,152424.000000,44850.000000,38.070839)}
{pt3dadd(192648.000000,152160.000000,44875.000000,23.442503)}
{pt3dadd(192672.000000,151884.000000,44950.000000,22.982451)}
{pt3dadd(192768.000000,151632.000000,45050.000000,12.241225)}
{pt3dadd(192840.000000,151392.000000,45075.000000,12.241225)}
{pt3dadd(192900.000000,151140.000000,45100.000000,12.241225)}
{pt3dadd(192960.000000,150960.000000,45125.000000,23.442503)}
{pt3dadd(192984.000000,150756.000000,45150.000000,12.701277)}
{pt3dadd(193020.000000,150540.000000,45300.000000,12.701277)}
{pt3dadd(193056.000000,150372.000000,45500.000000,12.701277)}
{pt3dadd(193092.000000,150216.000000,45700.000000,23.902554)}
{pt3dadd(193200.000000,150012.000000,45900.000000,12.701277)}
{pt3dadd(193188.000000,149808.000000,45925.000000,12.701277)}
{pt3dadd(193260.000000,149616.000000,45975.000000,12.701277)}
{pt3dadd(193320.000000,149424.000000,46025.000000,23.442503)}
{pt3dadd(193344.000000,149244.000000,46050.000000,12.241225)}
{pt3dadd(193368.000000,149052.000000,46075.000000,12.241225)}
{pt3dadd(193368.000000,148884.000000,46125.000000,12.241225)}
{pt3dadd(193368.000000,148716.000000,46175.000000,23.442503)}
{pt3dadd(193368.000000,148560.000000,46225.000000,12.701277)}
{pt3dadd(193368.000000,148380.000000,46275.000000,12.701277)}
{pt3dadd(193296.000000,148200.000000,46275.000000,12.701277)}
{pt3dadd(193296.000000,147924.000000,46300.000000,21.985675)}
{pt3dadd(193296.000000,147696.000000,46325.000000,10.784398)}
{pt3dadd(193356.000000,147444.000000,46300.000000,10.784398)}
{pt3dadd(193344.000000,147216.000000,46275.000000,10.784398)}
{pt3dadd(193380.000000,147024.000000,46250.000000,20.068796)}
{pt3dadd(193452.000000,146868.000000,46275.000000,10.784398)}
{pt3dadd(193560.000000,146688.000000,46325.000000,10.784398)}
{pt3dadd(193596.000000,146520.000000,46325.000000,10.784398)}
{pt3dadd(193632.000000,146328.000000,46325.000000,19.685420)}
{pt3dadd(193668.000000,146136.000000,46325.000000,10.401022)}
{pt3dadd(193704.000000,145920.000000,46325.000000,10.401022)}
{pt3dadd(193740.000000,145656.000000,46325.000000,10.401022)}
{pt3dadd(193728.000000,145464.000000,46275.000000,19.685420)}
{pt3dadd(193728.000000,145284.000000,46200.000000,10.784398)}
{pt3dadd(193692.000000,145068.000000,46150.000000,10.784398)}
{pt3dadd(193752.000000,144792.000000,46125.000000,10.784398)}
{pt3dadd(193776.000000,144564.000000,46100.000000,19.685420)}
{pt3dadd(193800.000000,144276.000000,46075.000000,10.401022)}
{pt3dadd(193728.000000,144120.000000,46075.000000,10.401022)}
{pt3dadd(193512.000000,143976.000000,46075.000000,10.401022)}
{pt3dadd(193332.000000,143784.000000,46025.000000,1.500000)}
{pt3dadd(193224.000000,143580.000000,46000.000000,1.500000)}

{create adhoc15}
{access adhoc15}
{connect adhoc15(1), adhoc14(0)}
{nseg = 1}
{strdef color color = "White"}
{pt3dclear()}
{pt3dadd(193224.000000,143580.000000,46000.000000,1.500000)}
{pt3dadd(193464.000000,143388.000000,46025.000000,20.168795)}
{pt3dadd(193572.000000,143172.000000,45975.000000,12.701277)}
{pt3dadd(193668.000000,142944.000000,45950.000000,25.120768)}
{pt3dadd(193764.000000,142752.000000,45925.000000,13.919491)}
{pt3dadd(193656.000000,142476.000000,45900.000000,28.272346)}
{pt3dadd(193548.000000,142248.000000,45875.000000,39.473623)}
{pt3dadd(193440.000000,142008.000000,45925.000000,44.090220)}
{pt3dadd(193428.000000,141852.000000,46300.000000,57.506386)}

{create adhoc16}
{access adhoc16}
{connect adhoc16(1), adhoc15(0)}
{nseg = 1}
{strdef color color = "White"}
{pt3dclear()}
{pt3dadd(193428.000000,141852.000000,46300.000000,57.506386)}
{pt3dadd(193764.000000,141684.000000,46750.000000,35.642792)}
{pt3dadd(193620.000000,141444.000000,47025.000000,21.985675)}
{pt3dadd(193572.000000,141264.000000,47050.000000,18.151917)}
{pt3dadd(193608.000000,141048.000000,47075.000000,8.867519)}
{pt3dadd(193572.000000,140868.000000,47250.000000,8.867519)}
{pt3dadd(193524.000000,140688.000000,47350.000000,8.867519)}
{pt3dadd(193584.000000,140484.000000,47400.000000,16.554517)}
{pt3dadd(193572.000000,140256.000000,47450.000000,9.186998)}
{pt3dadd(193560.000000,140052.000000,47500.000000,9.186998)}
{pt3dadd(193560.000000,139872.000000,47675.000000,9.186998)}
{pt3dadd(193560.000000,139704.000000,47725.000000,16.873996)}
{pt3dadd(193584.000000,139524.000000,47775.000000,9.186998)}
{pt3dadd(193512.000000,139272.000000,47850.000000,9.186998)}
{pt3dadd(193572.000000,139044.000000,47975.000000,9.186998)}
{pt3dadd(193572.000000,138816.000000,48075.000000,18.088020)}
{pt3dadd(193644.000000,138636.000000,48100.000000,10.401022)}
{pt3dadd(193644.000000,138408.000000,48075.000000,10.401022)}
{pt3dadd(193644.000000,138228.000000,48075.000000,10.401022)}
{pt3dadd(193644.000000,138036.000000,48075.000000,19.302043)}
{pt3dadd(193644.000000,137832.000000,48075.000000,10.401022)}
{pt3dadd(193644.000000,137616.000000,48150.000000,10.401022)}
{pt3dadd(193632.000000,137424.000000,48225.000000,10.401022)}
{pt3dadd(193620.000000,137232.000000,48300.000000,19.685420)}
{pt3dadd(193608.000000,137040.000000,48375.000000,10.784398)}
{pt3dadd(193572.000000,136848.000000,48350.000000,10.784398)}
{pt3dadd(193536.000000,136644.000000,48325.000000,19.685420)}
{pt3dadd(193572.000000,136392.000000,48325.000000,28.969818)}
{pt3dadd(193536.000000,136152.000000,48325.000000,31.809033)}
{pt3dadd(193500.000000,135936.000000,48375.000000,47.921990)}

{create adhoc17}
{access adhoc17}
{connect adhoc17(1), adhoc16(0)}
{nseg = 1}
{strdef color color = "White"}
{pt3dclear()}
{pt3dadd(193500.000000,135936.000000,48375.000000,47.921990)}
{pt3dadd(193416.000000,135756.000000,48625.000000,32.447993)}
{pt3dadd(193428.000000,135588.000000,48725.000000,20.068796)}
{pt3dadd(193464.000000,135384.000000,48900.000000,18.471396)}
{pt3dadd(193500.000000,135204.000000,49075.000000,9.186998)}
{pt3dadd(193536.000000,135036.000000,49275.000000,9.186998)}
{pt3dadd(193488.000000,134904.000000,49300.000000,9.186998)}
{pt3dadd(193440.000000,134784.000000,49250.000000,16.873996)}
{pt3dadd(193356.000000,134640.000000,49200.000000,9.186998)}
{pt3dadd(193248.000000,134508.000000,49250.000000,9.186998)}
{pt3dadd(193140.000000,134388.000000,49250.000000,9.186998)}
{pt3dadd(193032.000000,134244.000000,49250.000000,18.471396)}
{pt3dadd(192984.000000,134100.000000,49275.000000,10.784398)}
{pt3dadd(193056.000000,133980.000000,49300.000000,10.784398)}
{pt3dadd(193092.000000,133848.000000,49425.000000,10.784398)}
{pt3dadd(193080.000000,133716.000000,49575.000000,21.985675)}
{pt3dadd(192924.000000,133536.000000,49600.000000,21.602299)}
{pt3dadd(192840.000000,133308.000000,49575.000000,28.969817)}
{pt3dadd(192768.000000,133116.000000,49600.000000,47.283029)}
{pt3dadd(192876.000000,132924.000000,49850.000000,38.337593)}

{create adhoc18}
{access adhoc18}
{connect adhoc18(1), adhoc17(0)}
{nseg = 1}
{strdef color color = "White"}
{pt3dclear()}
{pt3dadd(192876.000000,132924.000000,49850.000000,38.337593)}
{pt3dadd(193032.000000,132780.000000,50150.000000,36.804090)}

{create adhoc19}
{access adhoc19}
{connect adhoc19(1), adhoc18(0)}
{nseg = 1}
{strdef color color = "White"}
{pt3dclear()}
{pt3dadd(193032.000000,132780.000000,50150.000000,36.804090)}
{pt3dadd(193164.000000,132612.000000,50225.000000,23.861083)}
{pt3dadd(193164.000000,132408.000000,50300.000000,14.916650)}
{pt3dadd(193164.000000,132264.000000,50375.000000,17.140230)}
{pt3dadd(193236.000000,132060.000000,50475.000000,10.784398)}
{pt3dadd(193332.000000,131856.000000,50600.000000,10.784398)}
{pt3dadd(193368.000000,131676.000000,50725.000000,10.784398)}
{pt3dadd(193368.000000,131484.000000,50775.000000,21.985675)}
{pt3dadd(193356.000000,131292.000000,50875.000000,12.701277)}
{pt3dadd(193320.000000,131088.000000,51000.000000,12.701277)}
{pt3dadd(193284.000000,130836.000000,51025.000000,26.202809)}
{pt3dadd(193284.000000,130644.000000,51050.000000,39.704341)}
{pt3dadd(193236.000000,130404.000000,51100.000000,46.505107)}
{pt3dadd(193200.000000,130212.000000,51400.000000,69.007660)}

{create adhoc20}
{access adhoc20}
{connect adhoc20(1), adhoc19(0)}
{nseg = 1}
{strdef color color = "White"}
{pt3dclear()}
{pt3dadd(193200.000000,130212.000000,51400.000000,69.007660)}
{pt3dadd(193332.000000,130044.000000,52400.000000,41.904596)}
{pt3dadd(193212.000000,129900.000000,53025.000000,25.742757)}
{pt3dadd(193092.000000,129708.000000,53300.000000,22.540802)}
{pt3dadd(192972.000000,129504.000000,53550.000000,11.799577)}
{pt3dadd(192744.000000,129288.000000,53700.000000,11.799577)}
{pt3dadd(192696.000000,129108.000000,53850.000000,11.799577)}
{pt3dadd(192648.000000,128952.000000,54150.000000,21.083975)}
{pt3dadd(192636.000000,128736.000000,54450.000000,10.784398)}
{pt3dadd(192528.000000,128616.000000,54750.000000,10.784398)}
{pt3dadd(192360.000000,128280.000000,55025.000000,10.784398)}
{pt3dadd(192000.000000,127860.000000,55350.000000,18.151916)}
{pt3dadd(191856.000000,127404.000000,55725.000000,8.867518)}
{pt3dadd(191820.000000,127104.000000,56100.000000,8.867518)}
{pt3dadd(191652.000000,126792.000000,56400.000000,8.867518)}
{pt3dadd(191556.000000,126300.000000,56700.000000,15.223350)}
{pt3dadd(191592.000000,126120.000000,56650.000000,7.855832)}
{pt3dadd(191544.000000,125952.000000,56825.000000,7.855832)}
{pt3dadd(191496.000000,125760.000000,56925.000000,7.855832)}
{pt3dadd(191424.000000,125532.000000,57025.000000,13.945430)}
{pt3dadd(191412.000000,125316.000000,57100.000000,7.589598)}
{pt3dadd(191376.000000,125124.000000,57200.000000,7.589598)}
{pt3dadd(191376.000000,124944.000000,57425.000000,7.589598)}
{pt3dadd(191364.000000,124752.000000,57600.000000,14.957117)}
{pt3dadd(191352.000000,124560.000000,57775.000000,8.867519)}
{pt3dadd(191280.000000,124356.000000,57950.000000,8.867519)}
{pt3dadd(191376.000000,124152.000000,58200.000000,8.867519)}
{pt3dadd(191508.000000,123888.000000,58400.000000,16.235037)}
{pt3dadd(191496.000000,123648.000000,58500.000000,8.867519)}
{pt3dadd(191460.000000,123420.000000,58625.000000,8.867519)}
{pt3dadd(191460.000000,123216.000000,58800.000000,8.867519)}
{pt3dadd(191496.000000,123024.000000,58925.000000,16.554517)}
{pt3dadd(191532.000000,122808.000000,59100.000000,9.186998)}
{pt3dadd(191604.000000,122580.000000,59475.000000,9.186998)}
{pt3dadd(191604.000000,122376.000000,59725.000000,9.186998)}
{pt3dadd(191604.000000,122196.000000,59875.000000,18.471396)}
{pt3dadd(191604.000000,122016.000000,60025.000000,10.784398)}
{pt3dadd(191604.000000,121764.000000,60175.000000,10.784398)}
{pt3dadd(191664.000000,121584.000000,60350.000000,10.784398)}
{pt3dadd(191724.000000,121380.000000,60525.000000,18.471396)}
{pt3dadd(191748.000000,121188.000000,60700.000000,9.186998)}
{pt3dadd(191700.000000,120948.000000,60725.000000,9.186998)}
{pt3dadd(191616.000000,120768.000000,60900.000000,9.186998)}
{pt3dadd(191508.000000,120552.000000,61150.000000,18.471396)}
{pt3dadd(191328.000000,120336.000000,61425.000000,10.784398)}
{pt3dadd(191220.000000,120060.000000,61525.000000,10.784398)}
{pt3dadd(191112.000000,119820.000000,61625.000000,10.784398)}
{pt3dadd(190992.000000,119640.000000,61750.000000,20.068796)}
{pt3dadd(190884.000000,119436.000000,61850.000000,20.068796)}
{pt3dadd(190848.000000,119244.000000,61850.000000,32.447993)}
{pt3dadd(190800.000000,119064.000000,61800.000000,47.921990)}

{create adhoc21}
{access adhoc21}
{connect adhoc21(1), adhoc20(0)}
{nseg = 1}
{strdef color color = "White"}
{pt3dclear()}
{pt3dadd(190800.000000,119064.000000,61800.000000,47.921990)}
{pt3dadd(190284.000000,118860.000000,61325.000000,25.718207)}
{pt3dadd(190104.000000,118668.000000,61375.000000,16.030924)}
{pt3dadd(189852.000000,118464.000000,61350.000000,11.993053)}
{pt3dadd(189816.000000,118272.000000,61375.000000,6.746526)}
{pt3dadd(189600.000000,118104.000000,61375.000000,6.746526)}
{pt3dadd(189552.000000,117924.000000,61325.000000,6.746526)}
{pt3dadd(189396.000000,117732.000000,61275.000000,11.068632)}
{pt3dadd(189216.000000,117540.000000,61250.000000,5.822105)}
{pt3dadd(189072.000000,117336.000000,61200.000000,5.822105)}
{pt3dadd(188844.000000,117120.000000,61175.000000,12.177937)}
{pt3dadd(188628.000000,116916.000000,61175.000000,15.729692)}
{pt3dadd(188484.000000,116700.000000,61150.000000,18.012644)}
{pt3dadd(188268.000000,116508.000000,61100.000000,19.258772)}

{create adhoc22}
{access adhoc22}
{connect adhoc22(1), adhoc21(0)}
{nseg = 1}
{strdef color color = "White"}
{pt3dclear()}
{pt3dadd(188268.000000,116508.000000,61100.000000,19.258772)}
{pt3dadd(188232.000000,116316.000000,60825.000000,14.623100)}
{pt3dadd(188016.000000,116076.000000,60575.000000,9.373860)}
{pt3dadd(187716.000000,115812.000000,60425.000000,9.219790)}
{pt3dadd(187152.000000,115536.000000,60225.000000,4.897684)}
{pt3dadd(186900.000000,115332.000000,60200.000000,4.897684)}
{pt3dadd(186720.000000,115296.000000,60200.000000,4.897684)}
{pt3dadd(186492.000000,115248.000000,60225.000000,6.826709)}
{pt3dadd(186240.000000,115092.000000,60150.000000,3.429025)}
{pt3dadd(186048.000000,115092.000000,60175.000000,3.429025)}
{pt3dadd(185832.000000,115080.000000,60225.000000,3.429025)}
{pt3dadd(185640.000000,114984.000000,60175.000000,6.338820)}
{pt3dadd(185436.000000,114924.000000,60075.000000,4.409795)}
{pt3dadd(185232.000000,114972.000000,59975.000000,4.409795)}
{pt3dadd(185040.000000,114876.000000,59875.000000,4.409795)}
{pt3dadd(184548.000000,114660.000000,59975.000000,7.961550)}
{pt3dadd(184404.000000,114648.000000,59700.000000,5.051754)}
{pt3dadd(184236.000000,114576.000000,59625.000000,5.051754)}
{pt3dadd(184092.000000,114540.000000,59600.000000,5.051754)}
{pt3dadd(183888.000000,114600.000000,59525.000000,8.603509)}
{pt3dadd(183672.000000,114564.000000,59500.000000,5.051754)}
{pt3dadd(183480.000000,114492.000000,59500.000000,5.051754)}
{pt3dadd(183276.000000,114552.000000,59475.000000,5.051754)}
{pt3dadd(183108.000000,114552.000000,59550.000000,8.603509)}
{pt3dadd(182964.000000,114552.000000,59575.000000,5.051754)}
{pt3dadd(182232.000000,114624.000000,59575.000000,5.051754)}
{pt3dadd(182016.000000,114516.000000,59400.000000,5.051754)}
{pt3dadd(181800.000000,114504.000000,59300.000000,7.961550)}
{pt3dadd(181632.000000,114504.000000,59225.000000,4.409795)}
{pt3dadd(181416.000000,114492.000000,59250.000000,4.409795)}
{pt3dadd(181248.000000,114480.000000,59275.000000,4.409795)}
{pt3dadd(181104.000000,114468.000000,59300.000000,7.319591)}
{pt3dadd(180888.000000,114480.000000,59225.000000,4.409795)}
{pt3dadd(180696.000000,114492.000000,59150.000000,4.409795)}
{pt3dadd(180516.000000,114492.000000,59125.000000,4.409795)}
{pt3dadd(180336.000000,114492.000000,59100.000000,7.319591)}
{pt3dadd(180180.000000,114432.000000,59075.000000,4.409795)}
{pt3dadd(180096.000000,114372.000000,59050.000000,4.409795)}
{pt3dadd(179832.000000,114384.000000,59025.000000,4.409795)}
{pt3dadd(179640.000000,114396.000000,59000.000000,8.547017)}
{pt3dadd(179460.000000,114324.000000,58925.000000,5.637221)}
{pt3dadd(179280.000000,114288.000000,58850.000000,5.637221)}
{pt3dadd(179100.000000,114216.000000,58775.000000,5.637221)}
{pt3dadd(178896.000000,114180.000000,58775.000000,8.547017)}
{pt3dadd(178704.000000,114156.000000,58625.000000,4.409795)}
{pt3dadd(178488.000000,114156.000000,58600.000000,4.409795)}
{pt3dadd(178332.000000,114156.000000,58525.000000,4.409795)}
{pt3dadd(178128.000000,114144.000000,58450.000000,8.369528)}
{pt3dadd(177900.000000,114132.000000,58375.000000,5.459733)}
{pt3dadd(177696.000000,114120.000000,58300.000000,5.459733)}
{pt3dadd(177504.000000,114144.000000,58275.000000,5.459733)}
{pt3dadd(177336.000000,114192.000000,58250.000000,11.815565)}
{pt3dadd(177204.000000,114240.000000,58275.000000,7.855832)}
{pt3dadd(177036.000000,114300.000000,58200.000000,7.855832)}
{pt3dadd(176844.000000,114396.000000,58200.000000,7.855832)}
{pt3dadd(176676.000000,114492.000000,58200.000000,12.177937)}
{pt3dadd(176484.000000,114648.000000,58175.000000,5.822105)}
{pt3dadd(176280.000000,114744.000000,58250.000000,5.822105)}
{pt3dadd(176136.000000,114900.000000,58300.000000,5.822105)}
{pt3dadd(175956.000000,115284.000000,58375.000000,8.731901)}
{pt3dadd(175776.000000,115488.000000,58425.000000,4.409795)}
{pt3dadd(175644.000000,115764.000000,58475.000000,4.409795)}
{pt3dadd(175452.000000,115908.000000,58525.000000,9.656322)}
{pt3dadd(175308.000000,116148.000000,58700.000000,13.978427)}
{pt3dadd(175140.000000,116340.000000,58900.000000,17.447720)}
{pt3dadd(175104.000000,116532.000000,59000.000000,23.110527)}

{create adhoc23}
{access adhoc23}
{connect adhoc23(1), adhoc22(0)}
{nseg = 1}
{strdef color color = "White"}
{pt3dclear()}
{pt3dadd(175104.000000,116532.000000,59000.000000,23.110527)}
{pt3dadd(175284.000000,116640.000000,59125.000000,11.918550)}
{pt3dadd(175368.000000,116760.000000,59325.000000,11.148814)}
{pt3dadd(175428.000000,116940.000000,59575.000000,10.963931)}
{pt3dadd(175464.000000,117108.000000,59725.000000,14.058177)}
{pt3dadd(175452.000000,117276.000000,59900.000000,22.186108)}

{create adhoc24}
{access adhoc24}
{connect adhoc24(1), adhoc23(0)}
{nseg = 1}
{strdef color color = "White"}
{pt3dclear()}
{pt3dadd(175452.000000,117276.000000,59900.000000,22.186108)}
{pt3dadd(175464.000000,117468.000000,60150.000000,13.245028)}
{pt3dadd(175320.000000,117672.000000,60425.000000,8.547017)}
{pt3dadd(175212.000000,117840.000000,60625.000000,5.967316)}
{pt3dadd(175188.000000,117984.000000,60750.000000,3.057520)}
{pt3dadd(175224.000000,118176.000000,60800.000000,3.057520)}
{pt3dadd(175284.000000,118380.000000,60925.000000,3.057520)}
{pt3dadd(175272.000000,118536.000000,61025.000000,4.986545)}
{pt3dadd(175284.000000,118704.000000,61150.000000,3.429025)}
{pt3dadd(175296.000000,118860.000000,61275.000000,3.429025)}
{pt3dadd(175212.000000,118992.000000,61425.000000,3.429025)}
{pt3dadd(175188.000000,119124.000000,61750.000000,8.675551)}
{pt3dadd(175116.000000,119232.000000,62300.000000,6.746526)}
{pt3dadd(175128.000000,119316.000000,62575.000000,6.746526)}
{pt3dadd(175068.000000,119328.000000,62875.000000,6.746526)}
{pt3dadd(175152.000000,119400.000000,63200.000000,13.102358)}
{pt3dadd(175212.000000,119484.000000,63500.000000,7.855832)}
{pt3dadd(175308.000000,119640.000000,63875.000000,7.855832)}
{pt3dadd(175332.000000,119760.000000,64175.000000,7.855832)}
{pt3dadd(175272.000000,119868.000000,64450.000000,13.945430)}
{pt3dadd(175428.000000,119760.000000,64750.000000,7.589598)}
{pt3dadd(175140.000000,119844.000000,64950.000000,7.589598)}
{pt3dadd(175032.000000,119880.000000,65225.000000,7.589598)}
{pt3dadd(175008.000000,119928.000000,65400.000000,8.579543)}
{pt3dadd(174984.000000,120024.000000,65675.000000,4.418969)}
{pt3dadd(175056.000000,120096.000000,65875.000000,5.976490)}
{pt3dadd(175356.000000,119928.000000,66125.000000,8.960816)}
{pt3dadd(175320.000000,119964.000000,66425.000000,9.287602)}

{create adhoc25}
{access adhoc25}
{connect adhoc25(1), adhoc24(0)}
{nseg = 1}
{strdef color color = "White"}
{pt3dclear()}
{pt3dadd(175320.000000,119964.000000,66425.000000,9.287602)}
{pt3dadd(175116.000000,120132.000000,66650.000000,5.374770)}

{create adhoc26}
{access adhoc26}
{connect adhoc26(1), adhoc24(0)}
{nseg = 1}
{strdef color color = "White"}
{pt3dclear()}
{pt3dadd(175320.000000,119964.000000,66425.000000,9.287602)}
{pt3dadd(174636.000000,119556.000000,66575.000000,5.745775)}
{pt3dadd(174336.000000,119448.000000,66700.000000,5.295399)}
{pt3dadd(174096.000000,119172.000000,66850.000000,4.512833)}
{pt3dadd(173880.000000,119016.000000,66975.000000,4.871480)}
{pt3dadd(173772.000000,119064.000000,66925.000000,5.374770)}

{create adhoc27}
{access adhoc27}
{connect adhoc27(1), adhoc26(0)}
{nseg = 1}
{strdef color color = "White"}
{pt3dclear()}
{pt3dadd(173772.000000,119064.000000,66925.000000,5.374770)}
{pt3dadd(173760.000000,118596.000000,66925.000000,3.784582)}
{pt3dadd(173688.000000,118464.000000,66900.000000,2.870749)}
{pt3dadd(173580.000000,118332.000000,66875.000000,2.870749)}
{pt3dadd(173544.000000,118212.000000,66800.000000,2.274954)}
{pt3dadd(173448.000000,118080.000000,66775.000000,2.274954)}
{pt3dadd(173400.000000,117972.000000,66850.000000,2.274954)}
{pt3dadd(173244.000000,117840.000000,66850.000000,2.721450)}
{pt3dadd(173172.000000,117732.000000,66900.000000,2.721450)}
{pt3dadd(173148.000000,117624.000000,66900.000000,3.496404)}
{pt3dadd(173016.000000,117432.000000,66900.000000,4.827340)}
{pt3dadd(172944.000000,117348.000000,66900.000000,5.374770)}

{create adhoc28}
{access adhoc28}
{connect adhoc28(1), adhoc26(0)}
{nseg = 1}
{strdef color color = "White"}
{pt3dclear()}
{pt3dadd(173772.000000,119064.000000,66925.000000,5.374770)}
{pt3dadd(173832.000000,119496.000000,66925.000000,6.679047)}
{pt3dadd(173880.000000,119604.000000,66925.000000,7.037365)}
{pt3dadd(173856.000000,119724.000000,66925.000000,6.449724)}

{create adhoc29}
{access adhoc29}
{connect adhoc29(1), adhoc23(0)}
{nseg = 1}
{strdef color color = "White"}
{pt3dclear()}
{pt3dadd(175452.000000,117276.000000,59900.000000,22.186108)}
{pt3dadd(175596.000000,117300.000000,59350.000000,9.959281)}
{pt3dadd(175668.000000,117480.000000,59300.000000,6.575569)}
{pt3dadd(175752.000000,117588.000000,59225.000000,3.428292)}
{pt3dadd(175836.000000,117684.000000,59200.000000,2.489945)}
{pt3dadd(175812.000000,117756.000000,59175.000000,3.479890)}
{pt3dadd(175896.000000,117960.000000,59175.000000,4.727823)}
{pt3dadd(175800.000000,118344.000000,59175.000000,5.229798)}
{pt3dadd(175848.000000,118464.000000,59175.000000,7.739669)}

{create adhoc30}
{access adhoc30}
{connect adhoc30(1), adhoc22(0)}
{nseg = 1}
{strdef color color = "White"}
{pt3dclear()}
{pt3dadd(175104.000000,116532.000000,59000.000000,23.110527)}
{pt3dadd(174636.000000,116640.000000,58725.000000,11.918550)}
{pt3dadd(174516.000000,116748.000000,58600.000000,9.680155)}
{pt3dadd(174420.000000,116892.000000,58500.000000,6.915570)}
{pt3dadd(174324.000000,117024.000000,58425.000000,7.310908)}
{pt3dadd(174192.000000,117156.000000,58350.000000,9.287602)}

{create adhoc31}
{access adhoc31}
{connect adhoc31(1), adhoc30(0)}
{nseg = 1}
{strdef color color = "White"}
{pt3dclear()}
{pt3dadd(174192.000000,117156.000000,58350.000000,9.287602)}
{pt3dadd(173952.000000,117264.000000,58250.000000,8.053916)}
{pt3dadd(173844.000000,117360.000000,58200.000000,5.432350)}
{pt3dadd(173748.000000,117492.000000,58125.000000,5.803854)}
{pt3dadd(173652.000000,117576.000000,58050.000000,3.429025)}
{pt3dadd(173544.000000,117744.000000,57925.000000,3.429025)}
{pt3dadd(173628.000000,117852.000000,57725.000000,4.986545)}
{pt3dadd(173748.000000,118008.000000,57550.000000,7.361374)}
{pt3dadd(173724.000000,118092.000000,57250.000000,8.053916)}
{pt3dadd(173436.000000,118476.000000,57075.000000,13.374147)}

{create adhoc32}
{access adhoc32}
{connect adhoc32(1), adhoc30(0)}
{nseg = 1}
{strdef color color = "White"}
{pt3dclear()}
{pt3dadd(174192.000000,117156.000000,58350.000000,9.287602)}
{pt3dadd(174636.000000,117180.000000,58325.000000,9.906776)}
{pt3dadd(174744.000000,117240.000000,58350.000000,8.960816)}
{pt3dadd(174792.000000,117324.000000,58350.000000,6.449724)}

{create adhoc33}
{access adhoc33}
{connect adhoc33(1), adhoc21(0)}
{nseg = 1}
{strdef color color = "White"}
{pt3dclear()}
{pt3dadd(188268.000000,116508.000000,61100.000000,19.258772)}
{pt3dadd(187920.000000,116316.000000,61600.000000,12.269250)}
{pt3dadd(187788.000000,116172.000000,61650.000000,7.961550)}
{pt3dadd(187668.000000,115968.000000,61600.000000,7.961550)}
{pt3dadd(187476.000000,115776.000000,61600.000000,5.051754)}
{pt3dadd(187284.000000,115560.000000,61700.000000,5.051754)}
{pt3dadd(187092.000000,115368.000000,61750.000000,5.051754)}
{pt3dadd(186888.000000,115188.000000,61825.000000,8.603509)}
{pt3dadd(186780.000000,114864.000000,61850.000000,5.051754)}
{pt3dadd(186636.000000,114672.000000,61850.000000,5.051754)}
{pt3dadd(186456.000000,114660.000000,61900.000000,5.051754)}
{pt3dadd(186324.000000,114564.000000,61975.000000,8.603509)}
{pt3dadd(186156.000000,114480.000000,62025.000000,5.051754)}
{pt3dadd(185988.000000,114420.000000,62050.000000,5.051754)}
{pt3dadd(185844.000000,114360.000000,62150.000000,5.051754)}
{pt3dadd(185700.000000,114336.000000,62300.000000,8.603509)}
{pt3dadd(185520.000000,114276.000000,62375.000000,5.051754)}
{pt3dadd(185292.000000,114168.000000,62475.000000,5.051754)}
{pt3dadd(185100.000000,114072.000000,62525.000000,5.051754)}
{pt3dadd(184896.000000,113976.000000,62575.000000,8.449439)}
{pt3dadd(184692.000000,113880.000000,62650.000000,4.897684)}
{pt3dadd(184512.000000,113760.000000,62625.000000,4.897684)}
{pt3dadd(184368.000000,113664.000000,62625.000000,4.897684)}
{pt3dadd(184200.000000,113544.000000,62700.000000,7.807480)}
{pt3dadd(183984.000000,113316.000000,62750.000000,4.409795)}
{pt3dadd(183804.000000,113148.000000,62750.000000,4.409795)}
{pt3dadd(183648.000000,112920.000000,62775.000000,4.409795)}
{pt3dadd(183480.000000,112728.000000,62775.000000,6.784625)}
{pt3dadd(183288.000000,112548.000000,62775.000000,3.874829)}
{pt3dadd(183108.000000,112344.000000,62825.000000,3.874829)}
{pt3dadd(182928.000000,112116.000000,62850.000000,3.874829)}
{pt3dadd(182760.000000,111840.000000,62825.000000,7.426584)}
{pt3dadd(182616.000000,111684.000000,62825.000000,5.051754)}
{pt3dadd(182460.000000,111564.000000,62825.000000,5.051754)}
{pt3dadd(182292.000000,111408.000000,62875.000000,5.051754)}
{pt3dadd(182160.000000,111276.000000,62875.000000,7.961550)}
{pt3dadd(181920.000000,111096.000000,62900.000000,4.409795)}
{pt3dadd(181788.000000,110916.000000,62850.000000,4.409795)}
{pt3dadd(181620.000000,110772.000000,62825.000000,4.409795)}
{pt3dadd(181452.000000,110604.000000,62850.000000,7.807479)}
{pt3dadd(181308.000000,110484.000000,62825.000000,4.897684)}
{pt3dadd(181164.000000,110376.000000,62875.000000,4.897684)}
{pt3dadd(181020.000000,110256.000000,62900.000000,4.897684)}
{pt3dadd(180828.000000,110136.000000,62875.000000,8.295368)}
{pt3dadd(180612.000000,109968.000000,62925.000000,4.897684)}
{pt3dadd(180444.000000,109812.000000,62900.000000,4.897684)}
{pt3dadd(180180.000000,109620.000000,62950.000000,4.897684)}
{pt3dadd(179940.000000,109452.000000,62975.000000,7.807480)}
{pt3dadd(179712.000000,109272.000000,63050.000000,4.409795)}
{pt3dadd(179520.000000,109128.000000,63200.000000,4.409795)}
{pt3dadd(179328.000000,109020.000000,63275.000000,4.409795)}
{pt3dadd(179160.000000,108828.000000,63300.000000,7.961550)}
{pt3dadd(178968.000000,108708.000000,63375.000000,5.051754)}
{pt3dadd(178788.000000,108552.000000,63325.000000,5.051754)}
{pt3dadd(178608.000000,108444.000000,63300.000000,5.051754)}
{pt3dadd(178452.000000,108348.000000,63300.000000,7.833158)}
{pt3dadd(178284.000000,108192.000000,63300.000000,4.281404)}
{pt3dadd(178284.000000,108048.000000,63275.000000,4.281404)}
{pt3dadd(178164.000000,107868.000000,63275.000000,4.281404)}
{pt3dadd(178008.000000,107688.000000,63275.000000,7.679088)}
{pt3dadd(177888.000000,107508.000000,63250.000000,4.897684)}
{pt3dadd(177696.000000,107340.000000,63125.000000,4.897684)}
{pt3dadd(177564.000000,107196.000000,63125.000000,4.897684)}
{pt3dadd(177372.000000,107040.000000,63050.000000,8.147461)}
{pt3dadd(177216.000000,106908.000000,63000.000000,4.749777)}
{pt3dadd(177120.000000,106800.000000,63025.000000,4.749777)}
{pt3dadd(176928.000000,106656.000000,62975.000000,4.749777)}
{pt3dadd(176724.000000,106452.000000,62900.000000,8.301531)}
{pt3dadd(176532.000000,106260.000000,62775.000000,5.051754)}
{pt3dadd(176376.000000,106272.000000,62750.000000,5.051754)}
{pt3dadd(176220.000000,106176.000000,62700.000000,5.051754)}
{pt3dadd(176100.000000,106116.000000,62625.000000,8.603509)}
{pt3dadd(175704.000000,105684.000000,62250.000000,7.833158)}
{pt3dadd(175584.000000,105504.000000,61975.000000,11.384912)}
{pt3dadd(175392.000000,105384.000000,61675.000000,17.974854)}
{pt3dadd(175212.000000,105228.000000,61450.000000,19.258772)}

{create adhoc34}
{access adhoc34}
{connect adhoc34(1), adhoc33(0)}
{nseg = 1}
{strdef color color = "White"}
{pt3dclear()}
{pt3dadd(175212.000000,105228.000000,61450.000000,19.258772)}
{pt3dadd(175236.000000,105108.000000,61200.000000,13.339181)}
{pt3dadd(175212.000000,104952.000000,60925.000000,8.603509)}
{pt3dadd(175140.000000,104784.000000,60675.000000,8.603509)}
{pt3dadd(175068.000000,104652.000000,60350.000000,5.051754)}
{pt3dadd(174972.000000,104592.000000,60025.000000,9.373860)}
{pt3dadd(174912.000000,104520.000000,59800.000000,15.729692)}
{pt3dadd(174828.000000,104484.000000,59525.000000,19.296562)}
{pt3dadd(174768.000000,104472.000000,59225.000000,33.279160)}

{create adhoc35}
{access adhoc35}
{connect adhoc35(1), adhoc34(0)}
{nseg = 1}
{strdef color color = "White"}
{pt3dclear()}
{pt3dadd(174768.000000,104472.000000,59225.000000,33.279160)}
{pt3dadd(174768.000000,103992.000000,58625.000000,16.051102)}
{pt3dadd(174804.000000,103860.000000,58650.000000,10.230661)}
{pt3dadd(174744.000000,103716.000000,58425.000000,6.784625)}
{pt3dadd(174684.000000,103572.000000,58350.000000,4.409795)}
{pt3dadd(174648.000000,103416.000000,58300.000000,4.409795)}
{pt3dadd(174564.000000,103248.000000,58225.000000,4.409795)}
{pt3dadd(174600.000000,103044.000000,57975.000000,6.784625)}
{pt3dadd(174564.000000,102756.000000,57775.000000,3.874829)}
{pt3dadd(174504.000000,102468.000000,57575.000000,3.874829)}
{pt3dadd(174528.000000,102324.000000,57425.000000,4.649783)}
{pt3dadd(174648.000000,102096.000000,57225.000000,5.424737)}
{pt3dadd(174744.000000,101976.000000,57050.000000,4.083180)}
{pt3dadd(174864.000000,101928.000000,57125.000000,5.374770)}

{create adhoc36}
{access adhoc36}
{connect adhoc36(1), adhoc34(0)}
{nseg = 1}
{strdef color color = "White"}
{pt3dclear()}
{pt3dadd(174768.000000,104472.000000,59225.000000,33.279160)}
{pt3dadd(174768.000000,104892.000000,58475.000000,21.792371)}
{pt3dadd(174876.000000,105048.000000,58300.000000,16.048977)}
{pt3dadd(175020.000000,105180.000000,58075.000000,16.048977)}

{create adhoc37}
{access adhoc37}
{connect adhoc37(1), adhoc36(0)}
{nseg = 1}
{strdef color color = "White"}
{pt3dclear()}
{pt3dadd(175020.000000,105180.000000,58075.000000,16.048977)}
{pt3dadd(174960.000000,105420.000000,57750.000000,10.307708)}
{pt3dadd(174948.000000,105672.000000,57575.000000,6.784625)}
{pt3dadd(174852.000000,105756.000000,57425.000000,6.142666)}
{pt3dadd(174732.000000,105804.000000,57175.000000,3.767836)}
{pt3dadd(174744.000000,106152.000000,56975.000000,3.767836)}
{pt3dadd(174828.000000,106428.000000,56675.000000,3.767836)}
{pt3dadd(174912.000000,106584.000000,56700.000000,5.696861)}
{pt3dadd(174960.000000,106716.000000,56625.000000,3.429025)}
{pt3dadd(175068.000000,106872.000000,56525.000000,3.429025)}
{pt3dadd(175116.000000,107028.000000,56525.000000,5.803854)}
{pt3dadd(175128.000000,107148.000000,56525.000000,6.578808)}
{pt3dadd(175092.000000,107268.000000,56575.000000,6.749639)}
{pt3dadd(175032.000000,107364.000000,56725.000000,5.374770)}

{create adhoc38}
{access adhoc38}
{connect adhoc38(1), adhoc36(0)}
{nseg = 1}
{strdef color color = "White"}
{pt3dclear()}
{pt3dadd(175020.000000,105180.000000,58075.000000,16.048977)}
{pt3dadd(175656.000000,105144.000000,57975.000000,8.932839)}
{pt3dadd(175836.000000,105096.000000,57975.000000,5.374770)}

{create adhoc39}
{access adhoc39}
{connect adhoc39(1), adhoc33(0)}
{nseg = 1}
{strdef color color = "White"}
{pt3dclear()}
{pt3dadd(175212.000000,105228.000000,61450.000000,19.258772)}
{pt3dadd(174660.000000,105036.000000,61525.000000,9.069499)}
{pt3dadd(174672.000000,104952.000000,61500.000000,8.064587)}
{pt3dadd(174576.000000,104796.000000,61600.000000,4.871480)}
{pt3dadd(174516.000000,104688.000000,61700.000000,7.739669)}

{create adhoc40}
{access adhoc40}
{connect adhoc40(1), adhoc20(0)}
{nseg = 1}
{strdef color color = "White"}
{pt3dclear()}
{pt3dadd(190800.000000,119064.000000,61800.000000,47.921990)}
{pt3dadd(190968.000000,118860.000000,62550.000000,25.718207)}
{pt3dadd(190812.000000,118704.000000,62900.000000,16.030924)}
{pt3dadd(190812.000000,118572.000000,63125.000000,10.298281)}
{pt3dadd(190788.000000,118440.000000,63175.000000,5.051754)}
{pt3dadd(190728.000000,118320.000000,63325.000000,5.051754)}
{pt3dadd(190644.000000,118176.000000,63400.000000,5.051754)}
{pt3dadd(190596.000000,118044.000000,63475.000000,9.373860)}
{pt3dadd(190560.000000,117876.000000,63500.000000,5.822105)}
{pt3dadd(190500.000000,117708.000000,63575.000000,5.822105)}
{pt3dadd(190440.000000,117540.000000,63650.000000,5.822105)}
{pt3dadd(190368.000000,117408.000000,63750.000000,8.731901)}
{pt3dadd(190344.000000,117288.000000,63800.000000,4.409795)}
{pt3dadd(190320.000000,117132.000000,63875.000000,4.409795)}
{pt3dadd(190260.000000,116988.000000,63950.000000,4.409795)}
{pt3dadd(190236.000000,116880.000000,64050.000000,8.731901)}
{pt3dadd(190176.000000,116748.000000,64125.000000,5.822105)}
{pt3dadd(190200.000000,116580.000000,64175.000000,5.822105)}
{pt3dadd(190140.000000,116424.000000,64225.000000,5.822105)}
{pt3dadd(190080.000000,116268.000000,64325.000000,11.068632)}
{pt3dadd(190068.000000,116100.000000,64400.000000,6.746526)}
{pt3dadd(189948.000000,115980.000000,64725.000000,6.746526)}
{pt3dadd(189708.000000,115824.000000,64925.000000,6.746526)}
{pt3dadd(189576.000000,115620.000000,65175.000000,11.068632)}
{pt3dadd(189444.000000,115200.000000,65300.000000,5.822105)}
{pt3dadd(189288.000000,115020.000000,65375.000000,5.822105)}
{pt3dadd(189156.000000,114840.000000,65475.000000,5.822105)}
{pt3dadd(188952.000000,114588.000000,65525.000000,9.219790)}
{pt3dadd(188796.000000,114432.000000,65600.000000,4.897684)}
{pt3dadd(188676.000000,114228.000000,65700.000000,4.897684)}
{pt3dadd(188568.000000,114036.000000,65775.000000,4.897684)}
{pt3dadd(188412.000000,113880.000000,65775.000000,7.679088)}
{pt3dadd(188280.000000,113712.000000,65775.000000,4.281404)}
{pt3dadd(188124.000000,113556.000000,65850.000000,4.281404)}
{pt3dadd(188016.000000,113424.000000,65900.000000,4.281404)}
{pt3dadd(187836.000000,113304.000000,65925.000000,6.210428)}
{pt3dadd(187716.000000,113172.000000,65925.000000,6.338820)}
{pt3dadd(187572.000000,113076.000000,66025.000000,9.564700)}
{pt3dadd(187428.000000,113124.000000,66050.000000,16.048977)}

{create adhoc41}
{access adhoc41}
{connect adhoc41(1), adhoc19(0)}
{nseg = 1}
{strdef color color = "White"}
{pt3dclear()}
{pt3dadd(193200.000000,130212.000000,51400.000000,69.007660)}
{pt3dadd(193392.000000,130044.000000,50575.000000,36.814217)}
{pt3dadd(193392.000000,129756.000000,50150.000000,22.688530)}
{pt3dadd(192864.000000,129612.000000,50000.000000,12.096793)}
{pt3dadd(192708.000000,129444.000000,49925.000000,4.409795)}
{pt3dadd(192636.000000,129264.000000,49825.000000,4.409795)}
{pt3dadd(192504.000000,129108.000000,49775.000000,4.409795)}
{pt3dadd(192396.000000,128976.000000,49750.000000,7.319591)}
{pt3dadd(192372.000000,128820.000000,49700.000000,4.409795)}
{pt3dadd(192216.000000,128676.000000,49600.000000,4.409795)}
{pt3dadd(192096.000000,128484.000000,49475.000000,4.409795)}
{pt3dadd(191928.000000,128280.000000,49400.000000,7.961550)}
{pt3dadd(191724.000000,128076.000000,49375.000000,5.051754)}
{pt3dadd(191592.000000,127884.000000,49300.000000,5.051754)}
{pt3dadd(191532.000000,127716.000000,49150.000000,5.051754)}
{pt3dadd(191280.000000,127536.000000,48875.000000,7.961550)}
{pt3dadd(191148.000000,127332.000000,48850.000000,4.409795)}
{pt3dadd(191064.000000,127188.000000,48750.000000,4.409795)}
{pt3dadd(190956.000000,127056.000000,48650.000000,4.409795)}
{pt3dadd(190764.000000,126924.000000,48625.000000,7.319591)}
{pt3dadd(190704.000000,126744.000000,48625.000000,4.409795)}
{pt3dadd(190572.000000,126564.000000,48475.000000,4.409795)}
{pt3dadd(190500.000000,126408.000000,48375.000000,4.409795)}
{pt3dadd(190260.000000,126216.000000,48300.000000,7.961550)}
{pt3dadd(190092.000000,126048.000000,48275.000000,5.051754)}
{pt3dadd(189840.000000,125880.000000,48150.000000,5.051754)}
{pt3dadd(189672.000000,125676.000000,48075.000000,5.051754)}
{pt3dadd(189504.000000,125544.000000,48075.000000,9.373860)}
{pt3dadd(189348.000000,125424.000000,48000.000000,5.822105)}
{pt3dadd(189276.000000,125244.000000,47925.000000,5.822105)}
{pt3dadd(189024.000000,125076.000000,47900.000000,5.822105)}
{pt3dadd(188832.000000,124884.000000,47875.000000,8.089942)}
{pt3dadd(188640.000000,124740.000000,47850.000000,3.767836)}
{pt3dadd(188376.000000,124596.000000,47825.000000,3.767836)}
{pt3dadd(188184.000000,124452.000000,47800.000000,3.767836)}
{pt3dadd(188088.000000,124320.000000,47800.000000,6.677632)}
{pt3dadd(187872.000000,124176.000000,47775.000000,4.409795)}
{pt3dadd(187788.000000,124032.000000,47675.000000,4.409795)}
{pt3dadd(187524.000000,123876.000000,47725.000000,4.409795)}
{pt3dadd(187296.000000,123696.000000,47675.000000,9.656322)}
{pt3dadd(187188.000000,123528.000000,47625.000000,6.746526)}
{pt3dadd(187068.000000,123360.000000,47550.000000,11.558205)}
{pt3dadd(186948.000000,123216.000000,47475.000000,15.109960)}
{pt3dadd(186936.000000,123072.000000,47525.000000,15.439056)}
{pt3dadd(186960.000000,122952.000000,47550.000000,19.258772)}

{create adhoc42}
{access adhoc42}
{connect adhoc42(1), adhoc41(0)}
{nseg = 1}
{strdef color color = "White"}
{pt3dclear()}
{pt3dadd(186960.000000,122952.000000,47550.000000,19.258772)}
{pt3dadd(187224.000000,122784.000000,47675.000000,14.623100)}
{pt3dadd(187320.000000,122640.000000,47675.000000,9.373860)}
{pt3dadd(187392.000000,122472.000000,47750.000000,8.196935)}
{pt3dadd(187464.000000,122340.000000,47925.000000,3.874829)}
{pt3dadd(187464.000000,122208.000000,47975.000000,3.874829)}
{pt3dadd(187572.000000,122076.000000,48125.000000,3.874829)}
{pt3dadd(187644.000000,121884.000000,48150.000000,5.803854)}
{pt3dadd(187656.000000,121716.000000,48125.000000,3.429025)}
{pt3dadd(187728.000000,121536.000000,48100.000000,3.429025)}
{pt3dadd(187812.000000,121380.000000,48100.000000,3.429025)}
{pt3dadd(187908.000000,121236.000000,48100.000000,4.986545)}
{pt3dadd(188040.000000,121080.000000,48075.000000,3.057520)}
{pt3dadd(188172.000000,120960.000000,48025.000000,3.057520)}
{pt3dadd(188268.000000,120816.000000,47950.000000,3.057520)}
{pt3dadd(188340.000000,120684.000000,47875.000000,5.967316)}
{pt3dadd(188496.000000,120528.000000,47800.000000,4.409795)}
{pt3dadd(188808.000000,120396.000000,47550.000000,4.409795)}
{pt3dadd(188964.000000,120192.000000,47525.000000,4.409795)}
{pt3dadd(189096.000000,120060.000000,47525.000000,7.319591)}
{pt3dadd(189240.000000,119856.000000,47425.000000,4.409795)}
{pt3dadd(189396.000000,119688.000000,47350.000000,4.409795)}
{pt3dadd(189540.000000,119472.000000,47275.000000,4.409795)}
{pt3dadd(189720.000000,119244.000000,47100.000000,7.319591)}
{pt3dadd(189840.000000,119040.000000,47000.000000,4.409795)}
{pt3dadd(189984.000000,118812.000000,46925.000000,4.409795)}
{pt3dadd(190080.000000,118608.000000,46775.000000,4.409795)}
{pt3dadd(190152.000000,118428.000000,46650.000000,6.784625)}
{pt3dadd(190236.000000,118272.000000,46525.000000,3.874829)}
{pt3dadd(190236.000000,117780.000000,46275.000000,3.874829)}
{pt3dadd(190224.000000,117504.000000,46025.000000,3.874829)}
{pt3dadd(190200.000000,117312.000000,46100.000000,6.784625)}
{pt3dadd(190176.000000,117180.000000,45900.000000,4.409795)}
{pt3dadd(190164.000000,117036.000000,45800.000000,4.409795)}
{pt3dadd(190116.000000,116892.000000,45725.000000,4.409795)}
{pt3dadd(190116.000000,116760.000000,45650.000000,7.659573)}
{pt3dadd(190176.000000,116628.000000,45550.000000,4.749777)}
{pt3dadd(190224.000000,116496.000000,45425.000000,4.749777)}
{pt3dadd(190224.000000,116352.000000,45325.000000,4.749777)}
{pt3dadd(190236.000000,116184.000000,45250.000000,7.124607)}
{pt3dadd(190320.000000,116004.000000,45125.000000,3.874829)}
{pt3dadd(190380.000000,115788.000000,45025.000000,3.874829)}
{pt3dadd(190392.000000,115596.000000,45025.000000,3.874829)}
{pt3dadd(190440.000000,115404.000000,45025.000000,5.714693)}
{pt3dadd(190500.000000,115236.000000,45075.000000,3.339864)}
{pt3dadd(190584.000000,115092.000000,45050.000000,3.339864)}
{pt3dadd(190584.000000,114960.000000,45150.000000,3.339864)}
{pt3dadd(190488.000000,114840.000000,45250.000000,5.714693)}
{pt3dadd(190476.000000,114696.000000,45350.000000,3.874829)}
{pt3dadd(190536.000000,114552.000000,45350.000000,3.874829)}
{pt3dadd(190620.000000,114396.000000,45700.000000,3.874829)}
{pt3dadd(190608.000000,114276.000000,45900.000000,7.426584)}
{pt3dadd(190464.000000,114012.000000,46075.000000,5.051754)}
{pt3dadd(190428.000000,113856.000000,46100.000000,9.373860)}
{pt3dadd(190260.000000,113724.000000,46425.000000,12.925614)}
{pt3dadd(190152.000000,113592.000000,46550.000000,14.623100)}
{pt3dadd(189912.000000,113400.000000,46550.000000,19.258772)}

{create adhoc43}
{access adhoc43}
{connect adhoc43(1), adhoc42(0)}
{nseg = 1}
{strdef color color = "White"}
{pt3dclear()}
{pt3dadd(189912.000000,113400.000000,46550.000000,19.258772)}
{pt3dadd(189756.000000,113124.000000,46525.000000,13.339181)}
{pt3dadd(189684.000000,112920.000000,46575.000000,8.603509)}
{pt3dadd(189636.000000,112680.000000,46600.000000,6.041699)}
{pt3dadd(189564.000000,112500.000000,46625.000000,2.489945)}
{pt3dadd(189456.000000,112284.000000,46675.000000,2.489945)}
{pt3dadd(189468.000000,112092.000000,46775.000000,2.489945)}
{pt3dadd(189312.000000,111852.000000,46850.000000,3.085740)}
{pt3dadd(189228.000000,111756.000000,46900.000000,2.095795)}
{pt3dadd(189120.000000,111636.000000,46875.000000,2.691590)}
{pt3dadd(189096.000000,111516.000000,46850.000000,3.466544)}
{pt3dadd(189144.000000,111408.000000,46850.000000,3.784582)}
{pt3dadd(189132.000000,111300.000000,46825.000000,5.374770)}

{create adhoc44}
{access adhoc44}
{connect adhoc44(1), adhoc42(0)}
{nseg = 1}
{strdef color color = "White"}
{pt3dclear()}
{pt3dadd(189912.000000,113400.000000,46550.000000,19.258772)}
{pt3dadd(189144.000000,113400.000000,47275.000000,12.284540)}
{pt3dadd(189060.000000,113508.000000,47275.000000,6.449724)}

{create adhoc45}
{access adhoc45}
{connect adhoc45(1), adhoc41(0)}
{nseg = 1}
{strdef color color = "White"}
{pt3dclear()}
{pt3dadd(186960.000000,122952.000000,47550.000000,19.258772)}
{pt3dadd(185988.000000,122952.000000,47175.000000,11.377640)}
{pt3dadd(185592.000000,122952.000000,47150.000000,7.426584)}
{pt3dadd(185472.000000,122904.000000,47125.000000,5.432350)}
{pt3dadd(185256.000000,122868.000000,47050.000000,3.057520)}
{pt3dadd(185004.000000,122760.000000,47025.000000,3.057520)}
{pt3dadd(184728.000000,122652.000000,46975.000000,3.057520)}
{pt3dadd(184500.000000,122592.000000,46875.000000,4.986545)}
{pt3dadd(184236.000000,122472.000000,46800.000000,3.429025)}
{pt3dadd(183948.000000,122364.000000,46700.000000,3.429025)}
{pt3dadd(183672.000000,122220.000000,46700.000000,3.429025)}
{pt3dadd(183384.000000,122124.000000,46700.000000,4.912245)}
{pt3dadd(183252.000000,122076.000000,46725.000000,2.983220)}
{pt3dadd(183072.000000,122004.000000,46750.000000,2.983220)}
{pt3dadd(182868.000000,121920.000000,46750.000000,2.983220)}
{pt3dadd(182712.000000,121836.000000,46750.000000,4.912245)}
{pt3dadd(182580.000000,121788.000000,46675.000000,3.429025)}
{pt3dadd(182436.000000,121728.000000,46700.000000,3.429025)}
{pt3dadd(182292.000000,121656.000000,46725.000000,3.429025)}
{pt3dadd(182148.000000,121632.000000,46750.000000,6.980779)}
{pt3dadd(182004.000000,121596.000000,46775.000000,5.051754)}
{pt3dadd(181860.000000,121536.000000,46800.000000,5.051754)}
{pt3dadd(181704.000000,121536.000000,46800.000000,5.051754)}
{pt3dadd(181560.000000,121476.000000,46775.000000,6.891618)}
{pt3dadd(181416.000000,121416.000000,46775.000000,3.339863)}
{pt3dadd(181248.000000,121320.000000,46750.000000,3.339863)}
{pt3dadd(181104.000000,121296.000000,46775.000000,3.339863)}
{pt3dadd(180972.000000,121308.000000,46825.000000,5.268888)}
{pt3dadd(180840.000000,121308.000000,46850.000000,3.429025)}
{pt3dadd(180696.000000,121272.000000,46800.000000,3.429025)}
{pt3dadd(180540.000000,121284.000000,46750.000000,3.429025)}
{pt3dadd(180396.000000,121320.000000,46775.000000,4.986545)}
{pt3dadd(180252.000000,121212.000000,46825.000000,3.057520)}
{pt3dadd(180120.000000,121212.000000,46850.000000,3.057520)}
{pt3dadd(179808.000000,121140.000000,46850.000000,3.057520)}
{pt3dadd(179652.000000,121176.000000,46875.000000,5.967316)}
{pt3dadd(179460.000000,121176.000000,46900.000000,4.409795)}
{pt3dadd(179256.000000,121188.000000,46900.000000,4.409795)}
{pt3dadd(179076.000000,121104.000000,47025.000000,4.409795)}
{pt3dadd(178920.000000,121176.000000,47175.000000,6.784625)}
{pt3dadd(178740.000000,121200.000000,47250.000000,3.874829)}
{pt3dadd(178608.000000,121224.000000,47300.000000,7.272514)}
{pt3dadd(178464.000000,121164.000000,47450.000000,10.824268)}
{pt3dadd(178308.000000,121200.000000,47650.000000,13.082398)}
{pt3dadd(178188.000000,121080.000000,47775.000000,19.258772)}

{create adhoc46}
{access adhoc46}
{connect adhoc46(1), adhoc45(0)}
{nseg = 1}
{strdef color color = "White"}
{pt3dclear()}
{pt3dadd(178188.000000,121080.000000,47775.000000,19.258772)}
{pt3dadd(177984.000000,120708.000000,47775.000000,11.377640)}
{pt3dadd(177888.000000,120288.000000,48075.000000,7.426584)}
{pt3dadd(177768.000000,120072.000000,48150.000000,6.249659)}
{pt3dadd(177708.000000,119916.000000,48150.000000,3.874829)}
{pt3dadd(177648.000000,119796.000000,48200.000000,3.874829)}
{pt3dadd(177636.000000,119604.000000,48150.000000,3.874829)}
{pt3dadd(177600.000000,119424.000000,48075.000000,5.432350)}
{pt3dadd(177504.000000,119244.000000,48075.000000,3.057520)}
{pt3dadd(177480.000000,119112.000000,48100.000000,3.057520)}
{pt3dadd(177540.000000,118980.000000,48075.000000,3.057520)}
{pt3dadd(177648.000000,118848.000000,48075.000000,5.432350)}
{pt3dadd(177648.000000,118716.000000,48050.000000,3.874829)}
{pt3dadd(177840.000000,118584.000000,48075.000000,3.874829)}
{pt3dadd(177984.000000,118440.000000,48025.000000,3.874829)}
{pt3dadd(178056.000000,118308.000000,48025.000000,6.249659)}
{pt3dadd(178272.000000,118152.000000,48150.000000,6.249659)}
{pt3dadd(178320.000000,118020.000000,48225.000000,7.435675)}
{pt3dadd(178380.000000,117888.000000,48150.000000,11.392792)}
{pt3dadd(178380.000000,117768.000000,48300.000000,7.430083)}

{create adhoc47}
{access adhoc47}
{connect adhoc47(1), adhoc45(0)}
{nseg = 1}
{strdef color color = "White"}
{pt3dclear()}
{pt3dadd(178188.000000,121080.000000,47775.000000,19.258772)}
{pt3dadd(177840.000000,121572.000000,47775.000000,10.486030)}
{pt3dadd(177732.000000,121716.000000,47850.000000,9.266447)}
{pt3dadd(177588.000000,121656.000000,47775.000000,7.272213)}
{pt3dadd(177672.000000,121872.000000,48100.000000,8.053916)}
{pt3dadd(177816.000000,121776.000000,48375.000000,9.287602)}

{create adhoc48}
{access adhoc48}
{connect adhoc48(1), adhoc18(0)}
{nseg = 1}
{strdef color color = "White"}
{pt3dclear()}
{pt3dadd(193032.000000,132780.000000,50150.000000,36.804090)}
{pt3dadd(191712.000000,132780.000000,50475.000000,15.863897)}
{pt3dadd(191496.000000,132780.000000,50600.000000,13.604883)}
{pt3dadd(191088.000000,132864.000000,50800.000000,7.310908)}
{pt3dadd(190860.000000,132948.000000,50900.000000,11.145123)}

{create adhoc49}
{access adhoc49}
{connect adhoc49(1), adhoc48(0)}
{nseg = 1}
{strdef color color = "White"}
{pt3dclear()}
{pt3dadd(190860.000000,132948.000000,50900.000000,11.145123)}
{pt3dadd(190548.000000,133248.000000,51125.000000,7.187074)}
{pt3dadd(190332.000000,133476.000000,51325.000000,4.912244)}
{pt3dadd(190200.000000,133620.000000,51450.000000,4.540740)}
{pt3dadd(190068.000000,134088.000000,51575.000000,3.057520)}
{pt3dadd(190056.000000,134208.000000,51450.000000,3.057520)}
{pt3dadd(189948.000000,134268.000000,51525.000000,3.653315)}
{pt3dadd(189828.000000,134340.000000,51575.000000,4.643260)}
{pt3dadd(189732.000000,134472.000000,51825.000000,4.142900)}
{pt3dadd(189636.000000,134724.000000,52100.000000,6.449724)}

{create adhoc50}
{access adhoc50}
{connect adhoc50(1), adhoc48(0)}
{nseg = 1}
{strdef color color = "White"}
{pt3dclear()}
{pt3dadd(190860.000000,132948.000000,50900.000000,11.145123)}
{pt3dadd(190800.000000,133632.000000,50900.000000,7.787922)}
{pt3dadd(190860.000000,133836.000000,50900.000000,5.864471)}
{pt3dadd(190884.000000,133980.000000,50900.000000,5.374770)}

{create adhoc51}
{access adhoc51}
{connect adhoc51(1), adhoc17(0)}
{nseg = 1}
{strdef color color = "White"}
{pt3dclear()}
{pt3dadd(192876.000000,132924.000000,49850.000000,38.337593)}
{pt3dadd(191724.000000,132924.000000,48825.000000,17.737247)}
{pt3dadd(191148.000000,132816.000000,48850.000000,11.242348)}
{pt3dadd(190680.000000,132696.000000,48825.000000,6.784625)}
{pt3dadd(190524.000000,132588.000000,48825.000000,4.409795)}
{pt3dadd(190344.000000,132564.000000,48700.000000,4.409795)}
{pt3dadd(190212.000000,132516.000000,48700.000000,4.409795)}
{pt3dadd(190080.000000,132516.000000,48675.000000,7.961550)}
{pt3dadd(189948.000000,132480.000000,48725.000000,5.051754)}
{pt3dadd(189672.000000,132444.000000,48750.000000,9.373860)}
{pt3dadd(189504.000000,132420.000000,48825.000000,12.925614)}
{pt3dadd(189360.000000,132420.000000,48825.000000,14.623100)}
{pt3dadd(189216.000000,132300.000000,48775.000000,19.258772)}

{create adhoc52}
{access adhoc52}
{connect adhoc52(1), adhoc51(0)}
{nseg = 1}
{strdef color color = "White"}
{pt3dclear()}
{pt3dadd(189216.000000,132300.000000,48775.000000,19.258772)}
{pt3dadd(188580.000000,132624.000000,48775.000000,9.396285)}
{pt3dadd(188280.000000,132744.000000,48975.000000,6.237771)}
{pt3dadd(188100.000000,132852.000000,49075.000000,4.243537)}
{pt3dadd(187980.000000,132960.000000,49050.000000,3.057520)}
{pt3dadd(187740.000000,133080.000000,49100.000000,3.057520)}
{pt3dadd(187632.000000,133152.000000,49225.000000,3.057520)}
{pt3dadd(187608.000000,133272.000000,49250.000000,3.789476)}
{pt3dadd(187428.000000,133392.000000,49325.000000,3.221901)}
{pt3dadd(187044.000000,133464.000000,49325.000000,4.369835)}
{pt3dadd(186852.000000,133464.000000,49325.000000,6.449724)}

{create adhoc53}
{access adhoc53}
{connect adhoc53(1), adhoc51(0)}
{nseg = 1}
{strdef color color = "White"}
{pt3dclear()}
{pt3dadd(189216.000000,132300.000000,48775.000000,19.258772)}
{pt3dadd(189048.000000,132180.000000,48850.000000,13.339181)}
{pt3dadd(188856.000000,132024.000000,48925.000000,8.603509)}
{pt3dadd(188652.000000,131904.000000,48975.000000,7.961550)}
{pt3dadd(188508.000000,131796.000000,48950.000000,4.409795)}
{pt3dadd(188352.000000,131700.000000,48950.000000,4.409795)}
{pt3dadd(188184.000000,131640.000000,48950.000000,4.409795)}
{pt3dadd(188028.000000,131508.000000,48975.000000,7.961550)}
{pt3dadd(187836.000000,131352.000000,48950.000000,5.051754)}
{pt3dadd(187644.000000,131148.000000,48975.000000,5.051754)}
{pt3dadd(187488.000000,131040.000000,49025.000000,5.051754)}
{pt3dadd(187320.000000,130920.000000,49100.000000,9.188976)}
{pt3dadd(187140.000000,130776.000000,49150.000000,5.637222)}
{pt3dadd(186936.000000,130656.000000,49150.000000,5.637222)}
{pt3dadd(186720.000000,130572.000000,49200.000000,5.637222)}
{pt3dadd(186564.000000,130464.000000,49225.000000,8.012051)}
{pt3dadd(186384.000000,130392.000000,49250.000000,3.874829)}
{pt3dadd(186180.000000,130296.000000,49200.000000,3.874829)}
{pt3dadd(185988.000000,130248.000000,49250.000000,3.874829)}
{pt3dadd(185820.000000,130200.000000,49350.000000,6.656233)}
{pt3dadd(185652.000000,130176.000000,49375.000000,4.281404)}
{pt3dadd(185472.000000,130140.000000,49400.000000,4.281404)}
{pt3dadd(185268.000000,130068.000000,49475.000000,4.281404)}
{pt3dadd(185064.000000,130032.000000,49600.000000,7.191199)}
{pt3dadd(184896.000000,129996.000000,49700.000000,4.409795)}
{pt3dadd(184716.000000,129972.000000,49700.000000,4.409795)}
{pt3dadd(184536.000000,130008.000000,49800.000000,4.409795)}
{pt3dadd(184380.000000,129996.000000,49825.000000,6.784625)}
{pt3dadd(184236.000000,130032.000000,49825.000000,3.874829)}
{pt3dadd(184104.000000,130008.000000,49750.000000,3.874829)}
{pt3dadd(183960.000000,130020.000000,49775.000000,3.874829)}
{pt3dadd(183780.000000,129996.000000,49750.000000,6.784625)}
{pt3dadd(183588.000000,130020.000000,49750.000000,4.409795)}
{pt3dadd(183444.000000,129972.000000,49775.000000,4.409795)}
{pt3dadd(183288.000000,129924.000000,49800.000000,4.409795)}
{pt3dadd(183132.000000,129888.000000,49800.000000,6.784625)}
{pt3dadd(182976.000000,129900.000000,49800.000000,3.874829)}
{pt3dadd(182820.000000,129852.000000,49800.000000,3.874829)}
{pt3dadd(182664.000000,129852.000000,49825.000000,3.874829)}
{pt3dadd(182472.000000,129804.000000,49875.000000,6.784625)}
{pt3dadd(182292.000000,129744.000000,49925.000000,4.409795)}
{pt3dadd(182100.000000,129696.000000,49950.000000,4.409795)}
{pt3dadd(181932.000000,129624.000000,49900.000000,4.409795)}
{pt3dadd(181764.000000,129576.000000,49875.000000,8.731901)}
{pt3dadd(181608.000000,129528.000000,49900.000000,5.822105)}
{pt3dadd(181404.000000,129492.000000,49850.000000,5.822105)}
{pt3dadd(181200.000000,129456.000000,49875.000000,5.822105)}
{pt3dadd(181044.000000,129420.000000,49900.000000,9.219789)}
{pt3dadd(180876.000000,129420.000000,49850.000000,4.897684)}
{pt3dadd(180684.000000,129348.000000,49850.000000,4.897684)}
{pt3dadd(180492.000000,129240.000000,49825.000000,4.897684)}
{pt3dadd(180300.000000,129180.000000,49800.000000,7.807479)}
{pt3dadd(180108.000000,129084.000000,49750.000000,4.409795)}
{pt3dadd(179940.000000,129048.000000,49700.000000,4.409795)}
{pt3dadd(179808.000000,129036.000000,49650.000000,4.409795)}
{pt3dadd(179664.000000,129000.000000,49675.000000,6.574918)}
{pt3dadd(179496.000000,128964.000000,49675.000000,3.665123)}
{pt3dadd(179316.000000,128904.000000,49600.000000,3.665123)}
{pt3dadd(179148.000000,128832.000000,49600.000000,3.665123)}
{pt3dadd(178992.000000,128772.000000,49625.000000,5.932959)}
{pt3dadd(178812.000000,128724.000000,49600.000000,3.767836)}
{pt3dadd(178632.000000,128616.000000,49625.000000,3.767836)}
{pt3dadd(178500.000000,128520.000000,49625.000000,3.767836)}
{pt3dadd(178308.000000,128472.000000,49675.000000,6.677632)}
{pt3dadd(178044.000000,128340.000000,49625.000000,4.409795)}
{pt3dadd(177864.000000,128244.000000,49575.000000,4.409795)}
{pt3dadd(177708.000000,128196.000000,49625.000000,4.409795)}
{pt3dadd(177564.000000,128064.000000,49650.000000,7.961550)}
{pt3dadd(177372.000000,128016.000000,49675.000000,5.051754)}
{pt3dadd(177180.000000,128004.000000,49650.000000,5.051754)}
{pt3dadd(176988.000000,127920.000000,49700.000000,5.051754)}
{pt3dadd(176796.000000,127896.000000,49675.000000,8.603509)}
{pt3dadd(176580.000000,127776.000000,49675.000000,5.051754)}
{pt3dadd(176376.000000,127668.000000,49700.000000,5.051754)}
{pt3dadd(176232.000000,127572.000000,49775.000000,5.051754)}
{pt3dadd(176028.000000,127608.000000,49800.000000,8.603509)}
{pt3dadd(175872.000000,127476.000000,49875.000000,5.051754)}
{pt3dadd(175740.000000,127284.000000,49875.000000,5.051754)}
{pt3dadd(175620.000000,126912.000000,50100.000000,5.051754)}
{pt3dadd(175488.000000,126732.000000,50075.000000,6.980779)}
{pt3dadd(175368.000000,126528.000000,50300.000000,3.429025)}
{pt3dadd(175452.000000,126348.000000,50350.000000,3.429025)}
{pt3dadd(175452.000000,126204.000000,50475.000000,3.429025)}
{pt3dadd(175476.000000,126060.000000,50600.000000,5.358049)}
{pt3dadd(175428.000000,125916.000000,50700.000000,3.429025)}
{pt3dadd(175392.000000,125748.000000,50750.000000,3.429025)}
{pt3dadd(175272.000000,125592.000000,50825.000000,3.429025)}
{pt3dadd(175224.000000,125448.000000,50850.000000,7.751130)}
{pt3dadd(175116.000000,125292.000000,50975.000000,11.068632)}
{pt3dadd(174876.000000,125172.000000,51425.000000,14.620386)}
{pt3dadd(174828.000000,125016.000000,51625.000000,23.367310)}
{pt3dadd(174864.000000,124836.000000,51825.000000,19.258772)}

{create adhoc54}
{access adhoc54}
{connect adhoc54(1), adhoc53(0)}
{nseg = 1}
{strdef color color = "White"}
{pt3dclear()}
{pt3dadd(174864.000000,124836.000000,51825.000000,19.258772)}
{pt3dadd(175128.000000,124776.000000,52400.000000,9.069499)}
{pt3dadd(175176.000000,124704.000000,52625.000000,9.082439)}
{pt3dadd(175212.000000,124608.000000,52800.000000,6.567900)}
{pt3dadd(175200.000000,124500.000000,52800.000000,9.287602)}

{create adhoc55}
{access adhoc55}
{connect adhoc55(1), adhoc53(0)}
{nseg = 1}
{strdef color color = "White"}
{pt3dclear()}
{pt3dadd(174864.000000,124836.000000,51825.000000,19.258772)}
{pt3dadd(174840.000000,124632.000000,51675.000000,13.339181)}
{pt3dadd(174816.000000,124488.000000,51600.000000,8.603509)}
{pt3dadd(174840.000000,124368.000000,51500.000000,6.609275)}
{pt3dadd(174888.000000,124248.000000,51450.000000,3.057520)}
{pt3dadd(174912.000000,124104.000000,51425.000000,3.057520)}
{pt3dadd(174948.000000,123960.000000,51425.000000,3.057520)}
{pt3dadd(174876.000000,123804.000000,51400.000000,4.986545)}
{pt3dadd(174792.000000,123660.000000,51325.000000,3.429025)}
{pt3dadd(174744.000000,123528.000000,51300.000000,3.429025)}
{pt3dadd(174648.000000,123396.000000,51300.000000,3.429025)}
{pt3dadd(174624.000000,123276.000000,51325.000000,5.358049)}
{pt3dadd(174408.000000,123144.000000,51350.000000,4.418969)}
{pt3dadd(174228.000000,123048.000000,51400.000000,6.364949)}
{pt3dadd(174276.000000,122940.000000,51450.000000,6.449724)}

{create adhoc56}
{access adhoc56}
{connect adhoc56(1), adhoc16(0)}
{nseg = 1}
{strdef color color = "White"}
{pt3dclear()}
{pt3dadd(193500.000000,135936.000000,48375.000000,47.921990)}
{pt3dadd(191664.000000,135936.000000,47450.000000,22.893587)}
{pt3dadd(191532.000000,135864.000000,47375.000000,14.336152)}
{pt3dadd(191364.000000,135804.000000,47325.000000,7.961550)}
{pt3dadd(191196.000000,135780.000000,47275.000000,4.409795)}
{pt3dadd(191040.000000,135732.000000,47100.000000,4.409795)}
{pt3dadd(190848.000000,135612.000000,47100.000000,4.409795)}
{pt3dadd(190536.000000,135468.000000,47025.000000,7.191199)}
{pt3dadd(190260.000000,135396.000000,46950.000000,4.281404)}
{pt3dadd(189984.000000,135348.000000,46800.000000,4.281404)}
{pt3dadd(189816.000000,135288.000000,46875.000000,4.281404)}
{pt3dadd(189660.000000,135204.000000,46800.000000,7.679088)}
{pt3dadd(189480.000000,135204.000000,46775.000000,4.897684)}
{pt3dadd(189324.000000,135108.000000,46700.000000,4.897684)}
{pt3dadd(189168.000000,135024.000000,46600.000000,4.897684)}
{pt3dadd(189024.000000,134964.000000,46475.000000,7.679088)}
{pt3dadd(188904.000000,134892.000000,46475.000000,4.281403)}
{pt3dadd(188784.000000,134832.000000,46400.000000,4.281403)}
{pt3dadd(188424.000000,134592.000000,46400.000000,4.281403)}
{pt3dadd(188280.000000,134508.000000,46350.000000,6.656233)}
{pt3dadd(188124.000000,134472.000000,46300.000000,3.874829)}
{pt3dadd(187980.000000,134328.000000,46275.000000,3.874829)}
{pt3dadd(187848.000000,134448.000000,46175.000000,3.874829)}
{pt3dadd(187716.000000,134556.000000,46025.000000,8.012051)}
{pt3dadd(187584.000000,134484.000000,45950.000000,5.637221)}
{pt3dadd(187440.000000,134436.000000,45925.000000,5.637221)}
{pt3dadd(187284.000000,134376.000000,45925.000000,5.637221)}
{pt3dadd(187140.000000,134400.000000,45900.000000,9.188976)}
{pt3dadd(186972.000000,134352.000000,45900.000000,5.051754)}
{pt3dadd(186816.000000,134340.000000,45900.000000,5.051754)}
{pt3dadd(186660.000000,134352.000000,45850.000000,5.051754)}
{pt3dadd(186444.000000,134352.000000,45775.000000,8.449439)}
{pt3dadd(186288.000000,134424.000000,45700.000000,4.897684)}
{pt3dadd(186108.000000,134460.000000,45650.000000,4.897684)}
{pt3dadd(185940.000000,134328.000000,45500.000000,4.897684)}
{pt3dadd(185352.000000,134316.000000,45500.000000,7.679088)}
{pt3dadd(184956.000000,134304.000000,45500.000000,4.281404)}
{pt3dadd(184788.000000,134232.000000,45325.000000,4.281404)}
{pt3dadd(184620.000000,134232.000000,45225.000000,4.281404)}
{pt3dadd(184428.000000,134244.000000,45175.000000,7.833158)}
{pt3dadd(184296.000000,134232.000000,45100.000000,5.051754)}
{pt3dadd(184128.000000,134184.000000,45000.000000,5.051754)}
{pt3dadd(183912.000000,134208.000000,44950.000000,5.051754)}
{pt3dadd(183636.000000,134244.000000,44875.000000,7.961550)}
{pt3dadd(183336.000000,134208.000000,44875.000000,4.409795)}
{pt3dadd(183012.000000,134160.000000,44825.000000,4.409795)}
{pt3dadd(182796.000000,134136.000000,44800.000000,4.409795)}
{pt3dadd(182652.000000,134088.000000,44750.000000,7.961550)}
{pt3dadd(182448.000000,134040.000000,44700.000000,5.051754)}
{pt3dadd(182292.000000,134004.000000,44650.000000,5.051754)}
{pt3dadd(182136.000000,133968.000000,44675.000000,5.051754)}
{pt3dadd(181956.000000,133968.000000,44625.000000,8.603509)}
{pt3dadd(181776.000000,133920.000000,44575.000000,5.051754)}
{pt3dadd(181608.000000,133860.000000,44500.000000,5.051754)}
{pt3dadd(181464.000000,133740.000000,44475.000000,5.051754)}
{pt3dadd(181260.000000,133692.000000,44425.000000,7.118272)}
{pt3dadd(181092.000000,133608.000000,44375.000000,3.566518)}
{pt3dadd(180936.000000,133572.000000,44350.000000,3.566518)}
{pt3dadd(180756.000000,133536.000000,44300.000000,3.566518)}
{pt3dadd(180576.000000,133512.000000,44225.000000,5.941347)}
{pt3dadd(180408.000000,133536.000000,44200.000000,3.874829)}
{pt3dadd(180228.000000,133560.000000,44150.000000,3.874829)}
{pt3dadd(179976.000000,133572.000000,44050.000000,3.874829)}
{pt3dadd(179820.000000,133572.000000,44025.000000,6.142666)}
{pt3dadd(179628.000000,133512.000000,43975.000000,3.767836)}
{pt3dadd(179328.000000,133464.000000,43850.000000,8.089942)}
{pt3dadd(179076.000000,133416.000000,43725.000000,11.487626)}
{pt3dadd(178800.000000,133272.000000,43575.000000,14.366316)}
{pt3dadd(178548.000000,133200.000000,43525.000000,18.488422)}

{create adhoc57}
{access adhoc57}
{connect adhoc57(1), adhoc56(0)}
{nseg = 1}
{strdef color color = "White"}
{pt3dclear()}
{pt3dadd(178548.000000,133200.000000,43525.000000,18.488422)}
{pt3dadd(178428.000000,132936.000000,42975.000000,9.139501)}
{pt3dadd(178176.000000,132816.000000,42800.000000,7.331635)}
{pt3dadd(178044.000000,132816.000000,42700.000000,4.708904)}
{pt3dadd(177936.000000,132756.000000,42675.000000,4.871480)}
{pt3dadd(177888.000000,132564.000000,42575.000000,5.374770)}

{create adhoc58}
{access adhoc58}
{connect adhoc58(1), adhoc56(0)}
{nseg = 1}
{strdef color color = "White"}
{pt3dclear()}
{pt3dadd(178548.000000,133200.000000,43525.000000,18.488422)}
{pt3dadd(178428.000000,133260.000000,43600.000000,13.082398)}
{pt3dadd(178260.000000,133272.000000,43625.000000,8.449439)}
{pt3dadd(178104.000000,133332.000000,43650.000000,7.766746)}
{pt3dadd(177936.000000,133380.000000,43675.000000,4.214991)}
{pt3dadd(177744.000000,133512.000000,43675.000000,4.214991)}
{pt3dadd(177576.000000,133548.000000,43725.000000,4.214991)}
{pt3dadd(177432.000000,133584.000000,43775.000000,6.144016)}
{pt3dadd(177312.000000,133704.000000,43750.000000,3.429025)}
{pt3dadd(177216.000000,134016.000000,43800.000000,3.429025)}
{pt3dadd(177096.000000,134244.000000,43825.000000,3.429025)}
{pt3dadd(176988.000000,134424.000000,43825.000000,4.986545)}
{pt3dadd(176856.000000,134556.000000,43800.000000,3.057520)}
{pt3dadd(176736.000000,134592.000000,43800.000000,3.057520)}
{pt3dadd(176580.000000,134856.000000,43775.000000,3.057520)}
{pt3dadd(176436.000000,134940.000000,43775.000000,4.615041)}
{pt3dadd(176256.000000,135276.000000,43950.000000,3.057520)}
{pt3dadd(176160.000000,135300.000000,43950.000000,3.057520)}
{pt3dadd(176040.000000,135420.000000,43975.000000,3.057520)}
{pt3dadd(175764.000000,135528.000000,44000.000000,4.540740)}
{pt3dadd(175644.000000,135540.000000,43925.000000,2.983220)}
{pt3dadd(175536.000000,135636.000000,43900.000000,2.983220)}
{pt3dadd(175392.000000,135684.000000,43850.000000,2.983220)}
{pt3dadd(175248.000000,135744.000000,43725.000000,5.358049)}
{pt3dadd(175128.000000,135780.000000,43700.000000,3.874829)}
{pt3dadd(175008.000000,135684.000000,43750.000000,3.874829)}
{pt3dadd(174876.000000,135696.000000,43750.000000,3.874829)}
{pt3dadd(174552.000000,135636.000000,43925.000000,5.122763)}
{pt3dadd(174288.000000,135516.000000,43925.000000,3.995868)}
{pt3dadd(174276.000000,135336.000000,43975.000000,4.985812)}
{pt3dadd(174156.000000,135252.000000,44050.000000,7.309687)}
{pt3dadd(174036.000000,135336.000000,43975.000000,6.449724)}

{create adhoc59}
{access adhoc59}
{connect adhoc59(1), adhoc15(0)}
{nseg = 1}
{strdef color color = "White"}
{pt3dclear()}
{pt3dadd(193428.000000,141852.000000,46300.000000,57.506386)}
{pt3dadd(193236.000000,141852.000000,44300.000000,47.921990)}
{pt3dadd(192876.000000,141708.000000,43825.000000,42.064858)}
{pt3dadd(192804.000000,141528.000000,43225.000000,39.934990)}

{create adhoc60}
{access adhoc60}
{connect adhoc60(1), adhoc59(0)}
{nseg = 1}
{strdef color color = "White"}
{pt3dclear()}
{pt3dadd(192804.000000,141528.000000,43225.000000,39.934990)}
{pt3dadd(192816.000000,140412.000000,43925.000000,20.231254)}
{pt3dadd(192672.000000,140232.000000,43850.000000,12.738752)}
{pt3dadd(192552.000000,140004.000000,43800.000000,9.373860)}
{pt3dadd(192468.000000,139800.000000,43750.000000,10.144211)}
{pt3dadd(192348.000000,139464.000000,43600.000000,14.466316)}
{pt3dadd(192156.000000,139176.000000,43450.000000,23.110527)}
{pt3dadd(192120.000000,138888.000000,43400.000000,23.110527)}

{create adhoc61}
{access adhoc61}
{connect adhoc61(1), adhoc60(0)}
{nseg = 1}
{strdef color color = "White"}
{pt3dclear()}
{pt3dadd(192120.000000,138888.000000,43400.000000,23.110527)}
{pt3dadd(191208.000000,138948.000000,43475.000000,9.995099)}
{pt3dadd(191112.000000,138876.000000,43450.000000,6.597059)}
{pt3dadd(191016.000000,138864.000000,43425.000000,2.721450)}
{pt3dadd(190908.000000,138732.000000,43450.000000,1.946496)}
{pt3dadd(190800.000000,138660.000000,43425.000000,1.946496)}
{pt3dadd(190704.000000,138612.000000,43425.000000,1.946496)}
{pt3dadd(190620.000000,138540.000000,43425.000000,2.721450)}
{pt3dadd(190536.000000,138480.000000,43350.000000,2.274954)}
{pt3dadd(190440.000000,138516.000000,43375.000000,2.870749)}
{pt3dadd(190344.000000,138504.000000,43400.000000,3.466544)}
{pt3dadd(190248.000000,138528.000000,43375.000000,3.485983)}
{pt3dadd(190152.000000,138516.000000,43350.000000,4.478975)}

{create adhoc62}
{access adhoc62}
{connect adhoc62(1), adhoc60(0)}
{nseg = 1}
{strdef color color = "White"}
{pt3dclear()}
{pt3dadd(192120.000000,138888.000000,43400.000000,23.110527)}
{pt3dadd(192192.000000,138756.000000,43325.000000,14.623100)}
{pt3dadd(192096.000000,138600.000000,43250.000000,15.835410)}
{pt3dadd(192036.000000,138444.000000,43200.000000,12.269250)}
{pt3dadd(191952.000000,138300.000000,43075.000000,19.258772)}

{create adhoc63}
{access adhoc63}
{connect adhoc63(1), adhoc62(0)}
{nseg = 1}
{strdef color color = "White"}
{pt3dclear()}
{pt3dadd(191952.000000,138300.000000,43075.000000,19.258772)}
{pt3dadd(191352.000000,138288.000000,42800.000000,9.069499)}
{pt3dadd(191280.000000,138120.000000,42625.000000,6.041699)}
{pt3dadd(191136.000000,138048.000000,42525.000000,3.737879)}
{pt3dadd(191112.000000,138000.000000,42375.000000,4.676958)}
{pt3dadd(190980.000000,137856.000000,42200.000000,7.051788)}
{pt3dadd(191028.000000,137760.000000,42000.000000,10.752980)}
{pt3dadd(190920.000000,137628.000000,41750.000000,13.374147)}

{create adhoc64}
{access adhoc64}
{connect adhoc64(1), adhoc62(0)}
{nseg = 1}
{strdef color color = "White"}
{pt3dclear()}
{pt3dadd(191952.000000,138300.000000,43075.000000,19.258772)}
{pt3dadd(192060.000000,138120.000000,42975.000000,12.835885)}
{pt3dadd(192084.000000,137964.000000,42925.000000,15.103062)}
{pt3dadd(192144.000000,137652.000000,42950.000000,12.835885)}
{pt3dadd(192144.000000,137400.000000,42875.000000,17.748884)}

{create adhoc65}
{access adhoc65}
{connect adhoc65(1), adhoc64(0)}
{nseg = 1}
{strdef color color = "White"}
{pt3dclear()}
{pt3dadd(192144.000000,137400.000000,42875.000000,17.748884)}
{pt3dadd(191724.000000,137412.000000,43425.000000,10.216111)}
{pt3dadd(191628.000000,137400.000000,43550.000000,6.449724)}

{create adhoc66}
{access adhoc66}
{connect adhoc66(1), adhoc64(0)}
{nseg = 1}
{strdef color color = "White"}
{pt3dclear()}
{pt3dadd(192144.000000,137400.000000,42875.000000,17.748884)}
{pt3dadd(192084.000000,137232.000000,42750.000000,12.835885)}
{pt3dadd(192060.000000,137052.000000,42575.000000,8.301531)}
{pt3dadd(192108.000000,136908.000000,42550.000000,8.603509)}
{pt3dadd(192144.000000,136608.000000,42400.000000,10.298281)}
{pt3dadd(192252.000000,136344.000000,42225.000000,14.620386)}
{pt3dadd(192312.000000,136092.000000,41950.000000,23.367310)}
{pt3dadd(192432.000000,135984.000000,41800.000000,23.110527)}

{create adhoc67}
{access adhoc67}
{connect adhoc67(1), adhoc66(0)}
{nseg = 1}
{strdef color color = "White"}
{pt3dclear()}
{pt3dadd(192432.000000,135984.000000,41800.000000,23.110527)}
{pt3dadd(192024.000000,135984.000000,41000.000000,11.299376)}
{pt3dadd(191784.000000,135984.000000,40800.000000,7.379626)}
{pt3dadd(191736.000000,135948.000000,40600.000000,4.047465)}
{pt3dadd(191652.000000,135900.000000,40375.000000,4.047465)}
{pt3dadd(191688.000000,135948.000000,40175.000000,5.745775)}
{pt3dadd(191796.000000,135984.000000,39975.000000,9.287602)}

{create adhoc68}
{access adhoc68}
{connect adhoc68(1), adhoc66(0)}
{nseg = 1}
{strdef color color = "White"}
{pt3dclear()}
{pt3dadd(192432.000000,135984.000000,41800.000000,23.110527)}
{pt3dadd(192372.000000,135492.000000,41425.000000,15.303063)}
{pt3dadd(192504.000000,135000.000000,40950.000000,9.781838)}
{pt3dadd(192708.000000,134412.000000,40550.000000,8.369528)}
{pt3dadd(192804.000000,134124.000000,40300.000000,7.319591)}
{pt3dadd(193116.000000,133680.000000,40000.000000,10.871345)}
{pt3dadd(193284.000000,132876.000000,39725.000000,17.118909)}
{pt3dadd(193548.000000,132684.000000,39475.000000,19.258772)}

{create adhoc69}
{access adhoc69}
{connect adhoc69(1), adhoc68(0)}
{nseg = 1}
{strdef color color = "White"}
{pt3dclear()}
{pt3dadd(193548.000000,132684.000000,39475.000000,19.258772)}
{pt3dadd(194532.000000,132720.000000,38925.000000,10.015458)}
{pt3dadd(194652.000000,132684.000000,38675.000000,6.609275)}
{pt3dadd(194688.000000,132720.000000,38425.000000,5.967316)}
{pt3dadd(194640.000000,132660.000000,38200.000000,4.409795)}
{pt3dadd(194712.000000,132528.000000,37975.000000,4.409795)}
{pt3dadd(194844.000000,132504.000000,37750.000000,7.319591)}
{pt3dadd(194880.000000,132480.000000,37525.000000,9.694420)}
{pt3dadd(194760.000000,132444.000000,37300.000000,10.307708)}
{pt3dadd(194616.000000,132408.000000,37100.000000,13.374147)}

{create adhoc70}
{access adhoc70}
{connect adhoc70(1), adhoc69(0)}
{nseg = 1}
{strdef color color = "White"}
{pt3dclear()}
{pt3dadd(194616.000000,132408.000000,37100.000000,13.374147)}
{pt3dadd(194280.000000,132060.000000,37150.000000,7.107957)}
{pt3dadd(194136.000000,131880.000000,37050.000000,4.864774)}
{pt3dadd(194052.000000,131640.000000,36875.000000,3.264899)}
{pt3dadd(193968.000000,131280.000000,36725.000000,3.522888)}
{pt3dadd(194040.000000,131160.000000,36675.000000,4.871480)}
{pt3dadd(194076.000000,131040.000000,36625.000000,7.739669)}

{create adhoc71}
{access adhoc71}
{connect adhoc71(1), adhoc69(0)}
{nseg = 1}
{strdef color color = "White"}
{pt3dclear()}
{pt3dadd(194616.000000,132408.000000,37100.000000,13.374147)}
{pt3dadd(194544.000000,132612.000000,36900.000000,8.053916)}
{pt3dadd(194472.000000,132828.000000,36725.000000,5.432350)}
{pt3dadd(194532.000000,132960.000000,36550.000000,4.540740)}
{pt3dadd(194412.000000,133212.000000,36400.000000,4.823083)}
{pt3dadd(194232.000000,133452.000000,36200.000000,7.038472)}
{pt3dadd(194232.000000,133728.000000,36025.000000,10.699318)}

{create adhoc72}
{access adhoc72}
{connect adhoc72(1), adhoc68(0)}
{nseg = 1}
{strdef color color = "White"}
{pt3dclear()}
{pt3dadd(193548.000000,132684.000000,39475.000000,19.258772)}
{pt3dadd(193404.000000,132528.000000,39625.000000,11.377640)}
{pt3dadd(193200.000000,132252.000000,39600.000000,7.426584)}
{pt3dadd(193128.000000,131976.000000,39625.000000,6.784625)}
{pt3dadd(192972.000000,131712.000000,39650.000000,4.409795)}
{pt3dadd(192936.000000,131484.000000,39625.000000,4.409795)}
{pt3dadd(192792.000000,131280.000000,39750.000000,4.409795)}
{pt3dadd(192792.000000,131076.000000,39775.000000,6.784625)}
{pt3dadd(192756.000000,130860.000000,39850.000000,3.874829)}
{pt3dadd(192756.000000,130668.000000,39900.000000,3.874829)}
{pt3dadd(192744.000000,130488.000000,39975.000000,3.874829)}
{pt3dadd(192816.000000,130308.000000,40000.000000,6.784625)}
{pt3dadd(192936.000000,130128.000000,40050.000000,4.409795)}
{pt3dadd(192996.000000,130008.000000,40100.000000,4.409795)}
{pt3dadd(193032.000000,129828.000000,40125.000000,7.319591)}
{pt3dadd(193068.000000,129648.000000,40150.000000,10.871345)}
{pt3dadd(193008.000000,129468.000000,40250.000000,12.269250)}
{pt3dadd(192960.000000,129300.000000,40275.000000,19.258772)}

{create adhoc73}
{access adhoc73}
{connect adhoc73(1), adhoc72(0)}
{nseg = 1}
{strdef color color = "White"}
{pt3dclear()}
{pt3dadd(192960.000000,129300.000000,40275.000000,19.258772)}
{pt3dadd(192768.000000,129216.000000,40775.000000,12.269250)}
{pt3dadd(192492.000000,129060.000000,41050.000000,7.961550)}
{pt3dadd(192360.000000,128988.000000,41300.000000,7.319591)}
{pt3dadd(192108.000000,128928.000000,41550.000000,4.409795)}
{pt3dadd(191964.000000,128904.000000,41575.000000,4.409795)}
{pt3dadd(191808.000000,128856.000000,41725.000000,4.409795)}
{pt3dadd(191592.000000,128760.000000,41800.000000,5.967316)}
{pt3dadd(191304.000000,128664.000000,41925.000000,4.305454)}
{pt3dadd(191040.000000,128724.000000,42000.000000,6.175757)}
{pt3dadd(191100.000000,128772.000000,42275.000000,7.739669)}

{create adhoc74}
{access adhoc74}
{connect adhoc74(1), adhoc72(0)}
{nseg = 1}
{strdef color color = "White"}
{pt3dclear()}
{pt3dadd(192960.000000,129300.000000,40275.000000,19.258772)}
{pt3dadd(193104.000000,129144.000000,40150.000000,11.377640)}
{pt3dadd(193236.000000,129000.000000,40025.000000,7.426584)}
{pt3dadd(193272.000000,128856.000000,40025.000000,6.784625)}
{pt3dadd(193320.000000,128700.000000,40050.000000,4.409795)}
{pt3dadd(193428.000000,128544.000000,40075.000000,4.409795)}
{pt3dadd(193452.000000,128376.000000,40025.000000,4.409795)}
{pt3dadd(193488.000000,128208.000000,40000.000000,7.319591)}
{pt3dadd(193488.000000,128040.000000,40050.000000,4.409795)}
{pt3dadd(193488.000000,127920.000000,40100.000000,4.409795)}
{pt3dadd(193404.000000,127776.000000,40225.000000,4.409795)}
{pt3dadd(193440.000000,127632.000000,40300.000000,7.961550)}
{pt3dadd(193380.000000,127488.000000,40325.000000,5.051754)}
{pt3dadd(193176.000000,127212.000000,40350.000000,5.051754)}
{pt3dadd(193032.000000,126864.000000,40525.000000,5.051754)}
{pt3dadd(193008.000000,126684.000000,40525.000000,7.426584)}
{pt3dadd(192900.000000,126480.000000,40600.000000,3.874829)}
{pt3dadd(192852.000000,126300.000000,40625.000000,3.874829)}
{pt3dadd(192816.000000,126120.000000,40650.000000,7.272513)}
{pt3dadd(192756.000000,125964.000000,40700.000000,10.670197)}
{pt3dadd(192612.000000,125808.000000,40850.000000,12.825613)}
{pt3dadd(192528.000000,125700.000000,40850.000000,18.488420)}

{create adhoc75}
{access adhoc75}
{connect adhoc75(1), adhoc74(0)}
{nseg = 1}
{strdef color color = "White"}
{pt3dclear()}
{pt3dadd(192528.000000,125700.000000,40850.000000,18.488420)}
{pt3dadd(192384.000000,125700.000000,41375.000000,15.756529)}
{pt3dadd(192252.000000,125556.000000,41775.000000,12.565755)}
{pt3dadd(192144.000000,125484.000000,42075.000000,8.916098)}

{create adhoc76}
{access adhoc76}
{connect adhoc76(1), adhoc74(0)}
{nseg = 1}
{strdef color color = "White"}
{pt3dclear()}
{pt3dadd(192528.000000,125700.000000,40850.000000,18.488420)}
{pt3dadd(192432.000000,125484.000000,40900.000000,12.012466)}
{pt3dadd(192360.000000,125328.000000,40900.000000,7.807479)}
{pt3dadd(192360.000000,125160.000000,40950.000000,5.399740)}
{pt3dadd(192420.000000,125016.000000,40925.000000,2.489945)}
{pt3dadd(192360.000000,124860.000000,40825.000000,2.489945)}
{pt3dadd(192336.000000,124260.000000,40825.000000,2.489945)}
{pt3dadd(192360.000000,123972.000000,40725.000000,3.737879)}
{pt3dadd(192264.000000,123720.000000,40550.000000,2.747934)}
{pt3dadd(192156.000000,123468.000000,40450.000000,2.747934)}
{pt3dadd(191940.000000,123192.000000,40350.000000,4.305454)}
{pt3dadd(191892.000000,122808.000000,40150.000000,5.553388)}
{pt3dadd(191808.000000,122472.000000,40075.000000,6.175757)}
{pt3dadd(191748.000000,122280.000000,40050.000000,7.739669)}

{create adhoc77}
{access adhoc77}
{connect adhoc77(1), adhoc59(0)}
{nseg = 1}
{strdef color color = "White"}
{pt3dclear()}
{pt3dadd(192804.000000,141528.000000,43225.000000,39.934990)}
{pt3dadd(192444.000000,141360.000000,42725.000000,39.934990)}
{pt3dadd(192324.000000,141360.000000,42375.000000,39.934990)}

{create adhoc78}
{access adhoc78}
{connect adhoc78(1), adhoc77(0)}
{nseg = 1}
{strdef color color = "White"}
{pt3dclear()}
{pt3dadd(192324.000000,141360.000000,42375.000000,39.934990)}
{pt3dadd(191400.000000,141156.000000,42375.000000,17.526704)}
{pt3dadd(190896.000000,141096.000000,42200.000000,11.116023)}
{pt3dadd(190788.000000,141060.000000,42225.000000,5.803854)}
{pt3dadd(190668.000000,141048.000000,42100.000000,3.874829)}
{pt3dadd(190224.000000,141108.000000,41950.000000,3.874829)}
{pt3dadd(190056.000000,141288.000000,41725.000000,3.874829)}
{pt3dadd(189864.000000,141348.000000,41525.000000,6.142666)}
{pt3dadd(189672.000000,141504.000000,41275.000000,3.767836)}
{pt3dadd(189528.000000,141732.000000,41100.000000,3.767836)}
{pt3dadd(189528.000000,142068.000000,40925.000000,3.767836)}
{pt3dadd(189540.000000,142224.000000,40725.000000,5.696861)}
{pt3dadd(189432.000000,142224.000000,40500.000000,3.429025)}
{pt3dadd(189432.000000,142464.000000,40275.000000,3.429025)}
{pt3dadd(189504.000000,142680.000000,40100.000000,3.429025)}
{pt3dadd(189588.000000,143064.000000,39975.000000,5.358049)}
{pt3dadd(189600.000000,143556.000000,39825.000000,3.429025)}
{pt3dadd(189600.000000,143712.000000,39650.000000,3.429025)}
{pt3dadd(189648.000000,143904.000000,39850.000000,5.358049)}
{pt3dadd(189600.000000,144552.000000,39850.000000,7.287074)}
{pt3dadd(189564.000000,144708.000000,39975.000000,7.930082)}
{pt3dadd(189600.000000,144840.000000,40000.000000,11.145123)}

{create adhoc79}
{access adhoc79}
{connect adhoc79(1), adhoc77(0)}
{nseg = 1}
{strdef color color = "White"}
{pt3dclear()}
{pt3dadd(192324.000000,141360.000000,42375.000000,39.934990)}
{pt3dadd(192552.000000,141504.000000,42125.000000,27.123327)}
{pt3dadd(192576.000000,141504.000000,41825.000000,16.873996)}
{pt3dadd(192588.000000,141516.000000,41550.000000,15.542830)}
{pt3dadd(192660.000000,141540.000000,41275.000000,7.855832)}
{pt3dadd(192744.000000,141468.000000,40975.000000,7.855832)}
{pt3dadd(192696.000000,141384.000000,40675.000000,7.855832)}
{pt3dadd(192804.000000,141336.000000,40400.000000,12.177937)}
{pt3dadd(192888.000000,141276.000000,40100.000000,5.822105)}
{pt3dadd(192900.000000,141192.000000,39900.000000,5.822105)}
{pt3dadd(192888.000000,141024.000000,39650.000000,5.822105)}
{pt3dadd(192924.000000,140808.000000,39425.000000,12.177937)}
{pt3dadd(192948.000000,140640.000000,39275.000000,7.855832)}
{pt3dadd(192996.000000,140604.000000,39025.000000,7.855832)}
{pt3dadd(193008.000000,140676.000000,38775.000000,7.855832)}
{pt3dadd(193212.000000,140676.000000,38350.000000,14.211664)}
{pt3dadd(193296.000000,140580.000000,37800.000000,14.211664)}
{pt3dadd(193368.000000,140568.000000,37550.000000,22.686107)}
{pt3dadd(193296.000000,140616.000000,37300.000000,33.279160)}

{create adhoc80}
{access adhoc80}
{connect adhoc80(1), adhoc79(0)}
{nseg = 1}
{strdef color color = "White"}
{pt3dclear()}
{pt3dadd(193296.000000,140616.000000,37300.000000,33.279160)}
{pt3dadd(193488.000000,139896.000000,36600.000000,16.942712)}
{pt3dadd(193608.000000,139680.000000,36475.000000,10.765627)}
{pt3dadd(193716.000000,139392.000000,36275.000000,7.319591)}
{pt3dadd(193908.000000,139188.000000,36100.000000,4.409795)}
{pt3dadd(193968.000000,138972.000000,35875.000000,4.409795)}
{pt3dadd(193980.000000,139008.000000,35650.000000,4.409795)}
{pt3dadd(194088.000000,138972.000000,35425.000000,7.961550)}
{pt3dadd(194208.000000,138972.000000,35175.000000,7.833158)}
{pt3dadd(194256.000000,139104.000000,34975.000000,12.055264)}
{pt3dadd(194760.000000,139068.000000,34775.000000,15.407019)}

{create adhoc81}
{access adhoc81}
{connect adhoc81(1), adhoc80(0)}
{nseg = 1}
{strdef color color = "White"}
{pt3dclear()}
{pt3dadd(194760.000000,139068.000000,34775.000000,15.407019)}
{pt3dadd(195264.000000,138792.000000,34675.000000,12.173612)}
{pt3dadd(195528.000000,138444.000000,34525.000000,13.374147)}

{create adhoc82}
{access adhoc82}
{connect adhoc82(1), adhoc80(0)}
{nseg = 1}
{strdef color color = "White"}
{pt3dclear()}
{pt3dadd(194760.000000,139068.000000,34775.000000,15.407019)}
{pt3dadd(194652.000000,139128.000000,34500.000000,12.565755)}
{pt3dadd(194664.000000,139020.000000,34325.000000,10.525949)}
{pt3dadd(194688.000000,138996.000000,34125.000000,9.287602)}

{create adhoc83}
{access adhoc83}
{connect adhoc83(1), adhoc79(0)}
{nseg = 1}
{strdef color color = "White"}
{pt3dclear()}
{pt3dadd(193296.000000,140616.000000,37300.000000,33.279160)}
{pt3dadd(193344.000000,140772.000000,37000.000000,20.837264)}
{pt3dadd(193320.000000,141240.000000,36825.000000,13.102358)}
{pt3dadd(193308.000000,141504.000000,36650.000000,9.656322)}
{pt3dadd(193320.000000,141732.000000,36425.000000,4.409795)}
{pt3dadd(193404.000000,142248.000000,36150.000000,4.409795)}
{pt3dadd(193416.000000,142584.000000,35975.000000,4.409795)}
{pt3dadd(193440.000000,143100.000000,35725.000000,7.961550)}
{pt3dadd(193428.000000,143580.000000,35550.000000,5.051754)}
{pt3dadd(193452.000000,143952.000000,35375.000000,5.051754)}
{pt3dadd(193476.000000,144144.000000,35175.000000,5.051754)}
{pt3dadd(193428.000000,144324.000000,35000.000000,7.961550)}
{pt3dadd(193404.000000,144504.000000,34775.000000,4.409795)}
{pt3dadd(193536.000000,144648.000000,34400.000000,4.409795)}
{pt3dadd(193656.000000,144804.000000,34175.000000,4.409795)}
{pt3dadd(193764.000000,144924.000000,34050.000000,6.784625)}
{pt3dadd(193848.000000,144852.000000,33875.000000,5.803854)}
{pt3dadd(193980.000000,145056.000000,33650.000000,8.673090)}
{pt3dadd(194076.000000,145104.000000,33425.000000,11.145123)}

{create adhoc84}
{access adhoc84}
{connect adhoc84(1), adhoc14(0)}
{nseg = 1}
{strdef color color = "White"}
{pt3dclear()}
{pt3dadd(193224.000000,143580.000000,46000.000000,1.500000)}
{pt3dadd(191340.000000,143580.000000,46025.000000,3.149908)}
{pt3dadd(190968.000000,143508.000000,46025.000000,2.489945)}
{pt3dadd(190872.000000,143508.000000,45975.000000,4.757781)}
{pt3dadd(190752.000000,143436.000000,45975.000000,3.767836)}
{pt3dadd(190656.000000,143400.000000,46000.000000,3.767836)}
{pt3dadd(190512.000000,143352.000000,45900.000000,3.767836)}
{pt3dadd(190392.000000,143304.000000,45875.000000,7.319591)}
{pt3dadd(190260.000000,143256.000000,45825.000000,5.051754)}
{pt3dadd(190128.000000,143220.000000,45725.000000,5.051754)}
{pt3dadd(189972.000000,143088.000000,45725.000000,5.051754)}
{pt3dadd(189756.000000,143040.000000,45675.000000,6.299688)}
{pt3dadd(189576.000000,142968.000000,45675.000000,2.747934)}
{pt3dadd(189444.000000,142896.000000,45625.000000,2.747934)}
{pt3dadd(189240.000000,142764.000000,45700.000000,2.747934)}
{pt3dadd(189048.000000,142512.000000,45825.000000,3.995868)}
{pt3dadd(188952.000000,142236.000000,45825.000000,2.747934)}
{pt3dadd(188784.000000,142044.000000,45825.000000,2.747934)}
{pt3dadd(188712.000000,141912.000000,45900.000000,4.305454)}
{pt3dadd(188568.000000,141624.000000,45900.000000,6.234479)}
{pt3dadd(188568.000000,141504.000000,45900.000000,7.310908)}
{pt3dadd(188556.000000,141360.000000,45900.000000,11.145123)}

{create adhoc85}
{access adhoc85}
{connect adhoc85(1), adhoc13(0)}
{nseg = 1}
{strdef color color = "White"}
{pt3dclear()}
{pt3dadd(192528.000000,152616.000000,44975.000000,57.506386)}
{pt3dadd(190908.000000,152616.000000,43700.000000,26.088386)}
{pt3dadd(190596.000000,152496.000000,43525.000000,16.253032)}
{pt3dadd(190440.000000,152328.000000,43500.000000,7.961550)}
{pt3dadd(190284.000000,152208.000000,43475.000000,4.409795)}
{pt3dadd(189960.000000,152064.000000,43425.000000,4.409795)}
{pt3dadd(189780.000000,151920.000000,43375.000000,7.319591)}
{pt3dadd(189636.000000,151824.000000,43400.000000,11.641696)}
{pt3dadd(189468.000000,151764.000000,43350.000000,13.553168)}
{pt3dadd(189288.000000,151692.000000,43325.000000,23.110527)}

{create adhoc86}
{access adhoc86}
{connect adhoc86(1), adhoc85(0)}
{nseg = 1}
{strdef color color = "White"}
{pt3dclear()}
{pt3dadd(189288.000000,151692.000000,43325.000000,23.110527)}
{pt3dadd(189204.000000,151596.000000,43875.000000,11.299376)}
{pt3dadd(189108.000000,151596.000000,43975.000000,8.929534)}
{pt3dadd(188820.000000,151440.000000,44125.000000,4.083180)}
{pt3dadd(188628.000000,151452.000000,44150.000000,5.374770)}

{create adhoc87}
{access adhoc87}
{connect adhoc87(1), adhoc85(0)}
{nseg = 1}
{strdef color color = "White"}
{pt3dclear()}
{pt3dadd(189288.000000,151692.000000,43325.000000,23.110527)}
{pt3dadd(189204.000000,151656.000000,43100.000000,15.907018)}
{pt3dadd(189048.000000,151656.000000,42950.000000,10.144211)}
{pt3dadd(188856.000000,151680.000000,42800.000000,8.196935)}
{pt3dadd(188700.000000,151668.000000,42625.000000,3.874829)}
{pt3dadd(188544.000000,151668.000000,42550.000000,3.874829)}
{pt3dadd(188412.000000,151596.000000,42475.000000,3.874829)}
{pt3dadd(188316.000000,151476.000000,42375.000000,5.803854)}
{pt3dadd(188196.000000,151356.000000,42350.000000,3.429025)}
{pt3dadd(188064.000000,151308.000000,41950.000000,3.429025)}
{pt3dadd(188028.000000,151212.000000,41775.000000,3.429025)}
{pt3dadd(187920.000000,151032.000000,41625.000000,4.676958)}
{pt3dadd(187920.000000,150936.000000,41425.000000,2.747934)}
{pt3dadd(187920.000000,150828.000000,41225.000000,2.747934)}
{pt3dadd(187932.000000,150612.000000,41050.000000,2.747934)}
{pt3dadd(187788.000000,150456.000000,40850.000000,4.305454)}
{pt3dadd(187836.000000,150300.000000,40700.000000,5.432350)}
{pt3dadd(187764.000000,150144.000000,40500.000000,7.361374)}
{pt3dadd(187608.000000,149988.000000,40300.000000,11.268957)}
{pt3dadd(187620.000000,149880.000000,40075.000000,11.145123)}

{create adhoc88}
{access adhoc88}
{connect adhoc88(1), adhoc12(0)}
{nseg = 1}
{strdef color color = "White"}
{pt3dclear()}
{pt3dadd(191820.000000,155700.000000,43525.000000,47.921990)}
{pt3dadd(190716.000000,155700.000000,41975.000000,34.462418)}
{pt3dadd(190716.000000,155580.000000,41700.000000,26.191930)}
{pt3dadd(190668.000000,155484.000000,41575.000000,23.110527)}

{create adhoc89}
{access adhoc89}
{connect adhoc89(1), adhoc88(0)}
{nseg = 1}
{strdef color color = "White"}
{pt3dclear()}
{pt3dadd(190668.000000,155484.000000,41575.000000,23.110527)}
{pt3dadd(189660.000000,155508.000000,41675.000000,9.696501)}
{pt3dadd(189264.000000,155520.000000,41675.000000,6.417900)}
{pt3dadd(188748.000000,155508.000000,41825.000000,3.085740)}
{pt3dadd(188388.000000,155520.000000,41950.000000,3.479890)}
{pt3dadd(188028.000000,155520.000000,42175.000000,4.254844)}
{pt3dadd(187596.000000,155520.000000,42325.000000,6.091406)}
{pt3dadd(187368.000000,155520.000000,42425.000000,5.374770)}

{create adhoc90}
{access adhoc90}
{connect adhoc90(1), adhoc88(0)}
{nseg = 1}
{strdef color color = "White"}
{pt3dclear()}
{pt3dadd(190668.000000,155484.000000,41575.000000,23.110527)}
{pt3dadd(190776.000000,155364.000000,41425.000000,15.907018)}
{pt3dadd(190824.000000,154620.000000,41050.000000,10.144211)}
{pt3dadd(190824.000000,154308.000000,40825.000000,8.731901)}
{pt3dadd(190800.000000,154176.000000,40625.000000,4.409795)}
{pt3dadd(190788.000000,154020.000000,40475.000000,7.319591)}
{pt3dadd(190704.000000,153792.000000,40250.000000,11.641696)}
{pt3dadd(190608.000000,153588.000000,40025.000000,13.553168)}
{pt3dadd(190800.000000,153468.000000,39800.000000,23.110527)}

{create adhoc91}
{access adhoc91}
{connect adhoc91(1), adhoc90(0)}
{nseg = 1}
{strdef color color = "White"}
{pt3dclear()}
{pt3dadd(190800.000000,153468.000000,39800.000000,23.110527)}
{pt3dadd(189960.000000,153636.000000,39725.000000,11.299376)}
{pt3dadd(189768.000000,153804.000000,39600.000000,8.154580)}
{pt3dadd(189504.000000,153540.000000,39425.000000,5.080408)}
{pt3dadd(189348.000000,153432.000000,39250.000000,4.871480)}
{pt3dadd(189192.000000,153288.000000,39075.000000,7.739669)}

{create adhoc92}
{access adhoc92}
{connect adhoc92(1), adhoc90(0)}
{nseg = 1}
{strdef color color = "White"}
{pt3dclear()}
{pt3dadd(190800.000000,153468.000000,39800.000000,23.110527)}
{pt3dadd(191184.000000,153264.000000,39600.000000,21.826609)}
{pt3dadd(191268.000000,153180.000000,39375.000000,21.826609)}
{pt3dadd(191340.000000,153084.000000,39175.000000,23.110527)}

{create adhoc93}
{access adhoc93}
{connect adhoc93(1), adhoc92(0)}
{nseg = 1}
{strdef color color = "White"}
{pt3dclear()}
{pt3dadd(191340.000000,153084.000000,39175.000000,23.110527)}
{pt3dadd(191184.000000,153216.000000,38925.000000,21.826609)}
{pt3dadd(191340.000000,153480.000000,38750.000000,18.581149)}
{pt3dadd(191556.000000,153852.000000,38600.000000,13.374147)}

{create adhoc94}
{access adhoc94}
{connect adhoc94(1), adhoc93(0)}
{nseg = 1}
{strdef color color = "White"}
{pt3dclear()}
{pt3dadd(191556.000000,153852.000000,38600.000000,13.374147)}
{pt3dadd(191952.000000,153780.000000,38500.000000,7.739669)}

{create adhoc95}
{access adhoc95}
{connect adhoc95(1), adhoc93(0)}
{nseg = 1}
{strdef color color = "White"}
{pt3dclear()}
{pt3dadd(191556.000000,153852.000000,38600.000000,13.374147)}
{pt3dadd(191496.000000,154296.000000,38500.000000,8.053916)}
{pt3dadd(191412.000000,154536.000000,38350.000000,5.432350)}
{pt3dadd(191148.000000,154812.000000,38200.000000,4.615041)}
{pt3dadd(191148.000000,154932.000000,38175.000000,3.057520)}
{pt3dadd(191088.000000,155076.000000,38225.000000,3.057520)}
{pt3dadd(191088.000000,155220.000000,38200.000000,3.057520)}
{pt3dadd(190644.000000,155484.000000,38200.000000,4.986545)}
{pt3dadd(190476.000000,155688.000000,38300.000000,3.429025)}
{pt3dadd(190248.000000,155796.000000,38350.000000,3.429025)}
{pt3dadd(189960.000000,155892.000000,38350.000000,3.429025)}
{pt3dadd(189756.000000,156000.000000,38350.000000,4.418969)}
{pt3dadd(189528.000000,156120.000000,38325.000000,3.737879)}
{pt3dadd(189132.000000,156156.000000,38350.000000,5.229798)}
{pt3dadd(189012.000000,156276.000000,38175.000000,7.739669)}

{create adhoc96}
{access adhoc96}
{connect adhoc96(1), adhoc92(0)}
{nseg = 1}
{strdef color color = "White"}
{pt3dclear()}
{pt3dadd(191340.000000,153084.000000,39175.000000,23.110527)}
{pt3dadd(191112.000000,152592.000000,38875.000000,11.299376)}
{pt3dadd(191256.000000,152448.000000,38850.000000,7.379626)}
{pt3dadd(191472.000000,152328.000000,38700.000000,6.609275)}
{pt3dadd(191724.000000,152208.000000,38450.000000,5.051754)}
{pt3dadd(191904.000000,152088.000000,38275.000000,5.051754)}
{pt3dadd(192000.000000,151968.000000,38100.000000,5.051754)}
{pt3dadd(192132.000000,151836.000000,37950.000000,7.426584)}
{pt3dadd(192156.000000,151632.000000,37650.000000,3.874829)}
{pt3dadd(192444.000000,151512.000000,37300.000000,3.874829)}
{pt3dadd(192396.000000,151356.000000,37100.000000,7.426584)}
{pt3dadd(192480.000000,151344.000000,36875.000000,10.336379)}
{pt3dadd(192516.000000,151392.000000,36575.000000,12.269250)}
{pt3dadd(192552.000000,151392.000000,36375.000000,16.048977)}

{create adhoc97}
{access adhoc97}
{connect adhoc97(1), adhoc96(0)}
{nseg = 1}
{strdef color color = "White"}
{pt3dclear()}
{pt3dadd(192552.000000,151392.000000,36375.000000,16.048977)}
{pt3dadd(192324.000000,151860.000000,36375.000000,8.227286)}
{pt3dadd(192240.000000,152016.000000,36275.000000,5.536371)}
{pt3dadd(192048.000000,152052.000000,36125.000000,3.401530)}
{pt3dadd(191856.000000,152088.000000,36000.000000,3.522888)}
{pt3dadd(191652.000000,152136.000000,35875.000000,4.871480)}
{pt3dadd(191412.000000,152280.000000,35750.000000,7.739669)}

{create adhoc98}
{access adhoc98}
{connect adhoc98(1), adhoc96(0)}
{nseg = 1}
{strdef color color = "White"}
{pt3dclear()}
{pt3dadd(192552.000000,151392.000000,36375.000000,16.048977)}
{pt3dadd(192720.000000,151272.000000,36150.000000,10.307708)}
{pt3dadd(192732.000000,151212.000000,35950.000000,6.784625)}
{pt3dadd(192768.000000,151188.000000,35700.000000,5.803854)}
{pt3dadd(192780.000000,151116.000000,35500.000000,3.429025)}
{pt3dadd(192756.000000,151080.000000,35300.000000,3.429025)}
{pt3dadd(192708.000000,151008.000000,35025.000000,3.429025)}
{pt3dadd(192648.000000,150948.000000,34825.000000,5.358049)}
{pt3dadd(192660.000000,150900.000000,34600.000000,4.986545)}
{pt3dadd(192720.000000,150888.000000,34350.000000,7.310908)}
{pt3dadd(192756.000000,150768.000000,34150.000000,9.287602)}

{create adhoc99}
{access adhoc99}
{connect adhoc99(1), adhoc11(0)}
{nseg = 1}
{strdef color color = "White"}
{pt3dclear()}
{pt3dadd(189948.000000,165564.000000,42750.000000,47.921990)}
{pt3dadd(188940.000000,165564.000000,40275.000000,47.921990)}

{create adhoc100}
{access adhoc100}
{connect adhoc100(1), adhoc99(0)}
{nseg = 1}
{strdef color color = "White"}
{pt3dclear()}
{pt3dadd(188940.000000,165564.000000,40275.000000,47.921990)}
{pt3dadd(188388.000000,164844.000000,40175.000000,18.623905)}
{pt3dadd(188196.000000,164688.000000,40100.000000,11.774343)}
{pt3dadd(188100.000000,164556.000000,40075.000000,3.264899)}
{pt3dadd(188004.000000,164472.000000,40000.000000,2.274954)}
{pt3dadd(187860.000000,164364.000000,39975.000000,2.274954)}
{pt3dadd(187740.000000,164256.000000,39975.000000,2.274954)}
{pt3dadd(187584.000000,164160.000000,39975.000000,2.870749)}
{pt3dadd(187488.000000,164052.000000,39950.000000,2.691590)}
{pt3dadd(187308.000000,163956.000000,39900.000000,3.681535)}
{pt3dadd(187116.000000,163848.000000,39900.000000,5.135891)}
{pt3dadd(187032.000000,163776.000000,39900.000000,6.449724)}

{create adhoc101}
{access adhoc101}
{connect adhoc101(1), adhoc99(0)}
{nseg = 1}
{strdef color color = "White"}
{pt3dclear()}
{pt3dadd(188940.000000,165564.000000,40275.000000,47.921990)}
{pt3dadd(188688.000000,165420.000000,39900.000000,58.145345)}
{pt3dadd(188676.000000,165288.000000,39475.000000,61.340144)}
{pt3dadd(188640.000000,165216.000000,39075.000000,57.506386)}

{create adhoc102}
{access adhoc102}
{connect adhoc102(1), adhoc101(0)}
{nseg = 1}
{strdef color color = "White"}
{pt3dclear()}
{pt3dadd(188640.000000,165216.000000,39075.000000,57.506386)}
{pt3dadd(187560.000000,164472.000000,39000.000000,23.468611)}
{pt3dadd(187296.000000,164340.000000,39000.000000,6.449724)}

{create adhoc103}
{access adhoc103}
{connect adhoc103(1), adhoc101(0)}
{nseg = 1}
{strdef color color = "White"}
{pt3dclear()}
{pt3dadd(188640.000000,165216.000000,39075.000000,57.506386)}
{pt3dadd(188532.000000,165012.000000,38750.000000,47.815495)}
{pt3dadd(188304.000000,164856.000000,38475.000000,39.934990)}

{create adhoc104}
{access adhoc104}
{connect adhoc104(1), adhoc103(0)}
{nseg = 1}
{strdef color color = "White"}
{pt3dclear()}
{pt3dadd(188304.000000,164856.000000,38475.000000,39.934990)}
{pt3dadd(187332.000000,164136.000000,38350.000000,18.269712)}
{pt3dadd(186984.000000,163728.000000,38350.000000,11.561827)}
{pt3dadd(186828.000000,163548.000000,38150.000000,5.122763)}
{pt3dadd(186708.000000,163260.000000,38250.000000,3.343729)}
{pt3dadd(186624.000000,163104.000000,38125.000000,4.118683)}
{pt3dadd(186492.000000,162948.000000,38075.000000,5.864471)}
{pt3dadd(186468.000000,162804.000000,38125.000000,5.374770)}

{create adhoc105}
{access adhoc105}
{connect adhoc105(1), adhoc104(0)}
{nseg = 1}
{strdef color color = "White"}
{pt3dclear()}
{pt3dadd(186468.000000,162804.000000,38125.000000,5.374770)}
{pt3dadd(186036.000000,162552.000000,38075.000000,4.871480)}
{pt3dadd(185808.000000,162372.000000,38075.000000,3.522888)}
{pt3dadd(185688.000000,162288.000000,38000.000000,3.995868)}
{pt3dadd(185556.000000,162192.000000,37975.000000,2.747934)}
{pt3dadd(185424.000000,162072.000000,37900.000000,2.747934)}
{pt3dadd(185316.000000,161916.000000,37875.000000,2.747934)}
{pt3dadd(185196.000000,161760.000000,37800.000000,4.676958)}
{pt3dadd(185052.000000,161640.000000,37825.000000,3.429025)}
{pt3dadd(184908.000000,161508.000000,37825.000000,3.429025)}
{pt3dadd(184776.000000,161508.000000,37750.000000,3.429025)}
{pt3dadd(184632.000000,161316.000000,37750.000000,4.986545)}
{pt3dadd(184524.000000,161316.000000,37750.000000,3.057520)}
{pt3dadd(184404.000000,161268.000000,37775.000000,3.057520)}
{pt3dadd(184308.000000,161124.000000,37875.000000,3.057520)}
{pt3dadd(184284.000000,160800.000000,37975.000000,4.615041)}
{pt3dadd(184104.000000,160632.000000,37975.000000,3.057520)}
{pt3dadd(183864.000000,160512.000000,38100.000000,3.057520)}
{pt3dadd(183720.000000,160416.000000,38175.000000,3.057520)}
{pt3dadd(183576.000000,160320.000000,38275.000000,4.047465)}
{pt3dadd(183540.000000,160200.000000,38275.000000,4.418969)}
{pt3dadd(183396.000000,160068.000000,38400.000000,6.364949)}
{pt3dadd(183432.000000,159924.000000,38475.000000,11.145123)}

{create adhoc106}
{access adhoc106}
{connect adhoc106(1), adhoc104(0)}
{nseg = 1}
{strdef color color = "White"}
{pt3dclear()}
{pt3dadd(186468.000000,162804.000000,38125.000000,5.374770)}
{pt3dadd(186540.000000,162660.000000,38100.000000,6.059874)}
{pt3dadd(186612.000000,162516.000000,38000.000000,7.430082)}

{create adhoc107}
{access adhoc107}
{connect adhoc107(1), adhoc103(0)}
{nseg = 1}
{strdef color color = "White"}
{pt3dclear()}
{pt3dadd(188304.000000,164856.000000,38475.000000,39.934990)}
{pt3dadd(188544.000000,164856.000000,38225.000000,29.146699)}
{pt3dadd(188604.000000,164796.000000,37950.000000,23.334546)}
{pt3dadd(188664.000000,164736.000000,37650.000000,20.894074)}
{pt3dadd(188616.000000,164652.000000,37425.000000,18.988421)}
{pt3dadd(188592.000000,164544.000000,37275.000000,27.732632)}

{create adhoc108}
{access adhoc108}
{connect adhoc108(1), adhoc107(0)}
{nseg = 1}
{strdef color color = "White"}
{pt3dclear()}
{pt3dadd(188592.000000,164544.000000,37275.000000,27.732632)}
{pt3dadd(188172.000000,165240.000000,37200.000000,14.879883)}
{pt3dadd(188028.000000,165504.000000,37000.000000,9.527930)}
{pt3dadd(187920.000000,165708.000000,36825.000000,5.271348)}
{pt3dadd(187896.000000,165936.000000,36650.000000,2.489945)}
{pt3dadd(187572.000000,166176.000000,36425.000000,2.489945)}
{pt3dadd(187404.000000,166404.000000,36225.000000,2.489945)}
{pt3dadd(187164.000000,166524.000000,36400.000000,4.047465)}
{pt3dadd(187068.000000,166644.000000,36475.000000,3.057520)}
{pt3dadd(186972.000000,166764.000000,36400.000000,3.057520)}
{pt3dadd(186948.000000,166872.000000,36350.000000,3.057520)}
{pt3dadd(186816.000000,166776.000000,36350.000000,4.305454)}
{pt3dadd(186684.000000,166764.000000,36300.000000,2.747934)}
{pt3dadd(186564.000000,166788.000000,36250.000000,2.747934)}
{pt3dadd(186444.000000,166824.000000,36250.000000,2.747934)}
{pt3dadd(186324.000000,166824.000000,36125.000000,3.995868)}
{pt3dadd(186216.000000,166776.000000,36075.000000,2.747934)}
{pt3dadd(185940.000000,166608.000000,36075.000000,2.747934)}
{pt3dadd(185832.000000,166596.000000,36100.000000,2.747934)}
{pt3dadd(185712.000000,166500.000000,36075.000000,4.676958)}
{pt3dadd(185592.000000,166536.000000,35900.000000,4.986545)}
{pt3dadd(185604.000000,166536.000000,35750.000000,7.310908)}
{pt3dadd(185616.000000,166692.000000,35550.000000,9.287602)}

{create adhoc109}
{access adhoc109}
{connect adhoc109(1), adhoc107(0)}
{nseg = 1}
{strdef color color = "White"}
{pt3dclear()}
{pt3dadd(188592.000000,164544.000000,37275.000000,27.732632)}
{pt3dadd(188772.000000,164340.000000,37075.000000,18.988421)}
{pt3dadd(188916.000000,164184.000000,36825.000000,11.993053)}
{pt3dadd(189048.000000,164016.000000,36525.000000,14.433524)}
{pt3dadd(189216.000000,163920.000000,36225.000000,15.276596)}
{pt3dadd(189408.000000,163848.000000,35975.000000,22.963594)}
{pt3dadd(189528.000000,163644.000000,35650.000000,37.272657)}
{pt3dadd(189648.000000,163656.000000,35350.000000,39.934990)}

{create adhoc110}
{access adhoc110}
{connect adhoc110(1), adhoc109(0)}
{nseg = 1}
{strdef color color = "White"}
{pt3dclear()}
{pt3dadd(189648.000000,163656.000000,35350.000000,39.934990)}
{pt3dadd(190332.000000,163260.000000,35200.000000,21.515172)}
{pt3dadd(190512.000000,163152.000000,35025.000000,13.509103)}
{pt3dadd(190644.000000,163068.000000,34800.000000,9.219789)}
{pt3dadd(190752.000000,162984.000000,34550.000000,4.897684)}
{pt3dadd(190884.000000,162960.000000,34300.000000,4.897684)}
{pt3dadd(191268.000000,162708.000000,34100.000000,4.897684)}
{pt3dadd(191460.000000,162564.000000,33875.000000,7.807479)}
{pt3dadd(191640.000000,162420.000000,33650.000000,4.409795)}
{pt3dadd(191952.000000,162144.000000,33400.000000,4.409795)}
{pt3dadd(192084.000000,161928.000000,33150.000000,4.409795)}
{pt3dadd(192408.000000,161424.000000,32800.000000,7.319591)}
{pt3dadd(192648.000000,161244.000000,32600.000000,4.409795)}
{pt3dadd(192444.000000,161088.000000,32575.000000,6.784625)}
{pt3dadd(192588.000000,160932.000000,32600.000000,8.342145)}
{pt3dadd(192696.000000,160800.000000,32675.000000,8.053916)}
{pt3dadd(192744.000000,160668.000000,32700.000000,9.287602)}

{create adhoc111}
{access adhoc111}
{connect adhoc111(1), adhoc109(0)}
{nseg = 1}
{strdef color color = "White"}
{pt3dclear()}
{pt3dadd(189648.000000,163656.000000,35350.000000,39.934990)}
{pt3dadd(189612.000000,164004.000000,35100.000000,23.055874)}
{pt3dadd(189708.000000,164232.000000,34900.000000,14.433524)}
{pt3dadd(189804.000000,164256.000000,34675.000000,11.993053)}
{pt3dadd(189888.000000,164352.000000,34400.000000,6.746526)}
{pt3dadd(189984.000000,164508.000000,34125.000000,6.746526)}
{pt3dadd(190248.000000,164916.000000,33875.000000,6.746526)}
{pt3dadd(190620.000000,165360.000000,33625.000000,10.298281)}
{pt3dadd(190656.000000,165504.000000,33375.000000,9.373860)}
{pt3dadd(190764.000000,165696.000000,33275.000000,14.185539)}
{pt3dadd(190884.000000,165840.000000,33150.000000,22.642565)}
{pt3dadd(190944.000000,166008.000000,32975.000000,25.558395)}

{create adhoc112}
{access adhoc112}
{connect adhoc112(1), adhoc111(0)}
{nseg = 1}
{strdef color color = "White"}
{pt3dclear()}
{pt3dadd(190944.000000,166008.000000,32975.000000,25.558395)}
{pt3dadd(191220.000000,166092.000000,31925.000000,14.369124)}
{pt3dadd(191292.000000,166032.000000,31750.000000,11.459353)}
{pt3dadd(191448.000000,166032.000000,31525.000000,5.229798)}
{pt3dadd(191532.000000,165936.000000,31325.000000,6.449724)}

{create adhoc113}
{access adhoc113}
{connect adhoc113(1), adhoc111(0)}
{nseg = 1}
{strdef color color = "White"}
{pt3dclear()}
{pt3dadd(190944.000000,166008.000000,32975.000000,25.558395)}
{pt3dadd(190932.000000,166212.000000,32750.000000,16.414834)}
{pt3dadd(190920.000000,166380.000000,32700.000000,10.448900)}
{pt3dadd(190932.000000,166536.000000,32650.000000,8.547017)}
{pt3dadd(191064.000000,166728.000000,32675.000000,4.409795)}
{pt3dadd(191124.000000,166908.000000,32650.000000,4.409795)}
{pt3dadd(191208.000000,167064.000000,32525.000000,4.409795)}
{pt3dadd(191172.000000,167196.000000,32400.000000,6.784625)}
{pt3dadd(191124.000000,167340.000000,32325.000000,3.874829)}
{pt3dadd(191220.000000,167472.000000,32325.000000,3.874829)}
{pt3dadd(191220.000000,167604.000000,32250.000000,3.874829)}
{pt3dadd(191172.000000,167748.000000,32150.000000,8.196935)}
{pt3dadd(191100.000000,167904.000000,32150.000000,5.822105)}
{pt3dadd(191076.000000,168036.000000,32200.000000,5.822105)}
{pt3dadd(191040.000000,168168.000000,32200.000000,5.822105)}
{pt3dadd(190980.000000,168360.000000,32175.000000,8.731901)}
{pt3dadd(190896.000000,168516.000000,32125.000000,4.409795)}
{pt3dadd(190896.000000,168696.000000,32100.000000,4.409795)}
{pt3dadd(190812.000000,168972.000000,32125.000000,4.409795)}
{pt3dadd(190740.000000,169140.000000,32150.000000,7.319591)}
{pt3dadd(190620.000000,169284.000000,32150.000000,4.409795)}
{pt3dadd(190524.000000,169440.000000,32075.000000,4.409795)}
{pt3dadd(190464.000000,169716.000000,32025.000000,4.409795)}
{pt3dadd(190248.000000,169944.000000,32025.000000,6.784625)}
{pt3dadd(189948.000000,170148.000000,32150.000000,3.874829)}
{pt3dadd(189672.000000,170292.000000,32200.000000,3.874829)}
{pt3dadd(189624.000000,170544.000000,32125.000000,3.874829)}
{pt3dadd(189540.000000,170700.000000,32150.000000,6.784625)}
{pt3dadd(189564.000000,170892.000000,32225.000000,4.409795)}
{pt3dadd(189432.000000,171072.000000,32150.000000,4.409795)}
{pt3dadd(189348.000000,171228.000000,32300.000000,4.409795)}
{pt3dadd(189264.000000,171384.000000,32300.000000,7.319591)}
{pt3dadd(189192.000000,171540.000000,32325.000000,4.409795)}
{pt3dadd(189120.000000,171684.000000,32350.000000,4.409795)}
{pt3dadd(189264.000000,171840.000000,32500.000000,4.409795)}
{pt3dadd(189420.000000,172116.000000,32625.000000,7.319591)}
{pt3dadd(189000.000000,172464.000000,32875.000000,4.409795)}
{pt3dadd(189000.000000,172620.000000,33025.000000,4.409795)}
{pt3dadd(189084.000000,172920.000000,32650.000000,4.409795)}
{pt3dadd(189000.000000,173076.000000,32700.000000,6.784625)}
{pt3dadd(188976.000000,173220.000000,32725.000000,3.874829)}
{pt3dadd(189024.000000,173364.000000,32725.000000,3.874829)}
{pt3dadd(189060.000000,173496.000000,32700.000000,3.874829)}
{pt3dadd(189036.000000,173640.000000,32675.000000,6.142666)}
{pt3dadd(189000.000000,173772.000000,32650.000000,6.677632)}
{pt3dadd(188988.000000,173916.000000,32575.000000,10.229386)}
{pt3dadd(188964.000000,174084.000000,32550.000000,16.048977)}
{pt3dadd(189012.000000,174216.000000,32475.000000,19.258772)}

{create adhoc114}
{access adhoc114}
{connect adhoc114(1), adhoc10(0)}
{nseg = 1}
{strdef color color = "White"}
{pt3dclear()}
{pt3dadd(188472.000000,173628.000000,43725.000000,66.247350)}
{pt3dadd(185496.000000,173628.000000,43750.000000,26.148889)}
{pt3dadd(185340.000000,173364.000000,43775.000000,16.289334)}
{pt3dadd(185112.000000,173304.000000,43750.000000,7.477085)}
{pt3dadd(184908.000000,173196.000000,43675.000000,5.637222)}
{pt3dadd(184704.000000,173112.000000,43600.000000,5.637222)}
{pt3dadd(184524.000000,173124.000000,43575.000000,5.637222)}
{pt3dadd(184368.000000,173100.000000,43550.000000,8.547017)}
{pt3dadd(184200.000000,173016.000000,43525.000000,4.409795)}
{pt3dadd(184020.000000,172992.000000,43450.000000,7.319591)}
{pt3dadd(183876.000000,172896.000000,43450.000000,10.871345)}
{pt3dadd(183720.000000,172920.000000,43400.000000,12.269250)}
{pt3dadd(183624.000000,172896.000000,43350.000000,19.258772)}

{create adhoc115}
{access adhoc115}
{connect adhoc115(1), adhoc114(0)}
{nseg = 1}
{strdef color color = "White"}
{pt3dclear()}
{pt3dadd(183624.000000,172896.000000,43350.000000,19.258772)}
{pt3dadd(183468.000000,172932.000000,43475.000000,14.314960)}
{pt3dadd(183336.000000,172920.000000,43475.000000,9.188976)}
{pt3dadd(183192.000000,172908.000000,43475.000000,9.188976)}
{pt3dadd(183024.000000,172896.000000,43475.000000,5.051754)}
{pt3dadd(182904.000000,172908.000000,43450.000000,5.051754)}
{pt3dadd(182724.000000,172896.000000,43475.000000,5.051754)}
{pt3dadd(182580.000000,172836.000000,43475.000000,7.426584)}
{pt3dadd(182436.000000,172836.000000,43550.000000,3.874829)}
{pt3dadd(182304.000000,172800.000000,43575.000000,3.874829)}
{pt3dadd(182208.000000,172776.000000,43600.000000,3.874829)}
{pt3dadd(182004.000000,172752.000000,43600.000000,6.784625)}
{pt3dadd(181800.000000,172728.000000,43600.000000,4.409795)}
{pt3dadd(181548.000000,172632.000000,43600.000000,4.409795)}
{pt3dadd(181356.000000,172536.000000,43775.000000,4.409795)}
{pt3dadd(181188.000000,172476.000000,43750.000000,8.731901)}
{pt3dadd(181080.000000,172464.000000,43750.000000,5.822105)}
{pt3dadd(180876.000000,172428.000000,43825.000000,5.822105)}
{pt3dadd(180696.000000,172380.000000,43875.000000,5.822105)}
{pt3dadd(180576.000000,172344.000000,43875.000000,8.731901)}
{pt3dadd(180408.000000,172272.000000,43975.000000,4.409795)}
{pt3dadd(180252.000000,172224.000000,44050.000000,4.409795)}
{pt3dadd(180096.000000,172200.000000,44050.000000,4.409795)}
{pt3dadd(179892.000000,172104.000000,44000.000000,7.807479)}
{pt3dadd(179628.000000,172008.000000,43875.000000,4.897684)}
{pt3dadd(179328.000000,171924.000000,43725.000000,4.897684)}
{pt3dadd(179136.000000,171900.000000,43725.000000,4.897684)}
{pt3dadd(178956.000000,171744.000000,43775.000000,8.449438)}
{pt3dadd(178800.000000,171696.000000,43775.000000,5.051754)}
{pt3dadd(178680.000000,171660.000000,43750.000000,5.051754)}
{pt3dadd(178512.000000,171636.000000,43675.000000,5.051754)}
{pt3dadd(178332.000000,171588.000000,43650.000000,8.603509)}
{pt3dadd(178176.000000,171504.000000,43650.000000,5.051754)}
{pt3dadd(178008.000000,171480.000000,43600.000000,5.051754)}
{pt3dadd(177840.000000,171372.000000,43700.000000,5.051754)}
{pt3dadd(177696.000000,171336.000000,43675.000000,9.373860)}
{pt3dadd(177540.000000,171348.000000,43600.000000,5.822105)}
{pt3dadd(177372.000000,171324.000000,43600.000000,5.822105)}
{pt3dadd(177216.000000,171300.000000,43600.000000,5.822105)}
{pt3dadd(177084.000000,171276.000000,43600.000000,9.373860)}
{pt3dadd(176868.000000,171204.000000,43575.000000,5.051754)}
{pt3dadd(176676.000000,171180.000000,43550.000000,5.051754)}
{pt3dadd(176484.000000,171120.000000,43500.000000,5.051754)}
{pt3dadd(176304.000000,171108.000000,43500.000000,8.449438)}
{pt3dadd(176112.000000,171120.000000,43500.000000,4.897684)}
{pt3dadd(175932.000000,171072.000000,43450.000000,4.897684)}
{pt3dadd(175752.000000,171012.000000,43425.000000,4.897684)}
{pt3dadd(175608.000000,170988.000000,43450.000000,8.449438)}
{pt3dadd(175440.000000,171000.000000,43450.000000,5.051754)}
{pt3dadd(175296.000000,170964.000000,43450.000000,5.051754)}
{pt3dadd(175104.000000,170940.000000,43400.000000,5.051754)}
{pt3dadd(174924.000000,170904.000000,43375.000000,8.603509)}
{pt3dadd(174780.000000,170844.000000,43425.000000,5.051754)}
{pt3dadd(174612.000000,170856.000000,43325.000000,5.051754)}
{pt3dadd(174456.000000,170856.000000,43325.000000,5.051754)}
{pt3dadd(174312.000000,170832.000000,43350.000000,8.603509)}
{pt3dadd(174096.000000,170844.000000,43400.000000,5.051754)}
{pt3dadd(173916.000000,170820.000000,43325.000000,5.051754)}
{pt3dadd(173748.000000,170724.000000,43375.000000,5.051754)}
{pt3dadd(173592.000000,170664.000000,43375.000000,9.188976)}
{pt3dadd(173436.000000,170676.000000,43350.000000,5.637221)}
{pt3dadd(173256.000000,170688.000000,43350.000000,5.637221)}
{pt3dadd(173088.000000,170652.000000,43350.000000,5.637221)}
{pt3dadd(172872.000000,170568.000000,43350.000000,9.959327)}
{pt3dadd(172692.000000,170544.000000,43350.000000,5.822105)}
{pt3dadd(172548.000000,170484.000000,43375.000000,5.822105)}
{pt3dadd(172356.000000,170400.000000,43375.000000,5.822105)}
{pt3dadd(172188.000000,170304.000000,43375.000000,9.373860)}
{pt3dadd(172008.000000,170208.000000,43400.000000,5.051754)}
{pt3dadd(171816.000000,170160.000000,43425.000000,9.373860)}
{pt3dadd(171624.000000,170100.000000,43475.000000,14.398525)}
{pt3dadd(171396.000000,170064.000000,43475.000000,17.077951)}
{pt3dadd(171192.000000,169968.000000,43500.000000,26.623327)}

{create adhoc116}
{access adhoc116}
{connect adhoc116(1), adhoc115(0)}
{nseg = 1}
{strdef color color = "White"}
{pt3dclear()}
{pt3dadd(171192.000000,169968.000000,43500.000000,26.623327)}
{pt3dadd(171024.000000,169968.000000,43525.000000,18.248885)}
{pt3dadd(170808.000000,169992.000000,43625.000000,11.549331)}
{pt3dadd(170628.000000,170040.000000,43700.000000,10.846771)}
{pt3dadd(170424.000000,169992.000000,43750.000000,5.822105)}
{pt3dadd(170232.000000,169980.000000,43750.000000,5.822105)}
{pt3dadd(170052.000000,169908.000000,43825.000000,5.822105)}
{pt3dadd(169884.000000,169896.000000,43825.000000,9.373860)}
{pt3dadd(169764.000000,170064.000000,43925.000000,5.051754)}
{pt3dadd(169632.000000,170076.000000,43925.000000,5.051754)}
{pt3dadd(169500.000000,170088.000000,43950.000000,5.051754)}
{pt3dadd(169392.000000,170136.000000,43950.000000,7.961550)}
{pt3dadd(169236.000000,170136.000000,43975.000000,4.409795)}
{pt3dadd(169104.000000,170136.000000,44000.000000,7.319591)}
{pt3dadd(168948.000000,170160.000000,44025.000000,10.229386)}
{pt3dadd(168828.000000,170208.000000,44075.000000,11.199318)}
{pt3dadd(168720.000000,170292.000000,44200.000000,16.048977)}

{create adhoc117}
{access adhoc117}
{connect adhoc117(1), adhoc116(0)}
{nseg = 1}
{strdef color color = "White"}
{pt3dclear()}
{pt3dadd(168720.000000,170292.000000,44200.000000,16.048977)}
{pt3dadd(168516.000000,170364.000000,44300.000000,12.269250)}
{pt3dadd(168360.000000,170412.000000,44350.000000,11.513304)}
{pt3dadd(168192.000000,170400.000000,44400.000000,11.513304)}
{pt3dadd(168048.000000,170388.000000,44450.000000,12.269250)}
{pt3dadd(167892.000000,170316.000000,44425.000000,16.048977)}

{create adhoc118}
{access adhoc118}
{connect adhoc118(1), adhoc116(0)}
{nseg = 1}
{strdef color color = "White"}
{pt3dclear()}
{pt3dadd(168720.000000,170292.000000,44200.000000,16.048977)}
{pt3dadd(168648.000000,170688.000000,44750.000000,8.945526)}
{pt3dadd(168336.000000,170880.000000,44975.000000,5.967316)}
{pt3dadd(168072.000000,171096.000000,45275.000000,4.986545)}
{pt3dadd(167916.000000,171192.000000,45575.000000,3.429025)}
{pt3dadd(167880.000000,171240.000000,45825.000000,3.429025)}
{pt3dadd(167724.000000,171480.000000,46050.000000,3.429025)}
{pt3dadd(167628.000000,171624.000000,46175.000000,7.566246)}
{pt3dadd(167592.000000,171744.000000,46475.000000,5.637222)}
{pt3dadd(167472.000000,171912.000000,46775.000000,5.637222)}
{pt3dadd(167208.000000,171972.000000,47050.000000,5.637222)}
{pt3dadd(166896.000000,171936.000000,47250.000000,8.012051)}
{pt3dadd(167064.000000,171900.000000,47450.000000,3.874829)}
{pt3dadd(167196.000000,171864.000000,47675.000000,6.249659)}
{pt3dadd(167280.000000,171828.000000,47925.000000,9.159454)}
{pt3dadd(167424.000000,171828.000000,48050.000000,10.307708)}
{pt3dadd(167664.000000,171864.000000,48225.000000,16.048977)}

{create adhoc119}
{access adhoc119}
{connect adhoc119(1), adhoc118(0)}
{nseg = 1}
{strdef color color = "White"}
{pt3dclear()}
{pt3dadd(167664.000000,171864.000000,48225.000000,16.048977)}
{pt3dadd(168108.000000,171876.000000,48450.000000,7.999567)}
{pt3dadd(168492.000000,171804.000000,48625.000000,5.399740)}
{pt3dadd(168780.000000,171672.000000,48875.000000,4.418969)}
{pt3dadd(168960.000000,171408.000000,49075.000000,3.429025)}
{pt3dadd(169104.000000,171384.000000,49275.000000,3.429025)}
{pt3dadd(169284.000000,171324.000000,49500.000000,3.429025)}
{pt3dadd(169404.000000,171168.000000,49750.000000,4.676958)}
{pt3dadd(169476.000000,171096.000000,50000.000000,2.747934)}
{pt3dadd(169404.000000,170892.000000,50225.000000,2.747934)}
{pt3dadd(169296.000000,170688.000000,50400.000000,2.747934)}
{pt3dadd(169308.000000,170604.000000,50600.000000,4.676958)}
{pt3dadd(169248.000000,170472.000000,50750.000000,3.429025)}
{pt3dadd(169176.000000,170352.000000,50950.000000,3.429025)}
{pt3dadd(169104.000000,170232.000000,51150.000000,3.429025)}
{pt3dadd(169032.000000,170112.000000,51225.000000,5.358049)}
{pt3dadd(168948.000000,170016.000000,51300.000000,3.429025)}
{pt3dadd(168768.000000,169884.000000,51350.000000,3.429025)}
{pt3dadd(168612.000000,169716.000000,51425.000000,4.676958)}
{pt3dadd(168612.000000,169584.000000,51475.000000,5.451912)}
{pt3dadd(168612.000000,169452.000000,51450.000000,4.871480)}
{pt3dadd(168660.000000,169332.000000,51525.000000,5.374770)}

{create adhoc120}
{access adhoc120}
{connect adhoc120(1), adhoc119(0)}
{nseg = 1}
{strdef color color = "White"}
{pt3dclear()}
{pt3dadd(168660.000000,169332.000000,51525.000000,5.374770)}
{pt3dadd(168840.000000,169152.000000,51625.000000,6.091406)}
{pt3dadd(168924.000000,168936.000000,51750.000000,6.879706)}
{pt3dadd(168852.000000,168708.000000,51900.000000,7.739669)}

{create adhoc121}
{access adhoc121}
{connect adhoc121(1), adhoc119(0)}
{nseg = 1}
{strdef color color = "White"}
{pt3dclear()}
{pt3dadd(168660.000000,169332.000000,51525.000000,5.374770)}
{pt3dadd(168384.000000,169752.000000,51625.000000,5.647092)}
{pt3dadd(168468.000000,169848.000000,51875.000000,5.374770)}

{create adhoc122}
{access adhoc122}
{connect adhoc122(1), adhoc118(0)}
{nseg = 1}
{strdef color color = "White"}
{pt3dclear()}
{pt3dadd(167664.000000,171864.000000,48225.000000,16.048977)}
{pt3dadd(167340.000000,171864.000000,48675.000000,10.079457)}
{pt3dadd(167244.000000,171756.000000,48825.000000,7.309687)}
{pt3dadd(167148.000000,171756.000000,49100.000000,7.739669)}

{create adhoc123}
{access adhoc123}
{connect adhoc123(1), adhoc115(0)}
{nseg = 1}
{strdef color color = "White"}
{pt3dclear()}
{pt3dadd(171192.000000,169968.000000,43500.000000,26.623327)}
{pt3dadd(171024.000000,169104.000000,43275.000000,11.524350)}
{pt3dadd(170976.000000,168984.000000,43250.000000,7.514610)}
{pt3dadd(170928.000000,168864.000000,43225.000000,3.264899)}
{pt3dadd(170916.000000,168744.000000,43150.000000,3.049908)}
{pt3dadd(170868.000000,168636.000000,43050.000000,4.297842)}
{pt3dadd(170844.000000,168540.000000,42900.000000,6.163070)}
{pt3dadd(170880.000000,168264.000000,42650.000000,7.739669)}

{create adhoc124}
{access adhoc124}
{connect adhoc124(1), adhoc114(0)}
{nseg = 1}
{strdef color color = "White"}
{pt3dclear()}
{pt3dadd(183624.000000,172896.000000,43350.000000,19.258772)}
{pt3dadd(183624.000000,172236.000000,42675.000000,9.396285)}
{pt3dadd(183624.000000,171996.000000,42675.000000,6.237771)}
{pt3dadd(183732.000000,171768.000000,42475.000000,3.460970)}
{pt3dadd(183624.000000,171432.000000,42275.000000,2.274954)}
{pt3dadd(183480.000000,171204.000000,42125.000000,2.274954)}
{pt3dadd(183468.000000,170988.000000,41925.000000,2.274954)}
{pt3dadd(183468.000000,170760.000000,41725.000000,3.213301)}
{pt3dadd(183444.000000,170568.000000,41500.000000,3.428292)}
{pt3dadd(183444.000000,170412.000000,41350.000000,4.713820)}
{pt3dadd(183432.000000,170280.000000,41350.000000,6.449724)}

{create adhoc125}
{access adhoc125}
{connect adhoc125(1), adhoc9(0)}
{nseg = 1}
{strdef color color = "White"}
{pt3dclear()}
{pt3dadd(187464.000000,178536.000000,45425.000000,79.496826)}
{pt3dadd(184824.000000,178536.000000,45125.000000,32.690677)}
{pt3dadd(184812.000000,178416.000000,45200.000000,8.341643)}
{pt3dadd(184740.000000,178320.000000,45150.000000,6.449724)}

{create adhoc126}
{access adhoc126}
{connect adhoc126(1), adhoc8(0)}
{nseg = 1}
{strdef color color = "White"}
{pt3dclear()}
{pt3dadd(186756.000000,179148.000000,45050.000000,82.809190)}
{pt3dadd(185364.000000,179148.000000,42725.000000,32.191922)}
{pt3dadd(185472.000000,179016.000000,42725.000000,4.478975)}

{create adhoc127}
{access adhoc127}
{connect adhoc127(1), adhoc7(0)}
{nseg = 1}
{strdef color color = "White"}
{pt3dclear()}
{pt3dadd(186756.000000,179280.000000,44950.000000,82.809190)}
{pt3dadd(186528.000000,179280.000000,42025.000000,39.196117)}
{pt3dadd(186372.000000,179160.000000,41575.000000,24.117670)}
{pt3dadd(186324.000000,179004.000000,41400.000000,13.102358)}
{pt3dadd(186288.000000,178908.000000,41125.000000,6.746526)}
{pt3dadd(186360.000000,178560.000000,40775.000000,6.746526)}
{pt3dadd(186240.000000,178440.000000,40425.000000,6.746526)}
{pt3dadd(186360.000000,178236.000000,40025.000000,13.102358)}
{pt3dadd(186456.000000,178044.000000,39775.000000,7.855832)}
{pt3dadd(186276.000000,177948.000000,39525.000000,7.855832)}
{pt3dadd(186204.000000,177852.000000,39325.000000,7.855832)}
{pt3dadd(186084.000000,177792.000000,39075.000000,12.177937)}
{pt3dadd(185892.000000,177636.000000,38800.000000,9.373860)}
{pt3dadd(185592.000000,177456.000000,38600.000000,12.925614)}
{pt3dadd(185196.000000,177192.000000,38450.000000,20.542690)}
{pt3dadd(185064.000000,177180.000000,38100.000000,19.258772)}

{create adhoc128}
{access adhoc128}
{connect adhoc128(1), adhoc127(0)}
{nseg = 1}
{strdef color color = "White"}
{pt3dclear()}
{pt3dadd(185064.000000,177180.000000,38100.000000,19.258772)}
{pt3dadd(184908.000000,177192.000000,37850.000000,9.499480)}
{pt3dadd(184764.000000,177048.000000,37875.000000,9.209484)}
{pt3dadd(184632.000000,176940.000000,37775.000000,8.032559)}
{pt3dadd(184548.000000,176772.000000,38100.000000,10.307708)}
{pt3dadd(184440.000000,176652.000000,38150.000000,13.374147)}

{create adhoc129}
{access adhoc129}
{connect adhoc129(1), adhoc128(0)}
{nseg = 1}
{strdef color color = "White"}
{pt3dclear()}
{pt3dadd(184440.000000,176652.000000,38150.000000,13.374147)}
{pt3dadd(184464.000000,176508.000000,37800.000000,9.237776)}
{pt3dadd(184476.000000,176352.000000,37575.000000,6.142666)}
{pt3dadd(184416.000000,176220.000000,37475.000000,5.015770)}
{pt3dadd(184248.000000,176088.000000,37375.000000,2.747934)}
{pt3dadd(184260.000000,175872.000000,37300.000000,2.747934)}
{pt3dadd(184404.000000,175668.000000,37225.000000,2.747934)}
{pt3dadd(184344.000000,175428.000000,37075.000000,3.995868)}
{pt3dadd(184092.000000,175176.000000,37175.000000,2.747934)}
{pt3dadd(183936.000000,174888.000000,37150.000000,2.747934)}
{pt3dadd(183708.000000,174636.000000,37075.000000,2.747934)}
{pt3dadd(183456.000000,174396.000000,37025.000000,3.995868)}
{pt3dadd(183276.000000,174144.000000,36975.000000,3.995868)}
{pt3dadd(183012.000000,173904.000000,37050.000000,5.659779)}
{pt3dadd(182832.000000,173592.000000,37050.000000,7.739669)}

{create adhoc130}
{access adhoc130}
{connect adhoc130(1), adhoc128(0)}
{nseg = 1}
{strdef color color = "White"}
{pt3dclear()}
{pt3dadd(184440.000000,176652.000000,38150.000000,13.374147)}
{pt3dadd(183864.000000,176652.000000,38450.000000,8.530930)}
{pt3dadd(183636.000000,176556.000000,38450.000000,6.652771)}
{pt3dadd(183468.000000,176436.000000,38600.000000,7.739669)}

{create adhoc131}
{access adhoc131}
{connect adhoc131(1), adhoc127(0)}
{nseg = 1}
{strdef color color = "White"}
{pt3dclear()}
{pt3dadd(185064.000000,177180.000000,38100.000000,19.258772)}
{pt3dadd(185064.000000,177768.000000,37275.000000,10.015458)}
{pt3dadd(185040.000000,177888.000000,37200.000000,6.609275)}
{pt3dadd(185040.000000,178008.000000,37025.000000,4.305454)}
{pt3dadd(184740.000000,178116.000000,36875.000000,4.305454)}
{pt3dadd(184704.000000,178200.000000,36700.000000,6.175757)}
{pt3dadd(184308.000000,178344.000000,36550.000000,9.287602)}

{create adhoc132}
{access adhoc132}
{connect adhoc132(1), adhoc6(0)}
{nseg = 1}
{strdef color color = "White"}
{pt3dclear()}
{pt3dadd(186084.000000,180972.000000,46800.000000,79.496820)}
{pt3dadd(186156.000000,180924.000000,49125.000000,32.348599)}
{pt3dadd(186300.000000,180804.000000,49275.000000,20.009159)}
{pt3dadd(186408.000000,180600.000000,49325.000000,7.319591)}
{pt3dadd(186420.000000,180348.000000,49375.000000,4.409795)}
{pt3dadd(186468.000000,180108.000000,49450.000000,4.409795)}
{pt3dadd(186588.000000,179844.000000,49550.000000,4.409795)}
{pt3dadd(186840.000000,179556.000000,49675.000000,7.961550)}
{pt3dadd(187056.000000,179232.000000,49800.000000,5.051754)}
{pt3dadd(187260.000000,178956.000000,49900.000000,5.051754)}
{pt3dadd(187524.000000,178596.000000,49975.000000,5.051754)}
{pt3dadd(187692.000000,178308.000000,49950.000000,9.188976)}
{pt3dadd(188052.000000,178020.000000,50000.000000,5.637221)}
{pt3dadd(188160.000000,177780.000000,50100.000000,5.637221)}
{pt3dadd(188064.000000,177516.000000,50150.000000,5.637221)}
{pt3dadd(188172.000000,177336.000000,50250.000000,8.547017)}
{pt3dadd(188304.000000,177168.000000,50225.000000,4.409795)}
{pt3dadd(188388.000000,176952.000000,50225.000000,4.409795)}
{pt3dadd(188484.000000,176736.000000,50250.000000,4.409795)}
{pt3dadd(188568.000000,176532.000000,50375.000000,8.731901)}
{pt3dadd(188640.000000,176304.000000,50300.000000,5.822105)}
{pt3dadd(188676.000000,176088.000000,50375.000000,5.822105)}
{pt3dadd(188688.000000,175884.000000,50325.000000,5.822105)}
{pt3dadd(188736.000000,175680.000000,50350.000000,9.373860)}
{pt3dadd(188832.000000,175476.000000,50350.000000,5.051754)}
{pt3dadd(188808.000000,175236.000000,50325.000000,5.051754)}
{pt3dadd(188880.000000,175032.000000,50250.000000,5.051754)}
{pt3dadd(188928.000000,174864.000000,50375.000000,7.961550)}
{pt3dadd(188940.000000,174624.000000,50425.000000,4.409795)}
{pt3dadd(188988.000000,174408.000000,50425.000000,4.409795)}
{pt3dadd(189048.000000,174216.000000,50450.000000,4.409795)}
{pt3dadd(189144.000000,174060.000000,50500.000000,7.961550)}
{pt3dadd(189252.000000,173928.000000,50550.000000,5.051754)}
{pt3dadd(189360.000000,173808.000000,50550.000000,5.051754)}
{pt3dadd(189432.000000,173688.000000,50500.000000,5.051754)}
{pt3dadd(189408.000000,173568.000000,50525.000000,8.603509)}
{pt3dadd(189468.000000,173448.000000,50550.000000,5.051754)}
{pt3dadd(189612.000000,173232.000000,50525.000000,5.051754)}
{pt3dadd(189660.000000,173040.000000,50550.000000,5.051754)}
{pt3dadd(189816.000000,172884.000000,50550.000000,9.373860)}
{pt3dadd(189840.000000,172728.000000,50525.000000,5.822105)}
{pt3dadd(189912.000000,172548.000000,50550.000000,5.822105)}
{pt3dadd(189972.000000,172392.000000,50575.000000,5.822105)}
{pt3dadd(190008.000000,172260.000000,50575.000000,10.144211)}
{pt3dadd(190056.000000,171972.000000,50625.000000,5.822105)}
{pt3dadd(190116.000000,171624.000000,50675.000000,5.822105)}
{pt3dadd(190200.000000,171252.000000,50725.000000,5.822105)}
{pt3dadd(190224.000000,170880.000000,50700.000000,9.959327)}
{pt3dadd(190248.000000,170508.000000,50650.000000,5.637222)}
{pt3dadd(190356.000000,170160.000000,50725.000000,5.637222)}
{pt3dadd(190368.000000,169896.000000,50775.000000,5.637222)}
{pt3dadd(190308.000000,169584.000000,50825.000000,9.188976)}
{pt3dadd(190320.000000,169320.000000,50900.000000,5.051754)}
{pt3dadd(190272.000000,169020.000000,50900.000000,5.051754)}
{pt3dadd(190032.000000,168840.000000,50875.000000,5.051754)}
{pt3dadd(189864.000000,168612.000000,50900.000000,10.298281)}
{pt3dadd(189660.000000,168420.000000,50950.000000,6.746526)}
{pt3dadd(189540.000000,168252.000000,50975.000000,6.746526)}
{pt3dadd(189276.000000,168096.000000,51050.000000,6.746526)}
{pt3dadd(189048.000000,167964.000000,51050.000000,11.068632)}
{pt3dadd(188892.000000,167808.000000,51025.000000,5.822105)}
{pt3dadd(188700.000000,167640.000000,51000.000000,5.822105)}
{pt3dadd(188208.000000,167448.000000,51000.000000,5.822105)}
{pt3dadd(187968.000000,167388.000000,50975.000000,10.144211)}
{pt3dadd(187752.000000,167376.000000,51000.000000,5.822105)}
{pt3dadd(187548.000000,167280.000000,51000.000000,5.822105)}
{pt3dadd(187404.000000,167196.000000,51000.000000,5.822105)}
{pt3dadd(187308.000000,167184.000000,50975.000000,9.373860)}
{pt3dadd(187128.000000,167172.000000,51000.000000,5.051754)}
{pt3dadd(186936.000000,167112.000000,51000.000000,5.051754)}
{pt3dadd(186756.000000,167016.000000,51025.000000,5.051754)}
{pt3dadd(186576.000000,166956.000000,51050.000000,7.961550)}
{pt3dadd(186396.000000,166944.000000,51050.000000,4.409795)}
{pt3dadd(186192.000000,166764.000000,50975.000000,4.409795)}
{pt3dadd(186024.000000,166692.000000,50925.000000,4.409795)}
{pt3dadd(185820.000000,166668.000000,50850.000000,7.319591)}
{pt3dadd(185652.000000,166656.000000,50775.000000,4.409795)}
{pt3dadd(185436.000000,166608.000000,50700.000000,4.409795)}
{pt3dadd(185220.000000,166524.000000,50625.000000,4.409795)}
{pt3dadd(185004.000000,166440.000000,50625.000000,7.961550)}
{pt3dadd(184764.000000,166392.000000,50650.000000,5.051754)}
{pt3dadd(184548.000000,166320.000000,50650.000000,5.051754)}
{pt3dadd(184296.000000,166284.000000,50650.000000,5.051754)}
{pt3dadd(184044.000000,166272.000000,50625.000000,8.603509)}
{pt3dadd(183780.000000,166236.000000,50600.000000,5.051754)}
{pt3dadd(183588.000000,166260.000000,50650.000000,5.051754)}
{pt3dadd(183336.000000,166236.000000,50650.000000,5.051754)}
{pt3dadd(183084.000000,166176.000000,50600.000000,8.449439)}
{pt3dadd(182952.000000,166116.000000,50600.000000,4.897684)}
{pt3dadd(182760.000000,166080.000000,50575.000000,4.897684)}
{pt3dadd(182520.000000,165900.000000,50625.000000,4.897684)}
{pt3dadd(182268.000000,165792.000000,50600.000000,7.807480)}
{pt3dadd(182004.000000,165696.000000,50575.000000,4.409795)}
{pt3dadd(181740.000000,165468.000000,50550.000000,4.409795)}
{pt3dadd(181524.000000,165348.000000,50575.000000,4.409795)}
{pt3dadd(181284.000000,165312.000000,50575.000000,6.249659)}
{pt3dadd(181056.000000,165276.000000,50575.000000,3.339864)}
{pt3dadd(180864.000000,165252.000000,50575.000000,3.339864)}
{pt3dadd(180684.000000,165264.000000,50575.000000,3.339864)}
{pt3dadd(180480.000000,165288.000000,50600.000000,5.714693)}
{pt3dadd(180276.000000,165252.000000,50625.000000,3.874829)}
{pt3dadd(180072.000000,165168.000000,50650.000000,3.874829)}
{pt3dadd(179892.000000,165072.000000,50675.000000,3.874829)}
{pt3dadd(179712.000000,164940.000000,50675.000000,6.249659)}
{pt3dadd(179532.000000,164916.000000,50675.000000,3.874829)}
{pt3dadd(179376.000000,164832.000000,50625.000000,3.874829)}
{pt3dadd(179232.000000,164736.000000,50625.000000,3.874829)}
{pt3dadd(179028.000000,164700.000000,50650.000000,5.432350)}
{pt3dadd(178836.000000,164676.000000,50650.000000,3.057520)}
{pt3dadd(178632.000000,164664.000000,50650.000000,3.057520)}
{pt3dadd(178452.000000,164688.000000,50600.000000,3.057520)}
{pt3dadd(178236.000000,164592.000000,50575.000000,4.615041)}
{pt3dadd(178020.000000,164580.000000,50575.000000,3.057520)}
{pt3dadd(177828.000000,164520.000000,50500.000000,3.057520)}
{pt3dadd(177636.000000,164580.000000,50500.000000,3.057520)}
{pt3dadd(177432.000000,164472.000000,50475.000000,4.615041)}
{pt3dadd(177204.000000,164448.000000,50475.000000,3.057520)}
{pt3dadd(177012.000000,164340.000000,50500.000000,3.057520)}
{pt3dadd(176796.000000,164316.000000,50450.000000,3.057520)}
{pt3dadd(176604.000000,164256.000000,50425.000000,4.615041)}
{pt3dadd(176376.000000,164160.000000,50400.000000,3.057520)}
{pt3dadd(176184.000000,164088.000000,50375.000000,3.057520)}
{pt3dadd(175992.000000,164028.000000,50375.000000,3.057520)}
{pt3dadd(175812.000000,164016.000000,50325.000000,5.967316)}
{pt3dadd(175608.000000,163980.000000,50225.000000,4.409795)}
{pt3dadd(175296.000000,163788.000000,50175.000000,4.409795)}
{pt3dadd(175044.000000,163656.000000,50100.000000,4.409795)}
{pt3dadd(174780.000000,163620.000000,50025.000000,7.319591)}
{pt3dadd(174552.000000,163716.000000,49800.000000,4.409795)}
{pt3dadd(174348.000000,163668.000000,49850.000000,4.409795)}
{pt3dadd(174180.000000,163608.000000,49950.000000,4.409795)}
{pt3dadd(173988.000000,163512.000000,49925.000000,6.338820)}
{pt3dadd(173772.000000,163416.000000,49975.000000,3.429025)}
{pt3dadd(173568.000000,163368.000000,49950.000000,3.429025)}
{pt3dadd(173340.000000,163272.000000,50000.000000,3.429025)}
{pt3dadd(173076.000000,163224.000000,50000.000000,5.803854)}
{pt3dadd(172860.000000,163236.000000,50000.000000,3.874829)}
{pt3dadd(172656.000000,163284.000000,50025.000000,3.874829)}
{pt3dadd(172452.000000,163332.000000,50075.000000,3.874829)}
{pt3dadd(172248.000000,163356.000000,50150.000000,8.012051)}
{pt3dadd(172068.000000,163296.000000,50200.000000,10.883748)}
{pt3dadd(171876.000000,163296.000000,50175.000000,12.723611)}
{pt3dadd(171684.000000,163344.000000,50050.000000,20.206019)}
{pt3dadd(171516.000000,163320.000000,50075.000000,10.699318)}

{create adhoc133}
{access adhoc133}
{connect adhoc133(1), adhoc132(0)}
{nseg = 1}
{strdef color color = "White"}
{pt3dclear()}
{pt3dadd(171516.000000,163320.000000,50075.000000,10.699318)}
{pt3dadd(171324.000000,163308.000000,49525.000000,7.781480)}
{pt3dadd(171144.000000,163296.000000,49400.000000,7.643718)}
{pt3dadd(170976.000000,163236.000000,49200.000000,7.361374)}
{pt3dadd(170760.000000,162948.000000,48925.000000,8.053916)}
{pt3dadd(170772.000000,162816.000000,48975.000000,9.287602)}

{create adhoc134}
{access adhoc134}
{connect adhoc134(1), adhoc132(0)}
{nseg = 1}
{strdef color color = "White"}
{pt3dclear()}
{pt3dadd(171516.000000,163320.000000,50075.000000,10.699318)}
{pt3dadd(171360.000000,163536.000000,51150.000000,7.781480)}
{pt3dadd(171024.000000,163608.000000,51400.000000,5.268888)}
{pt3dadd(170928.000000,163800.000000,51750.000000,6.826709)}
{pt3dadd(170928.000000,163908.000000,52125.000000,7.679088)}
{pt3dadd(170820.000000,164028.000000,52350.000000,11.230842)}
{pt3dadd(170820.000000,164172.000000,52575.000000,17.718071)}
{pt3dadd(170844.000000,164304.000000,52750.000000,19.258772)}

{create adhoc135}
{access adhoc135}
{connect adhoc135(1), adhoc5(0)}
{nseg = 1}
{strdef color color = "White"}
{pt3dclear()}
{pt3dadd(185244.000000,183408.000000,48825.000000,79.496820)}
{pt3dadd(183888.000000,183408.000000,51025.000000,33.418531)}
{pt3dadd(183660.000000,183216.000000,51300.000000,20.651118)}
{pt3dadd(183588.000000,183276.000000,51625.000000,12.738752)}
{pt3dadd(183552.000000,183396.000000,51825.000000,9.186998)}
{pt3dadd(183396.000000,183384.000000,52200.000000,9.186998)}
{pt3dadd(183060.000000,183468.000000,52500.000000,9.186998)}
{pt3dadd(182880.000000,183516.000000,52625.000000,12.738752)}
{pt3dadd(182664.000000,183588.000000,52725.000000,5.051754)}
{pt3dadd(182472.000000,183588.000000,52750.000000,5.051754)}
{pt3dadd(182280.000000,183576.000000,52800.000000,5.051754)}
{pt3dadd(182112.000000,183708.000000,52900.000000,9.373860)}
{pt3dadd(181968.000000,183840.000000,52875.000000,5.822105)}
{pt3dadd(181788.000000,183960.000000,52925.000000,5.822105)}
{pt3dadd(181620.000000,183996.000000,52975.000000,5.822105)}
{pt3dadd(181440.000000,184032.000000,52950.000000,11.911704)}
{pt3dadd(181236.000000,184080.000000,52975.000000,13.945430)}
{pt3dadd(180996.000000,184140.000000,53000.000000,19.191957)}
{pt3dadd(180792.000000,184212.000000,52975.000000,30.986595)}
{pt3dadd(180588.000000,184224.000000,53000.000000,27.732632)}

{create adhoc136}
{access adhoc136}
{connect adhoc136(1), adhoc135(0)}
{nseg = 1}
{strdef color color = "White"}
{pt3dclear()}
{pt3dadd(180588.000000,184224.000000,53000.000000,27.732632)}
{pt3dadd(180456.000000,184512.000000,53375.000000,16.163801)}
{pt3dadd(180300.000000,184644.000000,53575.000000,10.298281)}
{pt3dadd(180108.000000,184788.000000,53625.000000,8.603509)}
{pt3dadd(179904.000000,184824.000000,53675.000000,5.051754)}
{pt3dadd(179724.000000,184860.000000,53750.000000,5.051754)}
{pt3dadd(179580.000000,184896.000000,53800.000000,5.051754)}
{pt3dadd(179388.000000,184920.000000,53800.000000,7.961550)}
{pt3dadd(179208.000000,184956.000000,53825.000000,4.409795)}
{pt3dadd(179016.000000,185004.000000,53950.000000,4.409795)}
{pt3dadd(178824.000000,185088.000000,53950.000000,4.409795)}
{pt3dadd(178620.000000,185112.000000,53975.000000,6.784625)}
{pt3dadd(178380.000000,185100.000000,54025.000000,3.874829)}
{pt3dadd(178176.000000,185100.000000,54075.000000,3.874829)}
{pt3dadd(178032.000000,185088.000000,54175.000000,3.874829)}
{pt3dadd(177804.000000,185088.000000,54175.000000,6.249659)}
{pt3dadd(177588.000000,185088.000000,54200.000000,3.874829)}
{pt3dadd(177408.000000,185112.000000,54375.000000,3.874829)}
{pt3dadd(177216.000000,185124.000000,54375.000000,3.874829)}
{pt3dadd(177036.000000,185088.000000,54375.000000,6.784625)}
{pt3dadd(176844.000000,185088.000000,54400.000000,4.409795)}
{pt3dadd(176664.000000,185076.000000,54450.000000,4.409795)}
{pt3dadd(176484.000000,185052.000000,54500.000000,4.409795)}
{pt3dadd(176280.000000,185052.000000,54500.000000,7.319591)}
{pt3dadd(176076.000000,185052.000000,54550.000000,4.409795)}
{pt3dadd(175848.000000,185088.000000,54650.000000,4.409795)}
{pt3dadd(175632.000000,185124.000000,54725.000000,4.409795)}
{pt3dadd(175404.000000,185112.000000,54800.000000,7.961550)}
{pt3dadd(175176.000000,185148.000000,54800.000000,5.051754)}
{pt3dadd(174936.000000,185148.000000,54825.000000,5.051754)}
{pt3dadd(174744.000000,185196.000000,54900.000000,5.051754)}
{pt3dadd(174564.000000,185244.000000,54900.000000,8.603509)}
{pt3dadd(174336.000000,185316.000000,54850.000000,5.051754)}
{pt3dadd(174048.000000,185316.000000,54775.000000,5.051754)}
{pt3dadd(173916.000000,185316.000000,54800.000000,5.051754)}
{pt3dadd(173712.000000,185292.000000,54950.000000,8.449439)}
{pt3dadd(173496.000000,185268.000000,54950.000000,4.897684)}
{pt3dadd(173340.000000,185256.000000,54900.000000,4.897684)}
{pt3dadd(173136.000000,185292.000000,54900.000000,4.897684)}
{pt3dadd(172944.000000,185304.000000,54950.000000,7.807480)}
{pt3dadd(172728.000000,185340.000000,54975.000000,4.409795)}
{pt3dadd(172524.000000,185364.000000,55000.000000,4.409795)}
{pt3dadd(172308.000000,185400.000000,54975.000000,4.409795)}
{pt3dadd(172116.000000,185376.000000,55000.000000,7.961550)}
{pt3dadd(171912.000000,185412.000000,54975.000000,5.051754)}
{pt3dadd(171708.000000,185376.000000,55025.000000,5.051754)}
{pt3dadd(171480.000000,185400.000000,55075.000000,5.051754)}
{pt3dadd(171276.000000,185436.000000,55075.000000,8.603509)}
{pt3dadd(171144.000000,185436.000000,55075.000000,5.051754)}
{pt3dadd(170904.000000,185460.000000,55125.000000,5.051754)}
{pt3dadd(170700.000000,185448.000000,55125.000000,5.051754)}
{pt3dadd(170508.000000,185460.000000,55250.000000,8.603509)}
{pt3dadd(170280.000000,185508.000000,55275.000000,5.051754)}
{pt3dadd(170148.000000,185556.000000,55325.000000,5.051754)}
{pt3dadd(170004.000000,185568.000000,55375.000000,5.051754)}
{pt3dadd(169812.000000,185544.000000,55400.000000,9.373860)}
{pt3dadd(169668.000000,185592.000000,55450.000000,5.822105)}
{pt3dadd(169500.000000,185628.000000,55500.000000,5.822105)}
{pt3dadd(169368.000000,185664.000000,55625.000000,5.822105)}
{pt3dadd(169176.000000,185700.000000,55600.000000,10.144211)}
{pt3dadd(168960.000000,185688.000000,55725.000000,5.822105)}
{pt3dadd(168708.000000,185772.000000,55825.000000,5.822105)}
{pt3dadd(168492.000000,185784.000000,55850.000000,5.822105)}
{pt3dadd(168276.000000,185808.000000,55950.000000,9.373860)}
{pt3dadd(168072.000000,185856.000000,56025.000000,5.051754)}
{pt3dadd(167868.000000,185964.000000,56075.000000,5.051754)}
{pt3dadd(167640.000000,186144.000000,56050.000000,5.051754)}
{pt3dadd(167532.000000,186252.000000,56100.000000,7.833158)}
{pt3dadd(167412.000000,186516.000000,56325.000000,4.281404)}
{pt3dadd(167244.000000,186588.000000,56450.000000,4.281404)}
{pt3dadd(167088.000000,186636.000000,56500.000000,4.281404)}
{pt3dadd(166932.000000,186756.000000,56600.000000,6.656233)}
{pt3dadd(166764.000000,186912.000000,56675.000000,3.874829)}
{pt3dadd(166608.000000,187044.000000,56800.000000,3.874829)}
{pt3dadd(166464.000000,187200.000000,56875.000000,3.874829)}
{pt3dadd(166296.000000,187188.000000,57000.000000,5.803854)}
{pt3dadd(166128.000000,187332.000000,57000.000000,3.429025)}
{pt3dadd(165912.000000,187488.000000,57000.000000,3.429025)}
{pt3dadd(165768.000000,187560.000000,56925.000000,4.986545)}
{pt3dadd(165636.000000,187512.000000,56875.000000,5.924892)}
{pt3dadd(165492.000000,187584.000000,56925.000000,5.659779)}
{pt3dadd(165336.000000,187560.000000,56900.000000,6.191735)}

{create adhoc137}
{access adhoc137}
{connect adhoc137(1), adhoc135(0)}
{nseg = 1}
{strdef color color = "White"}
{pt3dclear()}
{pt3dadd(180588.000000,184224.000000,53000.000000,27.732632)}
{pt3dadd(180456.000000,184032.000000,52775.000000,18.988421)}
{pt3dadd(180240.000000,183936.000000,52625.000000,11.993053)}
{pt3dadd(180048.000000,183876.000000,52450.000000,10.298281)}
{pt3dadd(179868.000000,183852.000000,52400.000000,5.051754)}
{pt3dadd(179688.000000,183864.000000,52425.000000,5.051754)}
{pt3dadd(179472.000000,183768.000000,52375.000000,5.051754)}
{pt3dadd(179268.000000,183780.000000,52250.000000,7.833158)}
{pt3dadd(179052.000000,183792.000000,52150.000000,4.281404)}
{pt3dadd(178848.000000,183792.000000,52125.000000,4.281404)}
{pt3dadd(178632.000000,183816.000000,52050.000000,4.281404)}
{pt3dadd(178440.000000,183780.000000,52050.000000,7.191199)}
{pt3dadd(178248.000000,183804.000000,52000.000000,4.409795)}
{pt3dadd(178032.000000,183792.000000,51950.000000,4.409795)}
{pt3dadd(177816.000000,183816.000000,51925.000000,4.409795)}
{pt3dadd(177600.000000,183828.000000,51825.000000,8.731901)}
{pt3dadd(177384.000000,183828.000000,51775.000000,5.822105)}
{pt3dadd(177180.000000,183792.000000,51750.000000,5.822105)}
{pt3dadd(176952.000000,183792.000000,51725.000000,5.822105)}
{pt3dadd(176748.000000,183780.000000,51675.000000,9.219790)}
{pt3dadd(176484.000000,183720.000000,51700.000000,4.897684)}
{pt3dadd(176232.000000,183636.000000,51675.000000,4.897684)}
{pt3dadd(176040.000000,183660.000000,51700.000000,4.897684)}
{pt3dadd(175848.000000,183624.000000,51725.000000,9.219790)}
{pt3dadd(175644.000000,183552.000000,51700.000000,5.822105)}
{pt3dadd(175416.000000,183516.000000,51675.000000,5.822105)}
{pt3dadd(175212.000000,183516.000000,51675.000000,5.822105)}
{pt3dadd(175032.000000,183492.000000,51675.000000,10.144211)}
{pt3dadd(174828.000000,183456.000000,51650.000000,5.822105)}
{pt3dadd(174660.000000,183420.000000,51625.000000,5.822105)}
{pt3dadd(174492.000000,183348.000000,51675.000000,5.822105)}
{pt3dadd(174324.000000,183324.000000,51700.000000,9.373860)}
{pt3dadd(174132.000000,183312.000000,51750.000000,5.051754)}
{pt3dadd(173952.000000,183252.000000,51725.000000,5.051754)}
{pt3dadd(173736.000000,183216.000000,51675.000000,5.051754)}
{pt3dadd(173568.000000,183192.000000,51750.000000,8.603509)}
{pt3dadd(173412.000000,183168.000000,51725.000000,5.051754)}
{pt3dadd(173232.000000,183144.000000,51675.000000,5.051754)}
{pt3dadd(173040.000000,183144.000000,51725.000000,5.051754)}
{pt3dadd(172860.000000,183156.000000,51750.000000,8.603509)}
{pt3dadd(172656.000000,183120.000000,51775.000000,5.051754)}
{pt3dadd(172464.000000,183120.000000,51750.000000,5.051754)}
{pt3dadd(172260.000000,183120.000000,51725.000000,5.051754)}
{pt3dadd(172068.000000,183048.000000,51750.000000,7.426584)}
{pt3dadd(171852.000000,183024.000000,51750.000000,3.874829)}
{pt3dadd(171660.000000,182976.000000,51750.000000,3.874829)}
{pt3dadd(171444.000000,182976.000000,51700.000000,3.874829)}
{pt3dadd(171288.000000,182976.000000,51650.000000,6.784625)}
{pt3dadd(171168.000000,182856.000000,51650.000000,4.409795)}
{pt3dadd(170952.000000,182808.000000,51600.000000,4.409795)}
{pt3dadd(170784.000000,182844.000000,51550.000000,4.409795)}
{pt3dadd(170616.000000,182832.000000,51500.000000,7.191199)}
{pt3dadd(170424.000000,182760.000000,51500.000000,4.281404)}
{pt3dadd(170232.000000,182688.000000,51400.000000,4.281404)}
{pt3dadd(170040.000000,182664.000000,51325.000000,4.281404)}
{pt3dadd(169824.000000,182616.000000,51275.000000,7.833158)}
{pt3dadd(169632.000000,182592.000000,51275.000000,5.051754)}
{pt3dadd(169428.000000,182508.000000,51275.000000,5.051754)}
{pt3dadd(169212.000000,182472.000000,51225.000000,5.051754)}
{pt3dadd(169008.000000,182448.000000,51200.000000,10.076420)}
{pt3dadd(168840.000000,182448.000000,51225.000000,6.524665)}
{pt3dadd(168648.000000,182412.000000,51175.000000,6.524665)}
{pt3dadd(168408.000000,182376.000000,51125.000000,6.524665)}
{pt3dadd(168288.000000,182328.000000,50975.000000,9.434461)}
{pt3dadd(168120.000000,182256.000000,50925.000000,4.409795)}
{pt3dadd(167952.000000,182280.000000,50950.000000,4.409795)}
{pt3dadd(167772.000000,182292.000000,50875.000000,4.409795)}
{pt3dadd(167496.000000,182292.000000,50875.000000,7.961550)}
{pt3dadd(167232.000000,182292.000000,50725.000000,5.051754)}
{pt3dadd(167052.000000,182208.000000,50600.000000,5.051754)}
{pt3dadd(166884.000000,182160.000000,50475.000000,5.051754)}
{pt3dadd(166704.000000,182292.000000,50425.000000,7.961550)}
{pt3dadd(166536.000000,182340.000000,50325.000000,4.409795)}
{pt3dadd(166380.000000,182376.000000,50300.000000,4.409795)}
{pt3dadd(166248.000000,182496.000000,50250.000000,4.409795)}
{pt3dadd(166116.000000,182616.000000,50175.000000,5.967316)}
{pt3dadd(165984.000000,182664.000000,50100.000000,3.057520)}
{pt3dadd(165804.000000,182688.000000,50025.000000,3.057520)}
{pt3dadd(165648.000000,182736.000000,49975.000000,3.057520)}
{pt3dadd(165324.000000,182844.000000,49975.000000,4.986545)}
{pt3dadd(165168.000000,182868.000000,49825.000000,3.429025)}
{pt3dadd(165024.000000,182880.000000,49800.000000,3.429025)}
{pt3dadd(164592.000000,182856.000000,49650.000000,4.615041)}
{pt3dadd(164052.000000,182856.000000,49375.000000,5.604986)}
{pt3dadd(163440.000000,182856.000000,49200.000000,5.126602)}
{pt3dadd(162936.000000,182856.000000,49000.000000,6.449724)}

{create adhoc138}
{access adhoc138}
{connect adhoc138(1), adhoc4(0)}
{nseg = 1}
{strdef color color = "White"}
{pt3dclear()}
{pt3dadd(183876.000000,193524.000000,54825.000000,46.005108)}
{pt3dadd(180792.000000,196080.000000,54825.000000,35.003831)}
{pt3dadd(180300.000000,196092.000000,54275.000000,21.602299)}
{pt3dadd(180084.000000,196680.000000,55075.000000,32.275482)}
{pt3dadd(179820.000000,196704.000000,55275.000000,21.074205)}
{pt3dadd(179592.000000,196800.000000,55225.000000,37.336043)}
{pt3dadd(179388.000000,196872.000000,55175.000000,53.240929)}
{pt3dadd(179160.000000,196872.000000,55125.000000,55.111207)}
{pt3dadd(178980.000000,197028.000000,54875.000000,81.024430)}

{create adhoc139}
{access adhoc139}
{connect adhoc139(1), adhoc138(0)}
{nseg = 1}
{strdef color color = "White"}
{pt3dclear()}
{pt3dadd(178980.000000,197028.000000,54875.000000,81.024430)}
{pt3dadd(178800.000000,197424.000000,56275.000000,40.819807)}
{pt3dadd(178572.000000,197568.000000,56700.000000,25.091884)}
{pt3dadd(178320.000000,197736.000000,56750.000000,15.276596)}
{pt3dadd(178068.000000,197904.000000,56800.000000,7.589598)}
{pt3dadd(177756.000000,198036.000000,56825.000000,7.589598)}
{pt3dadd(177516.000000,198156.000000,56950.000000,7.589598)}
{pt3dadd(177264.000000,198216.000000,56950.000000,12.836125)}
{pt3dadd(177036.000000,198240.000000,56950.000000,6.746526)}
{pt3dadd(176820.000000,198204.000000,56950.000000,6.746526)}
{pt3dadd(176508.000000,198288.000000,57025.000000,6.746526)}
{pt3dadd(176076.000000,198396.000000,57075.000000,11.771192)}
{pt3dadd(175704.000000,198504.000000,57125.000000,6.524665)}
{pt3dadd(175320.000000,198612.000000,57175.000000,6.524665)}
{pt3dadd(175128.000000,198576.000000,57325.000000,6.524665)}
{pt3dadd(174924.000000,198600.000000,57325.000000,12.880497)}
{pt3dadd(174744.000000,198684.000000,57300.000000,7.855832)}
{pt3dadd(174540.000000,198744.000000,57350.000000,7.855832)}
{pt3dadd(174336.000000,198804.000000,57350.000000,7.855832)}
{pt3dadd(174108.000000,198888.000000,57425.000000,13.945430)}
{pt3dadd(173892.000000,198948.000000,57425.000000,7.589598)}
{pt3dadd(173712.000000,199008.000000,57375.000000,7.589598)}
{pt3dadd(173424.000000,199116.000000,57500.000000,7.589598)}
{pt3dadd(173232.000000,199188.000000,57600.000000,15.276596)}
{pt3dadd(173040.000000,199260.000000,57575.000000,9.186998)}
{pt3dadd(172848.000000,199284.000000,57575.000000,9.186998)}
{pt3dadd(172644.000000,199344.000000,57575.000000,9.186998)}
{pt3dadd(172404.000000,199416.000000,57625.000000,16.873996)}
{pt3dadd(172212.000000,199488.000000,57700.000000,9.186998)}
{pt3dadd(171984.000000,199560.000000,57775.000000,9.186998)}
{pt3dadd(171768.000000,199668.000000,57875.000000,9.186998)}
{pt3dadd(171540.000000,199668.000000,57950.000000,16.873996)}
{pt3dadd(171324.000000,199728.000000,58025.000000,9.186998)}
{pt3dadd(171072.000000,199848.000000,58075.000000,9.186998)}
{pt3dadd(170712.000000,199944.000000,58050.000000,9.186998)}
{pt3dadd(170460.000000,199956.000000,58050.000000,16.873996)}
{pt3dadd(170244.000000,199992.000000,58100.000000,9.186998)}
{pt3dadd(170088.000000,200028.000000,58150.000000,9.186998)}
{pt3dadd(169848.000000,200076.000000,58125.000000,9.186998)}
{pt3dadd(169668.000000,200112.000000,58100.000000,16.554516)}
{pt3dadd(169488.000000,200148.000000,58300.000000,8.867518)}
{pt3dadd(169332.000000,200148.000000,58200.000000,8.867518)}
{pt3dadd(169128.000000,200172.000000,58200.000000,8.867518)}
{pt3dadd(168960.000000,200184.000000,58250.000000,16.554516)}
{pt3dadd(168792.000000,200244.000000,58275.000000,9.186998)}
{pt3dadd(168588.000000,200352.000000,58275.000000,9.186998)}
{pt3dadd(168372.000000,200460.000000,58350.000000,9.186998)}
{pt3dadd(168156.000000,200568.000000,58350.000000,16.873996)}
{pt3dadd(167772.000000,200676.000000,58425.000000,9.186998)}
{pt3dadd(167448.000000,200772.000000,58475.000000,9.186998)}
{pt3dadd(167100.000000,200808.000000,58625.000000,9.186998)}
{pt3dadd(166728.000000,200856.000000,58750.000000,16.873996)}
{pt3dadd(166332.000000,200940.000000,58700.000000,9.186998)}
{pt3dadd(166008.000000,201096.000000,58650.000000,9.186998)}
{pt3dadd(165636.000000,200976.000000,58900.000000,9.186998)}
{pt3dadd(165336.000000,200880.000000,59100.000000,18.471396)}
{pt3dadd(165108.000000,200820.000000,59150.000000,10.784398)}
{pt3dadd(164904.000000,200796.000000,59200.000000,10.784398)}
{pt3dadd(164712.000000,200892.000000,59225.000000,21.985675)}
{pt3dadd(164496.000000,200988.000000,59250.000000,33.186952)}
{pt3dadd(164328.000000,201060.000000,59275.000000,38.837591)}
{pt3dadd(164148.000000,201096.000000,59275.000000,57.506386)}

{create adhoc140}
{access adhoc140}
{connect adhoc140(1), adhoc139(0)}
{nseg = 1}
{strdef color color = "White"}
{pt3dclear()}
{pt3dadd(164148.000000,201096.000000,59275.000000,57.506386)}
{pt3dadd(164052.000000,201000.000000,58600.000000,30.761849)}
{pt3dadd(163812.000000,200940.000000,58450.000000,19.057109)}
{pt3dadd(163572.000000,200928.000000,58350.000000,15.542830)}
{pt3dadd(163332.000000,200928.000000,58275.000000,9.186998)}
{pt3dadd(163080.000000,200976.000000,58250.000000,14.433524)}
{pt3dadd(162816.000000,201060.000000,58250.000000,19.680051)}
{pt3dadd(162636.000000,201156.000000,58150.000000,18.988421)}
{pt3dadd(162396.000000,201312.000000,58075.000000,27.732632)}

{create adhoc141}
{access adhoc141}
{connect adhoc141(1), adhoc140(0)}
{nseg = 1}
{strdef color color = "White"}
{pt3dclear()}
{pt3dadd(162396.000000,201312.000000,58075.000000,27.732632)}
{pt3dadd(161820.000000,201816.000000,58075.000000,20.837264)}
{pt3dadd(161640.000000,201960.000000,57850.000000,17.424464)}
{pt3dadd(161436.000000,202068.000000,57775.000000,17.424464)}
{pt3dadd(161256.000000,202176.000000,57700.000000,17.447720)}
{pt3dadd(161064.000000,202284.000000,57625.000000,27.732632)}

{create adhoc142}
{access adhoc142}
{connect adhoc142(1), adhoc141(0)}
{nseg = 1}
{strdef color color = "White"}
{pt3dclear()}
{pt3dadd(161064.000000,202284.000000,57625.000000,27.732632)}
{pt3dadd(160764.000000,202368.000000,57475.000000,18.988421)}
{pt3dadd(160488.000000,202608.000000,57375.000000,11.993053)}
{pt3dadd(160224.000000,202836.000000,57300.000000,13.102358)}
{pt3dadd(159960.000000,203112.000000,57250.000000,7.855832)}
{pt3dadd(159864.000000,203256.000000,57225.000000,11.481601)}
{pt3dadd(159768.000000,203400.000000,57275.000000,16.728128)}
{pt3dadd(159672.000000,203484.000000,57325.000000,16.287160)}
{pt3dadd(159444.000000,203568.000000,57225.000000,27.732632)}

{create adhoc143}
{access adhoc143}
{connect adhoc143(1), adhoc141(0)}
{nseg = 1}
{strdef color color = "White"}
{pt3dclear()}
{pt3dadd(161064.000000,202284.000000,57625.000000,27.732632)}
{pt3dadd(160776.000000,201660.000000,57625.000000,15.109160)}
{pt3dadd(160680.000000,201504.000000,57625.000000,6.449724)}

{create adhoc144}
{access adhoc144}
{connect adhoc144(1), adhoc140(0)}
{nseg = 1}
{strdef color color = "White"}
{pt3dclear()}
{pt3dadd(162396.000000,201312.000000,58075.000000,27.732632)}
{pt3dadd(161508.000000,200916.000000,58075.000000,12.840078)}
{pt3dadd(161148.000000,200736.000000,58075.000000,8.304047)}
{pt3dadd(160980.000000,200556.000000,58175.000000,4.615041)}
{pt3dadd(160776.000000,200484.000000,58225.000000,3.057520)}
{pt3dadd(160572.000000,200376.000000,58175.000000,3.057520)}
{pt3dadd(160416.000000,200364.000000,57975.000000,3.057520)}
{pt3dadd(160272.000000,200328.000000,57875.000000,4.986545)}
{pt3dadd(160152.000000,200232.000000,57850.000000,4.986545)}
{pt3dadd(160020.000000,200100.000000,57800.000000,7.310908)}
{pt3dadd(159912.000000,199776.000000,57650.000000,9.287602)}

{create adhoc145}
{access adhoc145}
{connect adhoc145(1), adhoc139(0)}
{nseg = 1}
{strdef color color = "White"}
{pt3dclear()}
{pt3dadd(164148.000000,201096.000000,59275.000000,57.506386)}
{pt3dadd(164052.000000,201000.000000,59850.000000,32.980459)}
{pt3dadd(163812.000000,201024.000000,60250.000000,30.644819)}
{pt3dadd(163596.000000,201228.000000,60450.000000,18.594239)}
{pt3dadd(163308.000000,201300.000000,60650.000000,26.550085)}

{create adhoc146}
{access adhoc146}
{connect adhoc146(1), adhoc145(0)}
{nseg = 1}
{strdef color color = "White"}
{pt3dclear()}
{pt3dadd(163308.000000,201300.000000,60650.000000,26.550085)}
{pt3dadd(163128.000000,201900.000000,60375.000000,14.699687)}
{pt3dadd(162936.000000,202416.000000,60300.000000,9.419812)}
{pt3dadd(162732.000000,202740.000000,60400.000000,7.961550)}
{pt3dadd(162540.000000,202968.000000,60375.000000,5.051754)}
{pt3dadd(162348.000000,203340.000000,60425.000000,5.051754)}
{pt3dadd(162144.000000,203688.000000,60525.000000,5.051754)}
{pt3dadd(161952.000000,204012.000000,60575.000000,8.603509)}
{pt3dadd(161772.000000,204288.000000,60750.000000,5.051754)}
{pt3dadd(161616.000000,204684.000000,61275.000000,5.051754)}
{pt3dadd(161460.000000,204864.000000,61500.000000,5.051754)}
{pt3dadd(161436.000000,205008.000000,61475.000000,7.961550)}
{pt3dadd(161280.000000,205164.000000,61600.000000,4.409795)}
{pt3dadd(161208.000000,205308.000000,61725.000000,7.961550)}
{pt3dadd(161088.000000,205464.000000,61800.000000,10.742954)}
{pt3dadd(160992.000000,205632.000000,61925.000000,12.055264)}
{pt3dadd(160824.000000,205836.000000,62175.000000,15.407019)}

{create adhoc147}
{access adhoc147}
{connect adhoc147(1), adhoc145(0)}
{nseg = 1}
{strdef color color = "White"}
{pt3dclear()}
{pt3dadd(163308.000000,201300.000000,60650.000000,26.550085)}
{pt3dadd(163188.000000,200568.000000,60825.000000,15.512836)}
{pt3dadd(162972.000000,200136.000000,61050.000000,9.907701)}
{pt3dadd(162852.000000,199944.000000,61150.000000,8.449439)}
{pt3dadd(162732.000000,199752.000000,61175.000000,5.051754)}
{pt3dadd(162708.000000,199572.000000,61200.000000,5.051754)}
{pt3dadd(162744.000000,199356.000000,61225.000000,5.051754)}
{pt3dadd(162720.000000,199104.000000,61300.000000,9.373860)}
{pt3dadd(162708.000000,198864.000000,61300.000000,10.144211)}
{pt3dadd(162732.000000,198660.000000,61300.000000,15.907018)}
{pt3dadd(162708.000000,198492.000000,61450.000000,23.110527)}

{create adhoc148}
{access adhoc148}
{connect adhoc148(1), adhoc147(0)}
{nseg = 1}
{strdef color color = "White"}
{pt3dclear()}
{pt3dadd(162708.000000,198492.000000,61450.000000,23.110527)}
{pt3dadd(162816.000000,198360.000000,61500.000000,14.623100)}
{pt3dadd(162936.000000,198192.000000,61600.000000,9.373860)}
{pt3dadd(162984.000000,197916.000000,61750.000000,9.373860)}
{pt3dadd(162996.000000,197712.000000,61825.000000,5.822105)}
{pt3dadd(163044.000000,197496.000000,61900.000000,5.822105)}
{pt3dadd(163188.000000,197328.000000,62100.000000,5.822105)}
{pt3dadd(163284.000000,197196.000000,62150.000000,9.373860)}
{pt3dadd(163488.000000,197208.000000,62025.000000,6.299688)}
{pt3dadd(163620.000000,196884.000000,62400.000000,9.499480)}
{pt3dadd(163332.000000,197028.000000,62825.000000,7.739669)}

{create adhoc149}
{access adhoc149}
{connect adhoc149(1), adhoc147(0)}
{nseg = 1}
{strdef color color = "White"}
{pt3dclear()}
{pt3dadd(162708.000000,198492.000000,61450.000000,23.110527)}
{pt3dadd(162444.000000,198360.000000,60875.000000,10.353417)}
{pt3dadd(162336.000000,198240.000000,60650.000000,6.812050)}
{pt3dadd(162228.000000,198048.000000,60475.000000,4.864774)}
{pt3dadd(162108.000000,197868.000000,60375.000000,3.874829)}
{pt3dadd(162012.000000,197724.000000,60300.000000,3.874829)}
{pt3dadd(161928.000000,197544.000000,60325.000000,3.874829)}
{pt3dadd(161832.000000,197340.000000,60225.000000,5.803854)}
{pt3dadd(161760.000000,197148.000000,60225.000000,3.429025)}
{pt3dadd(161580.000000,196980.000000,60125.000000,3.429025)}
{pt3dadd(161484.000000,196824.000000,60100.000000,6.338820)}
{pt3dadd(161484.000000,196620.000000,60050.000000,8.178684)}
{pt3dadd(161496.000000,196308.000000,59975.000000,9.416098)}
{pt3dadd(161400.000000,196020.000000,59950.000000,10.699318)}

{create adhoc150}
{access adhoc150}
{connect adhoc150(1), adhoc138(0)}
{nseg = 1}
{strdef color color = "White"}
{pt3dclear()}
{pt3dadd(178980.000000,197028.000000,54875.000000,81.024430)}
{pt3dadd(178800.000000,197268.000000,53900.000000,28.008143)}
{pt3dadd(178620.000000,197340.000000,53500.000000,17.404886)}
{pt3dadd(178320.000000,197580.000000,53375.000000,1.500000)}
{pt3dadd(178092.000000,197892.000000,53225.000000,1.500000)}
{pt3dadd(177876.000000,198180.000000,53125.000000,1.500000)}

{create adhoc151}
{access adhoc151}
{connect adhoc151(1), adhoc150(0)}
{nseg = 1}
{strdef color color = "White"}
{pt3dclear()}
{pt3dadd(177876.000000,198180.000000,53125.000000,1.500000)}
{pt3dadd(176388.000000,197724.000000,53250.000000,1.500000)}
{pt3dadd(176172.000000,197748.000000,53275.000000,1.500000)}
{pt3dadd(175980.000000,197736.000000,53275.000000,3.874829)}
{pt3dadd(175800.000000,197760.000000,53300.000000,3.874829)}
{pt3dadd(175620.000000,197736.000000,53300.000000,3.874829)}
{pt3dadd(175440.000000,197700.000000,53275.000000,3.874829)}
{pt3dadd(175164.000000,197724.000000,53250.000000,6.784625)}
{pt3dadd(174972.000000,197676.000000,53325.000000,4.409795)}
{pt3dadd(174768.000000,197640.000000,53300.000000,4.409795)}
{pt3dadd(174552.000000,197628.000000,53250.000000,4.409795)}
{pt3dadd(174336.000000,197604.000000,53275.000000,7.319591)}
{pt3dadd(174108.000000,197556.000000,53300.000000,4.409795)}
{pt3dadd(173880.000000,197580.000000,53250.000000,4.409795)}
{pt3dadd(173652.000000,197592.000000,53200.000000,4.409795)}
{pt3dadd(173460.000000,197532.000000,53275.000000,6.784625)}
{pt3dadd(173244.000000,197604.000000,53275.000000,3.874829)}
{pt3dadd(173040.000000,197652.000000,53325.000000,3.874829)}
{pt3dadd(172836.000000,197592.000000,53500.000000,3.874829)}
{pt3dadd(172656.000000,197484.000000,53475.000000,7.426584)}
{pt3dadd(172488.000000,197484.000000,53525.000000,5.051754)}
{pt3dadd(172284.000000,197388.000000,53575.000000,5.051754)}
{pt3dadd(172092.000000,197424.000000,53600.000000,5.051754)}
{pt3dadd(171900.000000,197448.000000,53375.000000,9.373860)}
{pt3dadd(171672.000000,197388.000000,53300.000000,5.822105)}
{pt3dadd(171468.000000,197364.000000,53300.000000,5.822105)}
{pt3dadd(171276.000000,197436.000000,53125.000000,5.822105)}
{pt3dadd(171072.000000,197340.000000,53125.000000,8.731901)}
{pt3dadd(170868.000000,197388.000000,53050.000000,4.409795)}
{pt3dadd(170640.000000,197388.000000,53075.000000,4.409795)}
{pt3dadd(170424.000000,197436.000000,53075.000000,4.409795)}
{pt3dadd(170172.000000,197484.000000,53075.000000,7.319591)}
{pt3dadd(169956.000000,197496.000000,53000.000000,4.409795)}
{pt3dadd(169716.000000,197508.000000,53025.000000,4.409795)}
{pt3dadd(169512.000000,197484.000000,53025.000000,4.409795)}
{pt3dadd(169296.000000,197460.000000,52975.000000,6.677632)}
{pt3dadd(168960.000000,197460.000000,52950.000000,3.767836)}
{pt3dadd(168600.000000,197544.000000,52925.000000,3.767836)}
{pt3dadd(168240.000000,197532.000000,52925.000000,3.767836)}
{pt3dadd(167904.000000,197508.000000,52975.000000,6.142666)}
{pt3dadd(167688.000000,197472.000000,52950.000000,3.874829)}
{pt3dadd(167448.000000,197448.000000,52975.000000,3.874829)}
{pt3dadd(167232.000000,197388.000000,53025.000000,3.874829)}
{pt3dadd(167016.000000,197340.000000,53000.000000,6.784625)}
{pt3dadd(166812.000000,197352.000000,53050.000000,4.409795)}
{pt3dadd(166596.000000,197256.000000,53075.000000,4.409795)}
{pt3dadd(166380.000000,197208.000000,53225.000000,4.409795)}
{pt3dadd(166140.000000,197220.000000,53300.000000,7.961550)}
{pt3dadd(165900.000000,197220.000000,53275.000000,5.051754)}
{pt3dadd(165684.000000,197208.000000,53350.000000,5.051754)}
{pt3dadd(165480.000000,197196.000000,53400.000000,5.051754)}
{pt3dadd(165288.000000,197280.000000,53500.000000,8.603509)}
{pt3dadd(165096.000000,197208.000000,53400.000000,5.051754)}
{pt3dadd(164760.000000,197184.000000,53450.000000,5.051754)}
{pt3dadd(164568.000000,197136.000000,53525.000000,5.051754)}
{pt3dadd(164376.000000,197136.000000,53550.000000,7.961550)}
{pt3dadd(164172.000000,197040.000000,53600.000000,4.409795)}
{pt3dadd(163980.000000,197040.000000,53600.000000,4.409795)}
{pt3dadd(163776.000000,196992.000000,53725.000000,4.409795)}
{pt3dadd(163572.000000,196848.000000,53700.000000,7.961550)}
{pt3dadd(163320.000000,196812.000000,53825.000000,5.051754)}
{pt3dadd(163068.000000,196608.000000,53850.000000,5.051754)}
{pt3dadd(162912.000000,196452.000000,53850.000000,5.051754)}
{pt3dadd(162708.000000,196356.000000,53925.000000,9.462677)}
{pt3dadd(162516.000000,195936.000000,53925.000000,9.462677)}
{pt3dadd(162312.000000,195804.000000,53925.000000,10.710611)}
{pt3dadd(162120.000000,195696.000000,53975.000000,16.851019)}
{pt3dadd(161940.000000,195600.000000,54025.000000,7.739669)}

{create adhoc152}
{access adhoc152}
{connect adhoc152(1), adhoc151(0)}
{nseg = 1}
{strdef color color = "White"}
{pt3dclear()}
{pt3dadd(161940.000000,195600.000000,54025.000000,7.739669)}
{pt3dadd(161448.000000,195756.000000,54200.000000,7.537939)}
{pt3dadd(161292.000000,195792.000000,54175.000000,5.122763)}
{pt3dadd(161028.000000,195936.000000,54175.000000,5.803854)}
{pt3dadd(160860.000000,196212.000000,54175.000000,3.429025)}
{pt3dadd(160716.000000,196380.000000,54125.000000,3.429025)}
{pt3dadd(160608.000000,196380.000000,54100.000000,4.676958)}
{pt3dadd(160644.000000,196692.000000,54200.000000,5.666903)}
{pt3dadd(160620.000000,196872.000000,54200.000000,5.229798)}
{pt3dadd(160524.000000,197016.000000,54275.000000,6.449724)}

{create adhoc153}
{access adhoc153}
{connect adhoc153(1), adhoc151(0)}
{nseg = 1}
{strdef color color = "White"}
{pt3dclear()}
{pt3dadd(161940.000000,195600.000000,54025.000000,7.739669)}
{pt3dadd(161652.000000,194856.000000,54200.000000,5.229798)}
{pt3dadd(161688.000000,194208.000000,54200.000000,3.737879)}
{pt3dadd(161652.000000,194004.000000,54350.000000,4.329808)}
{pt3dadd(161664.000000,193812.000000,54400.000000,3.339864)}
{pt3dadd(162072.000000,193464.000000,54575.000000,3.339864)}
{pt3dadd(162180.000000,193116.000000,54725.000000,5.268888)}
{pt3dadd(162360.000000,192696.000000,54750.000000,5.864683)}
{pt3dadd(162432.000000,192816.000000,55050.000000,5.708033)}
{pt3dadd(162468.000000,192984.000000,55275.000000,4.478975)}

{create adhoc154}
{access adhoc154}
{connect adhoc154(1), adhoc150(0)}
{nseg = 1}
{strdef color color = "White"}
{pt3dclear()}
{pt3dadd(177876.000000,198180.000000,53125.000000,1.500000)}
{pt3dadd(177660.000000,198564.000000,52975.000000,1.500000)}
{pt3dadd(177408.000000,198972.000000,52825.000000,1.500000)}
{pt3dadd(177336.000000,199176.000000,52750.000000,9.186998)}
{pt3dadd(177180.000000,199368.000000,52700.000000,9.186998)}
{pt3dadd(177120.000000,199596.000000,52500.000000,9.186998)}
{pt3dadd(176868.000000,199872.000000,52425.000000,9.186998)}
{pt3dadd(176712.000000,200112.000000,52300.000000,18.471396)}
{pt3dadd(176460.000000,200364.000000,52175.000000,10.784398)}
{pt3dadd(176112.000000,200616.000000,52100.000000,10.784398)}
{pt3dadd(175884.000000,200844.000000,51900.000000,10.784398)}
{pt3dadd(175668.000000,201024.000000,51900.000000,18.471396)}
{pt3dadd(175428.000000,201204.000000,51975.000000,9.186998)}
{pt3dadd(175200.000000,201540.000000,51950.000000,15.542830)}
{pt3dadd(175008.000000,201792.000000,51975.000000,21.898662)}
{pt3dadd(174792.000000,201888.000000,52025.000000,22.686107)}
{pt3dadd(174588.000000,202056.000000,51975.000000,33.279160)}

{create adhoc155}
{access adhoc155}
{connect adhoc155(1), adhoc154(0)}
{nseg = 1}
{strdef color color = "White"}
{pt3dclear()}
{pt3dadd(174588.000000,202056.000000,51975.000000,33.279160)}
{pt3dadd(174480.000000,201384.000000,51775.000000,19.296562)}
{pt3dadd(174240.000000,201180.000000,51625.000000,12.177937)}
{pt3dadd(174048.000000,201120.000000,51575.000000,9.373860)}
{pt3dadd(173856.000000,201156.000000,51500.000000,5.051754)}
{pt3dadd(173640.000000,201096.000000,51525.000000,5.051754)}
{pt3dadd(173448.000000,201180.000000,51650.000000,5.051754)}
{pt3dadd(173256.000000,201144.000000,51550.000000,8.603509)}
{pt3dadd(173088.000000,201120.000000,51475.000000,5.051754)}
{pt3dadd(172908.000000,201108.000000,51500.000000,5.051754)}
{pt3dadd(172692.000000,201144.000000,51475.000000,5.051754)}
{pt3dadd(172500.000000,201192.000000,51475.000000,8.603509)}
{pt3dadd(172284.000000,201204.000000,51450.000000,5.051754)}
{pt3dadd(172080.000000,201204.000000,51425.000000,5.051754)}
{pt3dadd(171900.000000,201216.000000,51450.000000,5.051754)}
{pt3dadd(171708.000000,201264.000000,51450.000000,9.188976)}
{pt3dadd(171516.000000,201240.000000,51475.000000,5.637221)}
{pt3dadd(171348.000000,201300.000000,51450.000000,5.637221)}
{pt3dadd(171168.000000,201288.000000,51425.000000,5.637221)}
{pt3dadd(170976.000000,201312.000000,51425.000000,9.188976)}
{pt3dadd(170796.000000,201348.000000,51400.000000,5.051754)}
{pt3dadd(170604.000000,201396.000000,51425.000000,5.051754)}
{pt3dadd(170400.000000,201456.000000,51350.000000,5.051754)}
{pt3dadd(170184.000000,201516.000000,51400.000000,8.603509)}
{pt3dadd(169956.000000,201504.000000,51375.000000,5.051754)}
{pt3dadd(169728.000000,201492.000000,51375.000000,5.051754)}
{pt3dadd(169500.000000,201528.000000,51275.000000,5.051754)}
{pt3dadd(169260.000000,201552.000000,51275.000000,8.603509)}
{pt3dadd(168984.000000,201576.000000,51275.000000,5.051754)}
{pt3dadd(168708.000000,201552.000000,51275.000000,5.051754)}
{pt3dadd(168528.000000,201564.000000,51250.000000,5.051754)}
{pt3dadd(168276.000000,201600.000000,51175.000000,7.426584)}
{pt3dadd(167988.000000,201636.000000,51100.000000,3.874829)}
{pt3dadd(167760.000000,201612.000000,51025.000000,3.874829)}
{pt3dadd(167568.000000,201588.000000,50950.000000,3.874829)}
{pt3dadd(167352.000000,201612.000000,50850.000000,6.784625)}
{pt3dadd(167088.000000,201600.000000,50750.000000,4.409795)}
{pt3dadd(166848.000000,201588.000000,50600.000000,4.409795)}
{pt3dadd(166644.000000,201612.000000,50625.000000,4.409795)}
{pt3dadd(166440.000000,201648.000000,50525.000000,6.784625)}
{pt3dadd(166224.000000,201624.000000,50400.000000,3.874829)}
{pt3dadd(166020.000000,201588.000000,50325.000000,3.874829)}
{pt3dadd(165804.000000,201552.000000,50250.000000,3.874829)}
{pt3dadd(165600.000000,201600.000000,50250.000000,6.784625)}
{pt3dadd(165396.000000,201540.000000,50175.000000,7.961550)}
{pt3dadd(165120.000000,201528.000000,50125.000000,12.269250)}
{pt3dadd(164904.000000,201636.000000,49950.000000,19.258772)}

{create adhoc156}
{access adhoc156}
{connect adhoc156(1), adhoc155(0)}
{nseg = 1}
{strdef color color = "White"}
{pt3dclear()}
{pt3dadd(164904.000000,201636.000000,49950.000000,19.258772)}
{pt3dadd(164700.000000,201792.000000,49750.000000,14.623100)}
{pt3dadd(164460.000000,201924.000000,49625.000000,9.373860)}
{pt3dadd(164196.000000,202032.000000,49450.000000,10.144211)}
{pt3dadd(163848.000000,202080.000000,49325.000000,5.822105)}
{pt3dadd(163656.000000,202164.000000,49200.000000,5.822105)}
{pt3dadd(163392.000000,202176.000000,49100.000000,5.822105)}
{pt3dadd(163176.000000,202272.000000,49025.000000,10.846771)}
{pt3dadd(162984.000000,202308.000000,48950.000000,6.524665)}
{pt3dadd(162756.000000,202284.000000,48775.000000,6.524665)}
{pt3dadd(162528.000000,202224.000000,48600.000000,6.524665)}
{pt3dadd(162336.000000,202116.000000,48325.000000,10.076420)}
{pt3dadd(162144.000000,202008.000000,48200.000000,5.051754)}
{pt3dadd(161940.000000,202020.000000,48050.000000,5.051754)}
{pt3dadd(161784.000000,201888.000000,47950.000000,5.051754)}
{pt3dadd(161868.000000,201672.000000,47775.000000,7.961550)}
{pt3dadd(161760.000000,201408.000000,47525.000000,4.409795)}
{pt3dadd(161676.000000,201216.000000,47225.000000,4.409795)}
{pt3dadd(161640.000000,201000.000000,46850.000000,4.409795)}
{pt3dadd(161664.000000,201000.000000,46500.000000,6.784625)}
{pt3dadd(161712.000000,200772.000000,46125.000000,3.874829)}
{pt3dadd(161880.000000,200544.000000,45800.000000,3.874829)}
{pt3dadd(162024.000000,200436.000000,45425.000000,3.874829)}
{pt3dadd(162240.000000,200244.000000,45050.000000,7.426584)}
{pt3dadd(162372.000000,200184.000000,44825.000000,6.980779)}
{pt3dadd(162528.000000,200088.000000,44625.000000,8.538299)}
{pt3dadd(162876.000000,200076.000000,44350.000000,13.230499)}
{pt3dadd(163092.000000,200088.000000,44250.000000,9.287602)}

{create adhoc157}
{access adhoc157}
{connect adhoc157(1), adhoc155(0)}
{nseg = 1}
{strdef color color = "White"}
{pt3dclear()}
{pt3dadd(164904.000000,201636.000000,49950.000000,19.258772)}
{pt3dadd(164808.000000,201120.000000,50200.000000,9.891623)}
{pt3dadd(164448.000000,200760.000000,50200.000000,6.534974)}
{pt3dadd(164244.000000,200652.000000,49925.000000,5.893015)}
{pt3dadd(164016.000000,200580.000000,49900.000000,4.409795)}
{pt3dadd(163740.000000,200388.000000,50150.000000,4.409795)}
{pt3dadd(163524.000000,200532.000000,50175.000000,4.409795)}
{pt3dadd(163320.000000,200508.000000,50125.000000,6.338820)}
{pt3dadd(163080.000000,200376.000000,50050.000000,3.429025)}
{pt3dadd(162876.000000,200340.000000,50050.000000,3.429025)}
{pt3dadd(162672.000000,200280.000000,50025.000000,3.429025)}
{pt3dadd(162480.000000,200244.000000,49975.000000,4.986545)}
{pt3dadd(162264.000000,200160.000000,49975.000000,3.057520)}
{pt3dadd(162084.000000,200052.000000,49850.000000,3.057520)}
{pt3dadd(161928.000000,199896.000000,49750.000000,3.057520)}
{pt3dadd(161736.000000,199800.000000,49725.000000,4.305454)}
{pt3dadd(161568.000000,199692.000000,49625.000000,2.747934)}
{pt3dadd(161448.000000,199584.000000,49550.000000,2.747934)}
{pt3dadd(161640.000000,199308.000000,49275.000000,2.747934)}
{pt3dadd(161604.000000,199080.000000,49050.000000,4.305454)}
{pt3dadd(161448.000000,198804.000000,48925.000000,3.057520)}
{pt3dadd(161280.000000,198624.000000,48975.000000,3.057520)}
{pt3dadd(161184.000000,198480.000000,48975.000000,3.057520)}
{pt3dadd(161148.000000,198324.000000,49000.000000,4.986545)}
{pt3dadd(161112.000000,198180.000000,48900.000000,3.429025)}
{pt3dadd(161076.000000,198024.000000,48700.000000,3.429025)}
{pt3dadd(161028.000000,197868.000000,48650.000000,3.429025)}
{pt3dadd(161028.000000,197724.000000,48525.000000,5.358049)}
{pt3dadd(160980.000000,197556.000000,48525.000000,6.338820)}
{pt3dadd(160932.000000,197148.000000,48450.000000,8.267845)}
{pt3dadd(160992.000000,196680.000000,48275.000000,12.779741)}
{pt3dadd(161232.000000,196392.000000,47900.000000,11.145123)}

{create adhoc158}
{access adhoc158}
{connect adhoc158(1), adhoc154(0)}
{nseg = 1}
{strdef color color = "White"}
{pt3dclear()}
{pt3dadd(174588.000000,202056.000000,51975.000000,33.279160)}
{pt3dadd(174480.000000,202776.000000,51975.000000,20.467496)}
{pt3dadd(174312.000000,203028.000000,52050.000000,12.880497)}
{pt3dadd(174108.000000,203160.000000,52100.000000,12.880497)}
{pt3dadd(173940.000000,203292.000000,52225.000000,7.855832)}
{pt3dadd(173724.000000,203424.000000,52150.000000,7.855832)}
{pt3dadd(173484.000000,203676.000000,52225.000000,7.855832)}
{pt3dadd(173316.000000,203808.000000,52200.000000,13.102358)}
{pt3dadd(173136.000000,203964.000000,52175.000000,6.746526)}
{pt3dadd(172992.000000,204144.000000,52225.000000,6.746526)}
{pt3dadd(172848.000000,204288.000000,52175.000000,6.746526)}
{pt3dadd(172704.000000,204408.000000,52300.000000,13.102358)}
{pt3dadd(172560.000000,204480.000000,52225.000000,7.855832)}
{pt3dadd(172428.000000,204504.000000,52275.000000,7.855832)}
{pt3dadd(172236.000000,204576.000000,52400.000000,7.855832)}
{pt3dadd(172044.000000,204708.000000,52350.000000,13.102358)}
{pt3dadd(171816.000000,204876.000000,52400.000000,6.746526)}
{pt3dadd(171624.000000,205008.000000,52400.000000,6.746526)}
{pt3dadd(171384.000000,205188.000000,52475.000000,6.746526)}
{pt3dadd(170988.000000,205392.000000,52525.000000,11.558205)}
{pt3dadd(170688.000000,205608.000000,52525.000000,6.311679)}
{pt3dadd(170376.000000,205788.000000,52525.000000,6.311679)}
{pt3dadd(170232.000000,205932.000000,52400.000000,6.311679)}
{pt3dadd(170052.000000,206028.000000,52425.000000,12.667511)}
{pt3dadd(169860.000000,206184.000000,52375.000000,7.855832)}
{pt3dadd(169704.000000,206388.000000,52300.000000,7.855832)}
{pt3dadd(169560.000000,206592.000000,52300.000000,7.855832)}
{pt3dadd(169356.000000,206928.000000,52225.000000,14.211664)}
{pt3dadd(169140.000000,207156.000000,52125.000000,7.855832)}
{pt3dadd(168924.000000,207216.000000,52175.000000,7.855832)}
{pt3dadd(168720.000000,207420.000000,52125.000000,7.855832)}
{pt3dadd(168528.000000,207480.000000,52175.000000,14.211664)}
{pt3dadd(168324.000000,207600.000000,52075.000000,7.855832)}
{pt3dadd(168132.000000,207720.000000,52050.000000,7.855832)}
{pt3dadd(167964.000000,207768.000000,52200.000000,7.855832)}
{pt3dadd(167772.000000,207816.000000,52175.000000,14.211664)}
{pt3dadd(167592.000000,207900.000000,52150.000000,7.855832)}
{pt3dadd(167448.000000,207984.000000,52125.000000,7.855832)}
{pt3dadd(167244.000000,208116.000000,52125.000000,7.855832)}
{pt3dadd(167016.000000,208188.000000,52125.000000,12.667511)}
{pt3dadd(166836.000000,208368.000000,52150.000000,6.311679)}
{pt3dadd(166632.000000,208572.000000,52150.000000,6.311679)}
{pt3dadd(166428.000000,208644.000000,52200.000000,6.311679)}
{pt3dadd(166296.000000,208728.000000,52250.000000,11.558205)}
{pt3dadd(166032.000000,208944.000000,52150.000000,6.746526)}
{pt3dadd(165828.000000,209076.000000,52150.000000,6.746526)}
{pt3dadd(165576.000000,209244.000000,52125.000000,6.746526)}
{pt3dadd(165324.000000,209340.000000,52125.000000,12.836125)}
{pt3dadd(165108.000000,209364.000000,52125.000000,7.589598)}
{pt3dadd(164868.000000,209496.000000,52175.000000,7.589598)}
{pt3dadd(164532.000000,209724.000000,52075.000000,7.589598)}
{pt3dadd(164328.000000,209808.000000,52075.000000,13.679197)}
{pt3dadd(164100.000000,209880.000000,52075.000000,7.589598)}
{pt3dadd(163884.000000,209964.000000,52200.000000,7.589598)}
{pt3dadd(163704.000000,210012.000000,52125.000000,7.589598)}
{pt3dadd(163476.000000,210084.000000,52125.000000,12.836125)}
{pt3dadd(163296.000000,210288.000000,52050.000000,6.746526)}
{pt3dadd(163092.000000,210336.000000,52100.000000,6.746526)}
{pt3dadd(162936.000000,210504.000000,52000.000000,6.746526)}
{pt3dadd(162756.000000,210708.000000,52075.000000,13.102358)}
{pt3dadd(162516.000000,210840.000000,52100.000000,7.855832)}
{pt3dadd(162300.000000,211056.000000,52150.000000,14.211664)}
{pt3dadd(162084.000000,211356.000000,52000.000000,19.458190)}
{pt3dadd(161892.000000,211512.000000,51950.000000,20.837264)}
{pt3dadd(161664.000000,211632.000000,52050.000000,27.732632)}

{create adhoc159}
{access adhoc159}
{connect adhoc159(1), adhoc158(0)}
{nseg = 1}
{strdef color color = "White"}
{pt3dclear()}
{pt3dadd(161664.000000,211632.000000,52050.000000,27.732632)}
{pt3dadd(161472.000000,211260.000000,52275.000000,17.447720)}
{pt3dadd(161136.000000,211104.000000,52500.000000,11.068632)}
{pt3dadd(160956.000000,211200.000000,52500.000000,7.070039)}
{pt3dadd(160776.000000,210996.000000,52575.000000,2.747934)}
{pt3dadd(160620.000000,210948.000000,52650.000000,2.747934)}
{pt3dadd(160440.000000,210876.000000,52750.000000,2.747934)}
{pt3dadd(160248.000000,210768.000000,52850.000000,5.657729)}
{pt3dadd(160080.000000,210888.000000,53025.000000,4.409795)}
{pt3dadd(159900.000000,210852.000000,53100.000000,4.409795)}
{pt3dadd(159732.000000,210936.000000,53350.000000,4.409795)}
{pt3dadd(159552.000000,211104.000000,53650.000000,8.731901)}
{pt3dadd(159456.000000,211152.000000,53675.000000,5.822105)}
{pt3dadd(159288.000000,211380.000000,53750.000000,5.822105)}
{pt3dadd(159108.000000,211488.000000,54000.000000,5.822105)}
{pt3dadd(158952.000000,211764.000000,54425.000000,9.373860)}
{pt3dadd(158916.000000,211908.000000,54450.000000,5.051754)}
{pt3dadd(158820.000000,212076.000000,54500.000000,5.051754)}
{pt3dadd(158760.000000,212208.000000,54675.000000,5.051754)}
{pt3dadd(158652.000000,212340.000000,54850.000000,7.961550)}
{pt3dadd(158496.000000,212568.000000,54950.000000,4.409795)}
{pt3dadd(158436.000000,212808.000000,55075.000000,4.409795)}
{pt3dadd(158364.000000,213072.000000,55125.000000,4.409795)}
{pt3dadd(158256.000000,213324.000000,55100.000000,6.784625)}
{pt3dadd(158148.000000,213648.000000,55100.000000,3.874829)}
{pt3dadd(158088.000000,213936.000000,55275.000000,3.874829)}
{pt3dadd(157992.000000,214176.000000,55450.000000,3.874829)}
{pt3dadd(157860.000000,214356.000000,55650.000000,6.249659)}
{pt3dadd(157680.000000,214560.000000,55850.000000,3.874829)}
{pt3dadd(157632.000000,214848.000000,56150.000000,5.432350)}
{pt3dadd(157644.000000,215124.000000,56225.000000,6.680284)}
{pt3dadd(157668.000000,215400.000000,56350.000000,6.175757)}
{pt3dadd(157584.000000,215628.000000,56475.000000,7.739669)}

{create adhoc160}
{access adhoc160}
{connect adhoc160(1), adhoc158(0)}
{nseg = 1}
{strdef color color = "White"}
{pt3dclear()}
{pt3dadd(161664.000000,211632.000000,52050.000000,27.732632)}
{pt3dadd(161472.000000,212112.000000,51950.000000,17.447720)}
{pt3dadd(161304.000000,212544.000000,51800.000000,11.068632)}
{pt3dadd(161112.000000,212940.000000,51700.000000,13.189623)}
{pt3dadd(160920.000000,213348.000000,51550.000000,8.867518)}
{pt3dadd(160716.000000,213600.000000,51350.000000,8.867518)}
{pt3dadd(160512.000000,213732.000000,51450.000000,14.114044)}
{pt3dadd(160332.000000,213912.000000,51325.000000,17.665799)}
{pt3dadd(160140.000000,214044.000000,51250.000000,16.163801)}
{pt3dadd(159924.000000,214764.000000,51775.000000,19.258772)}

{create adhoc161}
{access adhoc161}
{connect adhoc161(1), adhoc160(0)}
{nseg = 1}
{strdef color color = "White"}
{pt3dclear()}
{pt3dadd(159924.000000,214764.000000,51775.000000,19.258772)}
{pt3dadd(159972.000000,213996.000000,50800.000000,13.339181)}
{pt3dadd(159828.000000,213876.000000,50400.000000,14.530093)}
{pt3dadd(159840.000000,213768.000000,50125.000000,11.377640)}
{pt3dadd(160032.000000,213564.000000,49725.000000,19.258772)}

{create adhoc162}
{access adhoc162}
{connect adhoc162(1), adhoc161(0)}
{nseg = 1}
{strdef color color = "White"}
{pt3dclear()}
{pt3dadd(160032.000000,213564.000000,49725.000000,19.258772)}
{pt3dadd(160320.000000,213840.000000,49400.000000,10.634632)}
{pt3dadd(160392.000000,213804.000000,49025.000000,6.980779)}
{pt3dadd(160344.000000,213960.000000,48625.000000,4.615041)}
{pt3dadd(160200.000000,214128.000000,48325.000000,3.675961)}
{pt3dadd(160008.000000,213984.000000,48125.000000,4.923895)}
{pt3dadd(159636.000000,213744.000000,47850.000000,7.206492)}
{pt3dadd(159492.000000,213552.000000,47650.000000,7.739669)}

{create adhoc163}
{access adhoc163}
{connect adhoc163(1), adhoc162(0)}
{nseg = 1}
{strdef color color = "White"}
{pt3dclear()}
{pt3dadd(159492.000000,213552.000000,47650.000000,7.739669)}
{pt3dadd(159480.000000,213360.000000,47400.000000,6.794931)}
{pt3dadd(159888.000000,213264.000000,47125.000000,4.676958)}
{pt3dadd(160116.000000,213024.000000,46700.000000,4.986545)}
{pt3dadd(160236.000000,212892.000000,46400.000000,3.057520)}
{pt3dadd(160368.000000,213036.000000,46075.000000,3.057520)}
{pt3dadd(160488.000000,213228.000000,45825.000000,3.057520)}
{pt3dadd(160488.000000,213840.000000,45550.000000,4.047465)}
{pt3dadd(160200.000000,214140.000000,45350.000000,2.489945)}
{pt3dadd(160044.000000,214248.000000,45375.000000,2.489945)}
{pt3dadd(159888.000000,214452.000000,45350.000000,2.489945)}
{pt3dadd(159756.000000,214584.000000,45375.000000,3.737879)}
{pt3dadd(159624.000000,214668.000000,45375.000000,2.747934)}
{pt3dadd(159468.000000,214920.000000,45350.000000,2.747934)}
{pt3dadd(159312.000000,215028.000000,45375.000000,2.747934)}
{pt3dadd(159156.000000,215172.000000,45400.000000,3.522888)}
{pt3dadd(158976.000000,215256.000000,45450.000000,2.274954)}
{pt3dadd(158844.000000,215328.000000,45500.000000,2.274954)}
{pt3dadd(158676.000000,215352.000000,45425.000000,2.274954)}
{pt3dadd(158484.000000,215364.000000,45325.000000,5.826708)}
{pt3dadd(158292.000000,215328.000000,45200.000000,5.051754)}
{pt3dadd(158112.000000,215268.000000,45025.000000,5.051754)}
{pt3dadd(157980.000000,215316.000000,44900.000000,5.051754)}
{pt3dadd(157800.000000,215388.000000,44725.000000,6.609275)}
{pt3dadd(157656.000000,215424.000000,44625.000000,3.057520)}
{pt3dadd(157500.000000,215436.000000,44550.000000,3.057520)}
{pt3dadd(157332.000000,215496.000000,44550.000000,3.057520)}
{pt3dadd(157152.000000,215544.000000,44525.000000,4.305454)}
{pt3dadd(156972.000000,215556.000000,44525.000000,2.747934)}
{pt3dadd(156804.000000,215568.000000,44525.000000,2.747934)}
{pt3dadd(156744.000000,215736.000000,44475.000000,2.747934)}
{pt3dadd(156600.000000,215880.000000,44425.000000,4.305454)}
{pt3dadd(156540.000000,216036.000000,44300.000000,3.057520)}
{pt3dadd(156588.000000,216192.000000,44175.000000,3.057520)}
{pt3dadd(156576.000000,216300.000000,44100.000000,3.057520)}
{pt3dadd(156852.000000,216384.000000,43825.000000,7.379626)}
{pt3dadd(157068.000000,216444.000000,43500.000000,7.751130)}
{pt3dadd(157152.000000,216492.000000,43150.000000,11.918550)}
{pt3dadd(157164.000000,216612.000000,42850.000000,11.145123)}

{create adhoc164}
{access adhoc164}
{connect adhoc164(1), adhoc162(0)}
{nseg = 1}
{strdef color color = "White"}
{pt3dclear()}
{pt3dadd(159492.000000,213552.000000,47650.000000,7.739669)}
{pt3dadd(158976.000000,213696.000000,47650.000000,5.229798)}
{pt3dadd(158820.000000,213876.000000,47650.000000,3.737879)}
{pt3dadd(158664.000000,213984.000000,47700.000000,3.479890)}
{pt3dadd(158520.000000,214068.000000,47750.000000,2.489945)}
{pt3dadd(158376.000000,214176.000000,47800.000000,2.489945)}
{pt3dadd(158244.000000,214308.000000,47900.000000,2.489945)}
{pt3dadd(158100.000000,214416.000000,48000.000000,3.428292)}
{pt3dadd(157956.000000,214380.000000,48050.000000,3.624363)}
{pt3dadd(157812.000000,214428.000000,48100.000000,4.872297)}
{pt3dadd(157680.000000,214404.000000,48300.000000,7.120495)}
{pt3dadd(157548.000000,214356.000000,48550.000000,7.739669)}

{create adhoc165}
{access adhoc165}
{connect adhoc165(1), adhoc161(0)}
{nseg = 1}
{strdef color color = "White"}
{pt3dclear()}
{pt3dadd(160032.000000,213564.000000,49725.000000,19.258772)}
{pt3dadd(160080.000000,213132.000000,49400.000000,13.339181)}
{pt3dadd(160188.000000,212712.000000,49125.000000,8.603509)}
{pt3dadd(160188.000000,212496.000000,48750.000000,10.298281)}
{pt3dadd(160188.000000,212352.000000,48350.000000,6.746526)}
{pt3dadd(160380.000000,212232.000000,48050.000000,6.746526)}
{pt3dadd(160560.000000,212208.000000,47975.000000,6.746526)}
{pt3dadd(160488.000000,212124.000000,47700.000000,11.068632)}
{pt3dadd(160560.000000,212244.000000,47450.000000,5.822105)}
{pt3dadd(160536.000000,212460.000000,47200.000000,5.822105)}
{pt3dadd(160512.000000,212580.000000,46900.000000,5.822105)}
{pt3dadd(160452.000000,212580.000000,46600.000000,8.731901)}
{pt3dadd(160452.000000,212568.000000,46175.000000,4.409795)}
{pt3dadd(160608.000000,212532.000000,45875.000000,4.409795)}
{pt3dadd(160836.000000,212616.000000,45575.000000,4.409795)}
{pt3dadd(161016.000000,212688.000000,45275.000000,6.338820)}
{pt3dadd(160992.000000,212832.000000,44950.000000,3.429025)}
{pt3dadd(161184.000000,212916.000000,44625.000000,3.429025)}
{pt3dadd(161460.000000,212820.000000,44375.000000,3.429025)}
{pt3dadd(161688.000000,212880.000000,44075.000000,5.358049)}
{pt3dadd(161760.000000,213000.000000,43825.000000,3.429025)}
{pt3dadd(162012.000000,213144.000000,43425.000000,3.429025)}
{pt3dadd(162264.000000,213132.000000,43100.000000,3.429025)}
{pt3dadd(162468.000000,212964.000000,42875.000000,4.986545)}
{pt3dadd(162804.000000,212508.000000,42475.000000,4.986545)}
{pt3dadd(163248.000000,212028.000000,42125.000000,6.544065)}
{pt3dadd(163476.000000,211872.000000,41875.000000,9.906776)}
{pt3dadd(163740.000000,211692.000000,41600.000000,9.287602)}

{create adhoc166}
{access adhoc166}
{connect adhoc166(1), adhoc160(0)}
{nseg = 1}
{strdef color color = "White"}
{pt3dclear()}
{pt3dadd(159924.000000,214764.000000,51775.000000,19.258772)}
{pt3dadd(159744.000000,215208.000000,51800.000000,14.314960)}
{pt3dadd(159504.000000,215460.000000,51850.000000,9.188976)}
{pt3dadd(159312.000000,215832.000000,52000.000000,9.959327)}
{pt3dadd(159120.000000,215988.000000,52150.000000,5.822105)}
{pt3dadd(158988.000000,216528.000000,52175.000000,5.822105)}
{pt3dadd(158856.000000,216996.000000,52250.000000,5.822105)}
{pt3dadd(158676.000000,217188.000000,52250.000000,9.373860)}
{pt3dadd(158604.000000,217320.000000,52250.000000,5.051754)}
{pt3dadd(158628.000000,217524.000000,52225.000000,5.051754)}
{pt3dadd(158604.000000,217764.000000,52300.000000,5.051754)}
{pt3dadd(158580.000000,217956.000000,52425.000000,8.603509)}
{pt3dadd(158532.000000,218112.000000,52450.000000,5.051754)}
{pt3dadd(158520.000000,218316.000000,52425.000000,9.373860)}
{pt3dadd(158484.000000,218496.000000,52475.000000,13.695965)}
{pt3dadd(158544.000000,218760.000000,52400.000000,15.907018)}
{pt3dadd(158568.000000,218964.000000,52300.000000,23.110527)}

{create adhoc167}
{access adhoc167}
{connect adhoc167(1), adhoc166(0)}
{nseg = 1}
{strdef color color = "White"}
{pt3dclear()}
{pt3dadd(158568.000000,218964.000000,52300.000000,23.110527)}
{pt3dadd(158280.000000,219060.000000,52800.000000,13.553168)}
{pt3dadd(158208.000000,219192.000000,52950.000000,8.731901)}
{pt3dadd(158196.000000,219360.000000,53000.000000,6.249659)}
{pt3dadd(158184.000000,219528.000000,53050.000000,3.339863)}
{pt3dadd(158196.000000,219720.000000,53025.000000,3.339863)}
{pt3dadd(158052.000000,219876.000000,53150.000000,3.339863)}
{pt3dadd(158064.000000,220068.000000,53175.000000,5.179727)}
{pt3dadd(157896.000000,220224.000000,53275.000000,3.339864)}
{pt3dadd(157812.000000,220356.000000,53350.000000,3.339864)}
{pt3dadd(157740.000000,220524.000000,53425.000000,3.339864)}
{pt3dadd(157596.000000,220692.000000,53550.000000,5.714693)}
{pt3dadd(157560.000000,220944.000000,53650.000000,3.874829)}
{pt3dadd(157476.000000,221208.000000,53675.000000,3.874829)}
{pt3dadd(157392.000000,221508.000000,53875.000000,3.874829)}
{pt3dadd(157344.000000,221808.000000,54000.000000,5.432350)}
{pt3dadd(157260.000000,222084.000000,54075.000000,3.057520)}
{pt3dadd(157260.000000,222432.000000,54225.000000,3.057520)}
{pt3dadd(157212.000000,222756.000000,54300.000000,3.057520)}
{pt3dadd(157236.000000,223044.000000,54400.000000,4.615041)}
{pt3dadd(157308.000000,223356.000000,54350.000000,3.057520)}
{pt3dadd(157272.000000,223632.000000,54375.000000,3.057520)}
{pt3dadd(157140.000000,223992.000000,54350.000000,3.057520)}
{pt3dadd(157032.000000,224256.000000,54375.000000,4.305454)}
{pt3dadd(157044.000000,224784.000000,54375.000000,2.747934)}
{pt3dadd(156984.000000,225048.000000,54425.000000,2.747934)}
{pt3dadd(156912.000000,225276.000000,54550.000000,2.747934)}
{pt3dadd(156756.000000,225504.000000,54475.000000,4.305454)}
{pt3dadd(156708.000000,226068.000000,54475.000000,3.057520)}
{pt3dadd(156756.000000,226404.000000,54575.000000,4.615041)}
{pt3dadd(156684.000000,226692.000000,54650.000000,5.604986)}
{pt3dadd(156600.000000,226968.000000,54675.000000,5.745775)}
{pt3dadd(156612.000000,227232.000000,54700.000000,6.449724)}

{create adhoc168}
{access adhoc168}
{connect adhoc168(1), adhoc166(0)}
{nseg = 1}
{strdef color color = "White"}
{pt3dclear()}
{pt3dadd(158568.000000,218964.000000,52300.000000,23.110527)}
{pt3dadd(158556.000000,219060.000000,51975.000000,13.553168)}
{pt3dadd(158568.000000,219276.000000,51700.000000,8.731901)}
{pt3dadd(158484.000000,219480.000000,51650.000000,6.677632)}
{pt3dadd(158364.000000,219672.000000,51575.000000,6.677632)}
{pt3dadd(158232.000000,219828.000000,51550.000000,3.767836)}
{pt3dadd(158208.000000,220104.000000,51125.000000,3.767836)}
{pt3dadd(158064.000000,220452.000000,50950.000000,5.696861)}
{pt3dadd(157944.000000,220632.000000,50950.000000,3.429025)}
{pt3dadd(158004.000000,220776.000000,50850.000000,3.429025)}
{pt3dadd(157944.000000,220944.000000,50800.000000,3.429025)}
{pt3dadd(157908.000000,221100.000000,50750.000000,4.986545)}
{pt3dadd(157920.000000,221268.000000,50600.000000,3.057520)}
{pt3dadd(157980.000000,221412.000000,50575.000000,3.057520)}
{pt3dadd(158016.000000,221592.000000,50375.000000,3.057520)}
{pt3dadd(158124.000000,221928.000000,50150.000000,5.432350)}
{pt3dadd(158268.000000,222180.000000,49950.000000,3.874829)}
{pt3dadd(158424.000000,222372.000000,49725.000000,3.874829)}
{pt3dadd(158580.000000,222360.000000,49500.000000,3.874829)}
{pt3dadd(158748.000000,222336.000000,49300.000000,5.803854)}
{pt3dadd(158904.000000,222300.000000,49250.000000,5.268888)}
{pt3dadd(159084.000000,222276.000000,49000.000000,6.826409)}
{pt3dadd(159300.000000,222144.000000,48775.000000,10.377348)}
{pt3dadd(159624.000000,221760.000000,48525.000000,9.287602)}

{create adhoc169}
{access adhoc169}
{connect adhoc169(1), adhoc3(0)}
{nseg = 1}
{strdef color color = "White"}
{pt3dclear()}
{pt3dadd(187164.000000,198216.000000,68925.000000,109.896410)}
{pt3dadd(182760.000000,197352.000000,68925.000000,53.106133)}
{pt3dadd(182496.000000,197388.000000,68900.000000,32.463680)}
{pt3dadd(182244.000000,197208.000000,69250.000000,20.068796)}
{pt3dadd(182016.000000,197028.000000,69425.000000,10.784398)}
{pt3dadd(181680.000000,196860.000000,69525.000000,10.784398)}
{pt3dadd(181296.000000,196704.000000,69775.000000,10.784398)}
{pt3dadd(181008.000000,196476.000000,69850.000000,20.068796)}
{pt3dadd(180744.000000,196332.000000,70000.000000,10.784398)}
{pt3dadd(180492.000000,196296.000000,70025.000000,10.784398)}
{pt3dadd(180252.000000,196200.000000,70125.000000,10.784398)}
{pt3dadd(180024.000000,196128.000000,70225.000000,18.471396)}
{pt3dadd(179844.000000,195900.000000,70300.000000,9.186998)}
{pt3dadd(179592.000000,195672.000000,70400.000000,9.186998)}
{pt3dadd(179352.000000,195528.000000,70500.000000,9.186998)}
{pt3dadd(179124.000000,195372.000000,70675.000000,20.388275)}
{pt3dadd(178884.000000,195240.000000,70775.000000,12.701277)}
{pt3dadd(178644.000000,195120.000000,70900.000000,12.701277)}
{pt3dadd(178272.000000,195084.000000,71025.000000,12.701277)}
{pt3dadd(178032.000000,194844.000000,71225.000000,23.902554)}
{pt3dadd(177804.000000,194772.000000,71325.000000,12.701277)}
{pt3dadd(177588.000000,194664.000000,71475.000000,23.902554)}
{pt3dadd(177384.000000,194556.000000,71625.000000,34.643780)}
{pt3dadd(177144.000000,194448.000000,71725.000000,38.070838)}
{pt3dadd(176952.000000,194376.000000,71825.000000,55.206127)}

{create adhoc170}
{access adhoc170}
{connect adhoc170(1), adhoc169(0)}
{nseg = 1}
{strdef color color = "White"}
{pt3dclear()}
{pt3dadd(176952.000000,194376.000000,71825.000000,55.206127)}
{pt3dadd(176724.000000,194244.000000,71900.000000,34.876039)}
{pt3dadd(176496.000000,194256.000000,71975.000000,21.525623)}
{pt3dadd(176592.000000,193824.000000,71800.000000,16.030924)}
{pt3dadd(176304.000000,193512.000000,71775.000000,6.746526)}
{pt3dadd(175992.000000,193272.000000,71775.000000,11.993053)}
{pt3dadd(175812.000000,193068.000000,71800.000000,17.239579)}
{pt3dadd(175704.000000,192864.000000,71775.000000,18.988421)}
{pt3dadd(175680.000000,192636.000000,71725.000000,27.732632)}

{create adhoc171}
{access adhoc171}
{connect adhoc171(1), adhoc170(0)}
{nseg = 1}
{strdef color color = "White"}
{pt3dclear()}
{pt3dadd(175680.000000,192636.000000,71725.000000,27.732632)}
{pt3dadd(175596.000000,192456.000000,71700.000000,18.988421)}
{pt3dadd(175500.000000,192180.000000,71625.000000,11.993053)}
{pt3dadd(175476.000000,191952.000000,71550.000000,14.114045)}
{pt3dadd(175500.000000,191688.000000,71550.000000,16.554517)}
{pt3dadd(175524.000000,191448.000000,71550.000000,26.590861)}
{pt3dadd(175548.000000,191196.000000,71550.000000,39.934990)}

{create adhoc172}
{access adhoc172}
{connect adhoc172(1), adhoc171(0)}
{nseg = 1}
{strdef color color = "White"}
{pt3dclear()}
{pt3dadd(175548.000000,191196.000000,71550.000000,39.934990)}
{pt3dadd(175752.000000,190968.000000,71925.000000,23.055874)}
{pt3dadd(175872.000000,190764.000000,71975.000000,14.433524)}
{pt3dadd(175896.000000,190572.000000,71975.000000,11.993053)}
{pt3dadd(175860.000000,190308.000000,72000.000000,6.746526)}
{pt3dadd(175944.000000,190092.000000,71975.000000,11.993053)}
{pt3dadd(175860.000000,189864.000000,71925.000000,17.017718)}
{pt3dadd(175836.000000,189684.000000,71925.000000,18.618653)}
{pt3dadd(175896.000000,189480.000000,72000.000000,26.623327)}

{create adhoc173}
{access adhoc173}
{connect adhoc173(1), adhoc172(0)}
{nseg = 1}
{strdef color color = "White"}
{pt3dclear()}
{pt3dadd(175896.000000,189480.000000,72000.000000,26.623327)}
{pt3dadd(175884.000000,189276.000000,72075.000000,18.618653)}
{pt3dadd(175872.000000,189072.000000,72150.000000,11.771192)}
{pt3dadd(175932.000000,188844.000000,72225.000000,13.102358)}
{pt3dadd(175872.000000,188604.000000,72175.000000,7.855832)}
{pt3dadd(175932.000000,188376.000000,72325.000000,7.855832)}
{pt3dadd(176004.000000,188148.000000,72550.000000,7.855832)}
{pt3dadd(176160.000000,187944.000000,72675.000000,15.542830)}
{pt3dadd(176376.000000,187776.000000,72825.000000,9.186998)}
{pt3dadd(176460.000000,187524.000000,73175.000000,9.186998)}
{pt3dadd(176628.000000,187200.000000,73525.000000,9.186998)}
{pt3dadd(176640.000000,186972.000000,73825.000000,13.509103)}
{pt3dadd(176508.000000,186804.000000,73550.000000,9.373860)}
{pt3dadd(176400.000000,186636.000000,73500.000000,12.925614)}
{pt3dadd(176520.000000,186468.000000,73800.000000,20.542690)}
{pt3dadd(176568.000000,186252.000000,73975.000000,19.258772)}

{create adhoc174}
{access adhoc174}
{connect adhoc174(1), adhoc173(0)}
{nseg = 1}
{strdef color color = "White"}
{pt3dclear()}
{pt3dadd(176568.000000,186252.000000,73975.000000,19.258772)}
{pt3dadd(176688.000000,186048.000000,74050.000000,13.339181)}
{pt3dadd(176532.000000,185796.000000,74025.000000,8.603509)}
{pt3dadd(176460.000000,185604.000000,73975.000000,7.961550)}
{pt3dadd(176400.000000,185412.000000,74000.000000,7.319591)}
{pt3dadd(176412.000000,185220.000000,73925.000000,9.694420)}
{pt3dadd(176532.000000,185004.000000,73850.000000,15.157367)}
{pt3dadd(176616.000000,184824.000000,73775.000000,13.374147)}

{create adhoc175}
{access adhoc175}
{connect adhoc175(1), adhoc174(0)}
{nseg = 1}
{strdef color color = "White"}
{pt3dclear()}
{pt3dadd(176616.000000,184824.000000,73775.000000,13.374147)}
{pt3dadd(176868.000000,184680.000000,74000.000000,8.053916)}
{pt3dadd(177108.000000,184524.000000,74075.000000,5.432350)}
{pt3dadd(177432.000000,184368.000000,74175.000000,3.832474)}
{pt3dadd(177528.000000,184008.000000,74275.000000,2.274954)}
{pt3dadd(177612.000000,183816.000000,74250.000000,2.274954)}
{pt3dadd(177612.000000,183624.000000,74225.000000,2.274954)}
{pt3dadd(177672.000000,183456.000000,74275.000000,3.832474)}
{pt3dadd(177720.000000,183288.000000,74375.000000,3.057520)}
{pt3dadd(177804.000000,183096.000000,74325.000000,3.057520)}
{pt3dadd(177960.000000,182880.000000,74400.000000,3.969178)}
{pt3dadd(178140.000000,182700.000000,74450.000000,5.217111)}
{pt3dadd(178212.000000,182532.000000,74400.000000,5.099318)}
{pt3dadd(178212.000000,182388.000000,74300.000000,7.739669)}

{create adhoc176}
{access adhoc176}
{connect adhoc176(1), adhoc175(0)}
{nseg = 1}
{strdef color color = "White"}
{pt3dclear()}
{pt3dadd(178212.000000,182388.000000,74300.000000,7.739669)}
{pt3dadd(178224.000000,182244.000000,74175.000000,5.659779)}
{pt3dadd(178308.000000,182088.000000,74150.000000,3.995868)}
{pt3dadd(178308.000000,181944.000000,74125.000000,5.122763)}
{pt3dadd(178296.000000,181776.000000,74050.000000,3.874829)}
{pt3dadd(178344.000000,181584.000000,73900.000000,3.874829)}
{pt3dadd(178416.000000,181404.000000,73800.000000,3.874829)}
{pt3dadd(178488.000000,181236.000000,73800.000000,6.784625)}
{pt3dadd(178548.000000,180984.000000,73600.000000,4.409795)}
{pt3dadd(178452.000000,180828.000000,73575.000000,4.409795)}
{pt3dadd(178896.000000,180468.000000,73300.000000,4.409795)}
{pt3dadd(178908.000000,180288.000000,73100.000000,5.399740)}
{pt3dadd(179004.000000,180108.000000,72950.000000,3.479890)}
{pt3dadd(178908.000000,179940.000000,72750.000000,4.799816)}
{pt3dadd(178956.000000,179772.000000,72750.000000,6.449724)}

{create adhoc177}
{access adhoc177}
{connect adhoc177(1), adhoc176(0)}
{nseg = 1}
{strdef color color = "White"}
{pt3dclear()}
{pt3dadd(178956.000000,179772.000000,72750.000000,6.449724)}
{pt3dadd(178656.000000,179880.000000,72575.000000,5.374770)}

{create adhoc178}
{access adhoc178}
{connect adhoc178(1), adhoc176(0)}
{nseg = 1}
{strdef color color = "White"}
{pt3dclear()}
{pt3dadd(178956.000000,179772.000000,72750.000000,6.449724)}
{pt3dadd(179292.000000,179640.000000,72525.000000,6.449724)}

{create adhoc179}
{access adhoc179}
{connect adhoc179(1), adhoc175(0)}
{nseg = 1}
{strdef color color = "White"}
{pt3dclear()}
{pt3dadd(178212.000000,182388.000000,74300.000000,7.739669)}
{pt3dadd(178464.000000,182388.000000,74550.000000,5.374770)}

{create adhoc180}
{access adhoc180}
{connect adhoc180(1), adhoc174(0)}
{nseg = 1}
{strdef color color = "White"}
{pt3dclear()}
{pt3dadd(176616.000000,184824.000000,73775.000000,13.374147)}
{pt3dadd(176376.000000,184752.000000,73475.000000,8.381831)}
{pt3dadd(176100.000000,184632.000000,73200.000000,5.629098)}
{pt3dadd(176208.000000,184308.000000,72900.000000,5.183294)}
{pt3dadd(176208.000000,184080.000000,72625.000000,3.429025)}
{pt3dadd(176304.000000,183984.000000,72350.000000,3.429025)}
{pt3dadd(176280.000000,183516.000000,71975.000000,3.429025)}
{pt3dadd(176412.000000,182928.000000,71650.000000,4.986545)}
{pt3dadd(176496.000000,182472.000000,71350.000000,3.832474)}
{pt3dadd(176544.000000,182304.000000,71450.000000,5.387457)}
{pt3dadd(176820.000000,181896.000000,71225.000000,5.374770)}

{create adhoc181}
{access adhoc181}
{connect adhoc181(1), adhoc173(0)}
{nseg = 1}
{strdef color color = "White"}
{pt3dclear()}
{pt3dadd(176568.000000,186252.000000,73975.000000,19.258772)}
{pt3dadd(176412.000000,186252.000000,73475.000000,10.289425)}
{pt3dadd(176484.000000,186168.000000,73275.000000,5.159780)}

{create adhoc182}
{access adhoc182}
{connect adhoc182(1), adhoc172(0)}
{nseg = 1}
{strdef color color = "White"}
{pt3dclear()}
{pt3dadd(175896.000000,189480.000000,72000.000000,26.623327)}
{pt3dadd(175044.000000,189480.000000,71325.000000,11.166032)}
{pt3dadd(174912.000000,189480.000000,71225.000000,5.374770)}

{create adhoc183}
{access adhoc183}
{connect adhoc183(1), adhoc171(0)}
{nseg = 1}
{strdef color color = "White"}
{pt3dclear()}
{pt3dadd(175548.000000,191196.000000,71550.000000,39.934990)}
{pt3dadd(175104.000000,191112.000000,70875.000000,19.161322)}
{pt3dadd(174816.000000,190812.000000,70600.000000,18.452625)}
{pt3dadd(174540.000000,190428.000000,70275.000000,15.087733)}
{pt3dadd(174300.000000,190092.000000,69925.000000,19.296562)}
{pt3dadd(173868.000000,189564.000000,69500.000000,23.110527)}

{create adhoc184}
{access adhoc184}
{connect adhoc184(1), adhoc183(0)}
{nseg = 1}
{strdef color color = "White"}
{pt3dclear()}
{pt3dadd(173868.000000,189564.000000,69500.000000,23.110527)}
{pt3dadd(173556.000000,189072.000000,69150.000000,15.907018)}
{pt3dadd(173196.000000,188700.000000,68625.000000,21.746569)}
{pt3dadd(173184.000000,188412.000000,68150.000000,20.837264)}
{pt3dadd(173052.000000,188364.000000,68000.000000,27.732632)}

{create adhoc185}
{access adhoc185}
{connect adhoc185(1), adhoc184(0)}
{nseg = 1}
{strdef color color = "White"}
{pt3dclear()}
{pt3dadd(173052.000000,188364.000000,68000.000000,27.732632)}
{pt3dadd(172896.000000,188052.000000,67575.000000,20.393543)}
{pt3dadd(172836.000000,187848.000000,67325.000000,12.836126)}
{pt3dadd(172956.000000,187608.000000,66925.000000,11.726821)}
{pt3dadd(172836.000000,187116.000000,66450.000000,8.418625)}
{pt3dadd(172620.000000,186612.000000,66100.000000,11.970379)}
{pt3dadd(172104.000000,186660.000000,65700.000000,18.950632)}
{pt3dadd(172164.000000,186456.000000,65575.000000,19.258772)}

{create adhoc186}
{access adhoc186}
{connect adhoc186(1), adhoc185(0)}
{nseg = 1}
{strdef color color = "White"}
{pt3dclear()}
{pt3dadd(172164.000000,186456.000000,65575.000000,19.258772)}
{pt3dadd(172044.000000,185688.000000,65450.000000,11.377640)}
{pt3dadd(171936.000000,184812.000000,65150.000000,7.426584)}
{pt3dadd(172044.000000,184092.000000,64900.000000,8.196935)}
{pt3dadd(172260.000000,183288.000000,64650.000000,12.177937)}
{pt3dadd(172320.000000,183084.000000,64500.000000,14.959341)}
{pt3dadd(172440.000000,182796.000000,64275.000000,23.932235)}
{pt3dadd(172416.000000,182568.000000,64225.000000,15.407018)}

{create adhoc187}
{access adhoc187}
{connect adhoc187(1), adhoc186(0)}
{nseg = 1}
{strdef color color = "White"}
{pt3dclear()}
{pt3dadd(172416.000000,182568.000000,64225.000000,15.407018)}
{pt3dadd(172428.000000,182484.000000,63400.000000,13.339182)}
{pt3dadd(172296.000000,182412.000000,62975.000000,8.603509)}
{pt3dadd(172032.000000,182400.000000,62550.000000,10.846771)}
{pt3dadd(171840.000000,182268.000000,62225.000000,11.771192)}
{pt3dadd(171636.000000,182232.000000,61900.000000,18.618653)}
{pt3dadd(171444.000000,182172.000000,61575.000000,27.732632)}

{create adhoc188}
{access adhoc188}
{connect adhoc188(1), adhoc187(0)}
{nseg = 1}
{strdef color color = "White"}
{pt3dclear()}
{pt3dadd(171444.000000,182172.000000,61575.000000,27.732632)}
{pt3dadd(171384.000000,181800.000000,61225.000000,16.163801)}
{pt3dadd(171228.000000,181572.000000,60925.000000,10.298281)}
{pt3dadd(171156.000000,181428.000000,60650.000000,7.961550)}
{pt3dadd(171072.000000,181224.000000,60350.000000,4.409795)}
{pt3dadd(170976.000000,180996.000000,60000.000000,4.409795)}
{pt3dadd(170772.000000,180936.000000,59675.000000,4.409795)}
{pt3dadd(170484.000000,180684.000000,59325.000000,7.961550)}
{pt3dadd(170400.000000,180468.000000,59050.000000,5.051754)}
{pt3dadd(170256.000000,180312.000000,58750.000000,6.980779)}
{pt3dadd(169800.000000,180108.000000,58525.000000,10.532533)}
{pt3dadd(169608.000000,179832.000000,58200.000000,10.634632)}
{pt3dadd(169452.000000,179520.000000,57925.000000,19.258772)}

{create adhoc189}
{access adhoc189}
{connect adhoc189(1), adhoc188(0)}
{nseg = 1}
{strdef color color = "White"}
{pt3dclear()}
{pt3dadd(169452.000000,179520.000000,57925.000000,19.258772)}
{pt3dadd(169248.000000,179616.000000,57800.000000,11.145123)}

{create adhoc190}
{access adhoc190}
{connect adhoc190(1), adhoc188(0)}
{nseg = 1}
{strdef color color = "White"}
{pt3dclear()}
{pt3dadd(169452.000000,179520.000000,57925.000000,19.258772)}
{pt3dadd(169260.000000,178848.000000,57800.000000,11.377640)}
{pt3dadd(169044.000000,178476.000000,57625.000000,8.909803)}
{pt3dadd(169032.000000,178128.000000,57400.000000,7.732878)}
{pt3dadd(168888.000000,177744.000000,57150.000000,7.930082)}
{pt3dadd(168912.000000,177228.000000,56925.000000,13.374147)}

{create adhoc191}
{access adhoc191}
{connect adhoc191(1), adhoc187(0)}
{nseg = 1}
{strdef color color = "White"}
{pt3dclear()}
{pt3dadd(171444.000000,182172.000000,61575.000000,27.732632)}
{pt3dadd(170664.000000,182568.000000,61425.000000,17.417301)}
{pt3dadd(170304.000000,182976.000000,61175.000000,10.322998)}
{pt3dadd(170232.000000,183108.000000,61150.000000,6.449724)}

{create adhoc192}
{access adhoc192}
{connect adhoc192(1), adhoc186(0)}
{nseg = 1}
{strdef color color = "White"}
{pt3dclear()}
{pt3dadd(172416.000000,182568.000000,64225.000000,15.407018)}
{pt3dadd(172428.000000,182364.000000,64750.000000,8.731540)}
{pt3dadd(172800.000000,182088.000000,64925.000000,5.838924)}
{pt3dadd(173124.000000,181644.000000,65250.000000,5.967316)}
{pt3dadd(173520.000000,181020.000000,65500.000000,4.409795)}
{pt3dadd(173796.000000,180348.000000,65825.000000,4.409795)}
{pt3dadd(173880.000000,179784.000000,66050.000000,4.409795)}
{pt3dadd(173808.000000,179580.000000,66075.000000,6.338820)}
{pt3dadd(173604.000000,179412.000000,65900.000000,3.429025)}
{pt3dadd(173376.000000,178992.000000,65650.000000,3.429025)}
{pt3dadd(172788.000000,178704.000000,65225.000000,3.429025)}
{pt3dadd(172392.000000,178392.000000,64650.000000,8.453690)}
{pt3dadd(172020.000000,178092.000000,64075.000000,6.524665)}
{pt3dadd(171972.000000,177732.000000,63525.000000,6.524665)}
{pt3dadd(171660.000000,177348.000000,63000.000000,6.524665)}
{pt3dadd(171528.000000,177084.000000,62625.000000,10.846771)}
{pt3dadd(171396.000000,176760.000000,62500.000000,5.822105)}
{pt3dadd(171432.000000,176400.000000,61950.000000,5.822105)}
{pt3dadd(171360.000000,175992.000000,61425.000000,5.822105)}
{pt3dadd(171324.000000,175632.000000,61175.000000,8.196935)}
{pt3dadd(171276.000000,175284.000000,60975.000000,3.874829)}
{pt3dadd(171456.000000,174888.000000,60975.000000,3.874829)}
{pt3dadd(171480.000000,174552.000000,60900.000000,3.874829)}
{pt3dadd(171360.000000,174096.000000,61025.000000,7.426584)}
{pt3dadd(171516.000000,173724.000000,61300.000000,7.961550)}
{pt3dadd(171924.000000,173340.000000,61700.000000,8.951495)}
{pt3dadd(172260.000000,173004.000000,61775.000000,13.919158)}
{pt3dadd(173304.000000,172704.000000,62125.000000,6.449724)}

{create adhoc193}
{access adhoc193}
{connect adhoc193(1), adhoc185(0)}
{nseg = 1}
{strdef color color = "White"}
{pt3dclear()}
{pt3dadd(172164.000000,186456.000000,65575.000000,19.258772)}
{pt3dadd(172260.000000,187236.000000,65575.000000,11.377640)}
{pt3dadd(172188.000000,187428.000000,65400.000000,7.426584)}
{pt3dadd(172104.000000,187620.000000,65650.000000,5.060846)}
{pt3dadd(171528.000000,187836.000000,65325.000000,4.243537)}
{pt3dadd(171144.000000,188124.000000,65175.000000,7.153332)}
{pt3dadd(170772.000000,188508.000000,65000.000000,10.922220)}
{pt3dadd(170448.000000,188892.000000,64650.000000,16.048977)}

{create adhoc194}
{access adhoc194}
{connect adhoc194(1), adhoc184(0)}
{nseg = 1}
{strdef color color = "White"}
{pt3dclear()}
{pt3dadd(173052.000000,188364.000000,68000.000000,27.732632)}
{pt3dadd(172908.000000,189060.000000,68000.000000,3.732480)}

{create adhoc195}
{access adhoc195}
{connect adhoc195(1), adhoc183(0)}
{nseg = 1}
{strdef color color = "White"}
{pt3dclear()}
{pt3dadd(173868.000000,189564.000000,69500.000000,23.110527)}
{pt3dadd(173916.000000,190488.000000,69375.000000,6.449724)}

{create adhoc196}
{access adhoc196}
{connect adhoc196(1), adhoc170(0)}
{nseg = 1}
{strdef color color = "White"}
{pt3dclear()}
{pt3dadd(175680.000000,192636.000000,71725.000000,27.732632)}
{pt3dadd(174216.000000,192708.000000,72225.000000,11.535801)}
{pt3dadd(174024.000000,192708.000000,72325.000000,8.296434)}
{pt3dadd(173916.000000,192768.000000,72325.000000,4.039853)}
{pt3dadd(173784.000000,192804.000000,72300.000000,4.441498)}
{pt3dadd(173652.000000,192852.000000,72250.000000,6.449724)}

{create adhoc197}
{access adhoc197}
{connect adhoc197(1), adhoc169(0)}
{nseg = 1}
{strdef color color = "White"}
{pt3dclear()}
{pt3dadd(176952.000000,194376.000000,71825.000000,55.206127)}
{pt3dadd(176952.000000,195036.000000,73600.000000,24.251701)}
{pt3dadd(176436.000000,195252.000000,73975.000000,15.151021)}
{pt3dadd(176292.000000,195612.000000,74650.000000,17.911327)}
{pt3dadd(176400.000000,195984.000000,75175.000000,28.503064)}
{pt3dadd(176304.000000,196020.000000,75825.000000,37.787462)}
{pt3dadd(176364.000000,196320.000000,76425.000000,61.979103)}
{pt3dadd(176340.000000,196500.000000,77000.000000,47.921990)}

{create adhoc198}
{access adhoc198}
{connect adhoc198(1), adhoc197(0)}
{nseg = 1}
{strdef color color = "White"}
{pt3dclear()}
{pt3dadd(176340.000000,196500.000000,77000.000000,47.921990)}
{pt3dadd(176484.000000,196728.000000,77400.000000,47.283029)}
{pt3dadd(176616.000000,197040.000000,77925.000000,47.921990)}

{create adhoc199}
{access adhoc199}
{connect adhoc199(1), adhoc198(0)}
{nseg = 1}
{strdef color color = "White"}
{pt3dclear()}
{pt3dadd(176616.000000,197040.000000,77925.000000,47.921990)}
{pt3dadd(176640.000000,197400.000000,78175.000000,38.337593)}

{create adhoc200}
{access adhoc200}
{connect adhoc200(1), adhoc199(0)}
{nseg = 1}
{strdef color color = "White"}
{pt3dclear()}
{pt3dadd(176640.000000,197400.000000,78175.000000,38.337593)}
{pt3dadd(176784.000000,197472.000000,78500.000000,29.253194)}
{pt3dadd(176988.000000,197664.000000,78900.000000,18.151917)}
{pt3dadd(177216.000000,197760.000000,79150.000000,24.285930)}
{pt3dadd(177144.000000,197844.000000,79450.000000,15.001532)}
{pt3dadd(177108.000000,197916.000000,79800.000000,15.001532)}
{pt3dadd(177192.000000,198000.000000,80125.000000,22.369051)}
{pt3dadd(176988.000000,198096.000000,80425.000000,28.458649)}
{pt3dadd(177048.000000,198216.000000,80675.000000,23.928528)}
{pt3dadd(177156.000000,198204.000000,81000.000000,31.947992)}

{create adhoc201}
{access adhoc201}
{connect adhoc201(1), adhoc200(0)}
{nseg = 1}
{strdef color color = "White"}
{pt3dclear()}
{pt3dadd(177156.000000,198204.000000,81000.000000,31.947992)}
{pt3dadd(177312.000000,197796.000000,81200.000000,38.763564)}
{pt3dadd(177576.000000,197472.000000,81475.000000,46.005108)}

{create adhoc202}
{access adhoc202}
{connect adhoc202(1), adhoc201(0)}
{nseg = 1}
{strdef color color = "White"}
{pt3dclear()}
{pt3dadd(177576.000000,197472.000000,81475.000000,46.005108)}
{pt3dadd(177612.000000,197388.000000,81900.000000,50.477828)}
{pt3dadd(177660.000000,197412.000000,82225.000000,54.311587)}
{pt3dadd(177672.000000,197328.000000,82525.000000,57.506386)}

{create adhoc203}
{access adhoc203}
{connect adhoc203(1), adhoc202(0)}
{nseg = 1}
{strdef color color = "White"}
{pt3dclear()}
{pt3dadd(177672.000000,197328.000000,82525.000000,57.506386)}
{pt3dadd(177696.000000,197568.000000,82925.000000,38.070839)}
{pt3dadd(177660.000000,197544.000000,83275.000000,23.442503)}
{pt3dadd(177744.000000,197604.000000,83700.000000,21.525624)}
{pt3dadd(177780.000000,197700.000000,84075.000000,18.471396)}
{pt3dadd(177936.000000,197796.000000,84375.000000,24.827228)}
{pt3dadd(178044.000000,197700.000000,84675.000000,40.378713)}
{pt3dadd(178044.000000,197736.000000,84950.000000,33.279160)}

{create adhoc204}
{access adhoc204}
{connect adhoc204(1), adhoc203(0)}
{nseg = 1}
{strdef color color = "White"}
{pt3dclear()}
{pt3dadd(178044.000000,197736.000000,84950.000000,33.279160)}
{pt3dadd(178332.000000,197736.000000,85250.000000,22.686107)}
{pt3dadd(178320.000000,197544.000000,85575.000000,29.585660)}
{pt3dadd(178452.000000,197496.000000,85850.000000,27.123327)}
{pt3dadd(178536.000000,197508.000000,86100.000000,39.934990)}

{create adhoc205}
{access adhoc205}
{connect adhoc205(1), adhoc204(0)}
{nseg = 1}
{strdef color color = "White"}
{pt3dclear()}
{pt3dadd(178536.000000,197508.000000,86100.000000,39.934990)}
{pt3dadd(178668.000000,197004.000000,86450.000000,22.331127)}
{pt3dadd(178884.000000,196524.000000,86650.000000,13.998676)}
{pt3dadd(179136.000000,196164.000000,86975.000000,11.558205)}
{pt3dadd(179328.000000,195936.000000,87025.000000,6.746526)}
{pt3dadd(179544.000000,195804.000000,87175.000000,6.746526)}
{pt3dadd(179736.000000,195696.000000,87400.000000,6.746526)}
{pt3dadd(179928.000000,195528.000000,87400.000000,11.068632)}
{pt3dadd(180156.000000,195312.000000,87375.000000,5.822105)}
{pt3dadd(180384.000000,195060.000000,87525.000000,5.822105)}
{pt3dadd(180648.000000,194940.000000,87525.000000,8.731901)}
{pt3dadd(180924.000000,194568.000000,87725.000000,12.283655)}
{pt3dadd(180972.000000,194364.000000,87650.000000,12.269250)}
{pt3dadd(181176.000000,194184.000000,87750.000000,19.258772)}

{create adhoc206}
{access adhoc206}
{connect adhoc206(1), adhoc205(0)}
{nseg = 1}
{strdef color color = "White"}
{pt3dclear()}
{pt3dadd(181176.000000,194184.000000,87750.000000,19.258772)}
{pt3dadd(181188.000000,193992.000000,87625.000000,12.269250)}
{pt3dadd(181296.000000,193764.000000,87600.000000,10.742953)}
{pt3dadd(181428.000000,193536.000000,87575.000000,10.100994)}
{pt3dadd(181620.000000,193308.000000,87525.000000,10.985332)}
{pt3dadd(181752.000000,193176.000000,87500.000000,16.048977)}

{create adhoc207}
{access adhoc207}
{connect adhoc207(1), adhoc206(0)}
{nseg = 1}
{strdef color color = "White"}
{pt3dclear()}
{pt3dadd(181752.000000,193176.000000,87500.000000,16.048977)}
{pt3dadd(181704.000000,193020.000000,87425.000000,11.199318)}
{pt3dadd(181764.000000,192720.000000,87275.000000,7.319591)}
{pt3dadd(181932.000000,192420.000000,87250.000000,7.319591)}
{pt3dadd(182184.000000,192156.000000,87250.000000,4.409795)}
{pt3dadd(182388.000000,191844.000000,86975.000000,4.409795)}
{pt3dadd(182448.000000,191532.000000,86900.000000,4.409795)}
{pt3dadd(182472.000000,191160.000000,86575.000000,6.249659)}
{pt3dadd(182460.000000,190836.000000,86250.000000,3.339864)}
{pt3dadd(182340.000000,190500.000000,85975.000000,3.339864)}
{pt3dadd(182364.000000,190104.000000,85875.000000,3.339864)}
{pt3dadd(182256.000000,189888.000000,85725.000000,6.121268)}
{pt3dadd(182244.000000,189468.000000,85500.000000,4.281404)}
{pt3dadd(182268.000000,189060.000000,85275.000000,4.281404)}
{pt3dadd(182328.000000,188748.000000,84975.000000,4.281404)}
{pt3dadd(182436.000000,188556.000000,85050.000000,7.191200)}
{pt3dadd(182520.000000,188388.000000,85125.000000,4.409795)}
{pt3dadd(182616.000000,188196.000000,85100.000000,4.409795)}
{pt3dadd(182664.000000,188064.000000,85175.000000,4.409795)}
{pt3dadd(182532.000000,187908.000000,85200.000000,7.961550)}
{pt3dadd(182664.000000,187704.000000,85125.000000,5.051754)}
{pt3dadd(182724.000000,187500.000000,85150.000000,5.051754)}
{pt3dadd(182808.000000,187368.000000,85200.000000,5.051754)}
{pt3dadd(182856.000000,187176.000000,85250.000000,7.319591)}
{pt3dadd(182892.000000,187008.000000,85225.000000,3.767836)}
{pt3dadd(182976.000000,186840.000000,85175.000000,6.142666)}
{pt3dadd(183000.000000,186660.000000,85125.000000,7.700186)}
{pt3dadd(183084.000000,186516.000000,85100.000000,8.053916)}
{pt3dadd(183168.000000,186372.000000,85075.000000,9.287602)}

{create adhoc208}
{access adhoc208}
{connect adhoc208(1), adhoc206(0)}
{nseg = 1}
{strdef color color = "White"}
{pt3dclear()}
{pt3dadd(181752.000000,193176.000000,87500.000000,16.048977)}
{pt3dadd(182172.000000,193248.000000,87975.000000,9.422540)}
{pt3dadd(182556.000000,193248.000000,88275.000000,6.222789)}
{pt3dadd(182652.000000,193272.000000,88500.000000,6.449724)}

{create adhoc209}
{access adhoc209}
{connect adhoc209(1), adhoc205(0)}
{nseg = 1}
{strdef color color = "White"}
{pt3dclear()}
{pt3dadd(181176.000000,194184.000000,87750.000000,19.258772)}
{pt3dadd(181824.000000,194184.000000,88500.000000,11.579370)}
{pt3dadd(181956.000000,194184.000000,88600.000000,7.309687)}
{pt3dadd(182076.000000,194184.000000,88675.000000,6.449724)}

{create adhoc210}
{access adhoc210}
{connect adhoc210(1), adhoc204(0)}
{nseg = 1}
{strdef color color = "White"}
{pt3dclear()}
{pt3dadd(178536.000000,197508.000000,86100.000000,39.934990)}
{pt3dadd(178404.000000,198288.000000,86250.000000,18.471443)}
{pt3dadd(178380.000000,198540.000000,86450.000000,7.739669)}
{pt3dadd(178380.000000,198660.000000,86575.000000,7.739669)}

{create adhoc211}
{access adhoc211}
{connect adhoc211(1), adhoc210(0)}
{nseg = 1}
{strdef color color = "White"}
{pt3dclear()}
{pt3dadd(178380.000000,198660.000000,86575.000000,7.739669)}
{pt3dadd(178500.000000,198816.000000,86650.000000,4.478975)}

{create adhoc212}
{access adhoc212}
{connect adhoc212(1), adhoc210(0)}
{nseg = 1}
{strdef color color = "White"}
{pt3dclear()}
{pt3dadd(178380.000000,198660.000000,86575.000000,7.739669)}
{pt3dadd(178716.000000,198648.000000,86625.000000,7.739669)}

{create adhoc213}
{access adhoc213}
{connect adhoc213(1), adhoc203(0)}
{nseg = 1}
{strdef color color = "White"}
{pt3dclear()}
{pt3dadd(178044.000000,197736.000000,84950.000000,33.279160)}
{pt3dadd(178944.000000,196800.000000,84950.000000,13.742961)}
{pt3dadd(179316.000000,196548.000000,85075.000000,10.825667)}
{pt3dadd(179688.000000,196152.000000,85350.000000,4.799816)}
{pt3dadd(179880.000000,195900.000000,85350.000000,5.159780)}

{create adhoc214}
{access adhoc214}
{connect adhoc214(1), adhoc202(0)}
{nseg = 1}
{strdef color color = "White"}
{pt3dclear()}
{pt3dadd(177672.000000,197328.000000,82525.000000,57.506386)}
{pt3dadd(178068.000000,196548.000000,82650.000000,21.818703)}
{pt3dadd(178380.000000,196344.000000,82650.000000,15.018973)}
{pt3dadd(178488.000000,196212.000000,82550.000000,3.712918)}
{pt3dadd(178488.000000,196080.000000,82500.000000,5.159780)}

{create adhoc215}
{access adhoc215}
{connect adhoc215(1), adhoc202(0)}
{nseg = 1}
{strdef color color = "White"}
{pt3dclear()}
{pt3dadd(177672.000000,197328.000000,82525.000000,57.506386)}
{pt3dadd(177312.000000,196836.000000,82525.000000,22.453377)}
{pt3dadd(177240.000000,196716.000000,82500.000000,5.374770)}

{create adhoc216}
{access adhoc216}
{connect adhoc216(1), adhoc201(0)}
{nseg = 1}
{strdef color color = "White"}
{pt3dclear()}
{pt3dadd(177576.000000,197472.000000,81475.000000,46.005108)}
{pt3dadd(177780.000000,196656.000000,81600.000000,17.984944)}
{pt3dadd(177792.000000,196536.000000,81600.000000,11.390966)}
{pt3dadd(177660.000000,196428.000000,81575.000000,3.479890)}
{pt3dadd(177600.000000,196320.000000,81575.000000,3.737879)}
{pt3dadd(177552.000000,196200.000000,81575.000000,5.229798)}
{pt3dadd(177552.000000,196032.000000,81425.000000,7.739669)}

{create adhoc217}
{access adhoc217}
{connect adhoc217(1), adhoc200(0)}
{nseg = 1}
{strdef color color = "White"}
{pt3dclear()}
{pt3dadd(177156.000000,198204.000000,81000.000000,31.947992)}
{pt3dadd(176772.000000,198756.000000,81200.000000,17.568921)}
{pt3dadd(176604.000000,198900.000000,80950.000000,11.141353)}
{pt3dadd(176472.000000,199056.000000,81225.000000,7.961550)}
{pt3dadd(176364.000000,199236.000000,81350.000000,4.409795)}
{pt3dadd(176316.000000,199404.000000,81450.000000,4.409795)}
{pt3dadd(176316.000000,199608.000000,81550.000000,4.409795)}
{pt3dadd(176220.000000,199812.000000,81825.000000,7.961550)}
{pt3dadd(176124.000000,200040.000000,81925.000000,5.051754)}
{pt3dadd(176064.000000,200280.000000,82075.000000,5.051754)}
{pt3dadd(176016.000000,200508.000000,82225.000000,5.051754)}
{pt3dadd(175992.000000,200700.000000,82350.000000,9.373860)}
{pt3dadd(175860.000000,200976.000000,82525.000000,5.822105)}
{pt3dadd(175812.000000,201240.000000,82775.000000,5.822105)}
{pt3dadd(175800.000000,201432.000000,83125.000000,5.822105)}
{pt3dadd(175848.000000,201696.000000,83575.000000,10.144211)}
{pt3dadd(175968.000000,201912.000000,83850.000000,9.219790)}
{pt3dadd(176004.000000,202092.000000,84175.000000,11.594619)}
{pt3dadd(176160.000000,202080.000000,84525.000000,18.324365)}
{pt3dadd(176340.000000,202260.000000,84900.000000,13.374147)}

{create adhoc218}
{access adhoc218}
{connect adhoc218(1), adhoc217(0)}
{nseg = 1}
{strdef color color = "White"}
{pt3dclear()}
{pt3dadd(176340.000000,202260.000000,84900.000000,13.374147)}
{pt3dadd(176520.000000,202392.000000,85250.000000,19.865067)}
{pt3dadd(176616.000000,202440.000000,85550.000000,23.110527)}
{pt3dadd(176892.000000,202632.000000,85825.000000,23.110527)}

{create adhoc219}
{access adhoc219}
{connect adhoc219(1), adhoc218(0)}
{nseg = 1}
{strdef color color = "White"}
{pt3dclear()}
{pt3dadd(176892.000000,202632.000000,85825.000000,23.110527)}
{pt3dadd(177132.000000,202896.000000,86275.000000,17.447720)}
{pt3dadd(177144.000000,203124.000000,86700.000000,15.390737)}
{pt3dadd(177156.000000,203316.000000,87025.000000,16.315158)}
{pt3dadd(177384.000000,203472.000000,87375.000000,17.447720)}
{pt3dadd(177360.000000,203652.000000,87550.000000,27.732632)}

{create adhoc220}
{access adhoc220}
{connect adhoc220(1), adhoc219(0)}
{nseg = 1}
{strdef color color = "White"}
{pt3dclear()}
{pt3dadd(177360.000000,203652.000000,87550.000000,27.732632)}
{pt3dadd(177324.000000,203700.000000,87800.000000,23.110527)}

{create adhoc221}
{access adhoc221}
{connect adhoc221(1), adhoc220(0)}
{nseg = 1}
{strdef color color = "White"}
{pt3dclear()}
{pt3dadd(177324.000000,203700.000000,87800.000000,23.110527)}
{pt3dadd(177480.000000,203388.000000,88050.000000,19.296562)}
{pt3dadd(177432.000000,203244.000000,88375.000000,12.177937)}
{pt3dadd(177564.000000,203148.000000,88700.000000,11.993054)}
{pt3dadd(177792.000000,203112.000000,89125.000000,5.637222)}
{pt3dadd(178080.000000,203172.000000,89525.000000,5.637222)}
{pt3dadd(178452.000000,202968.000000,89875.000000,5.637222)}
{pt3dadd(178692.000000,202884.000000,90175.000000,9.959327)}
{pt3dadd(179232.000000,202764.000000,90475.000000,5.822105)}
{pt3dadd(179472.000000,202764.000000,90875.000000,5.822105)}
{pt3dadd(179868.000000,202668.000000,91200.000000,8.731901)}
{pt3dadd(180036.000000,202620.000000,91225.000000,11.641696)}
{pt3dadd(180180.000000,202608.000000,91275.000000,11.199318)}
{pt3dadd(180240.000000,202836.000000,91650.000000,16.048977)}

{create adhoc222}
{access adhoc222}
{connect adhoc222(1), adhoc221(0)}
{nseg = 1}
{strdef color color = "White"}
{pt3dclear()}
{pt3dadd(180240.000000,202836.000000,91650.000000,16.048977)}
{pt3dadd(180168.000000,203508.000000,91925.000000,12.779741)}
{pt3dadd(180372.000000,203520.000000,92100.000000,11.145123)}

{create adhoc223}
{access adhoc223}
{connect adhoc223(1), adhoc222(0)}
{nseg = 1}
{strdef color color = "White"}
{pt3dclear()}
{pt3dadd(180372.000000,203520.000000,92100.000000,11.145123)}
{pt3dadd(180180.000000,203796.000000,92350.000000,9.564700)}
{pt3dadd(180240.000000,203928.000000,92600.000000,6.338820)}
{pt3dadd(180144.000000,204396.000000,92850.000000,5.657729)}
{pt3dadd(180264.000000,204492.000000,93175.000000,5.657729)}
{pt3dadd(180396.000000,204576.000000,93450.000000,8.429549)}
{pt3dadd(180492.000000,204696.000000,93750.000000,16.048977)}

{create adhoc224}
{access adhoc224}
{connect adhoc224(1), adhoc223(0)}
{nseg = 1}
{strdef color color = "White"}
{pt3dclear()}
{pt3dadd(180492.000000,204696.000000,93750.000000,16.048977)}
{pt3dadd(180564.000000,204852.000000,94050.000000,11.199318)}
{pt3dadd(180588.000000,205116.000000,94400.000000,7.319591)}
{pt3dadd(180660.000000,205428.000000,94625.000000,5.967316)}
{pt3dadd(180588.000000,205848.000000,94925.000000,3.057520)}
{pt3dadd(180612.000000,206064.000000,95225.000000,3.057520)}
{pt3dadd(180528.000000,206424.000000,95625.000000,3.057520)}
{pt3dadd(180480.000000,206604.000000,95900.000000,5.967316)}
{pt3dadd(180624.000000,206580.000000,96200.000000,5.657729)}
{pt3dadd(180720.000000,206592.000000,96575.000000,7.215250)}
{pt3dadd(180648.000000,206580.000000,96900.000000,11.025416)}
{pt3dadd(180408.000000,206508.000000,97175.000000,9.287602)}

{create adhoc225}
{access adhoc225}
{connect adhoc225(1), adhoc223(0)}
{nseg = 1}
{strdef color color = "White"}
{pt3dclear()}
{pt3dadd(180492.000000,204696.000000,93750.000000,16.048977)}
{pt3dadd(180144.000000,204876.000000,93750.000000,11.599298)}
{pt3dadd(179988.000000,204936.000000,93750.000000,5.374770)}

{create adhoc226}
{access adhoc226}
{connect adhoc226(1), adhoc222(0)}
{nseg = 1}
{strdef color color = "White"}
{pt3dclear()}
{pt3dadd(180372.000000,203520.000000,92100.000000,11.145123)}
{pt3dadd(180228.000000,202764.000000,92100.000000,8.960816)}
{pt3dadd(180168.000000,202404.000000,92100.000000,8.669557)}
{pt3dadd(180132.000000,202284.000000,92100.000000,10.271345)}

{create adhoc227}
{access adhoc227}
{connect adhoc227(1), adhoc221(0)}
{nseg = 1}
{strdef color color = "White"}
{pt3dclear()}
{pt3dadd(180240.000000,202836.000000,91650.000000,16.048977)}
{pt3dadd(180648.000000,201924.000000,91650.000000,12.160567)}
{pt3dadd(181020.000000,201564.000000,91900.000000,11.145123)}

{create adhoc228}
{access adhoc228}
{connect adhoc228(1), adhoc220(0)}
{nseg = 1}
{strdef color color = "White"}
{pt3dclear()}
{pt3dadd(177324.000000,203700.000000,87800.000000,23.110527)}
{pt3dadd(177120.000000,204516.000000,87800.000000,14.623100)}
{pt3dadd(176664.000000,205704.000000,88125.000000,9.373860)}
{pt3dadd(176388.000000,206436.000000,88425.000000,7.961550)}
{pt3dadd(176304.000000,206592.000000,88575.000000,4.409795)}
{pt3dadd(176400.000000,206784.000000,88550.000000,4.409795)}
{pt3dadd(176280.000000,207036.000000,88575.000000,4.409795)}
{pt3dadd(176316.000000,207240.000000,88650.000000,7.961550)}
{pt3dadd(176388.000000,207408.000000,88600.000000,5.051754)}
{pt3dadd(176388.000000,207768.000000,88600.000000,5.051754)}
{pt3dadd(176484.000000,207960.000000,88650.000000,5.051754)}
{pt3dadd(176472.000000,208128.000000,88575.000000,8.603509)}
{pt3dadd(176436.000000,208332.000000,88350.000000,5.051754)}
{pt3dadd(176364.000000,208500.000000,88150.000000,5.051754)}
{pt3dadd(176256.000000,208716.000000,88000.000000,5.051754)}
{pt3dadd(176172.000000,208908.000000,87950.000000,7.961550)}
{pt3dadd(175896.000000,209088.000000,87875.000000,4.409795)}
{pt3dadd(175644.000000,209268.000000,87825.000000,4.409795)}
{pt3dadd(175236.000000,209724.000000,87875.000000,4.409795)}
{pt3dadd(174852.000000,210084.000000,87800.000000,5.893015)}
{pt3dadd(174636.000000,210492.000000,87900.000000,2.983220)}
{pt3dadd(174600.000000,210888.000000,88000.000000,4.540740)}
{pt3dadd(174564.000000,211272.000000,88125.000000,5.530685)}
{pt3dadd(174408.000000,211728.000000,88225.000000,5.745775)}
{pt3dadd(174372.000000,211944.000000,88300.000000,6.449724)}

{create adhoc229}
{access adhoc229}
{connect adhoc229(1), adhoc219(0)}
{nseg = 1}
{strdef color color = "White"}
{pt3dclear()}
{pt3dadd(177360.000000,203652.000000,87550.000000,27.732632)}
{pt3dadd(178212.000000,203064.000000,87550.000000,11.894119)}
{pt3dadd(178560.000000,202656.000000,87550.000000,7.736471)}
{pt3dadd(178620.000000,202140.000000,87550.000000,3.479890)}
{pt3dadd(178584.000000,202008.000000,87525.000000,3.264899)}
{pt3dadd(178584.000000,201852.000000,87475.000000,4.039853)}
{pt3dadd(178572.000000,201672.000000,87525.000000,5.733088)}
{pt3dadd(178500.000000,201492.000000,87625.000000,5.374770)}

{create adhoc230}
{access adhoc230}
{connect adhoc230(1), adhoc218(0)}
{nseg = 1}
{strdef color color = "White"}
{pt3dclear()}
{pt3dadd(176892.000000,202632.000000,85825.000000,23.110527)}
{pt3dadd(177792.000000,203124.000000,85975.000000,5.374770)}

{create adhoc231}
{access adhoc231}
{connect adhoc231(1), adhoc218(0)}
{nseg = 1}
{strdef color color = "White"}
{pt3dclear()}
{pt3dadd(176892.000000,202632.000000,85825.000000,23.110527)}
{pt3dadd(176340.000000,203256.000000,85925.000000,12.292368)}
{pt3dadd(176196.000000,203556.000000,85925.000000,7.684726)}
{pt3dadd(176088.000000,203772.000000,85925.000000,9.287602)}

{create adhoc232}
{access adhoc232}
{connect adhoc232(1), adhoc217(0)}
{nseg = 1}
{strdef color color = "White"}
{pt3dclear()}
{pt3dadd(176340.000000,202260.000000,84900.000000,13.374147)}
{pt3dadd(176664.000000,202764.000000,84900.000000,7.430082)}

{create adhoc233}
{access adhoc233}
{connect adhoc233(1), adhoc199(0)}
{nseg = 1}
{strdef color color = "White"}
{pt3dclear()}
{pt3dadd(176640.000000,197400.000000,78175.000000,38.337593)}
{pt3dadd(176856.000000,196272.000000,78175.000000,17.079014)}
{pt3dadd(176484.000000,196056.000000,78250.000000,6.449724)}

{create adhoc234}
{access adhoc234}
{connect adhoc234(1), adhoc199(0)}
{nseg = 1}
{strdef color color = "White"}
{pt3dclear()}
{pt3dadd(176640.000000,197400.000000,78175.000000,38.337593)}
{pt3dadd(175572.000000,198348.000000,78175.000000,19.074128)}
{pt3dadd(175164.000000,198576.000000,78175.000000,8.874820)}
{pt3dadd(175104.000000,198696.000000,78225.000000,7.739669)}

{create adhoc235}
{access adhoc235}
{connect adhoc235(1), adhoc198(0)}
{nseg = 1}
{strdef color color = "White"}
{pt3dclear()}
{pt3dadd(176616.000000,197040.000000,77925.000000,47.921990)}
{pt3dadd(175776.000000,196788.000000,77900.000000,7.739669)}

{create adhoc236}
{access adhoc236}
{connect adhoc236(1), adhoc197(0)}
{nseg = 1}
{strdef color color = "White"}
{pt3dclear()}
{pt3dadd(176340.000000,196500.000000,77000.000000,47.921990)}
{pt3dadd(175296.000000,196128.000000,77000.000000,18.623905)}
{pt3dadd(174984.000000,196020.000000,77000.000000,11.774343)}
{pt3dadd(174612.000000,195876.000000,76875.000000,5.399740)}
{pt3dadd(174396.000000,195612.000000,76675.000000,4.409795)}
{pt3dadd(174408.000000,195084.000000,76425.000000,4.409795)}
{pt3dadd(174492.000000,194604.000000,76125.000000,5.657729)}
{pt3dadd(174720.000000,193728.000000,75850.000000,6.905663)}
{pt3dadd(174732.000000,193572.000000,75950.000000,5.659779)}
{pt3dadd(174708.000000,193416.000000,75875.000000,7.739669)}

{create adhoc237}
{access adhoc237}
{connect adhoc237(1), adhoc2(0)}
{nseg = 1}
{strdef color color = "White"}
{pt3dclear()}
{pt3dadd(187368.000000,200832.000000,72375.000000,119.245230)}
{pt3dadd(184608.000000,201432.000000,72075.000000,56.222407)}
{pt3dadd(184248.000000,202188.000000,72975.000000,34.333444)}
{pt3dadd(183948.000000,202872.000000,73350.000000,18.151916)}
{pt3dadd(183564.000000,203232.000000,73425.000000,8.867518)}
{pt3dadd(183300.000000,203364.000000,73375.000000,8.867518)}
{pt3dadd(183072.000000,203868.000000,73375.000000,8.867518)}
{pt3dadd(182772.000000,204168.000000,73625.000000,18.151916)}
{pt3dadd(182448.000000,204684.000000,73675.000000,10.784398)}
{pt3dadd(182100.000000,205008.000000,73675.000000,10.784398)}
{pt3dadd(181812.000000,205212.000000,73475.000000,10.784398)}
{pt3dadd(181548.000000,205416.000000,73275.000000,27.046236)}
{pt3dadd(181248.000000,205692.000000,73150.000000,33.361202)}
{pt3dadd(180876.000000,205968.000000,73050.000000,46.862734)}
{pt3dadd(180480.000000,206220.000000,72950.000000,77.104557)}
{pt3dadd(180108.000000,206316.000000,72550.000000,69.007660)}

{create adhoc238}
{access adhoc238}
{connect adhoc238(1), adhoc237(0)}
{nseg = 1}
{strdef color color = "White"}
{pt3dclear()}
{pt3dadd(180108.000000,206316.000000,72550.000000,69.007660)}
{pt3dadd(179700.000000,206604.000000,71750.000000,39.476550)}
{pt3dadd(179160.000000,206892.000000,71550.000000,24.285930)}
{pt3dadd(178800.000000,207024.000000,71525.000000,18.471396)}
{pt3dadd(178476.000000,207240.000000,71400.000000,9.186998)}
{pt3dadd(178092.000000,207240.000000,71425.000000,9.186998)}
{pt3dadd(177660.000000,207420.000000,71325.000000,9.186998)}
{pt3dadd(177336.000000,207636.000000,71425.000000,13.509103)}
{pt3dadd(176964.000000,207804.000000,71375.000000,5.822105)}
{pt3dadd(176640.000000,207912.000000,71325.000000,5.822105)}
{pt3dadd(176196.000000,208044.000000,71450.000000,5.822105)}
{pt3dadd(175884.000000,208152.000000,71550.000000,10.846771)}
{pt3dadd(175572.000000,208428.000000,71675.000000,6.524665)}
{pt3dadd(175248.000000,208536.000000,71700.000000,6.524665)}
{pt3dadd(174828.000000,208464.000000,71650.000000,6.524665)}
{pt3dadd(174444.000000,208680.000000,71750.000000,16.824242)}
{pt3dadd(174072.000000,208848.000000,71775.000000,11.799577)}
{pt3dadd(173712.000000,208992.000000,71925.000000,11.799577)}
{pt3dadd(173352.000000,209160.000000,71975.000000,11.799577)}
{pt3dadd(172980.000000,209220.000000,72000.000000,20.700598)}
{pt3dadd(172584.000000,209316.000000,72100.000000,10.401022)}
{pt3dadd(172152.000000,209496.000000,72200.000000,10.401022)}
{pt3dadd(171684.000000,209592.000000,72300.000000,10.401022)}
{pt3dadd(171420.000000,209796.000000,72350.000000,19.302044)}
{pt3dadd(171024.000000,210048.000000,72450.000000,10.401022)}
{pt3dadd(170664.000000,210300.000000,72600.000000,10.401022)}
{pt3dadd(170268.000000,210588.000000,72750.000000,10.401022)}
{pt3dadd(169716.000000,210648.000000,72675.000000,19.302044)}
{pt3dadd(169200.000000,210936.000000,72900.000000,10.401022)}
{pt3dadd(168672.000000,211344.000000,73125.000000,10.401022)}
{pt3dadd(168156.000000,211644.000000,73300.000000,21.602299)}
{pt3dadd(167724.000000,211980.000000,73350.000000,29.289297)}
{pt3dadd(167304.000000,212520.000000,73525.000000,32.980459)}
{pt3dadd(166848.000000,212856.000000,73575.000000,39.934990)}

{create adhoc239}
{access adhoc239}
{connect adhoc239(1), adhoc238(0)}
{nseg = 1}
{strdef color color = "White"}
{pt3dclear()}
{pt3dadd(166848.000000,212856.000000,73575.000000,39.934990)}
{pt3dadd(166416.000000,212544.000000,72800.000000,29.146700)}
{pt3dadd(166068.000000,212412.000000,72500.000000,18.088020)}
{pt3dadd(165852.000000,212400.000000,72400.000000,18.088020)}
{pt3dadd(165600.000000,212568.000000,72225.000000,15.542830)}
{pt3dadd(165384.000000,212532.000000,72300.000000,24.904717)}
{pt3dadd(165192.000000,212520.000000,72125.000000,33.279160)}

{create adhoc240}
{access adhoc240}
{connect adhoc240(1), adhoc239(0)}
{nseg = 1}
{strdef color color = "White"}
{pt3dclear()}
{pt3dadd(165192.000000,212520.000000,72125.000000,33.279160)}
{pt3dadd(164916.000000,212652.000000,72050.000000,22.686107)}
{pt3dadd(164520.000000,212748.000000,71775.000000,14.211664)}
{pt3dadd(164148.000000,212700.000000,71275.000000,17.140230)}
{pt3dadd(163824.000000,212988.000000,71275.000000,10.784398)}
{pt3dadd(163548.000000,213096.000000,71125.000000,10.784398)}
{pt3dadd(163284.000000,213168.000000,70725.000000,10.784398)}
{pt3dadd(163044.000000,213336.000000,70600.000000,21.525623)}
{pt3dadd(162804.000000,213444.000000,70200.000000,12.241225)}
{pt3dadd(162576.000000,213816.000000,70050.000000,12.241225)}
{pt3dadd(162312.000000,214092.000000,69725.000000,12.241225)}
{pt3dadd(162132.000000,214224.000000,69525.000000,21.525623)}
{pt3dadd(161988.000000,214212.000000,69500.000000,10.784398)}
{pt3dadd(161736.000000,214248.000000,69375.000000,18.471396)}
{pt3dadd(161568.000000,214356.000000,69300.000000,26.158394)}
{pt3dadd(161328.000000,214572.000000,68900.000000,27.123327)}
{pt3dadd(161220.000000,214716.000000,68700.000000,39.934990)}

{create adhoc241}
{access adhoc241}
{connect adhoc241(1), adhoc240(0)}
{nseg = 1}
{strdef color color = "White"}
{pt3dclear()}
{pt3dadd(161220.000000,214716.000000,68700.000000,39.934990)}
{pt3dadd(160968.000000,214956.000000,68500.000000,27.123327)}
{pt3dadd(160644.000000,215256.000000,68100.000000,31.928512)}
{pt3dadd(160332.000000,215556.000000,67800.000000,26.590860)}
{pt3dadd(160044.000000,216468.000000,67550.000000,39.934990)}

{create adhoc242}
{access adhoc242}
{connect adhoc242(1), adhoc241(0)}
{nseg = 1}
{strdef color color = "White"}
{pt3dclear()}
{pt3dadd(160044.000000,216468.000000,67550.000000,39.934990)}
{pt3dadd(159804.000000,217092.000000,67325.000000,24.904717)}
{pt3dadd(159540.000000,217788.000000,67050.000000,15.542830)}
{pt3dadd(159372.000000,218340.000000,66875.000000,15.223350)}
{pt3dadd(159192.000000,218616.000000,66825.000000,8.867518)}
{pt3dadd(158988.000000,218988.000000,66875.000000,8.867518)}
{pt3dadd(158760.000000,219324.000000,66875.000000,8.867518)}
{pt3dadd(158544.000000,219660.000000,66800.000000,16.235036)}
{pt3dadd(158400.000000,219900.000000,66600.000000,8.867518)}
{pt3dadd(158184.000000,220008.000000,66550.000000,8.867518)}
{pt3dadd(158004.000000,220848.000000,66550.000000,8.867518)}
{pt3dadd(157776.000000,221184.000000,66400.000000,15.223350)}
{pt3dadd(157584.000000,221652.000000,66350.000000,7.855832)}
{pt3dadd(157380.000000,222120.000000,66200.000000,7.855832)}
{pt3dadd(157128.000000,222528.000000,66225.000000,7.855832)}
{pt3dadd(156900.000000,222768.000000,66150.000000,12.177937)}
{pt3dadd(156696.000000,223464.000000,65900.000000,5.822105)}
{pt3dadd(156540.000000,223764.000000,65850.000000,5.822105)}
{pt3dadd(156396.000000,223956.000000,65800.000000,5.822105)}
{pt3dadd(156312.000000,224244.000000,65775.000000,11.068632)}
{pt3dadd(156276.000000,224436.000000,65500.000000,6.746526)}
{pt3dadd(156264.000000,224628.000000,65600.000000,6.746526)}
{pt3dadd(156072.000000,224808.000000,65625.000000,6.746526)}
{pt3dadd(156036.000000,225012.000000,65575.000000,14.433524)}
{pt3dadd(155964.000000,225228.000000,65400.000000,9.186998)}
{pt3dadd(155784.000000,225408.000000,65200.000000,9.186998)}
{pt3dadd(155628.000000,225732.000000,65150.000000,9.186998)}
{pt3dadd(155544.000000,226044.000000,65025.000000,14.433524)}
{pt3dadd(155568.000000,226284.000000,64825.000000,6.746526)}
{pt3dadd(155448.000000,226620.000000,64775.000000,6.746526)}
{pt3dadd(155220.000000,227004.000000,64550.000000,6.746526)}
{pt3dadd(155208.000000,227436.000000,64350.000000,13.102358)}
{pt3dadd(155304.000000,227748.000000,64150.000000,7.855832)}
{pt3dadd(155112.000000,228192.000000,63550.000000,7.855832)}
{pt3dadd(154956.000000,228744.000000,62975.000000,7.855832)}
{pt3dadd(154896.000000,229284.000000,62650.000000,13.102358)}
{pt3dadd(154716.000000,229692.000000,62150.000000,6.746526)}
{pt3dadd(154632.000000,229836.000000,61500.000000,6.746526)}
{pt3dadd(154716.000000,230196.000000,60875.000000,10.298281)}
{pt3dadd(154848.000000,230664.000000,60175.000000,11.288226)}
{pt3dadd(154956.000000,230256.000000,59375.000000,9.069499)}
{pt3dadd(155100.000000,229968.000000,58600.000000,6.449724)}

{create adhoc243}
{access adhoc243}
{connect adhoc243(1), adhoc241(0)}
{nseg = 1}
{strdef color color = "White"}
{pt3dclear()}
{pt3dadd(160044.000000,216468.000000,67550.000000,39.934990)}
{pt3dadd(160044.000000,214404.000000,66300.000000,24.904717)}
{pt3dadd(160140.000000,214248.000000,66075.000000,24.187041)}
{pt3dadd(159768.000000,214488.000000,65700.000000,15.907018)}
{pt3dadd(159684.000000,214512.000000,65400.000000,23.110527)}

{create adhoc244}
{access adhoc244}
{connect adhoc244(1), adhoc243(0)}
{nseg = 1}
{strdef color color = "White"}
{pt3dclear()}
{pt3dadd(159684.000000,214512.000000,65400.000000,23.110527)}
{pt3dadd(159384.000000,214872.000000,65125.000000,15.907018)}
{pt3dadd(159276.000000,215124.000000,64875.000000,10.144211)}
{pt3dadd(159060.000000,215364.000000,64600.000000,10.144211)}
{pt3dadd(159144.000000,215532.000000,64350.000000,5.822105)}
{pt3dadd(159216.000000,215568.000000,63975.000000,5.822105)}
{pt3dadd(159096.000000,215628.000000,63600.000000,5.822105)}
{pt3dadd(158940.000000,215628.000000,63200.000000,8.603509)}
{pt3dadd(158796.000000,215652.000000,62900.000000,4.281404)}
{pt3dadd(158640.000000,215400.000000,62500.000000,4.281404)}
{pt3dadd(158328.000000,215880.000000,62325.000000,4.281404)}
{pt3dadd(158040.000000,216180.000000,62075.000000,7.191199)}
{pt3dadd(157692.000000,216432.000000,61800.000000,4.409795)}
{pt3dadd(157056.000000,216720.000000,61575.000000,5.967316)}
{pt3dadd(156744.000000,217008.000000,61325.000000,7.524836)}
{pt3dadd(156924.000000,216768.000000,60950.000000,6.691735)}
{pt3dadd(157176.000000,216936.000000,60675.000000,9.287602)}

{create adhoc245}
{access adhoc245}
{connect adhoc245(1), adhoc243(0)}
{nseg = 1}
{strdef color color = "White"}
{pt3dclear()}
{pt3dadd(159684.000000,214512.000000,65400.000000,23.110527)}
{pt3dadd(159636.000000,213804.000000,65250.000000,14.623100)}
{pt3dadd(159504.000000,213432.000000,65050.000000,9.373860)}
{pt3dadd(159348.000000,213360.000000,65050.000000,7.833158)}
{pt3dadd(159132.000000,213060.000000,64950.000000,4.281404)}
{pt3dadd(159096.000000,212172.000000,64575.000000,4.281404)}
{pt3dadd(159072.000000,211920.000000,64175.000000,4.281404)}
{pt3dadd(159132.000000,211440.000000,63800.000000,9.527930)}
{pt3dadd(159264.000000,210960.000000,63400.000000,6.746526)}
{pt3dadd(159372.000000,210924.000000,63000.000000,8.304047)}
{pt3dadd(159540.000000,210996.000000,62625.000000,11.213842)}
{pt3dadd(159816.000000,211056.000000,62225.000000,8.945526)}
{pt3dadd(159960.000000,210708.000000,62000.000000,16.048977)}

{create adhoc246}
{access adhoc246}
{connect adhoc246(1), adhoc240(0)}
{nseg = 1}
{strdef color color = "White"}
{pt3dclear()}
{pt3dadd(161220.000000,214716.000000,68700.000000,39.934990)}
{pt3dadd(161220.000000,213288.000000,68475.000000,19.161322)}
{pt3dadd(161220.000000,212556.000000,68250.000000,14.471623)}
{pt3dadd(161220.000000,211368.000000,68100.000000,9.694420)}
{pt3dadd(161172.000000,211176.000000,68025.000000,10.307708)}
{pt3dadd(161064.000000,211032.000000,68050.000000,16.048977)}

{create adhoc247}
{access adhoc247}
{connect adhoc247(1), adhoc239(0)}
{nseg = 1}
{strdef color color = "White"}
{pt3dclear()}
{pt3dadd(165192.000000,212520.000000,72125.000000,33.279160)}
{pt3dadd(164376.000000,211788.000000,72250.000000,16.942712)}
{pt3dadd(163812.000000,211368.000000,72250.000000,10.765627)}
{pt3dadd(163632.000000,210492.000000,72250.000000,7.961550)}
{pt3dadd(163428.000000,210372.000000,72200.000000,5.051754)}
{pt3dadd(163248.000000,210120.000000,72150.000000,5.051754)}
{pt3dadd(163860.000000,209496.000000,72150.000000,5.051754)}
{pt3dadd(164100.000000,209148.000000,72025.000000,7.961550)}
{pt3dadd(164268.000000,208752.000000,72000.000000,4.409795)}
{pt3dadd(164292.000000,208320.000000,71825.000000,4.409795)}
{pt3dadd(164460.000000,207876.000000,71425.000000,4.409795)}
{pt3dadd(164640.000000,207432.000000,71350.000000,7.319591)}
{pt3dadd(164856.000000,206976.000000,71075.000000,4.409795)}
{pt3dadd(164964.000000,206496.000000,70850.000000,4.409795)}
{pt3dadd(165132.000000,206100.000000,70550.000000,4.409795)}
{pt3dadd(165348.000000,205752.000000,70325.000000,7.319591)}
{pt3dadd(165480.000000,205596.000000,70050.000000,4.409795)}
{pt3dadd(165720.000000,205224.000000,69850.000000,4.409795)}
{pt3dadd(165756.000000,204816.000000,69650.000000,6.784625)}
{pt3dadd(165576.000000,204516.000000,69450.000000,8.713649)}
{pt3dadd(165492.000000,204096.000000,69275.000000,8.673090)}
{pt3dadd(165384.000000,203640.000000,68875.000000,11.145123)}

{create adhoc248}
{access adhoc248}
{connect adhoc248(1), adhoc238(0)}
{nseg = 1}
{strdef color color = "White"}
{pt3dclear()}
{pt3dadd(166848.000000,212856.000000,73575.000000,39.934990)}
{pt3dadd(166416.000000,213984.000000,74625.000000,23.055874)}
{pt3dadd(166416.000000,214572.000000,75075.000000,14.433524)}
{pt3dadd(166416.000000,215232.000000,75375.000000,14.433524)}
{pt3dadd(165876.000000,215664.000000,75550.000000,9.186998)}
{pt3dadd(165516.000000,216456.000000,75750.000000,9.186998)}
{pt3dadd(165204.000000,216960.000000,75700.000000,9.186998)}
{pt3dadd(164832.000000,217512.000000,75650.000000,15.542830)}
{pt3dadd(164460.000000,218304.000000,75850.000000,7.855832)}
{pt3dadd(164040.000000,219132.000000,75725.000000,7.855832)}
{pt3dadd(163896.000000,219612.000000,75625.000000,7.855832)}
{pt3dadd(163596.000000,220020.000000,75550.000000,16.756854)}
{pt3dadd(163248.000000,220476.000000,75525.000000,10.401022)}
{pt3dadd(162876.000000,220932.000000,75225.000000,10.401022)}
{pt3dadd(162684.000000,221352.000000,75425.000000,10.401022)}
{pt3dadd(162204.000000,221748.000000,75600.000000,18.088020)}
{pt3dadd(162156.000000,222192.000000,75425.000000,9.186998)}
{pt3dadd(162108.000000,222408.000000,75200.000000,9.186998)}
{pt3dadd(161856.000000,222828.000000,75150.000000,9.186998)}
{pt3dadd(161472.000000,223284.000000,75100.000000,16.873996)}
{pt3dadd(161400.000000,223740.000000,74875.000000,9.186998)}
{pt3dadd(161244.000000,224280.000000,74650.000000,9.186998)}
{pt3dadd(160956.000000,224784.000000,74600.000000,9.186998)}
{pt3dadd(160728.000000,225204.000000,74575.000000,14.433524)}
{pt3dadd(160656.000000,225504.000000,74500.000000,6.746526)}
{pt3dadd(160548.000000,225756.000000,74450.000000,6.746526)}
{pt3dadd(159912.000000,226128.000000,74200.000000,6.746526)}
{pt3dadd(159564.000000,226452.000000,73825.000000,13.102358)}
{pt3dadd(159336.000000,226872.000000,73600.000000,7.855832)}
{pt3dadd(159192.000000,227280.000000,73400.000000,7.855832)}
{pt3dadd(158784.000000,227604.000000,73200.000000,7.855832)}
{pt3dadd(158676.000000,228012.000000,73325.000000,14.211664)}
{pt3dadd(158556.000000,228132.000000,73325.000000,7.855832)}
{pt3dadd(158484.000000,228468.000000,72400.000000,7.855832)}
{pt3dadd(158172.000000,228780.000000,71575.000000,7.855832)}
{pt3dadd(157836.000000,229128.000000,71375.000000,13.102358)}
{pt3dadd(157764.000000,229572.000000,71150.000000,11.068632)}
{pt3dadd(157464.000000,230052.000000,70975.000000,16.315158)}
{pt3dadd(157320.000000,230220.000000,71000.000000,26.191930)}
{pt3dadd(157212.000000,230436.000000,71025.000000,27.732632)}

{create adhoc249}
{access adhoc249}
{connect adhoc249(1), adhoc237(0)}
{nseg = 1}
{strdef color color = "White"}
{pt3dclear()}
{pt3dadd(180108.000000,206316.000000,72550.000000,69.007660)}
{pt3dadd(179952.000000,206592.000000,74300.000000,39.476550)}
{pt3dadd(179808.000000,206796.000000,74975.000000,24.285930)}
{pt3dadd(179448.000000,207216.000000,75575.000000,20.068796)}
{pt3dadd(178968.000000,207660.000000,75825.000000,10.784398)}
{pt3dadd(178500.000000,208068.000000,75975.000000,10.784398)}
{pt3dadd(178056.000000,208284.000000,76275.000000,10.784398)}
{pt3dadd(177636.000000,208584.000000,76600.000000,17.140230)}
{pt3dadd(177168.000000,208884.000000,76750.000000,7.855832)}
{pt3dadd(176808.000000,209220.000000,77125.000000,7.855832)}
{pt3dadd(176340.000000,209364.000000,77350.000000,7.855832)}
{pt3dadd(175836.000000,209700.000000,77650.000000,15.542830)}
{pt3dadd(175380.000000,210036.000000,78000.000000,9.186998)}
{pt3dadd(174960.000000,210216.000000,78200.000000,9.186998)}
{pt3dadd(174552.000000,210396.000000,78400.000000,9.186998)}
{pt3dadd(173964.000000,210564.000000,78600.000000,16.873996)}
{pt3dadd(173472.000000,210732.000000,78900.000000,9.186998)}
{pt3dadd(173004.000000,210768.000000,78975.000000,16.554517)}
{pt3dadd(172548.000000,210876.000000,79150.000000,22.644115)}
{pt3dadd(172116.000000,211080.000000,79325.000000,23.928528)}
{pt3dadd(171780.000000,211260.000000,79400.000000,31.947992)}

{create adhoc250}
{access adhoc250}
{connect adhoc250(1), adhoc249(0)}
{nseg = 1}
{strdef color color = "White"}
{pt3dclear()}
{pt3dadd(171780.000000,211260.000000,79400.000000,31.947992)}
{pt3dadd(171396.000000,211920.000000,79800.000000,24.460994)}
{pt3dadd(171084.000000,212388.000000,79900.000000,22.963594)}
{pt3dadd(170832.000000,212868.000000,80150.000000,22.963594)}
{pt3dadd(170616.000000,213360.000000,80400.000000,24.460994)}
{pt3dadd(170460.000000,213792.000000,80575.000000,31.947992)}

{create adhoc251}
{access adhoc251}
{connect adhoc251(1), adhoc250(0)}
{nseg = 1}
{strdef color color = "White"}
{pt3dclear()}
{pt3dadd(170460.000000,213792.000000,80575.000000,31.947992)}
{pt3dadd(170172.000000,214344.000000,80875.000000,32.835437)}
{pt3dadd(169992.000000,214752.000000,81125.000000,33.279160)}

{create adhoc252}
{access adhoc252}
{connect adhoc252(1), adhoc251(0)}
{nseg = 1}
{strdef color color = "White"}
{pt3dclear()}
{pt3dadd(169992.000000,214752.000000,81125.000000,33.279160)}
{pt3dadd(169980.000000,215220.000000,81175.000000,22.686107)}
{pt3dadd(169824.000000,215712.000000,81275.000000,14.211664)}
{pt3dadd(169788.000000,215976.000000,81450.000000,13.102358)}
{pt3dadd(169860.000000,216192.000000,81450.000000,11.993053)}
{pt3dadd(169668.000000,216612.000000,81675.000000,18.988421)}
{pt3dadd(169452.000000,216804.000000,81750.000000,27.732632)}

{create adhoc253}
{access adhoc253}
{connect adhoc253(1), adhoc252(0)}
{nseg = 1}
{strdef color color = "White"}
{pt3dclear()}
{pt3dadd(169452.000000,216804.000000,81750.000000,27.732632)}
{pt3dadd(169548.000000,217032.000000,81775.000000,18.618653)}
{pt3dadd(169536.000000,217272.000000,81875.000000,11.771192)}
{pt3dadd(169452.000000,217548.000000,81975.000000,11.771192)}
{pt3dadd(169308.000000,218016.000000,82325.000000,6.746526)}
{pt3dadd(169224.000000,218328.000000,82500.000000,6.746526)}
{pt3dadd(169188.000000,218580.000000,82675.000000,6.746526)}
{pt3dadd(169260.000000,218832.000000,82925.000000,14.433524)}
{pt3dadd(169332.000000,219048.000000,83575.000000,15.542830)}
{pt3dadd(169188.000000,219276.000000,83750.000000,24.827228)}
{pt3dadd(169332.000000,219300.000000,84250.000000,40.378713)}
{pt3dadd(169392.000000,219360.000000,84800.000000,47.921990)}

{create adhoc254}
{access adhoc254}
{connect adhoc254(1), adhoc253(0)}
{nseg = 1}
{strdef color color = "White"}
{pt3dclear()}
{pt3dadd(169392.000000,219360.000000,84800.000000,47.921990)}
{pt3dadd(169416.000000,219360.000000,85250.000000,38.529871)}
{pt3dadd(169656.000000,219384.000000,85600.000000,27.732632)}

{create adhoc255}
{access adhoc255}
{connect adhoc255(1), adhoc254(0)}
{nseg = 1}
{strdef color color = "White"}
{pt3dclear()}
{pt3dadd(169656.000000,219384.000000,85600.000000,27.732632)}
{pt3dadd(169680.000000,219888.000000,86000.000000,20.837264)}
{pt3dadd(169956.000000,220020.000000,86500.000000,13.102358)}
{pt3dadd(170136.000000,220464.000000,86850.000000,14.211664)}
{pt3dadd(170700.000000,220500.000000,87375.000000,7.855832)}
{pt3dadd(170952.000000,220752.000000,87875.000000,7.855832)}
{pt3dadd(171204.000000,220884.000000,88325.000000,7.855832)}
{pt3dadd(171456.000000,221160.000000,88725.000000,13.102358)}
{pt3dadd(171564.000000,221196.000000,89025.000000,11.993053)}
{pt3dadd(171636.000000,221400.000000,89400.000000,18.988421)}
{pt3dadd(171780.000000,221424.000000,89600.000000,27.732632)}

{create adhoc256}
{access adhoc256}
{connect adhoc256(1), adhoc255(0)}
{nseg = 1}
{strdef color color = "White"}
{pt3dclear()}
{pt3dadd(171780.000000,221424.000000,89600.000000,27.732632)}
{pt3dadd(171960.000000,221280.000000,90025.000000,18.988421)}
{pt3dadd(172176.000000,221232.000000,90375.000000,11.993053)}
{pt3dadd(172788.000000,221220.000000,91250.000000,11.068632)}
{pt3dadd(173220.000000,221316.000000,91775.000000,8.196935)}
{pt3dadd(173256.000000,221448.000000,92150.000000,12.661558)}
{pt3dadd(173388.000000,221112.000000,92475.000000,13.374147)}

{create adhoc257}
{access adhoc257}
{connect adhoc257(1), adhoc256(0)}
{nseg = 1}
{strdef color color = "White"}
{pt3dclear()}
{pt3dadd(173388.000000,221112.000000,92475.000000,13.374147)}
{pt3dadd(173988.000000,220692.000000,92700.000000,10.307708)}
{pt3dadd(174360.000000,220512.000000,92725.000000,6.784625)}
{pt3dadd(174432.000000,220308.000000,92950.000000,7.319591)}
{pt3dadd(174612.000000,220104.000000,92975.000000,4.409795)}
{pt3dadd(174684.000000,219912.000000,92975.000000,4.409795)}
{pt3dadd(174612.000000,219696.000000,93050.000000,4.409795)}
{pt3dadd(174660.000000,219456.000000,93150.000000,6.338820)}
{pt3dadd(174708.000000,219276.000000,93050.000000,3.429025)}
{pt3dadd(174708.000000,219084.000000,93025.000000,3.429025)}
{pt3dadd(174780.000000,218916.000000,92975.000000,3.429025)}
{pt3dadd(174768.000000,218736.000000,92975.000000,4.676958)}
{pt3dadd(174708.000000,218568.000000,92800.000000,2.747934)}
{pt3dadd(174756.000000,218400.000000,92950.000000,2.747934)}
{pt3dadd(174720.000000,218220.000000,92900.000000,2.747934)}
{pt3dadd(174804.000000,218028.000000,92850.000000,5.657729)}
{pt3dadd(174720.000000,217812.000000,92900.000000,4.409795)}
{pt3dadd(174744.000000,217632.000000,92825.000000,4.409795)}
{pt3dadd(174792.000000,217404.000000,92800.000000,4.409795)}
{pt3dadd(174816.000000,217164.000000,92700.000000,7.961550)}
{pt3dadd(174864.000000,216912.000000,92575.000000,5.051754)}
{pt3dadd(174960.000000,216720.000000,92600.000000,5.051754)}
{pt3dadd(174852.000000,216504.000000,92625.000000,5.051754)}
{pt3dadd(174816.000000,216276.000000,92600.000000,7.426584)}
{pt3dadd(174780.000000,216024.000000,92575.000000,3.874829)}
{pt3dadd(174816.000000,215796.000000,92500.000000,3.874829)}
{pt3dadd(174912.000000,215640.000000,92500.000000,3.874829)}
{pt3dadd(175032.000000,215448.000000,92550.000000,6.784625)}
{pt3dadd(175128.000000,215184.000000,92575.000000,4.409795)}
{pt3dadd(175320.000000,214884.000000,92650.000000,4.409795)}
{pt3dadd(175584.000000,214656.000000,92875.000000,4.409795)}
{pt3dadd(175908.000000,214308.000000,92950.000000,6.338820)}
{pt3dadd(176244.000000,214020.000000,92900.000000,4.986545)}
{pt3dadd(176712.000000,213696.000000,92900.000000,6.915570)}
{pt3dadd(176928.000000,213648.000000,93400.000000,10.525949)}
{pt3dadd(177012.000000,213612.000000,93700.000000,11.145123)}

{create adhoc258}
{access adhoc258}
{connect adhoc258(1), adhoc256(0)}
{nseg = 1}
{strdef color color = "White"}
{pt3dclear()}
{pt3dadd(173388.000000,221112.000000,92475.000000,13.374147)}
{pt3dadd(172956.000000,221616.000000,92500.000000,12.011965)}
{pt3dadd(172944.000000,221856.000000,92800.000000,11.268957)}
{pt3dadd(172944.000000,222096.000000,93125.000000,11.145123)}

{create adhoc259}
{access adhoc259}
{connect adhoc259(1), adhoc255(0)}
{nseg = 1}
{strdef color color = "White"}
{pt3dclear()}
{pt3dadd(171780.000000,221424.000000,89600.000000,27.732632)}
{pt3dadd(171120.000000,222672.000000,89700.000000,16.798127)}
{pt3dadd(170928.000000,223056.000000,89700.000000,13.374147)}

{create adhoc260}
{access adhoc260}
{connect adhoc260(1), adhoc254(0)}
{nseg = 1}
{strdef color color = "White"}
{pt3dclear()}
{pt3dadd(169656.000000,219384.000000,85600.000000,27.732632)}
{pt3dadd(169824.000000,218760.000000,85600.000000,13.459252)}
{pt3dadd(169896.000000,218568.000000,85825.000000,10.636521)}
{pt3dadd(169992.000000,218148.000000,86100.000000,4.768284)}
{pt3dadd(170472.000000,217920.000000,86375.000000,5.374770)}

{create adhoc261}
{access adhoc261}
{connect adhoc261(1), adhoc253(0)}
{nseg = 1}
{strdef color color = "White"}
{pt3dclear()}
{pt3dadd(169392.000000,219360.000000,84800.000000,47.921990)}
{pt3dadd(168792.000000,219204.000000,84850.000000,4.478975)}

{create adhoc262}
{access adhoc262}
{connect adhoc262(1), adhoc252(0)}
{nseg = 1}
{strdef color color = "White"}
{pt3dclear()}
{pt3dadd(169452.000000,216804.000000,81750.000000,27.732632)}
{pt3dadd(168132.000000,216804.000000,81875.000000,16.048977)}

{create adhoc263}
{access adhoc263}
{connect adhoc263(1), adhoc251(0)}
{nseg = 1}
{strdef color color = "White"}
{pt3dclear()}
{pt3dadd(169992.000000,214752.000000,81125.000000,33.279160)}
{pt3dadd(169776.000000,214752.000000,82075.000000,18.012644)}
{pt3dadd(169608.000000,214368.000000,82600.000000,14.959341)}
{pt3dadd(169416.000000,214464.000000,82950.000000,10.532533)}
{pt3dadd(169224.000000,214284.000000,83500.000000,10.634632)}
{pt3dadd(169008.000000,214248.000000,83625.000000,11.145123)}

{create adhoc264}
{access adhoc264}
{connect adhoc264(1), adhoc250(0)}
{nseg = 1}
{strdef color color = "White"}
{pt3dclear()}
{pt3dadd(170460.000000,213792.000000,80575.000000,31.947992)}
{pt3dadd(169464.000000,213828.000000,80300.000000,14.245198)}
{pt3dadd(169164.000000,213828.000000,80050.000000,10.912018)}
{pt3dadd(168936.000000,213672.000000,79850.000000,4.441498)}
{pt3dadd(168900.000000,213540.000000,79675.000000,5.374770)}

{create adhoc265}
{access adhoc265}
{connect adhoc265(1), adhoc249(0)}
{nseg = 1}
{strdef color color = "White"}
{pt3dclear()}
{pt3dadd(171780.000000,211260.000000,79400.000000,31.947992)}
{pt3dadd(171780.000000,209316.000000,79350.000000,14.864372)}
{pt3dadd(171696.000000,209112.000000,79375.000000,9.518623)}
{pt3dadd(171636.000000,208908.000000,79400.000000,6.980779)}
{pt3dadd(171540.000000,208632.000000,79450.000000,5.051754)}
{pt3dadd(171396.000000,208476.000000,79525.000000,5.051754)}
{pt3dadd(171360.000000,208308.000000,79725.000000,5.051754)}
{pt3dadd(171264.000000,208380.000000,80050.000000,7.426584)}
{pt3dadd(171120.000000,208200.000000,80275.000000,5.803854)}
{pt3dadd(170940.000000,208092.000000,80550.000000,8.673090)}
{pt3dadd(170424.000000,208224.000000,80750.000000,11.145123)}

{create adhoc266}
{access adhoc266}
{connect adhoc266(1), adhoc265(0)}
{nseg = 1}
{strdef color color = "White"}
{pt3dclear()}
{pt3dadd(170424.000000,208224.000000,80750.000000,11.145123)}
{pt3dadd(170496.000000,208188.000000,81100.000000,9.287602)}

{create adhoc267}
{access adhoc267}
{connect adhoc267(1), adhoc265(0)}
{nseg = 1}
{strdef color color = "White"}
{pt3dclear()}
{pt3dadd(170424.000000,208224.000000,80750.000000,11.145123)}
{pt3dadd(169980.000000,208728.000000,80975.000000,9.390798)}
{pt3dadd(169512.000000,209100.000000,81150.000000,8.255647)}
{pt3dadd(169776.000000,209412.000000,81325.000000,7.739669)}

{create adhoc268}
{access adhoc268}
{connect adhoc268(1), adhoc1(0)}
{nseg = 1}
{strdef color color = "White"}
{pt3dclear()}
{pt3dadd(188580.000000,200952.000000,74875.000000,151.920790)}
{pt3dadd(188736.000000,200928.000000,75150.000000,96.930433)}
{pt3dadd(188880.000000,200904.000000,75750.000000,323.226980)}
{pt3dadd(189108.000000,201060.000000,76250.000000,442.281200)}
{pt3dadd(189456.000000,200916.000000,76675.000000,1323.843600)}

{create adhoc269}
{access adhoc269}
{connect adhoc269(1), adhoc268(0)}
{nseg = 1}
{strdef color color = "White"}
{pt3dclear()}
{pt3dadd(189456.000000,200916.000000,76675.000000,1323.843600)}
{pt3dadd(189684.000000,201144.000000,77250.000000,481.529610)}
{pt3dadd(189720.000000,201324.000000,77800.000000,289.517766)}
{pt3dadd(189732.000000,201300.000000,78350.000000,48.598092)}
{pt3dadd(189840.000000,201372.000000,78700.000000,25.049046)}
{pt3dadd(189984.000000,201492.000000,79100.000000,25.049046)}
{pt3dadd(190104.000000,201540.000000,79625.000000,25.049046)}
{pt3dadd(190284.000000,201612.000000,80275.000000,47.644131)}
{pt3dadd(190548.000000,201516.000000,80675.000000,24.095085)}
{pt3dadd(190632.000000,201564.000000,81175.000000,24.095085)}
{pt3dadd(190848.000000,201360.000000,81575.000000,24.095085)}
{pt3dadd(191028.000000,201228.000000,82000.000000,43.669290)}
{pt3dadd(191220.000000,201204.000000,82475.000000,21.074205)}
{pt3dadd(191328.000000,201240.000000,83025.000000,21.074205)}
{pt3dadd(191820.000000,201060.000000,83450.000000,21.074205)}
{pt3dadd(191868.000000,201060.000000,83925.000000,49.393061)}
{pt3dadd(192096.000000,201252.000000,84500.000000,29.818856)}
{pt3dadd(192276.000000,201336.000000,85225.000000,29.818856)}
{pt3dadd(192360.000000,201300.000000,85775.000000,29.818856)}
{pt3dadd(192372.000000,201132.000000,86275.000000,58.137712)}
{pt3dadd(192516.000000,201072.000000,86850.000000,29.818856)}
{pt3dadd(192552.000000,200964.000000,87225.000000,29.818856)}
{pt3dadd(192588.000000,200892.000000,87600.000000,29.818856)}
{pt3dadd(192624.000000,200820.000000,87975.000000,62.487776)}
{pt3dadd(192660.000000,200748.000000,88350.000000,34.168920)}
{pt3dadd(192696.000000,200724.000000,88700.000000,34.168920)}
{pt3dadd(192876.000000,200832.000000,89100.000000,34.168920)}
{pt3dadd(192876.000000,200700.000000,89650.000000,61.343022)}
{pt3dadd(193068.000000,200820.000000,90125.000000,28.674102)}
{pt3dadd(192960.000000,200964.000000,90700.000000,28.674102)}
{pt3dadd(192996.000000,200940.000000,91325.000000,28.674102)}
{pt3dadd(193176.000000,200904.000000,91925.000000,62.716728)}
{pt3dadd(193152.000000,200808.000000,92400.000000,35.542626)}
{pt3dadd(193380.000000,200712.000000,92875.000000,35.542626)}
{pt3dadd(193488.000000,200688.000000,93400.000000,35.542626)}
{pt3dadd(193644.000000,200616.000000,93975.000000,69.585252)}
{pt3dadd(193440.000000,200700.000000,94675.000000,35.542626)}
{pt3dadd(193224.000000,200748.000000,95075.000000,35.542626)}
{pt3dadd(193020.000000,200676.000000,95500.000000,35.542626)}
{pt3dadd(193104.000000,200604.000000,96050.000000,63.861482)}
{pt3dadd(192936.000000,200676.000000,96475.000000,29.818856)}
{pt3dadd(192636.000000,200940.000000,96950.000000,29.818856)}
{pt3dadd(192348.000000,201096.000000,97425.000000,29.818856)}
{pt3dadd(191796.000000,200892.000000,97950.000000,56.992958)}
{pt3dadd(191628.000000,200892.000000,98550.000000,28.674102)}
{pt3dadd(191460.000000,200892.000000,99050.000000,28.674102)}
{pt3dadd(191352.000000,200940.000000,99625.000000,28.674102)}
{pt3dadd(191316.000000,200988.000000,100175.000000,52.223148)}
{pt3dadd(190944.000000,200928.000000,100825.000000,25.049046)}
{pt3dadd(190872.000000,200784.000000,101675.000000,25.049046)}
{pt3dadd(190464.000000,200304.000000,102275.000000,25.049046)}
{pt3dadd(190404.000000,199872.000000,102875.000000,48.598092)}
{pt3dadd(190188.000000,199572.000000,103400.000000,25.049046)}
{pt3dadd(189864.000000,199056.000000,103850.000000,25.049046)}
{pt3dadd(189828.000000,198852.000000,104375.000000,25.049046)}
{pt3dadd(189792.000000,198600.000000,104875.000000,48.598092)}
{pt3dadd(189768.000000,198468.000000,105425.000000,25.049046)}
{pt3dadd(189624.000000,198228.000000,105900.000000,25.049046)}
{pt3dadd(189492.000000,198120.000000,106350.000000,25.049046)}
{pt3dadd(189480.000000,197784.000000,106825.000000,48.598092)}
{pt3dadd(189492.000000,197640.000000,107275.000000,25.049046)}
{pt3dadd(189240.000000,197304.000000,107725.000000,25.049046)}
{pt3dadd(189072.000000,196944.000000,108225.000000,25.049046)}
{pt3dadd(188964.000000,196668.000000,108775.000000,43.828284)}
{pt3dadd(188832.000000,196488.000000,109250.000000,20.279238)}
{pt3dadd(188664.000000,196392.000000,109750.000000,20.279238)}
{pt3dadd(188532.000000,195924.000000,110200.000000,20.279238)}
{pt3dadd(188388.000000,195480.000000,110775.000000,33.780770)}
{pt3dadd(188208.000000,195456.000000,111325.000000,15.001532)}
{pt3dadd(188100.000000,195024.000000,111775.000000,15.001532)}
{pt3dadd(187776.000000,194556.000000,112325.000000,15.001532)}
{pt3dadd(187572.000000,194160.000000,112675.000000,30.600897)}
{pt3dadd(187332.000000,193680.000000,113150.000000,17.099365)}
{pt3dadd(187128.000000,193344.000000,113450.000000,17.099365)}
{pt3dadd(186804.000000,192972.000000,113900.000000,17.099365)}
{pt3dadd(186588.000000,192756.000000,114350.000000,30.600897)}
{pt3dadd(186456.000000,192348.000000,114775.000000,15.001532)}
{pt3dadd(186324.000000,192204.000000,115200.000000,15.001532)}
{pt3dadd(186000.000000,191688.000000,115650.000000,15.001532)}
{pt3dadd(185868.000000,191412.000000,116000.000000,26.202809)}
{pt3dadd(185508.000000,191112.000000,116325.000000,12.701277)}
{pt3dadd(185364.000000,190932.000000,116600.000000,12.701277)}
{pt3dadd(185328.000000,190644.000000,116725.000000,12.701277)}
{pt3dadd(184860.000000,190368.000000,117075.000000,21.985675)}
{pt3dadd(184716.000000,190080.000000,117350.000000,10.784398)}
{pt3dadd(184464.000000,189780.000000,117625.000000,10.784398)}
{pt3dadd(184368.000000,189528.000000,117700.000000,10.784398)}
{pt3dadd(184080.000000,189312.000000,118100.000000,20.068796)}
{pt3dadd(183780.000000,189000.000000,118425.000000,10.784398)}
{pt3dadd(183792.000000,188748.000000,118400.000000,10.784398)}
{pt3dadd(183684.000000,188532.000000,118575.000000,10.784398)}
{pt3dadd(183552.000000,188316.000000,118625.000000,19.685420)}
{pt3dadd(183180.000000,188112.000000,119025.000000,10.401022)}
{pt3dadd(182880.000000,187920.000000,119350.000000,10.401022)}
{pt3dadd(182772.000000,187680.000000,119450.000000,10.401022)}
{pt3dadd(182676.000000,187476.000000,119475.000000,18.088020)}
{pt3dadd(182496.000000,187296.000000,119600.000000,9.186998)}
{pt3dadd(182436.000000,187068.000000,119650.000000,9.186998)}
{pt3dadd(182376.000000,186804.000000,119800.000000,9.186998)}
{pt3dadd(182328.000000,186564.000000,119925.000000,16.873996)}
{pt3dadd(181788.000000,185400.000000,120550.000000,9.186998)}
{pt3dadd(181416.000000,184860.000000,121050.000000,9.186998)}
{pt3dadd(180612.000000,184224.000000,121450.000000,9.186998)}
{pt3dadd(180204.000000,183624.000000,121825.000000,18.471396)}
{pt3dadd(179544.000000,183048.000000,122275.000000,10.784398)}
{pt3dadd(178548.000000,182520.000000,122675.000000,10.784398)}
{pt3dadd(177492.000000,181980.000000,123075.000000,10.784398)}
{pt3dadd(176532.000000,181368.000000,123250.000000,16.873996)}
{pt3dadd(176016.000000,180816.000000,123350.000000,7.589598)}
{pt3dadd(175620.000000,180348.000000,123550.000000,7.589598)}
{pt3dadd(175104.000000,179904.000000,123825.000000,7.589598)}
{pt3dadd(174336.000000,179328.000000,124025.000000,16.873996)}
{pt3dadd(174120.000000,179100.000000,124125.000000,10.784398)}
{pt3dadd(173844.000000,178788.000000,124275.000000,10.784398)}
{pt3dadd(173640.000000,178632.000000,124300.000000,10.784398)}
{pt3dadd(173352.000000,178416.000000,124550.000000,19.685420)}
{pt3dadd(173292.000000,178176.000000,124650.000000,10.401022)}
{pt3dadd(173232.000000,177960.000000,124750.000000,10.401022)}
{pt3dadd(173028.000000,177708.000000,125025.000000,10.401022)}
{pt3dadd(172740.000000,177432.000000,125425.000000,19.685420)}
{pt3dadd(172404.000000,176736.000000,125750.000000,10.784398)}
{pt3dadd(172008.000000,175836.000000,126175.000000,10.784398)}
{pt3dadd(171132.000000,175260.000000,126625.000000,10.784398)}
{pt3dadd(170772.000000,174612.000000,127000.000000,17.140230)}
{pt3dadd(170232.000000,173976.000000,127375.000000,7.855832)}
{pt3dadd(169260.000000,173100.000000,127800.000000,7.855832)}
{pt3dadd(169080.000000,172740.000000,128175.000000,7.855832)}
{pt3dadd(168216.000000,171900.000000,128700.000000,15.542830)}
{pt3dadd(167820.000000,171384.000000,129000.000000,9.186998)}
{pt3dadd(167640.000000,170796.000000,129300.000000,9.186998)}
{pt3dadd(166884.000000,170508.000000,129750.000000,9.186998)}
{pt3dadd(166440.000000,169788.000000,130100.000000,18.471396)}
{pt3dadd(166044.000000,169200.000000,130600.000000,10.784398)}
{pt3dadd(166020.000000,168996.000000,130575.000000,10.784398)}
{pt3dadd(165804.000000,168792.000000,130600.000000,10.784398)}
{pt3dadd(165552.000000,168612.000000,130800.000000,18.471396)}
{pt3dadd(165300.000000,168276.000000,131000.000000,9.186998)}
{pt3dadd(165060.000000,168024.000000,131125.000000,9.186998)}
{pt3dadd(164772.000000,167736.000000,131375.000000,9.186998)}
{pt3dadd(164664.000000,167400.000000,131500.000000,16.873996)}
{pt3dadd(164556.000000,167064.000000,131600.000000,9.186998)}
{pt3dadd(164268.000000,166884.000000,131775.000000,9.186998)}
{pt3dadd(164088.000000,166680.000000,131850.000000,9.186998)}
{pt3dadd(163908.000000,166428.000000,131925.000000,16.873996)}
{pt3dadd(163548.000000,166176.000000,132100.000000,9.186998)}
{pt3dadd(163116.000000,165996.000000,132275.000000,9.186998)}
{pt3dadd(162936.000000,165672.000000,132425.000000,9.186998)}
{pt3dadd(162732.000000,165348.000000,132575.000000,18.471396)}
{pt3dadd(162504.000000,165096.000000,132675.000000,10.784398)}
{pt3dadd(162300.000000,164808.000000,132725.000000,10.784398)}
{pt3dadd(162072.000000,164484.000000,132775.000000,10.784398)}
{pt3dadd(161844.000000,164124.000000,132850.000000,20.068796)}
{pt3dadd(161568.000000,163692.000000,133000.000000,10.784398)}
{pt3dadd(161328.000000,163584.000000,133125.000000,10.784398)}
{pt3dadd(161052.000000,163632.000000,133250.000000,10.784398)}
{pt3dadd(160800.000000,163752.000000,133300.000000,21.985675)}
{pt3dadd(160512.000000,163248.000000,133400.000000,12.701277)}
{pt3dadd(159564.000000,162684.000000,133500.000000,12.701277)}
{pt3dadd(158760.000000,162060.000000,133800.000000,12.701277)}
{pt3dadd(158616.000000,161772.000000,133975.000000,23.902554)}
{pt3dadd(158340.000000,161592.000000,134100.000000,12.701277)}
{pt3dadd(158424.000000,161340.000000,134150.000000,12.701277)}
{pt3dadd(158364.000000,161184.000000,134250.000000,12.701277)}
{pt3dadd(158112.000000,160908.000000,134550.000000,20.068796)}
{pt3dadd(158040.000000,160512.000000,134775.000000,8.867519)}
{pt3dadd(157908.000000,160236.000000,135025.000000,8.867519)}
{pt3dadd(157776.000000,159936.000000,135275.000000,8.867519)}
{pt3dadd(157788.000000,159648.000000,135325.000000,18.151917)}
{pt3dadd(157584.000000,159432.000000,135300.000000,10.784398)}
{pt3dadd(157464.000000,158700.000000,135675.000000,10.784398)}
{pt3dadd(157476.000000,158052.000000,135950.000000,10.784398)}
{pt3dadd(157548.000000,157440.000000,136325.000000,21.985675)}
{pt3dadd(157344.000000,157032.000000,136700.000000,12.701277)}
{pt3dadd(157308.000000,156732.000000,137300.000000,12.701277)}
{pt3dadd(157428.000000,156792.000000,137825.000000,12.701277)}
{pt3dadd(158400.000000,156456.000000,138275.000000,20.388275)}
{pt3dadd(158292.000000,156276.000000,138800.000000,9.186998)}
{pt3dadd(158076.000000,156456.000000,139475.000000,9.186998)}
{pt3dadd(157572.000000,156504.000000,139975.000000,9.186998)}
{pt3dadd(156816.000000,156708.000000,140375.000000,24.150388)}
{pt3dadd(156192.000000,156936.000000,140975.000000,16.463390)}
{pt3dadd(156012.000000,157008.000000,141450.000000,16.463390)}
{pt3dadd(155952.000000,157020.000000,141975.000000,16.463390)}
{pt3dadd(155808.000000,157008.000000,142475.000000,40.012436)}
{pt3dadd(156024.000000,156804.000000,142975.000000,25.049046)}
{pt3dadd(155988.000000,156516.000000,143350.000000,25.049046)}
{pt3dadd(155952.000000,156228.000000,143850.000000,25.049046)}
{pt3dadd(155868.000000,155904.000000,144250.000000,43.065114)}
{pt3dadd(155976.000000,155664.000000,144650.000000,19.516068)}
{pt3dadd(156192.000000,155448.000000,145050.000000,19.516068)}
{pt3dadd(156120.000000,155124.000000,145375.000000,19.516068)}
{pt3dadd(155868.000000,154836.000000,145800.000000,35.777906)}
{pt3dadd(155952.000000,154596.000000,146150.000000,17.761838)}
{pt3dadd(156024.000000,154320.000000,146425.000000,17.761838)}
{pt3dadd(156216.000000,154104.000000,146900.000000,17.761838)}
{pt3dadd(156120.000000,153864.000000,147100.000000,36.541074)}
{pt3dadd(155988.000000,153516.000000,147325.000000,20.279236)}
{pt3dadd(155880.000000,153180.000000,147500.000000,20.279236)}
{pt3dadd(155844.000000,152988.000000,147600.000000,20.279236)}
{pt3dadd(155700.000000,152616.000000,147800.000000,39.058472)}
{pt3dadd(155592.000000,152340.000000,147825.000000,20.279236)}
{pt3dadd(155604.000000,152028.000000,148375.000000,20.279236)}
{pt3dadd(155508.000000,151764.000000,148600.000000,20.279236)}
{pt3dadd(155592.000000,151452.000000,148700.000000,39.853441)}
{pt3dadd(155568.000000,151224.000000,148975.000000,21.074205)}
{pt3dadd(155472.000000,150984.000000,149050.000000,21.074205)}
{pt3dadd(155412.000000,150756.000000,149025.000000,21.074205)}
{pt3dadd(155244.000000,150036.000000,149375.000000,44.623251)}
{pt3dadd(155100.000000,149712.000000,150000.000000,25.049046)}
{pt3dadd(154704.000000,148992.000000,150450.000000,25.049046)}
{pt3dadd(154284.000000,148560.000000,150950.000000,25.049046)}
{pt3dadd(154116.000000,148128.000000,151450.000000,53.367902)}
{pt3dadd(153948.000000,147396.000000,151950.000000,29.818856)}
{pt3dadd(153672.000000,147144.000000,152450.000000,29.818856)}
{pt3dadd(153468.000000,147108.000000,152925.000000,29.818856)}
{pt3dadd(153516.000000,146892.000000,153400.000000,58.137712)}
{pt3dadd(153552.000000,146556.000000,153925.000000,29.818856)}
{pt3dadd(153408.000000,146592.000000,154475.000000,29.818856)}
{pt3dadd(153420.000000,146460.000000,154950.000000,29.818856)}
{pt3dadd(153888.000000,145692.000000,155425.000000,58.137712)}
{pt3dadd(152976.000000,146664.000000,155925.000000,29.818856)}
{pt3dadd(152796.000000,146712.000000,156425.000000,29.818856)}
{pt3dadd(152952.000000,146724.000000,156900.000000,29.818856)}
{pt3dadd(152556.000000,146520.000000,157325.000000,53.826182)}
{pt3dadd(152496.000000,146544.000000,157925.000000,25.507326)}
{pt3dadd(152052.000000,146340.000000,158400.000000,25.507326)}
{pt3dadd(151716.000000,146100.000000,158825.000000,25.507326)}
{pt3dadd(151260.000000,145932.000000,159350.000000,53.826182)}
{pt3dadd(151200.000000,145608.000000,159875.000000,29.818856)}
{pt3dadd(151056.000000,145212.000000,160400.000000,29.818856)}
{pt3dadd(151272.000000,144696.000000,160925.000000,29.818856)}
{pt3dadd(151380.000000,144324.000000,161375.000000,58.137712)}
{pt3dadd(151524.000000,144216.000000,161950.000000,29.818856)}
{pt3dadd(151500.000000,143868.000000,162500.000000,29.818856)}
{pt3dadd(152028.000000,143460.000000,163000.000000,29.818856)}
{pt3dadd(152208.000000,143388.000000,163475.000000,58.137712)}
{pt3dadd(152460.000000,143172.000000,163925.000000,29.818856)}
{pt3dadd(152424.000000,142992.000000,164400.000000,29.818856)}
{pt3dadd(152568.000000,142704.000000,164850.000000,29.818856)}
{pt3dadd(152616.000000,142356.000000,165325.000000,58.137712)}
{pt3dadd(152988.000000,142080.000000,165725.000000,29.818856)}
{pt3dadd(153444.000000,141756.000000,166175.000000,29.718856)}
{pt3dadd(153516.000000,141096.000000,166550.000000,29.718856)}
{pt3dadd(153708.000000,141324.000000,167025.000000,52.313941)}
{pt3dadd(153672.000000,140724.000000,167425.000000,23.995085)}
{pt3dadd(153900.000000,140604.000000,167925.000000,23.995085)}
{pt3dadd(154068.000000,140556.000000,168500.000000,24.095085)}
{pt3dadd(153948.000000,140376.000000,168875.000000,63.357789)}
{pt3dadd(153732.000000,140160.000000,169425.000000,40.762704)}
{pt3dadd(153648.000000,139968.000000,169925.000000,40.762704)}
{pt3dadd(153792.000000,139620.000000,170325.000000,40.762704)}
{pt3dadd(153828.000000,139500.000000,170750.000000,72.112868)}
{pt3dadd(153600.000000,139416.000000,171150.000000,32.850164)}
{pt3dadd(153588.000000,139272.000000,171525.000000,32.850164)}
{pt3dadd(153576.000000,139128.000000,171925.000000,32.850164)}
{pt3dadd(153552.000000,138864.000000,172525.000000,56.399210)}
{pt3dadd(153552.000000,138720.000000,173050.000000,25.049046)}
{pt3dadd(153528.000000,138348.000000,173475.000000,25.049046)}
{pt3dadd(153264.000000,138276.000000,173925.000000,25.049046)}
{pt3dadd(152340.000000,137868.000000,174450.000000,48.598092)}
{pt3dadd(151956.000000,137724.000000,174875.000000,25.049046)}
{pt3dadd(151836.000000,137460.000000,175475.000000,25.049046)}
{pt3dadd(151908.000000,137244.000000,176100.000000,25.049046)}
{pt3dadd(151860.000000,137028.000000,176550.000000,57.717970)}
{pt3dadd(151812.000000,136920.000000,177075.000000,34.168924)}
{pt3dadd(151764.000000,136800.000000,177700.000000,34.168924)}
{pt3dadd(151476.000000,136656.000000,178225.000000,34.168924)}
{pt3dadd(151392.000000,136584.000000,178725.000000,73.431628)}
{pt3dadd(151356.000000,136368.000000,179075.000000,40.762704)}
{pt3dadd(151164.000000,136212.000000,179400.000000,40.762704)}
{pt3dadd(151056.000000,136068.000000,179750.000000,40.762704)}
{pt3dadd(151008.000000,135924.000000,180050.000000,73.431624)}
{pt3dadd(151044.000000,135732.000000,180325.000000,34.168920)}
{pt3dadd(150900.000000,135684.000000,180600.000000,34.168920)}
{pt3dadd(150828.000000,135528.000000,180875.000000,34.168920)}
{pt3dadd(150684.000000,135156.000000,181175.000000,57.586933)}
{pt3dadd(150576.000000,135108.000000,181500.000000,24.918013)}
{pt3dadd(150456.000000,135060.000000,181800.000000,58.960639)}
{pt3dadd(150480.000000,134880.000000,182125.000000,258.660639)}
{pt3dadd(150504.000000,134736.000000,182450.000000,391.071043)}
{pt3dadd(150360.000000,134760.000000,182750.000000,1000.000000)}

{create adhoc270}
{access adhoc270}
{connect adhoc270(1), adhoc268(0)}
{nseg = 1}
{strdef color color = "White"}
{pt3dclear()}
{pt3dadd(189456.000000,200916.000000,76675.000000,1323.843600)}
{pt3dadd(187932.000000,202920.000000,76775.000000,792.733937)}
{pt3dadd(188004.000000,203136.000000,77150.000000,585.254036)}
{pt3dadd(187932.000000,203172.000000,77400.000000,373.405316)}
{pt3dadd(187944.000000,203256.000000,77675.000000,278.096618)}
{pt3dadd(187980.000000,203304.000000,77875.000000,268.292942)}
{pt3dadd(187968.000000,203316.000000,78100.000000,264.209754)}
{pt3dadd(188004.000000,203448.000000,78375.000000,245.001692)}
{pt3dadd(188040.000000,203556.000000,78625.000000,225.253054)}
{pt3dadd(188088.000000,203496.000000,78850.000000,204.321338)}
{pt3dadd(188196.000000,203604.000000,79075.000000,190.151736)}
{pt3dadd(188220.000000,203496.000000,79350.000000,177.068924)}
{pt3dadd(188220.000000,203604.000000,79575.000000,175.415592)}
{pt3dadd(188316.000000,203652.000000,79825.000000,175.424814)}
{pt3dadd(188436.000000,203676.000000,80125.000000,181.070682)}
{pt3dadd(188484.000000,203688.000000,80400.000000,184.631070)}
{pt3dadd(188568.000000,203628.000000,80650.000000,181.076664)}
{pt3dadd(188700.000000,203688.000000,80950.000000,194.578796)}
{pt3dadd(188772.000000,203628.000000,81150.000000,205.863368)}
{pt3dadd(188844.000000,203616.000000,81400.000000,208.871950)}
{pt3dadd(189048.000000,203604.000000,81675.000000,230.069740)}
{pt3dadd(189156.000000,203568.000000,81925.000000,246.944806)}
{pt3dadd(189288.000000,203592.000000,82200.000000,251.977054)}
{pt3dadd(189432.000000,203568.000000,82350.000000,263.022542)}
{pt3dadd(189552.000000,203532.000000,82500.000000,272.597428)}
{pt3dadd(189672.000000,203436.000000,82650.000000,259.911802)}
{pt3dadd(189792.000000,203436.000000,82800.000000,247.177088)}
{pt3dadd(189948.000000,203376.000000,82975.000000,239.921584)}
{pt3dadd(190116.000000,203292.000000,83125.000000,228.876096)}
{pt3dadd(190248.000000,203256.000000,83300.000000,223.837636)}
{pt3dadd(190380.000000,203160.000000,83475.000000,221.603726)}
{pt3dadd(190452.000000,203160.000000,83625.000000,238.183780)}
{pt3dadd(190536.000000,203208.000000,83775.000000,238.171424)}
{pt3dadd(190584.000000,203160.000000,83925.000000,240.618432)}
{pt3dadd(190680.000000,203280.000000,84100.000000,240.640464)}
{pt3dadd(190680.000000,203304.000000,84250.000000,247.682870)}
{pt3dadd(190728.000000,203376.000000,84425.000000,247.682870)}
{pt3dadd(190752.000000,203316.000000,84675.000000,264.491590)}
{pt3dadd(190728.000000,203328.000000,84800.000000,264.491590)}
{pt3dadd(190860.000000,203268.000000,85075.000000,260.138598)}
{pt3dadd(190980.000000,203280.000000,85225.000000,255.114364)}
{pt3dadd(191028.000000,203292.000000,85350.000000,246.223804)}
{pt3dadd(191184.000000,203352.000000,85550.000000,229.640538)}
{pt3dadd(191280.000000,203484.000000,85800.000000,217.734954)}
{pt3dadd(191400.000000,203484.000000,86075.000000,210.186174)}
{pt3dadd(191448.000000,203472.000000,86225.000000,190.787496)}
{pt3dadd(191424.000000,203448.000000,86475.000000,171.409804)}
{pt3dadd(191736.000000,203400.000000,86475.000000,159.917830)}
{pt3dadd(191712.000000,203412.000000,86700.000000,162.040724)}
{pt3dadd(191820.000000,203340.000000,86850.000000,158.250850)}
{pt3dadd(191820.000000,203376.000000,87025.000000,175.631356)}
{pt3dadd(191748.000000,203424.000000,87150.000000,202.640304)}
{pt3dadd(191784.000000,203340.000000,87300.000000,212.991438)}
{pt3dadd(191748.000000,203304.000000,87575.000000,220.334752)}
{pt3dadd(191796.000000,203340.000000,87700.000000,236.252924)}
{pt3dadd(191772.000000,203280.000000,87850.000000,248.334466)}
{pt3dadd(191808.000000,203244.000000,88000.000000,243.059016)}
{pt3dadd(191880.000000,203196.000000,88125.000000,246.210014)}
{pt3dadd(191856.000000,203112.000000,88275.000000,246.202382)}
{pt3dadd(191772.000000,203172.000000,88425.000000,243.620050)}
{pt3dadd(191904.000000,203076.000000,88550.000000,226.310632)}
{pt3dadd(192012.000000,203088.000000,88700.000000,219.615386)}
{pt3dadd(192096.000000,203004.000000,88850.000000,217.392130)}
{pt3dadd(192228.000000,202920.000000,89125.000000,213.655654)}
{pt3dadd(192468.000000,202860.000000,89225.000000,205.397480)}
{pt3dadd(192516.000000,202824.000000,89375.000000,206.267102)}
{pt3dadd(192696.000000,202776.000000,89500.000000,203.221550)}
{pt3dadd(192660.000000,202764.000000,89650.000000,192.095994)}
{pt3dadd(192792.000000,202656.000000,89800.000000,183.119314)}
{pt3dadd(192972.000000,202680.000000,89925.000000,175.826960)}
{pt3dadd(193164.000000,202680.000000,90125.000000,164.169594)}
{pt3dadd(193344.000000,202716.000000,90250.000000,161.467018)}
{pt3dadd(193476.000000,202776.000000,90450.000000,164.709012)}
{pt3dadd(193536.000000,202764.000000,90600.000000,171.374278)}
{pt3dadd(193548.000000,202764.000000,90750.000000,175.094960)}
{pt3dadd(193548.000000,202752.000000,90900.000000,179.603688)}
{pt3dadd(193572.000000,202884.000000,91050.000000,174.616372)}
{pt3dadd(193632.000000,202860.000000,91175.000000,166.697412)}
{pt3dadd(193608.000000,202848.000000,91275.000000,160.768436)}
{pt3dadd(193572.000000,202920.000000,91425.000000,162.679752)}
{pt3dadd(193548.000000,202908.000000,91575.000000,166.265300)}
{pt3dadd(193512.000000,202908.000000,91700.000000,173.082010)}
{pt3dadd(193488.000000,202944.000000,91800.000000,181.548850)}
{pt3dadd(193512.000000,202872.000000,91950.000000,193.533348)}
{pt3dadd(193488.000000,202968.000000,92075.000000,199.124204)}
{pt3dadd(193440.000000,203016.000000,92200.000000,208.081580)}
{pt3dadd(193428.000000,203004.000000,92350.000000,218.695560)}
{pt3dadd(193356.000000,202992.000000,92500.000000,238.316140)}
{pt3dadd(193320.000000,202944.000000,92625.000000,247.891026)}
{pt3dadd(193344.000000,202968.000000,92750.000000,262.293314)}
{pt3dadd(193296.000000,202956.000000,92875.000000,263.275454)}
{pt3dadd(193380.000000,202992.000000,92975.000000,264.001254)}
{pt3dadd(193392.000000,203016.000000,93125.000000,261.298874)}
{pt3dadd(193404.000000,203028.000000,93225.000000,258.734012)}
{pt3dadd(193368.000000,202956.000000,93350.000000,256.290654)}
{pt3dadd(193392.000000,203004.000000,93450.000000,266.354024)}
{pt3dadd(193428.000000,202980.000000,93575.000000,273.347032)}
{pt3dadd(193416.000000,202968.000000,93725.000000,273.606054)}
{pt3dadd(193404.000000,202992.000000,93825.000000,278.857532)}
{pt3dadd(193476.000000,202992.000000,93975.000000,273.560050)}
{pt3dadd(193476.000000,203004.000000,94100.000000,271.657394)}
{pt3dadd(193500.000000,202980.000000,94200.000000,257.262376)}
{pt3dadd(193584.000000,202956.000000,94350.000000,245.506398)}
{pt3dadd(193584.000000,202908.000000,94500.000000,223.617702)}
{pt3dadd(193680.000000,202920.000000,94650.000000,213.203242)}
{pt3dadd(193752.000000,202944.000000,94775.000000,197.332048)}
{pt3dadd(193776.000000,202956.000000,94900.000000,193.962958)}
{pt3dadd(193788.000000,202944.000000,95050.000000,181.513174)}
{pt3dadd(193752.000000,202932.000000,95200.000000,179.848164)}
{pt3dadd(193752.000000,203004.000000,95325.000000,177.824840)}
{pt3dadd(193740.000000,202944.000000,95500.000000,177.238894)}
{pt3dadd(193776.000000,202812.000000,95650.000000,174.834542)}
{pt3dadd(193824.000000,202800.000000,95800.000000,175.674838)}
{pt3dadd(193944.000000,202848.000000,95925.000000,175.680534)}
{pt3dadd(193908.000000,202788.000000,96075.000000,168.201016)}
{pt3dadd(194064.000000,202800.000000,96200.000000,166.557926)}
{pt3dadd(194040.000000,202752.000000,96375.000000,162.464622)}
{pt3dadd(194076.000000,202752.000000,96475.000000,166.363004)}
{pt3dadd(194064.000000,202776.000000,96575.000000,174.640930)}
{pt3dadd(193956.000000,202752.000000,96700.000000,182.305928)}
{pt3dadd(193980.000000,202716.000000,96850.000000,188.866738)}
{pt3dadd(193908.000000,202608.000000,96975.000000,196.716576)}
{pt3dadd(193908.000000,202608.000000,97100.000000,203.341170)}
{pt3dadd(193896.000000,202644.000000,97225.000000,198.464836)}
{pt3dadd(193836.000000,202632.000000,97350.000000,201.197646)}
{pt3dadd(193824.000000,202560.000000,97450.000000,196.474680)}
{pt3dadd(193872.000000,202536.000000,97575.000000,192.724424)}
{pt3dadd(193800.000000,202512.000000,97675.000000,186.105812)}
{pt3dadd(193764.000000,202380.000000,97800.000000,188.503886)}
{pt3dadd(193752.000000,202380.000000,98000.000000,194.145272)}
{pt3dadd(193680.000000,202296.000000,98150.000000,202.225958)}
{pt3dadd(193632.000000,202260.000000,98300.000000,211.352372)}
{pt3dadd(193716.000000,202296.000000,98425.000000,218.854544)}
{pt3dadd(193656.000000,202224.000000,98700.000000,226.565024)}
{pt3dadd(193380.000000,202200.000000,98950.000000,233.678818)}
{pt3dadd(193596.000000,202248.000000,99200.000000,241.036032)}
{pt3dadd(193320.000000,202248.000000,99475.000000,249.354400)}
{pt3dadd(193308.000000,202200.000000,99700.000000,259.926634)}
{pt3dadd(193332.000000,202176.000000,100075.000000,264.950868)}
{pt3dadd(193344.000000,202104.000000,100300.000000,264.179942)}
{pt3dadd(193320.000000,202008.000000,100525.000000,272.724968)}
{pt3dadd(193320.000000,201924.000000,100775.000000,284.387602)}
{pt3dadd(193188.000000,201876.000000,101050.000000,298.146802)}
{pt3dadd(193200.000000,201828.000000,101275.000000,315.418030)}
{pt3dadd(193212.000000,201840.000000,101550.000000,339.973432)}
{pt3dadd(193224.000000,201864.000000,101775.000000,349.804682)}
{pt3dadd(193176.000000,201840.000000,102000.000000,360.524366)}
{pt3dadd(193176.000000,201792.000000,102250.000000,338.310322)}
{pt3dadd(193116.000000,201768.000000,102500.000000,318.349680)}
{pt3dadd(192972.000000,201660.000000,102725.000000,297.886304)}
{pt3dadd(193008.000000,201720.000000,102975.000000,265.797374)}
{pt3dadd(192912.000000,201576.000000,103250.000000,258.362450)}
{pt3dadd(192768.000000,201456.000000,103475.000000,279.592582)}
{pt3dadd(192936.000000,201432.000000,103750.000000,270.899464)}
{pt3dadd(192840.000000,201288.000000,104025.000000,257.884182)}
{pt3dadd(192636.000000,201144.000000,104275.000000,278.044182)}
{pt3dadd(192432.000000,201012.000000,104525.000000,248.553854)}
{pt3dadd(192276.000000,200832.000000,104750.000000,234.579226)}
{pt3dadd(192012.000000,200796.000000,105025.000000,215.633268)}
{pt3dadd(191664.000000,200472.000000,105275.000000,205.156384)}
{pt3dadd(191808.000000,200604.000000,105450.000000,181.433294)}
{pt3dadd(191568.000000,200304.000000,105450.000000,193.417548)}
{pt3dadd(191352.000000,200052.000000,105450.000000,186.149688)}
{pt3dadd(191352.000000,199932.000000,105650.000000,218.805192)}
{pt3dadd(191280.000000,199680.000000,105800.000000,243.481412)}
{pt3dadd(191304.000000,199320.000000,105950.000000,277.642362)}
{pt3dadd(191340.000000,198960.000000,106075.000000,292.178514)}
{pt3dadd(191328.000000,198672.000000,106200.000000,323.776220)}
{pt3dadd(191268.000000,198564.000000,106225.000000,314.193702)}
{pt3dadd(191256.000000,198372.000000,106225.000000,293.261986)}
{pt3dadd(191208.000000,198312.000000,106275.000000,264.680126)}
{pt3dadd(191340.000000,198096.000000,106275.000000,249.070000)}
{pt3dadd(191460.000000,197880.000000,106275.000000,231.363794)}
{pt3dadd(191316.000000,197892.000000,106500.000000,247.378638)}
{pt3dadd(191388.000000,198012.000000,106725.000000,272.040300)}
{pt3dadd(191400.000000,197988.000000,106875.000000,289.275300)}
{pt3dadd(191364.000000,198024.000000,107025.000000,299.827680)}
{pt3dadd(191340.000000,198072.000000,107175.000000,297.049380)}
{pt3dadd(191364.000000,198156.000000,107325.000000,299.436170)}
{pt3dadd(191400.000000,198096.000000,107475.000000,304.633202)}
{pt3dadd(191412.000000,198120.000000,107625.000000,302.084230)}
{pt3dadd(191400.000000,198000.000000,107775.000000,299.476150)}
{pt3dadd(191340.000000,197976.000000,107950.000000,298.216846)}
{pt3dadd(191340.000000,197868.000000,108250.000000,288.003016)}
{pt3dadd(191316.000000,197832.000000,108375.000000,277.183124)}
{pt3dadd(191292.000000,197724.000000,108500.000000,274.218048)}
{pt3dadd(191304.000000,197640.000000,108625.000000,262.570174)}
{pt3dadd(191304.000000,197676.000000,108775.000000,250.611244)}
{pt3dadd(191352.000000,197556.000000,108900.000000,242.636538)}
{pt3dadd(191340.000000,197508.000000,109050.000000,232.232198)}
{pt3dadd(191304.000000,197460.000000,109200.000000,235.775246)}
{pt3dadd(191304.000000,197364.000000,109375.000000,261.507872)}
{pt3dadd(191268.000000,197304.000000,109500.000000,288.470738)}
{pt3dadd(191088.000000,197160.000000,109650.000000,320.207456)}
{pt3dadd(191016.000000,197040.000000,109775.000000,359.600340)}
{pt3dadd(190644.000000,196932.000000,109925.000000,378.050846)}
{pt3dadd(190416.000000,196692.000000,110175.000000,365.494926)}
{pt3dadd(190272.000000,196524.000000,110450.000000,365.145174)}
{pt3dadd(190284.000000,196392.000000,110725.000000,342.762856)}
{pt3dadd(190224.000000,196332.000000,111000.000000,321.494852)}
{pt3dadd(190320.000000,196116.000000,111375.000000,317.885832)}
{pt3dadd(190212.000000,196008.000000,111650.000000,326.973580)}
{pt3dadd(189900.000000,195708.000000,111900.000000,328.572700)}
{pt3dadd(189684.000000,195048.000000,112150.000000,334.127606)}
{pt3dadd(189420.000000,194808.000000,112400.000000,328.284216)}
{pt3dadd(189132.000000,194556.000000,112650.000000,321.519762)}
{pt3dadd(189156.000000,194448.000000,112900.000000,329.748390)}
{pt3dadd(189036.000000,194424.000000,113150.000000,318.775950)}
{pt3dadd(188976.000000,194280.000000,113400.000000,322.692390)}
{pt3dadd(188748.000000,194316.000000,113675.000000,314.980934)}
{pt3dadd(188424.000000,194100.000000,113950.000000,302.223902)}
{pt3dadd(188232.000000,194100.000000,114200.000000,279.091346)}
{pt3dadd(188148.000000,194052.000000,114450.000000,270.963460)}
{pt3dadd(187980.000000,194160.000000,114725.000000,261.516412)}
{pt3dadd(187848.000000,194124.000000,114975.000000,264.214238)}
{pt3dadd(187764.000000,194244.000000,115225.000000,272.246618)}
{pt3dadd(187632.000000,194376.000000,115525.000000,281.056456)}
{pt3dadd(187680.000000,194484.000000,115675.000000,297.137602)}
{pt3dadd(187728.000000,194592.000000,115825.000000,312.060698)}
{pt3dadd(187692.000000,194724.000000,115975.000000,320.820038)}
{pt3dadd(187596.000000,194904.000000,116200.000000,322.734448)}
{pt3dadd(187512.000000,195036.000000,116350.000000,339.698498)}
{pt3dadd(187464.000000,195168.000000,116500.000000,351.988518)}
{pt3dadd(187164.000000,195672.000000,116650.000000,342.596030)}
{pt3dadd(186780.000000,196116.000000,116875.000000,319.687816)}
{pt3dadd(186528.000000,196404.000000,116900.000000,299.168792)}
{pt3dadd(186552.000000,196944.000000,116900.000000,277.682252)}
{pt3dadd(186936.000000,197460.000000,116900.000000,270.260342)}
{pt3dadd(187212.000000,197976.000000,116900.000000,286.702158)}
{pt3dadd(187068.000000,197844.000000,117175.000000,332.952752)}
{pt3dadd(187176.000000,198036.000000,117300.000000,374.465056)}
{pt3dadd(187500.000000,198024.000000,117375.000000,431.638476)}
{pt3dadd(188256.000000,197988.000000,117375.000000,503.321380)}
{pt3dadd(189276.000000,197784.000000,117375.000000,527.080560)}
{pt3dadd(190272.000000,197484.000000,117375.000000,510.904946)}
{pt3dadd(191292.000000,197148.000000,117375.000000,567.954876)}
{pt3dadd(192048.000000,196428.000000,117375.000000,599.209544)}
{pt3dadd(191976.000000,195468.000000,117075.000000,559.426110)}
{pt3dadd(192024.000000,195108.000000,116725.000000,558.153100)}
{pt3dadd(192108.000000,194268.000000,116525.000000,592.009838)}
{pt3dadd(192240.000000,193740.000000,116350.000000,721.879058)}
{pt3dadd(192624.000000,193176.000000,116075.000000,869.358650)}
{pt3dadd(193344.000000,191700.000000,115800.000000,1031.945470)}
{pt3dadd(193716.000000,190164.000000,115575.000000,1236.755444)}
{pt3dadd(193848.000000,188964.000000,114800.000000,1370.203820)}
{pt3dadd(193572.000000,186096.000000,114800.000000,1208.948400)}
{pt3dadd(192396.000000,184128.000000,114800.000000,1044.732460)}
{pt3dadd(191892.000000,183120.000000,114800.000000,944.641550)}
{pt3dadd(194316.000000,184992.000000,114800.000000,784.720590)}
{pt3dadd(195072.000000,187044.000000,114800.000000,671.062310)}
{pt3dadd(195312.000000,189036.000000,114800.000000,666.316490)}
{pt3dadd(194808.000000,190512.000000,114800.000000,616.147186)}
{pt3dadd(193692.000000,191616.000000,114800.000000,515.019908)}
{pt3dadd(192888.000000,191052.000000,114800.000000,475.864608)}
{pt3dadd(192588.000000,190248.000000,114800.000000,452.098028)}
{pt3dadd(191988.000000,189432.000000,114800.000000,494.751298)}
{pt3dadd(191448.000000,188484.000000,114800.000000,518.325882)}
{pt3dadd(192036.000000,186600.000000,114800.000000,571.193550)}
{pt3dadd(191280.000000,185280.000000,114800.000000,824.609410)}
{pt3dadd(191640.000000,183456.000000,114800.000000,792.777678)}
{pt3dadd(193812.000000,188784.000000,115200.000000,735.857588)}
{pt3dadd(192012.000000,182760.000000,115200.000000,718.617372)}
{pt3dadd(195336.000000,186240.000000,115200.000000,674.536432)}
{pt3dadd(195012.000000,191376.000000,115200.000000,461.689172)}
{pt3dadd(193212.000000,191964.000000,115200.000000,578.967644)}
{pt3dadd(191688.000000,188952.000000,115200.000000,881.026484)}
{pt3dadd(191628.000000,183912.000000,115200.000000,854.423170)}
{pt3dadd(193272.000000,187740.000000,115950.000000,863.805094)}
{pt3dadd(191736.000000,182748.000000,115950.000000,926.440454)}
{pt3dadd(194856.000000,185832.000000,115950.000000,938.520734)}
{pt3dadd(194952.000000,187896.000000,115950.000000,673.307394)}
{pt3dadd(195024.000000,190176.000000,115950.000000,670.459658)}
{pt3dadd(194664.000000,192348.000000,115950.000000,672.729202)}
{pt3dadd(193452.000000,193716.000000,115950.000000,534.586614)}
{pt3dadd(190992.000000,192888.000000,115950.000000,429.587000)}
{pt3dadd(191880.000000,191460.000000,115950.000000,438.768170)}
{pt3dadd(192012.000000,189816.000000,115950.000000,454.427046)}
{pt3dadd(190728.000000,187956.000000,115950.000000,475.835366)}
{pt3dadd(190992.000000,185688.000000,115950.000000,742.739014)}
{pt3dadd(191352.000000,183264.000000,115950.000000,749.719476)}
{pt3dadd(193524.000000,190200.000000,116575.000000,743.276146)}
{pt3dadd(191748.000000,182964.000000,116575.000000,837.671526)}
{pt3dadd(193908.000000,184944.000000,116575.000000,867.378288)}
{pt3dadd(194772.000000,187008.000000,116575.000000,658.520668)}
{pt3dadd(195384.000000,189312.000000,116575.000000,674.385500)}
{pt3dadd(195480.000000,191652.000000,116575.000000,601.050796)}
{pt3dadd(195300.000000,193260.000000,116575.000000,475.710692)}
{pt3dadd(194100.000000,194892.000000,116575.000000,395.789726)}
{pt3dadd(192624.000000,195264.000000,116575.000000,352.680576)}
{pt3dadd(191184.000000,194964.000000,116575.000000,306.460056)}
{pt3dadd(190572.000000,193860.000000,116575.000000,304.557400)}
{pt3dadd(191100.000000,191736.000000,116575.000000,313.493194)}
{pt3dadd(191376.000000,190836.000000,116575.000000,381.917430)}
{pt3dadd(191088.000000,189564.000000,116575.000000,418.419920)}
{pt3dadd(190488.000000,188520.000000,116575.000000,497.293052)}
{pt3dadd(190056.000000,187176.000000,116575.000000,582.848424)}
{pt3dadd(190776.000000,185964.000000,116575.000000,813.485624)}
{pt3dadd(191280.000000,183528.000000,116575.000000,773.518164)}
{pt3dadd(192960.000000,190800.000000,117150.000000,754.654798)}
{pt3dadd(191592.000000,182988.000000,117150.000000,763.905286)}
{pt3dadd(193932.000000,185484.000000,117150.000000,774.093420)}
{pt3dadd(194652.000000,187812.000000,117150.000000,616.900060)}
{pt3dadd(195120.000000,189396.000000,117150.000000,709.536686)}
{pt3dadd(195420.000000,190824.000000,117150.000000,705.668478)}
{pt3dadd(195348.000000,192204.000000,117150.000000,632.961948)}
{pt3dadd(195396.000000,194232.000000,117150.000000,586.610562)}
{pt3dadd(194664.000000,195156.000000,117150.000000,561.282268)}
{pt3dadd(192972.000000,195840.000000,117150.000000,459.679522)}
{pt3dadd(191592.000000,196308.000000,117150.000000,441.491936)}
{pt3dadd(190920.000000,195984.000000,117150.000000,447.855526)}
{pt3dadd(190548.000000,195132.000000,117150.000000,465.874040)}
{pt3dadd(190176.000000,194280.000000,117150.000000,466.643498)}
{pt3dadd(190008.000000,193320.000000,117150.000000,445.408788)}
{pt3dadd(190056.000000,192300.000000,117150.000000,418.497948)}
{pt3dadd(190464.000000,191244.000000,117150.000000,445.038068)}
{pt3dadd(190668.000000,190116.000000,117150.000000,456.494782)}
{pt3dadd(190224.000000,188976.000000,117150.000000,491.729858)}
{pt3dadd(189708.000000,187872.000000,117150.000000,563.974088)}
{pt3dadd(189636.000000,186804.000000,117150.000000,672.778908)}
{pt3dadd(190236.000000,186060.000000,117150.000000,853.248908)}
{pt3dadd(191292.000000,183696.000000,117150.000000,779.699230)}
{pt3dadd(192396.000000,191400.000000,117675.000000,743.694696)}
{pt3dadd(191376.000000,183204.000000,117675.000000,746.580708)}
{pt3dadd(193752.000000,185976.000000,117675.000000,760.180596)}
{pt3dadd(194412.000000,187896.000000,117675.000000,612.141846)}
{pt3dadd(194772.000000,189096.000000,117675.000000,698.656208)}
{pt3dadd(195180.000000,190236.000000,117675.000000,808.825462)}
{pt3dadd(195480.000000,191304.000000,117675.000000,870.567662)}
{pt3dadd(195300.000000,192552.000000,117675.000000,871.269954)}
{pt3dadd(195324.000000,193668.000000,117675.000000,868.656564)}
{pt3dadd(195060.000000,194472.000000,117675.000000,839.913900)}
{pt3dadd(194748.000000,195096.000000,117675.000000,764.280500)}
{pt3dadd(194088.000000,195900.000000,117675.000000,703.196828)}
{pt3dadd(191784.000000,196644.000000,117675.000000,625.685374)}
{pt3dadd(190440.000000,197256.000000,117675.000000,538.917398)}
{pt3dadd(189600.000000,197712.000000,117675.000000,481.450890)}
{pt3dadd(187524.000000,197748.000000,117675.000000,443.436210)}
{pt3dadd(189420.000000,197244.000000,117675.000000,501.759590)}
{pt3dadd(190320.000000,196272.000000,117675.000000,506.163392)}
{pt3dadd(190572.000000,195156.000000,117675.000000,534.314612)}
{pt3dadd(189972.000000,194316.000000,117675.000000,601.191272)}
{pt3dadd(189564.000000,193416.000000,117675.000000,587.836572)}
{pt3dadd(189492.000000,192672.000000,117675.000000,468.172292)}
{pt3dadd(189684.000000,191784.000000,117675.000000,408.570664)}
{pt3dadd(189960.000000,190848.000000,117675.000000,442.115820)}
{pt3dadd(189912.000000,189888.000000,117675.000000,439.858268)}
{pt3dadd(189636.000000,188832.000000,117675.000000,474.379748)}
{pt3dadd(189156.000000,187020.000000,117675.000000,531.724876)}
{pt3dadd(189228.000000,185832.000000,117675.000000,795.996016)}
{pt3dadd(191040.000000,183876.000000,117675.000000,773.311616)}
{pt3dadd(192228.000000,191664.000000,117950.000000,779.566568)}
{pt3dadd(191268.000000,183924.000000,117950.000000,803.067048)}
{pt3dadd(193452.000000,186576.000000,117950.000000,860.537120)}
{pt3dadd(194124.000000,187980.000000,117950.000000,706.971892)}
{pt3dadd(194496.000000,189300.000000,117950.000000,733.753872)}
{pt3dadd(194976.000000,190332.000000,117950.000000,780.701424)}
{pt3dadd(195540.000000,191520.000000,117950.000000,820.201058)}
{pt3dadd(195708.000000,192600.000000,117950.000000,782.803948)}
{pt3dadd(195480.000000,194364.000000,117950.000000,735.761286)}
{pt3dadd(195036.000000,195228.000000,117950.000000,689.106954)}
{pt3dadd(194556.000000,196080.000000,117950.000000,654.897176)}
{pt3dadd(193944.000000,197148.000000,117950.000000,660.521922)}
{pt3dadd(191568.000000,197460.000000,117950.000000,643.126712)}
{pt3dadd(190344.000000,197784.000000,117950.000000,627.194222)}
{pt3dadd(189528.000000,197820.000000,117950.000000,629.835554)}
{pt3dadd(187692.000000,197880.000000,117950.000000,547.004450)}
{pt3dadd(188160.000000,197724.000000,117950.000000,471.637810)}
{pt3dadd(188952.000000,197448.000000,117950.000000,456.536570)}
{pt3dadd(189960.000000,197052.000000,117950.000000,491.221670)}
{pt3dadd(190224.000000,196092.000000,117950.000000,510.675834)}
{pt3dadd(189972.000000,194964.000000,117950.000000,538.771610)}
{pt3dadd(189636.000000,194040.000000,117950.000000,507.495834)}
{pt3dadd(189348.000000,193152.000000,117950.000000,437.464404)}
{pt3dadd(189120.000000,192204.000000,117950.000000,358.406264)}
{pt3dadd(189276.000000,191460.000000,117950.000000,300.056504)}
{pt3dadd(189576.000000,190416.000000,117950.000000,307.761858)}
{pt3dadd(189264.000000,189420.000000,117950.000000,392.120946)}
{pt3dadd(188976.000000,188436.000000,117950.000000,566.792936)}
{pt3dadd(189360.000000,187608.000000,117950.000000,722.177116)}
{pt3dadd(189804.000000,186504.000000,117950.000000,807.957492)}
{pt3dadd(190164.000000,185616.000000,117950.000000,1068.560752)}
{pt3dadd(190884.000000,184392.000000,117950.000000,1054.324106)}
{pt3dadd(192180.000000,192216.000000,118225.000000,981.437918)}
{pt3dadd(191448.000000,184296.000000,118225.000000,935.102098)}
{pt3dadd(193404.000000,186552.000000,118225.000000,961.216418)}
{pt3dadd(194136.000000,188388.000000,118225.000000,750.323678)}
{pt3dadd(194784.000000,189516.000000,118225.000000,686.262802)}
{pt3dadd(195324.000000,190680.000000,118225.000000,634.130778)}
{pt3dadd(195924.000000,191844.000000,118225.000000,596.353486)}
{pt3dadd(195924.000000,192792.000000,118225.000000,552.985266)}
{pt3dadd(195684.000000,194028.000000,118225.000000,545.916866)}
{pt3dadd(195588.000000,194964.000000,118225.000000,585.513196)}
{pt3dadd(195180.000000,195600.000000,118225.000000,621.028216)}
{pt3dadd(194580.000000,196152.000000,118225.000000,633.331148)}
{pt3dadd(193656.000000,197256.000000,118225.000000,684.340876)}
{pt3dadd(192708.000000,197892.000000,118225.000000,713.131916)}
{pt3dadd(191484.000000,197856.000000,118225.000000,775.503628)}
{pt3dadd(190356.000000,198192.000000,118225.000000,839.501240)}
{pt3dadd(188928.000000,198144.000000,118225.000000,920.270300)}
{pt3dadd(189996.000000,197352.000000,118225.000000,990.831352)}
{pt3dadd(190692.000000,197016.000000,118225.000000,1224.183792)}
{pt3dadd(191448.000000,196524.000000,118225.000000,1172.768460)}
{pt3dadd(192324.000000,193152.000000,118225.000000,1068.055186)}
{pt3dadd(189600.000000,193584.000000,118225.000000,924.236686)}
{pt3dadd(188892.000000,192420.000000,118225.000000,751.547740)}
{pt3dadd(189192.000000,191388.000000,118225.000000,453.949540)}
{pt3dadd(189336.000000,189972.000000,118225.000000,527.834120)}
{pt3dadd(189048.000000,188928.000000,118225.000000,647.162414)}
{pt3dadd(189540.000000,187200.000000,118225.000000,905.048334)}
{pt3dadd(190356.000000,185556.000000,118225.000000,909.571570)}
{pt3dadd(192048.000000,192012.000000,118550.000000,932.678970)}
{pt3dadd(191316.000000,184356.000000,118550.000000,876.052922)}
{pt3dadd(193428.000000,187008.000000,118550.000000,859.490562)}
{pt3dadd(194004.000000,188412.000000,118550.000000,670.942472)}
{pt3dadd(194616.000000,189804.000000,118550.000000,701.900010)}
{pt3dadd(195024.000000,190824.000000,118550.000000,684.558816)}
{pt3dadd(195444.000000,191952.000000,118550.000000,670.421824)}
{pt3dadd(195300.000000,193020.000000,118550.000000,628.832344)}
{pt3dadd(195060.000000,194304.000000,118550.000000,619.010134)}
{pt3dadd(194604.000000,195120.000000,118550.000000,704.389420)}
{pt3dadd(194352.000000,196344.000000,118550.000000,800.780354)}
{pt3dadd(193476.000000,197136.000000,118550.000000,832.669642)}
{pt3dadd(191076.000000,198300.000000,118550.000000,858.163682)}
{pt3dadd(189060.000000,198120.000000,118550.000000,995.030162)}
{pt3dadd(189588.000000,197304.000000,118550.000000,935.572808)}
{pt3dadd(192216.000000,192816.000000,118550.000000,888.191088)}
{pt3dadd(188736.000000,192276.000000,118550.000000,937.955400)}
{pt3dadd(189024.000000,188016.000000,118550.000000,863.815034)}
{pt3dadd(189516.000000,186816.000000,118550.000000,872.219114)}
{pt3dadd(190452.000000,184884.000000,118550.000000,840.486354)}
{pt3dadd(191592.000000,191964.000000,119025.000000,790.923394)}
{pt3dadd(191112.000000,184356.000000,119025.000000,691.094294)}
{pt3dadd(192984.000000,187056.000000,119025.000000,691.094294)}
{pt3dadd(193296.000000,188268.000000,119025.000000,508.013714)}
{pt3dadd(193572.000000,189204.000000,119025.000000,582.545246)}
{pt3dadd(193920.000000,190080.000000,119025.000000,634.808346)}
{pt3dadd(194112.000000,190740.000000,119025.000000,628.530666)}
{pt3dadd(194280.000000,191472.000000,119025.000000,640.688092)}
{pt3dadd(194340.000000,192252.000000,119025.000000,684.833892)}
{pt3dadd(194412.000000,192876.000000,119025.000000,620.307286)}
{pt3dadd(194136.000000,193512.000000,119025.000000,591.709346)}
{pt3dadd(193944.000000,194148.000000,119025.000000,616.162526)}
{pt3dadd(193644.000000,194784.000000,119025.000000,643.658706)}
{pt3dadd(193596.000000,195540.000000,119025.000000,689.010052)}
{pt3dadd(193272.000000,196140.000000,119025.000000,786.045666)}
{pt3dadd(192600.000000,197232.000000,119025.000000,850.493298)}
{pt3dadd(191808.000000,198312.000000,119025.000000,887.896246)}
{pt3dadd(190212.000000,198852.000000,119025.000000,941.410046)}
{pt3dadd(188880.000000,198420.000000,119025.000000,943.277060)}
{pt3dadd(188712.000000,197748.000000,119025.000000,915.867780)}
{pt3dadd(188796.000000,197160.000000,119025.000000,846.407628)}
{pt3dadd(189036.000000,196464.000000,119025.000000,867.660440)}
{pt3dadd(188928.000000,195480.000000,119025.000000,929.100720)}
{pt3dadd(189504.000000,194556.000000,119025.000000,928.671792)}
{pt3dadd(191556.000000,192564.000000,119025.000000,837.181176)}
{pt3dadd(188928.000000,192984.000000,119025.000000,783.972626)}
{pt3dadd(187668.000000,192432.000000,119025.000000,631.847906)}
{pt3dadd(188172.000000,191340.000000,119025.000000,471.153586)}
{pt3dadd(188112.000000,190884.000000,119025.000000,418.671042)}
{pt3dadd(188700.000000,190224.000000,119025.000000,528.282658)}
{pt3dadd(188736.000000,189336.000000,119025.000000,648.430888)}
{pt3dadd(188676.000000,188652.000000,119025.000000,844.128068)}
{pt3dadd(188688.000000,187932.000000,119025.000000,932.229808)}
{pt3dadd(189276.000000,187344.000000,119025.000000,925.553060)}
{pt3dadd(189468.000000,186684.000000,119025.000000,996.281620)}
{pt3dadd(190956.000000,184812.000000,119025.000000,874.370440)}
{pt3dadd(190764.000000,191784.000000,119350.000000,801.024770)}
{pt3dadd(191076.000000,184872.000000,119350.000000,747.159070)}
{pt3dadd(191988.000000,187080.000000,119350.000000,733.458500)}
{pt3dadd(192708.000000,188736.000000,119350.000000,645.459200)}
{pt3dadd(193224.000000,189972.000000,119350.000000,720.624726)}
{pt3dadd(193200.000000,190860.000000,119350.000000,709.544216)}
{pt3dadd(193200.000000,191592.000000,119350.000000,747.152936)}
{pt3dadd(193104.000000,192192.000000,119350.000000,760.853506)}
{pt3dadd(193128.000000,193104.000000,119350.000000,739.047658)}
{pt3dadd(192792.000000,193836.000000,119350.000000,756.701852)}
{pt3dadd(192576.000000,194652.000000,119350.000000,805.784792)}
{pt3dadd(192276.000000,195384.000000,119350.000000,908.475612)}
{pt3dadd(191664.000000,196680.000000,119350.000000,1013.593512)}
{pt3dadd(190212.000000,197280.000000,119350.000000,1001.424420)}
{pt3dadd(190260.000000,198912.000000,119350.000000,1012.381600)}
{pt3dadd(189408.000000,199344.000000,119350.000000,921.618920)}
{pt3dadd(188832.000000,198384.000000,119350.000000,763.613360)}
{pt3dadd(188508.000000,197004.000000,119350.000000,659.107520)}
{pt3dadd(188424.000000,195852.000000,119350.000000,637.487160)}
{pt3dadd(188436.000000,195084.000000,119350.000000,601.813480)}
{pt3dadd(188508.000000,194412.000000,119350.000000,732.971740)}
{pt3dadd(188580.000000,193608.000000,119350.000000,744.541240)}
{pt3dadd(190752.000000,192348.000000,119350.000000,689.257766)}
{pt3dadd(187908.000000,192144.000000,119350.000000,711.158266)}
{pt3dadd(188088.000000,190464.000000,119350.000000,783.874126)}
{pt3dadd(188304.000000,189228.000000,119350.000000,737.833126)}
{pt3dadd(188712.000000,188484.000000,119350.000000,710.995466)}
{pt3dadd(189108.000000,187464.000000,119350.000000,854.538620)}
{pt3dadd(190968.000000,185424.000000,119350.000000,780.999920)}
{pt3dadd(190368.000000,191892.000000,119700.000000,701.838200)}
{pt3dadd(191028.000000,185556.000000,119700.000000,604.563514)}
{pt3dadd(192216.000000,188112.000000,119700.000000,656.118902)}
{pt3dadd(192528.000000,189204.000000,119700.000000,580.290110)}
{pt3dadd(192648.000000,189960.000000,119700.000000,641.042262)}
{pt3dadd(192708.000000,190608.000000,119700.000000,609.161390)}
{pt3dadd(192648.000000,191268.000000,119700.000000,605.790302)}
{pt3dadd(192636.000000,192096.000000,119700.000000,550.523934)}
{pt3dadd(192408.000000,192624.000000,119700.000000,493.214418)}
{pt3dadd(192312.000000,193212.000000,119700.000000,480.724546)}
{pt3dadd(192156.000000,193752.000000,119700.000000,515.726958)}
{pt3dadd(192084.000000,194352.000000,119700.000000,578.936232)}
{pt3dadd(191964.000000,194964.000000,119700.000000,649.435864)}
{pt3dadd(191688.000000,195408.000000,119700.000000,744.297882)}
{pt3dadd(191472.000000,196080.000000,119700.000000,793.798762)}
{pt3dadd(191436.000000,197004.000000,119700.000000,777.170602)}
{pt3dadd(190416.000000,198288.000000,119700.000000,759.685862)}
{pt3dadd(189228.000000,198540.000000,119700.000000,743.266600)}
{pt3dadd(188940.000000,197772.000000,119700.000000,747.134130)}
{pt3dadd(188712.000000,196644.000000,119700.000000,756.604470)}
{pt3dadd(188592.000000,195540.000000,119700.000000,773.932130)}
{pt3dadd(188532.000000,194484.000000,119700.000000,790.163498)}
{pt3dadd(188340.000000,193716.000000,119700.000000,806.582760)}
{pt3dadd(188088.000000,192732.000000,119700.000000,763.458492)}
{pt3dadd(188040.000000,191964.000000,119700.000000,722.320132)}
{pt3dadd(188028.000000,191160.000000,119700.000000,731.130122)}
{pt3dadd(188148.000000,190428.000000,119700.000000,747.578434)}
{pt3dadd(188232.000000,189648.000000,119700.000000,771.304082)}
{pt3dadd(188316.000000,188904.000000,119700.000000,847.968630)}
{pt3dadd(188376.000000,188016.000000,119700.000000,868.567470)}
{pt3dadd(189444.000000,187440.000000,119700.000000,900.623220)}
{pt3dadd(190908.000000,186000.000000,119700.000000,839.219708)}
{pt3dadd(189924.000000,192144.000000,120075.000000,787.454748)}
{pt3dadd(190440.000000,185988.000000,120075.000000,694.468868)}
{pt3dadd(191640.000000,188664.000000,120075.000000,651.290008)}
{pt3dadd(191904.000000,190836.000000,120075.000000,597.536588)}
{pt3dadd(191544.000000,192804.000000,120075.000000,612.056380)}
{pt3dadd(191364.000000,193776.000000,120075.000000,631.598452)}
{pt3dadd(191328.000000,195156.000000,120075.000000,687.942572)}
{pt3dadd(190896.000000,196740.000000,120075.000000,711.547092)}
{pt3dadd(190368.000000,198036.000000,120075.000000,766.833512)}
{pt3dadd(190056.000000,198780.000000,120075.000000,741.739812)}
{pt3dadd(189396.000000,197868.000000,120075.000000,691.164520)}
{pt3dadd(188460.000000,197112.000000,120075.000000,695.148480)}
{pt3dadd(188328.000000,196296.000000,120075.000000,718.219400)}
{pt3dadd(188340.000000,195204.000000,120075.000000,697.670848)}
{pt3dadd(188088.000000,194088.000000,120075.000000,754.453328)}
{pt3dadd(187896.000000,193128.000000,120075.000000,749.817456)}
{pt3dadd(187524.000000,191976.000000,120075.000000,711.712216)}
{pt3dadd(187440.000000,190776.000000,120075.000000,768.944936)}
{pt3dadd(187896.000000,190116.000000,120075.000000,798.150928)}
{pt3dadd(188256.000000,188964.000000,120075.000000,745.436588)}
{pt3dadd(188664.000000,187992.000000,120075.000000,877.942380)}
{pt3dadd(190188.000000,186240.000000,120075.000000,844.797260)}
{pt3dadd(189672.000000,192024.000000,120425.000000,795.774140)}
{pt3dadd(190356.000000,186192.000000,120425.000000,688.191940)}
{pt3dadd(191388.000000,188736.000000,120425.000000,654.087270)}
{pt3dadd(191124.000000,191004.000000,120425.000000,514.790250)}
{pt3dadd(190968.000000,192972.000000,120425.000000,530.695150)}
{pt3dadd(190656.000000,194520.000000,120425.000000,492.325524)}
{pt3dadd(190704.000000,195888.000000,120425.000000,512.739012)}
{pt3dadd(190368.000000,197820.000000,120425.000000,571.557690)}
{pt3dadd(190260.000000,198648.000000,120425.000000,597.953070)}
{pt3dadd(189480.000000,198036.000000,120425.000000,618.181530)}
{pt3dadd(188844.000000,197016.000000,120425.000000,646.856382)}
{pt3dadd(188484.000000,195828.000000,120425.000000,724.617414)}
{pt3dadd(188016.000000,194736.000000,120425.000000,798.346146)}
{pt3dadd(187860.000000,193740.000000,120425.000000,878.174434)}
{pt3dadd(187584.000000,192588.000000,120425.000000,888.044434)}
{pt3dadd(187392.000000,191700.000000,120425.000000,892.882328)}
{pt3dadd(187548.000000,190944.000000,120425.000000,868.660676)}
{pt3dadd(187656.000000,190092.000000,120425.000000,831.018504)}
{pt3dadd(187668.000000,189144.000000,120425.000000,786.248756)}
{pt3dadd(188076.000000,188448.000000,120425.000000,788.298696)}
{pt3dadd(188436.000000,187992.000000,120425.000000,744.394376)}
{pt3dadd(189252.000000,187512.000000,120425.000000,854.426268)}
{pt3dadd(190200.000000,186564.000000,120425.000000,801.302330)}
{pt3dadd(189024.000000,191964.000000,120725.000000,843.075050)}
{pt3dadd(189660.000000,186612.000000,120725.000000,830.657622)}
{pt3dadd(190788.000000,189084.000000,120725.000000,815.557142)}
{pt3dadd(190692.000000,190476.000000,120725.000000,610.738662)}
{pt3dadd(190488.000000,191736.000000,120725.000000,625.405612)}
{pt3dadd(190248.000000,192888.000000,120725.000000,645.554792)}
{pt3dadd(189984.000000,194328.000000,120725.000000,631.180300)}
{pt3dadd(189780.000000,196092.000000,120725.000000,669.104788)}
{pt3dadd(189540.000000,198096.000000,120725.000000,709.729902)}
{pt3dadd(189132.000000,197964.000000,120725.000000,688.782522)}
{pt3dadd(188880.000000,197196.000000,120725.000000,609.286132)}
{pt3dadd(188556.000000,196320.000000,120725.000000,631.556498)}
{pt3dadd(188124.000000,195288.000000,120725.000000,667.643058)}
{pt3dadd(187728.000000,194340.000000,120725.000000,773.207004)}
{pt3dadd(187464.000000,193320.000000,120725.000000,869.323804)}
{pt3dadd(187392.000000,192504.000000,120725.000000,895.944006)}
{pt3dadd(187236.000000,191820.000000,120725.000000,866.777620)}
{pt3dadd(187212.000000,190920.000000,120725.000000,822.065680)}
{pt3dadd(187248.000000,190152.000000,120725.000000,740.348680)}
{pt3dadd(187392.000000,189540.000000,120725.000000,688.628020)}
{pt3dadd(187704.000000,188976.000000,120725.000000,646.071108)}
{pt3dadd(188064.000000,188484.000000,120725.000000,744.755008)}
{pt3dadd(189480.000000,187116.000000,120725.000000,712.221740)}
{pt3dadd(188772.000000,192084.000000,121100.000000,663.288160)}
{pt3dadd(189108.000000,187212.000000,121100.000000,616.008888)}
{pt3dadd(190440.000000,189912.000000,121100.000000,572.901232)}
{pt3dadd(190224.000000,190836.000000,121100.000000,471.520832)}
{pt3dadd(189876.000000,192348.000000,121100.000000,586.405572)}
{pt3dadd(189732.000000,193860.000000,121100.000000,649.388792)}
{pt3dadd(189036.000000,195672.000000,121100.000000,680.486504)}
{pt3dadd(188664.000000,196020.000000,121100.000000,723.594160)}
{pt3dadd(188112.000000,195096.000000,121100.000000,700.972988)}
{pt3dadd(187404.000000,193992.000000,121100.000000,577.769918)}
{pt3dadd(186888.000000,192888.000000,121100.000000,570.006950)}
{pt3dadd(186564.000000,191964.000000,121100.000000,593.928650)}
{pt3dadd(187212.000000,191196.000000,121100.000000,606.361258)}
{pt3dadd(187956.000000,189804.000000,121100.000000,685.798070)}
{pt3dadd(188760.000000,187944.000000,121100.000000,728.907220)}
{pt3dadd(188892.000000,191640.000000,121475.000000,720.730808)}
{pt3dadd(189516.000000,187944.000000,121475.000000,643.289282)}
{pt3dadd(190248.000000,190128.000000,121475.000000,566.297364)}
{pt3dadd(190644.000000,191208.000000,121475.000000,463.596224)}
{pt3dadd(190476.000000,192156.000000,121475.000000,395.810564)}
{pt3dadd(190128.000000,193056.000000,121475.000000,374.370094)}
{pt3dadd(190332.000000,193908.000000,121475.000000,393.517920)}
{pt3dadd(190344.000000,195120.000000,121475.000000,421.885064)}
{pt3dadd(190200.000000,196020.000000,121475.000000,475.797004)}
{pt3dadd(190068.000000,197256.000000,121475.000000,525.687724)}
{pt3dadd(189624.000000,197604.000000,121475.000000,533.299820)}
{pt3dadd(188964.000000,196872.000000,121475.000000,541.950280)}
{pt3dadd(188208.000000,195804.000000,121475.000000,581.947954)}
{pt3dadd(187788.000000,194952.000000,121475.000000,578.769614)}
{pt3dadd(187476.000000,194040.000000,121475.000000,616.739144)}
{pt3dadd(187332.000000,193356.000000,121475.000000,676.534726)}
{pt3dadd(187404.000000,192648.000000,121475.000000,701.556766)}
{pt3dadd(187572.000000,191796.000000,121475.000000,661.559092)}
{pt3dadd(187680.000000,190584.000000,121475.000000,628.278992)}
{pt3dadd(187788.000000,189660.000000,121475.000000,574.672070)}
{pt3dadd(188028.000000,188880.000000,121475.000000,550.765782)}
{pt3dadd(189096.000000,187800.000000,121475.000000,517.622002)}
{pt3dadd(188544.000000,193392.000000,121800.000000,531.805572)}
{pt3dadd(189144.000000,188004.000000,121800.000000,517.880072)}
{pt3dadd(189756.000000,190512.000000,121800.000000,494.973604)}
{pt3dadd(189792.000000,191580.000000,121800.000000,435.962270)}
{pt3dadd(189624.000000,192372.000000,121800.000000,408.373798)}
{pt3dadd(189576.000000,193212.000000,121800.000000,394.854914)}
{pt3dadd(189768.000000,194004.000000,121800.000000,406.968018)}
{pt3dadd(189696.000000,194784.000000,121800.000000,452.253658)}
{pt3dadd(189816.000000,195684.000000,121800.000000,477.690252)}
{pt3dadd(189336.000000,196548.000000,121800.000000,512.830764)}
{pt3dadd(188688.000000,196140.000000,121800.000000,525.580190)}
{pt3dadd(187920.000000,194964.000000,121800.000000,529.433512)}
{pt3dadd(187416.000000,194160.000000,121800.000000,533.911552)}
{pt3dadd(187140.000000,192828.000000,121800.000000,516.618252)}
{pt3dadd(187404.000000,191688.000000,121800.000000,519.805952)}
{pt3dadd(187656.000000,190656.000000,121800.000000,511.801566)}
{pt3dadd(188196.000000,189852.000000,121800.000000,517.547140)}
{pt3dadd(189048.000000,188280.000000,121800.000000,481.967034)}
{pt3dadd(188208.000000,192924.000000,122275.000000,447.105124)}
{pt3dadd(188520.000000,189156.000000,122275.000000,379.345190)}
{pt3dadd(189024.000000,191424.000000,122275.000000,353.540490)}
{pt3dadd(189156.000000,192576.000000,122275.000000,318.220490)}
{pt3dadd(189012.000000,193524.000000,122275.000000,287.699384)}
{pt3dadd(189108.000000,194604.000000,122275.000000,299.933504)}
{pt3dadd(188832.000000,195768.000000,122275.000000,346.732866)}
{pt3dadd(188388.000000,196140.000000,122275.000000,352.944266)}
{pt3dadd(188340.000000,195492.000000,122275.000000,350.808566)}
{pt3dadd(187800.000000,194904.000000,122275.000000,363.769058)}
{pt3dadd(187644.000000,193956.000000,122275.000000,381.871288)}
{pt3dadd(187440.000000,192996.000000,122275.000000,367.144980)}
{pt3dadd(187548.000000,192312.000000,122275.000000,376.057960)}
{pt3dadd(187692.000000,191580.000000,122275.000000,385.254480)}
{pt3dadd(187896.000000,190764.000000,122275.000000,360.478772)}
{pt3dadd(188364.000000,189504.000000,122275.000000,321.741482)}
{pt3dadd(188124.000000,192996.000000,122600.000000,269.208390)}
{pt3dadd(188256.000000,190296.000000,122600.000000,231.713550)}
{pt3dadd(188556.000000,192672.000000,122600.000000,199.002662)}
{pt3dadd(188736.000000,193728.000000,122600.000000,195.727270)}
{pt3dadd(188640.000000,195132.000000,122600.000000,193.459366)}
{pt3dadd(188100.000000,194880.000000,122600.000000,215.918664)}
{pt3dadd(187920.000000,194208.000000,122600.000000,208.589244)}
{pt3dadd(187680.000000,193236.000000,122600.000000,215.223518)}
{pt3dadd(187560.000000,192276.000000,122600.000000,210.379720)}
{pt3dadd(187968.000000,190524.000000,122600.000000,207.321030)}
