# Supplementary material for: Full reconstruction of large lobula plate tangential cells in Drosophila from a 3D EM dataset
Source: PLoS One. 2018 Nov 28;13(11):e0207828. doi: 10.1371/journal.pone.0207828 (PMC6261601; doi:10.1371/journal.pone.0207828)
Supplement: S1 Dataset — (ZIP) [file pone.0207828.s001.zip › Diameter hoc/VS_VSL_preliminary/VS2_3skels_ck.001_completed.hoc0003.hoc]

/* created with convertKnossosNmlToHoc.m */

{create adhoc1}
{access adhoc1}
{nseg = 1}
{strdef color color = "White"}
{pt3dclear()}
{pt3dadd(174312.000000,193884.000000,47375.000000,3.583180)}
{pt3dadd(174552.000000,194064.000000,47325.000000,2.841011)}
{pt3dadd(174660.000000,194472.000000,47475.000000,2.304607)}
{pt3dadd(174768.000000,194592.000000,47550.000000,3.445491)}
{pt3dadd(174780.000000,194916.000000,47725.000000,3.057520)}
{pt3dadd(174720.000000,195228.000000,47850.000000,3.057520)}
{pt3dadd(174900.000000,195504.000000,47950.000000,4.047465)}
{pt3dadd(174648.000000,195744.000000,48100.000000,5.037410)}
{pt3dadd(174636.000000,196008.000000,48225.000000,4.799816)}
{pt3dadd(175008.000000,196236.000000,48225.000000,6.449724)}

{create adhoc2}
{access adhoc2}
{connect adhoc2(1), adhoc1(0)}
{nseg = 1}
{strdef color color = "White"}
{pt3dclear()}
{pt3dadd(175008.000000,196236.000000,48225.000000,6.449724)}
{pt3dadd(175920.000000,195972.000000,48300.000000,3.110400)}

{create adhoc3}
{access adhoc3}
{connect adhoc3(1), adhoc1(0)}
{nseg = 1}
{strdef color color = "White"}
{pt3dclear()}
{pt3dadd(175008.000000,196236.000000,48225.000000,6.449724)}
{pt3dadd(174744.000000,196560.000000,48350.000000,5.126602)}
{pt3dadd(174396.000000,197052.000000,48550.000000,3.675961)}
{pt3dadd(174096.000000,197412.000000,48875.000000,4.615041)}
{pt3dadd(173832.000000,197748.000000,49125.000000,4.986545)}
{pt3dadd(173544.000000,198084.000000,49275.000000,8.538299)}
{pt3dadd(173448.000000,199008.000000,49250.000000,13.230499)}
{pt3dadd(173064.000000,200052.000000,49200.000000,19.258772)}

{create adhoc4}
{access adhoc4}
{connect adhoc4(1), adhoc3(0)}
{nseg = 1}
{strdef color color = "White"}
{pt3dclear()}
{pt3dadd(173064.000000,200052.000000,49200.000000,19.258772)}
{pt3dadd(173040.000000,199824.000000,48675.000000,14.019145)}
{pt3dadd(172860.000000,199572.000000,48175.000000,9.011487)}
{pt3dadd(172572.000000,199032.000000,47850.000000,6.234686)}
{pt3dadd(172764.000000,198744.000000,47375.000000,2.870749)}
{pt3dadd(173340.000000,198456.000000,47275.000000,3.784582)}
{pt3dadd(173496.000000,198300.000000,47225.000000,4.478975)}

{create adhoc5}
{access adhoc5}
{connect adhoc5(1), adhoc3(0)}
{nseg = 1}
{strdef color color = "White"}
{pt3dclear()}
{pt3dadd(173064.000000,200052.000000,49200.000000,19.258772)}
{pt3dadd(172800.000000,201240.000000,49650.000000,20.285907)}
{pt3dadd(172836.000000,201744.000000,50525.000000,23.110527)}

{create adhoc6}
{access adhoc6}
{connect adhoc6(1), adhoc5(0)}
{nseg = 1}
{strdef color color = "White"}
{pt3dclear()}
{pt3dadd(172836.000000,201744.000000,50525.000000,23.110527)}
{pt3dadd(172560.000000,202512.000000,49125.000000,19.258772)}

{create adhoc7}
{access adhoc7}
{connect adhoc7(1), adhoc6(0)}
{nseg = 1}
{strdef color color = "White"}
{pt3dclear()}
{pt3dadd(172560.000000,202512.000000,49125.000000,19.258772)}
{pt3dadd(172824.000000,201948.000000,48325.000000,10.062490)}
{pt3dadd(172860.000000,201684.000000,48050.000000,5.135891)}
{pt3dadd(173064.000000,201636.000000,48000.000000,4.478975)}

{create adhoc8}
{access adhoc8}
{connect adhoc8(1), adhoc6(0)}
{nseg = 1}
{strdef color color = "White"}
{pt3dclear()}
{pt3dadd(172560.000000,202512.000000,49125.000000,19.258772)}
{pt3dadd(172404.000000,203832.000000,48250.000000,16.048977)}

{create adhoc9}
{access adhoc9}
{connect adhoc9(1), adhoc8(0)}
{nseg = 1}
{strdef color color = "White"}
{pt3dclear()}
{pt3dadd(172404.000000,203832.000000,48250.000000,16.048977)}
{pt3dadd(172164.000000,204624.000000,48250.000000,8.005249)}
{pt3dadd(171684.000000,204924.000000,48300.000000,2.592000)}

{create adhoc10}
{access adhoc10}
{connect adhoc10(1), adhoc8(0)}
{nseg = 1}
{strdef color color = "White"}
{pt3dclear()}
{pt3dadd(172404.000000,203832.000000,48250.000000,16.048977)}
{pt3dadd(171972.000000,204192.000000,48175.000000,10.307708)}
{pt3dadd(172392.000000,204372.000000,47000.000000,10.716975)}
{pt3dadd(172488.000000,204168.000000,46425.000000,8.053916)}
{pt3dadd(171900.000000,203748.000000,45700.000000,9.287602)}

{create adhoc11}
{access adhoc11}
{connect adhoc11(1), adhoc10(0)}
{nseg = 1}
{strdef color color = "White"}
{pt3dclear()}
{pt3dadd(171900.000000,203748.000000,45700.000000,9.287602)}
{pt3dadd(172524.000000,202368.000000,45550.000000,2.592000)}

{create adhoc12}
{access adhoc12}
{connect adhoc12(1), adhoc10(0)}
{nseg = 1}
{strdef color color = "White"}
{pt3dclear()}
{pt3dadd(171900.000000,203748.000000,45700.000000,9.287602)}
{pt3dadd(172164.000000,203484.000000,45075.000000,5.374770)}

{create adhoc13}
{access adhoc13}
{connect adhoc13(1), adhoc5(0)}
{nseg = 1}
{strdef color color = "White"}
{pt3dclear()}
{pt3dadd(172836.000000,201744.000000,50525.000000,23.110527)}
{pt3dadd(172944.000000,202344.000000,51325.000000,14.366316)}
{pt3dadd(173268.000000,202404.000000,51925.000000,9.219790)}
{pt3dadd(173424.000000,202368.000000,52450.000000,7.807480)}
{pt3dadd(173784.000000,202464.000000,52900.000000,4.409795)}
{pt3dadd(173940.000000,202776.000000,53400.000000,4.409795)}
{pt3dadd(174528.000000,202920.000000,53675.000000,4.409795)}
{pt3dadd(174828.000000,203016.000000,54075.000000,13.694193)}
{pt3dadd(175188.000000,203112.000000,54475.000000,10.784398)}
{pt3dadd(175968.000000,204204.000000,55175.000000,10.784398)}
{pt3dadd(176532.000000,203292.000000,55475.000000,10.784398)}
{pt3dadd(176952.000000,203076.000000,55650.000000,18.151917)}
{pt3dadd(177516.000000,202404.000000,55425.000000,8.867519)}
{pt3dadd(177996.000000,201396.000000,55925.000000,8.867519)}
{pt3dadd(178788.000000,200136.000000,56850.000000,18.151917)}
{pt3dadd(179424.000000,199800.000000,57625.000000,37.726122)}
{pt3dadd(180060.000000,199308.000000,58350.000000,49.597672)}
{pt3dadd(182328.000000,195960.000000,59600.000000,99.371025)}

{create adhoc14}
{access adhoc14}
{connect adhoc14(1), adhoc13(0)}
{nseg = 1}
{strdef color color = "White"}
{pt3dclear()}
{pt3dadd(182328.000000,195960.000000,59600.000000,99.371025)}
{pt3dadd(182136.000000,197640.000000,61550.000000,79.128782)}
{pt3dadd(182616.000000,198828.000000,62800.000000,72.504049)}
{pt3dadd(182352.000000,199632.000000,64400.000000,79.496826)}

{create adhoc15}
{access adhoc15}
{connect adhoc15(1), adhoc14(0)}
{nseg = 1}
{strdef color color = "White"}
{pt3dclear()}
{pt3dadd(182352.000000,199632.000000,64400.000000,79.496826)}
{pt3dadd(182484.000000,200580.000000,65850.000000,50.001495)}
{pt3dadd(183372.000000,201360.000000,67275.000000,554.322220)}
{pt3dadd(183528.000000,202452.000000,68825.000000,1592.459000)}

{create adhoc16}
{access adhoc16}
{connect adhoc16(1), adhoc15(0)}
{nseg = 1}
{strdef color color = "White"}
{pt3dclear()}
{pt3dadd(183528.000000,202452.000000,68825.000000,1592.459000)}
{pt3dadd(183732.000000,204876.000000,72000.000000,572.991015)}
{pt3dadd(184824.000000,205248.000000,72650.000000,69.007660)}

{create adhoc17}
{access adhoc17}
{connect adhoc17(1), adhoc16(0)}
{nseg = 1}
{strdef color color = "White"}
{pt3dclear()}
{pt3dadd(184824.000000,205248.000000,72650.000000,69.007660)}
{pt3dadd(181176.000000,205140.000000,71100.000000,46.505107)}
{pt3dadd(179856.000000,205332.000000,71975.000000,28.503064)}
{pt3dadd(179496.000000,205464.000000,71675.000000,22.688530)}
{pt3dadd(179160.000000,205512.000000,71675.000000,9.186998)}
{pt3dadd(178812.000000,205596.000000,71975.000000,18.471396)}
{pt3dadd(178308.000000,205716.000000,72575.000000,26.158394)}
{pt3dadd(177876.000000,206088.000000,72775.000000,29.785660)}
{pt3dadd(177552.000000,206460.000000,72875.000000,39.934990)}

{create adhoc18}
{access adhoc18}
{connect adhoc18(1), adhoc17(0)}
{nseg = 1}
{strdef color color = "White"}
{pt3dclear()}
{pt3dadd(177552.000000,206460.000000,72875.000000,39.934990)}
{pt3dadd(177708.000000,205092.000000,73350.000000,17.651691)}
{pt3dadd(177576.000000,204216.000000,72750.000000,3.732480)}

{create adhoc19}
{access adhoc19}
{connect adhoc19(1), adhoc17(0)}
{nseg = 1}
{strdef color color = "White"}
{pt3dclear()}
{pt3dadd(177552.000000,206460.000000,72875.000000,39.934990)}
{pt3dadd(177192.000000,206868.000000,72850.000000,27.123327)}
{pt3dadd(176748.000000,207276.000000,72950.000000,16.873996)}
{pt3dadd(176184.000000,207456.000000,73150.000000,20.388275)}
{pt3dadd(175776.000000,207852.000000,73325.000000,12.701277)}
{pt3dadd(175368.000000,208260.000000,73500.000000,12.701277)}
{pt3dadd(174948.000000,208656.000000,73675.000000,21.985675)}
{pt3dadd(174528.000000,208920.000000,73775.000000,29.672673)}
{pt3dadd(174132.000000,209148.000000,73750.000000,29.785660)}
{pt3dadd(173688.000000,209376.000000,73750.000000,39.934990)}

{create adhoc20}
{access adhoc20}
{connect adhoc20(1), adhoc19(0)}
{nseg = 1}
{strdef color color = "White"}
{pt3dclear()}
{pt3dadd(173688.000000,209376.000000,73750.000000,39.934990)}
{pt3dadd(173148.000000,209004.000000,74275.000000,23.055874)}
{pt3dadd(172884.000000,208908.000000,74375.000000,14.433524)}
{pt3dadd(172584.000000,208944.000000,74350.000000,14.114044)}
{pt3dadd(172236.000000,209316.000000,74525.000000,8.867518)}
{pt3dadd(171432.000000,209400.000000,74675.000000,8.867518)}
{pt3dadd(170952.000000,209544.000000,75275.000000,8.867518)}
{pt3dadd(170496.000000,209856.000000,75475.000000,16.554516)}
{pt3dadd(169968.000000,210204.000000,75750.000000,9.186998)}
{pt3dadd(169332.000000,210732.000000,76050.000000,9.186998)}
{pt3dadd(168768.000000,211764.000000,76500.000000,9.186998)}
{pt3dadd(168168.000000,212220.000000,76825.000000,14.433524)}
{pt3dadd(168216.000000,212664.000000,77000.000000,6.746526)}
{pt3dadd(168072.000000,213072.000000,77125.000000,6.746526)}
{pt3dadd(167928.000000,213384.000000,77225.000000,6.746526)}
{pt3dadd(167784.000000,213732.000000,77325.000000,11.771192)}
{pt3dadd(167628.000000,214008.000000,77425.000000,12.880497)}
{pt3dadd(167436.000000,214392.000000,77525.000000,19.236329)}
{pt3dadd(167172.000000,214836.000000,77875.000000,31.060549)}
{pt3dadd(167124.000000,215340.000000,78300.000000,33.279160)}

{create adhoc21}
{access adhoc21}
{connect adhoc21(1), adhoc20(0)}
{nseg = 1}
{strdef color color = "White"}
{pt3dclear()}
{pt3dadd(167124.000000,215340.000000,78300.000000,33.279160)}
{pt3dadd(166944.000000,215904.000000,78100.000000,22.686107)}
{pt3dadd(166620.000000,216372.000000,78225.000000,14.211664)}
{pt3dadd(166524.000000,216720.000000,78175.000000,13.102358)}
{pt3dadd(166296.000000,217092.000000,78200.000000,6.746526)}
{pt3dadd(166092.000000,217464.000000,78175.000000,6.746526)}
{pt3dadd(165888.000000,217740.000000,78175.000000,6.746526)}
{pt3dadd(165732.000000,218040.000000,78175.000000,12.836125)}
{pt3dadd(165636.000000,218352.000000,78475.000000,7.589598)}
{pt3dadd(165696.000000,218640.000000,78500.000000,7.589598)}
{pt3dadd(165588.000000,219108.000000,78525.000000,12.836125)}
{pt3dadd(165432.000000,219504.000000,78600.000000,17.860790)}
{pt3dadd(165276.000000,219984.000000,78725.000000,18.618653)}
{pt3dadd(165264.000000,220404.000000,78925.000000,26.623327)}

{create adhoc22}
{access adhoc22}
{connect adhoc22(1), adhoc21(0)}
{nseg = 1}
{strdef color color = "White"}
{pt3dclear()}
{pt3dadd(165264.000000,220404.000000,78925.000000,26.623327)}
{pt3dadd(165288.000000,220920.000000,79275.000000,16.769811)}
{pt3dadd(165300.000000,221364.000000,79650.000000,10.661887)}
{pt3dadd(165252.000000,221784.000000,79950.000000,10.448900)}
{pt3dadd(165396.000000,222384.000000,80250.000000,11.558205)}
{pt3dadd(165444.000000,223068.000000,80550.000000,15.880311)}
{pt3dadd(165468.000000,223464.000000,80850.000000,25.467185)}
{pt3dadd(165480.000000,223848.000000,81200.000000,23.110527)}

{create adhoc23}
{access adhoc23}
{connect adhoc23(1), adhoc22(0)}
{nseg = 1}
{strdef color color = "White"}
{pt3dclear()}
{pt3dadd(165480.000000,223848.000000,81200.000000,23.110527)}
{pt3dadd(165492.000000,224196.000000,81550.000000,17.447720)}
{pt3dadd(165372.000000,224640.000000,81800.000000,21.561685)}
{pt3dadd(165312.000000,224856.000000,82025.000000,18.988421)}
{pt3dadd(165264.000000,225312.000000,82225.000000,27.732632)}

{create adhoc24}
{access adhoc24}
{connect adhoc24(1), adhoc23(0)}
{nseg = 1}
{strdef color color = "White"}
{pt3dclear()}
{pt3dadd(165264.000000,225312.000000,82225.000000,27.732632)}
{pt3dadd(165792.000000,225876.000000,82700.000000,23.110527)}

{create adhoc25}
{access adhoc25}
{connect adhoc25(1), adhoc24(0)}
{nseg = 1}
{strdef color color = "White"}
{pt3dclear()}
{pt3dadd(165792.000000,225876.000000,82700.000000,23.110527)}
{pt3dadd(165960.000000,226116.000000,83400.000000,15.907018)}
{pt3dadd(166248.000000,226584.000000,84300.000000,10.144211)}
{pt3dadd(166176.000000,226848.000000,84225.000000,7.379626)}
{pt3dadd(166296.000000,227148.000000,84650.000000,5.432350)}
{pt3dadd(166260.000000,227436.000000,84775.000000,7.361374)}
{pt3dadd(166188.000000,227748.000000,85050.000000,11.268957)}
{pt3dadd(166488.000000,228084.000000,85475.000000,11.145123)}

{create adhoc26}
{access adhoc26}
{connect adhoc26(1), adhoc24(0)}
{nseg = 1}
{strdef color color = "White"}
{pt3dclear()}
{pt3dadd(165792.000000,225876.000000,82700.000000,23.110527)}
{pt3dadd(167040.000000,225276.000000,86000.000000,14.623100)}
{pt3dadd(167652.000000,224580.000000,85750.000000,9.373860)}
{pt3dadd(167820.000000,224184.000000,85575.000000,5.826708)}
{pt3dadd(167748.000000,223728.000000,85350.000000,3.522888)}
{pt3dadd(168036.000000,223344.000000,85175.000000,5.451912)}
{pt3dadd(167964.000000,222996.000000,85300.000000,8.086521)}
{pt3dadd(167868.000000,222588.000000,85225.000000,11.145123)}

{create adhoc27}
{access adhoc27}
{connect adhoc27(1), adhoc26(0)}
{nseg = 1}
{strdef color color = "White"}
{pt3dclear()}
{pt3dadd(167868.000000,222588.000000,85225.000000,11.145123)}
{pt3dadd(168216.000000,222240.000000,85225.000000,6.691735)}
{pt3dadd(168360.000000,221940.000000,85250.000000,4.615041)}
{pt3dadd(168540.000000,221256.000000,84875.000000,3.675961)}
{pt3dadd(168144.000000,220500.000000,84550.000000,3.085740)}
{pt3dadd(167988.000000,220224.000000,84350.000000,4.142900)}
{pt3dadd(167712.000000,220248.000000,84350.000000,4.478975)}

{create adhoc28}
{access adhoc28}
{connect adhoc28(1), adhoc26(0)}
{nseg = 1}
{strdef color color = "White"}
{pt3dclear()}
{pt3dadd(167868.000000,222588.000000,85225.000000,11.145123)}
{pt3dadd(167244.000000,222288.000000,85125.000000,6.794931)}
{pt3dadd(166944.000000,221928.000000,84725.000000,7.595928)}
{pt3dadd(166800.000000,221568.000000,84425.000000,6.364949)}
{pt3dadd(166812.000000,221220.000000,84025.000000,6.449724)}

{create adhoc29}
{access adhoc29}
{connect adhoc29(1), adhoc23(0)}
{nseg = 1}
{strdef color color = "White"}
{pt3dclear()}
{pt3dadd(165264.000000,225312.000000,82225.000000,27.732632)}
{pt3dadd(164460.000000,226644.000000,82475.000000,12.840078)}
{pt3dadd(163728.000000,227820.000000,82600.000000,8.304047)}
{pt3dadd(163452.000000,228612.000000,82925.000000,4.986545)}
{pt3dadd(163152.000000,228960.000000,83000.000000,3.429025)}
{pt3dadd(163128.000000,229404.000000,83225.000000,3.429025)}
{pt3dadd(163284.000000,229956.000000,83350.000000,3.429025)}
{pt3dadd(163692.000000,230388.000000,83650.000000,6.023416)}
{pt3dadd(164220.000000,230796.000000,84175.000000,4.094392)}
{pt3dadd(164340.000000,231144.000000,84275.000000,4.094392)}
{pt3dadd(164496.000000,231432.000000,84625.000000,7.004187)}
{pt3dadd(164352.000000,231780.000000,85125.000000,10.555941)}
{pt3dadd(164412.000000,232092.000000,85650.000000,12.269250)}
{pt3dadd(164568.000000,231900.000000,86300.000000,19.258772)}

{create adhoc30}
{access adhoc30}
{connect adhoc30(1), adhoc29(0)}
{nseg = 1}
{strdef color color = "White"}
{pt3dclear()}
{pt3dadd(164568.000000,231900.000000,86300.000000,19.258772)}
{pt3dadd(164472.000000,232344.000000,86725.000000,12.284540)}
{pt3dadd(164412.000000,233136.000000,87100.000000,6.449724)}

{create adhoc31}
{access adhoc31}
{connect adhoc31(1), adhoc29(0)}
{nseg = 1}
{strdef color color = "White"}
{pt3dclear()}
{pt3dadd(164568.000000,231900.000000,86300.000000,19.258772)}
{pt3dadd(165000.000000,231444.000000,86650.000000,11.377640)}
{pt3dadd(165204.000000,231324.000000,87150.000000,7.426584)}
{pt3dadd(165528.000000,231432.000000,87525.000000,5.546928)}
{pt3dadd(165660.000000,231732.000000,87925.000000,3.767893)}
{pt3dadd(165660.000000,231996.000000,88325.000000,4.363688)}
{pt3dadd(165984.000000,232044.000000,88500.000000,6.272814)}
{pt3dadd(166236.000000,232320.000000,88450.000000,4.478975)}

{create adhoc32}
{access adhoc32}
{connect adhoc32(1), adhoc22(0)}
{nseg = 1}
{strdef color color = "White"}
{pt3dclear()}
{pt3dadd(165480.000000,223848.000000,81200.000000,23.110527)}
{pt3dadd(164376.000000,224460.000000,82050.000000,9.696501)}
{pt3dadd(163716.000000,224712.000000,82125.000000,7.186476)}
{pt3dadd(163464.000000,224568.000000,82075.000000,2.780960)}
{pt3dadd(163152.000000,224664.000000,82200.000000,3.110400)}

{create adhoc33}
{access adhoc33}
{connect adhoc33(1), adhoc21(0)}
{nseg = 1}
{strdef color color = "White"}
{pt3dclear()}
{pt3dadd(165264.000000,220404.000000,78925.000000,26.623327)}
{pt3dadd(163920.000000,220908.000000,79650.000000,11.166032)}
{pt3dadd(163740.000000,221100.000000,79550.000000,8.306079)}
{pt3dadd(163224.000000,221148.000000,79700.000000,3.177432)}
{pt3dadd(163188.000000,221568.000000,79775.000000,3.732480)}

{create adhoc34}
{access adhoc34}
{connect adhoc34(1), adhoc20(0)}
{nseg = 1}
{strdef color color = "White"}
{pt3dclear()}
{pt3dadd(167124.000000,215340.000000,78300.000000,33.279160)}
{pt3dadd(167664.000000,214836.000000,80525.000000,20.837264)}
{pt3dadd(168024.000000,214512.000000,80600.000000,13.102358)}
{pt3dadd(168096.000000,214092.000000,80700.000000,8.586390)}
{pt3dadd(168324.000000,213612.000000,80825.000000,3.339864)}
{pt3dadd(168636.000000,213096.000000,80725.000000,3.339864)}
{pt3dadd(168684.000000,212736.000000,80825.000000,3.339864)}
{pt3dadd(168672.000000,212412.000000,80625.000000,5.179727)}
{pt3dadd(168888.000000,212004.000000,80700.000000,3.339864)}
{pt3dadd(169200.000000,211500.000000,80425.000000,3.339864)}
{pt3dadd(169248.000000,211104.000000,80450.000000,3.339864)}
{pt3dadd(169392.000000,210624.000000,80525.000000,5.714693)}
{pt3dadd(169608.000000,210264.000000,80525.000000,3.874829)}
{pt3dadd(170064.000000,209904.000000,80350.000000,3.874829)}
{pt3dadd(170340.000000,209532.000000,80600.000000,3.874829)}
{pt3dadd(170820.000000,209232.000000,80700.000000,4.813176)}
{pt3dadd(171036.000000,208884.000000,80800.000000,4.367372)}
{pt3dadd(171180.000000,208656.000000,80775.000000,7.919126)}
{pt3dadd(171276.000000,208260.000000,80950.000000,12.198543)}
{pt3dadd(171348.000000,206916.000000,81175.000000,19.258772)}

{create adhoc35}
{access adhoc35}
{connect adhoc35(1), adhoc34(0)}
{nseg = 1}
{strdef color color = "White"}
{pt3dclear()}
{pt3dadd(171348.000000,206916.000000,81175.000000,19.258772)}
{pt3dadd(171252.000000,207240.000000,81600.000000,14.630771)}
{pt3dadd(171108.000000,207648.000000,81800.000000,5.374770)}

{create adhoc36}
{access adhoc36}
{connect adhoc36(1), adhoc34(0)}
{nseg = 1}
{strdef color color = "White"}
{pt3dclear()}
{pt3dadd(171348.000000,206916.000000,81175.000000,19.258772)}
{pt3dadd(171240.000000,205764.000000,80900.000000,10.015458)}
{pt3dadd(171516.000000,204792.000000,80800.000000,6.609275)}
{pt3dadd(171864.000000,204600.000000,80775.000000,3.653315)}
{pt3dadd(172080.000000,204300.000000,80775.000000,3.085740)}
{pt3dadd(172224.000000,204012.000000,80825.000000,3.681535)}
{pt3dadd(172404.000000,203808.000000,80875.000000,5.135891)}
{pt3dadd(172560.000000,203736.000000,80975.000000,4.478975)}

{create adhoc37}
{access adhoc37}
{connect adhoc37(1), adhoc19(0)}
{nseg = 1}
{strdef color color = "White"}
{pt3dclear()}
{pt3dadd(173688.000000,209376.000000,73750.000000,39.934990)}
{pt3dadd(173244.000000,210492.000000,73475.000000,23.055874)}
{pt3dadd(172572.000000,210888.000000,73225.000000,14.433524)}
{pt3dadd(172164.000000,210984.000000,73125.000000,11.993053)}
{pt3dadd(171768.000000,211080.000000,73025.000000,6.746526)}
{pt3dadd(171372.000000,211404.000000,73050.000000,6.746526)}
{pt3dadd(170964.000000,211812.000000,73125.000000,6.746526)}
{pt3dadd(170508.000000,212208.000000,73275.000000,11.068632)}
{pt3dadd(170112.000000,212244.000000,73200.000000,5.822105)}
{pt3dadd(169704.000000,212388.000000,73100.000000,5.822105)}
{pt3dadd(169380.000000,212568.000000,73050.000000,5.822105)}
{pt3dadd(169032.000000,212760.000000,73075.000000,10.144211)}
{pt3dadd(168672.000000,213012.000000,73150.000000,5.822105)}
{pt3dadd(168264.000000,213264.000000,73225.000000,5.822105)}
{pt3dadd(167844.000000,213516.000000,73300.000000,5.822105)}
{pt3dadd(167508.000000,213768.000000,73375.000000,10.144211)}
{pt3dadd(167088.000000,214020.000000,73450.000000,10.144211)}
{pt3dadd(166776.000000,214296.000000,73550.000000,13.393988)}
{pt3dadd(166368.000000,214656.000000,73700.000000,21.323313)}
{pt3dadd(165972.000000,214884.000000,74025.000000,17.748886)}

{create adhoc38}
{access adhoc38}
{connect adhoc38(1), adhoc37(0)}
{nseg = 1}
{strdef color color = "White"}
{pt3dclear()}
{pt3dadd(165972.000000,214884.000000,74025.000000,17.748886)}
{pt3dadd(165648.000000,215196.000000,74175.000000,14.119804)}
{pt3dadd(165216.000000,215532.000000,74125.000000,9.071883)}
{pt3dadd(164916.000000,215556.000000,74100.000000,11.068632)}
{pt3dadd(164592.000000,216540.000000,74350.000000,11.993053)}
{pt3dadd(164172.000000,217008.000000,74650.000000,18.348885)}
{pt3dadd(163680.000000,217512.000000,74525.000000,29.581475)}
{pt3dadd(163560.000000,217908.000000,74650.000000,33.279160)}

{create adhoc39}
{access adhoc39}
{connect adhoc39(1), adhoc38(0)}
{nseg = 1}
{strdef color color = "White"}
{pt3dclear()}
{pt3dadd(163560.000000,217908.000000,74650.000000,33.279160)}
{pt3dadd(163488.000000,218256.000000,74750.000000,23.428939)}
{pt3dadd(163056.000000,218568.000000,73625.000000,19.258772)}

{create adhoc40}
{access adhoc40}
{connect adhoc40(1), adhoc38(0)}
{nseg = 1}
{strdef color color = "White"}
{pt3dclear()}
{pt3dadd(163560.000000,217908.000000,74650.000000,33.279160)}
{pt3dadd(163296.000000,218568.000000,75625.000000,19.296562)}
{pt3dadd(163164.000000,219024.000000,75975.000000,12.177937)}
{pt3dadd(163044.000000,219420.000000,76325.000000,9.373860)}
{pt3dadd(162864.000000,219852.000000,76375.000000,5.051754)}
{pt3dadd(162672.000000,220224.000000,76425.000000,5.051754)}
{pt3dadd(162576.000000,220596.000000,76650.000000,5.051754)}
{pt3dadd(162612.000000,221016.000000,76725.000000,7.961550)}
{pt3dadd(162648.000000,221388.000000,76925.000000,4.409795)}
{pt3dadd(162576.000000,221628.000000,76975.000000,4.409795)}
{pt3dadd(162672.000000,221988.000000,77050.000000,4.409795)}
{pt3dadd(162780.000000,222408.000000,77175.000000,8.731901)}
{pt3dadd(162828.000000,222804.000000,77275.000000,5.822105)}
{pt3dadd(162624.000000,223284.000000,77275.000000,5.822105)}
{pt3dadd(162432.000000,223608.000000,77300.000000,5.822105)}
{pt3dadd(162336.000000,224112.000000,77475.000000,9.219789)}
{pt3dadd(162264.000000,224556.000000,77350.000000,7.679088)}
{pt3dadd(162204.000000,224964.000000,77325.000000,11.798479)}
{pt3dadd(162192.000000,225336.000000,77300.000000,15.407018)}

{create adhoc41}
{access adhoc41}
{connect adhoc41(1), adhoc40(0)}
{nseg = 1}
{strdef color color = "White"}
{pt3dclear()}
{pt3dadd(162192.000000,225336.000000,77300.000000,15.407018)}
{pt3dadd(162192.000000,225804.000000,77300.000000,11.798480)}
{pt3dadd(162192.000000,226152.000000,77275.000000,7.679088)}
{pt3dadd(162156.000000,226536.000000,77075.000000,6.826709)}
{pt3dadd(161964.000000,227160.000000,76625.000000,3.429025)}
{pt3dadd(161808.000000,227544.000000,76425.000000,3.429025)}
{pt3dadd(161628.000000,227868.000000,76400.000000,3.429025)}
{pt3dadd(161448.000000,228192.000000,76375.000000,5.696861)}
{pt3dadd(161244.000000,228816.000000,76500.000000,3.767836)}
{pt3dadd(161088.000000,229416.000000,76725.000000,3.767836)}
{pt3dadd(160968.000000,229920.000000,76950.000000,3.767836)}
{pt3dadd(160752.000000,230328.000000,77225.000000,5.522105)}
{pt3dadd(160644.000000,230616.000000,77275.000000,3.254269)}
{pt3dadd(160212.000000,231444.000000,77475.000000,3.254269)}
{pt3dadd(160188.000000,232116.000000,77750.000000,5.183294)}
{pt3dadd(160104.000000,232776.000000,77975.000000,7.112318)}
{pt3dadd(160032.000000,233316.000000,78300.000000,7.930082)}
{pt3dadd(159780.000000,233916.000000,78700.000000,11.145123)}

{create adhoc42}
{access adhoc42}
{connect adhoc42(1), adhoc41(0)}
{nseg = 1}
{strdef color color = "White"}
{pt3dclear()}
{pt3dadd(159780.000000,233916.000000,78700.000000,11.145123)}
{pt3dadd(159636.000000,235152.000000,78900.000000,7.310908)}
{pt3dadd(159516.000000,235440.000000,79125.000000,4.986545)}
{pt3dadd(159552.000000,235896.000000,79450.000000,4.615041)}
{pt3dadd(159096.000000,236256.000000,79800.000000,3.057520)}
{pt3dadd(159132.000000,236544.000000,80125.000000,4.986545)}
{pt3dadd(158820.000000,236808.000000,80375.000000,5.582340)}
{pt3dadd(158328.000000,237012.000000,80650.000000,5.708033)}
{pt3dadd(157896.000000,237156.000000,80900.000000,4.478975)}

{create adhoc43}
{access adhoc43}
{connect adhoc43(1), adhoc41(0)}
{nseg = 1}
{strdef color color = "White"}
{pt3dclear()}
{pt3dadd(159780.000000,233916.000000,78700.000000,11.145123)}
{pt3dadd(159840.000000,234156.000000,79200.000000,7.930082)}
{pt3dadd(159948.000000,234024.000000,79500.000000,5.358049)}
{pt3dadd(160296.000000,234084.000000,79975.000000,5.358049)}
{pt3dadd(160680.000000,234252.000000,80325.000000,3.429025)}
{pt3dadd(161076.000000,234456.000000,80675.000000,3.429025)}
{pt3dadd(161568.000000,234396.000000,81200.000000,3.429025)}
{pt3dadd(162060.000000,234372.000000,81850.000000,5.358049)}
{pt3dadd(162444.000000,234096.000000,82200.000000,3.429025)}
{pt3dadd(162636.000000,234120.000000,82575.000000,3.429025)}
{pt3dadd(162720.000000,234324.000000,83100.000000,3.429025)}
{pt3dadd(162336.000000,234492.000000,83725.000000,5.183294)}
{pt3dadd(161592.000000,234804.000000,84100.000000,3.847600)}
{pt3dadd(160932.000000,235284.000000,84275.000000,5.412666)}
{pt3dadd(160596.000000,235464.000000,84100.000000,4.466653)}

{create adhoc44}
{access adhoc44}
{connect adhoc44(1), adhoc40(0)}
{nseg = 1}
{strdef color color = "White"}
{pt3dclear()}
{pt3dadd(162192.000000,225336.000000,77300.000000,15.407018)}
{pt3dadd(161004.000000,225504.000000,77475.000000,6.449724)}

{create adhoc45}
{access adhoc45}
{connect adhoc45(1), adhoc44(0)}
{nseg = 1}
{strdef color color = "White"}
{pt3dclear()}
{pt3dadd(161004.000000,225504.000000,77475.000000,6.449724)}
{pt3dadd(161328.000000,225696.000000,77100.000000,5.135891)}
{pt3dadd(161136.000000,226104.000000,76925.000000,4.478975)}

{create adhoc46}
{access adhoc46}
{connect adhoc46(1), adhoc44(0)}
{nseg = 1}
{strdef color color = "White"}
{pt3dclear()}
{pt3dadd(161004.000000,225504.000000,77475.000000,6.449724)}
{pt3dadd(160632.000000,225504.000000,77725.000000,5.113995)}
{pt3dadd(160680.000000,225504.000000,78100.000000,3.732480)}

{create adhoc47}
{access adhoc47}
{connect adhoc47(1), adhoc37(0)}
{nseg = 1}
{strdef color color = "White"}
{pt3dclear()}
{pt3dadd(165972.000000,214884.000000,74025.000000,17.748886)}
{pt3dadd(165648.000000,213072.000000,73475.000000,9.512163)}
{pt3dadd(165288.000000,212808.000000,73350.000000,6.307298)}
{pt3dadd(165084.000000,211296.000000,72950.000000,4.986545)}
{pt3dadd(164952.000000,210516.000000,73050.000000,3.429025)}
{pt3dadd(164892.000000,210276.000000,73125.000000,3.429025)}
{pt3dadd(165216.000000,209940.000000,73075.000000,3.429025)}
{pt3dadd(165480.000000,209472.000000,73100.000000,4.203979)}
{pt3dadd(165552.000000,209280.000000,72850.000000,2.274954)}
{pt3dadd(165480.000000,208752.000000,72450.000000,2.274954)}
{pt3dadd(165828.000000,208404.000000,72375.000000,4.203979)}
{pt3dadd(165900.000000,207528.000000,71925.000000,4.650475)}
{pt3dadd(165840.000000,206988.000000,71700.000000,5.459201)}
{pt3dadd(165696.000000,206604.000000,71475.000000,3.732480)}

{create adhoc48}
{access adhoc48}
{connect adhoc48(1), adhoc16(0)}
{nseg = 1}
{strdef color color = "White"}
{pt3dclear()}
{pt3dadd(184824.000000,205248.000000,72650.000000,69.007660)}
{pt3dadd(186180.000000,206040.000000,76425.000000,46.505107)}
{pt3dadd(187080.000000,205956.000000,78125.000000,28.503064)}
{pt3dadd(189888.000000,205596.000000,82550.000000,28.503064)}
{pt3dadd(192084.000000,205356.000000,87200.000000,15.001532)}
{pt3dadd(191592.000000,205260.000000,90325.000000,15.001532)}
{pt3dadd(190500.000000,206328.000000,95600.000000,15.001532)}
{pt3dadd(187920.000000,205812.000000,100250.000000,27.951002)}
{pt3dadd(187416.000000,206640.000000,102550.000000,14.449470)}
{pt3dadd(185592.000000,204552.000000,107575.000000,14.449470)}
{pt3dadd(185712.000000,202476.000000,110025.000000,14.449470)}
{pt3dadd(184512.000000,200556.000000,112700.000000,20.805302)}
{pt3dadd(183276.000000,196968.000000,116700.000000,7.855832)}
{pt3dadd(179400.000000,192036.000000,121225.000000,7.855832)}
{pt3dadd(177564.000000,190356.000000,122900.000000,7.855832)}
{pt3dadd(175956.000000,188544.000000,124175.000000,14.211664)}
{pt3dadd(174912.000000,186876.000000,125075.000000,7.855832)}
{pt3dadd(173616.000000,185292.000000,126000.000000,7.855832)}
{pt3dadd(172272.000000,184152.000000,126775.000000,7.855832)}
{pt3dadd(171180.000000,182688.000000,126950.000000,17.140230)}
{pt3dadd(170232.000000,182832.000000,127700.000000,10.784398)}
{pt3dadd(167376.000000,180324.000000,129575.000000,10.784398)}
{pt3dadd(166344.000000,179016.000000,130775.000000,10.784398)}
{pt3dadd(164148.000000,176256.000000,133025.000000,21.985675)}
{pt3dadd(161640.000000,173544.000000,135425.000000,12.701277)}
{pt3dadd(160572.000000,171912.000000,137200.000000,12.701277)}
{pt3dadd(161004.000000,170532.000000,138000.000000,12.701277)}
{pt3dadd(160524.000000,167400.000000,139875.000000,25.650747)}
{pt3dadd(158208.000000,164028.000000,142600.000000,14.449470)}
{pt3dadd(156672.000000,161088.000000,144850.000000,14.449470)}
{pt3dadd(156660.000000,159876.000000,145975.000000,14.449470)}
{pt3dadd(156624.000000,159048.000000,146875.000000,30.711308)}
{pt3dadd(156576.000000,157464.000000,148325.000000,17.761838)}
{pt3dadd(156708.000000,155988.000000,149450.000000,17.761838)}
{pt3dadd(155592.000000,154416.000000,151325.000000,17.761838)}
{pt3dadd(155520.000000,152064.000000,153425.000000,34.023676)}
{pt3dadd(155892.000000,150804.000000,155075.000000,17.761838)}
{pt3dadd(156708.000000,149652.000000,157025.000000,17.761838)}
{pt3dadd(156684.000000,146976.000000,159300.000000,17.761838)}
{pt3dadd(156264.000000,145800.000000,160350.000000,33.361202)}
{pt3dadd(156180.000000,144324.000000,161075.000000,17.099364)}
{pt3dadd(156072.000000,142080.000000,162425.000000,17.099364)}
{pt3dadd(156564.000000,140484.000000,163775.000000,17.099364)}
{pt3dadd(156504.000000,139056.000000,165050.000000,33.361202)}
{pt3dadd(157368.000000,138456.000000,166125.000000,17.661838)}
{pt3dadd(157692.000000,137784.000000,167025.000000,17.661838)}
{pt3dadd(157164.000000,137964.000000,168025.000000,17.661838)}
{pt3dadd(157668.000000,137952.000000,168475.000000,33.923676)}
{pt3dadd(157140.000000,137784.000000,169125.000000,17.661838)}
{pt3dadd(157176.000000,137472.000000,169700.000000,17.761838)}
{pt3dadd(157440.000000,137112.000000,170475.000000,17.761838)}
{pt3dadd(156840.000000,136572.000000,171775.000000,34.023676)}
{pt3dadd(156660.000000,136296.000000,172775.000000,17.761838)}
{pt3dadd(156612.000000,136176.000000,173200.000000,17.761838)}
{pt3dadd(155760.000000,135588.000000,174225.000000,17.761838)}
{pt3dadd(154812.000000,135300.000000,174900.000000,34.023676)}
{pt3dadd(154788.000000,134700.000000,176200.000000,17.761838)}
{pt3dadd(154380.000000,134088.000000,177225.000000,17.761838)}
{pt3dadd(153948.000000,133704.000000,178300.000000,17.761838)}
{pt3dadd(154032.000000,133548.000000,179175.000000,34.023676)}
{pt3dadd(153384.000000,132516.000000,180650.000000,217.461838)}
{pt3dadd(153204.000000,132456.000000,181600.000000,361.436397)}
{pt3dadd(153000.000000,132216.000000,182375.000000,1000.000000)}

{create adhoc49}
{access adhoc49}
{connect adhoc49(1), adhoc15(0)}
{nseg = 1}
{strdef color color = "White"}
{pt3dclear()}
{pt3dadd(183528.000000,202452.000000,68825.000000,1592.459000)}
{pt3dadd(185460.000000,200580.000000,69700.000000,876.199223)}
{pt3dadd(185592.000000,200868.000000,69950.000000,710.204518)}
{pt3dadd(185724.000000,200856.000000,70100.000000,443.433378)}
{pt3dadd(185904.000000,200988.000000,70100.000000,388.134206)}
{pt3dadd(186024.000000,201264.000000,70100.000000,361.629830)}
{pt3dadd(186036.000000,201396.000000,70300.000000,319.930124)}
{pt3dadd(186120.000000,201588.000000,70425.000000,299.869210)}
{pt3dadd(186180.000000,201756.000000,70525.000000,311.015340)}
{pt3dadd(186216.000000,202128.000000,70525.000000,322.486126)}
{pt3dadd(186216.000000,202428.000000,70575.000000,292.746594)}
{pt3dadd(186204.000000,202560.000000,70725.000000,286.931330)}
{pt3dadd(186264.000000,202704.000000,70825.000000,274.144182)}
{pt3dadd(186264.000000,202572.000000,70975.000000,256.408498)}
{pt3dadd(186240.000000,202704.000000,71075.000000,248.848498)}
{pt3dadd(186264.000000,202968.000000,71175.000000,249.930844)}
{pt3dadd(186252.000000,203076.000000,71275.000000,238.327660)}
{pt3dadd(186228.000000,203148.000000,71400.000000,233.705110)}
{pt3dadd(186180.000000,203184.000000,71525.000000,233.046792)}
{pt3dadd(186216.000000,203208.000000,71650.000000,218.526792)}
{pt3dadd(186096.000000,203340.000000,71775.000000,211.089006)}
{pt3dadd(186084.000000,203544.000000,71900.000000,202.529330)}
{pt3dadd(186036.000000,203640.000000,72025.000000,191.370196)}
{pt3dadd(186072.000000,203736.000000,72150.000000,189.245174)}
{pt3dadd(185988.000000,203772.000000,72275.000000,189.245174)}
{pt3dadd(185988.000000,203784.000000,72400.000000,183.770768)}
{pt3dadd(186012.000000,203724.000000,72525.000000,180.538938)}
{pt3dadd(186120.000000,203784.000000,72650.000000,193.611214)}
{pt3dadd(186144.000000,203784.000000,72775.000000,195.716248)}
{pt3dadd(186204.000000,203748.000000,72925.000000,194.925504)}
{pt3dadd(186300.000000,203652.000000,73075.000000,201.544116)}
{pt3dadd(186360.000000,203604.000000,73225.000000,212.657316)}
{pt3dadd(186432.000000,203592.000000,73375.000000,219.438736)}
{pt3dadd(186408.000000,203508.000000,73525.000000,225.385936)}
{pt3dadd(186492.000000,203496.000000,73675.000000,232.454934)}
{pt3dadd(186552.000000,203376.000000,73825.000000,237.666168)}
{pt3dadd(186660.000000,203268.000000,73975.000000,237.678524)}
{pt3dadd(186672.000000,203172.000000,74150.000000,226.743344)}
{pt3dadd(186756.000000,203028.000000,74300.000000,218.691110)}
{pt3dadd(186792.000000,202992.000000,74450.000000,216.563574)}
{pt3dadd(186912.000000,202860.000000,74625.000000,208.298806)}
{pt3dadd(186912.000000,202872.000000,74800.000000,206.188686)}
{pt3dadd(186960.000000,202752.000000,74950.000000,201.301786)}
{pt3dadd(186828.000000,202560.000000,75250.000000,206.954020)}
{pt3dadd(186912.000000,202500.000000,75650.000000,194.643302)}
{pt3dadd(187056.000000,202644.000000,75925.000000,187.838608)}
{pt3dadd(187092.000000,202656.000000,76075.000000,190.967178)}
{pt3dadd(187104.000000,202704.000000,76225.000000,201.043870)}
{pt3dadd(187116.000000,202848.000000,76375.000000,189.625464)}
{pt3dadd(187128.000000,202872.000000,76525.000000,200.849670)}
{pt3dadd(187164.000000,202944.000000,76675.000000,211.598728)}
{pt3dadd(187128.000000,202860.000000,76825.000000,202.686552)}
{pt3dadd(187212.000000,203040.000000,76950.000000,183.094714)}
{pt3dadd(187020.000000,202932.000000,77100.000000,183.270030)}
{pt3dadd(186996.000000,202968.000000,77275.000000,189.805824)}
{pt3dadd(187008.000000,202980.000000,77425.000000,197.207834)}
{pt3dadd(186972.000000,202992.000000,77575.000000,209.645618)}
{pt3dadd(187056.000000,203016.000000,77725.000000,233.923170)}
{pt3dadd(187044.000000,203004.000000,77875.000000,248.640234)}
{pt3dadd(187104.000000,203004.000000,78000.000000,254.687908)}
{pt3dadd(187080.000000,203016.000000,78100.000000,254.188634)}
{pt3dadd(187212.000000,202980.000000,78225.000000,254.437192)}
{pt3dadd(187176.000000,203076.000000,78350.000000,261.637192)}
{pt3dadd(187260.000000,203076.000000,78475.000000,261.622892)}
{pt3dadd(187344.000000,203076.000000,78600.000000,256.832990)}
{pt3dadd(187416.000000,203016.000000,78750.000000,261.632170)}
{pt3dadd(187476.000000,203124.000000,78850.000000,266.422072)}
{pt3dadd(187536.000000,203100.000000,79000.000000,262.854726)}
{pt3dadd(187572.000000,203100.000000,79150.000000,273.961992)}
{pt3dadd(187644.000000,203100.000000,79275.000000,290.399508)}
{pt3dadd(187656.000000,203196.000000,79525.000000,295.940346)}
{pt3dadd(187728.000000,203232.000000,79700.000000,297.458672)}
{pt3dadd(187872.000000,203316.000000,79975.000000,292.448852)}
{pt3dadd(187944.000000,203364.000000,80275.000000,284.188608)}
{pt3dadd(188028.000000,203448.000000,80650.000000,272.800016)}
{pt3dadd(188076.000000,203580.000000,80975.000000,259.890638)}
{pt3dadd(188148.000000,203604.000000,81375.000000,248.797426)}
{pt3dadd(188184.000000,203628.000000,81800.000000,248.805838)}
{pt3dadd(188376.000000,203688.000000,82225.000000,247.419142)}
{pt3dadd(188532.000000,203760.000000,82575.000000,242.135280)}
{pt3dadd(188760.000000,203760.000000,82975.000000,255.621678)}
{pt3dadd(188928.000000,203772.000000,83175.000000,285.612650)}
{pt3dadd(189192.000000,203796.000000,83425.000000,296.168964)}
{pt3dadd(189504.000000,203712.000000,83550.000000,292.280210)}
{pt3dadd(189744.000000,203652.000000,83650.000000,298.823376)}
{pt3dadd(189900.000000,203616.000000,83775.000000,279.173060)}
{pt3dadd(190032.000000,203568.000000,83925.000000,245.047428)}
{pt3dadd(189984.000000,203520.000000,84050.000000,234.482702)}
{pt3dadd(190008.000000,203436.000000,84175.000000,225.975950)}
{pt3dadd(189948.000000,203424.000000,84275.000000,217.085390)}
{pt3dadd(189936.000000,203364.000000,84400.000000,236.158686)}
{pt3dadd(190104.000000,203280.000000,84525.000000,262.499758)}
{pt3dadd(190152.000000,203352.000000,84650.000000,279.153956)}
{pt3dadd(190128.000000,203364.000000,84850.000000,295.389258)}
{pt3dadd(190248.000000,203496.000000,85000.000000,297.971590)}
{pt3dadd(190296.000000,203412.000000,85150.000000,289.847774)}
{pt3dadd(190428.000000,203484.000000,85300.000000,270.926360)}
{pt3dadd(190476.000000,203448.000000,85450.000000,240.094922)}
{pt3dadd(190584.000000,203592.000000,85575.000000,219.922998)}
{pt3dadd(190620.000000,203712.000000,85725.000000,204.342752)}
{pt3dadd(190716.000000,203736.000000,85900.000000,187.708390)}
{pt3dadd(190704.000000,203736.000000,86025.000000,171.551160)}
{pt3dadd(190740.000000,203736.000000,86150.000000,168.457566)}
{pt3dadd(190800.000000,203760.000000,86275.000000,157.992142)}
{pt3dadd(190836.000000,203784.000000,86400.000000,147.899484)}
{pt3dadd(190788.000000,203808.000000,86550.000000,144.665850)}
{pt3dadd(190896.000000,203760.000000,86700.000000,169.077568)}
{pt3dadd(190848.000000,203640.000000,86925.000000,194.059858)}
{pt3dadd(190464.000000,203700.000000,87575.000000,235.477364)}
{pt3dadd(190404.000000,203988.000000,87925.000000,286.356256)}
{pt3dadd(190284.000000,204312.000000,88400.000000,284.851212)}
{pt3dadd(190176.000000,204648.000000,89150.000000,267.238938)}
{pt3dadd(190176.000000,204900.000000,89450.000000,265.084976)}
{pt3dadd(189600.000000,206004.000000,90325.000000,235.945022)}
{pt3dadd(189180.000000,206328.000000,90675.000000,202.005756)}
{pt3dadd(188928.000000,206520.000000,91000.000000,210.499576)}
{pt3dadd(189048.000000,206724.000000,91350.000000,210.516842)}
{pt3dadd(189228.000000,207084.000000,91800.000000,204.959348)}
{pt3dadd(189036.000000,207564.000000,92650.000000,209.877068)}
{pt3dadd(189024.000000,207912.000000,92075.000000,211.688574)}
{pt3dadd(188916.000000,208404.000000,92350.000000,224.553494)}
{pt3dadd(188808.000000,208440.000000,93200.000000,229.118234)}
{pt3dadd(188556.000000,208560.000000,93600.000000,222.646118)}
{pt3dadd(188412.000000,208596.000000,94325.000000,221.683434)}
{pt3dadd(188196.000000,208644.000000,94950.000000,220.811640)}
{pt3dadd(187956.000000,208764.000000,95250.000000,238.332014)}
{pt3dadd(187692.000000,208620.000000,95875.000000,252.950008)}
{pt3dadd(187512.000000,208620.000000,96200.000000,255.882896)}
{pt3dadd(187332.000000,208716.000000,96500.000000,251.927860)}
{pt3dadd(186912.000000,208620.000000,96975.000000,243.649934)}
{pt3dadd(186792.000000,208716.000000,97275.000000,215.194380)}
{pt3dadd(186816.000000,208680.000000,97575.000000,202.067168)}
{pt3dadd(186696.000000,208704.000000,97850.000000,206.340608)}
{pt3dadd(186468.000000,208692.000000,98175.000000,213.654308)}
{pt3dadd(186360.000000,208596.000000,98625.000000,224.920828)}
{pt3dadd(186348.000000,208704.000000,98950.000000,220.984206)}
{pt3dadd(186252.000000,208620.000000,99250.000000,215.106172)}
{pt3dadd(186228.000000,208752.000000,99550.000000,207.685126)}
{pt3dadd(186144.000000,208728.000000,99850.000000,206.649680)}
{pt3dadd(186144.000000,208620.000000,100125.000000,214.849840)}
{pt3dadd(186036.000000,208656.000000,100425.000000,225.174132)}
{pt3dadd(185796.000000,208548.000000,100775.000000,233.267790)}
{pt3dadd(185568.000000,207984.000000,101075.000000,236.062896)}
{pt3dadd(185400.000000,207780.000000,101375.000000,237.098928)}
{pt3dadd(185184.000000,207372.000000,101825.000000,233.703740)}
{pt3dadd(184944.000000,207156.000000,102150.000000,236.049348)}
{pt3dadd(184908.000000,206928.000000,102450.000000,227.778202)}
{pt3dadd(185100.000000,206580.000000,102600.000000,231.904868)}
{pt3dadd(185076.000000,206196.000000,102825.000000,230.868836)}
{pt3dadd(185472.000000,205920.000000,102825.000000,226.076220)}
{pt3dadd(185340.000000,205752.000000,103100.000000,219.800454)}
{pt3dadd(185580.000000,205188.000000,103250.000000,221.714396)}
{pt3dadd(185508.000000,204996.000000,103500.000000,223.916298)}
{pt3dadd(185556.000000,204564.000000,103500.000000,229.638044)}
{pt3dadd(185640.000000,203880.000000,103775.000000,238.092888)}
{pt3dadd(185748.000000,203460.000000,104050.000000,246.593694)}
{pt3dadd(185856.000000,203160.000000,104350.000000,263.284514)}
{pt3dadd(186072.000000,202068.000000,104625.000000,245.005424)}
{pt3dadd(186396.000000,201540.000000,104800.000000,236.069630)}
{pt3dadd(186828.000000,201072.000000,105100.000000,227.622418)}
{pt3dadd(186996.000000,200520.000000,105275.000000,223.051770)}
{pt3dadd(187248.000000,200232.000000,105500.000000,212.718154)}
{pt3dadd(187440.000000,199992.000000,105650.000000,214.544150)}
{pt3dadd(187788.000000,199656.000000,106025.000000,206.419544)}
{pt3dadd(188112.000000,199428.000000,106625.000000,202.266756)}
{pt3dadd(188472.000000,199380.000000,106750.000000,184.022146)}
{pt3dadd(188604.000000,199536.000000,106925.000000,168.934290)}
{pt3dadd(188640.000000,199620.000000,107225.000000,167.108294)}
{pt3dadd(188664.000000,199884.000000,107700.000000,166.949278)}
{pt3dadd(188796.000000,200028.000000,108350.000000,159.815558)}
{pt3dadd(188988.000000,200232.000000,108750.000000,180.653970)}
{pt3dadd(189408.000000,200148.000000,108975.000000,198.810460)}
{pt3dadd(189708.000000,199980.000000,109200.000000,229.954468)}
{pt3dadd(189792.000000,199752.000000,109475.000000,235.368638)}
{pt3dadd(189864.000000,199620.000000,109750.000000,237.021970)}
{pt3dadd(189792.000000,199704.000000,110200.000000,234.903666)}
{pt3dadd(189852.000000,199836.000000,110650.000000,229.599420)}
{pt3dadd(189516.000000,200160.000000,111050.000000,211.971254)}
{pt3dadd(189348.000000,200052.000000,111325.000000,232.067160)}
{pt3dadd(189036.000000,200100.000000,111700.000000,270.741368)}
{pt3dadd(188940.000000,200100.000000,112075.000000,275.074366)}
{pt3dadd(188400.000000,200244.000000,112700.000000,268.230822)}
{pt3dadd(188112.000000,200064.000000,113150.000000,291.547556)}
{pt3dadd(187956.000000,199944.000000,113575.000000,308.886272)}
{pt3dadd(187920.000000,199848.000000,113950.000000,316.421438)}
{pt3dadd(187920.000000,199824.000000,114300.000000,361.735666)}
{pt3dadd(187800.000000,199656.000000,114500.000000,456.146662)}
{pt3dadd(187788.000000,199632.000000,114775.000000,523.363812)}
{pt3dadd(187872.000000,199644.000000,115000.000000,594.023608)}
{pt3dadd(187920.000000,199560.000000,115250.000000,650.204932)}
{pt3dadd(187968.000000,199560.000000,115475.000000,732.373658)}
{pt3dadd(187920.000000,199632.000000,115750.000000,792.529246)}
{pt3dadd(187992.000000,199632.000000,115900.000000,814.160176)}
{pt3dadd(187920.000000,199644.000000,116175.000000,794.186624)}
{pt3dadd(187668.000000,200136.000000,116175.000000,819.501346)}
{pt3dadd(187140.000000,200796.000000,116175.000000,839.045152)}
{pt3dadd(186540.000000,201456.000000,116175.000000,860.831252)}
{pt3dadd(185760.000000,202164.000000,116175.000000,867.308526)}
{pt3dadd(185640.000000,202368.000000,116225.000000,793.512230)}
{pt3dadd(185568.000000,202332.000000,116575.000000,745.967198)}
{pt3dadd(182808.000000,202752.000000,116575.000000,613.229904)}
{pt3dadd(182736.000000,204024.000000,116575.000000,479.586238)}
{pt3dadd(184944.000000,204420.000000,116575.000000,400.448828)}
{pt3dadd(185880.000000,203640.000000,116575.000000,447.316778)}
{pt3dadd(186624.000000,202068.000000,116575.000000,544.916778)}
{pt3dadd(187728.000000,200580.000000,116575.000000,552.994652)}
{pt3dadd(185316.000000,202392.000000,117100.000000,565.090558)}
{pt3dadd(186792.000000,199164.000000,117100.000000,607.003814)}
{pt3dadd(187692.000000,198876.000000,117100.000000,571.252844)}
{pt3dadd(188796.000000,199344.000000,117100.000000,451.108576)}
{pt3dadd(188136.000000,200592.000000,117100.000000,523.709748)}
{pt3dadd(186924.000000,201468.000000,117100.000000,581.828528)}
{pt3dadd(185868.000000,202944.000000,117100.000000,512.058468)}
{pt3dadd(185340.000000,204240.000000,117100.000000,476.684798)}
{pt3dadd(183912.000000,205188.000000,117100.000000,450.239192)}
{pt3dadd(182664.000000,205248.000000,117100.000000,364.810750)}
{pt3dadd(181476.000000,204912.000000,117100.000000,288.365790)}
{pt3dadd(181788.000000,203964.000000,117100.000000,334.799470)}
{pt3dadd(182448.000000,203280.000000,117100.000000,460.160468)}
{pt3dadd(183624.000000,202320.000000,117100.000000,618.810382)}
{pt3dadd(184944.000000,202140.000000,117100.000000,691.274140)}
{pt3dadd(184020.000000,203772.000000,117650.000000,735.132648)}
{pt3dadd(185664.000000,200196.000000,117650.000000,750.100928)}
{pt3dadd(186600.000000,199440.000000,117650.000000,678.173586)}
{pt3dadd(187992.000000,199332.000000,117650.000000,504.996358)}
{pt3dadd(188520.000000,200124.000000,117650.000000,476.048510)}
{pt3dadd(187356.000000,201792.000000,117650.000000,453.702912)}
{pt3dadd(186168.000000,203400.000000,117650.000000,404.516652)}
{pt3dadd(185280.000000,205236.000000,117650.000000,381.991362)}
{pt3dadd(183168.000000,205656.000000,117650.000000,397.708550)}
{pt3dadd(181608.000000,205224.000000,117650.000000,377.179420)}
{pt3dadd(180540.000000,204672.000000,117650.000000,363.673750)}
{pt3dadd(181092.000000,204012.000000,117650.000000,391.132176)}
{pt3dadd(181932.000000,203124.000000,117650.000000,458.919464)}
{pt3dadd(182988.000000,202224.000000,117650.000000,705.180264)}
{pt3dadd(184536.000000,201732.000000,117650.000000,729.546146)}
{pt3dadd(184476.000000,202896.000000,118100.000000,742.008054)}
{pt3dadd(184848.000000,200508.000000,118100.000000,748.767608)}
{pt3dadd(186420.000000,199008.000000,118100.000000,734.309040)}
{pt3dadd(187920.000000,199680.000000,118100.000000,501.083964)}
{pt3dadd(188124.000000,200592.000000,118100.000000,481.827078)}
{pt3dadd(187452.000000,201708.000000,118100.000000,467.100770)}
{pt3dadd(186828.000000,202884.000000,118100.000000,435.098956)}
{pt3dadd(186372.000000,204504.000000,118100.000000,411.555742)}
{pt3dadd(185280.000000,205800.000000,118100.000000,452.001558)}
{pt3dadd(184224.000000,205620.000000,118100.000000,420.989352)}
{pt3dadd(182736.000000,205596.000000,118100.000000,420.989352)}
{pt3dadd(181716.000000,206052.000000,118100.000000,491.577906)}
{pt3dadd(180828.000000,205332.000000,118100.000000,597.275440)}
{pt3dadd(180888.000000,204396.000000,118100.000000,536.467032)}
{pt3dadd(181620.000000,203736.000000,118100.000000,562.370242)}
{pt3dadd(180996.000000,202596.000000,118100.000000,530.538788)}
{pt3dadd(182124.000000,201732.000000,118100.000000,682.263128)}
{pt3dadd(183660.000000,201312.000000,118100.000000,753.549648)}
{pt3dadd(184416.000000,202884.000000,118100.000000,759.383076)}
{pt3dadd(183792.000000,202776.000000,118625.000000,860.901326)}
{pt3dadd(185256.000000,198720.000000,118625.000000,922.918820)}
{pt3dadd(186720.000000,199512.000000,118625.000000,726.345306)}
{pt3dadd(188556.000000,200568.000000,118625.000000,504.683000)}
{pt3dadd(188100.000000,201492.000000,118625.000000,486.975826)}
{pt3dadd(187740.000000,202560.000000,118625.000000,375.298066)}
{pt3dadd(187392.000000,203772.000000,118625.000000,375.296652)}
{pt3dadd(186768.000000,205092.000000,118625.000000,358.463126)}
{pt3dadd(185424.000000,205692.000000,118625.000000,369.350162)}
{pt3dadd(183636.000000,206316.000000,118625.000000,370.382022)}
{pt3dadd(181632.000000,206724.000000,118625.000000,367.211882)}
{pt3dadd(181152.000000,205980.000000,118625.000000,348.434516)}
{pt3dadd(179808.000000,205464.000000,118625.000000,374.817804)}
{pt3dadd(180084.000000,204672.000000,118625.000000,447.633674)}
{pt3dadd(180144.000000,204288.000000,118625.000000,483.274428)}
{pt3dadd(180432.000000,204000.000000,118625.000000,565.186508)}
{pt3dadd(180372.000000,203016.000000,118625.000000,536.815198)}
{pt3dadd(180468.000000,202068.000000,118625.000000,554.483470)}
{pt3dadd(181980.000000,201588.000000,118625.000000,716.701570)}
{pt3dadd(183504.000000,201492.000000,118625.000000,926.281550)}
{pt3dadd(183576.000000,203028.000000,118625.000000,839.158170)}
{pt3dadd(182772.000000,203076.000000,119075.000000,982.814860)}
{pt3dadd(184524.000000,198828.000000,119075.000000,1029.481280)}
{pt3dadd(186084.000000,199620.000000,119075.000000,901.682020)}
{pt3dadd(187644.000000,200448.000000,119075.000000,734.988100)}
{pt3dadd(187500.000000,201636.000000,119075.000000,839.951640)}
{pt3dadd(186648.000000,202872.000000,119075.000000,765.448412)}
{pt3dadd(185652.000000,204432.000000,119075.000000,709.493912)}
{pt3dadd(184644.000000,205692.000000,119075.000000,695.002298)}
{pt3dadd(183192.000000,206364.000000,119075.000000,613.944164)}
{pt3dadd(181896.000000,206544.000000,119075.000000,532.179664)}
{pt3dadd(180864.000000,206364.000000,119075.000000,447.547074)}
{pt3dadd(179676.000000,205608.000000,119075.000000,419.154650)}
{pt3dadd(179256.000000,204672.000000,119075.000000,351.081988)}
{pt3dadd(179628.000000,204048.000000,119075.000000,380.611438)}
{pt3dadd(179832.000000,203208.000000,119075.000000,373.802128)}
{pt3dadd(179460.000000,202200.000000,119075.000000,451.513574)}
{pt3dadd(180348.000000,201636.000000,119075.000000,393.700498)}
{pt3dadd(181260.000000,201936.000000,119075.000000,616.057614)}
{pt3dadd(182460.000000,200664.000000,119075.000000,865.114158)}
{pt3dadd(182700.000000,203088.000000,119075.000000,823.355996)}
{pt3dadd(182844.000000,202872.000000,119725.000000,797.541892)}
{pt3dadd(184608.000000,198468.000000,119725.000000,979.116892)}
{pt3dadd(186324.000000,198852.000000,119725.000000,871.578092)}
{pt3dadd(186828.000000,199920.000000,119725.000000,705.353412)}
{pt3dadd(187488.000000,200700.000000,119725.000000,762.050172)}
{pt3dadd(187800.000000,201948.000000,119725.000000,761.280714)}
{pt3dadd(186696.000000,202992.000000,119725.000000,592.447720)}
{pt3dadd(186108.000000,203904.000000,119725.000000,453.405954)}
{pt3dadd(185400.000000,204816.000000,119725.000000,336.880714)}
{pt3dadd(184560.000000,205860.000000,119725.000000,353.314406)}
{pt3dadd(183636.000000,206700.000000,119725.000000,324.812020)}
{pt3dadd(182148.000000,207204.000000,119725.000000,391.845480)}
{pt3dadd(181200.000000,206820.000000,119725.000000,440.611186)}
{pt3dadd(180564.000000,205992.000000,119725.000000,562.125698)}
{pt3dadd(179220.000000,205140.000000,119725.000000,552.098438)}
{pt3dadd(179904.000000,203964.000000,119725.000000,510.747912)}
{pt3dadd(179904.000000,202620.000000,119725.000000,447.407886)}
{pt3dadd(180804.000000,201408.000000,119725.000000,426.877416)}
{pt3dadd(182028.000000,201324.000000,119725.000000,571.349384)}
{pt3dadd(183312.000000,199968.000000,119725.000000,821.610904)}
{pt3dadd(182628.000000,202752.000000,119725.000000,860.148270)}
{pt3dadd(182376.000000,202608.000000,120350.000000,932.017530)}
{pt3dadd(183600.000000,198192.000000,120350.000000,995.201270)}
{pt3dadd(184920.000000,198360.000000,120350.000000,824.800550)}
{pt3dadd(186372.000000,199212.000000,120350.000000,509.514976)}
{pt3dadd(187200.000000,200688.000000,120350.000000,578.890756)}
{pt3dadd(186144.000000,202224.000000,120350.000000,623.856056)}
{pt3dadd(184860.000000,202776.000000,120350.000000,647.094906)}
{pt3dadd(184332.000000,203796.000000,120350.000000,567.517446)}
{pt3dadd(183972.000000,204684.000000,120350.000000,650.392234)}
{pt3dadd(183516.000000,205740.000000,120350.000000,582.777334)}
{pt3dadd(182208.000000,206556.000000,120350.000000,490.185194)}
{pt3dadd(181164.000000,207264.000000,120350.000000,379.086094)}
{pt3dadd(180216.000000,206184.000000,120350.000000,691.628294)}
{pt3dadd(178488.000000,204480.000000,120350.000000,657.049080)}
{pt3dadd(182328.000000,202932.000000,120350.000000,680.010570)}
{pt3dadd(178416.000000,203352.000000,120350.000000,724.608958)}
{pt3dadd(178308.000000,201684.000000,120350.000000,744.890992)}
{pt3dadd(179892.000000,201312.000000,120350.000000,455.053478)}
{pt3dadd(181368.000000,200220.000000,120350.000000,785.487958)}
{pt3dadd(183036.000000,198972.000000,120350.000000,790.600476)}
{pt3dadd(182316.000000,202764.000000,120700.000000,829.107860)}
{pt3dadd(183912.000000,198492.000000,120700.000000,912.764826)}
{pt3dadd(185664.000000,198996.000000,120700.000000,879.473626)}
{pt3dadd(187212.000000,199908.000000,120700.000000,533.244166)}
{pt3dadd(187776.000000,200880.000000,120700.000000,548.589798)}
{pt3dadd(186336.000000,201996.000000,120700.000000,528.292374)}
{pt3dadd(185112.000000,202500.000000,120700.000000,506.028454)}
{pt3dadd(184524.000000,203472.000000,120700.000000,560.674038)}
{pt3dadd(184188.000000,204324.000000,120700.000000,586.791066)}
{pt3dadd(183708.000000,205236.000000,120700.000000,571.445434)}
{pt3dadd(182928.000000,206040.000000,120700.000000,508.279226)}
{pt3dadd(182412.000000,206808.000000,120700.000000,440.546966)}
{pt3dadd(181080.000000,207408.000000,120700.000000,505.788356)}
{pt3dadd(180540.000000,206208.000000,120700.000000,846.758148)}
{pt3dadd(179604.000000,205032.000000,120700.000000,900.298052)}
{pt3dadd(182160.000000,203124.000000,120700.000000,968.359312)}
{pt3dadd(178344.000000,204180.000000,120700.000000,1013.390192)}
{pt3dadd(178680.000000,202200.000000,120700.000000,926.794418)}
{pt3dadd(179484.000000,201360.000000,120700.000000,644.837846)}
{pt3dadd(181188.000000,200580.000000,120700.000000,930.244014)}
{pt3dadd(183324.000000,199200.000000,120700.000000,866.086514)}
{pt3dadd(182064.000000,202740.000000,121150.000000,805.886114)}
{pt3dadd(183156.000000,198048.000000,121150.000000,839.771928)}
{pt3dadd(184800.000000,198132.000000,121150.000000,845.448640)}
{pt3dadd(185796.000000,198960.000000,121150.000000,475.144712)}
{pt3dadd(185940.000000,199584.000000,121150.000000,469.672840)}
{pt3dadd(187512.000000,200292.000000,121150.000000,529.275048)}
{pt3dadd(186072.000000,201264.000000,121150.000000,535.090248)}
{pt3dadd(184788.000000,202128.000000,121150.000000,527.476428)}
{pt3dadd(184080.000000,203220.000000,121150.000000,534.575562)}
{pt3dadd(183564.000000,204384.000000,121150.000000,537.992604)}
{pt3dadd(182892.000000,205788.000000,121150.000000,454.891690)}
{pt3dadd(181092.000000,207252.000000,121150.000000,540.665170)}
{pt3dadd(180312.000000,206220.000000,121150.000000,465.369070)}
{pt3dadd(179832.000000,204660.000000,121150.000000,623.147024)}
{pt3dadd(177684.000000,204168.000000,121150.000000,718.382854)}
{pt3dadd(179100.000000,202740.000000,121150.000000,751.078080)}
{pt3dadd(179388.000000,201756.000000,121150.000000,605.816120)}
{pt3dadd(179820.000000,200868.000000,121150.000000,617.833060)}
{pt3dadd(180960.000000,200448.000000,121150.000000,784.562120)}
{pt3dadd(182700.000000,198924.000000,121150.000000,699.673000)}
{pt3dadd(181884.000000,202728.000000,121625.000000,691.703180)}
{pt3dadd(182904.000000,198192.000000,121625.000000,742.771680)}
{pt3dadd(184752.000000,198336.000000,121625.000000,748.974728)}
{pt3dadd(185364.000000,199152.000000,121625.000000,470.236248)}
{pt3dadd(186612.000000,199800.000000,121625.000000,508.774208)}
{pt3dadd(185880.000000,201048.000000,121625.000000,553.979848)}
{pt3dadd(184752.000000,202236.000000,121625.000000,580.271088)}
{pt3dadd(183792.000000,203496.000000,121625.000000,575.650380)}
{pt3dadd(183168.000000,205140.000000,121625.000000,565.170988)}
{pt3dadd(181980.000000,206436.000000,121625.000000,559.393636)}
{pt3dadd(180900.000000,207192.000000,121625.000000,570.133244)}
{pt3dadd(180396.000000,206088.000000,121625.000000,772.852184)}
{pt3dadd(179040.000000,205248.000000,121625.000000,754.526004)}
{pt3dadd(181752.000000,203280.000000,121625.000000,734.474196)}
{pt3dadd(177084.000000,204180.000000,121625.000000,779.429396)}
{pt3dadd(177960.000000,201948.000000,121625.000000,763.198152)}
{pt3dadd(179328.000000,201948.000000,121625.000000,511.214458)}
{pt3dadd(180972.000000,200736.000000,121625.000000,699.150458)}
{pt3dadd(182580.000000,198624.000000,121625.000000,718.660506)}
{pt3dadd(181908.000000,203448.000000,122125.000000,717.050298)}
{pt3dadd(182916.000000,199152.000000,122125.000000,769.061714)}
{pt3dadd(184596.000000,199584.000000,122125.000000,796.150708)}
{pt3dadd(186144.000000,200556.000000,122125.000000,661.484996)}
{pt3dadd(185172.000000,202380.000000,122125.000000,662.574840)}
{pt3dadd(184176.000000,203124.000000,122125.000000,638.233680)}
{pt3dadd(183708.000000,204096.000000,122125.000000,591.715240)}
{pt3dadd(182928.000000,205380.000000,122125.000000,572.796760)}
{pt3dadd(182256.000000,206748.000000,122125.000000,555.453938)}
{pt3dadd(181116.000000,207864.000000,122125.000000,543.875434)}
{pt3dadd(180576.000000,206664.000000,122125.000000,539.391394)}
{pt3dadd(179340.000000,205848.000000,122125.000000,691.146014)}
{pt3dadd(178356.000000,204960.000000,122125.000000,827.145014)}
{pt3dadd(181344.000000,204096.000000,122125.000000,945.620708)}
{pt3dadd(178392.000000,203472.000000,122125.000000,1010.310640)}
{pt3dadd(179400.000000,202368.000000,122125.000000,1039.936280)}
{pt3dadd(180816.000000,201624.000000,122125.000000,1071.420760)}
{pt3dadd(181800.000000,200448.000000,122125.000000,913.958296)}
{pt3dadd(181860.000000,203088.000000,122625.000000,797.847656)}
{pt3dadd(183024.000000,198624.000000,122625.000000,762.838456)}
{pt3dadd(184104.000000,199188.000000,122625.000000,693.231202)}
{pt3dadd(185832.000000,200148.000000,122625.000000,515.231002)}
{pt3dadd(185088.000000,201288.000000,122625.000000,529.677446)}
{pt3dadd(184476.000000,201984.000000,122625.000000,520.738246)}
{pt3dadd(183588.000000,203220.000000,122625.000000,545.319046)}
{pt3dadd(182712.000000,204624.000000,122625.000000,579.736560)}
{pt3dadd(181584.000000,206340.000000,122625.000000,566.754568)}
{pt3dadd(181080.000000,207072.000000,122625.000000,659.218328)}
{pt3dadd(180252.000000,206256.000000,122625.000000,809.434668)}
{pt3dadd(179256.000000,205152.000000,122625.000000,846.599600)}
{pt3dadd(178644.000000,204384.000000,122625.000000,985.560320)}
{pt3dadd(177600.000000,204360.000000,122625.000000,1181.467212)}
{pt3dadd(178644.000000,203556.000000,122625.000000,1234.386472)}
{pt3dadd(181776.000000,203412.000000,122625.000000,1104.628332)}
{pt3dadd(179340.000000,202380.000000,122625.000000,1095.370594)}
{pt3dadd(179508.000000,201744.000000,122625.000000,1002.610224)}
{pt3dadd(181152.000000,201132.000000,122625.000000,840.363976)}
{pt3dadd(181752.000000,200136.000000,122625.000000,895.463136)}
{pt3dadd(182316.000000,199056.000000,122625.000000,855.811126)}
{pt3dadd(181008.000000,202536.000000,123100.000000,816.311492)}
{pt3dadd(182172.000000,198912.000000,123100.000000,751.258702)}
{pt3dadd(183972.000000,199680.000000,123100.000000,738.509678)}
{pt3dadd(184380.000000,200568.000000,123100.000000,607.179178)}
{pt3dadd(183516.000000,201360.000000,123100.000000,620.950094)}
{pt3dadd(182652.000000,202224.000000,123100.000000,591.916114)}
{pt3dadd(182376.000000,203676.000000,123100.000000,557.214474)}
{pt3dadd(181728.000000,204972.000000,123100.000000,528.173566)}
{pt3dadd(181224.000000,206160.000000,123100.000000,426.856186)}
{pt3dadd(180192.000000,207204.000000,123100.000000,430.724394)}
{pt3dadd(179448.000000,206520.000000,123100.000000,383.558394)}
{pt3dadd(178908.000000,206124.000000,123100.000000,421.253926)}
{pt3dadd(177876.000000,205656.000000,123100.000000,452.094586)}
{pt3dadd(177396.000000,205068.000000,123100.000000,568.011006)}
{pt3dadd(176508.000000,204672.000000,123100.000000,683.950272)}
{pt3dadd(177336.000000,204132.000000,123100.000000,798.747884)}
{pt3dadd(178020.000000,203748.000000,123100.000000,873.108252)}
{pt3dadd(178068.000000,203100.000000,123100.000000,912.386672)}
{pt3dadd(178824.000000,202380.000000,123100.000000,925.342640)}
{pt3dadd(179604.000000,201612.000000,123100.000000,819.846760)}
{pt3dadd(180576.000000,201012.000000,123100.000000,887.149888)}
{pt3dadd(181932.000000,199596.000000,123100.000000,757.410288)}
{pt3dadd(180012.000000,203820.000000,123550.000000,653.951608)}
{pt3dadd(180876.000000,199524.000000,123550.000000,580.203500)}
{pt3dadd(182532.000000,199584.000000,123550.000000,561.224360)}
{pt3dadd(183012.000000,200256.000000,123550.000000,453.541380)}
{pt3dadd(183600.000000,200772.000000,123550.000000,550.882012)}
{pt3dadd(182340.000000,201768.000000,123550.000000,657.861044)}
{pt3dadd(182340.000000,202488.000000,123550.000000,656.753694)}
{pt3dadd(181704.000000,203100.000000,123550.000000,660.072822)}
{pt3dadd(181644.000000,203880.000000,123550.000000,652.846594)}
{pt3dadd(181296.000000,204672.000000,123550.000000,617.206602)}
{pt3dadd(180816.000000,205188.000000,123550.000000,564.123290)}
{pt3dadd(180480.000000,206112.000000,123550.000000,531.592900)}
{pt3dadd(179400.000000,207168.000000,123550.000000,504.233524)}
{pt3dadd(178632.000000,207060.000000,123550.000000,465.952172)}
{pt3dadd(178104.000000,206400.000000,123550.000000,449.532918)}
{pt3dadd(177156.000000,205752.000000,123550.000000,455.587446)}
{pt3dadd(175920.000000,204996.000000,123550.000000,447.750192)}
{pt3dadd(176808.000000,204108.000000,123550.000000,513.519468)}
{pt3dadd(177252.000000,203712.000000,123550.000000,612.533868)}
{pt3dadd(178128.000000,203136.000000,123550.000000,666.848262)}
{pt3dadd(179016.000000,202212.000000,123550.000000,636.433448)}
{pt3dadd(180072.000000,201036.000000,123550.000000,771.890442)}
{pt3dadd(180780.000000,199932.000000,123550.000000,751.810534)}
{pt3dadd(179472.000000,204636.000000,124150.000000,631.869386)}
{pt3dadd(181008.000000,200580.000000,124150.000000,576.566466)}
{pt3dadd(182268.000000,200616.000000,124150.000000,563.992792)}
{pt3dadd(181656.000000,201456.000000,124150.000000,445.093104)}
{pt3dadd(182100.000000,202068.000000,124150.000000,413.915484)}
{pt3dadd(181812.000000,202656.000000,124150.000000,397.008380)}
{pt3dadd(181512.000000,203268.000000,124150.000000,356.241156)}
{pt3dadd(181296.000000,204252.000000,124150.000000,360.128368)}
{pt3dadd(180576.000000,205296.000000,124150.000000,357.778580)}
{pt3dadd(180096.000000,206316.000000,124150.000000,353.809234)}
{pt3dadd(179352.000000,207384.000000,124150.000000,381.325196)}
{pt3dadd(178332.000000,207204.000000,124150.000000,384.438532)}
{pt3dadd(177468.000000,207036.000000,124150.000000,377.003608)}
{pt3dadd(176724.000000,206616.000000,124150.000000,501.821004)}
{pt3dadd(175836.000000,206016.000000,124150.000000,543.981642)}
{pt3dadd(177072.000000,205308.000000,124150.000000,591.921392)}
{pt3dadd(177120.000000,204564.000000,124150.000000,724.170700)}
{pt3dadd(178248.000000,203952.000000,124150.000000,856.975284)}
{pt3dadd(179172.000000,203016.000000,124150.000000,773.313444)}
{pt3dadd(179928.000000,202260.000000,124150.000000,890.376512)}
{pt3dadd(180876.000000,200724.000000,124150.000000,830.353632)}
{pt3dadd(178656.000000,204156.000000,124575.000000,781.595912)}
{pt3dadd(179640.000000,200760.000000,124575.000000,723.903114)}
{pt3dadd(180588.000000,200832.000000,124575.000000,665.538342)}
{pt3dadd(180756.000000,201156.000000,124575.000000,538.791622)}
{pt3dadd(181164.000000,202044.000000,124575.000000,550.874752)}
{pt3dadd(180804.000000,202548.000000,124575.000000,513.129532)}
{pt3dadd(180348.000000,203772.000000,124575.000000,453.285208)}
{pt3dadd(179844.000000,204672.000000,124575.000000,472.753200)}
{pt3dadd(179436.000000,205536.000000,124575.000000,439.074284)}
{pt3dadd(178824.000000,206256.000000,124575.000000,429.754160)}
{pt3dadd(178320.000000,206868.000000,124575.000000,359.496064)}
{pt3dadd(176844.000000,207000.000000,124575.000000,378.167902)}
{pt3dadd(175260.000000,206544.000000,124575.000000,395.327522)}
{pt3dadd(174960.000000,205812.000000,124575.000000,370.709072)}
{pt3dadd(175656.000000,205392.000000,124575.000000,380.320066)}
{pt3dadd(176412.000000,204576.000000,124575.000000,462.461652)}
{pt3dadd(177012.000000,204252.000000,124575.000000,489.578344)}
{pt3dadd(177780.000000,203976.000000,124575.000000,476.373024)}
{pt3dadd(178416.000000,202824.000000,124575.000000,599.260130)}
{pt3dadd(179088.000000,201540.000000,124575.000000,579.422524)}
{pt3dadd(179064.000000,203760.000000,124925.000000,526.244126)}
{pt3dadd(179820.000000,200952.000000,124925.000000,470.296086)}
{pt3dadd(180456.000000,200304.000000,124925.000000,468.393066)}
{pt3dadd(180900.000000,201312.000000,124925.000000,357.483432)}
{pt3dadd(180564.000000,202836.000000,124925.000000,372.123386)}
{pt3dadd(180336.000000,203988.000000,124925.000000,363.364794)}
{pt3dadd(179616.000000,204624.000000,124925.000000,369.512518)}
{pt3dadd(179208.000000,205380.000000,124925.000000,338.874490)}
{pt3dadd(178632.000000,206100.000000,124925.000000,332.462154)}
{pt3dadd(177000.000000,206736.000000,124925.000000,327.714132)}
{pt3dadd(175476.000000,205992.000000,124925.000000,350.335076)}
{pt3dadd(175548.000000,205356.000000,124925.000000,371.985986)}
{pt3dadd(176112.000000,205104.000000,124925.000000,415.032202)}
{pt3dadd(177180.000000,204480.000000,124925.000000,457.349366)}
{pt3dadd(177864.000000,203772.000000,124925.000000,515.603412)}
{pt3dadd(178812.000000,202416.000000,124925.000000,497.896468)}
{pt3dadd(178572.000000,204132.000000,125250.000000,450.057508)}
{pt3dadd(179736.000000,201336.000000,125250.000000,407.011292)}
{pt3dadd(180300.000000,200676.000000,125250.000000,389.343848)}
{pt3dadd(180600.000000,201192.000000,125250.000000,321.515106)}
{pt3dadd(180240.000000,202260.000000,125250.000000,334.548926)}
{pt3dadd(180096.000000,203688.000000,125250.000000,360.332092)}
{pt3dadd(179424.000000,204468.000000,125250.000000,397.493848)}
{pt3dadd(178776.000000,205080.000000,125250.000000,423.261804)}
{pt3dadd(177864.000000,206016.000000,125250.000000,462.798384)}
{pt3dadd(177456.000000,206376.000000,125250.000000,448.872124)}
{pt3dadd(175908.000000,206244.000000,125250.000000,452.863664)}
{pt3dadd(174816.000000,206148.000000,125250.000000,404.837990)}
{pt3dadd(175368.000000,205680.000000,125250.000000,374.653364)}
{pt3dadd(176112.000000,205068.000000,125250.000000,402.322162)}
{pt3dadd(177192.000000,204612.000000,125250.000000,423.979836)}
{pt3dadd(178356.000000,204192.000000,125250.000000,395.722746)}
{pt3dadd(177816.000000,204948.000000,125825.000000,387.033532)}
{pt3dadd(179580.000000,202668.000000,125825.000000,363.936982)}
{pt3dadd(178932.000000,204324.000000,125825.000000,312.051758)}
{pt3dadd(178068.000000,205380.000000,125825.000000,293.990076)}
{pt3dadd(177480.000000,205980.000000,125825.000000,284.139072)}
{pt3dadd(176628.000000,206700.000000,125825.000000,318.282832)}
{pt3dadd(175116.000000,206748.000000,125825.000000,345.370922)}
{pt3dadd(176988.000000,205428.000000,125825.000000,340.000710)}
{pt3dadd(177396.000000,205380.000000,125825.000000,419.111900)}

{create adhoc50}
{access adhoc50}
{connect adhoc50(1), adhoc14(0)}
{nseg = 1}
{strdef color color = "White"}
{pt3dclear()}
{pt3dadd(182352.000000,199632.000000,64400.000000,79.496826)}
{pt3dadd(178200.000000,198396.000000,66075.000000,39.934990)}

{create adhoc51}
{access adhoc51}
{connect adhoc51(1), adhoc13(0)}
{nseg = 1}
{strdef color color = "White"}
{pt3dclear()}
{pt3dadd(182328.000000,195960.000000,59600.000000,99.371025)}
{pt3dadd(182028.000000,194988.000000,58425.000000,105.995760)}
{pt3dadd(182664.000000,194232.000000,57350.000000,105.995760)}
{pt3dadd(183000.000000,192444.000000,56400.000000,99.371025)}

{create adhoc52}
{access adhoc52}
{connect adhoc52(1), adhoc51(0)}
{nseg = 1}
{strdef color color = "White"}
{pt3dclear()}
{pt3dadd(183000.000000,192444.000000,56400.000000,99.371025)}
{pt3dadd(183036.000000,191052.000000,54925.000000,49.597672)}
{pt3dadd(183924.000000,190116.000000,56525.000000,45.321993)}
{pt3dadd(184260.000000,188964.000000,55700.000000,39.249320)}
{pt3dadd(184704.000000,187284.000000,55450.000000,48.941537)}
{pt3dadd(185232.000000,185664.000000,55000.000000,69.007660)}

{create adhoc53}
{access adhoc53}
{connect adhoc53(1), adhoc52(0)}
{nseg = 1}
{strdef color color = "White"}
{pt3dclear()}
{pt3dadd(185232.000000,185664.000000,55000.000000,69.007660)}
{pt3dadd(182328.000000,185508.000000,54850.000000,27.217594)}
{pt3dadd(182040.000000,185376.000000,54750.000000,16.930557)}
{pt3dadd(181704.000000,185340.000000,54725.000000,5.358049)}
{pt3dadd(181404.000000,185376.000000,54750.000000,5.803854)}
{pt3dadd(181140.000000,185412.000000,54775.000000,8.178683)}
{pt3dadd(180768.000000,185424.000000,54825.000000,12.631139)}
{pt3dadd(180420.000000,185436.000000,54825.000000,13.374147)}

{create adhoc54}
{access adhoc54}
{connect adhoc54(1), adhoc53(0)}
{nseg = 1}
{strdef color color = "White"}
{pt3dclear()}
{pt3dadd(180420.000000,185436.000000,54825.000000,13.374147)}
{pt3dadd(180012.000000,184860.000000,55350.000000,8.673090)}
{pt3dadd(179808.000000,184776.000000,55750.000000,5.803854)}
{pt3dadd(179688.000000,184692.000000,56050.000000,4.986545)}
{pt3dadd(180180.000000,185136.000000,56400.000000,4.986545)}
{pt3dadd(180696.000000,185400.000000,57400.000000,7.310908)}
{pt3dadd(180804.000000,185532.000000,57300.000000,11.145123)}

{create adhoc55}
{access adhoc55}
{connect adhoc55(1), adhoc53(0)}
{nseg = 1}
{strdef color color = "White"}
{pt3dclear()}
{pt3dadd(180420.000000,185436.000000,54825.000000,13.374147)}
{pt3dadd(180036.000000,185460.000000,54825.000000,12.387598)}
{pt3dadd(179820.000000,185916.000000,54750.000000,16.048977)}

{create adhoc56}
{access adhoc56}
{connect adhoc56(1), adhoc55(0)}
{nseg = 1}
{strdef color color = "White"}
{pt3dclear()}
{pt3dadd(179820.000000,185916.000000,54750.000000,16.048977)}
{pt3dadd(179508.000000,185964.000000,54450.000000,10.129386)}
{pt3dadd(179160.000000,186120.000000,54350.000000,6.677632)}
{pt3dadd(178776.000000,186192.000000,54400.000000,5.696861)}
{pt3dadd(178488.000000,186168.000000,54475.000000,3.429025)}
{pt3dadd(178188.000000,186132.000000,54550.000000,3.429025)}
{pt3dadd(177900.000000,186096.000000,54625.000000,5.358049)}
{pt3dadd(177588.000000,186060.000000,54650.000000,7.732879)}
{pt3dadd(177276.000000,185928.000000,54675.000000,8.673090)}
{pt3dadd(177024.000000,185712.000000,54700.000000,13.374147)}

{create adhoc57}
{access adhoc57}
{connect adhoc57(1), adhoc56(0)}
{nseg = 1}
{strdef color color = "White"}
{pt3dclear()}
{pt3dadd(177024.000000,185712.000000,54700.000000,13.374147)}
{pt3dadd(176652.000000,185364.000000,54025.000000,8.053916)}
{pt3dadd(176412.000000,185292.000000,53600.000000,5.432350)}
{pt3dadd(176796.000000,184896.000000,53200.000000,3.379600)}
{pt3dadd(177312.000000,185136.000000,52800.000000,2.417875)}
{pt3dadd(177528.000000,185412.000000,52625.000000,2.739955)}
{pt3dadd(177696.000000,185904.000000,52450.000000,3.566592)}
{pt3dadd(177720.000000,186120.000000,52250.000000,3.110400)}

{create adhoc58}
{access adhoc58}
{connect adhoc58(1), adhoc56(0)}
{nseg = 1}
{strdef color color = "White"}
{pt3dclear()}
{pt3dadd(177024.000000,185712.000000,54700.000000,13.374147)}
{pt3dadd(176292.000000,185460.000000,54975.000000,9.345506)}
{pt3dadd(176568.000000,185256.000000,55925.000000,6.380449)}
{pt3dadd(176952.000000,185496.000000,56350.000000,4.478975)}

{create adhoc59}
{access adhoc59}
{connect adhoc59(1), adhoc55(0)}
{nseg = 1}
{strdef color color = "White"}
{pt3dclear()}
{pt3dadd(179820.000000,185916.000000,54750.000000,16.048977)}
{pt3dadd(179676.000000,186636.000000,55025.000000,7.342651)}
{pt3dadd(179316.000000,186852.000000,55125.000000,5.601385)}
{pt3dadd(179232.000000,186828.000000,55450.000000,2.909990)}
{pt3dadd(179088.000000,186984.000000,55075.000000,2.856992)}
{pt3dadd(178740.000000,187188.000000,55050.000000,2.592000)}

{create adhoc60}
{access adhoc60}
{connect adhoc60(1), adhoc52(0)}
{nseg = 1}
{strdef color color = "White"}
{pt3dclear()}
{pt3dadd(185232.000000,185664.000000,55000.000000,69.007660)}
{pt3dadd(185868.000000,184920.000000,54775.000000,46.505107)}
{pt3dadd(186876.000000,183936.000000,54550.000000,44.764902)}
{pt3dadd(186852.000000,182964.000000,54975.000000,47.525208)}
{pt3dadd(187536.000000,181956.000000,55100.000000,55.706127)}
{pt3dadd(187440.000000,181608.000000,54800.000000,82.809190)}

{create adhoc61}
{access adhoc61}
{connect adhoc61(1), adhoc60(0)}
{nseg = 1}
{strdef color color = "White"}
{pt3dclear()}
{pt3dadd(187440.000000,181608.000000,54800.000000,82.809190)}
{pt3dadd(187932.000000,180912.000000,55350.000000,54.602003)}
{pt3dadd(184368.000000,181404.000000,54500.000000,33.361202)}
{pt3dadd(184080.000000,181368.000000,54325.000000,19.028389)}
{pt3dadd(183780.000000,181236.000000,54275.000000,3.429025)}
{pt3dadd(183408.000000,180996.000000,54175.000000,3.429025)}
{pt3dadd(183036.000000,180912.000000,54075.000000,3.429025)}
{pt3dadd(182544.000000,180864.000000,54000.000000,6.338820)}
{pt3dadd(182196.000000,180696.000000,53950.000000,6.784625)}
{pt3dadd(181872.000000,180744.000000,53875.000000,10.307708)}
{pt3dadd(181560.000000,180228.000000,53750.000000,13.374147)}

{create adhoc62}
{access adhoc62}
{connect adhoc62(1), adhoc61(0)}
{nseg = 1}
{strdef color color = "White"}
{pt3dclear()}
{pt3dadd(181560.000000,180228.000000,53750.000000,13.374147)}
{pt3dadd(181044.000000,180360.000000,53150.000000,10.307708)}
{pt3dadd(180648.000000,180036.000000,52600.000000,7.774570)}
{pt3dadd(179892.000000,179640.000000,52150.000000,5.995535)}
{pt3dadd(179136.000000,178812.000000,51700.000000,4.142900)}
{pt3dadd(178680.000000,177768.000000,51225.000000,4.478975)}

{create adhoc63}
{access adhoc63}
{connect adhoc63(1), adhoc61(0)}
{nseg = 1}
{strdef color color = "White"}
{pt3dclear()}
{pt3dadd(181560.000000,180228.000000,53750.000000,13.374147)}
{pt3dadd(181044.000000,179760.000000,53925.000000,10.030610)}
{pt3dadd(180576.000000,179628.000000,54750.000000,7.430082)}

{create adhoc64}
{access adhoc64}
{connect adhoc64(1), adhoc60(0)}
{nseg = 1}
{strdef color color = "White"}
{pt3dclear()}
{pt3dadd(187440.000000,181608.000000,54800.000000,82.809190)}
{pt3dadd(188760.000000,180228.000000,55325.000000,82.809190)}

{create adhoc65}
{access adhoc65}
{connect adhoc65(1), adhoc64(0)}
{nseg = 1}
{strdef color color = "White"}
{pt3dclear()}
{pt3dadd(188760.000000,180228.000000,55325.000000,82.809190)}
{pt3dadd(189420.000000,179484.000000,55325.000000,55.706127)}
{pt3dadd(189780.000000,178620.000000,55250.000000,34.023676)}
{pt3dadd(189972.000000,177876.000000,55150.000000,26.662860)}
{pt3dadd(190164.000000,176604.000000,54975.000000,10.401022)}
{pt3dadd(190092.000000,175956.000000,54775.000000,21.602299)}
{pt3dadd(189888.000000,174864.000000,54550.000000,32.803576)}
{pt3dadd(190008.000000,173280.000000,54900.000000,38.837591)}
{pt3dadd(189984.000000,172044.000000,55075.000000,57.506386)}

{create adhoc66}
{access adhoc66}
{connect adhoc66(1), adhoc65(0)}
{nseg = 1}
{strdef color color = "White"}
{pt3dclear()}
{pt3dadd(189984.000000,172044.000000,55075.000000,57.506386)}
{pt3dadd(191208.000000,171132.000000,55025.000000,65.615915)}
{pt3dadd(191244.000000,170100.000000,55100.000000,70.333700)}

{create adhoc67}
{access adhoc67}
{connect adhoc67(1), adhoc66(0)}
{nseg = 1}
{strdef color color = "White"}
{pt3dclear()}
{pt3dadd(191244.000000,170100.000000,55100.000000,70.333700)}
{pt3dadd(192852.000000,169308.000000,55525.000000,74.050183)}
{pt3dadd(192504.000000,167904.000000,55425.000000,78.208680)}
{pt3dadd(192816.000000,167160.000000,55675.000000,82.809190)}

{create adhoc68}
{access adhoc68}
{connect adhoc68(1), adhoc67(0)}
{nseg = 1}
{strdef color color = "White"}
{pt3dclear()}
{pt3dadd(192816.000000,167160.000000,55675.000000,82.809190)}
{pt3dadd(192804.000000,165288.000000,55200.000000,57.506386)}

{create adhoc69}
{access adhoc69}
{connect adhoc69(1), adhoc68(0)}
{nseg = 1}
{strdef color color = "White"}
{pt3dclear()}
{pt3dadd(192804.000000,165288.000000,55200.000000,57.506386)}
{pt3dadd(193728.000000,164076.000000,55825.000000,37.334756)}
{pt3dadd(193164.000000,162168.000000,55400.000000,34.202131)}
{pt3dadd(193224.000000,161148.000000,55400.000000,35.950324)}
{pt3dadd(192768.000000,159732.000000,55350.000000,41.751245)}
{pt3dadd(192264.000000,159060.000000,55350.000000,66.247350)}

{create adhoc70}
{access adhoc70}
{connect adhoc70(1), adhoc69(0)}
{nseg = 1}
{strdef color color = "White"}
{pt3dclear()}
{pt3dadd(192264.000000,159060.000000,55350.000000,66.247350)}
{pt3dadd(192144.000000,157944.000000,55475.000000,54.562909)}
{pt3dadd(191604.000000,156900.000000,55025.000000,39.934990)}

{create adhoc71}
{access adhoc71}
{connect adhoc71(1), adhoc70(0)}
{nseg = 1}
{strdef color color = "White"}
{pt3dclear()}
{pt3dadd(191604.000000,156900.000000,55025.000000,39.934990)}
{pt3dadd(191460.000000,155964.000000,54875.000000,45.259657)}
{pt3dadd(191328.000000,155088.000000,54300.000000,47.921990)}

{create adhoc72}
{access adhoc72}
{connect adhoc72(1), adhoc71(0)}
{nseg = 1}
{strdef color color = "White"}
{pt3dclear()}
{pt3dadd(191328.000000,155088.000000,54300.000000,47.921990)}
{pt3dadd(188784.000000,154620.000000,53550.000000,19.569864)}
{pt3dadd(188580.000000,154776.000000,53400.000000,12.341918)}
{pt3dadd(188292.000000,155124.000000,53350.000000,4.243537)}
{pt3dadd(187896.000000,155232.000000,53150.000000,3.281811)}
{pt3dadd(187680.000000,155520.000000,53150.000000,4.469686)}
{pt3dadd(187332.000000,155880.000000,52850.000000,4.478975)}

{create adhoc73}
{access adhoc73}
{connect adhoc73(1), adhoc71(0)}
{nseg = 1}
{strdef color color = "White"}
{pt3dclear()}
{pt3dadd(191328.000000,155088.000000,54300.000000,47.921990)}
{pt3dadd(190956.000000,153876.000000,53825.000000,51.116789)}
{pt3dadd(191100.000000,152844.000000,53650.000000,47.921990)}

{create adhoc74}
{access adhoc74}
{connect adhoc74(1), adhoc73(0)}
{nseg = 1}
{strdef color color = "White"}
{pt3dclear()}
{pt3dadd(191100.000000,152844.000000,53650.000000,47.921990)}
{pt3dadd(191220.000000,151800.000000,53475.000000,29.785660)}
{pt3dadd(191448.000000,150192.000000,53425.000000,36.656816)}
{pt3dadd(191784.000000,148464.000000,53325.000000,31.809033)}
{pt3dadd(192036.000000,146784.000000,53900.000000,47.921990)}

{create adhoc75}
{access adhoc75}
{connect adhoc75(1), adhoc74(0)}
{nseg = 1}
{strdef color color = "White"}
{pt3dclear()}
{pt3dadd(192036.000000,146784.000000,53900.000000,47.921990)}
{pt3dadd(193056.000000,144720.000000,54075.000000,39.402525)}
{pt3dadd(193476.000000,143088.000000,54225.000000,38.337593)}

{create adhoc76}
{access adhoc76}
{connect adhoc76(1), adhoc75(0)}
{nseg = 1}
{strdef color color = "White"}
{pt3dclear()}
{pt3dadd(193476.000000,143088.000000,54225.000000,38.337593)}
{pt3dadd(191928.000000,142344.000000,52925.000000,16.994239)}
{pt3dadd(191748.000000,142128.000000,52675.000000,10.796543)}
{pt3dadd(191556.000000,141804.000000,52400.000000,6.338820)}
{pt3dadd(191340.000000,141468.000000,52025.000000,4.409795)}
{pt3dadd(191148.000000,141180.000000,51850.000000,4.409795)}
{pt3dadd(190944.000000,140832.000000,51475.000000,4.409795)}
{pt3dadd(190776.000000,140532.000000,51350.000000,7.961550)}
{pt3dadd(190536.000000,140220.000000,51075.000000,5.051754)}
{pt3dadd(190356.000000,139848.000000,50850.000000,5.051754)}
{pt3dadd(190176.000000,139428.000000,50625.000000,5.051754)}
{pt3dadd(189864.000000,139056.000000,50450.000000,7.709902)}
{pt3dadd(189780.000000,138696.000000,50150.000000,7.709902)}
{pt3dadd(189384.000000,138300.000000,49750.000000,11.849836)}
{pt3dadd(189060.000000,137940.000000,49650.000000,19.258772)}

{create adhoc77}
{access adhoc77}
{connect adhoc77(1), adhoc76(0)}
{nseg = 1}
{strdef color color = "White"}
{pt3dclear()}
{pt3dadd(189060.000000,137940.000000,49650.000000,19.258772)}
{pt3dadd(188724.000000,137556.000000,49550.000000,13.230499)}
{pt3dadd(188424.000000,137028.000000,49400.000000,11.268957)}
{pt3dadd(188124.000000,136668.000000,49250.000000,13.374147)}

{create adhoc78}
{access adhoc78}
{connect adhoc78(1), adhoc77(0)}
{nseg = 1}
{strdef color color = "White"}
{pt3dclear()}
{pt3dadd(188124.000000,136668.000000,49250.000000,13.374147)}
{pt3dadd(187836.000000,136224.000000,48950.000000,11.145123)}

{create adhoc79}
{access adhoc79}
{connect adhoc79(1), adhoc78(0)}
{nseg = 1}
{strdef color color = "White"}
{pt3dclear()}
{pt3dadd(187836.000000,136224.000000,48950.000000,11.145123)}
{pt3dadd(187620.000000,135756.000000,49225.000000,7.656539)}
{pt3dadd(187380.000000,135360.000000,49550.000000,5.374770)}

{create adhoc80}
{access adhoc80}
{connect adhoc80(1), adhoc78(0)}
{nseg = 1}
{strdef color color = "White"}
{pt3dclear()}
{pt3dadd(187836.000000,136224.000000,48950.000000,11.145123)}
{pt3dadd(187548.000000,136068.000000,48875.000000,8.673090)}
{pt3dadd(187320.000000,135960.000000,48700.000000,5.803854)}
{pt3dadd(186816.000000,135768.000000,48525.000000,6.142666)}
{pt3dadd(186384.000000,135324.000000,48150.000000,3.767836)}
{pt3dadd(186804.000000,134832.000000,47750.000000,3.767836)}
{pt3dadd(186972.000000,134328.000000,47475.000000,3.767836)}
{pt3dadd(187128.000000,134100.000000,47125.000000,5.696861)}
{pt3dadd(187584.000000,132864.000000,46700.000000,5.358049)}
{pt3dadd(187740.000000,132468.000000,46450.000000,7.930082)}
{pt3dadd(188472.000000,132048.000000,46825.000000,11.145123)}

{create adhoc81}
{access adhoc81}
{connect adhoc81(1), adhoc80(0)}
{nseg = 1}
{strdef color color = "White"}
{pt3dclear()}
{pt3dadd(188472.000000,132048.000000,46825.000000,11.145123)}
{pt3dadd(188472.000000,131676.000000,46825.000000,5.708033)}
{pt3dadd(188340.000000,131556.000000,46850.000000,4.839015)}
{pt3dadd(187824.000000,131280.000000,46850.000000,2.856992)}
{pt3dadd(187632.000000,131016.000000,46900.000000,2.592000)}

{create adhoc82}
{access adhoc82}
{connect adhoc82(1), adhoc80(0)}
{nseg = 1}
{strdef color color = "White"}
{pt3dclear()}
{pt3dadd(188472.000000,132048.000000,46825.000000,11.145123)}
{pt3dadd(188748.000000,132132.000000,46900.000000,6.370631)}
{pt3dadd(189144.000000,132432.000000,46725.000000,2.592000)}

{create adhoc83}
{access adhoc83}
{connect adhoc83(1), adhoc77(0)}
{nseg = 1}
{strdef color color = "White"}
{pt3dclear()}
{pt3dadd(188124.000000,136668.000000,49250.000000,13.374147)}
{pt3dadd(188652.000000,136392.000000,49600.000000,6.946369)}
{pt3dadd(189000.000000,136176.000000,49825.000000,4.638228)}
{pt3dadd(189036.000000,136044.000000,49850.000000,6.449724)}

{create adhoc84}
{access adhoc84}
{connect adhoc84(1), adhoc76(0)}
{nseg = 1}
{strdef color color = "White"}
{pt3dclear()}
{pt3dadd(189060.000000,137940.000000,49650.000000,19.258772)}
{pt3dadd(187440.000000,138000.000000,49375.000000,11.579370)}
{pt3dadd(185892.000000,137772.000000,48925.000000,8.012931)}
{pt3dadd(185412.000000,137700.000000,48875.000000,8.559454)}

{create adhoc85}
{access adhoc85}
{connect adhoc85(1), adhoc84(0)}
{nseg = 1}
{strdef color color = "White"}
{pt3dclear()}
{pt3dadd(185412.000000,137700.000000,48875.000000,8.559454)}
{pt3dadd(185064.000000,137484.000000,48600.000000,5.092639)}
{pt3dadd(184908.000000,137244.000000,48575.000000,3.732480)}

{create adhoc86}
{access adhoc86}
{connect adhoc86(1), adhoc84(0)}
{nseg = 1}
{strdef color color = "White"}
{pt3dclear()}
{pt3dadd(185412.000000,137700.000000,48875.000000,8.559454)}
{pt3dadd(184992.000000,138300.000000,48650.000000,5.839135)}
{pt3dadd(184776.000000,138204.000000,48450.000000,4.478975)}

{create adhoc87}
{access adhoc87}
{connect adhoc87(1), adhoc75(0)}
{nseg = 1}
{strdef color color = "White"}
{pt3dclear()}
{pt3dadd(193476.000000,143088.000000,54225.000000,38.337593)}
{pt3dadd(193308.000000,142236.000000,54100.000000,39.402524)}
{pt3dadd(193056.000000,141588.000000,54200.000000,37.716380)}
{pt3dadd(192720.000000,140352.000000,54300.000000,33.279160)}

{create adhoc88}
{access adhoc88}
{connect adhoc88(1), adhoc87(0)}
{nseg = 1}
{strdef color color = "White"}
{pt3dclear()}
{pt3dadd(192720.000000,140352.000000,54300.000000,33.279160)}
{pt3dadd(191196.000000,140256.000000,53775.000000,14.172943)}
{pt3dadd(191028.000000,140160.000000,53725.000000,9.103766)}
{pt3dadd(190764.000000,139968.000000,53675.000000,3.995868)}
{pt3dadd(190488.000000,139764.000000,53550.000000,2.747934)}
{pt3dadd(190200.000000,139632.000000,53500.000000,2.747934)}
{pt3dadd(189900.000000,139428.000000,53425.000000,3.995868)}
{pt3dadd(189576.000000,139200.000000,53425.000000,4.985812)}
{pt3dadd(189264.000000,139020.000000,53425.000000,5.229798)}
{pt3dadd(188856.000000,138876.000000,53500.000000,6.449724)}

{create adhoc89}
{access adhoc89}
{connect adhoc89(1), adhoc88(0)}
{nseg = 1}
{strdef color color = "White"}
{pt3dclear()}
{pt3dadd(188856.000000,138876.000000,53500.000000,6.449724)}
{pt3dadd(189072.000000,138528.000000,53875.000000,5.185658)}
{pt3dadd(189228.000000,138216.000000,54175.000000,3.732480)}

{create adhoc90}
{access adhoc90}
{connect adhoc90(1), adhoc88(0)}
{nseg = 1}
{strdef color color = "White"}
{pt3dclear()}
{pt3dadd(188856.000000,138876.000000,53500.000000,6.449724)}
{pt3dadd(188544.000000,138840.000000,53500.000000,4.799816)}
{pt3dadd(187476.000000,138564.000000,53500.000000,3.479890)}
{pt3dadd(187080.000000,138756.000000,53725.000000,3.737879)}
{pt3dadd(186468.000000,138564.000000,53225.000000,3.522888)}
{pt3dadd(185676.000000,138192.000000,52850.000000,4.871480)}
{pt3dadd(185652.000000,137904.000000,52875.000000,5.374770)}

{create adhoc91}
{access adhoc91}
{connect adhoc91(1), adhoc87(0)}
{nseg = 1}
{strdef color color = "White"}
{pt3dclear()}
{pt3dadd(192720.000000,140352.000000,54300.000000,33.279160)}
{pt3dadd(192684.000000,139908.000000,54325.000000,22.242384)}
{pt3dadd(192708.000000,139092.000000,54525.000000,13.945430)}
{pt3dadd(192780.000000,138288.000000,54500.000000,13.945430)}
{pt3dadd(192564.000000,137316.000000,54675.000000,14.211664)}
{pt3dadd(192096.000000,136416.000000,54875.000000,19.458190)}
{pt3dadd(191868.000000,135240.000000,55000.000000,31.430317)}
{pt3dadd(192072.000000,134640.000000,55100.000000,27.732632)}

{create adhoc92}
{access adhoc92}
{connect adhoc92(1), adhoc91(0)}
{nseg = 1}
{strdef color color = "White"}
{pt3dclear()}
{pt3dadd(192072.000000,134640.000000,55100.000000,27.732632)}
{pt3dadd(192036.000000,133944.000000,55050.000000,18.988421)}
{pt3dadd(192036.000000,133176.000000,55075.000000,11.993053)}
{pt3dadd(192024.000000,131892.000000,55350.000000,13.102358)}
{pt3dadd(191640.000000,130680.000000,55300.000000,7.855832)}
{pt3dadd(191208.000000,129384.000000,55550.000000,7.855832)}
{pt3dadd(191172.000000,128820.000000,55725.000000,7.855832)}
{pt3dadd(190872.000000,127824.000000,55600.000000,13.102358)}
{pt3dadd(190296.000000,126420.000000,55475.000000,11.993053)}
{pt3dadd(189996.000000,125448.000000,55475.000000,18.988421)}
{pt3dadd(189984.000000,124872.000000,55525.000000,27.732632)}

{create adhoc93}
{access adhoc93}
{connect adhoc93(1), adhoc92(0)}
{nseg = 1}
{strdef color color = "White"}
{pt3dclear()}
{pt3dadd(189984.000000,124872.000000,55525.000000,27.732632)}
{pt3dadd(190080.000000,124272.000000,55325.000000,29.581475)}
{pt3dadd(190080.000000,123348.000000,55200.000000,31.430317)}
{pt3dadd(189744.000000,122724.000000,55075.000000,33.279160)}

{create adhoc94}
{access adhoc94}
{connect adhoc94(1), adhoc93(0)}
{nseg = 1}
{strdef color color = "White"}
{pt3dclear()}
{pt3dadd(189744.000000,122724.000000,55075.000000,33.279160)}
{pt3dadd(189720.000000,122208.000000,55300.000000,35.054047)}
{pt3dadd(189312.000000,121344.000000,55450.000000,39.934990)}

{create adhoc95}
{access adhoc95}
{connect adhoc95(1), adhoc94(0)}
{nseg = 1}
{strdef color color = "White"}
{pt3dclear()}
{pt3dadd(189312.000000,121344.000000,55450.000000,39.934990)}
{pt3dadd(189324.000000,120612.000000,55250.000000,37.716380)}
{pt3dadd(189420.000000,120048.000000,55175.000000,35.497770)}
{pt3dadd(189120.000000,119088.000000,55400.000000,33.279160)}

{create adhoc96}
{access adhoc96}
{connect adhoc96(1), adhoc95(0)}
{nseg = 1}
{strdef color color = "White"}
{pt3dclear()}
{pt3dadd(189120.000000,119088.000000,55400.000000,33.279160)}
{pt3dadd(189144.000000,118032.000000,55950.000000,19.296562)}
{pt3dadd(188964.000000,117456.000000,56175.000000,12.177937)}
{pt3dadd(188904.000000,116628.000000,56725.000000,11.068632)}
{pt3dadd(189132.000000,115656.000000,57375.000000,6.746526)}
{pt3dadd(189264.000000,115128.000000,57750.000000,11.993053)}
{pt3dadd(189036.000000,114312.000000,58125.000000,18.348885)}
{pt3dadd(189060.000000,113616.000000,58825.000000,20.837264)}
{pt3dadd(188940.000000,113052.000000,59350.000000,33.279160)}

{create adhoc97}
{access adhoc97}
{connect adhoc97(1), adhoc96(0)}
{nseg = 1}
{strdef color color = "White"}
{pt3dclear()}
{pt3dadd(188940.000000,113052.000000,59350.000000,33.279160)}
{pt3dadd(188532.000000,112356.000000,59475.000000,29.889616)}
{pt3dadd(188100.000000,111612.000000,59450.000000,23.110527)}

{create adhoc98}
{access adhoc98}
{connect adhoc98(1), adhoc97(0)}
{nseg = 1}
{strdef color color = "White"}
{pt3dclear()}
{pt3dadd(188100.000000,111612.000000,59450.000000,23.110527)}
{pt3dadd(187572.000000,110988.000000,59250.000000,21.518468)}
{pt3dadd(187128.000000,110616.000000,59025.000000,19.258772)}

{create adhoc99}
{access adhoc99}
{connect adhoc99(1), adhoc98(0)}
{nseg = 1}
{strdef color color = "White"}
{pt3dclear()}
{pt3dadd(187128.000000,110616.000000,59025.000000,19.258772)}
{pt3dadd(186204.000000,110976.000000,58625.000000,11.307048)}
{pt3dadd(186144.000000,111420.000000,58675.000000,6.607384)}
{pt3dadd(186024.000000,112032.000000,58750.000000,5.159780)}

{create adhoc100}
{access adhoc100}
{connect adhoc100(1), adhoc99(0)}
{nseg = 1}
{strdef color color = "White"}
{pt3dclear()}
{pt3dadd(186024.000000,112032.000000,58750.000000,5.159780)}
{pt3dadd(185196.000000,112020.000000,59475.000000,4.299816)}

{create adhoc101}
{access adhoc101}
{connect adhoc101(1), adhoc99(0)}
{nseg = 1}
{strdef color color = "White"}
{pt3dclear()}
{pt3dadd(186024.000000,112032.000000,58750.000000,5.159780)}
{pt3dadd(185724.000000,112416.000000,58750.000000,5.162646)}
{pt3dadd(185664.000000,112884.000000,58825.000000,4.953388)}

{create adhoc102}
{access adhoc102}
{connect adhoc102(1), adhoc98(0)}
{nseg = 1}
{strdef color color = "White"}
{pt3dclear()}
{pt3dadd(187128.000000,110616.000000,59025.000000,19.258772)}
{pt3dadd(186876.000000,110040.000000,58900.000000,11.199318)}
{pt3dadd(186660.000000,109548.000000,58400.000000,10.229386)}
{pt3dadd(186444.000000,109464.000000,58150.000000,9.587427)}
{pt3dadd(186096.000000,109128.000000,57850.000000,11.199318)}
{pt3dadd(185976.000000,108432.000000,57275.000000,16.048977)}

{create adhoc103}
{access adhoc103}
{connect adhoc103(1), adhoc102(0)}
{nseg = 1}
{strdef color color = "White"}
{pt3dclear()}
{pt3dadd(185976.000000,108432.000000,57275.000000,16.048977)}
{pt3dadd(185796.000000,107400.000000,56875.000000,11.199318)}
{pt3dadd(185448.000000,106176.000000,56575.000000,9.694420)}
{pt3dadd(185208.000000,105540.000000,56600.000000,8.713649)}
{pt3dadd(185088.000000,105156.000000,56400.000000,8.673090)}
{pt3dadd(185100.000000,104688.000000,56425.000000,11.145123)}

{create adhoc104}
{access adhoc104}
{connect adhoc104(1), adhoc103(0)}
{nseg = 1}
{strdef color color = "White"}
{pt3dclear()}
{pt3dadd(185100.000000,104688.000000,56425.000000,11.145123)}
{pt3dadd(184836.000000,104160.000000,56575.000000,7.310908)}
{pt3dadd(184620.000000,103908.000000,56775.000000,6.234479)}
{pt3dadd(184452.000000,103500.000000,56850.000000,5.295399)}
{pt3dadd(184116.000000,102204.000000,57150.000000,5.229798)}
{pt3dadd(183792.000000,101952.000000,57350.000000,6.449724)}

{create adhoc105}
{access adhoc105}
{connect adhoc105(1), adhoc104(0)}
{nseg = 1}
{strdef color color = "White"}
{pt3dclear()}
{pt3dadd(183792.000000,101952.000000,57350.000000,6.449724)}
{pt3dadd(183924.000000,101976.000000,57625.000000,4.638228)}
{pt3dadd(184056.000000,101904.000000,57875.000000,3.732480)}

{create adhoc106}
{access adhoc106}
{connect adhoc106(1), adhoc104(0)}
{nseg = 1}
{strdef color color = "White"}
{pt3dclear()}
{pt3dadd(183792.000000,101952.000000,57350.000000,6.449724)}
{pt3dadd(183420.000000,101016.000000,57325.000000,5.019816)}
{pt3dadd(183420.000000,100860.000000,57025.000000,2.160000)}

{create adhoc107}
{access adhoc107}
{connect adhoc107(1), adhoc103(0)}
{nseg = 1}
{strdef color color = "White"}
{pt3dclear()}
{pt3dadd(185100.000000,104688.000000,56425.000000,11.145123)}
{pt3dadd(185016.000000,104136.000000,55650.000000,7.310908)}
{pt3dadd(185280.000000,103896.000000,54800.000000,4.986545)}
{pt3dadd(185484.000000,103728.000000,54025.000000,3.832474)}
{pt3dadd(185076.000000,103260.000000,53850.000000,2.493354)}
{pt3dadd(185232.000000,102924.000000,53525.000000,3.155590)}
{pt3dadd(184932.000000,102528.000000,53375.000000,2.592000)}

{create adhoc108}
{access adhoc108}
{connect adhoc108(1), adhoc102(0)}
{nseg = 1}
{strdef color color = "White"}
{pt3dclear()}
{pt3dadd(185976.000000,108432.000000,57275.000000,16.048977)}
{pt3dadd(185280.000000,108528.000000,56700.000000,8.429549)}
{pt3dadd(184836.000000,108504.000000,55825.000000,5.657729)}
{pt3dadd(184896.000000,108612.000000,55350.000000,5.015770)}
{pt3dadd(184668.000000,108540.000000,54950.000000,3.767836)}
{pt3dadd(184536.000000,108468.000000,54400.000000,3.767836)}
{pt3dadd(184524.000000,108348.000000,53800.000000,3.767836)}
{pt3dadd(184680.000000,108456.000000,53100.000000,5.696861)}
{pt3dadd(184716.000000,108744.000000,52400.000000,5.358049)}
{pt3dadd(185016.000000,108780.000000,51975.000000,7.930082)}
{pt3dadd(185340.000000,108888.000000,51650.000000,11.145123)}

{create adhoc109}
{access adhoc109}
{connect adhoc109(1), adhoc108(0)}
{nseg = 1}
{strdef color color = "White"}
{pt3dclear()}
{pt3dadd(185340.000000,108888.000000,51650.000000,11.145123)}
{pt3dadd(185448.000000,108756.000000,51250.000000,8.244180)}
{pt3dadd(185952.000000,108600.000000,50700.000000,6.022131)}
{pt3dadd(186204.000000,108720.000000,50775.000000,4.478975)}

{create adhoc110}
{access adhoc110}
{connect adhoc110(1), adhoc108(0)}
{nseg = 1}
{strdef color color = "White"}
{pt3dclear()}
{pt3dadd(185340.000000,108888.000000,51650.000000,11.145123)}
{pt3dadd(185532.000000,109368.000000,51500.000000,6.882572)}
{pt3dadd(185964.000000,109800.000000,51750.000000,4.031531)}
{pt3dadd(186120.000000,110016.000000,51975.000000,2.592000)}

{create adhoc111}
{access adhoc111}
{connect adhoc111(1), adhoc97(0)}
{nseg = 1}
{strdef color color = "White"}
{pt3dclear()}
{pt3dadd(188100.000000,111612.000000,59450.000000,23.110527)}
{pt3dadd(188364.000000,110748.000000,60025.000000,15.907018)}
{pt3dadd(188256.000000,110292.000000,60175.000000,10.144211)}
{pt3dadd(187920.000000,109740.000000,60375.000000,8.731901)}
{pt3dadd(187560.000000,109380.000000,60575.000000,6.784625)}
{pt3dadd(187368.000000,108936.000000,60725.000000,9.892411)}
{pt3dadd(186960.000000,108468.000000,60875.000000,15.487351)}
{pt3dadd(186036.000000,107760.000000,61825.000000,17.038929)}

{create adhoc112}
{access adhoc112}
{connect adhoc112(1), adhoc111(0)}
{nseg = 1}
{strdef color color = "White"}
{pt3dclear()}
{pt3dadd(186036.000000,107760.000000,61825.000000,17.038929)}
{pt3dadd(185016.000000,108060.000000,62800.000000,11.315316)}
{pt3dadd(185076.000000,108276.000000,63150.000000,7.389189)}
{pt3dadd(184956.000000,108492.000000,63575.000000,6.121267)}
{pt3dadd(184476.000000,108648.000000,64225.000000,4.587797)}
{pt3dadd(184428.000000,109380.000000,64725.000000,6.646329)}
{pt3dadd(184512.000000,109788.000000,65025.000000,7.739669)}

{create adhoc113}
{access adhoc113}
{connect adhoc113(1), adhoc112(0)}
{nseg = 1}
{strdef color color = "White"}
{pt3dclear()}
{pt3dadd(184512.000000,109788.000000,65025.000000,7.739669)}
{pt3dadd(184836.000000,110268.000000,65200.000000,7.739669)}
{pt3dadd(185208.000000,110652.000000,65625.000000,6.191735)}

{create adhoc114}
{access adhoc114}
{connect adhoc114(1), adhoc112(0)}
{nseg = 1}
{strdef color color = "White"}
{pt3dclear()}
{pt3dadd(184512.000000,109788.000000,65025.000000,7.739669)}
{pt3dadd(184392.000000,109308.000000,65250.000000,5.659779)}
{pt3dadd(184392.000000,109188.000000,65550.000000,5.243801)}
{pt3dadd(184680.000000,108552.000000,65750.000000,4.317948)}
{pt3dadd(184824.000000,108480.000000,65950.000000,4.116690)}
{pt3dadd(185112.000000,108180.000000,66025.000000,3.110400)}

{create adhoc115}
{access adhoc115}
{connect adhoc115(1), adhoc111(0)}
{nseg = 1}
{strdef color color = "White"}
{pt3dclear()}
{pt3dadd(186036.000000,107760.000000,61825.000000,17.038929)}
{pt3dadd(184980.000000,107196.000000,62400.000000,10.637692)}
{pt3dadd(184476.000000,106788.000000,61975.000000,6.982615)}
{pt3dadd(184284.000000,106272.000000,61575.000000,6.784625)}
{pt3dadd(183840.000000,105696.000000,61900.000000,4.409795)}
{pt3dadd(183588.000000,105180.000000,62125.000000,6.784625)}
{pt3dadd(183504.000000,104436.000000,61975.000000,8.032559)}
{pt3dadd(183636.000000,103824.000000,61975.000000,7.537939)}
{pt3dadd(183252.000000,103380.000000,61850.000000,7.739669)}

{create adhoc116}
{access adhoc116}
{connect adhoc116(1), adhoc96(0)}
{nseg = 1}
{strdef color color = "White"}
{pt3dclear()}
{pt3dadd(188940.000000,113052.000000,59350.000000,33.279160)}
{pt3dadd(188472.000000,112980.000000,60950.000000,15.308094)}
{pt3dadd(188424.000000,113028.000000,61250.000000,12.052693)}
{pt3dadd(187740.000000,112668.000000,61800.000000,7.625886)}
{pt3dadd(187332.000000,112392.000000,62425.000000,8.494768)}
{pt3dadd(186864.000000,113076.000000,63075.000000,11.145123)}

{create adhoc117}
{access adhoc117}
{connect adhoc117(1), adhoc116(0)}
{nseg = 1}
{strdef color color = "White"}
{pt3dclear()}
{pt3dadd(186864.000000,113076.000000,63075.000000,11.145123)}
{pt3dadd(186468.000000,113220.000000,63650.000000,10.525949)}
{pt3dadd(186324.000000,113196.000000,63700.000000,8.244180)}
{pt3dadd(186180.000000,112944.000000,63750.000000,4.299816)}

{create adhoc118}
{access adhoc118}
{connect adhoc118(1), adhoc116(0)}
{nseg = 1}
{strdef color color = "White"}
{pt3dclear()}
{pt3dadd(186864.000000,113076.000000,63075.000000,11.145123)}
{pt3dadd(186480.000000,114720.000000,63225.000000,12.631139)}
{pt3dadd(185940.000000,115380.000000,63700.000000,13.374147)}

{create adhoc119}
{access adhoc119}
{connect adhoc119(1), adhoc118(0)}
{nseg = 1}
{strdef color color = "White"}
{pt3dclear()}
{pt3dadd(185940.000000,115380.000000,63700.000000,13.374147)}
{pt3dadd(186240.000000,115752.000000,63175.000000,7.742631)}
{pt3dadd(186384.000000,116100.000000,62975.000000,4.777573)}
{pt3dadd(186588.000000,116484.000000,62775.000000,4.478975)}

{create adhoc120}
{access adhoc120}
{connect adhoc120(1), adhoc118(0)}
{nseg = 1}
{strdef color color = "White"}
{pt3dclear()}
{pt3dadd(185940.000000,115380.000000,63700.000000,13.374147)}
{pt3dadd(185580.000000,115728.000000,64225.000000,8.673090)}
{pt3dadd(185640.000000,115860.000000,64925.000000,8.041733)}
{pt3dadd(185868.000000,116352.000000,65375.000000,5.229798)}
{pt3dadd(185652.000000,116868.000000,65850.000000,6.449724)}

{create adhoc121}
{access adhoc121}
{connect adhoc121(1), adhoc120(0)}
{nseg = 1}
{strdef color color = "White"}
{pt3dclear()}
{pt3dadd(185652.000000,116868.000000,65850.000000,6.449724)}
{pt3dadd(185208.000000,116292.000000,66200.000000,5.745775)}
{pt3dadd(184476.000000,115956.000000,65825.000000,4.047465)}
{pt3dadd(183996.000000,116016.000000,65800.000000,4.305454)}
{pt3dadd(183432.000000,115716.000000,65775.000000,2.747934)}
{pt3dadd(182940.000000,115428.000000,65575.000000,2.747934)}
{pt3dadd(182400.000000,115272.000000,65550.000000,2.747934)}
{pt3dadd(181932.000000,115200.000000,65600.000000,3.686281)}
{pt3dadd(181164.000000,115188.000000,65700.000000,2.438347)}
{pt3dadd(180468.000000,115296.000000,65750.000000,2.438347)}
{pt3dadd(179856.000000,115356.000000,65950.000000,2.438347)}
{pt3dadd(179112.000000,115224.000000,65825.000000,3.034142)}
{pt3dadd(178476.000000,115152.000000,65800.000000,3.034142)}
{pt3dadd(177636.000000,114864.000000,65775.000000,4.056903)}
{pt3dadd(176844.000000,114696.000000,65750.000000,6.191735)}

{create adhoc122}
{access adhoc122}
{connect adhoc122(1), adhoc121(0)}
{nseg = 1}
{strdef color color = "White"}
{pt3dclear()}
{pt3dadd(176844.000000,114696.000000,65750.000000,6.191735)}
{pt3dadd(176964.000000,114480.000000,65700.000000,3.964712)}
{pt3dadd(177024.000000,113856.000000,65500.000000,2.592000)}

{create adhoc123}
{access adhoc123}
{connect adhoc123(1), adhoc121(0)}
{nseg = 1}
{strdef color color = "White"}
{pt3dclear()}
{pt3dadd(176844.000000,114696.000000,65750.000000,6.191735)}
{pt3dadd(175920.000000,114624.000000,65850.000000,4.056903)}
{pt3dadd(175104.000000,114960.000000,65975.000000,3.034142)}
{pt3dadd(174240.000000,115068.000000,65900.000000,2.870749)}
{pt3dadd(173292.000000,114960.000000,65950.000000,2.870749)}
{pt3dadd(172596.000000,114804.000000,66050.000000,3.784582)}
{pt3dadd(171996.000000,114756.000000,66025.000000,4.478975)}

{create adhoc124}
{access adhoc124}
{connect adhoc124(1), adhoc120(0)}
{nseg = 1}
{strdef color color = "White"}
{pt3dclear()}
{pt3dadd(185652.000000,116868.000000,65850.000000,6.449724)}
{pt3dadd(185652.000000,116628.000000,66275.000000,5.229798)}
{pt3dadd(186588.000000,117252.000000,66525.000000,3.737879)}
{pt3dadd(187020.000000,117648.000000,66550.000000,3.307897)}
{pt3dadd(187488.000000,117864.000000,66525.000000,3.307897)}
{pt3dadd(187872.000000,118068.000000,66400.000000,4.513162)}
{pt3dadd(188400.000000,118308.000000,66275.000000,7.739669)}

{create adhoc125}
{access adhoc125}
{connect adhoc125(1), adhoc124(0)}
{nseg = 1}
{strdef color color = "White"}
{pt3dclear()}
{pt3dadd(188400.000000,118308.000000,66275.000000,7.739669)}
{pt3dadd(188472.000000,117888.000000,66300.000000,8.255647)}
{pt3dadd(188532.000000,117540.000000,66275.000000,7.467347)}
{pt3dadd(188472.000000,117132.000000,66200.000000,5.374770)}

{create adhoc126}
{access adhoc126}
{connect adhoc126(1), adhoc124(0)}
{nseg = 1}
{strdef color color = "White"}
{pt3dclear()}
{pt3dadd(188400.000000,118308.000000,66275.000000,7.739669)}
{pt3dadd(188736.000000,118836.000000,66500.000000,5.659779)}
{pt3dadd(189204.000000,119412.000000,67100.000000,3.995868)}
{pt3dadd(189528.000000,120060.000000,67250.000000,3.995868)}
{pt3dadd(189672.000000,120900.000000,67175.000000,2.747934)}
{pt3dadd(189912.000000,121524.000000,67175.000000,2.747934)}
{pt3dadd(190068.000000,122160.000000,66975.000000,4.305454)}
{pt3dadd(190272.000000,122724.000000,66900.000000,5.862975)}
{pt3dadd(190836.000000,123420.000000,66250.000000,6.691735)}
{pt3dadd(191412.000000,123912.000000,66100.000000,9.287602)}

{create adhoc127}
{access adhoc127}
{connect adhoc127(1), adhoc95(0)}
{nseg = 1}
{strdef color color = "White"}
{pt3dclear()}
{pt3dadd(189120.000000,119088.000000,55400.000000,33.279160)}
{pt3dadd(189012.000000,118764.000000,55750.000000,20.837264)}
{pt3dadd(188472.000000,118824.000000,54400.000000,13.102358)}
{pt3dadd(188172.000000,118428.000000,53800.000000,9.121356)}
{pt3dadd(188088.000000,118128.000000,53225.000000,3.874829)}
{pt3dadd(188100.000000,117720.000000,52375.000000,3.874829)}
{pt3dadd(187908.000000,117264.000000,52050.000000,3.874829)}
{pt3dadd(187824.000000,116592.000000,52000.000000,5.714693)}
{pt3dadd(187704.000000,115956.000000,51800.000000,3.339864)}
{pt3dadd(186900.000000,115296.000000,51325.000000,5.268888)}
{pt3dadd(187248.000000,115296.000000,50950.000000,7.643718)}
{pt3dadd(187308.000000,115476.000000,50375.000000,8.673090)}
{pt3dadd(187188.000000,114960.000000,49850.000000,13.374147)}

{create adhoc128}
{access adhoc128}
{connect adhoc128(1), adhoc127(0)}
{nseg = 1}
{strdef color color = "White"}
{pt3dclear()}
{pt3dadd(187188.000000,114960.000000,49850.000000,13.374147)}
{pt3dadd(186972.000000,114996.000000,49525.000000,11.145123)}

{create adhoc129}
{access adhoc129}
{connect adhoc129(1), adhoc127(0)}
{nseg = 1}
{strdef color color = "White"}
{pt3dclear()}
{pt3dadd(187188.000000,114960.000000,49850.000000,13.374147)}
{pt3dadd(186204.000000,115020.000000,50000.000000,6.689242)}
{pt3dadd(185952.000000,115044.000000,50050.000000,3.110400)}

{create adhoc130}
{access adhoc130}
{connect adhoc130(1), adhoc94(0)}
{nseg = 1}
{strdef color color = "White"}
{pt3dclear()}
{pt3dadd(189312.000000,121344.000000,55450.000000,39.934990)}
{pt3dadd(187932.000000,121152.000000,55875.000000,16.391553)}
{pt3dadd(187716.000000,121164.000000,55925.000000,10.434932)}
{pt3dadd(187464.000000,121260.000000,56475.000000,4.305454)}
{pt3dadd(187344.000000,121296.000000,56975.000000,4.986545)}
{pt3dadd(187212.000000,120888.000000,57175.000000,6.234479)}
{pt3dadd(187224.000000,120708.000000,57600.000000,9.390798)}
{pt3dadd(187200.000000,120636.000000,57925.000000,7.739669)}

{create adhoc131}
{access adhoc131}
{connect adhoc131(1), adhoc93(0)}
{nseg = 1}
{strdef color color = "White"}
{pt3dclear()}
{pt3dadd(189744.000000,122724.000000,55075.000000,33.279160)}
{pt3dadd(188640.000000,122724.000000,53525.000000,18.130992)}
{pt3dadd(187848.000000,122412.000000,52550.000000,11.495988)}
{pt3dadd(187332.000000,122100.000000,51925.000000,13.374147)}

{create adhoc132}
{access adhoc132}
{connect adhoc132(1), adhoc131(0)}
{nseg = 1}
{strdef color color = "White"}
{pt3dclear()}
{pt3dadd(187332.000000,122100.000000,51925.000000,13.374147)}
{pt3dadd(186984.000000,121812.000000,51275.000000,8.673090)}
{pt3dadd(186480.000000,121488.000000,50475.000000,5.803854)}
{pt3dadd(186180.000000,121176.000000,49875.000000,4.160981)}
{pt3dadd(186576.000000,120876.000000,49350.000000,2.231956)}
{pt3dadd(187092.000000,121044.000000,49175.000000,2.231956)}
{pt3dadd(187344.000000,120960.000000,49100.000000,2.231956)}
{pt3dadd(187788.000000,121056.000000,49175.000000,3.006910)}
{pt3dadd(188244.000000,120816.000000,49150.000000,2.274954)}
{pt3dadd(188640.000000,120636.000000,49175.000000,2.721450)}
{pt3dadd(189024.000000,120780.000000,49125.000000,3.167946)}
{pt3dadd(189072.000000,120300.000000,48950.000000,2.988320)}
{pt3dadd(189060.000000,120036.000000,48950.000000,3.732480)}

{create adhoc133}
{access adhoc133}
{connect adhoc133(1), adhoc131(0)}
{nseg = 1}
{strdef color color = "White"}
{pt3dclear()}
{pt3dadd(187332.000000,122100.000000,51925.000000,13.374147)}
{pt3dadd(187740.000000,121908.000000,51775.000000,8.829529)}
{pt3dadd(188088.000000,121908.000000,51750.000000,5.374770)}

{create adhoc134}
{access adhoc134}
{connect adhoc134(1), adhoc92(0)}
{nseg = 1}
{strdef color color = "White"}
{pt3dclear()}
{pt3dadd(189984.000000,124872.000000,55525.000000,27.732632)}
{pt3dadd(188688.000000,125004.000000,55625.000000,12.840078)}
{pt3dadd(188472.000000,124704.000000,55850.000000,8.304047)}
{pt3dadd(187908.000000,124380.000000,55975.000000,3.832474)}
{pt3dadd(187104.000000,124080.000000,56000.000000,2.274954)}
{pt3dadd(186816.000000,124020.000000,56125.000000,2.274954)}
{pt3dadd(186444.000000,124152.000000,56400.000000,3.344467)}
{pt3dadd(185820.000000,124212.000000,56200.000000,4.334411)}
{pt3dadd(185340.000000,124128.000000,55400.000000,4.932429)}
{pt3dadd(185328.000000,124116.000000,55100.000000,6.449724)}

{create adhoc135}
{access adhoc135}
{connect adhoc135(1), adhoc91(0)}
{nseg = 1}
{strdef color color = "White"}
{pt3dclear()}
{pt3dadd(192072.000000,134640.000000,55100.000000,27.732632)}
{pt3dadd(191172.000000,134640.000000,54100.000000,16.163801)}
{pt3dadd(190908.000000,134424.000000,53900.000000,15.047940)}
{pt3dadd(190428.000000,134040.000000,53775.000000,9.416098)}
{pt3dadd(190056.000000,133368.000000,53450.000000,10.699318)}

{create adhoc136}
{access adhoc136}
{connect adhoc136(1), adhoc135(0)}
{nseg = 1}
{strdef color color = "White"}
{pt3dclear()}
{pt3dadd(190056.000000,133368.000000,53450.000000,10.699318)}
{pt3dadd(190044.000000,132984.000000,53425.000000,7.162307)}
{pt3dadd(189504.000000,132180.000000,53075.000000,4.897384)}
{pt3dadd(189144.000000,131256.000000,52525.000000,5.432350)}
{pt3dadd(188892.000000,130824.000000,52300.000000,6.784625)}
{pt3dadd(188556.000000,130212.000000,52275.000000,10.307708)}
{pt3dadd(188208.000000,129684.000000,51925.000000,16.048977)}

{create adhoc137}
{access adhoc137}
{connect adhoc137(1), adhoc136(0)}
{nseg = 1}
{strdef color color = "White"}
{pt3dclear()}
{pt3dadd(188208.000000,129684.000000,51925.000000,16.048977)}
{pt3dadd(188184.000000,128856.000000,51300.000000,15.157367)}
{pt3dadd(188388.000000,128160.000000,51100.000000,16.048977)}

{create adhoc138}
{access adhoc138}
{connect adhoc138(1), adhoc137(0)}
{nseg = 1}
{strdef color color = "White"}
{pt3dclear()}
{pt3dadd(188388.000000,128160.000000,51100.000000,16.048977)}
{pt3dadd(188220.000000,127692.000000,50375.000000,10.307708)}
{pt3dadd(188160.000000,127224.000000,50350.000000,6.784625)}
{pt3dadd(187800.000000,126708.000000,49825.000000,5.122763)}
{pt3dadd(187488.000000,126192.000000,49425.000000,2.747934)}
{pt3dadd(187608.000000,125904.000000,49200.000000,2.747934)}
{pt3dadd(188112.000000,125676.000000,48450.000000,2.747934)}
{pt3dadd(188820.000000,125460.000000,48300.000000,3.995868)}
{pt3dadd(189612.000000,125280.000000,48450.000000,4.676958)}
{pt3dadd(190236.000000,124944.000000,48275.000000,5.615305)}
{pt3dadd(189960.000000,124392.000000,48125.000000,8.358842)}
{pt3dadd(189840.000000,124284.000000,48300.000000,6.191735)}

{create adhoc139}
{access adhoc139}
{connect adhoc139(1), adhoc137(0)}
{nseg = 1}
{strdef color color = "White"}
{pt3dclear()}
{pt3dadd(188388.000000,128160.000000,51100.000000,16.048977)}
{pt3dadd(188880.000000,128112.000000,51600.000000,8.906562)}
{pt3dadd(189000.000000,127980.000000,51675.000000,4.478975)}

{create adhoc140}
{access adhoc140}
{connect adhoc140(1), adhoc136(0)}
{nseg = 1}
{strdef color color = "White"}
{pt3dclear()}
{pt3dadd(188208.000000,129684.000000,51925.000000,16.048977)}
{pt3dadd(187944.000000,129852.000000,51125.000000,10.856290)}
{pt3dadd(187692.000000,130752.000000,50475.000000,6.750791)}
{pt3dadd(187272.000000,130872.000000,50250.000000,3.732480)}

{create adhoc141}
{access adhoc141}
{connect adhoc141(1), adhoc135(0)}
{nseg = 1}
{strdef color color = "White"}
{pt3dclear()}
{pt3dadd(190056.000000,133368.000000,53450.000000,10.699318)}
{pt3dadd(188796.000000,133752.000000,53775.000000,10.604378)}
{pt3dadd(187992.000000,132936.000000,54350.000000,11.495988)}
{pt3dadd(187548.000000,131724.000000,54675.000000,13.374147)}

{create adhoc142}
{access adhoc142}
{connect adhoc142(1), adhoc141(0)}
{nseg = 1}
{strdef color color = "White"}
{pt3dclear()}
{pt3dadd(187548.000000,131724.000000,54675.000000,13.374147)}
{pt3dadd(187248.000000,130704.000000,54800.000000,7.537939)}
{pt3dadd(187284.000000,130284.000000,54900.000000,5.682726)}
{pt3dadd(187152.000000,129852.000000,54825.000000,3.526297)}
{pt3dadd(187080.000000,129648.000000,54725.000000,2.797272)}
{pt3dadd(186756.000000,129624.000000,54875.000000,2.592000)}

{create adhoc143}
{access adhoc143}
{connect adhoc143(1), adhoc141(0)}
{nseg = 1}
{strdef color color = "White"}
{pt3dclear()}
{pt3dadd(187548.000000,131724.000000,54675.000000,13.374147)}
{pt3dadd(187848.000000,131136.000000,55100.000000,14.087435)}
{pt3dadd(187824.000000,131340.000000,55575.000000,11.122378)}
{pt3dadd(187836.000000,131256.000000,55850.000000,4.478975)}

{create adhoc144}
{access adhoc144}
{connect adhoc144(1), adhoc74(0)}
{nseg = 1}
{strdef color color = "White"}
{pt3dclear()}
{pt3dadd(192036.000000,146784.000000,53900.000000,47.921990)}
{pt3dadd(192132.000000,145944.000000,54125.000000,27.732632)}

{create adhoc145}
{access adhoc145}
{connect adhoc145(1), adhoc144(0)}
{nseg = 1}
{strdef color color = "White"}
{pt3dclear()}
{pt3dadd(192132.000000,145944.000000,54125.000000,27.732632)}
{pt3dadd(191268.000000,145332.000000,53275.000000,20.393541)}
{pt3dadd(191376.000000,144852.000000,53550.000000,12.836125)}
{pt3dadd(191484.000000,144420.000000,53775.000000,11.911704)}
{pt3dadd(191604.000000,144036.000000,53975.000000,5.822105)}
{pt3dadd(191724.000000,143580.000000,54175.000000,5.822105)}
{pt3dadd(191844.000000,143196.000000,54375.000000,11.068632)}
{pt3dadd(191772.000000,142812.000000,54525.000000,16.315158)}
{pt3dadd(191700.000000,142416.000000,54600.000000,18.988421)}
{pt3dadd(191472.000000,141960.000000,54675.000000,27.732632)}

{create adhoc146}
{access adhoc146}
{connect adhoc146(1), adhoc145(0)}
{nseg = 1}
{strdef color color = "White"}
{pt3dclear()}
{pt3dadd(191472.000000,141960.000000,54675.000000,27.732632)}
{pt3dadd(190020.000000,141852.000000,54925.000000,9.287602)}

{create adhoc147}
{access adhoc147}
{connect adhoc147(1), adhoc146(0)}
{nseg = 1}
{strdef color color = "White"}
{pt3dclear()}
{pt3dadd(190020.000000,141852.000000,54925.000000,9.287602)}
{pt3dadd(189624.000000,141960.000000,55200.000000,6.919917)}
{pt3dadd(189792.000000,142200.000000,55450.000000,5.068210)}
{pt3dadd(190020.000000,142080.000000,55650.000000,3.732480)}

{create adhoc148}
{access adhoc148}
{connect adhoc148(1), adhoc146(0)}
{nseg = 1}
{strdef color color = "White"}
{pt3dclear()}
{pt3dadd(190020.000000,141852.000000,54925.000000,9.287602)}
{pt3dadd(189000.000000,141420.000000,54975.000000,7.310908)}
{pt3dadd(187860.000000,141240.000000,55450.000000,4.986545)}
{pt3dadd(186984.000000,140964.000000,55725.000000,5.268888)}
{pt3dadd(186348.000000,140784.000000,56125.000000,3.339864)}
{pt3dadd(185880.000000,140820.000000,56625.000000,3.339864)}
{pt3dadd(185760.000000,140820.000000,57025.000000,3.339864)}
{pt3dadd(186168.000000,140712.000000,57450.000000,6.121267)}
{pt3dadd(186324.000000,140640.000000,57900.000000,4.281404)}
{pt3dadd(186324.000000,140280.000000,58275.000000,4.281404)}
{pt3dadd(186420.000000,139716.000000,58850.000000,5.529337)}
{pt3dadd(186408.000000,139284.000000,59025.000000,6.519282)}
{pt3dadd(185916.000000,139092.000000,59225.000000,5.229798)}
{pt3dadd(185724.000000,139164.000000,59350.000000,6.449724)}

{create adhoc149}
{access adhoc149}
{connect adhoc149(1), adhoc145(0)}
{nseg = 1}
{strdef color color = "White"}
{pt3dclear()}
{pt3dadd(191472.000000,141960.000000,54675.000000,27.732632)}
{pt3dadd(191400.000000,141540.000000,54800.000000,18.618653)}
{pt3dadd(191736.000000,141120.000000,54900.000000,11.771192)}
{pt3dadd(191832.000000,140664.000000,55050.000000,11.771192)}
{pt3dadd(191844.000000,139836.000000,55450.000000,6.746526)}
{pt3dadd(191892.000000,139428.000000,55625.000000,6.746526)}
{pt3dadd(191700.000000,138960.000000,55875.000000,13.102358)}
{pt3dadd(191568.000000,138468.000000,56025.000000,19.191957)}
{pt3dadd(191436.000000,137724.000000,56175.000000,22.242384)}
{pt3dadd(190992.000000,136884.000000,56475.000000,31.947992)}

{create adhoc150}
{access adhoc150}
{connect adhoc150(1), adhoc149(0)}
{nseg = 1}
{strdef color color = "White"}
{pt3dclear()}
{pt3dadd(190992.000000,136884.000000,56475.000000,31.947992)}
{pt3dadd(191532.000000,136176.000000,56850.000000,20.023773)}
{pt3dadd(191436.000000,135156.000000,57350.000000,12.614264)}
{pt3dadd(191052.000000,134808.000000,57700.000000,12.880497)}
{pt3dadd(190992.000000,134316.000000,57625.000000,13.102358)}
{pt3dadd(190908.000000,133932.000000,58025.000000,20.837264)}
{pt3dadd(190716.000000,133560.000000,58225.000000,27.732632)}

{create adhoc151}
{access adhoc151}
{connect adhoc151(1), adhoc150(0)}
{nseg = 1}
{strdef color color = "White"}
{pt3dclear()}
{pt3dadd(190716.000000,133560.000000,58225.000000,27.732632)}
{pt3dadd(189900.000000,133452.000000,58775.000000,16.163801)}
{pt3dadd(189252.000000,133380.000000,59275.000000,10.298281)}
{pt3dadd(188352.000000,133620.000000,59650.000000,8.603509)}
{pt3dadd(187560.000000,133848.000000,60275.000000,5.051754)}
{pt3dadd(187716.000000,134640.000000,61500.000000,5.051754)}
{pt3dadd(187980.000000,135156.000000,62275.000000,7.961550)}
{pt3dadd(188472.000000,135492.000000,63000.000000,11.513304)}
{pt3dadd(189360.000000,135876.000000,64150.000000,12.269250)}
{pt3dadd(189804.000000,136032.000000,64775.000000,19.258772)}

{create adhoc152}
{access adhoc152}
{connect adhoc152(1), adhoc151(0)}
{nseg = 1}
{strdef color color = "White"}
{pt3dclear()}
{pt3dadd(189804.000000,136032.000000,64775.000000,19.258772)}
{pt3dadd(190572.000000,135732.000000,65600.000000,13.374147)}

{create adhoc153}
{access adhoc153}
{connect adhoc153(1), adhoc152(0)}
{nseg = 1}
{strdef color color = "White"}
{pt3dclear()}
{pt3dadd(190572.000000,135732.000000,65600.000000,13.374147)}
{pt3dadd(191760.000000,136872.000000,65725.000000,8.282099)}
{pt3dadd(192324.000000,137328.000000,65925.000000,3.732480)}

{create adhoc154}
{access adhoc154}
{connect adhoc154(1), adhoc152(0)}
{nseg = 1}
{strdef color color = "White"}
{pt3dclear()}
{pt3dadd(190572.000000,135732.000000,65600.000000,13.374147)}
{pt3dadd(190848.000000,135156.000000,66000.000000,10.322998)}
{pt3dadd(190860.000000,135276.000000,66450.000000,6.449724)}

{create adhoc155}
{access adhoc155}
{connect adhoc155(1), adhoc151(0)}
{nseg = 1}
{strdef color color = "White"}
{pt3dclear()}
{pt3dadd(189804.000000,136032.000000,64775.000000,19.258772)}
{pt3dadd(190020.000000,137472.000000,65475.000000,12.269250)}
{pt3dadd(190236.000000,138780.000000,65100.000000,7.961550)}
{pt3dadd(190152.000000,139308.000000,65225.000000,6.338820)}
{pt3dadd(190308.000000,139992.000000,65425.000000,3.429025)}
{pt3dadd(190476.000000,140364.000000,65500.000000,4.418969)}
{pt3dadd(190824.000000,140688.000000,65350.000000,5.193923)}
{pt3dadd(190740.000000,140964.000000,65275.000000,4.441498)}
{pt3dadd(190776.000000,141264.000000,64825.000000,5.374770)}

{create adhoc156}
{access adhoc156}
{connect adhoc156(1), adhoc150(0)}
{nseg = 1}
{strdef color color = "White"}
{pt3dclear()}
{pt3dadd(190716.000000,133560.000000,58225.000000,27.732632)}
{pt3dadd(191520.000000,132120.000000,58775.000000,18.988421)}
{pt3dadd(191748.000000,130800.000000,59275.000000,11.993053)}
{pt3dadd(191760.000000,129720.000000,59700.000000,10.298281)}
{pt3dadd(191892.000000,128484.000000,60300.000000,5.051754)}
{pt3dadd(191988.000000,127680.000000,60725.000000,8.603509)}
{pt3dadd(191724.000000,127392.000000,61125.000000,12.925614)}
{pt3dadd(191796.000000,127368.000000,61450.000000,14.623100)}
{pt3dadd(191628.000000,126744.000000,62000.000000,23.110527)}

{create adhoc157}
{access adhoc157}
{connect adhoc157(1), adhoc156(0)}
{nseg = 1}
{strdef color color = "White"}
{pt3dclear()}
{pt3dadd(191628.000000,126744.000000,62000.000000,23.110527)}
{pt3dadd(191292.000000,125160.000000,62400.000000,13.553168)}
{pt3dadd(190992.000000,124752.000000,62450.000000,8.731901)}
{pt3dadd(190980.000000,124416.000000,62575.000000,7.961550)}
{pt3dadd(190740.000000,124044.000000,62625.000000,5.051754)}
{pt3dadd(190692.000000,123660.000000,63200.000000,9.373860)}
{pt3dadd(190440.000000,123288.000000,63425.000000,13.511081)}
{pt3dadd(190188.000000,122952.000000,63650.000000,15.598878)}
{pt3dadd(189948.000000,122580.000000,63900.000000,22.186106)}

{create adhoc158}
{access adhoc158}
{connect adhoc158(1), adhoc157(0)}
{nseg = 1}
{strdef color color = "White"}
{pt3dclear()}
{pt3dadd(189948.000000,122580.000000,63900.000000,22.186106)}
{pt3dadd(188832.000000,122652.000000,63825.000000,12.353418)}
{pt3dadd(188148.000000,122376.000000,64100.000000,10.458384)}
{pt3dadd(187980.000000,122100.000000,64275.000000,5.577223)}
{pt3dadd(187872.000000,122424.000000,64650.000000,9.287602)}

{create adhoc159}
{access adhoc159}
{connect adhoc159(1), adhoc157(0)}
{nseg = 1}
{strdef color color = "White"}
{pt3dclear()}
{pt3dadd(189948.000000,122580.000000,63900.000000,22.186106)}
{pt3dadd(189996.000000,122124.000000,64125.000000,12.353418)}
{pt3dadd(189996.000000,121764.000000,64200.000000,8.012051)}
{pt3dadd(190068.000000,120984.000000,64500.000000,6.784625)}
{pt3dadd(189816.000000,120312.000000,64875.000000,4.409795)}
{pt3dadd(189792.000000,119844.000000,65050.000000,4.409795)}
{pt3dadd(189732.000000,119436.000000,65425.000000,4.409795)}
{pt3dadd(189912.000000,118944.000000,66000.000000,7.659572)}
{pt3dadd(190092.000000,118632.000000,66275.000000,4.749777)}
{pt3dadd(190236.000000,118320.000000,66450.000000,4.749777)}
{pt3dadd(190344.000000,117840.000000,66875.000000,4.749777)}
{pt3dadd(190692.000000,117456.000000,67475.000000,8.301531)}
{pt3dadd(190740.000000,117108.000000,67800.000000,5.051754)}
{pt3dadd(190728.000000,116784.000000,68025.000000,5.051754)}
{pt3dadd(190716.000000,116520.000000,68250.000000,5.051754)}
{pt3dadd(190440.000000,116160.000000,68425.000000,7.426584)}
{pt3dadd(190368.000000,115668.000000,68625.000000,3.874829)}
{pt3dadd(190512.000000,115356.000000,69025.000000,3.874829)}
{pt3dadd(190800.000000,114852.000000,69225.000000,3.874829)}
{pt3dadd(191172.000000,114276.000000,70025.000000,6.784625)}
{pt3dadd(191052.000000,113880.000000,70250.000000,4.409795)}
{pt3dadd(190872.000000,113496.000000,70175.000000,4.409795)}
{pt3dadd(190848.000000,113076.000000,70425.000000,4.409795)}
{pt3dadd(190776.000000,112620.000000,70750.000000,7.319591)}
{pt3dadd(190332.000000,112272.000000,70975.000000,4.409795)}
{pt3dadd(189924.000000,111876.000000,71200.000000,4.409795)}
{pt3dadd(189516.000000,111504.000000,71225.000000,4.409795)}
{pt3dadd(189228.000000,111072.000000,71275.000000,6.784625)}
{pt3dadd(188880.000000,110700.000000,71225.000000,3.874829)}
{pt3dadd(188880.000000,110268.000000,71300.000000,3.874829)}
{pt3dadd(188760.000000,109896.000000,71200.000000,3.874829)}
{pt3dadd(188304.000000,109440.000000,71175.000000,7.426584)}
{pt3dadd(188292.000000,109044.000000,71325.000000,5.051754)}
{pt3dadd(188244.000000,108672.000000,71475.000000,5.051754)}
{pt3dadd(188004.000000,108240.000000,71525.000000,5.051754)}
{pt3dadd(187956.000000,107820.000000,71575.000000,7.426584)}
{pt3dadd(188004.000000,107340.000000,71625.000000,3.874829)}
{pt3dadd(188220.000000,106968.000000,72075.000000,3.874829)}
{pt3dadd(187704.000000,106404.000000,72075.000000,3.874829)}
{pt3dadd(187260.000000,106020.000000,72475.000000,6.301058)}
{pt3dadd(186804.000000,105492.000000,72375.000000,3.926229)}
{pt3dadd(186240.000000,105120.000000,72550.000000,3.926229)}
{pt3dadd(185988.000000,104664.000000,72575.000000,3.926229)}
{pt3dadd(185772.000000,104220.000000,72175.000000,6.301058)}
{pt3dadd(185256.000000,103908.000000,71750.000000,5.803854)}
{pt3dadd(184236.000000,103452.000000,70750.000000,6.250350)}
{pt3dadd(183888.000000,102996.000000,70050.000000,9.417250)}
{pt3dadd(183240.000000,101220.000000,69800.000000,3.732480)}

{create adhoc160}
{access adhoc160}
{connect adhoc160(1), adhoc156(0)}
{nseg = 1}
{strdef color color = "White"}
{pt3dclear()}
{pt3dadd(191628.000000,126744.000000,62000.000000,23.110527)}
{pt3dadd(191952.000000,126984.000000,62400.000000,15.598878)}
{pt3dadd(191940.000000,126984.000000,63075.000000,9.959327)}
{pt3dadd(192192.000000,126816.000000,64675.000000,8.012051)}
{pt3dadd(192240.000000,126384.000000,65225.000000,3.874829)}
{pt3dadd(192516.000000,126024.000000,65800.000000,3.874829)}
{pt3dadd(192792.000000,125640.000000,66575.000000,3.874829)}
{pt3dadd(193116.000000,125748.000000,67175.000000,6.784625)}
{pt3dadd(193068.000000,125748.000000,67875.000000,7.319591)}
{pt3dadd(193080.000000,125616.000000,68625.000000,11.456812)}
{pt3dadd(192852.000000,125772.000000,69375.000000,18.094687)}
{pt3dadd(192504.000000,125700.000000,70275.000000,22.186106)}

{create adhoc161}
{access adhoc161}
{connect adhoc161(1), adhoc160(0)}
{nseg = 1}
{strdef color color = "White"}
{pt3dclear()}
{pt3dadd(192504.000000,125700.000000,70275.000000,22.186106)}
{pt3dadd(191760.000000,124548.000000,70550.000000,9.686959)}
{pt3dadd(191436.000000,124248.000000,70575.000000,7.454466)}
{pt3dadd(191100.000000,123864.000000,70025.000000,3.237152)}
{pt3dadd(190932.000000,123552.000000,69750.000000,4.478975)}

{create adhoc162}
{access adhoc162}
{connect adhoc162(1), adhoc160(0)}
{nseg = 1}
{strdef color color = "White"}
{pt3dclear()}
{pt3dadd(192504.000000,125700.000000,70275.000000,22.186106)}
{pt3dadd(192228.000000,125940.000000,70925.000000,16.048977)}

{create adhoc163}
{access adhoc163}
{connect adhoc163(1), adhoc162(0)}
{nseg = 1}
{strdef color color = "White"}
{pt3dclear()}
{pt3dadd(192228.000000,125940.000000,70925.000000,16.048977)}
{pt3dadd(191616.000000,126096.000000,70825.000000,8.385409)}
{pt3dadd(191304.000000,126276.000000,70675.000000,4.072550)}
{pt3dadd(191040.000000,126432.000000,70350.000000,3.110400)}

{create adhoc164}
{access adhoc164}
{connect adhoc164(1), adhoc162(0)}
{nseg = 1}
{strdef color color = "White"}
{pt3dclear()}
{pt3dadd(192228.000000,125940.000000,70925.000000,16.048977)}
{pt3dadd(192024.000000,126180.000000,71300.000000,10.985332)}
{pt3dadd(192204.000000,126576.000000,71875.000000,7.191199)}
{pt3dadd(192420.000000,126840.000000,72350.000000,6.939551)}
{pt3dadd(192336.000000,127044.000000,72550.000000,4.158147)}
{pt3dadd(192264.000000,127092.000000,72925.000000,4.158147)}
{pt3dadd(192312.000000,127248.000000,73400.000000,4.158147)}
{pt3dadd(192324.000000,127356.000000,73900.000000,6.087172)}
{pt3dadd(192420.000000,127524.000000,74175.000000,4.986545)}
{pt3dadd(192624.000000,127860.000000,74700.000000,5.924892)}
{pt3dadd(192576.000000,127800.000000,75375.000000,8.874820)}
{pt3dadd(192588.000000,127572.000000,75825.000000,6.191735)}

{create adhoc165}
{access adhoc165}
{connect adhoc165(1), adhoc149(0)}
{nseg = 1}
{strdef color color = "White"}
{pt3dclear()}
{pt3dadd(190992.000000,136884.000000,56475.000000,31.947992)}
{pt3dadd(189720.000000,136932.000000,56300.000000,13.299239)}
{pt3dadd(188688.000000,136584.000000,56500.000000,8.579543)}
{pt3dadd(188364.000000,136440.000000,56575.000000,3.737879)}
{pt3dadd(188040.000000,136536.000000,56675.000000,4.305454)}
{pt3dadd(187524.000000,136608.000000,56675.000000,5.553388)}
{pt3dadd(187044.000000,136332.000000,56475.000000,8.255647)}
{pt3dadd(186744.000000,136200.000000,56425.000000,7.739669)}

{create adhoc166}
{access adhoc166}
{connect adhoc166(1), adhoc144(0)}
{nseg = 1}
{strdef color color = "White"}
{pt3dclear()}
{pt3dadd(192132.000000,145944.000000,54125.000000,27.732632)}
{pt3dadd(190596.000000,145800.000000,54550.000000,16.163801)}
{pt3dadd(190236.000000,145728.000000,54700.000000,10.298281)}
{pt3dadd(189924.000000,145680.000000,54875.000000,8.603509)}
{pt3dadd(189672.000000,145596.000000,55050.000000,7.426584)}
{pt3dadd(189396.000000,145572.000000,55200.000000,11.377640)}
{pt3dadd(189144.000000,145584.000000,55325.000000,13.374147)}

{create adhoc167}
{access adhoc167}
{connect adhoc167(1), adhoc166(0)}
{nseg = 1}
{strdef color color = "White"}
{pt3dclear()}
{pt3dadd(189144.000000,145584.000000,55325.000000,13.374147)}
{pt3dadd(189396.000000,146040.000000,56750.000000,8.673090)}
{pt3dadd(189588.000000,146100.000000,57675.000000,5.803854)}
{pt3dadd(189720.000000,145980.000000,58525.000000,5.803854)}
{pt3dadd(189612.000000,145716.000000,59075.000000,3.874829)}
{pt3dadd(189480.000000,145272.000000,59325.000000,3.874829)}
{pt3dadd(189480.000000,145596.000000,59725.000000,4.649783)}
{pt3dadd(189492.000000,145728.000000,60325.000000,5.096279)}
{pt3dadd(189384.000000,146208.000000,60925.000000,3.535750)}
{pt3dadd(189624.000000,146880.000000,61475.000000,3.732480)}

{create adhoc168}
{access adhoc168}
{connect adhoc168(1), adhoc166(0)}
{nseg = 1}
{strdef color color = "White"}
{pt3dclear()}
{pt3dadd(189144.000000,145584.000000,55325.000000,13.374147)}
{pt3dadd(188748.000000,145500.000000,55425.000000,11.662454)}
{pt3dadd(188364.000000,145488.000000,55325.000000,9.287602)}

{create adhoc169}
{access adhoc169}
{connect adhoc169(1), adhoc168(0)}
{nseg = 1}
{strdef color color = "White"}
{pt3dclear()}
{pt3dadd(188364.000000,145488.000000,55325.000000,9.287602)}
{pt3dadd(187476.000000,144444.000000,55225.000000,5.659779)}
{pt3dadd(187020.000000,143676.000000,55750.000000,6.196632)}
{pt3dadd(186948.000000,143412.000000,56075.000000,5.167942)}
{pt3dadd(186816.000000,143532.000000,56275.000000,3.732480)}

{create adhoc170}
{access adhoc170}
{connect adhoc170(1), adhoc168(0)}
{nseg = 1}
{strdef color color = "White"}
{pt3dclear()}
{pt3dadd(188364.000000,145488.000000,55325.000000,9.287602)}
{pt3dadd(188040.000000,145896.000000,55450.000000,8.341643)}
{pt3dadd(187608.000000,146076.000000,55425.000000,9.287602)}

{create adhoc171}
{access adhoc171}
{connect adhoc171(1), adhoc170(0)}
{nseg = 1}
{strdef color color = "White"}
{pt3dclear()}
{pt3dadd(187608.000000,146076.000000,55425.000000,9.287602)}
{pt3dadd(187332.000000,147060.000000,55625.000000,3.732480)}

{create adhoc172}
{access adhoc172}
{connect adhoc172(1), adhoc170(0)}
{nseg = 1}
{strdef color color = "White"}
{pt3dclear()}
{pt3dadd(187608.000000,146076.000000,55425.000000,9.287602)}
{pt3dadd(186900.000000,145920.000000,55400.000000,2.160000)}

{create adhoc173}
{access adhoc173}
{connect adhoc173(1), adhoc166(0)}
{nseg = 1}
{strdef color color = "White"}
{pt3dclear()}
{pt3dadd(189144.000000,145584.000000,55325.000000,13.374147)}
{pt3dadd(189036.000000,145968.000000,55050.000000,8.673090)}
{pt3dadd(189048.000000,146292.000000,55100.000000,6.494532)}
{pt3dadd(188940.000000,146700.000000,55225.000000,4.441782)}
{pt3dadd(189180.000000,146976.000000,55375.000000,3.187929)}
{pt3dadd(189144.000000,147300.000000,55550.000000,3.110400)}

{create adhoc174}
{access adhoc174}
{connect adhoc174(1), adhoc74(0)}
{nseg = 1}
{strdef color color = "White"}
{pt3dclear()}
{pt3dadd(192036.000000,146784.000000,53900.000000,47.921990)}
{pt3dadd(190500.000000,146760.000000,51150.000000,22.893587)}
{pt3dadd(190656.000000,146256.000000,50625.000000,14.336152)}
{pt3dadd(190512.000000,146004.000000,50025.000000,8.449439)}
{pt3dadd(190164.000000,145524.000000,49475.000000,4.897684)}
{pt3dadd(189816.000000,144984.000000,48850.000000,4.897684)}
{pt3dadd(189468.000000,144816.000000,48200.000000,4.897684)}
{pt3dadd(189300.000000,145020.000000,47525.000000,6.455205)}
{pt3dadd(188796.000000,145104.000000,46825.000000,5.967316)}
{pt3dadd(187500.000000,146460.000000,45950.000000,8.342145)}
{pt3dadd(187524.000000,147324.000000,45625.000000,12.903575)}
{pt3dadd(187128.000000,148116.000000,45350.000000,13.374147)}

{create adhoc175}
{access adhoc175}
{connect adhoc175(1), adhoc174(0)}
{nseg = 1}
{strdef color color = "White"}
{pt3dclear()}
{pt3dadd(187128.000000,148116.000000,45350.000000,13.374147)}
{pt3dadd(187512.000000,148860.000000,44775.000000,8.673090)}
{pt3dadd(187164.000000,150072.000000,44525.000000,5.803854)}
{pt3dadd(186612.000000,150396.000000,44350.000000,5.268888)}
{pt3dadd(185952.000000,150732.000000,44000.000000,5.268888)}
{pt3dadd(185772.000000,150696.000000,43500.000000,7.781480)}
{pt3dadd(185784.000000,150996.000000,42975.000000,11.145123)}

{create adhoc176}
{access adhoc176}
{connect adhoc176(1), adhoc174(0)}
{nseg = 1}
{strdef color color = "White"}
{pt3dclear()}
{pt3dadd(187128.000000,148116.000000,45350.000000,13.374147)}
{pt3dadd(185820.000000,148572.000000,45650.000000,8.524488)}
{pt3dadd(185232.000000,148896.000000,45950.000000,5.714693)}
{pt3dadd(185124.000000,149124.000000,46150.000000,4.587797)}
{pt3dadd(185172.000000,149028.000000,46525.000000,3.522888)}
{pt3dadd(184836.000000,149232.000000,46150.000000,4.871480)}
{pt3dadd(184620.000000,149472.000000,46050.000000,5.374770)}

{create adhoc177}
{access adhoc177}
{connect adhoc177(1), adhoc73(0)}
{nseg = 1}
{strdef color color = "White"}
{pt3dclear()}
{pt3dadd(191100.000000,152844.000000,53650.000000,47.921990)}
{pt3dadd(188772.000000,152472.000000,52875.000000,20.932046)}
{pt3dadd(188460.000000,152304.000000,52775.000000,13.159227)}
{pt3dadd(188100.000000,152292.000000,52725.000000,5.432350)}
{pt3dadd(187776.000000,152112.000000,52675.000000,3.057520)}
{pt3dadd(187428.000000,151980.000000,52525.000000,3.057520)}
{pt3dadd(187044.000000,151980.000000,52500.000000,3.057520)}
{pt3dadd(186744.000000,151944.000000,52450.000000,5.432350)}
{pt3dadd(186408.000000,151812.000000,52450.000000,3.874829)}
{pt3dadd(185856.000000,151692.000000,52575.000000,3.874829)}
{pt3dadd(185184.000000,151560.000000,52375.000000,3.874829)}
{pt3dadd(184812.000000,151296.000000,51975.000000,5.803854)}
{pt3dadd(184440.000000,151068.000000,51550.000000,3.429025)}
{pt3dadd(184188.000000,150852.000000,51350.000000,3.429025)}
{pt3dadd(183996.000000,150576.000000,51050.000000,3.429025)}
{pt3dadd(183864.000000,150084.000000,50450.000000,5.803854)}
{pt3dadd(184344.000000,149976.000000,49800.000000,6.656233)}
{pt3dadd(184620.000000,150564.000000,49125.000000,7.431187)}
{pt3dadd(184668.000000,150912.000000,48825.000000,11.385312)}
{pt3dadd(184884.000000,151368.000000,48325.000000,5.374770)}

{create adhoc178}
{access adhoc178}
{connect adhoc178(1), adhoc177(0)}
{nseg = 1}
{strdef color color = "White"}
{pt3dclear()}
{pt3dadd(184884.000000,151368.000000,48325.000000,5.374770)}
{pt3dadd(184416.000000,151908.000000,48625.000000,3.865190)}
{pt3dadd(184416.000000,152400.000000,48800.000000,2.937600)}
{pt3dadd(184464.000000,152988.000000,49100.000000,2.592000)}

{create adhoc179}
{access adhoc179}
{connect adhoc179(1), adhoc177(0)}
{nseg = 1}
{strdef color color = "White"}
{pt3dclear()}
{pt3dadd(184884.000000,151368.000000,48325.000000,5.374770)}
{pt3dadd(185304.000000,151584.000000,47900.000000,7.132878)}

{create adhoc180}
{access adhoc180}
{connect adhoc180(1), adhoc70(0)}
{nseg = 1}
{strdef color color = "White"}
{pt3dclear()}
{pt3dadd(191604.000000,156900.000000,55025.000000,39.934990)}
{pt3dadd(190932.000000,157176.000000,56450.000000,16.048977)}

{create adhoc181}
{access adhoc181}
{connect adhoc181(1), adhoc69(0)}
{nseg = 1}
{strdef color color = "White"}
{pt3dclear()}
{pt3dadd(192264.000000,159060.000000,55350.000000,66.247350)}
{pt3dadd(189480.000000,159468.000000,56450.000000,27.932109)}
{pt3dadd(189264.000000,159600.000000,56375.000000,17.359265)}
{pt3dadd(188928.000000,159768.000000,56600.000000,7.319591)}
{pt3dadd(188520.000000,159960.000000,56675.000000,4.409795)}
{pt3dadd(188112.000000,160128.000000,56925.000000,4.409795)}
{pt3dadd(187608.000000,159984.000000,57050.000000,4.409795)}
{pt3dadd(187224.000000,160236.000000,57125.000000,7.191199)}
{pt3dadd(187536.000000,160716.000000,58650.000000,6.210428)}
{pt3dadd(187512.000000,160524.000000,60175.000000,9.350714)}
{pt3dadd(187860.000000,160032.000000,60825.000000,11.145123)}

{create adhoc182}
{access adhoc182}
{connect adhoc182(1), adhoc181(0)}
{nseg = 1}
{strdef color color = "White"}
{pt3dclear()}
{pt3dadd(187860.000000,160032.000000,60825.000000,11.145123)}
{pt3dadd(188460.000000,158964.000000,60575.000000,6.364949)}
{pt3dadd(188796.000000,158724.000000,60375.000000,4.418969)}
{pt3dadd(189108.000000,158412.000000,60150.000000,3.264899)}
{pt3dadd(189060.000000,158208.000000,59875.000000,2.274954)}
{pt3dadd(189108.000000,158148.000000,59675.000000,3.049908)}
{pt3dadd(189120.000000,158112.000000,59475.000000,3.496404)}
{pt3dadd(189180.000000,158064.000000,59225.000000,3.535750)}
{pt3dadd(189312.000000,158100.000000,59125.000000,3.732480)}

{create adhoc183}
{access adhoc183}
{connect adhoc183(1), adhoc181(0)}
{nseg = 1}
{strdef color color = "White"}
{pt3dclear()}
{pt3dadd(187860.000000,160032.000000,60825.000000,11.145123)}
{pt3dadd(188340.000000,159420.000000,61550.000000,8.494768)}
{pt3dadd(188916.000000,159540.000000,62000.000000,9.629211)}
{pt3dadd(189360.000000,159384.000000,62425.000000,8.053916)}
{pt3dadd(189840.000000,159060.000000,62675.000000,9.287602)}

{create adhoc184}
{access adhoc184}
{connect adhoc184(1), adhoc183(0)}
{nseg = 1}
{strdef color color = "White"}
{pt3dclear()}
{pt3dadd(189840.000000,159060.000000,62675.000000,9.287602)}
{pt3dadd(190008.000000,158688.000000,62375.000000,6.175757)}
{pt3dadd(190248.000000,158136.000000,62250.000000,4.305454)}
{pt3dadd(190584.000000,158184.000000,62250.000000,3.343729)}
{pt3dadd(190920.000000,157872.000000,62275.000000,2.095795)}
{pt3dadd(191424.000000,157824.000000,61850.000000,2.095795)}
{pt3dadd(191976.000000,157716.000000,61575.000000,2.095795)}
{pt3dadd(192480.000000,157848.000000,61625.000000,2.417875)}
{pt3dadd(193068.000000,158124.000000,61700.000000,1.822080)}
{pt3dadd(193464.000000,158244.000000,61825.000000,1.822080)}
{pt3dadd(193968.000000,158100.000000,62100.000000,1.822080)}
{pt3dadd(194292.000000,158004.000000,62325.000000,2.597034)}
{pt3dadd(194436.000000,157932.000000,62600.000000,2.274954)}
{pt3dadd(194976.000000,157644.000000,62900.000000,2.274954)}
{pt3dadd(195288.000000,157500.000000,62875.000000,2.274954)}
{pt3dadd(195636.000000,157404.000000,62875.000000,3.049908)}
{pt3dadd(195948.000000,157284.000000,62675.000000,2.721450)}
{pt3dadd(196248.000000,157224.000000,62600.000000,3.535750)}
{pt3dadd(196584.000000,157452.000000,62325.000000,3.732480)}

{create adhoc185}
{access adhoc185}
{connect adhoc185(1), adhoc183(0)}
{nseg = 1}
{strdef color color = "White"}
{pt3dclear()}
{pt3dadd(189840.000000,159060.000000,62675.000000,9.287602)}
{pt3dadd(190248.000000,159216.000000,62975.000000,5.745775)}
{pt3dadd(190452.000000,159408.000000,63325.000000,4.822419)}
{pt3dadd(190716.000000,159420.000000,63525.000000,4.039853)}
{pt3dadd(190992.000000,159732.000000,63750.000000,4.083180)}
{pt3dadd(191196.000000,159996.000000,63950.000000,5.374770)}

{create adhoc186}
{access adhoc186}
{connect adhoc186(1), adhoc68(0)}
{nseg = 1}
{strdef color color = "White"}
{pt3dclear()}
{pt3dadd(192804.000000,165288.000000,55200.000000,57.506386)}
{pt3dadd(191400.000000,164712.000000,52575.000000,27.372304)}
{pt3dadd(191160.000000,164376.000000,52250.000000,21.345488)}
{pt3dadd(191124.000000,163992.000000,51450.000000,14.281432)}
{pt3dadd(190356.000000,163392.000000,50550.000000,15.598878)}
{pt3dadd(189672.000000,162828.000000,49700.000000,22.186106)}

{create adhoc187}
{access adhoc187}
{connect adhoc187(1), adhoc186(0)}
{nseg = 1}
{strdef color color = "White"}
{pt3dclear()}
{pt3dadd(189672.000000,162828.000000,49700.000000,22.186106)}
{pt3dadd(188292.000000,163620.000000,49150.000000,21.518468)}
{pt3dadd(188004.000000,163764.000000,48775.000000,20.285906)}
{pt3dadd(187632.000000,164004.000000,48600.000000,18.488420)}

{create adhoc188}
{access adhoc188}
{connect adhoc188(1), adhoc187(0)}
{nseg = 1}
{strdef color color = "White"}
{pt3dclear()}
{pt3dadd(187632.000000,164004.000000,48600.000000,18.488420)}
{pt3dadd(187272.000000,164736.000000,47750.000000,11.120856)}
{pt3dadd(186948.000000,164772.000000,47575.000000,7.272513)}
{pt3dadd(186504.000000,164940.000000,47325.000000,6.784625)}
{pt3dadd(186048.000000,165132.000000,47075.000000,4.409795)}
{pt3dadd(185580.000000,165228.000000,47000.000000,4.409795)}
{pt3dadd(185016.000000,165348.000000,46850.000000,4.409795)}
{pt3dadd(184416.000000,165660.000000,46550.000000,5.657729)}
{pt3dadd(182808.000000,166104.000000,46400.000000,4.676958)}
{pt3dadd(181836.000000,166764.000000,46050.000000,6.234479)}
{pt3dadd(181392.000000,167604.000000,45975.000000,9.390798)}
{pt3dadd(181572.000000,168324.000000,45475.000000,9.287602)}

{create adhoc189}
{access adhoc189}
{connect adhoc189(1), adhoc188(0)}
{nseg = 1}
{strdef color color = "White"}
{pt3dclear()}
{pt3dadd(181572.000000,168324.000000,45475.000000,9.287602)}
{pt3dadd(181980.000000,168432.000000,45500.000000,5.833019)}
{pt3dadd(182280.000000,168624.000000,45600.000000,4.230143)}
{pt3dadd(182388.000000,169524.000000,45825.000000,4.478975)}

{create adhoc190}
{access adhoc190}
{connect adhoc190(1), adhoc188(0)}
{nseg = 1}
{strdef color color = "White"}
{pt3dclear()}
{pt3dadd(181572.000000,168324.000000,45475.000000,9.287602)}
{pt3dadd(181596.000000,168228.000000,45100.000000,6.870150)}
{pt3dadd(181452.000000,168120.000000,44925.000000,3.583180)}

{create adhoc191}
{access adhoc191}
{connect adhoc191(1), adhoc187(0)}
{nseg = 1}
{strdef color color = "White"}
{pt3dclear()}
{pt3dadd(187632.000000,164004.000000,48600.000000,18.488420)}
{pt3dadd(186972.000000,163656.000000,49050.000000,16.048977)}

{create adhoc192}
{access adhoc192}
{connect adhoc192(1), adhoc191(0)}
{nseg = 1}
{strdef color color = "White"}
{pt3dclear()}
{pt3dadd(186972.000000,163656.000000,49050.000000,16.048977)}
{pt3dadd(186420.000000,164244.000000,49050.000000,7.999567)}
{pt3dadd(185976.000000,164184.000000,48875.000000,6.393094)}
{pt3dadd(185772.000000,164340.000000,49025.000000,3.155590)}
{pt3dadd(185448.000000,164376.000000,48750.000000,2.592000)}

{create adhoc193}
{access adhoc193}
{connect adhoc193(1), adhoc191(0)}
{nseg = 1}
{strdef color color = "White"}
{pt3dclear()}
{pt3dadd(186972.000000,163656.000000,49050.000000,16.048977)}
{pt3dadd(186504.000000,163608.000000,49250.000000,9.564700)}
{pt3dadd(186252.000000,163440.000000,49675.000000,7.328765)}
{pt3dadd(185976.000000,163428.000000,49800.000000,5.666903)}
{pt3dadd(185628.000000,162936.000000,50225.000000,5.229798)}
{pt3dadd(185088.000000,162696.000000,50350.000000,7.739669)}

{create adhoc194}
{access adhoc194}
{connect adhoc194(1), adhoc193(0)}
{nseg = 1}
{strdef color color = "White"}
{pt3dclear()}
{pt3dadd(185088.000000,162696.000000,50350.000000,7.739669)}
{pt3dadd(184584.000000,162312.000000,50225.000000,3.943890)}
{pt3dadd(184416.000000,162168.000000,50050.000000,3.184734)}
{pt3dadd(183852.000000,161808.000000,49725.000000,2.068800)}
{pt3dadd(183504.000000,161604.000000,49525.000000,2.084000)}
{pt3dadd(183216.000000,161376.000000,49325.000000,2.160000)}

{create adhoc195}
{access adhoc195}
{connect adhoc195(1), adhoc193(0)}
{nseg = 1}
{strdef color color = "White"}
{pt3dclear()}
{pt3dadd(185088.000000,162696.000000,50350.000000,7.739669)}
{pt3dadd(185256.000000,162648.000000,50700.000000,5.659779)}
{pt3dadd(185388.000000,162648.000000,51175.000000,3.995868)}
{pt3dadd(185220.000000,162516.000000,51700.000000,4.305454)}
{pt3dadd(184956.000000,162480.000000,52375.000000,3.653315)}
{pt3dadd(184920.000000,162612.000000,52950.000000,3.871715)}
{pt3dadd(184788.000000,162864.000000,53425.000000,5.452859)}
{pt3dadd(184476.000000,163272.000000,53850.000000,2.592000)}

{create adhoc196}
{access adhoc196}
{connect adhoc196(1), adhoc186(0)}
{nseg = 1}
{strdef color color = "White"}
{pt3dclear()}
{pt3dadd(189672.000000,162828.000000,49700.000000,22.186106)}
{pt3dadd(189024.000000,161676.000000,49125.000000,22.802387)}
{pt3dadd(188652.000000,160452.000000,48600.000000,23.110527)}

{create adhoc197}
{access adhoc197}
{connect adhoc197(1), adhoc196(0)}
{nseg = 1}
{strdef color color = "White"}
{pt3dclear()}
{pt3dadd(188652.000000,160452.000000,48600.000000,23.110527)}
{pt3dadd(188388.000000,161316.000000,47850.000000,12.661558)}
{pt3dadd(188076.000000,161268.000000,47500.000000,8.196935)}
{pt3dadd(187860.000000,160860.000000,46875.000000,4.864774)}
{pt3dadd(187584.000000,160776.000000,46750.000000,2.489945)}
{pt3dadd(187272.000000,160536.000000,46650.000000,2.489945)}
{pt3dadd(186936.000000,160224.000000,46450.000000,2.489945)}
{pt3dadd(186480.000000,159984.000000,46050.000000,4.418969)}
{pt3dadd(185532.000000,159840.000000,45725.000000,3.429025)}
{pt3dadd(185388.000000,160308.000000,45175.000000,3.751105)}
{pt3dadd(185268.000000,160344.000000,44825.000000,3.969505)}
{pt3dadd(185160.000000,160704.000000,44475.000000,2.400800)}
{pt3dadd(184752.000000,161028.000000,44050.000000,2.592000)}

{create adhoc198}
{access adhoc198}
{connect adhoc198(1), adhoc196(0)}
{nseg = 1}
{strdef color color = "White"}
{pt3dclear()}
{pt3dadd(188652.000000,160452.000000,48600.000000,23.110527)}
{pt3dadd(188304.000000,159912.000000,48750.000000,15.907018)}
{pt3dadd(188136.000000,159804.000000,48825.000000,16.667440)}
{pt3dadd(187776.000000,159444.000000,48775.000000,12.372048)}
{pt3dadd(187416.000000,158880.000000,48725.000000,19.258772)}

{create adhoc199}
{access adhoc199}
{connect adhoc199(1), adhoc198(0)}
{nseg = 1}
{strdef color color = "White"}
{pt3dclear()}
{pt3dadd(187416.000000,158880.000000,48725.000000,19.258772)}
{pt3dadd(187320.000000,157512.000000,49350.000000,10.791070)}
{pt3dadd(186828.000000,157044.000000,49825.000000,5.374770)}

{create adhoc200}
{access adhoc200}
{connect adhoc200(1), adhoc198(0)}
{nseg = 1}
{strdef color color = "White"}
{pt3dclear()}
{pt3dadd(187416.000000,158880.000000,48725.000000,19.258772)}
{pt3dadd(186960.000000,158460.000000,48700.000000,19.258772)}
{pt3dadd(186456.000000,158076.000000,48800.000000,17.974854)}
{pt3dadd(185844.000000,157920.000000,48675.000000,15.407019)}

{create adhoc201}
{access adhoc201}
{connect adhoc201(1), adhoc200(0)}
{nseg = 1}
{strdef color color = "White"}
{pt3dclear()}
{pt3dadd(185844.000000,157920.000000,48675.000000,15.407019)}
{pt3dadd(185412.000000,158064.000000,49500.000000,8.607706)}
{pt3dadd(185040.000000,158232.000000,49925.000000,9.190991)}
{pt3dadd(184596.000000,158088.000000,49875.000000,7.210612)}
{pt3dadd(184164.000000,158172.000000,50575.000000,9.860491)}

{create adhoc202}
{access adhoc202}
{connect adhoc202(1), adhoc201(0)}
{nseg = 1}
{strdef color color = "White"}
{pt3dclear()}
{pt3dadd(184164.000000,158172.000000,50575.000000,9.860491)}
{pt3dadd(183900.000000,158436.000000,50150.000000,5.578420)}
{pt3dadd(183360.000000,158556.000000,50175.000000,5.044086)}
{pt3dadd(183084.000000,158700.000000,50075.000000,3.328390)}
{pt3dadd(182916.000000,159072.000000,49525.000000,3.110400)}

{create adhoc203}
{access adhoc203}
{connect adhoc203(1), adhoc201(0)}
{nseg = 1}
{strdef color color = "White"}
{pt3dclear()}
{pt3dadd(184164.000000,158172.000000,50575.000000,9.860491)}
{pt3dadd(183768.000000,158364.000000,50875.000000,6.366720)}
{pt3dadd(183384.000000,158616.000000,51350.000000,4.420032)}
{pt3dadd(183468.000000,158808.000000,51700.000000,3.995868)}
{pt3dadd(183780.000000,159168.000000,51875.000000,2.747934)}
{pt3dadd(184332.000000,159468.000000,52050.000000,2.747934)}
{pt3dadd(184968.000000,159756.000000,52000.000000,3.194430)}
{pt3dadd(185568.000000,159972.000000,52250.000000,3.516510)}
{pt3dadd(186000.000000,160116.000000,52450.000000,2.780960)}
{pt3dadd(186096.000000,160272.000000,52500.000000,3.110400)}

{create adhoc204}
{access adhoc204}
{connect adhoc204(1), adhoc200(0)}
{nseg = 1}
{strdef color color = "White"}
{pt3dclear()}
{pt3dadd(185844.000000,157920.000000,48675.000000,15.407019)}
{pt3dadd(185292.000000,157512.000000,48375.000000,9.350714)}
{pt3dadd(184680.000000,156876.000000,48100.000000,6.210428)}
{pt3dadd(184440.000000,156516.000000,48025.000000,3.875521)}
{pt3dadd(183972.000000,156300.000000,48025.000000,2.268576)}
{pt3dadd(183936.000000,155520.000000,48075.000000,2.780960)}
{pt3dadd(183684.000000,155124.000000,48175.000000,3.110400)}

{create adhoc205}
{access adhoc205}
{connect adhoc205(1), adhoc67(0)}
{nseg = 1}
{strdef color color = "White"}
{pt3dclear()}
{pt3dadd(192816.000000,167160.000000,55675.000000,82.809190)}
{pt3dadd(192444.000000,166596.000000,55525.000000,55.706127)}
{pt3dadd(190692.000000,166392.000000,57575.000000,34.023676)}
{pt3dadd(190320.000000,166344.000000,57375.000000,20.671633)}
{pt3dadd(189948.000000,166392.000000,57500.000000,4.409795)}
{pt3dadd(189612.000000,166212.000000,57475.000000,6.949617)}
{pt3dadd(189288.000000,166116.000000,57375.000000,9.324446)}
{pt3dadd(189000.000000,166044.000000,57425.000000,9.691085)}
{pt3dadd(188664.000000,165876.000000,57450.000000,13.374147)}

{create adhoc206}
{access adhoc206}
{connect adhoc206(1), adhoc205(0)}
{nseg = 1}
{strdef color color = "White"}
{pt3dclear()}
{pt3dadd(188664.000000,165876.000000,57450.000000,13.374147)}
{pt3dadd(188412.000000,165108.000000,57425.000000,11.268957)}
{pt3dadd(188268.000000,164724.000000,57475.000000,9.287602)}

{create adhoc207}
{access adhoc207}
{connect adhoc207(1), adhoc206(0)}
{nseg = 1}
{strdef color color = "White"}
{pt3dclear()}
{pt3dadd(188268.000000,164724.000000,57475.000000,9.287602)}
{pt3dadd(188916.000000,164796.000000,57750.000000,5.783252)}
{pt3dadd(188976.000000,164916.000000,57850.000000,3.583180)}

{create adhoc208}
{access adhoc208}
{connect adhoc208(1), adhoc206(0)}
{nseg = 1}
{strdef color color = "White"}
{pt3dclear()}
{pt3dadd(188268.000000,164724.000000,57475.000000,9.287602)}
{pt3dadd(188508.000000,164352.000000,57800.000000,7.037365)}
{pt3dadd(188208.000000,164424.000000,58025.000000,5.374770)}

{create adhoc209}
{access adhoc209}
{connect adhoc209(1), adhoc205(0)}
{nseg = 1}
{strdef color color = "White"}
{pt3dclear()}
{pt3dadd(188664.000000,165876.000000,57450.000000,13.374147)}
{pt3dadd(188376.000000,166032.000000,57425.000000,10.307708)}
{pt3dadd(188040.000000,166188.000000,57450.000000,6.784625)}
{pt3dadd(187668.000000,166344.000000,57450.000000,7.961550)}
{pt3dadd(187368.000000,166404.000000,57350.000000,5.051754)}
{pt3dadd(187116.000000,166488.000000,57475.000000,5.051754)}
{pt3dadd(186732.000000,166548.000000,57850.000000,5.051754)}
{pt3dadd(186540.000000,166908.000000,58325.000000,8.603509)}
{pt3dadd(186264.000000,167016.000000,58650.000000,5.051754)}
{pt3dadd(186096.000000,167580.000000,59150.000000,5.051754)}
{pt3dadd(186048.000000,168216.000000,59750.000000,8.449439)}
{pt3dadd(186180.000000,168264.000000,60100.000000,11.359234)}
{pt3dadd(186444.000000,168420.000000,60650.000000,12.012466)}
{pt3dadd(186684.000000,168156.000000,61250.000000,16.048977)}

{create adhoc210}
{access adhoc210}
{connect adhoc210(1), adhoc209(0)}
{nseg = 1}
{strdef color color = "White"}
{pt3dclear()}
{pt3dadd(186684.000000,168156.000000,61250.000000,16.048977)}
{pt3dadd(187428.000000,168108.000000,61600.000000,9.287602)}

{create adhoc211}
{access adhoc211}
{connect adhoc211(1), adhoc210(0)}
{nseg = 1}
{strdef color color = "White"}
{pt3dclear()}
{pt3dadd(187428.000000,168108.000000,61600.000000,9.287602)}
{pt3dadd(187416.000000,167988.000000,61875.000000,8.341643)}
{pt3dadd(187632.000000,167736.000000,62150.000000,7.037365)}
{pt3dadd(188232.000000,167484.000000,62525.000000,5.374770)}

{create adhoc212}
{access adhoc212}
{connect adhoc212(1), adhoc210(0)}
{nseg = 1}
{strdef color color = "White"}
{pt3dclear()}
{pt3dadd(187428.000000,168108.000000,61600.000000,9.287602)}
{pt3dadd(188508.000000,167868.000000,61850.000000,5.659779)}
{pt3dadd(189120.000000,167736.000000,62100.000000,3.995867)}
{pt3dadd(189720.000000,167748.000000,62300.000000,3.213301)}
{pt3dadd(189912.000000,167796.000000,62500.000000,2.870749)}
{pt3dadd(190140.000000,167712.000000,62875.000000,3.784582)}
{pt3dadd(190308.000000,167328.000000,63175.000000,4.478975)}

{create adhoc213}
{access adhoc213}
{connect adhoc213(1), adhoc209(0)}
{nseg = 1}
{strdef color color = "White"}
{pt3dclear()}
{pt3dadd(186684.000000,168156.000000,61250.000000,16.048977)}
{pt3dadd(186768.000000,169284.000000,61900.000000,10.271345)}

{create adhoc214}
{access adhoc214}
{connect adhoc214(1), adhoc213(0)}
{nseg = 1}
{strdef color color = "White"}
{pt3dclear()}
{pt3dadd(186768.000000,169284.000000,61900.000000,10.271345)}
{pt3dadd(186912.000000,169140.000000,62225.000000,10.031739)}
{pt3dadd(186924.000000,169176.000000,62500.000000,8.757865)}
{pt3dadd(186912.000000,169116.000000,62925.000000,6.449724)}

{create adhoc215}
{access adhoc215}
{connect adhoc215(1), adhoc213(0)}
{nseg = 1}
{strdef color color = "White"}
{pt3dclear()}
{pt3dadd(186768.000000,169284.000000,61900.000000,10.271345)}
{pt3dadd(186828.000000,169572.000000,62050.000000,6.073690)}
{pt3dadd(186720.000000,169860.000000,62050.000000,4.244214)}
{pt3dadd(186960.000000,170208.000000,62250.000000,4.418969)}
{pt3dadd(187392.000000,170592.000000,62525.000000,4.986545)}
{pt3dadd(187308.000000,170664.000000,62875.000000,6.234479)}
{pt3dadd(187536.000000,171096.000000,63050.000000,9.390798)}
{pt3dadd(187680.000000,171228.000000,63300.000000,7.739669)}

{create adhoc216}
{access adhoc216}
{connect adhoc216(1), adhoc66(0)}
{nseg = 1}
{strdef color color = "White"}
{pt3dclear()}
{pt3dadd(191244.000000,170100.000000,55100.000000,70.333700)}
{pt3dadd(188268.000000,169968.000000,53050.000000,30.364157)}
{pt3dadd(187896.000000,169920.000000,52750.000000,18.818494)}
{pt3dadd(187512.000000,169692.000000,52475.000000,9.373860)}
{pt3dadd(187068.000000,169632.000000,52225.000000,5.822105)}
{pt3dadd(186624.000000,169668.000000,52100.000000,5.822105)}
{pt3dadd(186180.000000,169536.000000,52075.000000,5.822105)}
{pt3dadd(185748.000000,169416.000000,51875.000000,9.373860)}
{pt3dadd(185280.000000,169152.000000,51850.000000,5.051754)}
{pt3dadd(184824.000000,169044.000000,51775.000000,5.051754)}
{pt3dadd(184320.000000,169128.000000,51425.000000,5.051754)}
{pt3dadd(184008.000000,168972.000000,51350.000000,9.188976)}
{pt3dadd(183624.000000,168900.000000,51350.000000,8.012051)}
{pt3dadd(183192.000000,168876.000000,51325.000000,10.921846)}
{pt3dadd(182304.000000,169740.000000,50750.000000,17.203077)}
{pt3dadd(181656.000000,170580.000000,50275.000000,16.048977)}

{create adhoc217}
{access adhoc217}
{connect adhoc217(1), adhoc216(0)}
{nseg = 1}
{strdef color color = "White"}
{pt3dclear()}
{pt3dadd(181656.000000,170580.000000,50275.000000,16.048977)}
{pt3dadd(181260.000000,170532.000000,49750.000000,16.048977)}

{create adhoc218}
{access adhoc218}
{connect adhoc218(1), adhoc217(0)}
{nseg = 1}
{strdef color color = "White"}
{pt3dclear()}
{pt3dadd(181260.000000,170532.000000,49750.000000,16.048977)}
{pt3dadd(180768.000000,170592.000000,49125.000000,8.945526)}
{pt3dadd(181020.000000,170688.000000,48825.000000,7.474226)}
{pt3dadd(181284.000000,171132.000000,48525.000000,4.011517)}
{pt3dadd(181488.000000,171228.000000,48325.000000,5.374770)}

{create adhoc219}
{access adhoc219}
{connect adhoc219(1), adhoc217(0)}
{nseg = 1}
{strdef color color = "White"}
{pt3dclear()}
{pt3dadd(181260.000000,170532.000000,49750.000000,16.048977)}
{pt3dadd(181116.000000,169572.000000,49575.000000,7.641249)}
{pt3dadd(181344.000000,169116.000000,49400.000000,6.555498)}
{pt3dadd(181560.000000,168756.000000,49000.000000,3.784582)}
{pt3dadd(181632.000000,168468.000000,48775.000000,5.374770)}

{create adhoc220}
{access adhoc220}
{connect adhoc220(1), adhoc216(0)}
{nseg = 1}
{strdef color color = "White"}
{pt3dclear()}
{pt3dadd(181656.000000,170580.000000,50275.000000,16.048977)}
{pt3dadd(181800.000000,171864.000000,50475.000000,8.945526)}
{pt3dadd(182112.000000,173112.000000,50625.000000,5.967316)}
{pt3dadd(182112.000000,173352.000000,50800.000000,4.305454)}
{pt3dadd(182064.000000,173712.000000,50850.000000,3.307897)}
{pt3dadd(182064.000000,173964.000000,50950.000000,3.526297)}
{pt3dadd(181512.000000,174276.000000,51150.000000,4.877162)}
{pt3dadd(180924.000000,174504.000000,51375.000000,2.592000)}

{create adhoc221}
{access adhoc221}
{connect adhoc221(1), adhoc65(0)}
{nseg = 1}
{strdef color color = "White"}
{pt3dclear()}
{pt3dadd(189984.000000,172044.000000,55075.000000,57.506386)}
{pt3dadd(187140.000000,172092.000000,55250.000000,22.248685)}
{pt3dadd(186408.000000,172032.000000,55100.000000,13.949211)}
{pt3dadd(185808.000000,171720.000000,54800.000000,3.995868)}
{pt3dadd(185124.000000,172044.000000,54875.000000,2.747934)}
{pt3dadd(184872.000000,172104.000000,54900.000000,3.995868)}
{pt3dadd(184572.000000,172188.000000,54725.000000,4.985812)}
{pt3dadd(184116.000000,172260.000000,54800.000000,5.229798)}
{pt3dadd(183552.000000,172248.000000,54775.000000,6.449724)}

{create adhoc222}
{access adhoc222}
{connect adhoc222(1), adhoc221(0)}
{nseg = 1}
{strdef color color = "White"}
{pt3dclear()}
{pt3dadd(183552.000000,172248.000000,54775.000000,6.449724)}
{pt3dadd(183132.000000,172332.000000,55375.000000,8.217808)}
{pt3dadd(183192.000000,172644.000000,55450.000000,9.782941)}
{pt3dadd(183216.000000,173040.000000,55675.000000,11.145123)}

{create adhoc223}
{access adhoc223}
{connect adhoc223(1), adhoc221(0)}
{nseg = 1}
{strdef color color = "White"}
{pt3dclear()}
{pt3dadd(183552.000000,172248.000000,54775.000000,6.449724)}
{pt3dadd(183360.000000,172524.000000,54475.000000,6.521388)}
{pt3dadd(183012.000000,172812.000000,54300.000000,5.408280)}
{pt3dadd(182712.000000,173052.000000,54200.000000,3.110400)}

{create adhoc224}
{access adhoc224}
{connect adhoc224(1), adhoc64(0)}
{nseg = 1}
{strdef color color = "White"}
{pt3dclear()}
{pt3dadd(188760.000000,180228.000000,55325.000000,82.809190)}
{pt3dadd(185832.000000,180360.000000,56575.000000,34.522654)}
{pt3dadd(185184.000000,180132.000000,56850.000000,21.313592)}
{pt3dadd(184860.000000,179784.000000,56950.000000,9.373860)}
{pt3dadd(184512.000000,179856.000000,57100.000000,5.822105)}
{pt3dadd(184212.000000,179856.000000,57175.000000,8.731901)}
{pt3dadd(183888.000000,179772.000000,57275.000000,10.660925)}
{pt3dadd(183612.000000,179688.000000,57375.000000,9.564700)}
{pt3dadd(183156.000000,180252.000000,57675.000000,11.145123)}

{create adhoc225}
{access adhoc225}
{connect adhoc225(1), adhoc224(0)}
{nseg = 1}
{strdef color color = "White"}
{pt3dclear()}
{pt3dadd(183156.000000,180252.000000,57675.000000,11.145123)}
{pt3dadd(182868.000000,180564.000000,58125.000000,7.930082)}
{pt3dadd(182436.000000,180540.000000,58100.000000,5.358049)}
{pt3dadd(182280.000000,180696.000000,58550.000000,5.358049)}
{pt3dadd(181848.000000,181068.000000,59125.000000,4.676958)}
{pt3dadd(181716.000000,181392.000000,59400.000000,6.794931)}
{pt3dadd(181452.000000,181704.000000,59400.000000,7.739669)}

{create adhoc226}
{access adhoc226}
{connect adhoc226(1), adhoc225(0)}
{nseg = 1}
{strdef color color = "White"}
{pt3dclear()}
{pt3dadd(181452.000000,181704.000000,59400.000000,7.739669)}
{pt3dadd(180492.000000,181524.000000,59325.000000,5.973958)}
{pt3dadd(180240.000000,181344.000000,59625.000000,3.732480)}

{create adhoc227}
{access adhoc227}
{connect adhoc227(1), adhoc225(0)}
{nseg = 1}
{strdef color color = "White"}
{pt3dclear()}
{pt3dadd(181452.000000,181704.000000,59400.000000,7.739669)}
{pt3dadd(181140.000000,182112.000000,59400.000000,5.659779)}
{pt3dadd(181104.000000,182508.000000,59250.000000,5.243801)}
{pt3dadd(181056.000000,182808.000000,59275.000000,4.280193)}
{pt3dadd(180864.000000,183216.000000,59350.000000,4.053765)}
{pt3dadd(180744.000000,183456.000000,59225.000000,2.921627)}

{create adhoc228}
{access adhoc228}
{connect adhoc228(1), adhoc224(0)}
{nseg = 1}
{strdef color color = "White"}
{pt3dclear()}
{pt3dadd(183156.000000,180252.000000,57675.000000,11.145123)}
{pt3dadd(183084.000000,178824.000000,57050.000000,11.145123)}
{pt3dadd(183276.000000,177624.000000,57275.000000,11.145123)}

{create adhoc229}
{access adhoc229}
{connect adhoc229(1), adhoc228(0)}
{nseg = 1}
{strdef color color = "White"}
{pt3dclear()}
{pt3dadd(183276.000000,177624.000000,57275.000000,11.145123)}
{pt3dadd(183312.000000,177360.000000,56950.000000,7.930082)}
{pt3dadd(183252.000000,176964.000000,56800.000000,6.907957)}
{pt3dadd(183024.000000,176700.000000,56650.000000,4.083180)}
{pt3dadd(183072.000000,176496.000000,56200.000000,5.374770)}

{create adhoc230}
{access adhoc230}
{connect adhoc230(1), adhoc228(0)}
{nseg = 1}
{strdef color color = "White"}
{pt3dclear()}
{pt3dadd(183276.000000,177624.000000,57275.000000,11.145123)}
{pt3dadd(183396.000000,177240.000000,57575.000000,5.251841)}
{pt3dadd(183576.000000,176808.000000,58100.000000,3.751105)}
{pt3dadd(183720.000000,176604.000000,58575.000000,2.812025)}
{pt3dadd(183900.000000,176424.000000,58800.000000,2.489945)}
{pt3dadd(184032.000000,175908.000000,59100.000000,2.489945)}
{pt3dadd(184332.000000,175596.000000,59325.000000,3.479890)}
{pt3dadd(184392.000000,175308.000000,59525.000000,3.801970)}
{pt3dadd(184716.000000,175284.000000,59700.000000,3.686708)}
{pt3dadd(185244.000000,175428.000000,59975.000000,3.110400)}

{create adhoc231}
{access adhoc231}
{connect adhoc231(1), adhoc51(0)}
{nseg = 1}
{strdef color color = "White"}
{pt3dclear()}
{pt3dadd(183000.000000,192444.000000,56400.000000,99.371025)}
{pt3dadd(179196.000000,191952.000000,55500.000000,42.931383)}
{pt3dadd(178788.000000,191820.000000,55625.000000,16.227299)}
{pt3dadd(178224.000000,191568.000000,55675.000000,19.258772)}

{create adhoc232}
{access adhoc232}
{connect adhoc232(1), adhoc231(0)}
{nseg = 1}
{strdef color color = "White"}
{pt3dclear()}
{pt3dadd(178224.000000,191568.000000,55675.000000,19.258772)}
{pt3dadd(177624.000000,190596.000000,55825.000000,12.055264)}
{pt3dadd(177492.000000,190452.000000,56025.000000,8.279654)}
{pt3dadd(177588.000000,190272.000000,56250.000000,5.975834)}
{pt3dadd(177288.000000,190044.000000,56325.000000,4.324050)}
{pt3dadd(177012.000000,189996.000000,56425.000000,7.739669)}

{create adhoc233}
{access adhoc233}
{connect adhoc233(1), adhoc231(0)}
{nseg = 1}
{strdef color color = "White"}
{pt3dclear()}
{pt3dadd(178224.000000,191568.000000,55675.000000,19.258772)}
{pt3dadd(177564.000000,191292.000000,55300.000000,18.188840)}
{pt3dadd(176748.000000,191412.000000,54950.000000,16.048977)}

{create adhoc234}
{access adhoc234}
{connect adhoc234(1), adhoc233(0)}
{nseg = 1}
{strdef color color = "White"}
{pt3dclear()}
{pt3dadd(176748.000000,191412.000000,54950.000000,16.048977)}
{pt3dadd(175596.000000,191280.000000,55700.000000,11.199318)}
{pt3dadd(174156.000000,191556.000000,54950.000000,10.125045)}
{pt3dadd(173568.000000,191820.000000,54800.000000,6.175757)}
{pt3dadd(172620.000000,192300.000000,54775.000000,7.739669)}

{create adhoc235}
{access adhoc235}
{connect adhoc235(1), adhoc234(0)}
{nseg = 1}
{strdef color color = "White"}
{pt3dclear()}
{pt3dadd(172620.000000,192300.000000,54775.000000,7.739669)}
{pt3dadd(171204.000000,192612.000000,55100.000000,4.871480)}
{pt3dadd(169680.000000,192540.000000,54950.000000,3.522888)}
{pt3dadd(168336.000000,192288.000000,54900.000000,2.548263)}
{pt3dadd(167268.000000,192072.000000,54850.000000,1.773309)}
{pt3dadd(166308.000000,191688.000000,54500.000000,1.773309)}
{pt3dadd(165528.000000,190968.000000,54275.000000,1.773309)}
{pt3dadd(165252.000000,190848.000000,54050.000000,2.369104)}
{pt3dadd(164784.000000,190572.000000,54250.000000,2.417875)}
{pt3dadd(164472.000000,190296.000000,54075.000000,3.029792)}
{pt3dadd(164412.000000,190056.000000,53900.000000,3.110400)}

{create adhoc236}
{access adhoc236}
{connect adhoc236(1), adhoc234(0)}
{nseg = 1}
{strdef color color = "White"}
{pt3dclear()}
{pt3dadd(172620.000000,192300.000000,54775.000000,7.739669)}
{pt3dadd(172572.000000,193404.000000,54900.000000,5.317041)}
{pt3dadd(172428.000000,193956.000000,55200.000000,3.732480)}

{create adhoc237}
{access adhoc237}
{connect adhoc237(1), adhoc233(0)}
{nseg = 1}
{strdef color color = "White"}
{pt3dclear()}
{pt3dadd(176748.000000,191412.000000,54950.000000,16.048977)}
{pt3dadd(175908.000000,191160.000000,55275.000000,11.199318)}
{pt3dadd(175488.000000,190416.000000,55475.000000,7.963751)}
{pt3dadd(175332.000000,189804.000000,55675.000000,2.573600)}
{pt3dadd(175344.000000,189660.000000,55725.000000,3.110400)}
