# Supplementary material for: Full reconstruction of large lobula plate tangential cells in Drosophila from a 3D EM dataset
Source: PLoS One. 2018 Nov 28;13(11):e0207828. doi: 10.1371/journal.pone.0207828 (PMC6261601; doi:10.1371/journal.pone.0207828)
Supplement: S1 Dataset — (ZIP) [file pone.0207828.s001.zip › Diameter hoc/VS_VSL_preliminary/VS4_skels_ck.001_completed.hoc0001.hoc]

/* created with convertKnossosNmlToHoc.m */

{create adhoc1}
{access adhoc1}
{nseg = 1}
{strdef color color = "White"}
{pt3dclear()}
{pt3dadd(178812.000000,217188.000000,81925.000000,7.430082)}
{pt3dadd(178920.000000,216960.000000,81750.000000,7.434743)}
{pt3dadd(179088.000000,216840.000000,81500.000000,5.060846)}
{pt3dadd(179196.000000,216732.000000,81450.000000,5.803854)}
{pt3dadd(179256.000000,216516.000000,81350.000000,11.116023)}
{pt3dadd(179544.000000,216516.000000,81250.000000,17.526704)}
{pt3dadd(180036.000000,216624.000000,80500.000000,39.934990)}

{create adhoc2}
{access adhoc2}
{connect adhoc2(1), adhoc1(0)}
{nseg = 1}
{strdef color color = "White"}
{pt3dclear()}
{pt3dadd(180036.000000,216624.000000,80500.000000,39.934990)}
{pt3dadd(179928.000000,216648.000000,80250.000000,27.123327)}
{pt3dadd(179772.000000,216912.000000,80050.000000,16.873996)}
{pt3dadd(179580.000000,217104.000000,79875.000000,18.471396)}
{pt3dadd(179376.000000,217296.000000,79375.000000,10.784398)}
{pt3dadd(179280.000000,217464.000000,79300.000000,20.068796)}
{pt3dadd(178824.000000,218052.000000,79100.000000,30.810023)}
{pt3dadd(178452.000000,218256.000000,78700.000000,34.876042)}
{pt3dadd(178092.000000,218376.000000,78350.000000,55.206135)}

{create adhoc3}
{access adhoc3}
{connect adhoc3(1), adhoc2(0)}
{nseg = 1}
{strdef color color = "White"}
{pt3dclear()}
{pt3dadd(178092.000000,218376.000000,78350.000000,55.206135)}
{pt3dadd(177912.000000,218376.000000,78100.000000,38.070840)}
{pt3dadd(177816.000000,218412.000000,77775.000000,23.442504)}
{pt3dadd(177576.000000,218400.000000,77325.000000,26.202809)}
{pt3dadd(177324.000000,218520.000000,76925.000000,15.001532)}
{pt3dadd(177192.000000,218568.000000,76525.000000,15.001532)}
{pt3dadd(176928.000000,218796.000000,76175.000000,15.001532)}
{pt3dadd(176592.000000,218904.000000,75775.000000,28.503064)}
{pt3dadd(176304.000000,218988.000000,75350.000000,28.503064)}
{pt3dadd(176280.000000,219144.000000,75075.000000,46.505107)}
{pt3dadd(175956.000000,219144.000000,74900.000000,69.007660)}

{create adhoc4}
{access adhoc4}
{connect adhoc4(1), adhoc3(0)}
{nseg = 1}
{strdef color color = "White"}
{pt3dclear()}
{pt3dadd(175956.000000,219144.000000,74900.000000,69.007660)}
{pt3dadd(175848.000000,219348.000000,74475.000000,46.505107)}
{pt3dadd(175620.000000,219456.000000,74075.000000,28.503064)}
{pt3dadd(175392.000000,219564.000000,73725.000000,26.202809)}
{pt3dadd(175200.000000,219468.000000,73375.000000,12.701277)}
{pt3dadd(174924.000000,219504.000000,73000.000000,12.701277)}
{pt3dadd(174528.000000,219696.000000,72700.000000,12.701277)}
{pt3dadd(174096.000000,219924.000000,72325.000000,20.388275)}
{pt3dadd(173676.000000,220200.000000,72075.000000,16.873996)}
{pt3dadd(173532.000000,220260.000000,71950.000000,23.229828)}
{pt3dadd(173352.000000,220320.000000,71875.000000,37.716380)}
{pt3dadd(173148.000000,220428.000000,71800.000000,33.279160)}

{create adhoc5}
{access adhoc5}
{connect adhoc5(1), adhoc4(0)}
{nseg = 1}
{strdef color color = "White"}
{pt3dclear()}
{pt3dadd(173148.000000,220428.000000,71800.000000,33.279160)}
{pt3dadd(172944.000000,220452.000000,71500.000000,24.904717)}
{pt3dadd(172764.000000,220560.000000,71375.000000,15.542830)}
{pt3dadd(172572.000000,220752.000000,71225.000000,16.873996)}
{pt3dadd(172368.000000,221016.000000,71225.000000,9.186998)}
{pt3dadd(171972.000000,221244.000000,71025.000000,9.186998)}
{pt3dadd(171804.000000,221352.000000,70900.000000,9.186998)}
{pt3dadd(171636.000000,221496.000000,70850.000000,18.471396)}
{pt3dadd(171456.000000,221628.000000,70750.000000,10.784398)}
{pt3dadd(171264.000000,221808.000000,70725.000000,10.784398)}
{pt3dadd(171060.000000,222132.000000,70800.000000,10.784398)}
{pt3dadd(171288.000000,222324.000000,71050.000000,18.471396)}
{pt3dadd(171216.000000,222516.000000,71175.000000,9.186998)}
{pt3dadd(171144.000000,222708.000000,71275.000000,9.186998)}
{pt3dadd(171072.000000,222876.000000,71300.000000,9.186998)}
{pt3dadd(170928.000000,223044.000000,71325.000000,14.433524)}
{pt3dadd(170784.000000,223248.000000,71375.000000,6.746526)}
{pt3dadd(170568.000000,223464.000000,71400.000000,6.746526)}
{pt3dadd(170412.000000,223656.000000,71375.000000,6.746526)}
{pt3dadd(170028.000000,223860.000000,71475.000000,14.433524)}
{pt3dadd(169896.000000,224028.000000,71425.000000,16.873996)}
{pt3dadd(169752.000000,224280.000000,71400.000000,27.123327)}
{pt3dadd(169428.000000,224412.000000,71500.000000,39.934990)}

{create adhoc6}
{access adhoc6}
{connect adhoc6(1), adhoc5(0)}
{nseg = 1}
{strdef color color = "White"}
{pt3dclear()}
{pt3dadd(169428.000000,224412.000000,71500.000000,39.934990)}
{pt3dadd(169152.000000,224544.000000,71350.000000,23.055874)}
{pt3dadd(169104.000000,224724.000000,71225.000000,18.755630)}
{pt3dadd(168912.000000,224916.000000,71200.000000,16.315158)}
{pt3dadd(168720.000000,225108.000000,71275.000000,17.447720)}
{pt3dadd(168540.000000,225384.000000,71225.000000,27.732632)}

{create adhoc7}
{access adhoc7}
{connect adhoc7(1), adhoc6(0)}
{nseg = 1}
{strdef color color = "White"}
{pt3dclear()}
{pt3dadd(168540.000000,225384.000000,71225.000000,27.732632)}
{pt3dadd(169140.000000,225720.000000,71100.000000,14.403990)}
{pt3dadd(169164.000000,225960.000000,71025.000000,7.739669)}

{create adhoc8}
{access adhoc8}
{connect adhoc8(1), adhoc6(0)}
{nseg = 1}
{strdef color color = "White"}
{pt3dclear()}
{pt3dadd(168540.000000,225384.000000,71225.000000,27.732632)}
{pt3dadd(168360.000000,225588.000000,71225.000000,17.447720)}
{pt3dadd(168180.000000,225732.000000,71150.000000,11.068632)}
{pt3dadd(168000.000000,225948.000000,71025.000000,10.144211)}
{pt3dadd(167808.000000,226104.000000,71125.000000,5.822105)}
{pt3dadd(167616.000000,226248.000000,71100.000000,5.822105)}
{pt3dadd(167448.000000,226452.000000,71150.000000,5.822105)}
{pt3dadd(167268.000000,226488.000000,71125.000000,8.731901)}
{pt3dadd(167088.000000,226536.000000,71300.000000,4.409795)}
{pt3dadd(166932.000000,226656.000000,71175.000000,4.409795)}
{pt3dadd(166788.000000,226956.000000,71550.000000,4.409795)}
{pt3dadd(166656.000000,227052.000000,71725.000000,8.731901)}
{pt3dadd(166440.000000,227244.000000,71850.000000,5.822105)}
{pt3dadd(166296.000000,227304.000000,71975.000000,5.822105)}
{pt3dadd(166116.000000,227556.000000,72125.000000,5.822105)}
{pt3dadd(165936.000000,227784.000000,72225.000000,11.068632)}
{pt3dadd(165756.000000,227940.000000,72300.000000,6.746526)}
{pt3dadd(165624.000000,228216.000000,72500.000000,6.746526)}
{pt3dadd(165456.000000,228444.000000,72600.000000,6.746526)}
{pt3dadd(165312.000000,228804.000000,72750.000000,11.068632)}
{pt3dadd(165168.000000,229212.000000,73025.000000,5.822105)}
{pt3dadd(165000.000000,229440.000000,73050.000000,5.822105)}
{pt3dadd(164892.000000,229908.000000,73000.000000,10.144211)}
{pt3dadd(164736.000000,230244.000000,73025.000000,13.695965)}
{pt3dadd(164784.000000,230172.000000,72825.000000,14.623100)}
{pt3dadd(164688.000000,230076.000000,72550.000000,19.258772)}

{create adhoc9}
{access adhoc9}
{connect adhoc9(1), adhoc5(0)}
{nseg = 1}
{strdef color color = "White"}
{pt3dclear()}
{pt3dadd(169428.000000,224412.000000,71500.000000,39.934990)}
{pt3dadd(169248.000000,224472.000000,72950.000000,23.055874)}
{pt3dadd(169308.000000,224676.000000,73250.000000,14.433524)}
{pt3dadd(169308.000000,225024.000000,73450.000000,10.298281)}
{pt3dadd(169416.000000,225408.000000,73725.000000,5.051754)}
{pt3dadd(169548.000000,225744.000000,73925.000000,5.051754)}
{pt3dadd(169644.000000,225972.000000,74200.000000,5.051754)}
{pt3dadd(169644.000000,226164.000000,74425.000000,7.961550)}
{pt3dadd(169668.000000,226704.000000,74725.000000,4.409795)}
{pt3dadd(169668.000000,227232.000000,74900.000000,4.409795)}
{pt3dadd(169596.000000,227376.000000,75125.000000,4.409795)}
{pt3dadd(169572.000000,227544.000000,75225.000000,7.191199)}
{pt3dadd(169440.000000,227796.000000,75525.000000,4.281404)}
{pt3dadd(169368.000000,228180.000000,75850.000000,4.281404)}
{pt3dadd(169032.000000,228468.000000,76100.000000,4.281404)}
{pt3dadd(168780.000000,228732.000000,76350.000000,7.833158)}
{pt3dadd(168576.000000,228924.000000,76625.000000,5.051754)}
{pt3dadd(168588.000000,229068.000000,76850.000000,5.051754)}
{pt3dadd(168456.000000,229236.000000,77125.000000,5.051754)}
{pt3dadd(168360.000000,229320.000000,77350.000000,7.426584)}
{pt3dadd(168216.000000,229488.000000,77550.000000,3.874829)}
{pt3dadd(168036.000000,229716.000000,77775.000000,6.249659)}
{pt3dadd(168036.000000,229872.000000,77925.000000,8.178683)}
{pt3dadd(167796.000000,230328.000000,78200.000000,8.673090)}
{pt3dadd(167832.000000,230724.000000,78400.000000,11.145123)}

{create adhoc10}
{access adhoc10}
{connect adhoc10(1), adhoc4(0)}
{nseg = 1}
{strdef color color = "White"}
{pt3dclear()}
{pt3dadd(173148.000000,220428.000000,71800.000000,33.279160)}
{pt3dadd(173148.000000,220692.000000,73025.000000,18.027796)}
{pt3dadd(173064.000000,220560.000000,73175.000000,7.430082)}

{create adhoc11}
{access adhoc11}
{connect adhoc11(1), adhoc3(0)}
{nseg = 1}
{strdef color color = "White"}
{pt3dclear()}
{pt3dadd(175956.000000,219144.000000,74900.000000,69.007660)}
{pt3dadd(174684.000000,218340.000000,74900.000000,26.598421)}
{pt3dadd(174552.000000,218196.000000,74950.000000,16.559052)}
{pt3dadd(174360.000000,218064.000000,74975.000000,3.832474)}
{pt3dadd(174000.000000,217896.000000,75075.000000,2.274954)}
{pt3dadd(173748.000000,217716.000000,75125.000000,2.274954)}
{pt3dadd(173460.000000,217452.000000,75200.000000,2.274954)}
{pt3dadd(173316.000000,217152.000000,75125.000000,4.649783)}
{pt3dadd(173232.000000,216852.000000,75050.000000,5.432350)}
{pt3dadd(173316.000000,216588.000000,74950.000000,8.053916)}
{pt3dadd(173412.000000,216288.000000,74800.000000,9.287602)}

{create adhoc12}
{access adhoc12}
{connect adhoc12(1), adhoc2(0)}
{nseg = 1}
{strdef color color = "White"}
{pt3dclear()}
{pt3dadd(178092.000000,218376.000000,78350.000000,55.206135)}
{pt3dadd(175896.000000,219432.000000,78425.000000,23.360094)}
{pt3dadd(175812.000000,219624.000000,78450.000000,14.616056)}
{pt3dadd(175548.000000,219804.000000,78575.000000,7.426584)}
{pt3dadd(175236.000000,220128.000000,78725.000000,5.051754)}
{pt3dadd(175044.000000,220332.000000,78850.000000,5.051754)}
{pt3dadd(174828.000000,220536.000000,78975.000000,5.051754)}
{pt3dadd(174576.000000,220608.000000,78900.000000,7.426584)}
{pt3dadd(174396.000000,220716.000000,78825.000000,3.874829)}
{pt3dadd(174408.000000,220992.000000,78900.000000,3.874829)}
{pt3dadd(174216.000000,221388.000000,79075.000000,3.874829)}
{pt3dadd(174060.000000,221724.000000,79375.000000,6.784625)}
{pt3dadd(173904.000000,221868.000000,79275.000000,4.409795)}
{pt3dadd(173736.000000,222120.000000,79375.000000,4.409795)}
{pt3dadd(173688.000000,222384.000000,79400.000000,4.409795)}
{pt3dadd(173568.000000,222660.000000,79600.000000,7.319591)}
{pt3dadd(173496.000000,222816.000000,79650.000000,4.409795)}
{pt3dadd(173340.000000,222948.000000,79800.000000,4.409795)}
{pt3dadd(173256.000000,223128.000000,79900.000000,4.409795)}
{pt3dadd(173256.000000,223476.000000,80175.000000,7.961550)}
{pt3dadd(173184.000000,223764.000000,80175.000000,5.051754)}
{pt3dadd(173088.000000,224124.000000,80150.000000,9.373860)}
{pt3dadd(172992.000000,224484.000000,80475.000000,12.925614)}
{pt3dadd(172956.000000,224748.000000,80775.000000,14.623100)}
{pt3dadd(172968.000000,224892.000000,80850.000000,19.258772)}

{create adhoc13}
{access adhoc13}
{connect adhoc13(1), adhoc12(0)}
{nseg = 1}
{strdef color color = "White"}
{pt3dclear()}
{pt3dadd(172968.000000,224892.000000,80850.000000,19.258772)}
{pt3dadd(172956.000000,225072.000000,81100.000000,14.623100)}
{pt3dadd(172836.000000,225180.000000,81525.000000,9.373860)}
{pt3dadd(172728.000000,225432.000000,82050.000000,11.068632)}
{pt3dadd(172728.000000,225696.000000,82525.000000,10.298281)}
{pt3dadd(172608.000000,225960.000000,82950.000000,16.163801)}
{pt3dadd(172812.000000,225912.000000,83275.000000,19.258772)}

{create adhoc14}
{access adhoc14}
{connect adhoc14(1), adhoc13(0)}
{nseg = 1}
{strdef color color = "White"}
{pt3dclear()}
{pt3dadd(172812.000000,225912.000000,83275.000000,19.258772)}
{pt3dadd(173484.000000,225732.000000,83600.000000,10.634632)}
{pt3dadd(173784.000000,225612.000000,83850.000000,6.980779)}
{pt3dadd(173940.000000,225696.000000,84075.000000,7.751130)}
{pt3dadd(174096.000000,225732.000000,84325.000000,5.822105)}
{pt3dadd(174204.000000,225708.000000,84625.000000,5.822105)}
{pt3dadd(174288.000000,225816.000000,84875.000000,5.822105)}
{pt3dadd(174348.000000,225960.000000,85125.000000,9.373860)}
{pt3dadd(174468.000000,226092.000000,85350.000000,5.051754)}
{pt3dadd(174432.000000,226116.000000,85575.000000,5.051754)}
{pt3dadd(174408.000000,226224.000000,85775.000000,5.051754)}
{pt3dadd(174372.000000,226416.000000,85950.000000,7.833158)}
{pt3dadd(174396.000000,226668.000000,86175.000000,4.281404)}
{pt3dadd(174480.000000,226884.000000,86375.000000,4.281404)}
{pt3dadd(174552.000000,227112.000000,86600.000000,6.210428)}
{pt3dadd(174660.000000,227220.000000,86825.000000,4.715041)}
{pt3dadd(174360.000000,227592.000000,87150.000000,11.145123)}

{create adhoc15}
{access adhoc15}
{connect adhoc15(1), adhoc13(0)}
{nseg = 1}
{strdef color color = "White"}
{pt3dclear()}
{pt3dadd(172812.000000,225912.000000,83275.000000,19.258772)}
{pt3dadd(172716.000000,225924.000000,83600.000000,11.145123)}

{create adhoc16}
{access adhoc16}
{connect adhoc16(1), adhoc12(0)}
{nseg = 1}
{strdef color color = "White"}
{pt3dclear()}
{pt3dadd(172968.000000,224892.000000,80850.000000,19.258772)}
{pt3dadd(172608.000000,224892.000000,80300.000000,10.015458)}
{pt3dadd(172488.000000,225024.000000,80250.000000,9.340428)}
{pt3dadd(172488.000000,225132.000000,80275.000000,6.051922)}
{pt3dadd(172320.000000,225372.000000,80275.000000,8.916098)}

{create adhoc17}
{access adhoc17}
{connect adhoc17(1), adhoc1(0)}
{nseg = 1}
{strdef color color = "White"}
{pt3dclear()}
{pt3dadd(180036.000000,216624.000000,80500.000000,39.934990)}
{pt3dadd(180132.000000,216336.000000,80725.000000,29.785660)}
{pt3dadd(180204.000000,216060.000000,80850.000000,18.471396)}
{pt3dadd(180756.000000,215688.000000,81000.000000,18.471396)}
{pt3dadd(180852.000000,215364.000000,81325.000000,9.186998)}
{pt3dadd(181056.000000,214992.000000,81400.000000,9.186998)}
{pt3dadd(181152.000000,214632.000000,81700.000000,9.186998)}
{pt3dadd(181500.000000,214320.000000,81825.000000,12.096793)}
{pt3dadd(181848.000000,213996.000000,82075.000000,4.409795)}
{pt3dadd(182136.000000,213600.000000,82125.000000,4.409795)}
{pt3dadd(182328.000000,213216.000000,82275.000000,4.409795)}
{pt3dadd(182580.000000,212892.000000,82400.000000,6.784625)}
{pt3dadd(182724.000000,212664.000000,82475.000000,3.874829)}
{pt3dadd(183036.000000,212376.000000,82625.000000,3.874829)}
{pt3dadd(183108.000000,212052.000000,82650.000000,3.874829)}
{pt3dadd(183216.000000,211740.000000,82675.000000,8.196935)}
{pt3dadd(183204.000000,211512.000000,82825.000000,5.822105)}
{pt3dadd(183372.000000,211212.000000,82850.000000,5.822105)}
{pt3dadd(183456.000000,210888.000000,82800.000000,5.822105)}
{pt3dadd(183600.000000,210624.000000,82925.000000,11.068632)}
{pt3dadd(183804.000000,210336.000000,83050.000000,6.746526)}
{pt3dadd(184032.000000,210096.000000,83125.000000,6.746526)}
{pt3dadd(184104.000000,209820.000000,83025.000000,6.746526)}
{pt3dadd(184356.000000,209568.000000,83125.000000,17.947804)}
{pt3dadd(184476.000000,209316.000000,83500.000000,12.701277)}
{pt3dadd(184716.000000,208992.000000,83550.000000,12.701277)}
{pt3dadd(184908.000000,208788.000000,83600.000000,12.701277)}
{pt3dadd(184944.000000,208608.000000,83700.000000,21.985675)}
{pt3dadd(184692.000000,208428.000000,83375.000000,10.784398)}
{pt3dadd(184548.000000,208188.000000,83050.000000,10.784398)}
{pt3dadd(184572.000000,207900.000000,82975.000000,10.784398)}
{pt3dadd(184644.000000,207684.000000,82925.000000,20.068796)}
{pt3dadd(184704.000000,207456.000000,83275.000000,10.784398)}
{pt3dadd(184704.000000,207216.000000,83025.000000,10.784398)}
{pt3dadd(184536.000000,206988.000000,82975.000000,10.784398)}
{pt3dadd(184524.000000,206676.000000,82975.000000,20.068796)}
{pt3dadd(184512.000000,206268.000000,82975.000000,10.784398)}
{pt3dadd(184536.000000,205932.000000,82950.000000,10.784398)}
{pt3dadd(184584.000000,205764.000000,83050.000000,10.784398)}
{pt3dadd(184500.000000,205608.000000,82900.000000,14.336152)}
{pt3dadd(184548.000000,205488.000000,82550.000000,18.553286)}
{pt3dadd(184740.000000,205356.000000,82125.000000,29.922144)}
{pt3dadd(185616.000000,201948.000000,82225.000000,69.007660)}

{create adhoc18}
{access adhoc18}
{connect adhoc18(1), adhoc17(0)}
{nseg = 1}
{strdef color color = "White"}
{pt3dclear()}
{pt3dadd(185616.000000,201948.000000,82225.000000,69.007660)}
{pt3dadd(185484.000000,202356.000000,82500.000000,42.671349)}
{pt3dadd(185460.000000,202620.000000,82775.000000,26.202809)}
{pt3dadd(185688.000000,202368.000000,83050.000000,23.902554)}
{pt3dadd(185796.000000,202428.000000,83375.000000,12.701277)}
{pt3dadd(186096.000000,202332.000000,83650.000000,12.701277)}
{pt3dadd(186216.000000,202356.000000,84025.000000,12.701277)}
{pt3dadd(186504.000000,202332.000000,84425.000000,19.057109)}
{pt3dadd(186888.000000,202224.000000,84850.000000,7.855832)}
{pt3dadd(187140.000000,202260.000000,85275.000000,15.542830)}
{pt3dadd(187332.000000,202296.000000,85525.000000,21.898662)}
{pt3dadd(187680.000000,202332.000000,85700.000000,24.904717)}
{pt3dadd(188088.000000,202752.000000,86275.000000,33.279160)}

{create adhoc19}
{access adhoc19}
{connect adhoc19(1), adhoc18(0)}
{nseg = 1}
{strdef color color = "White"}
{pt3dclear()}
{pt3dadd(188088.000000,202752.000000,86275.000000,33.279160)}
{pt3dadd(188580.000000,202692.000000,86800.000000,27.567050)}
{pt3dadd(188652.000000,202908.000000,87250.000000,17.140230)}
{pt3dadd(189132.000000,202932.000000,87850.000000,194.575338)}
{pt3dadd(189360.000000,203004.000000,88375.000000,307.818233)}
{pt3dadd(189672.000000,203040.000000,88875.000000,920.454700)}

{create adhoc20}
{access adhoc20}
{connect adhoc20(1), adhoc19(0)}
{nseg = 1}
{strdef color color = "White"}
{pt3dclear()}
{pt3dadd(189672.000000,203040.000000,88875.000000,920.454700)}
{pt3dadd(189852.000000,203124.000000,89400.000000,307.818233)}
{pt3dadd(189924.000000,203244.000000,89900.000000,208.839986)}
{pt3dadd(189888.000000,203232.000000,90425.000000,25.049046)}
{pt3dadd(190224.000000,203052.000000,91000.000000,25.049046)}
{pt3dadd(190440.000000,202812.000000,91525.000000,25.049046)}
{pt3dadd(190500.000000,202536.000000,92075.000000,38.550578)}
{pt3dadd(190584.000000,202248.000000,92600.000000,15.001532)}
{pt3dadd(190920.000000,202104.000000,93075.000000,15.001532)}
{pt3dadd(191340.000000,202212.000000,93675.000000,15.001532)}
{pt3dadd(191556.000000,202368.000000,94250.000000,38.550578)}
{pt3dadd(191664.000000,202548.000000,94775.000000,25.049046)}
{pt3dadd(191712.000000,202848.000000,95250.000000,25.049046)}
{pt3dadd(191892.000000,202968.000000,95725.000000,25.049046)}
{pt3dadd(191940.000000,203088.000000,96200.000000,53.367902)}
{pt3dadd(191736.000000,203376.000000,96625.000000,29.818856)}
{pt3dadd(191628.000000,203568.000000,97075.000000,29.818856)}
{pt3dadd(191496.000000,203832.000000,97650.000000,29.818856)}
{pt3dadd(191424.000000,203808.000000,98150.000000,53.367902)}
{pt3dadd(191400.000000,203748.000000,98700.000000,25.049046)}
{pt3dadd(191304.000000,203784.000000,99100.000000,25.049046)}
{pt3dadd(191004.000000,203784.000000,99600.000000,25.049046)}
{pt3dadd(190968.000000,203808.000000,100100.000000,41.310884)}
{pt3dadd(190680.000000,203892.000000,100600.000000,17.761838)}
{pt3dadd(190464.000000,203856.000000,101050.000000,17.761838)}
{pt3dadd(190104.000000,203964.000000,101650.000000,17.761838)}
{pt3dadd(189768.000000,203904.000000,102200.000000,37.336043)}
{pt3dadd(189696.000000,204024.000000,102800.000000,21.074205)}
{pt3dadd(189672.000000,204096.000000,103350.000000,21.074205)}
{pt3dadd(189636.000000,204108.000000,103800.000000,21.074205)}
{pt3dadd(189648.000000,204108.000000,104350.000000,49.393061)}
{pt3dadd(189504.000000,204084.000000,104800.000000,29.818856)}
{pt3dadd(189468.000000,204096.000000,105325.000000,29.818856)}
{pt3dadd(189432.000000,204348.000000,105800.000000,29.818856)}
{pt3dadd(189372.000000,204348.000000,106250.000000,49.393061)}
{pt3dadd(189120.000000,204132.000000,106800.000000,21.074205)}
{pt3dadd(188832.000000,204168.000000,107275.000000,21.074205)}
{pt3dadd(188700.000000,204144.000000,107825.000000,21.074205)}
{pt3dadd(188556.000000,204072.000000,108425.000000,37.336043)}
{pt3dadd(188460.000000,203796.000000,108825.000000,17.761838)}
{pt3dadd(188136.000000,203688.000000,109350.000000,17.761838)}
{pt3dadd(187896.000000,203508.000000,109800.000000,17.761838)}
{pt3dadd(187536.000000,203412.000000,110350.000000,28.963115)}
{pt3dadd(187512.000000,203160.000000,110775.000000,12.701277)}
{pt3dadd(187260.000000,202752.000000,111275.000000,12.701277)}
{pt3dadd(187008.000000,202752.000000,111750.000000,12.701277)}
{pt3dadd(186840.000000,202608.000000,111875.000000,23.442503)}
{pt3dadd(186648.000000,202308.000000,112275.000000,12.241225)}
{pt3dadd(186480.000000,202320.000000,112275.000000,12.241225)}
{pt3dadd(186156.000000,202152.000000,112775.000000,12.241225)}
{pt3dadd(185784.000000,201948.000000,113300.000000,22.982451)}
{pt3dadd(185028.000000,201852.000000,113750.000000,12.241225)}
{pt3dadd(184704.000000,201720.000000,114225.000000,12.241225)}
{pt3dadd(184428.000000,201468.000000,114650.000000,12.241225)}
{pt3dadd(184248.000000,201396.000000,115150.000000,25.742757)}
{pt3dadd(183708.000000,201132.000000,115650.000000,15.001532)}
{pt3dadd(183468.000000,200916.000000,116125.000000,15.001532)}
{pt3dadd(183144.000000,200700.000000,116550.000000,15.001532)}
{pt3dadd(182856.000000,200412.000000,117025.000000,24.285930)}
{pt3dadd(182652.000000,200172.000000,117425.000000,10.784398)}
{pt3dadd(182148.000000,199668.000000,117875.000000,10.784398)}
{pt3dadd(181968.000000,199524.000000,118225.000000,10.784398)}
{pt3dadd(181800.000000,199344.000000,118575.000000,17.140230)}
{pt3dadd(180948.000000,199128.000000,119025.000000,7.855832)}
{pt3dadd(181212.000000,198840.000000,119525.000000,7.855832)}
{pt3dadd(179940.000000,197952.000000,119950.000000,7.855832)}
{pt3dadd(179940.000000,197856.000000,120425.000000,14.211664)}
{pt3dadd(179172.000000,197196.000000,120825.000000,7.855832)}
{pt3dadd(178632.000000,196656.000000,121325.000000,7.855832)}
{pt3dadd(178080.000000,196080.000000,121800.000000,7.855832)}
{pt3dadd(177780.000000,195468.000000,122275.000000,17.140230)}
{pt3dadd(177540.000000,195408.000000,122400.000000,10.784398)}
{pt3dadd(177264.000000,195072.000000,122550.000000,10.784398)}
{pt3dadd(177012.000000,194628.000000,122825.000000,10.784398)}
{pt3dadd(176808.000000,194388.000000,123050.000000,18.471396)}
{pt3dadd(176580.000000,194112.000000,123350.000000,9.186998)}
{pt3dadd(176364.000000,193932.000000,123575.000000,9.186998)}
{pt3dadd(176160.000000,193728.000000,123675.000000,9.186998)}
{pt3dadd(175896.000000,193476.000000,123725.000000,18.471396)}
{pt3dadd(175644.000000,193104.000000,123950.000000,10.784398)}
{pt3dadd(175416.000000,192732.000000,123975.000000,10.784398)}
{pt3dadd(175188.000000,192492.000000,124175.000000,10.784398)}
{pt3dadd(174984.000000,192420.000000,124100.000000,17.140230)}
{pt3dadd(174444.000000,191724.000000,124550.000000,7.855832)}
{pt3dadd(174012.000000,191040.000000,124925.000000,7.855832)}
{pt3dadd(173580.000000,190344.000000,125275.000000,7.855832)}
{pt3dadd(173100.000000,189504.000000,125600.000000,14.211664)}
{pt3dadd(172380.000000,188400.000000,125975.000000,7.855832)}
{pt3dadd(171648.000000,187644.000000,126350.000000,7.855832)}
{pt3dadd(171468.000000,187356.000000,126700.000000,7.855832)}
{pt3dadd(171252.000000,187068.000000,126750.000000,13.102358)}
{pt3dadd(171036.000000,186816.000000,126800.000000,6.746526)}
{pt3dadd(170820.000000,186564.000000,126825.000000,6.746526)}
{pt3dadd(170616.000000,186264.000000,127000.000000,6.746526)}
{pt3dadd(170388.000000,186024.000000,127050.000000,14.433524)}
{pt3dadd(170160.000000,185652.000000,126950.000000,9.186998)}
{pt3dadd(169932.000000,185436.000000,127150.000000,9.186998)}
{pt3dadd(169716.000000,185256.000000,127250.000000,9.186998)}
{pt3dadd(169500.000000,185088.000000,127325.000000,16.554516)}
{pt3dadd(169272.000000,184944.000000,127475.000000,8.867518)}
{pt3dadd(169092.000000,184620.000000,127525.000000,8.867518)}
{pt3dadd(168864.000000,184668.000000,127550.000000,8.867518)}
{pt3dadd(168672.000000,184788.000000,127450.000000,15.223350)}
{pt3dadd(168564.000000,184620.000000,127500.000000,7.855832)}
{pt3dadd(168456.000000,184452.000000,127550.000000,7.855832)}
{pt3dadd(168420.000000,184236.000000,127575.000000,7.855832)}
{pt3dadd(168120.000000,183996.000000,127600.000000,15.542830)}
{pt3dadd(167472.000000,183756.000000,127650.000000,9.186998)}
{pt3dadd(167004.000000,183444.000000,127775.000000,9.186998)}
{pt3dadd(166764.000000,183204.000000,127900.000000,9.186998)}
{pt3dadd(166596.000000,182964.000000,127975.000000,16.873996)}
{pt3dadd(166356.000000,182700.000000,128150.000000,9.186998)}
{pt3dadd(166068.000000,182340.000000,128475.000000,9.186998)}
{pt3dadd(165816.000000,181956.000000,128700.000000,9.186998)}
{pt3dadd(165852.000000,181728.000000,128600.000000,18.471396)}
{pt3dadd(165744.000000,181548.000000,128650.000000,10.784398)}
{pt3dadd(165720.000000,181368.000000,128750.000000,10.784398)}
{pt3dadd(165696.000000,181212.000000,128850.000000,10.784398)}
{pt3dadd(165588.000000,181044.000000,128900.000000,17.140230)}
{pt3dadd(165480.000000,180852.000000,128950.000000,7.855832)}
{pt3dadd(165372.000000,180672.000000,129075.000000,7.855832)}
{pt3dadd(165264.000000,180480.000000,129200.000000,7.855832)}
{pt3dadd(165156.000000,180276.000000,129350.000000,14.211664)}
{pt3dadd(165084.000000,180060.000000,129500.000000,7.855832)}
{pt3dadd(165012.000000,179880.000000,129500.000000,7.855832)}
{pt3dadd(164352.000000,179676.000000,130025.000000,7.855832)}
{pt3dadd(163932.000000,178464.000000,130350.000000,16.756854)}
{pt3dadd(163176.000000,177588.000000,130775.000000,10.401022)}
{pt3dadd(162456.000000,177300.000000,131150.000000,10.401022)}
{pt3dadd(161952.000000,176652.000000,131625.000000,10.401022)}
{pt3dadd(161412.000000,176196.000000,132050.000000,19.685420)}
{pt3dadd(160716.000000,175728.000000,132450.000000,10.784398)}
{pt3dadd(160308.000000,175224.000000,132925.000000,10.784398)}
{pt3dadd(160044.000000,174612.000000,133350.000000,10.784398)}
{pt3dadd(160020.000000,173820.000000,133800.000000,20.068796)}
{pt3dadd(159948.000000,173424.000000,134150.000000,10.784398)}
{pt3dadd(159648.000000,172980.000000,134600.000000,10.784398)}
{pt3dadd(159288.000000,172404.000000,135000.000000,10.784398)}
{pt3dadd(158808.000000,171720.000000,135450.000000,18.471396)}
{pt3dadd(158472.000000,171288.000000,135900.000000,9.186998)}
{pt3dadd(157884.000000,170688.000000,136450.000000,9.186998)}
{pt3dadd(157080.000000,169992.000000,136975.000000,9.186998)}
{pt3dadd(156432.000000,169512.000000,137400.000000,22.688530)}
{pt3dadd(156300.000000,169224.000000,137850.000000,15.001532)}
{pt3dadd(156936.000000,168612.000000,138375.000000,15.001532)}
{pt3dadd(156804.000000,168180.000000,138925.000000,15.001532)}
{pt3dadd(156672.000000,168144.000000,139500.000000,26.202809)}
{pt3dadd(156192.000000,167844.000000,140100.000000,23.902554)}
{pt3dadd(155712.000000,167520.000000,140675.000000,35.103832)}
{pt3dadd(155436.000000,167232.000000,141150.000000,57.506386)}
{pt3dadd(155076.000000,166836.000000,141650.000000,57.506386)}

{create adhoc21}
{access adhoc21}
{connect adhoc21(1), adhoc20(0)}
{nseg = 1}
{strdef color color = "White"}
{pt3dclear()}
{pt3dadd(155076.000000,166836.000000,141650.000000,57.506386)}
{pt3dadd(154884.000000,166104.000000,142175.000000,38.837591)}
{pt3dadd(154416.000000,165228.000000,142800.000000,23.902554)}
{pt3dadd(154032.000000,164400.000000,143275.000000,28.963115)}
{pt3dadd(153672.000000,163512.000000,143725.000000,17.761838)}
{pt3dadd(153456.000000,163116.000000,144150.000000,17.761838)}
{pt3dadd(153240.000000,162492.000000,144700.000000,17.761838)}
{pt3dadd(153060.000000,162384.000000,145200.000000,37.336043)}
{pt3dadd(152988.000000,161844.000000,145750.000000,21.074205)}
{pt3dadd(152928.000000,161592.000000,146125.000000,21.074205)}
{pt3dadd(152988.000000,161256.000000,146550.000000,21.074205)}
{pt3dadd(153348.000000,160860.000000,146975.000000,40.648410)}
{pt3dadd(153384.000000,160596.000000,147400.000000,21.074205)}
{pt3dadd(153300.000000,160536.000000,147875.000000,21.074205)}
{pt3dadd(153456.000000,159852.000000,148350.000000,21.074205)}
{pt3dadd(153504.000000,159780.000000,148775.000000,37.336043)}
{pt3dadd(153924.000000,159504.000000,149225.000000,17.761838)}
{pt3dadd(154044.000000,159108.000000,149600.000000,17.761838)}
{pt3dadd(153984.000000,159012.000000,150000.000000,17.761838)}
{pt3dadd(153948.000000,158496.000000,150375.000000,34.023676)}
{pt3dadd(153948.000000,158352.000000,150650.000000,17.761838)}
{pt3dadd(153984.000000,158052.000000,151175.000000,17.761838)}
{pt3dadd(154032.000000,157512.000000,151700.000000,17.761838)}
{pt3dadd(154152.000000,156972.000000,152100.000000,28.963115)}
{pt3dadd(154236.000000,156492.000000,152575.000000,12.701277)}
{pt3dadd(154308.000000,156156.000000,152975.000000,12.701277)}
{pt3dadd(154380.000000,155880.000000,153450.000000,12.701277)}
{pt3dadd(154488.000000,155412.000000,153850.000000,23.654669)}
{pt3dadd(154728.000000,155136.000000,154275.000000,12.453392)}
{pt3dadd(154980.000000,154704.000000,154625.000000,12.453392)}
{pt3dadd(155184.000000,154152.000000,155050.000000,12.453392)}
{pt3dadd(155448.000000,153564.000000,155475.000000,25.954924)}
{pt3dadd(155424.000000,153564.000000,155900.000000,15.001532)}
{pt3dadd(155532.000000,153324.000000,156350.000000,15.001532)}
{pt3dadd(155844.000000,153180.000000,156775.000000,15.001532)}
{pt3dadd(156876.000000,152952.000000,157125.000000,34.575737)}
{pt3dadd(157392.000000,152520.000000,157575.000000,21.074205)}
{pt3dadd(157608.000000,152328.000000,158025.000000,21.074205)}
{pt3dadd(157908.000000,152076.000000,158400.000000,21.074205)}
{pt3dadd(157908.000000,151536.000000,158875.000000,34.575737)}
{pt3dadd(158016.000000,151212.000000,159250.000000,15.001532)}
{pt3dadd(158220.000000,150744.000000,159625.000000,15.001532)}
{pt3dadd(158532.000000,150312.000000,160050.000000,15.001532)}
{pt3dadd(158616.000000,149904.000000,160375.000000,31.263370)}
{pt3dadd(159036.000000,149436.000000,160750.000000,17.761838)}
{pt3dadd(159228.000000,149028.000000,161100.000000,17.761838)}
{pt3dadd(159408.000000,148740.000000,161500.000000,17.761838)}
{pt3dadd(159852.000000,148500.000000,161950.000000,34.023676)}
{pt3dadd(159780.000000,147924.000000,162350.000000,17.761838)}
{pt3dadd(160128.000000,147372.000000,162750.000000,17.761838)}
{pt3dadd(160320.000000,146964.000000,163150.000000,17.761838)}
{pt3dadd(160524.000000,146556.000000,163575.000000,34.023676)}
{pt3dadd(160872.000000,146052.000000,163975.000000,17.761838)}
{pt3dadd(160776.000000,145872.000000,164275.000000,17.761838)}
{pt3dadd(160788.000000,145440.000000,164700.000000,17.761838)}
{pt3dadd(161100.000000,144816.000000,165000.000000,37.336043)}
{pt3dadd(161328.000000,144396.000000,165425.000000,21.074205)}
{pt3dadd(161496.000000,144180.000000,165800.000000,21.074205)}
{pt3dadd(161916.000000,143892.000000,166150.000000,21.074205)}
{pt3dadd(162180.000000,143136.000000,166500.000000,40.648410)}
{pt3dadd(162516.000000,142704.000000,166850.000000,21.074205)}
{pt3dadd(162804.000000,142668.000000,167225.000000,21.074205)}
{pt3dadd(163188.000000,142368.000000,167600.000000,21.074205)}
{pt3dadd(163296.000000,142128.000000,167950.000000,40.648410)}
{pt3dadd(163308.000000,141984.000000,168325.000000,20.974205)}
{pt3dadd(163308.000000,141888.000000,168650.000000,20.974205)}
{pt3dadd(163308.000000,141900.000000,169025.000000,20.974205)}
{pt3dadd(163332.000000,141816.000000,169300.000000,44.523251)}
{pt3dadd(163572.000000,141432.000000,169625.000000,24.949046)}
{pt3dadd(163632.000000,141240.000000,169950.000000,25.049046)}
{pt3dadd(163836.000000,141060.000000,170225.000000,25.049046)}
{pt3dadd(163896.000000,140916.000000,170500.000000,48.598092)}
{pt3dadd(163980.000000,140604.000000,170775.000000,25.049046)}
{pt3dadd(163932.000000,140292.000000,171100.000000,25.049046)}
{pt3dadd(163884.000000,140040.000000,171400.000000,25.049046)}
{pt3dadd(163908.000000,139812.000000,171675.000000,48.598092)}
{pt3dadd(163932.000000,139584.000000,171950.000000,25.049046)}
{pt3dadd(163956.000000,139296.000000,172225.000000,25.049046)}
{pt3dadd(163980.000000,138912.000000,172550.000000,25.049046)}
{pt3dadd(164052.000000,138732.000000,172875.000000,48.598092)}
{pt3dadd(164148.000000,138480.000000,173225.000000,25.049046)}
{pt3dadd(164244.000000,138144.000000,173525.000000,25.049046)}
{pt3dadd(164232.000000,138000.000000,173825.000000,25.049046)}
{pt3dadd(164232.000000,137892.000000,174100.000000,53.367902)}
{pt3dadd(164088.000000,137664.000000,174400.000000,29.818856)}
{pt3dadd(163536.000000,137556.000000,174675.000000,29.818856)}
{pt3dadd(163428.000000,137484.000000,174975.000000,29.818856)}
{pt3dadd(163428.000000,137364.000000,175250.000000,62.487780)}
{pt3dadd(163464.000000,137220.000000,175550.000000,34.168924)}
{pt3dadd(163632.000000,137040.000000,175850.000000,34.168924)}
{pt3dadd(163584.000000,136860.000000,176200.000000,34.168924)}
{pt3dadd(163620.000000,136776.000000,176500.000000,61.343026)}
{pt3dadd(163680.000000,136524.000000,176800.000000,28.674102)}
{pt3dadd(163704.000000,136380.000000,177100.000000,28.674102)}
{pt3dadd(163728.000000,136260.000000,177375.000000,28.674102)}
{pt3dadd(163752.000000,136224.000000,177700.000000,55.848204)}
{pt3dadd(163716.000000,136152.000000,178000.000000,28.674102)}
{pt3dadd(163608.000000,135864.000000,178275.000000,28.674102)}
{pt3dadd(163668.000000,135600.000000,178550.000000,28.674102)}
{pt3dadd(163728.000000,135372.000000,178850.000000,56.992958)}
{pt3dadd(163752.000000,135252.000000,179125.000000,29.818856)}
{pt3dadd(163644.000000,135180.000000,179425.000000,29.818856)}
{pt3dadd(163560.000000,135144.000000,179775.000000,29.818856)}
{pt3dadd(163512.000000,134916.000000,180100.000000,63.861482)}
{pt3dadd(163476.000000,134628.000000,180450.000000,35.542626)}
{pt3dadd(163404.000000,134364.000000,180750.000000,35.542626)}
{pt3dadd(163356.000000,134016.000000,181100.000000,35.542626)}
{pt3dadd(163284.000000,133728.000000,181425.000000,69.585252)}
{pt3dadd(163212.000000,133392.000000,181775.000000,69.585252)}
{pt3dadd(163104.000000,133212.000000,182125.000000,269.285252)}
{pt3dadd(162996.000000,132876.000000,182550.000000,447.808753)}
{pt3dadd(162876.000000,132732.000000,182800.000000,1000.000000)}

{create adhoc22}
{access adhoc22}
{connect adhoc22(1), adhoc20(0)}
{nseg = 1}
{strdef color color = "White"}
{pt3dclear()}
{pt3dadd(155076.000000,166836.000000,141650.000000,57.506386)}
{pt3dadd(154368.000000,166464.000000,141575.000000,47.921990)}

{create adhoc23}
{access adhoc23}
{connect adhoc23(1), adhoc19(0)}
{nseg = 1}
{strdef color color = "White"}
{pt3dclear()}
{pt3dadd(189672.000000,203040.000000,88875.000000,920.454700)}
{pt3dadd(190764.000000,203340.000000,88750.000000,524.230943)}
{pt3dadd(191016.000000,203484.000000,88750.000000,424.480594)}
{pt3dadd(191220.000000,203460.000000,88750.000000,273.575934)}
{pt3dadd(191412.000000,203220.000000,88750.000000,230.341546)}
{pt3dadd(191328.000000,203352.000000,89050.000000,211.138824)}
{pt3dadd(191496.000000,203220.000000,89050.000000,195.828080)}
{pt3dadd(191652.000000,203088.000000,89050.000000,177.216724)}
{pt3dadd(191616.000000,203136.000000,89275.000000,181.159918)}
{pt3dadd(191748.000000,203088.000000,89525.000000,196.988548)}
{pt3dadd(191916.000000,203052.000000,89750.000000,211.416388)}
{pt3dadd(192024.000000,202968.000000,90025.000000,218.279920)}
{pt3dadd(192300.000000,202896.000000,90275.000000,220.200456)}
{pt3dadd(192468.000000,202764.000000,90525.000000,216.251566)}
{pt3dadd(192708.000000,202620.000000,90775.000000,203.830224)}
{pt3dadd(192852.000000,202500.000000,91025.000000,183.240006)}
{pt3dadd(192876.000000,202488.000000,91275.000000,172.106818)}
{pt3dadd(193068.000000,202536.000000,91275.000000,168.532520)}
{pt3dadd(193200.000000,202668.000000,91275.000000,171.933530)}
{pt3dadd(193128.000000,202644.000000,91625.000000,175.676866)}
{pt3dadd(193080.000000,202740.000000,91750.000000,187.533806)}
{pt3dadd(193128.000000,202800.000000,91875.000000,198.659362)}
{pt3dadd(193092.000000,202836.000000,91950.000000,206.367608)}
{pt3dadd(193020.000000,202836.000000,92075.000000,221.259988)}
{pt3dadd(192984.000000,202884.000000,92225.000000,237.678834)}
{pt3dadd(192900.000000,202848.000000,92375.000000,251.211292)}
{pt3dadd(192756.000000,202884.000000,92500.000000,270.250136)}
{pt3dadd(192780.000000,202968.000000,92650.000000,288.651770)}
{pt3dadd(192768.000000,203040.000000,92800.000000,299.744736)}
{pt3dadd(192696.000000,203160.000000,92950.000000,302.867814)}
{pt3dadd(192660.000000,203244.000000,93125.000000,305.545152)}
{pt3dadd(192648.000000,203316.000000,93250.000000,293.523964)}
{pt3dadd(192708.000000,203400.000000,93350.000000,284.689828)}
{pt3dadd(192732.000000,203448.000000,93500.000000,271.380660)}
{pt3dadd(192696.000000,203544.000000,93725.000000,262.981502)}
{pt3dadd(192780.000000,203700.000000,94000.000000,255.504984)}
{pt3dadd(192792.000000,203772.000000,94225.000000,250.718598)}
{pt3dadd(192864.000000,203808.000000,94475.000000,240.223358)}
{pt3dadd(192936.000000,203796.000000,94700.000000,231.296794)}
{pt3dadd(193008.000000,203832.000000,94925.000000,228.832034)}
{pt3dadd(193068.000000,203856.000000,95125.000000,222.124980)}
{pt3dadd(193044.000000,203892.000000,95300.000000,221.142840)}
{pt3dadd(192984.000000,203904.000000,95525.000000,212.612006)}
{pt3dadd(192960.000000,203856.000000,95775.000000,208.868670)}
{pt3dadd(193080.000000,203856.000000,95925.000000,199.349176)}
{pt3dadd(193080.000000,203856.000000,96075.000000,197.322952)}
{pt3dadd(193128.000000,203868.000000,96225.000000,190.203420)}
{pt3dadd(193152.000000,203868.000000,96350.000000,191.784712)}
{pt3dadd(193140.000000,203832.000000,96500.000000,190.026772)}
{pt3dadd(193116.000000,203832.000000,96650.000000,185.543632)}
{pt3dadd(193080.000000,203844.000000,96825.000000,179.849070)}
{pt3dadd(193044.000000,203844.000000,96950.000000,177.842188)}
{pt3dadd(193020.000000,203784.000000,97075.000000,186.385422)}
{pt3dadd(193056.000000,203796.000000,97225.000000,191.886698)}
{pt3dadd(192996.000000,203808.000000,97350.000000,197.404612)}
{pt3dadd(193032.000000,203820.000000,97500.000000,211.832452)}
{pt3dadd(193068.000000,203832.000000,97600.000000,224.502352)}
{pt3dadd(193056.000000,203772.000000,97725.000000,236.105536)}
{pt3dadd(192984.000000,203748.000000,97850.000000,258.957880)}
{pt3dadd(192960.000000,203784.000000,98000.000000,281.000326)}
{pt3dadd(192936.000000,203712.000000,98250.000000,301.053186)}
{pt3dadd(192900.000000,203640.000000,98500.000000,311.668546)}
{pt3dadd(192840.000000,203592.000000,98750.000000,323.914304)}
{pt3dadd(192672.000000,203532.000000,98950.000000,320.603884)}
{pt3dadd(192888.000000,203496.000000,99275.000000,324.047070)}
{pt3dadd(192708.000000,203388.000000,99525.000000,327.145368)}
{pt3dadd(192612.000000,203304.000000,99800.000000,334.472236)}
{pt3dadd(192588.000000,203268.000000,100075.000000,331.187476)}
{pt3dadd(192456.000000,203088.000000,100350.000000,326.880344)}
{pt3dadd(192348.000000,202968.000000,100625.000000,314.902872)}
{pt3dadd(192348.000000,203004.000000,100900.000000,284.829942)}
{pt3dadd(192336.000000,202872.000000,100900.000000,252.475536)}
{pt3dadd(192288.000000,202764.000000,101025.000000,216.867654)}
{pt3dadd(192144.000000,202704.000000,101025.000000,228.842474)}
{pt3dadd(191988.000000,202752.000000,101025.000000,234.380820)}
{pt3dadd(192048.000000,202848.000000,101400.000000,243.527632)}
{pt3dadd(191940.000000,202992.000000,101525.000000,253.147194)}
{pt3dadd(191784.000000,203148.000000,101650.000000,247.819650)}
{pt3dadd(191628.000000,203208.000000,101750.000000,201.667330)}
{pt3dadd(191400.000000,203184.000000,101750.000000,163.587334)}
{pt3dadd(191160.000000,203100.000000,101750.000000,131.504522)}
{pt3dadd(191136.000000,202980.000000,101750.000000,109.604920)}
{pt3dadd(190968.000000,202872.000000,101750.000000,116.451036)}
{pt3dadd(190872.000000,202704.000000,101875.000000,128.233898)}
{pt3dadd(190788.000000,202572.000000,102050.000000,138.816728)}
{pt3dadd(190824.000000,202548.000000,102175.000000,146.714476)}
{pt3dadd(190872.000000,202512.000000,102325.000000,151.451354)}
{pt3dadd(190776.000000,202308.000000,102325.000000,150.786606)}
{pt3dadd(190596.000000,202152.000000,102325.000000,143.605876)}
{pt3dadd(190512.000000,202068.000000,102550.000000,134.097596)}
{pt3dadd(190380.000000,202080.000000,102550.000000,129.257774)}
{pt3dadd(190320.000000,202068.000000,102825.000000,123.347512)}
{pt3dadd(190248.000000,202140.000000,102975.000000,111.809612)}
{pt3dadd(190152.000000,202272.000000,103100.000000,107.201536)}
{pt3dadd(190140.000000,202368.000000,103250.000000,117.822262)}
{pt3dadd(190056.000000,202416.000000,103400.000000,144.622108)}
{pt3dadd(190092.000000,202320.000000,103550.000000,180.251966)}
{pt3dadd(190272.000000,202320.000000,103700.000000,221.328636)}
{pt3dadd(190332.000000,202272.000000,103850.000000,256.705876)}
{pt3dadd(190380.000000,202248.000000,104025.000000,277.567270)}
{pt3dadd(190368.000000,202200.000000,104175.000000,282.616194)}
{pt3dadd(190344.000000,202140.000000,104300.000000,282.616194)}
{pt3dadd(190392.000000,202176.000000,104425.000000,278.870484)}
{pt3dadd(190392.000000,202152.000000,104550.000000,281.983820)}
{pt3dadd(190368.000000,202164.000000,104700.000000,284.686200)}
{pt3dadd(190380.000000,202224.000000,104825.000000,282.100164)}
{pt3dadd(190332.000000,202200.000000,104950.000000,276.537810)}
{pt3dadd(190296.000000,202188.000000,105100.000000,275.369520)}
{pt3dadd(190332.000000,202224.000000,105225.000000,272.246442)}
{pt3dadd(190392.000000,202212.000000,105375.000000,272.518416)}
{pt3dadd(190428.000000,202248.000000,105525.000000,272.280568)}
{pt3dadd(190416.000000,202248.000000,105675.000000,280.418684)}
{pt3dadd(190428.000000,202236.000000,105800.000000,281.586974)}
{pt3dadd(190440.000000,202272.000000,105925.000000,281.571210)}
{pt3dadd(190452.000000,202248.000000,106050.000000,276.269842)}
{pt3dadd(190392.000000,202152.000000,106225.000000,273.809864)}
{pt3dadd(190368.000000,202104.000000,106375.000000,263.243320)}
{pt3dadd(190368.000000,202080.000000,106525.000000,254.509030)}
{pt3dadd(190380.000000,202008.000000,106700.000000,245.774740)}
{pt3dadd(190260.000000,201960.000000,106900.000000,240.742492)}
{pt3dadd(190176.000000,201948.000000,107075.000000,240.742492)}
{pt3dadd(190080.000000,201984.000000,107225.000000,243.185220)}
{pt3dadd(190056.000000,201924.000000,107400.000000,246.668032)}
{pt3dadd(190068.000000,201948.000000,107475.000000,243.120832)}
{pt3dadd(190008.000000,201948.000000,107475.000000,243.120832)}
{pt3dadd(189984.000000,201888.000000,107750.000000,236.648716)}
{pt3dadd(189840.000000,201804.000000,108025.000000,233.174742)}
{pt3dadd(189660.000000,201756.000000,108275.000000,230.723176)}
{pt3dadd(189516.000000,201720.000000,108575.000000,243.004666)}
{pt3dadd(189372.000000,201600.000000,108875.000000,250.373206)}
{pt3dadd(189252.000000,201648.000000,109200.000000,252.275288)}
{pt3dadd(188988.000000,201564.000000,109525.000000,246.630324)}
{pt3dadd(188808.000000,201552.000000,109850.000000,232.605658)}
{pt3dadd(188640.000000,201504.000000,110175.000000,216.395862)}
{pt3dadd(188640.000000,201564.000000,110475.000000,203.803116)}
{pt3dadd(188676.000000,201600.000000,110775.000000,206.025756)}
{pt3dadd(188700.000000,201600.000000,111050.000000,204.195214)}
{pt3dadd(188844.000000,201612.000000,111575.000000,202.369218)}
{pt3dadd(188940.000000,201660.000000,111900.000000,198.601634)}
{pt3dadd(188940.000000,201756.000000,112175.000000,201.602584)}
{pt3dadd(188820.000000,201888.000000,112500.000000,199.399932)}
{pt3dadd(188664.000000,201924.000000,112775.000000,218.462998)}
{pt3dadd(188304.000000,202164.000000,113100.000000,265.113254)}
{pt3dadd(188028.000000,202428.000000,113425.000000,312.202028)}
{pt3dadd(187644.000000,202848.000000,113750.000000,351.596942)}
{pt3dadd(187212.000000,203328.000000,113900.000000,383.153530)}
{pt3dadd(186888.000000,203748.000000,114075.000000,392.557858)}
{pt3dadd(186744.000000,203916.000000,114375.000000,381.718906)}
{pt3dadd(186660.000000,204372.000000,114375.000000,370.302274)}
{pt3dadd(186420.000000,204852.000000,114675.000000,321.281816)}
{pt3dadd(186360.000000,205164.000000,114775.000000,280.259020)}
{pt3dadd(186216.000000,205704.000000,114775.000000,270.838132)}
{pt3dadd(186012.000000,206280.000000,114775.000000,285.668624)}
{pt3dadd(185736.000000,206868.000000,114775.000000,323.256452)}
{pt3dadd(185472.000000,207552.000000,114775.000000,393.194820)}
{pt3dadd(185280.000000,208368.000000,114775.000000,465.169210)}
{pt3dadd(185232.000000,208644.000000,114550.000000,524.142910)}
{pt3dadd(185280.000000,209940.000000,114050.000000,553.220250)}
{pt3dadd(185448.000000,210408.000000,113775.000000,562.949630)}
{pt3dadd(185388.000000,211104.000000,113775.000000,542.017334)}
{pt3dadd(185340.000000,211884.000000,113775.000000,473.453630)}
{pt3dadd(185556.000000,212808.000000,113775.000000,385.849762)}
{pt3dadd(185760.000000,213948.000000,113775.000000,341.941930)}
{pt3dadd(185112.000000,214800.000000,113775.000000,273.678482)}
{pt3dadd(185088.000000,216024.000000,113775.000000,211.215354)}
{pt3dadd(184824.000000,217344.000000,113775.000000,217.270876)}
{pt3dadd(185376.000000,217596.000000,113775.000000,228.677810)}
{pt3dadd(185544.000000,216312.000000,113775.000000,214.543062)}
{pt3dadd(185928.000000,215460.000000,113775.000000,197.899862)}
{pt3dadd(186192.000000,214620.000000,113775.000000,274.044326)}
{pt3dadd(186180.000000,213600.000000,113775.000000,274.474908)}
{pt3dadd(185652.000000,214440.000000,113450.000000,259.555712)}
{pt3dadd(185208.000000,210732.000000,113450.000000,260.264572)}
{pt3dadd(185556.000000,210228.000000,113450.000000,273.424960)}
{pt3dadd(185760.000000,210996.000000,113450.000000,230.204636)}
{pt3dadd(186036.000000,212172.000000,113450.000000,239.607962)}
{pt3dadd(186336.000000,213072.000000,113450.000000,247.185972)}
{pt3dadd(186732.000000,214104.000000,113450.000000,230.019972)}
{pt3dadd(186804.000000,215016.000000,113450.000000,251.330604)}
{pt3dadd(186408.000000,216336.000000,113450.000000,243.712320)}
{pt3dadd(185748.000000,217164.000000,113450.000000,237.405624)}
{pt3dadd(185004.000000,218328.000000,113450.000000,242.923538)}
{pt3dadd(184056.000000,218988.000000,113450.000000,226.985318)}
{pt3dadd(183504.000000,217980.000000,113450.000000,194.246116)}
{pt3dadd(183516.000000,217056.000000,113450.000000,205.157704)}
{pt3dadd(184080.000000,217056.000000,113450.000000,197.495832)}
{pt3dadd(184404.000000,216264.000000,113450.000000,229.412824)}
{pt3dadd(184452.000000,215340.000000,113450.000000,286.804078)}
{pt3dadd(184932.000000,214896.000000,113450.000000,433.257258)}
{pt3dadd(185244.000000,213828.000000,113450.000000,435.530390)}
{pt3dadd(185328.000000,215532.000000,112825.000000,454.779822)}
{pt3dadd(185520.000000,211836.000000,112825.000000,479.400196)}
{pt3dadd(186324.000000,211992.000000,112825.000000,491.961342)}
{pt3dadd(186660.000000,213420.000000,112825.000000,392.782416)}
{pt3dadd(186900.000000,214524.000000,112825.000000,412.762318)}
{pt3dadd(186984.000000,215184.000000,112825.000000,445.630490)}
{pt3dadd(186732.000000,215856.000000,112825.000000,487.189890)}
{pt3dadd(186288.000000,216408.000000,112825.000000,507.105730)}
{pt3dadd(186012.000000,216996.000000,112825.000000,477.307720)}
{pt3dadd(185304.000000,218376.000000,112825.000000,451.502360)}
{pt3dadd(184728.000000,219564.000000,112825.000000,424.723660)}
{pt3dadd(183996.000000,219576.000000,112825.000000,364.289344)}
{pt3dadd(183420.000000,218364.000000,112825.000000,331.826060)}
{pt3dadd(183060.000000,217572.000000,112825.000000,368.289546)}
{pt3dadd(183396.000000,216372.000000,112825.000000,438.085712)}
{pt3dadd(184116.000000,215436.000000,112825.000000,464.864412)}
{pt3dadd(184800.000000,214416.000000,112825.000000,637.708028)}
{pt3dadd(185052.000000,212436.000000,112825.000000,617.412292)}
{pt3dadd(185244.000000,215664.000000,112450.000000,610.723512)}
{pt3dadd(185604.000000,212220.000000,112450.000000,627.292184)}
{pt3dadd(186432.000000,212472.000000,112450.000000,650.354172)}
{pt3dadd(186912.000000,214188.000000,112450.000000,471.752664)}
{pt3dadd(187020.000000,214812.000000,112450.000000,468.931718)}
{pt3dadd(187080.000000,215772.000000,112450.000000,477.565070)}
{pt3dadd(186744.000000,216504.000000,112450.000000,413.181934)}
{pt3dadd(186324.000000,217200.000000,112450.000000,377.517248)}
{pt3dadd(186036.000000,218064.000000,112450.000000,402.615216)}
{pt3dadd(185664.000000,218784.000000,112450.000000,447.797602)}
{pt3dadd(185052.000000,219348.000000,112450.000000,437.438160)}
{pt3dadd(184296.000000,219408.000000,112450.000000,412.868458)}
{pt3dadd(183684.000000,219300.000000,112450.000000,405.444476)}
{pt3dadd(183048.000000,218880.000000,112450.000000,361.974408)}
{pt3dadd(182700.000000,218364.000000,112450.000000,336.071344)}
{pt3dadd(182448.000000,217524.000000,112450.000000,311.575054)}
{pt3dadd(182892.000000,216996.000000,112450.000000,340.351104)}
{pt3dadd(182568.000000,216168.000000,112450.000000,377.938932)}
{pt3dadd(183492.000000,215772.000000,112450.000000,425.768614)}
{pt3dadd(184008.000000,215004.000000,112450.000000,462.119758)}
{pt3dadd(184476.000000,214092.000000,112450.000000,599.573798)}
{pt3dadd(185064.000000,212940.000000,112450.000000,759.488054)}
{pt3dadd(184500.000000,218376.000000,112450.000000,718.781806)}
{pt3dadd(184836.000000,217032.000000,112050.000000,665.918006)}
{pt3dadd(185628.000000,212628.000000,112050.000000,690.075316)}
{pt3dadd(186444.000000,212472.000000,112050.000000,592.056164)}
{pt3dadd(186840.000000,213312.000000,112050.000000,439.944148)}
{pt3dadd(187608.000000,214068.000000,112050.000000,473.036886)}
{pt3dadd(187788.000000,214764.000000,112050.000000,525.929006)}
{pt3dadd(187212.000000,215580.000000,112050.000000,510.684776)}
{pt3dadd(186876.000000,216228.000000,112050.000000,516.053258)}
{pt3dadd(185940.000000,216984.000000,112050.000000,602.324454)}
{pt3dadd(185520.000000,217776.000000,112050.000000,612.820804)}
{pt3dadd(184896.000000,218700.000000,112050.000000,601.417010)}
{pt3dadd(184404.000000,219624.000000,112050.000000,563.945790)}
{pt3dadd(183396.000000,219528.000000,112050.000000,510.800192)}
{pt3dadd(182880.000000,219168.000000,112050.000000,407.408892)}
{pt3dadd(182040.000000,218724.000000,112050.000000,404.526052)}
{pt3dadd(182256.000000,218100.000000,112050.000000,563.561552)}
{pt3dadd(182616.000000,217260.000000,112050.000000,613.465380)}
{pt3dadd(184308.000000,217452.000000,112050.000000,658.764756)}
{pt3dadd(182844.000000,216480.000000,112050.000000,738.379856)}
{pt3dadd(182892.000000,215760.000000,112050.000000,737.824696)}
{pt3dadd(183708.000000,215256.000000,112050.000000,677.561288)}
{pt3dadd(183708.000000,214464.000000,112050.000000,630.036184)}
{pt3dadd(184668.000000,213888.000000,112050.000000,815.718996)}
{pt3dadd(185124.000000,212928.000000,112050.000000,734.166084)}
{pt3dadd(184896.000000,216996.000000,111750.000000,710.905468)}
{pt3dadd(185412.000000,212832.000000,111750.000000,672.222862)}
{pt3dadd(186600.000000,212676.000000,111750.000000,730.113592)}
{pt3dadd(187284.000000,213600.000000,111750.000000,529.704472)}
{pt3dadd(187620.000000,214512.000000,111750.000000,526.734550)}
{pt3dadd(188148.000000,215304.000000,111750.000000,475.540026)}
{pt3dadd(187728.000000,215832.000000,111750.000000,417.822260)}
{pt3dadd(187056.000000,217068.000000,111750.000000,407.456634)}
{pt3dadd(186072.000000,218028.000000,111750.000000,420.508674)}
{pt3dadd(184944.000000,219588.000000,111750.000000,456.901918)}
{pt3dadd(184416.000000,220596.000000,111750.000000,490.887226)}
{pt3dadd(183384.000000,220608.000000,111750.000000,478.240070)}
{pt3dadd(182508.000000,220428.000000,111750.000000,453.975582)}
{pt3dadd(182232.000000,219684.000000,111750.000000,653.000242)}
{pt3dadd(182280.000000,218568.000000,111750.000000,689.218132)}
{pt3dadd(184692.000000,217704.000000,111750.000000,815.280284)}
{pt3dadd(182664.000000,217428.000000,111750.000000,853.023860)}
{pt3dadd(182748.000000,216528.000000,111750.000000,885.102380)}
{pt3dadd(182940.000000,215748.000000,111750.000000,747.218472)}
{pt3dadd(183624.000000,215220.000000,111750.000000,703.633932)}
{pt3dadd(184704.000000,213852.000000,111750.000000,807.113972)}
{pt3dadd(185352.000000,213036.000000,111750.000000,777.148172)}
{pt3dadd(184716.000000,217392.000000,111400.000000,719.430312)}
{pt3dadd(186216.000000,212820.000000,111400.000000,715.939640)}
{pt3dadd(186780.000000,212712.000000,111400.000000,822.631480)}
{pt3dadd(187140.000000,213252.000000,111400.000000,684.568848)}
{pt3dadd(187188.000000,214092.000000,111400.000000,674.742292)}
{pt3dadd(187488.000000,214980.000000,111400.000000,650.490912)}
{pt3dadd(187764.000000,215796.000000,111400.000000,538.552706)}
{pt3dadd(187128.000000,216696.000000,111400.000000,383.736310)}
{pt3dadd(186804.000000,217776.000000,111400.000000,286.131652)}
{pt3dadd(186216.000000,218400.000000,111400.000000,323.460956)}
{pt3dadd(185688.000000,219036.000000,111400.000000,362.405502)}
{pt3dadd(185136.000000,219720.000000,111400.000000,426.730096)}
{pt3dadd(184392.000000,220332.000000,111400.000000,472.273664)}
{pt3dadd(183480.000000,220752.000000,111400.000000,545.982654)}
{pt3dadd(182664.000000,220620.000000,111400.000000,545.401206)}
{pt3dadd(182184.000000,219672.000000,111400.000000,584.115970)}
{pt3dadd(181848.000000,219168.000000,111400.000000,583.083256)}
{pt3dadd(182016.000000,218616.000000,111400.000000,620.663564)}
{pt3dadd(181956.000000,217656.000000,111400.000000,823.687784)}
{pt3dadd(182340.000000,217128.000000,111400.000000,900.875424)}
{pt3dadd(184368.000000,217608.000000,111400.000000,839.708670)}
{pt3dadd(182952.000000,216384.000000,111400.000000,896.683276)}
{pt3dadd(182916.000000,215220.000000,111400.000000,903.185066)}
{pt3dadd(183972.000000,214728.000000,111400.000000,612.594280)}
{pt3dadd(183984.000000,213936.000000,111400.000000,767.671840)}
{pt3dadd(185724.000000,212772.000000,111400.000000,733.963320)}
{pt3dadd(184788.000000,216984.000000,110875.000000,654.955114)}
{pt3dadd(186228.000000,212856.000000,110875.000000,657.038544)}
{pt3dadd(187140.000000,212796.000000,110875.000000,686.216274)}
{pt3dadd(187464.000000,213696.000000,110875.000000,448.477994)}
{pt3dadd(188124.000000,214752.000000,110875.000000,503.157846)}
{pt3dadd(187596.000000,215844.000000,110875.000000,482.875812)}
{pt3dadd(187056.000000,216744.000000,110875.000000,428.502062)}
{pt3dadd(186480.000000,217896.000000,110875.000000,438.328618)}
{pt3dadd(185880.000000,218976.000000,110875.000000,413.114408)}
{pt3dadd(184992.000000,219756.000000,110875.000000,358.415520)}
{pt3dadd(184200.000000,220188.000000,110875.000000,686.244520)}
{pt3dadd(182580.000000,220596.000000,110875.000000,690.456890)}
{pt3dadd(184632.000000,217164.000000,110875.000000,694.857570)}
{pt3dadd(181788.000000,219960.000000,110875.000000,713.013430)}
{pt3dadd(181344.000000,219612.000000,110875.000000,777.706490)}
{pt3dadd(181812.000000,218664.000000,110875.000000,489.591494)}
{pt3dadd(182100.000000,217800.000000,110875.000000,546.683946)}
{pt3dadd(182268.000000,217164.000000,110875.000000,556.156400)}
{pt3dadd(182532.000000,216540.000000,110875.000000,613.414710)}
{pt3dadd(183168.000000,215184.000000,110875.000000,575.346530)}
{pt3dadd(183948.000000,214080.000000,110875.000000,869.261526)}
{pt3dadd(185772.000000,213096.000000,110875.000000,786.258748)}
{pt3dadd(185028.000000,216828.000000,110375.000000,811.730402)}
{pt3dadd(186528.000000,212928.000000,110375.000000,796.160556)}
{pt3dadd(187524.000000,213540.000000,110375.000000,808.248662)}
{pt3dadd(187740.000000,214404.000000,110375.000000,469.355358)}
{pt3dadd(188064.000000,215484.000000,110375.000000,454.805804)}
{pt3dadd(187668.000000,216936.000000,110375.000000,396.427564)}
{pt3dadd(187140.000000,218136.000000,110375.000000,362.352610)}
{pt3dadd(186492.000000,218796.000000,110375.000000,451.973724)}
{pt3dadd(185520.000000,219264.000000,110375.000000,466.627908)}
{pt3dadd(184440.000000,219804.000000,110375.000000,836.430108)}
{pt3dadd(182940.000000,220560.000000,110375.000000,873.069560)}
{pt3dadd(185004.000000,217056.000000,110375.000000,871.666072)}
{pt3dadd(182004.000000,219840.000000,110375.000000,809.061280)}
{pt3dadd(181944.000000,219204.000000,110375.000000,900.571848)}
{pt3dadd(182376.000000,217692.000000,110375.000000,588.169648)}
{pt3dadd(182616.000000,216612.000000,110375.000000,593.450628)}
{pt3dadd(182964.000000,215652.000000,110375.000000,614.909404)}
{pt3dadd(183408.000000,214980.000000,110375.000000,644.074406)}
{pt3dadd(183768.000000,214236.000000,110375.000000,531.387834)}
{pt3dadd(184452.000000,213600.000000,110375.000000,826.052074)}
{pt3dadd(186420.000000,212784.000000,110375.000000,772.751594)}
{pt3dadd(185292.000000,216924.000000,109950.000000,749.660396)}
{pt3dadd(186252.000000,212904.000000,109950.000000,739.145706)}
{pt3dadd(187248.000000,212904.000000,109950.000000,838.050002)}
{pt3dadd(187728.000000,214104.000000,109950.000000,610.028802)}
{pt3dadd(187860.000000,214728.000000,109950.000000,635.184442)}
{pt3dadd(187824.000000,215628.000000,109950.000000,601.717292)}
{pt3dadd(188052.000000,216252.000000,109950.000000,572.528692)}
{pt3dadd(187812.000000,217092.000000,109950.000000,506.479520)}
{pt3dadd(187104.000000,218304.000000,109950.000000,449.954200)}
{pt3dadd(185784.000000,219576.000000,109950.000000,439.640046)}
{pt3dadd(184848.000000,220032.000000,109950.000000,442.926226)}
{pt3dadd(183456.000000,220788.000000,109950.000000,745.463446)}
{pt3dadd(182796.000000,220680.000000,109950.000000,735.741306)}
{pt3dadd(185196.000000,217116.000000,109950.000000,704.045966)}
{pt3dadd(181704.000000,219996.000000,109950.000000,755.482740)}
{pt3dadd(181608.000000,219276.000000,109950.000000,802.561000)}
{pt3dadd(182076.000000,218760.000000,109950.000000,555.696760)}
{pt3dadd(182412.000000,217440.000000,109950.000000,588.220220)}
{pt3dadd(182688.000000,216432.000000,109950.000000,590.598944)}
{pt3dadd(183096.000000,215532.000000,109950.000000,569.640032)}
{pt3dadd(183636.000000,214536.000000,109950.000000,547.648406)}
{pt3dadd(184104.000000,213768.000000,109950.000000,447.368406)}
{pt3dadd(184980.000000,213372.000000,109950.000000,770.736566)}
{pt3dadd(185676.000000,212988.000000,109950.000000,734.292508)}
{pt3dadd(185508.000000,216348.000000,109525.000000,715.620670)}
{pt3dadd(186180.000000,212772.000000,109525.000000,774.205484)}
{pt3dadd(187356.000000,212640.000000,109525.000000,832.185964)}
{pt3dadd(187596.000000,213936.000000,109525.000000,502.411372)}
{pt3dadd(188004.000000,214704.000000,109525.000000,564.984346)}
{pt3dadd(188304.000000,215676.000000,109525.000000,566.502956)}
{pt3dadd(188004.000000,216396.000000,109525.000000,497.079988)}
{pt3dadd(187716.000000,217272.000000,109525.000000,458.620994)}
{pt3dadd(187092.000000,218640.000000,109525.000000,448.479532)}
{pt3dadd(186156.000000,219696.000000,109525.000000,469.200912)}
{pt3dadd(185196.000000,220272.000000,109525.000000,496.334512)}
{pt3dadd(184236.000000,220440.000000,109525.000000,838.094432)}
{pt3dadd(183456.000000,220248.000000,109525.000000,870.429586)}
{pt3dadd(185472.000000,216768.000000,109525.000000,901.515460)}
{pt3dadd(182364.000000,219804.000000,109525.000000,942.724780)}
{pt3dadd(182796.000000,218904.000000,109525.000000,974.642920)}
{pt3dadd(182688.000000,217536.000000,109525.000000,580.234520)}
{pt3dadd(182724.000000,216528.000000,109525.000000,517.805646)}
{pt3dadd(183132.000000,215304.000000,109525.000000,526.613846)}
{pt3dadd(183672.000000,214572.000000,109525.000000,413.614646)}
{pt3dadd(184464.000000,213672.000000,109525.000000,597.930626)}
{pt3dadd(185796.000000,212952.000000,109525.000000,612.450626)}
{pt3dadd(185400.000000,215772.000000,109375.000000,652.199150)}
{pt3dadd(186048.000000,212772.000000,109375.000000,649.289910)}
{pt3dadd(187296.000000,212580.000000,109375.000000,682.585538)}
{pt3dadd(187464.000000,213300.000000,109375.000000,467.495758)}
{pt3dadd(188076.000000,214296.000000,109375.000000,519.353738)}
{pt3dadd(188208.000000,215100.000000,109375.000000,503.600172)}
{pt3dadd(187680.000000,215928.000000,109375.000000,472.604792)}
{pt3dadd(187236.000000,216528.000000,109375.000000,477.836194)}
{pt3dadd(186372.000000,217092.000000,109375.000000,449.993238)}
{pt3dadd(185592.000000,217728.000000,109375.000000,401.949548)}
{pt3dadd(184680.000000,218196.000000,109375.000000,413.399224)}
{pt3dadd(184020.000000,218220.000000,109375.000000,422.402978)}
{pt3dadd(183408.000000,218136.000000,109375.000000,438.130676)}
{pt3dadd(182616.000000,217608.000000,109375.000000,438.130676)}
{pt3dadd(182268.000000,216912.000000,109375.000000,699.118866)}
{pt3dadd(182496.000000,216396.000000,109375.000000,741.072726)}
{pt3dadd(185088.000000,215760.000000,109375.000000,687.186092)}
{pt3dadd(183036.000000,215892.000000,109375.000000,637.346876)}
{pt3dadd(183552.000000,214908.000000,109375.000000,654.587092)}
{pt3dadd(184032.000000,213984.000000,109375.000000,379.200612)}
{pt3dadd(184944.000000,213252.000000,109375.000000,550.053612)}
{pt3dadd(185868.000000,212832.000000,109375.000000,538.810522)}
{pt3dadd(185652.000000,215016.000000,109125.000000,494.525660)}
{pt3dadd(185904.000000,212820.000000,109125.000000,524.211220)}
{pt3dadd(186936.000000,212160.000000,109125.000000,639.934826)}
{pt3dadd(187440.000000,213264.000000,109125.000000,486.565876)}
{pt3dadd(187752.000000,214440.000000,109125.000000,581.829218)}
{pt3dadd(186984.000000,215376.000000,109125.000000,681.730648)}
{pt3dadd(186096.000000,216192.000000,109125.000000,672.447608)}
{pt3dadd(185628.000000,216780.000000,109125.000000,640.121582)}
{pt3dadd(185016.000000,217248.000000,109125.000000,626.735112)}
{pt3dadd(184200.000000,217620.000000,109125.000000,692.989380)}
{pt3dadd(183564.000000,217584.000000,109125.000000,671.483054)}
{pt3dadd(182904.000000,216840.000000,109125.000000,831.491554)}
{pt3dadd(181920.000000,216540.000000,109125.000000,741.395568)}
{pt3dadd(185568.000000,215148.000000,109125.000000,654.308638)}
{pt3dadd(182724.000000,215412.000000,109125.000000,553.069006)}
{pt3dadd(183816.000000,214776.000000,109125.000000,539.047852)}
{pt3dadd(184464.000000,214020.000000,109125.000000,545.630032)}
{pt3dadd(185112.000000,213084.000000,109125.000000,612.395808)}
{pt3dadd(185388.000000,215256.000000,108875.000000,716.051410)}
{pt3dadd(187224.000000,212604.000000,108875.000000,732.485102)}
{pt3dadd(187776.000000,214236.000000,108875.000000,715.699030)}
{pt3dadd(187560.000000,215148.000000,108875.000000,540.780758)}
{pt3dadd(186780.000000,216156.000000,108875.000000,548.394268)}
{pt3dadd(185688.000000,216852.000000,108875.000000,523.499476)}
{pt3dadd(184824.000000,217488.000000,108875.000000,479.690760)}
{pt3dadd(183996.000000,217644.000000,108875.000000,505.747432)}
{pt3dadd(183036.000000,217656.000000,108875.000000,439.488956)}
{pt3dadd(182040.000000,217176.000000,108875.000000,593.054176)}
{pt3dadd(181848.000000,216492.000000,108875.000000,541.861048)}
{pt3dadd(185244.000000,215424.000000,108875.000000,558.401184)}
{pt3dadd(182436.000000,215772.000000,108875.000000,508.495570)}
{pt3dadd(182208.000000,215328.000000,108875.000000,528.548430)}
{pt3dadd(183612.000000,214836.000000,108875.000000,382.912838)}
{pt3dadd(184260.000000,214176.000000,108875.000000,413.623746)}
{pt3dadd(184776.000000,213180.000000,108875.000000,673.014266)}
{pt3dadd(186780.000000,212676.000000,108875.000000,697.896320)}
{pt3dadd(185508.000000,216036.000000,108550.000000,776.018828)}
{pt3dadd(186696.000000,212556.000000,108550.000000,825.717080)}
{pt3dadd(187380.000000,213444.000000,108550.000000,878.114720)}
{pt3dadd(187836.000000,215124.000000,108550.000000,784.684900)}
{pt3dadd(187596.000000,216180.000000,108550.000000,959.874060)}
{pt3dadd(187476.000000,217092.000000,108550.000000,988.467920)}
{pt3dadd(187020.000000,217992.000000,108550.000000,934.867220)}
{pt3dadd(186192.000000,219552.000000,108550.000000,927.846592)}
{pt3dadd(185352.000000,219936.000000,108550.000000,772.720780)}
{pt3dadd(184260.000000,219912.000000,108550.000000,614.411886)}
{pt3dadd(183336.000000,219852.000000,108550.000000,598.046566)}
{pt3dadd(182580.000000,219504.000000,108550.000000,693.555786)}
{pt3dadd(182952.000000,218976.000000,108550.000000,934.156814)}
{pt3dadd(183540.000000,219000.000000,108550.000000,1009.521926)}
{pt3dadd(185496.000000,216672.000000,108550.000000,1036.672560)}
{pt3dadd(183132.000000,218364.000000,108550.000000,1066.294132)}
{pt3dadd(182880.000000,218064.000000,108550.000000,962.579500)}
{pt3dadd(182916.000000,216984.000000,108550.000000,666.237960)}
{pt3dadd(183252.000000,216132.000000,108550.000000,578.509960)}
{pt3dadd(183816.000000,215520.000000,108550.000000,643.671808)}
{pt3dadd(184284.000000,214584.000000,108550.000000,544.442982)}
{pt3dadd(185004.000000,213720.000000,108550.000000,809.490834)}
{pt3dadd(186372.000000,212880.000000,108550.000000,797.247886)}
{pt3dadd(185472.000000,216360.000000,108200.000000,836.454146)}
{pt3dadd(186276.000000,212700.000000,108200.000000,795.169998)}
{pt3dadd(187452.000000,213192.000000,108200.000000,871.124292)}
{pt3dadd(187728.000000,214476.000000,108200.000000,683.293812)}
{pt3dadd(187848.000000,215364.000000,108200.000000,763.694700)}
{pt3dadd(187368.000000,216048.000000,108200.000000,869.891420)}
{pt3dadd(187356.000000,216912.000000,108200.000000,929.544172)}
{pt3dadd(186900.000000,218808.000000,108200.000000,941.837064)}
{pt3dadd(185952.000000,219708.000000,108200.000000,896.011354)}
{pt3dadd(185028.000000,219828.000000,108200.000000,931.345214)}
{pt3dadd(183960.000000,219876.000000,108200.000000,828.626894)}
{pt3dadd(183300.000000,219156.000000,108200.000000,1005.820282)}
{pt3dadd(183108.000000,218556.000000,108200.000000,941.562730)}
{pt3dadd(185256.000000,216696.000000,108200.000000,941.703920)}
{pt3dadd(183348.000000,217368.000000,108200.000000,886.591520)}
{pt3dadd(182772.000000,216708.000000,108200.000000,884.968440)}
{pt3dadd(183180.000000,216264.000000,108200.000000,625.716788)}
{pt3dadd(184092.000000,215244.000000,108200.000000,625.716788)}
{pt3dadd(184608.000000,213756.000000,108200.000000,872.590168)}
{pt3dadd(185508.000000,213060.000000,108200.000000,791.259428)}
{pt3dadd(185604.000000,216144.000000,108025.000000,779.569908)}
{pt3dadd(186228.000000,212568.000000,108025.000000,849.819420)}
{pt3dadd(186912.000000,212772.000000,108025.000000,904.270380)}
{pt3dadd(187236.000000,213792.000000,108025.000000,679.687180)}
{pt3dadd(187584.000000,214692.000000,108025.000000,794.770830)}
{pt3dadd(187776.000000,215472.000000,108025.000000,743.910322)}
{pt3dadd(187272.000000,216372.000000,108025.000000,635.981092)}
{pt3dadd(187524.000000,217308.000000,108025.000000,575.551380)}
{pt3dadd(187020.000000,218172.000000,108025.000000,508.772580)}
{pt3dadd(186156.000000,218988.000000,108025.000000,446.744910)}
{pt3dadd(185292.000000,219540.000000,108025.000000,514.915418)}
{pt3dadd(184344.000000,219564.000000,108025.000000,617.724078)}
{pt3dadd(183600.000000,219432.000000,108025.000000,873.771630)}
{pt3dadd(183288.000000,218952.000000,108025.000000,943.433782)}
{pt3dadd(185688.000000,216552.000000,108025.000000,1016.958754)}
{pt3dadd(182808.000000,218700.000000,108025.000000,1054.099714)}
{pt3dadd(183096.000000,217704.000000,108025.000000,986.923104)}
{pt3dadd(183300.000000,216624.000000,108025.000000,736.854304)}
{pt3dadd(183768.000000,215688.000000,108025.000000,705.663332)}
{pt3dadd(184236.000000,214956.000000,108025.000000,891.849200)}
{pt3dadd(185328.000000,213108.000000,108025.000000,823.142730)}
{pt3dadd(185532.000000,215760.000000,107800.000000,869.335830)}
{pt3dadd(186156.000000,212748.000000,107800.000000,985.845890)}
{pt3dadd(187332.000000,213660.000000,107800.000000,1026.534870)}
{pt3dadd(187176.000000,214704.000000,107800.000000,809.478640)}
{pt3dadd(187644.000000,215712.000000,107800.000000,889.959850)}
{pt3dadd(187548.000000,216672.000000,107800.000000,843.314040)}
{pt3dadd(187200.000000,217476.000000,107800.000000,766.870920)}
{pt3dadd(187380.000000,218892.000000,107800.000000,758.337880)}
{pt3dadd(186216.000000,219348.000000,107800.000000,759.215016)}
{pt3dadd(185196.000000,219528.000000,107800.000000,758.151164)}
{pt3dadd(184308.000000,219480.000000,107800.000000,1035.335294)}
{pt3dadd(183576.000000,218652.000000,107800.000000,978.751314)}
{pt3dadd(185568.000000,216372.000000,107800.000000,912.276202)}
{pt3dadd(183480.000000,216756.000000,107800.000000,881.914324)}
{pt3dadd(182664.000000,216384.000000,107800.000000,780.500816)}
{pt3dadd(183480.000000,216012.000000,107800.000000,524.027024)}
{pt3dadd(183972.000000,214812.000000,107800.000000,757.100904)}
{pt3dadd(185640.000000,213084.000000,107800.000000,724.390608)}
{pt3dadd(185376.000000,215724.000000,107550.000000,749.873288)}
{pt3dadd(186180.000000,212400.000000,107550.000000,847.225408)}
{pt3dadd(186780.000000,212892.000000,107550.000000,869.547308)}
{pt3dadd(187068.000000,213600.000000,107550.000000,623.193918)}
{pt3dadd(187524.000000,213996.000000,107550.000000,688.941494)}
{pt3dadd(188064.000000,214872.000000,107550.000000,649.820692)}
{pt3dadd(187944.000000,215904.000000,107550.000000,666.884992)}
{pt3dadd(187776.000000,216564.000000,107550.000000,686.863884)}
{pt3dadd(187356.000000,217332.000000,107550.000000,751.541974)}
{pt3dadd(186852.000000,218568.000000,107550.000000,740.611806)}
{pt3dadd(186192.000000,219480.000000,107550.000000,726.813420)}
{pt3dadd(185148.000000,220224.000000,107550.000000,612.397000)}
{pt3dadd(184116.000000,220488.000000,107550.000000,791.741980)}
{pt3dadd(183408.000000,220128.000000,107550.000000,797.619200)}
{pt3dadd(185256.000000,216168.000000,107550.000000,815.707510)}
{pt3dadd(182652.000000,219264.000000,107550.000000,823.713056)}
{pt3dadd(182820.000000,218208.000000,107550.000000,858.250676)}
{pt3dadd(182772.000000,217728.000000,107550.000000,582.709536)}
{pt3dadd(182712.000000,216480.000000,107550.000000,513.672836)}
{pt3dadd(183276.000000,215604.000000,107550.000000,504.823686)}
{pt3dadd(183756.000000,215052.000000,107550.000000,573.952900)}
{pt3dadd(184560.000000,214452.000000,107550.000000,536.086640)}
{pt3dadd(184956.000000,213816.000000,107550.000000,806.342400)}
{pt3dadd(186024.000000,212460.000000,107550.000000,790.589440)}
{pt3dadd(185640.000000,215592.000000,107375.000000,775.108000)}
{pt3dadd(186156.000000,212364.000000,107375.000000,754.152412)}
{pt3dadd(187200.000000,212868.000000,107375.000000,823.053372)}
{pt3dadd(187416.000000,214056.000000,107375.000000,655.991382)}
{pt3dadd(187776.000000,214788.000000,107375.000000,707.271822)}
{pt3dadd(187560.000000,215688.000000,107375.000000,712.351402)}
{pt3dadd(187692.000000,216780.000000,107375.000000,695.698270)}
{pt3dadd(187488.000000,218196.000000,107375.000000,711.995230)}
{pt3dadd(186828.000000,218736.000000,107375.000000,663.490700)}
{pt3dadd(186240.000000,219144.000000,107375.000000,662.878640)}
{pt3dadd(185280.000000,220008.000000,107375.000000,942.017040)}
{pt3dadd(183876.000000,220404.000000,107375.000000,940.095360)}
{pt3dadd(185532.000000,216084.000000,107375.000000,867.146520)}
{pt3dadd(183216.000000,219948.000000,107375.000000,848.829940)}
{pt3dadd(182424.000000,219792.000000,107375.000000,833.297606)}
{pt3dadd(182256.000000,219432.000000,107375.000000,574.801166)}
{pt3dadd(181944.000000,218724.000000,107375.000000,541.722306)}
{pt3dadd(182556.000000,218316.000000,107375.000000,592.931226)}
{pt3dadd(182592.000000,217656.000000,107375.000000,645.222746)}
{pt3dadd(182772.000000,216852.000000,107375.000000,735.127580)}
{pt3dadd(183600.000000,216144.000000,107375.000000,743.195492)}
{pt3dadd(184344.000000,215316.000000,107375.000000,975.567812)}
{pt3dadd(185640.000000,213012.000000,107375.000000,928.694532)}
{pt3dadd(185760.000000,215820.000000,107100.000000,893.250912)}
{pt3dadd(186252.000000,212544.000000,107100.000000,925.889012)}
{pt3dadd(187056.000000,213024.000000,107100.000000,909.895372)}
{pt3dadd(186960.000000,214176.000000,107100.000000,721.108812)}
{pt3dadd(187836.000000,214872.000000,107100.000000,732.979680)}
{pt3dadd(187740.000000,215712.000000,107100.000000,798.675700)}
{pt3dadd(187608.000000,216360.000000,107100.000000,715.801420)}
{pt3dadd(187392.000000,217332.000000,107100.000000,701.551388)}
{pt3dadd(187224.000000,218376.000000,107100.000000,677.864928)}
{pt3dadd(186672.000000,219132.000000,107100.000000,733.970260)}
{pt3dadd(185700.000000,219864.000000,107100.000000,657.490614)}
{pt3dadd(184848.000000,219912.000000,107100.000000,826.133554)}
{pt3dadd(184212.000000,220200.000000,107100.000000,962.742174)}
{pt3dadd(185820.000000,216612.000000,107100.000000,1007.469054)}
{pt3dadd(183228.000000,218832.000000,107100.000000,997.061622)}
{pt3dadd(183384.000000,218004.000000,107100.000000,1026.852600)}
{pt3dadd(183072.000000,216540.000000,107100.000000,851.313560)}
{pt3dadd(183504.000000,215928.000000,107100.000000,780.545160)}
{pt3dadd(183864.000000,215268.000000,107100.000000,758.254980)}
{pt3dadd(185340.000000,213744.000000,107100.000000,888.080972)}
{pt3dadd(186096.000000,212940.000000,107100.000000,802.701420)}
{pt3dadd(185844.000000,215712.000000,106775.000000,764.566934)}
{pt3dadd(186204.000000,212412.000000,106775.000000,771.958654)}
{pt3dadd(186840.000000,213048.000000,106775.000000,829.641194)}
{pt3dadd(187092.000000,214344.000000,106775.000000,713.740914)}
{pt3dadd(187176.000000,214476.000000,106775.000000,733.261714)}
{pt3dadd(187656.000000,215052.000000,106775.000000,735.361074)}
{pt3dadd(187764.000000,216108.000000,106775.000000,684.304894)}
{pt3dadd(187416.000000,217788.000000,106775.000000,580.299334)}
{pt3dadd(186768.000000,218400.000000,106775.000000,515.774800)}
{pt3dadd(186048.000000,220044.000000,106775.000000,511.671090)}
{pt3dadd(184956.000000,220296.000000,106775.000000,502.198636)}
{pt3dadd(183996.000000,220164.000000,106775.000000,462.092922)}
{pt3dadd(183384.000000,219828.000000,106775.000000,515.862302)}
{pt3dadd(182592.000000,219144.000000,106775.000000,551.779836)}
{pt3dadd(183480.000000,218892.000000,106775.000000,523.740498)}
{pt3dadd(183696.000000,218100.000000,106775.000000,547.771818)}
{pt3dadd(183492.000000,217428.000000,106775.000000,582.980760)}
{pt3dadd(182988.000000,216468.000000,106775.000000,536.678446)}
{pt3dadd(183696.000000,215676.000000,106775.000000,652.289146)}
{pt3dadd(185916.000000,213000.000000,106775.000000,643.363300)}
{pt3dadd(185544.000000,215904.000000,106225.000000,642.434048)}
{pt3dadd(186204.000000,213084.000000,106225.000000,608.496834)}
{pt3dadd(186996.000000,213948.000000,106225.000000,601.029768)}
{pt3dadd(187632.000000,214428.000000,106225.000000,467.000828)}
{pt3dadd(187452.000000,215640.000000,106225.000000,521.656996)}
{pt3dadd(186924.000000,216588.000000,106225.000000,516.157628)}
{pt3dadd(186600.000000,217308.000000,106225.000000,477.631874)}
{pt3dadd(185916.000000,218148.000000,106225.000000,473.476820)}
{pt3dadd(184908.000000,218448.000000,106225.000000,435.751500)}
{pt3dadd(183984.000000,218316.000000,106225.000000,414.151170)}
{pt3dadd(182808.000000,218328.000000,106225.000000,443.917510)}
{pt3dadd(182196.000000,217692.000000,106225.000000,494.986010)}
{pt3dadd(182700.000000,217164.000000,106225.000000,517.554304)}
{pt3dadd(182880.000000,216660.000000,106225.000000,679.911884)}
{pt3dadd(183372.000000,215940.000000,106225.000000,723.208800)}
{pt3dadd(185340.000000,216072.000000,106225.000000,723.129560)}
{pt3dadd(183780.000000,215508.000000,106225.000000,727.245040)}
{pt3dadd(184632.000000,214656.000000,106225.000000,791.044460)}
{pt3dadd(185724.000000,213708.000000,106225.000000,596.608180)}
{pt3dadd(185304.000000,216348.000000,105800.000000,546.463188)}
{pt3dadd(186096.000000,213612.000000,105800.000000,509.678556)}
{pt3dadd(186612.000000,213864.000000,105800.000000,458.910088)}
{pt3dadd(187044.000000,215292.000000,105800.000000,332.324388)}
{pt3dadd(187056.000000,216108.000000,105800.000000,418.630940)}
{pt3dadd(186924.000000,217056.000000,105800.000000,438.530172)}
{pt3dadd(186132.000000,217344.000000,105800.000000,400.163320)}
{pt3dadd(185532.000000,217752.000000,105800.000000,424.997448)}
{pt3dadd(184272.000000,217488.000000,105800.000000,498.358208)}
{pt3dadd(182472.000000,217572.000000,105800.000000,460.895104)}
{pt3dadd(184980.000000,216624.000000,105800.000000,483.701064)}
{pt3dadd(182652.000000,216828.000000,105800.000000,585.157288)}
{pt3dadd(183792.000000,216000.000000,105800.000000,564.305992)}
{pt3dadd(184620.000000,215220.000000,105800.000000,600.317900)}
{pt3dadd(185832.000000,213864.000000,105800.000000,561.326042)}
{pt3dadd(185040.000000,215760.000000,105350.000000,509.035516)}
{pt3dadd(185460.000000,214344.000000,105350.000000,441.542342)}
{pt3dadd(186228.000000,214536.000000,105350.000000,426.189174)}
{pt3dadd(186516.000000,215232.000000,105350.000000,340.154226)}
{pt3dadd(186096.000000,216660.000000,105350.000000,370.403706)}
{pt3dadd(185568.000000,216876.000000,105350.000000,359.349376)}
{pt3dadd(184776.000000,216360.000000,105350.000000,308.833830)}
{pt3dadd(183588.000000,216420.000000,105350.000000,302.527134)}
{pt3dadd(182616.000000,216552.000000,105350.000000,316.473922)}
{pt3dadd(182844.000000,216228.000000,105350.000000,348.605660)}
{pt3dadd(183720.000000,215856.000000,105350.000000,425.264744)}
{pt3dadd(184632.000000,215268.000000,105350.000000,477.645694)}
{pt3dadd(184908.000000,214740.000000,105350.000000,472.963414)}
{pt3dadd(185100.000000,215688.000000,105050.000000,429.334674)}
{pt3dadd(185244.000000,214896.000000,105050.000000,380.349046)}
{pt3dadd(185880.000000,214896.000000,105050.000000,350.069274)}
{pt3dadd(186228.000000,215844.000000,105050.000000,334.789758)}
{pt3dadd(185472.000000,216156.000000,105050.000000,348.206328)}
{pt3dadd(184704.000000,216156.000000,105050.000000,374.554320)}
{pt3dadd(183540.000000,216060.000000,105050.000000,378.022492)}
{pt3dadd(184164.000000,215412.000000,105050.000000,375.501124)}
{pt3dadd(184536.000000,215196.000000,105050.000000,328.994444)}
{pt3dadd(185160.000000,215748.000000,104825.000000,320.017940)}
{pt3dadd(185280.000000,215304.000000,104825.000000,307.371394)}
{pt3dadd(185976.000000,215436.000000,104825.000000,302.482296)}
{pt3dadd(186108.000000,215880.000000,104825.000000,266.269448)}
{pt3dadd(185436.000000,216120.000000,104825.000000,275.062356)}
{pt3dadd(184668.000000,216024.000000,104825.000000,275.304570)}
{pt3dadd(184092.000000,215796.000000,104825.000000,284.775916)}
{pt3dadd(184068.000000,215412.000000,104825.000000,264.819437)}
{pt3dadd(184668.000000,215628.000000,104825.000000,317.520000)}

{create adhoc24}
{access adhoc24}
{connect adhoc24(1), adhoc18(0)}
{nseg = 1}
{strdef color color = "White"}
{pt3dclear()}
{pt3dadd(188088.000000,202752.000000,86275.000000,33.279160)}
{pt3dadd(190020.000000,202152.000000,86150.000000,11.145123)}

{create adhoc25}
{access adhoc25}
{connect adhoc25(1), adhoc17(0)}
{nseg = 1}
{strdef color color = "White"}
{pt3dclear()}
{pt3dadd(185616.000000,201948.000000,82225.000000,69.007660)}
{pt3dadd(185760.000000,201684.000000,81725.000000,46.505107)}
{pt3dadd(185832.000000,201276.000000,81350.000000,28.503064)}
{pt3dadd(185928.000000,201012.000000,81050.000000,26.202809)}
{pt3dadd(186540.000000,200424.000000,80600.000000,12.701277)}
{pt3dadd(186360.000000,200172.000000,80150.000000,12.701277)}
{pt3dadd(186384.000000,199860.000000,79750.000000,12.701277)}
{pt3dadd(186408.000000,199548.000000,79300.000000,26.202809)}
{pt3dadd(186540.000000,199200.000000,78875.000000,15.001532)}
{pt3dadd(186420.000000,198684.000000,78400.000000,15.001532)}
{pt3dadd(186456.000000,198156.000000,77975.000000,15.001532)}
{pt3dadd(186456.000000,197940.000000,77500.000000,28.503064)}
{pt3dadd(186408.000000,197724.000000,77200.000000,15.001532)}
{pt3dadd(186468.000000,197484.000000,77025.000000,15.001532)}
{pt3dadd(186468.000000,197292.000000,76850.000000,15.001532)}
{pt3dadd(186420.000000,197076.000000,76850.000000,31.263370)}
{pt3dadd(186528.000000,196884.000000,76725.000000,17.761838)}
{pt3dadd(186612.000000,196668.000000,76625.000000,17.761838)}
{pt3dadd(186648.000000,196380.000000,76675.000000,17.761838)}
{pt3dadd(186660.000000,196104.000000,76525.000000,34.023676)}
{pt3dadd(186888.000000,195804.000000,76475.000000,17.761838)}
{pt3dadd(186924.000000,195516.000000,76450.000000,17.761838)}
{pt3dadd(186900.000000,195240.000000,76125.000000,17.761838)}
{pt3dadd(187176.000000,195012.000000,75850.000000,33.361202)}
{pt3dadd(187260.000000,194748.000000,75725.000000,17.099364)}
{pt3dadd(187368.000000,194448.000000,75725.000000,17.099364)}
{pt3dadd(187752.000000,194160.000000,75625.000000,17.099364)}
{pt3dadd(187932.000000,193956.000000,75525.000000,33.361202)}
{pt3dadd(188064.000000,193728.000000,75425.000000,17.761838)}
{pt3dadd(188124.000000,193488.000000,75300.000000,17.761838)}
{pt3dadd(188328.000000,193224.000000,75150.000000,17.761838)}
{pt3dadd(188388.000000,192996.000000,75025.000000,33.361204)}
{pt3dadd(188472.000000,192756.000000,74925.000000,17.099366)}
{pt3dadd(188532.000000,192540.000000,74825.000000,17.099366)}
{pt3dadd(188568.000000,192312.000000,74800.000000,17.099366)}
{pt3dadd(188628.000000,192036.000000,74675.000000,33.361204)}
{pt3dadd(188688.000000,191808.000000,74550.000000,17.761838)}
{pt3dadd(188748.000000,191556.000000,74425.000000,17.761838)}
{pt3dadd(188760.000000,191268.000000,74400.000000,17.761838)}
{pt3dadd(188772.000000,190968.000000,74375.000000,33.361203)}
{pt3dadd(188856.000000,190632.000000,74250.000000,17.099365)}
{pt3dadd(188940.000000,190332.000000,74150.000000,17.099365)}
{pt3dadd(189120.000000,190056.000000,74050.000000,17.099365)}
{pt3dadd(189300.000000,189756.000000,73950.000000,33.361203)}
{pt3dadd(189312.000000,189516.000000,73900.000000,17.761838)}
{pt3dadd(189396.000000,189264.000000,73850.000000,17.761838)}
{pt3dadd(189456.000000,189000.000000,73825.000000,17.761838)}
{pt3dadd(189636.000000,188736.000000,73875.000000,31.263370)}
{pt3dadd(189720.000000,188448.000000,73850.000000,15.001532)}
{pt3dadd(189780.000000,188148.000000,73925.000000,15.001532)}
{pt3dadd(189792.000000,187740.000000,74300.000000,28.503064)}
{pt3dadd(189744.000000,187512.000000,74550.000000,42.004596)}
{pt3dadd(189924.000000,187272.000000,74675.000000,46.505107)}
{pt3dadd(189936.000000,186888.000000,74600.000000,69.007660)}

{create adhoc26}
{access adhoc26}
{connect adhoc26(1), adhoc25(0)}
{nseg = 1}
{strdef color color = "White"}
{pt3dclear()}
{pt3dadd(189936.000000,186888.000000,74600.000000,69.007660)}
{pt3dadd(190404.000000,186636.000000,74875.000000,78.208680)}
{pt3dadd(190584.000000,186348.000000,75075.000000,78.208680)}
{pt3dadd(190644.000000,186240.000000,75125.000000,69.007660)}

{create adhoc27}
{access adhoc27}
{connect adhoc27(1), adhoc26(0)}
{nseg = 1}
{strdef color color = "White"}
{pt3dclear()}
{pt3dadd(190644.000000,186240.000000,75125.000000,69.007660)}
{pt3dadd(191052.000000,185964.000000,75350.000000,46.505107)}
{pt3dadd(191340.000000,185688.000000,75400.000000,55.506128)}
{pt3dadd(191568.000000,185448.000000,75325.000000,46.505107)}
{pt3dadd(192012.000000,185136.000000,75250.000000,69.007660)}

{create adhoc28}
{access adhoc28}
{connect adhoc28(1), adhoc27(0)}
{nseg = 1}
{strdef color color = "White"}
{pt3dclear()}
{pt3dadd(192012.000000,185136.000000,75250.000000,69.007660)}
{pt3dadd(192012.000000,182088.000000,73025.000000,32.746764)}
{pt3dadd(192048.000000,181896.000000,72750.000000,20.248058)}
{pt3dadd(191892.000000,181692.000000,72400.000000,10.298281)}
{pt3dadd(191856.000000,181536.000000,72125.000000,5.051754)}
{pt3dadd(191676.000000,181332.000000,71850.000000,5.051754)}
{pt3dadd(191568.000000,181212.000000,71650.000000,9.373860)}
{pt3dadd(191424.000000,180936.000000,71350.000000,16.741378)}
{pt3dadd(191340.000000,180684.000000,71150.000000,20.982707)}
{pt3dadd(191448.000000,180744.000000,70975.000000,38.337593)}

{create adhoc29}
{access adhoc29}
{connect adhoc29(1), adhoc28(0)}
{nseg = 1}
{strdef color color = "White"}
{pt3dclear()}
{pt3dadd(191448.000000,180744.000000,70975.000000,38.337593)}
{pt3dadd(190860.000000,179868.000000,70975.000000,15.429106)}
{pt3dadd(190632.000000,179352.000000,70975.000000,13.715513)}
{pt3dadd(190560.000000,179232.000000,71075.000000,7.930082)}
{pt3dadd(190440.000000,179124.000000,71200.000000,11.145123)}

{create adhoc30}
{access adhoc30}
{connect adhoc30(1), adhoc29(0)}
{nseg = 1}
{strdef color color = "White"}
{pt3dclear()}
{pt3dadd(190440.000000,179124.000000,71200.000000,11.145123)}
{pt3dadd(190116.000000,179112.000000,71200.000000,8.086521)}
{pt3dadd(189960.000000,179100.000000,71200.000000,5.374770)}

{create adhoc31}
{access adhoc31}
{connect adhoc31(1), adhoc29(0)}
{nseg = 1}
{strdef color color = "White"}
{pt3dclear()}
{pt3dadd(190440.000000,179124.000000,71200.000000,11.145123)}
{pt3dadd(190500.000000,179004.000000,71125.000000,7.930082)}
{pt3dadd(190476.000000,178896.000000,71100.000000,5.358049)}
{pt3dadd(190488.000000,178788.000000,71175.000000,5.803854)}
{pt3dadd(190548.000000,178524.000000,71200.000000,3.874829)}
{pt3dadd(190608.000000,178392.000000,71175.000000,3.874829)}
{pt3dadd(190632.000000,178260.000000,71175.000000,3.874829)}
{pt3dadd(190560.000000,178140.000000,71225.000000,5.803854)}
{pt3dadd(190488.000000,178008.000000,71300.000000,3.429025)}
{pt3dadd(190428.000000,177900.000000,71350.000000,3.429025)}
{pt3dadd(190488.000000,177780.000000,71400.000000,3.429025)}
{pt3dadd(190608.000000,177660.000000,71425.000000,5.358049)}
{pt3dadd(190668.000000,177552.000000,71475.000000,3.429025)}
{pt3dadd(190632.000000,177444.000000,71525.000000,3.429025)}
{pt3dadd(190608.000000,177348.000000,71575.000000,3.429025)}
{pt3dadd(190584.000000,177240.000000,71575.000000,4.676958)}
{pt3dadd(190644.000000,177132.000000,71625.000000,2.747934)}
{pt3dadd(190680.000000,177012.000000,71625.000000,2.747934)}
{pt3dadd(190704.000000,176892.000000,71600.000000,2.747934)}
{pt3dadd(190764.000000,176772.000000,71650.000000,3.522888)}
{pt3dadd(190812.000000,176664.000000,71625.000000,3.832474)}
{pt3dadd(190824.000000,176556.000000,71775.000000,5.080408)}
{pt3dadd(190968.000000,176364.000000,72025.000000,7.467347)}
{pt3dadd(190968.000000,176256.000000,72125.000000,7.739669)}

{create adhoc32}
{access adhoc32}
{connect adhoc32(1), adhoc28(0)}
{nseg = 1}
{strdef color color = "White"}
{pt3dclear()}
{pt3dadd(191448.000000,180744.000000,70975.000000,38.337593)}
{pt3dadd(191544.000000,180756.000000,70625.000000,26.590861)}
{pt3dadd(191460.000000,180636.000000,70300.000000,16.554517)}
{pt3dadd(191244.000000,180612.000000,69950.000000,16.873996)}
{pt3dadd(190956.000000,180408.000000,69650.000000,9.186998)}
{pt3dadd(190812.000000,180240.000000,69300.000000,18.471396)}
{pt3dadd(190848.000000,180300.000000,68950.000000,26.158394)}
{pt3dadd(190728.000000,180216.000000,68675.000000,29.785660)}
{pt3dadd(190584.000000,180120.000000,68475.000000,39.934990)}

{create adhoc33}
{access adhoc33}
{connect adhoc33(1), adhoc32(0)}
{nseg = 1}
{strdef color color = "White"}
{pt3dclear()}
{pt3dadd(190584.000000,180120.000000,68475.000000,39.934990)}
{pt3dadd(190164.000000,179208.000000,68575.000000,16.391553)}
{pt3dadd(189960.000000,179100.000000,68525.000000,10.434932)}
{pt3dadd(189816.000000,178956.000000,68450.000000,5.657729)}
{pt3dadd(189768.000000,178812.000000,68300.000000,5.399740)}
{pt3dadd(189636.000000,178656.000000,68525.000000,6.389685)}
{pt3dadd(189840.000000,178512.000000,68625.000000,9.649475)}
{pt3dadd(189768.000000,178392.000000,68625.000000,6.449724)}

{create adhoc34}
{access adhoc34}
{connect adhoc34(1), adhoc32(0)}
{nseg = 1}
{strdef color color = "White"}
{pt3dclear()}
{pt3dadd(190584.000000,180120.000000,68475.000000,39.934990)}
{pt3dadd(190572.000000,180432.000000,68200.000000,29.785660)}
{pt3dadd(190596.000000,180528.000000,67900.000000,18.471396)}
{pt3dadd(190356.000000,180648.000000,67575.000000,17.140230)}
{pt3dadd(190176.000000,180708.000000,67275.000000,7.855832)}
{pt3dadd(189948.000000,180660.000000,67075.000000,7.855832)}
{pt3dadd(189876.000000,180732.000000,66725.000000,7.855832)}
{pt3dadd(189684.000000,180672.000000,66450.000000,12.177937)}
{pt3dadd(189360.000000,180768.000000,66225.000000,5.822105)}
{pt3dadd(188988.000000,181224.000000,66050.000000,5.822105)}
{pt3dadd(188592.000000,181356.000000,65825.000000,5.822105)}
{pt3dadd(188256.000000,181416.000000,65600.000000,11.068632)}
{pt3dadd(188256.000000,181440.000000,65375.000000,6.746526)}
{pt3dadd(187752.000000,181620.000000,65100.000000,6.746526)}
{pt3dadd(187560.000000,181608.000000,64775.000000,6.746526)}
{pt3dadd(187404.000000,181776.000000,64500.000000,14.433524)}
{pt3dadd(187008.000000,181956.000000,64275.000000,9.186998)}
{pt3dadd(186576.000000,182136.000000,63950.000000,9.186998)}
{pt3dadd(186408.000000,182100.000000,63800.000000,9.186998)}
{pt3dadd(186432.000000,182136.000000,63475.000000,14.433524)}
{pt3dadd(186468.000000,182172.000000,63175.000000,6.746526)}
{pt3dadd(186240.000000,182292.000000,62900.000000,6.746526)}
{pt3dadd(186192.000000,182172.000000,62625.000000,6.746526)}
{pt3dadd(186096.000000,182220.000000,62375.000000,11.993053)}
{pt3dadd(185940.000000,182172.000000,62050.000000,6.746526)}
{pt3dadd(185868.000000,182160.000000,61800.000000,6.746526)}
{pt3dadd(185640.000000,182076.000000,61500.000000,6.746526)}
{pt3dadd(185460.000000,182052.000000,61200.000000,11.993053)}
{pt3dadd(185124.000000,181884.000000,60925.000000,6.746526)}
{pt3dadd(184692.000000,181884.000000,60550.000000,6.746526)}
{pt3dadd(184524.000000,181812.000000,60325.000000,6.746526)}
{pt3dadd(184200.000000,181884.000000,60125.000000,7.994460)}
{pt3dadd(183840.000000,182040.000000,59950.000000,2.747934)}
{pt3dadd(183708.000000,182100.000000,59975.000000,2.747934)}
{pt3dadd(183564.000000,182160.000000,60050.000000,2.747934)}
{pt3dadd(183432.000000,182184.000000,60050.000000,5.122763)}
{pt3dadd(183300.000000,182304.000000,60150.000000,3.874829)}
{pt3dadd(183156.000000,182388.000000,60275.000000,3.874829)}
{pt3dadd(183036.000000,182448.000000,60300.000000,3.874829)}
{pt3dadd(182916.000000,182520.000000,60375.000000,5.122763)}
{pt3dadd(182808.000000,182664.000000,60450.000000,2.747934)}
{pt3dadd(182700.000000,182712.000000,60475.000000,2.747934)}
{pt3dadd(182316.000000,183252.000000,60475.000000,2.747934)}
{pt3dadd(182208.000000,183384.000000,60625.000000,5.122763)}
{pt3dadd(182076.000000,183612.000000,60675.000000,3.874829)}
{pt3dadd(182016.000000,183840.000000,60750.000000,3.874829)}
{pt3dadd(181920.000000,184056.000000,60925.000000,3.874829)}
{pt3dadd(181848.000000,184572.000000,61050.000000,5.432350)}
{pt3dadd(181716.000000,184992.000000,61200.000000,3.057520)}
{pt3dadd(181212.000000,185556.000000,61325.000000,3.057520)}
{pt3dadd(180456.000000,186000.000000,61325.000000,3.057520)}
{pt3dadd(180312.000000,186048.000000,61325.000000,5.967316)}
{pt3dadd(180204.000000,186120.000000,61275.000000,6.338820)}
{pt3dadd(180084.000000,186096.000000,61250.000000,7.896340)}
{pt3dadd(179976.000000,186180.000000,61275.000000,12.160567)}
{pt3dadd(179892.000000,186288.000000,61275.000000,9.287602)}

{create adhoc35}
{access adhoc35}
{connect adhoc35(1), adhoc27(0)}
{nseg = 1}
{strdef color color = "White"}
{pt3dclear()}
{pt3dadd(192012.000000,185136.000000,75250.000000,69.007660)}
{pt3dadd(192240.000000,184728.000000,75300.000000,46.505107)}
{pt3dadd(192480.000000,184452.000000,75350.000000,28.503064)}
{pt3dadd(192660.000000,184116.000000,75400.000000,28.503064)}
{pt3dadd(192888.000000,183840.000000,75575.000000,15.001532)}
{pt3dadd(193116.000000,183444.000000,75775.000000,15.001532)}
{pt3dadd(193284.000000,183060.000000,75650.000000,15.001532)}
{pt3dadd(193368.000000,182724.000000,75575.000000,26.202809)}
{pt3dadd(193848.000000,182292.000000,75725.000000,12.701277)}
{pt3dadd(194232.000000,181944.000000,75750.000000,12.701277)}
{pt3dadd(194352.000000,181668.000000,75775.000000,12.701277)}
{pt3dadd(194856.000000,181380.000000,75625.000000,25.650747)}
{pt3dadd(195060.000000,180996.000000,75475.000000,14.449470)}
{pt3dadd(195444.000000,180660.000000,75450.000000,14.449470)}
{pt3dadd(195804.000000,180240.000000,75125.000000,14.449470)}
{pt3dadd(195852.000000,179868.000000,75125.000000,27.951002)}
{pt3dadd(195912.000000,179604.000000,75100.000000,15.001532)}
{pt3dadd(196056.000000,179268.000000,75275.000000,15.001532)}
{pt3dadd(196164.000000,179016.000000,75375.000000,15.001532)}
{pt3dadd(196308.000000,178872.000000,75350.000000,31.263370)}
{pt3dadd(196296.000000,178740.000000,74950.000000,17.761838)}
{pt3dadd(196296.000000,178536.000000,74850.000000,17.761838)}
{pt3dadd(196344.000000,178272.000000,74900.000000,17.761838)}
{pt3dadd(196392.000000,178092.000000,74950.000000,31.263370)}
{pt3dadd(196572.000000,177828.000000,74875.000000,15.001532)}
{pt3dadd(196752.000000,177492.000000,74750.000000,15.001532)}
{pt3dadd(197040.000000,177156.000000,74825.000000,15.001532)}
{pt3dadd(197364.000000,176760.000000,74750.000000,27.951002)}
{pt3dadd(197424.000000,176472.000000,74625.000000,14.449470)}
{pt3dadd(197568.000000,176172.000000,74650.000000,14.449470)}
{pt3dadd(197652.000000,176028.000000,74650.000000,14.449470)}
{pt3dadd(197736.000000,175896.000000,74675.000000,30.048835)}
{pt3dadd(197664.000000,175752.000000,74675.000000,17.099365)}
{pt3dadd(197592.000000,175596.000000,74425.000000,17.099365)}
{pt3dadd(197520.000000,175416.000000,74175.000000,17.099365)}
{pt3dadd(197448.000000,175212.000000,73925.000000,32.062756)}
{pt3dadd(197448.000000,174912.000000,73975.000000,16.463391)}
{pt3dadd(197532.000000,174576.000000,73900.000000,16.463391)}
{pt3dadd(197496.000000,174300.000000,73925.000000,16.463391)}
{pt3dadd(197484.000000,173976.000000,73800.000000,27.664668)}
{pt3dadd(197484.000000,173844.000000,73750.000000,23.902554)}
{pt3dadd(197472.000000,173700.000000,73650.000000,35.103832)}
{pt3dadd(197436.000000,173568.000000,73550.000000,57.506386)}
{pt3dadd(197400.000000,173424.000000,73450.000000,57.506386)}

{create adhoc36}
{access adhoc36}
{connect adhoc36(1), adhoc35(0)}
{nseg = 1}
{strdef color color = "White"}
{pt3dclear()}
{pt3dadd(197400.000000,173424.000000,73450.000000,57.506386)}
{pt3dadd(197328.000000,173244.000000,73500.000000,38.837591)}
{pt3dadd(197076.000000,173028.000000,73325.000000,23.902554)}
{pt3dadd(196944.000000,172896.000000,73175.000000,23.902554)}
{pt3dadd(196944.000000,172752.000000,73100.000000,12.701277)}
{pt3dadd(196992.000000,172560.000000,73100.000000,12.701277)}
{pt3dadd(196956.000000,172380.000000,73100.000000,12.701277)}
{pt3dadd(196896.000000,172188.000000,72975.000000,23.442503)}
{pt3dadd(196920.000000,172008.000000,72925.000000,25.742757)}
{pt3dadd(196944.000000,171816.000000,72900.000000,39.244289)}
{pt3dadd(196944.000000,171636.000000,72800.000000,64.407149)}
{pt3dadd(196872.000000,171468.000000,72800.000000,69.007660)}

{create adhoc37}
{access adhoc37}
{connect adhoc37(1), adhoc36(0)}
{nseg = 1}
{strdef color color = "White"}
{pt3dclear()}
{pt3dadd(196872.000000,171468.000000,72800.000000,69.007660)}
{pt3dadd(196860.000000,171192.000000,72725.000000,46.505107)}
{pt3dadd(196824.000000,170928.000000,72650.000000,28.503064)}
{pt3dadd(196704.000000,170676.000000,72500.000000,27.951002)}
{pt3dadd(196704.000000,170436.000000,72450.000000,27.951002)}
{pt3dadd(196704.000000,170196.000000,72400.000000,45.585003)}
{pt3dadd(196668.000000,169932.000000,72350.000000,69.007660)}

{create adhoc38}
{access adhoc38}
{connect adhoc38(1), adhoc37(0)}
{nseg = 1}
{strdef color color = "White"}
{pt3dclear()}
{pt3dadd(196668.000000,169932.000000,72350.000000,69.007660)}
{pt3dadd(196668.000000,169620.000000,72525.000000,46.505107)}
{pt3dadd(196668.000000,169272.000000,72600.000000,28.503064)}
{pt3dadd(196668.000000,169008.000000,72675.000000,26.202809)}
{pt3dadd(196632.000000,168684.000000,72625.000000,26.202809)}
{pt3dadd(196500.000000,168408.000000,72500.000000,39.152279)}
{pt3dadd(196428.000000,168168.000000,72500.000000,64.253799)}
{pt3dadd(196356.000000,167868.000000,72550.000000,66.247350)}

{create adhoc39}
{access adhoc39}
{connect adhoc39(1), adhoc38(0)}
{nseg = 1}
{strdef color color = "White"}
{pt3dclear()}
{pt3dadd(196356.000000,167868.000000,72550.000000,66.247350)}
{pt3dadd(196344.000000,167592.000000,72600.000000,41.751245)}
{pt3dadd(196188.000000,167304.000000,72525.000000,25.650747)}
{pt3dadd(196068.000000,167064.000000,72300.000000,25.650747)}
{pt3dadd(196032.000000,166764.000000,72025.000000,14.449470)}
{pt3dadd(196116.000000,166524.000000,71850.000000,14.449470)}
{pt3dadd(196260.000000,166284.000000,71625.000000,14.449470)}
{pt3dadd(196284.000000,165996.000000,71425.000000,27.951002)}
{pt3dadd(196332.000000,165732.000000,71325.000000,15.001532)}
{pt3dadd(196416.000000,165492.000000,71375.000000,15.001532)}
{pt3dadd(196440.000000,165276.000000,71325.000000,15.001532)}
{pt3dadd(196428.000000,165036.000000,71250.000000,30.600897)}
{pt3dadd(196452.000000,164772.000000,71150.000000,17.099365)}
{pt3dadd(196476.000000,164472.000000,70950.000000,17.099365)}
{pt3dadd(196476.000000,164232.000000,70700.000000,17.099365)}
{pt3dadd(196500.000000,163992.000000,70800.000000,30.048835)}
{pt3dadd(196560.000000,163752.000000,70775.000000,14.449470)}
{pt3dadd(196548.000000,163488.000000,70700.000000,14.449470)}
{pt3dadd(196536.000000,163248.000000,70625.000000,14.449470)}
{pt3dadd(196356.000000,162972.000000,70500.000000,30.048835)}
{pt3dadd(196344.000000,162732.000000,70475.000000,17.099365)}
{pt3dadd(196344.000000,162528.000000,70275.000000,17.099365)}
{pt3dadd(196344.000000,162300.000000,70075.000000,33.361203)}
{pt3dadd(196344.000000,162084.000000,69950.000000,44.562480)}
{pt3dadd(196332.000000,161868.000000,69850.000000,47.271859)}
{pt3dadd(196716.000000,161496.000000,70575.000000,57.506386)}

{create adhoc40}
{access adhoc40}
{connect adhoc40(1), adhoc39(0)}
{nseg = 1}
{strdef color color = "White"}
{pt3dclear()}
{pt3dadd(196716.000000,161496.000000,70575.000000,57.506386)}
{pt3dadd(196920.000000,161292.000000,70925.000000,38.070838)}
{pt3dadd(196968.000000,161040.000000,70975.000000,23.442503)}
{pt3dadd(196992.000000,160788.000000,71025.000000,22.982451)}
{pt3dadd(196992.000000,160536.000000,71100.000000,12.241225)}
{pt3dadd(197052.000000,160212.000000,71175.000000,12.241225)}
{pt3dadd(197040.000000,159900.000000,71275.000000,12.241225)}
{pt3dadd(197004.000000,159648.000000,71325.000000,23.442503)}
{pt3dadd(196944.000000,159372.000000,71375.000000,23.442503)}
{pt3dadd(196932.000000,159132.000000,71450.000000,38.070838)}
{pt3dadd(196932.000000,158868.000000,71425.000000,55.206127)}

{create adhoc41}
{access adhoc41}
{connect adhoc41(1), adhoc40(0)}
{nseg = 1}
{strdef color color = "White"}
{pt3dclear()}
{pt3dadd(196932.000000,158868.000000,71425.000000,55.206127)}
{pt3dadd(196956.000000,158628.000000,71475.000000,34.876039)}
{pt3dadd(196980.000000,158424.000000,71525.000000,21.525623)}
{pt3dadd(196920.000000,158208.000000,71450.000000,21.985675)}
{pt3dadd(196944.000000,157992.000000,71525.000000,12.701277)}
{pt3dadd(196968.000000,157752.000000,71600.000000,12.701277)}
{pt3dadd(196992.000000,157476.000000,71675.000000,12.701277)}
{pt3dadd(197016.000000,157260.000000,71675.000000,23.442505)}
{pt3dadd(196980.000000,156948.000000,71725.000000,12.241228)}
{pt3dadd(196920.000000,156624.000000,71750.000000,12.241228)}
{pt3dadd(196920.000000,156336.000000,71750.000000,12.241228)}
{pt3dadd(197040.000000,156060.000000,71750.000000,21.525626)}
{pt3dadd(197040.000000,155796.000000,71800.000000,10.784398)}
{pt3dadd(197100.000000,155484.000000,71800.000000,10.784398)}
{pt3dadd(197004.000000,155172.000000,71775.000000,10.784398)}
{pt3dadd(196968.000000,154884.000000,71825.000000,20.068796)}
{pt3dadd(196968.000000,154656.000000,71850.000000,10.784398)}
{pt3dadd(196968.000000,154416.000000,71875.000000,10.784398)}
{pt3dadd(196812.000000,154176.000000,71875.000000,10.784398)}
{pt3dadd(196896.000000,153864.000000,72050.000000,22.695110)}
{pt3dadd(196920.000000,153516.000000,72175.000000,24.611989)}
{pt3dadd(196944.000000,153300.000000,72300.000000,40.019982)}
{pt3dadd(196908.000000,153036.000000,72225.000000,57.506386)}

{create adhoc42}
{access adhoc42}
{connect adhoc42(1), adhoc41(0)}
{nseg = 1}
{strdef color color = "White"}
{pt3dclear()}
{pt3dadd(196908.000000,153036.000000,72225.000000,57.506386)}
{pt3dadd(196968.000000,152892.000000,72225.000000,35.642792)}
{pt3dadd(196968.000000,152736.000000,72275.000000,21.985675)}
{pt3dadd(197172.000000,152496.000000,72700.000000,20.068796)}
{pt3dadd(197220.000000,152244.000000,72725.000000,10.784398)}
{pt3dadd(197244.000000,151932.000000,72675.000000,10.784398)}
{pt3dadd(197172.000000,151632.000000,72850.000000,10.784398)}
{pt3dadd(197316.000000,151404.000000,72800.000000,20.068796)}
{pt3dadd(197304.000000,151140.000000,72800.000000,10.784398)}
{pt3dadd(197232.000000,150936.000000,72800.000000,10.784398)}
{pt3dadd(197160.000000,150636.000000,72800.000000,10.784398)}
{pt3dadd(197088.000000,150384.000000,72775.000000,20.068796)}
{pt3dadd(197088.000000,150180.000000,72825.000000,10.784398)}
{pt3dadd(197052.000000,149916.000000,72900.000000,10.784398)}
{pt3dadd(196812.000000,149664.000000,72825.000000,10.784398)}
{pt3dadd(196872.000000,149424.000000,72825.000000,17.140230)}
{pt3dadd(196956.000000,149208.000000,72725.000000,7.855832)}
{pt3dadd(196944.000000,149064.000000,72675.000000,7.855832)}
{pt3dadd(196968.000000,148824.000000,72675.000000,7.855832)}
{pt3dadd(197076.000000,148512.000000,72550.000000,15.223351)}
{pt3dadd(197184.000000,148260.000000,72475.000000,8.867519)}
{pt3dadd(197172.000000,148020.000000,72475.000000,8.867519)}
{pt3dadd(197136.000000,147720.000000,72525.000000,8.867519)}
{pt3dadd(197100.000000,147468.000000,72525.000000,18.151917)}
{pt3dadd(197028.000000,147228.000000,72550.000000,10.784398)}
{pt3dadd(196956.000000,146988.000000,72550.000000,10.784398)}
{pt3dadd(197004.000000,146784.000000,72600.000000,10.784398)}
{pt3dadd(196968.000000,146376.000000,72550.000000,18.471396)}
{pt3dadd(196932.000000,146100.000000,72600.000000,9.186998)}
{pt3dadd(196932.000000,145836.000000,72650.000000,9.186998)}
{pt3dadd(196992.000000,145560.000000,72675.000000,9.186998)}
{pt3dadd(197052.000000,145320.000000,72700.000000,18.471396)}
{pt3dadd(197016.000000,145032.000000,72750.000000,20.068796)}
{pt3dadd(196980.000000,144720.000000,72800.000000,29.353194)}
{pt3dadd(196944.000000,144492.000000,72850.000000,47.921990)}
{pt3dadd(196908.000000,144324.000000,72900.000000,47.921990)}

{create adhoc43}
{access adhoc43}
{connect adhoc43(1), adhoc42(0)}
{nseg = 1}
{strdef color color = "White"}
{pt3dclear()}
{pt3dadd(196908.000000,144324.000000,72900.000000,47.921990)}
{pt3dadd(196992.000000,144132.000000,72950.000000,47.921990)}
{pt3dadd(196992.000000,144012.000000,73000.000000,47.921990)}

{create adhoc44}
{access adhoc44}
{connect adhoc44(1), adhoc43(0)}
{nseg = 1}
{strdef color color = "White"}
{pt3dclear()}
{pt3dadd(196992.000000,144012.000000,73000.000000,47.921990)}
{pt3dadd(196980.000000,143796.000000,72950.000000,32.447993)}
{pt3dadd(197004.000000,143520.000000,72950.000000,20.068796)}
{pt3dadd(197052.000000,143268.000000,73050.000000,20.068796)}
{pt3dadd(197040.000000,143040.000000,73150.000000,18.471396)}
{pt3dadd(197004.000000,142824.000000,73125.000000,29.785660)}
{pt3dadd(197064.000000,142716.000000,73175.000000,39.934990)}

{create adhoc45}
{access adhoc45}
{connect adhoc45(1), adhoc44(0)}
{nseg = 1}
{strdef color color = "White"}
{pt3dclear()}
{pt3dadd(197064.000000,142716.000000,73175.000000,39.934990)}
{pt3dadd(197304.000000,142560.000000,73225.000000,26.590861)}
{pt3dadd(197448.000000,142344.000000,73375.000000,16.554517)}
{pt3dadd(197472.000000,142128.000000,73300.000000,18.151917)}
{pt3dadd(197532.000000,141900.000000,73500.000000,10.784398)}
{pt3dadd(197616.000000,141636.000000,73500.000000,10.784398)}
{pt3dadd(197640.000000,141444.000000,73775.000000,10.784398)}
{pt3dadd(197688.000000,141264.000000,74075.000000,24.285930)}
{pt3dadd(197556.000000,141024.000000,74000.000000,25.742757)}
{pt3dadd(197460.000000,140844.000000,73925.000000,41.904596)}
{pt3dadd(197484.000000,140700.000000,74025.000000,55.206127)}

{create adhoc46}
{access adhoc46}
{connect adhoc46(1), adhoc45(0)}
{nseg = 1}
{strdef color color = "White"}
{pt3dclear()}
{pt3dadd(197484.000000,140700.000000,74025.000000,55.206127)}
{pt3dadd(197484.000000,140508.000000,74200.000000,34.876039)}
{pt3dadd(197412.000000,140280.000000,74125.000000,21.525623)}
{pt3dadd(197520.000000,140052.000000,74300.000000,20.068796)}
{pt3dadd(197604.000000,139848.000000,74400.000000,10.784398)}
{pt3dadd(197652.000000,139620.000000,74500.000000,10.784398)}
{pt3dadd(197652.000000,139404.000000,74400.000000,10.784398)}
{pt3dadd(197676.000000,139188.000000,74400.000000,18.471396)}
{pt3dadd(197724.000000,139032.000000,74575.000000,9.186998)}
{pt3dadd(197724.000000,138852.000000,74550.000000,9.186998)}
{pt3dadd(197748.000000,138660.000000,74575.000000,9.186998)}
{pt3dadd(197796.000000,138468.000000,74700.000000,18.471396)}
{pt3dadd(197856.000000,138240.000000,74850.000000,10.784398)}
{pt3dadd(197808.000000,138012.000000,75025.000000,10.784398)}
{pt3dadd(197808.000000,137820.000000,75100.000000,10.784398)}
{pt3dadd(197808.000000,137640.000000,75225.000000,20.068796)}
{pt3dadd(197736.000000,137484.000000,75275.000000,10.784398)}
{pt3dadd(197676.000000,137316.000000,75350.000000,10.784398)}
{pt3dadd(197640.000000,137148.000000,75400.000000,10.784398)}
{pt3dadd(197568.000000,136956.000000,75450.000000,18.471396)}
{pt3dadd(197568.000000,136752.000000,75575.000000,9.186998)}
{pt3dadd(197592.000000,136584.000000,75600.000000,9.186998)}
{pt3dadd(197616.000000,136368.000000,75600.000000,9.186998)}
{pt3dadd(197544.000000,136152.000000,75725.000000,16.873996)}
{pt3dadd(197472.000000,135960.000000,75825.000000,9.186998)}
{pt3dadd(197436.000000,135744.000000,75850.000000,9.186998)}
{pt3dadd(197520.000000,135516.000000,75875.000000,9.186998)}
{pt3dadd(197340.000000,135324.000000,75900.000000,15.542830)}
{pt3dadd(197268.000000,135096.000000,75900.000000,7.855832)}
{pt3dadd(197328.000000,134856.000000,75950.000000,7.855832)}
{pt3dadd(197256.000000,134652.000000,76000.000000,7.855832)}
{pt3dadd(197304.000000,134448.000000,76050.000000,17.140230)}
{pt3dadd(197388.000000,134232.000000,76100.000000,10.784398)}
{pt3dadd(197388.000000,134016.000000,76275.000000,10.784398)}
{pt3dadd(197412.000000,133848.000000,76425.000000,10.784398)}
{pt3dadd(197496.000000,133692.000000,76450.000000,18.471396)}
{pt3dadd(197640.000000,133488.000000,76775.000000,9.186998)}
{pt3dadd(197628.000000,133284.000000,76800.000000,9.186998)}
{pt3dadd(197628.000000,133116.000000,76925.000000,9.186998)}
{pt3dadd(197496.000000,132936.000000,77000.000000,18.471396)}
{pt3dadd(197376.000000,132768.000000,77125.000000,17.140230)}
{pt3dadd(197448.000000,132612.000000,77400.000000,27.567050)}
{pt3dadd(197724.000000,132504.000000,77950.000000,33.279160)}

{create adhoc47}
{access adhoc47}
{connect adhoc47(1), adhoc46(0)}
{nseg = 1}
{strdef color color = "White"}
{pt3dclear()}
{pt3dadd(197724.000000,132504.000000,77950.000000,33.279160)}
{pt3dadd(197904.000000,132372.000000,78550.000000,20.837264)}
{pt3dadd(197904.000000,132252.000000,78625.000000,13.102358)}
{pt3dadd(197928.000000,132156.000000,78775.000000,10.298281)}
{pt3dadd(197964.000000,131988.000000,78900.000000,5.051754)}
{pt3dadd(198036.000000,131784.000000,79125.000000,5.051754)}
{pt3dadd(198060.000000,131592.000000,79325.000000,5.051754)}
{pt3dadd(198096.000000,131424.000000,79425.000000,11.141353)}
{pt3dadd(198096.000000,131268.000000,79600.000000,7.589599)}
{pt3dadd(198060.000000,131088.000000,79675.000000,7.589599)}
{pt3dadd(198048.000000,130896.000000,79900.000000,7.589599)}
{pt3dadd(198036.000000,130692.000000,80000.000000,13.945431)}
{pt3dadd(198024.000000,130476.000000,80125.000000,14.211664)}
{pt3dadd(197928.000000,130284.000000,80025.000000,22.686107)}
{pt3dadd(197916.000000,130188.000000,80025.000000,33.279160)}

{create adhoc48}
{access adhoc48}
{connect adhoc48(1), adhoc47(0)}
{nseg = 1}
{strdef color color = "White"}
{pt3dclear()}
{pt3dadd(197916.000000,130188.000000,80025.000000,33.279160)}
{pt3dadd(197940.000000,129984.000000,79925.000000,18.012644)}
{pt3dadd(197892.000000,129744.000000,79950.000000,11.407586)}
{pt3dadd(197928.000000,129540.000000,79975.000000,8.603509)}
{pt3dadd(197880.000000,128376.000000,79975.000000,5.051754)}
{pt3dadd(197820.000000,128148.000000,80000.000000,5.051754)}
{pt3dadd(197736.000000,127944.000000,80000.000000,5.051754)}
{pt3dadd(197724.000000,127752.000000,80000.000000,8.603509)}
{pt3dadd(197640.000000,127476.000000,80025.000000,5.051754)}
{pt3dadd(197568.000000,127236.000000,80050.000000,5.051754)}
{pt3dadd(197484.000000,127032.000000,80075.000000,5.051754)}
{pt3dadd(197364.000000,126828.000000,80075.000000,8.603509)}
{pt3dadd(197160.000000,126612.000000,80075.000000,5.051754)}
{pt3dadd(197064.000000,126372.000000,80075.000000,5.051754)}
{pt3dadd(196992.000000,126168.000000,80125.000000,5.051754)}
{pt3dadd(196896.000000,125964.000000,80175.000000,8.603509)}
{pt3dadd(196848.000000,125724.000000,80125.000000,5.051754)}
{pt3dadd(196836.000000,125484.000000,80175.000000,5.051754)}
{pt3dadd(196836.000000,125316.000000,80275.000000,5.051754)}
{pt3dadd(196752.000000,125076.000000,80325.000000,9.188976)}
{pt3dadd(196752.000000,124836.000000,80400.000000,5.637222)}
{pt3dadd(196644.000000,124620.000000,80475.000000,5.637222)}
{pt3dadd(196680.000000,124392.000000,80450.000000,5.637222)}
{pt3dadd(196656.000000,124164.000000,80450.000000,9.959327)}
{pt3dadd(196608.000000,123996.000000,80500.000000,5.822105)}
{pt3dadd(196524.000000,123780.000000,80450.000000,5.822105)}
{pt3dadd(196512.000000,123576.000000,80425.000000,5.822105)}
{pt3dadd(196464.000000,123276.000000,80375.000000,10.144211)}
{pt3dadd(196332.000000,123048.000000,80350.000000,5.822105)}
{pt3dadd(196260.000000,122844.000000,80350.000000,5.822105)}
{pt3dadd(196176.000000,122592.000000,80450.000000,5.822105)}
{pt3dadd(196092.000000,122388.000000,80525.000000,11.068632)}
{pt3dadd(196008.000000,122184.000000,80600.000000,6.746526)}
{pt3dadd(196020.000000,122016.000000,80575.000000,6.746526)}
{pt3dadd(195900.000000,121788.000000,80450.000000,6.746526)}
{pt3dadd(195948.000000,121608.000000,80550.000000,11.068632)}
{pt3dadd(195828.000000,121404.000000,80725.000000,5.822105)}
{pt3dadd(195756.000000,121116.000000,80750.000000,5.822105)}
{pt3dadd(195684.000000,120876.000000,80825.000000,5.822105)}
{pt3dadd(195576.000000,120660.000000,80900.000000,10.144211)}
{pt3dadd(195492.000000,120468.000000,80975.000000,5.822105)}
{pt3dadd(195468.000000,120276.000000,80950.000000,5.822105)}
{pt3dadd(195360.000000,120072.000000,80950.000000,5.822105)}
{pt3dadd(195300.000000,119868.000000,81000.000000,9.219789)}
{pt3dadd(195120.000000,119676.000000,81125.000000,4.897684)}
{pt3dadd(194880.000000,119472.000000,81175.000000,4.897684)}
{pt3dadd(194736.000000,119256.000000,81300.000000,4.897684)}
{pt3dadd(194676.000000,119052.000000,81325.000000,9.219789)}
{pt3dadd(194568.000000,118872.000000,81350.000000,5.822105)}
{pt3dadd(194460.000000,118656.000000,81425.000000,5.822105)}
{pt3dadd(194436.000000,118464.000000,81500.000000,5.822105)}
{pt3dadd(194364.000000,118272.000000,81600.000000,9.373860)}
{pt3dadd(194244.000000,118092.000000,81675.000000,8.603509)}
{pt3dadd(194160.000000,117912.000000,81725.000000,13.339181)}
{pt3dadd(194088.000000,117816.000000,81825.000000,19.258772)}

{create adhoc49}
{access adhoc49}
{connect adhoc49(1), adhoc48(0)}
{nseg = 1}
{strdef color color = "White"}
{pt3dclear()}
{pt3dadd(194088.000000,117816.000000,81825.000000,19.258772)}
{pt3dadd(194136.000000,117588.000000,81800.000000,12.269250)}
{pt3dadd(194088.000000,117384.000000,81875.000000,7.961550)}
{pt3dadd(193920.000000,117180.000000,81900.000000,7.319591)}
{pt3dadd(193896.000000,117024.000000,81900.000000,4.409795)}
{pt3dadd(193764.000000,116808.000000,81900.000000,4.409795)}
{pt3dadd(193620.000000,116616.000000,82000.000000,4.409795)}
{pt3dadd(193488.000000,116460.000000,82050.000000,7.961550)}
{pt3dadd(193416.000000,116268.000000,82050.000000,5.051754)}
{pt3dadd(193356.000000,116064.000000,81975.000000,5.051754)}
{pt3dadd(193248.000000,115836.000000,81950.000000,5.051754)}
{pt3dadd(193116.000000,115620.000000,81925.000000,8.603509)}
{pt3dadd(193056.000000,115404.000000,81850.000000,5.051754)}
{pt3dadd(192984.000000,115176.000000,81850.000000,5.051754)}
{pt3dadd(192900.000000,114972.000000,81825.000000,5.051754)}
{pt3dadd(192780.000000,114768.000000,81825.000000,10.298281)}
{pt3dadd(192732.000000,114576.000000,81825.000000,6.746526)}
{pt3dadd(192588.000000,114276.000000,81800.000000,6.746526)}
{pt3dadd(192576.000000,114096.000000,81700.000000,6.746526)}
{pt3dadd(192576.000000,113856.000000,81700.000000,11.068632)}
{pt3dadd(192516.000000,113688.000000,81725.000000,9.373860)}
{pt3dadd(192444.000000,113484.000000,81725.000000,12.925614)}
{pt3dadd(192360.000000,113280.000000,81700.000000,20.542690)}
{pt3dadd(192312.000000,113136.000000,81675.000000,19.258772)}

{create adhoc50}
{access adhoc50}
{connect adhoc50(1), adhoc49(0)}
{nseg = 1}
{strdef color color = "White"}
{pt3dclear()}
{pt3dadd(192312.000000,113136.000000,81675.000000,19.258772)}
{pt3dadd(192468.000000,112920.000000,81600.000000,13.339181)}
{pt3dadd(192468.000000,112716.000000,81575.000000,8.603509)}
{pt3dadd(192444.000000,112536.000000,81550.000000,6.980779)}
{pt3dadd(192432.000000,112368.000000,81500.000000,3.429025)}
{pt3dadd(192372.000000,112188.000000,81500.000000,3.429025)}
{pt3dadd(192288.000000,111948.000000,81500.000000,3.429025)}
{pt3dadd(192276.000000,111720.000000,81425.000000,5.803854)}
{pt3dadd(192252.000000,111468.000000,81425.000000,3.874829)}
{pt3dadd(192168.000000,111276.000000,81350.000000,3.874829)}
{pt3dadd(192120.000000,111084.000000,81275.000000,3.874829)}
{pt3dadd(191928.000000,110904.000000,81275.000000,7.426584)}
{pt3dadd(191736.000000,110700.000000,81150.000000,5.051754)}
{pt3dadd(191664.000000,110484.000000,81125.000000,5.051754)}
{pt3dadd(191592.000000,110268.000000,81100.000000,5.051754)}
{pt3dadd(191508.000000,110052.000000,81075.000000,8.603509)}
{pt3dadd(191580.000000,109920.000000,80975.000000,5.051754)}
{pt3dadd(191520.000000,109764.000000,80925.000000,5.051754)}
{pt3dadd(191532.000000,109596.000000,80825.000000,5.051754)}
{pt3dadd(191604.000000,109440.000000,80750.000000,9.373860)}
{pt3dadd(191592.000000,109272.000000,80550.000000,5.822105)}
{pt3dadd(191568.000000,109104.000000,80450.000000,5.822105)}
{pt3dadd(191496.000000,108948.000000,80350.000000,5.822105)}
{pt3dadd(191376.000000,108792.000000,80225.000000,10.144211)}
{pt3dadd(191388.000000,108432.000000,80075.000000,5.822105)}
{pt3dadd(191076.000000,107976.000000,79900.000000,5.822105)}
{pt3dadd(190944.000000,107808.000000,79700.000000,5.822105)}
{pt3dadd(190716.000000,107592.000000,79625.000000,10.144211)}
{pt3dadd(190488.000000,107400.000000,79625.000000,10.846771)}
{pt3dadd(190188.000000,107112.000000,79450.000000,17.077952)}
{pt3dadd(190068.000000,106932.000000,79475.000000,26.623330)}

{create adhoc51}
{access adhoc51}
{connect adhoc51(1), adhoc50(0)}
{nseg = 1}
{strdef color color = "White"}
{pt3dclear()}
{pt3dadd(190068.000000,106932.000000,79475.000000,26.623330)}
{pt3dadd(190008.000000,106752.000000,79350.000000,17.077952)}
{pt3dadd(189936.000000,106584.000000,79275.000000,10.846771)}
{pt3dadd(189864.000000,106368.000000,79200.000000,9.373860)}
{pt3dadd(189756.000000,106176.000000,79125.000000,5.051754)}
{pt3dadd(189504.000000,105936.000000,78900.000000,8.603509)}
{pt3dadd(189240.000000,105744.000000,78825.000000,10.978338)}
{pt3dadd(188940.000000,105528.000000,78600.000000,11.377640)}
{pt3dadd(188688.000000,105432.000000,78500.000000,13.374147)}

{create adhoc52}
{access adhoc52}
{connect adhoc52(1), adhoc51(0)}
{nseg = 1}
{strdef color color = "White"}
{pt3dclear()}
{pt3dadd(188688.000000,105432.000000,78500.000000,13.374147)}
{pt3dadd(188460.000000,105252.000000,78375.000000,9.416098)}
{pt3dadd(188316.000000,105264.000000,78425.000000,7.807179)}
{pt3dadd(188148.000000,105084.000000,78350.000000,7.807179)}
{pt3dadd(187836.000000,105084.000000,78200.000000,8.053916)}
{pt3dadd(187524.000000,104976.000000,78125.000000,13.374147)}

{create adhoc53}
{access adhoc53}
{connect adhoc53(1), adhoc52(0)}
{nseg = 1}
{strdef color color = "White"}
{pt3dclear()}
{pt3dadd(187524.000000,104976.000000,78125.000000,13.374147)}
{pt3dadd(187092.000000,104808.000000,77875.000000,10.307708)}
{pt3dadd(186864.000000,104616.000000,77675.000000,6.784625)}
{pt3dadd(186624.000000,104472.000000,77725.000000,6.784625)}
{pt3dadd(186504.000000,104304.000000,77700.000000,3.874829)}
{pt3dadd(186408.000000,104136.000000,77725.000000,3.874829)}
{pt3dadd(186276.000000,103944.000000,77625.000000,3.874829)}
{pt3dadd(186276.000000,103800.000000,77700.000000,5.432350)}
{pt3dadd(186216.000000,103596.000000,77750.000000,3.057520)}
{pt3dadd(186048.000000,103440.000000,77700.000000,3.057520)}
{pt3dadd(185616.000000,103344.000000,77600.000000,3.057520)}
{pt3dadd(185520.000000,103176.000000,77575.000000,5.432350)}
{pt3dadd(185388.000000,102948.000000,77425.000000,3.874829)}
{pt3dadd(185376.000000,102744.000000,77400.000000,3.874829)}
{pt3dadd(185388.000000,102564.000000,77500.000000,3.874829)}
{pt3dadd(185172.000000,102360.000000,77525.000000,6.784625)}
{pt3dadd(185064.000000,102168.000000,77500.000000,4.409795)}
{pt3dadd(184992.000000,101916.000000,77600.000000,4.409795)}
{pt3dadd(184944.000000,101748.000000,77675.000000,4.409795)}
{pt3dadd(184836.000000,101592.000000,77800.000000,6.338820)}
{pt3dadd(184704.000000,101424.000000,77825.000000,4.676958)}
{pt3dadd(184476.000000,101268.000000,77850.000000,6.794931)}
{pt3dadd(184392.000000,101160.000000,78025.000000,7.739669)}

{create adhoc54}
{access adhoc54}
{connect adhoc54(1), adhoc52(0)}
{nseg = 1}
{strdef color color = "White"}
{pt3dclear()}
{pt3dadd(187524.000000,104976.000000,78125.000000,13.374147)}
{pt3dadd(188172.000000,104940.000000,78275.000000,11.145123)}

{create adhoc55}
{access adhoc55}
{connect adhoc55(1), adhoc51(0)}
{nseg = 1}
{strdef color color = "White"}
{pt3dclear()}
{pt3dadd(188688.000000,105432.000000,78500.000000,13.374147)}
{pt3dadd(189372.000000,105432.000000,78925.000000,8.829529)}
{pt3dadd(189360.000000,105312.000000,79000.000000,5.615640)}
{pt3dadd(189384.000000,105240.000000,79025.000000,3.732480)}

{create adhoc56}
{access adhoc56}
{connect adhoc56(1), adhoc50(0)}
{nseg = 1}
{strdef color color = "White"}
{pt3dclear()}
{pt3dadd(190068.000000,106932.000000,79475.000000,26.623330)}
{pt3dadd(189288.000000,106920.000000,80100.000000,13.089484)}
{pt3dadd(189096.000000,106800.000000,80325.000000,8.453691)}
{pt3dadd(189024.000000,106680.000000,80500.000000,5.803854)}
{pt3dadd(188796.000000,106596.000000,80825.000000,3.874829)}
{pt3dadd(188760.000000,106464.000000,80975.000000,3.874829)}
{pt3dadd(188784.000000,106476.000000,81150.000000,5.432350)}
{pt3dadd(188664.000000,106488.000000,81350.000000,7.361374)}
{pt3dadd(188868.000000,106692.000000,81450.000000,7.310908)}
{pt3dadd(188892.000000,106776.000000,81600.000000,11.145123)}

{create adhoc57}
{access adhoc57}
{connect adhoc57(1), adhoc49(0)}
{nseg = 1}
{strdef color color = "White"}
{pt3dclear()}
{pt3dadd(192312.000000,113136.000000,81675.000000,19.258772)}
{pt3dadd(191616.000000,113100.000000,81850.000000,10.361089)}
{pt3dadd(191472.000000,113184.000000,81850.000000,6.091406)}
{pt3dadd(191376.000000,113148.000000,81825.000000,6.449724)}

{create adhoc58}
{access adhoc58}
{connect adhoc58(1), adhoc48(0)}
{nseg = 1}
{strdef color color = "White"}
{pt3dclear()}
{pt3dadd(194088.000000,117816.000000,81825.000000,19.258772)}
{pt3dadd(193572.000000,117780.000000,82375.000000,4.478975)}

{create adhoc59}
{access adhoc59}
{connect adhoc59(1), adhoc47(0)}
{nseg = 1}
{strdef color color = "White"}
{pt3dclear()}
{pt3dadd(197916.000000,130188.000000,80025.000000,33.279160)}
{pt3dadd(197088.000000,130188.000000,81050.000000,25.216153)}
{pt3dadd(196980.000000,130632.000000,81325.000000,18.581149)}
{pt3dadd(196764.000000,130224.000000,81525.000000,13.374147)}

{create adhoc60}
{access adhoc60}
{connect adhoc60(1), adhoc59(0)}
{nseg = 1}
{strdef color color = "White"}
{pt3dclear()}
{pt3dadd(196764.000000,130224.000000,81525.000000,13.374147)}
{pt3dadd(196560.000000,129972.000000,81725.000000,9.416098)}
{pt3dadd(196452.000000,129924.000000,81700.000000,6.249659)}
{pt3dadd(196332.000000,129732.000000,81850.000000,5.432350)}
{pt3dadd(196224.000000,129600.000000,81825.000000,3.057520)}
{pt3dadd(196152.000000,129492.000000,81825.000000,4.305454)}
{pt3dadd(196188.000000,129552.000000,82075.000000,5.080408)}
{pt3dadd(196152.000000,129444.000000,82350.000000,4.871480)}
{pt3dadd(196152.000000,129276.000000,82550.000000,5.374770)}

{create adhoc61}
{access adhoc61}
{connect adhoc61(1), adhoc59(0)}
{nseg = 1}
{strdef color color = "White"}
{pt3dclear()}
{pt3dadd(196764.000000,130224.000000,81525.000000,13.374147)}
{pt3dadd(197016.000000,131100.000000,81525.000000,9.416098)}
{pt3dadd(196896.000000,131340.000000,81725.000000,6.249659)}
{pt3dadd(196800.000000,131856.000000,81900.000000,6.784625)}
{pt3dadd(196728.000000,132156.000000,82125.000000,4.409795)}
{pt3dadd(196776.000000,132312.000000,82075.000000,4.409795)}
{pt3dadd(196788.000000,132480.000000,82050.000000,4.409795)}
{pt3dadd(196800.000000,132612.000000,82025.000000,7.961550)}
{pt3dadd(196812.000000,132792.000000,82150.000000,5.051754)}
{pt3dadd(196800.000000,132936.000000,82300.000000,5.051754)}
{pt3dadd(196776.000000,133068.000000,82750.000000,5.051754)}
{pt3dadd(196884.000000,133200.000000,83050.000000,7.961550)}
{pt3dadd(196968.000000,133140.000000,83325.000000,4.409795)}
{pt3dadd(197148.000000,133176.000000,83625.000000,4.409795)}
{pt3dadd(197268.000000,133176.000000,83925.000000,4.409795)}
{pt3dadd(197124.000000,133236.000000,84125.000000,6.784625)}
{pt3dadd(197052.000000,133464.000000,84400.000000,3.874829)}
{pt3dadd(197088.000000,133740.000000,84675.000000,3.874829)}
{pt3dadd(197028.000000,133908.000000,84975.000000,3.874829)}
{pt3dadd(197028.000000,133788.000000,85300.000000,6.784625)}
{pt3dadd(197088.000000,133524.000000,85525.000000,5.399740)}
{pt3dadd(197196.000000,133440.000000,85775.000000,6.957261)}
{pt3dadd(197496.000000,133200.000000,86050.000000,10.595434)}
{pt3dadd(197844.000000,132804.000000,86225.000000,9.287602)}

{create adhoc62}
{access adhoc62}
{connect adhoc62(1), adhoc46(0)}
{nseg = 1}
{strdef color color = "White"}
{pt3dclear()}
{pt3dadd(197724.000000,132504.000000,77950.000000,33.279160)}
{pt3dadd(197016.000000,132504.000000,76175.000000,20.837264)}
{pt3dadd(196956.000000,132348.000000,76175.000000,13.102358)}
{pt3dadd(196812.000000,132204.000000,76150.000000,9.656322)}
{pt3dadd(196620.000000,132060.000000,76175.000000,4.409795)}
{pt3dadd(196716.000000,131916.000000,76125.000000,4.409795)}
{pt3dadd(196656.000000,131772.000000,76100.000000,4.409795)}
{pt3dadd(196560.000000,131628.000000,76075.000000,7.961550)}
{pt3dadd(196440.000000,131472.000000,76050.000000,5.051754)}
{pt3dadd(196380.000000,131340.000000,76050.000000,5.051754)}
{pt3dadd(196260.000000,131196.000000,76075.000000,9.373860)}
{pt3dadd(196188.000000,131052.000000,76050.000000,13.695965)}
{pt3dadd(196044.000000,130920.000000,76050.000000,15.907018)}
{pt3dadd(195960.000000,130788.000000,76075.000000,23.110527)}

{create adhoc63}
{access adhoc63}
{connect adhoc63(1), adhoc62(0)}
{nseg = 1}
{strdef color color = "White"}
{pt3dclear()}
{pt3dadd(195960.000000,130788.000000,76075.000000,23.110527)}
{pt3dadd(195576.000000,130944.000000,76075.000000,9.447669)}
{pt3dadd(195252.000000,131004.000000,76050.000000,7.603519)}
{pt3dadd(194964.000000,130932.000000,76050.000000,3.724862)}
{pt3dadd(194736.000000,131004.000000,76050.000000,5.374770)}

{create adhoc64}
{access adhoc64}
{connect adhoc64(1), adhoc62(0)}
{nseg = 1}
{strdef color color = "White"}
{pt3dclear()}
{pt3dadd(195960.000000,130788.000000,76075.000000,23.110527)}
{pt3dadd(195876.000000,130632.000000,75950.000000,15.907018)}
{pt3dadd(195768.000000,130440.000000,75875.000000,10.144211)}
{pt3dadd(195720.000000,130296.000000,75825.000000,9.373860)}
{pt3dadd(195588.000000,130152.000000,75850.000000,9.373860)}
{pt3dadd(195492.000000,130008.000000,75875.000000,13.695965)}
{pt3dadd(195396.000000,129852.000000,75875.000000,21.826609)}
{pt3dadd(195324.000000,129708.000000,75875.000000,23.110527)}

{create adhoc65}
{access adhoc65}
{connect adhoc65(1), adhoc64(0)}
{nseg = 1}
{strdef color color = "White"}
{pt3dclear()}
{pt3dadd(195324.000000,129708.000000,75875.000000,23.110527)}
{pt3dadd(194868.000000,129720.000000,75900.000000,12.949284)}
{pt3dadd(194604.000000,129720.000000,76050.000000,6.449724)}

{create adhoc66}
{access adhoc66}
{connect adhoc66(1), adhoc64(0)}
{nseg = 1}
{strdef color color = "White"}
{pt3dclear()}
{pt3dadd(195324.000000,129708.000000,75875.000000,23.110527)}
{pt3dadd(195240.000000,129540.000000,75825.000000,15.907018)}
{pt3dadd(195132.000000,129384.000000,75850.000000,10.144211)}
{pt3dadd(195084.000000,129216.000000,75800.000000,10.144211)}
{pt3dadd(194916.000000,129048.000000,75775.000000,5.822105)}
{pt3dadd(194856.000000,128856.000000,75775.000000,5.822105)}
{pt3dadd(194808.000000,128688.000000,75800.000000,5.822105)}
{pt3dadd(194760.000000,128520.000000,75825.000000,9.373860)}
{pt3dadd(194772.000000,128352.000000,75825.000000,5.051754)}
{pt3dadd(194724.000000,128184.000000,75800.000000,5.051754)}
{pt3dadd(194760.000000,128016.000000,75725.000000,5.051754)}
{pt3dadd(194772.000000,127848.000000,75625.000000,8.603509)}
{pt3dadd(194700.000000,127680.000000,75575.000000,5.051754)}
{pt3dadd(194628.000000,127512.000000,75575.000000,5.051754)}
{pt3dadd(194580.000000,127344.000000,75550.000000,5.051754)}
{pt3dadd(194604.000000,127176.000000,75550.000000,9.373860)}
{pt3dadd(194616.000000,127008.000000,75500.000000,5.822105)}
{pt3dadd(194472.000000,126840.000000,75400.000000,5.822105)}
{pt3dadd(194484.000000,126696.000000,75375.000000,5.822105)}
{pt3dadd(194484.000000,126516.000000,75400.000000,9.373860)}
{pt3dadd(194400.000000,126348.000000,75375.000000,9.373860)}
{pt3dadd(194340.000000,126180.000000,75325.000000,14.623100)}
{pt3dadd(194280.000000,126012.000000,75300.000000,23.110527)}

{create adhoc67}
{access adhoc67}
{connect adhoc67(1), adhoc66(0)}
{nseg = 1}
{strdef color color = "White"}
{pt3dclear()}
{pt3dadd(194280.000000,126012.000000,75300.000000,23.110527)}
{pt3dadd(194004.000000,126072.000000,76075.000000,12.003325)}
{pt3dadd(194004.000000,126012.000000,76475.000000,6.449724)}
{pt3dadd(193884.000000,126012.000000,76625.000000,6.449724)}

{create adhoc68}
{access adhoc68}
{connect adhoc68(1), adhoc66(0)}
{nseg = 1}
{strdef color color = "White"}
{pt3dclear()}
{pt3dadd(194280.000000,126012.000000,75300.000000,23.110527)}
{pt3dadd(194208.000000,125844.000000,75350.000000,16.722974)}
{pt3dadd(194184.000000,125664.000000,75350.000000,10.633784)}
{pt3dadd(194112.000000,125472.000000,75350.000000,10.633784)}
{pt3dadd(194040.000000,125340.000000,75350.000000,5.822105)}
{pt3dadd(193968.000000,125196.000000,75375.000000,5.822105)}
{pt3dadd(193920.000000,125028.000000,75400.000000,5.822105)}
{pt3dadd(193860.000000,124860.000000,75375.000000,10.144211)}
{pt3dadd(193812.000000,124692.000000,75425.000000,5.822105)}
{pt3dadd(193704.000000,124524.000000,75475.000000,5.822105)}
{pt3dadd(193560.000000,124356.000000,75475.000000,5.822105)}
{pt3dadd(193524.000000,124176.000000,75425.000000,10.144211)}
{pt3dadd(193476.000000,123996.000000,75450.000000,5.822105)}
{pt3dadd(193428.000000,123804.000000,75475.000000,5.822105)}
{pt3dadd(193356.000000,123660.000000,75475.000000,5.822105)}
{pt3dadd(193308.000000,123492.000000,75450.000000,9.959327)}
{pt3dadd(193260.000000,123324.000000,75425.000000,5.637221)}
{pt3dadd(193212.000000,123156.000000,75400.000000,9.188976)}
{pt3dadd(193056.000000,123012.000000,75425.000000,13.511081)}
{pt3dadd(192888.000000,122844.000000,75450.000000,14.623100)}
{pt3dadd(192852.000000,122676.000000,75450.000000,23.110527)}

{create adhoc69}
{access adhoc69}
{connect adhoc69(1), adhoc68(0)}
{nseg = 1}
{strdef color color = "White"}
{pt3dclear()}
{pt3dadd(192852.000000,122676.000000,75450.000000,23.110527)}
{pt3dadd(192516.000000,122664.000000,76025.000000,12.949284)}
{pt3dadd(192360.000000,122712.000000,76250.000000,9.287602)}

{create adhoc70}
{access adhoc70}
{connect adhoc70(1), adhoc68(0)}
{nseg = 1}
{strdef color color = "White"}
{pt3dclear()}
{pt3dadd(192852.000000,122676.000000,75450.000000,23.110527)}
{pt3dadd(192804.000000,122484.000000,75450.000000,15.907018)}
{pt3dadd(192756.000000,122328.000000,75375.000000,10.144211)}
{pt3dadd(192636.000000,122160.000000,75325.000000,9.219790)}
{pt3dadd(192672.000000,121992.000000,75300.000000,4.897684)}
{pt3dadd(192636.000000,121824.000000,75250.000000,4.897684)}
{pt3dadd(192600.000000,121656.000000,75200.000000,4.897684)}
{pt3dadd(192528.000000,121512.000000,75200.000000,9.219790)}
{pt3dadd(192444.000000,121344.000000,75175.000000,5.822105)}
{pt3dadd(192384.000000,121140.000000,75125.000000,5.822105)}
{pt3dadd(192372.000000,120972.000000,75050.000000,5.822105)}
{pt3dadd(192324.000000,120804.000000,75000.000000,10.144211)}
{pt3dadd(192264.000000,120636.000000,75050.000000,5.822105)}
{pt3dadd(192204.000000,120468.000000,75050.000000,5.822105)}
{pt3dadd(192144.000000,120300.000000,75000.000000,5.822105)}
{pt3dadd(192084.000000,120144.000000,74975.000000,10.144211)}
{pt3dadd(191988.000000,119976.000000,74900.000000,5.822105)}
{pt3dadd(191892.000000,119808.000000,74875.000000,5.822105)}
{pt3dadd(191832.000000,119616.000000,74875.000000,5.822105)}
{pt3dadd(191856.000000,119436.000000,74875.000000,10.144211)}
{pt3dadd(191844.000000,119268.000000,74850.000000,5.822105)}
{pt3dadd(191796.000000,119088.000000,74825.000000,5.822105)}
{pt3dadd(191784.000000,118920.000000,74775.000000,5.822105)}
{pt3dadd(191688.000000,118656.000000,74700.000000,9.373860)}
{pt3dadd(191592.000000,118488.000000,74600.000000,8.603509)}
{pt3dadd(191460.000000,118320.000000,74525.000000,12.155263)}
{pt3dadd(191400.000000,118140.000000,74475.000000,19.258772)}
{pt3dadd(191436.000000,117972.000000,74275.000000,19.258772)}

{create adhoc71}
{access adhoc71}
{connect adhoc71(1), adhoc70(0)}
{nseg = 1}
{strdef color color = "White"}
{pt3dclear()}
{pt3dadd(191436.000000,117972.000000,74275.000000,19.258772)}
{pt3dadd(190740.000000,117924.000000,75025.000000,10.015458)}
{pt3dadd(190428.000000,117612.000000,75300.000000,8.984104)}
{pt3dadd(190308.000000,117552.000000,75575.000000,6.989870)}
{pt3dadd(190380.000000,117564.000000,75875.000000,8.053916)}
{pt3dadd(190320.000000,117492.000000,76075.000000,9.287602)}

{create adhoc72}
{access adhoc72}
{connect adhoc72(1), adhoc71(0)}
{nseg = 1}
{strdef color color = "White"}
{pt3dclear()}
{pt3dadd(190320.000000,117492.000000,76075.000000,9.287602)}
{pt3dadd(190332.000000,117288.000000,76275.000000,7.739669)}

{create adhoc73}
{access adhoc73}
{connect adhoc73(1), adhoc71(0)}
{nseg = 1}
{strdef color color = "White"}
{pt3dclear()}
{pt3dadd(190320.000000,117492.000000,76075.000000,9.287602)}
{pt3dadd(190308.000000,117576.000000,76275.000000,9.906776)}
{pt3dadd(190284.000000,117600.000000,76500.000000,9.287602)}

{create adhoc74}
{access adhoc74}
{connect adhoc74(1), adhoc70(0)}
{nseg = 1}
{strdef color color = "White"}
{pt3dclear()}
{pt3dadd(191436.000000,117972.000000,74275.000000,19.258772)}
{pt3dadd(191580.000000,117804.000000,74075.000000,11.377640)}
{pt3dadd(191640.000000,117636.000000,74000.000000,7.426584)}
{pt3dadd(191364.000000,117480.000000,73800.000000,7.426584)}
{pt3dadd(191208.000000,117312.000000,73600.000000,5.051754)}
{pt3dadd(191064.000000,117144.000000,73350.000000,8.603509)}
{pt3dadd(190884.000000,116928.000000,73150.000000,12.925614)}
{pt3dadd(190752.000000,116736.000000,72975.000000,14.623100)}
{pt3dadd(190632.000000,116700.000000,72650.000000,23.110527)}

{create adhoc75}
{access adhoc75}
{connect adhoc75(1), adhoc74(0)}
{nseg = 1}
{strdef color color = "White"}
{pt3dclear()}
{pt3dadd(190632.000000,116700.000000,72650.000000,23.110527)}
{pt3dadd(190632.000000,115488.000000,72925.000000,15.133591)}
{pt3dadd(190644.000000,115260.000000,72925.000000,11.145123)}

{create adhoc76}
{access adhoc76}
{connect adhoc76(1), adhoc75(0)}
{nseg = 1}
{strdef color color = "White"}
{pt3dclear()}
{pt3dadd(190644.000000,115260.000000,72925.000000,11.145123)}
{pt3dadd(190956.000000,115224.000000,72875.000000,7.656539)}
{pt3dadd(191052.000000,115236.000000,72925.000000,6.449724)}

{create adhoc77}
{access adhoc77}
{connect adhoc77(1), adhoc75(0)}
{nseg = 1}
{strdef color color = "White"}
{pt3dclear()}
{pt3dadd(190644.000000,115260.000000,72925.000000,11.145123)}
{pt3dadd(190476.000000,115092.000000,72850.000000,10.634632)}
{pt3dadd(190392.000000,114924.000000,72800.000000,6.980779)}
{pt3dadd(190296.000000,114756.000000,72750.000000,7.961550)}
{pt3dadd(190344.000000,114564.000000,72850.000000,4.409795)}
{pt3dadd(190296.000000,114396.000000,72850.000000,4.409795)}
{pt3dadd(190212.000000,114228.000000,72925.000000,4.409795)}
{pt3dadd(190224.000000,114072.000000,73050.000000,6.784625)}
{pt3dadd(190200.000000,113964.000000,73100.000000,3.874829)}
{pt3dadd(190236.000000,113820.000000,73125.000000,3.874829)}
{pt3dadd(190008.000000,113664.000000,73225.000000,3.874829)}
{pt3dadd(189816.000000,113508.000000,73300.000000,6.784625)}
{pt3dadd(189636.000000,113340.000000,73275.000000,4.409795)}
{pt3dadd(189504.000000,113208.000000,73250.000000,4.409795)}
{pt3dadd(189348.000000,113052.000000,73050.000000,4.409795)}
{pt3dadd(189324.000000,112920.000000,73075.000000,6.784625)}
{pt3dadd(189276.000000,112764.000000,73125.000000,3.874829)}
{pt3dadd(189192.000000,112596.000000,73175.000000,3.874829)}
{pt3dadd(189132.000000,112440.000000,73175.000000,3.874829)}
{pt3dadd(189108.000000,112284.000000,73225.000000,6.784625)}
{pt3dadd(189096.000000,112128.000000,73275.000000,4.409795)}
{pt3dadd(189000.000000,111936.000000,73175.000000,4.409795)}
{pt3dadd(188940.000000,111768.000000,73175.000000,4.409795)}
{pt3dadd(188904.000000,111600.000000,73175.000000,7.807480)}
{pt3dadd(188868.000000,111408.000000,73175.000000,4.897684)}
{pt3dadd(188832.000000,111276.000000,73175.000000,4.897684)}
{pt3dadd(188796.000000,111156.000000,73175.000000,7.272514)}
{pt3dadd(188880.000000,111024.000000,73325.000000,9.201538)}
{pt3dadd(188820.000000,110892.000000,73450.000000,8.673090)}
{pt3dadd(188784.000000,110760.000000,73575.000000,11.145123)}

{create adhoc78}
{access adhoc78}
{connect adhoc78(1), adhoc74(0)}
{nseg = 1}
{strdef color color = "White"}
{pt3dclear()}
{pt3dadd(190632.000000,116700.000000,72650.000000,23.110527)}
{pt3dadd(190596.000000,116844.000000,72425.000000,14.623100)}
{pt3dadd(190428.000000,116904.000000,72150.000000,9.373860)}
{pt3dadd(190260.000000,116916.000000,71900.000000,8.603509)}
{pt3dadd(190032.000000,116904.000000,71650.000000,5.051754)}
{pt3dadd(189936.000000,116844.000000,71400.000000,5.051754)}
{pt3dadd(189804.000000,116880.000000,71075.000000,5.051754)}
{pt3dadd(189708.000000,117084.000000,70875.000000,7.426584)}
{pt3dadd(189480.000000,117672.000000,70925.000000,6.249659)}
{pt3dadd(189432.000000,118164.000000,70700.000000,9.416098)}
{pt3dadd(189504.000000,118488.000000,70475.000000,13.374147)}

{create adhoc79}
{access adhoc79}
{connect adhoc79(1), adhoc78(0)}
{nseg = 1}
{strdef color color = "White"}
{pt3dclear()}
{pt3dadd(189504.000000,118488.000000,70475.000000,13.374147)}
{pt3dadd(189060.000000,117876.000000,70475.000000,18.581149)}
{pt3dadd(188676.000000,117912.000000,70250.000000,21.826609)}
{pt3dadd(188760.000000,117756.000000,70025.000000,23.110527)}

{create adhoc80}
{access adhoc80}
{connect adhoc80(1), adhoc79(0)}
{nseg = 1}
{strdef color color = "White"}
{pt3dclear()}
{pt3dadd(188760.000000,117756.000000,70025.000000,23.110527)}
{pt3dadd(188124.000000,117432.000000,70100.000000,12.590966)}
{pt3dadd(187920.000000,117312.000000,70100.000000,5.374770)}

{create adhoc81}
{access adhoc81}
{connect adhoc81(1), adhoc79(0)}
{nseg = 1}
{strdef color color = "White"}
{pt3dclear()}
{pt3dadd(188760.000000,117756.000000,70025.000000,23.110527)}
{pt3dadd(188784.000000,117720.000000,69825.000000,14.623100)}
{pt3dadd(188496.000000,117900.000000,70000.000000,9.373860)}
{pt3dadd(188268.000000,117912.000000,70150.000000,6.609275)}
{pt3dadd(188124.000000,117924.000000,70225.000000,3.057520)}
{pt3dadd(187956.000000,117912.000000,70225.000000,3.057520)}
{pt3dadd(187788.000000,117900.000000,70250.000000,4.615041)}
{pt3dadd(187632.000000,117804.000000,70325.000000,5.389995)}
{pt3dadd(187476.000000,117756.000000,70325.000000,5.387457)}
{pt3dadd(187308.000000,117768.000000,70350.000000,5.374770)}

{create adhoc82}
{access adhoc82}
{connect adhoc82(1), adhoc78(0)}
{nseg = 1}
{strdef color color = "White"}
{pt3dclear()}
{pt3dadd(189504.000000,118488.000000,70475.000000,13.374147)}
{pt3dadd(189528.000000,119028.000000,70325.000000,10.307708)}
{pt3dadd(189504.000000,119448.000000,70150.000000,6.784625)}
{pt3dadd(189504.000000,119592.000000,70175.000000,5.399740)}
{pt3dadd(189504.000000,119724.000000,70200.000000,2.489945)}
{pt3dadd(189468.000000,119832.000000,70175.000000,2.489945)}
{pt3dadd(189336.000000,119952.000000,70075.000000,4.418969)}
{pt3dadd(189276.000000,120108.000000,69950.000000,7.328765)}
{pt3dadd(189312.000000,120264.000000,70050.000000,9.564700)}
{pt3dadd(189276.000000,120420.000000,70150.000000,16.048977)}

{create adhoc83}
{access adhoc83}
{connect adhoc83(1), adhoc82(0)}
{nseg = 1}
{strdef color color = "White"}
{pt3dclear()}
{pt3dadd(189276.000000,120420.000000,70150.000000,16.048977)}
{pt3dadd(189420.000000,120492.000000,70325.000000,11.145123)}

{create adhoc84}
{access adhoc84}
{connect adhoc84(1), adhoc82(0)}
{nseg = 1}
{strdef color color = "White"}
{pt3dclear()}
{pt3dadd(189276.000000,120420.000000,70150.000000,16.048977)}
{pt3dadd(189012.000000,120552.000000,70125.000000,9.564700)}
{pt3dadd(188868.000000,120684.000000,70150.000000,6.338820)}
{pt3dadd(188868.000000,120852.000000,70150.000000,7.751130)}
{pt3dadd(188916.000000,121032.000000,70225.000000,10.144211)}
{pt3dadd(188952.000000,121236.000000,70200.000000,15.907018)}
{pt3dadd(189000.000000,121392.000000,70250.000000,23.110527)}

{create adhoc85}
{access adhoc85}
{connect adhoc85(1), adhoc84(0)}
{nseg = 1}
{strdef color color = "White"}
{pt3dclear()}
{pt3dadd(189000.000000,121392.000000,70250.000000,23.110527)}
{pt3dadd(189252.000000,121284.000000,71000.000000,12.433307)}
{pt3dadd(189264.000000,121296.000000,71250.000000,6.449724)}

{create adhoc86}
{access adhoc86}
{connect adhoc86(1), adhoc84(0)}
{nseg = 1}
{strdef color color = "White"}
{pt3dclear()}
{pt3dadd(189000.000000,121392.000000,70250.000000,23.110527)}
{pt3dadd(188988.000000,121512.000000,70250.000000,15.907018)}
{pt3dadd(188976.000000,121704.000000,70425.000000,12.476685)}
{pt3dadd(189036.000000,121860.000000,70550.000000,5.387457)}
{pt3dadd(189084.000000,122016.000000,70575.000000,5.374770)}

{create adhoc87}
{access adhoc87}
{connect adhoc87(1), adhoc86(0)}
{nseg = 1}
{strdef color color = "White"}
{pt3dclear()}
{pt3dadd(189084.000000,122016.000000,70575.000000,5.374770)}
{pt3dadd(188748.000000,122100.000000,70775.000000,6.521388)}
{pt3dadd(188760.000000,122328.000000,70975.000000,7.739669)}

{create adhoc88}
{access adhoc88}
{connect adhoc88(1), adhoc86(0)}
{nseg = 1}
{strdef color color = "White"}
{pt3dclear()}
{pt3dadd(189084.000000,122016.000000,70575.000000,5.374770)}
{pt3dadd(189312.000000,122100.000000,70450.000000,4.871480)}
{pt3dadd(189444.000000,122208.000000,70350.000000,3.522888)}
{pt3dadd(189504.000000,122352.000000,70250.000000,3.995868)}
{pt3dadd(189564.000000,122496.000000,70175.000000,2.747934)}
{pt3dadd(189672.000000,122640.000000,70100.000000,2.747934)}
{pt3dadd(189804.000000,122772.000000,70075.000000,2.747934)}
{pt3dadd(189768.000000,122928.000000,69875.000000,4.305454)}
{pt3dadd(189756.000000,123060.000000,69800.000000,3.057520)}
{pt3dadd(189732.000000,123216.000000,69675.000000,3.057520)}
{pt3dadd(189768.000000,123372.000000,69700.000000,3.057520)}
{pt3dadd(189840.000000,123516.000000,69775.000000,4.047465)}
{pt3dadd(190080.000000,123996.000000,69750.000000,2.489945)}
{pt3dadd(190296.000000,124332.000000,69750.000000,2.489945)}
{pt3dadd(190380.000000,124476.000000,69650.000000,2.489945)}
{pt3dadd(190392.000000,124584.000000,69600.000000,3.479890)}
{pt3dadd(190404.000000,124692.000000,69575.000000,4.047465)}
{pt3dadd(190416.000000,125004.000000,69375.000000,5.745775)}
{pt3dadd(190428.000000,125124.000000,69375.000000,9.287602)}

{create adhoc89}
{access adhoc89}
{connect adhoc89(1), adhoc45(0)}
{nseg = 1}
{strdef color color = "White"}
{pt3dclear()}
{pt3dadd(197484.000000,140700.000000,74025.000000,55.206127)}
{pt3dadd(197088.000000,140700.000000,72275.000000,28.146253)}
{pt3dadd(196992.000000,140568.000000,72175.000000,17.487752)}
{pt3dadd(196932.000000,140400.000000,72075.000000,10.298281)}
{pt3dadd(196824.000000,140232.000000,71975.000000,5.051754)}
{pt3dadd(196728.000000,140088.000000,71975.000000,5.051754)}
{pt3dadd(196740.000000,139956.000000,71900.000000,5.051754)}
{pt3dadd(196740.000000,139788.000000,71825.000000,9.373860)}
{pt3dadd(196740.000000,139644.000000,71675.000000,5.822105)}
{pt3dadd(196704.000000,139488.000000,71525.000000,5.822105)}
{pt3dadd(196608.000000,139332.000000,71450.000000,5.822105)}
{pt3dadd(196620.000000,139176.000000,71350.000000,10.144211)}
{pt3dadd(196572.000000,139020.000000,71250.000000,5.822105)}
{pt3dadd(196476.000000,138864.000000,71200.000000,5.822105)}
{pt3dadd(196488.000000,138708.000000,71150.000000,5.822105)}
{pt3dadd(196392.000000,138552.000000,71025.000000,10.144211)}
{pt3dadd(196392.000000,138396.000000,70900.000000,9.373860)}
{pt3dadd(196296.000000,138240.000000,70800.000000,14.623100)}
{pt3dadd(196188.000000,138108.000000,70675.000000,19.258772)}

{create adhoc90}
{access adhoc90}
{connect adhoc90(1), adhoc89(0)}
{nseg = 1}
{strdef color color = "White"}
{pt3dclear()}
{pt3dadd(196188.000000,138108.000000,70675.000000,19.258772)}
{pt3dadd(195360.000000,138072.000000,70450.000000,9.499480)}
{pt3dadd(195228.000000,138084.000000,70450.000000,9.821928)}
{pt3dadd(195108.000000,138144.000000,70475.000000,7.370399)}
{pt3dadd(195000.000000,138192.000000,70450.000000,9.466075)}

{create adhoc91}
{access adhoc91}
{connect adhoc91(1), adhoc90(0)}
{nseg = 1}
{strdef color color = "White"}
{pt3dclear()}
{pt3dadd(195000.000000,138192.000000,70450.000000,9.466075)}
{pt3dadd(194892.000000,138168.000000,70475.000000,9.347093)}
{pt3dadd(194772.000000,138168.000000,70500.000000,9.287602)}

{create adhoc92}
{access adhoc92}
{connect adhoc92(1), adhoc90(0)}
{nseg = 1}
{strdef color color = "White"}
{pt3dclear()}
{pt3dadd(195000.000000,138192.000000,70450.000000,9.466075)}
{pt3dadd(194844.000000,138360.000000,70700.000000,6.235248)}
{pt3dadd(194544.000000,138456.000000,70800.000000,4.341149)}
{pt3dadd(194340.000000,138540.000000,70875.000000,3.995868)}
{pt3dadd(194004.000000,138636.000000,71000.000000,4.305454)}
{pt3dadd(193884.000000,138684.000000,71100.000000,6.234479)}
{pt3dadd(193776.000000,138684.000000,71100.000000,9.390798)}
{pt3dadd(193668.000000,138636.000000,71150.000000,11.145123)}

{create adhoc93}
{access adhoc93}
{connect adhoc93(1), adhoc89(0)}
{nseg = 1}
{strdef color color = "White"}
{pt3dclear()}
{pt3dadd(196188.000000,138108.000000,70675.000000,19.258772)}
{pt3dadd(195972.000000,137916.000000,70525.000000,14.623100)}
{pt3dadd(195984.000000,137784.000000,70450.000000,9.373860)}
{pt3dadd(195900.000000,137640.000000,70300.000000,11.068632)}
{pt3dadd(195828.000000,137520.000000,70175.000000,6.746526)}
{pt3dadd(195708.000000,137364.000000,70075.000000,6.746526)}
{pt3dadd(195648.000000,137208.000000,70000.000000,6.746526)}
{pt3dadd(195552.000000,137052.000000,69875.000000,11.993053)}
{pt3dadd(195492.000000,136884.000000,69800.000000,6.746526)}
{pt3dadd(195396.000000,136728.000000,69600.000000,6.746526)}
{pt3dadd(195312.000000,136548.000000,69525.000000,6.746526)}
{pt3dadd(195252.000000,136392.000000,69350.000000,12.836125)}
{pt3dadd(195060.000000,136236.000000,68950.000000,7.589598)}
{pt3dadd(194988.000000,136080.000000,68800.000000,7.589598)}
{pt3dadd(194748.000000,135936.000000,68450.000000,7.589598)}
{pt3dadd(194652.000000,135912.000000,68150.000000,11.911704)}
{pt3dadd(194364.000000,135816.000000,67900.000000,5.822105)}
{pt3dadd(193800.000000,135540.000000,67650.000000,5.822105)}
{pt3dadd(193368.000000,135276.000000,67475.000000,5.822105)}
{pt3dadd(193308.000000,135120.000000,67325.000000,8.731901)}
{pt3dadd(193056.000000,134964.000000,67325.000000,4.409795)}
{pt3dadd(192792.000000,134808.000000,67350.000000,4.409795)}
{pt3dadd(192552.000000,134652.000000,67325.000000,4.409795)}
{pt3dadd(192348.000000,134496.000000,67275.000000,6.784625)}
{pt3dadd(192060.000000,134340.000000,67225.000000,3.874829)}
{pt3dadd(191736.000000,134172.000000,67175.000000,3.874829)}
{pt3dadd(191472.000000,133992.000000,67100.000000,3.874829)}
{pt3dadd(191256.000000,133836.000000,67100.000000,6.784625)}
{pt3dadd(191088.000000,133680.000000,67100.000000,4.409795)}
{pt3dadd(190884.000000,133524.000000,67100.000000,7.961550)}
{pt3dadd(190656.000000,133368.000000,67100.000000,12.283655)}
{pt3dadd(190476.000000,133212.000000,67150.000000,14.623100)}
{pt3dadd(190164.000000,133080.000000,67325.000000,23.110527)}

{create adhoc94}
{access adhoc94}
{connect adhoc94(1), adhoc93(0)}
{nseg = 1}
{strdef color color = "White"}
{pt3dclear()}
{pt3dadd(190164.000000,133080.000000,67325.000000,23.110527)}
{pt3dadd(189708.000000,133008.000000,67825.000000,11.299376)}
{pt3dadd(189588.000000,133032.000000,67875.000000,7.379626)}
{pt3dadd(189468.000000,133044.000000,67925.000000,4.047465)}
{pt3dadd(189336.000000,133092.000000,68025.000000,2.489945)}
{pt3dadd(189216.000000,133188.000000,67975.000000,4.418969)}
{pt3dadd(189096.000000,133200.000000,67925.000000,6.347994)}
{pt3dadd(189000.000000,133248.000000,67975.000000,7.930082)}
{pt3dadd(188892.000000,133248.000000,68000.000000,11.145123)}

{create adhoc95}
{access adhoc95}
{connect adhoc95(1), adhoc93(0)}
{nseg = 1}
{strdef color color = "White"}
{pt3dclear()}
{pt3dadd(190164.000000,133080.000000,67325.000000,23.110527)}
{pt3dadd(190068.000000,132852.000000,67150.000000,14.623100)}
{pt3dadd(189936.000000,132696.000000,67050.000000,9.373860)}
{pt3dadd(189792.000000,132540.000000,67025.000000,6.980779)}
{pt3dadd(189720.000000,132480.000000,67000.000000,3.429025)}
{pt3dadd(189552.000000,132288.000000,67025.000000,3.429025)}
{pt3dadd(189420.000000,132024.000000,67050.000000,3.429025)}
{pt3dadd(189252.000000,131784.000000,67050.000000,5.358049)}
{pt3dadd(189084.000000,131436.000000,67000.000000,3.429025)}
{pt3dadd(189000.000000,131268.000000,66925.000000,3.429025)}
{pt3dadd(188988.000000,131112.000000,66875.000000,3.429025)}
{pt3dadd(188964.000000,130932.000000,66875.000000,5.803854)}
{pt3dadd(188964.000000,130776.000000,66875.000000,6.249659)}
{pt3dadd(189012.000000,130608.000000,66800.000000,8.517495)}
{pt3dadd(189060.000000,130440.000000,66775.000000,13.195825)}
{pt3dadd(189108.000000,130284.000000,66725.000000,12.839182)}

{create adhoc96}
{access adhoc96}
{connect adhoc96(1), adhoc95(0)}
{nseg = 1}
{strdef color color = "White"}
{pt3dclear()}
{pt3dadd(189108.000000,130284.000000,66725.000000,12.839182)}
{pt3dadd(189576.000000,130212.000000,66325.000000,8.494768)}
{pt3dadd(189000.000000,129924.000000,66025.000000,5.696861)}
{pt3dadd(188904.000000,129864.000000,65725.000000,6.338820)}
{pt3dadd(188916.000000,129744.000000,65500.000000,4.409795)}
{pt3dadd(188868.000000,129816.000000,65325.000000,6.784625)}
{pt3dadd(188868.000000,129924.000000,65175.000000,8.713649)}
{pt3dadd(188808.000000,129972.000000,64950.000000,8.673090)}
{pt3dadd(188892.000000,129852.000000,64725.000000,11.145123)}

{create adhoc97}
{access adhoc97}
{connect adhoc97(1), adhoc95(0)}
{nseg = 1}
{strdef color color = "White"}
{pt3dclear()}
{pt3dadd(189108.000000,130284.000000,66725.000000,12.839182)}
{pt3dadd(189216.000000,130092.000000,66650.000000,9.915400)}
{pt3dadd(189264.000000,129948.000000,66475.000000,6.549240)}
{pt3dadd(189180.000000,129780.000000,66275.000000,7.191199)}
{pt3dadd(189192.000000,129612.000000,66225.000000,4.409795)}
{pt3dadd(189240.000000,129432.000000,66225.000000,4.409795)}
{pt3dadd(189300.000000,129252.000000,66200.000000,4.409795)}
{pt3dadd(189360.000000,129120.000000,66225.000000,6.338820)}
{pt3dadd(189252.000000,128952.000000,66300.000000,3.429025)}
{pt3dadd(189180.000000,128736.000000,66300.000000,3.429025)}
{pt3dadd(189120.000000,128520.000000,66325.000000,3.429025)}
{pt3dadd(189000.000000,128328.000000,66350.000000,4.676958)}
{pt3dadd(189012.000000,128148.000000,66350.000000,2.747934)}
{pt3dadd(188988.000000,127956.000000,66350.000000,2.747934)}
{pt3dadd(188928.000000,127764.000000,66300.000000,2.747934)}
{pt3dadd(188880.000000,127572.000000,66200.000000,3.995868)}
{pt3dadd(188808.000000,127380.000000,66175.000000,3.737879)}
{pt3dadd(188712.000000,127200.000000,66150.000000,5.229798)}
{pt3dadd(188688.000000,127056.000000,66125.000000,6.449724)}

{create adhoc98}
{access adhoc98}
{connect adhoc98(1), adhoc44(0)}
{nseg = 1}
{strdef color color = "White"}
{pt3dclear()}
{pt3dadd(197064.000000,142716.000000,73175.000000,39.934990)}
{pt3dadd(195552.000000,142716.000000,72200.000000,16.391553)}
{pt3dadd(195420.000000,142668.000000,72175.000000,10.434932)}
{pt3dadd(195276.000000,142644.000000,72175.000000,4.305454)}
{pt3dadd(195156.000000,142668.000000,72225.000000,3.057520)}
{pt3dadd(195012.000000,142644.000000,72225.000000,3.057520)}
{pt3dadd(194880.000000,142620.000000,72200.000000,3.057520)}
{pt3dadd(194760.000000,142632.000000,72175.000000,4.615041)}
{pt3dadd(194640.000000,142608.000000,72150.000000,3.057520)}
{pt3dadd(194484.000000,142608.000000,72150.000000,3.057520)}
{pt3dadd(194352.000000,142620.000000,72075.000000,3.832474)}
{pt3dadd(194256.000000,142548.000000,72325.000000,4.428269)}
{pt3dadd(194076.000000,142476.000000,72400.000000,3.784582)}
{pt3dadd(194052.000000,142296.000000,72450.000000,4.478975)}

{create adhoc99}
{access adhoc99}
{connect adhoc99(1), adhoc43(0)}
{nseg = 1}
{strdef color color = "White"}
{pt3dclear()}
{pt3dadd(196992.000000,144012.000000,73000.000000,47.921990)}
{pt3dadd(197040.000000,144012.000000,74550.000000,30.097096)}
{pt3dadd(196920.000000,143988.000000,74800.000000,19.258773)}
{pt3dadd(196812.000000,143964.000000,75025.000000,15.407019)}

{create adhoc100}
{access adhoc100}
{connect adhoc100(1), adhoc99(0)}
{nseg = 1}
{strdef color color = "White"}
{pt3dclear()}
{pt3dadd(196812.000000,143964.000000,75025.000000,15.407019)}
{pt3dadd(197100.000000,143556.000000,75050.000000,13.065222)}
{pt3dadd(197208.000000,143448.000000,75250.000000,16.048977)}

{create adhoc101}
{access adhoc101}
{connect adhoc101(1), adhoc99(0)}
{nseg = 1}
{strdef color color = "White"}
{pt3dclear()}
{pt3dadd(196812.000000,143964.000000,75025.000000,15.407019)}
{pt3dadd(196692.000000,143868.000000,75275.000000,10.093722)}
{pt3dadd(196560.000000,143832.000000,75500.000000,6.656233)}
{pt3dadd(196488.000000,143880.000000,75725.000000,7.426584)}
{pt3dadd(196620.000000,143952.000000,75925.000000,5.051754)}
{pt3dadd(196716.000000,144060.000000,76275.000000,5.051754)}
{pt3dadd(196620.000000,144168.000000,76550.000000,5.051754)}
{pt3dadd(196632.000000,144288.000000,76800.000000,8.603509)}
{pt3dadd(196680.000000,144396.000000,77050.000000,9.373860)}
{pt3dadd(196632.000000,144528.000000,77275.000000,13.695965)}
{pt3dadd(196704.000000,144588.000000,77575.000000,21.826609)}
{pt3dadd(196548.000000,144672.000000,77775.000000,23.110527)}

{create adhoc102}
{access adhoc102}
{connect adhoc102(1), adhoc101(0)}
{nseg = 1}
{strdef color color = "White"}
{pt3dclear()}
{pt3dadd(196548.000000,144672.000000,77775.000000,23.110527)}
{pt3dadd(197244.000000,144288.000000,77725.000000,12.590966)}
{pt3dadd(197316.000000,144168.000000,77650.000000,5.374770)}

{create adhoc103}
{access adhoc103}
{connect adhoc103(1), adhoc101(0)}
{nseg = 1}
{strdef color color = "White"}
{pt3dclear()}
{pt3dadd(196548.000000,144672.000000,77775.000000,23.110527)}
{pt3dadd(196416.000000,144732.000000,77950.000000,15.907018)}
{pt3dadd(196440.000000,144876.000000,78125.000000,10.144211)}
{pt3dadd(196488.000000,144984.000000,78375.000000,9.373860)}
{pt3dadd(196572.000000,145176.000000,78625.000000,5.051754)}
{pt3dadd(196752.000000,145392.000000,78950.000000,5.051754)}
{pt3dadd(196896.000000,145296.000000,79250.000000,5.051754)}
{pt3dadd(196980.000000,145224.000000,79500.000000,5.647549)}
{pt3dadd(197040.000000,145152.000000,79750.000000,2.095795)}
{pt3dadd(197220.000000,144900.000000,79875.000000,2.095795)}
{pt3dadd(197400.000000,144600.000000,80000.000000,5.647549)}
{pt3dadd(197592.000000,144324.000000,80200.000000,9.199304)}
{pt3dadd(197544.000000,144204.000000,80425.000000,13.339181)}
{pt3dadd(197616.000000,144132.000000,80575.000000,19.258772)}

{create adhoc104}
{access adhoc104}
{connect adhoc104(1), adhoc103(0)}
{nseg = 1}
{strdef color color = "White"}
{pt3dclear()}
{pt3dadd(197616.000000,144132.000000,80575.000000,19.258772)}
{pt3dadd(197688.000000,144288.000000,80775.000000,11.377640)}
{pt3dadd(197832.000000,144288.000000,80950.000000,9.664462)}
{pt3dadd(198084.000000,144276.000000,81200.000000,5.229798)}
{pt3dadd(198348.000000,144108.000000,81425.000000,6.449724)}

{create adhoc105}
{access adhoc105}
{connect adhoc105(1), adhoc104(0)}
{nseg = 1}
{strdef color color = "White"}
{pt3dclear()}
{pt3dadd(198348.000000,144108.000000,81425.000000,6.449724)}
{pt3dadd(198804.000000,143772.000000,81500.000000,9.291157)}
{pt3dadd(199032.000000,143652.000000,81675.000000,16.048977)}

{create adhoc106}
{access adhoc106}
{connect adhoc106(1), adhoc104(0)}
{nseg = 1}
{strdef color color = "White"}
{pt3dclear()}
{pt3dadd(198348.000000,144108.000000,81425.000000,6.449724)}
{pt3dadd(198312.000000,144084.000000,81650.000000,8.444839)}
{pt3dadd(198288.000000,144048.000000,81875.000000,11.145123)}

{create adhoc107}
{access adhoc107}
{connect adhoc107(1), adhoc103(0)}
{nseg = 1}
{strdef color color = "White"}
{pt3dclear()}
{pt3dadd(197616.000000,144132.000000,80575.000000,19.258772)}
{pt3dadd(197592.000000,143772.000000,80525.000000,11.008450)}
{pt3dadd(197580.000000,143664.000000,80525.000000,6.271716)}
{pt3dadd(197556.000000,143436.000000,80525.000000,5.048572)}

{create adhoc108}
{access adhoc108}
{connect adhoc108(1), adhoc42(0)}
{nseg = 1}
{strdef color color = "White"}
{pt3dclear()}
{pt3dadd(196908.000000,144324.000000,72900.000000,47.921990)}
{pt3dadd(195240.000000,144324.000000,72700.000000,18.623905)}
{pt3dadd(194940.000000,144312.000000,72600.000000,11.774343)}
{pt3dadd(194724.000000,144312.000000,72400.000000,4.864774)}
{pt3dadd(194532.000000,144228.000000,72275.000000,6.784625)}
{pt3dadd(194364.000000,144216.000000,72025.000000,9.694420)}
{pt3dadd(194136.000000,144204.000000,71800.000000,15.157367)}
{pt3dadd(193884.000000,144288.000000,71575.000000,16.048977)}

{create adhoc109}
{access adhoc109}
{connect adhoc109(1), adhoc41(0)}
{nseg = 1}
{strdef color color = "White"}
{pt3dclear()}
{pt3dadd(196908.000000,153036.000000,72225.000000,57.506386)}
{pt3dadd(197436.000000,153216.000000,75875.000000,34.575813)}
{pt3dadd(197424.000000,153456.000000,76150.000000,24.281460)}
{pt3dadd(197352.000000,153576.000000,76450.000000,26.623327)}

{create adhoc110}
{access adhoc110}
{connect adhoc110(1), adhoc109(0)}
{nseg = 1}
{strdef color color = "White"}
{pt3dclear()}
{pt3dadd(197352.000000,153576.000000,76450.000000,26.623327)}
{pt3dadd(196620.000000,153540.000000,76425.000000,7.739669)}

{create adhoc111}
{access adhoc111}
{connect adhoc111(1), adhoc109(0)}
{nseg = 1}
{strdef color color = "White"}
{pt3dclear()}
{pt3dadd(197352.000000,153576.000000,76450.000000,26.623327)}
{pt3dadd(197268.000000,152616.000000,76500.000000,12.470310)}
{pt3dadd(197220.000000,152448.000000,76525.000000,11.568731)}
{pt3dadd(197352.000000,152436.000000,76825.000000,7.310908)}
{pt3dadd(197400.000000,152292.000000,77075.000000,9.287602)}

{create adhoc112}
{access adhoc112}
{connect adhoc112(1), adhoc111(0)}
{nseg = 1}
{strdef color color = "White"}
{pt3dclear()}
{pt3dadd(197400.000000,152292.000000,77075.000000,9.287602)}
{pt3dadd(197316.000000,152292.000000,77275.000000,9.287602)}

{create adhoc113}
{access adhoc113}
{connect adhoc113(1), adhoc111(0)}
{nseg = 1}
{strdef color color = "White"}
{pt3dclear()}
{pt3dadd(197400.000000,152292.000000,77075.000000,9.287602)}
{pt3dadd(197364.000000,152004.000000,76925.000000,5.374770)}

{create adhoc114}
{access adhoc114}
{connect adhoc114(1), adhoc109(0)}
{nseg = 1}
{strdef color color = "White"}
{pt3dclear()}
{pt3dadd(197352.000000,153576.000000,76450.000000,26.623327)}
{pt3dadd(197400.000000,153696.000000,76725.000000,18.618653)}
{pt3dadd(197268.000000,153852.000000,76975.000000,11.771192)}
{pt3dadd(197016.000000,153972.000000,77275.000000,10.298281)}
{pt3dadd(196956.000000,154272.000000,77525.000000,5.051754)}
{pt3dadd(196824.000000,154548.000000,77775.000000,5.051754)}
{pt3dadd(196764.000000,154728.000000,78025.000000,5.051754)}
{pt3dadd(196668.000000,155040.000000,78350.000000,9.373860)}
{pt3dadd(196632.000000,155424.000000,78700.000000,9.373860)}
{pt3dadd(196656.000000,155820.000000,79075.000000,12.925614)}
{pt3dadd(196620.000000,156036.000000,79250.000000,20.542690)}
{pt3dadd(196656.000000,156492.000000,79525.000000,19.258772)}

{create adhoc115}
{access adhoc115}
{connect adhoc115(1), adhoc114(0)}
{nseg = 1}
{strdef color color = "White"}
{pt3dclear()}
{pt3dadd(196656.000000,156492.000000,79525.000000,19.258772)}
{pt3dadd(196776.000000,155784.000000,79525.000000,16.048977)}

{create adhoc116}
{access adhoc116}
{connect adhoc116(1), adhoc114(0)}
{nseg = 1}
{strdef color color = "White"}
{pt3dclear()}
{pt3dadd(196656.000000,156492.000000,79525.000000,19.258772)}
{pt3dadd(196824.000000,156888.000000,79725.000000,14.623100)}
{pt3dadd(196944.000000,157212.000000,79950.000000,9.373860)}
{pt3dadd(197040.000000,157512.000000,80175.000000,10.846771)}
{pt3dadd(197220.000000,157728.000000,80400.000000,6.524665)}
{pt3dadd(197472.000000,158004.000000,80600.000000,6.524665)}
{pt3dadd(197592.000000,158136.000000,80825.000000,6.524665)}
{pt3dadd(197616.000000,158280.000000,80975.000000,8.899495)}
{pt3dadd(197652.000000,158292.000000,81300.000000,3.874829)}
{pt3dadd(197820.000000,158364.000000,81575.000000,3.874829)}
{pt3dadd(198060.000000,158472.000000,81825.000000,3.874829)}
{pt3dadd(198180.000000,158364.000000,82100.000000,10.230661)}
{pt3dadd(198216.000000,158244.000000,82375.000000,12.177937)}
{pt3dadd(198132.000000,158028.000000,82750.000000,19.296562)}
{pt3dadd(198228.000000,157980.000000,83025.000000,23.110527)}

{create adhoc117}
{access adhoc117}
{connect adhoc117(1), adhoc116(0)}
{nseg = 1}
{strdef color color = "White"}
{pt3dclear()}
{pt3dadd(198228.000000,157980.000000,83025.000000,23.110527)}
{pt3dadd(198744.000000,157164.000000,83025.000000,11.299376)}
{pt3dadd(198840.000000,156888.000000,83025.000000,7.379626)}
{pt3dadd(198828.000000,156768.000000,83000.000000,5.432350)}
{pt3dadd(198804.000000,156624.000000,82900.000000,3.874829)}
{pt3dadd(198768.000000,156504.000000,82825.000000,3.874829)}
{pt3dadd(198768.000000,156384.000000,82800.000000,3.874829)}
{pt3dadd(198792.000000,156228.000000,82800.000000,5.803854)}
{pt3dadd(198756.000000,156096.000000,82750.000000,3.429025)}
{pt3dadd(198720.000000,155964.000000,82775.000000,3.429025)}
{pt3dadd(198720.000000,155808.000000,82750.000000,3.429025)}
{pt3dadd(198684.000000,155652.000000,82725.000000,4.986545)}
{pt3dadd(198600.000000,155520.000000,82725.000000,3.057520)}
{pt3dadd(198564.000000,155388.000000,82775.000000,3.057520)}
{pt3dadd(198540.000000,155244.000000,82750.000000,3.057520)}
{pt3dadd(198528.000000,155112.000000,82750.000000,5.967316)}
{pt3dadd(198540.000000,154944.000000,82775.000000,6.784625)}
{pt3dadd(198552.000000,154800.000000,82800.000000,10.573968)}
{pt3dadd(198528.000000,154656.000000,82850.000000,16.623279)}
{pt3dadd(198504.000000,154536.000000,82900.000000,20.446714)}

{create adhoc118}
{access adhoc118}
{connect adhoc118(1), adhoc117(0)}
{nseg = 1}
{strdef color color = "White"}
{pt3dclear()}
{pt3dadd(198504.000000,154536.000000,82900.000000,20.446714)}
{pt3dadd(197988.000000,154536.000000,83375.000000,10.100153)}
{pt3dadd(197868.000000,154404.000000,83350.000000,4.478975)}

{create adhoc119}
{access adhoc119}
{connect adhoc119(1), adhoc117(0)}
{nseg = 1}
{strdef color color = "White"}
{pt3dclear()}
{pt3dadd(198504.000000,154536.000000,82900.000000,20.446714)}
{pt3dadd(198540.000000,154392.000000,82800.000000,12.665230)}
{pt3dadd(198564.000000,154236.000000,82825.000000,8.199138)}
{pt3dadd(198624.000000,154104.000000,82775.000000,6.784625)}
{pt3dadd(198720.000000,153984.000000,82875.000000,3.874829)}
{pt3dadd(198840.000000,153828.000000,82875.000000,3.874829)}
{pt3dadd(198852.000000,153684.000000,82825.000000,3.874829)}
{pt3dadd(198948.000000,153552.000000,82675.000000,4.649783)}
{pt3dadd(199044.000000,153420.000000,82600.000000,3.522888)}
{pt3dadd(199284.000000,153204.000000,82600.000000,4.118683)}
{pt3dadd(199368.000000,153060.000000,82625.000000,5.864471)}
{pt3dadd(199512.000000,153144.000000,82625.000000,4.478975)}

{create adhoc120}
{access adhoc120}
{connect adhoc120(1), adhoc116(0)}
{nseg = 1}
{strdef color color = "White"}
{pt3dclear()}
{pt3dadd(198228.000000,157980.000000,83025.000000,23.110527)}
{pt3dadd(198240.000000,158052.000000,83300.000000,11.145123)}

{create adhoc121}
{access adhoc121}
{connect adhoc121(1), adhoc40(0)}
{nseg = 1}
{strdef color color = "White"}
{pt3dclear()}
{pt3dadd(196932.000000,158868.000000,71425.000000,55.206127)}
{pt3dadd(195324.000000,158892.000000,71425.000000,23.360091)}
{pt3dadd(194712.000000,158628.000000,71425.000000,14.616055)}
{pt3dadd(194568.000000,158544.000000,71500.000000,5.714693)}
{pt3dadd(194400.000000,158544.000000,71525.000000,3.339864)}
{pt3dadd(194220.000000,158544.000000,71525.000000,3.339864)}
{pt3dadd(194088.000000,158496.000000,71525.000000,3.339864)}
{pt3dadd(193968.000000,158460.000000,71425.000000,4.897384)}
{pt3dadd(193848.000000,158400.000000,71375.000000,3.057520)}
{pt3dadd(193740.000000,158316.000000,71250.000000,3.057520)}
{pt3dadd(193620.000000,158388.000000,71325.000000,3.057520)}
{pt3dadd(193488.000000,158400.000000,71400.000000,4.986545)}
{pt3dadd(193380.000000,158484.000000,71500.000000,4.986545)}
{pt3dadd(193248.000000,158484.000000,71475.000000,6.915570)}
{pt3dadd(193128.000000,158532.000000,71500.000000,10.525949)}
{pt3dadd(192960.000000,158484.000000,71525.000000,11.145123)}

{create adhoc122}
{access adhoc122}
{connect adhoc122(1), adhoc121(0)}
{nseg = 1}
{strdef color color = "White"}
{pt3dclear()}
{pt3dadd(192960.000000,158484.000000,71525.000000,11.145123)}
{pt3dadd(192744.000000,158004.000000,71550.000000,13.374147)}

{create adhoc123}
{access adhoc123}
{connect adhoc123(1), adhoc121(0)}
{nseg = 1}
{strdef color color = "White"}
{pt3dclear()}
{pt3dadd(192960.000000,158484.000000,71525.000000,11.145123)}
{pt3dadd(192564.000000,158712.000000,71550.000000,9.564700)}
{pt3dadd(192420.000000,158760.000000,71500.000000,6.338820)}
{pt3dadd(192276.000000,158796.000000,71525.000000,6.784625)}
{pt3dadd(192192.000000,159240.000000,71550.000000,3.874829)}
{pt3dadd(192084.000000,159360.000000,71525.000000,5.803854)}
{pt3dadd(191940.000000,159324.000000,71525.000000,7.732879)}
{pt3dadd(191796.000000,159288.000000,71475.000000,7.930082)}
{pt3dadd(191688.000000,159252.000000,71425.000000,11.145123)}

{create adhoc124}
{access adhoc124}
{connect adhoc124(1), adhoc39(0)}
{nseg = 1}
{strdef color color = "White"}
{pt3dclear()}
{pt3dadd(196716.000000,161496.000000,70575.000000,57.506386)}
{pt3dadd(195264.000000,161400.000000,68300.000000,30.761849)}
{pt3dadd(194592.000000,161400.000000,67525.000000,19.057109)}
{pt3dadd(194616.000000,161520.000000,67225.000000,17.140230)}
{pt3dadd(194592.000000,161628.000000,66900.000000,18.471396)}
{pt3dadd(194520.000000,161688.000000,66575.000000,29.785660)}
{pt3dadd(194448.000000,161808.000000,66250.000000,39.934990)}

{create adhoc125}
{access adhoc125}
{connect adhoc125(1), adhoc124(0)}
{nseg = 1}
{strdef color color = "White"}
{pt3dclear()}
{pt3dadd(194448.000000,161808.000000,66250.000000,39.934990)}
{pt3dadd(194580.000000,160836.000000,66250.000000,23.055874)}
{pt3dadd(194400.000000,160692.000000,66075.000000,20.927985)}
{pt3dadd(194544.000000,160536.000000,66225.000000,12.324100)}
{pt3dadd(194520.000000,160380.000000,66175.000000,7.739669)}

{create adhoc126}
{access adhoc126}
{connect adhoc126(1), adhoc124(0)}
{nseg = 1}
{strdef color color = "White"}
{pt3dclear()}
{pt3dadd(194448.000000,161808.000000,66250.000000,39.934990)}
{pt3dadd(193944.000000,162636.000000,65975.000000,24.904717)}
{pt3dadd(193836.000000,162864.000000,65600.000000,15.542830)}
{pt3dadd(193740.000000,163176.000000,65250.000000,17.140230)}
{pt3dadd(193632.000000,163404.000000,64950.000000,10.784398)}
{pt3dadd(193416.000000,163632.000000,64650.000000,10.784398)}
{pt3dadd(193188.000000,164004.000000,64400.000000,10.784398)}
{pt3dadd(192960.000000,164376.000000,64225.000000,16.030924)}
{pt3dadd(192864.000000,164424.000000,64000.000000,6.746526)}
{pt3dadd(192732.000000,164112.000000,64125.000000,6.746526)}
{pt3dadd(192576.000000,164304.000000,64125.000000,6.746526)}
{pt3dadd(192432.000000,164856.000000,64050.000000,9.656322)}
{pt3dadd(192492.000000,165024.000000,64000.000000,4.409795)}
{pt3dadd(192360.000000,165192.000000,63950.000000,4.409795)}
{pt3dadd(192192.000000,165336.000000,63925.000000,4.409795)}
{pt3dadd(192096.000000,165468.000000,63850.000000,7.961550)}
{pt3dadd(191964.000000,165612.000000,63725.000000,5.051754)}
{pt3dadd(191868.000000,165780.000000,63625.000000,5.051754)}
{pt3dadd(191856.000000,165960.000000,63525.000000,5.051754)}
{pt3dadd(191832.000000,166188.000000,63400.000000,11.141353)}
{pt3dadd(191808.000000,166356.000000,63275.000000,7.589598)}
{pt3dadd(191712.000000,166512.000000,63250.000000,7.589598)}
{pt3dadd(191640.000000,166680.000000,63050.000000,7.589598)}
{pt3dadd(191508.000000,166860.000000,62950.000000,13.945430)}
{pt3dadd(191376.000000,166992.000000,62850.000000,7.855832)}
{pt3dadd(191244.000000,167124.000000,62750.000000,7.855832)}
{pt3dadd(191112.000000,167268.000000,62650.000000,7.855832)}
{pt3dadd(190980.000000,167412.000000,62550.000000,14.211664)}
{pt3dadd(190692.000000,167808.000000,62125.000000,7.855832)}
{pt3dadd(190332.000000,167904.000000,61725.000000,7.855832)}
{pt3dadd(190044.000000,168300.000000,61375.000000,7.855832)}
{pt3dadd(189588.000000,168660.000000,61050.000000,12.177937)}
{pt3dadd(188940.000000,169260.000000,60700.000000,5.822105)}
{pt3dadd(188580.000000,169500.000000,60550.000000,5.822105)}
{pt3dadd(188244.000000,169728.000000,60525.000000,5.822105)}
{pt3dadd(187944.000000,170148.000000,60525.000000,8.196935)}
{pt3dadd(187740.000000,170424.000000,60375.000000,3.874829)}
{pt3dadd(187560.000000,170676.000000,60250.000000,3.874829)}
{pt3dadd(187260.000000,170952.000000,60150.000000,3.874829)}
{pt3dadd(187044.000000,171120.000000,60150.000000,6.784625)}
{pt3dadd(186804.000000,171444.000000,59675.000000,4.409795)}
{pt3dadd(186480.000000,171600.000000,59425.000000,4.409795)}
{pt3dadd(186024.000000,171948.000000,59075.000000,4.409795)}
{pt3dadd(185928.000000,172080.000000,58900.000000,11.777313)}
{pt3dadd(185748.000000,172296.000000,58550.000000,14.114044)}
{pt3dadd(185568.000000,172524.000000,58300.000000,21.801042)}
{pt3dadd(185304.000000,172716.000000,58050.000000,35.335071)}
{pt3dadd(185148.000000,172872.000000,57850.000000,39.934990)}

{create adhoc127}
{access adhoc127}
{connect adhoc127(1), adhoc126(0)}
{nseg = 1}
{strdef color color = "White"}
{pt3dclear()}
{pt3dadd(185148.000000,172872.000000,57850.000000,39.934990)}
{pt3dadd(183888.000000,172944.000000,57825.000000,20.231254)}
{pt3dadd(183456.000000,172944.000000,57925.000000,12.738752)}
{pt3dadd(183324.000000,173124.000000,57925.000000,7.961550)}
{pt3dadd(183192.000000,173232.000000,57875.000000,4.409795)}
{pt3dadd(183060.000000,173304.000000,57850.000000,4.409795)}
{pt3dadd(182928.000000,173352.000000,57825.000000,4.409795)}
{pt3dadd(182796.000000,173496.000000,57750.000000,6.338820)}
{pt3dadd(182688.000000,173604.000000,57800.000000,4.676958)}
{pt3dadd(182580.000000,173748.000000,57850.000000,6.794931)}
{pt3dadd(182436.000000,173928.000000,57850.000000,7.739669)}

{create adhoc128}
{access adhoc128}
{connect adhoc128(1), adhoc126(0)}
{nseg = 1}
{strdef color color = "White"}
{pt3dclear()}
{pt3dadd(185148.000000,172872.000000,57850.000000,39.934990)}
{pt3dadd(185124.000000,172860.000000,57525.000000,27.123327)}
{pt3dadd(185064.000000,172920.000000,57150.000000,16.873996)}
{pt3dadd(185004.000000,172968.000000,56850.000000,12.096793)}
{pt3dadd(184944.000000,173052.000000,56575.000000,4.409795)}
{pt3dadd(184956.000000,173208.000000,56275.000000,4.409795)}
{pt3dadd(184944.000000,173484.000000,56075.000000,4.409795)}
{pt3dadd(184716.000000,173700.000000,55900.000000,7.961550)}
{pt3dadd(184392.000000,173844.000000,55675.000000,5.051754)}
{pt3dadd(183984.000000,173940.000000,55450.000000,5.051754)}
{pt3dadd(183624.000000,173988.000000,55225.000000,5.051754)}
{pt3dadd(183480.000000,174084.000000,55300.000000,8.603509)}
{pt3dadd(183300.000000,174120.000000,55300.000000,5.051754)}
{pt3dadd(183156.000000,174108.000000,55275.000000,5.051754)}
{pt3dadd(183072.000000,174120.000000,55000.000000,5.051754)}
{pt3dadd(182640.000000,174228.000000,54750.000000,8.603509)}
{pt3dadd(182148.000000,174444.000000,54700.000000,5.051754)}
{pt3dadd(181824.000000,174696.000000,54475.000000,8.603509)}
{pt3dadd(181716.000000,174924.000000,54275.000000,12.155263)}
{pt3dadd(181476.000000,175068.000000,53975.000000,13.339181)}
{pt3dadd(181356.000000,175236.000000,53700.000000,19.258772)}

{create adhoc129}
{access adhoc129}
{connect adhoc129(1), adhoc38(0)}
{nseg = 1}
{strdef color color = "White"}
{pt3dclear()}
{pt3dadd(196356.000000,167868.000000,72550.000000,66.247350)}
{pt3dadd(196356.000000,167112.000000,74650.000000,31.826661)}
{pt3dadd(196416.000000,166812.000000,75000.000000,19.695996)}
{pt3dadd(196536.000000,166716.000000,75250.000000,11.068632)}
{pt3dadd(196452.000000,166332.000000,75400.000000,5.822105)}
{pt3dadd(196260.000000,166032.000000,75675.000000,5.822105)}
{pt3dadd(196416.000000,165660.000000,76100.000000,12.177937)}
{pt3dadd(196584.000000,165204.000000,76600.000000,18.011951)}
{pt3dadd(196524.000000,165084.000000,76850.000000,21.816410)}
{pt3dadd(196584.000000,164964.000000,77100.000000,30.670070)}

{create adhoc130}
{access adhoc130}
{connect adhoc130(1), adhoc129(0)}
{nseg = 1}
{strdef color color = "White"}
{pt3dclear()}
{pt3dadd(196584.000000,164964.000000,77100.000000,30.670070)}
{pt3dadd(196164.000000,164292.000000,76925.000000,13.819224)}
{pt3dadd(196224.000000,164184.000000,76850.000000,8.891534)}
{pt3dadd(196272.000000,164064.000000,76925.000000,4.305454)}
{pt3dadd(196284.000000,163968.000000,76900.000000,2.747934)}
{pt3dadd(196308.000000,163836.000000,76875.000000,2.747934)}
{pt3dadd(196332.000000,163716.000000,76775.000000,2.747934)}
{pt3dadd(196344.000000,163596.000000,76725.000000,3.737879)}
{pt3dadd(196344.000000,163332.000000,76700.000000,4.047465)}
{pt3dadd(196320.000000,162876.000000,76700.000000,5.295399)}
{pt3dadd(196380.000000,162768.000000,76725.000000,7.825665)}
{pt3dadd(196464.000000,162624.000000,76775.000000,7.739669)}

{create adhoc131}
{access adhoc131}
{connect adhoc131(1), adhoc129(0)}
{nseg = 1}
{strdef color color = "White"}
{pt3dclear()}
{pt3dadd(196584.000000,164964.000000,77100.000000,30.670070)}
{pt3dadd(196872.000000,164940.000000,77475.000000,23.502553)}
{pt3dadd(197196.000000,165012.000000,77875.000000,14.701532)}
{pt3dadd(197496.000000,164772.000000,78200.000000,14.114044)}
{pt3dadd(197700.000000,164952.000000,78575.000000,6.746526)}
{pt3dadd(197844.000000,165024.000000,78875.000000,14.433524)}
{pt3dadd(198000.000000,165036.000000,79200.000000,22.120522)}
{pt3dadd(198144.000000,165120.000000,79550.000000,27.123327)}
{pt3dadd(198228.000000,165132.000000,79800.000000,39.934990)}

{create adhoc132}
{access adhoc132}
{connect adhoc132(1), adhoc131(0)}
{nseg = 1}
{strdef color color = "White"}
{pt3dclear()}
{pt3dadd(198228.000000,165132.000000,79800.000000,39.934990)}
{pt3dadd(197796.000000,164304.000000,79875.000000,16.954563)}
{pt3dadd(197772.000000,164196.000000,79875.000000,4.478975)}

{create adhoc133}
{access adhoc133}
{connect adhoc133(1), adhoc131(0)}
{nseg = 1}
{strdef color color = "White"}
{pt3dclear()}
{pt3dadd(198228.000000,165132.000000,79800.000000,39.934990)}
{pt3dadd(198192.000000,165180.000000,80150.000000,39.934990)}
{pt3dadd(198156.000000,165144.000000,80325.000000,37.716380)}
{pt3dadd(198144.000000,165180.000000,80700.000000,33.279160)}

{create adhoc134}
{access adhoc134}
{connect adhoc134(1), adhoc133(0)}
{nseg = 1}
{strdef color color = "White"}
{pt3dclear()}
{pt3dadd(198144.000000,165180.000000,80700.000000,33.279160)}
{pt3dadd(198444.000000,164436.000000,80750.000000,14.735953)}
{pt3dadd(198492.000000,164100.000000,80900.000000,6.222789)}
{pt3dadd(198468.000000,163872.000000,81025.000000,7.739669)}

{create adhoc135}
{access adhoc135}
{connect adhoc135(1), adhoc133(0)}
{nseg = 1}
{strdef color color = "White"}
{pt3dclear()}
{pt3dadd(198144.000000,165180.000000,80700.000000,33.279160)}
{pt3dadd(197808.000000,165588.000000,81125.000000,19.296562)}
{pt3dadd(197532.000000,165672.000000,81425.000000,12.177937)}
{pt3dadd(197304.000000,166008.000000,81675.000000,11.068632)}
{pt3dadd(197160.000000,166188.000000,82100.000000,6.746526)}
{pt3dadd(196920.000000,166272.000000,82425.000000,6.746526)}
{pt3dadd(196800.000000,166296.000000,82775.000000,11.068632)}
{pt3dadd(196608.000000,166032.000000,83125.000000,13.978427)}
{pt3dadd(196488.000000,165828.000000,83450.000000,13.553168)}
{pt3dadd(196332.000000,165420.000000,83775.000000,16.048977)}

{create adhoc136}
{access adhoc136}
{connect adhoc136(1), adhoc135(0)}
{nseg = 1}
{strdef color color = "White"}
{pt3dclear()}
{pt3dadd(196332.000000,165420.000000,83775.000000,16.048977)}
{pt3dadd(197088.000000,166236.000000,83800.000000,9.564700)}
{pt3dadd(197256.000000,166428.000000,84025.000000,6.338820)}
{pt3dadd(197388.000000,166536.000000,84275.000000,5.358049)}
{pt3dadd(197508.000000,166656.000000,84525.000000,3.429025)}
{pt3dadd(197604.000000,166980.000000,84725.000000,3.429025)}
{pt3dadd(197532.000000,167388.000000,85000.000000,4.024820)}
{pt3dadd(197364.000000,167700.000000,85200.000000,4.620615)}
{pt3dadd(197136.000000,168180.000000,85350.000000,3.485983)}
{pt3dadd(197004.000000,168624.000000,85525.000000,4.478975)}

{create adhoc137}
{access adhoc137}
{connect adhoc137(1), adhoc135(0)}
{nseg = 1}
{strdef color color = "White"}
{pt3dclear()}
{pt3dadd(196332.000000,165420.000000,83775.000000,16.048977)}
{pt3dadd(196272.000000,165024.000000,84025.000000,12.269250)}
{pt3dadd(196344.000000,164664.000000,84300.000000,18.639487)}
{pt3dadd(196452.000000,164484.000000,84600.000000,19.296562)}
{pt3dadd(196524.000000,164268.000000,84800.000000,33.279160)}

{create adhoc138}
{access adhoc138}
{connect adhoc138(1), adhoc137(0)}
{nseg = 1}
{strdef color color = "White"}
{pt3dclear()}
{pt3dadd(196524.000000,164268.000000,84800.000000,33.279160)}
{pt3dadd(196776.000000,164592.000000,85025.000000,19.296562)}
{pt3dadd(197064.000000,164748.000000,85275.000000,12.177937)}
{pt3dadd(197232.000000,164916.000000,85550.000000,7.751130)}
{pt3dadd(197376.000000,165084.000000,85800.000000,3.429025)}
{pt3dadd(197556.000000,165168.000000,85975.000000,3.429025)}
{pt3dadd(197688.000000,165252.000000,86200.000000,3.429025)}
{pt3dadd(197700.000000,165216.000000,86475.000000,5.358049)}
{pt3dadd(197772.000000,165024.000000,86700.000000,4.676958)}
{pt3dadd(197592.000000,165084.000000,86950.000000,6.794931)}
{pt3dadd(197472.000000,165084.000000,87125.000000,7.739669)}

{create adhoc139}
{access adhoc139}
{connect adhoc139(1), adhoc137(0)}
{nseg = 1}
{strdef color color = "White"}
{pt3dclear()}
{pt3dadd(196524.000000,164268.000000,84800.000000,33.279160)}
{pt3dadd(196368.000000,163524.000000,85100.000000,18.646970)}
{pt3dadd(196392.000000,163464.000000,85250.000000,9.287602)}

{create adhoc140}
{access adhoc140}
{connect adhoc140(1), adhoc37(0)}
{nseg = 1}
{strdef color color = "White"}
{pt3dclear()}
{pt3dadd(196668.000000,169932.000000,72350.000000,69.007660)}
{pt3dadd(194196.000000,169956.000000,70650.000000,27.217594)}
{pt3dadd(193224.000000,169956.000000,70100.000000,22.086790)}
{pt3dadd(192624.000000,169944.000000,69750.000000,10.093722)}
{pt3dadd(192276.000000,170016.000000,69525.000000,15.407019)}

{create adhoc141}
{access adhoc141}
{connect adhoc141(1), adhoc140(0)}
{nseg = 1}
{strdef color color = "White"}
{pt3dclear()}
{pt3dadd(192276.000000,170016.000000,69525.000000,15.407019)}
{pt3dadd(192564.000000,169272.000000,69525.000000,9.507153)}
{pt3dadd(192648.000000,169152.000000,69500.000000,7.467347)}
{pt3dadd(192696.000000,169032.000000,69475.000000,9.287602)}

{create adhoc142}
{access adhoc142}
{connect adhoc142(1), adhoc140(0)}
{nseg = 1}
{strdef color color = "White"}
{pt3dclear()}
{pt3dadd(192276.000000,170016.000000,69525.000000,15.407019)}
{pt3dadd(191748.000000,170592.000000,69350.000000,10.093722)}
{pt3dadd(191256.000000,171420.000000,69150.000000,6.656233)}
{pt3dadd(191280.000000,171660.000000,69200.000000,6.784625)}
{pt3dadd(191112.000000,171828.000000,69125.000000,4.409795)}
{pt3dadd(190980.000000,171972.000000,69025.000000,4.409795)}
{pt3dadd(190740.000000,172080.000000,68800.000000,4.409795)}
{pt3dadd(190512.000000,171996.000000,68625.000000,7.961550)}
{pt3dadd(190308.000000,172044.000000,68400.000000,5.051754)}
{pt3dadd(190116.000000,171912.000000,68025.000000,5.051754)}
{pt3dadd(190056.000000,171864.000000,67725.000000,6.980779)}
{pt3dadd(190020.000000,171996.000000,67400.000000,7.755733)}
{pt3dadd(189864.000000,172392.000000,67075.000000,6.006631)}
{pt3dadd(189432.000000,172884.000000,66800.000000,5.374770)}

{create adhoc143}
{access adhoc143}
{connect adhoc143(1), adhoc36(0)}
{nseg = 1}
{strdef color color = "White"}
{pt3dclear()}
{pt3dadd(196872.000000,171468.000000,72800.000000,69.007660)}
{pt3dadd(194388.000000,171444.000000,72950.000000,26.082443)}
{pt3dadd(193680.000000,171444.000000,73050.000000,16.249466)}
{pt3dadd(193344.000000,171444.000000,73100.000000,4.676958)}
{pt3dadd(193164.000000,171564.000000,73200.000000,3.429025)}
{pt3dadd(193032.000000,171576.000000,73325.000000,3.429025)}
{pt3dadd(193020.000000,171792.000000,73600.000000,3.429025)}
{pt3dadd(192900.000000,172068.000000,73875.000000,4.986545)}
{pt3dadd(192912.000000,172356.000000,74325.000000,3.057520)}
{pt3dadd(192912.000000,172560.000000,74550.000000,3.057520)}
{pt3dadd(192912.000000,172968.000000,74825.000000,4.986545)}
{pt3dadd(192600.000000,173136.000000,75125.000000,7.896340)}
{pt3dadd(192564.000000,173328.000000,75400.000000,9.564700)}
{pt3dadd(192540.000000,173640.000000,75675.000000,16.048977)}

{create adhoc144}
{access adhoc144}
{connect adhoc144(1), adhoc35(0)}
{nseg = 1}
{strdef color color = "White"}
{pt3dclear()}
{pt3dadd(197400.000000,173424.000000,73450.000000,57.506386)}
{pt3dadd(197904.000000,173424.000000,75675.000000,26.088386)}
{pt3dadd(197520.000000,172944.000000,76450.000000,16.253032)}
{pt3dadd(197520.000000,172368.000000,77175.000000,9.373860)}
{pt3dadd(197412.000000,171828.000000,77425.000000,5.822105)}
{pt3dadd(197448.000000,171648.000000,77825.000000,11.068632)}
{pt3dadd(197616.000000,171372.000000,78275.000000,15.390737)}
{pt3dadd(197448.000000,171132.000000,78700.000000,17.447720)}
{pt3dadd(197496.000000,171132.000000,79000.000000,23.110527)}

{create adhoc145}
{access adhoc145}
{connect adhoc145(1), adhoc144(0)}
{nseg = 1}
{strdef color color = "White"}
{pt3dclear()}
{pt3dadd(197496.000000,171132.000000,79000.000000,23.110527)}
{pt3dadd(196764.000000,170988.000000,78975.000000,12.949284)}
{pt3dadd(196524.000000,170892.000000,78975.000000,9.287602)}

{create adhoc146}
{access adhoc146}
{connect adhoc146(1), adhoc144(0)}
{nseg = 1}
{strdef color color = "White"}
{pt3dclear()}
{pt3dadd(197496.000000,171132.000000,79000.000000,23.110527)}
{pt3dadd(197100.000000,169656.000000,79075.000000,9.995099)}
{pt3dadd(197004.000000,169248.000000,78900.000000,7.587004)}
{pt3dadd(196920.000000,169080.000000,78675.000000,4.039853)}
{pt3dadd(196896.000000,168684.000000,78550.000000,4.441498)}
{pt3dadd(196800.000000,168540.000000,78575.000000,5.374770)}

{create adhoc147}
{access adhoc147}
{connect adhoc147(1), adhoc144(0)}
{nseg = 1}
{strdef color color = "White"}
{pt3dclear()}
{pt3dadd(197496.000000,171132.000000,79000.000000,23.110527)}
{pt3dadd(197400.000000,171228.000000,79325.000000,14.623100)}
{pt3dadd(196908.000000,171264.000000,79675.000000,9.373860)}
{pt3dadd(196416.000000,171276.000000,79925.000000,10.298281)}
{pt3dadd(196236.000000,171492.000000,80225.000000,10.298281)}
{pt3dadd(196104.000000,171672.000000,80525.000000,13.208076)}
{pt3dadd(195624.000000,171792.000000,80950.000000,21.013460)}
{pt3dadd(195612.000000,171756.000000,81100.000000,16.048977)}

{create adhoc148}
{access adhoc148}
{connect adhoc148(1), adhoc147(0)}
{nseg = 1}
{strdef color color = "White"}
{pt3dclear()}
{pt3dadd(195612.000000,171756.000000,81100.000000,16.048977)}
{pt3dadd(195840.000000,171660.000000,81250.000000,13.522749)}
{pt3dadd(195996.000000,171648.000000,81450.000000,13.374147)}

{create adhoc149}
{access adhoc149}
{connect adhoc149(1), adhoc147(0)}
{nseg = 1}
{strdef color color = "White"}
{pt3dclear()}
{pt3dadd(195612.000000,171756.000000,81100.000000,16.048977)}
{pt3dadd(195276.000000,172416.000000,81400.000000,10.307708)}
{pt3dadd(194964.000000,173208.000000,81575.000000,6.784625)}
{pt3dadd(194832.000000,173544.000000,81700.000000,6.784625)}
{pt3dadd(194712.000000,173952.000000,81725.000000,4.409795)}
{pt3dadd(194556.000000,174180.000000,81725.000000,4.409795)}
{pt3dadd(194400.000000,174168.000000,81775.000000,4.409795)}
{pt3dadd(194268.000000,174456.000000,81650.000000,6.338820)}
{pt3dadd(194148.000000,174696.000000,81625.000000,3.429025)}
{pt3dadd(193656.000000,175452.000000,81625.000000,3.429025)}
{pt3dadd(193524.000000,175500.000000,81750.000000,3.429025)}
{pt3dadd(193656.000000,175740.000000,81625.000000,4.986545)}
{pt3dadd(193704.000000,176160.000000,81550.000000,4.615041)}
{pt3dadd(194088.000000,176520.000000,81550.000000,6.691735)}
{pt3dadd(194448.000000,176796.000000,81550.000000,9.287602)}

{create adhoc150}
{access adhoc150}
{connect adhoc150(1), adhoc26(0)}
{nseg = 1}
{strdef color color = "White"}
{pt3dclear()}
{pt3dadd(190644.000000,186240.000000,75125.000000,69.007660)}
{pt3dadd(189996.000000,186240.000000,76200.000000,32.746764)}
{pt3dadd(189996.000000,186180.000000,76525.000000,20.248058)}
{pt3dadd(189576.000000,186480.000000,76750.000000,13.102358)}
{pt3dadd(189492.000000,186408.000000,77025.000000,13.102358)}
{pt3dadd(189300.000000,186408.000000,77250.000000,20.837264)}
{pt3dadd(189060.000000,186612.000000,77475.000000,27.732632)}

{create adhoc151}
{access adhoc151}
{connect adhoc151(1), adhoc150(0)}
{nseg = 1}
{strdef color color = "White"}
{pt3dclear()}
{pt3dadd(189060.000000,186612.000000,77475.000000,27.732632)}
{pt3dadd(189024.000000,186648.000000,77825.000000,20.837264)}
{pt3dadd(189084.000000,186636.000000,78150.000000,13.102358)}
{pt3dadd(189144.000000,186624.000000,78375.000000,14.211664)}
{pt3dadd(189192.000000,186576.000000,78625.000000,7.855832)}
{pt3dadd(189228.000000,186540.000000,78825.000000,7.855832)}
{pt3dadd(189348.000000,186456.000000,79025.000000,7.855832)}
{pt3dadd(189492.000000,186396.000000,79250.000000,12.177937)}
{pt3dadd(189540.000000,186324.000000,79575.000000,5.822105)}
{pt3dadd(189660.000000,186252.000000,79825.000000,5.822105)}
{pt3dadd(189936.000000,186060.000000,80075.000000,5.822105)}
{pt3dadd(190176.000000,185916.000000,80325.000000,12.177937)}
{pt3dadd(190404.000000,185880.000000,80575.000000,7.855832)}
{pt3dadd(190584.000000,185640.000000,80850.000000,7.855832)}
{pt3dadd(190668.000000,185520.000000,81100.000000,7.855832)}
{pt3dadd(190716.000000,185376.000000,81350.000000,13.102358)}
{pt3dadd(190860.000000,185304.000000,81625.000000,6.746526)}
{pt3dadd(190992.000000,185316.000000,81875.000000,12.836125)}
{pt3dadd(191148.000000,185340.000000,82125.000000,17.158231)}
{pt3dadd(191196.000000,185316.000000,82375.000000,18.852840)}
{pt3dadd(191280.000000,185388.000000,82650.000000,23.110527)}

{create adhoc152}
{access adhoc152}
{connect adhoc152(1), adhoc151(0)}
{nseg = 1}
{strdef color color = "White"}
{pt3dclear()}
{pt3dadd(191280.000000,185388.000000,82650.000000,23.110527)}
{pt3dadd(191880.000000,184944.000000,82900.000000,14.623100)}
{pt3dadd(192192.000000,184788.000000,83125.000000,9.373860)}
{pt3dadd(192336.000000,184728.000000,83025.000000,6.980779)}
{pt3dadd(192492.000000,184692.000000,83000.000000,3.429025)}
{pt3dadd(192648.000000,184512.000000,83050.000000,3.429025)}
{pt3dadd(192816.000000,183852.000000,83175.000000,3.429025)}
{pt3dadd(192228.000000,183228.000000,83175.000000,6.338820)}
{pt3dadd(192588.000000,182712.000000,83300.000000,6.784625)}
{pt3dadd(192768.000000,182664.000000,83450.000000,9.694420)}
{pt3dadd(192996.000000,182364.000000,83725.000000,15.157367)}
{pt3dadd(193296.000000,182208.000000,84000.000000,16.048977)}

{create adhoc153}
{access adhoc153}
{connect adhoc153(1), adhoc152(0)}
{nseg = 1}
{strdef color color = "White"}
{pt3dclear()}
{pt3dadd(193296.000000,182208.000000,84000.000000,16.048977)}
{pt3dadd(193212.000000,181860.000000,84125.000000,7.999567)}
{pt3dadd(193368.000000,181392.000000,84300.000000,5.399740)}
{pt3dadd(193560.000000,181272.000000,84500.000000,4.418969)}
{pt3dadd(193704.000000,181248.000000,84450.000000,3.429025)}
{pt3dadd(193836.000000,181212.000000,84475.000000,3.429025)}
{pt3dadd(193968.000000,181128.000000,84475.000000,3.429025)}
{pt3dadd(194112.000000,181044.000000,84550.000000,4.418969)}
{pt3dadd(194244.000000,180996.000000,84350.000000,3.479890)}
{pt3dadd(194364.000000,180912.000000,84300.000000,4.254844)}
{pt3dadd(194472.000000,180756.000000,84275.000000,6.091406)}
{pt3dadd(194592.000000,180744.000000,84225.000000,5.374770)}

{create adhoc154}
{access adhoc154}
{connect adhoc154(1), adhoc152(0)}
{nseg = 1}
{strdef color color = "White"}
{pt3dclear()}
{pt3dadd(193296.000000,182208.000000,84000.000000,16.048977)}
{pt3dadd(193584.000000,182232.000000,84125.000000,10.307708)}
{pt3dadd(193716.000000,182352.000000,83875.000000,8.267844)}
{pt3dadd(193860.000000,182484.000000,83775.000000,7.287074)}
{pt3dadd(194004.000000,182652.000000,83675.000000,7.187074)}
{pt3dadd(194148.000000,182604.000000,83650.000000,11.145123)}

{create adhoc155}
{access adhoc155}
{connect adhoc155(1), adhoc151(0)}
{nseg = 1}
{strdef color color = "White"}
{pt3dclear()}
{pt3dadd(191280.000000,185388.000000,82650.000000,23.110527)}
{pt3dadd(191028.000000,186516.000000,82750.000000,11.299376)}
{pt3dadd(191064.000000,186852.000000,82875.000000,7.379626)}
{pt3dadd(191112.000000,186996.000000,82900.000000,4.615041)}
{pt3dadd(191172.000000,187140.000000,82900.000000,4.305454)}
{pt3dadd(191196.000000,187272.000000,83025.000000,5.295399)}
{pt3dadd(191196.000000,187404.000000,83050.000000,7.825665)}
{pt3dadd(191388.000000,187524.000000,83150.000000,6.449724)}

{create adhoc156}
{access adhoc156}
{connect adhoc156(1), adhoc150(0)}
{nseg = 1}
{strdef color color = "White"}
{pt3dclear()}
{pt3dadd(189060.000000,186612.000000,77475.000000,27.732632)}
{pt3dadd(188376.000000,187332.000000,77600.000000,12.840078)}
{pt3dadd(188328.000000,187440.000000,77475.000000,8.304047)}
{pt3dadd(188316.000000,187560.000000,77375.000000,4.047465)}
{pt3dadd(188232.000000,187668.000000,77250.000000,3.264899)}
{pt3dadd(188052.000000,187728.000000,77050.000000,4.441498)}
{pt3dadd(187764.000000,187944.000000,76900.000000,5.374770)}

{create adhoc157}
{access adhoc157}
{connect adhoc157(1), adhoc25(0)}
{nseg = 1}
{strdef color color = "White"}
{pt3dclear()}
{pt3dadd(189936.000000,186888.000000,74600.000000,69.007660)}
{pt3dadd(188544.000000,186900.000000,74025.000000,27.217594)}
{pt3dadd(188412.000000,186972.000000,74100.000000,16.930557)}
{pt3dadd(188304.000000,186840.000000,74100.000000,5.803854)}
{pt3dadd(188172.000000,186708.000000,74075.000000,3.874829)}
{pt3dadd(188064.000000,186576.000000,73925.000000,3.874829)}
{pt3dadd(188016.000000,186456.000000,73750.000000,3.874829)}
{pt3dadd(188040.000000,186372.000000,73525.000000,6.249659)}
{pt3dadd(188064.000000,186216.000000,73375.000000,3.874829)}
{pt3dadd(188088.000000,186060.000000,73200.000000,3.874829)}
{pt3dadd(187944.000000,185892.000000,73000.000000,6.784625)}
{pt3dadd(187968.000000,185904.000000,72775.000000,9.159454)}
{pt3dadd(187908.000000,185832.000000,72600.000000,10.307708)}
{pt3dadd(187824.000000,185748.000000,72425.000000,13.374147)}

{create adhoc158}
{access adhoc158}
{connect adhoc158(1), adhoc157(0)}
{nseg = 1}
{strdef color color = "White"}
{pt3dclear()}
{pt3dadd(187824.000000,185748.000000,72425.000000,13.374147)}
{pt3dadd(187872.000000,185388.000000,72325.000000,11.317666)}
{pt3dadd(187908.000000,185244.000000,72150.000000,9.009525)}
{pt3dadd(187908.000000,185040.000000,71900.000000,6.449724)}

{create adhoc159}
{access adhoc159}
{connect adhoc159(1), adhoc157(0)}
{nseg = 1}
{strdef color color = "White"}
{pt3dclear()}
{pt3dadd(187824.000000,185748.000000,72425.000000,13.374147)}
{pt3dadd(187680.000000,186012.000000,72325.000000,8.673090)}
{pt3dadd(187608.000000,186312.000000,72325.000000,7.568753)}
{pt3dadd(187500.000000,186420.000000,72325.000000,4.441498)}
{pt3dadd(187464.000000,186528.000000,72275.000000,5.374770)}
